# Supplementary material for: ALDOC promotes non-small cell lung cancer through affecting MYC-mediated UBE2N transcription and regulating Wnt/β-catenin pathway
Source: publisher site journal article supplement (doi:10.18632/aging.205038), 2023-09-18
Supplement: Supplementary file [file aging-v15i18-205038-supplementary-material-SD1.pdf]

SUPPLEMENTARY FIGURE

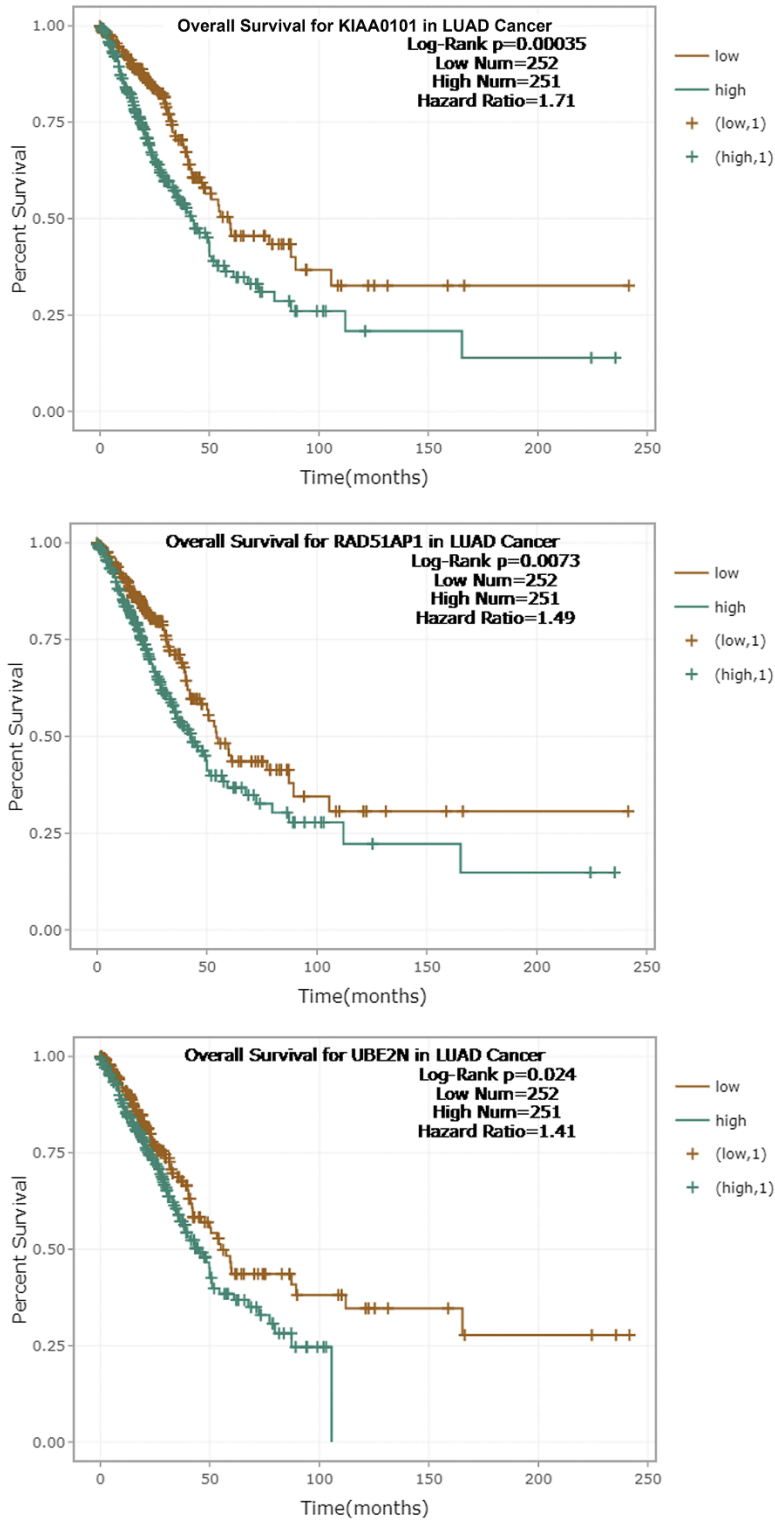

Supplementary Figure 1. The relationship between KIAA0101, UBE2N and RAD51AP1 expression with NSCLC patients' prognosis.
