# Supplementary material for: ALDOC promotes non-small cell lung cancer through affecting MYC-mediated UBE2N transcription and regulating Wnt/β-catenin pathway
Source: publisher site journal article supplement (doi:10.18632/aging.205038), 2023-09-18

**Supplementary Information File 1. Immunofluorescence data\_MYC\_ALDOC and MYC\_NC.**

Immunofluorescence data\_MYC\_ALDOC

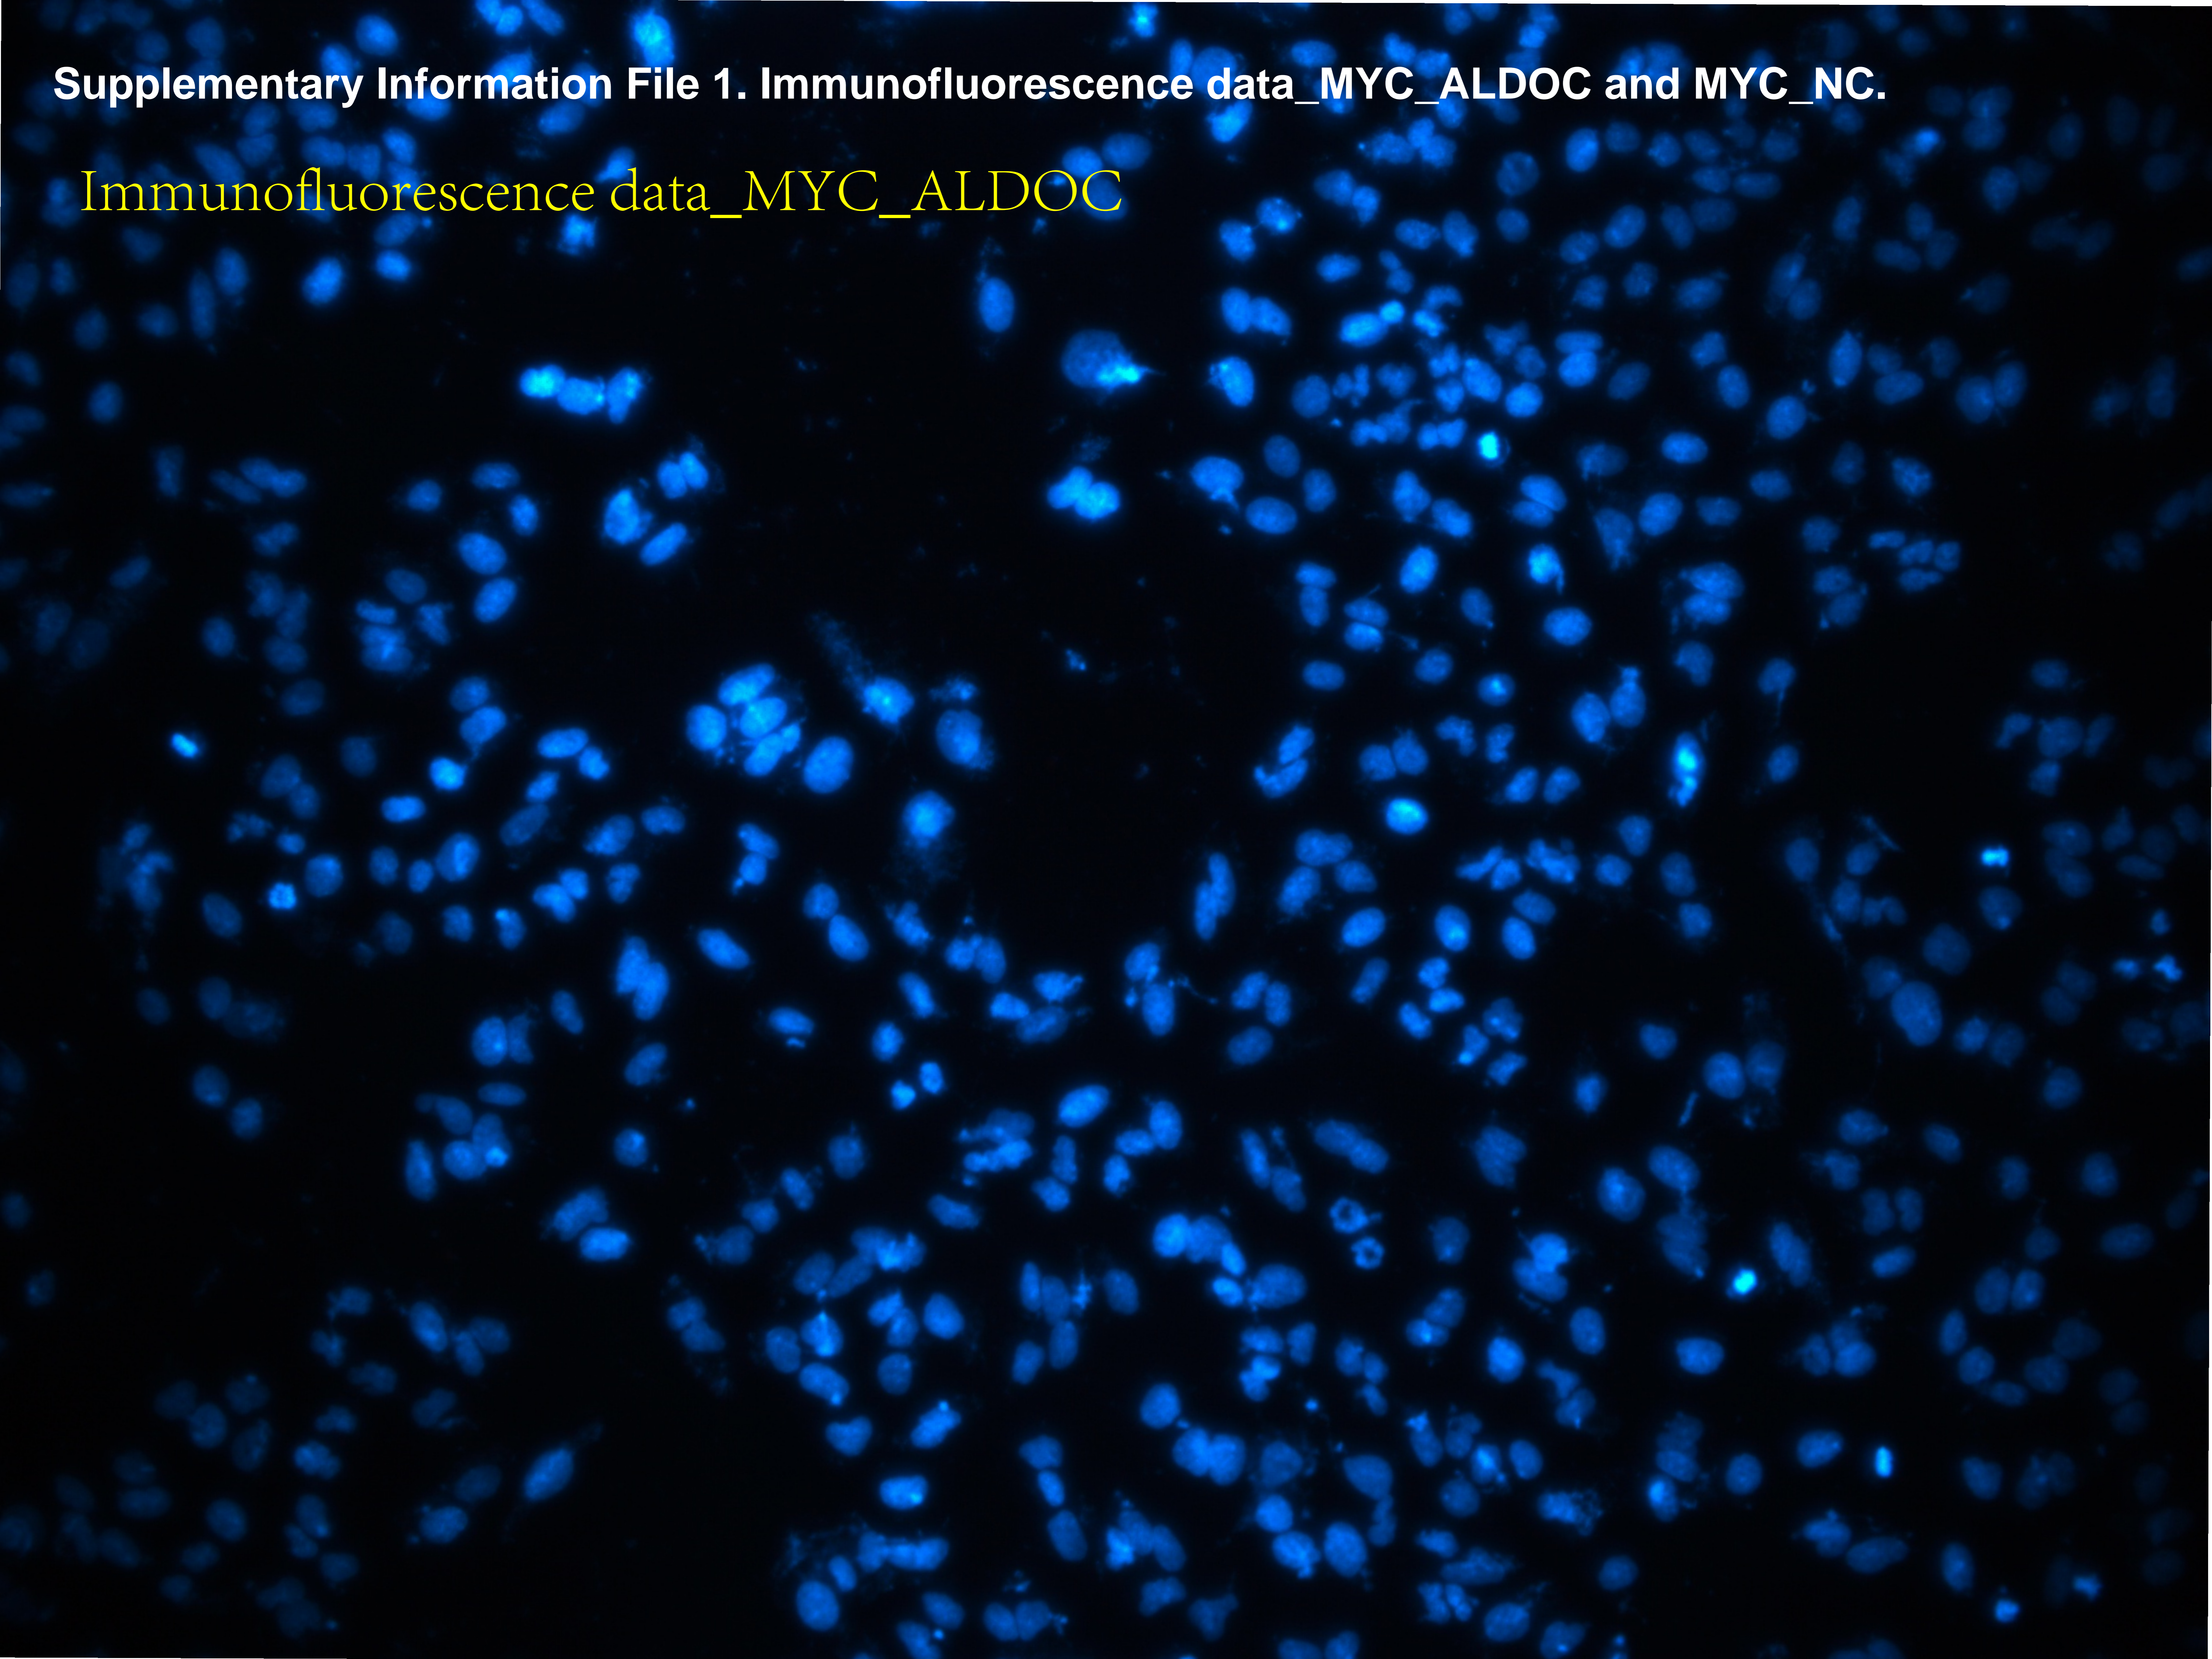

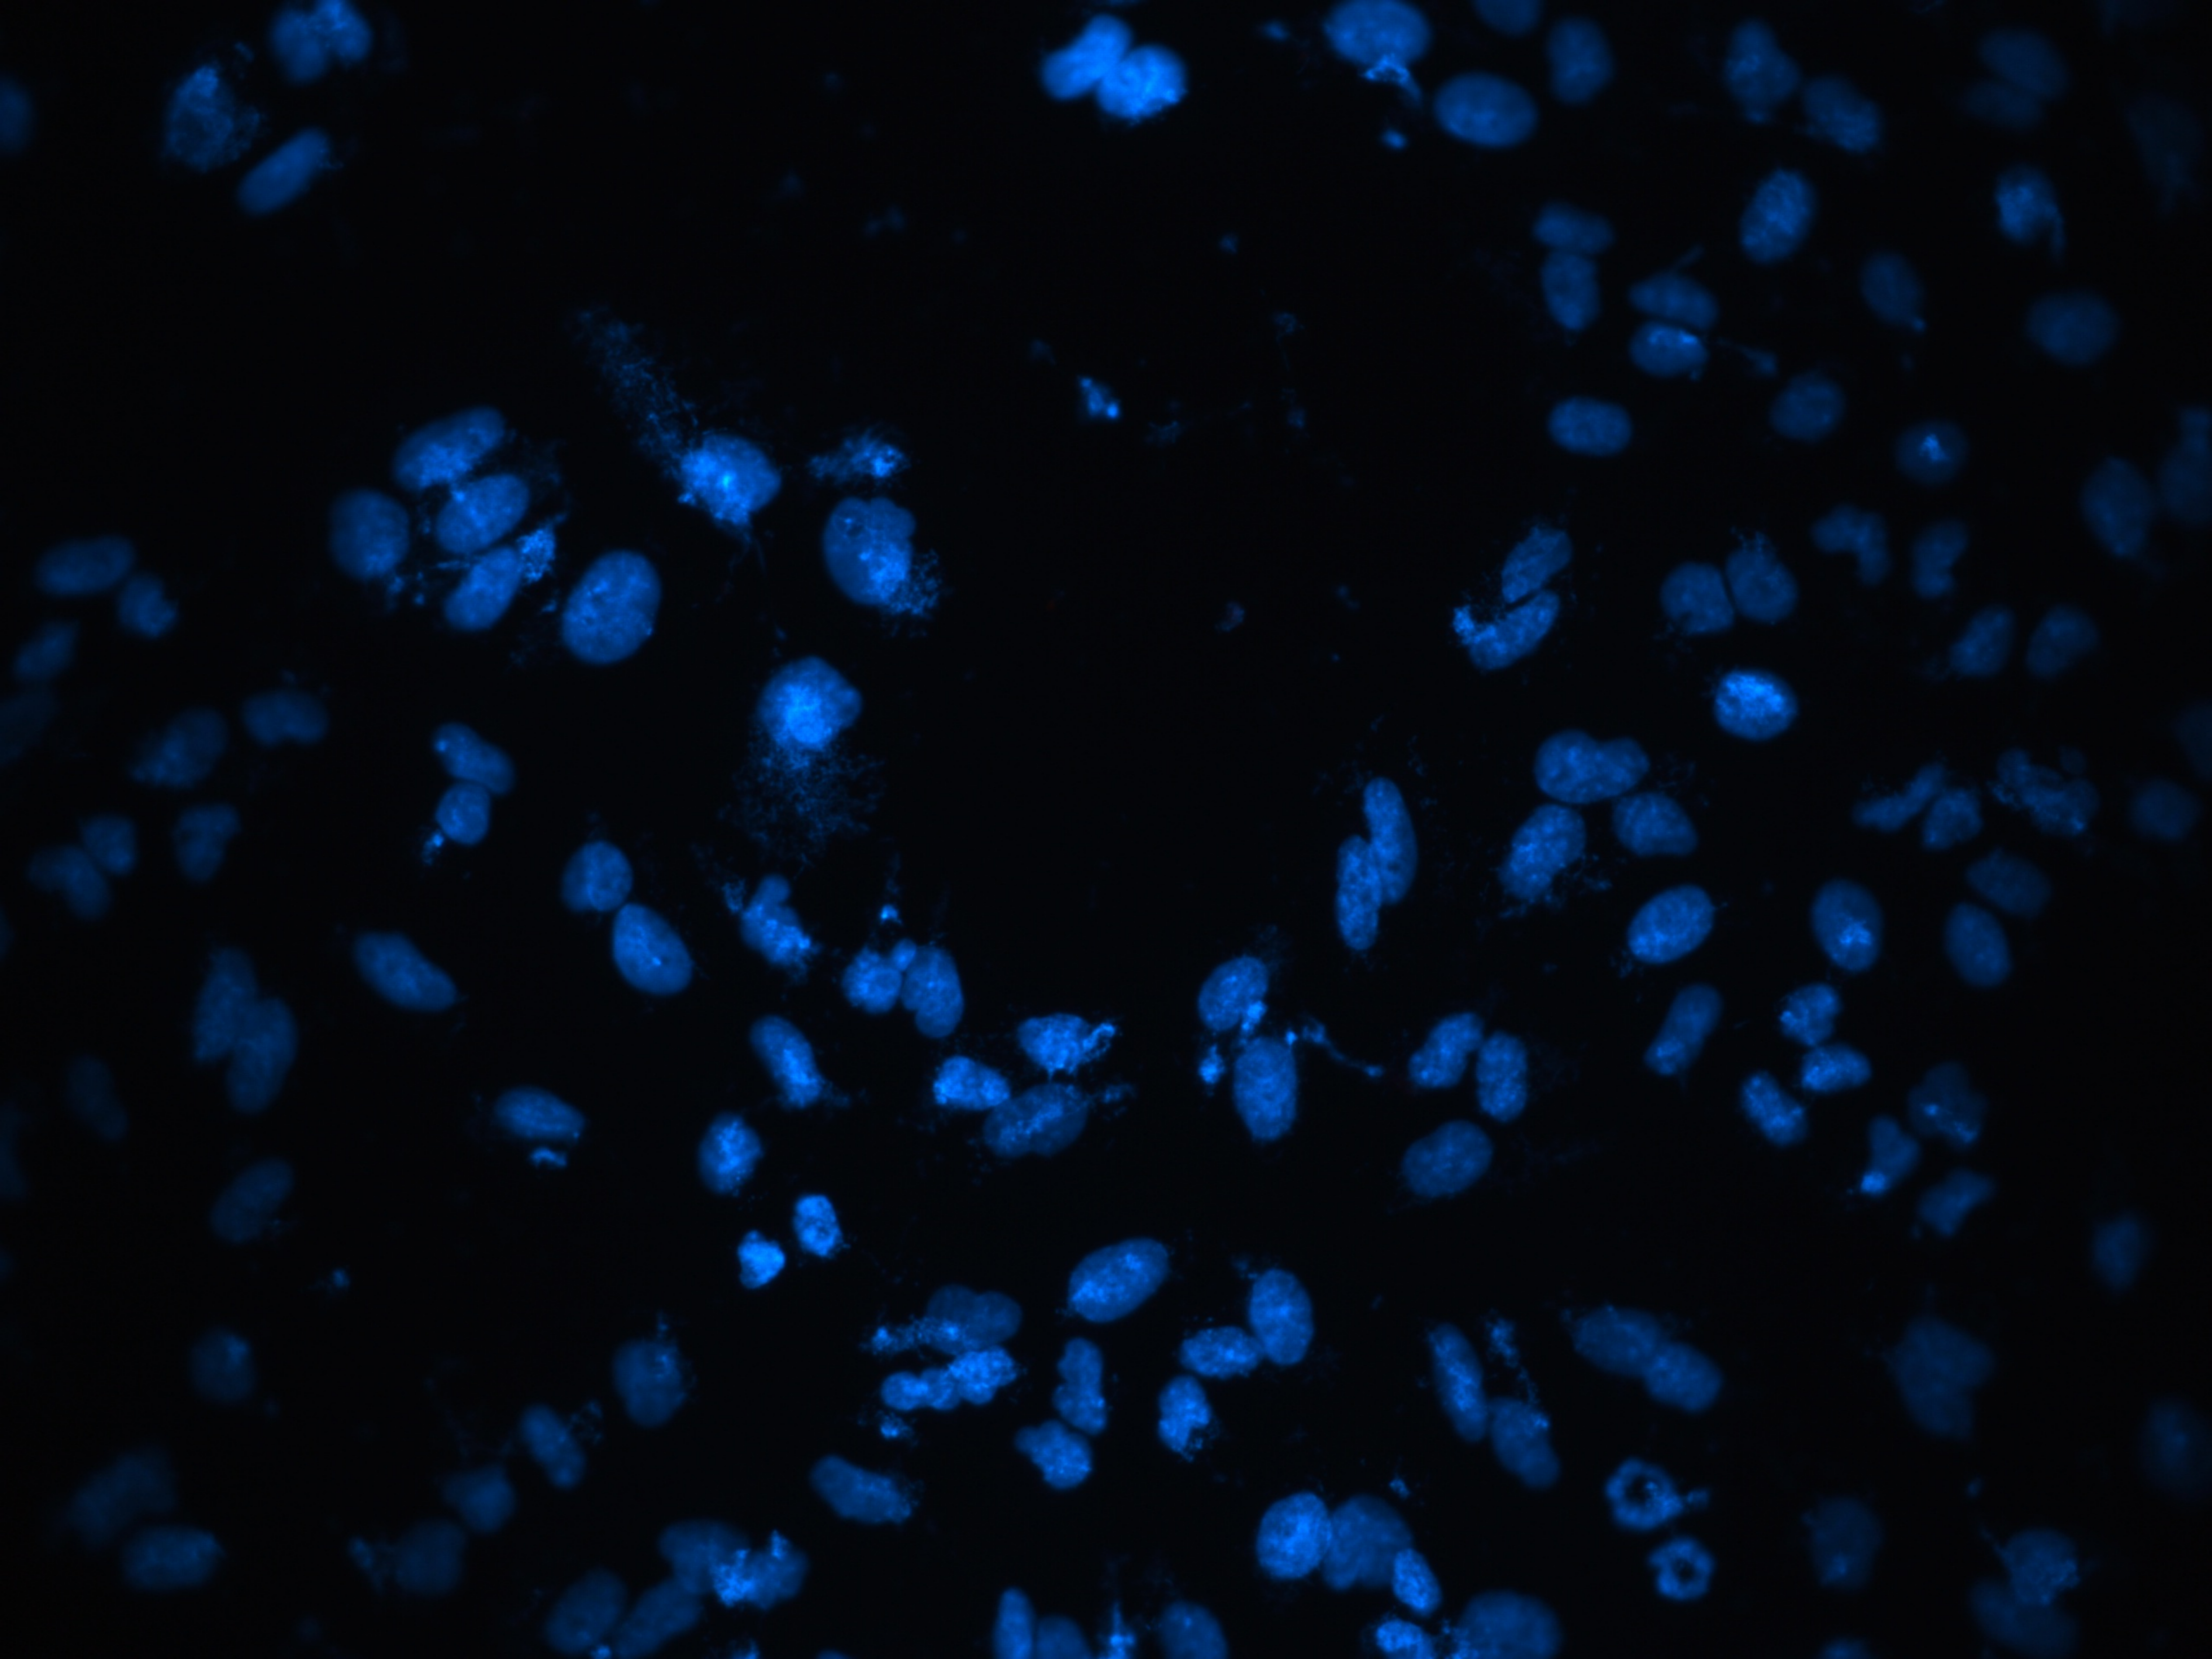

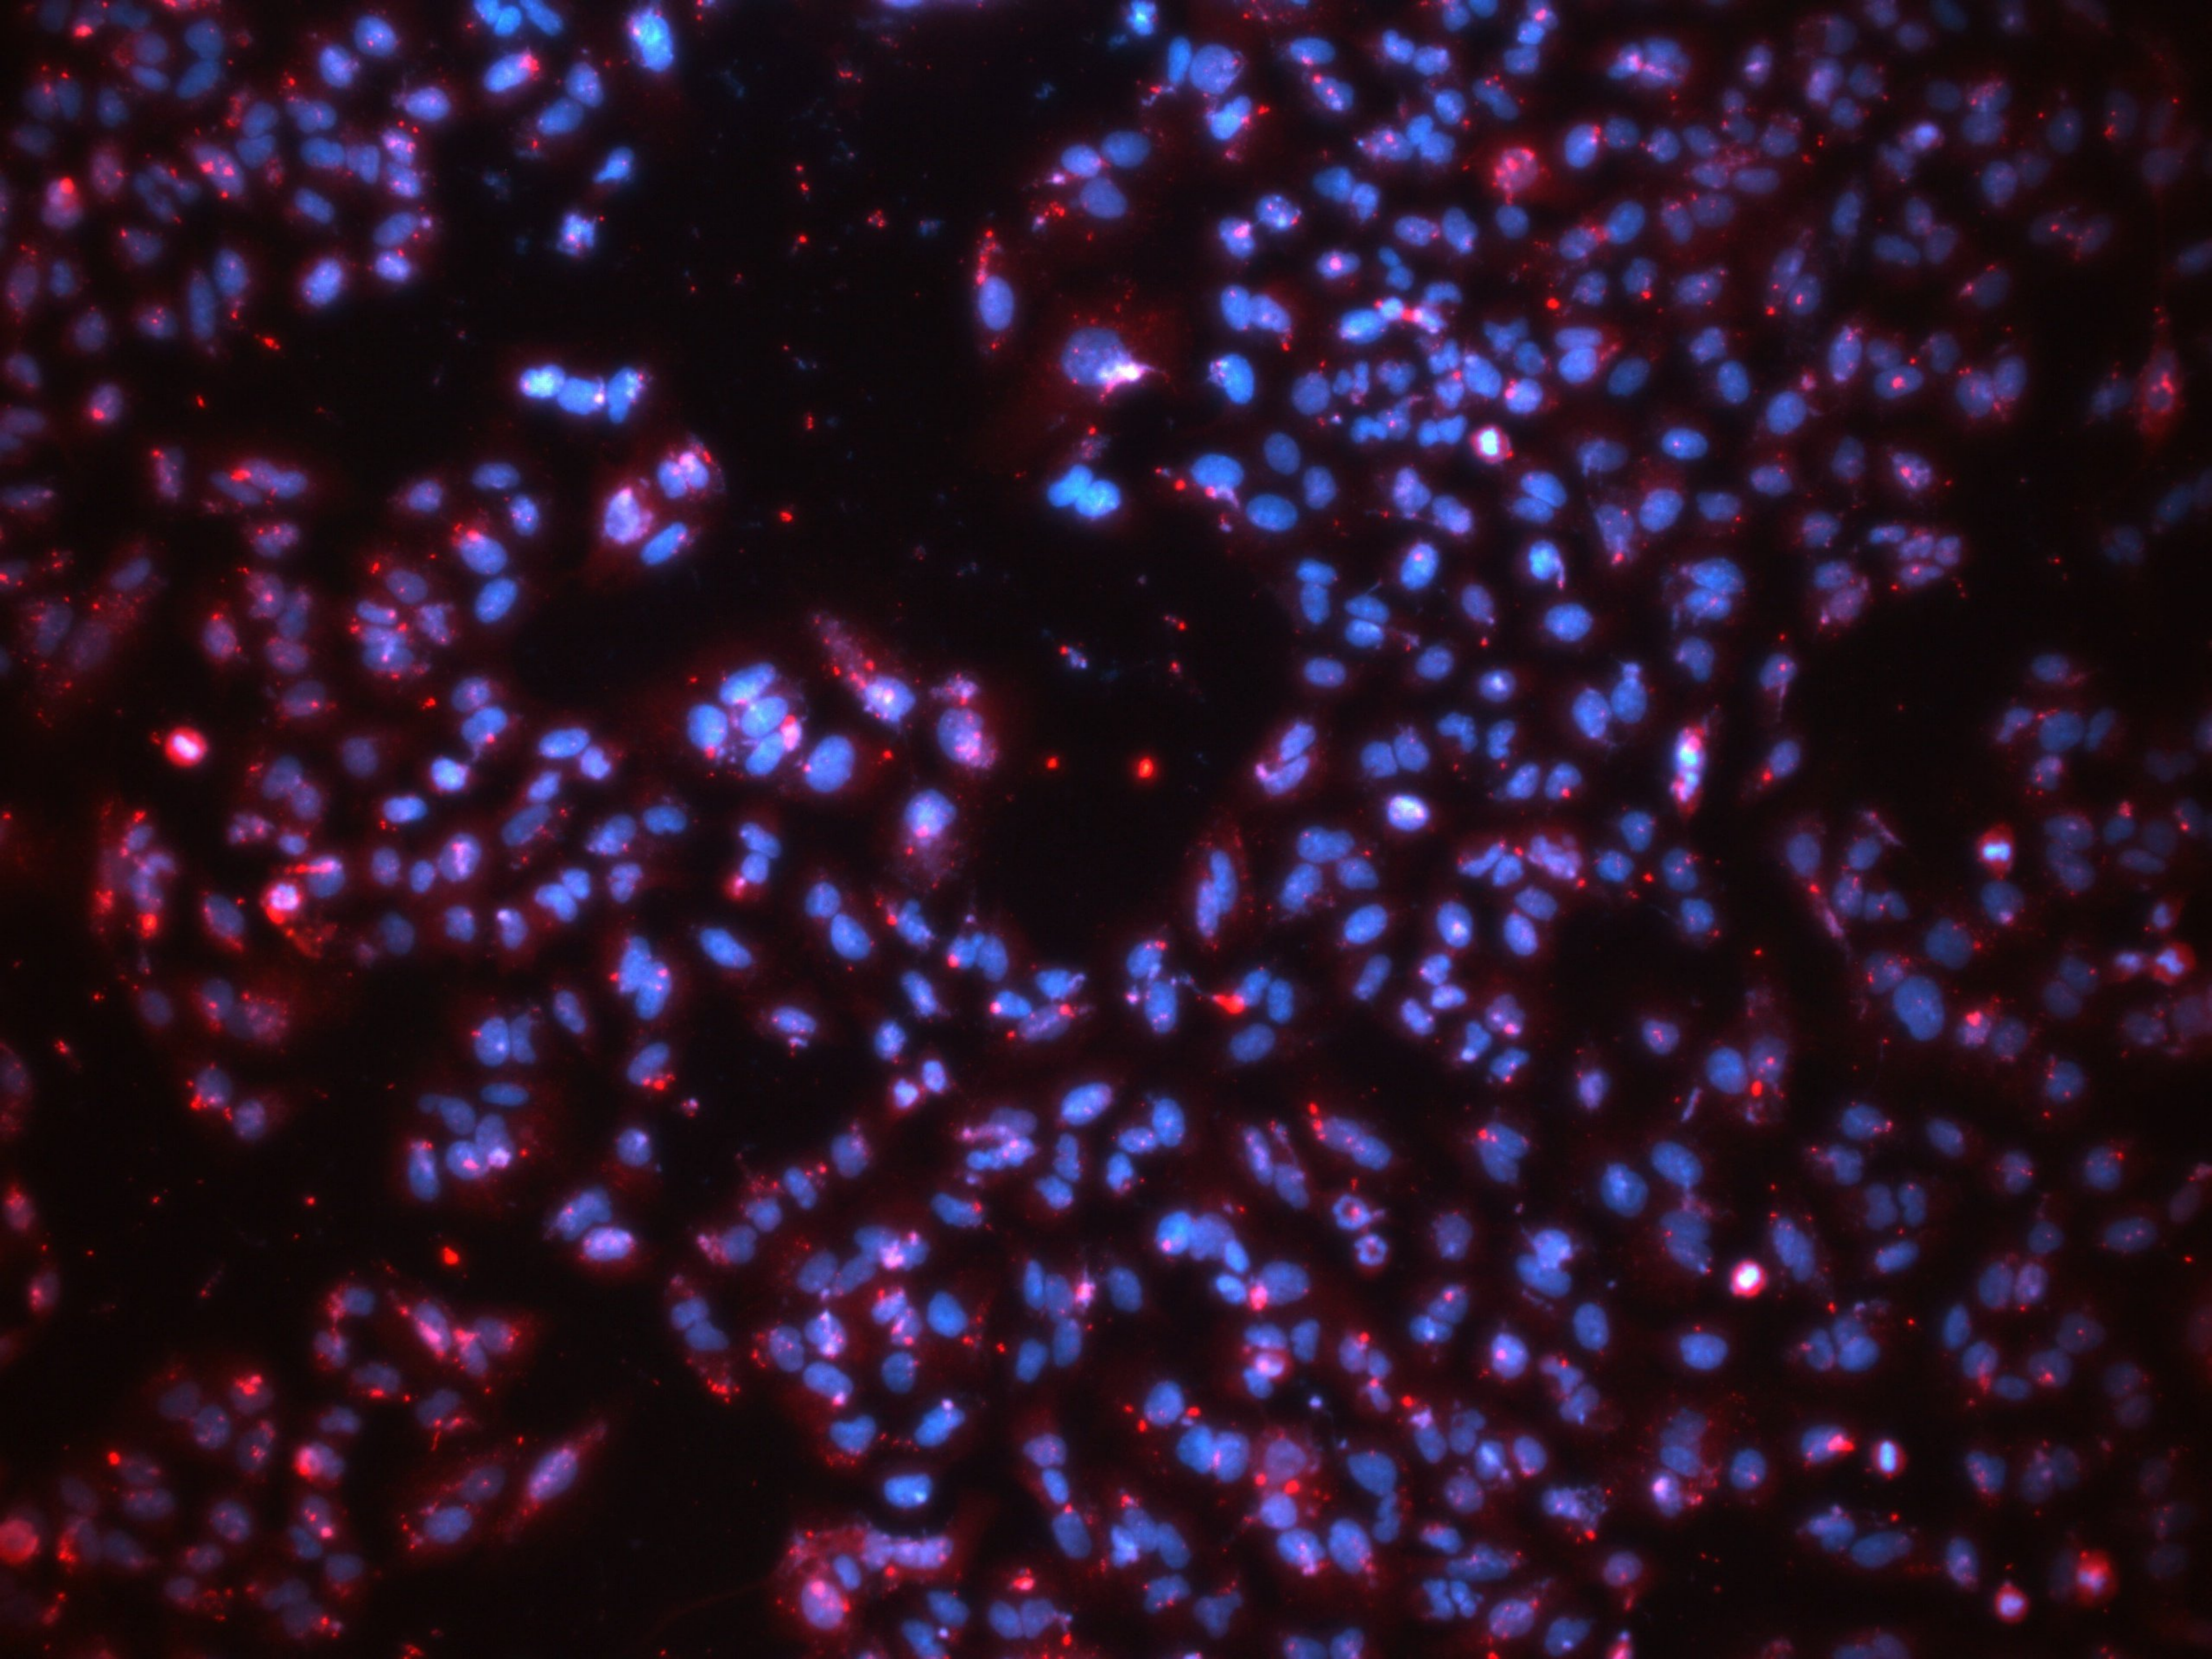

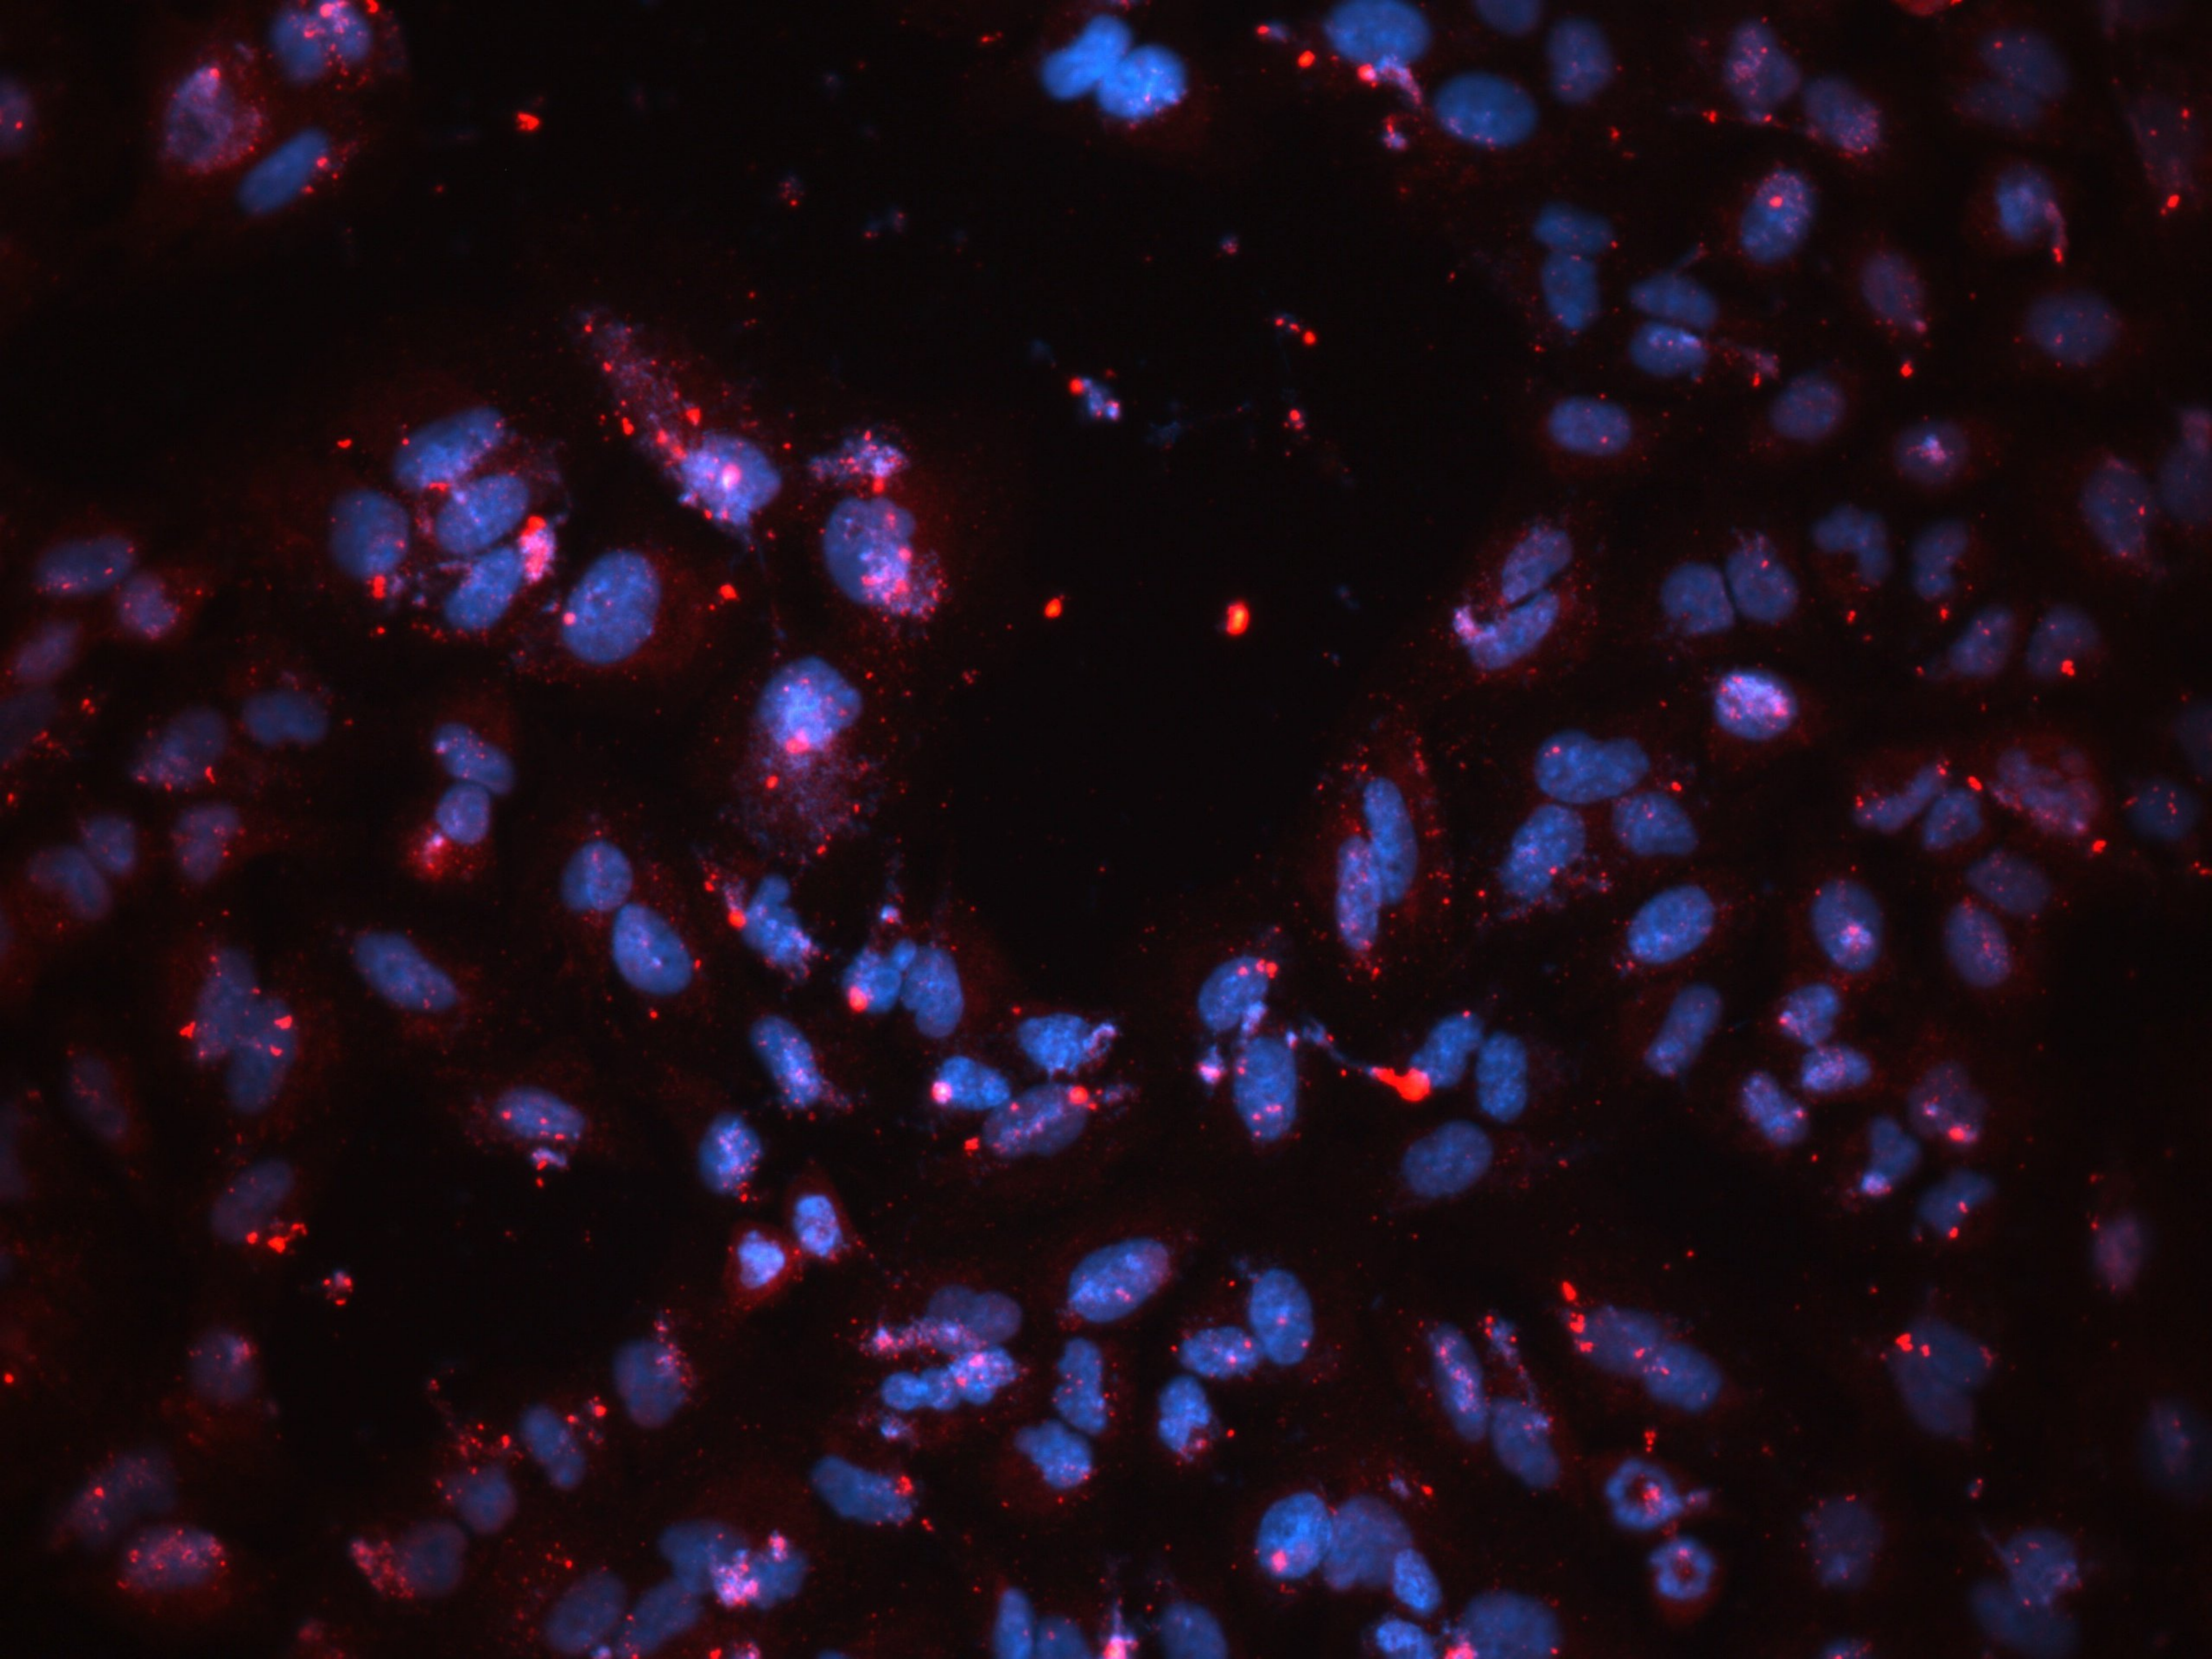





Immunofluorescence data\_MYC\_NC

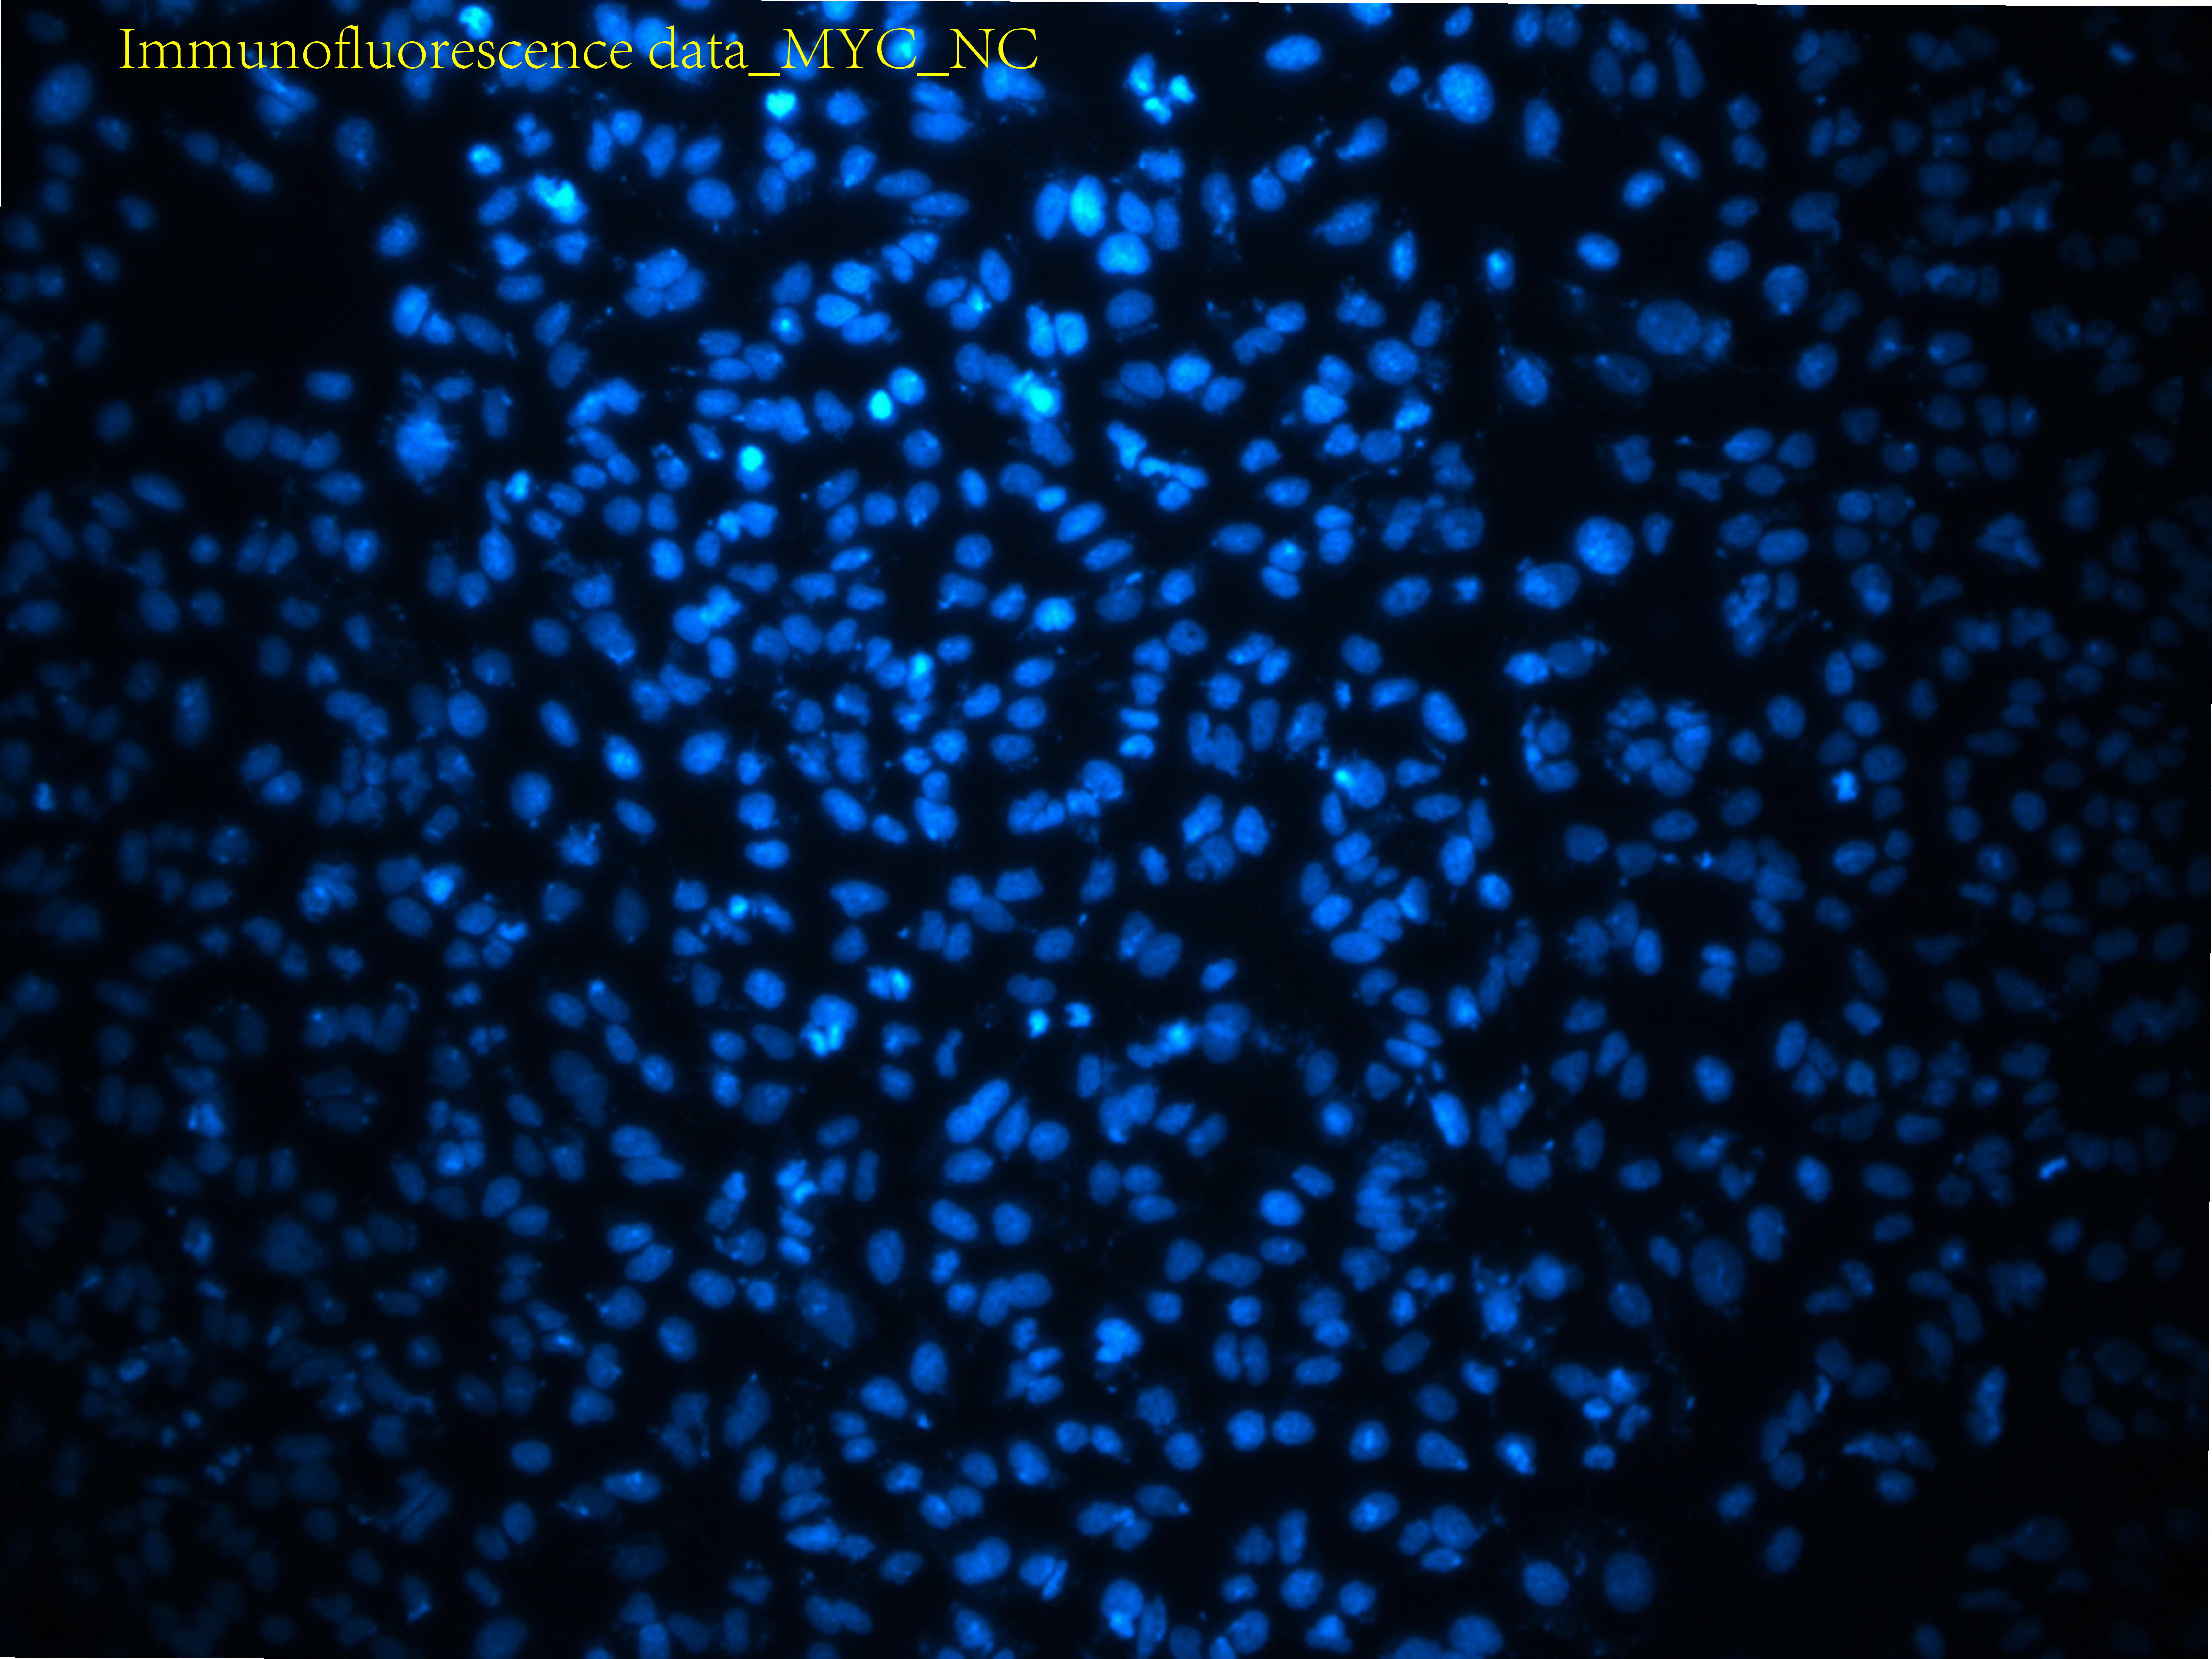

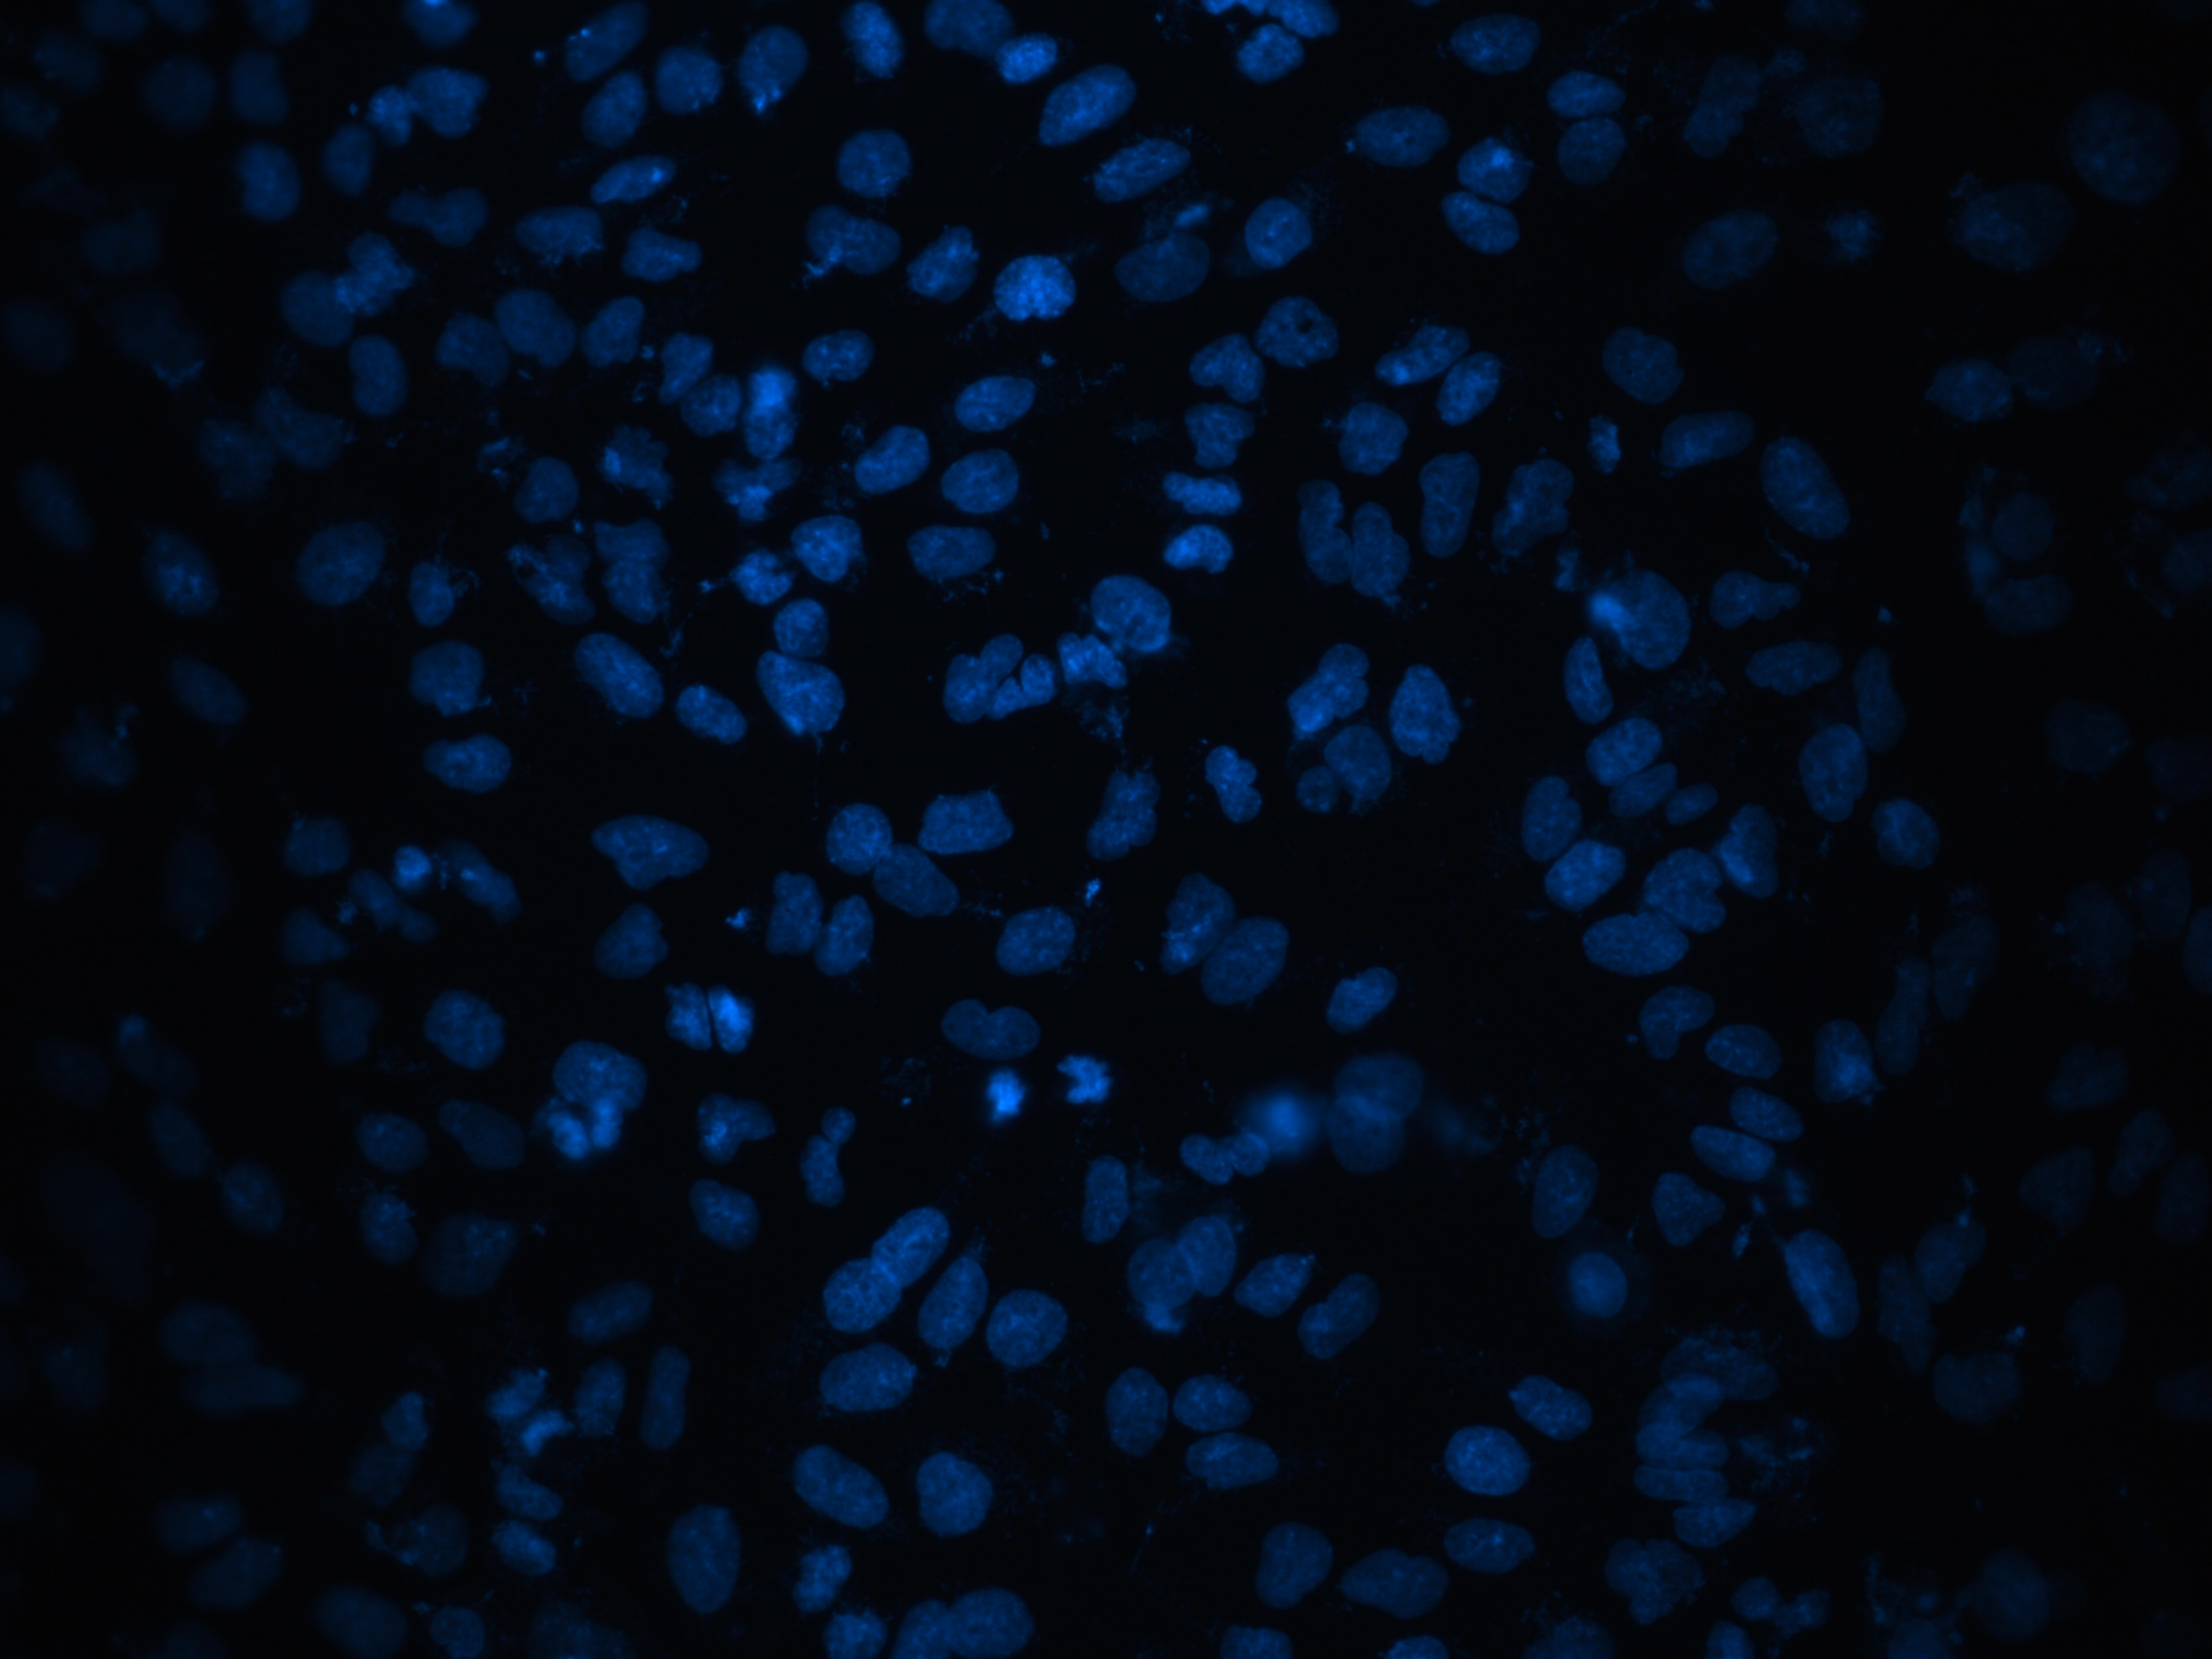



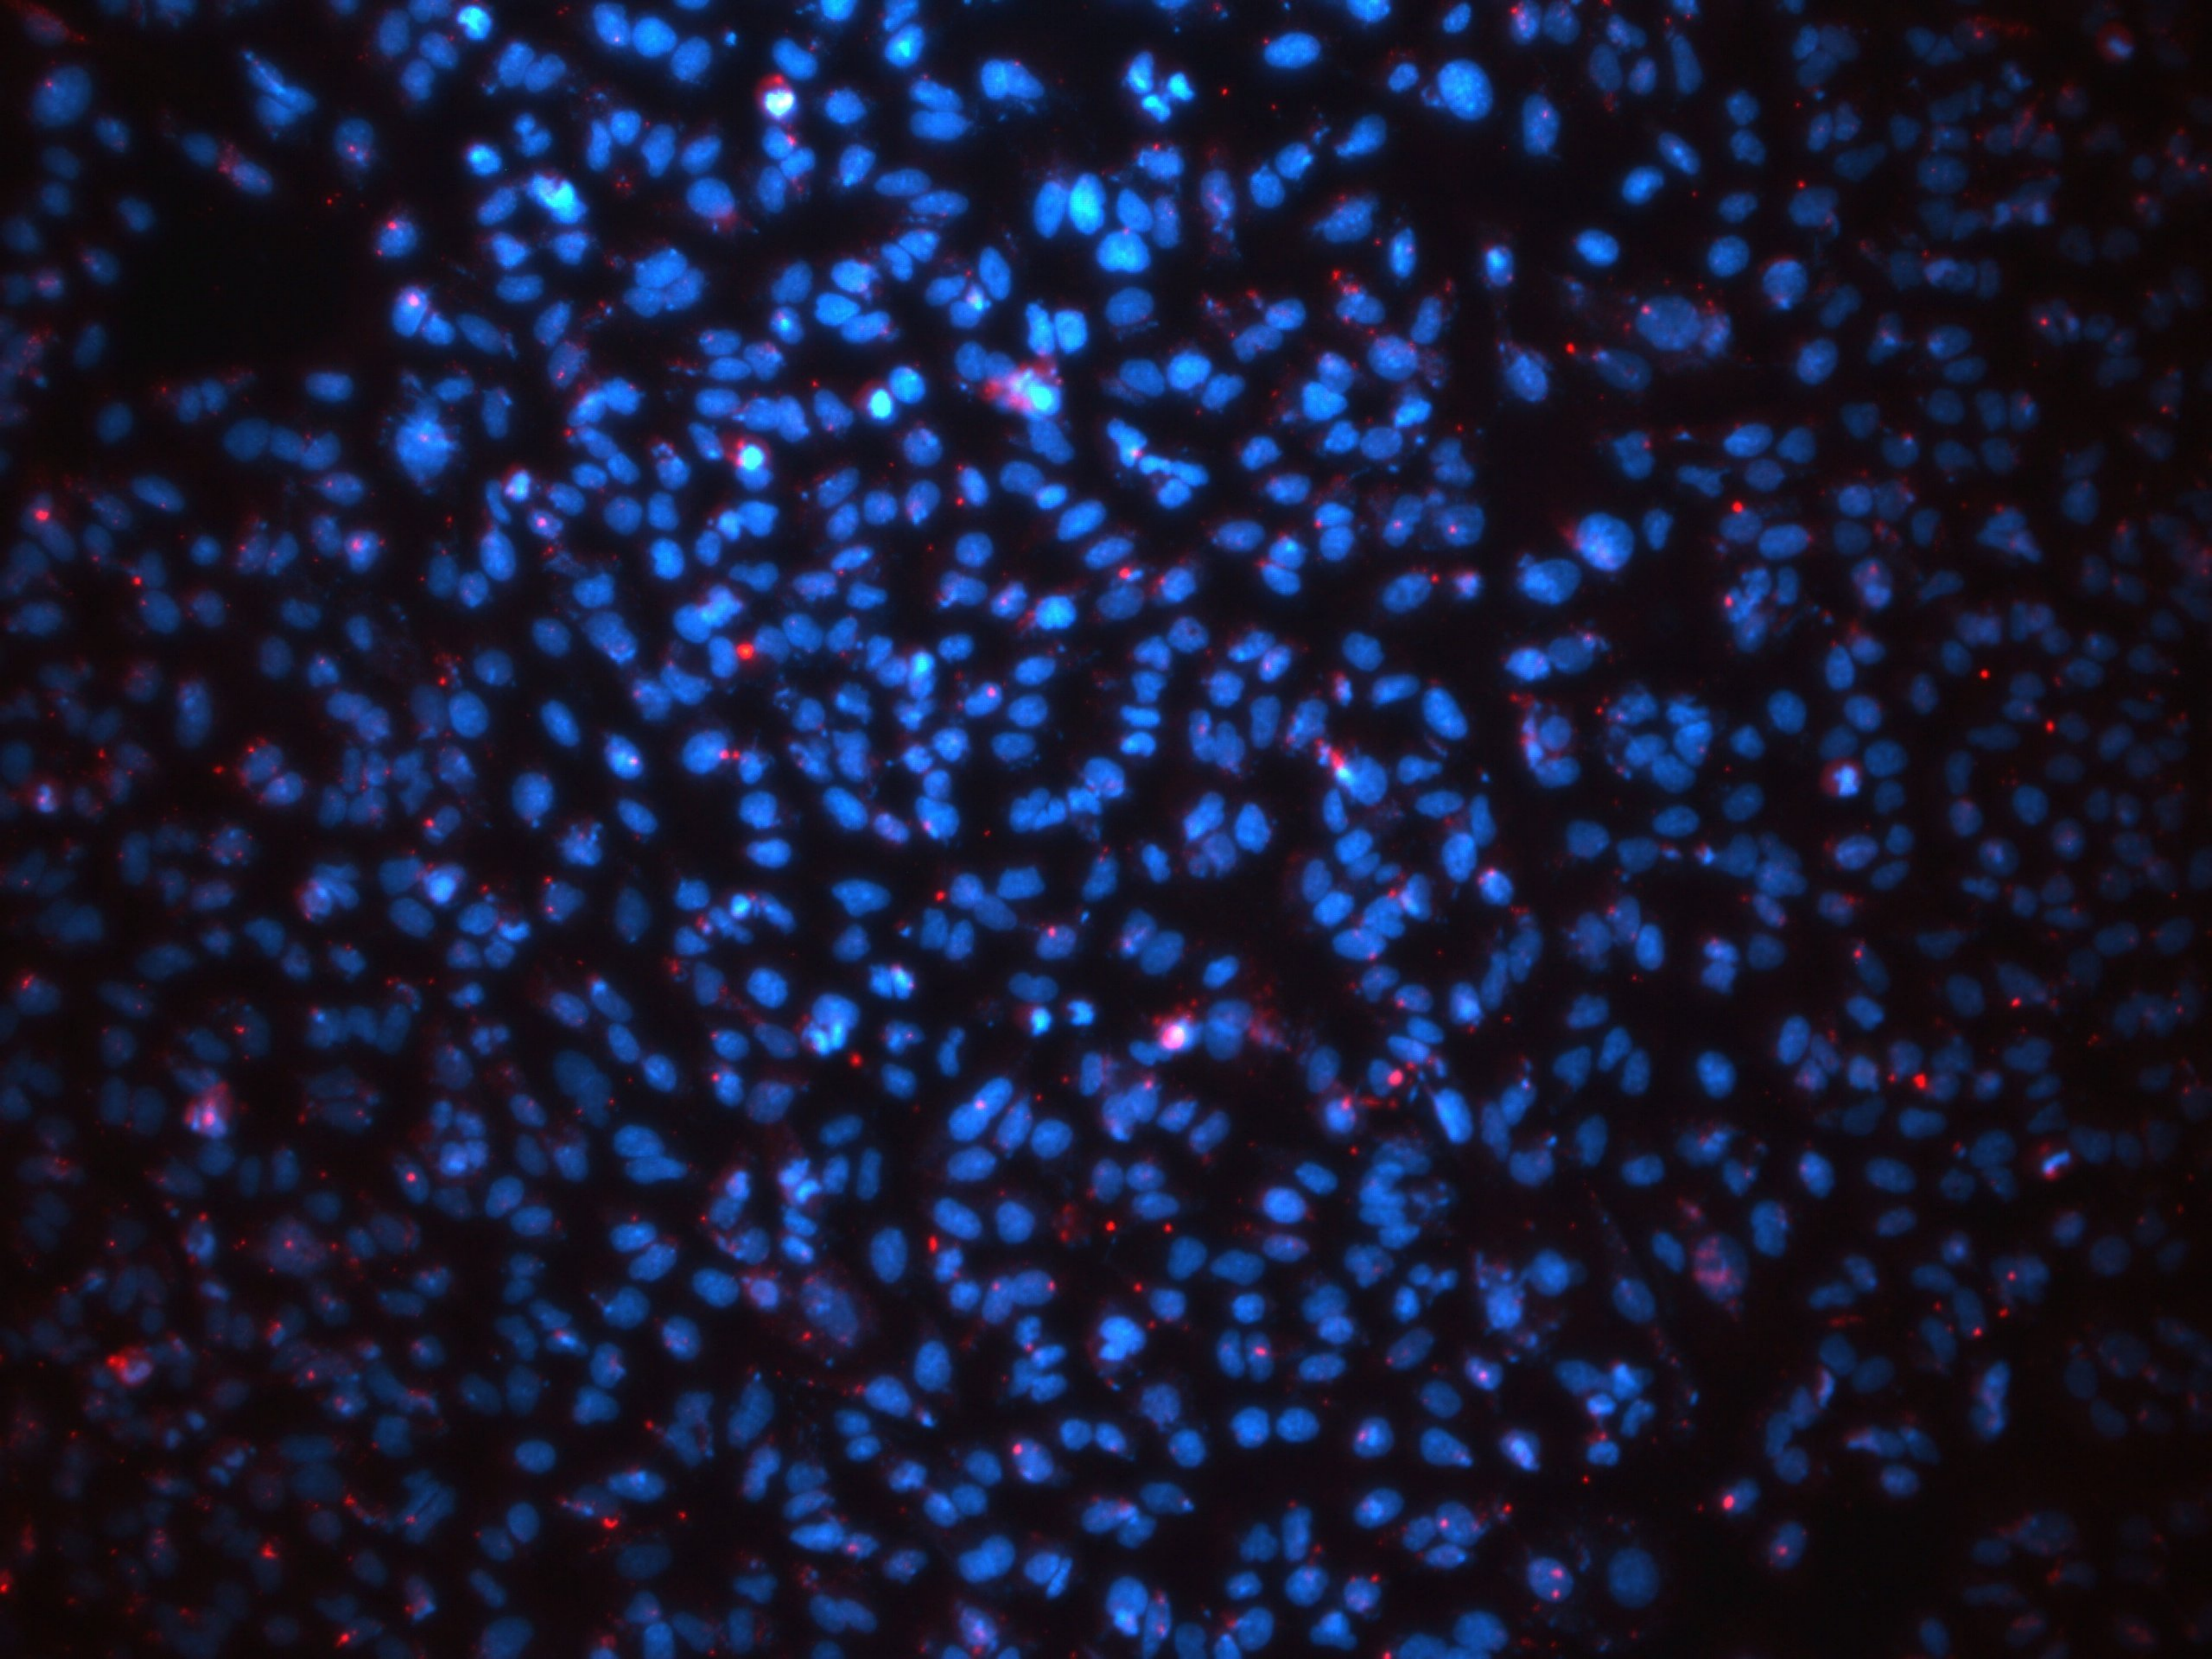

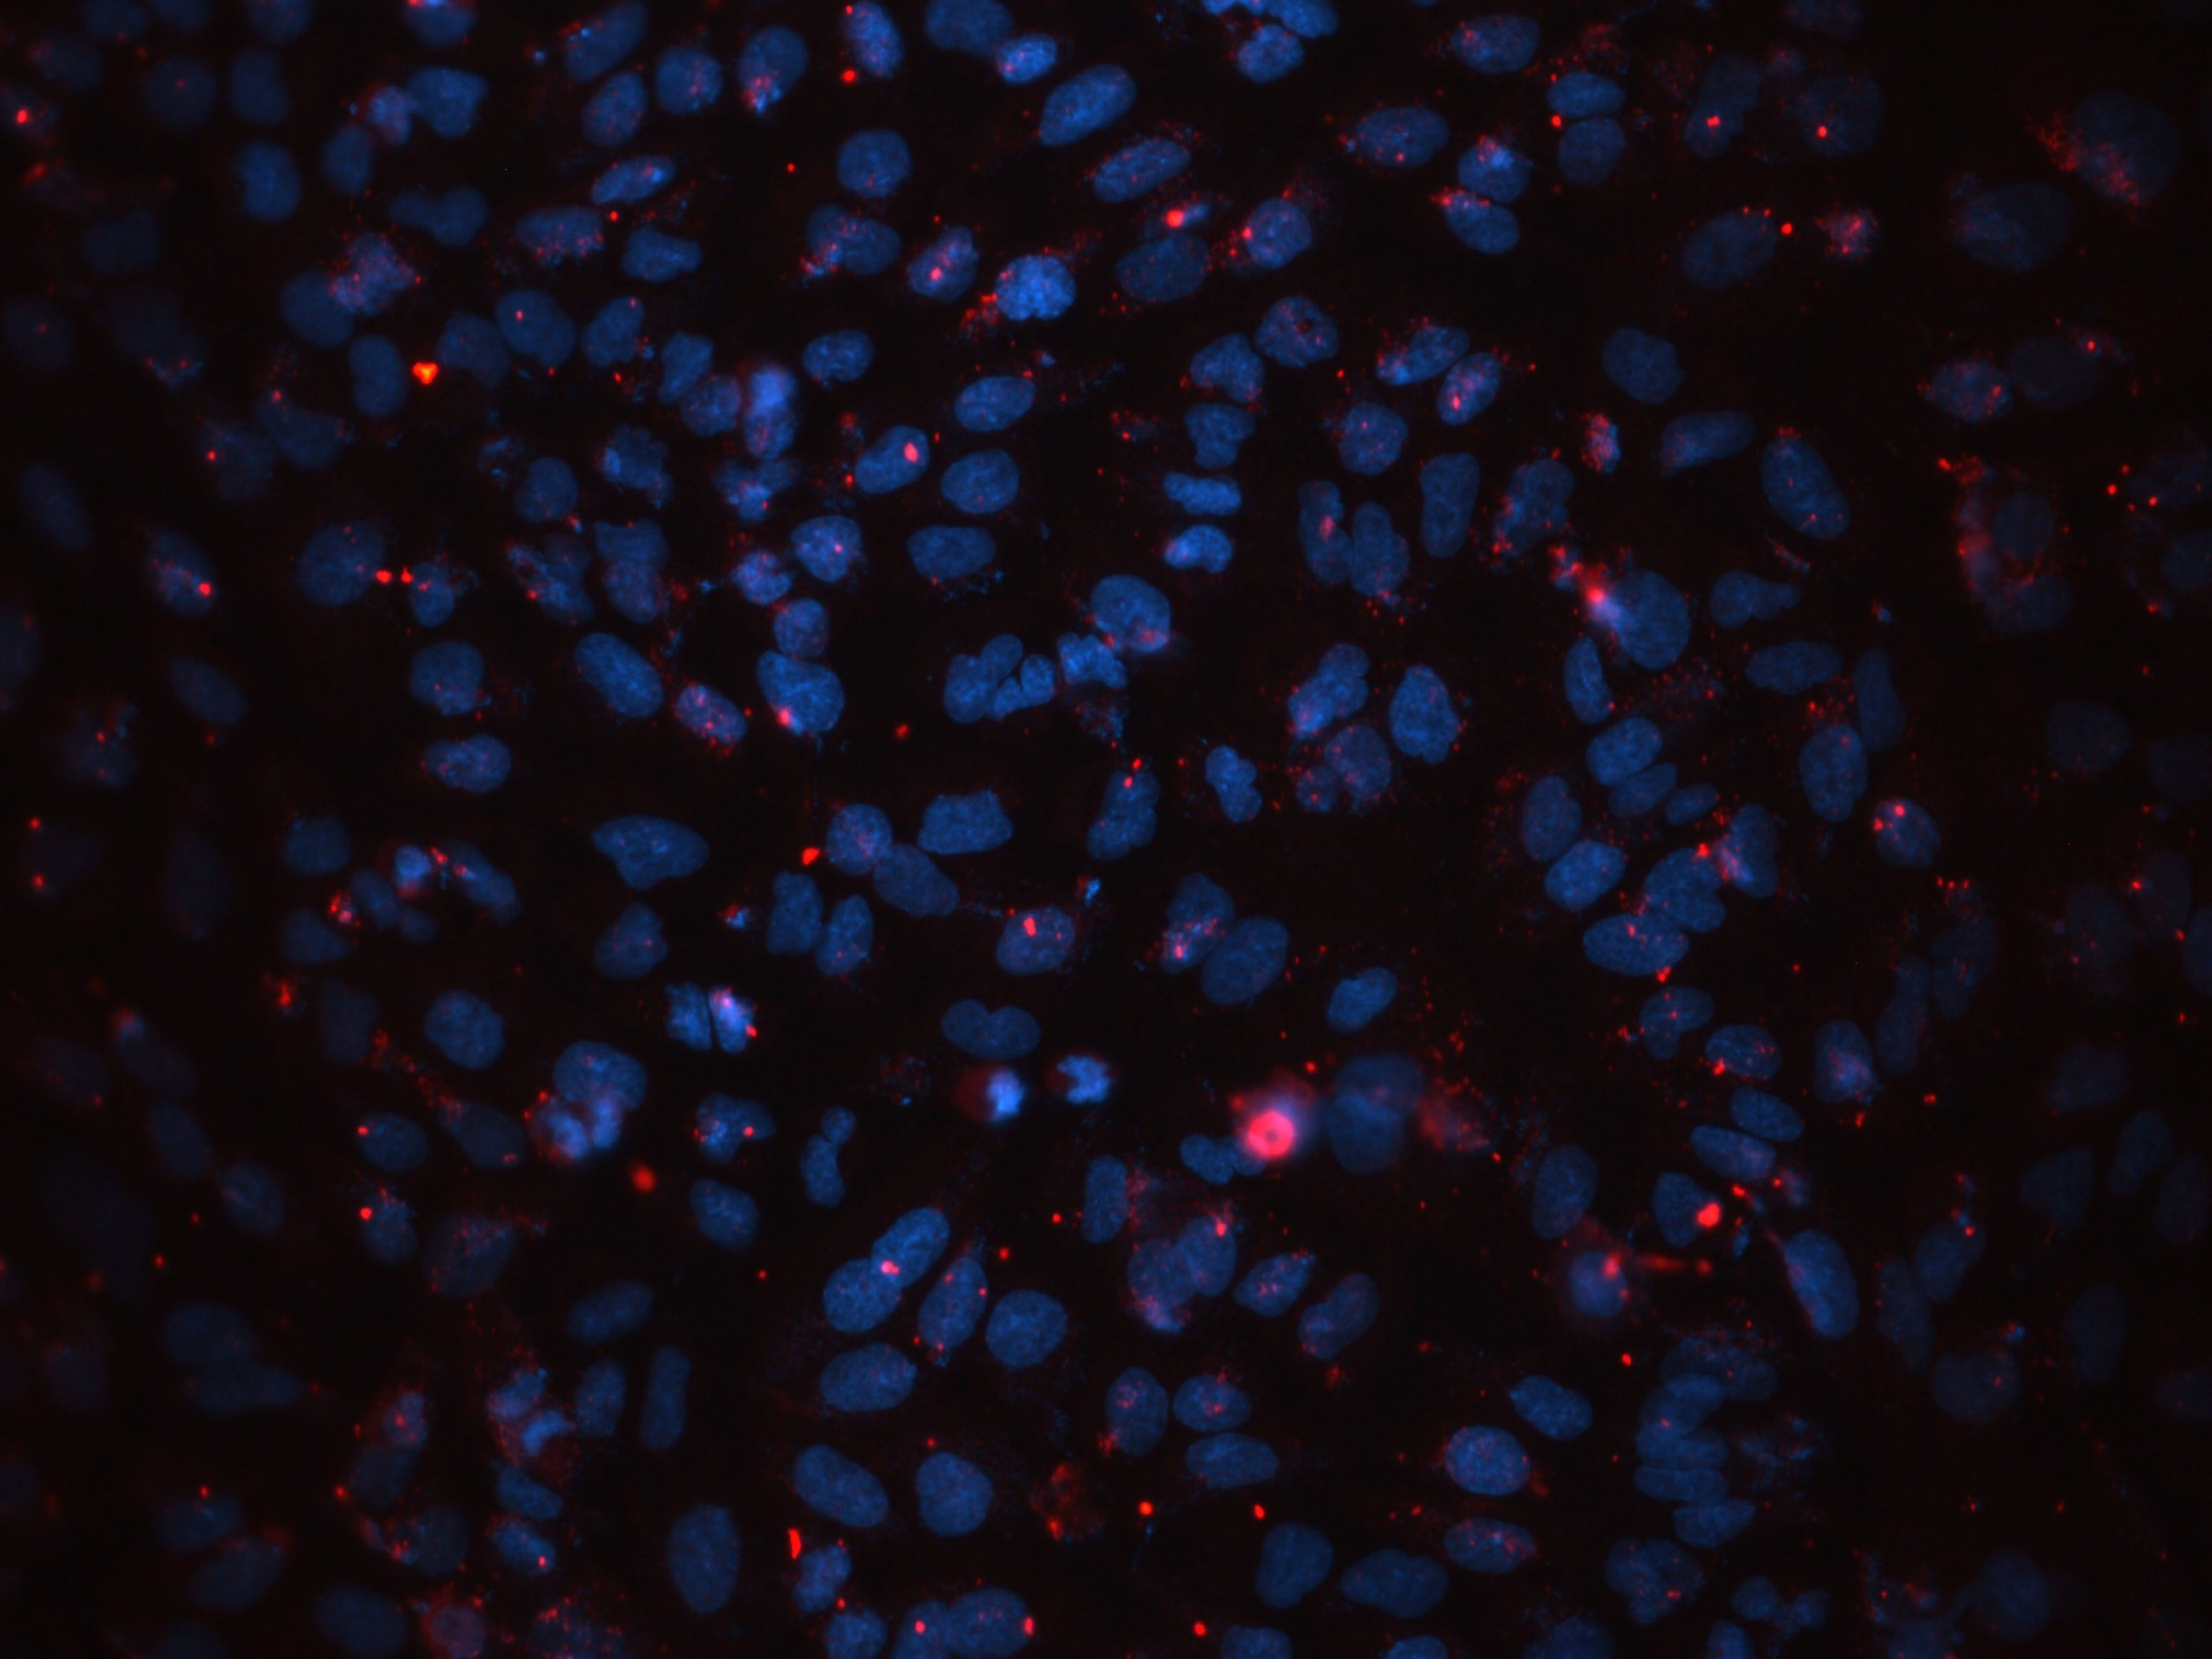

Supplement: Supplementary file [file aging-v15i18-205038-supplementary-material-SD3.pdf]
