# Supplementary material for: ALDOC promotes non-small cell lung cancer through affecting MYC-mediated UBE2N transcription and regulating Wnt/β-catenin pathway
Source: publisher site journal article supplement (doi:10.18632/aging.205038), 2023-09-18
Supplement: Supplementary file [file aging-v15i18-205038-supplementary-material-SD4.pdf]

## Supplementary Information File 2. Gene chip analysis.

### Gene chip analysis\_All\_probe\_FDR\_FC

| ProbeID  | Genesymbol | logFC    | P. Value | adj. P. Val |
|----------|------------|----------|----------|-------------|
| 11762533 | RAP1A      | 2.560714 | 1.57E-11 | 4.66E-07    |
| 11722728 | EGR2       | 2.805736 | 1.94E-11 | 4.66E-07    |
| 11721291 | F3         | 2.286221 | 2.86E-11 | 4.66E-07    |
| 11744683 | FKBP4      | -2.00882 | 5.81E-11 | 5.84E-07    |
| 11732191 | RAD51AP1   | -2.34297 | 6.62E-11 | 5.84E-07    |
| 11728696 | DUT        | -1.87905 | 8.46E-11 | 5.84E-07    |
| 11718482 | UBE2N      | -2.05145 | 1.08E-10 | 5.84E-07    |
| 11719292 | ITGB1BP1   | -1.98742 | 1.21E-10 | 5.84E-07    |
| 11717144 | LANCL1     | -1.71481 | 1.43E-10 | 5.84E-07    |
| 11716468 | ISCA1      | -1.78934 | 1.46E-10 | 5.84E-07    |
| 11743190 | RAD51AP1   | -2.30509 | 1.60E-10 | 5.84E-07    |
| 11728376 | NMU        | -1.86591 | 1.63E-10 | 5.84E-07    |
| 11729129 | CPA4       | 1.88552  | 1.70E-10 | 5.84E-07    |
| 11722850 | BIRC3      | 2.213271 | 2.07E-10 | 5.84E-07    |
| 11721138 | LSM6       | -2.02355 | 2.07E-10 | 5.84E-07    |
| 11723199 | HNRNPA3    | -2.45409 | 2.11E-10 | 5.84E-07    |
| 11729128 | CPA4       | 1.696111 | 2.27E-10 | 5.84E-07    |
| 11726583 | CKAP4      | -1.66332 | 2.32E-10 | 5.84E-07    |
| 11720825 | JAG1       | 1.691126 | 2.36E-10 | 5.84E-07    |
| 11748367 | GLS        | 2.002125 | 2.64E-10 | 5.84E-07    |
| 11727523 | ZNF267     | 1.982918 | 2.85E-10 | 5.84E-07    |
| 11727522 | ZNF267     | 2.015084 | 2.86E-10 | 5.84E-07    |
| 11742698 | SCG5       | 2.436254 | 2.89E-10 | 5.84E-07    |
| 11727181 | SKIL       | 1.631591 | 2.90E-10 | 5.84E-07    |
| 11734549 | TGFB1      | 1.590836 | 3.10E-10 | 5.84E-07    |
| 11727131 | CPD        | -1.86291 | 3.11E-10 | 5.84E-07    |
| 11736404 | IAH1       | -2.43885 | 3.42E-10 | 6.02E-07    |
| 11721137 | LSM6       | -1.81302 | 3.46E-10 | 6.02E-07    |
| 11715743 | RCC2       | -1.46826 | 3.57E-10 | 6.02E-07    |
| 11728377 | NMU        | -2.09142 | 3.72E-10 | 6.06E-07    |
| 11717142 | LANCL1     | -1.45388 | 3.93E-10 | 6.20E-07    |
| 11747886 | RAD51AP1   | -1.94129 | 4.11E-10 | 6.28E-07    |
| 11758564 | NUDT15     | -2.71292 | 4.40E-10 | 6.43E-07    |
| 11722851 | BIRC3      | 2.055566 | 4.52E-10 | 6.43E-07    |
| 11736240 | AAED1      | -1.59724 | 4.83E-10 | 6.43E-07    |
| 11738800 | BRWD3      | 1.514104 | 4.96E-10 | 6.43E-07    |
| 11718483 | UBE2N      | -2.13635 | 4.98E-10 | 6.43E-07    |
| 11727111 | FNBP1      | -1.7203  | 5.00E-10 | 6.43E-07    |
| 11722852 | BIRC3      | 1.980963 | 5.13E-10 | 6.43E-07    |
| 11718397 | JUN        | 1.604618 | 5.84E-10 | 7.06E-07    |
| 11754869 | ZNF267     | 1.925751 | 6.08E-10 | 7.06E-07    |
| 11723246 | SFRP1      | -1.38705 | 6.21E-10 | 7.06E-07    |
| 11715441 | CTGF       | 1.464066 | 6.32E-10 | 7.06E-07    |
| 11721314 | ESYT2      | -1.60356 | 6.64E-10 | 7.06E-07    |
| 11720293 | LIN28B     | 1.830698 | 6.74E-10 | 7.06E-07    |
| 11732997 | MCM6       | -1.49277 | 6.79E-10 | 7.06E-07    |
| 11738629 | PXYLP1     | -1.34024 | 6.96E-10 | 7.06E-07    |
| 11726218 | PRDM1      | 2.177436 | 7.10E-10 | 7.06E-07    |
| 11727023 | TMEM64     | 1.473207 | 7.10E-10 | 7.06E-07    |
| 11754392 | FAM208A    | -2.06598 | 7.38E-10 | 7.06E-07    |

|                    |          |          |          |
|--------------------|----------|----------|----------|
| 11719698_HSPB11    | -1.59826 | 7.72E-10 | 7.06E-07 |
| 11757863_TMEM261   | -1.69424 | 8.02E-10 | 7.06E-07 |
| 11716286_VAMP3     | -1.68183 | 8.08E-10 | 7.06E-07 |
| 11747517_FAM45A // | -1.53299 | 8.13E-10 | 7.06E-07 |
| 11743290_GALNT1    | -1.69803 | 8.19E-10 | 7.06E-07 |
| 11754659_TPD52     | -1.7446  | 8.22E-10 | 7.06E-07 |
| 11754082_LOC100128 | -1.41945 | 8.34E-10 | 7.06E-07 |
| 11721290_F3        | 2.371637 | 8.38E-10 | 7.06E-07 |
| 11717900_ASF1B     | -1.53539 | 8.57E-10 | 7.10E-07 |
| 11720926_POLR2G    | -1.8429  | 8.86E-10 | 7.22E-07 |
| 11720893_SOS1      | -1.32808 | 9.02E-10 | 7.23E-07 |
| 11756600_TPD52     | -1.75324 | 9.23E-10 | 7.26E-07 |
| 11743582_EEF1E1    | -1.48121 | 9.44E-10 | 7.26E-07 |
| 11719242_CAMK2N1   | -1.65666 | 9.57E-10 | 7.26E-07 |
| 11758138_MDC1      | -1.92731 | 9.88E-10 | 7.26E-07 |
| 11755242_SKIL      | 1.659653 | 9.90E-10 | 7.26E-07 |
| 11745250_TMEM40    | 1.642201 | 1.02E-09 | 7.26E-07 |
| 11743816_S1PR1     | 1.574513 | 1.04E-09 | 7.26E-07 |
| 11716890_TMEM261   | -1.67221 | 1.04E-09 | 7.26E-07 |
| 11730012_KBTBD8    | 1.491232 | 1.05E-09 | 7.26E-07 |
| 11725054_HNMT      | 1.49482  | 1.06E-09 | 7.26E-07 |
| 11739535_FN1       | 1.425989 | 1.07E-09 | 7.26E-07 |
| 11715967_NEDD8     | -1.40787 | 1.09E-09 | 7.32E-07 |
| 11715440_CTGF      | 1.408882 | 1.13E-09 | 7.44E-07 |
| 11749460_FN1       | 1.486691 | 1.15E-09 | 7.44E-07 |
| 11717481_FKBP10    | -1.5071  | 1.16E-09 | 7.44E-07 |
| 11731919_TMPO      | -1.28971 | 1.20E-09 | 7.56E-07 |
| 11738892_TPM1      | 1.484563 | 1.21E-09 | 7.56E-07 |
| 11755733_F3        | 1.557632 | 1.25E-09 | 7.65E-07 |
| 11745205_TPD52     | -1.78977 | 1.28E-09 | 7.65E-07 |
| 11728294 ICT1      | -2.74337 | 1.29E-09 | 7.65E-07 |
| 11727152_PRICKLE1  | 1.395967 | 1.30E-09 | 7.65E-07 |
| 11751629_ASF1B     | -1.63621 | 1.30E-09 | 7.65E-07 |
| 11715649_TXNRD1    | -1.32833 | 1.32E-09 | 7.67E-07 |
| 11716210_CITED2    | 1.381797 | 1.33E-09 | 7.67E-07 |
| 11758139_SDC1      | -1.42937 | 1.39E-09 | 7.89E-07 |
| 11716854_IMPAD1    | -1.55509 | 1.43E-09 | 8.01E-07 |
| 11716291_HNRNPA0   | -1.41591 | 1.48E-09 | 8.21E-07 |
| 11743151_GLS       | 2.230645 | 1.54E-09 | 8.45E-07 |
| 11746931_INHBA     | 1.339773 | 1.59E-09 | 8.61E-07 |
| 11719273_UBE2D3    | -1.44519 | 1.63E-09 | 8.64E-07 |
| 11741553_SKIL      | 1.681688 | 1.63E-09 | 8.64E-07 |
| 11729643_TPD52     | -1.78489 | 1.65E-09 | 8.64E-07 |
| 11715493_CYR61     | 1.294509 | 1.67E-09 | 8.64E-07 |
| 11758201_IMPAD1    | -1.70444 | 1.70E-09 | 8.64E-07 |
| 11757472_NEDD8     | -1.41674 | 1.76E-09 | 8.64E-07 |
| 11754334_EGR1      | 1.24662  | 1.77E-09 | 8.64E-07 |
| 11719272_UBE2D3    | -1.40285 | 1.78E-09 | 8.64E-07 |
| 11717143_LANCL1    | -1.99671 | 1.78E-09 | 8.64E-07 |
| 11716875_C14orf142 | -1.68807 | 1.80E-09 | 8.64E-07 |
| 11741409_RASAL2    | 1.370064 | 1.81E-09 | 8.64E-07 |

|                    |          |          |          |
|--------------------|----------|----------|----------|
| 11718859_NUDCD3    | -1.30287 | 1.81E-09 | 8.64E-07 |
| 11716066_SLC37A4   | -1.37108 | 1.82E-09 | 8.64E-07 |
| 11719738_DCP2      | 1.256685 | 1.86E-09 | 8.72E-07 |
| 11725999_FAS       | 1.410714 | 1.87E-09 | 8.72E-07 |
| 11746100_ZCCHC17   | -1.32097 | 1.92E-09 | 8.83E-07 |
| 11728388_TSPAN2    | 2.077624 | 1.94E-09 | 8.83E-07 |
| 11724682_TGFBR2    | 1.252381 | 1.97E-09 | 8.83E-07 |
| 11715435_TIMP3     | -1.82034 | 1.97E-09 | 8.83E-07 |
| 11715862_CDIPT     | -1.4334  | 2.00E-09 | 8.83E-07 |
| 11742309_TPM1      | 1.425303 | 2.01E-09 | 8.83E-07 |
| 11715968_LOC100128 | -1.53268 | 2.07E-09 | 9.04E-07 |
| 11718856_NUDCD3    | -1.8247  | 2.09E-09 | 9.04E-07 |
| 11757835_CPEB4     | 1.194847 | 2.12E-09 | 9.09E-07 |
| 11748534_DDAH1     | 1.202538 | 2.15E-09 | 9.09E-07 |
| 11739536_FN1       | 1.522518 | 2.16E-09 | 9.09E-07 |
| 11739973_NUAK1     | 1.273029 | 2.19E-09 | 9.15E-07 |
| 11728464_ZNF562    | 1.234157 | 2.27E-09 | 9.22E-07 |
| 11751122_SDC2      | 1.264935 | 2.30E-09 | 9.22E-07 |
| 11745837_FN1       | 1.468364 | 2.30E-09 | 9.22E-07 |
| 11741015_CDCA8     | -1.25974 | 2.33E-09 | 9.22E-07 |
| 11722188_MTDH      | -1.52273 | 2.33E-09 | 9.22E-07 |
| 11718400_PNP       | -1.39573 | 2.34E-09 | 9.22E-07 |
| 11725585_PI15      | 1.602631 | 2.37E-09 | 9.22E-07 |
| 11743618_ITGA2     | 1.17013  | 2.37E-09 | 9.22E-07 |
| 11751032_SLC37A4   | -1.32214 | 2.38E-09 | 9.22E-07 |
| 11721365_IREB2     | 1.283582 | 2.42E-09 | 9.31E-07 |
| 11716058_EFTUD2    | -1.15262 | 2.44E-09 | 9.31E-07 |
| 11718394_JUN       | 1.807433 | 2.49E-09 | 9.45E-07 |
| 11749444_CPA4      | 1.659507 | 2.53E-09 | 9.45E-07 |
| 11719062_SESN1     | 1.204481 | 2.55E-09 | 9.45E-07 |
| 11718939_TNFAIP3   | 1.352158 | 2.56E-09 | 9.45E-07 |
| 11716509_AKR1A1    | -1.56912 | 2.57E-09 | 9.45E-07 |
| 11715424_BCAP31    | -1.23835 | 2.62E-09 | 9.54E-07 |
| 11746594_MCM2      | -1.18464 | 2.67E-09 | 9.68E-07 |
| 11757597_YKT6      | -1.27342 | 2.70E-09 | 9.71E-07 |
| 11723752_MEOX2     | -1.29207 | 2.74E-09 | 9.77E-07 |
| 11756504_LOC728715 | -1.2035  | 2.88E-09 | 1.02E-06 |
| 11733456_SP4       | -1.37495 | 2.95E-09 | 1.04E-06 |
| 11736249_KIAA0101  | -2.08538 | 2.99E-09 | 1.04E-06 |
| 11755871_TNRC6A    | 1.138819 | 3.01E-09 | 1.04E-06 |
| 11732833_C9orf135  | 1.429245 | 3.05E-09 | 1.04E-06 |
| 11734735_FAR1      | -1.82599 | 3.06E-09 | 1.04E-06 |
| 11729641_TPD52     | -1.67319 | 3.07E-09 | 1.04E-06 |
| 11750416_TXNRD1    | -1.41606 | 3.12E-09 | 1.05E-06 |
| 11746744_TBC1D4    | 1.148723 | 3.13E-09 | 1.05E-06 |
| 11722999_UBE2D3    | -1.16665 | 3.16E-09 | 1.05E-06 |
| 11750805_LIMCH1    | 1.219247 | 3.17E-09 | 1.05E-06 |
| 11749965_ZCCHC17   | -1.21687 | 3.23E-09 | 1.06E-06 |
| 11726597_DUT       | -1.81677 | 3.26E-09 | 1.06E-06 |
| 11721803_BUB3      | -1.31157 | 3.28E-09 | 1.06E-06 |
| 11724951_CPEB2     | 1.347656 | 3.33E-09 | 1.07E-06 |

|                    |          |          |          |
|--------------------|----------|----------|----------|
| 11725385_UGCG      | 1.274149 | 3.38E-09 | 1.07E-06 |
| 11725335_MZT1      | -1.09645 | 3.38E-09 | 1.07E-06 |
| 11715423_BCAP31    | -1.2857  | 3.46E-09 | 1.08E-06 |
| 11735016_NEDD4     | 1.184825 | 3.46E-09 | 1.08E-06 |
| 11741535_TMEM2     | 1.208098 | 3.48E-09 | 1.08E-06 |
| 11733030_AIDA      | -1.37495 | 3.51E-09 | 1.08E-06 |
| 11725752_FBXW7     | 1.12302  | 3.52E-09 | 1.08E-06 |
| 11723200_HNRNPA3   | -1.14543 | 3.60E-09 | 1.10E-06 |
| 11731496_INHBA     | 1.492949 | 3.61E-09 | 1.10E-06 |
| 11758221_ARRDC3    | 1.317271 | 3.76E-09 | 1.12E-06 |
| 11715742_RCC2      | -1.42642 | 3.77E-09 | 1.12E-06 |
| 11755475_MTDH      | -1.1743  | 3.78E-09 | 1.12E-06 |
| 11728479_CCDC181   | 1.168326 | 3.78E-09 | 1.12E-06 |
| 11718747_PCGF2     | -1.15431 | 3.81E-09 | 1.12E-06 |
| 11716753_GNS       | -1.36042 | 3.83E-09 | 1.12E-06 |
| 11727586_NUDT12    | -1.18286 | 3.84E-09 | 1.12E-06 |
| 11755928_MMP1      | 1.556457 | 3.87E-09 | 1.12E-06 |
| 11718913_PDZD2     | -1.26781 | 3.92E-09 | 1.13E-06 |
| 11755315_RNPEP     | -1.18903 | 3.94E-09 | 1.13E-06 |
| 11757792_NUDCD3    | -1.26828 | 3.97E-09 | 1.13E-06 |
| 11725155_FJX1      | 1.099549 | 4.05E-09 | 1.14E-06 |
| 11716064_SLC37A4   | -1.41901 | 4.11E-09 | 1.15E-06 |
| 11753877_RRM2B     | 1.193835 | 4.22E-09 | 1.17E-06 |
| 11741536_TMEM2     | 1.105286 | 4.22E-09 | 1.17E-06 |
| 11730774_TMEM14A   | -1.10077 | 4.24E-09 | 1.17E-06 |
| 11715422_BCAP31    | -1.23642 | 4.30E-09 | 1.18E-06 |
| 11721428_TBX3      | 1.253106 | 4.38E-09 | 1.20E-06 |
| 11719634_KLF4      | 1.600992 | 4.43E-09 | 1.20E-06 |
| 11719525_DICER1    | 1.065973 | 4.51E-09 | 1.20E-06 |
| 11719739_DCP2      | 1.229366 | 4.54E-09 | 1.20E-06 |
| 11744519_POLE2     | -1.1375  | 4.54E-09 | 1.20E-06 |
| 11733671_EYA1      | -1.25716 | 4.54E-09 | 1.20E-06 |
| 11747500_AP1M1     | -1.18684 | 4.55E-09 | 1.20E-06 |
| 11718761_WLS       | -1.18656 | 4.61E-09 | 1.21E-06 |
| 11729996_SLFN12    | 1.036762 | 4.64E-09 | 1.21E-06 |
| 11756746_AKIP1 /// | 1.498723 | 4.66E-09 | 1.21E-06 |
| 11726013_AJUBA     | 1.044404 | 4.71E-09 | 1.22E-06 |
| 11726217_PRDM1     | 1.494225 | 4.73E-09 | 1.22E-06 |
| 11754176_IL24      | 1.108943 | 4.77E-09 | 1.22E-06 |
| 11742942_UBE2D3    | -1.33583 | 4.84E-09 | 1.23E-06 |
| 11716065_SLC37A4   | -1.2522  | 4.88E-09 | 1.23E-06 |
| 11716417_UNG       | -1.14636 | 4.89E-09 | 1.23E-06 |
| 11758478_CDCA7     | -1.39805 | 4.92E-09 | 1.23E-06 |
| 11732927_KLRC1     | 1.146818 | 4.94E-09 | 1.23E-06 |
| 11755137_CCDC109B  | -2.85304 | 5.02E-09 | 1.24E-06 |
| 11728362_KLHL28    | 1.314049 | 5.17E-09 | 1.25E-06 |
| 11741105_FHL2      | 1.062448 | 5.19E-09 | 1.25E-06 |
| 11734681_ATG4B     | -1.20183 | 5.22E-09 | 1.25E-06 |
| 11754063_ASF1B     | -1.38095 | 5.23E-09 | 1.25E-06 |
| 11736279_MUC7      | 1.349366 | 5.24E-09 | 1.25E-06 |
| 11745006_SDC2      | 1.023397 | 5.26E-09 | 1.25E-06 |

|                    |          |          |          |
|--------------------|----------|----------|----------|
| 11720421_AFF4      | 1.477324 | 5.29E-09 | 1.25E-06 |
| 11715650_TXNRD1    | -1.42105 | 5.31E-09 | 1.25E-06 |
| 11736013_GLE1      | -2.25634 | 5.32E-09 | 1.25E-06 |
| 11741191_BCAP31    | -1.21218 | 5.33E-09 | 1.25E-06 |
| 11717428_GNB1      | -1.15239 | 5.34E-09 | 1.25E-06 |
| 11747751_SLC2A14 / | 1.049646 | 5.35E-09 | 1.25E-06 |
| 11720799_RAB8B     | 1.031037 | 5.38E-09 | 1.25E-06 |
| 11756633_LIMCH1    | 1.250031 | 5.41E-09 | 1.25E-06 |
| 11746889_CKAP4     | -1.42137 | 5.42E-09 | 1.25E-06 |
| 11725998_FAS       | 1.324483 | 5.44E-09 | 1.25E-06 |
| 11751154_ALDOC     | -2.09317 | 5.47E-09 | 1.25E-06 |
| 11721647_CTNN1 //  | -1.23713 | 5.54E-09 | 1.26E-06 |
| 11723247_SFRP1     | -1.4532  | 5.59E-09 | 1.26E-06 |
| 11756207_PSME3     | -1.173   | 5.63E-09 | 1.26E-06 |
| 11757451_FKBP10    | -1.38028 | 5.63E-09 | 1.26E-06 |
| 11744985_FNDC3A    | 1.08729  | 5.66E-09 | 1.26E-06 |
| 11736729_RIMS2     | 1.800628 | 5.72E-09 | 1.27E-06 |
| 11729320_SOCS5     | 1.005724 | 5.72E-09 | 1.27E-06 |
| 11717658_CD109     | -1.19402 | 5.78E-09 | 1.27E-06 |
| 11753244_BDNF      | 1.252654 | 5.81E-09 | 1.27E-06 |
| 11737807_ABCB9     | 1.059731 | 5.84E-09 | 1.27E-06 |
| 11721516_SUDS3     | -1.12141 | 5.85E-09 | 1.27E-06 |
| 11719697_HSPB11    | -1.59606 | 5.85E-09 | 1.27E-06 |
| 11740430_FAM208A   | -1.87361 | 5.89E-09 | 1.27E-06 |
| 11716949_TM9SF3    | -1.17454 | 5.91E-09 | 1.27E-06 |
| 11717754_SEC14L1   | 1.172693 | 6.01E-09 | 1.27E-06 |
| 11734006_IRAK1     | -1.29992 | 6.05E-09 | 1.27E-06 |
| 11743197_TLR4      | 1.238289 | 6.06E-09 | 1.27E-06 |
| 11741116_FLG       | 2.12643  | 6.06E-09 | 1.27E-06 |
| 11726727_NABP1     | 1.261278 | 6.07E-09 | 1.27E-06 |
| 11724461_ALDOC     | -2.05563 | 6.13E-09 | 1.28E-06 |
| 11736429_STYX      | -1.03868 | 6.14E-09 | 1.28E-06 |
| 11724162_GXYLT1    | 1.298406 | 6.17E-09 | 1.28E-06 |
| 11722970_CREB5     | 1.448751 | 6.31E-09 | 1.29E-06 |
| 11742993_PSAT1     | -1.06813 | 6.32E-09 | 1.29E-06 |
| 11757718_MTDH      | -1.20957 | 6.35E-09 | 1.29E-06 |
| 11723095_CYLD      | 1.250768 | 6.38E-09 | 1.29E-06 |
| 11722422_PTRHD1    | -1.08438 | 6.40E-09 | 1.29E-06 |
| 11716633_TMEM50A   | -1.81101 | 6.40E-09 | 1.29E-06 |
| 11745361_CRNDE     | -1.33543 | 6.43E-09 | 1.29E-06 |
| 11720796_NUP58     | -1.33637 | 6.47E-09 | 1.30E-06 |
| 11743617_ITGA2     | 1.176164 | 6.57E-09 | 1.31E-06 |
| 11748382_SMURF2    | 1.049981 | 6.60E-09 | 1.31E-06 |
| 11718250_TBC1D13   | -1.30133 | 6.61E-09 | 1.31E-06 |
| 11716226_LIMA1     | 1.009432 | 6.67E-09 | 1.31E-06 |
| 11718395_JUN       | 1.501369 | 6.75E-09 | 1.33E-06 |
| 11751115_GDA       | 1.37844  | 6.80E-09 | 1.33E-06 |
| 11746798_SDC2      | 1.254496 | 6.84E-09 | 1.33E-06 |
| 11715460_DHCR24    | -1.18701 | 6.84E-09 | 1.33E-06 |
| 11734395_KLRC3     | 1.528837 | 6.89E-09 | 1.33E-06 |
| 11718773_SMARCE1   | -1.1474  | 6.95E-09 | 1.34E-06 |

|                   |          |          |          |
|-------------------|----------|----------|----------|
| 11728358_FAM13B   | 1.022867 | 7.07E-09 | 1.36E-06 |
| 11757679_SMAD5    | -1.07808 | 7.22E-09 | 1.36E-06 |
| 11735765_RAB30    | 1.204431 | 7.22E-09 | 1.36E-06 |
| 11753695_UBE2N    | -1.64673 | 7.23E-09 | 1.36E-06 |
| 11723198_HNRNPA3  | -1.24845 | 7.25E-09 | 1.36E-06 |
| 11747079_ALDOC    | -1.92141 | 7.25E-09 | 1.36E-06 |
| 11752545_PDLIM5   | 1.029046 | 7.29E-09 | 1.37E-06 |
| 11755494_SLC37A4  | -1.36527 | 7.35E-09 | 1.37E-06 |
| 11755762_TMEM2    | 1.221994 | 7.36E-09 | 1.37E-06 |
| 11719162_GPT2     | -1.3541  | 7.45E-09 | 1.38E-06 |
| 11717546_MPRIP    | -1.09344 | 7.46E-09 | 1.38E-06 |
| 11732192_RAD51AP1 | -1.91509 | 7.58E-09 | 1.39E-06 |
| 11756203_KIAA1143 | -1.07493 | 7.66E-09 | 1.40E-06 |
| 11722971_CREB5    | 1.339072 | 7.68E-09 | 1.40E-06 |
| 11719368_MAPKAPK2 | -1.45042 | 7.73E-09 | 1.40E-06 |
| 11719009_PAPOLA   | -1.08228 | 7.78E-09 | 1.41E-06 |
| 11731445_ANKRD1   | 2.121436 | 7.88E-09 | 1.42E-06 |
| 11741023_SMAD5    | -1.12908 | 7.91E-09 | 1.42E-06 |
| 11757924_SIPA1L2  | 1.110624 | 8.01E-09 | 1.43E-06 |
| 11745007_SDC2     | 1.195398 | 8.03E-09 | 1.43E-06 |
| 11733997_SERPINB7 | 1.283482 | 8.08E-09 | 1.44E-06 |
| 11755094_MEX3D    | -1.58483 | 8.16E-09 | 1.44E-06 |
| 11743640_FNDC3A   | 1.044654 | 8.18E-09 | 1.44E-06 |
| 11751214_RGS7     | 1.230603 | 8.19E-09 | 1.44E-06 |
| 11720367_TMEM2    | 1.171012 | 8.25E-09 | 1.44E-06 |
| 11748678_F2R      | 1.15484  | 8.27E-09 | 1.44E-06 |
| 11749964_ZCCHC17  | -1.19067 | 8.29E-09 | 1.44E-06 |
| 11715442_CTGF     | 1.192167 | 8.39E-09 | 1.45E-06 |
| 11739534_FN1      | 1.480188 | 8.47E-09 | 1.46E-06 |
| 11736289_PTPRG    | 1.081618 | 8.73E-09 | 1.50E-06 |
| 11739367_ASPH     | -1.01647 | 8.85E-09 | 1.52E-06 |
| 11739524_MPRIP    | -1.145   | 9.00E-09 | 1.54E-06 |
| 11747210_SRI      | -1.23283 | 9.03E-09 | 1.54E-06 |
| 11733187_IL7R     | 1.324521 | 9.05E-09 | 1.54E-06 |
| 11725399_MLLT1    | -1.22383 | 9.10E-09 | 1.54E-06 |
| 11751647_IL7R     | 1.346633 | 9.16E-09 | 1.54E-06 |
| 11735174_IL32     | 1.206563 | 9.16E-09 | 1.54E-06 |
| 11726533_CCDC148  | 1.125962 | 9.18E-09 | 1.54E-06 |
| 11718396_JUN      | 1.305371 | 9.25E-09 | 1.54E-06 |
| 11725418_LPCAT2   | 1.090987 | 9.27E-09 | 1.54E-06 |
| 11739798_LY6K     | -1.64638 | 9.46E-09 | 1.57E-06 |
| 11749167_PXYLP1   | -1.07792 | 9.55E-09 | 1.58E-06 |
| 11717860_EGR1     | 1.59349  | 9.67E-09 | 1.59E-06 |
| 11752081_EPT1     | 1.059938 | 9.70E-09 | 1.59E-06 |
| 11744021_CHD6     | -1.07831 | 9.83E-09 | 1.61E-06 |
| 11728285_RBMS2    | -1.09223 | 9.95E-09 | 1.62E-06 |
| 11755387_SACM1L   | -1.18623 | 1.02E-08 | 1.64E-06 |
| 11763263_SRSF11   | -0.95516 | 1.02E-08 | 1.64E-06 |
| 11743620_WHAMM    | 1.052752 | 1.02E-08 | 1.64E-06 |
| 11747314_PDP1     | 1.026887 | 1.02E-08 | 1.64E-06 |
| 11740354_EFTUD2   | -1.15491 | 1.02E-08 | 1.64E-06 |

|                    |          |          |          |
|--------------------|----------|----------|----------|
| 11754081_NEDD8     | -1.41048 | 1.03E-08 | 1.65E-06 |
| 11744835_CBS /// C | -1.03463 | 1.04E-08 | 1.65E-06 |
| 11751520_NCBP2     | -1.1002  | 1.04E-08 | 1.65E-06 |
| 11717901_ZCCHC17   | -1.25715 | 1.05E-08 | 1.66E-06 |
| 11741897_MMP1      | 1.786453 | 1.06E-08 | 1.66E-06 |
| 11747208_MYSM1     | 1.153593 | 1.06E-08 | 1.67E-06 |
| 11757650_FN1       | 1.230318 | 1.07E-08 | 1.67E-06 |
| 11755281_TGFBI     | 1.326932 | 1.07E-08 | 1.67E-06 |
| 11758219_RRM2      | -1.26332 | 1.08E-08 | 1.67E-06 |
| 11729319_SOCS5     | 1.068798 | 1.08E-08 | 1.67E-06 |
| 11726289_GRAMD3    | 1.194749 | 1.08E-08 | 1.67E-06 |
| 11748024_CLK4      | 1.136486 | 1.09E-08 | 1.69E-06 |
| 11757735_DNAJB9    | 1.0997   | 1.10E-08 | 1.69E-06 |
| 11728863_GINS1     | -1.01129 | 1.10E-08 | 1.69E-06 |
| 11722424_NEDD4L    | 0.922539 | 1.13E-08 | 1.72E-06 |
| 11743055_PLAA      | -1.2163  | 1.13E-08 | 1.72E-06 |
| 11758659_TBCA      | -0.95343 | 1.14E-08 | 1.72E-06 |
| 11758329_SDHD      | -1.01572 | 1.14E-08 | 1.73E-06 |
| 11734550_TGFBI     | 1.330522 | 1.15E-08 | 1.73E-06 |
| 11715690_CD164     | 1.003711 | 1.16E-08 | 1.75E-06 |
| 11758499_DTL       | -0.95741 | 1.18E-08 | 1.76E-06 |
| 11736555_SLC2A14 / | 1.489045 | 1.19E-08 | 1.78E-06 |
| 11718503_GPCPD1    | 0.911564 | 1.20E-08 | 1.78E-06 |
| 11753421_CITED2    | 1.351726 | 1.21E-08 | 1.80E-06 |
| 11728799_IMM2L     | 1.096187 | 1.24E-08 | 1.83E-06 |
| 11717844_ETNK1     | 0.985116 | 1.25E-08 | 1.85E-06 |
| 11734548_TGFBI     | 1.324458 | 1.27E-08 | 1.87E-06 |
| 11724902_MAP3K14   | 2.131354 | 1.27E-08 | 1.87E-06 |
| 11717925_YAP1      | 0.955398 | 1.27E-08 | 1.87E-06 |
| 11724635_YOD1      | 1.172924 | 1.28E-08 | 1.87E-06 |
| 11722930_GART      | -0.94555 | 1.31E-08 | 1.91E-06 |
| 11717399_TIPARP    | 0.939704 | 1.33E-08 | 1.93E-06 |
| 11748938_SLC37A4   | -1.15123 | 1.34E-08 | 1.93E-06 |
| 11718914_PDZD2     | -1.00525 | 1.34E-08 | 1.93E-06 |
| 11758842_THBS1     | 1.085016 | 1.34E-08 | 1.93E-06 |
| 11745912_PELI1     | 1.101371 | 1.35E-08 | 1.93E-06 |
| 11747323_NCBP2     | -1.03481 | 1.36E-08 | 1.95E-06 |
| 11718285_MRPL45    | -1.06001 | 1.38E-08 | 1.95E-06 |
| 11757365_MRPL45    | -1.06001 | 1.38E-08 | 1.95E-06 |
| 11729451_PCLO      | 1.109097 | 1.38E-08 | 1.96E-06 |
| 11725722_ATAD2     | -1.06149 | 1.41E-08 | 1.99E-06 |
| 11718183_CDCA5     | -0.99564 | 1.41E-08 | 1.99E-06 |
| 11724218_GPATCH2   | 1.22186  | 1.42E-08 | 1.99E-06 |
| 11751230_PSAT1     | -1.14679 | 1.42E-08 | 1.99E-06 |
| 11734657_SLC2A14 / | 1.426013 | 1.44E-08 | 2.00E-06 |
| 11718772_SMARCE1   | -1.15897 | 1.44E-08 | 2.00E-06 |
| 11751287_MMP19     | 1.476038 | 1.45E-08 | 2.00E-06 |
| 11716031_ARF3      | -1.35197 | 1.45E-08 | 2.00E-06 |
| 11742939_UBE2D3    | -1.04426 | 1.46E-08 | 2.00E-06 |
| 11720768_METTL9    | -1.29076 | 1.46E-08 | 2.00E-06 |
| 11739734_CPEB4     | 1.254328 | 1.46E-08 | 2.00E-06 |

|                    |          |          |          |
|--------------------|----------|----------|----------|
| 11716917_DDAH1     | 1.126727 | 1.46E-08 | 2.00E-06 |
| 11742961_FAM43A    | 0.941903 | 1.47E-08 | 2.00E-06 |
| 11741317_NHLH2     | 1.144577 | 1.49E-08 | 2.03E-06 |
| 11758795_MRPL45    | -0.9203  | 1.50E-08 | 2.03E-06 |
| 11716781_TBL1XR1   | -1.06582 | 1.50E-08 | 2.03E-06 |
| 11721142_MKI67     | -0.97229 | 1.51E-08 | 2.03E-06 |
| 11724963_FBXO5     | -0.97187 | 1.51E-08 | 2.03E-06 |
| 11738542_SERPINB7  | 1.012355 | 1.51E-08 | 2.03E-06 |
| 11744763_ASNS      | -0.93429 | 1.52E-08 | 2.03E-06 |
| 11721093_THBS1     | 0.963783 | 1.52E-08 | 2.03E-06 |
| 11740173_SOCS5     | 0.921341 | 1.52E-08 | 2.03E-06 |
| 11760482_NDUFS7    | -0.99823 | 1.53E-08 | 2.03E-06 |
| 11734226_LIMCH1    | 1.229477 | 1.54E-08 | 2.04E-06 |
| 11756403_KCTD10    | -1.02549 | 1.55E-08 | 2.05E-06 |
| 11717903_IER3IP1   | -0.87732 | 1.56E-08 | 2.06E-06 |
| 11750804_LIMCH1    | 1.285462 | 1.57E-08 | 2.06E-06 |
| 11715484_MCL1      | 1.123623 | 1.57E-08 | 2.06E-06 |
| 11724357_MYO5A     | 0.92019  | 1.58E-08 | 2.06E-06 |
| 11728936_KIAA1549L | -1.13948 | 1.59E-08 | 2.06E-06 |
| 11716365_ASNS      | -0.9364  | 1.59E-08 | 2.06E-06 |
| 11716630_ANGPTL4   | 1.394684 | 1.61E-08 | 2.08E-06 |
| 11723821_SMURF2    | 0.890195 | 1.63E-08 | 2.10E-06 |
| 11727880_CHAF1A    | -0.92267 | 1.65E-08 | 2.12E-06 |
| 11739328_CENPH     | -1.17033 | 1.65E-08 | 2.12E-06 |
| 11718675_CTNNAL1   | 0.953206 | 1.66E-08 | 2.13E-06 |
| 11746586_NDUFS7    | -1.04333 | 1.67E-08 | 2.14E-06 |
| 11719531_MMP19     | 1.647633 | 1.69E-08 | 2.16E-06 |
| 11729132_PSME3     | -1.18409 | 1.71E-08 | 2.17E-06 |
| 11753752_RRM2B     | 1.191991 | 1.74E-08 | 2.20E-06 |
| 11745871_PAPOLA    | -1.01793 | 1.74E-08 | 2.20E-06 |
| 11718724_ARRDC3    | 1.323833 | 1.75E-08 | 2.20E-06 |
| 11736194_RRM2B     | 1.266278 | 1.75E-08 | 2.20E-06 |
| 11728390_TSPAN2    | 2.058193 | 1.75E-08 | 2.20E-06 |
| 11716483_GRINA     | -0.97584 | 1.76E-08 | 2.21E-06 |
| 11719926_RBM12     | -1.15036 | 1.77E-08 | 2.21E-06 |
| 11745803_TPM1      | 0.988051 | 1.78E-08 | 2.21E-06 |
| 11744338_COPS7A    | -1.12318 | 1.79E-08 | 2.22E-06 |
| 11720075_SLC35F5   | 0.975612 | 1.80E-08 | 2.22E-06 |
| 11749905_CYR61     | 1.02014  | 1.80E-08 | 2.22E-06 |
| 200011_PMARF3      | -1.2731  | 1.80E-08 | 2.22E-06 |
| 11743444_RHOB      | 1.064641 | 1.81E-08 | 2.22E-06 |
| 11720570_JADE2     | -0.94977 | 1.81E-08 | 2.22E-06 |
| 11748213_TSC22D2   | 0.892633 | 1.83E-08 | 2.24E-06 |
| 11728296_RNMT      | 1.081597 | 1.84E-08 | 2.25E-06 |
| 11733126_PRIM1     | -1.00147 | 1.85E-08 | 2.25E-06 |
| 11722244_TMEM27    | 1.361277 | 1.86E-08 | 2.25E-06 |
| 11725077_RIT1      | 0.919395 | 1.86E-08 | 2.25E-06 |
| 11757504_DDAH1     | 0.975184 | 1.86E-08 | 2.25E-06 |
| 11730731_DNAJB9    | 1.188017 | 1.86E-08 | 2.25E-06 |
| 11734458_FAM160B1  | 1.730976 | 1.87E-08 | 2.25E-06 |
| 11717843_ETNK1     | 0.940586 | 1.88E-08 | 2.25E-06 |



|                    |          |          |          |
|--------------------|----------|----------|----------|
| 11717817_TNRC6A    | 1.024992 | 1.89E-08 | 2.26E-06 |
| 11734659_FOS       | 1.278136 | 1.90E-08 | 2.27E-06 |
| 11747091_TMPO      | -0.98308 | 1.90E-08 | 2.27E-06 |
| 11716059_EFTUD2    | -0.9819  | 1.91E-08 | 2.27E-06 |
| 11758254_SRI       | -1.37923 | 1.91E-08 | 2.27E-06 |
| 11717842_ETNK1     | 1.018458 | 1.92E-08 | 2.27E-06 |
| 11749240_GRAMD3    | 1.245897 | 1.94E-08 | 2.29E-06 |
| 11740238_SULF2     | 1.035723 | 1.96E-08 | 2.30E-06 |
| 11731848_KLRC1 /// | 1.442204 | 1.97E-08 | 2.31E-06 |
| 11716285_VAMP3     | -1.66124 | 1.98E-08 | 2.32E-06 |
| 11726191_ZNF45     | 0.894089 | 1.99E-08 | 2.32E-06 |
| 11731321_GLE1      | -1.44709 | 2.00E-08 | 2.32E-06 |
| 11715331_DSN1      | -0.99546 | 2.00E-08 | 2.32E-06 |
| 11755541_NUP58     | -1.20656 | 2.00E-08 | 2.32E-06 |
| 11741252_RCC1      | -0.94571 | 2.01E-08 | 2.33E-06 |
| 11726515_CLK4      | 1.028135 | 2.03E-08 | 2.34E-06 |
| 11727440_LOXL4     | 1.097632 | 2.04E-08 | 2.35E-06 |
| 11728714_THOC6     | -0.91467 | 2.04E-08 | 2.35E-06 |
| 11716384_CCL2      | 1.258282 | 2.05E-08 | 2.35E-06 |
| 11739335_SCYL2     | 0.846999 | 2.06E-08 | 2.36E-06 |
| 11755850_ZBTB10    | 0.995717 | 2.08E-08 | 2.37E-06 |
| 11745893_MTHFD2    | -0.87037 | 2.09E-08 | 2.37E-06 |
| 11716728_TPM1      | 0.869452 | 2.09E-08 | 2.37E-06 |
| 11745289_LIMA1     | 0.853427 | 2.10E-08 | 2.38E-06 |
| 11751822_MCM6      | -1.37298 | 2.11E-08 | 2.38E-06 |
| 11743815_S1PR1     | 1.411802 | 2.12E-08 | 2.39E-06 |
| 11732240_SLITRK6   | 0.924962 | 2.13E-08 | 2.39E-06 |
| 11726726_NABP1     | 0.953479 | 2.14E-08 | 2.39E-06 |
| 11744003_MTHFD2    | -0.91799 | 2.14E-08 | 2.39E-06 |
| 11755581_LATS2     | 1.045941 | 2.14E-08 | 2.39E-06 |
| 11749349_POLR2C    | -0.96881 | 2.15E-08 | 2.39E-06 |
| 11729250_B3GALT2   | 1.704898 | 2.15E-08 | 2.39E-06 |
| 11723062_NDUFS7    | -0.9469  | 2.17E-08 | 2.41E-06 |
| 11721091_THBS1     | 0.954428 | 2.18E-08 | 2.41E-06 |
| 11748015_VDAC3     | -0.87876 | 2.19E-08 | 2.43E-06 |
| 11718247_KIAA0430  | -1.09164 | 2.22E-08 | 2.44E-06 |
| 11718719_FOCAD     | -0.94904 | 2.22E-08 | 2.44E-06 |
| 11725375_HAPLN1    | 0.878046 | 2.23E-08 | 2.44E-06 |
| 11724741_HMGN2     | -0.90692 | 2.23E-08 | 2.44E-06 |
| 11731834_IL24      | 0.919617 | 2.23E-08 | 2.44E-06 |
| 11746797_SDC2      | 1.315075 | 2.24E-08 | 2.45E-06 |
| 11763170_FOSL2     | 0.83965  | 2.25E-08 | 2.45E-06 |
| 11745211_ZNF33B    | 1.028141 | 2.26E-08 | 2.45E-06 |
| 11748793_ASNS      | -0.88231 | 2.26E-08 | 2.45E-06 |
| 11722230_PDP1      | 0.875071 | 2.26E-08 | 2.45E-06 |
| 11716364_ASNS      | -0.93624 | 2.27E-08 | 2.45E-06 |
| 11738893_TPM1      | 0.8606   | 2.28E-08 | 2.45E-06 |
| 11742940_UBE2D3    | -1.02437 | 2.28E-08 | 2.45E-06 |
| 11720780_KIAA1324  | 1.473427 | 2.29E-08 | 2.45E-06 |
| 11752770_SMARCE1   | -1.11519 | 2.29E-08 | 2.45E-06 |
| 11743135_CEBPD     | 1.140837 | 2.35E-08 | 2.51E-06 |

|                    |          |          |          |
|--------------------|----------|----------|----------|
| 11725148_C9orf40   | -1.14268 | 2.37E-08 | 2.52E-06 |
| 11721517_SUDS3     | -1.10654 | 2.37E-08 | 2.52E-06 |
| 11720795_NUP58     | -1.34441 | 2.38E-08 | 2.52E-06 |
| 11732651_ZNF571    | 1.234574 | 2.40E-08 | 2.54E-06 |
| 11718774_SMARCE1   | -0.85104 | 2.42E-08 | 2.55E-06 |
| 11732312_ANKRD13C  | 0.872399 | 2.42E-08 | 2.55E-06 |
| 11717000_GUCD1     | -1.04824 | 2.45E-08 | 2.57E-06 |
| 11758584_STYX      | -0.94221 | 2.46E-08 | 2.58E-06 |
| 11726536_CYP1A1    | 1.155746 | 2.48E-08 | 2.59E-06 |
| 11736014_GLE1      | -1.8898  | 2.48E-08 | 2.59E-06 |
| 11749332_EBP       | -0.8316  | 2.52E-08 | 2.63E-06 |
| 11757047_ATF4      | -0.8126  | 2.54E-08 | 2.64E-06 |
| 11715689_CD164     | 0.953542 | 2.55E-08 | 2.64E-06 |
| 11741357_FNDC3A    | 0.908864 | 2.55E-08 | 2.64E-06 |
| 11758303_ZCCHC17   | -1.14468 | 2.56E-08 | 2.64E-06 |
| 11737718_EEF1E1 // | -0.96732 | 2.56E-08 | 2.64E-06 |
| 11723282_CEACAM1   | 0.851714 | 2.62E-08 | 2.69E-06 |
| 11750321_F2RL2     | 1.224693 | 2.66E-08 | 2.73E-06 |
| 11731351_NF1       | 0.975645 | 2.68E-08 | 2.75E-06 |
| 11715691_ZFP36     | 1.029986 | 2.71E-08 | 2.77E-06 |
| 11745543_AJUBA     | 0.88605  | 2.71E-08 | 2.77E-06 |
| 11737591_MYSM1     | 0.89104  | 2.77E-08 | 2.82E-06 |
| 11726619_C1GALT1C1 | -0.79931 | 2.78E-08 | 2.82E-06 |
| 11724462_ALDOC     | -1.72543 | 2.81E-08 | 2.85E-06 |
| 11739081_DNAJB4    | 0.910705 | 2.82E-08 | 2.85E-06 |
| 11742890_MND1      | -1.01792 | 2.82E-08 | 2.85E-06 |
| 11728569_GSTCD     | -1.11541 | 2.83E-08 | 2.85E-06 |
| 11743682_KLF10     | 1.202342 | 2.84E-08 | 2.85E-06 |
| 11759291_PSM12     | -0.97257 | 2.84E-08 | 2.85E-06 |
| 11722605_CDC37L1   | 1.058229 | 2.85E-08 | 2.85E-06 |
| 11725211_PLCXD1    | -0.96779 | 2.85E-08 | 2.85E-06 |
| 11733061_PELI1     | 0.871993 | 2.87E-08 | 2.87E-06 |
| 11754510_VDAC3     | -0.90416 | 2.88E-08 | 2.87E-06 |
| 11719699_CDC45     | -1.00309 | 2.89E-08 | 2.87E-06 |
| 11716136_COX7A2 // | -1.33362 | 2.90E-08 | 2.88E-06 |
| 11757430_TMED5     | 0.852585 | 2.91E-08 | 2.88E-06 |
| 11754075_SMARCE1   | -0.82625 | 2.95E-08 | 2.91E-06 |
| 11743808_DHCR7     | -1.11543 | 2.97E-08 | 2.93E-06 |
| 11753980_PXYLP1    | -1.28628 | 2.98E-08 | 2.93E-06 |
| 11720157_GDA       | 0.936446 | 2.99E-08 | 2.93E-06 |
| 11724949_WDR35     | 0.900969 | 2.99E-08 | 2.93E-06 |
| 11726193_4-Mar     | 0.852631 | 3.04E-08 | 2.96E-06 |
| 11729170_DUSP10    | 0.80749  | 3.05E-08 | 2.96E-06 |
| 11723709_CRY1      | 0.997313 | 3.05E-08 | 2.96E-06 |
| 11732419_TYW5      | 1.13982  | 3.05E-08 | 2.96E-06 |
| 11753951_PSPC1     | 0.869322 | 3.06E-08 | 2.96E-06 |
| 11757584_FNDC3A    | 0.927254 | 3.07E-08 | 2.97E-06 |
| 11725126_TMEM147   | -0.88309 | 3.11E-08 | 3.00E-06 |
| 11749158_PPP2R1A   | -0.81216 | 3.11E-08 | 3.00E-06 |
| 11726883_ATAD2B    | 1.095555 | 3.11E-08 | 3.00E-06 |
| 11751338_DHCR24    | -0.91667 | 3.14E-08 | 3.02E-06 |

|                    |          |          |          |
|--------------------|----------|----------|----------|
| 11719614_LARP4     | -1.09913 | 3.16E-08 | 3.03E-06 |
| 11761349_TPM1      | 0.979443 | 3.18E-08 | 3.03E-06 |
| 11749620_FAM45A // | -1.25764 | 3.18E-08 | 3.03E-06 |
| 11749139_SEMA3C    | 0.945301 | 3.22E-08 | 3.07E-06 |
| 11758571_NEDD4L    | 0.8344   | 3.23E-08 | 3.07E-06 |
| 11725751_FBXW7     | 1.007685 | 3.23E-08 | 3.07E-06 |
| 11744946_AIDA      | -1.34008 | 3.24E-08 | 3.07E-06 |
| 11758649_FBXW11    | -0.9584  | 3.27E-08 | 3.08E-06 |
| 11717039_GADD45A   | 0.872746 | 3.28E-08 | 3.08E-06 |
| 11731889_EDA2R     | 1.083311 | 3.29E-08 | 3.08E-06 |
| 11747253_UNG       | -0.88763 | 3.29E-08 | 3.08E-06 |
| 11751962_GPR37     | 1.23251  | 3.29E-08 | 3.08E-06 |
| 11722606_CDC37L1   | 0.886983 | 3.29E-08 | 3.08E-06 |
| 11744914_EID1      | -1.02521 | 3.30E-08 | 3.08E-06 |
| 11720672_PPM1A     | -1.04767 | 3.31E-08 | 3.08E-06 |
| 11751993_JAG1      | 1.706518 | 3.32E-08 | 3.09E-06 |
| 11747092_TMPO      | -0.92274 | 3.34E-08 | 3.10E-06 |
| 11744002_MTHFD2    | -0.84301 | 3.35E-08 | 3.10E-06 |
| 11738808_OSBPL10   | 0.787027 | 3.35E-08 | 3.10E-06 |
| 11719174_NT5E      | 0.958512 | 3.37E-08 | 3.11E-06 |
| 11758403_RAPH1     | 1.075754 | 3.38E-08 | 3.11E-06 |
| 11722062_REEP3     | 0.958738 | 3.38E-08 | 3.11E-06 |
| 11747670_WDR73     | 0.863724 | 3.39E-08 | 3.11E-06 |
| 11745130_HMGB3     | -1.17726 | 3.41E-08 | 3.13E-06 |
| 11736889_EPHX3     | 1.027795 | 3.44E-08 | 3.15E-06 |
| 11755408_FAM199X   | 0.784992 | 3.45E-08 | 3.16E-06 |
| 11751306_FBXO28    | 0.852652 | 3.47E-08 | 3.16E-06 |
| 11755127_TMF1      | 0.788721 | 3.48E-08 | 3.16E-06 |
| 11758876_CREBRF    | 0.940018 | 3.49E-08 | 3.16E-06 |
| 11742991_PSAT1     | -1.07397 | 3.50E-08 | 3.16E-06 |
| 11747430_ZNF260    | 1.08892  | 3.50E-08 | 3.16E-06 |
| 11723245_SFRP1     | -1.36886 | 3.50E-08 | 3.16E-06 |
| 11733068_KLF10     | 1.199073 | 3.54E-08 | 3.18E-06 |
| 11727219_DSE       | 0.896461 | 3.55E-08 | 3.18E-06 |
| 11731770_DSE       | 0.896461 | 3.55E-08 | 3.18E-06 |
| 11740656_HMGA2     | 0.834934 | 3.56E-08 | 3.18E-06 |
| 11723192_UHRF1     | -0.85701 | 3.56E-08 | 3.18E-06 |
| 11741547_NEDD4L    | 0.905696 | 3.57E-08 | 3.18E-06 |
| 11725419_LPCAT2    | 0.796444 | 3.57E-08 | 3.18E-06 |
| 11760258_KIAA1324  | 1.514912 | 3.59E-08 | 3.19E-06 |
| 11763585_TMPO      | -1.29629 | 3.59E-08 | 3.19E-06 |
| 11727447_ST6GALNAC | 1.269367 | 3.59E-08 | 3.19E-06 |
| 11732533_LMNB1     | -1.14449 | 3.62E-08 | 3.20E-06 |
| 11744889_LMNB1     | -1.14449 | 3.62E-08 | 3.20E-06 |
| 11722796_MAPK6     | 0.91536  | 3.63E-08 | 3.20E-06 |
| 11728792_EEF2K /// | -0.90434 | 3.64E-08 | 3.20E-06 |
| 11719881_OSTM1     | 1.195785 | 3.65E-08 | 3.21E-06 |
| 11731599_FOSL2     | 1.370653 | 3.69E-08 | 3.24E-06 |
| 11731918_TMPO      | -0.9802  | 3.73E-08 | 3.26E-06 |
| 11715991_MCM2      | -1.17322 | 3.73E-08 | 3.26E-06 |
| 11758396_POLR3G    | -0.99836 | 3.74E-08 | 3.26E-06 |

|                   |          |          |          |
|-------------------|----------|----------|----------|
| 11756773_FRMD5    | 1.170287 | 3.75E-08 | 3.27E-06 |
| 11752940_EGR1     | 1.192781 | 3.76E-08 | 3.27E-06 |
| 11729704_ZNF561   | 0.849067 | 3.77E-08 | 3.27E-06 |
| 11751272_ZNF562   | 1.115315 | 3.77E-08 | 3.27E-06 |
| 11719643_CDS1     | 1.22515  | 3.79E-08 | 3.27E-06 |
| 11739366_ASPH     | -0.83033 | 3.80E-08 | 3.27E-06 |
| 11729450_PCLO     | 0.875042 | 3.80E-08 | 3.27E-06 |
| 11719615_LARP4    | -1.05472 | 3.81E-08 | 3.27E-06 |
| 11718631_SERTAD1  | 0.896049 | 3.82E-08 | 3.27E-06 |
| 11755700_TIPARP   | 0.953025 | 3.82E-08 | 3.27E-06 |
| 11742941_UBE2D3   | -1.01087 | 3.82E-08 | 3.27E-06 |
| 11731621_ZNF91    | 1.535146 | 3.84E-08 | 3.27E-06 |
| 11717959_TCF3     | -0.8806  | 3.85E-08 | 3.27E-06 |
| 11732408_LMBRD2   | 1.088938 | 3.85E-08 | 3.27E-06 |
| 11719137_THOC1    | -0.875   | 3.85E-08 | 3.27E-06 |
| 11745868_KIF2C    | -0.83557 | 3.85E-08 | 3.27E-06 |
| 11741106_FHL2     | 1.064084 | 3.86E-08 | 3.27E-06 |
| 11745870_MTHFD2   | -1.00254 | 3.86E-08 | 3.27E-06 |
| 11723365_COPS7A   | -0.94809 | 3.89E-08 | 3.28E-06 |
| 11755050_PLCB4    | 0.865589 | 3.92E-08 | 3.30E-06 |
| 11720800_RAB8B    | 1.145198 | 3.92E-08 | 3.30E-06 |
| 11739369_PPM1D    | 0.871842 | 3.95E-08 | 3.31E-06 |
| 11722242_TSPAN12  | 0.850058 | 3.96E-08 | 3.32E-06 |
| 11721477_TTI1     | -0.75384 | 3.97E-08 | 3.32E-06 |
| 11757989_ANKRD46  | 0.917917 | 3.98E-08 | 3.32E-06 |
| 11747280_DHFR     | -0.95299 | 4.03E-08 | 3.36E-06 |
| 11736382_ZNF697   | 1.122436 | 4.05E-08 | 3.37E-06 |
| 11733188_INCENP   | -1.14893 | 4.09E-08 | 3.39E-06 |
| 11752382_S1PR1    | 1.294161 | 4.09E-08 | 3.39E-06 |
| 11749088_PTPRK    | 0.902075 | 4.09E-08 | 3.39E-06 |
| 11755211_DICER1   | 0.933744 | 4.10E-08 | 3.39E-06 |
| 11743498_BMP2     | 0.935534 | 4.11E-08 | 3.39E-06 |
| 11758330_SDHD     | -0.89445 | 4.12E-08 | 3.39E-06 |
| 11746580_ZNF140   | 0.852956 | 4.13E-08 | 3.39E-06 |
| 11753763_CDKN3    | -0.81283 | 4.13E-08 | 3.39E-06 |
| 11727736_AKAP7    | -1.44219 | 4.17E-08 | 3.41E-06 |
| 11742669_HIST2H4A | 0.851367 | 4.17E-08 | 3.41E-06 |
| 11754575_AHNAK    | -0.88765 | 4.17E-08 | 3.41E-06 |
| 11728052_FAM126B  | 0.829392 | 4.19E-08 | 3.41E-06 |
| 11754933_TSC22D2  | 0.933669 | 4.20E-08 | 3.41E-06 |
| 11716372_VPS26B   | -0.83976 | 4.20E-08 | 3.41E-06 |
| 11755807_DNA2     | -0.9726  | 4.20E-08 | 3.41E-06 |
| 11736367_MCM10    | -0.9546  | 4.22E-08 | 3.42E-06 |
| 11716514_ADD1     | -0.76629 | 4.22E-08 | 3.42E-06 |
| 11762266_IL7R     | 1.197025 | 4.28E-08 | 3.46E-06 |
| 11733811_FASTKD2  | -0.89315 | 4.29E-08 | 3.46E-06 |
| 11760466_ATP11B   | 1.23195  | 4.30E-08 | 3.46E-06 |
| 11716203_MGP      | 1.545092 | 4.33E-08 | 3.47E-06 |
| 11731622_ZNF91    | 1.20309  | 4.33E-08 | 3.47E-06 |
| 11727879_CHAF1A   | -0.96364 | 4.34E-08 | 3.48E-06 |
| 11752173_TMEM2    | 1.091955 | 4.36E-08 | 3.48E-06 |

|                    |          |          |          |
|--------------------|----------|----------|----------|
| 11758108_EFEMP1    | 1.388333 | 4.37E-08 | 3.49E-06 |
| 11756134_FHL2      | 0.937101 | 4.38E-08 | 3.49E-06 |
| 11730052_SNX16     | 0.88218  | 4.38E-08 | 3.49E-06 |
| 11746378_TAB3      | 1.03613  | 4.41E-08 | 3.51E-06 |
| 11734858_ER01B     | 0.760545 | 4.45E-08 | 3.53E-06 |
| 11719898_HBEGF     | 0.885659 | 4.50E-08 | 3.56E-06 |
| 11726516_CLK4      | 1.075228 | 4.53E-08 | 3.58E-06 |
| 11718998_DHFR      | -1.16739 | 4.54E-08 | 3.58E-06 |
| 11733799_SLC31A2   | 0.887101 | 4.55E-08 | 3.58E-06 |
| 11730735_PPP1R8    | -0.78341 | 4.56E-08 | 3.58E-06 |
| 11715524_COTL1     | -0.86667 | 4.56E-08 | 3.58E-06 |
| 11725198_IL1A      | 1.384836 | 4.57E-08 | 3.58E-06 |
| 11728861_DCAF17    | 1.059709 | 4.57E-08 | 3.58E-06 |
| 11730998_ZNF654    | 0.771805 | 4.60E-08 | 3.60E-06 |
| 11745100_CDH19     | 0.922907 | 4.61E-08 | 3.60E-06 |
| 11728076_HDAC9     | 0.915373 | 4.66E-08 | 3.62E-06 |
| 11726840_AVL9      | 0.984884 | 4.66E-08 | 3.62E-06 |
| 11744848_PRR16     | 1.340806 | 4.67E-08 | 3.62E-06 |
| 11722601_ACAT2     | -0.77229 | 4.68E-08 | 3.62E-06 |
| 11762135_PTPRK     | 1.25314  | 4.68E-08 | 3.62E-06 |
| 11736244_HIST1H2AC | 1.12649  | 4.68E-08 | 3.62E-06 |
| 11753442_TMEM64    | 1.565734 | 4.71E-08 | 3.63E-06 |
| 11731503_TBC1D4    | 0.865345 | 4.72E-08 | 3.63E-06 |
| 11717859_EBP       | -0.8999  | 4.73E-08 | 3.63E-06 |
| 11728050_FAM126B   | 0.920564 | 4.73E-08 | 3.63E-06 |
| 11728463_ZNF562    | 1.296589 | 4.74E-08 | 3.63E-06 |
| 11720082_CBX6      | -0.79118 | 4.74E-08 | 3.63E-06 |
| 11754178_RRM2B     | 1.111318 | 4.75E-08 | 3.63E-06 |
| 11738203_IMPDI1    | -0.75569 | 4.75E-08 | 3.63E-06 |
| 11718165_RBL2      | -0.98253 | 4.78E-08 | 3.64E-06 |
| 11746018_GRAMD3    | 1.135655 | 4.78E-08 | 3.64E-06 |
| 11730876_FANCI     | -0.84135 | 4.79E-08 | 3.64E-06 |
| 11741356_FNDC3A    | 1.069806 | 4.81E-08 | 3.65E-06 |
| 11756590_KMO       | 1.814892 | 4.85E-08 | 3.67E-06 |
| 11736596_GINS4     | -1.02277 | 4.86E-08 | 3.67E-06 |
| 11739470_TMEM87B   | 0.983153 | 4.87E-08 | 3.68E-06 |
| 11723441_EPHA4     | 1.099622 | 4.88E-08 | 3.68E-06 |
| 11716562_AIMP2     | -1.02859 | 4.89E-08 | 3.68E-06 |
| 11721473_HCCS      | 0.895074 | 4.92E-08 | 3.68E-06 |
| 11747404_ZNF586    | 0.938875 | 4.93E-08 | 3.68E-06 |
| 11725951_RIOK3     | 0.780293 | 4.93E-08 | 3.68E-06 |
| 11748815_RRM2B     | 1.047714 | 4.94E-08 | 3.68E-06 |
| 11722189_MTDH      | -1.06046 | 4.94E-08 | 3.68E-06 |
| 11717163_CDC20     | -0.83016 | 4.94E-08 | 3.68E-06 |
| 11758793_CCDC109B  | -2.14067 | 4.95E-08 | 3.68E-06 |
| 11755569_TMEM64    | 1.41237  | 4.95E-08 | 3.68E-06 |
| 11739469_TMEM87B   | 0.950069 | 4.97E-08 | 3.69E-06 |
| 11756182_PSAT1     | -1.04174 | 4.97E-08 | 3.69E-06 |
| 11742308_TPM1      | 0.830454 | 4.99E-08 | 3.69E-06 |
| 11726131_PKP2      | 0.893293 | 4.99E-08 | 3.69E-06 |
| 11749599_SEMA3C    | 0.883113 | 5.02E-08 | 3.70E-06 |

|                    |          |          |          |
|--------------------|----------|----------|----------|
| 11717041_MTMR4     | -1.00074 | 5.02E-08 | 3.70E-06 |
| 11718912_PDZD2     | -0.98233 | 5.05E-08 | 3.70E-06 |
| 11751110_FBXL2     | 0.860294 | 5.06E-08 | 3.70E-06 |
| 11739733_CPEB4     | 1.110243 | 5.06E-08 | 3.70E-06 |
| 11726097_BAZ2B     | 0.963056 | 5.06E-08 | 3.70E-06 |
| 11742763_FAM214A   | 0.957772 | 5.06E-08 | 3.70E-06 |
| 11748732_PAPOLA    | -0.97933 | 5.16E-08 | 3.77E-06 |
| 11727817_UBASH3B   | 0.849949 | 5.21E-08 | 3.80E-06 |
| 11740126_HIPK3     | 1.297123 | 5.22E-08 | 3.80E-06 |
| 11732313_ANKRD13C  | 0.821291 | 5.24E-08 | 3.81E-06 |
| 11726617_CDK1      | -0.77143 | 5.26E-08 | 3.82E-06 |
| 11753420_RRM2B     | 1.095644 | 5.27E-08 | 3.82E-06 |
| 11720247_CEP55     | -0.76241 | 5.30E-08 | 3.83E-06 |
| 11758770_HSPA4     | -1.58876 | 5.30E-08 | 3.83E-06 |
| 11715615_BTG2      | 0.79696  | 5.30E-08 | 3.83E-06 |
| 11720186_MAD2L1    | -0.8898  | 5.37E-08 | 3.84E-06 |
| 11722843_ENAH      | -1.12792 | 5.37E-08 | 3.84E-06 |
| 11720626_HNRNPDL   | -1.09364 | 5.37E-08 | 3.84E-06 |
| 11758498_DNM3      | 2.008691 | 5.38E-08 | 3.84E-06 |
| 11758248_SDHD      | -0.93247 | 5.38E-08 | 3.84E-06 |
| 11758311_SDHD      | -0.93247 | 5.38E-08 | 3.84E-06 |
| 11763834_PPP1R1C   | 0.796987 | 5.38E-08 | 3.84E-06 |
| 11720231_TES       | 1.008385 | 5.44E-08 | 3.88E-06 |
| 11716262_AP2B1     | 0.807502 | 5.50E-08 | 3.91E-06 |
| 11720823_JAG1      | 1.194996 | 5.50E-08 | 3.91E-06 |
| 11746183_RNF6      | 0.804743 | 5.52E-08 | 3.92E-06 |
| 11733955_SLC22A15  | 0.909832 | 5.54E-08 | 3.93E-06 |
| 11744598_CDCA8     | -1.0981  | 5.60E-08 | 3.96E-06 |
| 11744789_CENPU     | -0.79288 | 5.60E-08 | 3.96E-06 |
| 11736597_GINS4     | -0.99149 | 5.61E-08 | 3.96E-06 |
| 11758515_MTDH      | -1.13056 | 5.63E-08 | 3.97E-06 |
| 11722831_CCNY      | -0.89459 | 5.65E-08 | 3.98E-06 |
| 11748761_KLF5      | 0.937221 | 5.68E-08 | 3.99E-06 |
| 11722868_RAD1      | -0.81751 | 5.70E-08 | 4.01E-06 |
| 11747489_CLIP4     | 1.103416 | 5.75E-08 | 4.04E-06 |
| 11724516_GPD1L     | -0.94157 | 5.77E-08 | 4.04E-06 |
| 11726006_SLC30A1   | 0.858761 | 5.78E-08 | 4.04E-06 |
| 11749228_TMEM30A   | 0.748892 | 5.81E-08 | 4.05E-06 |
| 11724992_GTPBP3    | -0.79229 | 5.84E-08 | 4.07E-06 |
| 11716144_PDCD6IP   | -1.27571 | 5.86E-08 | 4.08E-06 |
| 11751952_MYO19     | -0.86947 | 5.87E-08 | 4.08E-06 |
| 11727448_ST6GALNAC | 1.290284 | 5.89E-08 | 4.09E-06 |
| 11757325_CIB1      | -0.95754 | 5.92E-08 | 4.11E-06 |
| 11758060_PCGF5     | 0.940532 | 5.94E-08 | 4.11E-06 |
| 11758629_SPTBN1    | -0.86881 | 5.98E-08 | 4.13E-06 |
| 11749201_IQCJ-SCHI | 0.83421  | 5.98E-08 | 4.13E-06 |
| 11736010_RSL1D1    | 0.743622 | 6.00E-08 | 4.14E-06 |
| 11719224_COQ10A    | -0.98965 | 6.04E-08 | 4.16E-06 |
| 11752670_FADS1     | -0.81502 | 6.05E-08 | 4.16E-06 |
| 11753831_CDKN3     | -0.88521 | 6.07E-08 | 4.17E-06 |
| 11724021_HIST1H2BD | 1.243147 | 6.12E-08 | 4.19E-06 |

|                    |          |          |          |
|--------------------|----------|----------|----------|
| 11726288_GRAMD3    | 1.131322 | 6.13E-08 | 4.20E-06 |
| 11756666_MCM2      | -1.00735 | 6.16E-08 | 4.21E-06 |
| 11743191_NTM       | 0.921893 | 6.20E-08 | 4.22E-06 |
| 11721097_TMX1      | -1.12998 | 6.21E-08 | 4.22E-06 |
| 11722190_MTDH      | -1.06924 | 6.21E-08 | 4.22E-06 |
| 11747288_WDR73     | 0.741851 | 6.22E-08 | 4.22E-06 |
| 11741159_EYA1      | -1.1757  | 6.22E-08 | 4.22E-06 |
| 11739166_LYPD1     | 0.843332 | 6.23E-08 | 4.22E-06 |
| 11726302_DTL       | -0.82824 | 6.27E-08 | 4.24E-06 |
| 11751237_DUSP10    | 0.813094 | 6.27E-08 | 4.24E-06 |
| 11724903_MAP3K14   | 1.243023 | 6.29E-08 | 4.24E-06 |
| 11723725_USP32     | 0.842581 | 6.29E-08 | 4.24E-06 |
| 11744888_LMNB1     | -1.03555 | 6.32E-08 | 4.24E-06 |
| 11724345_ITGA4     | 0.818259 | 6.32E-08 | 4.24E-06 |
| 11719792_GPRC5A    | 0.820324 | 6.32E-08 | 4.24E-06 |
| 11744286_CBS /// C | -1.03396 | 6.33E-08 | 4.25E-06 |
| 11729916_ARL5B     | 1.048718 | 6.42E-08 | 4.30E-06 |
| 11724612_DYRK2     | 0.830598 | 6.45E-08 | 4.31E-06 |
| 11756138_HK2       | -0.998   | 6.46E-08 | 4.31E-06 |
| 11718956_PRKAB2    | 0.983209 | 6.49E-08 | 4.33E-06 |
| 11748927_PTPRG     | 0.984637 | 6.52E-08 | 4.33E-06 |
| 11746154_PCGF2     | -0.98898 | 6.52E-08 | 4.33E-06 |
| 11721092_THBS1     | 0.777119 | 6.53E-08 | 4.33E-06 |
| 11737441_ST7L      | 0.918071 | 6.54E-08 | 4.34E-06 |
| 11736021_FKBP4     | -1.0471  | 6.57E-08 | 4.35E-06 |
| 11726247_PARP1     | -0.79936 | 6.59E-08 | 4.36E-06 |
| 11740663_GXYLT1    | 1.188246 | 6.60E-08 | 4.36E-06 |
| 11745256_CPEB4     | 0.953043 | 6.63E-08 | 4.37E-06 |
| 11733060_PELI1     | 1.063236 | 6.69E-08 | 4.41E-06 |
| 11743841_PLCXD2    | 1.190414 | 6.75E-08 | 4.44E-06 |
| 11748659_EFEMP1    | 1.377658 | 6.75E-08 | 4.44E-06 |
| 11721644_ARL1      | -0.77612 | 6.76E-08 | 4.44E-06 |
| 11726927_EPHX3     | 1.036245 | 6.82E-08 | 4.45E-06 |
| 11722964_AMMECR1   | 0.855155 | 6.82E-08 | 4.45E-06 |
| 11715812_MLLT6     | -0.96881 | 6.82E-08 | 4.45E-06 |
| 11724246_TMEM127   | -0.74699 | 6.82E-08 | 4.45E-06 |
| 11724037_PTGS2     | 1.340572 | 6.82E-08 | 4.45E-06 |
| 11758683_JADE2     | -1.022   | 6.83E-08 | 4.45E-06 |
| 11721800_NAA50     | -0.92474 | 6.84E-08 | 4.45E-06 |
| 11737335_ZNF283    | 1.00876  | 6.88E-08 | 4.46E-06 |
| 11722454_QKI       | -0.84448 | 6.89E-08 | 4.46E-06 |
| 11719344_ATF3      | 0.842422 | 6.89E-08 | 4.46E-06 |
| 11745738_AIDA      | -0.95646 | 6.90E-08 | 4.46E-06 |
| 11715347_HBB       | 1.619768 | 6.91E-08 | 4.46E-06 |
| 11720361_PHIP      | 0.951542 | 6.98E-08 | 4.50E-06 |
| 11732993_RGS4      | 0.960799 | 6.99E-08 | 4.50E-06 |
| 11739026_HMGB1     | -0.76772 | 7.06E-08 | 4.54E-06 |
| 11748362_ABCC3     | 1.075634 | 7.09E-08 | 4.55E-06 |
| 11728300_CCNE2     | -0.76542 | 7.13E-08 | 4.57E-06 |
| 11716878_B4GALT5   | -0.71842 | 7.13E-08 | 4.57E-06 |
| 11716563_AIMP2     | -1.13779 | 7.17E-08 | 4.59E-06 |

|                    |          |          |          |
|--------------------|----------|----------|----------|
| 11743822_WHSC1     | -0.89559 | 7.20E-08 | 4.60E-06 |
| 11733877_LM07      | 0.899303 | 7.22E-08 | 4.61E-06 |
| 11763310_MIR21 /// | 0.72984  | 7.23E-08 | 4.61E-06 |
| 11741222_FAM198B   | 0.930095 | 7.24E-08 | 4.61E-06 |
| 11740885_OSBPL3    | 0.827776 | 7.25E-08 | 4.61E-06 |
| 11723281_CREBZF    | 0.850188 | 7.27E-08 | 4.61E-06 |
| 11756409_BLM       | -0.75211 | 7.32E-08 | 4.64E-06 |
| 11739025_HMGB1     | -0.77266 | 7.35E-08 | 4.65E-06 |
| 11728156_LACC1     | 0.876558 | 7.37E-08 | 4.66E-06 |
| 11731369_ZNF442    | 0.945564 | 7.38E-08 | 4.66E-06 |
| 11719791_GPRC5A    | 0.755927 | 7.41E-08 | 4.67E-06 |
| 11756839_ZC3HAV1   | 0.815329 | 7.42E-08 | 4.67E-06 |
| 11742992_PSAT1     | -1.06287 | 7.45E-08 | 4.69E-06 |
| 11747400_COPS7A    | -1.10217 | 7.51E-08 | 4.71E-06 |
| 11722937_MB21D2    | 0.803116 | 7.51E-08 | 4.71E-06 |
| 11724727_EIF5      | -1.00048 | 7.52E-08 | 4.71E-06 |
| 11722555_HADH      | -0.71049 | 7.58E-08 | 4.74E-06 |
| 11749172_NEXN      | 0.84935  | 7.58E-08 | 4.74E-06 |
| 11730999_ZNF654    | 0.930514 | 7.59E-08 | 4.74E-06 |
| 11719642_CDS1      | 1.214724 | 7.63E-08 | 4.75E-06 |
| 11758061_LINC00472 | 1.411086 | 7.64E-08 | 4.75E-06 |
| 11744788_TMEM68    | -1.19856 | 7.71E-08 | 4.79E-06 |
| 11731806_CHRM3     | 1.040894 | 7.72E-08 | 4.79E-06 |
| 11741140_NEDD4L    | 0.818226 | 7.72E-08 | 4.79E-06 |
| 11719571_RCHY1     | 1.156946 | 7.74E-08 | 4.80E-06 |
| 11721738_LATS2     | 1.155622 | 7.79E-08 | 4.82E-06 |
| 11725376_HAPLN1    | 0.808804 | 7.81E-08 | 4.83E-06 |
| 11718349_TUSC2     | 0.812451 | 7.84E-08 | 4.83E-06 |
| 11732652_ZNF571    | 1.144758 | 7.84E-08 | 4.83E-06 |
| 11745181_NAA15     | -0.72653 | 7.84E-08 | 4.83E-06 |
| 11758915_YY1       | -1.01409 | 7.86E-08 | 4.83E-06 |
| 11731306_CNST      | 0.766833 | 7.87E-08 | 4.83E-06 |
| 11736427_CLIP4     | 0.943048 | 7.91E-08 | 4.85E-06 |
| 11735128_TSC22D2   | 0.93532  | 7.92E-08 | 4.85E-06 |
| 11723112_CCDC84    | 0.695194 | 7.93E-08 | 4.85E-06 |
| 11733157_CCDC50    | -0.72511 | 7.94E-08 | 4.85E-06 |
| 11718106_IPO5      | -0.88597 | 7.96E-08 | 4.86E-06 |
| 11728128_APTX      | -0.74571 | 7.99E-08 | 4.86E-06 |
| 11736603_GLG1      | -0.80298 | 7.99E-08 | 4.86E-06 |
| 11743470_WDFY3     | 1.060438 | 7.99E-08 | 4.86E-06 |
| 11749755_ZNF791    | 0.809645 | 8.01E-08 | 4.86E-06 |
| 11757515_ITGAV     | -0.82652 | 8.03E-08 | 4.87E-06 |
| 11717283_ASAP1     | 0.782181 | 8.06E-08 | 4.87E-06 |
| 11741396_GGT1 ///  | 1.257613 | 8.06E-08 | 4.87E-06 |
| 11749796_ERGIC1    | -0.80692 | 8.07E-08 | 4.87E-06 |
| 11759124_FBXL17    | -1.11442 | 8.07E-08 | 4.87E-06 |
| 11724545_HCFC2     | 0.924039 | 8.09E-08 | 4.87E-06 |
| 11722803_GNAI1     | 0.824293 | 8.10E-08 | 4.88E-06 |
| 11736477_ELL2      | 1.02877  | 8.16E-08 | 4.90E-06 |
| 11740054_NCBP2     | -0.91585 | 8.19E-08 | 4.91E-06 |
| 11749205_PXYLP1    | -0.7657  | 8.21E-08 | 4.92E-06 |



|                    |          |          |          |
|--------------------|----------|----------|----------|
| 11758645_EIF4EBP2  | -0.95113 | 8.25E-08 | 4.94E-06 |
| 11755450_ZNF608    | 0.909088 | 8.26E-08 | 4.94E-06 |
| 11757800_NFIB      | -0.72947 | 8.28E-08 | 4.94E-06 |
| 11753558_MCM7      | -0.78943 | 8.28E-08 | 4.94E-06 |
| 11723668_SEMA3C    | 0.686221 | 8.34E-08 | 4.97E-06 |
| 11721143_MKI67     | -0.79183 | 8.36E-08 | 4.98E-06 |
| 11757970_DICER1    | 0.847718 | 8.39E-08 | 4.99E-06 |
| 11740685_NAPEPLD   | 1.215592 | 8.40E-08 | 4.99E-06 |
| 11740172_SOCS5     | 1.088982 | 8.55E-08 | 5.07E-06 |
| 11758388_LHX8      | 0.841877 | 8.56E-08 | 5.07E-06 |
| 11716155_B4GALT1   | -0.7999  | 8.61E-08 | 5.09E-06 |
| 11744402_BLZF1     | 0.705073 | 8.62E-08 | 5.09E-06 |
| 11729169_DUSP10    | 0.820621 | 8.68E-08 | 5.13E-06 |
| 11715845_PTPRF     | -0.74854 | 8.73E-08 | 5.14E-06 |
| 11719373_DYNLT3    | -0.8274  | 8.74E-08 | 5.14E-06 |
| 11721854_NCAPH     | -0.92369 | 8.75E-08 | 5.14E-06 |
| 11724274_PTPRK     | 0.86468  | 8.83E-08 | 5.19E-06 |
| 11717609_MEN1      | -0.8623  | 8.85E-08 | 5.19E-06 |
| 11724273_PTPRK     | 1.031507 | 8.85E-08 | 5.19E-06 |
| 11746020_THUMPD2   | 0.886625 | 8.93E-08 | 5.23E-06 |
| 11724695_ZNF227    | 0.761373 | 9.00E-08 | 5.26E-06 |
| 11734631_BAGE2 /// | 0.744333 | 9.01E-08 | 5.26E-06 |
| 11728129_APTX      | -0.94967 | 9.03E-08 | 5.26E-06 |
| 11739370_PPM1D     | 0.895748 | 9.04E-08 | 5.26E-06 |
| 11754596_PAICS     | -0.70539 | 9.08E-08 | 5.28E-06 |
| 11754235_PTPRF     | -0.74064 | 9.12E-08 | 5.30E-06 |
| 11749023_SLC16A4   | 1.277855 | 9.14E-08 | 5.30E-06 |
| 11729717_SMAD5     | -0.9437  | 9.14E-08 | 5.30E-06 |
| 11738426_ADGRF1    | 0.749447 | 9.15E-08 | 5.30E-06 |
| 11721448 ETF1      | -0.80003 | 9.16E-08 | 5.30E-06 |
| 11756342_GDA       | 0.727036 | 9.19E-08 | 5.31E-06 |
| 11734821_APBB2     | 0.729561 | 9.24E-08 | 5.33E-06 |
| 11746463_IL6       | 1.705973 | 9.26E-08 | 5.33E-06 |
| 11751260_SFRP1     | -1.18912 | 9.30E-08 | 5.35E-06 |
| 11722098_RICTOR    | 0.768259 | 9.31E-08 | 5.35E-06 |
| 11719928_KDM5B     | 0.772771 | 9.33E-08 | 5.36E-06 |
| 11753992_FKBP10    | -0.85687 | 9.34E-08 | 5.36E-06 |
| 11721493_SULF2     | 0.987291 | 9.35E-08 | 5.36E-06 |
| 11756046_MDM2      | 0.751943 | 9.37E-08 | 5.36E-06 |
| 11728864_GINS1     | -0.82512 | 9.37E-08 | 5.36E-06 |
| 11718293_CDKN2A    | 0.993984 | 9.40E-08 | 5.36E-06 |
| 11737149_ETNK1     | 0.939038 | 9.41E-08 | 5.37E-06 |
| 11730875_FANCI     | -1.32094 | 9.44E-08 | 5.37E-06 |
| 11736426_CLIP4     | 0.811561 | 9.46E-08 | 5.37E-06 |
| 11752739_SLC2A14 / | 1.006373 | 9.47E-08 | 5.37E-06 |
| 11736478_ELL2      | 0.965348 | 9.47E-08 | 5.37E-06 |
| 11757874_PFDN1     | -0.76632 | 9.48E-08 | 5.37E-06 |
| 11757415_SLC5A3    | -0.74229 | 9.50E-08 | 5.37E-06 |
| 11745571_CENPA     | -0.79247 | 9.51E-08 | 5.37E-06 |
| 11754296_AEN       | 0.811704 | 9.52E-08 | 5.37E-06 |
| 11748014_VDAC3     | -0.80206 | 9.52E-08 | 5.37E-06 |

|                    |          |          |          |
|--------------------|----------|----------|----------|
| 11758151_RNASEH2A  | -0.89559 | 9.57E-08 | 5.39E-06 |
| 11730296_TLR3      | 1.234569 | 9.57E-08 | 5.39E-06 |
| 11744468_SYNCRIP   | -0.8623  | 9.58E-08 | 5.39E-06 |
| 11741479_PSAT1     | -0.90706 | 9.61E-08 | 5.40E-06 |
| 11752683_CCDC181   | 1.017655 | 9.63E-08 | 5.40E-06 |
| 11721799_NAA50     | -0.94764 | 9.64E-08 | 5.40E-06 |
| 11751258_DEK       | -0.73481 | 9.65E-08 | 5.40E-06 |
| 11741315_PLSCR4    | 1.35747  | 9.67E-08 | 5.41E-06 |
| 11752361_NEXN      | 0.912151 | 9.72E-08 | 5.43E-06 |
| 11724515_GPD1L     | -1.02847 | 9.73E-08 | 5.43E-06 |
| 11722371_TRIM22    | 1.436686 | 9.95E-08 | 5.54E-06 |
| 11742832_ASPM      | -0.74208 | 9.96E-08 | 5.55E-06 |
| 11745050_ALCAM     | 0.70243  | 9.98E-08 | 5.55E-06 |
| 11720382_STX6      | 0.879829 | 1.00E-07 | 5.58E-06 |
| 11745872_PAPOLA    | -0.97081 | 1.01E-07 | 5.61E-06 |
| 11758228_AMMECR1   | 0.847732 | 1.02E-07 | 5.61E-06 |
| 11736278_ZNF136    | 0.818134 | 1.02E-07 | 5.61E-06 |
| 11723666_SEMA3C    | 0.927203 | 1.02E-07 | 5.61E-06 |
| 11721874_IFIT2     | 0.767553 | 1.02E-07 | 5.61E-06 |
| 11717472_PRKCA     | 1.021586 | 1.02E-07 | 5.61E-06 |
| 11758336_AKT3      | 0.728427 | 1.02E-07 | 5.61E-06 |
| 11750839_ZNF561    | 0.826134 | 1.02E-07 | 5.62E-06 |
| 11744184_SIPA1L2   | 1.009861 | 1.03E-07 | 5.64E-06 |
| 11717352_RPRD1A    | -0.88771 | 1.03E-07 | 5.64E-06 |
| 11717450_NEK7      | 0.816275 | 1.03E-07 | 5.64E-06 |
| 11715683_KRT7      | 1.21819  | 1.03E-07 | 5.67E-06 |
| 11726433_OSBPL3    | 0.806395 | 1.04E-07 | 5.67E-06 |
| 11749721_ZFP30     | 0.988552 | 1.04E-07 | 5.69E-06 |
| 11739919_ZNF195    | 0.751633 | 1.05E-07 | 5.71E-06 |
| 11752905_MCM7      | -1.05215 | 1.06E-07 | 5.76E-06 |
| 11730961_TPM1      | 1.491381 | 1.06E-07 | 5.76E-06 |
| 11715799_PRRC2B    | -0.92006 | 1.06E-07 | 5.77E-06 |
| 11746882_ZNF155    | 0.855813 | 1.06E-07 | 5.77E-06 |
| 11758094_NFATC2IP  | -0.82959 | 1.06E-07 | 5.78E-06 |
| 11749806_SAV1      | 0.860331 | 1.07E-07 | 5.78E-06 |
| 11719863_TTLL12    | -0.87634 | 1.07E-07 | 5.79E-06 |
| 11734718_FAM45A // | -1.46829 | 1.07E-07 | 5.79E-06 |
| 11728730_DSCC1     | -0.79438 | 1.07E-07 | 5.79E-06 |
| 11750257_EEA1      | 1.142218 | 1.07E-07 | 5.79E-06 |
| 11743796_APITD1 // | -0.80753 | 1.07E-07 | 5.79E-06 |
| 11746094_MPP4      | 0.733428 | 1.08E-07 | 5.82E-06 |
| 11752869_CEBPD     | 1.120469 | 1.08E-07 | 5.82E-06 |
| 11756569_NUSAP1    | -0.71957 | 1.08E-07 | 5.82E-06 |
| 11746283_KRTAP2-3  | 1.33942  | 1.09E-07 | 5.87E-06 |
| 11746002_CASP4     | 0.733935 | 1.10E-07 | 5.90E-06 |
| 11759556_BLZF1     | 0.805679 | 1.10E-07 | 5.90E-06 |
| 11756128_NAA50     | -0.8423  | 1.11E-07 | 5.92E-06 |
| 11715487_MCL1      | 0.922419 | 1.11E-07 | 5.92E-06 |
| 11726668_MFSD8     | 0.841169 | 1.12E-07 | 5.96E-06 |
| 11752656_CBS /// C | -0.87981 | 1.12E-07 | 5.96E-06 |
| 11730049_CA13      | 0.937805 | 1.12E-07 | 5.97E-06 |

|                    |          |          |          |
|--------------------|----------|----------|----------|
| 11759342_FMN1      | -0.79803 | 1.12E-07 | 5.97E-06 |
| 11747279_DHFR      | -0.7356  | 1.13E-07 | 6.00E-06 |
| 11734587_BAGE2     | 0.781783 | 1.13E-07 | 6.00E-06 |
| 11715512_NDFIP1    | -0.82606 | 1.14E-07 | 6.02E-06 |
| 11736193_RRM2B     | 0.900631 | 1.14E-07 | 6.02E-06 |
| 11748435_CAP2      | 0.74505  | 1.14E-07 | 6.02E-06 |
| 11745843_CDK1      | -0.81374 | 1.15E-07 | 6.06E-06 |
| 11756949_PPP2R1A   | -0.71935 | 1.15E-07 | 6.06E-06 |
| 11746732_GRAMD3    | 0.881153 | 1.15E-07 | 6.06E-06 |
| 11745129_NOCT      | 1.144651 | 1.15E-07 | 6.06E-06 |
| 11725364_GAS7      | -0.72101 | 1.15E-07 | 6.07E-06 |
| 11723972_APTX      | -0.97586 | 1.15E-07 | 6.07E-06 |
| 11724901_IQCJ-SCHI | 0.69184  | 1.16E-07 | 6.07E-06 |
| 11753788_CDKN3     | -0.7798  | 1.16E-07 | 6.07E-06 |
| 11721256_CCND1     | 0.823197 | 1.17E-07 | 6.11E-06 |
| 11730112_DEPDC1    | -0.66832 | 1.17E-07 | 6.14E-06 |
| 11715741_RCC2      | -0.66561 | 1.17E-07 | 6.14E-06 |
| 11724095_PDE4B     | 0.740756 | 1.18E-07 | 6.15E-06 |
| 11731368_ZNF442    | 0.785254 | 1.18E-07 | 6.17E-06 |
| 11724610_E2F5      | 0.708556 | 1.19E-07 | 6.20E-06 |
| 11718374_WDR5      | -0.66259 | 1.19E-07 | 6.20E-06 |
| 11731750_DUSP9     | -1.03309 | 1.19E-07 | 6.21E-06 |
| 11749867_DHFR      | -0.89607 | 1.19E-07 | 6.21E-06 |
| 11723599_PHLPP2    | 0.929372 | 1.19E-07 | 6.21E-06 |
| 11725188_ADGRG6    | 0.951559 | 1.20E-07 | 6.23E-06 |
| 11726882_ATAD2B    | 1.276676 | 1.20E-07 | 6.23E-06 |
| 11745443_DCAF16    | -0.88566 | 1.20E-07 | 6.23E-06 |
| 11716765_IQGAP1    | -0.80735 | 1.20E-07 | 6.23E-06 |
| 11724836_NCEH1     | 1.154974 | 1.21E-07 | 6.23E-06 |
| 11735323_ZNF441    | 1.079458 | 1.21E-07 | 6.23E-06 |
| 11725442_FOXM1     | -0.6761  | 1.21E-07 | 6.25E-06 |
| 11717744_6-Mar     | -1.01995 | 1.22E-07 | 6.27E-06 |
| 11749176_RIOK3     | 1.07912  | 1.22E-07 | 6.27E-06 |
| 11721736_TNFRSF19  | -1.24193 | 1.22E-07 | 6.27E-06 |
| 11720433_FLRT2     | 0.875329 | 1.22E-07 | 6.27E-06 |
| 11739561_GDAP1     | 0.738514 | 1.22E-07 | 6.27E-06 |
| 11726610_MTF2      | 0.754721 | 1.23E-07 | 6.31E-06 |
| 11748563_REEP5     | 0.745782 | 1.24E-07 | 6.33E-06 |
| 11718399_TGM2      | -0.8627  | 1.24E-07 | 6.34E-06 |
| 11728729_DSCC1     | -0.93263 | 1.24E-07 | 6.34E-06 |
| 11746009_ACAT2     | -0.77685 | 1.24E-07 | 6.34E-06 |
| 11731566_MDM2      | 0.776491 | 1.25E-07 | 6.35E-06 |
| 11733933_TMEM68    | -1.15759 | 1.25E-07 | 6.36E-06 |
| 11729201_C6orf120  | 0.891614 | 1.25E-07 | 6.36E-06 |
| 11720218_MAP3K3    | -1.02686 | 1.25E-07 | 6.36E-06 |
| 11751701_TMX3      | 0.699467 | 1.26E-07 | 6.40E-06 |
| 11741706_GJA5      | 0.770143 | 1.27E-07 | 6.42E-06 |
| 11725334_MZT1      | -1.02341 | 1.27E-07 | 6.42E-06 |
| 11739261_ACSL3     | -0.92933 | 1.28E-07 | 6.47E-06 |
| 11746223_JMJD1C    | 0.788264 | 1.28E-07 | 6.48E-06 |
| 11718857_NUDCD3    | -1.10788 | 1.28E-07 | 6.48E-06 |

|                   |          |          |          |
|-------------------|----------|----------|----------|
| 11753836_BANF1    | -0.7339  | 1.28E-07 | 6.48E-06 |
| 11740934_NUSAP1   | -0.8351  | 1.29E-07 | 6.48E-06 |
| 11736131_DCBLD2   | 0.647341 | 1.29E-07 | 6.51E-06 |
| 11764156_TMEM41B  | -0.72302 | 1.30E-07 | 6.52E-06 |
| 11754972_BAZ2A    | -0.89472 | 1.30E-07 | 6.52E-06 |
| 11725950_RIOK3    | 0.711968 | 1.30E-07 | 6.53E-06 |
| 11758137_SPOPL    | -2.06986 | 1.30E-07 | 6.53E-06 |
| 11718723_ARRDC3   | 1.293597 | 1.31E-07 | 6.55E-06 |
| 11750120_FAM19A2  | 1.330388 | 1.31E-07 | 6.55E-06 |
| 11728587_PARD6B   | 1.05063  | 1.32E-07 | 6.57E-06 |
| 11718999_DHFR     | -1.09819 | 1.32E-07 | 6.57E-06 |
| 11716183_ALCAM    | 0.710613 | 1.32E-07 | 6.58E-06 |
| 11752965_GRINA    | -1.05439 | 1.32E-07 | 6.59E-06 |
| 11737620_PRR16    | 1.372558 | 1.33E-07 | 6.59E-06 |
| 11739336_SCYL2    | 0.740613 | 1.33E-07 | 6.59E-06 |
| 11754937_GMNN     | -0.96387 | 1.33E-07 | 6.60E-06 |
| 11733779_DUSP3    | -0.67547 | 1.33E-07 | 6.60E-06 |
| 11722913_USP13    | -0.86583 | 1.33E-07 | 6.60E-06 |
| 11733029_AIDA     | -0.88057 | 1.33E-07 | 6.60E-06 |
| 11721255_CCND1    | 0.653089 | 1.34E-07 | 6.61E-06 |
| 11755402_ZNF195   | 0.710635 | 1.34E-07 | 6.61E-06 |
| 11747348_PSAT1    | -0.82497 | 1.34E-07 | 6.62E-06 |
| 11746454_USP15    | 0.694666 | 1.34E-07 | 6.63E-06 |
| 11727102_IGF2BP1  | 0.772539 | 1.35E-07 | 6.64E-06 |
| 11755681_HMGB1    | -0.77345 | 1.35E-07 | 6.65E-06 |
| 11748774_CTSV     | -1.03491 | 1.35E-07 | 6.65E-06 |
| 11747349_PSAT1    | -0.97272 | 1.36E-07 | 6.67E-06 |
| 11726701_AFTPH    | 0.7258   | 1.36E-07 | 6.67E-06 |
| 11757696_P SMB6   | -0.81709 | 1.37E-07 | 6.69E-06 |
| 11756714_PPP2R2A  | -0.86381 | 1.37E-07 | 6.70E-06 |
| 11757785_HMGB1    | -0.72457 | 1.37E-07 | 6.70E-06 |
| 11727314_ABCC5    | 0.827312 | 1.37E-07 | 6.70E-06 |
| 11725441_FOXM1    | -0.77206 | 1.37E-07 | 6.70E-06 |
| 11740303_APITD1   | -0.71933 | 1.37E-07 | 6.70E-06 |
| 11757017_RNASEH2A | -0.85048 | 1.38E-07 | 6.71E-06 |
| 11751153_ALDOC    | -0.99086 | 1.38E-07 | 6.72E-06 |
| 11732534_RGS7     | 0.76512  | 1.39E-07 | 6.73E-06 |
| 11758619_LIF      | 0.778338 | 1.39E-07 | 6.73E-06 |
| 11752939_PGK1     | -0.70456 | 1.39E-07 | 6.73E-06 |
| 11748385_KIAA0430 | -0.73082 | 1.40E-07 | 6.77E-06 |
| 11732311_ANKRD13C | 0.886533 | 1.40E-07 | 6.77E-06 |
| 11746473_CDIPT    | -0.89881 | 1.40E-07 | 6.78E-06 |
| 11743007_NFKBIE   | 0.807027 | 1.40E-07 | 6.78E-06 |
| 11746019_THUMPD2  | 0.928389 | 1.40E-07 | 6.78E-06 |
| 11746207_OSBPL10  | 0.711274 | 1.41E-07 | 6.78E-06 |
| 11743698_EDEM3    | 0.696254 | 1.41E-07 | 6.80E-06 |
| 11716515_ADD1     | -0.67386 | 1.41E-07 | 6.80E-06 |
| 11737041_PHLDB2   | 0.70355  | 1.42E-07 | 6.80E-06 |
| 11740540_REV3L    | 0.71883  | 1.42E-07 | 6.80E-06 |
| 11758046_RAD1     | -0.80268 | 1.42E-07 | 6.80E-06 |
| 11715329_SLC6A15  | -1.03451 | 1.42E-07 | 6.80E-06 |

|                    |          |          |          |
|--------------------|----------|----------|----------|
| 11732493_TRMT10B   | 0.6994   | 1.42E-07 | 6.80E-06 |
| 11718594_CCNL1     | 0.739465 | 1.42E-07 | 6.80E-06 |
| 11757039_XIAP      | 0.999035 | 1.43E-07 | 6.84E-06 |
| 11744185_SIPAIL2   | 0.703953 | 1.43E-07 | 6.84E-06 |
| 11715579_VKORC1    | -0.77365 | 1.45E-07 | 6.89E-06 |
| 11745892_MTHFD2    | -0.8769  | 1.45E-07 | 6.89E-06 |
| 11717480_FKBP10    | -0.99755 | 1.45E-07 | 6.89E-06 |
| 11739435_FN1       | 0.981283 | 1.45E-07 | 6.92E-06 |
| 11754206_HIVEP2    | 1.170123 | 1.46E-07 | 6.95E-06 |
| 11743733_RCAN1     | -0.67044 | 1.46E-07 | 6.95E-06 |
| 11747725_STXBP6    | 1.114723 | 1.46E-07 | 6.95E-06 |
| 11748071_SRPR      | -0.68968 | 1.47E-07 | 6.98E-06 |
| 11754515_SNX13     | 0.738027 | 1.47E-07 | 6.98E-06 |
| 11743136_CEBPD     | 1.031282 | 1.48E-07 | 7.00E-06 |
| 11723928_PNMA2     | -1.01063 | 1.48E-07 | 7.01E-06 |
| 11735129_SPC24     | -0.76624 | 1.48E-07 | 7.01E-06 |
| 11731567_MDM2      | 0.736942 | 1.49E-07 | 7.01E-06 |
| 11721645_ARL1      | -0.82631 | 1.49E-07 | 7.02E-06 |
| 11724351_SMC6      | -0.66644 | 1.50E-07 | 7.04E-06 |
| 11749490_MSH2      | -0.67691 | 1.50E-07 | 7.06E-06 |
| 11758122_RLF       | 0.656676 | 1.50E-07 | 7.06E-06 |
| 11751335_MKRN1     | -0.71644 | 1.50E-07 | 7.06E-06 |
| 11730821_CDKN3     | -0.77775 | 1.51E-07 | 7.07E-06 |
| 11732712_FST       | -0.81652 | 1.51E-07 | 7.07E-06 |
| 11735832_WHSC1     | -0.84739 | 1.51E-07 | 7.07E-06 |
| 11746647_NSD1      | 0.83956  | 1.51E-07 | 7.07E-06 |
| 11727256_ZNF20 /// | 0.824177 | 1.51E-07 | 7.07E-06 |
| 11732756_ELAVL2    | 1.193512 | 1.51E-07 | 7.07E-06 |
| 11719970_PACSIN3   | -1.17956 | 1.52E-07 | 7.09E-06 |
| 11716551_HES1      | 1.237302 | 1.52E-07 | 7.09E-06 |
| 11722692_LOC105369 | -0.77578 | 1.53E-07 | 7.12E-06 |
| 11758476_BNC2      | -0.81088 | 1.54E-07 | 7.14E-06 |
| 11731841_B4GALT6   | -0.73699 | 1.54E-07 | 7.14E-06 |
| 11720867_PLAC8     | 1.090994 | 1.55E-07 | 7.21E-06 |
| 11719416_MSH2      | -0.88482 | 1.56E-07 | 7.22E-06 |
| 11763694_GLS       | 0.8629   | 1.56E-07 | 7.22E-06 |
| 11720380_IMPDI1    | -0.79001 | 1.56E-07 | 7.22E-06 |
| 11744465_PPP1R15A  | 0.763096 | 1.56E-07 | 7.22E-06 |
| 11756899_NUDT21    | -0.67004 | 1.56E-07 | 7.22E-06 |
| 11722434_MAD2L2    | -0.6947  | 1.57E-07 | 7.22E-06 |
| 11725863_FAM13B    | 0.792496 | 1.57E-07 | 7.22E-06 |
| 11751370_RAB8B     | 1.139826 | 1.57E-07 | 7.22E-06 |
| 11751446_RMND5A    | -0.90834 | 1.58E-07 | 7.26E-06 |
| 11759029_BRI3BP // | -1.19118 | 1.58E-07 | 7.28E-06 |
| 11722880_PHF19     | -0.7689  | 1.58E-07 | 7.28E-06 |
| 11718874_ATP2A2    | -0.80484 | 1.59E-07 | 7.30E-06 |
| 11736447_TMPO      | -0.79624 | 1.59E-07 | 7.31E-06 |
| 11755207_NT5E      | 0.876284 | 1.60E-07 | 7.32E-06 |
| 11731569_PAWR      | 0.748732 | 1.60E-07 | 7.32E-06 |
| 11739853_SNX16     | 0.828233 | 1.60E-07 | 7.32E-06 |
| 11741011_SACMIL    | -0.74497 | 1.62E-07 | 7.42E-06 |

|                    |          |          |          |
|--------------------|----------|----------|----------|
| 11722922_FAM122B   | -1.11028 | 1.63E-07 | 7.43E-06 |
| 11750302_PLK1      | -0.73763 | 1.63E-07 | 7.43E-06 |
| 11741628_ST7L      | 0.926375 | 1.63E-07 | 7.43E-06 |
| 11755401_ZNF195    | 0.717298 | 1.63E-07 | 7.43E-06 |
| 11747730_DOCK4     | 0.757189 | 1.63E-07 | 7.43E-06 |
| 11736556_SLC2A14 / | 0.929655 | 1.64E-07 | 7.43E-06 |
| 11720053_EMG1      | -0.63585 | 1.64E-07 | 7.44E-06 |
| 11723868_SYNJ1     | 0.714866 | 1.65E-07 | 7.46E-06 |
| 11723641_FUCA1     | 0.936294 | 1.65E-07 | 7.46E-06 |
| 11759730_OVOS ///  | -1.05931 | 1.65E-07 | 7.46E-06 |
| 11733562_KLHDC10   | 0.889112 | 1.65E-07 | 7.46E-06 |
| 11721337_WDR26     | 0.658173 | 1.66E-07 | 7.49E-06 |
| 11716217_PRKAB1    | 0.725451 | 1.66E-07 | 7.49E-06 |
| 11717689_RNF19A    | 0.938883 | 1.66E-07 | 7.49E-06 |
| 11758408_ZNF540    | 0.975093 | 1.66E-07 | 7.50E-06 |
| 11738935_KLRC3     | 1.833703 | 1.67E-07 | 7.50E-06 |
| 11757828_ATG5      | -1.06369 | 1.67E-07 | 7.50E-06 |
| 11759982_BAGE2     | 0.760166 | 1.67E-07 | 7.51E-06 |
| 11752798_IREB2     | 0.94164  | 1.68E-07 | 7.53E-06 |
| 11758106_NRM       | -0.80098 | 1.68E-07 | 7.54E-06 |
| 11723338_PDGFC     | 0.823141 | 1.68E-07 | 7.54E-06 |
| 11750967_ZNF586    | 0.813832 | 1.68E-07 | 7.54E-06 |
| 11733816_RPL22L1   | -0.6603  | 1.70E-07 | 7.59E-06 |
| 11745183_NAA15     | -0.6955  | 1.70E-07 | 7.61E-06 |
| 11742735_NUSAP1    | -0.80679 | 1.71E-07 | 7.61E-06 |
| 11725984_FBXO28    | 0.707972 | 1.71E-07 | 7.62E-06 |
| 11740614_TMEM30A   | 0.729588 | 1.71E-07 | 7.62E-06 |
| 11732320_ZNF92     | 0.748376 | 1.71E-07 | 7.62E-06 |
| 11732131_IDS       | -0.81884 | 1.71E-07 | 7.62E-06 |
| 11758970_PVRL3     | 0.727919 | 1.72E-07 | 7.63E-06 |
| 11729210_ORC2      | -0.74899 | 1.72E-07 | 7.63E-06 |
| 11738516_ZCCHC6    | 0.747635 | 1.72E-07 | 7.63E-06 |
| 11752120_SUCO      | -0.6946  | 1.72E-07 | 7.64E-06 |
| 11731751_RNF213    | 0.693593 | 1.73E-07 | 7.64E-06 |
| 11745209_SAMD4A    | 0.816942 | 1.73E-07 | 7.64E-06 |
| 11745826_CCNL1     | 0.794526 | 1.73E-07 | 7.64E-06 |
| 11722231_PDP1      | 0.743326 | 1.73E-07 | 7.65E-06 |
| 11748808_ARID3B    | 1.173994 | 1.74E-07 | 7.66E-06 |
| 11724032_FST       | -1.04777 | 1.76E-07 | 7.75E-06 |
| 11759151_SPC24     | -0.9782  | 1.76E-07 | 7.75E-06 |
| 11756884_C15orf52  | 0.649875 | 1.76E-07 | 7.75E-06 |
| 11719985_BLOC1S2   | 0.618353 | 1.78E-07 | 7.81E-06 |
| 11755241_AASS      | 0.714557 | 1.78E-07 | 7.81E-06 |
| 11739545_NEDD1     | -0.79667 | 1.79E-07 | 7.83E-06 |
| 11728744_C4orf46   | -1.02542 | 1.79E-07 | 7.83E-06 |
| 11717639_SDC4      | -0.78237 | 1.79E-07 | 7.83E-06 |
| 11746666_FAM45A // | -1.45845 | 1.79E-07 | 7.83E-06 |
| 11718794_ZBED1     | -0.70574 | 1.79E-07 | 7.83E-06 |
| 11731494_ITCH      | 0.720744 | 1.80E-07 | 7.85E-06 |
| 11715465_IGFBP4    | -1.07707 | 1.80E-07 | 7.86E-06 |
| 11721384_ATG2B     | 0.800028 | 1.80E-07 | 7.86E-06 |

|                    |          |          |          |
|--------------------|----------|----------|----------|
| 11721099_C3AR1     | 1.304435 | 1.80E-07 | 7.86E-06 |
| 11721593_CHST1     | -1.28854 | 1.82E-07 | 7.93E-06 |
| 11741727_NEDD1     | -0.66054 | 1.83E-07 | 7.93E-06 |
| 11753880_CDKN3     | -1.02445 | 1.83E-07 | 7.93E-06 |
| 11715826_HMG20B    | -0.82717 | 1.83E-07 | 7.93E-06 |
| 11717392_FN3KRP    | -0.79513 | 1.83E-07 | 7.93E-06 |
| 11740390_RBM47     | -0.68431 | 1.83E-07 | 7.93E-06 |
| 11758347_DDIT3     | 0.854093 | 1.83E-07 | 7.94E-06 |
| 11716395_ADGRG1    | 0.822749 | 1.84E-07 | 7.94E-06 |
| 11744285_CBS /// C | -0.7637  | 1.84E-07 | 7.94E-06 |
| 11726012_AJUBA     | 1.0388   | 1.84E-07 | 7.94E-06 |
| 11724229_RBMS1     | 0.780481 | 1.85E-07 | 8.00E-06 |
| 11763683_ARL6IP4   | -0.65405 | 1.86E-07 | 8.01E-06 |
| 11752840_ELL2      | 0.939283 | 1.86E-07 | 8.01E-06 |
| 11743692_MCM4      | -0.71051 | 1.88E-07 | 8.07E-06 |
| 11721842_GLIPR1    | 0.915468 | 1.88E-07 | 8.07E-06 |
| 11752535_CCNL1     | 0.666897 | 1.88E-07 | 8.08E-06 |
| 11720798_RAB8B     | 1.02698  | 1.89E-07 | 8.09E-06 |
| 11725698_XIAP      | 0.980042 | 1.89E-07 | 8.10E-06 |
| 11716848_PREX1     | -1.13983 | 1.89E-07 | 8.10E-06 |
| 11732393_WWC2      | 0.63948  | 1.89E-07 | 8.10E-06 |
| 11744617_RPRD1A    | -0.8984  | 1.90E-07 | 8.11E-06 |
| 11717862_EGR1      | 0.992986 | 1.90E-07 | 8.11E-06 |
| 11744662_HMG20B    | -0.68487 | 1.91E-07 | 8.14E-06 |
| 11719155_DRAM1     | 0.769722 | 1.91E-07 | 8.15E-06 |
| 11749389_LANCL1    | -1.2036  | 1.91E-07 | 8.15E-06 |
| 11749024_SLC16A4   | 0.961191 | 1.92E-07 | 8.18E-06 |
| 11754248_NAPEPLD   | 0.90242  | 1.93E-07 | 8.23E-06 |
| 11752090_PPM1D     | 0.89941  | 1.94E-07 | 8.24E-06 |
| 11743352_COBLL1    | 0.690404 | 1.95E-07 | 8.26E-06 |
| 11749986_CAMK2G    | -0.92174 | 1.95E-07 | 8.26E-06 |
| 11758428_DCP2      | 1.290954 | 1.95E-07 | 8.26E-06 |
| 11747402_COPS7A    | -0.98111 | 1.96E-07 | 8.28E-06 |
| 11732348_TCF20     | -0.63886 | 1.98E-07 | 8.36E-06 |
| 11718947_MPP5      | 0.675131 | 1.98E-07 | 8.36E-06 |
| 11723706_ABHD5     | 0.686699 | 1.98E-07 | 8.36E-06 |
| 11737967_C15orf54  | 1.17424  | 1.98E-07 | 8.36E-06 |
| 11759205_DOCK5     | -0.71363 | 1.98E-07 | 8.36E-06 |
| 11729194_MYNN      | 0.685489 | 1.98E-07 | 8.36E-06 |
| 11749454_ADGRF1    | 0.806004 | 1.99E-07 | 8.36E-06 |
| 11722883_CREBRF    | 0.82411  | 1.99E-07 | 8.36E-06 |
| 11720331_SELM      | 0.753544 | 1.99E-07 | 8.37E-06 |
| 11739137_RNF26     | -1.04692 | 1.99E-07 | 8.37E-06 |
| 11757631_VGLL3     | 0.953312 | 2.00E-07 | 8.37E-06 |
| 11751878_JMJD1C    | 0.82864  | 2.00E-07 | 8.37E-06 |
| 11757626_SLC16A4   | 0.728697 | 2.00E-07 | 8.37E-06 |
| 11742099_CD164     | 0.727314 | 2.00E-07 | 8.39E-06 |
| 11735902_BDNF      | 1.172624 | 2.02E-07 | 8.43E-06 |
| 11722455_ZNF655    | 0.745975 | 2.02E-07 | 8.43E-06 |
| 11742948_MARCKS    | -0.95854 | 2.04E-07 | 8.50E-06 |
| 11739526_LPP       | 0.628753 | 2.04E-07 | 8.51E-06 |

|                    |          |          |          |
|--------------------|----------|----------|----------|
| 11716185_ALCAM     | 0.70764  | 2.05E-07 | 8.52E-06 |
| 11743528_RALBP1    | -0.62396 | 2.05E-07 | 8.54E-06 |
| 11746608_RALBP1    | -0.62396 | 2.05E-07 | 8.54E-06 |
| 11735042_C1orf52   | 0.635305 | 2.05E-07 | 8.54E-06 |
| 11745069_TRAPPC13  | -0.62468 | 2.06E-07 | 8.54E-06 |
| 11726039_C3orf38   | 0.650547 | 2.06E-07 | 8.54E-06 |
| 11718105_IPO5      | -0.704   | 2.07E-07 | 8.56E-06 |
| 11738327_HNMT      | 1.243063 | 2.07E-07 | 8.56E-06 |
| 11718957_PRKAB2    | 0.985242 | 2.07E-07 | 8.56E-06 |
| 11726105_PPP2R3A   | -0.63423 | 2.08E-07 | 8.56E-06 |
| 11717717_FNDC3B    | 0.633574 | 2.08E-07 | 8.56E-06 |
| 11717777_USP15     | 0.760822 | 2.08E-07 | 8.56E-06 |
| 11734586_BAGE2 /// | 0.760515 | 2.08E-07 | 8.56E-06 |
| 11724851_STXBP6    | 1.155217 | 2.08E-07 | 8.56E-06 |
| 11740140_RASGRP3   | 1.369061 | 2.09E-07 | 8.60E-06 |
| 11759780_ANKRD13C  | 1.119938 | 2.09E-07 | 8.60E-06 |
| 11753764_TNFRSF21  | -0.61339 | 2.09E-07 | 8.60E-06 |
| 11753859_SNHG12    | 0.725296 | 2.10E-07 | 8.60E-06 |
| 11721209_EXO1      | -0.67433 | 2.10E-07 | 8.60E-06 |
| 11748713_ASPM      | -0.67043 | 2.10E-07 | 8.61E-06 |
| 11744681_NT5E      | 0.707423 | 2.10E-07 | 8.61E-06 |
| 11755695_FUCA1     | 0.882879 | 2.10E-07 | 8.61E-06 |
| 11724230_RBMS1     | 0.961484 | 2.11E-07 | 8.62E-06 |
| 11754177_RRM2B     | 1.085797 | 2.11E-07 | 8.62E-06 |
| 11733695_UBE2C     | -0.64249 | 2.11E-07 | 8.63E-06 |
| 11716766_IQGAP1    | -0.69776 | 2.12E-07 | 8.63E-06 |
| 11745452_TRMT13    | 0.694065 | 2.12E-07 | 8.63E-06 |
| 11724204_SNRPD1    | -1.04042 | 2.12E-07 | 8.63E-06 |
| 11741642_ZFX /// Z | 0.789139 | 2.12E-07 | 8.63E-06 |
| 11745561_ZFX /// Z | 0.789139 | 2.12E-07 | 8.63E-06 |
| 11743513_GINS2     | -0.83002 | 2.14E-07 | 8.68E-06 |
| 11743732_RCAN1     | -0.68264 | 2.14E-07 | 8.68E-06 |
| 11747740_PPP2R1A   | -0.73303 | 2.14E-07 | 8.68E-06 |
| 11725964_CAV2      | 0.681611 | 2.14E-07 | 8.69E-06 |
| 11752256_RBM15B    | -0.72353 | 2.16E-07 | 8.74E-06 |
| 11753243_BAGE ///  | 0.686763 | 2.16E-07 | 8.75E-06 |
| 11758261_CEP55     | -0.73022 | 2.17E-07 | 8.75E-06 |
| 11746010_ACAT2     | -0.6588  | 2.17E-07 | 8.75E-06 |
| 11739560_GDAP1     | 0.816567 | 2.17E-07 | 8.76E-06 |
| 11745204_TPD52     | -1.52863 | 2.18E-07 | 8.79E-06 |
| 11751329_FGFR1OP   | 0.632126 | 2.19E-07 | 8.82E-06 |
| 11716039_BABAM1    | -0.69209 | 2.19E-07 | 8.83E-06 |
| 11720550_NCAPD3    | -0.76262 | 2.19E-07 | 8.83E-06 |
| 11751187_ZNF485    | 0.83239  | 2.21E-07 | 8.86E-06 |
| 11748877_WRB       | -0.69128 | 2.21E-07 | 8.86E-06 |
| 11749564_EFEMP1    | 1.209026 | 2.21E-07 | 8.86E-06 |
| 11715762_API1M1    | -1.03113 | 2.21E-07 | 8.86E-06 |
| 11718217_RAB22A    | -0.87778 | 2.22E-07 | 8.86E-06 |
| 11757884_MSRB3     | 0.650365 | 2.22E-07 | 8.86E-06 |
| 11724217_GPATCH2   | 0.907213 | 2.22E-07 | 8.86E-06 |
| 11723829_ANO1      | -1.08525 | 2.22E-07 | 8.86E-06 |



|                    |          |          |          |
|--------------------|----------|----------|----------|
| 11716010_DYNC1LI2  | -0.72098 | 2.22E-07 | 8.86E-06 |
| 11742432_NBEAL1    | 0.835695 | 2.22E-07 | 8.86E-06 |
| 11725189_ADGRG6    | 0.980665 | 2.23E-07 | 8.88E-06 |
| 11727153_LRRC1     | 0.81084  | 2.24E-07 | 8.92E-06 |
| 11753856_CKS2      | -0.70239 | 2.24E-07 | 8.92E-06 |
| 11720163_VEGFC     | 0.680581 | 2.24E-07 | 8.92E-06 |
| 11749208_ELL2      | 0.76732  | 2.25E-07 | 8.95E-06 |
| 11729623_KIF2C     | -0.84484 | 2.25E-07 | 8.95E-06 |
| 11731845_IGSF3     | -0.90144 | 2.26E-07 | 8.95E-06 |
| 11758136_SLC35G2   | 0.654075 | 2.26E-07 | 8.96E-06 |
| 11716337_INSIG1    | -1.03015 | 2.26E-07 | 8.97E-06 |
| 11747230_BUB1      | -0.85758 | 2.27E-07 | 8.97E-06 |
| 11743457_ERGIC1    | -0.83229 | 2.27E-07 | 8.97E-06 |
| 11716169_CCDC28A   | -0.79031 | 2.27E-07 | 8.97E-06 |
| 11747047_MAP3K7CL  | 1.105299 | 2.27E-07 | 8.97E-06 |
| 11728745_C4orf46   | -1.38944 | 2.29E-07 | 9.04E-06 |
| 11716151_PMEPA1    | 0.852692 | 2.29E-07 | 9.04E-06 |
| 11762865_CREB5     | 1.752915 | 2.29E-07 | 9.04E-06 |
| 11715973_MTFR1L    | -0.79494 | 2.30E-07 | 9.04E-06 |
| 11727236_C18orf25  | 1.01599  | 2.30E-07 | 9.05E-06 |
| 11723556_DCAF16    | -1.1263  | 2.30E-07 | 9.05E-06 |
| 11728694_LOC100996 | 0.711866 | 2.31E-07 | 9.05E-06 |
| 11741284_RFC5      | -0.77985 | 2.31E-07 | 9.07E-06 |
| 11758044_KIAA0753  | 0.94531  | 2.32E-07 | 9.08E-06 |
| 11717924_YAP1      | 0.696431 | 2.32E-07 | 9.10E-06 |
| 11750674_STAT3     | 0.717009 | 2.33E-07 | 9.10E-06 |
| 11754259_FDFT1     | -0.64672 | 2.33E-07 | 9.11E-06 |
| 11742640_RDM1      | -0.97836 | 2.34E-07 | 9.16E-06 |
| 11726700_AFTPH     | 0.719343 | 2.35E-07 | 9.18E-06 |
| 11733857_EGLN1     | 0.758103 | 2.36E-07 | 9.22E-06 |
| 11743274_RSRC2     | 0.624325 | 2.37E-07 | 9.23E-06 |
| 11732241_SLITRK6   | 0.798175 | 2.37E-07 | 9.23E-06 |
| 11755561_PPP2R1A   | -0.7325  | 2.37E-07 | 9.23E-06 |
| 11743196_TLR4      | 0.783541 | 2.38E-07 | 9.24E-06 |
| 11727536_CCNF      | -0.79475 | 2.38E-07 | 9.25E-06 |
| 11717739_PCYOX1    | -0.6915  | 2.38E-07 | 9.25E-06 |
| 11736257_PRKCE     | 1.021814 | 2.40E-07 | 9.29E-06 |
| 11758198_DDIT3     | 0.860144 | 2.40E-07 | 9.30E-06 |
| 11725410_NAV1      | -0.84624 | 2.40E-07 | 9.31E-06 |
| 11749473_MEF2D     | 0.685368 | 2.40E-07 | 9.31E-06 |
| 11722241_SAV1      | 0.72508  | 2.41E-07 | 9.32E-06 |
| 11748529_CASP4     | 0.755932 | 2.41E-07 | 9.32E-06 |
| 11717638_SDC4      | -0.76768 | 2.42E-07 | 9.34E-06 |
| 11724122_SLC35G2   | 0.719678 | 2.42E-07 | 9.34E-06 |
| 11721656_CISD2     | -0.60168 | 2.42E-07 | 9.34E-06 |
| 11732370_CUX1      | -0.70746 | 2.43E-07 | 9.35E-06 |
| 11727805_UBE2W     | -0.63408 | 2.43E-07 | 9.36E-06 |
| 11717745_6-Mar     | -0.91464 | 2.44E-07 | 9.37E-06 |
| 11755707_YAF2      | 0.683949 | 2.44E-07 | 9.37E-06 |
| 11758436_SEC62     | -0.84465 | 2.45E-07 | 9.40E-06 |
| 11723939_CCNB1     | -0.65108 | 2.45E-07 | 9.40E-06 |

|                    |          |          |          |
|--------------------|----------|----------|----------|
| 11715437_TIMP3     | -0.68959 | 2.45E-07 | 9.40E-06 |
| 11739196_PCGF3     | -0.80581 | 2.45E-07 | 9.40E-06 |
| 11744369_EPB41L4A- | 0.742441 | 2.46E-07 | 9.41E-06 |
| 11752058_DNA2      | -0.78407 | 2.46E-07 | 9.41E-06 |
| 11721065_ADCY9     | -1.10179 | 2.46E-07 | 9.42E-06 |
| 11724308_MED30     | -0.61492 | 2.48E-07 | 9.45E-06 |
| 11757975_GFPT1     | 0.634913 | 2.48E-07 | 9.45E-06 |
| 11734015_SMAD2     | -0.79631 | 2.48E-07 | 9.45E-06 |
| 11745021_MYC       | 0.64764  | 2.48E-07 | 9.45E-06 |
| 11743650_DEK       | -0.69208 | 2.48E-07 | 9.45E-06 |
| 11747987_ZNF791    | 0.692279 | 2.50E-07 | 9.50E-06 |
| 11758375_RNF20     | 0.647316 | 2.52E-07 | 9.57E-06 |
| 11744188_ZNF420    | 0.744543 | 2.52E-07 | 9.59E-06 |
| 11718398_TGM2      | -0.87143 | 2.53E-07 | 9.61E-06 |
| 11748785_FOXRED1   | -0.82599 | 2.54E-07 | 9.61E-06 |
| 11718591_SDF2L1    | -0.7078  | 2.54E-07 | 9.61E-06 |
| 11759715_LRCH1     | 0.623022 | 2.54E-07 | 9.61E-06 |
| 11749574_RPA2      | -0.62869 | 2.54E-07 | 9.63E-06 |
| 11764030_CEBPD     | 0.730833 | 2.55E-07 | 9.64E-06 |
| 11715915_CD44      | -0.6455  | 2.56E-07 | 9.64E-06 |
| 11718112_SF3A3     | -0.68394 | 2.56E-07 | 9.64E-06 |
| 11742227_CLDN22    | 0.612671 | 2.56E-07 | 9.64E-06 |
| 11715363_A2M       | 1.578177 | 2.56E-07 | 9.64E-06 |
| 11716885_BANF1     | -0.70099 | 2.56E-07 | 9.64E-06 |
| 11745950_PARP1     | -0.75776 | 2.56E-07 | 9.65E-06 |
| 11718636_JMJD1C    | 0.623266 | 2.57E-07 | 9.65E-06 |
| 11758262_CCNJL     | 0.61727  | 2.57E-07 | 9.65E-06 |
| 11720052_EMG1      | -0.62665 | 2.57E-07 | 9.65E-06 |
| 11753810_CCL5      | 0.703822 | 2.57E-07 | 9.65E-06 |
| 11758442_ARID4A    | 0.751634 | 2.57E-07 | 9.65E-06 |
| 11736054_CELF1     | 0.630136 | 2.59E-07 | 9.68E-06 |
| 11755420_KDM4B     | 0.79095  | 2.59E-07 | 9.69E-06 |
| 11734136_MTBP      | -0.8113  | 2.60E-07 | 9.71E-06 |
| 11748766_FBXW7     | 0.944849 | 2.60E-07 | 9.73E-06 |
| 11731407_IFIT3     | 0.788126 | 2.62E-07 | 9.77E-06 |
| 11719063_SESN1     | 0.971861 | 2.62E-07 | 9.78E-06 |
| 11716849_PREX1     | -1.21003 | 2.63E-07 | 9.79E-06 |
| 11719741_DCP2      | 0.979693 | 2.65E-07 | 9.85E-06 |
| 11750186_ALDH1A3   | -0.65167 | 2.65E-07 | 9.86E-06 |
| 11720185_MAD2L1    | -0.74208 | 2.65E-07 | 9.86E-06 |
| 11718464_NEURL1B   | -1.36334 | 2.65E-07 | 9.86E-06 |
| 11748434_PARP2     | -0.70321 | 2.65E-07 | 9.86E-06 |
| 11726141_FMN2      | 0.65168  | 2.66E-07 | 9.86E-06 |
| 11734824_SPRED1    | -1.06536 | 2.67E-07 | 9.87E-06 |
| 11723435_TTK       | -0.71686 | 2.67E-07 | 9.87E-06 |
| 11735694_PRKACB    | 0.918436 | 2.67E-07 | 9.87E-06 |
| 11754109_BIRC5     | -0.84761 | 2.67E-07 | 9.87E-06 |
| 11742046_PCMTD2    | -0.63825 | 2.67E-07 | 9.87E-06 |
| 11719959_SGPL1     | -0.80524 | 2.67E-07 | 9.87E-06 |
| 11717268_CAMK2G    | -0.96605 | 2.67E-07 | 9.87E-06 |
| 11719154_DRAM1     | 0.739748 | 2.68E-07 | 9.87E-06 |

|                    |          |          |          |
|--------------------|----------|----------|----------|
| 11752557_CREBRF    | 0.874271 | 2.68E-07 | 9.87E-06 |
| 11731183_TFPI      | 0.661516 | 2.69E-07 | 9.90E-06 |
| 11759440_GLS       | 1.355355 | 2.69E-07 | 9.90E-06 |
| 11757492_RRAS2     | 0.69147  | 2.70E-07 | 9.91E-06 |
| 11753689_MDM2      | 0.665154 | 2.70E-07 | 9.91E-06 |
| 11763528_SLC12A4   | 0.724996 | 2.70E-07 | 9.91E-06 |
| 11756885_ATAD2     | -0.63021 | 2.70E-07 | 9.92E-06 |
| 11752458_PKM       | 0.974324 | 2.71E-07 | 9.93E-06 |
| 11721608_RAPGEF2   | 0.686804 | 2.71E-07 | 9.93E-06 |
| 11744077_ARPC1B    | -0.73023 | 2.71E-07 | 9.93E-06 |
| 11747588_HDAC9     | 0.778307 | 2.72E-07 | 9.95E-06 |
| 11756853_CLK4      | 1.127551 | 2.72E-07 | 9.95E-06 |
| 11753665_EGLN1     | 0.641777 | 2.73E-07 | 9.96E-06 |
| 11726608_MTF2      | 0.675804 | 2.73E-07 | 9.96E-06 |
| 11722786_TIMP2     | -0.80532 | 2.73E-07 | 9.97E-06 |
| 11736527_SMC2      | -0.64326 | 2.74E-07 | 9.98E-06 |
| 11730264_FAM83D    | -0.72685 | 2.75E-07 | 1.00E-05 |
| 11744828_CLK1      | 0.916858 | 2.75E-07 | 1.00E-05 |
| 11753632_ATF3      | 0.739317 | 2.76E-07 | 1.00E-05 |
| 11741856_ZNF658 // | 0.702844 | 2.76E-07 | 1.00E-05 |
| 11743604_RRM1      | -0.65875 | 2.76E-07 | 1.00E-05 |
| 11744297_RMI2      | -0.69793 | 2.77E-07 | 1.00E-05 |
| 11741297_SMARCA1   | -0.62343 | 2.77E-07 | 1.00E-05 |
| 11745469_INPP4B    | 0.715503 | 2.77E-07 | 1.00E-05 |
| 11752734_ZNF138    | 0.933162 | 2.77E-07 | 1.00E-05 |
| 11732078_EVA1A     | 0.687025 | 2.77E-07 | 1.00E-05 |
| 11744896_GPSM3     | -0.92671 | 2.78E-07 | 1.00E-05 |
| 11759031_ABCC2     | 0.631884 | 2.78E-07 | 1.00E-05 |
| 11731303_DUSP10    | 0.752702 | 2.78E-07 | 1.00E-05 |
| 11747401_COPS7A    | -1.03316 | 2.78E-07 | 1.00E-05 |
| 11737043_PHLDB2    | 0.638079 | 2.79E-07 | 1.00E-05 |
| 11750484_MRE11A    | -0.85532 | 2.79E-07 | 1.00E-05 |
| 11733077_PPP1R12A  | 0.619876 | 2.79E-07 | 1.00E-05 |
| 11718677_CTNNAL1 / | 0.758705 | 2.79E-07 | 1.00E-05 |
| 11755522_LPXN      | 0.716444 | 2.80E-07 | 1.00E-05 |
| 11731465_CTSC      | -0.79684 | 2.80E-07 | 1.00E-05 |
| 11736745_ZBTB20    | 0.841266 | 2.80E-07 | 1.00E-05 |
| 11734743_DCTN5     | 0.655156 | 2.81E-07 | 1.01E-05 |
| 11727916_CENPA     | -0.84613 | 2.81E-07 | 1.01E-05 |
| 11731525_TRIP13    | -0.63415 | 2.83E-07 | 1.01E-05 |
| 11755645_ZNF529    | 0.688528 | 2.83E-07 | 1.01E-05 |
| 11756174_SCD       | -0.6337  | 2.83E-07 | 1.01E-05 |
| 11744572_KLF5      | 0.627839 | 2.83E-07 | 1.01E-05 |
| 11744721_MSH2      | -0.85385 | 2.83E-07 | 1.01E-05 |
| 11742399_LOC105369 | -0.72376 | 2.83E-07 | 1.01E-05 |
| 11720427_ILVBL     | -0.58398 | 2.84E-07 | 1.01E-05 |
| 11717353_EAPP      | -1.01959 | 2.85E-07 | 1.01E-05 |
| 11754108_RBM14 /// | 0.676416 | 2.87E-07 | 1.02E-05 |
| 11750667_RRM1      | -0.67009 | 2.87E-07 | 1.02E-05 |
| 11721682_RBMX2     | -0.66394 | 2.88E-07 | 1.02E-05 |
| 11732246_HNRNPC    | -0.76611 | 2.88E-07 | 1.02E-05 |

|                    |          |          |          |
|--------------------|----------|----------|----------|
| 11718637_JMJD1C    | 0.673371 | 2.88E-07 | 1.02E-05 |
| 11749032_PTBP3     | 0.662306 | 2.89E-07 | 1.02E-05 |
| 11758948_SLC30A1   | 0.661388 | 2.89E-07 | 1.02E-05 |
| 11741296_SMARCA1   | -0.67283 | 2.90E-07 | 1.03E-05 |
| 11758537_TRIM25    | -0.75747 | 2.90E-07 | 1.03E-05 |
| 11721145_MKI67     | -0.7376  | 2.91E-07 | 1.03E-05 |
| 11737880_GALNT2    | 0.604089 | 2.91E-07 | 1.03E-05 |
| 11728705_COPG2     | -0.87813 | 2.91E-07 | 1.03E-05 |
| 11743298_CNOT6     | 0.75042  | 2.93E-07 | 1.03E-05 |
| 11728478_CCDC181   | 1.067259 | 2.93E-07 | 1.03E-05 |
| 11734799_RLIM      | 0.767242 | 2.94E-07 | 1.03E-05 |
| 11741198_ZNF138    | 0.726611 | 2.94E-07 | 1.04E-05 |
| 11754416_FBXO28    | 0.627798 | 2.95E-07 | 1.04E-05 |
| 11722305_ARHGAP23  | 0.664835 | 2.95E-07 | 1.04E-05 |
| 11743272_RSRC2     | 0.60139  | 2.96E-07 | 1.04E-05 |
| 11739139_RNF26     | -0.82991 | 2.97E-07 | 1.04E-05 |
| 11718299_CCDC25    | -0.69284 | 2.98E-07 | 1.05E-05 |
| 11744466_AK6 /// T | -0.69844 | 2.98E-07 | 1.05E-05 |
| 11722069_SKA1      | -0.93433 | 2.99E-07 | 1.05E-05 |
| 11722872_RFC4      | -0.95103 | 2.99E-07 | 1.05E-05 |
| 11743412_OTUD1     | 0.809036 | 3.00E-07 | 1.05E-05 |
| 11759510_MCM4      | -0.62807 | 3.00E-07 | 1.05E-05 |
| 11722251_NEK2      | -0.65526 | 3.01E-07 | 1.05E-05 |
| 11736328_ZNF322    | 0.797326 | 3.01E-07 | 1.05E-05 |
| 11756626_ZWINT     | -0.61271 | 3.02E-07 | 1.05E-05 |
| 11724882_TUFT1     | 0.759006 | 3.02E-07 | 1.05E-05 |
| 11720836_RIN2      | 0.62382  | 3.03E-07 | 1.06E-05 |
| 11736229_CRIM1     | 0.710431 | 3.04E-07 | 1.06E-05 |
| 11718965_NUFIP2    | -0.78831 | 3.04E-07 | 1.06E-05 |
| 11735003_ST7L      | 0.866402 | 3.06E-07 | 1.06E-05 |
| 11758101_EIF4EBP2  | -0.81477 | 3.06E-07 | 1.06E-05 |
| 11731497_ZNF134    | 0.778126 | 3.06E-07 | 1.06E-05 |
| 11751165_RBMS2     | 0.788073 | 3.06E-07 | 1.06E-05 |
| 11725413_TRIM14    | -0.63461 | 3.06E-07 | 1.06E-05 |
| 11722645_ZNHIT6    | 0.621287 | 3.07E-07 | 1.06E-05 |
| 11740097_TBX3      | 0.778739 | 3.08E-07 | 1.07E-05 |
| 11722802_GNAI1     | -0.64827 | 3.09E-07 | 1.07E-05 |
| 11756577_PEA15     | 0.657963 | 3.09E-07 | 1.07E-05 |
| 11740048_ZNF461    | 0.7581   | 3.10E-07 | 1.07E-05 |
| 11754080_CDIPT     | -1.31929 | 3.10E-07 | 1.07E-05 |
| 11719899_C11orf96  | -0.74115 | 3.12E-07 | 1.08E-05 |
| 11749798_GNAI1     | 0.794558 | 3.12E-07 | 1.08E-05 |
| 11757065_BANF1     | -0.62751 | 3.14E-07 | 1.08E-05 |
| 11716184_ALCAM     | 0.620679 | 3.14E-07 | 1.08E-05 |
| 11731775_ADGRE1    | 0.593883 | 3.15E-07 | 1.08E-05 |
| 11736025_MED28     | 0.797011 | 3.16E-07 | 1.08E-05 |
| 11743609_FAM3C     | 0.719361 | 3.16E-07 | 1.08E-05 |
| 11744752_GTF3C2    | -0.65924 | 3.16E-07 | 1.08E-05 |
| 11753978_MTFR1L    | -0.60381 | 3.16E-07 | 1.08E-05 |
| 11743064_CDC6      | -0.609   | 3.16E-07 | 1.08E-05 |
| 11744664_ADAMTS12  | 0.877354 | 3.17E-07 | 1.08E-05 |

|                   |          |          |          |
|-------------------|----------|----------|----------|
| 11726291_LRRC17   | 1.28047  | 3.17E-07 | 1.08E-05 |
| 11746985_TBX3     | 1.06522  | 3.17E-07 | 1.08E-05 |
| 11745819_H1FO     | -0.63265 | 3.17E-07 | 1.08E-05 |
| 11753858_SNHG12   | 0.6351   | 3.18E-07 | 1.08E-05 |
| 11718509_UBE2L3   | -0.5889  | 3.19E-07 | 1.09E-05 |
| 11751643_EGR1     | 0.664524 | 3.19E-07 | 1.09E-05 |
| 11732206_NAP1L1   | -0.7722  | 3.19E-07 | 1.09E-05 |
| 11751178_ATP6V1A  | 0.66308  | 3.20E-07 | 1.09E-05 |
| 11720498_CDC42EP3 | -0.77485 | 3.21E-07 | 1.09E-05 |
| 11728647_NUCKS1   | -0.99361 | 3.22E-07 | 1.10E-05 |
| 11722279_PHC3     | 0.735165 | 3.23E-07 | 1.10E-05 |
| 11721601_ZBTB18   | 0.713232 | 3.23E-07 | 1.10E-05 |
| 11725616_PPP1CB   | -0.91228 | 3.25E-07 | 1.10E-05 |
| 11753563_MDM2     | 0.679067 | 3.26E-07 | 1.11E-05 |
| 11754470_CHTF18   | -0.65603 | 3.26E-07 | 1.11E-05 |
| 11745424_SMC2     | -0.90466 | 3.27E-07 | 1.11E-05 |
| 11748858_BABAM1   | -0.74798 | 3.27E-07 | 1.11E-05 |
| 11739403_KMT5B    | 0.64612  | 3.28E-07 | 1.11E-05 |
| 11723337_PDGFC    | 0.781629 | 3.28E-07 | 1.11E-05 |
| 11743295_CENPF    | -0.87817 | 3.29E-07 | 1.11E-05 |
| 11751813_TMEM107  | -0.73527 | 3.29E-07 | 1.11E-05 |
| 11725082_CALB2    | 0.858912 | 3.29E-07 | 1.11E-05 |
| 11749457_FCHO2    | 0.805243 | 3.30E-07 | 1.11E-05 |
| 11722452_QKI      | -0.61865 | 3.30E-07 | 1.11E-05 |
| 11719849_UBE2S    | -0.63403 | 3.30E-07 | 1.11E-05 |
| 11726498_LIF      | 0.671426 | 3.31E-07 | 1.11E-05 |
| 11743651_DEK      | -0.61459 | 3.31E-07 | 1.11E-05 |
| 11729517_ZNF644   | 0.635994 | 3.32E-07 | 1.11E-05 |
| 11761742_IMM2L    | 1.289019 | 3.33E-07 | 1.12E-05 |
| 11720155_ZC3H7A   | 0.677325 | 3.33E-07 | 1.12E-05 |
| 11725937_LGALS3   | 0.67019  | 3.33E-07 | 1.12E-05 |
| 11750719_ZNF45    | 0.858114 | 3.33E-07 | 1.12E-05 |
| 11718797_PAQR4    | -0.67354 | 3.34E-07 | 1.12E-05 |
| 11719880_OSTM1    | 1.102461 | 3.34E-07 | 1.12E-05 |
| 11743189_RGL1     | 0.847207 | 3.35E-07 | 1.12E-05 |
| 11759296_MAP3K2   | 0.999171 | 3.35E-07 | 1.12E-05 |
| 11748976_STRADA   | -0.75041 | 3.35E-07 | 1.12E-05 |
| 11742816_FAM13A   | 0.681386 | 3.37E-07 | 1.12E-05 |
| 11724948_CITED4   | 0.683764 | 3.37E-07 | 1.12E-05 |
| 11716779	EIF1AX   | -0.62666 | 3.37E-07 | 1.12E-05 |
| 11720932_DLST     | -0.65868 | 3.39E-07 | 1.13E-05 |
| 11756530_ST7L     | 0.86748  | 3.39E-07 | 1.13E-05 |
| 11748762_KLF5     | 0.817815 | 3.39E-07 | 1.13E-05 |
| 11740190_DICER1   | 0.978771 | 3.39E-07 | 1.13E-05 |
| 11716984_PNKD     | -0.64861 | 3.40E-07 | 1.13E-05 |
| 11716727_PLK1     | -0.68901 | 3.41E-07 | 1.13E-05 |
| 11745621_APTX     | -0.88217 | 3.41E-07 | 1.13E-05 |
| 11751180_ADAM10   | 0.712075 | 3.42E-07 | 1.13E-05 |
| 11720827_CENPW    | -0.72987 | 3.44E-07 | 1.14E-05 |
| 11752187_NAPEPLD  | 1.100519 | 3.44E-07 | 1.14E-05 |
| 11718705_IGF1R    | -0.91002 | 3.45E-07 | 1.14E-05 |

|                    |          |          |          |
|--------------------|----------|----------|----------|
| 11739324_WDR4      | 0.963626 | 3.47E-07 | 1.14E-05 |
| 11722300_ETS1      | 0.630672 | 3.47E-07 | 1.14E-05 |
| 11723830_ANO1      | -1.03609 | 3.47E-07 | 1.14E-05 |
| 11749908_SYT11     | 0.752997 | 3.47E-07 | 1.14E-05 |
| 11726504_ERCC6-PGE | 0.961803 | 3.47E-07 | 1.14E-05 |
| 11721232_VCPKMT    | 0.742099 | 3.49E-07 | 1.15E-05 |
| 11739080_DNAJB4    | 0.880617 | 3.49E-07 | 1.15E-05 |
| 11746379_TAB3      | 0.615068 | 3.49E-07 | 1.15E-05 |
| 11744148_MRPL12    | -0.69873 | 3.49E-07 | 1.15E-05 |
| 11746119_SYNCRIP   | -0.6825  | 3.49E-07 | 1.15E-05 |
| 11758963_PAFAH1B2  | -0.66163 | 3.50E-07 | 1.15E-05 |
| 11756903_HHAT      | 0.919216 | 3.50E-07 | 1.15E-05 |
| 11722240_SAV1      | 0.763823 | 3.50E-07 | 1.15E-05 |
| 11720714_NIPA1     | -1.21203 | 3.51E-07 | 1.15E-05 |
| 11729837_ZCCHC2    | 0.734008 | 3.52E-07 | 1.15E-05 |
| 11716092_CKS1B     | -0.67402 | 3.52E-07 | 1.15E-05 |
| 11750446_ATG4B     | -0.76267 | 3.53E-07 | 1.15E-05 |
| 11756696_ZNF567    | 0.721636 | 3.53E-07 | 1.15E-05 |
| 11733076_PPP1R12A  | 0.598444 | 3.54E-07 | 1.15E-05 |
| 11732060_LEMD1     | 0.607954 | 3.54E-07 | 1.15E-05 |
| 11739285_ARL6IP6   | -0.72944 | 3.54E-07 | 1.15E-05 |
| 11720859_ABHD3     | -1.08607 | 3.54E-07 | 1.15E-05 |
| 11715885_TMEM248   | -0.69834 | 3.55E-07 | 1.15E-05 |
| 11741732_ANP32E    | -0.75479 | 3.56E-07 | 1.16E-05 |
| 11717909_IGFBP6    | -0.7179  | 3.56E-07 | 1.16E-05 |
| 11722804_PTBP2     | 0.614489 | 3.58E-07 | 1.16E-05 |
| 11754360_RRM2      | -0.57909 | 3.58E-07 | 1.16E-05 |
| 11751697_NAA50     | -0.67039 | 3.58E-07 | 1.16E-05 |
| 11757434_C1QBP     | -0.58692 | 3.59E-07 | 1.17E-05 |
| 11756665_CD164     | 0.618031 | 3.59E-07 | 1.17E-05 |
| 11755039_FBXL2     | 0.670252 | 3.60E-07 | 1.17E-05 |
| 11724593_NUP37     | -0.60812 | 3.61E-07 | 1.17E-05 |
| 11724468_RPA3      | -0.66725 | 3.63E-07 | 1.17E-05 |
| 11724203_SNRPD1    | -1.04448 | 3.63E-07 | 1.17E-05 |
| 11735268_SLC41A2   | 0.982619 | 3.64E-07 | 1.17E-05 |
| 11747125_RIOK3     | 0.892923 | 3.65E-07 | 1.18E-05 |
| 11730896_MAPKAPK2  | -1.21672 | 3.66E-07 | 1.18E-05 |
| 11730364_HRH1      | 1.0006   | 3.66E-07 | 1.18E-05 |
| 11726743_F2RL2     | 1.117586 | 3.67E-07 | 1.18E-05 |
| 11749193_UBE2L3    | -0.64235 | 3.68E-07 | 1.18E-05 |
| 11724752_TMF1      | 0.683492 | 3.68E-07 | 1.18E-05 |
| 11755984_TRIML2    | 0.896803 | 3.68E-07 | 1.18E-05 |
| 11718215_DDA1      | 0.587372 | 3.68E-07 | 1.18E-05 |
| 11715940_KHDRBS1   | -0.5643  | 3.69E-07 | 1.18E-05 |
| 11726038_C3orf38   | 0.631741 | 3.69E-07 | 1.18E-05 |
| 11758181_HMGB1     | -0.65304 | 3.69E-07 | 1.18E-05 |
| 11742997_MCM3      | -0.58631 | 3.70E-07 | 1.19E-05 |
| 11737442_ST7L      | 1.018815 | 3.72E-07 | 1.19E-05 |
| 11718735_PCMTD1    | 0.573893 | 3.73E-07 | 1.19E-05 |
| 11752877_TUBB      | -0.59749 | 3.74E-07 | 1.19E-05 |
| 11723782_AGPS      | -1.17977 | 3.74E-07 | 1.20E-05 |

|                    |          |          |          |
|--------------------|----------|----------|----------|
| 11725640_NSL1      | -0.57145 | 3.74E-07 | 1.20E-05 |
| 11729852_ZMYM5     | 0.705577 | 3.75E-07 | 1.20E-05 |
| 11728110_GRIP1     | 1.024709 | 3.75E-07 | 1.20E-05 |
| 11721231_VCPKMT    | 0.752943 | 3.77E-07 | 1.20E-05 |
| 11735146_PPP1R8    | -0.86656 | 3.78E-07 | 1.20E-05 |
| 11753085_PGK1      | -0.79738 | 3.79E-07 | 1.21E-05 |
| 11746856_SERPINE1  | 0.69963  | 3.79E-07 | 1.21E-05 |
| 11718517_AK6 /// T | -0.74453 | 3.79E-07 | 1.21E-05 |
| 11758208_KLF2      | 0.696949 | 3.80E-07 | 1.21E-05 |
| 11724643_SPOPL     | -0.8378  | 3.81E-07 | 1.21E-05 |
| 11727453_COPRS     | -0.62773 | 3.82E-07 | 1.21E-05 |
| 11751226_DLST      | -0.64483 | 3.83E-07 | 1.21E-05 |
| 11718013_IRS2      | -0.84833 | 3.83E-07 | 1.21E-05 |
| 11734010_TRAPPC13  | -0.61373 | 3.83E-07 | 1.21E-05 |
| 11729223_GATA3     | 0.883973 | 3.83E-07 | 1.21E-05 |
| 11753735_TMSB4X    | -0.61766 | 3.83E-07 | 1.21E-05 |
| 11718375_WDR5      | -0.63493 | 3.84E-07 | 1.21E-05 |
| 11718873_ATP2A2    | -0.78268 | 3.85E-07 | 1.22E-05 |
| 11721195_RRP1B     | -0.83409 | 3.85E-07 | 1.22E-05 |
| 11753904_CDC42EP2  | 0.624625 | 3.86E-07 | 1.22E-05 |
| 11745800_CCP110    | 0.759831 | 3.87E-07 | 1.22E-05 |
| 11719511_PHC1      | -0.78252 | 3.87E-07 | 1.22E-05 |
| 11721966_HMBOX1    | 0.867937 | 3.88E-07 | 1.22E-05 |
| 11726603_DARS2     | -0.58145 | 3.88E-07 | 1.22E-05 |
| 11752700_ATP11B    | 0.698644 | 3.88E-07 | 1.22E-05 |
| 11746584_MTF2      | 0.617192 | 3.89E-07 | 1.22E-05 |
| 11750831_ZNF571    | 0.935011 | 3.89E-07 | 1.22E-05 |
| 11720203_AURKB     | -0.65277 | 3.89E-07 | 1.22E-05 |
| 11715675_CCNG1     | 0.594753 | 3.89E-07 | 1.22E-05 |
| 11756155_NHS       | 0.812326 | 3.90E-07 | 1.22E-05 |
| 11744735_TMEM200A  | 1.323521 | 3.91E-07 | 1.22E-05 |
| 11747964_SLC4A7    | 0.735893 | 3.91E-07 | 1.22E-05 |
| 11736528_SMC2      | -0.95517 | 3.92E-07 | 1.23E-05 |
| 11718673_TMEM245   | 0.636828 | 3.93E-07 | 1.23E-05 |
| 11740000_CPEB3     | 0.96889  | 3.93E-07 | 1.23E-05 |
| 11726671_DCLRE1B   | -0.74363 | 3.93E-07 | 1.23E-05 |
| 11763238_CTCFL /// | -0.63859 | 3.94E-07 | 1.23E-05 |
| 11716339_INSIG1    | -0.68683 | 3.94E-07 | 1.23E-05 |
| 11754302_ATP2A2    | -0.77557 | 3.94E-07 | 1.23E-05 |
| 11722285_SLC30A7   | 0.711265 | 3.95E-07 | 1.23E-05 |
| 11740686_NAPEPLD   | 0.962927 | 3.95E-07 | 1.23E-05 |
| 11751923_ERBB2IP   | 0.639254 | 3.95E-07 | 1.23E-05 |
| 11718879_SMC1A     | -0.629   | 3.96E-07 | 1.23E-05 |
| 11749291_FOS       | 1.033013 | 3.96E-07 | 1.23E-05 |
| 11728676_MED14     | -0.67197 | 3.96E-07 | 1.23E-05 |
| 11748901_EDA2R     | 0.86282  | 3.96E-07 | 1.23E-05 |
| 11723177_FRAS1     | 0.920604 | 3.98E-07 | 1.23E-05 |
| 11759287_DNAJB4    | 0.810242 | 3.98E-07 | 1.23E-05 |
| 11728762_LOC100506 | 0.776191 | 3.98E-07 | 1.23E-05 |
| 11716703_PRKACB    | 0.636904 | 3.98E-07 | 1.23E-05 |
| 11717215_ATP9A     | -0.88413 | 3.99E-07 | 1.23E-05 |

|                    |          |          |          |
|--------------------|----------|----------|----------|
| 11725508_SLC7A6    | 0.973411 | 4.00E-07 | 1.24E-05 |
| 11755748_PLAC8     | 1.262131 | 4.00E-07 | 1.24E-05 |
| 11758569_HIST2H2BF | 1.289553 | 4.01E-07 | 1.24E-05 |
| 11734200_ZNF844    | 0.898029 | 4.02E-07 | 1.24E-05 |
| 11727675_MOCOS     | -0.56242 | 4.02E-07 | 1.24E-05 |
| 11748136_MAD2L1    | -0.73158 | 4.02E-07 | 1.24E-05 |
| 11746373_RRN3 ///  | 0.613001 | 4.03E-07 | 1.24E-05 |
| 11731648_NTM       | 0.755681 | 4.03E-07 | 1.24E-05 |
| 11733302_ZNF790    | 0.824333 | 4.04E-07 | 1.24E-05 |
| 11758773_HACD2     | -0.85922 | 4.04E-07 | 1.24E-05 |
| 11751123_CDC45     | -0.77644 | 4.05E-07 | 1.24E-05 |
| 11755772_FOXO1     | 0.964529 | 4.05E-07 | 1.24E-05 |
| 11760660_HIST2H2BC | 1.581778 | 4.05E-07 | 1.24E-05 |
| 11742100_ZNF195    | 0.706371 | 4.05E-07 | 1.24E-05 |
| 11758463_SCYL2     | 0.741205 | 4.06E-07 | 1.24E-05 |
| 11736737_RASA2     | 0.712064 | 4.07E-07 | 1.25E-05 |
| 11752768_MTFR1L    | -0.76478 | 4.09E-07 | 1.25E-05 |
| 11719779_CD164     | 0.5788   | 4.10E-07 | 1.25E-05 |
| 11723840_RMI1      | -0.83453 | 4.10E-07 | 1.25E-05 |
| 11728061_ZNF608    | 0.822161 | 4.11E-07 | 1.26E-05 |
| 11727666_TWIST1    | -0.65149 | 4.12E-07 | 1.26E-05 |
| 11760343_ZNF726    | -0.80648 | 4.13E-07 | 1.26E-05 |
| 11754966_AIF1L     | -0.62449 | 4.13E-07 | 1.26E-05 |
| 11724510_PMAIP1    | 0.678898 | 4.13E-07 | 1.26E-05 |
| 11739426_GPD2      | -0.57572 | 4.13E-07 | 1.26E-05 |
| 11730741_AKIRIN1   | 0.555461 | 4.13E-07 | 1.26E-05 |
| 11715252_RSRC1     | -0.71866 | 4.14E-07 | 1.26E-05 |
| 11737336_ZNF283    | 1.095933 | 4.14E-07 | 1.26E-05 |
| 11753301_CBR1      | -0.61847 | 4.14E-07 | 1.26E-05 |
| 11755923_ARHGFE28  | 0.677232 | 4.15E-07 | 1.26E-05 |
| 11732013_ZNF419    | 0.745836 | 4.16E-07 | 1.26E-05 |
| 11716332_RPL28     | 0.594121 | 4.17E-07 | 1.26E-05 |
| 11736027_ADAM10    | 0.71808  | 4.17E-07 | 1.26E-05 |
| 11726667_MFSD8     | 0.658048 | 4.18E-07 | 1.26E-05 |
| 11729603_MCM7      | -0.60973 | 4.18E-07 | 1.27E-05 |
| 11740938_TGIF1     | 0.607695 | 4.19E-07 | 1.27E-05 |
| 11727815_UBASH3B   | 0.70713  | 4.20E-07 | 1.27E-05 |
| 11764091_YY1       | -0.75237 | 4.20E-07 | 1.27E-05 |
| 11745180_ZNF24     | 0.784828 | 4.20E-07 | 1.27E-05 |
| 11744058_DDOST     | -0.68862 | 4.21E-07 | 1.27E-05 |
| 11742714_TBRG1     | -0.94413 | 4.22E-07 | 1.27E-05 |
| 11744103_TLCD1     | -0.92433 | 4.22E-07 | 1.27E-05 |
| 11722900_RARA      | 0.800396 | 4.22E-07 | 1.27E-05 |
| 11716760_CASP4     | 0.742234 | 4.23E-07 | 1.27E-05 |
| 11716492_SIVA1     | -0.59323 | 4.24E-07 | 1.27E-05 |
| 11744020_NUP210    | -0.6225  | 4.24E-07 | 1.27E-05 |
| 11727487_HAUS6     | -0.70857 | 4.24E-07 | 1.27E-05 |
| 11717233_MKLN1     | 0.805135 | 4.25E-07 | 1.27E-05 |
| 11751438_ST6GALNAC | 0.798567 | 4.26E-07 | 1.28E-05 |
| 11749528_CDCA7     | -0.95102 | 4.26E-07 | 1.28E-05 |
| 11746008_NEXN      | 0.782565 | 4.28E-07 | 1.28E-05 |



|                    |          |          |          |
|--------------------|----------|----------|----------|
| 11737992_GPR37     | 1.170325 | 4.29E-07 | 1.28E-05 |
| 11726740_EARS2     | -0.72786 | 4.29E-07 | 1.28E-05 |
| 11717833_TEX10     | 0.56733  | 4.29E-07 | 1.28E-05 |
| 11743502_GTF3C2    | -0.57049 | 4.30E-07 | 1.28E-05 |
| 11733898_TROVE2    | 0.735122 | 4.30E-07 | 1.28E-05 |
| 11725559_ZNF112    | 0.946059 | 4.31E-07 | 1.29E-05 |
| 11747816_GDAP1     | 0.604618 | 4.31E-07 | 1.29E-05 |
| 11758444_DHTKD1    | -0.83733 | 4.31E-07 | 1.29E-05 |
| 11759343_FMN1      | -0.76823 | 4.32E-07 | 1.29E-05 |
| 11739226_NF1       | 0.652768 | 4.34E-07 | 1.29E-05 |
| 11758456_GFPT1     | 0.689855 | 4.34E-07 | 1.29E-05 |
| 11741306_SAMD8     | 0.851587 | 4.34E-07 | 1.29E-05 |
| 11731221_MICU3     | 1.314856 | 4.34E-07 | 1.29E-05 |
| 11722936_MB21D2    | 1.01291  | 4.35E-07 | 1.29E-05 |
| 11721882_TUBGCP3   | -0.65018 | 4.35E-07 | 1.29E-05 |
| 11747231_SHC4      | 0.720335 | 4.36E-07 | 1.29E-05 |
| 11750929_FRS2      | 0.71498  | 4.36E-07 | 1.29E-05 |
| 11728281_RBMS2     | -0.56115 | 4.38E-07 | 1.30E-05 |
| 11725128_GNG4      | -0.74502 | 4.38E-07 | 1.30E-05 |
| 11725449_C2orf49   | 0.634461 | 4.38E-07 | 1.30E-05 |
| 11723724_USP32     | 0.683568 | 4.38E-07 | 1.30E-05 |
| 11739427_GPD2      | -0.61531 | 4.39E-07 | 1.30E-05 |
| 11745790_TMEM135   | 0.730445 | 4.41E-07 | 1.30E-05 |
| 11733702_UBE2C     | -0.54715 | 4.42E-07 | 1.31E-05 |
| 11721446_SNX4      | 0.702961 | 4.43E-07 | 1.31E-05 |
| 11727489_KIF11     | -0.61136 | 4.44E-07 | 1.31E-05 |
| 11725074_FAM126A   | 0.581458 | 4.44E-07 | 1.31E-05 |
| 11758864_SRP19     | -0.71667 | 4.45E-07 | 1.31E-05 |
| 11720782_CDK2      | -0.65969 | 4.45E-07 | 1.31E-05 |
| 11732936_TBC1D2B   | -0.55822 | 4.45E-07 | 1.31E-05 |
| 11722572_CCNA2     | -0.63034 | 4.46E-07 | 1.31E-05 |
| 11744796_DAB2      | 0.556392 | 4.46E-07 | 1.31E-05 |
| 11758279_CORO1C    | -0.6145  | 4.46E-07 | 1.31E-05 |
| 11718180_FERMT2    | 0.699472 | 4.47E-07 | 1.31E-05 |
| 11740111_COASY     | -0.66595 | 4.49E-07 | 1.32E-05 |
| 11729915_ARL5B     | 0.90773  | 4.50E-07 | 1.32E-05 |
| 11744932_CREBRF    | 0.736301 | 4.51E-07 | 1.32E-05 |
| 11756551_KLHL28    | 1.286286 | 4.51E-07 | 1.32E-05 |
| 11743172_SLC04A1   | -0.71957 | 4.53E-07 | 1.32E-05 |
| 11743273_RSRC2     | 0.565119 | 4.53E-07 | 1.32E-05 |
| 11759422_ZNF195    | 0.727592 | 4.53E-07 | 1.32E-05 |
| 11734359_RNASEL    | 0.633995 | 4.53E-07 | 1.32E-05 |
| 11730023_PILRB /// | 0.739999 | 4.55E-07 | 1.33E-05 |
| 11723950_PBK       | -0.66519 | 4.55E-07 | 1.33E-05 |
| 11723680_CNOT4     | 0.678019 | 4.55E-07 | 1.33E-05 |
| 11746351_REV3L     | 0.593551 | 4.56E-07 | 1.33E-05 |
| 11747713_PRC1      | -0.75765 | 4.56E-07 | 1.33E-05 |
| 11743597_ZNF140    | 0.792303 | 4.56E-07 | 1.33E-05 |
| 11745906_UMAD1     | -0.95287 | 4.58E-07 | 1.33E-05 |
| 11757851_ABL1      | -0.62839 | 4.58E-07 | 1.33E-05 |
| 11759175_MED28     | 0.658878 | 4.60E-07 | 1.34E-05 |

|                    |          |          |          |
|--------------------|----------|----------|----------|
| 11741122_LYPD1     | 0.89587  | 4.60E-07 | 1.34E-05 |
| 11745464_CDKN3     | -0.78576 | 4.60E-07 | 1.34E-05 |
| 11755324_NRXN3     | 0.950704 | 4.61E-07 | 1.34E-05 |
| 11751203_ZNHIT6    | 0.728593 | 4.62E-07 | 1.34E-05 |
| 11722369_TRIM22    | 0.933401 | 4.62E-07 | 1.34E-05 |
| 11744529_PELI1     | 1.096295 | 4.63E-07 | 1.34E-05 |
| 11759028_BRI3BP // | -1.12972 | 4.63E-07 | 1.34E-05 |
| 11736998_NIPAL1    | 0.987166 | 4.64E-07 | 1.34E-05 |
| 11743626_LGR4      | 0.703829 | 4.64E-07 | 1.34E-05 |
| 11718095_RNF38     | 0.668703 | 4.65E-07 | 1.34E-05 |
| 11715975_MTFR1L    | -0.6277  | 4.65E-07 | 1.34E-05 |
| 11751206_AURKA /// | -0.66085 | 4.66E-07 | 1.35E-05 |
| 11751896_COL12A1   | 1.134754 | 4.67E-07 | 1.35E-05 |
| 11726127_ABCB9     | 0.948254 | 4.68E-07 | 1.35E-05 |
| 11748631_REEP5     | -0.58212 | 4.68E-07 | 1.35E-05 |
| 11732996_HSP90AA1  | -0.89534 | 4.69E-07 | 1.35E-05 |
| 11719585_CNNM3     | -0.87209 | 4.69E-07 | 1.35E-05 |
| 11725749_GAL       | -0.65229 | 4.70E-07 | 1.35E-05 |
| 11755747_PLAC8     | 0.79273  | 4.71E-07 | 1.35E-05 |
| 11740253_ZWINT     | -0.59843 | 4.72E-07 | 1.36E-05 |
| 11716249_TMED9     | -0.65186 | 4.73E-07 | 1.36E-05 |
| 11725862_FAM13B    | 0.975436 | 4.76E-07 | 1.36E-05 |
| 11738845_NTM       | 0.70919  | 4.76E-07 | 1.36E-05 |
| 11758441_HOXA1     | 0.880837 | 4.76E-07 | 1.36E-05 |
| 11753688_MDM2      | 0.557404 | 4.77E-07 | 1.36E-05 |
| 11757796_NCS1      | -0.71036 | 4.77E-07 | 1.36E-05 |
| 11717688_RNF19A    | 0.701982 | 4.77E-07 | 1.37E-05 |
| 11722182_ATP6V1C1  | -0.87788 | 4.78E-07 | 1.37E-05 |
| 11718676_TMEM245   | 0.862698 | 4.78E-07 | 1.37E-05 |
| 11758306_CNOT6     | 0.732875 | 4.79E-07 | 1.37E-05 |
| 11739857_TENM2     | 0.882501 | 4.80E-07 | 1.37E-05 |
| 11737765_C3orf17   | 0.576676 | 4.81E-07 | 1.37E-05 |
| 11748174_MCM3      | -0.54381 | 4.82E-07 | 1.37E-05 |
| 11751018_PPM1D     | 0.824094 | 4.82E-07 | 1.37E-05 |
| 11736028_ADAM10    | 0.650875 | 4.82E-07 | 1.37E-05 |
| 11756971_PKM       | 0.979853 | 4.82E-07 | 1.37E-05 |
| 11726880_XIRP2     | 1.252929 | 4.82E-07 | 1.37E-05 |
| 11754889_PRIMPOL   | -0.60078 | 4.82E-07 | 1.37E-05 |
| 11758686_CD164     | 0.566837 | 4.82E-07 | 1.37E-05 |
| 11723244_CDK6      | 0.567491 | 4.84E-07 | 1.37E-05 |
| 11726870_SETBP1    | 0.82381  | 4.84E-07 | 1.37E-05 |
| 11732421_ZNF234    | 0.742315 | 4.84E-07 | 1.37E-05 |
| 11753949_ARL6IP4   | -0.68645 | 4.85E-07 | 1.37E-05 |
| 11729458_FANCI     | -1.03868 | 4.86E-07 | 1.37E-05 |
| 11727147_ZNF564    | 0.862954 | 4.86E-07 | 1.37E-05 |
| 11721208_IFFO2     | -0.66801 | 4.86E-07 | 1.37E-05 |
| 11748783_UHRF1     | -0.81023 | 4.86E-07 | 1.37E-05 |
| 11742812_RPS6KA3   | 0.600063 | 4.87E-07 | 1.37E-05 |
| 11750879_CREB5     | 1.362503 | 4.87E-07 | 1.37E-05 |
| 11724420_ZC3H6     | -0.72005 | 4.87E-07 | 1.37E-05 |
| 11747739_PPP2R1A   | -0.5882  | 4.87E-07 | 1.37E-05 |

|                   |          |          |          |
|-------------------|----------|----------|----------|
| 11751804_SPC24    | -0.73458 | 4.89E-07 | 1.38E-05 |
| 11743343_RMND5A   | -1.25632 | 4.90E-07 | 1.38E-05 |
| 11719474_IMP4     | -0.63728 | 4.90E-07 | 1.38E-05 |
| 11719382_PPIH     | -0.63541 | 4.90E-07 | 1.38E-05 |
| 11738052_MRGPRX3  | 0.740744 | 4.91E-07 | 1.38E-05 |
| 11726335_CRLS1    | -0.6777  | 4.93E-07 | 1.38E-05 |
| 11755908_IGSF3    | -0.77867 | 4.94E-07 | 1.39E-05 |
| 11763714_SSBP2    | 0.563106 | 4.94E-07 | 1.39E-05 |
| 11758521_SPIRE1   | -0.89429 | 4.95E-07 | 1.39E-05 |
| 11743864_ATP2B1   | 0.665056 | 4.95E-07 | 1.39E-05 |
| 11750542_NOC3L    | 0.583683 | 4.96E-07 | 1.39E-05 |
| 11753086_PGK1     | -0.70872 | 4.97E-07 | 1.39E-05 |
| 11730011_KBTBD8   | 1.190231 | 4.98E-07 | 1.39E-05 |
| 11752681_TMEM135  | 0.550741 | 4.98E-07 | 1.39E-05 |
| 11751466_C3orf38  | 0.654676 | 4.99E-07 | 1.39E-05 |
| 11724346_IFIH1    | 0.899819 | 4.99E-07 | 1.39E-05 |
| 11744261_SLC25A11 | -0.63167 | 4.99E-07 | 1.39E-05 |
| 11748408_SUCO     | -0.77319 | 5.00E-07 | 1.40E-05 |
| 11720679_CKLF /// | -0.61132 | 5.00E-07 | 1.40E-05 |
| 11743652_DEK      | -0.65487 | 5.01E-07 | 1.40E-05 |
| 11734890_IL32     | 1.082115 | 5.01E-07 | 1.40E-05 |
| 11748775_UPP1     | 0.665722 | 5.02E-07 | 1.40E-05 |
| 11733376_DLX1     | -0.67637 | 5.03E-07 | 1.40E-05 |
| 11757902_DYNC1LI2 | -0.67642 | 5.04E-07 | 1.40E-05 |
| 11751755_KIF22    | -0.5571  | 5.05E-07 | 1.40E-05 |
| 11723555_DCAF16   | -1.08184 | 5.06E-07 | 1.41E-05 |
| 11715974_MTFR1L   | -0.74532 | 5.06E-07 | 1.41E-05 |
| 11721242_FDFT1    | -0.63873 | 5.07E-07 | 1.41E-05 |
| 11748365_KIAA0753 | 0.81346  | 5.07E-07 | 1.41E-05 |
| 11730368_ZNF557   | 0.718785 | 5.07E-07 | 1.41E-05 |
| 11757852_APIG1    | 0.600324 | 5.08E-07 | 1.41E-05 |
| 11758892_NDC1     | -0.57533 | 5.08E-07 | 1.41E-05 |
| 11723667_SEMA3C   | 0.791944 | 5.09E-07 | 1.41E-05 |
| 11717622_SUCO     | -0.59835 | 5.10E-07 | 1.41E-05 |
| 11748942_TNRC6A   | 0.800184 | 5.10E-07 | 1.41E-05 |
| 11717931_TBK1     | 0.610595 | 5.12E-07 | 1.41E-05 |
| 11717496_IMPA2    | -0.65244 | 5.13E-07 | 1.42E-05 |
| 11741911_GBP3     | 1.354474 | 5.14E-07 | 1.42E-05 |
| 11728322_RAD54L   | -0.7181  | 5.15E-07 | 1.42E-05 |
| 11750838_ZNF561   | 0.760999 | 5.15E-07 | 1.42E-05 |
| 11756069_CDKN3    | -0.79624 | 5.15E-07 | 1.42E-05 |
| 11720770_PPIF     | 0.613768 | 5.15E-07 | 1.42E-05 |
| 11717117_PDXP /// | -0.7912  | 5.15E-07 | 1.42E-05 |
| 11719383_PPIH     | -0.63632 | 5.15E-07 | 1.42E-05 |
| 11721731_TMX3     | 0.680734 | 5.15E-07 | 1.42E-05 |
| 11726142_FMN2     | 0.702249 | 5.16E-07 | 1.42E-05 |
| 11748171_C1orf52  | 0.579838 | 5.17E-07 | 1.42E-05 |
| 11751810_GINS4    | -0.96235 | 5.17E-07 | 1.42E-05 |
| 11724388_ZNF721   | 0.913515 | 5.18E-07 | 1.42E-05 |
| 11752387_ETS1     | 0.91224  | 5.19E-07 | 1.42E-05 |
| 11739635_MED13    | 0.843011 | 5.19E-07 | 1.42E-05 |

|                    |          |          |          |
|--------------------|----------|----------|----------|
| 11721207_FAM160B1  | 0.8735   | 5.22E-07 | 1.43E-05 |
| 11726618_C1GALT1C1 | -0.73834 | 5.23E-07 | 1.43E-05 |
| 11721114_DERA      | -0.59519 | 5.23E-07 | 1.43E-05 |
| 11748314_CDC20     | -0.89363 | 5.25E-07 | 1.43E-05 |
| 11734734_FAR1      | -0.62978 | 5.25E-07 | 1.43E-05 |
| 11757447_CYTH3     | 0.586732 | 5.27E-07 | 1.44E-05 |
| 11732857_THAP1     | 0.623725 | 5.27E-07 | 1.44E-05 |
| 11721305_PHLDA1    | 0.529681 | 5.28E-07 | 1.44E-05 |
| 11728488_NRXN3     | 0.747753 | 5.28E-07 | 1.44E-05 |
| 11747142_PHC3      | 0.76196  | 5.28E-07 | 1.44E-05 |
| 11733138_ZNF586    | 0.902879 | 5.29E-07 | 1.44E-05 |
| 11733093_FOXRED2   | -0.66328 | 5.29E-07 | 1.44E-05 |
| 11718559_NOL4L     | 0.670327 | 5.29E-07 | 1.44E-05 |
| 11729267_WWC1      | 0.995157 | 5.30E-07 | 1.44E-05 |
| 11732821_MAP2K4    | 0.762276 | 5.32E-07 | 1.45E-05 |
| 11757942_UTRN      | 0.602947 | 5.34E-07 | 1.45E-05 |
| 11726248_PARP1     | -0.72518 | 5.35E-07 | 1.45E-05 |
| 11721257_CCND1     | 0.609093 | 5.35E-07 | 1.45E-05 |
| 11746496_YAP1      | 0.640432 | 5.35E-07 | 1.45E-05 |
| 11722571_CCNA2     | -0.57049 | 5.38E-07 | 1.46E-05 |
| 11725471_MAN2A1    | 0.556793 | 5.38E-07 | 1.46E-05 |
| 11731077_LONRF1    | 0.721671 | 5.38E-07 | 1.46E-05 |
| 11731652_C20orf24  | -0.56799 | 5.39E-07 | 1.46E-05 |
| 11754687_ZWILCH    | -0.56674 | 5.40E-07 | 1.46E-05 |
| 11731053_FNIP1     | 0.838272 | 5.41E-07 | 1.46E-05 |
| 11719740_DCP2      | 1.907338 | 5.43E-07 | 1.46E-05 |
| 11749400_TRAPPC4   | -0.63084 | 5.43E-07 | 1.46E-05 |
| 11756170_CXorf38   | 0.580767 | 5.43E-07 | 1.46E-05 |
| 11749013_ZBED1     | -0.77923 | 5.43E-07 | 1.46E-05 |
| 11716358_PRC1      | -0.59533 | 5.43E-07 | 1.46E-05 |
| 11723602_MYO19     | -0.62013 | 5.45E-07 | 1.47E-05 |
| 11743527_RALBP1    | -0.63872 | 5.47E-07 | 1.47E-05 |
| 11720835_CDC25C    | -1.01581 | 5.48E-07 | 1.47E-05 |
| 11729736_JAKMIP2   | 0.604852 | 5.48E-07 | 1.47E-05 |
| 11720971_TOP2A     | -0.56797 | 5.50E-07 | 1.48E-05 |
| 11741354_PON2      | 0.560589 | 5.50E-07 | 1.48E-05 |
| 11744729_GOLGA4    | 0.571417 | 5.52E-07 | 1.48E-05 |
| 11732823_MAP2K4 // | 0.857693 | 5.53E-07 | 1.48E-05 |
| 11747296_ARMC8     | 0.615914 | 5.53E-07 | 1.48E-05 |
| 11720704_TPD52L1   | 0.604422 | 5.53E-07 | 1.48E-05 |
| 11721483_CCDC85B   | -0.96408 | 5.54E-07 | 1.48E-05 |
| 11756141_KDEL2     | -0.59256 | 5.55E-07 | 1.48E-05 |
| 11740192_TMEM107   | -0.58386 | 5.56E-07 | 1.49E-05 |
| 11729232_KLF3      | 0.58206  | 5.57E-07 | 1.49E-05 |
| 11758529_CENPA     | -0.65181 | 5.58E-07 | 1.49E-05 |
| 11728283_RBMS2     | 0.700856 | 5.58E-07 | 1.49E-05 |
| 11744793_DLGAP5    | -0.74036 | 5.59E-07 | 1.49E-05 |
| 11748491_KHDRBS1   | -0.63834 | 5.59E-07 | 1.49E-05 |
| 11724509_PMAIP1    | 0.59422  | 5.62E-07 | 1.50E-05 |
| 11721104_POLDIP3   | -0.70784 | 5.63E-07 | 1.50E-05 |
| 11749666_ITCH      | 0.652816 | 5.63E-07 | 1.50E-05 |

|                    |          |          |          |
|--------------------|----------|----------|----------|
| 11716985_PNKD      | -0.77837 | 5.63E-07 | 1.50E-05 |
| 11736419_ZNF800    | 0.734256 | 5.63E-07 | 1.50E-05 |
| 11717861_EGR1      | 0.836389 | 5.64E-07 | 1.50E-05 |
| 11754516_CD109     | 0.709555 | 5.66E-07 | 1.50E-05 |
| 11754663_COPS7A    | -0.7647  | 5.66E-07 | 1.50E-05 |
| 11733796_RCAN1     | -0.62317 | 5.66E-07 | 1.50E-05 |
| 11720206_CLDN12    | 0.644875 | 5.68E-07 | 1.51E-05 |
| 11756925_AGO3      | 0.718787 | 5.69E-07 | 1.51E-05 |
| 11733765_IFNB1     | 1.319853 | 5.69E-07 | 1.51E-05 |
| 11736277_ZNF136    | 0.843347 | 5.71E-07 | 1.51E-05 |
| 11740529_UBE2K     | -0.67819 | 5.71E-07 | 1.51E-05 |
| 11755368_MSH6      | -0.52826 | 5.73E-07 | 1.51E-05 |
| 11719774_C5orf24   | 0.743994 | 5.73E-07 | 1.51E-05 |
| 11741208_CDK2      | -0.60876 | 5.73E-07 | 1.51E-05 |
| 11729689_LYRM7     | -0.5537  | 5.74E-07 | 1.51E-05 |
| 11753515_IL32      | 1.128184 | 5.74E-07 | 1.51E-05 |
| 11724397_PRRG1     | 0.602883 | 5.74E-07 | 1.51E-05 |
| 11731755_SYTL2     | 0.780082 | 5.74E-07 | 1.51E-05 |
| 11740790_ELK4      | 0.65835  | 5.75E-07 | 1.52E-05 |
| 11728203_PHGDH     | -0.62774 | 5.76E-07 | 1.52E-05 |
| 11756465_RND3      | 0.549888 | 5.76E-07 | 1.52E-05 |
| 11729914_ARL5B     | 1.082724 | 5.76E-07 | 1.52E-05 |
| 11728757_NHLRC3    | 0.624408 | 5.77E-07 | 1.52E-05 |
| 11753427_RND3      | 0.625228 | 5.78E-07 | 1.52E-05 |
| 11740105_TMEM17    | -0.9158  | 5.78E-07 | 1.52E-05 |
| 11754906_PTBP2     | 0.597359 | 5.79E-07 | 1.52E-05 |
| 11733056_PTBP3     | 0.763594 | 5.80E-07 | 1.52E-05 |
| 11741947_NF1       | 0.782449 | 5.81E-07 | 1.52E-05 |
| 11755786_FGFR3     | -0.69663 | 5.81E-07 | 1.52E-05 |
| 11720970_TOP2A     | -0.59866 | 5.82E-07 | 1.53E-05 |
| 11759258_HIST2H2AC | -0.93252 | 5.83E-07 | 1.53E-05 |
| 11759347_TXK       | 1.266624 | 5.84E-07 | 1.53E-05 |
| 11750101_ALDH1A3   | -0.57234 | 5.85E-07 | 1.53E-05 |
| 11731498_ZNF134    | 0.675213 | 5.86E-07 | 1.53E-05 |
| 11731887_KIF14     | -0.59969 | 5.86E-07 | 1.53E-05 |
| 11752680_TMEM135   | 0.708395 | 5.86E-07 | 1.53E-05 |
| 11725793_PTGER4    | 1.142831 | 5.86E-07 | 1.53E-05 |
| 11756368_KIF22     | -0.58541 | 5.88E-07 | 1.53E-05 |
| 11725569_KLHL15    | 0.575238 | 5.88E-07 | 1.53E-05 |
| 11746423_RNFT1     | 0.582059 | 5.92E-07 | 1.54E-05 |
| 11721307_PHLDA1    | 0.633062 | 5.92E-07 | 1.54E-05 |
| 11723010_KIF20A    | -0.69306 | 5.93E-07 | 1.54E-05 |
| 11719487_LAMB3     | 1.066992 | 5.93E-07 | 1.54E-05 |
| 11748094_FAM3C     | 0.727185 | 5.95E-07 | 1.55E-05 |
| 11715221_NSUN5     | -0.60439 | 5.95E-07 | 1.55E-05 |
| 11725326_CAMK2D    | -0.69761 | 5.96E-07 | 1.55E-05 |
| 11728103_ZNF416    | 0.800614 | 5.97E-07 | 1.55E-05 |
| 11739978_AGO3      | 0.722708 | 5.98E-07 | 1.55E-05 |
| 11751609_ADPRM     | 0.572177 | 5.99E-07 | 1.55E-05 |
| 11748004_SLC16A4   | 0.994887 | 5.99E-07 | 1.55E-05 |
| 11722826_NCAPG     | -0.61403 | 5.99E-07 | 1.55E-05 |

|                    |          |          |          |
|--------------------|----------|----------|----------|
| 11747720_BIRC5     | -0.6415  | 6.00E-07 | 1.55E-05 |
| 11720986_YRDC      | 0.678643 | 6.00E-07 | 1.55E-05 |
| 11724328_UBE2C     | -0.60318 | 6.00E-07 | 1.55E-05 |
| 11721551_SRCAP     | -0.61835 | 6.01E-07 | 1.55E-05 |
| 11763575_PAFAH1B2  | -0.64352 | 6.01E-07 | 1.55E-05 |
| 11727545_PANK3     | 0.78802  | 6.02E-07 | 1.56E-05 |
| 11756456_C10orf2   | -0.6899  | 6.03E-07 | 1.56E-05 |
| 11726392_GIMAP2    | 1.003606 | 6.04E-07 | 1.56E-05 |
| 11748263_DCAF17    | 1.086082 | 6.04E-07 | 1.56E-05 |
| 11758371_KIF15     | -0.67605 | 6.04E-07 | 1.56E-05 |
| 11762631_ZFC3H1    | 0.988619 | 6.06E-07 | 1.56E-05 |
| 11718128_TK1       | -0.65929 | 6.07E-07 | 1.56E-05 |
| 11739317_MAP3K2    | 0.780714 | 6.08E-07 | 1.56E-05 |
| 11720264_ASCC3     | 0.615254 | 6.08E-07 | 1.56E-05 |
| 11729711_MARS2     | 0.676505 | 6.09E-07 | 1.56E-05 |
| 11717009_MCFD2     | 0.617462 | 6.09E-07 | 1.56E-05 |
| 11721447_SNX4      | 0.584892 | 6.12E-07 | 1.57E-05 |
| 11721215_TMEM106B  | -1.19012 | 6.13E-07 | 1.57E-05 |
| 11729384_CCNY      | -0.80618 | 6.14E-07 | 1.58E-05 |
| 11744454_PARD3     | 0.572686 | 6.15E-07 | 1.58E-05 |
| 11753993_FKBP10    | -0.8615  | 6.15E-07 | 1.58E-05 |
| 11720297_PLEKHF2   | -0.61335 | 6.17E-07 | 1.58E-05 |
| 11752632_SMC1A     | -0.56914 | 6.18E-07 | 1.58E-05 |
| 11764151_TTC17     | -0.54767 | 6.21E-07 | 1.59E-05 |
| 11716325_CLK1      | 0.974544 | 6.21E-07 | 1.59E-05 |
| 11718484_H1FO      | -0.59632 | 6.22E-07 | 1.59E-05 |
| 11742186_TMOD2     | 0.792125 | 6.22E-07 | 1.59E-05 |
| 11723354_CHD7      | 0.63659  | 6.22E-07 | 1.59E-05 |
| 11739007_CAPZA1    | -0.61398 | 6.25E-07 | 1.59E-05 |
| 11719732_TIGAR     | 0.621628 | 6.25E-07 | 1.60E-05 |
| 11748733_KCTD7 /// | 0.599787 | 6.26E-07 | 1.60E-05 |
| 11739920_ZNF195    | 0.694642 | 6.27E-07 | 1.60E-05 |
| 11748878_WRB       | -0.56595 | 6.28E-07 | 1.60E-05 |
| 11733172_ARHGEF39  | -0.70649 | 6.32E-07 | 1.61E-05 |
| 11721250_LOC150776 | -0.68282 | 6.32E-07 | 1.61E-05 |
| 11719680_TNFRSF10B | -0.63124 | 6.32E-07 | 1.61E-05 |
| 11756032_CBR3      | -0.66733 | 6.33E-07 | 1.61E-05 |
| 11758936_HNRNPR    | -0.79974 | 6.34E-07 | 1.61E-05 |
| 11743608_FAM3C     | 0.787979 | 6.34E-07 | 1.61E-05 |
| 11751906_PTPRM     | 0.780319 | 6.34E-07 | 1.61E-05 |
| 11715473_SRPR      | -0.65454 | 6.34E-07 | 1.61E-05 |
| 11720602_SYT11     | 0.594235 | 6.36E-07 | 1.61E-05 |
| 11726282_BCR ///   | -0.89913 | 6.37E-07 | 1.61E-05 |
| 11749094_DSE       | 0.731181 | 6.37E-07 | 1.61E-05 |
| 11740287_NEDD1     | -0.77009 | 6.37E-07 | 1.61E-05 |
| 11726796_NEXN      | 0.714628 | 6.38E-07 | 1.61E-05 |
| 11749478_MCM3      | -0.66141 | 6.38E-07 | 1.61E-05 |
| 11757224_C4orf27 / | -0.57485 | 6.39E-07 | 1.61E-05 |
| 11731268_NUP98     | 0.905448 | 6.39E-07 | 1.61E-05 |
| 11715796_LUM       | 0.84582  | 6.40E-07 | 1.62E-05 |
| 11734811_EGR2      | 0.668423 | 6.41E-07 | 1.62E-05 |

|                    |          |          |          |
|--------------------|----------|----------|----------|
| 11727197_PCDHA1 // | 0.65341  | 6.42E-07 | 1.62E-05 |
| 11718386_ZHX2      | 0.819777 | 6.44E-07 | 1.62E-05 |
| 11741209_LOC145783 | -1.18017 | 6.44E-07 | 1.62E-05 |
| 11754858_ZNF383    | 1.125698 | 6.45E-07 | 1.62E-05 |
| 11754142_LOC728026 | -0.71829 | 6.46E-07 | 1.62E-05 |
| 11722690_SPTBN1    | -0.76315 | 6.48E-07 | 1.63E-05 |
| 11740366_SHMT1     | -0.54089 | 6.49E-07 | 1.63E-05 |
| 11756586_ARL6IP4   | -0.63353 | 6.49E-07 | 1.63E-05 |
| 11750840_TGFBR2    | 0.794854 | 6.50E-07 | 1.63E-05 |
| 11744479_RAB18     | 0.567844 | 6.51E-07 | 1.63E-05 |
| 11750740_ST3GAL5   | 0.644316 | 6.51E-07 | 1.63E-05 |
| 11736047_ANTXR2    | 0.73515  | 6.52E-07 | 1.64E-05 |
| 11723565_CENPA     | -0.80674 | 6.54E-07 | 1.64E-05 |
| 11722832_CCNY      | -0.71473 | 6.54E-07 | 1.64E-05 |
| 11756183_SLC25A11  | -0.58458 | 6.55E-07 | 1.64E-05 |
| 11736394_IL32      | 0.957932 | 6.56E-07 | 1.64E-05 |
| 11758316_SRPR      | -0.60884 | 6.57E-07 | 1.64E-05 |
| 11755251_FADS1     | -0.92421 | 6.59E-07 | 1.65E-05 |
| 11754461_UCP2      | -0.57024 | 6.60E-07 | 1.65E-05 |
| 11738250_CHEK1     | -0.52716 | 6.61E-07 | 1.65E-05 |
| 11754183_HMGB3     | -0.74257 | 6.61E-07 | 1.65E-05 |
| 11715240_ZNF184    | 0.664003 | 6.61E-07 | 1.65E-05 |
| 11726037_C3orf38   | 0.592692 | 6.62E-07 | 1.65E-05 |
| 11743901_NARS      | -0.52669 | 6.65E-07 | 1.66E-05 |
| 11743503_GTF3C2    | -0.64387 | 6.65E-07 | 1.66E-05 |
| 11736589_DET1      | -0.73529 | 6.68E-07 | 1.66E-05 |
| 11735748_ZNF317    | 0.65673  | 6.68E-07 | 1.66E-05 |
| 11756082_MID1      | 0.581568 | 6.69E-07 | 1.66E-05 |
| 11723209_KBTBD6    | -0.6592  | 6.69E-07 | 1.66E-05 |
| 11745789_TMEM135   | 0.55956  | 6.69E-07 | 1.66E-05 |
| 11732155_OGT       | 0.573335 | 6.70E-07 | 1.66E-05 |
| 11726126_ABCB9     | 0.75906  | 6.70E-07 | 1.66E-05 |
| 11744918_C19orf12  | 0.526166 | 6.71E-07 | 1.66E-05 |
| 11756747_RBMS2     | 0.619206 | 6.72E-07 | 1.67E-05 |
| 11730288_ARHGAP5   | -1.29745 | 6.76E-07 | 1.68E-05 |
| 11751389_FEN1      | -0.61844 | 6.77E-07 | 1.68E-05 |
| 11756808_ZNF225    | 0.877931 | 6.77E-07 | 1.68E-05 |
| 11740987_NFX1      | 0.579759 | 6.79E-07 | 1.68E-05 |
| 11721248_GNG2      | -0.56361 | 6.79E-07 | 1.68E-05 |
| 11720512_CARHSP1   | -0.63617 | 6.79E-07 | 1.68E-05 |
| 11728597_ZNF222    | 0.844072 | 6.80E-07 | 1.68E-05 |
| 11725379_POGLUT1   | 0.56214  | 6.80E-07 | 1.68E-05 |
| 11754483_PXDC1     | -0.5408  | 6.80E-07 | 1.68E-05 |
| 11743536_VRK1      | -0.77517 | 6.81E-07 | 1.68E-05 |
| 11722708_CC SER2   | 0.641932 | 6.82E-07 | 1.68E-05 |
| 11746041_TRA2B     | -0.60036 | 6.85E-07 | 1.69E-05 |
| 11729062_PDGF A    | 0.741345 | 6.85E-07 | 1.69E-05 |
| 11758200_CKS1B     | -0.6554  | 6.87E-07 | 1.69E-05 |
| 11729840_ZCCHC2    | 0.854665 | 6.87E-07 | 1.69E-05 |
| 11748436_CAP2      | 0.690735 | 6.90E-07 | 1.70E-05 |
| 11745717_HMGB1     | -0.63285 | 6.90E-07 | 1.70E-05 |

|                    |          |          |          |
|--------------------|----------|----------|----------|
| 11725403_TM4SF18   | 0.655824 | 6.90E-07 | 1.70E-05 |
| 11738703_ITGB3BP   | -0.58612 | 6.91E-07 | 1.70E-05 |
| 11735584_BRCA1     | -0.75733 | 6.92E-07 | 1.70E-05 |
| 11718940_TNFAIP3   | 1.363743 | 6.93E-07 | 1.70E-05 |
| 11724202_SNRPD1    | -0.5779  | 6.93E-07 | 1.70E-05 |
| 11745411_TMX3      | 0.66093  | 6.94E-07 | 1.70E-05 |
| 11720277_OLFML2A   | -0.80905 | 6.96E-07 | 1.70E-05 |
| 11743963_CNST      | 0.738434 | 6.98E-07 | 1.71E-05 |
| 11719598_CDCA3     | -0.77048 | 6.98E-07 | 1.71E-05 |
| 11739385_ROCK2     | 0.557738 | 6.99E-07 | 1.71E-05 |
| 11723381_DPY19L4   | 0.734821 | 6.99E-07 | 1.71E-05 |
| 11740857_AGO3      | 0.65312  | 6.99E-07 | 1.71E-05 |
| 11743169_LPXN      | 0.681799 | 7.00E-07 | 1.71E-05 |
| 11750797_ZNF317    | 0.717012 | 7.02E-07 | 1.71E-05 |
| 11722904_TBC1D9    | 0.878556 | 7.02E-07 | 1.71E-05 |
| 11718674_CTNNAL1 / | 0.909275 | 7.03E-07 | 1.71E-05 |
| 11741815_TAB3      | 0.570203 | 7.03E-07 | 1.71E-05 |
| 11740406_LHX4      | 0.663091 | 7.03E-07 | 1.71E-05 |
| 11743530_CENPK     | -0.57448 | 7.04E-07 | 1.71E-05 |
| 11749031_PTBP3     | 0.749726 | 7.05E-07 | 1.71E-05 |
| 11728153_HIST1H2BD | 1.174697 | 7.05E-07 | 1.71E-05 |
| 11722036_SND1      | -0.69344 | 7.05E-07 | 1.72E-05 |
| 11725842_PIF1      | -0.75597 | 7.08E-07 | 1.72E-05 |
| 11738060_HIST1H4H  | 1.418698 | 7.08E-07 | 1.72E-05 |
| 11739209_PRKAA1    | 0.613401 | 7.08E-07 | 1.72E-05 |
| 11715362_ATP6VOE1  | 0.530592 | 7.09E-07 | 1.72E-05 |
| 11717715_FNDC3B    | 0.601488 | 7.11E-07 | 1.72E-05 |
| 11750103_HADH      | -0.51143 | 7.12E-07 | 1.72E-05 |
| 11726648_ZHX1      | 0.570214 | 7.12E-07 | 1.72E-05 |
| 11722627_KIAA1033  | 0.698322 | 7.12E-07 | 1.72E-05 |
| 11720892_SOS1      | -0.95956 | 7.13E-07 | 1.73E-05 |
| 11719896_FAM91A1 / | 0.586832 | 7.14E-07 | 1.73E-05 |
| 11720659_CDK9      | -0.65325 | 7.16E-07 | 1.73E-05 |
| 11747743_MTF2      | 0.624073 | 7.18E-07 | 1.73E-05 |
| 11726458_GSPT2     | 0.557287 | 7.18E-07 | 1.74E-05 |
| 11725161_DDIAS     | -0.56414 | 7.19E-07 | 1.74E-05 |
| 11725788_CENPN     | -0.66626 | 7.19E-07 | 1.74E-05 |
| 11743653_DEK       | -0.56604 | 7.20E-07 | 1.74E-05 |
| 11722370_TRIM22    | 1.639501 | 7.23E-07 | 1.74E-05 |
| 11717486_HARS2     | -0.6064  | 7.24E-07 | 1.74E-05 |
| 11749744_TBL1XR1   | 0.598031 | 7.25E-07 | 1.75E-05 |
| 11751907_PTPRM     | 0.620477 | 7.26E-07 | 1.75E-05 |
| 11740066_ERCC6     | 1.054279 | 7.27E-07 | 1.75E-05 |
| 11757995_EDEM3     | 0.628558 | 7.27E-07 | 1.75E-05 |
| 11744661_HMG20B    | -0.66613 | 7.28E-07 | 1.75E-05 |
| 11763331_VPS36     | 0.654555 | 7.29E-07 | 1.75E-05 |
| 11717407_RPP25L    | -1.24775 | 7.29E-07 | 1.75E-05 |
| 11755469_MCM7      | -0.60189 | 7.30E-07 | 1.75E-05 |
| 11731318_WBSCR27   | -0.82632 | 7.32E-07 | 1.76E-05 |
| 11739957_BCL2L1    | 0.578892 | 7.32E-07 | 1.76E-05 |
| 11742806_TEX261    | -0.87966 | 7.33E-07 | 1.76E-05 |



|                    |          |          |          |
|--------------------|----------|----------|----------|
| 11719238_EFTUD1    | 0.591261 | 7.34E-07 | 1.76E-05 |
| 11757431_BLOC1S2   | 0.545538 | 7.35E-07 | 1.76E-05 |
| 11758164_FEN1      | -0.60638 | 7.36E-07 | 1.76E-05 |
| 11745322_FDFT1     | -0.61293 | 7.36E-07 | 1.76E-05 |
| 11752665_C1orf112  | -0.57231 | 7.36E-07 | 1.76E-05 |
| 11723578_SMIM13    | 0.951836 | 7.36E-07 | 1.76E-05 |
| 11744925_TUBGCP3   | -0.75231 | 7.39E-07 | 1.76E-05 |
| 11731838_SPTLC1    | 0.847484 | 7.39E-07 | 1.76E-05 |
| 11719343_ATF3      | 0.704491 | 7.39E-07 | 1.76E-05 |
| 11718958_PRKAB2    | 0.692257 | 7.39E-07 | 1.76E-05 |
| 11726602_DARS2     | -0.56179 | 7.39E-07 | 1.76E-05 |
| 11732258_SH3RF1    | 0.663697 | 7.40E-07 | 1.76E-05 |
| 11717818_TNRC6A    | 0.658599 | 7.40E-07 | 1.76E-05 |
| 11759521_SBN01     | 0.642368 | 7.40E-07 | 1.76E-05 |
| 11715436_TIMP3     | -0.57351 | 7.46E-07 | 1.77E-05 |
| 11734028_FOXM1     | -0.64453 | 7.48E-07 | 1.78E-05 |
| 11731319_WBSCR27   | -0.6022  | 7.48E-07 | 1.78E-05 |
| 11736250_KIAA0101  | -0.53335 | 7.48E-07 | 1.78E-05 |
| 11754812_NPAS2     | 0.609128 | 7.50E-07 | 1.78E-05 |
| 11743504_BCCIP     | -0.79504 | 7.51E-07 | 1.78E-05 |
| 11733873_PGK1      | -0.65807 | 7.51E-07 | 1.78E-05 |
| 11755819_DDX58     | 0.822937 | 7.54E-07 | 1.79E-05 |
| 11757721_CSRNP1    | 1.027852 | 7.54E-07 | 1.79E-05 |
| 11716311_LSM3      | -0.51228 | 7.54E-07 | 1.79E-05 |
| 11751388_FEN1      | -0.60301 | 7.57E-07 | 1.79E-05 |
| 11718707_IGF1R     | 0.636863 | 7.57E-07 | 1.79E-05 |
| 11741092_GPD2      | -0.57601 | 7.59E-07 | 1.80E-05 |
| 11721362_MAP4K3    | 0.768718 | 7.60E-07 | 1.80E-05 |
| 11726590_ELOVL4    | 0.73647  | 7.61E-07 | 1.80E-05 |
| 11750976_TEX10     | 0.569462 | 7.61E-07 | 1.80E-05 |
| 11725298_DXO /// T | -0.64109 | 7.62E-07 | 1.80E-05 |
| 11731842_B4GALT6   | -0.70516 | 7.63E-07 | 1.80E-05 |
| 11748000_C3orf17   | 0.547069 | 7.63E-07 | 1.80E-05 |
| 11742639_RDM1      | -0.81484 | 7.65E-07 | 1.80E-05 |
| 11724431_C3orf52   | 1.051631 | 7.66E-07 | 1.80E-05 |
| 11756358_PLK3      | 0.679369 | 7.66E-07 | 1.80E-05 |
| 11733464_XDH       | 0.644215 | 7.67E-07 | 1.81E-05 |
| 11746433_CLDN1     | 1.033887 | 7.68E-07 | 1.81E-05 |
| 11736850_FSD1L     | 0.784222 | 7.69E-07 | 1.81E-05 |
| 11724228_RBMS1     | 0.628892 | 7.69E-07 | 1.81E-05 |
| 11725803_C21orf91  | 0.937217 | 7.70E-07 | 1.81E-05 |
| 11718198_LHFP      | 0.634711 | 7.72E-07 | 1.81E-05 |
| 11721218_MS RB3    | 0.748768 | 7.72E-07 | 1.81E-05 |
| 11750400_GNE       | 0.654879 | 7.74E-07 | 1.82E-05 |
| 11723451_FTO       | -0.61427 | 7.75E-07 | 1.82E-05 |
| 11762402_ZMYND8    | -0.53729 | 7.75E-07 | 1.82E-05 |
| 11748017_PECR      | -0.57422 | 7.80E-07 | 1.83E-05 |
| 11720221_GFPT1     | 0.566706 | 7.80E-07 | 1.83E-05 |
| 11758872_CDC37L1   | 0.869949 | 7.81E-07 | 1.83E-05 |
| 11731942_PRDM1     | 1.2716   | 7.81E-07 | 1.83E-05 |
| 11730300_FAM19A2   | 1.208469 | 7.81E-07 | 1.83E-05 |

|                   |          |          |          |
|-------------------|----------|----------|----------|
| 11755902_TRPV2    | 0.606604 | 7.82E-07 | 1.83E-05 |
| 11739550_MTMR2    | 0.548157 | 7.82E-07 | 1.83E-05 |
| 11728673_KIF22    | -0.59373 | 7.82E-07 | 1.83E-05 |
| 11734299_INTS6    | 0.981334 | 7.87E-07 | 1.84E-05 |
| 11745049_CDC45    | -0.71767 | 7.87E-07 | 1.84E-05 |
| 11756374_TPST1    | 0.574439 | 7.88E-07 | 1.84E-05 |
| 11726607_MTF2     | 0.655856 | 7.89E-07 | 1.84E-05 |
| 11763293_ZSCAN9   | 0.878813 | 7.90E-07 | 1.84E-05 |
| 11743373_KNSTRN   | -0.64215 | 7.91E-07 | 1.84E-05 |
| 11753517_YWHAE    | -0.54335 | 7.92E-07 | 1.84E-05 |
| 11743367_PLCB4    | 0.802665 | 7.92E-07 | 1.84E-05 |
| 11729020_ZNF804A  | 0.865929 | 7.94E-07 | 1.85E-05 |
| 11733897_TROVE2   | 0.621537 | 7.95E-07 | 1.85E-05 |
| 11716726_PLK1     | -0.76267 | 7.97E-07 | 1.85E-05 |
| 11739408_KMT2C    | 0.753145 | 7.97E-07 | 1.85E-05 |
| 11743271_RSRC2    | 0.660576 | 7.97E-07 | 1.85E-05 |
| 11748275_FDFT1    | -0.61072 | 7.98E-07 | 1.85E-05 |
| 11719158_RAPH1    | 1.002064 | 7.99E-07 | 1.85E-05 |
| 11732133_IDS      | 0.809714 | 8.00E-07 | 1.85E-05 |
| 11719347_ARHGAP19 | -0.60198 | 8.01E-07 | 1.85E-05 |
| 11740806_CEP85L   | 0.610381 | 8.01E-07 | 1.85E-05 |
| 11718216_DDA1     | 0.577882 | 8.02E-07 | 1.86E-05 |
| 11749950_C3orf17  | 0.565641 | 8.02E-07 | 1.86E-05 |
| 11748826_PACIN3   | -0.84384 | 8.03E-07 | 1.86E-05 |
| 11730758_IL6ST    | 1.046682 | 8.04E-07 | 1.86E-05 |
| 11724134_SLC12A2  | 0.647855 | 8.05E-07 | 1.86E-05 |
| 11718620_CHRDL1   | -0.69814 | 8.06E-07 | 1.86E-05 |
| 11760825_MYSM1    | 0.950333 | 8.08E-07 | 1.86E-05 |
| 11739989_CPPED1   | 0.604519 | 8.09E-07 | 1.87E-05 |
| 11746462_LM07     | 0.867074 | 8.09E-07 | 1.87E-05 |
| 11716482_GRINA    | -0.83847 | 8.10E-07 | 1.87E-05 |
| 11740998_DGKA     | 0.681816 | 8.13E-07 | 1.87E-05 |
| 11724744_C8orf46  | 0.932843 | 8.16E-07 | 1.88E-05 |
| 11733058_PTBP3    | 0.774515 | 8.16E-07 | 1.88E-05 |
| 11744215_RNF149   | 0.647341 | 8.18E-07 | 1.88E-05 |
| 11720230_TES      | 0.713856 | 8.22E-07 | 1.89E-05 |
| 11717932_TBK1     | 0.611259 | 8.23E-07 | 1.89E-05 |
| 11718127_TK1      | -0.61896 | 8.23E-07 | 1.89E-05 |
| 11740681_TGIF1    | 0.581215 | 8.26E-07 | 1.90E-05 |
| 11754110_BIRC5    | -0.65208 | 8.26E-07 | 1.90E-05 |
| 11723399_ALPK2    | 0.647631 | 8.26E-07 | 1.90E-05 |
| 11744692_HP1BP3   | -0.51717 | 8.31E-07 | 1.90E-05 |
| 11728022_TMEM45A  | -0.56763 | 8.34E-07 | 1.91E-05 |
| 11748081_FLOT1    | -0.51447 | 8.34E-07 | 1.91E-05 |
| 11739283_TRIM23   | 0.576643 | 8.35E-07 | 1.91E-05 |
| 11726725_NABP1    | 0.969699 | 8.35E-07 | 1.91E-05 |
| 11746471_MAP4K4   | 0.517722 | 8.40E-07 | 1.92E-05 |
| 11718926_ARID5B   | 0.593132 | 8.41E-07 | 1.92E-05 |
| 11725837_C1orf112 | -0.64044 | 8.42E-07 | 1.92E-05 |
| 11736519_CXorf38  | 0.518071 | 8.45E-07 | 1.93E-05 |
| 11721217_TMEM106B | -0.83368 | 8.45E-07 | 1.93E-05 |

|                    |          |          |          |
|--------------------|----------|----------|----------|
| 11747442_NAPB      | 0.76757  | 8.45E-07 | 1.93E-05 |
| 11724094_COL4A5    | 0.567427 | 8.50E-07 | 1.94E-05 |
| 11730691_ALS2      | 0.682974 | 8.50E-07 | 1.94E-05 |
| 11719096_CYB5B     | -0.98677 | 8.53E-07 | 1.94E-05 |
| 11743085_KDM6A     | 0.602077 | 8.55E-07 | 1.95E-05 |
| 11757280_DEK       | -0.68049 | 8.58E-07 | 1.95E-05 |
| 11745635_TNIK      | 1.019911 | 8.60E-07 | 1.96E-05 |
| 11724732_TUBB      | -0.54038 | 8.62E-07 | 1.96E-05 |
| 11721588_TRAF1     | 0.849065 | 8.63E-07 | 1.96E-05 |
| 11717267_CAMK2G    | -0.61845 | 8.64E-07 | 1.96E-05 |
| 11722737_APPL1     | -0.62132 | 8.65E-07 | 1.96E-05 |
| 11755120_PSME4     | 0.580694 | 8.65E-07 | 1.96E-05 |
| 11722367_DLGAP5    | -0.72265 | 8.65E-07 | 1.96E-05 |
| 11758421_PTEN      | 0.617378 | 8.66E-07 | 1.96E-05 |
| 11739402_KMT5B     | 0.643619 | 8.66E-07 | 1.96E-05 |
| 11754566_RNF217    | 0.959157 | 8.66E-07 | 1.96E-05 |
| 11724953_PDIK1L    | -0.95999 | 8.68E-07 | 1.97E-05 |
| 11722882_CREBRF    | 0.691062 | 8.70E-07 | 1.97E-05 |
| 11735324_FAM72A // | -0.55279 | 8.73E-07 | 1.98E-05 |
| 11722005_NASP      | -0.56699 | 8.75E-07 | 1.98E-05 |
| 11748660_SPG20     | 0.50868  | 8.75E-07 | 1.98E-05 |
| 11751412_ARL1      | -0.6055  | 8.78E-07 | 1.98E-05 |
| 11756106_SETBP1    | 0.598881 | 8.81E-07 | 1.99E-05 |
| 11733797_RCAN1     | -0.61422 | 8.81E-07 | 1.99E-05 |
| 11763185_RPL7L1    | -0.61117 | 8.82E-07 | 1.99E-05 |
| 11746788_PRR16     | 0.779583 | 8.85E-07 | 2.00E-05 |
| 11727924_PURA      | -0.67528 | 8.87E-07 | 2.00E-05 |
| 11742688_HIST2H2AA | 0.869414 | 8.89E-07 | 2.00E-05 |
| 11729737_RCCD1     | -0.64624 | 8.90E-07 | 2.00E-05 |
| 11755641_PGAP1     | 0.676174 | 8.91E-07 | 2.00E-05 |
| 11732111_TNFRSF21  | -0.6282  | 8.91E-07 | 2.00E-05 |
| 11752184_ZNF608    | 0.745886 | 8.91E-07 | 2.00E-05 |
| 11720781_CDK2      | -0.54179 | 8.93E-07 | 2.01E-05 |
| 11759536_TTC17     | -0.66989 | 8.95E-07 | 2.01E-05 |
| 11731538_ADGRF1    | 0.704153 | 8.95E-07 | 2.01E-05 |
| 11749195_DDOST     | -0.66863 | 9.00E-07 | 2.02E-05 |
| 11724788_KIF3A     | 0.901439 | 9.00E-07 | 2.02E-05 |
| 11724679_TMEM131   | 0.538909 | 9.01E-07 | 2.02E-05 |
| 11753661_ID1       | -0.56335 | 9.02E-07 | 2.02E-05 |
| 11733839_ABHD2     | 0.750206 | 9.02E-07 | 2.02E-05 |
| 11764010_TMPO      | -0.90019 | 9.06E-07 | 2.03E-05 |
| 11759826_GPNMB     | 0.704768 | 9.10E-07 | 2.04E-05 |
| 11757005_FUCA1     | 0.996978 | 9.10E-07 | 2.04E-05 |
| 11734772_SYNRG     | 0.523979 | 9.10E-07 | 2.04E-05 |
| 11751081_NMD3      | 0.558692 | 9.11E-07 | 2.04E-05 |
| 11723798_CSTF3     | -0.53638 | 9.12E-07 | 2.04E-05 |
| 11726611_MAFF      | 0.871881 | 9.12E-07 | 2.04E-05 |
| 11725003_C8orf58   | 0.641259 | 9.12E-07 | 2.04E-05 |
| 11729741_CD68      | -0.71843 | 9.13E-07 | 2.04E-05 |
| 11752461_FMNL2     | 0.547395 | 9.13E-07 | 2.04E-05 |
| 11721643_ARL1      | -0.80963 | 9.14E-07 | 2.04E-05 |

|                    |          |          |          |
|--------------------|----------|----------|----------|
| 11757092_LSM3      | -0.53249 | 9.14E-07 | 2.04E-05 |
| 11749307_CCNG1     | 0.593724 | 9.14E-07 | 2.04E-05 |
| 11754746_ZNF561    | 0.568264 | 9.18E-07 | 2.04E-05 |
| 11749494_GTF2H1    | 0.550255 | 9.20E-07 | 2.05E-05 |
| 11753820_MDM2      | 0.721455 | 9.20E-07 | 2.05E-05 |
| 11718943_AURKA     | -0.6343  | 9.21E-07 | 2.05E-05 |
| 11723701_ABHD5     | 1.149304 | 9.22E-07 | 2.05E-05 |
| 11721881_TUBGCP3   | -0.51983 | 9.24E-07 | 2.05E-05 |
| 11747163_CEP85L    | 0.587353 | 9.25E-07 | 2.05E-05 |
| 11716852_IMPAD1    | -0.55011 | 9.26E-07 | 2.05E-05 |
| 11751569_SKA1      | -0.71598 | 9.27E-07 | 2.06E-05 |
| 11733037_DPH3      | 0.626179 | 9.33E-07 | 2.07E-05 |
| 11738026_DMD       | 0.84769  | 9.33E-07 | 2.07E-05 |
| 11759299_ARMC8     | 0.737828 | 9.33E-07 | 2.07E-05 |
| 11730403_MRE11A    | -0.59057 | 9.34E-07 | 2.07E-05 |
| 11748801_FDFT1     | -0.63859 | 9.36E-07 | 2.07E-05 |
| 11758603_PANK3     | 0.797355 | 9.36E-07 | 2.07E-05 |
| 11739304_CAMK4     | 0.602734 | 9.36E-07 | 2.07E-05 |
| 11722143_TRANK1    | 0.522848 | 9.40E-07 | 2.08E-05 |
| 11749956_TBC1D31   | -0.55363 | 9.40E-07 | 2.08E-05 |
| 11718088_TNKS      | -0.56767 | 9.40E-07 | 2.08E-05 |
| 11745114_ADGRE2    | 0.671933 | 9.41E-07 | 2.08E-05 |
| 11754124_COTL1     | -0.50492 | 9.43E-07 | 2.08E-05 |
| 11722022_CDK5R1    | 0.646921 | 9.45E-07 | 2.08E-05 |
| 11752488_CDH19     | 0.75589  | 9.46E-07 | 2.08E-05 |
| 11731897_PTHLH     | 1.117356 | 9.46E-07 | 2.08E-05 |
| 11748687_CSNK1A1   | 0.501359 | 9.46E-07 | 2.08E-05 |
| 11754236_PTPRF     | -0.53024 | 9.49E-07 | 2.09E-05 |
| 11725791_MRE11A    | -0.9679  | 9.49E-07 | 2.09E-05 |
| 11753851_ATP6VOE1  | 0.532057 | 9.50E-07 | 2.09E-05 |
| 11728257_RAD18     | -0.75671 | 9.52E-07 | 2.09E-05 |
| 11742758_GTF2H1    | 0.609208 | 9.53E-07 | 2.10E-05 |
| 11736582_TRIM36    | 0.659253 | 9.54E-07 | 2.10E-05 |
| 11715740_RCC2      | -0.7022  | 9.54E-07 | 2.10E-05 |
| 11748738_SEMA3E    | 1.29992  | 9.60E-07 | 2.11E-05 |
| 11744474_IDI1      | -0.5816  | 9.60E-07 | 2.11E-05 |
| 11718718_TOM1L2    | -0.64273 | 9.63E-07 | 2.11E-05 |
| 11716347_EFCAB14   | 0.557923 | 9.68E-07 | 2.12E-05 |
| 11729215_PIGX      | -0.57968 | 9.69E-07 | 2.12E-05 |
| 11745470_INPP4B    | 0.663417 | 9.70E-07 | 2.12E-05 |
| 11726082_CCNT2     | 0.663652 | 9.70E-07 | 2.12E-05 |
| 11757298_BRD3      | -0.65827 | 9.72E-07 | 2.12E-05 |
| 11728152_HIST1H2BD | 1.103143 | 9.72E-07 | 2.12E-05 |
| 11718704_IGF1R     | 0.712493 | 9.74E-07 | 2.13E-05 |
| 11734848_ERBB2IP   | 0.545618 | 9.78E-07 | 2.14E-05 |
| 11744409_KLHL18    | 0.649373 | 9.78E-07 | 2.14E-05 |
| 11715697_NOLC1     | -0.60758 | 9.79E-07 | 2.14E-05 |
| 11742750_GSPT1     | -0.57603 | 9.79E-07 | 2.14E-05 |
| 11722575_AP1G1     | 0.536955 | 9.80E-07 | 2.14E-05 |
| 11756354_RRP8      | 0.498198 | 9.80E-07 | 2.14E-05 |
| 11731403_ATP6V1G1  | -0.49449 | 9.81E-07 | 2.14E-05 |

|                    |          |          |          |
|--------------------|----------|----------|----------|
| 11752555_FMR1      | 0.526196 | 9.81E-07 | 2.14E-05 |
| 11723838_GATA6     | 0.915352 | 9.83E-07 | 2.14E-05 |
| 11723677_CKAP2     | -0.55208 | 9.87E-07 | 2.15E-05 |
| 11745838_MRS2      | 0.543578 | 9.87E-07 | 2.15E-05 |
| 11739079_ANP32A    | -0.58889 | 9.88E-07 | 2.15E-05 |
| 11717521_PTTG1 /// | -0.53303 | 9.93E-07 | 2.16E-05 |
| 11720728_UBR1      | 0.611075 | 9.94E-07 | 2.16E-05 |
| 11722610_CDC42SE1  | 0.572099 | 9.95E-07 | 2.16E-05 |
| 11730382_SNX18     | 0.665816 | 9.97E-07 | 2.16E-05 |
| 11755161_PLK2      | 0.487089 | 9.99E-07 | 2.17E-05 |
| 11728728_ADRB2     | 1.356087 | 9.99E-07 | 2.17E-05 |
| 11716851_IMPAD1    | -0.55015 | 1.00E-06 | 2.17E-05 |
| 11716095_KLF6      | 0.59353  | 1.00E-06 | 2.17E-05 |
| 11729525_CIZ1      | -0.50319 | 1.00E-06 | 2.17E-05 |
| 11726362_ATXN3     | -0.68753 | 1.00E-06 | 2.17E-05 |
| 11756336_ZNF23     | 0.680048 | 1.00E-06 | 2.17E-05 |
| 11722531_CALD1     | 0.563215 | 1.00E-06 | 2.17E-05 |
| 11757821_LDB1      | 0.598737 | 1.01E-06 | 2.17E-05 |
| 11739146_MKNK2     | -0.59337 | 1.01E-06 | 2.17E-05 |
| 11717616_OXSR1     | 0.560655 | 1.01E-06 | 2.17E-05 |
| 11716616_REEP5     | 0.510209 | 1.01E-06 | 2.17E-05 |
| 11718218_RAB22A    | 0.598129 | 1.01E-06 | 2.17E-05 |
| 11729239_CSRP2     | -0.6328  | 1.01E-06 | 2.17E-05 |
| 11732362_ZNF44     | 0.655837 | 1.01E-06 | 2.18E-05 |
| 11740369_PDLIM5    | 0.537281 | 1.01E-06 | 2.18E-05 |
| 11727022_TMEM64    | 0.989748 | 1.01E-06 | 2.18E-05 |
| 11751524_TMED5     | 0.566852 | 1.01E-06 | 2.18E-05 |
| 11743068_SIAH2     | -0.52692 | 1.01E-06 | 2.18E-05 |
| 11733107_COMMD2    | 0.547602 | 1.01E-06 | 2.18E-05 |
| 11718160_KLF13     | -0.76104 | 1.02E-06 | 2.18E-05 |
| 11751473_NAPG      | 0.759652 | 1.02E-06 | 2.18E-05 |
| 11745597_MICAL3    | 0.744554 | 1.02E-06 | 2.18E-05 |
| 11746559_CAP2      | 0.718967 | 1.02E-06 | 2.19E-05 |
| 11754231_TMEM185B  | -0.72692 | 1.02E-06 | 2.19E-05 |
| 11730436_TAF1D     | 0.603402 | 1.02E-06 | 2.19E-05 |
| 11743603_RRM1      | -0.64061 | 1.02E-06 | 2.19E-05 |
| 11742906_DNAJC1    | 0.64212  | 1.02E-06 | 2.19E-05 |
| 11750035_REEP5     | 0.508209 | 1.02E-06 | 2.19E-05 |
| 11736479_FAM72A // | -0.59808 | 1.02E-06 | 2.19E-05 |
| 11744827_CLK1      | 0.839851 | 1.02E-06 | 2.19E-05 |
| 11723180_ITSN2     | 0.543781 | 1.03E-06 | 2.19E-05 |
| 11745724_MALAT1    | -0.5812  | 1.03E-06 | 2.20E-05 |
| 11743865_ATP2B1    | 0.660749 | 1.03E-06 | 2.20E-05 |
| 11763073_BIRC5     | -0.60513 | 1.03E-06 | 2.20E-05 |
| 11729355_ZNF200    | 0.53387  | 1.03E-06 | 2.20E-05 |
| 11745098_SLC44A5   | 0.799219 | 1.03E-06 | 2.20E-05 |
| 11757558_LONRF1    | 0.719531 | 1.03E-06 | 2.20E-05 |
| 11720153_NRIP1     | 0.765179 | 1.03E-06 | 2.20E-05 |
| 11740881_IL15      | 1.038871 | 1.03E-06 | 2.20E-05 |
| 11721873_IFIT2     | 0.633135 | 1.03E-06 | 2.20E-05 |
| 11761515_ND1       | 0.489389 | 1.03E-06 | 2.20E-05 |

|                   |          |          |          |
|-------------------|----------|----------|----------|
| 11739467_PPP4R1   | 0.51663  | 1.03E-06 | 2.20E-05 |
| 11733038_DPH3     | 0.538727 | 1.03E-06 | 2.20E-05 |
| 11740791_ELK4     | 0.935424 | 1.03E-06 | 2.20E-05 |
| 11744426_KIAA0101 | -0.53741 | 1.04E-06 | 2.20E-05 |
| 11722522_SUSD1    | 1.066805 | 1.04E-06 | 2.20E-05 |
| 11718404_RFC3     | -0.52428 | 1.04E-06 | 2.21E-05 |
| 11717452_NEK7     | 0.535471 | 1.04E-06 | 2.21E-05 |
| 11755300_SAPCD2   | -1.13099 | 1.04E-06 | 2.21E-05 |
| 11754044_CLSPN    | -0.71132 | 1.04E-06 | 2.21E-05 |
| 11721769_GNE      | 0.549165 | 1.04E-06 | 2.21E-05 |
| 11744778_DCAF8    | 0.819434 | 1.04E-06 | 2.21E-05 |
| 11727768_BNC2     | -0.50104 | 1.04E-06 | 2.21E-05 |
| 11734413_TRIM23   | 0.547102 | 1.04E-06 | 2.21E-05 |
| 11725816_CPT1C    | -0.58974 | 1.05E-06 | 2.22E-05 |
| 11724172_FCHO2    | 0.543499 | 1.05E-06 | 2.22E-05 |
| 11745297_ITGB3BP  | -0.53539 | 1.05E-06 | 2.22E-05 |
| 11721775_ASPH     | 0.552386 | 1.05E-06 | 2.23E-05 |
| 11722902_TRMT13   | 0.594325 | 1.05E-06 | 2.23E-05 |
| 11746124_MAP3K7CL | 1.07251  | 1.05E-06 | 2.23E-05 |
| 11731076_LONRF1   | 0.782044 | 1.06E-06 | 2.23E-05 |
| 11717341_PTGFRN   | 0.551346 | 1.06E-06 | 2.23E-05 |
| 11752492_ACVR2A   | 0.991615 | 1.06E-06 | 2.23E-05 |
| 11719365_SPATS2L  | -0.65197 | 1.06E-06 | 2.23E-05 |
| 11723416_CNN2     | 0.707078 | 1.06E-06 | 2.23E-05 |
| 11749019_MYNN     | 0.514421 | 1.06E-06 | 2.24E-05 |
| 11738181_CNTNAP3  | 0.683324 | 1.07E-06 | 2.25E-05 |
| 11750974_PDGFA    | 0.620872 | 1.07E-06 | 2.25E-05 |
| 11720844_N4BP1    | 0.543344 | 1.07E-06 | 2.25E-05 |
| 11733931_PARP2    | -0.70497 | 1.07E-06 | 2.25E-05 |
| 11753279_SPAG5    | -0.6155  | 1.08E-06 | 2.26E-05 |
| 11720115_STK26    | -0.59217 | 1.08E-06 | 2.27E-05 |
| 11733942_TBCEL    | 0.612875 | 1.08E-06 | 2.27E-05 |
| 11750607_SNX13    | 0.689839 | 1.08E-06 | 2.27E-05 |
| 11718003_ZMYM3    | -0.59161 | 1.08E-06 | 2.27E-05 |
| 11722747_HOOK3    | -0.69859 | 1.08E-06 | 2.28E-05 |
| 11720261_TRIM33   | 0.506938 | 1.08E-06 | 2.28E-05 |
| 11761642_TPM1     | 0.750958 | 1.09E-06 | 2.28E-05 |
| 11736020_OPTN     | 0.559734 | 1.09E-06 | 2.28E-05 |
| 11748214_TSC22D2  | 0.777219 | 1.09E-06 | 2.28E-05 |
| 11721144_MKI67    | -0.71829 | 1.09E-06 | 2.28E-05 |
| 11739250_NUP58    | -0.53954 | 1.09E-06 | 2.29E-05 |
| 11747866_RBL2     | -0.61522 | 1.10E-06 | 2.29E-05 |
| 11732811_RIC1     | 0.720148 | 1.10E-06 | 2.30E-05 |
| 11716063_TNC      | 0.509982 | 1.10E-06 | 2.30E-05 |
| 11739546_NEDD1    | -0.74365 | 1.10E-06 | 2.30E-05 |
| 11745846_TMEM128  | -0.71804 | 1.10E-06 | 2.30E-05 |
| 11722686_LIFR     | 1.153101 | 1.11E-06 | 2.31E-05 |
| 11723179_ITSN2    | 0.663508 | 1.11E-06 | 2.31E-05 |
| 200040_PMKHDRBS1  | -0.53795 | 1.11E-06 | 2.31E-05 |
| 11725336_RLIM     | 0.516915 | 1.11E-06 | 2.31E-05 |
| 11730515_SGOL1    | -0.60699 | 1.11E-06 | 2.31E-05 |

|                    |          |          |          |
|--------------------|----------|----------|----------|
| 11758315_PER2      | 1.029533 | 1.11E-06 | 2.32E-05 |
| 11726759_PRMT3     | -0.71628 | 1.11E-06 | 2.32E-05 |
| 11722682_IRAK1 /// | -0.82061 | 1.11E-06 | 2.32E-05 |
| 11716062_TNC       | 0.590299 | 1.11E-06 | 2.32E-05 |
| 11735991_LARS      | -0.77993 | 1.11E-06 | 2.32E-05 |
| 11739562_GDAP1     | 0.559951 | 1.12E-06 | 2.32E-05 |
| 11740420_SPAG1     | 0.659455 | 1.12E-06 | 2.32E-05 |
| 11722884_CREBRF    | 0.735066 | 1.12E-06 | 2.32E-05 |
| 11743693_MCM4      | -0.57883 | 1.12E-06 | 2.32E-05 |
| 11757581_MT1X      | -0.62948 | 1.12E-06 | 2.32E-05 |
| 11729271_ASBI      | 0.528602 | 1.12E-06 | 2.32E-05 |
| 11720930_DLST      | -0.49779 | 1.12E-06 | 2.32E-05 |
| 11746316_AARS      | -0.4888  | 1.12E-06 | 2.32E-05 |
| 11739576_HPS5      | 0.660095 | 1.12E-06 | 2.33E-05 |
| 11716330_DNAJB6    | 0.489097 | 1.13E-06 | 2.33E-05 |
| 11744969_PAPLN     | 0.695821 | 1.13E-06 | 2.34E-05 |
| 11729185_PNO1      | 0.526514 | 1.13E-06 | 2.34E-05 |
| 11730319_TNFRSF11B | 0.651942 | 1.13E-06 | 2.34E-05 |
| 11726249_PARP1     | -0.65888 | 1.13E-06 | 2.34E-05 |
| 11734305_LACTB     | 0.671777 | 1.14E-06 | 2.35E-05 |
| 11717698_ARIH1     | 0.596229 | 1.14E-06 | 2.35E-05 |
| 11736730_RIMS2     | 1.514413 | 1.14E-06 | 2.36E-05 |
| 11743296_CENPF     | -0.58009 | 1.14E-06 | 2.36E-05 |
| 11719994_NLK       | 0.695018 | 1.14E-06 | 2.36E-05 |
| 11753793_KIAA0101  | -0.54051 | 1.14E-06 | 2.36E-05 |
| 11735806_SXS2 ///  | -0.52175 | 1.14E-06 | 2.36E-05 |
| 11747096_KCNK1     | -0.63481 | 1.15E-06 | 2.36E-05 |
| 11747183_CACUL1    | -0.71609 | 1.15E-06 | 2.36E-05 |
| 11757933_BTG2      | 0.726236 | 1.15E-06 | 2.36E-05 |
| 11720148_SH3D19    | 0.540319 | 1.15E-06 | 2.36E-05 |
| 11757534_FAM198B   | 1.276551 | 1.15E-06 | 2.36E-05 |
| 11750102_ALDH1A3   | -0.53805 | 1.15E-06 | 2.37E-05 |
| 11723186_FGD6      | 0.665812 | 1.15E-06 | 2.37E-05 |
| 11726387_ZFP82     | 0.623492 | 1.15E-06 | 2.37E-05 |
| 11736741_MKI67     | -0.5557  | 1.16E-06 | 2.37E-05 |
| 11719099_ISOC1     | -0.72752 | 1.16E-06 | 2.37E-05 |
| 11748956_IPT88     | 0.623182 | 1.16E-06 | 2.37E-05 |
| 11739360_AKAP10    | 0.666041 | 1.16E-06 | 2.38E-05 |
| 11739730_CSNK1G1   | 0.584113 | 1.16E-06 | 2.38E-05 |
| 11729146_HNRNPD    | -0.64306 | 1.16E-06 | 2.38E-05 |
| 11751495_YAF2      | 0.636231 | 1.16E-06 | 2.38E-05 |
| 11732824_MAP2K4    | 0.785509 | 1.17E-06 | 2.39E-05 |
| 11724248_TMEM127   | -0.58434 | 1.17E-06 | 2.39E-05 |
| 11747297_STRADA    | -0.65796 | 1.17E-06 | 2.39E-05 |
| 11759023_PPP2R5E   | -0.5649  | 1.17E-06 | 2.39E-05 |
| 11717435_CDCA7L    | -0.58903 | 1.17E-06 | 2.39E-05 |
| 11717965_KRAS      | -0.62205 | 1.17E-06 | 2.40E-05 |
| 11744483_POC1B     | 0.535513 | 1.17E-06 | 2.40E-05 |
| 11717529_SLC25A20  | 0.497577 | 1.18E-06 | 2.40E-05 |
| 11733864_BIRC5     | -0.50015 | 1.18E-06 | 2.41E-05 |
| 11743253_CALD1     | 0.494297 | 1.18E-06 | 2.42E-05 |

|                    |          |          |          |
|--------------------|----------|----------|----------|
| 11755513_ZNF136    | 0.727965 | 1.19E-06 | 2.42E-05 |
| 11757849_PNMA2     | -1.48003 | 1.19E-06 | 2.42E-05 |
| 11716179_C5orf15   | 0.49767  | 1.19E-06 | 2.42E-05 |
| 11757664_MKRN1     | -0.54233 | 1.19E-06 | 2.42E-05 |
| 11757824_RGL1      | 0.834167 | 1.19E-06 | 2.42E-05 |
| 11733696_UBE2C     | -0.53775 | 1.19E-06 | 2.42E-05 |
| 11724532_HAUS4     | -0.82331 | 1.19E-06 | 2.43E-05 |
| 11719136_THOC1     | -0.76295 | 1.20E-06 | 2.43E-05 |
| 11747302_ZNF337    | 0.568157 | 1.20E-06 | 2.44E-05 |
| 11725682_MRS2      | 0.675213 | 1.20E-06 | 2.44E-05 |
| 11761804_TSC22D2   | 0.845    | 1.20E-06 | 2.44E-05 |
| 11724026_TCF19     | -0.86167 | 1.21E-06 | 2.45E-05 |
| 11744924_ZNF451    | 0.554392 | 1.21E-06 | 2.46E-05 |
| 11715703_ITGA5     | 0.616174 | 1.21E-06 | 2.46E-05 |
| 11748837_RAB30     | 0.727918 | 1.21E-06 | 2.46E-05 |
| 11739939_ATP8A2    | 0.542499 | 1.21E-06 | 2.46E-05 |
| 11716494_MAP4      | -0.63511 | 1.21E-06 | 2.46E-05 |
| 11729705_ZNF561    | 0.925129 | 1.22E-06 | 2.46E-05 |
| 11734600_PSIP1     | -0.60051 | 1.22E-06 | 2.46E-05 |
| 11758126_EAF1      | 0.614523 | 1.22E-06 | 2.47E-05 |
| 11717550_BTBD10    | 0.561285 | 1.22E-06 | 2.47E-05 |
| 11716550_HES1      | 0.959093 | 1.22E-06 | 2.47E-05 |
| 11724011_SIKE1     | -0.68373 | 1.22E-06 | 2.47E-05 |
| 11754106_EFNA1     | 0.689315 | 1.23E-06 | 2.48E-05 |
| 11758249_FDPS      | -0.56058 | 1.23E-06 | 2.48E-05 |
| 11729574_ENC1      | 0.521551 | 1.23E-06 | 2.49E-05 |
| 11723470_LPGAT1    | 0.535661 | 1.23E-06 | 2.49E-05 |
| 11746806_C6orf120  | 0.658438 | 1.23E-06 | 2.49E-05 |
| 11721668_CDT1      | -0.92786 | 1.24E-06 | 2.49E-05 |
| 11726703_BCL10     | 0.601599 | 1.24E-06 | 2.49E-05 |
| 11716341_EFNA1     | 0.648591 | 1.24E-06 | 2.49E-05 |
| 11730563_STRADA    | -0.6076  | 1.24E-06 | 2.50E-05 |
| 11715978_C6orf48   | 0.491707 | 1.24E-06 | 2.50E-05 |
| 11758902_ZNF641    | 0.68375  | 1.24E-06 | 2.50E-05 |
| 11722260_EDEM1     | 0.668003 | 1.25E-06 | 2.51E-05 |
| 11725320_CRK       | 0.543203 | 1.25E-06 | 2.51E-05 |
| 11744288_ZNF622    | 0.565326 | 1.25E-06 | 2.51E-05 |
| 11720029_LDLR      | -0.59274 | 1.25E-06 | 2.51E-05 |
| 11754368_FBN1      | 0.592143 | 1.25E-06 | 2.51E-05 |
| 11749852_FOS       | 0.725882 | 1.25E-06 | 2.51E-05 |
| 11758638_MKL2      | -0.49868 | 1.26E-06 | 2.52E-05 |
| 11722684_MECP2     | -0.66586 | 1.26E-06 | 2.52E-05 |
| 11741056_ADORA2B   | -0.66547 | 1.26E-06 | 2.52E-05 |
| 11740119_SMC2      | -0.52955 | 1.26E-06 | 2.52E-05 |
| 11747085_DYNC1LI2  | -0.71593 | 1.26E-06 | 2.52E-05 |
| 11725064_TCOF1     | -0.87238 | 1.26E-06 | 2.52E-05 |
| 11753264_C3orf17   | 0.591504 | 1.26E-06 | 2.53E-05 |
| 11754877_MAP2K4 // | 0.695389 | 1.26E-06 | 2.53E-05 |
| 11718403_RFC3      | -0.54637 | 1.27E-06 | 2.53E-05 |
| 11748694_RAB5A     | 0.480105 | 1.27E-06 | 2.53E-05 |
| 11725733_NFYA      | -0.71951 | 1.27E-06 | 2.54E-05 |



|                    |          |          |          |
|--------------------|----------|----------|----------|
| 11729750_LPAR1     | 0.586652 | 1.27E-06 | 2.54E-05 |
| 11755778_ROB04     | -0.7945  | 1.27E-06 | 2.54E-05 |
| 11748205_ADGRE1    | 0.578695 | 1.27E-06 | 2.54E-05 |
| 11744391_PAPOLA    | -0.65445 | 1.28E-06 | 2.54E-05 |
| 11743927_SEC24A    | 0.62892  | 1.28E-06 | 2.55E-05 |
| 11723589_RC3H1     | 0.543447 | 1.29E-06 | 2.56E-05 |
| 11749589_CTSS      | 0.984982 | 1.29E-06 | 2.56E-05 |
| 11718100_CD59      | 0.4848   | 1.29E-06 | 2.57E-05 |
| 11729549_ADGRG6    | 0.838066 | 1.29E-06 | 2.57E-05 |
| 11733823_AGPAT3    | -0.68143 | 1.29E-06 | 2.57E-05 |
| 11718918_PAK4      | -0.68709 | 1.29E-06 | 2.57E-05 |
| 11727878_CHAF1A    | -0.69944 | 1.29E-06 | 2.57E-05 |
| 11716103_PCNA      | -0.4927  | 1.29E-06 | 2.57E-05 |
| 11747383_BIVM      | 0.564794 | 1.29E-06 | 2.57E-05 |
| 11722252_NEK2      | -0.52972 | 1.29E-06 | 2.57E-05 |
| 11746394_NRCAM     | 0.836592 | 1.30E-06 | 2.57E-05 |
| 11755818_FYCO1     | -0.59175 | 1.30E-06 | 2.57E-05 |
| 11759557_BLZF1     | 0.808056 | 1.30E-06 | 2.58E-05 |
| 11716655_TRAF4     | 0.491392 | 1.31E-06 | 2.59E-05 |
| 11726605_MTF2      | 0.533056 | 1.31E-06 | 2.59E-05 |
| 11722408_GALNT7    | 0.570081 | 1.31E-06 | 2.59E-05 |
| 11755007_LOC105376 | 0.586932 | 1.31E-06 | 2.59E-05 |
| 11728758_CHIC2     | 0.526625 | 1.31E-06 | 2.60E-05 |
| 11755563_MOK       | 0.482581 | 1.31E-06 | 2.60E-05 |
| 11759847_ALCAM     | 1.008373 | 1.32E-06 | 2.60E-05 |
| 11716008_RBM5      | 0.491487 | 1.32E-06 | 2.61E-05 |
| 11733751_BDNF      | 0.736557 | 1.32E-06 | 2.61E-05 |
| 11720744_CROT      | 0.589857 | 1.32E-06 | 2.61E-05 |
| 11731915_ZNF607    | 0.545807 | 1.32E-06 | 2.61E-05 |
| 11721172_TRIM32    | 0.532565 | 1.32E-06 | 2.61E-05 |
| 11723147_NAV3      | 0.516893 | 1.32E-06 | 2.61E-05 |
| 11741292_ZFP30     | 0.894107 | 1.32E-06 | 2.61E-05 |
| 11739286_KMT2A     | 0.47726  | 1.32E-06 | 2.61E-05 |
| 11747411_HAUS7 /// | -0.5523  | 1.33E-06 | 2.61E-05 |
| 11736444_RBAK      | 0.554429 | 1.33E-06 | 2.62E-05 |
| 11755405_KIAA0226L | 0.864167 | 1.34E-06 | 2.63E-05 |
| 11715938_KHDRBS1   | -0.46667 | 1.34E-06 | 2.63E-05 |
| 11740120_SMC2      | -0.84512 | 1.34E-06 | 2.64E-05 |
| 11746733_GRAMD3    | 0.916147 | 1.34E-06 | 2.64E-05 |
| 11716615_REEP5     | -0.55945 | 1.34E-06 | 2.64E-05 |
| 11739383_IDI1      | -0.59822 | 1.34E-06 | 2.64E-05 |
| 11751076_ZNF140    | 0.790626 | 1.35E-06 | 2.64E-05 |
| 11729351_MMP8      | 0.588078 | 1.35E-06 | 2.65E-05 |
| 11751818_PTGES3    | -0.50978 | 1.35E-06 | 2.65E-05 |
| 11749756_ZNF791    | 0.785573 | 1.35E-06 | 2.65E-05 |
| 11722002_HNRNPU    | -0.79931 | 1.36E-06 | 2.66E-05 |
| 11739384_ROCK2     | 0.73927  | 1.36E-06 | 2.66E-05 |
| 11758964_PAFAH1B2  | -0.50378 | 1.36E-06 | 2.66E-05 |
| 11718528_TOR3A     | -0.96563 | 1.36E-06 | 2.66E-05 |
| 11757991_ANKRD12   | 0.77512  | 1.36E-06 | 2.66E-05 |
| 11755873_ACSS1     | -0.52096 | 1.36E-06 | 2.66E-05 |

|                    |          |          |          |
|--------------------|----------|----------|----------|
| 11739863_TTF2      | -0.59336 | 1.36E-06 | 2.66E-05 |
| 11716782_TBL1XR1   | 0.541834 | 1.36E-06 | 2.67E-05 |
| 11730409_ABCC2     | 0.593457 | 1.36E-06 | 2.67E-05 |
| 11754793_RRP12     | 0.546105 | 1.36E-06 | 2.67E-05 |
| 11725564_MANEA     | -0.69528 | 1.37E-06 | 2.67E-05 |
| 11748457_TRIM37    | 0.524366 | 1.37E-06 | 2.67E-05 |
| 11755286_FAM200A   | 0.497416 | 1.37E-06 | 2.67E-05 |
| 11717390_LSM2      | -0.76262 | 1.37E-06 | 2.67E-05 |
| 11746145_SECISBP2L | 0.740089 | 1.37E-06 | 2.67E-05 |
| 11724952_CPEB2     | 0.700692 | 1.37E-06 | 2.67E-05 |
| 11724645_SPOPL     | -0.96405 | 1.37E-06 | 2.67E-05 |
| 11757767_NAV1      | -0.75462 | 1.37E-06 | 2.67E-05 |
| 11729653_SMAD2     | -0.50874 | 1.37E-06 | 2.67E-05 |
| 11724350_PPP1R14C  | -0.64071 | 1.37E-06 | 2.67E-05 |
| 11724057_AADAT     | 0.564489 | 1.38E-06 | 2.68E-05 |
| 11723105_CMPK2     | -0.86614 | 1.38E-06 | 2.68E-05 |
| 11732901_APOBEC3A  | -0.61753 | 1.38E-06 | 2.69E-05 |
| 11755691_DLC1      | 0.563153 | 1.38E-06 | 2.69E-05 |
| 11728301_CCNE2     | -0.62796 | 1.38E-06 | 2.69E-05 |
| 11734397_ZMYM5     | 0.693436 | 1.39E-06 | 2.69E-05 |
| 11720268_IBTK      | 0.499116 | 1.39E-06 | 2.69E-05 |
| 11754974_NT5C2     | 0.524596 | 1.39E-06 | 2.70E-05 |
| 11748688_CSNK1A1   | 0.497845 | 1.39E-06 | 2.70E-05 |
| 11722284_NAA35     | 0.572444 | 1.39E-06 | 2.70E-05 |
| 11732661_STIL      | -0.64593 | 1.39E-06 | 2.70E-05 |
| 11757568_ATG4B     | -0.75784 | 1.40E-06 | 2.70E-05 |
| 11719046_SNRK      | 0.56558  | 1.40E-06 | 2.70E-05 |
| 11724905_MAP4K5    | 0.530862 | 1.40E-06 | 2.70E-05 |
| 11754644_CNN2      | 0.497648 | 1.40E-06 | 2.70E-05 |
| 11730361_CCDC126   | 0.482557 | 1.40E-06 | 2.70E-05 |
| 11759599_PNISR     | 0.602193 | 1.40E-06 | 2.70E-05 |
| 11734793_SNAPC1    | 0.623234 | 1.40E-06 | 2.71E-05 |
| 11718181_FERMT2    | 0.563323 | 1.40E-06 | 2.71E-05 |
| 11724073_LOC102724 | -0.6834  | 1.40E-06 | 2.71E-05 |
| 11726395_FGD4      | 1.03243  | 1.40E-06 | 2.71E-05 |
| 11724358_MYO5A     | -0.87868 | 1.40E-06 | 2.71E-05 |
| 11745301_DNAJC6    | 0.614709 | 1.40E-06 | 2.71E-05 |
| 11724366_PPIP5K1   | -0.83301 | 1.41E-06 | 2.71E-05 |
| 11739006_CAPZA1    | -0.47692 | 1.41E-06 | 2.71E-05 |
| 11718157_PTX3      | 0.846301 | 1.41E-06 | 2.71E-05 |
| 11736133_PHF19     | -0.56397 | 1.41E-06 | 2.71E-05 |
| 11717240_RBBP4     | -0.55247 | 1.42E-06 | 2.72E-05 |
| 11723443_EPHA4     | 0.80096  | 1.42E-06 | 2.72E-05 |
| 11725079_RIT1      | 0.547216 | 1.42E-06 | 2.73E-05 |
| 11725681_MRS2      | 0.778551 | 1.42E-06 | 2.73E-05 |
| 11729585_SLC25A6   | -0.47099 | 1.42E-06 | 2.74E-05 |
| 11759561_PPP4R2    | -0.61837 | 1.43E-06 | 2.74E-05 |
| 11751295_HARS2     | -0.53088 | 1.43E-06 | 2.74E-05 |
| 11717803_NTN4      | 1.135606 | 1.43E-06 | 2.74E-05 |
| 11746956_ABHD2     | 0.627263 | 1.43E-06 | 2.74E-05 |
| 11756330_DDX58     | 0.564801 | 1.43E-06 | 2.74E-05 |

|                    |          |          |          |
|--------------------|----------|----------|----------|
| 11720976_WIPF2     | -0.48125 | 1.43E-06 | 2.74E-05 |
| 11763387_CDK8      | -0.55915 | 1.44E-06 | 2.75E-05 |
| 11744903_C16orf59  | -0.6189  | 1.44E-06 | 2.75E-05 |
| 11719320_GOLGA4    | 0.499226 | 1.44E-06 | 2.76E-05 |
| 11754920_VOPP1     | -0.56894 | 1.44E-06 | 2.76E-05 |
| 11754462_RSPRY1    | 0.486904 | 1.44E-06 | 2.76E-05 |
| 11718123_AIMP1     | -0.6344  | 1.45E-06 | 2.77E-05 |
| 11726259_RNF141    | -0.53305 | 1.45E-06 | 2.77E-05 |
| 11746633_POLA2     | -0.53814 | 1.45E-06 | 2.77E-05 |
| 11746232_KIDINS220 | 0.479026 | 1.45E-06 | 2.77E-05 |
| 11719122_DPCD      | 0.561989 | 1.45E-06 | 2.77E-05 |
| 11756194_TROAP     | -0.65288 | 1.45E-06 | 2.77E-05 |
| 11715306_AREG      | 1.342219 | 1.45E-06 | 2.77E-05 |
| 11748201_ZNF644    | 0.650891 | 1.46E-06 | 2.78E-05 |
| 11715536_IDH2      | -0.67713 | 1.46E-06 | 2.78E-05 |
| 11743490_RSRC2     | 0.556302 | 1.46E-06 | 2.78E-05 |
| 11759868_CDH19     | 0.848524 | 1.46E-06 | 2.78E-05 |
| 11760465_ATP11B    | 0.804068 | 1.46E-06 | 2.78E-05 |
| 11734728_FAM98B    | -0.46617 | 1.46E-06 | 2.78E-05 |
| 11744071_LSG1      | 0.469125 | 1.46E-06 | 2.78E-05 |
| 11740986_CD99L2    | -0.54211 | 1.46E-06 | 2.78E-05 |
| 11722183_ATP6V1C1  | -0.81452 | 1.46E-06 | 2.78E-05 |
| 11723304_TRAPPC1   | -0.60744 | 1.46E-06 | 2.78E-05 |
| 11739806_RASAL2    | 1.07003  | 1.47E-06 | 2.78E-05 |
| 11739189_AKT3      | 0.532154 | 1.47E-06 | 2.78E-05 |
| 11719318_GOLGA4    | 0.51375  | 1.47E-06 | 2.79E-05 |
| 11762245_RMND1     | 0.668895 | 1.47E-06 | 2.79E-05 |
| 11745453_TRMT13    | 0.601679 | 1.47E-06 | 2.79E-05 |
| 11749091_KDM6A     | 0.463286 | 1.47E-06 | 2.79E-05 |
| 11745877_HDGF      | -0.50241 | 1.47E-06 | 2.79E-05 |
| 11743694_H2AFV     | -0.54272 | 1.47E-06 | 2.79E-05 |
| 11730299_FAM19A2   | 1.016591 | 1.47E-06 | 2.79E-05 |
| 11733904_RRP15     | -0.67977 | 1.48E-06 | 2.79E-05 |
| 11736705_HPS5      | 0.55821  | 1.48E-06 | 2.80E-05 |
| 11721864_SLC37A3   | 0.597792 | 1.48E-06 | 2.80E-05 |
| 11744728_GOLGA4    | 0.517422 | 1.48E-06 | 2.80E-05 |
| 11753915_SEL1L3    | -0.73523 | 1.48E-06 | 2.80E-05 |
| 11717022_TMEM222   | -0.522   | 1.48E-06 | 2.80E-05 |
| 11737545_DGKH      | 1.035184 | 1.49E-06 | 2.80E-05 |
| 11716638_COL4A1    | 0.515406 | 1.49E-06 | 2.80E-05 |
| 11740133_CALD1     | 0.561065 | 1.49E-06 | 2.80E-05 |
| 11717805_CASP3     | 0.537387 | 1.49E-06 | 2.80E-05 |
| 11761516_HNRNPM    | 0.597214 | 1.49E-06 | 2.80E-05 |
| 11733196_KIAA1586  | 0.627479 | 1.49E-06 | 2.80E-05 |
| 11729655_SMAD2     | -0.8089  | 1.49E-06 | 2.80E-05 |
| 11718951_MPP5      | 0.689263 | 1.49E-06 | 2.81E-05 |
| 11732247_HNRNPC    | -0.68    | 1.50E-06 | 2.81E-05 |
| 11729898_ZBED8     | -0.94257 | 1.50E-06 | 2.83E-05 |
| 11745175_MKRN1     | -0.55646 | 1.50E-06 | 2.83E-05 |
| 11728783_ING3      | 0.696925 | 1.51E-06 | 2.84E-05 |
| 11721730_TMX3      | -0.68328 | 1.51E-06 | 2.85E-05 |

|                    |          |          |          |
|--------------------|----------|----------|----------|
| 11727789_USP1      | -0.51992 | 1.52E-06 | 2.85E-05 |
| 11739066_MAZ       | -0.70813 | 1.52E-06 | 2.85E-05 |
| 11746167_ZBTB26    | 0.778943 | 1.52E-06 | 2.85E-05 |
| 11738156_ZBTB26    | 0.631379 | 1.52E-06 | 2.85E-05 |
| 11733274_ZNF485    | 0.890178 | 1.52E-06 | 2.86E-05 |
| 11723805_AKAP12    | -0.49488 | 1.52E-06 | 2.86E-05 |
| 11720368_TMEM2     | 0.853738 | 1.53E-06 | 2.86E-05 |
| 11723998_SPC25     | -1.13324 | 1.53E-06 | 2.86E-05 |
| 11750732_NFATC2IP  | -1.00252 | 1.53E-06 | 2.86E-05 |
| 11753492_NUP37     | -0.5919  | 1.53E-06 | 2.86E-05 |
| 11722710_CBX2      | -0.73954 | 1.53E-06 | 2.87E-05 |
| 11750916_FAM73A    | 0.585232 | 1.53E-06 | 2.87E-05 |
| 11744511_ITGB3BP   | -0.55898 | 1.53E-06 | 2.87E-05 |
| 11744165_PPME1     | 0.568443 | 1.54E-06 | 2.87E-05 |
| 11731418_RFC5      | -0.62053 | 1.54E-06 | 2.87E-05 |
| 11719000_DHFR      | -0.75995 | 1.54E-06 | 2.87E-05 |
| 11753254_SGOL2     | -0.58975 | 1.54E-06 | 2.87E-05 |
| 11743056_PLAA      | -0.52183 | 1.54E-06 | 2.88E-05 |
| 11723614_DYRK1A    | 0.680632 | 1.55E-06 | 2.90E-05 |
| 11720190_AP3S2 /// | -0.68326 | 1.56E-06 | 2.91E-05 |
| 11747350_BTBD10    | 0.598186 | 1.56E-06 | 2.91E-05 |
| 11742657_HIST2H2AA | 0.831552 | 1.56E-06 | 2.91E-05 |
| 11733102_POLD3     | -0.63014 | 1.56E-06 | 2.91E-05 |
| 11715992_MCM2      | -0.76588 | 1.57E-06 | 2.92E-05 |
| 11727234_EPG5      | 0.715813 | 1.57E-06 | 2.92E-05 |
| 11716793_CCNB2     | -0.60122 | 1.57E-06 | 2.92E-05 |
| 11730399_ARID3A    | 0.565923 | 1.57E-06 | 2.92E-05 |
| 11725712_PPIA      | -0.5368  | 1.57E-06 | 2.92E-05 |
| 11749546_SLC39A6   | -0.55083 | 1.57E-06 | 2.92E-05 |
| 11750799_IL31RA    | 0.904462 | 1.57E-06 | 2.92E-05 |
| 11743114_DHX15     | -0.48225 | 1.58E-06 | 2.93E-05 |
| 11722379_GNG11     | 0.479138 | 1.58E-06 | 2.93E-05 |
| 11739603_BIRC5     | -0.51115 | 1.58E-06 | 2.93E-05 |
| 11739074_RPL7L1    | -0.49671 | 1.58E-06 | 2.93E-05 |
| 11740128_ZNF623    | 0.618422 | 1.58E-06 | 2.93E-05 |
| 11759613_GPALPP1   | -0.61661 | 1.59E-06 | 2.94E-05 |
| 11717436_CDCA7L    | -0.69885 | 1.59E-06 | 2.94E-05 |
| 11751373_PDGFC     | 0.866069 | 1.59E-06 | 2.95E-05 |
| 11735717_ZNF226    | 0.702321 | 1.59E-06 | 2.95E-05 |
| 11730865_VKORC1L1  | 0.455145 | 1.60E-06 | 2.95E-05 |
| 11722063_REEP3     | 0.836394 | 1.60E-06 | 2.96E-05 |
| 11731203_TOR1AIP2  | 0.763565 | 1.60E-06 | 2.96E-05 |
| 11720030_SCG2      | 0.52739  | 1.60E-06 | 2.96E-05 |
| 11758043_IER2      | 0.646209 | 1.60E-06 | 2.96E-05 |
| 11749687_MAP4K3    | 0.835864 | 1.61E-06 | 2.97E-05 |
| 11730848_ABHD13    | 0.648901 | 1.61E-06 | 2.97E-05 |
| 11722125_CCDC174   | 0.556439 | 1.61E-06 | 2.97E-05 |
| 11746815_SLC25A13  | 0.537485 | 1.61E-06 | 2.98E-05 |
| 11756338_DHRS11    | -0.4495  | 1.61E-06 | 2.98E-05 |
| 11750824_PRC1      | -0.60033 | 1.61E-06 | 2.98E-05 |
| 11743021_ZNF195    | 0.653442 | 1.62E-06 | 2.98E-05 |

|                    |          |          |          |
|--------------------|----------|----------|----------|
| 11736170_MTMR2     | 0.517573 | 1.62E-06 | 2.98E-05 |
| 11719573_TRUB1     | -0.55949 | 1.62E-06 | 2.98E-05 |
| 11763627_MRPL12    | -0.49255 | 1.62E-06 | 2.98E-05 |
| 11744370_OBSL1     | -0.5929  | 1.62E-06 | 2.99E-05 |
| 11728965_ZNF468    | 0.507544 | 1.62E-06 | 2.99E-05 |
| 11745873_PAPOLA    | -0.72552 | 1.62E-06 | 2.99E-05 |
| 11729696_C2orf69   | 0.650617 | 1.62E-06 | 2.99E-05 |
| 11715937_KHDRBS1   | -0.68029 | 1.63E-06 | 2.99E-05 |
| 11739177_ABHD17B   | 0.545183 | 1.63E-06 | 2.99E-05 |
| 11726369_BACH1 /// | 0.509665 | 1.63E-06 | 2.99E-05 |
| 11735904_IFNL1     | 0.790951 | 1.63E-06 | 2.99E-05 |
| 11752031_KIAA0753  | 0.716452 | 1.64E-06 | 3.01E-05 |
| 11751737_TMEM234   | 0.588153 | 1.64E-06 | 3.01E-05 |
| 11720384_STX6      | 0.60544  | 1.64E-06 | 3.01E-05 |
| 11747943_E2F8      | -0.54707 | 1.64E-06 | 3.02E-05 |
| 11721085_TRIM37    | 0.502256 | 1.65E-06 | 3.02E-05 |
| 11728751_OSBP      | 0.638212 | 1.65E-06 | 3.02E-05 |
| 11727543_OIP5      | -0.62658 | 1.65E-06 | 3.02E-05 |
| 11717541_WRNIP1    | -0.64507 | 1.65E-06 | 3.02E-05 |
| 11723869_ASB7      | -0.49575 | 1.65E-06 | 3.02E-05 |
| 11758527_ITPR2     | 0.543756 | 1.65E-06 | 3.02E-05 |
| 11718093_BIVM      | 0.655111 | 1.65E-06 | 3.02E-05 |
| 11733494_N4BP2L2   | 0.757633 | 1.66E-06 | 3.03E-05 |
| 11720680_DGKA      | 0.570158 | 1.66E-06 | 3.03E-05 |
| 11715988_ATP5G1    | -0.50681 | 1.66E-06 | 3.03E-05 |
| 11727628_ALKBH8    | 0.613927 | 1.66E-06 | 3.03E-05 |
| 11731697_ALG10 /// | -0.45419 | 1.66E-06 | 3.03E-05 |
| 11720561_PARP2     | -0.57146 | 1.66E-06 | 3.04E-05 |
| 11751270_PI15      | 0.705477 | 1.67E-06 | 3.04E-05 |
| 11718188_FOXJ2     | -0.51607 | 1.67E-06 | 3.04E-05 |
| 11743012_TAB2      | 0.566015 | 1.67E-06 | 3.04E-05 |
| 11746846_NAPEPLD   | 0.87519  | 1.67E-06 | 3.04E-05 |
| 11729679_PCDHB14   | 0.590093 | 1.67E-06 | 3.05E-05 |
| 11753996_HSPE1     | -0.46017 | 1.67E-06 | 3.05E-05 |
| 11756745_FAM214A   | 0.847026 | 1.68E-06 | 3.05E-05 |
| 11718084_LYN       | 0.519362 | 1.68E-06 | 3.05E-05 |
| 11722713_XPA       | 0.499339 | 1.68E-06 | 3.05E-05 |
| 11740378_AFTPH     | 0.647329 | 1.68E-06 | 3.05E-05 |
| 11724454_SLC22A4   | 0.528469 | 1.68E-06 | 3.05E-05 |
| 11753907_POFUT2    | 0.517188 | 1.68E-06 | 3.05E-05 |
| 11745845_NME7      | 0.572691 | 1.68E-06 | 3.06E-05 |
| 11749048_PSMC3     | -0.49436 | 1.69E-06 | 3.07E-05 |
| 11757804_CIZ1      | -0.52547 | 1.69E-06 | 3.07E-05 |
| 11747262_RRAS2     | 0.614614 | 1.69E-06 | 3.07E-05 |
| 11746634_CKAP2     | -0.53774 | 1.70E-06 | 3.07E-05 |
| 11744272_NCAPD2    | -0.61612 | 1.70E-06 | 3.07E-05 |
| 11717218_STK10     | 0.538111 | 1.70E-06 | 3.09E-05 |
| 11731074_PGGT1B    | 0.49287  | 1.70E-06 | 3.09E-05 |
| 11719961_CTBP1     | -0.54014 | 1.70E-06 | 3.09E-05 |
| 11744197_MYL12B    | 0.477811 | 1.71E-06 | 3.09E-05 |
| 11749970_GINS1     | -0.89106 | 1.71E-06 | 3.09E-05 |

|                    |          |          |          |
|--------------------|----------|----------|----------|
| 11722321_HHEX      | 0.548944 | 1.71E-06 | 3.09E-05 |
| 11743934_C1GALT1C1 | -0.81951 | 1.71E-06 | 3.09E-05 |
| 11751886_ERBB2IP   | 0.487392 | 1.71E-06 | 3.09E-05 |
| 11749616_IGFBP4    | -1.17264 | 1.71E-06 | 3.09E-05 |
| 11752407_EMX1 ///  | -0.64173 | 1.72E-06 | 3.10E-05 |
| 11730169_SERINC3   | 0.506639 | 1.72E-06 | 3.11E-05 |
| 11721156_USP38     | 0.604328 | 1.72E-06 | 3.11E-05 |
| 11749373_MTMR10    | 0.718524 | 1.73E-06 | 3.11E-05 |
| 11742785_SETX      | 0.525408 | 1.73E-06 | 3.11E-05 |
| 11758222_SLC20A1   | -0.45351 | 1.73E-06 | 3.11E-05 |
| 11722782_FGFBP2    | -0.63729 | 1.73E-06 | 3.11E-05 |
| 11718640_SPR       | -0.51564 | 1.73E-06 | 3.11E-05 |
| 11743270_RSRC2     | 0.590556 | 1.73E-06 | 3.11E-05 |
| 11738447_NFAT5     | 0.539097 | 1.73E-06 | 3.12E-05 |
| 11754031_CKS1B     | -0.60777 | 1.74E-06 | 3.13E-05 |
| 11741223_FAM198B   | 1.408044 | 1.74E-06 | 3.13E-05 |
| 11763403_CELF1     | 0.496314 | 1.74E-06 | 3.13E-05 |
| 11739361_AKAP10    | 0.576962 | 1.74E-06 | 3.13E-05 |
| 11744429_STX10     | -0.45441 | 1.75E-06 | 3.14E-05 |
| 11722253_NEK2      | -0.48424 | 1.75E-06 | 3.14E-05 |
| 11716596_SLC44A1   | -0.64985 | 1.75E-06 | 3.14E-05 |
| 11724289_TMEM256   | -0.4885  | 1.75E-06 | 3.14E-05 |
| 11727765_BNC2      | -0.55512 | 1.76E-06 | 3.15E-05 |
| 11718563_ANKRD10   | 0.633809 | 1.76E-06 | 3.15E-05 |
| 11739117_EFR3A     | 1.01315  | 1.76E-06 | 3.16E-05 |
| 11744823_GPR89A // | 0.546291 | 1.76E-06 | 3.16E-05 |
| 11759324_CEP85L    | 0.564609 | 1.76E-06 | 3.16E-05 |
| 11717800_ATF5      | -0.54682 | 1.77E-06 | 3.16E-05 |
| 11715916_CD44      | -0.61941 | 1.77E-06 | 3.16E-05 |
| 11739219_CACUL1    | -0.70214 | 1.77E-06 | 3.16E-05 |
| 11716221_EIF2S1    | -0.54615 | 1.77E-06 | 3.16E-05 |
| 11755519_TGS1      | -0.55771 | 1.77E-06 | 3.16E-05 |
| 11743592_TRIM4     | 0.576291 | 1.77E-06 | 3.16E-05 |
| 11728303_TGFA      | 0.578118 | 1.77E-06 | 3.17E-05 |
| 11732058_CDC7      | -0.524   | 1.78E-06 | 3.18E-05 |
| 11725065_TCOF1     | -0.5318  | 1.78E-06 | 3.18E-05 |
| 11746421_TRMT13    | 0.569574 | 1.78E-06 | 3.18E-05 |
| 11717471_PRKCA     | 0.827936 | 1.78E-06 | 3.18E-05 |
| 11758840_WIPF2     | -0.74671 | 1.79E-06 | 3.19E-05 |
| 11729838_ZCCHC2    | 0.614968 | 1.79E-06 | 3.19E-05 |
| 11750664_CFAP69    | 0.763336 | 1.80E-06 | 3.20E-05 |
| 11731443_ARHGEF12  | 0.643301 | 1.80E-06 | 3.20E-05 |
| 11733031_MTFR1L    | -0.60561 | 1.80E-06 | 3.20E-05 |
| 11721816_FCMR      | 0.916128 | 1.80E-06 | 3.20E-05 |
| 11753840_SNRPF     | -0.46083 | 1.80E-06 | 3.20E-05 |
| 11746337_API52     | 0.697006 | 1.80E-06 | 3.20E-05 |
| 11719123_TIMELESS  | -0.76712 | 1.80E-06 | 3.21E-05 |
| 11734004_TMEM192 / | 0.496704 | 1.81E-06 | 3.21E-05 |
| 11721511_NUS1      | -1.11976 | 1.81E-06 | 3.21E-05 |
| 11750598_TPX2      | -0.48997 | 1.81E-06 | 3.21E-05 |
| 11755254_METTL16   | -0.49797 | 1.81E-06 | 3.21E-05 |

|                    |          |          |          |
|--------------------|----------|----------|----------|
| 11751911_CDC42BPA  | 0.68811  | 1.81E-06 | 3.21E-05 |
| 11735999_ZNF791    | 0.816308 | 1.81E-06 | 3.22E-05 |
| 11720668_KAT2B     | 0.676412 | 1.81E-06 | 3.22E-05 |
| 11745271_OPTN      | 0.526284 | 1.81E-06 | 3.22E-05 |
| 11730278_PUS3      | 0.471304 | 1.82E-06 | 3.22E-05 |
| 11721667_CDT1      | -0.79018 | 1.82E-06 | 3.22E-05 |
| 11732774_ZNF860    | 0.985517 | 1.82E-06 | 3.22E-05 |
| 11717540_RYBP      | 0.576753 | 1.82E-06 | 3.22E-05 |
| 11729688_LYRM7     | -0.56288 | 1.82E-06 | 3.22E-05 |
| 11739243_NEMF      | 0.479616 | 1.82E-06 | 3.22E-05 |
| 11740652_LOC100996 | 0.475654 | 1.82E-06 | 3.23E-05 |
| 11725711_PPIA      | -0.48673 | 1.83E-06 | 3.23E-05 |
| 11760140_CDK17     | 0.700196 | 1.83E-06 | 3.23E-05 |
| 11716055_STMN3     | 0.831578 | 1.83E-06 | 3.23E-05 |
| 11746506_SPP1      | 0.481797 | 1.83E-06 | 3.23E-05 |
| 11752293_USP32 /// | 0.792371 | 1.83E-06 | 3.24E-05 |
| 11747443_PRPF3     | 0.543372 | 1.84E-06 | 3.24E-05 |
| 11729608_ZNF394    | 0.566872 | 1.84E-06 | 3.24E-05 |
| 11742944_CORO1A    | -0.73347 | 1.84E-06 | 3.24E-05 |
| 11759016_MAN1A2    | 0.482992 | 1.84E-06 | 3.24E-05 |
| 11718166_RBL2      | -0.6873  | 1.84E-06 | 3.25E-05 |
| 11730897_WAPL      | 0.493144 | 1.85E-06 | 3.25E-05 |
| 11733374_ZNF23     | 0.664064 | 1.86E-06 | 3.27E-05 |
| 11730831_KBTBD7    | -0.61032 | 1.86E-06 | 3.27E-05 |
| 11720165_ASXL1     | -0.62197 | 1.86E-06 | 3.27E-05 |
| 11727873_NHEJ1     | -0.58708 | 1.86E-06 | 3.27E-05 |
| 11722644_ZNHIT6    | 0.689362 | 1.86E-06 | 3.27E-05 |
| 11715537_IDH2      | -0.72832 | 1.87E-06 | 3.28E-05 |
| 11756857_JAK2      | 0.572478 | 1.87E-06 | 3.28E-05 |
| 11744674_VEZT      | 0.561758 | 1.87E-06 | 3.29E-05 |
| 11725660_DPP8      | 0.490824 | 1.87E-06 | 3.29E-05 |
| 11725057_NEDD9     | 0.610467 | 1.88E-06 | 3.29E-05 |
| 11752951_RPL15     | -0.45746 | 1.88E-06 | 3.30E-05 |
| 11723957_LSM5      | -0.93165 | 1.88E-06 | 3.30E-05 |
| 11763730_ARL6IP4   | -0.63675 | 1.88E-06 | 3.30E-05 |
| 11737157_TMEM241   | -0.53998 | 1.88E-06 | 3.30E-05 |
| 11757312_SERPINE1  | 1.26718  | 1.89E-06 | 3.30E-05 |
| 11742864_RLF       | 0.609351 | 1.89E-06 | 3.31E-05 |
| 11754859_KIAA0226L | 0.820484 | 1.90E-06 | 3.32E-05 |
| 11755235_FAR2      | 0.615162 | 1.90E-06 | 3.33E-05 |
| 11752290_ROR1      | 1.566004 | 1.90E-06 | 3.33E-05 |
| 11749681_EXOC5     | 0.494394 | 1.90E-06 | 3.33E-05 |
| 11748149_FNBP1     | 0.621964 | 1.90E-06 | 3.33E-05 |
| 11746938_NAA30     | 0.633819 | 1.91E-06 | 3.33E-05 |
| 11757943_NFAT5     | 0.485472 | 1.91E-06 | 3.33E-05 |
| 11743616_USP47     | 0.497336 | 1.91E-06 | 3.33E-05 |
| 11716053_LAMC1     | 0.554594 | 1.91E-06 | 3.33E-05 |
| 11717755_SEC14L1   | 0.70988  | 1.91E-06 | 3.33E-05 |
| 11716338_INSIG1    | -0.89598 | 1.91E-06 | 3.33E-05 |
| 11739960_VPS36     | 0.665706 | 1.91E-06 | 3.33E-05 |
| 11736759_SDHC      | -0.52952 | 1.91E-06 | 3.33E-05 |

|                    |          |          |          |
|--------------------|----------|----------|----------|
| 11732822_MAP2K4    | 0.658951 | 1.91E-06 | 3.33E-05 |
| 11733876_SMC4      | -0.63549 | 1.91E-06 | 3.33E-05 |
| 11757793_TFPI      | 0.686546 | 1.92E-06 | 3.34E-05 |
| 11745708_RDM1      | -1.06475 | 1.92E-06 | 3.34E-05 |
| 11724343_ITGA4     | 0.539402 | 1.92E-06 | 3.34E-05 |
| 11749028_PAPD4     | 0.486776 | 1.92E-06 | 3.34E-05 |
| 11719604_PTPN9     | -0.49412 | 1.92E-06 | 3.34E-05 |
| 11736670_MCM4      | -0.51759 | 1.92E-06 | 3.34E-05 |
| 11740782_RNF128    | 0.665724 | 1.92E-06 | 3.34E-05 |
| 11724160_GXYLT1    | 0.632058 | 1.92E-06 | 3.34E-05 |
| 11743713_ARID4A    | 0.68374  | 1.92E-06 | 3.34E-05 |
| 11744057_DDOST     | -0.52979 | 1.92E-06 | 3.34E-05 |
| 11758583_TMEM154   | -0.49436 | 1.92E-06 | 3.34E-05 |
| 11735300_FANCB     | -0.73461 | 1.93E-06 | 3.34E-05 |
| 11736083_GTSE1     | -0.56074 | 1.93E-06 | 3.34E-05 |
| 11753284_HAUS7     | -0.55943 | 1.93E-06 | 3.35E-05 |
| 11742848_ADPRM     | 0.69065  | 1.93E-06 | 3.35E-05 |
| 11763599_GPATCH2L  | 0.658645 | 1.93E-06 | 3.35E-05 |
| 11718876_DNER      | 0.790547 | 1.93E-06 | 3.35E-05 |
| 11751330_CCND1     | 0.571879 | 1.94E-06 | 3.35E-05 |
| 11755639_CDC42BPA  | 0.526471 | 1.94E-06 | 3.35E-05 |
| 11715361_ATP6VOE1  | 0.522311 | 1.94E-06 | 3.35E-05 |
| 11716009_DYNC1LI2  | -0.62443 | 1.94E-06 | 3.35E-05 |
| 11728852_TUB       | -0.82421 | 1.94E-06 | 3.36E-05 |
| 11717060_DECR1     | 0.537407 | 1.95E-06 | 3.36E-05 |
| 11728691_MKRN1     | -0.54861 | 1.95E-06 | 3.36E-05 |
| 11728385_SIX5      | -0.64407 | 1.95E-06 | 3.36E-05 |
| 11744210_RBM14-RBM | 0.498161 | 1.95E-06 | 3.36E-05 |
| 11754666_CORO1A    | -0.55608 | 1.95E-06 | 3.36E-05 |
| 11717020_TMEM222   | -0.55826 | 1.95E-06 | 3.36E-05 |
| 11754320_SMC4      | -0.48222 | 1.95E-06 | 3.36E-05 |
| 11733181_ETV1      | -0.81211 | 1.95E-06 | 3.37E-05 |
| 11742232_FAM3C     | 0.67751  | 1.96E-06 | 3.37E-05 |
| 11727499_ZRANB1    | 0.509389 | 1.96E-06 | 3.37E-05 |
| 11721681_RBMX2     | -0.61604 | 1.96E-06 | 3.37E-05 |
| 11726252_SLC1A3    | 1.388772 | 1.96E-06 | 3.37E-05 |
| 11736310_CSNK1A1   | 0.439845 | 1.96E-06 | 3.37E-05 |
| 11729718_SMAD5     | -0.99105 | 1.96E-06 | 3.37E-05 |
| 11725683_MRS2      | 0.503438 | 1.96E-06 | 3.37E-05 |
| 11740698_AKNAD1    | 0.900849 | 1.96E-06 | 3.37E-05 |
| 11753494_RAB18     | 0.564348 | 1.97E-06 | 3.38E-05 |
| 11723678_CKAP2     | -0.70279 | 1.97E-06 | 3.38E-05 |
| 11726636_KAT6A     | -0.48916 | 1.97E-06 | 3.38E-05 |
| 11720304_RTN3      | -0.47696 | 1.97E-06 | 3.38E-05 |
| 11758203_MID1      | 0.532679 | 1.97E-06 | 3.39E-05 |
| 11744586_GPATCH2   | 0.725489 | 1.98E-06 | 3.39E-05 |
| 11751932_STIL      | -0.54774 | 1.98E-06 | 3.39E-05 |
| 11719546_GOLGA1    | 0.471442 | 1.98E-06 | 3.40E-05 |
| 11721387_LACTB     | 0.505958 | 1.98E-06 | 3.40E-05 |
| 11720755_STAT3     | 0.548056 | 1.99E-06 | 3.40E-05 |
| 11729063_PDGFA     | 0.674547 | 1.99E-06 | 3.40E-05 |



|                    |          |          |          |
|--------------------|----------|----------|----------|
| 11717423_RBM8A     | -0.44359 | 1.99E-06 | 3.40E-05 |
| 11747840_NSMCE4A   | -0.46345 | 2.00E-06 | 3.42E-05 |
| 11718182_CDCA5     | -0.87488 | 2.00E-06 | 3.42E-05 |
| 11741571_ZNF682    | 0.513344 | 2.00E-06 | 3.42E-05 |
| 11727441_LOXL4     | 0.951256 | 2.00E-06 | 3.42E-05 |
| 11716193_SETD2     | 0.463814 | 2.00E-06 | 3.42E-05 |
| 11746942_DYNC1LI2  | -0.69258 | 2.00E-06 | 3.42E-05 |
| 11719457_EXOC5     | 0.439818 | 2.00E-06 | 3.42E-05 |
| 11748338_SLC31A2   | 0.54566  | 2.01E-06 | 3.43E-05 |
| 11723259_ZNF24     | 0.81338  | 2.01E-06 | 3.43E-05 |
| 11747922_RBFOX2    | 0.476184 | 2.01E-06 | 3.43E-05 |
| 11750034_REEP5     | 0.549918 | 2.02E-06 | 3.44E-05 |
| 11719924_RBM12     | -0.72514 | 2.02E-06 | 3.44E-05 |
| 11752598_ZDHC20    | 0.623792 | 2.02E-06 | 3.44E-05 |
| 11763708_MOK       | 0.459664 | 2.02E-06 | 3.44E-05 |
| 11721563_MELK      | -0.53073 | 2.03E-06 | 3.45E-05 |
| 11755986_EGFLAM    | 0.611496 | 2.03E-06 | 3.45E-05 |
| 11725614_PPP1CB    | -0.49776 | 2.04E-06 | 3.46E-05 |
| 11763298_ERVK3-1 / | 0.48399  | 2.04E-06 | 3.46E-05 |
| 11761149_C5orf45   | 0.544564 | 2.04E-06 | 3.47E-05 |
| 11724570_APPBP2    | 0.643807 | 2.04E-06 | 3.47E-05 |
| 11723835_C2orf42   | 0.53853  | 2.04E-06 | 3.47E-05 |
| 11731005_MIS18BP1  | -0.79695 | 2.05E-06 | 3.48E-05 |
| 11730742_AKIRIN1   | 0.560846 | 2.05E-06 | 3.48E-05 |
| 11717682_GNA13     | 0.716953 | 2.05E-06 | 3.48E-05 |
| 11717196_MEST      | -0.68701 | 2.05E-06 | 3.48E-05 |
| 11751011_SHMT1     | -0.51078 | 2.05E-06 | 3.48E-05 |
| 11763171_FOSL2     | 0.98213  | 2.06E-06 | 3.49E-05 |
| 11740007_POLR3G    | -0.69907 | 2.06E-06 | 3.49E-05 |
| 11758477_ANKRD13C  | 0.773252 | 2.06E-06 | 3.49E-05 |
| 11724344_ITGA4     | 0.838409 | 2.06E-06 | 3.49E-05 |
| 11736932_ZNF506    | 0.578042 | 2.06E-06 | 3.49E-05 |
| 11720327_POLR2C    | -0.80991 | 2.06E-06 | 3.49E-05 |
| 11718680_ADGRE5    | 0.47365  | 2.07E-06 | 3.51E-05 |
| 11747522_ZSCAN26   | 0.585906 | 2.07E-06 | 3.51E-05 |
| 11752190_ZDHC9     | 0.54497  | 2.07E-06 | 3.51E-05 |
| 11750887_BIRC2     | 0.455548 | 2.07E-06 | 3.51E-05 |
| 11739085_PCID2     | 0.572824 | 2.08E-06 | 3.51E-05 |
| 11729716_CBR1      | -0.44815 | 2.08E-06 | 3.52E-05 |
| 11763712_PPP1R1C   | 0.770392 | 2.08E-06 | 3.52E-05 |
| 11750441_LMNB1     | -0.67022 | 2.09E-06 | 3.52E-05 |
| 11739224_NF1       | 0.746722 | 2.09E-06 | 3.52E-05 |
| 11734997_SKI       | 0.722232 | 2.09E-06 | 3.52E-05 |
| 11727380_H2AFV     | -0.48356 | 2.09E-06 | 3.52E-05 |
| 11725678_LEPROT    | -0.503   | 2.09E-06 | 3.52E-05 |
| 11725321_CRK       | 0.534733 | 2.09E-06 | 3.52E-05 |
| 11744602_TMEM39A   | -0.64532 | 2.09E-06 | 3.52E-05 |
| 11757459_WIPF1     | -0.59669 | 2.09E-06 | 3.53E-05 |
| 11751494_YAF2      | 0.707132 | 2.10E-06 | 3.53E-05 |
| 11725781_ZC3H8     | 0.648039 | 2.10E-06 | 3.53E-05 |
| 11723884_SOWAHC    | 0.609402 | 2.10E-06 | 3.53E-05 |

|                    |          |          |          |
|--------------------|----------|----------|----------|
| 11755456_AP2S1     | -0.49568 | 2.10E-06 | 3.54E-05 |
| 11744274_NDC80     | -0.74244 | 2.12E-06 | 3.56E-05 |
| 11743046_FLOT1     | -0.54312 | 2.12E-06 | 3.56E-05 |
| 11716611_AP2S1     | -0.47302 | 2.12E-06 | 3.56E-05 |
| 11727970_SLC14A1   | 0.734467 | 2.12E-06 | 3.57E-05 |
| 11739190_AKT3      | 0.51547  | 2.13E-06 | 3.57E-05 |
| 11735063_ITGB3     | 0.57856  | 2.13E-06 | 3.57E-05 |
| 11739805_RASAL2    | 0.499358 | 2.13E-06 | 3.57E-05 |
| 11744738_LOC145783 | -1.46007 | 2.13E-06 | 3.57E-05 |
| 11736736_ZNF621    | 0.479666 | 2.13E-06 | 3.57E-05 |
| 11727737_AKAP7     | -1.20557 | 2.13E-06 | 3.57E-05 |
| 11717314_HAUS1     | -0.51913 | 2.13E-06 | 3.57E-05 |
| 11750741_TAB2      | 0.529201 | 2.14E-06 | 3.58E-05 |
| 11750154_RGS3      | 0.539705 | 2.14E-06 | 3.58E-05 |
| 11753986_CBLB      | 0.755029 | 2.14E-06 | 3.58E-05 |
| 11737795_KIAA1524  | -0.63053 | 2.14E-06 | 3.58E-05 |
| 11747384_BIVM      | 0.557472 | 2.14E-06 | 3.58E-05 |
| 11739008_CAPZA1    | -0.51536 | 2.14E-06 | 3.58E-05 |
| 11727188_WNT5A     | 0.470334 | 2.15E-06 | 3.59E-05 |
| 11746800_HACD3     | -0.47526 | 2.15E-06 | 3.59E-05 |
| 11758116_APPBP2    | -0.64678 | 2.15E-06 | 3.59E-05 |
| 11745671_FMN2      | 0.62329  | 2.15E-06 | 3.59E-05 |
| 11749260_MAGEA4    | -0.54786 | 2.16E-06 | 3.60E-05 |
| 11721737_TNFRSF19  | -0.76298 | 2.16E-06 | 3.60E-05 |
| 11746395_NRCAM     | 0.811363 | 2.16E-06 | 3.60E-05 |
| 11722637_ANKRD28   | -0.47407 | 2.16E-06 | 3.60E-05 |
| 11747001_ZNF615    | 0.489384 | 2.16E-06 | 3.60E-05 |
| 11744162_DUSP4     | 0.466005 | 2.16E-06 | 3.60E-05 |
| 11755686_CPOX      | -0.54391 | 2.16E-06 | 3.60E-05 |
| 11750196_ANXA4     | 0.506617 | 2.17E-06 | 3.60E-05 |
| 11721648_GPATCH4   | 0.487334 | 2.17E-06 | 3.60E-05 |
| 11728101_ZNF367    | 0.545297 | 2.17E-06 | 3.60E-05 |
| 11721609_PABPC1L   | 0.53056  | 2.17E-06 | 3.61E-05 |
| 11720647_BUB1B     | -0.74309 | 2.17E-06 | 3.61E-05 |
| 11745241_VEZT      | 0.54134  | 2.17E-06 | 3.61E-05 |
| 11745254_POLR3C    | 0.493999 | 2.18E-06 | 3.61E-05 |
| 11726124_TCN1      | 0.991216 | 2.18E-06 | 3.61E-05 |
| 11744005_PHLDA2    | 0.448111 | 2.18E-06 | 3.62E-05 |
| 11747458_MOK       | 0.555934 | 2.18E-06 | 3.62E-05 |
| 11754680_MAP3K2    | 0.531404 | 2.19E-06 | 3.63E-05 |
| 11716007_RBM5      | 0.54798  | 2.19E-06 | 3.63E-05 |
| 11760246_OGT       | 0.465945 | 2.19E-06 | 3.63E-05 |
| 11743729_CCDC47    | -0.5368  | 2.20E-06 | 3.64E-05 |
| 11720423_AFF4      | 1.031586 | 2.20E-06 | 3.64E-05 |
| 11744595_APTX      | -0.5909  | 2.20E-06 | 3.64E-05 |
| 11718005_CDC25B    | -0.51187 | 2.20E-06 | 3.65E-05 |
| 11758050_RGS3      | 0.466515 | 2.20E-06 | 3.65E-05 |
| 11724028_HIC2      | 0.603379 | 2.21E-06 | 3.65E-05 |
| 11743737_NR3C1     | -0.49608 | 2.21E-06 | 3.65E-05 |
| 11719184_ECD       | 0.45175  | 2.21E-06 | 3.66E-05 |
| 11724038_PTGS2     | 0.770306 | 2.21E-06 | 3.66E-05 |

|                    |          |          |          |
|--------------------|----------|----------|----------|
| 11717676_CYFIP2    | 0.660985 | 2.22E-06 | 3.66E-05 |
| 11760057_MICAL3    | 0.669201 | 2.22E-06 | 3.67E-05 |
| 11759779_ZNF800    | 1.099422 | 2.22E-06 | 3.67E-05 |
| 11756943_MAP2K4    | 0.604418 | 2.22E-06 | 3.67E-05 |
| 11723267_KPNA6     | 0.611293 | 2.22E-06 | 3.67E-05 |
| 11742744_STX10     | -0.45407 | 2.22E-06 | 3.67E-05 |
| 11726270_NKIRAS2   | 0.501218 | 2.23E-06 | 3.67E-05 |
| 11720258_TRAPPC6B  | 0.650537 | 2.23E-06 | 3.67E-05 |
| 11723947_ACSL5     | 1.027265 | 2.23E-06 | 3.67E-05 |
| 11755109_CYFIP2    | 0.667413 | 2.23E-06 | 3.67E-05 |
| 11719980_FMNL2     | 0.453479 | 2.23E-06 | 3.67E-05 |
| 11726591_ELOVL4    | 0.699509 | 2.23E-06 | 3.67E-05 |
| 11718911_PDZD2     | -0.94923 | 2.23E-06 | 3.67E-05 |
| 11746638_DHRS11    | -0.53289 | 2.24E-06 | 3.68E-05 |
| 11753263_C3orf17   | 0.576217 | 2.24E-06 | 3.68E-05 |
| 11728731_DSCC1     | -0.93451 | 2.24E-06 | 3.68E-05 |
| 11745459_FADS1     | -0.48428 | 2.24E-06 | 3.68E-05 |
| 11742905_DNAJC1    | 0.641095 | 2.26E-06 | 3.71E-05 |
| 11717504_CANT1     | -0.43291 | 2.26E-06 | 3.71E-05 |
| 11755061_SLTM      | 0.472848 | 2.26E-06 | 3.71E-05 |
| 11750794_TINAGL1   | 0.633518 | 2.26E-06 | 3.71E-05 |
| 11750442_LMNB1 /// | -1.08037 | 2.26E-06 | 3.71E-05 |
| 11751549_CD46      | 0.440527 | 2.26E-06 | 3.71E-05 |
| 11759601_PNISR     | 0.477084 | 2.27E-06 | 3.72E-05 |
| 11722120_KNTC1     | -0.61638 | 2.27E-06 | 3.72E-05 |
| 11717892_PTP4A1    | 0.519796 | 2.27E-06 | 3.72E-05 |
| 11720931_DLST      | -0.64601 | 2.27E-06 | 3.72E-05 |
| 11718120_ATP6V1A   | 0.542901 | 2.27E-06 | 3.72E-05 |
| 11731741_ZNF224    | 0.540813 | 2.28E-06 | 3.72E-05 |
| 11730232_TIAL1     | 0.513471 | 2.28E-06 | 3.73E-05 |
| 11757075_RPL15     | -0.54995 | 2.28E-06 | 3.73E-05 |
| 11720721_RRAS2     | 0.682672 | 2.29E-06 | 3.74E-05 |
| 11727490_KIF11     | -0.63368 | 2.29E-06 | 3.74E-05 |
| 11747298_S100A16   | 0.485025 | 2.29E-06 | 3.74E-05 |
| 11723197_HNRNPA3   | -0.95286 | 2.29E-06 | 3.74E-05 |
| 11754676_CENPE     | -0.61119 | 2.29E-06 | 3.74E-05 |
| 11724079_E2F2      | -0.51284 | 2.30E-06 | 3.75E-05 |
| 11717394_ARIH2     | -0.61343 | 2.30E-06 | 3.76E-05 |
| 11722694_ZMYM4     | 0.510206 | 2.30E-06 | 3.76E-05 |
| 11740170_ARHGAP42  | 1.174878 | 2.30E-06 | 3.76E-05 |
| 11717866_PSME4     | 0.499079 | 2.31E-06 | 3.76E-05 |
| 11738082_POC1B     | 0.720002 | 2.31E-06 | 3.76E-05 |
| 11736758_SDHC      | -0.52429 | 2.31E-06 | 3.77E-05 |
| 11745300_DNAJC6    | 0.489057 | 2.32E-06 | 3.77E-05 |
| 11741575_DEK       | -0.70344 | 2.32E-06 | 3.77E-05 |
| 11743924_GJA5      | 0.708558 | 2.32E-06 | 3.77E-05 |
| 11752930_GBP1      | 1.092794 | 2.32E-06 | 3.77E-05 |
| 11753631_ATF3      | 0.603727 | 2.33E-06 | 3.78E-05 |
| 11751381_C8orf46   | 1.161569 | 2.34E-06 | 3.80E-05 |
| 11718809_PRKCH     | 0.557915 | 2.34E-06 | 3.80E-05 |
| 11750580_ARHGEF12  | 0.857404 | 2.34E-06 | 3.80E-05 |

|                    |          |          |          |
|--------------------|----------|----------|----------|
| 11715614_BTG2      | 0.571097 | 2.34E-06 | 3.80E-05 |
| 11740032_DUSP14    | 0.478214 | 2.34E-06 | 3.81E-05 |
| 11732998_MCM6      | -0.96142 | 2.35E-06 | 3.81E-05 |
| 11741032_HMMR      | -0.50378 | 2.35E-06 | 3.81E-05 |
| 11720319_SPAG5     | -0.52753 | 2.35E-06 | 3.82E-05 |
| 11720630_SNRNP25   | -0.53955 | 2.35E-06 | 3.82E-05 |
| 11755047_NPLOC4    | -0.55635 | 2.35E-06 | 3.82E-05 |
| 11757428_SF3B5     | -0.56827 | 2.36E-06 | 3.82E-05 |
| 11743381_PRP40A    | -0.70773 | 2.36E-06 | 3.82E-05 |
| 11720443_BAZ1A     | 0.43752  | 2.36E-06 | 3.82E-05 |
| 11733075_PPP1R12A  | 0.587314 | 2.36E-06 | 3.82E-05 |
| 11743674_KDM6B     | 0.760262 | 2.36E-06 | 3.82E-05 |
| 11719408_HIPK2     | 0.529752 | 2.36E-06 | 3.82E-05 |
| 11726441_ERCC6L    | -0.72844 | 2.36E-06 | 3.82E-05 |
| 11736647_CRK       | 0.500827 | 2.36E-06 | 3.82E-05 |
| 11720154_NRIP1     | 0.770818 | 2.36E-06 | 3.82E-05 |
| 11715850_C6orf48   | 0.479275 | 2.36E-06 | 3.82E-05 |
| 11743939_CDC90B    | 0.44598  | 2.37E-06 | 3.83E-05 |
| 11721735_DHTKD1    | -0.84389 | 2.37E-06 | 3.83E-05 |
| 11760037_GLS       | 0.442168 | 2.37E-06 | 3.83E-05 |
| 11758175_SLC36A1   | 0.660915 | 2.38E-06 | 3.83E-05 |
| 11725182_NEK6      | 0.642158 | 2.38E-06 | 3.83E-05 |
| 11729858_H6PD      | -0.55393 | 2.38E-06 | 3.84E-05 |
| 11717046_C11orf95  | -0.47426 | 2.38E-06 | 3.84E-05 |
| 11731888_KIF14     | -0.51981 | 2.38E-06 | 3.84E-05 |
| 11717915_BIVM-ERCC | 0.463447 | 2.38E-06 | 3.84E-05 |
| 11741141_NEDD4L    | 0.689204 | 2.38E-06 | 3.84E-05 |
| 11721649_GPATCH4   | 0.484022 | 2.38E-06 | 3.84E-05 |
| 11731145_SYNE1     | 0.77459  | 2.39E-06 | 3.85E-05 |
| 11716171_LMNB2     | -0.47686 | 2.39E-06 | 3.85E-05 |
| 11760109_TMEM41B   | -0.738   | 2.39E-06 | 3.85E-05 |
| 11736464_ZNF773    | 0.818078 | 2.39E-06 | 3.85E-05 |
| 11731738_PGAP1     | 0.617615 | 2.40E-06 | 3.85E-05 |
| 11736637_DENND4A   | 0.654949 | 2.40E-06 | 3.85E-05 |
| 11750648_RPS6KB1   | 0.52971  | 2.40E-06 | 3.85E-05 |
| 11726797_NEXN      | 0.552466 | 2.40E-06 | 3.86E-05 |
| 11756910_FANCD2    | -0.4433  | 2.40E-06 | 3.86E-05 |
| 11735833_CEMIP     | -0.49731 | 2.41E-06 | 3.86E-05 |
| 11754992_CHD1      | 0.571384 | 2.41E-06 | 3.86E-05 |
| 11718600_TM2D2     | -0.55053 | 2.41E-06 | 3.86E-05 |
| 11749304_HNRNPD    | -0.44572 | 2.41E-06 | 3.86E-05 |
| 11725259_PPM1B     | 0.631806 | 2.41E-06 | 3.86E-05 |
| 11716218_PRKAB1    | 0.476866 | 2.42E-06 | 3.87E-05 |
| 11749814_NEK2      | -0.49605 | 2.42E-06 | 3.87E-05 |
| 11721610_KIAA0753  | 0.759201 | 2.42E-06 | 3.88E-05 |
| 11718501_UBE2Q1    | 0.443374 | 2.42E-06 | 3.88E-05 |
| 11717538_RYBP      | 0.490338 | 2.43E-06 | 3.88E-05 |
| 11723509_ZNF609    | 0.541743 | 2.43E-06 | 3.88E-05 |
| 11715728_ITGB1     | -0.52031 | 2.43E-06 | 3.89E-05 |
| 11726379_WHSC1     | -0.57562 | 2.44E-06 | 3.90E-05 |
| 11727790_SPP1      | 0.488496 | 2.45E-06 | 3.91E-05 |

|                    |          |          |          |
|--------------------|----------|----------|----------|
| 11720252_C20orf194 | 0.729144 | 2.45E-06 | 3.91E-05 |
| 11755981_HBEGF     | 0.911791 | 2.45E-06 | 3.92E-05 |
| 11741492_FAM111B   | -0.84566 | 2.46E-06 | 3.92E-05 |
| 11740067_ERCC6     | 0.563136 | 2.46E-06 | 3.92E-05 |
| 11742984_EGFLAM    | 0.788987 | 2.46E-06 | 3.93E-05 |
| 11751294_ST6GALNAC | 1.183955 | 2.46E-06 | 3.93E-05 |
| 11724686_IFNAR2    | 0.523696 | 2.47E-06 | 3.94E-05 |
| 11748771_YTHDF3    | 0.504227 | 2.47E-06 | 3.94E-05 |
| 11737760_RND3      | 0.501665 | 2.47E-06 | 3.94E-05 |
| 11732403_OGFR1     | 0.820924 | 2.48E-06 | 3.94E-05 |
| 11740118_SMC2      | -0.59381 | 2.48E-06 | 3.94E-05 |
| 11739216_RSAD2     | 1.007799 | 2.48E-06 | 3.94E-05 |
| 11759509_MCM4      | -0.63152 | 2.48E-06 | 3.94E-05 |
| 11721021_MTMR3     | 0.471667 | 2.48E-06 | 3.94E-05 |
| 11742933_PSIP1     | -0.43831 | 2.49E-06 | 3.95E-05 |
| 11731526_TRIP13    | -0.52041 | 2.49E-06 | 3.96E-05 |
| 11759551_OBSL1     | -0.63114 | 2.49E-06 | 3.96E-05 |
| 11731201_FIGN      | 0.53064  | 2.50E-06 | 3.97E-05 |
| 11759038_IL6ST     | 0.529329 | 2.50E-06 | 3.97E-05 |
| 11739003_HDGF      | -0.49945 | 2.50E-06 | 3.97E-05 |
| 11737479_PON2      | 0.536795 | 2.50E-06 | 3.97E-05 |
| 11740929_BAGE ///  | 0.743317 | 2.50E-06 | 3.97E-05 |
| 11718574_SERBP1    | -0.52843 | 2.51E-06 | 3.98E-05 |
| 11753809_LSM3      | -0.47592 | 2.51E-06 | 3.98E-05 |
| 11747080_TARS2     | -0.58265 | 2.51E-06 | 3.98E-05 |
| 11736052_EEF1A1    | -0.55082 | 2.51E-06 | 3.98E-05 |
| 11747367_RAB18     | 0.510898 | 2.52E-06 | 3.99E-05 |
| 11718071_NCOR2     | -0.43628 | 2.53E-06 | 4.00E-05 |
| 11728935_KIAA1549L | -0.65397 | 2.53E-06 | 4.00E-05 |
| 11756360_H2AFZ     | -0.44659 | 2.53E-06 | 4.00E-05 |
| 11741556_AKIRIN1   | 0.541479 | 2.54E-06 | 4.01E-05 |
| 11750738_PAK4      | -0.57324 | 2.54E-06 | 4.01E-05 |
| 11746650_ACER3     | -0.77962 | 2.54E-06 | 4.02E-05 |
| 11756477_TTLL11    | 0.923146 | 2.55E-06 | 4.03E-05 |
| 11747219_ARID4B    | 0.738348 | 2.56E-06 | 4.04E-05 |
| 11743770_MAB21L1 / | 0.655489 | 2.56E-06 | 4.04E-05 |
| 11748882_C1orf50   | 0.526577 | 2.56E-06 | 4.04E-05 |
| 11716346_EFCAB14   | 0.500219 | 2.56E-06 | 4.04E-05 |
| 11737161_CCNT2     | 0.889534 | 2.56E-06 | 4.04E-05 |
| 11747673_SACM1L    | -0.51918 | 2.57E-06 | 4.05E-05 |
| 11753379_MAPK1     | 0.554379 | 2.57E-06 | 4.05E-05 |
| 11727130_CPD       | 0.528646 | 2.57E-06 | 4.05E-05 |
| 11738092_PDE9A     | 0.646696 | 2.57E-06 | 4.05E-05 |
| 11754184_ALDH1A3   | -0.468   | 2.57E-06 | 4.05E-05 |
| 11728159_ATP6VOA4  | 0.568629 | 2.57E-06 | 4.05E-05 |
| 11744216_C15orf57  | 0.503796 | 2.58E-06 | 4.05E-05 |
| 11760158_HMGB1     | -0.52331 | 2.58E-06 | 4.06E-05 |
| 11744573_INO80     | 0.5922   | 2.58E-06 | 4.06E-05 |
| 11730171_AKAP8L    | 0.641798 | 2.58E-06 | 4.06E-05 |
| 11735718_GSTCD     | -0.66429 | 2.58E-06 | 4.06E-05 |
| 11724812_ZNF346    | 0.502109 | 2.58E-06 | 4.06E-05 |

|                    |          |          |          |
|--------------------|----------|----------|----------|
| 11735804_NAT6      | -0.54199 | 2.59E-06 | 4.06E-05 |
| 11726961_SGTB      | 0.751514 | 2.59E-06 | 4.06E-05 |
| 11717863_DUSP5     | 0.647323 | 2.59E-06 | 4.06E-05 |
| 11743277_UTRN      | 0.749433 | 2.59E-06 | 4.06E-05 |
| 11761125_SNX5      | 0.655962 | 2.59E-06 | 4.06E-05 |
| 11747742_MTF2      | 0.481876 | 2.59E-06 | 4.06E-05 |
| 11718248_KIAA0430  | -0.58588 | 2.59E-06 | 4.06E-05 |
| 11755897_FN1       | 0.64386  | 2.59E-06 | 4.06E-05 |
| 11751040_RAB18     | 0.493339 | 2.59E-06 | 4.07E-05 |
| 11717986_APOC1     | -0.52457 | 2.60E-06 | 4.07E-05 |
| 11744365_ZFAS1     | 0.436679 | 2.60E-06 | 4.08E-05 |
| 11755843_PCNXL2    | 0.592483 | 2.61E-06 | 4.09E-05 |
| 11743340_SMARCA2   | -0.48038 | 2.61E-06 | 4.09E-05 |
| 11734817_APBB2     | 0.621334 | 2.62E-06 | 4.10E-05 |
| 11733884_DEPDC1    | -0.46817 | 2.62E-06 | 4.10E-05 |
| 11739552_CREB5     | 1.146385 | 2.62E-06 | 4.10E-05 |
| 11735281_BTRC      | 0.523122 | 2.63E-06 | 4.10E-05 |
| 11723713_E2F1      | -0.62139 | 2.63E-06 | 4.10E-05 |
| 11731991_TROAP     | -0.6905  | 2.63E-06 | 4.10E-05 |
| 11716445_COMMD4 // | -0.51866 | 2.63E-06 | 4.10E-05 |
| 11720051_SPOCK1    | 0.562989 | 2.63E-06 | 4.10E-05 |
| 11729609_ZNF394    | 0.549556 | 2.63E-06 | 4.11E-05 |
| 11723038_SRSF3     | -0.4962  | 2.63E-06 | 4.11E-05 |
| 11736565_PTPN14    | 0.666038 | 2.64E-06 | 4.11E-05 |
| 11745940_PSD3      | 0.485504 | 2.64E-06 | 4.11E-05 |
| 11727163_ACVR2A    | 1.060883 | 2.64E-06 | 4.11E-05 |
| 11745767_MMP2      | 0.473838 | 2.64E-06 | 4.11E-05 |
| 11720198_RNF6      | 0.556837 | 2.65E-06 | 4.12E-05 |
| 11743602_RRM1      | -0.48975 | 2.65E-06 | 4.12E-05 |
| 11723241_CDK6      | 0.483803 | 2.65E-06 | 4.12E-05 |
| 11731595_STAM2     | -0.55874 | 2.66E-06 | 4.13E-05 |
| 11724399_DDX60L    | 0.63174  | 2.66E-06 | 4.13E-05 |
| 11724922_VPS13B    | 0.583934 | 2.66E-06 | 4.13E-05 |
| 11728957_E2F8      | -0.92349 | 2.66E-06 | 4.14E-05 |
| 11737042_PHLDB2    | 0.605394 | 2.67E-06 | 4.15E-05 |
| 11716636_AARS      | -0.45918 | 2.67E-06 | 4.15E-05 |
| 11722199_ADAM12    | 0.688824 | 2.67E-06 | 4.15E-05 |
| 11720929_DLST      | -0.66413 | 2.68E-06 | 4.15E-05 |
| 11759340_DENND1B   | 0.749467 | 2.68E-06 | 4.16E-05 |
| 11739943_SEPSECS   | 0.45029  | 2.68E-06 | 4.16E-05 |
| 11731113_PEMT      | -0.55241 | 2.68E-06 | 4.16E-05 |
| 11739228_FBXW11    | -0.44612 | 2.68E-06 | 4.16E-05 |
| 11724292_TRIT1     | 0.442538 | 2.68E-06 | 4.16E-05 |
| 11721288_WWOX      | 0.553422 | 2.68E-06 | 4.16E-05 |
| 11741186_HIST1H3D  | 0.926532 | 2.69E-06 | 4.16E-05 |
| 11747839_LPAR1     | 0.744102 | 2.69E-06 | 4.17E-05 |
| 11719882_OSTM1     | 0.508893 | 2.69E-06 | 4.17E-05 |
| 11732690_C9orf85   | 0.62841  | 2.70E-06 | 4.17E-05 |
| 11719813_SLC48A1   | 0.55871  | 2.70E-06 | 4.17E-05 |
| 11724291_TRIT1     | 0.427824 | 2.70E-06 | 4.18E-05 |
| 11725097_RABL3     | -1.18837 | 2.70E-06 | 4.18E-05 |

|                    |          |          |          |
|--------------------|----------|----------|----------|
| 11726319_WWP1      | 0.440396 | 2.71E-06 | 4.19E-05 |
| 11721171_TRIM32    | 0.536685 | 2.71E-06 | 4.19E-05 |
| 11726104_PPP2R3A   | -0.6581  | 2.71E-06 | 4.19E-05 |
| 11749608_RNF11     | 0.591903 | 2.72E-06 | 4.20E-05 |
| 11741225_CASC5     | -0.67591 | 2.72E-06 | 4.20E-05 |
| 11719837_LGALS8    | 0.465874 | 2.72E-06 | 4.20E-05 |
| 11746691_ARID4B    | 0.682669 | 2.72E-06 | 4.20E-05 |
| 11749401_TRIT1     | 0.493258 | 2.73E-06 | 4.21E-05 |
| 11716710_ADM       | 0.418429 | 2.73E-06 | 4.22E-05 |
| 11733028_AIDA      | -0.71039 | 2.74E-06 | 4.23E-05 |
| 11760222_CASP4     | 0.576237 | 2.74E-06 | 4.23E-05 |
| 11715466_ARHGDIB   | 0.486082 | 2.75E-06 | 4.23E-05 |
| 11716138_TMEM30A   | 0.474213 | 2.75E-06 | 4.23E-05 |
| 11736000_ZNF791    | 0.632395 | 2.75E-06 | 4.23E-05 |
| 11727686_KCTD18    | -0.72972 | 2.75E-06 | 4.24E-05 |
| 11745150_LOC100506 | 0.71989  | 2.76E-06 | 4.25E-05 |
| 11744675_FAM208A   | 0.447341 | 2.76E-06 | 4.25E-05 |
| 11736001_DCN       | 0.805352 | 2.76E-06 | 4.25E-05 |
| 11732448_EXOG      | 0.522998 | 2.77E-06 | 4.25E-05 |
| 11747652_CDC25B    | -0.47692 | 2.77E-06 | 4.26E-05 |
| 11715864_HACD3     | -0.4353  | 2.78E-06 | 4.26E-05 |
| 11746352_SLMAP     | 0.531688 | 2.78E-06 | 4.27E-05 |
| 11727037_MAVS      | -0.47835 | 2.78E-06 | 4.27E-05 |
| 11737611_ZDHC21    | 0.7705   | 2.80E-06 | 4.29E-05 |
| 11721914_MDM4      | 0.563453 | 2.80E-06 | 4.29E-05 |
| 11741643_ZFX       | 0.728132 | 2.80E-06 | 4.29E-05 |
| 11716404_EIF4EBP2  | -0.50511 | 2.80E-06 | 4.29E-05 |
| 11760530_AGO3      | 0.79822  | 2.80E-06 | 4.29E-05 |
| 11732205_NAP1L1    | -0.50793 | 2.80E-06 | 4.29E-05 |
| 11733616_HNMT      | 0.669318 | 2.80E-06 | 4.29E-05 |
| 11724036_PTGS2     | 0.755089 | 2.81E-06 | 4.29E-05 |
| 11758125_DEPDC1B   | -0.45372 | 2.81E-06 | 4.30E-05 |
| 11719338_SLC23A2   | 0.612167 | 2.82E-06 | 4.32E-05 |
| 11738121_SNX18     | 0.720253 | 2.83E-06 | 4.32E-05 |
| 11758536_KCTD15    | -0.46135 | 2.83E-06 | 4.33E-05 |
| 11737793_IDH3A     | -0.54773 | 2.83E-06 | 4.33E-05 |
| 11742025_NMNAT2    | 0.49387  | 2.84E-06 | 4.34E-05 |
| 11747969_RGL1      | 0.835031 | 2.84E-06 | 4.34E-05 |
| 11744306_LRR1      | -0.58017 | 2.84E-06 | 4.34E-05 |
| 11732171_GRSF1     | -0.90966 | 2.85E-06 | 4.35E-05 |
| 11746974_LDLR      | -0.54765 | 2.86E-06 | 4.36E-05 |
| 11752281_RBM5      | 0.59472  | 2.86E-06 | 4.36E-05 |
| 11744603_GTPBP6    | -0.45366 | 2.86E-06 | 4.36E-05 |
| 11749073_TNFRSF19  | -0.74112 | 2.86E-06 | 4.36E-05 |
| 11716621_TNPO1     | 0.464017 | 2.86E-06 | 4.37E-05 |
| 11758286_POLI      | -0.62269 | 2.87E-06 | 4.37E-05 |
| 11753760_CDK2AP2   | -0.47659 | 2.87E-06 | 4.37E-05 |
| 11732713_FST       | -0.80139 | 2.87E-06 | 4.38E-05 |
| 11719800_C6orf62   | -0.55806 | 2.88E-06 | 4.38E-05 |
| 11718422_CCNB1IP1  | 0.437512 | 2.88E-06 | 4.39E-05 |
| 11740719_PRMT3     | -0.55625 | 2.88E-06 | 4.39E-05 |

|                    |          |          |          |
|--------------------|----------|----------|----------|
| 11750066_NR2F1-AS1 | 0.649109 | 2.89E-06 | 4.39E-05 |
| 11735062_ITGB3     | 0.717398 | 2.89E-06 | 4.40E-05 |
| 11726042_STK17B    | 0.795261 | 2.89E-06 | 4.40E-05 |
| 11717286_HLTF      | -0.49184 | 2.90E-06 | 4.40E-05 |
| 11722801_SS18      | 0.464847 | 2.90E-06 | 4.40E-05 |
| 11719140_NFX1      | 0.640839 | 2.91E-06 | 4.41E-05 |
| 11744232_RFC5      | -0.62597 | 2.92E-06 | 4.43E-05 |
| 11720646_SPTLC2    | 0.589804 | 2.92E-06 | 4.43E-05 |
| 11719971_PACSIN3   | -0.80356 | 2.92E-06 | 4.43E-05 |
| 11722533_CALD1     | 0.526592 | 2.93E-06 | 4.44E-05 |
| 11744797_DAB2      | 0.635384 | 2.93E-06 | 4.44E-05 |
| 11716388_BAZ1B     | -0.45641 | 2.93E-06 | 4.44E-05 |
| 11737040_PHLDB2    | 0.472653 | 2.93E-06 | 4.44E-05 |
| 11721098_TMX1      | -0.41885 | 2.93E-06 | 4.44E-05 |
| 11728802_PAPD5     | 0.511846 | 2.94E-06 | 4.45E-05 |
| 11719934_TKT       | -1.59986 | 2.94E-06 | 4.45E-05 |
| 11754581_CERS6     | -0.55639 | 2.94E-06 | 4.45E-05 |
| 11727439_RALGAPB   | 0.429752 | 2.94E-06 | 4.46E-05 |
| 11757413_NDUFS3    | -0.50542 | 2.95E-06 | 4.46E-05 |
| 11718122_ATP6V1A   | 0.608618 | 2.95E-06 | 4.47E-05 |
| 11744412_TMEM131   | 0.527415 | 2.96E-06 | 4.47E-05 |
| 11723439_SRPX2     | 0.592942 | 2.96E-06 | 4.47E-05 |
| 11723971_APTX      | -0.6485  | 2.96E-06 | 4.47E-05 |
| 11733000_ICAM1     | 0.474032 | 2.97E-06 | 4.49E-05 |
| 11735486_HOXC8     | 0.503128 | 2.97E-06 | 4.49E-05 |
| 11759631_TRIO      | 0.585933 | 2.98E-06 | 4.50E-05 |
| 11742886_BAG5      | -0.43682 | 2.98E-06 | 4.50E-05 |
| 11740122_ZNF419    | 0.676767 | 2.99E-06 | 4.51E-05 |
| 11754422_CARS2     | 0.429384 | 2.99E-06 | 4.51E-05 |
| 11722529_PTPN21    | 0.643442 | 2.99E-06 | 4.51E-05 |
| 11726364_OASL      | 0.475096 | 2.99E-06 | 4.51E-05 |
| 11744462_PCID2     | 0.520007 | 2.99E-06 | 4.51E-05 |
| 11739227_FBXW11    | -0.47123 | 3.00E-06 | 4.51E-05 |
| 11755652_MBLAC2    | -0.89544 | 3.00E-06 | 4.51E-05 |
| 11755071_HMCN1     | 0.598543 | 3.00E-06 | 4.52E-05 |
| 11718755_MTMR10    | 0.559101 | 3.01E-06 | 4.53E-05 |
| 11759139_FAM98B    | -0.4787  | 3.01E-06 | 4.53E-05 |
| 11756695_PCNXL4    | 0.526207 | 3.01E-06 | 4.53E-05 |
| 11764173_TMEM183A  | -0.59488 | 3.01E-06 | 4.53E-05 |
| 11740714_SLC1A5    | -0.44442 | 3.01E-06 | 4.53E-05 |
| 11722141_RELB      | 0.579995 | 3.02E-06 | 4.53E-05 |
| 11758933_TM4SF18   | 0.623965 | 3.02E-06 | 4.53E-05 |
| 11740485_ABL1      | -0.58976 | 3.02E-06 | 4.54E-05 |
| 11734804_KIF20B    | -0.75121 | 3.03E-06 | 4.55E-05 |
| 11755671_SYTL2     | 0.730189 | 3.03E-06 | 4.55E-05 |
| 11725193_TTPAL     | -0.54569 | 3.03E-06 | 4.55E-05 |
| 11716304_ABHD14B   | -0.48737 | 3.04E-06 | 4.56E-05 |
| 11746032_RALGPS2   | 0.505444 | 3.04E-06 | 4.56E-05 |
| 11754705_MRPL43    | 0.498023 | 3.05E-06 | 4.57E-05 |
| 11725220_SLK       | 0.515264 | 3.05E-06 | 4.57E-05 |
| 11722518_SMC5      | 0.774327 | 3.05E-06 | 4.57E-05 |



|                    |          |          |          |
|--------------------|----------|----------|----------|
| 11744998_MPZL1     | 0.62504  | 3.06E-06 | 4.57E-05 |
| 11721721_MSH5 ///  | -0.52027 | 3.06E-06 | 4.57E-05 |
| 11737577_LRRC7     | 1.055793 | 3.06E-06 | 4.58E-05 |
| 11721666_CDT1      | -0.70598 | 3.06E-06 | 4.58E-05 |
| 11722442_NUF2      | -0.74308 | 3.06E-06 | 4.58E-05 |
| 11723723_SLAIN2    | 0.484533 | 3.06E-06 | 4.58E-05 |
| 11731337_ZNF398    | 0.548505 | 3.07E-06 | 4.58E-05 |
| 11733822_AGPAT3    | -0.41736 | 3.07E-06 | 4.58E-05 |
| 11717118_P4HA2     | 0.493045 | 3.07E-06 | 4.58E-05 |
| 11748773_CTSV      | -0.88412 | 3.07E-06 | 4.58E-05 |
| 11763716_ARL6IP4   | -0.61415 | 3.07E-06 | 4.58E-05 |
| 11742737_RAB9A     | 0.496223 | 3.07E-06 | 4.58E-05 |
| 11741095_CORO2A    | -0.54482 | 3.07E-06 | 4.58E-05 |
| 11728978_CASP8     | 0.59219  | 3.07E-06 | 4.58E-05 |
| 11752335_ZNF12     | 0.474759 | 3.08E-06 | 4.59E-05 |
| 11727293_ALG10B    | -1.40639 | 3.08E-06 | 4.59E-05 |
| 11739483_CCDC88A   | -0.44405 | 3.08E-06 | 4.59E-05 |
| 11717282_ASAP1     | 0.474557 | 3.08E-06 | 4.59E-05 |
| 11754333_ACAD8     | 0.600233 | 3.09E-06 | 4.60E-05 |
| 11728510_FKTN      | 0.696303 | 3.09E-06 | 4.61E-05 |
| 11729495_FAM133A   | -0.91444 | 3.10E-06 | 4.61E-05 |
| 11725514_SMAD7     | 0.698282 | 3.10E-06 | 4.61E-05 |
| 11732276_CCL5      | 0.694845 | 3.10E-06 | 4.61E-05 |
| 11749196_WDR46     | -0.48058 | 3.10E-06 | 4.61E-05 |
| 11715900_COASY     | -0.58787 | 3.11E-06 | 4.62E-05 |
| 11757283_DCN       | 0.853492 | 3.11E-06 | 4.62E-05 |
| 11718846_SH3GLB1   | 0.442663 | 3.11E-06 | 4.62E-05 |
| 11727353_CENPM     | -0.55796 | 3.11E-06 | 4.62E-05 |
| 11759525_GADD45B   | 0.602636 | 3.11E-06 | 4.62E-05 |
| 11739711_PHACTR2   | 0.686769 | 3.11E-06 | 4.62E-05 |
| 11756705_NAA25     | 0.499315 | 3.12E-06 | 4.63E-05 |
| 11721216_TMEM106B  | -0.90739 | 3.13E-06 | 4.64E-05 |
| 11747340_ABCB9     | 0.842452 | 3.13E-06 | 4.64E-05 |
| 11754058_SPARC     | 0.451704 | 3.13E-06 | 4.65E-05 |
| 11715359_TIMP1     | 0.440372 | 3.14E-06 | 4.65E-05 |
| 11729947_TRMT10A   | -0.63326 | 3.14E-06 | 4.65E-05 |
| 11729261_ZNF644    | 0.511643 | 3.14E-06 | 4.65E-05 |
| 11726584_ARMC1     | -0.49181 | 3.15E-06 | 4.66E-05 |
| 11738637_CTBP1     | -0.49164 | 3.15E-06 | 4.66E-05 |
| 11724990_CLTCL1    | 0.712274 | 3.15E-06 | 4.66E-05 |
| 11756678_FAM64A    | -0.54356 | 3.15E-06 | 4.66E-05 |
| 11739888_CEP85L    | 0.856324 | 3.15E-06 | 4.66E-05 |
| 11716865_SLC1A5    | -0.46703 | 3.15E-06 | 4.66E-05 |
| 11756187_RPA2      | -0.41608 | 3.16E-06 | 4.67E-05 |
| 11733352_NF2       | 0.478323 | 3.16E-06 | 4.67E-05 |
| 11735341_TANC1     | 0.418787 | 3.16E-06 | 4.67E-05 |
| 11741226_EYA1      | -0.7813  | 3.16E-06 | 4.67E-05 |
| 11756159_SEC22C    | -0.49921 | 3.16E-06 | 4.67E-05 |
| 11757056_LOC728026 | -0.44051 | 3.17E-06 | 4.67E-05 |
| 11733080_POT1      | -1.0756  | 3.17E-06 | 4.68E-05 |
| 11757614_OPA1      | -0.51277 | 3.17E-06 | 4.68E-05 |

|                    |          |          |          |
|--------------------|----------|----------|----------|
| 11727784_TPM4      | -0.4263  | 3.17E-06 | 4.68E-05 |
| 11715984_ADNP      | 0.415565 | 3.18E-06 | 4.68E-05 |
| 11736413_NHLH2     | 1.042614 | 3.18E-06 | 4.68E-05 |
| 11739305_WRB       | -0.55169 | 3.18E-06 | 4.68E-05 |
| 11754257_C15orf57  | 0.603097 | 3.18E-06 | 4.68E-05 |
| 11743054_CHORDC1   | 0.562621 | 3.19E-06 | 4.69E-05 |
| 11732395_NHLRC2    | 0.493615 | 3.19E-06 | 4.69E-05 |
| 11715605_SF3B5     | -0.53947 | 3.20E-06 | 4.70E-05 |
| 11721283_CDS2      | 0.531722 | 3.20E-06 | 4.70E-05 |
| 11718258_ANKRD27   | -0.43291 | 3.20E-06 | 4.70E-05 |
| 11735242_ZC3H12C   | 0.652649 | 3.21E-06 | 4.72E-05 |
| 11746114_ZNF35     | 0.886525 | 3.21E-06 | 4.72E-05 |
| 11756224_ZDHHC9    | 0.582177 | 3.22E-06 | 4.73E-05 |
| 11753582_PTTG3P    | -0.46685 | 3.22E-06 | 4.73E-05 |
| 11749692_ACTN2     | 0.69406  | 3.22E-06 | 4.73E-05 |
| 11720972_TOP2A     | -0.52626 | 3.22E-06 | 4.73E-05 |
| 11749493_GTF2H1    | 0.572691 | 3.23E-06 | 4.74E-05 |
| 11723116_RAD51L3-R | 0.473211 | 3.23E-06 | 4.74E-05 |
| 11741470_SLTM      | -0.54854 | 3.24E-06 | 4.75E-05 |
| 11719839_CASP3     | 0.520024 | 3.24E-06 | 4.76E-05 |
| 11746809_ZNF544    | 0.546884 | 3.25E-06 | 4.76E-05 |
| 11729633_YBX3      | 0.432715 | 3.25E-06 | 4.76E-05 |
| 11720124_SRD5A3    | -0.50262 | 3.26E-06 | 4.77E-05 |
| 11743417_P3H2      | 1.048931 | 3.26E-06 | 4.78E-05 |
| 11741368_MTFR1L    | -0.61421 | 3.26E-06 | 4.78E-05 |
| 11751245_CNN2      | 0.461982 | 3.26E-06 | 4.78E-05 |
| 11718980_YKT6      | -0.63967 | 3.27E-06 | 4.79E-05 |
| 11750961_PAK4      | -0.46919 | 3.28E-06 | 4.80E-05 |
| 11754654_KCTD2     | -0.70507 | 3.29E-06 | 4.80E-05 |
| 11719836_LGALS8    | 0.472044 | 3.29E-06 | 4.80E-05 |
| 11763852_ELOVL4    | 0.661488 | 3.29E-06 | 4.80E-05 |
| 11758857_RAB2A     | -0.70248 | 3.29E-06 | 4.80E-05 |
| 11733360_SLC14A1   | 0.821206 | 3.29E-06 | 4.80E-05 |
| 11716884_BANF1     | -0.67577 | 3.29E-06 | 4.80E-05 |
| 11731992_TROAP     | -0.72979 | 3.29E-06 | 4.80E-05 |
| 11754773_WWC2      | 0.518463 | 3.29E-06 | 4.80E-05 |
| 11748689_GNA13     | 0.475697 | 3.29E-06 | 4.80E-05 |
| 11716323_ICMT      | -0.44375 | 3.30E-06 | 4.80E-05 |
| 11733969_SHMT1     | -0.46364 | 3.30E-06 | 4.81E-05 |
| 11717628_BIRC2     | 0.477866 | 3.30E-06 | 4.81E-05 |
| 11734828_SPRED1    | 0.529846 | 3.30E-06 | 4.81E-05 |
| 11746042_TRA2B     | -0.57862 | 3.30E-06 | 4.81E-05 |
| 11728274_PMP22     | 0.444816 | 3.31E-06 | 4.81E-05 |
| 11739134_COL5A2    | 0.527265 | 3.31E-06 | 4.81E-05 |
| 11734823_APBB2     | 0.743001 | 3.31E-06 | 4.81E-05 |
| 11733292_PHF20L1   | 0.49336  | 3.31E-06 | 4.82E-05 |
| 11721513_NDEL1     | 0.442958 | 3.31E-06 | 4.82E-05 |
| 11720066_GPHN      | 0.414655 | 3.31E-06 | 4.82E-05 |
| 11747662_PTGES3    | -0.43145 | 3.32E-06 | 4.82E-05 |
| 11758140_CPSF6     | -0.57959 | 3.32E-06 | 4.82E-05 |
| 11722180_DR1       | 0.460863 | 3.32E-06 | 4.82E-05 |

|                    |          |          |          |
|--------------------|----------|----------|----------|
| 11722736_APPL1     | -0.60469 | 3.32E-06 | 4.82E-05 |
| 11728958_E2F8      | -0.92185 | 3.32E-06 | 4.82E-05 |
| 11715561_SCD       | -0.46907 | 3.33E-06 | 4.83E-05 |
| 11741608_RRP12     | 0.577689 | 3.33E-06 | 4.83E-05 |
| 11727937_MSANTD3   | 0.601956 | 3.33E-06 | 4.83E-05 |
| 11732222_TVP23B // | 0.446594 | 3.33E-06 | 4.83E-05 |
| 11739958_BCL2L1    | 0.456912 | 3.33E-06 | 4.83E-05 |
| 11743510_UFL1      | -0.55989 | 3.35E-06 | 4.85E-05 |
| 11718125_AIMP1     | -0.44345 | 3.35E-06 | 4.85E-05 |
| 11731594_STAM2     | -0.56711 | 3.35E-06 | 4.85E-05 |
| 11737127_ITGA1     | 0.586146 | 3.35E-06 | 4.85E-05 |
| 11755900_EXT1      | 0.471878 | 3.35E-06 | 4.85E-05 |
| 11726606_MTF2      | 0.550671 | 3.36E-06 | 4.85E-05 |
| 11720541_LGALS1    | 0.625858 | 3.36E-06 | 4.86E-05 |
| 11747726_STXBP6    | 0.593665 | 3.36E-06 | 4.86E-05 |
| 11748950_BAZ2B     | 0.60053  | 3.37E-06 | 4.86E-05 |
| 11745822_SRSF6     | 0.479825 | 3.37E-06 | 4.87E-05 |
| 11753283_HAUS7 /// | -0.64586 | 3.37E-06 | 4.87E-05 |
| 11729316_ISOC2     | -0.5799  | 3.38E-06 | 4.88E-05 |
| 11756505_USP32 /// | 0.735412 | 3.38E-06 | 4.88E-05 |
| 11732091_HMG20A    | -0.45264 | 3.38E-06 | 4.88E-05 |
| 11724482_SHOC2     | 0.441741 | 3.38E-06 | 4.88E-05 |
| 11725765_COL11A1   | 0.926612 | 3.39E-06 | 4.89E-05 |
| 11717764_MGLL      | 0.486947 | 3.39E-06 | 4.89E-05 |
| 11751474_ALCAM     | 0.524359 | 3.39E-06 | 4.89E-05 |
| 11763385_RPL7L1    | -0.44975 | 3.39E-06 | 4.89E-05 |
| 11757117_RPS2      | -0.60243 | 3.40E-06 | 4.90E-05 |
| 11739763_GINS3     | -0.62243 | 3.40E-06 | 4.90E-05 |
| 11739975_ZNF117    | 0.759721 | 3.40E-06 | 4.90E-05 |
| 11763332_VPS36     | 0.66302  | 3.40E-06 | 4.90E-05 |
| 11736053_EEF1A1    | -0.56557 | 3.40E-06 | 4.90E-05 |
| 11754911_NEXN      | 0.826532 | 3.41E-06 | 4.90E-05 |
| 11732902_APOBEC3B  | -0.54639 | 3.41E-06 | 4.91E-05 |
| 11717272_COL5A1    | 0.663781 | 3.42E-06 | 4.92E-05 |
| 11748543_TXNIP     | -0.4301  | 3.42E-06 | 4.92E-05 |
| 11744398_LIG1      | -0.46247 | 3.43E-06 | 4.92E-05 |
| 11753819_MDM2      | 0.775    | 3.43E-06 | 4.93E-05 |
| 11747606_NCAPD2    | -0.66836 | 3.43E-06 | 4.93E-05 |
| 11726634_KAT6A     | -0.59928 | 3.43E-06 | 4.93E-05 |
| 11724605_HS6ST2    | -0.53784 | 3.44E-06 | 4.93E-05 |
| 11755753_TENM2     | 0.518602 | 3.44E-06 | 4.93E-05 |
| 11737480_PON2      | 0.494487 | 3.44E-06 | 4.93E-05 |
| 11752280_RBM5      | 0.606021 | 3.44E-06 | 4.93E-05 |
| 11728555_ATP6V1E2  | -0.59806 | 3.44E-06 | 4.93E-05 |
| 11755151_ARNTL     | 0.750012 | 3.44E-06 | 4.93E-05 |
| 11723201_HNRNPA3   | -0.83085 | 3.45E-06 | 4.94E-05 |
| 11723299_RPS6KB1   | 0.469711 | 3.45E-06 | 4.95E-05 |
| 11757755_ZNF3      | 0.48698  | 3.45E-06 | 4.95E-05 |
| 11727155_TRIOBP    | 0.425772 | 3.46E-06 | 4.95E-05 |
| 11729199_C6orf120  | 0.736973 | 3.46E-06 | 4.95E-05 |
| 11726130_PKP2      | 0.635243 | 3.46E-06 | 4.95E-05 |

|                    |          |          |          |
|--------------------|----------|----------|----------|
| 11757285_DCTN5     | 0.624051 | 3.46E-06 | 4.95E-05 |
| 11733313_PCDHA1 // | 0.613115 | 3.47E-06 | 4.96E-05 |
| 11756742_AGPAT5    | 0.533403 | 3.47E-06 | 4.96E-05 |
| 11731722_ALDH3B1   | 0.582835 | 3.49E-06 | 4.98E-05 |
| 11752036_TMEM123   | -0.48597 | 3.49E-06 | 4.98E-05 |
| 11757978_FAM103A1  | 0.486665 | 3.49E-06 | 4.98E-05 |
| 11727199_PCDHA1 // | 0.694576 | 3.49E-06 | 4.99E-05 |
| 11741054_LAMP2     | -0.47336 | 3.49E-06 | 4.99E-05 |
| 11716874_WDR46     | -0.52148 | 3.49E-06 | 4.99E-05 |
| 11739410_KMT2C     | 0.477735 | 3.50E-06 | 4.99E-05 |
| 11740746_OPA1      | -0.57646 | 3.51E-06 | 5.00E-05 |
| 11726670_DCLRE1B   | -0.73733 | 3.51E-06 | 5.00E-05 |
| 11721063_ARFGEF2   | 0.734115 | 3.51E-06 | 5.01E-05 |
| 11755092_GPR180    | 0.488115 | 3.52E-06 | 5.01E-05 |
| 11756347_PRR11     | -0.59498 | 3.52E-06 | 5.01E-05 |
| 11726853_TPTE      | 0.675993 | 3.52E-06 | 5.01E-05 |
| 11716977_NSFL1C    | -0.61363 | 3.53E-06 | 5.03E-05 |
| 11759300_AKAP10    | 0.557682 | 3.54E-06 | 5.03E-05 |
| 11728384_SNAPC4    | 0.455885 | 3.54E-06 | 5.03E-05 |
| 11725486_CCDC77    | -0.47252 | 3.55E-06 | 5.04E-05 |
| 11754154_CYP1A1    | 0.846997 | 3.55E-06 | 5.04E-05 |
| 11718222_GSPT1     | -0.7218  | 3.55E-06 | 5.05E-05 |
| 11749306_CCNG1     | 0.629058 | 3.55E-06 | 5.05E-05 |
| 11754047_RDM1      | -1.05842 | 3.55E-06 | 5.05E-05 |
| 11743483_RNASEH2B  | -0.52516 | 3.56E-06 | 5.05E-05 |
| 11746799_HACD3     | -0.40308 | 3.56E-06 | 5.06E-05 |
| 11747335_CEP70     | -0.60842 | 3.57E-06 | 5.06E-05 |
| 11725412_TRIM14    | -0.47    | 3.58E-06 | 5.08E-05 |
| 11731649_NTM       | 0.591557 | 3.58E-06 | 5.08E-05 |
| 11739182_MTRF1L    | 0.4761   | 3.58E-06 | 5.08E-05 |
| 11724448_DNMBP     | 0.526739 | 3.59E-06 | 5.08E-05 |
| 11739303_DLC1      | 0.465692 | 3.59E-06 | 5.09E-05 |
| 11722095_KIF21B    | -0.56082 | 3.59E-06 | 5.09E-05 |
| 11720409_CYP1B1    | 0.705378 | 3.60E-06 | 5.09E-05 |
| 11726885_C15orf41  | -0.55437 | 3.60E-06 | 5.10E-05 |
| 11728600_FAM24B    | 0.666315 | 3.61E-06 | 5.10E-05 |
| 11715360_TIMP1     | 0.437305 | 3.61E-06 | 5.11E-05 |
| 11757889_RPL15     | -0.46339 | 3.61E-06 | 5.11E-05 |
| 11736327_ZNF670    | 0.541002 | 3.61E-06 | 5.11E-05 |
| 11721509_LOC105370 | -0.43518 | 3.61E-06 | 5.11E-05 |
| 11733568_ZNF433    | 0.509697 | 3.62E-06 | 5.11E-05 |
| 11726595_DUT       | -0.47936 | 3.62E-06 | 5.12E-05 |
| 11751321_CRIM1     | 0.602242 | 3.63E-06 | 5.13E-05 |
| 11724818_SH3KBP1   | -0.73102 | 3.63E-06 | 5.13E-05 |
| 11724820_NEK6      | 0.601018 | 3.63E-06 | 5.13E-05 |
| 11755434_PRKACB    | 0.753511 | 3.64E-06 | 5.13E-05 |
| 11745109_TMTC1     | 0.842275 | 3.64E-06 | 5.14E-05 |
| 11754059_SPARC     | 0.486836 | 3.65E-06 | 5.16E-05 |
| 11716642_DTYMK     | -0.56919 | 3.66E-06 | 5.16E-05 |
| 11723799_CSTF3     | -0.55902 | 3.66E-06 | 5.16E-05 |
| 11734957_PCNXL4    | 0.55889  | 3.66E-06 | 5.16E-05 |

|                    |          |          |          |
|--------------------|----------|----------|----------|
| 11743326_CCDC50    | -0.65759 | 3.66E-06 | 5.16E-05 |
| 11718325_SESN2     | 0.559983 | 3.66E-06 | 5.16E-05 |
| 11717627_BIRC2     | 0.418345 | 3.67E-06 | 5.17E-05 |
| 11748274_FDFT1     | -0.59567 | 3.67E-06 | 5.17E-05 |
| 11721538_COL4A3BP  | -0.54521 | 3.68E-06 | 5.18E-05 |
| 11726514_CLK4      | 0.836092 | 3.69E-06 | 5.19E-05 |
| 11733383_AFAP1     | -0.49129 | 3.69E-06 | 5.19E-05 |
| 11717109_PCM1      | -0.44489 | 3.69E-06 | 5.19E-05 |
| 11748248_CKAP2     | -0.50573 | 3.69E-06 | 5.19E-05 |
| 11734841_RAD51     | -0.46619 | 3.70E-06 | 5.20E-05 |
| 11749096_NEMF      | 0.508304 | 3.70E-06 | 5.20E-05 |
| 11747645_ADAM17    | 0.482897 | 3.71E-06 | 5.21E-05 |
| 11736192_RRM2B     | 0.498675 | 3.71E-06 | 5.21E-05 |
| 11716301_ITGAV     | 0.535429 | 3.71E-06 | 5.22E-05 |
| 11724096_PDE4B     | 0.484318 | 3.73E-06 | 5.23E-05 |
| 11749530_RALBP1    | -0.58324 | 3.73E-06 | 5.23E-05 |
| 11722366_HIRIP3    | -0.4637  | 3.73E-06 | 5.24E-05 |
| 11715519_MLEC      | -0.54611 | 3.74E-06 | 5.24E-05 |
| 11724562_RHOF      | -0.63527 | 3.74E-06 | 5.24E-05 |
| 11752155_KDM4C     | 0.428321 | 3.74E-06 | 5.24E-05 |
| 11757290_COL5A2    | 0.41665  | 3.74E-06 | 5.24E-05 |
| 11720535_MMAB      | -0.53713 | 3.75E-06 | 5.26E-05 |
| 11729354_ZNF200    | 0.551405 | 3.75E-06 | 5.26E-05 |
| 11735238_SEC22C    | 0.586999 | 3.75E-06 | 5.26E-05 |
| 11731891_ZNF658 // | 0.800808 | 3.76E-06 | 5.26E-05 |
| 11727484_TPR       | -0.46796 | 3.77E-06 | 5.27E-05 |
| 11745992_ATG5      | 0.435225 | 3.77E-06 | 5.27E-05 |
| 11722806_RAB35     | -0.48528 | 3.77E-06 | 5.27E-05 |
| 11749895_BCAT1     | 0.475202 | 3.77E-06 | 5.27E-05 |
| 11736706_HPS5      | 0.661822 | 3.77E-06 | 5.27E-05 |
| 11738147_LRIG3     | 0.455827 | 3.78E-06 | 5.28E-05 |
| 11747518_TLR4      | 0.883995 | 3.78E-06 | 5.28E-05 |
| 11745978_SMG1 ///  | 0.694421 | 3.78E-06 | 5.28E-05 |
| 11764248_LDLRAD3   | -0.45409 | 3.78E-06 | 5.28E-05 |
| 11731517_MFAP3     | 0.448706 | 3.79E-06 | 5.28E-05 |
| 11718126_AIMP1     | -0.45052 | 3.79E-06 | 5.29E-05 |
| 11737174_HMMR      | -0.48014 | 3.79E-06 | 5.29E-05 |
| 11731031_ZNF8      | 0.427351 | 3.79E-06 | 5.29E-05 |
| 11723358_SCAF11    | -0.42025 | 3.79E-06 | 5.29E-05 |
| 11725409_NAV1      | -0.56268 | 3.80E-06 | 5.29E-05 |
| 11718962_NUFIP2    | 0.457726 | 3.80E-06 | 5.29E-05 |
| 11757829_HACD3     | -0.4317  | 3.80E-06 | 5.29E-05 |
| 11726678_AFAP1L2   | 0.408271 | 3.80E-06 | 5.29E-05 |
| 11720182_SMG8      | -0.50174 | 3.80E-06 | 5.29E-05 |
| 11747734_KIAA0895  | 0.791005 | 3.80E-06 | 5.29E-05 |
| 11747762_MAGOH     | -0.49121 | 3.81E-06 | 5.30E-05 |
| 11722846_UBE2R2    | -0.48443 | 3.83E-06 | 5.32E-05 |
| 11733103_POLD3     | -0.53333 | 3.83E-06 | 5.33E-05 |
| 11756373_UMPS      | -0.45772 | 3.83E-06 | 5.33E-05 |
| 11726378_WHSC1     | -0.57877 | 3.83E-06 | 5.33E-05 |
| 11743311_PILRB /// | 0.582987 | 3.84E-06 | 5.33E-05 |

|                    |          |          |          |
|--------------------|----------|----------|----------|
| 11733932_TM68      | -0.70241 | 3.84E-06 | 5.33E-05 |
| 11744591_TTC8      | 0.528068 | 3.84E-06 | 5.33E-05 |
| 11719319_GOLGA4    | 0.493493 | 3.84E-06 | 5.33E-05 |
| 11724238_CYB5R4    | 0.479126 | 3.84E-06 | 5.33E-05 |
| 11719168_MOAP1     | 0.488415 | 3.84E-06 | 5.33E-05 |
| 11717038_RNF13     | 0.503814 | 3.85E-06 | 5.34E-05 |
| 11719418_ANKRA2    | 0.503309 | 3.85E-06 | 5.34E-05 |
| 11749776_TFAP2C    | -0.45423 | 3.85E-06 | 5.34E-05 |
| 11733259_TAOK3     | 0.487554 | 3.87E-06 | 5.36E-05 |
| 11723597_MAP2K7    | -0.54762 | 3.87E-06 | 5.36E-05 |
| 11715463_IGFBP4    | -0.68081 | 3.88E-06 | 5.38E-05 |
| 11719775_C5orf24   | 0.76301  | 3.88E-06 | 5.38E-05 |
| 11755395_REST      | 0.757103 | 3.88E-06 | 5.38E-05 |
| 11741816_TAB3      | 0.459629 | 3.89E-06 | 5.38E-05 |
| 11747688_ZNF623    | 0.495984 | 3.89E-06 | 5.38E-05 |
| 11753214_PIBF1     | 0.497394 | 3.89E-06 | 5.38E-05 |
| 11726292_WDR44     | 0.408267 | 3.89E-06 | 5.38E-05 |
| 11756796_UBXN7     | 0.536782 | 3.89E-06 | 5.38E-05 |
| 11746320_SERPINH1  | -0.44574 | 3.89E-06 | 5.38E-05 |
| 11748519_SEC22C    | -0.46744 | 3.90E-06 | 5.38E-05 |
| 11717718_FNDC3B    | 0.453182 | 3.90E-06 | 5.38E-05 |
| 11736810_RPL27A    | 0.662123 | 3.90E-06 | 5.38E-05 |
| 11728284_RBMS2     | 0.59572  | 3.90E-06 | 5.38E-05 |
| 11721837_MYLK      | 0.50379  | 3.91E-06 | 5.40E-05 |
| 11725882_RNFT2     | -0.56378 | 3.92E-06 | 5.40E-05 |
| 11716393_ADH5 ///  | -0.52858 | 3.92E-06 | 5.41E-05 |
| 11734912_ZNF443 // | 0.642159 | 3.92E-06 | 5.41E-05 |
| 11733929_ARMC8     | 0.526436 | 3.92E-06 | 5.41E-05 |
| 11715806_SEPW1     | 0.425431 | 3.93E-06 | 5.41E-05 |
| 11754456_GOLGB1    | 0.484498 | 3.94E-06 | 5.43E-05 |
| 11752101	EIF2S1    | -0.52786 | 3.94E-06 | 5.43E-05 |
| 11736612_RIC1      | 0.58306  | 3.95E-06 | 5.43E-05 |
| 11758089_HMMR      | -0.48335 | 3.95E-06 | 5.43E-05 |
| 11731246_SERTAD4   | 0.476101 | 3.95E-06 | 5.43E-05 |
| 11727796_NDFIP2    | 0.596533 | 3.95E-06 | 5.43E-05 |
| 11719763_VPS13C    | 0.490411 | 3.96E-06 | 5.44E-05 |
| 11735614_EGR4      | 0.972983 | 3.97E-06 | 5.46E-05 |
| 11752207_PRDM1     | 0.975416 | 3.97E-06 | 5.46E-05 |
| 11733874_SMC4      | -0.50844 | 3.97E-06 | 5.46E-05 |
| 11722019_CEP85     | -0.56748 | 3.97E-06 | 5.46E-05 |
| 11717271_PRAME     | -0.45995 | 3.98E-06 | 5.46E-05 |
| 11743926_SEC24A    | 0.50673  | 3.98E-06 | 5.46E-05 |
| 11730022_PILRB /// | 0.48908  | 3.99E-06 | 5.48E-05 |
| 11739002_HDGF      | -0.44754 | 4.00E-06 | 5.48E-05 |
| 11748264_DCAF17    | 1.010361 | 4.00E-06 | 5.48E-05 |
| 11725232_ATP8B2    | -0.46822 | 4.00E-06 | 5.49E-05 |
| 11756601_FAM8A1    | 0.648016 | 4.01E-06 | 5.50E-05 |
| 11759063_SIK2      | -0.50196 | 4.02E-06 | 5.50E-05 |
| 11717553_DERL2     | 0.409519 | 4.02E-06 | 5.50E-05 |
| 11716626_KIF3B     | 0.480881 | 4.02E-06 | 5.51E-05 |
| 11721339_NCOA1     | 0.459582 | 4.02E-06 | 5.51E-05 |

|                    |          |          |          |
|--------------------|----------|----------|----------|
| 11729642_TPD52     | -0.88459 | 4.03E-06 | 5.52E-05 |
| 11753965_MSL3P1    | -1.1004  | 4.04E-06 | 5.52E-05 |
| 11730331_BRI3BP    | -0.54353 | 4.04E-06 | 5.52E-05 |
| 11764036_KPNB1     | -0.53841 | 4.04E-06 | 5.52E-05 |
| 11747114_PLK4      | -0.57762 | 4.04E-06 | 5.53E-05 |
| 11754089_NKIRAS2   | 0.433582 | 4.04E-06 | 5.53E-05 |
| 11743923_TCFL5     | -0.48178 | 4.04E-06 | 5.53E-05 |
| 11721205_ANK3      | 0.554869 | 4.05E-06 | 5.53E-05 |
| 11723783_AGPS      | 0.478336 | 4.05E-06 | 5.53E-05 |
| 11721206_ANK3      | 0.451119 | 4.05E-06 | 5.53E-05 |
| 11751724_ZNF542P   | 0.592533 | 4.05E-06 | 5.53E-05 |
| 11752781_TANK      | 0.581525 | 4.05E-06 | 5.53E-05 |
| 11724171_FCH02     | 0.555457 | 4.06E-06 | 5.53E-05 |
| 11723560_SMC04     | -0.52939 | 4.06E-06 | 5.53E-05 |
| 11719359_ALDH5A1   | -0.96678 | 4.06E-06 | 5.54E-05 |
| 11742219_CD46      | 0.477522 | 4.06E-06 | 5.54E-05 |
| 11757625_CD200     | -0.75606 | 4.06E-06 | 5.54E-05 |
| 11755049_PIK3C3    | 0.441623 | 4.07E-06 | 5.54E-05 |
| 11721641_CAP2      | 0.699937 | 4.07E-06 | 5.54E-05 |
| 11749319_PGAP1     | 0.520185 | 4.07E-06 | 5.54E-05 |
| 11751097_SNX10     | -0.4034  | 4.08E-06 | 5.55E-05 |
| 11715746_MINOS1-NE | -0.46554 | 4.09E-06 | 5.57E-05 |
| 11722094_PPIC      | 0.462674 | 4.09E-06 | 5.57E-05 |
| 11756763_HINT2     | -0.54125 | 4.10E-06 | 5.57E-05 |
| 11758551_ZNF264    | 0.529286 | 4.11E-06 | 5.59E-05 |
| 11747967_SNX13     | 0.468324 | 4.12E-06 | 5.60E-05 |
| 11758344_SDCBP     | 0.402298 | 4.12E-06 | 5.60E-05 |
| 11732249_RCOR3     | 0.503909 | 4.12E-06 | 5.60E-05 |
| 11732294_ZNF566    | 0.573632 | 4.13E-06 | 5.61E-05 |
| 11729738_RCCD1     | -0.61668 | 4.13E-06 | 5.61E-05 |
| 11743882_STRN3     | 0.496788 | 4.13E-06 | 5.61E-05 |
| 11725885_CNEP1R1   | 0.596834 | 4.14E-06 | 5.61E-05 |
| 11733919_SERTAD2   | 0.447917 | 4.15E-06 | 5.63E-05 |
| 11720410_CYP1B1    | 0.714386 | 4.15E-06 | 5.63E-05 |
| 11717426_CHMP3 /// | -0.53365 | 4.15E-06 | 5.63E-05 |
| 11729158_UBE2T     | -0.55261 | 4.15E-06 | 5.63E-05 |
| 11731987_DNAJC9    | -0.59679 | 4.16E-06 | 5.63E-05 |
| 11754588_RBM5      | 0.557887 | 4.16E-06 | 5.63E-05 |
| 11739809_TMEM156   | 1.496244 | 4.16E-06 | 5.64E-05 |
| 11758514_SERBP1    | -0.66806 | 4.16E-06 | 5.64E-05 |
| 11757029_NDUFA9    | -0.55945 | 4.17E-06 | 5.64E-05 |
| 11746533_KIAA1217  | 0.426438 | 4.17E-06 | 5.65E-05 |
| 11720103_PAK1      | -0.4279  | 4.17E-06 | 5.65E-05 |
| 11716392_ADH5      | -0.63085 | 4.19E-06 | 5.66E-05 |
| 11733664_ARHGAP11A | -0.50283 | 4.19E-06 | 5.67E-05 |
| 11717706_VPS13D    | -0.75965 | 4.19E-06 | 5.67E-05 |
| 11746843_ABI2      | 0.503936 | 4.20E-06 | 5.67E-05 |
| 11720000_SYNJ2BP   | -0.5716  | 4.20E-06 | 5.67E-05 |
| 11718481_CFI       | 0.858805 | 4.20E-06 | 5.67E-05 |
| 11753415_ARL6IP4   | -0.5636  | 4.20E-06 | 5.68E-05 |
| 11729305_ATAD1     | 0.415538 | 4.20E-06 | 5.68E-05 |

|                   |          |          |          |
|-------------------|----------|----------|----------|
| 11722735_APPL1    | -0.44464 | 4.21E-06 | 5.68E-05 |
| 11756160_CTNNAL1  | 0.442589 | 4.21E-06 | 5.68E-05 |
| 11760295_EBNA1BP2 | 0.72319  | 4.21E-06 | 5.68E-05 |
| 11722918_KCNS3    | -0.78245 | 4.21E-06 | 5.68E-05 |
| 11725798_USP46    | 0.556544 | 4.22E-06 | 5.69E-05 |
| 11750010_WHSC1    | -0.52727 | 4.22E-06 | 5.69E-05 |
| 11716639_COL4A1   | 0.750099 | 4.22E-06 | 5.69E-05 |
| 11741269_CCDC77   | -0.45897 | 4.23E-06 | 5.69E-05 |
| 11720841_SMNDC1   | 0.402141 | 4.23E-06 | 5.69E-05 |
| 11715994_ID2      | 0.461059 | 4.23E-06 | 5.69E-05 |
| 11756490_BCLAF1   | -0.39137 | 4.23E-06 | 5.69E-05 |
| 11739783_CDON     | -0.44998 | 4.23E-06 | 5.70E-05 |
| 11739837_KDM5A    | 0.397797 | 4.24E-06 | 5.71E-05 |
| 11743546_MY01B    | 0.440558 | 4.24E-06 | 5.71E-05 |
| 11729353_LNPEP    | 0.7617   | 4.25E-06 | 5.71E-05 |
| 11728738_TBC1D20  | 0.40695  | 4.25E-06 | 5.71E-05 |
| 11758590_CYBRD1   | 0.434944 | 4.25E-06 | 5.71E-05 |
| 11718787_NRG1     | -0.46338 | 4.26E-06 | 5.72E-05 |
| 11723916_EIF2S2   | -0.55873 | 4.26E-06 | 5.72E-05 |
| 11738844_NTM      | 0.733571 | 4.26E-06 | 5.72E-05 |
| 11757810_TMED10   | -0.42561 | 4.27E-06 | 5.73E-05 |
| 11756625_FAM156A  | -0.39825 | 4.28E-06 | 5.74E-05 |
| 11755364_MAMLD1   | -0.5927  | 4.28E-06 | 5.74E-05 |
| 11744533_MTRF1L   | 0.436344 | 4.29E-06 | 5.76E-05 |
| 11745911_RUFY2    | 0.766129 | 4.31E-06 | 5.78E-05 |
| 11758213_AKIRIN1  | 0.408923 | 4.32E-06 | 5.79E-05 |
| 11721797_SUMO3    | -0.58486 | 4.33E-06 | 5.80E-05 |
| 11757563_PPP1R35  | -0.4744  | 4.33E-06 | 5.81E-05 |
| 11750612_ZNF112   | 0.947539 | 4.34E-06 | 5.81E-05 |
| 11739004_HDGF     | -0.59687 | 4.35E-06 | 5.82E-05 |
| 11722326_ZBTB34   | 0.755692 | 4.35E-06 | 5.83E-05 |
| 11725374_HAPLN1   | 0.583509 | 4.36E-06 | 5.84E-05 |
| 11742910_ANKRD50  | 0.437179 | 4.37E-06 | 5.84E-05 |
| 11736044_MYH10    | -0.4534  | 4.37E-06 | 5.84E-05 |
| 11721883_TUBGCP3  | -0.54988 | 4.37E-06 | 5.84E-05 |
| 11752334_ZNF12    | 0.458009 | 4.37E-06 | 5.84E-05 |
| 11728348_RPL39L   | -0.54094 | 4.37E-06 | 5.84E-05 |
| 11723747_FAM64A   | -0.67979 | 4.37E-06 | 5.84E-05 |
| 11719700_FARP1    | -0.55186 | 4.38E-06 | 5.85E-05 |
| 11751164_CPPED1   | 0.534292 | 4.38E-06 | 5.85E-05 |
| 11718728_ZNF655   | 0.505631 | 4.39E-06 | 5.87E-05 |
| 11749441_WDR41    | 0.428474 | 4.40E-06 | 5.87E-05 |
| 11729231_KLF3     | 0.432053 | 4.40E-06 | 5.87E-05 |
| 11746215_NAP1L4   | -0.43932 | 4.40E-06 | 5.87E-05 |
| 11741309_STK26    | -0.52395 | 4.40E-06 | 5.87E-05 |
| 11724740_HMG2     | -0.42147 | 4.40E-06 | 5.87E-05 |
| 11736465_ZNF773   | 0.781375 | 4.41E-06 | 5.87E-05 |
| 11749192_UBE2L3   | -0.6381  | 4.41E-06 | 5.87E-05 |
| 11721672_NXT1     | -0.47391 | 4.41E-06 | 5.88E-05 |
| 11748255_RBL2     | -0.57755 | 4.41E-06 | 5.88E-05 |
| 11743680_PTCH1    | -0.51815 | 4.42E-06 | 5.88E-05 |



|                    |          |          |          |
|--------------------|----------|----------|----------|
| 11737559_AJAP1     | 0.574126 | 4.42E-06 | 5.88E-05 |
| 11741661_ARMC8     | 0.608599 | 4.42E-06 | 5.88E-05 |
| 11717266_CAMK2G    | -0.61291 | 4.43E-06 | 5.89E-05 |
| 11755777_RECK      | 0.628488 | 4.43E-06 | 5.89E-05 |
| 11719701_FARP1     | -0.53153 | 4.44E-06 | 5.90E-05 |
| 11754004_ATP6V1G1  | -0.48753 | 4.44E-06 | 5.90E-05 |
| 11733492_SLC44A5   | 0.776759 | 4.44E-06 | 5.90E-05 |
| 11731625_CDC186    | 0.524222 | 4.45E-06 | 5.91E-05 |
| 11727438_RALGAPB   | -0.40203 | 4.45E-06 | 5.91E-05 |
| 11716595_SLC44A1   | -0.49531 | 4.46E-06 | 5.92E-05 |
| 11733875_SMC4      | -0.61697 | 4.46E-06 | 5.92E-05 |
| 11716866_SLC1A5    | -0.47483 | 4.46E-06 | 5.92E-05 |
| 11755756_NHSL1     | -0.47156 | 4.46E-06 | 5.92E-05 |
| 11720537_MMAB      | -0.55147 | 4.48E-06 | 5.94E-05 |
| 11728954_KITLG     | 0.864992 | 4.48E-06 | 5.94E-05 |
| 11723561_SMC04     | -0.87466 | 4.48E-06 | 5.94E-05 |
| 11727262_ENTPD7    | 0.653275 | 4.48E-06 | 5.94E-05 |
| 11734002_ACTN2     | 0.771496 | 4.48E-06 | 5.94E-05 |
| 11746771_CDC130    | 0.59656  | 4.49E-06 | 5.95E-05 |
| 11719838_CASP3     | 0.462825 | 4.50E-06 | 5.95E-05 |
| 11719362_SLF2      | -0.51458 | 4.50E-06 | 5.95E-05 |
| 11746195_LOC100996 | 0.42464  | 4.50E-06 | 5.96E-05 |
| 11719331_KIAA0907  | 0.489797 | 4.52E-06 | 5.98E-05 |
| 11746005_SPACA6    | 0.568138 | 4.52E-06 | 5.98E-05 |
| 11759191_NIPAL2    | 0.45479  | 4.52E-06 | 5.98E-05 |
| 11753782_TANK      | 0.503456 | 4.52E-06 | 5.98E-05 |
| 11745233_ZNF582    | 0.920623 | 4.53E-06 | 5.99E-05 |
| 11728167_ZNF264    | 0.572133 | 4.54E-06 | 5.99E-05 |
| 11718475_IDH1      | -0.4631  | 4.54E-06 | 5.99E-05 |
| 11744916_CAST      | 0.440516 | 4.54E-06 | 5.99E-05 |
| 11724429_ZNF337    | 0.664831 | 4.54E-06 | 5.99E-05 |
| 11718514_TSPAN14   | 0.507183 | 4.54E-06 | 6.00E-05 |
| 11741037_GPR89A // | 0.462959 | 4.55E-06 | 6.00E-05 |
| 11745203_RMI1      | -0.65702 | 4.55E-06 | 6.00E-05 |
| 11717656_SPRED2    | 0.423693 | 4.55E-06 | 6.00E-05 |
| 11717289_YTHDF3    | 0.446707 | 4.55E-06 | 6.00E-05 |
| 11720508_FBN1      | 0.641087 | 4.55E-06 | 6.00E-05 |
| 11716873_WDR46     | -0.52616 | 4.55E-06 | 6.00E-05 |
| 11744131_SECISBP2L | 0.650569 | 4.55E-06 | 6.00E-05 |
| 11741960_ADAM9     | 0.426956 | 4.56E-06 | 6.00E-05 |
| 11727848_GNA12     | -0.52076 | 4.56E-06 | 6.00E-05 |
| 11724100_MAP3K6    | -0.6768  | 4.56E-06 | 6.00E-05 |
| 11748128_SLC25A32  | 0.450994 | 4.56E-06 | 6.00E-05 |
| 11716833_TM7SF3    | 0.439211 | 4.56E-06 | 6.00E-05 |
| 11719835_LGALS8    | 0.465035 | 4.57E-06 | 6.01E-05 |
| 11754245_SDCBP     | 0.409872 | 4.57E-06 | 6.01E-05 |
| 11720107_KIF2A     | 0.488577 | 4.57E-06 | 6.01E-05 |
| 11727869_GALK2     | 0.449978 | 4.57E-06 | 6.01E-05 |
| 11755489_EXOC7     | -0.70734 | 4.57E-06 | 6.01E-05 |
| 11723243_CDK6      | 0.429618 | 4.57E-06 | 6.01E-05 |
| 11719316_PIBF1     | 0.480775 | 4.58E-06 | 6.01E-05 |

|                   |            |          |          |
|-------------------|------------|----------|----------|
| 11716195_ID1      | -0.4941    | 4.58E-06 | 6.01E-05 |
| 11728867_PCK2     | -0.67327   | 4.58E-06 | 6.01E-05 |
| 11731548_TMEM67   | 0.699362   | 4.58E-06 | 6.01E-05 |
| 11758085_CEP44    | -0.68979   | 4.59E-06 | 6.02E-05 |
| 11722500_LYSMD3   | 0.456377   | 4.60E-06 | 6.03E-05 |
| 11739456_SGMS1    | 0.413741   | 4.61E-06 | 6.04E-05 |
| 11722324_ZNF84    | 0.566236   | 4.61E-06 | 6.04E-05 |
| 11716348_EFCAB14  | 0.615458   | 4.61E-06 | 6.04E-05 |
| 11756784_NCAPG2   | -0.56374   | 4.61E-06 | 6.04E-05 |
| 11727969_SLC14A1  | 0.698726   | 4.61E-06 | 6.04E-05 |
| 11754186_ST7L     | 0.951595   | 4.62E-06 | 6.04E-05 |
| 11751517_PRKAA1   | 0.673653   | 4.62E-06 | 6.05E-05 |
| 11730290_ARHGAP5  | -0.58994   | 4.62E-06 | 6.05E-05 |
| 11722584_CAST     | 0.507713   | 4.63E-06 | 6.05E-05 |
| 11740518_LGALS8   | 0.434733   | 4.64E-06 | 6.07E-05 |
| 11734706_NMD3     | 0.481098   | 4.64E-06 | 6.07E-05 |
| 11759882_EPS15L1  | 0.70042    | 4.65E-06 | 6.07E-05 |
| 11723123_SH3PXD2B | -0.76336   | 4.65E-06 | 6.07E-05 |
| 11718824_IGIP     | -0.82608   | 4.65E-06 | 6.08E-05 |
| 11722175_SF3B3    | -0.53025   | 4.66E-06 | 6.08E-05 |
| 11717763_MGLL     | 0.496058   | 4.67E-06 | 6.09E-05 |
| 11725902_TMEM135  | 0.470437   | 4.67E-06 | 6.09E-05 |
| 11749449_HNRNPH2  | / -0.51624 | 4.67E-06 | 6.10E-05 |
| 11720756_STAT3    | 0.575236   | 4.67E-06 | 6.10E-05 |
| 11726002_KRCC1    | 0.593672   | 4.68E-06 | 6.10E-05 |
| 11756868_DLX1     | -0.56659   | 4.68E-06 | 6.10E-05 |
| 11731549_TMEM67   | 0.680039   | 4.68E-06 | 6.10E-05 |
| 11720771_PPIF     | 0.582023   | 4.68E-06 | 6.10E-05 |
| 11763731_VPS36    | 0.520828   | 4.69E-06 | 6.11E-05 |
| 11747814_IDH2     | -0.61934   | 4.70E-06 | 6.12E-05 |
| 11715844_PTPRF    | -0.56086   | 4.71E-06 | 6.13E-05 |
| 11733079_POT1     | -0.43888   | 4.71E-06 | 6.13E-05 |
| 11720669_KAT2B    | 0.548252   | 4.71E-06 | 6.13E-05 |
| 11718135_PRPS2    | -0.39925   | 4.71E-06 | 6.13E-05 |
| 11726768_SMPX     | 0.604172   | 4.73E-06 | 6.16E-05 |
| 11755735_GTPBP6   | -0.4729    | 4.75E-06 | 6.17E-05 |
| 11718927_ARID5B   | 0.542531   | 4.75E-06 | 6.17E-05 |
| 11743699_EDEM3    | 0.426299   | 4.75E-06 | 6.17E-05 |
| 11761864_TMOD3    | 0.473504   | 4.75E-06 | 6.17E-05 |
| 11732977_GON4L    | 0.466351   | 4.75E-06 | 6.17E-05 |
| 11759491_MRPL35   | -0.56521   | 4.75E-06 | 6.17E-05 |
| 11723733_OTUD6B   | 0.446419   | 4.76E-06 | 6.18E-05 |
| 11751224_MAPK1    | 0.416452   | 4.76E-06 | 6.18E-05 |
| 11719960_CTBP1    | -0.49251   | 4.77E-06 | 6.19E-05 |
| 11730394_ZNF552   | 0.939967   | 4.77E-06 | 6.19E-05 |
| 11727132_CPD      | 0.535433   | 4.78E-06 | 6.20E-05 |
| 11752694_PRR11    | -0.55671   | 4.80E-06 | 6.22E-05 |
| 11722325_ZNF84    | -0.47641   | 4.80E-06 | 6.22E-05 |
| 11757316_FLOT1    | -0.47442   | 4.80E-06 | 6.22E-05 |
| 11756393_CORO1A   | -0.6066    | 4.80E-06 | 6.22E-05 |
| 11740049_ZNF461   | 0.856489   | 4.80E-06 | 6.22E-05 |

|                    |          |          |          |
|--------------------|----------|----------|----------|
| 11744032_NACC2     | 0.787757 | 4.81E-06 | 6.23E-05 |
| 11730840_ZMYND8    | -0.54525 | 4.82E-06 | 6.23E-05 |
| 11744301_TTC17     | -0.52948 | 4.82E-06 | 6.23E-05 |
| 11735178_C4orf33   | -0.47415 | 4.82E-06 | 6.23E-05 |
| 11718177_CMTM4     | -0.52659 | 4.82E-06 | 6.24E-05 |
| 11716186_ALCAM     | 0.426723 | 4.82E-06 | 6.24E-05 |
| 11745018_WLS       | -0.42282 | 4.82E-06 | 6.24E-05 |
| 11755857_RNPS1     | -0.41223 | 4.83E-06 | 6.24E-05 |
| 11756717_UBE2K     | 0.440647 | 4.83E-06 | 6.24E-05 |
| 11725462_MAU2      | -0.46057 | 4.83E-06 | 6.25E-05 |
| 11741501_FAM133B / | 0.49223  | 4.84E-06 | 6.25E-05 |
| 11719769_RNF111    | 0.560381 | 4.85E-06 | 6.26E-05 |
| 11752999_GALNT2    | 0.514558 | 4.86E-06 | 6.27E-05 |
| 11724306_EAF1      | 0.788652 | 4.86E-06 | 6.27E-05 |
| 11763977_SNRPF     | -0.41076 | 4.86E-06 | 6.27E-05 |
| 11734684_UMPS      | -0.49016 | 4.87E-06 | 6.28E-05 |
| 11756282_MAZ       | -0.45196 | 4.87E-06 | 6.29E-05 |
| 11729765_ZNF331    | -0.39951 | 4.88E-06 | 6.30E-05 |
| 11726635_KAT6A     | -0.43677 | 4.89E-06 | 6.30E-05 |
| 11754375_SNX10     | -0.49539 | 4.90E-06 | 6.31E-05 |
| 11723442_EPHA4     | 0.770356 | 4.90E-06 | 6.31E-05 |
| 11738644_STAMBPL1  | 0.602185 | 4.90E-06 | 6.32E-05 |
| 11750960_AASS      | 0.704204 | 4.91E-06 | 6.32E-05 |
| 11754377_ASBI3     | -0.47054 | 4.92E-06 | 6.33E-05 |
| 11739391_ATE1      | 0.479924 | 4.92E-06 | 6.33E-05 |
| 11754497_VIPAS39   | 0.460636 | 4.92E-06 | 6.33E-05 |
| 11715939_KHDRBS1   | -0.61305 | 4.92E-06 | 6.33E-05 |
| 11743047_FLOT1     | -0.5547  | 4.92E-06 | 6.33E-05 |
| 11744581_KHDRBS3   | 0.532374 | 4.93E-06 | 6.33E-05 |
| 11748947_UBTF      | -0.44338 | 4.93E-06 | 6.33E-05 |
| 11758490_SPG20     | 0.438294 | 4.93E-06 | 6.34E-05 |
| 11715586_MAPRE1    | 0.468757 | 4.94E-06 | 6.35E-05 |
| 11718280_TRIAP1    | 0.445043 | 4.95E-06 | 6.35E-05 |
| 11716196_ID1       | -0.50326 | 4.95E-06 | 6.36E-05 |
| 11736026_ADAM10    | 0.557595 | 4.96E-06 | 6.36E-05 |
| 11726005_PDE4B     | 0.797279 | 4.97E-06 | 6.37E-05 |
| 11757351_TAP1      | 0.515423 | 4.97E-06 | 6.37E-05 |
| 11743886_ATXN1L    | -0.47231 | 4.98E-06 | 6.38E-05 |
| 11745143_SYNE2     | -0.55801 | 4.98E-06 | 6.39E-05 |
| 11722352_ACTA2     | 0.430677 | 4.99E-06 | 6.40E-05 |
| 11736501_SS18      | -0.52725 | 5.00E-06 | 6.40E-05 |
| 11748403_CNN2      | 0.586698 | 5.00E-06 | 6.40E-05 |
| 11758610_HDLBP     | -0.70688 | 5.00E-06 | 6.40E-05 |
| 11736710_DENND4A   | 0.462095 | 5.01E-06 | 6.41E-05 |
| 11737647_CRACR2A   | -0.66507 | 5.01E-06 | 6.41E-05 |
| 11725636_MOB1A     | 0.407172 | 5.01E-06 | 6.41E-05 |
| 11754092_ATG4B     | -0.486   | 5.01E-06 | 6.41E-05 |
| 11758446_TSC22D1   | 0.434995 | 5.02E-06 | 6.43E-05 |
| 11722628_KIAA1033  | 0.476121 | 5.03E-06 | 6.43E-05 |
| 11733032_RBM18     | 0.519306 | 5.03E-06 | 6.43E-05 |
| 11759548_SREBF2    | -0.60418 | 5.03E-06 | 6.43E-05 |

|                   |          |          |          |
|-------------------|----------|----------|----------|
| 200096_PMATP6VOE1 | 0.461736 | 5.03E-06 | 6.43E-05 |
| 11740499_CBX5     | 0.461853 | 5.03E-06 | 6.43E-05 |
| 11720595_CD46     | 0.424445 | 5.04E-06 | 6.43E-05 |
| 11741673_TMEM161B | 0.465172 | 5.04E-06 | 6.44E-05 |
| 11748603_CDKN1B   | 0.467365 | 5.05E-06 | 6.45E-05 |
| 11754363_CARM1    | -0.4108  | 5.07E-06 | 6.47E-05 |
| 11715388_CDKN1A   | 0.441157 | 5.08E-06 | 6.48E-05 |
| 11733446_MMS22L   | -0.72237 | 5.08E-06 | 6.48E-05 |
| 11748675_MCM5     | -0.52138 | 5.09E-06 | 6.49E-05 |
| 11718538_FAHD2A   | -0.45655 | 5.10E-06 | 6.50E-05 |
| 11730901_MBOAT2   | -0.4999  | 5.10E-06 | 6.50E-05 |
| 11724483_SHOC2    | 0.450601 | 5.11E-06 | 6.52E-05 |
| 11755715_CD46     | 0.444789 | 5.12E-06 | 6.52E-05 |
| 11716214_PRRF3    | 0.569777 | 5.12E-06 | 6.52E-05 |
| 11753366_PTGES3   | -0.44969 | 5.13E-06 | 6.52E-05 |
| 11743100_ENO2     | -0.54506 | 5.13E-06 | 6.53E-05 |
| 11743742_ATP11A   | -0.48362 | 5.13E-06 | 6.53E-05 |
| 11755252_AMIGO2   | 0.455852 | 5.13E-06 | 6.53E-05 |
| 11731110_ADAM17   | 0.571315 | 5.13E-06 | 6.53E-05 |
| 11758777_RBM8A    | -0.70192 | 5.16E-06 | 6.56E-05 |
| 11721243_LAP3     | -0.3887  | 5.16E-06 | 6.56E-05 |
| 11716012_TNFAIP1  | -0.46825 | 5.16E-06 | 6.56E-05 |
| 11756053_LPP      | 0.735727 | 5.17E-06 | 6.57E-05 |
| 11752748_MRS2     | 0.58225  | 5.18E-06 | 6.57E-05 |
| 11718099_IFT20    | 0.453025 | 5.18E-06 | 6.57E-05 |
| 11719089_PCK2     | -0.4792  | 5.18E-06 | 6.57E-05 |
| 11736761_CARD16   | 0.867789 | 5.18E-06 | 6.58E-05 |
| 11740248_SPAG1    | 0.627795 | 5.20E-06 | 6.59E-05 |
| 11725841_ZSCAN16  | 0.632617 | 5.20E-06 | 6.60E-05 |
| 11725521_GLUL     | -0.48647 | 5.21E-06 | 6.60E-05 |
| 11737169_STRN3    | 0.5257   | 5.21E-06 | 6.61E-05 |
| 11725813_MAST3    | -0.60919 | 5.21E-06 | 6.61E-05 |
| 11752327_ZBTB18   | 0.609024 | 5.23E-06 | 6.63E-05 |
| 11752237_SENP5    | 0.635176 | 5.24E-06 | 6.64E-05 |
| 11729676_CDK17    | 0.406214 | 5.24E-06 | 6.64E-05 |
| 11715710_CTSC     | -0.56166 | 5.24E-06 | 6.64E-05 |
| 11723777_BRD3     | -0.55976 | 5.24E-06 | 6.64E-05 |
| 11740587_ADNP     | 0.415261 | 5.25E-06 | 6.64E-05 |
| 11716622_CDK2AP2  | -0.4596  | 5.25E-06 | 6.64E-05 |
| 11729792_MAN1A2   | 0.710467 | 5.25E-06 | 6.64E-05 |
| 11758572_HELLS    | -0.43376 | 5.25E-06 | 6.64E-05 |
| 11739802_VCPIP1   | 0.542006 | 5.26E-06 | 6.64E-05 |
| 11733059_PTBP3    | 0.711647 | 5.26E-06 | 6.65E-05 |
| 11756005_COMMD4   | -0.44166 | 5.26E-06 | 6.65E-05 |
| 11743472_ZNF226   | 0.512325 | 5.27E-06 | 6.65E-05 |
| 11746886_RAD52    | 0.4452   | 5.27E-06 | 6.65E-05 |
| 11734362_NFX1     | 0.534334 | 5.27E-06 | 6.65E-05 |
| 11720599_SUB1     | -0.71483 | 5.27E-06 | 6.66E-05 |
| 11719284_UBR7     | -0.56007 | 5.28E-06 | 6.67E-05 |
| 11743339_MFSD11   | 0.534022 | 5.29E-06 | 6.67E-05 |
| 11735576_LETM2    | 0.760564 | 5.30E-06 | 6.68E-05 |

|                    |          |          |          |
|--------------------|----------|----------|----------|
| 11724170_FCH02     | 0.657625 | 5.31E-06 | 6.70E-05 |
| 11749469_PPP4R3A   | 0.436089 | 5.31E-06 | 6.70E-05 |
| 11729238_CSRP2     | -0.63732 | 5.32E-06 | 6.70E-05 |
| 11733078_PPP1R12A  | 0.535677 | 5.32E-06 | 6.70E-05 |
| 11717801_ATF5      | -0.57626 | 5.32E-06 | 6.70E-05 |
| 11721948_RAB3GAP2  | 0.484182 | 5.32E-06 | 6.70E-05 |
| 11748393_SLC37A3   | 0.620971 | 5.33E-06 | 6.71E-05 |
| 11758170_DIAPH2    | 1.060706 | 5.33E-06 | 6.71E-05 |
| 11715704_ITGA5     | 0.546566 | 5.33E-06 | 6.71E-05 |
| 11726455_MY05B     | 1.116445 | 5.34E-06 | 6.72E-05 |
| 11750681_CREBRF    | 0.722358 | 5.34E-06 | 6.72E-05 |
| 11757473_NSUN5     | -0.54437 | 5.34E-06 | 6.72E-05 |
| 11752384_COL6A1    | 0.418601 | 5.35E-06 | 6.73E-05 |
| 11716759_CASP4     | 0.68112  | 5.37E-06 | 6.75E-05 |
| 11748960_DDX3X     | 0.445381 | 5.38E-06 | 6.76E-05 |
| 11725748_MXD3      | -0.53683 | 5.38E-06 | 6.76E-05 |
| 11727180_PHTF1     | 0.460721 | 5.38E-06 | 6.76E-05 |
| 11716120_WDR34     | -0.452   | 5.38E-06 | 6.76E-05 |
| 11745202_RMI1      | -0.69832 | 5.39E-06 | 6.76E-05 |
| 11729614_H2AFZ     | -0.39918 | 5.39E-06 | 6.76E-05 |
| 11755910_UBXN7     | 0.477754 | 5.40E-06 | 6.77E-05 |
| 11755245_C3orf17   | 0.498776 | 5.41E-06 | 6.78E-05 |
| 11743024_ATP7A     | 0.54285  | 5.41E-06 | 6.78E-05 |
| 11753336_NIF3L1    | -0.49686 | 5.41E-06 | 6.78E-05 |
| 11724488_AKR1B10   | 0.538307 | 5.42E-06 | 6.79E-05 |
| 11742239_DEPDC1B   | -0.5045  | 5.42E-06 | 6.79E-05 |
| 11756163_MRPS34    | -0.43415 | 5.43E-06 | 6.80E-05 |
| 11724587_SYT1      | 0.697985 | 5.43E-06 | 6.80E-05 |
| 11724285_FRMD4A    | -0.44643 | 5.43E-06 | 6.80E-05 |
| 11754137_QKI       | -0.62868 | 5.43E-06 | 6.80E-05 |
| 11747324_NCBP2     | -0.42464 | 5.44E-06 | 6.81E-05 |
| 11757156_SNHG12 // | -0.45432 | 5.44E-06 | 6.81E-05 |
| 11717098_RPA2      | -0.473   | 5.45E-06 | 6.82E-05 |
| 11724915_TMTC3     | 0.609546 | 5.45E-06 | 6.82E-05 |
| 11716283_PAPD7     | -0.42977 | 5.46E-06 | 6.82E-05 |
| 11743092_THEM4     | -0.47    | 5.46E-06 | 6.82E-05 |
| 11736305_MIR22HG   | 0.410166 | 5.46E-06 | 6.82E-05 |
| 11760911_NSUN5P1 / | 0.405238 | 5.46E-06 | 6.82E-05 |
| 11758974_H2AFV     | -0.43891 | 5.46E-06 | 6.82E-05 |
| 11757973_NMT2      | 0.418689 | 5.47E-06 | 6.83E-05 |
| 11731194_SEMA3D    | 0.885478 | 5.47E-06 | 6.83E-05 |
| 11716744_TJP2      | 0.39335  | 5.48E-06 | 6.83E-05 |
| 11727992_STX11     | 1.400774 | 5.48E-06 | 6.83E-05 |
| 11728660_HN1L      | -0.87243 | 5.48E-06 | 6.83E-05 |
| 11722179_DR1       | 0.442115 | 5.48E-06 | 6.83E-05 |
| 11724838_NCEH1     | 0.732446 | 5.49E-06 | 6.84E-05 |
| 11715842_MAPK1     | 0.490936 | 5.49E-06 | 6.85E-05 |
| 11743761_SNIP1     | 0.505587 | 5.50E-06 | 6.85E-05 |
| 11753780_NEK2      | -0.51305 | 5.50E-06 | 6.85E-05 |
| 11759196_METTL10   | -1.24872 | 5.52E-06 | 6.87E-05 |
| 11745467_TMED5     | 0.472971 | 5.54E-06 | 6.90E-05 |

|                    |          |          |          |
|--------------------|----------|----------|----------|
| 11740148_ZNF429    | 0.971848 | 5.54E-06 | 6.90E-05 |
| 11734137_MTBP      | -0.58018 | 5.54E-06 | 6.90E-05 |
| 11739409_BAGE2 /// | 0.499735 | 5.55E-06 | 6.90E-05 |
| 11718678_PSEN1     | 0.507702 | 5.55E-06 | 6.90E-05 |
| 11758072_TMEM161B  | 0.438106 | 5.56E-06 | 6.91E-05 |
| 11729229_KLF3      | 0.6499   | 5.56E-06 | 6.91E-05 |
| 11739953_ZNF14     | 0.74895  | 5.56E-06 | 6.91E-05 |
| 11732960_EIF2D     | -0.46057 | 5.56E-06 | 6.91E-05 |
| 11733149_DDX58     | 0.665521 | 5.57E-06 | 6.92E-05 |
| 11760464_MED6      | 0.537921 | 5.57E-06 | 6.92E-05 |
| 11759405_STX10     | -0.44976 | 5.57E-06 | 6.92E-05 |
| 11726819_TMEM201   | -0.61814 | 5.57E-06 | 6.92E-05 |
| 11722609_CDC42SE1  | 0.428131 | 5.58E-06 | 6.92E-05 |
| 11739040_GTF2H1    | 0.416434 | 5.59E-06 | 6.93E-05 |
| 11736366_MCM10     | -0.7662  | 5.59E-06 | 6.93E-05 |
| 11726462_ZCCHC10   | 0.414604 | 5.59E-06 | 6.93E-05 |
| 11748082_FLOT1     | -0.60557 | 5.59E-06 | 6.93E-05 |
| 11720222_GFPT1     | 0.613769 | 5.60E-06 | 6.93E-05 |
| 11743679_PTCH1     | -0.5358  | 5.60E-06 | 6.93E-05 |
| 11744634_ZC3H7A    | 0.561894 | 5.60E-06 | 6.93E-05 |
| 11755664_WDR44     | 0.415571 | 5.60E-06 | 6.93E-05 |
| 11744841_TIPRL     | -0.49229 | 5.60E-06 | 6.93E-05 |
| 11761824_NSAP11    | 0.62247  | 5.60E-06 | 6.93E-05 |
| 11761565_CEP70     | -0.43414 | 5.60E-06 | 6.93E-05 |
| 11725255_IL15      | 0.567411 | 5.61E-06 | 6.93E-05 |
| 11746793_ZNF410    | 0.418863 | 5.61E-06 | 6.93E-05 |
| 11756275_PDLIM1    | 0.476775 | 5.62E-06 | 6.94E-05 |
| 11755694_AGFG1     | 0.422561 | 5.62E-06 | 6.95E-05 |
| 11757786_EXOC5     | 0.383824 | 5.64E-06 | 6.97E-05 |
| 11750423_SEPSECS   | 0.52459  | 5.65E-06 | 6.98E-05 |
| 11747801_HDAC9     | 1.04374  | 5.65E-06 | 6.98E-05 |
| 11722126_CCDC174   | 0.468804 | 5.66E-06 | 6.99E-05 |
| 11756111_ARAF      | -0.39483 | 5.66E-06 | 6.99E-05 |
| 11752899_SEC62     | 0.42474  | 5.67E-06 | 7.00E-05 |
| 11729584_SLC25A6   | -0.48161 | 5.67E-06 | 7.00E-05 |
| 11719407_HIPK2     | 0.46158  | 5.67E-06 | 7.00E-05 |
| 11730500_STRN      | 0.573694 | 5.67E-06 | 7.00E-05 |
| 11727389_TRPV2     | 0.600338 | 5.68E-06 | 7.00E-05 |
| 11741091_ARNTL     | 0.4862   | 5.68E-06 | 7.00E-05 |
| 11743018_NOC3L     | 0.479823 | 5.68E-06 | 7.00E-05 |
| 11758562_C1GALT1   | 0.403366 | 5.68E-06 | 7.00E-05 |
| 11726596_DUT       | -0.46126 | 5.69E-06 | 7.01E-05 |
| 11720205_CLDN12    | 0.541542 | 5.70E-06 | 7.02E-05 |
| 11717619_EPHA2     | 0.493163 | 5.71E-06 | 7.02E-05 |
| 11758432_CPEB1     | 0.551694 | 5.72E-06 | 7.04E-05 |
| 11749934_HSP90AA4P | -0.38688 | 5.72E-06 | 7.04E-05 |
| 11754604_SPP1      | 0.518316 | 5.73E-06 | 7.05E-05 |
| 11721880_ARID4B    | 0.484259 | 5.73E-06 | 7.05E-05 |
| 11726265_ME1       | -0.53282 | 5.74E-06 | 7.05E-05 |
| 11730886_FAM63B    | 0.386459 | 5.74E-06 | 7.06E-05 |
| 11723702_ABHD5     | 0.621821 | 5.75E-06 | 7.06E-05 |

|                    |          |          |          |
|--------------------|----------|----------|----------|
| 11747493_TMEM128   | -0.40833 | 5.75E-06 | 7.07E-05 |
| 11750554_NEDD4     | 0.546648 | 5.76E-06 | 7.07E-05 |
| 11732103_HIST1H3H  | 0.592648 | 5.76E-06 | 7.07E-05 |
| 11724921_VPS13B    | 0.42588  | 5.76E-06 | 7.07E-05 |
| 11726801_EBF1      | 0.743928 | 5.77E-06 | 7.08E-05 |
| 11759667_TTC17     | 0.536219 | 5.78E-06 | 7.09E-05 |
| 11759550_ZFAS1     | -0.70105 | 5.79E-06 | 7.10E-05 |
| 11715840_SDHC      | -0.66245 | 5.80E-06 | 7.11E-05 |
| 11728956_ZSWIM4    | 0.856867 | 5.80E-06 | 7.11E-05 |
| 11721925_BCL9      | -0.47092 | 5.81E-06 | 7.12E-05 |
| 11724335_USP8      | 0.385874 | 5.81E-06 | 7.12E-05 |
| 11717716_FNDC3B    | 0.494299 | 5.82E-06 | 7.13E-05 |
| 11754315_TMSB4X    | -0.6197  | 5.83E-06 | 7.14E-05 |
| 11724245_TMEM127   | -0.60607 | 5.83E-06 | 7.14E-05 |
| 11756256_FANCG     | -0.69846 | 5.83E-06 | 7.14E-05 |
| 11752167_SOCS4     | 0.879698 | 5.84E-06 | 7.14E-05 |
| 11731237_ZDBF2     | -0.91955 | 5.84E-06 | 7.14E-05 |
| 11721001_HEXIM1    | -0.46649 | 5.84E-06 | 7.14E-05 |
| 11753647_DR1       | 0.462965 | 5.84E-06 | 7.15E-05 |
| 11737944_SPP1      | 0.563414 | 5.84E-06 | 7.15E-05 |
| 11720802_BIN3      | -0.39392 | 5.85E-06 | 7.15E-05 |
| 11749790_CASP8     | 0.65906  | 5.85E-06 | 7.15E-05 |
| 11752439_MIA3      | 0.460011 | 5.85E-06 | 7.15E-05 |
| 200060_PMRNPS1     | -0.38882 | 5.86E-06 | 7.15E-05 |
| 11741188_SLC30A6   | 0.519543 | 5.86E-06 | 7.15E-05 |
| 11749045_TAPT1     | 0.663388 | 5.86E-06 | 7.15E-05 |
| 11721278_SUV39H1   | -0.65607 | 5.86E-06 | 7.15E-05 |
| 11745766_PRRC2A    | -0.39618 | 5.86E-06 | 7.15E-05 |
| 11755347_SAR1B     | 0.409897 | 5.87E-06 | 7.15E-05 |
| 11754437_KIAA0754  | 0.447723 | 5.87E-06 | 7.15E-05 |
| 11731101_MFI2      | -0.4354  | 5.87E-06 | 7.16E-05 |
| 11747048_ZDHHC20   | 0.653924 | 5.87E-06 | 7.16E-05 |
| 11718811_PRKCH     | 0.598236 | 5.88E-06 | 7.17E-05 |
| 11727174_EPC2      | 0.514967 | 5.88E-06 | 7.17E-05 |
| 11750593_TGM2      | -0.51824 | 5.89E-06 | 7.17E-05 |
| 11750627_HSPA4L    | 0.486466 | 5.90E-06 | 7.19E-05 |
| 11717537_VEGFB     | -0.43796 | 5.91E-06 | 7.19E-05 |
| 11717014_SNRPF     | -0.41794 | 5.91E-06 | 7.19E-05 |
| 11754907_RNF38     | 0.690353 | 5.91E-06 | 7.20E-05 |
| 11740132_DENND1B   | 0.538423 | 5.92E-06 | 7.20E-05 |
| 11736338_TXLNG     | 0.46468  | 5.92E-06 | 7.20E-05 |
| 11723797_ZDHHC12   | -0.42298 | 5.92E-06 | 7.20E-05 |
| 11717985_PITPNB    | 0.43475  | 5.93E-06 | 7.21E-05 |
| 11718107_IPO5      | -0.42517 | 5.93E-06 | 7.21E-05 |
| 11756711_CAST      | 0.460946 | 5.94E-06 | 7.21E-05 |
| 11754153_CASP8     | 0.532817 | 5.96E-06 | 7.24E-05 |
| 11747342_TTF2      | -0.47125 | 5.96E-06 | 7.24E-05 |
| 11755150_CCL3P1 // | 0.661097 | 5.97E-06 | 7.25E-05 |
| 11716958_AAAS      | -0.47208 | 5.98E-06 | 7.25E-05 |
| 11743372_PTGES3    | -0.42088 | 5.98E-06 | 7.26E-05 |
| 11724197_STC1      | 0.84001  | 5.98E-06 | 7.26E-05 |

|                    |          |          |          |
|--------------------|----------|----------|----------|
| 11725710_PPIA      | -0.47087 | 5.99E-06 | 7.26E-05 |
| 11752978_DR1       | 0.386095 | 5.99E-06 | 7.26E-05 |
| 11721753_ALG13     | 0.491616 | 5.99E-06 | 7.26E-05 |
| 11739433_ATP11B    | -0.55643 | 6.00E-06 | 7.27E-05 |
| 11763368_ZGRF1     | -0.70882 | 6.00E-06 | 7.27E-05 |
| 11744059_UQCRC2    | -0.43828 | 6.01E-06 | 7.28E-05 |
| 11734017_UBQLN1    | -0.41027 | 6.02E-06 | 7.29E-05 |
| 11741607_RRP12     | 0.597022 | 6.02E-06 | 7.29E-05 |
| 11716371_VPS26B    | -0.58455 | 6.02E-06 | 7.29E-05 |
| 11742759_TRIP11    | 0.465834 | 6.03E-06 | 7.30E-05 |
| 11718178_CMTM4     | -0.67069 | 6.03E-06 | 7.30E-05 |
| 11751451_TRIML2    | 0.903259 | 6.04E-06 | 7.30E-05 |
| 11746113_SYNE1     | 0.616933 | 6.04E-06 | 7.30E-05 |
| 11724837_NCEH1     | 0.862833 | 6.04E-06 | 7.30E-05 |
| 11754928_MYOF      | 0.490149 | 6.06E-06 | 7.32E-05 |
| 11746036_CBR1      | -0.49317 | 6.06E-06 | 7.33E-05 |
| 11751777_ARMC1     | -0.40536 | 6.06E-06 | 7.33E-05 |
| 11722949_CDRT4 /// | 0.400624 | 6.07E-06 | 7.33E-05 |
| 11747942_ZEB2      | 0.707234 | 6.07E-06 | 7.33E-05 |
| 11734752_ARHGAP24  | 0.613452 | 6.08E-06 | 7.33E-05 |
| 11715600_PPP1R11   | -0.648   | 6.08E-06 | 7.33E-05 |
| 11716963_PPM1F     | -0.4534  | 6.08E-06 | 7.34E-05 |
| 11728071_NCAPG2    | -0.71527 | 6.09E-06 | 7.35E-05 |
| 11746512_MTX3      | 0.652141 | 6.10E-06 | 7.36E-05 |
| 11715394_CD81      | -0.40672 | 6.11E-06 | 7.37E-05 |
| 11749245_CXCL11    | 1.020751 | 6.12E-06 | 7.38E-05 |
| 11720993_SOX2      | -0.53545 | 6.12E-06 | 7.38E-05 |
| 11756196_MTHFD1L   | -0.55871 | 6.13E-06 | 7.38E-05 |
| 11758962_PAFAH1B2  | -0.46368 | 6.14E-06 | 7.39E-05 |
| 11743576_CPE       | 0.4465   | 6.14E-06 | 7.40E-05 |
| 11753302_CBR1      | -0.45208 | 6.15E-06 | 7.40E-05 |
| 11747233_KBTBD7    | -0.53226 | 6.15E-06 | 7.41E-05 |
| 11725565_MANEA     | -0.68297 | 6.16E-06 | 7.41E-05 |
| 11757675_C16orf87  | 0.505422 | 6.16E-06 | 7.41E-05 |
| 11763803_TMEM67    | 0.813714 | 6.17E-06 | 7.42E-05 |
| 11754313_ARL4C     | 0.47784  | 6.17E-06 | 7.42E-05 |
| 11716350_HSPE1 /// | -0.57509 | 6.19E-06 | 7.45E-05 |
| 11719662_FAM188A   | 0.543939 | 6.20E-06 | 7.45E-05 |
| 11716991_AREL1     | 0.430139 | 6.21E-06 | 7.46E-05 |
| 11739407_KMT2C     | 0.577861 | 6.22E-06 | 7.47E-05 |
| 11721998_PARP14    | 0.800574 | 6.22E-06 | 7.47E-05 |
| 11721632_TMEM97    | -0.4349  | 6.22E-06 | 7.47E-05 |
| 11723587_RC3H1     | 0.422949 | 6.22E-06 | 7.47E-05 |
| 11732572_ZNF582    | 0.583607 | 6.23E-06 | 7.47E-05 |
| 11751364_SLC47A1   | -0.91346 | 6.23E-06 | 7.47E-05 |
| 11722879_PPP2R2B   | 0.53142  | 6.23E-06 | 7.48E-05 |
| 11755077_ZFP69B    | 0.53031  | 6.23E-06 | 7.48E-05 |
| 11739218_CACUL1    | -0.61531 | 6.24E-06 | 7.48E-05 |
| 11755583_FAM161A   | -0.46021 | 6.24E-06 | 7.48E-05 |
| 11752040_PHC3      | 0.948275 | 6.24E-06 | 7.48E-05 |
| 11716257_RERE      | 0.560466 | 6.24E-06 | 7.48E-05 |



|                    |          |          |          |
|--------------------|----------|----------|----------|
| 11723092_FNIP2     | 0.565417 | 6.25E-06 | 7.49E-05 |
| 11722933_CHML      | 0.666562 | 6.25E-06 | 7.49E-05 |
| 11738144_S SX2IP   | -0.6665  | 6.25E-06 | 7.49E-05 |
| 11756205_DCAF6     | 0.384132 | 6.26E-06 | 7.49E-05 |
| 11760221_CASP4     | 0.882466 | 6.26E-06 | 7.49E-05 |
| 11751469_NF1       | 0.50007  | 6.27E-06 | 7.50E-05 |
| 11751742_MED6      | 0.396787 | 6.28E-06 | 7.51E-05 |
| 11739781_TGM2      | -0.63905 | 6.28E-06 | 7.51E-05 |
| 11747540_ADAM9     | 0.390957 | 6.28E-06 | 7.51E-05 |
| 11745000_TXNRD2    | 0.484238 | 6.28E-06 | 7.51E-05 |
| 11725078_RIT1      | 0.645563 | 6.28E-06 | 7.51E-05 |
| 11731679_FAM20C    | -0.69852 | 6.29E-06 | 7.52E-05 |
| 11730923_ADAMTS4   | -0.51807 | 6.29E-06 | 7.52E-05 |
| 11743251_MMP2      | 0.428463 | 6.31E-06 | 7.53E-05 |
| 11726334_CRLS1     | -0.45566 | 6.31E-06 | 7.53E-05 |
| 11751687_EDEM1     | 0.573167 | 6.31E-06 | 7.53E-05 |
| 11739235_PDE12     | 0.563208 | 6.31E-06 | 7.53E-05 |
| 11725149_C9orf40   | -0.5902  | 6.33E-06 | 7.55E-05 |
| 11739455_SGMS1     | 0.466953 | 6.33E-06 | 7.55E-05 |
| 11717515_HSD17B10  | 0.445118 | 6.33E-06 | 7.55E-05 |
| 11725822_JPH1      | -0.41647 | 6.35E-06 | 7.57E-05 |
| 11738125_SLC25A24  | 0.458558 | 6.35E-06 | 7.57E-05 |
| 11754541_CEP95     | 0.424358 | 6.36E-06 | 7.57E-05 |
| 11748104_CDC25C    | -0.74868 | 6.36E-06 | 7.57E-05 |
| 11721294_GIT2      | -0.60577 | 6.36E-06 | 7.58E-05 |
| 11742685_LAMP2 /// | 0.480808 | 6.39E-06 | 7.61E-05 |
| 11717297_LRPPRC    | -0.6354  | 6.39E-06 | 7.61E-05 |
| 11718942_LSM14B    | -0.45382 | 6.41E-06 | 7.63E-05 |
| 11722163_PLK2      | 0.432518 | 6.42E-06 | 7.64E-05 |
| 11725890_ABCC6 /// | -1.10497 | 6.42E-06 | 7.64E-05 |
| 11719633_KLF4      | 0.65683  | 6.44E-06 | 7.65E-05 |
| 11745283_RBFOX2    | 0.402715 | 6.44E-06 | 7.66E-05 |
| 11733803_CPPED1    | 0.439197 | 6.44E-06 | 7.66E-05 |
| 11723720_SLAIN2    | -0.58693 | 6.45E-06 | 7.66E-05 |
| 11763456_TACC3     | -0.41605 | 6.45E-06 | 7.67E-05 |
| 11751859_PDCD1LG2  | 0.459261 | 6.46E-06 | 7.67E-05 |
| 11739281_TRIM23    | 0.556951 | 6.46E-06 | 7.67E-05 |
| 11728766_KLHL5     | 0.460623 | 6.47E-06 | 7.68E-05 |
| 11728427_IKBIP     | 0.588113 | 6.47E-06 | 7.68E-05 |
| 11735058_ARNT2     | -0.53026 | 6.48E-06 | 7.69E-05 |
| 11717350_NCAPH2    | -0.60501 | 6.49E-06 | 7.70E-05 |
| 11726494_SENP8     | -0.39458 | 6.50E-06 | 7.71E-05 |
| 11735758_SH3D19    | 0.517954 | 6.51E-06 | 7.71E-05 |
| 11733906_THAP1     | 0.569065 | 6.51E-06 | 7.72E-05 |
| 11751658_ATP11B    | 0.596603 | 6.52E-06 | 7.73E-05 |
| 11728538_MCC       | 0.648419 | 6.52E-06 | 7.73E-05 |
| 11716610_AP2S1     | -0.42922 | 6.53E-06 | 7.73E-05 |
| 11744146_RBM3      | 0.424382 | 6.53E-06 | 7.73E-05 |
| 11754125_COTL1     | -0.59591 | 6.54E-06 | 7.74E-05 |
| 11727535_CCNF      | -0.6773  | 6.56E-06 | 7.76E-05 |
| 11747708_CC SER2   | 0.699975 | 6.56E-06 | 7.77E-05 |

|                    |          |          |          |
|--------------------|----------|----------|----------|
| 11721625_GLUL      | -0.55412 | 6.59E-06 | 7.80E-05 |
| 11744480_RAB18     | 0.457402 | 6.59E-06 | 7.80E-05 |
| 11756869_PDZD2     | -0.72081 | 6.60E-06 | 7.80E-05 |
| 11747440_YKT6      | -0.48567 | 6.60E-06 | 7.80E-05 |
| 11721454_SERPINA1  | 0.78905  | 6.60E-06 | 7.80E-05 |
| 11727121_MYCBP2    | 0.414321 | 6.60E-06 | 7.80E-05 |
| 11722931_GART      | -0.51164 | 6.61E-06 | 7.80E-05 |
| 11729173_SKA2      | -0.3976  | 6.61E-06 | 7.80E-05 |
| 11739379_FAM198B   | 0.852318 | 6.61E-06 | 7.80E-05 |
| 11733946_RAP2B     | 0.386576 | 6.62E-06 | 7.82E-05 |
| 11724884_HAPLN3    | -0.51771 | 6.62E-06 | 7.82E-05 |
| 11753418_PGGT1B    | 0.527649 | 6.63E-06 | 7.82E-05 |
| 11717091_CDKN1B    | 0.503252 | 6.63E-06 | 7.82E-05 |
| 11763164_DNAJC9    | -0.57208 | 6.66E-06 | 7.85E-05 |
| 11749477_EDEM3     | 0.587052 | 6.66E-06 | 7.86E-05 |
| 11726587_TARS2     | -0.66398 | 6.68E-06 | 7.87E-05 |
| 11721313_ESYT2     | 0.534056 | 6.68E-06 | 7.87E-05 |
| 11741554_CASP8     | 0.642627 | 6.70E-06 | 7.89E-05 |
| 11726081_CCNT2     | 0.452282 | 6.70E-06 | 7.89E-05 |
| 11731222_SHOX2     | -0.69268 | 6.70E-06 | 7.90E-05 |
| 11740489_MAPK9     | 0.73376  | 6.71E-06 | 7.90E-05 |
| 11719471_DCP1A     | -0.40198 | 6.72E-06 | 7.91E-05 |
| 11726615_CDH2      | 0.408399 | 6.72E-06 | 7.91E-05 |
| 11737210_HDGF      | -0.40805 | 6.72E-06 | 7.91E-05 |
| 11749740_USP3      | 0.43559  | 6.73E-06 | 7.91E-05 |
| 11727495_TCEB3     | 0.399954 | 6.73E-06 | 7.91E-05 |
| 11735103_HDLBP     | -0.52899 | 6.73E-06 | 7.91E-05 |
| 11719613_LARP4     | 0.46217  | 6.74E-06 | 7.92E-05 |
| 11756406_ADM       | 0.418384 | 6.74E-06 | 7.92E-05 |
| 11723583_RACGAP1   | -0.44285 | 6.74E-06 | 7.92E-05 |
| 11715545_TMED10    | -0.46216 | 6.74E-06 | 7.92E-05 |
| 11745124_BDH1      | -0.71591 | 6.75E-06 | 7.92E-05 |
| 11746090_SLK       | 0.535465 | 6.77E-06 | 7.95E-05 |
| 11727833_WDR43     | 0.402848 | 6.77E-06 | 7.95E-05 |
| 11739696_AFF3      | 0.848352 | 6.78E-06 | 7.96E-05 |
| 11716725_ADCY6     | -0.48258 | 6.79E-06 | 7.97E-05 |
| 11752350_EOGT      | 0.652997 | 6.80E-06 | 7.97E-05 |
| 11744566_DDX49     | 0.43945  | 6.80E-06 | 7.97E-05 |
| 11716767_IQGAP1    | -0.46946 | 6.81E-06 | 7.98E-05 |
| 11755903_N4BP2L1   | -0.40808 | 6.82E-06 | 7.99E-05 |
| 11758886_RHBDD1    | -0.54384 | 6.82E-06 | 7.99E-05 |
| 11720259_TRIM33    | -0.4274  | 6.82E-06 | 7.99E-05 |
| 11718324_SESN2     | 0.545782 | 6.82E-06 | 7.99E-05 |
| 11751067_AKIRIN1   | 0.563196 | 6.82E-06 | 7.99E-05 |
| 11717727_HN1       | 0.521228 | 6.83E-06 | 7.99E-05 |
| 11749412_PARP14    | 0.764165 | 6.83E-06 | 7.99E-05 |
| 11725849_SENP7     | 0.440826 | 6.83E-06 | 7.99E-05 |
| 11745833_ECT2      | -0.42841 | 6.83E-06 | 7.99E-05 |
| 11720320_AK2       | -0.4358  | 6.85E-06 | 8.01E-05 |
| 11744528_GON4L /// | 0.387779 | 6.86E-06 | 8.02E-05 |
| 11717958_PATL1     | 0.526305 | 6.87E-06 | 8.03E-05 |

|                    |          |          |          |
|--------------------|----------|----------|----------|
| 11729171_NIFK      | 0.429229 | 6.87E-06 | 8.03E-05 |
| 11720411_CYP1B1    | 1.050988 | 6.89E-06 | 8.05E-05 |
| 11758308_HSP90AA1  | -0.38619 | 6.89E-06 | 8.05E-05 |
| 11749691_HELLS     | -0.39724 | 6.89E-06 | 8.05E-05 |
| 11757052_TWF2      | -0.44679 | 6.90E-06 | 8.05E-05 |
| 11716656_TRAF4     | 0.475825 | 6.90E-06 | 8.06E-05 |
| 11754005_ATP6V1G1  | -0.43377 | 6.90E-06 | 8.06E-05 |
| 11720312_XRCC5     | -0.37515 | 6.91E-06 | 8.06E-05 |
| 11733798_DDX5      | -0.59241 | 6.92E-06 | 8.07E-05 |
| 11732976_GON4L     | 0.641017 | 6.93E-06 | 8.08E-05 |
| 11741631_C3orf58   | -0.52588 | 6.93E-06 | 8.08E-05 |
| 11748476_DUSP3     | -0.57936 | 6.94E-06 | 8.09E-05 |
| 11741126_SLFN11    | -0.52956 | 6.95E-06 | 8.10E-05 |
| 11754967_CBX3      | -0.38296 | 6.96E-06 | 8.10E-05 |
| 11718096_MEF2A     | 0.491164 | 6.97E-06 | 8.12E-05 |
| 11760877_CEP70     | -0.49523 | 6.97E-06 | 8.12E-05 |
| 11720619_C19orf25  | -0.46396 | 6.98E-06 | 8.12E-05 |
| 11719127_CGRRF1    | 0.460977 | 6.98E-06 | 8.12E-05 |
| 11756233_AKIRIN2   | -0.44511 | 6.98E-06 | 8.12E-05 |
| 11734213_NDUFS3 // | -0.44683 | 6.99E-06 | 8.13E-05 |
| 11757907_HSPA1A // | -0.38612 | 6.99E-06 | 8.13E-05 |
| 11722912_USP13     | -0.41934 | 6.99E-06 | 8.13E-05 |
| 11733092_FOXRED2   | -0.60435 | 7.00E-06 | 8.13E-05 |
| 11749789_TP53I3    | 0.443179 | 7.00E-06 | 8.14E-05 |
| 11728735_ZBTB38    | 0.422353 | 7.01E-06 | 8.14E-05 |
| 11724385_HYLS1     | -0.43134 | 7.01E-06 | 8.14E-05 |
| 11763294_ZSCAN9    | 0.570339 | 7.01E-06 | 8.14E-05 |
| 11742193_CNR1      | 0.564844 | 7.01E-06 | 8.14E-05 |
| 11717765_MGLL      | 0.462852 | 7.01E-06 | 8.14E-05 |
| 11739005_CAPZA1    | -0.55127 | 7.03E-06 | 8.16E-05 |
| 11717902_IER3IP1   | -0.41707 | 7.04E-06 | 8.16E-05 |
| 11732870_CASP1     | 0.945631 | 7.04E-06 | 8.16E-05 |
| 11743544_CEP57     | -0.47447 | 7.04E-06 | 8.17E-05 |
| 11728094_MAP3K1    | 0.536394 | 7.05E-06 | 8.18E-05 |
| 11723242_CDK6      | 0.601222 | 7.06E-06 | 8.18E-05 |
| 200027_PMNARS      | -0.48786 | 7.06E-06 | 8.18E-05 |
| 11757322_HAUS7     | -0.58113 | 7.06E-06 | 8.18E-05 |
| 11723414_CNN2      | 0.726333 | 7.08E-06 | 8.20E-05 |
| 11750175_SVIL ///  | 0.55169  | 7.08E-06 | 8.20E-05 |
| 11736239_ABCA5     | 0.640938 | 7.10E-06 | 8.22E-05 |
| 11751635_PRKAB1    | 0.495818 | 7.10E-06 | 8.22E-05 |
| 11716705_TRIM44    | 0.408184 | 7.10E-06 | 8.22E-05 |
| 11746928_ENC1      | 0.52607  | 7.10E-06 | 8.22E-05 |
| 11731338_ZNF398    | 0.495432 | 7.12E-06 | 8.24E-05 |
| 11727194_ZNF202    | 0.484998 | 7.12E-06 | 8.24E-05 |
| 11763560_NF1       | 0.530216 | 7.13E-06 | 8.24E-05 |
| 11757937_BIRC2     | 0.385925 | 7.13E-06 | 8.24E-05 |
| 11722789_RAB5A     | 0.43223  | 7.14E-06 | 8.25E-05 |
| 11727178_MTHFR     | 0.446804 | 7.14E-06 | 8.25E-05 |
| 11755361_DET1      | -0.74184 | 7.14E-06 | 8.25E-05 |
| 11727521_INTS6     | 0.454751 | 7.16E-06 | 8.26E-05 |

|                    |          |          |          |
|--------------------|----------|----------|----------|
| 11725392_MAK16     | 0.432969 | 7.16E-06 | 8.27E-05 |
| 11727412_CLN8      | 0.472503 | 7.17E-06 | 8.28E-05 |
| 11735319_RBMS3     | 0.491879 | 7.18E-06 | 8.28E-05 |
| 11730745_AKIRIN1   | 0.444688 | 7.18E-06 | 8.29E-05 |
| 11744315_SGK223    | 0.603444 | 7.19E-06 | 8.29E-05 |
| 11741393_HMBOX1    | 0.509475 | 7.19E-06 | 8.29E-05 |
| 11760619_ABI2      | 0.417971 | 7.19E-06 | 8.29E-05 |
| 11756887_TNS2      | -0.37858 | 7.20E-06 | 8.30E-05 |
| 11731109_ADAM17    | 0.439158 | 7.21E-06 | 8.31E-05 |
| 11715739_PLPP3     | 0.453083 | 7.23E-06 | 8.33E-05 |
| 11732204_NAP1L1    | -0.56733 | 7.24E-06 | 8.34E-05 |
| 11731435_SLC7A6OS  | 0.48811  | 7.25E-06 | 8.34E-05 |
| 11725110_NDE1      | -0.39067 | 7.25E-06 | 8.34E-05 |
| 11744000_NFKBIA    | 0.439356 | 7.25E-06 | 8.34E-05 |
| 11717052_SSR1      | -0.41016 | 7.25E-06 | 8.35E-05 |
| 11749549_PIGX      | -0.62313 | 7.26E-06 | 8.36E-05 |
| 11725210_NFXL1     | 0.398753 | 7.27E-06 | 8.36E-05 |
| 11725302_DDX19A    | 0.415413 | 7.27E-06 | 8.36E-05 |
| 11722688_LIFR      | 0.993228 | 7.28E-06 | 8.37E-05 |
| 11738027_DMD       | 0.709888 | 7.28E-06 | 8.37E-05 |
| 11718638_ELP6      | -0.39895 | 7.28E-06 | 8.37E-05 |
| 11716127_BAG1      | 0.409747 | 7.29E-06 | 8.38E-05 |
| 11756635_PLCB4     | 0.861954 | 7.30E-06 | 8.38E-05 |
| 11741484_SCRN1     | 0.425661 | 7.30E-06 | 8.39E-05 |
| 11718297_TACC3     | -0.465   | 7.32E-06 | 8.40E-05 |
| 11739411_KMT2C     | 0.489475 | 7.32E-06 | 8.40E-05 |
| 11730754_AGPAT5    | 0.424711 | 7.32E-06 | 8.40E-05 |
| 11743594_FMR1      | 0.448448 | 7.32E-06 | 8.40E-05 |
| 11761986_ITSN1     | -0.40851 | 7.33E-06 | 8.41E-05 |
| 11737250_IL1RAPL1  | 0.598733 | 7.34E-06 | 8.42E-05 |
| 11727579_CSTF3     | -0.43045 | 7.35E-06 | 8.42E-05 |
| 11719374_EDEM2     | -0.46524 | 7.36E-06 | 8.43E-05 |
| 11717967_TYW1      | -0.46743 | 7.36E-06 | 8.43E-05 |
| 11737790_PTRH2     | 0.380374 | 7.37E-06 | 8.44E-05 |
| 11745679_CTBP1     | -0.4266  | 7.38E-06 | 8.45E-05 |
| 11722385_UBTF      | -0.74567 | 7.39E-06 | 8.46E-05 |
| 11737197_KIF4A /// | -0.62053 | 7.39E-06 | 8.46E-05 |
| 11745236_DPYD      | 0.404334 | 7.39E-06 | 8.46E-05 |
| 11725538_FAM199X   | 0.763176 | 7.39E-06 | 8.46E-05 |
| 11737747_GMFB      | -0.50903 | 7.40E-06 | 8.46E-05 |
| 11733074_PPP1R12A  | 0.41265  | 7.40E-06 | 8.47E-05 |
| 11720601_SYT11     | 0.555252 | 7.40E-06 | 8.47E-05 |
| 11718610_TP53INP1  | 0.608393 | 7.41E-06 | 8.47E-05 |
| 11718260_NOTCH1    | -0.44255 | 7.41E-06 | 8.47E-05 |
| 11748045_LDLR      | -0.4681  | 7.42E-06 | 8.48E-05 |
| 11729545_DZANK1    | 0.535298 | 7.42E-06 | 8.48E-05 |
| 11736834_TM2D2     | -0.55924 | 7.43E-06 | 8.48E-05 |
| 11755032_ASAP1     | 0.405327 | 7.43E-06 | 8.48E-05 |
| 11759019_MATR3     | -0.39447 | 7.44E-06 | 8.49E-05 |
| 11724380_NHSL1     | -0.38798 | 7.45E-06 | 8.50E-05 |
| 11739979_AKAP2 /// | 0.446925 | 7.46E-06 | 8.52E-05 |

|                   |          |          |          |
|-------------------|----------|----------|----------|
| 11756543_NXF1     | 0.407251 | 7.47E-06 | 8.52E-05 |
| 11732389_DYNC2LI1 | 0.413343 | 7.47E-06 | 8.52E-05 |
| 11716733_IRF1     | 1.017819 | 7.49E-06 | 8.54E-05 |
| 11717174_ABL1     | -0.65885 | 7.50E-06 | 8.55E-05 |
| 11754234_KLHDC10  | 0.760306 | 7.52E-06 | 8.56E-05 |
| 11727774_ARL13B   | 0.407192 | 7.52E-06 | 8.56E-05 |
| 11746224_SAYSD1   | -0.50348 | 7.52E-06 | 8.56E-05 |
| 11729664_STK38L   | -0.98778 | 7.52E-06 | 8.57E-05 |
| 11720485_SENP2    | -0.56753 | 7.53E-06 | 8.57E-05 |
| 11736437_DEDD     | 0.407364 | 7.53E-06 | 8.58E-05 |
| 11717687_JAK1     | 0.415449 | 7.54E-06 | 8.58E-05 |
| 11730289_ARHGAP5  | -0.41795 | 7.55E-06 | 8.59E-05 |
| 11722548_HIVEP1   | 0.438703 | 7.55E-06 | 8.59E-05 |
| 11729151_PIGM     | -0.45678 | 7.56E-06 | 8.60E-05 |
| 11735464_ABHD17B  | 0.436547 | 7.57E-06 | 8.61E-05 |
| 11733104_POLD3    | -0.5409  | 7.58E-06 | 8.61E-05 |
| 11728494_ZNF197   | 0.580687 | 7.58E-06 | 8.61E-05 |
| 11727103_IGF2BP1  | 0.415841 | 7.59E-06 | 8.62E-05 |
| 11752765_TXNIP    | -0.4751  | 7.60E-06 | 8.63E-05 |
| 11723454_RIOK2    | 0.387181 | 7.60E-06 | 8.63E-05 |
| 11723356_CHD7     | 0.412746 | 7.64E-06 | 8.67E-05 |
| 11721804_BUB3     | -0.41487 | 7.64E-06 | 8.67E-05 |
| 11736342_EGR3     | 0.631582 | 7.65E-06 | 8.68E-05 |
| 11730575_ZNF470   | 0.632664 | 7.65E-06 | 8.68E-05 |
| 11723431_ZFP91    | 0.376515 | 7.67E-06 | 8.70E-05 |
| 11721642_CAP2     | 0.730423 | 7.67E-06 | 8.70E-05 |
| 11716114_POR      | -0.39574 | 7.67E-06 | 8.70E-05 |
| 11754293_STK40    | 0.606085 | 7.67E-06 | 8.70E-05 |
| 11753913_S SX2IP  | -0.53014 | 7.68E-06 | 8.71E-05 |
| 11741283_AKAP7    | -1.09071 | 7.68E-06 | 8.71E-05 |
| 11751750_NXF1     | 0.490248 | 7.69E-06 | 8.71E-05 |
| 11725080_RNFT1    | 0.539551 | 7.69E-06 | 8.71E-05 |
| 11748702_ANXA4    | 0.399243 | 7.70E-06 | 8.71E-05 |
| 11753334_BAG1     | 0.44153  | 7.70E-06 | 8.71E-05 |
| 11732293_MTMR2    | 0.435983 | 7.70E-06 | 8.71E-05 |
| 11723686_FAM46A   | 0.501744 | 7.70E-06 | 8.72E-05 |
| 11736663_ZNF354B  | 0.669688 | 7.71E-06 | 8.73E-05 |
| 11717561_DTX3L    | 0.520321 | 7.72E-06 | 8.73E-05 |
| 11729617_UBE2J2   | 0.410617 | 7.72E-06 | 8.73E-05 |
| 11728372_DNAJC16  | 0.521427 | 7.72E-06 | 8.73E-05 |
| 11758512_EIF4E    | -0.49643 | 7.72E-06 | 8.73E-05 |
| 11743025_ATP7A    | 0.607985 | 7.73E-06 | 8.73E-05 |
| 11755929_THOP1    | -0.45023 | 7.73E-06 | 8.73E-05 |
| 11740083_AGMO     | -1.08685 | 7.74E-06 | 8.74E-05 |
| 11753332_HNRNPL   | -0.43036 | 7.75E-06 | 8.75E-05 |
| 11726156_POLA1    | -0.41461 | 7.75E-06 | 8.75E-05 |
| 11747988_SLC39A10 | 0.414706 | 7.75E-06 | 8.75E-05 |
| 11758123_RELL2    | 0.523869 | 7.76E-06 | 8.76E-05 |
| 11744687_ATG4B    | -0.41943 | 7.76E-06 | 8.76E-05 |
| 11745284_RBFOX2   | 0.437461 | 7.77E-06 | 8.77E-05 |
| 11732220_ECI1     | -0.53322 | 7.78E-06 | 8.77E-05 |

|                    |          |          |          |
|--------------------|----------|----------|----------|
| 11745856_RNF145    | 0.499797 | 7.78E-06 | 8.77E-05 |
| 11728313_ZNF148    | -0.82745 | 7.78E-06 | 8.77E-05 |
| 11720028_LDLR      | -0.56314 | 7.78E-06 | 8.77E-05 |
| 11746418_VIT       | 0.500656 | 7.79E-06 | 8.78E-05 |
| 11727150_PRICKLE1  | 1.061527 | 7.80E-06 | 8.78E-05 |
| 11739270_PAK2      | -0.42831 | 7.80E-06 | 8.78E-05 |
| 11755490_EXOC7     | -0.56661 | 7.81E-06 | 8.79E-05 |
| 11724602_ERAP1     | 0.462044 | 7.81E-06 | 8.79E-05 |
| 11723440_EPHA4     | 0.744422 | 7.81E-06 | 8.79E-05 |
| 11754133_INPP4B    | 0.5335   | 7.82E-06 | 8.80E-05 |
| 11749682_EXOC5     | 0.453334 | 7.83E-06 | 8.80E-05 |
| 11750166_EED       | -0.40432 | 7.83E-06 | 8.80E-05 |
| 11724425_FAM98A    | 0.387986 | 7.84E-06 | 8.81E-05 |
| 11750634_LOC100996 | 0.458115 | 7.84E-06 | 8.81E-05 |
| 11737369_HOXC5     | -0.47354 | 7.84E-06 | 8.81E-05 |
| 11751550_CD46      | 0.471313 | 7.84E-06 | 8.81E-05 |
| 11757917_CNOT6L    | -0.52014 | 7.85E-06 | 8.82E-05 |
| 11718706_IGF1R     | -0.67889 | 7.86E-06 | 8.83E-05 |
| 11740123_ZNF419    | 0.680698 | 7.86E-06 | 8.83E-05 |
| 11751369_PKD2      | 0.505228 | 7.87E-06 | 8.83E-05 |
| 11729638_FAM134C   | -0.49561 | 7.87E-06 | 8.83E-05 |
| 11725576_CDC14A    | 0.734542 | 7.87E-06 | 8.84E-05 |
| 11739212_ARL14EP   | 0.486644 | 7.88E-06 | 8.84E-05 |
| 11724604_HS6ST2    | -0.46641 | 7.88E-06 | 8.84E-05 |
| 11753491_ERP29     | -0.68418 | 7.90E-06 | 8.85E-05 |
| 11721774_ASPH      | 0.577431 | 7.90E-06 | 8.85E-05 |
| 11759439_PRKAR1B   | -0.63644 | 7.91E-06 | 8.86E-05 |
| 11758676_RHOQ      | 0.510581 | 7.91E-06 | 8.87E-05 |
| 11718823_EDRF1     | 0.390884 | 7.92E-06 | 8.87E-05 |
| 11749356_DCUN1D4   | 0.524276 | 7.92E-06 | 8.88E-05 |
| 11750105_HNRNPAB   | -0.37805 | 7.94E-06 | 8.89E-05 |
| 11729684_THAP10    | -0.45036 | 7.94E-06 | 8.89E-05 |
| 11757479_TMEM141   | -0.59049 | 7.95E-06 | 8.90E-05 |
| 11725923_ASAP2     | 0.42129  | 7.96E-06 | 8.91E-05 |
| 11737794_FGFR1OP   | 0.608806 | 7.97E-06 | 8.91E-05 |
| 11742220_CD46      | 0.415827 | 7.97E-06 | 8.92E-05 |
| 11748291_RTFDC1    | -0.46264 | 8.02E-06 | 8.96E-05 |
| 11717190_TXNIP     | -0.49407 | 8.02E-06 | 8.97E-05 |
| 11732242_PLK4      | -0.45177 | 8.02E-06 | 8.97E-05 |
| 11737527_DYRK1A    | 0.482741 | 8.03E-06 | 8.97E-05 |
| 11752822_ACTR1A    | -0.38873 | 8.03E-06 | 8.97E-05 |
| 11750812_FLI1      | 0.577857 | 8.03E-06 | 8.97E-05 |
| 11739923_ZNF37A    | 0.384007 | 8.04E-06 | 8.97E-05 |
| 11736238_ABCA5     | 0.763019 | 8.04E-06 | 8.98E-05 |
| 11741765_METTL20   | -0.45896 | 8.05E-06 | 8.98E-05 |
| 11743774_LZTFL1    | 0.448195 | 8.05E-06 | 8.98E-05 |
| 11720660_CDK9      | -0.51205 | 8.06E-06 | 8.99E-05 |
| 11727287_C5orf34   | -0.45042 | 8.06E-06 | 8.99E-05 |
| 11754675_CLIP4     | 0.489432 | 8.06E-06 | 8.99E-05 |
| 11722226_SDHAF3    | -0.70249 | 8.07E-06 | 8.99E-05 |
| 11732373_TSEN34    | -0.37929 | 8.07E-06 | 8.99E-05 |

|                    |          |          |          |
|--------------------|----------|----------|----------|
| 11754702_ZNF493    | 0.564024 | 8.08E-06 | 9.00E-05 |
| 11717963_KRAS      | -0.38786 | 8.08E-06 | 9.00E-05 |
| 11718249_TBC1D13   | -0.52851 | 8.09E-06 | 9.01E-05 |
| 11756402_MAGOHB    | -0.44697 | 8.09E-06 | 9.01E-05 |
| 11743673_KDM6B     | 0.711005 | 8.10E-06 | 9.01E-05 |
| 11726192_TFAP2C    | -0.40266 | 8.10E-06 | 9.01E-05 |
| 11720784_ACTL6A    | -0.39378 | 8.10E-06 | 9.01E-05 |
| 11721840_GLIPR1    | 0.782463 | 8.10E-06 | 9.01E-05 |
| 11751133_ATP6V1B2  | 0.486973 | 8.12E-06 | 9.03E-05 |
| 11751613_C20orf24  | -0.37569 | 8.12E-06 | 9.03E-05 |
| 11725651_DCAF5     | 0.458337 | 8.12E-06 | 9.03E-05 |
| 11756641_ZNF256    | 0.686273 | 8.13E-06 | 9.03E-05 |
| 11733294_PHF20L1   | 0.630167 | 8.14E-06 | 9.04E-05 |
| 11760590_OGFR1     | 0.801612 | 8.14E-06 | 9.04E-05 |
| 11746692_BAZ1A     | 0.464973 | 8.14E-06 | 9.04E-05 |
| 11717769_CTR9      | 0.45189  | 8.15E-06 | 9.04E-05 |
| 11754101_TAB2      | 0.505363 | 8.15E-06 | 9.04E-05 |
| 11728389_TSPAN2    | 1.813947 | 8.15E-06 | 9.04E-05 |
| 11754983_DAZAP1    | -0.42332 | 8.15E-06 | 9.04E-05 |
| 11759290_AKT3      | 0.434287 | 8.15E-06 | 9.04E-05 |
| 11717897_PTP4A1    | 0.511649 | 8.15E-06 | 9.04E-05 |
| 11757526_C19orf60  | -0.44195 | 8.17E-06 | 9.06E-05 |
| 11756962_HDAC6     | -0.69383 | 8.17E-06 | 9.06E-05 |
| 11751310_SNIP1     | 0.517108 | 8.17E-06 | 9.06E-05 |
| 11739642_STXBP5    | 0.613339 | 8.18E-06 | 9.06E-05 |
| 11739965_GPR39     | 1.038702 | 8.18E-06 | 9.06E-05 |
| 11727060_MRPS36    | -0.50077 | 8.19E-06 | 9.07E-05 |
| 11750244_MGLL      | 0.461729 | 8.19E-06 | 9.07E-05 |
| 11752050_WDR44     | 0.439125 | 8.20E-06 | 9.07E-05 |
| 11760405_TRMT13    | 0.623032 | 8.22E-06 | 9.10E-05 |
| 11721074_LAS1L     | -0.46991 | 8.22E-06 | 9.10E-05 |
| 11744816_RAPH1     | 0.528483 | 8.22E-06 | 9.10E-05 |
| 11717424_CHMP3 /// | -0.49133 | 8.23E-06 | 9.11E-05 |
| 11745754_SQSTM1    | 0.405854 | 8.23E-06 | 9.11E-05 |
| 11747082_NSMCE4A   | -0.44061 | 8.24E-06 | 9.11E-05 |
| 11747795_R3HCC1L   | 0.502266 | 8.24E-06 | 9.11E-05 |
| 11740237_KAT6A     | -0.39265 | 8.25E-06 | 9.11E-05 |
| 11744635_ZC3H7A    | 0.520155 | 8.25E-06 | 9.12E-05 |
| 11733220_MRPL11    | -0.3728  | 8.26E-06 | 9.13E-05 |
| 11724318_LRIF1     | 0.442329 | 8.26E-06 | 9.13E-05 |
| 11718424_ACD       | -0.4251  | 8.27E-06 | 9.13E-05 |
| 11755279_HLA-DPB1  | -0.46767 | 8.28E-06 | 9.14E-05 |
| 11741445_PTGES2    | -0.56311 | 8.28E-06 | 9.14E-05 |
| 11739840_INPP4B    | -0.68338 | 8.29E-06 | 9.14E-05 |
| 11721856_PIGK      | -0.60864 | 8.29E-06 | 9.14E-05 |
| 11728692_LOC100996 | 0.516722 | 8.30E-06 | 9.16E-05 |
| 11742745_PLIN2     | -0.71691 | 8.31E-06 | 9.16E-05 |
| 11758190_SDHD      | -0.71975 | 8.31E-06 | 9.16E-05 |
| 11719554_CTSS      | 0.466525 | 8.31E-06 | 9.16E-05 |
| 11719802_ELF1      | 0.399003 | 8.32E-06 | 9.17E-05 |
| 11716676_ZNF106    | 0.400953 | 8.32E-06 | 9.17E-05 |

|                    |          |          |          |
|--------------------|----------|----------|----------|
| 11759533_FIP1L1    | -0.68113 | 8.33E-06 | 9.17E-05 |
| 11734181_GAN       | 0.924674 | 8.33E-06 | 9.17E-05 |
| 11739082_NFYC      | -0.39703 | 8.33E-06 | 9.17E-05 |
| 11757812_INPP5A    | -0.47217 | 8.34E-06 | 9.17E-05 |
| 11730390_SEMA3A    | 0.379393 | 8.34E-06 | 9.17E-05 |
| 11752931_GBP1      | 0.858548 | 8.35E-06 | 9.18E-05 |
| 11718960_NUFIP2    | -0.39002 | 8.37E-06 | 9.20E-05 |
| 11725212_PLCXD1    | -0.40802 | 8.38E-06 | 9.21E-05 |
| 11758031_BHLHE41   | 0.668647 | 8.39E-06 | 9.23E-05 |
| 11748033_KIAA0895  | 0.787734 | 8.39E-06 | 9.23E-05 |
| 11760121_LONP2     | -0.41485 | 8.40E-06 | 9.24E-05 |
| 11728288_KRT15     | 0.750461 | 8.41E-06 | 9.24E-05 |
| 11719840_PHLDA3    | 0.44884  | 8.42E-06 | 9.25E-05 |
| 11739451_FRMD6     | 0.430548 | 8.43E-06 | 9.25E-05 |
| 11750245_MGLL      | 0.514367 | 8.43E-06 | 9.25E-05 |
| 11733200_CCDC14    | -0.38291 | 8.43E-06 | 9.25E-05 |
| 11756761_SQSTM1    | 0.363595 | 8.43E-06 | 9.26E-05 |
| 11734207_ZNF155    | 0.537606 | 8.44E-06 | 9.26E-05 |
| 11746837_PLK2      | 0.404356 | 8.44E-06 | 9.26E-05 |
| 11753808_LSM3      | -0.51264 | 8.45E-06 | 9.27E-05 |
| 11757843_PEA15     | 0.35535  | 8.46E-06 | 9.28E-05 |
| 11741362_ZNF26     | 0.692862 | 8.47E-06 | 9.28E-05 |
| 11726640_MIB1      | -0.76996 | 8.47E-06 | 9.28E-05 |
| 11758434_FBXW2     | -0.55971 | 8.47E-06 | 9.28E-05 |
| 11735495_C11orf63  | 0.786141 | 8.47E-06 | 9.28E-05 |
| 11743486_NAA25     | 0.372641 | 8.48E-06 | 9.29E-05 |
| 11761466_INTS4     | 0.528036 | 8.50E-06 | 9.31E-05 |
| 11745781_ZNF540    | 1.521099 | 8.52E-06 | 9.33E-05 |
| 11747836_RPS6KB1   | 0.439372 | 8.56E-06 | 9.37E-05 |
| 11722814_RANBP2 // | 0.399187 | 8.56E-06 | 9.37E-05 |
| 11720839_SMNDC1    | 0.382112 | 8.57E-06 | 9.38E-05 |
| 11743891_RUFY2     | 0.750296 | 8.58E-06 | 9.39E-05 |
| 11739191_AKT3      | 0.451063 | 8.60E-06 | 9.41E-05 |
| 11725224_ZSCAN9    | 0.543434 | 8.61E-06 | 9.41E-05 |
| 11725142_TGS1      | -0.55764 | 8.61E-06 | 9.41E-05 |
| 11746437_FZD3      | 0.449789 | 8.61E-06 | 9.41E-05 |
| 11757284_MYDGF     | -0.39709 | 8.62E-06 | 9.42E-05 |
| 11743013_RNF115    | 0.416234 | 8.62E-06 | 9.42E-05 |
| 11741051_IMPDI1    | -0.7117  | 8.63E-06 | 9.42E-05 |
| 11755051_USP25     | 0.603575 | 8.63E-06 | 9.43E-05 |
| 11746242_ARNTL2    | 0.49895  | 8.64E-06 | 9.43E-05 |
| 11743532_RUFY3     | 0.415432 | 8.66E-06 | 9.44E-05 |
| 11729200_C6orf120  | 0.479279 | 8.66E-06 | 9.44E-05 |
| 11755942_C19orf54  | -0.42173 | 8.66E-06 | 9.45E-05 |
| 11719036_UVRAG     | -0.49001 | 8.67E-06 | 9.45E-05 |
| 11754620_PKP4      | 0.527568 | 8.67E-06 | 9.45E-05 |
| 11753173_ZNF410    | 0.42734  | 8.67E-06 | 9.46E-05 |
| 11716093_KLF6      | 0.522744 | 8.69E-06 | 9.47E-05 |
| 11752445_NF1       | 0.513643 | 8.70E-06 | 9.48E-05 |
| 11728131_EXOC8     | 0.425955 | 8.70E-06 | 9.48E-05 |
| 11724782_HERC4     | 0.410063 | 8.70E-06 | 9.48E-05 |



|                   |          |          |          |
|-------------------|----------|----------|----------|
| 11739135_COL5A2   | 0.47835  | 8.71E-06 | 9.48E-05 |
| 11754330_IRF2     | 0.453337 | 8.72E-06 | 9.49E-05 |
| 11751356_SDCBP    | 0.390256 | 8.74E-06 | 9.51E-05 |
| 11753990_USP47    | 0.494491 | 8.75E-06 | 9.52E-05 |
| 11716574_KDM3A    | 0.3711   | 8.76E-06 | 9.53E-05 |
| 11728081_BARX1    | -0.41575 | 8.76E-06 | 9.53E-05 |
| 11729502_ASCC3    | 0.499914 | 8.77E-06 | 9.53E-05 |
| 11748544_TXNIP    | -0.42273 | 8.77E-06 | 9.53E-05 |
| 11722409_GALNT7   | 0.504633 | 8.77E-06 | 9.53E-05 |
| 11758567_IKBIP    | 0.429995 | 8.78E-06 | 9.54E-05 |
| 11717655_SPRED2   | 0.421377 | 8.78E-06 | 9.54E-05 |
| 11732456_1-Mar    | 0.739817 | 8.78E-06 | 9.54E-05 |
| 11727607_OGG1     | -0.37489 | 8.78E-06 | 9.54E-05 |
| 11747553_MCCC1    | 0.441464 | 8.79E-06 | 9.54E-05 |
| 11716287_RABAC1   | -0.40604 | 8.79E-06 | 9.54E-05 |
| 11719992_NLK      | 0.597895 | 8.79E-06 | 9.55E-05 |
| 11720081_CBX6     | -0.40594 | 8.80E-06 | 9.55E-05 |
| 11751895_DOCK4    | 0.471114 | 8.80E-06 | 9.55E-05 |
| 11723580_SMIM13   | 0.453901 | 8.80E-06 | 9.55E-05 |
| 11728234_CLDN1    | 1.058542 | 8.81E-06 | 9.55E-05 |
| 11755872_ATP11B   | 0.515232 | 8.82E-06 | 9.56E-05 |
| 11724941_ZNF343   | 0.401    | 8.82E-06 | 9.56E-05 |
| 11734068_SSR3     | 0.404523 | 8.83E-06 | 9.57E-05 |
| 11757888_DNAAF5   | -0.37448 | 8.85E-06 | 9.59E-05 |
| 11743977_MYL12A   | 0.370356 | 8.85E-06 | 9.59E-05 |
| 11740195_ZNF626   | 0.414384 | 8.86E-06 | 9.60E-05 |
| 11750147_TRIM4    | 0.537277 | 8.88E-06 | 9.61E-05 |
| 11750465_NFYC     | -0.45437 | 8.88E-06 | 9.61E-05 |
| 11716577_SDC1     | -0.46379 | 8.89E-06 | 9.63E-05 |
| 11749780_BCAT1    | 0.446119 | 8.90E-06 | 9.63E-05 |
| 11722566_NT5C2    | 0.489188 | 8.90E-06 | 9.63E-05 |
| 11733869_HLA-DOA  | -0.48418 | 8.91E-06 | 9.64E-05 |
| 11717419_DNAL1    | 0.669789 | 8.92E-06 | 9.64E-05 |
| 11733381_OSCP1    | 0.398597 | 8.92E-06 | 9.64E-05 |
| 11743630_RPL26L1  | -0.38134 | 8.92E-06 | 9.64E-05 |
| 11759663_SP100    | 0.606298 | 8.92E-06 | 9.64E-05 |
| 11723312_PXMP2    | -0.42096 | 8.93E-06 | 9.64E-05 |
| 11745328_LRPPRC   | 0.460555 | 8.93E-06 | 9.64E-05 |
| 11745997_APIG1    | 0.689674 | 8.96E-06 | 9.67E-05 |
| 11716117_PDIA4    | -0.44303 | 8.96E-06 | 9.67E-05 |
| 11754592_ATF5     | -0.56598 | 8.97E-06 | 9.68E-05 |
| 11762366_RBPJ     | -0.52343 | 8.99E-06 | 9.70E-05 |
| 11719391_PRKDC    | -0.38394 | 9.00E-06 | 9.71E-05 |
| 11721822_FSD1     | -0.41742 | 9.00E-06 | 9.71E-05 |
| 11717966_TYW1 /// | -0.3757  | 9.01E-06 | 9.72E-05 |
| 11747369_C1orf112 | -0.56034 | 9.02E-06 | 9.72E-05 |
| 11747357_CIAPIN1  | -0.43693 | 9.03E-06 | 9.73E-05 |
| 11755947_CMBL     | 0.465515 | 9.03E-06 | 9.73E-05 |
| 11720975_WIPF2    | -0.4083  | 9.03E-06 | 9.73E-05 |
| 11727847_GNA12    | -0.48115 | 9.04E-06 | 9.74E-05 |
| 11721918_BCL7C    | -0.42845 | 9.05E-06 | 9.75E-05 |

|                    |          |          |          |
|--------------------|----------|----------|----------|
| 11763847_LINC01119 | 0.619801 | 9.06E-06 | 9.75E-05 |
| 11727208_DDHD1     | 0.675971 | 9.06E-06 | 9.75E-05 |
| 11728565_FAM210A   | 0.370571 | 9.06E-06 | 9.75E-05 |
| 11715568_CD9       | -0.39308 | 9.06E-06 | 9.75E-05 |
| 11763503_NF1       | 0.933106 | 9.08E-06 | 9.76E-05 |
| 11735542_CDC14A    | 0.772131 | 9.08E-06 | 9.77E-05 |
| 11723771_MASTL     | -0.42906 | 9.09E-06 | 9.77E-05 |
| 11751328_FGFR10P   | 0.645181 | 9.10E-06 | 9.78E-05 |
| 11743709_NAA15     | -0.55866 | 9.10E-06 | 9.78E-05 |
| 11736333_PHF20     | -0.39744 | 9.11E-06 | 9.79E-05 |
| 11722542_HIVEP2    | 0.843534 | 9.12E-06 | 9.80E-05 |
| 11730478_RNF125    | -0.49805 | 9.13E-06 | 9.81E-05 |
| 11728053_INPP5B    | 0.435355 | 9.13E-06 | 9.81E-05 |
| 11723557_DCAF16    | -0.77851 | 9.15E-06 | 9.82E-05 |
| 11749421_CEP85     | -0.56724 | 9.15E-06 | 9.83E-05 |
| 11757373_APOC1     | -0.65695 | 9.17E-06 | 9.84E-05 |
| 11749475_ELM01     | -0.51167 | 9.22E-06 | 9.89E-05 |
| 11755123_LPCAT3    | -0.47387 | 9.22E-06 | 9.89E-05 |
| 11733218_TFAP4     | -0.42243 | 9.23E-06 | 9.90E-05 |
| 11746174_IDH1      | -0.44355 | 9.26E-06 | 9.93E-05 |
| 11745127_TNNT1     | -0.39474 | 9.26E-06 | 9.93E-05 |
| 11743904_PDLIM1    | 0.439186 | 9.26E-06 | 9.93E-05 |
| 11752754_SDC1      | -0.58927 | 9.27E-06 | 9.93E-05 |
| 11721734_GCH1      | -0.73252 | 9.31E-06 | 9.97E-05 |
| 11717125_SH3PXD2A  | -0.37794 | 9.31E-06 | 9.98E-05 |
| 11725463_MAU2      | -0.44566 | 9.32E-06 | 9.98E-05 |
| 11758020_EIF5      | 0.356438 | 9.33E-06 | 9.99E-05 |
| 11754568_FOXRED1   | -0.48806 | 9.33E-06 | 9.99E-05 |
| 11759503_FAM103A1  | 0.370961 | 9.35E-06 | 0.0001   |
| 11739432_ATP11B    | -0.58143 | 9.35E-06 | 0.0001   |
| 11739311_HUS1      | 0.757589 | 9.37E-06 | 0.0001   |
| 11715546_CBX1      | -0.4151  | 9.37E-06 | 0.0001   |
| 11720504_RAB6B     | -0.41616 | 9.39E-06 | 0.0001   |
| 11729613_H2AFZ     | -0.37006 | 9.39E-06 | 0.0001   |
| 11727941_EME1      | -0.46971 | 9.40E-06 | 0.0001   |
| 11739977_GPR180    | 0.489086 | 9.40E-06 | 0.0001   |
| 11763770_TMEM67    | 0.858587 | 9.40E-06 | 0.0001   |
| 11743940_CCDC90B   | 0.41291  | 9.40E-06 | 0.0001   |
| 11749451_DERA      | -0.57325 | 9.41E-06 | 0.0001   |
| 11727826_NDUFAF7   | 0.444706 | 9.42E-06 | 0.000101 |
| 11721699_PMS1      | -0.41459 | 9.44E-06 | 0.000101 |
| 11749000_MSH6      | -0.47743 | 9.44E-06 | 0.000101 |
| 11730054_SNX16     | 0.661193 | 9.44E-06 | 0.000101 |
| 11719584_CNNM3     | -0.91209 | 9.45E-06 | 0.000101 |
| 11730546_EFCAB11   | -0.39465 | 9.47E-06 | 0.000101 |
| 11726342_DNAJB14   | 0.409827 | 9.47E-06 | 0.000101 |
| 11743523_KDM5A     | 0.393118 | 9.49E-06 | 0.000101 |
| 11751223_MAPK1     | 0.393825 | 9.49E-06 | 0.000101 |
| 11722049_DUSP6     | 0.398365 | 9.49E-06 | 0.000101 |
| 11754751_BAG1      | 0.433627 | 9.50E-06 | 0.000101 |
| 11743909_ALG14     | -0.45171 | 9.50E-06 | 0.000101 |

|                    |          |          |          |
|--------------------|----------|----------|----------|
| 11743978_MYL12A    | 0.359233 | 9.50E-06 | 0.000101 |
| 11718000_MPLKIP    | -0.42137 | 9.51E-06 | 0.000101 |
| 11723596_MAP2K7    | -0.39772 | 9.53E-06 | 0.000101 |
| 11727528_PHF20L1   | 0.477733 | 9.54E-06 | 0.000102 |
| 11751553_DEPDC7    | 0.415233 | 9.56E-06 | 0.000102 |
| 11718147_ATG5      | 0.442907 | 9.56E-06 | 0.000102 |
| 11726806_PTPMT1    | -0.43295 | 9.57E-06 | 0.000102 |
| 11747154_FXYD6 /// | -0.68218 | 9.58E-06 | 0.000102 |
| 11718210_PYCR1     | -0.37634 | 9.59E-06 | 0.000102 |
| 11754135_H2AFZ     | -0.41068 | 9.60E-06 | 0.000102 |
| 11717562_DTX3L     | 0.588009 | 9.62E-06 | 0.000102 |
| 11756307_MTMR10    | 0.73209  | 9.63E-06 | 0.000102 |
| 11722432_C1orf27   | 0.539108 | 9.63E-06 | 0.000102 |
| 11746867_GRIK2     | 0.690755 | 9.64E-06 | 0.000102 |
| 11757671_FAM200B   | 0.385846 | 9.64E-06 | 0.000102 |
| 11758328_NCOA3     | 0.69354  | 9.67E-06 | 0.000103 |
| 11751689_GNE       | 0.597934 | 9.67E-06 | 0.000103 |
| 11754006_LAPTM4A   | -0.38121 | 9.69E-06 | 0.000103 |
| 11754767_RPL7L1    | -0.47517 | 9.71E-06 | 0.000103 |
| 11745355_PHLDB3    | 0.439618 | 9.72E-06 | 0.000103 |
| 11723584_RACGAP1   | -0.37412 | 9.73E-06 | 0.000103 |
| 11761734_HSP90AA4P | -0.38465 | 9.73E-06 | 0.000103 |
| 11722106_PCNX      | 0.594011 | 9.74E-06 | 0.000103 |
| 11734465_HIST1H1A  | -1.11758 | 9.75E-06 | 0.000103 |
| 11724169_ZNF322    | 0.483119 | 9.76E-06 | 0.000103 |
| 11726601_ZMPSTE24  | 0.465851 | 9.76E-06 | 0.000103 |
| 11751025_GALNT11   | -0.42735 | 9.76E-06 | 0.000103 |
| 11760881_TTF2      | -0.48198 | 9.78E-06 | 0.000104 |
| 11744416_SALL2     | -0.38378 | 9.78E-06 | 0.000104 |
| 11743019_ZSCAN29   | 0.660048 | 9.80E-06 | 0.000104 |
| 11717589_EXOSC8    | -0.38417 | 9.83E-06 | 0.000104 |
| 11731519_MFAP3     | 0.565556 | 9.86E-06 | 0.000104 |
| 11750790_UBE4A     | 0.443451 | 9.87E-06 | 0.000104 |
| 11741101_ZNF655    | 0.451286 | 9.89E-06 | 0.000105 |
| 11753749_ANP32A    | -0.40156 | 9.90E-06 | 0.000105 |
| 11720804_PAGR1     | -0.4206  | 9.90E-06 | 0.000105 |
| 11755587_TRIM22    | 1.281796 | 9.90E-06 | 0.000105 |
| 11744885_SPAG9     | 0.476638 | 9.91E-06 | 0.000105 |
| 11726385_MT1X      | -0.52846 | 9.92E-06 | 0.000105 |
| 11719842_PHLDA3    | 0.471739 | 9.92E-06 | 0.000105 |
| 11744132_SECISBP2L | 0.470324 | 9.94E-06 | 0.000105 |
| 11733130_ZSCAN26   | 0.512686 | 9.95E-06 | 0.000105 |
| 11718085_LYN       | 0.569257 | 9.96E-06 | 0.000105 |
| 11733303_ZNF790    | 0.879114 | 9.97E-06 | 0.000105 |
| 11738871_MAPK1     | 0.428945 | 9.98E-06 | 0.000105 |
| 11732303_CREB1     | -0.3929  | 9.99E-06 | 0.000105 |
| 11733057_PTBP3     | -0.38172 | 9.99E-06 | 0.000105 |
| 11740052_CENPP     | -0.59041 | 1.00E-05 | 0.000106 |
| 11743160_HJURP     | -0.37343 | 1.00E-05 | 0.000106 |
| 11742082_LCTL      | 0.397345 | 1.00E-05 | 0.000106 |
| 11727125_PVRL3     | 0.396396 | 1.01E-05 | 0.000106 |

|                    |          |          |          |
|--------------------|----------|----------|----------|
| 11735850_MRGPRX4   | 0.791853 | 1.01E-05 | 0.000106 |
| 11754198_LINCO0341 | -0.7576  | 1.01E-05 | 0.000106 |
| 11729698_PPP2R4    | -0.48108 | 1.01E-05 | 0.000106 |
| 11746548_CNN2      | 0.512203 | 1.01E-05 | 0.000106 |
| 11739655_EGFLAM    | 0.763325 | 1.01E-05 | 0.000106 |
| 200037_PMCBX3      | -0.39621 | 1.01E-05 | 0.000106 |
| 11725056_NEDD9     | 0.498176 | 1.01E-05 | 0.000106 |
| 11751762_INTS6     | 0.376546 | 1.01E-05 | 0.000106 |
| 11744372_PRPSAP1   | -0.37688 | 1.01E-05 | 0.000106 |
| 11742811_RPS6KA3   | -0.39286 | 1.01E-05 | 0.000106 |
| 11728360_BCDIN3D   | 0.450557 | 1.02E-05 | 0.000107 |
| 11719498_ZPR1      | 0.504091 | 1.02E-05 | 0.000107 |
| 11756527_SNX10     | -0.46165 | 1.02E-05 | 0.000107 |
| 11751805_TYMS      | -0.38971 | 1.02E-05 | 0.000107 |
| 11718858_NUDCD3    | -0.69048 | 1.02E-05 | 0.000107 |
| 11748074_PREB      | -0.44907 | 1.02E-05 | 0.000107 |
| 11745249_TMEM40    | 0.741317 | 1.02E-05 | 0.000107 |
| 11725657_ZUFSP     | 0.388469 | 1.02E-05 | 0.000107 |
| 11722211_NASP      | -0.59879 | 1.02E-05 | 0.000107 |
| 11761935_HNRNPLL   | 0.58789  | 1.02E-05 | 0.000107 |
| 11749042_DHCR24    | -0.69845 | 1.02E-05 | 0.000107 |
| 11755882_SLC35B3   | 0.503315 | 1.03E-05 | 0.000107 |
| 11717945_FNBP4     | 0.410255 | 1.03E-05 | 0.000108 |
| 11716073_ATP6V1B2  | 0.428824 | 1.03E-05 | 0.000108 |
| 11732701_CSGALNACT | 0.53656  | 1.03E-05 | 0.000108 |
| 11755445_ACTR8     | 0.459403 | 1.03E-05 | 0.000108 |
| 11746248_MANSC1    | 0.71501  | 1.03E-05 | 0.000108 |
| 11747338_ZNF544    | 0.564029 | 1.03E-05 | 0.000108 |
| 11731440_IFT57     | 0.359124 | 1.03E-05 | 0.000108 |
| 11762068_FCF1      | -0.43489 | 1.03E-05 | 0.000108 |
| 11739173_SNAP23    | 0.424188 | 1.03E-05 | 0.000108 |
| 11751922_LRP6      | 0.71925  | 1.04E-05 | 0.000108 |
| 11739933_FAM111B   | -0.88807 | 1.04E-05 | 0.000108 |
| 11755388_LOC441155 | 0.472312 | 1.04E-05 | 0.000108 |
| 11759131_HIST1H2AG | 1.108971 | 1.04E-05 | 0.000109 |
| 11730837_WDR55     | 0.473383 | 1.04E-05 | 0.000109 |
| 11741155_LIMS1     | 0.370612 | 1.04E-05 | 0.000109 |
| 11752049_WDR44     | 0.427774 | 1.04E-05 | 0.000109 |
| 11727426_CANX      | -0.52847 | 1.04E-05 | 0.000109 |
| 11757306_CD59      | 0.412099 | 1.04E-05 | 0.000109 |
| 11739793_LRIF1     | 0.423115 | 1.04E-05 | 0.000109 |
| 11746234_ZNF106    | 0.494028 | 1.04E-05 | 0.000109 |
| 11720694_HENMT1    | -0.48637 | 1.04E-05 | 0.000109 |
| 11725028_PSPC1     | -0.38588 | 1.05E-05 | 0.000109 |
| 11746311_ZNF326    | -0.38752 | 1.05E-05 | 0.000109 |
| 11722453_QKI       | -0.72898 | 1.05E-05 | 0.000109 |
| 11715518_MLEC      | -0.45859 | 1.05E-05 | 0.000109 |
| 11719746_NF2       | 0.578342 | 1.05E-05 | 0.000109 |
| 11731054_FNIP1     | 0.525117 | 1.05E-05 | 0.000109 |
| 11746225_GAS6-AS1  | 0.503817 | 1.05E-05 | 0.000109 |
| 11746427_WDR66     | 0.957632 | 1.05E-05 | 0.000109 |

|                    |          |          |          |
|--------------------|----------|----------|----------|
| 11720615_TUBG2     | 0.431083 | 1.05E-05 | 0.000109 |
| 11753091_AGPAT3    | -0.45092 | 1.05E-05 | 0.000109 |
| 11722616_UBLCP1    | 0.377442 | 1.05E-05 | 0.00011  |
| 11750424_FOXP1     | 0.450657 | 1.05E-05 | 0.00011  |
| 11753546_SNRPB2    | -0.39721 | 1.05E-05 | 0.00011  |
| 11739554_GAS7      | -0.5994  | 1.05E-05 | 0.00011  |
| 11743065_CDC6      | -0.41716 | 1.06E-05 | 0.00011  |
| 11724519_GUF1      | 0.489526 | 1.06E-05 | 0.00011  |
| 11733164_TTC29     | 0.562316 | 1.06E-05 | 0.00011  |
| 11759902_HACD4     | -0.52457 | 1.06E-05 | 0.00011  |
| 11726024_EDN1      | 0.999449 | 1.06E-05 | 0.00011  |
| 11740257_CXorf23   | 0.679481 | 1.06E-05 | 0.00011  |
| 11725380_POGLUT1   | 0.515057 | 1.06E-05 | 0.00011  |
| 11722730_APPL1     | -0.49682 | 1.06E-05 | 0.00011  |
| 11733106_COMMD2    | 0.46313  | 1.06E-05 | 0.00011  |
| 11741367_SDCBP     | 0.387839 | 1.06E-05 | 0.00011  |
| 11754913_TRPS1     | 0.393711 | 1.06E-05 | 0.00011  |
| 11715569_CD9       | -0.36336 | 1.06E-05 | 0.00011  |
| 11757354_FBXO25    | 0.452278 | 1.06E-05 | 0.00011  |
| 11734546_SDCBP     | 0.412464 | 1.06E-05 | 0.00011  |
| 11753655_PHLPP2    | 0.60295  | 1.06E-05 | 0.00011  |
| 11762649_UBA6      | 1.012167 | 1.06E-05 | 0.00011  |
| 11747864_CPEB1     | 0.728803 | 1.06E-05 | 0.00011  |
| 11747783_AHCY      | -0.35885 | 1.06E-05 | 0.00011  |
| 11718819_TSC1      | 0.459744 | 1.07E-05 | 0.000111 |
| 11756353_CLVS1     | -0.54355 | 1.07E-05 | 0.000111 |
| 11716572_RPA1      | -0.39854 | 1.07E-05 | 0.000111 |
| 11730969_THAP2     | 0.830944 | 1.07E-05 | 0.000111 |
| 11732489_NPHP3     | 0.521041 | 1.07E-05 | 0.000111 |
| 11718726_ZNF655    | 0.607214 | 1.07E-05 | 0.000111 |
| 11735329_CD47      | -0.52071 | 1.07E-05 | 0.000111 |
| 11729632_YBX3      | 0.459033 | 1.07E-05 | 0.000111 |
| 11721026_OCEL1     | -0.52127 | 1.07E-05 | 0.000111 |
| 11717451_NEK7      | 0.49349  | 1.07E-05 | 0.000111 |
| 11729182_NUAK2     | 0.477403 | 1.07E-05 | 0.000111 |
| 11730220_SPG20     | 0.451872 | 1.08E-05 | 0.000111 |
| 11715894_NGRN      | 0.415758 | 1.08E-05 | 0.000111 |
| 11750119_ZNF33A    | 0.443775 | 1.08E-05 | 0.000111 |
| 11727729_ZNF329    | 0.504664 | 1.08E-05 | 0.000111 |
| 11756162_PLPP3     | 0.482794 | 1.08E-05 | 0.000111 |
| 11732261_RRAGB     | 0.705079 | 1.08E-05 | 0.000111 |
| 11721550_POLR3C    | 0.432003 | 1.08E-05 | 0.000112 |
| 11745900_GON4L /// | 0.378375 | 1.08E-05 | 0.000112 |
| 11755260_C12orf4   | 0.482855 | 1.08E-05 | 0.000112 |
| 11755142_EOGT      | 0.595685 | 1.09E-05 | 0.000112 |
| 11718488_ORC3      | -0.39005 | 1.09E-05 | 0.000112 |
| 11721586_CASK      | -0.64315 | 1.09E-05 | 0.000112 |
| 11747754_BTBD2     | -0.54778 | 1.09E-05 | 0.000112 |
| 11751989_ITGB8     | 0.579662 | 1.09E-05 | 0.000112 |
| 11738446_NFAT5     | 0.525954 | 1.09E-05 | 0.000112 |
| 11755010_GALNT4 // | -0.6183  | 1.09E-05 | 0.000112 |

|                    |          |          |          |
|--------------------|----------|----------|----------|
| 11731862_CDHI9     | 0.51226  | 1.09E-05 | 0.000112 |
| 11751297_SUB1      | -0.56854 | 1.09E-05 | 0.000112 |
| 11744999_TXNRD2    | 0.459724 | 1.09E-05 | 0.000112 |
| 11731826_ZNF425    | 0.843043 | 1.09E-05 | 0.000113 |
| 11741980_DUSP6     | 0.361023 | 1.10E-05 | 0.000113 |
| 11723832_TAPT1     | 0.525098 | 1.10E-05 | 0.000113 |
| 11716251_RBFOX2    | 0.392587 | 1.10E-05 | 0.000113 |
| 11746269_ABHD3     | -0.73993 | 1.10E-05 | 0.000113 |
| 11733147_ZBTB14    | -0.4977  | 1.10E-05 | 0.000113 |
| 11751532_CD46      | 0.42885  | 1.10E-05 | 0.000113 |
| 11734049_SEH1L     | -0.47799 | 1.10E-05 | 0.000114 |
| 11718168_MYOF      | 0.398911 | 1.10E-05 | 0.000114 |
| 11742501_CLTA      | 0.463994 | 1.11E-05 | 0.000114 |
| 11757569_NDRG3     | -0.42332 | 1.11E-05 | 0.000114 |
| 11726102_PPP2R3A   | -0.46937 | 1.11E-05 | 0.000114 |
| 11756161_PMVK      | -0.42342 | 1.11E-05 | 0.000114 |
| 11746476_CALD1     | 0.373793 | 1.11E-05 | 0.000114 |
| 11725202_ESC01     | 0.40147  | 1.11E-05 | 0.000114 |
| 11717263_ATPAF1    | -0.59635 | 1.11E-05 | 0.000114 |
| 11754419_C3orf17   | -0.46776 | 1.11E-05 | 0.000114 |
| 11742784_SETX      | 0.546789 | 1.11E-05 | 0.000114 |
| 11745812_IDH3B     | -0.41449 | 1.11E-05 | 0.000114 |
| 11748973_CDC25B    | -0.46454 | 1.11E-05 | 0.000114 |
| 11745067_ODF2      | -0.49964 | 1.12E-05 | 0.000114 |
| 11724945_LIG4      | 0.522375 | 1.12E-05 | 0.000114 |
| 11721733_GCH1      | -0.79644 | 1.12E-05 | 0.000115 |
| 11747653_CDC25B    | -0.42474 | 1.12E-05 | 0.000115 |
| 11717721_ST6GAL1   | -0.44846 | 1.12E-05 | 0.000115 |
| 11740013_NEIL3     | -0.84136 | 1.12E-05 | 0.000115 |
| 11760886_GPR89B    | 0.465158 | 1.12E-05 | 0.000115 |
| 11719461_WDR41     | 0.41211  | 1.12E-05 | 0.000115 |
| 11749388_IQCK      | 0.479432 | 1.12E-05 | 0.000115 |
| 11734708_SMIM15    | -0.60446 | 1.12E-05 | 0.000115 |
| 11720653_BBX       | -0.37511 | 1.12E-05 | 0.000115 |
| 11744377_USP24     | 0.503675 | 1.12E-05 | 0.000115 |
| 11715467_ARHGDIB   | 0.459465 | 1.12E-05 | 0.000115 |
| 11755425_FAM179B   | 0.598712 | 1.13E-05 | 0.000115 |
| 11731087_TM9SF1    | -0.3619  | 1.13E-05 | 0.000115 |
| 11721325_GCAT      | -0.79608 | 1.13E-05 | 0.000115 |
| 11733644_NECAP2    | 0.353953 | 1.13E-05 | 0.000115 |
| 11728997_IQGAP3    | -0.63279 | 1.13E-05 | 0.000115 |
| 11744435_DUSP6     | 0.351674 | 1.13E-05 | 0.000115 |
| 11715930_SDHAF2    | 0.397265 | 1.13E-05 | 0.000115 |
| 11744317_BRCA1     | -0.56557 | 1.13E-05 | 0.000115 |
| 11729390_MIER1     | 0.4914   | 1.13E-05 | 0.000115 |
| 11755089_ZNF615    | 0.455058 | 1.13E-05 | 0.000115 |
| 11723842_SNX11     | 0.454236 | 1.13E-05 | 0.000115 |
| 11757454_CREBL2    | 0.455034 | 1.13E-05 | 0.000116 |
| 11725363_SMAD4     | -0.52071 | 1.13E-05 | 0.000116 |
| 11728482_ZNF181 // | 0.364931 | 1.13E-05 | 0.000116 |
| 11727539_ISCU      | 0.366665 | 1.13E-05 | 0.000116 |

|                    |          |          |          |
|--------------------|----------|----------|----------|
| 11740887_PROSER1   | -0.49184 | 1.13E-05 | 0.000116 |
| 11716913_MTUS1     | 0.379968 | 1.14E-05 | 0.000116 |
| 11726150_PPIP5K2   | -0.45362 | 1.14E-05 | 0.000116 |
| 11728483_ZNF181    | 0.504817 | 1.14E-05 | 0.000116 |
| 11729910_DNAH11    | -0.47087 | 1.14E-05 | 0.000116 |
| 11724334_USP8      | 0.358155 | 1.14E-05 | 0.000116 |
| 11725792_MRE11A    | -0.8386  | 1.14E-05 | 0.000116 |
| 11762038_ZNF844    | 0.800471 | 1.14E-05 | 0.000116 |
| 11748439_NTM       | 0.822103 | 1.14E-05 | 0.000116 |
| 11727486_HAUS6     | -0.41732 | 1.14E-05 | 0.000116 |
| 11748477_RARG      | -0.46889 | 1.14E-05 | 0.000116 |
| 11741124_SAR1B     | 0.421854 | 1.14E-05 | 0.000116 |
| 11725191_ADGRG6    | 0.496914 | 1.15E-05 | 0.000116 |
| 11722368_TRIM22    | 1.16088  | 1.15E-05 | 0.000116 |
| 11737878_GALNT2    | -0.37207 | 1.15E-05 | 0.000116 |
| 11736963_FLCN      | 0.554631 | 1.15E-05 | 0.000116 |
| 11721828_ZWILCH    | -0.35843 | 1.15E-05 | 0.000117 |
| 11726437_CMTM8     | -0.39618 | 1.15E-05 | 0.000117 |
| 11721961_RC3H2     | 0.437824 | 1.15E-05 | 0.000117 |
| 11715887_PIP4K2B   | 0.457702 | 1.15E-05 | 0.000117 |
| 11727468_MAGEA4    | -0.39377 | 1.15E-05 | 0.000117 |
| 11716403_EIF4EBP2  | -0.60477 | 1.15E-05 | 0.000117 |
| 11749614_UBE2I     | -0.41422 | 1.15E-05 | 0.000117 |
| 11731068_FIGNL1    | -0.4036  | 1.15E-05 | 0.000117 |
| 11716786_TRAK2     | 0.431013 | 1.15E-05 | 0.000117 |
| 11736093_RBM42     | -0.5166  | 1.15E-05 | 0.000117 |
| 11756133_TMEM138   | 0.402875 | 1.15E-05 | 0.000117 |
| 11723394_NEIL2     | -1.08929 | 1.15E-05 | 0.000117 |
| 11715629_LAPTM4A   | -0.38946 | 1.16E-05 | 0.000117 |
| 11737776_ZNF7      | 0.378837 | 1.16E-05 | 0.000117 |
| 11744073_PNKP      | -0.44822 | 1.16E-05 | 0.000117 |
| 11729413_LRRC8A    | -0.39894 | 1.16E-05 | 0.000117 |
| 11717585_PSM10     | -0.36967 | 1.16E-05 | 0.000117 |
| 11755136_ISY1      | -0.37058 | 1.16E-05 | 0.000117 |
| 11752444_NF1       | 0.454933 | 1.16E-05 | 0.000117 |
| 11748535_TAF11     | 0.474306 | 1.16E-05 | 0.000118 |
| 11724652_LMBR1     | 0.412074 | 1.16E-05 | 0.000118 |
| 11757593_TAPT1     | 0.437218 | 1.16E-05 | 0.000118 |
| 200071_PMSMDC1     | 0.388536 | 1.16E-05 | 0.000118 |
| 11722436_GOSR2     | 0.423546 | 1.17E-05 | 0.000118 |
| 11720141_HMMR      | -0.45763 | 1.17E-05 | 0.000118 |
| 11754798_CD164     | 0.38491  | 1.17E-05 | 0.000118 |
| 11722261_EDEM1     | 0.568676 | 1.17E-05 | 0.000118 |
| 11728698_HSPA4L    | 0.506395 | 1.17E-05 | 0.000118 |
| 11744868_SMC2      | -0.53785 | 1.17E-05 | 0.000118 |
| 11720042_RRP7A /// | -0.51306 | 1.17E-05 | 0.000118 |
| 11717608_VMA21     | -0.4227  | 1.17E-05 | 0.000118 |
| 11748560_PAFAH1B1  | 0.399677 | 1.17E-05 | 0.000118 |
| 11718329_NAPB      | 0.773814 | 1.17E-05 | 0.000118 |
| 11732377_BROX      | 0.522597 | 1.17E-05 | 0.000118 |
| 11722565_GOLPH3    | -0.40531 | 1.17E-05 | 0.000118 |

|                    |          |          |          |
|--------------------|----------|----------|----------|
| 11754957_HDAC6     | -0.6212  | 1.17E-05 | 0.000118 |
| 11722790_RAB5A     | 0.368706 | 1.17E-05 | 0.000118 |
| 11745899_YY1AP1    | 0.429287 | 1.17E-05 | 0.000118 |
| 11733451_SLFN11    | -0.41915 | 1.17E-05 | 0.000118 |
| 11716344_ZCCHC3    | 0.526129 | 1.17E-05 | 0.000118 |
| 11745667_ANO6      | 0.405523 | 1.17E-05 | 0.000118 |
| 11715883_DAP3      | 0.351468 | 1.17E-05 | 0.000118 |
| 11718516_AK6 /// T | -0.92341 | 1.17E-05 | 0.000118 |
| 11734642_BDNF      | 0.669283 | 1.17E-05 | 0.000118 |
| 11729793_MAN1A2    | 0.48505  | 1.17E-05 | 0.000118 |
| 11727839_ORC1      | -0.60506 | 1.17E-05 | 0.000118 |
| 11719258_TICAM1    | 0.511217 | 1.17E-05 | 0.000118 |
| 11718233_PRPF4B    | 0.379657 | 1.17E-05 | 0.000118 |
| 11726119_RPGR      | 0.632422 | 1.17E-05 | 0.000118 |
| 11730841_ZMYND8    | -0.45955 | 1.18E-05 | 0.000118 |
| 11755017_CHCHD7    | -0.37847 | 1.18E-05 | 0.000119 |
| 11735198_FAM104B   | -0.57614 | 1.18E-05 | 0.000119 |
| 11722807_WDR54     | -0.42433 | 1.18E-05 | 0.000119 |
| 11757773_ZFAS1     | 0.340043 | 1.19E-05 | 0.000119 |
| 11721935_DNAJC27   | 0.475763 | 1.19E-05 | 0.000119 |
| 11717220_NFIB      | -0.44104 | 1.19E-05 | 0.000119 |
| 11715516_PSMD3     | -0.39081 | 1.19E-05 | 0.000119 |
| 11749067_TRMT10B   | 0.631512 | 1.19E-05 | 0.00012  |
| 11727872_NHEJ1     | -0.61197 | 1.19E-05 | 0.00012  |
| 11722339_DIAPH2    | 0.406793 | 1.19E-05 | 0.00012  |
| 11743522_KDM5A     | 0.382426 | 1.19E-05 | 0.00012  |
| 11737533_SAE1      | -0.40438 | 1.19E-05 | 0.00012  |
| 11758859_RAB2A     | -0.38469 | 1.19E-05 | 0.00012  |
| 11729496_FAM133A   | -0.68284 | 1.20E-05 | 0.00012  |
| 11756564_AUP1      | 0.38612  | 1.20E-05 | 0.00012  |
| 11726704_BCL10     | 0.469144 | 1.20E-05 | 0.00012  |
| 11733835_TMEM9     | -0.37578 | 1.20E-05 | 0.00012  |
| 11715383_PHB2      | -0.37488 | 1.20E-05 | 0.00012  |
| 11733971_PCDH18    | 0.485119 | 1.20E-05 | 0.000121 |
| 11760519_NSD1      | 0.366772 | 1.20E-05 | 0.000121 |
| 11722164_RGS5      | 0.786611 | 1.20E-05 | 0.000121 |
| 11743353_STAT1     | 0.383198 | 1.21E-05 | 0.000121 |
| 11717737_PCYOX1    | -0.61293 | 1.21E-05 | 0.000121 |
| 11736813_PDCD1LG2  | 1.240966 | 1.21E-05 | 0.000121 |
| 11725574_NEDD4     | 0.408625 | 1.21E-05 | 0.000121 |
| 11727881_BBS12     | 0.438165 | 1.21E-05 | 0.000121 |
| 11763534_CNTNAP3   | 0.582015 | 1.21E-05 | 0.000121 |
| 11756424_NSMCE4A   | -0.36678 | 1.21E-05 | 0.000121 |
| 11754287_CMTR1     | -0.45191 | 1.21E-05 | 0.000121 |
| 11754609_STMN3     | 0.518745 | 1.21E-05 | 0.000121 |
| 11736236_RARA      | 0.627513 | 1.21E-05 | 0.000121 |
| 11719267_SERINC1   | 0.345224 | 1.21E-05 | 0.000121 |
| 11717040_MTMR4     | -0.70782 | 1.21E-05 | 0.000121 |
| 11743807_GAS7      | -0.5567  | 1.21E-05 | 0.000121 |
| 11746241_FAM133B / | 0.496018 | 1.21E-05 | 0.000121 |
| 11720772_PPIF      | 0.419437 | 1.21E-05 | 0.000121 |



|                   |          |          |          |
|-------------------|----------|----------|----------|
| 11747990_ZSCAN26  | 0.611522 | 1.22E-05 | 0.000121 |
| 11720622_CDK16    | -0.46818 | 1.22E-05 | 0.000121 |
| 11718119_CFL2     | 0.369263 | 1.22E-05 | 0.000121 |
| 11719109_FHL3     | 0.379154 | 1.22E-05 | 0.000122 |
| 11725836_NFKBIB   | 0.520947 | 1.22E-05 | 0.000122 |
| 11737979_ZNF570   | 0.463822 | 1.22E-05 | 0.000122 |
| 11721989_FAM131A  | -0.52367 | 1.23E-05 | 0.000122 |
| 11733148_ANXA4    | 0.400083 | 1.23E-05 | 0.000122 |
| 11717281_ASAP1    | 0.442858 | 1.23E-05 | 0.000122 |
| 11725096_RABL3    | -0.84017 | 1.23E-05 | 0.000122 |
| 11735261_SDK1     | 0.686469 | 1.23E-05 | 0.000122 |
| 11743250_MMP2     | 0.453194 | 1.23E-05 | 0.000122 |
| 11720398_NBN      | -0.41777 | 1.23E-05 | 0.000123 |
| 11715387_CDKN1A   | 0.426015 | 1.23E-05 | 0.000123 |
| 11747277_NAP1L4   | -0.45913 | 1.24E-05 | 0.000123 |
| 11719508_CSRP2BP  | -0.50824 | 1.24E-05 | 0.000123 |
| 11744619_SNX24    | 0.483659 | 1.24E-05 | 0.000123 |
| 11757820_DPY30    | -0.38174 | 1.24E-05 | 0.000123 |
| 11743840_PRDM2    | 0.463213 | 1.24E-05 | 0.000123 |
| 11757578_RHOC     | 0.353585 | 1.24E-05 | 0.000123 |
| 11756289_CCM2     | -0.41238 | 1.24E-05 | 0.000123 |
| 11741311_ZNF655   | 0.52595  | 1.24E-05 | 0.000123 |
| 11724055_SGOL2    | -0.53296 | 1.24E-05 | 0.000124 |
| 11763804_THUMPD2  | 0.691792 | 1.24E-05 | 0.000124 |
| 11740896_MIR22HG  | 0.562608 | 1.24E-05 | 0.000124 |
| 11736169_NDEL1    | 0.43952  | 1.25E-05 | 0.000124 |
| 11743477_SLC25A13 | 0.422084 | 1.25E-05 | 0.000124 |
| 11753216_NARS     | -0.42504 | 1.25E-05 | 0.000124 |
| 11739349_AMOT     | 0.378779 | 1.25E-05 | 0.000124 |
| 11746118_SYNCRIP  | -0.67484 | 1.25E-05 | 0.000124 |
| 11720359_PHIP     | -0.66263 | 1.25E-05 | 0.000124 |
| 11733990_ANGEL2   | -0.35284 | 1.25E-05 | 0.000124 |
| 11752025_ZMYM2    | 0.476432 | 1.25E-05 | 0.000124 |
| 11741376_LRP8     | -0.36448 | 1.26E-05 | 0.000125 |
| 11750085_TSC22D2  | 0.861084 | 1.26E-05 | 0.000125 |
| 11734509_KCTD8    | 0.490354 | 1.26E-05 | 0.000125 |
| 11725512_SLC38A4  | 0.542653 | 1.26E-05 | 0.000125 |
| 11739790_GCFC2    | 0.3942   | 1.26E-05 | 0.000125 |
| 11758602_THSD4    | 0.428537 | 1.26E-05 | 0.000125 |
| 11728872_RBM24    | 0.797154 | 1.26E-05 | 0.000125 |
| 11726639_MIB1     | -0.6073  | 1.26E-05 | 0.000125 |
| 11732467_CXCL11   | 0.894383 | 1.26E-05 | 0.000125 |
| 11725424_RAB27A   | -0.45637 | 1.26E-05 | 0.000125 |
| 11734030_FAM73A   | 0.557091 | 1.26E-05 | 0.000125 |
| 11755321_POLR1B   | 0.363937 | 1.26E-05 | 0.000125 |
| 11718427_HSDL2    | -0.5098  | 1.27E-05 | 0.000125 |
| 11720219_MAP3K3   | -0.58192 | 1.27E-05 | 0.000125 |
| 11754035_IRF1     | 0.790375 | 1.27E-05 | 0.000125 |
| 11740006_KIAA0895 | 0.796145 | 1.27E-05 | 0.000125 |
| 11758242_YAE1D1   | 0.450613 | 1.27E-05 | 0.000125 |
| 11734025_ZNF440   | 0.445464 | 1.27E-05 | 0.000125 |

|                    |          |          |          |
|--------------------|----------|----------|----------|
| 11739641_AFAP1     | -0.41087 | 1.27E-05 | 0.000125 |
| 11754429_LAMA2     | 0.336469 | 1.27E-05 | 0.000125 |
| 11739239_SNAPC3    | 0.433297 | 1.27E-05 | 0.000125 |
| 11748158_PRH1-PRR4 | 0.418524 | 1.27E-05 | 0.000125 |
| 11719236_INTS1     | -0.36058 | 1.27E-05 | 0.000125 |
| 11728365_ARPP21    | 0.637727 | 1.27E-05 | 0.000125 |
| 11748208_ZNF317    | 0.54611  | 1.27E-05 | 0.000125 |
| 11755624_MTFR2     | -0.51051 | 1.27E-05 | 0.000125 |
| 11719293_ITGB1BP1  | -1.00154 | 1.27E-05 | 0.000125 |
| 11743969_ACTN1     | 0.420869 | 1.27E-05 | 0.000125 |
| 11728051_FAM126B   | 0.679123 | 1.28E-05 | 0.000126 |
| 11751107_VIPAS39   | 0.418425 | 1.28E-05 | 0.000126 |
| 11746847_NAPEPLD   | 0.686865 | 1.28E-05 | 0.000126 |
| 11728474_CLHC1     | 0.62023  | 1.28E-05 | 0.000126 |
| 11720237_MAPK9     | -0.34566 | 1.28E-05 | 0.000126 |
| 11735263_SCN2A     | 1.965542 | 1.28E-05 | 0.000126 |
| 11721462_OSBPL2    | -0.52565 | 1.28E-05 | 0.000126 |
| 11719918_PEL0      | 0.346493 | 1.28E-05 | 0.000126 |
| 11754587_FYN       | 0.393644 | 1.28E-05 | 0.000126 |
| 11733750_BDNF      | 0.672112 | 1.29E-05 | 0.000127 |
| 11744776_NNMT      | 0.366535 | 1.29E-05 | 0.000127 |
| 11759018_MATR3     | -0.42112 | 1.29E-05 | 0.000127 |
| 11742730_CAPS      | -0.48314 | 1.29E-05 | 0.000127 |
| 11727506_RAB21     | 0.364521 | 1.29E-05 | 0.000127 |
| 11762632_ZFC3H1    | 1.057971 | 1.29E-05 | 0.000127 |
| 11757368_ANXA4     | 0.392455 | 1.29E-05 | 0.000127 |
| 11748523_PCGF5     | 1.092947 | 1.29E-05 | 0.000127 |
| 11754299_MXD4      | 0.437845 | 1.30E-05 | 0.000127 |
| 11745979_LIG1      | -0.52962 | 1.30E-05 | 0.000127 |
| 11726328_GBP1      | 0.816242 | 1.30E-05 | 0.000127 |
| 11746842_ABI2      | 0.359234 | 1.30E-05 | 0.000127 |
| 11723078_PBDC1     | 0.388431 | 1.30E-05 | 0.000127 |
| 11757745_IGF1R     | -0.58194 | 1.30E-05 | 0.000127 |
| 11730864_CTTNBP2NL | 0.43657  | 1.30E-05 | 0.000128 |
| 11747735_LIMS1     | 0.374871 | 1.30E-05 | 0.000128 |
| 11720340_STX1A     | 0.449111 | 1.30E-05 | 0.000128 |
| 11746347_B3GAT3    | 0.437669 | 1.30E-05 | 0.000128 |
| 11721476_AP1S1     | -0.44238 | 1.30E-05 | 0.000128 |
| 11735741_RASA3     | 0.351907 | 1.30E-05 | 0.000128 |
| 11759208_GPR176    | 0.336383 | 1.30E-05 | 0.000128 |
| 11755200_DCBLD2    | 0.389577 | 1.30E-05 | 0.000128 |
| 11718134_PRPS2     | -0.36906 | 1.31E-05 | 0.000128 |
| 11756304_CSNK1A1   | 0.37223  | 1.31E-05 | 0.000128 |
| 11718367_ZZZ3      | 0.439198 | 1.31E-05 | 0.000128 |
| 11744886_SPAG9     | 0.501287 | 1.31E-05 | 0.000128 |
| 11755250_RPL13A    | -0.36993 | 1.31E-05 | 0.000128 |
| 11743894_ZNF780A   | 0.827803 | 1.31E-05 | 0.000128 |
| 11716986_GTF2B     | 0.362797 | 1.31E-05 | 0.000128 |
| 11747223_EDNRB     | 0.656485 | 1.31E-05 | 0.000129 |
| 11756516_PISD      | 0.419317 | 1.31E-05 | 0.000129 |
| 11720045_DNAJC10   | 0.374771 | 1.31E-05 | 0.000129 |

|                    |          |          |          |
|--------------------|----------|----------|----------|
| 11762067_FCF1      | -0.4989  | 1.32E-05 | 0.000129 |
| 11734674_SAR1A     | 0.352898 | 1.32E-05 | 0.000129 |
| 11717753_SEC14L1   | 0.470804 | 1.32E-05 | 0.000129 |
| 11756410_KANSL2    | 0.375867 | 1.32E-05 | 0.000129 |
| 11745451_UBE2J2    | 0.350475 | 1.32E-05 | 0.000129 |
| 11755284_TSPAN13   | -0.56071 | 1.32E-05 | 0.000129 |
| 11754939_FADS2     | -0.45301 | 1.32E-05 | 0.000129 |
| 11743095_TMEM65    | 0.454166 | 1.32E-05 | 0.000129 |
| 11730933_AGPAT1    | -0.34419 | 1.32E-05 | 0.000129 |
| 11757987_PATZ1     | -0.38041 | 1.32E-05 | 0.000129 |
| 11719363_PRRX1     | -0.47316 | 1.32E-05 | 0.000129 |
| 11721615_THEMIS2   | -0.67396 | 1.32E-05 | 0.000129 |
| 11749482_LTBP3     | 0.375407 | 1.32E-05 | 0.000129 |
| 11758563_METTL21A  | -1.32253 | 1.32E-05 | 0.000129 |
| 11752113_INPP4B    | 0.469245 | 1.32E-05 | 0.000129 |
| 11730312_AHSA2     | 0.364819 | 1.32E-05 | 0.000129 |
| 11719315_PIBF1     | 0.455999 | 1.32E-05 | 0.000129 |
| 11754024_SLC25A11  | -0.52536 | 1.32E-05 | 0.000129 |
| 11720985_YRDC      | 0.420046 | 1.33E-05 | 0.000129 |
| 11754436_KIAA0754  | 0.410565 | 1.33E-05 | 0.000129 |
| 11754041_FXYD3     | -0.45776 | 1.33E-05 | 0.000129 |
| 11752993_DUSP1     | 0.361367 | 1.33E-05 | 0.00013  |
| 11728375_ACTN1     | 0.343586 | 1.33E-05 | 0.00013  |
| 11724234_HGSNAT    | -0.38504 | 1.34E-05 | 0.00013  |
| 11715802_PRRC2B    | -0.48101 | 1.34E-05 | 0.00013  |
| 11734687_MBD2      | 0.358868 | 1.34E-05 | 0.00013  |
| 11723981_ARHGAP28  | 0.619319 | 1.34E-05 | 0.00013  |
| 11746555_SPARC     | 0.350307 | 1.34E-05 | 0.000131 |
| 11758450_KDM4D     | -1.35229 | 1.34E-05 | 0.000131 |
| 11747479_MLST8     | -0.40391 | 1.34E-05 | 0.000131 |
| 11739414_ZMYM2     | 0.399867 | 1.34E-05 | 0.000131 |
| 11717773_THRA      | -0.62215 | 1.34E-05 | 0.000131 |
| 11733445_MMS22L    | -0.75526 | 1.34E-05 | 0.000131 |
| 11724216_GPATCH2   | 0.400257 | 1.35E-05 | 0.000131 |
| 11722166_RGS5      | 0.820888 | 1.35E-05 | 0.000131 |
| 11716153_PAFAH1B1  | 0.436187 | 1.35E-05 | 0.000131 |
| 11754831_SRPK2     | 0.445227 | 1.35E-05 | 0.000131 |
| 11721767_ATAD3A // | -0.38452 | 1.35E-05 | 0.000132 |
| 11718447_SH3BGRL2  | -0.66248 | 1.36E-05 | 0.000132 |
| 11747011_DCUN1D4   | 0.508901 | 1.36E-05 | 0.000132 |
| 11725500_WDR20     | 0.472044 | 1.36E-05 | 0.000132 |
| 11719587_MICALL1   | -0.38057 | 1.36E-05 | 0.000132 |
| 11722799_SS18      | 0.504259 | 1.36E-05 | 0.000132 |
| 11746185_KIF5B     | 0.371592 | 1.36E-05 | 0.000132 |
| 11723997_NKIRAS1   | 0.38035  | 1.37E-05 | 0.000132 |
| 11739878_TNIK      | 0.587456 | 1.37E-05 | 0.000133 |
| 11718221_GSPT1     | -1.30231 | 1.37E-05 | 0.000133 |
| 11745225_HN1L      | -0.38441 | 1.37E-05 | 0.000133 |
| 11755322_MBD1      | 0.358084 | 1.37E-05 | 0.000133 |
| 11739799_LY6K      | -0.50474 | 1.37E-05 | 0.000133 |
| 11753325_FANCA     | -0.3657  | 1.38E-05 | 0.000133 |

|                   |     |          |          |          |
|-------------------|-----|----------|----------|----------|
| 11733312_PCDHA1   | //  | 0.622682 | 1.38E-05 | 0.000133 |
| 11716163_CIAPIN1  |     | -0.48533 | 1.38E-05 | 0.000134 |
| 11715428_ARF4     |     | 0.355792 | 1.38E-05 | 0.000134 |
| 11749178_GALK2    |     | 0.572232 | 1.38E-05 | 0.000134 |
| 11716199_UBE2Q2   |     | 0.380599 | 1.38E-05 | 0.000134 |
| 11739174_SNAP23   |     | 0.405886 | 1.38E-05 | 0.000134 |
| 11723885_NATD1    |     | -0.43031 | 1.38E-05 | 0.000134 |
| 11748131_LGALS8   |     | 0.436029 | 1.39E-05 | 0.000134 |
| 11746461_TACC3    |     | -0.52325 | 1.39E-05 | 0.000134 |
| 11717275_COL5A1   |     | 0.921229 | 1.39E-05 | 0.000134 |
| 11720269_IBTK     |     | 0.378609 | 1.39E-05 | 0.000134 |
| 11720383_STX6     |     | 0.427396 | 1.39E-05 | 0.000134 |
| 11744352_RHOC     |     | 0.343076 | 1.39E-05 | 0.000134 |
| 11721264_GRIA2    |     | 0.526159 | 1.39E-05 | 0.000135 |
| 11725947_MPP2     |     | -0.51661 | 1.40E-05 | 0.000135 |
| 11742197_NF2      |     | 0.420626 | 1.40E-05 | 0.000135 |
| 11732376_TBC1D19  |     | 0.805072 | 1.40E-05 | 0.000135 |
| 11716734_IRF1     |     | 0.491141 | 1.40E-05 | 0.000135 |
| 11722431_C1orf27  |     | 0.34552  | 1.40E-05 | 0.000135 |
| 11723909_ESPL1    |     | -0.38744 | 1.40E-05 | 0.000135 |
| 11750823_PREB     |     | -0.46624 | 1.40E-05 | 0.000135 |
| 11756491_SDAD1    |     | 0.361878 | 1.40E-05 | 0.000135 |
| 11743687_HMGB2    |     | -0.43329 | 1.40E-05 | 0.000135 |
| 11752289_MID1     |     | 0.566269 | 1.40E-05 | 0.000135 |
| 11717274_COL5A1   |     | 0.514569 | 1.40E-05 | 0.000135 |
| 11724215_SPRYD4   |     | -0.58486 | 1.40E-05 | 0.000135 |
| 11736489_MXD4     |     | 0.366521 | 1.40E-05 | 0.000135 |
| 11748186_SLC1A4   |     | -0.38733 | 1.40E-05 | 0.000135 |
| 11753017_HSPD1    | /// | -0.35316 | 1.40E-05 | 0.000135 |
| 11746873_MFSD8    |     | 0.464217 | 1.40E-05 | 0.000135 |
| 11726766_TIPRL    |     | -0.42705 | 1.40E-05 | 0.000135 |
| 11758858_RAB2A    |     | -0.66417 | 1.41E-05 | 0.000135 |
| 11715872_ZFAND3   |     | 0.443452 | 1.41E-05 | 0.000135 |
| 11751581_SLF1     |     | -0.62758 | 1.41E-05 | 0.000135 |
| 11756026_DBI      |     | -0.36377 | 1.41E-05 | 0.000135 |
| 11717246_LSM4     |     | -0.34555 | 1.41E-05 | 0.000135 |
| 11751348_NDFIP2   |     | 0.364406 | 1.41E-05 | 0.000135 |
| 11747055_GFRA1    |     | 0.584327 | 1.41E-05 | 0.000135 |
| 11723992_PDCL     |     | -0.4425  | 1.41E-05 | 0.000135 |
| 11723226_SGCB     |     | -0.41718 | 1.41E-05 | 0.000135 |
| 11736526_CARD9    |     | 0.618464 | 1.41E-05 | 0.000135 |
| 11747506_NAP1L4   |     | -0.41299 | 1.41E-05 | 0.000136 |
| 11739272_PAK2     |     | -0.42303 | 1.41E-05 | 0.000136 |
| 11731876_C5orf58  |     | 0.756592 | 1.41E-05 | 0.000136 |
| 11722938_PKN3     |     | -0.61669 | 1.41E-05 | 0.000136 |
| 11722155_SGMS2    |     | 0.765495 | 1.41E-05 | 0.000136 |
| 11752468_PHC1     |     | -0.41344 | 1.42E-05 | 0.000136 |
| 11719796_PPP2R5D  |     | -0.45876 | 1.42E-05 | 0.000136 |
| 11752067_MAP4K4   |     | 0.458197 | 1.42E-05 | 0.000136 |
| 11755922_ARHGEF28 |     | 0.621536 | 1.42E-05 | 0.000136 |
| 11755702_RRP7A    |     | -0.51403 | 1.42E-05 | 0.000136 |

|                    |          |          |          |
|--------------------|----------|----------|----------|
| 11747147_PPP2R1B   | 0.34728  | 1.42E-05 | 0.000136 |
| 11746841_ABI2      | 0.388352 | 1.42E-05 | 0.000136 |
| 11718581_GPN2      | 0.424152 | 1.43E-05 | 0.000137 |
| 11727577_TMEN237   | -0.55972 | 1.43E-05 | 0.000137 |
| 11752842_FSTL1     | 0.446575 | 1.43E-05 | 0.000137 |
| 11744934_CCSE2     | 0.399264 | 1.43E-05 | 0.000137 |
| 11722229_PPA2      | -0.37447 | 1.44E-05 | 0.000137 |
| 11717827_DBI       | -0.39907 | 1.44E-05 | 0.000138 |
| 11720791_RHOC      | 0.345705 | 1.44E-05 | 0.000138 |
| 11730383_SNX18     | 0.398196 | 1.44E-05 | 0.000138 |
| 11730146_KLHL31    | 0.398156 | 1.44E-05 | 0.000138 |
| 11726705_USP8      | 0.425232 | 1.44E-05 | 0.000138 |
| 11716232_CTNNBIP1  | -0.35187 | 1.45E-05 | 0.000138 |
| 11733842_SSSCA1    | -0.47171 | 1.45E-05 | 0.000138 |
| 11719101_SENP6     | 0.422111 | 1.45E-05 | 0.000138 |
| 11755621_DUSP9     | -0.55882 | 1.45E-05 | 0.000138 |
| 11726540_NGLY1     | 0.373559 | 1.45E-05 | 0.000138 |
| 11721367_WDR83     | -0.48357 | 1.45E-05 | 0.000138 |
| 11743930_UHRF1BP1L | 0.634114 | 1.45E-05 | 0.000138 |
| 11756919_CAP2      | 0.582737 | 1.45E-05 | 0.000139 |
| 11722169_CSE1L     | -0.34739 | 1.45E-05 | 0.000139 |
| 11740175_ARSK      | 0.525329 | 1.45E-05 | 0.000139 |
| 11742718_SLTM      | 0.415606 | 1.45E-05 | 0.000139 |
| 11750656_LOC441155 | 0.486458 | 1.45E-05 | 0.000139 |
| 11730970_THAP2     | 1.130866 | 1.45E-05 | 0.000139 |
| 11737757_CARS      | 0.342223 | 1.46E-05 | 0.000139 |
| 11716022_ADRBK1    | -0.55992 | 1.46E-05 | 0.000139 |
| 11725945_TINAGL1   | 0.464106 | 1.46E-05 | 0.000139 |
| 11748995_MYO1C     | 0.434578 | 1.46E-05 | 0.000139 |
| 11736304_MIR22HG   | 0.454614 | 1.46E-05 | 0.000139 |
| 11743348_CD47      | 0.347081 | 1.46E-05 | 0.000139 |
| 11724613_DYRK2     | 0.431851 | 1.46E-05 | 0.000139 |
| 11717360_GCN1      | -0.35215 | 1.46E-05 | 0.000139 |
| 11723141_ZBTB11    | 0.349822 | 1.46E-05 | 0.000139 |
| 11736613_RIC1      | 0.757414 | 1.46E-05 | 0.000139 |
| 11736517_WHSC1     | -0.38363 | 1.46E-05 | 0.000139 |
| 11727094_TMEN19    | -0.51794 | 1.46E-05 | 0.000139 |
| 11749640_TNKS      | 0.37816  | 1.47E-05 | 0.000139 |
| 11747101_CN0T4     | 0.697849 | 1.47E-05 | 0.000139 |
| 11747454_ACTN4     | -0.39251 | 1.47E-05 | 0.00014  |
| 11759203_ZNF223    | 0.45402  | 1.47E-05 | 0.00014  |
| 11745357_API1S1    | -0.41379 | 1.47E-05 | 0.00014  |
| 11716430_SLC39A13  | -0.36046 | 1.47E-05 | 0.00014  |
| 11728369_CCP110    | 0.580649 | 1.47E-05 | 0.00014  |
| 11747796_LIG1      | -0.46519 | 1.47E-05 | 0.00014  |
| 11748156_TIA1      | 0.412368 | 1.47E-05 | 0.00014  |
| 11727034_PAPSS2    | -0.3636  | 1.47E-05 | 0.00014  |
| 11737986_ARHGAP11A | -0.34345 | 1.47E-05 | 0.00014  |
| 11763351_LOC286052 | -0.46978 | 1.47E-05 | 0.00014  |
| 11747063_LMBRD2    | 0.795879 | 1.47E-05 | 0.00014  |
| 11756988_TWF2      | -0.38797 | 1.48E-05 | 0.00014  |

|                    |          |          |          |
|--------------------|----------|----------|----------|
| 11735636_ZMYM5     | 0.652628 | 1.48E-05 | 0.00014  |
| 11745191_TRIP6     | 0.369733 | 1.48E-05 | 0.00014  |
| 11748452_ARHGEF39  | -0.4946  | 1.48E-05 | 0.00014  |
| 11731516_XPO4      | 0.444453 | 1.48E-05 | 0.00014  |
| 11724988_CCDC113   | 0.426569 | 1.48E-05 | 0.00014  |
| 11751716_RBM18     | 0.35987  | 1.48E-05 | 0.000141 |
| 11756447_GORAB     | 0.360316 | 1.48E-05 | 0.000141 |
| 11761846_ANXA4     | 0.402224 | 1.48E-05 | 0.000141 |
| 11741050_IMPDI1    | -0.54486 | 1.48E-05 | 0.000141 |
| 11729618_UBE2J2    | 0.384523 | 1.49E-05 | 0.000141 |
| 11720952_DCUN1D4   | 0.424499 | 1.49E-05 | 0.000141 |
| 11722532_CALD1     | 0.448292 | 1.49E-05 | 0.000141 |
| 11751301_POGLUT1   | 0.653795 | 1.49E-05 | 0.000141 |
| 11745330_ATP6V1D   | 0.341574 | 1.49E-05 | 0.000141 |
| 11763449_ZBTB20    | 0.656174 | 1.49E-05 | 0.000141 |
| 11724017_OSCP1     | 0.750628 | 1.49E-05 | 0.000141 |
| 11758487_MPZ       | 0.670576 | 1.50E-05 | 0.000141 |
| 11725094_TTC33     | -0.54257 | 1.50E-05 | 0.000141 |
| 11740789_CDH12     | 0.431636 | 1.50E-05 | 0.000141 |
| 11756832_EGR2      | 0.565422 | 1.50E-05 | 0.000142 |
| 11746827_DNAAF5    | -0.37    | 1.50E-05 | 0.000142 |
| 11759192_MAPK8     | 0.446083 | 1.50E-05 | 0.000142 |
| 11717999_MPLKIP    | -0.45212 | 1.50E-05 | 0.000142 |
| 11735512_PHTF2     | 0.466113 | 1.50E-05 | 0.000142 |
| 11746573_RHOB      | 0.444135 | 1.50E-05 | 0.000142 |
| 11729258_MNS1      | -0.48719 | 1.50E-05 | 0.000142 |
| 11758379_SLC25A46  | 0.381331 | 1.51E-05 | 0.000142 |
| 11728401_ATP6VOA2  | 0.371115 | 1.51E-05 | 0.000142 |
| 11757106_SVIL      | 0.407559 | 1.51E-05 | 0.000142 |
| 11746238_RBM14-RBM | 0.354343 | 1.51E-05 | 0.000142 |
| 11748638_BTRC      | 0.586063 | 1.51E-05 | 0.000142 |
| 11722119_LZTS1     | -0.59036 | 1.51E-05 | 0.000142 |
| 11718648_ACVR1     | -0.39556 | 1.51E-05 | 0.000142 |
| 11742191_LOC100506 | -0.38126 | 1.51E-05 | 0.000143 |
| 11729391_MIER1     | 0.385739 | 1.51E-05 | 0.000143 |
| 11723124_MORC3     | 0.569612 | 1.51E-05 | 0.000143 |
| 11744622_STK25     | -0.43561 | 1.52E-05 | 0.000143 |
| 11723232_RNF138    | 0.346281 | 1.52E-05 | 0.000143 |
| 11719516_SLC9A6    | 0.376052 | 1.52E-05 | 0.000143 |
| 11727871_PPM1K     | 0.667072 | 1.52E-05 | 0.000143 |
| 11750762_DHX40     | -0.39257 | 1.52E-05 | 0.000143 |
| 11743728_CCDC47    | 0.405766 | 1.52E-05 | 0.000143 |
| 11754984_MYH10     | -0.34336 | 1.53E-05 | 0.000144 |
| 11734135_NANOS1    | 0.598828 | 1.53E-05 | 0.000144 |
| 11735019_PPM1B     | 0.529235 | 1.53E-05 | 0.000144 |
| 11757723_CD163L1   | 0.886182 | 1.53E-05 | 0.000144 |
| 11754308_SEPHS1    | -0.44232 | 1.53E-05 | 0.000144 |
| 11759625_PWAR6     | -0.48397 | 1.53E-05 | 0.000144 |
| 11716224_CKAP5     | -0.33282 | 1.53E-05 | 0.000144 |
| 11754316_PIK3R3    | 0.426829 | 1.53E-05 | 0.000144 |
| 11750299_IL13RA1   | 0.512889 | 1.53E-05 | 0.000144 |

|                    |          |          |          |
|--------------------|----------|----------|----------|
| 11746438_SHMT2     | -0.41564 | 1.53E-05 | 0.000144 |
| 11734757_METTL6    | 0.339346 | 1.54E-05 | 0.000144 |
| 11741373_HIPK3     | 0.885936 | 1.54E-05 | 0.000144 |
| 11739731_CSNK1G1   | 0.437913 | 1.54E-05 | 0.000144 |
| 11718782_TMED1     | -0.3355  | 1.54E-05 | 0.000145 |
| 11723089_CXorf40A  | 0.409994 | 1.54E-05 | 0.000145 |
| 11736931_FAM72A // | -0.39205 | 1.54E-05 | 0.000145 |
| 11718330_NAPB      | 0.480716 | 1.54E-05 | 0.000145 |
| 11721155_USP38     | 0.416478 | 1.54E-05 | 0.000145 |
| 11743521_KHSRP     | -0.40106 | 1.54E-05 | 0.000145 |
| 11736740_EPC1      | 0.540457 | 1.55E-05 | 0.000145 |
| 11757386_NPM1      | -0.36625 | 1.55E-05 | 0.000145 |
| 11736611_RIC1      | 0.630708 | 1.55E-05 | 0.000145 |
| 11721977_PLCE1     | -0.59853 | 1.55E-05 | 0.000145 |
| 11744287_CBS /// C | -0.87096 | 1.55E-05 | 0.000145 |
| 11749773_GBP1      | 0.726856 | 1.55E-05 | 0.000145 |
| 11718725_ZNF655    | 0.497437 | 1.55E-05 | 0.000145 |
| 11736783_RAB11FIP1 | 0.656928 | 1.55E-05 | 0.000145 |
| 11750019_ATG4D     | -0.40639 | 1.55E-05 | 0.000145 |
| 11756090_ZHX1      | 0.456732 | 1.55E-05 | 0.000146 |
| 11743714_ARID4A    | 0.504705 | 1.55E-05 | 0.000146 |
| 11754672_CHFR      | 0.514114 | 1.56E-05 | 0.000146 |
| 11726934_SOX12     | -0.38075 | 1.56E-05 | 0.000146 |
| 11747861_SNRK      | 0.380936 | 1.56E-05 | 0.000146 |
| 11743053_CHORDC1   | -0.37865 | 1.56E-05 | 0.000146 |
| 11729027_RNF175    | -0.64764 | 1.56E-05 | 0.000146 |
| 11716234_CTNNBIP1  | 0.47147  | 1.56E-05 | 0.000146 |
| 11728497_SVIL      | 0.420949 | 1.56E-05 | 0.000146 |
| 11756573_RIMKLB    | 0.551172 | 1.56E-05 | 0.000146 |
| 11751337_DHCR24    | -0.68403 | 1.56E-05 | 0.000146 |
| 11739787_IGF2 ///  | 0.604954 | 1.56E-05 | 0.000146 |
| 11719993_NLK       | 0.496813 | 1.57E-05 | 0.000146 |
| 11724680_TMEM131   | 0.435482 | 1.57E-05 | 0.000147 |
| 11717466_NFAT5     | 0.560563 | 1.57E-05 | 0.000147 |
| 11718686_TXNRD2    | 0.410172 | 1.57E-05 | 0.000147 |
| 11743020_ZSCAN29   | 0.489289 | 1.57E-05 | 0.000147 |
| 11746625_GTF2H1    | 0.426058 | 1.57E-05 | 0.000147 |
| 11722026_TBL3      | -0.45841 | 1.57E-05 | 0.000147 |
| 11719017_CFBF      | 0.390576 | 1.58E-05 | 0.000147 |
| 11718656_SLC16A1   | -0.37571 | 1.58E-05 | 0.000147 |
| 11724505_MIS18A    | -0.42697 | 1.58E-05 | 0.000147 |
| 11722830_PEX12     | 0.382232 | 1.58E-05 | 0.000147 |
| 11723432_ZFP91     | 0.364087 | 1.58E-05 | 0.000148 |
| 11743681_S100A16   | 0.366242 | 1.58E-05 | 0.000148 |
| 11719665_GFM1      | 0.416602 | 1.59E-05 | 0.000148 |
| 11719618_PEX5      | -0.41848 | 1.59E-05 | 0.000148 |
| 11720774_DNAJC19   | -0.38795 | 1.59E-05 | 0.000148 |
| 11760659_LIMCH1    | 0.47377  | 1.59E-05 | 0.000148 |
| 11731603_TMEM154   | -0.62033 | 1.59E-05 | 0.000148 |
| 11745020_TNFRSF12A | 0.65551  | 1.59E-05 | 0.000148 |
| 11755270_GANAB     | -0.36772 | 1.59E-05 | 0.000148 |

|                    |          |          |          |
|--------------------|----------|----------|----------|
| 11723091_FNIP2     | 0.453391 | 1.59E-05 | 0.000148 |
| 11732570_ZNF582    | 0.804764 | 1.59E-05 | 0.000148 |
| 11730790_NPM1      | -0.33397 | 1.59E-05 | 0.000148 |
| 11722797_TMEM263   | 0.34059  | 1.59E-05 | 0.000148 |
| 11744673_SP100     | 0.598642 | 1.59E-05 | 0.000148 |
| 11721066_ADCY9     | -0.66306 | 1.59E-05 | 0.000148 |
| 11717367_ZC3HAV1   | 0.380462 | 1.60E-05 | 0.000148 |
| 11719690_TWSG1     | -0.61153 | 1.60E-05 | 0.000148 |
| 11737168_STRN3     | 0.424865 | 1.60E-05 | 0.000149 |
| 11758401_ZNF148    | -0.69629 | 1.60E-05 | 0.000149 |
| 11716178_C5orf15   | 0.356832 | 1.60E-05 | 0.000149 |
| 11727090_ZBTB18    | 0.543864 | 1.60E-05 | 0.000149 |
| 11744887_ZWILCH    | -0.414   | 1.60E-05 | 0.000149 |
| 11726267_KDM4C     | 0.511135 | 1.61E-05 | 0.000149 |
| 11747579_SENP2     | -0.35838 | 1.61E-05 | 0.000149 |
| 11716198_UBE2Q2    | 0.418199 | 1.61E-05 | 0.00015  |
| 11752964_SLC25A20  | 0.412224 | 1.62E-05 | 0.00015  |
| 11726386_PDZD8     | 0.584781 | 1.62E-05 | 0.00015  |
| 11716465_NIF3L1    | -0.41547 | 1.62E-05 | 0.00015  |
| 11718161_KLF13     | -0.8436  | 1.62E-05 | 0.00015  |
| 11736452_SRFBP1    | 0.456354 | 1.62E-05 | 0.00015  |
| 11744629_MGC27345  | -0.53019 | 1.62E-05 | 0.00015  |
| 11753489_EED       | -0.38452 | 1.62E-05 | 0.00015  |
| 11744425_KIAA0101  | -0.58834 | 1.62E-05 | 0.00015  |
| 11733359_CFAP45    | 0.787353 | 1.62E-05 | 0.00015  |
| 11739571_ASHIL     | 0.415779 | 1.62E-05 | 0.00015  |
| 11750036_DDIAS     | -0.49963 | 1.63E-05 | 0.000151 |
| 11716653_EML4      | 0.621759 | 1.63E-05 | 0.000151 |
| 11730752_AGPAT5    | 0.361641 | 1.63E-05 | 0.000151 |
| 11760451_ZNF484    | 0.82177  | 1.63E-05 | 0.000151 |
| 11732250_RCOR3     | 0.437668 | 1.63E-05 | 0.000151 |
| 11743479_PIN4      | -0.4466  | 1.63E-05 | 0.000151 |
| 11764014_GART      | 0.480211 | 1.63E-05 | 0.000151 |
| 11717868_ZNF263    | 0.379967 | 1.64E-05 | 0.000151 |
| 11718184_FCHSD2    | -0.35294 | 1.64E-05 | 0.000151 |
| 11717606_RNPS1     | -0.3497  | 1.64E-05 | 0.000151 |
| 11752412_PPP2R5D   | -0.44517 | 1.64E-05 | 0.000151 |
| 11752121_ZNF324    | 0.416138 | 1.64E-05 | 0.000151 |
| 11715261_HNRNPCL2  | -0.41756 | 1.64E-05 | 0.000151 |
| 11755640_RALGPS1   | -0.35932 | 1.64E-05 | 0.000151 |
| 11719747_NF2       | -0.5128  | 1.64E-05 | 0.000152 |
| 11757353_FBX025    | 0.537462 | 1.64E-05 | 0.000152 |
| 11752779_BGN       | -0.43587 | 1.64E-05 | 0.000152 |
| 11742195_ZNF451    | 0.419307 | 1.64E-05 | 0.000152 |
| 11751927_COPA      | 0.332205 | 1.64E-05 | 0.000152 |
| 11721901_NMRAL1    | -0.51379 | 1.65E-05 | 0.000152 |
| 11757649_CORO7-PAM | -0.43766 | 1.65E-05 | 0.000152 |
| 11754389_LRRC57    | 0.475312 | 1.65E-05 | 0.000152 |
| 11724918_TMTC3     | 0.465074 | 1.65E-05 | 0.000152 |
| 11750684_DDX31     | 0.492222 | 1.65E-05 | 0.000152 |
| 11743629_IRS1      | 0.492902 | 1.66E-05 | 0.000153 |



|                     |          |          |          |
|---------------------|----------|----------|----------|
| 11745015_SP100      | 0.42992  | 1.66E-05 | 0.000153 |
| 11717460_CHPF2      | 0.398482 | 1.66E-05 | 0.000153 |
| 11739530_PLGLB2     | 0.509544 | 1.66E-05 | 0.000153 |
| 11728687_SFXN1      | 0.391679 | 1.66E-05 | 0.000153 |
| 11730363_HRH1       | 1.036797 | 1.66E-05 | 0.000153 |
| 11732524_CHKCB-CPT1 | 0.433799 | 1.66E-05 | 0.000153 |
| 11724337_NRCAM      | 0.405161 | 1.66E-05 | 0.000153 |
| 11718840_PDHX       | 0.343197 | 1.66E-05 | 0.000153 |
| 11747152_PHLDB2     | 0.508861 | 1.66E-05 | 0.000153 |
| 11723699_OAS2 ///   | -0.45337 | 1.66E-05 | 0.000153 |
| 11755774_FAM208B    | 0.356635 | 1.66E-05 | 0.000153 |
| 11756897_TJP2       | 0.405499 | 1.66E-05 | 0.000153 |
| 11744169_MYBL2      | -0.61242 | 1.66E-05 | 0.000153 |
| 11743695_KMT2D      | -0.36444 | 1.66E-05 | 0.000153 |
| 11719012_FZD4       | -0.62124 | 1.67E-05 | 0.000153 |
| 11754671_NFYC       | -0.45205 | 1.67E-05 | 0.000153 |
| 11736771_SCRN1      | 0.492292 | 1.67E-05 | 0.000153 |
| 11720674_PPM1A      | -0.4395  | 1.67E-05 | 0.000153 |
| 11749957_REEP5      | 0.416681 | 1.67E-05 | 0.000153 |
| 11757302_GMPS       | -0.37287 | 1.67E-05 | 0.000154 |
| 11721996_PARP14     | 0.51474  | 1.67E-05 | 0.000154 |
| 11747711_LDB1       | 0.369667 | 1.68E-05 | 0.000154 |
| 11757762_IPPK       | 0.487987 | 1.68E-05 | 0.000154 |
| 11743649_DCAF6      | 0.331688 | 1.68E-05 | 0.000154 |
| 11740586_PTGFR      | 0.369849 | 1.68E-05 | 0.000154 |
| 11739193_SLMAP      | 0.346978 | 1.68E-05 | 0.000154 |
| 11739864_TTF2       | -0.51287 | 1.68E-05 | 0.000154 |
| 11727813_SRSF1      | -0.53599 | 1.68E-05 | 0.000154 |
| 11731007_MIS18BP1   | -0.57595 | 1.68E-05 | 0.000154 |
| 11740903_PTCH1      | -0.4272  | 1.68E-05 | 0.000154 |
| 11716583_DYNLT1     | 0.36116  | 1.68E-05 | 0.000154 |
| 11725714_RPS14      | -0.41265 | 1.68E-05 | 0.000154 |
| 11716648_DHX40      | -0.41337 | 1.69E-05 | 0.000154 |
| 11743156_POFUT1     | -0.48515 | 1.69E-05 | 0.000155 |
| 11726858_TAF5       | -0.35638 | 1.69E-05 | 0.000155 |
| 11716317_CYTH2      | 0.458863 | 1.69E-05 | 0.000155 |
| 11742809_BCL2L13    | 0.3782   | 1.69E-05 | 0.000155 |
| 11724173_SDSL       | 0.481225 | 1.69E-05 | 0.000155 |
| 11739282_TRIM23     | 0.497431 | 1.69E-05 | 0.000155 |
| 11725134_GCOM1 ///  | 0.385231 | 1.69E-05 | 0.000155 |
| 11723019_SUSD2      | 0.51216  | 1.69E-05 | 0.000155 |
| 11718220_HNRNPAB    | -0.35466 | 1.70E-05 | 0.000156 |
| 11716472_RAF1       | 0.385448 | 1.70E-05 | 0.000156 |
| 11738081_ZNF235     | 0.571042 | 1.71E-05 | 0.000156 |
| 11757894_NFKBIA     | 0.392167 | 1.71E-05 | 0.000156 |
| 11728910_ZNF615     | 0.507056 | 1.71E-05 | 0.000156 |
| 11718875_PNMA1      | -0.3579  | 1.71E-05 | 0.000156 |
| 11723170_FOXN2      | 0.818576 | 1.71E-05 | 0.000156 |
| 11758273_ARF6       | -0.38118 | 1.71E-05 | 0.000156 |
| 11736335_DEDD       | 0.342357 | 1.71E-05 | 0.000156 |
| 11754853_PDZK1 ///  | 0.760996 | 1.71E-05 | 0.000156 |

|                    |          |          |          |
|--------------------|----------|----------|----------|
| 11717645_GPR107    | 0.605122 | 1.71E-05 | 0.000156 |
| 11756063_SRSF5     | -0.32701 | 1.71E-05 | 0.000156 |
| 11739073_RPL7L1    | -0.6889  | 1.72E-05 | 0.000157 |
| 11715609_ATP6V1H   | 0.375149 | 1.72E-05 | 0.000157 |
| 11720486_SENP2     | -0.36146 | 1.72E-05 | 0.000157 |
| 11752843_SQSTM1    | 0.371719 | 1.72E-05 | 0.000157 |
| 11748147_MRPL2     | -0.58475 | 1.72E-05 | 0.000157 |
| 11757292_LOC101060 | 0.511347 | 1.72E-05 | 0.000157 |
| 11744264_SEC11C    | 0.362794 | 1.72E-05 | 0.000157 |
| 11753027_PLEKHB2   | 0.426955 | 1.73E-05 | 0.000157 |
| 11730074_INTU      | 1.012784 | 1.73E-05 | 0.000158 |
| 11732302_CREB1     | -0.5426  | 1.73E-05 | 0.000158 |
| 11758119_TMEM41B   | -0.41979 | 1.73E-05 | 0.000158 |
| 11732274_ELMOD2    | 0.426418 | 1.73E-05 | 0.000158 |
| 11747220_COPG2     | -0.69995 | 1.73E-05 | 0.000158 |
| 11754814_NUP93     | -0.38937 | 1.73E-05 | 0.000158 |
| 11736438_DEDD      | 0.34791  | 1.73E-05 | 0.000158 |
| 11742120_NFYC      | -0.39998 | 1.74E-05 | 0.000158 |
| 11726010_CBR4      | -0.37886 | 1.74E-05 | 0.000158 |
| 11731137_MYPN      | 1.258441 | 1.74E-05 | 0.000158 |
| 11715801_PRRC2B    | -0.37965 | 1.74E-05 | 0.000158 |
| 11738155_CELF1     | 0.523718 | 1.74E-05 | 0.000158 |
| 11750709_ZNF33B    | 0.649745 | 1.74E-05 | 0.000159 |
| 11732095_TTC8      | 0.475805 | 1.74E-05 | 0.000159 |
| 11729216_PIGX      | -0.65922 | 1.74E-05 | 0.000159 |
| 11759578_RASSF8    | -0.34799 | 1.75E-05 | 0.000159 |
| 11717013_SNRPF     | -0.48799 | 1.75E-05 | 0.000159 |
| 11717162_SLC29A1   | -0.63831 | 1.75E-05 | 0.000159 |
| 11755951_PRMT5     | -0.34872 | 1.75E-05 | 0.000159 |
| 11728678_HNRNPD    | -0.40339 | 1.75E-05 | 0.000159 |
| 11721904_CCDC28B   | 0.433309 | 1.75E-05 | 0.000159 |
| 11749813_NEK2      | -0.6801  | 1.75E-05 | 0.000159 |
| 11760228_KLHL23 // | -0.64919 | 1.75E-05 | 0.000159 |
| 11748629_IFRD1     | 0.354104 | 1.76E-05 | 0.000159 |
| 11716628_KIF3B     | 0.4114   | 1.76E-05 | 0.000159 |
| 11764160_LINC01605 | 0.639991 | 1.76E-05 | 0.000159 |
| 11730164_TRIM37    | 0.346809 | 1.76E-05 | 0.000159 |
| 11750279_STC1      | 0.55513  | 1.76E-05 | 0.000159 |
| 11755483_PPP1R21   | 0.481277 | 1.76E-05 | 0.000159 |
| 11719691_TWSG1     | -0.58268 | 1.76E-05 | 0.000159 |
| 11728907_B3GLCT    | -0.58176 | 1.76E-05 | 0.000159 |
| 11718118_CFL2      | 0.353062 | 1.76E-05 | 0.000159 |
| 11741076_CASP1     | 0.44818  | 1.76E-05 | 0.000159 |
| 11754985_ZNF180    | 0.500446 | 1.76E-05 | 0.000159 |
| 11728649_NUCKS1    | -0.33805 | 1.76E-05 | 0.000159 |
| 11755444_MCOLN3    | 0.508448 | 1.76E-05 | 0.000159 |
| 11724815_MED13L    | 0.430709 | 1.76E-05 | 0.00016  |
| 11756732_TSPAN12   | 0.862903 | 1.77E-05 | 0.00016  |
| 11732396_IFT80     | 0.390937 | 1.77E-05 | 0.00016  |
| 11715776_HSPB8     | 0.635608 | 1.77E-05 | 0.00016  |
| 11749632_BRCA1     | -0.5987  | 1.77E-05 | 0.00016  |

|                    |          |          |          |
|--------------------|----------|----------|----------|
| 11749061_STOM      | 0.36691  | 1.77E-05 | 0.00016  |
| 11724054_SGOL2     | -0.55195 | 1.77E-05 | 0.00016  |
| 11745551_KLHDC3    | 0.41934  | 1.78E-05 | 0.00016  |
| 11732216_PEF1      | -0.42049 | 1.78E-05 | 0.000161 |
| 11758916_YY1       | -0.58923 | 1.78E-05 | 0.000161 |
| 11734907_ZNF432    | 0.62119  | 1.78E-05 | 0.000161 |
| 11721495_WDR33     | -0.48773 | 1.78E-05 | 0.000161 |
| 11735320_RBMS3     | 0.546661 | 1.78E-05 | 0.000161 |
| 11732196_KPNA4     | 0.412645 | 1.78E-05 | 0.000161 |
| 11746293_KLHL20    | 0.474793 | 1.78E-05 | 0.000161 |
| 11748594_RABEP1    | 0.36706  | 1.79E-05 | 0.000161 |
| 11733701_FKBP11    | -0.39036 | 1.79E-05 | 0.000162 |
| 11721315_FBXL5     | 0.325021 | 1.79E-05 | 0.000162 |
| 11739594_RBM12     | -0.94878 | 1.80E-05 | 0.000162 |
| 11728749_HCG22 /// | -0.55431 | 1.80E-05 | 0.000162 |
| 11745212_ZNF33A // | 0.557769 | 1.80E-05 | 0.000162 |
| 11746995_NPL       | -0.72756 | 1.80E-05 | 0.000162 |
| 11718789_ZNF302    | 0.349042 | 1.80E-05 | 0.000162 |
| 11729156_SLC25A32  | 0.345712 | 1.81E-05 | 0.000163 |
| 11718366_FDPS      | -0.41053 | 1.81E-05 | 0.000163 |
| 11716518_VPS37B    | -0.35909 | 1.81E-05 | 0.000163 |
| 11748975_CWF19L1   | -0.47107 | 1.81E-05 | 0.000163 |
| 11743404_ZMAT2     | -0.38489 | 1.81E-05 | 0.000163 |
| 11757482_POLD2     | -0.36116 | 1.81E-05 | 0.000163 |
| 11727580_CSTF3     | -0.39925 | 1.82E-05 | 0.000163 |
| 11755384_OSBP      | -0.38963 | 1.82E-05 | 0.000164 |
| 11722818_GGH       | -0.5022  | 1.82E-05 | 0.000164 |
| 11730786_KLHL20    | 0.451219 | 1.82E-05 | 0.000164 |
| 11748481_TUBB      | -0.32308 | 1.82E-05 | 0.000164 |
| 11719367_PLEKH02   | -0.34757 | 1.82E-05 | 0.000164 |
| 11759087_NHLRC2    | 0.400482 | 1.82E-05 | 0.000164 |
| 11715631_LAPTM4A   | -0.35041 | 1.82E-05 | 0.000164 |
| 11748838_C20orf27  | -0.36576 | 1.82E-05 | 0.000164 |
| 11745904_UQCC2     | -0.39161 | 1.82E-05 | 0.000164 |
| 11730301_LIAS      | -0.56036 | 1.82E-05 | 0.000164 |
| 11762499_POLQ      | -0.64641 | 1.83E-05 | 0.000164 |
| 11729222_GATA3     | 0.405152 | 1.83E-05 | 0.000164 |
| 11756209_SHMT1     | -0.47042 | 1.83E-05 | 0.000164 |
| 11716662_SUS6      | 0.460466 | 1.83E-05 | 0.000164 |
| 11757291_ISCU      | 0.350099 | 1.83E-05 | 0.000164 |
| AFFX-HUMISTAT1     | 0.387039 | 1.83E-05 | 0.000164 |
| 11757301_SDCBP     | 0.319847 | 1.83E-05 | 0.000164 |
| 11759174_USP14     | -0.4381  | 1.83E-05 | 0.000164 |
| 11754908_ILF3      | -0.35079 | 1.83E-05 | 0.000164 |
| 11717482_PDHA1     | -0.36118 | 1.83E-05 | 0.000165 |
| 11737428_MSRI      | 0.511535 | 1.84E-05 | 0.000165 |
| 11718511_UBE2L3    | -0.69922 | 1.84E-05 | 0.000165 |
| 11728223_UBE2J1    | -0.44668 | 1.84E-05 | 0.000165 |
| 11725333_MZT1      | -0.32972 | 1.84E-05 | 0.000165 |
| 11716294_CARS      | 0.362474 | 1.84E-05 | 0.000165 |
| 11726834_DNAJC21   | 0.401784 | 1.85E-05 | 0.000165 |

|                    |          |          |          |
|--------------------|----------|----------|----------|
| 11724381_FAM65B    | 0.547382 | 1.85E-05 | 0.000166 |
| 11715270_KLF7      | 0.570477 | 1.85E-05 | 0.000166 |
| 11729751_LPAR1     | 0.615502 | 1.85E-05 | 0.000166 |
| 11756937_DDI2 ///  | 0.667675 | 1.85E-05 | 0.000166 |
| 11744743_TSHZ1     | -0.42904 | 1.86E-05 | 0.000166 |
| 11724213_LMAN1     | -0.44617 | 1.86E-05 | 0.000166 |
| 11721815_FCMR      | 0.675089 | 1.86E-05 | 0.000166 |
| 11715384_PHB2      | -0.38459 | 1.86E-05 | 0.000166 |
| 11727687_KCTD18    | -0.81957 | 1.86E-05 | 0.000166 |
| 11718496_REEP4     | -0.34401 | 1.86E-05 | 0.000166 |
| 11746229_RPL31     | -0.44224 | 1.86E-05 | 0.000166 |
| 11745242_TNFRSF21  | -0.4719  | 1.86E-05 | 0.000166 |
| 11755072_ICAM3     | -0.43252 | 1.86E-05 | 0.000166 |
| 11745507_7-Mar     | 0.342558 | 1.86E-05 | 0.000166 |
| 11752735_NARS      | -0.35876 | 1.86E-05 | 0.000166 |
| 11749573_ARRB2     | -0.44418 | 1.86E-05 | 0.000167 |
| 11723121_TRPM7     | 0.431772 | 1.87E-05 | 0.000167 |
| 11757710_KHSRP     | -0.3636  | 1.87E-05 | 0.000167 |
| 11717231_EP400     | -0.46568 | 1.87E-05 | 0.000167 |
| 11723161_ZNF776    | 0.388432 | 1.87E-05 | 0.000167 |
| 11739549_LOC102724 | 0.533138 | 1.88E-05 | 0.000168 |
| 11750198_CASP7     | -0.45972 | 1.88E-05 | 0.000168 |
| 11720866_AGO1 ///  | 0.378371 | 1.88E-05 | 0.000168 |
| 11725219_SLK       | 0.323528 | 1.88E-05 | 0.000168 |
| 11728371_DNAJC16   | 0.483352 | 1.88E-05 | 0.000168 |
| 11716773_SORBS3    | -0.52714 | 1.88E-05 | 0.000168 |
| 11741127_CANX      | -0.38293 | 1.88E-05 | 0.000168 |
| 11743383_PRPF40A   | -0.46417 | 1.89E-05 | 0.000168 |
| 11716258_RHEB      | -0.3669  | 1.89E-05 | 0.000168 |
| 11731589_ZNF576    | -0.37559 | 1.89E-05 | 0.000168 |
| 11759202_CARNMT1   | -0.52385 | 1.89E-05 | 0.000168 |
| 11734196_SAMD4B    | -0.3841  | 1.89E-05 | 0.000168 |
| 11728315_ZNF148    | -0.48866 | 1.89E-05 | 0.000169 |
| 11722887_EMB       | 0.388014 | 1.90E-05 | 0.000169 |
| 11747721_CXorf40A  | 0.330805 | 1.90E-05 | 0.000169 |
| 11723883_SOWAHC    | 0.651072 | 1.90E-05 | 0.000169 |
| 11715705_MGEA5     | 0.390868 | 1.90E-05 | 0.000169 |
| 11715998_CAB39     | 0.368586 | 1.90E-05 | 0.000169 |
| 11720938_TIMM17B   | -0.38061 | 1.90E-05 | 0.000169 |
| 11731043_ERLIN2    | 0.465596 | 1.90E-05 | 0.000169 |
| 11716783_TBL1XR1   | -0.40263 | 1.90E-05 | 0.000169 |
| 11752755_MTRF1     | -0.3834  | 1.91E-05 | 0.00017  |
| 11728612_ADAMTS6   | 0.577739 | 1.91E-05 | 0.00017  |
| 11744258_ATP1B3    | -0.37376 | 1.91E-05 | 0.00017  |
| 11715879_PITPNA    | -0.46655 | 1.91E-05 | 0.00017  |
| 11740004_SPATA5    | -0.36035 | 1.91E-05 | 0.00017  |
| 11763444_SNAPC4    | 0.493395 | 1.91E-05 | 0.00017  |
| 11751060_GPR89A // | 0.494235 | 1.91E-05 | 0.00017  |
| 11741168_MSRRB3    | 0.690703 | 1.91E-05 | 0.00017  |
| 11728393_BLOC1S5 / | -0.36514 | 1.91E-05 | 0.00017  |
| 11737961_RCOR3     | 0.455871 | 1.91E-05 | 0.00017  |

|                   |          |          |          |
|-------------------|----------|----------|----------|
| 11744069_LSG1     | 0.358206 | 1.91E-05 | 0.00017  |
| 11758398_LYSMD3   | 0.350355 | 1.92E-05 | 0.00017  |
| 11745313_SYNRG    | 0.464386 | 1.92E-05 | 0.00017  |
| 11724873_NFYC     | -0.42268 | 1.92E-05 | 0.00017  |
| 11736329_ACOT9    | 0.389661 | 1.92E-05 | 0.00017  |
| 11755466_CDCA2    | -0.34283 | 1.92E-05 | 0.00017  |
| 11741189_NKIRAS2  | 0.431729 | 1.92E-05 | 0.00017  |
| 11721727_TAF6     | -0.35048 | 1.92E-05 | 0.00017  |
| 11761560_TRMT13   | 0.351698 | 1.92E-05 | 0.00017  |
| 11739972_NUAK1    | 0.709047 | 1.92E-05 | 0.00017  |
| 11739116_EFR3A    | 0.584302 | 1.92E-05 | 0.00017  |
| 11731978_PCSK7    | 0.349246 | 1.92E-05 | 0.00017  |
| 11757579_RYBP     | 0.459474 | 1.92E-05 | 0.00017  |
| 11757737_RBPJ     | -0.35487 | 1.92E-05 | 0.00017  |
| 11746324_SH3GLB1  | 0.42475  | 1.92E-05 | 0.00017  |
| 11739653_BIRC5    | -0.43569 | 1.93E-05 | 0.00017  |
| 11720605_POLD2    | -0.35165 | 1.93E-05 | 0.000171 |
| 11734300_INTS6    | 0.746772 | 1.93E-05 | 0.000171 |
| 11720109_CREB3L4  | -0.57938 | 1.93E-05 | 0.000171 |
| 11753568_SNAP23   | 0.36273  | 1.93E-05 | 0.000171 |
| 11741400_STMN1    | -0.32899 | 1.93E-05 | 0.000171 |
| 11721460_TAPBPL   | 0.658634 | 1.93E-05 | 0.000171 |
| 11741213_SSU72    | -0.38172 | 1.94E-05 | 0.000171 |
| 11748111_MAPKAP1  | -0.71941 | 1.94E-05 | 0.000171 |
| 11716054_LAMC1    | 0.392774 | 1.94E-05 | 0.000171 |
| 11756431_TXNIP    | -0.44474 | 1.94E-05 | 0.000171 |
| 11740680_RHCE /// | -0.66682 | 1.94E-05 | 0.000171 |
| 11724299_DDX31    | 0.38628  | 1.94E-05 | 0.000171 |
| 11747245_UTP15    | 0.423993 | 1.94E-05 | 0.000171 |
| 11743377_NIN      | -0.47123 | 1.94E-05 | 0.000171 |
| 11753919_IDE      | 0.372739 | 1.94E-05 | 0.000172 |
| 11758045_KIAA1804 | -0.52493 | 1.95E-05 | 0.000172 |
| 11720628_ATP6V1D  | 0.383877 | 1.95E-05 | 0.000172 |
| 11723355_CHD7     | 0.426685 | 1.95E-05 | 0.000172 |
| 11751244_CNN2     | 0.361647 | 1.95E-05 | 0.000172 |
| 11741313_CLCC1    | 0.331888 | 1.95E-05 | 0.000172 |
| 11719085_SMARCC2  | -0.38243 | 1.95E-05 | 0.000172 |
| 11760503_RASSF8   | -0.33795 | 1.95E-05 | 0.000172 |
| 11728383_SNAPC4   | 0.516081 | 1.95E-05 | 0.000172 |
| 11720241_KIF4A    | -0.57864 | 1.95E-05 | 0.000172 |
| 11730732_DNASE2   | -0.35811 | 1.95E-05 | 0.000172 |
| 11746058_ZNF410   | 0.326646 | 1.95E-05 | 0.000172 |
| 11728321_NSL1     | -0.54845 | 1.95E-05 | 0.000172 |
| 11717106_PSBM5    | -0.3637  | 1.95E-05 | 0.000172 |
| 11737506_NOCT     | 0.699933 | 1.95E-05 | 0.000172 |
| 11721245_BGN      | -0.40577 | 1.95E-05 | 0.000172 |
| 11715553_IMMT     | -0.3377  | 1.96E-05 | 0.000172 |
| 11757481_COPS6    | -0.37654 | 1.96E-05 | 0.000172 |
| 11727530_PHF20L1  | 0.333659 | 1.96E-05 | 0.000172 |
| 11726661_GPN3     | -0.39642 | 1.96E-05 | 0.000172 |
| 11720530_JAZF1    | 0.775199 | 1.96E-05 | 0.000172 |

|                    |          |          |          |
|--------------------|----------|----------|----------|
| 11722440_SEMA4F    | -0.53987 | 1.96E-05 | 0.000172 |
| 11747763_ADD1      | -0.46682 | 1.96E-05 | 0.000172 |
| 11749856_ANTXR2    | 0.366917 | 1.96E-05 | 0.000173 |
| 11749495_SLC23A2   | 0.421903 | 1.97E-05 | 0.000173 |
| 11756799_TOR1AIP1  | -0.33886 | 1.97E-05 | 0.000173 |
| 11718058_TYMS      | -0.32497 | 1.97E-05 | 0.000173 |
| 11748416_DCAF6     | 0.398539 | 1.97E-05 | 0.000173 |
| 11740481_PAQR5     | -0.62538 | 1.97E-05 | 0.000173 |
| 11720054_CCNH      | 0.4315   | 1.97E-05 | 0.000173 |
| 11717720_ST6GAL1   | -0.32773 | 1.98E-05 | 0.000174 |
| 200054_PMZPR1      | 0.46556  | 1.98E-05 | 0.000174 |
| 11743259_PHF13     | -0.35875 | 1.99E-05 | 0.000174 |
| 11748790_SS18      | 0.424736 | 1.99E-05 | 0.000175 |
| 11742772_LSM14A    | -0.32241 | 1.99E-05 | 0.000175 |
| 11729310_SKA3      | -0.38327 | 1.99E-05 | 0.000175 |
| 11754780_ZNF767P   | 0.45584  | 1.99E-05 | 0.000175 |
| 11748355_SLC16A1   | -0.39862 | 1.99E-05 | 0.000175 |
| 11730729_TAP1      | 0.505418 | 1.99E-05 | 0.000175 |
| 11744694_BIRC2     | 0.336702 | 2.00E-05 | 0.000175 |
| 11739041_GTF2H1    | 0.356894 | 2.00E-05 | 0.000175 |
| 11757587_SLC39A6   | -0.38669 | 2.00E-05 | 0.000175 |
| 11746839_SKIV2L    | -0.38831 | 2.00E-05 | 0.000175 |
| 11733613_TCOF1     | -0.67051 | 2.00E-05 | 0.000175 |
| 11722162_PLK2      | 0.357875 | 2.00E-05 | 0.000175 |
| 11739567_FKBP5     | -0.41567 | 2.00E-05 | 0.000175 |
| 11729188_MAX       | 0.400148 | 2.01E-05 | 0.000175 |
| 11745334_LATS1     | 0.666219 | 2.01E-05 | 0.000176 |
| 11747073_ACTN4     | -0.38454 | 2.01E-05 | 0.000176 |
| 11743165_ETV6      | 0.501439 | 2.01E-05 | 0.000176 |
| 11728805_CADM1     | 0.571324 | 2.01E-05 | 0.000176 |
| 11725975_POM121    | -0.42558 | 2.01E-05 | 0.000176 |
| 11722093_PPIC      | 0.52789  | 2.01E-05 | 0.000176 |
| 11720966_DCK       | -0.34423 | 2.01E-05 | 0.000176 |
| 11733923_CROT      | 0.664661 | 2.01E-05 | 0.000176 |
| 11726690_STAT1     | 0.382314 | 2.01E-05 | 0.000176 |
| 11721758_TMEM47    | 0.393071 | 2.01E-05 | 0.000176 |
| 11716947_TM9SF3    | 0.346402 | 2.02E-05 | 0.000176 |
| 11720742_ZNF605    | 0.603405 | 2.02E-05 | 0.000176 |
| 11727488_HAUS6     | -0.59655 | 2.02E-05 | 0.000176 |
| 11718219_HNRNPAB   | -0.34561 | 2.02E-05 | 0.000176 |
| 11726702_AFTPH     | 0.518268 | 2.02E-05 | 0.000176 |
| 11725192_TTPAL     | -0.36324 | 2.02E-05 | 0.000176 |
| 11748606_POLR1B    | 0.403482 | 2.02E-05 | 0.000176 |
| 11725771_MIER3     | 0.389638 | 2.02E-05 | 0.000176 |
| 11743269_SRSF1     | -0.49135 | 2.02E-05 | 0.000176 |
| 11723273_FEM1C     | 0.428951 | 2.02E-05 | 0.000176 |
| 11732899_LOC105369 | 0.355592 | 2.02E-05 | 0.000176 |
| 11736307_CSNK1A1   | 0.378621 | 2.02E-05 | 0.000176 |
| 11748972_CDC25B    | -0.51518 | 2.02E-05 | 0.000176 |
| 11746099_PPP4R1    | 0.446209 | 2.03E-05 | 0.000176 |
| 11719964_UBE2E2    | 0.314669 | 2.03E-05 | 0.000177 |

|                    |          |          |          |
|--------------------|----------|----------|----------|
| 11724798_MAGOH     | -0.42482 | 2.03E-05 | 0.000177 |
| 11721504_CKLF ///  | -0.35311 | 2.03E-05 | 0.000177 |
| 11722570_VEZT      | 0.541013 | 2.03E-05 | 0.000177 |
| 11719940_DSCR3     | 0.405489 | 2.03E-05 | 0.000177 |
| 11754887_MSRB3     | 0.462261 | 2.03E-05 | 0.000177 |
| 11754569_MZT2A     | -0.34499 | 2.03E-05 | 0.000177 |
| 11729227_GRK5      | 0.42656  | 2.03E-05 | 0.000177 |
| 11732542_TRIM7     | -0.73157 | 2.03E-05 | 0.000177 |
| 11717870_ZNF263    | 0.450047 | 2.03E-05 | 0.000177 |
| 11760834_MED6      | 0.512746 | 2.03E-05 | 0.000177 |
| 11733258_TAOK3     | 0.528266 | 2.03E-05 | 0.000177 |
| 11744376_MPI       | -0.36073 | 2.04E-05 | 0.000177 |
| 11746115_ZNF35     | 0.663719 | 2.04E-05 | 0.000177 |
| 11746098_PPP4R1    | 0.481472 | 2.04E-05 | 0.000177 |
| 11727361_MYLK      | 0.486131 | 2.04E-05 | 0.000177 |
| 11730465_KCNJ2     | 0.673947 | 2.04E-05 | 0.000177 |
| 11726326_DCUN1D1   | 0.392081 | 2.04E-05 | 0.000177 |
| 11723789_FAM167A   | 0.348248 | 2.05E-05 | 0.000178 |
| 11722142_PITPNM1   | -0.40505 | 2.05E-05 | 0.000178 |
| 11733827_C19orf48  | -0.32898 | 2.05E-05 | 0.000178 |
| 11727988_SCML1     | 0.502937 | 2.05E-05 | 0.000178 |
| 11757464_PLXNB2    | 0.380848 | 2.05E-05 | 0.000178 |
| 11730863_CTTNBP2NL | 0.597094 | 2.05E-05 | 0.000178 |
| 11736504_NR3C1     | -0.42203 | 2.05E-05 | 0.000178 |
| 11719494_JOSD1     | 0.373799 | 2.05E-05 | 0.000178 |
| 11715405_COL6A1    | 0.384615 | 2.06E-05 | 0.000178 |
| 11715983_ADNP      | 0.381613 | 2.06E-05 | 0.000178 |
| 11739824_PCDHB16   | -0.39764 | 2.06E-05 | 0.000178 |
| 11721212_THBS4     | -0.42792 | 2.06E-05 | 0.000178 |
| 11750773_KIF2A     | 0.432775 | 2.06E-05 | 0.000178 |
| 11747932_LEF1      | -0.48187 | 2.06E-05 | 0.000178 |
| 11717549_BTBD10    | 0.486325 | 2.06E-05 | 0.000179 |
| 11749354_WDR41     | 0.373951 | 2.06E-05 | 0.000179 |
| 11728610_BBS7      | 0.585414 | 2.06E-05 | 0.000179 |
| 11756670_TUBA1C    | -0.35864 | 2.07E-05 | 0.000179 |
| 11724970_FLT1      | 0.844076 | 2.07E-05 | 0.000179 |
| 11717068_DIP2B     | 0.506957 | 2.07E-05 | 0.000179 |
| 11750722_GPHN      | 0.525691 | 2.07E-05 | 0.000179 |
| 11751130_NRBF2     | 0.353032 | 2.07E-05 | 0.000179 |
| 11727196_ZNF202    | 0.391557 | 2.07E-05 | 0.000179 |
| 11760879_RPL7L1    | -0.49577 | 2.08E-05 | 0.00018  |
| 11725461_MAU2      | 0.337608 | 2.08E-05 | 0.00018  |
| 11718089_TNKS      | 0.503841 | 2.08E-05 | 0.00018  |
| 11717021_TMEM222   | -0.49993 | 2.08E-05 | 0.00018  |
| 11719827_QPCT      | 0.41438  | 2.08E-05 | 0.00018  |
| 11729805_PPHLN1    | 0.375278 | 2.08E-05 | 0.00018  |
| 11751094_CEACAM1   | 0.696637 | 2.08E-05 | 0.00018  |
| 11756021_SNRPB2    | -0.35549 | 2.08E-05 | 0.00018  |
| 11753483_PARN      | -0.53681 | 2.08E-05 | 0.00018  |
| 11726691_ANGPT1    | 0.506406 | 2.08E-05 | 0.00018  |
| 11725706_AMOTL1    | -0.50343 | 2.08E-05 | 0.00018  |

|                    |          |          |          |
|--------------------|----------|----------|----------|
| 11727000_TSNAX     | -0.36907 | 2.09E-05 | 0.00018  |
| 11748895_GRPEL2    | 0.519891 | 2.09E-05 | 0.00018  |
| 11716094_KLF6      | 0.408886 | 2.09E-05 | 0.00018  |
| 11730804_PRPF38B   | 0.404618 | 2.09E-05 | 0.00018  |
| 11752572_SLC2A1    | -0.36768 | 2.09E-05 | 0.00018  |
| 11754958_ATP6AP1   | 0.375458 | 2.09E-05 | 0.000181 |
| 11726149_PPIP5K2   | -0.37534 | 2.09E-05 | 0.000181 |
| 11722551_ITSN1     | -0.40709 | 2.10E-05 | 0.000181 |
| 11754934_PTGES2    | -0.51579 | 2.10E-05 | 0.000181 |
| 11727769_BNC2      | -0.52778 | 2.10E-05 | 0.000181 |
| 11746820_SMAD2     | 0.426224 | 2.10E-05 | 0.000181 |
| 11759746_ARHGEF28  | 0.50866  | 2.10E-05 | 0.000181 |
| 11716182_ALCAM     | 0.550425 | 2.10E-05 | 0.000181 |
| 11715204_HIST2H2AC | -0.629   | 2.10E-05 | 0.000181 |
| 11716152_PAFAH1B1  | -0.49219 | 2.10E-05 | 0.000181 |
| 11719460_WDR41     | 0.526256 | 2.11E-05 | 0.000182 |
| 11715905_DDX3X     | 0.356985 | 2.11E-05 | 0.000182 |
| 11737612_ZDHC21    | 0.528221 | 2.11E-05 | 0.000182 |
| 11730685_CSMD3     | 0.636114 | 2.11E-05 | 0.000182 |
| 11746212_ODF2      | -0.40111 | 2.11E-05 | 0.000182 |
| 11751696_C3orf52   | 0.534667 | 2.11E-05 | 0.000182 |
| 11737221_FERMT2    | 0.58442  | 2.12E-05 | 0.000182 |
| 11729710_MARS2     | 0.574489 | 2.12E-05 | 0.000182 |
| 11728278_CASP6 /// | -0.56264 | 2.12E-05 | 0.000182 |
| 11758250_FBXL3     | 0.343152 | 2.12E-05 | 0.000182 |
| 11718073_IL4R      | 0.387337 | 2.12E-05 | 0.000182 |
| 11754486_NME4      | -0.34157 | 2.12E-05 | 0.000182 |
| 11755643_TNS3      | -0.34999 | 2.12E-05 | 0.000182 |
| 11716742_TJP2      | 0.349542 | 2.12E-05 | 0.000182 |
| 11729672_FAM200B   | 0.366277 | 2.12E-05 | 0.000182 |
| 11725737_UBR3      | 0.452539 | 2.12E-05 | 0.000182 |
| 11733117_SLC35B4   | -0.40117 | 2.13E-05 | 0.000183 |
| 11738214_LBX2      | -0.33209 | 2.13E-05 | 0.000183 |
| 11726999_TSNAX     | -0.56525 | 2.13E-05 | 0.000183 |
| 11739222_NF1       | 0.79729  | 2.13E-05 | 0.000183 |
| 11719274_PANK4     | -0.47715 | 2.13E-05 | 0.000183 |
| 11756612_BARD1     | -0.74797 | 2.13E-05 | 0.000183 |
| 11717099_HIST1H2BK | 0.334137 | 2.13E-05 | 0.000183 |
| 11720236_KAT8      | -0.34631 | 2.13E-05 | 0.000183 |
| 11755600_GEMIN6    | -0.39009 | 2.14E-05 | 0.000183 |
| 11717738_PCYOX1    | -0.57441 | 2.14E-05 | 0.000183 |
| 11721176_PPP1R26   | -0.32055 | 2.14E-05 | 0.000183 |
| 11758346_PAPSS2    | -0.39232 | 2.14E-05 | 0.000184 |
| 11749077_HDGF      | -0.43856 | 2.14E-05 | 0.000184 |
| 11748693_RAB5A     | 0.372345 | 2.15E-05 | 0.000184 |
| 11737416_ZNF69     | 0.57865  | 2.15E-05 | 0.000184 |
| 11728232_CLDN1     | 1.103556 | 2.15E-05 | 0.000184 |
| 11739672_ZNF253    | 0.724094 | 2.15E-05 | 0.000184 |
| 11720299_CHTOP     | -0.34526 | 2.15E-05 | 0.000184 |
| 11747166_WDR41     | 0.360452 | 2.15E-05 | 0.000184 |
| 11720833_YEATS4    | -0.51038 | 2.16E-05 | 0.000185 |



|                   |   |          |          |          |
|-------------------|---|----------|----------|----------|
| 11719509_CSRP2BP  | / | -0.48423 | 2.16E-05 | 0.000185 |
| 11757445_PTEN     |   | 0.361642 | 2.16E-05 | 0.000185 |
| 11720509_FBN1     |   | 0.480355 | 2.16E-05 | 0.000185 |
| 11725314_GBAS     |   | -0.46079 | 2.16E-05 | 0.000185 |
| 11739710_PHACTR2  |   | 0.409029 | 2.16E-05 | 0.000185 |
| 11759062_SIK2     |   | -0.44417 | 2.17E-05 | 0.000185 |
| 11757556_BLMH     |   | -0.33147 | 2.17E-05 | 0.000185 |
| 11735140_TNFSF9   |   | 0.455915 | 2.17E-05 | 0.000185 |
| 11719594_GMEB2    |   | -0.39589 | 2.17E-05 | 0.000186 |
| 11717105_PSMB5    |   | -0.35165 | 2.17E-05 | 0.000186 |
| 11743701_GNL3L    |   | 0.370944 | 2.18E-05 | 0.000186 |
| 11717685_JAK1     |   | 0.39695  | 2.18E-05 | 0.000186 |
| 11745010_DCBLD2   |   | 0.357265 | 2.18E-05 | 0.000186 |
| 11726626_CCNG2    |   | -0.50433 | 2.18E-05 | 0.000186 |
| 11721777_SSH2     |   | 0.323242 | 2.18E-05 | 0.000186 |
| 11733742_DCXR     |   | -0.44926 | 2.18E-05 | 0.000186 |
| 11724883_HAPLN3   |   | -0.51063 | 2.18E-05 | 0.000186 |
| 11724190_ATP5B    |   | -0.34693 | 2.18E-05 | 0.000186 |
| 11742932_SAMD1    |   | -0.56215 | 2.19E-05 | 0.000187 |
| 11725002_IRX3     |   | -0.5734  | 2.19E-05 | 0.000187 |
| 11716248_TMED9    |   | -0.44752 | 2.19E-05 | 0.000187 |
| 11729219_NCK1     |   | 0.39428  | 2.19E-05 | 0.000187 |
| 11736224_SPATS2   |   | 0.351353 | 2.19E-05 | 0.000187 |
| 11723620_OBSL1    |   | -0.59443 | 2.19E-05 | 0.000187 |
| 11723703_ABHD5    |   | 0.68119  | 2.19E-05 | 0.000187 |
| 11719707_DHRS13   |   | -0.4342  | 2.20E-05 | 0.000187 |
| 11718885_ARL5A    |   | 0.363831 | 2.20E-05 | 0.000187 |
| 11744259_ATP1B3   |   | -0.33263 | 2.20E-05 | 0.000188 |
| 11749233_NAP1L1   |   | -0.35216 | 2.20E-05 | 0.000188 |
| 11718425_HSDL2    |   | -0.41967 | 2.20E-05 | 0.000188 |
| 11737211_HDGF     |   | -0.40732 | 2.21E-05 | 0.000188 |
| 11723072_NDUFV3   |   | 0.459765 | 2.21E-05 | 0.000188 |
| 11751308_RBM24    |   | 0.787632 | 2.21E-05 | 0.000188 |
| 11740610_ZNF121   |   | 0.338752 | 2.21E-05 | 0.000188 |
| 11733482_DYRK3    |   | 0.358564 | 2.22E-05 | 0.000189 |
| AFFX-HUM1STAT1    |   | 0.376487 | 2.22E-05 | 0.000189 |
| 11754122_DBI      |   | -0.38134 | 2.22E-05 | 0.000189 |
| 11743051_CDKN2C   |   | -0.43132 | 2.22E-05 | 0.000189 |
| 11721567_POLD1    |   | -0.57915 | 2.22E-05 | 0.000189 |
| 11733094_FOXRED2  |   | -0.49999 | 2.22E-05 | 0.000189 |
| 11736405_DNMT1    |   | -0.43725 | 2.23E-05 | 0.000189 |
| 11717693_CEBPG    |   | -0.48473 | 2.23E-05 | 0.00019  |
| 11732729_AJAP1    |   | 0.583726 | 2.23E-05 | 0.00019  |
| 11729059_TOR4A    |   | -0.49653 | 2.23E-05 | 0.00019  |
| 11748777_ZNF671   |   | 0.419507 | 2.24E-05 | 0.00019  |
| 11727173_EPC2     |   | 0.524848 | 2.24E-05 | 0.00019  |
| 11742791_ATP6AP1L |   | -0.40614 | 2.24E-05 | 0.00019  |
| 11744160_ATAD3A   |   | -0.4238  | 2.25E-05 | 0.000191 |
| 11761428_LRRC7    |   | 1.359375 | 2.25E-05 | 0.000191 |
| 11747209_SEC62    |   | 0.327078 | 2.25E-05 | 0.000191 |
| 11748087_C10orf2  |   | -0.59975 | 2.25E-05 | 0.000191 |

|                   |          |          |          |
|-------------------|----------|----------|----------|
| 11717245_LSM4     | -0.32355 | 2.25E-05 | 0.000191 |
| 11726457_GSPT2    | 0.569734 | 2.25E-05 | 0.000191 |
| 11719438_SRGAP2   | -0.43809 | 2.25E-05 | 0.000191 |
| 11722461_TNKS2    | 0.456463 | 2.25E-05 | 0.000191 |
| 11736178_TRNT1    | 0.413902 | 2.25E-05 | 0.000191 |
| 11716228_MPDU1    | -0.50015 | 2.25E-05 | 0.000191 |
| 11760520_NSD1     | 0.408111 | 2.26E-05 | 0.000191 |
| 11721332_BRE      | 0.326374 | 2.26E-05 | 0.000191 |
| 11756328_TARDBP   | -0.46309 | 2.26E-05 | 0.000192 |
| 11736009_RSL1D1   | 0.339902 | 2.26E-05 | 0.000192 |
| 11719486_EPS15    | 0.337843 | 2.26E-05 | 0.000192 |
| 11731650_NTM      | 0.660853 | 2.27E-05 | 0.000192 |
| 11730294_SIN3A    | -0.40944 | 2.27E-05 | 0.000192 |
| 11725848_BCORL1   | -0.44888 | 2.27E-05 | 0.000192 |
| 11727810_ELP2     | 0.380268 | 2.27E-05 | 0.000192 |
| 11745804_LIMS1    | 0.349725 | 2.27E-05 | 0.000192 |
| 11716227_MPDU1    | -0.41038 | 2.27E-05 | 0.000192 |
| 11735156_ZNF585A  | 0.496764 | 2.27E-05 | 0.000192 |
| 11736523_TNNT1    | -0.3851  | 2.27E-05 | 0.000192 |
| 11715674_CCNG1    | 0.477583 | 2.27E-05 | 0.000192 |
| 11729935_PITX2    | -0.31829 | 2.28E-05 | 0.000193 |
| 11736493_DAZAP2   | -0.45138 | 2.28E-05 | 0.000193 |
| 11726251_SLC1A3   | 0.763103 | 2.28E-05 | 0.000193 |
| 11729644_GPX8     | -0.44276 | 2.29E-05 | 0.000193 |
| 11751336_MKRN1    | -0.50759 | 2.29E-05 | 0.000193 |
| 11748830_MKNK1    | 0.385007 | 2.29E-05 | 0.000193 |
| 11743541_CEP57    | -0.35137 | 2.29E-05 | 0.000193 |
| 11753493_RAB18    | 0.511616 | 2.29E-05 | 0.000193 |
| 11726461_PDCD2    | -0.31597 | 2.29E-05 | 0.000193 |
| 11729885_C18orf54 | -0.60445 | 2.29E-05 | 0.000193 |
| 11729937_NGF      | 0.410164 | 2.29E-05 | 0.000193 |
| 11719417_ANKRA2   | 0.516507 | 2.30E-05 | 0.000194 |
| 11723321_FBXO30   | 0.412622 | 2.30E-05 | 0.000194 |
| 11757642_FHOD1    | 0.332152 | 2.30E-05 | 0.000194 |
| 11758483_ARRDC4   | -0.64974 | 2.30E-05 | 0.000194 |
| 11761686_IFIH1    | 0.694553 | 2.30E-05 | 0.000194 |
| 11749003_ERAP1    | 0.510816 | 2.30E-05 | 0.000194 |
| 11731006_MIS18BP1 | -1.01262 | 2.30E-05 | 0.000194 |
| 11724209_KIFC1    | -0.59366 | 2.30E-05 | 0.000194 |
| 11742903_CETN3    | -0.40307 | 2.30E-05 | 0.000194 |
| 11726469_C1orf106 | -0.6628  | 2.30E-05 | 0.000194 |
| 11752693_SUV39H1  | -0.45473 | 2.31E-05 | 0.000194 |
| 11729145_HNRNPD   | -0.42531 | 2.31E-05 | 0.000194 |
| 11725668_HS2ST1   | -0.48239 | 2.31E-05 | 0.000194 |
| 11748080_DLST     | -0.60775 | 2.31E-05 | 0.000195 |
| 11746940_CD9      | -0.33858 | 2.31E-05 | 0.000195 |
| 11754854_ATF7IP2  | 0.407292 | 2.31E-05 | 0.000195 |
| 11754273_SH3RF1   | 0.479569 | 2.32E-05 | 0.000195 |
| 11758489_SHROOM3  | 0.389563 | 2.32E-05 | 0.000195 |
| 11719323_PTEN     | 0.419602 | 2.32E-05 | 0.000195 |
| 11757018_COL12A1  | 0.337425 | 2.32E-05 | 0.000195 |

|                    |          |          |          |
|--------------------|----------|----------|----------|
| 11725492_RAB20     | 0.439761 | 2.32E-05 | 0.000195 |
| 11721141_TCEA3     | 0.400977 | 2.32E-05 | 0.000195 |
| 11751671_LGALS8    | 0.362614 | 2.32E-05 | 0.000195 |
| 11726428_DCAF6     | 0.362592 | 2.32E-05 | 0.000195 |
| 11730906_PDS5B     | -0.39877 | 2.32E-05 | 0.000195 |
| 11727627_ALKBH8    | 0.384568 | 2.32E-05 | 0.000195 |
| 11743139_5-Mar     | 0.354381 | 2.33E-05 | 0.000196 |
| 11728793_EEF2K /// | -0.31806 | 2.33E-05 | 0.000196 |
| 11745907_UMAD1     | -0.64649 | 2.34E-05 | 0.000196 |
| 11736484_AFG1      | -0.44296 | 2.34E-05 | 0.000197 |
| 11748327_ZNF138    | 0.697153 | 2.34E-05 | 0.000197 |
| 11735282_SLC10A4   | -0.44101 | 2.34E-05 | 0.000197 |
| 11728754_TEX19     | -0.35584 | 2.34E-05 | 0.000197 |
| 11735789_MTFRIL    | -0.62629 | 2.35E-05 | 0.000197 |
| 11743543_CEP57     | -0.32499 | 2.35E-05 | 0.000197 |
| 11725625_ACE2      | 0.567195 | 2.35E-05 | 0.000197 |
| 11746616_WSB1      | 0.507412 | 2.36E-05 | 0.000197 |
| 11763322_CSNK2A2   | -0.35718 | 2.36E-05 | 0.000198 |
| 11755709_LARP6     | 0.36961  | 2.36E-05 | 0.000198 |
| 11716351_HSPE1 /// | -0.37679 | 2.36E-05 | 0.000198 |
| 11752897_HBP1      | 0.37241  | 2.36E-05 | 0.000198 |
| 11729192_MYNN      | 0.487599 | 2.37E-05 | 0.000198 |
| 11747414_ZNF548    | 0.571903 | 2.37E-05 | 0.000198 |
| 11739371_CPOX      | -0.34846 | 2.37E-05 | 0.000198 |
| 11753575_COQ7      | -0.45957 | 2.37E-05 | 0.000198 |
| 11751378_TMEM161B  | 0.337592 | 2.37E-05 | 0.000198 |
| 11724098_LRIG3     | 0.369241 | 2.37E-05 | 0.000198 |
| 11719305_SYNPO     | -0.40217 | 2.37E-05 | 0.000198 |
| 11739544_C19orf12  | 0.382101 | 2.38E-05 | 0.000199 |
| 11718272_TAX1BP1   | -0.58023 | 2.38E-05 | 0.000199 |
| 11717415_MLST8     | -0.38463 | 2.38E-05 | 0.000199 |
| 11748011_TMEM9     | -0.37457 | 2.38E-05 | 0.000199 |
| 11752580_AKAP10    | 0.588518 | 2.38E-05 | 0.000199 |
| 11753893_PRELP     | -0.36506 | 2.38E-05 | 0.000199 |
| 11727151_PRICKLE1  | 0.53676  | 2.38E-05 | 0.000199 |
| 11741154_LIMS1     | 0.394896 | 2.38E-05 | 0.000199 |
| 11746604_MTG2      | -0.3821  | 2.39E-05 | 0.000199 |
| 11723297_AKAP2 /// | 0.367888 | 2.39E-05 | 0.000199 |
| 11744897_ARMCX3    | 0.424239 | 2.39E-05 | 0.000199 |
| 11747820_UPP1      | 0.507451 | 2.39E-05 | 0.000199 |
| 11744085_UBALD2    | -0.45313 | 2.39E-05 | 0.000199 |
| 11726188_SHISA3    | -0.75288 | 2.39E-05 | 0.000199 |
| 11719752_VAC14     | -0.53886 | 2.39E-05 | 0.000199 |
| 11718522_SMG7      | 0.453206 | 2.39E-05 | 0.000199 |
| 11730269_NIPBL     | 0.382934 | 2.39E-05 | 0.000199 |
| 11730404_MEX3B     | -0.36519 | 2.39E-05 | 0.0002   |
| 11738256_GRK6      | -0.4458  | 2.39E-05 | 0.0002   |
| 11761284_DIMT1     | 0.521197 | 2.40E-05 | 0.0002   |
| 11717414_MLST8     | -0.38547 | 2.40E-05 | 0.0002   |
| 11717864_PSME4     | 0.445808 | 2.40E-05 | 0.0002   |
| 11729659_TMEM69    | -0.37362 | 2.41E-05 | 0.000201 |

|                    |          |          |          |
|--------------------|----------|----------|----------|
| 11727301_FGFR1     | -0.4037  | 2.41E-05 | 0.000201 |
| 11757044_HILPDA    | -0.42397 | 2.41E-05 | 0.000201 |
| 11719448_RAB14     | 0.429826 | 2.42E-05 | 0.000201 |
| 11753169_FKTN      | 0.87944  | 2.42E-05 | 0.000201 |
| 11723298_AKAP2 /// | 0.381862 | 2.42E-05 | 0.000201 |
| 11718344_CNOT7     | -0.34034 | 2.42E-05 | 0.000201 |
| 11750545_CNOT7     | -0.34034 | 2.42E-05 | 0.000201 |
| 11722516_PARS2     | -0.32164 | 2.42E-05 | 0.000202 |
| 11737966_C15orf54  | 0.967207 | 2.43E-05 | 0.000202 |
| 11754009_PSMB5     | -0.38086 | 2.43E-05 | 0.000202 |
| 11754759_CHTOP     | -0.37685 | 2.43E-05 | 0.000202 |
| 11747931_LEF1      | -0.60164 | 2.43E-05 | 0.000203 |
| 11725158_STEAP1    | -0.36129 | 2.44E-05 | 0.000203 |
| 11755299_SAPCD2    | -1.20987 | 2.44E-05 | 0.000203 |
| 11741038_GPR89A // | 0.423755 | 2.44E-05 | 0.000203 |
| 11724958_NT5M      | -0.46352 | 2.44E-05 | 0.000203 |
| 11743511_CDCA2     | -0.54028 | 2.44E-05 | 0.000203 |
| 11755584_FAM161A   | -0.46875 | 2.44E-05 | 0.000203 |
| 11720832_SOX18     | -0.43394 | 2.44E-05 | 0.000203 |
| 11755106_PDLIM3    | -0.47808 | 2.44E-05 | 0.000203 |
| 11740534_PTGES3L   | -0.55693 | 2.44E-05 | 0.000203 |
| 11758218_MOSPD1    | 0.444072 | 2.44E-05 | 0.000203 |
| 11728865_ZMYND19   | -0.35918 | 2.44E-05 | 0.000203 |
| 11757317_PEF1      | -0.40322 | 2.44E-05 | 0.000203 |
| 11754473_CADM1     | 0.52898  | 2.44E-05 | 0.000203 |
| 11742029_NR1D2     | 0.408364 | 2.44E-05 | 0.000203 |
| 11754252_5-Mar     | 0.355157 | 2.44E-05 | 0.000203 |
| 11726431_OSBPL3    | 0.35701  | 2.45E-05 | 0.000203 |
| 11716108_XPNPEP1   | 0.353605 | 2.45E-05 | 0.000203 |
| 11756489_NUDT8     | -0.38531 | 2.45E-05 | 0.000203 |
| 11750284_LINS1     | 0.44549  | 2.45E-05 | 0.000203 |
| 11743473_ZNF226    | 0.507148 | 2.45E-05 | 0.000203 |
| 11717709_LPCAT4    | -0.36223 | 2.45E-05 | 0.000203 |
| 11737758_CARS      | 0.364008 | 2.45E-05 | 0.000203 |
| 11729820_USMG5     | -0.38604 | 2.45E-05 | 0.000203 |
| 11739548_CSPG4     | -0.37234 | 2.46E-05 | 0.000204 |
| 11758107_PCBP1     | -0.30796 | 2.46E-05 | 0.000204 |
| 11754215_GPN3      | -0.36769 | 2.46E-05 | 0.000204 |
| 11726524_ZFH3      | -0.5924  | 2.46E-05 | 0.000204 |
| 11720904_QSER1     | -0.34391 | 2.47E-05 | 0.000204 |
| 11722048_LDAH      | 0.435379 | 2.47E-05 | 0.000204 |
| 11718781_SSBP2     | 0.470635 | 2.47E-05 | 0.000204 |
| 11751616_LACTB2    | -0.36735 | 2.47E-05 | 0.000204 |
| 11754830_CD22      | 0.654169 | 2.47E-05 | 0.000204 |
| 11742215_APP       | 0.309685 | 2.47E-05 | 0.000204 |
| 11725038_HADHB     | -0.31367 | 2.47E-05 | 0.000204 |
| 11746779_NCOA7     | 0.433338 | 2.47E-05 | 0.000204 |
| 11724814_MED13L    | 0.33382  | 2.47E-05 | 0.000204 |
| 11743760_CDC42SE2  | 0.654439 | 2.47E-05 | 0.000204 |
| 11725001_IRX3      | -0.59622 | 2.47E-05 | 0.000204 |
| 11727485_TPR       | -0.55453 | 2.48E-05 | 0.000205 |

|                    |          |          |          |
|--------------------|----------|----------|----------|
| 11723688_CREBL2    | 0.439749 | 2.48E-05 | 0.000205 |
| 11749075_PISD      | 0.359716 | 2.48E-05 | 0.000205 |
| 11744013_WIZ       | -0.3093  | 2.48E-05 | 0.000205 |
| 11756703_EPS15     | 0.409234 | 2.48E-05 | 0.000205 |
| 11751491_PARVA     | 0.362204 | 2.48E-05 | 0.000205 |
| 11728964_ZNF585A / | 0.479293 | 2.48E-05 | 0.000205 |
| 11744413_HSPA1A // | -0.36089 | 2.49E-05 | 0.000205 |
| 11729626_DCAF7     | 0.381202 | 2.49E-05 | 0.000205 |
| 11720648_IP6K2     | 0.327662 | 2.49E-05 | 0.000205 |
| 11724293_TRIT1     | 0.379883 | 2.49E-05 | 0.000206 |
| 11728809_COL8A1    | 0.562241 | 2.49E-05 | 0.000206 |
| 11728806_CADM1     | 0.484255 | 2.50E-05 | 0.000206 |
| 11715346_EBI3      | 0.573175 | 2.50E-05 | 0.000206 |
| 11722168_CSE1L     | -0.35815 | 2.50E-05 | 0.000206 |
| 11742725_ELF2      | 0.329615 | 2.50E-05 | 0.000206 |
| 11731121_VASH2     | -0.91844 | 2.50E-05 | 0.000206 |
| 11732160_NUDCD1    | 0.353502 | 2.51E-05 | 0.000206 |
| 11729671_FAM200B   | 0.327793 | 2.51E-05 | 0.000207 |
| 11727414_CLN8      | 0.591868 | 2.51E-05 | 0.000207 |
| 11733800_SLC31A2   | 0.481553 | 2.51E-05 | 0.000207 |
| 11754779_MSANTD2   | 0.407321 | 2.51E-05 | 0.000207 |
| 11757503_PNN       | -0.487   | 2.51E-05 | 0.000207 |
| 11726641_MIB1      | -0.37412 | 2.51E-05 | 0.000207 |
| 11724097_LRIG3     | 0.433316 | 2.51E-05 | 0.000207 |
| 11717265_CAMK2G    | -0.84985 | 2.51E-05 | 0.000207 |
| 11716437_RAD21     | -0.42997 | 2.51E-05 | 0.000207 |
| 11749099_HK2       | -0.60542 | 2.52E-05 | 0.000207 |
| 11723415_CNN2      | 0.46099  | 2.52E-05 | 0.000207 |
| 11725095_TTC33     | -0.56547 | 2.52E-05 | 0.000207 |
| 11742425_NR3C1     | -0.4936  | 2.52E-05 | 0.000207 |
| 11750373_BRCA1     | -0.38982 | 2.52E-05 | 0.000207 |
| 11717372_DNAJC3    | 0.47943  | 2.52E-05 | 0.000207 |
| 11720549_PEX6      | 0.321967 | 2.52E-05 | 0.000207 |
| 11748175_C19orf54  | -0.52686 | 2.52E-05 | 0.000207 |
| 11752357_DBT       | 0.407321 | 2.52E-05 | 0.000207 |
| 11721512_TIMM21    | -0.40788 | 2.52E-05 | 0.000207 |
| 11736418_ZNF800    | 0.440094 | 2.52E-05 | 0.000207 |
| 11724088_ZSCAN26   | 0.509175 | 2.52E-05 | 0.000207 |
| 11719044_ALKBH5    | -0.33235 | 2.53E-05 | 0.000207 |
| 11731641_LOC102724 | -0.51456 | 2.53E-05 | 0.000207 |
| 11744118_MRPL10    | -0.34732 | 2.53E-05 | 0.000208 |
| 11724506_MIS18A    | -0.4747  | 2.53E-05 | 0.000208 |
| 11757510_HP1BP3    | -0.35332 | 2.54E-05 | 0.000208 |
| 11743491_KTN1      | 0.317006 | 2.54E-05 | 0.000208 |
| 11718534_NKTR      | 0.342883 | 2.54E-05 | 0.000208 |
| 11715520_MLEC      | -0.38921 | 2.54E-05 | 0.000208 |
| 11744243_TRAF6     | 0.524526 | 2.54E-05 | 0.000208 |
| 11746097_NPEPPS    | 0.328429 | 2.54E-05 | 0.000208 |
| 11763289_EME2      | 0.56244  | 2.54E-05 | 0.000208 |
| 11752487_SNX25     | 0.494389 | 2.54E-05 | 0.000208 |
| 11743577_CPE       | 0.377283 | 2.55E-05 | 0.000209 |

|                    |          |          |          |
|--------------------|----------|----------|----------|
| 11716438_RAD21     | -0.39366 | 2.55E-05 | 0.000209 |
| 11758049_TIA1      | -0.41412 | 2.55E-05 | 0.000209 |
| 11723527_TCTEX1D2  | 0.347159 | 2.55E-05 | 0.000209 |
| 11759641_CSTF2     | -0.40949 | 2.55E-05 | 0.000209 |
| 11728834_C4orf32   | 0.448802 | 2.56E-05 | 0.000209 |
| 11752039_PHC3      | 0.726921 | 2.56E-05 | 0.000209 |
| 11749842_PSEN1     | 0.356062 | 2.56E-05 | 0.000209 |
| 11720041_VTA1      | 0.349504 | 2.56E-05 | 0.00021  |
| 11721938_RNF169    | 0.323771 | 2.57E-05 | 0.00021  |
| 11739531_PLGLB2    | 0.471461 | 2.57E-05 | 0.00021  |
| 11763270_IKZF5     | -0.70306 | 2.57E-05 | 0.00021  |
| 11728838_TMCC3     | 0.491003 | 2.57E-05 | 0.00021  |
| 11754723_HACL1     | 0.336591 | 2.57E-05 | 0.00021  |
| 11758334_BORA      | -0.4289  | 2.57E-05 | 0.00021  |
| 11757779_PPP4R1    | 0.371357 | 2.57E-05 | 0.00021  |
| 11722858_ZNF395    | -0.32554 | 2.58E-05 | 0.00021  |
| 11755724_MLF1      | -0.48867 | 2.58E-05 | 0.00021  |
| 11723631_NKIRAS2   | 0.422989 | 2.58E-05 | 0.00021  |
| 11721740_VANGL2    | -0.43634 | 2.58E-05 | 0.00021  |
| 11756139_LOC728554 | -0.37288 | 2.58E-05 | 0.000211 |
| 11744212_SNRPB2    | -0.30153 | 2.58E-05 | 0.000211 |
| 11721498_TPST2     | 0.398086 | 2.58E-05 | 0.000211 |
| 11728519_ZNF79     | 1.095109 | 2.58E-05 | 0.000211 |
| 11750128_IMMT      | -0.33768 | 2.59E-05 | 0.000211 |
| 11736655_PTGR1     | -0.34466 | 2.59E-05 | 0.000211 |
| 11743481_RB1CC1    | 0.339574 | 2.59E-05 | 0.000211 |
| 11717759_NDUFV1    | -0.33858 | 2.59E-05 | 0.000211 |
| 11727529_PHF20L1   | 0.516666 | 2.59E-05 | 0.000211 |
| 11731853_PPA2      | -0.35954 | 2.59E-05 | 0.000211 |
| 11733663_ARHGAP11A | -0.42496 | 2.59E-05 | 0.000211 |
| 11747781_CEP95     | 0.379214 | 2.60E-05 | 0.000212 |
| 11759968_LOXL3     | 0.478543 | 2.60E-05 | 0.000212 |
| 11721342_NCOA1     | 0.430084 | 2.60E-05 | 0.000212 |
| 11742683_HIST1H1C  | 0.366951 | 2.60E-05 | 0.000212 |
| 11727120_MYCBP2    | 0.382938 | 2.60E-05 | 0.000212 |
| 11733841_EVI2A     | 0.827009 | 2.60E-05 | 0.000212 |
| 11757717_FAM204A   | 0.360011 | 2.60E-05 | 0.000212 |
| 11718474_IDH1      | -0.39332 | 2.60E-05 | 0.000212 |
| 11739522_ST8SIA4   | -0.39105 | 2.60E-05 | 0.000212 |
| 11746091_MAP4K3    | 0.689424 | 2.61E-05 | 0.000212 |
| 11747202_MPDU1     | -0.38543 | 2.61E-05 | 0.000212 |
| 11731568_MDM2      | 0.34258  | 2.61E-05 | 0.000212 |
| 11715651_FSTL1     | 0.359199 | 2.61E-05 | 0.000212 |
| 11730576_ALPK1     | -0.54487 | 2.62E-05 | 0.000213 |
| 11722356_DAB2      | 0.686916 | 2.62E-05 | 0.000213 |
| 11753313_PHB2      | -0.33732 | 2.62E-05 | 0.000213 |
| 11739547_CSPG4     | -0.32627 | 2.62E-05 | 0.000213 |
| 11717810_CYTH3     | 0.775308 | 2.62E-05 | 0.000213 |
| 11745511_YTHDF1    | 0.395101 | 2.62E-05 | 0.000213 |
| 11744155_PIN1      | -0.30573 | 2.62E-05 | 0.000213 |
| 11743879_MAML3     | 0.405997 | 2.63E-05 | 0.000213 |

|                   |          |          |          |
|-------------------|----------|----------|----------|
| 11743111_NAMPT    | 0.410641 | 2.63E-05 | 0.000213 |
| 11723978_RAB3A    | -0.391   | 2.63E-05 | 0.000214 |
| 11754233_CEP152   | -0.41641 | 2.64E-05 | 0.000214 |
| 11716659_HNRNPH3  | -0.32237 | 2.64E-05 | 0.000214 |
| 11735911_WDFY3    | 0.73337  | 2.64E-05 | 0.000214 |
| 11718308_HEG1     | 0.383244 | 2.64E-05 | 0.000214 |
| 11754328_PIGG     | 0.360028 | 2.64E-05 | 0.000214 |
| 11725342_VPS37A   | 0.422916 | 2.65E-05 | 0.000215 |
| 11747286_SLC25A46 | 0.385853 | 2.65E-05 | 0.000215 |
| 11719661_FAM188A  | 0.50236  | 2.65E-05 | 0.000215 |
| 11733854_CD164    | 0.588062 | 2.65E-05 | 0.000215 |
| 11723697_FLI1     | 0.392809 | 2.65E-05 | 0.000215 |
| 11734530_HLA-F    | 0.392495 | 2.66E-05 | 0.000215 |
| 11720736_LRRC14   | -0.52249 | 2.66E-05 | 0.000216 |
| 11718199_KPNA3    | -0.33473 | 2.66E-05 | 0.000216 |
| 11725472_PAQR8    | -0.48502 | 2.66E-05 | 0.000216 |
| 11750046_TMEM54   | -0.33018 | 2.66E-05 | 0.000216 |
| 11720135_PROS1    | 0.449414 | 2.67E-05 | 0.000216 |
| 11717809_SEPN1    | -0.37231 | 2.67E-05 | 0.000216 |
| 11717290_SQSTM1   | 0.316506 | 2.67E-05 | 0.000216 |
| 11747250_GRK5     | 0.34728  | 2.67E-05 | 0.000216 |
| 11750315_ZNF429   | 0.602309 | 2.67E-05 | 0.000216 |
| 11737098_HLTF     | -0.47537 | 2.67E-05 | 0.000216 |
| 11726876_PML      | -0.35767 | 2.67E-05 | 0.000216 |
| 11717548_BTBD10   | 0.399049 | 2.67E-05 | 0.000216 |
| 11716500_PIR      | -0.32497 | 2.67E-05 | 0.000216 |
| 11719644_GATAD2A  | -0.36935 | 2.68E-05 | 0.000216 |
| 11722700_KIAA1109 | 0.498267 | 2.68E-05 | 0.000217 |
| 11729706_ZNF561   | 0.707004 | 2.68E-05 | 0.000217 |
| 11755249_CCNL2    | 0.366606 | 2.69E-05 | 0.000217 |
| 11755416_BRCA1    | -0.46411 | 2.69E-05 | 0.000217 |
| 11719430_SOS2     | 0.365168 | 2.69E-05 | 0.000217 |
| 11756450_SYNE2    | -0.40976 | 2.69E-05 | 0.000217 |
| 11740429_XRN1     | -0.30943 | 2.69E-05 | 0.000218 |
| 11716584_DYNLT1   | 0.354828 | 2.69E-05 | 0.000218 |
| 11735249_SP140L   | 0.37316  | 2.69E-05 | 0.000218 |
| 11731624_CCDC186  | 0.390941 | 2.70E-05 | 0.000218 |
| 11726402_ALG9     | 0.682788 | 2.70E-05 | 0.000218 |
| 11729531_MAP3K4   | -0.4401  | 2.70E-05 | 0.000218 |
| 11758889_FAM46A   | 0.521656 | 2.70E-05 | 0.000218 |
| 11753204_PTSS1    | -0.47519 | 2.70E-05 | 0.000218 |
| 11715554_CYB5R3   | -0.37874 | 2.71E-05 | 0.000218 |
| 11736082_GTSE1    | -0.54142 | 2.71E-05 | 0.000218 |
| 11744464_SNX25    | 0.510011 | 2.71E-05 | 0.000219 |
| 11748955_IFT88    | 0.47711  | 2.71E-05 | 0.000219 |
| 11725929_NEFL     | 0.405463 | 2.71E-05 | 0.000219 |
| 11719146_TMEM54   | -0.35141 | 2.72E-05 | 0.000219 |
| 11731832_DDO      | 0.599818 | 2.72E-05 | 0.000219 |
| 11717355_FEZ1     | 0.325087 | 2.72E-05 | 0.000219 |
| 11756297_PGK1     | -0.32261 | 2.72E-05 | 0.000219 |
| 11756229_FNTA     | 0.358828 | 2.72E-05 | 0.000219 |

|                    |          |          |          |
|--------------------|----------|----------|----------|
| 11718961_NUFIP2    | 0.540745 | 2.72E-05 | 0.000219 |
| 11719903_ANKRD40   | 0.418144 | 2.73E-05 | 0.000219 |
| 11723173_IL17RD    | 0.711641 | 2.73E-05 | 0.00022  |
| 11734698_GOLGA8A / | 0.504265 | 2.73E-05 | 0.00022  |
| 11732203_KPNA5     | 0.430726 | 2.73E-05 | 0.00022  |
| 11757412_MDP1 ///  | -0.73523 | 2.73E-05 | 0.00022  |
| 11715562_SCD       | -0.38508 | 2.73E-05 | 0.00022  |
| 11720699_CPA2      | 0.757858 | 2.74E-05 | 0.00022  |
| 11761141_LGALS8    | 0.36172  | 2.74E-05 | 0.00022  |
| 11728429_LCOR      | 0.311584 | 2.74E-05 | 0.00022  |
| 11752333_ITGAV     | -0.37075 | 2.75E-05 | 0.000221 |
| 11735449_NEUROG2   | -0.51362 | 2.75E-05 | 0.000221 |
| 11734989_DEDD      | 0.432118 | 2.75E-05 | 0.000221 |
| 11747505_CEP70     | -0.33473 | 2.75E-05 | 0.000221 |
| 11753451_WDR41     | 0.398756 | 2.75E-05 | 0.000221 |
| 11756166_TTC32     | -0.4734  | 2.75E-05 | 0.000221 |
| 11750050_CAST      | 0.327164 | 2.76E-05 | 0.000221 |
| 11757441_SRRD      | 0.330962 | 2.76E-05 | 0.000221 |
| 11727020_ABI2      | -0.34958 | 2.76E-05 | 0.000221 |
| 11718331_NAPB      | 0.572794 | 2.76E-05 | 0.000221 |
| 11716754_TPGS2     | -0.37826 | 2.76E-05 | 0.000222 |
| 11755462_TUBGCP4   | -0.34137 | 2.76E-05 | 0.000222 |
| 11726689_STAT1     | 0.409964 | 2.76E-05 | 0.000222 |
| 11721076_MTCH2     | -0.3188  | 2.76E-05 | 0.000222 |
| 11750222_ARID5B    | 0.387441 | 2.77E-05 | 0.000222 |
| 11721688_ID4       | 0.396127 | 2.77E-05 | 0.000222 |
| 11719795_PPP2R5D   | -0.43623 | 2.77E-05 | 0.000222 |
| 11718267_ANGPTL2   | 0.308898 | 2.77E-05 | 0.000222 |
| 11746392_INTS6     | 0.422488 | 2.77E-05 | 0.000222 |
| 11756468_SCYL3     | 0.466509 | 2.77E-05 | 0.000222 |
| 11753812_HMGNI     | -0.36687 | 2.77E-05 | 0.000222 |
| 11752788_VGLL4     | 0.554127 | 2.77E-05 | 0.000222 |
| 11733810_UBE2J2    | 0.358764 | 2.78E-05 | 0.000223 |
| 11725190_ADGRG6    | 0.496731 | 2.78E-05 | 0.000223 |
| 11719410_HIPK2     | 0.314869 | 2.78E-05 | 0.000223 |
| 11741405_RPL28     | 0.404626 | 2.78E-05 | 0.000223 |
| 11743759_CDC42SE2  | 0.542927 | 2.79E-05 | 0.000223 |
| 11735060_CD46      | 0.338068 | 2.79E-05 | 0.000223 |
| 11724444_ASB9      | -0.37138 | 2.79E-05 | 0.000223 |
| 11729026_BMP1      | 0.636595 | 2.79E-05 | 0.000223 |
| 11754240_MRPS5     | -0.32687 | 2.79E-05 | 0.000223 |
| 11749353_WDR41     | 0.357599 | 2.79E-05 | 0.000223 |
| 11754268_MED19     | 0.371348 | 2.80E-05 | 0.000224 |
| 11750914_GSPT2     | 0.48769  | 2.80E-05 | 0.000224 |
| 11758635_CREBBP    | -0.34593 | 2.81E-05 | 0.000225 |
| 11725262_WDR60     | 0.403556 | 2.81E-05 | 0.000225 |
| 11716448_NUDT9     | 0.316954 | 2.81E-05 | 0.000225 |
| 11747074_ACTN4     | -0.34482 | 2.81E-05 | 0.000225 |
| 11744299_FDCSP     | 1.114679 | 2.82E-05 | 0.000225 |
| 11726224_HNRNPL    | -0.3791  | 2.82E-05 | 0.000225 |
| 11734470_C8orf31   | 0.404479 | 2.82E-05 | 0.000225 |



|                    |          |          |          |
|--------------------|----------|----------|----------|
| 11739791_MOCS3     | 0.356972 | 2.82E-05 | 0.000225 |
| 11736513_NMT2      | 0.57743  | 2.82E-05 | 0.000225 |
| 11717555_SETD7     | -0.35556 | 2.82E-05 | 0.000225 |
| 11728368_CCP110    | 0.356085 | 2.82E-05 | 0.000225 |
| 11721204_ANK3      | 0.486987 | 2.82E-05 | 0.000225 |
| 11732306_CREB1     | -0.4413  | 2.82E-05 | 0.000225 |
| 11737429_MSRI      | 0.524254 | 2.82E-05 | 0.000225 |
| 11724208_DPH2      | 0.341581 | 2.83E-05 | 0.000225 |
| 11719616_ZNF12     | 0.42607  | 2.83E-05 | 0.000225 |
| 11719419_TMEN251   | -0.42624 | 2.83E-05 | 0.000226 |
| 11732580_ME3       | 0.443398 | 2.83E-05 | 0.000226 |
| 11718597_DDRGK1    | 0.436018 | 2.84E-05 | 0.000226 |
| 11732400_GSG2      | -0.42142 | 2.84E-05 | 0.000226 |
| 11721279_SUV39H1   | -0.48919 | 2.84E-05 | 0.000226 |
| 11721798_SUMO3     | -0.41563 | 2.84E-05 | 0.000226 |
| 11759630_GPATCH2   | 0.595012 | 2.84E-05 | 0.000226 |
| 11726178_SOX6      | -0.55402 | 2.84E-05 | 0.000226 |
| 11731564_MDM2      | 0.581273 | 2.84E-05 | 0.000227 |
| 11758112_GZF1      | 0.446405 | 2.85E-05 | 0.000227 |
| 11739392_RBPJ      | -0.44614 | 2.85E-05 | 0.000227 |
| 11749258_ATP6AP1   | 0.33682  | 2.85E-05 | 0.000227 |
| 11746690_URB2      | 0.390856 | 2.85E-05 | 0.000227 |
| 11715287_C15orf40  | 0.618807 | 2.86E-05 | 0.000227 |
| 11748572_ANKIFY1   | 0.369295 | 2.86E-05 | 0.000227 |
| 11720890_AGL       | 0.441794 | 2.86E-05 | 0.000227 |
| 11747619_CERS5     | 0.406313 | 2.86E-05 | 0.000227 |
| 11731759_RAD52     | 0.342315 | 2.86E-05 | 0.000227 |
| 11750881_LMBR1     | 0.359616 | 2.86E-05 | 0.000228 |
| 11743542_CEP57     | -0.44968 | 2.86E-05 | 0.000228 |
| 11720727_UBR1      | 0.366845 | 2.87E-05 | 0.000228 |
| 11721246_BGN       | -0.36181 | 2.87E-05 | 0.000228 |
| 11740442_APOBEC3A  | -0.31803 | 2.87E-05 | 0.000228 |
| 11736154_XPR1      | 0.350964 | 2.87E-05 | 0.000228 |
| 11742086_PRMT3     | -0.46682 | 2.87E-05 | 0.000228 |
| 11723647_DNAJA2    | 0.367981 | 2.87E-05 | 0.000228 |
| 11740704_ARID4A    | 0.430976 | 2.87E-05 | 0.000228 |
| 11739205_TTL       | 0.333682 | 2.88E-05 | 0.000228 |
| 11747970_ARMC4     | 0.529987 | 2.88E-05 | 0.000229 |
| 11715654_RTDFC1    | -0.39164 | 2.88E-05 | 0.000229 |
| 11727643_TRERF1    | -0.56448 | 2.88E-05 | 0.000229 |
| 11744436_CIT       | -0.52754 | 2.88E-05 | 0.000229 |
| 11721913_MDM4      | -0.37608 | 2.88E-05 | 0.000229 |
| 11742804_TEX261    | -0.47556 | 2.88E-05 | 0.000229 |
| 11732422_ZNF234    | 0.519135 | 2.89E-05 | 0.000229 |
| 11720604_STOM      | 0.319181 | 2.89E-05 | 0.000229 |
| 11743067_SIAH2     | -0.37248 | 2.89E-05 | 0.000229 |
| 11732482_PEX13     | 0.583882 | 2.89E-05 | 0.000229 |
| 11729399_ZNF597    | 0.754758 | 2.89E-05 | 0.000229 |
| 11732526_CSGALNACT | 0.72556  | 2.89E-05 | 0.000229 |
| 11727688_KCTD18    | -0.59155 | 2.90E-05 | 0.000229 |
| 11739854_LYRM1     | 0.436533 | 2.90E-05 | 0.000229 |

|                    |          |          |          |
|--------------------|----------|----------|----------|
| 11734199_ZNF844    | 0.685241 | 2.90E-05 | 0.000229 |
| 11732037_PTPN12    | 0.318728 | 2.90E-05 | 0.000229 |
| 11718793_C4orf27   | -0.39088 | 2.90E-05 | 0.000229 |
| 11736282_PDLIM5    | 0.395998 | 2.90E-05 | 0.000229 |
| 11720965_DCK       | -0.32444 | 2.90E-05 | 0.00023  |
| 11733859_CLASP2    | -0.40638 | 2.90E-05 | 0.00023  |
| 11715404_COL6A1    | 0.37377  | 2.90E-05 | 0.00023  |
| 11725081_RNFT1     | 0.492037 | 2.90E-05 | 0.00023  |
| 11717116_CERK      | -0.45744 | 2.91E-05 | 0.00023  |
| 11716578_TMEM43    | 0.389579 | 2.91E-05 | 0.00023  |
| 11716629_IER5      | 0.340562 | 2.92E-05 | 0.000231 |
| 11718164_PPP1R15B  | 0.344549 | 2.92E-05 | 0.000231 |
| 11748195_SLC39A9   | 0.593128 | 2.92E-05 | 0.000231 |
| 11719944_RARG      | -0.55424 | 2.93E-05 | 0.000232 |
| 11759494_ITGA9     | -0.47091 | 2.93E-05 | 0.000232 |
| 11727783_TPM4      | -0.33672 | 2.93E-05 | 0.000232 |
| 11731336_TRPV1     | 0.779383 | 2.93E-05 | 0.000232 |
| 11748486_AGPS      | 0.42765  | 2.94E-05 | 0.000232 |
| 11752852_PPHLN1    | 0.391018 | 2.94E-05 | 0.000232 |
| 11743929_UHRF1BP1L | 0.486081 | 2.94E-05 | 0.000232 |
| 11751138_USP46     | 0.524053 | 2.94E-05 | 0.000232 |
| 11754804_CDC16     | 0.362837 | 2.94E-05 | 0.000232 |
| 11754418_G3BP1     | -0.38109 | 2.95E-05 | 0.000232 |
| 11746367_CSE1L     | -0.34056 | 2.95E-05 | 0.000233 |
| 11734898_IPP       | -0.61133 | 2.95E-05 | 0.000233 |
| 11758600_SRSF1     | -0.4931  | 2.95E-05 | 0.000233 |
| 11744510_RANGRF    | -0.36484 | 2.95E-05 | 0.000233 |
| 11755852_PPRC1     | -0.3054  | 2.95E-05 | 0.000233 |
| 11720494_CTNNAL1   | 0.425634 | 2.96E-05 | 0.000233 |
| 11729072_AASDH     | -0.3357  | 2.96E-05 | 0.000233 |
| 11763619_SNAPC4    | 0.415581 | 2.96E-05 | 0.000233 |
| 11723691_CD302 /// | -0.54952 | 2.96E-05 | 0.000233 |
| 11741731_FBXO34    | 0.344999 | 2.96E-05 | 0.000233 |
| 11719459_EXOC5     | 0.315901 | 2.96E-05 | 0.000234 |
| 11721754_ALG13     | 0.448107 | 2.97E-05 | 0.000234 |
| 11752010_ANO3      | 0.541082 | 2.97E-05 | 0.000234 |
| 11720528_LTBP2     | 1.083372 | 2.97E-05 | 0.000234 |
| 11716238_ARHGAP1   | -0.34572 | 2.97E-05 | 0.000234 |
| 11733840_ABHD2     | 0.555116 | 2.97E-05 | 0.000234 |
| 11728724_TAF6      | -0.35715 | 2.98E-05 | 0.000234 |
| 11745214_PIK3CA    | 0.308855 | 2.98E-05 | 0.000234 |
| 11722998_ALDH6A1   | -0.5636  | 2.98E-05 | 0.000234 |
| 11737821_HS6ST2    | -0.70282 | 2.98E-05 | 0.000235 |
| 11740962_UBA5      | 0.327169 | 2.98E-05 | 0.000235 |
| 11723042_UBE2D1    | -0.63022 | 2.99E-05 | 0.000235 |
| 11730739_PDLIM4    | 0.324395 | 3.00E-05 | 0.000236 |
| 11731511_DBT       | -0.51257 | 3.00E-05 | 0.000236 |
| 11718976_ARPP19    | 0.410101 | 3.00E-05 | 0.000236 |
| 11757976_HTATSF1   | -0.31046 | 3.00E-05 | 0.000236 |
| 11753191_SLC17A5   | 0.567304 | 3.01E-05 | 0.000236 |
| 11755160_JOSD1     | 0.380687 | 3.01E-05 | 0.000236 |

|                   |          |          |          |
|-------------------|----------|----------|----------|
| 11736267_TRAPPC8  | 0.322669 | 3.01E-05 | 0.000236 |
| 11740528_AFF3     | 0.638573 | 3.01E-05 | 0.000236 |
| 11728767_KLHL5    | 0.451787 | 3.01E-05 | 0.000236 |
| 11758092_EFNA5    | -0.40287 | 3.01E-05 | 0.000236 |
| 11734972_MCM8     | -0.381   | 3.01E-05 | 0.000236 |
| 11746612_PTCD3    | 0.330205 | 3.02E-05 | 0.000237 |
| 11723906_ZNF75A   | 0.61853  | 3.02E-05 | 0.000237 |
| 11715976_VGLL4    | 0.399593 | 3.02E-05 | 0.000237 |
| 11763693_GLS      | 0.373746 | 3.02E-05 | 0.000237 |
| 11752481_APP      | 0.342198 | 3.02E-05 | 0.000237 |
| 11724307_ORAOV1   | 0.324552 | 3.03E-05 | 0.000237 |
| 11736938_USP36    | 0.413063 | 3.03E-05 | 0.000237 |
| 11721526_PROSER1  | -0.40144 | 3.03E-05 | 0.000238 |
| 11720627_ATP6V1D  | 0.322683 | 3.03E-05 | 0.000238 |
| 11725098_RABL3    | -0.85835 | 3.04E-05 | 0.000238 |
| 11726329_GBP1     | 0.71826  | 3.04E-05 | 0.000238 |
| 11733254_FXYD3    | -0.35889 | 3.04E-05 | 0.000238 |
| 11756990_ZNF550   | 0.4903   | 3.04E-05 | 0.000238 |
| 11733776_DUSP3    | -0.53948 | 3.04E-05 | 0.000238 |
| 11756991_WDR18    | -0.30038 | 3.04E-05 | 0.000238 |
| 11715702_ITGA5    | 0.406024 | 3.04E-05 | 0.000238 |
| 11733044_SLC7A2   | -0.42683 | 3.05E-05 | 0.000238 |
| 11747562_APIG1    | 0.57404  | 3.05E-05 | 0.000239 |
| 11754020_GNPTG    | 0.320932 | 3.05E-05 | 0.000239 |
| 11716780_CLDN4    | -0.48381 | 3.05E-05 | 0.000239 |
| 11720492_PARN     | -0.39587 | 3.05E-05 | 0.000239 |
| 11733422_LRRFIP2  | 0.444127 | 3.06E-05 | 0.000239 |
| 11715210_PNMAL1   | -0.31273 | 3.06E-05 | 0.000239 |
| 11751484_BGN      | -0.38338 | 3.06E-05 | 0.00024  |
| 11758661_CDKN2C   | -0.46882 | 3.07E-05 | 0.00024  |
| 11749782_BCAT1    | 0.44507  | 3.07E-05 | 0.00024  |
| 11721146_MKI67    | -0.45282 | 3.07E-05 | 0.00024  |
| 11728237_SMG1     | 0.333758 | 3.07E-05 | 0.00024  |
| 11733656_RSRC2    | 0.377005 | 3.07E-05 | 0.00024  |
| 11744070_LSG1     | 0.308826 | 3.07E-05 | 0.00024  |
| 11748600_ZNF410   | 0.371506 | 3.07E-05 | 0.00024  |
| 11746403_CEP70    | -0.33419 | 3.08E-05 | 0.00024  |
| 11740266_JRKL     | -0.5815  | 3.08E-05 | 0.00024  |
| 11739922_ZNF37A   | 0.348924 | 3.08E-05 | 0.00024  |
| 11753039_CLMP     | -0.39804 | 3.08E-05 | 0.000241 |
| 11728357_C10orf88 | 0.376495 | 3.08E-05 | 0.000241 |
| 11717393_FN3KRP   | -0.48493 | 3.09E-05 | 0.000241 |
| 11753224_TSEN34   | -0.34843 | 3.09E-05 | 0.000241 |
| 11715570_CD9      | -0.37136 | 3.09E-05 | 0.000241 |
| 11743323_CCDC50   | -0.36646 | 3.09E-05 | 0.000241 |
| 11758004_CEP350   | 0.423585 | 3.10E-05 | 0.000241 |
| 11754950_SSR4     | 0.315868 | 3.10E-05 | 0.000241 |
| 11725448_PLD6     | 0.420598 | 3.10E-05 | 0.000242 |
| 11739680_AHR      | 0.410021 | 3.10E-05 | 0.000242 |
| 11715827_M6PR     | 0.314385 | 3.10E-05 | 0.000242 |
| 11748605_POLR1B   | 0.428125 | 3.10E-05 | 0.000242 |

|                    |          |          |          |
|--------------------|----------|----------|----------|
| 11744267_VPS51     | -0.36443 | 3.10E-05 | 0.000242 |
| 11735390_TMEM237   | -0.36325 | 3.11E-05 | 0.000242 |
| 11727275_KDELC2    | -0.51109 | 3.11E-05 | 0.000242 |
| 11739380_FAM198B   | 0.476845 | 3.11E-05 | 0.000243 |
| 11718020_LRRC20    | -0.48807 | 3.12E-05 | 0.000243 |
| 11743073_IP09      | -0.33741 | 3.12E-05 | 0.000243 |
| 11719891_CRYZ      | -0.36884 | 3.13E-05 | 0.000243 |
| 11733642_NECAP2    | 0.376149 | 3.13E-05 | 0.000243 |
| 11744777_DPY30     | -0.32838 | 3.13E-05 | 0.000243 |
| 11734691_TAF11     | 0.416429 | 3.13E-05 | 0.000243 |
| 11759669_CEP57     | -0.49694 | 3.13E-05 | 0.000243 |
| 11752102_DNAJC10   | 0.311562 | 3.13E-05 | 0.000244 |
| 11743389_PHTF2     | 0.346041 | 3.13E-05 | 0.000244 |
| 11755312_FBXO25    | 0.520305 | 3.13E-05 | 0.000244 |
| 11743314_FASN      | -0.34223 | 3.13E-05 | 0.000244 |
| 11717563_DTX3L     | 0.605833 | 3.14E-05 | 0.000244 |
| 11723521_ZNF385A   | -0.52962 | 3.15E-05 | 0.000245 |
| 11747616_ASPH      | -0.39144 | 3.15E-05 | 0.000245 |
| 11731450_SEC62     | 0.386199 | 3.15E-05 | 0.000245 |
| 11760108_PHF10     | 0.389583 | 3.15E-05 | 0.000245 |
| 11745587_TUBD1     | -0.57229 | 3.15E-05 | 0.000245 |
| 11758735_COASY     | -0.51263 | 3.15E-05 | 0.000245 |
| 11716677_ZNF106    | 0.502616 | 3.16E-05 | 0.000245 |
| 11716652_EML4      | 0.475444 | 3.16E-05 | 0.000245 |
| 11749303_HNRNPD    | -0.36072 | 3.16E-05 | 0.000245 |
| 11717335_TRIM27    | -0.35537 | 3.17E-05 | 0.000246 |
| 11724301_EEA1      | 0.370402 | 3.17E-05 | 0.000246 |
| 11756820_IFIT1     | 0.326791 | 3.17E-05 | 0.000246 |
| 11715779_HNRNPH2   | -0.49307 | 3.17E-05 | 0.000246 |
| 11749774_MAP3K7CL  | 0.78666  | 3.18E-05 | 0.000246 |
| 11743091_SLC36A4   | -0.38558 | 3.18E-05 | 0.000246 |
| 11725393_MAK16     | 0.339866 | 3.18E-05 | 0.000246 |
| 11723390_CORO2A    | -0.55399 | 3.18E-05 | 0.000246 |
| 11739507_PBX3      | 0.313955 | 3.18E-05 | 0.000246 |
| 11758690_CRIPAK    | -0.37273 | 3.18E-05 | 0.000247 |
| 11717171_BCL2L2    | 0.39366  | 3.18E-05 | 0.000247 |
| 11727156_TRIOBP    | 0.341661 | 3.19E-05 | 0.000247 |
| 11733400_C3orf62   | 0.839281 | 3.19E-05 | 0.000247 |
| 11754739_ARHGAP5   | -0.39367 | 3.19E-05 | 0.000247 |
| 11719169_BRI3      | 0.348005 | 3.19E-05 | 0.000247 |
| 11721820_SRPK2     | 0.364171 | 3.19E-05 | 0.000247 |
| 11728748_ARAF      | -0.30472 | 3.20E-05 | 0.000247 |
| 11755834_CAST      | 0.417474 | 3.20E-05 | 0.000247 |
| 11719872_LTV1      | 0.354271 | 3.20E-05 | 0.000248 |
| 11755962_SLC25A28  | -0.30742 | 3.20E-05 | 0.000248 |
| 11752610_THEMIS2   | -0.43303 | 3.20E-05 | 0.000248 |
| 11742723_STAT6     | -0.34519 | 3.21E-05 | 0.000248 |
| 11739481_H3F3A /// | -0.3095  | 3.21E-05 | 0.000248 |
| 11758224_CCDC80    | 0.512935 | 3.21E-05 | 0.000248 |
| 11750750_DDX3X     | 0.295735 | 3.21E-05 | 0.000248 |
| 11731223_SHOX2     | -0.43117 | 3.21E-05 | 0.000248 |

|                    |          |          |          |
|--------------------|----------|----------|----------|
| 11729550_ADGRG6    | 0.494317 | 3.21E-05 | 0.000248 |
| 11720558_GEM       | 0.592415 | 3.21E-05 | 0.000248 |
| 11725804_C21orf91  | 0.589153 | 3.22E-05 | 0.000248 |
| 11737518_SNX18     | 0.435759 | 3.22E-05 | 0.000249 |
| 11726496_RYR2      | 0.720497 | 3.22E-05 | 0.000249 |
| 11758731_PPP2CA    | -0.40967 | 3.22E-05 | 0.000249 |
| 11722525_ANKHD1 // | 0.341514 | 3.23E-05 | 0.000249 |
| 11739879_TNIK      | 0.826463 | 3.23E-05 | 0.00025  |
| 11749899_ATAD1     | 0.332906 | 3.23E-05 | 0.00025  |
| 11719472_IRF2BP2   | -0.39476 | 3.23E-05 | 0.00025  |
| 11752499_CALD1     | 0.316909 | 3.24E-05 | 0.00025  |
| 11747206_C7orf43   | 0.418756 | 3.24E-05 | 0.00025  |
| 11727148_ZNF564    | 0.713307 | 3.24E-05 | 0.00025  |
| 11748227_GID8      | -0.33662 | 3.24E-05 | 0.00025  |
| 11728014_RIMKLB    | 0.443298 | 3.24E-05 | 0.00025  |
| 11726228_GNG4      | -0.31691 | 3.24E-05 | 0.00025  |
| 11741691_GPR89A // | 0.485597 | 3.25E-05 | 0.00025  |
| 11737839_MBOAT7    | -0.4326  | 3.25E-05 | 0.00025  |
| 11752129_BIVM-ERCC | 0.550831 | 3.25E-05 | 0.000251 |
| 11731640_LOC102724 | -0.32822 | 3.26E-05 | 0.000251 |
| 11731515_XPO4      | 0.455472 | 3.26E-05 | 0.000251 |
| 11733987_C7orf55-L | -0.37534 | 3.26E-05 | 0.000251 |
| 11742817_RNF214    | 0.459822 | 3.26E-05 | 0.000251 |
| 11749247_ZNF625 // | 0.391881 | 3.27E-05 | 0.000251 |
| 11719324_PTEN      | 0.356876 | 3.27E-05 | 0.000252 |
| 11743070_PRPF38A   | -0.3174  | 3.27E-05 | 0.000252 |
| 11743256_VAPA      | -0.45108 | 3.27E-05 | 0.000252 |
| 11754636_ZNF708    | 0.527385 | 3.27E-05 | 0.000252 |
| 11757690_LAMTOR2   | -0.33749 | 3.28E-05 | 0.000252 |
| 11746884_RAD52     | 0.480528 | 3.28E-05 | 0.000252 |
| 11738592_BLID      | -0.38241 | 3.28E-05 | 0.000252 |
| 11762746_ZNF826P   | -0.64878 | 3.28E-05 | 0.000252 |
| 11736469_SLC35D1   | 0.623645 | 3.29E-05 | 0.000253 |
| 11743895_RCOR3     | 0.445405 | 3.29E-05 | 0.000253 |
| 11715585_PMP22     | 0.301955 | 3.29E-05 | 0.000253 |
| 11744704_GOLGA3    | -0.33775 | 3.29E-05 | 0.000253 |
| 11749395_ZCCHC10   | 0.37875  | 3.29E-05 | 0.000253 |
| 11722562_CDK4      | -0.29994 | 3.29E-05 | 0.000253 |
| 11748527_ARHGAP24  | 0.399434 | 3.29E-05 | 0.000253 |
| 11762109_CXorf40A  | -0.45438 | 3.30E-05 | 0.000254 |
| 11746057_ZNF410    | 0.396376 | 3.30E-05 | 0.000254 |
| 11753145_SLC23A2   | -0.46457 | 3.30E-05 | 0.000254 |
| 11745550_TBC1D26 / | 0.51807  | 3.31E-05 | 0.000254 |
| 11739424_DPYSL5    | -0.45513 | 3.31E-05 | 0.000254 |
| 11721755_ALG13     | 0.413291 | 3.31E-05 | 0.000254 |
| 11715622_RNF114    | 0.355735 | 3.31E-05 | 0.000254 |
| 11753129_TM4SF1    | 0.325684 | 3.31E-05 | 0.000254 |
| 11753088_MCTP1     | 0.443706 | 3.31E-05 | 0.000254 |
| 11753952_GALT      | 0.364595 | 3.33E-05 | 0.000255 |
| 11755631_RMND1     | 0.486499 | 3.33E-05 | 0.000255 |
| 11735618_UHRF1BP1L | 0.431306 | 3.33E-05 | 0.000255 |

|                   |          |          |          |
|-------------------|----------|----------|----------|
| 11724442_PTGIS    | -0.36399 | 3.33E-05 | 0.000255 |
| 11715684_PPA1     | -0.32008 | 3.34E-05 | 0.000256 |
| 11736645_WWP2     | 0.487075 | 3.34E-05 | 0.000256 |
| 11725222_SNTB1    | 0.358551 | 3.34E-05 | 0.000256 |
| 11720594_DLG3     | -0.37639 | 3.34E-05 | 0.000256 |
| 11756171_PFKFB2   | -0.57896 | 3.35E-05 | 0.000256 |
| 11748258_TMEM67   | 0.867772 | 3.35E-05 | 0.000256 |
| 11753663_RDM1     | -1.19603 | 3.35E-05 | 0.000257 |
| 11717389_SEPT11   | 0.329398 | 3.35E-05 | 0.000257 |
| 11751527_WDR1     | 0.307929 | 3.36E-05 | 0.000257 |
| 11759213_BMP8B    | -0.55166 | 3.37E-05 | 0.000258 |
| 11756268_FBXO4    | -0.48847 | 3.37E-05 | 0.000258 |
| 11730395_ZNF552   | 0.678153 | 3.37E-05 | 0.000258 |
| 11746302_POLR1B   | 0.381582 | 3.37E-05 | 0.000258 |
| 11750134_DNMBP    | 0.360514 | 3.37E-05 | 0.000258 |
| 11717203_SEL1L    | 0.42923  | 3.37E-05 | 0.000258 |
| 11715750_SSRP1    | -0.33721 | 3.38E-05 | 0.000258 |
| 11727211_HEATR5B  | -0.37439 | 3.38E-05 | 0.000258 |
| 11720145_CCSAP    | -0.38577 | 3.39E-05 | 0.000259 |
| 11747477_MAPK8    | 0.508518 | 3.39E-05 | 0.000259 |
| 11748528_DEDD     | 0.457946 | 3.39E-05 | 0.000259 |
| 11751065_EXOG     | 0.443655 | 3.39E-05 | 0.000259 |
| 11745840_PAQR8    | -0.47614 | 3.40E-05 | 0.00026  |
| 11718393_PREPL    | -0.38422 | 3.40E-05 | 0.00026  |
| 11750123_CKAP2L   | -0.48374 | 3.40E-05 | 0.00026  |
| 11745713_CDCA2    | -0.55734 | 3.40E-05 | 0.00026  |
| 11742273_BRE      | 0.316881 | 3.40E-05 | 0.00026  |
| 11753497_BCL10    | 0.475783 | 3.41E-05 | 0.00026  |
| 11751062_TCOF1    | -0.39536 | 3.41E-05 | 0.00026  |
| 11733872_PGK1     | -0.32907 | 3.41E-05 | 0.00026  |
| 11754425_CENPJ    | -0.43293 | 3.41E-05 | 0.00026  |
| 11722381_TXNL4B   | 0.362505 | 3.42E-05 | 0.000261 |
| 11715602_SPARC    | -0.33311 | 3.42E-05 | 0.000261 |
| 11725667_HS2ST1   | -0.45477 | 3.42E-05 | 0.000261 |
| 11739807_MAZ      | -0.55524 | 3.42E-05 | 0.000261 |
| 11758159_RELL2    | 0.476549 | 3.42E-05 | 0.000261 |
| 11745213_SMARCB1  | -0.37245 | 3.42E-05 | 0.000261 |
| 11757911_RNF111   | 0.372257 | 3.42E-05 | 0.000261 |
| 11737209_IPP      | -0.43122 | 3.42E-05 | 0.000261 |
| 11763862_SH3BGRL  | 0.328591 | 3.42E-05 | 0.000261 |
| 11756238_SLC2A1   | -0.32867 | 3.43E-05 | 0.000261 |
| 11754792_RGMA     | -0.45539 | 3.43E-05 | 0.000261 |
| 11725844_SREK1IP1 | -0.43906 | 3.43E-05 | 0.000261 |
| 11719243_NAT9     | 0.365817 | 3.43E-05 | 0.000261 |
| 11719603_PTPN9    | -0.4733  | 3.43E-05 | 0.000261 |
| 11754508_COG1     | 0.413419 | 3.44E-05 | 0.000262 |
| 11756303_SH3TC1   | 0.389984 | 3.44E-05 | 0.000262 |
| 11728960_KRT80    | 0.299317 | 3.44E-05 | 0.000262 |
| 11763275_ITSN2    | 0.363952 | 3.44E-05 | 0.000262 |
| 11753600_H1FO     | -0.49485 | 3.44E-05 | 0.000262 |
| 11754385_WASL     | 0.36236  | 3.45E-05 | 0.000262 |

|                   |          |          |          |
|-------------------|----------|----------|----------|
| 11758343_USMG5    | -0.29719 | 3.45E-05 | 0.000262 |
| 11747590_FCMR     | 0.43183  | 3.45E-05 | 0.000262 |
| 11751869_SDHC     | -0.47272 | 3.45E-05 | 0.000263 |
| 11741423_MIER1    | 0.437697 | 3.46E-05 | 0.000263 |
| 11730990_KIAA1919 | 0.390401 | 3.46E-05 | 0.000263 |
| 200073_PMHNRNPD   | -0.37137 | 3.46E-05 | 0.000263 |
| 11719610_ADO      | 0.309016 | 3.47E-05 | 0.000263 |
| 11747989_TEAD2    | -0.32876 | 3.47E-05 | 0.000263 |
| 11756492_ZBTB48   | 0.628598 | 3.47E-05 | 0.000264 |
| 11755303_HLA-A    | 0.315302 | 3.48E-05 | 0.000264 |
| 11716192_SETD2    | 0.487355 | 3.48E-05 | 0.000264 |
| 11719547_GOLGA1   | 0.472568 | 3.48E-05 | 0.000264 |
| 11763244_CD59     | 0.415998 | 3.49E-05 | 0.000265 |
| 11731509_DBT      | 0.335984 | 3.50E-05 | 0.000265 |
| 11730928_IKBB     | -0.42992 | 3.50E-05 | 0.000265 |
| 11750073_WBSCR27  | -0.56219 | 3.50E-05 | 0.000265 |
| 11733828_C19orf48 | -0.36262 | 3.50E-05 | 0.000266 |
| 11722870_RAD1     | -0.39661 | 3.51E-05 | 0.000266 |
| 11727135_PUS7L    | 0.322588 | 3.51E-05 | 0.000266 |
| 11743115_KPNB1    | -0.33499 | 3.52E-05 | 0.000267 |
| 11743896_RCOR3    | 0.379493 | 3.52E-05 | 0.000267 |
| 11732995_RGS4     | 0.482687 | 3.52E-05 | 0.000267 |
| 11726552_ULBP2    | -0.37295 | 3.52E-05 | 0.000267 |
| 11752556_OSMR     | 0.739795 | 3.52E-05 | 0.000267 |
| 11754802_C12orf76 | 0.436905 | 3.52E-05 | 0.000267 |
| 11756394_KTN1     | 0.304606 | 3.53E-05 | 0.000267 |
| 11732331_ARL4C    | 0.542609 | 3.53E-05 | 0.000267 |
| 11729610_ELMO1    | -0.53545 | 3.53E-05 | 0.000267 |
| 11756930_DDX11    | -0.44026 | 3.53E-05 | 0.000267 |
| 11725039_FGF2     | 0.397211 | 3.53E-05 | 0.000267 |
| 11752429_LRIG3    | 0.374025 | 3.54E-05 | 0.000268 |
| 11715960_NCBP2    | -0.36021 | 3.54E-05 | 0.000268 |
| 11752131_RTN4     | -0.33284 | 3.54E-05 | 0.000268 |
| 11748030_STK25    | -0.37205 | 3.54E-05 | 0.000268 |
| 11750871_PAPSS2   | -0.37052 | 3.54E-05 | 0.000268 |
| 11723690_CREBL2   | 0.326846 | 3.54E-05 | 0.000268 |
| 11760514_CKAP2    | -0.41237 | 3.55E-05 | 0.000268 |
| 11760999_ARHGEF28 | 0.723161 | 3.55E-05 | 0.000268 |
| 11747523_TRAF4    | 0.494491 | 3.55E-05 | 0.000268 |
| 11736470_SLC35D1  | -0.34663 | 3.55E-05 | 0.000268 |
| 11723433_TBC1D22A | -0.40135 | 3.55E-05 | 0.000268 |
| 11737972_RAB39A   | 0.63072  | 3.55E-05 | 0.000268 |
| 11754376_JMJD8    | -0.33281 | 3.55E-05 | 0.000268 |
| 11723411_PLP1     | -0.35067 | 3.55E-05 | 0.000269 |
| 11750576_KDM3A    | 0.365133 | 3.56E-05 | 0.000269 |
| 11756260_ANKIB1   | 0.373294 | 3.56E-05 | 0.000269 |
| 11723151_SUGCT    | 0.56906  | 3.56E-05 | 0.000269 |
| 11757830_HNRNPA3  | -0.32522 | 3.56E-05 | 0.000269 |
| 11756377_DOK4     | -0.41343 | 3.56E-05 | 0.000269 |
| 11755553_WDR1     | 0.329937 | 3.56E-05 | 0.000269 |
| 11722262_EDEM1    | 0.333076 | 3.56E-05 | 0.000269 |

|                    |          |          |          |
|--------------------|----------|----------|----------|
| 11754521_MBNL2     | 0.384688 | 3.57E-05 | 0.000269 |
| 11722410_GALNT7    | 0.372785 | 3.58E-05 | 0.00027  |
| 11724600_DCAF10    | 0.381573 | 3.59E-05 | 0.00027  |
| 11750197_FAM98A    | 0.34631  | 3.59E-05 | 0.000271 |
| 11748962_PATL1     | 0.379906 | 3.59E-05 | 0.000271 |
| 11732367_FGF14     | 0.490063 | 3.59E-05 | 0.000271 |
| 11759316_NFIC      | -0.37017 | 3.59E-05 | 0.000271 |
| 11754085_PMVK      | -0.68461 | 3.59E-05 | 0.000271 |
| 11749485_SEC23A    | 0.327122 | 3.60E-05 | 0.000272 |
| 11720526_PEBP1     | -0.3964  | 3.61E-05 | 0.000272 |
| 11754131_BANF1     | -0.80194 | 3.61E-05 | 0.000272 |
| 11729715_CBR1      | -0.37174 | 3.61E-05 | 0.000272 |
| 11736792_NXT2      | -0.31369 | 3.61E-05 | 0.000272 |
| 11737095_CFL2      | 0.33854  | 3.61E-05 | 0.000272 |
| 11719406_HIPK2     | 0.381172 | 3.62E-05 | 0.000273 |
| 11716516_ADD1      | -0.44795 | 3.62E-05 | 0.000273 |
| 11723217_SFXN3     | -0.33738 | 3.63E-05 | 0.000273 |
| 11749357_TRMT10B   | 0.557987 | 3.64E-05 | 0.000274 |
| 11719641_CDS1      | 0.544144 | 3.64E-05 | 0.000274 |
| 11735995_USP14     | -0.43069 | 3.65E-05 | 0.000274 |
| 11751401_PRPSAP1   | -0.3446  | 3.65E-05 | 0.000274 |
| 11744942_SLC22A18A | 0.340728 | 3.65E-05 | 0.000274 |
| 11744783_SP100     | 0.405935 | 3.65E-05 | 0.000274 |
| 11721002_HEXIM1    | -0.32659 | 3.65E-05 | 0.000274 |
| 11755344_HLA-A     | 0.301483 | 3.65E-05 | 0.000274 |
| 11757372_NUDT1     | -0.45198 | 3.65E-05 | 0.000274 |
| 11719025_ZNF652    | 0.501614 | 3.66E-05 | 0.000275 |
| 11718992_FKBP2     | -0.49429 | 3.66E-05 | 0.000275 |
| 11726660_GPN3      | -0.5086  | 3.66E-05 | 0.000275 |
| 11718531_CAD       | -0.34585 | 3.66E-05 | 0.000275 |
| 11730207_ARAP2     | 0.640034 | 3.66E-05 | 0.000275 |
| 11754283_RANBP2    | 0.293016 | 3.66E-05 | 0.000275 |
| 11737076_PPP2R5C   | -0.36009 | 3.66E-05 | 0.000275 |
| 11736385_METTL10   | -0.89238 | 3.66E-05 | 0.000275 |
| 11758593_H3F3B     | -0.4037  | 3.67E-05 | 0.000275 |
| 11727057_RRP8      | 0.404662 | 3.67E-05 | 0.000275 |
| 11740404_GALNT10   | 0.410411 | 3.67E-05 | 0.000275 |
| 11716453_MYO1C     | 0.329137 | 3.67E-05 | 0.000275 |
| 11718862_SEC63     | -0.85537 | 3.67E-05 | 0.000275 |
| 11727985_TENM3     | 0.316194 | 3.67E-05 | 0.000275 |
| 11718544_ZBTB44    | -0.45001 | 3.68E-05 | 0.000276 |
| 11743283_TIMM10    | -0.33431 | 3.68E-05 | 0.000276 |
| 11720262_MITF      | 0.449379 | 3.68E-05 | 0.000276 |
| 11731654_ARL15     | 0.422344 | 3.68E-05 | 0.000276 |
| 11727646_DNAJC25   | 0.425638 | 3.68E-05 | 0.000276 |
| 11763276_PWP1      | -0.37201 | 3.68E-05 | 0.000276 |
| 11758048_THRB      | 0.34513  | 3.68E-05 | 0.000276 |
| 11733367_C19orf60  | -0.3892  | 3.69E-05 | 0.000276 |
| 11715564_H1FX      | -0.34545 | 3.69E-05 | 0.000276 |
| 11745182_NAA15     | -0.39039 | 3.69E-05 | 0.000276 |
| 11751711_SLC48A1   | 0.322355 | 3.69E-05 | 0.000276 |



|                    |          |          |          |
|--------------------|----------|----------|----------|
| 11731495_GDAP2     | 0.348803 | 3.69E-05 | 0.000276 |
| 11749872_MKRN2     | 0.331009 | 3.69E-05 | 0.000276 |
| 11736364_KIAA0586  | -0.41596 | 3.69E-05 | 0.000277 |
| 11753131_TM4SF1    | 0.32398  | 3.70E-05 | 0.000277 |
| 11743671_ZNF292    | 0.46034  | 3.70E-05 | 0.000277 |
| 11753588_RTN4      | -0.31909 | 3.70E-05 | 0.000277 |
| 11742454_PHF20L1   | 0.372158 | 3.70E-05 | 0.000277 |
| 11749711_XPNPEP3   | 0.568409 | 3.71E-05 | 0.000277 |
| 11721879_ARID4B    | 0.507742 | 3.71E-05 | 0.000277 |
| 11728608_NSUN5P1 / | 0.450285 | 3.72E-05 | 0.000278 |
| 11725867_EBF3      | -0.32777 | 3.72E-05 | 0.000278 |
| 11730852_ELM01     | -0.4102  | 3.72E-05 | 0.000278 |
| 11717539_RYBP      | 0.341683 | 3.72E-05 | 0.000278 |
| 11754766_MRPL32    | 0.299951 | 3.73E-05 | 0.000279 |
| 11721128_DNAJC2    | 0.372467 | 3.73E-05 | 0.000279 |
| 11726656_IFIT5     | 0.381554 | 3.73E-05 | 0.000279 |
| 11734281_ZNF17     | 0.451589 | 3.74E-05 | 0.000279 |
| 11763964_MTG2      | 0.417363 | 3.74E-05 | 0.000279 |
| 11759922_PARD3     | 0.508015 | 3.74E-05 | 0.000279 |
| 11729465_ZNF816    | 0.667144 | 3.74E-05 | 0.00028  |
| 11747719_KIAA0391  | -0.35855 | 3.75E-05 | 0.00028  |
| 11760321_ZMYM6     | 0.473397 | 3.75E-05 | 0.00028  |
| 11725931_HSPA5     | -0.37343 | 3.75E-05 | 0.00028  |
| 11716649_DHX40     | -0.35452 | 3.75E-05 | 0.00028  |
| 11759194_TXLNG     | 0.422297 | 3.76E-05 | 0.00028  |
| 11715630_LAPTM4A   | -0.43874 | 3.76E-05 | 0.000281 |
| 11749997_VSNL1     | -0.33316 | 3.76E-05 | 0.000281 |
| 11720094_CUL4B     | 0.356493 | 3.77E-05 | 0.000281 |
| 11716495_MAP4      | -0.43444 | 3.77E-05 | 0.000281 |
| 11727395_COX15     | 0.406098 | 3.77E-05 | 0.000281 |
| 11734712_PDE4B     | 0.527061 | 3.78E-05 | 0.000281 |
| 11747935_TNC       | 0.36435  | 3.78E-05 | 0.000282 |
| 11741458_NR4A3     | 0.959415 | 3.78E-05 | 0.000282 |
| 11749708_FLI1      | 0.393732 | 3.79E-05 | 0.000282 |
| 11718553_OTUD4     | 0.585801 | 3.79E-05 | 0.000282 |
| 11746178_RHBDF1    | 0.391396 | 3.79E-05 | 0.000282 |
| 11742691_UBE2I     | -0.29486 | 3.79E-05 | 0.000282 |
| 11754922_ZNF426    | 0.300355 | 3.79E-05 | 0.000282 |
| 11754466_SH3BP4    | 0.385719 | 3.79E-05 | 0.000282 |
| 11736599_DLG3      | -0.31459 | 3.79E-05 | 0.000282 |
| 11720456_CAPRIN1   | -0.35619 | 3.80E-05 | 0.000283 |
| 11727171_TRPS1     | 0.363498 | 3.80E-05 | 0.000283 |
| 11725715_RPS14     | -0.29262 | 3.80E-05 | 0.000283 |
| 11727469_MAGEA4    | -0.32204 | 3.80E-05 | 0.000283 |
| 11716397_AKR7A2    | -0.34301 | 3.81E-05 | 0.000283 |
| 11743403_CDC27     | 0.32439  | 3.82E-05 | 0.000284 |
| 11760963_LOC102724 | 0.337938 | 3.82E-05 | 0.000284 |
| 11757022_TFPI2     | 0.414997 | 3.82E-05 | 0.000284 |
| 11718593_RTN4      | -0.2979  | 3.82E-05 | 0.000284 |
| 11720830_C1orf21   | -0.46838 | 3.82E-05 | 0.000284 |
| 11741227_NR3C1     | -0.40772 | 3.82E-05 | 0.000284 |

|                    |          |          |          |
|--------------------|----------|----------|----------|
| 11720840_SMNDC1    | 0.417455 | 3.83E-05 | 0.000284 |
| 11730029_E2F7      | 0.330772 | 3.84E-05 | 0.000285 |
| 11719282_UBE2I     | -0.33838 | 3.84E-05 | 0.000285 |
| 11743762_SNIP1     | 0.461603 | 3.84E-05 | 0.000285 |
| 11745855_RNF145    | 0.466101 | 3.84E-05 | 0.000285 |
| 11760648_AKTIP     | -0.30073 | 3.84E-05 | 0.000285 |
| 11746767_ITGA4     | 0.401439 | 3.85E-05 | 0.000286 |
| 11763320_GLS       | 0.343567 | 3.85E-05 | 0.000286 |
| 11733802_CPPED1    | 0.43138  | 3.85E-05 | 0.000286 |
| 11725629_CNP       | -0.34729 | 3.86E-05 | 0.000286 |
| 11733782_RAB18     | 0.520744 | 3.86E-05 | 0.000286 |
| 11722107_PCNX      | -0.63661 | 3.87E-05 | 0.000287 |
| 11744344_YY1AP1    | 0.334173 | 3.87E-05 | 0.000287 |
| 11744697_CCDC90B   | 0.379938 | 3.87E-05 | 0.000287 |
| 11755941_TRAIP     | -0.35975 | 3.87E-05 | 0.000287 |
| 11744384_USMG5     | -0.33162 | 3.87E-05 | 0.000287 |
| 11739654_TNFRSF10A | 0.556016 | 3.87E-05 | 0.000287 |
| 11754306_MCCC1     | 0.462848 | 3.87E-05 | 0.000287 |
| 11744368_ZMYND11   | 0.424027 | 3.89E-05 | 0.000288 |
| 11744997_MPZL1     | 0.422064 | 3.90E-05 | 0.000289 |
| 11720665_SYNCRIP   | -0.34119 | 3.90E-05 | 0.000289 |
| 11744580_ZNF271P   | 0.597579 | 3.90E-05 | 0.000289 |
| 11732386_TCEANC2   | -0.34604 | 3.91E-05 | 0.00029  |
| 11737079_SLX4      | -0.34978 | 3.91E-05 | 0.00029  |
| 11723191_ZIC2      | -0.39686 | 3.91E-05 | 0.00029  |
| 11715659_ERRFI1    | 0.294158 | 3.91E-05 | 0.00029  |
| 11728374_ACTN1     | 0.288571 | 3.91E-05 | 0.00029  |
| 11750383_ZMYND8    | -0.41418 | 3.92E-05 | 0.00029  |
| 11728378_EED       | -0.34212 | 3.92E-05 | 0.00029  |
| 11743079_TRMT6     | 0.305589 | 3.92E-05 | 0.00029  |
| 11728326_TTC30A    | 0.353608 | 3.93E-05 | 0.00029  |
| 11758592_GAR1      | -0.28956 | 3.93E-05 | 0.00029  |
| 11728634_AP4E1     | 0.439272 | 3.93E-05 | 0.00029  |
| 11715881_DAP3      | 0.365741 | 3.93E-05 | 0.000291 |
| 11730932_ACSS3     | 0.401724 | 3.94E-05 | 0.000291 |
| 11745827_SUPT20H   | 0.303528 | 3.94E-05 | 0.000291 |
| 11743648_DCAF6     | 0.361533 | 3.95E-05 | 0.000291 |
| 11729507_NPAS3     | 0.668003 | 3.95E-05 | 0.000292 |
| 11749828_DPH2      | 0.31134  | 3.95E-05 | 0.000292 |
| 11725341_SAR1B     | 0.333297 | 3.95E-05 | 0.000292 |
| 11763313_SEPHS1    | -0.49045 | 3.95E-05 | 0.000292 |
| 11736308_CSNK1A1   | 0.346338 | 3.96E-05 | 0.000292 |
| 11719548_GOLGA1    | 0.443038 | 3.96E-05 | 0.000292 |
| 11718208_TMEM9B    | 0.332769 | 3.96E-05 | 0.000292 |
| 11743022_CLCC1     | 0.338689 | 3.96E-05 | 0.000292 |
| 11749930_AP3M2     | -0.34971 | 3.97E-05 | 0.000293 |
| 11717155_NME1 ///  | -0.31893 | 3.97E-05 | 0.000293 |
| 11727005_ADGRL4    | 0.404217 | 3.97E-05 | 0.000293 |
| 11718543_ZBTB44    | 0.410725 | 3.98E-05 | 0.000293 |
| 11723659_UBIAD1    | 0.395394 | 3.98E-05 | 0.000293 |
| 11742059_CHORDC1   | 0.379654 | 3.98E-05 | 0.000293 |

|                    |          |          |          |
|--------------------|----------|----------|----------|
| 11753374_XPO4      | 0.393048 | 3.98E-05 | 0.000294 |
| 11718387_RBSN      | 0.327327 | 3.99E-05 | 0.000294 |
| 200090_PMFNTA      | 0.328452 | 4.00E-05 | 0.000295 |
| 11743324_CCDC50    | 0.40398  | 4.00E-05 | 0.000295 |
| 11755404_PHF20     | -0.31397 | 4.00E-05 | 0.000295 |
| 11718081_ATP2B4    | -0.32527 | 4.01E-05 | 0.000295 |
| 11744273_SLBP      | -0.34674 | 4.01E-05 | 0.000295 |
| 11730549_IKZF2     | 1.020939 | 4.01E-05 | 0.000295 |
| 11716625_ANAPC13   | 0.299604 | 4.01E-05 | 0.000295 |
| 11723763_POLG2     | 0.369029 | 4.01E-05 | 0.000295 |
| 11753001_PPARG     | -0.3229  | 4.01E-05 | 0.000295 |
| 11757627_COX17     | -0.34266 | 4.01E-05 | 0.000295 |
| 11716131_FSTL3     | 0.322482 | 4.02E-05 | 0.000296 |
| 11722028_UBE2G1    | 0.317366 | 4.02E-05 | 0.000296 |
| 11746122_LOC441155 | 0.291887 | 4.03E-05 | 0.000296 |
| 11750384_APP       | 0.312513 | 4.03E-05 | 0.000296 |
| 11744670_LINC00852 | -0.32283 | 4.03E-05 | 0.000296 |
| 11733954_SLC22A15  | 0.619462 | 4.03E-05 | 0.000296 |
| 11744667_DENND5B   | 0.43707  | 4.04E-05 | 0.000297 |
| 11757549_C16orf58  | -0.29857 | 4.04E-05 | 0.000297 |
| 11726040_STK17B    | 0.634762 | 4.04E-05 | 0.000297 |
| 11718768_LAMTOR3   | 0.312896 | 4.04E-05 | 0.000297 |
| 11721895_GAS1      | -0.42101 | 4.05E-05 | 0.000297 |
| 11743366_PLCB4     | 0.752614 | 4.05E-05 | 0.000297 |
| 11715653_RTFDC1    | -0.43264 | 4.05E-05 | 0.000297 |
| 11752144_KMT5B     | 0.470501 | 4.05E-05 | 0.000297 |
| 11754071_TAGLN2    | -0.29744 | 4.05E-05 | 0.000297 |
| 11756927_SMARCAL1  | -0.44076 | 4.05E-05 | 0.000297 |
| 11744618_DUSP6     | 0.373795 | 4.05E-05 | 0.000297 |
| 11739632_MED13     | 0.704277 | 4.05E-05 | 0.000297 |
| 11749873_MKRN2     | 0.332245 | 4.05E-05 | 0.000297 |
| 11759323_CEP85L    | 0.627102 | 4.05E-05 | 0.000297 |
| 11724107_MRPS31P5  | 0.452601 | 4.06E-05 | 0.000298 |
| 11739932_FAM111B   | -0.77685 | 4.06E-05 | 0.000298 |
| 11726749_GTF3C4    | 0.356544 | 4.06E-05 | 0.000298 |
| 11721587_TRAF1     | 0.503065 | 4.07E-05 | 0.000298 |
| 11738872_MAPK1     | 0.372697 | 4.07E-05 | 0.000298 |
| 11723239_GNG7 ///  | -0.65155 | 4.07E-05 | 0.000298 |
| 11753947_TTC21B    | 0.380722 | 4.07E-05 | 0.000298 |
| 11746760_ERGIC1    | -0.84992 | 4.07E-05 | 0.000298 |
| 11763618_SNAPC4    | 0.326017 | 4.07E-05 | 0.000298 |
| 11739237_PDE12     | 0.319786 | 4.08E-05 | 0.000299 |
| 11751117_ACTN1     | 0.377545 | 4.08E-05 | 0.000299 |
| 11748549_ZDHC17    | 0.44294  | 4.08E-05 | 0.000299 |
| 11725015_MAP9      | 0.437912 | 4.08E-05 | 0.000299 |
| 11719048_CPNE1     | 0.28873  | 4.08E-05 | 0.000299 |
| 11752733_CSNK1G3   | 0.403108 | 4.08E-05 | 0.000299 |
| 11763455_TACC3     | -0.39289 | 4.08E-05 | 0.000299 |
| 11745770_RNPS1     | -0.38053 | 4.09E-05 | 0.000299 |
| 11755190_POLR1D    | 0.411765 | 4.09E-05 | 0.000299 |
| 11757873_ATP5B     | -0.30137 | 4.09E-05 | 0.000299 |

|                    |          |          |          |
|--------------------|----------|----------|----------|
| 11750051_CAST      | 0.335644 | 4.09E-05 | 0.000299 |
| 11745019_CBS /// C | -0.51928 | 4.09E-05 | 0.000299 |
| 11716274_ENSA      | -0.38542 | 4.09E-05 | 0.000299 |
| 11743501_TRAF3     | 0.335195 | 4.09E-05 | 0.000299 |
| 11732252_RCOR3     | 0.42278  | 4.10E-05 | 0.000299 |
| 11741651_POT1      | -0.38755 | 4.10E-05 | 0.0003   |
| 11724210_LMAN1     | 0.362535 | 4.10E-05 | 0.0003   |
| 11737922_SERPINB8  | 0.358769 | 4.10E-05 | 0.0003   |
| 11754799_NMD3      | 0.404083 | 4.10E-05 | 0.0003   |
| 11731561_APC       | 0.407687 | 4.10E-05 | 0.0003   |
| 11725301_DDX19A    | 0.354442 | 4.11E-05 | 0.0003   |
| 11752331_LOC105369 | 0.31359  | 4.11E-05 | 0.0003   |
| 11734295_ZNF772    | -0.3805  | 4.12E-05 | 0.000301 |
| 11741555_LIPA      | -0.35464 | 4.12E-05 | 0.000301 |
| 11739284_TRIM23    | 0.491576 | 4.13E-05 | 0.000301 |
| 11728499_SVIL      | 0.381898 | 4.13E-05 | 0.000301 |
| 11737769_MYO1C     | 0.370319 | 4.13E-05 | 0.000302 |
| 11720349_ROPN1L    | 1.141913 | 4.13E-05 | 0.000302 |
| 11721549_POLR3C    | 0.376935 | 4.13E-05 | 0.000302 |
| 11727591_OSGEPL1   | -0.33143 | 4.14E-05 | 0.000302 |
| 11737272_ZNF805    | 0.558053 | 4.14E-05 | 0.000302 |
| 11739241_NEMF      | 0.342773 | 4.14E-05 | 0.000302 |
| 11755240_NR3C1     | -0.34837 | 4.15E-05 | 0.000302 |
| 11745939_DNAJC6    | 0.666844 | 4.15E-05 | 0.000302 |
| 11755582_ZFP30     | 0.725827 | 4.15E-05 | 0.000302 |
| 11743284_CHD2      | 0.327598 | 4.15E-05 | 0.000302 |
| 11729094_GAD1      | 0.427426 | 4.15E-05 | 0.000302 |
| 11757931_KIAA0930  | -0.34227 | 4.15E-05 | 0.000302 |
| 11723606_AGFG1     | 0.38802  | 4.15E-05 | 0.000302 |
| 11758796_ZZZ3      | -0.44237 | 4.16E-05 | 0.000303 |
| 11724221_NAP1L2    | 0.516223 | 4.16E-05 | 0.000303 |
| 11747752_MORF4L1   | 0.286179 | 4.16E-05 | 0.000303 |
| 11754643_TMEM234   | 0.505629 | 4.17E-05 | 0.000303 |
| 11734825_SPRED1    | 0.36131  | 4.17E-05 | 0.000303 |
| 11748501_LOC105376 | 0.556428 | 4.17E-05 | 0.000303 |
| 11736659_MAP3K13   | 0.423099 | 4.17E-05 | 0.000303 |
| 11726052_FAM35A // | 0.296958 | 4.18E-05 | 0.000304 |
| 11750029	EIF4H     | -0.32956 | 4.18E-05 | 0.000304 |
| 11743342_RMND5A    | -0.64871 | 4.18E-05 | 0.000304 |
| 11744699_TDP1      | -0.33811 | 4.18E-05 | 0.000304 |
| 11744083_ANKIB1    | 0.357721 | 4.19E-05 | 0.000304 |
| 11726377_FAM50B    | -0.33295 | 4.19E-05 | 0.000305 |
| 11733491_SLC44A5   | 0.844843 | 4.19E-05 | 0.000305 |
| 11754800_GFM1      | 0.310563 | 4.19E-05 | 0.000305 |
| 11737629_TLR6      | 0.455591 | 4.19E-05 | 0.000305 |
| 11722791_MATN2     | 0.540388 | 4.20E-05 | 0.000305 |
| 11719975_WASF3     | 0.492789 | 4.20E-05 | 0.000305 |
| 11757775_C6orf120  | 0.549063 | 4.20E-05 | 0.000305 |
| 11730744_AKIRIN1   | 0.380272 | 4.21E-05 | 0.000306 |
| 11741476_MAP3K7    | 0.305445 | 4.21E-05 | 0.000306 |
| 11738058_HIST1H2AD | 0.472629 | 4.21E-05 | 0.000306 |

|                    |          |          |          |
|--------------------|----------|----------|----------|
| 11720414_CAMSAP1   | -0.53053 | 4.21E-05 | 0.000306 |
| 11744560_IFT20     | 0.350097 | 4.21E-05 | 0.000306 |
| 11735359_LOC101060 | 0.420839 | 4.22E-05 | 0.000307 |
| 11736610_RIC1      | 0.472517 | 4.23E-05 | 0.000307 |
| 11740121_LRIG2     | 0.419556 | 4.23E-05 | 0.000307 |
| 11752437_KCTD8     | 0.650463 | 4.23E-05 | 0.000307 |
| 11758891_TMEM183A  | -0.52216 | 4.24E-05 | 0.000307 |
| 11726190_DOCK4     | 0.357639 | 4.24E-05 | 0.000308 |
| 11760989_GLS       | 0.537292 | 4.24E-05 | 0.000308 |
| 11749156_ORC3      | -0.30758 | 4.24E-05 | 0.000308 |
| 11763307_NFATC2    | -0.3734  | 4.25E-05 | 0.000308 |
| 11760133_SUPT20H   | 0.360447 | 4.25E-05 | 0.000308 |
| 11735788_KCNG1     | -0.3163  | 4.25E-05 | 0.000308 |
| 11722413_SLC7A1    | -0.31183 | 4.25E-05 | 0.000308 |
| 11743928_NSUN3     | 0.389254 | 4.25E-05 | 0.000308 |
| 11745908_EFCAB14   | 0.554898 | 4.25E-05 | 0.000308 |
| 11764029_CEBPD     | 0.632656 | 4.25E-05 | 0.000308 |
| 11730509_ABCC5     | 0.44445  | 4.25E-05 | 0.000308 |
| 11743792_TTC39C    | 0.339007 | 4.25E-05 | 0.000308 |
| 11741775_IL24      | 0.647463 | 4.26E-05 | 0.000308 |
| 11736368_MCM10     | -0.50602 | 4.26E-05 | 0.000309 |
| 11754457_GOLGB1    | -0.36911 | 4.27E-05 | 0.000309 |
| 11721472_HCCS      | 0.338814 | 4.27E-05 | 0.000309 |
| 11721912_MDM4      | -0.38706 | 4.27E-05 | 0.000309 |
| 11723472_CHM       | 0.394427 | 4.27E-05 | 0.000309 |
| 11726003_KRCC1     | 0.478291 | 4.27E-05 | 0.000309 |
| 11743941_PPP1R21   | 0.490421 | 4.28E-05 | 0.000309 |
| 11729830_DCLRE1A   | -0.36206 | 4.28E-05 | 0.000309 |
| 11717869_ZNF263    | 0.467222 | 4.28E-05 | 0.000309 |
| 11722992_DMD       | 0.471649 | 4.28E-05 | 0.000309 |
| 11720090_NRSN2     | -0.54718 | 4.28E-05 | 0.000309 |
| 11719045_PER3      | -0.55013 | 4.29E-05 | 0.00031  |
| 11756175_NSMCE4A   | -0.38355 | 4.29E-05 | 0.00031  |
| 11734263_ZNF780A   | 0.394201 | 4.29E-05 | 0.00031  |
| 11735315_DYNC2LI1  | 0.507219 | 4.30E-05 | 0.00031  |
| 11731947_PAQR9     | -0.44534 | 4.30E-05 | 0.000311 |
| 11740939_SUMO1     | -0.40928 | 4.30E-05 | 0.000311 |
| 11754902_POLH      | 0.446714 | 4.30E-05 | 0.000311 |
| 11720407_PPP6R2    | 0.314485 | 4.31E-05 | 0.000311 |
| 11719637_DUSP22    | -0.53144 | 4.31E-05 | 0.000311 |
| 11718537_FAHD2A // | -0.36889 | 4.31E-05 | 0.000311 |
| 11747946_ACTR1A    | -0.35977 | 4.31E-05 | 0.000311 |
| 11758023_GABARAPL1 | 0.488118 | 4.31E-05 | 0.000311 |
| 11747968_PARG      | -0.56053 | 4.31E-05 | 0.000311 |
| 11743345_FTSJ1     | 0.313709 | 4.32E-05 | 0.000311 |
| 11736468_SLC35D1   | -0.43383 | 4.32E-05 | 0.000311 |
| 11741075_GALNT11   | -0.44263 | 4.32E-05 | 0.000312 |
| 11723453_RIOK2     | 0.317342 | 4.32E-05 | 0.000312 |
| 11751061_TCOF1     | -0.47233 | 4.33E-05 | 0.000312 |
| 11725805_ZNF606    | 0.502271 | 4.33E-05 | 0.000312 |
| 11716914_MTUS1     | 0.318289 | 4.33E-05 | 0.000312 |

|                    |          |          |          |
|--------------------|----------|----------|----------|
| 11752783_FLRT2     | 0.732601 | 4.33E-05 | 0.000312 |
| 11728615_GPR3      | -0.35439 | 4.34E-05 | 0.000312 |
| 11749425_BRD8      | -0.29616 | 4.34E-05 | 0.000313 |
| 11719256_LRP6      | 0.609063 | 4.35E-05 | 0.000313 |
| 11742557_ARPP19    | 0.434193 | 4.35E-05 | 0.000314 |
| 11742210_APP       | 0.347391 | 4.36E-05 | 0.000314 |
| 11734014_SMAD2     | 0.298914 | 4.36E-05 | 0.000314 |
| 11757111_ACER2     | 0.823084 | 4.36E-05 | 0.000314 |
| 11722800_SS18      | 0.45174  | 4.36E-05 | 0.000314 |
| 11756627_TMEM222   | -0.43494 | 4.36E-05 | 0.000314 |
| 11741059_SATB1     | 0.51442  | 4.36E-05 | 0.000314 |
| 11728249_TSFM      | -0.58078 | 4.36E-05 | 0.000314 |
| 11731537_FHL5      | 0.780028 | 4.37E-05 | 0.000314 |
| 11734122_TONSL     | -0.37159 | 4.37E-05 | 0.000314 |
| 11717643_MRPL24    | -0.3139  | 4.38E-05 | 0.000315 |
| 11721052_KLHL42    | -0.28227 | 4.38E-05 | 0.000315 |
| 11718489_ORC3      | -0.34725 | 4.38E-05 | 0.000315 |
| 11744294_FAM195B   | -0.39467 | 4.38E-05 | 0.000315 |
| 11748368_POR       | -0.46853 | 4.38E-05 | 0.000315 |
| 11722795_GDE1      | 0.309901 | 4.39E-05 | 0.000316 |
| 11728794_LDLRAD3   | -0.3697  | 4.39E-05 | 0.000316 |
| 11759560_SLC25A37  | -0.43938 | 4.39E-05 | 0.000316 |
| 11727198_PCDHA1 // | 0.498659 | 4.40E-05 | 0.000316 |
| 11722079_RHBDF1    | 0.311791 | 4.40E-05 | 0.000316 |
| 11718011_MRPL4     | -0.3293  | 4.40E-05 | 0.000316 |
| 11727456_OFD1      | 0.293586 | 4.40E-05 | 0.000316 |
| 11758719_RPS25     | -0.45975 | 4.40E-05 | 0.000316 |
| 11716957_CTDSP2    | 0.296453 | 4.40E-05 | 0.000316 |
| 11717072_KTN1      | 0.283347 | 4.40E-05 | 0.000316 |
| 11756210_RCL1      | 0.321222 | 4.41E-05 | 0.000316 |
| 11719053_CEP350    | 0.436174 | 4.41E-05 | 0.000316 |
| 11719434_ETV4      | -0.31686 | 4.41E-05 | 0.000316 |
| 11742923_LAPTM5    | 0.884593 | 4.42E-05 | 0.000317 |
| 11735487_HOXC8     | 0.353753 | 4.42E-05 | 0.000317 |
| 11746935_WARS2     | 0.416376 | 4.42E-05 | 0.000317 |
| 11737882_XRCC2     | -0.62962 | 4.42E-05 | 0.000317 |
| 11725566_MANEA     | -0.48393 | 4.43E-05 | 0.000317 |
| 11752780_TANK      | 0.341391 | 4.43E-05 | 0.000318 |
| 11752044_ANKHD1 // | 0.335002 | 4.43E-05 | 0.000318 |
| 11737219_ITGB1     | -0.45121 | 4.43E-05 | 0.000318 |
| 11719731_TIGAR     | 0.395667 | 4.43E-05 | 0.000318 |
| 11762978_SMN1 ///  | 0.306125 | 4.44E-05 | 0.000318 |
| 11728255_GLTSCR2   | 0.313668 | 4.44E-05 | 0.000318 |
| 11734572_HIST1H1E  | -0.69476 | 4.44E-05 | 0.000318 |
| 11729501_ASCC3     | 0.562972 | 4.45E-05 | 0.000318 |
| 11715811_MLLT6     | -0.35348 | 4.45E-05 | 0.000318 |
| 11743405_SMIM14    | -0.45714 | 4.45E-05 | 0.000318 |
| 11721677_RBM17     | -0.37919 | 4.45E-05 | 0.000318 |
| 11716675_ZNF106    | 0.371617 | 4.45E-05 | 0.000318 |
| 11740899_PPA2      | -0.3142  | 4.46E-05 | 0.000319 |
| 11744630_NXPE3     | 0.340783 | 4.46E-05 | 0.000319 |

|                    |          |          |          |
|--------------------|----------|----------|----------|
| 11738597_CTCFL     | -0.37361 | 4.46E-05 | 0.000319 |
| 11733108_GNAQ      | 0.39093  | 4.46E-05 | 0.000319 |
| 11718810_PRKCH     | 0.651189 | 4.46E-05 | 0.000319 |
| 11742198_NF2       | 0.35737  | 4.47E-05 | 0.000319 |
| 11721081_PARVA     | 0.335729 | 4.47E-05 | 0.000319 |
| 11727146_GPR160    | -0.5254  | 4.47E-05 | 0.00032  |
| 11744663_TOM1L1    | 0.372357 | 4.47E-05 | 0.00032  |
| 11718408_TMBIM6    | 0.285378 | 4.47E-05 | 0.00032  |
| 11750530_ASB9      | -0.30103 | 4.47E-05 | 0.00032  |
| 11723576_OSR2      | 0.415768 | 4.48E-05 | 0.00032  |
| 11756557_LRPAP1    | 0.319368 | 4.49E-05 | 0.000321 |
| 11758482_HS3ST3A1  | -0.48138 | 4.49E-05 | 0.000321 |
| 11754771_LMBR1     | 0.326037 | 4.49E-05 | 0.000321 |
| 11728768_KLHL5     | 0.428232 | 4.49E-05 | 0.000321 |
| 11744755_FHL3      | 0.365523 | 4.50E-05 | 0.000321 |
| 11739712_PHACTR2   | 0.392162 | 4.50E-05 | 0.000321 |
| 11730325_DGCR6 /// | -0.36141 | 4.50E-05 | 0.000321 |
| 11749943_METTL6    | 0.328589 | 4.51E-05 | 0.000321 |
| 11758253_CDK5RAP2  | -0.36373 | 4.51E-05 | 0.000322 |
| 11746031_PTPMT1    | -0.45638 | 4.51E-05 | 0.000322 |
| 11724236_RIPK2     | 0.464873 | 4.52E-05 | 0.000322 |
| 11739176_ABHD17B   | 0.35114  | 4.52E-05 | 0.000322 |
| 11753152_CFLAR     | 0.395358 | 4.53E-05 | 0.000323 |
| 11753518_YWHAE     | -0.33929 | 4.53E-05 | 0.000323 |
| 11729984_FUT10     | 0.471704 | 4.53E-05 | 0.000323 |
| 11734399_VPS13C    | 0.611275 | 4.54E-05 | 0.000323 |
| 11743038_CRTAP     | -0.63561 | 4.54E-05 | 0.000323 |
| 11729516_ZNF644    | 0.326828 | 4.54E-05 | 0.000323 |
| 11724378_PAG1      | 0.522365 | 4.54E-05 | 0.000323 |
| 11744495_IFT46     | -0.30016 | 4.54E-05 | 0.000323 |
| 11758517_ZNF274    | 0.445465 | 4.54E-05 | 0.000323 |
| 11730733_DNASE2    | -0.32472 | 4.54E-05 | 0.000323 |
| 11728966_ZNF28 /// | 0.660552 | 4.54E-05 | 0.000323 |
| 11755953_DMRTA1    | 0.784063 | 4.55E-05 | 0.000323 |
| 11748885_RNPS1     | -0.34094 | 4.55E-05 | 0.000323 |
| 11756434_DNMT1     | -0.3175  | 4.55E-05 | 0.000323 |
| 11760741_MPI       | 0.432956 | 4.55E-05 | 0.000324 |
| 11755623_ARSK      | 0.6218   | 4.55E-05 | 0.000324 |
| 11754653_BACE1     | 0.437998 | 4.55E-05 | 0.000324 |
| 11762283_TMX3      | 0.649723 | 4.56E-05 | 0.000324 |
| 11720941_DDX54     | -0.3297  | 4.56E-05 | 0.000324 |
| 11758167_PHTF2     | 0.333336 | 4.56E-05 | 0.000324 |
| 11752922_TUBB      | -0.29921 | 4.56E-05 | 0.000324 |
| 11721286_PREP      | 0.375037 | 4.57E-05 | 0.000325 |
| 11739423_DPYSL5    | -0.40593 | 4.57E-05 | 0.000325 |
| 11729857_H6PD      | -0.53598 | 4.57E-05 | 0.000325 |
| 11752061_INTS6     | 0.388906 | 4.57E-05 | 0.000325 |
| 11727998_MYEF2     | -0.49355 | 4.57E-05 | 0.000325 |
| 11735778_SYNE2     | -0.4997  | 4.57E-05 | 0.000325 |
| 11719828_QPCT      | 0.4291   | 4.58E-05 | 0.000325 |
| 11734913_HIST2H2BF | 0.635334 | 4.58E-05 | 0.000325 |

|                   |          |          |          |
|-------------------|----------|----------|----------|
| 11720880_EHD4     | 0.294569 | 4.58E-05 | 0.000325 |
| 11720749_INMT     | 0.324497 | 4.59E-05 | 0.000326 |
| 11758797_SRSF10   | -0.85957 | 4.59E-05 | 0.000326 |
| 11736195_CREB1    | -0.46169 | 4.60E-05 | 0.000326 |
| 11763872_SPARC    | 0.295586 | 4.60E-05 | 0.000326 |
| 11715486_MCL1     | 0.572307 | 4.60E-05 | 0.000327 |
| 11716517_ADD1     | -0.34911 | 4.61E-05 | 0.000327 |
| 11718353_ERP44    | -0.31331 | 4.61E-05 | 0.000327 |
| 11745882_CDK8     | -0.41176 | 4.61E-05 | 0.000327 |
| 11739937_DYRK3    | 0.297137 | 4.61E-05 | 0.000327 |
| 11751835_LTV1     | 0.401278 | 4.61E-05 | 0.000327 |
| 11731804_DCUN1D3  | 0.553831 | 4.62E-05 | 0.000327 |
| 11718148_APH1A    | -0.34398 | 4.62E-05 | 0.000327 |
| 11735385_DACT1    | 0.663361 | 4.62E-05 | 0.000327 |
| 11749990_HLA-A    | 0.324313 | 4.62E-05 | 0.000327 |
| 11758781_EMP1     | -0.63973 | 4.63E-05 | 0.000328 |
| 11741068_GTF2IRD2 | 0.44867  | 4.63E-05 | 0.000328 |
| 11747292_HMGNI    | -0.35824 | 4.63E-05 | 0.000328 |
| 11745278_SYNJ1    | 0.765677 | 4.64E-05 | 0.000329 |
| 11727948_RAB28    | -0.30463 | 4.64E-05 | 0.000329 |
| 11736976_ZBED9    | 0.651949 | 4.65E-05 | 0.000329 |
| 11752200_APP      | 0.286088 | 4.65E-05 | 0.000329 |
| 11756741_SH3BGRL  | 0.433042 | 4.65E-05 | 0.000329 |
| 11739602_BIRC5    | -0.3297  | 4.65E-05 | 0.000329 |
| 11728227_WDR45    | 0.3611   | 4.65E-05 | 0.000329 |
| 11717512_SEPT8    | 0.358139 | 4.65E-05 | 0.000329 |
| 11753187_SMARCB1  | -0.33382 | 4.65E-05 | 0.000329 |
| 11743970_ACTN1    | 0.36069  | 4.65E-05 | 0.000329 |
| 11747813_ABHD14B  | -0.45045 | 4.65E-05 | 0.000329 |
| 11736060_KIF5B    | 0.364967 | 4.65E-05 | 0.000329 |
| 11757313_VAT1     | -0.30084 | 4.66E-05 | 0.000329 |
| 11751929_MYPN     | 0.884691 | 4.66E-05 | 0.000329 |
| 11720434_CLCN6    | 0.287641 | 4.66E-05 | 0.000329 |
| 11715471_SRPR     | -0.56743 | 4.67E-05 | 0.00033  |
| 11723958_LSM5     | -0.31384 | 4.67E-05 | 0.00033  |
| 11729534_BRE      | 0.322499 | 4.67E-05 | 0.00033  |
| 11728739_TBC1D20  | 0.351757 | 4.67E-05 | 0.00033  |
| 11729593_LLGL1    | -0.30197 | 4.67E-05 | 0.00033  |
| 11723672_PSEN2    | 0.453717 | 4.68E-05 | 0.00033  |
| 11717871_KANK2    | -0.29234 | 4.68E-05 | 0.00033  |
| 11715233_SPATC1L  | -0.43097 | 4.68E-05 | 0.00033  |
| 11722399_DAPK3    | 0.484365 | 4.68E-05 | 0.000331 |
| 11723808_STX17    | 0.340221 | 4.69E-05 | 0.000331 |
| 11747499_ICAM1    | 0.428703 | 4.69E-05 | 0.000331 |
| 11720935_SNRPB    | -0.31527 | 4.69E-05 | 0.000331 |
| 11721140_TCEA3    | 0.405011 | 4.70E-05 | 0.000331 |
| 11723607_AGFG1    | -0.43995 | 4.70E-05 | 0.000332 |
| 11729187_PNO1     | 0.447415 | 4.71E-05 | 0.000332 |
| 11757674_ZMYND8   | -0.37991 | 4.71E-05 | 0.000332 |
| 11721855_PIGK     | -0.4073  | 4.71E-05 | 0.000332 |
| 11739242_NEMF     | 0.386758 | 4.72E-05 | 0.000332 |



|                    |          |          |          |
|--------------------|----------|----------|----------|
| 11755290_FBXL18    | -0.30819 | 4.72E-05 | 0.000332 |
| 11753378_CDK4      | -0.32352 | 4.72E-05 | 0.000332 |
| 11727648_DDX11 /// | -0.31121 | 4.72E-05 | 0.000333 |
| 11749582_WDR37     | 0.594725 | 4.72E-05 | 0.000333 |
| 11754434_CCND3     | -0.31856 | 4.72E-05 | 0.000333 |
| 11729892_ZNF569    | 0.396374 | 4.73E-05 | 0.000333 |
| 11739746_SVIL      | 0.413501 | 4.73E-05 | 0.000333 |
| 11723588_RC3H1     | 0.299148 | 4.73E-05 | 0.000333 |
| 11744590_TRIO      | 0.585048 | 4.73E-05 | 0.000333 |
| 11726541_NGLY1     | 0.343709 | 4.73E-05 | 0.000333 |
| 11758001_YWHAQ     | -0.3867  | 4.73E-05 | 0.000333 |
| 11721778_ACBD5     | 0.422469 | 4.74E-05 | 0.000333 |
| 11758105_CREBBP    | 0.308666 | 4.74E-05 | 0.000334 |
| 11752821_ACTR1A    | -0.34896 | 4.74E-05 | 0.000334 |
| 11741324_TRIM51 // | 0.523024 | 4.75E-05 | 0.000334 |
| 11754066_NPM1      | -0.29922 | 4.75E-05 | 0.000334 |
| 11754343_FAM73B    | 0.392931 | 4.77E-05 | 0.000335 |
| 11749615_UBE2I     | -0.28511 | 4.77E-05 | 0.000335 |
| 11752668_CNOT4     | 0.375495 | 4.77E-05 | 0.000335 |
| 11718490_FABP5 /// | -0.30221 | 4.77E-05 | 0.000335 |
| 11718286_UBL3      | 0.314897 | 4.77E-05 | 0.000335 |
| 11735139_TNFSF9    | 0.436279 | 4.78E-05 | 0.000336 |
| 11718062_NME3      | -0.33403 | 4.78E-05 | 0.000336 |
| 11763342_CEP57     | -0.48573 | 4.79E-05 | 0.000336 |
| 11745634_EDRF1     | 0.423597 | 4.79E-05 | 0.000337 |
| 11727540_INTS7     | 0.330987 | 4.80E-05 | 0.000337 |
| 11719469_PRPF31    | -0.31911 | 4.80E-05 | 0.000337 |
| 11721072_SF3A1     | -0.31064 | 4.80E-05 | 0.000337 |
| 11750992_SHMT2     | -0.3765  | 4.81E-05 | 0.000337 |
| 11724150_SWI5      | -0.49063 | 4.81E-05 | 0.000337 |
| 11757554_PPT2      | -0.34191 | 4.81E-05 | 0.000338 |
| 11746722_ZMYND8    | -0.37448 | 4.81E-05 | 0.000338 |
| 11726287_WARS      | -0.29261 | 4.82E-05 | 0.000338 |
| 11721077_ESD       | -0.3309  | 4.82E-05 | 0.000338 |
| 11757436_IFITM2    | 0.300781 | 4.83E-05 | 0.000339 |
| 11732338_KAT8      | -0.41775 | 4.83E-05 | 0.000339 |
| 11749881_PEX1      | 0.366358 | 4.83E-05 | 0.000339 |
| 11759893_PLEKHA8 / | 0.426291 | 4.84E-05 | 0.000339 |
| 11719512_PHC1      | -0.36174 | 4.86E-05 | 0.00034  |
| 11725583_FBXO10    | 0.314141 | 4.86E-05 | 0.00034  |
| 11727269_S100A3    | 0.312017 | 4.86E-05 | 0.00034  |
| 11736262_INHBE     | -0.83364 | 4.86E-05 | 0.00034  |
| 11758579_FLVCR1-AS | -0.3327  | 4.86E-05 | 0.000341 |
| 11756331_BFAR      | -0.35726 | 4.87E-05 | 0.000341 |
| 11745951_CCNL2     | 0.305982 | 4.87E-05 | 0.000341 |
| 11756934_STK4      | 0.61678  | 4.87E-05 | 0.000341 |
| 11726724_CKAP2L    | -0.59539 | 4.88E-05 | 0.000341 |
| 11722538_TMCO6     | -0.35132 | 4.88E-05 | 0.000342 |
| 11747543_MPDU1     | -0.34999 | 4.89E-05 | 0.000342 |
| 11716450_RFTN1     | 0.417562 | 4.89E-05 | 0.000342 |
| 11716164_CIAPIN1   | -0.36382 | 4.89E-05 | 0.000342 |

|                    |          |          |          |
|--------------------|----------|----------|----------|
| 11722991_DMD       | 0.442274 | 4.89E-05 | 0.000342 |
| 11746161_FBXL5     | 0.323784 | 4.90E-05 | 0.000342 |
| 11754348_KLHDC4 // | 0.34914  | 4.90E-05 | 0.000342 |
| 11747502_MTRF1L    | 0.384335 | 4.91E-05 | 0.000343 |
| 11739107_SEC61A1   | 0.299963 | 4.91E-05 | 0.000343 |
| 11733007_AMOTL2    | 0.373717 | 4.91E-05 | 0.000343 |
| 11739011_PAFAH1B1  | -0.28603 | 4.92E-05 | 0.000344 |
| 11739605_CCDC88A   | -0.45774 | 4.92E-05 | 0.000344 |
| 11743406_SMIM14    | -0.4177  | 4.92E-05 | 0.000344 |
| 11726087_HSPB3     | 0.495407 | 4.92E-05 | 0.000344 |
| 11737237_EOMES     | -0.61778 | 4.93E-05 | 0.000344 |
| 11724644_SPOPL     | 0.71254  | 4.93E-05 | 0.000344 |
| 11720400_NCS1      | -0.94988 | 4.94E-05 | 0.000345 |
| 11760226_ANKRD42   | 0.466549 | 4.94E-05 | 0.000345 |
| 11746136_LTV1      | 0.394633 | 4.94E-05 | 0.000345 |
| 11737113_MED19     | 0.321212 | 4.94E-05 | 0.000345 |
| 11726065_RPE       | -0.29909 | 4.94E-05 | 0.000345 |
| 11719666_STMN1     | -0.33316 | 4.95E-05 | 0.000345 |
| 11757542_SSR1      | -0.37647 | 4.95E-05 | 0.000345 |
| 11729190_MAX       | 0.329656 | 4.95E-05 | 0.000345 |
| 11732665_VSTM1     | 0.546581 | 4.95E-05 | 0.000345 |
| 11752851_PPHLN1    | 0.417536 | 4.95E-05 | 0.000345 |
| 11747507_NAP1L4    | -0.3865  | 4.96E-05 | 0.000346 |
| 11725870_ZBTB41    | 0.38963  | 4.96E-05 | 0.000346 |
| 11752570_RIN2      | 0.539635 | 4.97E-05 | 0.000346 |
| 11729846_BST1      | 0.34451  | 4.97E-05 | 0.000346 |
| 11753130_TM4SF1    | 0.299628 | 4.97E-05 | 0.000347 |
| 11737396_TROVE2    | 0.310206 | 4.98E-05 | 0.000347 |
| 11719346_ARHGAP19  | -0.49025 | 4.98E-05 | 0.000347 |
| 11740702_HMGB2     | -0.42555 | 4.99E-05 | 0.000347 |
| 11716156_B4GALT1   | -0.36726 | 4.99E-05 | 0.000347 |
| 11721119_ANKHD1 // | 0.367601 | 4.99E-05 | 0.000348 |
| 11754189_AKR1C1 // | -0.47594 | 5.00E-05 | 0.000348 |
| 11756905_DCBLD1    | 0.584113 | 5.00E-05 | 0.000348 |
| 11717001_YTHDC1    | 0.366675 | 5.01E-05 | 0.000349 |
| 11727999_MYEF2     | -0.52073 | 5.01E-05 | 0.000349 |
| 11758053_NCOA4     | 0.302121 | 5.01E-05 | 0.000349 |
| 11762627_NBPF8     | 0.31883  | 5.02E-05 | 0.000349 |
| 11752797_PCMTD2    | -0.47281 | 5.02E-05 | 0.000349 |
| 11749912_IGFBP3    | 0.411509 | 5.03E-05 | 0.00035  |
| 11723635_MMP3      | 1.434931 | 5.03E-05 | 0.00035  |
| 11720739_ITPKB     | 0.320112 | 5.04E-05 | 0.00035  |
| 11721983_PID1      | 0.551385 | 5.04E-05 | 0.000351 |
| 11752142_FLNA      | -0.30805 | 5.04E-05 | 0.000351 |
| 11734203_HBS1L     | 0.471194 | 5.05E-05 | 0.000351 |
| 11741833_KLHL23 // | -0.45768 | 5.05E-05 | 0.000351 |
| 11716746_FAM60A    | 0.294445 | 5.05E-05 | 0.000351 |
| 11727890_PFDN6     | -0.39567 | 5.05E-05 | 0.000351 |
| 11747162_FLT1      | 0.51069  | 5.05E-05 | 0.000351 |
| 11715956_ARL6IP5   | 0.310445 | 5.06E-05 | 0.000351 |
| 11741655_C1orf198  | 0.384153 | 5.06E-05 | 0.000351 |

|                    |          |          |          |
|--------------------|----------|----------|----------|
| 11719933_RTN4      | -0.30962 | 5.06E-05 | 0.000351 |
| 11723598_MAP2K7    | -0.34037 | 5.06E-05 | 0.000351 |
| 11741436_SPRYD7    | 0.29528  | 5.06E-05 | 0.000352 |
| 11730199_AHCY      | -0.29425 | 5.07E-05 | 0.000352 |
| 11715751_DPYSL3    | -0.35229 | 5.07E-05 | 0.000352 |
| 11720638_ACBD6 /// | 0.315201 | 5.07E-05 | 0.000352 |
| 11747464_SERINC3   | 0.309075 | 5.08E-05 | 0.000352 |
| 11735774_ANAPC10   | -0.41185 | 5.08E-05 | 0.000352 |
| 11754530_CDC14     | -0.3545  | 5.08E-05 | 0.000352 |
| 11718649_SYNE2     | -0.36863 | 5.09E-05 | 0.000353 |
| 11746459_KMT2C     | 0.488583 | 5.09E-05 | 0.000353 |
| 11751488_WWC2      | 0.411397 | 5.09E-05 | 0.000353 |
| 11733372_JAK2      | 0.436039 | 5.10E-05 | 0.000354 |
| 11723162_ZNF776    | 0.529093 | 5.10E-05 | 0.000354 |
| 11716858_MRPL51    | -0.28536 | 5.10E-05 | 0.000354 |
| 11720039_VTA1      | 0.313815 | 5.11E-05 | 0.000354 |
| 11743001_ADD2      | -0.46924 | 5.11E-05 | 0.000354 |
| 11722895_PIK3C2A   | 0.352831 | 5.11E-05 | 0.000354 |
| 11747420_ARF3      | -0.5363  | 5.11E-05 | 0.000354 |
| 11723077_PBDC1     | 0.378453 | 5.12E-05 | 0.000354 |
| 11726201_OAS2      | -0.5994  | 5.12E-05 | 0.000354 |
| 11747759_MOSPD1    | 0.537917 | 5.12E-05 | 0.000354 |
| 11729794_UGGT1     | 0.290359 | 5.12E-05 | 0.000354 |
| 11743789_FRS2      | -0.60714 | 5.12E-05 | 0.000354 |
| 11732663_OSR2      | 0.437191 | 5.13E-05 | 0.000355 |
| 11756810_MFAP2     | 0.359491 | 5.13E-05 | 0.000355 |
| 11749394_ZCCHC10   | 0.400104 | 5.13E-05 | 0.000355 |
| 11759041_VKORC1L1  | -0.35956 | 5.13E-05 | 0.000355 |
| 11747925_SEC23A    | 0.311744 | 5.14E-05 | 0.000355 |
| 11759592_PCGF5     | 0.310843 | 5.14E-05 | 0.000355 |
| 11756270_PKP4      | 0.391465 | 5.14E-05 | 0.000355 |
| 11734029_FAM73A    | 0.53647  | 5.14E-05 | 0.000355 |
| 11721149_LYSMD2    | 0.381475 | 5.14E-05 | 0.000355 |
| 11732215_PEF1      | -0.34384 | 5.14E-05 | 0.000356 |
| 11764001_MRPS11    | -0.28834 | 5.15E-05 | 0.000356 |
| 11756062_CASP8     | 0.457914 | 5.15E-05 | 0.000356 |
| 11737138_UBQLN1    | 0.291641 | 5.16E-05 | 0.000356 |
| 11746396_PARP4     | 0.3867   | 5.16E-05 | 0.000357 |
| 11724296_BMP7      | -0.59709 | 5.16E-05 | 0.000357 |
| 11739926_ANK3      | 0.464595 | 5.16E-05 | 0.000357 |
| 11744741_LINC00312 | -0.3661  | 5.16E-05 | 0.000357 |
| 11725276_CDK5RAP2  | -0.3043  | 5.17E-05 | 0.000357 |
| 11715724_ITM2B     | 0.281553 | 5.18E-05 | 0.000357 |
| 11731506_RAD23B    | -0.30323 | 5.18E-05 | 0.000357 |
| 11736258_PRKCE     | 0.693826 | 5.18E-05 | 0.000358 |
| 11749074_PISD      | 0.455957 | 5.18E-05 | 0.000358 |
| 11725729_C1orf56   | 0.296875 | 5.19E-05 | 0.000358 |
| 11743614_USP47     | -0.64482 | 5.19E-05 | 0.000358 |
| 11746549_CNN2      | 0.564462 | 5.20E-05 | 0.000358 |
| 11748851_UCK1      | -0.28847 | 5.20E-05 | 0.000358 |
| 11718121_ATP6V1A   | 0.437357 | 5.20E-05 | 0.000358 |

|                    |          |          |          |
|--------------------|----------|----------|----------|
| 11755155_SMARCB1   | -0.3661  | 5.20E-05 | 0.000359 |
| 11756073_HLA-DPB1  | -0.33806 | 5.20E-05 | 0.000359 |
| 11757951_ALG2      | 0.318825 | 5.20E-05 | 0.000359 |
| 11724926_LTN1      | 0.3003   | 5.21E-05 | 0.000359 |
| 11732193_MLF1      | -0.78943 | 5.21E-05 | 0.000359 |
| 11763593_ARHGEF28  | 0.382864 | 5.21E-05 | 0.000359 |
| 11728873_RBM24     | 0.671356 | 5.21E-05 | 0.000359 |
| 11739264_VPS4B     | 0.394293 | 5.22E-05 | 0.000359 |
| 11739556_C5orf22   | 0.410575 | 5.22E-05 | 0.00036  |
| 11733789_HSDL1     | 0.322738 | 5.22E-05 | 0.00036  |
| 11717997_NUP205    | -0.32148 | 5.22E-05 | 0.00036  |
| 11730743_AKIRIN1   | 0.375689 | 5.22E-05 | 0.00036  |
| 11727145_KLF11     | -0.43332 | 5.23E-05 | 0.00036  |
| 11755304_LONRF3    | 0.403826 | 5.23E-05 | 0.00036  |
| 11749665_DOCK7     | 0.318024 | 5.23E-05 | 0.00036  |
| 11741638_PLAG1     | 0.319835 | 5.24E-05 | 0.000361 |
| 11733136_SLC39A10  | 0.450888 | 5.25E-05 | 0.000361 |
| 11751832_ZNF317    | 0.608598 | 5.26E-05 | 0.000362 |
| 11737050_HRH1      | 0.672706 | 5.26E-05 | 0.000362 |
| 11739263_VPS4B     | 0.564078 | 5.26E-05 | 0.000362 |
| 11759344_FMN1      | -0.50419 | 5.26E-05 | 0.000362 |
| 11741040_DAP3      | 0.301528 | 5.26E-05 | 0.000362 |
| 11737077_PPP2R5C   | -0.33494 | 5.28E-05 | 0.000363 |
| 11721090_THBS1     | 0.373929 | 5.28E-05 | 0.000363 |
| 11717528_SLC25A20  | 0.431843 | 5.28E-05 | 0.000363 |
| 11745440_RELA      | 0.313906 | 5.28E-05 | 0.000363 |
| 11717944_FNBP4     | 0.373818 | 5.28E-05 | 0.000363 |
| 11723289_CRISPLD1  | -0.40392 | 5.29E-05 | 0.000363 |
| 11760502_WSB1      | -0.41533 | 5.29E-05 | 0.000364 |
| 11754556	EIF2AK4   | 0.331647 | 5.30E-05 | 0.000364 |
| 11733105_COMMD2    | 0.404573 | 5.30E-05 | 0.000364 |
| 11718047_ITPK1     | -0.38359 | 5.30E-05 | 0.000364 |
| 11729374_KRT34 /// | 0.412292 | 5.31E-05 | 0.000364 |
| 11762108_CXorf40A  | -0.45305 | 5.31E-05 | 0.000364 |
| 11759239_ZNF141    | 0.567317 | 5.31E-05 | 0.000365 |
| 11733096_UBL7      | -0.37407 | 5.31E-05 | 0.000365 |
| 11743322_OSER1     | 0.309818 | 5.32E-05 | 0.000365 |
| 11725679_SMC3      | -0.28603 | 5.32E-05 | 0.000365 |
| 11757148_RPL23 /// | 0.456569 | 5.32E-05 | 0.000365 |
| 11735184_EXOSC6    | 0.289288 | 5.32E-05 | 0.000365 |
| 11741300_GCOM1 /// | 0.313529 | 5.33E-05 | 0.000365 |
| 11719337_SLC23A2   | 0.382493 | 5.33E-05 | 0.000365 |
| 11758391_ZADH2     | -0.35107 | 5.34E-05 | 0.000366 |
| 11745173_ATF6      | 0.306945 | 5.34E-05 | 0.000366 |
| 11739666_RUBCN     | -0.33646 | 5.34E-05 | 0.000366 |
| 11749386_RBM48     | 0.408725 | 5.34E-05 | 0.000366 |
| 11717409_SH2B3     | 0.285219 | 5.35E-05 | 0.000366 |
| 11721851_CHCHD6    | 0.330724 | 5.35E-05 | 0.000366 |
| 11756011_PTPRJ     | -0.37166 | 5.35E-05 | 0.000366 |
| 11741564_CNNM3     | -0.5114  | 5.35E-05 | 0.000366 |
| 11742952_VIMP      | 0.324037 | 5.35E-05 | 0.000366 |

|                   |          |          |          |
|-------------------|----------|----------|----------|
| 11743319_DST      | 0.427637 | 5.35E-05 | 0.000366 |
| 11727056_SERPIND1 | 0.753761 | 5.35E-05 | 0.000366 |
| 11750151_HAUS6    | -0.31347 | 5.36E-05 | 0.000367 |
| 11729699_STXBP1   | -0.30614 | 5.36E-05 | 0.000367 |
| 11744332_NUMA1    | -0.28816 | 5.36E-05 | 0.000367 |
| 11755467_CHEK2    | -0.37312 | 5.37E-05 | 0.000367 |
| 11759643_NIT1     | 0.423452 | 5.37E-05 | 0.000367 |
| 11715598_TFG      | 0.295532 | 5.38E-05 | 0.000368 |
| 11716603_KBTBD2   | 0.346265 | 5.38E-05 | 0.000368 |
| 11729350_MMP8     | 0.544906 | 5.38E-05 | 0.000368 |
| 11736148_LYRM2    | 0.412686 | 5.39E-05 | 0.000368 |
| 11724633_BRAP     | 0.438906 | 5.39E-05 | 0.000369 |
| 11728111_SARM1    | 0.31947  | 5.40E-05 | 0.000369 |
| 11740445_ELF1     | 0.444488 | 5.40E-05 | 0.000369 |
| 11723340_TTC28    | -0.34131 | 5.40E-05 | 0.000369 |
| 11727015_PAPPA    | 1.179784 | 5.41E-05 | 0.000369 |
| 11735733_RPP14    | 0.313471 | 5.41E-05 | 0.000369 |
| 11751977_INPP5B   | 0.311844 | 5.41E-05 | 0.000369 |
| 11723265_SAYSD1   | -0.38756 | 5.41E-05 | 0.00037  |
| 11733293_PHF20L1  | 0.574951 | 5.42E-05 | 0.00037  |
| 11739262_VPS4B    | 0.362477 | 5.42E-05 | 0.00037  |
| 11739171_G2E3     | -0.48047 | 5.43E-05 | 0.000371 |
| 11721112_ACP6     | -0.39847 | 5.43E-05 | 0.000371 |
| 11723391_CORO2A   | -0.35414 | 5.43E-05 | 0.000371 |
| 11722988_BTAF1    | 0.389363 | 5.43E-05 | 0.000371 |
| 11718685_TXNRD2   | 0.452021 | 5.44E-05 | 0.000371 |
| 11715298_SH2D2A   | 0.351426 | 5.44E-05 | 0.000371 |
| 11719164_CLCN5    | -0.50085 | 5.44E-05 | 0.000371 |
| 11733154_UBTD2    | -0.29837 | 5.45E-05 | 0.000371 |
| 11725104_EGFR     | 0.31862  | 5.46E-05 | 0.000372 |
| 11749440_WDR41    | 0.366465 | 5.46E-05 | 0.000372 |
| 11751940_NR1D2    | 0.576135 | 5.46E-05 | 0.000372 |
| 11727246_CHRNB1   | 0.406648 | 5.47E-05 | 0.000373 |
| 11749316_SURF4    | -0.3001  | 5.47E-05 | 0.000373 |
| 11756185_POLR3K   | -0.35352 | 5.47E-05 | 0.000373 |
| 11728842_KCNK1    | -0.46492 | 5.47E-05 | 0.000373 |
| 11742211_APP      | 0.313724 | 5.48E-05 | 0.000373 |
| 11750827_SMAD4    | 0.313981 | 5.48E-05 | 0.000373 |
| 11742705_UBR5     | 0.330916 | 5.48E-05 | 0.000373 |
| 11716841_UBE4A    | 0.307143 | 5.49E-05 | 0.000373 |
| 11734669_KPNA1    | 0.375641 | 5.49E-05 | 0.000374 |
| 11721658_LMO4     | -0.54027 | 5.50E-05 | 0.000374 |
| 11735399_VPS13A   | 0.520613 | 5.50E-05 | 0.000374 |
| 11719713_PPM1B    | 0.338546 | 5.50E-05 | 0.000374 |
| 11759401_UBE2I    | -0.57647 | 5.50E-05 | 0.000374 |
| 11745389_C14orf93 | -0.33467 | 5.50E-05 | 0.000374 |
| 11754622_MEIS3    | 0.318163 | 5.51E-05 | 0.000375 |
| 11749281_ANKLE2   | 0.417679 | 5.51E-05 | 0.000375 |
| 11717735_ZCCHC24  | -0.27974 | 5.51E-05 | 0.000375 |
| 11754544_ZDHHC11  | 0.677186 | 5.52E-05 | 0.000375 |
| 11724651_LMBR1    | 0.406953 | 5.52E-05 | 0.000375 |

|                    |          |          |          |
|--------------------|----------|----------|----------|
| 11755524_ARCN1     | 0.318823 | 5.52E-05 | 0.000375 |
| 11753720_GMFB      | 0.324137 | 5.52E-05 | 0.000375 |
| 11718138_LOC105372 | -0.37459 | 5.53E-05 | 0.000375 |
| 11718179_FERMT2    | 0.427152 | 5.53E-05 | 0.000375 |
| 11724143_RAB11FIP2 | 0.405729 | 5.53E-05 | 0.000375 |
| 11724191_COPS2     | 0.298061 | 5.53E-05 | 0.000376 |
| 11759884_MLLT10    | -0.80722 | 5.53E-05 | 0.000376 |
| 11759967_LOC100128 | 0.634076 | 5.54E-05 | 0.000376 |
| 11720786_DYNC1LI1  | -0.35477 | 5.54E-05 | 0.000376 |
| 11731643_LOC102724 | -0.60498 | 5.54E-05 | 0.000376 |
| 11723279_CREBZF    | 0.477913 | 5.55E-05 | 0.000376 |
| 11723660_UBIAD1    | 0.405668 | 5.55E-05 | 0.000376 |
| 11743997_ACTR1A    | -0.35818 | 5.55E-05 | 0.000377 |
| 11744986_SAMD4A    | 0.65659  | 5.56E-05 | 0.000377 |
| 11715604_SPARC     | 0.288445 | 5.56E-05 | 0.000377 |
| 11717937_SMIM3     | 0.335929 | 5.56E-05 | 0.000377 |
| 11739194_SLMAP     | 0.34932  | 5.56E-05 | 0.000377 |
| 11728733_ZBTB38    | 0.292068 | 5.57E-05 | 0.000377 |
| 11736387_ABAT      | -0.93793 | 5.57E-05 | 0.000378 |
| 11722494_HIP1R     | -0.38661 | 5.57E-05 | 0.000378 |
| 11718257_CCDC130   | 0.350533 | 5.57E-05 | 0.000378 |
| 11730684_PTPRM     | 0.360289 | 5.58E-05 | 0.000378 |
| 11740895_MIR22HG   | 0.423663 | 5.58E-05 | 0.000378 |
| 11762367_RBPJ      | -0.41941 | 5.58E-05 | 0.000378 |
| 11755874_BORA      | -0.5088  | 5.59E-05 | 0.000379 |
| 11750512_CDK4      | -0.28247 | 5.59E-05 | 0.000379 |
| 11750890_MARS2     | 0.648004 | 5.59E-05 | 0.000379 |
| 11730877_EBAG9     | -0.30102 | 5.60E-05 | 0.000379 |
| 11740475_NOX4      | 0.431784 | 5.60E-05 | 0.000379 |
| 11723483_GAR1      | -0.3038  | 5.60E-05 | 0.000379 |
| 11752001_CUL4A     | -0.53715 | 5.60E-05 | 0.000379 |
| 11726049_FMO5      | 0.509943 | 5.60E-05 | 0.000379 |
| 11723687_FAM46A    | 0.360206 | 5.60E-05 | 0.000379 |
| 11755333_NFX1      | 0.39252  | 5.60E-05 | 0.000379 |
| 11739814_FZD1      | -0.30209 | 5.61E-05 | 0.000379 |
| 11739468_TMEM87B   | 0.382473 | 5.61E-05 | 0.00038  |
| 11756843_BMI1 ///  | 0.342092 | 5.62E-05 | 0.00038  |
| 11743497_BMP2      | 1.108692 | 5.62E-05 | 0.00038  |
| 11750256_RSF1      | 0.459002 | 5.62E-05 | 0.00038  |
| 11757967_CCDC50    | -0.48054 | 5.63E-05 | 0.00038  |
| 11744594_SEPT6     | -0.37877 | 5.63E-05 | 0.000381 |
| 11720747_ADCY7     | 0.319457 | 5.63E-05 | 0.000381 |
| 11732423_ZNF234    | 0.583831 | 5.64E-05 | 0.000381 |
| 11746330_GSS       | -0.29043 | 5.64E-05 | 0.000381 |
| 11733156_CCDC50    | 0.388558 | 5.64E-05 | 0.000381 |
| 11735084_FREM2     | -0.52595 | 5.65E-05 | 0.000382 |
| 11717054_SSR1      | -0.30727 | 5.66E-05 | 0.000382 |
| 11758277_NBPF11 // | 0.286137 | 5.66E-05 | 0.000382 |
| 11739606_CCDC88A   | -0.41522 | 5.67E-05 | 0.000383 |
| 11733161_TNFAIP8   | -0.54803 | 5.67E-05 | 0.000383 |
| 11718901_TGFBR3    | 0.649536 | 5.68E-05 | 0.000383 |

|                    |          |          |          |
|--------------------|----------|----------|----------|
| 11728967_ZNF468    | 0.661803 | 5.68E-05 | 0.000384 |
| 11755766_SNX30     | 0.330242 | 5.68E-05 | 0.000384 |
| 11715390_FKBP1A    | 0.281794 | 5.69E-05 | 0.000384 |
| 11720620_ACLY      | -0.44157 | 5.69E-05 | 0.000384 |
| 11716213_PLXNB2    | 0.35462  | 5.69E-05 | 0.000384 |
| 11723559_SMC04     | -0.96487 | 5.69E-05 | 0.000384 |
| 11730868_MEA1      | -0.3376  | 5.69E-05 | 0.000384 |
| 11723841_RMI1      | -0.70982 | 5.69E-05 | 0.000384 |
| 11757620_TIA1      | -0.29307 | 5.69E-05 | 0.000384 |
| 11743562_U2SURP    | -0.37156 | 5.70E-05 | 0.000384 |
| 11733830_GMCL1     | 0.346428 | 5.70E-05 | 0.000384 |
| 11747578_SENP2     | -0.38928 | 5.71E-05 | 0.000385 |
| 11724860_ACER3     | -0.66367 | 5.72E-05 | 0.000385 |
| 11751182_DBT       | 0.340112 | 5.72E-05 | 0.000385 |
| 11718450_NAGA      | -0.74781 | 5.72E-05 | 0.000385 |
| 11721173_VPS8      | 0.378341 | 5.72E-05 | 0.000385 |
| 11723125_MORC3     | 0.440645 | 5.73E-05 | 0.000386 |
| 11758071_SULF1     | 0.445029 | 5.74E-05 | 0.000386 |
| 11756791_RFK       | 0.369083 | 5.74E-05 | 0.000386 |
| 11749280_CAP2      | 0.746556 | 5.74E-05 | 0.000386 |
| 11727003_CSNK1E // | -0.40675 | 5.75E-05 | 0.000387 |
| 11715452_COL4A2    | 0.279132 | 5.75E-05 | 0.000387 |
| 11758542_ZRSR2     | 0.422181 | 5.76E-05 | 0.000387 |
| 11755831_WDR63     | 0.706964 | 5.76E-05 | 0.000387 |
| 11739418_IRGQ      | 0.731705 | 5.76E-05 | 0.000387 |
| 11753545_RAD52     | 0.359098 | 5.76E-05 | 0.000387 |
| 11722486_ALG11 /// | -0.39863 | 5.76E-05 | 0.000387 |
| 11736292_MAPK8     | 0.428747 | 5.77E-05 | 0.000388 |
| 11749390_LAMTOR1   | 0.292478 | 5.78E-05 | 0.000388 |
| 11735403_KIAA0754  | 0.672669 | 5.78E-05 | 0.000388 |
| 11726662_APOO      | -0.27649 | 5.78E-05 | 0.000389 |
| 11721352_SLC1A1    | 0.343991 | 5.79E-05 | 0.000389 |
| 11724859_ACER3     | -0.42808 | 5.79E-05 | 0.000389 |
| 11718309_HEG1      | 0.305169 | 5.80E-05 | 0.000389 |
| 11752784_FLRT2     | 0.619994 | 5.80E-05 | 0.00039  |
| 11740337_ZNF28     | 0.53516  | 5.80E-05 | 0.00039  |
| 11732983_TMEM8B    | -0.40403 | 5.81E-05 | 0.00039  |
| 11729186_PNO1      | 0.444712 | 5.82E-05 | 0.000391 |
| 11756056_SLC2A1    | -0.33816 | 5.82E-05 | 0.000391 |
| 11756556_C20orf24  | -0.32222 | 5.83E-05 | 0.000391 |
| 11753485_ATP5S     | -0.49397 | 5.84E-05 | 0.000392 |
| 11717484_PDHA1     | -0.30192 | 5.84E-05 | 0.000392 |
| 11724606_MAP2K6    | -0.39539 | 5.84E-05 | 0.000392 |
| 11731195_SEMA3D    | 0.449759 | 5.84E-05 | 0.000392 |
| 11750995_SYAP1     | 0.31052  | 5.85E-05 | 0.000392 |
| 11727113_EGF       | 0.811556 | 5.85E-05 | 0.000392 |
| 11715780_HNRNPH2 / | -0.47518 | 5.85E-05 | 0.000392 |
| 11745497_GON4L /// | 0.324831 | 5.86E-05 | 0.000393 |
| 11717244_LSM4      | -0.31099 | 5.86E-05 | 0.000393 |
| 11732793_EYA4      | -0.33566 | 5.86E-05 | 0.000393 |
| 11718931_SLC35D2   | 0.443221 | 5.86E-05 | 0.000393 |

|                    |          |          |          |
|--------------------|----------|----------|----------|
| 11736946_PSM10     | -0.27112 | 5.87E-05 | 0.000393 |
| 11747593_SH3BGR1   | 0.292915 | 5.87E-05 | 0.000394 |
| 11726659_ATG4C     | -0.36826 | 5.87E-05 | 0.000394 |
| 11741039_DAP3      | 0.367469 | 5.87E-05 | 0.000394 |
| 11722752_ELMSAN1   | 0.312768 | 5.88E-05 | 0.000394 |
| 11715955_ARL6IP5   | 0.318751 | 5.89E-05 | 0.000394 |
| 11732156_UFM1      | 0.334633 | 5.90E-05 | 0.000395 |
| 11751314_SLC39A1   | -0.33432 | 5.90E-05 | 0.000395 |
| 11754625_AP4B1     | 0.329277 | 5.90E-05 | 0.000395 |
| 11727050_PPP6C     | 0.354007 | 5.90E-05 | 0.000395 |
| 11755309_GLTSCR2   | 0.310876 | 5.90E-05 | 0.000395 |
| 11720884_HMBS      | -0.29688 | 5.90E-05 | 0.000395 |
| 11750337_LBX2      | -0.39055 | 5.90E-05 | 0.000395 |
| 11758506_RNF13     | 0.411497 | 5.91E-05 | 0.000395 |
| 11737014_HOXD8     | 0.299902 | 5.92E-05 | 0.000396 |
| 11746064_OGT       | 0.338595 | 5.92E-05 | 0.000396 |
| 11756283_CCAR1     | 0.310893 | 5.92E-05 | 0.000396 |
| 11723951_TFPI      | 0.442508 | 5.92E-05 | 0.000396 |
| 11717730_SQLE      | -0.36285 | 5.92E-05 | 0.000396 |
| 11715601_PPP1R11   | -0.60242 | 5.92E-05 | 0.000396 |
| 11736509_IL6R      | 0.551528 | 5.92E-05 | 0.000396 |
| 11756769_IL12A     | -0.74121 | 5.93E-05 | 0.000396 |
| 11727002_CSNK1E // | -0.39594 | 5.93E-05 | 0.000396 |
| 11740261_TXK       | 0.848467 | 5.93E-05 | 0.000396 |
| 11757695_ZNF512    | -0.33222 | 5.93E-05 | 0.000396 |
| 11723506_ZNF609    | 0.327474 | 5.93E-05 | 0.000396 |
| 11733065_NFYB      | 0.28099  | 5.93E-05 | 0.000396 |
| 11717326_KLF9      | -0.30049 | 5.93E-05 | 0.000396 |
| 11734975_CLTB      | 0.317754 | 5.94E-05 | 0.000396 |
| 11716750_CD99L2    | -0.44694 | 5.95E-05 | 0.000397 |
| 11739448_ROCK1 /// | 0.352432 | 5.96E-05 | 0.000398 |
| 11731627_CCDC186   | 0.536849 | 5.96E-05 | 0.000398 |
| 11733520_POU3F2    | -0.41839 | 5.97E-05 | 0.000398 |
| 11726538_KANK2     | -0.36411 | 5.97E-05 | 0.000398 |
| 11722550_ITSN1     | -0.29948 | 5.97E-05 | 0.000398 |
| 11757598_SWAP70    | 0.300283 | 5.97E-05 | 0.000398 |
| 11744679_SMAD4     | 0.30753  | 5.97E-05 | 0.000398 |
| 11746689_FAM46A    | 0.487355 | 5.97E-05 | 0.000398 |
| 11721732_TMX3      | 0.354869 | 5.98E-05 | 0.000399 |
| 11717857_DHX29     | 0.330519 | 5.99E-05 | 0.000399 |
| 11732492_KIAA1549  | -0.49768 | 5.99E-05 | 0.000399 |
| 11750778_MSRI      | 0.440116 | 5.99E-05 | 0.000399 |
| 11731100_MFI2      | -0.36765 | 5.99E-05 | 0.000399 |
| 11724349_PPP1R14C  | -0.52781 | 5.99E-05 | 0.000399 |
| 11722586_G3BP1     | -0.27581 | 6.00E-05 | 0.000399 |
| 11752747_MRS2      | 0.553927 | 6.00E-05 | 0.000399 |
| 11755515_DDI2 ///  | 0.500825 | 6.00E-05 | 0.0004   |
| 11741134_PTPN3     | 0.304716 | 6.01E-05 | 0.0004   |
| 11721190_TTC9C     | 0.288994 | 6.02E-05 | 0.000401 |
| 11731761_RAD52     | 0.458173 | 6.02E-05 | 0.000401 |
| 11715603_SPARC     | 0.305461 | 6.03E-05 | 0.000401 |



|                  |          |          |          |
|------------------|----------|----------|----------|
| 11716324_ICMT    | -0.35031 | 6.03E-05 | 0.000401 |
| 11728207_XPC     | 0.305818 | 6.03E-05 | 0.000401 |
| 11756116_TAF1    | 0.390001 | 6.04E-05 | 0.000402 |
| 11757945_TP53BP2 | -0.31991 | 6.04E-05 | 0.000402 |
| 11718440_NSUN4   | 0.326852 | 6.04E-05 | 0.000402 |
| 11761271_CARS2   | 0.282444 | 6.04E-05 | 0.000402 |
| 11720184_EEF1B2  | 0.276449 | 6.05E-05 | 0.000402 |
| 11749921_SDC4    | -0.29377 | 6.05E-05 | 0.000403 |
| 11746345_RANBP3  | -0.31168 | 6.06E-05 | 0.000403 |
| 11721543_CSRNP1  | 0.410426 | 6.06E-05 | 0.000403 |
| 11715923_GSS     | -0.32839 | 6.06E-05 | 0.000403 |
| 11727837_ORC6    | -0.32398 | 6.06E-05 | 0.000403 |
| 11717201_DNTP1   | 0.372301 | 6.07E-05 | 0.000403 |
| 11721591_FANCC   | -0.55416 | 6.07E-05 | 0.000403 |
| 11720642_IVD     | 0.292571 | 6.08E-05 | 0.000404 |
| 11740688_PHACTR2 | 0.597271 | 6.08E-05 | 0.000404 |
| 11736228_PIGC    | -0.33827 | 6.08E-05 | 0.000404 |
| 11746622_PHC1    | -0.65706 | 6.08E-05 | 0.000404 |
| 11749929_PGPEP1  | 0.455344 | 6.08E-05 | 0.000404 |
| 11743964_COL6A3  | 0.443207 | 6.08E-05 | 0.000404 |
| 11743672_ZNF292  | 0.40775  | 6.09E-05 | 0.000404 |
| 11742062_ANP32E  | -0.5419  | 6.09E-05 | 0.000404 |
| 11750841_PPP1R21 | 0.356418 | 6.09E-05 | 0.000404 |
| 11757960_ARAP2   | 0.560799 | 6.10E-05 | 0.000405 |
| 11718830_EHD1    | 0.337952 | 6.11E-05 | 0.000405 |
| 11732495_AUNIP   | -0.47946 | 6.11E-05 | 0.000405 |
| 11745039_ADCK2   | -0.33559 | 6.11E-05 | 0.000405 |
| 11729665_STK38L  | 0.59224  | 6.11E-05 | 0.000405 |
| 11745248_ILVBL   | -0.53198 | 6.11E-05 | 0.000405 |
| 11727470_ZNF544  | 0.421243 | 6.12E-05 | 0.000405 |
| 11756954_ZEB2    | 0.442355 | 6.12E-05 | 0.000405 |
| 11728379_EFCAB2  | -0.76241 | 6.12E-05 | 0.000406 |
| 11721510_NUS1    | -0.39792 | 6.13E-05 | 0.000406 |
| 11715555_CYB5R3  | -0.32788 | 6.13E-05 | 0.000406 |
| 11727899_CLMN    | -0.31931 | 6.14E-05 | 0.000407 |
| 11725127_EP300   | 0.32886  | 6.15E-05 | 0.000407 |
| 11728725_TAF6    | -0.30399 | 6.16E-05 | 0.000408 |
| 11721934_DNAJC27 | 0.395253 | 6.16E-05 | 0.000408 |
| 11747174_ERO1B   | 0.542562 | 6.17E-05 | 0.000408 |
| 11751625_DCUN1D1 | 0.32975  | 6.17E-05 | 0.000408 |
| 11763438_ZKSCAN5 | 0.440347 | 6.17E-05 | 0.000408 |
| 11754499_RBM7    | -0.26772 | 6.17E-05 | 0.000408 |
| 11732841_SCN3A   | 0.652069 | 6.18E-05 | 0.000409 |
| 11741745_ABL2    | 0.417319 | 6.18E-05 | 0.000409 |
| 11754070_SSNA1   | -0.39982 | 6.18E-05 | 0.000409 |
| 11733714_NAA16   | 0.441265 | 6.19E-05 | 0.00041  |
| 11740367_PTPN3   | 0.293772 | 6.19E-05 | 0.00041  |
| 11729237_MCCC2   | 0.344062 | 6.19E-05 | 0.00041  |
| 11743045_FLOT1   | -0.37902 | 6.19E-05 | 0.00041  |
| 11728915_TRIOBP  | -0.48993 | 6.20E-05 | 0.00041  |
| 11721953_RNF41   | -0.3538  | 6.20E-05 | 0.00041  |

|                    |          |          |          |
|--------------------|----------|----------|----------|
| 11727040_MAVS      | -0.5488  | 6.20E-05 | 0.00041  |
| 11723314_PXMP2     | -0.31432 | 6.21E-05 | 0.00041  |
| 11729366_PRKAA2    | 0.495309 | 6.21E-05 | 0.00041  |
| 11747504_ZNF510    | 0.337641 | 6.21E-05 | 0.00041  |
| 11740930_BVES      | 0.550017 | 6.21E-05 | 0.00041  |
| 11725139_FUBP3     | -0.4574  | 6.21E-05 | 0.00041  |
| 11737371_HLCS      | -0.49922 | 6.23E-05 | 0.000411 |
| 11729098_IL1RAP    | 0.41255  | 6.23E-05 | 0.000411 |
| 11731454_SEC62     | 0.306684 | 6.24E-05 | 0.000412 |
| 11759088_1-Mar     | 0.653915 | 6.24E-05 | 0.000412 |
| 11758615_FRMD4B    | 0.475199 | 6.24E-05 | 0.000412 |
| 11743915_SEL1L3    | -0.60045 | 6.24E-05 | 0.000412 |
| 11723256_PKMYT1    | -0.50053 | 6.25E-05 | 0.000412 |
| 11728217_BCLAF1    | -0.38444 | 6.25E-05 | 0.000413 |
| 11745001_AASDH     | -0.29807 | 6.25E-05 | 0.000413 |
| 11757574_TMEM123   | -0.70482 | 6.26E-05 | 0.000413 |
| 11719424_FAM220A   | -0.32489 | 6.26E-05 | 0.000413 |
| 11722499_LYSMD3    | 0.430428 | 6.26E-05 | 0.000413 |
| 11725058_NEDD9     | 0.55152  | 6.27E-05 | 0.000413 |
| 11749977_RNF6      | 0.580834 | 6.27E-05 | 0.000413 |
| 11715250_KIAA0825  | 0.837663 | 6.27E-05 | 0.000413 |
| 11756623_HSPA8     | -0.40139 | 6.27E-05 | 0.000413 |
| 11728282_RBMS2     | 0.609142 | 6.28E-05 | 0.000414 |
| 11724553_PCGF5     | 0.735755 | 6.28E-05 | 0.000414 |
| 11743187_CFAP97    | -0.37828 | 6.29E-05 | 0.000414 |
| 11740814_ATG7      | 0.32159  | 6.29E-05 | 0.000414 |
| 11757682_CYB5R2    | -0.32483 | 6.29E-05 | 0.000414 |
| 11753705_STMN1     | -0.30216 | 6.29E-05 | 0.000414 |
| 11715715_VOPP1     | -0.40415 | 6.29E-05 | 0.000414 |
| 11726120_BMP2K     | 0.6034   | 6.30E-05 | 0.000415 |
| 11748139_RNF14     | 0.310951 | 6.30E-05 | 0.000415 |
| 11745854_RNF145    | 0.341716 | 6.30E-05 | 0.000415 |
| 11753011_EXOSC9    | -0.3209  | 6.30E-05 | 0.000415 |
| 11743914_PKP4      | 0.439538 | 6.30E-05 | 0.000415 |
| 11733385_TMEM182   | -0.82898 | 6.31E-05 | 0.000415 |
| 11717348_ADD3      | -0.36495 | 6.31E-05 | 0.000415 |
| 11753509_FOXC1     | -0.38019 | 6.32E-05 | 0.000415 |
| 11755323_MBD1      | 0.394582 | 6.33E-05 | 0.000416 |
| 11733970_PCDH18    | 0.421654 | 6.33E-05 | 0.000416 |
| 11753625_TMEM9     | -0.2977  | 6.33E-05 | 0.000416 |
| 11732545_NOB1      | 0.306747 | 6.33E-05 | 0.000416 |
| 11748105_ASB3 ///  | 0.293099 | 6.34E-05 | 0.000416 |
| 11722731_APPL1     | -0.30887 | 6.35E-05 | 0.000417 |
| 11753275_LAPTM4A   | -0.33334 | 6.35E-05 | 0.000417 |
| 11758312_CCL3P1 // | 0.968959 | 6.35E-05 | 0.000417 |
| 11757972_MYLIP     | -0.32046 | 6.35E-05 | 0.000417 |
| 11726307_FAM204A   | 0.299748 | 6.35E-05 | 0.000417 |
| 11745274_PARD3     | 0.536265 | 6.36E-05 | 0.000418 |
| 11721530_ZDHHC2    | 0.433824 | 6.37E-05 | 0.000418 |
| 11739125_CPNE1     | 0.332989 | 6.37E-05 | 0.000418 |
| 11751672_LGALS8    | 0.332428 | 6.37E-05 | 0.000418 |

|                    |          |          |          |
|--------------------|----------|----------|----------|
| 11719035_ACSF2     | -0.28908 | 6.38E-05 | 0.000419 |
| 11720143_CCSAP     | -0.40123 | 6.39E-05 | 0.000419 |
| 11749009_NFYA      | -0.4625  | 6.40E-05 | 0.00042  |
| 11754548_RMDN1     | -0.29983 | 6.41E-05 | 0.00042  |
| 11757846_ARMCX3    | 0.412108 | 6.41E-05 | 0.00042  |
| 11715492_MORF4L1   | 0.269827 | 6.41E-05 | 0.00042  |
| 11721157_NTHL1     | -0.3295  | 6.41E-05 | 0.000421 |
| 11741301_GCOM1 /// | 0.330319 | 6.42E-05 | 0.000421 |
| 11743451_ELOVL6    | 0.342963 | 6.42E-05 | 0.000421 |
| 11718562_DNMT3A    | 0.329316 | 6.42E-05 | 0.000421 |
| 11756662_ERAL1     | -0.34102 | 6.42E-05 | 0.000421 |
| 11748985_VTA1      | 0.282589 | 6.42E-05 | 0.000421 |
| 11742822_DNPEP     | -0.32139 | 6.43E-05 | 0.000421 |
| 11736315_WBP5      | -0.52878 | 6.44E-05 | 0.000422 |
| 11720683_B3GALT6   | -0.3765  | 6.44E-05 | 0.000422 |
| 11763916_LOC105379 | 0.475336 | 6.45E-05 | 0.000422 |
| 11743414_UBE2K     | 0.29421  | 6.45E-05 | 0.000422 |
| 11753462_SLC39A9   | 0.558762 | 6.45E-05 | 0.000423 |
| 11744695_CDC90B    | 0.345032 | 6.46E-05 | 0.000423 |
| 11717847_FARSA     | -0.27819 | 6.46E-05 | 0.000423 |
| 11715195_IMPACT    | -0.45575 | 6.46E-05 | 0.000423 |
| 11729581_PDPF      | -0.36732 | 6.46E-05 | 0.000423 |
| 11740416_BRCA2     | -0.58638 | 6.47E-05 | 0.000423 |
| 11756417_KIZ       | -0.30365 | 6.47E-05 | 0.000423 |
| 11726963_SGTB      | 0.297651 | 6.47E-05 | 0.000423 |
| 11715413_TSC22D1   | 0.327816 | 6.47E-05 | 0.000423 |
| 11756615_SHMT2     | -0.37194 | 6.47E-05 | 0.000423 |
| 11740045_PHACTR2   | 0.510159 | 6.48E-05 | 0.000423 |
| 11763169_FOSL2     | 0.560301 | 6.48E-05 | 0.000424 |
| 11725658_MTFR1     | -0.31817 | 6.48E-05 | 0.000424 |
| 11722029_UBE3C     | 0.305319 | 6.50E-05 | 0.000425 |
| 11721722_MSH5 ///  | -0.33597 | 6.51E-05 | 0.000426 |
| 11741910_PKNOX2    | -0.4114  | 6.51E-05 | 0.000426 |
| 11717124_SH3PXD2A  | -0.32426 | 6.52E-05 | 0.000426 |
| 11728651_ZRANB2    | 0.322014 | 6.52E-05 | 0.000426 |
| 11729326_ZFHX4     | 0.354711 | 6.52E-05 | 0.000426 |
| 11743078_UPF3A     | 0.277267 | 6.53E-05 | 0.000427 |
| 11723991_ALG6      | -0.38217 | 6.54E-05 | 0.000427 |
| 11744708_LYRM1     | 0.43932  | 6.54E-05 | 0.000427 |
| 11719052_CEP350    | 0.397719 | 6.54E-05 | 0.000427 |
| 11737246_RALGAPA1  | 0.48886  | 6.57E-05 | 0.000429 |
| 11733871_PGK1      | -0.32688 | 6.57E-05 | 0.000429 |
| 11759479_PTP4A2    | -0.28082 | 6.57E-05 | 0.000429 |
| 11717886_PLAU      | 0.560484 | 6.57E-05 | 0.000429 |
| 11727033_PAPSS2    | -0.38317 | 6.57E-05 | 0.000429 |
| 11748556_SARNP     | 0.344917 | 6.58E-05 | 0.000429 |
| 11742828_PHF3      | -0.27517 | 6.58E-05 | 0.000429 |
| 11726416_ABI1      | -0.30717 | 6.58E-05 | 0.000429 |
| 11758574_THRB      | 0.524582 | 6.59E-05 | 0.00043  |
| 11743962_CNST      | 0.420183 | 6.59E-05 | 0.00043  |
| 11748824_TTLL12    | -0.40315 | 6.59E-05 | 0.00043  |

|                    |            |          |          |
|--------------------|------------|----------|----------|
| 11744582_USP15     | 0.581168   | 6.59E-05 | 0.00043  |
| 11755169_RP9 ///   | R 0.265678 | 6.59E-05 | 0.00043  |
| 11751038_ZNF263    | 0.339727   | 6.59E-05 | 0.00043  |
| 11736318_SNRNP48   | 0.518229   | 6.61E-05 | 0.000431 |
| 11720276_TREX1     | -0.33971   | 6.61E-05 | 0.000431 |
| 11736227_C16orf87  | 0.44158    | 6.61E-05 | 0.000431 |
| 11749510_SAMHD1    | 0.310528   | 6.62E-05 | 0.000431 |
| 11716456_RHOBTB3   | 0.30123    | 6.62E-05 | 0.000431 |
| 11718653_PKD2      | 0.440566   | 6.63E-05 | 0.000431 |
| 11720956_IKBKE     | 0.544911   | 6.63E-05 | 0.000431 |
| 11721479_GOLPH3L   | -0.33426   | 6.65E-05 | 0.000433 |
| 11734860_WDR37     | 0.385456   | 6.65E-05 | 0.000433 |
| 11724321_C11orf54  | 0.310893   | 6.65E-05 | 0.000433 |
| 11742689_SRA1      | 0.3695     | 6.66E-05 | 0.000433 |
| 11739050_ACPP      | 0.629135   | 6.66E-05 | 0.000433 |
| 11743788_GORAB     | 0.315576   | 6.66E-05 | 0.000433 |
| 11728469_BTBD11    | 0.377382   | 6.66E-05 | 0.000433 |
| 11758149_RACGAP1   | -0.56908   | 6.66E-05 | 0.000433 |
| 11755528_LOC399815 | -0.31384   | 6.66E-05 | 0.000433 |
| 11725847_FAM76B    | -0.56009   | 6.67E-05 | 0.000434 |
| 11748405_MDC1      | -0.81456   | 6.67E-05 | 0.000434 |
| 11726464_IGFLR1    | -0.33024   | 6.68E-05 | 0.000434 |
| 11724464_ANLN      | -0.31667   | 6.68E-05 | 0.000434 |
| 11717812_KIF3C     | -0.29536   | 6.68E-05 | 0.000434 |
| 11716948_TM9SF3    | 0.355883   | 6.68E-05 | 0.000434 |
| 11755966_HLA-B     | 0.343849   | 6.68E-05 | 0.000434 |
| 11715532_IFNGR2    | 0.294378   | 6.68E-05 | 0.000434 |
| 11753878_IL6ST     | 0.270716   | 6.69E-05 | 0.000434 |
| 11739217_RSAD2     | 0.542824   | 6.69E-05 | 0.000434 |
| 11741135_CHN1      | 0.373159   | 6.69E-05 | 0.000434 |
| 11739981_SOCS4     | 0.463102   | 6.69E-05 | 0.000435 |
| 11748012_TMEM9     | -0.37031   | 6.69E-05 | 0.000435 |
| 11740613_TMEM30A   | 0.381428   | 6.70E-05 | 0.000435 |
| 11743772_LZTFL1    | -0.36515   | 6.70E-05 | 0.000435 |
| 11722881_KIAA1468  | 0.50421    | 6.71E-05 | 0.000436 |
| 11728445_TGFBRAP1  | -0.32398   | 6.72E-05 | 0.000436 |
| 11759573_MGEA5     | 0.369678   | 6.73E-05 | 0.000436 |
| 11724573_APPBP2    | -0.64623   | 6.73E-05 | 0.000437 |
| 11727021_ABI2      | 0.307832   | 6.73E-05 | 0.000437 |
| 11728507_LY96      | 0.654931   | 6.73E-05 | 0.000437 |
| 11744136_CADM4     | -0.35566   | 6.74E-05 | 0.000437 |
| 11729191_MAX       | 0.384117   | 6.74E-05 | 0.000437 |
| 11755033_GABPA     | -0.45875   | 6.74E-05 | 0.000437 |
| 11752386_NAB1      | 0.394052   | 6.74E-05 | 0.000437 |
| 11746346_B3GAT3    | 0.436876   | 6.74E-05 | 0.000437 |
| 11717115_CERK      | -0.29415   | 6.75E-05 | 0.000437 |
| 11747537_SHMT2     | -0.37252   | 6.75E-05 | 0.000437 |
| 11750609_ITSN1     | -0.64157   | 6.75E-05 | 0.000437 |
| 11741055_SPRED2    | 0.417496   | 6.75E-05 | 0.000437 |
| 11753618_ADM       | 0.359966   | 6.76E-05 | 0.000438 |
| 11760964_NBPF1     | 0.322364   | 6.76E-05 | 0.000438 |

|                    |          |          |          |
|--------------------|----------|----------|----------|
| 11727986_TENM3     | -0.46025 | 6.76E-05 | 0.000438 |
| 11727496_LRRC75A-A | 0.272089 | 6.76E-05 | 0.000438 |
| 11745541_SSU72     | -0.30777 | 6.78E-05 | 0.000439 |
| 11748157_MRPL42    | -0.30025 | 6.78E-05 | 0.000439 |
| 11754374_HKR1      | 0.367193 | 6.78E-05 | 0.000439 |
| 11757053_TMEM43    | 0.293744 | 6.79E-05 | 0.000439 |
| 11715861_ACTN4     | -0.3025  | 6.79E-05 | 0.000439 |
| 11737943_SPP1      | 0.420237 | 6.79E-05 | 0.000439 |
| 11752011_CEMIP     | -0.34809 | 6.79E-05 | 0.000439 |
| 11749718_PLXNB2    | 0.302349 | 6.80E-05 | 0.00044  |
| 11739674_PDP2      | 0.43339  | 6.81E-05 | 0.00044  |
| 11725864_DISP2     | 0.367798 | 6.81E-05 | 0.00044  |
| 11748039_LOC440434 | 0.299498 | 6.81E-05 | 0.00044  |
| 11740973_SLC44A2   | -0.2953  | 6.83E-05 | 0.000441 |
| 11734243_SPTBN5    | 0.535266 | 6.84E-05 | 0.000442 |
| 11716303_SRSF6     | -0.29818 | 6.84E-05 | 0.000442 |
| 11725977_NCBP1     | -0.35933 | 6.84E-05 | 0.000442 |
| 11731438_MED6      | 0.311693 | 6.85E-05 | 0.000442 |
| 11740186_ZKSCAN5   | 0.323837 | 6.85E-05 | 0.000442 |
| 11731008_WDR89     | 0.396113 | 6.85E-05 | 0.000442 |
| 11755592_DNAJC24   | -0.43504 | 6.86E-05 | 0.000443 |
| 11740109_HEATR3    | 0.317879 | 6.86E-05 | 0.000443 |
| 11763889_SNHG8 /// | 0.30853  | 6.86E-05 | 0.000443 |
| 11748564_REEP5     | 0.46293  | 6.87E-05 | 0.000443 |
| 11751900_MON2      | 0.337209 | 6.87E-05 | 0.000443 |
| 11748744_ADD2      | -0.36505 | 6.88E-05 | 0.000444 |
| 11721706_GPAM      | -0.45397 | 6.88E-05 | 0.000444 |
| 11716201_PISD      | 0.316317 | 6.88E-05 | 0.000444 |
| 11720783_EDF1      | -0.30516 | 6.88E-05 | 0.000444 |
| 11741353_ESM1      | 0.382691 | 6.89E-05 | 0.000444 |
| 11723138_POP1      | 0.313239 | 6.89E-05 | 0.000444 |
| 11740196_ZNF626    | 0.346731 | 6.90E-05 | 0.000445 |
| 11736120_ZFAND5    | 0.335397 | 6.91E-05 | 0.000445 |
| 11755359_PHACTR4   | 0.39937  | 6.91E-05 | 0.000446 |
| 11724549_RSBN1     | 0.268882 | 6.92E-05 | 0.000446 |
| 11755933_HLA-B     | 0.306184 | 6.92E-05 | 0.000446 |
| 11729656_SMAD2     | 0.322025 | 6.92E-05 | 0.000446 |
| 11756621_MNX1      | -0.37163 | 6.92E-05 | 0.000446 |
| 11742190_NR3C1     | -0.47859 | 6.93E-05 | 0.000446 |
| 11717927_FOXK2     | -0.35621 | 6.93E-05 | 0.000446 |
| 11748657_DHX32     | 0.29154  | 6.93E-05 | 0.000446 |
| 11747337{EIF3I     | 0.286194 | 6.93E-05 | 0.000447 |
| 11718322_ACAP2     | -0.34601 | 6.94E-05 | 0.000447 |
| 11731400_TMCO1     | 0.287832 | 6.94E-05 | 0.000447 |
| 11724225_GGCT      | -0.3009  | 6.95E-05 | 0.000447 |
| 11716888_HEX A     | 0.313772 | 6.95E-05 | 0.000448 |
| 11722254_UQCC3     | -0.31412 | 6.96E-05 | 0.000448 |
| 11725973_HNRNPF    | -0.40114 | 6.97E-05 | 0.000448 |
| 11731492_PRPF18    | 0.289075 | 6.97E-05 | 0.000448 |
| 11757465_GBAS      | -0.34641 | 6.97E-05 | 0.000448 |
| 11717767_ATMIN     | 0.337213 | 6.97E-05 | 0.000448 |

|                    |          |          |          |
|--------------------|----------|----------|----------|
| 11727305_WDSUB1    | 0.309567 | 6.98E-05 | 0.000449 |
| 11715766_DUSP1     | 0.367326 | 6.98E-05 | 0.000449 |
| 11720847_PHF6      | -0.36051 | 6.98E-05 | 0.000449 |
| 11752354_KIAA1217  | 0.558158 | 6.98E-05 | 0.000449 |
| 11764077_EDIL3     | 0.639799 | 6.98E-05 | 0.000449 |
| 11728635_AP4E1     | 0.368456 | 6.98E-05 | 0.000449 |
| 11741582_SLC3A2    | 0.300388 | 6.99E-05 | 0.000449 |
| 11755721_ATP6V1G2  | -0.49188 | 6.99E-05 | 0.000449 |
| 11739113_ADPGK     | -0.34434 | 6.99E-05 | 0.000449 |
| 11730111_DEPDC1    | -0.43502 | 6.99E-05 | 0.000449 |
| 11751558_MSANTD2   | 0.420322 | 7.00E-05 | 0.000449 |
| 11759673_DBF4B     | -0.47681 | 7.00E-05 | 0.00045  |
| 11724258_MUC15     | -0.57143 | 7.01E-05 | 0.00045  |
| 11754648_UBFD1     | -0.31705 | 7.01E-05 | 0.00045  |
| 11726058_R3HCC1L   | 0.479551 | 7.02E-05 | 0.00045  |
| 11726394_FGD4      | 0.644519 | 7.03E-05 | 0.000451 |
| 11728884_TM6SF1    | -0.4249  | 7.03E-05 | 0.000451 |
| 11739931_MCM8      | -0.3515  | 7.03E-05 | 0.000451 |
| 11727587_HAGHL     | -0.36793 | 7.03E-05 | 0.000451 |
| 11744994_CHPF2     | 0.316348 | 7.04E-05 | 0.000451 |
| 11757397_CAST      | -0.34988 | 7.05E-05 | 0.000452 |
| 11736552_KLHL36    | 0.514513 | 7.07E-05 | 0.000453 |
| 11719794_PPP2R5D   | -0.36224 | 7.07E-05 | 0.000453 |
| 11722679_PARP8     | 0.312084 | 7.07E-05 | 0.000453 |
| 11754431_RBMX ///  | -0.30903 | 7.07E-05 | 0.000453 |
| 11742423_STEAP2    | -0.55082 | 7.08E-05 | 0.000454 |
| 11726788_DEPDC7    | 0.312205 | 7.08E-05 | 0.000454 |
| 11719108_FHL3      | 0.297214 | 7.09E-05 | 0.000454 |
| 11752198_PTPRM     | 0.315949 | 7.09E-05 | 0.000454 |
| 11735415_SLC39A6   | -0.39743 | 7.10E-05 | 0.000455 |
| 11750039_ASH1L     | 0.329484 | 7.10E-05 | 0.000455 |
| 11759634_TMEM39A   | -0.40344 | 7.10E-05 | 0.000455 |
| 11745327_ARL13B    | 0.334724 | 7.10E-05 | 0.000455 |
| 11733052_SCAMP1    | -0.42324 | 7.10E-05 | 0.000455 |
| 11722237_BLOC1S4   | 0.360743 | 7.10E-05 | 0.000455 |
| 11725707_AMOTL1    | 0.301607 | 7.11E-05 | 0.000455 |
| 11755730_SPP1      | 0.515    | 7.11E-05 | 0.000455 |
| 11744739_UBAP2L    | 0.301092 | 7.11E-05 | 0.000455 |
| 11754941_KRT18     | 0.30098  | 7.11E-05 | 0.000455 |
| 11740558_HOXA13    | -0.75517 | 7.12E-05 | 0.000455 |
| 11754187	EIF2AK1   | -0.31807 | 7.12E-05 | 0.000455 |
| 11748210_MMP8      | 0.665073 | 7.12E-05 | 0.000455 |
| 11741789_NDUFB6    | -0.33806 | 7.12E-05 | 0.000455 |
| 11729861_H6PD      | -0.36997 | 7.13E-05 | 0.000456 |
| 11721894_GAS1      | -0.31576 | 7.13E-05 | 0.000456 |
| 11727893_PRELP     | -0.55739 | 7.13E-05 | 0.000456 |
| 11744691_ARMC10    | 0.294159 | 7.14E-05 | 0.000456 |
| 11759887_NBPF8     | 0.303271 | 7.15E-05 | 0.000457 |
| 11758909_MAP2K6    | -0.67383 | 7.15E-05 | 0.000457 |
| 11762445_LINC01588 | 0.527987 | 7.15E-05 | 0.000457 |
| 11733847_CC2D1B    | 0.288367 | 7.16E-05 | 0.000458 |

|                    |          |          |          |
|--------------------|----------|----------|----------|
| 11763281_RPL23AP82 | 0.618587 | 7.16E-05 | 0.000458 |
| 11723280_CREBZF    | -0.50195 | 7.17E-05 | 0.000458 |
| 11715775_HSPB8     | 0.511164 | 7.18E-05 | 0.000459 |
| 11721893_CHEK2 /// | -0.3522  | 7.18E-05 | 0.000459 |
| 11720505_RAB6B     | 0.377905 | 7.19E-05 | 0.000459 |
| 11733911_UTP15     | 0.42009  | 7.19E-05 | 0.000459 |
| 11752225_ARNT      | 0.35172  | 7.19E-05 | 0.000459 |
| 11718550_NAA60     | 0.303409 | 7.20E-05 | 0.00046  |
| 11758496_SMARCAD1  | -0.43382 | 7.20E-05 | 0.00046  |
| 11720204_NT5DC1    | -0.40127 | 7.22E-05 | 0.000461 |
| 11739274_LOC102723 | 0.394567 | 7.22E-05 | 0.000461 |
| 11741214_SSU72     | -0.30495 | 7.22E-05 | 0.000461 |
| 11726336_CRLS1     | -0.60981 | 7.23E-05 | 0.000461 |
| 11719714_PPM1B     | 0.351293 | 7.23E-05 | 0.000461 |
| 11756876_UQCC2     | -0.41    | 7.23E-05 | 0.000461 |
| 11728817_USP28     | -0.29519 | 7.24E-05 | 0.000462 |
| 11745771_RNPS1     | -0.44674 | 7.24E-05 | 0.000462 |
| 11763855_CD9       | -0.27792 | 7.24E-05 | 0.000462 |
| 11716194_SETD2     | 0.318947 | 7.25E-05 | 0.000462 |
| 11754591_FAM57A    | -0.30012 | 7.26E-05 | 0.000462 |
| 11753159_CD274     | 0.576927 | 7.26E-05 | 0.000463 |
| 11754258_LIAS      | -0.27564 | 7.26E-05 | 0.000463 |
| 11723871_DOCK2     | 0.527713 | 7.27E-05 | 0.000463 |
| 11742200_PREPL     | 0.354213 | 7.28E-05 | 0.000463 |
| 11730545_EFCAB11   | -0.39961 | 7.28E-05 | 0.000464 |
| 11730045_KDELR3    | -0.26949 | 7.28E-05 | 0.000464 |
| 11717010_MCFD2     | 0.320085 | 7.29E-05 | 0.000464 |
| 11745178_MCFD2     | 0.320085 | 7.29E-05 | 0.000464 |
| 11755100_COL16A1   | 0.291561 | 7.29E-05 | 0.000464 |
| 11745966_PRRC2B    | -0.36481 | 7.29E-05 | 0.000464 |
| 11717156_ACP1      | -0.2826  | 7.29E-05 | 0.000464 |
| 11753399_ANXA2     | 0.272953 | 7.30E-05 | 0.000464 |
| 11747460_TAGLN2    | -0.38269 | 7.31E-05 | 0.000465 |
| 11753802_SRSF5     | -0.31629 | 7.31E-05 | 0.000465 |
| 11731565_MDM2      | 0.447437 | 7.31E-05 | 0.000465 |
| 11744891_LOC339803 | -0.3922  | 7.32E-05 | 0.000465 |
| 11744390_TIMM8B    | 0.272568 | 7.32E-05 | 0.000465 |
| 11722160_GRB10     | -0.32275 | 7.32E-05 | 0.000466 |
| 11722759_CAMSAP2   | 0.313388 | 7.32E-05 | 0.000466 |
| 11722000_HNRNPU    | -0.4275  | 7.34E-05 | 0.000466 |
| 11750359_CD68      | -0.3353  | 7.34E-05 | 0.000467 |
| 11734367_FOXD3     | -0.4093  | 7.38E-05 | 0.000469 |
| 11738083_POC1B     | 0.457974 | 7.38E-05 | 0.000469 |
| 11745073_TRMT44    | 0.481835 | 7.38E-05 | 0.000469 |
| 11721094_SLC39A7   | -0.46352 | 7.38E-05 | 0.000469 |
| 11715459_COX8A     | -0.28332 | 7.39E-05 | 0.000469 |
| 11761453_SERAC1    | 0.351577 | 7.39E-05 | 0.000469 |
| 11720810_MZT2A /// | -0.37755 | 7.39E-05 | 0.000469 |
| 11728686_SFXN1     | 0.327006 | 7.41E-05 | 0.00047  |
| 11716135_MVP       | 0.350937 | 7.41E-05 | 0.00047  |
| 11723257_PKMYT1    | -0.62153 | 7.42E-05 | 0.000471 |

|                    |          |          |          |
|--------------------|----------|----------|----------|
| 11719762_GPSM1     | -0.35198 | 7.42E-05 | 0.000471 |
| 11759512_CWC25     | 0.460869 | 7.42E-05 | 0.000471 |
| 11749590_FN3KRP    | -0.46134 | 7.43E-05 | 0.000471 |
| 11735066_ITGB3     | 0.586136 | 7.43E-05 | 0.000471 |
| 11753902_ACTN4     | -0.26531 | 7.44E-05 | 0.000472 |
| 11728088_DKK2      | 0.477233 | 7.44E-05 | 0.000472 |
| 11723569_CAPN7     | 0.371956 | 7.44E-05 | 0.000472 |
| 11743090_SLC36A4   | -0.40169 | 7.44E-05 | 0.000472 |
| 11729854_MOK       | 0.403442 | 7.44E-05 | 0.000472 |
| 11751744_MMD       | -0.2951  | 7.46E-05 | 0.000473 |
| 11725579_BEND3     | -0.53413 | 7.46E-05 | 0.000473 |
| 11739987_ZNF225    | 0.639417 | 7.47E-05 | 0.000474 |
| 11720518_TACC2     | 0.278668 | 7.47E-05 | 0.000474 |
| 11763739_SSR1      | 0.260021 | 7.48E-05 | 0.000474 |
| 11760100_PSBM2     | -0.40802 | 7.48E-05 | 0.000474 |
| 11747498_SORD      | -0.437   | 7.48E-05 | 0.000474 |
| 11753785_DYNLT1    | 0.323952 | 7.48E-05 | 0.000474 |
| 11727494_TCEB3     | -0.35595 | 7.50E-05 | 0.000475 |
| 11759176_GTSE1 /// | -0.44617 | 7.50E-05 | 0.000475 |
| 11759312_AGO4      | 0.424102 | 7.50E-05 | 0.000475 |
| 11751116_ACTN1     | 0.320193 | 7.51E-05 | 0.000475 |
| 11721465_OSBPL2    | -0.28833 | 7.52E-05 | 0.000476 |
| 11762098_SOBP      | -0.44045 | 7.52E-05 | 0.000476 |
| 11759429_KLF7      | 0.757529 | 7.53E-05 | 0.000477 |
| 11748892_RBM42     | -0.37287 | 7.54E-05 | 0.000477 |
| 11720801_BIN3      | -0.33972 | 7.54E-05 | 0.000477 |
| 11727279_SLC4A7    | 0.36517  | 7.54E-05 | 0.000477 |
| 11753918_NUP85     | -0.31925 | 7.55E-05 | 0.000478 |
| 11730580_HECW2     | 0.609185 | 7.55E-05 | 0.000478 |
| 11716538_SZRD1     | 0.337698 | 7.56E-05 | 0.000478 |
| 11733831_GMCL1 /// | 0.349375 | 7.56E-05 | 0.000478 |
| 11743659_SNRNP27   | 0.271096 | 7.57E-05 | 0.000478 |
| 11743075_IPO9      | -0.31891 | 7.58E-05 | 0.000479 |
| 11754424_ST5       | -0.40838 | 7.58E-05 | 0.000479 |
| 11719077_RPUSD4    | 0.438945 | 7.59E-05 | 0.000479 |
| 11730293_SIN3A     | -0.34968 | 7.59E-05 | 0.00048  |
| 11756964_DPH1 ///  | 0.325298 | 7.60E-05 | 0.00048  |
| 11717532_MAN2A2    | -0.48562 | 7.60E-05 | 0.00048  |
| 11727278_PIGL      | -0.2973  | 7.60E-05 | 0.00048  |
| 11715725_ITM2B     | 0.260089 | 7.61E-05 | 0.00048  |
| 11721376_BCL2      | -0.47066 | 7.61E-05 | 0.00048  |
| 11746704_HAUS7     | -0.47863 | 7.62E-05 | 0.000481 |
| 11717493_SSNA1     | -0.39071 | 7.62E-05 | 0.000481 |
| 11744879_RARS      | 0.265771 | 7.62E-05 | 0.000481 |
| 11715258_PTMS      | -0.30853 | 7.64E-05 | 0.000482 |
| 11717789_AAR2      | 0.307015 | 7.64E-05 | 0.000482 |
| 11730767_NGLY1     | 0.305555 | 7.65E-05 | 0.000483 |
| 11722754_SHPRH     | 0.356643 | 7.65E-05 | 0.000483 |
| 11715552_IMMT      | -0.28347 | 7.66E-05 | 0.000483 |
| 11728340_RTN4IP1   | -0.36119 | 7.66E-05 | 0.000483 |
| 11718149_APH1A     | -0.30063 | 7.68E-05 | 0.000484 |



|                    |          |          |          |
|--------------------|----------|----------|----------|
| 11738232_CENPI     | -0.53446 | 7.68E-05 | 0.000484 |
| 11751282_SLC35B2   | -0.34749 | 7.68E-05 | 0.000484 |
| 11751004_SH3BP4    | 0.523241 | 7.68E-05 | 0.000484 |
| 11739446_NELFCD    | -0.2892  | 7.68E-05 | 0.000484 |
| 11719539_NEMP1     | -0.28399 | 7.69E-05 | 0.000484 |
| 11764171_DCUN1D1   | 0.426035 | 7.69E-05 | 0.000485 |
| 11751036_RGL1      | 0.774886 | 7.70E-05 | 0.000485 |
| 11730757_IL6ST     | 0.339954 | 7.70E-05 | 0.000485 |
| 11747361_HMGA1     | -0.37684 | 7.70E-05 | 0.000485 |
| 11735194_NR3C1     | -0.36146 | 7.70E-05 | 0.000485 |
| 11752166_PKM       | -0.29001 | 7.70E-05 | 0.000485 |
| 11719156_FAM104A   | 0.299472 | 7.71E-05 | 0.000485 |
| 11758942_MOB1A     | -0.30797 | 7.73E-05 | 0.000487 |
| 11722585_CAST      | -0.28327 | 7.73E-05 | 0.000487 |
| 11757680_SLC1A4    | -0.32824 | 7.74E-05 | 0.000487 |
| 11723962_KIAA1143  | -0.30233 | 7.74E-05 | 0.000487 |
| 11733088_MAF       | 0.258095 | 7.74E-05 | 0.000487 |
| 11732581_SLC24A5   | 0.378715 | 7.74E-05 | 0.000487 |
| 11762349_ZNF254    | 0.337482 | 7.76E-05 | 0.000488 |
| 11745431_SVIL      | 0.361196 | 7.77E-05 | 0.000488 |
| 11732554_FAIM      | -0.48372 | 7.77E-05 | 0.000488 |
| 11741829_FAIM      | -0.48372 | 7.77E-05 | 0.000488 |
| 11759657_TOM1L1    | 0.324028 | 7.77E-05 | 0.000488 |
| 11728034_TBC1D7    | -0.36877 | 7.77E-05 | 0.000488 |
| 11742855_ASNSD1    | 0.362241 | 7.77E-05 | 0.000489 |
| 11744782_MORC4     | 0.329364 | 7.77E-05 | 0.000489 |
| 11763522_RYR2      | 0.728089 | 7.78E-05 | 0.000489 |
| 11717217_STK10     | -0.35076 | 7.78E-05 | 0.000489 |
| 11728944_LST1      | 0.430045 | 7.79E-05 | 0.000489 |
| 11736583_TRIM36    | 0.460188 | 7.80E-05 | 0.00049  |
| 11756928_TBCD      | -0.31708 | 7.80E-05 | 0.00049  |
| 11725014_MAP9      | 0.419057 | 7.81E-05 | 0.00049  |
| 11754670_SLC35B2   | -0.45936 | 7.81E-05 | 0.00049  |
| 11728130_DNAAF5    | -0.30246 | 7.81E-05 | 0.00049  |
| 11716147_CHMP7     | -0.38227 | 7.81E-05 | 0.00049  |
| 11757709_MRPL2     | -0.47688 | 7.82E-05 | 0.000491 |
| 11728554_ATP6V1E2  | -0.65204 | 7.82E-05 | 0.000491 |
| 11734871_COMT      | 0.292926 | 7.82E-05 | 0.000491 |
| 11719929_KDM5B     | 0.378364 | 7.83E-05 | 0.000491 |
| 11753095_SLC22A15  | 0.88371  | 7.83E-05 | 0.000491 |
| 11750503_TM9SF4    | 0.326161 | 7.84E-05 | 0.000492 |
| 11721821_SRPK2     | 0.267624 | 7.84E-05 | 0.000492 |
| 11737990_CEP170 // | 0.301029 | 7.85E-05 | 0.000492 |
| 11728386_SIX5      | -0.58884 | 7.85E-05 | 0.000492 |
| 11740382_RBL1      | -0.4563  | 7.86E-05 | 0.000492 |
| 11717256_PIM1      | -0.81901 | 7.86E-05 | 0.000493 |
| 11723621_C7orf60   | 0.381246 | 7.86E-05 | 0.000493 |
| 11755330_TMEM129   | -0.59489 | 7.87E-05 | 0.000493 |
| 11748357_CEP70     | -0.33729 | 7.87E-05 | 0.000493 |
| 11735678_LRTOMT    | 0.349282 | 7.88E-05 | 0.000494 |
| 11723311_C6orf136  | -0.31583 | 7.88E-05 | 0.000494 |

|                    |          |          |          |
|--------------------|----------|----------|----------|
| 11757742_PLEKHB2   | 0.289943 | 7.88E-05 | 0.000494 |
| 11720616_DNM1      | -0.39523 | 7.88E-05 | 0.000494 |
| 11734874_PPFIBP1   | -0.31375 | 7.89E-05 | 0.000494 |
| 11740214_TBLIX     | -0.31959 | 7.89E-05 | 0.000494 |
| 11726268_KDM4C     | 0.320015 | 7.89E-05 | 0.000494 |
| 11755058_BAZ1A     | 0.371703 | 7.90E-05 | 0.000495 |
| 11723683_METTL16   | -0.30822 | 7.90E-05 | 0.000495 |
| 11740747_DNMT3A    | 0.435952 | 7.91E-05 | 0.000495 |
| 11734077_TNRC6C    | 0.433741 | 7.91E-05 | 0.000495 |
| 11742677_PTBP1     | -0.25616 | 7.91E-05 | 0.000495 |
| 11736130_SRSF5     | -0.3706  | 7.91E-05 | 0.000495 |
| 11718884_ARL5A     | 0.294832 | 7.92E-05 | 0.000495 |
| 11719748_CDV3      | 0.275024 | 7.92E-05 | 0.000495 |
| 11728029_PWWP2A    | 0.351725 | 7.95E-05 | 0.000497 |
| 11755542_ZNF671    | 0.704697 | 7.96E-05 | 0.000497 |
| 11753817_HMGA1     | -0.30547 | 7.97E-05 | 0.000498 |
| 11751292_PIAS2     | 0.291262 | 7.98E-05 | 0.000499 |
| 11759838_ZNF506    | 0.353765 | 7.98E-05 | 0.000499 |
| 11744033_S100A11   | 0.270072 | 7.98E-05 | 0.000499 |
| 11735761_NAA11     | 0.376563 | 7.98E-05 | 0.000499 |
| 11728093_MAP3K1    | 0.343982 | 8.00E-05 | 0.0005   |
| 11732275_CCL5      | 0.615307 | 8.00E-05 | 0.0005   |
| 11754430_HPS6      | -0.28732 | 8.00E-05 | 0.0005   |
| 11722638_ANKRD28   | 0.277115 | 8.00E-05 | 0.0005   |
| 11749424_SMPD4     | -0.39442 | 8.01E-05 | 0.0005   |
| 11742424_POTEM     | 0.316996 | 8.01E-05 | 0.0005   |
| 11750676_ZNF567    | 0.612776 | 8.02E-05 | 0.0005   |
| 11731984_CERKL     | 0.525695 | 8.03E-05 | 0.000501 |
| 11716604_KBTBD2    | 0.270626 | 8.04E-05 | 0.000501 |
| 11751145_UFL1      | -0.46985 | 8.04E-05 | 0.000502 |
| 11715791_TUBG1     | -0.28709 | 8.05E-05 | 0.000502 |
| 11760461_SGOL1     | -0.5674  | 8.05E-05 | 0.000502 |
| 11757612_ASRGL1    | -0.33766 | 8.05E-05 | 0.000502 |
| 11736226_SPATS2    | 0.409677 | 8.07E-05 | 0.000503 |
| 11763965_MDN1      | 0.291842 | 8.09E-05 | 0.000504 |
| 11719902_PHF11     | 0.324302 | 8.09E-05 | 0.000505 |
| 11722683_MECP2     | 0.283635 | 8.10E-05 | 0.000505 |
| 11730794_MRPL4     | -0.29839 | 8.10E-05 | 0.000505 |
| 11740393_TNFRSF9   | 0.415914 | 8.11E-05 | 0.000505 |
| 11749004_PEX6      | 0.282298 | 8.11E-05 | 0.000505 |
| 11755331_ANK2      | -0.39856 | 8.11E-05 | 0.000505 |
| 11752789_IMMT      | -0.33942 | 8.12E-05 | 0.000506 |
| 11727348_BAIAP2L2  | -0.31744 | 8.14E-05 | 0.000507 |
| 11742928_AP3D1     | -0.28075 | 8.14E-05 | 0.000507 |
| 11725884_CNEP1R1   | 0.365006 | 8.16E-05 | 0.000508 |
| 11760232_SFSWAP    | 0.364648 | 8.17E-05 | 0.000509 |
| 11746292_CPOX      | -0.44733 | 8.17E-05 | 0.000509 |
| 11747052_GALNT4 // | -0.28116 | 8.17E-05 | 0.000509 |
| 11753825_FKBP1A // | 0.270247 | 8.17E-05 | 0.000509 |
| 11757616_C14orf1   | -0.35112 | 8.18E-05 | 0.000509 |
| 11723213_MEF2C     | 0.453518 | 8.18E-05 | 0.000509 |

|                    |          |          |          |
|--------------------|----------|----------|----------|
| 11732583_NUDT22    | -0.33596 | 8.19E-05 | 0.000509 |
| 11728609_BBS7      | 0.41013  | 8.19E-05 | 0.000509 |
| 11729290_HAND2     | -0.55026 | 8.19E-05 | 0.000509 |
| 11744122_FAM156A / | -0.4055  | 8.19E-05 | 0.000509 |
| 11724298_DDX31     | 0.326893 | 8.19E-05 | 0.000509 |
| 11724012_SIKE1     | -0.41453 | 8.19E-05 | 0.000509 |
| 11717339_SORD      | -0.31208 | 8.19E-05 | 0.000509 |
| 11728493_ZNF197    | 0.466859 | 8.19E-05 | 0.000509 |
| 11743571_ANKRD17   | 0.345253 | 8.20E-05 | 0.00051  |
| 11719404_HIPK2     | 0.315591 | 8.21E-05 | 0.00051  |
| 11735243_ZC3H12C   | 0.62465  | 8.21E-05 | 0.00051  |
| 11743176_RSFI      | 0.441637 | 8.21E-05 | 0.00051  |
| 11750042_ANXA5     | 0.267221 | 8.22E-05 | 0.000511 |
| 11720708_PPARG     | -0.4086  | 8.22E-05 | 0.000511 |
| 11728672_UBE2H     | 0.306756 | 8.22E-05 | 0.000511 |
| 11738200_CDC102B   | -0.41014 | 8.23E-05 | 0.000511 |
| 11752664_S1PR5     | -0.48607 | 8.24E-05 | 0.000511 |
| 11752707_TMPRSS9   | -0.30827 | 8.24E-05 | 0.000512 |
| 11749119_FGD4      | 0.507229 | 8.26E-05 | 0.000513 |
| 11733153_UBTD2     | -0.32754 | 8.26E-05 | 0.000513 |
| 11740637_GPR19     | 0.445605 | 8.26E-05 | 0.000513 |
| 11715515_PSMD3     | -0.33994 | 8.27E-05 | 0.000513 |
| 11718340_DAZAP2    | -0.35507 | 8.27E-05 | 0.000513 |
| 11754048_ERH       | -0.28091 | 8.27E-05 | 0.000513 |
| 11757927_DCUN1D4   | -0.28692 | 8.28E-05 | 0.000513 |
| 11725533_ZNF618    | -0.26705 | 8.28E-05 | 0.000514 |
| 11717571_CPSF3     | -0.26227 | 8.29E-05 | 0.000514 |
| 11752463_ANKLE1    | -0.32623 | 8.29E-05 | 0.000514 |
| 11743757_MKRN2     | 0.289755 | 8.30E-05 | 0.000514 |
| 11733145_ZBTB14    | -0.74904 | 8.30E-05 | 0.000515 |
| 11753590_COMMD9    | -0.29007 | 8.30E-05 | 0.000515 |
| 11744263_RAC2      | 0.351144 | 8.31E-05 | 0.000515 |
| 11732707_FGFR1     | -0.29    | 8.31E-05 | 0.000515 |
| 11755306_ZNF410    | 0.331381 | 8.31E-05 | 0.000515 |
| 11762859_TIMM23 // | 0.613842 | 8.32E-05 | 0.000515 |
| 11754060_DAD1      | -0.28478 | 8.32E-05 | 0.000516 |
| 11739156_TMX4      | 0.282134 | 8.32E-05 | 0.000516 |
| 11750142_YY1AP1    | 0.367826 | 8.33E-05 | 0.000516 |
| 11726735_TLK2      | 0.28821  | 8.34E-05 | 0.000516 |
| 11750408_ADGRE5    | 0.362589 | 8.34E-05 | 0.000516 |
| 11750970_LOX       | 0.306833 | 8.34E-05 | 0.000516 |
| 11745243_NBPFI1 // | 0.328793 | 8.34E-05 | 0.000516 |
| 11721272_LRRC59    | -0.31637 | 8.35E-05 | 0.000517 |
| 11719787_PSMB5     | -0.3068  | 8.36E-05 | 0.000517 |
| 11726781_ADD2      | -0.27398 | 8.37E-05 | 0.000518 |
| 11734971_MCM8      | -0.32996 | 8.37E-05 | 0.000518 |
| 11724034_CD2AP     | 0.524221 | 8.37E-05 | 0.000518 |
| 11715472_SRPR      | -0.34556 | 8.38E-05 | 0.000518 |
| 11730126_SPICE1    | -0.42155 | 8.38E-05 | 0.000518 |
| 11757908_RALGDS    | 0.263349 | 8.38E-05 | 0.000518 |
| 11746312_ZNF326    | -0.26001 | 8.38E-05 | 0.000518 |

|                    |          |          |          |
|--------------------|----------|----------|----------|
| 11720083_NUDT22    | -0.35781 | 8.38E-05 | 0.000518 |
| 11749423_LIG1      | -0.36269 | 8.39E-05 | 0.000518 |
| 11719401_Clorf122  | 0.3162   | 8.39E-05 | 0.000519 |
| 11722905_TBC1D9    | 0.444215 | 8.40E-05 | 0.000519 |
| 11739474_NAB1      | 0.366678 | 8.40E-05 | 0.000519 |
| 11731082_RNF144B   | 0.771508 | 8.40E-05 | 0.000519 |
| 11756037_NGLY1     | 0.370828 | 8.41E-05 | 0.000519 |
| 11747358_CIAPIN1   | -0.36325 | 8.41E-05 | 0.000519 |
| 11733809_ARMCX5-GP | -0.49974 | 8.41E-05 | 0.000519 |
| 11739396_UGT8      | -0.39947 | 8.41E-05 | 0.000519 |
| 11745844_MRPL18    | -0.27559 | 8.42E-05 | 0.00052  |
| 11724776_PGM2L1    | 0.501685 | 8.42E-05 | 0.00052  |
| 11720797_TIMM9     | 0.280983 | 8.43E-05 | 0.00052  |
| 11747977_ZNF180    | 0.398809 | 8.43E-05 | 0.00052  |
| 11759766_MRI       | 0.465159 | 8.44E-05 | 0.000521 |
| 11736548_FANCD2 // | -0.61017 | 8.44E-05 | 0.000521 |
| 11716168_MRFAP1L1  | -0.26753 | 8.44E-05 | 0.000521 |
| 11735340_TANC1     | 0.286582 | 8.45E-05 | 0.000521 |
| 11716250_RBFOX2    | 0.3143   | 8.46E-05 | 0.000522 |
| 11719873_LTV1      | 0.362147 | 8.46E-05 | 0.000522 |
| 11744522_BOD1      | -0.28781 | 8.47E-05 | 0.000522 |
| 11746106_CDC16     | 0.302715 | 8.47E-05 | 0.000522 |
| 11725160_FBXW2     | -0.53698 | 8.47E-05 | 0.000522 |
| 11721053_KLHL42    | -0.29921 | 8.48E-05 | 0.000523 |
| 11755008_SETDB2    | 0.476131 | 8.49E-05 | 0.000523 |
| 11729994_SEMA6B    | -0.3833  | 8.49E-05 | 0.000523 |
| 11753356_TUBB      | -0.28779 | 8.49E-05 | 0.000523 |
| 11752420_NPIPB6    | 0.460891 | 8.50E-05 | 0.000524 |
| 11751764_LDAH      | 0.446031 | 8.50E-05 | 0.000524 |
| 11752239_ZC3H15    | 0.269928 | 8.52E-05 | 0.000525 |
| 11755622_ROBO4     | -0.57904 | 8.53E-05 | 0.000525 |
| 11754120_ARL5A     | 0.306815 | 8.53E-05 | 0.000525 |
| 11740008_CHRFAM7A  | -0.48542 | 8.54E-05 | 0.000526 |
| 11763516_CPT1C     | -0.48563 | 8.54E-05 | 0.000526 |
| 11736016_ARCN1     | 0.300817 | 8.55E-05 | 0.000526 |
| 11750639_FBXO11    | 0.26935  | 8.55E-05 | 0.000526 |
| 11763816	EIF3M     | 0.311598 | 8.55E-05 | 0.000526 |
| 11739917_CSNK1D    | 0.291244 | 8.56E-05 | 0.000527 |
| 11738453_ACTBL2    | 0.722181 | 8.56E-05 | 0.000527 |
| 11730081_MTO1      | 0.281371 | 8.57E-05 | 0.000527 |
| 11762311_SPC24     | -0.73861 | 8.58E-05 | 0.000528 |
| 11756092_SERGEF    | -0.32566 | 8.58E-05 | 0.000528 |
| 11733838_UTP14A // | 0.279768 | 8.58E-05 | 0.000528 |
| 11748825_TTL12     | -0.43105 | 8.59E-05 | 0.000528 |
| 11721244_BGN       | -0.38447 | 8.59E-05 | 0.000528 |
| 11722825_NCAPG     | -0.41176 | 8.62E-05 | 0.00053  |
| 11753125_SF3B3     | -0.34305 | 8.62E-05 | 0.00053  |
| 11726426_DENND4C   | 0.352029 | 8.64E-05 | 0.000531 |
| 11725237_RBPMS2    | -0.37648 | 8.64E-05 | 0.000531 |
| 11715458_COX8A     | -0.27746 | 8.65E-05 | 0.000531 |
| 11719468_PRRF31    | -0.29254 | 8.65E-05 | 0.000531 |

|                    |          |          |          |
|--------------------|----------|----------|----------|
| 11739183_MTRF1L    | 0.462287 | 8.65E-05 | 0.000531 |
| 11754221_FAM104B   | -0.32422 | 8.65E-05 | 0.000531 |
| 11753258_PPT2 ///  | -0.26752 | 8.65E-05 | 0.000531 |
| 11751751_HNRNPH3   | -0.30009 | 8.65E-05 | 0.000531 |
| 11745450_AUH       | 0.3539   | 8.66E-05 | 0.000532 |
| 11742960_MEPCE     | -0.32834 | 8.66E-05 | 0.000532 |
| 11716698_HBP1      | 0.307041 | 8.69E-05 | 0.000533 |
| 11747780_GOLGA8DP  | 0.318532 | 8.70E-05 | 0.000534 |
| 11754130_BANF1     | -0.89099 | 8.70E-05 | 0.000534 |
| 11727136_PUS7L     | -0.3362  | 8.70E-05 | 0.000534 |
| 11723466_MRPS11    | -0.26796 | 8.70E-05 | 0.000534 |
| 11726151_PPIP5K2   | -0.35623 | 8.73E-05 | 0.000535 |
| 11739627_DDX52     | 0.305634 | 8.73E-05 | 0.000536 |
| 11739138_RNF26     | -0.36945 | 8.74E-05 | 0.000536 |
| 11721884_LINC00431 | -0.34829 | 8.74E-05 | 0.000536 |
| 11728259_DIEXF     | 0.284416 | 8.74E-05 | 0.000536 |
| 11720254_CNNM4     | -0.6178  | 8.74E-05 | 0.000536 |
| 11724595_RP2       | 0.376379 | 8.74E-05 | 0.000536 |
| 11758965_ATG4C     | -0.29737 | 8.74E-05 | 0.000536 |
| 11747240_DPH1 ///  | 0.356583 | 8.74E-05 | 0.000536 |
| 11727797_NDFIP2    | -0.45881 | 8.75E-05 | 0.000536 |
| 11748059_EAF1      | 0.61147  | 8.75E-05 | 0.000536 |
| 11719649_ALS2      | 0.443841 | 8.75E-05 | 0.000536 |
| 11748863_ARL6IP5   | 0.259804 | 8.76E-05 | 0.000536 |
| 11733560_PPP1R21   | 0.379975 | 8.76E-05 | 0.000536 |
| 11725509_SLC7A6    | 0.35422  | 8.76E-05 | 0.000536 |
| 11730551_STAC      | 0.565044 | 8.76E-05 | 0.000536 |
| 11716531_ELAVL1    | -0.46296 | 8.76E-05 | 0.000537 |
| 11719118_TPBG      | 0.413725 | 8.77E-05 | 0.000537 |
| 11733479_SUPT20H   | 0.269583 | 8.79E-05 | 0.000538 |
| 11750775_DENND1B   | 0.38882  | 8.80E-05 | 0.000538 |
| 11749135_BRD3      | -0.3949  | 8.80E-05 | 0.000538 |
| 11716261_AP2B1     | -0.29828 | 8.80E-05 | 0.000539 |
| 11739744_MXI1      | -0.30875 | 8.81E-05 | 0.000539 |
| 11748907_RARRES3   | 0.561592 | 8.81E-05 | 0.000539 |
| 11762891_BAGE      | 0.505035 | 8.82E-05 | 0.000539 |
| 11716838_CDV3      | 0.273955 | 8.82E-05 | 0.000539 |
| 11739618_PTPN3     | -0.62171 | 8.83E-05 | 0.00054  |
| 11745848_TJP2      | 0.349848 | 8.84E-05 | 0.00054  |
| 11735373_NETO1     | 0.536294 | 8.86E-05 | 0.000541 |
| 11719941_DSCR3     | 0.351577 | 8.86E-05 | 0.000541 |
| 11717209_RXRB      | -0.32753 | 8.86E-05 | 0.000542 |
| 11753911_TMEM242   | -0.39881 | 8.86E-05 | 0.000542 |
| 11717750_CD320     | -0.31204 | 8.87E-05 | 0.000542 |
| 11755593_ATG13     | -0.32329 | 8.87E-05 | 0.000542 |
| 11718189_FOXJ2     | -0.49702 | 8.88E-05 | 0.000542 |
| 11739271_PAK2      | -0.40623 | 8.88E-05 | 0.000542 |
| 11747339_ABCB9     | 0.527752 | 8.88E-05 | 0.000542 |
| 11729193_MYNN      | 0.440616 | 8.88E-05 | 0.000542 |
| 11741150_NRCAM     | 0.350998 | 8.89E-05 | 0.000543 |
| 11757564_ADI1      | -0.33266 | 8.89E-05 | 0.000543 |

|                   |          |          |          |
|-------------------|----------|----------|----------|
| 11719032_FADS3    | 0.361199 | 8.90E-05 | 0.000543 |
| 11730444_CCNJ     | 0.413021 | 8.90E-05 | 0.000543 |
| 11742713_TM223    | -0.29677 | 8.90E-05 | 0.000543 |
| 11734103_FGGY     | 0.353362 | 8.90E-05 | 0.000543 |
| 11721488_DLC1     | 0.450337 | 8.91E-05 | 0.000544 |
| 11728263_LUC7L    | 0.475885 | 8.91E-05 | 0.000544 |
| 11724139_SACS     | -0.33319 | 8.91E-05 | 0.000544 |
| 11750334_REL      | 0.395178 | 8.92E-05 | 0.000544 |
| 11722314_RAPGEF6  | 0.359932 | 8.93E-05 | 0.000544 |
| 11758854_ATL3     | -0.29948 | 8.93E-05 | 0.000544 |
| 11755175_HSPA12A  | -0.51415 | 8.93E-05 | 0.000544 |
| 11718769_LAMTOR3  | -0.47105 | 8.93E-05 | 0.000545 |
| 11755406_NPLOC4   | 0.274327 | 8.94E-05 | 0.000545 |
| 11716150_PMEPA1   | 0.605831 | 8.94E-05 | 0.000545 |
| 11718738_ST3GAL1  | 0.36063  | 8.94E-05 | 0.000545 |
| 11751269_SUPT3H   | 0.505783 | 8.95E-05 | 0.000545 |
| 11731457_MFN1     | 0.272342 | 8.96E-05 | 0.000546 |
| 11758820_DNAJC10  | -0.59944 | 8.98E-05 | 0.000547 |
| 11744926_KTN1     | 0.259064 | 8.98E-05 | 0.000547 |
| 11751217_CEACAM1  | 0.432593 | 8.98E-05 | 0.000547 |
| 11757507_DSP      | -0.34252 | 8.99E-05 | 0.000547 |
| 11736141_ITSN1    | -0.31634 | 9.00E-05 | 0.000548 |
| 11751502_SLC25A19 | -0.30996 | 9.00E-05 | 0.000548 |
| 11759345_RHOJ     | 0.487656 | 9.00E-05 | 0.000548 |
| 11718727_ZNF655   | 0.302867 | 9.00E-05 | 0.000548 |
| 11757905_KRT18    | 0.300919 | 9.02E-05 | 0.000549 |
| 11727713_KCNJ12   | 0.603857 | 9.04E-05 | 0.00055  |
| 11721361_FAM172A  | -0.2743  | 9.04E-05 | 0.00055  |
| 11747389_SRSF5    | -0.31063 | 9.05E-05 | 0.000551 |
| 11727411_MRPL19   | -0.29561 | 9.06E-05 | 0.000551 |
| 11723272_FEM1C    | -0.33114 | 9.06E-05 | 0.000551 |
| 11732490_NPHP3    | 0.489715 | 9.07E-05 | 0.000551 |
| 11756829_HEX A    | 0.295346 | 9.07E-05 | 0.000552 |
| 11721926_BCL9     | -0.30762 | 9.08E-05 | 0.000552 |
| 11722712_PPOX     | -0.28868 | 9.08E-05 | 0.000552 |
| 11741192_RBKS     | 0.547947 | 9.09E-05 | 0.000552 |
| 11724435_TPK1     | 0.400764 | 9.09E-05 | 0.000552 |
| 11757639_WDR61    | 0.27081  | 9.09E-05 | 0.000552 |
| 11716802_SETD5    | 0.363329 | 9.09E-05 | 0.000552 |
| 11721429_TBX3     | 0.484655 | 9.11E-05 | 0.000553 |
| 11718981_TAGLN2   | -0.30406 | 9.12E-05 | 0.000554 |
| 11720895_SOS1     | 0.277379 | 9.12E-05 | 0.000554 |
| 11722331_INO80    | 0.320805 | 9.12E-05 | 0.000554 |
| 11749793_ANXA4    | 0.336183 | 9.13E-05 | 0.000554 |
| 11719334_RCBTB1   | -0.36661 | 9.13E-05 | 0.000554 |
| 11726988_EIF2AK1  | -0.28138 | 9.13E-05 | 0.000554 |
| 11733184_OSMR     | 0.794077 | 9.15E-05 | 0.000555 |
| 11744375_C20orf27 | -0.27007 | 9.17E-05 | 0.000556 |
| 11725619_GAD1     | 1.072038 | 9.17E-05 | 0.000556 |
| 11722184_SPTSSA   | -0.36807 | 9.17E-05 | 0.000556 |
| 11732466_CXCL11   | 0.804198 | 9.18E-05 | 0.000557 |

|                    |          |          |          |
|--------------------|----------|----------|----------|
| 11719583_CNNM3     | -0.58499 | 9.18E-05 | 0.000557 |
| 11732535_FANCD2    | -0.34113 | 9.18E-05 | 0.000557 |
| 11721870_HIF1AN    | -0.27455 | 9.19E-05 | 0.000557 |
| 11740338_AGFG1     | -0.52042 | 9.21E-05 | 0.000559 |
| 11722600_P3H4      | -0.43575 | 9.22E-05 | 0.000559 |
| 11723581_SMIM13    | 0.335136 | 9.22E-05 | 0.000559 |
| 11748706_RALY      | -0.35873 | 9.22E-05 | 0.000559 |
| 11744650_PHLDB1    | 0.307434 | 9.22E-05 | 0.000559 |
| 11723277_CREBZF    | 0.292114 | 9.22E-05 | 0.000559 |
| 11733379_DCAF4L1   | 0.627845 | 9.23E-05 | 0.000559 |
| 11749155_NET1      | 0.307135 | 9.24E-05 | 0.00056  |
| 11733930_LDHAL6B   | -0.39914 | 9.25E-05 | 0.000561 |
| 11733329_CEP57L1   | -0.79464 | 9.27E-05 | 0.000561 |
| 11754524_TFPI2     | 0.364698 | 9.27E-05 | 0.000561 |
| 11739421_RCC1      | -0.49121 | 9.28E-05 | 0.000562 |
| 11757054_TMEM43    | 0.283914 | 9.28E-05 | 0.000562 |
| 11729722_PIAS2     | 0.298391 | 9.30E-05 | 0.000563 |
| 11746333_DENND4C   | 0.414062 | 9.31E-05 | 0.000563 |
| 11743802_RC3H2     | 0.313454 | 9.31E-05 | 0.000564 |
| 11760097_GTF2I /// | -0.29349 | 9.32E-05 | 0.000564 |
| 11722923_FAM122B   | -0.3159  | 9.32E-05 | 0.000564 |
| 11720511_CARHSP1   | -0.44761 | 9.33E-05 | 0.000564 |
| 11723858_DNAAF2    | -0.57895 | 9.33E-05 | 0.000564 |
| 11723254_HAT1      | -0.40747 | 9.34E-05 | 0.000565 |
| 11752349_TRAPPC11  | 0.294741 | 9.34E-05 | 0.000565 |
| 11750638_SF3A1     | -0.30907 | 9.34E-05 | 0.000565 |
| 11763688_FMNL1     | -0.35591 | 9.34E-05 | 0.000565 |
| 11716598_CHMP1A    | -0.29783 | 9.34E-05 | 0.000565 |
| 11763512_RMDN2     | 0.434753 | 9.34E-05 | 0.000565 |
| 11721534_TAF2      | 0.260756 | 9.34E-05 | 0.000565 |
| 11727009_ALDH7A1   | -0.30024 | 9.35E-05 | 0.000565 |
| 11734468_LOC101929 | -0.44151 | 9.35E-05 | 0.000565 |
| 11721323_TBC1D10B  | -0.26714 | 9.35E-05 | 0.000565 |
| 11745377_PTRF      | -0.34027 | 9.36E-05 | 0.000565 |
| 11724492_LIG1      | -0.42502 | 9.36E-05 | 0.000565 |
| 11763514_RCAN1     | -0.30121 | 9.36E-05 | 0.000565 |
| 11723258_PKMYT1    | -0.3552  | 9.36E-05 | 0.000565 |
| 11732391_EHMT2     | -0.44185 | 9.37E-05 | 0.000566 |
| 11751346_RBM22     | 0.282543 | 9.37E-05 | 0.000566 |
| 11747724_NUDT12    | -0.41678 | 9.39E-05 | 0.000567 |
| 11743419_ZKSCAN5   | 0.425105 | 9.39E-05 | 0.000567 |
| 11717077_ZFAND6    | 0.284208 | 9.39E-05 | 0.000567 |
| 11759185_GPR153    | -0.27091 | 9.40E-05 | 0.000567 |
| 11728784_ING3      | 0.384357 | 9.41E-05 | 0.000568 |
| 11739157_TMX4      | 0.293645 | 9.41E-05 | 0.000568 |
| 11757903_COL4A5    | 0.569598 | 9.42E-05 | 0.000568 |
| 11757166_HSPA8     | -0.34071 | 9.42E-05 | 0.000568 |
| 11724260_TRIO      | 0.517104 | 9.43E-05 | 0.000569 |
| 11717686_JAK1      | 0.256996 | 9.43E-05 | 0.000569 |
| 11749927_GNAQ      | 0.320494 | 9.45E-05 | 0.00057  |
| 11726537_KANK2     | -0.30377 | 9.45E-05 | 0.00057  |

|                    |          |          |          |
|--------------------|----------|----------|----------|
| 11715815_PSMC3     | -0.30838 | 9.46E-05 | 0.00057  |
| 11717214_NSMAF     | 0.328599 | 9.46E-05 | 0.00057  |
| 11753571_HMGA1     | -0.30743 | 9.47E-05 | 0.00057  |
| 11759559_SLC25A37  | -0.40218 | 9.47E-05 | 0.00057  |
| 11719851_RNF139    | 0.337866 | 9.48E-05 | 0.000571 |
| 11726708_FAM195B   | -0.39415 | 9.48E-05 | 0.000571 |
| 11743712_ARID4A    | 0.615102 | 9.50E-05 | 0.000572 |
| 11728132_EXOC8     | 0.321122 | 9.51E-05 | 0.000572 |
| 11715747_MINOS1-NE | -0.33257 | 9.51E-05 | 0.000572 |
| 11753715_MGST2     | 0.288393 | 9.51E-05 | 0.000573 |
| 11744440_CDK5RAP3  | -0.26722 | 9.52E-05 | 0.000573 |
| 11745998_ZNF252P   | 0.286879 | 9.53E-05 | 0.000573 |
| 11746818_PGK1      | -0.29454 | 9.53E-05 | 0.000573 |
| 11732210_MON2      | 0.308917 | 9.53E-05 | 0.000573 |
| 11727425_CANX      | -0.26817 | 9.54E-05 | 0.000574 |
| 11718065_PVRL2     | 0.310755 | 9.55E-05 | 0.000575 |
| 11736726_GEN1      | -0.31575 | 9.55E-05 | 0.000575 |
| 11721113_RPL41     | -0.31693 | 9.55E-05 | 0.000575 |
| 11728974_ACYP1     | -0.3326  | 9.56E-05 | 0.000575 |
| 11756597_TRMT44    | 0.343554 | 9.56E-05 | 0.000575 |
| 11751920_STARD13   | 0.369598 | 9.56E-05 | 0.000575 |
| 11747232_FGD4      | 0.50697  | 9.56E-05 | 0.000575 |
| 11723669_SEMA3C    | 0.400031 | 9.57E-05 | 0.000575 |
| 11748020_XPNPEP1   | 0.350141 | 9.57E-05 | 0.000575 |
| 11728508_FKTN      | -0.46083 | 9.58E-05 | 0.000576 |
| 11719206_ANKLE2    | 0.309827 | 9.58E-05 | 0.000576 |
| 11729189_MAX       | 0.286327 | 9.59E-05 | 0.000576 |
| 11747134_TRPS1     | 0.310048 | 9.59E-05 | 0.000576 |
| 11730938_PYCR1     | -0.33284 | 9.59E-05 | 0.000576 |
| 11745040_SUSD1     | 0.330028 | 9.60E-05 | 0.000576 |
| 11753597_SRP9      | -0.26754 | 9.60E-05 | 0.000576 |
| 11715884_TMEM248   | 0.321651 | 9.60E-05 | 0.000576 |
| 11751315_SLC39A1   | -0.37358 | 9.61E-05 | 0.000577 |
| 11748459_ARL13B    | 0.347365 | 9.61E-05 | 0.000577 |
| 11742835_UBXN4     | 0.399886 | 9.61E-05 | 0.000577 |
| 11725349_TFDP1     | -0.28506 | 9.62E-05 | 0.000577 |
| 11727186_WNT5A     | 0.252995 | 9.64E-05 | 0.000578 |
| 11748742_ZNF461    | 0.964901 | 9.64E-05 | 0.000578 |
| 11729648_CENPU     | -0.38956 | 9.64E-05 | 0.000578 |
| 11758577_ELOVL7    | -0.37516 | 9.65E-05 | 0.000578 |
| 11755606_IFI30     | 0.297873 | 9.65E-05 | 0.000578 |
| 11742733_MORF4L1   | 0.250037 | 9.65E-05 | 0.000579 |
| 11740689_PHACTR2   | 0.325402 | 9.66E-05 | 0.000579 |
| 11742797_C18orf21  | 0.288634 | 9.66E-05 | 0.000579 |
| 11748230_CORO1A    | -0.38047 | 9.66E-05 | 0.000579 |
| 11742925_LAMTOR1   | 0.293178 | 9.66E-05 | 0.000579 |
| 11755520_CERS6     | -0.42905 | 9.67E-05 | 0.000579 |
| 11729989_CACNA1A   | -0.32847 | 9.67E-05 | 0.000579 |
| 11733643_NECAP2    | 0.353264 | 9.67E-05 | 0.000579 |
| 11756743_LAMTOR1   | 0.295122 | 9.67E-05 | 0.000579 |
| 11721282_POLR2H    | -0.30863 | 9.68E-05 | 0.00058  |



|                  |     |          |          |          |
|------------------|-----|----------|----------|----------|
| 11723322_DDX11   | /// | -0.30193 | 9.68E-05 | 0.00058  |
| 11744345_TUBA1A  | //  | -0.25634 | 9.69E-05 | 0.00058  |
| 11719157_ASRTL1  |     | -0.39912 | 9.69E-05 | 0.00058  |
| 11743122_PRKAR1B |     | -0.34467 | 9.69E-05 | 0.00058  |
| 11720317_DAD1    |     | -0.31015 | 9.69E-05 | 0.00058  |
| 11740178_ANKLE1  |     | -0.36022 | 9.70E-05 | 0.000581 |
| 11754520_MBNL2   |     | 0.262241 | 9.70E-05 | 0.000581 |
| 11736566_LEF1    |     | -0.40513 | 9.71E-05 | 0.000581 |
| 11752296_DDX3X   |     | 0.344144 | 9.71E-05 | 0.000581 |
| 11717882_ZNF512  |     | -0.32743 | 9.72E-05 | 0.000581 |
| 11733186_OSMR    |     | 0.472374 | 9.72E-05 | 0.000581 |
| 11740377_PXMP4   |     | -0.45352 | 9.73E-05 | 0.000582 |
| 11715718_ZNHIT1  |     | 0.281761 | 9.73E-05 | 0.000582 |
| 11756478_UTP11L  |     | -0.31347 | 9.74E-05 | 0.000583 |
| 11756213_PGK1    |     | -0.27215 | 9.74E-05 | 0.000583 |
| 11726697_ZBTB7A  |     | 0.259411 | 9.74E-05 | 0.000583 |
| 11729414_LRRC8A  |     | -0.33951 | 9.76E-05 | 0.000583 |
| 11729674_SPRTN   |     | 0.311817 | 9.76E-05 | 0.000583 |
| 11757113_SNHG1   |     | -0.28816 | 9.76E-05 | 0.000583 |
| 11744047_MAP1B   |     | 0.262191 | 9.77E-05 | 0.000584 |
| 11726071_MAP4K4  |     | -0.3355  | 9.77E-05 | 0.000584 |
| 11757369_MAN2B1  |     | 0.387477 | 9.79E-05 | 0.000585 |
| 11739800_VCIPI1  |     | 0.311427 | 9.79E-05 | 0.000585 |
| 11754301_ATP2A2  |     | -0.46006 | 9.79E-05 | 0.000585 |
| 11760031_NSUN5P1 | /   | 0.317612 | 9.80E-05 | 0.000585 |
| 11716390_BACE1   |     | 0.417263 | 9.81E-05 | 0.000586 |
| 11750188_AGPAT1  |     | -0.38986 | 9.81E-05 | 0.000586 |
| 11739942_SEPSECS |     | -0.3465  | 9.81E-05 | 0.000586 |
| 11715706_MGEA5   |     | 0.427035 | 9.82E-05 | 0.000586 |
| 11726023_EDN1    |     | 0.649949 | 9.83E-05 | 0.000587 |
| 11763521_PPIC    |     | 0.485832 | 9.83E-05 | 0.000587 |
| 11746240_RWDD2A  |     | 0.305006 | 9.83E-05 | 0.000587 |
| 11756881_PCDH20  |     | 0.511604 | 9.83E-05 | 0.000587 |
| 11734776_CTTN    |     | 0.349953 | 9.84E-05 | 0.000587 |
| 11727497_ZRANB1  |     | 0.323976 | 9.84E-05 | 0.000587 |
| 11721326_C3orf14 |     | -0.28289 | 9.85E-05 | 0.000587 |
| 11727891_PRELP   |     | -0.30474 | 9.85E-05 | 0.000588 |
| 11721159_DRAM2   |     | 0.295841 | 9.86E-05 | 0.000588 |
| 11720089_NRSN2   |     | -0.43368 | 9.86E-05 | 0.000588 |
| 11741648_MBNL1   |     | 0.265211 | 9.86E-05 | 0.000588 |
| 11728316_CD274   |     | 1.036855 | 9.86E-05 | 0.000588 |
| 11742261_TTC26   |     | 0.375085 | 9.86E-05 | 0.000588 |
| 11748371_CYP20A1 |     | 0.341432 | 9.87E-05 | 0.000588 |
| 11721560_AHCYL2  |     | 0.302944 | 9.90E-05 | 0.00059  |
| 11733375_MSI2    |     | 0.437858 | 9.92E-05 | 0.000591 |
| 11759450_DDI2    |     | 0.495586 | 9.94E-05 | 0.000592 |
| 11722197_NMT1    |     | -0.39815 | 9.94E-05 | 0.000592 |
| 11739395_MFHAS1  |     | 0.319368 | 9.98E-05 | 0.000594 |
| 11718266_SMAD3   |     | -0.3482  | 9.98E-05 | 0.000594 |
| 11718966_NUFIP2  |     | 0.311415 | 9.99E-05 | 0.000594 |
| 11748027_MBD3    |     | -0.27984 | 9.99E-05 | 0.000594 |

|                    |          |          |          |
|--------------------|----------|----------|----------|
| 11725680_SMC3      | -0.32048 | 9.99E-05 | 0.000594 |
| 11717189_DNAJA1    | 0.257673 | 9.99E-05 | 0.000594 |
| 11757198_SCAND2P   | 0.360579 | 1.00E-04 | 0.000595 |
| 11723421_BTF3L4    | 0.2932   | 0.0001   | 0.000595 |
| 11749910_EIF2S1    | -0.26786 | 0.0001   | 0.000596 |
| 11725041_FGF2      | 0.358185 | 0.0001   | 0.000596 |
| 11717699_DCAF8     | 0.391707 | 0.0001   | 0.000596 |
| 11727516_RAVR2     | -0.59122 | 0.0001   | 0.000596 |
| 11735269_SLC41A2   | 0.841424 | 0.0001   | 0.000597 |
| 11756647_XPNPEP3   | 0.321823 | 0.0001   | 0.000597 |
| 11731151_LIX1L     | 0.321524 | 0.0001   | 0.000597 |
| 11757654_UCP2      | -0.39186 | 0.000101 | 0.000598 |
| 11757050_TAGLN2    | -0.32429 | 0.000101 | 0.000598 |
| 11719723_CCDC93    | 0.297316 | 0.000101 | 0.000598 |
| 11723600_PHLPP2    | 0.798158 | 0.000101 | 0.000598 |
| 11716716_CTSB      | -0.29958 | 0.000101 | 0.000598 |
| 11726299_LGALS8    | 0.295736 | 0.000101 | 0.000598 |
| 11743756_MKRN2     | 0.344832 | 0.000101 | 0.000598 |
| 11748375_TEK       | 0.50472  | 0.000101 | 0.000599 |
| 11752587_SEMA6B    | -0.30114 | 0.000101 | 0.000599 |
| 11743776_GLT8D2    | 0.277908 | 0.000101 | 0.0006   |
| 11750415_TUBB4B    | -0.26586 | 0.000101 | 0.0006   |
| 11753161_HFE       | -0.31861 | 0.000101 | 0.0006   |
| 11739927_OPA1      | -0.56406 | 0.000101 | 0.000601 |
| 11718429_EMD       | -0.35706 | 0.000101 | 0.000602 |
| 11743482_FAM21A // | 0.319284 | 0.000101 | 0.000602 |
| 11747690_FAM21A // | 0.319284 | 0.000101 | 0.000602 |
| 11719073_HSPE1-MOE | 0.258154 | 0.000101 | 0.000602 |
| 11736656_GPR176    | 0.570372 | 0.000102 | 0.000603 |
| 11756775_KLHL42    | 0.366742 | 0.000102 | 0.000603 |
| 11720805_PAGR1     | -0.45302 | 0.000102 | 0.000603 |
| 11742719_SLTM      | 0.347178 | 0.000102 | 0.000603 |
| 11718542_PARP6     | 0.384555 | 0.000102 | 0.000603 |
| 11740181_PTPN12    | 0.303994 | 0.000102 | 0.000603 |
| 11746796_DAG1      | -0.29675 | 0.000102 | 0.000604 |
| 11728226_CASP7     | -0.31523 | 0.000102 | 0.000604 |
| 11735581_MBNL3     | 0.474037 | 0.000102 | 0.000604 |
| 11726609_MTF2      | 0.503356 | 0.000102 | 0.000604 |
| 11732209_MON2      | 0.377728 | 0.000102 | 0.000605 |
| 11747137_ERAP2     | 0.753154 | 0.000102 | 0.000605 |
| 11747758_RTCA      | 0.273392 | 0.000102 | 0.000605 |
| 11754475_IQCK      | 0.40321  | 0.000102 | 0.000605 |
| 11718288_UBL3      | 0.285656 | 0.000102 | 0.000605 |
| 11735200_N4BP2     | 0.483431 | 0.000102 | 0.000606 |
| 11758158_FOXP1     | 0.334822 | 0.000102 | 0.000606 |
| 11729259_ZNF644    | 0.324903 | 0.000102 | 0.000606 |
| 11715711_AKR1C3    | 0.356244 | 0.000102 | 0.000606 |
| 11747542_MPDU1     | -0.42774 | 0.000103 | 0.000607 |
| 11717016_LAMTOR2   | -0.29676 | 0.000103 | 0.000607 |
| 11728334_ELL       | 0.478574 | 0.000103 | 0.000607 |
| 11757011_SPRYD7    | 0.305959 | 0.000103 | 0.000608 |

|                    |          |          |          |
|--------------------|----------|----------|----------|
| 11759670_CEP57     | -0.44895 | 0.000103 | 0.000608 |
| 11724113_SIX1      | -0.28986 | 0.000103 | 0.000608 |
| 11760913_ASAH2B    | 0.329837 | 0.000103 | 0.000609 |
| 11749674_SHTN1     | 0.404317 | 0.000103 | 0.000609 |
| 11727017_PAPPA     | 0.361626 | 0.000103 | 0.000609 |
| 11756334_ANXA3     | 0.527968 | 0.000103 | 0.000609 |
| 11745988_ADPGK     | -0.35536 | 0.000103 | 0.000609 |
| 11737952_RALGDS    | 0.26263  | 0.000103 | 0.000609 |
| 11752669_SREK1IP1  | 0.317098 | 0.000103 | 0.00061  |
| 11749033_NSMCE4A   | -0.33199 | 0.000103 | 0.00061  |
| 11747761_MAGOH     | -0.31735 | 0.000103 | 0.00061  |
| 11719859_SLC2A4RG  | -0.29114 | 0.000103 | 0.00061  |
| 11721455_SERPINA1  | 0.585837 | 0.000103 | 0.00061  |
| 11763975_MRPS11    | -0.29068 | 0.000103 | 0.000611 |
| 11719789_TUBB2A    | 0.282174 | 0.000103 | 0.000611 |
| 11722215_POLE4     | -0.27009 | 0.000103 | 0.000611 |
| 11747591_GLIPR1    | 0.381971 | 0.000104 | 0.000612 |
| 11720977_WARS2     | 0.433773 | 0.000104 | 0.000612 |
| 11743177_RSFI      | 0.264333 | 0.000104 | 0.000613 |
| 11729697_C2orf69   | 0.488844 | 0.000104 | 0.000613 |
| 11736171_RABL6     | -0.28663 | 0.000104 | 0.000614 |
| 11760537_HEXAX     | 0.28578  | 0.000104 | 0.000614 |
| 11745700_RAET1G // | -0.33854 | 0.000104 | 0.000614 |
| 11715908_MYOG      | 0.359388 | 0.000104 | 0.000614 |
| 11717533_MAN2A2    | 0.266245 | 0.000104 | 0.000615 |
| 11734904_ZNF16     | 0.351895 | 0.000104 | 0.000615 |
| 11750202_LAMP2     | 0.367881 | 0.000104 | 0.000615 |
| 11718736_PCMTD1    | 0.599012 | 0.000104 | 0.000615 |
| 11762056_LOC100133 | 0.366691 | 0.000104 | 0.000615 |
| 11757591_PAN3      | 0.298551 | 0.000104 | 0.000615 |
| 11724993_FAM101B   | -0.5633  | 0.000104 | 0.000616 |
| 11743566_ACBD3     | 0.268948 | 0.000105 | 0.000617 |
| 11723102_GNB4      | -0.24705 | 0.000105 | 0.000617 |
| 11755883_PGPEP1    | 0.577777 | 0.000105 | 0.000617 |
| 11740112_LACC1     | 0.48955  | 0.000105 | 0.000617 |
| 11756464_HDGFRP2   | -0.31988 | 0.000105 | 0.000617 |
| 11717962_KRAS      | -0.32204 | 0.000105 | 0.000618 |
| 11719002_KDELR3    | -0.34731 | 0.000105 | 0.000618 |
| 11723927_PNMA2     | -0.3001  | 0.000105 | 0.000618 |
| 11725213_METTL7B   | -0.37292 | 0.000105 | 0.000618 |
| 11726798_NEXN      | 0.695677 | 0.000105 | 0.000618 |
| 11724486_BFAR      | -0.29812 | 0.000105 | 0.000619 |
| 11743434_CHST11    | 0.440677 | 0.000105 | 0.000619 |
| 11718283	EIF4EBP1  | -0.30646 | 0.000105 | 0.000619 |
| 11722047_LDAH      | 0.502812 | 0.000105 | 0.000619 |
| 11750968_NFIC      | -0.2853  | 0.000105 | 0.000619 |
| 11729768_DGAT1     | -0.25583 | 0.000105 | 0.00062  |
| 11735241_ZC3H12C   | 0.643589 | 0.000105 | 0.00062  |
| 11754954_ENG       | 0.270783 | 0.000105 | 0.00062  |
| 11726558_PPP2CB    | -0.25652 | 0.000105 | 0.00062  |
| 11719173_PAICS     | -0.30134 | 0.000105 | 0.00062  |

|                    |          |          |          |
|--------------------|----------|----------|----------|
| 11715763_PODXL     | 0.279954 | 0.000106 | 0.000621 |
| 11761738_RBMX      | -0.36295 | 0.000106 | 0.000621 |
| 11733976_HAUS5     | -0.45933 | 0.000106 | 0.000621 |
| 11752419_HIVEP1    | 0.416426 | 0.000106 | 0.000621 |
| 11737000_ZNF41     | 0.428595 | 0.000106 | 0.000622 |
| 11764244_THOC2     | 0.321447 | 0.000106 | 0.000622 |
| 11741386_NRF1      | -0.40884 | 0.000106 | 0.000622 |
| 11755952_ARRB2     | -0.4865  | 0.000106 | 0.000622 |
| 11734758_METTL6    | 0.305719 | 0.000106 | 0.000622 |
| 11740171_PBRM1     | -0.28983 | 0.000106 | 0.000622 |
| 11720663_GNA11     | -0.29823 | 0.000106 | 0.000622 |
| 11732251_RCOR3     | 0.36631  | 0.000106 | 0.000622 |
| 11744989_ARMC10    | 0.300758 | 0.000106 | 0.000622 |
| 11749794_ANXA4     | 0.307772 | 0.000106 | 0.000623 |
| 11748686_ZC3H15    | 0.29192  | 0.000106 | 0.000623 |
| 11722298_RAB29     | 0.326444 | 0.000106 | 0.000623 |
| 11718614_RABEP1    | 0.284666 | 0.000106 | 0.000624 |
| 11759049_ACSS3     | 0.51781  | 0.000107 | 0.000625 |
| 11726995_PINK1     | -0.25636 | 0.000107 | 0.000625 |
| 11746483_MYO6      | 0.33415  | 0.000107 | 0.000625 |
| 11737823_POMK      | -0.44825 | 0.000107 | 0.000626 |
| 11756429_OSTC      | 0.293934 | 0.000107 | 0.000626 |
| 11724262_TRIO      | 0.380979 | 0.000107 | 0.000627 |
| 11727583_EPHA3     | 0.333402 | 0.000107 | 0.000627 |
| 11724487_BFAR      | -0.29767 | 0.000107 | 0.000627 |
| 11749514_ZNF641    | 0.401799 | 0.000107 | 0.000627 |
| 11752886_EHD1      | 0.407961 | 0.000107 | 0.000627 |
| 11719290_TMEM63A   | -0.27719 | 0.000107 | 0.000627 |
| 11724144_RAB11FIP2 | 0.449362 | 0.000107 | 0.000628 |
| 11749173_PPP2R5D   | -0.516   | 0.000107 | 0.000628 |
| 11747470_ZNF512    | -0.28823 | 0.000107 | 0.000628 |
| 11731843_RUFY3     | 0.54416  | 0.000107 | 0.000628 |
| 11747301_SP100     | 0.39712  | 0.000107 | 0.000628 |
| 11754846_MLLT10    | 0.309476 | 0.000107 | 0.000628 |
| 11731024_ATXN7     | 0.262563 | 0.000107 | 0.000628 |
| 11724465_ANLN      | -0.25692 | 0.000107 | 0.000628 |
| 11758669_RHOQ      | 0.296261 | 0.000108 | 0.000629 |
| 11728254_NMNAT2    | 0.368855 | 0.000108 | 0.000629 |
| 11750884_AKAP8L    | 0.547609 | 0.000108 | 0.00063  |
| 11721705_COL7A1    | 0.451494 | 0.000108 | 0.00063  |
| 11756871_SNX10     | -0.41053 | 0.000108 | 0.00063  |
| 11743667_COL8A2    | -0.54549 | 0.000108 | 0.00063  |
| 11742934_POC1A     | -0.32859 | 0.000108 | 0.000631 |
| 11726592_PIGH      | 0.436154 | 0.000108 | 0.000631 |
| 11737005_ZNF782    | 0.483571 | 0.000108 | 0.000632 |
| 11719429_SOS2      | 0.350949 | 0.000108 | 0.000632 |
| 11716680_SLC39A9   | 0.386821 | 0.000108 | 0.000633 |
| 11725090_TASP1     | 0.39879  | 0.000108 | 0.000633 |
| 11743990_BRD4      | 0.365956 | 0.000108 | 0.000633 |
| 11763168_ALG13     | 0.295732 | 0.000108 | 0.000634 |
| 11723907_LARP1B    | -0.30572 | 0.000109 | 0.000634 |

|                    |          |          |          |
|--------------------|----------|----------|----------|
| 11742386_CASP1     | 0.393837 | 0.000109 | 0.000635 |
| 11719742_C8orf76   | 0.306763 | 0.000109 | 0.000637 |
| 11749046_WWOX      | 0.48677  | 0.000109 | 0.000637 |
| 11726165_ZNF518B   | 0.445976 | 0.000109 | 0.000637 |
| 11722573_ERAP2     | 0.433988 | 0.000109 | 0.000638 |
| 11756365_EWSR1 /// | -0.31475 | 0.000109 | 0.000638 |
| 11718520_KCMF1     | -0.35766 | 0.000109 | 0.000639 |
| 11716867_FEM1A     | -0.29233 | 0.000109 | 0.000639 |
| 11756230_FLNB      | 0.311151 | 0.000109 | 0.000639 |
| 11739434_ATP11B    | 0.456563 | 0.00011  | 0.000639 |
| 11743538_DNAJC18   | -0.24736 | 0.00011  | 0.00064  |
| 11725750_GAL       | -0.3776  | 0.00011  | 0.00064  |
| 11723781_AGPS      | 0.399317 | 0.00011  | 0.00064  |
| 11739223_NF1       | 0.655424 | 0.00011  | 0.000641 |
| 11763854_CD9       | -0.31379 | 0.00011  | 0.000641 |
| 11720656_BBX       | -0.32874 | 0.00011  | 0.000642 |
| 11727642_TRERF1    | -0.63184 | 0.00011  | 0.000642 |
| 11738809_MARK3     | 0.288902 | 0.00011  | 0.000642 |
| 11722561_CDK4      | -0.27138 | 0.00011  | 0.000642 |
| 11740730_FUOM      | -0.26258 | 0.00011  | 0.000643 |
| 11720978_WARS2     | 0.345187 | 0.00011  | 0.000643 |
| 11723122_TRPM7     | 0.397923 | 0.00011  | 0.000643 |
| 11761752_CAMKMT    | 0.4261   | 0.00011  | 0.000643 |
| 11758548_PREP      | 0.306603 | 0.00011  | 0.000643 |
| 11759207_CNKSR2    | 0.38013  | 0.00011  | 0.000643 |
| 11724362_PIKFYVE   | 0.689748 | 0.00011  | 0.000644 |
| 11750297_MED23     | 0.372919 | 0.00011  | 0.000644 |
| 11722389_MTF1      | -0.30356 | 0.000111 | 0.000644 |
| 11751997_MYO18A    | -0.4332  | 0.000111 | 0.000644 |
| 11721907_SGPP1     | 0.357001 | 0.000111 | 0.000645 |
| 11718209_TMEM9B    | 0.266962 | 0.000111 | 0.000645 |
| 11731983_PTHLH     | 0.651317 | 0.000111 | 0.000645 |
| 11715825_PRMT1     | -0.28435 | 0.000111 | 0.000645 |
| 11749672_MORC4     | 0.384664 | 0.000111 | 0.000645 |
| 11747709_PITPNB    | 0.305245 | 0.000111 | 0.000645 |
| 11722626_KIAA1033  | 0.386214 | 0.000111 | 0.000645 |
| 11727079_NUFIP1    | 0.33813  | 0.000111 | 0.000646 |
| 11743182_C16orf59  | -0.46071 | 0.000111 | 0.000646 |
| 11717114_SUPT16H   | -0.27788 | 0.000111 | 0.000646 |
| 11746201_NAB1      | 0.324012 | 0.000111 | 0.000646 |
| 11718251_TBC1D13   | -0.37536 | 0.000111 | 0.000646 |
| 11744503_RSRP1     | 0.310111 | 0.000111 | 0.000646 |
| 11724842_ARMC4     | 0.911533 | 0.000111 | 0.000646 |
| 11745929_AHCY      | -0.3795  | 0.000111 | 0.000646 |
| 11748411_FLII      | 0.292524 | 0.000111 | 0.000646 |
| 11735482_ZNF699    | 0.834921 | 0.000111 | 0.000646 |
| 11716956_CTDSP2    | 0.292707 | 0.000111 | 0.000647 |
| 11750264_TMEM19    | -0.33168 | 0.000111 | 0.000647 |
| 11741137_CHN1      | 0.44905  | 0.000111 | 0.000647 |
| 11757476_TNNT1     | -0.35081 | 0.000111 | 0.000647 |
| 11756882_RTTN      | -0.40842 | 0.000112 | 0.000648 |

|                    |          |          |          |
|--------------------|----------|----------|----------|
| 11753434_SLC3A2    | 0.290988 | 0.000112 | 0.000648 |
| 11722711_PPOX      | -0.27863 | 0.000112 | 0.000648 |
| 11732999_ICAM1     | 0.497768 | 0.000112 | 0.000648 |
| 11723776_BRD3      | -0.34926 | 0.000112 | 0.000648 |
| 11746107_CDC16     | 0.247681 | 0.000112 | 0.000648 |
| 11722911_USP13     | -0.40462 | 0.000112 | 0.000649 |
| 11717494_SSNA1     | -0.30506 | 0.000112 | 0.000649 |
| 11720131_SPIRE1    | -0.5512  | 0.000112 | 0.000649 |
| 11731469_AKT2      | -0.53504 | 0.000112 | 0.000649 |
| 11725122_GATAD1    | 0.295017 | 0.000112 | 0.00065  |
| 11723412_PA2G4     | -0.26055 | 0.000112 | 0.00065  |
| 11743660_SNRNP27   | 0.258676 | 0.000112 | 0.00065  |
| 11761314_LOC100133 | 0.619856 | 0.000112 | 0.00065  |
| 11717668_POLR2K    | -0.28337 | 0.000112 | 0.00065  |
| 11742278_CTH       | 0.355211 | 0.000112 | 0.00065  |
| 11745315_CTNNAL1   | 0.410185 | 0.000112 | 0.00065  |
| 11717642_CSTF3     | 0.318843 | 0.000112 | 0.000651 |
| 11739054_PTPN6     | -0.3111  | 0.000112 | 0.000651 |
| 11732147_CAT       | -0.30446 | 0.000113 | 0.000652 |
| 11754243_H2AFX     | -0.2448  | 0.000113 | 0.000652 |
| 11724766_FASTKD2   | -0.39855 | 0.000113 | 0.000652 |
| 11757791_DUSP3     | -0.33877 | 0.000113 | 0.000653 |
| 11727946_SHPK      | -0.63414 | 0.000113 | 0.000653 |
| 11758130_HEBP1     | -0.42904 | 0.000113 | 0.000653 |
| 11718710_SLC9A1    | 0.26375  | 0.000113 | 0.000653 |
| 11717960_KCTD2     | -0.49871 | 0.000113 | 0.000654 |
| 11742823_LACTB2    | -0.42076 | 0.000113 | 0.000655 |
| 11728262_LUC7L     | 0.315228 | 0.000113 | 0.000656 |
| 11749883_FEZ1      | 0.309679 | 0.000113 | 0.000656 |
| 11719470_DCP1A     | -0.28779 | 0.000113 | 0.000657 |
| 11763692_VTI1B     | -0.35855 | 0.000114 | 0.000657 |
| 11758776_HMCES     | -0.40129 | 0.000114 | 0.000657 |
| 11727800_POP4      | -0.28145 | 0.000114 | 0.000657 |
| 11730439_AKAP9     | 0.334842 | 0.000114 | 0.000657 |
| 11734789_SRR       | -0.24924 | 0.000114 | 0.000658 |
| 11718786_PAN2      | -0.32038 | 0.000114 | 0.000658 |
| 11739256_FAM84B    | 0.310812 | 0.000114 | 0.000658 |
| 11736928_BMP2K     | 0.371045 | 0.000114 | 0.000659 |
| 11747472_PARPBP    | -0.38109 | 0.000114 | 0.000659 |
| 11746497_MSI2      | 0.416189 | 0.000114 | 0.000659 |
| 11728568_CCDC61    | -0.32932 | 0.000114 | 0.000659 |
| 11722287_SLC30A7   | 0.260261 | 0.000114 | 0.000659 |
| 11716667_MTHFD1    | -0.25316 | 0.000114 | 0.000659 |
| 11751935_EGF       | 0.668728 | 0.000114 | 0.00066  |
| 11716452_MYO1C     | 0.312877 | 0.000114 | 0.00066  |
| 11724779_PGM2L1    | 0.270771 | 0.000114 | 0.000661 |
| 11757344_SNRPB     | -0.30365 | 0.000114 | 0.000661 |
| 11735039_SHTN1     | 0.395355 | 0.000114 | 0.000661 |
| 11744367_ZMYND11   | 0.446835 | 0.000114 | 0.000661 |
| 11727038_MAVS      | -0.24506 | 0.000115 | 0.000662 |
| 11753786_PARD6B    | 0.559549 | 0.000115 | 0.000662 |

|                    |          |          |          |
|--------------------|----------|----------|----------|
| 11732304_CREB1     | -0.25608 | 0.000115 | 0.000663 |
| 11718360_COIL      | 0.356845 | 0.000115 | 0.000663 |
| 11717726_HN1       | 0.253877 | 0.000115 | 0.000663 |
| 11731560_FAM89A    | 0.398296 | 0.000115 | 0.000664 |
| 11725221_SNTB1     | 0.302982 | 0.000115 | 0.000664 |
| 11728614_GPR3      | -0.49871 | 0.000115 | 0.000664 |
| 11747733_LRRC14    | -0.48596 | 0.000115 | 0.000664 |
| 11735083_FREM2     | -0.37101 | 0.000115 | 0.000664 |
| 11715433_RBBP7     | -0.32055 | 0.000115 | 0.000664 |
| 11756654_SUB1      | -0.28671 | 0.000115 | 0.000665 |
| 11728402_ATP6VOA2  | 0.326155 | 0.000115 | 0.000665 |
| 11752470_EIF4B     | 0.271971 | 0.000115 | 0.000666 |
| 11725653_EMCN      | 0.582387 | 0.000115 | 0.000666 |
| 11723090_CXorf40A  | 0.336819 | 0.000116 | 0.000668 |
| 11756076_ATAD3A    | -0.25091 | 0.000116 | 0.000668 |
| 11745769_NOTCH2    | 0.364566 | 0.000116 | 0.000668 |
| 11721506_DVL3      | 0.383246 | 0.000116 | 0.000668 |
| 11748468_DVL3      | 0.383246 | 0.000116 | 0.000668 |
| 11718298_CDC25     | 0.289643 | 0.000116 | 0.000668 |
| 11718276_IFRD2     | -0.2989  | 0.000116 | 0.000669 |
| 11757340_RHOQ      | 0.309853 | 0.000116 | 0.000669 |
| 11763702_WDR48     | 0.290523 | 0.000116 | 0.000669 |
| 11743252_CALD1     | 0.296716 | 0.000116 | 0.000669 |
| 11737779_KITLG     | 0.772366 | 0.000116 | 0.000669 |
| 11739944_NBPF15 // | 0.293001 | 0.000116 | 0.000669 |
| 11749882_APH1A     | -0.24488 | 0.000116 | 0.000669 |
| 11731062_ZNF516    | -0.33845 | 0.000116 | 0.000669 |
| 11754697_ANAPC13   | 0.26863  | 0.000116 | 0.00067  |
| 11746615_UBE3C     | 0.36033  | 0.000116 | 0.00067  |
| 11717208_RXRB      | -0.37174 | 0.000117 | 0.000671 |
| 11761943_MRE11A    | -0.62294 | 0.000117 | 0.000671 |
| 11734911_WDR76     | -0.36004 | 0.000117 | 0.000671 |
| 11756740_LRRC75A-A | 0.259585 | 0.000117 | 0.000671 |
| 11729197_STX16     | 0.327399 | 0.000117 | 0.000672 |
| 11734692_TAF11     | 0.36755  | 0.000117 | 0.000672 |
| 11734865_PSMC3IP   | -0.39117 | 0.000117 | 0.000672 |
| 11728396_SNX14     | 0.252555 | 0.000117 | 0.000672 |
| 11753046_MBNL2     | 0.306158 | 0.000117 | 0.000672 |
| 11753704_STMN1     | -0.30842 | 0.000117 | 0.000673 |
| 11750204_TRUB1     | -0.41678 | 0.000117 | 0.000673 |
| 11757653_CDK5RAP3  | -0.29985 | 0.000117 | 0.000673 |
| 11735813_C8orf59   | 0.541039 | 0.000117 | 0.000673 |
| 11757621_MYLK      | 0.395223 | 0.000117 | 0.000673 |
| 11739477_SBF2      | 0.24679  | 0.000117 | 0.000674 |
| 11752316_CEP250    | -0.30631 | 0.000117 | 0.000674 |
| 11740241_CAPS      | -0.32118 | 0.000117 | 0.000674 |
| 11719683_MPC1      | -0.32488 | 0.000117 | 0.000674 |
| 11720635_ATP5D     | -0.32403 | 0.000117 | 0.000674 |
| 11754356_MRPS18B   | -0.31803 | 0.000117 | 0.000674 |
| 11748361_MBNL1     | 0.246646 | 0.000118 | 0.000675 |
| 11723140_ZBTB11    | 0.289497 | 0.000118 | 0.000676 |

|                    |          |          |          |
|--------------------|----------|----------|----------|
| 11754467_MED26     | 0.359785 | 0.000118 | 0.000676 |
| 11722810_SP1       | -0.2797  | 0.000118 | 0.000676 |
| 11755104_KIAA1671  | 0.318309 | 0.000118 | 0.000677 |
| 11718915_RGS19     | -0.30086 | 0.000118 | 0.000677 |
| 11719291_RRP36     | 0.299734 | 0.000118 | 0.000678 |
| 11739808_MAZ       | -0.61877 | 0.000118 | 0.000678 |
| 11752609_OSBPL2    | -0.29058 | 0.000118 | 0.000678 |
| 11731149_APOOL     | 0.314185 | 0.000118 | 0.000678 |
| 11730823_COX19     | -0.35012 | 0.000118 | 0.000679 |
| 11755921_GTF3C5    | -0.30261 | 0.000118 | 0.000679 |
| 11725677_STX4      | 0.399321 | 0.000119 | 0.00068  |
| 11761421_CD70      | 0.32674  | 0.000119 | 0.00068  |
| 11749229_SIRT5     | -0.45919 | 0.000119 | 0.00068  |
| 11715150_PCDHA4    | 0.297795 | 0.000119 | 0.00068  |
| 11760491_CASP4     | 0.735405 | 0.000119 | 0.00068  |
| 11740676_CLPX      | 0.280241 | 0.000119 | 0.00068  |
| 11758209_ZNF644    | 0.280296 | 0.000119 | 0.00068  |
| 11719572_TRUB1     | -0.3175  | 0.000119 | 0.00068  |
| 11735820_RIPPLY1   | -0.33173 | 0.000119 | 0.00068  |
| 11732353_NT5C3B    | 0.295493 | 0.000119 | 0.00068  |
| 11730118_RPP38     | 0.271458 | 0.000119 | 0.000681 |
| 11716461_NELFB     | -0.3842  | 0.000119 | 0.000681 |
| 11749925_ZNF346    | 0.581317 | 0.000119 | 0.000682 |
| 11758895_EIF2S2    | -0.36472 | 0.000119 | 0.000682 |
| 11741121_ZNF700    | 0.297415 | 0.000119 | 0.000682 |
| 11733780_SC5D      | 0.280452 | 0.000119 | 0.000683 |
| 11739895_USP1      | -0.28146 | 0.000119 | 0.000683 |
| 11756548_PKP4      | 0.423692 | 0.000119 | 0.000683 |
| 11726059_R3HCC1L   | 0.446857 | 0.000119 | 0.000683 |
| 11716599_CHMP1A    | -0.25743 | 0.00012  | 0.000685 |
| 11757968_TERF2IP   | 0.350588 | 0.00012  | 0.000685 |
| 11739240_SNAPC3    | 0.312601 | 0.00012  | 0.000685 |
| 11716457_RHOBTB3   | 0.284976 | 0.00012  | 0.000685 |
| 11728693_LOC100996 | 0.582272 | 0.00012  | 0.000686 |
| 11753670_API53     | 0.298904 | 0.00012  | 0.000686 |
| 11721135_IGFBP3    | 0.389977 | 0.00012  | 0.000686 |
| 11725627_NIPAL3    | -0.27688 | 0.00012  | 0.000686 |
| 11741873_CSNK1E // | -0.32949 | 0.00012  | 0.000686 |
| 11727932_VTI1A     | 0.522233 | 0.00012  | 0.000687 |
| 11746467_HELLS     | -0.39383 | 0.00012  | 0.000688 |
| 11724601_ERAP1     | 0.292555 | 0.00012  | 0.000688 |
| 11716310_CYBRD1    | 0.316616 | 0.00012  | 0.000688 |
| 11729564_DND1      | 0.300941 | 0.000121 | 0.000689 |
| 11724638_PAFAH2    | 0.336969 | 0.000121 | 0.000689 |
| 11739599_ZNF398    | 0.507179 | 0.000121 | 0.000689 |
| 11721919_ATP13A2   | 0.343702 | 0.000121 | 0.000689 |
| 11745552_CAB39     | 0.3102   | 0.000121 | 0.000689 |
| 11751817_MBNL2     | 0.25206  | 0.000121 | 0.000689 |
| 11727331_SPAG4     | -0.60985 | 0.000121 | 0.00069  |
| 11720224_TBC1D1    | -0.34986 | 0.000121 | 0.00069  |
| 11748318_LDAH      | 0.443056 | 0.000121 | 0.000691 |



|                    |          |          |          |
|--------------------|----------|----------|----------|
| 11747512_ARHGDIA   | -0.29946 | 0.000121 | 0.000691 |
| 11727699_TICRR     | -0.28352 | 0.000121 | 0.000691 |
| 11718211_PYCR1     | -0.4143  | 0.000121 | 0.000691 |
| 11730579_HECW2     | 0.488678 | 0.000121 | 0.000691 |
| 11757856_OSBP      | 0.268255 | 0.000121 | 0.000691 |
| 11733721_MAX       | 0.416456 | 0.000121 | 0.000691 |
| 11757535_PRR4      | 0.298265 | 0.000121 | 0.000691 |
| 11756340_UPF3A     | 0.248995 | 0.000121 | 0.000691 |
| 11717404_TDP2      | -0.33052 | 0.000121 | 0.000692 |
| 11745956_PRRC2C    | 0.268074 | 0.000122 | 0.000693 |
| 11747013_PPA2      | -0.28413 | 0.000122 | 0.000693 |
| 11755009_VCAN      | 0.295416 | 0.000122 | 0.000693 |
| 11734872_COMT      | 0.265608 | 0.000122 | 0.000693 |
| 11724212_LMAN1     | -0.34491 | 0.000122 | 0.000694 |
| 11751710_SLC48A1   | 0.301715 | 0.000122 | 0.000694 |
| 11734970_NCOA4     | 0.286392 | 0.000122 | 0.000694 |
| 11746937_CTDSP2    | 0.312466 | 0.000122 | 0.000694 |
| 11724064_SLC25A19  | -0.31648 | 0.000122 | 0.000695 |
| 11717315_DTD1      | -0.26796 | 0.000122 | 0.000695 |
| 11752920_CDC27     | 0.318175 | 0.000122 | 0.000695 |
| 11755248_PPFIBP1   | -0.31714 | 0.000122 | 0.000695 |
| 11750552_CARD16 // | 0.796163 | 0.000122 | 0.000695 |
| 11744115_RPIA      | -0.27256 | 0.000122 | 0.000695 |
| 11723905_ZNF75A    | 0.473169 | 0.000122 | 0.000695 |
| 11729859_H6PD      | -0.3018  | 0.000122 | 0.000695 |
| 11725180_RUNX2     | 0.499851 | 0.000122 | 0.000696 |
| 11749834_SH2B1     | -0.36491 | 0.000122 | 0.000696 |
| 11724446_PDE4D     | 0.313692 | 0.000122 | 0.000697 |
| 11719160_RAPH1     | 0.288233 | 0.000123 | 0.000697 |
| 11756503_LARP4B    | 0.315377 | 0.000123 | 0.000697 |
| 11734000_THRB      | 0.257731 | 0.000123 | 0.000697 |
| 11722281_PHC3      | 0.624775 | 0.000123 | 0.000697 |
| 11746310_WIZ       | -0.45853 | 0.000123 | 0.000697 |
| 11759015_SPECC1    | 0.449205 | 0.000123 | 0.000698 |
| 11732174_FANCF     | -0.27024 | 0.000123 | 0.000698 |
| 11715735_TMEM123   | -0.30049 | 0.000123 | 0.000698 |
| 11717410_ANO6      | 0.287863 | 0.000123 | 0.000701 |
| 11727647_DNAJC25   | 0.320332 | 0.000123 | 0.000701 |
| 11763499_ZNF202    | 0.347152 | 0.000124 | 0.000702 |
| 11733207_ZNF480    | 0.313725 | 0.000124 | 0.000702 |
| 11726522_ZFH3      | -0.30087 | 0.000124 | 0.000702 |
| 11739831_WAC       | 0.282139 | 0.000124 | 0.000702 |
| 11757443_TIMM21    | -0.32993 | 0.000124 | 0.000702 |
| 11719983_INPP5A    | -0.42253 | 0.000124 | 0.000704 |
| 11742690_UBE2I     | -0.31955 | 0.000124 | 0.000704 |
| 11754660_GOLT1A    | 0.731927 | 0.000124 | 0.000704 |
| 11718191_VEZF1     | -0.30104 | 0.000124 | 0.000704 |
| 11724895_GATAD2B   | -0.36942 | 0.000124 | 0.000705 |
| 11749900_PPP6R3    | 0.290928 | 0.000124 | 0.000705 |
| 11754959_AK4 /// A | 0.28246  | 0.000124 | 0.000706 |
| 11721818_SH3BP5L   | -0.36362 | 0.000124 | 0.000706 |

|                    |          |          |          |
|--------------------|----------|----------|----------|
| 11752037_MAVS      | -0.36713 | 0.000125 | 0.000707 |
| 11723592_LRRC8C    | -0.49305 | 0.000125 | 0.000707 |
| 11717228_CDR2 ///  | 0.303239 | 0.000125 | 0.000707 |
| 11742119_NFYC      | -0.33727 | 0.000125 | 0.000708 |
| 11728982_C8orf48   | 0.450051 | 0.000125 | 0.000709 |
| 11732140_COX16 /// | -0.59669 | 0.000125 | 0.000709 |
| 11751803_SPC24     | -0.71975 | 0.000125 | 0.00071  |
| 11721633_TMEM97    | -0.31405 | 0.000125 | 0.00071  |
| 11727101_IGF2BP1   | 0.245343 | 0.000125 | 0.000711 |
| 11718316_SLC25A10  | -0.51302 | 0.000126 | 0.000711 |
| 11757962_SRSF3     | -0.29464 | 0.000126 | 0.000711 |
| 11754717_TPP2      | 0.261548 | 0.000126 | 0.000711 |
| 11718760_WLS       | -0.33093 | 0.000126 | 0.000711 |
| 11731381_NHLRC3    | 0.282413 | 0.000126 | 0.000711 |
| 11728481_ZNF181 // | 0.310728 | 0.000126 | 0.000711 |
| 11757660_SNRPB     | -0.25782 | 0.000126 | 0.000712 |
| 11758016_CCDC34    | -0.24595 | 0.000126 | 0.000713 |
| 11747635_PYGB      | -0.29064 | 0.000126 | 0.000713 |
| 11758143_DUSP8 /// | 0.345289 | 0.000126 | 0.000713 |
| 11759767_MR1       | 0.482264 | 0.000126 | 0.000713 |
| 11729104_UBA52     | -0.42317 | 0.000126 | 0.000713 |
| 11720760_IVNS1ABP  | 0.323694 | 0.000126 | 0.000714 |
| 11737828_ZKSCAN8   | 0.450707 | 0.000126 | 0.000715 |
| 11716631_SERPINB2  | 0.505469 | 0.000127 | 0.000715 |
| 11739659_YIF1B     | -0.28465 | 0.000127 | 0.000715 |
| 11758333_RNF138 // | 0.333605 | 0.000127 | 0.000716 |
| 11735044_TRIM5     | 0.326072 | 0.000127 | 0.000716 |
| 11758596_ZRANB1    | 0.344392 | 0.000127 | 0.000716 |
| 11730350_TLDC1     | 0.393529 | 0.000127 | 0.000717 |
| 11735494_SIN3A     | -0.31872 | 0.000127 | 0.000717 |
| 11751955_ABCC5     | 0.392493 | 0.000127 | 0.000718 |
| 11728256_GLTSCR2   | 0.295413 | 0.000127 | 0.000718 |
| 11756255_YWHAH     | -0.25897 | 0.000127 | 0.000718 |
| 11759853_RPS27A    | -0.4111  | 0.000127 | 0.000719 |
| 11744052_SLC11A2   | 0.32897  | 0.000127 | 0.000719 |
| 11738846_GFM2      | 0.357327 | 0.000127 | 0.000719 |
| 11742757_GTF2H1    | 0.343923 | 0.000127 | 0.00072  |
| 11756416_KIZ       | -0.29889 | 0.000127 | 0.00072  |
| 11753646_CFL1      | -0.25738 | 0.000128 | 0.00072  |
| 11743178_RSFI      | 0.260099 | 0.000128 | 0.000721 |
| 11719269_RBM22     | 0.303077 | 0.000128 | 0.000721 |
| 11732491_BRAF ///  | 0.469621 | 0.000128 | 0.000721 |
| 11757520_ACBD6 /// | 0.283927 | 0.000128 | 0.000721 |
| 11747634_PYGB      | -0.27066 | 0.000128 | 0.000722 |
| 11726031_CSNK1G3   | 0.310354 | 0.000128 | 0.000723 |
| 11757358_SCOC      | -0.30801 | 0.000128 | 0.000724 |
| 11718232_KTI12 /// | 0.270972 | 0.000128 | 0.000724 |
| 11733892_FKBP14    | 0.255219 | 0.000129 | 0.000725 |
| 11739569_ASH1L     | 0.269774 | 0.000129 | 0.000725 |
| 11749763_UBE2I     | -0.27716 | 0.000129 | 0.000725 |
| 11732520_RAD51C    | 0.256387 | 0.000129 | 0.000725 |

|                    |          |          |          |
|--------------------|----------|----------|----------|
| 11748312_TMEM161B  | 0.345685 | 0.000129 | 0.000725 |
| 11724185_SART3     | -0.31405 | 0.000129 | 0.000725 |
| 11759211_LHX1      | -0.43234 | 0.000129 | 0.000725 |
| 11722398_RWDD4     | -0.2887  | 0.000129 | 0.000725 |
| 11757385_RPL13A // | -0.24053 | 0.000129 | 0.000727 |
| 11723633_IRF2BPL   | -0.24812 | 0.000129 | 0.000727 |
| 11754447_RPS6KA5   | 0.263157 | 0.000129 | 0.000727 |
| 11726962_SGTB      | 0.3241   | 0.000129 | 0.000727 |
| 11736337_RUSC1     | -0.27252 | 0.000129 | 0.000727 |
| 11758873_HPSE      | -0.47743 | 0.000129 | 0.000729 |
| 11744723_APH1A     | -0.28501 | 0.000129 | 0.000729 |
| 11737051_HRH1      | 0.77592  | 0.000129 | 0.000729 |
| 11724490_AKR1B10   | 0.523508 | 0.000129 | 0.000729 |
| 11759553_TIMM8B    | 0.431816 | 0.00013  | 0.000729 |
| 11736036_TADA3     | -0.29815 | 0.00013  | 0.000729 |
| 11739376_SREK1     | 0.27127  | 0.00013  | 0.000731 |
| 11757865_GADD45B   | 0.493466 | 0.00013  | 0.000731 |
| 11754432_RBMX      | -0.25537 | 0.00013  | 0.000731 |
| 11723937_SNX1      | 0.321227 | 0.00013  | 0.000732 |
| 11740744_TPM2      | 0.283951 | 0.00013  | 0.000732 |
| 11742091_TRAF3     | 0.325242 | 0.00013  | 0.000732 |
| 11726373_HAUS8     | -0.37342 | 0.00013  | 0.000732 |
| 11737658_TMEM244   | 0.378329 | 0.00013  | 0.000733 |
| 11718518_KCMF1     | 0.265017 | 0.00013  | 0.000733 |
| 11715909_MYO6      | 0.329615 | 0.00013  | 0.000733 |
| 11744467_SYNCRIP   | -0.32696 | 0.00013  | 0.000733 |
| 11744596_LYPD6B    | 0.490021 | 0.00013  | 0.000733 |
| 11735731_PRKRIR    | 0.2701   | 0.00013  | 0.000733 |
| 11743768_DLL3      | -0.33224 | 0.000131 | 0.000733 |
| 11740278_PAM       | 0.244651 | 0.000131 | 0.000734 |
| 11744574_INO80     | 0.421085 | 0.000131 | 0.000734 |
| 11759091_MIPOL1    | -0.47393 | 0.000131 | 0.000735 |
| 11715784_PRR4      | 0.2676   | 0.000131 | 0.000735 |
| 11747008_PAFAH1B1  | 0.314272 | 0.000131 | 0.000735 |
| 11715951_KCTD12    | -0.39229 | 0.000131 | 0.000736 |
| 11715999_CAB39     | 0.389919 | 0.000131 | 0.000736 |
| 11743485_NAA25     | 0.360323 | 0.000131 | 0.000738 |
| 11745011_PKMYT1    | -0.54961 | 0.000132 | 0.000739 |
| 11722906_MIA3      | 0.339255 | 0.000132 | 0.000739 |
| 11754400_SOX12     | -0.29267 | 0.000132 | 0.000739 |
| 11739352_ARMC8     | 0.545335 | 0.000132 | 0.00074  |
| 11730048_SLITRK5   | -0.33108 | 0.000132 | 0.00074  |
| 11725484_DIRC2     | -0.24119 | 0.000132 | 0.00074  |
| 11719409_HIPK2     | 0.289888 | 0.000132 | 0.00074  |
| 11743102_PTCD3     | 0.323187 | 0.000132 | 0.00074  |
| 11725644_TET2      | 0.468824 | 0.000132 | 0.00074  |
| 11750578_PYGB      | -0.26048 | 0.000132 | 0.00074  |
| 11717033_KIAA0141  | -0.23791 | 0.000132 | 0.00074  |
| 11752238_UNKL      | -0.38101 | 0.000132 | 0.00074  |
| 11758709_RDH11     | -0.26765 | 0.000132 | 0.000741 |
| 11730378_PHF14     | 0.749221 | 0.000132 | 0.000741 |

|                    |          |          |          |
|--------------------|----------|----------|----------|
| 11731612_PCID2     | 0.300409 | 0.000132 | 0.000741 |
| 11751760_LSM12     | 0.249821 | 0.000132 | 0.000742 |
| 11722776_PRKD1     | -0.31069 | 0.000133 | 0.000744 |
| 11743011_GPR137B   | 0.284216 | 0.000133 | 0.000744 |
| 11754525_RNF146    | 0.278196 | 0.000133 | 0.000744 |
| 11751059_PIN1      | -0.32538 | 0.000133 | 0.000744 |
| 11736540_TMEM170A  | 0.303577 | 0.000133 | 0.000744 |
| 11725473_PAQR8     | -0.38708 | 0.000133 | 0.000746 |
| 11730110_SLC23A2   | 0.549318 | 0.000133 | 0.000746 |
| 11736035_EXOSC2    | -0.28037 | 0.000133 | 0.000747 |
| 11748857_AK3       | 0.288576 | 0.000134 | 0.000748 |
| 11731501_UTP23     | 0.274175 | 0.000134 | 0.000748 |
| 11746198_METTL9    | -0.96658 | 0.000134 | 0.000748 |
| 11755493_EXOC6     | 0.329243 | 0.000134 | 0.000748 |
| 11720140_RILP      | -0.46989 | 0.000134 | 0.000748 |
| 11721554_COLGALT1  | -0.29015 | 0.000134 | 0.000749 |
| 11745849_PPP6R3    | 0.330444 | 0.000134 | 0.000749 |
| 11722425_NEDD4L    | -0.37346 | 0.000134 | 0.00075  |
| 11721441_RSRP1     | 0.434921 | 0.000134 | 0.00075  |
| 11751802_BFAR      | -0.33111 | 0.000134 | 0.00075  |
| 11723504_PDPR      | -0.30157 | 0.000134 | 0.00075  |
| 11756114_RBM10     | -0.25387 | 0.000134 | 0.00075  |
| 11746103_DTD1      | -0.32232 | 0.000134 | 0.000751 |
| 11736129_SRSF5     | -0.35574 | 0.000134 | 0.000751 |
| 11756603_FAM206A   | 0.378726 | 0.000134 | 0.000751 |
| 11751265_PTOV1     | -0.27005 | 0.000135 | 0.000752 |
| 11755809_NBN       | -0.47008 | 0.000135 | 0.000752 |
| 11727263_ENTPD7    | 0.6381   | 0.000135 | 0.000752 |
| 11723406_SCMH1     | -0.26235 | 0.000135 | 0.000752 |
| 11758227_ROBO1     | 0.299875 | 0.000135 | 0.000752 |
| 11746123_YY1AP1    | 0.267101 | 0.000135 | 0.000753 |
| 11724466_ANLN      | -0.24641 | 0.000135 | 0.000753 |
| 11730707_VGLL2     | 0.625586 | 0.000135 | 0.000753 |
| 11732463_TERF1     | -0.32063 | 0.000135 | 0.000753 |
| 11756864_ZFAND3    | 0.339522 | 0.000135 | 0.000753 |
| 11723530_GOSR1     | 0.3094   | 0.000135 | 0.000753 |
| 11717012_VAMP8     | 0.328311 | 0.000135 | 0.000754 |
| 11731698_ALG10 /// | -0.35248 | 0.000135 | 0.000755 |
| 11728885_TM6SF1    | -0.43008 | 0.000135 | 0.000755 |
| 11722185_SPTSSA    | -0.49894 | 0.000135 | 0.000755 |
| 11764007_CDKL3     | 0.320936 | 0.000135 | 0.000755 |
| 11743161_HILPDA    | -0.30294 | 0.000135 | 0.000755 |
| 11721997_PARP14    | 0.268374 | 0.000136 | 0.000756 |
| 11732394_WWC2      | 0.294055 | 0.000136 | 0.000756 |
| 11725877_SCARA3    | -0.45992 | 0.000136 | 0.000756 |
| 11716576_CCDC6     | 0.311867 | 0.000136 | 0.000756 |
| 11729631_AP3M1     | -0.27679 | 0.000136 | 0.000756 |
| 11751685_C5orf22   | 0.332185 | 0.000136 | 0.000757 |
| 11750788_CSNK1G1   | 0.438437 | 0.000136 | 0.000757 |
| 11758367_NACC1     | -0.32578 | 0.000136 | 0.000757 |
| 11754834_INTS6     | 0.308625 | 0.000136 | 0.000757 |

|                    |          |          |          |
|--------------------|----------|----------|----------|
| 11717921_YAP1      | -0.29369 | 0.000136 | 0.000758 |
| 11754335_TXNRD3 // | 0.372073 | 0.000136 | 0.000758 |
| 11717663_KLHL12    | -0.34504 | 0.000136 | 0.000759 |
| 11735873_FGFR4     | -0.32336 | 0.000136 | 0.000759 |
| 11721341_NCOA1     | 0.485197 | 0.000136 | 0.000759 |
| 11757879_DBNL      | -0.24378 | 0.000136 | 0.00076  |
| 11728787_PTPRR     | 0.77294  | 0.000137 | 0.000761 |
| 11750557_ZNF271P   | 0.420111 | 0.000137 | 0.000761 |
| 11723477_SLC17A5   | 0.322819 | 0.000137 | 0.000761 |
| 11746554_SPARC     | 0.254863 | 0.000137 | 0.000761 |
| 11758981_NUTF2     | -0.24351 | 0.000137 | 0.000762 |
| 11717178_STAT5A    | -0.29549 | 0.000137 | 0.000763 |
| 11733774_RPL37     | -0.30619 | 0.000137 | 0.000764 |
| 11719425_FAM220A   | -0.28384 | 0.000137 | 0.000764 |
| 11754567_FBXL12    | 0.251779 | 0.000137 | 0.000764 |
| 11745337_DNAJB12   | -0.23695 | 0.000138 | 0.000765 |
| 11725869_HOXC4     | -0.31597 | 0.000138 | 0.000765 |
| 11724187_SART3     | -0.32233 | 0.000138 | 0.000765 |
| 11757040_CNP       | -0.30598 | 0.000138 | 0.000765 |
| 11744359_MBD3      | -0.34632 | 0.000138 | 0.000765 |
| 11745954_KIAA0907  | 0.342818 | 0.000138 | 0.000765 |
| 11725835_NFKBIB    | 0.404279 | 0.000138 | 0.000765 |
| 11739558_RFWD3     | -0.3576  | 0.000138 | 0.000765 |
| 11747110_PASK      | -0.34661 | 0.000138 | 0.000765 |
| 11756995_GNB2      | -0.24692 | 0.000138 | 0.000766 |
| 11757383_CTSH      | -0.36833 | 0.000138 | 0.000766 |
| 11757661_SNRPB     | -0.2419  | 0.000138 | 0.000766 |
| 11743320_DST       | 0.454492 | 0.000138 | 0.000766 |
| 11736995_PPT2      | -0.33932 | 0.000138 | 0.000767 |
| 11733203_SH3TC2    | 0.251381 | 0.000138 | 0.000767 |
| 11738876_PPP2R5C   | -0.26151 | 0.000138 | 0.000768 |
| 11728021_CHCHD4    | -0.288   | 0.000138 | 0.000768 |
| 11729088_C8orf34   | 0.772239 | 0.000138 | 0.000768 |
| 11757984_RAD17     | -0.25397 | 0.000138 | 0.000769 |
| 11727766_BNC2      | -0.37942 | 0.000138 | 0.000769 |
| 200068_PMCANX      | -0.25639 | 0.000139 | 0.000769 |
| 11740611_ZNF121    | 0.319573 | 0.000139 | 0.000769 |
| 11736117_ZFAND5    | 0.255484 | 0.000139 | 0.000769 |
| 11759848_KIF16B    | 0.370954 | 0.000139 | 0.000769 |
| 11753117_SMAD4     | 0.296011 | 0.000139 | 0.000769 |
| 11745878_NFKBIA    | 0.365585 | 0.000139 | 0.000769 |
| 11716792_DKFZp686K | 0.308712 | 0.000139 | 0.00077  |
| 11736048_ANTXR2    | 0.278433 | 0.000139 | 0.00077  |
| 11729729_METRN     | -0.25451 | 0.000139 | 0.00077  |
| 11738053_PLAUR     | 0.266116 | 0.000139 | 0.000771 |
| 11719463_LSR       | -0.32368 | 0.000139 | 0.000771 |
| 11755763_NUP188    | -0.34547 | 0.000139 | 0.000772 |
| 11726881_IDS       | 0.33369  | 0.000139 | 0.000772 |
| 11715959_SREBF1    | -0.32915 | 0.000139 | 0.000772 |
| 11734045_KIAA0408  | 0.465198 | 0.000139 | 0.000772 |
| 11742225_MAP3K7    | 0.279011 | 0.000139 | 0.000773 |

|                    |          |          |          |
|--------------------|----------|----------|----------|
| 11719771_EXOC7     | -0.37811 | 0.00014  | 0.000774 |
| 11733977_HAUS5     | -0.28853 | 0.00014  | 0.000774 |
| 11760712_ITGA10    | -0.39584 | 0.00014  | 0.000775 |
| 11718654_PKD2      | 0.286357 | 0.00014  | 0.000775 |
| 11723507_ZNF609    | 0.381493 | 0.00014  | 0.000775 |
| 11744265_LAMB2     | 0.410886 | 0.00014  | 0.000776 |
| 11763208_CENPI     | -0.64524 | 0.00014  | 0.000776 |
| 11715517_SLC25A39  | -0.26654 | 0.00014  | 0.000777 |
| 11742681_ERP29     | -0.33608 | 0.000141 | 0.000778 |
| 11744715_SLC38A6   | -0.26414 | 0.000141 | 0.000778 |
| 11748211_OSBP19    | 0.26609  | 0.000141 | 0.000778 |
| 11728795_LSM14A    | -0.31348 | 0.000141 | 0.000779 |
| 11746697_SLC3A2    | 0.26967  | 0.000141 | 0.000779 |
| 11734625_TRIM49 // | -0.85482 | 0.000141 | 0.000779 |
| 11742843_RXRA      | -0.28465 | 0.000141 | 0.000779 |
| 11716926_EXOC3     | 0.27703  | 0.000141 | 0.000779 |
| 11727903_IL13RA1   | 0.337334 | 0.000141 | 0.000779 |
| 11755073_PRRF39    | 0.382899 | 0.000141 | 0.00078  |
| 11735737_SH2B1     | -0.32743 | 0.000141 | 0.00078  |
| 11740745_OPA1      | -0.58027 | 0.000141 | 0.00078  |
| 11715839_SDHC      | -0.51162 | 0.000141 | 0.00078  |
| 11754294_STK40     | 0.295896 | 0.000141 | 0.000781 |
| 11750734_ZNF782    | 0.324427 | 0.000142 | 0.000782 |
| 11725244_SPAST     | 0.472882 | 0.000142 | 0.000782 |
| 11731157_ERCC4     | 0.344091 | 0.000142 | 0.000783 |
| 11755859_RNF41     | -0.34908 | 0.000142 | 0.000784 |
| 11717670_NDUFB6    | -0.24728 | 0.000142 | 0.000784 |
| 11758531_GALE      | 0.257352 | 0.000142 | 0.000785 |
| 11722678_STEAP3    | -0.33146 | 0.000142 | 0.000786 |
| 11744839_KPNB1     | -0.3862  | 0.000142 | 0.000786 |
| 11723721_SLAIN2    | 0.313317 | 0.000142 | 0.000787 |
| 11726041_STK17B    | 0.493222 | 0.000143 | 0.000787 |
| 11752016_AP4E1     | 0.391073 | 0.000143 | 0.000787 |
| 11751763_LDAH      | 0.480077 | 0.000143 | 0.000787 |
| 11727134_PUS7L     | 0.382954 | 0.000143 | 0.000787 |
| 11759959_SCLT1     | 0.420986 | 0.000143 | 0.000787 |
| 11747222_CAPN1     | -0.42521 | 0.000143 | 0.000789 |
| 11719517_SLC9A6    | 0.299983 | 0.000143 | 0.00079  |
| 11717998_MPLKIP    | -0.30175 | 0.000143 | 0.000791 |
| 11745196_ADI1      | -0.29142 | 0.000143 | 0.000791 |
| 11718971_CD46      | 0.263916 | 0.000143 | 0.000791 |
| 11742930_BIRC6     | 0.336495 | 0.000143 | 0.000791 |
| 11751384_ANKRD12   | 0.314894 | 0.000143 | 0.000791 |
| 11724552_HPCAL1    | -0.25531 | 0.000143 | 0.000791 |
| 11729309_CLMP      | -0.32816 | 0.000143 | 0.000791 |
| 11748286_FAM219B   | 0.330902 | 0.000144 | 0.000793 |
| 11760444_HLA-C     | 0.305947 | 0.000144 | 0.000793 |
| 11746881_ZNF155    | 0.721861 | 0.000144 | 0.000793 |
| 11715846_EFEMP1    | 0.465705 | 0.000144 | 0.000793 |
| 11719761_ARRDC4    | -0.41776 | 0.000144 | 0.000794 |
| 11737876_VMAC      | -0.34684 | 0.000144 | 0.000795 |

|                    |          |          |          |
|--------------------|----------|----------|----------|
| 11741437_SPRYD7    | 0.247226 | 0.000144 | 0.000795 |
| 11718362_HS6ST1    | -0.29197 | 0.000144 | 0.000795 |
| 11731089_DDT /// D | -0.34717 | 0.000145 | 0.000796 |
| 11720355_INTS3     | -0.35755 | 0.000145 | 0.000796 |
| 11759113_LOC100506 | 0.292754 | 0.000145 | 0.000796 |
| 11728310_CMTR2     | 0.328652 | 0.000145 | 0.000796 |
| 11736068_NDRG4     | -0.2851  | 0.000145 | 0.000797 |
| 11749157_CFHR3 /// | 0.580427 | 0.000145 | 0.000797 |
| 11721838_GLIPR1    | 0.284916 | 0.000145 | 0.000798 |
| 11755938_DTX2      | -0.31424 | 0.000145 | 0.000798 |
| 11760509_HAGH      | -0.25285 | 0.000145 | 0.000799 |
| 11732277_FOXP1     | 0.311353 | 0.000145 | 0.0008   |
| 11717602_SECISBP2  | 0.308337 | 0.000146 | 0.000801 |
| 11731164_ZNF789    | 0.374124 | 0.000146 | 0.000801 |
| 11718268_ANGPTL2   | 0.442346 | 0.000146 | 0.000801 |
| 11749252_STOM      | 0.30269  | 0.000146 | 0.000801 |
| 11741149_SLC3A2    | 0.267781 | 0.000146 | 0.000801 |
| 11721260_WDR47     | 0.28895  | 0.000146 | 0.000801 |
| 11757378_RMDN3     | 0.270089 | 0.000146 | 0.000802 |
| 11756957_DCTN2     | -0.39128 | 0.000146 | 0.000802 |
| 11725016_MAP9      | -0.31172 | 0.000146 | 0.000802 |
| 11721302_CLEC2B    | 0.283378 | 0.000146 | 0.000802 |
| 11722993_PLIN3     | 0.249065 | 0.000146 | 0.000803 |
| 11745290_PHTF1     | 0.29752  | 0.000146 | 0.000803 |
| 11722417_LARP6     | 0.480589 | 0.000146 | 0.000804 |
| 11744499_CHMP1A    | -0.24928 | 0.000147 | 0.000805 |
| 11743881_MREG      | 0.281611 | 0.000147 | 0.000805 |
| 11733197_KIAA1586  | 0.379632 | 0.000147 | 0.000805 |
| 11756721_CASP8AP2  | -0.30854 | 0.000147 | 0.000805 |
| 11743037_CRTAP     | -0.33691 | 0.000147 | 0.000806 |
| 11736999_ZNF41     | 0.481337 | 0.000147 | 0.000806 |
| 11757818_CFL1      | -0.26869 | 0.000147 | 0.000806 |
| 11754068_CSRP1     | -0.2647  | 0.000147 | 0.000807 |
| 11762010_GRAMD1B   | 0.494853 | 0.000147 | 0.000807 |
| 11724434_TPK1      | 0.395967 | 0.000147 | 0.000807 |
| 11758736_PSMC2     | -0.46267 | 0.000147 | 0.000809 |
| 11737022_GRIN2B    | -0.265   | 0.000147 | 0.000809 |
| 11716996_TSPAN4    | 0.261923 | 0.000148 | 0.000809 |
| 11760430_GLA       | -0.29673 | 0.000148 | 0.000809 |
| 11716418_SPTBN1    | -0.27338 | 0.000148 | 0.000809 |
| 11741756_CPEB1     | 0.692268 | 0.000148 | 0.00081  |
| 11757300_ELOVL5    | -0.26773 | 0.000148 | 0.00081  |
| 11751227_CCDC91    | 0.276359 | 0.000148 | 0.00081  |
| 11728776_VDR       | -0.25069 | 0.000148 | 0.00081  |
| 11724053_FGFR1     | -0.26756 | 0.000148 | 0.000812 |
| 11718941_LSM14B    | -0.58893 | 0.000148 | 0.000812 |
| 11757611_H2AFV     | -0.27682 | 0.000148 | 0.000812 |
| 11751540_CYB561A3  | -0.3091  | 0.000148 | 0.000813 |
| 11722056_ZC3H7B    | 0.371909 | 0.000148 | 0.000813 |
| 11748862_ARL6IP5   | 0.270316 | 0.000148 | 0.000813 |
| 11746727_FBX038    | 0.262479 | 0.000148 | 0.000813 |

|                    |          |          |          |
|--------------------|----------|----------|----------|
| 11715888_PIP4K2B   | -0.2458  | 0.000149 | 0.000814 |
| 11733646_KYNU      | 0.389103 | 0.000149 | 0.000814 |
| 11728433_FAM19A1   | 0.540436 | 0.000149 | 0.000814 |
| 11750012_CSNK1D    | 0.254636 | 0.000149 | 0.000815 |
| 11744280_TIMM44    | -0.32686 | 0.000149 | 0.000816 |
| 11743033_ANXA5     | 0.242597 | 0.000149 | 0.000816 |
| 11725797_USP46     | 0.402789 | 0.000149 | 0.000817 |
| 11742324_CASP8     | 0.476978 | 0.00015  | 0.000818 |
| 11731839_B4GALT6   | -0.37361 | 0.00015  | 0.000818 |
| 11758264_HNRNPA0   | -0.28715 | 0.00015  | 0.000819 |
| 11726158_SPIN4     | -0.34724 | 0.00015  | 0.000819 |
| 11755144_PHF21B    | 0.478868 | 0.00015  | 0.00082  |
| 11743635_ZNRF2     | 0.486532 | 0.00015  | 0.00082  |
| 11751080_C7orf55-L | -0.2984  | 0.00015  | 0.00082  |
| 11742836_UBXN4     | 0.247732 | 0.00015  | 0.00082  |
| 11760527_LIG3      | -0.30758 | 0.00015  | 0.00082  |
| 11716014_SERPINF1  | -0.31866 | 0.00015  | 0.00082  |
| 11754681_HLA-DMB   | -0.24854 | 0.00015  | 0.00082  |
| 11739500_APOPT1    | -0.27028 | 0.00015  | 0.000821 |
| 11728734_ZBTB38    | 0.297473 | 0.00015  | 0.000822 |
| 11744116_RPIA      | -0.3045  | 0.00015  | 0.000822 |
| 11752846_ARHGEF7   | 0.273412 | 0.00015  | 0.000822 |
| 11738936_KLRC3     | 1.279299 | 0.00015  | 0.000822 |
| 11753917_NEMF      | 0.382166 | 0.00015  | 0.000822 |
| 11723114_CENPC     | 0.264376 | 0.000151 | 0.000823 |
| 11716268_AK1       | -0.25516 | 0.000151 | 0.000823 |
| 11723227_SGCB      | 0.289072 | 0.000151 | 0.000823 |
| 11725638_EIF3J     | 0.27759  | 0.000151 | 0.000824 |
| 11718412_GPKOW     | -0.38693 | 0.000151 | 0.000824 |
| 11743379_ABI1      | -0.2606  | 0.000151 | 0.000824 |
| 11739337_POLR1B    | 0.295449 | 0.000151 | 0.000824 |
| 11750020_SURF4     | -0.29459 | 0.000151 | 0.000824 |
| 11753016_CEP250    | -0.26065 | 0.000151 | 0.000825 |
| 11715559_YWHAQ     | -0.31357 | 0.000151 | 0.000825 |
| 11718561_RCOR1     | 0.290617 | 0.000151 | 0.000826 |
| 11750258_ATXN2L    | -0.39699 | 0.000151 | 0.000826 |
| 11755305_ZNF410    | 0.354441 | 0.000151 | 0.000826 |
| 11757390_KLHL24    | -0.42372 | 0.000152 | 0.000826 |
| 11743675_ABL2      | 0.299335 | 0.000152 | 0.000826 |
| 11743106_DHX9      | 0.246595 | 0.000152 | 0.000827 |
| 11731541_SESTD1    | -0.6461  | 0.000152 | 0.000827 |
| 11757896_RSRP1     | 0.393624 | 0.000152 | 0.000827 |
| 11741995_WBSCR22   | 0.257765 | 0.000152 | 0.000828 |
| 11743368_RPP14     | 0.33607  | 0.000152 | 0.000828 |
| 11738021_PLCB4     | 0.461192 | 0.000152 | 0.000828 |
| 11726600_ZMPSTE24  | 0.292048 | 0.000152 | 0.000828 |
| 11717188_DNAJA1    | 0.260991 | 0.000152 | 0.000828 |
| 11717814_ST3GAL4   | -0.24162 | 0.000152 | 0.000828 |
| 11719214_LOC100996 | 0.450006 | 0.000152 | 0.000828 |
| 11726985_CCNC      | 0.300668 | 0.000152 | 0.000829 |
| 11718780_SSBP2     | 0.415275 | 0.000152 | 0.00083  |



|                   |          |          |          |
|-------------------|----------|----------|----------|
| 11751699_USP3     | 0.335745 | 0.000152 | 0.00083  |
| 11743814_KLC1     | 0.339253 | 0.000152 | 0.00083  |
| 11716043_FAM168B  | 0.55424  | 0.000152 | 0.00083  |
| 11748449_ITGA5    | 0.439834 | 0.000153 | 0.00083  |
| 11745598_AGPAT2   | -0.27464 | 0.000153 | 0.00083  |
| 11739462_TGFBR1   | 0.579798 | 0.000153 | 0.000831 |
| 11736547_FANCD2   | -0.36334 | 0.000153 | 0.000831 |
| 11721664_TP53I13  | -0.26367 | 0.000153 | 0.000831 |
| 11751937_KIF27    | 0.55335  | 0.000153 | 0.000831 |
| 11722973_FOXP1    | -0.31375 | 0.000153 | 0.000831 |
| 11728065_SALL4    | -0.2882  | 0.000153 | 0.000831 |
| 11723342_C11orf84 | -0.30779 | 0.000153 | 0.000832 |
| 11727437_RALGAPB  | 0.275236 | 0.000153 | 0.000832 |
| 11719281_UBE2I    | -0.27404 | 0.000153 | 0.000833 |
| 11718878_SMC1A    | -0.71197 | 0.000153 | 0.000833 |
| 11730345_C6orf58  | 0.5908   | 0.000153 | 0.000833 |
| 11717705_VPS13D   | -0.45644 | 0.000153 | 0.000833 |
| 11726125_HOXA5    | 0.266703 | 0.000153 | 0.000833 |
| 11722032_SLC12A4  | 0.301726 | 0.000154 | 0.000835 |
| 11727674_RFXAP    | -0.30377 | 0.000154 | 0.000835 |
| 11730738_SCCPDH   | -0.76509 | 0.000154 | 0.000836 |
| 11750401_UVRAG    | 0.372369 | 0.000154 | 0.000836 |
| 11725830_PLCL2    | 0.851545 | 0.000154 | 0.000836 |
| 11715774_IMP3     | 0.252723 | 0.000154 | 0.000837 |
| 11739172_G2E3     | -0.28086 | 0.000154 | 0.000838 |
| 11749526_STK38L   | 0.326545 | 0.000154 | 0.000838 |
| 11725030_PNN      | 0.260212 | 0.000154 | 0.000838 |
| 11743754_ZFAND5   | 0.256207 | 0.000154 | 0.000838 |
| 11748347_ANKRD28  | 0.279047 | 0.000154 | 0.000838 |
| 11716352_TOMM34   | -0.23893 | 0.000155 | 0.000839 |
| 11731521_ZNF592   | -0.38792 | 0.000155 | 0.000842 |
| 11727721_BCAP29   | -0.39423 | 0.000155 | 0.000842 |
| 11733995_NADK2    | -0.29058 | 0.000155 | 0.000842 |
| 11725740_OGFOD3   | -0.41462 | 0.000155 | 0.000843 |
| 11728208_ISY1     | -0.33331 | 0.000156 | 0.000844 |
| 11730936_AKNA     | -0.39863 | 0.000156 | 0.000844 |
| 11741680_SERPINE2 | 0.242202 | 0.000156 | 0.000844 |
| 11746374_CCDC25   | 0.269509 | 0.000156 | 0.000844 |
| 11729385_FOXP1    | -0.48855 | 0.000156 | 0.000845 |
| 11722384_UBTF     | -0.33447 | 0.000156 | 0.000845 |
| 11748818_TADA3    | -0.2571  | 0.000156 | 0.000846 |
| 11730960_DGKG     | 0.284035 | 0.000156 | 0.000847 |
| 11750396_ZNF302   | 0.306996 | 0.000157 | 0.000848 |
| 11719299_CTDSP1   | -0.31158 | 0.000157 | 0.000849 |
| 11758134_PPM1H    | 0.391167 | 0.000157 | 0.000849 |
| 11737321_RREB1    | 0.372326 | 0.000157 | 0.000849 |
| 11719768_RNF111   | -0.46808 | 0.000157 | 0.00085  |
| 11742299_ING4     | -0.29134 | 0.000157 | 0.00085  |
| 11746845_TMEM143  | -0.24507 | 0.000157 | 0.00085  |
| 11721960_SNX30    | 0.239941 | 0.000157 | 0.000851 |
| 11722239_HIPK1    | 0.251188 | 0.000157 | 0.000851 |

|                    |          |          |          |
|--------------------|----------|----------|----------|
| 11718054_LSM1      | 0.249693 | 0.000157 | 0.000852 |
| 11725083_HDAC6     | -0.51015 | 0.000158 | 0.000853 |
| 11749137_FAM169A   | 0.339664 | 0.000158 | 0.000853 |
| 11727407_PLEKHA3   | 0.379163 | 0.000158 | 0.000853 |
| 11751951_TJP2      | 0.249388 | 0.000158 | 0.000853 |
| 11745853_RNF145    | 0.302439 | 0.000158 | 0.000854 |
| 11753891_TUBB      | -0.25715 | 0.000158 | 0.000854 |
| 11720064_GLIPR2    | -0.3145  | 0.000158 | 0.000854 |
| 11750789_EPS15     | 0.363476 | 0.000158 | 0.000855 |
| 11743416_C5orf30   | -0.39088 | 0.000158 | 0.000855 |
| 11740674_TCERG1    | 0.264852 | 0.000158 | 0.000855 |
| 11750889_GLTSCR2   | 0.264084 | 0.000158 | 0.000855 |
| 11734778_PCTP      | -0.28697 | 0.000158 | 0.000855 |
| 11744853_ZNF880    | 0.281392 | 0.000158 | 0.000856 |
| 11729864_MYBPC2    | -0.26855 | 0.000158 | 0.000857 |
| 11734922_ZNF276    | 0.267538 | 0.000159 | 0.000857 |
| 11720951_DCUN1D4   | -0.27028 | 0.000159 | 0.000858 |
| 11747385_STK25     | -0.3061  | 0.000159 | 0.000858 |
| 11757904_MAST3     | -0.37187 | 0.000159 | 0.000859 |
| 11736107_ENTPD4    | 0.511646 | 0.000159 | 0.000859 |
| 11725731_LUC7L     | 0.324931 | 0.000159 | 0.000859 |
| 11717684_RBM15B    | -0.27766 | 0.000159 | 0.00086  |
| 11745279_SYNJ1     | 0.547972 | 0.000159 | 0.00086  |
| 11730787_KLHL20    | 0.324034 | 0.000159 | 0.000861 |
| 11721612_IP011 /// | -0.32483 | 0.00016  | 0.000862 |
| 11752417_IMMT      | -0.26014 | 0.00016  | 0.000862 |
| 11754716_GATAD2A   | -0.29616 | 0.00016  | 0.000863 |
| 11723889_HELQ      | 0.443707 | 0.00016  | 0.000863 |
| 11746863_ARSJ      | 0.308924 | 0.00016  | 0.000863 |
| 11757557_CADM1     | 0.394684 | 0.00016  | 0.000864 |
| 11748273_RAF1      | 0.33856  | 0.00016  | 0.000865 |
| 11716436_RAD21     | -0.34239 | 0.00016  | 0.000865 |
| 11721862_STX12     | 0.278764 | 0.00016  | 0.000866 |
| 11715587_MAPRE1    | 0.267662 | 0.000161 | 0.000867 |
| 11720370_RTCA      | 0.299961 | 0.000161 | 0.000867 |
| 11753207_MOB1B     | 0.581278 | 0.000161 | 0.000867 |
| 11720958_SAT2      | 0.421067 | 0.000161 | 0.000867 |
| 11737796_KIAA1524  | -0.53344 | 0.000161 | 0.000868 |
| 11722027_UBE2G1    | -0.34003 | 0.000161 | 0.000868 |
| 11736925_UBP1      | 0.274636 | 0.000161 | 0.000868 |
| 11748150_MDC1      | -0.48222 | 0.000161 | 0.000868 |
| 11760241_SKP2      | 0.326613 | 0.000161 | 0.000869 |
| 11753156_GALNT2    | 0.441498 | 0.000161 | 0.000869 |
| 11716743_TJP2      | 0.25795  | 0.000161 | 0.000869 |
| 11743537_DNAJC18   | 0.292095 | 0.000162 | 0.000871 |
| 11724747_CHMP2B    | 0.316746 | 0.000162 | 0.000872 |
| 11758088_SOCS6     | -0.31587 | 0.000162 | 0.000872 |
| 11727525_C12orf29  | 0.255223 | 0.000162 | 0.000872 |
| 11725354_EPM2AIP1  | 0.41693  | 0.000162 | 0.000872 |
| 11759374_HIST1H3G  | -0.31675 | 0.000162 | 0.000873 |
| 11740154_ZNF384    | 0.243663 | 0.000162 | 0.000873 |

|                   |          |          |          |
|-------------------|----------|----------|----------|
| 11741678_SERPINE2 | 0.273388 | 0.000162 | 0.000874 |
| 11763439_HNRNPU   | -0.28366 | 0.000162 | 0.000875 |
| 11750865_CRISPLD1 | -0.32092 | 0.000163 | 0.000875 |
| 11722927_CCDC137  | -0.24095 | 0.000163 | 0.000875 |
| 11748112_MAPKAP1  | -0.46785 | 0.000163 | 0.000875 |
| 11748473_ZNF28    | 0.484737 | 0.000163 | 0.000876 |
| 11747392_IMMT     | -0.29738 | 0.000163 | 0.000876 |
| 11736424_STARD4   | -0.31774 | 0.000163 | 0.000876 |
| 11745918_USPL1    | 0.292845 | 0.000163 | 0.000876 |
| 11740308_SLC5A12  | 0.244852 | 0.000163 | 0.000877 |
| 11744901_NDUFS1   | -0.23418 | 0.000163 | 0.000877 |
| 11743775_MTRR     | 0.283576 | 0.000163 | 0.000877 |
| 11750630_MAP3K5   | 0.303963 | 0.000163 | 0.000878 |
| 11726327_DCUN1D1  | 0.299082 | 0.000163 | 0.000878 |
| 11759583_ERCC6L2  | 0.376545 | 0.000163 | 0.000878 |
| 11724418_UNKL     | -0.28301 | 0.000163 | 0.000878 |
| 11749664_DOCK7    | 0.447437 | 0.000163 | 0.000878 |
| 11719193_CBY1     | 0.241808 | 0.000163 | 0.000879 |
| 11729473_FANCA    | -0.39507 | 0.000164 | 0.000879 |
| 11744469_TBCD     | -0.30232 | 0.000164 | 0.000879 |
| 11758327_BAZ1A    | 0.299645 | 0.000164 | 0.000881 |
| 11748946_UBTF     | -0.35394 | 0.000164 | 0.000881 |
| 11754188_EIF2AK1  | -0.34484 | 0.000164 | 0.000881 |
| 11740166_FMN1     | -0.3916  | 0.000164 | 0.000881 |
| 11760085_HNRNPA1  | 0.277488 | 0.000164 | 0.000882 |
| 11735132_DNAJC21  | 0.289865 | 0.000164 | 0.000882 |
| 11756690_HN1L     | -0.29413 | 0.000164 | 0.000883 |
| 11721964_TCAIM    | 0.319456 | 0.000164 | 0.000883 |
| 11717648_MCMBP    | -0.29364 | 0.000164 | 0.000883 |
| 11727114_MARK2    | 0.280876 | 0.000165 | 0.000884 |
| 11746525_RBM48    | 0.308076 | 0.000165 | 0.000884 |
| 11754191_SRSF11   | 0.253047 | 0.000165 | 0.000884 |
| 11716988_PNRC2    | 0.233718 | 0.000165 | 0.000885 |
| 11723154_CAMTA1   | 0.308174 | 0.000165 | 0.000885 |
| 11717338_CUX1     | 0.30304  | 0.000165 | 0.000886 |
| 11727189_WNT5A    | -0.37634 | 0.000165 | 0.000886 |
| 11739508_NAA30    | 0.2446   | 0.000165 | 0.000886 |
| 11729963_ANKEF1   | 0.698834 | 0.000165 | 0.000886 |
| 11742743_CNN3     | 0.244933 | 0.000165 | 0.000886 |
| 11722760_CAMSAP2  | 0.274471 | 0.000165 | 0.000886 |
| 11726744_TAOK2    | 0.280312 | 0.000165 | 0.000886 |
| 11741096_CORO2A   | -0.47055 | 0.000165 | 0.000887 |
| 11744295_FAM195B  | -0.24772 | 0.000165 | 0.000887 |
| 11748573_TTC8     | 0.401621 | 0.000165 | 0.000887 |
| 11718605_SCRG1    | 0.456934 | 0.000166 | 0.000887 |
| 11748152_IFNGR1   | 0.284053 | 0.000166 | 0.000887 |
| 11725367_IER5L    | -0.29971 | 0.000166 | 0.000888 |
| 11745829_BTAF1    | 0.440008 | 0.000166 | 0.000888 |
| 11740309_ZNF460   | 0.525519 | 0.000166 | 0.000888 |
| 11745159_TGFA     | 0.537711 | 0.000166 | 0.00089  |
| 11746626_HAGH     | -0.27854 | 0.000166 | 0.00089  |

|                    |          |          |          |
|--------------------|----------|----------|----------|
| 11717940_U2AF2     | -0.25478 | 0.000166 | 0.00089  |
| 11721273_NR2C1     | -0.51134 | 0.000166 | 0.00089  |
| 11731684_RIF1      | 0.262908 | 0.000166 | 0.00089  |
| 11746618_RASSF8    | -0.42675 | 0.000166 | 0.00089  |
| 11741129_CAPN2     | 0.237361 | 0.000166 | 0.000891 |
| 11743875_CEP72     | -0.25934 | 0.000167 | 0.000891 |
| 11716658_HNRNP3    | -0.25888 | 0.000167 | 0.000891 |
| 11749889_SYAP1     | 0.247181 | 0.000167 | 0.000891 |
| 11748232_DIS3      | 0.306385 | 0.000167 | 0.000892 |
| 11739595_RBM12     | -0.35341 | 0.000167 | 0.000893 |
| 11749118_SORBS1    | 0.56615  | 0.000167 | 0.000893 |
| 11720084_NUDT22    | -0.37217 | 0.000167 | 0.000893 |
| 11743351_COBL1     | 0.459383 | 0.000167 | 0.000894 |
| 11728248_TSFM      | -0.26799 | 0.000167 | 0.000894 |
| 11754027_CYC1      | -0.24179 | 0.000168 | 0.000896 |
| 11757490_TSPYL1    | 0.236682 | 0.000168 | 0.000897 |
| 11758589_ERCC4     | 0.302471 | 0.000168 | 0.000897 |
| 11759428_KLF7      | 0.301471 | 0.000168 | 0.000897 |
| 11720493_MOB3A     | 0.325968 | 0.000168 | 0.000898 |
| 11742825_GTF3C1    | -0.27818 | 0.000168 | 0.000899 |
| 11715625_SH3BGR1   | 0.303625 | 0.000168 | 0.000899 |
| 11727016_PAPPA     | 0.57228  | 0.000168 | 0.000899 |
| 11721969_BDP1      | 0.324903 | 0.000168 | 0.000899 |
| 11727576_TMEM237   | -0.32413 | 0.000168 | 0.000899 |
| 11745083_MANEA     | -0.38128 | 0.000168 | 0.000899 |
| 11743268_PTP4A2    | 0.256528 | 0.000168 | 0.000899 |
| 11726333_LEF1      | -0.32105 | 0.000168 | 0.0009   |
| 11727406_TEK       | 0.896317 | 0.000169 | 0.0009   |
| 11723129_ARHGFE7   | 0.257638 | 0.000169 | 0.000901 |
| 11720404_EFNB2     | -0.24372 | 0.000169 | 0.000901 |
| 11759303_MFHAS1    | 0.301363 | 0.000169 | 0.000902 |
| 11745980_DIMT1     | -0.25321 | 0.000169 | 0.000902 |
| 11762282_HLA-A     | 0.265806 | 0.000169 | 0.000903 |
| 11723032_PLP2      | -0.29675 | 0.000169 | 0.000903 |
| 11740449_CFAP58    | 1.189997 | 0.000169 | 0.000904 |
| 11758267_ZBTB1     | 0.296547 | 0.00017  | 0.000905 |
| 11754689_TUSC3     | 0.267508 | 0.00017  | 0.000905 |
| 11750582_HDAC6     | -0.70827 | 0.00017  | 0.000905 |
| 11725268_FAT4      | 0.702718 | 0.00017  | 0.000905 |
| 11743484_NAA25     | 0.291146 | 0.00017  | 0.000905 |
| 11720519_LOC100996 | 0.491178 | 0.00017  | 0.000906 |
| 11755851_UBR4      | 0.296809 | 0.00017  | 0.000906 |
| 11716809_CDC16     | 0.250574 | 0.00017  | 0.000907 |
| 11716474_PUM1      | 0.275763 | 0.00017  | 0.000907 |
| 11717700_DCAF8     | -0.26981 | 0.00017  | 0.000908 |
| 11748884_SRSF11    | 0.242872 | 0.00017  | 0.000908 |
| 11735173_SNRPN /// | -0.27023 | 0.00017  | 0.000908 |
| 11718284	EIF4EBP1  | -0.25948 | 0.000171 | 0.000908 |
| 11751728_TNRC6A    | 0.626146 | 0.000171 | 0.000908 |
| 11756266_CYFIP2    | 0.351368 | 0.000171 | 0.000908 |
| 11756148_PHLDB1    | 0.248559 | 0.000171 | 0.00091  |

|                    |          |          |          |
|--------------------|----------|----------|----------|
| 11741627_ST7L      | 0.731025 | 0.000171 | 0.00091  |
| 11762368_KLHL8     | 0.323894 | 0.000171 | 0.00091  |
| 11746227_LOC652276 | 0.272876 | 0.000171 | 0.00091  |
| 11752692_NRBF2     | 0.26096  | 0.000171 | 0.000911 |
| 11746109_MPP2      | -0.36088 | 0.000171 | 0.000911 |
| 11722487_UTP14C    | -0.26592 | 0.000171 | 0.000911 |
| 11728713_LOC100996 | 0.274414 | 0.000171 | 0.000911 |
| 11723571_OTUD3     | 0.39643  | 0.000172 | 0.000913 |
| 11744060_UQCRC2    | -0.25191 | 0.000172 | 0.000913 |
| 11749955_SEC61A1   | 0.267412 | 0.000172 | 0.000913 |
| 11715773_IMP3      | 0.314834 | 0.000172 | 0.000913 |
| 11754737_ZNF41     | 0.399262 | 0.000172 | 0.000913 |
| 11748188_NAGA      | -0.35072 | 0.000172 | 0.000913 |
| 11728443_TAOK1     | 0.361118 | 0.000172 | 0.000913 |
| 11753184_KLF16     | -0.2603  | 0.000172 | 0.000914 |
| 11722332_INO80     | 0.234108 | 0.000172 | 0.000915 |
| 11726523_ZFH3      | -0.26933 | 0.000172 | 0.000915 |
| 11719188_NRAS      | 0.326246 | 0.000172 | 0.000916 |
| 11756344_ARMC10    | 0.292241 | 0.000172 | 0.000916 |
| 11756428_SLC25A16  | 0.393815 | 0.000172 | 0.000916 |
| 11724781_HERC4     | 0.366074 | 0.000172 | 0.000916 |
| 11755222_GNA13     | -0.33411 | 0.000173 | 0.000917 |
| 11746791_BECN1     | 0.254525 | 0.000173 | 0.000917 |
| 11729235_E2F6 ///  | 0.271904 | 0.000173 | 0.000918 |
| 11749988_AUH       | 0.311751 | 0.000173 | 0.000918 |
| 11727984_TENM3     | 0.313819 | 0.000173 | 0.000919 |
| 11760244_CARD8     | -0.35048 | 0.000173 | 0.00092  |
| 11717713_PALM      | -0.31799 | 0.000173 | 0.000921 |
| 11754314_TTC7B     | -0.29904 | 0.000174 | 0.000923 |
| 11734108_LSM11     | 0.286894 | 0.000174 | 0.000924 |
| 11760414_SLC44A5   | 0.395604 | 0.000174 | 0.000924 |
| 11748301_TFDP2     | -0.31821 | 0.000174 | 0.000925 |
| 11721419_POLI      | -0.65127 | 0.000174 | 0.000925 |
| 11724141_RAB11FIP2 | 0.363682 | 0.000174 | 0.000925 |
| 11755810_TAPT1     | 0.284244 | 0.000174 | 0.000925 |
| 11722485_UTP14C    | -0.32562 | 0.000174 | 0.000925 |
| 11721693_CYB561    | 0.244539 | 0.000174 | 0.000925 |
| 11716373_PTK2      | 0.287898 | 0.000175 | 0.000926 |
| 11718615_RABEP1    | 0.287718 | 0.000175 | 0.000926 |
| 11728659_HN1L      | -0.30181 | 0.000175 | 0.000926 |
| 11729150_PIGM      | -0.38885 | 0.000175 | 0.000926 |
| 11733071_SLC3A2    | 0.286907 | 0.000175 | 0.000927 |
| 11761979_ALG13     | 0.384109 | 0.000175 | 0.000927 |
| 11741414_RECQL4    | -0.28106 | 0.000175 | 0.000928 |
| 11717327_KLF9      | -0.27569 | 0.000175 | 0.000929 |
| 11725899_LRRC8D    | -0.30018 | 0.000176 | 0.00093  |
| 11763181_RQCD1     | -0.30566 | 0.000176 | 0.00093  |
| 11744304_MFSD3     | -0.34644 | 0.000176 | 0.00093  |
| 11720290_IQCE      | 0.301033 | 0.000176 | 0.000931 |
| 11748285_SENP7     | 0.51929  | 0.000176 | 0.000931 |
| 11748974_CWF19L1   | -0.40026 | 0.000176 | 0.000931 |

|                    |          |          |          |
|--------------------|----------|----------|----------|
| 11723353_CHD7      | 0.418792 | 0.000176 | 0.000931 |
| 11734394_KLRC3     | 0.740915 | 0.000176 | 0.000931 |
| 11742684_LAMP2     | -0.40837 | 0.000176 | 0.000932 |
| 11753481_SNAPC3    | 0.324937 | 0.000176 | 0.000933 |
| 11731995_SPANXA1 / | 0.256822 | 0.000176 | 0.000933 |
| 11722751_AKAP8     | 0.353365 | 0.000176 | 0.000933 |
| 11727897_LSM8 ///  | -0.28499 | 0.000176 | 0.000934 |
| 11723946_ACSL5     | 0.35888  | 0.000177 | 0.000935 |
| 11751219_GOLGA4    | 0.476532 | 0.000177 | 0.000935 |
| 11719339_SLC23A2   | -0.55346 | 0.000177 | 0.000935 |
| 11758163_ZFP62     | -0.32016 | 0.000177 | 0.000936 |
| 11744862_DHRS7     | 0.344945 | 0.000177 | 0.000936 |
| 11731362_ZNF624    | 0.452264 | 0.000177 | 0.000936 |
| 11725690_ZNF410    | 0.340211 | 0.000177 | 0.000936 |
| 11717470_EPT1      | -0.26194 | 0.000177 | 0.000937 |
| 11744392_PAPOLA    | -0.24618 | 0.000177 | 0.000937 |
| 11730524_PTPN13    | 0.336535 | 0.000177 | 0.000937 |
| 11716690_GOLGA3    | 0.248115 | 0.000177 | 0.000937 |
| 11728908_B3GLCT    | -0.25751 | 0.000178 | 0.000938 |
| 11746416_APEX2     | -0.29306 | 0.000178 | 0.000941 |
| 11763987_VEPH1     | 0.921763 | 0.000178 | 0.000941 |
| 11748984_VTA1      | 0.317758 | 0.000178 | 0.000941 |
| 11739472_MAGI1     | 0.425218 | 0.000178 | 0.000941 |
| 11757014_ARL15     | 0.44715  | 0.000178 | 0.000941 |
| 11727276_ZNF77     | 0.411406 | 0.000178 | 0.000942 |
| 11752552_MCCC1     | 0.354854 | 0.000178 | 0.000942 |
| 11730051_CA13      | 0.465841 | 0.000178 | 0.000942 |
| 11743922_NUDT11    | -0.70808 | 0.000179 | 0.000943 |
| 11720333_SLC5A6    | -0.23838 | 0.000179 | 0.000943 |
| 11736492_DAZAP2    | -0.51829 | 0.000179 | 0.000943 |
| 11752069_VCPIP1    | 0.302978 | 0.000179 | 0.000943 |
| 11725330_USP9X     | -0.52351 | 0.000179 | 0.000944 |
| 11725736_UBR3      | 0.500433 | 0.000179 | 0.000944 |
| 11746598_KHSRP     | -0.2961  | 0.000179 | 0.000945 |
| 11726528_FAM81A    | -0.22632 | 0.000179 | 0.000946 |
| 11752367_RABEP2    | -0.3177  | 0.000179 | 0.000947 |
| 11757154_SNORA3B   | -0.25586 | 0.00018  | 0.000947 |
| 11745527_HSF2      | 0.298229 | 0.00018  | 0.000948 |
| 11756208_SNX9      | 0.261951 | 0.00018  | 0.000948 |
| 11747777_RAB6A /// | 0.35437  | 0.00018  | 0.000949 |
| 11747823_NUP85     | -0.26365 | 0.00018  | 0.000949 |
| 11757448_ADD3      | -0.25436 | 0.00018  | 0.000949 |
| 11734221_CREG2     | -0.36251 | 0.00018  | 0.00095  |
| 11747514_GABARAPL2 | 0.250879 | 0.00018  | 0.000951 |
| 11718970_CD46      | 0.232585 | 0.000181 | 0.000951 |
| 11761869_PSIP1     | -0.44641 | 0.000181 | 0.000952 |
| 11742060_CHORDC1   | 0.360085 | 0.000181 | 0.000952 |
| 11721115_SPCS3     | 0.236272 | 0.000181 | 0.000953 |
| 11746953_PPIL2     | -0.42828 | 0.000181 | 0.000953 |
| 11715810_TRIP12    | 0.284075 | 0.000181 | 0.000953 |
| 11749419_KIF4A     | -0.47833 | 0.000181 | 0.000954 |

|                    |          |          |          |
|--------------------|----------|----------|----------|
| 11738624_ZNF268    | 0.281423 | 0.000181 | 0.000955 |
| 11744996_PDE1C     | 0.381162 | 0.000181 | 0.000955 |
| 11741572_RGS4      | 0.714784 | 0.000181 | 0.000955 |
| 11750037_CHMP7     | -0.24811 | 0.000181 | 0.000955 |
| 11748166_EPHA2     | 0.386451 | 0.000181 | 0.000955 |
| 11752620_YPEL5     | 0.240936 | 0.000182 | 0.000956 |
| 11731154_MTRR      | 0.302568 | 0.000182 | 0.000957 |
| 11726214_WWOX      | -0.40652 | 0.000182 | 0.000957 |
| 11754806_CADPS2    | 0.311369 | 0.000182 | 0.000957 |
| 11734373_CSPP1     | 0.260296 | 0.000182 | 0.000957 |
| 11749890_SYAP1     | 0.259523 | 0.000182 | 0.000957 |
| 11719528_PVRL2     | 0.31259  | 0.000182 | 0.000958 |
| 11718304_MYO18A // | -0.25102 | 0.000182 | 0.000958 |
| 11741064_RARG      | -0.40741 | 0.000182 | 0.000958 |
| 11763888_SNORA33   | -0.63471 | 0.000182 | 0.000958 |
| 11756581_PRSS23    | 0.275458 | 0.000182 | 0.000959 |
| 11734086_GALE      | 0.270529 | 0.000182 | 0.000959 |
| 11749103_ITGB8     | 0.429362 | 0.000182 | 0.000959 |
| 11721103_POLDIP3   | -0.31141 | 0.000183 | 0.00096  |
| 11760128_LIMS1     | 0.283942 | 0.000183 | 0.00096  |
| 11760127_LIMS1     | 0.280054 | 0.000183 | 0.00096  |
| 11730778_HSD17B11  | -0.2782  | 0.000183 | 0.000961 |
| 11756891_ZNF12     | 0.270643 | 0.000183 | 0.000961 |
| 11733746_GCNT2     | 0.254645 | 0.000183 | 0.000962 |
| 11721383_ATG2B     | -0.44023 | 0.000183 | 0.000962 |
| 11724585_SYT1      | 0.545831 | 0.000183 | 0.000962 |
| 11726022_FAM177A1  | 0.292814 | 0.000183 | 0.000963 |
| 11734371_SCML1     | 0.395092 | 0.000183 | 0.000963 |
| 11725525_DSG2      | 0.31854  | 0.000183 | 0.000963 |
| 11744861_DHRS7     | 0.354999 | 0.000184 | 0.000964 |
| 11762573_BAGE      | 0.269489 | 0.000184 | 0.000964 |
| 11718129_ARL2      | -0.25036 | 0.000184 | 0.000964 |
| 11723001_RANBP1    | -0.26189 | 0.000184 | 0.000964 |
| 11724161_GXYLT1    | 0.557527 | 0.000184 | 0.000964 |
| 11717647_MCMBP     | -0.27811 | 0.000184 | 0.000965 |
| 11759515_GTF3C3    | 0.289611 | 0.000184 | 0.000965 |
| 11722359_EPB41L2   | 0.28242  | 0.000184 | 0.000966 |
| 11759540_RPL35A    | -0.30486 | 0.000184 | 0.000966 |
| 11755562_GPR39     | 0.3056   | 0.000184 | 0.000966 |
| 11740879_ANXA2     | 0.231558 | 0.000184 | 0.000966 |
| 11723344_TRIM35    | 0.316717 | 0.000184 | 0.000966 |
| 11726407_SRRD      | 0.303557 | 0.000184 | 0.000966 |
| 11743851_ZNF146    | 0.267653 | 0.000184 | 0.000967 |
| 11715911_MYO6      | -0.79123 | 0.000185 | 0.000967 |
| 11724893_GATAD2B   | -0.25539 | 0.000185 | 0.000967 |
| 11751096_SNX10     | -0.48406 | 0.000185 | 0.000968 |
| 11752584_CEP104    | 0.284821 | 0.000185 | 0.000968 |
| 11755757_SYNM      | -0.25971 | 0.000185 | 0.000969 |
| 11720751_INPP1     | 0.321868 | 0.000185 | 0.000969 |
| 11759765_PLSCR1    | -0.82345 | 0.000185 | 0.000969 |
| 11745428_DFFB      | -0.48519 | 0.000185 | 0.000969 |

|                    |          |          |          |
|--------------------|----------|----------|----------|
| 11760515_LIAS      | -0.40701 | 0.000185 | 0.00097  |
| 11740162_ARAP1     | -0.2768  | 0.000185 | 0.00097  |
| 11751150_SNIP1     | 0.268305 | 0.000185 | 0.000971 |
| 11736225_SPATS2    | 0.252159 | 0.000186 | 0.000972 |
| 11755481_HELB      | 0.528917 | 0.000186 | 0.000972 |
| 11738474_SYAP1     | 0.283551 | 0.000186 | 0.000973 |
| 11728769_ST6GALNAC | 0.370877 | 0.000186 | 0.000974 |
| 11752562_CDH13     | 0.236132 | 0.000186 | 0.000974 |
| 11722015_OLR1      | 0.46211  | 0.000186 | 0.000975 |
| 11749130_TAF6      | -0.37667 | 0.000186 | 0.000975 |
| 11716915_MTUS1     | 0.357879 | 0.000186 | 0.000975 |
| 11753165_RAB27A    | 0.290987 | 0.000186 | 0.000975 |
| 11725120_GATAD1    | 0.300862 | 0.000187 | 0.000976 |
| 11726244_RORA      | 0.862936 | 0.000187 | 0.000976 |
| 11753645_CFL1      | -0.25625 | 0.000187 | 0.000977 |
| 11755770_HEATR5B   | -0.40075 | 0.000187 | 0.000977 |
| 11718699_C6orf89   | -0.39497 | 0.000187 | 0.000977 |
| 11731122_VASH2     | -0.55232 | 0.000187 | 0.000977 |
| 11722781_SLC6A19   | -0.27881 | 0.000187 | 0.000977 |
| 11752650_RALGAPB   | 0.269111 | 0.000187 | 0.000977 |
| 11757331_RPL13A    | -0.23938 | 0.000187 | 0.000977 |
| 11744854_ZNF28     | 0.348909 | 0.000187 | 0.000977 |
| 11721710_SHROOM3   | 0.354969 | 0.000187 | 0.000977 |
| 11728528_CGREF1    | -0.31102 | 0.000187 | 0.000977 |
| 11719648_CASP7     | -0.39824 | 0.000187 | 0.000977 |
| 11752916_LOC440434 | 0.257981 | 0.000187 | 0.000977 |
| 11725948_KRI1      | 0.245923 | 0.000187 | 0.000977 |
| 11759001_LDLRAD3   | -0.29949 | 0.000187 | 0.000977 |
| 11731003_RAB28     | -0.2854  | 0.000187 | 0.000978 |
| 11737897_ABCB7     | 0.265383 | 0.000187 | 0.000978 |
| 11721757_TMEM47    | 0.409404 | 0.000187 | 0.000978 |
| 11732630_ZNF765    | 0.451383 | 0.000187 | 0.000978 |
| 11729647_ESM1      | 0.312541 | 0.000188 | 0.000979 |
| 11715882_DAP3      | 0.270949 | 0.000188 | 0.00098  |
| 11756286_SFXN2     | -0.2914  | 0.000188 | 0.00098  |
| 11743110_NAMPT     | 0.227416 | 0.000188 | 0.00098  |
| 11720592_HDAC8     | -0.30513 | 0.000188 | 0.00098  |
| 11740364_PTPN3     | 0.261459 | 0.000188 | 0.00098  |
| 11750129_KLC1      | 0.394069 | 0.000188 | 0.00098  |
| 11724567_USP48     | -0.2506  | 0.000188 | 0.000981 |
| 11720681_TIFA      | -0.837   | 0.000188 | 0.000982 |
| 11720133_PROS1     | 0.327765 | 0.000188 | 0.000982 |
| 11728410_INO80C    | -0.27958 | 0.000188 | 0.000983 |
| 11737753_SNX5      | -0.25714 | 0.000188 | 0.000983 |
| 11718866_FAM192A   | -0.43146 | 0.000189 | 0.000983 |
| 11725329_USP9X     | 0.229532 | 0.000189 | 0.000983 |
| 11717584_VAPB      | -0.24795 | 0.000189 | 0.000983 |
| 11745335_MTMR1     | 0.381553 | 0.000189 | 0.000983 |
| 11744444_NDUFB10   | -0.28516 | 0.000189 | 0.000983 |
| 11744488_ACOT9     | 0.245791 | 0.000189 | 0.000983 |
| 11722490_HS1BP3    | -0.28361 | 0.000189 | 0.000983 |



|                    |          |          |          |
|--------------------|----------|----------|----------|
| 11750861_CMAHP     | 0.620862 | 0.000189 | 0.000983 |
| 11719593_RPRD2     | -0.41867 | 0.000189 | 0.000984 |
| 11731611_PCID2     | 0.265491 | 0.000189 | 0.000984 |
| 11758420_TRIM43 // | -0.35914 | 0.000189 | 0.000984 |
| 200023_PMEIF3F     | 0.231237 | 0.000189 | 0.000985 |
| 11754915_CCDC115   | -0.2308  | 0.000189 | 0.000985 |
| 11743415_NDRG4     | -0.27427 | 0.000189 | 0.000985 |
| 11751641_PHF11     | 0.345898 | 0.000189 | 0.000985 |
| 11757499_WBP1L     | 0.301505 | 0.000189 | 0.000985 |
| 11725332_CTSL      | 0.247639 | 0.000189 | 0.000986 |
| 11758217_ABHD17C   | -0.29086 | 0.00019  | 0.000986 |
| 11731204_TOR1AIP2  | 0.443523 | 0.00019  | 0.000986 |
| 11725187_KLF12     | 0.363087 | 0.00019  | 0.000986 |
| 11751826_FMR1      | 0.444856 | 0.00019  | 0.000986 |
| 11737991_CEP170    | 0.271603 | 0.00019  | 0.000989 |
| 11753289_LOC100506 | 0.725355 | 0.00019  | 0.000989 |
| 11759575_UQCRH     | 0.253957 | 0.00019  | 0.00099  |
| 11716172_SYVN1     | 0.233696 | 0.00019  | 0.00099  |
| 11735202_N4BP2     | 0.287101 | 0.000191 | 0.00099  |
| 11755048_MED22     | -0.29427 | 0.000191 | 0.00099  |
| 11747594_SH3BGRL   | 0.272117 | 0.000191 | 0.00099  |
| 11733221_DLL3      | -0.26585 | 0.000191 | 0.00099  |
| 11739387_CDC73     | 0.280735 | 0.000191 | 0.000991 |
| 11757977_SLC12A7   | -0.33675 | 0.000191 | 0.000991 |
| 11718053_TBC1D23   | 0.298827 | 0.000191 | 0.000991 |
| 11732148_CAT       | -0.25746 | 0.000191 | 0.000991 |
| 11739431_FCF1      | -0.29219 | 0.000191 | 0.000993 |
| 11753942_UCA1      | 0.400261 | 0.000191 | 0.000993 |
| 11721606_ADD3      | -0.30353 | 0.000191 | 0.000993 |
| 11744840_KPNB1     | -0.2617  | 0.000191 | 0.000994 |
| 11754720_C16orf86  | -0.33347 | 0.000192 | 0.000995 |
| 11754295_FAM107B   | -0.30421 | 0.000192 | 0.000995 |
| 11746646_DDX59     | -0.24561 | 0.000192 | 0.000995 |
| 11720281_EVA1C     | -0.39514 | 0.000192 | 0.000995 |
| 11756942_ING5      | 0.508931 | 0.000192 | 0.000995 |
| 11743004_EXOSC9    | -0.27481 | 0.000192 | 0.000996 |
| 11725005_C8orf58   | 0.446775 | 0.000192 | 0.000996 |
| 11744054_ZNFX1     | -0.27254 | 0.000192 | 0.000996 |
| 11746464_YAF2      | 0.363539 | 0.000192 | 0.000996 |
| 11733129_ZSCAN26   | 0.453893 | 0.000192 | 0.000998 |
| 11726308_FAM204A   | 0.265573 | 0.000192 | 0.000998 |
| 11754322_KCTD10    | -0.45536 | 0.000193 | 0.000998 |
| 11724802_NSRP1     | 0.269021 | 0.000193 | 0.000999 |
| 11747585_C8orf34   | 0.538995 | 0.000193 | 0.001    |
| 11755417_KIAA0922  | 0.381472 | 0.000193 | 0.001    |
| 11750467_UBE3B     | -0.24469 | 0.000193 | 0.001    |
| 11721284_CDS2      | 0.363425 | 0.000193 | 0.001001 |
| 11749815_SPIN1     | 0.28155  | 0.000193 | 0.001001 |
| 11737454_ZNF763    | 0.492079 | 0.000193 | 0.001001 |
| 11750860_CMAHP     | 0.696285 | 0.000193 | 0.001001 |
| 11744223_ATP5D     | -0.31785 | 0.000193 | 0.001001 |

|                    |          |          |          |
|--------------------|----------|----------|----------|
| 11754132_COMT      | 0.271756 | 0.000193 | 0.001002 |
| 11749153_KLHL18    | 0.432447 | 0.000193 | 0.001002 |
| 11716962_PPM1F     | 0.386168 | 0.000194 | 0.001003 |
| 11719939_CAND1     | -0.25477 | 0.000194 | 0.001004 |
| 11718936_MMD       | -0.30657 | 0.000194 | 0.001004 |
| 11750588_CTND1 //  | 0.397255 | 0.000194 | 0.001005 |
| 11749146_TAF6      | -0.27822 | 0.000194 | 0.001005 |
| 11745137_ZNF331    | -0.37584 | 0.000194 | 0.001006 |
| 11748180_SERPINB8  | 0.362634 | 0.000194 | 0.001006 |
| 11754778_MRPL55    | -0.25286 | 0.000195 | 0.001008 |
| 11728312_ZNF148    | -0.41791 | 0.000195 | 0.001008 |
| 11761138_PRKAG1    | -0.30359 | 0.000195 | 0.001009 |
| 11717736_ZCCHC24   | -0.32921 | 0.000195 | 0.00101  |
| 11727215_NRG1      | 0.385449 | 0.000195 | 0.00101  |
| 11758560_HERC4     | 0.37496  | 0.000196 | 0.001011 |
| 11739925_ZNF37A    | 0.376858 | 0.000196 | 0.001011 |
| 11762163_RNF5      | -0.31338 | 0.000196 | 0.001012 |
| 11745718_GTF2I /// | -0.24144 | 0.000196 | 0.001013 |
| 11746737_TMBIM1    | -0.31192 | 0.000196 | 0.001014 |
| 11750216_SLC39A1   | -0.35682 | 0.000196 | 0.001014 |
| 11724797_MAGOH     | -0.43483 | 0.000196 | 0.001014 |
| 11718606_DESI1     | 0.283026 | 0.000196 | 0.001014 |
| 11755375_DGKH      | 0.690337 | 0.000196 | 0.001014 |
| 11753247_MTERF4    | 0.468276 | 0.000196 | 0.001015 |
| 11758624_ERBB2IP   | 0.275778 | 0.000196 | 0.001015 |
| 11727333_RSP04     | -0.23413 | 0.000197 | 0.001015 |
| 11757853_TWIST2    | -0.30878 | 0.000197 | 0.001017 |
| 11756693_MAGED1    | -0.31243 | 0.000197 | 0.001017 |
| 11719788_TUBB2A    | 0.267393 | 0.000197 | 0.001017 |
| 11747979_MAP4      | -0.23385 | 0.000197 | 0.001017 |
| 11719008_PAPOLA    | -0.24408 | 0.000197 | 0.001018 |
| 11731774_GABPB2    | 0.39898  | 0.000197 | 0.001018 |
| 11717835_GLG1      | -0.22647 | 0.000197 | 0.001019 |
| 11728650_NUCKS1    | -0.33576 | 0.000197 | 0.001019 |
| 11763133_RAB6A     | 0.24529  | 0.000197 | 0.001019 |
| 11719568_KIAA2013  | -0.26149 | 0.000197 | 0.001019 |
| 11755357_ACO1      | 0.294245 | 0.000198 | 0.00102  |
| 11731760_RAD52     | 0.41447  | 0.000198 | 0.001021 |
| 11718117_NFS1      | -0.28773 | 0.000198 | 0.001023 |
| 11754619_TLK2      | -0.3171  | 0.000198 | 0.001023 |
| 11720263_MITF      | 0.38263  | 0.000198 | 0.001024 |
| 11721869_HIF1AN    | -0.35414 | 0.000199 | 0.001024 |
| 11724379_NHSL1     | -0.30227 | 0.000199 | 0.001024 |
| 11716974_PDK4      | 0.385139 | 0.000199 | 0.001024 |
| 11716881_ZZEF1     | 0.244784 | 0.000199 | 0.001024 |
| 11715957_PEPD      | -0.28509 | 0.000199 | 0.001025 |
| 11731896_TNFSF4    | 1.150518 | 0.000199 | 0.001025 |
| 11727704_ZNF439    | 0.464069 | 0.000199 | 0.001025 |
| 11747996_ETV4      | -0.33488 | 0.000199 | 0.001027 |
| 11745449_ZNF121    | 0.350913 | 0.000199 | 0.001027 |
| 11732858_ADGRA2    | -0.38856 | 0.000199 | 0.001027 |

|                    |          |          |          |
|--------------------|----------|----------|----------|
| 11717498_SLC25A36  | 0.244739 | 0.000199 | 0.001027 |
| 11748709_GLI2      | 0.246715 | 0.000199 | 0.001027 |
| 11730679_ASXB7     | 0.288274 | 0.000199 | 0.001027 |
| 11722823_SKP1      | -0.28587 | 0.0002   | 0.001028 |
| 11720740_MCF2L     | 0.355299 | 0.0002   | 0.001028 |
| 11750993_MAP3K7    | 0.274013 | 0.0002   | 0.001028 |
| 11723854_SAMD9     | 0.254739 | 0.0002   | 0.001029 |
| 11755876_IFRD2     | -0.31568 | 0.0002   | 0.001029 |
| 11756575_CABIN1    | -0.28987 | 0.0002   | 0.00103  |
| 11736339_PCSK1     | 0.431691 | 0.0002   | 0.00103  |
| 11724769_FCGR2A // | 0.290404 | 0.0002   | 0.001031 |
| 11736045_MYH10     | -0.2668  | 0.0002   | 0.001031 |
| 11739413_MTR       | -0.25257 | 0.0002   | 0.001031 |
| 11728670_UBE2H     | 0.267432 | 0.0002   | 0.001031 |
| 11757797_EPM2A     | -0.24315 | 0.0002   | 0.001031 |
| 11716145_PDCD6IP   | 0.22963  | 0.0002   | 0.001031 |
| 11731795_EPHX4     | 0.30028  | 0.000201 | 0.001032 |
| 11758622_MXRA7     | 0.244701 | 0.000201 | 0.001032 |
| 11732450_AGRN      | 0.240569 | 0.000201 | 0.001032 |
| 11759304_UGT8      | -0.26702 | 0.000201 | 0.001033 |
| 11741824_PPA2      | -0.30898 | 0.000201 | 0.001033 |
| 11717939_U2AF2     | -0.34678 | 0.000201 | 0.001034 |
| 11745919_RANBP6    | 0.317438 | 0.000201 | 0.001035 |
| 11746636_LEF1      | -0.54705 | 0.000201 | 0.001035 |
| 11762798_PALM      | -0.33855 | 0.000201 | 0.001035 |
| 11721188_ARHGEF9   | -1.00319 | 0.000202 | 0.001035 |
| 11723450_FTO       | -0.29499 | 0.000202 | 0.001035 |
| 11757946_CPNE3     | -0.2701  | 0.000202 | 0.001035 |
| 11749886_BCL2L13   | 0.492212 | 0.000202 | 0.001037 |
| 11760107_PHF10     | 0.479615 | 0.000202 | 0.001038 |
| 11721795_SMO       | -0.24286 | 0.000202 | 0.001038 |
| 11755464_TBC1D31   | -0.34449 | 0.000202 | 0.001039 |
| 11748252_CEP57     | -0.23923 | 0.000202 | 0.001039 |
| 11747459_GMPPA     | -0.23382 | 0.000202 | 0.001039 |
| 11725785_BORA      | -0.51834 | 0.000202 | 0.001039 |
| 11759668_CEP57     | -0.39588 | 0.000202 | 0.001039 |
| 11727991_STX11     | 0.277829 | 0.000203 | 0.001039 |
| 11718554_MCOLN1    | -0.30199 | 0.000203 | 0.001041 |
| 11759574_NCOR1     | 0.319454 | 0.000203 | 0.001041 |
| 11726089_VPS53     | 0.245729 | 0.000203 | 0.001042 |
| 11717527_RDX       | 0.286185 | 0.000203 | 0.001042 |
| 11721437_STC2      | 0.442924 | 0.000203 | 0.001043 |
| 11733941_TBCEL     | 0.641458 | 0.000203 | 0.001043 |
| 11715993_SPG7      | 0.272635 | 0.000203 | 0.001043 |
| 11727244_CCDC66    | 0.474513 | 0.000204 | 0.001044 |
| 11739771_OXR1      | 0.314492 | 0.000204 | 0.001044 |
| 11751003_TUFT1     | 0.325878 | 0.000204 | 0.001044 |
| 11740135_USP40     | 0.34038  | 0.000204 | 0.001044 |
| 11731510_DBT       | 0.281828 | 0.000204 | 0.001044 |
| 11755028_DENND1A   | 0.269153 | 0.000204 | 0.001045 |
| 11725932_HSPA5     | -0.22844 | 0.000204 | 0.001045 |

|                    |          |          |          |
|--------------------|----------|----------|----------|
| 11720562_PLXNA2    | 0.42741  | 0.000204 | 0.001045 |
| 11734245_ICAM5     | -0.4702  | 0.000204 | 0.001046 |
| 11741982_CRACR2A   | -0.39127 | 0.000204 | 0.001046 |
| 11724071_PHF10     | -0.2981  | 0.000204 | 0.001046 |
| 11729233_E2F6      | 0.276707 | 0.000204 | 0.001046 |
| 11743903_CD46      | 0.28297  | 0.000204 | 0.001047 |
| 11717431_SNRPD3    | -0.30004 | 0.000204 | 0.001047 |
| 11720864_SLC25A24  | 0.359507 | 0.000205 | 0.001048 |
| 11754892_P3H4      | -0.35496 | 0.000205 | 0.001048 |
| 11735630_CLP1      | 0.263923 | 0.000205 | 0.001049 |
| 11722953_BIK       | 0.308879 | 0.000205 | 0.001049 |
| 11754777_SH2D2A    | 0.508509 | 0.000205 | 0.001049 |
| 11730849_ABHD13    | 0.350356 | 0.000205 | 0.001049 |
| 11750683_NEK4      | 0.242847 | 0.000205 | 0.001049 |
| 11751211_NCAM2     | -0.52081 | 0.000205 | 0.001049 |
| 11730254_ELK3      | 0.298763 | 0.000205 | 0.00105  |
| 11738988_GANAB     | -0.28701 | 0.000205 | 0.00105  |
| 11717731_SQLE      | -0.36947 | 0.000205 | 0.00105  |
| 11722382_TXNL4B    | 0.278817 | 0.000206 | 0.001051 |
| 11750792_SLC6A9    | -0.37604 | 0.000206 | 0.001052 |
| 11732831_RNF216P1  | 0.299435 | 0.000206 | 0.001052 |
| 11750541_SSFA2     | 0.323526 | 0.000206 | 0.001052 |
| 11731146_RGPD1 /// | 0.520831 | 0.000206 | 0.001052 |
| 11758057_GATA3     | 0.417042 | 0.000206 | 0.001053 |
| 11730218_CERS5     | 0.29744  | 0.000206 | 0.001053 |
| 11759821_RPL37A    | -0.3818  | 0.000206 | 0.001054 |
| 11738141_ZNF621    | 0.389211 | 0.000206 | 0.001054 |
| 11721772_INO80D    | 0.31572  | 0.000206 | 0.001055 |
| 11751289_NR3C1     | -0.28705 | 0.000207 | 0.001056 |
| 11715809_PYGB      | -0.28023 | 0.000207 | 0.001056 |
| 11754190_SRSF11    | 0.274283 | 0.000207 | 0.001058 |
| 11720886_ZNF629    | -0.54166 | 0.000207 | 0.001058 |
| 11753886_IL6ST     | 0.296602 | 0.000207 | 0.00106  |
| 11732689_TTC14     | 0.290643 | 0.000208 | 0.00106  |
| 11742982_DOPEY1    | 0.440652 | 0.000208 | 0.00106  |
| 11741710_COL6A3    | 0.465053 | 0.000208 | 0.00106  |
| 11730989_KIAA1919  | 0.588568 | 0.000208 | 0.001061 |
| 11742950_CNOT8     | -0.38971 | 0.000208 | 0.001061 |
| 11736989_PRRPF40B  | -0.25082 | 0.000208 | 0.001061 |
| 11719607_RRN3      | 0.280969 | 0.000208 | 0.001062 |
| 11747380_FBXL4     | 0.312853 | 0.000208 | 0.001063 |
| 11741875_AKTIP     | -0.30351 | 0.000208 | 0.001063 |
| 11744296_DEDD2     | 0.278308 | 0.000208 | 0.001063 |
| 11720717_FGF13     | 0.238382 | 0.000208 | 0.001063 |
| 11730355_ATRIP     | -0.28252 | 0.000208 | 0.001063 |
| 11759328_CASC5     | -0.32729 | 0.000209 | 0.001063 |
| 11755877_APLP1     | -0.32914 | 0.000209 | 0.001065 |
| 11736602_BRIP1     | -0.55851 | 0.000209 | 0.001065 |
| 11721404_NCOA3     | 0.489368 | 0.000209 | 0.001065 |
| 11729441_KDM4D     | -0.77965 | 0.000209 | 0.001065 |
| 11761350_PPIH      | -0.27398 | 0.000209 | 0.001066 |

|                   |          |          |          |
|-------------------|----------|----------|----------|
| 11754946_C7orf49  | -0.33884 | 0.00021  | 0.001069 |
| 11717285_WASL     | 0.384132 | 0.00021  | 0.001069 |
| 11722772_ZNF473   | 0.250163 | 0.00021  | 0.001069 |
| 11733496_COMMD6   | 0.224064 | 0.00021  | 0.001069 |
| 11715239_IFITM3   | 0.233336 | 0.00021  | 0.00107  |
| 11748577_IFT20    | 0.307586 | 0.00021  | 0.00107  |
| 11733247_SPG21    | -0.24306 | 0.00021  | 0.00107  |
| 11754192_SRSF11   | 0.264458 | 0.00021  | 0.00107  |
| 11748280_SERPINB1 | 0.293037 | 0.00021  | 0.00107  |
| 11758070_PBX1     | -0.30407 | 0.00021  | 0.00107  |
| 11728498_SVIL     | 0.326466 | 0.00021  | 0.00107  |
| 11719997_TLE4     | -0.26645 | 0.00021  | 0.00107  |
| 11753352_SLC47A1  | -0.29403 | 0.00021  | 0.001071 |
| 11731514_XPO4     | -0.51879 | 0.000211 | 0.001073 |
| 11718560_RCOR1    | -0.23842 | 0.000211 | 0.001074 |
| 11733146_ZBTB14   | -0.35334 | 0.000211 | 0.001074 |
| 11721084_TRIM37   | 0.321066 | 0.000211 | 0.001074 |
| 11759666_HLA-DPB1 | -0.44419 | 0.000211 | 0.001075 |
| 11755544_EFHB     | 0.346667 | 0.000211 | 0.001075 |
| 11750233_ATF2     | 0.35344  | 0.000211 | 0.001075 |
| 11760750_PRKD3    | -0.49075 | 0.000211 | 0.001075 |
| 11729180_DHRX     | 0.28552  | 0.000211 | 0.001075 |
| 11732361_CTPS2    | -0.76787 | 0.000212 | 0.001076 |
| 11721377_BCL2     | -0.56337 | 0.000212 | 0.001079 |
| 11733189_INCENP   | -0.61946 | 0.000212 | 0.001079 |
| 11729103_RARS     | 0.254859 | 0.000212 | 0.00108  |
| 11754134_PDLIM3   | -0.4203  | 0.000213 | 0.001081 |
| 11726085_FAM69B   | -0.25508 | 0.000213 | 0.001082 |
| 11743747_PHKA1    | -0.48645 | 0.000213 | 0.001082 |
| 11756571_PSEN1    | 0.373601 | 0.000213 | 0.001082 |
| 11741462_PRKAG1   | -0.28012 | 0.000213 | 0.001083 |
| 11758115_PTBP2    | 0.536148 | 0.000213 | 0.001083 |
| 11724586_SYT1     | 0.513412 | 0.000213 | 0.001083 |
| 11733442_SAA1     | 0.588526 | 0.000213 | 0.001083 |
| 11747961_PSMC8    | -0.30302 | 0.000213 | 0.001084 |
| 11718529_PCIF1    | -0.24987 | 0.000214 | 0.001085 |
| 11753506_CEACAM1  | 0.455057 | 0.000214 | 0.001085 |
| 11746342_CFLAR    | 0.406441 | 0.000214 | 0.001085 |
| 11744787_ANLN     | -0.27043 | 0.000214 | 0.001085 |
| 11722517_SMC5     | 0.272549 | 0.000214 | 0.001086 |
| 11756077_NDE1     | -0.2795  | 0.000214 | 0.001087 |
| 11727154_LRRC1    | 0.593442 | 0.000214 | 0.001088 |
| 11724324_SLC12A6  | 0.399537 | 0.000214 | 0.001088 |
| 11754318_SSH1     | -0.24342 | 0.000214 | 0.001088 |
| 11752883_UPF3A    | 0.251908 | 0.000215 | 0.001088 |
| 11721991_SLC6A6   | 0.299912 | 0.000215 | 0.001088 |
| 11753068_CFI      | 0.760301 | 0.000215 | 0.001088 |
| 11751215_SLAIN1   | -0.29184 | 0.000215 | 0.001089 |
| 11718332_TSPAN3   | 0.243757 | 0.000215 | 0.001089 |
| 11725634_MRPS25   | 0.249318 | 0.000215 | 0.001089 |
| 11723255_HAT1     | -0.36971 | 0.000215 | 0.00109  |

|                   |          |          |          |
|-------------------|----------|----------|----------|
| 11741967_CDYL     | 0.363782 | 0.000215 | 0.00109  |
| 11728342_DCLK1    | 0.730857 | 0.000215 | 0.00109  |
| 11718670_MED9     | -0.39736 | 0.000215 | 0.00109  |
| 11754158_CFL1     | -0.26232 | 0.000215 | 0.001091 |
| 11726869_MFSD12   | 0.222394 | 0.000215 | 0.001091 |
| 11756800_CELSR1   | -0.31864 | 0.000215 | 0.001091 |
| 11752436_MAP9     | 0.234861 | 0.000215 | 0.001091 |
| 11725117_NLN      | 0.24923  | 0.000215 | 0.001091 |
| 11724247_TMEM127  | -0.44087 | 0.000216 | 0.001092 |
| 11752456_ABHD17C  | -0.27715 | 0.000216 | 0.001092 |
| 11729427_GLI1     | -0.25179 | 0.000216 | 0.001092 |
| 11722489_UTP14C   | -0.29527 | 0.000216 | 0.001092 |
| 11757498_TMEM106C | -0.24984 | 0.000216 | 0.001092 |
| 11730899_WAPL     | -0.25465 | 0.000216 | 0.001093 |
| 11722204_FBXO22   | 0.245871 | 0.000216 | 0.001094 |
| 11733035_C7orf73  | -0.45951 | 0.000216 | 0.001095 |
| 11757494_HSD17B11 | -0.26104 | 0.000216 | 0.001095 |
| 11736247_AMIGO2   | 0.236251 | 0.000217 | 0.001097 |
| 11763463_ATF3     | 0.382176 | 0.000217 | 0.001097 |
| 11723418_VSNL1    | -0.29459 | 0.000217 | 0.001098 |
| 11717887_PTPN12   | 0.22412  | 0.000217 | 0.001098 |
| 11729993_STOX2    | -0.33376 | 0.000217 | 0.0011   |
| 11722829_SDAD1    | 0.252038 | 0.000217 | 0.0011   |
| 11754940_TSN      | -0.26457 | 0.000218 | 0.0011   |
| 11718461_SLC39A11 | 0.326418 | 0.000218 | 0.0011   |
| 11744175	EIF2B5   | 0.297556 | 0.000218 | 0.001101 |
| 11717922_YAP1     | -0.34    | 0.000218 | 0.001102 |
| 11754341_ELAC2    | -0.25322 | 0.000218 | 0.001102 |
| 11746869_EVI5     | 0.326125 | 0.000218 | 0.001103 |
| 11736518_WHSC1    | -0.40877 | 0.000218 | 0.001103 |
| 11719467_PRRF31   | -0.30527 | 0.000218 | 0.001103 |
| 11759119_TBCEL    | 0.262198 | 0.000218 | 0.001104 |
| 11727819_DDX46    | -0.32809 | 0.000219 | 0.001105 |
| 11733042_SLC7A2   | -0.50062 | 0.000219 | 0.001105 |
| 11736639_CNKSR2   | 0.332997 | 0.000219 | 0.001105 |
| 11723235_IFI44L   | 0.521986 | 0.000219 | 0.001106 |
| 11758402_FAM179B  | 0.418914 | 0.000219 | 0.001106 |
| 11745375_ZNF43    | 0.367892 | 0.000219 | 0.001106 |
| 11729875_FAM209A  | 0.580452 | 0.000219 | 0.001106 |
| 11729421_TTC26    | 0.395267 | 0.000219 | 0.001106 |
| 11727115_MARK2    | 0.296268 | 0.000219 | 0.001106 |
| 11727213_DTWD1    | -0.23414 | 0.000219 | 0.001106 |
| 200063_PMNPM1     | -0.22767 | 0.000219 | 0.001107 |
| 11730198_TECR     | -0.245   | 0.000219 | 0.001107 |
| 11720229_STAT5B   | 0.451888 | 0.000219 | 0.001107 |
| 11719056_PDE8A    | 0.254999 | 0.000219 | 0.001107 |
| 11723769_SNX24    | -0.29276 | 0.000219 | 0.001108 |
| 11730440_CERS6    | 0.597747 | 0.00022  | 0.001108 |
| 11763339_SIVA1    | -0.3065  | 0.00022  | 0.001108 |
| 11715757_RGS2     | 0.262665 | 0.00022  | 0.001108 |
| 11727059_MRPS36   | -0.46156 | 0.00022  | 0.001108 |

|                    |          |          |          |
|--------------------|----------|----------|----------|
| 11739325_PTPN2     | 0.290384 | 0.00022  | 0.001108 |
| 11743499_PSMG4     | -0.30856 | 0.00022  | 0.001109 |
| 11752005_RGPD4     | 0.315669 | 0.00022  | 0.001109 |
| 11757932_LOC100996 | 0.226423 | 0.00022  | 0.001109 |
| 11726159_IQCG      | 0.469956 | 0.00022  | 0.00111  |
| 11721663_HDAC11    | -0.58928 | 0.00022  | 0.00111  |
| 11717147_PTPN1     | 0.312828 | 0.00022  | 0.00111  |
| 11751074_ARHGDI1A  | -0.22448 | 0.00022  | 0.00111  |
| 11721805_KLF2      | 0.363629 | 0.000221 | 0.001111 |
| 11745358_SAMD15    | 0.358488 | 0.000221 | 0.001111 |
| 11760162_WSB1      | -0.40737 | 0.000221 | 0.001112 |
| 11728074_PLEKHM3   | 0.251994 | 0.000221 | 0.001112 |
| 11719379_RAP1GDS1  | -0.38088 | 0.000221 | 0.001113 |
| 11758075_SLC18B1   | 0.454407 | 0.000221 | 0.001113 |
| 11719183_DEF8      | -0.24128 | 0.000221 | 0.001113 |
| 11763704_SAT1      | 0.231682 | 0.000221 | 0.001113 |
| 11751000_UBXN4     | 0.379052 | 0.000221 | 0.001113 |
| 11740743_TPM2      | 0.268247 | 0.000221 | 0.001113 |
| 11759193_TXLNG     | 0.264237 | 0.000221 | 0.001114 |
| 11738204_SPAM1     | -0.2968  | 0.000222 | 0.001115 |
| 11728566_FAM210A   | -0.42269 | 0.000222 | 0.001116 |
| 11751027_TMC7      | 0.592473 | 0.000222 | 0.001116 |
| 11750353_MR1       | 0.385934 | 0.000222 | 0.001116 |
| 11721847_REEP2     | -0.34197 | 0.000222 | 0.001116 |
| 11763357_TMEM170A  | 0.331936 | 0.000222 | 0.001117 |
| AFFX-HUMISTAT1     | 0.266726 | 0.000222 | 0.001117 |
| 11716240_RAB6A     | 0.271412 | 0.000222 | 0.001118 |
| 11747394_ORC3      | -0.24535 | 0.000222 | 0.001118 |
| 11746913_SLC9B2    | 0.288523 | 0.000223 | 0.00112  |
| 11730719_AP1S2     | 0.278545 | 0.000223 | 0.00112  |
| 11723574_MORC4     | 0.342367 | 0.000223 | 0.001121 |
| 11753435_SLC3A2    | 0.287165 | 0.000223 | 0.001121 |
| 11722113_ZNF232    | -0.24568 | 0.000223 | 0.001122 |
| 11757727_ATP50     | -0.27944 | 0.000223 | 0.001123 |
| 11721955_RFX7      | 0.26077  | 0.000224 | 0.001125 |
| 11752336_MFSD11    | 0.428047 | 0.000224 | 0.001126 |
| 11726568	EIF4G1    | -0.23727 | 0.000224 | 0.001127 |
| 11728712_ZFP64     | -0.26918 | 0.000224 | 0.001128 |
| 11723807_STX17     | 0.310367 | 0.000225 | 0.001129 |
| 11739882_GLIS3     | 0.286563 | 0.000225 | 0.001129 |
| 11755360_SLC38A10  | -0.22791 | 0.000225 | 0.001129 |
| 11739293_IGSF3     | -0.32814 | 0.000225 | 0.001129 |
| 11755915_HPS3      | -0.33929 | 0.000225 | 0.001129 |
| 11753537_CCDC102B  | -0.35178 | 0.000225 | 0.00113  |
| 11742996_MCM3      | -0.32394 | 0.000225 | 0.00113  |
| 11720085_KIAA0368  | -0.75879 | 0.000225 | 0.00113  |
| 11758658_EPM2AIP1  | 0.284146 | 0.000225 | 0.001131 |
| 11744490_C2orf24   | -0.23023 | 0.000225 | 0.001131 |
| 11723002_RANBP1    | -0.35229 | 0.000225 | 0.001131 |
| 11763209_DOCK7     | 0.404842 | 0.000226 | 0.001132 |
| 11733645_KYNU      | 0.678303 | 0.000226 | 0.001132 |

|                   |          |          |          |
|-------------------|----------|----------|----------|
| 11737820_MAP3K3   | -0.49256 | 0.000226 | 0.001133 |
| 11747643_BUB3     | -0.25331 | 0.000226 | 0.001133 |
| 11743509_UFL1     | -0.46804 | 0.000226 | 0.001133 |
| 11731404_ATP6V1G1 | -0.28271 | 0.000226 | 0.001133 |
| 11737103_GDAP2    | 0.299369 | 0.000226 | 0.001134 |
| 11719720_LSM7     | -0.25448 | 0.000226 | 0.001135 |
| 11746191_KIAA2013 | -0.27167 | 0.000227 | 0.001136 |
| 11715666_TPM3     | -0.34395 | 0.000227 | 0.001136 |
| 11738887_MICA     | 0.277702 | 0.000227 | 0.001136 |
| 11742856_ASNSD1   | 0.282055 | 0.000227 | 0.001136 |
| 11745903_SLAMF7   | 0.62504  | 0.000227 | 0.001136 |
| 11751101_OTUD6B   | 0.349363 | 0.000227 | 0.001137 |
| 11757571_UBLCP1   | 0.290737 | 0.000227 | 0.001138 |
| 11752737_CLEC7A   | 0.733175 | 0.000227 | 0.001138 |
| 11743810_TFAM     | 0.365751 | 0.000227 | 0.001138 |
| 11732381_USP6NL   | 0.289746 | 0.000227 | 0.001139 |
| 11727994_STX11    | 0.667983 | 0.000227 | 0.001139 |
| 11755670_SYT14    | 0.72015  | 0.000228 | 0.00114  |
| 11729895_CHRAC1   | -0.27167 | 0.000228 | 0.001142 |
| 11741949_NF1      | -0.30267 | 0.000228 | 0.001143 |
| 11742884_LTBP3    | 0.360285 | 0.000228 | 0.001144 |
| 11730893_UBA6     | 0.276691 | 0.000228 | 0.001144 |
| 11749053_ZNF552   | 0.578772 | 0.000229 | 0.001144 |
| 11754785_ZFYVE19  | -0.26141 | 0.000229 | 0.001145 |
| 11731382_BEST3    | 0.614571 | 0.000229 | 0.001145 |
| 11755261_MPV17    | 0.247778 | 0.000229 | 0.001145 |
| 11757795_RCOR3    | 0.350662 | 0.000229 | 0.001146 |
| 11715819_LRPAP1   | 0.279301 | 0.000229 | 0.001147 |
| 11718621_DUSP12   | 0.2422   | 0.000229 | 0.001147 |
| 11737847_MR1      | 0.50054  | 0.00023  | 0.001149 |
| 11748075_NFE2L1   | -0.28211 | 0.00023  | 0.001149 |
| 11721850_CHCHD6   | 0.24305  | 0.00023  | 0.001149 |
| 11736539_RAB29    | 0.302648 | 0.00023  | 0.00115  |
| 11730937_PYCR1    | -0.34669 | 0.00023  | 0.00115  |
| 11758806_CGRRF1   | 0.421856 | 0.00023  | 0.00115  |
| 11749709_ABLIM1   | 0.302849 | 0.00023  | 0.00115  |
| 11726258_RNF141   | -0.34973 | 0.00023  | 0.00115  |
| 11755479_ZNF528   | 0.417837 | 0.00023  | 0.00115  |
| 11759737_BIRC5    | -0.35106 | 0.00023  | 0.00115  |
| 11734206_ZNF155   | 0.453106 | 0.00023  | 0.00115  |
| 11752012_SREBF2   | -0.39591 | 0.00023  | 0.001151 |
| 11726949_RBM15    | 0.281464 | 0.000231 | 0.001152 |
| 11739557_VAMP5    | 0.288274 | 0.000231 | 0.001152 |
| 11745210_PCDH9    | -0.2618  | 0.000231 | 0.001152 |
| 11754319_SSH1     | -0.25047 | 0.000231 | 0.001152 |
| 11725759_C6orf203 | 0.322279 | 0.000231 | 0.001152 |
| 11754049_CCDC91   | 0.256058 | 0.000231 | 0.001152 |
| 11724681_ATG16L1  | 0.342665 | 0.000231 | 0.001152 |
| 11732957_RNPEPL1  | -0.25435 | 0.000231 | 0.001152 |
| 11719414_PBX1     | -0.28899 | 0.000231 | 0.001152 |
| 11753910_TMEM242  | -0.41795 | 0.000231 | 0.001152 |



|                    |          |          |          |
|--------------------|----------|----------|----------|
| 11728750_OSBP      | 0.373151 | 0.000231 | 0.001153 |
| 11756312_SERPINF1  | -0.28926 | 0.000231 | 0.001153 |
| 11747075_TMEM165   | 0.241735 | 0.000231 | 0.001153 |
| 11723710_COMMD3    | 0.228257 | 0.000231 | 0.001153 |
| 11751526_WDR1      | 0.25798  | 0.000231 | 0.001153 |
| 11726147_C17orf96  | -0.46597 | 0.000231 | 0.001153 |
| 11718231_HLA-F     | 0.283094 | 0.000231 | 0.001153 |
| 11747748_ETV1      | 0.296008 | 0.000231 | 0.001153 |
| 11729982_PARP11    | 0.367587 | 0.000231 | 0.001154 |
| 11746203_ASB13     | -0.49644 | 0.000231 | 0.001154 |
| 11728700_BMPR2     | 0.287462 | 0.000231 | 0.001154 |
| 11746746_AKAP9     | 0.244499 | 0.000232 | 0.001155 |
| 11761775_PLGLB1 // | 0.575773 | 0.000232 | 0.001155 |
| 11722894_PIK3C2A   | -0.30007 | 0.000232 | 0.001156 |
| 11752146_SOX5      | -0.22955 | 0.000232 | 0.001156 |
| 11719450_RAB14     | 0.281888 | 0.000232 | 0.001156 |
| 11750969_SQLE      | -0.3535  | 0.000232 | 0.001157 |
| 11715652_PCOLCE    | -0.237   | 0.000232 | 0.001157 |
| 11718032_ATP6VOA1  | 0.227532 | 0.000233 | 0.00116  |
| 11721480_GOLPH3L   | -0.26617 | 0.000233 | 0.001162 |
| 11746053_LOC100996 | 0.343495 | 0.000233 | 0.001163 |
| 11716281_COL18A1   | 0.298433 | 0.000234 | 0.001164 |
| 11736907_KLF17     | 0.391839 | 0.000234 | 0.001164 |
| 11718547_ILF3      | -0.22819 | 0.000234 | 0.001166 |
| 11743996_ACTR1A    | -0.32423 | 0.000234 | 0.001166 |
| 11754241_ATAD1     | 0.229109 | 0.000234 | 0.001167 |
| 11744987_WBSCR22   | 0.291559 | 0.000234 | 0.001167 |
| 11758452_CENPQ     | -0.35463 | 0.000235 | 0.001167 |
| 11722885_WDR24     | -0.37863 | 0.000235 | 0.001167 |
| 11751733_RNMT      | 0.344217 | 0.000235 | 0.001168 |
| 11748832_RAD52     | 0.32995  | 0.000235 | 0.001168 |
| 11719317_PIBF1     | 0.377708 | 0.000235 | 0.001168 |
| 11751656_TMEM154   | -0.32849 | 0.000235 | 0.001168 |
| 11719969_NVL       | 0.284114 | 0.000235 | 0.00117  |
| 11748813_TRIP12    | 0.296662 | 0.000235 | 0.00117  |
| 11719982_INPP5A    | -0.31374 | 0.000235 | 0.001171 |
| 11740260_CDC42BPB  | -0.26384 | 0.000236 | 0.001172 |
| 11750041_ANXA5     | 0.232022 | 0.000236 | 0.001172 |
| 11758475_HMGXB4    | -0.23122 | 0.000236 | 0.001172 |
| 11721213_CLIP2     | -0.44737 | 0.000236 | 0.001172 |
| 11717617_PXN       | 0.243685 | 0.000236 | 0.001172 |
| 11722097_ZNF131    | 0.303788 | 0.000236 | 0.001173 |
| 11751374_PDYN      | -0.2982  | 0.000236 | 0.001173 |
| 11758073_ZC3H15    | 0.252018 | 0.000236 | 0.001173 |
| 11738621_XKR5      | -0.2402  | 0.000236 | 0.001174 |
| 11734826_SPRED1    | 0.308461 | 0.000237 | 0.001176 |
| 11725659_MTFR1     | -0.25716 | 0.000237 | 0.001176 |
| 11728617_CARD6     | 0.342214 | 0.000237 | 0.001176 |
| 11718355_ERP44     | 0.261737 | 0.000237 | 0.001176 |
| 11719569_QARS      | -0.25063 | 0.000237 | 0.001178 |
| 11739106_TMEM33    | 0.255323 | 0.000237 | 0.001178 |

|                    |          |          |          |
|--------------------|----------|----------|----------|
| 11739709_PHACTR2   | 0.417693 | 0.000237 | 0.001178 |
| 11727608_OGG1      | -0.22385 | 0.000237 | 0.001179 |
| 11756246_TTC28     | -0.33427 | 0.000237 | 0.001179 |
| 11720099_CEP70     | -0.27815 | 0.000238 | 0.001179 |
| 11750608_PELP1     | -0.28331 | 0.000238 | 0.001182 |
| 11754439_NELFCD    | -0.25308 | 0.000238 | 0.001182 |
| 11757026_SERPINF1  | -0.29391 | 0.000238 | 0.001183 |
| 11739471_MAGI1     | 0.26815  | 0.000238 | 0.001183 |
| 11744349_DDR2      | -0.25485 | 0.000239 | 0.001184 |
| 11720544_AGPAT2    | -0.29245 | 0.000239 | 0.001184 |
| 11748541_PRADC1    | -0.35603 | 0.000239 | 0.001184 |
| 11745875_VCP       | -0.30967 | 0.000239 | 0.001184 |
| 11715949_KCTD12    | -0.70249 | 0.000239 | 0.001185 |
| 11747179_ARL1      | -0.4865  | 0.000239 | 0.001185 |
| 11740002_CTBP2     | -0.42281 | 0.000239 | 0.001185 |
| 11725762_PELI3     | -0.34191 | 0.000239 | 0.001186 |
| 11729990_CACNA1A   | -0.30873 | 0.000239 | 0.001186 |
| 11730982_RNF25     | 0.329809 | 0.000239 | 0.001186 |
| 11718192_VEZF1     | -0.26369 | 0.000239 | 0.001187 |
| 11751095_CEACAM1   | 0.328539 | 0.000239 | 0.001187 |
| 11746531_TYW5      | 0.34895  | 0.00024  | 0.001187 |
| 11756536_C5orf22   | 0.239444 | 0.00024  | 0.001187 |
| 11740880_ANXA2     | 0.221736 | 0.00024  | 0.001188 |
| 11756858_MKNK1     | 0.264616 | 0.00024  | 0.001188 |
| 11722418_UTP3      | 0.267192 | 0.00024  | 0.001188 |
| 11753028_NDUFA10   | -0.4582  | 0.00024  | 0.001188 |
| 11763988_CLPX      | 0.255509 | 0.00024  | 0.001189 |
| 11754087_CTNND1 // | 0.472613 | 0.00024  | 0.001189 |
| 11723045_FRG1 ///  | -0.27283 | 0.00024  | 0.001189 |
| 11724314_LUZP1     | 0.282174 | 0.00024  | 0.001189 |
| 11728810_ECHDC3    | -0.32188 | 0.00024  | 0.001189 |
| 11748247_ZNF235    | 0.469452 | 0.00024  | 0.00119  |
| 11721950_EFR3B     | -0.2337  | 0.000241 | 0.001191 |
| 11754868_ERGIC3    | 0.263489 | 0.000241 | 0.001192 |
| 11749866_GALK1     | -0.24644 | 0.000241 | 0.001192 |
| 11715878_PITPNA    | -0.33975 | 0.000241 | 0.001193 |
| 11735155_ZNF585A   | 0.435332 | 0.000241 | 0.001193 |
| 11731585_OMA1      | -0.25854 | 0.000241 | 0.001193 |
| 11739269_LOC102723 | 0.374039 | 0.000241 | 0.001193 |
| 11717996_NUP205    | -0.25777 | 0.000241 | 0.001193 |
| 11735696_ENTPD6    | 0.247217 | 0.000241 | 0.001194 |
| 11730724_EIF3C /// | -0.29669 | 0.000242 | 0.001194 |
| 11723438_AK3       | 0.239455 | 0.000242 | 0.001194 |
| 11727191_BFSP1     | 0.624783 | 0.000242 | 0.001196 |
| 11745533_PPP5C     | -0.34374 | 0.000242 | 0.001198 |
| 11722419_UTP3      | 0.236339 | 0.000242 | 0.001199 |
| 11733311_PCYT1B    | -0.38786 | 0.000243 | 0.0012   |
| 11737812_NNT       | -0.29668 | 0.000243 | 0.0012   |
| 11729983_PARP11    | 0.47935  | 0.000243 | 0.001201 |
| 11715904_DDX3X     | 0.300019 | 0.000243 | 0.001203 |
| 11718504_SRSF10    | -0.31458 | 0.000244 | 0.001203 |

|                    |          |          |          |
|--------------------|----------|----------|----------|
| 11746556_SLBP      | -0.25604 | 0.000244 | 0.001204 |
| 11731629_MIOS      | 0.264144 | 0.000244 | 0.001204 |
| 11730846_PIK3R3    | 0.282858 | 0.000244 | 0.001205 |
| 11739856_TENM2     | 0.428439 | 0.000244 | 0.001205 |
| 11759733_FAM91A1   | 0.935627 | 0.000244 | 0.001206 |
| 11747371_ANKRD17   | 0.241435 | 0.000244 | 0.001206 |
| 11719917_PEL0      | 0.27001  | 0.000244 | 0.001206 |
| 11745818_H1F0      | -0.39465 | 0.000244 | 0.001207 |
| 11722990_BTAF1     | 0.284476 | 0.000244 | 0.001207 |
| 11728646_NUCKS1    | -0.23605 | 0.000245 | 0.001207 |
| 11745977_SOX12     | -0.48315 | 0.000245 | 0.001207 |
| 11744804_HIPK1     | 0.297211 | 0.000245 | 0.001207 |
| 11736915_HIST1H1D  | -0.64495 | 0.000245 | 0.001208 |
| 11727846_CDKN2AIP  | 0.342889 | 0.000245 | 0.001208 |
| 11753596_SMIM15    | 0.246212 | 0.000245 | 0.001208 |
| 11742732_MORF4L1   | 0.217558 | 0.000245 | 0.001208 |
| 11724768_FCGR2A // | 0.228743 | 0.000245 | 0.001209 |
| 11751615_TM9SF3    | 0.319855 | 0.000245 | 0.00121  |
| 11746235_LIN37     | 0.238564 | 0.000245 | 0.00121  |
| 11744850_SSH2      | 0.36168  | 0.000246 | 0.001211 |
| 11718572_SERBP1    | -0.22207 | 0.000246 | 0.001212 |
| 11739610_CALML4    | -0.29502 | 0.000246 | 0.001212 |
| 11758829_CHTOP     | -0.24451 | 0.000246 | 0.001212 |
| 11723229_PHF23     | 0.258056 | 0.000246 | 0.001213 |
| 11757895_TULP4     | -0.47144 | 0.000246 | 0.001214 |
| 11730327_DCAF13    | -0.2549  | 0.000247 | 0.001215 |
| 11741242_ZNF674    | 0.48517  | 0.000247 | 0.001216 |
| 11756180_PHKB      | 0.256523 | 0.000247 | 0.001216 |
| 11724261_TRIO      | 0.364999 | 0.000247 | 0.001217 |
| 11723689_CREBL2    | 0.352439 | 0.000247 | 0.001217 |
| 11728049_HIST1H4J  | 0.240794 | 0.000247 | 0.001217 |
| 11720018_SMAP1     | -0.27438 | 0.000247 | 0.001217 |
| 11744656_AZIN2     | -0.2258  | 0.000247 | 0.001217 |
| 11719370_SLC25A44  | 0.253256 | 0.000247 | 0.001218 |
| 11728558_HSF2BP // | 0.309645 | 0.000247 | 0.001218 |
| 11735115_CN0T4     | 0.32189  | 0.000247 | 0.001218 |
| 11749246_ENG       | 0.283699 | 0.000248 | 0.001218 |
| 11749145_RUFY3     | 0.463951 | 0.000248 | 0.001219 |
| 11719011_TM0M99    | -0.25337 | 0.000248 | 0.001219 |
| 11730498_MX11      | -0.23487 | 0.000248 | 0.001219 |
| 11728911_CDK5R2    | -0.23276 | 0.000248 | 0.001219 |
| 11755828_SZR01     | -0.29331 | 0.000248 | 0.001219 |
| 11716666_ID3       | -0.28479 | 0.000248 | 0.001219 |
| 11717298_LRPPRC    | 0.281457 | 0.000248 | 0.001221 |
| 11752422_ANKLE1    | -0.32294 | 0.000248 | 0.001222 |
| 11745508_YY1AP1    | 0.291663 | 0.000248 | 0.001222 |
| 11721522_APEX2     | -0.23566 | 0.000248 | 0.001222 |
| 11756630_TMED10    | 0.274186 | 0.000249 | 0.001222 |
| 11715165_DNAJC12   | 0.223675 | 0.000249 | 0.001224 |
| 11730270_NIPBL     | 0.243943 | 0.000249 | 0.001224 |
| 11734988_FEM1B     | 0.27734  | 0.000249 | 0.001224 |

|                    |          |          |          |
|--------------------|----------|----------|----------|
| 11747429_ZNF260    | 0.506796 | 0.000249 | 0.001224 |
| 11733403_CLEC7A    | 0.722866 | 0.000249 | 0.001224 |
| 11743167_ETV6      | 0.329414 | 0.000249 | 0.001224 |
| 11755298_UBE2Q2    | 0.286052 | 0.000249 | 0.001225 |
| 11724742_ZBTB17    | 0.301348 | 0.000249 | 0.001225 |
| 11751612_SOCS2     | 0.313779 | 0.00025  | 0.001226 |
| 11759947_KU-MEL-3  | -0.23444 | 0.00025  | 0.001228 |
| 11759951_ZNF599    | -0.42619 | 0.00025  | 0.001228 |
| 11725361_SMAD4     | 0.274103 | 0.00025  | 0.001228 |
| 11732227_PEX10     | -0.32669 | 0.00025  | 0.001228 |
| 11754469_ZXDC      | -0.34052 | 0.00025  | 0.001229 |
| 11719958_SGPL1     | -0.26875 | 0.000251 | 0.00123  |
| 11746393_INTS6     | 0.243306 | 0.000251 | 0.00123  |
| 11722787_PKM       | -0.25294 | 0.000251 | 0.001231 |
| 11718048_GLRX      | 0.262443 | 0.000251 | 0.001231 |
| 11758757_ADH5 ///  | -0.37078 | 0.000251 | 0.001233 |
| 11757990_CFH /// C | 0.259279 | 0.000251 | 0.001234 |
| 11746111_G3BP1     | -0.28639 | 0.000252 | 0.001234 |
| 11756520_AKR7A2    | -0.39218 | 0.000252 | 0.001235 |
| 11729675_SPRTN     | 0.321541 | 0.000252 | 0.001235 |
| 11757566_NOL8      | 0.222418 | 0.000252 | 0.001236 |
| 11761289_FPGT      | -0.50224 | 0.000252 | 0.001236 |
| 11725121_GATAD1    | 0.330222 | 0.000252 | 0.001236 |
| 11732728_SLITRK4   | -0.40811 | 0.000252 | 0.001236 |
| 11725828_ARMC9     | 0.313315 | 0.000252 | 0.001237 |
| 11743526_RALBP1    | -0.37965 | 0.000252 | 0.001237 |
| 11716627_KIF3B     | 0.335078 | 0.000252 | 0.001237 |
| 11746816_PIAS2     | 0.28273  | 0.000252 | 0.001237 |
| 11757722_SEPT8     | 0.256354 | 0.000253 | 0.001237 |
| 11726305_FAM204A   | 0.274571 | 0.000253 | 0.001238 |
| 11743878_PPP1R1C   | 0.427473 | 0.000253 | 0.001239 |
| 11755894_MFN1      | 0.251819 | 0.000253 | 0.001239 |
| 11720963_DCK       | -0.30317 | 0.000253 | 0.00124  |
| 11740310_ZNF460    | 0.599913 | 0.000253 | 0.00124  |
| 11757876_LYRM9     | -0.34255 | 0.000253 | 0.001241 |
| 11723014_EXT2      | 0.278234 | 0.000253 | 0.001241 |
| 11743533_RUFY3     | 0.393336 | 0.000253 | 0.001241 |
| 11738115_ROR1      | 0.463801 | 0.000253 | 0.001241 |
| 11721108_ZNF627    | 0.27169  | 0.000254 | 0.001242 |
| 11725920_HEXIM2    | -0.26318 | 0.000254 | 0.001243 |
| 11754160_MAX       | 0.276488 | 0.000254 | 0.001244 |
| 11743287_ZNF384    | 0.232011 | 0.000254 | 0.001244 |
| 11749656_ARHGAP11A | -0.2695  | 0.000254 | 0.001244 |
| 11758868_RAPGEF6   | 0.286026 | 0.000254 | 0.001245 |
| 11747332_HSPBP1    | -0.2564  | 0.000254 | 0.001245 |
| 11728370_DNAJC16   | 0.237082 | 0.000255 | 0.001245 |
| 11735273_TBX18     | 0.275992 | 0.000255 | 0.001246 |
| 11743138_5-Mar     | -0.31687 | 0.000255 | 0.001246 |
| 11716200_UBE2Q2    | 0.311666 | 0.000255 | 0.001246 |
| 11721860_STX12     | 0.314506 | 0.000255 | 0.001247 |
| 11729287_MSL3      | 0.247583 | 0.000255 | 0.001248 |

|                    |          |          |          |
|--------------------|----------|----------|----------|
| 11749437_NFIC      | -0.29478 | 0.000256 | 0.00125  |
| 11757619_SOD1      | -0.25487 | 0.000256 | 0.00125  |
| 11747190_FCHSD1    | 0.305779 | 0.000256 | 0.001251 |
| 11718552_OTUD4     | -0.30605 | 0.000256 | 0.001251 |
| 11734763_HIP1      | -0.24223 | 0.000256 | 0.001252 |
| 11729686_LYRM7     | -0.309   | 0.000256 | 0.001252 |
| 11735248_DUSP19    | -0.26885 | 0.000256 | 0.001252 |
| 11746768_SUV39H1   | -0.34954 | 0.000256 | 0.001252 |
| 11759039_SVIP      | 0.244261 | 0.000256 | 0.001253 |
| 11743980_ZFPL1     | -0.26867 | 0.000257 | 0.001253 |
| 11744485_WDR81     | -0.30598 | 0.000257 | 0.001253 |
| 11747975_RNF145    | 0.304696 | 0.000257 | 0.001253 |
| 11759719_PASK      | -0.34108 | 0.000257 | 0.001256 |
| 11733010_VCP       | -0.28207 | 0.000257 | 0.001256 |
| 11754694_ANKRD36 / | -0.44328 | 0.000258 | 0.001258 |
| 11760407_TMEM136   | 0.328253 | 0.000258 | 0.001258 |
| 11749731_SH2B3     | 0.22048  | 0.000258 | 0.001258 |
| 11718720_BRD8      | -0.29244 | 0.000258 | 0.001259 |
| 11747155_FXYD6 /// | -0.38479 | 0.000258 | 0.001259 |
| 11716078_ELOVL5    | -0.25979 | 0.000258 | 0.001259 |
| 11732585_IL1RAP    | 0.55088  | 0.000258 | 0.00126  |
| 11729140_SLAMF7    | 0.609737 | 0.000258 | 0.00126  |
| 11753400_SGOL1     | -0.39421 | 0.000258 | 0.00126  |
| 11725758_ISL1      | 0.303055 | 0.000259 | 0.001262 |
| 11763580_BIRC5     | -0.44134 | 0.000259 | 0.001262 |
| 11744698_TPRG1L    | -0.3092  | 0.000259 | 0.001262 |
| 11754844_COPS5     | 0.239078 | 0.000259 | 0.001263 |
| 11750478_THEM6     | -0.32237 | 0.000259 | 0.001263 |
| 11750704_SCMH1     | -0.30293 | 0.000259 | 0.001264 |
| 11742480_GCDH      | -0.25645 | 0.00026  | 0.001265 |
| 11726028_MC1R      | -0.33644 | 0.00026  | 0.001265 |
| 11761331_ZNF720    | 0.933281 | 0.00026  | 0.001266 |
| 11730250_LNX1      | 0.32501  | 0.00026  | 0.001266 |
| 11744361_NCOA6     | -0.25922 | 0.00026  | 0.001267 |
| 11731055_FNIP1     | 0.422272 | 0.00026  | 0.001268 |
| 11751213_SCOC      | -0.27382 | 0.00026  | 0.001268 |
| 11726655_IFIT5     | 0.245375 | 0.000261 | 0.001269 |
| 11749532_RASGRF1   | 0.356313 | 0.000261 | 0.001269 |
| 11760918_MRRF      | 0.365838 | 0.000261 | 0.00127  |
| 11754242_TJP1      | 0.328783 | 0.000261 | 0.00127  |
| 11734069_SSR3      | 0.270795 | 0.000261 | 0.00127  |
| 11758984_ZRANB1    | -0.37543 | 0.000261 | 0.00127  |
| 11760289_VAMP4     | 0.377275 | 0.000261 | 0.00127  |
| 11719061_ATRN      | -0.26041 | 0.000261 | 0.00127  |
| 11755974_TUBB4B    | -0.2457  | 0.000261 | 0.001271 |
| 11742435_DNM1L     | -0.23278 | 0.000261 | 0.001272 |
| 11727394_COX15     | -0.45973 | 0.000261 | 0.001273 |
| 11719552_RHOBTB1   | 0.426979 | 0.000262 | 0.001274 |
| 11759607_ATF7      | -0.39014 | 0.000262 | 0.001274 |
| 11741302_GCOM1 /// | 0.298867 | 0.000262 | 0.001274 |
| 11751174_SLC39A9   | 0.330456 | 0.000262 | 0.001275 |

|                    |          |          |          |
|--------------------|----------|----------|----------|
| 11718765_NDUFA6    | -0.23466 | 0.000262 | 0.001276 |
| 11721239_ATP5L     | -0.24901 | 0.000262 | 0.001276 |
| 11747319_FXYD6 /// | -0.2766  | 0.000262 | 0.001276 |
| 11739918_RASGRP3   | 0.666301 | 0.000263 | 0.001278 |
| 11755790_FER1L4    | 0.602413 | 0.000263 | 0.001278 |
| 11721227_LEMD3     | 0.377512 | 0.000263 | 0.00128  |
| 11757687_DAD1      | -0.2364  | 0.000263 | 0.00128  |
| 11720105_SLC26A2   | 0.256393 | 0.000263 | 0.00128  |
| 11746969_MBT1      | 0.318858 | 0.000263 | 0.00128  |
| 11716528_ELAVL1    | -0.40537 | 0.000263 | 0.00128  |
| 11759604_BCL2L13   | -0.36101 | 0.000263 | 0.00128  |
| 11724315_LUZF1     | 0.337669 | 0.000264 | 0.001281 |
| 11757602_ERP29     | -0.24739 | 0.000264 | 0.001283 |
| 11758454_DENND6A   | -0.26407 | 0.000264 | 0.001284 |
| 11731095_TRAF3IP1  | -0.26635 | 0.000265 | 0.001285 |
| 11720942_DDX54     | -0.36701 | 0.000265 | 0.001287 |
| 11719276_MRPL17    | -0.37883 | 0.000265 | 0.001287 |
| 11730476_KCNV1     | 0.418654 | 0.000265 | 0.001288 |
| 11737879_GALNT2    | -0.26954 | 0.000265 | 0.001289 |
| 11719348_ARHGAP19  | -0.24759 | 0.000266 | 0.001291 |
| 11716025_GOLGA7    | 0.247149 | 0.000266 | 0.001291 |
| 11744761_ARHGEF1 / | -0.23401 | 0.000266 | 0.001291 |
| 11757072_HS6ST1    | -0.2817  | 0.000266 | 0.001292 |
| 11721095_SLC39A7   | -0.39529 | 0.000266 | 0.001293 |
| 11721351_SLC1A1    | 0.280519 | 0.000266 | 0.001293 |
| 11758513_SPEN      | 0.232312 | 0.000266 | 0.001293 |
| 11731296_SPATA6L   | 0.522467 | 0.000266 | 0.001293 |
| 11721117_SPCS3     | 0.237112 | 0.000267 | 0.001293 |
| 11721541_GMEB1     | 0.280516 | 0.000267 | 0.001293 |
| 11755618_ALDH4A1   | -0.40943 | 0.000267 | 0.001293 |
| 11719149_SAP130    | -0.24127 | 0.000267 | 0.001293 |
| 11754489_NDUFAF5   | 0.262813 | 0.000267 | 0.001295 |
| 11721450 ETF1      | 0.220422 | 0.000267 | 0.001297 |
| 11729687_LYRM7     | -0.3196  | 0.000268 | 0.001297 |
| 11722191_TTC37     | 0.251822 | 0.000268 | 0.001298 |
| 11735587_KCNH1     | 0.358385 | 0.000268 | 0.001301 |
| 11719145_TMEM54    | -0.24857 | 0.000268 | 0.001301 |
| 11719104_CPNE3     | -0.27982 | 0.000268 | 0.001301 |
| 11733198_DDX39A    | -0.27801 | 0.000268 | 0.001301 |
| 11751505_YIPF1     | 0.313534 | 0.000269 | 0.001301 |
| 11727294_ALG10 /// | -0.37408 | 0.000269 | 0.001302 |
| 11753667_ITM2C     | -0.2548  | 0.000269 | 0.001304 |
| 11749254_PRSS23    | 0.258922 | 0.000269 | 0.001304 |
| 11730827_MOB2      | 0.22569  | 0.000269 | 0.001305 |
| 11721360_FAM172A   | -0.28519 | 0.000269 | 0.001305 |
| 11750694_RECQL     | -0.26099 | 0.00027  | 0.001305 |
| 11754195_XIST      | 0.344826 | 0.00027  | 0.001305 |
| 11751916_KIAA0586  | -0.23774 | 0.00027  | 0.001306 |
| 11729893_ZNF569    | 0.306983 | 0.00027  | 0.001306 |
| 11724546_HCFC2     | 0.593003 | 0.00027  | 0.001308 |
| 11721158_DRAM2     | 0.263394 | 0.00027  | 0.001308 |

|                   |          |          |          |
|-------------------|----------|----------|----------|
| 11753967_SLC6A2   | -0.34586 | 0.000271 | 0.001309 |
| 11719625_CDC16    | 0.275872 | 0.000271 | 0.00131  |
| 11720096_LIMD2    | 0.26233  | 0.000271 | 0.001311 |
| 11739930_MCM8     | -0.25572 | 0.000271 | 0.001311 |
| 11758355_CLDN4    | -0.47128 | 0.000271 | 0.001311 |
| 11745208_SAMD4A   | 0.413534 | 0.000271 | 0.001312 |
| 11756397_PTOV1    | -0.24385 | 0.000271 | 0.001313 |
| 11744414_HTATSF1  | -0.28135 | 0.000272 | 0.001314 |
| 11722108_PCNX     | -0.27199 | 0.000272 | 0.001314 |
| 11749586_RMDN2    | 0.337044 | 0.000272 | 0.001314 |
| 11743786_THAP9    | 0.387116 | 0.000272 | 0.001316 |
| 11722552_ITSN1    | -0.54609 | 0.000272 | 0.001316 |
| 11754000_CD58     | 0.21644  | 0.000272 | 0.001316 |
| 11753385_C19orf54 | -0.36024 | 0.000272 | 0.001316 |
| 11748518_CSRP1    | -0.24093 | 0.000273 | 0.001318 |
| 11731052_CEP126   | 0.267456 | 0.000273 | 0.001319 |
| 11731583_LARP1B   | 0.361297 | 0.000274 | 0.001322 |
| 11725789_DPYD     | 0.244405 | 0.000274 | 0.001323 |
| 11751829_PINLYP   | 0.296369 | 0.000274 | 0.001324 |
| 11739301_TERF1    | -0.28822 | 0.000274 | 0.001326 |
| 11728697_HSPA4L   | 0.435268 | 0.000275 | 0.001326 |
| 11747409_ARHGDI1A | -0.2258  | 0.000275 | 0.001326 |
| 11758040_BAZ2B    | 0.616986 | 0.000275 | 0.001326 |
| 11738297_CNGA2    | -0.26263 | 0.000275 | 0.001327 |
| 11740012_NEIL3    | -0.9682  | 0.000275 | 0.001327 |
| 11756387_ARL4A    | 0.257245 | 0.000275 | 0.001328 |
| 11737883_MAGEA10  | -0.22855 | 0.000275 | 0.001328 |
| 11750906_RAD1     | -0.37045 | 0.000275 | 0.001329 |
| 11716038_SLC25A29 | -0.32221 | 0.000275 | 0.001329 |
| 11737772_ZNF93    | 0.333857 | 0.000276 | 0.001331 |
| 11754404_PARP14   | 0.366966 | 0.000276 | 0.001332 |
| 11722376_MEAF6    | -0.40035 | 0.000276 | 0.001332 |
| 11719067	EIF2S3   | 0.244543 | 0.000276 | 0.001332 |
| 11754690_HUWE1    | -0.27507 | 0.000276 | 0.001333 |
| 11726807_ZAK      | -0.22507 | 0.000276 | 0.001333 |
| 11752872_SEC23A   | 0.300731 | 0.000277 | 0.001334 |
| 11757839_NECAP2   | 0.268498 | 0.000277 | 0.001334 |
| 11745421_BID      | 0.354163 | 0.000277 | 0.001335 |
| 11757162_SNORA40  | -0.33013 | 0.000277 | 0.001335 |
| 11740560_NSMAF    | 0.280055 | 0.000277 | 0.001336 |
| 11754476_DNM1     | -0.30894 | 0.000277 | 0.001336 |
| 11721293_GIT2     | 0.278213 | 0.000277 | 0.001336 |
| 11731581_WASFI    | 0.267815 | 0.000277 | 0.001336 |
| 11737338_ZNF527   | 0.508216 | 0.000278 | 0.001338 |
| 11746899_UROS     | 0.217876 | 0.000278 | 0.001339 |
| 11741277_TMEM144  | -0.2301  | 0.000278 | 0.001341 |
| 11749840_CPEB1    | 0.358814 | 0.000278 | 0.001341 |
| 11744492_SRSF5    | -0.30193 | 0.000278 | 0.001341 |
| 11745996_APH1A    | -0.2174  | 0.000278 | 0.001341 |
| 11745890_WSB1     | 0.305345 | 0.000278 | 0.001341 |
| 11757880_DAG1     | -0.26851 | 0.000278 | 0.001341 |

|                    |          |          |          |
|--------------------|----------|----------|----------|
| 11729719_SMAD5     | -0.36463 | 0.000279 | 0.001343 |
| 11719297_MAPKAP1   | -0.23052 | 0.000279 | 0.001343 |
| 11744501_ASXL1     | 0.349948 | 0.000279 | 0.001343 |
| 11744222_ATP5D     | -0.32892 | 0.000279 | 0.001344 |
| 11751791_CCDC80    | 0.531645 | 0.000279 | 0.001344 |
| 11744794_MBNL1     | 0.310357 | 0.000279 | 0.001344 |
| 11724917_TMTC3     | 0.255959 | 0.000279 | 0.001345 |
| 11741147_ZNF207    | 0.234018 | 0.00028  | 0.001345 |
| 11731805_DCUN1D3   | 0.453773 | 0.00028  | 0.001346 |
| 11743611_ZMYND11   | 0.248885 | 0.00028  | 0.001347 |
| 11744171_DNAJC4    | -0.27544 | 0.00028  | 0.001347 |
| 11720468_DPAGT1    | -0.24712 | 0.00028  | 0.001347 |
| 11743725_MFSD1     | 0.254058 | 0.00028  | 0.001347 |
| 11754155_ANP32A // | -0.2597  | 0.00028  | 0.001347 |
| 11715749_SSRP1     | -0.2297  | 0.00028  | 0.001348 |
| 11741228_PHACTR4   | 0.226805 | 0.00028  | 0.001348 |
| 11763997_IL31RA    | 0.576738 | 0.000281 | 0.001349 |
| 11723809_STX17     | 0.340314 | 0.000281 | 0.001351 |
| 11718829_EHD1      | 0.27481  | 0.000281 | 0.001353 |
| 11748810_EVA1C     | -0.49986 | 0.000282 | 0.001354 |
| 11724888_CARD10    | 0.322349 | 0.000282 | 0.001355 |
| 11744829_HLA-E     | 0.261173 | 0.000282 | 0.001356 |
| 11729099_IL1RAP    | 0.427254 | 0.000282 | 0.001356 |
| 11721726_IFT88     | 0.40787  | 0.000282 | 0.001356 |
| 11731613_RHEBL1    | -0.49955 | 0.000282 | 0.001356 |
| 11725800_USP46     | 0.264887 | 0.000282 | 0.001356 |
| 11719283_UBR7      | -0.37274 | 0.000282 | 0.001357 |
| 11719830_ERCC1     | 0.24887  | 0.000283 | 0.001357 |
| 11718371_NRBF2     | 0.281996 | 0.000283 | 0.001358 |
| 11722402_CSTF2     | -0.23907 | 0.000283 | 0.001359 |
| 11757462_OSGEP     | 0.292888 | 0.000283 | 0.001359 |
| 11721357_NMB       | -0.22982 | 0.000283 | 0.001359 |
| 11763981_XPNPEP3   | -0.24604 | 0.000283 | 0.001359 |
| 11723482_TIA1      | 0.248939 | 0.000283 | 0.001359 |
| 11754232_CMTR2     | 0.313285 | 0.000283 | 0.00136  |
| 11758392_NCAM2     | -0.45208 | 0.000284 | 0.001361 |
| 11759302_ROCK2     | 0.2895   | 0.000284 | 0.001362 |
| 11725140_FUBP3     | -0.3354  | 0.000284 | 0.001362 |
| 11720868_ZNF275    | 0.285958 | 0.000284 | 0.001362 |
| 11759079_PLRG1     | -0.22456 | 0.000284 | 0.001363 |
| 11750126_MANBA     | 0.268108 | 0.000284 | 0.001363 |
| 11740375_RGS10     | 0.233075 | 0.000284 | 0.001363 |
| 11716678_SLC39A9   | 0.326639 | 0.000284 | 0.001364 |
| 11732481_ITGAM     | 0.306172 | 0.000284 | 0.001364 |
| 11719667_STMN1     | -0.22069 | 0.000284 | 0.001364 |
| 11756789_ATRNL1    | -0.36271 | 0.000285 | 0.001364 |
| 11719286_PEX11B    | -0.25301 | 0.000285 | 0.001365 |
| 11718657_MIR21 /// | 0.221654 | 0.000285 | 0.001366 |
| 11750864_CRISPLD1  | -0.28905 | 0.000285 | 0.001367 |
| 11727207_DDHD1     | 0.543409 | 0.000285 | 0.001367 |
| 11718317_SLC25A10  | -0.41422 | 0.000285 | 0.001368 |



|                    |          |          |          |
|--------------------|----------|----------|----------|
| 11745509_IQGAP2    | 0.226827 | 0.000285 | 0.001368 |
| 11739244_ANKFY1    | 0.294119 | 0.000285 | 0.001368 |
| 11720374_PRUNE     | 0.306497 | 0.000286 | 0.001369 |
| 11750949_NMT2      | 0.325096 | 0.000286 | 0.00137  |
| 11716300_ITGAV     | -0.63546 | 0.000286 | 0.001371 |
| 11737761_HSD17B4   | -0.24372 | 0.000286 | 0.001371 |
| 11741138_GSDMD     | -0.22681 | 0.000286 | 0.001372 |
| 11761481_MPI       | 0.458488 | 0.000287 | 0.001373 |
| 11724514_GPD1L     | -0.59023 | 0.000287 | 0.001375 |
| 11744584_HYI       | 0.328812 | 0.000287 | 0.001376 |
| 11750132_PAN3      | 0.287578 | 0.000287 | 0.001376 |
| 11737993_DST       | 0.223006 | 0.000287 | 0.001376 |
| 11758616_H2AFV     | -0.38802 | 0.000288 | 0.001377 |
| 11733064_SIL1      | 0.291984 | 0.000288 | 0.001377 |
| 11723430_ZFP91 /// | 0.263575 | 0.000288 | 0.001377 |
| 11722954_BIK       | 0.239358 | 0.000288 | 0.001377 |
| 11717229_CDR2 ///  | 0.281376 | 0.000288 | 0.001378 |
| 11756955_GZF1      | 0.379392 | 0.000288 | 0.001378 |
| 11745727_TCF12     | 0.235823 | 0.000288 | 0.00138  |
| 11752588_ABCE1     | -0.26047 | 0.000289 | 0.00138  |
| 11763377_RBM5      | 0.285004 | 0.000289 | 0.001381 |
| 11743806_MRPL42    | -0.23527 | 0.000289 | 0.001381 |
| 11750011_MLST8     | -0.23227 | 0.000289 | 0.001382 |
| 11754251_USP36     | 0.406654 | 0.000289 | 0.001382 |
| 11722341_PRR12     | -0.30156 | 0.000289 | 0.001383 |
| 11720170_MRPS16    | -0.247   | 0.00029  | 0.001384 |
| 11722530_CALD1     | 0.252461 | 0.00029  | 0.001384 |
| 11729666_STK38L    | -0.26629 | 0.00029  | 0.001385 |
| 11732582_NUDT22    | -0.31356 | 0.00029  | 0.001385 |
| 11747520_PMS2CL    | 0.501447 | 0.00029  | 0.001386 |
| 11759758_LOC339803 | -0.3455  | 0.00029  | 0.001387 |
| 11731994_SPANXA1 / | 0.274274 | 0.00029  | 0.001387 |
| 11763542_SLC12A4   | 0.282253 | 0.000291 | 0.001389 |
| 11734358_RNASEL    | 0.373744 | 0.000291 | 0.001389 |
| 11730931_ACSS3     | 0.349822 | 0.000291 | 0.00139  |
| 11742995_RAB10     | 0.254338 | 0.000291 | 0.00139  |
| 11751753_FAM122B   | -0.36916 | 0.000291 | 0.00139  |
| 11730749_CRNKL1    | 0.282232 | 0.000291 | 0.00139  |
| 11715698_NOLC1     | -0.23255 | 0.000291 | 0.001391 |
| 11757805_ATRAID    | -0.23622 | 0.000292 | 0.001392 |
| 11761938_TRIO      | 0.327308 | 0.000292 | 0.001392 |
| 11746829_DDX55     | 0.229215 | 0.000292 | 0.001392 |
| 11715727_OAZ2      | -0.37689 | 0.000292 | 0.001392 |
| 11741750_FBXO9     | 0.23811  | 0.000292 | 0.001393 |
| 11754040_FXYD3     | -0.30207 | 0.000292 | 0.001393 |
| 11734520_SCLT1     | -0.26479 | 0.000292 | 0.001393 |
| 11725197_CAMKMT    | 0.368813 | 0.000292 | 0.001393 |
| 11754438_GJC1      | -0.27314 | 0.000292 | 0.001394 |
| 11742431_DGKI      | 0.347916 | 0.000292 | 0.001394 |
| 11716634_TMEM50A   | -0.24321 | 0.000293 | 0.001396 |
| 11735090_SLC16A6   | 0.6664   | 0.000293 | 0.001397 |

|                    |          |          |          |
|--------------------|----------|----------|----------|
| 11718920_IQSEC1    | -0.31014 | 0.000293 | 0.001398 |
| 11717159_NDUFB3    | -0.29219 | 0.000293 | 0.001398 |
| 11752258_ACSL4     | 0.321752 | 0.000293 | 0.001399 |
| 11751483_BGN       | -0.30356 | 0.000293 | 0.001399 |
| 11716934_CCDC80    | 0.602695 | 0.000294 | 0.0014   |
| 11742052_ARNT      | 0.311664 | 0.000294 | 0.0014   |
| 11759993_ORAOV1    | 0.413213 | 0.000294 | 0.001401 |
| 11752957_DZANK1    | 0.287769 | 0.000294 | 0.001401 |
| 11750921_LCLAT1    | 0.440997 | 0.000294 | 0.001401 |
| 11717856_PSMG1     | -0.30093 | 0.000294 | 0.001403 |
| 11743563_MAP7D3    | -0.31481 | 0.000295 | 0.001404 |
| 11727709_LIPT1     | 0.405494 | 0.000295 | 0.001404 |
| 11759293_KMT2A     | 0.252728 | 0.000295 | 0.001404 |
| 11719892_VASH1     | -0.31331 | 0.000295 | 0.001405 |
| 11722701_KIAA1109  | 0.338175 | 0.000295 | 0.001405 |
| 11755075_NADSYN1   | 0.465501 | 0.000295 | 0.001406 |
| 11725049_ARHGDIA   | -0.24088 | 0.000295 | 0.001406 |
| 11747567_CNP       | -0.34819 | 0.000295 | 0.001406 |
| 11746150_AGAP9 /// | 0.257207 | 0.000296 | 0.001408 |
| 11719751_VAC14     | -0.23632 | 0.000296 | 0.001409 |
| 11754298_CSNK1D    | 0.260886 | 0.000296 | 0.001409 |
| 11731224_SHOX2     | -0.54257 | 0.000296 | 0.00141  |
| 11757051_TWF2      | -0.28345 | 0.000296 | 0.00141  |
| 11720457_CAPRIN1   | -0.5739  | 0.000297 | 0.001411 |
| 11759723_TUBGCP3   | -0.41517 | 0.000297 | 0.001411 |
| 11743074_IP09      | -0.36063 | 0.000297 | 0.001412 |
| 11752489_SLC47A1   | -0.76035 | 0.000297 | 0.001413 |
| 11755719_MLLT11    | -0.22275 | 0.000297 | 0.001414 |
| 11756849_NOP2      | 0.24935  | 0.000298 | 0.001415 |
| 11742401_C9orf9    | 0.305083 | 0.000298 | 0.001415 |
| 11720641_MRPS27    | 0.240407 | 0.000298 | 0.001415 |
| 11747415_CKAP5     | -0.23073 | 0.000298 | 0.001416 |
| 11716042_PPP2CB    | -0.23078 | 0.000298 | 0.001416 |
| 11721276_TADA1     | -0.24751 | 0.000298 | 0.001417 |
| 11733920_SERTAD2   | 0.306099 | 0.000298 | 0.001417 |
| 11717150_USB1      | -0.25664 | 0.000298 | 0.001417 |
| 11725303_RAC1      | -0.27401 | 0.000298 | 0.001418 |
| 11763259_CFL1      | -0.24601 | 0.000298 | 0.001418 |
| 11755381_PLGLA /// | 0.357923 | 0.000298 | 0.001418 |
| 11756264_IPW       | -0.42236 | 0.000299 | 0.001418 |
| 11744575_ELOVL2    | 0.396806 | 0.000299 | 0.001419 |
| 11755343_SETMAR    | -0.23547 | 0.000299 | 0.00142  |
| 11745444_TMEM161B  | 0.313379 | 0.000299 | 0.00142  |
| 11716953_TMEM126A  | 0.226885 | 0.000299 | 0.00142  |
| 11724596_TANK      | 0.330351 | 0.000299 | 0.00142  |
| 11759322_BCL6      | 0.329005 | 0.000299 | 0.001421 |
| 11734087_GALE      | 0.249442 | 0.0003   | 0.001422 |
| 11727466_FLJ10038  | 0.298762 | 0.0003   | 0.001423 |
| 11718347_S100P     | -0.30168 | 0.0003   | 0.001426 |
| 11724400_ENKD1     | -0.23158 | 0.000301 | 0.001426 |
| 11718850_SRPK1     | 0.262594 | 0.000301 | 0.001426 |

|                    |          |          |          |
|--------------------|----------|----------|----------|
| 11742238_DEPDC1B   | -0.29012 | 0.000301 | 0.001426 |
| 11746137_SRSF5     | -0.25881 | 0.000301 | 0.001428 |
| 11732318_KHDRBS3   | 0.379238 | 0.000301 | 0.001428 |
| 11749387_IQCK      | 0.306643 | 0.000301 | 0.001428 |
| 11716177_METAP2    | -0.27691 | 0.000301 | 0.001429 |
| 11759734_BLZF1     | 0.853133 | 0.000301 | 0.001429 |
| 11720112_SNTB2     | -0.23294 | 0.000302 | 0.001429 |
| 11758285_GTF3C1    | -0.25791 | 0.000302 | 0.001429 |
| 11736157_TBC1D2B   | -0.4623  | 0.000302 | 0.001429 |
| 11744289_JMJD6     | 0.259204 | 0.000302 | 0.00143  |
| 11757167_HSPA8     | -0.26379 | 0.000302 | 0.00143  |
| 11741016_AP2A2     | 0.307168 | 0.000302 | 0.001431 |
| 11739061_SLC7A5    | -0.26405 | 0.000302 | 0.001431 |
| 11717577_VPS26A    | -0.24641 | 0.000302 | 0.001431 |
| 11753994_IQCB1     | 0.279706 | 0.000302 | 0.001431 |
| 11716241_RAB6A     | 0.275423 | 0.000302 | 0.001431 |
| 11739268_PAK2      | 0.291788 | 0.000302 | 0.001432 |
| 11717543_MAPK3     | -0.34831 | 0.000302 | 0.001432 |
| 11739346_TNFRSF1A  | 0.303372 | 0.000303 | 0.001433 |
| 11746384_RICTOR    | 0.300285 | 0.000303 | 0.001433 |
| 11753860_GNG4      | -0.30875 | 0.000303 | 0.001433 |
| 11758177_LRWD1     | 0.296524 | 0.000303 | 0.001433 |
| 11734806_RDH13     | -0.23071 | 0.000303 | 0.001434 |
| 11727047_SGCE      | -0.25038 | 0.000303 | 0.001434 |
| 11727065_ANKRD11   | 0.270926 | 0.000303 | 0.001435 |
| 11743008_ARHGEF1   | -0.24336 | 0.000303 | 0.001435 |
| 11717535_TMEM259   | -0.35879 | 0.000303 | 0.001436 |
| 11730222_PNPLA2    | -0.28912 | 0.000304 | 0.001437 |
| 11715804_PPP2CA    | -0.28813 | 0.000304 | 0.001439 |
| 11739990_SRI       | -0.52725 | 0.000304 | 0.001439 |
| 11748108_TEX9      | 0.559911 | 0.000304 | 0.001439 |
| 11755665_VARS2     | -0.27093 | 0.000304 | 0.001439 |
| 11729505_HDDC3     | -0.23258 | 0.000304 | 0.00144  |
| 11751253_GOLPH3    | -0.25153 | 0.000305 | 0.00144  |
| 11733741_SYMPK     | -0.25857 | 0.000305 | 0.00144  |
| 11731499_ZNF134    | -0.25554 | 0.000305 | 0.00144  |
| 11753142_PSM11     | -0.22032 | 0.000305 | 0.00144  |
| 11736821_TP73      | -0.369   | 0.000305 | 0.001441 |
| 11751151_BRAP      | 0.465249 | 0.000305 | 0.001442 |
| 11757686_PCID2     | 0.281044 | 0.000306 | 0.001444 |
| 11752928_PPIA      | -0.36757 | 0.000306 | 0.001445 |
| 11736731_RIMS2     | 0.967138 | 0.000306 | 0.001445 |
| 11732413_LRRC8B    | -0.32702 | 0.000306 | 0.001445 |
| 11716433_SCD5      | -0.41596 | 0.000306 | 0.001447 |
| 11723475_TRMT61B   | -0.29121 | 0.000306 | 0.001447 |
| 11736357_CLSPN     | -0.35143 | 0.000306 | 0.001447 |
| 11717366_ZC3HAV1   | 0.30376  | 0.000307 | 0.001449 |
| 11759542_PAC1N2    | -0.32273 | 0.000307 | 0.001451 |
| 11728045_EXOC3-AS1 | -0.27937 | 0.000307 | 0.001451 |
| 11763467_WHSC1     | -0.40578 | 0.000308 | 0.001452 |
| 11755502_TECR      | -0.24415 | 0.000308 | 0.001454 |

|                    |          |          |          |
|--------------------|----------|----------|----------|
| 11739377_SREK1     | 0.279064 | 0.000308 | 0.001455 |
| 11720435_CLCN6     | 0.256421 | 0.000308 | 0.001455 |
| 11751347_FMR1      | 0.374708 | 0.000308 | 0.001455 |
| 11743336_UIMC1     | 0.256054 | 0.000308 | 0.001455 |
| 11730992	EIF2AK2   | 0.229663 | 0.000308 | 0.001455 |
| 11730657_CHD2      | 0.236905 | 0.000309 | 0.001457 |
| 11715500_TARDBP    | -0.22589 | 0.000309 | 0.001458 |
| 11730272_PPP2R5E   | 0.243157 | 0.000309 | 0.001458 |
| 11730197_RNF187    | -0.24156 | 0.000309 | 0.00146  |
| 11716331_DNAJB6    | 0.23544  | 0.00031  | 0.001461 |
| 11747937_DNAJB6    | 0.23544  | 0.00031  | 0.001461 |
| 11728703_KIAA0232  | -0.29129 | 0.00031  | 0.001463 |
| 11716308_CYBRD1    | 0.258188 | 0.00031  | 0.001464 |
| 11742946_UBE2E3    | 0.222971 | 0.000311 | 0.001467 |
| 11733040_DPH3      | 0.239185 | 0.000311 | 0.001467 |
| 11741086_APLP2     | -0.27326 | 0.000311 | 0.001467 |
| 11716129_IGF2R     | 0.280016 | 0.000311 | 0.001468 |
| 11751739_PTPRE     | 0.428324 | 0.000312 | 0.001468 |
| 11726539_OSBPL9    | 0.247141 | 0.000312 | 0.00147  |
| 11717600_SECISBP2  | 0.258494 | 0.000312 | 0.00147  |
| 11717511_UTP4      | 0.228883 | 0.000312 | 0.00147  |
| 11718599_TM2D2     | -0.2851  | 0.000312 | 0.00147  |
| 11733219_TFAP4     | -0.32416 | 0.000312 | 0.001471 |
| 11718023_SSFA2     | 0.256736 | 0.000312 | 0.001471 |
| 11747793_PTK2      | 0.298884 | 0.000312 | 0.001471 |
| 11724950_CPEB2     | 0.358461 | 0.000313 | 0.001472 |
| 11758883_SP3       | -0.31991 | 0.000313 | 0.001473 |
| 11743755_ZFAND5    | 0.270039 | 0.000313 | 0.001473 |
| 11753122_TMEM109   | -0.23759 | 0.000313 | 0.001473 |
| 11741316_RTN3      | -0.24221 | 0.000313 | 0.001474 |
| 11754338_RABL6     | -0.22996 | 0.000313 | 0.001474 |
| 11727223_CSGALNACT | 0.476277 | 0.000313 | 0.001475 |
| 11728018_RHPN1     | 0.271701 | 0.000314 | 0.001475 |
| 11750622_ALS2      | 0.274971 | 0.000314 | 0.001475 |
| 11756472_TRMT61B   | -0.28216 | 0.000314 | 0.001476 |
| 11722085_PDCD2L    | 0.269396 | 0.000314 | 0.001476 |
| 11750765_ORC3      | -0.3059  | 0.000314 | 0.001477 |
| 11726747_TMEM57    | -0.31928 | 0.000314 | 0.001478 |
| 11721696_MRPL18    | -0.2144  | 0.000315 | 0.001479 |
| 11732604_TRIM45    | -0.32607 | 0.000315 | 0.00148  |
| 11730367_ZNF557    | 0.319644 | 0.000315 | 0.00148  |
| 11754117_ST3GAL4   | -0.26606 | 0.000315 | 0.00148  |
| 11736543_CARNMT1   | -0.36491 | 0.000315 | 0.00148  |
| 11725819_PAQR3     | 0.27056  | 0.000315 | 0.00148  |
| 11743101	EIF3F     | 0.356375 | 0.000315 | 0.001481 |
| 11726293_WDR44     | 0.302037 | 0.000315 | 0.001481 |
| 11721739_LATS2     | 0.309595 | 0.000315 | 0.001481 |
| 11724252_SLC39A8   | -0.37617 | 0.000315 | 0.001481 |
| 11724313_ALDH16A1  | -0.379   | 0.000315 | 0.001481 |
| 11746591_CDH13     | 0.231584 | 0.000315 | 0.001482 |
| 11758785_SLC25A1   | -0.22823 | 0.000315 | 0.001482 |

|                    |          |          |          |
|--------------------|----------|----------|----------|
| 11723888_ZNF251    | 0.285165 | 0.000316 | 0.001482 |
| 11739029_CLTC      | 0.219115 | 0.000316 | 0.001483 |
| 11757703_SNRPG     | -0.24094 | 0.000316 | 0.001483 |
| 11748203_PPP6R2    | 0.24485  | 0.000316 | 0.001483 |
| 11757816_MARCKS    | -0.23533 | 0.000316 | 0.001484 |
| 11731680_NOX4      | 0.264734 | 0.000316 | 0.001484 |
| 11757025_SERPINF1  | -0.34703 | 0.000317 | 0.001487 |
| 11724133_SLC12A2   | -0.39422 | 0.000317 | 0.001488 |
| 11717829_TSC22D3   | 0.279473 | 0.000317 | 0.001489 |
| 11731737_PGAP1     | 0.309677 | 0.000317 | 0.00149  |
| 11728177_DYX1C1    | 0.425385 | 0.000318 | 0.001491 |
| 11748894_ACD       | -0.22553 | 0.000318 | 0.001491 |
| 11754979_ARIH2     | 0.291001 | 0.000318 | 0.001492 |
| 11729298_SDE2      | -0.2334  | 0.000318 | 0.001493 |
| 11763721_APH1A     | -0.30061 | 0.000318 | 0.001494 |
| 11725974_POM121 // | -0.22853 | 0.000319 | 0.001495 |
| 11722025_ABCF2     | 0.284301 | 0.000319 | 0.001495 |
| 11719298_MAPKAP1   | -0.24977 | 0.000319 | 0.001495 |
| 11718896_SPAG9     | -0.32395 | 0.000319 | 0.001495 |
| 11751633_PRSS23    | 0.209406 | 0.000319 | 0.001495 |
| 11761781_SRSF11    | 0.312957 | 0.000319 | 0.001495 |
| 11754783_COMMD3    | 0.216875 | 0.000319 | 0.001495 |
| 11745285_AFF4      | 0.352688 | 0.00032  | 0.001498 |
| 11738847_GFM2      | 0.306467 | 0.00032  | 0.001498 |
| 11742891_C17orf53  | -0.21537 | 0.00032  | 0.001499 |
| 11729645_GPX8      | -0.32569 | 0.00032  | 0.0015   |
| 11759804_PDCD6     | -0.30056 | 0.00032  | 0.0015   |
| 11736346_HFE       | -0.31412 | 0.00032  | 0.001501 |
| 11743972_DDIT4     | -0.2451  | 0.00032  | 0.001501 |
| 11722273_MSANTD4   | 0.254968 | 0.000321 | 0.001502 |
| 11734364_RFX3      | 0.316396 | 0.000321 | 0.001502 |
| 11742415_BAHCC1    | -0.33531 | 0.000321 | 0.001503 |
| 11757683_IRF2BP2   | -0.42298 | 0.000321 | 0.001504 |
| 11721861_STX12     | -0.34431 | 0.000321 | 0.001504 |
| 11726454_MYO5B     | 0.494663 | 0.000321 | 0.001504 |
| 11736209_METTL2B   | 0.255209 | 0.000322 | 0.001505 |
| 11756206_YIPF1     | 0.292266 | 0.000322 | 0.001506 |
| 11744792_SLF2      | -0.31992 | 0.000322 | 0.001506 |
| 11744807_POLM      | 0.243696 | 0.000322 | 0.001507 |
| 11734361_SLC16A7   | 0.367024 | 0.000322 | 0.001508 |
| 11762406_GBP2      | -0.35649 | 0.000323 | 0.00151  |
| 11724010_GPR162    | -0.22416 | 0.000323 | 0.00151  |
| 11749517_EHD1      | 0.281543 | 0.000323 | 0.001511 |
| 11755771_ZNF275    | 0.259649 | 0.000323 | 0.001511 |
| 11746213_PAAF1     | -0.22563 | 0.000323 | 0.001512 |
| 11760043_XRN1      | 0.587306 | 0.000323 | 0.001512 |
| 11740788_CDH12     | 0.408285 | 0.000324 | 0.001516 |
| 11722222_TMEM160   | -0.35234 | 0.000324 | 0.001516 |
| 11727557_TK2       | -0.27344 | 0.000324 | 0.001517 |
| 11716899_ARL3      | -0.35514 | 0.000324 | 0.001517 |
| 11721607_RAPGEF2   | 0.527234 | 0.000324 | 0.001517 |

|                   |     |          |          |          |
|-------------------|-----|----------|----------|----------|
| 11728417_ELMOD1   | //  | 0.292678 | 0.000325 | 0.001517 |
| 11745604_NFKBIB   |     | 0.519526 | 0.000325 | 0.00152  |
| 11754757_ARID2    |     | -0.49225 | 0.000325 | 0.00152  |
| 11724198_STC1     |     | 0.47162  | 0.000325 | 0.001521 |
| 11751867_C8orf59  |     | -0.24264 | 0.000325 | 0.001521 |
| 11721000_HEXIM1   |     | -0.26685 | 0.000325 | 0.001521 |
| 11755415_EIF2B4   |     | 0.259336 | 0.000326 | 0.001521 |
| 11721388_P2RX5    |     | 0.404634 | 0.000326 | 0.001521 |
| 11747156_FXYD6    | /// | -0.27914 | 0.000326 | 0.001521 |
| 11760463_MED6     |     | 0.490338 | 0.000326 | 0.001521 |
| 11727922_PURA     |     | -0.29219 | 0.000326 | 0.001522 |
| 11743000_CD83     |     | -0.46759 | 0.000326 | 0.001523 |
| 11748356_CEP70    |     | -0.28163 | 0.000326 | 0.001524 |
| 11717230_EP400    |     | -0.24415 | 0.000327 | 0.001525 |
| 11722275_ZBED4    |     | -0.3744  | 0.000327 | 0.001526 |
| 11760234_GPATCH11 |     | -0.21544 | 0.000327 | 0.001526 |
| 11749838_DCTN4    |     | 0.270903 | 0.000327 | 0.001526 |
| 11731432_PCDH10   |     | 0.317866 | 0.000327 | 0.001526 |
| 11723908_KCNMA1   |     | 0.429989 | 0.000327 | 0.001527 |
| 11719432_KIAA0513 |     | -0.24135 | 0.000327 | 0.001527 |
| 11733480_SUPT20H  |     | 0.245651 | 0.000327 | 0.001528 |
| 11747778_RAB6A    |     | 0.24134  | 0.000328 | 0.001528 |
| 11755586_MAN2C1   |     | 0.229471 | 0.000328 | 0.00153  |
| 11715403_COL6A1   |     | 0.28723  | 0.000329 | 0.001534 |
| 11733140_ARL4A    |     | 0.299666 | 0.000329 | 0.001535 |
| 11757296_EIF3F    |     | 0.210614 | 0.000329 | 0.001535 |
| 11725730_LUC7L    |     | 0.272926 | 0.000329 | 0.001536 |
| 11750876_SCFD1    |     | 0.262278 | 0.00033  | 0.001537 |
| 11744612_NUDCD1   |     | 0.257098 | 0.00033  | 0.001537 |
| 11753896_PDHA1    |     | -0.24935 | 0.00033  | 0.001538 |
| 11722591_BCAP29   |     | 0.224275 | 0.00033  | 0.001539 |
| 11750529_ASXB9    |     | -0.30316 | 0.00033  | 0.001539 |
| 11751943_LRCH2    |     | -0.32851 | 0.00033  | 0.001539 |
| 11743751_NUDT13   |     | 0.564934 | 0.000331 | 0.001542 |
| 11723913_CACTIN   |     | -0.25747 | 0.000331 | 0.001542 |
| 11739234_SAFB2    |     | 0.242387 | 0.000331 | 0.001544 |
| 11716987_HMGCS1   |     | 0.223347 | 0.000332 | 0.001545 |
| 11755213_KIAA1522 |     | -0.37122 | 0.000332 | 0.001546 |
| 11743395_BMI1     | /// | 0.248771 | 0.000332 | 0.001546 |
| 11729275_NPAS2    |     | 0.371423 | 0.000332 | 0.001546 |
| 11753327_ZNF274   |     | 0.215185 | 0.000332 | 0.001546 |
| 11753023_IL31RA   |     | 0.675776 | 0.000333 | 0.00155  |
| 11725528_ZNF248   |     | 0.572264 | 0.000333 | 0.00155  |
| 11739236_PDE12    |     | 0.266002 | 0.000333 | 0.00155  |
| 11755904_RILPL1   |     | 0.269393 | 0.000333 | 0.001552 |
| 11729252_SLC44A3  |     | 0.400118 | 0.000333 | 0.001552 |
| 11727578_TCP11    |     | -0.32925 | 0.000333 | 0.001552 |
| 11724300_RABGGTB  |     | 0.220919 | 0.000334 | 0.001553 |
| 11744493_ADGRA2   |     | -0.29151 | 0.000334 | 0.001553 |
| 11728028_PWWP2A   |     | 0.479934 | 0.000334 | 0.001554 |
| 11718491_FABP5    |     | -0.32944 | 0.000334 | 0.001554 |

|                    |          |          |          |
|--------------------|----------|----------|----------|
| 11729448_TINF2     | -0.29434 | 0.000334 | 0.001554 |
| 11720130_COMTD1    | -0.21608 | 0.000334 | 0.001554 |
| 11719687_SETDB1    | 0.315409 | 0.000335 | 0.001558 |
| 11745913_GOLGA8A / | 0.382364 | 0.000335 | 0.001559 |
| 11756326_BPNT1     | -0.23306 | 0.000336 | 0.001561 |
| 11720282_NACC1     | -0.26997 | 0.000336 | 0.001561 |
| 11724876_AEBP2     | 0.228885 | 0.000336 | 0.001561 |
| 11722641_DGAT2     | -0.27775 | 0.000336 | 0.001561 |
| 11744975_DOC2A     | -0.22996 | 0.000337 | 0.001564 |
| 11719606_RRN3      | 0.220645 | 0.000337 | 0.001564 |
| 11737058_PANK2     | 0.306146 | 0.000337 | 0.001566 |
| 11734106_FBXO27    | -0.25649 | 0.000337 | 0.001567 |
| 11724417_C7orf43   | 0.272908 | 0.000337 | 0.001567 |
| 11755484_NUP107    | -0.24183 | 0.000338 | 0.001571 |
| 11740024_RUFY1     | 0.267103 | 0.000338 | 0.001571 |
| 11716955_CTDSP2    | -0.26304 | 0.000338 | 0.001572 |
| 11716026_SELT      | 0.289592 | 0.000338 | 0.001572 |
| 11721863_SLC37A3   | 0.382767 | 0.000339 | 0.001573 |
| 11728349_STIM2     | 0.246975 | 0.000339 | 0.001575 |
| 11721039_CAPN15    | 0.205851 | 0.000339 | 0.001576 |
| 11722963_COPZ2     | 0.254117 | 0.000339 | 0.001576 |
| 11717652_SPRY1     | -0.29938 | 0.000339 | 0.001576 |
| 11738073_SPRY1     | -0.29938 | 0.000339 | 0.001576 |
| 11748725_PHEX      | 0.388994 | 0.00034  | 0.001577 |
| 11737700_DDX31     | 0.352566 | 0.00034  | 0.001577 |
| 11725260_REG3G     | -0.25727 | 0.00034  | 0.001577 |
| 11731420_UBE2G2    | 0.224924 | 0.00034  | 0.001579 |
| 11723420_BTF3L4    | 0.257177 | 0.00034  | 0.00158  |
| 11739868_ATF2      | 0.420581 | 0.000341 | 0.001581 |
| 11753235_E2F6      | 0.262387 | 0.000341 | 0.001581 |
| 11729806_UBXN11    | 0.356683 | 0.000341 | 0.001581 |
| 11739400_FBXO7     | -0.24358 | 0.000341 | 0.001583 |
| 11724824_LSM12     | 0.221706 | 0.000342 | 0.001585 |
| 11763511_RMDN2     | 0.344815 | 0.000342 | 0.001585 |
| 11718007_MYLIP     | -0.26752 | 0.000342 | 0.001585 |
| 11761907_NRII3     | 0.279361 | 0.000342 | 0.001585 |
| 11717566_EMP1      | 0.26273  | 0.000342 | 0.001586 |
| 11759943_FAM13A    | 0.655728 | 0.000342 | 0.001586 |
| 11757157_RPL27A // | -0.28748 | 0.000342 | 0.001586 |
| 11763757_CLPX      | 0.271653 | 0.000342 | 0.001586 |
| 11727904_IL13RA1   | 0.534139 | 0.000342 | 0.001586 |
| 11725228_P2RY6     | -0.28287 | 0.000342 | 0.001586 |
| 11756058_CEACAM1   | 0.26648  | 0.000342 | 0.001586 |
| 11737902_METTL5    | -0.23521 | 0.000343 | 0.001587 |
| 11739880_GLIS3     | 0.261872 | 0.000343 | 0.001587 |
| 11758212_EFCAB14   | 0.243505 | 0.000343 | 0.001587 |
| 11754883_RFC3      | -0.36416 | 0.000343 | 0.001587 |
| 11755602_ENO3      | 0.479708 | 0.000343 | 0.001587 |
| 11718368_LAMA5     | 0.254743 | 0.000343 | 0.001589 |
| 11748670_PIK3R1    | 0.262626 | 0.000343 | 0.00159  |
| 11742338_KRTAP4-9  | 0.304802 | 0.000344 | 0.001591 |

|                   |          |          |          |
|-------------------|----------|----------|----------|
| 11751800_MDC1     | -0.35051 | 0.000344 | 0.001591 |
| 11741113_PDCD4    | -0.24103 | 0.000344 | 0.001592 |
| 11730455_SLC35A3  | 0.372341 | 0.000344 | 0.001592 |
| 11744628_ZCCHC7   | 0.234304 | 0.000344 | 0.001592 |
| 11750774_FBXO27   | -0.28966 | 0.000344 | 0.001593 |
| 11733891_FKBP14   | 0.318909 | 0.000344 | 0.001594 |
| 11720933_DAGLB    | 0.353088 | 0.000345 | 0.001595 |
| 11753221_RANBP3   | -0.23124 | 0.000345 | 0.001595 |
| 11717250_NAE1     | -0.21386 | 0.000345 | 0.001596 |
| 11718900_TGFBR3   | 0.422038 | 0.000345 | 0.001596 |
| 11721759_ASAP3    | -0.36006 | 0.000345 | 0.001596 |
| 11752004_GCC2 /// | 0.326758 | 0.000345 | 0.001596 |
| 11722355_DAB2     | 0.275127 | 0.000345 | 0.001597 |
| 11719507_CSRP2BP  | -0.48523 | 0.000345 | 0.001597 |
| 11734883_ARID2    | 0.244638 | 0.000345 | 0.001597 |
| 11731480_SNRPB2   | -0.3941  | 0.000346 | 0.001597 |
| 11740134_CALD1    | 0.243768 | 0.000346 | 0.001597 |
| 11736551_REL      | 0.477691 | 0.000346 | 0.001598 |
| 11722363_LMBR1L   | 0.262514 | 0.000346 | 0.001598 |
| 11750404_RNF145   | 0.241687 | 0.000346 | 0.001598 |
| 11715678_NAP1L4   | -0.24384 | 0.000346 | 0.001599 |
| 11745409_LARP1B   | 0.294638 | 0.000346 | 0.001599 |
| 11755478_PROSC    | 0.218362 | 0.000346 | 0.001599 |
| 11757623_RNF5 /// | -0.29065 | 0.000346 | 0.0016   |
| 11750911_TAF15    | 0.269676 | 0.000346 | 0.0016   |
| 11726924_ASB6     | 0.261304 | 0.000347 | 0.0016   |
| 11757440_PTP4A2   | 0.214322 | 0.000347 | 0.001601 |
| 11726290_CD22     | 0.271174 | 0.000347 | 0.001602 |
| 11744767_BCKDK    | -0.21501 | 0.000347 | 0.001604 |
| 11744919_TPGS2    | -0.29079 | 0.000348 | 0.001605 |
| 11744335_PFKL     | -0.26959 | 0.000348 | 0.001605 |
| 11726014_GPC6     | 0.244269 | 0.000348 | 0.001605 |
| 11760138_NCAPG2   | -0.33371 | 0.000348 | 0.001606 |
| 11750016_MXD1     | 0.875006 | 0.000348 | 0.001607 |
| 11749029_SART3    | -0.24712 | 0.000348 | 0.001607 |
| 11728648_NUCKS1   | -0.25696 | 0.000348 | 0.001607 |
| 11751496_LATS1    | 0.590972 | 0.000348 | 0.001607 |
| 11756272_NAA16    | 0.337964 | 0.000349 | 0.001609 |
| 11727345_FBLN1    | -0.36633 | 0.000349 | 0.001609 |
| 11722871_DYNC2H1  | 0.28286  | 0.000349 | 0.001611 |
| 11753774_TMEM203  | -0.26453 | 0.000349 | 0.001611 |
| 11756313_SERPINF1 | -0.26582 | 0.00035  | 0.001614 |
| 11724033_CD2AP    | 0.354046 | 0.00035  | 0.001614 |
| 11748637_REEP4    | -0.44013 | 0.00035  | 0.001615 |
| 11747856_SH3PXD2A | -0.3687  | 0.00035  | 0.001616 |
| 11745991_UVRAG    | 0.281193 | 0.000351 | 0.001616 |
| 11718880_ZCCHC14  | -0.2158  | 0.000351 | 0.001617 |
| 11744343_ZNF664   | -0.21605 | 0.000351 | 0.001617 |
| 11757910_EIF2S3   | 0.216173 | 0.000351 | 0.001617 |
| 11753664_RDM1     | -1.2009  | 0.000352 | 0.00162  |
| 11726971_TRIM41   | 0.241324 | 0.000352 | 0.001621 |



|                    |          |          |          |
|--------------------|----------|----------|----------|
| 11721507_DVL3      | 0.237148 | 0.000352 | 0.001622 |
| 11735203_MEGF10    | 0.673935 | 0.000352 | 0.001623 |
| 11735803_NAT6      | -0.43965 | 0.000353 | 0.001624 |
| 11740096_TMCC1     | 0.331573 | 0.000353 | 0.001624 |
| 11726343_DNAJB14   | 0.307086 | 0.000353 | 0.001625 |
| 11744209_SERPINH1  | -0.26377 | 0.000353 | 0.001625 |
| 11715563_SCD       | -0.36104 | 0.000353 | 0.001625 |
| 11740444_ELF1      | 0.309344 | 0.000353 | 0.001625 |
| 11746299_CNTRLN    | -0.31277 | 0.000353 | 0.001625 |
| 11758369_HLA-DPB1  | -0.27593 | 0.000353 | 0.001626 |
| 11739999_SCN2A     | 0.798144 | 0.000354 | 0.001628 |
| 11744400_MYL6B     | -0.23154 | 0.000354 | 0.001628 |
| 11728796_LSM14A    | -0.24875 | 0.000354 | 0.001629 |
| 11724392_ASPHD2    | 0.257658 | 0.000354 | 0.00163  |
| 11730219_SPG20     | -0.3359  | 0.000354 | 0.00163  |
| 11726623_DIS3      | 0.265598 | 0.000354 | 0.00163  |
| 11717130_SARIA     | 0.258776 | 0.000354 | 0.00163  |
| 11723945_PTTG1IP   | 0.249632 | 0.000355 | 0.001633 |
| 11728461_CARD9 /// | -0.25356 | 0.000355 | 0.001633 |
| 11753266_TCEA3     | 0.449481 | 0.000356 | 0.001635 |
| 11734416_ZNF718    | -0.28647 | 0.000356 | 0.001636 |
| 11723446_TMEM132A  | 0.266234 | 0.000356 | 0.001636 |
| 11728311_ERCC1     | 0.240106 | 0.000356 | 0.001636 |
| 11737511_SP100     | 0.369814 | 0.000356 | 0.001637 |
| 11719631_BIN1      | 0.348599 | 0.000356 | 0.001638 |
| 11717053_SSR1      | 0.255687 | 0.000357 | 0.001639 |
| 11724626_IFT74     | 0.225579 | 0.000357 | 0.001639 |
| 11736276_AMDHD2    | -0.27749 | 0.000357 | 0.001639 |
| 11726380_WHSC1     | -0.48378 | 0.000357 | 0.00164  |
| 11722110_PCNX      | -0.41196 | 0.000357 | 0.00164  |
| 11729236_MCCC2     | -0.24177 | 0.000357 | 0.00164  |
| 11753174_ZNF410    | 0.359523 | 0.000357 | 0.001641 |
| 11719782_RPS23     | -0.20648 | 0.000357 | 0.001641 |
| 11746866_APP       | 0.289134 | 0.000357 | 0.001641 |
| 11720437_ACVR1B    | 0.296251 | 0.000358 | 0.001642 |
| 11726614_CDH2      | 0.226665 | 0.000358 | 0.001643 |
| 11721277_SUV39H1   | -0.3043  | 0.000358 | 0.001643 |
| 11743152_TUSC3     | 0.260526 | 0.000358 | 0.001643 |
| 11730261_PRKAR2B   | -0.24068 | 0.000358 | 0.001644 |
| 11763279_TMEM136   | 0.355122 | 0.000358 | 0.001644 |
| 11745609_WDR1      | 0.241226 | 0.000358 | 0.001644 |
| 11764141_SLC25A1   | -0.2171  | 0.000358 | 0.001644 |
| 11721631_TMEM97    | -0.30631 | 0.000359 | 0.001645 |
| 11754105_SNRPB     | -0.24606 | 0.000359 | 0.001646 |
| 11716657_TRAF4     | 0.327656 | 0.000359 | 0.001647 |
| 11717884_ZHX3      | -0.3627  | 0.000359 | 0.001648 |
| 11760371_LOC100507 | 0.283507 | 0.000359 | 0.001648 |
| 11718269_ANGPTL2   | 0.416522 | 0.00036  | 0.001651 |
| 11759454_TUBB8     | -0.74325 | 0.00036  | 0.001651 |
| 11749243_FAM98A    | 0.249415 | 0.00036  | 0.001651 |
| 11736038_TADA3     | -0.41127 | 0.00036  | 0.001651 |

|                    |          |          |          |
|--------------------|----------|----------|----------|
| 11718622_PPP5C     | -0.32844 | 0.00036  | 0.001651 |
| 11718150_PRADC1    | -0.25886 | 0.00036  | 0.001651 |
| 11746412_VCP       | -0.29039 | 0.00036  | 0.001651 |
| 11753995_SNCG      | -0.23566 | 0.000361 | 0.001653 |
| 11726298_LGALS8    | 0.266651 | 0.000361 | 0.001654 |
| 11740081_EPOR      | -0.31453 | 0.000362 | 0.001659 |
| 11732571_ZNF582    | 0.622352 | 0.000362 | 0.001659 |
| 11716176_METAP2    | -0.22858 | 0.000362 | 0.00166  |
| 11747355_FSCN1     | -0.22912 | 0.000363 | 0.001661 |
| 11721238_ATP5L     | -0.29062 | 0.000363 | 0.001663 |
| 11731772_KIAA1161  | -0.24756 | 0.000363 | 0.001664 |
| 11748536_DIMT1     | -0.27063 | 0.000363 | 0.001664 |
| 11725705_AMOTL1    | -0.25476 | 0.000363 | 0.001664 |
| 11746197_HUS1      | 0.24114  | 0.000364 | 0.001665 |
| 11718026_NCOA7     | 0.244612 | 0.000364 | 0.001665 |
| 11721501_SWAP70    | 0.22088  | 0.000364 | 0.001666 |
| 11736693_TRIM38    | 0.459376 | 0.000364 | 0.001666 |
| 11726205_CCNJL     | 0.480973 | 0.000364 | 0.001666 |
| 11755687_TGOLN2    | 0.223309 | 0.000364 | 0.001667 |
| 11716785_TRAK2     | 0.452408 | 0.000364 | 0.001667 |
| 11722238_DPM3      | -0.23845 | 0.000365 | 0.001671 |
| 11716435_RAPGEF1   | 0.25202  | 0.000365 | 0.001671 |
| 11751064_EXOG      | 0.359514 | 0.000365 | 0.001671 |
| 11746221_ATG4D     | -0.36317 | 0.000365 | 0.001672 |
| 11727019_ABI2      | -0.31967 | 0.000366 | 0.001672 |
| 11737555_NUDT17    | 0.23262  | 0.000366 | 0.001672 |
| 11728392_LRP12     | 0.287253 | 0.000366 | 0.001673 |
| 11728462_DNLZ      | -0.30898 | 0.000366 | 0.001673 |
| 11748708_SRCAP     | -0.31093 | 0.000366 | 0.001673 |
| 11745397_KLHL8     | 0.341749 | 0.000366 | 0.001673 |
| 11721839_GLIPR1    | 0.296914 | 0.000367 | 0.001678 |
| 11758268_MEST      | -0.27767 | 0.000367 | 0.001679 |
| 11720062_IER3      | -0.27518 | 0.000367 | 0.001679 |
| 11729860_H6PD      | -0.29806 | 0.000367 | 0.001679 |
| 11740005_KIAA0895  | 0.687609 | 0.000368 | 0.001682 |
| 11744801_NR2C2AP   | -0.3426  | 0.000368 | 0.001684 |
| 11721180_FAM175B   | 0.239243 | 0.000369 | 0.001686 |
| 11719021_WDFY1     | -0.28142 | 0.000369 | 0.001686 |
| 11726815_GPRIN1    | -0.50127 | 0.000369 | 0.001686 |
| 11744237_ARHGEF19  | -0.27262 | 0.000369 | 0.001687 |
| 11732382_USP6NL    | 0.375464 | 0.000369 | 0.001688 |
| 11754053_TPI1      | -0.22049 | 0.00037  | 0.001689 |
| 11756878_FBL       | -0.21831 | 0.00037  | 0.001691 |
| 11733354_RFESD     | 0.386327 | 0.00037  | 0.001692 |
| 11744730_DLEU2 /// | -0.26054 | 0.00037  | 0.001692 |
| 11741548_MBNL1     | 0.239237 | 0.000371 | 0.001692 |
| 11739673_PDP2      | 0.29057  | 0.000371 | 0.001692 |
| 11736868_MMP16     | 0.250852 | 0.000371 | 0.001692 |
| 11727680_ADSL      | 0.231045 | 0.000371 | 0.001692 |
| 11724186_SART3     | -0.3373  | 0.000371 | 0.001692 |
| 11750165_FARSB     | -0.22269 | 0.000371 | 0.001692 |

|                    |          |          |          |
|--------------------|----------|----------|----------|
| 11716834_PRRC2A    | -0.31651 | 0.000371 | 0.001693 |
| 11727458_KIF18A    | -0.28858 | 0.000371 | 0.001693 |
| 11720957_IKBKE     | 0.420735 | 0.000371 | 0.001693 |
| 11751901_MON2      | 0.264339 | 0.000372 | 0.001695 |
| 11723028_MEST      | -0.41692 | 0.000372 | 0.001695 |
| 11733328_CEP57L1   | -0.44086 | 0.000372 | 0.001697 |
| 11744408_GOLGA8A   | 0.316496 | 0.000372 | 0.001698 |
| 11748317_MCFD2     | 0.249336 | 0.000372 | 0.001699 |
| 11739478_SBF2      | 0.255779 | 0.000373 | 0.001699 |
| 11727575_TMEM237   | -0.36068 | 0.000373 | 0.0017   |
| 11716309_CYBRD1    | 0.283075 | 0.000373 | 0.0017   |
| 11763808_ATP6VOD1  | 0.224858 | 0.000373 | 0.001701 |
| 11751983_EGFR      | 0.335184 | 0.000373 | 0.001701 |
| 11743050_DNAJC15   | 0.205951 | 0.000373 | 0.001701 |
| 11757442_SERPINE2  | 0.205751 | 0.000374 | 0.001703 |
| 11740216_LMOD3     | 0.492037 | 0.000374 | 0.001703 |
| 11758445_EDNRB     | 0.310016 | 0.000374 | 0.001703 |
| 11764234_INTS7     | -0.5949  | 0.000374 | 0.001703 |
| 11718844_BCL2L2-PA | -0.25878 | 0.000374 | 0.001705 |
| 11749610_CD58      | 0.236517 | 0.000374 | 0.001705 |
| 11738863_PTPN2     | -0.22513 | 0.000375 | 0.001706 |
| 11737623_DSTYK     | 0.274453 | 0.000375 | 0.001706 |
| 11728180_CHIC1     | 0.349991 | 0.000375 | 0.001708 |
| 11740117_RNF24     | 0.232406 | 0.000375 | 0.001708 |
| 11717557_POM121 // | -0.26275 | 0.000377 | 0.001716 |
| 11739230_ARL4A     | 0.271121 | 0.000377 | 0.001717 |
| 11744737_RTKN2     | -0.29432 | 0.000377 | 0.001718 |
| 11738008_APP       | 0.235287 | 0.000378 | 0.001719 |
| 11744098_NOP58     | 0.214977 | 0.000378 | 0.001719 |
| 11723080_C2orf47   | 0.214861 | 0.000378 | 0.00172  |
| 11716391_BACE1     | 0.249594 | 0.000378 | 0.001721 |
| 11747868_SDHA      | -0.26254 | 0.000378 | 0.001721 |
| 11739801_VCPIP1    | 0.28828  | 0.000378 | 0.001721 |
| 11758007_YAF2      | -0.32642 | 0.000378 | 0.001721 |
| 11740368_PTPN3     | 0.318088 | 0.000379 | 0.001722 |
| 11724746_CHMP2B    | 0.286188 | 0.000379 | 0.001722 |
| 11747999_TUBD1     | -0.37614 | 0.000379 | 0.001724 |
| 11732153_ZDHHC6    | 0.226293 | 0.000379 | 0.001724 |
| 11759587_HTRA3     | -0.45769 | 0.000379 | 0.001725 |
| 11725766_COL11A1   | 0.555432 | 0.000379 | 0.001725 |
| 11732334_SEC31A    | 0.255513 | 0.00038  | 0.001726 |
| 11756984_GNB2      | -0.24262 | 0.00038  | 0.001727 |
| 11722276_ZBED4     | -0.37879 | 0.00038  | 0.001729 |
| 11749858_AP4B1     | 0.327431 | 0.00038  | 0.001729 |
| 11764017_APH1A     | -0.23057 | 0.000381 | 0.001729 |
| 11748402_HDAC6     | -0.34723 | 0.000381 | 0.00173  |
| 11740630_ZNF780B   | 0.601015 | 0.000381 | 0.001732 |
| 11722574_APIG1     | -0.22785 | 0.000381 | 0.001733 |
| 11740156_SH2D1B    | 0.433274 | 0.000382 | 0.001734 |
| 11725483_UNC13A    | 0.407877 | 0.000382 | 0.001735 |
| 11746613_7-Mar     | 0.2387   | 0.000382 | 0.001735 |

|                    |          |          |          |
|--------------------|----------|----------|----------|
| 11758135_C14orf2   | 0.216915 | 0.000382 | 0.001736 |
| 11723795_SLC29A2   | -0.41145 | 0.000383 | 0.001737 |
| 11730836_ZDHC4     | -0.25961 | 0.000383 | 0.001738 |
| 11750587_CTND1 //  | 0.287793 | 0.000383 | 0.001739 |
| 11750203_TRUB1     | -0.41544 | 0.000383 | 0.001739 |
| 11739512_TIMM50    | -0.25863 | 0.000383 | 0.001739 |
| 11722474_DGKQ      | -0.26362 | 0.000384 | 0.001741 |
| 11721443_RNASEH2C  | -0.24403 | 0.000384 | 0.001742 |
| 11718721_BRD8      | -0.23385 | 0.000384 | 0.001742 |
| 11751207_MLX       | 0.23145  | 0.000384 | 0.001742 |
| 11759567_TMEM265   | 0.621303 | 0.000384 | 0.001742 |
| 11734696_GOLGA8A / | 0.281956 | 0.000384 | 0.001744 |
| 11716539_SZRD1     | -0.29934 | 0.000384 | 0.001744 |
| 11743745_CSPP1     | 0.257533 | 0.000385 | 0.001745 |
| 11726991_EIF2AK1   | -0.29233 | 0.000385 | 0.001746 |
| 11761569_TMC6      | -0.24782 | 0.000385 | 0.001747 |
| 11743854_FBXO21    | -0.22663 | 0.000386 | 0.001748 |
| 11753682_LSM12     | 0.226721 | 0.000386 | 0.001748 |
| 11739288_KMT2A     | 0.414731 | 0.000386 | 0.001749 |
| 11751759_LSM12     | 0.239019 | 0.000386 | 0.001749 |
| 11746973_POR       | -0.27787 | 0.000386 | 0.001749 |
| 11755693_LDLRAD3   | -0.34156 | 0.000386 | 0.001749 |
| 11753624_ARL2 ///  | -0.24101 | 0.000386 | 0.001749 |
| 11721015_WTAP      | 0.242694 | 0.000386 | 0.001751 |
| 11731605_HSD17B12  | -0.23518 | 0.000386 | 0.001751 |
| 11735004_JADE1     | -0.33396 | 0.000387 | 0.001752 |
| 11717361_GPC1      | -0.30522 | 0.000387 | 0.001752 |
| 11731123_TMEM200A  | 0.605029 | 0.000387 | 0.001753 |
| 11717278_THRAP3    | -0.21601 | 0.000387 | 0.001753 |
| 11728404_SHCBP1    | -0.30194 | 0.000387 | 0.001753 |
| 11731593_STAM2     | 0.352496 | 0.000387 | 0.001754 |
| 11723234_IFI44L    | 0.42921  | 0.000387 | 0.001754 |
| 11730442_FAM155A   | -0.27695 | 0.000387 | 0.001754 |
| 11717319_SEC24D    | 0.241346 | 0.000387 | 0.001754 |
| 11740559_NSMAF     | 0.30253  | 0.000387 | 0.001754 |
| 11733111_TLK1      | 0.380473 | 0.000388 | 0.001755 |
| 11739372_MAPRE2    | 0.288835 | 0.000388 | 0.001758 |
| 11744430_KIF9      | -0.21979 | 0.000389 | 0.001758 |
| 11747334_DDX39A    | -0.22931 | 0.000389 | 0.001759 |
| 11744366_ZFAS1     | 0.270657 | 0.000389 | 0.00176  |
| 11737331_PDE1C     | 0.262528 | 0.000389 | 0.00176  |
| 11716306_ATXN10    | 0.234975 | 0.000389 | 0.001761 |
| 11760820_IDS       | 0.48618  | 0.00039  | 0.001763 |
| 11718027_PUS1      | 0.310275 | 0.00039  | 0.001763 |
| 11759531_NUDT22    | 0.289229 | 0.00039  | 0.001764 |
| 11743724_MFSD1     | 0.230672 | 0.00039  | 0.001766 |
| 11720391_SLC39A10  | 0.270305 | 0.000391 | 0.001766 |
| 11755935_MYL5      | 0.223029 | 0.000391 | 0.001766 |
| 11754529_SLC3A2    | 0.235223 | 0.000391 | 0.001766 |
| 11754061_IFITM2    | 0.28716  | 0.000391 | 0.001767 |
| 11730338_SMAD6     | 0.303413 | 0.000391 | 0.001767 |

|                    |          |          |          |
|--------------------|----------|----------|----------|
| 11729775_PCDHB7    | 0.229953 | 0.000391 | 0.001767 |
| 11733347_CNOT7     | -0.23605 | 0.000391 | 0.001768 |
| 11747833_KLF11     | -0.35708 | 0.000391 | 0.001768 |
| 11743830_PAM       | 0.213943 | 0.000391 | 0.001769 |
| 11715566_COPZ1     | 0.266653 | 0.000392 | 0.001771 |
| 11760081_CEACAM1   | 0.312834 | 0.000392 | 0.001772 |
| 11718796_PAQR4     | -0.30916 | 0.000393 | 0.001777 |
| 11729894_CHRAC1    | -0.27308 | 0.000393 | 0.001777 |
| 11729442_ENTHD2    | 0.314496 | 0.000393 | 0.001777 |
| 11757922_DDX52     | 0.304099 | 0.000394 | 0.001777 |
| 11737039_PHLDB2    | 0.533158 | 0.000394 | 0.001777 |
| 11721259_WDR47     | 0.227235 | 0.000394 | 0.001778 |
| 11723119_DSTYK     | 0.25084  | 0.000394 | 0.001779 |
| 11745435_ZBTB1     | 0.255874 | 0.000394 | 0.001779 |
| 11725523_DSG2      | 0.260313 | 0.000394 | 0.001779 |
| 11743347_CD47      | -0.2346  | 0.000394 | 0.00178  |
| 11752182_DLG1      | 0.326963 | 0.000394 | 0.00178  |
| 11760237_CRELD2    | -0.35831 | 0.000395 | 0.001781 |
| 11717107_PDLIM5    | 0.220705 | 0.000395 | 0.001781 |
| 11727044_TMEM173   | 0.33723  | 0.000395 | 0.001783 |
| 11731034_SPTY2D1   | 0.226357 | 0.000395 | 0.001783 |
| 11718200_KPNA3     | -0.24547 | 0.000395 | 0.001783 |
| 11756861_RAET1G // | -0.29477 | 0.000395 | 0.001784 |
| 11744685_B4GALNT1  | -0.26478 | 0.000396 | 0.001786 |
| 11718893_RFC1      | -0.26509 | 0.000397 | 0.001788 |
| 11731602_TMEM154   | -0.36393 | 0.000397 | 0.001788 |
| 11730948_MRPL52    | 0.362794 | 0.000397 | 0.001789 |
| 11732224_ZNF664    | -0.22609 | 0.000397 | 0.001792 |
| 11753162_YIPF5     | 0.228127 | 0.000398 | 0.001792 |
| 11725879_UBR2      | 0.473694 | 0.000398 | 0.001792 |
| 11751761_INTS6     | 0.352148 | 0.000398 | 0.001793 |
| 11756872_SAMD4A    | 0.620491 | 0.000398 | 0.001794 |
| 11757700_NDFIP2    | 0.213307 | 0.000399 | 0.001798 |
| 11744525_MTERF2    | -0.27068 | 0.000399 | 0.0018   |
| 11718345_CNOT7     | -0.22741 | 0.0004   | 0.001801 |
| 11760564_SP140L    | 0.452742 | 0.0004   | 0.001801 |
| 11733217_USP53     | 0.23042  | 0.0004   | 0.001802 |
| 11758841_PARVA     | 0.219266 | 0.0004   | 0.001803 |
| 11731136_NCKAP5    | 0.335517 | 0.0004   | 0.001804 |
| 11717558_POM121 // | -0.26552 | 0.0004   | 0.001804 |
| 11749940_BACE1     | 0.319291 | 0.000401 | 0.001805 |
| 11758360_MRAS      | 0.245699 | 0.000401 | 0.001805 |
| 11733340_HDGFRP2   | -0.37689 | 0.000401 | 0.001807 |
| 11746173_DDHD1     | 0.485672 | 0.000401 | 0.001807 |
| 11715892_PYCR2     | -0.22983 | 0.000402 | 0.00181  |
| 11729998_B3GNT7    | 0.25664  | 0.000402 | 0.001811 |
| 11744570_MAN2C1    | 0.220775 | 0.000402 | 0.001811 |
| 11735610_RPS6KA5   | 0.228501 | 0.000402 | 0.001811 |
| 11715373_TRIM28    | -0.29059 | 0.000403 | 0.001811 |
| 11725429_LAMP3     | -0.51487 | 0.000403 | 0.001812 |
| 11744456_GSK3B     | 0.241556 | 0.000403 | 0.001812 |

|                    |          |          |          |
|--------------------|----------|----------|----------|
| 11748647_PTPRR     | 0.907143 | 0.000403 | 0.001812 |
| 11743900_CIITA     | 0.295446 | 0.000403 | 0.001813 |
| 11731685_RIF1      | 0.318127 | 0.000403 | 0.001813 |
| 11739813_FZD1      | -0.28869 | 0.000403 | 0.001813 |
| 11722725_CSF2RB    | -0.31665 | 0.000403 | 0.001814 |
| 11719976_WASF3     | 0.275511 | 0.000403 | 0.001814 |
| 11763184_IDE       | 0.231989 | 0.000404 | 0.001816 |
| 11751475_DCTN4     | 0.243848 | 0.000404 | 0.001818 |
| 11719490_TMEM189   | 0.243742 | 0.000405 | 0.001819 |
| 11758117_LRRFIP2   | 0.244364 | 0.000405 | 0.001819 |
| 11737864_PIGF      | -0.30132 | 0.000405 | 0.00182  |
| 11733287_CYP20A1   | 0.300424 | 0.000406 | 0.001823 |
| 11715521_MLEC      | -0.22704 | 0.000406 | 0.001825 |
| 11761765_HOXA2     | -0.43962 | 0.000407 | 0.001828 |
| 11724819_SH3KBP1   | 0.209511 | 0.000407 | 0.001829 |
| 11749818_ARFIP2    | 0.267329 | 0.000407 | 0.00183  |
| 11727834_WDR43     | 0.275973 | 0.000407 | 0.00183  |
| 11763297_TRMT13    | 0.27667  | 0.000408 | 0.001831 |
| 11753318_ST6GALNAC | 0.27209  | 0.000408 | 0.001833 |
| 11737334_AMIGO2    | 0.236826 | 0.000409 | 0.001836 |
| 11717982_FBXL3     | 0.210638 | 0.000409 | 0.001838 |
| 11716536_SZRD1     | 0.337197 | 0.000409 | 0.001838 |
| 11740840_ABL2      | 0.254876 | 0.000409 | 0.001838 |
| 11721151_RAB40C    | -0.34881 | 0.000409 | 0.001838 |
| 11757788_DDR2      | -0.27591 | 0.000409 | 0.001838 |
| 11721399_SLIT2     | 0.327137 | 0.00041  | 0.001838 |
| 11716449_DDX56     | 0.210521 | 0.00041  | 0.001839 |
| 11724022_TRIM13    | -0.26781 | 0.00041  | 0.001839 |
| 11746695_PAFAH1B1  | 0.209155 | 0.00041  | 0.00184  |
| 11739752_SLC25A16  | 0.381738 | 0.00041  | 0.00184  |
| 11744540_RTN3      | -0.2179  | 0.00041  | 0.001841 |
| 11757794_PAPD5     | 0.228986 | 0.00041  | 0.001841 |
| 11733509_LIMK2     | 0.273723 | 0.00041  | 0.001841 |
| 11750764_ROBO4     | -0.30669 | 0.00041  | 0.001841 |
| 11715696_NOLC1     | -0.31096 | 0.00041  | 0.001841 |
| 11750021_SURF4     | -0.22992 | 0.000411 | 0.001843 |
| 11730655_CNOT1     | 0.257717 | 0.000411 | 0.001844 |
| 11721196_SLC18B1   | 0.468406 | 0.000411 | 0.001844 |
| 11730940_ZBTB8A    | 0.214053 | 0.000411 | 0.001845 |
| 11728904_SATB2     | 0.304093 | 0.000412 | 0.001845 |
| 11723488_GNAZ      | -0.34996 | 0.000412 | 0.001847 |
| 11726066_BUD13     | -0.26694 | 0.000412 | 0.001847 |
| 11718052_TBC1D23   | 0.246195 | 0.000412 | 0.001847 |
| 11741802_KIAA1324L | 0.293587 | 0.000413 | 0.001851 |
| 11718917_PAK4      | -0.31137 | 0.000413 | 0.001852 |
| 11725518_FRAT2     | 0.288066 | 0.000413 | 0.001852 |
| 11739143_VPS39     | 0.241801 | 0.000413 | 0.001852 |
| 11720563_PLXNA2    | 0.502211 | 0.000414 | 0.001853 |
| 11739604_CCDC88A   | -0.23387 | 0.000414 | 0.001854 |
| 11718306_GSE1      | 0.270166 | 0.000414 | 0.001854 |
| 11724821_NEK6      | 0.250169 | 0.000414 | 0.001855 |

|                    |          |          |          |
|--------------------|----------|----------|----------|
| 11741207_ZNF207    | 0.214363 | 0.000414 | 0.001855 |
| 11744818_ZNF24     | 0.235382 | 0.000414 | 0.001856 |
| 11717347_ADD3      | -0.22143 | 0.000414 | 0.001856 |
| 11746674_ZNF232    | -0.27647 | 0.000414 | 0.001856 |
| 11740324_SLC6A2    | -0.2584  | 0.000415 | 0.001856 |
| 11717788_AAR2      | 0.248594 | 0.000415 | 0.001857 |
| 11719612_LARP4     | 0.24297  | 0.000415 | 0.001857 |
| 11721040_TRAPPC11  | 0.334864 | 0.000415 | 0.001857 |
| 11723494_RNF166    | -0.34893 | 0.000416 | 0.001861 |
| 11749601_LRTOMT    | 0.651521 | 0.000416 | 0.001862 |
| 11752435_EXT2      | 0.219075 | 0.000416 | 0.001862 |
| 11763592_TARID     | -0.21482 | 0.000416 | 0.001862 |
| 11724059_TECPR2    | 0.320294 | 0.000416 | 0.001863 |
| 11743797_ADM5      | -0.27216 | 0.000417 | 0.001865 |
| 11723005_WASF1     | 0.279127 | 0.000417 | 0.001866 |
| 11723646_TAF15     | 0.214065 | 0.000417 | 0.001867 |
| 11727388_RSU1      | -0.35125 | 0.000418 | 0.001868 |
| 11743282_SULF1     | 0.442824 | 0.000418 | 0.001868 |
| 11716540_SZRDI     | 0.27728  | 0.000418 | 0.001868 |
| 11717167_KDM2A     | -0.51586 | 0.000418 | 0.001869 |
| 11719724_CCDC93    | 0.476369 | 0.000418 | 0.001869 |
| 11758867_WDR33     | 0.512125 | 0.000419 | 0.001871 |
| 11747666_WARS      | -0.27127 | 0.000419 | 0.001871 |
| 11723238_GNG7      | -0.27217 | 0.000419 | 0.001873 |
| 11758168_MAGEF1    | -0.26858 | 0.000419 | 0.001873 |
| 11746127_CLPTM1    | 0.201696 | 0.000419 | 0.001873 |
| 11748533_IST1      | 0.231959 | 0.00042  | 0.001877 |
| 11715393_C3        | 0.474747 | 0.00042  | 0.001877 |
| 11748905_CTHRC1    | 0.228601 | 0.00042  | 0.001878 |
| 11756446_PITHD1    | -0.23756 | 0.00042  | 0.001878 |
| 11742882_PPID      | 0.239573 | 0.000421 | 0.001879 |
| 11737181_UHMK1     | 0.252893 | 0.000421 | 0.001881 |
| 11728732_STRA13    | -0.24383 | 0.000421 | 0.001882 |
| 11733730_DPH1 ///  | 0.254879 | 0.000422 | 0.001882 |
| 11752887_EHD1      | 0.321424 | 0.000422 | 0.001883 |
| 11728819_HAUS2     | -0.25445 | 0.000422 | 0.001884 |
| 11715790_MRPL37    | -0.21847 | 0.000422 | 0.001885 |
| 11736699_BMP8B     | -0.49643 | 0.000424 | 0.001892 |
| 11722734_APPL1     | -0.32212 | 0.000425 | 0.001895 |
| 11725587_RAB36     | -0.37188 | 0.000425 | 0.001895 |
| 11742209_PDE8A     | 0.290067 | 0.000425 | 0.001895 |
| 11730991_EIF2AK2   | 0.227278 | 0.000425 | 0.001895 |
| 11733495_COMMD6    | 0.20651  | 0.000425 | 0.001895 |
| 11725137_SYNGR1    | -0.20762 | 0.000426 | 0.001899 |
| 11744007_PBRM1     | -0.22778 | 0.000426 | 0.0019   |
| 11751746_GAMT      | -0.22245 | 0.000426 | 0.0019   |
| 11722581_LOC100630 | 0.311558 | 0.000426 | 0.0019   |
| 11757799_VAMP7     | 0.236135 | 0.000426 | 0.001901 |
| 11745154_NCL       | -0.20546 | 0.000427 | 0.001902 |
| 11719510_HELZ      | -0.34285 | 0.000427 | 0.001902 |
| 11718607_DESI1     | 0.274257 | 0.000427 | 0.001903 |

|                    |          |          |          |
|--------------------|----------|----------|----------|
| 11743647_HMGNA     | -0.22158 | 0.000427 | 0.001904 |
| 11729387_RPL31     | -0.33149 | 0.000427 | 0.001905 |
| 11733844_AMACR /// | 0.2572   | 0.000427 | 0.001905 |
| 11742724_STAT6     | -0.31075 | 0.000428 | 0.001907 |
| 11729308_CLMP      | -0.4085  | 0.000428 | 0.001908 |
| 11720664_GNA11     | -0.25387 | 0.000428 | 0.001908 |
| 11761552_KATNBL1   | -0.35971 | 0.000428 | 0.001908 |
| 11734955_SCML1     | 0.289559 | 0.000429 | 0.001909 |
| 11763529_SLC12A4   | 0.344471 | 0.000429 | 0.001909 |
| 11739769_TMOD2     | 0.663852 | 0.000429 | 0.00191  |
| 11718195_ATP6VOD1  | 0.215939 | 0.000429 | 0.001911 |
| 11718083_ATP2B4    | -0.25069 | 0.000429 | 0.001912 |
| 11729843_VNN1      | 0.351565 | 0.00043  | 0.001913 |
| 11758508_ZNF548    | 0.382573 | 0.00043  | 0.001913 |
| 11755521_CTSV      | -0.74452 | 0.00043  | 0.001913 |
| 11757518_COX14     | -0.21636 | 0.00043  | 0.001914 |
| 11730712_ADCK1     | -0.22307 | 0.00043  | 0.001915 |
| 11751034_NLE1      | -0.23353 | 0.000431 | 0.001916 |
| 11746468_DARS      | -0.25759 | 0.000431 | 0.001916 |
| 11717722_ASAH1     | 0.216618 | 0.000431 | 0.001917 |
| 11720583_TCF12     | 0.228479 | 0.000431 | 0.001919 |
| 11755477_METAP2    | -0.28345 | 0.000431 | 0.001919 |
| 11736793_NXT2      | -0.44792 | 0.000432 | 0.001921 |
| 11754836_ZNF232    | -0.21571 | 0.000432 | 0.001922 |
| 11720603_STOM      | 0.290404 | 0.000433 | 0.001923 |
| 11726371_EXOSC9    | -0.28673 | 0.000433 | 0.001923 |
| 11740473_CLIP1     | 0.236182 | 0.000433 | 0.001924 |
| 11716141_SIGMAR1   | -0.23008 | 0.000433 | 0.001924 |
| 11716944_YIPF3     | 0.224002 | 0.000433 | 0.001925 |
| 11757261_SCARNA14  | 0.305554 | 0.000433 | 0.001926 |
| 11743722_MARCKSL1  | -0.23291 | 0.000433 | 0.001926 |
| 11740624_CEP131    | -0.30874 | 0.000434 | 0.001928 |
| 11716041_PPP2CB    | -0.24891 | 0.000434 | 0.001929 |
| 11749978_MVP       | 0.296028 | 0.000434 | 0.00193  |
| 11716432_MNAT1     | 0.244167 | 0.000434 | 0.00193  |
| 11725802_USP46     | 0.377021 | 0.000434 | 0.00193  |
| 11740259_STXBP4    | -0.21289 | 0.000434 | 0.00193  |
| 11722176_SF3B3     | -0.24732 | 0.000435 | 0.00193  |
| 11719422_ABCC1     | 0.212604 | 0.000435 | 0.001931 |
| 11735168_QPCTL     | -0.23414 | 0.000435 | 0.001932 |
| 11737143_CAST      | -0.2528  | 0.000436 | 0.001935 |
| 11756408_LMBR1     | 0.376683 | 0.000436 | 0.001936 |
| 11758959_EMSY      | -0.35612 | 0.000436 | 0.001938 |
| 11722798_TMEM263   | 0.234545 | 0.000437 | 0.001938 |
| 11743960_SLC16A3   | 0.236658 | 0.000437 | 0.001938 |
| 11748155_ZNF670-ZN | -0.42654 | 0.000437 | 0.001939 |
| 11725709_WDHD1     | -0.63518 | 0.000437 | 0.00194  |
| 11753268_GALE      | 0.221613 | 0.000437 | 0.001941 |
| 11758811_HNRNPA1   | -0.3573  | 0.000437 | 0.001941 |
| 11751982_CNTNAP3 / | 0.329256 | 0.000437 | 0.001941 |
| 11759545_PRMT2     | -0.37779 | 0.000437 | 0.001941 |



|                    |          |          |          |
|--------------------|----------|----------|----------|
| 11729278_CRCP      | 0.243045 | 0.000437 | 0.001941 |
| 11743420_ZKSCAN5   | 0.416528 | 0.000438 | 0.001941 |
| 11732314_ANKRD13C  | 0.384158 | 0.000438 | 0.001941 |
| 11721355_YPEL3     | 0.241156 | 0.000438 | 0.001944 |
| 11730612_MBOAT7    | -0.27006 | 0.000439 | 0.001946 |
| 11722435_GOSR2     | 0.274456 | 0.000439 | 0.001948 |
| 11750387_RTN3      | -0.22126 | 0.000439 | 0.001948 |
| 11717439_FMO4 ///  | 0.250494 | 0.000439 | 0.001949 |
| 11739755_ZNF74     | 0.271145 | 0.00044  | 0.00195  |
| 11744091_ATXN7L3B  | 0.284193 | 0.00044  | 0.00195  |
| 11717984_PITPNB    | 0.247528 | 0.00044  | 0.001951 |
| 11722109_PCNX      | -0.52147 | 0.000441 | 0.001953 |
| 11719134_COMMD9    | -0.28241 | 0.000441 | 0.001954 |
| 11762530_FERMT1    | -0.33713 | 0.000441 | 0.001954 |
| 11720098_CEP70     | -0.28405 | 0.000441 | 0.001955 |
| 11721978_PLCE1     | -0.33735 | 0.000441 | 0.001955 |
| 11722733_APPL1     | -0.27138 | 0.000442 | 0.001957 |
| 11734941_FAM212B / | 0.286281 | 0.000442 | 0.001958 |
| 11745719_HMG20A    | 0.353012 | 0.000443 | 0.001961 |
| 11758707_SIMC1     | -0.21626 | 0.000443 | 0.001961 |
| 11716817_ENOPH1    | -0.27533 | 0.000443 | 0.001962 |
| 11725606_TRIM9     | 0.541693 | 0.000443 | 0.001963 |
| 11742726_TMEM87A   | 0.197489 | 0.000443 | 0.001964 |
| 11722755_SHPRH     | 0.369974 | 0.000444 | 0.001964 |
| 11762344_RPS18     | 0.338982 | 0.000444 | 0.001966 |
| 11727445_TMEM255A  | 0.616729 | 0.000444 | 0.001967 |
| 11743782_ANKRD55   | 0.681105 | 0.000445 | 0.001967 |
| 11755121_OSCP1     | 0.452936 | 0.000445 | 0.001967 |
| 11735001_ST7L      | 0.55144  | 0.000445 | 0.001967 |
| 200046_PMDAD1      | -0.24323 | 0.000445 | 0.001967 |
| 11745782_ZNF540    | 0.600219 | 0.000445 | 0.001969 |
| 11715889_ATP5I     | -0.22714 | 0.000445 | 0.001969 |
| 11722989_BTAF1     | 0.318048 | 0.000445 | 0.001969 |
| 11755346_ATP5O     | -0.23701 | 0.000445 | 0.001969 |
| 11747980_MAP4      | -0.23381 | 0.000445 | 0.00197  |
| 11744866_CEL       | 0.316633 | 0.000446 | 0.001973 |
| 11741107_MRPS14    | -0.23003 | 0.000446 | 0.001974 |
| 11756395_AP1S2     | 0.280372 | 0.000446 | 0.001974 |
| 11760500_ZNF451    | 0.411727 | 0.000447 | 0.001976 |
| 11763863_IP6K2     | 0.347996 | 0.000447 | 0.001976 |
| 11734958_PCNXL4    | 0.402854 | 0.000448 | 0.00198  |
| 11724432_TRAPPC2   | -0.31376 | 0.000448 | 0.001981 |
| 11756712_ACP2      | -0.26287 | 0.000448 | 0.001982 |
| 11751037_WDR48     | 0.34523  | 0.000449 | 0.001985 |
| 11717381_FOPNL     | -0.25284 | 0.000449 | 0.001986 |
| 11731437_MED6      | 0.220275 | 0.00045  | 0.001986 |
| 11719152_LDOC1L    | 0.303799 | 0.00045  | 0.001987 |
| 11720467_DPAGT1    | -0.25409 | 0.00045  | 0.001987 |
| 11740472_CLIP1     | 0.366229 | 0.00045  | 0.001987 |
| 11725475_ZNF354A   | 0.267148 | 0.00045  | 0.001988 |
| 11734717_CBLL1     | 0.214151 | 0.00045  | 0.001989 |

|                   |          |          |          |
|-------------------|----------|----------|----------|
| 11722024_ABCF2    | 0.273056 | 0.000451 | 0.001991 |
| 11743042_STIP1    | -0.26484 | 0.000451 | 0.001991 |
| 11721285_TBPL1    | 0.250368 | 0.000451 | 0.001992 |
| 11727835_EVL      | -0.33101 | 0.000451 | 0.001992 |
| 11763248 EIF4EBP1 | -0.20861 | 0.000452 | 0.001994 |
| 11740422_HTR7     | 0.304418 | 0.000452 | 0.001996 |
| 11740208_GPR155   | -0.63902 | 0.000452 | 0.001997 |
| 11746326_CHFR     | 0.421317 | 0.000453 | 0.001997 |
| 11753405_NEK6     | 0.211225 | 0.000453 | 0.001997 |
| 11730570_DIP2A    | -0.32831 | 0.000453 | 0.001998 |
| 11733401_TMEM201  | -0.34299 | 0.000453 | 0.002    |
| 11750215_SLC39A1  | -0.31352 | 0.000453 | 0.002    |
| 11725928_NEFL     | 0.270019 | 0.000454 | 0.002    |
| 11744383_CLTA     | 0.256708 | 0.000454 | 0.002    |
| 11716592_BTBD1    | 0.278612 | 0.000454 | 0.002002 |
| 11737854_P2RY1    | -0.23716 | 0.000455 | 0.002005 |
| 11756432_TMEM41A  | 0.230111 | 0.000455 | 0.002005 |
| 11723015_EXT2     | 0.235945 | 0.000455 | 0.002005 |
| 11754995_PCBP2    | -0.29829 | 0.000455 | 0.002005 |
| 11733025_CLCA2    | 0.623138 | 0.000455 | 0.002005 |
| 11733408_PXDNL    | 0.230575 | 0.000455 | 0.002007 |
| 11752344_STAC2    | -0.36667 | 0.000455 | 0.002008 |
| 11733308_PHF12    | -0.2214  | 0.000456 | 0.002008 |
| 11743727_ZNF207   | 0.220407 | 0.000456 | 0.002008 |
| 11737872_ZCCHC9   | 0.238352 | 0.000456 | 0.002012 |
| 11716370_FAM89B   | -0.22679 | 0.000457 | 0.002012 |
| 11760424_TACC3    | -0.44026 | 0.000457 | 0.002012 |
| 11743310_WIP12    | 0.212458 | 0.000457 | 0.002013 |
| 11716730_ERH      | -0.20149 | 0.000458 | 0.002016 |
| 11723828_ANO1     | -0.27657 | 0.000458 | 0.002017 |
| 11755133_SNHG7    | 0.231735 | 0.000458 | 0.002017 |
| 11726945_PPM1A    | -0.31666 | 0.000458 | 0.002017 |
| 11741762_C14orf93 | -0.30805 | 0.000458 | 0.002018 |
| 11748634_ZCCHC24  | -0.25595 | 0.000458 | 0.002018 |
| 11757981_WASF3    | 0.298879 | 0.000458 | 0.002018 |
| 11749436_NFIC     | -0.21622 | 0.000458 | 0.002018 |
| 11739867_GPR107   | 0.368663 | 0.000459 | 0.002019 |
| 11726286_WARS     | -0.27495 | 0.000459 | 0.002019 |
| 11743613_TMOD3    | 0.335229 | 0.000459 | 0.002019 |
| 11731671_FUNDC1   | -0.23046 | 0.00046  | 0.002022 |
| 11727980_SNX21    | -0.27205 | 0.00046  | 0.002025 |
| 11736365_KIAA0586 | -0.28445 | 0.00046  | 0.002025 |
| 11735538_EN2      | 0.295088 | 0.00046  | 0.002026 |
| 11716233_CTNNBIP1 | 0.271263 | 0.000461 | 0.002028 |
| 11715225_VPS54    | 0.258401 | 0.000461 | 0.002029 |
| 11720516_ZBTB4    | -0.20077 | 0.000461 | 0.00203  |
| 11750223_APOA1BP  | -0.20603 | 0.000462 | 0.002031 |
| 11754018_PRDX3    | -0.20291 | 0.000462 | 0.002032 |
| 11730594_EBLN2    | -0.23674 | 0.000463 | 0.002038 |
| 11736564_DOCK5    | 0.561582 | 0.000464 | 0.002038 |
| 11743097_ITPK1    | -0.32005 | 0.000464 | 0.002038 |

|                   |          |          |          |
|-------------------|----------|----------|----------|
| 11717641_UBE3A    | 0.211959 | 0.000464 | 0.002038 |
| 11763183_RQCD1    | 0.249716 | 0.000464 | 0.002038 |
| 11747697_CLPTM1   | 0.220785 | 0.000464 | 0.002039 |
| 11730914_ERLIN1   | 0.265218 | 0.000464 | 0.002041 |
| 11715580_TBCB     | -0.23071 | 0.000464 | 0.002041 |
| 11717023_SDF2     | 0.237079 | 0.000465 | 0.002042 |
| 11726694_Clorf35  | -0.21492 | 0.000465 | 0.002042 |
| 11753879_IL6ST    | 0.263913 | 0.000465 | 0.002043 |
| 11733530_C1RL     | -0.24925 | 0.000465 | 0.002044 |
| 11741433_ARCN1    | 0.226661 | 0.000465 | 0.002044 |
| 11718459_SLC39A11 | 0.24598  | 0.000466 | 0.002046 |
| 11753510_PIBF1    | 0.365337 | 0.000466 | 0.002046 |
| 11739028_CLTC     | 0.212684 | 0.000466 | 0.002048 |
| 11742113_ABL2     | 0.50636  | 0.000467 | 0.002048 |
| 11752464_SLC1A3   | 0.37516  | 0.000467 | 0.00205  |
| 11739996_SMARCA2  | 0.238691 | 0.000467 | 0.00205  |
| 11715821_SYPL1    | 0.213187 | 0.000467 | 0.002051 |
| 11753740_CYB5A    | -0.24191 | 0.000467 | 0.002051 |
| 11717601_SECISBP2 | 0.265166 | 0.000467 | 0.002051 |
| 11748728_CDC14B   | 0.253682 | 0.000468 | 0.002052 |
| 11725317_VAPA     | 0.210931 | 0.000468 | 0.002054 |
| 11717845_CDK7     | 0.217313 | 0.000469 | 0.002056 |
| 11722219_WBP4     | 0.268345 | 0.000469 | 0.002056 |
| 11736606_TAF5L    | 0.269742 | 0.000469 | 0.002058 |
| 11754076_ANP32A   | -0.24721 | 0.000469 | 0.002058 |
| 11743285_GOLT1B   | -0.2312  | 0.000469 | 0.002058 |
| 11736512_NMT2     | 0.425214 | 0.000469 | 0.002058 |
| 11730650_ANO3     | 0.501965 | 0.000469 | 0.002058 |
| 11715304_PLCB3    | -0.23851 | 0.00047  | 0.00206  |
| 11730237_ABHD10   | -0.23544 | 0.00047  | 0.002062 |
| 11734960_TRHDE    | 0.271544 | 0.00047  | 0.002062 |
| 11742144_RHCE     | -0.43782 | 0.00047  | 0.002062 |
| 11756679_ALDH3A2  | -0.2331  | 0.00047  | 0.002062 |
| 11720758_IVNS1ABP | 0.209901 | 0.00047  | 0.002062 |
| 11716455_RHOBTB3  | 0.231698 | 0.000471 | 0.002062 |
| 11757869_AKAP13   | 0.199695 | 0.000471 | 0.002062 |
| 11725723_SDCCAG8  | 0.243477 | 0.000471 | 0.002062 |
| 11715211_ZNF680   | 0.376256 | 0.000471 | 0.002062 |
| 11723117_PCNT     | -0.24504 | 0.000471 | 0.002062 |
| 11730613_MBOAT7   | -0.26433 | 0.000471 | 0.002065 |
| 11759907_ITGBL1   | 0.283207 | 0.000472 | 0.002066 |
| 11720548_HNRNPUL2 | -0.27891 | 0.000473 | 0.002072 |
| 11730818_CTDSP2   | 0.27577  | 0.000473 | 0.002073 |
| 11749114_DLG1     | 0.248424 | 0.000474 | 0.002074 |
| 11735434_GPR158   | 0.36154  | 0.000474 | 0.002075 |
| 11720614_CLNS1A   | -0.24177 | 0.000474 | 0.002077 |
| 11719895_FAM91A1  | 0.194768 | 0.000474 | 0.002077 |
| 11723171_IL17RD   | 0.299893 | 0.000475 | 0.002078 |
| 11754973_MANSC1   | 0.349254 | 0.000475 | 0.002079 |
| 11745238_TMEM218  | -0.2813  | 0.000476 | 0.002081 |
| 11719711_PDPK1    | 0.37048  | 0.000476 | 0.002081 |

|                    |          |          |          |
|--------------------|----------|----------|----------|
| 11756591_MBNL1     | 0.295686 | 0.000476 | 0.002081 |
| 11725499_GOLGA7B   | 0.319393 | 0.000476 | 0.002081 |
| 11739821_ZNF714    | -0.46706 | 0.000476 | 0.002081 |
| 11729349_MMP8      | 0.311745 | 0.000476 | 0.002081 |
| 11755409_EP400     | -0.32391 | 0.000476 | 0.002082 |
| 11743153_C16orf72  | -0.30938 | 0.000476 | 0.002082 |
| 11731864_NKX2-2    | -0.32184 | 0.000477 | 0.002084 |
| 11736727_GEN1      | -0.31095 | 0.000477 | 0.002085 |
| 11717761_G6PC3     | -0.21575 | 0.000477 | 0.002087 |
| 11726723_WDFY2     | 0.346879 | 0.000478 | 0.002088 |
| 11730106_PLCB1     | 0.285476 | 0.000478 | 0.002088 |
| 11758155_ARHGAP10  | 0.428763 | 0.000478 | 0.002089 |
| 11720686_CDR2L     | -0.23924 | 0.000478 | 0.002091 |
| 11715407_PSMB4     | -0.21126 | 0.000479 | 0.002092 |
| 11744882_PPP1R21   | 0.37418  | 0.000479 | 0.002092 |
| 11728350_STIM2     | 0.208499 | 0.000479 | 0.002094 |
| 11720005_NPTX2     | 0.325664 | 0.000479 | 0.002094 |
| 11761590_GTF3C3    | -0.45786 | 0.00048  | 0.002095 |
| 11735518_HES7      | -0.21707 | 0.00048  | 0.002096 |
| 11733255_CHKB-CPT1 | 0.379427 | 0.00048  | 0.002096 |
| 11724000_ZNF581    | 0.210482 | 0.000481 | 0.0021   |
| 11717321_OAF       | -0.21142 | 0.000481 | 0.0021   |
| 11757752_STK36     | 0.224318 | 0.000481 | 0.0021   |
| 11745133_FYCO1     | -0.39809 | 0.000481 | 0.002101 |
| 11737217_ZNF124    | 0.213748 | 0.000482 | 0.002103 |
| 11718978_CAPN2     | 0.20958  | 0.000482 | 0.002104 |
| 11746006_VPS52     | -0.21679 | 0.000482 | 0.002105 |
| 11755308_TMEM189   | 0.213523 | 0.000482 | 0.002106 |
| 11745775_LIPA      | -0.31185 | 0.000483 | 0.002106 |
| 11743146_FBXO11    | 0.222572 | 0.000483 | 0.002108 |
| 11716708_DDR1      | -0.26872 | 0.000483 | 0.002108 |
| 11741394_EXOG      | 0.474448 | 0.000483 | 0.002109 |
| 11722524_TMCO4     | -0.26221 | 0.000484 | 0.00211  |
| 11748502_IFT122    | 0.3052   | 0.000484 | 0.002113 |
| 11749312_HS6ST2    | -0.30847 | 0.000484 | 0.002113 |
| 11722081_RUFY3     | 0.261347 | 0.000485 | 0.002115 |
| 11716594_BTBD1     | 0.23676  | 0.000486 | 0.002119 |
| 11718548_ILF3      | -0.22762 | 0.000486 | 0.00212  |
| 11722535_CCNYL1    | 0.242475 | 0.000486 | 0.00212  |
| 11763296_ZNF85     | -0.43159 | 0.000486 | 0.002121 |
| 11721756_DENND2A   | -0.33227 | 0.000487 | 0.002122 |
| 11747675_SUN1      | 0.261321 | 0.000487 | 0.002122 |
| 11753957_DHPS      | -0.26547 | 0.000487 | 0.002125 |
| 11749267_SRD5A1    | -0.29361 | 0.000487 | 0.002125 |
| 11741043_MBLAC2    | -0.30025 | 0.000488 | 0.002125 |
| 11756778_NEFL      | 0.220578 | 0.000488 | 0.002127 |
| 11725755_BTN2A2    | 0.54611  | 0.000488 | 0.002128 |
| 11754761_HMGN1     | -0.20933 | 0.000489 | 0.00213  |
| 11730391_SEMA3A    | 0.238724 | 0.000489 | 0.002131 |
| 11719803_UBL4A     | -0.26097 | 0.000489 | 0.002131 |
| 11748202_PTK7      | -0.29526 | 0.000489 | 0.002131 |

|                    |          |          |          |
|--------------------|----------|----------|----------|
| 11734454_WFDC3     | 0.213398 | 0.000489 | 0.002132 |
| 11718334_GRB2      | 0.22674  | 0.00049  | 0.002133 |
| 11758111_FOXC1     | -0.62157 | 0.00049  | 0.002133 |
| 11749781_BCAT1     | 0.297502 | 0.00049  | 0.002133 |
| 11756650_CHP1      | 0.22381  | 0.00049  | 0.002134 |
| 11732706_FGFRL1    | -0.24117 | 0.000491 | 0.002138 |
| 11737156_TMEM241   | -0.31936 | 0.000491 | 0.002139 |
| 11740410_RNF24     | 0.292436 | 0.000491 | 0.002139 |
| 11752165_PKM       | -0.21864 | 0.000491 | 0.002139 |
| 11723738_WDR36     | 0.27282  | 0.000492 | 0.00214  |
| 11741219_EDARADD   | -0.27736 | 0.000492 | 0.00214  |
| 11737896_TAF13     | 0.38018  | 0.000492 | 0.002143 |
| 11732859_DNHD1     | 0.532777 | 0.000493 | 0.002143 |
| 11726713_COG1      | 0.361733 | 0.000493 | 0.002144 |
| 11720555_TSEN15    | -0.29128 | 0.000493 | 0.002145 |
| 11759759_CCNL1     | -0.31286 | 0.000493 | 0.002147 |
| 11733792_SLC25A12  | 0.266601 | 0.000493 | 0.002147 |
| 11729289_BMX       | 0.499776 | 0.000494 | 0.002147 |
| 11752814_TNFRSF1A  | 0.297304 | 0.000494 | 0.002148 |
| 11728264_NEK4      | 0.216989 | 0.000495 | 0.00215  |
| 11744350_RPS27L    | 0.210109 | 0.000495 | 0.002151 |
| 11729410_ZNF415    | 0.489348 | 0.000495 | 0.002151 |
| 11748729_CDC14B // | 0.252758 | 0.000495 | 0.002151 |
| 11718802_PSRC1     | -0.20549 | 0.000495 | 0.002151 |
| 11740999_GAP43     | 0.354871 | 0.000495 | 0.002152 |
| 11736830_MAP3K7    | 0.224459 | 0.000496 | 0.002156 |
| 11718480_MID1IP1   | -0.29127 | 0.000496 | 0.002156 |
| 11724389_ZDHC16    | 0.214833 | 0.000496 | 0.002157 |
| 11758694_RAB28     | -0.25379 | 0.000497 | 0.002158 |
| 11727097_NT5C1B-RD | 0.214537 | 0.000497 | 0.002161 |
| 11752240_ANKRD28   | 0.279616 | 0.000497 | 0.002161 |
| 11756675_SLC25A1   | -0.26171 | 0.000498 | 0.002162 |
| 11717620_LSS       | -0.24275 | 0.000499 | 0.002168 |
| 11728800_FBXL4     | 0.317092 | 0.000499 | 0.002169 |
| 11720698_RUFY1     | 0.230562 | 0.0005   | 0.00217  |
| 11731710_ZNF160    | 0.275808 | 0.0005   | 0.00217  |
| 11757293_MRPL18    | -0.27564 | 0.0005   | 0.00217  |
| 11758594_CSTF2T    | -0.24015 | 0.0005   | 0.00217  |
| 11754513_SNHG11 // | 0.294985 | 0.0005   | 0.002171 |
| 11723329_GSN       | 0.22755  | 0.0005   | 0.002172 |
| 11719492_IFI35     | -0.24428 | 0.000501 | 0.002174 |
| 11728000_CERS1 /// | -0.26478 | 0.000501 | 0.002174 |
| 11742875_C1orf32   | 0.295752 | 0.000501 | 0.002175 |
| 11723074_BCL9L     | 0.242027 | 0.000502 | 0.002176 |
| 11737247_ZNF141    | 0.235006 | 0.000502 | 0.002176 |
| 11758620_MMAB      | -0.53669 | 0.000502 | 0.002177 |
| 11749525_AKT2      | -0.34586 | 0.000503 | 0.00218  |
| 11745387_KIAA1217  | 0.315343 | 0.000503 | 0.002181 |
| 11740984_NRDC      | 0.205137 | 0.000503 | 0.002181 |
| 11727058_MRPS36    | -0.46209 | 0.000503 | 0.002181 |
| 11732906_EDNRB     | 0.536692 | 0.000503 | 0.002182 |

|                    |          |          |          |
|--------------------|----------|----------|----------|
| 11743489_C14orf93  | -0.33409 | 0.000503 | 0.002182 |
| 11750815_DDX5      | 0.20364  | 0.000503 | 0.002183 |
| 11739729_RECQL     | -0.2848  | 0.000504 | 0.002184 |
| 11745131_ZNF763    | 0.323252 | 0.000504 | 0.002184 |
| 11743080_BBS7      | 0.231391 | 0.000504 | 0.002184 |
| 11757500_CTDSP1    | -0.43209 | 0.000504 | 0.002184 |
| 11758888_MUT       | -0.50474 | 0.000504 | 0.002186 |
| 11723160_ZNF776    | 0.667583 | 0.000504 | 0.002186 |
| 11717653_GIT1      | -0.2513  | 0.000505 | 0.002187 |
| 11721111_ACOT13    | -0.25458 | 0.000505 | 0.002187 |
| 11746770_RWDD4     | -0.28824 | 0.000505 | 0.002187 |
| 11741570_UBE2Q2    | 0.272099 | 0.000505 | 0.002187 |
| 11719271_GUSB      | -0.23691 | 0.000505 | 0.002187 |
| 11741143_NOX4      | 0.411817 | 0.000505 | 0.002187 |
| 11732947_MED23     | 0.311171 | 0.000505 | 0.002187 |
| 11725971_HNRNPF    | -0.45446 | 0.000505 | 0.002187 |
| 11726432_OSBP1     | -0.29457 | 0.000505 | 0.002188 |
| 11759289_AKT3      | -0.34848 | 0.000505 | 0.002189 |
| 11755723_CFHR3 /// | 0.356134 | 0.000506 | 0.002189 |
| 11722295_PCF11     | -0.24912 | 0.000506 | 0.002191 |
| 11717070_KTN1      | 0.210078 | 0.000506 | 0.002191 |
| 11716074_HSBP1     | -0.28392 | 0.000507 | 0.002193 |
| 11760011_LINC00656 | -0.23755 | 0.000508 | 0.002198 |
| 11745739_SCO2      | -0.24261 | 0.000508 | 0.002198 |
| 11718300_RPP25     | -0.22891 | 0.000509 | 0.002202 |
| 11722577_P3H1      | 0.220406 | 0.000509 | 0.002202 |
| 11757410_C6orf106  | -0.25318 | 0.000509 | 0.002202 |
| 11743041_STIP1     | -0.24442 | 0.000509 | 0.002204 |
| 11717697_ARHGAP1   | -0.28642 | 0.00051  | 0.002204 |
| 11727803_GJA9-MYCE | 0.252203 | 0.00051  | 0.002205 |
| 11750185_CCDC71L   | 0.263124 | 0.00051  | 0.002206 |
| 11734797_HIST1H2BG | 0.3712   | 0.00051  | 0.002206 |
| 11744819_PAAF1     | -0.2301  | 0.00051  | 0.002206 |
| 11754339_NADSYN1   | 0.311928 | 0.000511 | 0.002207 |
| 11741375_CADM1     | 0.212069 | 0.000511 | 0.002209 |
| 11736884_STXBP5    | 0.386667 | 0.000511 | 0.002209 |
| 11716575_CCDC6     | 0.395957 | 0.000511 | 0.002209 |
| 11730935_AKNA      | -0.49202 | 0.000511 | 0.002209 |
| 11741658_SYDE1     | 0.254117 | 0.000511 | 0.00221  |
| 11756526_MRPL48    | -0.21364 | 0.000512 | 0.002213 |
| 11735583_NIN       | -0.48733 | 0.000512 | 0.002213 |
| 11750307_SHTN1     | 0.367464 | 0.000512 | 0.002214 |
| 11716356_TMEM167A  | 0.253827 | 0.000513 | 0.002214 |
| 11733707_COL11A1   | 0.475405 | 0.000513 | 0.002214 |
| 11726989	EIF2AK1   | -0.22551 | 0.000513 | 0.002214 |
| 11742128_DEGS1     | 0.201271 | 0.000513 | 0.002215 |
| 11756396_PTOV1     | -0.24326 | 0.000513 | 0.002216 |
| 11726140_SIRT1     | -0.23959 | 0.000513 | 0.002216 |
| 11749518_SRD5A1    | -0.28385 | 0.000514 | 0.002218 |
| 11720129_COMTD1    | -0.28289 | 0.000514 | 0.002219 |
| 11725350_KIAA0930  | -0.27428 | 0.000514 | 0.00222  |

|                    |          |          |          |
|--------------------|----------|----------|----------|
| 11743670_ZNF292    | 0.255732 | 0.000515 | 0.002221 |
| 11715572_CLSTN1    | -0.1997  | 0.000515 | 0.002222 |
| 11719001_TADA3     | -0.1954  | 0.000515 | 0.002224 |
| 11759004_SLC33A1   | -0.42238 | 0.000516 | 0.002226 |
| 11748651_PMS1      | -0.25655 | 0.000517 | 0.00223  |
| 11754373_MARK3     | 0.303764 | 0.000517 | 0.00223  |
| 11733470_CD300LB   | -0.24069 | 0.000518 | 0.002234 |
| 11717475_CHGB      | 0.931297 | 0.000518 | 0.002234 |
| 11717175_ABL1      | -0.35539 | 0.000518 | 0.002234 |
| 11753308_RAET1G // | -0.30213 | 0.000518 | 0.002236 |
| 11747710_SMARCD2   | -0.22393 | 0.000519 | 0.00224  |
| 11759694_LOC145783 | -0.48936 | 0.00052  | 0.00224  |
| 11750276_EHD1      | 0.3167   | 0.00052  | 0.00224  |
| 11722592_BCAP29    | -0.38084 | 0.00052  | 0.002241 |
| 11756508_TAF6      | -0.21322 | 0.00052  | 0.002242 |
| 11725401_C11orf57  | -0.2594  | 0.00052  | 0.002244 |
| 11728661_GABARAPL2 | 0.247824 | 0.000521 | 0.002244 |
| 11721440_TOR1AIP1  | -0.2121  | 0.000521 | 0.002245 |
| 11737775_NOP2      | 0.229853 | 0.000521 | 0.002245 |
| 11740627_ANKRD30A  | -0.23281 | 0.000521 | 0.002246 |
| 11727370_TSN       | -0.28875 | 0.000522 | 0.002248 |
| 11730069_USP33     | 0.226494 | 0.000522 | 0.002248 |
| 11743212_PTTG2     | -0.47169 | 0.000522 | 0.002248 |
| 11752197_ENG       | 0.220141 | 0.000522 | 0.002249 |
| 11739527_SECTM1    | 0.212798 | 0.000523 | 0.002251 |
| 11742700_C1R       | -0.35887 | 0.000523 | 0.002252 |
| 11736019_NOP2      | 0.226934 | 0.000523 | 0.002252 |
| 11730134_ICK       | 0.232879 | 0.000523 | 0.002252 |
| 11751621_SPOCK3    | -0.25223 | 0.000523 | 0.002252 |
| 11728752_OSBP      | -0.30251 | 0.000523 | 0.002253 |
| 11745943_GUCD1     | -0.2608  | 0.000524 | 0.002254 |
| 11746705_RGS16     | -0.26214 | 0.000524 | 0.002255 |
| 11748700_TOMM34    | -0.27236 | 0.000524 | 0.002256 |
| 11733734_AAMP      | -0.43159 | 0.000524 | 0.002256 |
| 11764039_MAPRE2    | -0.21795 | 0.000524 | 0.002256 |
| 11741846_RAPH1     | 0.25398  | 0.000524 | 0.002257 |
| 11719945_RARG      | -0.47613 | 0.000525 | 0.002257 |
| 11718238_CAPRIN1   | 0.300362 | 0.000526 | 0.002262 |
| 11755682_POU6F1    | -0.32025 | 0.000527 | 0.002265 |
| 11744559_SLC25A37  | 0.2293   | 0.000527 | 0.002269 |
| 11754840_LINC00470 | -0.3548  | 0.000527 | 0.002269 |
| 11733784_PPP2R1B   | 0.398671 | 0.000528 | 0.002269 |
| 11758491_AGPS      | -0.37714 | 0.000528 | 0.002269 |
| 11717168_PER1      | 0.288331 | 0.000528 | 0.002269 |
| 11749289_CHMP1A    | -0.23419 | 0.000528 | 0.002269 |
| 11731331_ZIC1      | -0.36134 | 0.000528 | 0.00227  |
| 11721536_SURF1     | 0.251139 | 0.000528 | 0.002271 |
| 11727861_TIMM8A    | 0.282517 | 0.000528 | 0.002272 |
| 11718533_SIK3      | 0.307065 | 0.000529 | 0.002272 |
| 11758377_TLR1      | 0.397394 | 0.000529 | 0.002272 |
| 11754288_LMAN2L    | 0.248849 | 0.000529 | 0.002273 |

|                    |          |          |          |
|--------------------|----------|----------|----------|
| 11739910_ELOVL6    | 0.228322 | 0.00053  | 0.002275 |
| 11751183_EWSAT1    | 0.310485 | 0.00053  | 0.002275 |
| 11747865_EIF3C /// | -0.20583 | 0.00053  | 0.002276 |
| 11762444_TRPV3     | -0.30442 | 0.00053  | 0.002278 |
| 11747586_MCM3AP    | 0.253907 | 0.000531 | 0.002282 |
| 11751523_TMED5     | 0.42803  | 0.000531 | 0.002282 |
| 11721292_GIT2      | 0.227573 | 0.000531 | 0.002283 |
| 11746236_LIN37     | 0.252518 | 0.000532 | 0.002286 |
| 11734852_KIAA0226L | 0.581254 | 0.000533 | 0.002288 |
| 11741133_HNRNPF    | -0.22739 | 0.000534 | 0.002293 |
| 11726376_MPV17L2   | -0.20349 | 0.000534 | 0.002294 |
| 11757940_PGF       | 0.325046 | 0.000535 | 0.002295 |
| 11754093_HSPBP1    | -0.25685 | 0.000535 | 0.002296 |
| 11724268_TMEM185A  | -0.37753 | 0.000535 | 0.002296 |
| 11757669_PPIL1     | -0.20166 | 0.000535 | 0.002297 |
| 11745834_ECT2      | -0.31365 | 0.000535 | 0.002298 |
| 11743866_MPHOSPH10 | 0.216965 | 0.000536 | 0.002299 |
| 11748649_VPS13C    | 0.418804 | 0.000536 | 0.0023   |
| 11740748_MAX       | 0.238243 | 0.000536 | 0.0023   |
| 11722537_MSANTD3-T | 0.243731 | 0.000537 | 0.002303 |
| 11754823_KIAA0226L | 0.74492  | 0.000537 | 0.002303 |
| 11755451_PQLC2     | 0.343101 | 0.000537 | 0.002303 |
| 11727939_SLC45A3   | -0.33624 | 0.000537 | 0.002304 |
| 11754030_PABPC4    | 0.206801 | 0.000537 | 0.002304 |
| 11722896_PIK3C2A   | 0.398899 | 0.000537 | 0.002304 |
| 11723405_SCMH1     | -0.35287 | 0.000537 | 0.002304 |
| 11715120_HIST1H2BE | -0.29197 | 0.000538 | 0.002306 |
| 11746914_ACAD8     | 0.372371 | 0.000538 | 0.002306 |
| 11720183_EEF1B2    | 0.227858 | 0.000538 | 0.002307 |
| 11757701_VAMP4     | 0.197643 | 0.000538 | 0.002307 |
| 11759532_FIP1L1    | -0.6548  | 0.000539 | 0.002309 |
| 11751220_BLMH      | -0.25611 | 0.000539 | 0.002309 |
| 11751367_EDEM1     | 0.584034 | 0.000539 | 0.002312 |
| 11718348_TUSC2     | 0.244511 | 0.00054  | 0.002312 |
| 11732057_CDC7      | -0.25272 | 0.00054  | 0.002312 |
| 11730942_OSCAR     | -0.24283 | 0.00054  | 0.002313 |
| 11757684_TPD52L2   | -0.22844 | 0.00054  | 0.002315 |
| AFFX-HUMISTAT1     | 0.288242 | 0.00054  | 0.002315 |
| 11754420_PREPL     | 0.233431 | 0.00054  | 0.002315 |
| 11740441_APOBEC3A  | -0.22011 | 0.000541 | 0.002315 |
| 11757986_MIS12     | -0.26733 | 0.000541 | 0.002316 |
| 11722696_SFI1      | -0.29638 | 0.000541 | 0.002316 |
| 11758275_EIF5      | -0.20561 | 0.000541 | 0.002316 |
| 11721581_CAMKK1    | -0.22389 | 0.000542 | 0.002319 |
| 11744843_PAPPA     | 0.570816 | 0.000542 | 0.00232  |
| 11756886_TSC2      | 0.296403 | 0.000542 | 0.002321 |
| 11720134_PROS1     | 0.34713  | 0.000542 | 0.002321 |
| 11722709_CC SER2   | 0.222584 | 0.000542 | 0.002322 |
| 11740513_PDE4D     | 0.386733 | 0.000543 | 0.002324 |
| 11741065_EPHX1     | -0.31369 | 0.000543 | 0.002325 |
| 11715544_TMED10    | 0.274433 | 0.000543 | 0.002325 |



|                    |          |          |          |
|--------------------|----------|----------|----------|
| 11715430_AKR1B1    | -0.22773 | 0.000544 | 0.002326 |
| 11745964_ALDOA     | -0.19681 | 0.000544 | 0.002326 |
| 11742061_CHORDC1   | -0.28955 | 0.000544 | 0.002327 |
| 11717090_HIST2H2BE | 0.715182 | 0.000544 | 0.002327 |
| 11756025_S100A13   | 0.209279 | 0.000544 | 0.002327 |
| 11746321_SERPINH1  | -0.24994 | 0.000544 | 0.002327 |
| 11746720_PPP1CB    | 0.309518 | 0.000544 | 0.002328 |
| 11760038_GLS       | 0.320012 | 0.000545 | 0.002328 |
| 11719030_TSPYL2    | -0.23842 | 0.000545 | 0.00233  |
| 11717446_DHPS      | -0.27537 | 0.000546 | 0.002332 |
| 11741044_PLS1      | 0.280382 | 0.000546 | 0.002333 |
| 11746260_PIGA      | 0.263253 | 0.000546 | 0.002335 |
| 11740256_GJC1      | -0.27581 | 0.000546 | 0.002335 |
| 11742846_CUL4B     | 0.252602 | 0.000546 | 0.002335 |
| 11757532_RBM47     | -0.40367 | 0.000547 | 0.002335 |
| 11760110_GSDMD     | -0.30544 | 0.000547 | 0.002336 |
| 11719654_SV2A      | -0.32137 | 0.000547 | 0.002336 |
| 11728030_IGSF10    | 0.513849 | 0.000547 | 0.002337 |
| 11728701_CD55      | 0.213211 | 0.000547 | 0.002337 |
| 11757085_ASAH2 /// | 0.297642 | 0.000547 | 0.002337 |
| 11744563_FMR1      | 0.258526 | 0.000548 | 0.002338 |
| 11727214_DTWD1     | 0.253353 | 0.000548 | 0.002339 |
| 11720171_MRPS16    | -0.23487 | 0.000548 | 0.00234  |
| 11753044_USP25     | 0.411707 | 0.000548 | 0.002341 |
| 11743991_MRGBP     | -0.34238 | 0.000549 | 0.002342 |
| 11729074_HYKK      | -0.28018 | 0.000549 | 0.002345 |
| 11756298_SNRPA     | -0.24067 | 0.000549 | 0.002345 |
| 11725825_GJB3      | -0.34448 | 0.000549 | 0.002345 |
| 11748259_CUEDC1    | 0.213657 | 0.00055  | 0.002345 |
| 11755385_BTBD2     | -0.24398 | 0.00055  | 0.002346 |
| 11723145_RANBP17   | 0.440244 | 0.00055  | 0.002346 |
| 11720086_KIAA0368  | -0.22656 | 0.00055  | 0.002346 |
| 11717137_CDC42EP4  | -0.40665 | 0.00055  | 0.002346 |
| 11730130_HOXD10    | 0.257501 | 0.00055  | 0.002348 |
| 11736222_FOXRED2   | -0.2458  | 0.00055  | 0.002348 |
| 11756426_TRIM41    | 0.225036 | 0.000551 | 0.002348 |
| 11755433_ARHGEF1 / | -0.20104 | 0.000551 | 0.002348 |
| 11741885_CASP1     | 0.557072 | 0.000551 | 0.002348 |
| 11739164_PYCRL     | -0.21762 | 0.000551 | 0.002349 |
| 11739820_ZNF714    | -0.6071  | 0.000551 | 0.002349 |
| 11724757_GBP1L1    | 0.227926 | 0.000551 | 0.002351 |
| 11746991_ATP1B1    | 0.299946 | 0.000552 | 0.002352 |
| 11733601_NPAS4     | -0.31268 | 0.000552 | 0.002352 |
| 11734725_PNPT1     | 0.220715 | 0.000552 | 0.002354 |
| 11723458_RBM48     | 0.441766 | 0.000552 | 0.002354 |
| 11756245_ANXA5     | 0.201947 | 0.000553 | 0.002355 |
| 11741591_ABCD3     | 0.266902 | 0.000553 | 0.002356 |
| 11725685_PTPRO     | 0.612646 | 0.000553 | 0.002356 |
| 11741381_ARNT      | 0.286812 | 0.000553 | 0.002358 |
| 11758990_SLC9A3R1  | -0.24504 | 0.000554 | 0.002358 |
| 11730304_FANCA     | -0.29756 | 0.000554 | 0.002359 |

|                    |          |          |          |
|--------------------|----------|----------|----------|
| 11743432_C17orf100 | -0.29589 | 0.000554 | 0.00236  |
| 11759254_TNFSF18   | 0.617255 | 0.000554 | 0.00236  |
| 11719026_PSD3      | 0.348143 | 0.000554 | 0.00236  |
| 11759597_HSPA14    | 0.224778 | 0.000555 | 0.002362 |
| 11743121_PRKAR1B   | -0.30522 | 0.000555 | 0.002362 |
| 11746441_TGFBR1    | 0.58201  | 0.000555 | 0.002363 |
| 11731139_KLHL8     | 0.245007 | 0.000555 | 0.002363 |
| 11719580_HIGD2A    | -0.20521 | 0.000555 | 0.002363 |
| 11719692_RARRES3   | 0.423514 | 0.000555 | 0.002363 |
| 11722589_BCAP29    | 0.232568 | 0.000555 | 0.002364 |
| 11734056_PTGR2     | -0.30721 | 0.000556 | 0.002364 |
| 11716975_PDK4      | 0.381247 | 0.000556 | 0.002365 |
| 11717990_SIDT2     | 0.302067 | 0.000556 | 0.002367 |
| 11715101_HIST1H3G  | -0.22773 | 0.000557 | 0.002368 |
| 11757524_CYC1      | -0.20089 | 0.000557 | 0.002369 |
| 11748667_SDCCAG8   | 0.256856 | 0.000557 | 0.00237  |
| 11753979_RAB13     | -0.28597 | 0.000557 | 0.002371 |
| 11722888_EMB /// E | -0.23421 | 0.000557 | 0.002371 |
| 11732704_FGFR1     | -0.277   | 0.000558 | 0.002371 |
| 11734900_UCK1      | -0.23389 | 0.000558 | 0.002372 |
| 11731686_RIF1      | 0.268797 | 0.000558 | 0.002373 |
| 11717395_ARIH2     | 0.235434 | 0.000558 | 0.002373 |
| 11716789_TARS      | 0.195687 | 0.000558 | 0.002374 |
| 11747356_FSCN1     | -0.23779 | 0.000559 | 0.002377 |
| 11742813_SEMA6A    | -0.32587 | 0.000559 | 0.002377 |
| 11718441_RAVR1     | -0.32058 | 0.00056  | 0.002379 |
| 11743961_CNST      | 0.396319 | 0.00056  | 0.002381 |
| 11749237_MRPS27    | 0.237863 | 0.00056  | 0.002381 |
| 11748068_CCPG1 /// | 0.216984 | 0.000561 | 0.002383 |
| 11716428_PMF1      | -0.27287 | 0.000562 | 0.002387 |
| 11720321_AK2       | -0.23072 | 0.000562 | 0.002387 |
| 11754451_SON       | 0.204006 | 0.000562 | 0.002388 |
| 11725992_SNX11     | 0.295724 | 0.000563 | 0.002389 |
| 11727749_NR5A2     | 0.301847 | 0.000564 | 0.002394 |
| 11724986_CCDC113   | 0.376873 | 0.000565 | 0.002398 |
| 11722578_P3H1      | 0.263022 | 0.000565 | 0.002399 |
| 11723730_KREMEN1   | -0.21046 | 0.000565 | 0.0024   |
| 11757401_KRT10     | 0.201192 | 0.000565 | 0.0024   |
| 11716454_MYO1C     | 0.207536 | 0.000566 | 0.002402 |
| 11759598_HSPA14    | 0.301035 | 0.000566 | 0.002402 |
| 11750141_CTPS1     | -0.20542 | 0.000566 | 0.002402 |
| 11721905_PSMA4     | -0.2423  | 0.000566 | 0.002402 |
| 11747672_KTN1      | 0.293449 | 0.000566 | 0.002402 |
| 11749645_ZNF268    | 0.256455 | 0.000566 | 0.002402 |
| 11750982_SHKBP1    | -0.26571 | 0.000566 | 0.002402 |
| 11721519_ZDHHC17   | 0.436156 | 0.000566 | 0.002402 |
| 11750493_RNF216    | 0.255057 | 0.000567 | 0.002403 |
| 11743734_GNPTG     | 0.293006 | 0.000567 | 0.002405 |
| 11738174_PTCHD4    | 0.35236  | 0.000568 | 0.002407 |
| 11735295_LRRK2     | 0.655301 | 0.000568 | 0.002408 |
| 11752399_FUBP1     | 0.199649 | 0.000568 | 0.002409 |

|                    |          |          |          |
|--------------------|----------|----------|----------|
| 11729474_FANCA     | -0.51805 | 0.000568 | 0.002409 |
| 11756637_RNF219    | -0.24734 | 0.000568 | 0.00241  |
| 11736002_DCN       | 0.448803 | 0.000569 | 0.002411 |
| 11753196_CDC40     | 0.211858 | 0.000569 | 0.002412 |
| 11718201_HEY1      | -0.20086 | 0.000569 | 0.002413 |
| 11744631_FLT1      | 0.313443 | 0.000569 | 0.002413 |
| 11751479_CCDC152   | 0.334635 | 0.00057  | 0.002416 |
| 11757517_POR       | -0.26794 | 0.00057  | 0.002417 |
| 11750180_ASPH      | 0.212315 | 0.00057  | 0.002417 |
| 11718598_DDRGK1    | 0.265196 | 0.000571 | 0.002418 |
| 11718346_CN0T7     | -0.2143  | 0.000571 | 0.002418 |
| 11752247_TCF12     | 0.206289 | 0.000571 | 0.002418 |
| 11725708_WDHD1     | -0.49796 | 0.000571 | 0.002419 |
| 11715769_SET       | -0.19024 | 0.000571 | 0.00242  |
| 11757652_P3H1      | 0.225243 | 0.000572 | 0.002421 |
| 11722689_SPTBN1    | -0.26739 | 0.000572 | 0.002422 |
| 11747610_AP1S2 /// | 0.349943 | 0.000572 | 0.002423 |
| 11758304_PNRC2     | 0.201832 | 0.000572 | 0.002424 |
| 11743586_PAPD4     | 0.200857 | 0.000573 | 0.002425 |
| 11733428_BICD1     | 0.288892 | 0.000573 | 0.002427 |
| 11750766_TACC2     | 0.250049 | 0.000573 | 0.002427 |
| 11744666_FAN1      | 0.302934 | 0.000573 | 0.002427 |
| 11746192_NAP1L2    | 0.663461 | 0.000574 | 0.002427 |
| 11730740_PDLIM4    | 0.29649  | 0.000574 | 0.002431 |
| 11753073_TNFSF4    | 0.593529 | 0.000575 | 0.002433 |
| 11756958_NLE1      | -0.20213 | 0.000575 | 0.002433 |
| 11748622_CTSA      | 0.235311 | 0.000575 | 0.002433 |
| 11731288_MBD2      | 0.279699 | 0.000575 | 0.002433 |
| 11719957_LOC441155 | 0.234835 | 0.000576 | 0.002434 |
| 11754519_PRR4      | 0.199954 | 0.000576 | 0.002435 |
| 11727480_RDH13     | -0.24742 | 0.000576 | 0.002435 |
| 11757455_GPX1      | 0.204352 | 0.000576 | 0.002436 |
| 11719820_CLN5      | 0.2471   | 0.000576 | 0.002436 |
| 11724199_LSS       | -0.20713 | 0.000577 | 0.002438 |
| 11724816_SH3KBP1   | 0.201587 | 0.000577 | 0.002438 |
| 11752224_SLFN5     | 0.280557 | 0.000577 | 0.002438 |
| 11756301_TSTA3     | 0.235118 | 0.000577 | 0.002439 |
| 11745112_C8orf31   | 0.376921 | 0.000577 | 0.002439 |
| 11750078_GYG1      | 0.255959 | 0.000577 | 0.002439 |
| 11749317_ATP6VOD1  | 0.236581 | 0.000577 | 0.002439 |
| 11728571_PLCL1     | 0.482727 | 0.000577 | 0.00244  |
| 11750058_UBE2W     | -0.2931  | 0.000578 | 0.002441 |
| 11725495_ROBO1     | 0.356697 | 0.000578 | 0.002441 |
| 11731442_ARHGFEF12 | -0.3961  | 0.000578 | 0.002441 |
| 11755345_C9orf142  | -0.20333 | 0.000578 | 0.002442 |
| 11724387_HOXB2     | 0.219802 | 0.000578 | 0.002442 |
| 11754829_PI4KA /// | 0.206028 | 0.000579 | 0.002445 |
| 11755181_TCF7L2    | 0.227208 | 0.000579 | 0.002447 |
| 11763337_LHX6      | -0.41023 | 0.000579 | 0.002447 |
| 11763269_MYSM1     | 0.210472 | 0.00058  | 0.00245  |
| 11723572_OTUD3     | 0.462168 | 0.00058  | 0.00245  |

|                    |          |          |          |
|--------------------|----------|----------|----------|
| 11717374_DNAJC3    | 0.241213 | 0.00058  | 0.00245  |
| 11724257_MUC15     | -0.25205 | 0.000581 | 0.002451 |
| 11722665_GABRB3    | -0.30339 | 0.000581 | 0.002451 |
| 11750236_AGBL1     | -0.31017 | 0.000581 | 0.002452 |
| 11755505_ZSWIM7    | 0.240498 | 0.000581 | 0.002453 |
| 11756589_NSUN5P1   | 0.267702 | 0.000582 | 0.002455 |
| 11747039_EHD1      | 0.324191 | 0.000582 | 0.002457 |
| 11736568_LEF1      | -0.31285 | 0.000583 | 0.002458 |
| 11739570_ASH1L     | 0.260322 | 0.000583 | 0.002458 |
| 11741377_MMP2      | 0.5112   | 0.000583 | 0.002458 |
| 11736446_PDCD7     | -0.27915 | 0.000583 | 0.002459 |
| 11725347_TFDP1     | -0.22427 | 0.000583 | 0.002459 |
| 11741152_PLAGL1    | -0.40029 | 0.000583 | 0.002459 |
| 11753950_ENTPD4    | 0.305198 | 0.000583 | 0.002459 |
| 11742734_WDR3      | 0.201678 | 0.000583 | 0.00246  |
| 11745471_ZNF276    | 0.304997 | 0.000583 | 0.00246  |
| 11731544_SIK2      | 0.231318 | 0.000584 | 0.002461 |
| 11737703_ADCK1     | -0.26654 | 0.000584 | 0.002461 |
| 11744393_PAPOLA    | -0.2451  | 0.000584 | 0.002461 |
| 11743260_MLX       | 0.221311 | 0.000584 | 0.002462 |
| 11758967_TFPI2     | 0.428482 | 0.000585 | 0.002464 |
| 11745194_OXCT1     | -0.27818 | 0.000585 | 0.002465 |
| 11751350_APP       | 0.289046 | 0.000585 | 0.002465 |
| 11723806_STX17     | 0.297831 | 0.000585 | 0.002465 |
| 11726977_EIF4A2    | -0.22665 | 0.000586 | 0.002468 |
| 11751114_ARFIP1    | 0.217444 | 0.000586 | 0.002469 |
| 11757070_LLPH      | 0.220055 | 0.000586 | 0.002469 |
| 11735041_C1orf52   | -0.33522 | 0.000586 | 0.002469 |
| 11748991_CDK5RAP2  | -0.22026 | 0.000587 | 0.00247  |
| 11724925_LTN1      | 0.272684 | 0.000587 | 0.002471 |
| 11759619_TRAPPC10  | 0.196964 | 0.000587 | 0.002471 |
| 11718279_RPRD1B    | 0.215442 | 0.000588 | 0.002476 |
| 11724822_CWF19L2   | -0.22003 | 0.000588 | 0.002476 |
| 11755846_EIF3C /// | -0.19535 | 0.000588 | 0.002476 |
| 11723305_PYG02     | -0.2251  | 0.000588 | 0.002477 |
| 11733013_PEX2      | -0.34562 | 0.000589 | 0.002479 |
| 11723977_RAB3A     | -0.60824 | 0.000589 | 0.002479 |
| 11761067_TALDO1    | -0.22621 | 0.000589 | 0.00248  |
| 11761009_TES       | 0.567645 | 0.00059  | 0.002482 |
| 11752342_PKM       | -0.20766 | 0.00059  | 0.002483 |
| 11758368_SGTA      | -0.22216 | 0.000591 | 0.002486 |
| 11742805_TEX261    | -0.38794 | 0.000591 | 0.002486 |
| 11717165_RANGAP1   | -0.22024 | 0.000591 | 0.002487 |
| 11731502_UTP23     | 0.208507 | 0.000591 | 0.002487 |
| 11740363_PTPN3     | 0.204203 | 0.000592 | 0.002489 |
| 11717420_SLC35A2   | -0.22442 | 0.000592 | 0.002491 |
| 11755972_MGEA5     | 0.24385  | 0.000592 | 0.002491 |
| 11732525_CSGALNACT | 0.432831 | 0.000592 | 0.002491 |
| 11750751_DDX3X     | 0.265124 | 0.000593 | 0.002493 |
| 11730196_RNF187    | -0.20234 | 0.000594 | 0.002495 |
| 11723043_UBE2D1    | 0.240537 | 0.000594 | 0.002496 |

|                    |          |          |          |
|--------------------|----------|----------|----------|
| 11759416_HFE       | -0.47383 | 0.000594 | 0.002498 |
| 11747081_INPP5A    | -0.31574 | 0.000595 | 0.002499 |
| 11747747_MVK       | -0.23418 | 0.000595 | 0.002502 |
| 11732097_CDC14A    | 0.552573 | 0.000596 | 0.002503 |
| 11721461_COPS5     | 0.225741 | 0.000596 | 0.002504 |
| 11750108_INTS3     | -0.21342 | 0.000596 | 0.002504 |
| 11747058_DTWD1     | 0.264658 | 0.000596 | 0.002505 |
| 11723786_ZNF766    | 0.233631 | 0.000597 | 0.002506 |
| 11739359_CHSY1     | 0.245506 | 0.000597 | 0.002506 |
| 11758223_GNPDA1    | -0.2994  | 0.000597 | 0.002506 |
| 11763336_DKFZP586I | -0.34269 | 0.000597 | 0.002508 |
| 11758417_HLA-DPA1  | -0.24591 | 0.000597 | 0.002508 |
| 11748431_VPS33B    | 0.242582 | 0.000598 | 0.002511 |
| 11739297_METTL2A   | 0.257885 | 0.000598 | 0.002511 |
| 11737028_OTX1      | -0.45311 | 0.000598 | 0.002511 |
| 11747405_EPDR1     | 0.192088 | 0.000599 | 0.002513 |
| 11757304_ARL2BP    | 0.205316 | 0.000599 | 0.002513 |
| 11756382_SUPT7L    | 0.24649  | 0.000599 | 0.002514 |
| 11727268_ZBED3     | -0.34875 | 0.000599 | 0.002514 |
| 11719657_MMP9      | 0.247282 | 0.000599 | 0.002514 |
| 11757845_ENDOD1    | -0.22449 | 0.000599 | 0.002514 |
| 11729420_TTC26     | 0.375831 | 0.000599 | 0.002514 |
| 11727452_FAM21C    | 0.200638 | 0.000599 | 0.002514 |
| 11729886_C18orf54  | -0.39508 | 0.0006   | 0.002515 |
| 11737189_RECQL5    | -0.29369 | 0.0006   | 0.002517 |
| 11721436_STC2      | 0.26768  | 0.0006   | 0.002517 |
| 11750903_ATXN10    | 0.228203 | 0.000601 | 0.00252  |
| 11717565_EMP1      | 0.228559 | 0.000601 | 0.002521 |
| 11754725_SATB1     | 0.361355 | 0.000602 | 0.002522 |
| 11717524_RDX       | 0.202353 | 0.000602 | 0.002524 |
| 11738642_NOX3      | 0.313025 | 0.000602 | 0.002524 |
| 11758282_TUBA1C    | -0.27647 | 0.000603 | 0.002526 |
| 11721178_PITX1     | -0.22172 | 0.000603 | 0.002526 |
| 11748780_TOM1L1    | 0.229119 | 0.000603 | 0.002527 |
| 11757513_NFKBIZ    | 0.244659 | 0.000603 | 0.002528 |
| 11728876_CSF2      | 0.390284 | 0.000604 | 0.002529 |
| 11755076_ORAI2     | 0.245514 | 0.000604 | 0.00253  |
| 11730854_TMEM39B   | -0.20696 | 0.000604 | 0.002531 |
| 11743069_PRRF38A   | 0.205839 | 0.000604 | 0.002532 |
| 11754340_ELAC2     | -0.23401 | 0.000605 | 0.002534 |
| 11739980_SOCS4     | 0.443136 | 0.000605 | 0.002536 |
| 11724347_ASTN2     | 0.303234 | 0.000606 | 0.002538 |
| 11730231_TIAL1     | 0.193637 | 0.000606 | 0.002538 |
| 11749090_FOXP1     | 0.251438 | 0.000606 | 0.002539 |
| 11716071_PIM3      | -0.22925 | 0.000606 | 0.002539 |
| 11727700_HOXC13    | 0.215337 | 0.000607 | 0.002541 |
| 11717164_RANGAP1   | -0.19189 | 0.000607 | 0.002543 |
| 11758540_ZNF449    | 0.331002 | 0.000608 | 0.002545 |
| 11738216_RELL1     | 0.33047  | 0.000609 | 0.002548 |
| 11717681_GNA13     | 0.204683 | 0.000609 | 0.002548 |
| 11743131_APEH      | -0.23981 | 0.00061  | 0.002551 |

|                    |          |          |          |
|--------------------|----------|----------|----------|
| 11719307_RASSF4    | -0.41461 | 0.00061  | 0.002552 |
| 11719932_KIAA0319L | 0.206741 | 0.00061  | 0.002552 |
| 11720766_METTL9    | -0.19401 | 0.00061  | 0.002552 |
| 11751620_RABL6     | -0.31848 | 0.00061  | 0.002553 |
| 11724907_MAP4K5    | 0.222949 | 0.000611 | 0.002554 |
| 11722172_TOLLIP    | 0.212421 | 0.000611 | 0.002555 |
| 11718354_ERP44     | 0.224482 | 0.000611 | 0.002555 |
| 11740176_ARSK      | 0.241397 | 0.000611 | 0.002556 |
| 11760398_PHBP19    | -0.32219 | 0.000612 | 0.00256  |
| 11731481_STK25     | -0.22171 | 0.000612 | 0.00256  |
| 11745633_TRAPPC8   | 0.396007 | 0.000613 | 0.002563 |
| 11746792_BECN1     | 0.22723  | 0.000613 | 0.002563 |
| 11716635_TMEM50A   | -0.20289 | 0.000613 | 0.002565 |
| 11733020_LDHA      | -0.19109 | 0.000614 | 0.002567 |
| 11722597_ACKR3     | -0.47424 | 0.000614 | 0.002568 |
| 11725346_GPX1      | 0.208238 | 0.000614 | 0.002568 |
| 11737301_NUP155    | -0.21021 | 0.000614 | 0.002568 |
| 11741326_ENSA      | -0.24909 | 0.000615 | 0.00257  |
| 11738100_C2orf195  | -0.22361 | 0.000616 | 0.002574 |
| 11717146_PTPN1     | 0.21895  | 0.000616 | 0.002574 |
| 11734658_FOS       | 0.402305 | 0.000616 | 0.002574 |
| 11749241_RPP14     | 0.23097  | 0.000616 | 0.002574 |
| 11731170_DEFEB126  | -0.27141 | 0.000617 | 0.002577 |
| 11726878_ZNF436-AS | -0.2711  | 0.000617 | 0.002578 |
| 11735022_CEP63     | 0.424282 | 0.000618 | 0.002582 |
| 11732579_ZNF880    | 0.436592 | 0.000619 | 0.002586 |
| 11739436_KDM3B     | -0.26243 | 0.000619 | 0.002586 |
| 11716463_GBA2      | 0.245135 | 0.000619 | 0.002586 |
| 11715761_TBC1D14   | 0.214626 | 0.000619 | 0.002586 |
| 11720211_TP53BP2   | -0.31523 | 0.00062  | 0.002589 |
| 11756064_CBWD1 /// | 0.231975 | 0.00062  | 0.00259  |
| 11758189_ITGB1     | -0.19751 | 0.000621 | 0.002591 |
| 11740976_SLAIN1    | -0.25812 | 0.000621 | 0.002591 |
| 11722611_TBC1D25   | -0.39472 | 0.000621 | 0.002591 |
| 11728086_FAM179B   | 0.412575 | 0.000621 | 0.002592 |
| 11747627_TYW1 ///  | -0.22659 | 0.000621 | 0.002593 |
| 11758557_ZFP36L1   | 0.211035 | 0.000622 | 0.002596 |
| 11755232_ZNF468    | 0.449508 | 0.000622 | 0.002597 |
| 11732670_CCDC107   | 0.245916 | 0.000623 | 0.002597 |
| 11728279_CASP6 /// | -0.322   | 0.000623 | 0.002597 |
| 11731596_ZNF503    | -0.28985 | 0.000623 | 0.002597 |
| 11715408_PSMB4     | -0.19988 | 0.000623 | 0.002598 |
| 11753580_SERF1A // | 0.309229 | 0.000624 | 0.0026   |
| 11740980_CCNG1     | 0.373199 | 0.000624 | 0.0026   |
| 11736023_MED28     | 0.299046 | 0.000624 | 0.0026   |
| 11734578_CFH       | 0.568998 | 0.000624 | 0.0026   |
| 11736867_MMP16     | 0.300635 | 0.000624 | 0.002602 |
| 11751627_KDSR      | 0.295863 | 0.000624 | 0.002602 |
| 11731258_TMEM170B  | 0.308571 | 0.000625 | 0.002604 |
| 11753529_CDK11A // | 0.199063 | 0.000626 | 0.002607 |
| 11728512_TRAF5     | 0.281093 | 0.000626 | 0.002607 |

|                    |          |          |          |
|--------------------|----------|----------|----------|
| 11717380_FOPNL     | -0.2009  | 0.000626 | 0.002608 |
| 11752913_SESN3     | 0.445918 | 0.000626 | 0.002609 |
| 11730203_FAM104A   | 0.249212 | 0.000626 | 0.002609 |
| 11759842_PTPRG     | 0.254537 | 0.000626 | 0.00261  |
| 11739757_FAM57A    | -0.25458 | 0.000627 | 0.00261  |
| 11748804_MTG2      | -0.23023 | 0.000627 | 0.002611 |
| 11747669_ITM2C     | -0.23665 | 0.000627 | 0.002612 |
| 11720381_NFU1      | 0.202264 | 0.000628 | 0.002613 |
| 11719749_EBPL      | -0.19173 | 0.000628 | 0.002613 |
| 11725649_DCAF5     | 0.380637 | 0.000628 | 0.002613 |
| 11720246_CDPF1     | -0.27459 | 0.000628 | 0.002616 |
| 11747424_RNPS1     | -0.2263  | 0.000628 | 0.002616 |
| 11729731_TPD52L3   | -0.32451 | 0.000629 | 0.002617 |
| 11723629_TAF1      | -0.28052 | 0.000629 | 0.002618 |
| 11761102_FCAR      | 0.404335 | 0.000629 | 0.002619 |
| 11717457_NLGN2     | -0.25149 | 0.00063  | 0.00262  |
| 11747365_QARS      | -0.25488 | 0.00063  | 0.002621 |
| 11756252_KLHDC3    | 0.244023 | 0.00063  | 0.002621 |
| 11716791_DKFZp686K | 0.241009 | 0.00063  | 0.002621 |
| 11732443_BPTF      | -0.46809 | 0.00063  | 0.002621 |
| 11716738_MSRB1     | -0.22068 | 0.00063  | 0.002622 |
| 11732194_KPNA4     | 0.195138 | 0.000631 | 0.002622 |
| 11745649_SS18      | 0.257233 | 0.000631 | 0.002623 |
| 11726695_C1orf35   | -0.30482 | 0.000631 | 0.002623 |
| 11725283_ZFP90     | 0.193567 | 0.000631 | 0.002623 |
| 11715623_RNF114    | 0.209519 | 0.000631 | 0.002623 |
| 11720520_LOC100996 | 0.358495 | 0.000631 | 0.002624 |
| 11741650_LRP12     | 0.204947 | 0.000632 | 0.002626 |
| 11719078_AAGAB     | 0.223948 | 0.000632 | 0.002627 |
| 11725670_IP07      | -0.2189  | 0.000632 | 0.002628 |
| 11719785_B4GALT4   | -0.25067 | 0.000632 | 0.002628 |
| 11743258_LTBP3     | 0.280214 | 0.000633 | 0.002629 |
| 11737008_KIAA1429  | 0.244689 | 0.000633 | 0.00263  |
| 11739974_ZNF117    | 0.488599 | 0.000634 | 0.002633 |
| 11741017_AP2A2     | 0.283696 | 0.000634 | 0.002633 |
| 11725697_TRIM56    | 0.232015 | 0.000635 | 0.002638 |
| 11721348_SSH3      | -0.2661  | 0.000635 | 0.002638 |
| 11740062_SIGMAR1   | -0.23253 | 0.000635 | 0.002638 |
| 11732480_ITGAM     | 0.745656 | 0.000636 | 0.00264  |
| 11744217_TSPAN17   | -0.34694 | 0.000636 | 0.00264  |
| 11746489_GPAA1     | -0.20168 | 0.000636 | 0.00264  |
| 11759886_ANKRD36 / | -0.48437 | 0.000636 | 0.002643 |
| 11738526_GFM2      | 0.264454 | 0.000637 | 0.002643 |
| 11720905_QSER1     | 0.2108   | 0.000637 | 0.002643 |
| 11726567	EIF4G1    | -0.21747 | 0.000637 | 0.002643 |
| 11724897_FZR1      | -0.29147 | 0.000637 | 0.002644 |
| 11743107_DHX9      | 0.292628 | 0.000637 | 0.002645 |
| 11750362_CNTD1     | -0.24211 | 0.000638 | 0.002646 |
| 11724889_POLRMT    | -0.24921 | 0.000638 | 0.002648 |
| 11739772_OXR1      | 0.226918 | 0.000638 | 0.002648 |
| 11751868_C8orf59   | -0.26126 | 0.000639 | 0.00265  |

|                    |          |          |          |
|--------------------|----------|----------|----------|
| 11733868_HLA-DOA   | -0.33935 | 0.000639 | 0.00265  |
| 11758179_ZNF175    | 0.299347 | 0.000639 | 0.00265  |
| 11747025_ERBB3     | -0.2202  | 0.000639 | 0.00265  |
| 11721403_NCOA3     | 0.196196 | 0.000639 | 0.00265  |
| 11747837_ZFAND1    | 0.227962 | 0.000639 | 0.00265  |
| 11758507_SHC4      | 0.347759 | 0.000639 | 0.00265  |
| 11729264_ADAT1     | 0.246525 | 0.000639 | 0.002651 |
| 11716844_DNAJC13   | 0.254416 | 0.00064  | 0.002653 |
| 11722764_WDR62     | -0.23999 | 0.00064  | 0.002653 |
| 11755498_ATP6VOE2  | -0.25122 | 0.00064  | 0.002653 |
| 11736521_ZNF701    | 0.429137 | 0.00064  | 0.002653 |
| 11721306_PHLDA1    | 0.201041 | 0.00064  | 0.002653 |
| 11724116_UCKL1 /// | -0.22064 | 0.000641 | 0.002657 |
| 11733295_ZC3H14    | -0.26706 | 0.000642 | 0.002659 |
| 11757158_RPL27A // | -0.2776  | 0.000642 | 0.002659 |
| 11729285_NFU1      | 0.193773 | 0.000642 | 0.002659 |
| 11741079_CREM      | 0.199638 | 0.000642 | 0.002659 |
| 11721622_KATNAL1   | 0.330349 | 0.000642 | 0.00266  |
| 11727763_PRODH2    | -0.29678 | 0.000642 | 0.002661 |
| 11719072_WDR18     | -0.2027  | 0.000643 | 0.002664 |
| 11730929_IKBKB     | -0.24299 | 0.000644 | 0.002666 |
| 11722463_TNKS2     | 0.302811 | 0.000644 | 0.002667 |
| 11729678_POLK      | 0.317364 | 0.000645 | 0.00267  |
| 11758451_VCP       | -0.22633 | 0.000645 | 0.00267  |
| 11721515_IP04 ///  | -0.19692 | 0.000645 | 0.002671 |
| 11718801_C1orf216  | -0.27972 | 0.000646 | 0.002673 |
| 11725166_MED23     | 0.190858 | 0.000646 | 0.002674 |
| 11741966_TMTC4     | -0.23795 | 0.000647 | 0.002676 |
| 11723664_SREBF2    | -0.28837 | 0.000647 | 0.002676 |
| 11756790_ITGA3     | 0.197201 | 0.000647 | 0.002676 |
| 11727378_TBC1D15   | -0.19803 | 0.000647 | 0.002677 |
| 11722100_RICTOR    | 0.218278 | 0.000647 | 0.002678 |
| 11754977_CTSB      | -0.20252 | 0.000648 | 0.002681 |
| 11718929_TGIF2     | 0.209091 | 0.000649 | 0.002685 |
| 11751707_TASP1     | 0.311421 | 0.000649 | 0.002686 |
| 11725089_TASP1     | 0.30415  | 0.00065  | 0.002687 |
| 11720556_TSEN15    | -0.19592 | 0.00065  | 0.002688 |
| 11747076_DBNL      | -0.2019  | 0.00065  | 0.002688 |
| 11756725_SHISA5    | -0.2466  | 0.00065  | 0.002689 |
| 11727339_ZBTB2     | -0.33666 | 0.00065  | 0.002689 |
| 11763212_CBLB      | 0.436077 | 0.000651 | 0.00269  |
| 11756606_RWDD2B    | 0.24977  | 0.000651 | 0.00269  |
| 11726580_PSME1     | 0.199915 | 0.000651 | 0.002691 |
| 11748612_ETV5      | -0.20723 | 0.000651 | 0.002692 |
| 11747310_WBP11     | -0.26051 | 0.000651 | 0.002692 |
| 11723426 ETFB      | -0.20117 | 0.000652 | 0.002694 |
| 11720310_SERP1     | -0.20751 | 0.000652 | 0.002696 |
| 11749737_CPEB1     | 0.53821  | 0.000652 | 0.002696 |
| 11717806_ZSWIM8    | 0.23071  | 0.000653 | 0.002696 |
| 11717646_MCMBP     | -0.23115 | 0.000653 | 0.002696 |
| 11735701_CD151     | -0.22292 | 0.000653 | 0.002698 |



|                    |          |          |          |
|--------------------|----------|----------|----------|
| 11727682_ACVR2B    | -0.27765 | 0.000653 | 0.002699 |
| 11756818_PATL2     | -0.23787 | 0.000654 | 0.0027   |
| 11747954_PYROXD1   | 0.273898 | 0.000654 | 0.002701 |
| 11724118_SAMD9L    | 0.517066 | 0.000654 | 0.002701 |
| 11743787_GORAB     | 0.253088 | 0.000654 | 0.002702 |
| 11719860_SLC2A4RG  | -0.20565 | 0.000654 | 0.002702 |
| 11750859_ZFP37     | 0.364942 | 0.000655 | 0.002702 |
| 11736546_FANCD2    | -0.29855 | 0.000655 | 0.002702 |
| 11731044_ERLIN2    | 0.315155 | 0.000655 | 0.002702 |
| 11734768_THOC2     | -0.21987 | 0.000655 | 0.002703 |
| 11732330_MAP7D1    | -0.21909 | 0.000655 | 0.002704 |
| 11717657_EZH2      | -0.22741 | 0.000656 | 0.002708 |
| 11719024_ZNF652    | 0.432569 | 0.000656 | 0.002708 |
| 11727936_SLC9A3R1  | -0.22677 | 0.000657 | 0.002709 |
| 11717775_GYPC      | 0.266437 | 0.000657 | 0.002709 |
| 11749722_NDUFS1    | -0.18702 | 0.000657 | 0.002709 |
| 11717083_TSPAN9    | 0.334821 | 0.000657 | 0.002709 |
| 11756458_MSH5-SAPC | -0.20686 | 0.000658 | 0.002712 |
| 11715402_ILF2      | -0.18537 | 0.000658 | 0.002713 |
| 11717059_CECR5     | -0.21765 | 0.000658 | 0.002713 |
| 11756765_BCL2L13   | 0.254449 | 0.000658 | 0.002713 |
| 11726301_ATG4A     | 0.246447 | 0.000658 | 0.002713 |
| 11727806_UBE2W     | -0.29999 | 0.000658 | 0.002713 |
| 11717732_PFKFB3    | 0.240707 | 0.000658 | 0.002714 |
| 11757693_PIAS3     | -0.23739 | 0.000658 | 0.002714 |
| 11720413_ARRDC1-AS | -0.20814 | 0.000659 | 0.002716 |
| 11718818_SLC26A6   | 0.235924 | 0.000659 | 0.002717 |
| 11717503_NUB1      | -0.19344 | 0.00066  | 0.002719 |
| 11760103_PRKAR2A   | -0.21215 | 0.00066  | 0.00272  |
| 11752890_SNTA1     | -0.38763 | 0.00066  | 0.002722 |
| 11718812_MKNK1     | 0.360473 | 0.000661 | 0.002722 |
| 11742035_PLCL1     | 0.451682 | 0.000661 | 0.002724 |
| 11734893_SOBP      | -0.24306 | 0.000661 | 0.002724 |
| 11762396_KIAA1324  | 0.303905 | 0.000661 | 0.002725 |
| 11716225_LIMA1     | 0.486071 | 0.000662 | 0.002725 |
| 11735316_CLPSL1    | -0.20819 | 0.000662 | 0.002725 |
| 11756722_STOML2    | -0.22552 | 0.000662 | 0.002727 |
| 11724375_PAG1      | 0.454716 | 0.000662 | 0.002727 |
| 11739743_MXI1      | -0.40696 | 0.000663 | 0.002728 |
| 11756915_CYP4F11   | 0.238156 | 0.000663 | 0.002731 |
| 11747487_PPP2R2B   | 0.214764 | 0.000663 | 0.002731 |
| 11716850_MFSD14B   | -0.23255 | 0.000664 | 0.002733 |
| 11751319 EIF4A1 // | -0.18801 | 0.000664 | 0.002733 |
| 11760177_ZSCAN32   | -0.30563 | 0.000665 | 0.002735 |
| 11753151_HDAC8     | -0.2147  | 0.000665 | 0.002735 |
| 11747484_JADE2     | -0.27987 | 0.000665 | 0.002737 |
| 200080_PMH3F3A /// | -0.2654  | 0.000666 | 0.002739 |
| 11744364_INPP5D    | 0.257239 | 0.000666 | 0.002739 |
| 11730828_CPSF2     | 0.194582 | 0.000666 | 0.002739 |
| 11749179_MTMR9     | 0.355295 | 0.000666 | 0.00274  |
| 11739726_NAP1L1    | 0.189129 | 0.000666 | 0.00274  |

|                    |          |          |          |
|--------------------|----------|----------|----------|
| 11719602_MOXD1     | 0.199488 | 0.000666 | 0.002741 |
| 11742444_PIP4K2C   | 0.251581 | 0.000668 | 0.002746 |
| 11739121_XPO7      | -0.2143  | 0.000668 | 0.002748 |
| 11716840_UBE4A     | 0.210075 | 0.000668 | 0.002748 |
| 11719270_RBM22     | 0.198254 | 0.000669 | 0.002749 |
| 11749455_KDM5B     | 0.330056 | 0.000669 | 0.002749 |
| 11760507_ELF2      | -0.25184 | 0.000669 | 0.002751 |
| 11722588_BCAP29    | 0.230135 | 0.000669 | 0.002752 |
| 11747746_HADHB     | -0.22033 | 0.00067  | 0.002752 |
| 11745483_BECN1     | 0.202756 | 0.00067  | 0.002753 |
| 11722595_AKAP13    | 0.216298 | 0.00067  | 0.002753 |
| 11727081_TIPIN     | -0.34548 | 0.00067  | 0.002754 |
| 11733870_HLA-DOA   | -0.41373 | 0.000671 | 0.002755 |
| 11752022_NCOA3     | 0.237295 | 0.000671 | 0.002755 |
| 11748980_USP46     | 0.434245 | 0.000671 | 0.002758 |
| 11715808_PYGB      | -0.22528 | 0.000671 | 0.002758 |
| 11757768_AK3       | 0.225931 | 0.000672 | 0.00276  |
| 11749066_BGN       | -0.24162 | 0.000672 | 0.00276  |
| 11723118_DSTYK     | 0.237118 | 0.000672 | 0.00276  |
| 11751450_ALKBH5    | -0.19762 | 0.000672 | 0.002761 |
| 11758278_BCDIN3D   | 0.205001 | 0.000672 | 0.002761 |
| 11724723_HSPA2     | -0.42996 | 0.000673 | 0.002762 |
| 11732965_DMD       | 0.257857 | 0.000673 | 0.002764 |
| 11719440_SRGAP2    | -0.30371 | 0.000673 | 0.002764 |
| 11754064_ANXA2     | 0.189069 | 0.000673 | 0.002764 |
| 11720114_UBE2D4    | -0.28204 | 0.000674 | 0.002766 |
| 11719986_CCDC117   | -0.20497 | 0.000674 | 0.002766 |
| 11732705_FGFR1     | -0.24134 | 0.000674 | 0.002766 |
| 11727505_RAB21     | -0.23718 | 0.000674 | 0.002767 |
| 11723481_TIA1      | 0.252772 | 0.000675 | 0.002769 |
| 11723187_FGD6      | 0.476041 | 0.000675 | 0.002771 |
| 11730891_NSUN6     | -0.23664 | 0.000676 | 0.002771 |
| 11717513_SEPT8     | 0.22736  | 0.000676 | 0.002772 |
| 11755457_SLAIN1    | -0.3106  | 0.000676 | 0.002773 |
| 11761058_CCNT2-AS1 | -0.24625 | 0.000676 | 0.002773 |
| 11753480_RTN4IP1   | -0.33086 | 0.000677 | 0.002775 |
| 11751239_SHPK ///  | -0.48891 | 0.000677 | 0.002775 |
| 11720809_MZT2B /// | -0.22493 | 0.000677 | 0.002777 |
| 11753976_ZMYM3     | -0.2477  | 0.000677 | 0.002777 |
| 11746619_RTEL1 /// | -0.24003 | 0.000678 | 0.00278  |
| 11751954_MAGI3     | -0.36909 | 0.000678 | 0.002781 |
| 11730229_TIAL1     | 0.240867 | 0.000678 | 0.002781 |
| 11759076_HIST1H3H  | 0.269764 | 0.000679 | 0.002781 |
| 11758472_RICTOR    | 0.249874 | 0.000679 | 0.002782 |
| 11747146_TMBIM6    | -0.29216 | 0.000679 | 0.002783 |
| 11716069_DESI2     | -0.20499 | 0.000679 | 0.002783 |
| 11737905_CASC4     | 0.210857 | 0.00068  | 0.002784 |
| 11743371_DNM1L     | -0.28704 | 0.00068  | 0.002784 |
| 11716032_ARF3      | -0.24649 | 0.00068  | 0.002785 |
| 11726758_CDC25A    | -0.24097 | 0.00068  | 0.002786 |
| 11750331_INTS7     | 0.252288 | 0.00068  | 0.002787 |

|                   |          |          |          |
|-------------------|----------|----------|----------|
| 11719981_RBPM5    | 0.287008 | 0.000681 | 0.00279  |
| 11736176_TRNT1    | 0.2408   | 0.000681 | 0.002791 |
| 11755295_SIGMAR1  | -0.20138 | 0.000682 | 0.002791 |
| 11724302_EEA1     | 0.401927 | 0.000682 | 0.002792 |
| 11726084_FAM69B   | -0.30194 | 0.000682 | 0.002792 |
| 11717311_FBX07    | -0.20559 | 0.000682 | 0.002792 |
| 11726001_TRA2A    | 0.291879 | 0.000682 | 0.002792 |
| 11724049_COG6     | -0.24502 | 0.000682 | 0.002792 |
| 11715558_TMEM59   | 0.198268 | 0.000682 | 0.002792 |
| 11727216_FRS3     | -0.25863 | 0.000682 | 0.002792 |
| 11747831_FGFR10P  | 0.313111 | 0.000683 | 0.002794 |
| 11728880_PPP3R1   | 0.249443 | 0.000683 | 0.002794 |
| 11762908_TNFRSF14 | 0.243284 | 0.000683 | 0.002794 |
| 11743743_ATP11A   | -0.2602  | 0.000684 | 0.002796 |
| 11730915_ERLIN1   | 0.26082  | 0.000684 | 0.002797 |
| 11726113_FAM46B   | 0.288203 | 0.000684 | 0.002797 |
| 11731880_NLRP1    | 0.448276 | 0.000685 | 0.0028   |
| 11758934_RAB27A   | -0.49927 | 0.000685 | 0.002801 |
| 11735732_RPP14    | 0.364832 | 0.000686 | 0.002806 |
| 11717254_HSPA4    | -0.27419 | 0.000686 | 0.002806 |
| 11730285_SMU1     | 0.270865 | 0.000687 | 0.002808 |
| 11755268_DDX18    | 0.239887 | 0.000687 | 0.002808 |
| 11739826_DNAJB12  | -0.20557 | 0.000687 | 0.002809 |
| 11747471_PARBP    | -0.31709 | 0.000687 | 0.00281  |
| 11750480_ATF2     | 0.313741 | 0.000688 | 0.00281  |
| 11719811_TRIB3    | -0.28509 | 0.000688 | 0.002811 |
| 11738146_ZRANB3   | -0.23909 | 0.000689 | 0.002814 |
| 11734489_PUSL1    | -0.25815 | 0.000689 | 0.002817 |
| 11759026_SLC25A40 | -0.20261 | 0.000689 | 0.002817 |
| 11741791_RPS27A   | -0.23752 | 0.00069  | 0.002817 |
| 11721413_MBTD1    | 0.292488 | 0.00069  | 0.002818 |
| 11757449_IFI27L1  | -0.2524  | 0.00069  | 0.002818 |
| 11738551_ANXA2    | 0.289283 | 0.00069  | 0.002819 |
| 11718894_RFC1     | -0.24732 | 0.000691 | 0.002821 |
| 11740548_YAP1     | -0.28764 | 0.000691 | 0.002822 |
| 11748854_RPUSD4   | 0.311227 | 0.000692 | 0.002825 |
| 11725861_MYBL1    | 0.250426 | 0.000692 | 0.002827 |
| 11755895_FAM129A  | -0.24278 | 0.000693 | 0.002829 |
| 11722445_TRAPPC5  | 0.217261 | 0.000693 | 0.002831 |
| 11746439_GLO1     | -0.20375 | 0.000694 | 0.002831 |
| 11719885_KAZN     | 0.429784 | 0.000694 | 0.002831 |
| 11720389_PTPN23   | -0.28451 | 0.000694 | 0.002832 |
| 11760344_ATP10D   | 0.376966 | 0.000694 | 0.002833 |
| 11731436_CETN2    | 0.229593 | 0.000695 | 0.002836 |
| 11722817_ZNF3     | 0.351495 | 0.000695 | 0.002836 |
| 11745887_USP42    | 0.249054 | 0.000696 | 0.00284  |
| 11739231_TMEM106B | -0.21038 | 0.000697 | 0.002844 |
| 11733905_RRP15    | 0.323263 | 0.000697 | 0.002845 |
| 11723343_TRIM35   | 0.410992 | 0.000697 | 0.002845 |
| 11721564_PLA2G4C  | 0.308482 | 0.000698 | 0.002845 |
| 200028_PMSTARD7   | -0.19106 | 0.000698 | 0.002846 |

|                    |          |          |          |
|--------------------|----------|----------|----------|
| 11715927_SH3GL1    | -0.18992 | 0.000698 | 0.002848 |
| 11734057_PTGR2     | -0.26587 | 0.000699 | 0.00285  |
| 11746711_NDUFAF7   | 0.222709 | 0.000699 | 0.00285  |
| 11758724_YWHAQ /// | -0.2119  | 0.000701 | 0.002859 |
| 11719491_IFI35     | -0.23873 | 0.000702 | 0.00286  |
| 11733845_GRK6      | -0.19766 | 0.000702 | 0.00286  |
| 11726148_PPIP5K2   | -0.25387 | 0.000702 | 0.002861 |
| 11754631_PIK3R1    | 0.252188 | 0.000702 | 0.002861 |
| 11754249_WHAMMP2 / | 0.238225 | 0.000703 | 0.002864 |
| 11745009_LZTS2     | -0.18749 | 0.000703 | 0.002864 |
| 11755215_JRK       | -0.35543 | 0.000703 | 0.002864 |
| 11756939_BRD7      | 0.221098 | 0.000703 | 0.002866 |
| 11757666_SNRPD2    | -0.18778 | 0.000704 | 0.002869 |
| 11758641_BLCAP     | 0.288912 | 0.000705 | 0.00287  |
| 11721275_TADA1     | -0.20626 | 0.000705 | 0.00287  |
| 11723594_TNK2      | -0.23194 | 0.000705 | 0.00287  |
| 11759514_BCL2L1    | 0.225013 | 0.000706 | 0.002873 |
| 11739768_PTPRE     | 0.246226 | 0.000706 | 0.002874 |
| 11759647_ZC3H7A    | 0.448995 | 0.000706 | 0.002874 |
| 11761371_BMS1P21   | -0.29155 | 0.000707 | 0.002878 |
| 11727182_ZNF175    | 0.293369 | 0.000707 | 0.00288  |
| 11748135_TYW1 ///  | -0.31679 | 0.000708 | 0.00288  |
| 11728003_C4orf48   | 0.194594 | 0.000708 | 0.00288  |
| 11732150_DCAF11    | -0.20172 | 0.000708 | 0.00288  |
| 11752180_VHL       | -0.21731 | 0.000708 | 0.002882 |
| 11732056_SNRNP35   | -0.30162 | 0.000708 | 0.002882 |
| 11723750_TRMO      | 0.312126 | 0.000709 | 0.002883 |
| 11730497_ZNF239    | 0.342321 | 0.000709 | 0.002884 |
| 11723251_RPS15A    | 0.206991 | 0.000709 | 0.002884 |
| 11730958_CHCHD4    | -0.23494 | 0.000709 | 0.002884 |
| 11756131_UPF3A     | 0.189424 | 0.000711 | 0.002892 |
| 11729138_SLAMF7    | 0.378164 | 0.000711 | 0.002892 |
| 11721297_ABRACL    | -0.20472 | 0.000711 | 0.002893 |
| 11756288_NRDE2     | -0.23946 | 0.000711 | 0.002893 |
| 11754527_RQCD1     | 0.246465 | 0.000712 | 0.002894 |
| 11754097_GTF2A2    | 0.194869 | 0.000712 | 0.002896 |
| 11746920_C5orf34   | -0.51491 | 0.000712 | 0.002896 |
| 11718571_NT5DC3    | -0.20521 | 0.000713 | 0.002897 |
| 11740281_TSEN2     | -0.44232 | 0.000713 | 0.002899 |
| 11723306_PYG02     | -0.2383  | 0.000713 | 0.002899 |
| 11717403_SCAMP3    | 0.197867 | 0.000713 | 0.0029   |
| 11751417_GNA12     | -0.24786 | 0.000714 | 0.002903 |
| 11755059_TCF3      | -0.25457 | 0.000714 | 0.002903 |
| 11756100_TMEM60    | -0.25546 | 0.000715 | 0.002904 |
| 11728253_NMNAT2    | 0.207459 | 0.000715 | 0.002904 |
| 11717813_ST3GAL4   | -0.26246 | 0.000715 | 0.002904 |
| 11721393_NINJ2     | 0.279817 | 0.000715 | 0.002906 |
| 11757609_DLG5      | 0.224097 | 0.000716 | 0.002906 |
| 11760529_RDM1      | -0.35325 | 0.000716 | 0.002908 |
| 11727221_XYLT1     | -0.46073 | 0.000716 | 0.002908 |
| 11737418_ERCC6L2   | 0.264753 | 0.000716 | 0.002908 |

|                    |          |          |          |
|--------------------|----------|----------|----------|
| 11719922_GM2A      | -0.25024 | 0.000716 | 0.002909 |
| 11719609_ADO       | 0.256441 | 0.000717 | 0.00291  |
| 11734780_ZNF639    | 0.217855 | 0.000717 | 0.002912 |
| 11716206_GLUD1     | -0.20248 | 0.000717 | 0.002912 |
| 11715260_RRNAD1    | -0.2531  | 0.000717 | 0.002912 |
| 11754947_NAV1      | -0.23176 | 0.000718 | 0.002914 |
| 11749398_B9D1      | 0.189514 | 0.000719 | 0.002918 |
| 11748889_RBM18     | 0.395654 | 0.000719 | 0.002918 |
| 11760354_CNTLN     | -0.93077 | 0.000719 | 0.002918 |
| 11730217_CERS5     | 0.318657 | 0.000719 | 0.002918 |
| 11747034_IL7       | -0.25836 | 0.000719 | 0.002918 |
| 11738152_RBM24     | 0.391902 | 0.00072  | 0.00292  |
| 11716689_GOLGA3    | 0.374708 | 0.00072  | 0.002923 |
| 11731600_FOSL2     | 0.473863 | 0.000721 | 0.002925 |
| 11738015_SLC10A3   | -0.25116 | 0.000721 | 0.002925 |
| 11761960_TRAC ///  | 0.344038 | 0.000721 | 0.002926 |
| 11733204_SH3TC2    | 0.258568 | 0.000721 | 0.002926 |
| 11747871_ZMYND11   | 0.331423 | 0.000722 | 0.002926 |
| 11722181_ATP6V1C1  | 0.249574 | 0.000722 | 0.002926 |
| 11756117_ZFP28     | 0.490182 | 0.000722 | 0.002926 |
| 11742315_RHCE ///  | -0.68088 | 0.000722 | 0.002926 |
| 11757310_TMEN98    | -0.27943 | 0.000722 | 0.002926 |
| 11717294_SRSF7     | -0.20451 | 0.000722 | 0.002926 |
| 11740981_DTX2      | -0.35634 | 0.000722 | 0.002927 |
| 11727092_IL18      | 0.572755 | 0.000723 | 0.002928 |
| 11717680_UNC13B    | 0.199318 | 0.000723 | 0.002929 |
| 11716771_LOC102724 | 0.325436 | 0.000723 | 0.002929 |
| 11755053_ELAC2     | -0.24255 | 0.000723 | 0.002929 |
| 11757585_MAGED1    | -0.2029  | 0.000723 | 0.00293  |
| 11747729_SDHA ///  | -0.24959 | 0.000723 | 0.002931 |
| 11745026_ERLIN2    | -0.22739 | 0.000724 | 0.002932 |
| 11717073_AEBP1     | 0.27052  | 0.000724 | 0.002933 |
| 11756985_MAT2A     | 0.195467 | 0.000724 | 0.002933 |
| 11754326_GPATCH8   | -0.25245 | 0.000725 | 0.002935 |
| 11747681_THRA      | -0.36537 | 0.000726 | 0.002938 |
| 11725572_TAOK2     | -0.22526 | 0.000726 | 0.002939 |
| 11726780_YPEL3     | 0.23632  | 0.000726 | 0.002939 |
| 11751836_GPX6      | -0.38318 | 0.000726 | 0.00294  |
| 11730359_CCDC126   | 0.46989  | 0.000726 | 0.00294  |
| 11743739_NR3C1     | -0.2435  | 0.000726 | 0.00294  |
| 11753470_TIA1      | 0.308909 | 0.000727 | 0.002942 |
| 11724376_PAG1      | 0.27477  | 0.000727 | 0.002943 |
| 11721199_IFT122    | 0.255312 | 0.000727 | 0.002943 |
| 11722286_SLC30A7   | 0.213192 | 0.000727 | 0.002943 |
| 11724979_DPEP2     | -0.28627 | 0.000728 | 0.002943 |
| 11717340_PTGFRN    | 0.265098 | 0.000728 | 0.002943 |
| 11734209_CNTF ///  | 0.380394 | 0.000728 | 0.002944 |
| 11743380_NFE2L2    | 0.191935 | 0.000729 | 0.002948 |
| 11718500_UBE2Q1    | 0.242566 | 0.000729 | 0.002948 |
| 11745611_PDDC1     | 0.198623 | 0.000729 | 0.002948 |
| 11760020_PIGP      | -0.27174 | 0.000729 | 0.002948 |

|                    |          |          |          |
|--------------------|----------|----------|----------|
| 11749308_FCH02     | 0.304709 | 0.00073  | 0.00295  |
| 11760025_EXD3      | 0.545906 | 0.00073  | 0.00295  |
| 11743931_ERP29     | -0.21084 | 0.00073  | 0.002951 |
| 11758026_SLC35A5   | -0.21819 | 0.00073  | 0.002952 |
| 11725123_POLB      | 0.198579 | 0.00073  | 0.002952 |
| 11752611_SSR1      | 0.260515 | 0.000731 | 0.002953 |
| 11762047_USP32     | 0.260467 | 0.000731 | 0.002953 |
| 11753719_GMFB      | 0.27158  | 0.000731 | 0.002953 |
| 11747905_NID2      | -0.38288 | 0.000731 | 0.002953 |
| 11755913_LPO       | -0.25802 | 0.000731 | 0.002955 |
| 11727782_TPM4      | -0.29437 | 0.000731 | 0.002955 |
| 11732397_IFT80     | -0.25402 | 0.000732 | 0.002955 |
| 11751236_TBC1D14   | 0.267958 | 0.000732 | 0.002957 |
| 11730686_WT1       | -0.21564 | 0.000732 | 0.002958 |
| 11716037_GPAA1     | -0.19895 | 0.000732 | 0.002958 |
| 11731550_PLSCR4    | 0.339576 | 0.000733 | 0.002958 |
| 11716876_TSTA3     | 0.212375 | 0.000733 | 0.002958 |
| 11728432_FAM19A1   | 0.414261 | 0.000733 | 0.002959 |
| 11739341_TGDS      | -0.20886 | 0.000734 | 0.002962 |
| 11730030_E2F7      | 0.239676 | 0.000734 | 0.002962 |
| 11728513_NDUFAF6   | 0.237804 | 0.000734 | 0.002963 |
| 11742953_ACTR8     | 0.337989 | 0.000734 | 0.002963 |
| 11759924_TRIM4     | 0.307899 | 0.000734 | 0.002964 |
| 11736149_LYRM2     | 0.241611 | 0.000735 | 0.002967 |
| 11755887_MTMR12    | 0.297677 | 0.000735 | 0.002967 |
| 11718307_GSE1      | -0.33907 | 0.000736 | 0.002968 |
| 11757241_KRT17P5   | -0.33906 | 0.000736 | 0.002968 |
| 11736246_AMIGO2    | 0.266071 | 0.000736 | 0.002969 |
| 11733846_GRK6      | -0.32251 | 0.000736 | 0.002969 |
| 11739707_SLC35A2   | -0.22891 | 0.000736 | 0.00297  |
| 11737200_PRRX1     | -0.24497 | 0.000736 | 0.00297  |
| 11736860_CPEB1     | 0.415398 | 0.000737 | 0.002971 |
| 11720428_CDC40     | 0.245319 | 0.000737 | 0.002972 |
| 11757861_TSHZ1     | -0.34189 | 0.000738 | 0.002975 |
| 11753757_NUTF2     | -0.18134 | 0.000738 | 0.002975 |
| 11733089_ZNF277    | 0.227605 | 0.000738 | 0.002976 |
| 11749414	EIF2B4    | 0.218378 | 0.000738 | 0.002976 |
| 11719204_ANKLE2    | 0.216293 | 0.000738 | 0.002976 |
| 11715849_APOLD1 // | 0.183437 | 0.000738 | 0.002976 |
| 11763423_ATP6VOD1  | 0.197453 | 0.000739 | 0.002979 |
| 11723656_DDX19A // | 0.24312  | 0.000739 | 0.00298  |
| 11725639_NSL1      | -0.28506 | 0.00074  | 0.00298  |
| 11744167_DPP3      | -0.23257 | 0.00074  | 0.002982 |
| 11731662_KIAA1217  | 0.363226 | 0.00074  | 0.002983 |
| 11758642_NF1       | -0.21692 | 0.000742 | 0.002989 |
| 200069_PMSART3     | -0.25245 | 0.000743 | 0.002993 |
| 11745359_MLIP      | 0.230699 | 0.000744 | 0.002995 |
| 11727007_SORT1     | 0.245966 | 0.000744 | 0.002996 |
| 11755659_CTAGE5    | -0.22397 | 0.000744 | 0.002996 |
| 11756105_BMPR2     | 0.226785 | 0.000744 | 0.002997 |
| 11730262_TBCD      | -0.28685 | 0.000744 | 0.002997 |

|                    |          |          |          |
|--------------------|----------|----------|----------|
| 11751173_PGPEP1    | 0.209619 | 0.000745 | 0.002998 |
| 11720324_POLR2F    | -0.21235 | 0.000745 | 0.003    |
| 11720235_RHOBTB2   | -0.25703 | 0.000745 | 0.003    |
| 11748413_DDB1      | -0.19098 | 0.000745 | 0.003001 |
| 11740562_MASP2     | -0.28253 | 0.000746 | 0.003001 |
| 11736428_STYX      | -0.28593 | 0.000746 | 0.003001 |
| 11725348_TFDP1     | -0.21676 | 0.000746 | 0.003001 |
| 11733806_AMN       | -0.22946 | 0.000746 | 0.003001 |
| 11718388_NUDT2     | -0.25228 | 0.000746 | 0.003002 |
| 11748580_STX1A     | 0.669265 | 0.000746 | 0.003002 |
| 11727195_ZNF202    | 0.390081 | 0.000747 | 0.003003 |
| 11731247_GTPBP8    | 0.242305 | 0.000747 | 0.003004 |
| 11726185_PARPBP    | -0.26145 | 0.000747 | 0.003004 |
| 11720608_S100B     | 0.242612 | 0.000747 | 0.003004 |
| 11735722_PNKD      | 0.238771 | 0.000747 | 0.003006 |
| 11748843_USP42     | 0.247998 | 0.000748 | 0.00301  |
| 11736230_CRIM1     | 0.408378 | 0.000749 | 0.003011 |
| 11753619	EIF5A /// | -0.19226 | 0.000749 | 0.003013 |
| 11753681_TRAF4     | 0.221556 | 0.00075  | 0.003014 |
| 11741488_EFCAB2    | -0.24976 | 0.00075  | 0.003014 |
| 11759357_PAXBP1    | 0.379027 | 0.000751 | 0.003017 |
| 11717673	EIF2B2    | 0.204972 | 0.000751 | 0.003018 |
| 11757509_RAB6A     | 0.187294 | 0.000751 | 0.003018 |
| 11759225_EDF1      | -0.22972 | 0.000751 | 0.003018 |
| 11723856_TXNDC16   | -0.32672 | 0.000751 | 0.003019 |
| 11751528_CWC25     | 0.221803 | 0.000751 | 0.003019 |
| 11725846_SREK1IP1  | 0.194649 | 0.000751 | 0.003019 |
| 11721634_TMEM97    | -0.25433 | 0.000751 | 0.003019 |
| 11720499_CDC42EP3  | -0.22402 | 0.000751 | 0.003019 |
| 11758066_VAPB      | -0.50453 | 0.000753 | 0.003024 |
| 11751001_PAK4      | -0.2546  | 0.000753 | 0.003024 |
| 11730176_C4orf3    | -0.21425 | 0.000753 | 0.003026 |
| 11746044_ELF2      | 0.235349 | 0.000754 | 0.003028 |
| 11757432_EBAG9     | -0.25233 | 0.000754 | 0.003029 |
| 11723135_SRC       | -0.20058 | 0.000755 | 0.003033 |
| 11733388_ZKSCAN3   | 0.349837 | 0.000755 | 0.003033 |
| 11736733_DPY19L3   | 0.303595 | 0.000757 | 0.003038 |
| 11715531_PRRF8     | -0.21161 | 0.000758 | 0.003042 |
| 11719415_YES1      | 0.21645  | 0.000758 | 0.003044 |
| 11718695_YIF1B     | -0.22988 | 0.000758 | 0.003044 |
| 11723671_BNIP2     | 0.194787 | 0.000759 | 0.003044 |
| 11763213_NSUN5P1 / | 0.20258  | 0.000759 | 0.003045 |
| 11750994_SYAP1     | 0.235932 | 0.000759 | 0.003046 |
| 11751509_DKFZp686K | 0.230882 | 0.000759 | 0.003046 |
| 11734502_NUP98     | 0.199255 | 0.00076  | 0.003048 |
| 11720049_GBE1      | -0.25608 | 0.00076  | 0.003049 |
| 11726938_PHPT1     | 0.208348 | 0.00076  | 0.00305  |
| 11730366_ZNF557    | 0.339791 | 0.000761 | 0.00305  |
| 11719542_PAXBP1    | 0.216845 | 0.000761 | 0.003051 |
| 11721395_MUM1      | -0.28187 | 0.000761 | 0.003051 |
| 11723566_CAPN7     | 0.262147 | 0.000761 | 0.003053 |

|                    |          |          |          |
|--------------------|----------|----------|----------|
| 11756086_HNRNPA1L2 | -0.18872 | 0.000762 | 0.003053 |
| 11757151_SNORA72   | -0.23776 | 0.000762 | 0.003056 |
| 11741104_CPEB1     | 0.244097 | 0.000762 | 0.003057 |
| 11748526_HVCN1     | -0.32134 | 0.000763 | 0.003057 |
| 11764275_SLC11A2   | -0.19844 | 0.000763 | 0.003057 |
| 11744109_ZC3H15    | 0.187342 | 0.000763 | 0.003059 |
| 11717334_HMGXB3    | 0.203328 | 0.000763 | 0.003059 |
| 11715748_SSRP1     | -0.20859 | 0.000764 | 0.003061 |
| 11745751_MSL1      | 0.224195 | 0.000764 | 0.003061 |
| 11717051_SSR1      | 0.190601 | 0.000764 | 0.003061 |
| 11734969_RUSC1     | -0.2213  | 0.000764 | 0.003061 |
| 11753598_FHL1      | 0.432267 | 0.000765 | 0.003063 |
| 11716208_GLUD1     | -0.47798 | 0.000765 | 0.003064 |
| 11724039_EHHADH    | -0.71776 | 0.000765 | 0.003064 |
| 11758598_SERPINE2  | 0.185526 | 0.000765 | 0.003065 |
| 11729987_ROBO2     | 0.291456 | 0.000765 | 0.003066 |
| 11740203_BORCS7 // | 0.302159 | 0.000766 | 0.003066 |
| 11758887_RHBDD1    | -0.2345  | 0.000766 | 0.003066 |
| 11719381_PSENE1    | 0.203359 | 0.000767 | 0.00307  |
| 11741295_DDI2 ///  | 0.23157  | 0.000767 | 0.00307  |
| 11732730_AJAP1     | 0.349039 | 0.000767 | 0.00307  |
| 11719776_NDST1     | 0.319262 | 0.000767 | 0.003072 |
| 11719589_TOM1L1    | 0.218632 | 0.000768 | 0.003074 |
| 11749587_FCGR2A // | 0.307819 | 0.000768 | 0.003074 |
| 11739000_SLC38A2   | -0.18991 | 0.000768 | 0.003074 |
| 11745035_LINC01296 | 0.217464 | 0.000769 | 0.003076 |
| 11720586_SMCHD1    | -0.23021 | 0.000769 | 0.003076 |
| 11758924_LOC100129 | -0.34887 | 0.000769 | 0.003078 |
| 11759522_ALKBH7    | -0.24209 | 0.000769 | 0.003078 |
| 11742326_GHRHR     | -0.24886 | 0.00077  | 0.003079 |
| 11717370_ARSD      | 0.301418 | 0.000771 | 0.003082 |
| 11745740_SCOC      | -0.22968 | 0.000771 | 0.003082 |
| 11731131_JRK       | -0.29048 | 0.000771 | 0.003084 |
| 11749652_ZBTB21    | 0.377687 | 0.000772 | 0.003086 |
| 11717207_GOLGA2    | 0.211394 | 0.000772 | 0.003088 |
| 11732785_C16orf45  | -0.20917 | 0.000772 | 0.003088 |
| 11759854_RPS27A    | -0.35303 | 0.000772 | 0.003088 |
| 11744224_DCAF15    | -0.27947 | 0.000773 | 0.003088 |
| 11753401_TPI1      | -0.1856  | 0.000773 | 0.00309  |
| 11724222_YIPF4     | 0.197194 | 0.000773 | 0.00309  |
| 11744027_TMEM181   | -0.21057 | 0.000773 | 0.00309  |
| 11743593_DIMT1     | -0.20125 | 0.000773 | 0.00309  |
| 11756067_GNAQ      | 0.386747 | 0.000774 | 0.003091 |
| 11737602_NLGN1     | 0.348968 | 0.000774 | 0.003094 |
| 11744399_MYE0V2    | 0.185802 | 0.000776 | 0.003099 |
| 11747386_STK25     | -0.32895 | 0.000776 | 0.003099 |
| 11724689_CD58      | 0.205195 | 0.000776 | 0.003099 |
| 11719617_UCK1      | -0.22527 | 0.000776 | 0.003099 |
| 11716745_FAM60A    | 0.188108 | 0.000776 | 0.003099 |
| 11739484_CCDC88A   | 0.248307 | 0.000776 | 0.0031   |
| 11752076_SEPT10    | -0.20423 | 0.000776 | 0.0031   |



|                    |          |          |          |
|--------------------|----------|----------|----------|
| 11730469_LM02      | 0.226146 | 0.000777 | 0.003101 |
| 11719476_FAM210B   | 0.208888 | 0.000777 | 0.003103 |
| 11728017_RHPN1     | -0.25059 | 0.000778 | 0.003106 |
| 11743376_XRCC6BP1  | -0.33238 | 0.000778 | 0.003107 |
| 11723383_PRR3      | -0.23697 | 0.000779 | 0.003107 |
| 11716869_UTP18     | 0.232434 | 0.000779 | 0.003108 |
| 11720618_TRIM9     | 0.329045 | 0.000779 | 0.003109 |
| 11744539_RTN3      | -0.21103 | 0.000779 | 0.003109 |
| 11716252_RBFOX2    | 0.223503 | 0.000779 | 0.003109 |
| 11754743_CWC22     | 0.244156 | 0.00078  | 0.003112 |
| 11720201_MGMT      | -0.27168 | 0.00078  | 0.003114 |
| 11742909_ANKRD50   | 0.211956 | 0.000781 | 0.003115 |
| 11740039_EHBP1     | -0.21411 | 0.000781 | 0.003116 |
| 11748576_CYB5R1    | -0.20142 | 0.000781 | 0.003116 |
| 11725185_KLF12     | -0.29553 | 0.000781 | 0.003116 |
| 11717122_C6orf106  | 0.271603 | 0.000781 | 0.003116 |
| 11748034_CMAHP     | 0.423169 | 0.000782 | 0.003118 |
| 11739728_RECQL     | -0.20967 | 0.000782 | 0.003119 |
| 11758726_ATP5C1    | -0.44075 | 0.000782 | 0.003119 |
| 11716083_AHSA1     | -0.19584 | 0.000782 | 0.003119 |
| 11719439_SRGAP2    | -0.28296 | 0.000783 | 0.00312  |
| 11761424_RAG1      | -0.32034 | 0.000783 | 0.00312  |
| 11752223_POLH      | 0.393871 | 0.000783 | 0.003121 |
| 11756723_LDHA      | -0.21159 | 0.000783 | 0.003121 |
| 11727393_COX15     | 0.182165 | 0.000784 | 0.003125 |
| 11723422_BTFF3L4   | 0.228292 | 0.000785 | 0.003127 |
| 11752372_ABCA10    | 0.244987 | 0.000785 | 0.003127 |
| 11730788_APLP2     | -0.21944 | 0.000785 | 0.003128 |
| 11727929_FOXO1     | 0.601903 | 0.000786 | 0.00313  |
| 11717501_HAGH      | -0.24558 | 0.000786 | 0.003131 |
| 11752593_CEP170    | 0.196232 | 0.000786 | 0.003131 |
| 11723319_FAM234B   | 0.422798 | 0.000787 | 0.003135 |
| 11745030_LINC00597 | 0.435614 | 0.000787 | 0.003135 |
| 11716336_PRCC      | 0.209448 | 0.000787 | 0.003136 |
| 11722768_RAPGEF5   | -0.28857 | 0.000788 | 0.003139 |
| 11745022_TRMT2B    | -0.21393 | 0.000788 | 0.003139 |
| 11729799_MTTP      | 0.265746 | 0.000789 | 0.003142 |
| 11716679_SLC39A9   | 0.21218  | 0.00079  | 0.003144 |
| 11719120_KYNU      | 0.281616 | 0.00079  | 0.003146 |
| 11754495_GABARAPL2 | 0.192144 | 0.000791 | 0.003149 |
| 11728233_CLDN1     | 0.347785 | 0.000791 | 0.00315  |
| 11757957_SOX6      | -0.40259 | 0.000792 | 0.003154 |
| 11727793_DLAT      | -0.19293 | 0.000794 | 0.003158 |
| 11737762_HSD17B4   | -0.20549 | 0.000794 | 0.003158 |
| 11739611_CALML4    | -0.28783 | 0.000794 | 0.003158 |
| 11732461_SPINK2    | -0.41881 | 0.000794 | 0.003159 |
| 11717949_SC5D      | -0.55729 | 0.000794 | 0.003159 |
| 11730211_PFKL      | -0.21334 | 0.000795 | 0.003163 |
| 11731962_ZNF709    | 0.302231 | 0.000795 | 0.003163 |
| 11724142_RAB11FIP2 | 0.315206 | 0.000796 | 0.003165 |
| 11759307_RREB1     | 0.253029 | 0.000797 | 0.003168 |

|                   |     |          |          |          |
|-------------------|-----|----------|----------|----------|
| 11741200_AKAP2    | /// | 0.273076 | 0.000797 | 0.003169 |
| 11736537_RHCE     | /// | -0.29553 | 0.000797 | 0.00317  |
| 11757632_LIMK2    |     | 0.380105 | 0.000797 | 0.00317  |
| 11726757_CDC25A   |     | -0.23052 | 0.000798 | 0.003171 |
| 11721499_C TSA    |     | 0.203027 | 0.000798 | 0.003172 |
| 11757081_OXCT2    | /// | -0.227   | 0.000798 | 0.003172 |
| 11744337_GLUL     |     | -0.24203 | 0.000798 | 0.003172 |
| 11724288_PRMT9    |     | 0.265088 | 0.000798 | 0.003172 |
| 11723987_NR2F2    |     | 0.215353 | 0.000798 | 0.003173 |
| 11750562_ZMYM4    |     | 0.192257 | 0.0008   | 0.003177 |
| 11744015_KDELR1   |     | -0.22438 | 0.0008   | 0.003177 |
| 11719590_SUGP2    |     | 0.206651 | 0.000801 | 0.00318  |
| 11725967_THUMPD1  |     | 0.261085 | 0.000801 | 0.003181 |
| 11719920_TIMM10B  |     | 0.26997  | 0.000801 | 0.003182 |
| 11746575_LTBP3    |     | 0.298242 | 0.000801 | 0.003182 |
| 11744947_ZDHC5    |     | 0.219935 | 0.000802 | 0.003186 |
| 11757759_PEG10    |     | -0.93354 | 0.000803 | 0.003188 |
| 11726356_ENPP1    |     | -0.54875 | 0.000803 | 0.00319  |
| 11752003_IQGAP1   |     | -0.24214 | 0.000804 | 0.003191 |
| 11717895_PTP4A1   |     | 0.203669 | 0.000804 | 0.003191 |
| 11754610_FICD     |     | -0.2271  | 0.000804 | 0.003192 |
| 11719844_SMAP2    |     | -0.21458 | 0.000804 | 0.003193 |
| 11729985_FUT10    |     | 0.317179 | 0.000805 | 0.003194 |
| 11739613_CALML4   |     | -0.22369 | 0.000805 | 0.003195 |
| 11753061_SLFN5    |     | 0.297537 | 0.000805 | 0.003196 |
| 11747090_NOP58    |     | 0.24029  | 0.000806 | 0.003196 |
| 11742245_HTRA2    |     | -0.22978 | 0.000806 | 0.003197 |
| 11735216_CHRNA5   |     | -0.18827 | 0.000806 | 0.003197 |
| 11761703_DNAJA1   |     | 0.213225 | 0.000806 | 0.003198 |
| 11730192_SEC14L2  |     | -0.19164 | 0.000807 | 0.003202 |
| 11758648_KCTD10   |     | -0.2103  | 0.000807 | 0.003202 |
| 11738191_MTFR1    |     | -0.26389 | 0.000808 | 0.003203 |
| 11756135_NUBP2    |     | -0.19133 | 0.000808 | 0.003206 |
| 11752185_MSH5     | /// | -0.26218 | 0.00081  | 0.00321  |
| 11756792_DBNL     |     | -0.20666 | 0.000811 | 0.003215 |
| 11755090_MTG1     |     | -0.20258 | 0.000811 | 0.003217 |
| 11742747_SPPL3    |     | 0.202313 | 0.000811 | 0.003217 |
| 11715274_TPM2     |     | 0.302218 | 0.000813 | 0.003222 |
| 11724728_CD8A     |     | -0.21999 | 0.000813 | 0.003222 |
| 11719574_RINT1    |     | 0.202466 | 0.000813 | 0.003223 |
| 11738906_BLVRA    |     | -0.2529  | 0.000813 | 0.003223 |
| 11759150_CN0T4    |     | -0.22287 | 0.000814 | 0.003224 |
| 11723986_NR2F2    |     | 0.195251 | 0.000814 | 0.003227 |
| 11746961_HLA-DMB  |     | -0.26384 | 0.000815 | 0.003228 |
| 11733500_ZBTB25   |     | 0.229144 | 0.000815 | 0.003228 |
| 11718174_C1D      |     | -0.22227 | 0.000815 | 0.003228 |
| 11731159_TAF1C    |     | 0.261134 | 0.000816 | 0.003231 |
| 11757013_CAV1     |     | 0.198728 | 0.000816 | 0.003231 |
| 11748596_KLHL2    |     | 0.315144 | 0.000816 | 0.003233 |
| 11722150	EIF2AK3  |     | 0.267224 | 0.000817 | 0.003234 |
| 11759588_SLC25A35 |     | -0.24982 | 0.000817 | 0.003235 |

|                    |          |          |          |
|--------------------|----------|----------|----------|
| 11752199_APP       | 0.26042  | 0.000817 | 0.003235 |
| 11744585_ATRN      | -0.38812 | 0.000817 | 0.003236 |
| 11736831_SEC23B    | -0.25306 | 0.000817 | 0.003236 |
| 11746469_DARS      | -0.19302 | 0.000817 | 0.003236 |
| 11720188_NDUFA7    | -0.19007 | 0.000817 | 0.003236 |
| 11742143_RHCE ///  | -0.64254 | 0.000818 | 0.003238 |
| 11728573_MBNL1     | 0.219245 | 0.000818 | 0.003238 |
| 11744641_CLDND1    | 0.197616 | 0.000819 | 0.003239 |
| 11722277_ZBED4     | -0.24987 | 0.000819 | 0.003239 |
| 11723652_MUT       | -0.23039 | 0.000819 | 0.003239 |
| 11759408_AQR       | -0.28332 | 0.000819 | 0.003241 |
| 11722527_PTPN21    | 0.417949 | 0.000819 | 0.003242 |
| 11735730_PRKRIR    | 0.206134 | 0.000821 | 0.003246 |
| 11730670_OPHN1     | 0.343388 | 0.000821 | 0.003247 |
| 11715948_KCTD12    | -0.35323 | 0.000821 | 0.003247 |
| 11748055_TFDP1     | -0.21567 | 0.000821 | 0.003247 |
| 11741821_NAF1      | 0.290604 | 0.000821 | 0.003248 |
| 11722857_FBXO16 // | -0.23998 | 0.000821 | 0.003248 |
| 11760395_IQCH      | 0.382376 | 0.000821 | 0.003248 |
| 11718895_RFC1      | -0.23634 | 0.000822 | 0.003248 |
| 11733066_NFYB      | -0.22342 | 0.000822 | 0.003249 |
| 11746275_FKBP5     | -0.33049 | 0.000822 | 0.003249 |
| 11742789_SYCN      | -0.19067 | 0.000822 | 0.003249 |
| 11716707_ARL2BP    | 0.246938 | 0.000822 | 0.003249 |
| 11739030_CLTC      | 0.206736 | 0.000822 | 0.003249 |
| 11757185_CDK16     | -0.46247 | 0.000823 | 0.003251 |
| 11754311_DPF2      | 0.194611 | 0.000823 | 0.003251 |
| 11716719_GLA       | -0.18825 | 0.000823 | 0.003253 |
| 11716061_FAM162A   | -0.20919 | 0.000824 | 0.003254 |
| 11758414_ZBTB21    | 0.208155 | 0.000824 | 0.003254 |
| 11749430_NDUFAF6   | 0.251554 | 0.000824 | 0.003254 |
| 11754517_CHP1      | 0.198698 | 0.000824 | 0.003256 |
| 11740917_WDFY3     | 0.550663 | 0.000825 | 0.003257 |
| 11724099_MAP3K6    | -0.24814 | 0.000825 | 0.003258 |
| 11724722_HAGHL     | -0.24217 | 0.000826 | 0.003262 |
| 11727237_UST       | 0.55055  | 0.000827 | 0.003264 |
| 11754403_PARP14    | 0.293218 | 0.000827 | 0.003264 |
| 11740462_SMIM19    | -0.26865 | 0.000828 | 0.003267 |
| 11750293_RAD51C    | 0.230233 | 0.000828 | 0.003267 |
| 11728626_HOXA4     | -0.19909 | 0.000828 | 0.003268 |
| 11749667_AFAP1L2   | 0.30377  | 0.000829 | 0.003271 |
| 11729576_TM9SF4    | 0.313214 | 0.00083  | 0.003275 |
| 11730251_LNX1      | 0.278135 | 0.00083  | 0.003276 |
| 11724109_C9orf116  | -0.27839 | 0.000831 | 0.003277 |
| 11758220_TOR1A     | 0.182636 | 0.000831 | 0.003278 |
| 11733214_SLFN5     | 0.258999 | 0.000832 | 0.003281 |
| 11723016_HM13      | 0.273445 | 0.000832 | 0.003282 |
| 11719018_CBFB      | 0.208342 | 0.000832 | 0.003282 |
| 11751089_GTF2H4 // | -0.22683 | 0.000832 | 0.003283 |
| 11747307_GDI1      | 0.228245 | 0.000832 | 0.003283 |
| 11739012_ASH2L     | -0.20923 | 0.000833 | 0.003284 |

|                   |          |          |          |
|-------------------|----------|----------|----------|
| 11717695_TYSND1   | -0.26104 | 0.000833 | 0.003284 |
| 11746409_LPAR1    | 0.242892 | 0.000833 | 0.003284 |
| 11757506_PYG02    | -0.2185  | 0.000833 | 0.003284 |
| 11742844_RXRA     | -0.21234 | 0.000833 | 0.003285 |
| 11758907_ZNF827   | -0.24241 | 0.000835 | 0.003294 |
| 11726189_HCF1R1   | -0.20277 | 0.000836 | 0.003294 |
| 11751030_ZNF155   | 0.4943   | 0.000836 | 0.003294 |
| 11736061_SERPINB5 | -0.57206 | 0.000836 | 0.003295 |
| 11718401_NUDT21   | -0.22845 | 0.000836 | 0.003296 |
| 11744486_WDR81    | -0.19033 | 0.000837 | 0.003298 |
| 11741136_CHN1     | 0.197465 | 0.000838 | 0.003301 |
| 11748313_MTFR1    | -0.25895 | 0.000838 | 0.003301 |
| 11729051_PPFIBP1  | -0.21961 | 0.000839 | 0.003305 |
| 11740022_LRRCC1   | -0.38351 | 0.000839 | 0.003306 |
| 11732925_PEAR1    | 0.442329 | 0.000839 | 0.003306 |
| 11725236_ZBTB39   | 0.246385 | 0.000841 | 0.003312 |
| 11753982_PSM11    | -0.20776 | 0.000841 | 0.003312 |
| 200043_PWERH      | -0.20688 | 0.000842 | 0.003315 |
| 11738257_GRK6     | -0.36581 | 0.000843 | 0.003319 |
| 11720542_B3GALNT2 | 0.294035 | 0.000843 | 0.003319 |
| 11722576_APIG1    | 0.195252 | 0.000843 | 0.00332  |
| 11751128_SHISA5   | -0.21787 | 0.000844 | 0.003321 |
| 11752433_SMPD4    | -0.23968 | 0.000844 | 0.003324 |
| 11716830_ATG9A    | 0.211185 | 0.000844 | 0.003324 |
| 11745774_AES      | -0.20365 | 0.000845 | 0.003326 |
| 11720922_HCP5     | -0.55372 | 0.000845 | 0.003327 |
| 11743449_BICD2    | -0.22509 | 0.000846 | 0.00333  |
| 11744606_SLC35F3  | -0.66954 | 0.000846 | 0.00333  |
| 11757332_DDX5     | 0.191848 | 0.000846 | 0.00333  |
| 11756104_SMC1A    | -0.81348 | 0.000846 | 0.00333  |
| 11733110_TLK1     | 0.266639 | 0.000847 | 0.003331 |
| 11722809_SP1      | 0.353383 | 0.000847 | 0.003331 |
| 11754156_ARF5     | -0.18896 | 0.000847 | 0.003332 |
| 11719821_CLN5     | 0.230183 | 0.000848 | 0.003334 |
| 11756407_RFX3     | 0.379778 | 0.000848 | 0.003334 |
| 11764018_CLCN3    | -0.24634 | 0.000848 | 0.003336 |
| 11753181_BAZ2A    | -0.26648 | 0.000849 | 0.003338 |
| 11733918_PSM14    | -0.27629 | 0.00085  | 0.00334  |
| 11719066_EIF2S3   | 0.186901 | 0.00085  | 0.003341 |
| 11735225_GAMT     | -0.20642 | 0.00085  | 0.003341 |
| 11746513_RPRD2    | -0.21015 | 0.000852 | 0.003347 |
| 11720307_SERP1    | -0.26284 | 0.000852 | 0.003347 |
| 11738897_DAZAP2   | -0.32162 | 0.000852 | 0.003348 |
| 11754304_CDK10    | -0.25213 | 0.000852 | 0.003348 |
| 11725812_KLC1     | 0.208879 | 0.000853 | 0.00335  |
| 11756535_SLC25A45 | 0.245424 | 0.000854 | 0.003356 |
| 11733834_ANKMY2   | 0.193159 | 0.000855 | 0.003361 |
| 11731023_ATXN7    | 0.270008 | 0.000856 | 0.003361 |
| 11763367_NABP1    | 0.648167 | 0.000856 | 0.003361 |
| 11719503_DHX36    | 0.209414 | 0.000856 | 0.003362 |
| 11716527_GSTK1    | 0.195119 | 0.000856 | 0.003362 |

|                    |          |          |          |
|--------------------|----------|----------|----------|
| 11733856_EGLN1     | 0.207431 | 0.000856 | 0.003362 |
| 11754023_COX7A2L   | 0.211359 | 0.000856 | 0.003362 |
| 11757866_FBXO38    | 0.213385 | 0.000857 | 0.003365 |
| 11730651_SYTL4     | -0.29217 | 0.000857 | 0.003365 |
| 11756512_ZHX3      | 0.303121 | 0.000858 | 0.003368 |
| 11752845_ARHGEF7   | 0.300333 | 0.000858 | 0.003368 |
| 11728708_EMP2      | 0.205068 | 0.000858 | 0.003369 |
| 11740648_SPIRE1    | -0.36993 | 0.000858 | 0.003369 |
| 11750167_CAPN2     | 0.209919 | 0.000859 | 0.003373 |
| 11716243_PPP1R16A  | 0.27947  | 0.00086  | 0.003374 |
| 11726300_KLHL26    | -0.23981 | 0.000861 | 0.003379 |
| 11735721_KRT79     | -0.2317  | 0.000861 | 0.00338  |
| 11718094_NPRL2     | -0.19482 | 0.000862 | 0.003381 |
| 11718028_PUS1      | 0.259973 | 0.000862 | 0.003383 |
| 11731777_POMGNT2   | -0.25533 | 0.000863 | 0.003384 |
| 11717729_SQLE      | -0.30371 | 0.000864 | 0.003388 |
| 11719300_CTDSP1    | -0.40794 | 0.000864 | 0.003388 |
| 11734840_GTF2F1    | 0.207251 | 0.000864 | 0.003388 |
| 11730572_CEP97     | -0.278   | 0.000865 | 0.003391 |
| 11745923_MAOA      | 0.192341 | 0.000865 | 0.003393 |
| 11756214_PCMT1     | -0.21453 | 0.000866 | 0.003394 |
| 11747757_RNF167    | -0.18428 | 0.000866 | 0.003395 |
| 11715197_PYG01     | 0.255718 | 0.000866 | 0.003396 |
| 11732415_TIAM1     | 0.225717 | 0.000867 | 0.0034   |
| 11716419_SPTBN1    | -0.30813 | 0.000867 | 0.0034   |
| 11721827_ZWILCH    | -0.20924 | 0.000868 | 0.003404 |
| 11754366_TMEM161B  | 0.2417   | 0.000869 | 0.003404 |
| 11726186_PARPBP    | -0.20547 | 0.000869 | 0.003405 |
| 11746218_Tead2     | -0.2357  | 0.000869 | 0.003406 |
| 11760301_HEXa      | 0.246308 | 0.000869 | 0.003406 |
| 11750411_HSPA1A // | -0.19168 | 0.000869 | 0.003406 |
| 11759141_HIP1      | -0.22344 | 0.000869 | 0.003406 |
| 11732328_RBM26     | 0.195356 | 0.000869 | 0.003406 |
| 11718066_TCTN1     | 0.225787 | 0.00087  | 0.003407 |
| 11750443_TNIP1     | 0.190201 | 0.00087  | 0.003409 |
| 11737850_PPP1R21   | 0.186331 | 0.000871 | 0.003409 |
| 11747427_SEC14L2   | -0.19927 | 0.000871 | 0.003409 |
| 11723518_ELAC1     | 0.303889 | 0.000871 | 0.003413 |
| 11759810_PPP2R3C   | 0.461923 | 0.000872 | 0.003413 |
| 11754091_SMAD3     | -0.22141 | 0.000872 | 0.003413 |
| 11730635_GRHL3     | 0.469257 | 0.000872 | 0.003414 |
| 11741142_TTI2      | 0.182489 | 0.000872 | 0.003414 |
| 11736383_METTL10   | -0.3155  | 0.000873 | 0.003415 |
| 11737318_ZNF546    | 0.496534 | 0.000873 | 0.003415 |
| 11742927_GSTA4     | -0.20723 | 0.000873 | 0.003416 |
| 11722007_PRKAR1A   | 0.191872 | 0.000873 | 0.003417 |
| 11754369_UPRT      | -0.29098 | 0.000873 | 0.003417 |
| 11736977_ZNF431    | 0.293088 | 0.000875 | 0.003422 |
| 11729492_PPFIA4    | -0.35023 | 0.000875 | 0.003424 |
| 11715530_CCT6A     | 0.192736 | 0.000876 | 0.003426 |
| 11723207_MBTPS2    | -0.1905  | 0.000876 | 0.003428 |

|                    |          |          |          |
|--------------------|----------|----------|----------|
| 11748869_CLN3      | -0.19358 | 0.000876 | 0.003428 |
| 11752652_METTL16   | -0.32323 | 0.000877 | 0.003429 |
| 11738937_S SX3     | -0.2435  | 0.000877 | 0.003429 |
| 11746880_FLNA      | -0.21729 | 0.000877 | 0.003429 |
| 11746163_LARP4B    | 0.252906 | 0.000877 | 0.003429 |
| 11728395_TAC1      | 0.214654 | 0.000877 | 0.003429 |
| 11730696_TBC1D26   | -0.29962 | 0.000878 | 0.003433 |
| 11717920_YAP1      | -0.27327 | 0.000878 | 0.003434 |
| 11757006_RNF4      | 0.254683 | 0.000879 | 0.003435 |
| 11727433_NUTF2     | -0.24417 | 0.000879 | 0.003437 |
| 11736678_PODXL     | 0.361469 | 0.00088  | 0.003438 |
| 11715506_MAGED1    | -0.20091 | 0.00088  | 0.003438 |
| 11739348_PIP4K2A   | 0.245031 | 0.00088  | 0.00344  |
| 11725775_TBC1D24   | -0.25377 | 0.000881 | 0.003441 |
| 11755468_WASH2P    | 0.196034 | 0.000881 | 0.003441 |
| 11756730_ATP13A2   | 0.26866  | 0.000881 | 0.003443 |
| 11744541_ACKR3     | -0.36416 | 0.000882 | 0.003446 |
| 11754021_GNPTG     | 0.279829 | 0.000882 | 0.003446 |
| 11750997_CERK      | -0.21721 | 0.000883 | 0.003449 |
| 11721189_CNPY4     | -0.25648 | 0.000883 | 0.003449 |
| 11721920_SENP5     | 0.4488   | 0.000884 | 0.003452 |
| 11752150_ADAM22    | 0.46459  | 0.000884 | 0.003453 |
| 11745381_COBLL1    | 0.24845  | 0.000884 | 0.003453 |
| 11751729_SAE1      | -0.19267 | 0.000885 | 0.003456 |
| 11746484_FAR2P1 // | 0.432326 | 0.000885 | 0.003457 |
| 11719349_PIK3R4    | -0.23678 | 0.000886 | 0.003457 |
| 11747858_ABCE1     | -0.19937 | 0.000886 | 0.003457 |
| 11738623_ZNF268    | 0.269756 | 0.000887 | 0.003462 |
| 11748470_MTA2      | -0.20929 | 0.000888 | 0.003466 |
| 11746537_EIF4G3    | 0.200776 | 0.000888 | 0.003467 |
| 11752388_ARAF      | -0.23091 | 0.000888 | 0.003467 |
| 11743976_MYL12A    | 0.240908 | 0.000888 | 0.003467 |
| 11746096_TLDC1     | 0.306713 | 0.000889 | 0.003469 |
| 11756291_CCDC53    | -0.21922 | 0.00089  | 0.003472 |
| 11716775_RAI14     | -0.24286 | 0.00089  | 0.003472 |
| 11749637_SEC24B    | 0.246247 | 0.00089  | 0.003473 |
| 11732494_AUNIP     | -0.40658 | 0.000891 | 0.003474 |
| 11735349_NDRG3     | -0.40605 | 0.000891 | 0.003474 |
| 11720757_IVNS1ABP  | 0.207598 | 0.000891 | 0.003475 |
| 11717723_RAB1A     | -0.29596 | 0.000892 | 0.003477 |
| 11739619_PTPN3     | 0.32124  | 0.000892 | 0.003477 |
| 11721715_ATRX      | -0.19643 | 0.000892 | 0.003479 |
| 11755710_GTPBP8    | 0.191234 | 0.000893 | 0.00348  |
| 11716815_SLC2A1    | -0.23378 | 0.000893 | 0.00348  |
| 11718944_PGPEP1    | 0.236431 | 0.000893 | 0.00348  |
| 11740487_FBF1      | -0.22278 | 0.000893 | 0.003481 |
| 11744995_PANK1     | 0.304804 | 0.000894 | 0.003482 |
| 11727430_LINC01590 | -0.27105 | 0.000894 | 0.003482 |
| 11717644_GPR107    | -0.21978 | 0.000895 | 0.003486 |
| 11725004_C8orf58   | 0.213969 | 0.000895 | 0.003486 |
| 11749348_SLC25A12  | 0.229941 | 0.000895 | 0.003488 |

|                    |          |          |          |
|--------------------|----------|----------|----------|
| 11720431_COL15A1   | 0.445428 | 0.000896 | 0.00349  |
| 11747986_SS18      | 0.232918 | 0.000896 | 0.00349  |
| 11755424_HMOX2     | 0.184606 | 0.000896 | 0.00349  |
| 11753002_DMBT1     | -0.2698  | 0.000897 | 0.003494 |
| 11758309_YWHAE     | -0.20916 | 0.000897 | 0.003494 |
| 11732327_RBM26     | 0.18459  | 0.000898 | 0.003498 |
| 11757831_SNAP23    | 0.25744  | 0.000899 | 0.0035   |
| 11745863_LOC730098 | -0.26275 | 0.000899 | 0.003501 |
| 11719807_BLOC1S6   | 0.221259 | 0.000899 | 0.003501 |
| 11720666_SYNCRIP   | -0.19122 | 0.0009   | 0.003502 |
| 11725343_VPS37A    | -0.53446 | 0.0009   | 0.003504 |
| 11755869_JAM3      | -0.18675 | 0.000901 | 0.003506 |
| 11756072_SAA1 ///  | 0.392267 | 0.000901 | 0.003508 |
| 11750173_CLTCL1    | 0.336731 | 0.000902 | 0.00351  |
| 11732818_TMEM171   | 0.186372 | 0.000902 | 0.00351  |
| 11764062_RAPGEF2   | 0.217921 | 0.000903 | 0.003513 |
| 11722788_ENG       | 0.188654 | 0.000904 | 0.003516 |
| 11725371_VEGFA     | -0.20497 | 0.000904 | 0.003517 |
| 11723159_TMEM229B  | -0.2515  | 0.000905 | 0.00352  |
| 11720621_ACLY      | -0.22046 | 0.000906 | 0.003522 |
| 11715722_GOLM1     | 0.253458 | 0.000906 | 0.003523 |
| 11736022_FKBP4     | -0.59617 | 0.000906 | 0.003524 |
| 11728235_CD5       | -0.29436 | 0.000906 | 0.003524 |
| 11751824_SNRPD2P2  | -0.20648 | 0.000907 | 0.003525 |
| 11743072_FBXO34    | 0.235978 | 0.000908 | 0.00353  |
| 11746193_METTL3    | -0.2467  | 0.000908 | 0.003531 |
| 11728747_ARAF      | -0.26818 | 0.000909 | 0.003533 |
| 11758459_API5      | 0.210564 | 0.000909 | 0.003533 |
| 11733893_NPLOC4    | 0.247902 | 0.000909 | 0.003534 |
| 11731260_KCND1     | -0.21655 | 0.00091  | 0.003536 |
| 11738440_FGF22     | -0.2088  | 0.00091  | 0.003536 |
| 11756221_ASTN1     | -0.23765 | 0.00091  | 0.003536 |
| 11726976_PERP      | -0.42095 | 0.00091  | 0.003536 |
| 11720429_CDC40     | 0.18419  | 0.00091  | 0.003537 |
| 11727927_FOXO1     | 0.679874 | 0.000911 | 0.003539 |
| 11720484_MRPL9     | -0.19906 | 0.000911 | 0.00354  |
| 11757338_GRHPR     | 0.202834 | 0.000912 | 0.003543 |
| 11763365_CARD8     | -0.3262  | 0.000912 | 0.003544 |
| 11758554_RFWD2     | 0.1901   | 0.000913 | 0.003546 |
| 11744790_LRCH1     | 0.445058 | 0.000913 | 0.003546 |
| 11716816_ENOPH1    | -0.19493 | 0.000914 | 0.003548 |
| 11763513_NF1       | 0.203582 | 0.000914 | 0.003549 |
| 11761351_SYNGR1    | -0.23285 | 0.000914 | 0.003549 |
| 11740290_HOXC6     | 0.189733 | 0.000914 | 0.003549 |
| 11732933_LOC100506 | 0.258013 | 0.000914 | 0.003549 |
| 11740553_XPC       | 0.255299 | 0.000914 | 0.003549 |
| 11756592_CCDC115   | -0.24329 | 0.000914 | 0.003549 |
| 11752133_CEP97     | 0.27769  | 0.000915 | 0.003551 |
| 11719822_CLN5      | 0.266906 | 0.000915 | 0.003551 |
| 11716924_PURB      | 0.272718 | 0.000916 | 0.003555 |
| 11746102_WDR76     | -0.34184 | 0.000918 | 0.00356  |

|                    |          |          |          |
|--------------------|----------|----------|----------|
| 11717140_COG4      | 0.198656 | 0.000918 | 0.003561 |
| 11733563_KLHDC10   | 0.207634 | 0.000918 | 0.003561 |
| 11755644_CDK11A // | 0.211595 | 0.000918 | 0.003561 |
| 11717623_SUCO      | -0.23899 | 0.000918 | 0.003562 |
| 11731882_ZNF540    | 0.27945  | 0.000918 | 0.003562 |
| 11751856_TIE1      | -0.22296 | 0.000919 | 0.003562 |
| 11743036_SAT1      | 0.216041 | 0.000919 | 0.003562 |
| 11724569_USP48     | -0.209   | 0.000919 | 0.003564 |
| 11756661_DARS      | -0.19967 | 0.00092  | 0.003566 |
| 11740161_KCNK17    | -0.29415 | 0.00092  | 0.003566 |
| 11757857_XIST      | -0.20481 | 0.00092  | 0.003567 |
| 11724058_CPTP      | -0.19281 | 0.00092  | 0.003567 |
| 11761170_ACAN      | -0.21498 | 0.00092  | 0.003567 |
| 11716997_TSPAN4    | 0.218855 | 0.00092  | 0.003567 |
| 11731746_IPMK      | 0.371038 | 0.000921 | 0.003568 |
| 11757341_OPTN      | 0.29672  | 0.000921 | 0.00357  |
| 11723024_CREB3     | 0.188007 | 0.000922 | 0.003573 |
| 11763283_PIK3CA    | 0.23653  | 0.000923 | 0.003575 |
| 11740692_VPS13A    | 0.221703 | 0.000923 | 0.003576 |
| 11758405_SMO       | -0.29226 | 0.000925 | 0.003582 |
| 11762286_WISP3     | 0.325278 | 0.000925 | 0.003582 |
| 11747215_C20orf24  | -0.19496 | 0.000925 | 0.003582 |
| 11717449_ASCC2     | 0.189487 | 0.000925 | 0.003582 |
| 11723046_MALSU1    | -0.18866 | 0.000925 | 0.003582 |
| 11719147_FAM117A   | -0.3442  | 0.000925 | 0.003583 |
| 11728643_ACTR3     | 0.183363 | 0.000926 | 0.003584 |
| 11748218_ARFGAP2   | -0.40033 | 0.000926 | 0.003584 |
| 11719596_EHD3      | 0.227806 | 0.000927 | 0.003588 |
| 11746565_CHSY1     | 0.29553  | 0.000928 | 0.003591 |
| 11735772_LOC440040 | -0.46569 | 0.000928 | 0.003592 |
| 11720741_ZNF605    | 0.403285 | 0.000928 | 0.003592 |
| 11752172_FGFR4     | -0.29863 | 0.000928 | 0.003593 |
| 11737690_ZP3       | -0.2246  | 0.000929 | 0.003596 |
| 11754015_TIMM50    | -0.21059 | 0.000929 | 0.003596 |
| 11753754_SNCG      | -0.22287 | 0.000929 | 0.003596 |
| 11753178_LOC283788 | -0.26396 | 0.00093  | 0.003596 |
| 11746368_FAM222B   | 0.278023 | 0.00093  | 0.003596 |
| 11742775_GPR161    | -0.3738  | 0.00093  | 0.003596 |
| 11744514_YIPF2     | -0.2224  | 0.00093  | 0.003599 |
| 11743932_NCAM2     | -0.33452 | 0.000931 | 0.0036   |
| 11758156_SLC17A5   | 0.213537 | 0.000931 | 0.0036   |
| 11717896_PTP4A1    | 0.279481 | 0.000931 | 0.003602 |
| 11741053_LAMP2     | -0.45909 | 0.000932 | 0.003602 |
| 11740991_TSPAN4    | 0.224961 | 0.000932 | 0.003603 |
| 11722053_NQO2      | -0.23722 | 0.000932 | 0.003604 |
| 11733100_USP12     | 0.235301 | 0.000933 | 0.003606 |
| 11729166_DCTD      | 0.218903 | 0.000933 | 0.003606 |
| 11728460_HSCB      | 0.253734 | 0.000933 | 0.003606 |
| 11759332_ZNF117    | 0.50806  | 0.000933 | 0.003607 |
| 11719451_RAB14     | 0.230876 | 0.000933 | 0.003607 |
| 11722839_LYAR      | -0.185   | 0.000934 | 0.003609 |



|                    |          |          |          |
|--------------------|----------|----------|----------|
| 11727385_PCCA      | 0.213034 | 0.000935 | 0.003612 |
| 11747311_WBP11 /// | -0.20196 | 0.000936 | 0.003618 |
| 11730553_TICAM2 // | 0.189485 | 0.000936 | 0.003618 |
| 11752096_CEP120    | 0.254153 | 0.000938 | 0.003623 |
| 11721808_IST1      | 0.228862 | 0.000938 | 0.003624 |
| 11741325_TRIM51    | 0.288118 | 0.000939 | 0.003628 |
| 11720214_C17orf75  | -0.21925 | 0.000939 | 0.003628 |
| 11739096_CPSF7     | -0.19458 | 0.00094  | 0.003628 |
| 11729850_MLLT10    | 0.232352 | 0.000941 | 0.003632 |
| 11742858_WBP11 /// | -0.17684 | 0.000941 | 0.003632 |
| 11718867_FAM192A   | -0.20654 | 0.000941 | 0.003633 |
| 11741331_ANAPC11   | -0.21923 | 0.000942 | 0.003638 |
| 11751155_PPP1R15B  | 0.207856 | 0.000943 | 0.003638 |
| 11752140_GIT1      | -0.18472 | 0.000943 | 0.003642 |
| 11717615_OXSR1     | 0.268946 | 0.000944 | 0.003643 |
| 11747345_ACADM     | 0.199043 | 0.000944 | 0.003644 |
| 11720792_AACS      | 0.195582 | 0.000944 | 0.003645 |
| 11746034_FAM193A   | 0.239071 | 0.000944 | 0.003645 |
| 11717961_MED11     | -0.23708 | 0.000945 | 0.003646 |
| 11758283_MGA       | 0.219372 | 0.000945 | 0.003648 |
| 11746265_FAR2P1    | 0.217818 | 0.000946 | 0.003649 |
| 11754765_KPNA2 /// | -0.19732 | 0.000946 | 0.00365  |
| 11717421_SLC35A2   | -0.25424 | 0.000946 | 0.003651 |
| 11731153_MTRR      | 0.285804 | 0.000947 | 0.003652 |
| 11720529_JAZF1     | 0.639724 | 0.000947 | 0.003652 |
| 11722914_BMPRI1A   | 0.22424  | 0.000947 | 0.003653 |
| 11749393_ANP32E    | -0.18753 | 0.000947 | 0.003653 |
| 11747270_NELFCD    | -0.20972 | 0.000948 | 0.003656 |
| 11716070_DESI2     | -0.22423 | 0.000949 | 0.003659 |
| 11729077_AKAP5     | 0.25882  | 0.000949 | 0.003659 |
| 11750782_ATG7      | 0.260658 | 0.00095  | 0.003661 |
| 11719647_CASP7     | -0.28318 | 0.00095  | 0.003661 |
| 11755143_BNC2      | -0.23973 | 0.00095  | 0.003662 |
| 11748861_ACPP      | 0.400237 | 0.000951 | 0.003664 |
| 11747664_UBXN8     | 0.194349 | 0.000951 | 0.003664 |
| 11724410_2-Mar     | -0.19385 | 0.000951 | 0.003664 |
| 11716334_RBX1      | -0.22502 | 0.000951 | 0.003664 |
| 11759654_SLC6A13   | 0.373873 | 0.000951 | 0.003664 |
| 11754411_CLUAP1    | 0.263529 | 0.000951 | 0.003664 |
| 11741463_PRR4      | 0.274585 | 0.000951 | 0.003664 |
| 11743925_SBN01     | 0.181474 | 0.000951 | 0.003664 |
| 11715425_FLNA      | -0.18415 | 0.000952 | 0.003666 |
| 11753579_IL6ST     | 0.363124 | 0.000952 | 0.003666 |
| 11725840_SLC24A1   | -0.28021 | 0.000952 | 0.003666 |
| 11724280_ING3      | 0.208629 | 0.000954 | 0.003674 |
| 11735511_PHTF2     | 0.223785 | 0.000954 | 0.003674 |
| 11723401_STK4      | 0.175984 | 0.000955 | 0.003676 |
| 11754655_UBE4B     | 0.217827 | 0.000955 | 0.003676 |
| 11719124_TIMELESS  | -0.29619 | 0.000957 | 0.003684 |
| 11739732_CSNK1G1   | 0.371991 | 0.000957 | 0.003685 |
| 11745259_C11orf21  | -0.24812 | 0.000957 | 0.003685 |

|                    |          |          |          |
|--------------------|----------|----------|----------|
| 11722209_PTGS1     | 0.263728 | 0.000957 | 0.003685 |
| 11763395_ZC3HAV1L  | 0.296851 | 0.000958 | 0.003686 |
| 11731099_DNPH1     | -0.20156 | 0.000958 | 0.003687 |
| 11747575_SORBS3    | -0.39349 | 0.000958 | 0.003687 |
| 11716385_TGFB1     | -0.21188 | 0.000958 | 0.003687 |
| 11718024_IFT52     | 0.179035 | 0.000958 | 0.003687 |
| 11744173_DNAJC4    | -0.18513 | 0.000959 | 0.00369  |
| 11722213_NPM3      | -0.18646 | 0.000959 | 0.00369  |
| 11734881_TAF15     | 0.23194  | 0.00096  | 0.003691 |
| 11761299_SCNM1 /// | 0.20175  | 0.00096  | 0.003691 |
| 11719288_PEX11B    | -0.26566 | 0.00096  | 0.003691 |
| 11733484_PCLO      | 0.324057 | 0.000961 | 0.003695 |
| 11741696_NSUN5P1   | 0.304813 | 0.000962 | 0.003697 |
| 11719938_CAND1     | 0.213525 | 0.000962 | 0.003699 |
| 11759724_ZHX1-C8or | 0.362574 | 0.000962 | 0.003699 |
| 11750973_ALAS1     | -0.183   | 0.000962 | 0.003699 |
| 11744990_TOR3A     | -0.70801 | 0.000962 | 0.003699 |
| 11715449_ERGIC3    | 0.210998 | 0.000963 | 0.003702 |
| 11740125_HIST1H2AM | -0.32602 | 0.000963 | 0.003702 |
| 11740179_CDYL2     | 0.268509 | 0.000964 | 0.003705 |
| 11739687_FAM107B   | -0.23625 | 0.000965 | 0.003706 |
| 11754008_ID3       | -0.19509 | 0.000965 | 0.003707 |
| 11757121_EIF4A2 // | -0.31577 | 0.000965 | 0.003708 |
| 11754039_CNBP      | 0.193087 | 0.000965 | 0.003709 |
| 11758276_ITGB1     | -0.17527 | 0.000967 | 0.003715 |
| 11739013_ASH2L     | -0.22521 | 0.000967 | 0.003715 |
| 11726166_ZNF518B   | 0.258349 | 0.000967 | 0.003716 |
| 11716597_SEC24B    | 0.200353 | 0.000968 | 0.003716 |
| 11748521_SURF4     | -0.2366  | 0.000968 | 0.003717 |
| 11750054_PRIM2     | -0.34362 | 0.000968 | 0.003718 |
| 11741663_EIF3C /// | -0.20942 | 0.000968 | 0.003718 |
| 11728459_CDH10     | 0.270416 | 0.000969 | 0.003718 |
| 11736664_JDP2      | -0.28206 | 0.000969 | 0.003718 |
| 11717306_ADIRF     | -0.21614 | 0.000969 | 0.003718 |
| 11743315_TXNL1     | 0.1923   | 0.000969 | 0.003721 |
| 11735592_MYO3B     | -0.21945 | 0.00097  | 0.003722 |
| 11755036_CNP       | -0.21841 | 0.000972 | 0.003729 |
| 11745302_STARD3    | -0.31776 | 0.000972 | 0.00373  |
| 11718679_PSEN1     | -0.27302 | 0.000973 | 0.003733 |
| 11736076_URM1      | -0.17694 | 0.000973 | 0.003735 |
| 11724789_KIF3A     | 0.264104 | 0.000974 | 0.003737 |
| 11722375_GGA2      | 0.190058 | 0.000974 | 0.003737 |
| 11721125_SPPL2A    | 0.21515  | 0.000975 | 0.003739 |
| 11759562_PPP4R2    | 0.205428 | 0.000975 | 0.003741 |
| 11738036_APLP2     | -0.23116 | 0.000976 | 0.003743 |
| 11728702_KIAA0232  | 0.218261 | 0.000976 | 0.003744 |
| 11726512_TCHP      | -0.21495 | 0.000977 | 0.003747 |
| 11732719_EREG      | 0.323635 | 0.000978 | 0.00375  |
| 11719481_FABP7     | -0.26262 | 0.000978 | 0.003751 |
| 11749320_TGDS      | -0.22792 | 0.000978 | 0.003751 |
| 11722625_FASTKD1   | -0.22457 | 0.000979 | 0.003751 |

|                    |          |          |          |
|--------------------|----------|----------|----------|
| 11720731_SUMF1     | 0.215041 | 0.000979 | 0.003754 |
| 11721096_TM1       | -0.32514 | 0.000979 | 0.003754 |
| 11742854_UGDH      | -0.18877 | 0.00098  | 0.003755 |
| 11729314_PRKAA1    | -0.47929 | 0.00098  | 0.003757 |
| 11719619_TMEM187   | -0.46882 | 0.000981 | 0.003759 |
| 11743142_COX11     | -0.22549 | 0.000981 | 0.003759 |
| 11763422_ATP6VOD1  | 0.233564 | 0.000981 | 0.00376  |
| 11727792_DLAT      | -0.20946 | 0.000982 | 0.00376  |
| 11750988_ILF3      | -0.23514 | 0.000982 | 0.003761 |
| 11735679_ACOT8     | 0.260421 | 0.000982 | 0.003761 |
| 11746933_ATP6VOA2  | 0.240981 | 0.000982 | 0.003761 |
| 11718886_TPRKB     | -0.3524  | 0.000982 | 0.003761 |
| 11760618_ZXDC      | -0.29753 | 0.000983 | 0.003765 |
| 11759832_IL15      | 0.563892 | 0.000983 | 0.003765 |
| 11728286_RBMS2     | -0.25608 | 0.000983 | 0.003765 |
| 11739415_IRGQ      | 0.300487 | 0.000985 | 0.003769 |
| 11754196_XIST      | 0.200506 | 0.000985 | 0.00377  |
| 11737954_SLC16A5   | -0.17543 | 0.000985 | 0.003772 |
| 11749287_ARL2BP    | 0.182838 | 0.000986 | 0.003773 |
| 11760216_TMEM170A  | 0.439703 | 0.000986 | 0.003773 |
| 11760938_MAT2A     | 0.278176 | 0.000986 | 0.003774 |
| 11721304_RAMP1     | 0.224509 | 0.000987 | 0.003775 |
| 11725153_NFKB2     | 0.283469 | 0.000987 | 0.003775 |
| 11747545_BMP1      | 0.335856 | 0.000987 | 0.003775 |
| 11752355_KIAA1217  | 0.319637 | 0.000988 | 0.00378  |
| 11745460_NDUFV3    | 0.194696 | 0.000988 | 0.00378  |
| 11737913_CCT7      | -0.19259 | 0.000988 | 0.003781 |
| 11737861_ZSCAN5A   | -0.31017 | 0.000988 | 0.003781 |
| 11744428_SYAP1     | 0.185978 | 0.000989 | 0.003781 |
| 11744351_LOC728392 | -0.21916 | 0.000989 | 0.003781 |
| 11727996_MYEF2     | 0.349431 | 0.000989 | 0.003782 |
| 11723748_ALPP      | -0.50516 | 0.00099  | 0.003784 |
| 11760229_KLHL23 // | -0.46459 | 0.00099  | 0.003785 |
| 11715344_GSTP1     | -0.1959  | 0.00099  | 0.003785 |
| 11719966_U2AF1 /// | -0.19067 | 0.000992 | 0.003793 |
| 11723084_SCN1B     | 0.24614  | 0.000993 | 0.003796 |
| 11719638_NEK3      | 0.336446 | 0.000995 | 0.003803 |
| 11724089_MXD3 ///  | 0.203726 | 0.000995 | 0.003803 |
| 11730099_FLT3LG    | -0.24829 | 0.000995 | 0.003804 |
| 11742031_PPIP5K1   | -0.26374 | 0.000996 | 0.003806 |
| 11757315_TAB2      | 0.219025 | 0.000996 | 0.003807 |
| 11718365_LYPLA1    | 0.187261 | 0.000996 | 0.003807 |
| 11728633_AP4E1     | 0.518238 | 0.000996 | 0.003807 |
| 11724845_NR2C2AP   | -0.33849 | 0.000996 | 0.003807 |
| 11749406_TMEM54    | -0.25442 | 0.000997 | 0.003809 |
| 11744089_SH2B2     | -0.21439 | 0.000999 | 0.003814 |
| 11727552_FZD2      | -0.26544 | 0.000999 | 0.003817 |
| 11728444_TAOK1     | -0.30104 | 0.001    | 0.003818 |
| 11764006_TXNL1     | 0.178842 | 0.001    | 0.00382  |
| 11752302_LAMB3     | 0.272205 | 0.001    | 0.00382  |
| 11736919_ATAD5     | -0.27083 | 0.001001 | 0.00382  |

|                    |          |          |          |
|--------------------|----------|----------|----------|
| 11752870_LRRCC1    | -0.35966 | 0.001002 | 0.003826 |
| 11754157_JMJD8     | -0.37212 | 0.001003 | 0.003829 |
| 11717545_MRPS5     | -0.20395 | 0.001003 | 0.00383  |
| 11760814_KANK3     | 0.209382 | 0.001003 | 0.00383  |
| 11759037_IL6ST     | 0.227208 | 0.001004 | 0.003833 |
| 11715717_MSN       | -0.17744 | 0.001004 | 0.003833 |
| 11723860_MPP6      | 0.186004 | 0.001005 | 0.003835 |
| 11752366_RABEP2    | -0.43269 | 0.001005 | 0.003836 |
| 11748552_STX5      | -0.23249 | 0.001006 | 0.003837 |
| 11757181_FGFR4     | -0.30967 | 0.001006 | 0.003837 |
| 11763326_FER       | -0.22897 | 0.001006 | 0.003837 |
| 11752385_NGEF      | -0.25448 | 0.001006 | 0.003838 |
| 11732994_RGS4      | 0.342738 | 0.001006 | 0.003839 |
| 11723814_ARHGAP29  | -0.19028 | 0.001007 | 0.003841 |
| 11747452_ABLIM1    | 0.335352 | 0.001008 | 0.003843 |
| 11726384_FRY       | -0.20404 | 0.001008 | 0.003845 |
| 11718372_NRBF2     | 0.201306 | 0.00101  | 0.003851 |
| 11728141_SHISA2    | -0.17949 | 0.00101  | 0.003851 |
| 11740841_NFIA      | 0.252697 | 0.001012 | 0.003857 |
| 11735137_WIP12     | 0.220441 | 0.001012 | 0.003857 |
| 11719592_GLTP      | 0.205683 | 0.001012 | 0.003857 |
| 11755779_ADAMTS20  | 0.36872  | 0.001013 | 0.00386  |
| 11746363_SYNGR2    | 0.207988 | 0.001014 | 0.003863 |
| 11742904_BAG2      | 0.276327 | 0.001014 | 0.003863 |
| 11763853_FAAP20    | -0.56207 | 0.001014 | 0.003866 |
| 11741784_BCAS4     | -0.2303  | 0.001015 | 0.003866 |
| 11725845_SREK1IP1  | 0.211977 | 0.001015 | 0.003866 |
| 11763451_SSU72     | -0.20253 | 0.001015 | 0.003867 |
| 11726624_CCNG2     | -0.1985  | 0.001015 | 0.003868 |
| 11746220_ATG4D     | -0.36762 | 0.001016 | 0.003872 |
| 11749876_LAMP2     | -0.32344 | 0.001017 | 0.003873 |
| 11742798_CLCN3     | 0.222082 | 0.001017 | 0.003874 |
| 11746440_GLO1      | -0.21628 | 0.001018 | 0.003879 |
| 11730080_IFNLR1    | -0.32572 | 0.001019 | 0.00388  |
| 11715610_ARPC1A    | 0.219367 | 0.001019 | 0.003881 |
| 11733512_MTMR1     | 0.1987   | 0.00102  | 0.003882 |
| 11733282_KRBOX4 // | 0.257141 | 0.00102  | 0.003882 |
| 11758802_ENY2      | 0.262258 | 0.00102  | 0.003883 |
| 11753116_SOX10     | -0.2401  | 0.00102  | 0.003884 |
| 11716511_SRRM2     | -0.22587 | 0.00102  | 0.003884 |
| 11743817_Tead1     | 0.239322 | 0.001021 | 0.003886 |
| 11742330_OR9K2     | -0.29069 | 0.001021 | 0.003887 |
| 11722729_METTL23   | -0.17848 | 0.001023 | 0.003893 |
| 11743553_KIN       | 0.251673 | 0.001023 | 0.003893 |
| 11745933_EIF4E2    | 0.200926 | 0.001023 | 0.003893 |
| 11718767_PRSS23    | 0.234434 | 0.001023 | 0.003893 |
| 11743370_PPP1R2    | 0.233724 | 0.001024 | 0.003895 |
| 11747680_THRA      | -0.33779 | 0.001024 | 0.003896 |
| 11715482_MCL1      | -0.22056 | 0.001024 | 0.003897 |
| 11736953_SETDB2    | 0.586534 | 0.001025 | 0.003897 |
| 11732195_KPNA4     | 0.174733 | 0.001025 | 0.003898 |

|                   |          |          |          |
|-------------------|----------|----------|----------|
| 11718832_LOXL2    | 0.195215 | 0.001026 | 0.0039   |
| 11755446_ANKH /// | 0.17604  | 0.001026 | 0.003902 |
| 11725183_KLF12    | -0.19232 | 0.001026 | 0.003902 |
| 11727787_CACYBP   | -0.31442 | 0.001027 | 0.003903 |
| 11723073_BCL9L    | 0.227898 | 0.001027 | 0.003903 |
| 11718700_C6orf89  | -0.35757 | 0.001028 | 0.003908 |
| 11716405_HTRA1    | -0.2165  | 0.001029 | 0.00391  |
| 11716027_SELT     | 0.214424 | 0.001029 | 0.003912 |
| 11721308_PHLDA1   | 0.19337  | 0.001029 | 0.003912 |
| 11748770_PMPCA    | 0.188076 | 0.00103  | 0.003915 |
| 11742039_PTK7     | -0.24385 | 0.001031 | 0.003919 |
| 11730055_NPC1L1   | -0.18741 | 0.001032 | 0.00392  |
| 11726174_SAMD5    | 0.224676 | 0.001032 | 0.00392  |
| 11729735_SPECC1   | 0.264743 | 0.001032 | 0.003922 |
| 11718040_SNRPE    | -0.1807  | 0.001033 | 0.003924 |
| 11717104_GRHPR    | 0.200763 | 0.001033 | 0.003925 |
| 11728391_LRP12    | 0.230187 | 0.001035 | 0.003929 |
| 11753127_ARNTL    | 0.560151 | 0.001035 | 0.003931 |
| 11756651_TAF12    | -0.22261 | 0.001035 | 0.003931 |
| 11716579_CYSTM1   | 0.194582 | 0.001036 | 0.003933 |
| 11750044_NFS1     | -0.22406 | 0.001038 | 0.00394  |
| 11758617_TRMT10B  | 0.266598 | 0.001039 | 0.003943 |
| 11730287_ARHGAP5  | -0.23362 | 0.001039 | 0.003945 |
| 11743441_PDIA3    | 0.179191 | 0.001039 | 0.003945 |
| 11718323_ACAP2    | 0.426857 | 0.00104  | 0.003946 |
| 11736507_FRMD6    | 0.207481 | 0.001041 | 0.003949 |
| 11733139_ARL4A    | 0.281695 | 0.001041 | 0.003949 |
| 11757404_ID3      | -0.20452 | 0.001041 | 0.00395  |
| 11740347_NRG1     | 0.282231 | 0.001042 | 0.003954 |
| 11746915_ACAD8    | 0.20958  | 0.001043 | 0.003955 |
| 11754710_ZNF185   | -0.27679 | 0.001043 | 0.003955 |
| 11736996_PPT2     | -0.21577 | 0.001043 | 0.003955 |
| 11719086_SMARCC2  | -0.22484 | 0.001043 | 0.003956 |
| 11749409_DMKN     | 0.392948 | 0.001044 | 0.003961 |
| 11741793_FUOM     | -0.31541 | 0.001044 | 0.003961 |
| 11728509_FKTN     | 0.353752 | 0.001044 | 0.003961 |
| 11735107_CENPO    | -0.22283 | 0.001045 | 0.003961 |
| 11744690_ARMC10   | 0.221739 | 0.001046 | 0.003965 |
| 11754632_THAP8    | -0.25147 | 0.001046 | 0.003968 |
| 11715736_CASC3    | -0.19453 | 0.001047 | 0.003971 |
| 11730451_SDHAF4   | -0.19899 | 0.001049 | 0.003975 |
| 11748206_ZSWIM4   | 0.262285 | 0.001049 | 0.003977 |
| 11728804_NAA16    | 0.372187 | 0.001049 | 0.003977 |
| 11755678_ZNF257   | 0.213162 | 0.00105  | 0.003978 |
| 11752328_IGF1R    | 0.390888 | 0.00105  | 0.003978 |
| 11743758_ACO1     | 0.185919 | 0.001052 | 0.003985 |
| 11722967_ZDHHHC8  | -0.25161 | 0.001052 | 0.003986 |
| 11731658_TRAMIL1  | -0.35376 | 0.001054 | 0.003992 |
| 11730873_RASSF5   | -0.28908 | 0.001054 | 0.003993 |
| 11726593_PIGH     | 0.359797 | 0.001055 | 0.003997 |
| 11715694_COX7B    | -0.17869 | 0.001056 | 0.003999 |

|                    |          |          |          |
|--------------------|----------|----------|----------|
| 11759384_DEFB128   | -0.22808 | 0.001056 | 0.004    |
| 11762418_SCAND2P   | 0.182943 | 0.001056 | 0.004001 |
| 11741216_APP       | 0.201075 | 0.001056 | 0.004001 |
| 11717483_PDHA1     | -0.18607 | 0.001057 | 0.004001 |
| 11733697_CTAG1A // | -0.22398 | 0.001057 | 0.004002 |
| 11753390_RAB7A     | 0.178962 | 0.001057 | 0.004002 |
| 11728909_B3GLCT    | -0.22938 | 0.001057 | 0.004003 |
| 11715593_YWHAH     | -0.21512 | 0.001057 | 0.004003 |
| 11749659_HSPH1     | 0.172253 | 0.001058 | 0.004003 |
| 11717781_DHX35     | -0.24826 | 0.001058 | 0.004003 |
| 11754638_USP30     | -0.31172 | 0.001058 | 0.004006 |
| 11732255_ZBTB33    | 0.178537 | 0.001059 | 0.004009 |
| 11723033_NOV       | -0.24769 | 0.00106  | 0.004009 |
| 11756531_MEF2C     | 0.444925 | 0.00106  | 0.004009 |
| 11757355_RPL41     | -0.17325 | 0.00106  | 0.004009 |
| 11746504_ICA1      | 0.35071  | 0.00106  | 0.004011 |
| 11743781_XRN1      | -0.18756 | 0.00106  | 0.004011 |
| 11760313_CLK4      | 0.299245 | 0.001061 | 0.004014 |
| 11757808_RERE      | -0.18593 | 0.001062 | 0.004015 |
| 11750091_TPRKB     | -0.35009 | 0.001062 | 0.004015 |
| 11735217_ELF2      | 0.218013 | 0.001063 | 0.004019 |
| 11730193_SEC14L2   | 0.327434 | 0.001063 | 0.004019 |
| 11729790_CUZD1 /// | 0.356379 | 0.001063 | 0.004019 |
| 11729184_RPAP3     | -0.2112  | 0.001063 | 0.00402  |
| 11717879_PPFIA1    | 0.179499 | 0.001064 | 0.004022 |
| 11754151_STXBP5    | 0.275584 | 0.001065 | 0.004026 |
| 11747127_RPRD1B    | 0.495656 | 0.001066 | 0.004029 |
| 11733017_PIK3R1    | 0.266238 | 0.001066 | 0.00403  |
| 11746759_HSD52     | 0.194118 | 0.001066 | 0.00403  |
| 11757854_PLEKHA5   | 0.240617 | 0.001068 | 0.004034 |
| 11756875_COMMD6    | 0.199075 | 0.001069 | 0.004038 |
| 11719801_C6orf62   | -0.23657 | 0.001069 | 0.004038 |
| 11725891_ABHD14A-A | -0.19006 | 0.001069 | 0.004041 |
| 11724428_ZNF337    | 0.248768 | 0.001071 | 0.004045 |
| 11735936_IFNK      | 0.300155 | 0.001071 | 0.004046 |
| 11726359_KMT2E     | 0.173114 | 0.001072 | 0.004048 |
| 11746934_SPIRE1    | -0.35883 | 0.001072 | 0.004048 |
| 11730714_XRCC6     | -0.26708 | 0.001072 | 0.004048 |
| 11736554_ZNF223    | 0.220961 | 0.001072 | 0.004048 |
| 11734039_FEZ1      | 0.265742 | 0.001073 | 0.004051 |
| 11716106_TOMM22    | -0.23084 | 0.001074 | 0.004056 |
| 11758737_PGRMC2    | -0.19508 | 0.001075 | 0.004059 |
| 11739866_GPR107    | 0.184933 | 0.001076 | 0.004061 |
| 11723895_TEP1      | 0.250987 | 0.001077 | 0.004064 |
| 11744142_SARS      | 0.209983 | 0.001077 | 0.004064 |
| 11760390_CEP78     | -0.35036 | 0.001077 | 0.004065 |
| 11748391_ZDHHC16   | 0.226492 | 0.001077 | 0.004066 |
| 11760327_BPTF      | 0.18274  | 0.001078 | 0.004067 |
| 11735260_ERLIN2    | -0.27616 | 0.001078 | 0.004068 |
| 11754229_ANAPC11   | -0.21431 | 0.001078 | 0.004069 |
| 11748926_GANAB     | -0.27414 | 0.001079 | 0.00407  |

|                    |          |          |          |
|--------------------|----------|----------|----------|
| 11745879_SARAF     | 0.206055 | 0.001079 | 0.004071 |
| 11757458_LRRC8A    | -0.2708  | 0.001079 | 0.004071 |
| 11751019_FBXL20    | -0.20229 | 0.001079 | 0.004072 |
| 11721013_WTAP      | 0.21049  | 0.00108  | 0.004072 |
| 11754553_LRRC41    | -0.23669 | 0.00108  | 0.004075 |
| 11720280_KCNMA1    | -0.31265 | 0.001081 | 0.004076 |
| 11720132_SPIRE1    | -0.46334 | 0.001081 | 0.004078 |
| 11756299_SNRPA     | -0.20942 | 0.001081 | 0.004078 |
| 11753935_ATP6V1G3  | 0.405255 | 0.001082 | 0.004078 |
| 11749772_C6orf118  | 0.197502 | 0.001082 | 0.004078 |
| 11753530_CLTA      | 0.173928 | 0.001083 | 0.004081 |
| 11755065_ITGB3     | 0.241671 | 0.001083 | 0.004081 |
| 11715926_PLEC      | 0.196617 | 0.001083 | 0.004081 |
| 200072_PMHNRNPM    | -0.19328 | 0.001083 | 0.004081 |
| 11740157_SH2D1B    | 0.236937 | 0.001084 | 0.004086 |
| 11750729_PARN      | -0.4169  | 0.001085 | 0.004087 |
| 11741959_IL6R      | 0.380692 | 0.001086 | 0.004092 |
| 11717531_UBA2      | -0.24985 | 0.001086 | 0.004092 |
| 11762048_EZH2      | -0.20674 | 0.001086 | 0.004093 |
| 11748107_UBP1      | 0.307643 | 0.001088 | 0.004098 |
| 11755167_LINC00847 | -0.20584 | 0.001089 | 0.004101 |
| 11745563_DNAJC4    | -0.3012  | 0.001089 | 0.004101 |
| 11733936_PAIP1     | -0.21846 | 0.001089 | 0.004101 |
| 11716729 EMC3      | 0.174678 | 0.001089 | 0.004103 |
| 11750695_RECQL     | -0.21137 | 0.00109  | 0.004105 |
| 11716709_DDR1      | -0.21487 | 0.00109  | 0.004106 |
| 11726257_RNF141    | -0.44288 | 0.00109  | 0.004106 |
| 11718228_R3HDM4    | 0.237185 | 0.00109  | 0.004106 |
| 11724108_FAM58A    | -0.26841 | 0.001091 | 0.004106 |
| 11725246_SDK1      | 0.449873 | 0.001091 | 0.004108 |
| 11747592_ERI3      | -0.22951 | 0.001093 | 0.004113 |
| 11758673_SORD      | -0.18321 | 0.001093 | 0.004113 |
| 11731907_FBXO11    | -0.76399 | 0.001093 | 0.004114 |
| 11736600_DLG3      | -0.28494 | 0.001094 | 0.004118 |
| 11716165_MGST3     | -0.20576 | 0.001094 | 0.004118 |
| 11750913_ME1       | 0.217706 | 0.001095 | 0.00412  |
| 11743631_ALMS1     | -0.22691 | 0.001096 | 0.004122 |
| 11749894_DCK       | -0.24967 | 0.001096 | 0.004125 |
| 11762480_SP140     | 0.276045 | 0.001097 | 0.004126 |
| 11729228_GRK5      | 0.394999 | 0.001098 | 0.00413  |
| 11754878_UBAP1     | 0.185205 | 0.001098 | 0.004131 |
| 11756994_GNB2      | -0.22667 | 0.001098 | 0.004131 |
| 11727179_MTHFR     | 0.272721 | 0.001099 | 0.004132 |
| 11754303_RAD21     | -0.32021 | 0.001099 | 0.004133 |
| 11726401_ALG9      | 0.378718 | 0.0011   | 0.004135 |
| 11724535_UBA5      | 0.200461 | 0.0011   | 0.004135 |
| 11718969_DDX6      | -0.24959 | 0.0011   | 0.004135 |
| 11760798_CIB2      | -0.21852 | 0.0011   | 0.004136 |
| 11726711_PFAS      | -0.17997 | 0.001101 | 0.004138 |
| 11718406_TMBIM6    | 0.18778  | 0.001101 | 0.004139 |
| 11756987_TWF2      | -0.2516  | 0.001103 | 0.004146 |

|                   |          |          |          |
|-------------------|----------|----------|----------|
| 11742703_C17orf89 | 0.185558 | 0.001103 | 0.004146 |
| 11724332_C6orf226 | -0.24818 | 0.001104 | 0.004148 |
| 11727622_VIT      | 0.300327 | 0.001104 | 0.004148 |
| 11754477_GNL1     | -0.25604 | 0.001105 | 0.00415  |
| 11735773_TRIM48   | -0.32712 | 0.001105 | 0.00415  |
| 11753092_YWHAE    | -0.20286 | 0.001105 | 0.00415  |
| 11754098_AGO2     | 0.182038 | 0.001106 | 0.004154 |
| 11724223_YIPF4    | 0.22488  | 0.001106 | 0.004155 |
| 11761311_IFT20    | 0.411791 | 0.001107 | 0.004159 |
| 11763230_FBXO11   | 0.264521 | 0.001108 | 0.004162 |
| 11746340_NOL8     | 0.256925 | 0.00111  | 0.004167 |
| 11717320_OAF      | -0.21177 | 0.00111  | 0.004168 |
| 11745512_ANO3     | 0.447351 | 0.00111  | 0.004168 |
| 11718963_NUFIP2   | -0.1989  | 0.001111 | 0.004173 |
| 11725983_BHLHE40  | 0.368819 | 0.001112 | 0.004173 |
| 11750259_ATXN2L   | -0.2289  | 0.001112 | 0.004174 |
| 11736849_FSD1L    | 0.40857  | 0.001112 | 0.004174 |
| 11740780_FOXD2    | -0.24875 | 0.001112 | 0.004175 |
| 11729527_POMT2    | -0.28356 | 0.001113 | 0.004175 |
| 11761473_SPATA41  | -0.3273  | 0.001113 | 0.004175 |
| 11735476_PALM2    | 0.419939 | 0.001114 | 0.004179 |
| 11717030_PACS1    | -0.2596  | 0.001115 | 0.004182 |
| 11746199_METTL9   | -0.17409 | 0.001115 | 0.004182 |
| 11735681_CD46     | 0.239703 | 0.001115 | 0.004185 |
| 11746587_TMEM9B   | 0.25846  | 0.001116 | 0.004185 |
| 11756655_MCAT     | -0.25146 | 0.001116 | 0.004186 |
| 11744993_SIRT7    | 0.207548 | 0.001117 | 0.004189 |
| 11751668_AGPAT1   | -0.21734 | 0.001117 | 0.004189 |
| 11717259_STX5     | -0.18007 | 0.001118 | 0.004192 |
| 11721494_WDR33    | -0.27021 | 0.00112  | 0.004199 |
| 11752497_MEF2D    | 0.40578  | 0.001121 | 0.004201 |
| 11717923_YAP1     | -0.1729  | 0.001122 | 0.004205 |
| 11750095_FAM65C   | -0.2559  | 0.001122 | 0.004205 |
| 11730808_FPGT     | -0.20671 | 0.001122 | 0.004205 |
| 11743476_SLC25A13 | 0.360405 | 0.001122 | 0.004206 |
| 11720123_GIGYF1   | -0.2439  | 0.001122 | 0.004207 |
| 11715448_ERGIC3   | 0.202404 | 0.001123 | 0.004208 |
| 11728403_SHCBP1   | -0.1949  | 0.001124 | 0.004213 |
| 11745258_RBM14    | -0.19875 | 0.001126 | 0.00422  |
| 11754734_ATP6V1C2 | -0.18383 | 0.001127 | 0.004222 |
| 11735394_XCL1 /// | 0.260058 | 0.001127 | 0.004223 |
| 11755613_FERMT1   | -0.18486 | 0.001129 | 0.004228 |
| 11734670_KPNA1    | -0.35777 | 0.00113  | 0.004232 |
| 11726890_MAPKAP1  | -0.18352 | 0.00113  | 0.004233 |
| 11746447_FAM76B   | 0.22878  | 0.00113  | 0.004233 |
| 11719879_UBXN2B   | 0.538881 | 0.001131 | 0.004234 |
| 11725252_FAM120C  | -0.29186 | 0.001131 | 0.004234 |
| 11752636_TRPC4AP  | 0.213775 | 0.001131 | 0.004234 |
| 11763280_TMEM136  | 0.370298 | 0.001131 | 0.004234 |
| 11747565_PPP2R4   | -0.27601 | 0.001131 | 0.004234 |
| 11728198_ALG1     | 0.200289 | 0.001131 | 0.004236 |



|                   |          |          |          |
|-------------------|----------|----------|----------|
| 11736732_DPY19L3  | 0.378328 | 0.001132 | 0.004236 |
| 11730730_PTRF     | -0.19804 | 0.001132 | 0.004237 |
| 11751013_GLRB     | 0.255108 | 0.001132 | 0.004238 |
| 11745505_ITSN1    | -0.20833 | 0.001133 | 0.004239 |
| 11737498_SLC25A53 | -0.21174 | 0.001133 | 0.00424  |
| 11733120_SLC35B4  | 0.261272 | 0.001134 | 0.004244 |
| 11750837_SCYL3    | 0.249551 | 0.001136 | 0.004252 |
| 11757766_MAP1B    | 0.23672  | 0.001138 | 0.004256 |
| 11747305_CD1E     | -0.19632 | 0.001138 | 0.004257 |
| 11763805_LSM14B   | -0.32625 | 0.001138 | 0.004258 |
| 11727556_GRHL1    | 0.32334  | 0.001138 | 0.004258 |
| 11723698_OAS2 /// | -0.33148 | 0.001139 | 0.004258 |
| 11716409_PKDCC    | -0.20008 | 0.001139 | 0.004261 |
| 11728532_FCER1A   | -0.24783 | 0.00114  | 0.004263 |
| 11725489_ATG14    | 0.2295   | 0.00114  | 0.004264 |
| 11762384_GOLGA4   | 0.372157 | 0.001141 | 0.004267 |
| 11719436_ZNF746   | 0.269918 | 0.001143 | 0.004273 |
| 11734483_TADA2A   | -0.1881  | 0.001143 | 0.004273 |
| 11737224_MAS1     | 0.198703 | 0.001144 | 0.004275 |
| 11755428_POLK     | 0.27429  | 0.001145 | 0.004278 |
| 11761685_IST1     | 0.268504 | 0.001145 | 0.004281 |
| 11743063_PLAUR    | 0.234281 | 0.001147 | 0.004286 |
| 11747364_CYB561A3 | -0.19675 | 0.001147 | 0.004287 |
| 11720195_CLPB     | -0.28202 | 0.001147 | 0.004288 |
| 11759061_SIK2     | -0.32324 | 0.001149 | 0.004292 |
| 11726276_SNN      | -0.40894 | 0.001149 | 0.004295 |
| 11750201_FLJ10038 | -0.41754 | 0.00115  | 0.004295 |
| 11764037_DNAJA1   | 0.195256 | 0.00115  | 0.004298 |
| 11726911_MCC      | 0.343607 | 0.001152 | 0.004301 |
| 11722444_ELP5     | -0.19405 | 0.001153 | 0.004305 |
| 11742892_PSMA4    | -0.17717 | 0.001153 | 0.004305 |
| 11724025_TRIM13   | 0.244109 | 0.001154 | 0.004308 |
| 11727302_TMEM71   | 0.635923 | 0.001154 | 0.004308 |
| 11741914_ISM2     | 0.227626 | 0.001154 | 0.004308 |
| 11752356_ABCC4    | 0.321805 | 0.001154 | 0.004308 |
| 11754718_CCDC47   | 0.215726 | 0.001154 | 0.004309 |
| 11720759_IVNS1ABP | 0.312653 | 0.001154 | 0.004309 |
| 11754888_ADSSL1   | 0.422181 | 0.001156 | 0.004314 |
| 11738077_ATP6VOA4 | 0.39833  | 0.001156 | 0.004314 |
| 11761992_KDM4B    | -0.23879 | 0.001156 | 0.004315 |
| 11737337_ZNF527   | 0.296756 | 0.001156 | 0.004315 |
| 11758949_ASXL2    | 0.255197 | 0.001157 | 0.004316 |
| 11739905_ZNF583   | 0.298574 | 0.001157 | 0.004316 |
| 11755296_PSAP     | 0.18744  | 0.001157 | 0.004316 |
| 11756653_FGF1     | 0.227431 | 0.001157 | 0.004317 |
| 11757681_RNASEH2C | -0.20605 | 0.001158 | 0.004318 |
| 11759513_LZIC     | -0.30133 | 0.001158 | 0.004319 |
| 200047_PMY1       | 0.187273 | 0.001159 | 0.004321 |
| 11732505_TP73-AS1 | -0.25225 | 0.001159 | 0.004321 |
| 11720617_TRIM9    | 0.222149 | 0.001161 | 0.004328 |
| 11741358_PTPN4    | 0.272768 | 0.001161 | 0.004328 |

|                    |          |          |          |
|--------------------|----------|----------|----------|
| 11749713_KBTBD6    | -0.36322 | 0.001161 | 0.004328 |
| 11718086_SHKBP1    | -0.38851 | 0.001162 | 0.004332 |
| 11733465_XDH       | 0.237203 | 0.001162 | 0.004333 |
| 11741304_NRG1      | 0.339651 | 0.001162 | 0.004333 |
| 11744270_SNRPA     | -0.25248 | 0.001163 | 0.004335 |
| 11721043_ERI1      | 0.193882 | 0.001164 | 0.004337 |
| 11741783_BNIP1     | -0.19595 | 0.001164 | 0.004339 |
| 11756311_PPT2      | -0.19719 | 0.001164 | 0.004339 |
| 11752117_ACAD11 // | -0.26537 | 0.001165 | 0.004341 |
| 11735695_ARF5      | -0.19108 | 0.001165 | 0.004343 |
| 11720136_ATP13A3   | 0.191586 | 0.001166 | 0.004346 |
| 11722124_RNF219    | -0.23566 | 0.001167 | 0.004348 |
| 11732735_CHSY3     | -0.54812 | 0.001167 | 0.004348 |
| 11741679_SERPINE2  | 0.207189 | 0.001168 | 0.004352 |
| 11728521_ART3      | -0.18293 | 0.001169 | 0.004353 |
| 11717802_ATF5      | -0.29109 | 0.00117  | 0.004357 |
| 11723590_TTC13     | 0.243317 | 0.00117  | 0.004357 |
| 11752162_IQSEC3    | -0.39537 | 0.001171 | 0.00436  |
| 11744135_MIB2      | 0.244313 | 0.001171 | 0.004362 |
| 11722697_SFI1      | -0.28941 | 0.001172 | 0.004363 |
| 11758036_TDG       | 0.193035 | 0.001172 | 0.004365 |
| 11727778_GNAI3     | 0.193567 | 0.001172 | 0.004365 |
| 11722437_GOSR2     | 0.32046  | 0.001172 | 0.004365 |
| 11743035_DDX1      | 0.180917 | 0.001173 | 0.004365 |
| 11721219_CPS1      | 0.32642  | 0.001174 | 0.004368 |
| 11725892_PLEKHH1   | 0.409176 | 0.001174 | 0.004369 |
| 11723793_OSBP11    | 0.177499 | 0.001174 | 0.004369 |
| 11733232_HPS1      | -0.18628 | 0.001174 | 0.004369 |
| 11733986_TUBA3E    | -0.24042 | 0.001175 | 0.004372 |
| 11749427_MTM1      | 0.248547 | 0.001175 | 0.004372 |
| 11763689_FMNL1     | -0.23699 | 0.001175 | 0.004372 |
| 11756108_CHAF1B    | -0.21912 | 0.001176 | 0.004374 |
| 11741636_OR2W3 /// | 0.447836 | 0.001176 | 0.004374 |
| 11717556_POM121 // | -0.22966 | 0.001176 | 0.004375 |
| 11727717_ZBTB42    | -0.46661 | 0.001176 | 0.004375 |
| 11721340_NCOA1     | 0.324904 | 0.001178 | 0.004381 |
| 11738272_PSMG4     | -0.17707 | 0.001179 | 0.004385 |
| 11739631_RPGR      | 0.316105 | 0.00118  | 0.004386 |
| 11726646_CDHR5     | -0.18875 | 0.00118  | 0.004387 |
| 11727671_SYT17     | -0.22022 | 0.00118  | 0.004388 |
| 11725344_VPS37A    | -0.2182  | 0.001181 | 0.004389 |
| 11723508_ZNF609    | 0.487164 | 0.001181 | 0.004389 |
| 11716116_NDUFS6    | -0.19046 | 0.001181 | 0.004391 |
| 11724140_CRIPAK    | -0.22189 | 0.001182 | 0.004392 |
| 11743856_CTHRC1    | 0.194316 | 0.001182 | 0.004394 |
| 11757152_SNORA18 / | -0.17009 | 0.001183 | 0.004395 |
| 11719372_NGFRAP1   | -0.21111 | 0.001183 | 0.004396 |
| 11757294_RABGGTB   | 0.205021 | 0.001183 | 0.004397 |
| 11733549_TEC /// T | 0.380148 | 0.001185 | 0.004403 |
| 11715969_EPRS      | -0.18845 | 0.001186 | 0.004404 |
| 11757511_HLA-DPA1  | -0.18843 | 0.001186 | 0.004405 |

|                    |          |          |          |
|--------------------|----------|----------|----------|
| 11763131_IGKC      | -0.28261 | 0.001186 | 0.004406 |
| 11748133_SLC2A11   | 0.236053 | 0.001186 | 0.004406 |
| 11718510_UBE2L3    | -0.45654 | 0.001186 | 0.004406 |
| 11756768_TEKT3     | 0.377401 | 0.001187 | 0.004406 |
| 11750282_DBNL      | -0.22109 | 0.001187 | 0.004406 |
| 11745408_TMEM161B  | 0.32722  | 0.001187 | 0.004406 |
| 11727968_ESCO2     | -0.28158 | 0.001187 | 0.004406 |
| 11747745_HADHB     | -0.20282 | 0.001187 | 0.004406 |
| 11756614_RNF145    | 0.17258  | 0.001187 | 0.004406 |
| 11762466_GOLGA2P10 | -0.25271 | 0.001187 | 0.004407 |
| 11730303_FANCA     | -0.21725 | 0.001188 | 0.004409 |
| 11730737_SCCPDH    | -0.19726 | 0.001188 | 0.004409 |
| 11729457_BCL6B     | -0.28451 | 0.001188 | 0.004409 |
| 11751448_DDB1      | -0.23885 | 0.001189 | 0.004412 |
| 11760501_WSB1      | -0.22596 | 0.00119  | 0.004416 |
| 11754975_USP30     | 0.183348 | 0.001191 | 0.004419 |
| 11733382_AFAP1     | 0.276761 | 0.001192 | 0.004422 |
| 11722317_PTPN13    | 0.29305  | 0.001194 | 0.004429 |
| 11752915_RYR2      | 0.525174 | 0.001194 | 0.00443  |
| 11748228_BPNT1     | -0.19581 | 0.001195 | 0.004434 |
| 11715971_PFKP      | -0.2     | 0.001196 | 0.004435 |
| 11725952_RNF10     | -0.25481 | 0.001197 | 0.004437 |
| 11715400_SLC25A5   | -0.17257 | 0.001199 | 0.004448 |
| 11724237_LAT2      | 0.268236 | 0.0012   | 0.004448 |
| 11758058_DPY19L4   | 0.178234 | 0.0012   | 0.004449 |
| 11726262_DFFA      | -0.20778 | 0.001201 | 0.004452 |
| 11758383_USP6NL    | 0.383954 | 0.001202 | 0.004454 |
| 11731996_TRIM58    | 0.187814 | 0.001202 | 0.004455 |
| 11758788_PHF5A     | -0.41258 | 0.001202 | 0.004455 |
| 11720127_ITPKC     | 0.459662 | 0.001203 | 0.004458 |
| 11726017_FAM222B   | 0.184308 | 0.001203 | 0.00446  |
| 11721467_CD276     | -0.32206 | 0.001204 | 0.00446  |
| 11717093_TCTA      | 0.193033 | 0.001204 | 0.004461 |
| 11757618_IFT43     | 0.318036 | 0.001205 | 0.004464 |
| 11749295_GPR161    | -0.37578 | 0.001205 | 0.004464 |
| 11739559_RFWD3     | -0.22611 | 0.001206 | 0.004469 |
| 11727403_GPC4      | -0.27924 | 0.001207 | 0.00447  |
| 11743583_PRELID3B  | -0.19297 | 0.001208 | 0.004473 |
| 11739591_MINA      | -0.23395 | 0.00121  | 0.00448  |
| 11742679_HNRNPA2B1 | -0.23757 | 0.001211 | 0.004485 |
| 11759223_EDF1      | -0.33819 | 0.001211 | 0.004486 |
| 11716266_UBE2A     | -0.1879  | 0.001214 | 0.004497 |
| 11752984_LOC100996 | 0.219041 | 0.001216 | 0.004504 |
| 11739899_SLC19A3   | 0.521407 | 0.001217 | 0.004504 |
| 11744826_WBSCR22   | 0.222461 | 0.001217 | 0.004505 |
| 11743006_RECQL     | -0.33527 | 0.001218 | 0.004509 |
| 11750374_RAPGEF6   | 0.209556 | 0.001219 | 0.004512 |
| 11733212_EDARADD   | -0.28418 | 0.001219 | 0.004513 |
| 11733085_ENO3      | 0.243083 | 0.001219 | 0.004513 |
| 11715584_CAV1      | 0.178051 | 0.00122  | 0.004515 |
| 11745715_CAV1      | 0.178051 | 0.00122  | 0.004515 |

|                    |          |          |          |
|--------------------|----------|----------|----------|
| 11732387_TCEANC2   | 0.211482 | 0.001221 | 0.004517 |
| 11739884_DOCK7     | 0.222566 | 0.001221 | 0.004518 |
| 11724919_HSD17B8   | -0.30969 | 0.001221 | 0.004519 |
| 11740380_DDX55     | 0.185658 | 0.001223 | 0.004523 |
| 11750414_RARA      | 0.268955 | 0.001223 | 0.004524 |
| 11726234_GIT2      | 0.27953  | 0.001224 | 0.004527 |
| 11753045_MBNL2     | 0.224437 | 0.001225 | 0.004531 |
| 11732130_EIF4E     | -0.39588 | 0.001226 | 0.004534 |
| 11753998_CD58      | 0.197656 | 0.001229 | 0.004546 |
| 11755170_DPY30 /// | 0.176212 | 0.00123  | 0.004547 |
| 11737326_SLC6A9    | -0.36265 | 0.00123  | 0.004548 |
| 11717042_GID8      | -0.28429 | 0.00123  | 0.004548 |
| 11748707_NDUFA10   | -0.22841 | 0.001232 | 0.004554 |
| 11744696_CCDC90B   | 0.274522 | 0.001234 | 0.004561 |
| 11733119_SLC35B4   | 0.251729 | 0.001234 | 0.004563 |
| 11721521_ZDHC17    | 0.528234 | 0.001235 | 0.004563 |
| 11730523_ISM1      | -0.21213 | 0.001235 | 0.004564 |
| 11742138_UBE2E3    | 0.186554 | 0.001235 | 0.004565 |
| 11724967_USP31     | 0.36736  | 0.001235 | 0.004565 |
| 11756771_SPTY2D1   | 0.222689 | 0.001235 | 0.004565 |
| 11718001_C10orf54  | 0.263354 | 0.001236 | 0.004566 |
| 11735167_RFC2      | -0.25044 | 0.001237 | 0.00457  |
| 11720503_ALDH3A2   | -0.22591 | 0.001237 | 0.00457  |
| 11759770_UCHL5     | 0.231144 | 0.001238 | 0.004571 |
| 11727158_STRBP     | 0.249235 | 0.001238 | 0.004571 |
| 11754264_KHSRP     | -0.19647 | 0.00124  | 0.00458  |
| 11728394_ANO4      | 0.343622 | 0.00124  | 0.00458  |
| 11718432_SASH1     | 0.196207 | 0.001241 | 0.004583 |
| 11725568_ATP8A1    | -0.28996 | 0.001242 | 0.004584 |
| 11720220_FBXL2     | 0.300156 | 0.001242 | 0.004584 |
| 11757624_PARP12    | 0.275701 | 0.001242 | 0.004586 |
| 11756380_TRMT112   | -0.18468 | 0.001243 | 0.004587 |
| 11722196_NMT1      | 0.200066 | 0.001243 | 0.004588 |
| 11747921_PUS1      | 0.276555 | 0.001244 | 0.004592 |
| 11734699_GOLGA8A / | 0.180418 | 0.001244 | 0.004592 |
| 11733275_PCNXL2    | 0.260578 | 0.001246 | 0.004596 |
| 11729299_SDE2      | 0.229072 | 0.001246 | 0.004597 |
| 11753791_PRKAR1A   | -0.20524 | 0.001246 | 0.004597 |
| 11723083_HEMK1     | -0.20706 | 0.001246 | 0.004597 |
| 11716107_TOMM22    | -0.18067 | 0.001247 | 0.004598 |
| 11716643_ERLEC1    | -0.18418 | 0.001248 | 0.004605 |
| 11750292_IST1      | 0.199594 | 0.001249 | 0.004606 |
| 11747272_STK26     | -0.26753 | 0.00125  | 0.00461  |
| 11728652_ZRANB2    | 0.179741 | 0.00125  | 0.004611 |
| 11717444_BYSL      | 0.231412 | 0.001251 | 0.004612 |
| 11720339_FIBIN     | -0.24073 | 0.001251 | 0.004612 |
| 11755944_KRT39     | -0.30131 | 0.001252 | 0.004615 |
| 11736436_ZNF430    | 0.253879 | 0.001252 | 0.004616 |
| 11754484_COPS7B    | -0.21784 | 0.001252 | 0.004616 |
| 11742456_PTBP1     | -0.17259 | 0.001253 | 0.004618 |
| 11719095_CYB5B     | -0.20308 | 0.001253 | 0.004619 |

|                    |          |          |          |
|--------------------|----------|----------|----------|
| 11749360_LYPLA1    | 0.184355 | 0.001253 | 0.004619 |
| 11723988_NR2F2     | -0.51681 | 0.001254 | 0.004623 |
| 11744489_C2Oorf24  | -0.19826 | 0.001256 | 0.004627 |
| 11757837_HNRNPA1   | -0.17023 | 0.001256 | 0.004627 |
| 11757832_TRA2B     | -0.1813  | 0.001256 | 0.004629 |
| 11725944_STT3A     | -0.19387 | 0.001257 | 0.00463  |
| 11752820_PID1      | 0.421682 | 0.001258 | 0.004634 |
| 11731709_TMEM5     | 0.177332 | 0.001258 | 0.004635 |
| 11752459_TMEM5     | 0.177332 | 0.001258 | 0.004635 |
| 11749498_NFIB      | -0.20424 | 0.001258 | 0.004635 |
| 11730903_JDP2      | -0.2549  | 0.001259 | 0.004635 |
| 11759580_SYNCRIP   | -0.68193 | 0.00126  | 0.004639 |
| 11722534_RPRM      | -0.2079  | 0.00126  | 0.00464  |
| 11722031_RNF11     | 0.26965  | 0.00126  | 0.004641 |
| 11756996_CFLAR     | 0.31674  | 0.00126  | 0.004641 |
| 11720180_DDX28     | -0.20389 | 0.001261 | 0.004641 |
| 11743805_MRPL42    | -0.31252 | 0.001261 | 0.004642 |
| 11722546_DHRS11    | -0.25563 | 0.001261 | 0.004642 |
| 11744921_SLC43A1   | -0.28981 | 0.001262 | 0.004644 |
| 11717219_NFIB      | -0.24075 | 0.001262 | 0.004644 |
| 11746383_ZNF131    | 0.256791 | 0.001262 | 0.004645 |
| 11758700_SMC3      | -0.22226 | 0.001263 | 0.004647 |
| 11757102_BOP1      | -0.19224 | 0.001263 | 0.004649 |
| 11719846_TFPT      | 0.258966 | 0.001263 | 0.004649 |
| 11722547_HIVEP1    | 0.587437 | 0.001264 | 0.004649 |
| 11739437_PPTC7     | 0.216855 | 0.001264 | 0.004651 |
| 11748930_PGAM5     | -0.19949 | 0.001265 | 0.004653 |
| 11749481_TRIM35    | 0.344927 | 0.001266 | 0.004655 |
| 11754116_S100B     | 0.220581 | 0.001266 | 0.004656 |
| 11720961_NBAS      | 0.21277  | 0.001266 | 0.004656 |
| 11732345_ZNF33A    | -0.25507 | 0.001267 | 0.004658 |
| 11744395_CALCO2    | -0.19928 | 0.001267 | 0.004659 |
| 11762801_ZNF496    | -0.29922 | 0.001267 | 0.004659 |
| 11736146_LYRM2     | 0.220036 | 0.001268 | 0.004664 |
| 11753857_NF2       | 0.412142 | 0.00127  | 0.004667 |
| 11745197_BOLA2 /// | 0.201528 | 0.00127  | 0.004667 |
| 11717804_NTN4      | 0.351516 | 0.00127  | 0.004668 |
| 11744323_PWWP2A    | 0.202622 | 0.00127  | 0.004668 |
| 11743633_STX2      | -0.19963 | 0.00127  | 0.004668 |
| 11722149_YTHDC2    | 0.433914 | 0.001271 | 0.004671 |
| 11756509_BAMBI     | 0.206059 | 0.001272 | 0.004674 |
| 11743039_CRTAP     | -0.2913  | 0.001273 | 0.004677 |
| 11728471_PLPPR5    | -0.24486 | 0.001273 | 0.004677 |
| 11718303_PAFAH1B3  | -0.17515 | 0.001273 | 0.004677 |
| 11758664_RHOBTB3   | 0.241987 | 0.001273 | 0.004677 |
| 11720587_SMCHD1    | 0.23714  | 0.001273 | 0.004677 |
| 11743946_CCDC15    | -0.36646 | 0.001274 | 0.004679 |
| 11744067_SYNGR2    | 0.19745  | 0.001274 | 0.004681 |
| 11734915_ARHGAP11A | -0.51162 | 0.001275 | 0.004683 |
| 11719411_RAB32     | 0.216749 | 0.001276 | 0.004685 |
| 11721716_ATRX      | 0.268724 | 0.001276 | 0.004685 |

|                    |          |          |          |
|--------------------|----------|----------|----------|
| 11745968_BCLAF1    | -0.38882 | 0.001276 | 0.004686 |
| 11725854_VWA8      | 0.213798 | 0.001278 | 0.004691 |
| 11722249_C10orf11  | 0.308816 | 0.001278 | 0.004691 |
| 11725886_LCAT      | 0.213984 | 0.001278 | 0.004693 |
| 11739489_ATP10D    | 0.232391 | 0.001279 | 0.004695 |
| 11755994_ITLN2     | 0.300337 | 0.00128  | 0.004697 |
| 11746186_LTBP4     | -0.17316 | 0.00128  | 0.004699 |
| 11739065_GNG12     | 0.190125 | 0.001281 | 0.004702 |
| 11755683_TNFRSF8   | -0.24614 | 0.001282 | 0.004703 |
| 11742118_NEIL2     | -0.43847 | 0.001282 | 0.004705 |
| 11761390_ANKRD10   | -0.18397 | 0.001282 | 0.004705 |
| 11762436_PCDHA2 // | -0.22735 | 0.001283 | 0.004707 |
| 11718635_KIF1B     | -0.19225 | 0.001284 | 0.00471  |
| 11740041_ATP10A    | -0.37637 | 0.001284 | 0.004711 |
| 11731678_FAM20C    | -0.31273 | 0.001286 | 0.004716 |
| 11744159_VPS33A    | 0.213618 | 0.001286 | 0.004716 |
| 11754440_GAS6      | 0.250279 | 0.001286 | 0.004716 |
| 11748721_LONP1     | -0.19446 | 0.001286 | 0.004717 |
| 11744775_BZW1      | 0.166585 | 0.001287 | 0.00472  |
| 11734802_TMEM159   | 0.38642  | 0.001288 | 0.004721 |
| 11749020_SASH1     | 0.254594 | 0.001289 | 0.004726 |
| 11719841_PHLDA3    | 0.238592 | 0.001289 | 0.004727 |
| 11717388_SEPT11    | -0.1815  | 0.00129  | 0.004728 |
| 11763531_METTL15   | 0.448582 | 0.00129  | 0.004728 |
| 11721214_TMEM106B  | -0.18649 | 0.00129  | 0.004728 |
| 11758387_ZNF613    | 0.310128 | 0.00129  | 0.004729 |
| 11739702_ISG20L2   | 0.196812 | 0.001291 | 0.004731 |
| 11727387_NPY1R     | -0.38644 | 0.001291 | 0.004732 |
| 11754664_RAP2C     | 0.176616 | 0.001291 | 0.004732 |
| 11756098_SYTL5     | 0.188697 | 0.001292 | 0.004734 |
| 11753058_UGGT2     | 0.215955 | 0.001292 | 0.004734 |
| 11749282_MAGEA2 // | -0.18086 | 0.001293 | 0.004736 |
| 11744936_LINGO2    | 0.172306 | 0.001294 | 0.004738 |
| 11719897_FAM91A1   | -0.35296 | 0.001295 | 0.004741 |
| 11721852_NCAPH     | -0.25544 | 0.001295 | 0.004743 |
| 11739912_TSEN15    | -0.1758  | 0.001295 | 0.004743 |
| 11735247_DUSP19    | -0.32893 | 0.001296 | 0.004744 |
| 11716229_TMEM167B  | 0.230754 | 0.001296 | 0.004744 |
| 11753977_YDJC      | -0.16631 | 0.001296 | 0.004747 |
| 11730187_IDH3B     | -0.2076  | 0.001297 | 0.004748 |
| 11722835_KPTN      | -0.17613 | 0.001297 | 0.004749 |
| 11756089_MSR1      | 0.364384 | 0.001298 | 0.00475  |
| 11715451_COL4A2    | 0.193062 | 0.001298 | 0.00475  |
| 11719877_TRPT1     | -0.2389  | 0.001298 | 0.00475  |
| 11731417_NDUFS1    | -0.18809 | 0.001298 | 0.004751 |
| 11760729_DTWD1     | 0.310804 | 0.001299 | 0.004753 |
| 11751560_ROBO1     | 0.218298 | 0.001299 | 0.004753 |
| 11727091_ING2      | -0.18467 | 0.0013   | 0.004756 |
| 11749671_NPAS2     | 0.264487 | 0.0013   | 0.004757 |
| 11734707_SMIM15    | 0.173487 | 0.001301 | 0.004758 |
| 11733837_VTI1B     | 0.18443  | 0.001301 | 0.004758 |

|                    |          |          |          |
|--------------------|----------|----------|----------|
| 11736356_MDN1      | 0.342326 | 0.001301 | 0.004759 |
| 11715607_PP1B      | 0.170891 | 0.001301 | 0.004759 |
| 11738299_HUS1B     | 0.343698 | 0.001301 | 0.004759 |
| 11732278_FOXP1     | 0.309302 | 0.001302 | 0.00476  |
| 11728125_GZMH      | -0.28722 | 0.001302 | 0.004762 |
| 11724112_SIX1      | -0.27241 | 0.001303 | 0.004765 |
| 11729801_EIF1AD    | 0.349379 | 0.001304 | 0.004769 |
| 11761577_MOP-1     | -0.36617 | 0.001306 | 0.004774 |
| 11763427_ANKRD36BP | -0.27015 | 0.001307 | 0.004776 |
| 11732184_PAPOLG    | 0.202333 | 0.001307 | 0.004777 |
| 11756228_NECAP2    | 0.289059 | 0.001308 | 0.00478  |
| 11718253_PPP1R10   | 0.212886 | 0.001308 | 0.004781 |
| 11732281_FOXP1     | 0.364854 | 0.001309 | 0.004783 |
| 11746855_APOA1BP   | -0.19068 | 0.001309 | 0.004783 |
| 11754852_USP37     | 0.246484 | 0.001311 | 0.00479  |
| 11718382_PARP4     | 0.189026 | 0.001311 | 0.00479  |
| 11739100_CSTF1     | 0.202953 | 0.001311 | 0.004791 |
| 11757819_HELZ      | 0.206912 | 0.001312 | 0.004793 |
| 11725286_ANKS6     | -0.23933 | 0.001312 | 0.004793 |
| 11733405_CLDN19    | -0.27466 | 0.001313 | 0.004795 |
| 11722837_FUBP1     | 0.197033 | 0.001314 | 0.0048   |
| 11721830_CHURC1    | 0.202839 | 0.001314 | 0.0048   |
| 11724475_MTUS1     | 0.549471 | 0.001315 | 0.0048   |
| 11758237_AGO4      | 0.480463 | 0.001315 | 0.0048   |
| 11751589_NMT1      | 0.172892 | 0.001315 | 0.004801 |
| 11753459_HNRNPA1   | -0.21371 | 0.001315 | 0.004802 |
| 11756533_YTHDF3    | -0.20658 | 0.001317 | 0.004806 |
| 11719102_SENP6     | -0.28487 | 0.001317 | 0.004806 |
| 11756153_SERF2     | 0.165234 | 0.001317 | 0.004806 |
| 11739199_TMEM106C  | -0.19783 | 0.001317 | 0.004807 |
| 11726269_ITFG1     | 0.204935 | 0.001318 | 0.004811 |
| 11731228_DLK2      | -0.21202 | 0.001319 | 0.004812 |
| 11731093_BRD1      | 0.184993 | 0.001319 | 0.004814 |
| 11754857_MRPL22    | -0.17385 | 0.00132  | 0.004814 |
| 11728811_OTUD7B    | 0.21794  | 0.00132  | 0.004817 |
| 200000_PMPRPF8     | -0.21236 | 0.001321 | 0.004817 |
| 11732232_ORAI2     | 0.170571 | 0.001321 | 0.004819 |
| 11718527_MSC       | -0.35231 | 0.001321 | 0.00482  |
| 11720636_ISCA2     | -0.21045 | 0.001322 | 0.004821 |
| 11725411_NAV1      | 0.245802 | 0.001323 | 0.004823 |
| 11722084_INTS5     | -0.25657 | 0.001323 | 0.004826 |
| 11719093_CYB5B     | -0.24616 | 0.001324 | 0.004829 |
| 11743554_KIN       | 0.205514 | 0.001325 | 0.004831 |
| 11743363_EIF5B     | 0.191269 | 0.001325 | 0.004831 |
| 11746511_SEPHS1    | -0.1732  | 0.001325 | 0.004832 |
| 11759034_STT3B     | -0.1817  | 0.001325 | 0.004832 |
| 200052_PMILF2      | -0.17794 | 0.001326 | 0.004834 |
| 11731478_CHMP1B    | -0.22789 | 0.001327 | 0.004836 |
| 11737829_ZKSCAN8   | 0.58447  | 0.001327 | 0.004837 |
| 11736662_CADPS2    | 0.437967 | 0.001328 | 0.004839 |
| 11753941_SFR1      | -0.27573 | 0.001329 | 0.004841 |

|                    |          |          |          |
|--------------------|----------|----------|----------|
| 11721350_ANAPC11   | -0.18933 | 0.001329 | 0.004843 |
| 11754732_CNDP1     | 0.238752 | 0.001329 | 0.004843 |
| 11731108_STAG2     | -0.16802 | 0.001331 | 0.004851 |
| 11722171_TOLLIP    | -0.23711 | 0.001332 | 0.004851 |
| 11759707_ASPH      | 0.557033 | 0.001332 | 0.004852 |
| 11760039_LRP1      | -0.23064 | 0.001332 | 0.004853 |
| 11718665_SRSF9     | -0.17708 | 0.001332 | 0.004853 |
| 11758127_CHCHD2    | -0.17421 | 0.001333 | 0.004855 |
| 11716752_GNS       | 0.237053 | 0.001333 | 0.004856 |
| 11742770_AGAP1     | 0.185344 | 0.001334 | 0.004856 |
| 11729599_GABRG2    | -0.34338 | 0.001335 | 0.00486  |
| 11755037_KIAA0319L | 0.236717 | 0.001335 | 0.004861 |
| 11754038_CNBP      | 0.19542  | 0.001336 | 0.004864 |
| 11717234_MKLN1     | -0.27834 | 0.001337 | 0.004867 |
| 11729328_ZFHX4     | -0.16414 | 0.001338 | 0.004869 |
| 11752371_ABCA10    | 0.183414 | 0.001338 | 0.004869 |
| 11728841_PLEKHA5   | 0.189791 | 0.001338 | 0.00487  |
| 11756262_NUBP1     | -0.20987 | 0.001338 | 0.00487  |
| 11730411_PXMP4     | -0.36612 | 0.001339 | 0.004873 |
| 11720723_ZNF408    | 0.226002 | 0.001339 | 0.004873 |
| 11739198_DDX52     | 0.263769 | 0.001341 | 0.004878 |
| 11731004_MIS18BP1  | -0.33575 | 0.001342 | 0.004882 |
| 11741374_ATM       | 0.323127 | 0.001342 | 0.004883 |
| 11724924_PPP1R9A   | 0.314702 | 0.001342 | 0.004883 |
| 11718827_ITM2C     | -0.24102 | 0.001343 | 0.004886 |
| 11722693_ZMYM4     | -0.22474 | 0.001343 | 0.004886 |
| 11717086_RBM39     | 0.225143 | 0.001343 | 0.004886 |
| 11721485_TP53RK    | -0.18717 | 0.001344 | 0.004886 |
| 11728580_ADRA2C    | -0.28388 | 0.001344 | 0.004886 |
| 11722358_EPB41L2   | 0.266609 | 0.001344 | 0.004886 |
| 11717373_DNAJC3    | 0.170742 | 0.001344 | 0.004887 |
| 11725831_OTUB2     | -0.23696 | 0.001345 | 0.00489  |
| 11737848_RSPH3     | 0.312699 | 0.001346 | 0.004892 |
| 11738365_PBLD      | 0.213773 | 0.001347 | 0.004896 |
| 11744902_FADS2     | -0.21745 | 0.001347 | 0.004897 |
| 11718469_USP33     | 0.190536 | 0.001348 | 0.004899 |
| 11721916_MDM4      | -0.29872 | 0.00135  | 0.004904 |
| 11726332_LEF1      | -0.30654 | 0.00135  | 0.004905 |
| 11745963_PPP4R1L   | 0.20832  | 0.001351 | 0.004909 |
| 11734570_DCTN4     | 0.211956 | 0.001351 | 0.00491  |
| 11759222_KIAA1958  | -0.34519 | 0.001352 | 0.00491  |
| 11748441_SLC9B2    | 0.328043 | 0.001352 | 0.004911 |
| 11751050_NUCB1     | -0.1767  | 0.001353 | 0.004916 |
| 11723283_CEACAM1   | 0.198638 | 0.001354 | 0.004919 |
| 11737947_CSNK2B // | 0.332513 | 0.001355 | 0.00492  |
| 11749810_ISYNA1    | 0.176189 | 0.001355 | 0.004921 |
| 11724023_TRIM13    | -0.31591 | 0.001356 | 0.004923 |
| 11719114_PJA2      | 0.181621 | 0.001356 | 0.004924 |
| 11744872_ARF5      | -0.19181 | 0.001358 | 0.00493  |
| 11756127_PGM1      | -0.20177 | 0.001358 | 0.00493  |
| 11748453_SNRPA     | -0.25568 | 0.00136  | 0.004936 |



|                    |          |          |          |
|--------------------|----------|----------|----------|
| 11757220_RPS2P32   | -0.17944 | 0.00136  | 0.004937 |
| 11720767_METTL9    | -0.22958 | 0.00136  | 0.004937 |
| 11754208_NTAN1     | -0.27666 | 0.00136  | 0.004937 |
| 11740731_FUOM      | -0.27655 | 0.001361 | 0.004938 |
| 11717799_ZER1      | -0.22957 | 0.001361 | 0.004938 |
| 11724436_FLJ10038  | -0.28468 | 0.001361 | 0.004938 |
| 11748060_ADAMTSL4  | -0.28267 | 0.001361 | 0.004938 |
| 11754629_SLC16A6   | 0.681248 | 0.001364 | 0.004947 |
| 11725637_EIF3J     | 0.16735  | 0.001364 | 0.004948 |
| 11759334_AMACR /// | -0.21568 | 0.001364 | 0.004949 |
| 11733735_AAMP      | -0.35668 | 0.001364 | 0.004949 |
| 11724756_FAM53C    | 0.173898 | 0.001365 | 0.004949 |
| 11731434_MRPL34    | 0.16696  | 0.001365 | 0.004951 |
| 11732757_ESPNL     | -0.32233 | 0.001365 | 0.004951 |
| 11730328_DCAF13    | -0.29472 | 0.001366 | 0.004953 |
| 11728756_NHLRC3    | 0.446823 | 0.001366 | 0.004953 |
| 200033_PMDDX5      | 0.171366 | 0.001367 | 0.004955 |
| 11745765_TCF4      | 0.305496 | 0.001368 | 0.00496  |
| 11738270_SERP2     | -0.18177 | 0.00137  | 0.004965 |
| 11719756_COA6      | -0.17359 | 0.001371 | 0.004969 |
| 11744532_PNN       | 0.193909 | 0.001372 | 0.004974 |
| 11726888_PORCN     | -0.26265 | 0.001373 | 0.004974 |
| 11759229_NBPF4     | 0.518696 | 0.001373 | 0.004975 |
| 11730445_CCNJ      | 0.224067 | 0.001373 | 0.004976 |
| 11717674_EIF2B2    | 0.198365 | 0.001373 | 0.004976 |
| 11720439_ACVR1B    | 0.24535  | 0.001373 | 0.004976 |
| 11717734_ZCCHC24   | -0.21266 | 0.001375 | 0.00498  |
| 11718910_OTUD5     | -0.20845 | 0.001375 | 0.004981 |
| 11717239_RBBP4     | -0.18888 | 0.001375 | 0.004982 |
| 11741649_SLC12A4   | 0.292972 | 0.001376 | 0.004986 |
| 11761874_SLMAP     | 0.335787 | 0.001377 | 0.004988 |
| 11758922_STXBP6    | 0.69371  | 0.001377 | 0.004988 |
| 11743009_ARHGEF1 / | -0.20813 | 0.001378 | 0.004989 |
| 11715349_COX7C     | -0.17228 | 0.001378 | 0.004989 |
| 11746187_MRPS18B   | -0.26021 | 0.001379 | 0.004991 |
| 11760764_ADAMTS16  | -0.45447 | 0.001379 | 0.004991 |
| 11727508_CLDN12 // | 0.210689 | 0.00138  | 0.004996 |
| 11734781_SORBS3    | -0.38822 | 0.00138  | 0.004997 |
| 11751573_LBR       | 0.178588 | 0.001381 | 0.004998 |
| 11745224_RIF1      | 0.223158 | 0.001382 | 0.005001 |
| 11745666_ASXL1     | -0.26005 | 0.001382 | 0.005001 |
| 11758769_MRPL20    | 0.494147 | 0.001383 | 0.005005 |
| 11717443_JAGN1     | 0.170567 | 0.001385 | 0.005011 |
| 11721823_ARPC5L    | 0.193234 | 0.001385 | 0.005011 |
| 11740332_ATP2A2    | 0.179673 | 0.001386 | 0.005015 |
| 11757429_CYC1      | -0.21342 | 0.001388 | 0.005023 |
| 11756225_DNAJB6    | 0.188602 | 0.001388 | 0.005023 |
| 11755205_HSPH1     | 0.209929 | 0.001389 | 0.005024 |
| 11735738_SH2B1     | -0.18065 | 0.00139  | 0.005027 |
| 11753679_SNCG      | -0.21726 | 0.001391 | 0.00503  |
| 11755440_SPDYE1 // | 0.271649 | 0.001391 | 0.005032 |

|                    |          |          |          |
|--------------------|----------|----------|----------|
| 11740245_PTHLH     | 0.770209 | 0.001392 | 0.005034 |
| 11736397_RFT1      | -0.29034 | 0.001392 | 0.005035 |
| 11737276_HTR7      | 0.266088 | 0.001394 | 0.005038 |
| 11762823_DHRS4 /// | -0.27145 | 0.001394 | 0.005038 |
| 11738890_BPIFB6    | -0.18268 | 0.001395 | 0.005044 |
| 11716072_ATP6V1B2  | 0.201917 | 0.001395 | 0.005044 |
| 11746151_BMS1P4    | 0.229925 | 0.001396 | 0.005048 |
| 11737815_METTL21B  | -0.20355 | 0.001397 | 0.005051 |
| 11756544_C22orf29  | -0.23011 | 0.001399 | 0.005057 |
| 11721456_SERPINA1  | 0.425593 | 0.001401 | 0.005063 |
| 11747881_BCL2L13   | 0.191802 | 0.001402 | 0.005065 |
| 11754342_ELAC2     | -0.19798 | 0.001402 | 0.005065 |
| 11724227_SUPT20H   | 0.245274 | 0.001403 | 0.005068 |
| 11751902_CDON      | -0.22067 | 0.001403 | 0.005069 |
| 11754455_CABLES1   | 0.192143 | 0.001406 | 0.00508  |
| 11764012_TMPO      | -0.4315  | 0.001408 | 0.005084 |
| 11720964_DCK       | -0.24557 | 0.001409 | 0.00509  |
| 11756322_CNBP2     | -0.19085 | 0.001409 | 0.00509  |
| 11719923_GM2A      | -0.33846 | 0.00141  | 0.005091 |
| 11721051_C5orf51   | 0.180206 | 0.00141  | 0.005092 |
| 11748381_GALC      | 0.314519 | 0.001411 | 0.005095 |
| 11753842_UFM1      | 0.198294 | 0.001411 | 0.005096 |
| 11740707_PPP6C     | 0.167742 | 0.001413 | 0.005102 |
| 11748251_USP34     | 0.194945 | 0.001413 | 0.005102 |
| 11716295_FLOT2     | -0.19416 | 0.001413 | 0.005102 |
| 11751586_SLC36A2   | 0.189422 | 0.001414 | 0.005102 |
| 11732590_TRIM5     | 0.347897 | 0.001414 | 0.005102 |
| 11717530_UBA2      | -0.28487 | 0.001414 | 0.005103 |
| 11746128_CLPTM1    | 0.17002  | 0.001415 | 0.005106 |
| 11746672_ZNF8      | 0.243695 | 0.001415 | 0.005107 |
| 11745077_CRNKL1    | 0.252218 | 0.001417 | 0.005114 |
| 11758366_ABT1      | 0.294283 | 0.001418 | 0.005115 |
| 11730206_PSMD9     | -0.21826 | 0.001418 | 0.005115 |
| 11717079_VPS52     | -0.1677  | 0.001418 | 0.005115 |
| 11756066_LRRC23    | -0.25581 | 0.001419 | 0.005117 |
| 11724355_LOC102724 | 0.174696 | 0.00142  | 0.005122 |
| 11720720_C22orf29  | -0.30907 | 0.00142  | 0.005122 |
| 11723926_PNMA2     | -0.43033 | 0.00142  | 0.005122 |
| 11725665_HS2ST1    | -0.17286 | 0.001423 | 0.005131 |
| 11760362_PGAM5     | -0.23521 | 0.001424 | 0.005133 |
| 11736302_FN3K      | -0.2899  | 0.001424 | 0.005133 |
| 11738443_OR6B1     | -0.23048 | 0.001424 | 0.005134 |
| 11740346_NRG1      | 0.219333 | 0.001424 | 0.005135 |
| 11748243_DVL2      | -0.17017 | 0.001426 | 0.005139 |
| 11750977_SCMH1     | -0.27241 | 0.001426 | 0.005139 |
| 11746509_TDG       | 0.291606 | 0.001426 | 0.00514  |
| 11748410_FLII      | 0.190714 | 0.001426 | 0.005141 |
| 11749683_COL4A3BP  | -0.19565 | 0.001428 | 0.005146 |
| 11732142_TSR1      | 0.182004 | 0.001428 | 0.005146 |
| 11745198_CDCA4     | -0.17068 | 0.001429 | 0.005149 |
| 11717849_CCDC167   | -0.25414 | 0.001429 | 0.005149 |

|                    |          |          |          |
|--------------------|----------|----------|----------|
| 11732132_IDS       | 0.241785 | 0.00143  | 0.005152 |
| 11743303_ICE1      | 0.195052 | 0.00143  | 0.005152 |
| 11754388_QSOX2     | -0.2111  | 0.00143  | 0.005152 |
| 11718853_ZBED5     | 0.201569 | 0.001431 | 0.005153 |
| 11758665_TEAD2     | -0.24824 | 0.001431 | 0.005153 |
| 11755206_HSPH1     | 0.187598 | 0.001431 | 0.005154 |
| 11740182_RHOJ      | 0.303279 | 0.001431 | 0.005154 |
| AFFX-HSACTB        | 0.16992  | 0.001434 | 0.005165 |
| 11742018_CACNA1D   | -0.22009 | 0.001434 | 0.005165 |
| 11745487_ZNF512    | -0.21992 | 0.001435 | 0.005166 |
| 11732135_ADCK3     | -0.23109 | 0.001436 | 0.005168 |
| 11758323_VOPP1     | -0.33616 | 0.001437 | 0.005173 |
| 11723039_SRSF3     | -0.21085 | 0.001437 | 0.005173 |
| 11760017_SNRPA1    | -0.25768 | 0.001437 | 0.005173 |
| 11720272_RIMS4     | -0.29899 | 0.001437 | 0.005173 |
| 11755573_FAXDC2    | -0.20477 | 0.001438 | 0.005174 |
| 11727761_PALM3     | -0.48613 | 0.001439 | 0.005177 |
| 11718385_C2orf68   | 0.232403 | 0.001439 | 0.005178 |
| 11719812_SLC48A1   | 0.254043 | 0.001439 | 0.005178 |
| 11758656_UBQLN2    | -0.19184 | 0.001439 | 0.005178 |
| 11722563_CYP51A1 / | -0.33783 | 0.00144  | 0.005179 |
| 11752317_NVL       | 0.211515 | 0.00144  | 0.005179 |
| 11734445_AARD      | -0.27323 | 0.00144  | 0.005179 |
| 11744100_GMPPB     | -0.2795  | 0.001441 | 0.005181 |
| 11721724_GLB1L2    | -0.19256 | 0.001443 | 0.005189 |
| 11720753_SDC2      | 0.269775 | 0.001443 | 0.005189 |
| 11742755_VRK2      | 0.218544 | 0.001444 | 0.005191 |
| 11723880_KCNC4     | -0.33045 | 0.001444 | 0.005194 |
| 11755495_LRRC27    | 0.447862 | 0.001446 | 0.005197 |
| 11750723_MICB      | -0.23347 | 0.001446 | 0.005199 |
| 11731202_AIM1L     | 0.245879 | 0.001447 | 0.005201 |
| 11719804_ASPN      | 0.394802 | 0.001447 | 0.005201 |
| 11740127_LATS1     | 0.537684 | 0.001448 | 0.005203 |
| 11721060_PLPP5     | 0.238517 | 0.001449 | 0.005206 |
| 11730725_GABBR1    | 0.270003 | 0.001449 | 0.005207 |
| 11759569_CDK5RAP3  | -0.32594 | 0.00145  | 0.005209 |
| 11756787_HAPLN3    | -0.32264 | 0.00145  | 0.005209 |
| 11747315_ENTPD6    | 0.161008 | 0.00145  | 0.005211 |
| 11733165_YIPF5     | -0.23918 | 0.001451 | 0.005212 |
| 11764051_CHST1     | -0.26511 | 0.001451 | 0.005213 |
| 11729668_ZCCHC8    | 0.197888 | 0.001452 | 0.005216 |
| 11739398_UBE2F     | 0.192727 | 0.001452 | 0.005216 |
| 11746524_FAM81A    | -0.17961 | 0.001453 | 0.005219 |
| 11718877_SMC1A     | -0.20132 | 0.001453 | 0.005219 |
| 11744949_NELFE     | -0.19727 | 0.001453 | 0.005219 |
| 11748389_GON4L /// | 0.190822 | 0.001457 | 0.005233 |
| 11759387_OR10H5    | -0.30641 | 0.001459 | 0.005239 |
| 11763292_ENDOV     | 0.201258 | 0.001459 | 0.005239 |
| 11759760_HIST1H2BC | 0.549824 | 0.00146  | 0.005241 |
| 11753468_AMT       | 0.230123 | 0.00146  | 0.005242 |
| 11724786_GSKIP     | 0.187503 | 0.00146  | 0.005242 |

|                    |          |          |          |
|--------------------|----------|----------|----------|
| 11739624_ZNF740    | -0.20692 | 0.001461 | 0.005243 |
| 11728668_TRIM16 // | 0.186013 | 0.001461 | 0.005244 |
| 11750689_ADAM11    | -0.21314 | 0.001461 | 0.005244 |
| 11757540_YIPF3     | 0.198381 | 0.001463 | 0.005248 |
| 11757789_EPB41L2   | -0.17588 | 0.001463 | 0.00525  |
| 11734919_TCEA1     | -0.18597 | 0.001464 | 0.005252 |
| 11728246_FAM134A   | -0.37707 | 0.001464 | 0.005253 |
| 11746610_CAND2     | -0.39934 | 0.001464 | 0.005253 |
| 11743753_ZFAND5    | -0.25776 | 0.001465 | 0.005254 |
| 11755844_DNAJC16   | 0.258606 | 0.001467 | 0.00526  |
| 11718352_VPS33B    | 0.167347 | 0.001468 | 0.005265 |
| 11757265_EIF3K     | -0.17255 | 0.001469 | 0.005268 |
| 11733899_TROVE2    | 0.189068 | 0.00147  | 0.005271 |
| 11718634_KIF1B     | -0.1697  | 0.001471 | 0.005274 |
| 11729431_PALD1     | -0.38779 | 0.001473 | 0.005282 |
| 11717914_BIVM-ERCC | 0.246151 | 0.001474 | 0.005284 |
| 11728755_NHLRC3    | 0.253104 | 0.001474 | 0.005284 |
| 11729377_TMEM205   | -0.1815  | 0.001475 | 0.005288 |
| 11715664_STARD7    | -0.18982 | 0.001476 | 0.005292 |
| 11758099_CHCHD2    | -0.17702 | 0.001477 | 0.005293 |
| 11735692_RAP1GDS1  | 0.197545 | 0.001477 | 0.005294 |
| 11749757_SDHA      | -0.20379 | 0.001477 | 0.005294 |
| 11744624_TRIQK     | -0.29676 | 0.001479 | 0.005299 |
| 11746408_SORT1     | 0.239943 | 0.001479 | 0.005299 |
| 11730139_RIOK1     | 0.185322 | 0.00148  | 0.005302 |
| 11755292_CYB561A3  | -0.17823 | 0.001481 | 0.005305 |
| 11717255_HSPA4     | -0.20471 | 0.001481 | 0.005305 |
| 11751134_MAT2A     | 0.196415 | 0.001483 | 0.005312 |
| 11736675_SNRPB     | -0.17639 | 0.001485 | 0.005317 |
| 11749034_RASA2     | 0.345803 | 0.001485 | 0.005319 |
| 11729601_PPP6C     | 0.161333 | 0.001485 | 0.00532  |
| 11744053_SLC11A2   | 0.239347 | 0.001486 | 0.00532  |
| 11760254_IFI44     | 0.355877 | 0.001486 | 0.00532  |
| 11718009_STX18     | 0.17098  | 0.001486 | 0.00532  |
| 11745744_AMPD2     | -0.20221 | 0.001487 | 0.005323 |
| 11717193_OST4      | 0.166211 | 0.001487 | 0.005323 |
| 11735502_TAPBP     | 0.323459 | 0.001488 | 0.005325 |
| 11718446_SH3BGR2   | -0.42873 | 0.001488 | 0.005325 |
| 11720328_ATP50     | -0.21977 | 0.001488 | 0.005326 |
| 11734222_ZNF543    | 0.374185 | 0.001488 | 0.005327 |
| 11720303_RTN3      | -0.16624 | 0.001489 | 0.00533  |
| 11755069_KDM5A     | 0.227757 | 0.001491 | 0.005334 |
| 11747264_BCAS1     | -0.29941 | 0.001491 | 0.005335 |
| 11717332_BMS1      | -0.29782 | 0.001492 | 0.005337 |
| 11737824_STX16     | -0.17693 | 0.001492 | 0.005337 |
| 11727563_PCDHB5    | -0.21181 | 0.001492 | 0.005338 |
| 11757871_PBX1      | -0.2401  | 0.001492 | 0.005339 |
| 11717988_C1orf49   | -0.22467 | 0.001493 | 0.005341 |
| 11739088_MESDC2    | 0.201662 | 0.001495 | 0.005346 |
| 11715918_CD24      | 0.349948 | 0.001495 | 0.005347 |
| 11726417_ABI1      | -0.19822 | 0.001496 | 0.005348 |

|                   |          |          |          |
|-------------------|----------|----------|----------|
| 11744482_TM246    | -0.21847 | 0.001496 | 0.00535  |
| 11716605_ADAM12   | -0.20303 | 0.001497 | 0.005351 |
| 11743281_WNK1     | -0.22209 | 0.001497 | 0.005352 |
| 11734393_ERBB3    | -0.2391  | 0.001498 | 0.005354 |
| 11724390_ZDHC16   | 0.196102 | 0.001498 | 0.005355 |
| 11720710_KIF1B    | 0.266099 | 0.001498 | 0.005356 |
| 11736440_INF2     | -0.21135 | 0.0015   | 0.00536  |
| 11717667_POLA2    | -0.2471  | 0.0015   | 0.005362 |
| 11733430_C10orf90 | 0.176902 | 0.001501 | 0.005363 |
| 11756961_HYOU1    | 0.172087 | 0.001502 | 0.005367 |
| 11738631_PCSK6    | -0.19094 | 0.001503 | 0.005369 |
| 11742922_LAPTM5   | 0.2273   | 0.001503 | 0.005369 |
| 11746840_PPP1R9A  | 0.252122 | 0.001503 | 0.005371 |
| 11716859_ETFA     | 0.187822 | 0.001504 | 0.005372 |
| 11761868_TPTE2    | 0.244095 | 0.001504 | 0.005374 |
| 11735633_RPS6KA5  | 0.417363 | 0.001505 | 0.005374 |
| 11721783_SLC9A8   | -0.19426 | 0.001505 | 0.005377 |
| 11722354_SEC23A   | 0.173603 | 0.001506 | 0.005377 |
| 11718690_ACOT8    | 0.173046 | 0.001506 | 0.005378 |
| 11731132_JRK      | -0.22857 | 0.001506 | 0.005379 |
| 11719716_CD79A    | -0.36998 | 0.001507 | 0.005381 |
| 11728084_DGKE     | 0.331815 | 0.001509 | 0.005387 |
| 11735720_ARMCX5   | 0.184424 | 0.001509 | 0.005387 |
| 11720298_CXCL10   | 0.454888 | 0.00151  | 0.00539  |
| 11721017_FBRSL1   | -0.29789 | 0.00151  | 0.005391 |
| 11726279_RAN      | -0.17768 | 0.001511 | 0.005394 |
| 11747463_PHKG2    | 0.182112 | 0.001512 | 0.005395 |
| 11716646_HM13     | 0.205303 | 0.001512 | 0.005395 |
| 11756698_AKT2     | -0.24278 | 0.001512 | 0.005395 |
| 11744678_C16orf62 | -0.17612 | 0.001512 | 0.005395 |
| 11760746_STK32B   | -0.20852 | 0.001512 | 0.005395 |
| 11726488_DHX57    | 0.244127 | 0.001512 | 0.005395 |
| 11747133_ZFH3     | -0.23701 | 0.001512 | 0.005395 |
| 11750124_NCAM2    | -0.3309  | 0.001513 | 0.005396 |
| 11735121_TUBGCP4  | -0.17802 | 0.001515 | 0.005403 |
| 11719038_ARAP1    | -0.21287 | 0.001515 | 0.005403 |
| 11746331_ADK      | 0.185203 | 0.001515 | 0.005404 |
| 11729592_LLGL1    | -0.25939 | 0.001516 | 0.005407 |
| 11751288_LOXL2    | 0.182793 | 0.001516 | 0.005407 |
| 11723739_WDR36    | -0.1731  | 0.001517 | 0.005408 |
| 11753652_FPGS     | -0.23536 | 0.001518 | 0.005411 |
| 11746962_HLA-DMB  | -0.26265 | 0.001518 | 0.005413 |
| 11760561_RBM26    | 0.179944 | 0.001519 | 0.005415 |
| 11753333_RTN3     | -0.20388 | 0.001519 | 0.005416 |
| 11739213_ARL14EP  | 0.184648 | 0.001519 | 0.005416 |
| 11745761_AHSA1    | -0.18312 | 0.00152  | 0.005416 |
| 11744565_PPWD1    | -0.21335 | 0.00152  | 0.005417 |
| 11727588_ZNF48    | -0.16426 | 0.001521 | 0.005421 |
| 11719195_POLR1C   | 0.21876  | 0.001522 | 0.005423 |
| 11717307_IARS2    | -0.18204 | 0.001522 | 0.005423 |
| 11725031_PNN      | 0.185971 | 0.001525 | 0.005432 |

|                    |          |          |          |
|--------------------|----------|----------|----------|
| 11754595_SLC26A2   | 0.168941 | 0.001526 | 0.005435 |
| 11732112_IL17A     | -0.25176 | 0.001527 | 0.00544  |
| 11737365_PCDHA1 // | 0.327945 | 0.001527 | 0.00544  |
| 11730252_AHCTF1    | 0.171052 | 0.001527 | 0.00544  |
| 11757833_RAB31     | 0.186389 | 0.001528 | 0.005443 |
| 11748125_PPP6C     | 0.183137 | 0.001529 | 0.005446 |
| 11715550_DAG1      | -0.1675  | 0.001529 | 0.005446 |
| 11745245_ITGBL1    | 0.366424 | 0.00153  | 0.005447 |
| 11761047_MKKS      | -0.24117 | 0.00153  | 0.005448 |
| 11758794_ORM1      | -0.21496 | 0.001531 | 0.005449 |
| 11750092_TPRKB     | -0.20361 | 0.001531 | 0.005449 |
| 11755174_CGN       | 0.256567 | 0.001531 | 0.005451 |
| 11718296_SEMA4B    | -0.19681 | 0.001532 | 0.005452 |
| 11722212_PQLC1     | -0.22239 | 0.001533 | 0.005457 |
| 11754010_GOLGA2    | 0.201089 | 0.001533 | 0.005457 |
| 11727350_RARA      | 0.419266 | 0.001534 | 0.005457 |
| 11752518_ATG2B     | 0.545796 | 0.001535 | 0.005461 |
| 11737983_CYHR1     | -0.19596 | 0.001535 | 0.005461 |
| 11749211_LOC100126 | -0.23888 | 0.001536 | 0.005464 |
| 11722560_ILF3      | -0.24188 | 0.001536 | 0.005465 |
| 11733001_PMM2      | 0.204143 | 0.001537 | 0.005466 |
| 11719919_TIMM10B   | 0.221957 | 0.001537 | 0.005469 |
| 11744362_PSM14     | -0.17187 | 0.001539 | 0.005474 |
| 11755435_POLI      | 0.259017 | 0.00154  | 0.005477 |
| 11719329_ALAS1     | -0.19078 | 0.00154  | 0.005477 |
| 11737422_FAM163B   | -0.1945  | 0.001541 | 0.00548  |
| 11715831_SURF4     | -0.19324 | 0.001541 | 0.005481 |
| 11754317_ANXA4     | 0.18067  | 0.001543 | 0.005486 |
| 11755523_RBM47     | -0.31236 | 0.001544 | 0.00549  |
| 11749647_ZKSCAN2   | 0.348997 | 0.001544 | 0.00549  |
| 11745263_SNX17     | 0.16403  | 0.001545 | 0.005493 |
| 11753987_DOCK7     | 0.225578 | 0.001546 | 0.005494 |
| 11720401_NCS1      | -0.2824  | 0.001547 | 0.005499 |
| 11725186_KLF12     | -0.23724 | 0.001547 | 0.005499 |
| 11722691_AVEN      | 0.261529 | 0.001549 | 0.005504 |
| 11763480_DLEU2     | -0.17555 | 0.001551 | 0.00551  |
| 11753118_POLR3D    | -0.16611 | 0.001551 | 0.005511 |
| 11725240_RTP4      | 0.345375 | 0.001552 | 0.005513 |
| 11736869_MMP16     | -0.17857 | 0.001552 | 0.005514 |
| 11730871_RASSF5    | -0.25771 | 0.001552 | 0.005514 |
| 11752434_EXT2      | 0.182326 | 0.001552 | 0.005514 |
| 11722920_DOLPP1    | -0.19646 | 0.001553 | 0.005515 |
| 11760760_UCHL5     | 0.294989 | 0.001553 | 0.005516 |
| 11758086_WHAMMP3   | 0.212664 | 0.001553 | 0.005517 |
| 11761065_C11orf73  | -0.33224 | 0.001554 | 0.005519 |
| 11760141_RBM3      | 0.507281 | 0.001555 | 0.005522 |
| 11739200_TMEM106C  | -0.16713 | 0.001558 | 0.005532 |
| 11726805_PTPMT1    | -0.26139 | 0.001558 | 0.005533 |
| 11730422_FLVCR1    | 0.30078  | 0.001559 | 0.005533 |
| 11748140_AMD1      | 0.174733 | 0.001559 | 0.005534 |
| 11747727_LMAN2L    | 0.199641 | 0.00156  | 0.005535 |

|                    |          |          |          |
|--------------------|----------|----------|----------|
| 11758896_CCNI      | -0.17508 | 0.00156  | 0.005536 |
| 11732503_ICA1L     | -0.27215 | 0.001561 | 0.00554  |
| 11722569_VEZT      | 0.275153 | 0.001561 | 0.00554  |
| 11753934_AGAP2-AS1 | -0.38138 | 0.001562 | 0.005541 |
| 11728485_LIMD1     | -0.26056 | 0.001563 | 0.005545 |
| 11730734_PPP1R8    | -0.35492 | 0.001563 | 0.005545 |
| 11750172_CLTCL1    | 0.384225 | 0.001563 | 0.005545 |
| 11743919_MAP3K7    | 0.222223 | 0.001564 | 0.00555  |
| 11753718_LRTOMT    | 0.29687  | 0.001565 | 0.00555  |
| 11719287_PEX11B    | -0.30351 | 0.001565 | 0.00555  |
| 11727785_CACYBP    | -0.33825 | 0.001565 | 0.005552 |
| 11746190_PLIN4     | -0.19228 | 0.001566 | 0.005552 |
| 11720216_PIGU      | -0.17005 | 0.001567 | 0.005557 |
| 11753548_SIGMAR1   | -0.21437 | 0.001568 | 0.00556  |
| 11725540_GATA4     | -0.31477 | 0.001569 | 0.005563 |
| 11751820_SLC9B2    | 0.166747 | 0.00157  | 0.005566 |
| 11749188_ENTPD1    | 0.174195 | 0.001571 | 0.005568 |
| 11743059_COMMD10   | 0.216487 | 0.001571 | 0.005569 |
| 11717694_CEBPG     | 0.236309 | 0.001572 | 0.00557  |
| 11736601_BRIP1     | -0.47041 | 0.001573 | 0.005573 |
| 11715222_MAGI3     | -0.32058 | 0.001573 | 0.005573 |
| 11746148_SLC25A29  | -0.2513  | 0.001574 | 0.005578 |
| 11760170_SNRPB     | -0.20355 | 0.001577 | 0.005588 |
| 11761460_CBWD1 /// | 0.269134 | 0.001577 | 0.005588 |
| 11717368_ZC3HAV1   | 0.323801 | 0.001577 | 0.005589 |
| 11754144_MET       | 0.332357 | 0.001578 | 0.00559  |
| 11750599_OSBP16    | -0.19903 | 0.001578 | 0.00559  |
| 11753841_COMMD6    | 0.203323 | 0.001578 | 0.00559  |
| 11755657_DMXL1     | 0.311016 | 0.001579 | 0.005592 |
| 11720585_SMCHD1    | 0.199427 | 0.001579 | 0.005592 |
| 11733049_NSMCE1    | -0.19279 | 0.001581 | 0.005598 |
| 11736245_PRKAG2    | 0.194792 | 0.001581 | 0.005599 |
| 11736594_ZBTB24    | 0.330677 | 0.001582 | 0.005601 |
| 11739375_SYT7      | -0.21386 | 0.001583 | 0.005603 |
| 11733883_TTF1      | -0.19212 | 0.001583 | 0.005604 |
| 11739104_TMEM33    | 0.173494 | 0.001585 | 0.005611 |
| 11723616_PLTP      | -0.16817 | 0.001586 | 0.005613 |
| 11746281_LPCAT3    | -0.23003 | 0.001586 | 0.005614 |
| 11748098_ZNF331    | -0.29149 | 0.001586 | 0.005614 |
| 11748919_CCSAP     | -0.26681 | 0.001587 | 0.005616 |
| 11750621_TMOD2     | 0.507399 | 0.00159  | 0.005627 |
| 11734157_LENG1     | -0.18337 | 0.001591 | 0.005627 |
| 11742448_LRRIQ3    | 0.334432 | 0.001591 | 0.005627 |
| 11736037_TADA3     | -0.25052 | 0.001591 | 0.005627 |
| 11733054_SCAMP1    | -0.20642 | 0.001591 | 0.005627 |
| 11723960_SCFD2     | 0.225543 | 0.001591 | 0.005627 |
| 11746268_ZNF630    | 0.315249 | 0.001591 | 0.005628 |
| 11758440_RFX7      | 0.210737 | 0.001593 | 0.005634 |
| 11721463_OSBP12    | -0.20939 | 0.001594 | 0.005638 |
| 11748162_EML5      | 0.297679 | 0.001595 | 0.00564  |
| 11736575_GPR155    | -0.28239 | 0.001595 | 0.005641 |

|                    |          |          |          |
|--------------------|----------|----------|----------|
| 11763747_CLPX      | 0.198985 | 0.001597 | 0.005646 |
| 11731486_NFIC      | -0.20951 | 0.001597 | 0.005646 |
| 11719313_FAM111A   | -0.21903 | 0.001598 | 0.005649 |
| 11733915_DSC3      | 0.475545 | 0.001598 | 0.005649 |
| 11733182_ETV1      | 0.235617 | 0.001598 | 0.00565  |
| 11724840_PKN2      | 0.257884 | 0.001598 | 0.00565  |
| 11751179_TMPRSS5   | -0.25049 | 0.001599 | 0.00565  |
| 11721584_TMCC1     | 0.277312 | 0.001599 | 0.005652 |
| 11720715_NIPAI     | -0.20013 | 0.001602 | 0.005661 |
| 11726280_BCR       | -0.21982 | 0.001603 | 0.005663 |
| 11740581_ASAH1     | 0.201035 | 0.001603 | 0.005665 |
| 11754407_ZMIZ2     | 0.356304 | 0.001603 | 0.005665 |
| 11745338_RAB3IL1   | -0.20919 | 0.001604 | 0.005668 |
| 11725694_SDPR      | 0.281417 | 0.001606 | 0.005672 |
| 11718696_YIF1B     | -0.25552 | 0.001606 | 0.005672 |
| 11738715_OR52D1    | -0.34373 | 0.001606 | 0.005673 |
| 11763325_FER       | -0.17285 | 0.001608 | 0.005679 |
| 11758809_RRAGC     | 0.208569 | 0.001608 | 0.005681 |
| 11744078_SDHA ///  | -0.25727 | 0.001609 | 0.005683 |
| 11735450_TMEM255B  | 0.208309 | 0.00161  | 0.005684 |
| 11718038_DCAF12    | 0.17196  | 0.00161  | 0.005686 |
| 11758738_SREBF1    | -0.17717 | 0.001611 | 0.005688 |
| 11721263_GRIA2     | 0.415974 | 0.001611 | 0.005688 |
| 11723787_ZNF766    | 0.298417 | 0.001611 | 0.005688 |
| 11758467_CCZ1 ///  | -0.17438 | 0.001611 | 0.005688 |
| 11748160_LAMP2     | 0.221527 | 0.001611 | 0.005688 |
| 11716497_CHMP4B    | -0.17659 | 0.001612 | 0.005691 |
| 11749366_ATP9B     | 0.175043 | 0.001613 | 0.005692 |
| 11745689_CMPK2     | -0.20452 | 0.001613 | 0.005692 |
| 11722103_PAN3      | 0.289014 | 0.001613 | 0.005693 |
| 11723792_OSBPL11   | 0.216654 | 0.001614 | 0.005695 |
| 11747038_METTL20   | -0.43479 | 0.001614 | 0.005695 |
| 11748299_SHC4      | 0.356165 | 0.001616 | 0.0057   |
| 11748967_RDX       | 0.164126 | 0.001617 | 0.005705 |
| 11730614_SLC1A4    | -0.27794 | 0.001617 | 0.005706 |
| 11734736_FAR1      | 0.225203 | 0.001618 | 0.005706 |
| 11731249_SLC35A2   | -0.38966 | 0.001618 | 0.005707 |
| 11719894_FAM91A1 / | 0.184338 | 0.001618 | 0.005707 |
| 11736607_ZNF528    | 0.329704 | 0.001619 | 0.005709 |
| 11729306_ATAD1     | 0.216726 | 0.00162  | 0.005712 |
| 11759671_KCNMA1    | 0.19352  | 0.00162  | 0.005714 |
| 11737618_RFPL4B    | -0.21154 | 0.001621 | 0.005714 |
| 11739233_SAFB2     | 0.208037 | 0.001621 | 0.005714 |
| 11733073_DDX21     | 0.189468 | 0.001622 | 0.005717 |
| 11720960_NBAS      | 0.256398 | 0.001622 | 0.005718 |
| 11743181_C16orf59  | -0.33637 | 0.001622 | 0.005718 |
| 11729940_TMEM56    | 0.365532 | 0.001626 | 0.005731 |
| 11738630_RBL1      | -0.19449 | 0.001627 | 0.005732 |
| 11757041_CNP       | -0.20768 | 0.001629 | 0.005742 |
| 11719611_ADO       | 0.238218 | 0.001631 | 0.005748 |
| 11753471_HSPG2     | -0.27842 | 0.001632 | 0.005749 |



|                    |          |          |          |
|--------------------|----------|----------|----------|
| 11754224_LOC102724 | -0.54717 | 0.001633 | 0.005752 |
| 11746217_HPS3      | -0.35912 | 0.001633 | 0.005753 |
| 11749113_DLG1      | 0.231257 | 0.001634 | 0.005754 |
| 11734164_ARHGEF26  | 0.323537 | 0.001635 | 0.005759 |
| 11746140_ARHGEF26  | 0.323537 | 0.001635 | 0.005759 |
| 11744682	EIF5A     | -0.16358 | 0.001635 | 0.005759 |
| 11719400_DOCK6     | 0.190672 | 0.001636 | 0.00576  |
| 11759182_FAM168A   | -0.16906 | 0.001637 | 0.005764 |
| 11716319_IGBP1     | 0.222878 | 0.001638 | 0.005766 |
| 11761436_CIAPIN1   | -0.24011 | 0.001638 | 0.005766 |
| 11745842_CNDP2     | -0.17952 | 0.001638 | 0.005766 |
| 11722192_UBE2M     | -0.20244 | 0.001641 | 0.005775 |
| 11739087_MESDC2    | 0.193925 | 0.001645 | 0.005789 |
| 11716992_CIC       | -0.18803 | 0.001645 | 0.005789 |
| 11725480_XRCC1     | -0.20216 | 0.001646 | 0.005792 |
| 11745865_SSFA2     | 0.162582 | 0.001646 | 0.005792 |
| 11750566_LPIN1     | 0.171929 | 0.001646 | 0.005793 |
| 11721985_SLC37A3   | 0.401758 | 0.001648 | 0.005798 |
| 11716927_TBC1D5    | 0.166349 | 0.001648 | 0.005798 |
| 11719335_DCP1B     | 0.162674 | 0.001648 | 0.005799 |
| 11758296_CDC34     | 0.173392 | 0.001648 | 0.005799 |
| 11727461_ZXDC      | -0.22994 | 0.001649 | 0.005801 |
| 11751665_PARPBP    | -0.24609 | 0.00165  | 0.005805 |
| 11733002_PMM2      | 0.251545 | 0.001651 | 0.005808 |
| 11756248_PDPK1     | 0.196068 | 0.001652 | 0.005811 |
| 11749871_GBGT1     | -0.23436 | 0.001653 | 0.005814 |
| 11756261_C16orf59  | -0.22255 | 0.001654 | 0.005815 |
| 11716374_PTK2      | 0.195322 | 0.001654 | 0.005816 |
| 11720673_PPM1A     | 0.186303 | 0.001654 | 0.005816 |
| 11748370_MAGED2    | 0.161538 | 0.001655 | 0.005816 |
| 11720838_RAD17     | -0.19705 | 0.001655 | 0.005816 |
| 11723449_NDUFV3    | 0.215767 | 0.001655 | 0.005816 |
| 11753958_GARS      | 0.178145 | 0.001655 | 0.005816 |
| 11722338_PEX7      | 0.289134 | 0.001655 | 0.005817 |
| 11719042_ACSL4     | -0.21011 | 0.001656 | 0.00582  |
| 11748928_PAFAH2    | 0.381467 | 0.001657 | 0.005822 |
| 11753448_PHAX      | 0.178581 | 0.001659 | 0.00583  |
| 11741434_SEPT10    | -0.19637 | 0.001659 | 0.00583  |
| 11719203_ERI3      | -0.16847 | 0.001659 | 0.005831 |
| 11727064_ANKRD11   | 0.181517 | 0.00166  | 0.005833 |
| 11742880_UBE2B     | 0.175908 | 0.001661 | 0.005833 |
| 11719721_LSM7      | -0.20289 | 0.001661 | 0.005836 |
| 11718808_TP53BP1   | 0.171442 | 0.001663 | 0.005841 |
| 11717702_RB1       | -0.33408 | 0.001663 | 0.005842 |
| 11758595_NBEA      | 0.280516 | 0.001664 | 0.005844 |
| 11745685_SCLT1     | -0.40939 | 0.001664 | 0.005845 |
| 11754584_RHNO1     | -0.25353 | 0.001665 | 0.005845 |
| 11719921_GM2A      | -0.29858 | 0.001665 | 0.005847 |
| 11746081_FAM60A    | 0.242951 | 0.001667 | 0.005852 |
| 11761634_SLC37A3   | 0.536496 | 0.001667 | 0.005853 |
| 11744252_RFX3      | 0.457359 | 0.00167  | 0.005863 |

|                    |          |          |          |
|--------------------|----------|----------|----------|
| 11732465_USP44     | 0.378878 | 0.001671 | 0.005864 |
| 11740193_UBE2A     | -0.19857 | 0.001671 | 0.005865 |
| 11734894_CTC1      | -0.17631 | 0.001672 | 0.005868 |
| 11743145_GTF2H4 // | -0.20079 | 0.001672 | 0.005869 |
| 11740514_YTHDC1    | 0.297873 | 0.001672 | 0.005869 |
| 11726195_METTL21B  | -0.17426 | 0.001673 | 0.00587  |
| 11727144_KLF11     | -0.17657 | 0.001675 | 0.005876 |
| 11754115_S100B     | 0.20077  | 0.001675 | 0.005876 |
| 11715507_MAGED1    | -0.19758 | 0.001675 | 0.005876 |
| 11725809_ARC       | 0.256935 | 0.001675 | 0.005876 |
| 11733634_HOXD13    | -0.19096 | 0.001675 | 0.005877 |
| 11759980_NF1       | 0.185454 | 0.001677 | 0.005881 |
| 11723382_PRR3      | -0.25875 | 0.001677 | 0.005881 |
| 11733175_ZNF507    | 0.267986 | 0.001678 | 0.005885 |
| 11742888_GCSH ///  | -0.16668 | 0.00168  | 0.00589  |
| 11762228_DEPDC7    | 0.478462 | 0.00168  | 0.005892 |
| 11722387_MIDN      | 0.245537 | 0.00168  | 0.005892 |
| 11720743_CROT      | 0.254419 | 0.001682 | 0.005896 |
| 11745164_HADHB     | -0.16933 | 0.001683 | 0.0059   |
| 11722034_SLC12A4   | 0.354659 | 0.001683 | 0.0059   |
| 11749998_SLC47A1   | -0.30794 | 0.001683 | 0.005901 |
| 11726511_TCHP      | -0.21189 | 0.001684 | 0.005902 |
| 11745603_CLTA      | 0.180787 | 0.001685 | 0.005904 |
| 11754795_PIGV      | -0.24772 | 0.001685 | 0.005905 |
| 11731069_NIT1      | 0.173156 | 0.001686 | 0.005907 |
| 11747772_PDHA1     | -0.23418 | 0.001687 | 0.005909 |
| 11718630_BOK       | -0.43384 | 0.001687 | 0.005911 |
| 11746451_COG5      | 0.232743 | 0.001687 | 0.005911 |
| 11743773_LZTFL1    | -0.35117 | 0.001689 | 0.005916 |
| 11743002_DCTN6     | 0.196956 | 0.001689 | 0.005917 |
| 11727533_FEZ2      | 0.186461 | 0.00169  | 0.005918 |
| 11746772_REG4      | -0.24932 | 0.00169  | 0.005918 |
| 11716462_RFXANK    | -0.23581 | 0.00169  | 0.005918 |
| 11728835_GLMN      | 0.23054  | 0.00169  | 0.005919 |
| 11730292_ARHGAP5   | -0.28577 | 0.001691 | 0.005923 |
| 11724093_SLC35E2 / | -0.20868 | 0.001692 | 0.005926 |
| 11733021_LDHA      | -0.16766 | 0.001693 | 0.005928 |
| 11763165_PABPN1    | 0.225586 | 0.001694 | 0.005929 |
| 11760137_IGHA1     | -0.1898  | 0.001695 | 0.005934 |
| 11759511_MOSPD2    | -0.25304 | 0.001697 | 0.00594  |
| 11754016_TIMM50    | -0.20024 | 0.001697 | 0.00594  |
| 11734723_EDIL3     | 0.428647 | 0.001697 | 0.00594  |
| 11725738_3-Mar     | -0.18028 | 0.001697 | 0.00594  |
| 11763406_BICC1     | -0.22247 | 0.001697 | 0.00594  |
| 11759373_CSRP1     | -0.19233 | 0.001698 | 0.005942 |
| 11758558_ATP2A2    | 0.159044 | 0.001699 | 0.005944 |
| 11733008_AMOTL2    | 0.213703 | 0.0017   | 0.005948 |
| 11733336_HDX       | 0.601391 | 0.001701 | 0.005951 |
| 11726281_BCR       | -0.23159 | 0.001701 | 0.005951 |
| 11742240_ZMAT3     | 0.173896 | 0.001702 | 0.005952 |
| 11726115_MTAP      | -0.22246 | 0.001702 | 0.005953 |

|                    |          |          |          |
|--------------------|----------|----------|----------|
| 11728400_MDFIC     | -0.2612  | 0.001702 | 0.005953 |
| 11733097_ALDOA     | -0.17993 | 0.001706 | 0.005967 |
| 11728858_CEP19     | 0.354837 | 0.001706 | 0.005967 |
| 11742756_GTF2H1    | 0.201901 | 0.001707 | 0.005969 |
| 11723891_CAND2     | -0.44714 | 0.001707 | 0.005969 |
| 11763355_EP400NL   | 0.244753 | 0.001709 | 0.005977 |
| 11733036_CEBPZ     | 0.209406 | 0.00171  | 0.005978 |
| 11757550_C16orf58  | -0.22335 | 0.00171  | 0.005979 |
| 11716601_KBTBD2    | 0.218482 | 0.001711 | 0.005981 |
| 11746160_FLT1      | 0.561231 | 0.001711 | 0.005981 |
| 11737565_DHPS      | -0.23747 | 0.001711 | 0.005981 |
| 11729682_TMEM231   | -0.21442 | 0.001711 | 0.005981 |
| 11736964_C8orf37   | -0.18629 | 0.001712 | 0.005983 |
| 11754965_TRIM52    | 0.316372 | 0.001714 | 0.00599  |
| 11724476_MTUS1     | 0.34338  | 0.001715 | 0.005992 |
| 11736110_ARL8A     | 0.185391 | 0.001717 | 0.006    |
| 11757219_LINC00473 | -0.32956 | 0.001718 | 0.006002 |
| 11721751_FZD7      | -0.20927 | 0.001719 | 0.006005 |
| 11745723_MALAT1    | -0.18329 | 0.001719 | 0.006005 |
| 11717778_USP15     | 0.32432  | 0.001719 | 0.006005 |
| 11721423_AMZ2      | 0.212693 | 0.00172  | 0.006008 |
| 11720940_DDX54     | -0.19954 | 0.001721 | 0.006011 |
| 11718647_ACVR1     | -0.27347 | 0.001725 | 0.006022 |
| 11753373	EIF3L     | 0.170235 | 0.001725 | 0.006022 |
| 11754898_ZNF573    | 0.238599 | 0.001725 | 0.006023 |
| 11720360_PHIP      | 0.176014 | 0.001727 | 0.006031 |
| 11743442_RHOB      | 0.172905 | 0.00173  | 0.006038 |
| 11746945_UBL4A     | -0.25354 | 0.00173  | 0.006039 |
| 11740138_MCTP2     | 0.217975 | 0.001732 | 0.006045 |
| 11743429_RBM27     | 0.352326 | 0.001732 | 0.006045 |
| 11734621_VPS13B    | 0.315786 | 0.001733 | 0.006047 |
| 11749931_AP3M2     | -0.23306 | 0.001733 | 0.006047 |
| 11741272_GOPC      | 0.314006 | 0.001734 | 0.006049 |
| 11763901	EIF4A2    | -0.25487 | 0.001734 | 0.006049 |
| 11753648_TRAF4     | 0.174456 | 0.001735 | 0.006055 |
| 11720158_WDR19     | 0.211106 | 0.001737 | 0.006059 |
| 11744871_ARF5      | -0.24449 | 0.001737 | 0.006061 |
| 11763327_FER       | -0.21047 | 0.001739 | 0.006066 |
| 11725013_MMACHC    | -0.19412 | 0.001739 | 0.006066 |
| 11725739_3-Mar     | -0.23293 | 0.001739 | 0.006067 |
| 11723357_SCAF11    | 0.204913 | 0.00174  | 0.006069 |
| 11737593_KLLN      | 0.288115 | 0.001741 | 0.00607  |
| 11740781_ILF3      | -0.28197 | 0.001743 | 0.006079 |
| 11753362_IER5      | 0.242228 | 0.001744 | 0.00608  |
| 11724524_CDK5RAP2  | -0.22501 | 0.001745 | 0.006083 |
| 11727767_BNC2      | -0.40859 | 0.001746 | 0.006086 |
| 11720447_SOX9      | 0.272068 | 0.001746 | 0.006086 |
| 11748515_SLC35B2   | -0.29845 | 0.001746 | 0.006087 |
| 11721626_SEPT6     | -0.27041 | 0.001746 | 0.006087 |
| 11745029_NKRF      | 0.263799 | 0.001747 | 0.006088 |
| 11736057_BORCS7    | 0.206338 | 0.001747 | 0.006089 |

|                    |          |          |          |
|--------------------|----------|----------|----------|
| 11745216_KBTBD4    | -0.16535 | 0.001747 | 0.006089 |
| 11722302_LRRFIP1   | -0.42128 | 0.001748 | 0.00609  |
| 11715935_NBEAL2    | -0.25876 | 0.001748 | 0.00609  |
| 11717076_ATP8B5P / | 0.184531 | 0.00175  | 0.006096 |
| 11759594_ERVK-19 / | 0.323259 | 0.00175  | 0.006097 |
| 11748715_PEX1      | 0.274161 | 0.00175  | 0.006097 |
| 11742696_WAC       | 0.164786 | 0.001751 | 0.006099 |
| 11719624_PLEKHM1   | 0.204728 | 0.001753 | 0.006105 |
| 11745795_DDX5      | 0.173568 | 0.001755 | 0.006113 |
| 11737395_SOWAHD    | -0.19107 | 0.001756 | 0.006114 |
| 11755773_FAM63B    | 0.255328 | 0.001757 | 0.006117 |
| 11748705_PCMT1     | -0.20162 | 0.001757 | 0.006117 |
| 11717346_ADD3      | -0.21543 | 0.001757 | 0.006118 |
| 11719249_MXD1      | 0.475932 | 0.001757 | 0.006118 |
| 11715899_SUCLG1    | -0.27617 | 0.001757 | 0.006118 |
| 11753903_TP53TG1   | 0.224176 | 0.001758 | 0.00612  |
| 11757651_OST4      | 0.157607 | 0.001759 | 0.006123 |
| 11762434_CSNK1A1   | -0.24008 | 0.001762 | 0.006131 |
| 11746481_TMEM219   | 0.177877 | 0.001762 | 0.006131 |
| 11716880_MAD2L1BP  | 0.196774 | 0.001765 | 0.00614  |
| 11732280_FOXP1     | 0.262193 | 0.001765 | 0.006141 |
| 11719232_PTPRS     | -0.17935 | 0.001765 | 0.006141 |
| 11750457_GTPBP10 / | 0.300663 | 0.001765 | 0.006142 |
| 11736522_TNNT1     | -0.27355 | 0.001767 | 0.006146 |
| 11717445_DHPS      | -0.19299 | 0.001768 | 0.006152 |
| 11749459_RAP1GAP2  | -0.1929  | 0.00177  | 0.006158 |
| 11722348_REPS2     | -0.21986 | 0.001772 | 0.006163 |
| 11726717_C1orf74   | 0.192919 | 0.001773 | 0.006168 |
| 11751783_MFSD1     | 0.220647 | 0.001774 | 0.00617  |
| 11723128_HERC6     | 0.223694 | 0.001775 | 0.006171 |
| 200098_PMANAPC5    | -0.17449 | 0.001775 | 0.006173 |
| 11724571_APPBP2    | 0.214957 | 0.001776 | 0.006176 |
| 11722087_NR1D2     | 0.178597 | 0.001777 | 0.00618  |
| 11718847_SH3GLB1   | -0.26416 | 0.001779 | 0.006186 |
| 11724084_KLHDC9    | -0.24276 | 0.00178  | 0.006188 |
| 11715427_SNU13     | -0.1837  | 0.00178  | 0.006189 |
| 11717751_HUWE1     | -0.1685  | 0.001781 | 0.006189 |
| 11718907_ADCK2     | -0.2389  | 0.001781 | 0.00619  |
| 11727963_CYP4F2    | 0.377895 | 0.001781 | 0.00619  |
| 11754935_NPRL2     | -0.19987 | 0.001783 | 0.006194 |
| 11757893_TNKS2     | 0.16802  | 0.001783 | 0.006196 |
| 11730968_RIC8B     | -0.23293 | 0.001783 | 0.006197 |
| 11754633_PPP1CA    | -0.17326 | 0.001784 | 0.006199 |
| 11748511_RNF220    | -0.20652 | 0.001784 | 0.006199 |
| 11726459_FAM117B   | -0.34098 | 0.001787 | 0.006209 |
| 11747294_TKFC      | -0.20649 | 0.00179  | 0.006219 |
| 11750770_GCLC      | 0.173405 | 0.001791 | 0.006222 |
| 11724582_TPRG1L    | -0.27732 | 0.001792 | 0.006223 |
| 11732496_AP1S3     | 0.337527 | 0.001792 | 0.006225 |
| 11730175_C4orf3    | -0.21653 | 0.001793 | 0.006228 |
| 11724761_CALM1 /// | -0.16182 | 0.001794 | 0.00623  |

|                    |          |          |          |
|--------------------|----------|----------|----------|
| 11752728_SLC35A2   | -0.24176 | 0.001797 | 0.006241 |
| 11726275_ATG101    | 0.1676   | 0.001797 | 0.006241 |
| 11730895_UBA6      | -0.3664  | 0.001799 | 0.006245 |
| 11731309_C15orf56  | -0.33322 | 0.001799 | 0.006245 |
| 11742975_USP42     | 0.295703 | 0.0018   | 0.006249 |
| 11754121_BIK       | 0.311743 | 0.001802 | 0.006254 |
| 11736762_ZNF33B    | 0.249804 | 0.001802 | 0.006256 |
| 11740421_HTR7      | 0.306633 | 0.001805 | 0.006262 |
| 11763927_SNORD12B  | -0.42079 | 0.001805 | 0.006263 |
| 11716023_ADRBK1    | -0.16473 | 0.001805 | 0.006263 |
| 11746360_REEP2     | -0.22455 | 0.001806 | 0.006265 |
| 11737256_SP100     | 0.431786 | 0.001807 | 0.006271 |
| 11718697_C6orf89   | 0.205109 | 0.001808 | 0.006272 |
| 11743335_LEMD2     | 0.214928 | 0.001809 | 0.006275 |
| 11740817_DLC1      | 0.217745 | 0.001809 | 0.006275 |
| 11722104_TPRA1     | 0.23173  | 0.00181  | 0.006277 |
| 11725046_ANP32E    | -0.20957 | 0.00181  | 0.006278 |
| 11716098_RAP1A     | 0.166963 | 0.00181  | 0.006278 |
| 11727049_PPP6C     | 0.16501  | 0.001811 | 0.006281 |
| 11758238_ABCC4     | 0.160721 | 0.001811 | 0.006281 |
| 11721908_SGPP1     | 0.304898 | 0.001812 | 0.006281 |
| 11721841_GLIPR1    | 0.172404 | 0.001812 | 0.006282 |
| 11730750_CRNKL1    | 0.182736 | 0.001813 | 0.006284 |
| 11754445_C12orf29  | -0.15916 | 0.001813 | 0.006284 |
| 11716015_CMTM3     | 0.172688 | 0.001813 | 0.006284 |
| 11723457_MON1A     | 0.201157 | 0.001813 | 0.006285 |
| 11730525_SSC4D     | -0.16758 | 0.001814 | 0.006288 |
| 11741341_ADAMTS12  | 0.247808 | 0.001815 | 0.006288 |
| 11743785_CLIP1     | 0.209563 | 0.001815 | 0.006288 |
| 11736445_RBAK      | 0.270115 | 0.001815 | 0.006288 |
| 11747521_PMS2 ///  | -0.19532 | 0.001815 | 0.006289 |
| 11753062_SRRM2     | -0.18484 | 0.001816 | 0.006291 |
| 11722649_RGS12     | -0.18835 | 0.001816 | 0.006291 |
| 11722018_TCP1      | -0.16808 | 0.001818 | 0.006299 |
| 11750796_DNER      | 0.307044 | 0.00182  | 0.006302 |
| 11740124_HIST1H2AM | -0.3819  | 0.00182  | 0.006304 |
| 11754345_TRAPPC12  | -0.19681 | 0.001821 | 0.006306 |
| 11718790_HES6      | -0.34323 | 0.001821 | 0.006306 |
| 11757320_CYB5A     | -0.29726 | 0.001822 | 0.00631  |
| 11756576_GNB2      | -0.22366 | 0.001823 | 0.006311 |
| 11718995_DDX20     | 0.211713 | 0.001823 | 0.006311 |
| 11763984_PLEKHA8   | 0.240651 | 0.001823 | 0.006312 |
| 11720334_ZMIZ1     | -0.20422 | 0.001823 | 0.006312 |
| 11731118_PLEKHA8P1 | -0.35606 | 0.001823 | 0.006312 |
| 11728790_DGCR6L    | -0.33152 | 0.001824 | 0.006312 |
| 11754405_CLIC4     | -0.21922 | 0.001824 | 0.006313 |
| 11749639_ZNF449    | 0.304086 | 0.001825 | 0.006317 |
| 11757813_AKT2      | -0.2906  | 0.001826 | 0.006317 |
| 11733309_PHF12     | -0.2424  | 0.001828 | 0.006325 |
| 11725794_PTGER4    | 0.190149 | 0.001829 | 0.006327 |
| 11717249_MRPL20    | 0.159459 | 0.001829 | 0.006328 |

|                    |          |          |          |
|--------------------|----------|----------|----------|
| 11724848_DIXDC1    | 0.240924 | 0.001829 | 0.006328 |
| 11758411_CD99L2    | -0.39736 | 0.001829 | 0.006328 |
| 11736829_MAP3K7    | 0.200803 | 0.00183  | 0.006329 |
| 11723970_MAPKAPK5  | 0.244801 | 0.00183  | 0.006331 |
| 11718668_MED9      | -0.44737 | 0.001831 | 0.006332 |
| 11750548_CYP4A11   | -0.22371 | 0.001832 | 0.006334 |
| 11721343_NCOA1     | 0.314089 | 0.001833 | 0.006338 |
| 11757885_VSIG10    | -0.47113 | 0.001834 | 0.006342 |
| 11721871_HIF1AN    | -0.22853 | 0.001835 | 0.006345 |
| 11759986_TMEM161B  | 0.231016 | 0.001837 | 0.006351 |
| 11717257_PIM1      | -0.31976 | 0.001838 | 0.006356 |
| 11725909_TCL1B     | 0.25189  | 0.001839 | 0.006356 |
| 11719261_LMNA      | -0.18033 | 0.001839 | 0.006356 |
| 11755376_TTC12     | 0.306725 | 0.001842 | 0.006366 |
| 11747282_ANXA2P2   | 0.169322 | 0.001842 | 0.006366 |
| 11723425_IFNAR1    | 0.259282 | 0.001843 | 0.00637  |
| 11726828_TYW1B     | -0.22806 | 0.001845 | 0.006374 |
| 11752320(EIF2AK1   | -0.27678 | 0.001846 | 0.006379 |
| 11720860_ARHGEF3   | -0.21518 | 0.001846 | 0.006379 |
| 11752176_AREL1     | 0.232641 | 0.001848 | 0.006385 |
| 11723567_CAPN7     | 0.262951 | 0.00185  | 0.00639  |
| 11738990_GANAB     | -0.17645 | 0.00185  | 0.006392 |
| 11724536_UBA5      | 0.246309 | 0.001852 | 0.006396 |
| 11754612_SEPT11    | -0.17912 | 0.001852 | 0.006396 |
| 11748968_RDX       | 0.190349 | 0.001854 | 0.006402 |
| 11745034_LINCO0313 | -0.25535 | 0.001854 | 0.006404 |
| 11736354_CAMK2G    | -0.26632 | 0.001855 | 0.006404 |
| 11745654_ST6GALNAC | 0.332021 | 0.001857 | 0.006411 |
| 11740658_SLC22A5   | 0.400864 | 0.001859 | 0.006419 |
| 11725289_RHBDL3    | -0.23146 | 0.00186  | 0.006421 |
| 11752559_PLXNB2    | 0.224455 | 0.001861 | 0.006426 |
| 11743716_BRWD1     | 0.458676 | 0.001862 | 0.006426 |
| 11725313_TMED7     | -0.27483 | 0.001862 | 0.006428 |
| 11724720_GALNT12   | -0.39432 | 0.001862 | 0.006428 |
| 11730736_PPP1R8    | -0.22195 | 0.001863 | 0.006429 |
| 11747792_SLC31A1   | 0.254254 | 0.001863 | 0.006429 |
| 11724650_MEIS2     | -0.25175 | 0.001864 | 0.006433 |
| 11719345_UBTD1     | 0.214889 | 0.001865 | 0.006435 |
| 11726566(EIF4G1    | -0.17283 | 0.001865 | 0.006436 |
| 11737881_XRCC2     | -0.1818  | 0.001866 | 0.006436 |
| 11730452_KIF24     | -0.53723 | 0.001866 | 0.006438 |
| 11759555_CAMTA1    | -0.17947 | 0.001868 | 0.006443 |
| 11720326_FRZB      | 0.280248 | 0.001868 | 0.006443 |
| 11748778_C1orf27   | 0.177379 | 0.001869 | 0.006447 |
| 11744163_AADAC     | 0.471379 | 0.00187  | 0.006448 |
| 11757539_STIM2     | 0.227183 | 0.00187  | 0.006448 |
| 11758096_ABR       | -0.18385 | 0.00187  | 0.006449 |
| 11730533_COL13A1   | 0.225613 | 0.00187  | 0.006449 |
| 11727519_INTS6     | -0.31392 | 0.001871 | 0.00645  |
| 11721849_REEP2     | -0.2009  | 0.001872 | 0.006452 |
| 11756685_SEC23IP   | 0.173748 | 0.001872 | 0.006453 |

|                    |          |          |          |
|--------------------|----------|----------|----------|
| 11735096_MLX       | 0.175372 | 0.001872 | 0.006453 |
| 11750800_LNX1      | 0.333585 | 0.001873 | 0.006455 |
| 11743551_PAK1IP1   | 0.160608 | 0.001874 | 0.006459 |
| 11720937_YARS2     | 0.165804 | 0.001875 | 0.00646  |
| 11751949_FAM21C    | 0.203005 | 0.001876 | 0.006465 |
| 11757463_IGSF8     | -0.18113 | 0.001877 | 0.006467 |
| 11739825_DNAJB12   | -0.17109 | 0.001878 | 0.006469 |
| 11726403_OPTC      | -0.19646 | 0.00188  | 0.006478 |
| 11744442_CCDC82    | 0.223915 | 0.00188  | 0.006479 |
| 11718390_TRIM26    | 0.18672  | 0.001881 | 0.006481 |
| 11726679_AFAP1L2   | 0.161719 | 0.001882 | 0.006481 |
| 11743741_CWC25     | 0.257582 | 0.001882 | 0.006484 |
| 11715832_SURF4     | -0.171   | 0.001883 | 0.006484 |
| 11759864_ZNF609    | 0.197956 | 0.001884 | 0.006487 |
| 11727818_DDX46     | -0.17423 | 0.001884 | 0.006489 |
| 11763960_NDUFB3    | -0.24111 | 0.001885 | 0.006492 |
| 11727930_ATP2B1    | 0.229362 | 0.001887 | 0.006496 |
| 11755182_FILIP1L   | -0.18651 | 0.001887 | 0.006497 |
| 11716807_CSNK2A2   | 0.215987 | 0.001887 | 0.006497 |
| 11718137_LOC105372 | -0.18247 | 0.001887 | 0.006497 |
| 11737955_C15orf40  | 0.163206 | 0.001887 | 0.006497 |
| 11723657_ZNF668    | 0.20586  | 0.001888 | 0.006498 |
| 11733553_MAGI1     | 0.344872 | 0.001888 | 0.006499 |
| 11732239_TMEM259   | -0.2303  | 0.001889 | 0.0065   |
| 11741003_ZNF3      | 0.216703 | 0.00189  | 0.006504 |
| 11757112_SNHG8     | 0.241555 | 0.00189  | 0.006504 |
| 11748298_BNIP2     | 0.209301 | 0.00189  | 0.006504 |
| 11728105_TMPRSS3   | 0.250873 | 0.00189  | 0.006504 |
| 11757964_SNTB1     | -0.237   | 0.001892 | 0.006507 |
| 11757115_HSPA8     | -0.33494 | 0.001893 | 0.006511 |
| 11722836_FUBP1     | 0.195177 | 0.001895 | 0.006517 |
| 11757523_WDR35     | -0.25396 | 0.001895 | 0.006519 |
| 11722046_LDAH      | 0.208857 | 0.001895 | 0.006519 |
| 11717536_TMEM259   | -0.20412 | 0.001896 | 0.006519 |
| 11745762_AHSA1     | -0.17652 | 0.001896 | 0.006519 |
| 11718063_C11orf98  | -0.20134 | 0.001896 | 0.006519 |
| 11749584_UBA2      | -0.18187 | 0.001896 | 0.00652  |
| 11747104_CYP1B1    | 0.370317 | 0.001897 | 0.006523 |
| 11726622_DIS3      | -0.20419 | 0.001898 | 0.006524 |
| 11753082_ZDHC15    | 0.203134 | 0.001898 | 0.006525 |
| 11720040_VTA1      | 0.188351 | 0.001901 | 0.006536 |
| 11755132_SNHG7 /// | 0.221998 | 0.001902 | 0.006536 |
| 11736177_TRNT1     | 0.178504 | 0.001903 | 0.006538 |
| 11716128_IGF2R     | 0.214142 | 0.001903 | 0.006538 |
| 11755128_SRSF3     | -0.17715 | 0.001903 | 0.00654  |
| 11749995_RNF216P1  | 0.206664 | 0.001905 | 0.006546 |
| 11745235_DPYD      | 0.27448  | 0.001905 | 0.006546 |
| 11743123_TLN1      | -0.22067 | 0.001907 | 0.006551 |
| 11734748_LOC100507 | -0.20147 | 0.001908 | 0.006554 |
| 11746589_PRSS54    | -0.26753 | 0.001909 | 0.006556 |
| 11719952_FKBP15    | 0.280061 | 0.001909 | 0.006557 |

|                    |          |          |          |
|--------------------|----------|----------|----------|
| 11717928_FOLR1     | 0.482087 | 0.001909 | 0.006557 |
| 11732726_PIGW      | -0.17948 | 0.00191  | 0.006559 |
| 11740606_HYKK      | -0.29327 | 0.001912 | 0.006565 |
| 11745516_STX16     | 0.268843 | 0.001912 | 0.006565 |
| 11725195_ZSWIM7    | 0.3067   | 0.001912 | 0.006565 |
| 11746723_NPC1      | 0.309038 | 0.001915 | 0.006575 |
| 11719057_PDE8A     | 0.201322 | 0.001915 | 0.006575 |
| 11723623_TRIM21    | 0.244544 | 0.001916 | 0.006577 |
| 11748307_AIMP1     | -0.15873 | 0.001917 | 0.006579 |
| 11719396_EXTL2     | -0.18443 | 0.001918 | 0.006583 |
| 11719506_DHX36     | 0.157826 | 0.001918 | 0.006584 |
| 11719965_U2AF1 /// | -0.21769 | 0.00192  | 0.006591 |
| 11732514_LYN       | 0.333193 | 0.001921 | 0.006592 |
| 11754052_NUP85     | -0.25766 | 0.001921 | 0.006593 |
| 11751640_PHF11     | 0.190658 | 0.001922 | 0.006593 |
| 11721435_STC2      | 0.583304 | 0.001922 | 0.006594 |
| 11743369_PPP1R2    | -0.20783 | 0.001922 | 0.006594 |
| 11757321_TAPBP     | 0.211655 | 0.001922 | 0.006595 |
| 11724817_SH3KBP1   | 0.19657  | 0.001926 | 0.006608 |
| 11742096_SCLY ///  | 0.169143 | 0.001927 | 0.00661  |
| 11750575_ZFPM2     | -0.27296 | 0.001928 | 0.006614 |
| 11732876_TRPM8     | 0.435759 | 0.00193  | 0.006619 |
| 11745122_FNIP1     | 0.448706 | 0.00193  | 0.006619 |
| 11736223_IKZF5     | 0.23587  | 0.001932 | 0.006625 |
| 11757512_ADI1      | -0.19766 | 0.001932 | 0.006626 |
| 11763859_UTY       | 0.376722 | 0.001933 | 0.006627 |
| 11721459_TAPBPL    | 0.18442  | 0.001933 | 0.006627 |
| 11722448_KCNMB4    | -0.22269 | 0.001934 | 0.006629 |
| 11720375_PRUNE     | 0.218887 | 0.001934 | 0.00663  |
| 11749779_TTC26     | 0.277199 | 0.001934 | 0.006631 |
| 11741568_FUT8      | -0.16854 | 0.001935 | 0.006632 |
| 11758290_CDC6      | -0.18393 | 0.001939 | 0.006644 |
| 11745636_MON2      | 0.294766 | 0.001939 | 0.006645 |
| 11743585_DENR      | 0.16183  | 0.001939 | 0.006645 |
| 11744010_TMEM175   | -0.18321 | 0.001939 | 0.006646 |
| 11727001_CSNK1E // | -0.20555 | 0.001943 | 0.006657 |
| 11756598_HKR1      | 0.251402 | 0.001945 | 0.006663 |
| 11733925_RIOK1     | 0.170709 | 0.001945 | 0.006663 |
| 11746025_MILR1     | 0.351299 | 0.001947 | 0.006669 |
| 11758800_SERBP1    | -0.19581 | 0.001947 | 0.006669 |
| 11749318_TSTA3     | 0.191597 | 0.001948 | 0.006671 |
| 11739872_NME6      | 0.255468 | 0.001948 | 0.006673 |
| 11747193_ZNF185    | -0.2112  | 0.001949 | 0.006674 |
| 11750567_MTOR      | -0.24651 | 0.001951 | 0.00668  |
| 11724914_SPATA18   | -0.29301 | 0.001952 | 0.006685 |
| 11733310_PCYT1B    | -0.4002  | 0.001955 | 0.006693 |
| 11759883_SRP19 /// | 0.256705 | 0.001956 | 0.006695 |
| 11734981_RALY      | -0.23442 | 0.001956 | 0.006697 |
| 11750263_ZNF786    | 0.157766 | 0.001958 | 0.006702 |
| 11746086_LOC728752 | -0.19989 | 0.001958 | 0.006702 |
| 11759125_FBXL17    | -0.36484 | 0.001959 | 0.006704 |



|                    |          |          |          |
|--------------------|----------|----------|----------|
| 11757399_PRKDC     | -0.24522 | 0.001959 | 0.006704 |
| 11727546_PANK3     | 0.217037 | 0.001962 | 0.006714 |
| 11750610_ZNF268    | 0.250523 | 0.001962 | 0.006714 |
| 11726050_ABHD17C   | -0.21192 | 0.001963 | 0.006718 |
| 11721718_ATRX      | 0.247589 | 0.001964 | 0.006719 |
| 11726627_ZC3H10    | -0.24039 | 0.001964 | 0.00672  |
| 11748332_HLA-E     | 0.218403 | 0.001964 | 0.00672  |
| 11757272_JTB       | 0.160848 | 0.001965 | 0.00672  |
| 11717992_DNAJC7    | 0.18154  | 0.001965 | 0.006721 |
| 11744931_ELF2      | 0.217618 | 0.001965 | 0.006722 |
| 11741398_GPR63     | 0.196757 | 0.001967 | 0.006726 |
| 11748532_IST1      | 0.208586 | 0.001967 | 0.006727 |
| 11735642_FAM132A   | -0.19771 | 0.001968 | 0.00673  |
| 11722488_ALG11 /// | -0.31721 | 0.001969 | 0.006732 |
| 11751980_RASGRF1   | 0.40714  | 0.001969 | 0.006732 |
| 11759310_FAM171B   | -0.24449 | 0.001971 | 0.006738 |
| 11722076_DONSON    | -0.27313 | 0.001972 | 0.006741 |
| 11727877_MIA-RAB4E | 0.237494 | 0.001972 | 0.006741 |
| 11737228_SETD4     | 0.26884  | 0.001972 | 0.006741 |
| 11717177_SNX27     | -0.16559 | 0.001973 | 0.006743 |
| 11763545_ATP10B    | -0.25311 | 0.001973 | 0.006743 |
| 11731254_C16orf13  | -0.23812 | 0.001973 | 0.006743 |
| 11748148_COQ6      | 0.164285 | 0.001975 | 0.00675  |
| 11718132_RBP4      | -0.28289 | 0.001976 | 0.006753 |
| 11722186_AKT1      | -0.18266 | 0.001977 | 0.006755 |
| 11727337_ADD2      | -0.18662 | 0.001978 | 0.006758 |
| 11746170_LOC440173 | -0.24435 | 0.001979 | 0.006762 |
| 11724470_MGST1     | -0.24077 | 0.001979 | 0.006762 |
| 11733101_USP12     | 0.256783 | 0.00198  | 0.006763 |
| 11743500_PSMG4     | -0.20368 | 0.001981 | 0.006767 |
| 11732840_ERC2      | -0.32446 | 0.001981 | 0.006767 |
| 11761019_LINCO0525 | -0.35858 | 0.001982 | 0.006768 |
| 11752833_PGAP2     | -0.21695 | 0.001982 | 0.00677  |
| 11739914_CRELD1    | -0.23405 | 0.001983 | 0.00677  |
| 11727920_OSTF1     | 0.237112 | 0.001984 | 0.006774 |
| 11723262_AMN1      | -0.24206 | 0.001985 | 0.006776 |
| 11753714_HBE1      | 0.19915  | 0.001986 | 0.00678  |
| 11723290_CRISPLD1  | -0.26266 | 0.001986 | 0.00678  |
| 11747933_NAPRT     | -0.15769 | 0.001988 | 0.006784 |
| 11725245_SDK1      | 0.424798 | 0.001988 | 0.006784 |
| 11725271_PIGA      | 0.165922 | 0.001988 | 0.006785 |
| 11740434_MARK3     | 0.274769 | 0.001988 | 0.006785 |
| 11760517_AP2M1     | -0.25508 | 0.001988 | 0.006786 |
| 11739877_BSG       | -0.17083 | 0.001989 | 0.006787 |
| 11720372_TESC      | 0.30616  | 0.00199  | 0.006789 |
| 11729728_METRN     | -0.22981 | 0.00199  | 0.006789 |
| 11744709_HRAS      | 0.178101 | 0.001992 | 0.006796 |
| 11743907_CTPS1     | -0.2059  | 0.001992 | 0.006796 |
| 11760664_TINAG     | 0.339588 | 0.001993 | 0.006798 |
| 11720100_SPIN1     | 0.205258 | 0.001993 | 0.006798 |
| 11739520_CHID1     | -0.20974 | 0.001995 | 0.006804 |

|                    |          |          |          |
|--------------------|----------|----------|----------|
| 11759346_MAML2     | 0.214548 | 0.001995 | 0.006804 |
| 11733879_HMGXB4    | -0.18603 | 0.001995 | 0.006804 |
| 11719325_KDM1A     | -0.17353 | 0.001997 | 0.006809 |
| 11716960_FAM3A     | -0.18609 | 0.001998 | 0.006811 |
| 11728631_LYSMD1    | 0.364048 | 0.001999 | 0.006817 |
| 11759148_FBXO3     | -0.18949 | 0.002001 | 0.006822 |
| 11741162_SLC12A4   | 0.202507 | 0.002002 | 0.006824 |
| 11748421_TMEM18    | -0.26523 | 0.002002 | 0.006825 |
| 11743984_AKAP1     | -0.22614 | 0.002002 | 0.006825 |
| 11757750_DHX8      | 0.196334 | 0.002003 | 0.006825 |
| 11763033_RPS16     | -0.1738  | 0.002003 | 0.006825 |
| 11764270_PLGLB1 // | 0.404918 | 0.002003 | 0.006826 |
| 11761131_NOL12     | -0.18462 | 0.002004 | 0.006828 |
| 11729213_PCBP2     | -0.25677 | 0.002004 | 0.006829 |
| 11718841_CXCL8     | 0.166159 | 0.002005 | 0.00683  |
| 11724972_PIGN      | -0.23697 | 0.002005 | 0.006831 |
| 11757746_ST13      | -0.17928 | 0.002005 | 0.006831 |
| 11753932_PHAX      | 0.188469 | 0.002006 | 0.006834 |
| 11716736_PRRF19    | -0.2482  | 0.002007 | 0.006836 |
| 11731542_SESTD1    | -0.28057 | 0.002011 | 0.006849 |
| 11720946_CA12      | -0.20203 | 0.002012 | 0.006852 |
| 11715990_COX7A2L   | 0.155947 | 0.002013 | 0.006855 |
| 11745888_USP42     | 0.241833 | 0.002014 | 0.006859 |
| 11754464_GIT1      | -0.23034 | 0.002017 | 0.006867 |
| 11751365_SLC47A1   | -0.38206 | 0.002019 | 0.006872 |
| 11756554_PSMC5     | -0.16333 | 0.002021 | 0.00688  |
| 11734751_MAT2A     | 0.168046 | 0.002021 | 0.00688  |
| 11743666_SPEN      | 0.177342 | 0.002022 | 0.006884 |
| 11721458_MAN1B1    | -0.18877 | 0.002022 | 0.006884 |
| 11752055_TERT      | -0.26611 | 0.002023 | 0.006885 |
| 11731308_KCNIP4    | 0.35302  | 0.002024 | 0.006887 |
| 11717989_SUN1      | 0.155589 | 0.002024 | 0.006888 |
| 11715695_COX7B     | -0.15568 | 0.002024 | 0.006888 |
| 11748931_MUC5B     | -0.16161 | 0.002025 | 0.006888 |
| 11758505_HOXD13    | -0.23118 | 0.002025 | 0.006888 |
| 11731484_NFIC      | -0.20728 | 0.002026 | 0.006891 |
| 11731573_FRMD4B    | 0.253154 | 0.002026 | 0.006892 |
| 11743466_MPHOSPH6  | -0.15357 | 0.002027 | 0.006894 |
| 11721528_ZDHHC2    | 0.277363 | 0.002029 | 0.006902 |
| 11734676_ITIH5     | 0.422129 | 0.002031 | 0.006908 |
| 11719378_RAP1GDS1  | 0.187704 | 0.002031 | 0.006908 |
| 11716747_AFF1      | 0.255837 | 0.002032 | 0.006908 |
| 11718742_DCTN4     | 0.175182 | 0.002034 | 0.006916 |
| 11763273_ZBTB80S   | 0.252745 | 0.002034 | 0.006917 |
| 11756523_SHISA5    | -0.21432 | 0.002035 | 0.006917 |
| 11720726_UBR1      | 0.230901 | 0.002035 | 0.006917 |
| 11757741_SOX4      | -0.2511  | 0.002039 | 0.00693  |
| 11763691_VTI1B     | -0.47376 | 0.002039 | 0.00693  |
| 11747834_SPATA5    | -0.3219  | 0.002039 | 0.006931 |
| 11757822_C11orf31  | 0.159593 | 0.00204  | 0.006932 |
| 11752509_PSAP      | 0.173908 | 0.00204  | 0.006932 |

|                    |          |          |          |
|--------------------|----------|----------|----------|
| 11718756_APLP1     | -0.46074 | 0.00204  | 0.006932 |
| 11746824_PXMP4     | -0.3851  | 0.00204  | 0.006932 |
| 11757239_NFYC-AS1  | 0.228332 | 0.002041 | 0.006934 |
| 11743084_BNIP3     | -0.15841 | 0.002041 | 0.006935 |
| 11726625_CCNG2     | -0.25385 | 0.002042 | 0.006936 |
| 11748153_PTCD2     | 0.200442 | 0.002042 | 0.006938 |
| 11728060_LRTOMT    | 0.382079 | 0.002044 | 0.006944 |
| 11726621_TMEM106C  | -0.17297 | 0.002044 | 0.006944 |
| 11721719_NAAA      | -0.26735 | 0.002045 | 0.006944 |
| 11730843_MXI1      | -0.19732 | 0.002045 | 0.006944 |
| 200021_PMCFL1      | -0.15704 | 0.002047 | 0.00695  |
| 11745190_FUS       | -0.16977 | 0.002047 | 0.006952 |
| 11750883_EIF2A     | 0.174126 | 0.002047 | 0.006952 |
| 11746868_GIT2      | 0.219711 | 0.002048 | 0.006953 |
| 11720415_CAMSAP1   | 0.194605 | 0.002048 | 0.006954 |
| 11744927_SLC9B2    | 0.360455 | 0.002049 | 0.006956 |
| 11739463_GIGYF2    | 0.267337 | 0.00205  | 0.006957 |
| 11716900_ARL3      | -0.19547 | 0.002051 | 0.006963 |
| 11719753_ADAMTS9   | 0.215157 | 0.002053 | 0.006967 |
| 11743456_AP5M1     | -0.20281 | 0.002053 | 0.006968 |
| 11730360_CCDC126   | 0.167437 | 0.002054 | 0.006969 |
| 11722218_WBP4      | 0.194912 | 0.002055 | 0.006973 |
| 11723253_SCNM1 /// | 0.190817 | 0.002056 | 0.006975 |
| 11743587_BECN1     | 0.181843 | 0.002056 | 0.006976 |
| 11761741_DEPDC7    | 0.249078 | 0.002057 | 0.006979 |
| 11755799_TIE1      | -0.48231 | 0.002058 | 0.00698  |
| 11744228_ORAI3     | -0.17914 | 0.002059 | 0.006983 |
| 11762614_TRIM63    | -0.25926 | 0.00206  | 0.006987 |
| 11756421_HTRA2     | -0.19796 | 0.002061 | 0.006989 |
| 11751049_NUCB1     | -0.18018 | 0.002061 | 0.006989 |
| 11732366_SCAPER    | 0.331854 | 0.002061 | 0.006989 |
| 11761007_FIBP      | 0.435092 | 0.002062 | 0.006991 |
| 11758187_ST13      | 0.155298 | 0.002062 | 0.006991 |
| 11726116_MTAP      | -0.19222 | 0.002063 | 0.006995 |
| 11740197_ISPD      | -0.622   | 0.002064 | 0.006996 |
| 11728465_ZNF562    | 0.233086 | 0.002065 | 0.007    |
| 11739967_DNAJC24   | -0.43573 | 0.002065 | 0.007001 |
| 11724989_CLTCL1    | 0.410307 | 0.002066 | 0.007004 |
| 11761480_MAST4     | -0.23702 | 0.002067 | 0.007005 |
| 11762129_CFHR3     | 0.235842 | 0.002067 | 0.007005 |
| 11739876_BSG       | -0.20404 | 0.002068 | 0.007008 |
| 11751210_CYB561    | -0.16621 | 0.002072 | 0.007021 |
| 11739316_KDR       | 0.178679 | 0.002072 | 0.007021 |
| 11743951_ZNF214    | 0.453387 | 0.002072 | 0.007021 |
| 11752017_SPECC1L / | -0.17478 | 0.002073 | 0.007022 |
| 11718642_OSBPL8    | -0.19439 | 0.002073 | 0.007023 |
| 11734965_TRIM65    | -0.2565  | 0.002073 | 0.007023 |
| 11759541_RPL35A    | 0.196134 | 0.002073 | 0.007023 |
| 11743834_RSN1L     | 0.194193 | 0.002074 | 0.007025 |
| 11736207_PLXNC1    | 0.292114 | 0.002075 | 0.007028 |
| 11727247_CHRNB1    | 0.326692 | 0.002076 | 0.007028 |

|                   |          |          |          |
|-------------------|----------|----------|----------|
| 11742168_FAM27L   | -0.17207 | 0.002076 | 0.007028 |
| 11722808_SP1      | -0.18661 | 0.002076 | 0.00703  |
| 11715732_P SMB3   | -0.16743 | 0.002077 | 0.007033 |
| 11716735_RNF185   | 0.18792  | 0.002077 | 0.007033 |
| 11750697_SLC44A5  | 0.482687 | 0.002078 | 0.007033 |
| 11715886_PIP4K2B  | 0.393876 | 0.002079 | 0.007037 |
| 11751090_CBLB     | 0.456761 | 0.00208  | 0.00704  |
| 11716519_SDR39U1  | -0.22672 | 0.002081 | 0.007042 |
| 11725029_PNN      | 0.1927   | 0.002081 | 0.007042 |
| 11744898_PRRC2C   | 0.156057 | 0.002082 | 0.007046 |
| 11733812_SLC25A17 | 0.179386 | 0.002083 | 0.007048 |
| 11731635_GAB1     | 0.230971 | 0.002084 | 0.007051 |
| 11723867_SYNJ1    | 0.505419 | 0.002084 | 0.007051 |
| 11722623_TMEN8A   | 0.216481 | 0.002086 | 0.007056 |
| 11735284_KMT2E    | 0.173301 | 0.002086 | 0.007057 |
| 11733727_SNAP25   | 0.393199 | 0.002087 | 0.00706  |
| 11717197_SCFD1    | 0.203818 | 0.002088 | 0.007062 |
| 11716158_RNF40    | 0.164092 | 0.002089 | 0.007065 |
| 11746259_PIGA     | 0.241754 | 0.002089 | 0.007066 |
| 11734569_DCTN4    | 0.177536 | 0.00209  | 0.007067 |
| 11738389_TCF23    | -0.17783 | 0.00209  | 0.007067 |
| 11759484_STAG1    | -0.22932 | 0.00209  | 0.007067 |
| 11750081_TIE1     | -0.24665 | 0.00209  | 0.007067 |
| 11719758_SMCR8    | 0.200669 | 0.002091 | 0.007069 |
| 11749124_SMCR8    | 0.200669 | 0.002091 | 0.007069 |
| 11746138_AKT2     | -0.21676 | 0.002092 | 0.007072 |
| 11748239_TBCD     | -0.26621 | 0.002092 | 0.007073 |
| 11720588_HSD17B14 | -0.18032 | 0.002094 | 0.007078 |
| 11723603_C14orf79 | 0.184687 | 0.002095 | 0.00708  |
| 11732799_ACER2    | 0.640273 | 0.002095 | 0.00708  |
| 11722090_EFNA4    | -0.23905 | 0.002097 | 0.007084 |
| 11739459_COX20    | 0.197425 | 0.002097 | 0.007084 |
| 11726715_DDX59    | -0.25832 | 0.002097 | 0.007085 |
| 11735653_FAM213B  | -0.40298 | 0.002098 | 0.007087 |
| 11736332_PHF20    | -0.20316 | 0.002099 | 0.00709  |
| 11753090_OGFR     | -0.19063 | 0.002099 | 0.007091 |
| 11758655_RRAGA    | 0.162738 | 0.0021   | 0.007094 |
| 11764011_TMPO     | -0.33341 | 0.0021   | 0.007094 |
| 11721088_YLPM1    | -0.18232 | 0.002101 | 0.007094 |
| 11733895_TADA2B   | 0.219618 | 0.002102 | 0.007097 |
| 11758940_MOB1A    | -0.18446 | 0.002103 | 0.007102 |
| 11740797_POLR1C   | 0.210375 | 0.002105 | 0.007107 |
| 11716932_CCDC80   | 0.22757  | 0.002106 | 0.00711  |
| 11752465_RPS6KB1  | 0.281572 | 0.002107 | 0.007112 |
| 11759638_MESDC2   | 0.26011  | 0.002107 | 0.007112 |
| 11755472_DBR1     | 0.169854 | 0.002107 | 0.007113 |
| 11757643_SERPINE2 | 0.172474 | 0.002109 | 0.00712  |
| 11745272_ATP6V1C1 | 0.245037 | 0.00211  | 0.007121 |
| 11739308_DLG1     | 0.158168 | 0.002111 | 0.007125 |
| 11739700_STON1    | 0.275885 | 0.002111 | 0.007126 |
| 11750594_PLCL1    | 0.277578 | 0.002113 | 0.00713  |

|                    |          |          |          |
|--------------------|----------|----------|----------|
| 11757348_SLU7      | 0.206372 | 0.002113 | 0.00713  |
| 11732392_TPI1      | -0.17707 | 0.002114 | 0.007133 |
| 11739525_LPP       | 0.248519 | 0.002114 | 0.007133 |
| 11746276_RGS12     | -0.37676 | 0.002115 | 0.007134 |
| 11718566_KIAA1147  | 0.192891 | 0.002116 | 0.007137 |
| 11728013_RIMKLB    | 0.245829 | 0.002116 | 0.007137 |
| 11736962_MBNL2     | 0.198687 | 0.00212  | 0.007149 |
| 11748716_ERCC6L2   | 0.230274 | 0.00212  | 0.007151 |
| 11763518_PMS1      | -0.22998 | 0.002122 | 0.007156 |
| 11728302_TGFA      | 0.182209 | 0.002122 | 0.007156 |
| 11755146_SGIP1     | 0.223297 | 0.002123 | 0.007158 |
| 11721486_TP53RK    | -0.18921 | 0.002123 | 0.007158 |
| 11752015_AP4E1     | 0.311121 | 0.002125 | 0.007164 |
| 11739903_STAG2     | 0.179776 | 0.002125 | 0.007165 |
| 11751525_CCDC69    | -0.23016 | 0.002126 | 0.007167 |
| 11738255_C7orf57   | 0.588149 | 0.002126 | 0.007167 |
| 11757662_FBXO16    | -0.20506 | 0.002126 | 0.007167 |
| 11722568_NT5C2     | 0.233979 | 0.002128 | 0.007171 |
| 11753930_ZNF821    | 0.301069 | 0.002128 | 0.007171 |
| 11716296_FLOT2     | -0.23703 | 0.002129 | 0.007174 |
| 11725949_KRI1      | 0.250235 | 0.002129 | 0.007174 |
| 11740957_SLC2A6    | 0.163883 | 0.002129 | 0.007174 |
| 11717296_LRPPRC    | 0.192684 | 0.002129 | 0.007174 |
| 11723936_SNX1      | -0.17937 | 0.00213  | 0.007176 |
| 11719059_ATRN      | -0.23587 | 0.002131 | 0.007179 |
| 11736326_SWSAP1    | -0.23992 | 0.002133 | 0.007185 |
| 11740992_DBNL      | -0.18175 | 0.002135 | 0.00719  |
| 11746247_GK3P      | -0.24757 | 0.002136 | 0.007192 |
| 11736430_NOL8      | 0.179899 | 0.002141 | 0.007212 |
| 11736667_PTER      | -0.25815 | 0.002143 | 0.007216 |
| 11731771_PCDHB15   | 0.339838 | 0.002143 | 0.007216 |
| 11752673_LMNA      | -0.16195 | 0.002143 | 0.007216 |
| 11715830_PLS3      | -0.16209 | 0.002145 | 0.007223 |
| 11754605_TCF4      | 0.18262  | 0.002146 | 0.007225 |
| 11723266_SAYSD1    | -0.27825 | 0.002147 | 0.007228 |
| 11758727_ATP5C1    | -0.21371 | 0.002148 | 0.007229 |
| 11715399_SLC25A5   | -0.16165 | 0.002149 | 0.007234 |
| 11724801_NSRP1     | 0.265322 | 0.002149 | 0.007234 |
| 11718039_DCAF12    | 0.205698 | 0.00215  | 0.007236 |
| 11727306_ZNF320    | 0.219576 | 0.00215  | 0.007236 |
| 11715401_ILF2      | -0.15758 | 0.002151 | 0.00724  |
| 11755024_MYEOV     | 0.312201 | 0.002152 | 0.007241 |
| 11735345_C1QTNF5 / | -0.21414 | 0.002154 | 0.007249 |
| 11750870_NUP160    | 0.290858 | 0.002155 | 0.007252 |
| 11741411_ERC1      | 0.241383 | 0.002156 | 0.007252 |
| 11754261_SLC39A1   | -0.24115 | 0.002156 | 0.007253 |
| 11746452_ZHX1      | 0.389532 | 0.002159 | 0.007262 |
| 11759577_MRS2      | 0.19049  | 0.002163 | 0.007277 |
| 11739517_DFFA      | -0.18886 | 0.002164 | 0.007278 |
| 11721853_NCAPH     | -0.27475 | 0.002165 | 0.007281 |
| 11737874_SULF1     | 0.425262 | 0.002166 | 0.007283 |

|                    |          |          |          |
|--------------------|----------|----------|----------|
| 11723711_SLC24A3   | 0.317735 | 0.002166 | 0.007283 |
| 11722156_PRKRA     | 0.162415 | 0.002168 | 0.007288 |
| 11731098_FAM161A   | -0.24505 | 0.002168 | 0.007288 |
| 11732459_ZNF599    | -0.21573 | 0.002168 | 0.007289 |
| 11726370_BACH1 /// | 0.352461 | 0.002171 | 0.007298 |
| 11729575_XBP1      | 0.159077 | 0.002171 | 0.007298 |
| 11731187_PPM1E     | 0.320479 | 0.002172 | 0.0073   |
| 11731881_PPP2R1B   | 0.198334 | 0.002172 | 0.007301 |
| 11760565_AKAP9     | 0.217396 | 0.002173 | 0.007304 |
| 11739553_GAS7      | 0.233616 | 0.002176 | 0.007311 |
| 11745517_SDHB      | -0.15619 | 0.002176 | 0.007312 |
| 11757596_TRIM13    | 0.190673 | 0.002177 | 0.007315 |
| 11718012_IRS2      | 0.185128 | 0.002178 | 0.007317 |
| 11739985_AMACR /// | 0.239225 | 0.002179 | 0.00732  |
| 11740683_PRKG1     | -0.28376 | 0.00218  | 0.007322 |
| 11733211_BRCC3     | 0.187055 | 0.00218  | 0.007323 |
| 11747200_GTF2F1    | 0.177178 | 0.002181 | 0.007325 |
| 11747374_ZNF738    | 0.310221 | 0.002182 | 0.007328 |
| 200020_PMTARDBP    | -0.18796 | 0.002182 | 0.007329 |
| 11724913_ILK       | 0.175816 | 0.002183 | 0.007329 |
| 11726551_RAET1L // | -0.24134 | 0.002183 | 0.007329 |
| 11733144_IMPA1     | 0.153218 | 0.002183 | 0.00733  |
| 11746814_NAB1      | 0.209338 | 0.002184 | 0.007331 |
| 11742702_C17orf89  | 0.206392 | 0.002184 | 0.007333 |
| 11715857_NCKAP1    | 0.185625 | 0.002185 | 0.007334 |
| 11715416_DDB1      | -0.19173 | 0.002185 | 0.007334 |
| 11719712_PPM1B     | 0.205489 | 0.002185 | 0.007334 |
| 11723762_PLCG1     | -0.34957 | 0.002186 | 0.007335 |
| 11728814_OTUD7B    | 0.189728 | 0.002186 | 0.007336 |
| 11733067_NFYB      | -0.18115 | 0.002188 | 0.007342 |
| 11748609_ZNF841    | 0.267824 | 0.00219  | 0.00735  |
| 11755087_C4orf47   | 0.279834 | 0.002191 | 0.00735  |
| 11735030_CLASP1    | 0.328017 | 0.002194 | 0.007359 |
| 11743529_OPA1      | 0.235517 | 0.002194 | 0.007362 |
| 11726118_CPN1      | -0.19343 | 0.002195 | 0.007364 |
| 11754471_HLA-DMB   | -0.25634 | 0.002196 | 0.007367 |
| 11723335_GMIP      | -0.19956 | 0.002196 | 0.007367 |
| 11748954_MBD1      | 0.243474 | 0.002197 | 0.007368 |
| 11725536_ANKRD34A  | 0.168207 | 0.002198 | 0.00737  |
| 11715898_TNIP1     | 0.162627 | 0.002198 | 0.007371 |
| 11715873_OLFML3    | 0.217473 | 0.002198 | 0.007372 |
| 11731580_KCTD20    | 0.293133 | 0.002199 | 0.007374 |
| 11748297_PPP2R5E   | 0.182669 | 0.002201 | 0.00738  |
| 11733009_LUC7L3    | 0.154014 | 0.002203 | 0.007384 |
| 11718437_ATPAF2    | 0.204778 | 0.002203 | 0.007384 |
| 11744236_DDX60     | 0.28669  | 0.002203 | 0.007384 |
| 11744449_ARHGAP4   | -0.18273 | 0.002205 | 0.00739  |
| 11723035_GTF2A2    | 0.191178 | 0.002205 | 0.00739  |
| 11749585_RMDN2     | 0.410843 | 0.002205 | 0.007391 |
| 11727804_PRDX3     | -0.18621 | 0.002207 | 0.007396 |
| 11720117_SIPA1     | -0.22899 | 0.002208 | 0.007398 |

|                   |          |          |          |
|-------------------|----------|----------|----------|
| 11728570_ZFPM2    | -0.22274 | 0.002208 | 0.007398 |
| 11720590_PHF21A   | -0.25111 | 0.002212 | 0.00741  |
| 11718194_VEZF1    | 0.165651 | 0.002212 | 0.00741  |
| 11756646_IRF2BP2  | 0.15943  | 0.002213 | 0.007412 |
| 11753466_ACSS2    | 0.254707 | 0.002213 | 0.007413 |
| 11717412_ANO6     | 0.212197 | 0.002213 | 0.007413 |
| 11735948_ANAPC7   | 0.237342 | 0.002215 | 0.007419 |
| 11756427_ARL16    | 0.192097 | 0.002216 | 0.007422 |
| 11725664_EDNRB    | 0.241877 | 0.002217 | 0.007425 |
| 11722397_RWDD4    | -0.26542 | 0.002218 | 0.007425 |
| 11727831_DDX42    | -0.39324 | 0.002218 | 0.007425 |
| 11754225_SEC23B   | -0.17646 | 0.002218 | 0.007425 |
| 11757760_DNAJB12  | -0.21969 | 0.002218 | 0.007425 |
| 11742478_NRG1     | 0.304777 | 0.002219 | 0.007427 |
| 11715277_AURKAIP1 | -0.2039  | 0.002219 | 0.007429 |
| 11752616_DLG1     | 0.258263 | 0.002223 | 0.007442 |
| 11753739_CYB5A    | -0.24401 | 0.002224 | 0.007445 |
| 11728690_RABIF    | 0.264418 | 0.002226 | 0.00745  |
| 11740232_ASX      | -0.20907 | 0.002226 | 0.00745  |
| 11763572_POLE3    | -0.17844 | 0.002226 | 0.00745  |
| 11716593_BTBD1    | 0.194412 | 0.002228 | 0.007455 |
| 11751575_ACTN2    | 0.349377 | 0.00223  | 0.00746  |
| 11754594_SLC26A2  | 0.155692 | 0.00223  | 0.007461 |
| 11724853_LRP3     | -0.22443 | 0.00223  | 0.007461 |
| 11740100_ZNF37A   | 0.222544 | 0.00223  | 0.007461 |
| 11764080_USP6NL   | -0.3529  | 0.002231 | 0.007463 |
| 11724320_C11orf54 | 0.20061  | 0.002232 | 0.007465 |
| 11742899_CGGBP1   | 0.201379 | 0.002233 | 0.007467 |
| 11748624_HYOU1    | 0.194298 | 0.002233 | 0.007467 |
| 11746194_METTL3   | -0.17854 | 0.002237 | 0.007481 |
| 11715608_PPIB     | 0.155495 | 0.002237 | 0.007481 |
| 11725111_NDE1     | -0.18794 | 0.002239 | 0.007485 |
| 11719814_BET1     | -0.44144 | 0.00224  | 0.007488 |
| 11721321_LYRM4    | 0.225652 | 0.002241 | 0.007494 |
| 11717336_RBM6     | 0.176022 | 0.002242 | 0.007494 |
| 11763478_PIF1     | -0.2954  | 0.002242 | 0.007495 |
| 11743547_ASAH1    | 0.184788 | 0.002243 | 0.007497 |
| 11759895_PCDH9    | -0.19891 | 0.002245 | 0.007503 |
| 11761399_WRB      | -0.25387 | 0.002249 | 0.007515 |
| 11728666_PCBP2    | -0.162   | 0.002249 | 0.007517 |
| 11733924_RIOK1    | 0.207639 | 0.002252 | 0.007524 |
| 11739601_AASS     | -0.27061 | 0.002253 | 0.007529 |
| 11740371_PDHX     | 0.206917 | 0.002253 | 0.007529 |
| 11752409_NDC1     | 0.201022 | 0.002254 | 0.00753  |
| 11755156_REPS1    | 0.211212 | 0.002255 | 0.007533 |
| 11758850 EMC1     | -0.28435 | 0.002255 | 0.007533 |
| 11725159_FBXW2    | 0.242146 | 0.002257 | 0.00754  |
| 11758386_MANBA    | 0.320564 | 0.002258 | 0.007542 |
| 11738552_ANXA2    | 0.185526 | 0.002258 | 0.007542 |
| 11758202_ATPIF1   | -0.18926 | 0.002259 | 0.007544 |
| 11717891_ECM1     | 0.178697 | 0.002262 | 0.007553 |

|                    |          |          |          |
|--------------------|----------|----------|----------|
| 11756700_TRIM26    | 0.16441  | 0.002262 | 0.007553 |
| 11743837_NCBP3     | 0.271012 | 0.002265 | 0.007562 |
| 11745084_FAM168B   | 0.239847 | 0.002266 | 0.007566 |
| 11753034_ZNFX1     | -0.20031 | 0.002267 | 0.007569 |
| 11735220_LPAR3     | -0.30839 | 0.002268 | 0.007572 |
| 11718423_SMARCA5   | 0.167676 | 0.002269 | 0.007573 |
| 11738057_TMEM136   | 0.180921 | 0.00227  | 0.007578 |
| 11733012_PEX2      | -0.27195 | 0.00227  | 0.007578 |
| 11760622_C8orf34   | -0.2431  | 0.002271 | 0.007579 |
| 11737339_ABCG8     | -0.19629 | 0.002272 | 0.007581 |
| 11742103_TLE2      | -0.38271 | 0.002273 | 0.007584 |
| 11745934_LOC102724 | 0.170518 | 0.002274 | 0.007586 |
| 11755567_DMPK      | 0.253445 | 0.002276 | 0.007592 |
| 11754274_ST6GALNAC | 0.319082 | 0.002276 | 0.007594 |
| 200014_PMHNRNPC    | -0.18607 | 0.002277 | 0.007596 |
| 11755669_DHX33     | 0.343921 | 0.002278 | 0.007599 |
| 11744750_LGI4      | -0.15774 | 0.002279 | 0.0076   |
| 11750323_HMG2P46   | -0.18897 | 0.00228  | 0.007603 |
| 11719275_PSMA2     | -0.16137 | 0.002281 | 0.007606 |
| 11726136_TMSB15B   | 0.195176 | 0.002282 | 0.007608 |
| 11750600_CLCA3P    | 0.264154 | 0.002282 | 0.007611 |
| 11717280_URM1      | -0.1629  | 0.002284 | 0.007616 |
| 11748839_NFS1      | -0.22483 | 0.002285 | 0.007617 |
| 11741688_LRP5L     | 0.377441 | 0.002287 | 0.007624 |
| 11734267_HOXC11    | 0.219925 | 0.002288 | 0.007626 |
| 11723040_FABP1     | -0.33668 | 0.002288 | 0.007627 |
| 11759517_GRIP2     | -0.29115 | 0.002288 | 0.007627 |
| 11724438_CDC24     | 0.201646 | 0.002289 | 0.007627 |
| 11729260_ZNF644    | 0.203682 | 0.00229  | 0.007632 |
| 11719772_C5orf24   | -0.33188 | 0.00229  | 0.007632 |
| 11754307_CAPN1     | -0.20529 | 0.00229  | 0.007632 |
| 11759729_TTC14     | 0.351893 | 0.002291 | 0.007632 |
| 11737755_ABCB6 /// | 0.158818 | 0.002291 | 0.007632 |
| 11761553_KATNBL1   | -0.25375 | 0.002291 | 0.007633 |
| 11748865_TMEM139   | 0.286377 | 0.002292 | 0.007634 |
| 11742306_SULT1C3   | -0.24505 | 0.002292 | 0.007634 |
| 11756729_CTDSP2    | 0.200072 | 0.002292 | 0.007635 |
| 11744717_C18orf8   | 0.161105 | 0.002293 | 0.007637 |
| 11742457_PTBP1     | -0.17009 | 0.002294 | 0.007641 |
| 11750255_ARID1A    | -0.1575  | 0.002296 | 0.007646 |
| 11739145_ITGA3     | 0.220636 | 0.002298 | 0.007652 |
| 11716813_GATM      | 0.252576 | 0.002298 | 0.007652 |
| 11742701_C1R       | -0.31682 | 0.0023   | 0.007656 |
| 11757713_ATXN2L    | -0.18141 | 0.0023   | 0.007656 |
| 11721891_ADGRL1    | -0.22125 | 0.0023   | 0.007657 |
| 11759073_DNAJC9    | -0.24897 | 0.0023   | 0.007657 |
| 11715411_EPAS1     | 0.191674 | 0.002302 | 0.007664 |
| 11738807_CMIP      | -0.18159 | 0.002303 | 0.007664 |
| 11761114_AKR1C2    | -0.26852 | 0.002303 | 0.007665 |
| 11737289_FLJ44635  | -0.15439 | 0.002303 | 0.007665 |
| 11756979_TUBA1A // | -0.16504 | 0.002304 | 0.007666 |



|                    |          |          |          |
|--------------------|----------|----------|----------|
| 11722147_PAIP2B    | -0.20067 | 0.002305 | 0.007668 |
| 11730952_PDK3      | -0.27835 | 0.002305 | 0.00767  |
| 11739149_SAMHD1    | 0.270704 | 0.002305 | 0.00767  |
| 11717893_PTP4A1    | 0.19863  | 0.002306 | 0.007671 |
| 11727978_SRGAP1    | 0.176654 | 0.002307 | 0.007673 |
| 11729580_CDH13     | 0.172573 | 0.002307 | 0.007675 |
| 11723716_CYB5D1    | 0.212508 | 0.002309 | 0.007679 |
| 11740484_USP51     | -0.27525 | 0.002309 | 0.007679 |
| 11743241_LINC01198 | 0.197904 | 0.00231  | 0.007683 |
| 11743567_ACBD3     | 0.168076 | 0.002311 | 0.007686 |
| 11748987_REEP5     | -0.22717 | 0.002313 | 0.00769  |
| 11758581_IPO9      | -0.21248 | 0.002315 | 0.007697 |
| 11719889_GIGYF2    | -0.28961 | 0.002315 | 0.007697 |
| 11740221_ZNF273    | -0.33353 | 0.002315 | 0.007697 |
| 11727938_SEMA3B    | 0.210082 | 0.002317 | 0.007701 |
| 11720352_ETV5      | -0.16203 | 0.002317 | 0.007701 |
| 11742116_LDHA      | -0.17263 | 0.002318 | 0.007704 |
| 11737901_METTL5    | -0.19753 | 0.002318 | 0.007704 |
| 11722875_LRBA      | 0.597875 | 0.00232  | 0.007709 |
| 11724976_ZNF579    | 0.163357 | 0.002322 | 0.007717 |
| 11743410_RBM25     | 0.202262 | 0.002324 | 0.007723 |
| 11721381_GNPTAB    | 0.249175 | 0.002325 | 0.007725 |
| 11746448_ARHGAP35  | -0.24299 | 0.002327 | 0.007731 |
| 11723704_ABHD5     | 0.330198 | 0.00233  | 0.007741 |
| 11740736_TMC7      | 0.445287 | 0.002331 | 0.007744 |
| 11762560_RGS11     | -0.29775 | 0.002331 | 0.007744 |
| 11763956_SCARNA14  | 0.229877 | 0.002333 | 0.007749 |
| 11742552_OR13C8    | 0.20751  | 0.002335 | 0.007755 |
| 11722695_ZMYM4     | 0.166778 | 0.002337 | 0.00776  |
| 11735606_RAB12     | 0.203162 | 0.002338 | 0.007766 |
| 11733409_MPND      | -0.21416 | 0.002339 | 0.007768 |
| 11735038_SORCS1    | 0.218541 | 0.00234  | 0.007768 |
| 11759331_B3GAT2    | 0.248679 | 0.00234  | 0.007768 |
| 11716019_RAB31     | 0.23597  | 0.00234  | 0.00777  |
| 11737852_PPP1R18   | 0.18499  | 0.002341 | 0.007773 |
| 11725372_VEGFA     | -0.18651 | 0.002343 | 0.007779 |
| 11756753_IQGAP3    | -0.31454 | 0.002344 | 0.00778  |
| 11751563_GLYCTK    | -0.22281 | 0.002344 | 0.00778  |
| 11747069_DDX11 /// | -0.40168 | 0.002344 | 0.00778  |
| 11720351_ETV5      | -0.2279  | 0.002344 | 0.00778  |
| 11718887_TPRKB     | -0.21107 | 0.002345 | 0.007781 |
| 11723528_LENG8     | 0.184164 | 0.002346 | 0.007783 |
| 11738041_TNIP3     | -0.25905 | 0.002346 | 0.007784 |
| 11745942_PITRM1    | 0.164338 | 0.002346 | 0.007784 |
| 11722484_C8orf82   | -0.28278 | 0.002348 | 0.007788 |
| 11756454_EXOC7     | -0.16451 | 0.002349 | 0.007793 |
| 11761671_ETV7      | 0.360991 | 0.00235  | 0.007794 |
| 11729539_IMMPL1L   | -0.24249 | 0.00235  | 0.007794 |
| 11731924_KCNRG     | -0.19458 | 0.002351 | 0.007797 |
| 11752326_ANKRD19P  | 0.238412 | 0.002354 | 0.007807 |
| 11762347_RNF7      | 0.312382 | 0.002355 | 0.007809 |

|                    |          |          |          |
|--------------------|----------|----------|----------|
| 11725578_BEND3     | -0.26043 | 0.002357 | 0.007816 |
| 11721464_OSBPL2    | -0.18676 | 0.002358 | 0.007818 |
| 11718836_NDUFS2    | -0.17639 | 0.00236  | 0.007823 |
| 11732342_ZNF33A // | 0.380342 | 0.002361 | 0.007827 |
| 11729872_SLC8A3    | -0.23699 | 0.002361 | 0.007827 |
| 11754753_SCAF11    | 0.188692 | 0.002362 | 0.007829 |
| 11743062_PLAUR     | 0.155045 | 0.002365 | 0.00784  |
| 11749641_ZNF254    | 0.344629 | 0.002366 | 0.00784  |
| 11759566_NPL       | -0.2325  | 0.002367 | 0.007844 |
| 11754297_TNFRSF1A  | 0.187123 | 0.002369 | 0.00785  |
| 11727277_TMEM169   | 0.212828 | 0.002369 | 0.007852 |
| 11730119_CLDND2    | -0.24413 | 0.00237  | 0.007853 |
| 11738493_OR4F17 // | 0.182454 | 0.00237  | 0.007853 |
| 11739175_HNRNPM    | -0.18025 | 0.00237  | 0.007853 |
| 11719342_ATF3      | 0.298605 | 0.002372 | 0.007858 |
| 11739430_FCF1 ///  | -0.22691 | 0.002373 | 0.00786  |
| 11740582_ASAH1     | 0.158636 | 0.002375 | 0.007867 |
| 11734892_SOBP      | -0.24203 | 0.002378 | 0.007876 |
| 11751713_C6orf62   | -0.206   | 0.002379 | 0.007877 |
| 11719773_C5orf24   | -0.18497 | 0.00238  | 0.00788  |
| 11726382_SLAMF1    | -0.18058 | 0.00238  | 0.00788  |
| 11745311_SH3GLB2   | -0.19974 | 0.002383 | 0.007889 |
| 11743195_PRRG2     | -0.27208 | 0.002384 | 0.007893 |
| 11718669_MED9      | -0.45715 | 0.002384 | 0.007893 |
| 11731626_CCDC186   | 0.294853 | 0.002384 | 0.007893 |
| 11743794_CFAP69    | 0.415319 | 0.002385 | 0.007893 |
| 11752304_ITGB4     | 0.236448 | 0.002386 | 0.007897 |
| 11751113_SNX11     | 0.308295 | 0.002387 | 0.0079   |
| 11756481_FDXR      | 0.194976 | 0.002395 | 0.007926 |
| 11730186_IDH3B     | -0.19334 | 0.002396 | 0.007928 |
| 11742752_ETS2      | 0.18125  | 0.002396 | 0.007929 |
| 11749715_TUBB4A    | -0.45149 | 0.002397 | 0.007932 |
| 11721319_LYRM4     | 0.198748 | 0.002399 | 0.007937 |
| 11747312_WBP11     | -0.17469 | 0.0024   | 0.007941 |
| 11748888_FTO       | -0.27422 | 0.002402 | 0.007946 |
| 11734995_SKI       | 0.173052 | 0.002403 | 0.007949 |
| 11716466_ISCA1     | -0.19391 | 0.002403 | 0.007949 |
| 11753261_DENR      | 0.16818  | 0.002404 | 0.00795  |
| 11720882_BOLA1     | -0.36648 | 0.002404 | 0.007951 |
| 11723898_CCBL1     | -0.17436 | 0.002404 | 0.007952 |
| 11739201_ATP5G3    | -0.16328 | 0.002406 | 0.007957 |
| 11731645_CAMKK2    | -0.2172  | 0.002407 | 0.00796  |
| 11721373_C10orf35  | -0.25539 | 0.002409 | 0.007965 |
| 11734066_IRAK4     | 0.178259 | 0.002413 | 0.007977 |
| 11749767_PCYOX1    | -0.25248 | 0.002414 | 0.007982 |
| 11717284_WASL      | 0.22131  | 0.002415 | 0.007984 |
| 11724748_CHMP2B    | 0.15942  | 0.002416 | 0.007985 |
| 11728242_SCO1      | 0.165815 | 0.002419 | 0.007995 |
| 11716868_UTP18     | 0.14901  | 0.002419 | 0.007995 |
| 11743293_BCKDK     | -0.15637 | 0.002419 | 0.007996 |
| 11753175_ADIPOR1   | 0.190285 | 0.00242  | 0.007999 |

|                    |          |          |          |
|--------------------|----------|----------|----------|
| 11753732_PAOX      | -0.27384 | 0.002421 | 0.008001 |
| 11737894_SLC12A6   | 0.30146  | 0.002422 | 0.008002 |
| 11757914_KNOP1     | -0.17422 | 0.002422 | 0.008002 |
| 11755533_ADGRA3    | -0.22978 | 0.002422 | 0.008003 |
| 11747650_LRRC41    | -0.22676 | 0.002423 | 0.008005 |
| 11760960_EML2      | -0.20928 | 0.002424 | 0.008007 |
| 11723295_PIGB      | 0.185633 | 0.002424 | 0.008007 |
| 11758682_TMEM261   | -0.28796 | 0.002426 | 0.008013 |
| 11719688_TCF25     | -0.1994  | 0.002427 | 0.008014 |
| 11731532_MTPAP     | -0.37815 | 0.002427 | 0.008014 |
| 11719301_GRPEL2    | 0.203826 | 0.002427 | 0.008014 |
| 11726672_ACCS      | 0.173187 | 0.002428 | 0.008018 |
| 11716282_FURIN     | 0.197146 | 0.00243  | 0.008024 |
| 11754383_GFOD2     | 0.203222 | 0.002434 | 0.008037 |
| 11724975_HRASLS5   | -0.23853 | 0.002434 | 0.008037 |
| 11717184_GTPBP2    | 0.198752 | 0.002435 | 0.00804  |
| 11746825_FPGT      | -0.24211 | 0.002438 | 0.008048 |
| 11746294_HERC2 /// | 0.225977 | 0.002439 | 0.00805  |
| 11724649_VANGL1    | -0.25232 | 0.00244  | 0.008053 |
| 11720273_SFT2D3    | -0.17948 | 0.00244  | 0.008053 |
| 11755105_DGKZ      | 0.190334 | 0.002441 | 0.008057 |
| 11720077_EXOSC4    | 0.189965 | 0.002444 | 0.008063 |
| 11759803_PDCD6     | -0.21004 | 0.002444 | 0.008063 |
| 11717100_SLC38A1   | -0.17182 | 0.002445 | 0.008067 |
| 11741271_GOPC      | -0.16447 | 0.002446 | 0.008069 |
| 11754271_PSMB4     | -0.16512 | 0.002448 | 0.008075 |
| 11730180_KDSR      | -0.2369  | 0.002448 | 0.008075 |
| 11722420_PPP3CC    | -0.19602 | 0.002454 | 0.008093 |
| 11759259_C10orf111 | -0.23418 | 0.002454 | 0.008095 |
| 11723203_MTMR6     | 0.165376 | 0.002455 | 0.008098 |
| 11752130_STAG1     | 0.187808 | 0.002456 | 0.008098 |
| 11739476_SBF2      | 0.241699 | 0.002456 | 0.008099 |
| 11718601_ATXN2     | 0.188661 | 0.002457 | 0.008101 |
| 11758904_RCAN3     | -0.26872 | 0.002458 | 0.008105 |
| 11739036_PLP1      | -0.16788 | 0.002458 | 0.008105 |
| 11744812_SCAP      | -0.20842 | 0.00246  | 0.008108 |
| 11719704_CD2BP2    | -0.16221 | 0.00246  | 0.008108 |
| 11717378_SRPRB     | 0.178051 | 0.00246  | 0.008108 |
| 11740230_PHEX      | 0.27613  | 0.002461 | 0.008111 |
| 11745336_DMXL1     | 0.348596 | 0.002461 | 0.008112 |
| 11717497_SLC25A36  | 0.176526 | 0.002463 | 0.008115 |
| 11759184_PLXNC1    | 0.354841 | 0.002463 | 0.008115 |
| 11726745_TAOK2     | -0.19644 | 0.002464 | 0.00812  |
| 11734788_OLFM3     | 0.221692 | 0.002465 | 0.008121 |
| 11751591_RMND1     | 0.309722 | 0.002465 | 0.008121 |
| 11746110_LOC102724 | -0.16071 | 0.002465 | 0.008122 |
| 11729629_AP3M1     | 0.149423 | 0.002466 | 0.008122 |
| 11717971_FAM20B    | -0.17241 | 0.002466 | 0.008122 |
| 11718465_NCK2      | 0.187727 | 0.002467 | 0.008126 |
| 11720483_POLM      | 0.183488 | 0.002469 | 0.008132 |
| 11749309_PRUNE     | 0.198788 | 0.002469 | 0.008132 |

|                    |          |          |          |
|--------------------|----------|----------|----------|
| 11755189_TMEMI75   | -0.1838  | 0.00247  | 0.008134 |
| 11757801_HLA-DPB1  | -0.20163 | 0.00247  | 0.008135 |
| 11752074_GK5       | 0.209973 | 0.002472 | 0.00814  |
| 11751919_DIXDC1    | 0.261706 | 0.002473 | 0.008141 |
| 11762426_MYT1L     | -0.32998 | 0.002475 | 0.008148 |
| 11726438_MALT1     | 0.231824 | 0.002476 | 0.008149 |
| 11764246_STT3B     | -0.18298 | 0.002476 | 0.00815  |
| 11725656_MAGOHB    | -0.46112 | 0.002476 | 0.00815  |
| 11748460_RHOBTB1   | 0.269564 | 0.002476 | 0.00815  |
| 11740749_OGG1      | -0.19682 | 0.002477 | 0.008153 |
| 11760182_ZNF549    | 0.312199 | 0.002478 | 0.008155 |
| 11715535_GPS1      | -0.17145 | 0.002478 | 0.008155 |
| 11715353_COL1A2    | -0.35555 | 0.002478 | 0.008155 |
| 11746164_MEAF6     | 0.160341 | 0.00248  | 0.008161 |
| 11724765_FASTKD2   | 0.162578 | 0.002481 | 0.008161 |
| 11715578_RAC1      | -0.16542 | 0.002481 | 0.008162 |
| 11754774_NPAS2     | 0.169219 | 0.002481 | 0.008163 |
| 11718703_INO80E    | -0.18017 | 0.002485 | 0.008173 |
| 11757994_ZNF674    | 0.514267 | 0.002485 | 0.008173 |
| 11755141_CACNA2D4  | 0.343572 | 0.002486 | 0.008175 |
| 11727532_FEZ2      | 0.177296 | 0.002487 | 0.008178 |
| 11748290_PRPSAP2   | -0.16077 | 0.002487 | 0.008178 |
| 11744621_LOC100130 | 0.165082 | 0.002488 | 0.008182 |
| 11724790_PKP3      | -0.16966 | 0.002488 | 0.008182 |
| 11740415_DNAJC5B   | -0.19691 | 0.002488 | 0.008182 |
| 11745524_CTNNBIP1  | -0.24401 | 0.00249  | 0.008185 |
| 11721139_UCKL1     | -0.20831 | 0.002491 | 0.008187 |
| 11758021_DDX3X     | 0.16675  | 0.002492 | 0.008191 |
| 11716954_CTDSP2    | -0.23636 | 0.002493 | 0.008193 |
| 11760508_VRK2      | 0.399577 | 0.002496 | 0.008204 |
| 11721806 EMC1      | 0.189934 | 0.002497 | 0.008205 |
| 11721825_ARPC5L    | 0.178628 | 0.002498 | 0.00821  |
| 11724311_SH3BP2    | -0.19955 | 0.002503 | 0.008226 |
| 11754714_EP400     | -0.28342 | 0.002504 | 0.008229 |
| 11719395_EXTL2     | -0.18137 | 0.002506 | 0.008234 |
| 11716937_NUPR1     | -0.17911 | 0.002507 | 0.008238 |
| 11724241_TCF4      | 0.193647 | 0.002508 | 0.00824  |
| 11746329_MAEA      | 0.164323 | 0.002509 | 0.008241 |
| 11717629_KIF1BP    | -0.19977 | 0.00251  | 0.008243 |
| 11720806_ING4      | -0.18742 | 0.00251  | 0.008245 |
| 11748002_HPCAL1    | -0.18107 | 0.002511 | 0.008246 |
| 11718906_ADCK2     | -0.1567  | 0.002511 | 0.008247 |
| 11718693_TMEMI60   | -0.2276  | 0.002512 | 0.00825  |
| 11751590_NCOR1     | 0.224622 | 0.002513 | 0.008253 |
| 11739754_SLAMF8    | -0.17667 | 0.002513 | 0.008253 |
| 11751884_PSME4     | 0.222266 | 0.002514 | 0.008253 |
| 11758573_MORC4     | 0.214936 | 0.002514 | 0.008254 |
| 11757077_LOC102723 | -0.17743 | 0.002514 | 0.008254 |
| 11734820_APBB2     | 0.328354 | 0.002515 | 0.008255 |
| 11732223_ZP3       | -0.16446 | 0.002515 | 0.008255 |
| 11757855_GARS      | 0.154265 | 0.002518 | 0.008264 |

|                    |          |          |          |
|--------------------|----------|----------|----------|
| 11719398_RRAGC     | 0.174264 | 0.00252  | 0.008269 |
| 11758422_SLC35G1   | 0.234477 | 0.002523 | 0.008281 |
| 11723753_ZFAND2A   | 0.154141 | 0.002527 | 0.008292 |
| 11737782_PROSC     | 0.240424 | 0.002527 | 0.008292 |
| 11719847_C7orf25   | 0.152352 | 0.002531 | 0.008303 |
| 11739450_ROCK1     | 0.163367 | 0.002534 | 0.008313 |
| 11720571_JADE2     | -0.16828 | 0.002534 | 0.008314 |
| 11746921_RANBP17   | -0.279   | 0.002536 | 0.008318 |
| 11752736_CHID1     | -0.20008 | 0.002538 | 0.008325 |
| 11759078_PLRG1     | -0.20446 | 0.002538 | 0.008325 |
| 11734607_SHQ1      | 0.167427 | 0.002539 | 0.008327 |
| 11747410_MRRF      | 0.222465 | 0.002539 | 0.008327 |
| 11729939_CRYBB3    | -0.18817 | 0.00254  | 0.00833  |
| 11730677_RNF150    | -0.22932 | 0.00254  | 0.00833  |
| 11760837_RAET1E    | 0.505099 | 0.002541 | 0.00833  |
| 11749971_CYB561    | 0.17356  | 0.002541 | 0.00833  |
| 11730340_MSX2      | 0.279252 | 0.002545 | 0.008342 |
| 11751748_CHN2 ///  | -0.29355 | 0.002545 | 0.008344 |
| 11719402_RAP2A     | -0.21189 | 0.002546 | 0.008344 |
| 11720527_LTBP2     | 0.458632 | 0.002548 | 0.008352 |
| 11740038_ANKRD36 / | 0.167838 | 0.002549 | 0.008356 |
| 11762127_CD33      | -0.25503 | 0.002553 | 0.008366 |
| 11717032_KIAA0141  | -0.20711 | 0.002553 | 0.008366 |
| 11737164_TRPC3     | -0.27745 | 0.002553 | 0.008366 |
| 11760678_PPIL2     | -0.49279 | 0.002554 | 0.008367 |
| 11764090_DNAJC5    | 0.21003  | 0.002554 | 0.008367 |
| 11724641_ARHGAP44  | -0.20713 | 0.002555 | 0.00837  |
| 11716883_RAP1B     | 0.169652 | 0.002555 | 0.00837  |
| 11730582_USP43     | -0.42326 | 0.002557 | 0.008375 |
| 11735369_UNC5C     | 0.276215 | 0.002558 | 0.008377 |
| 11745626_PCDHGA2   | -0.3157  | 0.002558 | 0.008377 |
| 11737130_PGAM5     | -0.28712 | 0.00256  | 0.008382 |
| 11725047_ANP32E    | -0.15348 | 0.00256  | 0.008382 |
| 11724359_BTRC      | 0.253486 | 0.00256  | 0.008383 |
| 11741625_SLC22A23  | -0.23252 | 0.002561 | 0.008385 |
| 11759808_PLEKHS1   | 0.352517 | 0.002562 | 0.00839  |
| 11746885_RAD52     | 0.237397 | 0.002564 | 0.008394 |
| 11759463_ADAMTS20  | -0.26133 | 0.002565 | 0.008397 |
| 11746895_BIN1      | 0.156937 | 0.002566 | 0.008399 |
| 11723995_GLCCI1    | -0.30585 | 0.002568 | 0.008405 |
| 11720055_METAP1    | -0.14795 | 0.002571 | 0.008416 |
| 11758544_RDH10     | -0.27314 | 0.002574 | 0.008426 |
| 11749391_QPRT      | -0.19082 | 0.002575 | 0.008427 |
| 11754961_RNF220    | -0.16284 | 0.002576 | 0.008428 |
| 11723812_STX17     | 0.472219 | 0.002577 | 0.008433 |
| 11752305_PARPBP    | -0.28033 | 0.002579 | 0.008437 |
| 11740799_PALM2     | 0.427155 | 0.002582 | 0.008446 |
| 11756309_MXD3 ///  | 0.205595 | 0.002582 | 0.008447 |
| 11721555_COLGALT1  | -0.17071 | 0.002583 | 0.00845  |
| 11748547_TMEM39B   | -0.15061 | 0.002591 | 0.008475 |
| 11742710_SRGN      | 0.19732  | 0.002592 | 0.008478 |

|                    |          |          |          |
|--------------------|----------|----------|----------|
| 11715863_DDAH2     | -0.32796 | 0.002594 | 0.008485 |
| 11762199_LOC100287 | -0.31912 | 0.002596 | 0.008489 |
| 11727959_ING1      | -0.19348 | 0.002597 | 0.008492 |
| 11726075_PDCD2     | 0.146772 | 0.002597 | 0.008493 |
| 11724132_GFRA1     | 0.572606 | 0.002598 | 0.008496 |
| 11721742_COL5A3    | 0.175852 | 0.002599 | 0.008499 |
| 11744427_SYAP1     | 0.17935  | 0.0026   | 0.008499 |
| 11745307_NFKBID    | -0.26631 | 0.002601 | 0.008503 |
| 11746769_RWDD4     | -0.22028 | 0.002604 | 0.008511 |
| 11721809_IST1      | 0.164899 | 0.002604 | 0.008511 |
| 11749879_PGAP2     | -0.24895 | 0.002604 | 0.008511 |
| 11715642_TTC3      | 0.160578 | 0.002605 | 0.008512 |
| 11719080_CDC5L     | -0.17343 | 0.002605 | 0.008513 |
| 11731045_ERLIN2    | 0.193786 | 0.002605 | 0.008513 |
| 11745916_ZNF549    | 0.334068 | 0.002606 | 0.008516 |
| 11754349_SRSF5     | -0.1635  | 0.002607 | 0.008519 |
| 11762890_SUN1      | -0.1538  | 0.002608 | 0.00852  |
| 11752702_MAP2K7    | -0.20611 | 0.002611 | 0.00853  |
| 11732159_YIF1A     | 0.190772 | 0.002614 | 0.00854  |
| 11716143_SIGMAR1   | -0.17667 | 0.002615 | 0.008541 |
| 11750065_IFT52     | 0.178505 | 0.002618 | 0.00855  |
| 11716903_TGOLN2    | 0.186739 | 0.002618 | 0.008552 |
| 11725965_CAV2      | 0.169396 | 0.002621 | 0.008561 |
| 11729334_CAV2      | 0.169396 | 0.002621 | 0.008561 |
| 11735135_TLL2      | -0.17744 | 0.002625 | 0.008573 |
| 11757420_ZFP36L2   | 0.186958 | 0.002626 | 0.008573 |
| 11724590_TCP10L    | 0.212287 | 0.002626 | 0.008574 |
| 11722842_ENAH      | -0.15406 | 0.002627 | 0.008576 |
| 11721579_DIO2      | 0.305816 | 0.002627 | 0.008577 |
| 11720223_GFPT1     | 0.153546 | 0.002629 | 0.008582 |
| 11757586_SLC27A5   | -0.17219 | 0.002629 | 0.008583 |
| 11729406_IFNGR1    | 0.190335 | 0.00263  | 0.008585 |
| 11749065_MCU       | 0.247082 | 0.002634 | 0.008595 |
| 11755830_MYO1G     | -0.21093 | 0.002635 | 0.008598 |
| 11722543_TRPC1     | -0.23975 | 0.002635 | 0.008598 |
| 11724758_GBP1L1    | 0.154868 | 0.002636 | 0.008601 |
| 11728536_MCC       | 0.367336 | 0.002639 | 0.008609 |
| 11718519_KCMF1     | -0.34599 | 0.002639 | 0.008611 |
| 11723575_MAPKAP1   | -0.28257 | 0.00264  | 0.008614 |
| 11739221_CACUL1    | -0.26212 | 0.002641 | 0.008614 |
| 11735597_PTCH1     | -0.19741 | 0.002642 | 0.008618 |
| 11743341_SMARCA2   | 0.178227 | 0.002642 | 0.008619 |
| 11754284_CYB561    | 0.171947 | 0.002643 | 0.008619 |
| 11720554_ARHGEF18  | 0.17354  | 0.002643 | 0.008621 |
| 11734061_PSTK      | 0.178501 | 0.002644 | 0.008622 |
| 11721692_CYB561    | 0.177862 | 0.002645 | 0.008625 |
| 11748037_CS        | -0.15655 | 0.002645 | 0.008625 |
| 11754289_LMAN2L    | 0.20184  | 0.002646 | 0.008626 |
| 11733386_TMEM182   | -0.3029  | 0.002648 | 0.008631 |
| 11757098_GAS6-AS1  | -0.16285 | 0.002648 | 0.008631 |
| 11733887_FBX042    | 0.177492 | 0.00265  | 0.008638 |

|                    |          |          |          |
|--------------------|----------|----------|----------|
| 11717703_KIFC3     | 0.164452 | 0.002652 | 0.008643 |
| 11736121_ZFAND5    | 0.187133 | 0.002653 | 0.008646 |
| 11735094_LEP       | -0.28653 | 0.002654 | 0.008648 |
| 11755217_ZNF142    | 0.398168 | 0.002656 | 0.008656 |
| 11735119_NBR1      | -0.16973 | 0.002656 | 0.008656 |
| 11742316_RHCE      | -0.34973 | 0.002657 | 0.008658 |
| 11748454_PUDP      | -0.22772 | 0.002658 | 0.008659 |
| 11756677_CYB5D2    | 0.230311 | 0.002658 | 0.00866  |
| 11725072_JADE1     | -0.27144 | 0.002658 | 0.00866  |
| 11724159_ECSCR     | 0.151382 | 0.002659 | 0.008662 |
| 11727741_SYNDIG1L  | -0.25716 | 0.00266  | 0.008665 |
| 11739350_AMOT      | 0.538894 | 0.002662 | 0.008671 |
| 11719393_NR1H3     | -0.21382 | 0.002662 | 0.008671 |
| 11755795_PRDM2     | 0.338878 | 0.002663 | 0.008673 |
| 11726675_ASCL1     | -0.16937 | 0.002667 | 0.008684 |
| 11751794_GLI2      | 0.183597 | 0.002667 | 0.008684 |
| 11717187_MEF2D     | 0.222653 | 0.002667 | 0.008684 |
| 11748588_ORC3      | -0.19841 | 0.002668 | 0.008686 |
| 11748054_ESPL1     | -0.25384 | 0.002668 | 0.008686 |
| 11757858_EIF2S3    | 0.20481  | 0.002669 | 0.008687 |
| 11751928_EIF4G3    | 0.154333 | 0.00267  | 0.008689 |
| 11742893_LAMTOR5   | -0.17521 | 0.00267  | 0.008689 |
| 11740114_CGN       | 0.452078 | 0.002673 | 0.008699 |
| 11743863_ATP2B1    | 0.280798 | 0.002673 | 0.0087   |
| 11740937_LIAS      | -0.54804 | 0.002676 | 0.008709 |
| 11753706_CALM2 /// | 0.186303 | 0.002677 | 0.008712 |
| 11732979_IFNA21    | -0.41194 | 0.002682 | 0.008728 |
| 11742678_PTBP1     | -0.15936 | 0.002683 | 0.008731 |
| 11726354_ENPP1     | -0.22611 | 0.002685 | 0.008735 |
| 11723063_GCHFR     | -0.23786 | 0.002686 | 0.008739 |
| 11735896_DEFEB106A | -0.21045 | 0.002687 | 0.00874  |
| 11755083_APBA3     | 0.169033 | 0.00269  | 0.00875  |
| 11753560_RAN       | -0.15231 | 0.002691 | 0.008751 |
| 11751891_ASXL2     | 0.21771  | 0.002692 | 0.008756 |
| 11759859_BACH1 /// | 0.650177 | 0.002692 | 0.008756 |
| 11728331_KCTD15    | -0.23879 | 0.002694 | 0.008759 |
| 11752847_NFIC      | -0.19479 | 0.002694 | 0.008759 |
| 11723819_PM2OD2    | 0.434423 | 0.002694 | 0.008759 |
| 11735097_MLX       | 0.175899 | 0.002695 | 0.008764 |
| 11763617_COL12A1   | 0.370881 | 0.0027   | 0.008777 |
| 11747902_EML1      | 0.179607 | 0.002704 | 0.008789 |
| 11752403_STEAP3    | -0.19533 | 0.002704 | 0.008789 |
| 11721585_TMCC1     | 0.380233 | 0.002708 | 0.008801 |
| 11736797_RUNX1T1   | -0.27417 | 0.002708 | 0.008802 |
| 11728632_AP4E1     | 0.365084 | 0.00271  | 0.008807 |
| 11740533_KRTAP5-9  | -0.29414 | 0.00271  | 0.008807 |
| 11719328_ALAS1     | -0.1616  | 0.002712 | 0.008814 |
| 11757878_UBE2E1    | 0.156122 | 0.002712 | 0.008814 |
| 11744538_CALHM2    | -0.18322 | 0.002713 | 0.008814 |
| 11763143_LAMTOR5P1 | -0.19276 | 0.002713 | 0.008814 |
| 11743186_CFAP97    | -0.19283 | 0.002713 | 0.008815 |

|                    |          |          |          |
|--------------------|----------|----------|----------|
| 11758133_COL4A3BP  | -0.21852 | 0.002716 | 0.008821 |
| 11731022_ATXN7     | 0.178371 | 0.002716 | 0.008822 |
| 11750013_CSNK1D    | 0.271575 | 0.002717 | 0.008826 |
| 11722952_SLC27A1   | -0.19619 | 0.002717 | 0.008826 |
| 11728181_CHIC1     | 0.471394 | 0.002718 | 0.008827 |
| 11715890_ATP5I     | -0.15335 | 0.002721 | 0.008835 |
| 11716075_HSBP1     | 0.18714  | 0.002723 | 0.008843 |
| 11764020_PPTC7     | 0.191205 | 0.002724 | 0.008844 |
| 11745432_CDK12     | 0.228812 | 0.002726 | 0.00885  |
| 11745794_OXR1      | 0.210438 | 0.002726 | 0.00885  |
| 11724749_CEND1     | -0.21    | 0.002727 | 0.008851 |
| 11750935_BMP6      | -0.26799 | 0.002727 | 0.008851 |
| 11719094_CYB5B     | -0.21738 | 0.002727 | 0.008852 |
| 11723914_CACTIN    | -0.16516 | 0.002728 | 0.008855 |
| 11723955_CLINT1    | 0.156263 | 0.002729 | 0.008857 |
| 11754980_SMARCD3   | 0.19142  | 0.002729 | 0.008857 |
| 11747620_FBXO22    | 0.182711 | 0.002731 | 0.008862 |
| 11736309_CSNK1A1   | 0.298402 | 0.002731 | 0.008862 |
| 11737662_TET2      | -0.2152  | 0.002734 | 0.00887  |
| 11731070_NIT1      | 0.162962 | 0.002736 | 0.008876 |
| 11747433_C11orf54  | 0.188034 | 0.002737 | 0.00888  |
| 11756405_GCSH ///  | -0.14771 | 0.002738 | 0.008881 |
| 11753674_PFN2      | -0.18985 | 0.002739 | 0.008883 |
| 11750082_ERCC2     | 0.210852 | 0.00274  | 0.008888 |
| 11738153_RBM24     | 0.587585 | 0.002741 | 0.008888 |
| 11715805_PPP2CA    | 0.155214 | 0.002741 | 0.008891 |
| 11739151_TTYH3     | -0.14879 | 0.002742 | 0.008892 |
| 11715714_VOPP1     | -0.23515 | 0.002745 | 0.0089   |
| 11754204_PEX11A    | 0.181609 | 0.002746 | 0.008903 |
| 11748550_COQ6      | 0.2526   | 0.002747 | 0.008905 |
| 11750897_THRA      | -0.34708 | 0.00275  | 0.008914 |
| 11732282_SLC30A5   | -0.18224 | 0.00275  | 0.008914 |
| 11722813_PABPC4    | 0.156695 | 0.00275  | 0.008916 |
| 11728164_EPPIN     | -0.34414 | 0.002754 | 0.008928 |
| 11716535_PPT1      | 0.158894 | 0.00276  | 0.008945 |
| 11754760_GRAMD1A   | 0.151533 | 0.002762 | 0.008952 |
| 11727889_HYAL3     | 0.185379 | 0.002763 | 0.008955 |
| 11717288_PI4KA     | 0.145211 | 0.002764 | 0.008958 |
| 11747953_PYROXD1   | 0.206761 | 0.002766 | 0.008961 |
| 11732256_SHB       | 0.205743 | 0.002769 | 0.008971 |
| 11756534_TMEM108   | -0.2029  | 0.002769 | 0.008972 |
| 11716270_SLIRP     | -0.16451 | 0.00277  | 0.008973 |
| 11755197_PGM3      | 0.234693 | 0.00277  | 0.008973 |
| 11748219_UGT1A1 // | -0.16171 | 0.002772 | 0.008978 |
| 11752108_PPP6R3    | 0.184602 | 0.002773 | 0.008982 |
| 11750189_CD44      | 0.173091 | 0.002778 | 0.008997 |
| 11735400_BNC1      | 0.180407 | 0.00278  | 0.009002 |
| 11745678_KIF6      | 0.251317 | 0.00278  | 0.009003 |
| 11758801_TM4SF1    | -0.17052 | 0.002781 | 0.009005 |
| 11748450_METTL17   | -0.23083 | 0.002781 | 0.009005 |
| 11740385_METTL20   | -0.24744 | 0.002781 | 0.009005 |



|                    |          |          |          |
|--------------------|----------|----------|----------|
| 11736173_KIAA0355  | -0.31542 | 0.002783 | 0.009008 |
| 11754624_CYB5A     | -0.31808 | 0.002783 | 0.009008 |
| 11748948_BIVM-ERCC | 0.342681 | 0.002783 | 0.009008 |
| 11757213_FLJ34503  | 0.265094 | 0.002784 | 0.009012 |
| 11755948_SH3RF1    | 0.326983 | 0.002785 | 0.009015 |
| 11721906_PSMA4     | -0.15825 | 0.002786 | 0.009016 |
| 11757999_RAB38     | -0.15747 | 0.002786 | 0.009016 |
| 11728969_AASDHPPT  | 0.169056 | 0.002787 | 0.009019 |
| 11733455_SP4       | -0.30113 | 0.002788 | 0.00902  |
| 11717075_ZFAND6    | 0.200984 | 0.002789 | 0.009025 |
| 11719240_PANX1     | 0.169667 | 0.002791 | 0.009029 |
| 11716001_FAF2      | 0.177701 | 0.002794 | 0.009038 |
| 11747285_TOM1L1    | 0.173027 | 0.002794 | 0.009038 |
| 11723692_CD302 /// | -0.23302 | 0.002795 | 0.009042 |
| 11754290_LMAN2L    | 0.197423 | 0.002798 | 0.00905  |
| 11719205_ANKLE2    | 0.205252 | 0.002799 | 0.009052 |
| 11749958_DSCR3     | 0.183021 | 0.002799 | 0.009053 |
| 11747598_CLPTM1    | 0.218034 | 0.002802 | 0.00906  |
| 11758804_MON1B     | -0.24028 | 0.002806 | 0.009073 |
| 11731833_AK4       | 0.179663 | 0.002806 | 0.009073 |
| 11720547_PDSS1     | 0.163781 | 0.002806 | 0.009074 |
| 11743129_SORL1     | 0.532435 | 0.002807 | 0.009075 |
| 11720138_ALKBH2    | -0.1802  | 0.002808 | 0.009077 |
| 11749223_PTRF      | -0.26507 | 0.00281  | 0.009083 |
| 11749102_SECISBP2  | 0.242205 | 0.00281  | 0.009084 |
| 11720591_PHF21A    | 0.238107 | 0.002812 | 0.00909  |
| 11758982_ST6GALNAC | 0.536233 | 0.002813 | 0.009093 |
| 11736156_FAM168A   | 0.305316 | 0.002816 | 0.009099 |
| 11742988_EZR       | 0.168719 | 0.002816 | 0.0091   |
| 11736673_SIRT7     | 0.173036 | 0.002817 | 0.009104 |
| 11746285_FDXACB1   | -0.18255 | 0.002819 | 0.00911  |
| 11761361_PPARGC1B  | -0.21205 | 0.002822 | 0.009116 |
| 11763330_VPS36     | 0.407637 | 0.002824 | 0.009122 |
| 11743606_ACSL3     | -0.15982 | 0.002824 | 0.009122 |
| 11722030_UBE3C     | 0.18721  | 0.002826 | 0.009129 |
| 11740855_KRIT1     | 0.14534  | 0.002828 | 0.009136 |
| 11734815_GSG1      | 0.368597 | 0.002829 | 0.009137 |
| 11719681_TNFRSF10B | 0.163152 | 0.002831 | 0.009142 |
| 11744700_TDP1      | -0.21401 | 0.002831 | 0.009144 |
| 11728073_ITPRIP    | 0.175265 | 0.002832 | 0.009146 |
| 11718692_SBN02     | 0.228808 | 0.002834 | 0.009149 |
| 11736766_C14orf28  | 0.449288 | 0.002835 | 0.009152 |
| 11748859_TFEC      | 0.26718  | 0.002835 | 0.009152 |
| 11736590_RAMP3     | -0.19823 | 0.002837 | 0.009157 |
| 11759546_CXXC5     | -0.19264 | 0.002837 | 0.009158 |
| 11757001_SEC14L2   | 0.209861 | 0.002838 | 0.00916  |
| 11758539_DOCK10    | 0.170144 | 0.002842 | 0.009173 |
| 11759236_ZNF284    | 0.444885 | 0.002842 | 0.009173 |
| 11715415_COL3A1    | 0.299364 | 0.002844 | 0.009179 |
| 11727450_MORN4     | 0.190606 | 0.002845 | 0.00918  |
| 11748846_NIT1      | 0.17162  | 0.002845 | 0.009181 |

|                    |          |          |          |
|--------------------|----------|----------|----------|
| 11752514_SLC6A9    | -0.17442 | 0.002845 | 0.009181 |
| 11717586_SCAP      | -0.19857 | 0.002852 | 0.009202 |
| 11741294_DDI2      | 0.361593 | 0.002856 | 0.009215 |
| 11737751_TMEM254   | -0.26849 | 0.002857 | 0.009215 |
| 11732616_FEV       | -0.27116 | 0.002857 | 0.009217 |
| 11764239_TBRG1     | 0.248341 | 0.002858 | 0.009217 |
| 11719750_POLE      | -0.17925 | 0.002858 | 0.009217 |
| 11728711_NFATC2IP  | 0.201997 | 0.002858 | 0.009217 |
| 11717973_FAM219B   | 0.233015 | 0.002858 | 0.009217 |
| 11723313_PXMP2     | -0.18938 | 0.00286  | 0.009223 |
| 11723979_PHKA2     | -0.1761  | 0.002861 | 0.009226 |
| 11722773_ZNF473    | 0.193313 | 0.002861 | 0.009226 |
| 11752718_GDI1      | 0.166338 | 0.002862 | 0.009226 |
| 11729352_MYF6      | -0.2372  | 0.002863 | 0.009231 |
| 11723651_CIAO1     | 0.229815 | 0.002864 | 0.009234 |
| 11731302_ITPRIPL1  | -0.2024  | 0.002866 | 0.009238 |
| 11733320_HRAS      | 0.193088 | 0.002866 | 0.009238 |
| 11752705_FAM225A / | -0.22727 | 0.002866 | 0.009238 |
| 11721333_PLOD2     | 0.165854 | 0.002867 | 0.009238 |
| 11752267_RPS6KA4   | -0.17237 | 0.002867 | 0.009239 |
| 11739936_HMGXB4    | -0.17081 | 0.002867 | 0.009239 |
| 11720894_SOS1      | 0.184085 | 0.002869 | 0.009245 |
| 11757860_QKI       | -0.19523 | 0.002871 | 0.009249 |
| 11720063_GLIPR2    | -0.3141  | 0.002871 | 0.009251 |
| 11761037_ARL16     | 0.205139 | 0.002873 | 0.009255 |
| 11747170_METTL2B   | 0.18489  | 0.002874 | 0.009259 |
| 11756227_PEX2      | -0.21505 | 0.002879 | 0.009272 |
| 11729317_UACA      | 0.227913 | 0.002879 | 0.009274 |
| 11762413_CDCA3     | -0.32019 | 0.002881 | 0.009277 |
| 11739122_EPB41     | 0.287919 | 0.002883 | 0.009285 |
| 11723759_ZFR       | 0.229313 | 0.002884 | 0.009286 |
| 11741883_MRPL39    | -0.18744 | 0.002884 | 0.009287 |
| 11739249_FGFR2     | -0.17181 | 0.002885 | 0.009288 |
| 11724548_RSBN1     | 0.149193 | 0.002886 | 0.009292 |
| 11747149_SHOX2     | -0.53623 | 0.002886 | 0.009292 |
| 11718186_UHRF2     | 0.161347 | 0.002886 | 0.009292 |
| 11756574_RNF167    | -0.15647 | 0.002888 | 0.009297 |
| 11752624_PDE4A     | -0.18239 | 0.002891 | 0.009304 |
| 11732166_LMF1      | -0.26864 | 0.002893 | 0.00931  |
| 11740439_FUT6      | -0.21611 | 0.002895 | 0.009316 |
| 11720787_DYNC1LI1  | -0.16338 | 0.002895 | 0.009316 |
| 11746402_ZFAND5    | 0.220855 | 0.002895 | 0.009316 |
| 11745473_NEK11     | 0.280529 | 0.002896 | 0.00932  |
| 11720332_SLC5A6    | -0.26245 | 0.002897 | 0.009321 |
| 11761821_NEK2      | -0.33126 | 0.002897 | 0.009321 |
| 11755782_C20orf194 | 0.239012 | 0.002898 | 0.009324 |
| 11733041_ALAS1     | -0.17553 | 0.0029   | 0.009328 |
| 11716623_XPO1      | -0.15008 | 0.002901 | 0.00933  |
| 11715820_BUD31     | 0.167556 | 0.002901 | 0.009331 |
| 11743120_EIF4A1 // | -0.14329 | 0.002902 | 0.009334 |
| 11763667_FER       | -0.22338 | 0.002902 | 0.009334 |

|                   |          |          |          |
|-------------------|----------|----------|----------|
| 11725378_GSTO1    | 0.143568 | 0.002904 | 0.009337 |
| 11726555_SALL1    | -0.23798 | 0.002904 | 0.009337 |
| 11736369_MBOAT1   | -0.18408 | 0.002905 | 0.009339 |
| 11756430_GBGT1    | -0.19443 | 0.002905 | 0.009341 |
| 11744434_PARP9    | 0.193081 | 0.002906 | 0.009343 |
| 11737562_RAD51B   | 0.228107 | 0.002906 | 0.009343 |
| 11741773_TCEA2    | -0.21336 | 0.002906 | 0.009343 |
| 11734424_GPR26    | -0.26107 | 0.002907 | 0.009343 |
| 11732907_C8orf74  | -0.17883 | 0.002908 | 0.009346 |
| 11723681_USP34    | 0.142865 | 0.002911 | 0.009355 |
| 11755140_CUL9     | -0.22621 | 0.002911 | 0.009355 |
| 11744494_JTB      | 0.151084 | 0.002914 | 0.009365 |
| 11748517_ACP2     | -0.1508  | 0.002916 | 0.009369 |
| 11746343_RANBP3   | -0.26153 | 0.002916 | 0.00937  |
| 11736570_SLC39A14 | -0.16048 | 0.002916 | 0.00937  |
| 11725953_RNF10    | 0.202077 | 0.002917 | 0.00937  |
| 11740974_CYFIP1   | 0.16799  | 0.002922 | 0.009386 |
| 11720056_METAP1   | -0.19113 | 0.002922 | 0.009387 |
| 11757402_MED13    | -0.15521 | 0.002923 | 0.009388 |
| 11746583_ZNF558   | 0.329884 | 0.002925 | 0.009395 |
| 11722283_CA11     | -0.16314 | 0.002926 | 0.009396 |
| 11715970_EPRS     | -0.1479  | 0.00293  | 0.009408 |
| 11749703_SIRT1    | -0.15702 | 0.002932 | 0.009415 |
| 11722715_STK35    | -0.18971 | 0.002933 | 0.009417 |
| 11744239_CCDC159  | 0.26977  | 0.002933 | 0.009417 |
| 11723586_GRB14    | -0.33441 | 0.002934 | 0.009418 |
| 11729905_LRCH2    | -0.32482 | 0.002934 | 0.009419 |
| 11755853_IL22RA1  | -0.31482 | 0.002936 | 0.009425 |
| 11738325_OR14I1   | -0.19244 | 0.002938 | 0.00943  |
| 11746668_ALDH9A1  | 0.160755 | 0.00294  | 0.009436 |
| 11736765_C14orf28 | 0.316879 | 0.00294  | 0.009437 |
| 11754086_VAPA     | 0.213677 | 0.002941 | 0.009437 |
| 11751598_DPP7     | -0.35103 | 0.002941 | 0.009438 |
| 11733370_PSME1    | 0.170622 | 0.002942 | 0.009439 |
| 11715744_ATP5J    | -0.16862 | 0.002943 | 0.009442 |
| 11746450_MEIS2    | -0.17054 | 0.002943 | 0.009443 |
| 11728602_CIB2     | -0.21066 | 0.002944 | 0.009445 |
| 11746206_RHOF     | 0.175343 | 0.00295  | 0.009465 |
| 11729133_STK24    | -0.18613 | 0.002953 | 0.009471 |
| 11716674_ACIN1    | -0.18155 | 0.002953 | 0.009471 |
| 11729247_SIRT5    | -0.28913 | 0.002954 | 0.009474 |
| 11724868_IP08     | -0.16948 | 0.002956 | 0.00948  |
| 11758080_PPP1R15B | 0.147513 | 0.002958 | 0.009487 |
| 11757537_RAD23A   | -0.1602  | 0.002959 | 0.009489 |
| 11756168_RAB13    | -0.20563 | 0.00296  | 0.00949  |
| 11746231_ZMYM6    | 0.182377 | 0.00296  | 0.009491 |
| 11739015_ERMN     | -0.28023 | 0.00296  | 0.009491 |
| 11736842_KLRAP1   | -0.27071 | 0.002961 | 0.009491 |
| 11723548_PEX1     | 0.165001 | 0.002962 | 0.009496 |
| 11742913_GLOD5    | 0.282289 | 0.002964 | 0.0095   |
| 11747382_SERGEF   | -0.17005 | 0.002966 | 0.009508 |

|                    |          |          |          |
|--------------------|----------|----------|----------|
| 11718540_TM243     | 0.159567 | 0.002971 | 0.009521 |
| 11738305_VAX1      | -0.19105 | 0.002972 | 0.009525 |
| 11750526_CYP11A1   | -0.27904 | 0.002974 | 0.00953  |
| 11750213_ADPRHL2   | -0.22904 | 0.002974 | 0.009531 |
| 11727981_SNX21     | -0.26736 | 0.002977 | 0.00954  |
| 11719853_SEPT10    | -0.17433 | 0.00298  | 0.009546 |
| 11760179_WASH3P    | -0.16514 | 0.002984 | 0.009559 |
| 11751398_NDRG3     | 0.176992 | 0.002984 | 0.009559 |
| 11757883_RNF4      | 0.171468 | 0.002985 | 0.009561 |
| 11717166_KDM2A     | -0.22773 | 0.002987 | 0.009566 |
| 11721876_SLC7A11   | -0.16435 | 0.002987 | 0.009569 |
| 11720557_TRMT11    | 0.159047 | 0.00299  | 0.009576 |
| 11754355_NSMCE1    | -0.16948 | 0.00299  | 0.009576 |
| 11762897_TM280     | -0.15763 | 0.002991 | 0.009576 |
| 11715429_ARF4      | 0.158651 | 0.002991 | 0.009576 |
| 11724277_SLC35C1   | -0.21088 | 0.002991 | 0.009577 |
| 11736859_FAM89B    | -0.16285 | 0.002993 | 0.009582 |
| 11749330_SIGMAR1   | -0.22373 | 0.002998 | 0.009599 |
| 11759797_ANXA1     | 0.222749 | 0.002999 | 0.009599 |
| 11758734	EIF5A     | -0.16266 | 0.003    | 0.009601 |
| 11724024_TRIM13    | -0.17955 | 0.003    | 0.009602 |
| 11724067_TNS3      | -0.22504 | 0.003    | 0.009602 |
| 11758668_ARL17A // | 0.230864 | 0.003    | 0.009602 |
| 11744284_MRPS12    | -0.18247 | 0.003002 | 0.009606 |
| 11721016_USP5      | -0.16793 | 0.003004 | 0.009611 |
| 11739592_MINA      | -0.28    | 0.003005 | 0.009614 |
| 11759085_KIAA1715  | -0.23418 | 0.003005 | 0.009614 |
| 11753384_C19orf54  | -0.3187  | 0.003005 | 0.009614 |
| 11725611_TM200B    | -0.30017 | 0.003005 | 0.009614 |
| 11723103_GNB4      | -0.18517 | 0.003005 | 0.009614 |
| 11720575_CRAT      | -0.1582  | 0.00301  | 0.009627 |
| 11716149_PMEPA1    | 0.148991 | 0.003013 | 0.009636 |
| 11724196_STC1      | 0.244635 | 0.003017 | 0.009648 |
| 11763321_CSNK2A2   | 0.260814 | 0.003017 | 0.009648 |
| 11721936_CHN2 ///  | -0.29896 | 0.003017 | 0.00965  |
| 11745601_ERAP2     | 0.258808 | 0.003018 | 0.009651 |
| 11763274_SIPA1L1   | -0.29303 | 0.003019 | 0.009654 |
| 11730555_TRIM34 // | 0.262141 | 0.003023 | 0.009666 |
| 11740961_CD33      | 0.208281 | 0.003025 | 0.009672 |
| 11719861_SLC2A4RG  | -0.16577 | 0.003026 | 0.009673 |
| 11744500_ASXL1     | -0.22065 | 0.003027 | 0.009675 |
| 11757471_TBC1D15   | -0.31102 | 0.003028 | 0.009679 |
| 11748038_CS        | -0.14965 | 0.00303  | 0.009683 |
| 11759025_PPP2R5E   | -0.17469 | 0.003034 | 0.009698 |
| 11754827_FBXO17    | -0.26039 | 0.003037 | 0.009706 |
| 11733882_TTF1      | -0.15069 | 0.003037 | 0.009706 |
| 11720260_TRIM33    | 0.151529 | 0.003042 | 0.00972  |
| 11718664_SLC35B2   | -0.33344 | 0.003043 | 0.009724 |
| 11725624_ACE2      | 0.369992 | 0.003044 | 0.009724 |
| 11717796_ZDHHC3    | 0.175202 | 0.003044 | 0.009724 |
| 11747255_MEIS1     | 0.21443  | 0.003046 | 0.009729 |

|                   |            |          |          |
|-------------------|------------|----------|----------|
| 11736098_CDK20    | 0.257966   | 0.003047 | 0.009735 |
| 11742776_GPR161   | -0.18683   | 0.00305  | 0.009742 |
| 11716567_PRRC2C   | 0.147675   | 0.003051 | 0.009745 |
| 11760195_ANKS1B   | -0.34042   | 0.003051 | 0.009745 |
| 11752312_ISLR2    | -0.20832   | 0.003053 | 0.009749 |
| 11730173_C4orf3   | 0.185246   | 0.003055 | 0.009755 |
| 11723543_ESRP1    | 0.251347   | 0.003055 | 0.009756 |
| 11724489_AKR1B10  | / 0.51681  | 0.003056 | 0.009757 |
| 11737055_ZNF678   | 0.799373   | 0.003056 | 0.009757 |
| 11716581_G3BP2    | 0.154593   | 0.003056 | 0.009757 |
| 11760163_WSB1     | -0.38773   | 0.003057 | 0.009757 |
| 11743664_COG5     | 0.172767   | 0.003057 | 0.009759 |
| 11727621_LIPH     | 0.414433   | 0.003059 | 0.009765 |
| 11750069_ALKBH2   | -0.19876   | 0.003061 | 0.009769 |
| 11750187_AGPAT1   | -0.18921   | 0.003062 | 0.009772 |
| 11743508_ARHGAP26 | 0.354885   | 0.003064 | 0.009779 |
| 11746162_FAM49B   | 0.149647   | 0.003067 | 0.009785 |
| 11758035_MAPKBP1  | 0.218348   | 0.003068 | 0.009788 |
| 11720336_PHC2     | -0.19769   | 0.003068 | 0.009789 |
| 11735478_CHST6    | -0.29661   | 0.003069 | 0.009792 |
| 11753511_GTF2F2   | 0.146261   | 0.003069 | 0.009792 |
| 11753975_TRA2B    | -0.14966   | 0.003071 | 0.009797 |
| 11764111_ELMOD2   | -0.17548   | 0.003072 | 0.009797 |
| 11734917_METTL4   | -0.33343   | 0.003072 | 0.009797 |
| 11719170_IPO4     | 0.159121   | 0.003073 | 0.009802 |
| 11733573_DMRT3    | -0.25073   | 0.003073 | 0.009802 |
| 11730845_PIK3R3   | 0.388006   | 0.003075 | 0.009806 |
| 11746606_ANKRD36  | / -0.20098 | 0.003077 | 0.009812 |
| 11747687_SUPT6H   | 0.231585   | 0.00308  | 0.009821 |
| 11717044_TCERG1   | 0.193836   | 0.003081 | 0.009824 |
| 11724994_FAM101B  | -0.35805   | 0.003084 | 0.00983  |
| 11737900_TOX2     | -0.15263   | 0.003084 | 0.009833 |
| 11751678_GULP1    | 0.154154   | 0.003085 | 0.009833 |
| 11760239_MCM9     | -0.17598   | 0.003085 | 0.009835 |
| 11749916_AGBL2    | 0.236005   | 0.003086 | 0.009837 |
| 11717354_PCBD1    | -0.1737    | 0.003087 | 0.009837 |
| 11742935_RTN4R    | -0.39201   | 0.003087 | 0.009837 |
| 11726698_ZBTB7A   | 0.281562   | 0.003089 | 0.009842 |
| 11756236_FBLN1    | -0.25546   | 0.00309  | 0.009845 |
| 11746775_CGREF1   | -0.42574   | 0.003091 | 0.009849 |
| 11749936_HDAC8    | -0.2766    | 0.003093 | 0.009853 |
| 11734347_PRPS1L1  | -0.38549   | 0.003093 | 0.009853 |
| 11723285_ITGBL1   | 0.327288   | 0.003093 | 0.009853 |
| 11734571_DCTN4    | 0.152526   | 0.003093 | 0.009853 |
| 11753779_ENSA     | -0.20085   | 0.003093 | 0.009853 |
| 11757613	EIF3K    | -0.15116   | 0.003094 | 0.009854 |
| 11739665_RUBCN    | -0.18854   | 0.003094 | 0.009855 |
| 11744929_JARID2   | 0.193508   | 0.003095 | 0.009855 |
| 11718187_BNIP1    | -0.14973   | 0.003098 | 0.009866 |
| 11721811_SF3A2    | -0.18228   | 0.003099 | 0.009866 |
| 11723801_PYROXD1  | -0.17212   | 0.003099 | 0.009867 |

|                    |          |          |          |
|--------------------|----------|----------|----------|
| 11755775_TMEM181   | -0.19563 | 0.0031   | 0.009869 |
| 11728955_KITLG     | 0.579313 | 0.003102 | 0.009874 |
| 11745928_TMEM68    | -0.23531 | 0.003102 | 0.009875 |
| 11749635_FLII      | 0.20313  | 0.003102 | 0.009875 |
| 11755443_MAOA      | 0.205102 | 0.003102 | 0.009875 |
| 11738206_PKD2L2    | 0.277312 | 0.003104 | 0.009879 |
| 11718460_SLC39A11  | 0.225641 | 0.003108 | 0.009889 |
| 11720733_INPPL1    | -0.18971 | 0.003109 | 0.009892 |
| 11726497_LIF       | 0.364783 | 0.003109 | 0.009892 |
| 11754029_VAPA      | 0.214533 | 0.00311  | 0.009895 |
| 11718468_NECAB3    | -0.15416 | 0.003111 | 0.009897 |
| 11748661_KCNJ11    | -0.32418 | 0.003111 | 0.009897 |
| 11755253_USF3      | -0.19841 | 0.003112 | 0.009898 |
| 11738970_PYDC2     | -0.17098 | 0.003112 | 0.009898 |
| 11741352_ZNF334    | 0.159505 | 0.003113 | 0.009902 |
| 11721833_CHURC1    | 0.310006 | 0.003113 | 0.009902 |
| 11720454_YME1L1    | 0.157328 | 0.003114 | 0.009904 |
| 11723870_ASB7      | -0.18866 | 0.003114 | 0.009904 |
| 200074_PMRPL14 /// | 0.148589 | 0.003115 | 0.009905 |
| 11757980_EP400     | -0.17234 | 0.003115 | 0.009905 |
| 11722705_B3GNT5    | 0.180878 | 0.003118 | 0.009915 |
| 11723190_ADAM19    | -0.18029 | 0.003122 | 0.009925 |
| 11722313_RAPGEF6   | 0.167233 | 0.003124 | 0.009933 |
| 11721069_DGKD      | 0.160922 | 0.003126 | 0.009938 |
| 11729272_ASB1      | -0.17012 | 0.003128 | 0.009942 |
| 11718273_EIF3L     | 0.150707 | 0.003129 | 0.009945 |
| 11722441_SEMA4F    | -0.19549 | 0.00313  | 0.009947 |
| 11736562_ZNF518A   | 0.191773 | 0.003133 | 0.009956 |
| 11746632_MAP3K11   | -0.19492 | 0.003135 | 0.009962 |
| 11733576_IDH3B     | -0.22515 | 0.003136 | 0.009966 |
| 11744579_CDADC1    | -0.24534 | 0.003137 | 0.009967 |
| 11746001_ZNF252P   | 0.219009 | 0.003137 | 0.009967 |
| 11726696_ZBTB7A    | 0.200297 | 0.003138 | 0.009969 |
| 11742049_DMTF1     | 0.207482 | 0.003139 | 0.009971 |
| 11737433_WTH3DI    | -0.28795 | 0.003139 | 0.009972 |
| 11726400_ALG9      | 0.181742 | 0.00314  | 0.009973 |
| 11747116_JMY       | 0.271008 | 0.00314  | 0.009973 |
| 11727402_ERGIC2    | 0.144472 | 0.00314  | 0.009973 |
| 11721565_OSTC      | 0.215944 | 0.003141 | 0.009974 |
| 11722761_GATA2     | -0.20327 | 0.003141 | 0.009974 |
| 11741119_ANKEF1    | 0.320502 | 0.003141 | 0.009974 |
| 11740526_TSPAN4    | 0.197796 | 0.003141 | 0.009974 |
| 11758176_ATP10D    | 0.190193 | 0.003142 | 0.009975 |
| 11736691_CCDC89    | 0.188949 | 0.003145 | 0.009986 |
| 11720609_PHB       | -0.15751 | 0.003147 | 0.00999  |
| 11728764_PVRL4     | 0.676183 | 0.003149 | 0.009996 |
| 11753660_UBE2V1    | 0.183278 | 0.003149 | 0.009996 |
| 11756856_HELQ      | 0.295909 | 0.003151 | 0.01     |
| 11760942_STAG3L1 / | 0.225871 | 0.003151 | 0.01     |
| 11757289_CLTA      | 0.152537 | 0.003154 | 0.010008 |
| 11732079_POM121L12 | -0.18702 | 0.003159 | 0.010025 |

|                    |          |          |          |
|--------------------|----------|----------|----------|
| 11733027_CLCA2     | 0.242948 | 0.003159 | 0.010025 |
| 11744770_HOXA11    | -0.2233  | 0.00316  | 0.010026 |
| 11719014_FZD4      | -0.2379  | 0.003161 | 0.010029 |
| 11716923_PURB      | 0.190557 | 0.003161 | 0.010029 |
| 11716188_SEC13     | -0.17432 | 0.003163 | 0.010035 |
| 11733109_TLK1      | 0.245131 | 0.003164 | 0.010037 |
| 11729136_STK24     | -0.51261 | 0.003165 | 0.010039 |
| 11751999_UBAP2     | 0.150275 | 0.003165 | 0.010039 |
| 11751234_SLC26A4   | 0.48931  | 0.003165 | 0.010039 |
| 11749210_HNRNPK    | -0.2618  | 0.003166 | 0.01004  |
| 11758214_SRRM2     | -0.2386  | 0.003167 | 0.010044 |
| 11753729_XRRA1     | 0.227297 | 0.003168 | 0.010044 |
| 11720569_NGEF      | -0.17376 | 0.003168 | 0.010045 |
| 11719632_ABCC4     | 0.199376 | 0.00317  | 0.010049 |
| 11759721_LOC105372 | -0.16335 | 0.00317  | 0.010049 |
| 11722020_CDK16     | -0.23482 | 0.003173 | 0.010058 |
| 11724971_FLT1      | 0.2166   | 0.003175 | 0.010063 |
| 11742053_COG5      | 0.218767 | 0.003176 | 0.010065 |
| 11760644_C21orf58  | -0.25599 | 0.003177 | 0.010069 |
| 11718930_TGIF2     | 0.14912  | 0.003178 | 0.010073 |
| 11722915_BMPR1A    | 0.195598 | 0.00318  | 0.010077 |
| 11738740_OR10G7 // | -0.28068 | 0.00318  | 0.010077 |
| 11722268_NFRKB     | 0.19375  | 0.003182 | 0.010082 |
| 11740706_NFRKB     | 0.19375  | 0.003182 | 0.010082 |
| 11733048_ABI1      | 0.182464 | 0.003184 | 0.010088 |
| 11739206_TTL       | 0.147142 | 0.003185 | 0.010089 |
| 11750240_GHITM     | 0.142527 | 0.003185 | 0.010091 |
| 11715726_OAZ2      | 0.161731 | 0.003186 | 0.010092 |
| 11728425_BOLA3     | -0.18006 | 0.003186 | 0.010092 |
| 11739968_ZNF101    | -0.20251 | 0.003187 | 0.010094 |
| 11723261_ZNF24     | 0.166892 | 0.003188 | 0.010096 |
| 11750043_MTG1      | -0.14715 | 0.003188 | 0.010096 |
| 11763565_ATP10B    | -0.1496  | 0.00319  | 0.010101 |
| 11742300_GEMIN2    | 0.172171 | 0.003192 | 0.010108 |
| 11751125_ABCC6P1   | -0.37401 | 0.003193 | 0.010108 |
| 11748720_USP28     | -0.23976 | 0.003193 | 0.010108 |
| 11719037_UVRAG     | 0.206773 | 0.003195 | 0.010114 |
| 11732144_BBS2      | -0.23724 | 0.003197 | 0.010119 |
| 11720517_ZBTB4     | -0.16815 | 0.003197 | 0.010119 |
| 11733369_HIST1H4I  | -0.40648 | 0.003199 | 0.010127 |
| 11723919_LMAN2     | -0.19045 | 0.003204 | 0.010141 |
| 11728290_SH2D1A    | -0.17425 | 0.003206 | 0.010145 |
| 11761376_ZNF90     | -0.46515 | 0.003209 | 0.010154 |
| 11761676_TAMM41    | 0.150895 | 0.003211 | 0.01016  |
| 11718835_PELP1     | -0.21072 | 0.003212 | 0.010163 |
| 11756118_KMT2E     | 0.254851 | 0.003213 | 0.010167 |
| 11746876_TRA2A     | 0.205572 | 0.003214 | 0.010167 |
| 11750170_TRIM22    | 0.263198 | 0.003214 | 0.010169 |
| 11720685_CDR2L     | -0.35191 | 0.003218 | 0.010179 |
| 11748736_PARPBP    | -0.20229 | 0.003219 | 0.010182 |
| 11720632_SDHB      | -0.17083 | 0.003221 | 0.010186 |

|                    |          |          |          |
|--------------------|----------|----------|----------|
| 11741435_GRB2      | -0.15151 | 0.003223 | 0.010194 |
| 11731903_CD207     | -0.22684 | 0.003223 | 0.010194 |
| 11722266_ADCY1     | -0.25894 | 0.003224 | 0.010197 |
| 11739716_KIAA0556  | 0.242771 | 0.003225 | 0.010199 |
| 11720106_SLC26A2   | 0.146818 | 0.003226 | 0.010201 |
| 11731636_GAB1      | -0.27221 | 0.003227 | 0.010203 |
| 11763223_GAP43     | -0.19618 | 0.003227 | 0.010203 |
| 11736559_MAP2      | 0.36247  | 0.003227 | 0.010203 |
| 11757724_BSCL2 /// | -0.17403 | 0.003228 | 0.010204 |
| 11729685_LYRM7     | -0.31644 | 0.003229 | 0.010206 |
| 11731152_MTRR      | 0.249441 | 0.00323  | 0.010207 |
| 11720735_LRRC14    | 0.195715 | 0.003231 | 0.01021  |
| 11745820_PLAGL1    | -0.18427 | 0.003232 | 0.010214 |
| 11756263_UBE3B     | 0.189922 | 0.003232 | 0.010214 |
| 11748525_ECM1      | 0.164291 | 0.003234 | 0.010217 |
| 11745136_AAK1      | 0.330005 | 0.003234 | 0.010217 |
| 11743334_MRPL35    | -0.17802 | 0.003234 | 0.010217 |
| 11718431_PPP6R1    | -0.28626 | 0.003237 | 0.010225 |
| 11749697_NDUFS1    | -0.15531 | 0.00324  | 0.010233 |
| 11745876_SEC11A    | -0.1585  | 0.00324  | 0.010233 |
| 11750642_ABCB5     | 0.203899 | 0.00324  | 0.010234 |
| 11748200_FANCL     | -0.15344 | 0.003241 | 0.010237 |
| 11743275_COPB1     | 0.159855 | 0.003242 | 0.01024  |
| 11716931_DGCR2     | -0.23925 | 0.003243 | 0.01024  |
| 11727429_SMIM8     | -0.36599 | 0.003244 | 0.010244 |
| 11758836_MED4      | -0.25156 | 0.003249 | 0.010259 |
| 11761237_TRIT1     | -0.22394 | 0.003249 | 0.010259 |
| 11723230_RNF138    | -0.28142 | 0.00325  | 0.01026  |
| 11723110_PLEKHB2   | 0.157354 | 0.00325  | 0.01026  |
| 11745905_PML       | -0.30323 | 0.003251 | 0.010262 |
| 11734993_SKI       | 0.187522 | 0.003253 | 0.010267 |
| 11739147_MKNK2     | -0.24557 | 0.003253 | 0.010267 |
| 11748514_SLC35B2   | -0.16135 | 0.003253 | 0.010267 |
| 11730547_PMVK      | -0.20868 | 0.003255 | 0.010274 |
| 11728517_NSUN5P1   | -0.22776 | 0.003256 | 0.010276 |
| 11721589_TRAF1     | 0.373191 | 0.003259 | 0.010284 |
| 11747321_TRIM26    | 0.190833 | 0.003259 | 0.010284 |
| 11748276_CANT1     | -0.16945 | 0.00326  | 0.010284 |
| 11732357_ZNRF1     | 0.160544 | 0.00326  | 0.010285 |
| 11715145_KRTAP20-2 | -0.29195 | 0.003261 | 0.010288 |
| 11741605_CHD3      | 0.191259 | 0.003262 | 0.01029  |
| 11725133_GCOM1 /// | -0.15702 | 0.003264 | 0.010295 |
| 11737191_ZGRF1     | -0.3037  | 0.003267 | 0.010303 |
| 11736275_CEL       | 0.327594 | 0.003267 | 0.010305 |
| 11717733_ZCCHC24   | -0.188   | 0.003269 | 0.01031  |
| 11745839_C9orf3    | 0.160052 | 0.00327  | 0.010311 |
| 11744170_NAT14     | -0.15188 | 0.003272 | 0.010317 |
| 11717182_PDS5A     | -0.17369 | 0.003274 | 0.010321 |
| 11716714_ARHGAP17  | 0.169959 | 0.003274 | 0.010321 |
| 11718356_ERP44     | -0.229   | 0.003274 | 0.010321 |
| 11725652_EMCN      | 0.305703 | 0.003278 | 0.010334 |



|                    |          |          |          |
|--------------------|----------|----------|----------|
| 11747370_CDC42SE1  | 0.303175 | 0.003279 | 0.010334 |
| 11755803_FAAP20    | -0.16845 | 0.003279 | 0.010334 |
| 11744786_OGFR      | -0.158   | 0.00328  | 0.010337 |
| 11747291_UTP6      | 0.176585 | 0.003283 | 0.010347 |
| 11743889_ZNF10     | 0.252508 | 0.003285 | 0.010351 |
| 11725243_SPAST     | -0.17649 | 0.003285 | 0.010353 |
| 11720169_MRPS16    | -0.23787 | 0.003286 | 0.010353 |
| 11732151_DCAF11    | -0.25267 | 0.003287 | 0.010358 |
| 11735640_DNAH14    | 0.188025 | 0.003291 | 0.010368 |
| 11731927_CST8      | -0.16608 | 0.003291 | 0.010369 |
| 11744207_IDH3B     | -0.21443 | 0.003291 | 0.010369 |
| 11730534_COL13A1   | 0.145538 | 0.003292 | 0.010369 |
| 11725071_JADE1     | -0.17105 | 0.003292 | 0.010369 |
| 11763552_FKBP9     | -0.31459 | 0.003294 | 0.010376 |
| 11755011_ZNF106    | 0.195187 | 0.003295 | 0.010379 |
| 11743861_NIPSNAP3A | -0.14408 | 0.003297 | 0.010381 |
| 11761438_NDUFS3    | 0.156436 | 0.003297 | 0.010381 |
| 11761409_LOC105376 | -0.23652 | 0.003298 | 0.010384 |
| 11730885_FAM63B    | 0.157242 | 0.003298 | 0.010386 |
| 11742544_OR5AS1    | -0.32095 | 0.003299 | 0.010386 |
| 11757133_SNORA8 // | -0.2644  | 0.0033   | 0.010388 |
| 11736947_ZNF334    | 0.161003 | 0.003302 | 0.010395 |
| 11717438_TOP1      | 0.151094 | 0.003302 | 0.010396 |
| 11753288_ZNF148    | -0.27043 | 0.003303 | 0.010397 |
| 11750477_THEM6     | -0.19611 | 0.003304 | 0.010398 |
| 11738951_SPRED3    | 0.31433  | 0.003305 | 0.010401 |
| 11759843_ARL6      | -0.21114 | 0.003306 | 0.010403 |
| 11732157_UFM1      | 0.37653  | 0.003306 | 0.010403 |
| 11745174_ATF6      | 0.212187 | 0.003306 | 0.010403 |
| 11748639_RBAK      | 0.198119 | 0.003306 | 0.010403 |
| 11742262_TTC26     | 0.265606 | 0.003308 | 0.010407 |
| 11745549_ARHGEF2   | -0.16193 | 0.003309 | 0.01041  |
| 11730216_CSRP1     | -0.14725 | 0.003309 | 0.01041  |
| 11733115_CA2       | 0.213579 | 0.003309 | 0.01041  |
| 11721524_ZNF706    | -0.24949 | 0.00331  | 0.01041  |
| 11754728_MAL       | -0.21051 | 0.003311 | 0.010413 |
| 11752854_PIGA      | 0.18459  | 0.003312 | 0.010416 |
| 11737403_TMEM89    | -0.14088 | 0.003313 | 0.010418 |
| 11717746_6-Mar     | 0.141445 | 0.003314 | 0.01042  |
| 11736801_PLAG1     | 0.176147 | 0.003314 | 0.01042  |
| 11735524_GDPGP1    | -0.19288 | 0.003316 | 0.010427 |
| 11724136_ZBTB4     | -0.16059 | 0.003318 | 0.010431 |
| 11730590_KCTD21    | 0.224321 | 0.003321 | 0.010442 |
| 11739103_TMEM33    | 0.180602 | 0.003323 | 0.010447 |
| 11737287_GALR1     | -0.18435 | 0.003325 | 0.01045  |
| 11727637_PRR14L    | 0.179828 | 0.003327 | 0.010458 |
| 11760264_POLR2J2 / | -0.1663  | 0.003328 | 0.010459 |
| 11740274_TMEM242   | -0.19099 | 0.00333  | 0.010466 |
| 11728760_SSBP1     | -0.16493 | 0.003331 | 0.010467 |
| 11731461_CPM       | 0.222683 | 0.003331 | 0.010468 |
| 11729670_BDH1      | -0.28793 | 0.003335 | 0.010479 |

|                    |          |          |          |
|--------------------|----------|----------|----------|
| 11719755_COA6      | -0.18116 | 0.003337 | 0.010485 |
| 11758015_HPRT1     | -0.14508 | 0.00334  | 0.010494 |
| 11759981_TSC1      | 0.156755 | 0.003341 | 0.010496 |
| 11742159_OR2M4     | -0.18722 | 0.003341 | 0.010496 |
| 11741489_EFCAB2    | -0.26506 | 0.003345 | 0.010506 |
| 11733185_OSMR      | 0.249841 | 0.003346 | 0.010509 |
| 11733662_KCNH2     | -0.2822  | 0.003347 | 0.010513 |
| 11719968_HTT /// M | -0.29424 | 0.003348 | 0.010514 |
| 11723060_RILPL2    | -0.20366 | 0.003349 | 0.010516 |
| 11740972_MAPRE2    | -0.24439 | 0.003349 | 0.010517 |
| 11749472_CALM1 /// | -0.18887 | 0.003351 | 0.010523 |
| 11737748_GMFB      | 0.155416 | 0.003352 | 0.010525 |
| 11724673_BCKDHB    | 0.298713 | 0.003357 | 0.010539 |
| 11743870_TENM4     | 0.265409 | 0.003358 | 0.010541 |
| 11720092_RPUSD1    | -0.16933 | 0.003358 | 0.010541 |
| 11723008_CCPG1     | 0.208459 | 0.003358 | 0.010541 |
| 11716801_SETD5     | 0.161781 | 0.003361 | 0.010549 |
| 11733283_KRBOX4    | 0.300834 | 0.003361 | 0.010549 |
| 11740344_GNAT1     | -0.22536 | 0.003362 | 0.010551 |
| 11722793_ZNHIT3    | -0.16741 | 0.003365 | 0.010559 |
| 11741446_MED7      | -0.2282  | 0.003366 | 0.010563 |
| 11727997_MYEF2     | 0.248234 | 0.003369 | 0.010571 |
| 11744257_TUBB4A    | -0.47321 | 0.00337  | 0.010575 |
| 11750133_TNIP1     | 0.156783 | 0.003372 | 0.01058  |
| 11725735_NFYA      | -0.26472 | 0.003373 | 0.01058  |
| 11760367_DLGAP1    | -0.2241  | 0.003373 | 0.01058  |
| 11742612_OR10G7 // | -0.27841 | 0.003373 | 0.010581 |
| 11717474_CHGB      | 0.256161 | 0.003378 | 0.010595 |
| 11741330_ANAPC11   | -0.18988 | 0.00338  | 0.0106   |
| 11759829_C1orf43   | -0.34945 | 0.003382 | 0.010605 |
| 11761070_MRPL20    | -0.20336 | 0.003384 | 0.010611 |
| 11755163_FANCL     | -0.1503  | 0.003384 | 0.010612 |
| 11746166_R3HDM2    | -0.15399 | 0.003386 | 0.010616 |
| 11717126_SH3PXD2A  | -0.1508  | 0.003386 | 0.010617 |
| 11747376_CCPG1     | 0.235156 | 0.003386 | 0.010617 |
| 11761121_PIGL      | -0.21736 | 0.003389 | 0.010624 |
| 11763484_LRP10     | 0.300688 | 0.003389 | 0.010624 |
| 11760155_FUBP1     | 0.208618 | 0.00339  | 0.010626 |
| 11728182_CHIC1     | 0.333876 | 0.00339  | 0.010626 |
| 11744358_TACC1     | 0.154181 | 0.003393 | 0.010635 |
| 11760142_CDK1      | -0.525   | 0.003395 | 0.01064  |
| 11718407_TMBIM6    | 0.177004 | 0.003396 | 0.010641 |
| 11749234_NAP1L1    | -0.15112 | 0.003398 | 0.010646 |
| 11717544_POLR2A    | -0.15336 | 0.003398 | 0.010646 |
| 11738911_TAS2R43 / | 0.192706 | 0.003399 | 0.010648 |
| 11727432_NUTF2     | -0.15075 | 0.003401 | 0.010655 |
| 11715713_VOPP1     | -0.25485 | 0.003402 | 0.010659 |
| 11747698_TCF4      | 0.268751 | 0.003404 | 0.010663 |
| 11762339_AKR7A2    | -0.28188 | 0.003406 | 0.010668 |
| 11726633_TRIM8     | 0.198874 | 0.003407 | 0.010673 |
| 11747252_GTF2F1    | 0.163321 | 0.00341  | 0.01068  |

|                    |          |          |          |
|--------------------|----------|----------|----------|
| 11720943_RGS16     | -0.22527 | 0.00341  | 0.01068  |
| 11758580_TNRC6B    | 0.164018 | 0.003412 | 0.010683 |
| 11719128_LMF2      | -0.20618 | 0.003412 | 0.010684 |
| 11753251_JTB       | 0.160422 | 0.003415 | 0.010692 |
| 11719650_ARHGEF10  | 0.177757 | 0.003415 | 0.010692 |
| 11749480_LONP1     | -0.18099 | 0.003415 | 0.010692 |
| 11745632_SEMA3D    | 0.357379 | 0.003416 | 0.010693 |
| 11745828_BNIP3L    | 0.157403 | 0.003419 | 0.010701 |
| 11726824_ZNF565    | -0.2385  | 0.003419 | 0.010701 |
| 11735786_BARX2     | -0.21719 | 0.00342  | 0.010704 |
| 11715950_KCTD12    | -0.20346 | 0.00342  | 0.010705 |
| 11736417_CCDC82    | 0.179079 | 0.003421 | 0.010706 |
| 11764061_NDUFB3    | -0.1607  | 0.003423 | 0.01071  |
| 11744746_TNIP1     | 0.184164 | 0.003424 | 0.010713 |
| 11754250_WHAMMP3   | 0.299198 | 0.003425 | 0.010717 |
| 11718064_S100A4    | 0.140573 | 0.003427 | 0.010723 |
| 11740360_FOXN3     | 0.218378 | 0.00343  | 0.010729 |
| 11716299_ITGAV     | -0.14969 | 0.00343  | 0.010729 |
| 11763182_RQCD1     | -0.18865 | 0.003431 | 0.010732 |
| 11716822_BDH2 ///  | -0.14413 | 0.003434 | 0.010742 |
| 11726321_ERO1A     | 0.210018 | 0.003436 | 0.010747 |
| 11736056_BORCS7    | 0.23905  | 0.003439 | 0.010755 |
| 11725018_RCOR2     | -0.24782 | 0.00344  | 0.010758 |
| 11716641_PSBM10    | 0.207303 | 0.00344  | 0.010758 |
| 11729991_CACNA1A   | -0.15697 | 0.003441 | 0.010758 |
| 11757548_ADAMTSL1  | 0.273271 | 0.003441 | 0.010758 |
| 11728047_RAB3IP    | 0.267241 | 0.003442 | 0.010762 |
| 11746271_ZNF639    | 0.162762 | 0.003443 | 0.010763 |
| 11736384_METTL10   | -0.3277  | 0.003443 | 0.010763 |
| 11745608_WDR1      | 0.18421  | 0.003447 | 0.010774 |
| 11718361_COIL      | 0.298571 | 0.003448 | 0.010777 |
| 11715478_TFRC      | 0.173539 | 0.003448 | 0.010777 |
| 11756931_ZNF257    | 0.246751 | 0.003449 | 0.010778 |
| 11718731_MAPT      | -0.1808  | 0.003449 | 0.010778 |
| 11759195_MDN1      | 0.210925 | 0.003452 | 0.010787 |
| 11723221_EXOC6     | 0.149658 | 0.003452 | 0.010787 |
| 11720335_ZMIZ1     | -0.2433  | 0.003453 | 0.010789 |
| 11739093_AZIN1     | -0.17056 | 0.003454 | 0.01079  |
| 11746546_LOC102723 | -0.19621 | 0.003454 | 0.010792 |
| 11747835_FUBP1     | 0.145786 | 0.003457 | 0.010798 |
| 11763435_CAPN10    | -0.18354 | 0.003459 | 0.010803 |
| 11749817_CSF1R     | 0.179198 | 0.003459 | 0.010804 |
| 11717082_TSPAN9    | -0.20035 | 0.003459 | 0.010805 |
| 11739254_SLC35E1   | 0.140329 | 0.003462 | 0.010811 |
| 11734557_GALNT5    | 0.238226 | 0.003463 | 0.010813 |
| 11756757_SDR39U1   | -0.19709 | 0.003465 | 0.010819 |
| 11753317_TBCEL     | 0.350788 | 0.003466 | 0.010821 |
| 11715251_CHST7     | 0.238831 | 0.003468 | 0.010827 |
| 11752087_TEAD1     | 0.400735 | 0.00347  | 0.010833 |
| 11718043_MED17     | 0.171756 | 0.003471 | 0.010836 |
| 11730751_CRNKL1    | 0.220078 | 0.003472 | 0.010837 |

|                    |          |          |          |
|--------------------|----------|----------|----------|
| 11734044_SOGA3     | 0.748601 | 0.003472 | 0.010839 |
| 11763022_CLEC7A    | -0.33054 | 0.003474 | 0.010842 |
| 11732364_ZNF2      | 0.159607 | 0.003476 | 0.01085  |
| 11728870_ELAVL3    | 0.194498 | 0.003479 | 0.010857 |
| 11727409_NCLN      | 0.167169 | 0.003481 | 0.010863 |
| 11724066_HCFC1R1   | -0.15273 | 0.003482 | 0.010865 |
| 11720227_YDJC      | -0.15022 | 0.003483 | 0.010868 |
| 11762512_ERICH1    | 0.23059  | 0.003485 | 0.010872 |
| 11759865_ZNF609    | 0.176318 | 0.003486 | 0.010877 |
| 11746492_SGCE      | -0.17194 | 0.003489 | 0.010885 |
| 11760332_ZFAND2B   | -0.22445 | 0.003489 | 0.010885 |
| 11727303_ZDHC16    | 0.144398 | 0.003491 | 0.010889 |
| 11723006_S100A4    | 0.141889 | 0.003492 | 0.010892 |
| 11735429_RNF135    | -0.15267 | 0.003498 | 0.010908 |
| 11724148_SFTPD     | -0.16759 | 0.003498 | 0.010908 |
| 11756036_MLH1      | -0.14219 | 0.003501 | 0.010919 |
| 11721518_SUDS3     | 0.377434 | 0.003505 | 0.010931 |
| 11763369_CHORDC1   | -0.17933 | 0.003506 | 0.010932 |
| 11755499_METAP1D   | -0.17574 | 0.003509 | 0.010941 |
| 11746574_RHOB      | 0.255509 | 0.003509 | 0.010941 |
| 11753267_PRPSAP2   | -0.15223 | 0.003509 | 0.010941 |
| 11739063_GNG12     | -0.17028 | 0.00351  | 0.010942 |
| 11758684_DUSP8 /// | 0.266493 | 0.00351  | 0.010942 |
| 11754845_FAM109A   | -0.22804 | 0.003512 | 0.010946 |
| 11752103_HK1       | -0.16529 | 0.003513 | 0.010949 |
| 11722739_CEP250    | -0.17399 | 0.003514 | 0.010952 |
| 11715335_OR6P1     | -0.23156 | 0.003515 | 0.010954 |
| 11753409_AKR1E2    | -0.22285 | 0.003519 | 0.010965 |
| 11719179_PVR       | -0.17557 | 0.003519 | 0.010966 |
| 11717237_AMD1      | -0.1409  | 0.00352  | 0.010968 |
| 11749082_PIN1P1    | -0.17252 | 0.003526 | 0.010984 |
| 11729669 EIF3K     | -0.16668 | 0.003527 | 0.010989 |
| 11726647_BTN3A1 // | -0.17994 | 0.003531 | 0.010999 |
| 11752159_HDLBP     | -0.15236 | 0.003531 | 0.010999 |
| 11747924_SCML2     | 0.349445 | 0.003532 | 0.011003 |
| 11751399_NDRG3     | 0.177742 | 0.003533 | 0.011004 |
| 11724080_COL21A1   | 0.146723 | 0.003535 | 0.011008 |
| 11748555_CDKL3     | 0.303302 | 0.003535 | 0.011009 |
| 11755611_PFKFB3    | -0.17515 | 0.003536 | 0.01101  |
| 11751852_TRAF4     | 0.202664 | 0.003537 | 0.011013 |
| 11735231_SPATA12   | -0.24472 | 0.003537 | 0.011013 |
| 11728564_RTKN2     | -0.31571 | 0.003538 | 0.011015 |
| 11719004_ANKH      | 0.156587 | 0.003539 | 0.011019 |
| 11721660_LMO4      | -0.16912 | 0.003541 | 0.011023 |
| 11720065_C12orf4   | 0.192267 | 0.003544 | 0.011033 |
| 11718420_CLPTM1L   | -0.17907 | 0.003545 | 0.011034 |
| 11746929_MOB3C     | 0.23737  | 0.003545 | 0.011035 |
| 11742281_NAF1      | -0.21947 | 0.003549 | 0.011045 |
| 11720828_S100BP    | -0.19801 | 0.003549 | 0.011045 |
| 11732628_ZNF765    | 0.275374 | 0.003549 | 0.011045 |
| 11731814_GATA1     | -0.17608 | 0.003553 | 0.011055 |

|                    |          |          |          |
|--------------------|----------|----------|----------|
| 11729131_PSME3     | -0.21619 | 0.003554 | 0.011056 |
| 11727719_BCAP29    | 0.151583 | 0.003558 | 0.011071 |
| 11756803_MS4A14    | 0.22171  | 0.003559 | 0.011071 |
| 11716399_TP53INP2  | -0.17004 | 0.003559 | 0.011072 |
| 11717331_BMS1      | 0.164361 | 0.00356  | 0.011074 |
| 11762345_LOC100128 | -0.29931 | 0.003561 | 0.011077 |
| 11755968_NRG1      | 0.299708 | 0.003562 | 0.011078 |
| 11733632_P2RY14    | -0.19594 | 0.003563 | 0.01108  |
| 11756565_IDH3A     | -0.15321 | 0.003563 | 0.01108  |
| 11732285_DZIP3     | -0.52021 | 0.003563 | 0.01108  |
| 11733511_MTMR1     | 0.150317 | 0.003564 | 0.011083 |
| 11721497_WDR33     | -0.38355 | 0.003565 | 0.011084 |
| 11745657_PAX5      | -0.166   | 0.003565 | 0.011084 |
| 11720111_SNTB2     | -0.19518 | 0.003567 | 0.011087 |
| 11748378_BTBD7     | 0.242808 | 0.003567 | 0.011088 |
| 11727457_OFD1      | 0.162524 | 0.003568 | 0.011092 |
| 11717031_KIAA0141  | -0.20585 | 0.003569 | 0.011094 |
| 11737195_RMDN2     | 0.241668 | 0.003572 | 0.0111   |
| 11744758_PSORS1C1  | 0.178277 | 0.003572 | 0.011102 |
| 11716860_PIAS3     | -0.158   | 0.003573 | 0.011103 |
| 11731639_GAB1      | 0.482042 | 0.003573 | 0.011104 |
| 11759892_PLEKHA8   | 0.290421 | 0.003574 | 0.011105 |
| 11719233_PTPRS     | -0.24032 | 0.003575 | 0.011108 |
| 11731730_VPS13A    | 0.314413 | 0.003577 | 0.011112 |
| 11744371_CLDN4     | -0.23144 | 0.00358  | 0.011123 |
| 11755394_ZNF575    | -0.33471 | 0.003582 | 0.011128 |
| 11756295_ARFIP2    | 0.165683 | 0.003584 | 0.011133 |
| 11754141_FXYD6 /// | -0.20124 | 0.003586 | 0.011137 |
| 11763762_RPUSD1    | -0.1685  | 0.003586 | 0.011137 |
| 11733118_SLC35B4   | 0.221622 | 0.003591 | 0.011151 |
| 11716671_PIGY ///  | -0.15114 | 0.003593 | 0.011157 |
| 11720697_HDAC7     | -0.15708 | 0.003593 | 0.011157 |
| 11742095_SCLY ///  | 0.16254  | 0.003594 | 0.011159 |
| 11727460_ZXDC      | -0.21953 | 0.003598 | 0.011171 |
| 11747859_ABCE1     | -0.16905 | 0.0036   | 0.011177 |
| 11742127_PAOX      | -0.24615 | 0.003603 | 0.011186 |
| 11734316_WDR17     | 0.226141 | 0.003604 | 0.011188 |
| 11740219_ZFP37     | 0.343278 | 0.003607 | 0.011195 |
| 11737053_HSPD1     | -0.19668 | 0.003608 | 0.011198 |
| 11720305_VAT1      | -0.23706 | 0.003609 | 0.011201 |
| 11727386_NPY1R     | -0.1455  | 0.003613 | 0.011212 |
| 11752379_MCTP1     | 0.371516 | 0.003617 | 0.011226 |
| 11730608_HNF4G     | 0.259424 | 0.003618 | 0.011227 |
| 11744609_ATXN7     | 0.246984 | 0.003622 | 0.011237 |
| 11719265_MLPH      | -0.21871 | 0.003622 | 0.011237 |
| 11732923_ENAM      | -0.20643 | 0.003622 | 0.011237 |
| 11724201_TMEM143   | -0.24011 | 0.003624 | 0.011244 |
| 11761858_CCM2      | -0.2241  | 0.003625 | 0.011244 |
| 11733225_RLTPR     | -0.19525 | 0.003625 | 0.011246 |
| 11754917_SP100     | 0.186884 | 0.003626 | 0.011246 |
| 11717408_SH2B3     | 0.1779   | 0.003626 | 0.011246 |

|                    |          |          |          |
|--------------------|----------|----------|----------|
| 11761888_PSG9      | -0.19665 | 0.003626 | 0.011246 |
| 11720292_LIN28B    | 0.814371 | 0.003628 | 0.011251 |
| 11739929_MAN1C1    | -0.259   | 0.00363  | 0.011257 |
| 11727707_BBC3      | 0.268851 | 0.003632 | 0.011263 |
| 11745207_CDK5RAP1  | -0.16711 | 0.003636 | 0.011275 |
| 11728877_ARID1B    | 0.237182 | 0.003637 | 0.011276 |
| 11735190_FBXO48    | -0.27805 | 0.003638 | 0.011277 |
| 11739727_NAP1L1    | 0.153647 | 0.003639 | 0.01128  |
| 11753962_SSR3      | -0.22509 | 0.003639 | 0.011281 |
| 11750288_DYX1C1    | 0.208795 | 0.003642 | 0.011288 |
| 11748672_POLR1E    | 0.207097 | 0.003643 | 0.01129  |
| 11749515_SHKBP1    | -0.21459 | 0.003643 | 0.01129  |
| 11718854_MRPS30    | 0.16861  | 0.003645 | 0.011295 |
| 11734333_LINC01559 | -0.18399 | 0.003645 | 0.011295 |
| 11718256_URGCP     | 0.20127  | 0.003646 | 0.011297 |
| 11717635_MLH1      | -0.21759 | 0.003647 | 0.011299 |
| 11753064_MX2       | -0.19673 | 0.003648 | 0.011302 |
| 11748390_ZDHC16    | 0.17585  | 0.003648 | 0.011302 |
| 11729440_TMEM31    | -0.3111  | 0.003648 | 0.011302 |
| 11719677_MED21     | -0.19683 | 0.003649 | 0.011304 |
| 11744380_COL3A1    | 0.291247 | 0.00365  | 0.011304 |
| 11719705_BCKDK     | -0.18122 | 0.003651 | 0.011307 |
| 11756192_CLASP2    | -0.3526  | 0.003651 | 0.011307 |
| 11760786_C2CD2     | 0.204753 | 0.003651 | 0.011307 |
| 11760233_SFSWAP    | 0.236137 | 0.003653 | 0.011312 |
| 11760288_VAMP4     | 0.303307 | 0.003658 | 0.011326 |
| 11756449_RBCK1     | 0.15291  | 0.003663 | 0.011342 |
| 11745567_USP48     | -0.15934 | 0.003663 | 0.011342 |
| 11719502_DHX36     | 0.156963 | 0.003665 | 0.011344 |
| 11749232_ZCCHC6    | 0.291621 | 0.003665 | 0.011344 |
| 11732185_PAPOLG    | 0.247344 | 0.003666 | 0.011347 |
| 11740796_CALHM3    | -0.22856 | 0.003666 | 0.011348 |
| 11718902_TGFBR3    | 0.2432   | 0.003667 | 0.01135  |
| 11729118_CDKN1C    | 0.198104 | 0.003668 | 0.011353 |
| 11722720_BAIAP2    | 0.186094 | 0.003671 | 0.011359 |
| 11758246_ARL4D     | -0.15253 | 0.003672 | 0.011362 |
| 11726072 EMC2      | -0.25659 | 0.003673 | 0.011364 |
| 11720863_PNPLA4    | -0.19259 | 0.003673 | 0.011365 |
| 11716460_TUBA4A    | -0.18035 | 0.003675 | 0.01137  |
| 11722492_SEZ6L2    | -0.17943 | 0.003675 | 0.01137  |
| 11717840_ETNK1     | 0.18806  | 0.003677 | 0.011375 |
| 11727958_ING1      | -0.27709 | 0.003678 | 0.011376 |
| 11718312_ACADSB    | -0.29658 | 0.003679 | 0.01138  |
| 11740467_MAGIX     | -0.27681 | 0.00368  | 0.011382 |
| 11718576_NET1      | 0.219638 | 0.003682 | 0.011387 |
| 11737483_RAET1G    | -0.23123 | 0.003682 | 0.011387 |
| 11745382_COG7      | 0.247641 | 0.003683 | 0.01139  |
| 11731763_RPS6KA2   | -0.17442 | 0.003684 | 0.01139  |
| 11745624_INADL     | 0.408509 | 0.003684 | 0.011391 |
| 11728572_MBNL1     | 0.152511 | 0.003685 | 0.011392 |
| 11759678_RAB12     | -0.29723 | 0.003685 | 0.011392 |

|                    |          |          |          |
|--------------------|----------|----------|----------|
| 11739310_DLG1      | 0.278202 | 0.003685 | 0.011393 |
| 11725669_HS2ST1    | 0.267848 | 0.003686 | 0.011393 |
| 11715613_BTG2      | 0.346629 | 0.003688 | 0.0114   |
| 11764038_STYXL1    | -0.16851 | 0.003691 | 0.011408 |
| 11757061_GCSH ///  | -0.14934 | 0.003692 | 0.011409 |
| 11716585_PDZD11    | -0.18741 | 0.003693 | 0.011411 |
| 11744202_C19orf70  | -0.15684 | 0.003693 | 0.011412 |
| 11728875_LIN9      | -0.23582 | 0.003694 | 0.011415 |
| 11720983_PSMC6     | -0.16307 | 0.003697 | 0.011422 |
| 11728025_PPM1J     | -0.34099 | 0.003699 | 0.011428 |
| 11734011_TRAPPC13  | 0.171852 | 0.003703 | 0.011438 |
| 11753889_STAT6     | -0.23617 | 0.003705 | 0.011444 |
| 11758748_RAB6A     | 0.303111 | 0.003705 | 0.011445 |
| 11753292_CD44      | 0.142303 | 0.003705 | 0.011445 |
| 11715389_FKBP1A    | 0.207627 | 0.003706 | 0.011447 |
| 11743676_TTL7      | 0.353578 | 0.003708 | 0.01145  |
| 11759097_ZNF703    | -0.17456 | 0.003708 | 0.011451 |
| 11731252_PSMG4     | -0.17384 | 0.003709 | 0.011451 |
| 11736577_IRAK1BP1  | -0.26573 | 0.003709 | 0.011451 |
| 11741307_KLK3      | -0.22105 | 0.003709 | 0.011451 |
| 11734873_SCAPER    | 0.166692 | 0.003709 | 0.011451 |
| 11745830_ALAD      | -0.16566 | 0.003709 | 0.011451 |
| 11758024_TTC31     | -0.1466  | 0.00371  | 0.011451 |
| 11728476_CXCL3     | 0.526517 | 0.003711 | 0.011454 |
| 11726322_ACOX1     | -0.20176 | 0.003712 | 0.011456 |
| 11738997_DPYSL2    | 0.155604 | 0.003712 | 0.011456 |
| 11716223_SEC61G    | -0.17675 | 0.003712 | 0.011456 |
| 11750006_COA1      | -0.16244 | 0.003713 | 0.011458 |
| 11757538_GOT1      | -0.14143 | 0.003713 | 0.011459 |
| 11740280_SAMD15    | 0.298509 | 0.003714 | 0.01146  |
| 11725007_DACT3     | -0.19232 | 0.003716 | 0.011465 |
| 11735073_ZNF596    | 0.336381 | 0.003717 | 0.011468 |
| 11731282_TMEM72    | -0.18529 | 0.003718 | 0.011469 |
| 11752318_BTN3A3    | -0.1654  | 0.003718 | 0.011469 |
| 11756680_APH1B     | 0.206174 | 0.003719 | 0.011471 |
| 11737792_IDH3A     | -0.17915 | 0.003719 | 0.011471 |
| 11733958_GTPBP3    | -0.1693  | 0.00372  | 0.011473 |
| 11723022_BCKDHB    | -0.27254 | 0.003721 | 0.011477 |
| 11719829_SLC26A11  | -0.17886 | 0.003722 | 0.011478 |
| 11752516_ANKHD1 // | 0.180295 | 0.003723 | 0.011481 |
| 11727184_ZNF175    | 0.267109 | 0.003725 | 0.011487 |
| 11718433_SASH1     | 0.146364 | 0.003727 | 0.01149  |
| 11759635_THOC2     | 0.266057 | 0.003728 | 0.011493 |
| 11731598_KLHL1     | 0.210167 | 0.003728 | 0.011493 |
| 11725402_C11orf57  | -0.17445 | 0.003729 | 0.011495 |
| 11728763_GAL3ST4   | -0.36382 | 0.003729 | 0.011495 |
| 11761643_DHPS      | -0.17775 | 0.003729 | 0.011495 |
| 11747093_PPP3R1    | 0.210323 | 0.003731 | 0.011498 |
| 11747359_JADE1     | -0.18135 | 0.003732 | 0.011503 |
| 11757502_SCRG1     | 0.441035 | 0.003737 | 0.011515 |
| 11741057_ENOX2     | -0.25534 | 0.003737 | 0.011517 |

|                    |          |          |          |
|--------------------|----------|----------|----------|
| 11753398_CLTA      | 0.143069 | 0.003739 | 0.011521 |
| 11755796_ADAM9     | 0.227638 | 0.003739 | 0.011521 |
| 11721133_GFPT2     | -0.17437 | 0.003742 | 0.011529 |
| 11717952_ZDHC18    | 0.163657 | 0.003742 | 0.01153  |
| 11744504_POLR2J    | -0.18676 | 0.003744 | 0.011533 |
| 11747599_CLPTM1    | 0.175249 | 0.003744 | 0.011533 |
| 11758654_BLOC1S5 / | -0.19275 | 0.003746 | 0.011539 |
| 11762501_VGLL3     | -0.21651 | 0.003748 | 0.011544 |
| 11715589_DYNC1H1   | -0.18556 | 0.003749 | 0.011545 |
| 11749928_PGPEP1    | 0.228535 | 0.003749 | 0.011546 |
| 11723136_SRC       | -0.16844 | 0.003753 | 0.011556 |
| 11727085_GJB2      | -0.16434 | 0.003753 | 0.011556 |
| 11752390_MED15     | -0.15035 | 0.003757 | 0.011566 |
| 11726838_SCAI      | -0.23892 | 0.003757 | 0.011566 |
| 11758091_LCMT2     | -0.19769 | 0.003758 | 0.011569 |
| 11718644_OSBPL8    | 0.150862 | 0.00376  | 0.011575 |
| 11729172_NIFK      | 0.141038 | 0.003762 | 0.011581 |
| 11751141_ACTR3     | 0.154148 | 0.003764 | 0.011586 |
| 11761012_LOC102724 | -0.17114 | 0.003767 | 0.011595 |
| 11726958_TMEM81    | -0.24064 | 0.003768 | 0.011596 |
| 11718278_NDUFB4    | -0.15969 | 0.003768 | 0.011596 |
| 11745384_NDUFB4    | -0.15969 | 0.003768 | 0.011596 |
| 11744283_COQ4      | 0.202809 | 0.00377  | 0.011602 |
| 11739365_FAM92A1   | -0.14023 | 0.003771 | 0.011604 |
| 11732344_ZNF33A    | -0.22255 | 0.003773 | 0.011608 |
| 11720102_SPIN1     | 0.176635 | 0.003774 | 0.011611 |
| 11719161_GPT2      | -0.1685  | 0.003775 | 0.011614 |
| 11720390_PTPN23    | -0.20412 | 0.003777 | 0.011618 |
| 11757067_ING5      | -0.18002 | 0.003778 | 0.011621 |
| 11719653_SV2A      | -0.17175 | 0.00378  | 0.011625 |
| 11733230_PTPRB     | 0.300217 | 0.00378  | 0.011626 |
| 11759035_STT3B     | -0.15648 | 0.00378  | 0.011626 |
| 11759844_ZNF778    | 0.174953 | 0.003781 | 0.011626 |
| 11752859_ABHD6     | 0.18634  | 0.003782 | 0.01163  |
| 11752291_SLC30A6   | 0.235521 | 0.003785 | 0.011638 |
| 11748674_AFF4      | 0.264698 | 0.003785 | 0.011638 |
| 11740074_SCN8A     | 0.226291 | 0.003786 | 0.01164  |
| 11741456_WIPF3     | -0.15108 | 0.003791 | 0.011654 |
| 11723529_GOSR1     | -0.20091 | 0.003792 | 0.011656 |
| 11722528_PTPN21    | 0.393764 | 0.003793 | 0.011658 |
| 11747078_SPOCK3    | -0.32018 | 0.003796 | 0.011667 |
| 11721237_LHFPL2    | 0.221916 | 0.003797 | 0.011669 |
| 11748043_KMT5A     | 0.181646 | 0.003799 | 0.011675 |
| 11716048_TRIB1     | 0.237331 | 0.0038   | 0.011678 |
| 11730405_MEX3B     | -0.21694 | 0.003802 | 0.011684 |
| 11735122_TIMM8A    | -0.21244 | 0.003806 | 0.011694 |
| 11762400_PPIL2     | -0.19731 | 0.003808 | 0.011701 |
| 11724370_KIAA1644  | -0.15712 | 0.00381  | 0.011704 |
| 11752823_KLHDC3    | 0.165408 | 0.00381  | 0.011706 |
| 11751776_PHB       | -0.16618 | 0.003811 | 0.011706 |
| 11721430_SYBU      | 0.176798 | 0.003814 | 0.011715 |



|                    |          |          |          |
|--------------------|----------|----------|----------|
| 11740461_ATF6      | 0.276014 | 0.003815 | 0.011718 |
| 11746710_DOCK10    | 0.207005 | 0.003821 | 0.011734 |
| 11734506_MECOM     | -0.20665 | 0.003821 | 0.011735 |
| 11761017_SDHAP1 // | -0.23282 | 0.003822 | 0.011735 |
| 11729870_EMILIN1   | -0.21648 | 0.003822 | 0.011735 |
| 11737486_SRF       | -0.15685 | 0.003822 | 0.011736 |
| 11715125_MORC2     | -0.15537 | 0.003823 | 0.011737 |
| 11756877_GNGT2     | -0.24654 | 0.003823 | 0.011738 |
| 11737111_ERC1      | 0.150759 | 0.003825 | 0.011742 |
| 11734430_BPIFC     | -0.17921 | 0.003825 | 0.011743 |
| 11742863_CD200     | -0.38635 | 0.003826 | 0.011743 |
| 11743619_DUS4L     | -0.14303 | 0.003826 | 0.011744 |
| 11719241_CAMK2N1   | -0.21297 | 0.003828 | 0.01175  |
| 11725799_USP46     | -0.15589 | 0.00383  | 0.011754 |
| 11759735_OBSCN     | -0.22926 | 0.003831 | 0.011756 |
| 11739101_SYF2      | 0.174394 | 0.003831 | 0.011756 |
| 11723535_PDGFR_L   | -0.29434 | 0.003834 | 0.011764 |
| 11735895_BCL2L11   | -0.26167 | 0.003834 | 0.011764 |
| 11720459_CAPRIN1   | -0.15761 | 0.003838 | 0.011774 |
| 11737773_MCU       | 0.172628 | 0.00384  | 0.011779 |
| 11758582_SIX4      | 0.169706 | 0.003843 | 0.01179  |
| 11735578_VPS13B    | 0.151334 | 0.003848 | 0.011804 |
| 11717406_FAM120AOS | 0.336871 | 0.003848 | 0.011804 |
| 11719845_SMAP2     | 0.178684 | 0.003849 | 0.011805 |
| 11755875_STRN      | 0.228515 | 0.00385  | 0.011806 |
| 11731578_ACSS1     | -0.31053 | 0.003855 | 0.01182  |
| 11763785_KCNN4     | 0.145287 | 0.003855 | 0.011821 |
| 11756167_FOXP2     | 0.145098 | 0.003856 | 0.011823 |
| 11717260_CCDC142 / | 0.173631 | 0.003857 | 0.011825 |
| 11757343_FIBP      | -0.1527  | 0.003858 | 0.011829 |
| 11759984_ZNF273    | -0.27029 | 0.003859 | 0.011831 |
| 11738138_HSPBP1    | -0.16007 | 0.00386  | 0.011832 |
| 11754267_HBA1 ///  | -0.18826 | 0.003862 | 0.011837 |
| 11730144_KLHL31    | -0.18649 | 0.003865 | 0.011845 |
| 11722816_RANBP2    | 0.16905  | 0.003867 | 0.011851 |
| 11736220_TANGO2    | -0.17059 | 0.003867 | 0.011852 |
| 11762709_CYP2U1    | -0.16964 | 0.00387  | 0.011858 |
| 11731762_RPS6KA2   | -0.22401 | 0.003872 | 0.011866 |
| 11726733_AGGF1     | -0.14929 | 0.003874 | 0.011869 |
| 11756386_WDR1      | -0.16366 | 0.003875 | 0.011872 |
| 11717213_NSMAF     | 0.208426 | 0.003875 | 0.011872 |
| 11752360_RBM22     | 0.136713 | 0.003875 | 0.011872 |
| 11715897_SCARB2    | -0.14721 | 0.003878 | 0.011878 |
| 11722929_CNKSR3    | 0.199325 | 0.003878 | 0.011881 |
| 11727117_NPPB      | 0.289398 | 0.003879 | 0.011881 |
| 11722599_P3H4      | -0.28892 | 0.00388  | 0.011884 |
| 11722506_PLPPR2    | -0.24932 | 0.003883 | 0.011893 |
| 11733045_SLC7A2    | -0.32933 | 0.003884 | 0.011893 |
| 11744144	EIF3H     | 0.145447 | 0.003885 | 0.011898 |
| 11739097_ALDH3A2   | -0.16492 | 0.003895 | 0.011927 |
| 11748073_LDLRAD4   | -0.25012 | 0.003899 | 0.011937 |

|                   |          |          |          |
|-------------------|----------|----------|----------|
| 11744087_GPANK1   | 0.151151 | 0.003904 | 0.011952 |
| 11756699_AKT2     | -0.24885 | 0.003906 | 0.011958 |
| 11762262_NUB1     | 0.225137 | 0.003908 | 0.011964 |
| 11732693_PTH2R    | -0.14973 | 0.003909 | 0.011966 |
| 11715903_DDX3X    | 0.147948 | 0.003914 | 0.011981 |
| 11718196_ATP6VOD1 | 0.176818 | 0.003916 | 0.011985 |
| 11743061_DCTPP1   | -0.15116 | 0.003917 | 0.011987 |
| 11729969_WNT6     | -0.20975 | 0.003917 | 0.011987 |
| 11747428_CDK20    | 0.234819 | 0.003919 | 0.011992 |
| 11752712_CEP128   | -0.381   | 0.003924 | 0.012007 |
| 11726996_PINK1    | -0.25549 | 0.003925 | 0.012011 |
| 11755680_SLC30A6  | 0.255097 | 0.003928 | 0.012018 |
| 11742667_RPS28    | 0.135887 | 0.00393  | 0.012023 |
| 11723707_AIFM2    | 0.178347 | 0.00393  | 0.012023 |
| 11718041_SNRPE    | -0.26653 | 0.003931 | 0.012024 |
| 11727960_ING1     | -0.20388 | 0.003931 | 0.012024 |
| 11720914_ACP2     | -0.17953 | 0.003932 | 0.012026 |
| 11727923_PURA     | -0.1508  | 0.003933 | 0.012029 |
| 11719225_NXN      | -0.27948 | 0.003934 | 0.012032 |
| 11725282_YJEFN3   | 0.205597 | 0.003935 | 0.012033 |
| 11729766_ZNF331   | -0.25065 | 0.003938 | 0.01204  |
| 11757259_SCARNA9L | -0.21126 | 0.003938 | 0.01204  |
| 11751167_P2RX5    | 0.185649 | 0.003938 | 0.012041 |
| 11726716_DDX59    | -0.25246 | 0.003939 | 0.012042 |
| 11750027_SLC35F2  | 0.141884 | 0.003943 | 0.012055 |
| 11728896_LRP8     | -0.19686 | 0.003947 | 0.012065 |
| 11741339_GAB1     | 0.302452 | 0.003947 | 0.012065 |
| 11749333_GNL3     | 0.138761 | 0.003953 | 0.012081 |
| 11741165_FAM193A  | 0.188886 | 0.003954 | 0.012083 |
| 11737722_GLIS3    | 0.196905 | 0.003958 | 0.012095 |
| 11736623_TMEM110  | 0.195316 | 0.003958 | 0.012095 |
| 11726750_GTF3C4   | 0.170501 | 0.003961 | 0.012102 |
| 11739019_RAB5C    | -0.14992 | 0.003961 | 0.012103 |
| 11749739_ASNA1    | -0.19122 | 0.003961 | 0.012103 |
| 11730271_PPP2R5E  | 0.147776 | 0.003962 | 0.012104 |
| 11753019_EWSR1    | 0.22318  | 0.003963 | 0.012105 |
| 11719022_ZNF652   | 0.237426 | 0.003963 | 0.012105 |
| 11749891_HLF      | -0.1834  | 0.003963 | 0.012106 |
| 11742465_PTP4A2   | -0.16764 | 0.003965 | 0.012111 |
| 11724120_TRIM59   | 0.180598 | 0.003966 | 0.012114 |
| 11718146_HPCAL1   | -0.16613 | 0.003968 | 0.012117 |
| 11716981_MIEN1    | -0.15804 | 0.003968 | 0.012118 |
| 11716682_SLC39A9  | -0.15181 | 0.00397  | 0.012123 |
| 11754932_XRCC6    | -0.163   | 0.003972 | 0.012128 |
| 11731827_ZNF425   | 0.224849 | 0.003975 | 0.012135 |
| 11748586_XP01     | -0.1367  | 0.003976 | 0.012139 |
| 11720824_JAG1     | 0.200819 | 0.003977 | 0.012141 |
| 11731574_FRMD4B   | 0.164914 | 0.003978 | 0.012142 |
| 11726077_ANAPC15  | -0.1692  | 0.003982 | 0.012154 |
| 11760998_COQ6     | 0.207918 | 0.003982 | 0.012155 |
| 11716353_STARD3   | -0.20405 | 0.003986 | 0.012165 |

|                    |          |          |          |
|--------------------|----------|----------|----------|
| 11716376_SERPINA5  | -0.15667 | 0.003995 | 0.012193 |
| 11757362_NPM1      | -0.15653 | 0.003998 | 0.0122   |
| 11747326_IPO4 ///  | -0.17521 | 0.003999 | 0.012204 |
| 11751500_SLC22A10  | -0.17682 | 0.004    | 0.012205 |
| 11751559_LRRK1     | -0.25356 | 0.004004 | 0.012217 |
| 11745655_MED16     | -0.15657 | 0.004005 | 0.01222  |
| 11726983_CCNC      | 0.187778 | 0.004007 | 0.012223 |
| 11745779_KMT2E     | 0.272133 | 0.004007 | 0.012223 |
| 11750291_IST1      | 0.158745 | 0.004007 | 0.012223 |
| 11757919_MEGF9     | 0.183111 | 0.004008 | 0.012225 |
| 11744450_ARHGAP4   | -0.15979 | 0.00401  | 0.01223  |
| 11759931_PHTF1     | 0.205997 | 0.00401  | 0.01223  |
| 11747309_VTA1      | 0.16406  | 0.004013 | 0.012237 |
| 11761452_GOLGA3    | -0.36015 | 0.004014 | 0.012241 |
| 11719709_PDPK1     | 0.199106 | 0.004017 | 0.012249 |
| 11721453_MRPL44    | 0.160394 | 0.004017 | 0.012249 |
| 11723705_ABHD5     | 0.242007 | 0.004018 | 0.012249 |
| 11745796_WBP11     | -0.15924 | 0.004025 | 0.012271 |
| 11759568_SLC45A4   | -0.35092 | 0.004026 | 0.012273 |
| 11755607_KIAA1549  | 0.166787 | 0.004028 | 0.012279 |
| 11738368_CLPSL2    | -0.22068 | 0.00403  | 0.012285 |
| 11749968_RAD52     | 0.20373  | 0.004033 | 0.012292 |
| 11725323_ZNHIT2    | 0.199866 | 0.004037 | 0.012302 |
| 11757079_CCDC166   | -0.17553 | 0.00404  | 0.01231  |
| 11757104_CCDC166   | -0.17553 | 0.00404  | 0.01231  |
| 11722827_SDAD1     | 0.359895 | 0.004041 | 0.012312 |
| 11736118_ZFAND5    | -0.20261 | 0.004041 | 0.012313 |
| 11737134_ZNF385A   | -0.21922 | 0.004043 | 0.012317 |
| 11718087_SHKBP1    | -0.16922 | 0.004043 | 0.012318 |
| 11734527_RECQL5    | -0.35021 | 0.004045 | 0.012323 |
| 11739142_HNRNPF    | -0.15688 | 0.00405  | 0.012338 |
| 11745309_FRMD3     | 0.228094 | 0.004051 | 0.012338 |
| 11751318_EIF4A1 // | -0.13628 | 0.004055 | 0.01235  |
| 11735866_OR12D2    | -0.19048 | 0.004056 | 0.012353 |
| 11731752_RNF213    | 0.285502 | 0.004056 | 0.012353 |
| 11716647_HM13      | 0.194577 | 0.004057 | 0.012355 |
| 11722280_PHC3      | -0.15345 | 0.004058 | 0.012356 |
| 11761180_TMED9     | -0.20958 | 0.004058 | 0.012356 |
| 11744113_COQ5      | -0.15424 | 0.004059 | 0.012359 |
| 11740267_CCDC18    | -0.17623 | 0.004062 | 0.012365 |
| 11757658_LZIC      | -0.16564 | 0.004063 | 0.012368 |
| 11731491_HK1       | -0.15013 | 0.004065 | 0.012375 |
| 11736080_CAMLG     | -0.17879 | 0.004066 | 0.012376 |
| 11744515_SLC25A38  | 0.147303 | 0.00407  | 0.012389 |
| 11742881_UBE2B     | 0.188253 | 0.004073 | 0.012396 |
| 11725288_RHBDL3    | -0.26161 | 0.004073 | 0.012396 |
| 11742265_HFE       | -0.22797 | 0.004074 | 0.012397 |
| 11753319_KCNMB3    | 0.232613 | 0.004074 | 0.012397 |
| 11752622_PXK       | -0.24445 | 0.004074 | 0.012397 |
| 11719540_NEMP1     | 0.144745 | 0.004075 | 0.012397 |
| 11726665_TLE3      | 0.275864 | 0.004075 | 0.012397 |

|                    |            |          |          |
|--------------------|------------|----------|----------|
| 11753150_CELF2     | -0.27721   | 0.004075 | 0.012397 |
| 11748399_VCL       | 0.19681    | 0.004076 | 0.012399 |
| 11747088_GRID2     | 0.330944   | 0.004078 | 0.012404 |
| 11726984_CCNC      | 0.164691   | 0.004081 | 0.012414 |
| 11722299_RAB29     | 0.15758    | 0.004087 | 0.012431 |
| 11725464_SLC4A2    | -0.14156   | 0.004088 | 0.012432 |
| 11755332_TJAP1     | 0.193132   | 0.004088 | 0.012433 |
| 11753748_MED16     | -0.16924   | 0.004089 | 0.012434 |
| 11720898_MTM1      | 0.206842   | 0.00409  | 0.012436 |
| 11745786_CSNK2B    | 0.167489   | 0.004091 | 0.012438 |
| 11743031_S100A6    | 0.147118   | 0.004093 | 0.012443 |
| 11754203_PNPLA8    | 0.149573   | 0.004094 | 0.012446 |
| 11729569_CLEC12B   | 0.176955   | 0.004095 | 0.012448 |
| 11725152_L3HYPDH   | 0.15991    | 0.004095 | 0.012448 |
| 11749812_FOXO3 /// | 0.154134   | 0.0041   | 0.012461 |
| 11746129_GSTM3     | 0.190719   | 0.0041   | 0.012463 |
| 11752633_OLFM1     | -0.21937   | 0.004102 | 0.012465 |
| 11745874_EVL       | -0.16951   | 0.004104 | 0.012473 |
| 11754547_ENOX2     | -0.1727    | 0.004105 | 0.012473 |
| 11724194_SERF2     | 0.135852   | 0.004105 | 0.012473 |
| 11761966_TMC2      | -0.30351   | 0.004105 | 0.012473 |
| 11757303_BNIP3L    | 0.168009   | 0.004105 | 0.012473 |
| 11715807_STARD10   | 0.195677   | 0.004106 | 0.012474 |
| 11757478_MAP2K1    | -0.15012   | 0.004106 | 0.012474 |
| 11723612_TOX2      | -0.32634   | 0.004107 | 0.012476 |
| 11751480_TMEM231   | -0.26795   | 0.004109 | 0.012482 |
| 11721116_SPCS3     | -0.14776   | 0.004116 | 0.012503 |
| 11731608_EGFL8 /// | -0.15357   | 0.004119 | 0.01251  |
| 11748143_SLC39A1   | -0.16242   | 0.004121 | 0.012514 |
| 11730772_ZFYVE1    | 0.205313   | 0.004123 | 0.01252  |
| 11756463_TUBG2     | 0.181628   | 0.004125 | 0.012525 |
| 11741629_POLR3H    | 0.220235   | 0.004126 | 0.012528 |
| 11754733_TCF4      | 0.275797   | 0.004128 | 0.012532 |
| 11738252_HRH2      | -0.16877   | 0.004128 | 0.012532 |
| 11719386_MAPRE3    | 0.22514    | 0.004132 | 0.012543 |
| 11729472_FANCA     | -0.36455   | 0.004132 | 0.012544 |
| 11748445_HP1BP3    | 0.165701   | 0.004133 | 0.012545 |
| 11718171_RFWD2     | 0.180869   | 0.004138 | 0.012559 |
| 11724115_ZNF512B   | -0.20006   | 0.004139 | 0.012563 |
| 11757279_TIMMDC1   | 0.145614   | 0.004146 | 0.012582 |
| 11755969_NUCB1     | -0.14352   | 0.004147 | 0.012585 |
| 11729037_PRKX ///  | 0.274992   | 0.00415  | 0.012594 |
| 11760323_RBM4      | 0.242415   | 0.004157 | 0.012613 |
| 11724564_CHCHD1    | -0.15346   | 0.004158 | 0.012617 |
| 11759084_SLC30A5   | -0.28804   | 0.004159 | 0.012619 |
| 11718666_SRSF9     | -0.14115   | 0.004162 | 0.012625 |
| 11741451_RDM1      | -0.29105   | 0.004162 | 0.012625 |
| 11720934_DAGLB     | 0.25617    | 0.004162 | 0.012626 |
| 11724220_NAP1L2    | 0.394297   | 0.004163 | 0.012627 |
| 11720316_SLC44A2   | -0.17601   | 0.004167 | 0.012638 |
| 11762882_C1S ///   | E 0.410442 | 0.004171 | 0.01265  |

|                    |          |          |          |
|--------------------|----------|----------|----------|
| 11759906_EXD3      | -0.15286 | 0.004172 | 0.012652 |
| 11723896_JAG2      | -0.18704 | 0.004174 | 0.012658 |
| 11721533_TAF2      | 0.158522 | 0.004175 | 0.01266  |
| 11738177_NKX3-2    | -0.31395 | 0.004176 | 0.012662 |
| 11755060_TCF3      | -0.15352 | 0.004178 | 0.012668 |
| 11760399_PHBP19    | -0.27396 | 0.004179 | 0.01267  |
| 11756828_RNF144A   | 0.269677 | 0.004181 | 0.012673 |
| 11761530_SRSF2     | 0.276991 | 0.004184 | 0.012682 |
| 11762457_ZFYVE26   | -0.24037 | 0.004186 | 0.012689 |
| 11752536_DNAH6     | 0.274211 | 0.004187 | 0.01269  |
| 11724072_ZSWIM3    | 0.211144 | 0.004188 | 0.012691 |
| 11721186_RABGGTA   | -0.15545 | 0.004191 | 0.0127   |
| 11753291_CD44      | 0.154906 | 0.004192 | 0.012703 |
| 11729286_MSL3      | 0.232741 | 0.004193 | 0.012705 |
| 11763758_VILL      | -0.17001 | 0.004195 | 0.012709 |
| 11737163_ATP13A2   | 0.198638 | 0.004198 | 0.012718 |
| 11739105_TMEM33    | -0.16017 | 0.0042   | 0.012723 |
| 11717974_FAM219B   | 0.236347 | 0.0042   | 0.012724 |
| 11732447_EXOG      | 0.190991 | 0.004201 | 0.012724 |
| 11719575_RINT1     | 0.145185 | 0.004201 | 0.012724 |
| 11729364_PRKAA2    | 0.266071 | 0.004207 | 0.012744 |
| 11740492_AGAP1     | 0.163622 | 0.004208 | 0.012745 |
| 11743684_GPR21 /// | 0.14779  | 0.004208 | 0.012745 |
| 11748636_FPGT      | -0.20738 | 0.00421  | 0.012749 |
| 11719213_LOC100996 | 0.179622 | 0.004212 | 0.012753 |
| 11723649_CIAO1     | 0.18834  | 0.004212 | 0.012755 |
| 11739229_FBXW11    | -0.17565 | 0.004214 | 0.01276  |
| 11731620_ARRB2     | -0.4058  | 0.004215 | 0.01276  |
| 11759656_KLHL7     | -0.17908 | 0.004215 | 0.01276  |
| 11750394_MED15     | -0.15706 | 0.004215 | 0.01276  |
| 11724124_PIDD1     | 0.154924 | 0.004216 | 0.012762 |
| 11719314_NMRK1     | 0.170027 | 0.004217 | 0.012763 |
| 11719207_NPTN      | -0.18909 | 0.004218 | 0.012765 |
| 11748717_ERCC6L2   | 0.298933 | 0.004218 | 0.012765 |
| 11723944_PTTG1IP   | 0.16356  | 0.004218 | 0.012765 |
| 11760231_TDGF1P3   | -0.21338 | 0.004219 | 0.012766 |
| 11741766_AGAP3     | -0.13807 | 0.004222 | 0.012774 |
| 11735067_CERS1 /// | -0.15884 | 0.004223 | 0.012776 |
| 11753550_LINCO0189 | 0.360746 | 0.004224 | 0.012779 |
| 11724672_ELP5      | -0.20283 | 0.004225 | 0.012781 |
| 11747368_CDK10     | -0.17817 | 0.004227 | 0.012786 |
| 11734933_SRSF2     | -0.21374 | 0.00423  | 0.012796 |
| 11737329_SLC26A4   | 0.380417 | 0.004232 | 0.012802 |
| 11728946_GATA2     | -0.19366 | 0.004234 | 0.012807 |
| 11730775_CFDP1     | 0.160311 | 0.004237 | 0.012816 |
| 11761165_VWA9      | -0.25045 | 0.00424  | 0.012822 |
| 11742189_WDR17     | 0.324136 | 0.00424  | 0.012823 |
| 11727705_CCDC42    | -0.1948  | 0.004242 | 0.012827 |
| 11720238_MAPK9     | -0.20372 | 0.004242 | 0.012827 |
| 11728874_LIN9      | -0.15466 | 0.004243 | 0.012827 |
| 11747027_SLC1A4    | -0.1526  | 0.004245 | 0.012834 |

|                    |          |          |          |
|--------------------|----------|----------|----------|
| 11730202_FAM104A   | 0.208096 | 0.004249 | 0.012846 |
| 11747044_WBSCR16   | -0.15302 | 0.00425  | 0.012846 |
| 11719309_MKS1      | -0.17319 | 0.004251 | 0.012849 |
| 11715771_MRPL13    | -0.16691 | 0.004252 | 0.012851 |
| 11728897_FBXO17    | -0.20017 | 0.004254 | 0.012856 |
| 11763500_ZNF93     | 0.161973 | 0.004256 | 0.012862 |
| 11747333_HSD17B4   | -0.20504 | 0.00426  | 0.012875 |
| 11747860_ABCE1     | -0.16186 | 0.004264 | 0.012884 |
| 11762850_ESPNP     | -0.16962 | 0.004265 | 0.012887 |
| 11721826_ARPC5L    | 0.199266 | 0.004265 | 0.012887 |
| 11742931_BIRC6     | 0.205704 | 0.004266 | 0.012889 |
| 11751251_PML       | -0.18022 | 0.004267 | 0.01289  |
| 11731669_GPR65     | 0.163024 | 0.004269 | 0.012894 |
| 11750026_DNM1L     | -0.14503 | 0.004272 | 0.012904 |
| 11743350_C15orf48  | 0.457711 | 0.004273 | 0.012906 |
| 11725428_ABLIM3    | 0.498422 | 0.004274 | 0.012907 |
| 11719364_SPATS2L   | -0.1916  | 0.004278 | 0.01292  |
| 11715980_AIP       | -0.17275 | 0.004279 | 0.012921 |
| 11727610_ENSA      | -0.18117 | 0.004281 | 0.012927 |
| 11718389_TRIM26    | 0.1896   | 0.004282 | 0.012929 |
| 11724336_HSPA12A   | -0.26145 | 0.004284 | 0.012935 |
| 11742056_ZNF365    | -0.27218 | 0.004289 | 0.012948 |
| 11744114_GMPPA     | -0.27411 | 0.004294 | 0.012962 |
| 11752608_ST7 /// S | 0.148267 | 0.004294 | 0.012963 |
| 11752970_RAD52     | 0.270279 | 0.004296 | 0.012966 |
| 11731346_DGKZ      | 0.16371  | 0.004296 | 0.012966 |
| 11759067_CCDC186   | -0.37245 | 0.004297 | 0.012969 |
| 11724439_TSACC     | -0.20904 | 0.0043   | 0.012979 |
| 11715470_TXN       | -0.13976 | 0.004301 | 0.012979 |
| 11748238_TBCD      | -0.22416 | 0.004301 | 0.01298  |
| 11746267_CHRND     | -0.22379 | 0.004302 | 0.01298  |
| 11734127_CYP11B1   | -0.20423 | 0.004303 | 0.012983 |
| 11755398_USP43     | -0.25172 | 0.004304 | 0.012984 |
| 11750853_PRRC2A    | -0.18762 | 0.004304 | 0.012985 |
| 11760856_FAM185A   | -0.18956 | 0.004307 | 0.012994 |
| 11732564_ADAT2     | -0.26159 | 0.004313 | 0.013009 |
| 11721153_STK3      | 0.149334 | 0.004313 | 0.013009 |
| 11716493_MAP4      | -0.14246 | 0.004314 | 0.01301  |
| 11733698_SGK1      | -0.14886 | 0.004315 | 0.013015 |
| 11762940_HLA-C     | 0.192532 | 0.004316 | 0.013016 |
| 11755113_UPF2      | 0.158272 | 0.004316 | 0.013016 |
| 11721628_SEPT6     | -0.19134 | 0.00432  | 0.013026 |
| 11724061_OSBP1A    | -0.15044 | 0.00432  | 0.013027 |
| 11724126_MID2      | 0.165817 | 0.004321 | 0.013028 |
| 11761949_NALCN     | 0.355186 | 0.004321 | 0.013028 |
| 11735697_ENTPD6    | 0.158444 | 0.004324 | 0.013036 |
| 11716692_NPEPPS    | 0.140473 | 0.004325 | 0.013036 |
| 11739211_HNRNPK    | -0.22342 | 0.004326 | 0.013041 |
| 11762130_CFHR3     | 0.217492 | 0.00433  | 0.013052 |
| 11737786_KCNAB2    | -0.20426 | 0.004331 | 0.013053 |
| 11719998_SYNJ2BP / | 0.138165 | 0.004331 | 0.013053 |

|                    |          |          |          |
|--------------------|----------|----------|----------|
| 11726306_FAM204A   | -0.26572 | 0.004331 | 0.013053 |
| 11721866_GNPDA2    | 0.183796 | 0.004334 | 0.013059 |
| 11734713_DBF4      | -0.17504 | 0.004335 | 0.013061 |
| 11715220_C2orf44   | 0.270003 | 0.004337 | 0.013067 |
| 11746897_CRTAP     | 0.189109 | 0.004338 | 0.013068 |
| 11740240_FGFR4     | -0.17211 | 0.00434  | 0.013074 |
| 11725546_OPCML     | -0.17835 | 0.004341 | 0.013077 |
| 11761965_TMC2      | -0.22473 | 0.004343 | 0.013083 |
| 11732077_IGSF22    | -0.21257 | 0.004351 | 0.013106 |
| 11739108_CXorf56   | -0.2181  | 0.004351 | 0.013106 |
| 11749568_DDX55     | 0.14373  | 0.004358 | 0.013126 |
| 11739220_CACUL1    | -0.28945 | 0.004364 | 0.013141 |
| 11757484_MAMDC4    | 0.177333 | 0.004364 | 0.013142 |
| 11741823_NBPF7     | -0.31419 | 0.004366 | 0.013146 |
| 11737312_CCL1      | -0.24457 | 0.00437  | 0.013157 |
| 11722636_ELL3      | -0.3238  | 0.004371 | 0.013161 |
| 11729203_PLXND1    | -0.17434 | 0.004372 | 0.013161 |
| 11725466_LRRC28    | -0.1928  | 0.004373 | 0.013164 |
| 11736480_TREML2    | -0.19853 | 0.004373 | 0.013164 |
| 11761872_RAB3GAP1  | -0.29258 | 0.004374 | 0.013164 |
| 11720991_SOX2      | -0.18419 | 0.004375 | 0.013169 |
| 11737841_FAM214B   | -0.20369 | 0.004376 | 0.01317  |
| 11756146_S100A4    | 0.144744 | 0.004377 | 0.013171 |
| 11727965_ELANE     | -0.21575 | 0.004378 | 0.013174 |
| 11755629_OGFOD2    | -0.20594 | 0.004381 | 0.013181 |
| 11720358_SMAP1     | 0.158973 | 0.004381 | 0.013182 |
| 11749338_GALNT11   | -0.22247 | 0.004388 | 0.013202 |
| 11723989_NRID1 /// | 0.27303  | 0.004391 | 0.01321  |
| 11722523_TMCO4     | -0.16287 | 0.004393 | 0.013216 |
| 11748970_TRA2A     | 0.177814 | 0.004394 | 0.013219 |
| 11763719_RPL18     | -0.22443 | 0.004398 | 0.013228 |
| 11764251_MOSPD1    | 0.160477 | 0.004401 | 0.013237 |
| 11763366_ANKRD36 / | 0.21592  | 0.004401 | 0.013237 |
| 11722464_C17orf80  | 0.177226 | 0.004404 | 0.013245 |
| 11746517_ZNF484    | 0.193453 | 0.004406 | 0.013248 |
| 11720116_STK26     | -0.22757 | 0.004408 | 0.013254 |
| 11749324_KCTD15    | -0.34555 | 0.004412 | 0.013265 |
| 11744766_NPRL2     | -0.15284 | 0.004416 | 0.013278 |
| 11735844_CCDC144A  | 0.298587 | 0.004417 | 0.01328  |
| 11748041_MAVS      | -0.19143 | 0.004418 | 0.013281 |
| 11761101_FCAR      | 0.376357 | 0.004423 | 0.013296 |
| 11742259_ENTPD2    | -0.20109 | 0.004423 | 0.013296 |
| 11757281_ATP5G3    | -0.13982 | 0.004424 | 0.013297 |
| 11752368_DMRT2     | -0.14325 | 0.004426 | 0.013301 |
| 11716591_BTBD1     | 0.165207 | 0.004427 | 0.013304 |
| 11728905_SATB2     | 0.246038 | 0.004429 | 0.013311 |
| 11732641_JKAMP     | -0.18429 | 0.004432 | 0.013317 |
| 11761377_ZNF90     | -0.30294 | 0.004433 | 0.013321 |
| 11750604_GTF2IRD1  | -0.17216 | 0.004434 | 0.013321 |
| 11749694_CD276     | -0.21384 | 0.004435 | 0.013326 |
| 11716017_MAL2      | 0.228135 | 0.00444  | 0.01334  |

|                    |          |          |          |
|--------------------|----------|----------|----------|
| 11737047_KCNH6     | -0.31791 | 0.004442 | 0.013343 |
| 11720813_INTS10    | -0.15436 | 0.004442 | 0.013344 |
| 11731533_MTPAP     | 0.202135 | 0.004444 | 0.013349 |
| 11721654_AGPAT4    | 0.251297 | 0.004445 | 0.013352 |
| 11757179_RPL4 ///  | 0.260359 | 0.004447 | 0.013354 |
| 11744445_DUSP14    | 0.155594 | 0.00445  | 0.013365 |
| 11731297_MAGEA2 // | -0.14503 | 0.004451 | 0.013367 |
| 11723402_STK4      | 0.169924 | 0.004452 | 0.013368 |
| 11736461_RAB3B     | 0.257796 | 0.004453 | 0.013371 |
| 11744401_CAMTA1    | -0.15031 | 0.004454 | 0.013371 |
| 11748360_RAD23A    | -0.14898 | 0.004455 | 0.013374 |
| 11722957_SMURF1    | 0.177379 | 0.004455 | 0.013375 |
| 11739828_CYS1      | -0.30017 | 0.004456 | 0.013375 |
| 11747640_TDP2      | -0.21651 | 0.004459 | 0.013384 |
| 11725503_TJP1      | 0.184962 | 0.00446  | 0.013387 |
| 11741182_PROSER3   | -0.17669 | 0.004461 | 0.013387 |
| 11717270_SNAPC2    | -0.23109 | 0.004462 | 0.013392 |
| 11730064_INSM2     | 0.270873 | 0.004463 | 0.013393 |
| 11759433_POLR3A    | 0.164961 | 0.004467 | 0.013405 |
| 11732004_ADAL      | 0.239543 | 0.004468 | 0.013405 |
| 11719191_FBXO9     | 0.147382 | 0.004469 | 0.013407 |
| 11748223_LIPH      | 0.463406 | 0.004471 | 0.013415 |
| 11729566_GTDC1     | 0.177011 | 0.004472 | 0.013417 |
| 11734749_LIN52     | -0.17921 | 0.004474 | 0.013422 |
| 11758348_PTTG1IP   | 0.191573 | 0.004475 | 0.013423 |
| 11758000_CXADR     | 0.252387 | 0.004475 | 0.013423 |
| 11715104_OTOP2     | -0.17093 | 0.004475 | 0.013423 |
| 11760099_SCARB1    | -0.22822 | 0.004476 | 0.013424 |
| 11763742_AMT       | -0.2043  | 0.004477 | 0.013426 |
| 11755310_ACOT1 /// | 0.148012 | 0.004478 | 0.013429 |
| 11752561_CDH13     | 0.155094 | 0.004479 | 0.013432 |
| 11760262_STARD3    | -0.20586 | 0.00448  | 0.013433 |
| 11742559_OR2T27    | -0.25337 | 0.004481 | 0.013435 |
| 11761475_ULBP3     | 0.367677 | 0.004484 | 0.013443 |
| 11758255_CSNK1G3   | -0.15534 | 0.004484 | 0.013443 |
| 11727157_STRBP     | 0.17261  | 0.004486 | 0.013447 |
| 11727858_NAA40     | -0.25677 | 0.004487 | 0.01345  |
| 11717049_DES ///   | -0.1782  | 0.004488 | 0.013451 |
| 11727479_HECTD1    | 0.142229 | 0.004491 | 0.01346  |
| 11730858_ZC2HC1A   | 0.145916 | 0.004491 | 0.01346  |
| 11743910_FAM69A    | -0.19743 | 0.004492 | 0.013461 |
| 11758623_KMT2A     | 0.177953 | 0.004492 | 0.013461 |
| 11718098_ENDOD1    | -0.21945 | 0.004493 | 0.013463 |
| 11742968_MED8      | 0.199864 | 0.004494 | 0.013463 |
| 11751106_NUP35     | 0.140681 | 0.004495 | 0.013466 |
| 11715513_NDFIP1    | -0.14947 | 0.004498 | 0.013474 |
| 11758376_CFAP69    | 0.29073  | 0.0045   | 0.01348  |
| 11731214_GNB1L     | 0.159909 | 0.0045   | 0.01348  |
| 11754571_GMDS      | -0.1916  | 0.004505 | 0.013492 |
| 11730401_RASGRF1   | 0.5697   | 0.004505 | 0.013493 |
| 11739586_CLCN3     | 0.19154  | 0.004505 | 0.013493 |



|                  |          |          |          |
|------------------|----------|----------|----------|
| 11724421_EPHB3   | -0.1716  | 0.004507 | 0.013497 |
| 11716582_G3BP2   | -0.17861 | 0.004508 | 0.013498 |
| 11755504_RBM34   | 0.346597 | 0.004514 | 0.013515 |
| 11729654_SMAD2   | -0.293   | 0.004516 | 0.013523 |
| 11756542_GPR87   | 0.325446 | 0.004518 | 0.013526 |
| 11727681_ACVR2B  | -0.16074 | 0.004519 | 0.013527 |
| 11742749_SPPL3   | 0.169309 | 0.004519 | 0.013527 |
| 11742071_RAB27A  | -0.2186  | 0.004519 | 0.013527 |
| 11727408_NCLN    | -0.15702 | 0.004521 | 0.013532 |
| 11736347_HFE     | -0.28427 | 0.004522 | 0.013535 |
| 11762511_IL31RA  | 0.326221 | 0.004522 | 0.013535 |
| 11748461_RHOBTB1 | 0.162082 | 0.004523 | 0.013537 |
| 11751510_RARA    | 0.211966 | 0.004524 | 0.013537 |
| 11729101_AKR1C2  | -0.22596 | 0.004524 | 0.013538 |
| 11720306_SERP1   | -0.14408 | 0.004526 | 0.013542 |
| 11722476_CMC1    | -0.20523 | 0.004528 | 0.013546 |
| 11739758_KBTBD3  | -0.16041 | 0.004533 | 0.013562 |
| 11722634_ICE2    | -0.23164 | 0.004535 | 0.013566 |
| 11754998_MCTP1   | 0.257099 | 0.004539 | 0.013577 |
| 11720441_OLFML2B | -0.21233 | 0.004539 | 0.013577 |
| 11759260_EIF5A   | -0.14843 | 0.004539 | 0.013577 |
| 11752189_ARHGEF6 | 0.322996 | 0.00454  | 0.013578 |
| 11741635_GPR6    | -0.21776 | 0.004543 | 0.013586 |
| 11716971_MRAS    | 0.164192 | 0.004543 | 0.013586 |
| 11754797_CHUK    | 0.179807 | 0.004543 | 0.013586 |
| 11726897_ADGRL3  | -0.3186  | 0.004549 | 0.013601 |
| 11726630_HTRA2   | -0.16732 | 0.004551 | 0.013606 |
| 11752791_EPHB4   | -0.18228 | 0.004552 | 0.013608 |
| 11739690_DCAF11  | -0.22586 | 0.004553 | 0.013611 |
| 11750693_FTSJ3   | 0.140781 | 0.004553 | 0.013612 |
| 11721760_TSEN54  | -0.20593 | 0.004555 | 0.013614 |
| 11715599_ANAPC5  | -0.16119 | 0.004555 | 0.013614 |
| 11743193_PARD6G  | -0.18265 | 0.004558 | 0.013624 |
| 11733363_ZFP64   | 0.219725 | 0.00456  | 0.013628 |
| 11743883_NRF1    | -0.20253 | 0.00456  | 0.013629 |
| 11750002_RAB2A   | -0.1534  | 0.004566 | 0.013644 |
| 11726802_EBF1    | 0.233971 | 0.00457  | 0.013656 |
| 11726083_FAM69B  | -0.18362 | 0.004572 | 0.013661 |
| 11719091_TAB1    | -0.16616 | 0.004573 | 0.013663 |
| 11737030_SLC9A7  | 0.275346 | 0.004574 | 0.013664 |
| 11717277_THRAP3  | -0.26689 | 0.004578 | 0.013676 |
| 11722766_MBNL2   | 0.225674 | 0.004579 | 0.013678 |
| 11733546_HCN1    | 0.250792 | 0.004581 | 0.013685 |
| 11755832_XRRA1   | 0.195327 | 0.004582 | 0.013686 |
| 11730856_HMG3    | -0.15461 | 0.004583 | 0.013686 |
| 11720762_FBXO3   | 0.155332 | 0.004584 | 0.013689 |
| 11730298_SPARCL1 | -0.19964 | 0.004584 | 0.013689 |
| 11724384_RAP2C   | 0.163079 | 0.004584 | 0.013689 |
| 11740585_PTGFR   | 0.347907 | 0.004586 | 0.013693 |
| 11720308_SERP1   | -0.13796 | 0.004588 | 0.013699 |
| 11739364_FAM92A1 | -0.15098 | 0.00459  | 0.013703 |

|                   |          |          |          |
|-------------------|----------|----------|----------|
| 11717816_ZBTB5    | 0.157678 | 0.004591 | 0.013705 |
| 11743278_WNK1     | -0.15757 | 0.004596 | 0.013719 |
| 11746518_BVES     | 0.249214 | 0.004598 | 0.013724 |
| 11753955_C16orf13 | -0.13715 | 0.004599 | 0.013726 |
| 11719831_KMT5A    | -0.20745 | 0.004599 | 0.013726 |
| 11739976_ITGA11   | 0.146935 | 0.004603 | 0.013738 |
| 11715154_ZNF675   | 0.485995 | 0.004604 | 0.013741 |
| 11720597_CSRNP2   | 0.17341  | 0.004607 | 0.013748 |
| 11759778_ASXL1    | 0.270354 | 0.004607 | 0.013748 |
| 11751985_EPS15    | 0.17462  | 0.004611 | 0.013757 |
| 11719070_HSPA13   | -0.20678 | 0.004611 | 0.013757 |
| 11745880_GUCA1A   | -0.28526 | 0.004611 | 0.013757 |
| 11736498_TNRC6B   | 0.171451 | 0.004613 | 0.013762 |
| 11724117_SAMD9L   | 0.231432 | 0.004615 | 0.013766 |
| 11746595_PCMI     | 0.153784 | 0.004617 | 0.013771 |
| 11722272_MSANTD4  | 0.144999 | 0.004617 | 0.013771 |
| 11734667_KPNA1    | 0.209112 | 0.004618 | 0.013773 |
| 11738464_TPH2     | -0.15119 | 0.004619 | 0.013776 |
| 11749220_C6orf89  | 0.155621 | 0.00462  | 0.013776 |
| 11721859_MIPEP    | -0.17226 | 0.004622 | 0.013782 |
| 11742202_DSPP     | -0.23312 | 0.004624 | 0.013786 |
| 11722811_RAB7A    | 0.144801 | 0.004625 | 0.01379  |
| 11722193_C12orf75 | -0.13349 | 0.00463  | 0.013804 |
| 11757387_RPS28    | 0.137529 | 0.004631 | 0.013804 |
| 11725488_ATG14    | 0.166351 | 0.004631 | 0.013804 |
| 11730374_FYB      | 0.317258 | 0.004631 | 0.013804 |
| 11728347_ABI3     | -0.20518 | 0.004631 | 0.013804 |
| 11722859_ZNF395   | -0.17637 | 0.004634 | 0.01381  |
| 11728438_BRWD1    | 0.272476 | 0.004634 | 0.01381  |
| 11746040_ZFHX2    | 0.265044 | 0.004637 | 0.013818 |
| 11759424_ANXA5    | -0.24855 | 0.004638 | 0.01382  |
| 11760817_CDKL3    | -0.41251 | 0.004638 | 0.01382  |
| 11754209_SLC44A2  | -0.17124 | 0.004638 | 0.01382  |
| 11731490_NUP43    | -0.15713 | 0.004639 | 0.013821 |
| 11741500_DAGLB    | 0.224625 | 0.004642 | 0.01383  |
| 11717310_GNL3     | 0.150745 | 0.004645 | 0.013836 |
| 11737477_C2orf54  | -0.2339  | 0.004645 | 0.013836 |
| 11722365_SLC4A1AP | 0.161272 | 0.004646 | 0.013837 |
| 11717651_SPRY1    | -0.14847 | 0.004646 | 0.013837 |
| 11728448_ADCK5    | -0.18155 | 0.004649 | 0.013845 |
| 11737771_PKIG     | 0.186732 | 0.00465  | 0.013849 |
| 11748129_RNF220   | -0.16209 | 0.004651 | 0.01385  |
| 11724297_BMP7     | -0.3132  | 0.004652 | 0.013851 |
| 11763791_IL22RA1  | -0.22873 | 0.004653 | 0.013854 |
| 11730431_ZDHC7    | -0.13928 | 0.004654 | 0.013856 |
| 11760689_ZGRF1    | -0.24404 | 0.004656 | 0.013861 |
| 11720967_GPSM2    | -0.17932 | 0.004657 | 0.013865 |
| 11716077_HSBP1    | 0.133881 | 0.004658 | 0.013867 |
| 11740419_XRRA1    | 0.224464 | 0.00466  | 0.013871 |
| 11721410_STK16    | -0.20306 | 0.004661 | 0.013873 |
| 11734847_ERBB2IP  | 0.278349 | 0.004661 | 0.013873 |

|                    |          |          |          |
|--------------------|----------|----------|----------|
| 11721624_WSB1      | 0.165779 | 0.004665 | 0.013882 |
| 11759431_TAF3      | 0.283081 | 0.004665 | 0.013882 |
| 11731734_LYPD6     | -0.18399 | 0.004668 | 0.01389  |
| 11729165_XPO5      | -0.1746  | 0.00467  | 0.013895 |
| 11742790_ATP6AP1L  | -0.17153 | 0.00467  | 0.013895 |
| 11742072_PBX3      | 0.175378 | 0.004672 | 0.013901 |
| 11716451_RFTN1     | 0.18149  | 0.004673 | 0.013901 |
| 11758087_DPYS      | 0.19349  | 0.004673 | 0.013901 |
| 11752578_SOX5      | -0.17286 | 0.004675 | 0.013905 |
| 11759833_NDUFS7    | -0.20346 | 0.004676 | 0.013908 |
| 11745351_CEP104    | 0.173883 | 0.004676 | 0.013908 |
| 11739669_SS18L1    | -0.16139 | 0.004677 | 0.01391  |
| 11757268_HNRNPA1 / | -0.22514 | 0.004679 | 0.013916 |
| 11717520_LOC102724 | 0.169107 | 0.004681 | 0.01392  |
| 11740870_ZNF682    | 0.159455 | 0.004681 | 0.01392  |
| 11728695_ARG2      | -0.14671 | 0.004686 | 0.013932 |
| 11739745_MLH3      | 0.170747 | 0.004687 | 0.013934 |
| 11761468_TFAP2A    | 0.234482 | 0.004692 | 0.013948 |
| 11755960_LRRC39    | 0.292516 | 0.004698 | 0.013967 |
| 11745962_QRICH1    | -0.2329  | 0.004699 | 0.013967 |
| 11737862_PIGF      | -0.28217 | 0.004703 | 0.013979 |
| 11752251_SPARCL1   | -0.17777 | 0.004708 | 0.013994 |
| 11758300_B2M       | 0.132242 | 0.004717 | 0.014019 |
| 11740497_SPATA31E1 | -0.25076 | 0.004721 | 0.01403  |
| 11754647_MAN1B1    | -0.18477 | 0.004724 | 0.014037 |
| 11716644_ERLEC1    | -0.15277 | 0.004724 | 0.014037 |
| 11755497_WBSCR16   | -0.17318 | 0.004724 | 0.014037 |
| 11715267_EPPK1     | 0.284359 | 0.004725 | 0.01404  |
| 11744718_CTHRC1    | 0.141937 | 0.004727 | 0.014044 |
| 11749808_ZNF107    | 0.243856 | 0.004732 | 0.014057 |
| 11734095_ZNF845    | 0.139498 | 0.004737 | 0.014072 |
| 11762529_FERMT1    | -0.27562 | 0.004737 | 0.014072 |
| 11745185_LOC644762 | -0.14727 | 0.004738 | 0.014073 |
| 11755516_KIF16B    | 0.203031 | 0.004744 | 0.014092 |
| 11718778_PCMT1     | -0.15902 | 0.004745 | 0.014093 |
| 11729542_CAMKK2    | -0.21617 | 0.004746 | 0.014093 |
| 11739187_CCDC142 / | 0.208683 | 0.004748 | 0.014098 |
| 11742422_CEP192    | -0.17638 | 0.004756 | 0.014121 |
| 11761173_HIF3A     | 0.156352 | 0.004757 | 0.014122 |
| 11761174_HIF3A     | 0.156352 | 0.004757 | 0.014122 |
| 11751041_PCMTD2    | 0.253655 | 0.004757 | 0.014123 |
| 11746159_PBX3      | 0.162094 | 0.004759 | 0.014127 |
| 11754361_GSK3B     | 0.155221 | 0.00476  | 0.014129 |
| 11727374_HMGCR     | -0.15638 | 0.004762 | 0.014136 |
| 11725623_JMJD4     | -0.21077 | 0.004763 | 0.014137 |
| 11716819_CUL1      | 0.167663 | 0.004763 | 0.014137 |
| 11748958_ACSS1     | -0.24941 | 0.004765 | 0.014141 |
| 11733635_FAM92B    | -0.25131 | 0.004769 | 0.014152 |
| 11742563_OR10A7    | -0.15383 | 0.00477  | 0.014154 |
| 11716485_STK38     | -0.33583 | 0.004773 | 0.014161 |
| 11721523_ZNF706    | 0.144248 | 0.004774 | 0.014166 |

|                    |          |          |          |
|--------------------|----------|----------|----------|
| 11739841_BCL6      | -0.26401 | 0.004775 | 0.014167 |
| 11719310_CRY2      | 0.204558 | 0.004777 | 0.014171 |
| 11718384_C2orf68   | -0.17254 | 0.004782 | 0.014187 |
| 11758621_FAM134A   | 0.179672 | 0.004784 | 0.014191 |
| 11745354_SNX17     | 0.145073 | 0.004785 | 0.014192 |
| 11761290_CTU2 ///  | -0.17475 | 0.00479  | 0.014207 |
| 11718974_LPL       | -0.14564 | 0.00479  | 0.014207 |
| 11724991_GTPBP3    | -0.16947 | 0.004792 | 0.014212 |
| 11744048_MAP1B     | 0.18817  | 0.004794 | 0.014217 |
| 11717478_LAMP2     | 0.146363 | 0.004796 | 0.014223 |
| 11746288_LOC100289 | 0.191528 | 0.0048   | 0.014233 |
| 11734962_ADAM33    | -0.18844 | 0.004801 | 0.014233 |
| 11756415_RBM6      | 0.161274 | 0.004803 | 0.01424  |
| 11759186_CCDC103   | -0.22912 | 0.004803 | 0.01424  |
| 11716099_RAP1A     | 0.14623  | 0.004804 | 0.01424  |
| 11723288_CRISPLD1  | -0.29678 | 0.004805 | 0.014242 |
| 11736316_WBP5      | -0.20766 | 0.004805 | 0.014242 |
| 11737590_PHTF2     | 0.378295 | 0.004805 | 0.014242 |
| 11742962_IP6K2     | 0.211569 | 0.004806 | 0.014242 |
| 11740517_FAM76A    | -0.47899 | 0.004808 | 0.014249 |
| 11745889_KIDINS220 | 0.183741 | 0.004811 | 0.014255 |
| 11734026_ZNF440    | -0.40889 | 0.004811 | 0.014255 |
| 11753248_TPP1      | 0.175422 | 0.004815 | 0.014266 |
| 11723096_CYLD      | -0.18194 | 0.004816 | 0.014268 |
| 11748142_SLC39A1   | -0.25289 | 0.004816 | 0.014269 |
| 11719129_POLR3D    | -0.14705 | 0.004817 | 0.01427  |
| 11740944_MPL       | -0.1841  | 0.004818 | 0.01427  |
| 11759010_SLC25A6   | -0.17288 | 0.004818 | 0.01427  |
| 11730835_MTX2      | 0.16171  | 0.004818 | 0.01427  |
| 11739188_BAG5      | -0.15576 | 0.00482  | 0.014275 |
| 11731166_PARL      | 0.158038 | 0.004822 | 0.014281 |
| 11725688_RHPN2     | -0.2008  | 0.004828 | 0.014296 |
| 11723517_CAB39L    | 0.238951 | 0.004829 | 0.014298 |
| 11754817_REG1P     | -0.14583 | 0.004832 | 0.014306 |
| 11725994_MRPL11    | -0.33228 | 0.004833 | 0.014309 |
| 11756797_TTC39B    | 0.149869 | 0.004836 | 0.014318 |
| 11721010_GDPD5     | 0.235208 | 0.00484  | 0.014328 |
| 11750439_SLC17A1   | -0.34104 | 0.00484  | 0.014328 |
| 11762040_GUCY1B2   | 0.283431 | 0.004842 | 0.014333 |
| 11732563_ADAT2     | 0.218023 | 0.004843 | 0.014334 |
| 11748489_MAGED2    | 0.188784 | 0.004844 | 0.014336 |
| 11718916_IRF7      | -0.17867 | 0.004849 | 0.014351 |
| 11746472_XRN2      | 0.182427 | 0.004852 | 0.014359 |
| 11763740_ACTR6     | -0.1559  | 0.004854 | 0.014364 |
| 11718379_PRKAG2    | 0.161727 | 0.004855 | 0.014366 |
| 11727895_G3BP2     | 0.158979 | 0.004859 | 0.014376 |
| 11717669_IWS1      | -0.16575 | 0.004861 | 0.014382 |
| 11747958_CDIP1     | -0.23113 | 0.004866 | 0.014396 |
| 11750717_TNFRSF8   | -0.30283 | 0.004868 | 0.014402 |
| 11746261_KIF5C     | 0.209738 | 0.004871 | 0.014408 |
| 11728741_COQ3      | -0.18605 | 0.004872 | 0.014411 |

|                   |              |          |          |
|-------------------|--------------|----------|----------|
| 11717839_PDCD6    | 0.132986     | 0.004873 | 0.014411 |
| 11760243_CNTN1    | -0.19105     | 0.004875 | 0.014418 |
| 11744944_FAM153A  | / -0.20107   | 0.004876 | 0.014421 |
| 11760806_SLC4A2   | -0.15579     | 0.004881 | 0.014434 |
| 11757242_KRT17P5  | -0.25697     | 0.004882 | 0.014435 |
| 11763831_SLC12A4  | 0.172448     | 0.004882 | 0.014436 |
| 11755555_FANCM    | -0.25833     | 0.004883 | 0.014437 |
| 11720910_NELL2    | 0.331805     | 0.004885 | 0.014442 |
| 11728862_DCAF17   | 0.198806     | 0.004887 | 0.014447 |
| 11751109_KCTD20   | 0.373511     | 0.004888 | 0.014448 |
| 11730527_DAPK2    | 0.14413      | 0.004888 | 0.014448 |
| 11740764_SLC39A8  | -0.21218     | 0.004888 | 0.014449 |
| 11730201_GPM6A    | 0.228672     | 0.004892 | 0.01446  |
| 11753009_UCKL1    | -0.2422      | 0.004894 | 0.014464 |
| 11734495_GRB10    | 0.207742     | 0.004895 | 0.014466 |
| 11739057_NFE2L2   | 0.145489     | 0.004896 | 0.014468 |
| 11723670_BNIP2    | 0.145013     | 0.004897 | 0.014471 |
| 11745146_ZNF624   | 0.380974     | 0.004898 | 0.014473 |
| 11724881_ZNF217   | 0.154721     | 0.004899 | 0.014473 |
| 11730781_SCRN1    | -0.15107     | 0.004901 | 0.014479 |
| 11745925_ZEB1-AS1 | 0.21658      | 0.004903 | 0.014483 |
| 11718067_MYO1E    | -0.21772     | 0.004907 | 0.014495 |
| 11724854_RND2     | -0.26392     | 0.004907 | 0.014495 |
| 11726422_WDR53    | -0.16271     | 0.004908 | 0.014496 |
| 11747642_TMEM129  | -0.18998     | 0.004913 | 0.01451  |
| 11733599_METRNL   | 0.208403     | 0.004914 | 0.014512 |
| 11722044_METTL17  | -0.16873     | 0.004916 | 0.014517 |
| 11743518_NNT      | -0.20001     | 0.004919 | 0.014525 |
| 11749786_HNRNPF   | -0.20206     | 0.00492  | 0.014527 |
| 11726837_SCAI     | -0.36754     | 0.004921 | 0.014529 |
| 11716718_GLA      | -0.17024     | 0.004922 | 0.014531 |
| 11736985_NUBPL    | -0.17792     | 0.004923 | 0.014533 |
| 11744805_DHRS4    | /// -0.18546 | 0.004924 | 0.014534 |
| 11728037_CMTM5    | -0.22523     | 0.004924 | 0.014534 |
| 11748056_SOX15    | 0.352698     | 0.004925 | 0.014537 |
| 11735098_MLX      | 0.285564     | 0.004926 | 0.014538 |
| 11727048_PPP6C    | 0.190725     | 0.004927 | 0.014542 |
| 11752153_NBEAL2   | -0.18897     | 0.004931 | 0.014551 |
| 11723486_WDR20    | -0.23222     | 0.004931 | 0.014552 |
| 11737958	EIF5A    | -0.14588     | 0.004933 | 0.014556 |
| 11726444_SAMD13   | 0.178213     | 0.004933 | 0.014556 |
| 11747341_ARL6     | 0.188275     | 0.004937 | 0.014567 |
| 11756337_HNRNPC   | -0.13337     | 0.004938 | 0.014567 |
| 11759024_PPP2R5E  | -0.21303     | 0.004944 | 0.014584 |
| 11723903_PLEKHG1  | 0.224364     | 0.004949 | 0.014599 |
| 11752346_OS9      | 0.161361     | 0.004952 | 0.014606 |
| 11721154_STK3     | -0.29412     | 0.004953 | 0.014609 |
| 11736658_MAP3K13  | 0.410002     | 0.004954 | 0.01461  |
| 11716367_PRR13    | -0.13331     | 0.004956 | 0.014615 |
| 11757756_ASXL2    | 0.146159     | 0.004956 | 0.014615 |
| 11734121_LRP1B    | 0.321859     | 0.004958 | 0.01462  |

|                    |          |          |          |
|--------------------|----------|----------|----------|
| 11719248_AIM1      | 0.184026 | 0.004959 | 0.014622 |
| 11757982_KIF21A    | -0.21396 | 0.004959 | 0.014622 |
| 11716961_FAM3A     | -0.17518 | 0.004964 | 0.014634 |
| 11731027_CREM      | 0.141449 | 0.004964 | 0.014635 |
| 11718327_WWC3      | 0.169121 | 0.004967 | 0.014641 |
| 11725266_COL4A4    | -0.20139 | 0.004967 | 0.014642 |
| 11742208_VCAN      | 0.258575 | 0.004969 | 0.014647 |
| 11759187_TNFAIP8L1 | -0.19917 | 0.00497  | 0.014649 |
| 11715514_HERPUD1   | -0.14211 | 0.00497  | 0.014649 |
| 11725398_MLLT1     | -0.2943  | 0.004974 | 0.014659 |
| 11726978_SUGP2     | 0.187347 | 0.004976 | 0.014665 |
| 11726813_KDM5D     | -0.15334 | 0.00498  | 0.014675 |
| 11723811_STX17     | 0.181954 | 0.004981 | 0.014676 |
| 11725772_MIER3     | 0.223172 | 0.004985 | 0.014687 |
| 11716113_STAMBP    | 0.157722 | 0.004994 | 0.014712 |
| 11755797_ADAM9     | 0.199535 | 0.004995 | 0.014714 |
| 11757488_POP7      | -0.17043 | 0.004996 | 0.014716 |
| 11730593_SLC16A12  | 0.25413  | 0.004996 | 0.014718 |
| 11717269_FPGS      | -0.16147 | 0.004998 | 0.014721 |
| 11717659_CD109     | 0.171007 | 0.004999 | 0.014723 |
| 11736286_CHKA      | -0.26882 | 0.005    | 0.014725 |
| 11716142_SIGMAR1   | -0.18611 | 0.005003 | 0.014733 |
| 11762490_CAPS2     | -0.21786 | 0.005003 | 0.014733 |
| 11732230_NEUROD6   | -0.24546 | 0.005004 | 0.014733 |
| 11749325_OLFML2B   | -0.14219 | 0.005006 | 0.01474  |
| 11746204_NFASC     | -0.22479 | 0.005007 | 0.014742 |
| 11757361_PSMA2     | -0.19572 | 0.005011 | 0.014753 |
| 11719148_ARRDC2    | -0.24053 | 0.005015 | 0.014763 |
| 11745246_SEPT7     | 0.137955 | 0.005018 | 0.01477  |
| 11744062_ACTR1B    | -0.1357  | 0.00502  | 0.014775 |
| 11716861_TMEM184B  | -0.15921 | 0.005021 | 0.014777 |
| 11737719_GAGE10    | -0.16111 | 0.005021 | 0.014778 |
| 11749257_HERPUD1   | -0.13769 | 0.005022 | 0.014779 |
| 11746446_DUOXA1    | -0.16665 | 0.005023 | 0.014781 |
| 11719570_RCHY1     | 0.170574 | 0.005027 | 0.014794 |
| 11726206_SH2D5     | 0.209267 | 0.005029 | 0.014798 |
| 11751838_DMRT1     | -0.14459 | 0.005032 | 0.014806 |
| 11754164_BCL2L15   | 0.151659 | 0.005035 | 0.014813 |
| 11755246_GREB1     | 0.367152 | 0.005036 | 0.014816 |
| 11746325_HLF       | -0.19565 | 0.005038 | 0.014819 |
| 11734493_KCP       | -0.16429 | 0.005038 | 0.01482  |
| 11739823_CPNE8     | 0.134475 | 0.005039 | 0.014823 |
| 11755086_XIAP      | 0.151134 | 0.00504  | 0.014823 |
| 11751693_KCNK4     | -0.22547 | 0.005043 | 0.014832 |
| 11761209_MESDC2    | 0.155495 | 0.005043 | 0.014832 |
| 11748992_PFAS      | -0.2362  | 0.005045 | 0.014836 |
| 11728857_CEP19     | 0.294052 | 0.005049 | 0.014846 |
| 11758570_CDADC1    | 0.167204 | 0.005052 | 0.014853 |
| 11725505_GDF11     | -0.2071  | 0.005052 | 0.014854 |
| 11758998_STIM2     | -0.15417 | 0.005055 | 0.01486  |
| 11758148_B2M       | 0.133632 | 0.005055 | 0.01486  |

|                    |          |          |          |
|--------------------|----------|----------|----------|
| 11758192_B2M       | 0.133632 | 0.005055 | 0.01486  |
| 11762669_MTIF3     | 0.164926 | 0.005061 | 0.014876 |
| 11755603_ARL8B     | 0.141047 | 0.005062 | 0.014879 |
| 11717852_NAGLU     | 0.142647 | 0.005064 | 0.014884 |
| 11753716_AP4S1     | 0.2246   | 0.005068 | 0.014894 |
| 11717221_PPP3CB    | -0.19176 | 0.005068 | 0.014894 |
| 11754507_ZCCHC11   | -0.23966 | 0.00507  | 0.014897 |
| 11736709_LIMCH1    | -0.26326 | 0.005073 | 0.014906 |
| 11756381_TRMT112   | -0.13359 | 0.005074 | 0.014907 |
| 11726582_PLPP7     | -0.22974 | 0.005075 | 0.014909 |
| 11743117_XRN2      | 0.133565 | 0.005075 | 0.014909 |
| 11742937_AS1       | -0.15098 | 0.005076 | 0.014911 |
| 11756645_CXCL16    | 0.178857 | 0.005078 | 0.014916 |
| 11729207_PTPN11    | 0.247586 | 0.005078 | 0.014916 |
| 11754789_SMYD2     | -0.20817 | 0.00508  | 0.014921 |
| 11755269_MRPS24 // | -0.15787 | 0.005081 | 0.014924 |
| 11743954_EHBP1L1   | -0.16368 | 0.005082 | 0.014926 |
| 11723436_CEP41     | -0.15704 | 0.005084 | 0.014928 |
| 11737147_CLEC7A    | 0.306598 | 0.005087 | 0.014937 |
| 11753599_FHL1      | 0.181116 | 0.005087 | 0.014937 |
| 11725985_NONO      | -0.13847 | 0.005088 | 0.014937 |
| 11754159_CD28      | 0.187607 | 0.00509  | 0.014942 |
| 11723460_NLE1      | -0.14827 | 0.005093 | 0.01495  |
| 11747918_UBAP2     | 0.225245 | 0.005104 | 0.014984 |
| 11741777_PAOX      | -0.20612 | 0.005106 | 0.014986 |
| 11726680_HNRNPK    | -0.2014  | 0.005106 | 0.014986 |
| 11737294_TMIGD1    | -0.28797 | 0.005106 | 0.014987 |
| 11720406_PPP6R2    | 0.158475 | 0.005107 | 0.014987 |
| 11722512_SP110     | -0.17821 | 0.005109 | 0.014994 |
| 11763576_LSM14B    | -0.33825 | 0.00511  | 0.014995 |
| 11730803_PRRPF38B  | 0.159182 | 0.005111 | 0.014997 |
| 11747624_SNX17     | 0.145725 | 0.005112 | 0.014998 |
| 11757769_VCL       | 0.149929 | 0.005114 | 0.015002 |
| 11724283_ANXA3     | 0.359217 | 0.005114 | 0.015002 |
| 11750822_SHQ1      | 0.165147 | 0.005119 | 0.015016 |
| 11721132_HCFC1     | -0.14757 | 0.005119 | 0.015016 |
| 11716191_VWA9      | -0.17495 | 0.005119 | 0.015016 |
| 11725832_OTUB2     | -0.21891 | 0.005122 | 0.015022 |
| 11720215_PIGU      | -0.16516 | 0.005123 | 0.015026 |
| 11741474_FOXN1     | -0.29078 | 0.005127 | 0.015035 |
| 11764013_LOC105375 | -0.14953 | 0.005128 | 0.015037 |
| 11720950_PFDN4     | -0.13893 | 0.005129 | 0.015041 |
| 11726208_C19orf44  | 0.281622 | 0.005134 | 0.015053 |
| 11761177_DLST      | -0.19882 | 0.005135 | 0.015055 |
| 11742742_SNX2      | 0.175989 | 0.005136 | 0.015057 |
| 11719304 EMC8      | 0.175534 | 0.005143 | 0.015078 |
| 11733600_NPAS4     | -0.22749 | 0.005144 | 0.01508  |
| 11715469_TXN       | -0.1629  | 0.005146 | 0.015083 |
| 11749864_RHOJ      | 0.249843 | 0.005148 | 0.015089 |
| 11726245_HIST1H4C  | -0.13759 | 0.005149 | 0.015091 |
| 11741234_CASC1     | -0.15928 | 0.005151 | 0.015097 |

|                    |          |          |          |
|--------------------|----------|----------|----------|
| 11738686_OR1L3     | -0.21382 | 0.005155 | 0.015108 |
| 11719530_KLF16     | -0.15853 | 0.005161 | 0.015123 |
| 11747689_NFATC2IP  | 0.146905 | 0.005162 | 0.015125 |
| 11726861_DCAKD     | -0.14978 | 0.005162 | 0.015125 |
| 11749122_MAP7D3    | -0.21492 | 0.005163 | 0.015125 |
| 11763635_UBE2I     | -0.25453 | 0.005166 | 0.015135 |
| 11761589_HNRNPD    | -0.16285 | 0.005166 | 0.015135 |
| 11726714_DDX59     | -0.17142 | 0.005167 | 0.015136 |
| 11718097_MEF2A     | -0.13641 | 0.005169 | 0.015142 |
| 11723231_RNF138 // | 0.170241 | 0.00517  | 0.015142 |
| 11724703_ELF5      | -0.1828  | 0.005175 | 0.015155 |
| 11717287_POGZ      | -0.16273 | 0.005175 | 0.015156 |
| 11727814_UBASH3B   | 0.165275 | 0.005178 | 0.015164 |
| 11725086_LANCL2    | -0.13261 | 0.005179 | 0.015166 |
| 11719513_ADAM15    | -0.20768 | 0.005182 | 0.015172 |
| 11742352_OR2Y1     | -0.14466 | 0.005183 | 0.015174 |
| 11756172_TBC1D22A  | -0.14564 | 0.005183 | 0.015174 |
| 11753406_EPHB4     | -0.17661 | 0.005185 | 0.015179 |
| 11729866_UGT3A1    | -0.17854 | 0.005186 | 0.015181 |
| 11752363_SBN01     | 0.182965 | 0.005188 | 0.015186 |
| 11743344_RMND5A    | -0.20043 | 0.005192 | 0.015198 |
| 11723615_DYRK1A    | 0.417054 | 0.005192 | 0.015198 |
| 11759414_GCSH      | -0.26888 | 0.005193 | 0.015198 |
| 11763264_PCYT1A    | 0.225486 | 0.005194 | 0.015201 |
| 11743852_FBX021    | -0.2246  | 0.005195 | 0.015201 |
| 11751243_OTUD7B    | -0.18201 | 0.005198 | 0.015211 |
| 11756883_PRRC2C    | 0.132798 | 0.005198 | 0.015211 |
| 11746986_HSPD1     | -0.14845 | 0.0052   | 0.015216 |
| 11753544_RAD52     | 0.420998 | 0.005201 | 0.015216 |
| 11759768_FSBP ///  | 0.202359 | 0.005201 | 0.015216 |
| 11763502_LOC100287 | -0.25288 | 0.005202 | 0.015216 |
| 11754246_PABPC1    | 0.140103 | 0.005202 | 0.015216 |
| 11721627_SEPT6     | 0.232886 | 0.005203 | 0.015218 |
| 11735046_ATP6VOD2  | -0.1764  | 0.005206 | 0.015225 |
| 11727417_ATP5SL    | -0.142   | 0.005206 | 0.015225 |
| 11731531_DOK1      | -0.16462 | 0.005208 | 0.015231 |
| 11722177_MAN2C1    | 0.177751 | 0.005209 | 0.015231 |
| 11747023_RPS6KC1   | -0.13653 | 0.005211 | 0.015236 |
| 11732950_AHI1      | 0.252928 | 0.005213 | 0.015243 |
| 11759313_AGO4      | 0.180335 | 0.005214 | 0.015243 |
| 11747441_GLRX      | 0.166066 | 0.005214 | 0.015243 |
| 11756917_ZNF618    | -0.20767 | 0.005215 | 0.015246 |
| 11735387_ZNF560    | 0.428105 | 0.005216 | 0.015248 |
| 11755474_ADAM15    | -0.16798 | 0.005216 | 0.015248 |
| 11738150_AVIL      | 0.420687 | 0.005217 | 0.015249 |
| 11750836_EFHC1     | 0.24985  | 0.005219 | 0.015254 |
| 11727623_EID3      | 0.30719  | 0.005221 | 0.015258 |
| 11731402_TMCO1     | -0.57989 | 0.005225 | 0.015268 |
| 11758633_PDCD5     | -0.17072 | 0.005225 | 0.015268 |
| 11735705_BSG       | -0.16645 | 0.005225 | 0.015269 |
| 11741579_SLC30A2   | -0.25784 | 0.005226 | 0.015269 |



|                    |    |          |          |          |
|--------------------|----|----------|----------|----------|
| 11763012_CCL4L1    | // | -0.22537 | 0.005228 | 0.015274 |
| 11758404_BCLAF1    |    | -0.49475 | 0.005229 | 0.015277 |
| 11763434_CAPN10    |    | -0.21168 | 0.005235 | 0.015294 |
| 11742874_CINP      |    | -0.17295 | 0.005238 | 0.015299 |
| 11757120	EIF4A2    | // | -0.35565 | 0.005239 | 0.015302 |
| 11754200_CREBBP    |    | 0.232925 | 0.005239 | 0.015303 |
| 11747451_ZNF76     |    | -0.20405 | 0.00524  | 0.015304 |
| 11726997_FIBP      |    | -0.15976 | 0.005241 | 0.015307 |
| 11715431_TMBIM1    |    | -0.24609 | 0.005242 | 0.015308 |
| 11737601_DI01      |    | 0.130548 | 0.005244 | 0.015312 |
| 11723050_HSPA6     |    | -0.1499  | 0.005245 | 0.015315 |
| 11724018_LDHC      |    | -0.23582 | 0.005247 | 0.01532  |
| 11725963_LONP1     |    | -0.15086 | 0.005249 | 0.015326 |
| 11719227_KCNN4     |    | 0.180118 | 0.005253 | 0.015337 |
| 11745345_PYCR2     |    | -0.20371 | 0.005254 | 0.015338 |
| 11731155_GLYAT     |    | -0.19388 | 0.005258 | 0.015348 |
| 11716504_CRMP1     |    | -0.19499 | 0.00526  | 0.015354 |
| 11729139_SLAMF7    |    | 0.336195 | 0.005265 | 0.015367 |
| 11733584_TM4SF19   | /  | -0.25431 | 0.005267 | 0.01537  |
| 11718230_HLA-F     |    | 0.295737 | 0.00527  | 0.015379 |
| 11725853_XRCC4     |    | -0.16987 | 0.005271 | 0.015382 |
| 11757461_BTBD3     |    | -0.14239 | 0.005272 | 0.015385 |
| 11748260_ELP3      |    | 0.153431 | 0.005274 | 0.015387 |
| 11753176_GTPBP3    |    | -0.21067 | 0.005274 | 0.015387 |
| 11719034_FTSJ3     |    | 0.140382 | 0.005274 | 0.015388 |
| 11755574_GALK1     |    | -0.17678 | 0.005275 | 0.015388 |
| 11719541_PAXBP1    |    | 0.178545 | 0.005275 | 0.015388 |
| 11726645_CDHR5     |    | -0.21158 | 0.005278 | 0.015395 |
| 11746892_PPWD1     |    | -0.14584 | 0.005279 | 0.015396 |
| 11763609_DRG1      |    | 0.143054 | 0.005289 | 0.015425 |
| 11723104_GNB4      |    | -0.13912 | 0.005291 | 0.015429 |
| 11737973_RAB39A    |    | 0.236887 | 0.005291 | 0.015429 |
| 11760006_GNB5      |    | -0.1893  | 0.005294 | 0.015436 |
| 11747254_POLK      |    | 0.136005 | 0.005294 | 0.015436 |
| 11743588_BECN1     |    | 0.130938 | 0.005294 | 0.015437 |
| 11734782_WDR92     |    | -0.2008  | 0.005299 | 0.01545  |
| 11718987_LARS2     |    | -0.16343 | 0.005307 | 0.015472 |
| 11754329_TANC2     |    | -0.21252 | 0.005308 | 0.015472 |
| 11733180_ETV1      |    | -0.14253 | 0.005309 | 0.015476 |
| 11716467_ISCA1     |    | -0.15584 | 0.005312 | 0.015484 |
| 11759480_PTP4A2    |    | -0.13676 | 0.005312 | 0.015484 |
| 11724663_TMEM120B  |    | -0.14933 | 0.005314 | 0.015489 |
| 11758778_LOC102724 |    | -0.13935 | 0.005315 | 0.01549  |
| 11747236_COG4      |    | 0.139846 | 0.005316 | 0.015492 |
| 11720419_NCKIPSD   |    | -0.17142 | 0.005317 | 0.015494 |
| 11718909_CHST2     |    | -0.13918 | 0.005318 | 0.015495 |
| 11725297_MAPRE2    |    | 0.132473 | 0.005319 | 0.015497 |
| 11735152_SLC8A1    |    | -0.32567 | 0.005322 | 0.015506 |
| 11739875_BSG       |    | -0.13489 | 0.005324 | 0.015509 |
| 11720210_CHID1     |    | -0.17925 | 0.005324 | 0.01551  |
| 11719212_LOC100996 |    | 0.159489 | 0.005325 | 0.015511 |

|                    |          |          |          |
|--------------------|----------|----------|----------|
| 11723403_PPARGC1A  | 0.691622 | 0.005325 | 0.015511 |
| 11738811_INPP4A    | 0.128808 | 0.005327 | 0.015516 |
| 11733357_CDC185    | -0.18835 | 0.005328 | 0.015518 |
| 11748807_RDH11     | -0.17983 | 0.005329 | 0.015518 |
| 11727589_IL2ORB    | 0.348137 | 0.005329 | 0.015518 |
| 11745999_ZNF252P   | 0.252885 | 0.00533  | 0.01552  |
| 11738402_WDPCP     | 0.301078 | 0.005331 | 0.015523 |
| 11716137_COX7A2 // | 0.144219 | 0.005333 | 0.015526 |
| 11755019_SCUBE3    | -0.25377 | 0.005333 | 0.015527 |
| 11750538_TXN       | -0.12715 | 0.005334 | 0.015529 |
| 11756912_AOX1      | 0.223369 | 0.005336 | 0.015532 |
| 11717950_SC5D      | 0.170469 | 0.005337 | 0.015536 |
| 11763724_ZNF668    | 0.189731 | 0.005338 | 0.015537 |
| 11715444_CPB1      | 0.173356 | 0.005345 | 0.015558 |
| 11726800_EBF1      | 0.192481 | 0.005349 | 0.015566 |
| 11728843_PROSER2   | 0.151517 | 0.005349 | 0.015568 |
| 11760192_TMEM68    | 0.205069 | 0.005352 | 0.015573 |
| 11723872_ADGRG1    | 0.203388 | 0.005353 | 0.015576 |
| 11761914_MR1       | 0.329341 | 0.005355 | 0.01558  |
| 11751229_PPP2R2D   | 0.135577 | 0.005359 | 0.015591 |
| 11721708_GPAM      | -0.20747 | 0.00536  | 0.015593 |
| 11736971_MKRN3     | 0.30985  | 0.005363 | 0.015601 |
| 11751262_MBOAT1    | -0.15799 | 0.005364 | 0.015602 |
| 11728356_BBS10     | 0.172518 | 0.005365 | 0.015606 |
| 11754446_ZNF761    | 0.25243  | 0.005366 | 0.015606 |
| 11725643_MRPS26    | -0.14258 | 0.005366 | 0.015607 |
| 11750109_MYO18A    | -0.24411 | 0.005372 | 0.015622 |
| 11738247_TNNT1     | -0.25816 | 0.005372 | 0.015623 |
| 11718141_DKK1      | 0.156551 | 0.005375 | 0.015629 |
| 11755964_NRXN1     | 0.216426 | 0.005378 | 0.015636 |
| 11747637_ST5       | -0.16134 | 0.00538  | 0.015641 |
| 11745859_ATP5SL    | -0.14908 | 0.00538  | 0.015642 |
| 11745799_ETV1      | -0.14111 | 0.00538  | 0.015642 |
| 11743459_HDLBP     | -0.14874 | 0.005381 | 0.015642 |
| 11763323_GRAMD1B   | 0.308791 | 0.005387 | 0.015659 |
| 11757032_DNAJB12   | -0.16943 | 0.005391 | 0.015669 |
| 11722840_LYAR      | -0.1421  | 0.005394 | 0.015679 |
| 11758381_C22orf46  | -0.25232 | 0.005396 | 0.015683 |
| 11721717_ATRX      | 0.157818 | 0.005397 | 0.015683 |
| 11735927_PRDM7     | 0.187323 | 0.005397 | 0.015683 |
| 11736124_CPLX2     | -0.2243  | 0.005399 | 0.015688 |
| 11758030_FOXG1     | -0.40615 | 0.005399 | 0.015689 |
| 11755430_C19orf25  | -0.27629 | 0.0054   | 0.015689 |
| 11731489_NUP43     | -0.14328 | 0.005401 | 0.015691 |
| 11720314_ATP6VOB   | 0.138993 | 0.005402 | 0.015693 |
| 11746901_PPEF2     | 0.269985 | 0.005403 | 0.015694 |
| 11727715_ITGA10    | -0.1871  | 0.005403 | 0.015694 |
| 11762205_ZNF718    | -0.2546  | 0.005404 | 0.015696 |
| 11739165_PYCRL     | -0.18953 | 0.005405 | 0.015699 |
| 11716941_TRIB2     | 0.155609 | 0.005408 | 0.015706 |
| 11745778_GABRE     | -0.1465  | 0.005408 | 0.015707 |

|                    |          |          |          |
|--------------------|----------|----------|----------|
| 11754942_C17orf62  | -0.15211 | 0.00541  | 0.015709 |
| 11756016_CLN3      | -0.14235 | 0.00541  | 0.015709 |
| 11725555_TMEM133   | 0.218839 | 0.00541  | 0.015709 |
| 11756200_CHI3L2    | -0.18078 | 0.005413 | 0.015714 |
| 11744143	EIF3H     | 0.138548 | 0.005413 | 0.015714 |
| 11730867_MEP1A     | -0.1822  | 0.005414 | 0.015718 |
| 11747530_CSNK2B    | 0.159261 | 0.005416 | 0.015723 |
| 11718262_ERF       | -0.22783 | 0.005417 | 0.015723 |
| 11755509_ARHGEF9   | -0.13908 | 0.005418 | 0.015726 |
| 11742601_OR6C75    | -0.22864 | 0.005418 | 0.015726 |
| 11761316_DCP1B     | 0.222179 | 0.005421 | 0.015733 |
| 11746428_PAQR3     | 0.175097 | 0.005424 | 0.015739 |
| 11762874_PCSK9     | -0.1762  | 0.005424 | 0.015739 |
| 11730941_FAM71A    | -0.3823  | 0.005427 | 0.015747 |
| 11762322_APOL4     | -0.1995  | 0.005429 | 0.015753 |
| 11729596_TKFC      | -0.18651 | 0.005431 | 0.015757 |
| 11732040_SXX4 ///  | -0.27381 | 0.005435 | 0.015767 |
| 11740963_UBA5      | 0.155531 | 0.005436 | 0.015769 |
| 11746687_ZSCAN1    | -0.16662 | 0.005437 | 0.015772 |
| 11754460_RGMA      | -0.29166 | 0.005437 | 0.015772 |
| 11755015_CPS1      | 0.198278 | 0.005439 | 0.015775 |
| 11750880_METTL16   | -0.24278 | 0.00544  | 0.015779 |
| 11763642_FMNL1     | -0.23084 | 0.005442 | 0.015783 |
| 11721062_ARFGEF2   | -0.15049 | 0.005443 | 0.015785 |
| 11761896_POU5F1P3  | -0.16412 | 0.005448 | 0.015797 |
| 11749060_LSP1      | -0.17926 | 0.005448 | 0.015797 |
| 11715989_JTB       | 0.136165 | 0.005449 | 0.015798 |
| 11724754_ALG2      | 0.267052 | 0.00545  | 0.015802 |
| 11761014_PKMYT1    | -0.34017 | 0.005464 | 0.01584  |
| 11736215_CASP6     | 0.163385 | 0.005464 | 0.01584  |
| 11735201_N4BP2     | 0.298029 | 0.005464 | 0.01584  |
| 11749660_MOV10     | 0.169265 | 0.005467 | 0.015846 |
| 11745071_TCEAL4    | -0.16618 | 0.00547  | 0.015852 |
| 11763314_ARL4C     | 0.221981 | 0.00547  | 0.015852 |
| 11746022_TDGF1 /// | -0.23504 | 0.005471 | 0.015855 |
| 11754359_ZFYVE27   | 0.172189 | 0.005472 | 0.015858 |
| 11718478_STAR      | -0.18313 | 0.005476 | 0.015869 |
| 11730510_EID2B     | -0.45278 | 0.005478 | 0.015872 |
| 11739964_FDXACB1   | -0.17737 | 0.005479 | 0.015873 |
| 11715758_TTC1      | 0.168891 | 0.005479 | 0.015873 |
| 11721194_RRP1B     | -0.23903 | 0.005479 | 0.015874 |
| 11756068_BACE2     | -0.16241 | 0.00548  | 0.015874 |
| 11725618_GAD1      | 0.42624  | 0.00548  | 0.015875 |
| 11723188_ADAM19    | -0.17856 | 0.005481 | 0.015876 |
| 11760753_PDGFR     | 0.365475 | 0.005482 | 0.015877 |
| 11758851 EMC1      | -0.25744 | 0.005482 | 0.015877 |
| 11718314_LRP11     | -0.14841 | 0.005483 | 0.015879 |
| 11763588_NSD1      | 0.190204 | 0.005484 | 0.015881 |
| 11742786_SETX      | 0.215618 | 0.005485 | 0.015884 |
| 11757470_TCF25     | -0.1638  | 0.005488 | 0.01589  |
| 11746681_VNN3      | -0.21852 | 0.00549  | 0.015896 |

|                    |          |          |          |
|--------------------|----------|----------|----------|
| 11715646_ADIPOR1   | 0.147081 | 0.005491 | 0.015897 |
| 11748438_FANCA     | -0.22616 | 0.005495 | 0.015909 |
| 11754880_DOCK9     | 0.165628 | 0.005497 | 0.015914 |
| 11735893_MBD3L2 // | -0.20457 | 0.005498 | 0.015915 |
| 11717195_RAB5B     | 0.136939 | 0.005498 | 0.015915 |
| 11740975_TP53I11   | -0.20325 | 0.005505 | 0.015931 |
| 11754722_PI4K2B    | -0.14748 | 0.005505 | 0.015931 |
| 11763525_COL12A1   | 0.373082 | 0.005509 | 0.015943 |
| 11762350_ZNF28     | -0.14409 | 0.005514 | 0.015956 |
| 11752672_NARFL     | -0.13934 | 0.005514 | 0.015956 |
| 11744097_KAT2A     | 0.146934 | 0.005515 | 0.015956 |
| 11743688_GLI2      | 0.164312 | 0.005515 | 0.015956 |
| 11748695_SYNGR1    | -0.16115 | 0.005521 | 0.015974 |
| 11751296_EPHA1     | -0.1698  | 0.005522 | 0.015976 |
| 11728988_FAHD2B    | -0.28654 | 0.005526 | 0.015986 |
| 11733396_FLG2      | 0.228712 | 0.005532 | 0.016001 |
| 11742607_OR4S2     | -0.22618 | 0.005533 | 0.016004 |
| 11731930_OPALIN    | -0.1792  | 0.005534 | 0.016004 |
| 11716443_RNF181    | 0.133151 | 0.005534 | 0.016005 |
| 11750339_GGNBP1    | -0.2055  | 0.005536 | 0.016009 |
| 11732404_NKRF      | 0.193857 | 0.005539 | 0.016018 |
| 11715979_BRK1      | 0.154884 | 0.005546 | 0.016036 |
| 11736578_APIG2     | 0.16824  | 0.005548 | 0.01604  |
| 11748028_MBD3      | -0.24181 | 0.005548 | 0.01604  |
| 11756179_SEC13     | -0.14208 | 0.005549 | 0.016042 |
| 11731632_MAP1LC3B  | 0.160738 | 0.005549 | 0.016042 |
| 11715658_SLC39A1   | -0.20494 | 0.005552 | 0.016049 |
| 11720729_CSDC2     | -0.1644  | 0.005554 | 0.016055 |
| 11716000_FAF2      | 0.178871 | 0.005559 | 0.016066 |
| 11741276_TMEM144   | -0.30909 | 0.00556  | 0.016068 |
| 11754365_ROR2      | -0.22894 | 0.005561 | 0.016072 |
| 11732942_LOC101929 | -0.19916 | 0.005562 | 0.016072 |
| 11717768_PDE6G     | -0.16529 | 0.005562 | 0.016072 |
| 11732783_RGSL1     | -0.15539 | 0.005565 | 0.016079 |
| 11716768_UBQLN2    | -0.17089 | 0.00557  | 0.016092 |
| 11751632_TFAP4     | -0.16863 | 0.005574 | 0.016104 |
| 11757541_TXNDC17   | 0.137042 | 0.005576 | 0.016108 |
| 11721181_VLDLR     | -0.1454  | 0.005576 | 0.016109 |
| 11753897_SSB       | -0.23723 | 0.005579 | 0.016116 |
| 11745075_GSTA4     | -0.14702 | 0.00558  | 0.016118 |
| 11750891_UBE3C     | 0.323393 | 0.005582 | 0.016124 |
| 11759149_FBXO3     | -0.42982 | 0.005583 | 0.016125 |
| 11748057_SOX15     | 0.222082 | 0.005586 | 0.016131 |
| 11725811_PLA2G5    | -0.24557 | 0.005587 | 0.016133 |
| 11742247_EGFR      | 0.175588 | 0.005587 | 0.016133 |
| 11760995_WRB       | -0.38168 | 0.005589 | 0.016137 |
| 11754956_SNHG7     | -0.16207 | 0.00559  | 0.016141 |
| 11733418_RET       | -0.12827 | 0.005595 | 0.016153 |
| 11763240_TRAV12-2  | -0.33126 | 0.005596 | 0.016155 |
| 11724325_RABGAP1L  | 0.300493 | 0.0056   | 0.016164 |
| 11745836_DYSF      | 0.314238 | 0.0056   | 0.016164 |

|                    |          |          |          |
|--------------------|----------|----------|----------|
| 11729398_FBXL20    | -0.13514 | 0.005602 | 0.016171 |
| 11746371_AASDHPPT  | 0.148748 | 0.005603 | 0.016172 |
| 11733762_ADAMTSL1  | 0.216208 | 0.005606 | 0.016178 |
| 11719545_ZFAND2B   | -0.19573 | 0.005607 | 0.016181 |
| 11749803_ARL8B     | 0.14673  | 0.005608 | 0.016183 |
| 11722865_NETO2     | 0.150107 | 0.005609 | 0.016185 |
| 11715818_ZFP36L2   | 0.183994 | 0.00561  | 0.016187 |
| 11758618_SOX11     | -0.16475 | 0.005611 | 0.01619  |
| 11761845_ANXA4     | 0.183139 | 0.005613 | 0.016195 |
| 11756327_RPS19     | 0.144754 | 0.005619 | 0.016211 |
| 11753775_TXN       | -0.15599 | 0.005623 | 0.016221 |
| 11719268_TNNC1     | 0.366395 | 0.005626 | 0.016227 |
| 11731644_LOC102724 | 0.216954 | 0.005628 | 0.016232 |
| 11746906_CARD8     | 0.249669 | 0.005629 | 0.016234 |
| 11723525_TBC1D8    | 0.136779 | 0.00563  | 0.016236 |
| 11716146_PRKACA    | -0.16148 | 0.00563  | 0.016236 |
| 11718295_SEMA4B    | -0.25393 | 0.005638 | 0.016257 |
| 11722478_CUL5      | 0.23483  | 0.005638 | 0.016257 |
| 11723268_KPNA6     | -0.13491 | 0.005642 | 0.016267 |
| 11733410_MPND      | -0.17935 | 0.005646 | 0.016277 |
| 11717080_VPS52     | -0.14476 | 0.005647 | 0.01628  |
| 11741587_ERLIN2    | -0.15043 | 0.005648 | 0.016282 |
| 11718813_PVRL1     | -0.24334 | 0.005651 | 0.016291 |
| 11737531_CCDC144NL | -0.23143 | 0.005654 | 0.016298 |
| 11759308_MAGI1     | 0.270618 | 0.005654 | 0.016298 |
| 11731250_EPHA8     | -0.13525 | 0.005655 | 0.016299 |
| 11746070_UGT8      | -0.19227 | 0.005658 | 0.016307 |
| 11759750_ZNF880    | 0.255669 | 0.005659 | 0.016309 |
| 11759002_CACNA1E   | -0.19144 | 0.005659 | 0.016309 |
| 11719832_KMT5A     | 0.130415 | 0.005661 | 0.016312 |
| 11762093_CFHR3     | 0.369782 | 0.005662 | 0.016315 |
| 11717485_MYDGF     | -0.1884  | 0.005663 | 0.016316 |
| 11736125_CPLX2     | -0.14469 | 0.005663 | 0.016316 |
| 11720969_GART      | -0.13352 | 0.005665 | 0.016319 |
| 11715648_ADIPOR1   | 0.156113 | 0.005668 | 0.016328 |
| 11751246_MET       | 0.167958 | 0.005669 | 0.016329 |
| 11759728_SEC24A    | 0.28052  | 0.005669 | 0.016329 |
| 11720939_DDX54     | -0.15374 | 0.005673 | 0.016339 |
| 11757134_SNORA65   | -0.23891 | 0.005674 | 0.016341 |
| 11723023_BCKDHB    | -0.17145 | 0.005676 | 0.016346 |
| 11749823_SLC6A9    | -0.13761 | 0.005678 | 0.016349 |
| 11746653_SETD6     | -0.13537 | 0.005685 | 0.016369 |
| 11733343_UTP6      | 0.159497 | 0.005685 | 0.016369 |
| 11717640_UBE3A     | 0.149956 | 0.005685 | 0.016369 |
| 11725101_ESF1      | 0.130996 | 0.005687 | 0.016371 |
| 11755950_CCDC71    | -0.16041 | 0.005687 | 0.016372 |
| 11718049_GLRX      | 0.146965 | 0.005691 | 0.016383 |
| 11762617_ANKRD36   | -0.26464 | 0.005693 | 0.016386 |
| 11730829_AMPD2     | -0.14119 | 0.005693 | 0.016387 |
| 11737282_ZC3HAV1L  | 0.48978  | 0.005695 | 0.01639  |
| 11724176_TSPAN11   | -0.21625 | 0.005695 | 0.01639  |

|                   |          |          |          |
|-------------------|----------|----------|----------|
| 11763345_Clorf174 | -0.14792 | 0.005696 | 0.01639  |
| 11742796_HNRNPK   | -0.32839 | 0.005696 | 0.01639  |
| 11744517_SLC2A10  | -0.29643 | 0.005704 | 0.016414 |
| 11748755_MEIS2    | -0.17605 | 0.005705 | 0.016415 |
| 11734614_GABRE    | -0.16419 | 0.005708 | 0.016423 |
| 11725661_DPP8     | 0.180005 | 0.005709 | 0.016423 |
| 11731859_ZNF720   | -0.15869 | 0.005709 | 0.016423 |
| 11725666_HS2ST1   | 0.331464 | 0.005709 | 0.016423 |
| 11732406_PRPH2    | -0.25895 | 0.005711 | 0.016426 |
| 11729802_EIF1AD   | 0.144026 | 0.005711 | 0.016426 |
| 11751918_BNC1     | 0.28041  | 0.005711 | 0.016426 |
| 11761702_ADAM33   | -0.16771 | 0.005713 | 0.016429 |
| 11724497_NPRL3    | -0.14776 | 0.005714 | 0.016431 |
| 11727748_TMEM63C  | -0.17197 | 0.005715 | 0.016435 |
| 11736395_BPGM     | -0.16229 | 0.005717 | 0.016439 |
| 11741030_PTC2     | 0.180388 | 0.005719 | 0.016444 |
| 11753157_LMAN2L   | 0.172036 | 0.005727 | 0.016466 |
| 11742951_MED10    | 0.166067 | 0.00573  | 0.016474 |
| 11751587_UCHL5    | -0.19449 | 0.005732 | 0.016479 |
| 11729332_ZNF879   | 0.35974  | 0.005735 | 0.016485 |
| 11723591_LRRC8C   | 0.151616 | 0.00574  | 0.016499 |
| 11747041_CCT4     | -0.14023 | 0.00574  | 0.016499 |
| 11757771_ABCC8    | -0.19935 | 0.005745 | 0.01651  |
| 11735120_SREBF1   | -0.25087 | 0.005745 | 0.016511 |
| 11747870_MLLT3    | 0.17267  | 0.005747 | 0.016516 |
| 11745228_TMEM144  | -0.3155  | 0.005753 | 0.01653  |
| 11763196_DYM      | -0.26269 | 0.005756 | 0.016538 |
| 11763197_DYM      | -0.26269 | 0.005756 | 0.016538 |
| 11752204_AP3D1    | -0.14419 | 0.005758 | 0.016542 |
| 11751542_ALDH3B2  | -0.25839 | 0.005759 | 0.016545 |
| 11718826_ITM2C    | -0.19233 | 0.005764 | 0.016558 |
| 11757605_EPB41L4B | -0.29671 | 0.005764 | 0.016558 |
| 11727029_MAP1A    | -0.13168 | 0.005765 | 0.016559 |
| 11745119_DST      | 0.159784 | 0.005768 | 0.016566 |
| 11743162_CTSE     | 0.471189 | 0.00577  | 0.016571 |
| 11725531_DSC2     | 0.18441  | 0.00577  | 0.016572 |
| 11719126_CGRRF1   | 0.226881 | 0.005773 | 0.016577 |
| 11759662_MORN4    | -0.19587 | 0.005774 | 0.016579 |
| 11758455_THAP6    | 0.308851 | 0.005774 | 0.01658  |
| 11719645_GATAD2A  | -0.22058 | 0.005778 | 0.016591 |
| 11728866_NMRK2    | -0.22401 | 0.005779 | 0.016591 |
| 11718568_WIPF1    | 0.285899 | 0.00578  | 0.016593 |
| 11747723_DAXX     | 0.174813 | 0.00578  | 0.016593 |
| 11728977_SRRM3    | -0.21321 | 0.005783 | 0.016598 |
| 11744852_KIAA0125 | -0.14163 | 0.005783 | 0.016598 |
| 11743573_TMEM184C | 0.195882 | 0.005785 | 0.016603 |
| 11738813_LEPR     | 0.210151 | 0.005786 | 0.016605 |
| 11749863_TBP      | 0.206779 | 0.005787 | 0.016607 |
| 11732732_DNAH8    | -0.15599 | 0.005787 | 0.016608 |
| 11742819_PLAUR    | -0.13411 | 0.005788 | 0.016608 |
| 11720923_HCP5     | -0.12951 | 0.005789 | 0.016609 |

|                    |          |          |          |
|--------------------|----------|----------|----------|
| 11738574_TECTB     | -0.19607 | 0.00579  | 0.016613 |
| 11749443_PYCRL     | -0.17095 | 0.005793 | 0.016619 |
| 11728421_PLA2G7    | -0.17583 | 0.005793 | 0.016619 |
| 11744150_LPIN2     | -0.14761 | 0.005794 | 0.01662  |
| 11718116_METTL13   | -0.13097 | 0.005796 | 0.016625 |
| 11743081_TAF3      | 0.236538 | 0.005796 | 0.016625 |
| 11760242_SRSF5     | -0.19208 | 0.005796 | 0.016625 |
| 11724793_PGS1      | 0.148527 | 0.005798 | 0.016628 |
| 11719421_ABCC1     | 0.2002   | 0.005801 | 0.016635 |
| 11729023_KCNA5     | -0.19198 | 0.005804 | 0.016643 |
| 11751261_ITPK1     | -0.15792 | 0.005807 | 0.016651 |
| 11720442_INAFM1    | -0.26251 | 0.00581  | 0.016658 |
| 11720901_GRAMD1C   | -0.25821 | 0.005813 | 0.016666 |
| 11744724_CERS2     | -0.13323 | 0.005813 | 0.016667 |
| 11730242_PRKAG1    | -0.18067 | 0.005814 | 0.016667 |
| 11723544_ESRP1     | 0.297543 | 0.005814 | 0.016667 |
| 11723148_SLC19A2   | 0.244662 | 0.005815 | 0.016669 |
| 11718698_C6orf89   | 0.198586 | 0.005816 | 0.01667  |
| 11755316_TMEM139   | 0.146433 | 0.005817 | 0.016671 |
| 11719189_NRAS      | -0.1364  | 0.005822 | 0.016685 |
| 11719285_PEX11B    | -0.24192 | 0.005823 | 0.016686 |
| 11742577_OR6C6     | -0.19779 | 0.005823 | 0.016686 |
| 11718541_MTSS1     | -0.27976 | 0.005823 | 0.016686 |
| 11760773_HLA-DRA   | -0.28541 | 0.005826 | 0.016692 |
| 11735085_FREM2     | -0.53591 | 0.00583  | 0.016705 |
| 11739035_ACTR2     | -0.15264 | 0.005831 | 0.016707 |
| 11727603_BMP5      | 0.195257 | 0.005835 | 0.016717 |
| 11720565_NAV2      | 0.256628 | 0.005836 | 0.016717 |
| 11756815_PCDH17    | 0.242761 | 0.005837 | 0.016719 |
| 11715582_SF3B2     | -0.1656  | 0.005838 | 0.016721 |
| 11745344_PYCR2     | -0.18049 | 0.005839 | 0.016723 |
| 11744061_ACTR1B    | -0.14628 | 0.005841 | 0.016728 |
| 11716691_NPEPPS    | 0.147009 | 0.005845 | 0.016739 |
| 11761522_CHURC1 // | -0.16413 | 0.005846 | 0.016741 |
| 11745160_TGFA      | 0.178617 | 0.005848 | 0.016746 |
| 11727231_ZNF19     | 0.281277 | 0.005851 | 0.016752 |
| 11761875_ROCK1P1   | 0.21003  | 0.005852 | 0.016756 |
| 11726179_SOX6      | -0.25658 | 0.005854 | 0.01676  |
| 11730428_AP1B1     | -0.16786 | 0.005855 | 0.016761 |
| 11726860_DCAKD     | -0.22311 | 0.005855 | 0.016761 |
| 11731116_PLEKHA8P1 | -0.4052  | 0.005857 | 0.016765 |
| 11727841_PRKCD     | 0.143363 | 0.005861 | 0.016775 |
| 11736553_TGFB2     | -0.20997 | 0.005862 | 0.016778 |
| 11717459_MRPL39    | -0.12792 | 0.005865 | 0.016784 |
| 11715617_RNF130    | -0.14639 | 0.005866 | 0.016786 |
| 11756859_UBE2D2    | -0.13013 | 0.00587  | 0.016797 |
| 11720879_CABIN1    | -0.20664 | 0.005872 | 0.016801 |
| 11759177_MAN1A1    | -0.25058 | 0.005872 | 0.016802 |
| 11759564_RPS2 ///  | -0.38303 | 0.005874 | 0.016805 |
| 11757184_SC5D      | 0.153591 | 0.005874 | 0.016806 |
| 11753914_SXX2IP    | -0.16708 | 0.005875 | 0.016806 |

|                    |          |          |          |
|--------------------|----------|----------|----------|
| 11751332_CRLF3     | 0.176188 | 0.005875 | 0.016806 |
| 11742771_KIAA0100  | -0.14854 | 0.00588  | 0.016819 |
| 11755827_SMARCD1   | -0.12574 | 0.005881 | 0.016822 |
| 11721451 ETF1      | 0.160686 | 0.005883 | 0.016824 |
| 11755349_GDPD3     | -0.27683 | 0.005891 | 0.016847 |
| 11723833_TAPT1     | 0.334767 | 0.005892 | 0.01685  |
| 11741450_P2RX5 /// | 0.145845 | 0.005893 | 0.016851 |
| 11749848_CTNS      | -0.138   | 0.005894 | 0.016853 |
| 11754910_MICALL2   | 0.156382 | 0.005895 | 0.016855 |
| 11750143_PIGZ      | -0.20515 | 0.005897 | 0.016859 |
| 11753956_C16orf13  | -0.13941 | 0.005897 | 0.016859 |
| 11723764_MCM3AP    | 0.200842 | 0.005897 | 0.016859 |
| 11723463_C14orf80  | -0.28484 | 0.005898 | 0.016859 |
| 11759382_GRK7      | -0.28162 | 0.005898 | 0.016859 |
| 11721817_SH3BP5L   | -0.1433  | 0.0059   | 0.016864 |
| 11736441_UROC1     | -0.17462 | 0.005901 | 0.016864 |
| 11756247_ATXN2     | 0.150298 | 0.005901 | 0.016866 |
| 11744355_SUN2      | -0.19457 | 0.005904 | 0.016871 |
| 11735131_DNAJC21   | 0.208071 | 0.005905 | 0.016873 |
| 11748262_PMS1      | -0.22244 | 0.005905 | 0.016873 |
| 11756022_RHOJ      | 0.29832  | 0.005908 | 0.016879 |
| 11720234_RHOBTB2   | -0.15671 | 0.005908 | 0.01688  |
| 11737295_KIAA1328  | -0.19871 | 0.005912 | 0.016889 |
| 11757096_ZNF492 // | -0.24498 | 0.005912 | 0.01689  |
| 11744256_TUBB4A    | -0.2518  | 0.005915 | 0.016896 |
| 11721222_MIER2     | 0.151342 | 0.005915 | 0.016896 |
| 11757370_POLR2J    | -0.17425 | 0.005916 | 0.016897 |
| 11729760_PLA2G2D   | -0.25317 | 0.005918 | 0.016901 |
| 11725960_CALM2 /// | -0.13033 | 0.005922 | 0.016912 |
| 11758018_UBR3      | 0.230374 | 0.005923 | 0.016913 |
| 11752583_CD6       | -0.25677 | 0.005926 | 0.016922 |
| 11715228_SLC51B    | -0.21462 | 0.00593  | 0.016931 |
| 11761250_ARL5A     | 0.130966 | 0.00593  | 0.016931 |
| 11732044_FBLN1     | -0.28414 | 0.005938 | 0.016952 |
| 11738934_GSX1      | -0.31084 | 0.005938 | 0.016952 |
| 11759914_GANC      | -0.24541 | 0.005942 | 0.016963 |
| 11725373_TRADD     | -0.1776  | 0.005943 | 0.016963 |
| 11717714_CHST10    | -0.21936 | 0.005944 | 0.016966 |
| 11719679_EPN2      | -0.19638 | 0.005949 | 0.016979 |
| 11744523_NBAS      | 0.185426 | 0.005951 | 0.016985 |
| 11735743_ARL14     | 0.683864 | 0.005953 | 0.01699  |
| 11738264_ZNF679    | 0.201726 | 0.005954 | 0.016993 |
| 11757435_BIN1      | 0.21012  | 0.005959 | 0.017004 |
| 11757467_TSPAN6    | 0.146115 | 0.005961 | 0.017009 |
| 11751439_NECAP1    | 0.168882 | 0.005961 | 0.017009 |
| 11748420_ATXN7     | 0.28928  | 0.005963 | 0.017013 |
| 11750014_SSBP1     | -0.14537 | 0.005968 | 0.017026 |
| 11717223_EXTL3     | -0.19128 | 0.00597  | 0.01703  |
| 11723816_ARHGAP29  | -0.15741 | 0.005972 | 0.017036 |
| 11748392_GAL3ST4   | -0.15335 | 0.005975 | 0.017042 |
| 11734033_C15orf61  | -0.14381 | 0.005975 | 0.017042 |



|                   |          |          |          |
|-------------------|----------|----------|----------|
| 11747888_SH3YL1   | 0.327131 | 0.005976 | 0.017044 |
| 11760801_SPHK2    | -0.19614 | 0.005979 | 0.017051 |
| 11755885_UBXN7    | -0.21663 | 0.005983 | 0.017061 |
| 11716973_NSF      | 0.174364 | 0.005985 | 0.017066 |
| 11754924_ADTRP    | 0.311422 | 0.005985 | 0.017066 |
| 11759317_EXOC6B   | 0.18184  | 0.005989 | 0.017076 |
| 11722749_HOOK3    | -0.17162 | 0.00599  | 0.017078 |
| 11749996_VSNL1    | -0.30018 | 0.005995 | 0.017092 |
| 11735077_CYP2C18  | -0.22499 | 0.005997 | 0.017095 |
| 11736811_PDCD1LG2 | 0.197837 | 0.005999 | 0.017101 |
| 11716895_ISG15    | 0.209806 | 0.006    | 0.017101 |
| 11760165_AP1S2    | 0.167296 | 0.006002 | 0.017106 |
| 11731467_CYP2E1   | 0.251287 | 0.006002 | 0.017106 |
| 11723658_ZNF668   | 0.257506 | 0.006005 | 0.017114 |
| 11717762_CPVL     | -0.16678 | 0.006006 | 0.017114 |
| 11716507_CUL3     | -0.20844 | 0.006008 | 0.017119 |
| 11736336_RBM19    | 0.203103 | 0.00601  | 0.017125 |
| 11731879_NLRP1    | 0.245333 | 0.006012 | 0.017129 |
| 11748559_DBNL     | -0.14042 | 0.006013 | 0.017132 |
| 11735757_GATSL2   | -0.25211 | 0.006015 | 0.017135 |
| 11716889_TMEM261  | -0.27518 | 0.006017 | 0.01714  |
| 11735660_AGBL4    | -0.13582 | 0.006017 | 0.017141 |
| 11725726_C1orf56  | -0.16849 | 0.006018 | 0.017142 |
| 11741879_PML      | -0.12886 | 0.006021 | 0.017149 |
| 11724767_PMM1     | -0.15364 | 0.006023 | 0.017153 |
| 11725050_FAIM2    | -0.19199 | 0.006023 | 0.017153 |
| 11727629_APBA2    | -0.20504 | 0.006032 | 0.017178 |
| 11761027_FCRL5    | -0.18388 | 0.006035 | 0.017184 |
| 11743089_LRRC6    | 0.306055 | 0.006038 | 0.017193 |
| 11758578_AEBP2    | 0.160467 | 0.006038 | 0.017193 |
| 11716189_SEC13    | -0.1266  | 0.00604  | 0.017197 |
| 11725615_PPP1CB   | 0.153502 | 0.006043 | 0.017204 |
| 11728273_GINM1    | 0.152719 | 0.006046 | 0.017212 |
| 11732268_KLHL40   | -0.27003 | 0.006047 | 0.017213 |
| 11737056_ACTR3B   | 0.153618 | 0.006048 | 0.017216 |
| 11719394_FBXO32   | 0.201501 | 0.006054 | 0.017231 |
| 11754412_CLUAP1   | 0.150358 | 0.006056 | 0.017235 |
| 11744225_HERC1    | 0.218704 | 0.006056 | 0.017235 |
| 11762235_KIAA0907 | 0.230953 | 0.006058 | 0.017238 |
| 11726666_MFSD8    | 0.209304 | 0.006062 | 0.017251 |
| 11743524_KDM5A    | 0.285683 | 0.006065 | 0.017256 |
| 11755609_HYDIN    | -0.14635 | 0.006065 | 0.017257 |
| 11756459_SLC22A18 | -0.21    | 0.006071 | 0.017271 |
| 11718948_MPP5     | 0.190085 | 0.006072 | 0.017274 |
| 11721752_FZD7     | -0.14091 | 0.006074 | 0.017277 |
| 11741478_SPATA1   | 0.271847 | 0.006074 | 0.017277 |
| 11754606_HSP90B1  | -0.16895 | 0.006085 | 0.01731  |
| 11730007_RETN     | -0.13447 | 0.006087 | 0.017312 |
| 11721287_WWOX     | 0.270034 | 0.006088 | 0.017314 |
| 11734798_RLIM     | 0.132794 | 0.00609  | 0.01732  |
| 11761288_RNLS     | -0.20131 | 0.006093 | 0.017326 |

|                    |          |          |          |
|--------------------|----------|----------|----------|
| 11762589_RALGPS1   | -0.19149 | 0.006099 | 0.017341 |
| 11735795_GPSM1     | -0.16703 | 0.006099 | 0.017341 |
| 11749787_SEPT2     | 0.138873 | 0.0061   | 0.017344 |
| 11743766_CUL4A     | -0.14459 | 0.006102 | 0.017348 |
| 11720069_COMMD8    | 0.178167 | 0.006107 | 0.017363 |
| 11763700_FAAP20    | -0.15414 | 0.006109 | 0.017367 |
| 11717437_TOP1      | 0.142442 | 0.00611  | 0.017369 |
| 11718860_SUPV3L1   | 0.146823 | 0.006111 | 0.017369 |
| 11721064_ELP4      | -0.19319 | 0.006111 | 0.01737  |
| 11750017_STX3      | 0.156712 | 0.006117 | 0.017385 |
| 11758906_DNAJC5    | -0.18857 | 0.006121 | 0.017397 |
| 11733014_RNF213    | 0.148061 | 0.006123 | 0.0174   |
| 11734067_IRAK4     | -0.24344 | 0.006124 | 0.017403 |
| 11723424_IFNAR1    | 0.157991 | 0.006134 | 0.01743  |
| 11760693_SIGLEC9   | -0.16896 | 0.006142 | 0.017452 |
| 11746004_LTBP1     | -0.16914 | 0.006143 | 0.017453 |
| 11746717_KDM4C     | 0.193549 | 0.006143 | 0.017453 |
| 11741197_KIF5C     | -0.41451 | 0.006147 | 0.017461 |
| 11745396_MYO5B     | 0.362398 | 0.006147 | 0.017461 |
| 11757419_UXT       | -0.14342 | 0.006148 | 0.017464 |
| 11743750_FAM169A   | -0.16569 | 0.006151 | 0.017471 |
| 11745572_DPY19L1 / | 0.15828  | 0.006152 | 0.017472 |
| 11744447_HLCS      | -0.22309 | 0.006153 | 0.017474 |
| 11720631_SDHB      | -0.22163 | 0.006153 | 0.017474 |
| 11747072_TUBB6     | 0.133415 | 0.006156 | 0.01748  |
| 11763718_CDKN1C    | 0.26253  | 0.006156 | 0.01748  |
| 11756087_AMFR      | 0.177834 | 0.006157 | 0.017482 |
| 11761097_ARFGAP2   | -0.22411 | 0.006159 | 0.017486 |
| 11737733_CAPS2     | 0.25173  | 0.006162 | 0.017493 |
| 11716757_DHX30     | 0.139949 | 0.006164 | 0.017499 |
| 11758772_HLA-DPB1  | -0.16266 | 0.006166 | 0.017504 |
| 11730595_LYG1      | 0.168637 | 0.006167 | 0.017504 |
| 11743428_RUNX3     | -0.19483 | 0.006167 | 0.017505 |
| 11752002_PLEKHG1   | 0.233437 | 0.006169 | 0.017508 |
| 11718448_SH3BGRL2  | -0.45217 | 0.006176 | 0.017526 |
| 11736167_CCDC34    | -0.1339  | 0.006176 | 0.017526 |
| 11715867_MRPL41    | -0.13859 | 0.006184 | 0.017548 |
| 11728470_BTBD11    | 0.220747 | 0.006188 | 0.017559 |
| 11719515_ADNP2     | 0.168853 | 0.006189 | 0.017559 |
| 11716607_TCEB2     | -0.13634 | 0.006189 | 0.017559 |
| 11724333_USP8      | 0.160453 | 0.006194 | 0.017572 |
| 11744045_OSGIN1    | 0.154541 | 0.006196 | 0.017576 |
| 11727977_SRGAP1    | 0.219238 | 0.006197 | 0.017579 |
| 11750137_PLCD4     | 0.14239  | 0.006202 | 0.017592 |
| 11740036_CARD8     | -0.33835 | 0.006204 | 0.017598 |
| 11721392_LOXL3     | -0.12649 | 0.006207 | 0.017605 |
| 11727008_SORT1     | 0.255003 | 0.006212 | 0.017618 |
| 11720011_JARID2    | 0.221429 | 0.006218 | 0.017633 |
| 11746519_NOC2L     | -0.22002 | 0.006219 | 0.017636 |
| 11742834_FAM76A    | -0.38566 | 0.00622  | 0.017637 |
| 11750791_NEK11     | 0.22193  | 0.00622  | 0.017637 |

|                    |          |          |          |
|--------------------|----------|----------|----------|
| 11718715_B4GALT2   | -0.14785 | 0.006221 | 0.017638 |
| 11746079_ADCY7     | 0.266112 | 0.006223 | 0.017641 |
| 11746972_1-Mar     | 0.428988 | 0.006232 | 0.017666 |
| 11731673_LCORL     | -0.19777 | 0.006235 | 0.017674 |
| 11726579_PSME1     | 0.169241 | 0.006235 | 0.017674 |
| 11726833_HSPB2 /// | -0.17677 | 0.006239 | 0.017682 |
| 11753717_KDM7A     | 0.18832  | 0.006242 | 0.017692 |
| 11728216_BCLAF1    | -0.15075 | 0.006246 | 0.017702 |
| 11752760_TMED7     | 0.135681 | 0.006247 | 0.017703 |
| 11759603_BCL2L13   | -0.20368 | 0.006249 | 0.017708 |
| 11717186_MEF2D     | -0.19444 | 0.00625  | 0.017708 |
| 11735569_ZAR1L     | -0.24316 | 0.00625  | 0.017708 |
| 11750793_SLC6A9    | -0.21475 | 0.00625  | 0.017708 |
| 11758321_GATSL2    | -0.15618 | 0.006251 | 0.017709 |
| 11725972_HNRNPF    | -0.15676 | 0.006252 | 0.017711 |
| 11720353_ETV5      | -0.14754 | 0.006256 | 0.017721 |
| 11760436_DST       | 0.184925 | 0.006258 | 0.017726 |
| 11758905_TMED4     | -0.15605 | 0.006259 | 0.017727 |
| 11733962_LGR5      | -0.17325 | 0.006261 | 0.017733 |
| 11728100_NXPH3     | -0.15884 | 0.006263 | 0.017737 |
| 11750361_SLAMF1    | -0.15788 | 0.006272 | 0.017763 |
| 11725093_RFX5      | 0.136641 | 0.006276 | 0.017771 |
| 11727775_GNAI3     | 0.143428 | 0.006278 | 0.017777 |
| 11724537_ABCG2     | -0.20516 | 0.006281 | 0.017783 |
| 11750328_WAPL      | -0.16745 | 0.006282 | 0.017784 |
| 11753367_NUCKS1    | -0.14306 | 0.006282 | 0.017784 |
| 11746015_MSTO1 /// | -0.1448  | 0.006285 | 0.017794 |
| 11737291_OXGR1     | -0.19704 | 0.006291 | 0.01781  |
| 11727786_CACYBP    | -0.1314  | 0.006294 | 0.017816 |
| 11726933_SOX12     | -0.27538 | 0.0063   | 0.01783  |
| 11748199_TMEM189   | 0.162845 | 0.0063   | 0.017832 |
| 11719916_IL1B      | 0.141712 | 0.006302 | 0.017836 |
| 11726091_VPS53     | 0.148728 | 0.006305 | 0.017843 |
| 11744095_DDX24     | 0.130949 | 0.006309 | 0.017852 |
| 11740423_PRKDC     | -0.13944 | 0.006309 | 0.017852 |
| 11729179_POLH      | 0.332254 | 0.006309 | 0.017852 |
| 11735706_BSG       | -0.13722 | 0.00631  | 0.017853 |
| 11723012_CAPZA2    | 0.134555 | 0.00631  | 0.017853 |
| 11720122_GIGYF1    | -0.17568 | 0.006321 | 0.01788  |
| 11758928_NLN       | -0.16066 | 0.006323 | 0.017887 |
| 11751139_ZNF101    | -0.20948 | 0.006327 | 0.017897 |
| 11756093_IGHG1 /// | -0.17903 | 0.006327 | 0.017897 |
| 11740395_FGFR2     | -0.18488 | 0.00633  | 0.017904 |
| 11748618_CCDC80    | 0.355048 | 0.006336 | 0.017918 |
| 11742687_FCGRT     | -0.20997 | 0.006342 | 0.017933 |
| 11732645_SYT6      | -0.20015 | 0.006342 | 0.017933 |
| 11728577_C2CD4C    | -0.14565 | 0.006343 | 0.017933 |
| 11725924_RASSF5    | -0.24229 | 0.006343 | 0.017933 |
| 11722650_RGS12     | -0.18289 | 0.006344 | 0.017936 |
| 11757208_C22orf34  | -0.20159 | 0.006346 | 0.017941 |
| 11721445_ERBB3     | -0.15721 | 0.006349 | 0.017947 |

|                    |          |          |          |
|--------------------|----------|----------|----------|
| 11741443_RBMX      | -0.15063 | 0.00635  | 0.017952 |
| 11725626_ACE2      | 0.24985  | 0.006353 | 0.017958 |
| 11746887_NUDT16P1  | -0.2354  | 0.006359 | 0.017975 |
| 11744497_FAM149B1  | -0.20876 | 0.006361 | 0.017976 |
| 11753854_CD28      | -0.15286 | 0.006361 | 0.017976 |
| 11754822_TDP1      | -0.26913 | 0.006361 | 0.017976 |
| 11735903_RAET1E    | 0.201156 | 0.006361 | 0.017976 |
| 11746878_ID2       | 0.181223 | 0.006366 | 0.017988 |
| 11721331_RNGTT     | 0.152764 | 0.006368 | 0.017993 |
| 11733229_PTPRB     | 0.334814 | 0.00637  | 0.017998 |
| 11735117_VAMP4     | -0.35077 | 0.006373 | 0.018004 |
| 11735256_RNF122    | -0.16296 | 0.006376 | 0.018013 |
| 11729119_HSPA1A // | -0.12995 | 0.006382 | 0.018027 |
| 11746344_RANBP3    | -0.23234 | 0.006383 | 0.018029 |
| 11745731_TNIP1     | 0.162847 | 0.006383 | 0.01803  |
| 11737845_FAM102A   | -0.15123 | 0.006384 | 0.018032 |
| 11736987_NUBPL     | 0.209587 | 0.006387 | 0.018038 |
| 11743813_EVI2B     | 0.210579 | 0.006388 | 0.01804  |
| 11719581_BPGM      | -0.15793 | 0.006389 | 0.01804  |
| 11725087_LANCL2    | -0.21107 | 0.006389 | 0.01804  |
| 11744111_TMEM94    | -0.15617 | 0.00639  | 0.018042 |
| 11717371_CHD1L     | 0.161249 | 0.00639  | 0.018043 |
| 11723648_DNAJA2    | -0.1595  | 0.006392 | 0.018046 |
| 11745532_ZNF518A   | 0.26357  | 0.006396 | 0.018058 |
| 11752048_MYRIP     | 0.171572 | 0.006399 | 0.018065 |
| 11736979_FSIP1     | 0.227668 | 0.006401 | 0.018068 |
| 11748756_MEIS2     | -0.1592  | 0.006402 | 0.018069 |
| 11725284_ZFP90     | 0.209306 | 0.006403 | 0.018071 |
| 11730183_SH3GL2    | 0.273431 | 0.006405 | 0.018077 |
| 11720482_POLM      | 0.161211 | 0.006409 | 0.018086 |
| 11738839_DYTN      | -0.14655 | 0.006412 | 0.018095 |
| 11756398_VPRBP     | -0.18344 | 0.006413 | 0.018097 |
| 11723250_EML2      | -0.18593 | 0.006414 | 0.018099 |
| 11724138_PRSS21    | -0.20117 | 0.00642  | 0.018114 |
| 11734568_MUTYH     | -0.13898 | 0.006423 | 0.018121 |
| 11762876_CAPRIN2   | -0.15524 | 0.006423 | 0.018121 |
| 11759701_SLC31A1   | -0.14633 | 0.006426 | 0.018128 |
| 11751998_ZYG11A    | 0.214157 | 0.006431 | 0.01814  |
| 11717547_INTS12    | 0.197939 | 0.006434 | 0.018147 |
| 11717043_GID8      | 0.14843  | 0.006434 | 0.018147 |
| 11748265_LDLRAD3   | -0.18224 | 0.00644  | 0.018163 |
| 11732517_SCRN2     | -0.14956 | 0.006442 | 0.018168 |
| 11725801_USP46     | 0.164391 | 0.006445 | 0.018175 |
| 11726032_CSNK1G3   | 0.191261 | 0.006446 | 0.018176 |
| 11725062_USP7      | -0.38193 | 0.006446 | 0.018177 |
| 11761153_CYP51A1-A | -0.15006 | 0.006449 | 0.018182 |
| 11747346_ACADM     | 0.138561 | 0.006449 | 0.018183 |
| 11724491_NUDCD2    | -0.13909 | 0.00645  | 0.018183 |
| 11737390_ZSCAN4    | -0.2174  | 0.006452 | 0.018189 |
| 11739812_HDGFRP3   | -0.14492 | 0.006456 | 0.018197 |
| 11720997_ADCY2     | -0.15976 | 0.006458 | 0.018203 |

|                    |          |          |          |
|--------------------|----------|----------|----------|
| 11730501_CACNA2D3  | 0.329803 | 0.006459 | 0.018205 |
| 11737628_TLR6      | 0.216107 | 0.00646  | 0.018207 |
| 11723994_STYXL1    | -0.14388 | 0.006468 | 0.018227 |
| 11741544_SLFN14    | -0.20438 | 0.006468 | 0.018228 |
| 11752230_BPTF      | 0.18587  | 0.006469 | 0.018228 |
| 11737885_ZFAND4    | -0.15268 | 0.00647  | 0.018229 |
| 11734058_ADAM30    | -0.19289 | 0.006471 | 0.018233 |
| 11729598_TKFC      | -0.26116 | 0.006473 | 0.018236 |
| 11750951_TMEM182   | -0.30594 | 0.006473 | 0.018237 |
| 11744443_CCDC82    | 0.197431 | 0.00648  | 0.018254 |
| 11750539_KCNMB2    | -0.16809 | 0.00648  | 0.018254 |
| 11721230_BEND7     | 0.155224 | 0.006482 | 0.018257 |
| 11730427_AP1B1     | -0.20254 | 0.006486 | 0.018267 |
| 11752418_AFAP1L1   | -0.16505 | 0.006494 | 0.018291 |
| 11754821_SLC38A1   | 0.129599 | 0.006497 | 0.018298 |
| 11746543_SNX9      | 0.154138 | 0.006499 | 0.018301 |
| 11738251_CHEK1     | -0.15972 | 0.006499 | 0.018301 |
| 11758005_RANBP2    | 0.182871 | 0.006501 | 0.018306 |
| 11718546_ILF3      | -0.1265  | 0.006502 | 0.018308 |
| 11720675_CCS       | -0.20415 | 0.006508 | 0.018322 |
| 11756545_GKN2      | -0.27424 | 0.006508 | 0.018322 |
| 11754505_SLC39A4   | -0.21571 | 0.00651  | 0.018325 |
| 11726776_WNT10B    | -0.2713  | 0.006513 | 0.018335 |
| 11739503_ABCA1     | 0.386419 | 0.006515 | 0.018338 |
| 11753946_PCBP2     | -0.12336 | 0.006515 | 0.018338 |
| 11763945_RPSAP9    | 0.170389 | 0.00652  | 0.018349 |
| 11716832_TM7SF3    | 0.124483 | 0.006525 | 0.018362 |
| 11725535_TBC1D31   | -0.19706 | 0.006526 | 0.018365 |
| 11749832_UBXN2A    | 0.179282 | 0.006533 | 0.018383 |
| 11754449_ZNF584    | 0.216487 | 0.006541 | 0.018404 |
| 11753556_TTTY13    | -0.14173 | 0.006541 | 0.018404 |
| 11729480_GUK1      | 0.157418 | 0.006547 | 0.018418 |
| 11758846_NUS1      | 0.14008  | 0.006548 | 0.018423 |
| 11755997_SAMD9L    | 0.170106 | 0.006549 | 0.018423 |
| 11756951_STT3B     | -0.14214 | 0.006554 | 0.018436 |
| 11723113_CENPC     | 0.224438 | 0.006555 | 0.018439 |
| 11732803_VSX2      | -0.16125 | 0.006564 | 0.018461 |
| 11737377_LUZP4     | -0.2252  | 0.006566 | 0.018466 |
| 11757243_FBXL20    | -0.14861 | 0.006568 | 0.018471 |
| 11742802_SRD5A1    | -0.14455 | 0.006569 | 0.018474 |
| 11719719_LAD1      | -0.17314 | 0.006574 | 0.018486 |
| 11755138_ZXDB      | -0.28753 | 0.006576 | 0.01849  |
| 11739792_MOCS3     | 0.158833 | 0.006582 | 0.018508 |
| 11757763_IGF2BP2   | 0.15824  | 0.006584 | 0.018509 |
| 11756004_DHRS4 /// | -0.23171 | 0.006584 | 0.018509 |
| 11756015_DHRS4 /// | -0.23171 | 0.006584 | 0.018509 |
| 11746219_EYA3      | 0.124938 | 0.006585 | 0.01851  |
| 11720955_CWC22     | 0.220642 | 0.006588 | 0.018517 |
| 11720420_AFF4      | 0.18743  | 0.006591 | 0.018525 |
| 11722220_WBP4      | 0.13219  | 0.006597 | 0.018541 |
| 11739405_FPGS      | -0.13686 | 0.006599 | 0.018546 |

|                    |          |          |          |
|--------------------|----------|----------|----------|
| 11758799_SERBP1    | -0.14412 | 0.006611 | 0.01858  |
| 11759916_YME1L1    | -0.14878 | 0.006627 | 0.018622 |
| 11719888_GIGYF2    | 0.189278 | 0.006629 | 0.018627 |
| 11760738_SPOCK3    | -0.2725  | 0.00663  | 0.018627 |
| 11715803_ANXA6     | 0.160947 | 0.006636 | 0.018643 |
| 11750651_ABCC4     | 0.233757 | 0.006641 | 0.018657 |
| 11736997_MOSPD3    | -0.16498 | 0.006641 | 0.018657 |
| 11758172_SLC03A1   | -0.15388 | 0.006643 | 0.01866  |
| 11758644_ZNF639    | 0.17191  | 0.006652 | 0.018685 |
| 11719192_FBX09     | -0.2933  | 0.006652 | 0.018685 |
| 11742500_PRY /// P | -0.18149 | 0.006654 | 0.018688 |
| 11757299_GUK1      | 0.14     | 0.006655 | 0.01869  |
| 11740098_ANK1      | 0.202392 | 0.006659 | 0.018701 |
| 11735274_TBX18     | 0.16391  | 0.006661 | 0.018704 |
| 11744112_COQ5      | -0.13591 | 0.006666 | 0.018718 |
| 11715278_AURKAIP1  | -0.15868 | 0.006668 | 0.018722 |
| 11755870_YTHDF1    | 0.125259 | 0.006672 | 0.018732 |
| 11760592_SLC35E1   | 0.154565 | 0.006672 | 0.018732 |
| 11742748_SPPL3     | 0.134871 | 0.006676 | 0.018741 |
| 11733945_RAP2B     | -0.31916 | 0.006677 | 0.018742 |
| 11725527_ZNF248    | -0.15157 | 0.006684 | 0.018762 |
| 11725990_MARK3     | 0.133568 | 0.006689 | 0.018774 |
| 11718035_PPIL1     | -0.13437 | 0.00669  | 0.018777 |
| 11742162_KRTAP4-2  | -0.15241 | 0.006692 | 0.018781 |
| 11717169_TRPC4AP   | 0.126566 | 0.006694 | 0.018785 |
| 11716904_TGOLN2    | 0.136614 | 0.006696 | 0.01879  |
| 11751467_PIGU      | -0.21424 | 0.006699 | 0.018796 |
| 11745056_CACTIN    | -0.17432 | 0.006699 | 0.018796 |
| 11744373_GYG1      | 0.161025 | 0.0067   | 0.018798 |
| 11743564_MAP7D3    | -0.13811 | 0.006701 | 0.018799 |
| 11722466_PAX6      | -0.16756 | 0.006701 | 0.018799 |
| 11718684_ANP32B    | -0.12647 | 0.006702 | 0.018802 |
| 11742727_RER1      | -0.19104 | 0.006708 | 0.018816 |
| 11718239_CAPRIN1   | 0.160977 | 0.006711 | 0.018823 |
| 11754815_LDLRAP1   | -0.1404  | 0.006711 | 0.018823 |
| 11747002_CPA1      | -0.23039 | 0.006713 | 0.018826 |
| 11717411_ANO6      | 0.208102 | 0.006714 | 0.018829 |
| 11717111_REPIN1    | 0.128497 | 0.006715 | 0.01883  |
| 11756244_FBX031    | 0.202023 | 0.006718 | 0.018837 |
| 11744648_AIFM2     | 0.156861 | 0.006718 | 0.018837 |
| 11752746_PFKL      | -0.20854 | 0.006719 | 0.018839 |
| 11733051_SCAMP1    | -0.14274 | 0.006723 | 0.018849 |
| 11741099_TP53BP2   | -0.25481 | 0.006724 | 0.018851 |
| 11740919_RSPO1     | -0.26804 | 0.006725 | 0.018851 |
| 11745412_LOC441178 | -0.15361 | 0.006725 | 0.018852 |
| 11734179_PTGFR     | 0.312725 | 0.006731 | 0.018867 |
| 11744977_MGC45922  | -0.15307 | 0.006739 | 0.018888 |
| 11739083_SLC39A14  | -0.21568 | 0.006743 | 0.018898 |
| 11733674_WDR49     | -0.18575 | 0.006749 | 0.018915 |
| 11754838_DSC3      | 0.202851 | 0.006752 | 0.01892  |
| 11749016_AMPD3     | 0.28102  | 0.006755 | 0.01893  |

|                   |          |          |          |
|-------------------|----------|----------|----------|
| 11746208_BAK1     | -0.23402 | 0.006757 | 0.018934 |
| 11722702_DZIP1    | -0.15334 | 0.006759 | 0.018937 |
| 11743917_FKBP5    | -0.29326 | 0.006761 | 0.01894  |
| 11751605_SP140    | 0.182958 | 0.006761 | 0.01894  |
| 11754683_ALS2CL   | 0.232965 | 0.006763 | 0.018946 |
| 11752976_SYNRG    | 0.239581 | 0.006763 | 0.018946 |
| 11729515_SLC26A9  | -0.21128 | 0.006765 | 0.018949 |
| 11753115_CLEC12B  | 0.179165 | 0.006767 | 0.018953 |
| 11759664_B4GALNT1 | -0.22803 | 0.006768 | 0.018957 |
| 11726692_ANGPT1   | 0.178024 | 0.00677  | 0.018961 |
| 11715647_ADIPOR1  | 0.135507 | 0.006772 | 0.018964 |
| 11737924_LECT2    | -0.20545 | 0.006773 | 0.018965 |
| 11758956_WWP1     | 0.204142 | 0.006785 | 0.018998 |
| 11739247_FAM208B  | 0.227135 | 0.006786 | 0.019001 |
| 11717568_NQO1     | -0.15012 | 0.006786 | 0.019001 |
| 11725454_MYO1B    | 0.181434 | 0.006788 | 0.019004 |
| 11728477_CXCL3    | 0.328911 | 0.006795 | 0.019021 |
| 11744472_TLK2     | 0.158919 | 0.006796 | 0.019023 |
| 11763132_IGKC     | -0.2377  | 0.006798 | 0.019027 |
| 200079_PMKARS     | 0.140316 | 0.006798 | 0.019029 |
| 11756475_C6orf1   | -0.19023 | 0.006801 | 0.019035 |
| 11735698_ENTPD6   | 0.201955 | 0.006803 | 0.019038 |
| 11729066_ZNF211   | 0.207215 | 0.006808 | 0.019053 |
| 11731372_NODAL    | -0.17917 | 0.006809 | 0.019055 |
| 11739713_NCOA2    | 0.271062 | 0.006816 | 0.019072 |
| 11751063_RAB40B   | -0.13684 | 0.00682  | 0.019083 |
| 11755369_KDM5D    | -0.22475 | 0.006826 | 0.019099 |
| 11737205_GIPR     | -0.14314 | 0.006832 | 0.019112 |
| 11745926_ADAM15   | -0.15449 | 0.006833 | 0.019116 |
| 11730487_DOK6     | -0.31824 | 0.006834 | 0.019116 |
| 11743231_TOR1AIP2 | -0.17436 | 0.006834 | 0.019116 |
| 11718557_CREB3L2  | 0.26593  | 0.006835 | 0.019117 |
| 11749465_SMC1B    | -0.26614 | 0.006835 | 0.019117 |
| 11725650_DCAF5    | 0.302503 | 0.006836 | 0.019118 |
| 11749288_ST5      | -0.16131 | 0.006837 | 0.019121 |
| 11724807_CBL      | -0.14407 | 0.006838 | 0.019121 |
| 11722205_CDC42EP1 | -0.16255 | 0.006839 | 0.019124 |
| 11730773_ZFYVE1   | 0.226899 | 0.006842 | 0.019131 |
| 11723061_RILPL2   | -0.17658 | 0.006843 | 0.019133 |
| 11746466_PRMT2    | -0.17719 | 0.00685  | 0.019152 |
| 11728230_RNF2     | 0.1757   | 0.006854 | 0.019162 |
| 11738984_MAP1LC3B | 0.125499 | 0.006855 | 0.019162 |
| 11753404_HLA-E    | 0.189707 | 0.006857 | 0.019168 |
| 11719071_HSPA13   | -0.17884 | 0.006858 | 0.01917  |
| 11727318_PURG     | -0.33766 | 0.006859 | 0.019172 |
| 11739289_KMT2A    | 0.132989 | 0.006861 | 0.019174 |
| 11755192_TM9SF4   | 0.142084 | 0.006861 | 0.019174 |
| 11740735_TMC7     | 0.179808 | 0.006862 | 0.019176 |
| 11763489_NSD1     | -0.16562 | 0.006869 | 0.019193 |
| 11753929_ST3GAL2  | -0.2141  | 0.006869 | 0.019193 |
| 11726246_HIST1H4C | -0.12476 | 0.006871 | 0.019197 |

|                    |          |          |          |
|--------------------|----------|----------|----------|
| 11741641_ZFX       | 0.312542 | 0.006873 | 0.019202 |
| 11738049_ATP2C2    | -0.19171 | 0.006873 | 0.019202 |
| 11745784_LOC148413 | -0.17979 | 0.006874 | 0.019203 |
| 11741545_FBXO11    | 0.152714 | 0.006876 | 0.019207 |
| 11729906_LRCH2     | -0.28179 | 0.006876 | 0.019207 |
| 11744381_HNRNPU    | -0.18974 | 0.00688  | 0.019216 |
| 11723766_GFER      | 0.133286 | 0.006883 | 0.019224 |
| 11755183_MLLT4     | 0.175336 | 0.006884 | 0.019226 |
| 11717711_MTFP1     | -0.17182 | 0.006885 | 0.019228 |
| 11732788_ZNF436-AS | -0.18287 | 0.006889 | 0.019238 |
| 11749769_B4GALNT1  | -0.14826 | 0.006892 | 0.019243 |
| 11722114_RPS6KC1   | -0.14829 | 0.006896 | 0.019255 |
| 11732126_UBB       | -0.12274 | 0.006904 | 0.019276 |
| 11725145_MIS12     | -0.21463 | 0.006905 | 0.019277 |
| 11726294_CEBPA     | -0.3533  | 0.006906 | 0.019278 |
| 11732080_FSD1L     | 0.309021 | 0.006907 | 0.019281 |
| 11719211_HSF2      | 0.216205 | 0.00691  | 0.019288 |
| 11758152_LRRTM4    | -0.19007 | 0.00691  | 0.019288 |
| 11725006_ARHGEF25  | -0.19115 | 0.006912 | 0.019292 |
| 11743570_EML1      | 0.22684  | 0.006918 | 0.019308 |
| 11737131_FITM2     | 0.257026 | 0.006919 | 0.01931  |
| 11757024_RNASEK // | 0.137681 | 0.006921 | 0.019314 |
| 11745817_CDIP1     | -0.20877 | 0.006927 | 0.019328 |
| 11747158_PPP6R1    | -0.2294  | 0.006934 | 0.019347 |
| 11726527_MFAP3L    | -0.33396 | 0.006941 | 0.019365 |
| 11728921_CTTNBP2   | 0.321639 | 0.006952 | 0.019396 |
| 11733781_RAB18     | 0.177296 | 0.006954 | 0.019401 |
| 11726368_ERICH1    | 0.138167 | 0.006956 | 0.019405 |
| 11761373_PKMYT1    | -0.17947 | 0.006957 | 0.019405 |
| 11740235_RAB27B    | 0.496689 | 0.006958 | 0.019407 |
| 11718984_KLHL21    | -0.13472 | 0.00696  | 0.019411 |
| 11763774_ITM2C     | -0.23716 | 0.006962 | 0.019416 |
| 11743446_SUPT6H    | 0.20492  | 0.006963 | 0.019419 |
| 11760878_HLA-DPB1  | -0.28847 | 0.006964 | 0.01942  |
| 11751363_CCDC86    | 0.152753 | 0.006965 | 0.019421 |
| 11715977_VGLL4     | 0.218529 | 0.006966 | 0.019421 |
| 11750858_PCDHB11   | 0.184874 | 0.006966 | 0.019421 |
| 11739071_EPDR1     | 0.215222 | 0.006967 | 0.019424 |
| 11726967_COL22A1   | -0.19835 | 0.006971 | 0.019433 |
| 11719626_RDH10     | 0.192667 | 0.006973 | 0.019437 |
| 11739034_ACTR2     | -0.14529 | 0.006977 | 0.019447 |
| 11757956_PRTFDC1   | -0.30223 | 0.006979 | 0.019454 |
| 11730213_MRPS7     | 0.145846 | 0.00698  | 0.019454 |
| 11728950_LSMEM2    | -0.20235 | 0.00698  | 0.019454 |
| 11748602_BAG2      | 0.202829 | 0.006982 | 0.019459 |
| 11723719_C12orf45  | 0.157756 | 0.006984 | 0.019462 |
| 11759164_GATSL2    | -0.18968 | 0.006986 | 0.019466 |
| 11734441_FOXI1     | -0.21566 | 0.006988 | 0.019472 |
| 11723679_CD69      | 0.288119 | 0.006992 | 0.01948  |
| 11758941_MOB1A     | -0.13551 | 0.007004 | 0.019513 |
| 11755596_NLRP4     | -0.17219 | 0.007009 | 0.019526 |



|                    |          |          |          |
|--------------------|----------|----------|----------|
| 11721018_FBRSL1    | -0.16061 | 0.00701  | 0.019529 |
| 11734704_LAMA4     | 0.132455 | 0.007011 | 0.019531 |
| 11736268_TRAPPC8   | -0.35746 | 0.007013 | 0.019534 |
| 11730716_PAGE5     | 0.122823 | 0.007015 | 0.019539 |
| 11753531_ZNF428    | -0.24232 | 0.007018 | 0.019547 |
| 11720523_RRP9      | -0.17705 | 0.00702  | 0.019549 |
| 11740078_RGS17     | 0.253281 | 0.007021 | 0.019551 |
| 11716606_STOML2    | -0.15766 | 0.007022 | 0.019553 |
| 11717004_FKBP9 /// | -0.12424 | 0.007026 | 0.019563 |
| 11755918_PTK7      | -0.1514  | 0.007026 | 0.019563 |
| 11724890_POLRMT    | -0.2295  | 0.007027 | 0.019565 |
| 11753721_TRAPPC2 / | 0.135361 | 0.007029 | 0.019568 |
| 11732737_NUP62CL   | -0.29147 | 0.007033 | 0.019579 |
| 11734864_SARNP     | 0.139463 | 0.007035 | 0.019582 |
| 11739033_ACTR2     | -0.15246 | 0.007036 | 0.019584 |
| 11744096_DDX24     | 0.150654 | 0.007039 | 0.019593 |
| 11751268_MYO18A    | -0.28029 | 0.00704  | 0.019594 |
| 11722145_USP37     | 0.282459 | 0.007042 | 0.019599 |
| 11724479_FOSL1     | -0.12185 | 0.007045 | 0.019604 |
| 11735676_OSGIN1    | 0.176266 | 0.007045 | 0.019604 |
| 11749426_PLXNB1    | 0.165517 | 0.007048 | 0.019611 |
| 11746989_NRBP1     | 0.139063 | 0.007052 | 0.01962  |
| 11715858_NCKAP1    | 0.152994 | 0.007054 | 0.019625 |
| 11718224_GSPT1     | 0.132133 | 0.007056 | 0.01963  |
| 11728710_NFATC2IP  | 0.135756 | 0.007062 | 0.019646 |
| 11726706_IL34      | 0.147583 | 0.007063 | 0.019647 |
| 11760071_LOC440313 | -0.18823 | 0.007065 | 0.019652 |
| 11739538_ITPR2     | -0.17573 | 0.007073 | 0.019672 |
| 11717141_COG4      | 0.139426 | 0.007075 | 0.019676 |
| 11752980_ABHD12    | -0.17557 | 0.007075 | 0.019676 |
| 11724609_FUZ       | -0.19694 | 0.007076 | 0.019677 |
| 11745085_SALL1     | -0.15946 | 0.007076 | 0.019677 |
| 11724427_TMPRSS5   | -0.17693 | 0.007078 | 0.019682 |
| 11744036_CMIP      | -0.17086 | 0.007079 | 0.019684 |
| 11756152_PCNP      | -0.13191 | 0.007087 | 0.019705 |
| 11749609_ZNF321P / | -0.24642 | 0.007091 | 0.019714 |
| 11741581_SNAP23    | 0.212784 | 0.007094 | 0.01972  |
| 11722661_NFE2L3    | 0.245608 | 0.007096 | 0.019726 |
| 11731943_AGAP4 /// | 0.143145 | 0.007103 | 0.019745 |
| 11751945_ZNF765    | 0.148285 | 0.007104 | 0.019746 |
| 11730872_RASSF5    | -0.17224 | 0.007104 | 0.019746 |
| 11729292_SPPL2B    | -0.18324 | 0.007109 | 0.019758 |
| 11726862_FOXO4     | -0.22377 | 0.00711  | 0.019758 |
| 11730075_KIAA1024  | 0.326969 | 0.007114 | 0.019769 |
| 11757273_MBP       | -0.15936 | 0.007115 | 0.019771 |
| 11742795_LRP10     | 0.145875 | 0.007122 | 0.019789 |
| 11722117_LZTS1     | -0.28926 | 0.007124 | 0.019793 |
| 11745569_LOC100996 | 0.157394 | 0.007124 | 0.019794 |
| 11721566_KBTBD11   | -0.38141 | 0.007132 | 0.019813 |
| 11747890_CTPS1     | -0.16009 | 0.007133 | 0.019814 |
| 11740236_FFAR3     | -0.2309  | 0.007135 | 0.01982  |

|                    |          |          |          |
|--------------------|----------|----------|----------|
| 11752660_SIRPB1    | -0.16633 | 0.007135 | 0.01982  |
| 11726295_ZNF500    | 0.14954  | 0.007138 | 0.019827 |
| 11749197_NPAT      | 0.160588 | 0.007139 | 0.019828 |
| 11755704_AFAP1     | 0.226543 | 0.007148 | 0.019852 |
| 11747524_GALC      | 0.132944 | 0.00715  | 0.019856 |
| 11738076_ZIC4      | -0.23803 | 0.007152 | 0.019861 |
| 11724522_DNAJC5    | 0.139541 | 0.007158 | 0.019876 |
| 11729579_CDH13     | 0.130768 | 0.007162 | 0.019887 |
| 11727376_HMGCR     | -0.14852 | 0.007167 | 0.019897 |
| 11729481_GUK1      | 0.133562 | 0.007168 | 0.019901 |
| 11740645_NXPE4     | -0.15707 | 0.007169 | 0.019903 |
| 11747492_ACAD8     | 0.129935 | 0.00717  | 0.019903 |
| 11729927_ZNF510    | 0.249766 | 0.007172 | 0.019907 |
| 11753256_SLC12A7   | -0.20119 | 0.007172 | 0.019907 |
| 11719264_SPRYD3    | -0.14785 | 0.007174 | 0.019911 |
| 11764146_MOSPD2    | -0.16697 | 0.007177 | 0.019919 |
| 11726827_STAP1     | -0.26826 | 0.007179 | 0.019922 |
| 11747994_TBC1D1    | 0.178792 | 0.007182 | 0.01993  |
| 11733143_IMPA1     | 0.16126  | 0.007183 | 0.019933 |
| 11730993_NLGN4X    | -0.15837 | 0.007186 | 0.019939 |
| 11726572_SEMA7A    | 0.175539 | 0.007188 | 0.019943 |
| 11737175_WNK1      | -0.17873 | 0.007189 | 0.019945 |
| 11717273_COL5A1    | 0.634565 | 0.007193 | 0.019954 |
| 11734835_TAF9B     | 0.131948 | 0.007195 | 0.019959 |
| 11746726_SUPT6H    | 0.138721 | 0.007197 | 0.019962 |
| 11733426_HIST1H3I  | 0.192013 | 0.007197 | 0.019962 |
| 11758612_MPPED2    | -0.24122 | 0.007197 | 0.019962 |
| 11761321_ANXA8 /// | -0.2068  | 0.007198 | 0.019963 |
| 11734252_TMEM87A   | 0.155583 | 0.007198 | 0.019963 |
| 11729800_MTP       | -0.22358 | 0.007199 | 0.019964 |
| 11758509_ENPEP     | 0.365063 | 0.0072   | 0.019964 |
| 11723400_STK4      | 0.132286 | 0.007206 | 0.019982 |
| 11746754_ZDHHC7    | -0.21159 | 0.007209 | 0.019988 |
| 11746631_CEP41     | -0.16135 | 0.007209 | 0.019988 |
| 11723341_OXR1      | 0.167735 | 0.007212 | 0.019994 |
| 11760297_NTMT1     | 0.134857 | 0.007215 | 0.020001 |
| 11735123_POLR1E    | 0.133236 | 0.007215 | 0.020001 |
| 11753928_ST3GAL2   | -0.29602 | 0.007223 | 0.020022 |
| 11756480_CSDE1     | -0.12057 | 0.007225 | 0.020026 |
| 11757131_SNORD15B  | -0.18765 | 0.007226 | 0.020027 |
| 11737827_ZKSCAN8   | 0.246228 | 0.007231 | 0.020041 |
| 11742676_IRF2BP2   | 0.123817 | 0.007232 | 0.020041 |
| 11720226_TBC1D1    | 0.13711  | 0.007239 | 0.020059 |
| 11749973_TIE1      | -0.13755 | 0.00724  | 0.020062 |
| 11717854_ZSCAN18   | 0.280203 | 0.007241 | 0.020062 |
| 11731681_KATNAL2   | -0.13258 | 0.007249 | 0.020085 |
| 11753771_XRN2      | 0.131766 | 0.00725  | 0.020087 |
| 11743330_PGP       | -0.1343  | 0.007255 | 0.020097 |
| 11755293_GLO1      | -0.15331 | 0.007255 | 0.020097 |
| 11725115_NCOR1     | 0.142834 | 0.007258 | 0.020104 |
| 11752091_THADA     | 0.178768 | 0.007258 | 0.020104 |

|                    |          |          |          |
|--------------------|----------|----------|----------|
| 11764149_DUSP16    | -0.17927 | 0.007265 | 0.020121 |
| 11749294_TPD52L2   | -0.1863  | 0.007269 | 0.020132 |
| 11738971_PYDC2     | -0.15614 | 0.007271 | 0.020135 |
| 11716237_MGAT1     | -0.12512 | 0.007271 | 0.020135 |
| 11727418_ATP5SL    | -0.17273 | 0.007272 | 0.020135 |
| 11756300_ANP32B    | -0.13566 | 0.007273 | 0.020138 |
| 11730113_ZDHC13    | -0.1962  | 0.007274 | 0.020138 |
| 11747845_PRKCZ     | 0.143858 | 0.007275 | 0.02014  |
| 11750574_ATP8B3    | -0.34078 | 0.00728  | 0.020154 |
| 11756211_C11orf73  | 0.141242 | 0.007282 | 0.020158 |
| 11729040_ZNF469    | 0.170727 | 0.007283 | 0.020159 |
| 11725550_PDE4A     | -0.2518  | 0.007284 | 0.020159 |
| 11716717_NINJ1     | 0.151373 | 0.007284 | 0.020159 |
| 11750107_SEL1L3    | -0.18259 | 0.007284 | 0.020159 |
| 11750910_ARHGFEF4  | 0.141525 | 0.007287 | 0.020166 |
| 11734521_SCLT1     | -0.22132 | 0.007288 | 0.020168 |
| 11744654_CD44      | -0.13227 | 0.007291 | 0.020175 |
| 11716085_SF3B1     | 0.127549 | 0.007292 | 0.020176 |
| 11718908_CHST2     | -0.19725 | 0.007294 | 0.02018  |
| 11716814_GATM      | 0.275966 | 0.007296 | 0.020184 |
| 11753113_DDX11 /// | -0.21406 | 0.007297 | 0.020186 |
| 11715874_ATP5H     | -0.12975 | 0.007297 | 0.020186 |
| 11757066_ING5      | 0.235952 | 0.007301 | 0.020196 |
| 11744411_RSL24D1   | -0.12718 | 0.007302 | 0.020198 |
| 11719478_FKBP3     | -0.147   | 0.007307 | 0.02021  |
| 11764081_FAM26E    | -0.19375 | 0.00731  | 0.020218 |
| 11733861_CLASP2    | -0.16406 | 0.007311 | 0.020219 |
| 11734680_ATG4B     | -0.32694 | 0.007312 | 0.020221 |
| 11742327_GHRHR     | -0.16789 | 0.007313 | 0.020223 |
| 11720031_TRIM29    | -0.37143 | 0.007315 | 0.020227 |
| 11744324_SLX4IP    | -0.15555 | 0.007319 | 0.020237 |
| 11717898_MMS19     | -0.18898 | 0.007319 | 0.020237 |
| 11738833_TCL6      | 0.204697 | 0.007327 | 0.020255 |
| 11742185_CALN1     | -0.19768 | 0.007328 | 0.020258 |
| 11763968_SFTPC     | -0.22412 | 0.007336 | 0.02028  |
| 11725687_PRIM2     | -0.16399 | 0.007339 | 0.020285 |
| 11749405_NCKIPSD   | -0.18384 | 0.007339 | 0.020285 |
| 11741494_BTBD1     | 0.164387 | 0.00734  | 0.020286 |
| 11725141_FUBP3     | -0.23976 | 0.007351 | 0.020314 |
| 11753179_FAM134B   | -0.12276 | 0.007351 | 0.020314 |
| 11739037_PLP1      | -0.18918 | 0.007355 | 0.020325 |
| 11728102_ZNF367    | 0.121752 | 0.007356 | 0.020326 |
| 11759543_PRMT2     | 0.151186 | 0.007357 | 0.020328 |
| 11739443_CCDC71L   | 0.217921 | 0.007357 | 0.020328 |
| 11741425_MRO       | 0.179766 | 0.007364 | 0.020344 |
| 11746582_ZNF558    | 0.273741 | 0.007366 | 0.02035  |
| 11758535_GPAM      | -0.20551 | 0.007369 | 0.020357 |
| 11732154_OGT       | -0.19789 | 0.00737  | 0.020358 |
| 11737391_OR2L13    | -0.25418 | 0.007372 | 0.020363 |
| 11723260_ZNF24     | -0.13561 | 0.007373 | 0.020363 |
| 11720658_SH3BP4    | 0.261389 | 0.007373 | 0.020363 |

|                    |          |          |          |
|--------------------|----------|----------|----------|
| 11758230_NFIA      | 0.296327 | 0.007374 | 0.020363 |
| 11754487_NADK2     | 0.15631  | 0.007374 | 0.020364 |
| 11759747_MBD1      | 0.165018 | 0.007376 | 0.020367 |
| 11720865_IFT27     | 0.288464 | 0.007379 | 0.020374 |
| 11733291_TRPM1     | -0.15445 | 0.007379 | 0.020374 |
| 11763844_UBXN6     | 0.145984 | 0.007384 | 0.020386 |
| 11754991_RXRB      | -0.35536 | 0.007387 | 0.020393 |
| 11730435_SRSF12    | -0.1824  | 0.007388 | 0.020393 |
| 11720181_DRG1      | 0.150506 | 0.007388 | 0.020393 |
| 11752607_ST7 /// S | 0.158793 | 0.007388 | 0.020393 |
| 11741520_CD14      | 0.194492 | 0.007392 | 0.020403 |
| 11750845_CSPG5     | -0.25273 | 0.007396 | 0.020413 |
| 11739488_RBM47     | -0.14057 | 0.007399 | 0.020419 |
| 11760325_MSI2      | 0.30567  | 0.007401 | 0.020424 |
| 11748250_NDRG3     | 0.136047 | 0.007407 | 0.02044  |
| 11757817_BASP1     | -0.21727 | 0.007409 | 0.020445 |
| 11761970_ALS2      | 0.459821 | 0.007413 | 0.020453 |
| 11716864_NISCH     | 0.153279 | 0.007413 | 0.020453 |
| 11762747_MMP13     | 0.174343 | 0.007419 | 0.020466 |
| 11737572_HIST1H2AL | -0.31305 | 0.007419 | 0.020466 |
| 11752054_DGKG      | 0.286198 | 0.00742  | 0.020467 |
| 11739689_DCAF11    | -0.23532 | 0.007426 | 0.020484 |
| 11758458_GPX4      | -0.13183 | 0.007427 | 0.020486 |
| 11721984_ZBED6CL   | -0.16077 | 0.00743  | 0.020493 |
| 11751730_SAE1      | -0.13961 | 0.007436 | 0.020507 |
| 11749447_NBR2      | -0.1886  | 0.007437 | 0.020508 |
| 11759809_PLEKHS1   | 0.534477 | 0.00744  | 0.020518 |
| 11716028_SELT      | 0.154559 | 0.007446 | 0.020529 |
| 11726628_SEMA4A    | 0.178345 | 0.007446 | 0.020529 |
| 11717179_EDC4      | 0.140302 | 0.007446 | 0.020529 |
| 11726099_NKAIN1    | -0.1354  | 0.007448 | 0.020534 |
| 11724264_IFT22     | 0.146813 | 0.007451 | 0.020542 |
| 11748913_B4GALT4   | -0.19519 | 0.007457 | 0.020557 |
| 11763382_NUMB      | 0.340662 | 0.007461 | 0.020567 |
| 11726979_SUGP2     | -0.29063 | 0.007461 | 0.020567 |
| 11747605_RPP30     | -0.15201 | 0.007464 | 0.020572 |
| 11727620_LIPH      | 0.445544 | 0.007464 | 0.020572 |
| 11755784_JADE2     | -0.13213 | 0.007469 | 0.020584 |
| 11750739_SLF1      | -0.14977 | 0.007474 | 0.020597 |
| 11756656_RPS6KC1   | -0.13128 | 0.007476 | 0.0206   |
| 11743520_STAG2     | 0.154199 | 0.00748  | 0.02061  |
| 11724944_CLSTN2    | 0.183279 | 0.007481 | 0.020612 |
| 11719230_PCDH1     | 0.129986 | 0.007482 | 0.020612 |
| 11753523_MED16     | -0.14086 | 0.007486 | 0.020624 |
| 11757952_LRP11     | -0.24631 | 0.007488 | 0.020627 |
| 11763696_NIPA2     | -0.1706  | 0.007489 | 0.02063  |
| 11718376_LOC401127 | 0.123639 | 0.007492 | 0.020636 |
| 11758266_PSMD2     | -0.14093 | 0.007492 | 0.020636 |
| 11735891_EDA       | -0.26599 | 0.007496 | 0.020646 |
| 11742553_OR52N1    | -0.17356 | 0.007497 | 0.020647 |
| 11722539_CLDN15    | 0.172025 | 0.007504 | 0.020665 |

|                    |          |          |          |
|--------------------|----------|----------|----------|
| 11741029_CSTF1     | 0.145956 | 0.007505 | 0.020667 |
| 11731287_GRXCR1    | -0.25437 | 0.007506 | 0.020667 |
| 11734335_SIGIRR    | -0.1615  | 0.007507 | 0.02067  |
| 11739883_DOCK7     | 0.237481 | 0.007507 | 0.02067  |
| 11729003_ADRB1     | -0.30683 | 0.007512 | 0.020682 |
| 11757708_GZF1      | 0.290298 | 0.007513 | 0.020682 |
| 11730959_DGKG      | 0.204624 | 0.007518 | 0.020695 |
| 11754514_ACACA     | -0.21495 | 0.007521 | 0.020704 |
| 11754073_TCL1A     | -0.21319 | 0.007523 | 0.020707 |
| 11731614_ETFA      | 0.122973 | 0.007525 | 0.02071  |
| 11753813_RBM15     | 0.128925 | 0.007525 | 0.02071  |
| 11751112_ADAT1     | 0.265242 | 0.007531 | 0.020725 |
| 11719635_NUP153    | 0.159438 | 0.007531 | 0.020725 |
| 11764187_LOC105377 | -0.25072 | 0.00754  | 0.020747 |
| 11743098_TARSL2    | 0.308508 | 0.007542 | 0.020753 |
| 11735857_IFNE      | 0.218171 | 0.007544 | 0.020757 |
| 11751600_DAPP1     | -0.17642 | 0.007545 | 0.020758 |
| 11728008_FUT3      | -0.2383  | 0.007547 | 0.020762 |
| 11751875_MGA       | 0.214449 | 0.007548 | 0.020765 |
| 11727200_ZRANB2    | 0.130693 | 0.00755  | 0.020768 |
| 11742268_CLEC4M    | -0.22377 | 0.007555 | 0.02078  |
| 11757114_SNORA12   | 0.260294 | 0.007555 | 0.020781 |
| 11744702_KCNMA1    | 0.149192 | 0.007557 | 0.020783 |
| 11762910_LOC100506 | 0.268351 | 0.007561 | 0.020793 |
| 11753185_KLF16     | -0.14881 | 0.007561 | 0.020794 |
| 11752767_SPAG9     | 0.135025 | 0.007563 | 0.020798 |
| 11716512_SRRM2     | -0.15274 | 0.007564 | 0.020799 |
| AFFX-HSACACTB      | 0.119719 | 0.007565 | 0.0208   |
| 11740604_15-Sep    | 0.123012 | 0.007566 | 0.020802 |
| 11747963_ARFGAP2   | -0.21084 | 0.007567 | 0.020803 |
| 11722318_EFNB3     | -0.12955 | 0.007569 | 0.020808 |
| 11723380_CEP170B   | -0.14453 | 0.007569 | 0.020808 |
| 11748063_HDAC7     | -0.16578 | 0.007573 | 0.020816 |
| 11749802_ARL8B     | 0.131428 | 0.007575 | 0.020821 |
| 11721271_LRRC59    | -0.1908  | 0.007578 | 0.020829 |
| 11744203_PRPF6     | -0.16291 | 0.00758  | 0.020833 |
| 11762338_GSTP1     | -0.1776  | 0.007581 | 0.020834 |
| 11719936_EDC3      | 0.182983 | 0.007582 | 0.020834 |
| 11742978_CHMP4C    | 0.314269 | 0.007582 | 0.020834 |
| 11759100 EIF5A     | -0.13316 | 0.007584 | 0.020839 |
| 11724684_ARL6IP4   | -0.19413 | 0.007585 | 0.020841 |
| 11763806_KCNN4     | 0.133717 | 0.007586 | 0.020841 |
| 11762211_DLEU2     | -0.22856 | 0.007587 | 0.020843 |
| 11763743_AMT       | -0.18583 | 0.007589 | 0.020847 |
| 11750551_STK4      | 0.13562  | 0.00759  | 0.020849 |
| 11722687_LIFR      | 0.191968 | 0.007597 | 0.020866 |
| 11758745_SYVN1     | 0.140321 | 0.007603 | 0.020884 |
| 11754017_RANBP3    | -0.13778 | 0.007609 | 0.020896 |
| 11758494_RAD51D    | -0.21448 | 0.007609 | 0.020896 |
| 11728031_KERA      | -0.20049 | 0.007613 | 0.020906 |
| 11752829_WAC       | 0.13351  | 0.007622 | 0.020931 |

|                    |          |          |          |
|--------------------|----------|----------|----------|
| 11715234_UCN       | 0.150008 | 0.007627 | 0.020943 |
| 11732104_TM2D1     | -0.1424  | 0.007634 | 0.02096  |
| 11746050_VPS52     | -0.16917 | 0.007635 | 0.020963 |
| 11748648_PTPRR     | 0.361147 | 0.007638 | 0.020968 |
| 11732149_DCAF11    | -0.17271 | 0.007638 | 0.020968 |
| 11725776_ATF7IP2   | 0.229105 | 0.007639 | 0.020968 |
| 11721819_MST1      | -0.16292 | 0.00764  | 0.020971 |
| 11754824_LGALS1    | 0.32131  | 0.007641 | 0.020972 |
| 11751457_MAT2A     | 0.156205 | 0.007646 | 0.020984 |
| 11726413_USP54     | 0.200758 | 0.007648 | 0.020989 |
| 11754936_C14orf119 | 0.126026 | 0.007649 | 0.020992 |
| 11753478_CCDC24    | 0.15959  | 0.007655 | 0.021005 |
| 11716758_DHX30     | 0.141008 | 0.007655 | 0.021006 |
| 11726237_TRIM36    | -0.19091 | 0.007659 | 0.021013 |
| 11717129_SARIA     | -0.14998 | 0.007659 | 0.021013 |
| 11729386_RPL31     | -0.16801 | 0.007661 | 0.021016 |
| 11728314_ZNF148    | -0.18701 | 0.007661 | 0.021016 |
| 11732340_BCL11A    | 0.182479 | 0.007666 | 0.021028 |
| 11732753_FAM205A   | 0.157228 | 0.007669 | 0.021036 |
| 11725673_HINT3     | 0.181218 | 0.007673 | 0.021045 |
| 11726693_ANGPT1    | 0.15472  | 0.007675 | 0.02105  |
| 11744396_CALCOCO2  | -0.1786  | 0.00769  | 0.02109  |
| 11732540_HSD17B13  | -0.13858 | 0.007693 | 0.021098 |
| 11751714_TESK2     | -0.27054 | 0.0077   | 0.021115 |
| 11728451_PCOLCE2   | -0.16626 | 0.007702 | 0.021121 |
| 11747213_CFHR3     | 0.414048 | 0.007707 | 0.021132 |
| 11731487_NFIC      | -0.15163 | 0.007708 | 0.021134 |
| 11720480_BCCIP     | -0.14913 | 0.007723 | 0.021174 |
| 11735996_USP14     | -0.17118 | 0.007725 | 0.021178 |
| 11721781_ITGAE     | 0.141134 | 0.007728 | 0.021184 |
| 11743116_KPNB1     | -0.12988 | 0.007729 | 0.021186 |
| 11719143_INSIG2    | -0.17169 | 0.007736 | 0.021203 |
| 11720460_F11R      | -0.1413  | 0.007738 | 0.021209 |
| 11740047_ANKRD17   | -0.13315 | 0.00774  | 0.021212 |
| 11719260_LMNA      | -0.133   | 0.007741 | 0.021215 |
| 11741780_C10orf91  | -0.21074 | 0.007742 | 0.021216 |
| 11744543_KDELR1    | -0.15591 | 0.007743 | 0.021219 |
| 11715835_PSM3      | -0.12805 | 0.007744 | 0.021219 |
| 11725156_CCDC91    | 0.162345 | 0.007748 | 0.021229 |
| 11725654_GTF2H5    | -0.14603 | 0.007752 | 0.021239 |
| 11730830_AMPD2     | -0.1328  | 0.007759 | 0.021257 |
| 11748921_NSMF      | -0.14476 | 0.007759 | 0.021257 |
| 11763558_FMNL1     | -0.20164 | 0.007767 | 0.021277 |
| 11716530_ELAVL1    | -0.13237 | 0.007768 | 0.021277 |
| 11753777_KCNMB2    | 0.208669 | 0.00777  | 0.021282 |
| 11726925_HCF1R1    | -0.13886 | 0.00777  | 0.021282 |
| 11745277_SSH1      | 0.260388 | 0.007771 | 0.021284 |
| 11721054_KLHL42    | -0.16899 | 0.007773 | 0.021287 |
| 11725573_CST9L     | -0.15962 | 0.007775 | 0.021291 |
| 11719308_RASSF4    | -0.26819 | 0.007776 | 0.021292 |
| 11745145_METTL16   | -0.14724 | 0.00778  | 0.021302 |

|                    |          |          |          |
|--------------------|----------|----------|----------|
| 11744092_ATXN7L3B  | -0.15576 | 0.007781 | 0.021302 |
| 11748296_PPP2R5E   | 0.197299 | 0.007781 | 0.021302 |
| 11756071_ACTB      | 0.122257 | 0.007781 | 0.021303 |
| 11717170_TRPC4AP   | 0.134635 | 0.007785 | 0.02131  |
| 11734830_SUV39H2   | -0.15139 | 0.007791 | 0.021327 |
| 11734959_TRHDE     | -0.15909 | 0.007798 | 0.021344 |
| 11753031_AES       | -0.20303 | 0.007801 | 0.021353 |
| 11762420_FBXO11    | -0.18021 | 0.007803 | 0.021356 |
| 11741031_HAX1      | -0.14432 | 0.007805 | 0.02136  |
| 11715392_MTCH1     | -0.12111 | 0.007805 | 0.02136  |
| 11737012_APLF ///  | 0.250765 | 0.007806 | 0.021361 |
| 11752208_GATA2     | -0.26239 | 0.007814 | 0.021381 |
| 11741167_PCDHB8    | 0.210919 | 0.007818 | 0.02139  |
| 11734980_RALY      | -0.15038 | 0.007818 | 0.02139  |
| 11731810_FCRL4     | -0.17195 | 0.00782  | 0.021395 |
| 11722723_UNC13D    | -0.19468 | 0.007823 | 0.021402 |
| 11759899_ATF7IP    | -0.32946 | 0.007825 | 0.021405 |
| 11745008_KATNB1    | -0.15865 | 0.007831 | 0.02142  |
| 11746179_RHBDF1    | 0.168568 | 0.007833 | 0.021425 |
| 11726175_CACNA1D   | -0.32605 | 0.007835 | 0.02143  |
| 11724224_AMPD2     | -0.13679 | 0.007838 | 0.021436 |
| 11756517_LOC105379 | -0.18083 | 0.007845 | 0.021454 |
| 11757930_PAAF1     | -0.18277 | 0.007845 | 0.021454 |
| 11743356_ZBTB40    | 0.156013 | 0.007849 | 0.021462 |
| 11747009_MTRF1     | -0.26521 | 0.007854 | 0.021476 |
| 11745652_EPCAM     | 0.2958   | 0.007857 | 0.021482 |
| 11751423_OVGP1     | 0.275108 | 0.007857 | 0.021482 |
| 11740759_VPS13D    | -0.18676 | 0.007864 | 0.0215   |
| 11715719_CDC37     | 0.1366   | 0.007866 | 0.021502 |
| 11749450_DNASE2    | -0.19382 | 0.007868 | 0.021506 |
| 11760928_LRCH3     | 0.138391 | 0.007872 | 0.021515 |
| 11748010_CTNNA2    | -0.18879 | 0.007872 | 0.021515 |
| 11727553_PKIB      | 0.131464 | 0.007874 | 0.021519 |
| 11742350_OR52H1    | -0.32506 | 0.007876 | 0.021525 |
| 11744757_TARS      | 0.132979 | 0.007881 | 0.021537 |
| 200008_PMGDI2      | 0.130029 | 0.007881 | 0.021537 |
| 11722208_PTGS1     | -0.18014 | 0.007885 | 0.021546 |
| 11752942_DBP       | -0.14641 | 0.007887 | 0.021548 |
| 11742476_GLRA4     | -0.24441 | 0.007887 | 0.021548 |
| 11724086_FIZ1      | -0.13565 | 0.00789  | 0.021556 |
| 11721944_RABL2A // | 0.173215 | 0.007892 | 0.021561 |
| 11751352_HMG20A    | -0.23056 | 0.0079   | 0.021579 |
| 11746679_SRRM1     | 0.133911 | 0.007902 | 0.021584 |
| 11723541_TMEM80    | -0.16944 | 0.007902 | 0.021584 |
| 11719987_CCDC117   | -0.18544 | 0.007907 | 0.021595 |
| 11716600_CHMP1A    | -0.17388 | 0.00791  | 0.021603 |
| 11755591_MSTO1     | 0.150376 | 0.007919 | 0.021625 |
| 11734109_LSM11     | 0.225001 | 0.007924 | 0.021639 |
| 11718318_CD93      | -0.23103 | 0.007931 | 0.021658 |
| 11735944_TTC21B    | 0.281082 | 0.007935 | 0.021665 |
| 11743565_CABLES2   | -0.16781 | 0.007935 | 0.021665 |

|                    |          |          |          |
|--------------------|----------|----------|----------|
| 11745514_PRPSAP2   | -0.13523 | 0.007936 | 0.021666 |
| 11725554_TMEM133   | 0.274429 | 0.007938 | 0.021671 |
| 11736029_ITGA6     | 0.120063 | 0.007941 | 0.021677 |
| 11749174_PLEKHS1   | -0.13138 | 0.007944 | 0.021684 |
| 11757345_TNNI2     | 0.221141 | 0.007945 | 0.021686 |
| 11734903_C7orf26   | 0.127328 | 0.007954 | 0.021709 |
| 11730323_RPS29     | 0.21094  | 0.007955 | 0.02171  |
| 11719651_SPAG6     | 0.256312 | 0.007955 | 0.02171  |
| 11716796_IFI16     | -0.12628 | 0.007957 | 0.021716 |
| 11757095_HGH1      | -0.177   | 0.007964 | 0.021734 |
| 11757697_FAM96A    | -0.142   | 0.007968 | 0.021743 |
| 11727055_SERPIND1  | 0.191072 | 0.007969 | 0.021745 |
| 11717819_TOB2      | -0.16368 | 0.007976 | 0.021762 |
| 11756640_LRWD1     | 0.223842 | 0.007977 | 0.021762 |
| 11759518_KIAA0754  | 0.224276 | 0.007977 | 0.021762 |
| 11751700_KCNK2     | -0.14757 | 0.00798  | 0.021768 |
| 11725716_KIF21A    | -0.1962  | 0.007984 | 0.021779 |
| 11747455_TAF1A     | 0.166656 | 0.007985 | 0.021781 |
| 11720245_CDPF1     | -0.17141 | 0.007986 | 0.021782 |
| 11739541_PIK3R1    | 0.190065 | 0.007995 | 0.021804 |
| 11730050_CA13      | 0.379515 | 0.007998 | 0.021811 |
| 11737899_TOX2      | -0.16462 | 0.008    | 0.021816 |
| 11758742_RNF40     | 0.155857 | 0.008004 | 0.021825 |
| 11750040_ANXA5     | 0.188835 | 0.008004 | 0.021825 |
| 11761725_PNOC      | -0.30932 | 0.008005 | 0.021825 |
| 11739681_AHR       | 0.180326 | 0.008005 | 0.021825 |
| 11739120_XPO7      | -0.13548 | 0.00801  | 0.021836 |
| 11746742_AS1       | -0.13188 | 0.008011 | 0.021839 |
| 11758650_SNRPC     | -0.12603 | 0.008014 | 0.021845 |
| 11754147_LZTS1     | -0.19278 | 0.008015 | 0.021847 |
| 11730178_SPOP      | 0.162763 | 0.008017 | 0.021851 |
| 11762414_ABCC13    | -0.25387 | 0.008019 | 0.021857 |
| 11715731_CYP19A1   | 0.161321 | 0.008022 | 0.021863 |
| 11738907_OR52L1    | -0.14977 | 0.008023 | 0.021863 |
| 11734337_THSD7B    | 0.148987 | 0.008026 | 0.02187  |
| 11724101_MAP3K6    | -0.30449 | 0.008026 | 0.02187  |
| 11741850_TCTE3     | -0.20712 | 0.008028 | 0.021873 |
| 11741498_ZNF484    | 0.208286 | 0.008032 | 0.021884 |
| 11719534_STX3      | 0.13728  | 0.008033 | 0.021886 |
| 11758364_C19orf52  | -0.14269 | 0.008038 | 0.021896 |
| 11749622_TRIM41    | 0.137191 | 0.008038 | 0.021897 |
| 11724983_PCDH7     | 0.365389 | 0.008042 | 0.021906 |
| 11745780_OXR1      | 0.144343 | 0.008048 | 0.021921 |
| 11753055_RAP1B /// | 0.185577 | 0.008051 | 0.021929 |
| 11734576_AS16-AS1  | -0.13073 | 0.008054 | 0.021934 |
| 11724608_FUZ       | -0.19938 | 0.008057 | 0.021941 |
| 11716446_PRAF2     | 0.15219  | 0.00806  | 0.02195  |
| 11718042_MED17     | -0.18397 | 0.008063 | 0.021954 |
| 11740145_CEP164    | 0.155144 | 0.008064 | 0.021958 |
| 11753603_RAC1      | -0.14181 | 0.008067 | 0.021964 |
| 11723512_CDC14B    | 0.234088 | 0.008068 | 0.021966 |



|                    |          |          |          |
|--------------------|----------|----------|----------|
| 11734162_TFEC      | 0.248738 | 0.008068 | 0.021966 |
| 11742857_TXNDC17   | 0.208795 | 0.008074 | 0.021979 |
| 11720637_CXADR     | 0.278583 | 0.008074 | 0.021979 |
| 11736734_DPY19L3   | 0.433676 | 0.008075 | 0.02198  |
| 11734336_SIGIRR    | -0.15078 | 0.008077 | 0.021984 |
| 11754923_HPS4      | -0.20869 | 0.008078 | 0.021984 |
| 11724634_ABCB10    | -0.14878 | 0.008078 | 0.021985 |
| 11732305_CREB1     | -0.18419 | 0.00808  | 0.02199  |
| 11719911_TNFSF12   | -0.17872 | 0.008084 | 0.021999 |
| 11750986_TNIP1     | 0.176886 | 0.008085 | 0.021999 |
| 11763462_ZNF780A   | 0.229945 | 0.008085 | 0.021999 |
| 11719420_ABCC1     | 0.152771 | 0.008086 | 0.022001 |
| 11726315_METTL22   | 0.204696 | 0.008089 | 0.022008 |
| 11755084_CD55      | 0.155271 | 0.008091 | 0.02201  |
| 11730148_ADGRG5    | -0.26754 | 0.008092 | 0.022014 |
| 11746149_BCHE      | -0.20965 | 0.008094 | 0.022017 |
| 11724485_CSK       | 0.12183  | 0.008103 | 0.022041 |
| 11727066_ANKRD11   | 0.17042  | 0.008108 | 0.022053 |
| 11763227_C6orf48 / | -0.37695 | 0.00811  | 0.022057 |
| 11720551_IFFO1     | 0.137461 | 0.008111 | 0.022058 |
| 11742841_SMARCA1   | -0.15786 | 0.00812  | 0.02208  |
| 11736898_NAIP      | 0.188414 | 0.008121 | 0.022084 |
| 11755636_RIC8A     | 0.12268  | 0.008127 | 0.022097 |
| 11719956_POLR3H    | 0.135929 | 0.008127 | 0.022097 |
| 11730499_MXI1      | -0.41059 | 0.008127 | 0.022097 |
| 11736283_NKX3-1    | 0.169696 | 0.00813  | 0.022102 |
| 11740079_ZNF219    | -0.21248 | 0.008133 | 0.022108 |
| 11728453_DOCK9     | 0.140962 | 0.008135 | 0.022114 |
| 11731610_GPALPP1   | -0.18634 | 0.008137 | 0.022117 |
| 11717972_FAM219B   | 0.213061 | 0.008137 | 0.022117 |
| 11741986_NXPE4     | -0.1987  | 0.008144 | 0.022135 |
| 11759688_PANK2     | 0.1569   | 0.008153 | 0.022157 |
| 11758855_ZNF689    | 0.248385 | 0.008157 | 0.022167 |
| 11729823_DPH7      | 0.146149 | 0.00816  | 0.022173 |
| 11749292_NIPAL2    | 0.359714 | 0.008163 | 0.022182 |
| 11756103_HS3ST5    | 0.186064 | 0.008167 | 0.022191 |
| 11734870_NADK      | -0.1176  | 0.008168 | 0.022193 |
| 11732674_C1orf53   | -0.18308 | 0.008171 | 0.0222   |
| 11718512_TSPAN14   | -0.18259 | 0.00818  | 0.022222 |
| 11756997_LENG8     | 0.138795 | 0.008182 | 0.022227 |
| 11732770_FOXD4 /// | 0.261518 | 0.008183 | 0.022228 |
| 11733213_SLFN5     | 0.206452 | 0.008184 | 0.022228 |
| 11760175_UQCC2     | -0.16808 | 0.008184 | 0.022228 |
| 11756624_RABL2A    | 0.198469 | 0.008184 | 0.022228 |
| 11741805_WNT2B     | -0.1592  | 0.008191 | 0.022246 |
| 11717489_SEPT5 /// | -0.18124 | 0.008195 | 0.022254 |
| 11760861_WBSCR16   | 0.218631 | 0.008207 | 0.022286 |
| 11717206_GOLGA2    | -0.12702 | 0.008209 | 0.022289 |
| 11756051_MTR       | -0.2386  | 0.008214 | 0.022302 |
| 11730379_KRIT1     | 0.128051 | 0.008214 | 0.022302 |
| 11725520_ICA1      | 0.174374 | 0.008215 | 0.022302 |

|                    |          |          |          |
|--------------------|----------|----------|----------|
| 11724647_VANGL1    | 0.172001 | 0.008215 | 0.022302 |
| 11727415_CLN8      | 0.268463 | 0.008217 | 0.022304 |
| 11757105_UBTFL1 // | -0.21162 | 0.008219 | 0.02231  |
| 11734253_ZNF572    | -0.24314 | 0.008221 | 0.022314 |
| 11734594_LIN7B     | 0.194961 | 0.008225 | 0.022322 |
| 11728276_PLA2G12A  | -0.13875 | 0.008226 | 0.022324 |
| 11758317_DENND3    | -0.17099 | 0.008234 | 0.022345 |
| 11763315_KCNAB2    | -0.22545 | 0.008235 | 0.022347 |
| 11722657_SMN1 ///  | 0.133219 | 0.008236 | 0.022348 |
| 11724060_TECPR2    | -0.27608 | 0.008239 | 0.022355 |
| 11747889_SH3YL1    | 0.201189 | 0.008246 | 0.022374 |
| 11730410_PXMP4     | -0.19625 | 0.00825  | 0.022383 |
| 11747482_HNRNPR    | -0.13415 | 0.00825  | 0.022383 |
| 11763996_FBXL17    | 0.190221 | 0.008257 | 0.022399 |
| 11724614_LIMK1     | -0.19066 | 0.008258 | 0.022399 |
| 11763394_LOC105377 | -0.25561 | 0.008258 | 0.022399 |
| 11736152_XPR1      | 0.211147 | 0.008272 | 0.022436 |
| 11756237_FBLN1     | -0.22822 | 0.008277 | 0.022448 |
| 11736396_RFT1      | -0.16448 | 0.008278 | 0.022449 |
| 11763142_LAMTOR5P1 | -0.14372 | 0.008282 | 0.022461 |
| 11747444_NCF1 ///  | -0.21386 | 0.008284 | 0.022464 |
| 11759490_OSER1     | 0.193306 | 0.008288 | 0.022475 |
| 11733631_LRRC10    | -0.23633 | 0.00829  | 0.022478 |
| 11764283_PNISR     | 0.151255 | 0.008294 | 0.022486 |
| 11746505_ICA1      | 0.224397 | 0.008294 | 0.022486 |
| 11739368_DMXL2     | -0.17196 | 0.008295 | 0.022487 |
| 11749331_PNPO      | 0.188757 | 0.008297 | 0.022491 |
| 11763083_LSM12     | 0.172388 | 0.0083   | 0.022498 |
| 11743349_TRAF7     | -0.13465 | 0.008305 | 0.022512 |
| 11746243_E2F6      | 0.163317 | 0.008307 | 0.022516 |
| 11728952_SLC38A10  | 0.165659 | 0.008309 | 0.02252  |
| 11763354_PGAM5     | -0.13972 | 0.00831  | 0.022521 |
| 11748423_PGM1      | -0.15142 | 0.008313 | 0.022528 |
| 11740200_FCMR      | 0.232139 | 0.008314 | 0.022528 |
| 11756223_DDX21     | 0.127343 | 0.008314 | 0.022528 |
| 11726632_TRIM8     | 0.118558 | 0.008316 | 0.022532 |
| 11739501_DSP       | -0.15712 | 0.008317 | 0.022533 |
| 11743686_ZNF436    | 0.19617  | 0.008319 | 0.022538 |
| 11734320_SLC17A4   | -0.17457 | 0.00832  | 0.02254  |
| 11718270_HNRNPUL1  | -0.13297 | 0.008321 | 0.02254  |
| 11726415_ANKRD6    | 0.519463 | 0.008321 | 0.02254  |
| 11752884_UPF3A     | 0.140276 | 0.008322 | 0.02254  |
| 11740866_CDK10     | -0.14568 | 0.008322 | 0.02254  |
| 11743331_KIDINS220 | 0.201992 | 0.008324 | 0.022543 |
| 11745736_ACADVL    | -0.16025 | 0.008325 | 0.022545 |
| 11745852_NUBP2     | -0.13572 | 0.008327 | 0.022548 |
| 11719199_CCND2     | -0.18118 | 0.008329 | 0.022553 |
| 11722510_CRTC3     | 0.14085  | 0.00833  | 0.022554 |
| 11762795_RUSC1-AS1 | -0.14789 | 0.00833  | 0.022554 |
| 11737803_YIPF2     | -0.14356 | 0.008333 | 0.022559 |
| 11716751_GNS       | 0.146407 | 0.008335 | 0.022564 |

|                    |          |          |          |
|--------------------|----------|----------|----------|
| 11743641_TFAP2A    | 0.170388 | 0.008338 | 0.022572 |
| 11763344_FAM204A   | -0.30061 | 0.008343 | 0.022583 |
| 11727820_CISD1     | -0.15454 | 0.008353 | 0.022609 |
| 11743643_DHODH     | -0.17804 | 0.008354 | 0.02261  |
| 11718274	EIF3L     | 0.137681 | 0.00836  | 0.022626 |
| 11715733_NIPSNAP1  | -0.14879 | 0.008362 | 0.022631 |
| 11724568_USP48     | -0.15384 | 0.008365 | 0.022637 |
| 11732307_CREB1     | -0.38202 | 0.008366 | 0.022638 |
| 11748628_ZNF252P   | 0.304602 | 0.008366 | 0.022638 |
| 11725541_GATA4     | -0.26346 | 0.008367 | 0.022639 |
| 11748903_PARVG     | -0.13313 | 0.00837  | 0.022645 |
| 11731953_SLC4A8    | -0.20817 | 0.008371 | 0.022647 |
| 11748665_PICALM    | 0.139937 | 0.008375 | 0.022656 |
| 11746328_MAEA      | 0.150595 | 0.008376 | 0.022658 |
| 11738783_HIST1H3C  | -0.22895 | 0.008386 | 0.022684 |
| 11728671_UBE2H     | 0.18142  | 0.00839  | 0.022692 |
| 11737564_CCDC74B   | 0.160074 | 0.008398 | 0.022714 |
| 11742651_C16orf13  | -0.14121 | 0.0084   | 0.022718 |
| 11742043_CD44      | 0.130963 | 0.008401 | 0.022719 |
| 11729615_HMOX2     | 0.130976 | 0.008408 | 0.022738 |
| 11758110_SIX1      | -0.12897 | 0.00841  | 0.02274  |
| 11726264_STRADB    | 0.229487 | 0.008411 | 0.02274  |
| 11724266_C2orf72   | -0.12277 | 0.008411 | 0.02274  |
| 11734590_NPBWR2    | -0.23358 | 0.008413 | 0.022745 |
| 11718569_WIPF1     | -0.14884 | 0.008413 | 0.022745 |
| 11744589_PCGF2     | -0.17055 | 0.008421 | 0.022765 |
| 11740670_TNRC6B    | 0.156551 | 0.008429 | 0.022785 |
| 11755003_ADCY4     | -0.17381 | 0.008432 | 0.022791 |
| 11719843_ABI3BP    | -0.14396 | 0.008433 | 0.022791 |
| 11740705_NYAP2     | -0.16328 | 0.008433 | 0.022791 |
| 11734666_POLR2B    | -0.13388 | 0.008447 | 0.022827 |
| 11753804_TXN       | -0.12785 | 0.008447 | 0.022827 |
| 11745041_CIDEC     | -0.12915 | 0.00845  | 0.022833 |
| 11729877_ZNF445    | -0.19642 | 0.008458 | 0.022852 |
| 11737384_PCDH7     | 0.334951 | 0.008458 | 0.022852 |
| 11716368_PRR13     | -0.12062 | 0.008459 | 0.022854 |
| 11763963_NKD1      | -0.12683 | 0.00846  | 0.022857 |
| 11737721_COL25A1   | -0.1219  | 0.008466 | 0.022871 |
| 11720399_NCS1      | -0.21627 | 0.008466 | 0.022871 |
| 11745458_EYA3      | 0.245787 | 0.008469 | 0.022877 |
| 11741662	EIF3C /// | -0.13641 | 0.008471 | 0.022881 |
| 11722475_ARID3B    | 0.268203 | 0.008472 | 0.022883 |
| 11744657_FGFR4     | -0.27666 | 0.008473 | 0.022884 |
| 11754179_GOLT1B    | 0.159484 | 0.008474 | 0.022886 |
| 11748558_DBNL      | -0.14178 | 0.00848  | 0.0229   |
| 11751821_CYBB      | -0.26205 | 0.008481 | 0.022901 |
| 11726325_MAGEC2    | 0.125548 | 0.00849  | 0.022925 |
| 11717344_FOSB      | -0.16153 | 0.008496 | 0.022938 |
| 11720671_SNX7      | -0.12861 | 0.008496 | 0.022938 |
| 11726409_GID4      | 0.178657 | 0.0085   | 0.022947 |
| 11717078_ATP8B5P / | 0.15018  | 0.008503 | 0.022953 |

|                    |          |          |          |
|--------------------|----------|----------|----------|
| 11725386_HOMER1    | 0.135539 | 0.008506 | 0.022962 |
| 11720921_ACAA1     | 0.135761 | 0.008507 | 0.022964 |
| 11756425_ANKS1A    | -0.1824  | 0.008509 | 0.022966 |
| 11734070_SSR3      | -0.16015 | 0.008511 | 0.02297  |
| 11755677_ZNF257    | 0.138397 | 0.008511 | 0.02297  |
| 11753906_SMARCA1   | -0.12951 | 0.008518 | 0.022988 |
| 11730791_SVIP      | -0.1433  | 0.008519 | 0.022989 |
| 11756109_MGAT2     | 0.117281 | 0.00852  | 0.022989 |
| 11718996_MSRB2     | 0.277132 | 0.008521 | 0.02299  |
| 11747320_FAM3A     | -0.18217 | 0.008521 | 0.02299  |
| 11750239_VPS13B    | 0.148719 | 0.008523 | 0.022995 |
| 11750579_HDAC4     | -0.13635 | 0.008534 | 0.023023 |
| 11741609_PTPRS     | -0.1929  | 0.008537 | 0.023031 |
| 11724239_TCF4      | -0.15471 | 0.008539 | 0.023033 |
| 11719493_AK6 /// T | 0.133839 | 0.008546 | 0.023053 |
| 11726164_EPHA7     | 0.209588 | 0.008548 | 0.023056 |
| 11735875_PCDHGA4   | -0.23457 | 0.008556 | 0.023075 |
| 11737135_HOXC6     | 0.144379 | 0.00856  | 0.023086 |
| 11731191_KIAA2022  | -0.19884 | 0.008573 | 0.023118 |
| 11758767_SEL1L     | -0.24024 | 0.008576 | 0.023127 |
| 11732326_PBLD      | 0.249442 | 0.008579 | 0.023132 |
| 11755673_WHSC1     | -0.13268 | 0.008585 | 0.023147 |
| 11727160_NFIX      | -0.15336 | 0.008587 | 0.023152 |
| 11726920_HAPLN4    | -0.25173 | 0.008599 | 0.023183 |
| 11725915_POU6F1    | -0.31755 | 0.0086   | 0.023185 |
| 11759106_NKD1      | -0.20681 | 0.008603 | 0.02319  |
| 11737813_NNT       | -0.18514 | 0.008604 | 0.023192 |
| 11738110_PIKFYVE   | 0.290925 | 0.008605 | 0.023193 |
| 11744154_SMG5      | 0.161232 | 0.008607 | 0.023198 |
| 11746266_CHRND     | -0.31874 | 0.008607 | 0.023198 |
| 11718702_ARFIP1    | 0.166523 | 0.008609 | 0.0232   |
| 11717953_DCPS      | -0.20498 | 0.00861  | 0.023201 |
| 11745750_PNPLA8    | 0.126137 | 0.008613 | 0.023209 |
| 11750230_ABHD14A-A | -0.13224 | 0.008615 | 0.023213 |
| 11741438_CLGN      | -0.24446 | 0.008615 | 0.023213 |
| 11741748_DLG1      | -0.16687 | 0.008617 | 0.023215 |
| 11748690_EZH2      | -0.14429 | 0.008617 | 0.023215 |
| 11735413_CRCP      | 0.157543 | 0.008618 | 0.023217 |
| 11733084_PALLD     | 0.198634 | 0.008622 | 0.023226 |
| 11718845_BCL2L2-PA | 0.126974 | 0.008623 | 0.023227 |
| 11736828_ST3GAL1   | 0.146744 | 0.008623 | 0.023227 |
| 11745617_TRIM15    | -0.15682 | 0.008624 | 0.023227 |
| 11718530_PCIF1     | -0.15547 | 0.008624 | 0.023227 |
| 11742504_CLTA      | 0.157217 | 0.008625 | 0.023229 |
| 11733888_FBXO42    | 0.152046 | 0.008635 | 0.023251 |
| 11754964_NDUFA10   | -0.27296 | 0.008635 | 0.023251 |
| 11756460_CEP41     | -0.12191 | 0.008636 | 0.023251 |
| 11739320_ATG12     | 0.152544 | 0.008636 | 0.023251 |
| 11720341_NDUFA13   | -0.21792 | 0.008636 | 0.023251 |
| 11726709_PFAS      | -0.21524 | 0.008637 | 0.023251 |
| 11750375_RAPGEF6   | 0.176378 | 0.00864  | 0.02326  |

|                    |          |          |          |
|--------------------|----------|----------|----------|
| 11719783_RPS23     | -0.11883 | 0.008654 | 0.023296 |
| 11753848_DGCR6 /// | -0.19815 | 0.008658 | 0.023305 |
| 11730709_C9orf57   | 0.228294 | 0.008658 | 0.023305 |
| 11721318_PARM1     | 0.174478 | 0.008665 | 0.023322 |
| 11724622_HPNI      | -0.14382 | 0.008671 | 0.023336 |
| 11753765_CHN2 ///  | -0.21913 | 0.008677 | 0.023352 |
| 11734742_LIMK2     | 0.162256 | 0.008679 | 0.023356 |
| 11737704_ADCK1     | -0.22982 | 0.008684 | 0.023368 |
| 11741759_PAK3      | -0.13692 | 0.008685 | 0.02337  |
| 11761582_LRCH3     | 0.147142 | 0.008687 | 0.023373 |
| 11724471_MGST1     | -0.14287 | 0.008689 | 0.023377 |
| 11720058_ATG16L1   | 0.13947  | 0.008693 | 0.023386 |
| 11752310_SEMA6B    | -0.25403 | 0.008699 | 0.023401 |
| 11760675_CCDC74B   | -0.19858 | 0.008699 | 0.023401 |
| 11743362_ADSS      | -0.12968 | 0.008704 | 0.023412 |
| 11740211_BPTF ///  | 0.1462   | 0.00871  | 0.023426 |
| 11751793_MLXIP     | -0.14695 | 0.008719 | 0.02345  |
| 11721698_UBE3B     | 0.159776 | 0.008724 | 0.023463 |
| 11722654_STK17A    | -0.27691 | 0.008726 | 0.023465 |
| 11743204_NANOS3    | -0.13377 | 0.008726 | 0.023465 |
| 11749078_CEP104    | 0.193189 | 0.008727 | 0.023466 |
| 11750703_PAPPA-AS1 | 0.131902 | 0.008735 | 0.023486 |
| 11763746_CLPX      | 0.174956 | 0.008736 | 0.023487 |
| 11748652_PMS1      | -0.22276 | 0.00874  | 0.023497 |
| 11747089_PTPRS     | -0.13857 | 0.008744 | 0.023505 |
| 11725292_DAO       | -0.3716  | 0.008747 | 0.023512 |
| 11717828_LTBR      | 0.130088 | 0.008748 | 0.023514 |
| 11719340_MYRF      | -0.14122 | 0.008751 | 0.023522 |
| 11735605_NAT16     | -0.13793 | 0.008752 | 0.023522 |
| 11734093_CCER1     | -0.16795 | 0.008755 | 0.023529 |
| 11763764_GPATCH3   | -0.18733 | 0.008757 | 0.023534 |
| 11744614_SLC6A13   | -0.23932 | 0.008762 | 0.023545 |
| 11731274_CLEC4G    | -0.25462 | 0.008767 | 0.023557 |
| 11762867_ABCB4     | 0.118618 | 0.00877  | 0.023564 |
| 11726256_RNF141    | -0.24057 | 0.008772 | 0.023569 |
| 11761559_TRMT13    | 0.149851 | 0.008785 | 0.023602 |
| 11732468_ATP12A    | -0.16772 | 0.008788 | 0.023608 |
| 11718795_PAQR4     | -0.1664  | 0.008788 | 0.023608 |
| 11757084_GLRX3     | 0.139431 | 0.00879  | 0.02361  |
| 11743691_MRPL30    | -0.15529 | 0.00879  | 0.02361  |
| 11754253_COLGALT2  | 0.208383 | 0.008794 | 0.023619 |
| 11741611_DGKG      | 0.273664 | 0.008796 | 0.023624 |
| 11731215_MATN4     | -0.18384 | 0.0088   | 0.023634 |
| 11726760_RCE1      | 0.211916 | 0.008803 | 0.023641 |
| 11746365_EPB41     | 0.276491 | 0.008806 | 0.023646 |
| 11756296_MFF       | -0.13322 | 0.008807 | 0.023648 |
| 11761682_CD5L      | -0.31726 | 0.008808 | 0.02365  |
| 11730132_CACNA1F   | -0.24891 | 0.008809 | 0.023652 |
| 11717499_SLC25A36  | 0.135829 | 0.008812 | 0.023659 |
| 11762298_TMEM234   | -0.15826 | 0.008815 | 0.023665 |
| 11745990_SECISBP2  | 0.164023 | 0.00882  | 0.023676 |

|                    |          |          |          |
|--------------------|----------|----------|----------|
| 11748050_CAPN10    | -0.16564 | 0.008821 | 0.023678 |
| 11746357_PARG      | -0.18781 | 0.008824 | 0.023684 |
| 11719630_BRD2      | 0.116001 | 0.008824 | 0.023684 |
| 11736682_LHX1      | -0.25145 | 0.008825 | 0.023686 |
| 11745215_KBTBD4    | -0.21895 | 0.008827 | 0.023689 |
| 11754589_XPO6      | 0.126193 | 0.008827 | 0.023689 |
| 11731963_ZNF709    | 0.131327 | 0.008828 | 0.023689 |
| 11732842_KCNS2     | -0.2597  | 0.008828 | 0.023689 |
| 11754083_BSG       | -0.13282 | 0.00883  | 0.023692 |
| 11739845_MSR1      | 0.174325 | 0.008833 | 0.023697 |
| 11716624_XPO1      | -0.16383 | 0.008833 | 0.023697 |
| 11717851_ZNF282    | 0.181962 | 0.008836 | 0.023704 |
| 11717783_PHF5A     | -0.15521 | 0.008837 | 0.023706 |
| 11729869_EMILIN1   | -0.20967 | 0.008839 | 0.023711 |
| 11733457_INTS2     | 0.169886 | 0.008841 | 0.023713 |
| 11749751_WIPF1     | 0.180457 | 0.008845 | 0.023721 |
| 11748061_PHF21A    | 0.202693 | 0.008845 | 0.023721 |
| 11763823_TAT       | -0.21456 | 0.008849 | 0.023732 |
| 11752062_SUN2      | -0.21166 | 0.00885  | 0.023733 |
| 11716477_LARP1     | -0.11963 | 0.008852 | 0.023736 |
| 11722916_BMPRIA    | 0.174687 | 0.008853 | 0.023737 |
| 11722307_GLCE      | 0.15635  | 0.008853 | 0.023737 |
| 11747661_DMTN      | -0.13843 | 0.008856 | 0.023743 |
| 11728172_MOB3C     | 0.204287 | 0.008861 | 0.023756 |
| 11735466_FGF17     | 0.156887 | 0.008863 | 0.023759 |
| 11759068_RIF1      | -0.20956 | 0.008868 | 0.023772 |
| 11753134_SGK2      | -0.26017 | 0.00887  | 0.023776 |
| 11719201_PDE6D     | -0.13718 | 0.00888  | 0.023801 |
| 11735368_ZNF549    | 0.255295 | 0.008886 | 0.023816 |
| 11740959_DMD       | 0.281581 | 0.008892 | 0.023828 |
| 11762470_SH3GL3    | -0.22984 | 0.008892 | 0.023828 |
| 11749121_IFNAR2    | 0.229787 | 0.008892 | 0.023828 |
| 11747266_TNNC2     | 0.22902  | 0.008896 | 0.023838 |
| 11715276_AURKAIP1  | -0.17759 | 0.008901 | 0.023851 |
| 11740835_CYP27C1   | -0.24571 | 0.008902 | 0.023851 |
| 11753074_PON3      | -0.36394 | 0.008903 | 0.023852 |
| 11721789_PTPRD     | 0.288235 | 0.008905 | 0.023858 |
| 11732137_AATF      | -0.11915 | 0.008912 | 0.023875 |
| 11737068_CCDC27    | -0.20142 | 0.008921 | 0.023897 |
| 11732474_ALPI      | -0.15543 | 0.008923 | 0.0239   |
| 11727100_NUMBL     | -0.15747 | 0.008923 | 0.0239   |
| 11760743_DYNC1LI2  | -0.39211 | 0.008924 | 0.023901 |
| 11757395_MCM3AP    | 0.170887 | 0.008925 | 0.023902 |
| 11740956_PLEKHN1   | -0.20435 | 0.008928 | 0.023908 |
| 11731421_UBE2G2    | 0.16709  | 0.008931 | 0.023914 |
| 11717564_EMP1      | -0.26887 | 0.008933 | 0.023919 |
| 11761238_LOC100506 | -0.20899 | 0.008934 | 0.023921 |
| 11739296_ICOSLG // | -0.2024  | 0.008938 | 0.02393  |
| 11715848_ATP5G2    | -0.11966 | 0.008938 | 0.02393  |
| 11743346_C11orf24  | -0.11966 | 0.008941 | 0.023936 |
| 11718275_EIF3L     | 0.118088 | 0.008944 | 0.023942 |

|                    |          |          |          |
|--------------------|----------|----------|----------|
| 11743076_PRKRA     | 0.122349 | 0.008945 | 0.023943 |
| 11721236_LHFPL2    | 0.217255 | 0.008946 | 0.023945 |
| 11718578_GSTM3     | 0.136276 | 0.008946 | 0.023945 |
| 11731854_C8G       | -0.18799 | 0.008956 | 0.023968 |
| 11760809_CACYBP    | -0.29214 | 0.008956 | 0.023969 |
| 11734339_POU3F1    | -0.29849 | 0.008957 | 0.023969 |
| 11745171_DIAPH1    | -0.11961 | 0.008957 | 0.023969 |
| 11728163_HSD17B3   | -0.15723 | 0.008958 | 0.02397  |
| 11718825_MVB12B    | -0.14707 | 0.008959 | 0.02397  |
| 11744655_AZIN2     | -0.13242 | 0.008959 | 0.02397  |
| 11725900_LRRC8D    | -0.18106 | 0.00897  | 0.023999 |
| 11721426_FZD5      | 0.205103 | 0.008974 | 0.024008 |
| 11744858_LHPP      | -0.17771 | 0.008976 | 0.024011 |
| 11730053_SNX16     | 0.357322 | 0.008984 | 0.02403  |
| 11734555_NRBP1     | 0.142162 | 0.008986 | 0.024035 |
| 11723107_RBFA      | -0.16324 | 0.008996 | 0.024061 |
| 11720244_PLCG2     | -0.19215 | 0.008996 | 0.024061 |
| 11729449_TINF2     | -0.15664 | 0.009009 | 0.024093 |
| 11735350_FAM71D    | -0.14419 | 0.00901  | 0.024094 |
| 11743685_GPR21 /// | 0.151716 | 0.009016 | 0.024109 |
| 11737695_KCNQ2     | -0.19347 | 0.009019 | 0.024117 |
| 11757576_CSNK2B    | 0.139682 | 0.009025 | 0.024131 |
| 11720240_TMSB15A   | -0.18754 | 0.009027 | 0.024134 |
| 11757237_HTR7P1    | -0.23292 | 0.009029 | 0.024138 |
| 11740824_TPTE2     | 0.218241 | 0.009033 | 0.024148 |
| 11758293_RIC8B     | -0.12383 | 0.009035 | 0.024153 |
| 11749206_TUB       | 0.277959 | 0.009036 | 0.024153 |
| 11758029_SUPT7L    | 0.18192  | 0.009038 | 0.024157 |
| 11757339_NR1H2     | 0.137073 | 0.009039 | 0.024159 |
| 11736866_MMP16     | 0.22039  | 0.009041 | 0.024163 |
| 11750747_SLC9A8    | 0.179909 | 0.009054 | 0.024197 |
| 11754816_GAS8      | 0.155936 | 0.009056 | 0.024201 |
| 11722962_LINS1     | 0.153174 | 0.00906  | 0.024209 |
| 11733544_LOC100996 | -0.21977 | 0.009062 | 0.024215 |
| 11748585_XPO1      | -0.11966 | 0.009063 | 0.024215 |
| 11745161_MED25     | -0.11712 | 0.009065 | 0.024217 |
| 11753643_MED16     | -0.14057 | 0.009065 | 0.024217 |
| 11748587_AFF1      | 0.267613 | 0.009065 | 0.024217 |
| 11749255_ACP2      | -0.1639  | 0.009066 | 0.024217 |
| 11745513_ANO3      | 0.159258 | 0.009071 | 0.024228 |
| 11744554_CROT      | 0.147801 | 0.009072 | 0.024232 |
| 11715183_ZNF391    | 0.237391 | 0.009074 | 0.024234 |
| 11741841_C10orf71  | -0.1793  | 0.009074 | 0.024234 |
| 11728043_PANX2     | -0.20435 | 0.009076 | 0.024237 |
| 11731019_AIF1      | -0.19971 | 0.009078 | 0.024241 |
| 11760308_OSBP10    | -0.14496 | 0.009079 | 0.024244 |
| 11734186_PPIL6     | -0.2781  | 0.009081 | 0.024247 |
| 11718359_PEG10     | -0.19254 | 0.009087 | 0.024262 |
| 11715445_DNAJB1    | 0.128135 | 0.009089 | 0.024266 |
| 11721843_ATL3      | 0.124609 | 0.009096 | 0.024284 |
| 200048_PMJTB       | 0.137589 | 0.009098 | 0.024286 |

|                    |          |          |          |
|--------------------|----------|----------|----------|
| 11758640_FARSB     | -0.16198 | 0.009099 | 0.024286 |
| 11762410_DNAJB14   | 0.191781 | 0.009099 | 0.024286 |
| 11747416_FGFR1     | -0.19019 | 0.009101 | 0.024291 |
| 11739440_KRT4      | -0.19452 | 0.009104 | 0.024297 |
| 11747805_BAG4      | 0.185667 | 0.009111 | 0.024315 |
| 11716420_SPTBN1    | -0.13808 | 0.009112 | 0.024317 |
| 11745896_UPF2      | 0.13081  | 0.00912  | 0.024336 |
| 11715931_SGK1      | -0.14613 | 0.009122 | 0.024339 |
| 11740099_ZNF37A    | 0.223015 | 0.009127 | 0.024352 |
| 11759086_RBM26     | -0.19605 | 0.009133 | 0.024367 |
| 11716387_BAZ1B     | -0.12592 | 0.009134 | 0.024367 |
| 11749605_CYP4F3    | 0.285587 | 0.009137 | 0.024375 |
| 11727743_CAMK2N2   | -0.21501 | 0.009137 | 0.024375 |
| 11723791_APOC3     | -0.22708 | 0.009143 | 0.02439  |
| 11752430_ADAM21 // | -0.1462  | 0.009145 | 0.024393 |
| 11761527_LPCAT3    | -0.23939 | 0.009148 | 0.024399 |
| 11752095_PTPRC     | 0.165556 | 0.009155 | 0.024416 |
| 11736491_ICA1      | 0.225523 | 0.009155 | 0.024416 |
| 11722667_MAPT      | -0.15478 | 0.009158 | 0.024423 |
| 11729033_ITPRIPL2  | 0.137127 | 0.009161 | 0.024429 |
| 11745074_GSTA4     | -0.16337 | 0.009166 | 0.024439 |
| 11749059_RTN4      | -0.14684 | 0.009168 | 0.024445 |
| 11733047_ABI1      | -0.19312 | 0.009178 | 0.024471 |
| 11726736_PDLIM7    | -0.15838 | 0.009179 | 0.024472 |
| 11752396_RAPGEF4   | 0.386099 | 0.009189 | 0.024498 |
| 11749754_EEF1A1    | -0.45669 | 0.009191 | 0.024499 |
| 11742974_USP42     | 0.257132 | 0.009193 | 0.024505 |
| 11746043_TRA2B     | -0.14868 | 0.009197 | 0.024513 |
| 11735520_FGF18     | 0.136491 | 0.009201 | 0.024523 |
| 11737843_SMIM11A / | 0.18391  | 0.009202 | 0.024523 |
| 11745958_CD99      | 0.117515 | 0.009203 | 0.024527 |
| 11757356_RPL30     | 0.119678 | 0.009205 | 0.024529 |
| 11741199_LRRCC1    | -0.35475 | 0.009208 | 0.024535 |
| 11754713_PLXNB1    | 0.116897 | 0.009209 | 0.024538 |
| 11723328_PTRH1     | -0.18976 | 0.00921  | 0.024538 |
| 11757036_SAC3D1    | -0.12971 | 0.009215 | 0.024552 |
| 11730898_WAPL      | 0.163384 | 0.009218 | 0.024557 |
| 11748324_VARS2     | -0.37607 | 0.00922  | 0.024562 |
| 11750241_KNG1      | -0.312   | 0.009221 | 0.024563 |
| 11727640_ZNF335    | 0.197456 | 0.009222 | 0.024564 |
| 11761989_ADGRF5    | -0.23618 | 0.009222 | 0.024564 |
| 11728815_AARS2     | -0.15079 | 0.009226 | 0.024572 |
| 11755221_VPS41     | 0.129191 | 0.009227 | 0.024572 |
| 11716471_GNL2      | -0.13254 | 0.009236 | 0.024595 |
| 11737541_ZACN      | -0.17449 | 0.009238 | 0.024601 |
| 11748792_GFRA3     | -0.25706 | 0.009242 | 0.02461  |
| 11729086_TBX19     | -0.17626 | 0.009247 | 0.024623 |
| 11752967_HSP90B1   | -0.165   | 0.009252 | 0.024634 |
| 11723520_GRTP1     | -0.13965 | 0.009254 | 0.024638 |
| 11745886_USP42     | 0.149532 | 0.009255 | 0.024639 |
| 11745941_PSD3      | 0.285857 | 0.009256 | 0.024641 |



|                    |          |          |          |
|--------------------|----------|----------|----------|
| 11743332_MRPL35    | -0.2817  | 0.009258 | 0.024643 |
| 11725267_FAT4      | 0.325688 | 0.009274 | 0.024686 |
| 11723389_C16orf74  | -0.17889 | 0.009278 | 0.024695 |
| 11742711_THBS2     | -0.27069 | 0.009281 | 0.024699 |
| 11738230_FOXR2     | 0.154085 | 0.009281 | 0.024699 |
| 11756356_FAM81B    | -0.28859 | 0.009282 | 0.024701 |
| 11715662_TMEM189-U | 0.116558 | 0.009283 | 0.024703 |
| 11725548_PDE4A     | -0.19916 | 0.009284 | 0.024705 |
| 11746470_MAP4K4    | 0.154415 | 0.009298 | 0.024739 |
| 11757160_SNORA30   | -0.1645  | 0.009304 | 0.024754 |
| 11755093_CLSTN1    | -0.1151  | 0.009306 | 0.02476  |
| 11746254_TMTC4     | -0.13364 | 0.009313 | 0.024775 |
| 11736432_PPP4R2    | 0.141691 | 0.009315 | 0.024778 |
| 11740206_GPR155    | -0.4355  | 0.009318 | 0.024786 |
| 11722290_ZBTB43    | 0.149774 | 0.009319 | 0.024789 |
| 11748304_ENTPD6    | 0.127613 | 0.009322 | 0.024795 |
| 11761596_HERPUD1   | -0.32228 | 0.009327 | 0.024805 |
| 11717365_SNTA1     | -0.30369 | 0.009327 | 0.024805 |
| 11720695_C1orf54   | -0.13888 | 0.009327 | 0.024805 |
| 11756865_PACRGL    | -0.13229 | 0.009332 | 0.024816 |
| 11762217_LOC100132 | -0.23677 | 0.009338 | 0.024829 |
| 11763324_VAMP4     | 0.191237 | 0.00934  | 0.024834 |
| 11724270_CACNB1    | -0.15435 | 0.009341 | 0.024836 |
| 11755924_RAB11FIP4 | -0.14827 | 0.009348 | 0.024854 |
| 11715619_SDF4      | 0.167256 | 0.009349 | 0.024854 |
| 11722939_PKN3      | -0.26148 | 0.009361 | 0.024883 |
| 11762334_NFATC2IP  | -0.40216 | 0.009364 | 0.024891 |
| 11749746_EZR       | 0.171224 | 0.009367 | 0.024897 |
| 11723270_KPNA6     | -0.13975 | 0.009373 | 0.024911 |
| 11754674_RAB12     | 0.222752 | 0.009373 | 0.024911 |
| 11720426_WDR7      | 0.166917 | 0.009376 | 0.024919 |
| 11735870_TRIM64    | -0.19913 | 0.009385 | 0.02494  |
| 11718523_ANTXR1    | 0.176941 | 0.009389 | 0.024949 |
| 11746984_INTS3     | -0.12061 | 0.009392 | 0.024956 |
| 11743396_CSDE1     | -0.12554 | 0.009394 | 0.024961 |
| 11762989_TRAV38-1  | -0.18365 | 0.009395 | 0.024961 |
| 11726782_KATNBL1   | 0.258597 | 0.009397 | 0.024964 |
| 11718240_CAPRIN1   | 0.16346  | 0.009397 | 0.024964 |
| 11751577_TMED2     | -0.15466 | 0.009408 | 0.024992 |
| 11741024_TBCCD1    | 0.144853 | 0.009409 | 0.024992 |
| 11716566_PRRC2C    | -0.13746 | 0.009411 | 0.024997 |
| 11733653_FTMT      | 0.162715 | 0.009414 | 0.025005 |
| 11722969_TRPV4     | -0.14421 | 0.009415 | 0.025005 |
| 11734839_GTF2F1    | 0.133424 | 0.009417 | 0.025008 |
| 11756676_NBPF22P / | 0.231109 | 0.009417 | 0.025008 |
| 11762806_COMMD5 // | -0.1351  | 0.009419 | 0.025012 |
| 11742340_OR6T1     | -0.21791 | 0.009436 | 0.025055 |
| 11744029_BBS4      | 0.139956 | 0.009442 | 0.02507  |
| 11747171_MXD4      | -0.2331  | 0.009444 | 0.025073 |
| 11753585_HRH3      | -0.14506 | 0.009445 | 0.025075 |
| 11753358_ACVR1     | -0.12656 | 0.009447 | 0.025078 |

|                    |          |          |          |
|--------------------|----------|----------|----------|
| 11720543_B3GALNT2  | -0.11858 | 0.009451 | 0.025087 |
| 11725501_AHNAK     | 0.180096 | 0.009451 | 0.025087 |
| 11758627_ASS1      | -0.23309 | 0.009453 | 0.025089 |
| 11749314_ABI1      | 0.125626 | 0.009453 | 0.025089 |
| 11745221_ATP2C1    | 0.135139 | 0.009454 | 0.02509  |
| 11734148_SLC6A4    | -0.22008 | 0.009454 | 0.02509  |
| 11734759_HYAL2     | -0.14598 | 0.009459 | 0.025101 |
| 11725037_SEC23IP   | 0.123609 | 0.009463 | 0.025111 |
| 11750510_EFNA3     | -0.17321 | 0.009464 | 0.025111 |
| 11742644_SPATA31B1 | -0.2086  | 0.009464 | 0.025112 |
| 11735818_THADA     | 0.123174 | 0.009466 | 0.025114 |
| 11716790_TARS      | 0.127915 | 0.009468 | 0.025116 |
| 11732128_CCT4      | -0.14531 | 0.009468 | 0.025116 |
| 11731910_RIMBP2    | -0.16961 | 0.009469 | 0.025118 |
| 11717782_PHF5A     | -0.13727 | 0.009471 | 0.025121 |
| 11747684_SRSF1     | -0.12339 | 0.009472 | 0.025123 |
| 11731178_FAM189A2  | 0.201537 | 0.009475 | 0.025129 |
| 11734561_WBSCR17   | -0.21962 | 0.009478 | 0.025136 |
| 11719597_EHD3      | 0.146494 | 0.009481 | 0.025143 |
| 11747768_FCRL5     | -0.29294 | 0.009483 | 0.025148 |
| 11763195_ARAF      | 0.183449 | 0.00949  | 0.025164 |
| 11758457_GPX4      | -0.11692 | 0.009492 | 0.025167 |
| 11724137_ST3GAL3   | -0.14744 | 0.009493 | 0.02517  |
| 11744651_NOX1      | -0.18654 | 0.009495 | 0.025175 |
| 11759255_PCDHGB5   | -0.31839 | 0.009497 | 0.025178 |
| 11760480_CIDECP    | -0.17232 | 0.009499 | 0.025179 |
| 11732536_ACRV1     | 0.376788 | 0.009499 | 0.025179 |
| 11718988_RNASE4    | -0.33089 | 0.009505 | 0.025195 |
| 11724178_DAAM2     | -0.2623  | 0.009506 | 0.025195 |
| 11728627_DACH2     | 0.222843 | 0.009507 | 0.025196 |
| 11733638_CHM       | 0.245353 | 0.009508 | 0.025199 |
| 11724912_NDNF      | -0.29739 | 0.009514 | 0.025213 |
| 11753269_DSTYK     | 0.205937 | 0.009515 | 0.025214 |
| 11753586_CXADR /// | 0.351153 | 0.009521 | 0.02523  |
| 11727901_HPS1      | 0.131182 | 0.009526 | 0.02524  |
| 11756694_RNF44     | 0.13954  | 0.009527 | 0.025243 |
| 11726553_TMEM155   | -0.14042 | 0.009532 | 0.025254 |
| 11730381_SNX18     | 0.150306 | 0.009535 | 0.025261 |
| 11730847_BTK       | -0.12468 | 0.009536 | 0.025261 |
| 11732439_SMPDL3B   | -0.17043 | 0.009537 | 0.025263 |
| 11762120_SUCLG2    | 0.528685 | 0.009544 | 0.025281 |
| 11715366_SEPT2     | 0.130542 | 0.009547 | 0.025287 |
| 11757083_CHCHD3    | -0.12215 | 0.009549 | 0.025291 |
| 11715924_TRAM1     | 0.137781 | 0.009557 | 0.02531  |
| 11758821_HLA-DQB1  | -0.12988 | 0.009558 | 0.025312 |
| 11761145_ZNF273    | -0.22156 | 0.009559 | 0.025312 |
| 11716297_CLPTM1    | 0.153869 | 0.009559 | 0.025312 |
| 11754395_BRD4      | 0.126596 | 0.009561 | 0.025316 |
| 11741836_IL17C     | -0.18368 | 0.009571 | 0.025339 |
| 11719247_AIM1      | 0.12735  | 0.009575 | 0.025349 |
| 11748925_LRRC7     | 0.324794 | 0.009575 | 0.025349 |

|                   |          |          |          |
|-------------------|----------|----------|----------|
| 11738000_DMC1     | -0.28992 | 0.009576 | 0.025349 |
| 11750987_TNIP1    | 0.199859 | 0.009578 | 0.025354 |
| 11758433_SLC4A1AP | 0.130353 | 0.009585 | 0.02537  |
| 11731849_COLQ     | 0.13815  | 0.009586 | 0.025372 |
| 11753658_BACE1    | 0.228529 | 0.009591 | 0.025383 |
| 11755373_ECHDC2   | 0.152106 | 0.009592 | 0.025385 |
| 11734765_FGFR1    | -0.17308 | 0.009597 | 0.025398 |
| 11760124_KLF6     | -0.21983 | 0.0096   | 0.025404 |
| 11747947_AKT2     | -0.23982 | 0.009603 | 0.02541  |
| 11737865_IGSF11   | -0.2686  | 0.009605 | 0.025414 |
| 11752961_FAM168A  | 0.238432 | 0.009606 | 0.025416 |
| 11717313_IKKBAP   | 0.150855 | 0.009608 | 0.025419 |
| 11748574_RAB11B   | -0.15429 | 0.009609 | 0.025421 |
| 11719106_ELMO2    | 0.114273 | 0.00961  | 0.025422 |
| 11717133_MAFG     | 0.140648 | 0.009622 | 0.02545  |
| 11740103_MAFG     | 0.140648 | 0.009622 | 0.02545  |
| 11738202_DAXX     | 0.124641 | 0.009623 | 0.025453 |
| 11715573_KDELR2   | -0.15789 | 0.009626 | 0.025459 |
| 11722844_ENAH     | -0.12687 | 0.009628 | 0.025463 |
| 11731367_TSPAN32  | -0.15219 | 0.00963  | 0.025466 |
| 11717071_KTN1     | 0.222398 | 0.009649 | 0.025514 |
| 11739039_CEACAM5  | -0.21963 | 0.009652 | 0.025521 |
| 11735175_NOS1     | -0.17074 | 0.009654 | 0.025526 |
| 11715595_PSMB7    | -0.14829 | 0.009661 | 0.025541 |
| 11758032_DBF4     | -0.17954 | 0.009661 | 0.025541 |
| 11742924_PRDX1    | -0.11458 | 0.009661 | 0.025541 |
| 11737940_RIPK1    | -0.15332 | 0.00967  | 0.025562 |
| 11756445_R3HDM4   | 0.151951 | 0.009679 | 0.025584 |
| 11729723_UGT3A2   | -0.24375 | 0.009683 | 0.025596 |
| 11744298_RCN3     | -0.30796 | 0.009685 | 0.025598 |
| 11725773_TBC1D24  | -0.13836 | 0.009687 | 0.025601 |
| 11751814_NME9     | -0.17102 | 0.009687 | 0.025601 |
| 11757045_C7orf34  | -0.22225 | 0.009694 | 0.025617 |
| 11757850_PA2G4    | -0.11774 | 0.009695 | 0.025619 |
| 11754811_CTNNA1   | 0.121851 | 0.009696 | 0.025619 |
| 11753516_NADK2    | 0.129608 | 0.009696 | 0.02562  |
| 11725519_ICA1     | 0.123147 | 0.009698 | 0.025621 |
| 11759915_C11orf21 | -0.27257 | 0.009698 | 0.025621 |
| 11758693_PSMC2    | 0.128901 | 0.009701 | 0.025629 |
| 11723595_MAP2K7   | -0.14531 | 0.009705 | 0.025636 |
| 11749538_MICB     | -0.17263 | 0.009705 | 0.025636 |
| 11745422_FCRL5    | -0.19783 | 0.009706 | 0.025638 |
| 11730756_TXNDC12  | 0.116129 | 0.009709 | 0.025642 |
| 11739971_NUAK1    | 0.24253  | 0.009719 | 0.025668 |
| 11758723_IDH2     | -0.67845 | 0.00973  | 0.025695 |
| 11733460_PSG6     | -0.11269 | 0.00973  | 0.025695 |
| 11719485_EPS15    | -0.16027 | 0.009732 | 0.025698 |
| 11749835_SH2B1    | -0.17486 | 0.009733 | 0.025701 |
| 11723461_NLE1     | -0.16104 | 0.009737 | 0.025709 |
| 11743574_TMEM184C | 0.126661 | 0.009743 | 0.025724 |
| 11753583_SCAND2P  | 0.266502 | 0.009761 | 0.025771 |

|                    |          |          |          |
|--------------------|----------|----------|----------|
| 11757330_SNRPC     | -0.11942 | 0.009773 | 0.0258   |
| 11750168_GLUD1     | -0.1206  | 0.009774 | 0.025802 |
| 11717085_PRPS1     | 0.149225 | 0.009779 | 0.025813 |
| 11754916_CCDC115   | -0.17002 | 0.00978  | 0.025814 |
| 11720702_PARP16    | -0.14362 | 0.009783 | 0.025821 |
| 11746016_MSTO1 /// | -0.18802 | 0.009784 | 0.025822 |
| 11740750_HACD4     | -0.18156 | 0.009791 | 0.025838 |
| 11761677_TAMM41    | 0.129703 | 0.009791 | 0.025838 |
| 11742643_MBD3L5    | -0.2126  | 0.009792 | 0.025838 |
| 11751847_ORAOV1    | 0.310397 | 0.009793 | 0.025841 |
| 11725423_ZNF521    | -0.28151 | 0.009798 | 0.025853 |
| 11716170_LMNB2     | -0.42533 | 0.009801 | 0.025859 |
| 11720582_TCF12     | 0.137648 | 0.009806 | 0.02587  |
| 11727270_TRIM55    | -0.19016 | 0.009818 | 0.0259   |
| 11746510_PSMC6     | 0.114782 | 0.009821 | 0.025908 |
| 11746949_HNRNPDL   | -0.14659 | 0.009826 | 0.025919 |
| 11746997_PRR3      | -0.15565 | 0.009827 | 0.025919 |
| 11716524_PFDN2     | -0.14238 | 0.009844 | 0.025964 |
| 11733807_KARS      | 0.114173 | 0.009845 | 0.025964 |
| 11733177_ZNF507    | -0.38657 | 0.009845 | 0.025964 |
| 11715737_CASC3     | -0.12583 | 0.009846 | 0.025965 |
| 11757739_RAB3GAP2  | 0.117847 | 0.00985  | 0.025975 |
| 11733529_ULK2      | -0.14775 | 0.009853 | 0.025981 |
| 11756594_UROD      | -0.14086 | 0.009856 | 0.025987 |
| 11741755_SEMA7A    | 0.200933 | 0.009865 | 0.026008 |
| 11725602_DENND5B   | 0.165921 | 0.009866 | 0.026009 |
| 11724841_PKN2      | 0.146779 | 0.009866 | 0.026009 |
| 11736897_PRRG4     | 0.478406 | 0.009867 | 0.026009 |
| 11750395_GLI2      | 0.253611 | 0.00987  | 0.026018 |
| 11732708_MSI2      | 0.34306  | 0.009874 | 0.026025 |
| 11718057_UTP11L    | -0.16908 | 0.009874 | 0.026025 |
| 11759623_C11orf71  | -0.19252 | 0.009875 | 0.026027 |
| 11739406_FPGS      | -0.12317 | 0.009877 | 0.026028 |
| 11739668_SS18L1    | 0.171283 | 0.009877 | 0.026028 |
| 11750907_RAD1      | -0.16533 | 0.009887 | 0.026052 |
| 11745427_RTEL1 /// | -0.2072  | 0.009889 | 0.026056 |
| 11745308_EPB41L4A- | -0.14535 | 0.00989  | 0.026059 |
| 11746112_MPHOSPH8  | 0.183826 | 0.009892 | 0.026062 |
| 11752830_ZNF747 // | -0.22781 | 0.009901 | 0.026085 |
| 11748418_RSPO1     | -0.33411 | 0.009906 | 0.026095 |
| 11742028_ANGPT2    | -0.13048 | 0.00991  | 0.026105 |
| 11721932_KIF23     | -0.17807 | 0.00991  | 0.026105 |
| 11726975_PERP      | -0.1343  | 0.009912 | 0.026109 |
| 11731063_DBF4B     | -0.29115 | 0.009914 | 0.026112 |
| 11731986_XG /// XG | 0.240085 | 0.009917 | 0.026118 |
| 11751904_COL11A1   | 0.440438 | 0.009921 | 0.026124 |
| 11728213_TRMT1L    | 0.173167 | 0.009921 | 0.026124 |
| 11727547_RBBP8     | -0.162   | 0.009921 | 0.026124 |
| 11732500_FAM3B     | -0.26014 | 0.009927 | 0.026136 |
| 11726443_KCTD6     | -0.13975 | 0.009927 | 0.026136 |
| 11731576_CTBS      | 0.136215 | 0.009927 | 0.026136 |

|                    |          |          |          |
|--------------------|----------|----------|----------|
| 11727172_TRPS1     | -0.16606 | 0.009927 | 0.026136 |
| 11753189_MBOAT1    | -0.38333 | 0.009933 | 0.026149 |
| 11743847_CFH       | 0.199131 | 0.009934 | 0.026151 |
| 11755429_KIAA1549  | 0.182542 | 0.009939 | 0.026162 |
| 11758597_AGPAT3    | -0.19187 | 0.00994  | 0.026164 |
| 11734612_KRTAP10-4 | -0.1263  | 0.009941 | 0.026165 |
| 11764157_TDRP      | -0.18203 | 0.009943 | 0.026169 |
| 11716724_DPY19L1   | -0.11726 | 0.009948 | 0.026179 |
| 11746614_7-Mar     | 0.116663 | 0.009949 | 0.026182 |
| 11732082_STOML3    | -0.15706 | 0.009953 | 0.026192 |
| 11762863_HNRNPDL   | -0.18635 | 0.009955 | 0.026194 |
| 11720752_OGDH      | -0.13829 | 0.009959 | 0.026202 |
| 11733513_WLS       | -0.13141 | 0.00997  | 0.026232 |
| 11729876_FAM209A / | 0.271589 | 0.009972 | 0.026235 |
| 11720687_HOOK2     | 0.124678 | 0.009973 | 0.026235 |
| 11761853_LLPH      | 0.158136 | 0.009976 | 0.026243 |
| 11733240_IRAK2     | 0.242835 | 0.009979 | 0.026249 |
| 11763149_GYPB      | -0.26226 | 0.009984 | 0.026261 |
| 11762151_NFATC2    | -0.13672 | 0.009985 | 0.026263 |
| 11726320_ERO1A     | 0.156904 | 0.009992 | 0.026278 |
| 11757206_DLEU2     | -0.15484 | 0.009993 | 0.02628  |
| 11763464_ZCCHC2    | -0.21576 | 0.01     | 0.026298 |
| 11759080_GSR       | -0.14021 | 0.010003 | 0.026305 |
| 11715660_RPN2      | 0.115361 | 0.010004 | 0.026305 |
| 11757508_ATP5SL    | -0.26136 | 0.010009 | 0.026316 |
| 11736847_B4GALNT3  | -0.12831 | 0.010009 | 0.026316 |
| 11728297_RNMT      | 0.150204 | 0.010012 | 0.026322 |
| 11744063_MUC5B     | -0.12807 | 0.010015 | 0.026327 |
| 11743005_BRF2      | 0.188912 | 0.010016 | 0.026329 |
| 11731449_SEC62     | 0.163289 | 0.010019 | 0.026334 |
| 11755787_TCTN1     | 0.117957 | 0.010021 | 0.026339 |
| 11763039_OFCC1     | 0.13161  | 0.010025 | 0.026348 |
| 11745438_TTC3      | 0.134643 | 0.010026 | 0.02635  |
| 11724542_TKTL2     | -0.24669 | 0.010028 | 0.026354 |
| 11725760_BORCS8    | -0.14697 | 0.010032 | 0.026363 |
| 11741653_ABCG4     | -0.31862 | 0.010037 | 0.026374 |
| 11757394_LOC102724 | -0.16094 | 0.010043 | 0.026389 |
| 11737750_SGK1      | -0.13613 | 0.010046 | 0.026394 |
| 11734153_DLX6      | -0.43513 | 0.010046 | 0.026394 |
| 11735302_ADGRA1    | -0.14474 | 0.010048 | 0.026397 |
| 11733304_ZMAT3     | -0.13557 | 0.010056 | 0.026415 |
| 11732105_TMEM208   | -0.13973 | 0.010056 | 0.026415 |
| 11717630_KIF1BP    | -0.13133 | 0.010064 | 0.026436 |
| 11724342_LGALS7 // | -0.18462 | 0.010065 | 0.026436 |
| 11725502_LGALS7 // | -0.18462 | 0.010065 | 0.026436 |
| 11735180_DLX2      | -0.15039 | 0.010074 | 0.026458 |
| 11763875_LOC100506 | -0.20276 | 0.010075 | 0.026459 |
| 11755365_ERC1      | 0.151228 | 0.010084 | 0.02648  |
| 11745200_ATP1A3    | -0.26012 | 0.010084 | 0.02648  |
| 11734242_KIF19     | -0.16739 | 0.010086 | 0.026482 |
| 11716148_TRAF3IP2  | 0.125099 | 0.010087 | 0.026482 |

|                    |          |          |          |
|--------------------|----------|----------|----------|
| 11730964_DAZAP1    | -0.16284 | 0.010087 | 0.026482 |
| 11751395_SLC28A1   | -0.17098 | 0.010087 | 0.026482 |
| 11760957_BCL7C     | -0.18099 | 0.010088 | 0.026482 |
| 11750086_FGFBP2    | -0.16087 | 0.010089 | 0.026485 |
| 11730107_PLCB1     | 0.165713 | 0.010091 | 0.026487 |
| 11756704_ZNF284    | 0.238735 | 0.010092 | 0.026489 |
| 11763173_PGM3      | -0.169   | 0.010093 | 0.02649  |
| 11728727_CEACAM7   | -0.19756 | 0.010094 | 0.026492 |
| 11724751_MRT04     | 0.146905 | 0.0101   | 0.026506 |
| 11760668_STX17     | -0.33156 | 0.010105 | 0.026518 |
| 11725917_RNF19B    | 0.189205 | 0.010107 | 0.026522 |
| 11758994_FAR2      | 0.137482 | 0.010113 | 0.026537 |
| 11749857_KAZN      | 0.27871  | 0.010118 | 0.026548 |
| 11727264_LRRC8E    | -0.18725 | 0.01012  | 0.026551 |
| 11732431_MFAP3L    | -0.21291 | 0.010121 | 0.026551 |
| 11734678_DLGAP4    | 0.174335 | 0.010121 | 0.026552 |
| 11743440_PDIA3     | -0.13516 | 0.010122 | 0.026553 |
| 11727307_ZNF320    | 0.226612 | 0.010124 | 0.026556 |
| 11755397_HDAC9     | 0.309393 | 0.010124 | 0.026556 |
| 11716967_NRP2      | -0.13969 | 0.010126 | 0.026557 |
| 11722526_PTPN21    | 0.217958 | 0.010127 | 0.02656  |
| 11745229_TRMT2B    | -0.22871 | 0.010129 | 0.026561 |
| 11717362_GPC1      | -0.16446 | 0.010129 | 0.026561 |
| 11753867_NDUFA1    | -0.12827 | 0.010129 | 0.026561 |
| 11760225_KIZ       | -0.25647 | 0.010138 | 0.026583 |
| 11717712_SDHAF1    | 0.138799 | 0.010148 | 0.026607 |
| 11742764_BCAS2     | -0.15055 | 0.010155 | 0.026625 |
| 11731941_PRSS33    | -0.23312 | 0.010156 | 0.026625 |
| 11746571_SLC25A47  | -0.1642  | 0.010156 | 0.026625 |
| 11756806_ISG20     | 0.13632  | 0.01016  | 0.026632 |
| 11726775_POU2F1    | 0.156051 | 0.010168 | 0.026653 |
| 11726529_BRCC3     | 0.165135 | 0.010173 | 0.026664 |
| 11753776_LAIR2     | 0.15707  | 0.010175 | 0.026669 |
| 11756671_PGAP2     | -0.15419 | 0.010176 | 0.026669 |
| 11735776_HIST1H4K  | 0.159117 | 0.010178 | 0.026673 |
| 11721012_SMOC1     | -0.15943 | 0.01018  | 0.026676 |
| 11745293_PTPN23    | -0.17978 | 0.010184 | 0.026685 |
| 11734142_METTL8    | 0.152208 | 0.010186 | 0.02669  |
| 11716670_RAB1A /// | -0.14697 | 0.01019  | 0.0267   |
| 11748220_SIRT2     | 0.144468 | 0.010191 | 0.0267   |
| 11761252_SUCO      | 0.132179 | 0.010193 | 0.026703 |
| 11747939_BPHL      | 0.207717 | 0.010193 | 0.026703 |
| 11738227_HRNR      | -0.20577 | 0.010194 | 0.026703 |
| 11749651_RECQL5    | -0.17985 | 0.010195 | 0.026706 |
| 11741348_DLG4      | 0.169942 | 0.010197 | 0.026709 |
| 11720199_DVL2      | -0.15627 | 0.010205 | 0.026729 |
| 11718494_SLC1A2    | -0.18913 | 0.010211 | 0.026742 |
| 11715944_TSG101    | 0.124749 | 0.010219 | 0.02676  |
| 11728309_ARPP21    | -0.14945 | 0.010219 | 0.02676  |
| 11718018_ADARBI    | 0.168451 | 0.010219 | 0.02676  |
| 11762087_EVX1      | -0.13384 | 0.010224 | 0.026771 |

|                    |          |          |          |
|--------------------|----------|----------|----------|
| 11763128_YWHAQP8   | -0.18278 | 0.010226 | 0.026773 |
| 11763129_YWHAQP8   | -0.18278 | 0.010226 | 0.026773 |
| 11733503_TBC1D16   | -0.13477 | 0.010227 | 0.026774 |
| 11723925_KRT13     | -0.16966 | 0.010229 | 0.026777 |
| 11724520_ZNF526    | 0.119386 | 0.01023  | 0.026777 |
| 11728543_MRO       | -0.15934 | 0.01023  | 0.026777 |
| 200078_PMATP6VOB   | 0.126294 | 0.010236 | 0.026791 |
| 11750127_PHF14     | 0.174442 | 0.010238 | 0.026797 |
| 11750647_ASCC3     | 0.279252 | 0.010241 | 0.026802 |
| 11716284_GLO1      | -0.12002 | 0.010245 | 0.02681  |
| 11753524_RPL14     | 0.118894 | 0.010248 | 0.026818 |
| 11739204_TTL       | 0.147724 | 0.010249 | 0.026818 |
| 11747115_EHHADH    | -0.24173 | 0.010249 | 0.026818 |
| 11736073_ALDH1B1   | -0.17166 | 0.010252 | 0.026821 |
| 11749417_CEP128    | -0.19349 | 0.010252 | 0.026821 |
| 11724105_C8orf44-S | -0.1359  | 0.010252 | 0.026821 |
| 11727898_CLMN      | -0.28095 | 0.010254 | 0.026825 |
| 11743134_FKBP8     | -0.13209 | 0.010255 | 0.026825 |
| 11757921_COL14A1   | 0.163636 | 0.010257 | 0.026829 |
| 11723636_C11orf58  | -0.14345 | 0.010258 | 0.026831 |
| 11724869_IP08      | -0.13633 | 0.010261 | 0.026837 |
| 11736324_CD96      | 0.139528 | 0.010264 | 0.026843 |
| 11739770_TMOD2     | -0.24219 | 0.010265 | 0.026844 |
| 11722033_SLC12A4   | 0.266661 | 0.010265 | 0.026844 |
| 11741844_NPAS3     | 0.143825 | 0.010267 | 0.026849 |
| 11738363_ANKUB1    | -0.19102 | 0.010271 | 0.026856 |
| 11757396_ANXA8 /// | -0.1185  | 0.010272 | 0.026856 |
| 11757749_ARNT      | 0.221244 | 0.010272 | 0.026856 |
| 11726331_CEP170    | 0.127848 | 0.010274 | 0.026858 |
| 11736109_ARL8A     | 0.184679 | 0.010274 | 0.026858 |
| 11739089_OSBPL5    | -0.15975 | 0.01028  | 0.026873 |
| 11725274_RGS20     | 0.238215 | 0.010284 | 0.026881 |
| 11722396_RWDD4     | -0.15649 | 0.01029  | 0.026895 |
| 11716911_NR2F6     | -0.14224 | 0.01029  | 0.026895 |
| 11754199_INPPL1    | -0.1817  | 0.010293 | 0.026902 |
| 11762968_MEI1      | -0.18784 | 0.010298 | 0.026912 |
| 11720908_LRRC16A   | 0.187274 | 0.010298 | 0.026912 |
| 11731135_LTB4R     | 0.223297 | 0.010299 | 0.026912 |
| 11762549_MCTP1     | 0.149893 | 0.010305 | 0.026926 |
| 11742112_C1orf141  | -0.1665  | 0.010306 | 0.026927 |
| 11756831_CXXC1     | -0.15834 | 0.010307 | 0.026927 |
| 11750208_DCX       | -0.16826 | 0.010307 | 0.026927 |
| 11741551_GOLGA6A / | -0.20448 | 0.010309 | 0.026932 |
| 11762099_IGHA1     | -0.20686 | 0.010312 | 0.026937 |
| 11744049_MAP1B     | 0.131433 | 0.010318 | 0.026951 |
| 11759938_ITFG2 /// | -0.14599 | 0.010319 | 0.026954 |
| 11756220_ROBO3     | -0.13423 | 0.010326 | 0.026968 |
| 11715420_CCT2      | 0.121123 | 0.010326 | 0.026968 |
| 11723485_GTSF1     | -0.13519 | 0.010326 | 0.026968 |
| 11761860_AUP1      | 0.186663 | 0.010332 | 0.02698  |
| 11727520_INTS6     | -0.156   | 0.010338 | 0.026996 |

|                    |          |          |          |
|--------------------|----------|----------|----------|
| 11722941_MUC2      | -0.18412 | 0.01034  | 0.026999 |
| 11757599_NUTF2     | -0.11863 | 0.010342 | 0.027002 |
| 11720846_CD248     | -0.18921 | 0.010346 | 0.027012 |
| 11757221_RPS2P32   | -0.23302 | 0.010349 | 0.027018 |
| 11760122_RBM14-RBM | 0.267767 | 0.01035  | 0.027019 |
| 11734556_DDX27 /// | 0.138491 | 0.010354 | 0.027027 |
| 11729356_PAPD4     | -0.19803 | 0.010354 | 0.027027 |
| 11725790_DPYD      | 0.1177   | 0.010355 | 0.027028 |
| 11728824_SLC25A3   | 0.119784 | 0.010358 | 0.027032 |
| 11763381_STYXL1    | -0.18821 | 0.010358 | 0.027032 |
| 11744547_MED16     | -0.12414 | 0.010359 | 0.027032 |
| 11745255_FBXO16    | -0.20623 | 0.010359 | 0.027032 |
| 11735435_GPR158    | 0.172199 | 0.010365 | 0.027047 |
| 11758109_ZNF428    | -0.1999  | 0.010367 | 0.027052 |
| 11716181_MED15     | -0.11943 | 0.01037  | 0.027056 |
| 11754384_COG4      | 0.128814 | 0.010372 | 0.027062 |
| 11730434_SRSF12    | -0.21713 | 0.010374 | 0.027065 |
| 11759771_UCHL5     | 0.145461 | 0.010377 | 0.027071 |
| 11750981_SHKBP1    | -0.14997 | 0.010378 | 0.027074 |
| 11746648_IKBB      | -0.14398 | 0.010386 | 0.027092 |
| 11753149_CELF2     | 0.146822 | 0.010395 | 0.027114 |
| 11749069_PAQR4     | -0.16666 | 0.010396 | 0.027114 |
| 11749602_HPNA-S1   | -0.19269 | 0.0104   | 0.027123 |
| 11722744_BORCS8    | -0.32957 | 0.0104   | 0.027123 |
| 11731358_ADAMTS3   | -0.33561 | 0.010407 | 0.027139 |
| 11748828_PIK3R3    | 0.18264  | 0.010409 | 0.027142 |
| 11729211_ORC2      | -0.16187 | 0.010416 | 0.027161 |
| 11738779_EPGN      | 0.152499 | 0.01042  | 0.02717  |
| 11758675_RABL2A // | 0.183772 | 0.010421 | 0.02717  |
| 11742829_PHF3      | -0.12358 | 0.010427 | 0.027184 |
| 11718619_CHRD1     | -0.34972 | 0.010427 | 0.027184 |
| 11744822_NDUFB2    | 0.138571 | 0.010437 | 0.027207 |
| 11722357_ACADM     | 0.142972 | 0.010441 | 0.027216 |
| 11755276_GPX2      | -0.18762 | 0.010443 | 0.027221 |
| 11748910_LOC100129 | 0.138547 | 0.010444 | 0.027222 |
| 11729777_TMTC2     | 0.177225 | 0.010449 | 0.027232 |
| 11754443_GTF2F1    | 0.124841 | 0.010451 | 0.027237 |
| 11719875_MTX1      | -0.15576 | 0.010455 | 0.027245 |
| 11738192_MTFR1     | -0.13175 | 0.010465 | 0.027269 |
| 11746753_CCDC180 / | -0.17508 | 0.010471 | 0.027285 |
| 11754491_C16orf46  | 0.237226 | 0.010478 | 0.027302 |
| 11749983_SERPINB5  | -0.23858 | 0.010485 | 0.027317 |
| 11752510_PSAP      | 0.127212 | 0.010491 | 0.027333 |
| 11760916_MLH1      | -0.20476 | 0.010492 | 0.027333 |
| 11726453_TIGD5     | -0.1258  | 0.010495 | 0.02734  |
| 11727474_TMEN260   | 0.203216 | 0.010497 | 0.027344 |
| 11752977_SYNRG     | 0.173864 | 0.0105   | 0.027349 |
| 11747628_VMP1      | 0.118719 | 0.010507 | 0.027366 |
| 11720345_USP4      | 0.128396 | 0.010516 | 0.027388 |
| 11739214_SLC25A23  | -0.19089 | 0.010518 | 0.027393 |
| 11757486_NIT1      | 0.123419 | 0.010519 | 0.027395 |



|                    |          |          |          |
|--------------------|----------|----------|----------|
| 11716548_FGFR1     | 0.156395 | 0.01052  | 0.027395 |
| 11733949_PAX9      | 0.260334 | 0.010523 | 0.0274   |
| 11733777_DUSP3     | -0.1537  | 0.01053  | 0.027419 |
| 11744034_VASP      | 0.12352  | 0.010531 | 0.02742  |
| 11758753_STARD3    | -0.20224 | 0.010533 | 0.027422 |
| 11718788_ADA       | 0.11736  | 0.010535 | 0.027426 |
| 11750110_MYO18A // | -0.13472 | 0.010536 | 0.027429 |
| 11751965_ESYT3     | -0.30774 | 0.010545 | 0.027448 |
| 11754742_CWF19L1   | -0.24751 | 0.010545 | 0.027448 |
| 11722070_CHPT1     | -0.13007 | 0.010546 | 0.027448 |
| 11727811_SRSF1     | -0.12273 | 0.010547 | 0.027449 |
| 11748503_IFT122 // | 0.134594 | 0.010547 | 0.027449 |
| 11733273_MICB      | -0.13838 | 0.010549 | 0.027453 |
| 11748953_SLC2A2    | -0.11359 | 0.01055  | 0.027455 |
| 11732603_TRIM45    | -0.2638  | 0.010554 | 0.027463 |
| 11725986_NONO      | 0.119111 | 0.010556 | 0.027466 |
| 11732666_PSMB5     | -0.12845 | 0.010559 | 0.027474 |
| 11762944_IL19      | -0.27537 | 0.010567 | 0.027491 |
| 11717894_PTP4A1    | 0.151808 | 0.010572 | 0.027504 |
| 11747239_LZTS2     | -0.12928 | 0.010573 | 0.027506 |
| 11732343_ZNF33A    | -0.17249 | 0.010576 | 0.02751  |
| 11717330_BMS1      | 0.126004 | 0.01058  | 0.027521 |
| 11752274_MYH2      | 0.14954  | 0.010583 | 0.027527 |
| 11742543_OR6Y1     | -0.20858 | 0.010584 | 0.027527 |
| 11761538_TSTA3     | 0.169294 | 0.010584 | 0.027527 |
| 11763211_LINC00654 | -0.23663 | 0.010586 | 0.027531 |
| 11746422_C9orf3    | 0.319737 | 0.010589 | 0.027537 |
| 11740867_BTBD19    | 0.368369 | 0.010595 | 0.027551 |
| 11722540_LCLAT1    | 0.141308 | 0.010596 | 0.027551 |
| 11759096_GNAQ      | 0.159052 | 0.010597 | 0.027552 |
| 11757916_TBX3      | 0.137095 | 0.010597 | 0.027552 |
| 11725727_C1orf56   | -0.15914 | 0.010603 | 0.027565 |
| 11752817_TPP1      | 0.200433 | 0.010603 | 0.027565 |
| 11738033_PCDHGB4   | -0.15768 | 0.010607 | 0.027572 |
| 11734777_PCTP      | -0.2187  | 0.010617 | 0.027597 |
| 11716526_SPON2     | -0.14917 | 0.010619 | 0.0276   |
| 11724527_FAHD1     | 0.174681 | 0.010619 | 0.0276   |
| 11758662_ZNF358    | -0.16096 | 0.01062  | 0.0276   |
| 11722263_MRPS10    | 0.151423 | 0.010627 | 0.027616 |
| 11728004_RALGPS2   | 0.115085 | 0.010635 | 0.027638 |
| 11740935_BANP      | 0.112038 | 0.010637 | 0.02764  |
| 11728742_ARAP3     | 0.152438 | 0.010637 | 0.02764  |
| 11727027_ATG7      | 0.174938 | 0.010648 | 0.027666 |
| 11758957_WWP1      | 0.174212 | 0.010651 | 0.027672 |
| 11718075_IL4R      | 0.217526 | 0.010652 | 0.027674 |
| 11742824_TMEM199   | -0.15308 | 0.010666 | 0.027709 |
| 11733863_TMOD1 /// | 0.156292 | 0.010672 | 0.027722 |
| 11736116_FGFR10P2  | 0.144462 | 0.010673 | 0.027723 |
| 11757187_PLD2      | -0.14097 | 0.010674 | 0.027725 |
| 11746965_ANPEP     | 0.127448 | 0.010678 | 0.027733 |
| 11719560_SOX4      | -0.17939 | 0.010679 | 0.027736 |

|                   |          |          |          |
|-------------------|----------|----------|----------|
| 11723662_SPHK2    | -0.26035 | 0.010684 | 0.027746 |
| 11740209_ZSCAN12  | 0.20679  | 0.010692 | 0.027766 |
| 11734844_MPHOSPH8 | 0.121114 | 0.010693 | 0.027766 |
| 11721646_ARL1     | -0.12182 | 0.010695 | 0.027769 |
| 11747818_ARL1     | -0.12182 | 0.010695 | 0.027769 |
| 11758775_SRPRB    | 0.159405 | 0.010695 | 0.027769 |
| 11759975_XRCC6BP1 | -0.16367 | 0.010701 | 0.027782 |
| 11727332_CATSPER3 | -0.29412 | 0.010702 | 0.027782 |
| 11738302_KRTAP3-1 | 0.16539  | 0.010704 | 0.027786 |
| 11747207_ELAVL1   | -0.11604 | 0.010708 | 0.027795 |
| 11747728_SYP      | 0.175831 | 0.01071  | 0.027799 |
| 11744900_FADS2    | -0.14524 | 0.010716 | 0.027813 |
| 11720070_TIMM23   | 0.112408 | 0.010722 | 0.027827 |
| 11722699_KIAA1109 | 0.280489 | 0.010726 | 0.027836 |
| 11746751_RAPGEF6  | 0.24823  | 0.01073  | 0.027846 |
| 11746857_WDR55    | 0.211321 | 0.010732 | 0.027849 |
| 11744668_SLC4A2   | -0.14452 | 0.010738 | 0.027863 |
| 11749820_CHRNB1   | 0.187688 | 0.01074  | 0.027866 |
| 11715296_KRT33A   | -0.20259 | 0.010745 | 0.027878 |
| 11715398_APEX1    | -0.11632 | 0.010747 | 0.027882 |
| 11732922_GJA3     | 0.256793 | 0.010751 | 0.027891 |
| 11722195_NMT1     | 0.121917 | 0.010757 | 0.027905 |
| 11758758_SPINT1   | -0.15877 | 0.010758 | 0.027907 |
| 11743034_RDH11    | -0.16606 | 0.010759 | 0.027907 |
| 11719462_HNRNPA1  | -0.12408 | 0.01076  | 0.027907 |
| 11726951_FAM131B  | -0.22123 | 0.010766 | 0.027922 |
| 11760558_COL4A1   | 0.162458 | 0.010767 | 0.027924 |
| 11717149_USB1     | -0.16996 | 0.01077  | 0.027929 |
| 11752862_KLF8     | 0.196468 | 0.010775 | 0.027942 |
| 11728200_LOX      | 0.168431 | 0.010777 | 0.027944 |
| 11740021_ACBD7    | -0.13846 | 0.010777 | 0.027944 |
| 11744178_C19orf66 | 0.172118 | 0.01078  | 0.02795  |
| 11723923_IPO13    | 0.181018 | 0.010781 | 0.027952 |
| 11745675_TRPV4    | -0.14169 | 0.010784 | 0.027955 |
| 11727286_ZSCAN31  | 0.234566 | 0.010784 | 0.027955 |
| 11749822_FAM167A  | -0.19299 | 0.010786 | 0.027959 |
| 11728667_PCBP2    | -0.13377 | 0.010787 | 0.027961 |
| 11717063_SMARCD2  | -0.26591 | 0.010788 | 0.027962 |
| 11726374_GPR34    | -0.13007 | 0.01079  | 0.027965 |
| 11753018_HSPD1    | -0.11941 | 0.010792 | 0.027968 |
| 11758931_HEATR5A  | 0.249702 | 0.010794 | 0.027973 |
| 11727108_DROSHA   | -0.148   | 0.010795 | 0.027973 |
| 11717148_C11orf31 | 0.141984 | 0.010806 | 0.028    |
| 11757877_KIF1A    | -0.19758 | 0.010807 | 0.028    |
| 11756366_EWSR1    | -0.13008 | 0.010807 | 0.028    |
| 11754621_EWSAT1   | 0.263127 | 0.010807 | 0.028    |
| 11749329_ARHGAP9  | -0.27384 | 0.010809 | 0.028004 |
| 11746948_HNRNPD1  | -0.1405  | 0.01081  | 0.028004 |
| 11716080_CALCOO1  | -0.15665 | 0.010814 | 0.028012 |
| 11725108_POLR3GL  | -0.14681 | 0.010818 | 0.02802  |
| 11719200_PDE6D    | -0.13785 | 0.010818 | 0.02802  |

|                    |          |          |          |
|--------------------|----------|----------|----------|
| 11751431_C7orf60   | 0.203515 | 0.01082  | 0.028025 |
| 11756310_NXT2      | -0.2284  | 0.010821 | 0.028025 |
| 11724290_ZNF641    | 0.385802 | 0.010822 | 0.028025 |
| 11717930_FOLR1     | 0.261425 | 0.010825 | 0.028032 |
| 11751195_KCNQ5     | 0.224107 | 0.010827 | 0.028037 |
| 11752154_NBEAL2    | -0.12954 | 0.010828 | 0.028038 |
| 11743683_MFSD14A   | -0.184   | 0.010847 | 0.028085 |
| 11749693_ARHGAP17  | 0.131125 | 0.01085  | 0.028091 |
| 11735632_KRT82     | -0.19742 | 0.010856 | 0.028104 |
| 11751255_GUSBP11   | -0.15786 | 0.010859 | 0.028112 |
| 11737649_ANKFY1    | 0.231861 | 0.010865 | 0.028126 |
| 11716322_PRKCDBP   | -0.16664 | 0.010867 | 0.028129 |
| 11756898_PGM5      | 0.258506 | 0.010879 | 0.028159 |
| 11716389_BAZ1B     | -0.11351 | 0.010884 | 0.028171 |
| 11744518_SLC2A10   | -0.26391 | 0.010889 | 0.028181 |
| 11741502_HSD3B7    | -0.15461 | 0.01089  | 0.028183 |
| 11746233_PI4KA /// | -0.12006 | 0.010895 | 0.028193 |
| 11719055_CEP350    | 0.202523 | 0.010899 | 0.028202 |
| 11748988_REEP5     | -0.20032 | 0.010901 | 0.028206 |
| 11749698_STRA6     | 0.141133 | 0.010902 | 0.028207 |
| 11736011_MGAT2     | 0.130985 | 0.010906 | 0.028217 |
| 11762751_WASH1 /// | -0.20345 | 0.010914 | 0.028235 |
| 11754174_SNX12     | 0.175191 | 0.010916 | 0.02824  |
| 11759356_KCNH5     | -0.15884 | 0.010919 | 0.028246 |
| 11724805_LAIR1     | -0.18781 | 0.01092  | 0.028246 |
| 11760431_RASSF8    | -0.19793 | 0.010921 | 0.028248 |
| 11718955_FBLIM1    | 0.282666 | 0.010926 | 0.02826  |
| 11738398_LHX6      | -0.44799 | 0.01093  | 0.028269 |
| 11752319	EIF2AK1   | -0.24937 | 0.010932 | 0.028271 |
| 11733208_ZNF480    | 0.12669  | 0.010932 | 0.028271 |
| 11720446_NSD1      | -0.19645 | 0.010934 | 0.028275 |
| 11753109_CDH11     | -0.19501 | 0.010937 | 0.02828  |
| 11742080_SMARCD2   | -0.15389 | 0.010939 | 0.028283 |
| 11746391_C5orf28   | 0.190368 | 0.01095  | 0.028309 |
| 11720289_CDC42BPA  | 0.11683  | 0.01095  | 0.028309 |
| 11759897_OFD1      | 0.169023 | 0.010955 | 0.02832  |
| 11719216_TDRD7     | 0.160758 | 0.010956 | 0.02832  |
| 11759709_NSUN5P1 / | 0.186258 | 0.010956 | 0.02832  |
| 11717993_CBX7      | -0.20024 | 0.010958 | 0.028323 |
| 11742438_NLRP8     | -0.19962 | 0.010966 | 0.028344 |
| 11763226_CXCL8     | 0.15865  | 0.010967 | 0.028346 |
| 11743286_DTX4      | -0.21278 | 0.010968 | 0.028346 |
| 11751242_FCGR2A // | 0.199228 | 0.010971 | 0.028352 |
| 11718745_ARHGAP21  | -0.3012  | 0.010972 | 0.028353 |
| 11719663_GDI1      | 0.124931 | 0.010975 | 0.028358 |
| 11730890_NSUN6     | -0.17978 | 0.010979 | 0.028367 |
| 11761851_RANBP1    | -0.15072 | 0.010983 | 0.028377 |
| 11721439_TOR1AIP1  | -0.14952 | 0.010984 | 0.028377 |
| 11757901_CXXC5     | -0.15648 | 0.010984 | 0.028377 |
| 11742709_P4HTM     | -0.2035  | 0.010991 | 0.02839  |
| 11722928_AP5Z1     | 0.15642  | 0.010991 | 0.02839  |

|                   |          |          |          |
|-------------------|----------|----------|----------|
| 11726135_CRB3     | -0.14111 | 0.011003 | 0.028421 |
| 11741469_NPC1L1   | -0.13938 | 0.011004 | 0.028422 |
| 11758955_LGALS8   | 0.140173 | 0.011008 | 0.028432 |
| 11748999_PARP11   | 0.171269 | 0.011013 | 0.028441 |
| 11759438_EIF3F    | 0.246559 | 0.011016 | 0.028447 |
| 11728289_TBC1D2   | 0.13428  | 0.011017 | 0.02845  |
| 11718370_NRBF2    | 0.160916 | 0.011028 | 0.028477 |
| 11720822_AS1      | -0.14647 | 0.011037 | 0.028497 |
| 11738180_BTBD9    | 0.203844 | 0.011038 | 0.028498 |
| 11729397_GOSR2    | 0.221686 | 0.011042 | 0.028507 |
| 11739215_SLC25A23 | -0.17771 | 0.011044 | 0.028511 |
| 11725641_EFHD2    | 0.170567 | 0.011046 | 0.028515 |
| 11755289_MORF4L2  | 0.112105 | 0.011047 | 0.028515 |
| 11738043_MPV17L   | -0.23122 | 0.011047 | 0.028515 |
| 11726034_PTPN6    | -0.23857 | 0.011049 | 0.028519 |
| 11746930_BHLHE41  | 0.15775  | 0.01105  | 0.028519 |
| 11751051_DDX24    | 0.117299 | 0.011058 | 0.028538 |
| 11754201_ALDH7A1  | 0.139991 | 0.011058 | 0.028538 |
| 11736515_HTR5A    | -0.14947 | 0.011064 | 0.028551 |
| 11718185_FCHSD2   | -0.23002 | 0.011065 | 0.028551 |
| 11721382_ATG2B    | -0.15549 | 0.011071 | 0.028566 |
| 11750985_EXTL2    | -0.16158 | 0.011078 | 0.028583 |
| 11748062_CCR5     | -0.29141 | 0.011084 | 0.028596 |
| 11721683_MRPS9    | 0.122578 | 0.011085 | 0.028598 |
| 11725106_AZIN1    | 0.115344 | 0.011089 | 0.028607 |
| 11741120_ELK1     | -0.16908 | 0.011093 | 0.028615 |
| 11747353_CUL1     | 0.158698 | 0.011094 | 0.028617 |
| 11743697_TEX30    | -0.14227 | 0.011095 | 0.028618 |
| 11738169_ANKRD30B | 0.260186 | 0.011104 | 0.02864  |
| 11742328_NRII3    | 0.186732 | 0.011107 | 0.028645 |
| 11746795_NADK2    | 0.178666 | 0.011116 | 0.028666 |
| 11716056_STMN3    | 0.188665 | 0.01112  | 0.028677 |
| 11738128_SARDH    | -0.19528 | 0.011122 | 0.028677 |
| 11756558_DXO      | 0.122493 | 0.011122 | 0.028677 |
| 11742885_BAG5     | -0.14747 | 0.011124 | 0.028682 |
| 11730265_CCDC69   | 0.159    | 0.011128 | 0.028689 |
| 11733421_LRRFIP2  | 0.24512  | 0.011131 | 0.028698 |
| 11760396_ZNF333   | -0.25109 | 0.011134 | 0.028704 |
| 11728718_LTBP1    | -0.16163 | 0.011135 | 0.028704 |
| 11753894_CNPPD1   | -0.16345 | 0.011139 | 0.028712 |
| 11756863_DDX3Y    | 0.198498 | 0.011143 | 0.028721 |
| 11733852_EGLN3    | 0.20905  | 0.011144 | 0.028724 |
| 11743824_TOPBP1   | -0.12297 | 0.011146 | 0.028724 |
| 11757628_TSPYL2   | 0.123439 | 0.011146 | 0.028724 |
| 11761287_HDAC1    | 0.172835 | 0.011146 | 0.028724 |
| 11748768_NRIH2    | 0.149805 | 0.011154 | 0.028742 |
| 11750671_MMRN2    | -0.15838 | 0.011157 | 0.02875  |
| 11746894_MPP1     | -0.1242  | 0.011159 | 0.028752 |
| 11756890_ATP5A1   | -0.16185 | 0.011163 | 0.028761 |
| 11716180_VPS25    | 0.119398 | 0.01117  | 0.028776 |
| 11744211_NELFE    | -0.15708 | 0.01117  | 0.028776 |

|                    |          |          |          |
|--------------------|----------|----------|----------|
| 11737073_COPE      | 0.123175 | 0.011173 | 0.028783 |
| 11726965_L3MBTL3   | -0.35832 | 0.011175 | 0.028785 |
| 11752919_ACADM     | 0.134843 | 0.011187 | 0.028814 |
| 11716329_GJA1      | -0.24159 | 0.011188 | 0.028816 |
| 11750904_RBM6      | 0.185382 | 0.01119  | 0.028821 |
| 11746911_CALCOCO2  | -0.12572 | 0.011195 | 0.028831 |
| 11753830_MLLT11    | -0.12723 | 0.011199 | 0.02884  |
| 11728268_FAAP100   | -0.15799 | 0.011204 | 0.028851 |
| 11755975_PKIB      | 0.179777 | 0.011204 | 0.028851 |
| 11757825_C7orf55 / | -0.12392 | 0.011211 | 0.028865 |
| 11752958_MPP1      | -0.14149 | 0.011215 | 0.028876 |
| 11744182_FARS2     | 0.144883 | 0.011218 | 0.028881 |
| 11738460_NUTM2F // | -0.23256 | 0.011221 | 0.028886 |
| 11721400_ELOF1     | -0.12207 | 0.011225 | 0.028896 |
| 11737941_HDHD2     | -0.23646 | 0.011225 | 0.028896 |
| 11757941_THBS2     | -0.26802 | 0.011227 | 0.028899 |
| 11719686_MICAL1    | 0.174904 | 0.011236 | 0.02892  |
| 11749207_SH2D1B    | 0.1773   | 0.011239 | 0.028925 |
| 11762256_AKR1E2    | 0.11027  | 0.011239 | 0.028925 |
| 11749283_MAGEA2 // | -0.12453 | 0.01124  | 0.028926 |
| 11748989_TMEM35    | -0.11686 | 0.011242 | 0.028929 |
| 11751994_JAG1      | 0.255963 | 0.011244 | 0.028934 |
| 11746669_FAM118A   | 0.201594 | 0.011248 | 0.028943 |
| 11753818_MUC1      | -0.22254 | 0.011252 | 0.028949 |
| 11753630_ARL1      | -0.15791 | 0.011252 | 0.028949 |
| 11761432_LOC100506 | -0.16344 | 0.011254 | 0.028952 |
| 11742166_KRTAP7-1  | -0.20698 | 0.01126  | 0.028967 |
| 11741245_OTUD5     | 0.139006 | 0.011263 | 0.028972 |
| 11753746_CHRAC1    | -0.12852 | 0.011266 | 0.028979 |
| 11743015_DIP2C     | 0.194381 | 0.011271 | 0.02899  |
| 11740989_HYAL1     | -0.20687 | 0.011272 | 0.028992 |
| 11758856_ZNF689    | 0.148475 | 0.011273 | 0.028992 |
| 11747799_ENO1      | -0.1159  | 0.011274 | 0.028993 |
| 11732228_PEX10     | -0.12136 | 0.011278 | 0.029001 |
| 11723985_PDCD11    | 0.137442 | 0.011278 | 0.029001 |
| 11757827_TTC9B     | -0.13373 | 0.011281 | 0.029007 |
| 11726349_ANKRD2    | -0.14051 | 0.011288 | 0.029023 |
| 11747914_MAP4      | -0.12425 | 0.01129  | 0.029025 |
| 11721674_GLRX5     | -0.12902 | 0.01129  | 0.029025 |
| 11730971_CYP4F12   | -0.16269 | 0.011306 | 0.029066 |
| 11719526_LZTR1     | -0.14244 | 0.011323 | 0.029106 |
| 11755002_FAAP100   | -0.11662 | 0.011323 | 0.029106 |
| 11759456_TUBB8     | -0.19581 | 0.011326 | 0.029112 |
| 11719848_C7orf25   | 0.140401 | 0.011333 | 0.029128 |
| 11740511_PDE4D     | 0.236593 | 0.011335 | 0.029133 |
| 11722493_HIP1R     | -0.16922 | 0.011339 | 0.02914  |
| 11736243_MRPL52    | 0.11583  | 0.011347 | 0.029161 |
| 11753417_HLA-G     | -0.17141 | 0.011355 | 0.029178 |
| 11742289_GABRR3    | 0.206983 | 0.011357 | 0.029182 |
| 11717198_MRPL14    | 0.13122  | 0.011358 | 0.029184 |
| 11748123_ZNF691    | 0.128918 | 0.01136  | 0.029186 |

|                    |          |          |          |
|--------------------|----------|----------|----------|
| 11719333_DMKN      | 0.242357 | 0.011363 | 0.029193 |
| 11750690_VAC14     | -0.26243 | 0.011364 | 0.029195 |
| 11750075_SP4       | -0.21182 | 0.011367 | 0.029201 |
| 11746139_AKT2      | -0.24374 | 0.01137  | 0.029207 |
| 11724774_GHDC      | -0.14223 | 0.01138  | 0.029231 |
| 11738717_OR4C12    | -0.27194 | 0.011392 | 0.02926  |
| 11757398_LINC00657 | -0.14247 | 0.011395 | 0.029266 |
| 11762473_LOC100131 | -0.18783 | 0.011395 | 0.029266 |
| 11755278_CYP2S1    | -0.25157 | 0.0114   | 0.029274 |
| 11726213_CCL15     | 0.172034 | 0.0114   | 0.029274 |
| 11737605_ZBTB8B    | -0.21678 | 0.011401 | 0.029276 |
| 11742272_TM6SF1    | -0.20032 | 0.011406 | 0.029287 |
| 11720430_ORMDL1    | 0.17466  | 0.011409 | 0.029293 |
| 11731667_PDGFBR    | 0.197157 | 0.011413 | 0.029301 |
| 11726357_KMT2E     | 0.120523 | 0.011425 | 0.02933  |
| 11759602_RSRP1     | 0.372301 | 0.011428 | 0.029338 |
| 11749474_AACS      | 0.125452 | 0.011433 | 0.029348 |
| 11739897_ZNF280C   | 0.319225 | 0.011439 | 0.029362 |
| 11723248_LRRC40    | -0.12685 | 0.01144  | 0.029362 |
| 11723333_FOXA1     | -0.25162 | 0.011444 | 0.029372 |
| 11718608_UBA7      | 0.155771 | 0.01145  | 0.029385 |
| 11745764_SEC31A    | 0.132417 | 0.011451 | 0.029386 |
| 11749371_CDADC1    | 0.192773 | 0.011459 | 0.029405 |
| 11736933_POU2F3    | -0.20375 | 0.011464 | 0.029418 |
| 11718805_PUM2      | 0.154406 | 0.011467 | 0.029423 |
| 11718172_C2CD5     | -0.13597 | 0.011469 | 0.029426 |
| 11754399_RNF121    | -0.26503 | 0.011471 | 0.029428 |
| 11717396_CHTF8     | -0.13381 | 0.011471 | 0.029428 |
| 11759969_STAT5B    | -0.12015 | 0.011471 | 0.029428 |
| 11757282_ATP5G3    | -0.1178  | 0.011476 | 0.029438 |
| 11755337_ENPP2     | 0.218149 | 0.011492 | 0.029479 |
| 11726448_ZNF614    | 0.192113 | 0.011495 | 0.029483 |
| 11760961_EML2      | -0.14007 | 0.011498 | 0.02949  |
| 11720187_SLC27A3   | -0.19486 | 0.011498 | 0.02949  |
| 11723029_MEST      | -0.20113 | 0.0115   | 0.029493 |
| 11749384_COG3      | 0.192272 | 0.011501 | 0.029494 |
| 11758231_HLA-DPA1  | -0.13297 | 0.011503 | 0.029498 |
| 11746141_ARHGEF26  | 0.241042 | 0.011504 | 0.029498 |
| 11751070_TOMM40    | -0.20776 | 0.011505 | 0.029498 |
| 11720855_NFIA      | 0.203036 | 0.011509 | 0.029509 |
| 11716204_ASNA1     | -0.15043 | 0.01151  | 0.029509 |
| 11743443_RHOB      | 0.24134  | 0.011512 | 0.029512 |
| 11723538_KNOP1     | -0.13465 | 0.011512 | 0.029512 |
| 11731776_CCL11     | -0.20248 | 0.011525 | 0.029542 |
| 11734491_SPATA24   | -0.16287 | 0.011525 | 0.029542 |
| 11749462_ZNF845    | 0.221712 | 0.011527 | 0.029545 |
| 11715432_TMBIM1    | -0.19004 | 0.01153  | 0.02955  |
| 11737976_ZSCAN23   | -0.12801 | 0.011534 | 0.029559 |
| 11739009_MYH9      | 0.121896 | 0.011537 | 0.029565 |
| 11757295_KIAA0391  | -0.11666 | 0.011539 | 0.02957  |
| 11749489_IFT140    | -0.17367 | 0.011551 | 0.029599 |

|                    |          |          |          |
|--------------------|----------|----------|----------|
| 11754279_MYEF2     | 0.170458 | 0.011552 | 0.0296   |
| 11729787_SOX13     | -0.14917 | 0.011559 | 0.029616 |
| 11728704_KIAA0232  | -0.22552 | 0.011562 | 0.029621 |
| 11730151_PATE1     | -0.20787 | 0.011569 | 0.029637 |
| 11751654_KIAA1456  | -0.19641 | 0.011579 | 0.029661 |
| 11742818_PLAUR     | 0.155999 | 0.011579 | 0.029661 |
| 11721505_SARS2     | -0.13819 | 0.01158  | 0.029661 |
| 11727593_KIAA2026  | 0.202695 | 0.011583 | 0.029667 |
| 11715641_TTC3      | 0.159102 | 0.011583 | 0.029667 |
| 11763261_PKIA      | 0.228563 | 0.011587 | 0.029674 |
| 11724447_PDE4D     | -0.36241 | 0.011592 | 0.029687 |
| 11726653_ARHGAP32  | -0.22482 | 0.011594 | 0.02969  |
| 11749070_PAQR4     | -0.1824  | 0.011601 | 0.029706 |
| 11738380_FGF23     | -0.19713 | 0.011603 | 0.029711 |
| 11759905_EXD3      | -0.14563 | 0.011606 | 0.029714 |
| 11752631_SASH3     | -0.19671 | 0.011606 | 0.029714 |
| 11754551_ENO1      | -0.13121 | 0.011607 | 0.029715 |
| 11727615_SCN2B     | -0.14145 | 0.011608 | 0.029716 |
| 11753861_PRICKLE4  | -0.12695 | 0.011609 | 0.029716 |
| 11727849_NIP7      | 0.15271  | 0.01161  | 0.029716 |
| 11728428_CCDC136   | 0.129998 | 0.01161  | 0.029716 |
| 11718589_CHMP6     | -0.15409 | 0.011611 | 0.029718 |
| 11761710_HSFY1 /// | -0.19623 | 0.011613 | 0.029721 |
| 11724572_APPBP2    | 0.181003 | 0.011615 | 0.029725 |
| 11743426_AHCYL1    | -0.1275  | 0.011625 | 0.02975  |
| 11720709_KIF1B     | 0.156086 | 0.011631 | 0.029762 |
| 11736077_NEK9      | -0.22166 | 0.011631 | 0.029762 |
| 11756593_UROD      | -0.13887 | 0.011633 | 0.029766 |
| 11756579_PSDM1     | -0.11704 | 0.011637 | 0.029773 |
| 11719027_PSD3      | 0.174544 | 0.011642 | 0.029785 |
| 11740130_CACNA1B   | -0.13694 | 0.011643 | 0.029785 |
| 11726420_HFE2      | -0.3703  | 0.011644 | 0.029788 |
| 11757909_XAB2      | -0.27743 | 0.011648 | 0.029797 |
| 11727203_ZNF230    | 0.168789 | 0.011653 | 0.029807 |
| 11719521_SEMA5A    | 0.240188 | 0.011656 | 0.029812 |
| 11757379_TYK2      | -0.17731 | 0.011669 | 0.029845 |
| 11751968_FAM193A   | 0.11788  | 0.01167  | 0.029846 |
| 11715759_RPL36AL   | 0.122632 | 0.011679 | 0.029867 |
| 11720693_IL17D     | 0.140691 | 0.01168  | 0.029869 |
| 11732987_IFNA6     | -0.17623 | 0.011682 | 0.029872 |
| 11747306_ELP5      | -0.13778 | 0.011686 | 0.029879 |
| 11762927_HSP90AA5P | -0.16231 | 0.011694 | 0.029899 |
| 11722391_MTF1      | -0.31495 | 0.01171  | 0.029937 |
| 11715800_PRRC2B    | -0.20479 | 0.011714 | 0.029945 |
| 11736557_TMEM121   | -0.15343 | 0.011714 | 0.029945 |
| 11735582_ZSCAN2    | -0.16343 | 0.011714 | 0.029945 |
| 11719904_ANKRD40   | 0.141144 | 0.011725 | 0.029971 |
| 11760013_CCDC88C / | -0.27737 | 0.011727 | 0.029975 |
| 11758295_CAPNS1    | 0.112641 | 0.01173  | 0.029981 |
| 11729276_CRCP      | 0.115539 | 0.011735 | 0.029991 |
| 11736341_EGR3      | -0.12375 | 0.01174  | 0.030002 |

|                    |          |          |          |
|--------------------|----------|----------|----------|
| 11747005_EML4      | 0.21269  | 0.011747 | 0.030018 |
| 11748685_NEBL      | -0.14726 | 0.011747 | 0.030018 |
| 11741948_NF1       | 0.2782   | 0.011748 | 0.030019 |
| 11718779_S100A2    | -0.13113 | 0.01175  | 0.030021 |
| 11737281_ZC3HAV1L  | 0.333227 | 0.011755 | 0.030032 |
| 11716207_GLUD1 /// | -0.11663 | 0.011756 | 0.030032 |
| 11753452_PLCD4     | -0.18915 | 0.011756 | 0.030032 |
| 11730002_NRTN      | -0.12445 | 0.01176  | 0.030039 |
| 11756279_FAM118B   | 0.130304 | 0.01176  | 0.030039 |
| 11728059_SERTAD3   | 0.141615 | 0.01176  | 0.030039 |
| 11745353_C2orf54   | -0.13685 | 0.011762 | 0.030041 |
| 11721613_KIT       | -0.13004 | 0.011764 | 0.030044 |
| 11762138_PPHLN1    | 0.293423 | 0.011765 | 0.030047 |
| 11737016_PPP1R12B  | 0.187739 | 0.011766 | 0.030048 |
| 11727491_ZNF350    | 0.205878 | 0.011768 | 0.030049 |
| 11759065_ZNF576    | -0.2224  | 0.011768 | 0.030049 |
| 11753382_ZC4H2     | -0.1276  | 0.01177  | 0.030052 |
| 11746850_STAT6     | -0.17759 | 0.011773 | 0.030057 |
| 11729812_ZADH2     | -0.29733 | 0.011777 | 0.030067 |
| 11742345_OR2T11    | -0.15089 | 0.011779 | 0.030069 |
| 11755157_KLHL8     | 0.188268 | 0.011779 | 0.030069 |
| 11762503_ADGRG6    | 0.10814  | 0.011787 | 0.030085 |
| 11732430_PDE7A     | -0.43442 | 0.011787 | 0.030085 |
| 11716096_SGTA      | -0.14517 | 0.011787 | 0.030085 |
| 11761644_PIGP      | -0.13791 | 0.011789 | 0.030088 |
| 11747168_CIB2      | -0.44878 | 0.01179  | 0.03009  |
| 11743669_ZNF292    | 0.180872 | 0.011795 | 0.0301   |
| 11749725_NR4A1     | -0.14247 | 0.011807 | 0.030131 |
| 11752452_NDST4     | -0.16382 | 0.011812 | 0.03014  |
| 11764054_FMR1      | 0.131716 | 0.011813 | 0.030142 |
| 11748244_ZNF300    | 0.140898 | 0.011815 | 0.030145 |
| 11723513_CDC14B    | 0.122277 | 0.011816 | 0.030147 |
| 11745220_ARHGAP12  | 0.120889 | 0.011824 | 0.030166 |
| 11735479_CCDC125   | -0.2275  | 0.011835 | 0.030192 |
| 11745914_GOLGA8A   | 0.189614 | 0.011836 | 0.030192 |
| 11758626_UBA2      | -0.26123 | 0.01184  | 0.0302   |
| 11719702_FARP1     | -0.13012 | 0.011842 | 0.030204 |
| 11759693_RTKN2     | -0.35282 | 0.011853 | 0.03023  |
| 11734641_IRGM      | 0.180446 | 0.011853 | 0.03023  |
| 11735760_POPDC2    | 0.210791 | 0.011865 | 0.030259 |
| 11756085_MAGEC1    | -0.19306 | 0.011868 | 0.030265 |
| 11730485_CAPNS2    | 0.163625 | 0.011872 | 0.030274 |
| 11753104_PARPBP    | -0.18452 | 0.011873 | 0.030275 |
| 11722994_ADH1A /// | -0.21931 | 0.011875 | 0.030277 |
| 11729083_GIPC3     | -0.204   | 0.011881 | 0.030291 |
| 11737048_RIBC1     | -0.18684 | 0.011882 | 0.030292 |
| 11756035_PFKFB3    | -0.17247 | 0.011885 | 0.030299 |
| 11717276_MAPK14    | 0.130535 | 0.011889 | 0.030306 |
| 11748282_PPP3CB    | -0.16688 | 0.011889 | 0.030306 |
| 11734843_MPHOSPH8  | 0.227322 | 0.011891 | 0.030308 |
| 11729395_HECTD2    | 0.268669 | 0.011891 | 0.030308 |



|                    |          |          |          |
|--------------------|----------|----------|----------|
| 11736822_TP73      | -0.16076 | 0.011894 | 0.030314 |
| 11755689_NCLN      | 0.135036 | 0.011908 | 0.030347 |
| 11735397_CNGB1     | -0.24092 | 0.011908 | 0.030347 |
| 11745047_SLC27A4   | 0.121097 | 0.01191  | 0.030349 |
| 11721942_ZFAT      | 0.19943  | 0.011916 | 0.030363 |
| 11760920_PHKG2     | 0.181518 | 0.011917 | 0.030363 |
| 11751666_TUFT1     | 0.294974 | 0.011922 | 0.030376 |
| 11740983_MB        | -0.15933 | 0.011924 | 0.030379 |
| 11757201_MESTIT1   | -0.18651 | 0.011938 | 0.030411 |
| 11717797_ZER1      | 0.15729  | 0.011938 | 0.030411 |
| 11716423_SPTBN1    | -0.16779 | 0.011942 | 0.03042  |
| 11758822_KIF2A     | 0.184881 | 0.01195  | 0.030437 |
| 11754585_WDR82     | 0.156163 | 0.01195  | 0.030437 |
| 11732625_RIMS1     | 0.262803 | 0.011953 | 0.030443 |
| 11746790_BECN1     | 0.12046  | 0.011958 | 0.030455 |
| 11763990_ALKBH7    | -0.15966 | 0.011959 | 0.030456 |
| 11717607_VMA21     | -0.25994 | 0.011962 | 0.030462 |
| 11727618_EFNA3     | -0.17679 | 0.011965 | 0.030467 |
| 11746485_FAR2P2 // | 0.1448   | 0.011977 | 0.030497 |
| 11759595_ERVK-6    | 0.259162 | 0.011984 | 0.030511 |
| 11754782_KIAA1614  | -0.26723 | 0.011984 | 0.030511 |
| 11736698_NEBL      | -0.22016 | 0.011985 | 0.030511 |
| 11739956_SLC25A15  | 0.127874 | 0.012005 | 0.030561 |
| 11725756_LRRC47    | -0.12547 | 0.012009 | 0.03057  |
| 11740874_FES       | -0.1411  | 0.012012 | 0.030577 |
| 11758534_SLC25A17  | -0.15345 | 0.012017 | 0.030588 |
| 11728604_RSPH14    | -0.32266 | 0.012026 | 0.030608 |
| 11731291_PIAS2     | 0.191631 | 0.012028 | 0.030613 |
| 11719371_GYS1      | -0.12856 | 0.01203  | 0.030615 |
| 11758384_CYP2U1    | -0.13192 | 0.012033 | 0.030623 |
| 11726783_CEP112    | 0.228651 | 0.012036 | 0.030629 |
| 11750386_CTNNA1    | 0.134131 | 0.012042 | 0.030642 |
| 11736776_CBLN1     | -0.16414 | 0.012047 | 0.030651 |
| 11756332_MFSD10    | 0.132506 | 0.01205  | 0.030658 |
| 11725704_AMOTL1    | -0.13084 | 0.012055 | 0.030667 |
| 11762008_ATP10B    | -0.19763 | 0.012055 | 0.030667 |
| 11734385_PROCA1    | -0.24204 | 0.012055 | 0.030667 |
| 11752864_FER       | 0.190422 | 0.012059 | 0.030673 |
| 11749851_HSDL1     | 0.238337 | 0.012059 | 0.030673 |
| 11745195_UNC45A    | -0.15277 | 0.012065 | 0.030686 |
| 11760236_CBR1      | -0.12659 | 0.012065 | 0.030686 |
| 11725927_CLIC4     | -0.11376 | 0.012067 | 0.03069  |
| 11738652_KRTAP24-1 | 0.234184 | 0.012069 | 0.030694 |
| 11742026_CCDC113   | 0.160903 | 0.012072 | 0.030698 |
| 11742111_DRC3      | -0.14695 | 0.012074 | 0.030701 |
| 11752507_LMNA      | -0.1173  | 0.012076 | 0.030706 |
| 11742986_PARK7     | 0.112831 | 0.012078 | 0.030709 |
| 11757228_ABHD11-AS | -0.1451  | 0.012088 | 0.030733 |
| 11739684_PHF2      | -0.12933 | 0.012099 | 0.030759 |
| 11739155_FAM129A   | -0.11464 | 0.012116 | 0.030801 |
| 11733055_SCAMP1    | -0.14658 | 0.012117 | 0.030801 |

|                    |          |          |          |
|--------------------|----------|----------|----------|
| 11760068_YME1L1    | -0.13707 | 0.012119 | 0.030805 |
| 11751743_HRH3      | -0.19071 | 0.012119 | 0.030805 |
| 11747555_ENO3      | 0.212174 | 0.012121 | 0.030808 |
| 11722021_CDK16     | -0.1486  | 0.012127 | 0.030821 |
| 11764147_ZNF546    | 0.189831 | 0.012129 | 0.030824 |
| 11739363_FKRP      | 0.157763 | 0.012142 | 0.030856 |
| 11717752_SEC14L1   | 0.115174 | 0.012144 | 0.03086  |
| 11732672_CCDC107   | 0.234276 | 0.012148 | 0.030867 |
| 11724846_NR2C2AP   | -0.20292 | 0.01215  | 0.03087  |
| 11746802_BNIP3L    | 0.12975  | 0.012151 | 0.030872 |
| 11741909_PKNOX2    | -0.16166 | 0.012152 | 0.030872 |
| 11737916_NEK11     | 0.222145 | 0.012156 | 0.030881 |
| 11716808_ITPA      | 0.128768 | 0.012162 | 0.030893 |
| 11723980_PHKA2     | -0.14732 | 0.012162 | 0.030893 |
| 11727039_MAVS      | -0.29768 | 0.012163 | 0.030893 |
| 11754146_THPO      | -0.26163 | 0.012163 | 0.030893 |
| 11729218_GCLC      | 0.134537 | 0.012177 | 0.030926 |
| 11746977_GAPVD1    | -0.13074 | 0.012178 | 0.030929 |
| 11760816_C21orf58  | -0.25795 | 0.012182 | 0.030935 |
| 11732071_SLC16A8   | -0.13778 | 0.012182 | 0.030935 |
| 11736735_ZNF621    | 0.208517 | 0.012196 | 0.030969 |
| 11728662_GABARAPL2 | 0.134839 | 0.012197 | 0.030971 |
| 11732959_SPRR3     | -0.14255 | 0.012201 | 0.030978 |
| 11722319_EFNB3     | -0.15211 | 0.012205 | 0.030986 |
| 11748455_SLC46A1   | 0.150629 | 0.012211 | 0.031    |
| 11743809_WBP5      | -0.14299 | 0.012211 | 0.031    |
| 11763257_LZTS1     | -0.15602 | 0.012213 | 0.031002 |
| 11739588_RERE      | 0.126679 | 0.012213 | 0.031002 |
| 11717123_PPP1R12B  | 0.151574 | 0.012214 | 0.031002 |
| 11746630_INPP5J    | -0.18929 | 0.012217 | 0.031008 |
| 11758945_FAM163A   | -0.13739 | 0.012218 | 0.031008 |
| 11756779_JTB       | 0.123109 | 0.012219 | 0.031008 |
| 11758870_GOSR2     | 0.185912 | 0.012227 | 0.031029 |
| 11753747_CHRAC1    | -0.16101 | 0.012234 | 0.031044 |
| 11742845_AQR       | 0.13357  | 0.012235 | 0.031044 |
| 11758439_TRIM7     | -0.1422  | 0.012236 | 0.031046 |
| 11732402_UBAC1     | -0.12205 | 0.012237 | 0.031048 |
| 11754987_C21orf58  | -0.15453 | 0.012239 | 0.031049 |
| 11758747_TMEM167B  | -0.384   | 0.012239 | 0.031049 |
| 11764221_MUM1L1    | -0.21393 | 0.012246 | 0.031066 |
| 11745326_DUS1L     | 0.116466 | 0.012256 | 0.031089 |
| 11723879_KCNC4     | -0.28001 | 0.012257 | 0.03109  |
| 11744133_ZSWIM6    | 0.11172  | 0.012258 | 0.03109  |
| 11738032_FAM153C   | -0.19452 | 0.012265 | 0.031108 |
| 11762037_ESR2      | -0.17454 | 0.012273 | 0.031127 |
| 11726067_PDDC1     | 0.212444 | 0.012276 | 0.03113  |
| 11763925_SNORD9    | -0.21139 | 0.012276 | 0.03113  |
| 11718113_SF3A3     | 0.112669 | 0.012279 | 0.031136 |
| 11722174_UQCC1     | 0.116924 | 0.012281 | 0.03114  |
| 11760067_NPSR1-AS1 | -0.15997 | 0.012282 | 0.03114  |
| 11727088_DACH1     | 0.367451 | 0.012283 | 0.03114  |

|                    |          |          |          |
|--------------------|----------|----------|----------|
| 11730306_TERF2     | 0.16176  | 0.012285 | 0.031145 |
| 11717850_ZNF282    | 0.163457 | 0.012286 | 0.031145 |
| 11753445_HMOX1     | 0.139366 | 0.012287 | 0.031146 |
| 11742020_INPP4A    | -0.13606 | 0.012288 | 0.031147 |
| 11723497_YBEY      | 0.133984 | 0.012289 | 0.031147 |
| 11760623_CKLF ///  | 0.221602 | 0.012294 | 0.031116 |
| 11728139_ADAMTS13  | -0.14975 | 0.012302 | 0.031178 |
| 11763924_SNORD9    | -0.21108 | 0.012305 | 0.031184 |
| 11743242_OMP       | -0.20367 | 0.012319 | 0.031218 |
| 11735523_FAM47E    | 0.324353 | 0.012324 | 0.031228 |
| 11729279_FAM175A   | 0.152951 | 0.012325 | 0.03123  |
| 11741018_FAM65A    | -0.12455 | 0.012327 | 0.031234 |
| 11746535_LOC100132 | -0.14817 | 0.012331 | 0.031241 |
| 11753505_PGAP2     | -0.15381 | 0.012339 | 0.031261 |
| 11755999_DEPDC4    | -0.4291  | 0.01234  | 0.031261 |
| 11756285_IGF2BP3   | 0.112774 | 0.012343 | 0.031268 |
| 11760364_DPAGT1    | -0.17842 | 0.012345 | 0.031271 |
| 11721265_GATB      | -0.19499 | 0.012347 | 0.031274 |
| 11761554_POLR2C    | -0.1701  | 0.012348 | 0.031276 |
| 11733766_CSN2      | -0.16246 | 0.012349 | 0.031276 |
| 11737706_FAM181A   | -0.15836 | 0.012354 | 0.031286 |
| 11758953_RAN       | -0.13801 | 0.012354 | 0.031286 |
| 11725958_CALM2 /// | -0.279   | 0.012358 | 0.031294 |
| 11723810_STX17     | 0.150559 | 0.012362 | 0.0313   |
| 11754037_UBE2F     | 0.153682 | 0.012362 | 0.0313   |
| 11737536_SAMD12    | 0.174377 | 0.012362 | 0.0313   |
| 11751592_WDR3      | 0.192357 | 0.012363 | 0.0313   |
| 11718455_INPP5K    | 0.167151 | 0.012364 | 0.0313   |
| 11732347_TCF20     | -0.23289 | 0.012372 | 0.031319 |
| 11721006_TMCO3     | -0.14367 | 0.012374 | 0.031323 |
| 11717573_NECAP1    | 0.134453 | 0.012375 | 0.031323 |
| 11726472_TAF5L     | -0.13133 | 0.012379 | 0.031333 |
| 11735849_CSNK1A1L  | 0.208712 | 0.012381 | 0.031336 |
| 11754645_STT3B     | -0.12095 | 0.012388 | 0.031353 |
| 11730584_ABCG4     | -0.15391 | 0.012389 | 0.031353 |
| 11720732_SUMF1     | 0.171742 | 0.01239  | 0.031354 |
| 11718777_SRRM1     | 0.108018 | 0.012391 | 0.031354 |
| 11752063_CTNNA2    | 0.192068 | 0.012391 | 0.031354 |
| 11762232_ICAM3     | -0.22463 | 0.012396 | 0.031365 |
| 11726835_DNAJC21   | -0.27732 | 0.0124   | 0.031374 |
| 11761994_ALS2      | 0.166721 | 0.012415 | 0.031407 |
| 11716020_RAD23A    | -0.12857 | 0.012415 | 0.031407 |
| 11718291_HK1       | -0.13034 | 0.012417 | 0.03141  |
| 11751221_PADI1     | -0.1357  | 0.012418 | 0.031411 |
| 11729503_CFAP53    | 0.162214 | 0.012419 | 0.031412 |
| 11728192_LCN1      | -0.16686 | 0.01242  | 0.031412 |
| 11728816_AARS2     | -0.19532 | 0.01242  | 0.031412 |
| 11735170_MXD3      | -0.24977 | 0.012421 | 0.031412 |
| 11721402_NCOA3     | 0.156021 | 0.012423 | 0.031417 |
| 11741511_SCD5      | -0.1664  | 0.01243  | 0.031431 |
| 11762871_CHTF18    | -0.159   | 0.012432 | 0.031435 |

|                    |          |          |          |
|--------------------|----------|----------|----------|
| 11752543_TFCP2     | 0.113864 | 0.012432 | 0.031435 |
| 11749010_BRSK2     | -0.22073 | 0.012437 | 0.031444 |
| 11748328_KRT16 /// | -0.27751 | 0.012443 | 0.03146  |
| 11719133_COMMD9    | -0.15155 | 0.012447 | 0.031467 |
| 11718681_PHF14     | 0.196535 | 0.012451 | 0.031475 |
| 11762239_LOC101926 | 0.124917 | 0.012455 | 0.031484 |
| 11731572_FRMD4B    | 0.182223 | 0.012456 | 0.031484 |
| 11731536_FHL5      | 0.246619 | 0.012466 | 0.031509 |
| 11756467_TMEM50A   | -0.12563 | 0.01247  | 0.031516 |
| 11749035_ITGA3     | 0.161515 | 0.01247  | 0.031516 |
| 11736495_TNRC6B    | 0.193417 | 0.012471 | 0.031517 |
| 11725524_DSG2      | 0.143847 | 0.012472 | 0.031517 |
| 11750863_PHF19     | -0.16851 | 0.012479 | 0.031533 |
| 11727250_ZSCAN22   | -0.16448 | 0.012482 | 0.031539 |
| 11739663_RIMS3     | -0.15244 | 0.012484 | 0.031544 |
| 11742799_ATF7IP    | 0.14347  | 0.012487 | 0.031548 |
| 11747982_GAB1      | 0.348944 | 0.01249  | 0.031556 |
| 11717935_ERMP1     | -0.16498 | 0.012492 | 0.031558 |
| 11761136_OBSCN     | -0.29468 | 0.012493 | 0.03156  |
| 11757143_SNORA15   | -0.39433 | 0.012494 | 0.03156  |
| 11727910_RELT      | -0.14386 | 0.012496 | 0.031564 |
| 11759696_SLITRK3   | -0.42783 | 0.0125   | 0.031573 |
| 11750872_SLC30A10  | -0.22866 | 0.012509 | 0.031592 |
| 11733335_HDX       | 0.175832 | 0.012514 | 0.031604 |
| 11749623_TYW1 ///  | -0.15123 | 0.012517 | 0.031611 |
| 11748911_SAFB2     | 0.151629 | 0.012521 | 0.031618 |
| 11750061_DAZAP2    | -0.15154 | 0.012527 | 0.031633 |
| 11747486_TMEM254   | -0.21601 | 0.01253  | 0.031637 |
| 11742596_OR51B6    | -0.14082 | 0.012531 | 0.031638 |
| 11745433_PHC2      | -0.1434  | 0.012533 | 0.031642 |
| 11715932_TUBB6     | 0.144467 | 0.012534 | 0.031644 |
| 11733788_HSDL1     | 0.111954 | 0.012537 | 0.031649 |
| 11725362_SMAD4     | 0.153186 | 0.012544 | 0.031664 |
| 11729813_ZADH2     | -0.17408 | 0.012554 | 0.031689 |
| 11737402_PRG3      | -0.14727 | 0.012556 | 0.031691 |
| 11748568_METTL3    | -0.1421  | 0.012557 | 0.031694 |
| 11734467_AMER1     | -0.15524 | 0.012571 | 0.031726 |
| 11737296_TMTC4     | -0.21818 | 0.012576 | 0.031736 |
| 11729602_CHMP2A    | -0.13044 | 0.012576 | 0.031737 |
| 11749512_STAT4     | 0.116469 | 0.012584 | 0.031752 |
| 11721372_TCF7L1    | -0.13511 | 0.012584 | 0.031752 |
| 11758708_PRAMEF1 / | -0.11558 | 0.012594 | 0.031776 |
| 11725910_COL4A6    | 0.413703 | 0.012596 | 0.031781 |
| 11763628_POU3F3    | -0.30652 | 0.012613 | 0.031821 |
| 11716082_WDR77     | -0.14773 | 0.012615 | 0.031821 |
| 11741441_FGF13     | 0.171257 | 0.012616 | 0.031821 |
| 11731939_UCP3      | 0.298515 | 0.012616 | 0.031821 |
| 11742736_MCEE      | 0.157061 | 0.012616 | 0.031821 |
| 11761827_C21orf58  | -0.22019 | 0.012625 | 0.031843 |
| 11760202_IGFBP7    | -0.28079 | 0.012628 | 0.03185  |
| 11749259_IST1      | 0.16009  | 0.012631 | 0.031854 |

|                    |          |          |          |
|--------------------|----------|----------|----------|
| 11752414_BRSK2     | -0.15516 | 0.012638 | 0.031872 |
| 11755685_LOC100130 | -0.13143 | 0.012639 | 0.031872 |
| 11737788_SHISA5    | -0.15049 | 0.012641 | 0.031876 |
| 11731413_GALM      | -0.18577 | 0.012649 | 0.031893 |
| 11760342_PPP3CB    | 0.138453 | 0.012652 | 0.031899 |
| 11746861_CACNA2D4  | 0.166249 | 0.012658 | 0.031913 |
| 11729394_HECTD2    | 0.148614 | 0.012659 | 0.031913 |
| 11763596_JAKMIP3   | -0.13006 | 0.012661 | 0.031916 |
| 11753381_BTBD19 // | 0.160695 | 0.012663 | 0.031919 |
| 11721420_RAP1GAP2  | -0.15251 | 0.012663 | 0.031919 |
| 11757247_OR6W1P    | -0.14499 | 0.012665 | 0.031923 |
| 11748225_ABHD10    | -0.14422 | 0.012668 | 0.031928 |
| 11746350_PIM1      | -0.34322 | 0.01267  | 0.031932 |
| 11760897_CCDC40    | -0.24445 | 0.012676 | 0.031946 |
| 11747212_ZNF174    | 0.122058 | 0.012678 | 0.031946 |
| 11752710_ZNF215    | 0.281803 | 0.012678 | 0.031946 |
| 11722594_AKAP13    | -0.17707 | 0.012681 | 0.031952 |
| 11723274_SLC35F2   | 0.149256 | 0.012689 | 0.031971 |
| 11742006_KRTAP12-2 | 0.262426 | 0.012694 | 0.031981 |
| 11738737_OR2A12    | -0.15869 | 0.012696 | 0.031985 |
| 11751084_PLXND1    | -0.13477 | 0.012697 | 0.031986 |
| 11753158_PDGFDF    | 0.303152 | 0.012698 | 0.031988 |
| 11721221_ZNF318    | 0.135119 | 0.0127   | 0.031992 |
| 11747767_MBD1      | 0.133786 | 0.012705 | 0.032001 |
| 11760316_PXN       | 0.135889 | 0.012706 | 0.032002 |
| 11744601_RPS17     | -0.11382 | 0.012706 | 0.032002 |
| 11743948_BMP6      | -0.21108 | 0.012709 | 0.032006 |
| 11752351_PPP1R15B  | 0.212568 | 0.012709 | 0.032006 |
| 11732120_DBN1      | -0.12894 | 0.012713 | 0.032013 |
| 11759262_ADARB2-AS | -0.14528 | 0.012713 | 0.032013 |
| 11735854_TAAR5     | -0.2983  | 0.01272  | 0.032028 |
| 11733222_DLL3      | -0.15696 | 0.012725 | 0.032039 |
| 11744011_AMDHD2    | -0.151   | 0.012726 | 0.032039 |
| 11734309_NPVF      | -0.21876 | 0.012727 | 0.03204  |
| 11757601_COPS3     | 0.109556 | 0.012727 | 0.03204  |
| 11728082_ELFN1     | -0.14195 | 0.01274  | 0.032071 |
| 11739759_KBTBD3    | 0.415113 | 0.012744 | 0.032077 |
| 11746734_SCN1B     | 0.17154  | 0.012755 | 0.032104 |
| 11718358_PEG10     | -0.22452 | 0.012757 | 0.032107 |
| 11749300_WDR77     | 0.117813 | 0.01276  | 0.032115 |
| 11725216_FCN3      | -0.12909 | 0.012766 | 0.032128 |
| 11743305_SMIM7     | -0.11039 | 0.012768 | 0.032132 |
| 11757199_LOC100190 | -0.20333 | 0.01277  | 0.032133 |
| 11756728_GAS2      | -0.17722 | 0.012772 | 0.032137 |
| 200065_PMARF1      | -0.11342 | 0.012772 | 0.032137 |
| 11723034_GTF2A2    | 0.236758 | 0.012773 | 0.032137 |
| 11740242_TOX       | 0.237617 | 0.012775 | 0.03214  |
| 11759571_IGLC1 /// | -0.18825 | 0.01278  | 0.03215  |
| 11719535_AP3M2     | -0.19145 | 0.012785 | 0.03216  |
| 11752676_OGFR      | -0.11177 | 0.012785 | 0.03216  |
| 11735886_NEK11     | 0.316005 | 0.012789 | 0.032168 |

|                   |          |          |          |
|-------------------|----------|----------|----------|
| 11749142_DHX35    | -0.16978 | 0.01279  | 0.032169 |
| 11743254_15-Sep   | 0.112288 | 0.012797 | 0.032186 |
| 11722297_LRFN4    | 0.112038 | 0.012799 | 0.03219  |
| 11722919_DOLPP1   | -0.18584 | 0.012801 | 0.032192 |
| 11741644_ATXN7L1  | 0.140964 | 0.012811 | 0.032216 |
| 11742912_GAREM1   | 0.169843 | 0.012818 | 0.032232 |
| 11743558_NOA1     | 0.114078 | 0.012819 | 0.032233 |
| 11731422_FCGR3A   | -0.18666 | 0.012833 | 0.032265 |
| 11758625_GSTA4    | -0.12317 | 0.012833 | 0.032265 |
| 11720462_F11R     | -0.1871  | 0.012835 | 0.032268 |
| 11753730_SNCA     | 0.139879 | 0.012843 | 0.032285 |
| 11716046_RGL2     | 0.128732 | 0.012852 | 0.032307 |
| 11744001_LRRC45   | -0.15878 | 0.012858 | 0.032318 |
| 11728298_SCARB1   | -0.11915 | 0.012858 | 0.032318 |
| 11739070_PPIL2    | -0.17567 | 0.012863 | 0.03233  |
| 11717795_ZDHC3    | -0.14954 | 0.012874 | 0.032355 |
| 11760415_SLC44A5  | 0.464694 | 0.012876 | 0.032358 |
| 11763830_CD72     | -0.18184 | 0.012879 | 0.032364 |
| 11741560_HOXA6    | 0.191514 | 0.01289  | 0.03239  |
| 11725445_BCL3     | 0.167281 | 0.012892 | 0.032393 |
| 11719131_POLR3D   | -0.11554 | 0.012893 | 0.032393 |
| 11731468_CYP2E1   | 0.237721 | 0.012894 | 0.032393 |
| 11724874_RAD9A    | -0.11601 | 0.012894 | 0.032393 |
| 11760159_USP36    | -0.24229 | 0.012894 | 0.032393 |
| 11753164_SKIV2L   | -0.33541 | 0.012895 | 0.032393 |
| 11764058_PRNP     | 0.162368 | 0.012898 | 0.032399 |
| 11733989_CMTR1    | -0.17209 | 0.012904 | 0.032413 |
| 11757009_LPCAT3   | -0.14232 | 0.012907 | 0.032417 |
| 11742165_SPANXN3  | -0.14225 | 0.012907 | 0.032417 |
| 11740522_TPO      | -0.20031 | 0.012919 | 0.032445 |
| 11717807_RNF103   | 0.144053 | 0.012927 | 0.032465 |
| 11751460_DDX20    | 0.120037 | 0.012928 | 0.032465 |
| 11729754_ULK2     | -0.12395 | 0.01293  | 0.032468 |
| 11755746_CNIH4    | -0.12011 | 0.012933 | 0.032474 |
| 11741761_C14orf93 | -0.32024 | 0.012937 | 0.032482 |
| 11758926_PSPC1    | 0.190242 | 0.012938 | 0.032484 |
| 11743835_DSC3     | 0.16811  | 0.012944 | 0.032496 |
| 11721014_WTAP     | 0.161211 | 0.012952 | 0.032516 |
| 11746171_KLHL17   | -0.18972 | 0.012953 | 0.032517 |
| 11719138_MGME1    | 0.10844  | 0.012955 | 0.032517 |
| 11727598_C9orf64  | -0.19435 | 0.012955 | 0.032517 |
| 11722618_RIPK4    | -0.22698 | 0.012957 | 0.03252  |
| 11723630_CRYBG3   | 0.151454 | 0.012962 | 0.032532 |
| 200051_PMSART1    | 0.110053 | 0.012963 | 0.032533 |
| 11758184_KRT8     | 0.116548 | 0.012966 | 0.032538 |
| 11734720_PLPP2    | -0.13711 | 0.012968 | 0.032542 |
| 11747696_WDR24    | -0.21462 | 0.012976 | 0.03256  |
| 11737078_CARD16   | 0.339386 | 0.012978 | 0.032563 |
| 11724078_E2F2     | -0.22678 | 0.012985 | 0.032581 |
| 11747112_ZNF766   | 0.158528 | 0.012987 | 0.032584 |
| 11751200_ARHGEF16 | -0.14705 | 0.01299  | 0.03259  |

|                    |          |          |          |
|--------------------|----------|----------|----------|
| 11749580_PCDH18    | 0.147142 | 0.012993 | 0.032595 |
| 11725116_NCOR1     | 0.181563 | 0.012998 | 0.032607 |
| 11733095_SET ///   | -0.11642 | 0.013004 | 0.032618 |
| 11736431_NOL8      | 0.126154 | 0.013005 | 0.032619 |
| 11758556_PGM2      | 0.151101 | 0.013008 | 0.032626 |
| 11736147_LYRM2     | 0.139548 | 0.013013 | 0.032636 |
| 11744353_TATDN2    | -0.15454 | 0.013017 | 0.032645 |
| 11743452_CDCA4     | -0.12883 | 0.01302  | 0.032652 |
| 11742518_OR7G2     | -0.18634 | 0.013022 | 0.032653 |
| 11724555_FOLH1 /// | 0.250705 | 0.013031 | 0.032675 |
| 11749147_ATP7B     | -0.18255 | 0.013035 | 0.032682 |
| 11754572_THNSL2    | 0.170836 | 0.013035 | 0.032682 |
| 11725968_THUMPD1   | 0.109967 | 0.01304  | 0.032693 |
| 11757099_FAM207A   | 0.161393 | 0.013045 | 0.032704 |
| 11750164_SCRN3     | 0.138562 | 0.013047 | 0.032706 |
| 11729052_PPFIBP1   | 0.228609 | 0.013053 | 0.032719 |
| 11733858_CLASP2    | 0.133293 | 0.013054 | 0.032722 |
| 11754193_PCYT1A    | 0.133671 | 0.013059 | 0.032731 |
| 11742079_FAM222A   | -0.22648 | 0.013061 | 0.032735 |
| 11739639_CDK12     | -0.15845 | 0.013066 | 0.032745 |
| 11736805_ZNF43     | 0.199378 | 0.013069 | 0.032753 |
| 11758862_PAIP2B    | -0.1825  | 0.013076 | 0.032768 |
| 11723149_SLC19A2   | 0.147003 | 0.013084 | 0.032785 |
| 11744616_SLC19A2   | 0.147003 | 0.013084 | 0.032785 |
| 11735947_ZNF221    | 0.275057 | 0.013087 | 0.032791 |
| 11755022_ARL6IP1   | -0.12785 | 0.013096 | 0.032811 |
| 11743436_TBC1D12   | 0.149919 | 0.013098 | 0.032814 |
| 11761267_DLG2      | -0.18781 | 0.013099 | 0.032815 |
| 11748671_CUL4A     | -0.1158  | 0.013101 | 0.032818 |
| 11723055_SYNGR3    | -0.19412 | 0.013102 | 0.032819 |
| 11761929_FUT10     | 0.429597 | 0.013104 | 0.032824 |
| 11762993_YME1L1    | 0.156135 | 0.013109 | 0.032833 |
| 11759563_EPC1      | 0.234111 | 0.013109 | 0.032833 |
| 11729622_CLCN4     | 0.278434 | 0.013112 | 0.032837 |
| 11754747_QTRT1     | -0.17037 | 0.013113 | 0.032838 |
| 11761262_PPIC      | 0.325292 | 0.01312  | 0.032854 |
| 11762657_C6orf141  | -0.20734 | 0.013122 | 0.032858 |
| 11760256_BDH2      | -0.36855 | 0.013123 | 0.032858 |
| 11750471_PRSS16    | -0.23353 | 0.013124 | 0.032859 |
| 11736379_MSL2      | 0.177307 | 0.013126 | 0.032863 |
| 11752013_CHD9      | 0.244595 | 0.013127 | 0.032863 |
| 11760098_CD37      | -0.1802  | 0.013128 | 0.032863 |
| 11752849_CWC27     | -0.16296 | 0.013129 | 0.032865 |
| 11746177_RHBDF1    | 0.126629 | 0.013139 | 0.032889 |
| 11753457_PDDC1     | 0.158255 | 0.013143 | 0.032896 |
| 11748316_JPH4      | -0.18209 | 0.013154 | 0.032923 |
| 11737105_ARL17A    | 0.137441 | 0.013159 | 0.032932 |
| 11720233_RHOBTB2   | -0.14369 | 0.013159 | 0.032932 |
| 11741758_TRPV4     | -0.13194 | 0.01316  | 0.032932 |
| 11756738_FANCC     | -0.17137 | 0.013162 | 0.032936 |
| 11721408_PAOX      | -0.31267 | 0.013167 | 0.032946 |

|                    |          |          |          |
|--------------------|----------|----------|----------|
| 11716044_FAM168B   | 0.138449 | 0.013167 | 0.032946 |
| 11715301_NOP16     | 0.144465 | 0.013168 | 0.032946 |
| 11729683_TMEM231   | -0.20577 | 0.013176 | 0.032964 |
| 11734229_FRRS1     | 0.352535 | 0.013177 | 0.032964 |
| 11715692_CIRBP     | -0.1664  | 0.013192 | 0.033    |
| 11750509_TROAP     | -0.17831 | 0.013194 | 0.033005 |
| 11763814_OPRK1     | -0.25906 | 0.013196 | 0.033008 |
| 11750277_POLR3D    | -0.12016 | 0.013211 | 0.033044 |
| 11718921_IQSEC1    | 0.127995 | 0.013212 | 0.033045 |
| 11731688_SI        | 0.300532 | 0.013215 | 0.033049 |
| 11754435_WRAP73    | -0.12704 | 0.013217 | 0.033051 |
| 11728641_DEFA5     | -0.13213 | 0.013217 | 0.033051 |
| 11735558_TBC1D28   | -0.15828 | 0.013219 | 0.033051 |
| 11753726_IGF2 ///  | -0.11427 | 0.013219 | 0.033051 |
| 11720137_ANAPC4    | -0.11527 | 0.013219 | 0.033051 |
| 11729415_ST20      | 0.145502 | 0.013222 | 0.033057 |
| 11730824_COX19     | 0.162649 | 0.013226 | 0.033066 |
| 11719082_GADD45GIP | -0.12617 | 0.013234 | 0.033083 |
| 11737020_AGAP2     | -0.2165  | 0.013247 | 0.033115 |
| 11733551_ZIC5      | -0.46259 | 0.013252 | 0.033124 |
| 11755038_SREK1     | 0.142759 | 0.013252 | 0.033124 |
| 11748051_DPH7      | 0.168448 | 0.013254 | 0.033127 |
| 11760050_LOC100134 | -0.13641 | 0.01326  | 0.033141 |
| 11747525_C6orf89   | 0.120626 | 0.013261 | 0.033142 |
| 11751969_FAM193A   | 0.124541 | 0.013265 | 0.03315  |
| 11720909_TMEM44    | -0.24035 | 0.013267 | 0.033153 |
| 11721824_ARPC5L    | 0.133564 | 0.01327  | 0.033158 |
| 11755559_ADCK4     | -0.13171 | 0.013275 | 0.033169 |
| 11744108_SAE1      | -0.12858 | 0.013289 | 0.033202 |
| 11757190_LITAF     | 0.106945 | 0.013291 | 0.033205 |
| 11749278_FETUB     | 0.204036 | 0.013296 | 0.033217 |
| 11731715_ACKR2     | -0.23825 | 0.013305 | 0.033237 |
| 11743516_LAMC2     | -0.18058 | 0.013309 | 0.033245 |
| 11756274_ALDH1L1   | 0.2368   | 0.013311 | 0.033248 |
| 11720870_PDE7A     | -0.27251 | 0.013311 | 0.033248 |
| 11747390_FBXO44    | -0.20444 | 0.013313 | 0.033251 |
| 11761234_NFATC4    | -0.21467 | 0.013319 | 0.033264 |
| 11741289_NXPH4     | -0.1645  | 0.013324 | 0.033275 |
| 11754539_LOC90768  | 0.173599 | 0.013329 | 0.033284 |
| 11720322_AK2       | 0.118889 | 0.013332 | 0.03329  |
| 11746522_FOXO3 /// | 0.170245 | 0.013335 | 0.033297 |
| 11752506_LMNA      | -0.11475 | 0.013343 | 0.033315 |
| 11749607_LOC399815 | -0.22814 | 0.013349 | 0.033329 |
| 11728280_HSPBAP1   | -0.14379 | 0.013352 | 0.033333 |
| 11744074_GLI4 ///  | -0.11623 | 0.013352 | 0.033333 |
| 11735931_FRG2 ///  | -0.2053  | 0.013369 | 0.033373 |
| 11732067_RGAG1     | -0.21649 | 0.013373 | 0.033381 |
| 11757359_TMA7      | -0.11147 | 0.013379 | 0.033394 |
| 11719533_STX3      | 0.152539 | 0.013386 | 0.03341  |
| 11715597_P SMB7    | -0.11073 | 0.013393 | 0.033427 |
| 11718037_MDK       | -0.12736 | 0.013394 | 0.033427 |



|                    |          |          |          |
|--------------------|----------|----------|----------|
| 11721131_HCF1      | -0.17655 | 0.013395 | 0.033428 |
| 11726057_PPP4R3B   | -0.17393 | 0.013401 | 0.033442 |
| 11734927_BPNT1     | -0.17809 | 0.013402 | 0.033442 |
| 11753414_DMAP1     | -0.12561 | 0.013409 | 0.033458 |
| 11756578_RHOT1     | 0.111678 | 0.013415 | 0.033469 |
| 11755230_PDZD3     | -0.14227 | 0.013415 | 0.033469 |
| 11716661_GRAMD4    | -0.12422 | 0.013416 | 0.033471 |
| 11733237_RPGRIP1L  | -0.25407 | 0.013417 | 0.033471 |
| 11746609_CAND2     | -0.28047 | 0.013418 | 0.033472 |
| 11730072_CNTN3     | 0.119114 | 0.013419 | 0.033472 |
| 11756620_RTEL1 /// | -0.20835 | 0.01342  | 0.033472 |
| 11744327_UBB       | -0.10648 | 0.01342  | 0.033472 |
| 11749821_CCT4      | -0.10941 | 0.013421 | 0.033472 |
| 11761122_PIGL      | -0.13436 | 0.013429 | 0.03349  |
| 11732875_GAGE1 /// | 0.122421 | 0.013438 | 0.033511 |
| 11726681_HNRNPK    | -0.1663  | 0.013446 | 0.03353  |
| 11747465_NDST1     | 0.333659 | 0.013453 | 0.033546 |
| 11760940_HDAC6     | -0.17706 | 0.013459 | 0.033559 |
| 11725291_FUT1      | -0.147   | 0.01346  | 0.03356  |
| 11746834_ACADM     | 0.160169 | 0.013466 | 0.033572 |
| 11753042_KREMEN2   | -0.16062 | 0.013469 | 0.033578 |
| 11761365_MIR181A1H | 0.170283 | 0.013473 | 0.033588 |
| 11715621_UFC1      | -0.11424 | 0.013474 | 0.033588 |
| 11725469_LIPG      | 0.161653 | 0.01348  | 0.033601 |
| 11725806_KCNJ8     | -0.26176 | 0.013487 | 0.033618 |
| 11735728_ZNF385A   | -0.16126 | 0.01349  | 0.033622 |
| 11721496_WDR33     | -0.27474 | 0.013493 | 0.033627 |
| 11743294_BCKDK     | -0.13156 | 0.013494 | 0.033629 |
| 11717787_CLUH      | -0.15484 | 0.013499 | 0.033639 |
| 11739314_AES       | -0.1259  | 0.013502 | 0.033646 |
| 11729841_GRM2      | -0.17355 | 0.013509 | 0.03366  |
| 11762705_LOC100128 | -0.18788 | 0.013509 | 0.03366  |
| 11763062_NPSR1-AS1 | -0.13901 | 0.013516 | 0.033674 |
| 11762690_PPP1R1C   | 0.303552 | 0.01352  | 0.033683 |
| 11718869_PALMD     | -0.26535 | 0.013525 | 0.033694 |
| 11740660_IGFALS    | -0.13255 | 0.013529 | 0.033703 |
| 11753985_DMKN      | 0.181474 | 0.013568 | 0.033796 |
| 11724932_CREM      | 0.136482 | 0.013568 | 0.033796 |
| 11732809_PROK2     | -0.22991 | 0.013591 | 0.03385  |
| 11749177_FAM63A    | 0.285187 | 0.013597 | 0.033865 |
| 11716940_TRIB2     | -0.13157 | 0.013601 | 0.033873 |
| 11728665_PCBP2     | -0.11955 | 0.013606 | 0.033884 |
| 11723049_CCHCR1    | -0.23325 | 0.013617 | 0.033906 |
| 11727550_DOCK3     | 0.360001 | 0.013617 | 0.033906 |
| 11739822_CPNE8     | 0.225976 | 0.013617 | 0.033906 |
| 11736712_TMIE      | -0.1846  | 0.013619 | 0.033909 |
| 11754688_UBAP2     | 0.159214 | 0.013621 | 0.033912 |
| 11722118_LZTS1     | -0.17506 | 0.013623 | 0.033914 |
| 11755259_C12orf74  | -0.16217 | 0.013626 | 0.033922 |
| 11751698_EAF2      | -0.17583 | 0.013632 | 0.033935 |
| 11760477_EP400NL   | 0.216624 | 0.013634 | 0.033937 |

|                    |          |          |          |
|--------------------|----------|----------|----------|
| 11718442_MAPK8IP3  | 0.171143 | 0.013636 | 0.033941 |
| 11732584_WRN       | 0.240745 | 0.013638 | 0.033944 |
| 11750500_RECQL5    | -0.1416  | 0.013642 | 0.033952 |
| 11763650_GET4      | -0.18305 | 0.013646 | 0.033961 |
| 11739027_CLTC      | -0.20952 | 0.013647 | 0.033962 |
| 11720944_RGS16     | -0.13188 | 0.013649 | 0.033964 |
| 11718236_PRPF4B    | 0.109247 | 0.013655 | 0.033978 |
| 11745831_NRXN1     | -0.16786 | 0.013669 | 0.034011 |
| 11749500_SLC4A1AP  | 0.16102  | 0.013671 | 0.034013 |
| 11718339_DAZAP2    | -0.13181 | 0.013674 | 0.03402  |
| 11717036_HDAC5     | -0.13051 | 0.013677 | 0.034025 |
| 11723760_ZFR       | 0.152899 | 0.013691 | 0.03406  |
| 11722886_EMB /// E | 0.264385 | 0.013693 | 0.034063 |
| 11757049_CTDPI     | -0.26939 | 0.013695 | 0.034065 |
| 11737290_OXGR1     | -0.17874 | 0.013696 | 0.034067 |
| 11739986_AMACR /// | 0.211355 | 0.013702 | 0.03408  |
| 11741231_GGPS1     | -0.12534 | 0.013704 | 0.034082 |
| 11749467_PRKDC     | -0.15925 | 0.013707 | 0.034089 |
| 11745669_KANSL1L   | -0.12063 | 0.013716 | 0.03411  |
| 11751276_CALCOCO2  | -0.11825 | 0.013718 | 0.034113 |
| 11721335_PLOD2     | 0.130971 | 0.013728 | 0.034134 |
| 11756003_IGF2 ///  | 0.333694 | 0.013729 | 0.034134 |
| 11752577_FTH1      | -0.14119 | 0.013729 | 0.034134 |
| 11756639_NFASC     | -0.17082 | 0.013732 | 0.034139 |
| 11753604_IL21      | -0.17589 | 0.013735 | 0.034147 |
| 11745841_CNBP2     | -0.25003 | 0.01374  | 0.034157 |
| 11755212_SVOPL     | -0.23034 | 0.013745 | 0.034167 |
| 11741239_COPE      | 0.117521 | 0.013746 | 0.034168 |
| 11749133_NLRX1     | -0.13329 | 0.013754 | 0.034186 |
| 11745971_EIF3B     | 0.116504 | 0.013755 | 0.034188 |
| 11729512_CSF3      | -0.14179 | 0.013756 | 0.034189 |
| 11722394_P4HTM     | -0.1512  | 0.01377  | 0.034221 |
| 11725396_TWISTNB   | 0.114037 | 0.013771 | 0.034222 |
| 11738019_RTP2      | -0.14938 | 0.01378  | 0.034242 |
| 200044_PMSRSF9     | -0.10691 | 0.013782 | 0.034244 |
| 11719717_PPP1R14B  | -0.1118  | 0.013787 | 0.034255 |
| 11733754_PLEKHA4   | 0.125832 | 0.013791 | 0.034263 |
| 11741146_ALDH3B1   | 0.135632 | 0.013795 | 0.034272 |
| 11735754_EPHB4     | -0.14563 | 0.013806 | 0.034297 |
| 11715406_COL6A1    | 0.201223 | 0.013809 | 0.034303 |
| 11731689_TUBA3D    | -0.23579 | 0.013817 | 0.034319 |
| 11744308_TTC39A    | -0.15594 | 0.013817 | 0.034319 |
| 11726485_CPEDI     | -0.49881 | 0.013818 | 0.034321 |
| 11725356_PRTFDC1   | -0.19555 | 0.013822 | 0.034328 |
| 11720152_DENND4B   | -0.13014 | 0.013823 | 0.03433  |
| 11751865_PLA2G1B   | -0.26208 | 0.013826 | 0.034335 |
| 11721080_PARVA     | 0.187718 | 0.013837 | 0.034359 |
| 11754871_TSPAN32   | -0.14556 | 0.013838 | 0.034359 |
| 11746406_TLR10     | 0.251407 | 0.013838 | 0.034359 |
| 11742019_ARID1A    | -0.14928 | 0.013843 | 0.03437  |
| 11760123_PIAS3     | -0.19843 | 0.013847 | 0.034379 |

|                    |          |          |          |
|--------------------|----------|----------|----------|
| 11723966_SLC22A11  | -0.24183 | 0.013848 | 0.03438  |
| 11719685_NTS       | -0.16227 | 0.013853 | 0.034389 |
| 11747263_TRIML1    | -0.16887 | 0.013855 | 0.034392 |
| 11752362_SBN01     | 0.17715  | 0.013855 | 0.034392 |
| 11750445_SLC22A24  | -0.15781 | 0.013859 | 0.034401 |
| 11761620_S SX6     | -0.26751 | 0.013861 | 0.034403 |
| 11726446_KCNK3     | -0.16873 | 0.013862 | 0.034404 |
| 11716764_NSMF      | -0.17296 | 0.013865 | 0.034407 |
| 11748077_ARPC4-TTL | 0.161063 | 0.013865 | 0.034407 |
| 11728524_SPOCD1    | -0.19505 | 0.013866 | 0.034407 |
| 11720463_F11R      | -0.11135 | 0.013875 | 0.034428 |
| 11752028_DIAPH3    | 0.181947 | 0.013876 | 0.03443  |
| 11757371_ISYNA1    | 0.130997 | 0.013877 | 0.034431 |
| 11731081_RBP2      | -0.18586 | 0.013879 | 0.034434 |
| 11748522_ARFIP2    | 0.207468 | 0.013885 | 0.034446 |
| 11737145_SH3YL1    | 0.154596 | 0.013887 | 0.034449 |
| 11755226_KLHDC7A   | 0.19147  | 0.013887 | 0.034449 |
| 11753781_THPO      | -0.20575 | 0.013894 | 0.034461 |
| 11725880_ZFP41     | -0.10841 | 0.013894 | 0.034461 |
| 11757497_CMPK1     | 0.133553 | 0.013896 | 0.034465 |
| 11761425_GALNT11   | 0.52796  | 0.013899 | 0.034472 |
| 11760870_PARPBP    | -0.33406 | 0.013903 | 0.034479 |
| 11716525_SPON2     | -0.12621 | 0.013906 | 0.034486 |
| 11746765_SCEL      | 0.222074 | 0.01391  | 0.034493 |
| 11737910_SLC39A14  | -0.11991 | 0.013914 | 0.0345   |
| 11715523_HADHA     | 0.121813 | 0.013915 | 0.034502 |
| 11718733_MAPT      | -0.19415 | 0.013921 | 0.034516 |
| 11754861_SUCLG1    | -0.12804 | 0.013926 | 0.034526 |
| 11725102_EGFR      | 0.306049 | 0.013927 | 0.034526 |
| 11722202_FBXO22    | 0.112649 | 0.013929 | 0.034529 |
| 11750354_TMEM184C  | 0.223246 | 0.013931 | 0.034532 |
| 11743292_GALNT1    | 0.10964  | 0.013934 | 0.034538 |
| 11720356_SMAP1     | 0.193731 | 0.013943 | 0.03456  |
| 11750980_ARFGAP3   | 0.126653 | 0.013946 | 0.034565 |
| 11719453_BBS1      | 0.158491 | 0.013947 | 0.034565 |
| 11743445_SUPT6H    | 0.200997 | 0.013951 | 0.034573 |
| 11749382_STK11IP   | -0.1469  | 0.013954 | 0.034579 |
| 11716235_RAE1      | -0.1155  | 0.013968 | 0.034613 |
| 11738461_NUTM2F    | -0.16839 | 0.01397  | 0.034615 |
| 11721298_MRPS21    | -0.12292 | 0.013975 | 0.034627 |
| 11757561_NOC2L     | -0.13031 | 0.01398  | 0.034636 |
| 11729018_SPRY3     | -0.12695 | 0.01398  | 0.034636 |
| 11738746_OR2T29 // | -0.12281 | 0.013986 | 0.034647 |
| 11715716_MSN       | -0.12287 | 0.013988 | 0.034652 |
| 11733413_SLC26A6   | 0.128177 | 0.013992 | 0.034659 |
| 11753761_KLK6      | -0.16484 | 0.013998 | 0.034673 |
| 11727856_NUP50     | -0.13034 | 0.014    | 0.034675 |
| 11724940_CDHR3     | -0.2096  | 0.01401  | 0.034699 |
| 11763999_GPRIN3    | -0.24579 | 0.014021 | 0.034723 |
| 11753988_SPRY2     | 0.108543 | 0.014027 | 0.034738 |
| 11717867_ZNRD1     | 0.131554 | 0.014032 | 0.034749 |

|                    |          |          |          |
|--------------------|----------|----------|----------|
| 11727918_MUC20     | 0.205584 | 0.014041 | 0.034768 |
| 11737578_LRRC7     | 0.507242 | 0.014044 | 0.034774 |
| 11752703_CHD6      | -0.23046 | 0.014048 | 0.034782 |
| 11753163_CDC73     | 0.137333 | 0.014051 | 0.034786 |
| 11763139_KRTAP22-2 | -0.24236 | 0.014051 | 0.034786 |
| 11729007_OVOL2     | -0.17548 | 0.014064 | 0.034817 |
| 11720812_C9orf16   | 0.117495 | 0.014068 | 0.034825 |
| 11728261_ZNF300    | 0.120499 | 0.014069 | 0.034825 |
| 11715665_PSMB8     | -0.15232 | 0.014077 | 0.034843 |
| 11740776_CCDC36    | -0.12651 | 0.014078 | 0.034843 |
| 11755311_ITGB1BP1  | -0.11439 | 0.014082 | 0.034852 |
| 11723901_PLEKHG1   | 0.32543  | 0.014085 | 0.034857 |
| 11727375_HMGCR     | -0.13868 | 0.014091 | 0.034871 |
| 11731363_KLC3      | -0.21447 | 0.014093 | 0.034875 |
| 11755760_GDAP2     | 0.133184 | 0.014101 | 0.034893 |
| 11746226_GAS6-AS1  | 0.189073 | 0.014104 | 0.034899 |
| 11759579_CNPY2     | 0.112289 | 0.014113 | 0.034919 |
| 11746581_PCCA      | 0.123574 | 0.014117 | 0.034926 |
| 11743744_FAM26E    | 0.231077 | 0.014121 | 0.034934 |
| 11761130_BOLA2     | 0.220359 | 0.014123 | 0.034938 |
| 11725304_RAC1      | -0.12822 | 0.014126 | 0.034944 |
| 11753672_GTF2H2 // | 0.13391  | 0.014127 | 0.034944 |
| 11727190_THAP6     | 0.153468 | 0.014131 | 0.034952 |
| 11721897_DHX58     | 0.244663 | 0.014136 | 0.034964 |
| 11743591_ZDHC7     | -0.10661 | 0.014142 | 0.034977 |
| 11749164_TMEM206   | 0.146121 | 0.014149 | 0.034992 |
| 11742380_OR52A5    | -0.17386 | 0.014151 | 0.034995 |
| 11716487_WDR59     | 0.119858 | 0.014152 | 0.034995 |
| 11727657_EPHB1     | 0.19768  | 0.014154 | 0.034998 |
| 11716486_FCGBP     | -0.14737 | 0.014156 | 0.035001 |
| 11745003_POLR2K    | -0.10848 | 0.014157 | 0.035003 |
| 11756506_CHL1      | 0.150427 | 0.014158 | 0.035003 |
| 11747503_TAF6L     | -0.18823 | 0.01416  | 0.035005 |
| 11762185_FOXRED1   | -0.1769  | 0.014164 | 0.035015 |
| 11736373_MLLT4-AS1 | -0.27303 | 0.014167 | 0.035021 |
| 11753569_LZTS1     | -0.33168 | 0.014169 | 0.035021 |
| 11755180_TCF7      | 0.148635 | 0.014169 | 0.035021 |
| 11729971_SPTB      | 0.185012 | 0.014175 | 0.035034 |
| 11715640_TTC3      | 0.181901 | 0.014176 | 0.035037 |
| 11751637_XXYL1     | -0.12777 | 0.014182 | 0.035048 |
| 11752721_CNOT10    | 0.143032 | 0.014192 | 0.035072 |
| 11716057_EFTUD2    | -0.21203 | 0.014193 | 0.035072 |
| 11720649_FBXW9     | 0.221747 | 0.014199 | 0.035084 |
| 11756401_FAM49B    | 0.108331 | 0.014199 | 0.035084 |
| 11720532_C9orf72   | -0.12766 | 0.014202 | 0.035088 |
| 11727658_KLK10     | 0.139687 | 0.014206 | 0.035096 |
| 11725273_C5orf45   | 0.135205 | 0.014206 | 0.035096 |
| 11725981_CCR7      | -0.23031 | 0.014208 | 0.0351   |
| 11727866_SLC25A27  | 0.169033 | 0.014213 | 0.035108 |
| 11752423_F13A1     | -0.24281 | 0.014215 | 0.035112 |
| 11726644_PEX3      | -0.15283 | 0.014217 | 0.035116 |

|                    |          |          |          |
|--------------------|----------|----------|----------|
| 11761944_UTP14A    | 0.215649 | 0.014219 | 0.035118 |
| 11756963_SOS2      | 0.127669 | 0.014234 | 0.035153 |
| 11745664_KRTAP21-1 | 0.125902 | 0.014236 | 0.035157 |
| 11724167_COLGALT2  | 0.168689 | 0.01424  | 0.035165 |
| 11753000_MOBP      | -0.19283 | 0.014242 | 0.035168 |
| 11740437_MYOM1     | 0.256557 | 0.014243 | 0.035169 |
| 11722704_DZIP1     | -0.19849 | 0.014248 | 0.035178 |
| 11724062_RAD51C    | -0.13743 | 0.014248 | 0.035178 |
| 11743206_SLC38A8   | -0.15328 | 0.014251 | 0.035184 |
| 11754227_WHSC1L1   | 0.149995 | 0.014256 | 0.035193 |
| 11733927_CTNS      | -0.14036 | 0.014259 | 0.0352   |
| 11741110_ZNF57     | 0.182368 | 0.014261 | 0.035202 |
| 11736903_KLHDC1    | -0.21179 | 0.014267 | 0.035215 |
| 11744084_ANKIB1    | 0.151801 | 0.014268 | 0.035216 |
| 11721364_IREB2     | -0.15503 | 0.01427  | 0.035219 |
| 11753713_AGER      | -0.17671 | 0.014275 | 0.035231 |
| 11754667_CPNE6     | -0.1449  | 0.01428  | 0.035241 |
| 11735913_TNXA ///  | -0.17545 | 0.014281 | 0.035241 |
| 11731366_TSPAN32   | -0.15699 | 0.014285 | 0.03525  |
| 11742803_SRD5A1    | -0.14828 | 0.014297 | 0.035277 |
| 11743823_TOPBP1    | -0.12201 | 0.014299 | 0.035281 |
| 11736471_RAB9B     | -0.17584 | 0.01431  | 0.035304 |
| 11748791_AP5M1     | -0.14374 | 0.014311 | 0.035304 |
| 11738118_CARD14    | 0.153601 | 0.014312 | 0.035304 |
| 11738943_LOC105371 | -0.30156 | 0.014312 | 0.035304 |
| 11758144_HNRNPC    | -0.10431 | 0.014313 | 0.035304 |
| 11739566_FKBP5     | -0.23443 | 0.014313 | 0.035304 |
| 11719142_INSIG2    | -0.14818 | 0.014313 | 0.035304 |
| 11729544_MAGEC1    | -0.1568  | 0.014316 | 0.035307 |
| 11737995_LRRC3     | -0.11819 | 0.014324 | 0.035326 |
| 11731169_SPRR2G    | -0.16101 | 0.014326 | 0.035326 |
| 11730448_DHRS12    | -0.24409 | 0.014326 | 0.035326 |
| 11726731_AGGF1     | 0.146656 | 0.014326 | 0.035326 |
| 11743804_ABCE1     | -0.10985 | 0.01433  | 0.035333 |
| 11737981_PHF6      | -0.15517 | 0.01433  | 0.035333 |
| 11750939_SLC39A7   | -0.15572 | 0.014345 | 0.035366 |
| 11722198_UBE2D2    | -0.16813 | 0.014348 | 0.035372 |
| 11726122_MYO1F     | -0.1257  | 0.014348 | 0.035372 |
| 11734613_KRTAP10-4 | -0.12091 | 0.014349 | 0.035373 |
| 11725208_LETM1     | -0.1345  | 0.014351 | 0.035375 |
| 11719760_ARRDC4    | -0.1988  | 0.014355 | 0.035383 |
| 11720581_TCF12     | 0.147802 | 0.014361 | 0.035397 |
| 11757364_BLOC1S6   | 0.128938 | 0.014365 | 0.035405 |
| 11763285_KLHDC10   | 0.132647 | 0.014366 | 0.035405 |
| 11762536_BAGE      | 0.157316 | 0.014367 | 0.035405 |
| 11747457_UGT1A1 // | -0.14629 | 0.014373 | 0.035419 |
| 11748465_POGK      | 0.151017 | 0.014382 | 0.03544  |
| 11727501_ALDH3B2   | -0.20434 | 0.014383 | 0.03544  |
| 11737764_TSKU      | -0.13205 | 0.014384 | 0.035441 |
| 11752921_SPTY2D1   | 0.171545 | 0.014394 | 0.035462 |
| 11723973_CHST12 // | -0.15015 | 0.014398 | 0.035472 |

|                    |          |          |          |
|--------------------|----------|----------|----------|
| 11734282_SLC25A48  | -0.21689 | 0.014404 | 0.035483 |
| 11730133_ICK       | -0.23639 | 0.014409 | 0.035493 |
| 11747476_SPIDR     | -0.12235 | 0.014409 | 0.035493 |
| 11731807_CATSPER1  | 0.132165 | 0.01441  | 0.035493 |
| 11746313_TCF7L2    | 0.158434 | 0.014417 | 0.035506 |
| 11759572_STAU2     | -0.16271 | 0.014418 | 0.035506 |
| 11716713_ARHGAP17  | 0.153597 | 0.014418 | 0.035506 |
| 11718313_LRP11     | -0.13104 | 0.014418 | 0.035506 |
| 11740618_ADRA1D    | 0.260272 | 0.014422 | 0.035512 |
| 11730033_RPS6KL1   | 0.162733 | 0.014422 | 0.035512 |
| 11736760_FKBP11    | 0.134235 | 0.014431 | 0.03553  |
| 11761690_CD37      | -0.16074 | 0.014431 | 0.03553  |
| 11761556_ACADL     | -0.19431 | 0.014437 | 0.035542 |
| 11747379_ATP6AP2   | 0.10956  | 0.014437 | 0.035542 |
| 11760925_MSTO1 /// | -0.18357 | 0.01444  | 0.035547 |
| 11734248_SYCE1     | -0.14592 | 0.014442 | 0.03555  |
| 11762165_ERBB2     | -0.22107 | 0.014444 | 0.035555 |
| 11740184_CCHCR1    | -0.16233 | 0.014448 | 0.035562 |
| 11745728_TCF12     | 0.157845 | 0.01445  | 0.035565 |
| 11761501_GALC      | -0.12453 | 0.014451 | 0.035567 |
| 11752156_ATG9B     | -0.14036 | 0.014452 | 0.035567 |
| 11746377_GRIN1     | 0.155462 | 0.014461 | 0.035588 |
| 11763312_MXD4      | -0.12279 | 0.014464 | 0.035592 |
| 11763236_ZNF362    | -0.12576 | 0.014466 | 0.035595 |
| 11760021_CTNNA3    | -0.22412 | 0.01447  | 0.035603 |
| 11749200_PIGG      | 0.122325 | 0.014476 | 0.035617 |
| 11756918_KIF23     | -0.17877 | 0.014479 | 0.035623 |
| 11715869_TINF2     | -0.15783 | 0.014484 | 0.035633 |
| 11745702_SHPRH     | -0.1457  | 0.014488 | 0.035641 |
| 11748610_PLOD2     | 0.128236 | 0.014498 | 0.035662 |
| 11735076_CYP2C18   | -0.12858 | 0.014501 | 0.035668 |
| 11740139_ABCA2     | -0.18343 | 0.014505 | 0.035676 |
| 11726968_BCAS4     | -0.12817 | 0.014505 | 0.035676 |
| 11730648_GP9       | -0.15558 | 0.014506 | 0.035676 |
| 11747547_SFI1      | -0.12215 | 0.014511 | 0.035687 |
| 11760445_ZNF302    | 0.116492 | 0.014513 | 0.03569  |
| 11720012_JARID2    | 0.195705 | 0.014515 | 0.035692 |
| 11740090_DPH6      | -0.19394 | 0.014516 | 0.035692 |
| 11738383_IL22RA2   | -0.21611 | 0.014517 | 0.035692 |
| 11752394_SULT1C4   | -0.15475 | 0.014517 | 0.035692 |
| 11726513_ZNF407    | 0.116455 | 0.014518 | 0.035692 |
| 11727201_ZNF230    | 0.172357 | 0.014519 | 0.035693 |
| 11736660_MAP3K13   | 0.258704 | 0.014522 | 0.035699 |
| 11758205_CAPNS1    | 0.12273  | 0.014528 | 0.035713 |
| 11745179_DCAF11    | -0.17553 | 0.014529 | 0.035713 |
| 11715777_LUZP6 /// | 0.110681 | 0.014531 | 0.035715 |
| 11737918_PTPRS     | -0.15574 | 0.014534 | 0.035721 |
| 11732212_ZKSCAN1   | 0.150459 | 0.014538 | 0.03573  |
| 11746719_LMCD1     | -0.1223  | 0.014556 | 0.035773 |
| 11716369_SUMO2     | -0.11809 | 0.014561 | 0.035781 |
| 11734009_KDM8      | -0.13593 | 0.014578 | 0.035822 |

|                    |          |          |          |
|--------------------|----------|----------|----------|
| 11757155_SNORA3B   | -0.13776 | 0.014584 | 0.035835 |
| 11730138_KLF1      | -0.17059 | 0.014596 | 0.035863 |
| 11755336_KRI1      | 0.15789  | 0.0146   | 0.035871 |
| 11717261_AMFR      | 0.111394 | 0.014602 | 0.035873 |
| 11736496_TNRC6B    | 0.156448 | 0.014603 | 0.035873 |
| 200016_PMHNRNPA1   | -0.10482 | 0.014603 | 0.035873 |
| 11729772_RNASE2    | -0.18978 | 0.014607 | 0.035882 |
| 11722874_MSL3      | 0.117084 | 0.014613 | 0.035895 |
| 11716105_MPZL1     | -0.1965  | 0.014629 | 0.035933 |
| 11759101_UBXN10    | -0.27203 | 0.014633 | 0.03594  |
| 11729177_FBXO38    | 0.144276 | 0.014634 | 0.035941 |
| 11750057_SPSB3     | -0.1545  | 0.014638 | 0.035948 |
| 11730266_CCDC69    | -0.13222 | 0.01464  | 0.035951 |
| 11740044_MTFMT     | -0.18052 | 0.014642 | 0.035953 |
| 11726274_PCK1      | -0.15955 | 0.014647 | 0.035965 |
| 11729070_HS2ST1    | 0.165298 | 0.014658 | 0.035991 |
| 11762261_HSPA8     | -0.12057 | 0.014675 | 0.03603  |
| 11739577_IGFBPL1   | -0.23087 | 0.014678 | 0.036036 |
| 11739343_NNAT      | -0.17614 | 0.014679 | 0.036036 |
| 11744451_DHX38     | 0.115282 | 0.014684 | 0.036047 |
| 11718629_BOK       | -0.14107 | 0.014689 | 0.036057 |
| 11750737_SMPD4     | -0.26815 | 0.014694 | 0.036068 |
| 11739487_SUZ12     | -0.10673 | 0.014698 | 0.036075 |
| 11728840_TMCC3     | 0.189242 | 0.014708 | 0.036099 |
| 11716936_UNC45A    | -0.1173  | 0.014709 | 0.0361   |
| 11721857_PIGK      | -0.18048 | 0.014716 | 0.036114 |
| 11727077_NUFIP1    | 0.14438  | 0.01472  | 0.036123 |
| 11720819_CXCL12    | -0.19916 | 0.014723 | 0.036128 |
| 11722096	EIF4ENIF1 | -0.1593  | 0.014725 | 0.036128 |
| 11733880_HMGXB4    | -0.14039 | 0.014725 | 0.036128 |
| 11727358_SLC6A3    | -0.17393 | 0.014725 | 0.036128 |
| 11758741_TRAF3IP2  | -0.22006 | 0.01473  | 0.036137 |
| 11724759_CALM1 /// | 0.116133 | 0.014731 | 0.036139 |
| 11744639_SH3D21    | -0.25404 | 0.014734 | 0.036142 |
| 11754305_ULK3      | 0.121268 | 0.014734 | 0.036142 |
| 11738764_TAS2R16   | -0.15138 | 0.014735 | 0.036142 |
| 11752800_KCNK4     | -0.15794 | 0.014736 | 0.036142 |
| 11733264_EML1      | 0.119052 | 0.014736 | 0.036142 |
| 11745706_GSTM2P1   | -0.11427 | 0.014746 | 0.036164 |
| 11749581_CHST10    | -0.17645 | 0.014756 | 0.036186 |
| 11724560_TSR2      | -0.15544 | 0.014764 | 0.036204 |
| 11734697_GOLGA8A / | 0.184413 | 0.014768 | 0.036213 |
| 11731860_ZNF720    | -0.11233 | 0.014774 | 0.036226 |
| 11755341_RPE       | -0.13594 | 0.014778 | 0.036234 |
| 11721967_IGSF11    | -0.16507 | 0.014781 | 0.036239 |
| 11751882_LYST      | 0.249227 | 0.014784 | 0.036244 |
| 11728970_RNF133    | 0.193885 | 0.014791 | 0.036259 |
| 11735852_OR10H1 // | -0.17122 | 0.014792 | 0.036259 |
| 11742325_OR10H1 // | -0.17122 | 0.014792 | 0.036259 |
| 11742778_TBCC      | 0.120139 | 0.0148   | 0.036277 |
| 11743453_HDAC4     | -0.15081 | 0.014811 | 0.036302 |

|                   |          |          |          |
|-------------------|----------|----------|----------|
| 11725560_RECK     | 0.225846 | 0.014818 | 0.036317 |
| 11720444_ERLIN1   | 0.12671  | 0.01482  | 0.03632  |
| 200050_PMZNF146   | 0.147371 | 0.014822 | 0.036323 |
| 11718008_CPNE2    | -0.1451  | 0.014825 | 0.036328 |
| 11760723_KIF6     | 0.372291 | 0.01483  | 0.03634  |
| 11723371_SHANK3   | -0.22442 | 0.014835 | 0.036349 |
| 11749994_CD300LG  | -0.12544 | 0.014839 | 0.036359 |
| 11716778_EIF1AX   | -0.11188 | 0.014846 | 0.036374 |
| 11721226_MTSSL    | 0.330937 | 0.014849 | 0.036379 |
| 11735863_GHRHR    | -0.14832 | 0.014854 | 0.03639  |
| 11724249_SLC39A8  | -0.14753 | 0.014859 | 0.036399 |
| 11762028_ARHGAP29 | 0.138389 | 0.01486  | 0.036401 |
| 11761723_MKRN3    | -0.13854 | 0.014865 | 0.03641  |
| 11732433_GK       | -0.17153 | 0.01487  | 0.036422 |
| 11742699_C1R      | -0.21756 | 0.014873 | 0.036427 |
| 11717377_SRPRB    | 0.143435 | 0.014876 | 0.036433 |
| 11761030_SLC11A1  | -0.22041 | 0.014881 | 0.036441 |
| 11754417_RPL14    | 0.104613 | 0.014881 | 0.036441 |
| 11745735_MRPS14   | -0.12903 | 0.014884 | 0.036445 |
| 11726128_EPYC     | -0.23196 | 0.014886 | 0.036449 |
| 11760380_SEPT6    | -0.17736 | 0.014889 | 0.036455 |
| 11718416_PLA2G2A  | -0.17503 | 0.014897 | 0.036472 |
| 11753616_ARL8B    | 0.104481 | 0.014898 | 0.036472 |
| 11734020_SHANK2   | -0.1274  | 0.014898 | 0.036472 |
| 11720037_VTA1     | -0.12229 | 0.014901 | 0.036477 |
| 11760261_PPIG     | -0.2807  | 0.014902 | 0.036478 |
| 11750641_BCARI    | 0.12524  | 0.014904 | 0.036481 |
| 11738754_OR4D10   | -0.15477 | 0.014907 | 0.036485 |
| 11755983_UBE3D    | 0.143706 | 0.01491  | 0.036492 |
| 11759201_TMEM38A  | -0.21641 | 0.014915 | 0.036503 |
| 11748730_CDC14B   | 0.189805 | 0.014917 | 0.036503 |
| 11715547_TMEM109  | -0.11972 | 0.014917 | 0.036503 |
| 11740669_KLRF1    | -0.23613 | 0.014918 | 0.036503 |
| 11739339_FAM46C   | 0.375151 | 0.014918 | 0.036503 |
| 11723533_BRMS1L   | 0.15776  | 0.01493  | 0.03653  |
| 11759421_SNRNP70  | -0.22004 | 0.014938 | 0.036547 |
| 11736071_C8orf33  | -0.12886 | 0.014939 | 0.036547 |
| 11730483_MYB      | -0.16175 | 0.01495  | 0.036574 |
| 11716891_TMEM261  | -0.22254 | 0.014956 | 0.036586 |
| 11721958_YPEL2    | -0.14774 | 0.01496  | 0.036595 |
| 11719551_RHOBTB1  | 0.16998  | 0.014962 | 0.036597 |
| 11716837_CDV3     | 0.136282 | 0.014964 | 0.036597 |
| 11732271_ANGPTL3  | 0.175691 | 0.014965 | 0.036597 |
| 11726069_PDDC1    | -0.12116 | 0.014965 | 0.036597 |
| 11717066_GREM1    | -0.19663 | 0.014966 | 0.036597 |
| 11730423_APCDD1L  | -0.16353 | 0.014966 | 0.036597 |
| 11738176_NKX3-2   | -0.14252 | 0.014967 | 0.036597 |
| 11753954_VPS26A   | 0.116932 | 0.014969 | 0.036601 |
| 11743720_KSR2     | -0.18343 | 0.014975 | 0.036613 |
| 11752619_FCRL2    | -0.1852  | 0.014978 | 0.036619 |
| 11724616_MOCS1    | -0.15485 | 0.014984 | 0.036633 |



|                    |          |          |          |
|--------------------|----------|----------|----------|
| 11741772_TCEA2     | -0.11723 | 0.014986 | 0.036636 |
| 11752548_ALDH1A1   | 0.200167 | 0.014988 | 0.036639 |
| 11733432_AK7       | -0.1709  | 0.014993 | 0.036649 |
| 11744892_GOLT1B    | 0.103404 | 0.014995 | 0.036653 |
| 11740978_MGAT1     | -0.19154 | 0.014999 | 0.036659 |
| 11743568_ADGRL2    | 0.219796 | 0.015003 | 0.036667 |
| 11737873_ACER1     | -0.20851 | 0.015006 | 0.036673 |
| 11763939_LOC284441 | 0.173467 | 0.015012 | 0.036686 |
| 11763282_RPL23AP82 | 0.518871 | 0.015013 | 0.036687 |
| 11756231_TAF6L     | -0.11458 | 0.015023 | 0.036709 |
| 11757377_DNAH14    | 0.167911 | 0.015026 | 0.036714 |
| 11733083_PALLD     | 0.151347 | 0.015037 | 0.036739 |
| 11751601_DPP7      | -0.14196 | 0.015046 | 0.03676  |
| 11718632_PCBP4     | -0.11842 | 0.015054 | 0.036778 |
| 11740779_CFAP74    | -0.14692 | 0.015062 | 0.036795 |
| 11745368_WDR86     | -0.14559 | 0.015067 | 0.036805 |
| 11751787_DBF4B     | -0.16275 | 0.015068 | 0.036806 |
| 11733733_DPH5      | -0.11613 | 0.015072 | 0.036815 |
| 11737588_KCNA7     | -0.21354 | 0.015073 | 0.036815 |
| 11758193_B2M       | 0.111742 | 0.015075 | 0.036818 |
| 11724809_CBL       | -0.15409 | 0.015076 | 0.036819 |
| 11720968_GART      | -0.10438 | 0.01508  | 0.036826 |
| 11751614_PYROXD2   | 0.113106 | 0.015085 | 0.036837 |
| 11729313_RAC3      | -0.1364  | 0.015087 | 0.036839 |
| 11747244_KCTD20    | 0.144469 | 0.015088 | 0.036839 |
| 11734329_TNN       | -0.27465 | 0.015089 | 0.03684  |
| 11720061_WBP2      | -0.10664 | 0.015095 | 0.036853 |
| 11735872_PTF1A     | 0.13012  | 0.015096 | 0.036855 |
| 11722748_HOOK3     | -0.13824 | 0.015109 | 0.036885 |
| 11720047_ARMCX1    | -0.1413  | 0.015112 | 0.036889 |
| 11726871_LEPR      | 0.109913 | 0.015113 | 0.03689  |
| 11736865_MMP16     | 0.112969 | 0.015117 | 0.036897 |
| 11747920_CLASP2    | 0.120575 | 0.015122 | 0.036908 |
| 11740915_RFX8      | -0.21327 | 0.015126 | 0.036916 |
| 11727298_CASC10    | 0.17705  | 0.015129 | 0.036922 |
| 11718254_PPP1R10   | 0.128119 | 0.015135 | 0.036935 |
| 11723526_HOXB9     | -0.12565 | 0.015137 | 0.036938 |
| 11759366_ZNF835    | -0.19626 | 0.01514  | 0.036944 |
| 11736007_MAPK1IP1L | -0.30048 | 0.015142 | 0.036945 |
| 11738780_EPGN      | -0.14104 | 0.015145 | 0.036951 |
| 11761780_GS1-124K5 | 0.137405 | 0.015146 | 0.036952 |
| 11739197_PCGF3     | 0.14309  | 0.015152 | 0.036965 |
| 11758372_EI24      | 0.119121 | 0.015156 | 0.036974 |
| 11737425_RASGRP4   | -0.18329 | 0.015161 | 0.036983 |
| 11752677_GNL2      | -0.1087  | 0.01518  | 0.037029 |
| 11735782_HHLA3     | 0.170843 | 0.015183 | 0.037031 |
| 11743918_ANK2      | -0.22073 | 0.015183 | 0.037031 |
| 11750090_ZBTB80S   | 0.125061 | 0.015184 | 0.037033 |
| 11729163_BTG3      | -0.15051 | 0.015193 | 0.037052 |
| 11741380_ARNT      | 0.170061 | 0.015198 | 0.037062 |
| 11724027_PPP6R3    | -0.12854 | 0.0152   | 0.037065 |

|                    |          |          |          |
|--------------------|----------|----------|----------|
| 11719833_MPZL2     | -0.17878 | 0.015215 | 0.037101 |
| 11763492_NRN1      | -0.23336 | 0.015217 | 0.037104 |
| 11726253_AKIRIN2   | -0.14995 | 0.01522  | 0.03711  |
| 11762493_GPR135    | 0.180475 | 0.015232 | 0.037137 |
| 11730215_CSRP1     | -0.11514 | 0.015237 | 0.037146 |
| 11740542_CNGB3     | -0.17856 | 0.015243 | 0.037159 |
| 11721848_REEP2     | -0.14562 | 0.015244 | 0.037159 |
| 11738762_OR6Q1     | -0.14658 | 0.015245 | 0.03716  |
| 11755661_KCNMA1    | 0.16734  | 0.015246 | 0.03716  |
| 11715770_SET       | -0.10485 | 0.01525  | 0.03717  |
| 11757232_KCNQ10T1  | 0.181555 | 0.015254 | 0.037176 |
| 11763329_DOK1      | -0.12496 | 0.015256 | 0.037179 |
| 11735377_MSTN      | -0.18774 | 0.015262 | 0.037192 |
| 11753549_CMTM3     | 0.111089 | 0.015264 | 0.037196 |
| 11746431_FBXO11    | 0.15043  | 0.015283 | 0.037239 |
| 11727983_LRRC46    | -0.15557 | 0.015286 | 0.037245 |
| 11719060_ATRN      | -0.16112 | 0.01529  | 0.037252 |
| 11754741_DZANK1    | 0.118876 | 0.01529  | 0.037252 |
| 11720502_UBE4B     | -0.13002 | 0.015291 | 0.037252 |
| 11721782_SLC9A8    | 0.111269 | 0.015304 | 0.037281 |
| 11755390_GAPVD1    | 0.103188 | 0.015304 | 0.037281 |
| 11729348_HMGN5     | -0.30364 | 0.015311 | 0.037296 |
| 11745126_FAM120C   | -0.1261  | 0.015316 | 0.037306 |
| 11749487_SNRNP200  | 0.114571 | 0.015321 | 0.037317 |
| 11729803_LYPD5     | 0.299013 | 0.015328 | 0.037331 |
| 11755078_TADA2B    | 0.148516 | 0.015333 | 0.037341 |
| 11741109_ZNF57     | 0.169496 | 0.015339 | 0.037353 |
| 11759406_SEC16B    | -0.20405 | 0.01534  | 0.037355 |
| 11739378_SREK1     | 0.130215 | 0.015343 | 0.03736  |
| 11727212_DTWD1     | -0.29114 | 0.015346 | 0.037366 |
| 11743475_ITGAX     | -0.14312 | 0.01535  | 0.037372 |
| 11757647_LINCO0909 | 0.175437 | 0.015352 | 0.037375 |
| 11746134_NOP56     | 0.107214 | 0.015354 | 0.03738  |
| 11740412_PRKD2     | -0.13    | 0.015358 | 0.037388 |
| 11741363_RAB23     | 0.134508 | 0.01536  | 0.037391 |
| 11742610_OR6C3     | -0.12105 | 0.015363 | 0.037395 |
| 11760102_UBE2B     | 0.196633 | 0.015365 | 0.037399 |
| 11746046_UBQLN2    | -0.12927 | 0.015366 | 0.037399 |
| 11760248_OXNAD1    | 0.136064 | 0.015368 | 0.037403 |
| 11761354_LOC100289 | -0.15004 | 0.015374 | 0.037416 |
| 11761163_GS52      | -0.24571 | 0.015379 | 0.037427 |
| 11718752_FUK       | 0.148158 | 0.015381 | 0.037429 |
| 11763117_IGHG1     | 0.309036 | 0.015383 | 0.037433 |
| 11720531_C9orf72   | -0.15122 | 0.015387 | 0.037439 |
| 11729528_POMT2     | 0.196498 | 0.015393 | 0.037453 |
| 11758010_GOLGA6L1  | -0.21603 | 0.015396 | 0.037457 |
| 11751837_HSPA4     | -0.11709 | 0.015405 | 0.037478 |
| 11718661_NENF      | 0.129056 | 0.015409 | 0.037484 |
| 11731989_HESX1     | 0.185842 | 0.015412 | 0.037491 |
| 11748993_COG3      | 0.156485 | 0.015414 | 0.037495 |
| 11741327_GAGE1 /// | 0.188323 | 0.015436 | 0.037543 |

|                    |          |          |          |
|--------------------|----------|----------|----------|
| 11742411_CCDC168   | 0.174237 | 0.015436 | 0.037543 |
| 11743935_FGD1      | -0.12628 | 0.015439 | 0.037549 |
| 11721228_LEMD3     | 0.114375 | 0.015444 | 0.037559 |
| 11735661_PLA2G2F   | -0.13457 | 0.015462 | 0.037602 |
| 11740239_CFAP161   | -0.19244 | 0.015463 | 0.037602 |
| 11750268_LINCO0612 | 0.283207 | 0.015464 | 0.037602 |
| 11759796_HELZ2     | 0.141528 | 0.015466 | 0.037605 |
| 11748052_EI24      | 0.145625 | 0.01547  | 0.037613 |
| 11739756_ZNF74     | 0.208384 | 0.015474 | 0.03762  |
| 11716421_SPTBN1    | -0.15199 | 0.015474 | 0.03762  |
| 11730157_CYP8B1    | -0.12723 | 0.015481 | 0.037634 |
| 11733231_PTPRB     | -0.20373 | 0.015484 | 0.037639 |
| 11734741_LIMK2     | 0.218733 | 0.015492 | 0.037657 |
| 11732231_ORAI2     | 0.138113 | 0.015513 | 0.037706 |
| 11732388_TCEANC2   | 0.12689  | 0.015522 | 0.037727 |
| 11759547_DDR2      | -0.32074 | 0.015525 | 0.037733 |
| 11758991_FAM171A2  | -0.21062 | 0.015528 | 0.037737 |
| 11737307_ATP1A4    | -0.19355 | 0.01554  | 0.037765 |
| 11724717_DMAP1     | -0.11286 | 0.015545 | 0.037775 |
| 11732668_APITD1-CC | -0.14814 | 0.015549 | 0.037782 |
| 11751676_AK2       | -0.15293 | 0.015552 | 0.037789 |
| 11760227_GNAI2     | -0.15597 | 0.015553 | 0.037789 |
| 11742057_CNTN1     | -0.17453 | 0.015557 | 0.037795 |
| 11736804_ZNF43     | 0.147905 | 0.015557 | 0.037795 |
| 11725408_DEAF1     | 0.127561 | 0.015563 | 0.037807 |
| 11725196_ZSWIM7    | 0.225806 | 0.015566 | 0.037812 |
| 11737084_ZNF490    | 0.115698 | 0.015567 | 0.037814 |
| 11729000_CD84      | -0.19965 | 0.015568 | 0.037814 |
| 11742972_CCAR1     | 0.162112 | 0.015574 | 0.037827 |
| 11738034_PCDHGB4   | -0.21727 | 0.015576 | 0.03783  |
| 11740642_PLAC8     | 0.195991 | 0.015582 | 0.037842 |
| 11724955_LOC105369 | -0.14458 | 0.015595 | 0.037871 |
| 11751058_OTX1      | -0.15805 | 0.015595 | 0.037871 |
| 11729164_XPO5      | -0.17076 | 0.0156   | 0.037881 |
| 11736266_TRAPPC8   | -0.13314 | 0.015605 | 0.037891 |
| 11761637_MST1      | -0.16186 | 0.015606 | 0.037891 |
| 11715914_EFNB1     | -0.14758 | 0.01563  | 0.037945 |
| 11744331_CFB       | -0.14619 | 0.01563  | 0.037945 |
| 11739873_ATAD3C    | -0.11938 | 0.015633 | 0.03795  |
| 11761001_RHD       | -0.16315 | 0.015644 | 0.037977 |
| 11753623_RAP1B /// | 0.160437 | 0.015651 | 0.03799  |
| 11750314_WDR87     | -0.14735 | 0.015651 | 0.03799  |
| 11721655_CISD2     | -0.1397  | 0.015659 | 0.038004 |
| 11732868_FARP1     | -0.26033 | 0.015659 | 0.038004 |
| 11719003_ANKH      | -0.43769 | 0.015659 | 0.038004 |
| 11743238_LRRC30    | -0.15022 | 0.01566  | 0.038004 |
| 11753290_CHODL     | -0.11457 | 0.015666 | 0.038017 |
| 11746952_MDK       | -0.11906 | 0.015673 | 0.038032 |
| 11732751_CC2D2A    | 0.193387 | 0.01568  | 0.038045 |
| 11741237_C4orf17   | -0.2323  | 0.015682 | 0.038048 |
| 11718045_RAB11B    | -0.11676 | 0.015685 | 0.038056 |

|                    |          |          |          |
|--------------------|----------|----------|----------|
| 11741674_NTRK1     | -0.12234 | 0.015688 | 0.03806  |
| 11736295_FGFBP3    | -0.3289  | 0.015689 | 0.03806  |
| 11730949_MRPL52    | 0.106317 | 0.015689 | 0.03806  |
| 11761571_STK11IP   | -0.25619 | 0.015696 | 0.038074 |
| 11741115_CYP3A7 // | 0.269183 | 0.015712 | 0.03811  |
| 11731262_SLC4A5    | -0.43522 | 0.015713 | 0.038111 |
| 11746665_PAXBPI    | 0.133489 | 0.015716 | 0.038115 |
| 11739697_AFF3      | 0.245728 | 0.015717 | 0.038115 |
| 11734976_FAM218A   | 0.160002 | 0.015717 | 0.038115 |
| 11751326_RAB11A    | -0.10561 | 0.015726 | 0.038136 |
| 11740531_CLEC10A   | -0.17959 | 0.015728 | 0.038139 |
| 11718103_RELA      | 0.181099 | 0.015731 | 0.038143 |
| 11718473_CLIP3     | -0.16612 | 0.015734 | 0.038148 |
| 11715985_HTN3      | -0.1458  | 0.015745 | 0.038173 |
| 11728709_EMP2      | 0.12412  | 0.015747 | 0.038176 |
| 11722377_PNPO      | -0.11046 | 0.015754 | 0.038191 |
| 11729834_EIF5A2    | -0.18588 | 0.015775 | 0.038241 |
| 11756351_SOD1      | -0.10435 | 0.015778 | 0.038247 |
| 11745028_NKRF      | 0.119361 | 0.015779 | 0.038248 |
| 11734241_KIF19     | -0.1834  | 0.015783 | 0.038253 |
| 11729443_PML       | -0.12729 | 0.015783 | 0.038253 |
| 11745404_ADAMTSL5  | 0.118214 | 0.015799 | 0.038289 |
| 11725070_JADE1     | -0.15087 | 0.0158   | 0.038289 |
| 11750614_GRIN1     | -0.17253 | 0.015801 | 0.038289 |
| 11743397_CSDE1     | -0.12846 | 0.015805 | 0.038299 |
| 11741525_C22orf24  | -0.22677 | 0.015808 | 0.038302 |
| 11724533_CCDC184   | -0.1588  | 0.015809 | 0.038304 |
| 11732835_MBD3L1    | -0.27704 | 0.015812 | 0.03831  |
| 11747830_BAP1      | -0.13748 | 0.015818 | 0.038321 |
| 11747105_HSPH1     | 0.10649  | 0.015819 | 0.038321 |
| 11724607_RTKN      | -0.1554  | 0.01582  | 0.038321 |
| 11716589_TMEM165   | 0.106306 | 0.015821 | 0.038321 |
| 11751812_TMEM241   | -0.18339 | 0.015821 | 0.038321 |
| 11720232_UCHL3     | 0.111525 | 0.015822 | 0.038321 |
| 11731786_ERC1      | 0.136574 | 0.015829 | 0.038338 |
| 11733091_TSPAN8    | 0.229859 | 0.015835 | 0.038349 |
| 11729597_TKFC      | -0.13846 | 0.015835 | 0.038349 |
| 11750514_TP53      | -0.11237 | 0.015856 | 0.038398 |
| 11751795_CPQ       | 0.310585 | 0.015864 | 0.038415 |
| 11725008_SEPT6     | -0.17378 | 0.015873 | 0.038434 |
| 11734574_HIST1H3F  | -0.18924 | 0.015884 | 0.038459 |
| 11717007_POLDIP3   | -0.13678 | 0.015886 | 0.038461 |
| 11754067_TXNDC9    | 0.125173 | 0.015892 | 0.038474 |
| 11743132_SLN       | -0.18061 | 0.015901 | 0.038495 |
| 11715336_SP9       | -0.20868 | 0.015903 | 0.038499 |
| 11729368_GANC      | 0.136677 | 0.015913 | 0.03852  |
| 11728844_PROSER2   | -0.13144 | 0.015914 | 0.03852  |
| 11752613_JAK3      | -0.17139 | 0.01593  | 0.038557 |
| 11732951_ENTPD8    | -0.14803 | 0.015937 | 0.038573 |
| 11732273_COA7      | 0.137365 | 0.015938 | 0.038573 |
| 11732287_DZIP3     | -0.10962 | 0.01594  | 0.038577 |

|                    |          |          |          |
|--------------------|----------|----------|----------|
| 11720843_N4BP1     | -0.109   | 0.015942 | 0.038577 |
| 11750623_FILIP1L   | -0.20601 | 0.015942 | 0.038577 |
| 11723751_TFF2      | -0.18545 | 0.015946 | 0.038583 |
| 11740603_APH1B     | 0.177059 | 0.015946 | 0.038583 |
| 11752626_PBX1      | -0.18784 | 0.015948 | 0.038585 |
| 11751959_NEK1      | 0.31834  | 0.015963 | 0.03862  |
| 11741878_PML       | -0.15217 | 0.015969 | 0.038632 |
| 11735484_LANCL3    | 0.152931 | 0.015983 | 0.038664 |
| 11716968_NRP2      | -0.26566 | 0.015984 | 0.038664 |
| 11720291_IQCE      | -0.14585 | 0.015995 | 0.038691 |
| 11745410_SLC36A1   | 0.231396 | 0.015996 | 0.038691 |
| 11749559_CYP4F8    | -0.15782 | 0.016    | 0.038698 |
| 11744665_RAB40C    | -0.17616 | 0.016006 | 0.038711 |
| 11728454_DOCK9     | 0.16711  | 0.016007 | 0.038712 |
| 11726808_ZAK       | -0.1552  | 0.016018 | 0.038736 |
| 11760909_LTBP4     | -0.13324 | 0.01602  | 0.038738 |
| 11729462_CTNS      | -0.12444 | 0.01602  | 0.038738 |
| 11758234_MED21     | -0.13558 | 0.016022 | 0.03874  |
| 11722515_PARS2     | -0.19285 | 0.016028 | 0.038753 |
| 11753513_UBXN2A    | 0.178549 | 0.016039 | 0.038776 |
| 11727187_WNT5A     | 0.238987 | 0.016041 | 0.038779 |
| 11716951_NANS      | -0.11241 | 0.016042 | 0.038779 |
| 11751362_SUGCT     | 0.240034 | 0.016046 | 0.038788 |
| 11735881_MYBBP1A   | -0.11277 | 0.016047 | 0.038789 |
| 11725165_C7orf31   | -0.19475 | 0.016053 | 0.038801 |
| 11725969_THUMPD1   | 0.121908 | 0.016055 | 0.038803 |
| 11723718_CSNK2B    | 0.136635 | 0.016061 | 0.038817 |
| 11754763_GNPDA1    | -0.12602 | 0.016068 | 0.038831 |
| 11760077_CEP290    | -0.26206 | 0.016071 | 0.038837 |
| 11747453_PPP1R18   | 0.120147 | 0.016076 | 0.038847 |
| 11730513_LSMEM1    | 0.24829  | 0.016081 | 0.038856 |
| 11760101_IP6K2     | -0.13415 | 0.016082 | 0.038857 |
| 11750965_SRL       | -0.19758 | 0.016082 | 0.038857 |
| 11730305_FANCA     | -0.12989 | 0.016085 | 0.038862 |
| 11728961_DISC1 /// | 0.128092 | 0.01609  | 0.038869 |
| 11735303_HOXA11    | -0.16605 | 0.01609  | 0.038869 |
| 11740108_BCL7A     | -0.21154 | 0.016091 | 0.038869 |
| 11748802_GLDN      | -0.13935 | 0.016092 | 0.038871 |
| 11746983_INTS3     | -0.14703 | 0.016097 | 0.038881 |
| 11759460_ZNF836    | -0.13683 | 0.016101 | 0.038888 |
| 11728033_SFT2D2    | 0.12266  | 0.016103 | 0.038892 |
| 11752810_DOLK      | 0.113471 | 0.016106 | 0.038896 |
| 11726884_LDHD      | -0.12213 | 0.016111 | 0.038905 |
| 11738803_CACNA1G   | -0.21382 | 0.016123 | 0.038932 |
| 11763622_FKBP9     | -0.21115 | 0.016123 | 0.038932 |
| 11754616_UPF1      | -0.1604  | 0.016129 | 0.038945 |
| 11755301_TOLLIP    | 0.192607 | 0.016131 | 0.038946 |
| 11735619_LEXM      | 0.164509 | 0.01614  | 0.038968 |
| 11750972_CACTIN    | -0.14434 | 0.016145 | 0.038978 |
| 11722372_GGA2      | -0.20626 | 0.016162 | 0.039015 |
| 11732629_ZNF765    | 0.306072 | 0.01617  | 0.039034 |

|                    |          |          |          |
|--------------------|----------|----------|----------|
| 11760238_RWDD3     | 0.379471 | 0.016172 | 0.039037 |
| 11758322_GATSL2    | -0.16796 | 0.0162   | 0.039101 |
| 11737302_CHST5     | -0.16285 | 0.016203 | 0.039108 |
| 11749566_LCMT2     | -0.14191 | 0.016204 | 0.039109 |
| 11730505_RD3       | -0.11695 | 0.016207 | 0.039114 |
| 11756521_IREB2     | -0.18279 | 0.01621  | 0.039118 |
| 11739608_ZNF805    | 0.112451 | 0.016217 | 0.039133 |
| 11736573_PRKCD     | 0.136303 | 0.016218 | 0.039133 |
| 11740470_HM13      | 0.128176 | 0.016223 | 0.039144 |
| 11757923_VPS41     | 0.169826 | 0.016225 | 0.039146 |
| 11739315_KDR       | 0.167846 | 0.016246 | 0.039196 |
| 11737090_NOS1AP    | -0.19367 | 0.016247 | 0.039196 |
| 11724808_CBL       | 0.186442 | 0.016248 | 0.039197 |
| 11726899_SLC6A17   | -0.14495 | 0.016252 | 0.039204 |
| 11755625_CCDC81    | 0.254557 | 0.01626  | 0.039221 |
| 11743738_NR3C1     | -0.12439 | 0.016263 | 0.039228 |
| 11747587_VWA9      | -0.11163 | 0.016271 | 0.039244 |
| 11739130_ABAT      | -0.24327 | 0.016276 | 0.039255 |
| 11732773_CCDC57    | 0.12464  | 0.016278 | 0.039257 |
| 11742468_RASSF10   | -0.1788  | 0.016286 | 0.039276 |
| 11743288_PEA1      | -0.12466 | 0.016292 | 0.039288 |
| 11740144_CEP164    | 0.13061  | 0.0163   | 0.039304 |
| 11755798_AMER1     | -0.23348 | 0.0163   | 0.039304 |
| 11760324_MSI2      | 0.148991 | 0.016308 | 0.03932  |
| 11736858_ZNF182    | -0.19248 | 0.016341 | 0.039397 |
| 11716870_PHC2      | -0.12066 | 0.016348 | 0.039413 |
| 11721036_SUFU      | -0.12536 | 0.016355 | 0.039428 |
| 11727254_TMEM51    | -0.1511  | 0.016357 | 0.03943  |
| 11730043_C19orf45  | -0.10638 | 0.016357 | 0.03943  |
| 11716669_RAB1A /// | -0.11367 | 0.016358 | 0.03943  |
| 11725529_ZNF248    | -0.15863 | 0.016367 | 0.03945  |
| 11725582_IL17B     | -0.12797 | 0.016369 | 0.039453 |
| 11762509_CBWD1 /// | 0.191502 | 0.01637  | 0.039453 |
| 11731353_RIMBP3 // | -0.1784  | 0.016372 | 0.039455 |
| 11734384_AKR1E2    | -0.20054 | 0.016375 | 0.03946  |
| 11760010_LINCO0656 | -0.23633 | 0.016381 | 0.039472 |
| 11758780_NOP16     | 0.114432 | 0.016383 | 0.039475 |
| 11718689_NES       | -0.11996 | 0.016385 | 0.039478 |
| 11760896_SLC29A1   | -0.18143 | 0.016395 | 0.0395   |
| 11716723_DPY19L1   | -0.12145 | 0.016396 | 0.039502 |
| 11762058_FAM120B   | 0.163285 | 0.016398 | 0.039504 |
| 11721888_MID1      | -0.12192 | 0.016399 | 0.039504 |
| 11747184_SHBG      | -0.16122 | 0.016399 | 0.039504 |
| 11753464_MED16     | -0.13056 | 0.016407 | 0.03952  |
| 11743906_UXS1      | -0.12617 | 0.016413 | 0.039533 |
| 11756009_SHANK2    | -0.2719  | 0.016422 | 0.039552 |
| 11715320_TTN       | -0.15229 | 0.016433 | 0.039577 |
| 11761727_AQP7      | -0.28893 | 0.016444 | 0.039602 |
| 11743227_CR1L      | -0.21116 | 0.016447 | 0.039606 |
| 11722214_QTRT1     | -0.1541  | 0.016448 | 0.039607 |
| 11719601_MOXD1     | 0.262554 | 0.01645  | 0.03961  |

|                    |          |          |          |
|--------------------|----------|----------|----------|
| 11729034_ITPRIPL2  | 0.132996 | 0.016454 | 0.039618 |
| 11746657_VRK3      | 0.152461 | 0.016455 | 0.039618 |
| 11724875_CD36      | 0.160641 | 0.016471 | 0.039655 |
| 11718588_BEX4      | -0.2821  | 0.016473 | 0.039658 |
| 11734159_HACE1     | 0.190276 | 0.016476 | 0.039662 |
| 11718328_SGSM2     | -0.10427 | 0.016477 | 0.039662 |
| 11718377_PRKAG2    | 0.177485 | 0.016478 | 0.039664 |
| 11724009_GPR162    | -0.1257  | 0.016479 | 0.039664 |
| 11718977_CAPN2     | 0.154583 | 0.016487 | 0.039682 |
| 11719950_BCAN      | 0.144575 | 0.016498 | 0.039705 |
| 11736089_TRIOBP    | 0.108628 | 0.016499 | 0.039706 |
| 11761230_CD79B     | -0.23395 | 0.016516 | 0.039744 |
| 11745402_CYP2U1    | 0.262524 | 0.016516 | 0.039744 |
| 11729143_KDM5C     | 0.129049 | 0.016518 | 0.039746 |
| 11717728_HSPB7     | -0.13799 | 0.016526 | 0.039764 |
| 11760917_GBF1      | 0.126214 | 0.016527 | 0.039765 |
| 11759621_TCL6      | -0.17413 | 0.016529 | 0.039766 |
| 11753482_NPSR1     | -0.1883  | 0.016545 | 0.039802 |
| 11760188_DDTL      | -0.23354 | 0.016545 | 0.039802 |
| 11763798_STMN4     | 0.186985 | 0.016555 | 0.039824 |
| 11762111_PPT2 ///  | -0.12931 | 0.016583 | 0.039888 |
| 11763479_FAAP20    | -0.26839 | 0.016584 | 0.039889 |
| 11757033_IL13RA2   | 0.110563 | 0.016586 | 0.039893 |
| 11745936_SLC50A1   | 0.116179 | 0.016601 | 0.039926 |
| 11716609_CRABP2    | 0.120317 | 0.016622 | 0.039974 |
| 11763235_HSP90AB4P | -0.13942 | 0.016632 | 0.039996 |
| 11747178_GM2A      | -0.35172 | 0.016633 | 0.039996 |
| 11754534_ZFYVE16   | 0.142271 | 0.01664  | 0.040012 |
| 11723309_TNFRSF10D | -0.15948 | 0.016641 | 0.040013 |
| 11751663_CD300LB   | -0.18582 | 0.016645 | 0.04002  |
| 11746432_FBXO11    | 0.147059 | 0.016646 | 0.04002  |
| 11758670_STK3      | -0.11297 | 0.016655 | 0.040041 |
| 11717943_EIF2B1    | 0.119432 | 0.016662 | 0.040055 |
| 11726879_TTBK1     | -0.16665 | 0.01667  | 0.040073 |
| 11727267_SRPK3     | -0.14904 | 0.016671 | 0.040073 |
| 11754509_SORBS1    | 0.153227 | 0.016674 | 0.040077 |
| 11741713_KCP       | -0.12013 | 0.016678 | 0.040086 |
| 11743237_TMEM8C    | -0.2234  | 0.016679 | 0.040087 |
| 11724974_MYRIP     | 0.232066 | 0.016682 | 0.040091 |
| 11727078_NUFIP1    | 0.137986 | 0.016693 | 0.040115 |
| 11721067_MGRN1     | 0.114066 | 0.016693 | 0.040115 |
| 11744360_RTN4      | -0.18057 | 0.016695 | 0.040117 |
| 11736398_RFT1      | -0.198   | 0.016701 | 0.04013  |
| 11734545_NARFL     | -0.11645 | 0.016704 | 0.040136 |
| 11724581_ZNF827    | 0.216568 | 0.016706 | 0.040138 |
| 11740829_SYDE2     | 0.249128 | 0.016714 | 0.040153 |
| 11755370_BZRAP1    | -0.20141 | 0.016715 | 0.040156 |
| 11719121_PPP1R14A  | 0.198894 | 0.016723 | 0.040172 |
| 11733248_DBNDD2 // | 0.101529 | 0.016725 | 0.040174 |
| 11757562_CLEC18A / | -0.21551 | 0.01673  | 0.040184 |
| 11750818_TTC39B    | 0.261059 | 0.016735 | 0.040195 |

|                    |          |          |          |
|--------------------|----------|----------|----------|
| 11755135_ABHD1     | -0.24757 | 0.016737 | 0.040197 |
| 11734211_TMPRSS11B | -0.16313 | 0.016737 | 0.040197 |
| 11757588_ALG5      | 0.113809 | 0.016738 | 0.040197 |
| 11751196_VPS13D    | -0.24176 | 0.01674  | 0.040198 |
| 11747318_TTC26     | 0.138505 | 0.016741 | 0.0402   |
| 11751556_NUDT13    | 0.259595 | 0.016743 | 0.040201 |
| 11763494_FRMD8     | 0.13746  | 0.016748 | 0.040212 |
| 11753167_SYPL2     | -0.14894 | 0.016752 | 0.040221 |
| 11721502_SWAP70    | -0.13857 | 0.016755 | 0.040225 |
| 11718246_SPIDR     | -0.1102  | 0.016762 | 0.040241 |
| 11764166_EHF       | 0.27671  | 0.016771 | 0.040258 |
| 11757274_ARGLU1    | 0.102617 | 0.016771 | 0.040258 |
| 11733018_PIK3R1    | 0.13502  | 0.016773 | 0.040262 |
| 11727220_FITM1     | -0.11818 | 0.016782 | 0.040278 |
| 11728222_TRAPPC3   | -0.12381 | 0.016782 | 0.040278 |
| 11762121_DNMT3B    | -0.24243 | 0.016785 | 0.040284 |
| 11763779_RGS12     | -0.1605  | 0.016791 | 0.040297 |
| 11728525_C11orf63  | 0.337523 | 0.016792 | 0.040297 |
| 11746605_KIAA0586  | -0.10209 | 0.016794 | 0.040298 |
| 11717519_LOC102724 | 0.129227 | 0.016799 | 0.04031  |
| 11757267_SIRT2     | -0.13329 | 0.016806 | 0.040323 |
| 11727716_ITGA10    | -0.16516 | 0.016813 | 0.04034  |
| 11716990_AREL1     | 0.183528 | 0.016815 | 0.040341 |
| 11728836_LRRTM1    | -0.14735 | 0.016817 | 0.040344 |
| 11753666_PTN       | 0.201138 | 0.016818 | 0.040344 |
| 11745564_DNAJC4    | -0.13403 | 0.016839 | 0.040391 |
| 11760952_HNRNPD    | -0.24324 | 0.016839 | 0.040391 |
| 11736531_LRRFIP1   | -0.19195 | 0.016841 | 0.040393 |
| 11738246_OR3A2     | -0.14887 | 0.016842 | 0.040395 |
| 11729116_PRKCG     | -0.15555 | 0.016848 | 0.040406 |
| 11733824_AGPAT3    | -0.28712 | 0.016849 | 0.040407 |
| 11758006_SMARCAD1  | -0.12859 | 0.016851 | 0.040411 |
| 11760319_HBP1      | -0.34789 | 0.016852 | 0.040411 |
| 11758511_AK5       | -0.24663 | 0.016853 | 0.040412 |
| 11723785_LIMCH1    | -0.11563 | 0.016857 | 0.040419 |
| 11718711_SLC9A1    | 0.153828 | 0.01686  | 0.040425 |
| 11720285_TRAK1     | 0.12623  | 0.016862 | 0.040425 |
| 11752853_HNF1A     | 0.147473 | 0.016862 | 0.040425 |
| 11715263_SPEF2     | -0.21344 | 0.016865 | 0.040429 |
| 11753677_WNT5A     | 0.130358 | 0.016866 | 0.040431 |
| 11751596_ABI1      | 0.109699 | 0.016869 | 0.040436 |
| 11737668_TAS2R4    | -0.13344 | 0.016882 | 0.040464 |
| 11753007_BCR       | -0.2305  | 0.016896 | 0.040496 |
| 11726849_SHC4      | 0.172328 | 0.016899 | 0.0405   |
| 11740019_TMEM200C  | -0.18116 | 0.016931 | 0.040575 |
| 11754503_CEPT1     | -0.1077  | 0.016931 | 0.040575 |
| 11739941_SENP1     | -0.14877 | 0.016936 | 0.040583 |
| 11749068_ARMT1     | 0.131324 | 0.016939 | 0.04059  |
| 11744599_NUP62     | -0.1145  | 0.016944 | 0.040599 |
| 11726414_EPM2A     | -0.15865 | 0.016963 | 0.040644 |
| 11746304_NOP14     | 0.112223 | 0.01697  | 0.040658 |



|                    |          |          |          |
|--------------------|----------|----------|----------|
| 11763717_CDKN1C    | 0.224595 | 0.016975 | 0.040665 |
| 11722996_NOL11     | -0.12325 | 0.016976 | 0.040665 |
| 11736064_P2RX7     | -0.16919 | 0.016976 | 0.040665 |
| 11733536_KCNG3     | -0.21819 | 0.016982 | 0.040678 |
| 11747265_BCAS1     | -0.26406 | 0.016984 | 0.04068  |
| 11749271_DNAH9     | -0.21579 | 0.016985 | 0.04068  |
| 11715965_ST14      | -0.17915 | 0.016985 | 0.04068  |
| 11725757_ISL1      | 0.220328 | 0.016986 | 0.040681 |
| 11720688_ZNF133    | 0.107387 | 0.016989 | 0.040686 |
| 11757004_KCTD10    | -0.15438 | 0.016991 | 0.040688 |
| 11725987_MMP14     | -0.15418 | 0.017003 | 0.040714 |
| 11743598_RNF207    | 0.16627  | 0.017005 | 0.040718 |
| 11734258_PRKAG3    | -0.19758 | 0.017006 | 0.040718 |
| 11739452_ME2       | 0.119577 | 0.01702  | 0.040748 |
| 11761094_ZNF614    | -0.15512 | 0.017021 | 0.040751 |
| 11752119_SLC17A5   | 0.141608 | 0.017023 | 0.040753 |
| 11722257_SCRN2     | -0.15277 | 0.017028 | 0.040762 |
| 11723804_AKAP12    | -0.11524 | 0.01703  | 0.040766 |
| 11724146_RAB38     | -0.12508 | 0.017041 | 0.040789 |
| 11720589_PHF21A    | 0.119784 | 0.017042 | 0.040789 |
| 11754531_SUGP1     | -0.11976 | 0.01705  | 0.040807 |
| 11741892_FOXP3     | -0.16422 | 0.017052 | 0.04081  |
| 11760209_RPL37A    | -0.15324 | 0.017054 | 0.040814 |
| 11758874_C1orf51   | -0.16633 | 0.017066 | 0.04084  |
| 11719084_SMARCC2   | -0.11015 | 0.017067 | 0.04084  |
| 11741901_KIR2DL5A  | -0.1109  | 0.017074 | 0.040854 |
| 11759937_LINCO1547 | -0.13217 | 0.017076 | 0.040858 |
| 11760201_MAN1B1    | -0.16622 | 0.01708  | 0.040865 |
| 11740028_CREM      | 0.111226 | 0.017081 | 0.040865 |
| 11748641_ZADH2     | -0.19523 | 0.017086 | 0.040875 |
| 11736774_ZIC3      | -0.27743 | 0.017104 | 0.040916 |
| 11725834_ALKBH1    | -0.15093 | 0.017105 | 0.040917 |
| 11762666_AP5M1     | 0.260038 | 0.017109 | 0.040925 |
| 11762372_GSN-AS1   | -0.2831  | 0.017122 | 0.040954 |
| 11755556_EXOC2     | 0.121464 | 0.017129 | 0.040968 |
| 11727475_TMEM260   | 0.183359 | 0.017131 | 0.040972 |
| 11735951_SSTR4     | -0.17934 | 0.017134 | 0.040975 |
| 11717880_ATXN7L3   | -0.14764 | 0.017134 | 0.040975 |
| 11732832_RNASEH2B  | -0.14908 | 0.017139 | 0.040985 |
| 11751921_AHR       | -0.11034 | 0.017147 | 0.041002 |
| 11719600_HOMER2    | -0.11865 | 0.017151 | 0.041009 |
| 11730135_ZFR2      | -0.13334 | 0.017153 | 0.041013 |
| 11753211_DHRS4 /// | -0.1371  | 0.017157 | 0.041018 |
| 11734875_PPF1BP1   | 0.13799  | 0.017162 | 0.041028 |
| 11732867_CEACAM21  | -0.1264  | 0.017168 | 0.041041 |
| 11744928_SIAH1     | -0.12384 | 0.01717  | 0.041043 |
| 11733973_PCDH18    | 0.143876 | 0.01717  | 0.041043 |
| 11741005_PARG      | -0.18787 | 0.017175 | 0.041051 |
| 11736511_PTPRJ     | 0.273976 | 0.017184 | 0.041071 |
| 11729035_ITPRIPL2  | 0.134745 | 0.017185 | 0.041073 |
| 11749775_GTDC1     | 0.190889 | 0.017194 | 0.041091 |

|                    |          |          |          |
|--------------------|----------|----------|----------|
| 11750028_ATP6AP2   | 0.111878 | 0.017207 | 0.04112  |
| 11753834_CXADR     | 0.239262 | 0.017211 | 0.041127 |
| 11752137_ADAMTS6   | 0.23055  | 0.017218 | 0.041142 |
| 11718814_PVRL1     | -0.17269 | 0.017218 | 0.041142 |
| 11740671_COX15     | 0.124116 | 0.017221 | 0.041146 |
| 11747926_IFI16     | -0.1038  | 0.017223 | 0.041148 |
| 11725034_SYP       | -0.13432 | 0.017223 | 0.041148 |
| 11719007_BTBD6     | -0.12298 | 0.017233 | 0.041168 |
| 11744869_B3GNT2    | -0.19828 | 0.017244 | 0.041193 |
| 11729357_PAPD4     | -0.14993 | 0.017254 | 0.041215 |
| 11718617_DNAJA4    | -0.10792 | 0.017256 | 0.041217 |
| 11731253_C16orf13  | -0.12171 | 0.017265 | 0.041236 |
| 11733210_BRCC3     | 0.190351 | 0.017269 | 0.041243 |
| 11726019_EEPD1     | -0.19425 | 0.017273 | 0.041251 |
| 11749313_ABI1      | 0.125067 | 0.017286 | 0.041279 |
| 11726763_RLBP1     | -0.1729  | 0.017286 | 0.041279 |
| 11738625_SLC17A8   | -0.19428 | 0.017287 | 0.041279 |
| 11739115_TSPYL1    | 0.120558 | 0.01729  | 0.041285 |
| 11755317_CBWD1 /// | 0.142517 | 0.017303 | 0.041314 |
| 11717469_EPT1      | 0.200449 | 0.017311 | 0.04133  |
| 11726047_ASXL2     | 0.159223 | 0.017311 | 0.04133  |
| 11724271_HLF       | 0.124876 | 0.017314 | 0.041333 |
| 11746752_NOTCH4    | -0.13188 | 0.017316 | 0.041334 |
| 11718414_NONO      | 0.105011 | 0.017316 | 0.041334 |
| 11724968_USP31     | 0.164352 | 0.017316 | 0.041334 |
| 11717625_TBL2      | 0.132136 | 0.017323 | 0.041346 |
| 11754019_CD99      | 0.148711 | 0.017326 | 0.041353 |
| 11738821_NOX5      | -0.11902 | 0.017331 | 0.041361 |
| 11718883_ARL5A     | 0.121603 | 0.017339 | 0.041379 |
| 11729476_GGN       | -0.18046 | 0.017343 | 0.041385 |
| 11724589_MMP12     | 0.208313 | 0.017343 | 0.041385 |
| 11732631_KCNN3     | -0.1639  | 0.017351 | 0.041401 |
| 11727940_SLC45A3   | -0.14477 | 0.017357 | 0.041414 |
| 11725084_UCHL5     | -0.11016 | 0.017363 | 0.041428 |
| 11760365_DPAGT1    | -0.13018 | 0.017374 | 0.041451 |
| 11731216_MATN4     | -0.21798 | 0.017379 | 0.04146  |
| 11734403_MTCP1     | 0.17877  | 0.017382 | 0.041467 |
| 11759488_EYA3      | 0.126356 | 0.017383 | 0.041467 |
| 11734620_VPS13B    | 0.276556 | 0.017396 | 0.041494 |
| 11739911_PCBD2     | 0.184223 | 0.017398 | 0.041498 |
| 11758480_COG8 ///  | 0.109434 | 0.017406 | 0.041515 |
| 11717955_STK39     | 0.129392 | 0.017421 | 0.041548 |
| 11732286_DZIP3     | -0.24443 | 0.017424 | 0.041554 |
| 11763450_MPHOSPH8  | 0.131451 | 0.017427 | 0.041559 |
| 11730145_KLHL31    | 0.139386 | 0.017433 | 0.04157  |
| 11763849_STYXL1    | -0.27607 | 0.017438 | 0.041581 |
| 11747878_STX3      | 0.11657  | 0.017455 | 0.041618 |
| 11730240_SLC2A12   | 0.17005  | 0.017455 | 0.041618 |
| 11760208_AK2       | 0.174471 | 0.017458 | 0.041623 |
| 11753293_BEST1     | -0.24304 | 0.017462 | 0.041631 |
| 11715738_SNX3      | -0.11334 | 0.01747  | 0.041644 |

|                   |          |          |          |
|-------------------|----------|----------|----------|
| 11719226_MOB1B    | 0.132972 | 0.01747  | 0.041644 |
| 11744551_CHRNA3   | 0.236336 | 0.017483 | 0.041674 |
| 11731990_CYP3A43  | 0.131083 | 0.017485 | 0.041678 |
| 11742420_GRM5     | 0.247457 | 0.017493 | 0.041694 |
| 11731874_CTAGE5   | -0.16142 | 0.017498 | 0.041704 |
| 11734488_HIPK1    | 0.182208 | 0.017503 | 0.041714 |
| 11757545_PECAM1   | -0.13232 | 0.017507 | 0.041722 |
| 11746000_ZNF252P  | 0.160244 | 0.017522 | 0.041755 |
| 11727052_HOXB13   | -0.17136 | 0.017529 | 0.041769 |
| 11752988_BCR      | -0.26981 | 0.017545 | 0.041805 |
| 11717463_NSUN2    | 0.116396 | 0.017546 | 0.041807 |
| 11754944_USP39    | -0.10612 | 0.017548 | 0.04181  |
| 11739095_CPSF7    | -0.14093 | 0.017551 | 0.041814 |
| 11756317_ZNF276   | 0.156157 | 0.017553 | 0.041817 |
| 11756355_TP73     | -0.15578 | 0.017563 | 0.041838 |
| 11750486_HDAC8    | -0.21879 | 0.017571 | 0.041853 |
| 11737437_CNTRLN   | -0.20173 | 0.017571 | 0.041853 |
| 11728879_PPP3R1   | 0.174646 | 0.017572 | 0.041854 |
| 11761051_ROBO3    | -0.17018 | 0.017573 | 0.041854 |
| 11738454_ACTBL2   | 0.202021 | 0.017575 | 0.041857 |
| 11730121_ATP8B4   | 0.341399 | 0.017576 | 0.041857 |
| 11737172_CD80     | -0.19718 | 0.017583 | 0.041869 |
| 11723276_CREBZF   | 0.162863 | 0.017583 | 0.041869 |
| 11744487_CNBP     | 0.126453 | 0.017584 | 0.041869 |
| 11738012_INHBC    | -0.16333 | 0.017586 | 0.041874 |
| 11731092_BRD1     | 0.206125 | 0.017589 | 0.041877 |
| 11730585_ABCG4    | -0.22025 | 0.017597 | 0.041895 |
| 11721712_SHROOM3  | -0.12188 | 0.017608 | 0.04192  |
| 11719809_BLOC1S6  | 0.114435 | 0.017615 | 0.041934 |
| 11748595_GABRR2   | -0.17499 | 0.017617 | 0.041937 |
| 11743584_PRELID3B | -0.11161 | 0.01762  | 0.04194  |
| 11755865_SLC22A8  | -0.14119 | 0.017622 | 0.041945 |
| 11746252_DENR     | 0.123068 | 0.017623 | 0.041946 |
| 11723900_USF3     | -0.14758 | 0.017625 | 0.041946 |
| 11747049_B4GALT1  | -0.24358 | 0.01763  | 0.041956 |
| 11717413_WIPI1    | -0.10195 | 0.01764  | 0.041979 |
| 11742391_OR1L4    | -0.22594 | 0.017646 | 0.041991 |
| 11739482_PLAC8    | 0.161833 | 0.017649 | 0.041996 |
| 11736994_DNAJB7   | -0.16186 | 0.01765  | 0.041997 |
| 11755139_RPL14    | 0.102615 | 0.017656 | 0.042007 |
| 11731631_SOX30    | -0.27541 | 0.017657 | 0.042007 |
| 11736764_ZNF347   | 0.227871 | 0.017657 | 0.042007 |
| 11746246_GK3P     | -0.17187 | 0.017665 | 0.042024 |
| 11753397_DLK1     | -0.12466 | 0.017668 | 0.042028 |
| 11760843_CTAGE3P  | -0.14217 | 0.017682 | 0.04206  |
| 11730630_WDR72    | -0.15509 | 0.01769  | 0.042078 |
| 11743525_KDM5A    | 0.13935  | 0.017692 | 0.042079 |
| 11720610_PHB      | -0.12654 | 0.017701 | 0.042098 |
| 11718821_MTIF2    | -0.11535 | 0.017701 | 0.042098 |
| 11728333_ELL      | 0.114041 | 0.017703 | 0.0421   |
| 11722206_CDC42EP1 | -0.15119 | 0.017706 | 0.042105 |

|                    |          |          |          |
|--------------------|----------|----------|----------|
| 11746992_MFAP3L    | -0.21016 | 0.017713 | 0.04212  |
| 11753944_TRA2B     | -0.1432  | 0.017714 | 0.042121 |
| 11760134_LRCH3     | 0.249719 | 0.017719 | 0.04213  |
| 11755471_NE CAB2   | -0.14251 | 0.017736 | 0.042167 |
| 11731902_AXDND1    | 0.104351 | 0.017737 | 0.042167 |
| 11763383_STYXL1    | -0.14654 | 0.017737 | 0.042167 |
| 11721396_MUM1      | -0.15489 | 0.017739 | 0.042168 |
| 11761546_HDGFL1    | -0.24606 | 0.01774  | 0.04217  |
| 11726350_ANKRD39   | -0.20572 | 0.017741 | 0.04217  |
| 11764249_LOC105369 | 0.174813 | 0.017747 | 0.042182 |
| 11723323_TDP1      | -0.13647 | 0.017753 | 0.042193 |
| 11741073_TCP11L1   | 0.15315  | 0.017755 | 0.042195 |
| 11719361_SLF2      | 0.327572 | 0.017756 | 0.042195 |
| 11749014_SEMA3F    | -0.12764 | 0.017756 | 0.042195 |
| 11717594_ELF3      | -0.23192 | 0.017769 | 0.042224 |
| 11735567_MMP27     | -0.16418 | 0.017772 | 0.042229 |
| 11731923_POFUT2    | 0.378418 | 0.017777 | 0.042239 |
| 11718986_IFI6      | 0.113955 | 0.017779 | 0.042241 |
| 11759970_STAT5B    | -0.13861 | 0.017799 | 0.042288 |
| 11723735_RNF216    | -0.13102 | 0.017822 | 0.04234  |
| 11749551_RNGTT     | 0.107531 | 0.017826 | 0.042348 |
| 11719087_CCDC124   | -0.14459 | 0.017851 | 0.042405 |
| 11755224_RBM33     | -0.19628 | 0.017861 | 0.042425 |
| 11718645_OSBPL8    | 0.131688 | 0.017861 | 0.042425 |
| 11719550_RHOBTB1   | 0.272104 | 0.017865 | 0.042429 |
| 11731316_CPNE9     | -0.15682 | 0.017866 | 0.042429 |
| 11728788_SLC32A1   | -0.13497 | 0.017866 | 0.042429 |
| 11723320_CALY      | -0.12149 | 0.017873 | 0.042444 |
| 11753669_CHEK2     | -0.14985 | 0.017879 | 0.042456 |
| 11756217_SNX22     | -0.15596 | 0.017882 | 0.042462 |
| 11740361_FOXN3     | -0.13789 | 0.017886 | 0.042469 |
| 11747268_NBR1      | 0.146459 | 0.017898 | 0.042496 |
| 11752308_ADAM18    | -0.20514 | 0.017899 | 0.042496 |
| 11723374_GLI3      | 0.121042 | 0.017901 | 0.042499 |
| 11731186_PPM1E     | 0.253085 | 0.017905 | 0.042506 |
| 11756318_TRA2B     | -0.10369 | 0.017928 | 0.042559 |
| 11719484_EPS15     | -0.13879 | 0.01793  | 0.042561 |
| 11732978_ALB       | -0.29599 | 0.017936 | 0.042573 |
| 11732541_HSD17B13  | -0.13925 | 0.017946 | 0.042595 |
| 11757010_ACP2      | -0.18131 | 0.01795  | 0.042603 |
| 11753392_MSH5 ///  | -0.19042 | 0.017959 | 0.042621 |
| 11753112_MED25     | -0.14425 | 0.017961 | 0.042625 |
| 11728439_BRWD1     | -0.12258 | 0.017963 | 0.042627 |
| 11753659_RPL30     | 0.102503 | 0.017967 | 0.042633 |
| 11739721_GIMAP8    | -0.1831  | 0.017975 | 0.042652 |
| 11721150_RAB40C    | -0.17049 | 0.017979 | 0.042658 |
| 11755265_NT5DC1    | -0.10804 | 0.017982 | 0.042665 |
| 11755836_NARFL     | -0.12105 | 0.017986 | 0.042672 |
| 11736795_GHSR      | -0.12174 | 0.017987 | 0.042672 |
| 11743158_GTF2F2    | 0.109636 | 0.017999 | 0.042697 |
| 11729681_PHYH      | -0.14542 | 0.018002 | 0.042702 |

|                    |          |          |          |
|--------------------|----------|----------|----------|
| 11715792_STOM      | 0.122589 | 0.018002 | 0.042702 |
| 11738775_CLEC2A    | -0.13178 | 0.018004 | 0.042703 |
| 11739579_PGBD1     | 0.155661 | 0.018006 | 0.042708 |
| 11748524_PIGK      | -0.16027 | 0.018029 | 0.042759 |
| 11729887_HACD1     | -0.11048 | 0.018031 | 0.042761 |
| 11763926_SNORA70C  | 0.249181 | 0.018032 | 0.042761 |
| 11739862_DDX26B    | 0.311392 | 0.018034 | 0.042764 |
| 11732725_GCM1      | -0.14511 | 0.018042 | 0.042782 |
| 11716797_LBR       | 0.128118 | 0.018043 | 0.042782 |
| 11719442_WNT5B     | -0.10731 | 0.01805  | 0.042797 |
| 11751756_RBM14     | -0.19735 | 0.018057 | 0.04281  |
| 11731479_TXNDC9    | -0.12694 | 0.018059 | 0.042813 |
| 11753188_DOC2A     | -0.12012 | 0.018068 | 0.042833 |
| 11717216_ATP9A     | -0.14756 | 0.018069 | 0.042834 |
| 11757020_MGST3     | -0.11531 | 0.018078 | 0.042853 |
| 11725517_ABCG1     | -0.30089 | 0.018085 | 0.042866 |
| 11735364_AKTIP     | -0.23302 | 0.018089 | 0.042874 |
| 11737615_ERICH6B   | -0.12232 | 0.0181   | 0.042899 |
| 11746685_PXK       | -0.14487 | 0.018102 | 0.0429   |
| 11740893_RASSF7    | -0.1893  | 0.018105 | 0.042905 |
| 11729196_STX16     | -0.11822 | 0.018109 | 0.04291  |
| 11721807 EMC1      | -0.14295 | 0.018109 | 0.04291  |
| 11716470_UQCRB     | -0.20377 | 0.018109 | 0.04291  |
| 11759252_HIST1H2AI | 0.158296 | 0.01811  | 0.04291  |
| 11733683_FAM221B   | -0.20394 | 0.018115 | 0.042919 |
| 11761330_NME9      | -0.14481 | 0.01812  | 0.04293  |
| 11729217_DDX4      | -0.15435 | 0.018128 | 0.042945 |
| 11746694_PAFAH1B1  | 0.259607 | 0.018136 | 0.042963 |
| 11744473_BAG6      | 0.125257 | 0.018143 | 0.042974 |
| 11763846_SPATA20   | 0.11451  | 0.018143 | 0.042974 |
| 11754256_MCPH1     | 0.209596 | 0.018143 | 0.042974 |
| 11723942_PTTG1IP   | 0.125488 | 0.018151 | 0.042991 |
| 11726898_ADGRL3    | -0.17559 | 0.018157 | 0.043002 |
| 11720818_CXCL12    | 0.140546 | 0.018167 | 0.043023 |
| 11760892_LY9       | -0.26039 | 0.018171 | 0.04303  |
| 11742572_OR5D14    | -0.16867 | 0.018174 | 0.043035 |
| 11757253_CDRT15P1  | -0.19524 | 0.018177 | 0.043041 |
| 11760206_GNL1      | -0.14428 | 0.018179 | 0.043042 |
| 11717848_QRICH1    | -0.1158  | 0.01818  | 0.043043 |
| 11715712_NRDC      | -0.12289 | 0.018196 | 0.04308  |
| 11751172_TRIB3     | -0.23643 | 0.018198 | 0.043083 |
| 11725389_CD6       | -0.16912 | 0.018203 | 0.043091 |
| 11742101_QRFPR     | -0.16893 | 0.018204 | 0.043092 |
| 11732717_SYCE3     | -0.12594 | 0.018205 | 0.043093 |
| 11717293_SRSF7     | 0.100732 | 0.01821  | 0.043103 |
| 11761674_PLA2G7    | -0.22539 | 0.018215 | 0.043111 |
| 11719397_RRAGC     | 0.111779 | 0.01822  | 0.043122 |
| 11750925_TOX       | 0.157546 | 0.018226 | 0.043134 |
| 11755115_NRBP1     | 0.119344 | 0.018238 | 0.043159 |
| 11723929_OGDHL     | -0.28625 | 0.018247 | 0.043179 |
| 11752471_NEU3      | -0.12765 | 0.018253 | 0.043191 |

|                    |          |          |          |
|--------------------|----------|----------|----------|
| 11756585_AQP3      | 0.171763 | 0.018254 | 0.043193 |
| 11764057_RSRP1     | 0.327095 | 0.018256 | 0.043193 |
| 11749011_BRSK2     | -0.113   | 0.018257 | 0.043195 |
| 11728611_FAM159A   | -0.14635 | 0.018259 | 0.043195 |
| 11755736_NOX4      | 0.36319  | 0.018259 | 0.043195 |
| 11746077_NARFL     | -0.13253 | 0.018263 | 0.043203 |
| 11753123_CNP       | -0.25564 | 0.018264 | 0.043203 |
| 11749340_SIAH1     | 0.150614 | 0.018267 | 0.043208 |
| 11752272_MAN1B1    | -0.10122 | 0.018268 | 0.043208 |
| 11741576_LEMD2     | 0.127767 | 0.018273 | 0.043216 |
| 11721471_EIF3A     | 0.117871 | 0.018273 | 0.043216 |
| 11755917_NXF5      | -0.20292 | 0.018274 | 0.043216 |
| 11717500_CTSF      | -0.21253 | 0.018276 | 0.043219 |
| 11726479_MX2       | -0.13453 | 0.018279 | 0.043223 |
| 11746181_TOE1      | -0.16474 | 0.01828  | 0.043223 |
| 11720514_LURAP1L   | 0.113532 | 0.018282 | 0.043228 |
| 200097_PMHNRNPK    | -0.11778 | 0.018292 | 0.043249 |
| 11750475_FAM153A / | -0.18515 | 0.018294 | 0.043252 |
| 11733706_COL11A1   | 0.168229 | 0.018296 | 0.043254 |
| 11741566_SYNPO2L   | -0.21108 | 0.018297 | 0.043254 |
| 11730162_SLC6A10P  | 0.11866  | 0.0183   | 0.043258 |
| 11727690_IL11      | 0.193359 | 0.018301 | 0.04326  |
| 11727604_EPB41L4A  | -0.19992 | 0.018305 | 0.043266 |
| 11740635_C19orf57  | -0.20433 | 0.018311 | 0.043279 |
| 11715661_TMEM189-U | 0.101127 | 0.018319 | 0.043293 |
| 11735277_TMEM189-U | 0.101127 | 0.018319 | 0.043293 |
| 11726604_PAFAH1B2  | 0.146032 | 0.018322 | 0.043298 |
| 11747483_TNFAIP8   | -0.39235 | 0.018323 | 0.043298 |
| 11730354_CYP26B1   | -0.17423 | 0.018327 | 0.043304 |
| 11715836_PSM3      | -0.10566 | 0.018328 | 0.043304 |
| 11720139_VSTM2L    | 0.109982 | 0.018328 | 0.043304 |
| 11724507_DUS2      | 0.134714 | 0.018346 | 0.043344 |
| 11749695_NDC1      | 0.129161 | 0.018349 | 0.043349 |
| 11757327_FTL       | 0.102687 | 0.018355 | 0.043362 |
| 11762007_SLC4A8    | -0.30957 | 0.01836  | 0.043372 |
| 11721289_TPM3      | -0.24158 | 0.018361 | 0.043372 |
| 11715479_GABARAP   | 0.115032 | 0.018366 | 0.043381 |
| 11716422_SPTBN1    | -0.12484 | 0.01837  | 0.043388 |
| 11715693_CIRBP     | -0.15908 | 0.018392 | 0.043438 |
| 11742045_PAK6      | -0.17171 | 0.018401 | 0.043458 |
| 11728917_SLC7A4    | -0.18119 | 0.018403 | 0.04346  |
| 11759297_FAM114A1  | -0.11608 | 0.018407 | 0.043467 |
| 11729755_ULK2      | -0.25405 | 0.018412 | 0.043478 |
| 11725851_ZNF319    | 0.207989 | 0.018414 | 0.043481 |
| 11715480_GABARAP   | 0.113314 | 0.018417 | 0.043485 |
| 11723056_MRPL33    | 0.104865 | 0.01842  | 0.043489 |
| 11745867_PSEN2     | 0.172207 | 0.018421 | 0.043491 |
| 11758380_TRIM45    | -0.16631 | 0.018449 | 0.043554 |
| 11721764_ADRBK2    | -0.14697 | 0.018452 | 0.043559 |
| 11718898_SPAG9     | -0.11331 | 0.018461 | 0.043576 |
| 11754478_ATP6VOB   | 0.112679 | 0.018461 | 0.043576 |

|                    |          |          |          |
|--------------------|----------|----------|----------|
| 11746093_POLR2A    | -0.14271 | 0.018465 | 0.043583 |
| 11748592_NFASC     | 0.117554 | 0.018471 | 0.043594 |
| 11760954_EIF3G     | -0.16171 | 0.018471 | 0.043594 |
| 11763508_CINP      | -0.20232 | 0.018474 | 0.043599 |
| 11762957_DPY30     | 0.140356 | 0.018478 | 0.043605 |
| 11740672_COX15     | 0.11033  | 0.018481 | 0.04361  |
| 11762323_HCN3      | 0.149998 | 0.018482 | 0.043611 |
| 11752723_CD200R1   | 0.268049 | 0.018483 | 0.043611 |
| 11742010_S100G     | -0.25798 | 0.018487 | 0.043618 |
| 11756749_EGF       | 0.217519 | 0.018488 | 0.04362  |
| 11750281_TLDC1     | -0.21208 | 0.018504 | 0.043654 |
| 11763360_VSIG2     | -0.20727 | 0.018507 | 0.04366  |
| 11743208_GPRC5D    | -0.17294 | 0.018513 | 0.043671 |
| 11716431_SLC39A13  | -0.14189 | 0.018514 | 0.043673 |
| 11733928_ARMC8     | 0.247586 | 0.01852  | 0.043685 |
| 11754332_SYDE1     | 0.178806 | 0.018541 | 0.043731 |
| 11719496_HMGB4     | -0.19282 | 0.018544 | 0.043736 |
| 11752701_RHCE ///  | -0.13536 | 0.018558 | 0.043766 |
| 11757707_HIGD1B    | -0.13884 | 0.018559 | 0.043766 |
| 11728932_FXYD7     | -0.18314 | 0.018563 | 0.043775 |
| 11736785_HOXA2     | -0.17984 | 0.018572 | 0.043794 |
| 11730946_TRMT2A    | -0.1919  | 0.018574 | 0.043797 |
| 11721187_ARHGEF9   | 0.132708 | 0.018577 | 0.0438   |
| 11746743_RUVBL2    | -0.10663 | 0.018587 | 0.043824 |
| 11749264_DDX25     | -0.18631 | 0.018596 | 0.043839 |
| 11745461_C1QTNF9 / | -0.13832 | 0.018596 | 0.043839 |
| 11759467_VSTM5     | -0.13887 | 0.018608 | 0.043866 |
| 11734573_HIST1H3F  | -0.14066 | 0.018609 | 0.043866 |
| 11753413_DLK1      | -0.19691 | 0.01861  | 0.043866 |
| 11752338_SYTL5     | 0.188312 | 0.018611 | 0.043868 |
| 11759138_FAM45A // | -0.37873 | 0.018614 | 0.043872 |
| 11719995_TLE4      | 0.140202 | 0.018617 | 0.043874 |
| 11757939_SEPT11    | 0.124671 | 0.018617 | 0.043874 |
| 11750059_MLX       | 0.109758 | 0.018622 | 0.043883 |
| 11723487_LAMB1     | 0.130168 | 0.018624 | 0.043885 |
| 11741961_CD209     | -0.18831 | 0.018624 | 0.043885 |
| 11736605_XPO7      | -0.12754 | 0.018638 | 0.043915 |
| 11736723_PDLIM7    | -0.14223 | 0.018639 | 0.043915 |
| 11715311_DEFEB103A | -0.2495  | 0.018639 | 0.043915 |
| 11746860_SGSM1     | -0.16528 | 0.018649 | 0.043935 |
| 11761303_POLR1C    | 0.247079 | 0.018658 | 0.043955 |
| 11762939_ERVH-6    | -0.12533 | 0.018661 | 0.043958 |
| 11718030_RAB11A    | -0.1144  | 0.018667 | 0.043972 |
| 11733574_PGBD4     | -0.15922 | 0.01867  | 0.043976 |
| 11722105_PIGF      | -0.13148 | 0.018672 | 0.043979 |
| 11744341_SARNP     | 0.125118 | 0.01869  | 0.044019 |
| 11753997_RLTPR     | -0.20297 | 0.018695 | 0.044028 |
| 11744126_PRKCSH    | -0.11056 | 0.018707 | 0.044054 |
| 11729168_DCTD      | 0.116004 | 0.018708 | 0.044054 |
| 11717160_CLTA      | 0.108611 | 0.01871  | 0.044058 |
| 11734379_C11orf53  | -0.18319 | 0.018713 | 0.044062 |

|                    |          |          |          |
|--------------------|----------|----------|----------|
| 11715618_SDF4      | 0.144384 | 0.01872  | 0.044078 |
| 11725351_KIAA0930  | -0.24262 | 0.018733 | 0.044104 |
| 11763971_LINCO1082 | 0.178455 | 0.018737 | 0.044113 |
| 11729951_ZBTB37    | 0.15103  | 0.018745 | 0.04413  |
| 11752100_E2F3      | 0.147618 | 0.018762 | 0.044166 |
| 11732032_HMGA2     | -0.19429 | 0.018765 | 0.044172 |
| 11747040_RABEP2    | -0.24928 | 0.018766 | 0.044172 |
| 11734412_ZNF280A   | 0.246884 | 0.018775 | 0.044191 |
| 11722344_GNB5      | -0.11514 | 0.018778 | 0.044196 |
| 11749499_MED25     | -0.12313 | 0.018782 | 0.044204 |
| 11723956_APOBEC3C  | 0.103711 | 0.018784 | 0.044207 |
| 11740158_ATG10     | -0.15102 | 0.018793 | 0.044226 |
| 11760676_NUPL2     | -0.16875 | 0.018794 | 0.044226 |
| 11743289_PEAK1     | -0.12572 | 0.018799 | 0.044235 |
| 11719655_SV2A      | -0.15298 | 0.018801 | 0.044237 |
| 11759788_NUP210P1  | -0.33216 | 0.01881  | 0.044257 |
| 11718623_PLA2G1B   | -0.27175 | 0.018812 | 0.04426  |
| 11734999_SIPAIL3   | -0.10105 | 0.018819 | 0.044273 |
| 11762070_SLC02B1   | -0.19526 | 0.018821 | 0.044277 |
| 11747165_LOC100499 | -0.13125 | 0.018823 | 0.044278 |
| 11761482_MPI       | 0.147531 | 0.018836 | 0.044305 |
| 11725833_ALKBH1    | 0.128989 | 0.018836 | 0.044305 |
| 11721546_ZEB1      | -0.12305 | 0.018839 | 0.044311 |
| 11720377_SAP30L    | -0.16003 | 0.018842 | 0.044315 |
| 11760315_PXN       | 0.119554 | 0.018843 | 0.044316 |
| 11738707_OR8J1     | -0.18619 | 0.018845 | 0.044317 |
| 11730617_ULBP1     | -0.25093 | 0.01885  | 0.044327 |
| 11762598_CARF      | -0.17804 | 0.018855 | 0.044338 |
| 11762293_C9orf3    | 0.160025 | 0.018856 | 0.044338 |
| 11747705_TBC1D3P2  | 0.216447 | 0.018859 | 0.044342 |
| 11747786_CLN3      | -0.21136 | 0.018861 | 0.044346 |
| 11724015_FRA10AC1  | -0.12896 | 0.018865 | 0.044353 |
| 11717476_CHGB      | 0.240865 | 0.018873 | 0.04437  |
| 11721657_LMO4      | -0.26707 | 0.01888  | 0.044383 |
| 11719865_ENO1 ///  | -0.19997 | 0.018887 | 0.044398 |
| 11763229_IGLJ3 /// | -0.20471 | 0.01889  | 0.044401 |
| 11744976_DOC2A     | -0.17153 | 0.01889  | 0.044401 |
| 11754062_YIPF3     | 0.125055 | 0.018892 | 0.044404 |
| 11763399_MEI1      | -0.13319 | 0.018897 | 0.044411 |
| 11723057_MRPL33    | 0.118757 | 0.0189   | 0.044418 |
| 11763105_TTTY6B    | 0.276683 | 0.018902 | 0.044419 |
| 200030_PMSLC25A3   | 0.10081  | 0.018913 | 0.044443 |
| 11742058_ECE2      | -0.14842 | 0.018923 | 0.044466 |
| 11725728_C1orf56   | 0.272926 | 0.018924 | 0.044466 |
| 11759432_TDRP      | -0.15744 | 0.018926 | 0.044467 |
| 11737982_SMYD3     | 0.124157 | 0.018936 | 0.044489 |
| 11734008_NDOR1     | -0.12493 | 0.018943 | 0.044503 |
| 11731753_ZNF577    | 0.189391 | 0.018945 | 0.044507 |
| 11739416_IRGQ      | 0.131641 | 0.018949 | 0.044514 |
| 11736703_MAP3K9    | -0.10568 | 0.018952 | 0.044519 |
| 11732958_USF1      | -0.11562 | 0.01896  | 0.044536 |



|                    |          |          |          |
|--------------------|----------|----------|----------|
| 11762971_NARFL     | -0.11607 | 0.018967 | 0.044549 |
| 11744569_RNMT      | 0.221032 | 0.01897  | 0.044553 |
| 11751648_HGS       | 0.114286 | 0.018979 | 0.044573 |
| 11756764_RPL14     | 0.111077 | 0.01898  | 0.044573 |
| 11763204_KRT16P1   | -0.1225  | 0.018982 | 0.044575 |
| 11728850_RAB39B    | 0.136405 | 0.018985 | 0.04458  |
| 11741620_SMARCD1   | -0.1174  | 0.018991 | 0.044591 |
| 11728688_SFXN1     | 0.105889 | 0.018994 | 0.044597 |
| 11758768_AMD1      | 0.126733 | 0.018999 | 0.044608 |
| 11739898_ZNF280C   | 0.225544 | 0.019001 | 0.044609 |
| 11720763_SELPLG    | 0.121375 | 0.019004 | 0.044613 |
| 11721680_TM2D1     | 0.119234 | 0.019004 | 0.044613 |
| 11722115_RPS6KC1   | -0.11284 | 0.019006 | 0.044615 |
| 11739896_ZNF280C   | 0.148061 | 0.019021 | 0.044649 |
| 11754292_TSSC1     | -0.10064 | 0.019022 | 0.044649 |
| 11725551_PDE4A     | -0.16378 | 0.019038 | 0.044684 |
| 11718539_NRN1      | -0.16595 | 0.019044 | 0.044696 |
| 11747663_L3HYPDH   | 0.100187 | 0.019047 | 0.044701 |
| 11725721_MRM1      | -0.17984 | 0.019056 | 0.044718 |
| 11730780_ADH1C     | -0.16341 | 0.019056 | 0.044718 |
| 11723712_MLXIP     | -0.15604 | 0.01909  | 0.044795 |
| 11734715_DBF4      | -0.12455 | 0.019098 | 0.04481  |
| 11724091_RNF208    | -0.15494 | 0.019098 | 0.04481  |
| 11722982_LYST      | 0.265566 | 0.019108 | 0.04483  |
| 11734317_STARD8    | -0.13408 | 0.019109 | 0.04483  |
| 11716140_SMS       | 0.100595 | 0.019131 | 0.044879 |
| 11756854_EHBP1     | 0.1151   | 0.01914  | 0.0449   |
| 11722877_NDUFAF1   | -0.12535 | 0.019151 | 0.044923 |
| 11754210_CACNA2D2  | -0.13878 | 0.019161 | 0.044944 |
| 11744134_ZSWIM6    | 0.116557 | 0.019165 | 0.044952 |
| 11742014_METTL20   | -0.22739 | 0.01917  | 0.044961 |
| 11723844_TMEM183A  | 0.109201 | 0.019172 | 0.044962 |
| 11718967_DDX6      | 0.107259 | 0.019173 | 0.044963 |
| 11745288_NOX5      | 0.279703 | 0.019181 | 0.044979 |
| 11763134_ZBTB80S   | 0.278988 | 0.019181 | 0.044979 |
| 11730888_USF2      | -0.20562 | 0.019183 | 0.044982 |
| 11727696_OGG1      | -0.1248  | 0.019188 | 0.04499  |
| 11740805_RPUSD4    | 0.147379 | 0.019189 | 0.04499  |
| 11763884_LINCO1000 | 0.251518 | 0.019208 | 0.045033 |
| 11741235_JKAMP     | 0.116112 | 0.01921  | 0.045035 |
| 11718746_ARHGAP21  | -0.10607 | 0.019216 | 0.045047 |
| 11753789_ST3GAL3   | -0.23473 | 0.019218 | 0.045049 |
| 11745937_TCF3      | -0.18528 | 0.019219 | 0.045049 |
| 11751366_GEMIN4    | -0.18189 | 0.01922  | 0.045051 |
| 11738678_OR8G5     | -0.12565 | 0.019234 | 0.045081 |
| 11756499_KLHDC2    | -0.11807 | 0.019249 | 0.045114 |
| 11722926_MMRN1     | -0.18245 | 0.019251 | 0.045117 |
| 11761169_ACAN      | -0.16543 | 0.019254 | 0.04512  |
| 11741592_ABCD3     | 0.146957 | 0.019257 | 0.045124 |
| 11747907_PDZK1 /// | 0.129263 | 0.019257 | 0.045124 |
| 11740201_FCMR      | 0.121471 | 0.019264 | 0.045138 |

|                    |          |          |          |
|--------------------|----------|----------|----------|
| 11759552_MPI       | -0.1374  | 0.019266 | 0.04514  |
| 11725946_MPP2      | -0.21558 | 0.019269 | 0.045144 |
| 11731547_TMEMP67   | 0.368775 | 0.01927  | 0.045144 |
| 11725881_C15orf52  | 0.10093  | 0.019282 | 0.045171 |
| 11716561_STRN4     | 0.158625 | 0.019297 | 0.045204 |
| 11743202_IGF1      | -0.1317  | 0.019305 | 0.045221 |
| 11743312_TMEMP218  | -0.11684 | 0.019307 | 0.045225 |
| 11742566_OR2V2     | -0.16538 | 0.019314 | 0.045238 |
| 11716016_MAL2      | 0.253541 | 0.019316 | 0.04524  |
| 11747276_AKAP1     | -0.12525 | 0.019318 | 0.045242 |
| 11751970_ABCC13    | 0.270244 | 0.019321 | 0.045247 |
| 11716314_MRPL15    | -0.32673 | 0.019325 | 0.045254 |
| 11720366_FDX1L     | 0.097619 | 0.019326 | 0.045254 |
| 11718290_FXYD5     | 0.118553 | 0.01933  | 0.045262 |
| 11752201_SP140 /// | 0.318759 | 0.019332 | 0.045266 |
| 11727602_PPF4      | -0.14766 | 0.019336 | 0.045271 |
| 11759622_DDX21     | 0.099025 | 0.019346 | 0.045292 |
| 11759486_GBPB1     | -0.17771 | 0.019347 | 0.045292 |
| 11717603_SECISBP2  | 0.163384 | 0.019363 | 0.045329 |
| 11747636_PLA2G6    | -0.14784 | 0.019364 | 0.045329 |
| 11725327_CAMK2D    | -0.12384 | 0.01937  | 0.045341 |
| 11747289_PER1      | 0.19525  | 0.019372 | 0.045342 |
| 11744837_CDH13     | 0.159005 | 0.019375 | 0.045348 |
| 11751085_GBA /// G | 0.116158 | 0.019376 | 0.045348 |
| 11749328_CD99L2    | -0.19245 | 0.019385 | 0.045367 |
| 11722303_LRRFIP1   | -0.11464 | 0.019389 | 0.045375 |
| 11727341_ATG9B     | -0.20257 | 0.019396 | 0.04539  |
| 11733679_TMIGD2    | -0.16542 | 0.019398 | 0.045391 |
| 11722849_PPP3CA    | 0.111852 | 0.019403 | 0.045401 |
| 11734564_C1QTNF3   | 0.152689 | 0.019405 | 0.045403 |
| 11752148_FOXP2     | -0.16124 | 0.019434 | 0.045467 |
| 11726530_BRCC3     | 0.191231 | 0.019435 | 0.045467 |
| 11759822_RPL37A    | -0.34217 | 0.019435 | 0.045467 |
| 11760036_PPIL6     | -0.21142 | 0.019438 | 0.045471 |
| 11746388_SPIDR     | -0.129   | 0.019439 | 0.045471 |
| 11729400_PCP4L1    | -0.23738 | 0.019441 | 0.045475 |
| 11726851_ZC3H3     | -0.13544 | 0.019444 | 0.04548  |
| 11722917_IGF2BP3   | 0.112603 | 0.019447 | 0.045484 |
| 11722614_CYP2J2    | 0.206898 | 0.019456 | 0.045502 |
| 11737152_C4orf51   | -0.12225 | 0.019462 | 0.045514 |
| 11735110_FBXO3     | 0.134749 | 0.019464 | 0.045516 |
| 11718536_NKTR      | 0.106877 | 0.019465 | 0.045518 |
| 11753798_TSG101    | 0.124367 | 0.019474 | 0.045536 |
| 11736451_SRFBP1    | 0.25577  | 0.019477 | 0.045541 |
| 11717416_RHOU      | -0.17278 | 0.019479 | 0.045543 |
| 11718006_MYLIP     | -0.16143 | 0.01948  | 0.045544 |
| 11733469_TMEMP164  | 0.166259 | 0.019488 | 0.04556  |
| 11724716_BCOR      | 0.130923 | 0.019489 | 0.04556  |
| 11758103_TMED3     | -0.11697 | 0.019494 | 0.04557  |
| 11724857_CEP63     | 0.129414 | 0.019495 | 0.04557  |
| 11758989_USP1      | -0.33344 | 0.019498 | 0.045575 |

|                    |          |          |          |
|--------------------|----------|----------|----------|
| 11757929_RALGAPA2  | -0.10035 | 0.019503 | 0.045584 |
| 11733415_PAGE5     | 0.130214 | 0.019507 | 0.04559  |
| 11732478_XAGE2     | 0.214832 | 0.019507 | 0.04559  |
| 11760393_GRK4      | 0.232696 | 0.019508 | 0.04559  |
| 11725954_RNF10     | 0.107995 | 0.01951  | 0.04559  |
| 11746502_ZNF814    | 0.135009 | 0.01951  | 0.04559  |
| 11730797_FAM114A2  | -0.14065 | 0.019517 | 0.045604 |
| 11735819_C3orf20   | -0.21062 | 0.01952  | 0.04561  |
| 11734688_MBD2      | -0.16635 | 0.019527 | 0.045624 |
| 11719388_MAFK      | 0.143259 | 0.019536 | 0.045641 |
| 11753602_HLA-G     | -0.16751 | 0.019553 | 0.045679 |
| 11756488_KIF2B     | -0.217   | 0.019554 | 0.045679 |
| 11731364_CCDC63    | -0.20485 | 0.019556 | 0.045682 |
| 11733393_KCNMB3    | 0.194745 | 0.01957  | 0.04571  |
| 11759923_TRIM4     | 0.165057 | 0.019571 | 0.04571  |
| 11744106_ATP9B     | 0.188495 | 0.019571 | 0.04571  |
| 11741503_CREM      | -0.26149 | 0.019575 | 0.045719 |
| 11721552_GABBR1    | 0.106146 | 0.019578 | 0.045723 |
| 11717425_CHMP3 /// | 0.109267 | 0.01958  | 0.045725 |
| 11741461_PCDHGB2   | -0.17748 | 0.019584 | 0.045732 |
| 11734863_SARNP     | 0.119094 | 0.019586 | 0.045736 |
| 11747062_PROM2     | -0.14507 | 0.01959  | 0.045742 |
| 11737543_TMEM202   | -0.15454 | 0.019599 | 0.04576  |
| 11760788_BBS1      | -0.14056 | 0.019601 | 0.045763 |
| 11724699_ARHGFEF37 | -0.15216 | 0.019603 | 0.045765 |
| 11716510_GTF2E2    | 0.099107 | 0.019604 | 0.045765 |
| 11734173_CALR3     | -0.11644 | 0.019624 | 0.045811 |
| 11736017_PXN       | -0.10328 | 0.019646 | 0.045858 |
| 11744855_SERPINB9P | -0.16869 | 0.019655 | 0.045879 |
| 11717088_RBM39     | 0.109461 | 0.019669 | 0.04591  |
| 11751828_NFS1      | -0.17578 | 0.019676 | 0.045923 |
| 11716943_EXOSC5    | -0.1168  | 0.01968  | 0.045929 |
| 11726487_CPED1     | -0.20008 | 0.01968  | 0.045929 |
| 11753032_GPR85     | 0.226782 | 0.019684 | 0.045934 |
| 11740043_MTFMT     | -0.17667 | 0.019687 | 0.04594  |
| 11723815_ARHGAP29  | 0.128191 | 0.019688 | 0.045941 |
| 11749492_RPS6KA1   | -0.11307 | 0.01969  | 0.045941 |
| 11725993_SLC22A8   | -0.14571 | 0.019694 | 0.045947 |
| 11742837_RPS6KB2   | -0.1304  | 0.019695 | 0.045947 |
| 11756659_FBXL7     | -0.12285 | 0.019695 | 0.045947 |
| 11762210_PRKAA1    | -0.17723 | 0.0197   | 0.045958 |
| 11728078_TBC1D22B  | 0.158715 | 0.019709 | 0.045976 |
| 11739715_NCOA2     | 0.198402 | 0.019717 | 0.045991 |
| 11721728_ARHGAP30  | -0.12402 | 0.01972  | 0.045994 |
| 11745188_BET1L     | -0.11906 | 0.01972  | 0.045994 |
| 11737774_RNF182    | 0.168805 | 0.01972  | 0.045994 |
| 11744235_TJAP1     | 0.131754 | 0.019723 | 0.045998 |
| 11755955_FAP       | 0.13339  | 0.019724 | 0.045998 |
| 11757544_ICAM2     | -0.14597 | 0.019733 | 0.046017 |
| 11739118_CNPY3     | -0.13554 | 0.019736 | 0.046021 |
| 11719006_ANKH      | -0.23718 | 0.01974  | 0.046028 |

|                    |          |          |          |
|--------------------|----------|----------|----------|
| 11748650_ADAM33    | -0.12532 | 0.019748 | 0.046045 |
| 11761982_USP32P1   | -0.1546  | 0.019749 | 0.046045 |
| 11726046_FCGR2B    | -0.20948 | 0.01975  | 0.046046 |
| 11734796_HIST1H2BG | 0.375699 | 0.019754 | 0.046051 |
| 11743947_GGACT     | 0.243194 | 0.019755 | 0.046051 |
| 11727313_BHLHE22   | -0.16496 | 0.019763 | 0.046066 |
| 11729153_CEACAM6   | -0.14877 | 0.019763 | 0.046066 |
| 11745176_TPD52L2   | -0.16451 | 0.019764 | 0.046066 |
| 11727634_BAG6      | 0.117068 | 0.019768 | 0.046074 |
| 11722265_WDR33     | 0.146175 | 0.01978  | 0.0461   |
| 11761086_AKT2      | -0.16102 | 0.019786 | 0.046111 |
| 11761507_SLC35D1   | 0.194028 | 0.019797 | 0.046135 |
| 11755867_HNRNPUL1  | -0.11698 | 0.019804 | 0.046148 |
| 11734427_TRIM71    | -0.1489  | 0.019805 | 0.046148 |
| 11747948_SMAP2     | 0.196982 | 0.019813 | 0.046164 |
| 11721438_DEFA1 /// | -0.21575 | 0.019813 | 0.046164 |
| 11761127_CEACAM3   | -0.19827 | 0.019826 | 0.046192 |
| 11745556_C11orf74  | -0.10024 | 0.019833 | 0.046205 |
| 11760627_SDHAP3    | 0.294813 | 0.01984  | 0.046219 |
| 11722158_SLC7A8    | -0.16384 | 0.019855 | 0.046253 |
| 11748222_TRIM27    | 0.135002 | 0.019859 | 0.046258 |
| 11757551_MRPL3     | -0.11889 | 0.01987  | 0.046283 |
| 11716305_ATXN10    | -0.19389 | 0.019879 | 0.046301 |
| 11757638_CD93      | -0.17153 | 0.01988  | 0.046301 |
| 11759443_SLC19A1   | -0.16224 | 0.019895 | 0.046334 |
| 11749058_TSPAN32   | -0.14884 | 0.019897 | 0.046338 |
| 11752114_ABCC11    | -0.1837  | 0.019899 | 0.046339 |
| 11724472_SART1     | 0.123599 | 0.019911 | 0.046364 |
| 11737062_MTMR3     | -0.15638 | 0.019913 | 0.046368 |
| 11752903_CYP24A1   | -0.20125 | 0.019923 | 0.046388 |
| 11734172_HSD3B7    | -0.17552 | 0.019925 | 0.04639  |
| 11757038_H3F3B     | 0.101789 | 0.019929 | 0.046397 |
| 11722010_AZI2      | 0.126351 | 0.019936 | 0.046411 |
| 11718749_C1QL1     | -0.23252 | 0.019937 | 0.046412 |
| 11762626_OR9H1P    | -0.30093 | 0.019943 | 0.046424 |
| 11760169_SNRPB     | -0.1863  | 0.019947 | 0.046432 |
| 11757073_THAP4     | -0.13182 | 0.019951 | 0.046438 |
| 11764008_LOC102724 | -0.14069 | 0.019955 | 0.046446 |
| 11749310_PRUNE     | 0.12281  | 0.01997  | 0.046479 |
| 11750731_EOMES     | -0.23371 | 0.019971 | 0.046479 |
| 11749432_LILRB1    | 0.197806 | 0.019979 | 0.046494 |
| 11729381_AK5       | -0.21836 | 0.019982 | 0.046497 |
| 11758121_RBM33     | -0.13062 | 0.019982 | 0.046497 |
| 11729904_AGFG2     | -0.15453 | 0.019983 | 0.046497 |
| 11721779_ACBD5     | 0.103223 | 0.019995 | 0.046523 |
| 11750851_SLC6A6    | 0.306616 | 0.019996 | 0.046523 |
| 11755095_CFAP20    | -0.11153 | 0.02     | 0.04653  |
| 11755821_HDLBP     | -0.10825 | 0.020003 | 0.046535 |
| 11745510_CTBP1-AS2 | -0.16731 | 0.020005 | 0.046537 |
| 11723327_CA9       | -0.12334 | 0.020009 | 0.046544 |
| 11728912_CDK5R2    | -0.1399  | 0.020011 | 0.046547 |

|                    |          |          |          |
|--------------------|----------|----------|----------|
| 11724657_RBP3      | -0.10392 | 0.020012 | 0.046547 |
| 11717675_SLC39A3   | -0.13653 | 0.020019 | 0.04656  |
| 11748302_GUSBP9 // | 0.110213 | 0.02002  | 0.046561 |
| 11759242_FCN2      | -0.18825 | 0.020022 | 0.046561 |
| 11733558_PIP5KL1   | -0.22802 | 0.020023 | 0.046561 |
| 11737655_PIP5KL1   | -0.22802 | 0.020023 | 0.046561 |
| 11723788_FAM167A   | 0.135825 | 0.020028 | 0.046571 |
| 11762953_NARFL     | -0.14116 | 0.020033 | 0.046581 |
| 11722743_TLE2      | -0.15961 | 0.020038 | 0.046589 |
| 11750611_ERBB2     | -0.1102  | 0.020041 | 0.046596 |
| 11745710_CD274     | 0.168405 | 0.020043 | 0.046598 |
| 11722775_DIDO1     | 0.124945 | 0.020044 | 0.046598 |
| 11734928_BPNT1     | -0.13742 | 0.020046 | 0.046598 |
| 11735422_MYOG      | -0.19022 | 0.020047 | 0.046598 |
| 11740353_EFTUD2    | -0.22818 | 0.020047 | 0.046598 |
| 11738835_NDRG2     | -0.17889 | 0.020057 | 0.046616 |
| 11761709_WDR13     | -0.15973 | 0.020059 | 0.046616 |
| 11720613_ELP3      | 0.145318 | 0.020059 | 0.046616 |
| 11728931_FXYD7     | -0.19254 | 0.02006  | 0.046616 |
| 11757944_MIEF1     | -0.13374 | 0.02006  | 0.046616 |
| 11753253_GHRHR     | -0.20838 | 0.020061 | 0.046616 |
| 11745745_SLC39A1   | -0.18076 | 0.020072 | 0.046639 |
| 11726309_GLRB      | 0.251034 | 0.020076 | 0.046647 |
| 11718265_SMAD3     | -0.11825 | 0.020079 | 0.046652 |
| 11748887_RING1     | -0.15093 | 0.020081 | 0.046653 |
| 11751419_TMEM185A  | -0.15537 | 0.020103 | 0.046704 |
| 11717258_PIM1      | -0.27589 | 0.020118 | 0.046737 |
| 11741504_NREP      | 0.127079 | 0.02012  | 0.046738 |
| 11746024_LOC100293 | 0.204363 | 0.020129 | 0.046757 |
| 11715314_RABGEF1   | -0.17362 | 0.020134 | 0.046766 |
| 11730639_GCM2      | -0.13133 | 0.020138 | 0.046774 |
| 11724339_SLC35F1   | -0.15473 | 0.02014  | 0.046776 |
| 11715208_CLCN6     | -0.19299 | 0.020143 | 0.04678  |
| 11739685_EXOC6B    | 0.416816 | 0.020156 | 0.046808 |
| 11757101_SPEF2     | -0.1806  | 0.020166 | 0.046829 |
| 11725959_CALM2 /// | -0.1928  | 0.020167 | 0.04683  |
| 11723018_LCMT2     | -0.11332 | 0.020169 | 0.046833 |
| 11733935_GEMIN4    | -0.1716  | 0.020171 | 0.046833 |
| 11758104_RAB2B     | -0.13778 | 0.020172 | 0.046833 |
| 11724523_CDK5RAP2  | -0.15891 | 0.020173 | 0.046835 |
| 11733675_WDR49     | -0.28086 | 0.020181 | 0.046852 |
| 11735894_BCL2L11   | -0.19427 | 0.020184 | 0.046856 |
| 11726352_EFNA5     | 0.139417 | 0.020205 | 0.0469   |
| 11723904_UNC80     | 0.174124 | 0.020205 | 0.0469   |
| 11748372_C16orf62  | 0.131784 | 0.020222 | 0.046938 |
| 11750686_KIF3C     | -0.13347 | 0.020227 | 0.046946 |
| 11724705_ST8SIA3   | -0.23082 | 0.020255 | 0.047009 |
| 11730016_NEUROD2   | -0.23123 | 0.020257 | 0.047011 |
| 11721184_TSPAN33   | -0.19914 | 0.020267 | 0.047029 |
| 11757068_FAAP20    | 0.150145 | 0.020268 | 0.047029 |
| 11727829_SNAP29    | -0.15219 | 0.020268 | 0.047029 |

|                    |          |          |          |
|--------------------|----------|----------|----------|
| 11718452_AXIN2     | -0.28874 | 0.020268 | 0.047029 |
| 11741685_TAS1R1    | -0.17341 | 0.020293 | 0.047085 |
| 11756538_JMJD7 /// | -0.19164 | 0.020296 | 0.047089 |
| 11761061_UQCRC1    | -0.10972 | 0.020311 | 0.047122 |
| 11740754_LAIR2     | -0.13927 | 0.020313 | 0.047123 |
| 11764175_LOC105371 | -0.14253 | 0.020315 | 0.047127 |
| 11717488_SEPT5 /// | -0.19361 | 0.020316 | 0.047127 |
| 11736290_PTPRG     | 0.242304 | 0.02032  | 0.047133 |
| 11760348_CRYAB     | -0.17369 | 0.020322 | 0.047135 |
| 11725171_PPARD     | -0.16812 | 0.020322 | 0.047135 |
| 11753800_SMIM11A / | 0.14969  | 0.020326 | 0.04714  |
| 11722935_CHML      | -0.19863 | 0.02033  | 0.047147 |
| 11758098_TPT1      | 0.096535 | 0.020335 | 0.047157 |
| 11760794_STMN4     | -0.16067 | 0.020354 | 0.047198 |
| 11728848_RAB39B    | -0.20305 | 0.02036  | 0.047209 |
| 11741002_RNF123    | 0.163798 | 0.020361 | 0.047209 |
| 11762972_WDR34     | -0.12067 | 0.020361 | 0.047209 |
| 11739587_RERE      | 0.127062 | 0.020363 | 0.047211 |
| 11743986_AKAP1     | -0.14939 | 0.020365 | 0.047212 |
| 11744050_MAP1B     | 0.103338 | 0.020366 | 0.047214 |
| 11736808_VAV2      | 0.140205 | 0.020369 | 0.047217 |
| 11761404_RING1     | -0.13464 | 0.02037  | 0.047217 |
| 11761779_MPZL3     | -0.1591  | 0.020377 | 0.047233 |
| 11761450_SRRM2     | -0.15335 | 0.020384 | 0.047245 |
| 11718193_VEZF1     | 0.142496 | 0.020385 | 0.047247 |
| 11763874_LOC100128 | -0.19655 | 0.020387 | 0.047249 |
| 11749111_MTTP      | -0.20396 | 0.020394 | 0.047262 |
| 11730166_C11orf16  | -0.16865 | 0.020395 | 0.047263 |
| 11725510_SLC7A6    | 0.106088 | 0.020403 | 0.047278 |
| 11720337_C19orf43  | 0.105304 | 0.020404 | 0.047278 |
| 11751608_TTC33     | -0.1703  | 0.020411 | 0.047291 |
| 11760706_CDK11A    | 0.176178 | 0.020411 | 0.047291 |
| 11740405_LHX4      | 0.109967 | 0.02042  | 0.047309 |
| 11743718_ZIK1      | 0.123146 | 0.020421 | 0.047309 |
| 11756926_TMEM63B   | 0.151795 | 0.020422 | 0.047309 |
| 11734939_SLC16A9   | 0.1815   | 0.020427 | 0.047319 |
| 11725223_SNTB1     | -0.13391 | 0.020435 | 0.047334 |
| 11732420_TYW5      | -0.15678 | 0.020438 | 0.047341 |
| 11734924_ATP6V1G2  | -0.18749 | 0.020448 | 0.047361 |
| 11752077_AP2A1     | -0.12022 | 0.020451 | 0.047366 |
| 11717181_OCRL      | 0.170998 | 0.020452 | 0.047366 |
| 11715814_TRAP1     | -0.13735 | 0.020466 | 0.047396 |
| 11752666_B3GNT5    | 0.158576 | 0.020469 | 0.047401 |
| 11762359_SPRY4     | 0.288686 | 0.020471 | 0.047403 |
| 11719443_PTPRZ1    | 0.314445 | 0.020479 | 0.04742  |
| 11761850_KMT5C     | -0.13502 | 0.020493 | 0.04745  |
| 11750498_SLC1A4    | -0.15597 | 0.020527 | 0.047526 |
| 11741832_SNRPN /// | -0.12049 | 0.020538 | 0.047548 |
| 11739329_WDR82     | -0.10989 | 0.020541 | 0.047554 |
| 11729322_RASD2     | -0.1427  | 0.020542 | 0.047554 |
| 11719591_GLTP      | 0.108697 | 0.020549 | 0.047569 |

|                    |          |          |          |
|--------------------|----------|----------|----------|
| 11739043_LIMK2     | 0.188987 | 0.02055  | 0.047569 |
| 11742419_MYLK3     | 0.185596 | 0.020556 | 0.047578 |
| 11727046_HPDL      | -0.26913 | 0.020556 | 0.047578 |
| 11752709_ZNF215    | 0.250734 | 0.020569 | 0.047604 |
| 11730212_MRPS7     | 0.126361 | 0.02057  | 0.047606 |
| 11751854_GSG1L     | -0.13504 | 0.020572 | 0.047606 |
| 11725024_LOC100129 | -0.16527 | 0.02058  | 0.047622 |
| 11721130_HCFC1     | -0.15172 | 0.020589 | 0.047643 |
| 11719132_FAM49B    | 0.123873 | 0.020597 | 0.047658 |
| 11761223_USP15     | 0.25869  | 0.020618 | 0.047706 |
| 11720861_ARHGEF3   | -0.11388 | 0.02064  | 0.047751 |
| 11734134_NANOS1    | 0.301208 | 0.02064  | 0.047751 |
| 11736927_PCDHA12   | 0.246763 | 0.020644 | 0.047759 |
| 11724102_PDZRN3    | -0.12561 | 0.020649 | 0.047767 |
| 11715734_NIPSNAP1  | -0.10971 | 0.020654 | 0.047777 |
| 11717618_PXN       | -0.10209 | 0.02066  | 0.047788 |
| 11729475_GGN       | -0.16888 | 0.020678 | 0.047827 |
| 11723873_TMEM104   | -0.13518 | 0.020682 | 0.047835 |
| 11733992_TMEM150C  | -0.10179 | 0.020688 | 0.047846 |
| 11752803_PCSK9     | -0.15619 | 0.020692 | 0.047854 |
| 11749116_DNM2      | -0.11097 | 0.020697 | 0.047863 |
| 11743575_CCDC180 / | -0.10676 | 0.020718 | 0.047909 |
| 11759094_GNAQ      | 0.111929 | 0.020723 | 0.047918 |
| 11715673_JUNB      | 0.139594 | 0.020727 | 0.047926 |
| 11744915_NEGR1     | -0.18332 | 0.020742 | 0.047957 |
| 11755793_WDR27     | 0.10981  | 0.020765 | 0.048008 |
| 11721794_CR2       | -0.16757 | 0.020772 | 0.048022 |
| 11752009_TNC       | 0.17423  | 0.020775 | 0.048028 |
| 11762380_TRO       | -0.19313 | 0.020779 | 0.048034 |
| 11731091_CACHD1    | 0.132119 | 0.020784 | 0.048043 |
| 11735348_ZFP69     | 0.131411 | 0.020785 | 0.048043 |
| 11725308_CALU      | 0.108118 | 0.020786 | 0.048043 |
| 11754721_TXNDC15   | 0.154815 | 0.020793 | 0.048057 |
| 11749343_ABHD4     | -0.14493 | 0.020794 | 0.048057 |
| 11740773_LIN54     | -0.23941 | 0.020797 | 0.048061 |
| 11720845_CD248     | 0.151291 | 0.020799 | 0.048065 |
| 11742132_MFSD2B    | -0.11487 | 0.020805 | 0.048075 |
| 11758831_POLR2C    | -0.422   | 0.020807 | 0.048078 |
| 11740693_FAM83C    | -0.21304 | 0.020808 | 0.048078 |
| 11727240_C4orf19   | 0.243891 | 0.020819 | 0.048102 |
| 11734180_PTGFR     | -0.15911 | 0.020823 | 0.048109 |
| 11734504_ZNF177 // | 0.26422  | 0.020824 | 0.048109 |
| 11758047_MFSD14A   | -0.10152 | 0.02083  | 0.048119 |
| 11760673_LYRM4     | -0.19666 | 0.020834 | 0.048126 |
| 11732688_UBXN2A    | 0.115502 | 0.020835 | 0.048126 |
| 11744194_ABCC3     | 0.167643 | 0.020839 | 0.048134 |
| 11742603_OR10K2    | -0.19624 | 0.020842 | 0.048139 |
| 11760769_SNRPB     | -0.17652 | 0.020851 | 0.048158 |
| 11759027_AHSA2     | 0.201514 | 0.020854 | 0.048161 |
| 11724413_PPARA     | -0.14693 | 0.020857 | 0.048166 |
| 11752948_PRCP      | 0.114382 | 0.020875 | 0.048204 |

|                    |          |          |          |
|--------------------|----------|----------|----------|
| 11732502_ICA1L     | -0.18789 | 0.020875 | 0.048204 |
| 11747256_TTC39C    | 0.246405 | 0.02088  | 0.048213 |
| 11734473_EXD1      | -0.15608 | 0.02089  | 0.048234 |
| 11719955_POLR3H    | 0.182601 | 0.020891 | 0.048234 |
| 11743892_ZNF780A   | 0.154415 | 0.020901 | 0.048255 |
| 11741007_PARG      | -0.12851 | 0.020942 | 0.048347 |
| 11746756_KY        | -0.15316 | 0.020976 | 0.048423 |
| 11762363_NEUROD2   | -0.26971 | 0.020986 | 0.048443 |
| 11746785_SLC35E1   | 0.18646  | 0.02099  | 0.04845  |
| 11717089_RBM39     | 0.112393 | 0.020991 | 0.04845  |
| 11745673_CEP290    | -0.27367 | 0.021002 | 0.048473 |
| 11742429_ZNF716    | 0.222657 | 0.021003 | 0.048473 |
| 11729160_UCP2      | -0.1709  | 0.021005 | 0.048475 |
| 11749736_RBBP5     | 0.185095 | 0.02101  | 0.048485 |
| 11731455_TPM3      | 0.179573 | 0.021029 | 0.048527 |
| 11752874_B4GALNT1  | -0.27438 | 0.021033 | 0.048533 |
| 11752241_JPH4      | -0.14814 | 0.021043 | 0.048555 |
| 11726314_TBL1X     | -0.13787 | 0.021044 | 0.048555 |
| 11724995_KIAA1804  | -0.21663 | 0.02105  | 0.048567 |
| 11748193_MAEA      | 0.112218 | 0.021058 | 0.048582 |
| 11722519_HKDC1     | -0.10098 | 0.021067 | 0.048601 |
| 11763103_FCN2      | -0.17969 | 0.021068 | 0.048601 |
| 11730477_RNF125    | -0.23918 | 0.02107  | 0.048604 |
| 11753270_HABP2     | -0.19166 | 0.021077 | 0.048618 |
| 11721201_TRIM62    | -0.15989 | 0.021111 | 0.048694 |
| 11745986_SALL2     | -0.28465 | 0.021113 | 0.048695 |
| 11760966_SLC25A14  | -0.17047 | 0.021131 | 0.048736 |
| 11735438_NRXN2     | -0.10342 | 0.021133 | 0.048737 |
| 11743704_ABHD11    | -0.12434 | 0.021138 | 0.048747 |
| 11727754_PLA2G4A   | 0.138809 | 0.021149 | 0.048768 |
| 11737582_SGCD      | 0.10098  | 0.021156 | 0.048783 |
| 11746637_MARS      | -0.10066 | 0.02116  | 0.048788 |
| 11737619_RFPL4B    | -0.14703 | 0.02116  | 0.048788 |
| 11759974_TMEM75    | -0.15866 | 0.021168 | 0.048804 |
| 11755082_ZNF836    | -0.24027 | 0.021169 | 0.048805 |
| 11750758_ABCC6 /// | -0.15257 | 0.021176 | 0.048817 |
| 11741452_NDUFAF3   | -0.10322 | 0.021187 | 0.04884  |
| 11718757_HIF1A     | -0.10806 | 0.02119  | 0.048845 |
| 11745757_DCLK1     | 0.170502 | 0.021194 | 0.048853 |
| 11744564_PPWD1     | -0.11681 | 0.021196 | 0.048856 |
| 11746249_PIFO      | -0.20961 | 0.021199 | 0.048859 |
| 11732298_KIAA1715  | 0.113959 | 0.021205 | 0.04887  |
| 11722558_MPP1      | -0.21614 | 0.02121  | 0.04888  |
| 11753194_LINCO0893 | -0.15926 | 0.021215 | 0.048888 |
| 11726669_PPIL4     | -0.17592 | 0.021222 | 0.048903 |
| 11748977_DMKN      | -0.13482 | 0.021227 | 0.04891  |
| 11734259_SCP2      | 0.160083 | 0.021227 | 0.04891  |
| 11753933_PHAX      | 0.159689 | 0.021228 | 0.04891  |
| 11743313_FARP2     | -0.17523 | 0.02124  | 0.048934 |
| 11754563_CCBE1     | 0.38066  | 0.021247 | 0.048946 |
| 11762988_YME1L1    | -0.22609 | 0.021247 | 0.048946 |



|                    |          |          |          |
|--------------------|----------|----------|----------|
| 11723547_PEX1      | 0.108471 | 0.021248 | 0.048946 |
| 11752250_RSP01     | -0.12779 | 0.021249 | 0.048948 |
| 11746105_PLEKHM1 / | 0.121159 | 0.021252 | 0.048948 |
| 11741139_MPPED2    | -0.17983 | 0.021253 | 0.048948 |
| 11740082_AGMO      | -0.13578 | 0.021253 | 0.048948 |
| 11761714_TFAP2A    | -0.20122 | 0.021254 | 0.048948 |
| 11725989_MMP14     | -0.11728 | 0.021257 | 0.048954 |
| 11720778_KLHL22    | -0.18708 | 0.021266 | 0.048971 |
| 11722291_ZBTB43    | 0.142995 | 0.021268 | 0.048974 |
| 11757238_DISC2     | -0.19216 | 0.02127  | 0.048975 |
| 11729616_UBE2J2    | 0.129993 | 0.021276 | 0.048987 |
| 11737766_TIGD1     | -0.13729 | 0.021279 | 0.048989 |
| 11760329_RCBTB1    | -0.10985 | 0.021279 | 0.048989 |
| 11746059_PSMD7     | -0.15377 | 0.02128  | 0.048989 |
| 11730967_ACTL6B    | -0.23882 | 0.021283 | 0.048994 |
| 11723817_ARHGAP29  | -0.19382 | 0.021285 | 0.048997 |
| 11760479_SLC25A47  | -0.12881 | 0.021287 | 0.048999 |
| 11729561_AHRR      | 0.123139 | 0.02129  | 0.049002 |
| 11759318_ISG20L2   | 0.124197 | 0.02129  | 0.049002 |
| 11718454_INPP5K    | 0.124787 | 0.021291 | 0.049002 |
| 11718861_HCK       | 0.179894 | 0.021295 | 0.049008 |
| 11744199_RETSAT    | -0.1861  | 0.0213   | 0.049018 |
| 11754943_SLC25A35  | -0.1315  | 0.021302 | 0.04902  |
| 11755285_BCAS3     | -0.11569 | 0.021304 | 0.049024 |
| 11753989_PQBP1     | 0.121208 | 0.021315 | 0.049046 |
| 11746449_MEIS2     | -0.13837 | 0.021319 | 0.049052 |
| 11755761_FANCM     | -0.20979 | 0.021322 | 0.049056 |
| 11719355_SH3BP5    | 0.160149 | 0.021323 | 0.049056 |
| 11744734_SIN3B     | 0.122015 | 0.021328 | 0.049067 |
| 11719098_MVK       | -0.1316  | 0.021329 | 0.049067 |
| 11760557_TTL5      | -0.21301 | 0.021332 | 0.04907  |
| 11729746_DNAJC17   | -0.20207 | 0.021338 | 0.049083 |
| 11717593_CENPB     | -0.12613 | 0.021341 | 0.049086 |
| 11723172_IL17RD    | 0.334942 | 0.021342 | 0.049086 |
| 11741184_AMPD3     | 0.169541 | 0.021344 | 0.04909  |
| 11746147_EIF2B1    | 0.099891 | 0.021346 | 0.049091 |
| 11747638_FARSB     | -0.1378  | 0.021349 | 0.049094 |
| 11727780_SCARA5    | 0.157853 | 0.021349 | 0.049094 |
| 11718764_COX5B     | -0.12347 | 0.021351 | 0.049095 |
| 11747516_EXOSC10   | -0.14059 | 0.021352 | 0.049095 |
| 11735306_C9orf139  | 0.159163 | 0.021353 | 0.049095 |
| 11752196_ENG       | 0.107387 | 0.021353 | 0.049095 |
| 11732931_ERI2      | -0.24524 | 0.021355 | 0.049095 |
| 11720553_ZXDC      | -0.18199 | 0.021357 | 0.049099 |
| 11742230_SUPT20HL1 | -0.12308 | 0.021363 | 0.04911  |
| 11718691_SBN02     | 0.173435 | 0.021371 | 0.049125 |
| 11735358_VAX2      | -0.25079 | 0.021372 | 0.049125 |
| 11760545_DACH2     | -0.21595 | 0.021376 | 0.049129 |
| 11722940_SRGAP2    | 0.120763 | 0.021376 | 0.049129 |
| 11758142_RAB10     | -0.30162 | 0.021376 | 0.049129 |
| 11740785_RGPD4     | -0.20341 | 0.021394 | 0.049167 |

|                    |          |          |          |
|--------------------|----------|----------|----------|
| 11728773_ZDHC3     | -0.10464 | 0.021401 | 0.049181 |
| 11748496_ZNF785    | -0.15116 | 0.021421 | 0.049224 |
| 11730972_CYP4F12   | -0.13724 | 0.021424 | 0.049229 |
| 11759197_RAB9B     | -0.17965 | 0.021425 | 0.049229 |
| 11720522_NSDHL     | -0.10408 | 0.02145  | 0.049285 |
| 11753071_TASP1     | 0.116419 | 0.021471 | 0.049331 |
| 11751146_KLHL14    | -0.11624 | 0.021474 | 0.049334 |
| 11756176_EIF4A3    | -0.11335 | 0.021483 | 0.049353 |
| 11746707_LINC00314 | -0.21796 | 0.02149  | 0.049368 |
| 11745610_PDDC1     | 0.179488 | 0.021498 | 0.049383 |
| 11762700_OFD1      | -0.11733 | 0.021503 | 0.049392 |
| 11725261_C20orf144 | -0.11354 | 0.021508 | 0.049402 |
| 11731078_SLC05A1   | 0.096966 | 0.021515 | 0.049416 |
| 11723291_NDUFA1    | -0.09442 | 0.021525 | 0.049433 |
| 11748683_NXN       | -0.16823 | 0.021526 | 0.049433 |
| 11746601_GGA3      | 0.106811 | 0.021526 | 0.049433 |
| 11737681_SLC26A10  | 0.147172 | 0.021528 | 0.049435 |
| 11732050_PRR20A // | -0.13547 | 0.02153  | 0.049439 |
| 11754863_VPS37C    | 0.103259 | 0.021534 | 0.049445 |
| 11750882_KCNV1     | 0.305164 | 0.021536 | 0.049447 |
| 11743637_DIS3L2    | 0.136477 | 0.021538 | 0.04945  |
| 11721366_TRIM47    | 0.100463 | 0.021543 | 0.049459 |
| 11740411_PRKD2     | -0.11038 | 0.021553 | 0.04948  |
| 11734567_RASGRP2   | -0.15877 | 0.021558 | 0.049487 |
| 11747841_ACVR1     | -0.15384 | 0.02156  | 0.049489 |
| 11742717_TBRG1     | 0.116439 | 0.021562 | 0.049492 |
| 11727126_RAPGEFL1  | -0.20398 | 0.021563 | 0.049492 |
| 11733246_DTNBP1    | -0.17426 | 0.021564 | 0.049492 |
| 11738963_KRTAP12-3 | -0.11155 | 0.021569 | 0.049501 |
| 11755229_ENGASE    | -0.16195 | 0.021584 | 0.049535 |
| 11760921_ZNF451    | 0.221848 | 0.021586 | 0.049536 |
| 11756502_COA5      | -0.11742 | 0.021594 | 0.049552 |
| 11727354_CALN1     | -0.13709 | 0.021603 | 0.04957  |
| 11725474_MAP3K5    | 0.166667 | 0.021606 | 0.049574 |
| 11763555_SNX12     | 0.130067 | 0.021621 | 0.049606 |
| 11722137_GUCY1A3   | -0.17953 | 0.021622 | 0.049606 |
| 11728923_ONECUT2   | -0.16579 | 0.021622 | 0.049606 |
| 11743706_MGA       | 0.162811 | 0.021628 | 0.049616 |
| 11749025_PPP1R12C  | -0.13988 | 0.021641 | 0.049645 |
| 11737787_SHISA5    | -0.13155 | 0.021644 | 0.049648 |
| 11756550_YJEFN3    | 0.115459 | 0.02166  | 0.049684 |
| 11752738_RIF1      | -0.12535 | 0.021674 | 0.049712 |
| 11736823_VN1R1     | -0.16705 | 0.021678 | 0.049717 |
| 11722121_PC        | -0.39233 | 0.021678 | 0.049717 |
| 11757055_SH3BP5L   | -0.13576 | 0.021685 | 0.049731 |
| 11764261_TMPRSS11A | 0.097594 | 0.021693 | 0.049748 |
| 11734992_ARFIP1    | 0.1666   | 0.021719 | 0.049803 |
| 11736233_PTER      | -0.1689  | 0.021723 | 0.049812 |
| 11752832_CD55      | 0.10399  | 0.021725 | 0.049813 |
| 11758951_NEURL1    | -0.28223 | 0.021738 | 0.04984  |
| 11742704_CHD3      | 0.10336  | 0.02174  | 0.049842 |

|                    |          |          |          |
|--------------------|----------|----------|----------|
| 11745423_PRKAR1B   | -0.29994 | 0.021741 | 0.049842 |
| 11756191_MAN1C1    | -0.27453 | 0.021748 | 0.049856 |
| 11735729_ALG12     | 0.212649 | 0.021749 | 0.049856 |
| 11727738_AKAP7     | -0.17279 | 0.021766 | 0.049893 |
| 11752483_STK32B    | 0.146545 | 0.021771 | 0.049901 |
| 11763970_PRRX2-AS1 | -0.24934 | 0.021772 | 0.049901 |
| 11755791_SASS6     | -0.18467 | 0.021798 | 0.049958 |
| 11763782_TTC5      | -0.13377 | 0.021798 | 0.049958 |
| 11720488_HSPB6     | -0.25368 | 0.021808 | 0.049975 |
| 11760988_LRRC41    | -0.15122 | 0.021808 | 0.049975 |
| 11730492_LRRC4B    | -0.21183 | 0.021814 | 0.049986 |
| 11730690_FAM111A   | -0.10537 | 0.021817 | 0.049992 |
| 11759502_TRAF3     | -0.11413 | 0.021831 | 0.050022 |
| 11728435_ATP5S     | -0.1187  | 0.021835 | 0.050027 |
| 11738410_KRTAP8-1  | -0.12922 | 0.021836 | 0.050028 |
| 11743607_COG2      | -0.11135 | 0.021839 | 0.050032 |
| 11737963_PCDHGA1 / | -0.12793 | 0.02184  | 0.050032 |
| 11761166_ZNF283    | 0.188682 | 0.021851 | 0.050055 |
| 11750624_MAP3K13   | 0.341618 | 0.02186  | 0.050072 |
| 11755525_ATOH8     | -0.13581 | 0.021883 | 0.050125 |
| 11755768_SPATA31D4 | -0.1784  | 0.021889 | 0.050135 |
| 11746055_CARD8     | 0.253111 | 0.021897 | 0.05015  |
| 11761599_PMS2      | -0.18729 | 0.021897 | 0.05015  |
| 11750633_OGDH      | -0.11319 | 0.021905 | 0.050162 |
| 11757439_GDI2      | 0.110375 | 0.021905 | 0.050162 |
| 11729047_ZNF34     | 0.281212 | 0.021913 | 0.050179 |
| 11731543_SESTD1    | -0.18778 | 0.021915 | 0.050179 |
| 11743279_WNK1      | -0.10851 | 0.021915 | 0.050179 |
| 11752192_PTPRB     | -0.25182 | 0.021919 | 0.050184 |
| 11731466_CTSC      | -0.10391 | 0.021928 | 0.050204 |
| 11732736_CHSY3     | -0.21341 | 0.021931 | 0.050208 |
| 11733043_SLC7A2    | -0.15419 | 0.021951 | 0.05025  |
| 11720667_KAT2B     | 0.254095 | 0.021971 | 0.050295 |
| 11750585_SEPT9     | 0.103268 | 0.021995 | 0.050347 |
| 11750093_PRICKLE4  | -0.14939 | 0.022    | 0.050356 |
| 11747544_TPCN1     | -0.17577 | 0.022001 | 0.050356 |
| 11750946_RIN1      | -0.13855 | 0.022003 | 0.050359 |
| 11750518_LINC01135 | -0.267   | 0.022007 | 0.050365 |
| 11719556_PDK2      | -0.16524 | 0.02201  | 0.050371 |
| 11722148_YTHDC2    | 0.134434 | 0.022019 | 0.050389 |
| 11738720_OR2T3 /// | -0.17146 | 0.022028 | 0.050406 |
| 11747998_SNX17     | 0.108972 | 0.022043 | 0.050435 |
| 11754729_LOC102724 | -0.165   | 0.022044 | 0.050435 |
| 11737884_TMEM82    | -0.14631 | 0.022044 | 0.050435 |
| 11723310_TNFRSF10D | -0.13074 | 0.022058 | 0.050464 |
| 11723573_MORC4     | 0.246722 | 0.022058 | 0.050464 |
| 11753310_NARF      | -0.1355  | 0.022061 | 0.050468 |
| 11725425_RAB27A    | -0.16238 | 0.022063 | 0.050468 |
| 11749087_FKTN      | -0.16859 | 0.022063 | 0.050468 |
| 11758012_APOA1     | -0.23433 | 0.022071 | 0.050484 |
| 11760218_DNAJC10   | 0.245237 | 0.022077 | 0.050495 |

|                    |          |          |          |
|--------------------|----------|----------|----------|
| 11757172_SNORA47   | -0.14526 | 0.022085 | 0.05051  |
| 11746736_CACNA2D3  | 0.179757 | 0.022086 | 0.05051  |
| 11754615_UFM1      | 0.115605 | 0.022087 | 0.050511 |
| 11738238_PURG      | 0.370205 | 0.022096 | 0.050529 |
| 11746488_B9D1      | 0.110463 | 0.022098 | 0.050532 |
| 11727421_CANX      | -0.11789 | 0.022103 | 0.05054  |
| 11759237_CLEC7A    | 0.154628 | 0.022105 | 0.050542 |
| 11741042_PSMA1     | 0.119802 | 0.022111 | 0.050553 |
| 11749516_PAF1      | 0.106984 | 0.022112 | 0.050554 |
| 11737586_ACOT11    | -0.20896 | 0.022117 | 0.050562 |
| 11759017_SLC2A5    | -0.18882 | 0.022118 | 0.050562 |
| 11748281_CNNM4     | -0.28375 | 0.022123 | 0.050571 |
| 11732638_NOVA2     | -0.11349 | 0.022125 | 0.050573 |
| 11732697_COL24A1   | 0.210465 | 0.022141 | 0.050608 |
| 11729404_DOC2A     | -0.14266 | 0.022149 | 0.050624 |
| 11729733_ZNF281    | 0.102537 | 0.022161 | 0.050648 |
| 11748582_ART3      | -0.11908 | 0.022162 | 0.050649 |
| 11738741_MYL10     | -0.12709 | 0.02217  | 0.050664 |
| 11751103_TTTY10    | -0.13999 | 0.022174 | 0.050672 |
| 11760473_TOR1AIP2  | -0.14646 | 0.022181 | 0.050682 |
| 11719369_LACRT     | -0.2307  | 0.022181 | 0.050682 |
| 11724092_SLC35E2 / | -0.10699 | 0.022182 | 0.050682 |
| 11735330_ZNF837    | -0.1048  | 0.022191 | 0.0507   |
| 11717210_NEO1      | 0.16103  | 0.022193 | 0.050703 |
| 11752696_PGM2      | 0.120176 | 0.022196 | 0.050708 |
| 11740031_DUSP14    | 0.115066 | 0.022197 | 0.050708 |
| 200075_PMGUK1      | 0.125177 | 0.022202 | 0.050715 |
| 11761761_CD300LG   | -0.15662 | 0.022228 | 0.050773 |
| 11748909_BNIP3L    | 0.104251 | 0.022232 | 0.050778 |
| 11753422_BNIP3L    | 0.104251 | 0.022232 | 0.050778 |
| 11745425_USP25     | 0.208438 | 0.022233 | 0.050778 |
| 11755614_FERMT1    | -0.14401 | 0.022239 | 0.050788 |
| 11732031_OTOS      | -0.14713 | 0.022244 | 0.050798 |
| 11717006_POLDIP3   | -0.11659 | 0.022247 | 0.0508   |
| 11724538_ABCG2     | -0.20307 | 0.022248 | 0.0508   |
| 11748711_EIF4G3    | 0.119363 | 0.022248 | 0.0508   |
| 11744404_TXNDC11   | -0.16734 | 0.022261 | 0.050828 |
| 11745493_TEL02     | -0.19772 | 0.022275 | 0.050856 |
| 11751773_SCRN1     | 0.118108 | 0.022277 | 0.050859 |
| 11756482_STT3B     | -0.11142 | 0.022292 | 0.050888 |
| 11723736_RNF216    | 0.128947 | 0.022293 | 0.050888 |
| 11750436_IRX5      | -0.17532 | 0.022293 | 0.050888 |
| 11744410_STMN4     | -0.15363 | 0.022306 | 0.050914 |
| 11722812_RAB7A     | -0.10628 | 0.022306 | 0.050914 |
| 11758783_COX6C     | -0.18228 | 0.022311 | 0.050922 |
| 11739419_AMPD3     | 0.220154 | 0.022317 | 0.050935 |
| 11752149_UBASH3A   | -0.24344 | 0.022319 | 0.050935 |
| 11740933_FOXA2     | -0.14679 | 0.02233  | 0.050959 |
| 11736790_FBXO4     | -0.13155 | 0.022335 | 0.050967 |
| 11718890_FOXO3     | 0.114823 | 0.022338 | 0.050972 |
| 11735059_WISP2     | -0.26175 | 0.022339 | 0.050972 |

|                  |     |          |          |          |
|------------------|-----|----------|----------|----------|
| 11761003_CBWD1   | /// | 0.247791 | 0.022355 | 0.051006 |
| 11753512_DNAJB6  |     | 0.099085 | 0.022364 | 0.051025 |
| 11744234_TJAP1   |     | 0.110561 | 0.022367 | 0.051028 |
| 11735703_MT1A    | /// | -0.13656 | 0.02237  | 0.051033 |
| 11729981_PARP11  |     | -0.17969 | 0.022382 | 0.051059 |
| AFFX-HUMGGAPDH   |     | -0.09433 | 0.022384 | 0.05106  |
| 11750193_NFATC4  |     | -0.12729 | 0.022386 | 0.051063 |
| 11748871_ACSM5   |     | 0.1546   | 0.022392 | 0.051074 |
| 11751353_RRAGC   |     | 0.114221 | 0.022396 | 0.05108  |
| 11739323_WDR4    |     | 0.217938 | 0.022397 | 0.05108  |
| 11736135_OAS2    |     | -0.18218 | 0.022402 | 0.05109  |
| 11743280_WNK1    |     | 0.113386 | 0.022404 | 0.051092 |
| 11725280_PRDM8   |     | -0.13928 | 0.022406 | 0.051093 |
| 11725254_FREM1   |     | 0.174445 | 0.022417 | 0.051116 |
| 11715962_ACTR10  |     | -0.15976 | 0.022435 | 0.051157 |
| 11729701_STXBP1  |     | -0.11241 | 0.022437 | 0.051157 |
| 11754693_AHI1    |     | 0.246412 | 0.022438 | 0.051157 |
| 11736806_GABRA4  |     | -0.15841 | 0.02244  | 0.051159 |
| 11732014_ZNF821  |     | 0.226225 | 0.022447 | 0.05117  |
| 11727584_SPIN3   |     | -0.21433 | 0.022447 | 0.05117  |
| 11760499_ZNF451  |     | 0.184823 | 0.022455 | 0.051186 |
| 11721922_PRKCB   |     | -0.16021 | 0.022467 | 0.051211 |
| 11742041_ATXN2L  |     | -0.10879 | 0.022478 | 0.051235 |
| 11724791_PKP3    |     | -0.20771 | 0.022497 | 0.051276 |
| 11749874_OXCT1   |     | 0.13722  | 0.022515 | 0.051314 |
| 11751455_REEP1   |     | -0.17933 | 0.022516 | 0.051315 |
| 11726830_ANTXR1  |     | 0.148613 | 0.022538 | 0.051358 |
| 11751218_CA10    |     | -0.20611 | 0.022538 | 0.051358 |
| 11718090_TPCN1   |     | -0.10805 | 0.022553 | 0.051389 |
| 11745295_ANKRD66 |     | -0.16995 | 0.022553 | 0.051389 |
| 11742201_APAF1   |     | -0.19419 | 0.022564 | 0.05141  |
| 11720737_ZNF559  |     | 0.118655 | 0.022564 | 0.05141  |
| 11746858_LPA     |     | -0.1339  | 0.022582 | 0.051448 |
| 11752945_SLC36A1 |     | -0.1126  | 0.022586 | 0.051454 |
| 11759941_UHRF1   |     | -0.14994 | 0.02259  | 0.051462 |
| 11725820_PAQR3   |     | 0.100835 | 0.022592 | 0.051464 |
| 11717794_ZDHHC3  |     | -0.17138 | 0.022599 | 0.051476 |
| 11760697_CCM2    |     | -0.19173 | 0.0226   | 0.051477 |
| 11723347_MTERF3  |     | -0.09494 | 0.022612 | 0.051501 |
| 11743916_NPC1    |     | 0.167709 | 0.022626 | 0.05153  |
| 11720294_PLPP2   |     | -0.13661 | 0.022638 | 0.051555 |
| 11740546_ADAM22  |     | 0.344061 | 0.022649 | 0.051572 |
| 11722944_PALB2   |     | -0.1484  | 0.022649 | 0.051572 |
| 11756892_C2CD2   |     | 0.223802 | 0.022649 | 0.051572 |
| 11720696_HDAC7   |     | -0.10895 | 0.022649 | 0.051572 |
| 11743291_GALNT1  |     | -0.13356 | 0.022655 | 0.051581 |
| 11741718_PDE10A  |     | -0.28337 | 0.022656 | 0.051582 |
| 11715577_RAC1    |     | -0.13292 | 0.022657 | 0.051582 |
| 11715910_MYO6    |     | 0.152279 | 0.022669 | 0.051607 |
| 11724177_TSPAN11 |     | -0.19087 | 0.022674 | 0.051615 |
| 11715283_CCKAR   |     | -0.13696 | 0.022681 | 0.051629 |

|                    |          |          |          |
|--------------------|----------|----------|----------|
| 11725648_DCAF5     | -0.14141 | 0.022682 | 0.051629 |
| 11720318_MROH7-TTC | 0.115035 | 0.022695 | 0.051656 |
| 11731609_GPALPP1   | -0.14478 | 0.022704 | 0.051674 |
| 11719715_FXR1      | 0.101966 | 0.022705 | 0.051674 |
| 11737216_SIGLECL1  | -0.17395 | 0.022709 | 0.051681 |
| 11719444_PTZRZ1    | 0.286374 | 0.022725 | 0.051715 |
| 11730076_SHF       | -0.11416 | 0.022735 | 0.051737 |
| 11731836_SLC35C2   | 0.102757 | 0.022744 | 0.051753 |
| 11738384_CLRN2     | -0.14022 | 0.022748 | 0.05176  |
| 11732883_F7        | -0.15079 | 0.022755 | 0.051773 |
| 11719725_PUM3      | -0.10409 | 0.022761 | 0.051785 |
| 11764021_CAMTA1    | -0.11138 | 0.022767 | 0.051797 |
| 11754482_PSMB1     | -0.11181 | 0.022775 | 0.051813 |
| 11742365_OR51I1    | -0.11455 | 0.022781 | 0.051823 |
| 11748916_PDE4DIP   | 0.273685 | 0.02279  | 0.051841 |
| 11750094_TOMM6     | -0.11879 | 0.0228   | 0.051862 |
| 11745090_PLXDC2    | -0.17642 | 0.022802 | 0.051863 |
| 11753734_WFDC2     | -0.1214  | 0.022806 | 0.05187  |
| 11761072_NEURL3    | -0.18974 | 0.02281  | 0.051877 |
| 11717979_C7        | -0.12703 | 0.022815 | 0.051886 |
| 11757770_TOMM70A   | 0.093994 | 0.022823 | 0.051902 |
| 11759823_RPL37A    | -0.26742 | 0.022824 | 0.051902 |
| 11741528_ACP1      | -0.10011 | 0.022834 | 0.051922 |
| 11762521_CHRNB1    | -0.22028 | 0.022835 | 0.051922 |
| 11760476_RPTOR     | -0.20198 | 0.022837 | 0.051924 |
| 11756379_H3F3A /// | -0.10384 | 0.022843 | 0.051936 |
| 11720639_MRPS27    | 0.108251 | 0.02285  | 0.051949 |
| 11721100_SGSH      | -0.17655 | 0.022867 | 0.051985 |
| 11758017_PPIA      | -0.09707 | 0.02287  | 0.05199  |
| 11743689_PTCHD2    | -0.141   | 0.022872 | 0.051992 |
| 11742182_POTEE /// | 0.10809  | 0.022896 | 0.052044 |
| 11733604_SLC52A1   | -0.16467 | 0.022907 | 0.052067 |
| 11751659_MAPRE3    | 0.327771 | 0.022917 | 0.052088 |
| 11745163_HADHB     | -0.12085 | 0.022922 | 0.052096 |
| 11720146_DAPK1     | 0.187056 | 0.022923 | 0.052096 |
| 11749170_KRT6A     | -0.16163 | 0.022927 | 0.052103 |
| 11763602_ZNF839    | 0.175642 | 0.022937 | 0.05212  |
| 11752825_ARHGEF6   | 0.157892 | 0.022937 | 0.05212  |
| 11754576_LEAP2     | 0.147719 | 0.022941 | 0.052128 |
| 11753210_HYAL1     | -0.15636 | 0.022958 | 0.052162 |
| 11719553_C2CD2L    | 0.118403 | 0.022959 | 0.052162 |
| 11733205_AFAP1L1   | -0.1027  | 0.02296  | 0.052162 |
| 11748855_CYB5R1    | -0.1209  | 0.022962 | 0.052163 |
| 11725838_FAM163A   | -0.15555 | 0.022962 | 0.052163 |
| 11734342_ZMYM1     | -0.1048  | 0.022972 | 0.052182 |
| 11759948_HDAC8     | 0.133509 | 0.022973 | 0.052182 |
| 11748994_AMBRA1    | -0.19938 | 0.022981 | 0.052198 |
| 11763416_KBTBD3    | -0.15214 | 0.022986 | 0.052204 |
| 11736874_ZNF514    | 0.183601 | 0.022987 | 0.052204 |
| 11719112_PJA2      | -0.11435 | 0.022987 | 0.052204 |
| 11727036_SLC9B2    | 0.108977 | 0.022988 | 0.052204 |

|                    |          |          |          |
|--------------------|----------|----------|----------|
| 11745637_ADARB2    | -0.11335 | 0.022989 | 0.052204 |
| 11730708_C9orf57   | -0.2609  | 0.022997 | 0.05222  |
| 11737853_TNFSF18   | 0.233565 | 0.022998 | 0.05222  |
| 11744833_TSHZ2     | -0.18069 | 0.023001 | 0.052225 |
| 11734324_PAQR7     | -0.22076 | 0.023027 | 0.052279 |
| 11762450_KLF14     | 0.147727 | 0.023027 | 0.052279 |
| 11746052_CHD1L     | 0.129594 | 0.023044 | 0.052315 |
| 11753036_ANKS1B    | 0.17001  | 0.023045 | 0.052315 |
| 11716335_RBX1      | -0.10105 | 0.023046 | 0.052315 |
| 11744471_CRP       | -0.28294 | 0.023063 | 0.05235  |
| 11721109_NAP1L3    | -0.39258 | 0.023067 | 0.052358 |
| 11731552_HAP1      | -0.11691 | 0.023077 | 0.052377 |
| 11739486_SUZ12     | -0.18146 | 0.023083 | 0.052389 |
| 11722726_ZNF286A / | -0.10597 | 0.023107 | 0.05244  |
| 11754197_FAM120B   | 0.106021 | 0.02311  | 0.052444 |
| 11751476_INPP5B    | 0.200805 | 0.023117 | 0.052458 |
| 11745415_DIAPH1    | -0.10593 | 0.023126 | 0.052477 |
| 11754138_PSPH      | -0.16748 | 0.02313  | 0.052484 |
| 11730491_LRRC4B    | -0.11177 | 0.023136 | 0.052495 |
| 11751669_ADH6      | -0.20819 | 0.023139 | 0.052498 |
| 11738419_ANGPT4    | 0.118971 | 0.023146 | 0.052512 |
| 11724452_PATZ1     | 0.10449  | 0.023155 | 0.05253  |
| 11760190_ZSCAN30   | -0.12817 | 0.023162 | 0.052543 |
| 11759298_SCYL2     | -0.13526 | 0.023173 | 0.052565 |
| 11736885_PAPOLB    | -0.155   | 0.023176 | 0.052571 |
| 11715634_TMEM14C   | -0.13669 | 0.023182 | 0.052581 |
| 11754216_ZBTB80S   | 0.096492 | 0.023185 | 0.052585 |
| 11736212_MRPL57    | -0.10717 | 0.023188 | 0.05259  |
| 11739300_CISD3     | 0.121141 | 0.023199 | 0.052613 |
| 11746202_NAB1      | 0.155102 | 0.0232   | 0.052614 |
| 11738663_TUBB7P    | -0.19013 | 0.023213 | 0.052637 |
| 11719733_SENP3     | -0.13881 | 0.023213 | 0.052637 |
| 11725099_ESF1      | 0.097463 | 0.023228 | 0.052668 |
| 11746696_DOCK8     | 0.146057 | 0.02323  | 0.052671 |
| 11747466_STK19     | -0.15563 | 0.023236 | 0.052681 |
| 11731415_PSMC6     | 0.095419 | 0.023239 | 0.052685 |
| 11738400_RGMA      | -0.18125 | 0.023256 | 0.052724 |
| 11719010_TMEM99    | 0.108402 | 0.023258 | 0.052726 |
| 11738226_GPR179    | -0.16132 | 0.023261 | 0.05273  |
| 11735480_FAM160A1  | 0.140877 | 0.023272 | 0.052753 |
| 11736408_XYLB      | 0.228948 | 0.023276 | 0.052758 |
| 11747655_TM9SF4    | 0.143699 | 0.023278 | 0.05276  |
| 11736864_KIAA1958  | -0.13338 | 0.023288 | 0.052779 |
| 11737640_ZNF556    | 0.168738 | 0.023289 | 0.052779 |
| 11731182_ACTL8     | -0.16684 | 0.023303 | 0.05281  |
| 11749109_ADGRF5    | -0.13728 | 0.023325 | 0.052856 |
| 11715161_KRTAP21-2 | -0.15519 | 0.023332 | 0.05287  |
| 11759950_LCNL1     | 0.110947 | 0.023348 | 0.052905 |
| 11738345_VSTM4     | -0.12938 | 0.023352 | 0.052911 |
| 11740483_TNR       | -0.32923 | 0.023356 | 0.052918 |
| 11727089_DACH1     | 0.292958 | 0.023359 | 0.052921 |

|                    |          |          |          |
|--------------------|----------|----------|----------|
| 11761218_CORO1B    | 0.098481 | 0.023374 | 0.052954 |
| 11725051_FAIM2     | -0.12141 | 0.023376 | 0.052954 |
| 11758462_ZNF215    | 0.292157 | 0.023377 | 0.052954 |
| 11721281_CELA3A    | -0.16415 | 0.023378 | 0.052955 |
| 11726055_B3GALT4   | -0.22931 | 0.023387 | 0.052972 |
| 11716087_AKT1      | -0.12614 | 0.023392 | 0.052982 |
| 11729435_ZBTB22    | -0.21734 | 0.0234   | 0.052997 |
| 11761235_NFATC4    | -0.17984 | 0.023402 | 0.052999 |
| 11752228_MAP3K12   | -0.15748 | 0.023407 | 0.053008 |
| 11754593_TUBB3     | -0.10977 | 0.023411 | 0.053011 |
| 11745862_TCF12     | 0.149228 | 0.023411 | 0.053011 |
| 11747607_P2RX7     | -0.19397 | 0.023412 | 0.053011 |
| 11752426_CAMTA1    | 0.122137 | 0.023414 | 0.053011 |
| 11756346_FAM102B   | 0.273145 | 0.023414 | 0.053011 |
| 11755225_TTL4      | -0.19695 | 0.023417 | 0.053016 |
| 11715483_MCL1      | 0.110048 | 0.023454 | 0.053097 |
| 11743387_CCDC127   | -0.14582 | 0.023455 | 0.053098 |
| 11762435_FGFR2     | -0.33927 | 0.023459 | 0.053103 |
| 11718592_RTN4      | -0.1678  | 0.023473 | 0.053131 |
| 11732322_FXN       | 0.118269 | 0.023473 | 0.053131 |
| 11759793_FAM71D    | -0.13893 | 0.023476 | 0.053134 |
| 11750072_RTP1      | -0.16682 | 0.023477 | 0.053134 |
| 11743723_GALC      | 0.151973 | 0.023482 | 0.053143 |
| 11745102_NOX4      | 0.118501 | 0.023491 | 0.053161 |
| 11742153_OR1B1     | -0.18531 | 0.023498 | 0.053175 |
| 11717679_UNC13B    | 0.120058 | 0.023506 | 0.053189 |
| 11715865_ATP6V1F   | 0.11186  | 0.023507 | 0.053189 |
| 11758914_YY1       | -0.26801 | 0.023507 | 0.053189 |
| 11752179_NBR1      | 0.120315 | 0.023528 | 0.053233 |
| 11723519_ELAC1     | 0.159055 | 0.023531 | 0.053237 |
| 11715596_PSMB7     | -0.09321 | 0.023546 | 0.05327  |
| 11756643_SMAP1     | 0.171314 | 0.023548 | 0.053271 |
| 11716139_SMS       | 0.101716 | 0.02355  | 0.053272 |
| 11762596_CEP57L1   | -0.2407  | 0.023551 | 0.053272 |
| 11751567_EGR3      | 0.17275  | 0.023554 | 0.053277 |
| 11759773_LOC102723 | 0.23174  | 0.023562 | 0.053292 |
| 11741131_NLGN4X    | -0.11184 | 0.023567 | 0.053301 |
| 11760902_NAPSB     | -0.14713 | 0.023583 | 0.053334 |
| 11728258_DIEXF     | 0.098796 | 0.023599 | 0.05337  |
| 11756559_SNUPN     | -0.1172  | 0.023619 | 0.053411 |
| 11715921_SEPT9     | 0.099806 | 0.023621 | 0.053412 |
| 11739597_AGO4      | -0.15177 | 0.023621 | 0.053412 |
| 11755363_WDR91     | -0.20739 | 0.023636 | 0.053443 |
| 11756045_AQP1      | -0.13219 | 0.023641 | 0.053451 |
| 11750332_ASZ1      | 0.219213 | 0.023643 | 0.053453 |
| 11756400_QDPR      | -0.11115 | 0.02365  | 0.053466 |
| 11746230_ZMYM6     | 0.164061 | 0.023665 | 0.053497 |
| 11722446_SIRT3     | 0.112475 | 0.023683 | 0.053536 |
| 11737743_ARSF      | -0.20274 | 0.023686 | 0.053541 |
| 11751872_EPGN      | 0.152406 | 0.023691 | 0.053549 |
| 11727887_ZNF25     | 0.112724 | 0.023694 | 0.053554 |



|                    |          |          |          |
|--------------------|----------|----------|----------|
| 11724123_ZNF853    | -0.19909 | 0.023707 | 0.053581 |
| 11754876_PCDH20    | 0.199971 | 0.023709 | 0.053581 |
| 11738784_PLA2G2E   | -0.17181 | 0.02371  | 0.053581 |
| 11763955_SCARNA10  | -0.18963 | 0.023711 | 0.053581 |
| 11717936_ERMP1     | -0.13182 | 0.023711 | 0.053581 |
| 11756541_ABHD12    | -0.12763 | 0.023715 | 0.053587 |
| 11726721_MPG       | -0.1216  | 0.02372  | 0.053596 |
| 11763027_HFE       | -0.1615  | 0.023722 | 0.053597 |
| 11740391_CTBP1-AS2 | -0.13532 | 0.023729 | 0.05361  |
| 11741340_GAB1      | -0.21253 | 0.023733 | 0.053617 |
| 11751731_PADI1     | -0.20549 | 0.023745 | 0.053642 |
| 11728168_KAZN      | -0.17968 | 0.023765 | 0.053684 |
| 11763098_TSL       | 0.168516 | 0.023766 | 0.053684 |
| 11747657_CDK10     | -0.09905 | 0.023772 | 0.053695 |
| 11751752_HSPBAP1   | -0.19879 | 0.023776 | 0.0537   |
| 11748341_TPP1      | 0.200754 | 0.023776 | 0.0537   |
| 11733900_EPN1      | -0.09944 | 0.023791 | 0.05373  |
| 200001_PMCAPNS1    | 0.104649 | 0.023792 | 0.053732 |
| 11739513_TIMM50    | -0.20746 | 0.023798 | 0.05374  |
| 11744397_ABCC5     | 0.10044  | 0.023798 | 0.05374  |
| 11751861_HYAL1     | -0.13076 | 0.023813 | 0.053771 |
| 11761259_ACOT7     | -0.26911 | 0.023817 | 0.053777 |
| 11751291_SFXN4     | -0.12651 | 0.023825 | 0.053793 |
| 11761936_MLIP      | -0.25861 | 0.023826 | 0.053793 |
| 11753797_TSG101    | 0.135988 | 0.023834 | 0.053806 |
| 11736142_ENPP4     | 0.203217 | 0.023834 | 0.053806 |
| 11748840_MTAP      | -0.09731 | 0.023841 | 0.053819 |
| 11738857_ANTXR1    | -0.19628 | 0.023844 | 0.053822 |
| 11717253_PRM1      | -0.18015 | 0.023847 | 0.053826 |
| 11746184_DHDDS     | -0.1649  | 0.023848 | 0.053826 |
| 11747844_PPIL2     | -0.18088 | 0.023852 | 0.053833 |
| 11751504_QTRTD1    | 0.129368 | 0.023854 | 0.053836 |
| 11715576_RAC1      | -0.1699  | 0.023856 | 0.053838 |
| 11749962_BCAS1     | -0.19657 | 0.023862 | 0.053849 |
| 11740510_SSPN      | -0.24096 | 0.023865 | 0.053853 |
| 11748788_CCNJL     | 0.113469 | 0.023868 | 0.053856 |
| 11761551_DHRS3     | -0.15867 | 0.02387  | 0.053859 |
| 11718167_PRDM4     | 0.101663 | 0.023887 | 0.053896 |
| 11732626_NEMP2     | -0.24987 | 0.023891 | 0.053903 |
| 11749633_CLOCK     | 0.230191 | 0.023901 | 0.053923 |
| 11745938_AIM1      | 0.147599 | 0.023924 | 0.053972 |
| 11730530_ZNF684    | 0.118991 | 0.023929 | 0.05398  |
| 11730168_LITAF     | 0.098525 | 0.023939 | 0.054001 |
| 11742364_OR5AR1    | -0.17158 | 0.023941 | 0.054003 |
| 11744808_TRPM8     | 0.256609 | 0.023948 | 0.054016 |
| 11730759_CRIPT     | 0.104034 | 0.023954 | 0.054028 |
| 11758069_C1orf186  | -0.18322 | 0.023958 | 0.054032 |
| 11720501_UBE4B     | 0.143499 | 0.023962 | 0.05404  |
| 11756079_RHBDD1    | -0.11484 | 0.023971 | 0.054058 |
| 11738555_TAS2R40   | -0.11151 | 0.023973 | 0.05406  |
| 11763488_CLASP2    | 0.159066 | 0.023974 | 0.05406  |

|                    |          |          |          |
|--------------------|----------|----------|----------|
| 11754832_PPP1R12C  | -0.15088 | 0.023977 | 0.054062 |
| 11724477_FOSL1     | -0.1181  | 0.024004 | 0.054121 |
| 11743183_SLC19A1   | -0.13129 | 0.024012 | 0.054138 |
| 11750450_UBAC2     | -0.11681 | 0.024016 | 0.054145 |
| 11722066_C12orf49  | 0.124942 | 0.024018 | 0.054147 |
| 11722660_NFE2L3    | 0.117278 | 0.024022 | 0.054152 |
| 11739260_YIPF6     | 0.116137 | 0.024034 | 0.054177 |
| 11726737_PDLIM7    | -0.17115 | 0.024039 | 0.054186 |
| 11738561_OR2D3     | -0.18709 | 0.02405  | 0.054209 |
| 11728556_KCNF1     | -0.21312 | 0.024057 | 0.054219 |
| 11723582_MTHFSD    | -0.1085  | 0.024058 | 0.054219 |
| 11743949_FRAT1     | -0.2149  | 0.024058 | 0.054219 |
| 11759402_VCAN      | 0.194231 | 0.024066 | 0.054235 |
| 11740383_RBL1      | -0.24705 | 0.024071 | 0.054243 |
| 11743731_TNFSF10   | -0.23722 | 0.024074 | 0.054248 |
| 11735687_C20orf173 | -0.19429 | 0.024077 | 0.05425  |
| 11747819_THEM6     | -0.16808 | 0.024079 | 0.054254 |
| 11735861_FAM9A     | -0.16863 | 0.024088 | 0.054271 |
| 11728355_BBS10     | 0.103241 | 0.024094 | 0.054282 |
| 11750226_ADCK1     | -0.13983 | 0.024099 | 0.05429  |
| 11758667_YWHAZ     | -0.10471 | 0.024103 | 0.054298 |
| 11729331_MAB21L2   | -0.20875 | 0.024111 | 0.054314 |
| 11753222_MAGT1     | 0.14988  | 0.024113 | 0.054314 |
| 11738933_CDX4      | -0.15728 | 0.024121 | 0.054332 |
| 11749801_BAIAP2    | -0.12744 | 0.024131 | 0.054351 |
| 11720479_BCCIP     | -0.16329 | 0.024134 | 0.054353 |
| 11751334_BPNT1     | -0.12701 | 0.024134 | 0.054353 |
| 11735468_MC4R      | -0.15291 | 0.024136 | 0.054355 |
| 11757787_FTL       | 0.096239 | 0.024138 | 0.054356 |
| 11744254_COPB2     | 0.110023 | 0.024146 | 0.054371 |
| 11759383_KRTAP20-2 | -0.18317 | 0.024147 | 0.054371 |
| 11720875_CORO2B    | 0.13711  | 0.024151 | 0.054377 |
| 11720300_SLA       | -0.09694 | 0.024181 | 0.054443 |
| 11715594_RBM38     | -0.161   | 0.024188 | 0.054453 |
| 11744562_EVA1B     | 0.144493 | 0.024188 | 0.054453 |
| 11729137_UGT2B7    | 0.149221 | 0.024189 | 0.054453 |
| 11751175_SORCS3    | -0.27561 | 0.024193 | 0.054461 |
| 11749055_MRVI1     | -0.20343 | 0.024197 | 0.054467 |
| 11719178_PVR       | -0.11911 | 0.024212 | 0.054498 |
| 11721417_SCNN1B    | -0.22141 | 0.024214 | 0.054499 |
| 11743450_ELOVL6    | 0.169128 | 0.024217 | 0.054504 |
| 11738793_DEFB124   | -0.12724 | 0.02422  | 0.054509 |
| 11743517_NNT       | -0.09752 | 0.024229 | 0.054526 |
| 11728637_ATP5A1    | -0.09234 | 0.024233 | 0.054531 |
| 11756278_SAGE1     | 0.155472 | 0.024234 | 0.054531 |
| 11736666_PTER      | -0.14838 | 0.024235 | 0.054532 |
| 11715565_PSMC2     | -0.11369 | 0.024246 | 0.054554 |
| 11737466_RUSC1-AS1 | -0.13124 | 0.024267 | 0.0546   |
| 11723953_CLINT1    | 0.099903 | 0.02427  | 0.054604 |
| 11746602_GGA3      | -0.10381 | 0.024279 | 0.054621 |
| 11717151_APMAP     | -0.16384 | 0.024285 | 0.054631 |

|                    |          |          |          |
|--------------------|----------|----------|----------|
| 11756525_IDI2-AS1  | 0.152021 | 0.024286 | 0.054631 |
| 11750402_ZNF606    | 0.281791 | 0.024287 | 0.054631 |
| 11715760_RPL36AL   | 0.097824 | 0.024293 | 0.054641 |
| 11747622_APLP1     | -0.13478 | 0.0243   | 0.054655 |
| 11724916_TMTC3     | -0.15842 | 0.024309 | 0.054674 |
| 11752217_PRDM4     | 0.107817 | 0.024318 | 0.054692 |
| 11754170_TBRG1     | 0.134887 | 0.024325 | 0.054702 |
| 11717956_STK39     | 0.231419 | 0.024325 | 0.054702 |
| 11749558_CYP4F8    | -0.11355 | 0.024331 | 0.054712 |
| 11750376_KCNMA1    | -0.18082 | 0.024355 | 0.054764 |
| 11725247_ZSCAN25   | -0.2113  | 0.024384 | 0.054828 |
| 11749129_C10orf90  | 0.13956  | 0.024397 | 0.054853 |
| 11738884_CASP1     | 0.393523 | 0.0244   | 0.054858 |
| 11764231_LOC105378 | -0.24462 | 0.024414 | 0.054886 |
| 11729953_STARD5    | -0.15633 | 0.02442  | 0.054898 |
| 11734113_ADAMTS19  | 0.284116 | 0.024422 | 0.054899 |
| 11720283_JMY       | 0.094091 | 0.02444  | 0.054938 |
| 11760223_MBD4      | -0.13583 | 0.024444 | 0.054944 |
| 11754745_CEACAM21  | -0.12956 | 0.024452 | 0.054957 |
| 11734192_CTAG2     | -0.23599 | 0.024452 | 0.054957 |
| 11752644_TIAL1     | 0.099731 | 0.024458 | 0.054966 |
| 11753033_GPR85     | 0.347964 | 0.024458 | 0.054966 |
| 11738501_LY6G6F    | -0.19754 | 0.024461 | 0.054969 |
| 11728193_PSMB2     | -0.09708 | 0.024463 | 0.05497  |
| 11729257_IPPK      | -0.15769 | 0.024463 | 0.05497  |
| 11730825_COX19     | 0.216615 | 0.024465 | 0.054972 |
| 11736358_LGI2      | -0.13437 | 0.02448  | 0.055001 |
| 11726767_SLC39A3   | -0.17448 | 0.024483 | 0.055008 |
| 11717588_CLPP      | -0.09438 | 0.024489 | 0.055018 |
| 11730005_SEMA4D    | -0.13158 | 0.024492 | 0.055021 |
| 11745931_TMEM150A  | -0.16641 | 0.024493 | 0.055022 |
| 11761844_TTL9      | -0.16342 | 0.024496 | 0.055026 |
| 11761904_MCF2L2    | -0.18157 | 0.024501 | 0.055034 |
| 11733539_MROH1     | 0.196925 | 0.024503 | 0.055037 |
| 11743224_IQSEC3    | -0.20702 | 0.02451  | 0.05505  |
| 11757087_LOC101060 | -0.13837 | 0.024512 | 0.055051 |
| 11732727_SLITRK4   | -0.10952 | 0.024518 | 0.055063 |
| 11738263_AUTS2     | -0.2036  | 0.024527 | 0.05508  |
| 11747901_LOC102724 | 0.135412 | 0.02453  | 0.055083 |
| 11747566_UBXN11    | 0.170717 | 0.024532 | 0.055085 |
| 11721702_CMTM7     | -0.10556 | 0.024535 | 0.05509  |
| 11763191_PRICKLE3  | -0.09882 | 0.024536 | 0.05509  |
| 11732886_VENTX     | -0.14418 | 0.024544 | 0.055106 |
| 11741170_MC2R      | -0.1829  | 0.024549 | 0.055114 |
| 11734566_FAM188B   | 0.106843 | 0.024553 | 0.055121 |
| 11734064_AMPD3     | 0.237903 | 0.024554 | 0.055121 |
| 11716901_TGOLN2    | 0.159227 | 0.024565 | 0.055143 |
| 11735745_SERPINA10 | 0.216855 | 0.024567 | 0.055144 |
| 11762439_ADRA1A    | -0.12551 | 0.024568 | 0.055144 |
| 11763826_NDUFAF1   | -0.11994 | 0.024581 | 0.05517  |
| 11724676_KLHL2     | 0.178143 | 0.024584 | 0.055175 |

|                    |          |          |          |
|--------------------|----------|----------|----------|
| 11735725_TP53BP1   | 0.124598 | 0.024594 | 0.055195 |
| 11722128_FAM102B   | -0.15842 | 0.024595 | 0.055195 |
| 11716863_NISCH     | 0.112747 | 0.024599 | 0.055202 |
| 11760345_HES1      | -0.16267 | 0.024606 | 0.055214 |
| 11758298_KRT8      | 0.118505 | 0.024624 | 0.055251 |
| 11716722_PHF1      | -0.11383 | 0.024627 | 0.055256 |
| 11738902_KCNK18    | -0.15048 | 0.024636 | 0.055274 |
| 11752532_PIKFYVE   | 0.284804 | 0.024638 | 0.055275 |
| 11744880_ZNF165    | 0.407498 | 0.02464  | 0.055278 |
| 11733384_TMEM182   | -0.14092 | 0.02465  | 0.055298 |
| 11721611_IPO11     | -0.12537 | 0.02467  | 0.05534  |
| 11760924_RBM8A     | -0.11136 | 0.024674 | 0.055348 |
| 11749969_TSPAN5    | 0.120852 | 0.024677 | 0.055352 |
| 11723887_TRMU      | 0.145765 | 0.024687 | 0.055371 |
| 11748005_FRY       | -0.23278 | 0.024692 | 0.055379 |
| 11743066_PTSS1     | 0.11714  | 0.024694 | 0.055382 |
| 11728994_AZI2      | -0.10817 | 0.024705 | 0.055403 |
| 11728430_HEY2      | -0.15618 | 0.024716 | 0.055426 |
| 11744991_ACACB     | -0.26679 | 0.024724 | 0.055441 |
| 11742243_ATF3      | 0.110295 | 0.024725 | 0.055441 |
| 11731932_KANK1     | 0.116677 | 0.024744 | 0.05548  |
| 11749902_PCNP      | -0.10683 | 0.02475  | 0.055491 |
| 11724642_TMEM88    | 0.270689 | 0.024751 | 0.055491 |
| 11727630_APBA2     | -0.14064 | 0.024757 | 0.055501 |
| 11759379_OR5L1     | -0.17196 | 0.024772 | 0.055533 |
| 11742656_MSGN1     | -0.17958 | 0.024773 | 0.055533 |
| 11727807_FECH      | -0.11833 | 0.024776 | 0.055537 |
| 11750145_TOP3B     | 0.095477 | 0.024786 | 0.055557 |
| 11720540_ANAPC2    | -0.10281 | 0.024792 | 0.055568 |
| 11762892_TMCO1     | 0.149278 | 0.0248   | 0.055584 |
| 11758055_RGPD5 /// | -0.10894 | 0.024806 | 0.055595 |
| 11740552_ASPG      | -0.17546 | 0.024808 | 0.055597 |
| 11751747_ERG       | -0.27522 | 0.024852 | 0.055693 |
| 11761224_KRT16P1   | -0.17013 | 0.024857 | 0.0557   |
| 11723911_GAB3      | 0.194173 | 0.024864 | 0.055715 |
| 11744129_MYO9B     | -0.11122 | 0.024866 | 0.055715 |
| 11753075_TNFRSF10B | 0.119372 | 0.024872 | 0.055726 |
| 11727183_ZNF175    | 0.273718 | 0.024873 | 0.055726 |
| 11720877_ABTB2     | -0.11429 | 0.024874 | 0.055726 |
| 11758725_H1FX      | -0.20909 | 0.024875 | 0.055727 |
| 11752815_SARAF     | 0.112838 | 0.024883 | 0.055742 |
| 11725010_SCTR      | -0.21021 | 0.024884 | 0.055742 |
| 11731014_BBS5      | 0.168723 | 0.024906 | 0.055787 |
| 11752773_PAX4      | -0.18823 | 0.024924 | 0.055825 |
| 11748561_DAAM2     | -0.17393 | 0.024925 | 0.055825 |
| 11757780_RPS4X     | -0.10102 | 0.024927 | 0.055825 |
| 11738992_ATP6VOE2  | -0.21231 | 0.024927 | 0.055825 |
| 11754826_EEF1D     | 0.104415 | 0.024938 | 0.055847 |
| 11746318_PCDHB18P  | 0.209738 | 0.024945 | 0.055861 |
| 11744268_GIPC1     | 0.097988 | 0.024954 | 0.055877 |
| 11757572_UBAC2     | -0.10922 | 0.02496  | 0.055888 |

|                    |          |          |          |
|--------------------|----------|----------|----------|
| 11722271_MSANTD4   | 0.212451 | 0.024979 | 0.055927 |
| 11741929_HTR3C     | -0.22216 | 0.024982 | 0.055933 |
| 11725570_RAB7B     | -0.10967 | 0.024988 | 0.055942 |
| 11746475_MFSD4     | -0.21291 | 0.025022 | 0.056018 |
| 11758657_PKIG      | 0.092706 | 0.025039 | 0.056052 |
| 11729013_ACPP      | 0.190431 | 0.025041 | 0.056053 |
| 11761206_FAM153B / | 0.175841 | 0.025044 | 0.056059 |
| 11730307_RIC3      | -0.28024 | 0.025046 | 0.056059 |
| 11737387_S100BPB   | -0.20071 | 0.025047 | 0.056059 |
| 11753048_VPS53     | -0.10741 | 0.02506  | 0.056087 |
| 11734961_SYNJ2     | 0.111854 | 0.025064 | 0.056091 |
| 11760247_ZNF226    | 0.171854 | 0.025064 | 0.056091 |
| 11757920_ZYG11B    | -0.11507 | 0.025068 | 0.056095 |
| 11731736_PGAP1     | -0.17983 | 0.025069 | 0.056095 |
| 11750795_KLHL1     | -0.12957 | 0.025076 | 0.056109 |
| 11739767_PTPRE     | 0.19441  | 0.025093 | 0.056142 |
| 11728295_PKIG      | 0.095475 | 0.025094 | 0.056142 |
| 11730662_RASL10A   | 0.124496 | 0.025094 | 0.056142 |
| 11729365_PRKAA2    | 0.18215  | 0.025109 | 0.056173 |
| 11746300_CFLAR     | 0.156944 | 0.025111 | 0.056174 |
| 11745189_APOL1     | -0.1249  | 0.025139 | 0.056234 |
| 11743913_SPOP      | 0.115518 | 0.025141 | 0.056237 |
| 11723855_CASKIN2   | -0.11529 | 0.025154 | 0.056263 |
| 11716162_LBH       | -0.15246 | 0.025159 | 0.056272 |
| 11760700_LSAMP     | -0.13768 | 0.025161 | 0.056273 |
| 11761668_DMPK      | -0.13932 | 0.02517  | 0.056292 |
| 11736870_C10orf12  | 0.181725 | 0.025173 | 0.056296 |
| 11720842_RHOD      | -0.17357 | 0.025176 | 0.056299 |
| 11750290_ALDOB     | 0.120685 | 0.025178 | 0.056302 |
| 11731406_YIPF5     | 0.113709 | 0.025185 | 0.056313 |
| 11722873_RTKN      | -0.11896 | 0.025192 | 0.056328 |
| 11736403_GABRA3    | 0.221451 | 0.025212 | 0.05637  |
| 11722459_ZNF768    | -0.26474 | 0.025214 | 0.056372 |
| 11740657_SLC22A5   | 0.252073 | 0.02522  | 0.056382 |
| 11729183_RPAP3     | 0.101004 | 0.025221 | 0.056382 |
| 11733885_TRIM25    | -0.146   | 0.025225 | 0.056388 |
| 11738695_FANCD2OS  | -0.16433 | 0.025236 | 0.05641  |
| 11734982_GPRASP1   | 0.146518 | 0.025251 | 0.05644  |
| 11760320_RPL31     | -0.12391 | 0.025251 | 0.05644  |
| 11763476_LOC100506 | -0.17433 | 0.025255 | 0.056444 |
| 11760851_ARID5A    | -0.195   | 0.025258 | 0.05645  |
| 11736880_FCRL1     | -0.14834 | 0.025269 | 0.056471 |
| 11727217_CETP      | 0.115688 | 0.025273 | 0.056477 |
| 11755112_HNRNPUL1  | -0.11289 | 0.025294 | 0.056522 |
| 11754986_WDR25     | 0.105864 | 0.025296 | 0.056524 |
| 11724627_MAT1A     | -0.15331 | 0.025303 | 0.056535 |
| 11735752_CXXC5     | -0.11826 | 0.025303 | 0.056535 |
| 11736101_MAN1A1    | 0.151536 | 0.025309 | 0.056545 |
| 11761412_ZNF232    | -0.26135 | 0.025318 | 0.056564 |
| 11750561_LYST      | 0.162561 | 0.025321 | 0.056568 |
| 11757384_UROD      | -0.09807 | 0.025329 | 0.056583 |

|                    |          |          |          |
|--------------------|----------|----------|----------|
| 11738945_MRAP      | -0.16807 | 0.025335 | 0.056592 |
| 11730275_CALCRL    | 0.15582  | 0.025336 | 0.056593 |
| 11741201_NAT10     | 0.117159 | 0.025338 | 0.056593 |
| 11760459_EPS8L2    | -0.11492 | 0.025349 | 0.056617 |
| 11760607_AGR2      | 0.275878 | 0.025367 | 0.056653 |
| 11719930_ARGLU1    | 0.108911 | 0.025382 | 0.056686 |
| 11719477_FASTKD5   | -0.09885 | 0.025386 | 0.056691 |
| 11730565_PNMT      | -0.11519 | 0.025399 | 0.056718 |
| 11762291_AGPAT4    | -0.12922 | 0.025406 | 0.056731 |
| 11741888_LINCO0303 | -0.12412 | 0.02541  | 0.056737 |
| 11717660_PPP1R16B  | -0.1511  | 0.025438 | 0.056797 |
| 11755754_ATRX      | 0.098784 | 0.02545  | 0.056821 |
| 11758365_TTLL8     | 0.220355 | 0.025452 | 0.056823 |
| 11722767_MBNL2     | 0.110495 | 0.025457 | 0.056832 |
| 11719326_DMTF1     | 0.118379 | 0.02546  | 0.056836 |
| 11729409_ZNF764    | 0.154471 | 0.025461 | 0.056836 |
| 11756618_TAPBP     | 0.1113   | 0.025464 | 0.056839 |
| 11740638_NOG       | 0.109806 | 0.025475 | 0.056862 |
| 11748608_ARHGEF11  | 0.093357 | 0.025508 | 0.056932 |
| 11747019_HMHA1     | -0.20631 | 0.025509 | 0.056933 |
| 11741952_PAQR5     | -0.18581 | 0.025515 | 0.056942 |
| 11761921_PYY       | -0.13104 | 0.025518 | 0.056946 |
| 11745036_NRG1      | 0.124227 | 0.025525 | 0.05696  |
| 11723984_PDCD11    | 0.096934 | 0.025527 | 0.056962 |
| 11722288_ZBTB43    | 0.139961 | 0.025534 | 0.056974 |
| 11763727_RPL10     | 0.111002 | 0.025539 | 0.056985 |
| 11757422_RPL23     | 0.099064 | 0.025543 | 0.056989 |
| 11722672_AKAP11    | 0.105884 | 0.02555  | 0.057002 |
| 11715551_GAS6      | 0.14331  | 0.025554 | 0.05701  |
| 11764024_SFTPC     | 0.126939 | 0.025556 | 0.057012 |
| 11750720_GK        | -0.1859  | 0.02557  | 0.057039 |
| 11738103_HIST1H4F  | -0.17198 | 0.02559  | 0.057082 |
| 11758652_KANK1     | 0.112263 | 0.025598 | 0.057094 |
| 11740396_NLRP12    | -0.14737 | 0.025599 | 0.057094 |
| 11763773_ITM2C     | -0.18317 | 0.025599 | 0.057094 |
| 11759388_OR9Q2     | -0.15181 | 0.025604 | 0.057103 |
| 11747548_PICALM    | 0.121015 | 0.02562  | 0.057135 |
| 11761866_NCOA7     | -0.1801  | 0.025631 | 0.057157 |
| 11724275_TMEM158   | -0.15656 | 0.025636 | 0.057166 |
| 11731661_DBP       | -0.15426 | 0.025647 | 0.057187 |
| 11752284_ALOX15B   | -0.14557 | 0.025654 | 0.0572   |
| 11750131_FGD1      | -0.22133 | 0.025656 | 0.057204 |
| 11755566_MROH1     | -0.11175 | 0.02567  | 0.057231 |
| 11719979_RAI1      | -0.09937 | 0.025674 | 0.057238 |
| 11752300_PADI2     | -0.10072 | 0.025679 | 0.057246 |
| 11733366_NR2E1     | -0.22086 | 0.025687 | 0.057261 |
| 11725027_PSPC1     | 0.10946  | 0.025688 | 0.057261 |
| 11743507_ARHGAP26  | 0.239729 | 0.025689 | 0.057261 |
| 11737049_RIBC1     | -0.20697 | 0.025693 | 0.057268 |
| 11744080_PRSS1 /// | -0.10107 | 0.025696 | 0.057272 |
| 11762173_NFYC      | -0.14537 | 0.025699 | 0.057275 |

|                   |          |          |          |
|-------------------|----------|----------|----------|
| 11724619_RSP03    | -0.24247 | 0.025702 | 0.05728  |
| 11719664_GDI1     | 0.150734 | 0.025723 | 0.057324 |
| 11742787_DHX34    | -0.14769 | 0.025726 | 0.057327 |
| 11725865_EBF3     | -0.1099  | 0.025727 | 0.057328 |
| 11715624_SH3BGRL  | 0.113029 | 0.025743 | 0.057361 |
| 11743778_HERC2    | 0.106662 | 0.025748 | 0.05737  |
| 11748066_LRRC49   | 0.121641 | 0.025755 | 0.057381 |
| 11755335_C1orf21  | -0.14613 | 0.025759 | 0.057388 |
| 11745168_DIAPH1   | -0.10897 | 0.025762 | 0.057392 |
| 11721749_INF2     | -0.1836  | 0.025768 | 0.057402 |
| 11747584_C8orf34  | 0.10786  | 0.025769 | 0.057402 |
| 11750211_CYYR1    | -0.19719 | 0.025772 | 0.057405 |
| 11727979_MAN2B2   | 0.149205 | 0.025778 | 0.057416 |
| 11756760_GCDH     | -0.11512 | 0.025779 | 0.057416 |
| 11758247_ARL4D    | -0.10826 | 0.025782 | 0.05742  |
| 11755392_SATB2    | 0.120487 | 0.025783 | 0.057421 |
| 11749466_GATS /// | -0.15022 | 0.025785 | 0.057421 |
| 11753231_GATS /// | -0.15022 | 0.025785 | 0.057421 |
| 11732487_TRIM50   | -0.12089 | 0.025795 | 0.057438 |
| 11724014_SOAT1    | -0.12733 | 0.025796 | 0.057439 |
| 11752635_KCNH2    | -0.15333 | 0.025828 | 0.057507 |
| 11716402_EIF4EBP2 | -0.14106 | 0.025829 | 0.057507 |
| 11763736_MBNL3    | 0.20614  | 0.025838 | 0.057525 |
| 11755288_KLHL26   | -0.19918 | 0.025845 | 0.057538 |
| 11762346_MTAP     | 0.117344 | 0.025851 | 0.057549 |
| 11757426_GLB1L2   | -0.11812 | 0.025854 | 0.057553 |
| 11760330_GPALPP1  | -0.1258  | 0.025856 | 0.057555 |
| 11720167_SELL     | -0.23518 | 0.025869 | 0.05758  |
| 11717559_ABLIM1   | 0.136693 | 0.02587  | 0.057581 |
| 11752454_TBKBP1   | -0.18076 | 0.02588  | 0.0576   |
| 11738014_SMTNL2   | -0.12782 | 0.025886 | 0.05761  |
| 11745418_COG3     | 0.230201 | 0.025891 | 0.057618 |
| 11733327_NKD1     | -0.25985 | 0.025893 | 0.05762  |
| 11729304_UBE3B    | 0.097735 | 0.025894 | 0.05762  |
| 11748209_ABCA4    | -0.19434 | 0.025895 | 0.057621 |
| 11756744_DUSP11   | 0.116575 | 0.0259   | 0.057627 |
| 11756932_ZNF257   | 0.146385 | 0.025907 | 0.057641 |
| 11757007_NUTM1    | -0.17275 | 0.025908 | 0.057641 |
| 11754673_ABCA10   | 0.167191 | 0.025917 | 0.057659 |
| 11721432_MAP1S    | 0.11816  | 0.025919 | 0.05766  |
| 11749550_SCPEP1   | -0.1777  | 0.025934 | 0.057692 |
| 11755595_TGDS     | -0.10065 | 0.025937 | 0.057696 |
| 11729605_ATL1     | 0.16034  | 0.025947 | 0.057715 |
| 11731446_SNCA     | -0.17274 | 0.025956 | 0.057731 |
| 11755662_LRSAM1   | 0.10821  | 0.025958 | 0.057734 |
| 11740737_ECE2     | -0.17678 | 0.025974 | 0.057764 |
| 11742140_CFHR4    | 0.174889 | 0.025974 | 0.057764 |
| 11762515_ODF2L    | 0.196346 | 0.025975 | 0.057764 |
| 11763487_GLG1     | -0.20052 | 0.025977 | 0.057767 |
| 11719566_MRPS15   | -0.10685 | 0.026012 | 0.05784  |
| 11727842_SLC11A1  | -0.13331 | 0.026014 | 0.057842 |

|                    |          |          |          |
|--------------------|----------|----------|----------|
| 11762351_ZNF28     | -0.16954 | 0.026021 | 0.057855 |
| 11759825_MR1       | 0.343667 | 0.026027 | 0.057864 |
| 11718109_DLD       | 0.10755  | 0.026027 | 0.057864 |
| 11755111_DLGAP4    | 0.111337 | 0.026033 | 0.057875 |
| 11740968_LOC391322 | -0.18507 | 0.026036 | 0.057878 |
| 11747945_PPFIA2    | 0.16515  | 0.026041 | 0.057882 |
| 11751212_ABHD18    | 0.153896 | 0.026041 | 0.057882 |
| 11725042_YWHAB     | -0.10675 | 0.026041 | 0.057882 |
| 11738866_PVRL1     | -0.21262 | 0.026042 | 0.057882 |
| 11739060_SLC7A5    | -0.13946 | 0.026058 | 0.057911 |
| 11727096_TMEM19    | -0.10137 | 0.026058 | 0.057911 |
| 11724526_FAHD1     | 0.163661 | 0.026077 | 0.057952 |
| 11750406_DPY19L3   | 0.145969 | 0.026083 | 0.057961 |
| 11749972_TIE1      | -0.13944 | 0.026087 | 0.057969 |
| 11749761_PCED1A    | 0.094793 | 0.026104 | 0.058002 |
| 11750355_CCPG1 /// | 0.126872 | 0.026117 | 0.05803  |
| 11730234_CTNN2     | 0.170851 | 0.026147 | 0.058094 |
| 11726814_KDM5D     | -0.233   | 0.02615  | 0.058098 |
| 11760540_PTCHD4    | 0.227599 | 0.026163 | 0.058125 |
| 11759606_YIPF2     | -0.16174 | 0.026165 | 0.058125 |
| 11726243_ANKDD1A   | 0.138044 | 0.026168 | 0.058129 |
| 11725420_ARHGAP35  | -0.1119  | 0.026182 | 0.058159 |
| 11754036_C2orf194  | 0.113524 | 0.026191 | 0.058176 |
| 11735064_ITGB3     | -0.15286 | 0.026197 | 0.058187 |
| 11737911_GPR84     | -0.18839 | 0.026199 | 0.058187 |
| 11750632_ZFYVE16   | 0.203418 | 0.026204 | 0.058193 |
| 11750701_MAN2C1    | 0.103143 | 0.026204 | 0.058193 |
| 11744204_PAF1      | 0.127868 | 0.02621  | 0.058205 |
| 11733785_PPP2R1B   | -0.1233  | 0.026216 | 0.058215 |
| 11718213_SLC27A2   | -0.11527 | 0.026231 | 0.058245 |
| 11722465_C1orf80   | 0.097929 | 0.026236 | 0.058253 |
| 11760615_SKIV2L    | -0.16435 | 0.026237 | 0.058253 |
| 11737723_GLIS3     | 0.11181  | 0.026243 | 0.058265 |
| 11716021_RAD23A    | -0.10555 | 0.026253 | 0.058283 |
| 11716549_ISLR      | -0.17864 | 0.026254 | 0.058283 |
| 11725868_SSC5D     | -0.11959 | 0.026256 | 0.058286 |
| 11747136_POLR1A    | -0.19781 | 0.026263 | 0.058296 |
| 11743480_RB1CC1    | 0.115949 | 0.026263 | 0.058296 |
| 11745625_PCDHGA2   | -0.12508 | 0.02627  | 0.058309 |
| 11751511_ETV7      | 0.180779 | 0.026292 | 0.058354 |
| 11749521_CPT1C     | -0.12513 | 0.026307 | 0.058386 |
| 11747197_CR1L      | 0.142075 | 0.026322 | 0.058416 |
| 11753304_APBB3     | -0.09057 | 0.026339 | 0.058448 |
| 11740512_PDE4D     | 0.227016 | 0.026339 | 0.058448 |
| 11727233_EPG5      | 0.190595 | 0.026376 | 0.058527 |
| 11741303_PRICKLE4  | 0.18505  | 0.026383 | 0.05854  |
| 11744307_TTC39A    | 0.225482 | 0.026384 | 0.05854  |
| 11736968_TMEM213   | 0.194316 | 0.026385 | 0.05854  |
| 11760680_FSD1      | -0.22208 | 0.026389 | 0.058546 |
| 11724839_XRCC3     | -0.16645 | 0.026401 | 0.05857  |
| 11739144_SKP2      | 0.12173  | 0.026406 | 0.058577 |



|                    |          |          |          |
|--------------------|----------|----------|----------|
| 11735965_PLXNA4    | -0.12747 | 0.026413 | 0.058591 |
| 11736024_MED28     | 0.24893  | 0.026421 | 0.058605 |
| 11717384_RNF34     | 0.101155 | 0.026427 | 0.058617 |
| 11761849_CRADD     | -0.13566 | 0.026433 | 0.058628 |
| 11747491_KIAA0513  | -0.17383 | 0.026451 | 0.058664 |
| 11748933_CCDC150   | -0.2268  | 0.026459 | 0.058679 |
| 11734392_TAS2R10   | 0.186372 | 0.026475 | 0.058713 |
| 11734729_SLC39A12  | 0.200535 | 0.026481 | 0.058723 |
| 11744549_COX20 /// | 0.113687 | 0.026483 | 0.058724 |
| 11721537_COL4A3BP  | -0.17765 | 0.026494 | 0.058748 |
| 11733179_SH3GL3    | -0.27657 | 0.0265   | 0.058758 |
| 11729752_EPS15L1   | -0.1034  | 0.026507 | 0.05877  |
| 11727359_SLC6A3    | -0.18908 | 0.026508 | 0.05877  |
| 11725201_BSN       | 0.347931 | 0.026511 | 0.058774 |
| 11762092_LETM1     | -0.13266 | 0.026513 | 0.058777 |
| 11719544_MSLN      | -0.12548 | 0.026533 | 0.058817 |
| 11744922_RPL13P5   | -0.14026 | 0.026546 | 0.058842 |
| 11760368_TXNRD2    | -0.38132 | 0.026547 | 0.058842 |
| 11725700_XIAP      | 0.102036 | 0.026549 | 0.058842 |
| 11729274_GBP5      | 0.224834 | 0.026549 | 0.058842 |
| 11731094_TRAF3IP1  | 0.219328 | 0.026557 | 0.058857 |
| 11762550_SCML4     | -0.26366 | 0.026559 | 0.05886  |
| 11725686_PTPRO     | 0.2312   | 0.026564 | 0.058867 |
| 11750917_C15orf39  | 0.116079 | 0.026566 | 0.058868 |
| 11728576_PYROXD2   | 0.121475 | 0.026574 | 0.058885 |
| 11735270_GCNT1     | -0.18054 | 0.026601 | 0.058942 |
| 11762249_RPF2      | 0.305825 | 0.026603 | 0.058942 |
| 11742037_CACNB2    | -0.17322 | 0.026611 | 0.058956 |
| 11728589_MFSD13A   | 0.097418 | 0.026612 | 0.058956 |
| 11758525_SOX4      | -0.107   | 0.026612 | 0.058956 |
| 11736877_DTWD2     | 0.180227 | 0.026627 | 0.058983 |
| 11736747_ADAM28    | -0.23032 | 0.026627 | 0.058983 |
| 11725745_SORBS1    | 0.185832 | 0.026638 | 0.059003 |
| 11735527_IFT74     | 0.128952 | 0.026638 | 0.059003 |
| 11717101_SLC38A1   | -0.18437 | 0.026643 | 0.059011 |
| 11733612_DOCK8     | 0.198763 | 0.026671 | 0.05907  |
| 11754533_NUDCD3    | -0.13437 | 0.026677 | 0.059081 |
| 11728473_PLPPR5    | -0.22629 | 0.026684 | 0.059093 |
| 11735027_LOC105369 | -0.12775 | 0.026703 | 0.059133 |
| 11736704_C6        | -0.15765 | 0.026709 | 0.059144 |
| 11744640_SH3D21    | -0.23154 | 0.02672  | 0.059165 |
| 11758885_MRPS11    | -0.11294 | 0.026722 | 0.059168 |
| 11762355_LOC554207 | 0.247376 | 0.026741 | 0.059206 |
| 11717304_PDAP1     | -0.1002  | 0.026784 | 0.059296 |
| 11740985_NRDC      | 0.094901 | 0.026784 | 0.059296 |
| 11761254_NRP1      | -0.16779 | 0.026798 | 0.059324 |
| 11719628_PUDP      | -0.12196 | 0.0268   | 0.059325 |
| 11759530_NUDT22    | 0.248051 | 0.026801 | 0.059325 |
| 11722294_NAPSA     | -0.12607 | 0.026819 | 0.059362 |
| 11716088_SNW1      | -0.10821 | 0.026827 | 0.059378 |
| 11747934_DTX2P1-UP | 0.134049 | 0.026829 | 0.059379 |

|                    |          |          |          |
|--------------------|----------|----------|----------|
| 11758817_RRP7A     | 0.144447 | 0.026835 | 0.05939  |
| 11762504_ZRANB3    | -0.17038 | 0.026848 | 0.059416 |
| 11720662_TSR3      | -0.11009 | 0.026856 | 0.05943  |
| 11753862_KRTAP20-4 | -0.16345 | 0.026858 | 0.059432 |
| 11744876_LARP4     | 0.093216 | 0.02687  | 0.059457 |
| 11736846_STARD13   | 0.118528 | 0.026873 | 0.05946  |
| 11751458_TRIM68    | -0.12354 | 0.02689  | 0.059496 |
| 11759800_AKAP6     | 0.189717 | 0.02691  | 0.059537 |
| 11729396_NEK1      | 0.099727 | 0.026912 | 0.059538 |
| 11741613_KCNB2     | -0.10841 | 0.026922 | 0.059558 |
| 11718799_PPCDC     | -0.13425 | 0.026929 | 0.05957  |
| 11719518_SEMA5A    | 0.134003 | 0.02693  | 0.05957  |
| 11730100_FLT3LG    | -0.15641 | 0.026936 | 0.05958  |
| 11747417_FGFR1     | -0.21505 | 0.026937 | 0.05958  |
| 11746603_ACAP3     | -0.15752 | 0.026943 | 0.059592 |
| 11723233_LEO1      | 0.103038 | 0.02695  | 0.059605 |
| 11726637_MIB1      | -0.09595 | 0.026957 | 0.059615 |
| 11741246_FOXB1     | -0.13351 | 0.026957 | 0.059615 |
| 11722685_LIFR      | -0.16896 | 0.026966 | 0.059632 |
| 11761416_CTHRC1    | 0.114473 | 0.026969 | 0.059636 |
| 11741936_METTL24   | -0.16311 | 0.02698  | 0.059656 |
| 11731048_RIMKLA    | -0.14309 | 0.026984 | 0.059663 |
| 11761876_SKCG-1    | 0.096846 | 0.026988 | 0.059669 |
| 11762310_LOC202181 | -0.16317 | 0.026991 | 0.059672 |
| 11747059_ZBTB7C    | -0.15197 | 0.027002 | 0.059694 |
| 11717917_WFDC2     | -0.14738 | 0.027007 | 0.059703 |
| 11752397_CPAMD8    | -0.18674 | 0.027024 | 0.059738 |
| 11748035_PDLIM7    | -0.14466 | 0.02703  | 0.059748 |
| 11756054_HSPB1     | -0.10418 | 0.027042 | 0.059773 |
| 11748419_GATS      | -0.20879 | 0.027048 | 0.059782 |
| 11728036_CMTM5     | -0.12814 | 0.02705  | 0.059784 |
| 11751408_PYCRL     | -0.1114  | 0.027058 | 0.0598   |
| 11734543_SPINK8    | -0.14895 | 0.027063 | 0.059808 |
| 11723445_TMEM132A  | 0.120596 | 0.027073 | 0.059828 |
| 11739590_DRAXIN    | -0.20822 | 0.02708  | 0.05984  |
| 11723532_BRMS1L    | 0.119917 | 0.027106 | 0.059894 |
| 11730339_SMAD6     | 0.123277 | 0.027113 | 0.059908 |
| 11723863_DOCK10    | 0.266378 | 0.02713  | 0.059942 |
| 11748923_SCLY ///  | 0.092521 | 0.027135 | 0.059951 |
| 11750190_CD44      | 0.10472  | 0.027136 | 0.059951 |
| 11719857_ARID1A    | -0.11832 | 0.027141 | 0.059959 |
| 11733528_CRB2      | -0.1595  | 0.027153 | 0.059982 |
| 11716476_LARP1     | -0.10268 | 0.027154 | 0.059983 |
| 11754426_CHPF      | -0.09448 | 0.027156 | 0.059983 |
| 11741812_LCNL1     | -0.11671 | 0.027161 | 0.059992 |
| 11737814_GYG1      | 0.102405 | 0.027164 | 0.059997 |
| 11733461_SUSD5     | -0.13853 | 0.02717  | 0.060006 |
| 11725035_LMBRD1    | 0.146436 | 0.027173 | 0.060009 |
| 11742078_FAM222A   | -0.10447 | 0.027188 | 0.060039 |
| 11730147_ADGRG5    | -0.15911 | 0.027189 | 0.060039 |
| 11720378_SAP30L    | 0.092695 | 0.027193 | 0.060046 |

|                    |          |          |          |
|--------------------|----------|----------|----------|
| 11757947_PSM5      | 0.114592 | 0.0272   | 0.060059 |
| 11760979_NR4A1     | -0.19329 | 0.027221 | 0.060102 |
| 11735777_SPDYC     | -0.29403 | 0.02723  | 0.06012  |
| 11716696_TSPAN6    | 0.091911 | 0.027241 | 0.060141 |
| 11749120_SCUBE2    | 0.183999 | 0.027249 | 0.060155 |
| 11738364_CEACAM16  | -0.14433 | 0.02725  | 0.060155 |
| 11734608_SHQ1      | 0.115192 | 0.027251 | 0.060155 |
| 11744161_RFX1      | -0.10682 | 0.027256 | 0.060163 |
| 11724904_TIMP4     | -0.09877 | 0.027263 | 0.060176 |
| 11743119_XRN2      | 0.110128 | 0.027265 | 0.060178 |
| 11730643_CT55      | -0.24575 | 0.027273 | 0.060191 |
| 11762894_GOSR1     | 0.201842 | 0.027273 | 0.060191 |
| 11753637_RPS12 /// | 0.093546 | 0.027275 | 0.060191 |
| 11762454_COL8A1    | 0.260564 | 0.027288 | 0.060217 |
| 11724973_MYRIP     | 0.235425 | 0.027296 | 0.060233 |
| 11741975_OR11A1    | -0.12845 | 0.027301 | 0.060237 |
| 11742032_NUTM2G    | -0.17826 | 0.027301 | 0.060237 |
| 11759708_NSUN5 /// | -0.13833 | 0.027302 | 0.060237 |
| 11717002_YTHDC1    | -0.15619 | 0.02732  | 0.060275 |
| 11762025_DOCK5     | 0.108125 | 0.027323 | 0.060278 |
| 11754611_EPS8L2    | -0.18744 | 0.027324 | 0.060278 |
| 11717132_AHNAK2    | 0.170555 | 0.027334 | 0.060297 |
| 11761247_CDKAL1    | 0.200895 | 0.027337 | 0.060301 |
| 11735086_CUBN      | 0.23023  | 0.02734  | 0.060305 |
| 11727809_FECH      | -0.15697 | 0.027342 | 0.060307 |
| 11723632_IRF2BPL   | -0.13239 | 0.027349 | 0.060321 |
| 11739834_HSPE1-MOB | -0.10454 | 0.027353 | 0.060324 |
| 11751572_TAPBP     | 0.148396 | 0.027353 | 0.060324 |
| 11732399_RAD51D    | -0.13323 | 0.027355 | 0.060325 |
| 11742965_MTERF4    | 0.185272 | 0.027363 | 0.06034  |
| 11717899_MAGT1     | -0.1253  | 0.027369 | 0.060351 |
| 11733162_PSTPIP1   | -0.09902 | 0.027379 | 0.06037  |
| 11732934_DPPA5     | -0.12014 | 0.027394 | 0.0604   |
| 11731349_UEVLD     | 0.188855 | 0.027395 | 0.0604   |
| 11744784_TXNDC9    | 0.108091 | 0.0274   | 0.060408 |
| 11747995_TBC1D1    | 0.172756 | 0.027411 | 0.06043  |
| 11740864_FBXO22    | 0.221555 | 0.027429 | 0.060466 |
| 11725325_TSPAN31   | 0.119824 | 0.02743  | 0.060466 |
| 11755980_SLC25A3   | 0.090413 | 0.027437 | 0.060478 |
| 11733623_ZNF831    | -0.17938 | 0.02744  | 0.060478 |
| 11724862_THNSL1    | -0.12974 | 0.02744  | 0.060478 |
| 11749788_L2HGDH    | -0.13721 | 0.027441 | 0.060478 |
| 11729748_IL10RA    | -0.15315 | 0.027444 | 0.060482 |
| 11763461_PLCB3     | -0.11113 | 0.027455 | 0.060504 |
| 11737891_PAX5      | -0.09837 | 0.027463 | 0.060519 |
| 11743836_NCBP3     | 0.142585 | 0.027486 | 0.060566 |
| 11748593_ADAT2     | -0.27156 | 0.027487 | 0.060566 |
| 11724531_MBIP      | -0.10507 | 0.027503 | 0.060598 |
| 11749422_FAM65A    | -0.11975 | 0.027503 | 0.060598 |
| 11734842_MPHOSPH8  | 0.181961 | 0.027508 | 0.060604 |
| 11724180_DNAJB5    | 0.135814 | 0.027511 | 0.060609 |

|                   |          |          |          |
|-------------------|----------|----------|----------|
| 11721829_C9orf78  | 0.105674 | 0.027516 | 0.060618 |
| 11739736_GNAT1    | -0.14523 | 0.027524 | 0.060631 |
| 11754808_CPAMD8   | -0.12865 | 0.027529 | 0.06064  |
| 11729113_PSM7     | -0.10824 | 0.027546 | 0.060674 |
| 11744688_HNRNPDL  | -0.10265 | 0.027554 | 0.06069  |
| 11760745_STK32B   | 0.194788 | 0.027555 | 0.06069  |
| 11742126_TM74B    | -0.17152 | 0.027558 | 0.060693 |
| 11751914_ELF3     | -0.13447 | 0.027563 | 0.060702 |
| 11731107_STAG2    | -0.0956  | 0.027565 | 0.060703 |
| 11757514_RPS27    | 0.090193 | 0.02757  | 0.060711 |
| 11734923_ATHL1    | -0.17437 | 0.027576 | 0.060722 |
| 11732409_KTN1     | 0.174475 | 0.027603 | 0.060778 |
| 11734099_ZNF578   | 0.198462 | 0.027604 | 0.060778 |
| 11733862_TSTD2    | 0.102952 | 0.027624 | 0.06082  |
| 11751879_IYD      | -0.15841 | 0.027626 | 0.060822 |
| 11740509_ARHGAP26 | 0.306832 | 0.027632 | 0.060833 |
| 11739714_NCOA2    | 0.135317 | 0.027637 | 0.060838 |
| 11716415_NDUFB8   | 0.100279 | 0.027638 | 0.060838 |
| 11722943_ATXN1    | 0.146118 | 0.027662 | 0.060889 |
| 11749408_ZFR      | 0.105031 | 0.027665 | 0.060893 |
| 11730917_TAF6L    | -0.14966 | 0.027668 | 0.060896 |
| 11731161_ITGA2B   | -0.17333 | 0.027669 | 0.060897 |
| 11736085_CTNNB1   | 0.118373 | 0.027681 | 0.06092  |
| 11742985_LY9      | -0.16603 | 0.027686 | 0.060926 |
| 11755102_SELO     | -0.09579 | 0.027686 | 0.060926 |
| 11719028_PSD3     | 0.151573 | 0.027689 | 0.060929 |
| 11743113_S100A10  | 0.097622 | 0.027693 | 0.060935 |
| 11726875_PML      | -0.17477 | 0.027697 | 0.060941 |
| 11759364_GPR157   | 0.140086 | 0.0277   | 0.060946 |
| 11753758_NUTF2    | -0.09599 | 0.027707 | 0.060958 |
| 11762695_SORBS2   | 0.185317 | 0.027725 | 0.060995 |
| 11757726_NHP2     | -0.09915 | 0.027727 | 0.060997 |
| 11721235_CHAD     | -0.09811 | 0.027732 | 0.061005 |
| 11734943_SLAMF6   | -0.14421 | 0.027733 | 0.061005 |
| 11733979_CD28     | -0.12695 | 0.027737 | 0.06101  |
| 11734125_NOD1     | -0.11617 | 0.02774  | 0.061014 |
| 11733183_ETV1     | 0.148538 | 0.027744 | 0.061021 |
| 11742109_FBLN7    | -0.20065 | 0.027746 | 0.061023 |
| 11755565_KLK8     | -0.16742 | 0.027756 | 0.061041 |
| 11727473_CLC      | -0.16821 | 0.027794 | 0.061122 |
| 11726029_UPK1B    | -0.18609 | 0.027798 | 0.061129 |
| 11750397_RASGRP1  | -0.20097 | 0.027803 | 0.061137 |
| 11725431_PBX2     | 0.136699 | 0.027807 | 0.061142 |
| 11733982_PDK1     | 0.160962 | 0.02781  | 0.061145 |
| 11729141_KDM5C    | -0.2289  | 0.027813 | 0.061151 |
| 11717074_LZTS2    | -0.09755 | 0.027825 | 0.061174 |
| 11760713_TM726B   | -0.14375 | 0.027835 | 0.061191 |
| 11726891_SFTA3    | -0.09854 | 0.027836 | 0.061191 |
| 11757670_UQCR10   | -0.09692 | 0.027856 | 0.061233 |
| 11746419_SNX17    | 0.09368  | 0.027871 | 0.061261 |
| 11737740_FGF4     | -0.1265  | 0.027872 | 0.061261 |

|                    |          |          |          |
|--------------------|----------|----------|----------|
| 11723761_PLCG1     | -0.13047 | 0.027872 | 0.061261 |
| 11736421_ZNF800    | 0.102125 | 0.027874 | 0.061263 |
| 11724733_ABCB8     | -0.12657 | 0.027883 | 0.061279 |
| 11748306_M1AP      | -0.1067  | 0.027886 | 0.061284 |
| 11724712_LRRC23    | -0.20429 | 0.027905 | 0.061322 |
| 11761176_POLL      | -0.16931 | 0.027908 | 0.061325 |
| 11752235_IKBKB     | -0.13122 | 0.027916 | 0.06134  |
| 11746620_FCRL2     | -0.13284 | 0.027917 | 0.06134  |
| 11722756_TMEM37    | -0.19901 | 0.02792  | 0.061341 |
| 11762308_DHRS4 /// | -0.12515 | 0.02792  | 0.061341 |
| 11726389_NLGN3     | 0.219275 | 0.027921 | 0.061341 |
| 11735798_OPN1MW // | -0.13488 | 0.027924 | 0.061341 |
| 11727478_AGTRAP    | -0.11844 | 0.027924 | 0.061341 |
| 11739153_PSMD5     | 0.113473 | 0.027931 | 0.061354 |
| 11760932_TEFM      | 0.235218 | 0.027935 | 0.06136  |
| 11727926_ADAP1     | -0.24729 | 0.027937 | 0.061363 |
| 11760857_CACNB3    | -0.16757 | 0.02794  | 0.061365 |
| 11743535_PPP2R5C   | -0.09583 | 0.027943 | 0.061369 |
| 11746069_GATM      | 0.205198 | 0.027949 | 0.06138  |
| 11746049_VPS52     | -0.14144 | 0.027954 | 0.061388 |
| 11762718_WDR92     | -0.1475  | 0.027961 | 0.0614   |
| 11731339_ECE2      | -0.1622  | 0.027965 | 0.061407 |
| 11743421_ITGA9     | -0.24342 | 0.027971 | 0.061417 |
| 11760950_UROD      | -0.15464 | 0.027973 | 0.061417 |
| 11728845_NCOA1     | 0.255138 | 0.027974 | 0.061417 |
| 11740030_CREM      | 0.122081 | 0.027974 | 0.061417 |
| 11722099_RICTOR    | 0.123681 | 0.027976 | 0.061417 |
| 11722828_SDAD1 /// | 0.13259  | 0.027983 | 0.061431 |
| 11734444_AARD      | -0.13662 | 0.027993 | 0.06145  |
| 11727273_SHROOM2   | -0.11581 | 0.027997 | 0.061454 |
| 11752523_ST8SIA5   | -0.18074 | 0.027999 | 0.061454 |
| 11726712_TFIP11    | 0.137349 | 0.027999 | 0.061454 |
| 11729073_TSPAN19   | 0.142788 | 0.028006 | 0.061466 |
| 11724576_MYCBPAP   | -0.0928  | 0.028007 | 0.061466 |
| 11731143_ADGRD1    | 0.149948 | 0.028014 | 0.061477 |
| 11731327_GFAP      | -0.14732 | 0.028024 | 0.061498 |
| 11742682_COPS8     | -0.10504 | 0.028026 | 0.061499 |
| 11740579_NTRK3     | -0.19961 | 0.028038 | 0.061522 |
| 11726173_SCARA3    | -0.12536 | 0.02804  | 0.061525 |
| 11741840_PIWIL3    | 0.165923 | 0.028056 | 0.061556 |
| 11723693_TMEM183A  | 0.095275 | 0.028063 | 0.061569 |
| 11752629_RBM39     | 0.112089 | 0.028064 | 0.061569 |
| 11732170_GRSF1     | 0.116114 | 0.028066 | 0.06157  |
| 11752675_OGFR      | -0.11023 | 0.028076 | 0.06159  |
| 11738253_PCDHA10   | 0.176146 | 0.028083 | 0.061603 |
| 11744557_STOML1    | 0.121451 | 0.028093 | 0.061622 |
| 11748841_SAMHD1    | 0.155934 | 0.028097 | 0.061626 |
| 11749141_TRAF5     | 0.184103 | 0.028097 | 0.061626 |
| 11743658_H2AFY2    | -0.1772  | 0.0281   | 0.061629 |
| 11729041_DLEC1     | -0.11626 | 0.028107 | 0.061641 |
| 11757149_EEF1B2 // | -0.12308 | 0.028109 | 0.061642 |

|                    |          |          |          |
|--------------------|----------|----------|----------|
| 11762992_ATP6 ///  | 0.090245 | 0.028116 | 0.061655 |
| 11759640_CLEC16A   | 0.2678   | 0.028126 | 0.061675 |
| 11723308_SCAF8     | -0.0915  | 0.028152 | 0.061728 |
| 11749420_MAMLD1    | -0.14694 | 0.028153 | 0.061728 |
| 11753407_FUT6      | 0.130961 | 0.028155 | 0.061729 |
| 11733450_SLFN11    | -0.19084 | 0.028158 | 0.061733 |
| 11716024_GOLGA7    | 0.107997 | 0.028169 | 0.061755 |
| 11753498_SLED1     | -0.14269 | 0.028172 | 0.061757 |
| 11748204_CTNN2     | -0.14977 | 0.028173 | 0.061757 |
| 11721390_HTRA3     | -0.12498 | 0.028174 | 0.061758 |
| 11752405_SPATA13   | -0.1183  | 0.028181 | 0.061767 |
| 11757573_FZD5      | 0.093114 | 0.028181 | 0.061767 |
| 11716952_DPH1 ///  | 0.145439 | 0.028205 | 0.061817 |
| 11742148_KRTAP10-1 | -0.12347 | 0.028221 | 0.06185  |
| 11720640_MRPS27    | 0.107409 | 0.028223 | 0.061851 |
| 11763835_HACD1     | -0.24411 | 0.028228 | 0.06186  |
| 11745716_CAV1      | 0.09403  | 0.028232 | 0.061866 |
| 11754007_GNAS      | -0.08924 | 0.028242 | 0.061884 |
| 11739152_TTYH3     | -0.12094 | 0.028256 | 0.061912 |
| 11735037_SORCS1    | 0.148337 | 0.028258 | 0.061913 |
| 11725561_OGFOD3    | -0.12004 | 0.028263 | 0.061922 |
| 11748446_IL17RC    | -0.11529 | 0.028274 | 0.061943 |
| 11738856_CERKL     | -0.13944 | 0.028306 | 0.06201  |
| 11734409_FOXD4L1   | 0.15397  | 0.028313 | 0.062022 |
| 11729923_TMEM134   | 0.10333  | 0.02832  | 0.062035 |
| 11737446_SYT16     | 0.290547 | 0.028322 | 0.062038 |
| 11721022_DIDO1     | -0.098   | 0.028324 | 0.06204  |
| 11739952_GFOD1     | -0.13896 | 0.028327 | 0.062043 |
| 11735455_IFT81     | 0.256127 | 0.028331 | 0.062048 |
| 11736323_BAIAP3    | -0.15282 | 0.028336 | 0.062056 |
| 11738985_DKK3      | -0.11776 | 0.028337 | 0.062057 |
| 11727226_NAALAD2   | -0.17775 | 0.028341 | 0.062063 |
| 11727295_ZSCAN32   | 0.1781   | 0.028347 | 0.062072 |
| 11756895_SBF1      | -0.10053 | 0.028349 | 0.062075 |
| 11753554_SPINK13   | 0.202421 | 0.028359 | 0.062094 |
| 11733732_GFOD2     | 0.146226 | 0.028364 | 0.062101 |
| 11715167_ARHGAP22  | -0.14716 | 0.028367 | 0.062107 |
| 11762313_ECHDC2    | -0.10182 | 0.028377 | 0.062124 |
| 11745566_INTS4     | -0.09423 | 0.028383 | 0.062135 |
| 11761245_CHRD      | -0.28885 | 0.02839  | 0.062146 |
| 11747391_FBXO44    | -0.21315 | 0.02839  | 0.062146 |
| 11721073_SF3A1     | -0.18036 | 0.028392 | 0.062146 |
| 11758332_LINCO1001 | 0.10106  | 0.028402 | 0.062165 |
| 11748677_ULK3      | 0.156327 | 0.028411 | 0.062183 |
| 11731017_KLK4      | -0.12075 | 0.028432 | 0.062224 |
| 11747880_BCL2L13   | 0.114137 | 0.028448 | 0.062258 |
| 11732310_CTU2      | -0.09856 | 0.028468 | 0.062298 |
| 11747560_RPS6KB2   | -0.13421 | 0.028469 | 0.062298 |
| 11754145_IGKV1-27  | 0.128611 | 0.02847  | 0.062298 |
| 11756059_CXCL14    | -0.17804 | 0.028472 | 0.062299 |
| 11745946_C5orf28   | 0.135279 | 0.028496 | 0.062349 |

|                    |          |          |          |
|--------------------|----------|----------|----------|
| 11744172_DNAJC4    | -0.12343 | 0.028501 | 0.062357 |
| 11751765_RAVR2     | -0.15293 | 0.028513 | 0.062381 |
| 11749021_CTNNB1    | 0.092824 | 0.028516 | 0.062384 |
| 11739578_PGBD1     | -0.17108 | 0.028532 | 0.062417 |
| 11715720_C1orf43   | 0.089107 | 0.028541 | 0.062433 |
| 11729934_HSF4      | -0.11801 | 0.028542 | 0.062433 |
| 11736221_CCDC103 / | -0.14599 | 0.02855  | 0.062448 |
| 11757844_GNG5      | 0.094242 | 0.028554 | 0.062453 |
| 11751411_CCDC64    | -0.13124 | 0.028564 | 0.062473 |
| 11761745_IGSF6     | -0.24941 | 0.02857  | 0.062482 |
| 11740316_MIP       | 0.110849 | 0.028575 | 0.062491 |
| 11733851_EIF2A     | -0.15803 | 0.028577 | 0.062491 |
| 11757074_MLLT4     | -0.16172 | 0.028584 | 0.062504 |
| 11721031_SH3BGR    | 0.195212 | 0.028585 | 0.062504 |
| 11751057_SH2D4A    | 0.156413 | 0.028596 | 0.062527 |
| 11747248_MAP3K13   | 0.340007 | 0.028606 | 0.062542 |
| 11760035_GRIN2C    | -0.09041 | 0.028607 | 0.062542 |
| 11724896_FZR1      | -0.09835 | 0.028607 | 0.062542 |
| 11747153_ACOT9     | 0.111001 | 0.028608 | 0.062542 |
| 11728214_NRP1      | 0.15628  | 0.02861  | 0.062542 |
| 11742255_POTEG /// | 0.142171 | 0.028614 | 0.062549 |
| 11760416_TMEM39B   | 0.154459 | 0.028628 | 0.062575 |
| 11719150_SAP130    | -0.17914 | 0.028647 | 0.062614 |
| 11733694_C1orf61   | -0.1192  | 0.028668 | 0.062658 |
| 11758653_ADGRL4    | 0.165308 | 0.028674 | 0.062665 |
| 11758808_CNIH4     | 0.127252 | 0.028674 | 0.062665 |
| 11722159_SLC7A8    | 0.10755  | 0.028676 | 0.062665 |
| 11750677_FAM65C    | -0.1178  | 0.028676 | 0.062665 |
| 11728584_ZMAT1     | -0.19015 | 0.028706 | 0.062727 |
| 11745816_CDIP1     | -0.18081 | 0.028718 | 0.062751 |
| 11742163_MYEOV2    | 0.119295 | 0.028721 | 0.062755 |
| 11761214_APOD      | 0.125385 | 0.028724 | 0.062757 |
| 11730481_GJB6      | 0.137089 | 0.028725 | 0.062757 |
| 11740808_PRAMEF1 / | -0.11789 | 0.028732 | 0.062767 |
| 11762592_DBF4B     | -0.14971 | 0.028732 | 0.062767 |
| 11719254_CDK19     | 0.343891 | 0.028759 | 0.062824 |
| 11716469_UQCRB     | -0.11104 | 0.028766 | 0.062835 |
| 11720373_PRUNE     | 0.143529 | 0.028769 | 0.062838 |
| 11759818_DDHD2     | -0.17376 | 0.02879  | 0.062881 |
| 11756013_BCL2L10   | -0.09546 | 0.028796 | 0.062892 |
| 11739839_GNAL      | -0.27478 | 0.028811 | 0.062922 |
| 11737155_OXT       | 0.10814  | 0.028817 | 0.062931 |
| 11755956_POLE3     | -0.09992 | 0.028818 | 0.062931 |
| 11759115_GMCL1     | 0.156273 | 0.028824 | 0.062943 |
| 11739955_IL2RA     | -0.11159 | 0.028833 | 0.062959 |
| 11751202_C19orf66  | 0.149916 | 0.028835 | 0.06296  |
| 11761517_MACF1     | 0.212396 | 0.028853 | 0.062998 |
| 11756852_KIAA0100  | -0.12461 | 0.028866 | 0.063023 |
| 11745076_CRNKL1    | 0.113441 | 0.028903 | 0.0631   |
| 11762696_ADAMTSL1  | -0.16215 | 0.02891  | 0.063114 |
| 11738562_GFRA4     | -0.16878 | 0.028914 | 0.063118 |

|                    |          |          |          |
|--------------------|----------|----------|----------|
| 11758425_ZNF782    | 0.173032 | 0.028915 | 0.063118 |
| 11727392_COX15     | 0.123084 | 0.028916 | 0.063118 |
| 11717592_CENPB     | -0.10172 | 0.028926 | 0.063137 |
| 11748085_ST14      | -0.12492 | 0.02894  | 0.063165 |
| 11753750_SUMO2     | -0.13164 | 0.028948 | 0.06318  |
| 11725914_POU6F1    | -0.17267 | 0.028956 | 0.063194 |
| 11737756_ATG9A     | 0.097251 | 0.028973 | 0.063227 |
| 11746370_ENTPD6    | 0.095795 | 0.028976 | 0.063231 |
| 11752615_DLG1      | 0.149157 | 0.028983 | 0.063242 |
| 11740345_SNX29     | -0.12965 | 0.028983 | 0.063242 |
| 11721711_SHROOM3   | -0.17032 | 0.028985 | 0.063242 |
| 11755755_DDX26B    | 0.16884  | 0.028996 | 0.063263 |
| 11743166_ETV6      | 0.156724 | 0.028997 | 0.063264 |
| 11761257_ARMC6     | -0.16028 | 0.029003 | 0.063275 |
| 11763720_SNAP29    | -0.1547  | 0.029033 | 0.063336 |
| 11741160_SWT1      | 0.181179 | 0.029036 | 0.063341 |
| 11718044_RAB11B    | -0.13921 | 0.029039 | 0.063343 |
| 11724639_PAFAH2    | 0.241829 | 0.029045 | 0.063354 |
| 11732488_HIST1H2BA | -0.14688 | 0.029047 | 0.063354 |
| 11725534_ZNF618    | -0.11825 | 0.029047 | 0.063354 |
| 11716720_AKT1S1    | -0.15105 | 0.029069 | 0.063399 |
| 11732462_ADAMTSL1  | 0.289976 | 0.029082 | 0.063423 |
| 11747387_CTNNB1    | 0.132568 | 0.029088 | 0.063435 |
| 11748621_CDK11A // | 0.10485  | 0.029091 | 0.063438 |
| 11753572 EMC4      | -0.09291 | 0.029096 | 0.063447 |
| 11730494_KCNK2     | 0.138339 | 0.029122 | 0.063499 |
| 11753380_C3orf67   | -0.17303 | 0.029123 | 0.063499 |
| 11746500_GSTO2     | -0.09864 | 0.029128 | 0.063507 |
| 11750869_ZNF852    | 0.133582 | 0.029143 | 0.063537 |
| 11735381_MAP3K19   | -0.17646 | 0.029151 | 0.06355  |
| 11737935_PCDHGA5   | -0.13427 | 0.029152 | 0.06355  |
| 11721329_RNGTT     | 0.170879 | 0.029153 | 0.06355  |
| 11762731_SUMO1     | -0.1808  | 0.029154 | 0.063551 |
| 11741236_TRIM17    | -0.16999 | 0.029163 | 0.063564 |
| 11724653_ZBTB47    | -0.29242 | 0.029163 | 0.063564 |
| 11723983_KRT6B     | -0.13719 | 0.02918  | 0.063597 |
| 11727310_PLIN4     | -0.11845 | 0.029186 | 0.063608 |
| 11752816_LIG1      | -0.14062 | 0.029189 | 0.063611 |
| 11744542_POLR3F    | -0.11584 | 0.029198 | 0.063629 |
| 11733365_NR2E1     | -0.19105 | 0.029212 | 0.063656 |
| 11744420_MIR600HG  | -0.16903 | 0.029223 | 0.063674 |
| 11762537_LINC00328 | 0.13396  | 0.029224 | 0.063674 |
| 11758025_INPP5F    | -0.09507 | 0.029224 | 0.063674 |
| 11762507_GTDC1     | -0.19566 | 0.029229 | 0.063683 |
| 11733626_FAM196A   | -0.1731  | 0.029236 | 0.063694 |
| 11737978_NIMIK     | 0.155084 | 0.029246 | 0.063714 |
| 11718204_REC8      | 0.187274 | 0.029255 | 0.06373  |
| 11748506_HTR2C     | -0.13574 | 0.029258 | 0.063734 |
| 11726430_C11orf52  | 0.104454 | 0.029268 | 0.063753 |
| 11724040_EHHADH    | -0.16101 | 0.029276 | 0.063767 |
| 11716886_VPS45     | -0.09246 | 0.029278 | 0.063767 |



|                    |          |          |          |
|--------------------|----------|----------|----------|
| 11752211_VWA2      | 0.154796 | 0.029279 | 0.063767 |
| 11744649_HP        | -0.24198 | 0.029282 | 0.063771 |
| 11716668_RAB1A /// | -0.10138 | 0.029289 | 0.063784 |
| 11734629_GPHB5     | -0.10772 | 0.029299 | 0.063802 |
| 11743163_ATF1      | -0.15213 | 0.029318 | 0.063841 |
| 11715643_ATP6AP2   | 0.100216 | 0.02932  | 0.063843 |
| 11715342_BRI3      | 0.216068 | 0.029322 | 0.063843 |
| 11737380_PRR19     | -0.1799  | 0.029322 | 0.063843 |
| 11730541_TAF1A     | 0.098071 | 0.029339 | 0.063876 |
| 11737074_COPE      | 0.099564 | 0.029345 | 0.063887 |
| 11731460_CPM       | 0.090642 | 0.029368 | 0.063932 |
| 11759828_SP100     | 0.148607 | 0.029392 | 0.063982 |
| 11756975_TBX2      | 0.10754  | 0.029406 | 0.06401  |
| 11762432_WDR31     | 0.24007  | 0.029408 | 0.064012 |
| 11740594_HIST1H3E  | 0.223896 | 0.029413 | 0.06402  |
| 11741769_SNX21     | -0.17503 | 0.029414 | 0.06402  |
| 11732566_SLC6A14   | 0.226498 | 0.029437 | 0.064066 |
| 11732937_CPT1A     | 0.164867 | 0.029441 | 0.064072 |
| 11737928_C6orf141  | -0.11463 | 0.029449 | 0.064088 |
| 11749892_RGS11     | -0.15712 | 0.029452 | 0.064091 |
| 11716788_B4GAT1    | 0.114369 | 0.029456 | 0.064093 |
| 11739695_ATL1      | 0.268573 | 0.029456 | 0.064093 |
| 11719951_FKBP15    | 0.145417 | 0.029458 | 0.064095 |
| 11719130_POLR3D    | -0.09728 | 0.02946  | 0.064097 |
| 11753559_SAA3P     | -0.18273 | 0.029472 | 0.064119 |
| 11731708_EGFLAM    | -0.23133 | 0.029473 | 0.064119 |
| 11745860_ATP5SL    | -0.11073 | 0.029476 | 0.064124 |
| 11719727_SIRPA     | -0.09974 | 0.029484 | 0.064138 |
| 11726146_TMEM61    | -0.11322 | 0.029497 | 0.064162 |
| 11720925_TCAP      | -0.11433 | 0.029516 | 0.064199 |
| 11723362_SOCS6     | 0.095939 | 0.029516 | 0.064199 |
| 11733227_TTC5      | -0.10815 | 0.029528 | 0.064222 |
| 11756860_RNH1      | 0.108284 | 0.029541 | 0.064245 |
| 11734931_LRRTM3    | -0.14493 | 0.029542 | 0.064245 |
| 11757417_CD63      | 0.107284 | 0.029552 | 0.064265 |
| 11729500_HHATL     | -0.10979 | 0.029564 | 0.064288 |
| 11764003_ARMC9     | 0.230121 | 0.029585 | 0.064331 |
| 11748249_NDRG3     | 0.132223 | 0.029588 | 0.064336 |
| 11734838_ACSF3     | -0.10437 | 0.029591 | 0.064338 |
| 11761340_RRN3P1    | 0.197353 | 0.029602 | 0.064361 |
| 11747024_CHRM5     | -0.19595 | 0.029608 | 0.064371 |
| 11737448_DNAJC22   | 0.118465 | 0.029631 | 0.064418 |
| 11740865_CLEC9A    | -0.16152 | 0.029634 | 0.06442  |
| 11762208_ATG16L2   | -0.13832 | 0.029656 | 0.064466 |
| 11747629_SYNPO2    | -0.15092 | 0.029661 | 0.064473 |
| 11740379_RHOT1     | 0.098654 | 0.02967  | 0.06449  |
| 11735669_MROH8     | -0.21373 | 0.029687 | 0.064524 |
| 11724127_MID2      | 0.150689 | 0.029711 | 0.064572 |
| 11725162_CYP39A1   | -0.10028 | 0.029711 | 0.064572 |
| 11724426_CNIH2     | -0.10551 | 0.029721 | 0.06459  |
| 11717665_TSPYL4    | 0.108585 | 0.029725 | 0.064596 |

|                   |          |          |          |
|-------------------|----------|----------|----------|
| 11734450_ACTRT1   | -0.15655 | 0.029727 | 0.064597 |
| 11727365_MED29    | -0.10776 | 0.029731 | 0.064603 |
| 11737667_KCNH6    | -0.11326 | 0.029743 | 0.064627 |
| 11733026_CLCA2    | 0.234079 | 0.029751 | 0.06464  |
| 11724244_TCF4     | -0.13706 | 0.029752 | 0.06464  |
| 11753676_AGER     | -0.17092 | 0.029762 | 0.064658 |
| 11732746_HGF      | -0.13358 | 0.029768 | 0.064669 |
| 11743494_SPATA5L1 | 0.11703  | 0.029779 | 0.06469  |
| 11748270_KMT5A    | 0.123048 | 0.029781 | 0.06469  |
| 11743179_RSFI     | 0.113764 | 0.029782 | 0.064691 |
| 11733921_GJB6     | -0.14996 | 0.029789 | 0.064703 |
| 11745110_GLYCTK   | -0.17367 | 0.029808 | 0.064742 |
| 11738450_GP5      | -0.12119 | 0.029812 | 0.064748 |
| 11755886_C5orf42  | 0.109542 | 0.029814 | 0.064748 |
| 11750707_GLP1R    | -0.12637 | 0.029825 | 0.064766 |
| 11750005_CNTR0B   | -0.10451 | 0.029826 | 0.064766 |
| 11745373_SNX22    | -0.13466 | 0.029826 | 0.064766 |
| 11727653_SRRM4    | -0.20097 | 0.02983  | 0.064771 |
| 11753702_TM220    | -0.17615 | 0.029833 | 0.064776 |
| 11730084_MINK1    | 0.20767  | 0.029835 | 0.064776 |
| 11733160_FAM84A   | -0.13342 | 0.029839 | 0.064783 |
| 11723178_SLC15A4  | -0.10753 | 0.029862 | 0.06483  |
| 11748912_LMF1     | -0.14476 | 0.029877 | 0.06486  |
| 11727617_EFNA3    | -0.15782 | 0.029885 | 0.064873 |
| 11737332_TRPM3    | 0.271104 | 0.029894 | 0.064885 |
| 11720533_HMGCS2   | -0.28385 | 0.029895 | 0.064885 |
| 11758613_ZNF507   | 0.121718 | 0.029896 | 0.064885 |
| 11761950_NALCN    | 0.185962 | 0.029898 | 0.064885 |
| 11723802_F10      | -0.14426 | 0.029899 | 0.064885 |
| 11738591_IQCJ     | -0.161   | 0.0299   | 0.064885 |
| 11734856_ERO1B    | 0.218899 | 0.029901 | 0.064885 |
| 11749634_CDON     | -0.18236 | 0.029901 | 0.064885 |
| 11732838_GUCA2B   | -0.16572 | 0.029909 | 0.0649   |
| 11744246_KCNE2    | 0.097421 | 0.029915 | 0.06491  |
| 11758280_HSD17B6  | -0.15819 | 0.02992  | 0.064918 |
| 11730200_ALAD     | 0.164668 | 0.029923 | 0.064922 |
| 11722102_TYRO3    | -0.12687 | 0.029935 | 0.064944 |
| 11721386_CUL7     | 0.155092 | 0.02995  | 0.064974 |
| 11716739_GRAMD1A  | 0.134834 | 0.029952 | 0.064975 |
| 11719043_ALKBH5   | -0.13587 | 0.029955 | 0.06498  |
| 11721684_ZW10     | -0.10043 | 0.030003 | 0.06508  |
| 11746108_MPP2     | -0.16646 | 0.030007 | 0.065087 |
| 11721442_RNASEH2C | -0.09796 | 0.030018 | 0.065108 |
| 11759646_ZC3H7A   | 0.251892 | 0.030028 | 0.065127 |
| 11720773_DNAJC19  | -0.22388 | 0.030061 | 0.065195 |
| 11723169_FOXP2    | -0.0928  | 0.030067 | 0.065204 |
| 11751543_HFE      | -0.19706 | 0.030078 | 0.065226 |
| 11729315_ULK4     | 0.097678 | 0.030079 | 0.065226 |
| 11751531_CD99L2   | -0.15663 | 0.030082 | 0.065229 |
| 11727483_TPR      | -0.09756 | 0.03009  | 0.065243 |
| 11715639_TTC3     | 0.12002  | 0.030097 | 0.065255 |

|                    |          |          |          |
|--------------------|----------|----------|----------|
| 11744123_BRINP2    | -0.17679 | 0.030102 | 0.065263 |
| 11728959_LCLAT1    | 0.135562 | 0.030113 | 0.065284 |
| 11763059_LOC100128 | -0.14559 | 0.030117 | 0.06529  |
| 11752679_TAB3      | 0.195329 | 0.030128 | 0.065312 |
| 11730017_EPHA10    | -0.13459 | 0.030134 | 0.065322 |
| 11737417_ERCC6L2   | 0.234229 | 0.030136 | 0.065322 |
| 11723634_GDF3      | -0.1076  | 0.030147 | 0.065341 |
| 11719710_PDPK1     | 0.127339 | 0.030147 | 0.065341 |
| 11745108_MYT1      | -0.14731 | 0.030166 | 0.065379 |
| 11743791_FRS2      | 0.113099 | 0.030171 | 0.065388 |
| 11737678_C1QTNF8   | -0.14675 | 0.030177 | 0.065397 |
| 11746805_ERCC8     | 0.110645 | 0.030185 | 0.065411 |
| 11722073_HEYL      | -0.17595 | 0.030186 | 0.065411 |
| 11718124_AIMP1     | -0.10204 | 0.0302   | 0.065437 |
| 11729703_DBN1      | -0.1649  | 0.030216 | 0.065469 |
| 11762477_CPXM2     | -0.15557 | 0.030217 | 0.065469 |
| 11739780_ARL17A // | 0.121621 | 0.030226 | 0.065486 |
| 11727366_MED29     | -0.12275 | 0.030227 | 0.065486 |
| 11737996_LRRC3     | 0.091858 | 0.030241 | 0.065512 |
| 11738009_DGKB      | -0.13181 | 0.030243 | 0.065513 |
| 11722462_TNKS2     | 0.10004  | 0.030246 | 0.065517 |
| 11760945_BMP1      | -0.12681 | 0.030248 | 0.065518 |
| 11716640_PSBM10    | 0.106675 | 0.030261 | 0.065545 |
| 11763498_CPT1C     | -0.127   | 0.030275 | 0.065572 |
| 11717127_ANPEP     | 0.102479 | 0.030281 | 0.065581 |
| 11723292_ORAI1     | 0.10475  | 0.030297 | 0.065612 |
| 11715155_TUBB7P // | -0.08837 | 0.030297 | 0.065612 |
| 11753368_OAZ1      | -0.10981 | 0.030306 | 0.065627 |
| 11754658_WSCD2     | -0.14966 | 0.030307 | 0.065627 |
| 11717447_DSTN      | -0.08904 | 0.030326 | 0.065663 |
| 11723579_SMIM13    | 0.181199 | 0.030327 | 0.065663 |
| 11752628_SYNCRIP   | -0.10705 | 0.030329 | 0.065665 |
| 11726616_MARCO     | -0.11609 | 0.030332 | 0.065669 |
| 11735977_HCCAT5    | -0.22607 | 0.030342 | 0.065688 |
| 11720987_SEC22A    | 0.125658 | 0.030362 | 0.065728 |
| 11722507_CLIC5     | -0.12712 | 0.030371 | 0.065745 |
| 11731394_VIM       | -0.08733 | 0.030385 | 0.065773 |
| 11746660_TMEM260   | 0.143258 | 0.030391 | 0.065782 |
| 11723865_CHODL     | -0.24292 | 0.030401 | 0.065799 |
| 11737151_ACOT6     | -0.169   | 0.030401 | 0.065799 |
| 11727041_TTI2      | 0.099649 | 0.030407 | 0.065808 |
| 11753807_TIMM10B   | 0.100516 | 0.030411 | 0.065811 |
| 11757043_MAGED2    | 0.120443 | 0.030411 | 0.065811 |
| 11740838_FAM98B    | -0.168   | 0.030418 | 0.065822 |
| 11750668_DENND4A   | 0.122884 | 0.030421 | 0.065827 |
| 11763176_NPRL3     | -0.10405 | 0.030438 | 0.06586  |
| 11735933_C2CD4D    | -0.1095  | 0.030446 | 0.065875 |
| 11727632_SLC16A10  | -0.12792 | 0.030465 | 0.065912 |
| 11747903_SAMD4B    | -0.1476  | 0.030466 | 0.065912 |
| 11755688_ADAMTSL4  | -0.18787 | 0.030473 | 0.065922 |
| 11747529_CALCOCO1  | -0.19687 | 0.030475 | 0.065922 |

|                    |          |          |          |
|--------------------|----------|----------|----------|
| 11745383_XRCC6BP1  | -0.09144 | 0.030475 | 0.065922 |
| 11734936_CNOT2     | -0.11177 | 0.030479 | 0.065928 |
| 11756827_RTN1      | -0.17503 | 0.030481 | 0.06593  |
| 11719777_NDST1     | -0.11515 | 0.030483 | 0.065932 |
| 11763482_GRK1      | -0.13201 | 0.030485 | 0.065932 |
| 11753195_SCUBE1    | -0.11042 | 0.030496 | 0.065953 |
| 11730618_ULBP1     | -0.14269 | 0.030497 | 0.065953 |
| 11759381_ADAM19    | -0.18639 | 0.030511 | 0.065981 |
| 11749723_FUT8      | -0.10623 | 0.030519 | 0.065995 |
| 11750483_DIP2C     | -0.12715 | 0.030528 | 0.066011 |
| 11739815_DLG4      | 0.172477 | 0.03054  | 0.066035 |
| 11756308_FAM50A    | 0.118966 | 0.030543 | 0.066038 |
| 11749944_GABRP     | 0.165021 | 0.030548 | 0.066046 |
| 11735406_RNF215    | -0.15144 | 0.030553 | 0.066055 |
| 11746037_RBM19     | 0.136381 | 0.030559 | 0.066064 |
| 11734575_HDAC7     | -0.10177 | 0.030562 | 0.066067 |
| 11756570_TMEM50B   | 0.121696 | 0.030564 | 0.06607  |
| 11728185_ZSWIM5    | 0.218294 | 0.03057  | 0.066078 |
| 11755745_VEGFA     | -0.14278 | 0.030572 | 0.06608  |
| 11739246_ANKFY1    | 0.169802 | 0.030583 | 0.066099 |
| 11745120_MYO5C     | -0.20197 | 0.030583 | 0.066099 |
| 11748130_HPCAL4    | -0.14644 | 0.03059  | 0.06611  |
| 11760901_NAPSB     | -0.20372 | 0.030599 | 0.066125 |
| 11753171_PGC       | -0.19243 | 0.0306   | 0.066125 |
| 11750435_IRX5      | -0.16848 | 0.030608 | 0.06614  |
| 11738573_MS4A2     | 0.203858 | 0.03062  | 0.066163 |
| 11717397_DDB2      | 0.114195 | 0.030621 | 0.066163 |
| 11749764_KMT5B     | -0.12777 | 0.030626 | 0.06617  |
| 11758188_KRT8      | 0.098049 | 0.030628 | 0.066173 |
| 11760740_NSMCE4A   | -0.1383  | 0.030634 | 0.066182 |
| 11723139_POP1      | -0.13863 | 0.030656 | 0.066227 |
| 11737500_SLC25A53  | -0.19148 | 0.030659 | 0.06623  |
| 11763752_CCNB1IP1  | 0.257784 | 0.030686 | 0.066285 |
| 11757139_SNORA5A   | -0.18774 | 0.030689 | 0.06629  |
| 11744712_ZNF823    | 0.098094 | 0.030691 | 0.066291 |
| 11737405_ST8SIA4   | 0.131282 | 0.030692 | 0.066291 |
| 11750074_RHBDL2    | 0.116765 | 0.030699 | 0.066302 |
| 11744637_OPRL1     | -0.11898 | 0.030701 | 0.066303 |
| 11747561_RPS6KB2   | -0.14892 | 0.030702 | 0.066303 |
| 11760084_LOC254896 | -0.18104 | 0.030708 | 0.066313 |
| 11715269_ALG1L     | -0.11228 | 0.03071  | 0.066313 |
| 11759523_ALKBH7    | -0.18825 | 0.030711 | 0.066314 |
| 11745891_PTPRN     | -0.20073 | 0.030718 | 0.066323 |
| 11744626_RPAIN     | 0.107897 | 0.030718 | 0.066323 |
| 11731259_SCUBE1    | -0.13019 | 0.030747 | 0.066381 |
| 11720992_SOX2      | -0.16942 | 0.030748 | 0.066381 |
| 11752758	EIF4B     | 0.088398 | 0.030756 | 0.066395 |
| 11740183_ZNF568    | 0.16088  | 0.030763 | 0.066407 |
| 11732198_PLAGL2    | -0.12569 | 0.030768 | 0.066415 |
| 11729924_TET3      | -0.1193  | 0.03077  | 0.066417 |
| 11754532_C1orf127  | -0.10329 | 0.030776 | 0.066426 |

|                    |          |          |          |
|--------------------|----------|----------|----------|
| 11719520_SEMA5A    | 0.198124 | 0.030784 | 0.066443 |
| 11759596_PCAT4     | -0.11855 | 0.030794 | 0.066459 |
| 11752282_PPFIBP2   | 0.173038 | 0.030812 | 0.066495 |
| 11760602_LINCO0337 | -0.26961 | 0.030813 | 0.066495 |
| 11728117_ADAMTSL3  | 0.143351 | 0.030831 | 0.06653  |
| 11720267_KLC4      | -0.13929 | 0.030832 | 0.06653  |
| 11715868_TINF2     | -0.11988 | 0.03084  | 0.066542 |
| 11731472_TMEM70    | 0.09462  | 0.03084  | 0.066542 |
| 11763193_GDPD1     | 0.124808 | 0.030841 | 0.066542 |
| 11750757_RPAP2     | 0.113614 | 0.030847 | 0.066552 |
| 11726682_MEIS1     | 0.194476 | 0.030878 | 0.066615 |
| 11760191_UQCRQ     | -0.10946 | 0.030886 | 0.066625 |
| 11715943_PSMB1     | -0.10065 | 0.030886 | 0.066625 |
| 11727248_MYH3      | -0.35095 | 0.030887 | 0.066625 |
| 11735384_DIP2A     | -0.14641 | 0.030888 | 0.066626 |
| 11744725_GPR17     | 0.183124 | 0.0309   | 0.066648 |
| 11763781_EZH1      | -0.18102 | 0.030903 | 0.06665  |
| 11741617_GPRIN3    | 0.134246 | 0.030911 | 0.066665 |
| 11740330_ZNF575    | -0.11881 | 0.030914 | 0.066669 |
| 11750000_CLEC7A    | 0.197007 | 0.030923 | 0.066686 |
| 11718163_UGT1A1 // | -0.16017 | 0.030926 | 0.06669  |
| 11728251_GK2       | -0.23709 | 0.030932 | 0.066699 |
| 11761459_SLC6A11   | -0.22718 | 0.03094  | 0.066715 |
| 11763219_GABARAP   | -0.1106  | 0.030951 | 0.066732 |
| 11737509_LDLRAD2   | -0.09484 | 0.030951 | 0.066732 |
| 11757725_NHP2      | -0.08772 | 0.030965 | 0.066758 |
| 11752662_MKS1      | -0.14965 | 0.030973 | 0.066772 |
| 11760787_ARHGAP11B | 0.137634 | 0.030977 | 0.066776 |
| 11726436_ANKRD16   | -0.18872 | 0.030977 | 0.066776 |
| 11737998_LRRC3     | -0.0998  | 0.030994 | 0.066808 |
| 11727812_SRSF1     | -0.08905 | 0.030995 | 0.066808 |
| 11716013_TMEM258   | -0.08762 | 0.030999 | 0.066813 |
| 11719295_AP3B1     | 0.148015 | 0.031004 | 0.066822 |
| 11734389_GLYATL2   | -0.41215 | 0.031015 | 0.066842 |
| 11726449_ZNF614    | 0.110202 | 0.031021 | 0.066853 |
| 11729897_C11orf87  | 0.118217 | 0.031045 | 0.066902 |
| 11716034_BST2      | -0.10343 | 0.031063 | 0.066937 |
| 11752301_ITIH5     | -0.15257 | 0.031069 | 0.066943 |
| 11715866_ATP6V1F   | 0.11228  | 0.031069 | 0.066943 |
| 11752098_DHX8      | 0.14191  | 0.03107  | 0.066943 |
| 11741835_PDX1      | -0.13584 | 0.031072 | 0.066944 |
| 11730437_PPIL3     | -0.10296 | 0.031079 | 0.066958 |
| 11737539_PVR       | -0.11252 | 0.031086 | 0.066966 |
| 11732414_LRRC8B    | -0.31279 | 0.031088 | 0.066966 |
| 11744810_ZBTB24    | 0.139805 | 0.031089 | 0.066966 |
| 11744860_LOC100287 | 0.158081 | 0.03109  | 0.066966 |
| 11737136_HOXC6     | 0.195003 | 0.031091 | 0.066966 |
| 11760682_DNAJB2    | -0.1833  | 0.031092 | 0.066966 |
| 11736956_ZNF687    | -0.15146 | 0.031093 | 0.066966 |
| 11732549_FBXL14    | -0.15756 | 0.031101 | 0.066982 |
| 11745768_NOTCH2    | 0.124352 | 0.031103 | 0.066983 |

|                    |          |          |          |
|--------------------|----------|----------|----------|
| 11736252_MUC21     | -0.17519 | 0.031106 | 0.066986 |
| 11761535_HERC2P9   | 0.12299  | 0.031111 | 0.066992 |
| 11720068_APH1B     | 0.17698  | 0.031124 | 0.067018 |
| 11749161_SPHK2     | -0.14595 | 0.031135 | 0.067038 |
| 11733471_PLEKHG4B  | -0.17555 | 0.031137 | 0.067039 |
| 11737553_C15orf32  | -0.15569 | 0.031138 | 0.067039 |
| 11757125_SNORA74A  | -0.22919 | 0.03114  | 0.067041 |
| 11759107_TTC39B    | 0.19757  | 0.031144 | 0.067046 |
| 11755982_TNPO3     | -0.10527 | 0.031145 | 0.067046 |
| 11741632_TAP2      | -0.16802 | 0.03116  | 0.067075 |
| 11737459_ADARB2    | -0.15    | 0.031163 | 0.067078 |
| 11718618_DNAJA4    | -0.13702 | 0.03117  | 0.067091 |
| 11751599_DPP7      | -0.15956 | 0.031178 | 0.067105 |
| 11735883_DNAH9     | -0.20503 | 0.031182 | 0.067109 |
| 11733245_DTNBP1    | -0.1107  | 0.031182 | 0.067109 |
| 11731993_CLECL1    | -0.17708 | 0.031188 | 0.067118 |
| 11731767_ARSB      | 0.167414 | 0.031189 | 0.067118 |
| 11723214_MEF2C     | -0.17107 | 0.031197 | 0.067131 |
| 11763686_FMNL1     | -0.22533 | 0.031215 | 0.067168 |
| 11729922_RENBP     | -0.27326 | 0.03122  | 0.067175 |
| 11745915_GOLGA8A / | 0.091604 | 0.031222 | 0.067177 |
| 11720059_TTYH1     | -0.13389 | 0.031224 | 0.067179 |
| 11741365_IFT22     | 0.096943 | 0.031228 | 0.067184 |
| 11725138_S100A12   | -0.13734 | 0.031245 | 0.067218 |
| 11734138_ABHD18    | -0.09061 | 0.031257 | 0.067238 |
| 11751607_CAMKV     | -0.16308 | 0.031258 | 0.067238 |
| 11734591_GTF2IRD2  | 0.247553 | 0.031267 | 0.067255 |
| 11732989_HIST3H2BB | -0.15282 | 0.031271 | 0.067262 |
| 11762587_MAML3     | -0.20639 | 0.031274 | 0.067263 |
| 11748267_ZNF282    | 0.148439 | 0.031275 | 0.067263 |
| 11749190_CLGN      | -0.13243 | 0.031297 | 0.067304 |
| 11746959_ABCF3     | -0.11023 | 0.031297 | 0.067304 |
| 11746434_OXCT1     | -0.13893 | 0.031321 | 0.06735  |
| 11750079_ADRM1     | -0.11411 | 0.031321 | 0.06735  |
| 11748295_EIF3G     | 0.100299 | 0.031324 | 0.067354 |
| 11726543_TULP2     | -0.24421 | 0.031327 | 0.067358 |
| 11717834_GLG1      | -0.11599 | 0.031333 | 0.067368 |
| 11737932_LILRA1    | -0.09887 | 0.031334 | 0.067368 |
| 11730687_WT1       | -0.10688 | 0.031344 | 0.067384 |
| 11728889_SERF1A // | 0.150698 | 0.031354 | 0.067403 |
| 11722151_EIF2AK3   | 0.156393 | 0.031357 | 0.067405 |
| 11750325_LOC151760 | -0.18677 | 0.031358 | 0.067405 |
| 11762508_SLC35A3   | -0.16367 | 0.031359 | 0.067405 |
| 11741798_ZNF304    | 0.14478  | 0.03136  | 0.067405 |
| 11746315_TCF7L2    | 0.089605 | 0.031361 | 0.067405 |
| 11736787_CATSPER2  | -0.12922 | 0.031366 | 0.067412 |
| 11732253_MED18     | 0.158709 | 0.031371 | 0.067417 |
| 11728563_FOXD1     | 0.120079 | 0.031371 | 0.067417 |
| 11741865_CSTL1     | -0.10303 | 0.031373 | 0.067418 |
| 11752730_PAX4      | -0.19779 | 0.03138  | 0.06743  |
| 11730599_KRT74     | -0.10241 | 0.031383 | 0.067433 |

|                    |          |          |          |
|--------------------|----------|----------|----------|
| 11721320_LYRM4     | 0.162213 | 0.031404 | 0.067475 |
| 11761697_C21orf59  | -0.15065 | 0.031405 | 0.067475 |
| 11738366_MUC1      | -0.13928 | 0.031406 | 0.067475 |
| 11736055_BORCS7    | 0.111083 | 0.031418 | 0.067497 |
| 11732093_PEX16     | 0.1046   | 0.031449 | 0.067561 |
| 11731933_GABRA2    | -0.14136 | 0.031476 | 0.067615 |
| 11757958_POGZ      | -0.11397 | 0.031494 | 0.067651 |
| 11749502_RELN      | 0.176096 | 0.031501 | 0.067664 |
| 11718565_KIAA1147  | 0.192017 | 0.031503 | 0.067665 |
| 11755350_XIRP1     | -0.16055 | 0.031515 | 0.067687 |
| 11745602_CLTA      | 0.089449 | 0.031518 | 0.06769  |
| 11763318_CSNK1A1   | 0.116886 | 0.031523 | 0.067697 |
| 11730352_ZNF423    | -0.21876 | 0.031524 | 0.067697 |
| 11737019_AGAP2     | -0.17024 | 0.031525 | 0.067697 |
| 11750555_NUP214    | -0.1121  | 0.031528 | 0.0677   |
| 11755062_KDELC1    | 0.136725 | 0.031538 | 0.067719 |
| 11725073_JADE1     | -0.12832 | 0.031543 | 0.067727 |
| 11729817_IGF1      | -0.12668 | 0.031564 | 0.067768 |
| 11740056_HARBI1    | 0.121381 | 0.031568 | 0.067774 |
| 11725557_FBXL18    | -0.12401 | 0.031577 | 0.067791 |
| 11716545_PSMC1     | -0.09684 | 0.031581 | 0.067796 |
| 11729344_BPI       | -0.22945 | 0.031597 | 0.067829 |
| 11718302_HSD11B2   | -0.11068 | 0.031599 | 0.06783  |
| 11731683_RIF1      | -0.10774 | 0.031601 | 0.067831 |
| 11720826_JAG1      | 0.234322 | 0.031602 | 0.067831 |
| 11739859_PACSIN1   | -0.17425 | 0.031604 | 0.067831 |
| 11737054_PHRF1     | -0.15963 | 0.031606 | 0.067833 |
| 11745523_MYBPC1    | -0.11666 | 0.03161  | 0.067838 |
| 11721617_THEMIS2   | -0.15323 | 0.031615 | 0.067845 |
| 11719913_POMT1     | 0.149607 | 0.031616 | 0.067845 |
| 11718381_PSD4      | -0.12165 | 0.03163  | 0.067873 |
| 11739425_DPYSL5    | -0.12546 | 0.031646 | 0.067904 |
| 11718458_STK11IP   | -0.09803 | 0.031649 | 0.067907 |
| 11730441_FAM155A   | -0.19678 | 0.031651 | 0.067909 |
| 11723546_PLD1      | 0.138519 | 0.031654 | 0.067912 |
| 11720650_DUSP23    | -0.09001 | 0.031674 | 0.067951 |
| 11737415_BPIFB4    | -0.13766 | 0.031679 | 0.06796  |
| 11732578_NCCRP1    | -0.11938 | 0.031694 | 0.067988 |
| 11753731_SNCA      | 0.117776 | 0.031695 | 0.067988 |
| 11732990_HIST3H2BB | -0.13406 | 0.031707 | 0.06801  |
| 11741709_PRCDC     | -0.10883 | 0.031714 | 0.068023 |
| 11755356_PSMF1     | 0.097226 | 0.031726 | 0.068045 |
| 11762389_USP38     | 0.28162  | 0.031727 | 0.068045 |
| 11724001_LNP1      | -0.17527 | 0.031736 | 0.06806  |
| 11715933_PPP1R7    | -0.14838 | 0.031758 | 0.068105 |
| 11752359_DDX24     | 0.091983 | 0.031764 | 0.068111 |
| 11727159_LRP5      | 0.130138 | 0.031765 | 0.068111 |
| 11737652_FAM9B     | 0.323602 | 0.031765 | 0.068111 |
| 11724677_TRMT5     | -0.10481 | 0.031769 | 0.068116 |
| 11740834_DST       | -0.15274 | 0.031809 | 0.068199 |
| 11736817_KIRREL    | -0.10369 | 0.031818 | 0.068215 |

|                    |          |          |          |
|--------------------|----------|----------|----------|
| 11715447_TALD01    | -0.09459 | 0.031819 | 0.068215 |
| 11757466_FAM177A1  | -0.12183 | 0.031821 | 0.068217 |
| 11722343_ZNF558    | 0.153712 | 0.031825 | 0.068223 |
| 11759042_VKORC1L1  | -0.12513 | 0.031829 | 0.068228 |
| 11760672_AGGF1     | 0.125795 | 0.031844 | 0.068256 |
| 11739465_ALKBH4    | -0.12998 | 0.031854 | 0.068273 |
| 11745446_LMO3      | 0.123847 | 0.031855 | 0.068273 |
| 11721695_DUSP2     | 0.13039  | 0.031863 | 0.068287 |
| 11719380_THOC7     | 0.092915 | 0.031875 | 0.06831  |
| 11734857_ER01B     | -0.1599  | 0.031895 | 0.068351 |
| 11727463_ZXDC      | -0.09163 | 0.031918 | 0.068397 |
| 11760818_CDKL3     | 0.131172 | 0.031923 | 0.068405 |
| 11736264_FBXO44    | -0.22482 | 0.031933 | 0.068422 |
| 11751692_GSTO2     | -0.15332 | 0.031936 | 0.068428 |
| 11717987_MRPL40    | -0.09546 | 0.03194  | 0.068431 |
| 11729479_CLEC12A   | -0.18193 | 0.031976 | 0.068506 |
| 11755546_LFNG      | -0.1379  | 0.032003 | 0.068562 |
| 11754600_SHC3      | -0.17673 | 0.032045 | 0.068647 |
| 11735624_MADD      | 0.112926 | 0.032066 | 0.068689 |
| 11719537_CPXM2     | -0.13169 | 0.032072 | 0.068697 |
| 11741561_ADGRF5    | 0.219816 | 0.032072 | 0.068697 |
| 11745038_FRAT1     | -0.12419 | 0.032073 | 0.068697 |
| 11726926_CT47A1 // | -0.22019 | 0.032098 | 0.068747 |
| 11735771_WFDC8     | 0.157376 | 0.032106 | 0.068761 |
| 11751415_TSC22D3   | 0.131266 | 0.032133 | 0.068814 |
| 11731324_LSS       | -0.1688  | 0.032135 | 0.068816 |
| 11748458_ATXN2L    | -0.124   | 0.032137 | 0.068818 |
| 11719819 EMC10     | 0.111599 | 0.032145 | 0.06883  |
| 11733603_SLC52A1   | -0.17209 | 0.032145 | 0.06883  |
| 11731037_FIBCD1    | -0.17987 | 0.032166 | 0.068871 |
| 11732612_CELF3     | -0.17218 | 0.032171 | 0.068876 |
| 11756359_ADRA2C    | -0.17026 | 0.032171 | 0.068876 |
| 11761833_PI16      | -0.11126 | 0.032174 | 0.068878 |
| 11729680_KHK       | -0.24964 | 0.032179 | 0.068887 |
| 11721703_TNRC18    | -0.09311 | 0.032202 | 0.068933 |
| 11752478_SLC6A13   | -0.16167 | 0.03221  | 0.068947 |
| 11763469_AZIN2     | -0.14107 | 0.032217 | 0.068956 |
| 11727514_TTC9      | 0.138306 | 0.032217 | 0.068956 |
| 11735305_FLCN      | 0.108731 | 0.032219 | 0.068957 |
| 11761606_CDH22     | -0.15928 | 0.032263 | 0.069048 |
| 11741419_KCNQ1     | -0.11284 | 0.032269 | 0.069057 |
| 11753004_CKB       | 0.099628 | 0.032279 | 0.069073 |
| 11740861_SNX17     | 0.105038 | 0.032279 | 0.069073 |
| 11744620_ZNF821    | 0.245763 | 0.032283 | 0.069076 |
| 11751779_VWF       | -0.12668 | 0.032283 | 0.069076 |
| 11729491_PPFIA4    | -0.11843 | 0.032287 | 0.069082 |
| 11757758_RPS10 /// | 0.089053 | 0.032291 | 0.069086 |
| 11750456_RHCE ///  | -0.16331 | 0.032295 | 0.069093 |
| 11756048_LCN10     | -0.17926 | 0.032298 | 0.069096 |
| 11743912_MYOC      | -0.14469 | 0.032308 | 0.069114 |
| 11758790_STMN2     | -0.23675 | 0.032309 | 0.069115 |



|                    |          |          |          |
|--------------------|----------|----------|----------|
| 11723921_KLHL41    | 0.182254 | 0.032325 | 0.069145 |
| 11762928_DNAJC18 / | -0.2502  | 0.032342 | 0.069178 |
| 11752174_MST1R     | -0.16993 | 0.032344 | 0.06918  |
| 11757161_SNORA30   | -0.17326 | 0.032351 | 0.069191 |
| 11746585_NFATC1    | -0.20294 | 0.032358 | 0.069203 |
| 11738708_OR10K1    | -0.25146 | 0.032367 | 0.06922  |
| 200009_PMGDI2      | 0.094111 | 0.032377 | 0.069238 |
| 11738556_KIR2DL4   | -0.17829 | 0.032386 | 0.069254 |
| 11723075_BCL9L     | 0.108966 | 0.032389 | 0.069255 |
| 11745149_C2CD5     | -0.0989  | 0.032389 | 0.069255 |
| 11757656_RPAIN     | 0.098721 | 0.032409 | 0.069292 |
| 11736881_FCRL1     | -0.12417 | 0.03241  | 0.069292 |
| 11722112_ADRA2A    | -0.16375 | 0.032411 | 0.069292 |
| 11745155_NCL       | -0.0941  | 0.032414 | 0.069293 |
| 11756271_FANK1     | 0.138902 | 0.032414 | 0.069293 |
| 11752246_STAB1     | -0.20418 | 0.032419 | 0.069299 |
| 11750802_LIMK2     | 0.166512 | 0.032448 | 0.069359 |
| 11742907_TTL5      | 0.111791 | 0.032459 | 0.069379 |
| 11763174_PGM3      | -0.11017 | 0.032476 | 0.069414 |
| 11750269_LINC00612 | -0.14152 | 0.032492 | 0.069444 |
| 11724778_PGM2L1    | 0.120485 | 0.032496 | 0.069449 |
| 11755571_MAP7D1    | -0.09405 | 0.032507 | 0.06947  |
| 11741690_SUMF2     | 0.100805 | 0.03251  | 0.069473 |
| 11759784_SVIL      | -0.20317 | 0.032513 | 0.069477 |
| 11747568_FUZ       | -0.20905 | 0.03252  | 0.069488 |
| 11760513_PRMT1     | -0.24426 | 0.032524 | 0.069495 |
| 11762387_MYO3B     | -0.26506 | 0.032532 | 0.069509 |
| 11736293_SPATS2L   | -0.09904 | 0.032544 | 0.069531 |
| 11727396_CTNNA1    | 0.107385 | 0.03255  | 0.069541 |
| 11763419_AP5S1     | -0.09069 | 0.032559 | 0.069556 |
| 11742879_CRYZL1    | 0.120683 | 0.03256  | 0.069556 |
| 11727509_GTPBP10 / | 0.169536 | 0.032572 | 0.069578 |
| 11757082_TMEM167A  | 0.089676 | 0.032573 | 0.069578 |
| 11737599_CXorf67   | -0.11721 | 0.032576 | 0.069581 |
| 11715982_DUS1L     | 0.107515 | 0.032581 | 0.069588 |
| 11754727_VPS39     | -0.12348 | 0.032606 | 0.069638 |
| 11721796_ALDH9A1   | 0.096822 | 0.03261  | 0.069644 |
| 11750756_SBN02     | 0.10872  | 0.032616 | 0.069655 |
| 11755439_UBAC2     | -0.09307 | 0.032635 | 0.069693 |
| 11716307_UQCR11    | 0.135993 | 0.032637 | 0.069693 |
| 11722671_AKAP11    | 0.105362 | 0.032645 | 0.069706 |
| 11741676_MANEAL    | 0.215119 | 0.032661 | 0.069739 |
| 11726445_KCNK3     | 0.180497 | 0.032666 | 0.069746 |
| 11758314_NDUFAF2   | 0.098435 | 0.032668 | 0.069746 |
| 11732682_ZNF471    | 0.149273 | 0.032672 | 0.069753 |
| 11757307_CTSD      | -0.10307 | 0.032676 | 0.069756 |
| 11747192_NFIC      | -0.22202 | 0.032676 | 0.069756 |
| 11760550_FBXW4P1   | 0.162055 | 0.032687 | 0.069773 |
| 11760551_FBXW4P1   | 0.162055 | 0.032687 | 0.069773 |
| 11736653_CFAP57    | -0.17816 | 0.032699 | 0.069794 |
| 11723153_GON4L     | -0.14642 | 0.0327   | 0.069794 |

|                    |          |          |          |
|--------------------|----------|----------|----------|
| 11761483_CLK3      | -0.1094  | 0.032702 | 0.069796 |
| 11738732_OR2G6     | -0.21263 | 0.032708 | 0.069805 |
| 11737159_SLC9A2    | -0.13397 | 0.032711 | 0.069808 |
| 11753144_KLRAP1    | -0.19173 | 0.032718 | 0.069821 |
| 11756595_ZNF142    | 0.128909 | 0.032721 | 0.069823 |
| 11734630_DSG4      | -0.12959 | 0.032744 | 0.069869 |
| 11743431_LYRM9     | -0.15967 | 0.032754 | 0.069888 |
| 11733281_KPRP      | -0.15643 | 0.032758 | 0.069893 |
| 11746132_MYO10     | -0.10107 | 0.032762 | 0.069898 |
| 11718485_EI24      | 0.105165 | 0.032785 | 0.069946 |
| 11758932_CHAF1B    | -0.16236 | 0.032792 | 0.069957 |
| 11751283_ADPRH     | -0.20497 | 0.032808 | 0.069988 |
| 11736668_CLEC4E    | -0.16151 | 0.032815 | 0.069999 |
| 11742766_DENND5A   | -0.14165 | 0.032833 | 0.070035 |
| 11732483_PEX13     | 0.112028 | 0.032856 | 0.070081 |
| 11751298_TBL2      | 0.088378 | 0.032869 | 0.070106 |
| 11745031_PPP1R2P9  | -0.2112  | 0.032874 | 0.070114 |
| 11751056_ZBP1      | -0.3208  | 0.032882 | 0.070128 |
| 11744262_RNF167    | -0.10838 | 0.032894 | 0.07015  |
| 11722847_PPP3CA    | 0.099242 | 0.032901 | 0.070162 |
| 11724966_BLOC1S1-R | 0.130194 | 0.032903 | 0.070164 |
| 11763713_AAR2      | 0.146502 | 0.03292  | 0.070194 |
| 11723284_REEP6     | -0.16111 | 0.03292  | 0.070194 |
| 11734814_PDE1A     | -0.19092 | 0.032928 | 0.070207 |
| 11739417_IRGQ      | 0.202735 | 0.03293  | 0.070207 |
| 11749275_SKAP2     | 0.133341 | 0.032931 | 0.070207 |
| 11761696_MRPL48    | -0.14584 | 0.032932 | 0.070207 |
| 11727107_DROSHA    | -0.09997 | 0.032949 | 0.070241 |
| 11734348_NEUROG1   | -0.14423 | 0.032952 | 0.070243 |
| 11732460_PLEKHS1   | 0.246005 | 0.032962 | 0.070261 |
| 11725366_IER5L     | -0.09243 | 0.032968 | 0.070268 |
| 11736567_LEF1      | -0.14566 | 0.032968 | 0.070268 |
| 11731073_ZNF587    | 0.142807 | 0.032972 | 0.070273 |
| 11763060_NPSR1-AS1 | -0.1211  | 0.03298  | 0.070287 |
| 11747108_RPGRIP1L  | 0.12669  | 0.032983 | 0.070291 |
| 11739630_RAG2      | -0.09375 | 0.032995 | 0.070313 |
| 11738280_KLK12     | -0.13704 | 0.032997 | 0.070314 |
| 11732684_ABCA12    | 0.41515  | 0.033008 | 0.070336 |
| 11746943_SH2D6     | -0.22542 | 0.033018 | 0.070353 |
| 11746038_RBM19     | 0.118006 | 0.033037 | 0.07039  |
| 11758911_DYRK2     | -0.18065 | 0.033042 | 0.070399 |
| 11721398_DOT1L     | 0.148403 | 0.033051 | 0.070413 |
| 11723000_MYL7      | -0.15969 | 0.033057 | 0.070423 |
| 11746628_RIC3      | -0.18846 | 0.03306  | 0.070426 |
| 11736143_ENPP4     | -0.14129 | 0.033068 | 0.070442 |
| 11737808_CDK18     | 0.098016 | 0.033085 | 0.070472 |
| 11754282_GYG2      | 0.148898 | 0.033085 | 0.070472 |
| 11755096_ANKRD16   | 0.151526 | 0.033128 | 0.070561 |
| 11736824_C10orf95  | -0.09494 | 0.03313  | 0.070561 |
| 11755054_RUNX3     | -0.1027  | 0.033138 | 0.070574 |
| 11756500_DPH5      | -0.11624 | 0.033159 | 0.070617 |

|                    |          |          |          |
|--------------------|----------|----------|----------|
| 11739290_KMT2A     | 0.087959 | 0.033162 | 0.070619 |
| 11763352_ZNF576    | -0.13502 | 0.033172 | 0.070637 |
| 11725732_LOC102724 | 0.105313 | 0.033173 | 0.070637 |
| 11748277_ASCC1     | 0.110438 | 0.033179 | 0.070647 |
| 11730922_NHLRC4    | -0.11509 | 0.033188 | 0.070664 |
| 11720302_SLA       | -0.14193 | 0.033195 | 0.070673 |
| 11743408_RBM25     | 0.110256 | 0.033196 | 0.070673 |
| 11745535_CRB1      | 0.103054 | 0.033199 | 0.070677 |
| 11757699_PSMC4     | -0.10175 | 0.033204 | 0.070685 |
| 11756697_OSBP1     | -0.11287 | 0.033209 | 0.070692 |
| 11725324_TSPAN31   | 0.098062 | 0.033212 | 0.070695 |
| 11727063_UCK2      | -0.10816 | 0.03323  | 0.070731 |
| 11718229_R3HDM4    | 0.112094 | 0.033234 | 0.070735 |
| 11736033_VAMP1     | -0.12048 | 0.033237 | 0.070739 |
| 11723758_ZFR       | 0.089005 | 0.033256 | 0.070777 |
| 11743717_SMTNL1    | -0.22115 | 0.03326  | 0.070781 |
| 11753172_GRB7      | 0.103239 | 0.033262 | 0.070783 |
| 11734987_ZNF418    | 0.183975 | 0.033266 | 0.070789 |
| 11734182_CCDC9     | -0.15167 | 0.033271 | 0.070798 |
| 11747352_ZSCAN32   | 0.11973  | 0.033278 | 0.070805 |
| 11726460_FAM117B   | -0.14721 | 0.033278 | 0.070805 |
| 11739479_NINL      | -0.21419 | 0.033292 | 0.070826 |
| 11730564_ZC2HC1B   | -0.13325 | 0.033292 | 0.070826 |
| 11746222_TTBK2     | 0.097883 | 0.033292 | 0.070826 |
| 11734018_URB1      | -0.14585 | 0.033295 | 0.070826 |
| 11743622_TM9SF2    | 0.093729 | 0.033295 | 0.070826 |
| 11716930_DGCR2     | 0.154728 | 0.033311 | 0.070857 |
| 11759022_ELK3      | 0.085494 | 0.033319 | 0.070868 |
| 11743392_MATR3     | -0.12287 | 0.033319 | 0.070868 |
| 11742973_ACAT1     | 0.107092 | 0.033347 | 0.070924 |
| 11721765_ADRBK2    | -0.22744 | 0.03336  | 0.070949 |
| 11748224_AMDHD2    | -0.15909 | 0.033368 | 0.070963 |
| 11753847_KRTAP21-3 | -0.09778 | 0.033394 | 0.071011 |
| 11753640_MUC1      | -0.10491 | 0.033394 | 0.071011 |
| 11732887_VENTX     | -0.17122 | 0.033398 | 0.071017 |
| 11744441_BASP1     | -0.18652 | 0.033405 | 0.071029 |
| 11757525_BICD2     | 0.106795 | 0.033407 | 0.071031 |
| 11725935_CAMK2A    | -0.16034 | 0.033423 | 0.071062 |
| 11749726_NR4A1     | -0.09371 | 0.03343  | 0.071073 |
| 11761807_FER       | -0.13631 | 0.033432 | 0.071073 |
| 11728337_LINGO1    | -0.18329 | 0.033441 | 0.071091 |
| 11760356_PMP2B     | 0.274699 | 0.033446 | 0.071097 |
| 11759475_CYP2C19   | -0.26164 | 0.033466 | 0.071136 |
| 11744326_RPL37 /// | -0.09262 | 0.033467 | 0.071136 |
| 11753351_SHISA6    | -0.1744  | 0.033469 | 0.071137 |
| 11729303_UBE3B     | 0.157115 | 0.033473 | 0.071143 |
| 11751286_SLC35A5   | -0.10635 | 0.033475 | 0.071144 |
| 11763626_MLLT1     | -0.36    | 0.033496 | 0.071186 |
| 11744248_LRRC4C    | 0.190714 | 0.033516 | 0.071225 |
| 11753447_SGCZ      | -0.14418 | 0.033519 | 0.071228 |
| 11729702_DBN1      | -0.0923  | 0.033547 | 0.071285 |

|                    |          |          |          |
|--------------------|----------|----------|----------|
| 11737166_ANKRD34B  | -0.14103 | 0.033552 | 0.07129  |
| 11729382_AK5       | 0.161926 | 0.033553 | 0.07129  |
| 11760699_LSAMP     | 0.116788 | 0.033584 | 0.071354 |
| 11749675_BCL11A    | -0.11948 | 0.033585 | 0.071354 |
| 11738532_KLHL4     | -0.10844 | 0.033588 | 0.071355 |
| 11734866_CENPJ     | -0.30102 | 0.033594 | 0.071366 |
| 11716115_ZFP36L1   | 0.093749 | 0.033599 | 0.071372 |
| 11730665_FOXP1     | 0.103518 | 0.033608 | 0.071388 |
| 11748883_FAM217B   | -0.183   | 0.033613 | 0.071397 |
| 11742692_APRT      | -0.10762 | 0.033661 | 0.071496 |
| 11729430_CDC121    | 0.248396 | 0.033663 | 0.071497 |
| 11732511_C10orf25  | -0.18229 | 0.033672 | 0.071513 |
| 11753527_RAB23     | 0.154819 | 0.033676 | 0.071517 |
| 11747879_CYP2C8    | -0.18973 | 0.033679 | 0.071522 |
| 11751397_COMMD9    | -0.11572 | 0.033682 | 0.071525 |
| 11751843_CRIP3 /// | -0.28228 | 0.0337   | 0.07156  |
| 11718207_COQ6      | 0.143494 | 0.033713 | 0.071583 |
| 11763218_DEFB121   | -0.11892 | 0.033731 | 0.071619 |
| 11755992_ICAM2     | -0.13662 | 0.033744 | 0.071643 |
| 11723287_TYROBP    | -0.14222 | 0.033754 | 0.071662 |
| 11741447_RNASE4    | -0.2793  | 0.03376  | 0.071672 |
| 11730602_APOBEC3F  | 0.255662 | 0.03377  | 0.07169  |
| 11745321_ZFP28     | 0.22854  | 0.033791 | 0.071732 |
| 11747997_SNX17     | 0.134535 | 0.033815 | 0.071779 |
| 11755377_NARF      | -0.09131 | 0.033822 | 0.071792 |
| 11729778_CDH17     | -0.11591 | 0.03383  | 0.071806 |
| 11734663_TRA2B     | -0.14127 | 0.033835 | 0.071811 |
| 11754182_IL2RG     | 0.222025 | 0.033845 | 0.071831 |
| 11751588_UCHL5     | -0.102   | 0.033847 | 0.071831 |
| 11735181_DLX2      | -0.08491 | 0.033851 | 0.071836 |
| 11723794_SLC29A2   | -0.12249 | 0.033862 | 0.071857 |
| 11734007_NDOR1     | -0.14576 | 0.033872 | 0.071875 |
| 11719231_PTPRS     | -0.13098 | 0.033886 | 0.071901 |
| 11729253_GEMIN8    | 0.190373 | 0.033888 | 0.071904 |
| 11761046_RNF34     | -0.17398 | 0.033901 | 0.071928 |
| 11763071_NPSR1-AS1 | 0.276554 | 0.033907 | 0.071938 |
| 11758014_TGFBR1    | -0.09164 | 0.033911 | 0.071942 |
| 11752875_SATB2-AS1 | -0.1044  | 0.033929 | 0.071976 |
| 11744227_MACROD1   | -0.10457 | 0.033934 | 0.071986 |
| 11747160_RUBCN     | -0.15636 | 0.033941 | 0.071995 |
| 11724611_DYRK2     | 0.122735 | 0.033942 | 0.071995 |
| 11739998_SMARCA2   | 0.097127 | 0.033944 | 0.071997 |
| 11750957_NOX4      | 0.229595 | 0.033947 | 0.072001 |
| 11754077_RAB11B    | -0.16283 | 0.033954 | 0.072012 |
| 11733378_DCAF4L1   | 0.319153 | 0.033958 | 0.072016 |
| 11726358_KMT2E     | 0.132184 | 0.03396  | 0.072017 |
| 11758406_KIAA1644  | -0.21046 | 0.033961 | 0.072017 |
| 11740883_RWDD3 /// | 0.122934 | 0.033965 | 0.072021 |
| 11729148_SMDT1     | 0.087995 | 0.033966 | 0.072021 |
| 11716375_PRKCZ     | 0.101994 | 0.033994 | 0.072078 |
| 11718226_SMIM12    | 0.123462 | 0.034025 | 0.07214  |

|                    |          |          |          |
|--------------------|----------|----------|----------|
| 11758901_RIPK2     | 0.228455 | 0.034029 | 0.072144 |
| 11729346_ZNF513    | 0.096073 | 0.03403  | 0.072144 |
| 11716683_SLC39A9   | -0.1319  | 0.034032 | 0.072145 |
| 11727714_KCNJ12    | 0.192012 | 0.034033 | 0.072145 |
| 11718031_ATP6VOA1  | 0.104619 | 0.034045 | 0.072166 |
| 11727951_DHX33     | 0.130243 | 0.034051 | 0.072177 |
| 11748982_CYP2S1    | -0.17347 | 0.03406  | 0.072193 |
| 11747541_ARMC4     | 0.28958  | 0.034066 | 0.072202 |
| 11725818_PAQR3     | 0.107761 | 0.034088 | 0.072245 |
| 11739076_NFE2L1    | -0.23899 | 0.034092 | 0.07225  |
| 11750115_PLXNB3    | -0.14929 | 0.034099 | 0.072263 |
| 11756524_RBBP9     | -0.15149 | 0.034103 | 0.072267 |
| 11763786_NARFL     | -0.15468 | 0.034104 | 0.072267 |
| 11763200_FBXW8     | -0.152   | 0.034118 | 0.072293 |
| 11723026_FAM26F    | -0.11897 | 0.034133 | 0.072322 |
| 11735440_RBM11     | -0.18394 | 0.034144 | 0.072343 |
| 11744313_ST20      | 0.106599 | 0.034153 | 0.072358 |
| 11759900_TMEM144   | -0.22736 | 0.034157 | 0.072364 |
| 11732820_TMEM217   | -0.14834 | 0.034159 | 0.072366 |
| 11746735_IFT140    | -0.10899 | 0.034161 | 0.072366 |
| 11725996_DDX25     | -0.12002 | 0.034169 | 0.072379 |
| 11742286_PAX3      | -0.13727 | 0.034178 | 0.072396 |
| 11760908_MYL6      | -0.21331 | 0.034193 | 0.072425 |
| 11730574_ZNF470    | 0.112638 | 0.034195 | 0.072425 |
| 11729318_UACA      | -0.26265 | 0.0342   | 0.072433 |
| 11750392_IL17RE    | -0.17482 | 0.034202 | 0.072435 |
| 11729873_USP19     | -0.12733 | 0.034207 | 0.072441 |
| 11718816_PLCD1     | -0.15899 | 0.03421  | 0.072445 |
| 11732122_PMPCB     | -0.12062 | 0.034213 | 0.072449 |
| 11758787_FUCA2     | -0.18255 | 0.03423  | 0.072481 |
| 11731700_C1orf66   | -0.13457 | 0.034239 | 0.072497 |
| 11741021_KLK3      | -0.12499 | 0.034265 | 0.072549 |
| 11750249_FAM221B   | 0.170178 | 0.034277 | 0.072571 |
| 11716503_CRMP1     | -0.12436 | 0.034279 | 0.072571 |
| 11716425_PCDHGA1 / | -0.1204  | 0.034284 | 0.07258  |
| 11740699_ENTPD8    | -0.1298  | 0.034291 | 0.072591 |
| 11740547_KCNJ14    | -0.12675 | 0.03431  | 0.072628 |
| 11717200_DPM2      | -0.09104 | 0.034314 | 0.072633 |
| 11717748_MCTS1     | -0.09675 | 0.034316 | 0.072635 |
| 11733478_OLIG3     | -0.12536 | 0.034319 | 0.072637 |
| 11755412_IKBKB     | -0.14993 | 0.034326 | 0.072649 |
| 11742883_ST6GALNAC | -0.13742 | 0.034337 | 0.072669 |
| 11728820_HAUS2     | -0.11047 | 0.034341 | 0.072675 |
| 11728993_CCDC70    | -0.10977 | 0.034386 | 0.072767 |
| 11750716_RBM47     | -0.15328 | 0.034394 | 0.07278  |
| 11728616_CARD6     | 0.13949  | 0.034399 | 0.072787 |
| 11730226_QRSL1     | 0.15992  | 0.034401 | 0.072788 |
| 11751358_MEI1      | -0.18015 | 0.034402 | 0.072788 |
| 11754072_TCL1A     | -0.10264 | 0.034445 | 0.072877 |
| 11726990	EIF2AK1   | 0.150998 | 0.034447 | 0.072877 |
| 11727510_UBN2      | -0.17079 | 0.034449 | 0.072878 |

|                    |          |          |          |
|--------------------|----------|----------|----------|
| 11748134_SLC2A11   | -0.14471 | 0.034481 | 0.072943 |
| 11716715_CTSB      | -0.08578 | 0.034495 | 0.072968 |
| 11738789_HIST1H4G  | -0.18423 | 0.034501 | 0.072977 |
| 11736924_DLGAP1    | 0.188203 | 0.034523 | 0.073023 |
| 11729627_DCAF7     | 0.094316 | 0.03454  | 0.073055 |
| 11720369_RANBP6    | 0.112538 | 0.034541 | 0.073055 |
| 11751449_CEP41     | -0.16141 | 0.034548 | 0.073065 |
| 11760895_SLC29A1   | -0.22237 | 0.034553 | 0.073073 |
| 11757367_HSPA6 /// | -0.16327 | 0.034562 | 0.073087 |
| 11745014_WT1 /// W | -0.11479 | 0.034565 | 0.073092 |
| 11755907_ATP13A1   | 0.105354 | 0.034576 | 0.073109 |
| 11750121_HDAC4     | -0.10909 | 0.034576 | 0.073109 |
| 11754111_PNOC      | -0.20139 | 0.034578 | 0.07311  |
| 11758704_COMMD5    | -0.09401 | 0.034581 | 0.073113 |
| 11718036_PPIL1     | -0.11691 | 0.034583 | 0.073114 |
| 11718333_SCAMP4    | -0.12072 | 0.034604 | 0.073151 |
| 11731981_ADTRP     | 0.104562 | 0.034604 | 0.073151 |
| 11761076_ACOT8     | 0.147364 | 0.034605 | 0.073151 |
| 11742966_MTERF4    | 0.112464 | 0.034616 | 0.073171 |
| 11718214_DDA1      | -0.11417 | 0.034637 | 0.073212 |
| 11715633_MAF1      | -0.0967  | 0.034651 | 0.073238 |
| 11731623_AGXT      | -0.11464 | 0.034653 | 0.073239 |
| 11759611_SMIM11A / | 0.186395 | 0.03466  | 0.073252 |
| 11761446_STAU2     | -0.17602 | 0.034662 | 0.073252 |
| 11730357_KCNE4     | 0.176541 | 0.03467  | 0.073265 |
| 11717199_POLR1D    | 0.116992 | 0.034677 | 0.073278 |
| 11728669_UBE2H     | 0.108956 | 0.034679 | 0.073278 |
| 11718170_KMT2B     | 0.088571 | 0.034686 | 0.07329  |
| 11736096_GGA1      | -0.12851 | 0.034695 | 0.073307 |
| 11724517_GUF1      | 0.089967 | 0.034698 | 0.07331  |
| 11736772_SCRN1     | -0.09135 | 0.0347   | 0.07331  |
| 11735800_P2RX3     | -0.16729 | 0.034729 | 0.073365 |
| 11747203_CLN3      | -0.10492 | 0.034729 | 0.073365 |
| 11745683_HTR3E     | -0.13146 | 0.034732 | 0.073368 |
| 11747732_ADCK3     | -0.13118 | 0.034737 | 0.073376 |
| 11764170_DNAJC10   | -0.14966 | 0.034745 | 0.07339  |
| 11756522_SCARB1    | -0.10791 | 0.034759 | 0.073417 |
| 11730073_CNTN3     | 0.149859 | 0.034761 | 0.073418 |
| 11718068_MYO1E     | -0.1131  | 0.034763 | 0.073418 |
| 11719079_AAGAB     | 0.127834 | 0.034783 | 0.073456 |
| 11719622_GTPBP1    | -0.18773 | 0.03479  | 0.073468 |
| 11735816_PCDHGA1 / | -0.10579 | 0.034792 | 0.073469 |
| 11726204_CCNJL     | 0.098916 | 0.034797 | 0.073478 |
| 11755912_YEATS2    | -0.1024  | 0.034811 | 0.073504 |
| 11755025_FAM193B   | 0.107886 | 0.034812 | 0.073504 |
| 11758320_GATSL2    | -0.1672  | 0.034823 | 0.073522 |
| 11735504_NLRC4     | 0.119749 | 0.034829 | 0.073532 |
| 11724711_DMXL1     | 0.145765 | 0.034839 | 0.073549 |
| 11740435_GRPR      | 0.206591 | 0.034847 | 0.073565 |
| 11717096_HSPH1     | 0.09222  | 0.03485  | 0.073567 |
| 11739273_PAK2      | 0.127378 | 0.034851 | 0.073567 |

|                    |          |          |          |
|--------------------|----------|----------|----------|
| 11746749_ZBBX      | -0.17127 | 0.03486  | 0.073582 |
| 11726154_FAM19A5   | -0.11954 | 0.034862 | 0.073582 |
| 11750842_KY        | -0.0981  | 0.034872 | 0.0736   |
| 11755063_NKAP      | -0.10734 | 0.034899 | 0.073655 |
| 11725270_SLC12A3   | 0.194721 | 0.034904 | 0.073661 |
| 11730065_TIGD7     | -0.13275 | 0.034924 | 0.073702 |
| 11740386_SHROOM4   | -0.21602 | 0.034942 | 0.073735 |
| 11753736_MT1JP /// | -0.1127  | 0.034945 | 0.073738 |
| 11720365_COL6A2    | -0.08833 | 0.03495  | 0.073746 |
| 11729570_MAP4K1    | -0.17777 | 0.034952 | 0.073748 |
| 11760649_MKNK1     | -0.10475 | 0.034957 | 0.073754 |
| 11737061_MTMR3     | 0.143167 | 0.034958 | 0.073754 |
| 11753822_KCNMB2    | -0.16187 | 0.034967 | 0.07377  |
| 11726074_ARHGEF7   | -0.09441 | 0.034997 | 0.073829 |
| 11755247_DAND5     | -0.23378 | 0.035013 | 0.07386  |
| 11728195_TRO       | -0.2107  | 0.035023 | 0.073879 |
| 11733545_NWD1      | -0.18413 | 0.035025 | 0.07388  |
| 11732547_KALRN     | 0.131646 | 0.035038 | 0.073904 |
| 11754810_ITGB5     | 0.114724 | 0.035045 | 0.073916 |
| 11759044_VKORC1L1  | 0.088433 | 0.035063 | 0.073947 |
| 11761728_SMARCE1   | -0.21781 | 0.035063 | 0.073947 |
| 11727853_NUP50     | -0.09817 | 0.035072 | 0.073962 |
| 11733173_ARHGEF39  | -0.1687  | 0.035079 | 0.073973 |
| 11760304_RBBP6     | -0.10497 | 0.035087 | 0.073988 |
| 11759411_MIF       | 0.093068 | 0.03512  | 0.074053 |
| 11721075_MTCH2     | -0.10092 | 0.035123 | 0.074057 |
| 11722721_CENPV     | 0.149555 | 0.035131 | 0.07407  |
| 11741232_GGPS1     | -0.10575 | 0.035151 | 0.074106 |
| 11723897_TESK2     | -0.15497 | 0.035151 | 0.074106 |
| 11726546_PITPNM3   | -0.12803 | 0.035158 | 0.074119 |
| 11742627_OR4N5     | -0.1952  | 0.035181 | 0.074163 |
| 11753843_NDUFA3    | 0.091843 | 0.035184 | 0.074166 |
| 11760544_FAM160A2  | -0.12102 | 0.035189 | 0.074173 |
| 11752141_EEPD1     | -0.16986 | 0.035192 | 0.074177 |
| 11723066_NAIF1     | 0.114697 | 0.035202 | 0.074195 |
| 11742827_PHF3      | -0.09507 | 0.035217 | 0.074224 |
| 11739394_MFHAS1    | 0.102566 | 0.035224 | 0.074235 |
| 11731803_COLCA1    | -0.16259 | 0.035227 | 0.074237 |
| 11754496_FMO1      | -0.08902 | 0.035236 | 0.074254 |
| 11752908_TCEA1     | -0.12433 | 0.035241 | 0.074261 |
| 11752299_HERC1     | 0.117707 | 0.035277 | 0.074333 |
| 11729992_DQX1      | -0.1482  | 0.03528  | 0.074334 |
| 11729209_PDYN      | -0.19654 | 0.03528  | 0.074334 |
| 11763915_MAGED2    | -0.12836 | 0.035285 | 0.074341 |
| 11743266_RPL34     | -0.13693 | 0.035293 | 0.074355 |
| 11729541_CAMKK2    | -0.13254 | 0.035312 | 0.07439  |
| 11755847_SEC14L2   | 0.088152 | 0.035313 | 0.07439  |
| 11726732_AGGF1     | -0.12451 | 0.035315 | 0.07439  |
| 11743800_DNAH2     | 0.257503 | 0.035325 | 0.074409 |
| 11744242_ANKRD29   | 0.27006  | 0.035335 | 0.074428 |
| 11731447_SNCA      | 0.11379  | 0.035352 | 0.074459 |

|                    |          |          |          |
|--------------------|----------|----------|----------|
| 11745895_UPF2      | 0.121211 | 0.035358 | 0.074468 |
| 11761345_ZNF812P   | 0.098349 | 0.035371 | 0.074493 |
| 11762260_MST1P2    | -0.27497 | 0.035388 | 0.074521 |
| 11758528_PCDHB6    | 0.088677 | 0.035388 | 0.074521 |
| 11727735_TMEM91    | -0.11782 | 0.035389 | 0.074521 |
| 11730407_P SMA8    | -0.14428 | 0.035391 | 0.074522 |
| 11764053_RBPJ      | -0.13513 | 0.035392 | 0.074522 |
| 11740061_CSK       | 0.108369 | 0.03541  | 0.074555 |
| 11759144_ZNF710    | -0.13058 | 0.035413 | 0.074558 |
| 11745984_SRRM1     | 0.099803 | 0.035422 | 0.074574 |
| 11726720_MPG       | -0.08506 | 0.035435 | 0.074596 |
| 11761301_B4GALNT1  | -0.14996 | 0.035435 | 0.074596 |
| 11716776_EPS8L2    | -0.1348  | 0.035437 | 0.074597 |
| 11737423_NLRP1     | -0.15459 | 0.035455 | 0.07463  |
| 11762375_FCRL5     | -0.16936 | 0.035459 | 0.074636 |
| 11720286_TRAK1     | -0.09728 | 0.035468 | 0.074652 |
| 11739636_CDK12     | -0.18028 | 0.035471 | 0.074656 |
| 11762624_VRK3      | -0.1099  | 0.035473 | 0.074656 |
| 11728973_HES5      | -0.2338  | 0.035476 | 0.074659 |
| 11757646_UBL5      | -0.13381 | 0.035477 | 0.074659 |
| 11761959_TRAC ///  | 0.182948 | 0.035503 | 0.074709 |
| 11730748_PAIP2     | 0.089162 | 0.035504 | 0.07471  |
| 11763526_CHRNA3    | -0.17407 | 0.035508 | 0.074714 |
| 11751801_CCDC107   | 0.12562  | 0.03551  | 0.074714 |
| 11751938_EVC2      | -0.15043 | 0.035515 | 0.074722 |
| 11740591_DTNB      | -0.08721 | 0.035517 | 0.074724 |
| 11749218_TMPRSS4   | -0.12698 | 0.035533 | 0.074754 |
| 11718506_TFF3      | -0.09286 | 0.035543 | 0.074773 |
| 11763410_GLG1      | 0.240876 | 0.035549 | 0.074782 |
| 11716501_CRMP1     | -0.15576 | 0.035555 | 0.074791 |
| 11758972_ZNF354C   | -0.12921 | 0.03556  | 0.074797 |
| 11746116_PINX1     | -0.08944 | 0.035571 | 0.074818 |
| 11757210_ASMTL-AS1 | -0.11423 | 0.035582 | 0.074837 |
| 11726906_PIGO      | -0.10438 | 0.035599 | 0.074869 |
| 11750852_PRRC2A    | -0.13982 | 0.0356   | 0.074869 |
| 11722414_SLC7A1    | 0.203236 | 0.035603 | 0.074873 |
| 11726008_DPY19L2   | 0.135328 | 0.035613 | 0.074889 |
| 11715745_KIAA1191  | 0.087981 | 0.035616 | 0.074894 |
| 11731387_TTC22     | -0.14299 | 0.035626 | 0.074911 |
| 11732810_HHIPL1    | -0.10589 | 0.035629 | 0.074914 |
| 11749706_CCDC138   | -0.10555 | 0.035631 | 0.074916 |
| 11744939_C11orf74  | -0.10319 | 0.03565  | 0.074952 |
| 11730268_NIPBL     | 0.186738 | 0.035665 | 0.074979 |
| 11741725_SCAF4     | 0.08692  | 0.035676 | 0.075001 |
| 11733666_GPATCH2L  | 0.119195 | 0.035678 | 0.075002 |
| 11764083_SLC6A11   | -0.18085 | 0.035694 | 0.075032 |
| 11731890_ADAMTS16  | -0.14333 | 0.035714 | 0.075069 |
| 11755517_ATRX      | -0.12617 | 0.035717 | 0.075072 |
| 11722234_FBXO2     | -0.14846 | 0.035729 | 0.075095 |
| 11719445_UGGT2     | 0.116963 | 0.035736 | 0.075106 |
| 11729933_ZNF135    | -0.12806 | 0.035739 | 0.075109 |



|                    |          |          |          |
|--------------------|----------|----------|----------|
| 11741996_VN1R10P   | -0.1837  | 0.035763 | 0.075158 |
| 11724617_MOCS1     | -0.14608 | 0.035769 | 0.075166 |
| 11754586_WDR82     | 0.111368 | 0.035773 | 0.075172 |
| 11727507_GTPBP10   | 0.178166 | 0.035785 | 0.075193 |
| 11731471_AKT2      | -0.16308 | 0.035799 | 0.07522  |
| 11756664_CD19      | -0.18679 | 0.035812 | 0.075242 |
| 11758171_KTN1      | 0.125758 | 0.035813 | 0.075242 |
| 11744389_ARFRP1    | -0.10257 | 0.035819 | 0.075249 |
| 11738018_ARV1      | 0.100094 | 0.035819 | 0.075249 |
| 11749463_SEMA5B    | -0.14867 | 0.035834 | 0.075276 |
| 11715326_VSTM5     | -0.18847 | 0.035848 | 0.075303 |
| 11755527_PRPSAP2   | -0.13849 | 0.035855 | 0.075315 |
| 11748996_PUM2      | 0.0989   | 0.035857 | 0.075316 |
| 11736065_P2RX7     | -0.15077 | 0.035859 | 0.075316 |
| 11756555_SCAMP5    | -0.09173 | 0.035864 | 0.075323 |
| 11722333_FNDC5     | -0.11146 | 0.03587  | 0.075334 |
| 11761523_ATP2C2    | -0.1215  | 0.035872 | 0.075334 |
| 11736628_ARHGEF34P | -0.12594 | 0.03588  | 0.075348 |
| 11764047_CCIN      | -0.18164 | 0.035896 | 0.075379 |
| 11743399_STARD3NL  | 0.106745 | 0.035907 | 0.075393 |
| 11747407_AAGAB     | 0.110766 | 0.035907 | 0.075393 |
| 11718775_SRRM1     | 0.104177 | 0.035908 | 0.075393 |
| 11763520_PIF1      | -0.25178 | 0.035914 | 0.075402 |
| 11750070_ATG2A     | -0.13352 | 0.035927 | 0.075426 |
| 11756923_LOC102724 | -0.14003 | 0.035929 | 0.075427 |
| 11754346_DBNDD1    | 0.119975 | 0.035939 | 0.075446 |
| 11717516_EFHD1     | -0.15996 | 0.035945 | 0.075454 |
| 11749862_APOL3     | -0.10947 | 0.035946 | 0.075454 |
| 11723593_TNK2      | -0.09757 | 0.035956 | 0.075472 |
| 11734535_SPATA31A1 | 0.099378 | 0.035959 | 0.075475 |
| 11724295_TSPAN18   | -0.13965 | 0.035961 | 0.075475 |
| 11761253_ZNF638    | 0.192306 | 0.035984 | 0.075518 |
| 11745686_SCLT1     | -0.17816 | 0.035985 | 0.075518 |
| 11721003_HEXIM1    | 0.087296 | 0.036013 | 0.075575 |
| 11734496_C6orf222  | -0.11936 | 0.036018 | 0.075583 |
| 11745391_MRPL3     | -0.09105 | 0.036021 | 0.075586 |
| 11733709_TMEM189-U | 0.095329 | 0.036032 | 0.075605 |
| 11748119_RNF44     | -0.09427 | 0.036043 | 0.075625 |
| 11745135_TMEM239   | -0.13669 | 0.036046 | 0.075629 |
| 11735235_SNX7      | -0.09033 | 0.036064 | 0.075663 |
| 11749735_SPATA5L1  | 0.117641 | 0.036082 | 0.075697 |
| 11760588_ITSN1     | 0.152535 | 0.036086 | 0.075702 |
| 11739628_CSF1      | -0.10491 | 0.036095 | 0.075719 |
| 11739154_FAM129A   | -0.15299 | 0.036098 | 0.075721 |
| 11721025_TRAPPC6A  | -0.16634 | 0.036115 | 0.075754 |
| 11761694_LINC01166 | -0.13779 | 0.036118 | 0.075755 |
| 11754286_BCL7B     | 0.125058 | 0.036119 | 0.075755 |
| 11733443_LCE2B     | -0.12314 | 0.036145 | 0.075807 |
| 11737364_BZRAP1    | -0.183   | 0.036148 | 0.075809 |
| 11741923_THRB      | 0.187123 | 0.036159 | 0.075829 |
| 11734071_MORN1     | -0.14264 | 0.036166 | 0.075837 |

|                    |          |          |          |
|--------------------|----------|----------|----------|
| 11734909_WDR26     | 0.090156 | 0.036166 | 0.075837 |
| 11740662_TEX12     | -0.18632 | 0.036174 | 0.075849 |
| 11748194_POLL      | -0.22671 | 0.036175 | 0.075849 |
| 11720651_DUSP23    | -0.11347 | 0.03618  | 0.075857 |
| 11721598_EFS       | 0.119005 | 0.036182 | 0.075858 |
| 11722681_RBP7      | -0.16376 | 0.036185 | 0.075861 |
| 11757342_DCTD      | 0.093933 | 0.036187 | 0.075861 |
| 11743876_CETN1     | -0.15361 | 0.036189 | 0.075863 |
| 11745206_RAD23B    | -0.1157  | 0.036203 | 0.07589  |
| 11729439_CAPSL     | 0.105215 | 0.036257 | 0.076    |
| 11762287_TRBC2 /// | -0.14574 | 0.036269 | 0.07602  |
| 11726578_PEX14     | -0.0877  | 0.036284 | 0.076049 |
| 11758240_ARMC6     | -0.09579 | 0.036299 | 0.076075 |
| 11740506_FRRS1L    | -0.25214 | 0.0363   | 0.076075 |
| 11759014_ZNF281    | 0.103502 | 0.036301 | 0.076075 |
| 11743612_ZNF830    | 0.122977 | 0.036305 | 0.07608  |
| 11736819_RPE65     | -0.17573 | 0.036307 | 0.076081 |
| 11744873_KLKP1     | -0.17435 | 0.03633  | 0.076125 |
| 11758939_MOB1A     | -0.09897 | 0.036336 | 0.076136 |
| 11763682_ABCB9     | -0.13984 | 0.03636  | 0.076181 |
| 11729444_SULT2B1   | -0.21398 | 0.036373 | 0.076205 |
| 11717205_RSAD1     | -0.10659 | 0.036378 | 0.076214 |
| 11751259_CACNA2D1  | 0.236372 | 0.036381 | 0.076214 |
| 11743849_SLC2A5    | -0.15236 | 0.036382 | 0.076214 |
| 11726886_SLC45A1   | -0.11852 | 0.036383 | 0.076214 |
| 11749966_CCDC78    | -0.14002 | 0.036389 | 0.076223 |
| 11724445_LYZL1 /// | -0.09843 | 0.036393 | 0.076227 |
| 11750023_H1FOO     | -0.1407  | 0.036396 | 0.07623  |
| 11741730_ANO6      | -0.12588 | 0.036402 | 0.07624  |
| 11735867_C5orf46   | 0.135672 | 0.036405 | 0.076244 |
| 11749880_PGAP2     | -0.17164 | 0.036407 | 0.076244 |
| 11760567_RAPGEF6   | 0.174507 | 0.036408 | 0.076244 |
| 11763903_SNORA50A  | 0.174934 | 0.036439 | 0.076304 |
| 11735342_TBXA2R    | -0.12568 | 0.03644  | 0.076304 |
| 11741046_SETD3     | 0.117879 | 0.036444 | 0.07631  |
| 11761576	EIF3G     | -0.12237 | 0.036446 | 0.076311 |
| 11741799_BCOR      | 0.101987 | 0.036464 | 0.076344 |
| 11763707_CCDC93    | 0.188679 | 0.036477 | 0.076369 |
| 11741422_ADPRHL1   | -0.10677 | 0.036491 | 0.076395 |
| 11717337_ITGB2     | 0.144992 | 0.036497 | 0.076404 |
| 11750349_GRID1     | -0.14199 | 0.036515 | 0.076439 |
| 11751874_ATM       | 0.171478 | 0.036533 | 0.076471 |
| 11721078_PNISR     | 0.092023 | 0.036541 | 0.076485 |
| 11726683_CDIP1     | -0.10241 | 0.036549 | 0.076499 |
| 11721744_NID2      | -0.20602 | 0.036562 | 0.076524 |
| 11758566_BCS1L     | -0.10591 | 0.036576 | 0.076549 |
| 11748294_CHRD      | -0.19019 | 0.036583 | 0.076562 |
| 11719050_BTN2A1    | 0.105321 | 0.036609 | 0.07661  |
| 11731954_CEACAM19  | -0.11047 | 0.03661  | 0.07661  |
| 11751264_MAN2A2    | -0.09865 | 0.036642 | 0.076673 |
| 11747976_EPB41L1   | -0.12611 | 0.036643 | 0.076673 |

|                    |          |          |          |
|--------------------|----------|----------|----------|
| 11760489_TMED3     | -0.13273 | 0.036652 | 0.076688 |
| 11739796_RHBD2     | -0.09637 | 0.036657 | 0.076691 |
| 11720707_BCCIP     | 0.088655 | 0.036657 | 0.076691 |
| 11735522_C9orf106  | -0.13338 | 0.036658 | 0.076691 |
| 11732611_LVRN      | 0.302485 | 0.03666  | 0.076693 |
| 11726112_METTL25   | 0.158725 | 0.036666 | 0.076702 |
| 11748173_RIMS1     | 0.253231 | 0.036678 | 0.076724 |
| 11755410_KLC2      | 0.104652 | 0.036698 | 0.076761 |
| 11750488_GRAP2     | -0.10779 | 0.036711 | 0.076785 |
| 11761826_LOC101929 | 0.145313 | 0.036712 | 0.076785 |
| 11762161_AKAP8     | 0.14054  | 0.036739 | 0.076838 |
| 11741464_UPK2      | -0.12433 | 0.036749 | 0.076856 |
| 11726020_EEPD1     | -0.13179 | 0.036752 | 0.076856 |
| 11739312_HUS1      | 0.114225 | 0.036752 | 0.076856 |
| 11748969_MCOLN1    | -0.17147 | 0.036758 | 0.076864 |
| 11715103_TNFAIP8L1 | -0.17412 | 0.036764 | 0.076873 |
| 11752421_ANKLE1    | -0.17994 | 0.036779 | 0.076902 |
| 11743971_KATNB1    | -0.12813 | 0.036785 | 0.076912 |
| 11758039_SDS       | -0.19683 | 0.036813 | 0.076967 |
| 11753133_MCM8      | -0.12293 | 0.03682  | 0.076977 |
| 11727165_CEP295    | 0.110325 | 0.036826 | 0.076988 |
| 11762936_AQP7      | -0.11883 | 0.036834 | 0.077    |
| 11727336_SAMD12    | 0.142594 | 0.03685  | 0.077031 |
| 11748116_PKNOX2    | -0.12486 | 0.036863 | 0.077054 |
| 11721999_HNRNPU    | -0.0909  | 0.036871 | 0.077067 |
| 11741811_NME9      | -0.27501 | 0.036881 | 0.077086 |
| 11748632_LRRC27    | 0.101903 | 0.036889 | 0.077099 |
| 11745066_MYT1L     | -0.1069  | 0.036898 | 0.077112 |
| 11716084_SF3B1     | 0.093744 | 0.036899 | 0.077112 |
| 200085_PMTCEB2     | -0.11221 | 0.0369   | 0.077112 |
| 11742649_CLDN25    | -0.19697 | 0.036902 | 0.077112 |
| 11721005_TMCO3     | -0.09083 | 0.036904 | 0.077114 |
| 11729195_STX16     | -0.09842 | 0.036909 | 0.077122 |
| 11746327_SNX6      | 0.099776 | 0.036919 | 0.077139 |
| 11727251_RDH12     | -0.13104 | 0.036923 | 0.077143 |
| 11723331_VAT1L     | -0.13824 | 0.036949 | 0.077193 |
| 11744550_COX20     | 0.113094 | 0.03695  | 0.077193 |
| 11752614_NUP214    | -0.09139 | 0.036973 | 0.077237 |
| 11717062_APIM2     | -0.09143 | 0.036976 | 0.077242 |
| 11728238_SMG1      | 0.114173 | 0.036983 | 0.077253 |
| 11736958_TNFSF15   | 0.166714 | 0.036991 | 0.077262 |
| 11763215_DMKN      | 0.302914 | 0.036992 | 0.077262 |
| 11725761_CNTNAP1   | -0.10072 | 0.036992 | 0.077262 |
| 11757634_LCN2      | -0.20499 | 0.037001 | 0.077277 |
| 11759168_HIST1H2BE | -0.17034 | 0.03701  | 0.077292 |
| 11749974_PGAP3     | -0.12981 | 0.037013 | 0.077295 |
| 11733499_LPAR4     | -0.16854 | 0.03703  | 0.077328 |
| 11732749_SEC14L5   | -0.13019 | 0.037052 | 0.07737  |
| 11733790_HSDL1     | 0.156788 | 0.037055 | 0.077372 |
| 11764059_GJC2      | -0.14537 | 0.037057 | 0.077375 |
| 11737375_RUNDC3A   | -0.09851 | 0.037061 | 0.077376 |

|                    |          |          |          |
|--------------------|----------|----------|----------|
| 11726476_HS6ST3    | -0.15615 | 0.037061 | 0.077376 |
| 11729167_DCTD      | 0.097393 | 0.037071 | 0.07739  |
| 11743164_ATF1      | -0.13769 | 0.037071 | 0.07739  |
| 11735794_CDHR5     | -0.19386 | 0.03708  | 0.077405 |
| 11743899_LIN54     | -0.17672 | 0.03709  | 0.077423 |
| 11749710_ABLIM1    | 0.117853 | 0.037093 | 0.077426 |
| 11745885_UBE2Z     | -0.15731 | 0.037104 | 0.077445 |
| 11727043_TTI2      | 0.113851 | 0.037106 | 0.077446 |
| 11721019_MTMR3     | 0.205205 | 0.037108 | 0.077447 |
| 11746777_ELN       | -0.16683 | 0.037111 | 0.077449 |
| 11743645_MXRA7     | 0.109404 | 0.03712  | 0.077466 |
| 11755608_KIAA1549  | 0.127019 | 0.037124 | 0.07747  |
| 11718513_TSPAN14   | -0.11257 | 0.037126 | 0.077472 |
| 11742969_MAPK12    | -0.14373 | 0.037153 | 0.077525 |
| 11715685_ARPC5     | -0.08659 | 0.037178 | 0.077573 |
| 11760286_EIF2AK4   | -0.19629 | 0.037186 | 0.077588 |
| 11764139_LOC101929 | -0.14326 | 0.03719  | 0.077591 |
| 11723185_CNOT6L    | -0.11883 | 0.037191 | 0.077591 |
| 11746056_CCDC163P  | -0.14917 | 0.037209 | 0.077625 |
| 11762958_LOC100128 | 0.212343 | 0.037213 | 0.077629 |
| 11729763_LSM10     | 0.082488 | 0.037222 | 0.077645 |
| 11735941_STH       | -0.09986 | 0.037247 | 0.077694 |
| 11748617_SLC30A9   | 0.099693 | 0.037256 | 0.077709 |
| 11730204_EEF1D     | 0.103851 | 0.037266 | 0.077726 |
| 11753964_HSPH1     | 0.093295 | 0.037291 | 0.077776 |
| 11748103_ZNF513    | 0.095162 | 0.037315 | 0.077822 |
| 11715581_SF3B2     | -0.09864 | 0.037318 | 0.077825 |
| 11754327_TBC1D10A  | 0.16234  | 0.037322 | 0.077831 |
| 11755233_CCDC33    | -0.0956  | 0.037328 | 0.077838 |
| 11726316_SELE      | 0.253442 | 0.037329 | 0.077838 |
| 11740282_TSEN2     | 0.102705 | 0.037338 | 0.077854 |
| 11718203_PRICKLE4  | -0.08758 | 0.037346 | 0.077867 |
| 11738664_OR6A2     | -0.20114 | 0.037362 | 0.077898 |
| 11750084_FAM69A    | -0.23413 | 0.037366 | 0.077898 |
| 11740440_NLRP6     | -0.18072 | 0.037367 | 0.077898 |
| 11756190_CLK3      | 0.094614 | 0.037368 | 0.077898 |
| 11739042_LIMK2     | 0.16713  | 0.037369 | 0.077898 |
| 11742332_OR14J1    | -0.12016 | 0.03737  | 0.077898 |
| 11718287_UBL3      | 0.128871 | 0.037376 | 0.077907 |
| 11736816_KIRREL    | 0.122685 | 0.037379 | 0.07791  |
| 11739069_PSAP      | 0.089236 | 0.037387 | 0.077924 |
| 11756102_GUCY2F    | -0.26827 | 0.037394 | 0.077934 |
| 11754386_LOC728743 | -0.11175 | 0.037409 | 0.077961 |
| 11719943_CXCL9     | -0.14065 | 0.037412 | 0.077964 |
| 11751642_LOC100132 | -0.2117  | 0.037417 | 0.077971 |
| 11743639_PPM1N     | -0.22742 | 0.037418 | 0.077971 |
| 11717382_FOPNL     | -0.09142 | 0.03742  | 0.077972 |
| 11756495_SPAG6     | -0.15069 | 0.037445 | 0.078021 |
| 11722669_BAIAP2L1  | -0.13742 | 0.03745  | 0.078026 |
| 11754493_CSRP1     | -0.11044 | 0.037452 | 0.078026 |
| 11728971_PTPRJ     | -0.20016 | 0.037453 | 0.078026 |

|                    |          |          |          |
|--------------------|----------|----------|----------|
| 11737427_IL12RB2   | -0.16069 | 0.037455 | 0.078026 |
| 11739894_CNTD1     | 0.212268 | 0.037456 | 0.078026 |
| 11745498_IRF3      | 0.092543 | 0.037457 | 0.078026 |
| 11757477_LASP1     | 0.085046 | 0.037512 | 0.078136 |
| 11727956_PIANP     | -0.19335 | 0.037517 | 0.078144 |
| 11720257_TRAPPC6B  | 0.091468 | 0.037537 | 0.078182 |
| 11716684_MYO1D     | 0.137264 | 0.037545 | 0.078195 |
| 11746092_ROGDI     | -0.11339 | 0.037556 | 0.078214 |
| 11718415_NONO      | -0.08937 | 0.037564 | 0.078228 |
| 11731114_SGCG      | -0.13253 | 0.037565 | 0.078228 |
| 11743950_POU4F1    | -0.14416 | 0.037585 | 0.078266 |
| 11747532_PHF21B    | -0.12883 | 0.037592 | 0.078276 |
| 11716197_ADIPOR2   | 0.10607  | 0.037596 | 0.078282 |
| 11761451_FRAS1     | -0.17563 | 0.037624 | 0.078336 |
| 11740576_SORCS1    | 0.157246 | 0.037627 | 0.07834  |
| 11725913_ERBB4     | -0.20499 | 0.037631 | 0.078344 |
| 11739596_KIAA1429  | 0.092032 | 0.037644 | 0.078368 |
| 11747913_UBXN2A    | 0.099889 | 0.037656 | 0.07839  |
| 11727685_NTRK3     | -0.13005 | 0.037667 | 0.07841  |
| 11742648_MORF4L1   | 0.089855 | 0.037674 | 0.078421 |
| 11723004_F2        | -0.14848 | 0.037682 | 0.078433 |
| 11733652_TMEM225   | -0.25433 | 0.037698 | 0.078464 |
| 11757223_LOC100268 | -0.18425 | 0.037705 | 0.078475 |
| 11752314_ATF7IP    | -0.09053 | 0.03771  | 0.078482 |
| 11759653_NRF1      | -0.31027 | 0.037722 | 0.078504 |
| 11728415_POMZP3 // | -0.10771 | 0.03773  | 0.078516 |
| 11721223_ACOX2     | 0.096379 | 0.037732 | 0.078516 |
| 11738278_TRIM34    | 0.197138 | 0.037735 | 0.078516 |
| 11742199_NBR1      | -0.12011 | 0.037735 | 0.078516 |
| 11744583_AMDHD2    | -0.1127  | 0.037739 | 0.078516 |
| 11760438_DSTNP2    | -0.19489 | 0.037739 | 0.078516 |
| 11760439_DSTNP2    | -0.19489 | 0.037739 | 0.078516 |
| 11752466_RPS6KB1   | 0.106701 | 0.037752 | 0.07854  |
| 11741887_WDR64     | 0.187838 | 0.037756 | 0.078545 |
| 11741427_OSBP1A    | -0.10049 | 0.037765 | 0.078559 |
| 11717572_NECAP1    | 0.103179 | 0.037778 | 0.078584 |
| 11752585_PDZD7     | -0.13699 | 0.037781 | 0.078587 |
| 11747497_CES4A     | -0.31393 | 0.037808 | 0.07864  |
| 11752202_HAL       | -0.25345 | 0.037812 | 0.078642 |
| 11724042_PDZD4     | -0.12312 | 0.037812 | 0.078642 |
| 11737802_MAD1L1    | -0.12478 | 0.037846 | 0.078706 |
| 11720120_GIGYF1    | -0.15155 | 0.037847 | 0.078706 |
| 11737953_SLC28A2   | -0.13726 | 0.037849 | 0.078707 |
| 11764150_ZNF281    | 0.103816 | 0.037856 | 0.078719 |
| 11761343_ADAM8     | 0.170701 | 0.037882 | 0.07877  |
| 11738841_SPAM1     | -0.15581 | 0.037889 | 0.07878  |
| 11729241_SLC35E3   | 0.103747 | 0.037897 | 0.078794 |
| 11717552_FNBP1L    | 0.113738 | 0.037901 | 0.078798 |
| 11716560_STRN4     | 0.10877  | 0.037911 | 0.078816 |
| 11739995_C5orf28   | -0.08777 | 0.037934 | 0.078858 |
| 11750727_C5orf28   | -0.08777 | 0.037934 | 0.078858 |

|                    |          |          |          |
|--------------------|----------|----------|----------|
| 11729809_CEP104    | 0.110371 | 0.037953 | 0.078892 |
| 11757202_LOC202181 | -0.16943 | 0.037954 | 0.078892 |
| 11745520_ABI1      | 0.084043 | 0.037959 | 0.078897 |
| 11735551_FCRL6     | -0.17672 | 0.037959 | 0.078897 |
| 11735690_KBTBD4    | -0.08225 | 0.03797  | 0.078915 |
| 11729707_FKBP1A    | 0.100011 | 0.037989 | 0.078949 |
| 11731416_NDUFS1    | -0.16116 | 0.03799  | 0.078949 |
| 11723407_HOXD1     | -0.12496 | 0.037991 | 0.078949 |
| 11761302_B4GALNT1  | -0.19912 | 0.037996 | 0.078956 |
| 11728442_CHD5      | -0.16999 | 0.038    | 0.078961 |
| 11745534_CRB1      | -0.12602 | 0.038019 | 0.078998 |
| 11725382_RAPGEF3   | 0.094661 | 0.038022 | 0.079001 |
| 11732200_PLAGL2    | -0.10007 | 0.038024 | 0.079001 |
| 11725452_MCUR1     | -0.10992 | 0.038027 | 0.079002 |
| 11732002_WDR86     | -0.13116 | 0.038028 | 0.079002 |
| 11737589_PHTF2     | 0.176463 | 0.038038 | 0.079021 |
| 11729808_CEP104    | 0.106835 | 0.03804  | 0.079022 |
| 11743958_SNX8      | -0.10648 | 0.038046 | 0.07903  |
| 11753500_HOMER1    | 0.090718 | 0.038055 | 0.079045 |
| 200067_PMSNX3      | -0.10497 | 0.038079 | 0.079091 |
| 11759814_CCDC122   | -0.14942 | 0.038081 | 0.079093 |
| 11749379_UXS1      | -0.13815 | 0.038108 | 0.079145 |
| 11723130_ARHGEF7   | 0.09089  | 0.038123 | 0.079173 |
| 11756290_PRRC1     | 0.111401 | 0.038129 | 0.079181 |
| 11736145_SPATA20   | 0.096443 | 0.038143 | 0.079208 |
| 11763615_HNF4A     | -0.25018 | 0.038147 | 0.079214 |
| 11760276_SRSF5     | -0.12596 | 0.038149 | 0.079215 |
| 11762984_SH3TC1    | -0.14311 | 0.038162 | 0.079235 |
| 11754990_EPB41     | -0.11531 | 0.038163 | 0.079235 |
| 11727225_GALNT16   | -0.12608 | 0.038164 | 0.079235 |
| 11761622_TIPIN     | -0.13819 | 0.038179 | 0.079262 |
| 11732695_DRD5      | -0.16853 | 0.038181 | 0.079263 |
| 11738926_KRTAP5-1  | -0.17254 | 0.038184 | 0.079266 |
| 11740087_CSNK2A1   | -0.10894 | 0.038192 | 0.07928  |
| 11745193_SERPINA12 | -0.15121 | 0.038231 | 0.079356 |
| 11748076_ZNF487    | -0.17833 | 0.038242 | 0.079376 |
| 11758174_FAM222B   | 0.152274 | 0.038245 | 0.079379 |
| 11763401_VAV3      | -0.1955  | 0.038254 | 0.079395 |
| 11741743_CACNA1C   | -0.26348 | 0.038258 | 0.079399 |
| 11749006_ZFYVE28   | -0.12147 | 0.038263 | 0.079407 |
| 11746239_SIN3B     | -0.12517 | 0.038265 | 0.079408 |
| 11760144_HLA-F     | 0.149678 | 0.038268 | 0.079411 |
| 11747480_CENPT     | -0.11348 | 0.038273 | 0.079414 |
| 11727641_NOM1      | 0.143295 | 0.038273 | 0.079414 |
| 11730346_PUS7      | 0.102933 | 0.038275 | 0.079414 |
| 11752145_SLITRK2   | -0.14    | 0.038282 | 0.079426 |
| 11748509_VDAC2     | 0.085067 | 0.038292 | 0.079443 |
| 11722216_GPR108    | 0.086345 | 0.038294 | 0.079444 |
| 11726822_CXorf36   | -0.09939 | 0.038304 | 0.079462 |
| 11741176_CHRDL1    | -0.13209 | 0.038322 | 0.079492 |
| 11752431_ANAPC2    | -0.1563  | 0.038322 | 0.079492 |

|                    |          |          |          |
|--------------------|----------|----------|----------|
| 11751248_MTMR7     | -0.14723 | 0.03834  | 0.079525 |
| 11718212_PYCR1     | -0.14909 | 0.038344 | 0.079531 |
| 11738794_DEFEB124  | -0.15775 | 0.038381 | 0.079604 |
| 11735570_SORBS2    | -0.10206 | 0.038382 | 0.079604 |
| 11745696_C9orf57   | -0.18383 | 0.03839  | 0.079616 |
| 11742534_FAM58BP   | -0.18662 | 0.038395 | 0.079622 |
| 11716067_VAMP2     | -0.12217 | 0.038401 | 0.079632 |
| 11756411_STAB1     | -0.1929  | 0.038408 | 0.079644 |
| 11735519_ART5      | -0.21776 | 0.038418 | 0.079662 |
| 11752160_FPGT-TNNI | -0.11801 | 0.03842  | 0.079662 |
| 11739111_MASP1     | -0.20296 | 0.038423 | 0.079665 |
| 11743820_NTPCR     | 0.091612 | 0.038456 | 0.079729 |
| 11735074_ST20-AS1  | 0.104107 | 0.038459 | 0.079733 |
| 11752542_MUC21     | -0.13962 | 0.038463 | 0.079736 |
| 11738593_FXYD4     | -0.11683 | 0.038466 | 0.079741 |
| 11738112_RGPD5 /// | 0.084802 | 0.038468 | 0.079741 |
| 11729839_ZCCHC2    | 0.250609 | 0.038483 | 0.079767 |
| 11763629_LIG3      | -0.20854 | 0.038498 | 0.079795 |
| 11715202_TCEAL1    | -0.09785 | 0.038513 | 0.079823 |
| 11762766_NGRN      | 0.144502 | 0.038537 | 0.079871 |
| 11742231_RSP04     | -0.17662 | 0.03854  | 0.079874 |
| 11749567_DDX55     | 0.093029 | 0.038544 | 0.079879 |
| 11715499_CBX3      | -0.11951 | 0.038551 | 0.079885 |
| 11724232_ALDH1A2   | 0.104571 | 0.038551 | 0.079885 |
| 11755740_PRM2      | -0.11074 | 0.038553 | 0.079885 |
| 11750308_APMAP     | -0.09388 | 0.038554 | 0.079885 |
| 11741249_NCDN      | -0.11823 | 0.038556 | 0.079885 |
| 11726045_AGER      | -0.10025 | 0.038557 | 0.079885 |
| 11752744_LGMN      | -0.09325 | 0.038583 | 0.079934 |
| 11735973_POU4F3    | -0.19682 | 0.038595 | 0.079956 |
| 11760450_ADAM15    | -0.09851 | 0.0386   | 0.079963 |
| 11749350_BPHL      | 0.152523 | 0.038614 | 0.07999  |
| 11761497_PPP3CB    | 0.17975  | 0.038629 | 0.080016 |
| 11758269_MAT2B     | -0.11143 | 0.038634 | 0.080024 |
| 11744552_SMUG1     | -0.10274 | 0.038646 | 0.080046 |
| 11731485_NFIC      | -0.09748 | 0.038671 | 0.080094 |
| 11731079_HCAR1     | -0.12307 | 0.038674 | 0.080097 |
| 11748499_SYT5      | -0.10871 | 0.038697 | 0.080139 |
| AFFX-HUMGGAPDH     | -0.08215 | 0.038698 | 0.080139 |
| 11760370_HLA-H     | 0.212542 | 0.0387   | 0.080139 |
| 11754402_ZNF488    | -0.10108 | 0.038711 | 0.080159 |
| 11752273_CSF1R     | -0.16312 | 0.038729 | 0.080193 |
| 11763620_MLLT1     | -0.16274 | 0.038735 | 0.080201 |
| 11725355_EPM2AIP1  | 0.114119 | 0.038738 | 0.080203 |
| 11742312_OR4K15    | -0.24333 | 0.038739 | 0.080203 |
| 11742715_TBRG1     | -0.10672 | 0.038747 | 0.080216 |
| 11721867_GNPDA2    | 0.140269 | 0.038763 | 0.080247 |
| 11759645_COX11     | 0.093285 | 0.038772 | 0.080262 |
| 11751104_ZNF2      | 0.141268 | 0.038782 | 0.08028  |
| 11733514_SPAG11A / | -0.12072 | 0.038794 | 0.0803   |
| 11726556_TAF7L     | 0.169666 | 0.038801 | 0.080311 |

|                    |          |          |          |
|--------------------|----------|----------|----------|
| 11750329_WAPL      | -0.10237 | 0.038802 | 0.080311 |
| 11746564_FAM65A    | -0.10855 | 0.038804 | 0.080312 |
| 11760041_MAGT1     | -0.15047 | 0.038809 | 0.080318 |
| 11760070_LOC645010 | -0.1243  | 0.038823 | 0.080343 |
| 11738996_DPYSL2    | 0.089157 | 0.038826 | 0.080343 |
| 11723685_FAM46A    | 0.135561 | 0.038826 | 0.080343 |
| 11759786_BRF1      | -0.1765  | 0.038846 | 0.08038  |
| 11725339_NOL12     | -0.12984 | 0.038852 | 0.080391 |
| 11751177_RAB5B     | 0.092137 | 0.038861 | 0.080406 |
| 11716547_TLR9      | -0.13779 | 0.03887  | 0.080421 |
| 11731185_PPM1E     | 0.236126 | 0.038873 | 0.080423 |
| 11718252_HINFP     | 0.132341 | 0.038882 | 0.080439 |
| 11726998_CLDN6     | -0.12648 | 0.038884 | 0.08044  |
| 11719735_BAG6      | 0.089037 | 0.038905 | 0.080478 |
| 11730558_BCO2      | 0.129071 | 0.038911 | 0.080488 |
| 11757212_FLJ36777  | -0.16451 | 0.038914 | 0.080492 |
| 11757425_VCAM1     | 0.2029   | 0.038922 | 0.080499 |
| 11747445_KIFC3     | -0.10481 | 0.038922 | 0.080499 |
| 11741098_A2ML1     | 0.179569 | 0.038923 | 0.080499 |
| 11735237_EFCAB3    | -0.22592 | 0.038925 | 0.080501 |
| 11750371_INGX      | -0.11599 | 0.038927 | 0.080501 |
| 11737120_DACH2     | -0.15853 | 0.03893  | 0.080504 |
| 11715305_HOXA10    | -0.11776 | 0.038936 | 0.080513 |
| 11738275_SPATA21   | -0.1725  | 0.038958 | 0.080554 |
| 11750462_CLEC4M    | 0.114747 | 0.038976 | 0.080589 |
| 11739865_GPR107    | 0.092797 | 0.039009 | 0.080653 |
| 11756343_DPEP1     | -0.15081 | 0.039017 | 0.080667 |
| 11749375_VAMP1     | 0.16015  | 0.039032 | 0.080694 |
| 11753974_SNRPG     | -0.0893  | 0.039055 | 0.080738 |
| 11727915_NCAM1     | -0.30101 | 0.039064 | 0.080752 |
| 11723166_EPHB2     | 0.202641 | 0.039065 | 0.080752 |
| 11740264_ETV3      | -0.14296 | 0.039082 | 0.080784 |
| 11727740_CD300LF   | -0.21568 | 0.039098 | 0.080813 |
| 200077_PMOAZ1      | -0.08329 | 0.039119 | 0.080851 |
| 11742741_GEMIN5    | -0.10626 | 0.039121 | 0.080851 |
| 11733349_ZNF287    | 0.272847 | 0.039121 | 0.080851 |
| 11722960_CYB561D1  | 0.151894 | 0.03915  | 0.080908 |
| 11720899_GRAMD1C   | -0.20598 | 0.03916  | 0.080924 |
| 11725905_S1PR3     | -0.22162 | 0.039168 | 0.080938 |
| 11762125_KIAA0895  | 0.1879   | 0.03919  | 0.080979 |
| 11726936_HOXB4     | -0.11742 | 0.039196 | 0.080988 |
| 11758226_UBE2J1    | -0.12027 | 0.039197 | 0.080988 |
| 11723417_HSP90AB1  | -0.08899 | 0.03921  | 0.081012 |
| 11735285_ERCC2     | 0.088136 | 0.039213 | 0.081013 |
| 11759071_PROX1     | 0.236895 | 0.039216 | 0.081016 |
| 11715838_NEU1      | 0.132706 | 0.039218 | 0.081017 |
| 11751850_ZNF169    | -0.09624 | 0.039225 | 0.081029 |
| 11745748_XRCC1     | -0.12886 | 0.039236 | 0.081047 |
| 11741825_GBX1      | -0.14778 | 0.03924  | 0.081053 |
| 11751778_TIMM23    | 0.094443 | 0.039243 | 0.081055 |
| 11759362_PHKG1     | 0.164711 | 0.039246 | 0.081058 |



|                    |          |          |          |
|--------------------|----------|----------|----------|
| 11752377_CASC3     | -0.08755 | 0.039262 | 0.081087 |
| 11735463_NTNG1     | -0.21413 | 0.039271 | 0.081103 |
| 11744950_FAM71D // | -0.08593 | 0.03928  | 0.081115 |
| 11724019_C21orf2   | -0.10844 | 0.03928  | 0.081115 |
| 11750644_PPIP5K1   | -0.15359 | 0.039283 | 0.081117 |
| 11752094	EIF4G2    | 0.088573 | 0.039305 | 0.081159 |
| 11749144_ETFDH     | -0.13195 | 0.039309 | 0.081163 |
| 11730851_ELMO1     | -0.12281 | 0.039313 | 0.081169 |
| 11718487_EI24      | 0.083704 | 0.039317 | 0.081173 |
| 11725645_WDR13     | -0.09366 | 0.039323 | 0.081181 |
| 11715453_COL4A2    | 0.112807 | 0.039336 | 0.081207 |
| 11730853_P4HA1     | -0.10895 | 0.039351 | 0.081233 |
| 11738903_LILRA5    | -0.2016  | 0.039373 | 0.081275 |
| 11759710_TXNDC9    | 0.123774 | 0.039377 | 0.08128  |
| 11753966_ZNF204P   | 0.243971 | 0.039381 | 0.081285 |
| 11740639_NMUR1     | -0.17479 | 0.039401 | 0.081322 |
| 11725601_SOWAHA    | -0.30205 | 0.039405 | 0.081326 |
| 11727639_MPHOSPH9  | -0.10307 | 0.039406 | 0.081326 |
| 11754278_GAK       | -0.08717 | 0.039429 | 0.08137  |
| 11743407_RBM25     | 0.108723 | 0.039431 | 0.081371 |
| 11722061_PPP1R1A   | -0.14232 | 0.039458 | 0.08142  |
| 11719737_FAM134B   | 0.111335 | 0.039458 | 0.08142  |
| 11716928_TBC1D5    | 0.10002  | 0.039467 | 0.081434 |
| 11725249_LY75      | 0.14086  | 0.039472 | 0.081442 |
| 11747827_KLHL17    | -0.10933 | 0.03948  | 0.081454 |
| 11730921_NHLRC4    | -0.17648 | 0.039486 | 0.081462 |
| 11726491_SLC4A1    | -0.17957 | 0.039487 | 0.081462 |
| 11738503_OR7D4     | -0.15687 | 0.039496 | 0.081478 |
| 11741589_EEF1D     | 0.088986 | 0.039498 | 0.081478 |
| 11722072_MESDC1    | 0.091581 | 0.039505 | 0.08149  |
| 11720118_HEATR6    | -0.13783 | 0.03951  | 0.081497 |
| 11729144_KDM5C     | 0.112308 | 0.039521 | 0.081516 |
| 11733249_ARHGAP31  | 0.100115 | 0.039525 | 0.081521 |
| 11749448_NBR2      | -0.11991 | 0.039531 | 0.081529 |
| 11724267_C2orf72   | -0.13555 | 0.039558 | 0.081583 |
| 11724214_SPRYD4    | -0.15352 | 0.039561 | 0.081583 |
| 11755184_PLEKHM3   | 0.104366 | 0.039573 | 0.081606 |
| 11715852_PDGFRB    | -0.13087 | 0.039579 | 0.081614 |
| 11762942_SOSTDC1   | -0.10584 | 0.039584 | 0.081621 |
| 11760839_ANKS1A    | -0.18363 | 0.039595 | 0.081639 |
| 11758352_RRNAD1    | -0.0971  | 0.039596 | 0.081639 |
| 11730627_SPHKAP    | -0.14922 | 0.039612 | 0.081669 |
| 11721994_UBE2L6    | 0.10731  | 0.039624 | 0.081689 |
| 11754712_TBC1D10A  | 0.171995 | 0.039626 | 0.08169  |
| 11759966_ITPKB     | -0.25136 | 0.039636 | 0.081707 |
| 11728009_VPREB3    | -0.1387  | 0.039655 | 0.081736 |
| 11760129_ZFPL1     | -0.19798 | 0.039656 | 0.081736 |
| 11756433_MSL1      | 0.193018 | 0.039656 | 0.081736 |
| 11731723_ALDH3B1   | 0.204497 | 0.039657 | 0.081736 |
| 11749819_CNOT8     | -0.08234 | 0.039692 | 0.081806 |
| 11717183_PDS5A     | 0.092775 | 0.039702 | 0.081822 |

|                    |          |          |          |
|--------------------|----------|----------|----------|
| 11755114_NRBP1     | 0.12054  | 0.039703 | 0.081822 |
| 11752684_C12orf40  | -0.08418 | 0.039715 | 0.081843 |
| 11753166_WDR6      | -0.14408 | 0.039717 | 0.081843 |
| 11723181_MAPK4     | -0.17596 | 0.039726 | 0.081859 |
| 11740888_MRO       | 0.118777 | 0.039745 | 0.081895 |
| 11739847_MSR1      | -0.10519 | 0.039764 | 0.081931 |
| 11716620_TNPO1     | 0.084315 | 0.039783 | 0.081966 |
| 11737082_ASXL3     | -0.21623 | 0.03979  | 0.081976 |
| 11727538_NME5      | -0.16837 | 0.039793 | 0.081979 |
| 11717661_PPP1R16B  | -0.15979 | 0.039797 | 0.081983 |
| 11756944_SNTG1     | 0.112557 | 0.0398   | 0.081983 |
| 11742285_PAX3      | -0.14265 | 0.039801 | 0.081983 |
| 11722792_APLNR     | -0.19642 | 0.039803 | 0.081983 |
| 11715756_UBL5      | -0.09543 | 0.039803 | 0.081983 |
| 11731184_MESP2     | -0.11409 | 0.039811 | 0.081993 |
| 11753650_SRSF3     | -0.09402 | 0.039813 | 0.081993 |
| 11735354_GSTM4     | 0.095884 | 0.039813 | 0.081993 |
| 11739940_SENP1     | -0.12411 | 0.039846 | 0.082057 |
| 11721973_JADE3     | 0.188465 | 0.039848 | 0.082059 |
| 11753312_DNAJC5G   | -0.1261  | 0.039855 | 0.082066 |
| 11728939_RASEF     | -0.1151  | 0.039855 | 0.082066 |
| 11760956_GGNBP2    | -0.12807 | 0.039865 | 0.082083 |
| 11750451_UBAC2     | -0.09794 | 0.039885 | 0.082119 |
| 11756136_PLGRKT    | -0.09058 | 0.039886 | 0.082119 |
| 11756420_LRCH4     | -0.1371  | 0.03989  | 0.082124 |
| 11718888_TMEM59L   | -0.14079 | 0.039901 | 0.082143 |
| 11759677_HERC4     | 0.136151 | 0.039907 | 0.082152 |
| 11724440_LNX2      | 0.111326 | 0.03991  | 0.082155 |
| 11737439_BMF       | -0.1143  | 0.039918 | 0.082169 |
| 11740878_ZNF669    | 0.12086  | 0.039946 | 0.082223 |
| 11760149_PRSS1     | -0.12149 | 0.039957 | 0.082238 |
| 11723007_CCPG1 /// | 0.088559 | 0.039958 | 0.082238 |
| 11745070_LOC440040 | -0.22457 | 0.039959 | 0.082238 |
| 11728807_SIRT5     | -0.16245 | 0.039966 | 0.08225  |
| 11742635_GSTA5     | -0.18384 | 0.039992 | 0.082299 |
| 11732984_FTHL17    | -0.10415 | 0.040004 | 0.082319 |
| 11722783_FOXQ1     | 0.170795 | 0.040005 | 0.082319 |
| 11716124_NAT10     | 0.104619 | 0.040007 | 0.082321 |
| 11731000_AP5B1     | 0.148524 | 0.040012 | 0.082327 |
| 11717888_CHAMP1    | -0.12311 | 0.040021 | 0.082342 |
| 11717462_NSUN2     | 0.087741 | 0.040048 | 0.082395 |
| 11730649_TEX43     | 0.217237 | 0.040052 | 0.082398 |
| 11763350_FAM212B / | 0.115334 | 0.040058 | 0.082407 |
| 11730760_CRIPT     | 0.095746 | 0.040087 | 0.082464 |
| 11750176_SVILP1    | -0.1006  | 0.040094 | 0.082474 |
| 11759355_GPR32     | -0.11738 | 0.040096 | 0.082475 |
| 11760180_CSNK2B    | -0.14376 | 0.040097 | 0.082475 |
| 11750708_EFCAB5    | -0.13894 | 0.040101 | 0.082479 |
| 11738515_LIPK      | 0.174092 | 0.040117 | 0.082508 |
| 11737663_EML5      | 0.165826 | 0.040134 | 0.082539 |
| 11729888_BRINP3    | 0.223766 | 0.040138 | 0.082544 |

|                    |          |          |          |
|--------------------|----------|----------|----------|
| 11739951_GFOD1     | -0.12523 | 0.040157 | 0.082579 |
| 11748278_ASCC1     | 0.090678 | 0.040162 | 0.082587 |
| 11753276_CYP4A11 / | -0.09477 | 0.040171 | 0.0826   |
| 11718624_PLA2G1B   | -0.33681 | 0.040172 | 0.0826   |
| 11728215_NRP1      | 0.14436  | 0.040178 | 0.08261  |
| 11724276_SLC35C1   | -0.12432 | 0.040188 | 0.082627 |
| 11732829_CCL16     | -0.20777 | 0.040196 | 0.082639 |
| 11758473_ZEB1      | 0.096033 | 0.040223 | 0.082692 |
| 11748731_ZNF616    | 0.167725 | 0.040229 | 0.082699 |
| 11762224_SLC1A3    | -0.1395  | 0.040237 | 0.082714 |
| 11733703_SKIDA1    | 0.36204  | 0.040246 | 0.082727 |
| 11762296_PDE7B     | -0.14368 | 0.04025  | 0.082733 |
| 11722243_FBXO25    | -0.14593 | 0.040268 | 0.082766 |
| 11761470_APBB1     | 0.102919 | 0.040281 | 0.08279  |
| 11737754_ABCB6 /// | 0.099443 | 0.040287 | 0.082799 |
| 11760628_TTL5      | 0.191847 | 0.040302 | 0.082825 |
| 11725365_IER5L     | 0.15612  | 0.040307 | 0.082833 |
| 11737461_LINGO4    | -0.19213 | 0.040317 | 0.08285  |
| 11744711_C21orf2   | -0.11592 | 0.04032  | 0.082852 |
| 11745553_SMAP2     | 0.194903 | 0.040345 | 0.082901 |
| 11749039_PNRC1     | -0.09658 | 0.040361 | 0.082929 |
| 11756838_FCN2      | 0.115821 | 0.040364 | 0.082932 |
| 11733731_BCKDHA    | -0.09581 | 0.04038  | 0.082962 |
| 11736254_NUP160    | 0.094817 | 0.040404 | 0.083008 |
| 11745481_GLYCTK    | -0.16018 | 0.040415 | 0.083026 |
| 11739287_KMT2A     | 0.107387 | 0.040425 | 0.083043 |
| 11722088_NRID2     | -0.27186 | 0.040435 | 0.083061 |
| 11720936_CACFD1    | 0.087701 | 0.040441 | 0.08307  |
| 11744457_MDK       | -0.11126 | 0.040483 | 0.083152 |
| 11718351_NLRP2     | -0.14223 | 0.0405   | 0.083184 |
| 11747857_MPDZ      | 0.129265 | 0.040508 | 0.083198 |
| 11736058_BORCS7    | 0.194555 | 0.04052  | 0.083218 |
| 11728212_TRMT1L    | -0.18898 | 0.040526 | 0.083227 |
| 11726969_BCAS4     | -0.2641  | 0.040538 | 0.083248 |
| 11742083_KIRREL2   | -0.15195 | 0.04055  | 0.083268 |
| 11752956_C5orf51   | 0.141719 | 0.040561 | 0.083288 |
| 11740471_CLIP1     | 0.090518 | 0.040578 | 0.083319 |
| 11754272_SNRPN /// | -0.08977 | 0.040601 | 0.083359 |
| 11733169_FBXO45    | -0.14759 | 0.040601 | 0.083359 |
| 11731582_WASF1     | 0.162206 | 0.040611 | 0.083377 |
| 11750492_RNF216    | 0.112967 | 0.040616 | 0.083384 |
| 11715636_SERPINE1  | 0.17905  | 0.040636 | 0.083418 |
| 11727942_FPR3      | 0.087935 | 0.040638 | 0.083418 |
| 11729307_GPR35     | -0.12759 | 0.040638 | 0.083418 |
| 11730604_EPB41L4B  | 0.131898 | 0.040641 | 0.08342  |
| 11737783_PROSC     | 0.123884 | 0.040648 | 0.083431 |
| 11723215_MEF2C     | -0.12011 | 0.040652 | 0.083435 |
| 11750975_GBA       | 0.082657 | 0.040653 | 0.083435 |
| 11749191_ZAK       | -0.13762 | 0.040671 | 0.083468 |
| 11756540_TMPRSS5   | -0.11467 | 0.040676 | 0.083475 |
| 11763268_FAM120B   | 0.110854 | 0.040682 | 0.083484 |

|                       |          |          |          |
|-----------------------|----------|----------|----------|
| 11748097_PABPC1       | 0.083785 | 0.040686 | 0.083488 |
| 11724451_ZDHC22       | -0.12648 | 0.040688 | 0.083489 |
| 11722853_HABP4        | 0.158943 | 0.04069  | 0.08349  |
| 11726790_CNTN2        | -0.15646 | 0.040711 | 0.083529 |
| 11745815_CDIP1        | -0.11579 | 0.040714 | 0.083531 |
| 11721941_CYP3A5       | 0.115039 | 0.040755 | 0.083612 |
| 11744068_APOE         | -0.09086 | 0.040758 | 0.083615 |
| 11745125_TUBGCP2      | 0.096545 | 0.040771 | 0.083637 |
| 11741442_RBMX ///     | -0.09577 | 0.040778 | 0.08365  |
| 11753628_ABHD11       | -0.09166 | 0.040781 | 0.083652 |
| 11727596_PADI2        | -0.11203 | 0.040787 | 0.083661 |
| 11721580_DIO2         | 0.155947 | 0.040793 | 0.08367  |
| 11715772_MRPL13       | -0.09372 | 0.040827 | 0.083736 |
| 11741705_NR4A3        | 0.105459 | 0.040833 | 0.08374  |
| 11734744_SON          | 0.106832 | 0.040835 | 0.08374  |
| 11752540_PPIL2        | -0.09573 | 0.040835 | 0.08374  |
| 11737393_PATE2        | 0.17054  | 0.040836 | 0.08374  |
| 11732290_TRMT61A      | -0.10838 | 0.040849 | 0.08376  |
| 11762998_YME1L1       | 0.096219 | 0.040849 | 0.08376  |
| 11755159_COG3         | 0.123629 | 0.040856 | 0.083771 |
| 11741372_SPDYE6       | 0.195465 | 0.040862 | 0.08378  |
| 11753905_SMARCA1      | -0.11812 | 0.040884 | 0.083821 |
| 11733907_CYP2D6 //    | 0.147001 | 0.040886 | 0.083821 |
| 11756989_KRT8         | 0.106345 | 0.04089  | 0.083826 |
| 11726710_PFAS         | -0.11409 | 0.040904 | 0.083851 |
| 11760049_LINC00308    | -0.13472 | 0.040913 | 0.083867 |
| 11729815_ZADH2        | -0.12527 | 0.040915 | 0.083868 |
| 11740279_IRX2         | -0.12988 | 0.040917 | 0.083868 |
| 11760629_LIPC         | -0.18147 | 0.040922 | 0.083874 |
| 11733577_DOCK9        | -0.10224 | 0.040951 | 0.08393  |
| 11738122_NR5A2        | 0.246617 | 0.040954 | 0.083933 |
| 11720471_MED20        | 0.108773 | 0.040975 | 0.083972 |
| 11756553_GUK1         | 0.105079 | 0.040988 | 0.083995 |
| 11753287_TECPR2       | 0.254598 | 0.040991 | 0.083998 |
| 11760363_FAM227B      | -0.12751 | 0.041028 | 0.08407  |
| 11721951_MRAP2        | -0.19883 | 0.041031 | 0.084073 |
| 11732739_ARSB         | 0.152445 | 0.041033 | 0.084073 |
| 11722593_BCAP29       | -0.08996 | 0.041037 | 0.084078 |
| 11739309_DLG1         | -0.10559 | 0.041063 | 0.084127 |
| 11715813_HIGD1A       | -0.18292 | 0.041066 | 0.084131 |
| 11752257_SLC22A2      | -0.14098 | 0.041076 | 0.084147 |
| 11756305_SMARCA4      | 0.104033 | 0.041081 | 0.084154 |
| 11734577_SCN5A        | -0.15534 | 0.041101 | 0.084192 |
| 11715795_MANF         | -0.10014 | 0.041106 | 0.084199 |
| 11736175_ARPIN        | -0.12003 | 0.041136 | 0.084256 |
| 11741108_MRPS14       | -0.11203 | 0.041142 | 0.084264 |
| 11747900_DMTF1        | 0.153539 | 0.041143 | 0.084264 |
| 11760106_ATP5SL       | -0.1483  | 0.041154 | 0.084279 |
| 11715138_CGB ///<br>C | -0.0867  | 0.041155 | 0.084279 |
| 11744973_SLC30A5      | -0.1214  | 0.041155 | 0.084279 |
| 11760650_ANKRD37      | 0.210678 | 0.041167 | 0.084298 |

|                    |          |          |          |
|--------------------|----------|----------|----------|
| 11715249_MAGEA12   | -0.11316 | 0.041188 | 0.084338 |
| 11731257_TRIM67    | 0.245786 | 0.041207 | 0.084374 |
| 11734834_TAF9B     | 0.092541 | 0.041212 | 0.08438  |
| 11723772_SMPD2     | 0.203756 | 0.041222 | 0.084397 |
| 11753654_PRAP1 /// | -0.15803 | 0.041224 | 0.084398 |
| 11726114_FAM46B    | 0.110235 | 0.041233 | 0.084412 |
| 11763278_FGFR10P2  | 0.137152 | 0.041248 | 0.08444  |
| 11757229_TPH1      | -0.13569 | 0.041256 | 0.084448 |
| 11743155_POFUT1    | -0.11966 | 0.041256 | 0.084448 |
| 11727218_TSSK2     | -0.12379 | 0.041275 | 0.084484 |
| 11732371_KLK7      | -0.10245 | 0.041281 | 0.08449  |
| 11720288_CDC42BPA  | 0.108326 | 0.041281 | 0.08449  |
| 11756438_SAFB      | 0.092962 | 0.041307 | 0.08454  |
| 11722003_CYCS      | -0.15294 | 0.041323 | 0.084568 |
| 11720848_PHF6      | -0.14802 | 0.041332 | 0.084584 |
| 11753683_KLK4      | -0.15212 | 0.041335 | 0.084586 |
| 11737376_CFAP46    | -0.13636 | 0.041346 | 0.084602 |
| 11722293_NAPSA     | -0.09017 | 0.041346 | 0.084602 |
| 11743112_S100A10   | 0.089611 | 0.041392 | 0.084692 |
| 11728091_SHISA7    | -0.12217 | 0.041415 | 0.084736 |
| 11736581_GCNT1     | -0.1527  | 0.041423 | 0.084749 |
| 11726170_FLT4      | -0.12137 | 0.041441 | 0.084781 |
| 11761926_RHBDF1    | 0.149951 | 0.041446 | 0.084788 |
| 11731900_PPAT      | 0.115894 | 0.041457 | 0.084807 |
| 11718466_NCK2      | 0.082889 | 0.041461 | 0.08481  |
| 11722921_MVB12A    | -0.10894 | 0.041462 | 0.08481  |
| 11760187_DDT ///   | -0.22417 | 0.041481 | 0.084846 |
| 11738170_ADCYAP1   | 0.205249 | 0.04149  | 0.08486  |
| 11717212_NEO1      | -0.16501 | 0.041501 | 0.084873 |
| 11742728_SNX5      | 0.089771 | 0.041501 | 0.084873 |
| 11726629_CDK11B    | 0.117959 | 0.041502 | 0.084873 |
| 11739900_SLC19A3   | 0.115733 | 0.041503 | 0.084873 |
| 11745059_RIN1      | -0.0954  | 0.041546 | 0.084957 |
| 11742075_LMX1A     | -0.1207  | 0.041551 | 0.084958 |
| 11740035_CARD8     | 0.1593   | 0.041553 | 0.084958 |
| 11735823_ZP4       | 0.111186 | 0.041553 | 0.084958 |
| 11717790_APPL2     | -0.10422 | 0.041554 | 0.084958 |
| 11720172_SF1       | 0.092417 | 0.041571 | 0.08499  |
| 11742943_CKM       | -0.13521 | 0.04159  | 0.085026 |
| 11722655_STK17A    | 0.087186 | 0.041592 | 0.085026 |
| 11746812_BCOR      | 0.124604 | 0.041631 | 0.085102 |
| 11760186_ACTA2     | -0.25855 | 0.04165  | 0.085137 |
| 11763203_PROCA1    | -0.31314 | 0.041661 | 0.085157 |
| 11725586_RAB36     | -0.12523 | 0.041673 | 0.085174 |
| 11753411_FAF2      | 0.105256 | 0.041674 | 0.085174 |
| 11748845_SLAMF7    | 0.215325 | 0.041675 | 0.085174 |
| 11718714_B4GALT2   | -0.11177 | 0.041677 | 0.085176 |
| 11747956_FAM117A   | -0.13597 | 0.041698 | 0.085215 |
| 11731175_KDF1      | -0.16051 | 0.041706 | 0.085227 |
| 11756157_PSG2      | 0.146562 | 0.041724 | 0.085261 |
| 11732441_BPTF      | 0.105283 | 0.041744 | 0.085294 |

|                    |          |          |          |
|--------------------|----------|----------|----------|
| 11719627_RDH10     | 0.190872 | 0.041744 | 0.085294 |
| 11736325_SWSAP1    | -0.15624 | 0.041755 | 0.085313 |
| 11737122_ANKFN1    | 0.271595 | 0.041769 | 0.085338 |
| 11748714_COL21A1   | 0.118367 | 0.041788 | 0.085372 |
| 11762059_PDGFA     | 0.11674  | 0.041789 | 0.085372 |
| 11729031_C1orf194  | -0.16907 | 0.041804 | 0.0854   |
| 11734683_UMPS      | -0.17856 | 0.041807 | 0.085401 |
| 11723219_IAPP      | -0.19527 | 0.041816 | 0.085416 |
| 11756097_ZMYND10   | -0.19902 | 0.041827 | 0.085435 |
| 11739044_SLC15A2   | 0.140031 | 0.041838 | 0.085453 |
| 11733298_VIPR1     | 0.121499 | 0.041851 | 0.085477 |
| 11754651_KRBA1     | 0.09141  | 0.041853 | 0.085477 |
| 11751031_CSK       | 0.106722 | 0.041856 | 0.085479 |
| 11744636_OPRL1     | -0.20065 | 0.041866 | 0.085497 |
| 11742114_OR7A5     | -0.12122 | 0.041873 | 0.085508 |
| 11758431_U2AF2     | -0.16589 | 0.041887 | 0.085533 |
| 11762518_KIAA2012  | -0.20068 | 0.041893 | 0.085541 |
| 11749942_ADORA2A / | -0.1024  | 0.0419   | 0.08555  |
| 11742484_SLC22A20  | -0.14987 | 0.0419   | 0.08555  |
| 11717995_NR4A1     | -0.08446 | 0.041944 | 0.085635 |
| 11725610_DTNA      | 0.184455 | 0.041957 | 0.085658 |
| 11732880_TBX1      | -0.1431  | 0.041976 | 0.085693 |
| 11748565_EBNA1BP2  | 0.108194 | 0.041978 | 0.085693 |
| 11724810_CBL       | -0.12214 | 0.04198  | 0.085694 |
| 11744815_SPATA2L   | 0.139304 | 0.041983 | 0.085696 |
| 11759516_GTF3C3    | -0.20446 | 0.041996 | 0.085719 |
| 11742409_KLK8      | -0.17123 | 0.042011 | 0.085743 |
| 11752878_ZNF750    | -0.13406 | 0.042011 | 0.085743 |
| 11729928_AQP2      | -0.10956 | 0.042025 | 0.085768 |
| 11725451_TMEM45B   | 0.151411 | 0.042039 | 0.085788 |
| 11746854_SPINT1    | -0.15702 | 0.042039 | 0.085788 |
| 11749311_GRPEL1    | 0.098015 | 0.04204  | 0.085788 |
| 11744200_SNRNP200  | 0.087283 | 0.042043 | 0.085788 |
| 11717358_RTF1      | -0.09659 | 0.042044 | 0.085788 |
| 11722959_ABLIM2    | -0.12567 | 0.042045 | 0.085788 |
| 11734822_APBB2     | -0.20488 | 0.04206  | 0.085814 |
| 11761496_ESCO2     | -0.28591 | 0.042062 | 0.085814 |
| 11750828_HIP1R     | -0.21304 | 0.042075 | 0.085835 |
| 11729509_FLRT1     | -0.13456 | 0.042075 | 0.085835 |
| 11756060_RPS13     | 0.081194 | 0.04209  | 0.08586  |
| 11735065_ITGB3     | 0.173372 | 0.042091 | 0.08586  |
| 11739708_CACYBP    | -0.15437 | 0.042094 | 0.085861 |
| 11745013_MORN1     | -0.15514 | 0.042104 | 0.085878 |
| 11719387_GOLGA5    | 0.088928 | 0.042124 | 0.085917 |
| 11735294_LRRK2     | 0.199524 | 0.042127 | 0.08592  |
| 11739983_PRH1      | 0.157245 | 0.042137 | 0.085937 |
| 11748698_LYVE1     | -0.14192 | 0.04214  | 0.085937 |
| 11720034_CASP2     | 0.119067 | 0.04216  | 0.085976 |
| 11745858_ATP5SL    | -0.10794 | 0.042179 | 0.086009 |
| 11734352_ANK1      | 0.254297 | 0.04218  | 0.086009 |
| 11737240_TEX15     | -0.26506 | 0.042204 | 0.086054 |

|                    |          |          |          |
|--------------------|----------|----------|----------|
| 11721487_TP53RK    | -0.10978 | 0.042214 | 0.086071 |
| 11740536_KRTAP19-3 | -0.12482 | 0.042216 | 0.086072 |
| 11726507_CDKN2B    | -0.1757  | 0.042224 | 0.086078 |
| 11735347_MIEF2     | 0.121439 | 0.042225 | 0.086078 |
| 11715612_TMX2      | 0.081564 | 0.042225 | 0.086078 |
| 11715193_UNCX      | -0.11691 | 0.042226 | 0.086078 |
| 11733912_HS3ST1    | -0.13275 | 0.042244 | 0.08611  |
| 11747908_CUL7      | 0.149575 | 0.042262 | 0.086143 |
| 11759132_SH3D21    | -0.12524 | 0.042266 | 0.086149 |
| 11728765_PVRL4     | 0.188559 | 0.04228  | 0.086173 |
| 11726525_ZFH3      | -0.14682 | 0.042284 | 0.086176 |
| 11732506_TP73-AS1  | -0.08752 | 0.042285 | 0.086176 |
| 11726904_COBL      | 0.113143 | 0.042317 | 0.086235 |
| 11748673_LOC644794 | 0.111057 | 0.042319 | 0.086235 |
| 11723625_SPSB4     | -0.22569 | 0.042319 | 0.086235 |
| 11733206_AFAP1L1   | 0.140911 | 0.042328 | 0.086249 |
| 11755812_BNC2      | -0.14626 | 0.042346 | 0.086283 |
| 11722337_TBC1D9B   | -0.11121 | 0.042351 | 0.08629  |
| 11756177_CMTM6     | -0.10114 | 0.042359 | 0.086301 |
| 11729282_PTP4A3    | -0.18393 | 0.042361 | 0.086303 |
| 11736041_KIF1A     | -0.14642 | 0.042364 | 0.086305 |
| 11728087_ZXDB      | 0.149815 | 0.042367 | 0.086308 |
| 11751235_NR1H2     | 0.154124 | 0.042371 | 0.086313 |
| 11761713_TCTE1     | -0.13393 | 0.042374 | 0.086315 |
| 11731026_CREM      | 0.202935 | 0.042377 | 0.086318 |
| 11718932_FKBP1A-SD | 0.099349 | 0.042396 | 0.086352 |
| 11731474_SFRP4     | 0.109814 | 0.042402 | 0.086361 |
| 11760860_SUMF1     | -0.10803 | 0.042409 | 0.086371 |
| 11754269_SOCS1     | 0.222547 | 0.04243  | 0.086409 |
| 11730705_OR51E2    | -0.21517 | 0.042431 | 0.086409 |
| 11755029_HID1      | -0.11579 | 0.042447 | 0.086438 |
| 11744844_GON4L     | 0.099014 | 0.042466 | 0.086474 |
| 11756008_AGBL4     | -0.10046 | 0.042483 | 0.086504 |
| 11750696_RASAL1    | -0.12212 | 0.042491 | 0.086516 |
| 11746282_TMEM53    | -0.09115 | 0.042513 | 0.086559 |
| 11720451_PLEKHH2   | -0.1204  | 0.042519 | 0.086561 |
| 11740575_SORCS1    | 0.104073 | 0.042519 | 0.086561 |
| 11744909_HDHD2     | -0.14649 | 0.04252  | 0.086561 |
| 11735477_CHST6     | -0.17791 | 0.042526 | 0.08657  |
| 11738795_KRTAP4-3  | -0.14842 | 0.042541 | 0.086593 |
| 11758897_APOBEC3C  | 0.091337 | 0.042542 | 0.086593 |
| 11750152_SLC23A2   | 0.121956 | 0.042543 | 0.086593 |
| 11731977_DNAJB3 // | -0.18386 | 0.042549 | 0.086603 |
| 11738035_RTN4      | -0.10037 | 0.042559 | 0.086619 |
| 11740943_SHOX      | -0.21065 | 0.042567 | 0.086631 |
| 11749552_LAMP3     | -0.1587  | 0.042589 | 0.086672 |
| 11762085_MAP3K7CL  | -0.23076 | 0.04259  | 0.086672 |
| 11729524_ASIC2     | -0.14233 | 0.042598 | 0.086683 |
| 11746563_FAM65A    | -0.09545 | 0.042626 | 0.086738 |
| 11726501_MYPOP     | -0.08856 | 0.042641 | 0.086765 |
| 11741751_NLRP14    | -0.17175 | 0.042668 | 0.086815 |

|                   |          |          |          |
|-------------------|----------|----------|----------|
| 11757124_SNORA74B | -0.13436 | 0.042669 | 0.086815 |
| 11719153_LDOC1L   | -0.17058 | 0.042674 | 0.08682  |
| 11755419_LRTM2    | -0.14719 | 0.042679 | 0.086826 |
| 11750200_ZNF215   | 0.091363 | 0.042689 | 0.086843 |
| 11757382_MRPL52   | 0.098375 | 0.042693 | 0.086848 |
| 11753675_PFN2     | 0.14803  | 0.042698 | 0.086854 |
| 11747915_MAP4     | -0.11933 | 0.042701 | 0.086857 |
| 11744446_SUN2     | -0.19935 | 0.042723 | 0.086899 |
| 11724725_EIF5     | 0.119968 | 0.042758 | 0.086966 |
| 11724371_SLC22A7  | -0.11913 | 0.042776 | 0.086999 |
| 11730826_TMEM106A | 0.125345 | 0.042787 | 0.087019 |
| 11738969_DEFB116  | -0.21208 | 0.042795 | 0.087031 |
| 11726181_SMYD4    | -0.11585 | 0.042812 | 0.087061 |
| 11731972_PTPN22   | 0.122224 | 0.042832 | 0.087098 |
| 11725383_C15orf39 | 0.100305 | 0.042842 | 0.087113 |
| 11739092_LUC7L3   | 0.112722 | 0.042843 | 0.087113 |
| 11749108_ADGRF5   | -0.12085 | 0.042844 | 0.087113 |
| 200045_PMABCF1    | 0.107682 | 0.042852 | 0.087124 |
| 11731398_FGA      | -0.16237 | 0.042853 | 0.087124 |
| 11745356_IKBKB    | -0.12844 | 0.042862 | 0.087138 |
| 11751686_WDR77    | 0.081257 | 0.042893 | 0.087197 |
| 11739699_STON1    | 0.146567 | 0.042895 | 0.087197 |
| 11761923_RXFP1    | -0.15545 | 0.042901 | 0.087205 |
| 11733755_PKD2L1   | -0.11397 | 0.042902 | 0.087205 |
| 11751717_SLC6A13  | -0.13105 | 0.042907 | 0.087212 |
| 11726652_ARHGAP32 | -0.11098 | 0.042919 | 0.087232 |
| 11747004_SUOX     | -0.0837  | 0.042939 | 0.087269 |
| 11725970_HNRNPFF  | -0.09147 | 0.042952 | 0.087293 |
| 11755291_DENND2D  | -0.13028 | 0.042961 | 0.087307 |
| 11760992_L3HYPDH  | 0.219028 | 0.042998 | 0.087378 |
| 11735759_DNM2     | -0.09321 | 0.043001 | 0.087378 |
| 11741089_CD79A    | -0.18813 | 0.043001 | 0.087378 |
| 11746925_UMODL1   | -0.15484 | 0.043006 | 0.087383 |
| 11732609_NBPF3    | -0.10919 | 0.043014 | 0.087397 |
| 11727616_RASL10B  | -0.19245 | 0.043051 | 0.087468 |
| 11728354_CHCHD5   | -0.13794 | 0.043095 | 0.087554 |
| 11749504_RELN     | 0.154842 | 0.043099 | 0.087558 |
| 11739338_FAM46C   | 0.098029 | 0.043113 | 0.087582 |
| 11755177_XYLT2    | -0.10496 | 0.043142 | 0.087639 |
| 11762265_C4BPB    | -0.14477 | 0.043148 | 0.087647 |
| 11758059_ANKRD49  | 0.106932 | 0.043159 | 0.087665 |
| 11738568_KRTAP5-3 | -0.10166 | 0.043167 | 0.087677 |
| 11747094_C19orf43 | 0.101328 | 0.043171 | 0.087682 |
| 11755759_MEGF11   | 0.305744 | 0.043182 | 0.0877   |
| 11720775_RNF8     | 0.101698 | 0.043193 | 0.08772  |
| 11729174_SKA2     | -0.09141 | 0.043236 | 0.087801 |
| 11739775_LYPD5    | 0.327958 | 0.043237 | 0.087801 |
| 11733195_FMNL3    | -0.10138 | 0.043239 | 0.087802 |
| 11726941_ZKSCAN2  | 0.115306 | 0.043257 | 0.087834 |
| 11756474_CPT1A    | 0.096982 | 0.043269 | 0.087856 |
| 11757030_ECH1 /// | 0.100666 | 0.043273 | 0.087861 |



|                    |          |          |          |
|--------------------|----------|----------|----------|
| 11762888_DI030S    | -0.10219 | 0.043278 | 0.087866 |
| 11728898_CDH15     | -0.11815 | 0.043306 | 0.08792  |
| 11732675_RNF180    | -0.24675 | 0.043339 | 0.087982 |
| 11733832_MAP2      | 0.251473 | 0.04334  | 0.087982 |
| 11727511_UBN2      | -0.21053 | 0.043353 | 0.088005 |
| 11716613_RPLP2     | 0.081624 | 0.043369 | 0.088032 |
| 11760907_PPA2      | 0.254849 | 0.043411 | 0.088115 |
| 11730874_UBQLN3    | -0.10748 | 0.043417 | 0.088124 |
| 11761202_NIPAL3    | -0.15609 | 0.04342  | 0.088124 |
| 11734755_CCBL2     | 0.107175 | 0.043421 | 0.088124 |
| 11745367_FANCM     | -0.19761 | 0.043435 | 0.088146 |
| 11720793_AACS      | 0.137808 | 0.043435 | 0.088146 |
| 11722077_SEPT3     | -0.11627 | 0.043438 | 0.088147 |
| 11726399_SPTB      | -0.09919 | 0.04344  | 0.088148 |
| 11759973_PDSS1     | -0.19265 | 0.043467 | 0.088199 |
| 11732561_FZD3      | 0.22551  | 0.043472 | 0.088206 |
| 11718737_ST3GAL1   | 0.113118 | 0.043479 | 0.088216 |
| 11736626_BAAT      | 0.191991 | 0.043488 | 0.088231 |
| 11717822_SLC4A4    | -0.23479 | 0.043496 | 0.088242 |
| 11729093_IGF2-AS   | -0.13125 | 0.043497 | 0.088242 |
| 11749367_FXYD5     | 0.086735 | 0.0435   | 0.088242 |
| 11749935_TPM3      | -0.08875 | 0.043501 | 0.088242 |
| 11762610_YIF1B     | -0.20847 | 0.043505 | 0.088247 |
| 11750489_ALPK1     | 0.213225 | 0.043512 | 0.088258 |
| 11717364_BCL2L12   | -0.09692 | 0.043516 | 0.088262 |
| 11723564_NR2C2     | -0.0916  | 0.043526 | 0.088279 |
| 11738381_FGF23     | -0.1552  | 0.043537 | 0.088298 |
| 11737445_SYT16     | 0.225239 | 0.043552 | 0.088324 |
| 11752490_NMUR1     | -0.15092 | 0.043568 | 0.088353 |
| 11738061_S100A7 // | 0.147741 | 0.043574 | 0.088361 |
| 11718570_NT5DC3    | -0.19231 | 0.043579 | 0.088368 |
| 11761184_GPR137    | 0.100852 | 0.043603 | 0.088412 |
| 11728221_NRIP3     | -0.15043 | 0.043607 | 0.088416 |
| 11754599_NISCH     | 0.114472 | 0.043611 | 0.088421 |
| 11756074_MMP7      | 0.150582 | 0.043619 | 0.088433 |
| 11731958_FOLH1 /// | -0.20344 | 0.043634 | 0.088462 |
| 11721295_STAM      | -0.1017  | 0.043637 | 0.088464 |
| 11725069_JADE1     | -0.10649 | 0.043644 | 0.088474 |
| 11740583_POGZ      | 0.114773 | 0.04368  | 0.088541 |
| 11757552_ARPC3     | 0.092558 | 0.043681 | 0.088541 |
| 11716157_BAHD1     | 0.094404 | 0.043699 | 0.088574 |
| 11720125_SRD5A3    | -0.18444 | 0.043701 | 0.088575 |
| 11738335_TP53      | -0.12843 | 0.043706 | 0.088581 |
| 11732769_RNF152    | -0.10907 | 0.043723 | 0.088611 |
| 11748656_FHL1      | -0.13508 | 0.043725 | 0.088613 |
| 11723737_RNF216    | -0.11034 | 0.043733 | 0.088624 |
| 11738705_OR4K2     | -0.187   | 0.043739 | 0.088632 |
| 11760691_CHRD12    | -0.22034 | 0.043751 | 0.088655 |
| 11744379_COL3A1    | 0.24313  | 0.043755 | 0.088658 |
| 11728539_MDGA1     | -0.10768 | 0.043762 | 0.088669 |
| 11720038_VTA1      | -0.11186 | 0.043766 | 0.088674 |

|                    |          |          |          |
|--------------------|----------|----------|----------|
| 11763579_GLI2      | -0.1662  | 0.043779 | 0.088697 |
| 11716159_RNF40     | 0.153994 | 0.043783 | 0.0887   |
| 11719973_AKAP17A   | 0.139079 | 0.043796 | 0.088723 |
| 11724934_THAP7     | -0.11351 | 0.043803 | 0.088733 |
| 11750452_CYP2C8    | -0.12026 | 0.043805 | 0.088733 |
| 11730228_QRSL1     | -0.10075 | 0.043808 | 0.088737 |
| 11729884_C18orf54  | -0.20841 | 0.043818 | 0.088753 |
| 11755800_CCDC30    | -0.13104 | 0.043827 | 0.088767 |
| 11746851_FAM192A   | -0.10195 | 0.04385  | 0.088809 |
| 11730540_TAF1A     | 0.127584 | 0.043852 | 0.08881  |
| 11759282_SERINC5   | -0.15734 | 0.043857 | 0.088816 |
| 11750114_PLXNB3    | -0.10558 | 0.043858 | 0.088816 |
| 11743226_CCDC160   | 0.174078 | 0.043863 | 0.088822 |
| 11757076_C7orf72   | -0.19321 | 0.043868 | 0.088828 |
| 11749578_COX10     | 0.104096 | 0.043877 | 0.088842 |
| 11757406_NEK1      | 0.164683 | 0.04389  | 0.088865 |
| 11738056_TMEM136   | 0.09059  | 0.043896 | 0.088875 |
| 11743413_UBE2K     | 0.094739 | 0.043902 | 0.088879 |
| 11736661_MAP3K13   | 0.371239 | 0.043902 | 0.088879 |
| 11719703_CD2BP2    | -0.09375 | 0.043937 | 0.088947 |
| 11726531_BRCC3     | 0.185526 | 0.043943 | 0.088955 |
| 11741308_XPR1      | -0.17351 | 0.043949 | 0.088963 |
| 11756583_ESRRG     | 0.114284 | 0.043956 | 0.088974 |
| 11752661_MKS1      | -0.09996 | 0.043968 | 0.088994 |
| 11743040_CRTAP     | 0.086183 | 0.043987 | 0.089028 |
| 11739537_ITPR2     | 0.155765 | 0.043989 | 0.08903  |
| 11759495_BAG4      | 0.096954 | 0.043994 | 0.089032 |
| 11719234_RASL12    | -0.19758 | 0.043994 | 0.089032 |
| 11744720_GSG1      | 0.231335 | 0.044008 | 0.089056 |
| 11745965_IDH3A     | -0.10334 | 0.044009 | 0.089056 |
| 11719543_C3orf18   | -0.29618 | 0.044018 | 0.08907  |
| 11724460_MCAM      | -0.08608 | 0.044029 | 0.089088 |
| 11719116_GOT2      | -0.09799 | 0.044043 | 0.089113 |
| 11746404_TCF7L2    | 0.156631 | 0.044065 | 0.089154 |
| AFFX-HUMGGAPDH     | -0.08042 | 0.044107 | 0.089234 |
| 11762996_YME1L1    | 0.237891 | 0.04411  | 0.089236 |
| 11763343_AZIN2     | -0.12813 | 0.044112 | 0.089237 |
| 11735081_GALNT13   | -0.15105 | 0.044119 | 0.089248 |
| 11746361_CPED1     | -0.13647 | 0.044124 | 0.089255 |
| 11744460_PI4KB     | 0.094204 | 0.044126 | 0.089255 |
| 11757528_NOL12     | 0.106892 | 0.044141 | 0.089281 |
| 11728434_GH2       | -0.27212 | 0.044152 | 0.089299 |
| 11719728_SIRPA     | -0.24827 | 0.044157 | 0.089305 |
| 11722404_MTHFS /// | -0.08142 | 0.044167 | 0.089324 |
| 11748848_DAW1      | -0.11203 | 0.044183 | 0.089351 |
| 11752255_ZNF417    | 0.176643 | 0.044196 | 0.089374 |
| 11758162_FDX1      | -0.11531 | 0.044202 | 0.089382 |
| 11759718_SETMAR    | -0.18841 | 0.044217 | 0.089408 |
| 11738219_GJB4      | -0.10944 | 0.044238 | 0.089447 |
| 11743077_CEBPB     | -0.10955 | 0.044264 | 0.089498 |
| 11741946_LIPM      | -0.18267 | 0.044266 | 0.089498 |

|                    |          |          |          |
|--------------------|----------|----------|----------|
| 11755926_CNGA4     | -0.15254 | 0.044268 | 0.089498 |
| 11727987_DNMT3B    | -0.09817 | 0.044273 | 0.089501 |
| 200070_PMCNPPD1    | -0.09277 | 0.044273 | 0.089501 |
| 11764046_IGHM      | -0.17582 | 0.044277 | 0.089505 |
| 11756383_FARSB     | -0.13071 | 0.044281 | 0.089509 |
| 11758678_ZNF423    | -0.1838  | 0.044307 | 0.089558 |
| 11734779_ZNF639    | -0.12854 | 0.044322 | 0.089584 |
| 11752777_BMP8A /// | 0.140382 | 0.044329 | 0.089596 |
| 11725200_PTH1R     | -0.1665  | 0.044336 | 0.089605 |
| 11732139_TIMM13    | -0.11827 | 0.04434  | 0.08961  |
| 11717624_TBL2      | -0.08759 | 0.044371 | 0.089669 |
| 11761031_RPS28     | 0.082681 | 0.044379 | 0.089681 |
| 11730249_MRPS28    | 0.081769 | 0.044401 | 0.089722 |
| 11737347_ASB16     | -0.11426 | 0.044423 | 0.089762 |
| 11740180_KCNQ2     | -0.09157 | 0.044436 | 0.089785 |
| 11752786_CARD6     | 0.249103 | 0.044438 | 0.089785 |
| 11746027_NMI       | 0.10368  | 0.044457 | 0.089821 |
| 11747051_SLC35C2   | 0.114451 | 0.044475 | 0.089852 |
| 11738918_CRLF2     | -0.09384 | 0.044478 | 0.089856 |
| 11753170_CD300C    | -0.14055 | 0.044482 | 0.089859 |
| 11721956_RFX7      | 0.122409 | 0.044489 | 0.089869 |
| 11737701_DDX31     | -0.15839 | 0.044493 | 0.089872 |
| 11729979_PAGE2 /// | 0.114471 | 0.044494 | 0.089872 |
| 11725146_MIS12     | -0.12437 | 0.044498 | 0.089878 |
| 11727614_SCN2B     | -0.10135 | 0.044542 | 0.089962 |
| 11742618_OR4K14    | -0.30112 | 0.044557 | 0.089988 |
| 11741941_GML       | -0.12376 | 0.044564 | 0.09     |
| 11746210_SCYL1     | -0.08849 | 0.04457  | 0.090008 |
| 11741973_UNC80     | -0.14831 | 0.044574 | 0.090011 |
| 11735968_NDRG2     | -0.25201 | 0.044584 | 0.090029 |
| 11757357_SPSB2     | -0.09143 | 0.044589 | 0.090034 |
| 11727565_TNFSF13B  | 0.274632 | 0.044612 | 0.090077 |
| 11736708_ZNF547    | 0.241456 | 0.044621 | 0.090092 |
| 11739077_NFE2L1    | -0.08378 | 0.044636 | 0.090119 |
| 11750368_KRTAP5-2  | -0.1483  | 0.044649 | 0.090141 |
| 11755717_DOK2      | -0.12764 | 0.044658 | 0.090153 |
| 11762425_WRNIP1    | -0.12018 | 0.044659 | 0.090153 |
| 11760708	EIF4A2    | -0.10142 | 0.044663 | 0.090157 |
| 11746455_JAM2      | 0.209218 | 0.044664 | 0.090157 |
| 11732779_PSMC12    | -0.15561 | 0.044672 | 0.090168 |
| 11719555_PDK2      | -0.12334 | 0.044683 | 0.090188 |
| 11734094_PROM2     | -0.16519 | 0.044696 | 0.090208 |
| 11763559_FMNL1     | -0.15267 | 0.044697 | 0.090208 |
| 11761319_LOC101060 | 0.106899 | 0.04475  | 0.090312 |
| 11723275_MAPK8IP1  | 0.175226 | 0.044756 | 0.09032  |
| 11754769_BEND5     | -0.13064 | 0.044762 | 0.090329 |
| 11733337_FANCE     | 0.137567 | 0.044776 | 0.090353 |
| 11736211_MRPL57    | -0.09142 | 0.044817 | 0.09043  |
| 11731192_UNC13C    | -0.10133 | 0.044818 | 0.09043  |
| 11743329_BRICD5 // | -0.13408 | 0.044829 | 0.090449 |
| 11747122_ALG9      | 0.148191 | 0.044838 | 0.090463 |

|                    |          |          |          |
|--------------------|----------|----------|----------|
| 11741349_SLFN12L   | 0.161869 | 0.044845 | 0.090472 |
| 11760679_TNFRSF10C | -0.22583 | 0.044848 | 0.090475 |
| 11737547_CDH9      | -0.13689 | 0.044856 | 0.090488 |
| 11735932_FRG2C /// | -0.17029 | 0.044866 | 0.090504 |
| 11719793_MAP3K11   | -0.13088 | 0.04487  | 0.090509 |
| 11736680_SLC46A1   | -0.2381  | 0.044895 | 0.090555 |
| 11725515_ABCG1     | -0.29667 | 0.0449   | 0.090559 |
| 11722001_HNRNPU    | -0.0808  | 0.0449   | 0.090559 |
| 11729489_ATP2B3    | -0.1201  | 0.044905 | 0.090565 |
| 11758385_HEY2      | -0.2968  | 0.044911 | 0.090572 |
| 11752689_OS9       | 0.115139 | 0.044918 | 0.090584 |
| 11753738_DIO1      | -0.20802 | 0.044937 | 0.090617 |
| 11737907_PPP1CA    | -0.08831 | 0.04494  | 0.090621 |
| 11753622_FGF4      | -0.12466 | 0.044963 | 0.090661 |
| 11720156_ACAD10    | -0.13475 | 0.044964 | 0.090661 |
| 11758816_RRP7A     | 0.141214 | 0.04497  | 0.090668 |
| 11737860_SEPT9     | -0.09654 | 0.044985 | 0.090695 |
| 11747241_PPP2R5C   | -0.0998  | 0.044988 | 0.090698 |
| 11737580_HLA-L     | 0.231621 | 0.045014 | 0.090747 |
| 11720239_MAPK9     | -0.08049 | 0.045026 | 0.090768 |
| 11725763_PELI3     | -0.13155 | 0.04503  | 0.090771 |
| 11739334_PTPRC     | 0.099382 | 0.045032 | 0.090771 |
| 11738283_WFDC9     | -0.12846 | 0.045043 | 0.090787 |
| 11734519_PAGE2 /// | 0.107637 | 0.045043 | 0.090787 |
| 11748959_ZNF559    | 0.113246 | 0.045046 | 0.090788 |
| 11752586_C19orf47  | -0.1357  | 0.045052 | 0.090797 |
| 11736930_G6PC      | -0.12758 | 0.045059 | 0.090808 |
| 11743127_CHCHD10   | -0.1109  | 0.045074 | 0.090833 |
| 11743812_TFAM      | 0.088031 | 0.045154 | 0.090992 |
| 11728548_ZNF536    | -0.09886 | 0.045166 | 0.09101  |
| 11719360_SLF2      | 0.15475  | 0.045167 | 0.09101  |
| 11735843_CCDC144A  | -0.15654 | 0.045177 | 0.091021 |
| 11761768_PACRGL    | -0.10039 | 0.045179 | 0.091021 |
| 11740050_ZNF461    | 0.207827 | 0.04518  | 0.091021 |
| 11726571_SEMA7A    | 0.279522 | 0.045182 | 0.091021 |
| 11724833_MUC13     | 0.114857 | 0.045182 | 0.091021 |
| 11741792_PARD6G-AS | -0.09982 | 0.045204 | 0.091063 |
| 11746387_SPIDR     | -0.17851 | 0.04524  | 0.091131 |
| 11744874_CLN3      | -0.09402 | 0.045248 | 0.091144 |
| 11746762_ZNF211    | 0.11457  | 0.04525  | 0.091144 |
| 11744128_CXCL2     | 0.124212 | 0.045279 | 0.091198 |
| 11723459_NLE1      | 0.112101 | 0.045297 | 0.09123  |
| 11760694_C3orf52   | -0.11848 | 0.045298 | 0.09123  |
| 11745759_TERF1     | -0.08967 | 0.045307 | 0.091243 |
| 11736126_CPLX2     | -0.14466 | 0.045317 | 0.091259 |
| 11722664_GABRB3    | -0.15839 | 0.045333 | 0.091287 |
| 11717719_ST6GAL1   | -0.13947 | 0.045345 | 0.091309 |
| 11720652_BBX       | 0.090583 | 0.045348 | 0.09131  |
| 11736571_WDR31     | -0.07986 | 0.045362 | 0.091335 |
| 11753024_NFIB      | -0.12014 | 0.045367 | 0.091338 |
| 11739225_NF1       | -0.09026 | 0.045367 | 0.091338 |

|                    |          |          |          |
|--------------------|----------|----------|----------|
| 11738502_OR2L3 /// | 0.234624 | 0.045373 | 0.091346 |
| 11724852_LRP3      | -0.10414 | 0.045376 | 0.091347 |
| 11715895_SCARB2    | -0.10529 | 0.045386 | 0.091364 |
| 11756619_C12orf43  | 0.080785 | 0.045406 | 0.091397 |
| 11722311_COQ2      | 0.098724 | 0.045408 | 0.091397 |
| 11721234_ZNF75D    | 0.097521 | 0.045409 | 0.091397 |
| 11760252_IFI44     | 0.210755 | 0.045409 | 0.091397 |
| 11721492_ANKRD7    | 0.219711 | 0.045421 | 0.091416 |
| 11755486_MAGT1     | -0.10552 | 0.045429 | 0.091428 |
| 11728520_PLPP4     | 0.118695 | 0.045443 | 0.091453 |
| 11738655_FAHD1     | -0.14751 | 0.045455 | 0.091473 |
| 11735946_ZPLD1     | 0.13506  | 0.045465 | 0.09149  |
| 11744255_ACADVL    | -0.0883  | 0.045482 | 0.09152  |
| 11762428_METTL2B   | -0.09463 | 0.045515 | 0.091583 |
| 11717262_C7orf50   | -0.10193 | 0.045523 | 0.091595 |
| 11734234_HIST1H2AG | 0.134065 | 0.045533 | 0.091612 |
| 11717954_MOGS      | 0.100583 | 0.045551 | 0.091645 |
| 11743628_IRS1      | 0.125169 | 0.045565 | 0.091668 |
| 11745615_TRIM15    | -0.16193 | 0.045574 | 0.091683 |
| 11750654_ITPR1     | -0.21743 | 0.045585 | 0.091701 |
| 11764113_LINC00581 | 0.18231  | 0.045618 | 0.091765 |
| 11759990_VSX1      | -0.24527 | 0.045625 | 0.091773 |
| 11747026_SLC1A4    | -0.13084 | 0.045628 | 0.091777 |
| 11761334_TROAP     | -0.14468 | 0.045643 | 0.091799 |
| 11734323_PAQR7     | -0.09516 | 0.045645 | 0.091799 |
| 11750214_RNF114    | -0.1644  | 0.045645 | 0.091799 |
| 11763992_ATPAF1    | 0.260223 | 0.045647 | 0.091799 |
| 11736502_IL17RC    | -0.08687 | 0.045658 | 0.091817 |
| 11729658_SP110     | 0.131507 | 0.04568  | 0.091858 |
| 11729208_PTPN11    | 0.109765 | 0.045691 | 0.091874 |
| 11757629_RPS29     | 0.07892  | 0.045692 | 0.091874 |
| 11721469_EFHC1     | -0.12523 | 0.045699 | 0.091881 |
| 11729312_NMNAT1    | 0.153875 | 0.045699 | 0.091881 |
| 11724669_MRPS22    | -0.10201 | 0.045704 | 0.091887 |
| 11757240_NFYC-AS1  | 0.123381 | 0.045711 | 0.091897 |
| 11721790_PTPRD     | -0.16441 | 0.045718 | 0.091908 |
| 11759392_KRTAP21-2 | -0.13643 | 0.045732 | 0.091933 |
| 11758353_APOA1     | -0.15572 | 0.045759 | 0.091983 |
| 11727512_UBN2      | 0.137955 | 0.04577  | 0.092002 |
| 11760782_MGAT4EP   | -0.1127  | 0.045778 | 0.09201  |
| 11744979_RNF123    | 0.142728 | 0.045778 | 0.09201  |
| 11752690_RBCK1     | 0.121121 | 0.0458   | 0.092051 |
| 11761229_CD79B     | -0.23508 | 0.045803 | 0.092052 |
| 11737456_CXorf66   | -0.15491 | 0.045813 | 0.092069 |
| 11739091_LUC7L3    | 0.088962 | 0.045823 | 0.092084 |
| 11764115_LOC101929 | -0.18446 | 0.045833 | 0.092101 |
| 11715876_P2RX5-TAX | -0.09488 | 0.045838 | 0.092108 |
| 11758692_TRIM24    | 0.105043 | 0.045846 | 0.09212  |
| 11757521_TCEA2     | -0.1183  | 0.045854 | 0.092132 |
| 11755548_OSBPL8    | 0.135157 | 0.045864 | 0.092143 |
| 11745447_SAC3D1    | -0.10163 | 0.045867 | 0.092143 |

|                    |          |          |          |
|--------------------|----------|----------|----------|
| 11724386_C20orf196 | -0.11856 | 0.045867 | 0.092143 |
| 11759790_SPPL2B    | 0.134895 | 0.045867 | 0.092143 |
| 11761431_PGAM5 /// | -0.09852 | 0.045881 | 0.092167 |
| 11741558_HOXB6     | -0.13922 | 0.045889 | 0.09218  |
| 11731409_SLC8A2    | -0.15805 | 0.045898 | 0.092194 |
| 11762650_LOC100289 | -0.10031 | 0.0459   | 0.092194 |
| 11742042_IRAK4     | 0.145494 | 0.045902 | 0.092194 |
| 11735442_ZNF781    | 0.272788 | 0.045903 | 0.092194 |
| 11730920_SLC10A7   | 0.094136 | 0.045906 | 0.092194 |
| 11745730_POLR1E    | 0.1273   | 0.045926 | 0.092231 |
| 11735439_NRXN2     | -0.11138 | 0.045929 | 0.092233 |
| 11759327_ATP8A2    | 0.160923 | 0.045957 | 0.092286 |
| 11755400_STK39     | 0.171442 | 0.045975 | 0.092319 |
| 11754661_CAMK1G    | -0.14465 | 0.04598  | 0.092324 |
| 11742158_OR52A1    | -0.18166 | 0.045987 | 0.092336 |
| 11727823_TPMT      | 0.128859 | 0.046022 | 0.092401 |
| 11743677_P2RY8     | -0.14669 | 0.046024 | 0.092402 |
| 11757953_TTC39C    | -0.13724 | 0.046028 | 0.092406 |
| 11735112_PTGER3    | 0.171996 | 0.046036 | 0.092417 |
| 11747388_CTNNB1    | 0.088623 | 0.046038 | 0.092417 |
| 11753233_NDRG1     | -0.08779 | 0.046046 | 0.092431 |
| 11738346_ZNF713    | -0.12495 | 0.046073 | 0.092479 |
| 11760488_SNTB1     | -0.17575 | 0.046074 | 0.092479 |
| 11729833_EIF5A2    | -0.16546 | 0.04609  | 0.092507 |
| 11750367_CPA2      | 0.208439 | 0.046108 | 0.092539 |
| 11715418_SKP1      | -0.11732 | 0.04611  | 0.09254  |
| 11729867_UGT3A1    | -0.09589 | 0.046131 | 0.092578 |
| 11764253_IFITM10   | 0.158092 | 0.046151 | 0.092614 |
| 11758362_EXTL2     | -0.09308 | 0.046154 | 0.092618 |
| 11724002_DPP6      | -0.11535 | 0.046157 | 0.09262  |
| 11746875_GNAI2     | -0.09995 | 0.046163 | 0.092628 |
| 11750931_RGS6      | -0.22424 | 0.046172 | 0.092641 |
| 11723974_APOL3     | 0.159407 | 0.046178 | 0.092649 |
| 11731883_CCDC150   | -0.25055 | 0.046182 | 0.092654 |
| 11731050_CEP126    | -0.11592 | 0.046209 | 0.092705 |
| 11736448_GIN1      | -0.09646 | 0.046212 | 0.092707 |
| 11741321_CREM      | -0.22103 | 0.046243 | 0.092765 |
| 11742105_CASP10    | -0.16022 | 0.046247 | 0.092769 |
| 11742321_EDA       | -0.16235 | 0.046271 | 0.092813 |
| 11718776_SRRM1     | 0.087418 | 0.046278 | 0.092823 |
| 11729126_SLC25A3   | 0.081057 | 0.046288 | 0.092839 |
| 11716824_BDH2      | -0.24387 | 0.046302 | 0.092865 |
| 11756012_SULT6B1   | -0.17251 | 0.046335 | 0.092927 |
| 11758345_CCL3P1 // | 0.216054 | 0.046344 | 0.092942 |
| 11754265_YIPF6     | -0.07965 | 0.046349 | 0.092947 |
| 11754371_FAM102A   | -0.08498 | 0.046367 | 0.09298  |
| 11732854_SCARF1    | 0.226795 | 0.046371 | 0.092983 |
| 11751819_PPP2R3A   | 0.097928 | 0.046386 | 0.093009 |
| 11734694_NECAB1    | 0.156952 | 0.046398 | 0.09303  |
| 11734610_KRTAP5-7  | -0.10566 | 0.046402 | 0.093034 |
| 11743144_COX11     | -0.10118 | 0.046407 | 0.09304  |

|                    |          |          |          |
|--------------------|----------|----------|----------|
| 11757892_EXOC1     | 0.083981 | 0.046431 | 0.093084 |
| 11751519_TMED4     | 0.107551 | 0.046435 | 0.093089 |
| 11747694_ANO9      | -0.20835 | 0.046455 | 0.093126 |
| 11729127_SLC25A3   | 0.07988  | 0.046458 | 0.093127 |
| 11746774_SLC27A1   | -0.18773 | 0.046478 | 0.093162 |
| 11760387_IL16      | -0.31259 | 0.046479 | 0.093162 |
| 11762301_WRAP73    | -0.15808 | 0.046492 | 0.093185 |
| 11747784_LOC100287 | -0.11489 | 0.046496 | 0.093189 |
| 11758937_EIF3B     | -0.25802 | 0.046506 | 0.093205 |
| 11743936_FIP1L1    | -0.09661 | 0.046523 | 0.093235 |
| 11735089_MAP3K12   | 0.122397 | 0.046536 | 0.093258 |
| 11748126_TIMP2     | 0.087422 | 0.046552 | 0.093285 |
| 11759936_SEC13     | -0.08813 | 0.046556 | 0.09329  |
| 11734616_PRR23A    | -0.16873 | 0.046566 | 0.093305 |
| 11734638_OR51B4    | -0.08942 | 0.046567 | 0.093305 |
| 11715503_LASP1     | 0.086844 | 0.04657  | 0.093307 |
| 11757333_NUDT4 /// | -0.09415 | 0.046574 | 0.093311 |
| 11738612_OR2B2     | 0.175716 | 0.046589 | 0.093337 |
| 11732896_HSD11B1L  | -0.09391 | 0.046603 | 0.09336  |
| 11762880_NARF      | -0.11345 | 0.04662  | 0.093392 |
| 11717465_LXN       | -0.12695 | 0.046624 | 0.093396 |
| 11759114_LOC100506 | 0.111014 | 0.046626 | 0.093396 |
| 11758893_MLXIP     | -0.10021 | 0.046641 | 0.093422 |
| 11739351_AMOT      | 0.082492 | 0.046643 | 0.093422 |
| 11734126_NOD1      | -0.13983 | 0.046649 | 0.09343  |
| 11747812_EGR3      | 0.08855  | 0.046656 | 0.09344  |
| 11760389_PI4KAP2   | -0.09659 | 0.04666  | 0.093444 |
| 11732009_QRICH2    | -0.1007  | 0.046673 | 0.093467 |
| 11740629_ZNF611    | -0.136   | 0.046679 | 0.093472 |
| 11739449_ROCK1     | 0.150917 | 0.04668  | 0.093472 |
| 11724724_EIF5      | 0.096601 | 0.046681 | 0.093472 |
| 11736376_MPP3      | -0.16564 | 0.046691 | 0.093487 |
| 11762739_PSTPIP1   | -0.14044 | 0.046699 | 0.093499 |
| 11757123_SNORA74B  | -0.09298 | 0.046705 | 0.093507 |
| 11733326_NKD1      | -0.13501 | 0.04671  | 0.093514 |
| 11738991_ATP6VOE2  | -0.12872 | 0.046721 | 0.093532 |
| 11751481_PRMT6     | -0.09984 | 0.04673  | 0.093546 |
| 11737912_TM2D3     | -0.13092 | 0.046734 | 0.093551 |
| 11724016_FRA10AC1  | -0.0823  | 0.046736 | 0.093551 |
| 11755149_MEF2D     | 0.143104 | 0.04674  | 0.093555 |
| 11718336_LMOD1     | -0.17559 | 0.046754 | 0.093578 |
| 11732329_MAP7D1    | -0.09312 | 0.04676  | 0.093584 |
| 11717654_CMC4 ///  | -0.09454 | 0.04676  | 0.093584 |
| 11731179_ESPN      | -0.11106 | 0.04678  | 0.093619 |
| 11755731_KLK3      | -0.21908 | 0.046782 | 0.093621 |
| 11740388_TFAP2A    | -0.14169 | 0.046796 | 0.093644 |
| 11750357_ETNK2     | -0.12315 | 0.046815 | 0.093678 |
| 11738254_GREB1     | -0.32759 | 0.046836 | 0.093716 |
| 11763993_ATPAF1    | 0.097276 | 0.046849 | 0.093739 |
| 11722050_CC2D1A    | -0.10616 | 0.04687  | 0.093774 |
| 11731088_TM9SF1    | -0.12247 | 0.046871 | 0.093774 |

|                   |     |          |          |          |
|-------------------|-----|----------|----------|----------|
| 11741523_SLC35G4  | /   | -0.09752 | 0.046882 | 0.093794 |
| 11726831_ANTXR1   |     | 0.165818 | 0.046889 | 0.093804 |
| 11741839_RBBP8NL  |     | -0.1318  | 0.046898 | 0.093818 |
| 11726599_PLPPR1   |     | -0.14199 | 0.046908 | 0.093832 |
| 11749123_HIF1A    |     | -0.08863 | 0.046939 | 0.093891 |
| 11745286 EIF4E3   |     | 0.146993 | 0.046953 | 0.093915 |
| 11758898_APOBEC3C |     | 0.096469 | 0.046955 | 0.093915 |
| 11754755_POLR3B   |     | 0.121561 | 0.046979 | 0.093957 |
| 11723796_SFMBT1   |     | 0.169658 | 0.04698  | 0.093957 |
| 11717309_WDR75    |     | -0.10285 | 0.04699  | 0.093971 |
| 11732562_FZD3     |     | 0.17193  | 0.04699  | 0.093971 |
| 11735700_SLC13A2  |     | -0.16361 | 0.04702  | 0.094026 |
| 11743877_PPP1R1C  |     | 0.147133 | 0.047025 | 0.094032 |
| 11741350_ANXA11   |     | 0.084204 | 0.047051 | 0.094081 |
| 11744448_MSRA     |     | 0.122406 | 0.047062 | 0.0941   |
| 11732640_JKAMP    |     | 0.096377 | 0.047069 | 0.094108 |
| 11724656_MAP4K1   |     | -0.15574 | 0.047116 | 0.094196 |
| 11758860_HNRNPU   |     | -0.54911 | 0.047116 | 0.094196 |
| 11730918_SLC10A7  |     | -0.13768 | 0.047121 | 0.094201 |
| 11763198_PHACTR1  |     | -0.14147 | 0.047125 | 0.094205 |
| 11754677_FAM169A  |     | 0.105384 | 0.047126 | 0.094205 |
| 11742716_TBRG1    |     | 0.096719 | 0.047153 | 0.094254 |
| 11754254_MAP7D2   |     | -0.14848 | 0.047164 | 0.094272 |
| 11726366_ERICH1   |     | 0.091274 | 0.047167 | 0.094273 |
| 11758160_EEF2KMT  | /   | -0.0931  | 0.047179 | 0.094292 |
| 11760613_METTL3   |     | -0.18639 | 0.04718  | 0.094292 |
| 11760303_HEX A    |     | 0.127492 | 0.047203 | 0.094335 |
| 11756235_DGCR2    |     | -0.15428 | 0.04722  | 0.094359 |
| 11735283_KMT2E    |     | 0.116744 | 0.047221 | 0.094359 |
| 11747422_WBSCR22  |     | 0.105433 | 0.047221 | 0.094359 |
| 11751168_EGFL8    | /// | -0.28758 | 0.047231 | 0.094374 |
| 11756922_VASN     |     | -0.11394 | 0.047257 | 0.094422 |
| 11743540_ACAD9    |     | -0.07975 | 0.047265 | 0.094432 |
| 11747330_ACAD9    |     | -0.07975 | 0.047265 | 0.094432 |
| 11738186_PDE8B    |     | -0.19229 | 0.047281 | 0.09446  |
| 11730647_SIRPD    |     | -0.13421 | 0.047297 | 0.094488 |
| 11748336_GIF      |     | 0.096456 | 0.047299 | 0.094488 |
| 11746640_RASSF2   |     | -0.1027  | 0.047301 | 0.094489 |
| 11753353_SLC47A1  |     | -0.14474 | 0.047316 | 0.094513 |
| 11746999_CDHR3    |     | -0.15667 | 0.047323 | 0.094525 |
| 11731938_FTCD     |     | -0.10072 | 0.04733  | 0.094535 |
| 11738849_SERINC5  |     | -0.2087  | 0.047339 | 0.094549 |
| 11742887_BAG5     |     | -0.11547 | 0.047358 | 0.094583 |
| 11725632_NR4A2    |     | -0.18786 | 0.047362 | 0.094586 |
| 11722374_GGA2     |     | 0.103722 | 0.047365 | 0.094588 |
| 11746080_MY03B    |     | -0.17502 | 0.047387 | 0.094628 |
| 11715341_MROH9    |     | -0.26016 | 0.047395 | 0.094636 |
| 11735923_AMELY    |     | -0.11685 | 0.047395 | 0.094636 |
| 11757433_TRIM27   |     | 0.113217 | 0.047397 | 0.094637 |
| 11742242_PCSK6    |     | -0.10804 | 0.0474   | 0.09464  |
| 11733490_ZNF704   |     | 0.122141 | 0.047403 | 0.094642 |



|                    |          |          |          |
|--------------------|----------|----------|----------|
| 11746401_ZSWIM3    | 0.113947 | 0.047408 | 0.094647 |
| 11732119_USP10     | 0.094363 | 0.047414 | 0.094656 |
| 11732017_IL18RAP   | -0.15194 | 0.047421 | 0.094666 |
| 11734120_THRA      | -0.08772 | 0.047444 | 0.094708 |
| 11730909_CCR5      | -0.15968 | 0.047447 | 0.09471  |
| 11754065_ORM1      | -0.12875 | 0.047449 | 0.09471  |
| 11734895_CTC1      | -0.15688 | 0.047452 | 0.09471  |
| 11737229_TGIF2LX / | -0.14295 | 0.047453 | 0.09471  |
| 11718730_CCDC97    | 0.088589 | 0.047457 | 0.094713 |
| 11742671_GH1       | -0.15675 | 0.047458 | 0.094713 |
| 11752551_AMOT      | -0.16964 | 0.047493 | 0.094779 |
| 11721529_ZDHC2     | 0.10847  | 0.047503 | 0.094795 |
| 11743799_SPAG17    | 0.096569 | 0.047507 | 0.094798 |
| 11723163_NR3C2     | -0.12762 | 0.047513 | 0.094807 |
| 11718082_ATP2B4    | 0.137485 | 0.047518 | 0.094813 |
| 11734745_ALAS2     | -0.11934 | 0.04752  | 0.094813 |
| 11735472_CCDC169 / | 0.205717 | 0.047525 | 0.09482  |
| 11747955_PDZD3     | -0.08332 | 0.047559 | 0.094884 |
| 11720722_REXO1     | 0.080698 | 0.047589 | 0.094939 |
| 11740990_HYAL1     | -0.19425 | 0.047597 | 0.09495  |
| 11722986_UBOX5     | 0.157387 | 0.047598 | 0.09495  |
| 11753799_SMIM11A / | 0.133494 | 0.047609 | 0.094968 |
| 11744744_SLITRK3   | -0.27191 | 0.047612 | 0.094969 |
| 11727299_CASC10    | 0.157337 | 0.047615 | 0.094972 |
| 11718259_NOTCH1    | -0.09482 | 0.047619 | 0.094976 |
| 11756259_NFATC1    | -0.12111 | 0.047669 | 0.095069 |
| 11716488_PIGT      | -0.08713 | 0.04767  | 0.095069 |
| 11718535_NKTR      | 0.078564 | 0.047673 | 0.095073 |
| 11760779_MMP19     | 0.123414 | 0.04772  | 0.095161 |
| 11750540_KCNMB2    | -0.12199 | 0.04777  | 0.095257 |
| 11763025_MUC1      | -0.11588 | 0.047783 | 0.095273 |
| 11736270_NANP      | 0.10399  | 0.047784 | 0.095273 |
| 11746169_LOC440173 | -0.21624 | 0.047784 | 0.095273 |
| 11750199_HCLS1     | -0.11988 | 0.047796 | 0.09529  |
| 11754504_AGAP4 /// | 0.100963 | 0.047796 | 0.09529  |
| 11760955_NDUFA8    | -0.08831 | 0.047825 | 0.095341 |
| 11733585_TEX29     | -0.13708 | 0.047825 | 0.095341 |
| 11729277_CRCP      | 0.105027 | 0.047834 | 0.095354 |
| 11732647_PCDH8     | 0.15009  | 0.047843 | 0.095368 |
| 11729856_CNFN      | -0.13477 | 0.047873 | 0.095424 |
| 11742545_OR5R1     | -0.20677 | 0.047878 | 0.09543  |
| 11737124_TRAPPC3L  | -0.21796 | 0.047882 | 0.095434 |
| 11738530_PCDHGA6   | 0.132188 | 0.047889 | 0.095444 |
| 11721971_JADE3     | 0.088091 | 0.047904 | 0.09547  |
| 11753900_MT2A      | -0.08122 | 0.047908 | 0.095475 |
| 11744407_GOLGA8A   | 0.094504 | 0.047922 | 0.095498 |
| 11763980_SRRT      | 0.091771 | 0.047937 | 0.095523 |
| 11736718_NCALD     | 0.209229 | 0.047953 | 0.095553 |
| 11755107_RIN3      | -0.094   | 0.047955 | 0.095553 |
| 11726117_MTAP      | -0.08513 | 0.047959 | 0.095556 |
| 11751976_LRP2      | -0.14299 | 0.047966 | 0.095566 |

|                    |          |          |          |
|--------------------|----------|----------|----------|
| 11739589_DRAXIN    | -0.09574 | 0.047981 | 0.095592 |
| 11760028_MCF2L     | -0.16326 | 0.047983 | 0.095592 |
| 11732518_GPR52     | 0.120504 | 0.04799  | 0.0956   |
| 11738487_PSKH2     | -0.19866 | 0.047991 | 0.0956   |
| 11762424_BRD4      | -0.08362 | 0.047993 | 0.0956   |
| 11733113_MANBAL    | 0.094315 | 0.047999 | 0.095608 |
| 11728892_TPPP      | -0.20484 | 0.048004 | 0.095615 |
| 11761068_AKR1C1 // | 0.154228 | 0.048053 | 0.095709 |
| 11744422_CRADD     | -0.07797 | 0.048059 | 0.095716 |
| 11736321_ANKRD26   | 0.093032 | 0.048066 | 0.095727 |
| 11754218_SLC45A4   | 0.168212 | 0.04807  | 0.095731 |
| 11726451_B3GAT1    | -0.15829 | 0.048076 | 0.095738 |
| 11731773_KIAA1161  | -0.11349 | 0.048086 | 0.095755 |
| 11734626_PRY /// P | -0.13921 | 0.048094 | 0.095766 |
| 11725205_RPH3AL    | -0.11001 | 0.048119 | 0.095813 |
| 11760655_LRP3      | -0.20688 | 0.048132 | 0.095835 |
| 11731800_C3orf70   | 0.128247 | 0.048148 | 0.095863 |
| 11759487_ARHGEF40  | -0.2193  | 0.048156 | 0.095875 |
| 11752021_ADGRF3    | -0.15619 | 0.048208 | 0.095969 |
| 11761568_TMC6      | -0.13924 | 0.048209 | 0.095969 |
| 11717379_PUF60     | -0.08636 | 0.048209 | 0.095969 |
| 11737844_FAM102A   | -0.14479 | 0.048226 | 0.09599  |
| 11749888_ORAI3     | -0.13536 | 0.048227 | 0.09599  |
| 11753753_TTTY6 /// | -0.14735 | 0.048228 | 0.09599  |
| 11736435_SEMA3E    | 0.234516 | 0.048228 | 0.09599  |
| 11720036_CASP2     | 0.145551 | 0.04823  | 0.09599  |
| 11763102_FCN2      | -0.14919 | 0.048256 | 0.096038 |
| 11731979_FNDC7     | -0.26419 | 0.048261 | 0.096045 |
| 11718133_CDK5RAP1  | -0.10628 | 0.048293 | 0.096104 |
| 11763106_TTTY6B    | 0.228089 | 0.048314 | 0.096142 |
| 11738455_C20orf197 | -0.18589 | 0.048317 | 0.096144 |
| 11758688_OLA1      | 0.083216 | 0.048321 | 0.096148 |
| 11748042_KMT5A     | -0.09847 | 0.048327 | 0.096157 |
| 11733559_EDAR      | -0.14324 | 0.048329 | 0.096157 |
| 11760598_ATP5L2    | -0.09282 | 0.048343 | 0.096181 |
| 11745280_ANKRD19P  | 0.159794 | 0.048353 | 0.096196 |
| 11731405_ATP6V1G1  | -0.24135 | 0.048355 | 0.096197 |
| 11741585_DNAJC28   | -0.16347 | 0.048391 | 0.096264 |
| 11724771_FCGR2A // | 0.116704 | 0.048403 | 0.096278 |
| 11753089_OGFR      | -0.10928 | 0.048403 | 0.096278 |
| 11753547_C9orf66   | -0.12564 | 0.048405 | 0.096278 |
| 11717837_AIF1      | -0.18972 | 0.048406 | 0.096278 |
| 11722602_PLEKHF1   | 0.130449 | 0.048414 | 0.09629  |
| 11730433_ZNF341    | -0.20659 | 0.048421 | 0.0963   |
| 11741087_RTKN      | -0.09238 | 0.048434 | 0.096321 |
| 11741371_GRID2IP   | -0.14638 | 0.048442 | 0.096334 |
| 11743493_KTN1      | 0.126918 | 0.048444 | 0.096334 |
| 11730763_CRIPT     | 0.126923 | 0.048448 | 0.096339 |
| 11734101_ZNF578    | -0.13172 | 0.048454 | 0.096345 |
| 11725876_GPIHBP1   | -0.15772 | 0.048456 | 0.096346 |
| 11742539_OR10X1    | -0.19884 | 0.04848  | 0.09639  |

|                    |          |          |          |
|--------------------|----------|----------|----------|
| 11748917_GPD1      | -0.09619 | 0.048511 | 0.096449 |
| 11728699_BMP2R2    | 0.142991 | 0.048525 | 0.096472 |
| 11725603_HOXA10-HC | -0.22865 | 0.04853  | 0.096477 |
| 11757997_OAT       | -0.12104 | 0.048545 | 0.096503 |
| 11717878_PPFIA1    | 0.107053 | 0.048563 | 0.096536 |
| 11734762_HIP1      | -0.12545 | 0.04857  | 0.096543 |
| 11732600_CHRNB2    | -0.14195 | 0.048571 | 0.096543 |
| 11724164_RUBCN     | -0.24243 | 0.048573 | 0.096544 |
| 11720197_TOMM40L   | 0.126729 | 0.048594 | 0.096579 |
| 11740093_NTRK2     | -0.16354 | 0.048597 | 0.096579 |
| 11743539_ACAD9     | -0.11851 | 0.048597 | 0.096579 |
| 11735846_ASBI4     | -0.14267 | 0.048599 | 0.096579 |
| 11718498_F8A1 ///  | -0.08716 | 0.048618 | 0.096613 |
| 11717664_KLHL12    | -0.10118 | 0.04864  | 0.096651 |
| 11728605_LIMS1 /// | -0.10277 | 0.048641 | 0.096651 |
| 11741070_ZNF146    | 0.095772 | 0.048678 | 0.096722 |
| 11754163_IL7       | -0.10794 | 0.048686 | 0.096732 |
| 11746761_PXK       | -0.11757 | 0.048708 | 0.096771 |
| 11762016_CDK15     | -0.13635 | 0.048709 | 0.096771 |
| 11724052_PIGQ      | -0.11788 | 0.048712 | 0.096773 |
| 11730082_GFI1B     | -0.11357 | 0.048718 | 0.096778 |
| 11730815_LILRB4    | -0.20675 | 0.048719 | 0.096778 |
| 11751991_MOV10L1   | -0.10252 | 0.048721 | 0.096778 |
| 11720465_SKIV2L2   | -0.08376 | 0.048741 | 0.096814 |
| 11743471_WDFY3     | 0.142087 | 0.048824 | 0.096975 |
| 11735032_UPRT      | -0.24952 | 0.048865 | 0.097052 |
| 11716458_MRPS35    | 0.080799 | 0.048874 | 0.097066 |
| 11717008_BNIP3L    | 0.091345 | 0.04888  | 0.097075 |
| 11756199_ATMIN     | 0.110499 | 0.048893 | 0.097098 |
| 11719117_GOT2      | -0.0805  | 0.048917 | 0.09714  |
| 11726809_SLC12A8   | 0.116702 | 0.048926 | 0.097155 |
| 11725214_HAAO      | -0.10559 | 0.048933 | 0.097165 |
| 11751593_STX1A     | 0.110188 | 0.048955 | 0.097203 |
| 11731493_ITCH      | -0.09442 | 0.048972 | 0.097234 |
| 11715290_CLDN3     | -0.09694 | 0.048974 | 0.097234 |
| 11755722_RPP21 /// | -0.13088 | 0.048977 | 0.097235 |
| 11717567_NQO1      | 0.078529 | 0.049002 | 0.097282 |
| 11745223_ATP2C1    | -0.13578 | 0.049013 | 0.097299 |
| 11752896_MIF4GD    | -0.08249 | 0.049016 | 0.097299 |
| 11754652_ECI2      | -0.09397 | 0.049017 | 0.097299 |
| 11715370_LGALS3BP  | 0.087043 | 0.049026 | 0.097313 |
| 11723068_CRHBP     | 0.229353 | 0.04903  | 0.097317 |
| 11754994_SART1     | 0.101948 | 0.049042 | 0.097337 |
| 11737606_ZNF438    | 0.17309  | 0.04906  | 0.09737  |
| 11729553_PRR7      | -0.09797 | 0.049068 | 0.097381 |
| 11726493_ZNF775    | -0.14018 | 0.049084 | 0.097409 |
| 11730283_SMU1      | 0.160651 | 0.049118 | 0.097469 |
| 11751054_SPOCK3    | -0.21467 | 0.049118 | 0.097469 |
| 11731966_PODNL1    | -0.10716 | 0.049123 | 0.097473 |
| 11749183_ALDH4A1   | -0.12327 | 0.049124 | 0.097473 |
| 11715273_TPM2      | 0.147253 | 0.04913  | 0.097473 |

|                    |          |          |          |
|--------------------|----------|----------|----------|
| 11748018_KCNJ13    | -0.10767 | 0.04913  | 0.097473 |
| 11730695_TBC1D26   | -0.14873 | 0.04913  | 0.097473 |
| 11740459_TRIM39 // | -0.11667 | 0.049145 | 0.097498 |
| 11758400_IGF2 ///  | -0.15267 | 0.049153 | 0.097511 |
| 11719252_DNAJB5    | -0.12538 | 0.049157 | 0.097514 |
| 11730280_RAD50     | 0.194041 | 0.049186 | 0.097564 |
| 11741026_PIP5K1A   | 0.14711  | 0.049186 | 0.097564 |
| 11759118_FKBP14    | 0.123285 | 0.049221 | 0.097629 |
| 11762685_LILRB3    | -0.11832 | 0.049241 | 0.097664 |
| 11750849_RIPK1     | -0.12045 | 0.049248 | 0.097674 |
| 11734325_CADM2     | -0.08373 | 0.04925  | 0.097674 |
| 11721160_TARBP2    | 0.087086 | 0.049256 | 0.097682 |
| 11726018_FAM222B   | 0.088312 | 0.049264 | 0.097695 |
| 11748498_ANKRD19P  | 0.194563 | 0.049273 | 0.097709 |
| 11729149_MRPS23    | -0.07931 | 0.049294 | 0.097747 |
| 11760762_DENND2A   | -0.13157 | 0.049299 | 0.097752 |
| 11762719_IREB2     | -0.17258 | 0.049303 | 0.097757 |
| 11733178_ZBTB1     | -0.11699 | 0.049307 | 0.097761 |
| 11742686_FCGR1     | -0.18271 | 0.049368 | 0.097876 |
| 11734435_TMEM132E  | -0.12336 | 0.049387 | 0.09791  |
| 11748046_SLC44A4   | -0.10737 | 0.049444 | 0.098019 |
| 11741407_SFMBT2    | 0.111744 | 0.049476 | 0.098079 |
| 11725217_WDSUB1    | 0.139743 | 0.049479 | 0.098082 |
| 11761724_SCGB2A2   | 0.180826 | 0.049487 | 0.098093 |
| 11763983_SNRPC     | -0.13854 | 0.049492 | 0.098099 |
| 11745570_LSP1P3    | 0.100109 | 0.049498 | 0.098099 |
| 11752794_STAT2     | -0.09547 | 0.049498 | 0.098099 |
| 11750449_GRM2      | 0.131551 | 0.049502 | 0.098099 |
| 11741890_NKX2-4    | -0.10442 | 0.049502 | 0.098099 |
| 11726187_SHISA3    | -0.09851 | 0.049502 | 0.098099 |
| 11715498_OXA1L     | 0.096658 | 0.049523 | 0.098136 |
| 11731785_IL9       | -0.14837 | 0.049534 | 0.09815  |
| 11734512_ASCL4     | -0.144   | 0.049536 | 0.09815  |
| 11760783_FN3K      | -0.14136 | 0.049536 | 0.09815  |
| 11725322_ZNHIT2    | 0.121984 | 0.049546 | 0.098167 |
| 11715913_EFNB1     | -0.13274 | 0.049549 | 0.098168 |
| 11728202_DNNTIP2   | 0.092176 | 0.049565 | 0.098195 |
| 11721793_RGMB      | -0.19963 | 0.049581 | 0.09822  |
| 11732213_ZKSCAN1   | 0.102695 | 0.049581 | 0.09822  |
| 11723743_CADM3     | -0.12241 | 0.049628 | 0.098309 |
| 11741238_COPE      | 0.080265 | 0.049639 | 0.098326 |
| 11747488_TMX2      | 0.087286 | 0.049646 | 0.098336 |
| 11756169_OAZ1      | -0.07886 | 0.049658 | 0.098356 |
| 11760377_EFCAB11   | -0.14196 | 0.049664 | 0.098364 |
| 11742450_COL13A1   | 0.130534 | 0.049675 | 0.098378 |
| 11758337_ADA       | 0.096883 | 0.049675 | 0.098378 |
| 11759430_KLF7      | 0.169316 | 0.049682 | 0.098387 |
| 11757603_NTNG1     | 0.174896 | 0.049685 | 0.09839  |
| 11742068_CALHM1    | -0.1204  | 0.049693 | 0.098402 |
| 11727982_SNX21     | -0.19984 | 0.049704 | 0.098418 |
| 11723910_CMKLR1    | -0.14939 | 0.049711 | 0.098428 |

|                     |          |          |          |
|---------------------|----------|----------|----------|
| 11722997_NOL11      | -0.09198 | 0.049737 | 0.098475 |
| 11747677_BZW2       | 0.09621  | 0.049738 | 0.098475 |
| 11723952_KRT1       | -0.14589 | 0.04976  | 0.098515 |
| 11715785_CRYBB2     | -0.13835 | 0.049766 | 0.098522 |
| 11732815_CPN2       | -0.12864 | 0.049779 | 0.098544 |
| 11750549_NPHS2      | -0.13186 | 0.049794 | 0.098569 |
| 11722980_F8         | -0.20699 | 0.049799 | 0.098575 |
| 11732289_TRMT61A    | -0.10502 | 0.049803 | 0.098575 |
| 11721449 ETF1       | 0.100594 | 0.049803 | 0.098575 |
| 11734422_C17orf98   | -0.1546  | 0.049818 | 0.098602 |
| 11741776_TMEM179    | -0.15263 | 0.049831 | 0.098623 |
| 11762160_AKAP8      | -0.20501 | 0.049842 | 0.09864  |
| 11735627_ZNF841     | 0.104344 | 0.049847 | 0.098647 |
| 11719636_NUP153     | 0.104936 | 0.049865 | 0.098678 |
| 11732435_SCIMP      | -0.1105  | 0.049868 | 0.098679 |
| 11717241_MAEA       | 0.082855 | 0.049887 | 0.098713 |
| 11717983_GGPS1      | -0.11746 | 0.049892 | 0.098719 |
| 11739948_PFKFB2     | -0.14385 | 0.049894 | 0.098719 |
| 11738975_DEFEB130 / | -0.16409 | 0.049896 | 0.09872  |
| 11734083_PDHA2      | -0.13972 | 0.049902 | 0.098727 |
| 11752242_SBN02      | 0.136444 | 0.049915 | 0.098748 |
| 11749015_VASH2      | -0.12006 | 0.049951 | 0.098816 |
| 11734637_TAS2R60    | -0.15262 | 0.049969 | 0.098848 |
| 11735262_CATSPER2   | -0.21433 | 0.049971 | 0.098848 |
| 11752601_MRC1       | -0.21152 | 0.049985 | 0.098872 |
| 11763537_RAD51D     | -0.0959  | 0.049997 | 0.098891 |
| 11757985_PDE7B      | 0.175491 | 0.050021 | 0.098935 |
| 11750745_HSPA9      | 0.082631 | 0.050023 | 0.098935 |
| 11743983_SH3GLB2    | -0.10325 | 0.05003  | 0.098943 |
| 11749562_MTMR11     | 0.160248 | 0.050031 | 0.098943 |
| 11742746_PLIN2      | -0.08489 | 0.050036 | 0.098949 |
| 11735008_ZNF555     | 0.105295 | 0.050061 | 0.098995 |
| 11739885_DOCK7      | 0.157625 | 0.050072 | 0.099011 |
| 11741206_SCAMP5     | -0.10865 | 0.050108 | 0.09908  |
| 11761695_MRPL48     | 0.107005 | 0.050134 | 0.099127 |
| 11731096_WNT10A     | -0.15289 | 0.050139 | 0.099132 |
| 11751444_TRABD      | -0.10282 | 0.050156 | 0.099161 |
| 11757491_ROMO1      | 0.083209 | 0.050198 | 0.099241 |
| 11762054_HNRNPC     | -0.15874 | 0.050205 | 0.099251 |
| 11734539_MS4A15     | -0.18707 | 0.050216 | 0.099268 |
| 11746947_PTPRA      | -0.12275 | 0.050222 | 0.099276 |
| 11717534_TMEM259    | -0.12392 | 0.050249 | 0.099326 |
| 11716989_PNRC2      | 0.087126 | 0.050251 | 0.099326 |
| 11727962_ING1       | -0.09566 | 0.05026  | 0.09934  |
| 11731607_SCIN       | -0.14945 | 0.050275 | 0.099365 |
| 11763725_HNRNPU     | -0.10061 | 0.050288 | 0.099387 |
| 11721968_IGSF11     | -0.17757 | 0.05031  | 0.099426 |
| 11716489_STATH      | -0.16707 | 0.050314 | 0.099429 |
| 11758550_C9orf91    | -0.11271 | 0.050321 | 0.099439 |
| 11732315_SGCD       | -0.12945 | 0.050331 | 0.099455 |
| 11732627_NEMP2      | -0.11867 | 0.050356 | 0.099501 |

|                   |          |          |          |
|-------------------|----------|----------|----------|
| 11728006_PRAC1    | -0.12785 | 0.050385 | 0.099554 |
| 11756057_MED16    | -0.10019 | 0.050408 | 0.099595 |
| 11718839_MON1B    | -0.09776 | 0.050413 | 0.099601 |
| 11761402_ISCU     | 0.124703 | 0.05043  | 0.099631 |
| 11724372_ANXA10   | 0.149018 | 0.050452 | 0.09967  |
| 11733459_PSG6     | -0.09958 | 0.050455 | 0.099673 |
| 11747150_SLC28A1  | -0.18987 | 0.050459 | 0.099676 |
| 11723531_GOSR1    | 0.106692 | 0.050497 | 0.099746 |
| 11743458_FAM49A   | -0.13846 | 0.050518 | 0.099784 |
| 11717226_CBFA2T2  | -0.10027 | 0.050548 | 0.099839 |
| 11723467_NDUFA3   | 0.082373 | 0.050562 | 0.099864 |
| 11736018_PXN      | 0.115245 | 0.050576 | 0.099887 |
| 11743388_NAGPA    | -0.11434 | 0.050579 | 0.099888 |
| 11729254_NKAIN2   | -0.09522 | 0.050587 | 0.099899 |
| 11722750_AKAP8    | 0.097622 | 0.050588 | 0.099899 |
| 11741495_KCNQ3    | -0.09104 | 0.050616 | 0.099949 |
| 11740251_SPTLC1   | 0.101866 | 0.050636 | 0.099985 |
| 11763899_SNORA70B | 0.194125 | 0.050639 | 0.099986 |
| 11755841_KIF26B   | 0.106343 | 0.050646 | 0.099993 |
| 11729591_KLK2     | -0.07784 | 0.050646 | 0.099993 |
| 11753066_PAH      | -0.16777 | 0.050656 | 0.100009 |
| 11756276_NUP210   | -0.19738 | 0.050666 | 0.100025 |
| 11716340_NDUFS4   | -0.08428 | 0.050675 | 0.100038 |
| 200062_PMRPL30    | 0.075856 | 0.050727 | 0.100137 |
| 11731462_CPM      | 0.217491 | 0.050735 | 0.100144 |
| 11756888_TFCP2L1  | -0.18949 | 0.050735 | 0.100144 |
| 11729980_PLCXD3   | -0.1603  | 0.050742 | 0.100147 |
| 11718925_WWP2     | 0.089615 | 0.050742 | 0.100147 |
| 11761605_SPTY2D1  | 0.09198  | 0.050743 | 0.100147 |
| 11729068_MYH8     | 0.119222 | 0.050748 | 0.100155 |
| 11721110_NAP1L3   | -0.17595 | 0.050755 | 0.100163 |
| 11721240_ZNF787   | -0.13285 | 0.050777 | 0.100202 |
| 11752801_SP110    | 0.09519  | 0.050783 | 0.100211 |
| 11729069_KLK11    | 0.17474  | 0.050786 | 0.100213 |
| 11761261_NAAA     | 0.170504 | 0.050791 | 0.100218 |
| 11727990_FAXC     | 0.116259 | 0.050798 | 0.100227 |
| 11724361_PIKFYVE  | 0.092303 | 0.050803 | 0.100227 |
| 11751390_CYSLTR2  | 0.29996  | 0.050803 | 0.100227 |
| 11759128_CD300E   | -0.12082 | 0.050804 | 0.100227 |
| 11741493_PEX5     | -0.14674 | 0.050807 | 0.100228 |
| 11727018_PAPPA    | 0.208504 | 0.050808 | 0.100228 |
| 11729046_TCERG1L  | 0.09226  | 0.050828 | 0.100262 |
| 11738040_ZNF630   | 0.18451  | 0.050839 | 0.100274 |
| 11721023_DIDO1    | -0.11003 | 0.050841 | 0.100274 |
| 11752276_DIDO1    | -0.11003 | 0.050841 | 0.100274 |
| 11745024_A4GALT   | -0.08876 | 0.050842 | 0.100274 |
| 11753446_HMOX1    | 0.089094 | 0.050852 | 0.10029  |
| 11716439_TAF7     | -0.09523 | 0.050869 | 0.100319 |
| 11717786_CLUH     | -0.15122 | 0.050881 | 0.10034  |
| 11716929_DGCR2    | 0.213422 | 0.050915 | 0.100402 |
| 11739633_MED13    | 0.093041 | 0.05095  | 0.100468 |

|                    |          |          |          |
|--------------------|----------|----------|----------|
| 11730037_DEGS2     | -0.11606 | 0.050953 | 0.100469 |
| 11744772_MLANA     | -0.17139 | 0.050974 | 0.100503 |
| 11751894_GPRI55    | -0.21722 | 0.050975 | 0.100503 |
| 11735764_NOSTRIN   | -0.15189 | 0.050978 | 0.100506 |
| 11719909_MLLT10 // | 0.096701 | 0.050983 | 0.100511 |
| 11730311_TFCP2L1   | -0.17463 | 0.050991 | 0.100524 |
| 11749212_ITGBL1    | 0.210578 | 0.051013 | 0.100564 |
| 11763821_CHST1     | -0.17031 | 0.051031 | 0.100595 |
| 11743550_BRWD1     | 0.148346 | 0.051038 | 0.100604 |
| 11735603_OSBPL7    | -0.10854 | 0.05104  | 0.100604 |
| 11722479_CUL5      | -0.12903 | 0.051045 | 0.10061  |
| 11737379_MTNR1B    | -0.19842 | 0.051053 | 0.100621 |
| 11756781_OPALIN    | -0.17494 | 0.051056 | 0.100624 |
| 11733597_AWAT2     | -0.12462 | 0.051068 | 0.100644 |
| 11715310_MLXIPL    | -0.14223 | 0.051075 | 0.100653 |
| 11744884_NCOR1     | 0.106456 | 0.05108  | 0.100658 |
| 11719350_GCC2      | -0.17481 | 0.051087 | 0.100667 |
| 11724008_ENTPD1    | -0.15136 | 0.05109  | 0.100667 |
| 11745927_ADAM15    | -0.12034 | 0.051091 | 0.100667 |
| 11756130_GSK3A     | -0.09088 | 0.051095 | 0.100671 |
| 11763982_SNRPC     | -0.139   | 0.051115 | 0.100707 |
| 11757640_ART3      | -0.09626 | 0.051117 | 0.100708 |
| 11733158_NOP9      | -0.09561 | 0.051125 | 0.100719 |
| 11751312_BAIAP3    | -0.09715 | 0.051128 | 0.100721 |
| 11753234_TAMM41    | 0.092758 | 0.051138 | 0.100736 |
| 11738069_HAS3      | -0.17894 | 0.051146 | 0.100748 |
| 11761762_FSD1      | -0.1105  | 0.051153 | 0.100758 |
| 11760505_LOC100506 | -0.11299 | 0.051158 | 0.100764 |
| 11745475_MAML3     | -0.09574 | 0.051185 | 0.100813 |
| 11718979_HTATIP2   | 0.092811 | 0.051201 | 0.10084  |
| 11733267_PIRT      | -0.12165 | 0.051222 | 0.100872 |
| 11745138_FAM223A / | -0.10094 | 0.051222 | 0.100872 |
| 11743023_RTNR4RL2  | -0.12276 | 0.051223 | 0.100872 |
| 11740544_NRG1      | -0.12946 | 0.051256 | 0.100932 |
| 11741240_APAF1     | -0.09508 | 0.051261 | 0.100937 |
| 11729540_NCAPH2    | -0.11824 | 0.051264 | 0.100939 |
| 11738657_CDKL4     | -0.14023 | 0.051277 | 0.10096  |
| 11721311_SRSF10    | 0.0929   | 0.051283 | 0.100969 |
| 11740486_RUNX3     | -0.08712 | 0.05131  | 0.101019 |
| 11724206_MAD1L1    | -0.08989 | 0.051314 | 0.10102  |
| 11741533_EVC2      | 0.120859 | 0.051315 | 0.10102  |
| 11720777_POLL      | -0.09058 | 0.051324 | 0.101033 |
| 11722039_FES       | -0.11264 | 0.051371 | 0.101123 |
| 11742595_OR51F1    | -0.23238 | 0.051373 | 0.101123 |
| 11747731_DBF4      | -0.11957 | 0.051386 | 0.101144 |
| 11758679_NOP56     | 0.078099 | 0.051408 | 0.101182 |
| 11762767_NGRN      | 0.141673 | 0.051428 | 0.101218 |
| 11736720_CCR4      | -0.14057 | 0.051437 | 0.101232 |
| 11736779_ZNF486    | 0.099598 | 0.051439 | 0.101232 |
| 11751009_IK        | -0.08538 | 0.051444 | 0.101237 |
| 11742050_API5      | 0.118373 | 0.051487 | 0.101316 |

|                    |          |          |          |
|--------------------|----------|----------|----------|
| 11735831_FGF21     | -0.165   | 0.051488 | 0.101316 |
| 11754095_TAGLN     | -0.15288 | 0.051495 | 0.101325 |
| 11739532_DAW1      | 0.117245 | 0.051499 | 0.10133  |
| 11729972_CYP4Z1    | 0.183038 | 0.051502 | 0.10133  |
| 11742027_ANGPT2    | -0.22651 | 0.05151  | 0.101343 |
| 11723269_KPNA6     | -0.12155 | 0.051519 | 0.101356 |
| 11726910_MRI1      | 0.084181 | 0.051542 | 0.101398 |
| 11733191_FAAP24    | -0.1639  | 0.051546 | 0.101401 |
| 11756040_ANGPTL8   | -0.20824 | 0.051557 | 0.101417 |
| 11755244_ADAMTS13  | -0.13728 | 0.051558 | 0.101417 |
| 11718421_TMEM115   | 0.077686 | 0.051567 | 0.10143  |
| 11760903_RSAD1     | -0.1941  | 0.051583 | 0.101458 |
| 11730569_MS4A5     | -0.22251 | 0.0516   | 0.10148  |
| 11734660_CLSTN3    | -0.13995 | 0.0516   | 0.10148  |
| 11755572_MAP7D1    | -0.08365 | 0.051601 | 0.10148  |
| 11748159_PHLDB1    | 0.083467 | 0.051624 | 0.101522 |
| 11721414_TMEM62    | 0.142089 | 0.051626 | 0.101522 |
| 11749606_LOC399815 | -0.13151 | 0.05164  | 0.101546 |
| 11727202_ZNF230    | 0.121358 | 0.051673 | 0.101605 |
| 11741945_NHSL2     | 0.202771 | 0.051675 | 0.101605 |
| 11746101_PQLC1     | -0.11992 | 0.051679 | 0.101607 |
| 11740336_GPATCH11  | -0.12759 | 0.05168  | 0.101607 |
| 11727566_OTULIN    | 0.107157 | 0.051683 | 0.101608 |
| 11731971_XKR4      | -0.23914 | 0.051684 | 0.101608 |
| 11757058_TSPO      | 0.082557 | 0.051688 | 0.101611 |
| 11755988_AIPL1     | -0.13786 | 0.05173  | 0.101689 |
| 11737198_TMPRSS15  | -0.15599 | 0.051732 | 0.10169  |
| 11750504_ACY3      | -0.14614 | 0.051736 | 0.101693 |
| 11740207_GPR155    | -0.18005 | 0.051743 | 0.101702 |
| 11732982_OR2J2     | -0.10839 | 0.051753 | 0.101716 |
| 11724721_GALNT12   | -0.19476 | 0.051754 | 0.101716 |
| 11752132_DLG2      | -0.10921 | 0.051761 | 0.101726 |
| 11721931_TMCC2     | -0.14054 | 0.051774 | 0.101748 |
| 11740034_PCDH1     | -0.17509 | 0.051787 | 0.101768 |
| 11730103_SCN9A     | 0.218011 | 0.051825 | 0.101839 |
| 11718526_ESRRA     | -0.10421 | 0.051843 | 0.10187  |
| 11747061_COG2      | -0.10398 | 0.051845 | 0.10187  |
| 11729903_AGFG2     | -0.11248 | 0.051848 | 0.101873 |
| 11733748_GPR63     | 0.134101 | 0.051859 | 0.101889 |
| 11728001_TMEM114   | -0.14579 | 0.051869 | 0.101904 |
| 11737473_ZNF213    | 0.094449 | 0.051883 | 0.101928 |
| 11746832_ARID1A    | -0.15761 | 0.051914 | 0.101984 |
| 11726510_SMPD3     | -0.15768 | 0.051917 | 0.101984 |
| 11735608_C12orf56  | 0.106659 | 0.051917 | 0.101984 |
| 11724330_DGCR8     | -0.1154  | 0.051941 | 0.102026 |
| 11748936_POMT1     | 0.081558 | 0.051983 | 0.102104 |
| 11743952_CFAP206   | 0.167489 | 0.051986 | 0.102107 |
| 11723626_ENHO      | -0.09056 | 0.052016 | 0.10216  |
| 11761312_EDC4      | -0.11532 | 0.052034 | 0.102189 |
| 11731352_IL19      | -0.12091 | 0.052034 | 0.102189 |
| 11724395_ZNF83     | -0.09704 | 0.052055 | 0.102226 |



|                    |          |          |          |
|--------------------|----------|----------|----------|
| 11763017_HSPD1     | 0.164806 | 0.052058 | 0.102227 |
| 11751655_OAZ1      | -0.0944  | 0.05206  | 0.102228 |
| 11741418_KCNQ1     | -0.17594 | 0.052064 | 0.10223  |
| 11743998_SSBP4     | -0.10483 | 0.052075 | 0.102248 |
| 11737554_GJD4      | -0.13915 | 0.052084 | 0.102262 |
| 11763668_FER       | -0.29164 | 0.052086 | 0.102263 |
| 11751092_LOC101928 | 0.118115 | 0.052092 | 0.10227  |
| 11728492_KANK4     | -0.1283  | 0.052112 | 0.102305 |
| 11761182_NACAP1    | -0.28895 | 0.052145 | 0.102365 |
| 11757531_HSPD1     | -0.07819 | 0.052148 | 0.102367 |
| 200006_PMPARK7     | 0.07607  | 0.052153 | 0.102368 |
| 11750873_RAB11FIP1 | -0.13076 | 0.052154 | 0.102368 |
| 11720266_TBCK      | -0.12051 | 0.052155 | 0.102368 |
| 11724156_SULT1E1   | 0.124647 | 0.052163 | 0.102379 |
| 11716434_SCD5      | -0.15409 | 0.052166 | 0.102379 |
| 11718935_STK19     | 0.115222 | 0.052167 | 0.102379 |
| 11738724_OR4D6     | -0.11083 | 0.052202 | 0.102445 |
| 11759872_PDXDC1    | -0.2538  | 0.052223 | 0.102481 |
| 11734819_APBB2     | 0.115839 | 0.052242 | 0.102515 |
| 11762060_CD55      | 0.130156 | 0.052268 | 0.102561 |
| 11738829_C1orf109  | 0.080889 | 0.052278 | 0.102576 |
| 11722116_RARB      | 0.083964 | 0.05229  | 0.102596 |
| 11749244_FAM98A    | 0.11697  | 0.052294 | 0.102601 |
| 11759998_SLC3A1    | 0.126319 | 0.052297 | 0.102601 |
| 11728527_PEX5L     | -0.0903  | 0.052301 | 0.102605 |
| 11751806_STARD4    | 0.157843 | 0.052306 | 0.102609 |
| 11760994_WARS      | 0.242387 | 0.052308 | 0.102609 |
| 11729060_DNAH5     | 0.122459 | 0.052309 | 0.102609 |
| 11751792_MLXIP     | -0.11435 | 0.052319 | 0.102622 |
| 11734731_MRPS12    | -0.10351 | 0.05232  | 0.102622 |
| 11750807_KIRREL    | -0.09896 | 0.05234  | 0.102654 |
| 11720445_NSD1      | 0.131357 | 0.05234  | 0.102654 |
| 11738600_KRTAP5-6  | -0.15897 | 0.052345 | 0.102654 |
| 11745023_SLC25A27  | 0.115069 | 0.052345 | 0.102654 |
| 11718716_PKD1      | -0.10268 | 0.052347 | 0.102654 |
| 11762519_ERVMER61  | -0.14613 | 0.052351 | 0.102658 |
| 11744771_TTTY12    | -0.16515 | 0.052368 | 0.102687 |
| 11758839_CA12      | -0.21489 | 0.052381 | 0.102708 |
| 11754247_ATRX      | 0.080631 | 0.052386 | 0.102715 |
| 11750746_FRMD3     | 0.084098 | 0.052393 | 0.102724 |
| 11735961_BHLHA15   | -0.09241 | 0.052405 | 0.102744 |
| 11718613_ABCD4     | -0.13576 | 0.052415 | 0.102759 |
| 11728092_RASIP1    | -0.11342 | 0.052417 | 0.102759 |
| 11757366_UNC50     | 0.080541 | 0.052441 | 0.102801 |
| 11724193_COPS2     | -0.11731 | 0.052443 | 0.102801 |
| 11762243_CDKN3     | -0.17043 | 0.052449 | 0.102809 |
| 11725154_TDRD9     | 0.15933  | 0.052452 | 0.102812 |
| 11762485_RFX4      | -0.27286 | 0.052456 | 0.102813 |
| 11733619_ACVR1C    | -0.18311 | 0.052457 | 0.102813 |
| 11751597_ABI1      | 0.098244 | 0.052462 | 0.102818 |
| 11742074_ENSA      | 0.097796 | 0.05247  | 0.102829 |

|                    |          |          |          |
|--------------------|----------|----------|----------|
| 11759867_CNBD2     | -0.10677 | 0.05248  | 0.102845 |
| 11721147_SYNGR1    | 0.097003 | 0.05253  | 0.102939 |
| 11745646_EGR4      | 0.114455 | 0.052541 | 0.102956 |
| 11753160_PCDHGB6   | -0.15393 | 0.052547 | 0.102965 |
| 11731483_CNRIPI    | 0.087638 | 0.052554 | 0.102974 |
| 11762044_SIGLEC16  | -0.16126 | 0.052558 | 0.102977 |
| 11747181_LMAN1     | -0.08713 | 0.052562 | 0.102981 |
| 11752649_ACO2      | -0.11212 | 0.052569 | 0.10299  |
| 11751416_ERBB2     | -0.13227 | 0.052571 | 0.10299  |
| 11726360_ALDH3A1   | 0.170455 | 0.052581 | 0.103003 |
| 11763833_PLIN1     | -0.12794 | 0.052582 | 0.103003 |
| 11721068_FHOD3     | 0.110809 | 0.052601 | 0.103033 |
| 11737119_NEK10     | 0.173238 | 0.052601 | 0.103033 |
| 11753219_KLRF1     | -0.12675 | 0.052608 | 0.103043 |
| 11736319_SNRNP48   | 0.096588 | 0.05261  | 0.103043 |
| 11753081_CCT5      | -0.08411 | 0.052639 | 0.103094 |
| 11730225_POLDIP2   | -0.08121 | 0.052647 | 0.103106 |
| 11721170_TRIM32    | 0.153738 | 0.052652 | 0.103112 |
| 11733998_THRB      | 0.165194 | 0.052656 | 0.103115 |
| 11763178_UBE2F     | 0.156108 | 0.05267  | 0.103139 |
| 11728598_ALLC      | -0.12205 | 0.052672 | 0.103139 |
| 11752715_CCNI      | 0.078513 | 0.052679 | 0.103149 |
| 11721409_STK16     | -0.10358 | 0.052701 | 0.103188 |
| 11760125_KLF6      | -0.16504 | 0.052724 | 0.103228 |
| 11725103_EGFR      | 0.170915 | 0.052735 | 0.103242 |
| 11745457_CANX      | -0.08966 | 0.052735 | 0.103242 |
| 11734753_TATDN3    | 0.145224 | 0.052751 | 0.103268 |
| 11745005_POLD4     | 0.102713 | 0.052763 | 0.103288 |
| 11756232_VDAC2     | 0.080104 | 0.052767 | 0.103288 |
| 11763744_TMEM67    | 0.221185 | 0.052767 | 0.103288 |
| 11728603_CLDN23    | 0.080107 | 0.052781 | 0.103306 |
| 11746516_ADAM15    | -0.10436 | 0.052781 | 0.103306 |
| 11748182_SYNPO     | -0.17282 | 0.0528   | 0.103339 |
| 11760160_USP36     | -0.14697 | 0.052803 | 0.103341 |
| 11726429_YPEL1     | -0.07867 | 0.052821 | 0.103372 |
| 11718604_MTURN     | 0.197427 | 0.052827 | 0.103381 |
| 11741924_GRB10     | 0.163475 | 0.052866 | 0.10345  |
| 11731824_GPR83     | -0.12637 | 0.052867 | 0.10345  |
| 11715186_PRB1      | -0.18228 | 0.052874 | 0.103459 |
| 11755780_FCRL5     | -0.1863  | 0.052897 | 0.103501 |
| 11715787_ATP6VOC   | -0.08555 | 0.052899 | 0.103501 |
| 11733481_CNGB1     | -0.12476 | 0.052939 | 0.103573 |
| 11718319_CD93      | -0.20792 | 0.05294  | 0.103573 |
| 11753021_TOM1      | -0.10119 | 0.052949 | 0.103585 |
| 11735684_PPP1R3G   | -0.09442 | 0.052951 | 0.103585 |
| 11738607_KCTD16    | -0.1699  | 0.052971 | 0.10362  |
| 11718785_R3HCC1    | -0.08411 | 0.052999 | 0.103668 |
| 11734250_SEPT14    | -0.17095 | 0.052999 | 0.103668 |
| 11721317_PARM1     | 0.08096  | 0.053004 | 0.10367  |
| 11762036_LOC339059 | -0.1525  | 0.053005 | 0.10367  |
| 11722228_DNAJC30   | -0.13122 | 0.053007 | 0.103671 |

|                    |          |          |          |
|--------------------|----------|----------|----------|
| 11720379_GALNS     | 0.085927 | 0.053014 | 0.103679 |
| 11763661_FMNL1     | -0.09833 | 0.053018 | 0.103683 |
| 11741416_EIF4E     | 0.084581 | 0.053034 | 0.10371  |
| 11731272_KCNE1 /// | -0.12538 | 0.053041 | 0.103721 |
| 11742929_AP3D1     | -0.09461 | 0.053078 | 0.103788 |
| 11724662_PAX8      | -0.13672 | 0.053082 | 0.103791 |
| 11730078_SHF       | -0.10823 | 0.053099 | 0.103821 |
| 11732352_SAC3D1    | -0.09711 | 0.053102 | 0.103823 |
| 11730321_CLEC2D    | -0.15871 | 0.053108 | 0.103828 |
| 11748696_SYT4      | -0.07942 | 0.053109 | 0.103828 |
| 11745252_LINCO0346 | 0.155471 | 0.053128 | 0.103861 |
| 11730314_ERMAP     | -0.09748 | 0.05314  | 0.10388  |
| 11717243_YTHDF2    | 0.07724  | 0.053153 | 0.103902 |
| 11736255_INPP4A    | -0.13055 | 0.053157 | 0.103904 |
| 11721249_GNG2      | -0.10022 | 0.053163 | 0.103913 |
| 11743821_NTPCR     | 0.085752 | 0.053168 | 0.103918 |
| 11757676_C7orf76 / | -0.097   | 0.053203 | 0.10398  |
| 11728823_SLC25A3   | 0.077668 | 0.053204 | 0.10398  |
| 11734942_FAM212B / | 0.148097 | 0.053209 | 0.103987 |
| 11730950_TMEM151B  | -0.14157 | 0.053213 | 0.103987 |
| 11754428_ZFYVE26   | -0.12579 | 0.053215 | 0.103987 |
| 11715966_ABHD17A   | 0.083044 | 0.053216 | 0.103987 |
| 11729938_C1orf111  | -0.09725 | 0.053218 | 0.103988 |
| 11747683_ARHGAP27  | -0.09253 | 0.053221 | 0.103989 |
| 11730548_ZNF789    | -0.13652 | 0.053226 | 0.103993 |
| 11761108_PDLIM7    | -0.09885 | 0.053229 | 0.103996 |
| 11753424_RAB11B    | -0.12422 | 0.053241 | 0.104016 |
| 11747703_CARD8     | 0.135966 | 0.053252 | 0.104034 |
| 11740969_NPAP1     | -0.09739 | 0.053283 | 0.10409  |
| 11760253_IFI44     | 0.372118 | 0.053292 | 0.104103 |
| 11725747_ATP2C1    | -0.09365 | 0.053302 | 0.104118 |
| 11760437_DNPEP     | -0.08766 | 0.053306 | 0.104122 |
| 11744065_ZNF589    | 0.084124 | 0.053335 | 0.104173 |
| 11734478_TMEM252   | -0.14492 | 0.053342 | 0.104184 |
| 11715282_CGB /// C | -0.10151 | 0.053346 | 0.104187 |
| 11753198_SMARCA2   | 0.087197 | 0.053364 | 0.104217 |
| 11762455_COL8A1    | 0.23008  | 0.053388 | 0.104261 |
| 11732877_CYP24A1   | 0.221344 | 0.053394 | 0.104269 |
| 11715421_CCT2      | 0.079016 | 0.053401 | 0.104277 |
| 11752324_TBC1D30   | -0.1149  | 0.053403 | 0.104277 |
| 11738408_SPACA3    | -0.21092 | 0.053416 | 0.104298 |
| 11732436_RHOV      | -0.12658 | 0.053429 | 0.104321 |
| 11738976_DEFB131 / | -0.14016 | 0.053433 | 0.104323 |
| 11721741_VANGL2    | -0.19486 | 0.053452 | 0.104356 |
| 11729408_CNTNAP4   | -0.15396 | 0.053459 | 0.104366 |
| 11725676_RORA      | 0.369777 | 0.053462 | 0.104366 |
| 11747362_ARHGAP1   | -0.13666 | 0.053463 | 0.104366 |
| 11749805_MASP1     | -0.14725 | 0.053475 | 0.104386 |
| 11726483_ZNF260    | 0.117711 | 0.053484 | 0.104398 |
| 11720032_TRIM29    | -0.22267 | 0.053514 | 0.104454 |
| 11748269_PHF23     | 0.085613 | 0.053527 | 0.104474 |

|                    |          |          |          |
|--------------------|----------|----------|----------|
| 11744470_MIF       | 0.081965 | 0.053537 | 0.10449  |
| 11752860_CD80      | -0.1387  | 0.053551 | 0.104512 |
| 11740258_MAML2     | 0.134176 | 0.053562 | 0.104529 |
| 11731778_MARC1     | -0.09956 | 0.053593 | 0.104587 |
| 11746823_RASSF4    | -0.11884 | 0.053617 | 0.104629 |
| 11760722_HCRP1     | -0.21226 | 0.053623 | 0.104637 |
| 11728012_PRTG      | 0.144446 | 0.05364  | 0.104662 |
| 11762408_RASGEF1B  | -0.2574  | 0.05364  | 0.104662 |
| 11734756_METTL6    | 0.098404 | 0.053655 | 0.104685 |
| 11728323_PPP3R2    | 0.085753 | 0.053658 | 0.104688 |
| 11759281_SERINC5   | -0.10619 | 0.053663 | 0.104693 |
| 11747630_XAF1      | 0.145928 | 0.053665 | 0.104693 |
| 11749673_CTNNA1    | 0.080887 | 0.053685 | 0.104727 |
| 11723352_TMEM178A  | 0.106366 | 0.053695 | 0.104743 |
| 11732445_RBPMS     | 0.127488 | 0.05371  | 0.104767 |
| 11718587_SAP30BP   | -0.07815 | 0.053713 | 0.104767 |
| 11741275_TMEM144   | -0.12276 | 0.053715 | 0.104767 |
| 11760265_PIH1D2    | -0.10402 | 0.053716 | 0.104767 |
| 11753396_PDCD2     | 0.100279 | 0.053718 | 0.104767 |
| 11739075_NFE2L1    | -0.1074  | 0.053736 | 0.104794 |
| 11722579_CHMP4A    | 0.098399 | 0.053737 | 0.104794 |
| 11741584_ASB10     | 0.156304 | 0.053738 | 0.104794 |
| 11718101_CD59      | -0.08829 | 0.053746 | 0.104804 |
| 11745930_PAK6      | -0.09283 | 0.053753 | 0.104814 |
| 11723542_ABHD14A   | -0.12093 | 0.053758 | 0.10482  |
| 11758232_RNGTT     | -0.15089 | 0.05376  | 0.10482  |
| 11748943_CHD4      | -0.10498 | 0.053764 | 0.104823 |
| 11735958_WFDC12    | -0.13886 | 0.053779 | 0.104848 |
| 11759644_OSMR      | -0.17143 | 0.053784 | 0.104854 |
| 11720716_FGF13     | 0.11596  | 0.053793 | 0.104868 |
| 11720010_JARID2    | 0.109152 | 0.053815 | 0.104906 |
| 11748047_MFSD14B   | -0.1193  | 0.053825 | 0.104922 |
| 11734859_WDR37     | -0.11767 | 0.053849 | 0.104964 |
| 11740769_FSCN2     | 0.154407 | 0.053872 | 0.105005 |
| 11726902_PRDM15    | 0.132169 | 0.053882 | 0.10502  |
| 11732577_NANOG     | -0.19747 | 0.053904 | 0.105057 |
| 11759013_CHEK1     | -0.12909 | 0.053909 | 0.105057 |
| 11718928_ANKS1A    | -0.08515 | 0.05391  | 0.105057 |
| 11760156_EVL       | -0.15944 | 0.05391  | 0.105057 |
| 11726734_TLK2      | -0.10164 | 0.053919 | 0.105063 |
| 11735236_SNX7      | -0.0897  | 0.053919 | 0.105063 |
| 11730536_CHST13    | -0.13921 | 0.053919 | 0.105063 |
| 11741704_HIST1H2BC | 0.143355 | 0.053936 | 0.105087 |
| 11760863_NBR1      | -0.22068 | 0.053938 | 0.105087 |
| 11760114_HERC2P2   | -0.08819 | 0.053939 | 0.105087 |
| 11757633_FTH1      | 0.095786 | 0.05394  | 0.105087 |
| 11747959_KLHDC3    | 0.080099 | 0.053954 | 0.105109 |
| 11735443_ZNF781    | 0.212261 | 0.053959 | 0.105116 |
| 11728638_ADH1A     | -0.11545 | 0.05397  | 0.105133 |
| 11740320_CFAP47    | -0.09884 | 0.053981 | 0.10515  |
| 11719659_ATP1A2    | -0.12351 | 0.053993 | 0.105165 |

|                    |          |          |          |
|--------------------|----------|----------|----------|
| 11738756_OR10AG1   | -0.16985 | 0.053994 | 0.105165 |
| 11741123_ADK       | 0.170377 | 0.053995 | 0.105165 |
| 11732202_TMEM39A   | -0.084   | 0.054009 | 0.105188 |
| 11750646_PDE2A     | -0.08602 | 0.054017 | 0.105199 |
| 11753898_HLA-DQA1  | -0.10028 | 0.054023 | 0.105207 |
| 11730181_KDSR      | 0.095866 | 0.054031 | 0.105217 |
| 11749967_GABRB2    | -0.09987 | 0.054032 | 0.105217 |
| 11748021_SUMF2     | 0.080545 | 0.054041 | 0.105227 |
| 11746990_PEX14     | -0.11301 | 0.054042 | 0.105227 |
| 11759354_GPR32     | -0.10237 | 0.054061 | 0.105261 |
| 11724561_TSR2      | -0.16241 | 0.054065 | 0.105262 |
| 11733016_CCIN      | -0.10089 | 0.054067 | 0.105262 |
| 11750496_MRPL43    | -0.09018 | 0.054115 | 0.105353 |
| 11750089_PFDN5     | 0.081815 | 0.054124 | 0.105365 |
| 11762517_COBL      | 0.156201 | 0.054128 | 0.105369 |
| 11737190_ZGRF1     | -0.08771 | 0.054132 | 0.105374 |
| 11752410_PBOV1     | -0.1109  | 0.054159 | 0.105422 |
| 11739001_PRKCZ     | 0.09755  | 0.054178 | 0.105454 |
| 11717173_RNF31     | -0.09095 | 0.054192 | 0.105477 |
| 11744686_SHARPIN   | -0.10948 | 0.054198 | 0.105484 |
| 11733389_DEF6      | -0.2177  | 0.054203 | 0.10549  |
| 11715592_DYNC1H1   | 0.084564 | 0.054215 | 0.105505 |
| 11729811_WFIKKN2   | -0.1241  | 0.054215 | 0.105505 |
| 11752581_GGT6      | -0.19046 | 0.054229 | 0.105527 |
| 11758245_SUB1      | 0.091891 | 0.054234 | 0.105533 |
| 11761711_FEZ1      | -0.16322 | 0.05424  | 0.10554  |
| 11749625_PQLC3     | 0.142545 | 0.054242 | 0.10554  |
| 11728299_AP2A1     | -0.10422 | 0.054287 | 0.105625 |
| 11734096_TMEM108   | -0.13258 | 0.054296 | 0.105638 |
| 11756241_PSMF1     | -0.08565 | 0.054299 | 0.105639 |
| 11736807_GABRA4    | -0.14633 | 0.054317 | 0.105669 |
| 11730258_EPN3      | -0.10394 | 0.054327 | 0.105685 |
| 11734356_DRP2      | -0.11389 | 0.054339 | 0.105701 |
| 11760274_EIF3H     | 0.219858 | 0.05434  | 0.105701 |
| 11735304_HOXA11    | -0.20599 | 0.054359 | 0.105734 |
| 11746072_TRPM2     | -0.08057 | 0.054369 | 0.105749 |
| 11727597_PADI2     | -0.11792 | 0.054377 | 0.105761 |
| 11759137_POMT1     | -0.132   | 0.054393 | 0.105784 |
| 11745653_CASP10    | 0.143361 | 0.054393 | 0.105784 |
| 11735193_ADGRE2    | 0.12523  | 0.054402 | 0.105798 |
| 11758081_ENSA      | 0.096822 | 0.054406 | 0.105801 |
| 11755485_OPLAH     | -0.13683 | 0.05442  | 0.105822 |
| 11747647_MSTO1     | 0.106957 | 0.054421 | 0.105822 |
| 11733004_FCGR3A // | 0.201132 | 0.054437 | 0.105848 |
| 11735749_GEMIN8    | 0.113664 | 0.05444  | 0.105849 |
| 11749506_PLOD3     | -0.09638 | 0.054442 | 0.105849 |
| 11720376_SAP30L    | -0.12922 | 0.054452 | 0.105863 |
| 11755925_CTSD      | -0.09779 | 0.054453 | 0.105863 |
| 11750485_ESR1      | -0.10755 | 0.054476 | 0.105903 |
| 11763376_PCBP2     | 0.102635 | 0.054491 | 0.105928 |
| 11758532_IFT57     | -0.18541 | 0.054495 | 0.105931 |

|                    |          |          |          |
|--------------------|----------|----------|----------|
| 11742235_SUPT20HL2 | -0.15799 | 0.054505 | 0.105947 |
| 11747396_DHX38     | -0.09004 | 0.05451  | 0.105952 |
| 11737797_STRIP1    | -0.11748 | 0.054534 | 0.105995 |
| 11739991_SRI       | -0.08633 | 0.054543 | 0.106009 |
| 11736520_KCNA4     | -0.16653 | 0.054556 | 0.106029 |
| 11751950_MUC4      | -0.08914 | 0.054568 | 0.106047 |
| 11725718_CDC42     | -0.11252 | 0.054569 | 0.106047 |
| 11718584_SAP30BP   | 0.118688 | 0.054573 | 0.10605  |
| 11736487_RASGEF1B  | -0.14205 | 0.05459  | 0.106079 |
| 11761570_WDR74     | -0.15321 | 0.054599 | 0.106091 |
| 11719433_HECA      | -0.11882 | 0.054607 | 0.106104 |
| 11749847_MSR1      | 0.188401 | 0.054612 | 0.106104 |
| 11737499_SLC25A53  | -0.11211 | 0.054612 | 0.106104 |
| 11719806_ASPN      | 0.164747 | 0.054634 | 0.106144 |
| 11727073_PLAC4     | -0.10168 | 0.05464  | 0.106151 |
| 11749901_KIF6      | 0.277932 | 0.054653 | 0.106168 |
| 11735031_UPRT      | -0.1371  | 0.054654 | 0.106168 |
| 11742870_ARPC2     | 0.087398 | 0.054657 | 0.106171 |
| 11742362_OR6V1     | -0.1981  | 0.054679 | 0.106209 |
| 11757864_INSM1     | -0.15242 | 0.054688 | 0.106221 |
| 11754423_CASKIN2   | -0.10919 | 0.05469  | 0.106221 |
| 11734677_ITIH5     | 0.282936 | 0.054709 | 0.106255 |
| 11735985_TAS2R41   | -0.12573 | 0.054712 | 0.106257 |
| 11730955_P2RX1     | -0.18297 | 0.054724 | 0.106275 |
| 11735177_HAL       | -0.08884 | 0.054735 | 0.106292 |
| 11727482_TPR       | -0.07891 | 0.054747 | 0.106309 |
| 11742507_PRR21     | -0.11713 | 0.054748 | 0.106309 |
| 11716799_FADD      | -0.0784  | 0.054801 | 0.106409 |
| 11737201_CSF1      | -0.1081  | 0.054813 | 0.106427 |
| 11759333_AMACR /// | -0.17166 | 0.054834 | 0.106463 |
| 11715255_TAS2R30   | -0.15178 | 0.054842 | 0.106475 |
| 11737303_ACOX3     | 0.144876 | 0.054856 | 0.106498 |
| 11756879_STARD9    | -0.17266 | 0.054866 | 0.106512 |
| 11764042_BLOC1S3   | -0.0922  | 0.054879 | 0.106535 |
| 11723601_ATG2A     | -0.10662 | 0.054902 | 0.10657  |
| 11752868_ATG2A     | -0.10662 | 0.054902 | 0.10657  |
| 11726718_GEMIN7    | -0.13106 | 0.054911 | 0.106583 |
| 11738905_MOGAT1    | -0.10453 | 0.054918 | 0.106592 |
| 11718342_TUBGCP2   | 0.111692 | 0.05492  | 0.106592 |
| 11726311_GLRB      | -0.26911 | 0.054925 | 0.106597 |
| 11761011_PRC1      | -0.17688 | 0.054945 | 0.106632 |
| 11725850_USP48     | 0.089612 | 0.054959 | 0.106656 |
| 11724558_GNA15     | -0.1749  | 0.054963 | 0.106659 |
| 11743974_MRPL38    | -0.11065 | 0.054998 | 0.106722 |
| 11727141_EPB41L3   | 0.151552 | 0.055    | 0.106722 |
| 11757560_NPY       | -0.13637 | 0.055011 | 0.106739 |
| 11742869_PBXIP1    | -0.10033 | 0.05502  | 0.106752 |
| 11761625_RFC4      | 0.17627  | 0.05503  | 0.106767 |
| 11758294_ARMCX1    | 0.129062 | 0.05504  | 0.106784 |
| 11721385_CUL7      | 0.085539 | 0.055052 | 0.106801 |
| 11745665_SCN5A     | -0.13211 | 0.055062 | 0.106817 |

|                    |     |          |          |          |
|--------------------|-----|----------|----------|----------|
| 11757388_C7orf76   | /   | -0.08893 | 0.055079 | 0.106846 |
| 11747325_LDB3      |     | -0.21468 | 0.055092 | 0.106867 |
| 11741174_PKIA      |     | 0.11328  | 0.055099 | 0.106876 |
| 11757823_TNRC6B    |     | 0.08454  | 0.055101 | 0.106877 |
| 11741268_LDB2      |     | 0.193413 | 0.055132 | 0.106932 |
| 11737626_SETD4     |     | 0.087996 | 0.05515  | 0.106959 |
| 11764241_LOC105373 |     | -0.20455 | 0.055151 | 0.106959 |
| 11747437_CARD8     |     | 0.143629 | 0.055155 | 0.10696  |
| 11762115_DDI2      |     | -0.12401 | 0.055155 | 0.10696  |
| 11748945_ABI3BP    |     | -0.09291 | 0.055168 | 0.106981 |
| 11734580_CSN3      |     | -0.22405 | 0.055179 | 0.106997 |
| 11747097_RIBC1     |     | -0.15041 | 0.055203 | 0.107039 |
| 11757594_PDAP1     |     | -0.07516 | 0.055221 | 0.107071 |
| 11755178_MYT1      |     | -0.1508  | 0.055231 | 0.107085 |
| 11732956_TARP      | /// | -0.10823 | 0.055245 | 0.107108 |
| 11721700_RERG      |     | 0.101372 | 0.055255 | 0.107123 |
| 11756125_NDUFA1    |     | -0.08634 | 0.055257 | 0.107123 |
| 11750378_ATP2B2    |     | -0.12374 | 0.055262 | 0.107128 |
| 11757836_SEC24A    |     | 0.094074 | 0.055265 | 0.10713  |
| 11747328_FHL1      |     | 0.11328  | 0.055273 | 0.107142 |
| 11739789_GCFC2     |     | 0.102733 | 0.055294 | 0.107178 |
| 11760813_ADAMTS7   |     | -0.22482 | 0.055309 | 0.107203 |
| 11758779_TMEM50B   |     | -0.12606 | 0.055311 | 0.107203 |
| 11753375_SLC25A35  |     | -0.14578 | 0.055325 | 0.107226 |
| 11747811_POLR2M    |     | 0.103515 | 0.055348 | 0.107261 |
| 11737184_SAA2      |     | 0.241307 | 0.055348 | 0.107261 |
| 11758131_NDNL2     |     | -0.09582 | 0.055359 | 0.107279 |
| 11740787_FBXO28    |     | 0.092687 | 0.055363 | 0.107282 |
| 11759167_HIST1H2BE |     | -0.19989 | 0.055375 | 0.1073   |
| 11754370_SYTL1     |     | -0.12895 | 0.055382 | 0.10731  |
| 11737746_ADGRG1    |     | 0.087634 | 0.055386 | 0.107314 |
| 11727585_SPIN3     |     | 0.196615 | 0.055392 | 0.107322 |
| 11745776_TTC31     |     | -0.07849 | 0.055402 | 0.107336 |
| 11734059_PSTK      |     | 0.141403 | 0.055433 | 0.107392 |
| 11733988_POLR2J2   | /   | 0.116599 | 0.055449 | 0.107419 |
| 11761886_C21orf58  |     | -0.21305 | 0.055457 | 0.10743  |
| 11737742_TTBK2     |     | 0.106906 | 0.055487 | 0.107484 |
| 11739210_COG6      |     | -0.21095 | 0.05549  | 0.107484 |
| 11725315_PRELID1   |     | 0.083023 | 0.055501 | 0.107503 |
| 11716877_B4GALT5   |     | -0.12089 | 0.055526 | 0.107546 |
| 11746445_ZNF626    |     | 0.153057 | 0.05554  | 0.107568 |
| 11733688_DPH6      |     | -0.21689 | 0.055548 | 0.107578 |
| 11733050_HP1BP3    |     | 0.086621 | 0.055551 | 0.107578 |
| 11724985_EXPH5     |     | -0.1209  | 0.055551 | 0.107578 |
| 11761854_LLPH      |     | 0.126767 | 0.055557 | 0.107584 |
| 11741256_APOBEC3F  |     | 0.141199 | 0.05557  | 0.107607 |
| 11715657_GLB1      |     | -0.10152 | 0.055584 | 0.107629 |
| 11754949_HSPB7     |     | -0.14982 | 0.05559  | 0.107637 |
| 11726240_PAX3      |     | 0.105941 | 0.055603 | 0.107658 |
| 11733720_MAX       |     | -0.12336 | 0.055617 | 0.10768  |
| 11763527_MAP2K5    |     | -0.25605 | 0.055624 | 0.10769  |

|                    |          |          |          |
|--------------------|----------|----------|----------|
| 11744431_LIPF      | -0.129   | 0.05563  | 0.107698 |
| 11715369_NDUFA4    | 0.080714 | 0.055638 | 0.107708 |
| 11729899_C4BPB     | -0.16482 | 0.055704 | 0.107832 |
| 11737832_KIR2DL2 / | -0.19442 | 0.055722 | 0.107858 |
| 11720225_TBC1D1    | 0.089023 | 0.055722 | 0.107858 |
| 11752627_CLGN      | -0.11135 | 0.055731 | 0.107872 |
| 11760536_HEXAX     | 0.129923 | 0.055745 | 0.107894 |
| 11750682_TPCN1     | -0.1121  | 0.055763 | 0.107925 |
| 11727843_SLC11A1   | -0.10739 | 0.05577  | 0.107933 |
| 11715798_WDR45B    | 0.08063  | 0.055779 | 0.107947 |
| 11729771_KREMEN2   | -0.08165 | 0.055795 | 0.107974 |
| 11724783_MRPS18C   | -0.08017 | 0.055806 | 0.107991 |
| 11757126_SNORA74A  | -0.18876 | 0.055815 | 0.108003 |
| 11752901_AZIN2     | -0.16286 | 0.05582  | 0.108008 |
| 11717058_RPL5      | 0.079587 | 0.055831 | 0.108026 |
| 11750868_ZNF852    | 0.14191  | 0.055847 | 0.108052 |
| 11761005_NDUFS2    | -0.09081 | 0.055853 | 0.10806  |
| 11760475_STK4      | 0.116136 | 0.055892 | 0.108132 |
| 11716570_NOTCH3    | -0.08767 | 0.055899 | 0.10814  |
| 11761066_CLK4      | 0.19105  | 0.055941 | 0.108217 |
| 11722400_DAPK3     | -0.10135 | 0.055959 | 0.108249 |
| 11730120_TMPRSS3   | 0.116423 | 0.055963 | 0.108251 |
| 11730994_S1PR4     | 0.143393 | 0.055968 | 0.108256 |
| 11722051_PRRH      | -0.17831 | 0.055985 | 0.108285 |
| 11749219_CACNA2D4  | 0.099371 | 0.055993 | 0.108296 |
| 11716003_FAF2      | 0.117942 | 0.056024 | 0.108353 |
| 11722292_NYNRIN    | -0.12123 | 0.056032 | 0.108359 |
| 11737491_WFDC10B   | -0.13444 | 0.056032 | 0.108359 |
| 11750351_MADCAM1   | -0.09606 | 0.056037 | 0.108364 |
| 11729764_LSM10     | 0.133808 | 0.056047 | 0.108379 |
| 11737684_ZNF517    | -0.20574 | 0.05606  | 0.108401 |
| 11762332_NDUFA13   | 0.197885 | 0.056067 | 0.108409 |
| 11752203_ELMO2     | 0.121655 | 0.056071 | 0.108412 |
| 11734098_C14orf37  | 0.291862 | 0.056077 | 0.108419 |
| 11746651_SLC29A2   | -0.10008 | 0.056081 | 0.108419 |
| 11737675_KCNK7     | 0.141916 | 0.056082 | 0.108419 |
| 11755995_OAZ1      | -0.07537 | 0.056083 | 0.108419 |
| 11718338_NHP2      | -0.07623 | 0.056086 | 0.10842  |
| 11744090_ZNF397    | -0.08648 | 0.056099 | 0.108442 |
| 11735562_PRKACG    | 0.120289 | 0.05611  | 0.108458 |
| 11740911_LDHAL6A   | 0.182616 | 0.056122 | 0.108477 |
| 11738925_KRTAP5-1  | -0.15303 | 0.056127 | 0.108482 |
| 11732451_AGRN      | -0.11012 | 0.056131 | 0.108482 |
| 11738096_CATIP     | -0.09934 | 0.056133 | 0.108482 |
| 11753212_TMEM131   | 0.197628 | 0.056134 | 0.108482 |
| 11716769_CHERP     | -0.10473 | 0.056163 | 0.108535 |
| 11761859_AUP1      | 0.145948 | 0.056167 | 0.108539 |
| 11749175_TAF1B     | -0.10905 | 0.056191 | 0.108579 |
| 11723585_SMPDL3A   | 0.162243 | 0.056192 | 0.108579 |
| 11733903_SPATA4    | 0.175332 | 0.056202 | 0.108593 |
| 11741224_EIF5      | -0.09738 | 0.056224 | 0.108631 |



|                    |          |          |          |
|--------------------|----------|----------|----------|
| 11722014_CWC15     | -0.07832 | 0.056227 | 0.108633 |
| 11732961_ZP2       | -0.0976  | 0.05623  | 0.108635 |
| 11737075_RBFOX2    | 0.105856 | 0.05626  | 0.108688 |
| 11739094_CXCR4     | -0.11001 | 0.056267 | 0.108698 |
| 11743071_LPAR6     | 0.106761 | 0.056271 | 0.108701 |
| 11731628_OSGIN2    | -0.11326 | 0.056283 | 0.108719 |
| 11760714_LOC101060 | -0.10484 | 0.056289 | 0.108727 |
| 11739818_C9        | -0.12647 | 0.056294 | 0.108733 |
| 11724484_CSK       | 0.099521 | 0.056303 | 0.108746 |
| 11750163_NLRP2     | -0.11198 | 0.056315 | 0.108765 |
| 11760029_ABCA8     | -0.1073  | 0.056324 | 0.108778 |
| 11735363_AKTIP     | -0.21272 | 0.05634  | 0.1088   |
| 11732180_PTAFR     | -0.2339  | 0.05634  | 0.1088   |
| 11723474_LYPLAL1   | -0.15517 | 0.056343 | 0.108801 |
| 11716231_TMEM167B  | 0.091758 | 0.056351 | 0.108811 |
| 11753053_CLN3      | -0.11273 | 0.056365 | 0.108836 |
| 11744026_EGLN2 /// | 0.089059 | 0.056368 | 0.108838 |
| 11728837_MLH3      | -0.10947 | 0.056397 | 0.108889 |
| 11729936_CLCNKA    | -0.08822 | 0.056436 | 0.10896  |
| 11756804_FSTL4     | -0.13253 | 0.056443 | 0.108969 |
| 11746523_FOXO3     | 0.092677 | 0.05645  | 0.108975 |
| 11753453_GTF2H2 // | 0.073744 | 0.056451 | 0.108975 |
| 11719376_DAXX      | 0.082862 | 0.056464 | 0.108996 |
| 11754481_CORO7     | -0.07388 | 0.056492 | 0.109047 |
| 11752000_UNC13D    | -0.16485 | 0.05655  | 0.10915  |
| 11751769_GLYATL1 / | -0.14435 | 0.056551 | 0.10915  |
| 11741388_TSPAN14   | 0.123613 | 0.0566   | 0.109242 |
| 11723469_LPGAT1    | 0.084913 | 0.056619 | 0.109273 |
| 11717631_KLHL9     | -0.09862 | 0.056622 | 0.109276 |
| 11749663_HFM1      | 0.154682 | 0.056631 | 0.109285 |
| 11748741_SCNN1A    | -0.13298 | 0.056631 | 0.109285 |
| 11730393_GPR4      | -0.15214 | 0.056634 | 0.109286 |
| 11731315_CPNE9     | -0.15221 | 0.056691 | 0.109387 |
| 11751815_CDK5      | -0.15642 | 0.056691 | 0.109387 |
| 11762728_CTCFL     | -0.11428 | 0.056708 | 0.109415 |
| 11760768_DLL1      | -0.14433 | 0.056713 | 0.109421 |
| 11744845_SLC22A2   | -0.15805 | 0.056723 | 0.109435 |
| 11724478_FOSL1     | -0.08444 | 0.056735 | 0.109454 |
| 11759256_HIST2H4A  | -0.18654 | 0.056773 | 0.109523 |
| 11718891_FOXO3 /// | 0.108231 | 0.056775 | 0.109523 |
| 200056_PMC1D       | -0.09816 | 0.056796 | 0.109559 |
| 11738059_HIST1H2AD | 0.288937 | 0.056806 | 0.109574 |
| 11742622_OR4S1     | -0.20121 | 0.056811 | 0.10958  |
| 11734901_CYP4V2    | 0.101464 | 0.056832 | 0.109612 |
| 11733351_KLHL11    | 0.141972 | 0.056833 | 0.109612 |
| 11737784_CST4      | -0.10317 | 0.05685  | 0.109641 |
| 11735036_SORCS1    | 0.201744 | 0.056852 | 0.109641 |
| 11731837_SLC35C2   | 0.079204 | 0.056874 | 0.109679 |
| 11716831_XPOT      | -0.11417 | 0.056895 | 0.109715 |
| 11756156_TFRC      | -0.0885  | 0.056899 | 0.109718 |
| 11741194_ACP2      | -0.12722 | 0.056912 | 0.109739 |

|                    |          |          |          |
|--------------------|----------|----------|----------|
| 11760341_ANKUB1    | -0.28455 | 0.056926 | 0.109757 |
| 11757231_CHODL-AS1 | -0.16498 | 0.056927 | 0.109757 |
| 11753577_AZIN2     | -0.16102 | 0.05693  | 0.109757 |
| 11725234_ZBTB39    | -0.15286 | 0.056932 | 0.109757 |
| 11728307_GULP1     | 0.086167 | 0.056932 | 0.109757 |
| 11716699_CMAS      | 0.08368  | 0.056936 | 0.10976  |
| 11745506_PIGP      | -0.08878 | 0.056942 | 0.109767 |
| 11738342_MAGEA10-M | -0.10809 | 0.056946 | 0.10977  |
| 11759147_ATP13A5   | -0.11646 | 0.056952 | 0.109777 |
| 11762761_LOC100288 | -0.19481 | 0.056958 | 0.109779 |
| 11742497_S SX6     | -0.08047 | 0.056959 | 0.109779 |
| 11731140_ZNF333    | 0.145246 | 0.056959 | 0.109779 |
| 11718004_NCOA5     | -0.11135 | 0.056972 | 0.109799 |
| 11745811_IDH3B     | -0.14238 | 0.057017 | 0.109881 |
| 11730834_KATNA1    | 0.131793 | 0.057019 | 0.109882 |
| 11738028_LAMA1     | 0.12377  | 0.057025 | 0.109888 |
| 11753087_XPNPEP2   | -0.17936 | 0.057029 | 0.109892 |
| 11754099_SEC16A    | -0.18813 | 0.057042 | 0.109913 |
| 11742589_OR4L1     | -0.13607 | 0.057051 | 0.109926 |
| 11758929_TFDP2     | 0.11294  | 0.057064 | 0.109946 |
| 11726829_TYW1B     | -0.14587 | 0.057078 | 0.109968 |
| 11724665_APLN      | -0.11029 | 0.05709  | 0.109988 |
| 11736005_P RH2     | 0.143598 | 0.057134 | 0.110068 |
| 11718985_TMED5     | 0.328832 | 0.057138 | 0.110068 |
| 11760278_HCG8 ///  | -0.09679 | 0.057139 | 0.110068 |
| 11753359_PIGA      | 0.119805 | 0.057148 | 0.110082 |
| 11750816_CD96      | 0.101506 | 0.057165 | 0.110111 |
| 11716845_STIM1     | -0.08564 | 0.057185 | 0.110145 |
| 11734079_LONP2     | 0.096227 | 0.057204 | 0.110177 |
| 11724340_PRIMA1    | -0.121   | 0.057217 | 0.110197 |
| 11761562_HEATR1    | 0.099071 | 0.057229 | 0.110216 |
| 11763266_FAM120B   | 0.092611 | 0.057239 | 0.11023  |
| 11744214_TRAFD1    | 0.112893 | 0.057243 | 0.110233 |
| 11761905_MCF2L2    | -0.1613  | 0.057252 | 0.110247 |
| 11734973_L2HGDH    | 0.13196  | 0.057291 | 0.110313 |
| 11738268_FAM122C   | -0.32012 | 0.057293 | 0.110313 |
| 11742038_CACNB2    | -0.13584 | 0.057294 | 0.110313 |
| 11738088_C5orf56   | 0.1149   | 0.057295 | 0.110313 |
| 11746085_LOC728752 | -0.12692 | 0.057315 | 0.110346 |
| 11761216_BEST1     | -0.09429 | 0.057328 | 0.110367 |
| 11760810_BST2      | -0.1496  | 0.057341 | 0.110388 |
| 11736456_KCNK6     | -0.13365 | 0.057348 | 0.110398 |
| 11757918_MAP7      | 0.26013  | 0.057355 | 0.110407 |
| 11739381_GPR85     | -0.18705 | 0.057358 | 0.110408 |
| 11716045_FAM168B   | 0.083327 | 0.057361 | 0.110409 |
| 11735620_SP011     | 0.158337 | 0.057364 | 0.11041  |
| 11739292_EHF       | -0.1419  | 0.05737  | 0.110418 |
| 11730205_PSM D9    | 0.091374 | 0.057394 | 0.110459 |
| 11764252_ATP10A    | -0.20045 | 0.057404 | 0.110474 |
| 11738899_SERPINB12 | -0.10729 | 0.05741  | 0.110481 |
| 11720954_RPL30     | 0.079124 | 0.057422 | 0.1105   |

|                    |          |          |          |
|--------------------|----------|----------|----------|
| 11760824_MORN5     | -0.15061 | 0.057426 | 0.110505 |
| 11737890_LAT2      | 0.130384 | 0.057439 | 0.110525 |
| 11729562_TBX4      | -0.13156 | 0.057442 | 0.110527 |
| 11761219_CRACR2B   | -0.1033  | 0.057446 | 0.110529 |
| 11721407_FLYWCH1   | -0.09838 | 0.057448 | 0.11053  |
| 11741921_DGAT2L6   | -0.1538  | 0.057452 | 0.110533 |
| 11730645_SP7       | -0.09412 | 0.057472 | 0.110566 |
| 11744535_TCEB1     | -0.09221 | 0.057507 | 0.11063  |
| 11751396_SRCIN1    | -0.16309 | 0.057522 | 0.110652 |
| 11759122_TMEM150C  | -0.09553 | 0.057523 | 0.110652 |
| 11743953_MSANTD1   | -0.11681 | 0.057528 | 0.110657 |
| 11760072_PCDHA4    | 0.136537 | 0.057535 | 0.110666 |
| 11731615_CNR1      | 0.186989 | 0.057544 | 0.110679 |
| 11738589_OR5F1     | -0.21814 | 0.05755  | 0.110687 |
| 11715824_NOP10     | 0.09269  | 0.057578 | 0.110735 |
| 11751925_VWDE      | -0.12157 | 0.057581 | 0.110736 |
| 11727863_LIX1      | 0.147416 | 0.057598 | 0.110765 |
| 11726210_KLF15     | 0.108417 | 0.057611 | 0.110785 |
| 11745537_NFATC3    | 0.089743 | 0.057628 | 0.110815 |
| 11751618_HLA-E     | 0.079181 | 0.057632 | 0.110818 |
| 11743149_ZNF22     | -0.08724 | 0.057651 | 0.110846 |
| 11733745_GCNT2     | 0.13928  | 0.057651 | 0.110846 |
| 11750045_TPM3      | -0.08909 | 0.057692 | 0.110921 |
| 11739072_EPDR1     | 0.114562 | 0.057701 | 0.110933 |
| 11730019_MLIP      | -0.07674 | 0.057714 | 0.110953 |
| 11761828_OSBPL1A   | -0.15735 | 0.057718 | 0.110956 |
| 11757954_AGAP1     | 0.093384 | 0.057757 | 0.111027 |
| 11762578_MKL2      | 0.144662 | 0.057759 | 0.111028 |
| 11751454_MEST      | -0.21524 | 0.057772 | 0.111048 |
| 11726475_TMEM52    | -0.09994 | 0.057806 | 0.111108 |
| 11737767_BRDT      | -0.16438 | 0.057834 | 0.111157 |
| 11749732_LONP2     | 0.079187 | 0.057851 | 0.111187 |
| 11741509_RPE       | -0.09169 | 0.057861 | 0.111201 |
| 11760611_SETD6     | -0.09478 | 0.057863 | 0.111201 |
| 11719770_EXOC7     | -0.0913  | 0.057911 | 0.111288 |
| 11748630_TRMT2A    | -0.09511 | 0.057918 | 0.111298 |
| 11718059_TTYH2     | -0.15329 | 0.057951 | 0.111356 |
| 11723975_APOL3     | 0.105034 | 0.057974 | 0.111395 |
| 11734461_RFPL2     | 0.092091 | 0.057985 | 0.111414 |
| 11716982_CMSS1     | -0.08148 | 0.058038 | 0.111505 |
| 11723976_ABCC8     | -0.10759 | 0.058041 | 0.111505 |
| 11761222_GORASP1   | -0.16914 | 0.058041 | 0.111505 |
| 11716862_TMEM184B  | -0.15707 | 0.058042 | 0.111505 |
| 11723496_YBEY      | 0.147513 | 0.05807  | 0.111552 |
| 11737945_LCE1B     | -0.12272 | 0.058071 | 0.111552 |
| 11736671_SPERT     | -0.08231 | 0.058087 | 0.111578 |
| 11743825_PODXL2    | 0.139942 | 0.058093 | 0.111586 |
| 11743140_PPP1R12C  | -0.1196  | 0.058104 | 0.111602 |
| 11715778_LUZP6 /// | -0.08255 | 0.058114 | 0.111616 |
| 11749918_ELMOD3    | 0.145073 | 0.058116 | 0.111616 |
| 11763265_PCYT1A    | 0.085233 | 0.058151 | 0.111679 |

|                    |          |          |          |
|--------------------|----------|----------|----------|
| 11758054_DR1       | -0.07793 | 0.058178 | 0.111726 |
| 11725622_JMJD4     | 0.091238 | 0.058182 | 0.11173  |
| 11752979_ABHD12    | -0.09211 | 0.058184 | 0.11173  |
| 11745737_ACADVL    | 0.078669 | 0.058199 | 0.111754 |
| 11743994_KCTD5     | 0.095002 | 0.05821  | 0.111771 |
| 11739355_CHDH      | -0.19505 | 0.058234 | 0.111811 |
| 11742562_OR10H4    | -0.15812 | 0.058236 | 0.111811 |
| 11726076_PDCD2     | 0.08867  | 0.05824  | 0.111813 |
| 11727836_CPZ /// G | -0.20632 | 0.058241 | 0.111813 |
| 11752741_SLC29A3   | -0.13325 | 0.058259 | 0.111842 |
| 11715358_CST3      | 0.106102 | 0.058264 | 0.111848 |
| 11744516_SLC2A10   | -0.08324 | 0.058293 | 0.1119   |
| 11730488_DOK6      | -0.17396 | 0.0583   | 0.111905 |
| 11734481_RTP1      | 0.211262 | 0.058301 | 0.111905 |
| 11735458_FBXO39    | -0.12293 | 0.058317 | 0.111933 |
| 11763010_LOC100506 | -0.19836 | 0.058327 | 0.111948 |
| 11746888_BPHL      | 0.175134 | 0.058352 | 0.111991 |
| 11750313_VEGFA     | -0.07886 | 0.058355 | 0.111991 |
| 11744153_RTN1      | -0.19202 | 0.058383 | 0.112037 |
| 11758716_NDUFA4    | -0.15496 | 0.058388 | 0.112037 |
| 11747981_APCDD1    | -0.13146 | 0.058389 | 0.112037 |
| 11735209_MDGA2     | -0.12083 | 0.05839  | 0.112037 |
| 11754999_RBM25     | 0.083081 | 0.058392 | 0.112037 |
| 11744491_SEMA3B    | 0.083691 | 0.058392 | 0.112037 |
| 11717308_WDR75     | -0.15295 | 0.058441 | 0.112125 |
| 11724282_UGT1A1 // | -0.08319 | 0.058458 | 0.112154 |
| 11750007_S100Z     | 0.188887 | 0.058502 | 0.112234 |
| 11739461_ECE1      | 0.117856 | 0.058535 | 0.112292 |
| 11750928_CDK20     | 0.093234 | 0.058537 | 0.112293 |
| 11721661_TBXAS1    | -0.16384 | 0.058541 | 0.112296 |
| 11747693_MME       | 0.108058 | 0.058571 | 0.112346 |
| 11757211_H1FX-AS1  | -0.12721 | 0.058572 | 0.112346 |
| 11737270_ASB4      | -0.12766 | 0.058577 | 0.112352 |
| 11716407_MET       | 0.094195 | 0.058608 | 0.112407 |
| 11760543_RGS16     | -0.09885 | 0.058629 | 0.112442 |
| 11715922_SEPT9     | 0.082551 | 0.058633 | 0.112446 |
| 11729300_GLYAT     | 0.148581 | 0.058639 | 0.112454 |
| 11719988_SNX19     | 0.081021 | 0.058642 | 0.112455 |
| 11753096_VPS37C    | -0.12441 | 0.058663 | 0.112491 |
| 11755064_ZNF669    | 0.110028 | 0.058667 | 0.112494 |
| 11725542_GATA4     | -0.16125 | 0.058714 | 0.112579 |
| 11729488_DCLRE1C   | -0.10915 | 0.058719 | 0.112585 |
| 11734679_TXNL4A    | -0.16797 | 0.058732 | 0.112606 |
| 11717853_CCL21     | -0.14058 | 0.058747 | 0.112629 |
| 11719456_EXOC5     | -0.11946 | 0.058749 | 0.112629 |
| 11736144_ENPP4     | -0.20061 | 0.05877  | 0.112665 |
| 11731086_NXPH1     | 0.382014 | 0.058784 | 0.112686 |
| 11721300_ROMO1     | 0.078543 | 0.058797 | 0.112707 |
| 11761633_SLC37A3   | 0.28847  | 0.058835 | 0.112776 |
| 11743623_DPP9      | 0.080644 | 0.058856 | 0.112812 |
| 11731281_NFATC1    | -0.13682 | 0.058876 | 0.112846 |

|                    |          |          |          |
|--------------------|----------|----------|----------|
| 11758178_COR01B    | 0.087848 | 0.058908 | 0.112903 |
| 11751445_TRABD     | -0.12317 | 0.05895  | 0.112978 |
| 11761010_CKMT1A // | -0.16393 | 0.05898  | 0.113032 |
| 11748512_RNF220    | -0.16168 | 0.059001 | 0.113067 |
| 11720464_F11R      | -0.16071 | 0.059003 | 0.113067 |
| 11743325_CCDC50    | -0.08864 | 0.059013 | 0.113082 |
| 11761353_CCM2      | -0.14854 | 0.059025 | 0.1131   |
| 11745027_C11orf80  | -0.10242 | 0.059028 | 0.113102 |
| 11724151_TNS4      | -0.11912 | 0.059041 | 0.113121 |
| 11727026_NDUFB5    | -0.07619 | 0.059056 | 0.113145 |
| 11757381_GTF2A2    | 0.10356  | 0.059065 | 0.113158 |
| 11750763_FKBP9 /// | -0.10216 | 0.059082 | 0.113188 |
| 11719399_DOCK6     | -0.10314 | 0.059095 | 0.113207 |
| 11743569_EML1      | 0.188317 | 0.059098 | 0.113209 |
| 11728832_DSG3      | -0.19534 | 0.059101 | 0.113209 |
| 11715663_STARD7    | -0.10485 | 0.059107 | 0.113213 |
| 11754263_CHD9      | -0.10006 | 0.059108 | 0.113213 |
| 11762330_NPSR1-AS1 | -0.13738 | 0.059109 | 0.113213 |
| 11722210_PTGS1     | 0.161788 | 0.059116 | 0.113219 |
| 11757938_NMI       | 0.096889 | 0.059117 | 0.113219 |
| 11719605_RRN3      | 0.105238 | 0.059125 | 0.11323  |
| 11731801_C3orf70   | 0.269617 | 0.059137 | 0.113247 |
| 11761260_SART1     | -0.10975 | 0.05915  | 0.113269 |
| 11720785_CLASRP    | 0.10675  | 0.059159 | 0.11328  |
| 11730102_SCN9A     | 0.234644 | 0.059172 | 0.113302 |
| 11735594_SLC24A4   | -0.16617 | 0.059179 | 0.113311 |
| 11749242_SMOC2     | -0.1066  | 0.059214 | 0.113374 |
| 11743942_CCDC152   | 0.299319 | 0.059258 | 0.113453 |
| 11722582_LOC100630 | 0.099159 | 0.059262 | 0.113456 |
| 11735544_C8orf44   | -0.16191 | 0.059273 | 0.113472 |
| 11737799_R3HDM1    | -0.08667 | 0.059279 | 0.113479 |
| 11756628_NPFFR2    | 0.211612 | 0.059287 | 0.113492 |
| 11723993_STYXL1    | -0.10693 | 0.059295 | 0.113499 |
| 11725633_MRPS25    | 0.130624 | 0.059296 | 0.113499 |
| 11737411_SPATA45   | -0.18286 | 0.059325 | 0.113546 |
| 11745969_SFXN5     | -0.10239 | 0.059325 | 0.113546 |
| 11760474_TOR1AIP2  | -0.09741 | 0.059333 | 0.113554 |
| 11732613_CELF3     | -0.20553 | 0.059334 | 0.113554 |
| 11753649_SRSF3     | -0.07393 | 0.059344 | 0.113568 |
| 11715382_PLD3      | -0.09845 | 0.05935  | 0.113575 |
| 11752442_MIR17HG / | 0.106006 | 0.059352 | 0.113575 |
| 11760560_RBM26     | 0.145529 | 0.059371 | 0.113603 |
| 11728545_SMYD1     | 0.157423 | 0.059371 | 0.113603 |
| 11741060_HVCN1     | 0.099458 | 0.059384 | 0.113623 |
| 11747601_SLC25A14  | -0.11157 | 0.059395 | 0.11364  |
| 11727360_GJD3      | -0.13156 | 0.059428 | 0.113698 |
| 11715226_PCDHA6    | -0.122   | 0.059461 | 0.113756 |
| 11715964_SPTAN1    | -0.11994 | 0.059468 | 0.113766 |
| 11755663_FOXO3 /// | 0.097246 | 0.059475 | 0.113776 |
| 11726559_LCP1      | 0.1689   | 0.059483 | 0.113785 |
| 11759659_LOC100130 | 0.102676 | 0.059493 | 0.1138   |

|                    |          |          |          |
|--------------------|----------|----------|----------|
| 11747885_TAF1C     | -0.11284 | 0.059521 | 0.11385  |
| 11746084_PCMT1     | -0.08614 | 0.059524 | 0.11385  |
| 11761292_RGL3      | -0.1199  | 0.059556 | 0.113907 |
| 11753922_C7orf13   | -0.10388 | 0.059584 | 0.113952 |
| 11743468_DKC1      | -0.08386 | 0.059584 | 0.113952 |
| 11759105_SNRNP35   | -0.16748 | 0.059591 | 0.113961 |
| 11758064_FZD8      | 0.104269 | 0.059593 | 0.113961 |
| 11733475_KCNJ6     | -0.1192  | 0.059599 | 0.113964 |
| 11751636_GGT5      | -0.08188 | 0.0596   | 0.113964 |
| 11735525_CLDN14    | 0.08937  | 0.059652 | 0.114061 |
| 11734326_RERE      | -0.12913 | 0.059696 | 0.114138 |
| 11759655_SLC6A13   | 0.224139 | 0.059697 | 0.114138 |
| 11756692_SH3TC2    | 0.101221 | 0.059725 | 0.114186 |
| 11717506_TRAM2     | -0.07828 | 0.059734 | 0.114195 |
| 11733152_COX18     | -0.14212 | 0.059734 | 0.114195 |
| 11716410_PKDCC     | -0.10131 | 0.05976  | 0.114239 |
| 11737114_ZNF483    | 0.168957 | 0.059769 | 0.114252 |
| 11750769_CCR2      | -0.13151 | 0.059789 | 0.114286 |
| 11761593_ZNF384    | -0.2531  | 0.059798 | 0.114294 |
| 11762804_APP       | 0.091433 | 0.059798 | 0.114294 |
| 11752446_KLHL32    | -0.11117 | 0.059807 | 0.114303 |
| 11722334_FNDC5     | -0.1003  | 0.059807 | 0.114303 |
| 11725976_WDR91     | -0.09248 | 0.05981  | 0.114304 |
| 11742673_SPINK14   | -0.09028 | 0.059827 | 0.114333 |
| 11724493_FAM71D // | -0.0783  | 0.059879 | 0.114426 |
| 11717329_KLF9      | -0.15838 | 0.059882 | 0.114428 |
| 11736893_C3orf67   | -0.17045 | 0.059908 | 0.114472 |
| 11759824_LILRA1    | -0.14108 | 0.05991  | 0.114472 |
| 11736719_ZNF474    | -0.14918 | 0.059912 | 0.114472 |
| 11735336_CPLX4     | 0.157672 | 0.05992  | 0.114484 |
| 11738873_KIF25     | 0.113784 | 0.059941 | 0.114518 |
| 11740786_SYNM      | -0.14727 | 0.059992 | 0.114611 |
| 11734190_OOSP2     | -0.14182 | 0.060006 | 0.114635 |
| 11728822_GDPD2     | -0.14579 | 0.060012 | 0.114641 |
| 11720657_HLA-DRB5  | -0.08969 | 0.060015 | 0.114642 |
| 11735334_HRH3      | -0.0897  | 0.060037 | 0.114679 |
| 11737851_PPP1R18   | 0.084207 | 0.060051 | 0.114703 |
| 11759685_IGLV1-40  | -0.17011 | 0.060058 | 0.11471  |
| 11743465_TNPO3     | -0.10652 | 0.06006  | 0.11471  |
| 11719949_SPDL1     | -0.07627 | 0.060067 | 0.11472  |
| 11762680_CADM1 /// | 0.243651 | 0.060084 | 0.114747 |
| 11736714_LMOD2     | 0.131012 | 0.0601   | 0.114773 |
| 11729460_AK9       | 0.246089 | 0.060108 | 0.114783 |
| 11746870_SLC17A1   | -0.1746  | 0.060125 | 0.114812 |
| 11733825_C1orf198  | -0.07786 | 0.060138 | 0.114832 |
| 11757194_LMLN      | -0.09829 | 0.060145 | 0.11484  |
| 11732653_ANKRD65   | -0.08839 | 0.060159 | 0.114862 |
| 11755856_C2orf16   | -0.10748 | 0.060173 | 0.114885 |
| 11755848_C17orf51  | 0.145369 | 0.060179 | 0.114893 |
| 11729868_UGT3A1    | -0.10198 | 0.060204 | 0.114936 |
| 11754856_CA12      | -0.19533 | 0.060228 | 0.114977 |

|                    |          |          |          |
|--------------------|----------|----------|----------|
| 11730800_CRTC1     | -0.09227 | 0.060234 | 0.114984 |
| 11725770_MIER3     | 0.123179 | 0.060239 | 0.114988 |
| 11754905_PLCZ1     | 0.266108 | 0.060254 | 0.115013 |
| 11762776_ACTR2     | 0.228544 | 0.060259 | 0.115018 |
| 11738632_GPAT2     | -0.11986 | 0.060279 | 0.115052 |
| 11740722_IL1RN     | -0.08008 | 0.060282 | 0.115053 |
| 11733228_DNMT3L    | -0.09007 | 0.060287 | 0.115059 |
| 11732863_OXER1     | -0.20216 | 0.0603   | 0.115079 |
| 11746817_AGPAT3    | -0.12918 | 0.060305 | 0.115084 |
| 11727451_MORN4     | 0.157507 | 0.060309 | 0.115086 |
| 11720765_TOR1A     | 0.088151 | 0.060321 | 0.115106 |
| 11749362_MMGT1     | 0.093863 | 0.060367 | 0.115188 |
| 11736800_PDE10A    | -0.20502 | 0.060375 | 0.115199 |
| 11741740_LRRC14B   | -0.16201 | 0.060407 | 0.115256 |
| 11718411_NDUFAF3   | -0.08852 | 0.06042  | 0.115276 |
| 11762758_BAIAP2    | -0.07675 | 0.060424 | 0.11528  |
| 11721356_YPEL3     | 0.080188 | 0.060448 | 0.11532  |
| 11748900_RAB37     | -0.10292 | 0.06045  | 0.11532  |
| 11745850_SCP2      | 0.098806 | 0.060453 | 0.11532  |
| 11726093_KANK3     | -0.1032  | 0.060473 | 0.115355 |
| 11762031_UNC80     | 0.18198  | 0.060493 | 0.115388 |
| 11724584_ZKSCAN4   | 0.150662 | 0.060528 | 0.115451 |
| 11751885_PSME4     | 0.19558  | 0.060559 | 0.115505 |
| 11725296_PHF7      | 0.120511 | 0.060569 | 0.115519 |
| 11744881_GLYCTK    | -0.13786 | 0.06059  | 0.115556 |
| 11721508_DVL3      | -0.14722 | 0.060594 | 0.115558 |
| 11737805_TMPRSS11D | -0.1095  | 0.060596 | 0.115558 |
| 11748545_RNLS      | -0.12378 | 0.060598 | 0.115558 |
| 11740029_CREM      | 0.137587 | 0.06061  | 0.115575 |
| 11759954_PCDHB17P  | -0.18223 | 0.060615 | 0.11558  |
| 11742668_FABP9     | 0.075381 | 0.060625 | 0.115594 |
| 11752248_MET       | 0.09889  | 0.060638 | 0.115615 |
| 11723108_GBPB1     | 0.075639 | 0.060666 | 0.115664 |
| 11739529_PLGLB1 // | 0.151595 | 0.060674 | 0.115672 |
| 11715667_TPM3      | -0.07256 | 0.06068  | 0.115672 |
| 11740632_REP15     | -0.11887 | 0.060681 | 0.115672 |
| 11718865_COX10     | -0.08581 | 0.060682 | 0.115672 |
| 11730776_CEP68     | -0.12442 | 0.060682 | 0.115672 |
| 11761494_CFAP65    | -0.15118 | 0.060694 | 0.115691 |
| 11734662_TRA2B     | -0.07849 | 0.0607   | 0.115697 |
| 11741440_PLPP5     | 0.166889 | 0.060715 | 0.115721 |
| 11748007_CMAHP     | -0.11611 | 0.060728 | 0.115742 |
| 11742528_OR6K3     | -0.11555 | 0.060745 | 0.11577  |
| 11735118_VAMP4     | 0.131491 | 0.060755 | 0.115784 |
| 11763051_RNF165    | -0.09305 | 0.060786 | 0.115834 |
| 11721162_CTDSP1    | 0.136606 | 0.060787 | 0.115834 |
| 11743299_SRP72     | -0.08042 | 0.060789 | 0.115834 |
| 11740142_BEND6     | -0.21652 | 0.060792 | 0.115837 |
| 11757276_RPL24     | -0.09941 | 0.060816 | 0.115878 |
| 11734247_KRT3      | -0.21664 | 0.060864 | 0.115965 |
| 11720179_DDX28     | -0.09371 | 0.060866 | 0.115965 |

|                    |          |          |          |
|--------------------|----------|----------|----------|
| 11750596_BPESC1    | 0.157612 | 0.060871 | 0.115969 |
| 11718292_HK1       | -0.08555 | 0.060879 | 0.115979 |
| 11724563_RHOF      | 0.094777 | 0.060946 | 0.116103 |
| 11748472_CTNNA2    | 0.127099 | 0.06096  | 0.116125 |
| 11734343_P2RY4     | -0.18756 | 0.060963 | 0.116125 |
| 11735842_LCE4A     | -0.17428 | 0.060966 | 0.116125 |
| 11751118_TUBB4A    | -0.16489 | 0.060967 | 0.116125 |
| 11717113_ETHE1     | 0.078647 | 0.060995 | 0.116173 |
| 11746013_NCF1 ///  | -0.14505 | 0.060999 | 0.116176 |
| 11754607_HSP90B1   | -0.08964 | 0.06103  | 0.116231 |
| 11762193_ANGPT1    | 0.170246 | 0.061034 | 0.116235 |
| 11742152_OR1Q1     | -0.09063 | 0.06104  | 0.116241 |
| 11762320_C9orf114  | -0.09729 | 0.061044 | 0.116244 |
| 11755176_PAXIP1    | 0.087769 | 0.061066 | 0.116282 |
| 11742638_SEBOX     | -0.16292 | 0.061072 | 0.116289 |
| 11762858_TIMM23 // | 0.118051 | 0.061079 | 0.116298 |
| 11722975_HOXB5     | -0.14862 | 0.061083 | 0.116301 |
| 11731597_ZNF503    | -0.21696 | 0.061107 | 0.116342 |
| 11723837_SPNS2     | -0.16367 | 0.061117 | 0.116357 |
| 11732930_SLC6A18   | -0.11533 | 0.061142 | 0.116398 |
| 200059_PMRHOA      | 0.076517 | 0.061144 | 0.116399 |
| 11752060_ERN2      | -0.16757 | 0.061161 | 0.116426 |
| 11740150_DDTL      | -0.14187 | 0.061169 | 0.116436 |
| 11729649_PRF1      | -0.14434 | 0.061179 | 0.116447 |
| 11729416_CCDC102A  | -0.09592 | 0.061181 | 0.116447 |
| 11720422_AFF4      | 0.097089 | 0.061181 | 0.116447 |
| 11723742_CADM3     | -0.14749 | 0.061223 | 0.11652  |
| 11737825_STX16     | -0.08844 | 0.061244 | 0.116557 |
| 11739652_HNRNPLL   | 0.099138 | 0.061256 | 0.116575 |
| 11758056_TARSL2    | 0.153532 | 0.061271 | 0.116599 |
| 11753450_SPATA3    | -0.13834 | 0.061297 | 0.116644 |
| 11750501_CLNK      | -0.15155 | 0.061313 | 0.116669 |
| 11736186_DDX51     | 0.103361 | 0.061321 | 0.116681 |
| 11762430_DAB1      | 0.107552 | 0.061346 | 0.11672  |
| 11717969_FGFR3     | -0.13454 | 0.061347 | 0.11672  |
| 11762264_C4BPB     | -0.134   | 0.061378 | 0.116776 |
| 11735246_TRPV3     | -0.17479 | 0.061395 | 0.116803 |
| 11718162_MCRS1     | -0.09591 | 0.061402 | 0.116811 |
| 11726138_MTMR9     | 0.142646 | 0.061416 | 0.116833 |
| 11759932_CLK4      | -0.11104 | 0.061435 | 0.116866 |
| 11761818_TMEM26    | -0.18042 | 0.061443 | 0.116874 |
| 11743746_PHKA1     | 0.08573  | 0.061444 | 0.116874 |
| 11742512_KRTAP4-8  | 0.117766 | 0.061455 | 0.11689  |
| 11736700_RBM43     | 0.166393 | 0.061465 | 0.116904 |
| 11737888_HRH4      | -0.12731 | 0.061487 | 0.116942 |
| 11723902_PLEKHG1   | 0.199783 | 0.061531 | 0.11702  |
| 11738541_FAM129C   | -0.11249 | 0.061559 | 0.117069 |
| 11719726_POLD4     | 0.083577 | 0.061565 | 0.117077 |
| 11759612_FNDC3B    | 0.085764 | 0.061576 | 0.117093 |
| 11732024_MAMDC4    | 0.095403 | 0.061591 | 0.117114 |
| 11748395_MYADM     | 0.076676 | 0.061592 | 0.117114 |



|                    |          |          |          |
|--------------------|----------|----------|----------|
| 11761889_RPL14     | -0.12701 | 0.061596 | 0.117118 |
| 11728721_PDE1B     | -0.10868 | 0.061609 | 0.117138 |
| 11738471_OR56B1    | -0.1201  | 0.061633 | 0.117177 |
| 11718739_ST3GAL1   | -0.13425 | 0.061635 | 0.117177 |
| 11734490_VSX1      | -0.15622 | 0.061646 | 0.117193 |
| 11738444_OR51G2    | -0.20567 | 0.061657 | 0.117211 |
| 11758760_GSTK1     | 0.137423 | 0.061683 | 0.117255 |
| 11732098_BRMS1     | -0.0824  | 0.061714 | 0.117309 |
| 11717490_TDRD3     | 0.10534  | 0.06174  | 0.117355 |
| 11716828_NPC2      | 0.077993 | 0.061758 | 0.117385 |
| 11755630_OGFOD2    | -0.13134 | 0.061763 | 0.11739  |
| 11735163_OSBPL5    | -0.12038 | 0.061791 | 0.117438 |
| 11718945_PGPEP1    | 0.113908 | 0.061826 | 0.117498 |
| 11715655_VDAC1     | -0.09292 | 0.061829 | 0.117498 |
| 11730637_CTLA4     | -0.1402  | 0.06183  | 0.117498 |
| 11748325_MRPS22    | -0.0904  | 0.061865 | 0.11756  |
| 11731212_GGT6      | -0.17154 | 0.061873 | 0.117572 |
| 11761932_TUBB4B    | -0.10907 | 0.061891 | 0.117601 |
| 11754421_VSIG2     | -0.13451 | 0.061915 | 0.117641 |
| 11728097_CROCC     | -0.17571 | 0.061934 | 0.117668 |
| 11763587_ZC3H4     | -0.09613 | 0.061934 | 0.117668 |
| 11745659_POM121 // | -0.07502 | 0.061952 | 0.117697 |
| 11729551_MKLN1     | -0.08471 | 0.06196  | 0.117709 |
| 11738329_LKAAEAR1  | -0.09118 | 0.061982 | 0.117747 |
| 11744043_BCAM      | -0.09652 | 0.062004 | 0.117783 |
| 11717454_SPOCK2    | -0.09275 | 0.062027 | 0.117815 |
| 11758713_RP1L1     | -0.09614 | 0.062029 | 0.117815 |
| 11752502_ALDH7A1   | 0.103077 | 0.062029 | 0.117815 |
| 11759295_EHF       | 0.20082  | 0.06203  | 0.117815 |
| 11763922_SNORA71C  | -0.18878 | 0.062035 | 0.117819 |
| 11760178_RTFDC1    | -0.14895 | 0.062051 | 0.117844 |
| 11748554_THAP8     | -0.11061 | 0.062055 | 0.117849 |
| 11740051_DUSP27    | 0.258827 | 0.062083 | 0.117896 |
| 11753311_CARNMT1   | -0.18431 | 0.062113 | 0.117949 |
| 11754891_CCM2L     | -0.13973 | 0.062116 | 0.117949 |
| 11744597_KIAA0100  | -0.08766 | 0.062118 | 0.117949 |
| 11761194_TGOLN2    | 0.182351 | 0.062173 | 0.118049 |
| 11715768_SIRT2     | 0.088274 | 0.062176 | 0.118049 |
| 11739788_C11orf57  | -0.09898 | 0.062178 | 0.11805  |
| 11717666_TSPYL4    | 0.105409 | 0.062184 | 0.118057 |
| 11722663_GABRB3    | 0.293801 | 0.062204 | 0.11809  |
| 11736137_CTNNA2    | -0.12739 | 0.062218 | 0.118112 |
| 11743232_MLLT4     | 0.150299 | 0.062224 | 0.118117 |
| 11761825_CDK13     | -0.2074  | 0.062226 | 0.118117 |
| 11729389_MIER1     | -0.09038 | 0.062255 | 0.118167 |
| 11730140_LGALS13   | -0.20601 | 0.062257 | 0.118167 |
| 11729691_KLHL24    | 0.187451 | 0.062259 | 0.118167 |
| 11742606_OR1N1     | -0.10193 | 0.062263 | 0.11817  |
| 11728338_CENPBD1   | -0.09264 | 0.062271 | 0.118179 |
| 11736003_GDI2      | 0.082799 | 0.062279 | 0.11819  |
| 11728818_USP28     | -0.16427 | 0.062284 | 0.118196 |

|                    |          |          |          |
|--------------------|----------|----------|----------|
| 11762611_YIF1B     | -0.14925 | 0.062292 | 0.118202 |
| 11751490_MAPKAP1   | -0.07885 | 0.062292 | 0.118202 |
| 11729419_ATP2A3    | -0.27115 | 0.0623   | 0.118211 |
| 11715880_PITPNA    | 0.092105 | 0.062302 | 0.118211 |
| 11736652_CFAP57    | 0.140129 | 0.06231  | 0.118222 |
| 11725702_AQP9      | -0.14809 | 0.062313 | 0.118223 |
| 11742920_HSPA9     | 0.079288 | 0.062323 | 0.118234 |
| 11734249_SEPT14    | -0.19579 | 0.062326 | 0.118234 |
| 11762855_CYP4F24P  | -0.07849 | 0.062329 | 0.118234 |
| 11762856_CYP4F24P  | -0.07849 | 0.062329 | 0.118234 |
| 11743838_ATR       | 0.098541 | 0.062336 | 0.118243 |
| 11730512_CHST8     | -0.1235  | 0.062396 | 0.118352 |
| 11760597_ERCC8     | 0.096151 | 0.062398 | 0.118352 |
| 11739429_ZDHC24    | -0.09023 | 0.062401 | 0.118352 |
| 11745504_MPP1      | -0.18124 | 0.062406 | 0.118357 |
| 11760891_GPAT2     | -0.14413 | 0.062437 | 0.118411 |
| 11732218_BID       | 0.081822 | 0.062439 | 0.118411 |
| 11727851_TEX264    | 0.086052 | 0.062444 | 0.118414 |
| 11731317_MMP28     | -0.125   | 0.062445 | 0.118414 |
| 11725426_RAB27A    | -0.07538 | 0.06245  | 0.118418 |
| 11750635_PTPRH     | 0.110383 | 0.062454 | 0.118422 |
| 11741090_ESRRG     | 0.149586 | 0.062461 | 0.118431 |
| 11762652_ADRA1A    | -0.0947  | 0.062466 | 0.118435 |
| 11730083_TCTE1     | -0.21721 | 0.062479 | 0.118454 |
| 11742469_MAGEB16   | 0.136214 | 0.062482 | 0.118456 |
| 11744544_KDELR1    | -0.08821 | 0.062513 | 0.11851  |
| 11726348_EMSY      | -0.10019 | 0.062526 | 0.11853  |
| 11753100_PER2      | 0.090048 | 0.062549 | 0.118569 |
| 11724404_WTAP      | 0.075889 | 0.062605 | 0.118672 |
| 11729532_REM2      | -0.12539 | 0.062623 | 0.118701 |
| 11747668_NECAP1    | 0.106047 | 0.062631 | 0.118712 |
| 11721032_FAM107A   | -0.12241 | 0.062634 | 0.118712 |
| 11746951_REXO2     | -0.08892 | 0.062638 | 0.118715 |
| 11724654_ZBTB47    | -0.18087 | 0.062695 | 0.118819 |
| 11734174_MEIOB     | -0.16935 | 0.062707 | 0.118836 |
| 11744014_WIZ       | -0.12344 | 0.062724 | 0.118864 |
| 11719734_MFSD12    | 0.078733 | 0.062761 | 0.11893  |
| 11733658_GDPD4     | -0.17217 | 0.062776 | 0.118953 |
| 11742222_ZNF99     | -0.16097 | 0.062783 | 0.118962 |
| 11751434_ACER3     | 0.089352 | 0.062794 | 0.118979 |
| 11751192_SPOCK3    | -0.10194 | 0.062807 | 0.118998 |
| 11743198_SLC6A16   | 0.126634 | 0.062811 | 0.119001 |
| 11733650_FAM228B   | -0.15366 | 0.062826 | 0.119026 |
| 11715268_GP1BB /// | -0.08969 | 0.062834 | 0.119035 |
| 11734727_IL16      | -0.19557 | 0.062836 | 0.119035 |
| 11745162_BCL2L11   | 0.169422 | 0.062844 | 0.119046 |
| 11740063_CAMK2D    | 0.092665 | 0.062879 | 0.119108 |
| 11717811_KIF3C     | -0.08519 | 0.062895 | 0.119132 |
| 11726347_LAT2      | 0.153614 | 0.062907 | 0.119151 |
| 11761654_KDM5D     | -0.10272 | 0.062936 | 0.119201 |
| 11721832_CHURC1    | 0.07294  | 0.062939 | 0.119202 |

|                    |          |          |          |
|--------------------|----------|----------|----------|
| 11742125_TPTE2     | 0.138104 | 0.062967 | 0.119251 |
| 11761085_ADAM33    | -0.19522 | 0.062971 | 0.119254 |
| 11758715_DEFEB126  | -0.1213  | 0.062985 | 0.119276 |
| 11725040_FGF2      | -0.1419  | 0.062988 | 0.119277 |
| 11737534_CIDEB     | -0.13181 | 0.063003 | 0.1193   |
| 11744830_LOC105369 | 0.083069 | 0.063018 | 0.119322 |
| 11738391_DEFEB121  | -0.14868 | 0.063019 | 0.119322 |
| 11723410_PLP1      | 0.090522 | 0.063037 | 0.119347 |
| 11758350_PARG ///  | 0.131321 | 0.063037 | 0.119347 |
| 11720947_CA12      | -0.19182 | 0.063044 | 0.119355 |
| 11750888_PMCHL1 // | -0.17537 | 0.063068 | 0.119397 |
| 11731378_MED25     | -0.10099 | 0.063099 | 0.11945  |
| 11736439_INF2      | -0.13816 | 0.063102 | 0.119451 |
| 11741866_OR1J2     | -0.18582 | 0.063148 | 0.119534 |
| 11763234_CCDC91 // | 0.123029 | 0.063169 | 0.119565 |
| 11761092_PSMB8     | -0.15759 | 0.06317  | 0.119565 |
| 11741749_LRRC2     | 0.089372 | 0.063179 | 0.119577 |
| 11762443_HIPK2     | -0.08856 | 0.063185 | 0.119585 |
| 11718580_COQ9      | 0.080752 | 0.063189 | 0.119588 |
| 11720121_GIGYF1    | -0.12915 | 0.063197 | 0.119599 |
| 11759615_PRPF38B   | 0.096576 | 0.063211 | 0.11962  |
| 11760418_RCAN1     | -0.07503 | 0.063216 | 0.119623 |
| 11736311_FCGR1A    | -0.14597 | 0.063217 | 0.119623 |
| 11732592_SMC1B     | -0.16348 | 0.063224 | 0.119624 |
| 11751317_EI24      | 0.089653 | 0.063224 | 0.119624 |
| 11730805_BCAS3     | 0.092865 | 0.063225 | 0.119624 |
| 11740493_AGAP1     | 0.146911 | 0.063234 | 0.119636 |
| 11738107_SHANK1    | 0.119491 | 0.063236 | 0.119636 |
| 11729742_IFI27L2   | -0.0936  | 0.063263 | 0.119681 |
| 11756966_ERICH6    | -0.09764 | 0.063271 | 0.119689 |
| 11744051_TSPAN1    | -0.10294 | 0.063273 | 0.119689 |
| 11748964_ETV1      | 0.196877 | 0.063274 | 0.119689 |
| 11755297_ARHGEF40  | -0.07668 | 0.063295 | 0.119724 |
| 11720510_APOBEC3G  | -0.10895 | 0.063337 | 0.119799 |
| 11716818_VSIG4     | -0.21404 | 0.06335  | 0.119816 |
| 11719005_ANKH      | 0.090159 | 0.063353 | 0.119816 |
| 11734189_TSNARE1   | 0.096865 | 0.063354 | 0.119816 |
| 11726948_TLR8      | -0.10032 | 0.063367 | 0.119837 |
| 11749953_POU2F1    | 0.101518 | 0.063386 | 0.119868 |
| 11731408_CLN3      | -0.08497 | 0.063404 | 0.119897 |
| 11763676_ACSL5     | -0.20506 | 0.063408 | 0.119898 |
| 11726068_PDDC1     | 0.283864 | 0.063409 | 0.119898 |
| 11753926_ARMC6     | -0.07698 | 0.063428 | 0.119929 |
| 11755314_VARS2     | -0.10401 | 0.063432 | 0.119932 |
| 11719306_WRAP53    | -0.08768 | 0.063451 | 0.119961 |
| 11734514_TEPP      | -0.21015 | 0.063454 | 0.119961 |
| 11732980_IFNA21    | -0.20427 | 0.063455 | 0.119961 |
| 11728720_RHOH      | -0.10841 | 0.063475 | 0.119995 |
| 11743826_FSTL5     | 0.150141 | 0.063481 | 0.12     |
| 11723643_ANXA7     | 0.082123 | 0.063483 | 0.12     |
| 11719823_ZAK       | -0.12202 | 0.063495 | 0.120018 |

|                    |          |          |          |
|--------------------|----------|----------|----------|
| 11755706_BBX       | 0.085438 | 0.063505 | 0.120032 |
| 11736476_TCHP      | -0.07935 | 0.063523 | 0.120061 |
| 11743839_ST3GAL6   | 0.202383 | 0.06355  | 0.120108 |
| 11752630_RBM39     | 0.081842 | 0.063557 | 0.120117 |
| 11761687_ENTPD6    | -0.10578 | 0.063567 | 0.12013  |
| 11716959_POMGNT1   | -0.09162 | 0.06357  | 0.120133 |
| 11736164_CNDP1     | -0.14605 | 0.06358  | 0.120147 |
| 11724731_YY1       | -0.0853  | 0.063591 | 0.120163 |
| 11755742_ADH7      | -0.14016 | 0.063626 | 0.120225 |
| 11757998_GOLGA7    | 0.075631 | 0.063641 | 0.120247 |
| 11730001_NRTN      | -0.15312 | 0.063658 | 0.120275 |
| 11761511_TOR1A     | -0.2198  | 0.063701 | 0.120351 |
| 11741928_SH2D7     | -0.18041 | 0.063704 | 0.120351 |
| 11743985_AKAP1     | -0.08645 | 0.063705 | 0.120351 |
| 11750064_PLRG1     | 0.073555 | 0.063721 | 0.120376 |
| 11741694_SERHL /// | -0.10475 | 0.063734 | 0.120395 |
| 11742334_OR52W1    | -0.19016 | 0.063751 | 0.120424 |
| 11750821_MIPOL1    | 0.104633 | 0.06376  | 0.120433 |
| 11742002_OR2H2     | -0.11963 | 0.063761 | 0.120433 |
| 11731313_PAXBP1    | -0.09076 | 0.063769 | 0.120444 |
| 11718975_ARPP19    | -0.07927 | 0.063807 | 0.120508 |
| 11730115_10-Mar    | -0.14605 | 0.063808 | 0.120508 |
| 11753940_NRL       | -0.14885 | 0.063814 | 0.120514 |
| 11722310_TMC4      | -0.14299 | 0.063824 | 0.120525 |
| 11751683_RAB11A    | -0.07863 | 0.063825 | 0.120525 |
| 11745898_PIAS3     | -0.13776 | 0.063837 | 0.120543 |
| 11752051_MYH9      | 0.106066 | 0.063843 | 0.12055  |
| 11763897_SNORA77   | -0.10643 | 0.063874 | 0.120604 |
| 11730170_GPX3      | -0.11742 | 0.063907 | 0.120661 |
| 11730028_MT1B      | -0.13181 | 0.063912 | 0.120666 |
| 11721452_ACTR6     | -0.08513 | 0.063914 | 0.120666 |
| 11724111_ARHGAP4   | -0.08221 | 0.063922 | 0.120675 |
| 11737571_SCX       | -0.15988 | 0.063926 | 0.120679 |
| 11741863_OR5V1     | -0.13344 | 0.063938 | 0.120696 |
| 11726944_ZKSCAN2   | 0.300955 | 0.063948 | 0.120712 |
| 11737759_RABGGTA   | -0.07639 | 0.063951 | 0.120712 |
| 11722082_RUFY3     | 0.129416 | 0.06399  | 0.120777 |
| 11763510_LINC01013 | -0.20948 | 0.063991 | 0.120777 |
| 11750285_NFIX      | -0.09388 | 0.064019 | 0.120827 |
| 11723857_TXNDC16   | -0.27042 | 0.064026 | 0.120835 |
| 11762411_OK/SW-CL. | -0.13019 | 0.064046 | 0.120869 |
| 11758009_AMPD3     | 0.162559 | 0.064052 | 0.120875 |
| 11757988_PRUNE2    | -0.17052 | 0.064106 | 0.120971 |
| 11761754_MST1P2    | -0.10518 | 0.064108 | 0.120971 |
| 11758930_HEATR1    | -0.07986 | 0.064124 | 0.120996 |
| 11718055_BTBD3     | 0.093328 | 0.064127 | 0.120997 |
| 11763723_SRRT      | 0.080428 | 0.064132 | 0.121001 |
| 11725713_DIRAS3    | -0.15423 | 0.064144 | 0.12102  |
| 11720015_CGNL1     | -0.12731 | 0.064151 | 0.121029 |
| 11752404_SIGLEC10  | -0.22558 | 0.064166 | 0.121053 |
| 11755436_ARID1A    | -0.09943 | 0.064186 | 0.121086 |

|                    |          |          |          |
|--------------------|----------|----------|----------|
| 11761077_SPOCK2    | -0.12081 | 0.064197 | 0.121098 |
| 11729089_Clorf87   | -0.14615 | 0.064202 | 0.121098 |
| 11761255_KCNG1     | -0.15145 | 0.064202 | 0.121098 |
| 11729959_ASIC1     | -0.17119 | 0.064203 | 0.121098 |
| 11721559_ZNF638    | -0.14774 | 0.064212 | 0.121105 |
| 11722717_GABPA     | 0.166923 | 0.064213 | 0.121105 |
| 11754161_PIGP      | -0.08667 | 0.064213 | 0.121105 |
| 11730371_EIF4E3    | -0.19905 | 0.064217 | 0.121106 |
| 11739509_NAA30     | 0.177051 | 0.064234 | 0.121134 |
| 11729057_ERICH4    | -0.13111 | 0.064249 | 0.121157 |
| 11727296_TGFB3     | 0.138002 | 0.064252 | 0.121159 |
| 11720301_SLA       | -0.12177 | 0.064294 | 0.121233 |
| 11748789_CCNJL     | 0.081135 | 0.064303 | 0.121245 |
| 11760997_ARHGAP27  | -0.24686 | 0.064313 | 0.121259 |
| 11741148_PRDX2     | 0.076559 | 0.064316 | 0.12126  |
| 11716898_ARL3      | -0.26061 | 0.064361 | 0.121341 |
| 11725655_GTF2H5    | -0.0831  | 0.064378 | 0.121367 |
| 11735940_DEFB103A  | -0.10198 | 0.064381 | 0.12137  |
| 11761296_TSPAN16   | 0.143345 | 0.064397 | 0.121395 |
| 11723617_C3orf79   | -0.18493 | 0.064405 | 0.121405 |
| 11721697_UBE3B     | 0.086413 | 0.064415 | 0.121416 |
| 11750309_ERI2      | -0.10991 | 0.064416 | 0.121416 |
| 11739499_GRIA1     | -0.08554 | 0.064422 | 0.121423 |
| 11742063_BTN3A1    | 0.149779 | 0.064428 | 0.12143  |
| 11728640_EDARADD / | -0.09168 | 0.064433 | 0.121435 |
| 11751355_CEACAM7   | -0.16537 | 0.06444  | 0.121442 |
| 11743600_OTUD5     | 0.082654 | 0.064446 | 0.121447 |
| 11759215_CCR4      | 0.113872 | 0.064447 | 0.121447 |
| 11744825_CNBP      | 0.089766 | 0.064453 | 0.121452 |
| 11737728_XKR6      | 0.14226  | 0.064533 | 0.121597 |
| 11728145_SHC2      | -0.10203 | 0.064534 | 0.121597 |
| 11735515_PATE4     | -0.24724 | 0.064538 | 0.1216   |
| 11760381_STK19     | -0.13095 | 0.064555 | 0.121625 |
| 11729021_CNTN4     | 0.129275 | 0.064557 | 0.121625 |
| 11744955_ANXA1     | 0.082659 | 0.064568 | 0.121641 |
| 11738524_MICAL3    | 0.1433   | 0.06457  | 0.121641 |
| 11721254_ARMCX3    | -0.13684 | 0.064574 | 0.121643 |
| 11746724_BTN2A3P   | 0.114689 | 0.064597 | 0.121683 |
| 11734529_PILRA     | -0.12926 | 0.064611 | 0.121704 |
| 11761790_TRDC      | -0.17911 | 0.064629 | 0.121733 |
| 11760400_SUCLG1    | -0.12352 | 0.064635 | 0.12174  |
| 11755599_POU5F1    | 0.107975 | 0.064644 | 0.121753 |
| 11749470_TRPM8     | 0.162632 | 0.064659 | 0.121775 |
| 11721397_DOT1L     | 0.106642 | 0.064664 | 0.12178  |
| 11763291_CFAP65    | -0.09499 | 0.064667 | 0.121782 |
| 11720745_BCL6      | -0.13383 | 0.064681 | 0.121803 |
| 11745810_KIAA0040  | 0.178117 | 0.064694 | 0.121823 |
| 11717542_NFKB1     | -0.07817 | 0.064721 | 0.121868 |
| 11721161_CTDSPL    | 0.090024 | 0.064738 | 0.121894 |
| 11741715_POTEG /// | 0.085119 | 0.064739 | 0.121894 |
| 11759585_RAB18     | -0.11502 | 0.06475  | 0.12191  |

|                    |          |          |          |
|--------------------|----------|----------|----------|
| 11748615_IFNAR1    | -0.10168 | 0.064756 | 0.121916 |
| 11749054_PXN       | 0.116437 | 0.064764 | 0.121926 |
| 11729244_DDX18     | 0.076354 | 0.064776 | 0.121944 |
| 11731377_RABL2A // | 0.126175 | 0.064785 | 0.121957 |
| 11735452_NHLRC1    | -0.09351 | 0.064792 | 0.121965 |
| 11761471_ZNF169    | -0.12155 | 0.064794 | 0.121965 |
| 11762255_LIAS      | -0.20602 | 0.064829 | 0.122026 |
| 11751201_GYS1      | -0.08845 | 0.064834 | 0.122031 |
| 11716909_NR2F6     | 0.078526 | 0.064902 | 0.122148 |
| 11730782_SLC2A6    | 0.096044 | 0.064903 | 0.122148 |
| 11740222_FAM196B   | -0.07415 | 0.064906 | 0.122148 |
| 11752866_FAM47E-ST | -0.21502 | 0.064906 | 0.122148 |
| 11756691_GBX2      | -0.15481 | 0.064936 | 0.122198 |
| 11730241_SLC2A12   | -0.13679 | 0.064939 | 0.1222   |
| 11734273_GPR18     | 0.192403 | 0.064946 | 0.122207 |
| 11745558_BNIPL     | -0.12269 | 0.064951 | 0.122213 |
| 11761197_SLC43A2   | 0.082477 | 0.064966 | 0.122236 |
| 11732190_NOTCH2    | -0.14248 | 0.064987 | 0.12227  |
| 11763836_HACD1     | -0.16447 | 0.065004 | 0.122299 |
| 11757592_SRP14     | 0.072787 | 0.065027 | 0.122337 |
| 11745722_FHL1      | 0.105842 | 0.065043 | 0.122362 |
| 11740967_LOC391322 | -0.12361 | 0.065077 | 0.122419 |
| 11752591_CIT       | -0.18022 | 0.065078 | 0.122419 |
| 11743605_VBP1      | -0.08895 | 0.065096 | 0.122447 |
| 11753070_EPHB4     | -0.09853 | 0.065098 | 0.122447 |
| 11763551_IGLJ3 /// | -0.1103  | 0.065147 | 0.122535 |
| 11723101_DDX10     | 0.128374 | 0.065155 | 0.122544 |
| 11735825_SLC9A3    | -0.11722 | 0.065157 | 0.122544 |
| 11755079_ZC3H12A   | 0.094925 | 0.065178 | 0.122579 |
| 11752079_ADAMTS4   | -0.13574 | 0.065203 | 0.12262  |
| 11759134_CHRNA3    | 0.118515 | 0.065241 | 0.122687 |
| 11716050_GBF1      | 0.144685 | 0.065245 | 0.12269  |
| 11731226_TDRD6     | -0.17737 | 0.065264 | 0.12272  |
| 11755858_MS4A1     | -0.0961  | 0.065266 | 0.12272  |
| 11715133_PCDHGA1   | -0.16245 | 0.065304 | 0.122787 |
| 11759162_KRTAP19-1 | -0.10802 | 0.065314 | 0.122801 |
| 11743644_MXRA7     | 0.148093 | 0.065344 | 0.122844 |
| 11737004_PDE3A     | -0.12988 | 0.065347 | 0.122844 |
| 11764027_MRPS11    | -0.24627 | 0.065347 | 0.122844 |
| 11729774_PCDHB7    | 0.093482 | 0.065348 | 0.122844 |
| 11734849_CELSR2    | -0.12367 | 0.065349 | 0.122844 |
| 11746572_TTC39B    | 0.131386 | 0.065393 | 0.122922 |
| 11729405_DOC2A     | -0.12594 | 0.065405 | 0.122939 |
| 11733361_PKHD1L1   | 0.139426 | 0.065412 | 0.122947 |
| 11728914_TRIOBP    | 0.10952  | 0.06544  | 0.122995 |
| 11744231_MAPK7     | -0.07508 | 0.065449 | 0.123008 |
| 200039_PMPSMB2     | -0.08424 | 0.065455 | 0.123014 |
| 11723044_SMAD1     | 0.12224  | 0.065462 | 0.123023 |
| 11758863_ATP6V1C1  | -0.21808 | 0.065477 | 0.123045 |
| 11758100_C1S       | 0.164002 | 0.065485 | 0.123057 |
| 11729611_ARPC4     | -0.09716 | 0.065504 | 0.123084 |

|                    |          |          |          |
|--------------------|----------|----------|----------|
| 11722023_ABCF2     | 0.079315 | 0.065505 | 0.123084 |
| 11763137_HSP90AA6P | -0.25693 | 0.065513 | 0.123095 |
| 11761952_PARBPB    | -0.24848 | 0.065519 | 0.123102 |
| 11738331_B3GALT5   | -0.11371 | 0.065526 | 0.123109 |
| 11741774_PPP1R17   | -0.0991  | 0.065551 | 0.123152 |
| 11748196_ACADSB    | 0.156383 | 0.065574 | 0.123191 |
| 11715159_SFT2D1    | 0.089994 | 0.065584 | 0.123205 |
| 11723017_HM13      | 0.114965 | 0.0656   | 0.123225 |
| 11747221_FBXO10    | -0.09875 | 0.0656   | 0.123225 |
| 11727420_CNBP      | -0.08793 | 0.065628 | 0.123274 |
| 11726196_SYN2      | -0.13892 | 0.065659 | 0.123326 |
| 11750209_HEY1      | -0.13808 | 0.065661 | 0.123326 |
| 11735892_RESP18    | -0.19696 | 0.065676 | 0.123345 |
| 11755016_LOC101928 | 0.099894 | 0.065676 | 0.123345 |
| 11753828_GNAS      | -0.07385 | 0.065687 | 0.12336  |
| 11757423_SEC11A    | -0.07222 | 0.065693 | 0.123367 |
| 11732741_PAK3      | -0.13744 | 0.065697 | 0.12337  |
| 11732116_KRTAP19-5 | -0.08206 | 0.0657   | 0.123371 |
| 11730003_CACNB1    | -0.18728 | 0.065713 | 0.12339  |
| 11763356_LOC157503 | -0.18646 | 0.065723 | 0.123404 |
| 11737804_TMPRSS11D | -0.13546 | 0.065738 | 0.123428 |
| 11738967_DEFB112   | -0.14987 | 0.065755 | 0.123455 |
| 11734328_FAM227B   | 0.188039 | 0.065765 | 0.123469 |
| 11761985_ITSN1     | -0.09267 | 0.065778 | 0.123489 |
| 11763019_PNRC1     | 0.110311 | 0.06579  | 0.123506 |
| 11745106_MEIS3     | 0.092973 | 0.065802 | 0.123523 |
| 11715464_IGFBP4    | -0.11932 | 0.065808 | 0.12353  |
| 11725866_EBF3      | -0.15932 | 0.065817 | 0.123542 |
| 11738595_PF4V1     | -0.12383 | 0.065828 | 0.123559 |
| 11723064_TMEM18    | -0.09406 | 0.065857 | 0.123608 |
| 11763969_SFTPC     | -0.12613 | 0.06586  | 0.123608 |
| 11746066_CLINT1    | 0.074771 | 0.065866 | 0.123615 |
| 11761680_MLH3      | -0.12351 | 0.065872 | 0.123622 |
| 11748234_URGCP     | 0.130104 | 0.065879 | 0.12363  |
| 11745861_TCF12     | 0.10578  | 0.065883 | 0.123634 |
| 11715837_HEXB      | 0.091091 | 0.065961 | 0.12377  |
| 11749909_MLC1      | -0.15286 | 0.065961 | 0.12377  |
| 11747788_AURKC     | -0.10763 | 0.065999 | 0.123837 |
| 11722668_SCAF1     | -0.09771 | 0.066018 | 0.123867 |
| 11721885_CDC42     | -0.14655 | 0.066055 | 0.123932 |
| 11761865_ZNF396    | -0.13668 | 0.066071 | 0.123957 |
| 11749181_MBD1      | 0.124944 | 0.066085 | 0.123978 |
| 11736814_GIPC2     | -0.10821 | 0.066181 | 0.124154 |
| 11763232_SUMO1     | -0.08482 | 0.06619  | 0.124165 |
| 11722924_MMRN1     | -0.19725 | 0.066196 | 0.124172 |
| 11738776_SH2D6     | -0.14136 | 0.066218 | 0.124209 |
| 11755727_AXDND1    | -0.22467 | 0.066236 | 0.124237 |
| 11756642_DECR2     | 0.086154 | 0.066238 | 0.124237 |
| 11726236_ACY3      | -0.08364 | 0.066271 | 0.12429  |
| 11754554_ECHDC2    | 0.121696 | 0.066271 | 0.12429  |
| 11730358_CCDC54    | -0.21014 | 0.066274 | 0.12429  |

|                    |          |          |          |
|--------------------|----------|----------|----------|
| 11731245_GDF9      | -0.25318 | 0.066279 | 0.124294 |
| 11738994_CYP21A1P  | -0.10411 | 0.066308 | 0.124345 |
| 11733438_C1orf92   | -0.15129 | 0.066318 | 0.124358 |
| 11747130_PRSS8     | -0.11695 | 0.066331 | 0.124379 |
| 11731505_C22orf39  | -0.087   | 0.066334 | 0.124379 |
| 11739634_MED13     | -0.08881 | 0.066337 | 0.12438  |
| 11716049_TRIB1     | 0.118586 | 0.066352 | 0.124403 |
| 11746883_ABCC12    | 0.24348  | 0.066356 | 0.124405 |
| 11761834_EED       | 0.201293 | 0.066359 | 0.124406 |
| 11752023_MGAT4A    | -0.16133 | 0.066361 | 0.124406 |
| 11726250_AGR2      | -0.13536 | 0.066368 | 0.124414 |
| 11746205_DMWD      | 0.099114 | 0.066378 | 0.124429 |
| 11729330_EPB41L4B  | -0.12961 | 0.066388 | 0.124443 |
| 11754033_PLA2G2A   | -0.08317 | 0.066391 | 0.124443 |
| 11732337_BCAS1     | -0.13768 | 0.06643  | 0.124509 |
| 11749705_NCOA5     | -0.08115 | 0.066431 | 0.124509 |
| 11739390_OXTR      | 0.158012 | 0.066444 | 0.124528 |
| 11759180_GOLIM4    | -0.12255 | 0.066453 | 0.124539 |
| 11716160_LBH       | -0.19026 | 0.066455 | 0.124539 |
| 11751404_ABI2      | 0.126985 | 0.066463 | 0.12455  |
| 11746896_ALDH2     | -0.0867  | 0.06647  | 0.124557 |
| 11733141_PFKFB3    | -0.16808 | 0.06649  | 0.124591 |
| 11736585_KCTD4     | -0.14963 | 0.066518 | 0.124638 |
| 11751807_TTTY11    | -0.12065 | 0.066532 | 0.12466  |
| 11732764_CCDC120   | -0.07655 | 0.066545 | 0.124678 |
| 11761195_TGOLN2    | 0.136431 | 0.06655  | 0.124684 |
| 11724739_TMEM204   | -0.09245 | 0.066598 | 0.124767 |
| 11749248_WIPF2     | -0.15734 | 0.066599 | 0.124767 |
| 11738017_LOC102030 | -0.08839 | 0.066609 | 0.12478  |
| 11749213_TSGA10    | -0.20236 | 0.066614 | 0.124785 |
| 11750516_ATPAF1    | 0.083386 | 0.06663  | 0.124809 |
| 11752960_COL9A1    | 0.110713 | 0.066633 | 0.124811 |
| 11746465_EPS15L1   | -0.08766 | 0.066651 | 0.124839 |
| 11747910_PARP10    | 0.097764 | 0.066664 | 0.124858 |
| 11750933_ZNF480    | 0.106475 | 0.066704 | 0.124929 |
| 11716902_TGOLN2    | 0.088309 | 0.066707 | 0.124929 |
| 11747614_ALOXE3    | -0.1339  | 0.066715 | 0.124941 |
| 11736685_FGF5      | 0.110361 | 0.066743 | 0.124988 |
| 11750003_BRCC3     | 0.126833 | 0.06675  | 0.124996 |
| 11744244_MASP1     | -0.08855 | 0.066785 | 0.125058 |
| 11735926_C10orf120 | -0.16149 | 0.066798 | 0.125076 |
| 11746153_VWA3B     | -0.10041 | 0.066802 | 0.125079 |
| 11754494_DNHD1     | 0.100256 | 0.066839 | 0.125144 |
| 11755590_PRMT8     | -0.18945 | 0.066846 | 0.125152 |
| 11727477_SAP30     | -0.10418 | 0.066851 | 0.125157 |
| 11752243_CMIP      | -0.1174  | 0.066868 | 0.125183 |
| 11754211_PPIG      | -0.09427 | 0.066877 | 0.125196 |
| 11719390_SIRT6     | 0.104974 | 0.066883 | 0.125203 |
| 11722651_RUNDC1    | 0.129485 | 0.06692  | 0.125267 |
| 11759524_UCN       | 0.124978 | 0.066928 | 0.125276 |
| 11755532_RABGGTA   | -0.09447 | 0.066936 | 0.125286 |



|                    |          |          |          |
|--------------------|----------|----------|----------|
| 11756137_BTF3      | 0.072755 | 0.066938 | 0.125286 |
| 11729565_DND1      | -0.106   | 0.066951 | 0.125306 |
| 11716805_PLEKHA2   | -0.17056 | 0.066962 | 0.125321 |
| 11743467_DKC1      | -0.08655 | 0.066967 | 0.125325 |
| 11720416_CAMSAP1   | 0.080163 | 0.066973 | 0.125332 |
| 11732015_TTC23L    | 0.1032   | 0.066976 | 0.125332 |
| 11722762_GATA2     | -0.25576 | 0.066989 | 0.125352 |
| 11724871_CLDN2     | -0.09884 | 0.067025 | 0.125412 |
| 11724128_FAM65C    | 0.136292 | 0.067026 | 0.125412 |
| 11731102_PFN4      | -0.19243 | 0.067054 | 0.12546  |
| 11738815_EGFR      | -0.1029  | 0.067065 | 0.125476 |
| 11728645_NUCKS1    | -0.11519 | 0.06707  | 0.125481 |
| 11727549_NOL4      | -0.14422 | 0.067077 | 0.125488 |
| 11750547_GALNT14   | 0.116515 | 0.067092 | 0.125512 |
| 11753608_GPER1     | -0.11306 | 0.067096 | 0.125514 |
| 11715112_ERICH3    | 0.096506 | 0.0671   | 0.125517 |
| 11747519_TG        | -0.15772 | 0.067125 | 0.125559 |
| 11756494_SETD6     | 0.077868 | 0.06713  | 0.125563 |
| 11741513_LDHAL6A   | -0.10329 | 0.067176 | 0.125644 |
| 11750162_WDR45B    | -0.10229 | 0.067205 | 0.125691 |
| 11735199_GJA9 ///  | -0.15559 | 0.067206 | 0.125691 |
| 11731411_SLC8A2    | -0.13093 | 0.067221 | 0.125714 |
| 11726086_C1orf65   | -0.10322 | 0.067237 | 0.12574  |
| 11735709_KRT2      | -0.13538 | 0.067296 | 0.125845 |
| 11720536_MMAB      | -0.13403 | 0.067301 | 0.125849 |
| 11721892_ANAPC1    | 0.100143 | 0.067304 | 0.125849 |
| 11746786_STXBP1    | -0.07405 | 0.067312 | 0.12586  |
| 11753916_LINCO0526 | -0.129   | 0.06733  | 0.125889 |
| 11741600_C1QL3     | -0.12974 | 0.067336 | 0.125892 |
| 11761609_ZNF586    | 0.25262  | 0.067337 | 0.125892 |
| 11735228_FAM71E2   | -0.11881 | 0.067369 | 0.125946 |
| 11732375_HTATIP2   | 0.073698 | 0.067371 | 0.125946 |
| 11749766_KCNH5     | 0.208425 | 0.067376 | 0.12595  |
| 11731937_HFM1      | 0.17549  | 0.067397 | 0.125986 |
| 11759753_ATXN7L1   | 0.124828 | 0.067409 | 0.125999 |
| 11750843_CLCNKA    | -0.10066 | 0.067409 | 0.125999 |
| 11749159_SCG3      | 0.120624 | 0.067414 | 0.126003 |
| 11729630_AP3M1     | 0.089535 | 0.067424 | 0.126016 |
| 11727911_ANKRD23 / | -0.11533 | 0.067453 | 0.126066 |
| 11742087_DCHS2     | -0.13393 | 0.067483 | 0.126115 |
| 11764159_LOC101060 | -0.19064 | 0.067484 | 0.126115 |
| 11738823_SLC26A5   | -0.20538 | 0.067506 | 0.12615  |
| 11742777_TBCC      | 0.07773  | 0.067509 | 0.126152 |
| 11742451_TAS1R2    | -0.21883 | 0.06752  | 0.126167 |
| 11740700_CACNG6    | -0.08581 | 0.067537 | 0.126194 |
| 11737646_CTXN2     | -0.20809 | 0.067546 | 0.126207 |
| 11747201_IDS       | 0.095526 | 0.067557 | 0.126221 |
| 11730316_RGS7BP    | -0.15681 | 0.067584 | 0.126267 |
| 11736780_ZNF486    | 0.200207 | 0.067586 | 0.126267 |
| 11724718_DEXI      | -0.07838 | 0.067589 | 0.126268 |
| 11736184_FSCB      | -0.09229 | 0.067624 | 0.126328 |

|                    |          |          |          |
|--------------------|----------|----------|----------|
| 11753072_FAM170A   | -0.14333 | 0.06767  | 0.126409 |
| 11745756_TMEM41B   | 0.122809 | 0.067744 | 0.126542 |
| 11734380_RAD51B    | -0.13273 | 0.067753 | 0.126554 |
| 11715919_SH3BGRL3  | -0.07114 | 0.067767 | 0.126576 |
| 11754790_FAM193A   | 0.111814 | 0.067772 | 0.12658  |
| 11715488_PGRMC1    | -0.07664 | 0.067782 | 0.126595 |
| 11740922_C1orf80   | 0.097848 | 0.067792 | 0.126608 |
| 11734537_GAS2L3    | -0.07754 | 0.067813 | 0.126642 |
| 11743469_WDFY3     | 0.140809 | 0.067828 | 0.126662 |
| 11760556_MGC24103  | 0.151465 | 0.067829 | 0.126662 |
| 11735688_C21orf59  | -0.08101 | 0.067831 | 0.126662 |
| 11754228_RPL23AP82 | 0.090709 | 0.067837 | 0.126666 |
| 11753114_KCTD7     | -0.10696 | 0.067839 | 0.126666 |
| 11754929_UBE2L3    | -0.07247 | 0.067846 | 0.126674 |
| 11747686_ARFIP2    | 0.082972 | 0.067854 | 0.126686 |
| 11743229_PCDHGC4   | -0.14118 | 0.06786  | 0.126689 |
| 11762828_CCT5      | 0.151348 | 0.067861 | 0.126689 |
| 11740710_ACAD10    | -0.08382 | 0.06787  | 0.126698 |
| 11716205_NDUFA8    | -0.07553 | 0.067873 | 0.126698 |
| 11750421_PPWD1     | -0.09216 | 0.067874 | 0.126698 |
| 11750358_LOC401296 | -0.15993 | 0.067915 | 0.12677  |
| 11761632_OCIAD1    | 0.261792 | 0.067919 | 0.12677  |
| 11746068_NBPF3     | 0.127164 | 0.06792  | 0.12677  |
| 11755110_LRIG1     | 0.082785 | 0.067941 | 0.126804 |
| 11740399_MCTS1     | -0.10942 | 0.06796  | 0.126831 |
| 11736291_NIPAL2    | 0.165088 | 0.067961 | 0.126831 |
| 11720761_FBXO3     | 0.098237 | 0.067964 | 0.126831 |
| 11730638_FRMPD1    | -0.15763 | 0.067975 | 0.126844 |
| 11762999_IGH       | -0.13821 | 0.067975 | 0.126844 |
| 11740010_ZFP14     | 0.115412 | 0.068004 | 0.126893 |
| 11748466_PIK3CB    | 0.10728  | 0.068016 | 0.12691  |
| 11736322_BAIAP3    | -0.08999 | 0.068046 | 0.126958 |
| 11728426_UHRF1BP1  | -0.10294 | 0.068047 | 0.126958 |
| 11742889_FBXO6     | -0.11721 | 0.068061 | 0.12698  |
| 11760213_TMC5      | -0.10956 | 0.068076 | 0.127003 |
| 11724530_APOB      | -0.14274 | 0.06811  | 0.12706  |
| 11747876_EDNRA     | -0.23093 | 0.068139 | 0.12711  |
| 11763907_PABPC4 // | -0.14633 | 0.068142 | 0.127111 |
| 11755804_SEMA4D    | -0.14388 | 0.068172 | 0.127162 |
| 11722946_MUM1L1    | 0.150786 | 0.068184 | 0.127179 |
| 11741221_COLCA2    | -0.09207 | 0.068196 | 0.127197 |
| 11751571_SGCA      | -0.11826 | 0.068211 | 0.127221 |
| 11716090_PRG2      | 0.092456 | 0.068219 | 0.127231 |
| 11743265_ENSA      | 0.134856 | 0.068223 | 0.127233 |
| 11744592_GON4L     | -0.11729 | 0.068238 | 0.127255 |
| 11760391_CYP2C9    | -0.13576 | 0.068246 | 0.127262 |
| 11752232_ECT2L     | -0.11864 | 0.068246 | 0.127262 |
| 11751402_REM2      | -0.09747 | 0.068259 | 0.127281 |
| 11752524_CELSR3    | -0.13604 | 0.068269 | 0.127294 |
| 11749115_BCR       | -0.08688 | 0.068276 | 0.127302 |
| 11756986_KLHDC1    | -0.11739 | 0.068291 | 0.127325 |

|                    |          |          |          |
|--------------------|----------|----------|----------|
| 11723437_CEP41     | -0.09049 | 0.0683   | 0.127338 |
| 11746560_TREML1    | -0.07641 | 0.06831  | 0.127346 |
| 11730753_AGPAT5    | -0.21343 | 0.06831  | 0.127346 |
| 11735192_ADGRE2    | 0.278191 | 0.068325 | 0.12737  |
| 11762244_SLC36A2   | -0.21309 | 0.06833  | 0.127375 |
| 11745614_LINCO0161 | -0.08619 | 0.068334 | 0.127376 |
| 11762883_EMG1      | 0.151199 | 0.068343 | 0.127388 |
| 11729831_CLDN8     | -0.11595 | 0.068354 | 0.127404 |
| 11764116_LOC100996 | 0.115292 | 0.068385 | 0.127455 |
| 11728707_EMP2      | -0.07952 | 0.068386 | 0.127455 |
| 11760448_TXLNGY    | 0.088398 | 0.068437 | 0.127545 |
| 11730646_ECEL1     | -0.08986 | 0.068441 | 0.127546 |
| 11741526_SUMO2     | -0.07217 | 0.068469 | 0.127594 |
| 11716821_ATPIF1    | -0.07776 | 0.068511 | 0.127667 |
| 11743386_PRPF40A   | -0.07316 | 0.068523 | 0.127685 |
| 11763594_HS3ST3B1  | 0.119044 | 0.068537 | 0.127706 |
| 11735411_FZD9      | -0.1471  | 0.068575 | 0.127771 |
| 11731072_ZNF587    | 0.081201 | 0.068579 | 0.127776 |
| 11752059_SARDH     | -0.12895 | 0.068593 | 0.127796 |
| 11742137_OTOL1     | -0.1504  | 0.068603 | 0.127809 |
| 11760890_LOC220729 | -0.20206 | 0.068609 | 0.127816 |
| 11737146_SOCS1     | 0.190452 | 0.068644 | 0.127876 |
| 11731333_GPR55     | -0.09968 | 0.068647 | 0.127876 |
| 11718694_YIF1B     | -0.12917 | 0.068683 | 0.12794  |
| 11739275_PAK2      | -0.07623 | 0.068718 | 0.128    |
| 11731144_ADGRD1    | -0.11434 | 0.068732 | 0.12802  |
| 11763819_FAM149A   | -0.13365 | 0.068752 | 0.128053 |
| 11741346_TBC1D32   | -0.09399 | 0.068763 | 0.128068 |
| 11747533_GRSF1     | 0.080374 | 0.068784 | 0.128103 |
| 11724047_TAF1C     | -0.08266 | 0.068789 | 0.128107 |
| 11727031_SQSTM1    | 0.073687 | 0.068806 | 0.128134 |
| 11717134_MAFG      | -0.08902 | 0.068826 | 0.128167 |
| 11748178_XYL2      | -0.13202 | 0.068831 | 0.128171 |
| 11762292_TNRC6A    | -0.10652 | 0.068849 | 0.1282   |
| 11749043_SLC22A7   | 0.111482 | 0.068858 | 0.128212 |
| 11732127_CCT4      | -0.0749  | 0.068861 | 0.128213 |
| 11742395_CACNG5    | -0.1569  | 0.068864 | 0.128213 |
| 11763396_SEC24D    | 0.211639 | 0.068874 | 0.128226 |
| 11741366_TEAD2     | -0.12824 | 0.068889 | 0.12825  |
| 11744266_PLEKHM2   | -0.10895 | 0.068897 | 0.12826  |
| 11732295_ZNF566    | -0.13547 | 0.06894  | 0.128335 |
| 11716573_KDM3A     | 0.134411 | 0.068942 | 0.128335 |
| 11751720_ATP1A2    | -0.13057 | 0.068948 | 0.128341 |
| 11759772_USP45     | 0.083228 | 0.068965 | 0.128366 |
| 11740224_CHST4     | -0.15921 | 0.068989 | 0.128407 |
| 11734515_TEPP      | -0.15652 | 0.068997 | 0.128416 |
| 11738210_GPR17     | 0.162675 | 0.06902  | 0.128454 |
| 11760111_ACTN1     | -0.11252 | 0.069028 | 0.128464 |
| 11737592_EYS       | -0.27913 | 0.069036 | 0.128474 |
| 11750996_ZNF577    | 0.084935 | 0.069051 | 0.128498 |
| 11755965_PAFAH1B1  | -0.09681 | 0.069058 | 0.128506 |

|                    |          |          |          |
|--------------------|----------|----------|----------|
| 11723726_USP32 /// | -0.0888  | 0.069096 | 0.128572 |
| 11743580_ACTR2     | -0.08355 | 0.069103 | 0.128579 |
| 11748578_UROD      | -0.08963 | 0.069122 | 0.12861  |
| 11757352_TRMT1     | 0.139213 | 0.069193 | 0.128732 |
| 11727702_C9orf152  | -0.07158 | 0.069193 | 0.128732 |
| 11736155_XPR1      | 0.111212 | 0.069204 | 0.128747 |
| 11718378_PRKAG2    | 0.098594 | 0.06921  | 0.128753 |
| 11716426_PCDHGA1 / | -0.07628 | 0.069228 | 0.128782 |
| 11754875_C20orf96  | -0.12453 | 0.069233 | 0.128787 |
| 11727944_ARHGAP8 / | -0.10506 | 0.069236 | 0.128788 |
| 11747474_NR4A2     | -0.09453 | 0.069304 | 0.128907 |
| 11760433_SLC22A11  | -0.08803 | 0.069305 | 0.128907 |
| 11756070_MT1IP     | -0.2032  | 0.069318 | 0.128926 |
| 11734813_TMEM86A   | -0.07073 | 0.069354 | 0.128988 |
| 11761484_CLK3      | 0.099368 | 0.069359 | 0.128992 |
| 11737927_C6orf141  | 0.150125 | 0.069363 | 0.128994 |
| 11737579_HLA-L     | 0.165915 | 0.069374 | 0.129011 |
| 11715126_HIST1H2BN | 0.115063 | 0.0694   | 0.129053 |
| 11717292_JAM3      | -0.09819 | 0.069422 | 0.12909  |
| 11752064_RGSL1     | 0.104771 | 0.069427 | 0.129095 |
| 11729920_BBOF1     | 0.172215 | 0.06944  | 0.129114 |
| 11726576_CYP2A6    | -0.13847 | 0.069451 | 0.129129 |
| 11733434_MCF2      | 0.10588  | 0.069471 | 0.129161 |
| 11745949_CHEK1     | -0.07456 | 0.069475 | 0.129163 |
| 11738349_POMZP3    | -0.08787 | 0.069478 | 0.129163 |
| 11736188_ORMDL3    | 0.089964 | 0.069483 | 0.129163 |
| 11721164_KHNYN     | -0.08382 | 0.069484 | 0.129163 |
| 11758765_HIST2H2BE | -0.1427  | 0.069488 | 0.129163 |
| 11758766_HIST2H2BE | -0.1427  | 0.069488 | 0.129163 |
| 11758378_RBMXL1    | -0.08793 | 0.069494 | 0.129166 |
| 11762714_FILIP1L   | -0.17307 | 0.069495 | 0.129166 |
| 11751501_FAXDC2    | -0.09182 | 0.069502 | 0.129175 |
| 11732168_STAG3     | -0.10222 | 0.069537 | 0.129235 |
| 11741263_LTBP1     | -0.19093 | 0.06954  | 0.129236 |
| 11759466_ARL17A // | -0.18876 | 0.069551 | 0.129247 |
| 11740003_SPATA5    | -0.16721 | 0.069551 | 0.129247 |
| 11740927_C14orf177 | -0.18994 | 0.069554 | 0.129247 |
| 11737126_CTAGE15 / | -0.1101  | 0.069592 | 0.129313 |
| 11729739_SIGLEC5   | 0.217164 | 0.069614 | 0.129345 |
| 11762303_HNMT      | 0.124628 | 0.069615 | 0.129345 |
| 11749476_UNC13D    | -0.11503 | 0.069624 | 0.129357 |
| 11751349_ZNF345    | 0.165367 | 0.069633 | 0.129369 |
| 11718402_NUDT21    | 0.078757 | 0.069643 | 0.129377 |
| 11754918_HMGCS1    | 0.095903 | 0.069643 | 0.129377 |
| 11752602_TBC1D17   | -0.08855 | 0.069655 | 0.129392 |
| 11716366_CELA3A // | -0.1034  | 0.069658 | 0.129392 |
| 11761119_SH3GLB2   | -0.10707 | 0.069663 | 0.129392 |
| 11749221_SLC13A3   | 0.073647 | 0.069665 | 0.129392 |
| 11764031_GADD45B   | 0.121275 | 0.069667 | 0.129392 |
| 11715308_MLXIPL    | -0.08565 | 0.069667 | 0.129392 |
| 11727976_KLK1      | -0.11425 | 0.069672 | 0.129397 |

|                    |          |          |          |
|--------------------|----------|----------|----------|
| 11727884_ERAP1     | -0.15381 | 0.069685 | 0.129416 |
| 11761048_ANKRD46   | -0.13733 | 0.0697   | 0.129439 |
| 11733261_CELF2     | -0.16942 | 0.069711 | 0.129455 |
| 11719336_TEAD3     | -0.13025 | 0.069718 | 0.129463 |
| 11723036_TRMT12    | 0.087595 | 0.069755 | 0.129526 |
| 11745104_PJA1      | -0.07886 | 0.069762 | 0.129533 |
| 11728743_ARAP3     | -0.14    | 0.069764 | 0.129533 |
| 11762195_TCEA3     | -0.08843 | 0.069796 | 0.129587 |
| 11761900_LOC554174 | -0.14736 | 0.069826 | 0.129639 |
| 11759442_DDR2      | 0.123366 | 0.069829 | 0.129639 |
| 11747381_SEPT1     | -0.14779 | 0.06989  | 0.129747 |
| 11721671_RPS6KA4   | -0.13396 | 0.069899 | 0.12976  |
| 11728882_PRSS35    | 0.193625 | 0.069907 | 0.129769 |
| 11753295_COL1A2    | -0.17966 | 0.069933 | 0.129812 |
| 11735414_CRCP      | 0.090276 | 0.069936 | 0.129814 |
| 11732685_POGZ      | 0.116121 | 0.069964 | 0.129859 |
| 11754976_CNPY3     | -0.09298 | 0.069977 | 0.12988  |
| 11738199_PDE6B     | -0.2065  | 0.069987 | 0.129894 |
| 11758881_RPS15A    | -0.12279 | 0.069992 | 0.129894 |
| 11719538_BBOX1     | -0.10698 | 0.069993 | 0.129894 |
| 11747347_ARHGEF10L | 0.084781 | 0.07     | 0.129903 |
| 11746998_AGBL2     | 0.145208 | 0.070016 | 0.129926 |
| 11761498_FAM129C   | -0.12329 | 0.070035 | 0.129957 |
| 11716803_SBF1      | -0.10026 | 0.070046 | 0.129974 |
| 11736420_ZNF800    | 0.089682 | 0.070049 | 0.129974 |
| 11722329_PGBD5     | -0.12972 | 0.070056 | 0.129982 |
| 11750340_ADGRD2    | -0.12908 | 0.07006  | 0.129984 |
| 11744745_TNIP1     | -0.0886  | 0.07008  | 0.130016 |
| 11750736_STEAP4    | -0.1458  | 0.070088 | 0.130024 |
| 11747829_TCF7L2    | 0.134346 | 0.070089 | 0.130024 |
| 11745436_ZNF148    | -0.08492 | 0.070094 | 0.130027 |
| 11750225_RNF215    | -0.11086 | 0.070101 | 0.130035 |
| 11745115_SLC1A2    | -0.11413 | 0.070153 | 0.130124 |
| 11759860_GRIK1-AS2 | 0.09187  | 0.070154 | 0.130124 |
| 11733937_PAIP1     | -0.07913 | 0.070179 | 0.130166 |
| 11734945_CYSLTR2   | -0.19216 | 0.07021  | 0.130217 |
| 11720871_PDE7A     | 0.076591 | 0.070223 | 0.130238 |
| 11756969_ALB       | -0.15186 | 0.070232 | 0.130249 |
| 11720814_INTS10    | -0.07422 | 0.070235 | 0.13025  |
| 11750713_GRM4      | -0.10051 | 0.070254 | 0.130275 |
| 11762583_GRIK2     | -0.13552 | 0.070255 | 0.130275 |
| 11728504_BDKRB1    | 0.121752 | 0.070257 | 0.130275 |
| 11759074_BRSK2     | -0.15124 | 0.07026  | 0.130276 |
| 11732039_TPD52L3   | 0.278455 | 0.070292 | 0.130329 |
| 11756727_PEX14     | -0.09963 | 0.070294 | 0.130329 |
| 11753297_BIRC7     | -0.1048  | 0.070298 | 0.130332 |
| 11725933_HSPA5     | -0.07652 | 0.070402 | 0.130517 |
| 11724310_SH3BP2    | 0.104951 | 0.070406 | 0.130517 |
| 11760061_FCRL2     | -0.21454 | 0.070406 | 0.130517 |
| 11759489_TXNL1     | -0.09114 | 0.070431 | 0.130559 |
| 11762230_HAAO      | -0.13549 | 0.070439 | 0.130568 |

|                    |          |          |          |
|--------------------|----------|----------|----------|
| 11725852_ZNF319    | -0.10438 | 0.070442 | 0.130568 |
| 11719435_LRP4      | -0.0858  | 0.070466 | 0.130608 |
| 11726821_CXorf36   | -0.21529 | 0.070469 | 0.13061  |
| 11717707_VPS13D    | -0.14679 | 0.070484 | 0.130632 |
| 11749442_PYCRL     | -0.0885  | 0.070505 | 0.130666 |
| 11751979_MYOM3     | 0.193351 | 0.07052  | 0.130689 |
| 11746600_MCOLN3    | 0.164366 | 0.070542 | 0.130725 |
| 11748819_FRMD1     | -0.10992 | 0.070548 | 0.130731 |
| 11729102_CDC42     | -0.08701 | 0.070559 | 0.130747 |
| 11763530_TMC5      | -0.14051 | 0.070577 | 0.130775 |
| 11725206_OTOR      | -0.20719 | 0.070604 | 0.130819 |
| 11752595_HSPA9     | 0.073393 | 0.070608 | 0.130822 |
| 11732955_FDXR      | 0.100178 | 0.070632 | 0.130862 |
| 11737252_SLC16A11  | -0.10328 | 0.070646 | 0.130879 |
| 11741257_APOBEC3F  | 0.120149 | 0.07065  | 0.130879 |
| 11750726_ZNF568    | 0.187483 | 0.070652 | 0.130879 |
| 11749604_CYP4F2 // | 0.085165 | 0.070652 | 0.130879 |
| 11718950_MPP5      | 0.094617 | 0.070661 | 0.13089  |
| 11763611_GLI2      | -0.15655 | 0.070672 | 0.130907 |
| 11756713_WIPF2     | -0.13138 | 0.07068  | 0.130915 |
| 11733704_TMEM229A  | 0.138963 | 0.070684 | 0.130918 |
| 11729956_KNG1      | -0.09135 | 0.070687 | 0.130919 |
| 11733394_TRPM6     | -0.08689 | 0.070691 | 0.130921 |
| 11737469_TMEM240   | -0.20846 | 0.070698 | 0.13093  |
| 11727444_TMEM255A  | 0.134901 | 0.07071  | 0.130943 |
| 11717158_ZNF593    | 0.08362  | 0.070711 | 0.130943 |
| 11734585_KLRC4     | 0.249831 | 0.070725 | 0.130965 |
| 11736769_USP45     | -0.12435 | 0.070759 | 0.131023 |
| 11750330_MYOCD     | -0.09477 | 0.070772 | 0.131039 |
| 11757414_PUF60     | -0.07105 | 0.070773 | 0.131039 |
| 11727906_MMP10     | 0.333315 | 0.070782 | 0.13105  |
| 11721887_CRYM      | -0.17489 | 0.070788 | 0.131055 |
| 11725675_RORA      | 0.107808 | 0.0708   | 0.131072 |
| 11723577_OSR2      | 0.31     | 0.070802 | 0.131072 |
| 11750877_ANKS3     | 0.092734 | 0.070805 | 0.131073 |
| 11733263_BSDC1     | -0.08558 | 0.070841 | 0.131135 |
| 11740728_KRTAP5-3  | -0.12394 | 0.070844 | 0.131136 |
| 11734145_ZNF778    | 0.18345  | 0.070882 | 0.131201 |
| 11742348_OR51I2    | -0.21577 | 0.070897 | 0.131223 |
| 11732167_STAG3     | -0.16467 | 0.070924 | 0.131269 |
| 11756324_WDR26     | 0.102889 | 0.070929 | 0.131273 |
| 11751722_FBXO3     | 0.090571 | 0.070969 | 0.13134  |
| 11738184_PARD3B    | -0.11675 | 0.070971 | 0.13134  |
| 11757411_MRPL33    | 0.108262 | 0.07099  | 0.131371 |
| 11735012_DYNLL2    | 0.093845 | 0.071026 | 0.131432 |
| 11748124_CIRBP     | -0.10308 | 0.071032 | 0.131435 |
| 11737261_BICC1     | -0.14217 | 0.071033 | 0.131435 |
| 11747164_U2SURP    | -0.08428 | 0.071045 | 0.131451 |
| 11738868_SLC2A7    | -0.13393 | 0.071047 | 0.131452 |
| 11734705_LAMA4     | -0.12017 | 0.071086 | 0.131518 |
| 11717029_BAP1      | -0.11519 | 0.071097 | 0.131534 |

|                   |          |          |          |
|-------------------|----------|----------|----------|
| 11751266_SLC44A3  | 0.173359 | 0.071107 | 0.131547 |
| 11733948_PAX9     | 0.127787 | 0.071115 | 0.131556 |
| 11743561_PTPRC    | 0.129088 | 0.071117 | 0.131556 |
| 11720927_SRM      | 0.073241 | 0.071133 | 0.131581 |
| 11736119_ZFAND5   | 0.093422 | 0.071163 | 0.131631 |
| 11715816_ZFP36L2  | 0.119572 | 0.071179 | 0.131656 |
| 11730460_C17orf74 | -0.12893 | 0.071206 | 0.131701 |
| 11749162_ZSCAN30  | -0.10217 | 0.071216 | 0.131713 |
| 11736459_NOX1     | -0.08875 | 0.071218 | 0.131713 |
| 11759358_PYG01    | 0.196153 | 0.071223 | 0.131716 |
| 11738095_FASTK    | -0.10685 | 0.071239 | 0.131741 |
| 11756218_MIIP     | -0.07426 | 0.071243 | 0.131745 |
| 11735890_TRIM14   | -0.09184 | 0.071298 | 0.131841 |
| 11732550_PTGER2   | -0.13536 | 0.071314 | 0.131866 |
| 11729248_RNF24    | 0.166106 | 0.071331 | 0.131893 |
| 11720412_SLC41A1  | 0.084136 | 0.071361 | 0.131942 |
| 11736916_C17orf58 | -0.0739  | 0.071377 | 0.131964 |
| 11741382_ZNF114   | -0.1822  | 0.071378 | 0.131964 |
| 11725628_CNP      | -0.18034 | 0.071381 | 0.131964 |
| 11760249_ZNF511   | -0.23748 | 0.071386 | 0.131969 |
| 11760670_FMO3     | -0.11335 | 0.071434 | 0.132048 |
| 11746739_ORC2     | -0.08902 | 0.071435 | 0.132048 |
| 11743133_FKBP8    | -0.0762  | 0.071453 | 0.132078 |
| 11760884_ZNF397   | 0.261121 | 0.071504 | 0.132167 |
| 11719708_PDPK1    | 0.128353 | 0.071517 | 0.132185 |
| 11724473_AMPH     | -0.13069 | 0.071544 | 0.132231 |
| 11743601_OTUD5    | 0.093261 | 0.07155  | 0.132234 |
| 11726856_ADAMTS5  | 0.228589 | 0.071552 | 0.132234 |
| 11715972_SMOC2    | -0.08869 | 0.071569 | 0.132262 |
| 11755148_DMXL2    | 0.093765 | 0.071574 | 0.132266 |
| 11744183_ACADS    | -0.08068 | 0.071589 | 0.132288 |
| 11729871_ASGR2    | -0.20704 | 0.0716   | 0.132304 |
| 11728593_FOXL2    | -0.13548 | 0.071607 | 0.132311 |
| 11748344_IFT22    | 0.071995 | 0.071611 | 0.132314 |
| 11739062_GTPBP4   | -0.08579 | 0.07162  | 0.132326 |
| 11738914_CD200R1  | -0.11828 | 0.07163  | 0.132339 |
| 11751186_UBE2K    | 0.122523 | 0.071632 | 0.132339 |
| 11725275_IRX1     | -0.12406 | 0.071655 | 0.132375 |
| 11729302_GLYAT    | -0.19645 | 0.071675 | 0.132408 |
| 11742971_COLEC12  | -0.09498 | 0.071679 | 0.13241  |
| 11734979_BTNL3    | 0.133535 | 0.071683 | 0.132413 |
| 11761133_KDM5C    | -0.21671 | 0.071726 | 0.132487 |
| 11739915_FAM13C   | 0.151185 | 0.071729 | 0.132487 |
| 11720343_NUDT4    | -0.09138 | 0.071771 | 0.13256  |
| 11744309_DBH      | -0.13757 | 0.071774 | 0.13256  |
| 11753209_HYAL1    | -0.13401 | 0.07179  | 0.132586 |
| 11715102_HIST1H3G | -0.13326 | 0.071799 | 0.132592 |
| 11722130_ECHDC2   | 0.083338 | 0.071799 | 0.132592 |
| 11759806_WBSCR16  | -0.08181 | 0.071866 | 0.13271  |
| 11755280_FTL      | 0.075403 | 0.071878 | 0.132727 |
| 11740168_HUNK     | -0.10796 | 0.071884 | 0.132734 |

|                    |          |          |          |
|--------------------|----------|----------|----------|
| 11737537_SAMD12    | 0.10698  | 0.071888 | 0.132736 |
| 11743200_ARMC2     | -0.108   | 0.071911 | 0.132774 |
| 11728567_KCNC1     | -0.11742 | 0.071914 | 0.132774 |
| 11727347_ITPKA     | -0.07004 | 0.071963 | 0.132859 |
| 11752603_RTCB      | -0.09876 | 0.071982 | 0.132885 |
| 11732300_KIAA1715  | -0.1174  | 0.071985 | 0.132885 |
| 11745416_DIAPH1    | -0.07352 | 0.071985 | 0.132885 |
| 11724457_HCN4      | -0.15017 | 0.072036 | 0.132975 |
| 11740732_SYT14     | 0.110471 | 0.072048 | 0.132988 |
| 11760151_LOC730098 | -0.09688 | 0.072049 | 0.132988 |
| 11760447_FAM124A   | 0.170094 | 0.072114 | 0.133102 |
| 11729761_PLA2G2D   | -0.13885 | 0.07213  | 0.133127 |
| 11731822_WISP1     | -0.09254 | 0.072133 | 0.133127 |
| 11751876_ADGRG4    | -0.19503 | 0.072141 | 0.133137 |
| 11746927_FAM155A   | -0.16339 | 0.072158 | 0.133164 |
| 11730762_CRIPT     | 0.101483 | 0.072168 | 0.133173 |
| 11756251_RPS5      | 0.075246 | 0.072169 | 0.133173 |
| 11763417_HCG8 ///  | 0.110438 | 0.072177 | 0.133183 |
| 11751638_NT5C      | -0.08269 | 0.072185 | 0.133193 |
| 11754873_ZNF641    | 0.104884 | 0.072194 | 0.133205 |
| 11735976_NRII3     | 0.172013 | 0.072204 | 0.133218 |
| 11760533_ALDH9A1   | 0.102686 | 0.072232 | 0.133266 |
| 11725843_SCP2D1    | -0.18151 | 0.072248 | 0.133289 |
| 11746530_SLC25A15  | 0.095896 | 0.072256 | 0.133299 |
| 11738662_TUBB7P    | -0.16148 | 0.072265 | 0.133311 |
| 11751942_DNMT3B    | -0.14507 | 0.072274 | 0.133323 |
| 11751071_PABPC5    | -0.098   | 0.072281 | 0.13333  |
| 11722146_PAIP2B    | -0.13152 | 0.072285 | 0.133333 |
| 11743668_CEP120    | -0.10513 | 0.072291 | 0.133338 |
| 11733368_HIST1H4I  | -0.2643  | 0.072308 | 0.133365 |
| 11754536_ERCC2     | 0.127877 | 0.072314 | 0.133372 |
| 11756345_TMEM91    | -0.14072 | 0.072325 | 0.133387 |
| 11738164_C11orf42  | -0.09759 | 0.072337 | 0.133403 |
| 11722716_STK35     | -0.1079  | 0.072343 | 0.133406 |
| 11742866_PHACTR1   | 0.3083   | 0.072344 | 0.133406 |
| 11732083_STOML3    | -0.12292 | 0.072368 | 0.133446 |
| 11730658_MAPK15    | -0.2076  | 0.072375 | 0.133453 |
| 11757457_NENF      | 0.098472 | 0.072381 | 0.13346  |
| 11722383_MDM1      | -0.11853 | 0.07239  | 0.133471 |
| 11728204_FAM120A   | -0.07929 | 0.072395 | 0.133475 |
| 11740249_CFHR5     | -0.16835 | 0.072423 | 0.133516 |
| 11763190_SIGIRR    | -0.14824 | 0.072427 | 0.133516 |
| 11725287_ANKS6     | 0.138164 | 0.072428 | 0.133516 |
| 11747030_NETO1     | 0.098742 | 0.072428 | 0.133516 |
| 11728533_SNX3      | -0.08047 | 0.072462 | 0.133574 |
| 11731850_COLQ      | 0.243149 | 0.072478 | 0.133598 |
| 11748654_PTPN22    | 0.089781 | 0.072481 | 0.133598 |
| 11748899_CD244     | 0.188138 | 0.072498 | 0.133625 |
| 11763822_EREG      | -0.16121 | 0.072509 | 0.133639 |
| 11763958_FCGRT     | -0.16774 | 0.072515 | 0.133647 |
| 11718069_NCOR2     | -0.12392 | 0.072535 | 0.133677 |



|                    |          |          |          |
|--------------------|----------|----------|----------|
| 11761766_CNTROB    | -0.12349 | 0.072551 | 0.133701 |
| 11759636_THOC2     | 0.07134  | 0.072553 | 0.133701 |
| 11736538_RHCE ///  | -0.3252  | 0.072556 | 0.133702 |
| 11726423_SCN3B     | -0.17641 | 0.07256  | 0.133704 |
| 11755353_MY07B     | -0.14138 | 0.072567 | 0.133708 |
| 11729064_OPA3      | 0.119834 | 0.072568 | 0.133708 |
| 11746322_ADH1B     | -0.1189  | 0.072581 | 0.133727 |
| 11730659_OXSM      | -0.08202 | 0.07259  | 0.133739 |
| 11764258_LOC102723 | -0.23504 | 0.072619 | 0.133787 |
| 11727827_NDUFAF7   | -0.15122 | 0.072623 | 0.133789 |
| 11726465_ADORA3 // | -0.18239 | 0.072625 | 0.133789 |
| 11745857_SGSM3     | -0.0958  | 0.072649 | 0.133828 |
| 11753475_BRF1      | -0.11443 | 0.072667 | 0.133855 |
| 11742646_LINC00207 | -0.14363 | 0.072696 | 0.133904 |
| 11750434_SPIDR     | -0.09621 | 0.072704 | 0.133913 |
| 11761933_RPS4X     | -0.23206 | 0.072738 | 0.133969 |
| 11728353_MSMP      | -0.11896 | 0.07274  | 0.133969 |
| 11732884_F7        | -0.19438 | 0.072775 | 0.134025 |
| 11761437_VRK3      | -0.21702 | 0.072775 | 0.134025 |
| 11756370_CRIP2     | -0.0758  | 0.072795 | 0.134057 |
| 11722236_FBXO2     | 0.210007 | 0.07283  | 0.134115 |
| 11747806_RNGTT     | 0.077364 | 0.072838 | 0.134122 |
| 11726137_LDB3      | -0.08224 | 0.072839 | 0.134122 |
| 11741970_SIM2      | -0.17476 | 0.07286  | 0.13415  |
| 11762986_ARL2BP    | -0.08985 | 0.07286  | 0.13415  |
| 11763961_SFTPC     | -0.09216 | 0.072874 | 0.134165 |
| 11735682_XKR7      | -0.1459  | 0.072874 | 0.134165 |
| 11736371_MBOAT1    | -0.16389 | 0.072876 | 0.134165 |
| 11733411_TCF15     | -0.1017  | 0.072894 | 0.134185 |
| 11725306_CALU      | 0.079834 | 0.072894 | 0.134185 |
| 11751799_PRDX6     | 0.078354 | 0.072896 | 0.134185 |
| 11741417_EIF4E     | 0.088786 | 0.072977 | 0.134331 |
| 11744747_FGFR10P2  | -0.06862 | 0.073002 | 0.134371 |
| 11750418_PLEKHD1   | -0.09167 | 0.073013 | 0.134385 |
| 11740507_ARHGAP26  | 0.278626 | 0.073015 | 0.134385 |
| 11760379_GTPBP6    | -0.14283 | 0.073075 | 0.134488 |
| 11739748_KLHL7     | -0.09954 | 0.073077 | 0.134488 |
| 11747126_ART3      | -0.13292 | 0.07308  | 0.13449  |
| 11735836_PPHLN1    | 0.072776 | 0.073099 | 0.134516 |
| 11749038_ARHGEF2   | -0.08131 | 0.0731   | 0.134516 |
| 11763790_SYCP1     | -0.12116 | 0.073105 | 0.13452  |
| 11744940_ABHD17A   | 0.086771 | 0.073109 | 0.134522 |
| 11742516_OR2T4     | -0.11248 | 0.073132 | 0.134559 |
| 11716882_ZZEF1     | 0.151955 | 0.073147 | 0.134582 |
| 11726877_GJB5      | -0.14222 | 0.073218 | 0.134708 |
| 11742499_ARID3C    | -0.14818 | 0.073224 | 0.134713 |
| 11725170_PPARD     | -0.1438  | 0.073275 | 0.134803 |
| 11761406_TPRKB     | -0.09987 | 0.073286 | 0.134813 |
| 11758639_HSPH1     | 0.081316 | 0.073286 | 0.134813 |
| 11753833_DYNLL1    | 0.076711 | 0.073295 | 0.134824 |
| 11724870_IP08      | 0.093422 | 0.073317 | 0.134861 |

|                    |          |          |          |
|--------------------|----------|----------|----------|
| 11762463_C8orf17   | 0.120345 | 0.073347 | 0.134909 |
| 11726914_ZNF182    | 0.080898 | 0.073378 | 0.134961 |
| 11738638_TGM6      | -0.12149 | 0.073388 | 0.134975 |
| 11744623_POLDIP2   | 0.070412 | 0.0734   | 0.134992 |
| 11726304_MFSD4     | 0.140744 | 0.073423 | 0.135028 |
| 11732335_SLC31A1   | 0.093409 | 0.073428 | 0.135033 |
| 11741867_P2RX2     | -0.08708 | 0.073435 | 0.135041 |
| 11730641_UNC93A    | -0.08905 | 0.073443 | 0.135051 |
| 11738124_SIGLEC10  | 0.164346 | 0.073475 | 0.135105 |
| 11751275_CALCO2    | -0.0887  | 0.073487 | 0.135122 |
| 11754762_TCIRG1    | 0.069005 | 0.073499 | 0.135138 |
| 11754988_SYNPO     | -0.11867 | 0.073506 | 0.135141 |
| 11729912_IBA57     | -0.11457 | 0.073511 | 0.135141 |
| 11754378_SERPINB6  | -0.07683 | 0.073511 | 0.135141 |
| 11753514_PNRC1     | 0.099094 | 0.073511 | 0.135141 |
| 11737639_CST9      | -0.12051 | 0.073525 | 0.135161 |
| 11743235_PKD1L3    | -0.16299 | 0.073531 | 0.135164 |
| 11758195_TPT1      | 0.072031 | 0.073532 | 0.135164 |
| 11719016_PQLC3     | 0.069319 | 0.073544 | 0.13518  |
| 11740802_INV5      | 0.125054 | 0.07355  | 0.135187 |
| 11758097_MATN3     | -0.19726 | 0.073564 | 0.135203 |
| 11732416_TIAM1     | 0.109275 | 0.073565 | 0.135203 |
| 11750978_CRHR2     | -0.0705  | 0.073599 | 0.135258 |
| 11721616_THEMIS2   | -0.0706  | 0.0736   | 0.135258 |
| 11725978_NCBP1     | 0.079732 | 0.073638 | 0.135323 |
| 11743184_CYB5R1    | -0.11768 | 0.073646 | 0.135332 |
| 11756953_IL1R1     | -0.19077 | 0.07365  | 0.135335 |
| 11728535_BGLAP     | 0.110381 | 0.073655 | 0.135339 |
| 11749429_RPN1      | 0.083377 | 0.073666 | 0.135354 |
| 11729477_LY6G6C    | -0.07707 | 0.073673 | 0.135362 |
| 11726502_LSAMP     | 0.128309 | 0.073695 | 0.135393 |
| 11732619_CD164L2   | -0.13099 | 0.073696 | 0.135393 |
| 11729273_SH3RF2    | 0.082462 | 0.073711 | 0.135415 |
| 11729962_ADCYAP1   | -0.12213 | 0.073724 | 0.135434 |
| 11741664_PCDHGA11  | -0.14971 | 0.073731 | 0.135443 |
| 11749186_CDADC1    | -0.14263 | 0.073739 | 0.135452 |
| 11719640_PLXNA1    | 0.094276 | 0.07375  | 0.135467 |
| 11757266_GPX3      | -0.15449 | 0.073759 | 0.135479 |
| 11725823_JPH1      | -0.12969 | 0.073775 | 0.135503 |
| 11724155_SULT1E1   | -0.14831 | 0.073807 | 0.135557 |
| 11738952_LCN9      | 0.10757  | 0.073812 | 0.135562 |
| 11720385_MRC2      | -0.11848 | 0.07382  | 0.13557  |
| 11747336_MED24     | -0.08126 | 0.073835 | 0.135593 |
| 11759930_PHTF1     | 0.099223 | 0.073845 | 0.135607 |
| 11752451_PLPPR4    | -0.11188 | 0.073865 | 0.135638 |
| 11751241_FAM47E-ST | -0.12979 | 0.07389  | 0.135679 |
| 11747022_ATP13A4   | -0.11098 | 0.0739   | 0.135691 |
| 11748121_CD96      | 0.069224 | 0.073931 | 0.135743 |
| 11758660_DLX4      | -0.11619 | 0.073947 | 0.135768 |
| 200064_PMHSP90AB1  | -0.06948 | 0.073953 | 0.135775 |
| 11753227_DDX11L2   | -0.08267 | 0.073967 | 0.135794 |

|                    |          |          |          |
|--------------------|----------|----------|----------|
| 11762083_CS NK2A1  | -0.17802 | 0.073989 | 0.135829 |
| 11762807_COMMD5 // | -0.09172 | 0.074013 | 0.135868 |
| 11732026_CRIP3     | -0.08234 | 0.074025 | 0.135886 |
| 11750553_CASP1     | 0.101333 | 0.074067 | 0.135958 |
| 11761716_COA3      | -0.11332 | 0.074087 | 0.135987 |
| 11729822_DPH7      | 0.140396 | 0.074088 | 0.135987 |
| 11737239_EOMES     | -0.20033 | 0.074095 | 0.135993 |
| 11753615_ARL8B     | 0.080213 | 0.074122 | 0.136035 |
| 11748088_AKAP1     | -0.09407 | 0.074123 | 0.136035 |
| 11730983_ZFYVE9    | 0.106532 | 0.074157 | 0.136093 |
| 11718806_PUM2      | -0.0991  | 0.074201 | 0.136168 |
| 11745455_ABCB8     | -0.11641 | 0.074222 | 0.136201 |
| 11739607_BAIAP2    | -0.08    | 0.074246 | 0.136241 |
| 11730189_OLA1      | 0.076165 | 0.074252 | 0.136247 |
| 11748433_NDUFC2    | -0.08167 | 0.074281 | 0.136294 |
| 11719784_RPS23     | 0.080849 | 0.074284 | 0.136294 |
| 11732052_ZSCAN2    | -0.14156 | 0.07429  | 0.1363   |
| 11754219_SIPAIL1   | -0.09832 | 0.074335 | 0.136377 |
| 11721299_MRPS21    | -0.08716 | 0.074379 | 0.136453 |
| 11756030_PQBP1     | 0.079125 | 0.074384 | 0.136458 |
| 11719495_CLK2      | -0.07518 | 0.074398 | 0.136475 |
| 11724157_SULT1E1   | 0.110458 | 0.074399 | 0.136475 |
| 11755801_IGSF22    | -0.07779 | 0.074412 | 0.136493 |
| 11741426_ISLR2     | -0.15611 | 0.074445 | 0.136549 |
| 11762563_WHSC1     | -0.18736 | 0.07445  | 0.136553 |
| 11750710_CPEB3     | 0.147173 | 0.074476 | 0.136595 |
| 11734128_CYP11B1   | -0.12996 | 0.07448  | 0.136597 |
| 11740691_AIF1      | -0.10621 | 0.074489 | 0.13661  |
| 11719047_WEE1      | 0.081238 | 0.074508 | 0.13664  |
| 11761801_MAP4K2    | -0.11203 | 0.074521 | 0.136658 |
| 11721568_C9orf3    | 0.078573 | 0.074527 | 0.136663 |
| 11763348_CYP3A7    | 0.09461  | 0.074531 | 0.136666 |
| 11715152_PCDHGB1   | 0.117953 | 0.074544 | 0.136681 |
| 11749270_GPRC5B    | -0.20671 | 0.074545 | 0.136681 |
| 11730628_SPHKAP    | -0.10832 | 0.074557 | 0.136699 |
| 11750117_PHF2      | 0.101695 | 0.074574 | 0.136723 |
| 11761440_MICAL2    | -0.09606 | 0.074603 | 0.136768 |
| 11754731_MTA3      | 0.087578 | 0.074604 | 0.136768 |
| 11736414_MFI2      | -0.18498 | 0.074611 | 0.136776 |
| 11723478_CDC123    | -0.08121 | 0.074613 | 0.136776 |
| 11721690_CYB561    | -0.11391 | 0.074622 | 0.136787 |
| 11747057_C10orf142 | -0.16175 | 0.074646 | 0.136825 |
| 11739330_WDR82     | 0.0817   | 0.074669 | 0.136863 |
| 11751021_LRRC15    | -0.15794 | 0.07468  | 0.136877 |
| 11763726_RPL10     | 0.075041 | 0.074682 | 0.136877 |
| 11747300_CDK14     | -0.08756 | 0.074699 | 0.1369   |
| 11758666_FAM230A / | -0.1407  | 0.074701 | 0.1369   |
| 11720837_HIRA      | 0.081671 | 0.074705 | 0.136902 |
| 11744865_MAGI2     | 0.15226  | 0.074711 | 0.136909 |
| 11737708_ORC5      | 0.110306 | 0.074714 | 0.136909 |
| 11738161_NANOS2    | -0.10493 | 0.074732 | 0.136932 |

|                   |          |          |          |
|-------------------|----------|----------|----------|
| 11717477_CHGB     | 0.20253  | 0.074732 | 0.136932 |
| 11741195_SIGLEC14 | 0.121949 | 0.074738 | 0.136937 |
| 11735104_HDLBP    | -0.09439 | 0.074759 | 0.136971 |
| 11730230_TIAL1    | 0.075556 | 0.074861 | 0.137152 |
| 11726229_HTR3A    | -0.13537 | 0.074887 | 0.137195 |
| 11760270_CDC16    | 0.145229 | 0.074894 | 0.137203 |
| 11763210_ZMYND8   | -0.12464 | 0.074904 | 0.137216 |
| 11730504_ADAMTS2  | -0.09847 | 0.074918 | 0.137236 |
| 11724597_KIFC2    | -0.11836 | 0.074923 | 0.13724  |
| 11761188_VIL1     | 0.075702 | 0.07494  | 0.137266 |
| 11759815_IGHM     | -0.08681 | 0.074943 | 0.137267 |
| 11736453_ZNF197   | 0.075784 | 0.074986 | 0.137337 |
| 11748908_ORAI2    | 0.12382  | 0.074987 | 0.137337 |
| 11727290_CDK3 /// | 0.161529 | 0.074992 | 0.137341 |
| 11738896_CD200R1L | -0.14435 | 0.075046 | 0.137435 |
| 11739565_FKBP5    | -0.13582 | 0.075065 | 0.137464 |
| 11756173_INTS9    | -0.12073 | 0.075088 | 0.137501 |
| 11720678_CREB3L1  | -0.15518 | 0.075099 | 0.137516 |
| 11747785_LCP1     | 0.08836  | 0.075116 | 0.137537 |
| 11731208_PTPRH    | 0.107002 | 0.075116 | 0.137537 |
| 11761692_CSMD2    | 0.165009 | 0.075156 | 0.137606 |
| 11726746_TAOK2    | -0.12437 | 0.07517  | 0.137625 |
| 11755326_ABHD16A  | 0.118083 | 0.075173 | 0.137625 |
| 11740438_FUT6     | -0.33771 | 0.075214 | 0.137695 |
| 11760733_CCNY     | -0.12204 | 0.07522  | 0.137696 |
| 11727140_MUSTN1   | -0.12999 | 0.075224 | 0.137696 |
| 11719967_HTT      | -0.08839 | 0.075225 | 0.137696 |
| 11725163_CYP39A1  | 0.21282  | 0.075225 | 0.137696 |
| 11751547_HDAC6    | -0.15544 | 0.075231 | 0.137702 |
| 11738377_IFNA2    | 0.126838 | 0.075238 | 0.137709 |
| 11728089_DKK2     | 0.113992 | 0.075256 | 0.137737 |
| 11743173_SLC04A1  | -0.07006 | 0.07527  | 0.137757 |
| 11729747_IL10RA   | -0.09397 | 0.075287 | 0.137784 |
| 11733959_GTPBP3   | -0.09872 | 0.075293 | 0.137789 |
| 11762687_MUC1     | 0.079004 | 0.075299 | 0.137791 |
| 11762113_NXF3     | -0.09372 | 0.0753   | 0.137791 |
| 11729590_KLK2     | -0.11895 | 0.075339 | 0.137859 |
| 11729784_CMTM2    | -0.09035 | 0.075347 | 0.137868 |
| 11739994_TMEM25   | 0.141424 | 0.075388 | 0.137937 |
| 11763491_TTC39A   | 0.135169 | 0.075395 | 0.137944 |
| 11757720_EVPLL    | -0.10107 | 0.075401 | 0.13795  |
| 11757128_RPSA /// | -0.13065 | 0.075405 | 0.137953 |
| 11744754_DIS3L2   | 0.15094  | 0.075419 | 0.137973 |
| 11715426_SNU13    | -0.0754  | 0.075423 | 0.137976 |
| 11760894_SRSF5    | -0.13897 | 0.075446 | 0.138012 |
| 11715841_MAPK1    | -0.09438 | 0.075448 | 0.138012 |
| 11739946_PKP1     | -0.11943 | 0.075461 | 0.138029 |
| 11721198_TMEM119  | -0.08691 | 0.075474 | 0.138048 |
| 11762076_SERHL2   | 0.220768 | 0.075493 | 0.138077 |
| 11740527_DEFB118  | -0.10079 | 0.075526 | 0.138129 |
| 11727410_MRPL19   | 0.096636 | 0.075527 | 0.138129 |

|                    |          |          |          |
|--------------------|----------|----------|----------|
| 11743043_FBLN5     | -0.1455  | 0.07555  | 0.138166 |
| 11748352_WDR81     | -0.13895 | 0.075561 | 0.138181 |
| 11729978_CARD18    | -0.09648 | 0.075582 | 0.138215 |
| 11725856_DNAH1     | 0.116422 | 0.075589 | 0.138222 |
| 11726959_GRIN2A    | -0.15272 | 0.075603 | 0.138242 |
| 11740647_CREBBP    | -0.12897 | 0.075629 | 0.138284 |
| 11733466_NEMP1     | 0.224006 | 0.075639 | 0.138298 |
| 11737167_ANKRD34B  | -0.15723 | 0.075656 | 0.138324 |
| 11735469_OPN1SW    | -0.0974  | 0.075663 | 0.138331 |
| 11757374_RPL18A    | 0.068777 | 0.075677 | 0.138352 |
| 11762321_TRAV12-2  | 0.12616  | 0.075697 | 0.138383 |
| 11738075_PDE4A     | -0.11752 | 0.075735 | 0.138447 |
| 11744082_MRPS31    | 0.077875 | 0.075745 | 0.138461 |
| 11715136_OR8U1 /// | -0.134   | 0.075751 | 0.138466 |
| 11730844_PIK3R3    | 0.092195 | 0.075801 | 0.138551 |
| 11758900_YIPF4     | -0.19882 | 0.075803 | 0.138551 |
| 11732683_ABCA12    | 0.132583 | 0.075814 | 0.138566 |
| 11719019_CFBF      | -0.08736 | 0.075847 | 0.138621 |
| 11749486_DIP2B     | 0.071292 | 0.075863 | 0.138641 |
| 11730490_UNC5A     | -0.08905 | 0.075864 | 0.138641 |
| 11755792_PPFIA3    | -0.09071 | 0.075908 | 0.138717 |
| 11715502_RPL18A    | 0.068658 | 0.075922 | 0.138737 |
| 11741726_PIP5K1A   | 0.114546 | 0.075933 | 0.138752 |
| 11755650_MROH2B    | -0.13652 | 0.075977 | 0.138828 |
| 11761902_FAM186A   | -0.16875 | 0.075997 | 0.138859 |
| 11733736_CD2       | 0.137968 | 0.076021 | 0.138898 |
| 11755575_KCNU1     | -0.14052 | 0.076043 | 0.138932 |
| 11763722_SIRT6     | 0.107225 | 0.076048 | 0.138937 |
| 11726748_TMEM57    | -0.09772 | 0.076056 | 0.138946 |
| 11734645_PCDHA3    | 0.128006 | 0.076121 | 0.139059 |
| 11760164_TRDN      | 0.103886 | 0.07619  | 0.13918  |
| 11757645_FIBIN     | -0.12181 | 0.076208 | 0.139208 |
| 11739871_DNAJB2    | 0.108178 | 0.076213 | 0.139213 |
| 11746975_MLC1      | -0.08918 | 0.076221 | 0.139222 |
| 11741169_MC2R      | -0.16113 | 0.07624  | 0.139251 |
| 11742428_HR        | -0.07954 | 0.076261 | 0.139284 |
| 11748424_DDX3Y     | -0.1326  | 0.076264 | 0.139285 |
| 11734672_NFATC4    | -0.08491 | 0.076272 | 0.139294 |
| 11736123_FCGRT     | -0.14503 | 0.076284 | 0.139307 |
| 11721345_PLEK2     | 0.198381 | 0.076285 | 0.139307 |
| 11752270_TRPC7     | -0.08005 | 0.076307 | 0.139343 |
| 11740794_C1orf220  | -0.17726 | 0.076339 | 0.139395 |
| 11723152_GON4L     | 0.090007 | 0.076359 | 0.139427 |
| 11724710_SOX11     | -0.15281 | 0.076393 | 0.139483 |
| 11754331_SYDE1     | 0.111302 | 0.076404 | 0.139497 |
| 11762104_MOCS1     | -0.22537 | 0.076437 | 0.139548 |
| 11722403_PLEKH01   | -0.08716 | 0.076437 | 0.139548 |
| 11732872_MTRF1     | -0.15556 | 0.076465 | 0.139595 |
| 11720402_EFNB2     | -0.07998 | 0.076475 | 0.139606 |
| 11734225_LIMCH1    | -0.10587 | 0.07652  | 0.139684 |
| 11759799_ZDHHC11   | 0.227373 | 0.076535 | 0.139705 |

|                   |          |          |          |
|-------------------|----------|----------|----------|
| 11744458_RAB2B    | -0.12989 | 0.076551 | 0.139731 |
| 11729014_CACNA1E  | -0.10249 | 0.076574 | 0.139766 |
| 11736550_RAB29    | 0.084057 | 0.076593 | 0.139797 |
| 11720874_CORO2B   | -0.10749 | 0.076609 | 0.139821 |
| 11762140_BTNL9    | -0.08379 | 0.076618 | 0.139831 |
| 11740906_CCDC129  | 0.212394 | 0.076626 | 0.13984  |
| 11746794_NADK2    | 0.070593 | 0.076683 | 0.13994  |
| 11739528_SECTM1   | 0.104327 | 0.07669  | 0.139948 |
| 11760687_CCDC178  | -0.19024 | 0.076726 | 0.140009 |
| 11761721_GATB     | -0.21441 | 0.076747 | 0.140039 |
| 200053_PMSPAG7    | 0.07321  | 0.076749 | 0.140039 |
| 11715262_MTNRIA   | -0.1143  | 0.076752 | 0.14004  |
| 11718946_PGPEP1   | 0.132757 | 0.07679  | 0.140104 |
| 11744137_CAMK1D   | -0.08107 | 0.076798 | 0.140114 |
| 11741027_BTBD3    | 0.088572 | 0.076807 | 0.140123 |
| 11728779_ZAP70    | -0.11072 | 0.076812 | 0.140127 |
| 11736049_FAM229B  | -0.10556 | 0.076843 | 0.140178 |
| 11740387_SHROOM4  | -0.09355 | 0.076845 | 0.140178 |
| 11753539_ZNF573   | 0.120008 | 0.076854 | 0.140188 |
| 11718050_BASP1    | -0.1071  | 0.07686  | 0.140196 |
| 11747120_HS6ST1   | -0.0874  | 0.076876 | 0.140219 |
| 11763703_ZNF839   | -0.11991 | 0.076915 | 0.140284 |
| 11721594_ARHGAP39 | 0.160181 | 0.07693  | 0.140306 |
| 11727568_OTULIN   | 0.111226 | 0.076979 | 0.14039  |
| 11763054_YIPF7    | -0.11904 | 0.076996 | 0.140417 |
| 11759329_B3GAT2   | -0.17866 | 0.077009 | 0.140435 |
| 11730227_QRSL1    | -0.07696 | 0.07705  | 0.140504 |
| 11750846_SLC22A6  | -0.10819 | 0.077062 | 0.140521 |
| 11722411_SLC7A1   | 0.078439 | 0.077074 | 0.140537 |
| 11755027_TGFB1I1  | -0.1227  | 0.077078 | 0.140539 |
| 11755949_PUS10    | 0.086009 | 0.077082 | 0.14054  |
| 11727443_MPO      | -0.12513 | 0.077086 | 0.14054  |
| 11728934_LELP1    | -0.14828 | 0.077087 | 0.14054  |
| 11736696_HEMGN    | -0.13163 | 0.07709  | 0.140541 |
| 11733223_ZNF71    | 0.116313 | 0.077106 | 0.140565 |
| 11730916_RBBP6    | 0.071896 | 0.077129 | 0.140601 |
| 11734482_ETV3L    | -0.07269 | 0.077132 | 0.140602 |
| 11716825_FMOD     | -0.14014 | 0.077152 | 0.140632 |
| 11741542_CNTN5    | -0.08916 | 0.077157 | 0.140637 |
| 11736832_PEX26    | -0.10921 | 0.077201 | 0.140712 |
| 11762045_GLP2R    | -0.11262 | 0.077222 | 0.140745 |
| 11743811_TFAM     | 0.085597 | 0.077238 | 0.140768 |
| 11739347_PIP4K2A  | 0.196156 | 0.077248 | 0.140782 |
| 11734055_CFAP61   | -0.10987 | 0.077254 | 0.140787 |
| 11758646_MICU1    | -0.07745 | 0.077259 | 0.140789 |
| 11732088_ISX      | -0.15991 | 0.077261 | 0.140789 |
| 11729205_DTNA     | -0.21171 | 0.077301 | 0.140852 |
| 11726913_ZNF182   | -0.18661 | 0.077303 | 0.140852 |
| 11730911_SPRR1A   | -0.18148 | 0.077304 | 0.140852 |
| 11761612_DDX11    | -0.10397 | 0.077335 | 0.140902 |
| 11718852_SRPK1    | -0.07395 | 0.077337 | 0.140902 |

|                    |          |          |          |
|--------------------|----------|----------|----------|
| 11740271_MAP10     | -0.07436 | 0.077348 | 0.140917 |
| 11745318_ALDH1A3   | -0.15681 | 0.077367 | 0.140945 |
| 11751670_G6PC      | -0.1399  | 0.077379 | 0.140962 |
| 11730141_AKIP1     | 0.101442 | 0.077385 | 0.140967 |
| 11731591_NOC4L     | -0.06979 | 0.07739  | 0.140973 |
| 11749716_SLC4A8    | -0.18028 | 0.077407 | 0.140998 |
| 11740762_GCC2 ///  | 0.100824 | 0.077413 | 0.141003 |
| 11756981_HDAC7     | -0.08509 | 0.077424 | 0.141018 |
| 11741859_ZAR1      | -0.14805 | 0.077441 | 0.141044 |
| 11756306_PARP9     | 0.158596 | 0.07746  | 0.141073 |
| 11742388_OR5J2     | -0.13822 | 0.077487 | 0.141113 |
| 11758524_GRIK2     | 0.174811 | 0.077487 | 0.141113 |
| 11749452_ZFYVE27   | 0.113594 | 0.077492 | 0.141116 |
| 11747167_ADH1B     | -0.12315 | 0.077516 | 0.141151 |
| 11733818_FHL1      | 0.116127 | 0.077517 | 0.141151 |
| 11738739_OR6C4     | -0.11742 | 0.077523 | 0.141157 |
| 11724294_HPCA      | -0.08071 | 0.077527 | 0.141159 |
| 11730150_ENPP7     | -0.12557 | 0.077537 | 0.141172 |
| 11756002_NBEAL1    | 0.108558 | 0.077569 | 0.14122  |
| 11756904_STAB2     | -0.13776 | 0.077569 | 0.14122  |
| 11761021_LOC100507 | 0.078872 | 0.077576 | 0.141227 |
| 11717318_GPAT4     | -0.16287 | 0.077603 | 0.14127  |
| 11741291_REG3G     | -0.1349  | 0.077615 | 0.141287 |
| 11744374_HLA-DRB1  | 0.079214 | 0.077626 | 0.141302 |
| 11716553_RHBDD2    | -0.08531 | 0.077633 | 0.141308 |
| 11716906_CDH1      | -0.10493 | 0.077646 | 0.141327 |
| 11740760_TRPA1     | -0.17981 | 0.077658 | 0.141343 |
| 11736111_ARHGAP18  | 0.086325 | 0.077668 | 0.141357 |
| 11735880_MYBBP1A   | -0.0956  | 0.077676 | 0.141366 |
| 11749896_FMOD      | -0.16785 | 0.077682 | 0.141373 |
| 11741009_FGF12     | -0.08911 | 0.077701 | 0.141402 |
| 11726804_HELZ2     | -0.14561 | 0.07771  | 0.141413 |
| 11717578_VPS26A    | 0.084123 | 0.077725 | 0.141432 |
| 11755868_CLCC1     | 0.097224 | 0.077727 | 0.141432 |
| 11746237_AKTIP     | -0.2257  | 0.077739 | 0.14145  |
| 11736234_PTER      | -0.1052  | 0.077759 | 0.14148  |
| 11760815_C21orf58  | -0.10882 | 0.077765 | 0.141486 |
| 11761095_ZNF614    | -0.08368 | 0.077774 | 0.141496 |
| 11718409_STXBP2    | -0.07578 | 0.077776 | 0.141496 |
| 11722703_DZIP1     | -0.08836 | 0.077803 | 0.141539 |
| 11745390_PC        | -0.09352 | 0.077805 | 0.141539 |
| 11737863_PIGF      | -0.11106 | 0.077819 | 0.141558 |
| 11760872_TNFRSF1A  | 0.117383 | 0.077825 | 0.141563 |
| 11727744_CAMK2N2   | -0.12978 | 0.077827 | 0.141563 |
| 11746256 ORM2      | -0.09784 | 0.077858 | 0.141614 |
| 11754699_NPHP4     | -0.10406 | 0.077865 | 0.141621 |
| 11744981_ZNF541    | -0.10926 | 0.077884 | 0.141645 |
| 11757809_KIF5B     | 0.0705   | 0.077884 | 0.141645 |
| 11734916_METTL4    | -0.11489 | 0.077918 | 0.141697 |
| 11751579_TTC31     | -0.09001 | 0.077918 | 0.141697 |
| 11760435_CBR4      | 0.204928 | 0.077954 | 0.141757 |

|                    |          |          |          |
|--------------------|----------|----------|----------|
| 11717975_METTL3    | -0.07973 | 0.077965 | 0.141772 |
| 11731361_TREH      | -0.11651 | 0.077978 | 0.14179  |
| 11719658_TF        | -0.11356 | 0.077986 | 0.141799 |
| 11748897_AQP7      | -0.07573 | 0.077997 | 0.141814 |
| 11746514_KIF21B    | -0.10695 | 0.07803  | 0.141868 |
| 11721988_CCDC191   | 0.115313 | 0.078046 | 0.141891 |
| 11754127_BRMS1     | -0.0727  | 0.078054 | 0.141902 |
| 11752667_LZTS1     | -0.15384 | 0.078061 | 0.141908 |
| 11725293_USP9Y     | -0.18719 | 0.078076 | 0.14193  |
| 11731666_PDGFB     | 0.149595 | 0.078091 | 0.141952 |
| 11744943_RHBDL1    | 0.109277 | 0.078096 | 0.141956 |
| 11744463_CNPY2     | -0.07202 | 0.078136 | 0.142024 |
| 11738078_AVPR1B    | -0.09107 | 0.078152 | 0.142048 |
| 11762100_NRP2      | -0.11685 | 0.078196 | 0.142122 |
| 11746089_LTBP4     | -0.08989 | 0.078202 | 0.142127 |
| 11747509_FAM107B   | -0.0788  | 0.078271 | 0.142248 |
| 11722677_STEAP3    | -0.11588 | 0.078299 | 0.142294 |
| 11751102_TCF7L2    | 0.11372  | 0.078322 | 0.142331 |
| 11756921_TRPC3     | -0.14667 | 0.078416 | 0.142495 |
| 11724525_FAHD1     | 0.080143 | 0.078441 | 0.142537 |
| 11746133_TRA2A     | 0.105549 | 0.078461 | 0.142566 |
| 11716556_TNS1      | 0.096121 | 0.078518 | 0.142666 |
| 11735223_KLRG1     | -0.11969 | 0.078525 | 0.142673 |
| 11759934_C22orf15  | -0.12357 | 0.078535 | 0.142685 |
| 11737060_MTMR3     | 0.128652 | 0.078553 | 0.142712 |
| 11725397_TWISTNB   | 0.085244 | 0.078555 | 0.142712 |
| 11744832_RPAIN     | 0.077768 | 0.07856  | 0.142715 |
| 11745701_METRNL    | 0.103529 | 0.078563 | 0.142716 |
| 11738022_MEIOC     | 0.135899 | 0.078581 | 0.142743 |
| 11735658_LIG3      | -0.17126 | 0.078595 | 0.142762 |
| 11731878_REC114    | -0.12808 | 0.078619 | 0.142801 |
| 11732257_SHB       | -0.1296  | 0.078631 | 0.142818 |
| 11728920_RASGRP1   | -0.11031 | 0.078645 | 0.142837 |
| 11750743_EPN1      | -0.09784 | 0.078669 | 0.142876 |
| 11731744_TRDMT1    | -0.17579 | 0.078688 | 0.142899 |
| 11729819_IGF1      | -0.08818 | 0.07869  | 0.142899 |
| 11747141_KIF26B    | -0.09885 | 0.078693 | 0.142899 |
| 11730988_MCPH1     | -0.16765 | 0.078693 | 0.142899 |
| 11740684_HEPHL1    | -0.11827 | 0.078714 | 0.14293  |
| 11730032_MKX       | 0.185437 | 0.078722 | 0.142939 |
| 11762781_WRB       | -0.1258  | 0.07873  | 0.142949 |
| 11737245_AGAP5     | 0.072045 | 0.078738 | 0.142958 |
| 11747912_PAPD7     | -0.11184 | 0.078741 | 0.142958 |
| 11737693_LOC391343 | -0.11378 | 0.078762 | 0.142992 |
| 11724982_PCDH7     | 0.19688  | 0.078774 | 0.143008 |
| 11756552_SMARCAD1  | 0.085682 | 0.07878  | 0.143013 |
| 11742344_OR4K1     | -0.11908 | 0.078783 | 0.143013 |
| 11751204_GPM6A     | 0.091158 | 0.078815 | 0.143066 |
| 11716216_E2F4      | 0.084007 | 0.07884  | 0.143107 |
| 11721963_SLC4A8    | 0.157203 | 0.078851 | 0.143121 |
| 11725693_BOC       | -0.10995 | 0.0789   | 0.1432   |



|                    |          |          |          |
|--------------------|----------|----------|----------|
| 11740965_GTF2A1    | -0.09131 | 0.0789   | 0.1432   |
| 11757814_SLC25A30  | -0.08141 | 0.078926 | 0.143242 |
| 11747070_PRUNE     | 0.097974 | 0.078935 | 0.143253 |
| 11754090_SNCA      | 0.096369 | 0.078954 | 0.143282 |
| 11757826_DHX8      | 0.081961 | 0.07896  | 0.143286 |
| 11749987_CEP72     | -0.07829 | 0.078973 | 0.143306 |
| 11722144_USP37     | 0.106152 | 0.079004 | 0.143356 |
| 11754788_POLD4     | 0.092911 | 0.079019 | 0.143378 |
| 11761044_BCRP3     | -0.07867 | 0.079068 | 0.143463 |
| 11756164_ADIPOR2   | -0.08085 | 0.079072 | 0.143463 |
| 11738909_H1FOO     | -0.18351 | 0.079077 | 0.143468 |
| 11758943_AK4       | 0.15391  | 0.079087 | 0.14348  |
| 11720019_RTEL1 /// | -0.10661 | 0.079099 | 0.143497 |
| 11717830_TSC22D3   | 0.166145 | 0.079104 | 0.1435   |
| 11728928_CPNE7     | -0.0949  | 0.079108 | 0.143502 |
| 11753299_FCF1      | -0.09711 | 0.079145 | 0.143563 |
| 11754352_RNF213    | 0.109494 | 0.079147 | 0.143563 |
| 11748190_MYRF      | -0.09484 | 0.079152 | 0.143566 |
| 11744851_DDX31     | 0.082109 | 0.079167 | 0.143587 |
| 11722346_ACSS2     | 0.083666 | 0.079171 | 0.14359  |
| 11757400_DDX42     | -0.08446 | 0.079188 | 0.143615 |
| 11733462_SUSD5     | -0.1658  | 0.079203 | 0.143638 |
| 11736510_IL6R      | -0.1004  | 0.079228 | 0.143677 |
| 11727465_ZXDC      | -0.1059  | 0.079254 | 0.143718 |
| 11716938_SEC61B    | 0.067953 | 0.079256 | 0.143718 |
| 11738634_LMX1A     | -0.0849  | 0.079292 | 0.143777 |
| 11763914_SNHG17    | -0.15096 | 0.079304 | 0.143793 |
| 11752531_MDH1B     | -0.1321  | 0.079317 | 0.143812 |
| 11735497_ANKAR     | -0.11074 | 0.079325 | 0.143821 |
| 11739067_MAZ       | -0.1112  | 0.079359 | 0.143877 |
| 11759851_IQCE      | -0.14792 | 0.079376 | 0.143903 |
| 11716119_PDIA4     | -0.07909 | 0.079393 | 0.143928 |
| 11741360_RALGDS    | 0.181835 | 0.079439 | 0.144006 |
| 11740792_POU6F2    | -0.08128 | 0.079472 | 0.144061 |
| 11736906_ROR2      | -0.12696 | 0.079481 | 0.144073 |
| 11717981_ACP5      | -0.08776 | 0.079544 | 0.14418  |
| 11730013_MYO3A     | 0.079612 | 0.079556 | 0.144195 |
| 11742370_OR52A4P   | -0.15171 | 0.07956  | 0.144195 |
| 11721791_PTFRD     | 0.184799 | 0.079561 | 0.144195 |
| 11724683_CD300A    | -0.11144 | 0.07958  | 0.144225 |
| 11758552_CORIN     | 0.093303 | 0.079586 | 0.14423  |
| 11758485_ANKRD13C  | 0.157031 | 0.079602 | 0.144255 |
| 11754884_WDFY1     | -0.06654 | 0.079607 | 0.144258 |
| 11749134_POMT1     | 0.142685 | 0.079623 | 0.144282 |
| 11753939_PSMB10    | 0.086839 | 0.079631 | 0.14429  |
| 11717994_NR4A1     | -0.09138 | 0.079641 | 0.144303 |
| 11748712_PPRC1     | 0.091709 | 0.07965  | 0.144314 |
| 11715606_TSC22D1   | 0.095307 | 0.079657 | 0.144315 |
| 11741103_ANXA11    | 0.069381 | 0.079658 | 0.144315 |
| 11731829_GPC2      | -0.32832 | 0.079659 | 0.144315 |
| 11731355_IGFL3     | -0.09554 | 0.079672 | 0.144333 |

|                    |          |          |          |
|--------------------|----------|----------|----------|
| 11739581_PRKD3     | 0.084993 | 0.07968  | 0.144343 |
| 11756287_AOAH      | -0.13083 | 0.079701 | 0.144375 |
| 11720079_NTRK2     | -0.10992 | 0.079716 | 0.144392 |
| 11737389_MTMR11    | -0.08681 | 0.079719 | 0.144392 |
| 11730656_LILRA3    | 0.088479 | 0.079721 | 0.144392 |
| 11760887_PIGL      | -0.1457  | 0.079723 | 0.144392 |
| 11750834_B3GALNT1  | -0.1073  | 0.079798 | 0.144524 |
| 11735259_ERLIN2    | -0.23109 | 0.079842 | 0.144598 |
| 11728329_PRICKLE3  | -0.08722 | 0.079856 | 0.144618 |
| 11751181_ZNF763    | 0.146383 | 0.079861 | 0.144621 |
| 11728679_CD163     | -0.08241 | 0.079871 | 0.144634 |
| 11744593_GRASP     | -0.08273 | 0.079887 | 0.144657 |
| 11715322_FABP12    | 0.122713 | 0.079913 | 0.144699 |
| 11750112_RNF40     | 0.093304 | 0.079921 | 0.144708 |
| 11738529_PCDHA8    | -0.11222 | 0.079938 | 0.144734 |
| 11737293_TACR3     | -0.12525 | 0.07995  | 0.144751 |
| 11719354_SH3BP5    | 0.100848 | 0.079962 | 0.144766 |
| 11735407_LMTK3     | -0.07532 | 0.079966 | 0.144768 |
| 11724628_MAT1A     | -0.11576 | 0.079995 | 0.144811 |
| 11721004_HEXIM1    | 0.08075  | 0.079995 | 0.144811 |
| 11754700_SH3BP1    | -0.12479 | 0.080002 | 0.144814 |
| 11722909_GATS      | -0.15219 | 0.080003 | 0.144814 |
| 11734996_SKI       | 0.080588 | 0.08003  | 0.144858 |
| 11755088_MYO9A     | -0.07219 | 0.080051 | 0.14489  |
| 11761990_ADGRF5    | -0.15048 | 0.080079 | 0.144936 |
| 11740431_ZFP62     | -0.14907 | 0.080121 | 0.145001 |
| 11760983_L3MBTL4   | 0.101878 | 0.080121 | 0.145001 |
| 11716541_PRSS8     | -0.11277 | 0.080159 | 0.145065 |
| 11723071_SGCE      | -0.07179 | 0.080179 | 0.145096 |
| 11745352_KIF19     | -0.13103 | 0.080185 | 0.1451   |
| 11732602_CEP135    | -0.07827 | 0.080194 | 0.145106 |
| 11744627_RPAIN     | 0.080181 | 0.080194 | 0.145106 |
| 11743893_ZNF780A   | 0.135382 | 0.080207 | 0.145125 |
| 11740882_PRSS38    | -0.07753 | 0.080229 | 0.145158 |
| 11718261_NOTCH1    | -0.1121  | 0.080245 | 0.145182 |
| 11715590_DYNC1H1   | 0.086802 | 0.080276 | 0.145234 |
| 11727644_TRERF1    | 0.11674  | 0.080289 | 0.145251 |
| 11745793_PIAS3     | -0.1227  | 0.0803   | 0.145265 |
| 11761006_CDK10     | -0.1396  | 0.080328 | 0.145311 |
| 11746597_LOX       | -0.10149 | 0.080352 | 0.145349 |
| 11725754_GRIA3     | -0.17543 | 0.08036  | 0.145358 |
| 11750862_ADGRE3    | 0.156723 | 0.080372 | 0.145365 |
| 11738480_CRLF2     | -0.1162  | 0.080373 | 0.145365 |
| 11749565_HERC2 /// | 0.079066 | 0.080376 | 0.145365 |
| 11716508_CUL3      | -0.22425 | 0.080376 | 0.145365 |
| 11754637_SYTL1     | -0.1087  | 0.080392 | 0.145389 |
| 11730221_PNPLA2    | -0.13426 | 0.080415 | 0.145425 |
| 11738778_CABYR     | 0.103219 | 0.080418 | 0.145425 |
| 11722771_PSD2      | -0.09813 | 0.080439 | 0.145458 |
| 11727852_TEX264    | 0.08527  | 0.080477 | 0.145518 |
| 11747526_TSPAN6    | 0.09667  | 0.080478 | 0.145518 |

|                    |          |          |          |
|--------------------|----------|----------|----------|
| 11741072_PRDM8     | -0.08052 | 0.080494 | 0.145541 |
| 11738583_OR8G2 /// | 0.101679 | 0.080518 | 0.145579 |
| 11756689_HNIL      | -0.13923 | 0.080528 | 0.145592 |
| 11752264_TRIM3     | 0.093373 | 0.080537 | 0.1456   |
| 11730247_PVRIG /// | -0.19041 | 0.080538 | 0.1456   |
| 11720275_CFLAR     | 0.076593 | 0.080554 | 0.145623 |
| 11738276_SPDYE3    | -0.11577 | 0.080571 | 0.145647 |
| 11715477_TFRC      | -0.07822 | 0.080591 | 0.145679 |
| 11752453_GPD2      | -0.07901 | 0.080599 | 0.145688 |
| 11741596_SMR3A     | -0.08104 | 0.080606 | 0.145696 |
| 11762030_AVL9      | 0.09537  | 0.080624 | 0.145713 |
| 11762762_LOC100288 | -0.18758 | 0.080624 | 0.145713 |
| 11727832_DDX42     | -0.07795 | 0.080624 | 0.145713 |
| 11736359_LGI2      | -0.10758 | 0.080634 | 0.145724 |
| 11734139_TBC1D10C  | -0.16844 | 0.08064  | 0.145729 |
| 11723922_IP013     | 0.116757 | 0.080656 | 0.145754 |
| 11763340_LOC642852 | 0.16602  | 0.080661 | 0.145758 |
| 11748215_C8orf44   | -0.13967 | 0.080675 | 0.145777 |
| 11735205_MMAA      | 0.097254 | 0.080686 | 0.145792 |
| 11755936_ENOSF1    | -0.08305 | 0.08072  | 0.145845 |
| 11716826_FMOD      | 0.150673 | 0.080722 | 0.145845 |
| 11725022_VILL      | -0.10557 | 0.080732 | 0.145859 |
| 11758225_IQGAP2    | 0.153755 | 0.080738 | 0.145864 |
| 11732121_PMPCB     | 0.070584 | 0.08078  | 0.145929 |
| 11716269_KRTCAP2   | -0.07002 | 0.08078  | 0.145929 |
| 11761151_GGA3      | -0.1359  | 0.080802 | 0.145963 |
| 11719855_FAAH      | -0.12872 | 0.080807 | 0.145966 |
| 11748870_CLN3      | -0.08298 | 0.080815 | 0.145977 |
| 11740335_GPR173    | -0.15446 | 0.08084  | 0.146015 |
| 11721500_SWAP70    | 0.147574 | 0.080847 | 0.146023 |
| 11724623_CLEC1A    | -0.14759 | 0.080861 | 0.146037 |
| 11729560_FOXL1     | -0.11451 | 0.080861 | 0.146037 |
| 11763566_WDR48     | -0.20527 | 0.080863 | 0.146037 |
| 11761618_SGCA      | -0.18455 | 0.080873 | 0.146048 |
| 11742660_URAD      | -0.07709 | 0.080888 | 0.146071 |
| 11757046_SLCO4A1-A | -0.07895 | 0.080907 | 0.146099 |
| 11736926_TMSB4Y    | -0.1097  | 0.080913 | 0.146103 |
| 11745362_RPS11     | 0.073348 | 0.080915 | 0.146103 |
| 11731458_PRH2      | -0.14084 | 0.080948 | 0.146154 |
| 11762881_AGK       | 0.110357 | 0.08095  | 0.146154 |
| 11724701_AS3MT /// | -0.24553 | 0.081015 | 0.146266 |
| 11759898_ECM2      | -0.22879 | 0.08103  | 0.146289 |
| 11733170_FBXO45    | 0.070852 | 0.081038 | 0.146298 |
| 11722458_TMEM206   | 0.089722 | 0.08106  | 0.14633  |
| 11744831_RPAIN     | 0.084382 | 0.081062 | 0.14633  |
| 11734185_ZNF677    | -0.08373 | 0.081075 | 0.146345 |
| 11744644_HSF1 ///  | -0.06605 | 0.081076 | 0.146345 |
| 11751452_MYH2      | 0.104429 | 0.081083 | 0.146352 |
| 11732816_CPN2      | -0.10748 | 0.081099 | 0.146375 |
| 11733980_CD28      | -0.10601 | 0.081135 | 0.146435 |
| 11715391_MTCH1     | -0.0689  | 0.08114  | 0.146438 |

|                    |          |          |          |
|--------------------|----------|----------|----------|
| 11742263_SPAG8     | -0.15244 | 0.081151 | 0.146453 |
| 11733436_SLC7A10   | 0.085505 | 0.08117  | 0.146482 |
| 11731424_CXCR2     | 0.163596 | 0.081204 | 0.146536 |
| 11725490_ATG14     | -0.12036 | 0.081206 | 0.146536 |
| 11729661_GLB1      | -0.07643 | 0.08122  | 0.146556 |
| 11719790_MYL3      | -0.12006 | 0.081229 | 0.146566 |
| 11762105_FGFR2     | -0.09872 | 0.081302 | 0.146688 |
| 11721106_RAB3GAP1  | 0.090987 | 0.081303 | 0.146688 |
| 11741742_LEUTX     | -0.11826 | 0.08131  | 0.146688 |
| 11752997_OPRM1     | -0.15241 | 0.08131  | 0.146688 |
| 11750786_DGCR2     | -0.07687 | 0.081311 | 0.146688 |
| 11739018_USP22     | 0.103694 | 0.081351 | 0.146754 |
| 11739055_PTPN6     | -0.11817 | 0.081361 | 0.146768 |
| 11747787_HTRA1     | -0.08389 | 0.081368 | 0.146773 |
| 11758229_GREM1     | 0.130833 | 0.081376 | 0.146784 |
| 11736197_DCX       | -0.11941 | 0.081402 | 0.146825 |
| 11731042_FBXO24    | -0.16777 | 0.081413 | 0.146839 |
| 11716242_PES1      | 0.082665 | 0.081426 | 0.146857 |
| 11730710_TERT      | -0.11607 | 0.081435 | 0.146865 |
| 11757890_MTERF2    | -0.09223 | 0.081437 | 0.146865 |
| 11718717_TOMIL2    | -0.15881 | 0.081456 | 0.146894 |
| 11738326_TAS2R19   | -0.17904 | 0.081471 | 0.146917 |
| 11738072_LRCH3     | 0.074858 | 0.081479 | 0.146925 |
| 11751498_SLC10A7   | 0.083112 | 0.081517 | 0.146988 |
| 11728317_FAM122A   | 0.109405 | 0.081548 | 0.147039 |
| 11730408_C1orf33   | 0.082826 | 0.081578 | 0.147088 |
| 11725032_TPP1      | 0.092083 | 0.081607 | 0.147134 |
| 11715709_MB        | -0.1485  | 0.081611 | 0.147137 |
| 11725207_LETM1     | 0.095719 | 0.081617 | 0.147142 |
| 11736909_C1orf210  | -0.12518 | 0.081667 | 0.147227 |
| 11751740_ACER3     | 0.125748 | 0.081674 | 0.147234 |
| 11722758_NPR3      | -0.11899 | 0.081708 | 0.14729  |
| 11750425_CCDC17    | -0.18417 | 0.081715 | 0.147297 |
| 11762960_C3orf67   | -0.20377 | 0.08178  | 0.147408 |
| 11748497_GCA       | -0.15065 | 0.081795 | 0.14743  |
| 11721987_PRICKLE2  | 0.129838 | 0.081826 | 0.147481 |
| 11738675_OR5AU1    | -0.12537 | 0.081834 | 0.147489 |
| 11742008_SPAG11A / | 0.215182 | 0.081842 | 0.147498 |
| 11726073_ARHGEF7   | -0.11229 | 0.081849 | 0.147505 |
| 11722131_PLCB2     | -0.09345 | 0.081868 | 0.147534 |
| 11731431_PCDH10    | 0.164519 | 0.081883 | 0.147554 |
| 11715230_PARD6A    | -0.08412 | 0.081885 | 0.147554 |
| 11718650_SYNE2     | -0.14564 | 0.081892 | 0.147561 |
| 11740900_C4orf45   | 0.078895 | 0.081901 | 0.147568 |
| 11743409_RBM25     | 0.09083  | 0.081902 | 0.147568 |
| 11761168_SLC35A2   | -0.11948 | 0.081905 | 0.147568 |
| 11759624_PWAR6     | -0.09348 | 0.081943 | 0.147631 |
| 11757887_YWHAB     | -0.06918 | 0.081946 | 0.147632 |
| 11742430_N6AMT1    | 0.173008 | 0.081963 | 0.147655 |
| 11740084_LGALS9B / | -0.11382 | 0.081965 | 0.147655 |
| 11727727_DMRT2     | -0.08498 | 0.081982 | 0.14768  |

|                    |          |          |          |
|--------------------|----------|----------|----------|
| 11736213_MRPL57    | 0.111791 | 0.081998 | 0.147698 |
| 11756448_EBNA1BP2  | 0.080854 | 0.081998 | 0.147698 |
| 11748997_MYBPC1    | -0.1466  | 0.082016 | 0.147725 |
| 11737186_DUOX1     | -0.1231  | 0.082055 | 0.14779  |
| 11728930_RNASE11   | -0.15558 | 0.082063 | 0.147799 |
| 11722615_HCAR2 /// | -0.10047 | 0.08207  | 0.147806 |
| 11715928_SH3GL1    | -0.09005 | 0.082088 | 0.147832 |
| 11719850_RNF139    | -0.12996 | 0.08209  | 0.147832 |
| 11761588_SORD      | 0.134418 | 0.08211  | 0.14786  |
| 11743474_SMIM4     | -0.06919 | 0.082115 | 0.14786  |
| 11720684_B3GALT6   | 0.080257 | 0.082115 | 0.14786  |
| 11727745_METTL21C  | 0.161346 | 0.082136 | 0.147893 |
| 11764082_TNP01     | -0.17252 | 0.082157 | 0.147924 |
| 11733420_ZNF563    | -0.14898 | 0.082161 | 0.147927 |
| 11740955_PLEKHN1   | -0.17384 | 0.082186 | 0.147958 |
| 11762854_EIF4A1    | 0.078089 | 0.082188 | 0.147958 |
| 11717597_GNAS      | -0.0663  | 0.082188 | 0.147958 |
| 11739010_MYH9      | -0.13695 | 0.082191 | 0.147958 |
| 11726176_C17orf58  | -0.07569 | 0.082202 | 0.147972 |
| 11745380_SLC25A27  | 0.132832 | 0.082206 | 0.147975 |
| 11722498_RPTOR     | -0.08396 | 0.082227 | 0.148007 |
| 11718108_DLD       | 0.066572 | 0.082232 | 0.148009 |
| 11745482_PRNP      | 0.08028  | 0.082245 | 0.148028 |
| 11754325_GPATCH8   | -0.08136 | 0.082249 | 0.148029 |
| 11733773_OSTN      | -0.08596 | 0.082266 | 0.148049 |
| 11749717_RP1       | -0.14206 | 0.082266 | 0.148049 |
| 11716118_PDIA4     | -0.0699  | 0.082269 | 0.148049 |
| 11731230_RPUSD3    | -0.08927 | 0.082324 | 0.148143 |
| 11734624_TAC4      | -0.19449 | 0.082328 | 0.148145 |
| 11761848_SNRPD3    | -0.12272 | 0.082343 | 0.148167 |
| 11742983_GALNT9    | -0.071   | 0.082355 | 0.148182 |
| 11726612_SLC22A6   | -0.09428 | 0.082376 | 0.14821  |
| 11723155_CAMTA1    | 0.135244 | 0.082379 | 0.14821  |
| 11720078_NTRK2     | -0.11404 | 0.082381 | 0.14821  |
| 11730812_LRRTM2    | -0.11801 | 0.082383 | 0.14821  |
| 11728095_DSCAM     | -0.16741 | 0.082393 | 0.148225 |
| 11736563_ZNF518A   | -0.22093 | 0.082427 | 0.148279 |
| 11735821_AQP12A // | -0.12081 | 0.082436 | 0.14829  |
| 11741695_GEMIN2    | 0.087296 | 0.082451 | 0.148312 |
| 11730557_DMRTC2    | 0.128726 | 0.082486 | 0.148366 |
| 11753722_PFN1      | -0.07125 | 0.082488 | 0.148366 |
| 11734154_KBTBD3    | 0.10712  | 0.082493 | 0.148366 |
| 11735162_OSBP15    | -0.11267 | 0.082493 | 0.148366 |
| 11758067_PPIA      | -0.06957 | 0.082515 | 0.148397 |
| 11729338_PSTPIP2   | -0.10303 | 0.082517 | 0.148397 |
| 11755906_FAM135A   | 0.158006 | 0.082522 | 0.1484   |
| 11753885_MAPK14    | -0.09828 | 0.082525 | 0.1484   |
| 11736896_PRRG4     | 0.147601 | 0.082544 | 0.14843  |
| 11742252_SLC22A24  | -0.14859 | 0.082551 | 0.148437 |
| 11760429_CHCHD3    | -0.16313 | 0.082563 | 0.148452 |
| 11748743_ADD2      | -0.07414 | 0.082583 | 0.148484 |

|                    |          |          |          |
|--------------------|----------|----------|----------|
| 11749509_CREB3L1   | -0.19972 | 0.082587 | 0.148484 |
| 11726893_ST7 /// S | 0.068026 | 0.082589 | 0.148484 |
| 11755526_NDUFC2    | -0.12474 | 0.082596 | 0.14849  |
| 11724480_NREP      | -0.102   | 0.082598 | 0.14849  |
| 11719452_SLC30A9   | 0.071923 | 0.082603 | 0.148492 |
| 11742850_HLA-DRA   | -0.07604 | 0.082615 | 0.148509 |
| 11751024_XYLB      | 0.098265 | 0.082637 | 0.148542 |
| 11719780_TNFAIP8L2 | -0.10405 | 0.082642 | 0.148545 |
| 11729829_FAM110B   | -0.11589 | 0.082653 | 0.14856  |
| 11752294_USP6      | 0.143437 | 0.082668 | 0.148581 |
| 11760064_HIC1      | -0.11383 | 0.082674 | 0.148586 |
| 11722892_SLC17A7   | -0.13231 | 0.082698 | 0.148624 |
| 11763517_FILIP1L   | -0.13059 | 0.082701 | 0.148624 |
| 11737583_SGCD      | 0.102824 | 0.08271  | 0.148636 |
| 11747685_ARFIP2    | 0.074272 | 0.082751 | 0.148704 |
| 11755861_LPIN3     | -0.13784 | 0.082758 | 0.148711 |
| 11748373_SFTPA1 // | 0.131775 | 0.082788 | 0.148759 |
| 11747966_SKIDA1    | -0.07329 | 0.082864 | 0.148889 |
| 11756720_PCSK1     | -0.11729 | 0.082882 | 0.148918 |
| 11734132_SLC2A4    | -0.1789  | 0.082897 | 0.148935 |
| 11748874_MRPS25    | -0.12271 | 0.082898 | 0.148935 |
| 11728035_RS1       | -0.1817  | 0.082933 | 0.148993 |
| 11748820_CMAS      | 0.086186 | 0.082944 | 0.148997 |
| 11748319_TP53      | -0.09647 | 0.082944 | 0.148997 |
| 11729848_BIRC7     | -0.08376 | 0.082945 | 0.148997 |
| 11736943_WFIKKN1   | -0.125   | 0.082961 | 0.149016 |
| 11741014_DNM2      | -0.08675 | 0.082962 | 0.149016 |
| 11738064_MGAT5     | 0.162637 | 0.082973 | 0.149031 |
| 11730669_OPHN1     | 0.156394 | 0.082991 | 0.149058 |
| 11742633_OR4K13    | -0.14129 | 0.083011 | 0.149089 |
| 11758265_KIAA1468  | -0.0813  | 0.083016 | 0.149092 |
| 11762299_COMMD4    | -0.17342 | 0.083021 | 0.149095 |
| 11716035_BST2      | -0.1045  | 0.08303  | 0.149106 |
| 11742926_CPT2      | 0.08731  | 0.083034 | 0.149108 |
| 11759423_EPPK1     | 0.250299 | 0.083045 | 0.149123 |
| 11737785_KCNAB2    | -0.13434 | 0.083062 | 0.149147 |
| 11738773_STK32A    | -0.14115 | 0.083076 | 0.149167 |
| 11723058_TAP2      | 0.068157 | 0.083083 | 0.149174 |
| 11741270_IL12RB1   | -0.11438 | 0.083091 | 0.14918  |
| 11760976_APBB1     | -0.09409 | 0.083093 | 0.14918  |
| 11760541_SRI       | 0.130423 | 0.0831   | 0.149188 |
| 11748583_ART3      | -0.0847  | 0.083107 | 0.149194 |
| 11746130	EIF3H     | 0.076556 | 0.08315  | 0.149261 |
| 11726549_SMAD3     | -0.08916 | 0.083151 | 0.149261 |
| 11742276_EPM2A     | -0.17908 | 0.083153 | 0.149261 |
| 11719165_DAB2IP    | 0.094984 | 0.08319  | 0.149322 |
| 11754885_PLEKHH3   | -0.07587 | 0.083197 | 0.149328 |
| 11715212_SCAND1    | 0.085449 | 0.083199 | 0.149328 |
| 11753703_TMEM44    | -0.15709 | 0.083205 | 0.149332 |
| 11718156_THTPA     | -0.08831 | 0.083217 | 0.149348 |
| 11725567_ATP8A1    | -0.13946 | 0.083239 | 0.149382 |

|                    |          |          |          |
|--------------------|----------|----------|----------|
| 11742878_SLC52A2   | -0.07361 | 0.083245 | 0.149389 |
| 11744960_ZNF311    | 0.138391 | 0.083334 | 0.149543 |
| 11755432_AGO1      | 0.095767 | 0.083354 | 0.149572 |
| 11737021_GRIN2B    | -0.15443 | 0.083357 | 0.149573 |
| 11750295_CLEC11A   | -0.09451 | 0.083389 | 0.149624 |
| 11730195_SEC14L2   | 0.19935  | 0.083414 | 0.149663 |
| 11754770_ZNF646    | 0.08977  | 0.083419 | 0.149668 |
| 11720250_RWDD1     | 0.072071 | 0.083462 | 0.149739 |
| 11742519_OR11G2    | -0.14499 | 0.083484 | 0.149772 |
| 11737840_CYP2W1    | -0.17318 | 0.083502 | 0.149799 |
| 11737800_ECE1      | -0.09592 | 0.083514 | 0.149816 |
| 11727317_KCNE5     | -0.20156 | 0.083529 | 0.149835 |
| 11727733_CCDC40    | 0.201604 | 0.083531 | 0.149835 |
| 11729120_HSPA1B    | -0.09243 | 0.083541 | 0.149848 |
| 11743304_EYA3      | 0.113323 | 0.083555 | 0.149867 |
| 11719449_RAB14     | -0.14094 | 0.083558 | 0.149867 |
| 11720584_TCF12     | 0.084129 | 0.083569 | 0.149881 |
| 11753307_UPK1A     | -0.10491 | 0.08358  | 0.149896 |
| 11754879_SDR16C5   | -0.12125 | 0.083588 | 0.149904 |
| 11755313_ZNF559    | 0.121032 | 0.083592 | 0.149906 |
| 11731748_HEPACAM   | -0.07888 | 0.083596 | 0.149907 |
| 11746987_ADAM2     | 0.125816 | 0.083613 | 0.149933 |
| 11716614_TSPO      | 0.079909 | 0.083622 | 0.149943 |
| 11728418_ACSBG2    | -0.09035 | 0.083641 | 0.149972 |
| 11715264_UTS2R     | -0.13063 | 0.083647 | 0.149977 |
| 11724166_COLGALT2  | -0.08743 | 0.083661 | 0.149995 |
| 11744117_THSD7A    | 0.153071 | 0.083663 | 0.149995 |
| 11718743_CXCL12    | -0.12528 | 0.083687 | 0.150032 |
| 11719935_EDC3      | 0.071908 | 0.083697 | 0.150037 |
| 11754463_SNRNP70   | -0.07436 | 0.083701 | 0.150037 |
| 11755283_SNRNP70   | -0.07436 | 0.083701 | 0.150037 |
| 11729123_RCN2      | -0.09508 | 0.083702 | 0.150037 |
| 11761895_LOC100130 | 0.098167 | 0.083717 | 0.150058 |
| 11743721_LGALS1    | 0.066923 | 0.083729 | 0.150076 |
| 11744319_PIGZ      | -0.0855  | 0.083735 | 0.15008  |
| 11744305_LRRK1     | -0.11125 | 0.08375  | 0.150096 |
| 11721792_RGMB      | -0.09289 | 0.08375  | 0.150096 |
| 11734442_FOXI1     | -0.10853 | 0.083755 | 0.1501   |
| 11725044_YWHAB     | 0.070463 | 0.083762 | 0.150106 |
| 11737510_ZNF695    | 0.230573 | 0.083795 | 0.15016  |
| 11741985_KCNC4     | -0.08992 | 0.083803 | 0.150169 |
| 11743548_SLC22A23  | 0.13438  | 0.083836 | 0.150223 |
| 11729865_SPATA2L   | 0.092701 | 0.08385  | 0.150242 |
| 11754860_ZKSCAN1   | -0.07857 | 0.083874 | 0.150279 |
| 11732152_AGBL5     | 0.128239 | 0.083879 | 0.150284 |
| 11756376_TTC19     | 0.076681 | 0.083887 | 0.150289 |
| 11753296_KIR2DL4   | -0.14807 | 0.08389  | 0.150289 |
| 11730795_MRPL4     | -0.09224 | 0.083892 | 0.150289 |
| 11750238_SARM1     | -0.10094 | 0.08392  | 0.150332 |
| 11742831_BRD4      | -0.08551 | 0.083922 | 0.150332 |
| 11725063_CNOT10    | 0.08723  | 0.083945 | 0.150369 |

|                    |          |          |          |
|--------------------|----------|----------|----------|
| 11725817_CABP1     | -0.17525 | 0.083954 | 0.150378 |
| 11752671_NARFL     | -0.09568 | 0.083963 | 0.15039  |
| 11756776_GCGR      | -0.08253 | 0.083981 | 0.150416 |
| 11754408_LDB2      | 0.145236 | 0.08399  | 0.150426 |
| 11716255_ECE1      | -0.18203 | 0.083998 | 0.150435 |
| 11760654_LRP3      | -0.1105  | 0.084001 | 0.150436 |
| 11734808_DTNA      | 0.201484 | 0.084029 | 0.15048  |
| 11743222_AWAT1     | -0.07541 | 0.084048 | 0.150509 |
| 11742196_VPS41     | 0.13865  | 0.084059 | 0.150523 |
| 11759504_MAP7D3    | -0.13806 | 0.084072 | 0.15054  |
| 11755447_OTOP3     | -0.31774 | 0.084091 | 0.150568 |
| 11736782_RAB11FIP1 | 0.116245 | 0.084109 | 0.150596 |
| 11744055_METTL1    | 0.086427 | 0.084117 | 0.150602 |
| 11740071_PSMF1     | 0.074811 | 0.084119 | 0.150602 |
| 11736815_GIPC2     | 0.10689  | 0.084125 | 0.150607 |
| 11734169_CD300E    | -0.16096 | 0.084141 | 0.150631 |
| 11741944_AADACL3   | -0.13451 | 0.084149 | 0.150639 |
| 11746287_LGMN      | -0.08912 | 0.084154 | 0.150644 |
| 11717514_ANXA1     | 0.075658 | 0.084163 | 0.150654 |
| 11726106_LRFN3     | -0.08313 | 0.084167 | 0.150655 |
| 11736095_GATC      | 0.093259 | 0.084175 | 0.150664 |
| 11725930_HSPA5     | -0.0809  | 0.084192 | 0.15069  |
| 11747246_MAPT      | -0.09664 | 0.084217 | 0.150724 |
| 11751953_PAPLN     | 0.134846 | 0.084218 | 0.150724 |
| 11723278_CREBZF    | -0.09461 | 0.084224 | 0.150729 |
| 11751514_ZNF772    | 0.099669 | 0.084237 | 0.150747 |
| 11762792_POLR3K    | -0.07922 | 0.084273 | 0.150806 |
| 11738704_OR52B2    | -0.21764 | 0.084298 | 0.150845 |
| 11762033_TTLL5     | 0.172542 | 0.084312 | 0.150865 |
| 11729714_IRX2      | -0.18348 | 0.084326 | 0.150885 |
| 11751673_ZMIZ2     | 0.106096 | 0.084337 | 0.1509   |
| 11741697_ITPA      | 0.071395 | 0.084368 | 0.150948 |
| 11751035_EPHB2     | -0.11252 | 0.084395 | 0.150987 |
| 11720645_SPTLC2    | -0.08282 | 0.084395 | 0.150987 |
| 11718438_NSUN4     | -0.08278 | 0.084405 | 0.150993 |
| 11762496_BAIAP2    | -0.09876 | 0.084405 | 0.150993 |
| 11746932_ASPHD1    | 0.096594 | 0.084422 | 0.151013 |
| 11716558_TNS1      | -0.12829 | 0.084428 | 0.151013 |
| 11741971_KRT38     | -0.16108 | 0.084428 | 0.151013 |
| 11756811_TOM1      | 0.117726 | 0.084429 | 0.151013 |
| 11729009_MYLK4     | -0.1726  | 0.084433 | 0.151016 |
| 11753430_WBP2      | -0.08659 | 0.084479 | 0.151092 |
| 11723638_C11orf58  | 0.114525 | 0.084513 | 0.151145 |
| 11727770_NIN       | -0.1107  | 0.084515 | 0.151145 |
| 11720807_EIF1AY    | 0.089198 | 0.084543 | 0.151189 |
| 11724377_PAG1      | -0.2534  | 0.084546 | 0.151189 |
| 11726215_DENND1A   | 0.109446 | 0.084555 | 0.1512   |
| 11759083_RAB11FIP3 | -0.10559 | 0.084568 | 0.151217 |
| 11759732_LARP1B    | -0.09104 | 0.084573 | 0.151222 |
| 11750022_LCORL     | 0.081449 | 0.084584 | 0.151236 |
| 11748806_ACTR2     | -0.06654 | 0.084588 | 0.151238 |



|                    |          |          |          |
|--------------------|----------|----------|----------|
| 11758182_FTL       | 0.071688 | 0.084629 | 0.151305 |
| 11727517_TMEM79    | 0.106493 | 0.084654 | 0.151345 |
| 11755927_CACNA1C   | -0.12389 | 0.084702 | 0.151424 |
| 11762571_GNPDA2    | 0.089878 | 0.084721 | 0.151453 |
| 11725476_ACAP1     | 0.100228 | 0.084734 | 0.151471 |
| 11743853_FBXO21    | -0.09895 | 0.084742 | 0.151478 |
| 11752287_PRPF4B    | 0.089363 | 0.084755 | 0.151497 |
| 11736622_C1orf106  | -0.09117 | 0.084799 | 0.151571 |
| 11751594_SRSF10    | -0.12358 | 0.084828 | 0.151616 |
| 11724879_ZNF217    | -0.08874 | 0.08486  | 0.151668 |
| 11729478_LY6G6C    | -0.12428 | 0.084888 | 0.151712 |
| 11741144_CD151     | 0.074245 | 0.084899 | 0.151727 |
| 11725553_UGT2A3    | -0.08971 | 0.08491  | 0.151741 |
| 11728925_NFAM1     | -0.20247 | 0.084985 | 0.151862 |
| 11719107_REXO4     | -0.09162 | 0.084987 | 0.151862 |
| 11720026_VGF       | 0.065984 | 0.084987 | 0.151862 |
| 11761743_UCK2      | -0.1334  | 0.084995 | 0.151871 |
| 11738728_OR5B2     | -0.08793 | 0.085002 | 0.151877 |
| 11741920_GRXCR2    | -0.11111 | 0.085006 | 0.151879 |
| 11721434_CRBN      | 0.097381 | 0.085019 | 0.151891 |
| 11721037_SUFU      | -0.12656 | 0.085019 | 0.151891 |
| 11723813_ARHGAP29  | -0.09446 | 0.085052 | 0.151944 |
| 11758983_SAP30     | -0.06697 | 0.085056 | 0.151947 |
| 11735533_HIVEP3    | -0.0882  | 0.085073 | 0.151972 |
| 11760460_RBM48     | -0.08574 | 0.085085 | 0.151987 |
| 11760800_SPHK2     | -0.11162 | 0.085092 | 0.151994 |
| 11744710_TTL4      | -0.0732  | 0.085111 | 0.152021 |
| 11741957_LRRIQ1    | 0.13463  | 0.08513  | 0.152046 |
| 11720623_MYD88     | 0.108456 | 0.085131 | 0.152046 |
| 11747919_YTHDF2    | 0.084144 | 0.085142 | 0.152061 |
| 11744347_MYO10     | 0.067588 | 0.085153 | 0.15207  |
| 11742406_CSH1 ///  | -0.20687 | 0.085156 | 0.15207  |
| 11736686_FGF5      | 0.098202 | 0.085156 | 0.15207  |
| 11755223_KDM7A     | -0.12359 | 0.085172 | 0.152093 |
| 11734650_VHLL      | -0.09822 | 0.085176 | 0.152094 |
| 11760199_ITIH4     | -0.08623 | 0.085183 | 0.152101 |
| 11731940_UCP3      | 0.134379 | 0.085198 | 0.152118 |
| 11723106_NCF4      | 0.164884 | 0.0852   | 0.152118 |
| 11750300_ZNF277    | 0.114659 | 0.085205 | 0.152118 |
| 11735346_C1QTNF5 / | -0.13985 | 0.085205 | 0.152118 |
| 11719041_CYGB      | -0.10147 | 0.085218 | 0.152136 |
| 11754442_ELN       | -0.10347 | 0.085249 | 0.152185 |
| 11759879_NELL1     | -0.14793 | 0.085252 | 0.152185 |
| 11718800_PTPRU     | -0.09732 | 0.085263 | 0.152198 |
| 11731397_YWHAB     | 0.092351 | 0.085274 | 0.15221  |
| 11752687_ASB15     | -0.1987  | 0.085275 | 0.15221  |
| 11759090_ZNF571    | -0.09774 | 0.085279 | 0.15221  |
| 11728344_SYNPO     | -0.16031 | 0.085319 | 0.152277 |
| 11728706_EMP2      | 0.086676 | 0.085327 | 0.152285 |
| 11734455_WFDC3     | 0.083553 | 0.08533  | 0.152285 |
| 11739099_CSTF1     | -0.12708 | 0.08534  | 0.152293 |

|                    |          |          |          |
|--------------------|----------|----------|----------|
| 11722876_ARHGEF15  | -0.06534 | 0.085341 | 0.152293 |
| 11748329_PMM2      | 0.138268 | 0.085363 | 0.152328 |
| 11746963_DNAJB2    | -0.13513 | 0.085386 | 0.152358 |
| 11761090_HEXDC     | -0.137   | 0.085386 | 0.152358 |
| 11746182_TOE1      | -0.07234 | 0.085391 | 0.152361 |
| 11752695_SASH3     | -0.11411 | 0.085416 | 0.152396 |
| 11742814_SEMA6A    | -0.1824  | 0.085417 | 0.152396 |
| 11758805_NUDCD3    | -0.16471 | 0.08542  | 0.152396 |
| 11725369_SPRR1B    | -0.11179 | 0.085444 | 0.152433 |
| 11718104_RELA      | 0.136556 | 0.085462 | 0.15246  |
| 11734407_MATN4     | -0.10294 | 0.085474 | 0.152476 |
| 11739651_HNRNPLL   | 0.104774 | 0.085506 | 0.152522 |
| 11760153_LOC730098 | -0.12649 | 0.085507 | 0.152522 |
| 11744181_FARS2     | 0.118794 | 0.085513 | 0.152528 |
| 11749539_MICB      | -0.09135 | 0.085567 | 0.152619 |
| 11721087_YLPM1     | -0.1898  | 0.0856   | 0.152673 |
| 11730902_JDP2      | -0.14851 | 0.085639 | 0.152736 |
| 11728846_HAND1     | -0.12007 | 0.085661 | 0.15277  |
| 11747354_IQGAP2    | 0.163086 | 0.085701 | 0.152837 |
| 11734116_LLGL2     | -0.12354 | 0.08571  | 0.152847 |
| 11718646_OSBP18    | -0.06492 | 0.085716 | 0.152851 |
| 11727571_MARK1     | -0.09835 | 0.085743 | 0.152891 |
| 11763026_MUC1      | -0.10792 | 0.085745 | 0.152891 |
| 11746659_NR2F6     | -0.08255 | 0.08576  | 0.152913 |
| 11759437_EIF3F     | 0.081397 | 0.085853 | 0.153073 |
| 11744526_INPP5F    | 0.092891 | 0.085874 | 0.153101 |
| 11760423_TACC3     | -0.18059 | 0.085882 | 0.153101 |
| 11754781_HDAC2     | -0.07366 | 0.085882 | 0.153101 |
| 11732702_CITED1    | -0.13324 | 0.085883 | 0.153101 |
| 11722948_CDRT4 /// | -0.13939 | 0.085884 | 0.153101 |
| 11736871_TRPC6     | -0.1381  | 0.085922 | 0.153162 |
| 11724394_KIAA1211L | -0.08548 | 0.085927 | 0.153167 |
| 11763857_COPE ///  | 0.091709 | 0.085944 | 0.153191 |
| 11745902_NPC2      | -0.0835  | 0.085977 | 0.153244 |
| 11732049_PRR20A // | -0.19334 | 0.08598  | 0.153244 |
| 11761968_KIAA2012  | -0.11255 | 0.086009 | 0.153291 |
| 11749676_BCL11A    | -0.08147 | 0.086024 | 0.153311 |
| 11751079_ADGRG5    | -0.08837 | 0.086029 | 0.153314 |
| 11750534_CRYZL1    | 0.158572 | 0.086036 | 0.153319 |
| 11762754_CCT8      | -0.16363 | 0.086038 | 0.153319 |
| 11735212_STYK1     | 0.149187 | 0.08606  | 0.153353 |
| 11759582_AKAP17A   | -0.08538 | 0.086065 | 0.153356 |
| 11719159_RAPH1     | 0.296352 | 0.086075 | 0.153363 |
| 11732830_ETV2      | 0.142989 | 0.086075 | 0.153363 |
| 11734908_CADPS2    | -0.14588 | 0.086079 | 0.153364 |
| 11760841_ZNF99     | 0.158836 | 0.08609  | 0.153378 |
| 11739811_SIRT3     | -0.1301  | 0.086094 | 0.15338  |
| 11716569_NOTCH3    | 0.114145 | 0.086106 | 0.153396 |
| 11723348_GAPVD1    | 0.068    | 0.086128 | 0.153429 |
| 11717941_U2AF2     | -0.1905  | 0.086135 | 0.153436 |
| 11742936_TSEN2     | 0.083986 | 0.086154 | 0.153464 |

|                    |          |          |          |
|--------------------|----------|----------|----------|
| 11732365_NT5C3A    | 0.090014 | 0.086162 | 0.153473 |
| 11742592_OR2M5     | -0.11638 | 0.086182 | 0.153503 |
| 11749151_FAM129C   | 0.157976 | 0.08619  | 0.153512 |
| 11748029_TFE3      | -0.06961 | 0.086205 | 0.153532 |
| 11717507_TRAM2     | -0.06968 | 0.086213 | 0.153542 |
| 11753553_DNAJC27   | 0.122484 | 0.086247 | 0.153597 |
| 11760742_SYT8      | -0.13415 | 0.086251 | 0.153598 |
| 11732914_MEIG1     | 0.153237 | 0.086258 | 0.1536   |
| 11720701_C1orf101  | -0.14281 | 0.086258 | 0.1536   |
| 11750962_JPH2      | -0.07505 | 0.086262 | 0.153601 |
| 11740971_RINL      | 0.076779 | 0.086271 | 0.153611 |
| 11751456_REEP1     | -0.08318 | 0.08629  | 0.153638 |
| 11725277_TRIM6     | -0.09872 | 0.086292 | 0.153638 |
| 11762212_TRAIP     | 0.15302  | 0.086308 | 0.153661 |
| 11757704_WDR13     | -0.06934 | 0.086323 | 0.153681 |
| 11738065_PCDH10    | -0.13535 | 0.086335 | 0.153698 |
| 11715368_SERPING1  | -0.17213 | 0.086377 | 0.153762 |
| 11734711_GPR37L1   | -0.07067 | 0.086378 | 0.153762 |
| 11754180_SPRR1A    | -0.12847 | 0.086396 | 0.15379  |
| 11723746_SLC13A5   | -0.09242 | 0.086415 | 0.153817 |
| 11739778_RAD17     | -0.08585 | 0.086424 | 0.153827 |
| 11716552_LRRC49    | 0.101591 | 0.08643  | 0.153833 |
| 11732254_MED18     | 0.065031 | 0.086439 | 0.153838 |
| 11716755_RNF7      | -0.07346 | 0.086439 | 0.153838 |
| 11762775_ACTR2     | 0.264044 | 0.086443 | 0.153839 |
| 11756805_EHMT1     | 0.065804 | 0.086447 | 0.15384  |
| 11736724_PDLIM7    | -0.10871 | 0.08646  | 0.153854 |
| 11743495_SV2B      | -0.108   | 0.086461 | 0.153854 |
| 11719529_KLF16     | -0.0869  | 0.086482 | 0.153883 |
| 11752949_COX6B2    | -0.15229 | 0.086483 | 0.153883 |
| 11737032_FBXL13    | -0.10677 | 0.086507 | 0.15392  |
| 11725979_CALB1     | 0.246241 | 0.086518 | 0.153933 |
| 11741022_SEPT7     | 0.109181 | 0.086534 | 0.153956 |
| 11755637_ARHGEF10L | 0.086652 | 0.086539 | 0.15396  |
| 11731357_ADAMTS3   | -0.11285 | 0.08655  | 0.153973 |
| 11715481_SST       | -0.09169 | 0.086557 | 0.15398  |
| 11759121_SLC5A8    | 0.140342 | 0.086579 | 0.154009 |
| 11721930_TMCC2     | -0.14241 | 0.086579 | 0.154009 |
| 11753762_KLK6      | -0.12205 | 0.086634 | 0.1541   |
| 11746716_KIRREL3   | 0.130603 | 0.086644 | 0.154112 |
| 11731248_TMEM116   | -0.12761 | 0.086666 | 0.154142 |
| 11728058_SERTAD3   | 0.130988 | 0.086667 | 0.154142 |
| 11755838_PCDHB13   | 0.072763 | 0.086709 | 0.15421  |
| 11737150_IL26      | -0.1241  | 0.086711 | 0.15421  |
| 11726980_PAQR6     | 0.098159 | 0.086742 | 0.154258 |
| 11728949_LSMEM2    | -0.09699 | 0.086769 | 0.154301 |
| 11758165_MRT04     | 0.072295 | 0.086775 | 0.154305 |
| 11726761_RCE1      | 0.101865 | 0.086809 | 0.15436  |
| 11753525_MED25     | -0.07917 | 0.086815 | 0.154366 |
| 11757318_TRIP10    | -0.06607 | 0.086821 | 0.154366 |
| 11716424_PCDHGA1   | -0.07609 | 0.086821 | 0.154366 |

|                   |          |          |          |
|-------------------|----------|----------|----------|
| 11762835_DNASE1   | 0.081203 | 0.086859 | 0.154428 |
| 11737141_RSPH1    | -0.12239 | 0.08689  | 0.154477 |
| 11727896_LSM8 /// | -0.12777 | 0.086922 | 0.154528 |
| 11738581_OR8D1    | -0.07514 | 0.086954 | 0.154579 |
| 11754730_EHMT1    | -0.10342 | 0.086976 | 0.154606 |
| 11731735_VCX2     | 0.07538  | 0.086978 | 0.154606 |
| 11753638_VCX2     | 0.07538  | 0.086978 | 0.154606 |
| 11764256_ND4      | 0.064721 | 0.086989 | 0.154618 |
| 11734565_C1QTNF3  | -0.12555 | 0.086991 | 0.154618 |
| 11742851_SPINT2   | 0.08972  | 0.087009 | 0.154643 |
| 11753607_REG3G    | -0.18342 | 0.087012 | 0.154644 |
| 11716253_RBFOX2   | 0.096535 | 0.087017 | 0.154646 |
| 11762799_FGFR4    | -0.09307 | 0.087044 | 0.154689 |
| 11762146_CGREF1   | 0.080934 | 0.087052 | 0.154694 |
| 11734428_MAGEA11  | -0.07934 | 0.087054 | 0.154694 |
| 11720296_PLEKHF2  | -0.09715 | 0.087056 | 0.154694 |
| 11725175_ADAP2    | -0.1628  | 0.087171 | 0.154892 |
| 11721810_PIM2     | -0.07803 | 0.087201 | 0.154939 |
| 11748625_HYOU1    | 0.077184 | 0.087209 | 0.154948 |
| 11716772_C11orf68 | 0.078288 | 0.087232 | 0.154983 |
| 11722891_SLC17A7  | -0.16567 | 0.087258 | 0.155024 |
| 11753350_KRR1     | 0.083284 | 0.087276 | 0.155049 |
| 11751017_EARS2    | 0.069216 | 0.087278 | 0.155049 |
| 11750780_LOC51145 | -0.13992 | 0.087294 | 0.155071 |
| 11731423_CXCR2    | 0.173144 | 0.087303 | 0.155079 |
| 11731384_DFFB     | -0.07607 | 0.087305 | 0.155079 |
| 11732197_PLAGL2   | 0.083149 | 0.087323 | 0.155106 |
| 11758197_APOA1    | -0.17999 | 0.087331 | 0.155114 |
| 11734396_HRASLS2  | -0.08988 | 0.087341 | 0.155127 |
| 11748246_CUL2     | -0.08032 | 0.08735  | 0.155136 |
| 11749484_AXDND1   | -0.23721 | 0.087353 | 0.155136 |
| 11750752_RANBP3L  | -0.08733 | 0.087367 | 0.155156 |
| 11759816_IGHM     | -0.10951 | 0.087419 | 0.15524  |
| 11725118_BORCS5   | -0.12742 | 0.087421 | 0.15524  |
| 11739723_ATP2B2   | -0.17674 | 0.087443 | 0.155275 |
| 11748852_HMP19    | -0.23684 | 0.087463 | 0.155303 |
| 11738116_GABRQ    | -0.13633 | 0.087491 | 0.155348 |
| 11743159_FGG      | -0.12381 | 0.087501 | 0.15536  |
| 11731205_SPATA33  | 0.102741 | 0.087505 | 0.155362 |
| 11741310_ZNF772   | 0.164101 | 0.087526 | 0.155392 |
| 11749727_RNGTT    | 0.1212   | 0.087539 | 0.155411 |
| 11762599_PPFIBP2  | -0.21606 | 0.087597 | 0.155507 |
| 11733602_DNAJC5G  | -0.09857 | 0.087666 | 0.155625 |
| 11728414_PDIA2    | -0.10935 | 0.087686 | 0.155655 |
| 11747549_PICALM   | 0.077208 | 0.087709 | 0.15569  |
| 11740092_MSMO1    | 0.090829 | 0.087715 | 0.155694 |
| 11757648_MLLT4    | -0.12431 | 0.087767 | 0.155776 |
| 11724045_USP2     | -0.07281 | 0.087767 | 0.155776 |
| 11749759_SCN3A    | 0.190874 | 0.087797 | 0.155824 |
| 11715934_TAGLN    | 0.084778 | 0.087802 | 0.155826 |
| 11756795_ADCY2    | -0.11322 | 0.08781  | 0.155835 |

|                    |          |          |          |
|--------------------|----------|----------|----------|
| 11761104_C12orf10  | -0.15326 | 0.087814 | 0.155836 |
| 11724592_TCP10L    | -0.07501 | 0.087837 | 0.155872 |
| 11755711_ANKRD30BP | -0.17946 | 0.087849 | 0.155887 |
| 11745370_EBF2      | -0.23617 | 0.087854 | 0.15589  |
| 11734896_MATN1     | -0.10016 | 0.087858 | 0.155893 |
| 11761894_LOC100130 | 0.095165 | 0.087867 | 0.155903 |
| 11740847_ZNF229    | -0.19122 | 0.08788  | 0.155919 |
| 11751440_MTUS2     | -0.16888 | 0.087884 | 0.15592  |
| 11750744_TMC8      | -0.12581 | 0.087886 | 0.15592  |
| 11719989_SNX19     | -0.08651 | 0.087898 | 0.155934 |
| 11729455_CYP2B6    | -0.08309 | 0.087905 | 0.155942 |
| 11761385_ARGLU1    | 0.094937 | 0.087955 | 0.156021 |
| 11746848_ZNF532    | 0.071656 | 0.087957 | 0.156021 |
| 11727663_STOX1     | -0.10534 | 0.087992 | 0.156078 |
| 11758291_MRPS10    | 0.084659 | 0.087995 | 0.156078 |
| 11724110_ARHGAP4   | -0.07743 | 0.087999 | 0.15608  |
| 11730489_DOK6      | -0.16415 | 0.088014 | 0.1561   |
| 11721525_BOLA2 /// | 0.104728 | 0.088026 | 0.156112 |
| 11740815_CNCA1     | 0.090811 | 0.088027 | 0.156112 |
| 11720600_CAPZB     | 0.079503 | 0.088036 | 0.156123 |
| 11737410_C4orf36   | -0.11367 | 0.088041 | 0.156126 |
| 11739671_GRAP ///  | -0.1397  | 0.088068 | 0.156168 |
| 11748440_LOC100287 | 0.118089 | 0.088082 | 0.156186 |
| 11749844_CSF2RA    | -0.09177 | 0.088092 | 0.1562   |
| 11734861_KCNH8     | 0.203597 | 0.088097 | 0.156203 |
| 11762969_MEI1      | -0.08919 | 0.088109 | 0.156218 |
| 11746359_NUCB2     | -0.07792 | 0.088118 | 0.156228 |
| 11724957_ENOX1     | 0.169822 | 0.088183 | 0.156333 |
| 11729896_C11orf87  | -0.15339 | 0.088183 | 0.156333 |
| 11735762_RGS12     | -0.08686 | 0.088186 | 0.156333 |
| 11722559_PSG1      | 0.101847 | 0.088209 | 0.156363 |
| 11748847_GOLGA2P5  | -0.18939 | 0.088212 | 0.156363 |
| 11728398_MT1M      | -0.07573 | 0.088213 | 0.156363 |
| 11761887_C21orf58  | -0.18468 | 0.088218 | 0.156367 |
| 11734682_PSMA7     | -0.06575 | 0.088244 | 0.156407 |
| 11723866_CHODL     | 0.152308 | 0.088254 | 0.156419 |
| 11737557_AMTN      | -0.12026 | 0.088262 | 0.156426 |
| 11734891_SOBP      | -0.1602  | 0.088277 | 0.156448 |
| 11745430_PODNL1    | -0.09365 | 0.088288 | 0.156462 |
| 11735465_ZNF326    | -0.10749 | 0.088295 | 0.156468 |
| 11735474_CD8B      | 0.079356 | 0.088305 | 0.156481 |
| 11757209_ASMTL-AS1 | -0.13357 | 0.088346 | 0.156547 |
| 11736549_RAB29     | 0.130655 | 0.088349 | 0.156548 |
| 11742794_SBDS ///  | 0.090422 | 0.088372 | 0.156582 |
| 11759464_OTOP2     | -0.08233 | 0.088384 | 0.156598 |
| 11736179_RBBP5     | 0.070926 | 0.088464 | 0.156733 |
| 11722738_ICK       | 0.202492 | 0.088472 | 0.156742 |
| 11760023_VPS29     | 0.093139 | 0.088497 | 0.156775 |
| 11760024_VPS29     | 0.093139 | 0.088497 | 0.156775 |
| 11751379_USP17L1 / | -0.13593 | 0.088513 | 0.156797 |
| 11752796_C3orf33   | 0.152479 | 0.088574 | 0.156897 |

|                    |          |          |          |
|--------------------|----------|----------|----------|
| 11733617_RXRG      | 0.155232 | 0.088578 | 0.156897 |
| 11725980_CFD       | -0.13035 | 0.08858  | 0.156897 |
| 11758495_C1GALT1C1 | -0.10116 | 0.088582 | 0.156897 |
| 11734110_TIGIT     | -0.10185 | 0.088608 | 0.156938 |
| 11730295_SLC25A40  | 0.090731 | 0.088633 | 0.156976 |
| 11737383_IFITM5    | -0.09454 | 0.088666 | 0.157029 |
| 11744913_NFATC4    | -0.14721 | 0.088684 | 0.15705  |
| 11762196_TCEA3     | 0.07312  | 0.088684 | 0.15705  |
| 11751231_HAL       | -0.20134 | 0.088695 | 0.157064 |
| 11741516_SELV      | -0.20608 | 0.088706 | 0.157078 |
| 11716857_SUPT7L    | -0.0874  | 0.088727 | 0.157109 |
| 11715143_OR9Q2     | -0.13673 | 0.088734 | 0.157115 |
| 11738584_KRTAP9-3  | -0.14511 | 0.088737 | 0.157115 |
| 11740811_TPSG1     | -0.11742 | 0.088761 | 0.157152 |
| 11740218_SIRPB1    | -0.13678 | 0.088766 | 0.157155 |
| 11735437_NRXN2     | 0.13681  | 0.088772 | 0.157159 |
| 11752188_GIGYF2    | -0.08253 | 0.088786 | 0.157179 |
| 11741860_CAV3      | -0.13848 | 0.088823 | 0.157234 |
| 11727808_FECH      | -0.06547 | 0.088823 | 0.157234 |
| 11752947_CHRNG     | -0.09438 | 0.088827 | 0.157234 |
| 11718897_SPAG9     | -0.09115 | 0.088857 | 0.157282 |
| 11759679_TRPM1     | -0.14436 | 0.088874 | 0.157306 |
| 11757189_TMEM254-A | -0.11406 | 0.088888 | 0.157326 |
| 11730522_SLITRK2   | 0.160743 | 0.088901 | 0.157343 |
| 11732385_RELT      | 0.111571 | 0.088906 | 0.157345 |
| 11736541_NRXN1     | 0.150676 | 0.088915 | 0.157356 |
| 11727349_TBC1D21   | -0.08612 | 0.088929 | 0.157375 |
| 11735421_NKD2      | -0.11321 | 0.088958 | 0.15742  |
| 11756561_MED20     | -0.07029 | 0.088964 | 0.157425 |
| 11759473_TAS2R30 / | 0.17105  | 0.088972 | 0.157434 |
| 11731348_FAM71F2   | 0.112005 | 0.088984 | 0.157449 |
| 11755963_TTL13P    | -0.22237 | 0.088997 | 0.157464 |
| 11717964_KRAS      | 0.079081 | 0.089002 | 0.157464 |
| 11753551_KDM8      | 0.086535 | 0.089005 | 0.157464 |
| 11733395_PPFIA1    | 0.092954 | 0.089005 | 0.157464 |
| 11733373_JAK2      | 0.104182 | 0.089022 | 0.157488 |
| 11737581_CAPN9     | -0.08296 | 0.089026 | 0.15749  |
| 11740225_CHST4     | -0.12055 | 0.089037 | 0.157504 |
| 11764066_EPB41L5   | 0.322797 | 0.089059 | 0.157537 |
| 11728830_RAB3IP    | 0.124177 | 0.089084 | 0.157576 |
| 11721503_A4GALT    | -0.18574 | 0.089096 | 0.157591 |
| 11724803_TMEM55B   | 0.077776 | 0.089123 | 0.157631 |
| 11724254_B3GNT3    | -0.17363 | 0.089125 | 0.157631 |
| 11741763_C1orf229  | 0.209715 | 0.089129 | 0.157633 |
| 11727169_PDLIM7    | -0.09868 | 0.089135 | 0.157638 |
| 11742959_SMARCA4   | 0.065908 | 0.089153 | 0.157663 |
| 11754344_SPRY4     | 0.083146 | 0.089192 | 0.157725 |
| 11763881_FAM24B    | -0.10356 | 0.089208 | 0.157744 |
| 11742551_OR2W1     | 0.09746  | 0.089208 | 0.157744 |
| 11724858_CEP63     | -0.09788 | 0.089239 | 0.157793 |
| 11756841_SLC25A33  | -0.0705  | 0.089248 | 0.157803 |

|                    |          |          |          |
|--------------------|----------|----------|----------|
| 11755130_CLIP3     | 0.081617 | 0.08927  | 0.157836 |
| 11738888_MICA      | 0.094583 | 0.08928  | 0.157848 |
| 11760059_ZNF445    | -0.12319 | 0.089284 | 0.157849 |
| 11761705_HMGA2     | -0.07241 | 0.089323 | 0.157911 |
| 11717701_DCAF8     | 0.070978 | 0.089328 | 0.157915 |
| 11763505_NF1       | 0.141401 | 0.08935  | 0.157949 |
| 11740538_SCGB1C1 / | -0.09123 | 0.089354 | 0.15795  |
| 11721928_TMCC2     | -0.09828 | 0.089362 | 0.157958 |
| 11731295_SPATA6L   | 0.170938 | 0.089373 | 0.157973 |
| 11726974_PERP      | -0.08487 | 0.089382 | 0.157983 |
| 11715229_GRIP2     | -0.08352 | 0.089393 | 0.157991 |
| 11742135_ACBD4     | -0.22219 | 0.089394 | 0.157991 |
| 11735446_TVP23A    | -0.22435 | 0.089404 | 0.157993 |
| 11729369_GANC      | 0.156076 | 0.089404 | 0.157993 |
| 11754634_SPATA31D4 | -0.10573 | 0.089404 | 0.157993 |
| 11746274_SLC25A44  | 0.161088 | 0.089408 | 0.157994 |
| 11719475_BEX1      | 0.090697 | 0.08943  | 0.158028 |
| 11763159_OR6C4 /// | -0.20132 | 0.089474 | 0.158099 |
| 11723540_TMEM80    | -0.13402 | 0.089478 | 0.158101 |
| 11760606_EGLN3     | -0.10799 | 0.089485 | 0.158107 |
| 11733866_RARS2     | 0.074887 | 0.089492 | 0.158109 |
| 11717793_ZDHHC3    | -0.06694 | 0.089492 | 0.158109 |
| 11763153_THPO      | -0.10982 | 0.089509 | 0.158132 |
| 11717328_KLF9      | -0.08806 | 0.089538 | 0.158177 |
| 11759238_CLEC7A    | 0.103324 | 0.089548 | 0.158189 |
| 11761116_FAM65B    | -0.21034 | 0.089551 | 0.15819  |
| 11724449_ZDHHC22   | -0.15624 | 0.089566 | 0.158211 |
| 11737521_CHRNA9    | -0.21576 | 0.089601 | 0.158266 |
| 11728243_SLC12A1   | -0.10205 | 0.089642 | 0.158333 |
| 11746216_FKBP8     | -0.10098 | 0.089655 | 0.158351 |
| 11763820_GABRA2    | -0.11171 | 0.08967  | 0.158371 |
| 11745983_GRIA1     | -0.13149 | 0.089676 | 0.158375 |
| 11738113_PCDHB1    | -0.15424 | 0.089712 | 0.158433 |
| 11763116_IGHG1     | 0.259823 | 0.089732 | 0.158463 |
| 11757607_SUSD4     | 0.140862 | 0.089763 | 0.158513 |
| 11753564_PPP1R14A  | 0.086398 | 0.089784 | 0.158543 |
| 11727993_STX11     | 0.196744 | 0.089791 | 0.158546 |
| 11760576_PXK       | -0.2041  | 0.089792 | 0.158546 |
| 11747773_SPTSSB    | -0.12043 | 0.089813 | 0.158576 |
| 11737315_LOC102724 | -0.14344 | 0.089815 | 0.158576 |
| 11721917_ANKRD37   | -0.10901 | 0.089834 | 0.158603 |
| 11730616_PLCD4     | 0.136912 | 0.089881 | 0.158681 |
| 11727862_LIX1      | -0.08138 | 0.089908 | 0.158722 |
| 11756107_MEX3A     | -0.07838 | 0.089922 | 0.158741 |
| 11755510_PCCB      | -0.07483 | 0.08993  | 0.158749 |
| 11748388_GLYR1     | -0.09458 | 0.089943 | 0.158767 |
| 11755166_ESAM      | 0.133271 | 0.08996  | 0.158792 |
| 11735467_C1orf82   | -0.12873 | 0.089981 | 0.158823 |
| 11729606_PGM2      | 0.075179 | 0.089994 | 0.158841 |
| 11722407_CHAC1     | -0.08328 | 0.090022 | 0.158879 |
| 11760948_ANAPC2    | -0.147   | 0.090023 | 0.158879 |

|                    |          |          |          |
|--------------------|----------|----------|----------|
| 11748990_KIF1B     | 0.097227 | 0.090028 | 0.158882 |
| 11729954_FHIT      | 0.09466  | 0.090082 | 0.158972 |
| 11715419_LY6E      | -0.08022 | 0.090104 | 0.159006 |
| 11747704_CLDN11    | -0.1088  | 0.090112 | 0.159013 |
| 11734078_TNRC6C    | 0.101541 | 0.090116 | 0.159015 |
| 11743557_PPP1R3F   | -0.17878 | 0.090161 | 0.159088 |
| 11757230_CHODL-AS1 | -0.11205 | 0.090211 | 0.159171 |
| 11741448_DUSP13    | -0.15373 | 0.090224 | 0.159188 |
| 11752527_ZNF554    | -0.14252 | 0.090227 | 0.159188 |
| 11742203_PCDHGA11  | -0.12002 | 0.090269 | 0.159256 |
| 11761488_SDF4      | 0.103222 | 0.090275 | 0.159261 |
| 11758342_COL3A1    | 0.164093 | 0.090295 | 0.15929  |
| 11731742_TRDMT1    | 0.182704 | 0.090299 | 0.159293 |
| 11762353_NPSR1-AS1 | 0.24047  | 0.090328 | 0.159337 |
| 11721896_GAS1      | -0.09714 | 0.090337 | 0.159343 |
| 11733521_NTSR1     | -0.10552 | 0.090338 | 0.159343 |
| 11727668_MTA1      | -0.10373 | 0.090349 | 0.159355 |
| 11721946_MRVI1     | 0.156083 | 0.090351 | 0.159355 |
| 11725916_BVES      | 0.1378   | 0.090376 | 0.159393 |
| 11743828_LDLRAD4   | -0.17014 | 0.090414 | 0.159454 |
| 11763507_CINP      | 0.129082 | 0.090429 | 0.159474 |
| 11743534_PPP2R5C   | -0.08093 | 0.090443 | 0.159494 |
| 11736592_LDB3      | -0.11985 | 0.090471 | 0.159538 |
| 11722675_HIF3A     | -0.08644 | 0.090475 | 0.159539 |
| 11755000_SPAG9     | 0.119808 | 0.090481 | 0.159541 |
| 11763301_RPL39     | 0.069559 | 0.090483 | 0.159541 |
| 11724911_TMPRS2    | -0.14163 | 0.090545 | 0.159645 |
| 11751578_TTC31     | -0.08273 | 0.090565 | 0.159675 |
| 11738269_RUFY4     | -0.12969 | 0.090579 | 0.159693 |
| 11719366_CXCL1     | -0.06648 | 0.090594 | 0.159714 |
| 11746703_FAM219A   | -0.08659 | 0.090623 | 0.159761 |
| 11742108_PPT1      | 0.070495 | 0.09065  | 0.159802 |
| 11756039_MRPL52    | 0.096227 | 0.090678 | 0.159845 |
| 11764052_MARC2     | -0.18598 | 0.090709 | 0.159894 |
| 11736683_CYFIP1    | 0.074359 | 0.090724 | 0.159915 |
| 11762921_COX3      | -0.14829 | 0.090728 | 0.159916 |
| 11740304_KIAA0319  | -0.11907 | 0.090735 | 0.159922 |
| 11731562_APC       | -0.14787 | 0.090748 | 0.159941 |
| 11732504_HPN       | -0.09832 | 0.090758 | 0.159951 |
| 11722111_HLX       | 0.162628 | 0.090763 | 0.159951 |
| 11722289_ZBTB43    | 0.098878 | 0.090764 | 0.159951 |
| 11731401_TMC01     | -0.08085 | 0.09077  | 0.159955 |
| 11732065_RIPPLY2   | -0.13383 | 0.090795 | 0.159994 |
| 11716978_NSFL1C    | -0.07217 | 0.09083  | 0.160049 |
| 11751734_ODF2      | -0.10975 | 0.090851 | 0.160072 |
| 11728079_TBC1D22B  | 0.072942 | 0.090852 | 0.160072 |
| 11751846_ORAOV1    | 0.137927 | 0.090853 | 0.160072 |
| 11758307_TPT1      | 0.073943 | 0.090871 | 0.160099 |
| 11760970_RBM23     | -0.17402 | 0.090906 | 0.160154 |
| 11746776_RPRD1A    | -0.08183 | 0.090916 | 0.160166 |
| 11726895_IRAK3     | -0.13667 | 0.090933 | 0.160191 |



|                    |          |          |          |
|--------------------|----------|----------|----------|
| 11746980_CHI7-351M | -0.18826 | 0.090941 | 0.160199 |
| 11725883_ERVFRD-1  | -0.10836 | 0.090958 | 0.16022  |
| 11721886_CDC42     | -0.10913 | 0.09096  | 0.16022  |
| 11762134_ZNF76     | -0.16443 | 0.090965 | 0.160224 |
| 11760240_MCM9      | 0.089068 | 0.090985 | 0.160252 |
| 11745783_TGM3      | -0.14861 | 0.090988 | 0.160252 |
| 11761472_SLC35B3   | -0.16413 | 0.090995 | 0.160259 |
| 11738273_PSMG4     | 0.130582 | 0.091013 | 0.160284 |
| 11734501_NUP98     | -0.10175 | 0.091022 | 0.160295 |
| 11736114_TTC14     | 0.086435 | 0.091074 | 0.160381 |
| 11754526_PTGES     | 0.079118 | 0.091085 | 0.160395 |
| 11735639_KRTAP5-2  | -0.09571 | 0.091091 | 0.160395 |
| 11740564_FAM76A    | -0.12617 | 0.091092 | 0.160395 |
| 11751144_ERCC8     | 0.078812 | 0.091099 | 0.160403 |
| 11737497_ADRA2B    | -0.09849 | 0.091123 | 0.160439 |
| 11742065_KCNQ2     | -0.1124  | 0.091153 | 0.160486 |
| 11716011_TNFAIP1   | 0.095025 | 0.09119  | 0.160545 |
| 11724984_EXPH5     | 0.178692 | 0.091221 | 0.160594 |
| 11740210_ZSCAN12   | 0.231393 | 0.091231 | 0.160604 |
| 11745476_TRMU      | 0.079859 | 0.091233 | 0.160604 |
| 11732434_ZNF250    | 0.138848 | 0.091238 | 0.160606 |
| 11720202_GMPR      | -0.10725 | 0.091282 | 0.160678 |
| 11759876_STARD13   | 0.102708 | 0.091304 | 0.160711 |
| 11753148_MADCAM1   | -0.12817 | 0.091325 | 0.160741 |
| 11728332_KCTD15    | -0.09842 | 0.091353 | 0.160785 |
| 11741659_CDH26     | -0.13635 | 0.091411 | 0.160883 |
| 11759483_WWTR1     | -0.07405 | 0.091421 | 0.160893 |
| 11722642_DGAT2     | -0.06674 | 0.09147  | 0.160974 |
| 11749949_LBX1-AS1  | -0.1342  | 0.091476 | 0.16098  |
| 11742826_PHF3      | -0.07607 | 0.091501 | 0.161017 |
| 11751966_IARS      | 0.068014 | 0.091523 | 0.161051 |
| 11721422_SPAG16    | 0.158591 | 0.091569 | 0.161125 |
| 11753402_RAB35     | -0.09066 | 0.091582 | 0.161143 |
| 11737139_MURC      | 0.168698 | 0.091593 | 0.161157 |
| 11728689_RABIF     | -0.08724 | 0.091603 | 0.161168 |
| 11749345_MVB12B    | 0.126472 | 0.091612 | 0.161178 |
| 11725114_ANKHD1    | 0.086537 | 0.091624 | 0.161194 |
| 11761581_MPHOSPH6  | -0.15137 | 0.091645 | 0.161224 |
| 11736051_FAM229B   | -0.09607 | 0.091661 | 0.161246 |
| 11760634_ARHGEF10  | 0.137716 | 0.091669 | 0.161255 |
| 11732454_KCNJ15    | -0.14475 | 0.091744 | 0.161377 |
| 11730717_PAGE5     | 0.072382 | 0.091745 | 0.161377 |
| 11729970_SPTB      | 0.109264 | 0.091879 | 0.161601 |
| 11720902_CACNB3    | -0.16028 | 0.091879 | 0.161601 |
| 11734938_CSF2RA    | -0.13828 | 0.09192  | 0.161662 |
| 11726345_GPA33     | -0.11286 | 0.091921 | 0.161662 |
| 11757008_LPCAT3    | -0.12811 | 0.091942 | 0.16169  |
| 11735267_SIGLEC8   | -0.11711 | 0.091943 | 0.16169  |
| 11751368_CD34      | -0.1181  | 0.091956 | 0.161705 |
| 11746838_GIGYF2    | -0.08002 | 0.091961 | 0.161705 |
| 11738557_BARHL2    | -0.08825 | 0.091961 | 0.161705 |

|                    |          |          |          |
|--------------------|----------|----------|----------|
| 11761022_LOC100507 | -0.07576 | 0.091968 | 0.161711 |
| 11742455_DPF3      | 0.134189 | 0.091994 | 0.161747 |
| 11716081_WDR77     | 0.07308  | 0.091995 | 0.161747 |
| 11746477_COX6B2    | -0.10407 | 0.092    | 0.161747 |
| 11747862_BCARI     | 0.096982 | 0.092002 | 0.161747 |
| 11760758_UCHL5     | 0.231053 | 0.092028 | 0.161788 |
| 11742493_EME2      | -0.11124 | 0.092048 | 0.161817 |
| 11752745_LGMN      | -0.11885 | 0.09206  | 0.161832 |
| 11730165_GSC       | -0.15174 | 0.092063 | 0.161832 |
| 11745044_PCYT1B    | -0.0744  | 0.092069 | 0.161835 |
| 11731664_UTP20     | 0.093559 | 0.092081 | 0.161851 |
| 11729412_C9orf142  | -0.10515 | 0.092111 | 0.161898 |
| 11746389_CDH3      | -0.07325 | 0.092116 | 0.161902 |
| 11756687_MRPL46    | 0.08162  | 0.092124 | 0.161906 |
| 11749036_TRAF2     | -0.08039 | 0.092126 | 0.161906 |
| 11749131_DDX24     | 0.077512 | 0.092199 | 0.16203  |
| 11734165_ARHGEF26  | 0.094859 | 0.092213 | 0.162048 |
| 11726260_RNF141    | -0.07043 | 0.092243 | 0.162096 |
| 11755067_CLEC16A   | 0.082393 | 0.092268 | 0.162133 |
| 11735286_MYADML2   | -0.08639 | 0.092274 | 0.162138 |
| 11751008_SMARCD1   | -0.11947 | 0.092298 | 0.162175 |
| 11736330_SLC2A11   | 0.069309 | 0.092304 | 0.162179 |
| 11741290_TNFSF14   | -0.17337 | 0.09231  | 0.162183 |
| 11727436_AIPL1     | -0.12247 | 0.092336 | 0.162224 |
| 11728922_ONECUT2   | -0.14287 | 0.092369 | 0.162271 |
| 11726351_EFNA5     | -0.09342 | 0.09237  | 0.162271 |
| 11718712_SFSWAP    | 0.081545 | 0.092401 | 0.16232  |
| 11716357_AHSG      | -0.13565 | 0.092415 | 0.162338 |
| 11754433_CLRN3     | -0.17375 | 0.092449 | 0.162392 |
| 11717874_IRF8      | -0.11269 | 0.092452 | 0.162393 |
| 11728979_ADGRG3    | -0.11847 | 0.092462 | 0.162403 |
| 11735691_RBM4B     | 0.109443 | 0.092477 | 0.162424 |
| 11731906_PRRG3     | -0.14743 | 0.092532 | 0.162516 |
| 11742896_H2AFY     | -0.07808 | 0.092542 | 0.162528 |
| 11739564_ITPR1     | -0.1664  | 0.092563 | 0.162558 |
| 11724463_GPNMB     | -0.09666 | 0.092567 | 0.162559 |
| 11723388_EMX2      | -0.14534 | 0.092592 | 0.162597 |
| 11724777_PGM2L1    | 0.147239 | 0.092613 | 0.162629 |
| 11761647_ZNF333    | 0.113352 | 0.092621 | 0.162636 |
| 11740852_TRAPPC2   | -0.15879 | 0.092633 | 0.162653 |
| 11728211_TRMT1L    | -0.13893 | 0.092652 | 0.16268  |
| 11724632_SYT13     | -0.11003 | 0.092696 | 0.16275  |
| 11723770_SNX24     | -0.07112 | 0.092709 | 0.162768 |
| 11760982_CDK10     | -0.09548 | 0.092722 | 0.162781 |
| 11748386_SOX13     | -0.09802 | 0.092723 | 0.162781 |
| 11738372_CA5A      | -0.14137 | 0.092739 | 0.162802 |
| 11716132_FSTL3     | -0.07405 | 0.092763 | 0.162834 |
| 11717108_PCMI      | -0.08727 | 0.092763 | 0.162834 |
| 11731138_MYPN      | 0.066417 | 0.092785 | 0.162865 |
| 11762069_SEPT6     | -0.15783 | 0.092801 | 0.162889 |
| 11727676_BLOC1S3   | -0.08811 | 0.092825 | 0.162925 |

|                    |          |          |          |
|--------------------|----------|----------|----------|
| 11717518_OCIAD1    | 0.067442 | 0.092852 | 0.162966 |
| 11728929_CPNE7     | -0.09149 | 0.092887 | 0.163022 |
| 11719353_GCC2      | -0.09242 | 0.092892 | 0.163024 |
| 11727854_NUP50     | -0.09075 | 0.092906 | 0.163043 |
| 11735835_PPHLN1    | 0.07745  | 0.092916 | 0.163055 |
| 11759006_ZNF771    | 0.126927 | 0.092927 | 0.163068 |
| 11716645_TTC19     | 0.091853 | 0.092958 | 0.163118 |
| 11715173_KRTAP10-1 | -0.11156 | 0.092974 | 0.163131 |
| 11727054_HOXB13    | -0.07577 | 0.092977 | 0.163131 |
| 11720546_ANGEL1    | -0.09805 | 0.092979 | 0.163131 |
| 11733758_ZNF446    | -0.09089 | 0.092979 | 0.163131 |
| 11731115_ACTL9     | -0.17783 | 0.092993 | 0.163149 |
| 11759944_ZFP28     | -0.09753 | 0.093009 | 0.163168 |
| 11726792_ALS2CL    | -0.09166 | 0.093011 | 0.163168 |
| 11715174_KRTAP10-1 | -0.11566 | 0.09302  | 0.163174 |
| 11748113_RPN1      | 0.07346  | 0.09302  | 0.163174 |
| 11724709_SOX11     | -0.07872 | 0.093038 | 0.163199 |
| 11748177_XYLT2     | -0.07328 | 0.093068 | 0.163245 |
| 11716475_STRAP     | -0.07515 | 0.093072 | 0.163247 |
| 11760874_USP36     | 0.148501 | 0.093083 | 0.16326  |
| 11757360_BAG3      | -0.06334 | 0.093115 | 0.163311 |
| 11727850_NIP7      | 0.093516 | 0.093123 | 0.163318 |
| 11757706_DCUN1D5   | 0.064332 | 0.093154 | 0.163367 |
| 11755620_HYAL1     | -0.10112 | 0.093163 | 0.163377 |
| 11742416_USP24     | 0.068624 | 0.093183 | 0.163401 |
| 11757250_INGX      | -0.15586 | 0.093184 | 0.163401 |
| 11763241_TRAV12-2  | -0.0771  | 0.093196 | 0.163418 |
| 11751754_RTCB      | -0.08499 | 0.093232 | 0.163474 |
| 11741974_SLC26A5   | -0.11071 | 0.093247 | 0.163496 |
| 11735158_ZNF501    | -0.09804 | 0.093306 | 0.163593 |
| 11762961_TPT1      | -0.24157 | 0.093323 | 0.163617 |
| 11757064_WBSCR16   | -0.07128 | 0.09333  | 0.163624 |
| 11731083_RNF144B   | 0.080297 | 0.093343 | 0.16364  |
| 11722947_MUMIL1    | 0.111923 | 0.093349 | 0.163644 |
| 11730945_TRMT2A    | -0.0958  | 0.09336  | 0.163657 |
| 11738767_OR8B4     | -0.12843 | 0.093366 | 0.163662 |
| 11746553_S SX2IP   | 0.131197 | 0.093374 | 0.163671 |
| 11728419_KIF7      | -0.14847 | 0.093379 | 0.163674 |
| 11736100_GBA /// G | 0.08815  | 0.093401 | 0.163701 |
| 11727595_KIAA2026  | 0.066145 | 0.093403 | 0.163701 |
| 11738242_TLX1NB    | -0.12468 | 0.093407 | 0.163701 |
| 11733743_AAMDC     | -0.08781 | 0.093408 | 0.163701 |
| 11735787_BARX2     | -0.09231 | 0.09345  | 0.163763 |
| 11726923_ASB6      | 0.092546 | 0.09345  | 0.163763 |
| 11732599_CHRNB2    | -0.07195 | 0.093456 | 0.163768 |
| 11737508_WDR87     | 0.14304  | 0.09348  | 0.163804 |
| 11731976_DNAJB3    | -0.12594 | 0.093503 | 0.163836 |
| 11732882_FBXO43    | -0.17621 | 0.093505 | 0.163836 |
| 11721929_TMCC2     | -0.10594 | 0.093516 | 0.163849 |
| 11735942_HIST1H4D  | -0.13992 | 0.093558 | 0.163917 |
| 11726231_NROB2     | -0.1641  | 0.093569 | 0.16393  |

|                    |          |          |          |
|--------------------|----------|----------|----------|
| 11746442_SLC35C2   | 0.073859 | 0.093586 | 0.163955 |
| 11730188_OLA1      | 0.071693 | 0.09367  | 0.164095 |
| 11745600_TSKS      | -0.1691  | 0.093688 | 0.16412  |
| 11748303_PSMC1     | -0.07867 | 0.093704 | 0.164143 |
| 11730380_KRIT1     | 0.07233  | 0.093812 | 0.164326 |
| 11737435_HMX2      | -0.14809 | 0.093818 | 0.164332 |
| 11761953_FXYD2     | -0.09807 | 0.093829 | 0.164345 |
| 11760015_CELP      | -0.11126 | 0.09384  | 0.164358 |
| 11726079_GALNT15   | -0.10679 | 0.093848 | 0.164366 |
| 11737763_TIAM2     | 0.071261 | 0.09389  | 0.164434 |
| 11737451_FGF5      | 0.112893 | 0.093902 | 0.164445 |
| 11750571_AGTPBP1   | -0.10694 | 0.093903 | 0.164445 |
| 11752052_MYH9      | 0.096592 | 0.093908 | 0.164448 |
| 11756369_MECR      | -0.07658 | 0.093943 | 0.164502 |
| 11762073_ADGRG5    | 0.128385 | 0.094025 | 0.164641 |
| 11725575_EML6      | 0.107309 | 0.094036 | 0.164653 |
| 11742355_OR2A2     | -0.1536  | 0.094044 | 0.164661 |
| 11735026_LOC105369 | -0.07088 | 0.094074 | 0.16471  |
| 11724250_SLC39A8   | 0.084523 | 0.094086 | 0.164724 |
| 11738660_GAL3ST2   | -0.12016 | 0.09411  | 0.164759 |
| 11734184_PRDM5     | -0.09225 | 0.094139 | 0.164805 |
| 11730973_CA4       | -0.10792 | 0.094164 | 0.164843 |
| 11728890_SLIT1     | -0.14602 | 0.094196 | 0.164893 |
| 11733550_ZIC5      | -0.09843 | 0.094211 | 0.164913 |
| 11748939_TOMIL2    | 0.099654 | 0.094224 | 0.16493  |
| 11759216_PCDHB13   | -0.11923 | 0.094262 | 0.16499  |
| 11737015_KCNQ4     | -0.28712 | 0.094274 | 0.165006 |
| 11753237_LOC728989 | -0.10432 | 0.094291 | 0.16503  |
| 11753056_ZNF667    | -0.07594 | 0.094299 | 0.165038 |
| 11731747_HEPACAM   | -0.08977 | 0.094304 | 0.16504  |
| 11761541_CASP1     | -0.12159 | 0.094313 | 0.16505  |
| 11732752_RBM44     | -0.10489 | 0.094329 | 0.165073 |
| 11728142_ZBTB32    | 0.091683 | 0.094341 | 0.165087 |
| 11744813_AANAT     | -0.08701 | 0.094351 | 0.165099 |
| 11722521_HKDC1     | -0.06486 | 0.094355 | 0.1651   |
| 11732926_VNN3      | 0.0758   | 0.094365 | 0.165112 |
| 11748488_DLD       | 0.070915 | 0.094399 | 0.165166 |
| 11728486_LIMD1     | 0.145778 | 0.094442 | 0.165235 |
| 11717252_NDUFB11   | 0.070542 | 0.094451 | 0.165242 |
| 11743579_MRPS6     | -0.07775 | 0.094453 | 0.165242 |
| 11742695_WAC       | 0.083623 | 0.094458 | 0.165245 |
| 11760120_LOC100507 | -0.11742 | 0.094498 | 0.165309 |
| 11752698_PCED1A    | 0.071546 | 0.09451  | 0.165324 |
| 11717333_HACD2     | -0.10562 | 0.094524 | 0.165339 |
| 11750808_ALOX15    | -0.12674 | 0.094525 | 0.165339 |
| 11735615_PRR35     | -0.11945 | 0.094559 | 0.165391 |
| 11724930_DTX1      | -0.08289 | 0.094564 | 0.165395 |
| 11755816_COL21A1   | -0.12217 | 0.094575 | 0.165409 |
| 11746706 EMC9      | -0.06357 | 0.094591 | 0.16543  |
| 11727076_PLAC4     | -0.114   | 0.094601 | 0.165441 |
| 11726803_HELZ2     | -0.09768 | 0.094604 | 0.165441 |

|                    |           |          |          |
|--------------------|-----------|----------|----------|
| 11758720_RPS25     | -0.08511  | 0.094673 | 0.165556 |
| 11757753_IP07      | 0.066437  | 0.094682 | 0.165566 |
| 11732401_DKK4      | -0.07788  | 0.094703 | 0.165596 |
| 11748627_UGDH      | 0.083765  | 0.094726 | 0.16563  |
| 11733338_FANCE     | -0.13461  | 0.094743 | 0.165655 |
| 11715526_ATP6V1G2  | -0.069969 | 0.09475  | 0.165661 |
| 11731828_GPC2      | -0.34454  | 0.094783 | 0.165713 |
| 11758082_FAM46D    | -0.15019  | 0.094795 | 0.165728 |
| 11743245_OR52E6    | -0.11555  | 0.094842 | 0.165804 |
| 11747667_C16orf58  | -0.11685  | 0.094877 | 0.165858 |
| 11749792_PBX1      | 0.168748  | 0.094882 | 0.165863 |
| 11740288_CHRNA1    | -0.0884   | 0.094938 | 0.165953 |
| 11744799_XRCC4     | -0.10788  | 0.094949 | 0.165967 |
| 11753416_ABCA2     | -0.11274  | 0.094957 | 0.165975 |
| 11756649_SEH1L     | 0.072445  | 0.09498  | 0.166004 |
| 11732163_ZCRB1     | -0.10684  | 0.09498  | 0.166004 |
| 11761020_RTCA      | -0.16282  | 0.095003 | 0.166034 |
| 11761112_GPATCH4   | 0.13373   | 0.095004 | 0.166034 |
| 11717791_APPL2     | -0.09346  | 0.095085 | 0.166169 |
| 11742070_CYP11B2   | -0.12592  | 0.09512  | 0.166224 |
| 11740612_SLC8A1    | -0.07903  | 0.09513  | 0.166236 |
| 11719621_GTPBP1    | 0.099357  | 0.095165 | 0.166292 |
| 11744689_ARMC10    | 0.096842  | 0.095178 | 0.166309 |
| 11753999_CD58      | -0.10879  | 0.095196 | 0.166334 |
| 11719454_BBS1      | 0.096151  | 0.09526  | 0.166439 |
| 11745555_C11orf74  | -0.07275  | 0.095289 | 0.166484 |
| 11725595_IYD       | 0.081702  | 0.095303 | 0.166503 |
| 11733552_MAGI1     | 0.129662  | 0.095321 | 0.166525 |
| 11761640_TERF2     | 0.104623  | 0.095322 | 0.166525 |
| 11761338_TCAF2     | 0.104326  | 0.095346 | 0.16656  |
| 11718029_RAB11A    | -0.07049  | 0.095362 | 0.166582 |
| 11748914_AP3B2     | 0.15887   | 0.095391 | 0.166622 |
| 11760490_ST3GAL5   | 0.143091  | 0.095392 | 0.166622 |
| 11734193_FXYD3     | -0.0987   | 0.095411 | 0.16665  |
| 11721359_ITIH1     | -0.1923   | 0.095421 | 0.166662 |
| 11754558_FAM71E1   | -0.20714  | 0.095431 | 0.166672 |
| 11740554_PHOSPHO1  | -0.12203  | 0.095476 | 0.166735 |
| 11737938_RIPK1     | -0.08706  | 0.095477 | 0.166735 |
| 11756423_ITIH1     | -0.14     | 0.095479 | 0.166735 |
| 11752719_DHX34     | -0.0902   | 0.09548  | 0.166735 |
| 11722624_CNOT3     | -0.16651  | 0.095497 | 0.166758 |
| 11738922_OR5I1     | 0.177924  | 0.095523 | 0.166793 |
| 11735052_KIAA1211  | 0.12871   | 0.095524 | 0.166793 |
| 11755164_LEFTY1    | 0.200547  | 0.095528 | 0.166794 |
| 11748425_ZNF736    | 0.182776  | 0.095532 | 0.166796 |
| 11738968_KRTAP19-8 | -0.17383  | 0.095546 | 0.166815 |
| 11727656_EPHB1     | 0.07434   | 0.095589 | 0.166883 |
| 11756823_CENPL     | -0.10003  | 0.095608 | 0.166911 |
| 11742570_OR8J3     | -0.13191  | 0.095636 | 0.166953 |
| 11717838_SRSF4     | -0.06249  | 0.095647 | 0.166967 |
| 11747570_MGST1     | -0.07304  | 0.095661 | 0.166985 |

|                    |          |          |          |
|--------------------|----------|----------|----------|
| 11755026_PHF2      | 0.085829 | 0.095679 | 0.167007 |
| 11763177_KIAA0907  | 0.079678 | 0.095681 | 0.167007 |
| 11748231_UNC13B    | 0.098161 | 0.095701 | 0.167035 |
| 11753591_PRR13     | -0.07726 | 0.095705 | 0.167035 |
| 11725699_XIAP      | 0.078617 | 0.095707 | 0.167035 |
| 11732598_CHRNB2    | 0.083096 | 0.095759 | 0.16712  |
| 11729523_NLRC5     | 0.134159 | 0.095784 | 0.167157 |
| 11742921_HSPA9     | 0.080464 | 0.095798 | 0.167176 |
| 11726062_PTGIR     | -0.12136 | 0.095809 | 0.16719  |
| 11746012_EXD2      | -0.0668  | 0.095819 | 0.167201 |
| 11722439_FLYWCH2   | -0.0722  | 0.095838 | 0.167228 |
| 11722006_KLHL25    | -0.0825  | 0.095871 | 0.167279 |
| 11760559_PHLDB3    | 0.187624 | 0.095888 | 0.167303 |
| 11762415_PLPP3     | -0.07866 | 0.095936 | 0.167381 |
| 11757996_FKBPL     | -0.12362 | 0.095952 | 0.167403 |
| 11753132_SLC50A1   | 0.098899 | 0.095956 | 0.167404 |
| 11721911_SOX8      | -0.07659 | 0.095975 | 0.16743  |
| 11734344_TRIM10    | -0.06499 | 0.095979 | 0.167433 |
| 11725497_RAP1GAP   | -0.1762  | 0.095994 | 0.167452 |
| 11721368_CRLF1     | -0.09499 | 0.096004 | 0.167464 |
| 11739393_RBPJ      | -0.09063 | 0.096023 | 0.167492 |
| 11717069_DIP2B     | -0.06679 | 0.096027 | 0.167493 |
| 11744910_NUP160    | 0.0924   | 0.096065 | 0.167553 |
| 11759920_PHC3      | 0.167254 | 0.096101 | 0.16761  |
| 11740597_FAM161B   | -0.12278 | 0.096109 | 0.167613 |
| 11727971_ST7 /// S | 0.076138 | 0.09611  | 0.167613 |
| 11738651_KRT35     | -0.12748 | 0.096118 | 0.167622 |
| 11755714_GPX5      | -0.081   | 0.096122 | 0.167622 |
| 11738258_CXorf49 / | -0.12753 | 0.096157 | 0.167676 |
| 11760079_ABCA1     | -0.16128 | 0.096163 | 0.167682 |
| 11755220_C17orf97  | 0.099506 | 0.09617  | 0.167688 |
| 11729583_CA1       | -0.12141 | 0.096183 | 0.167705 |
| 11751477_B4GALT6   | -0.09306 | 0.096198 | 0.167715 |
| 11726664_ZMIZ2     | 0.151624 | 0.096203 | 0.167715 |
| 11742030_ZMIZ2     | 0.151624 | 0.096203 | 0.167715 |
| 11748570_FAXDC2    | -0.1439  | 0.096205 | 0.167715 |
| 11731456_MFN1      | 0.071559 | 0.096206 | 0.167715 |
| 11740863_TPH1      | -0.18419 | 0.096247 | 0.16778  |
| 11722057_SNRNP40   | -0.0765  | 0.096263 | 0.167801 |
| 11722666_GABRB3    | 0.124796 | 0.096267 | 0.167803 |
| 11727098_NUMBL     | -0.07819 | 0.096286 | 0.167827 |
| 11755097_KIF17     | 0.095858 | 0.096288 | 0.167827 |
| 11759244_LINCO0477 | -0.118   | 0.096306 | 0.167853 |
| 11759103_CYP4F3    | 0.164754 | 0.096311 | 0.167855 |
| 11735918_FBXL6     | -0.10408 | 0.096318 | 0.167862 |
| 11729782_BOLL      | 0.218522 | 0.09633  | 0.167873 |
| 11729071_HS2ST1    | 0.118148 | 0.096331 | 0.167873 |
| 11758559_NUDT4 /// | -0.14702 | 0.09634  | 0.167881 |
| 11721070_DEF8      | 0.074758 | 0.096343 | 0.167881 |
| 11717933_DNAL4     | -0.07981 | 0.096361 | 0.167907 |
| 11751087_SF1       | 0.068545 | 0.096422 | 0.168007 |

|                    |          |          |          |
|--------------------|----------|----------|----------|
| 11754951_NCOA7     | 0.075714 | 0.096446 | 0.16804  |
| 11763206_SH3RF2    | 0.16545  | 0.096448 | 0.16804  |
| 11756219_FGL1      | -0.14794 | 0.096455 | 0.168047 |
| 11762932_PIK3IP1   | -0.1162  | 0.096499 | 0.168116 |
| 11736840_FAM198A   | 0.087472 | 0.096502 | 0.168116 |
| 11738712_OR52K2    | -0.154   | 0.09652  | 0.168142 |
| 11724396_ZNF83     | -0.09425 | 0.096585 | 0.168249 |
| 11734215_MPP7      | -0.1237  | 0.096617 | 0.168298 |
| 11727330_C7orf61   | 0.102449 | 0.096632 | 0.168319 |
| 11750698_ZNF418    | 0.117069 | 0.096647 | 0.16834  |
| 11760641_SLC22A20  | -0.11065 | 0.096662 | 0.16836  |
| 11715333_NXNL2     | -0.1072  | 0.096667 | 0.168361 |
| 11761524_SLC2A6    | -0.10268 | 0.096686 | 0.168388 |
| 11731177_BCL2L15   | -0.11201 | 0.096696 | 0.1684   |
| 11751967_RAPGEF6   | 0.129407 | 0.096716 | 0.168429 |
| 11722123_CYP27B1   | 0.105849 | 0.096743 | 0.168471 |
| 11737091_MED12L    | 0.112827 | 0.09675  | 0.168477 |
| 11758718_ATP5E /// | 0.115404 | 0.096758 | 0.168484 |
| 11727747_TMEM63C   | -0.12167 | 0.096806 | 0.168563 |
| 11747269_ALB       | 0.112826 | 0.09681  | 0.168563 |
| 11735454_TBP       | 0.064669 | 0.096819 | 0.168572 |
| 11751176_PRUNE2    | 0.213238 | 0.096838 | 0.1686   |
| 11743735_CCNK      | -0.0727  | 0.09686  | 0.168631 |
| 11737253_SLC16A11  | -0.09124 | 0.096893 | 0.168681 |
| 11715345_ADAMTS15  | -0.10673 | 0.096897 | 0.168681 |
| 11750606_CD101     | -0.09026 | 0.096898 | 0.168681 |
| 11734381_RAD51B    | 0.169211 | 0.096918 | 0.168709 |
| 11722335_FNDC5     | -0.08698 | 0.096932 | 0.168727 |
| 11730191_SEC14L2   | -0.11903 | 0.096956 | 0.168762 |
| 11728791_THRSP     | -0.08508 | 0.096961 | 0.168764 |
| 11727283_ECM2      | 0.124871 | 0.096963 | 0.168764 |
| 11759389_OR10A2    | -0.09494 | 0.097006 | 0.168831 |
| 11731707_VRTN      | -0.08114 | 0.097037 | 0.168877 |
| 11742895_DRG2      | 0.084833 | 0.097039 | 0.168877 |
| 11740463_SYCE1L    | -0.07916 | 0.097046 | 0.168883 |
| 11763649_APOC1     | -0.22681 | 0.097073 | 0.168915 |
| 11726355_ENPP1     | -0.16206 | 0.097075 | 0.168915 |
| 11747344_ACADM     | 0.118398 | 0.097078 | 0.168915 |
| 11762826_PAH       | -0.10488 | 0.09708  | 0.168915 |
| 11739119_CNPY3     | -0.11016 | 0.097084 | 0.168915 |
| 11730785_TTC21A    | 0.128597 | 0.097084 | 0.168915 |
| 11762929_FAM66D // | -0.11126 | 0.097122 | 0.168972 |
| 11720150_C1orf116  | -0.18154 | 0.097124 | 0.168972 |
| 11743364_EIF5B     | 0.092621 | 0.097135 | 0.168985 |
| 11745645_STMN1     | -0.07276 | 0.097205 | 0.169101 |
| 11751913_FGD5      | 0.118387 | 0.097212 | 0.169107 |
| 11725769_MIER3     | 0.13445  | 0.09724  | 0.169149 |
| 11740065_IL17RA    | 0.07253  | 0.097319 | 0.16928  |
| 11762756_CHRNA3    | -0.1335  | 0.097355 | 0.169338 |
| 11725903_ZNF502    | 0.16923  | 0.097361 | 0.169341 |
| 11763138_RBM15     | 0.090841 | 0.097374 | 0.169355 |

|                    |          |          |          |
|--------------------|----------|----------|----------|
| 11750280_EFEMP2    | -0.06655 | 0.097376 | 0.169355 |
| 11728265_LILRB2    | -0.15385 | 0.097401 | 0.169392 |
| 11720108_THAP11    | -0.07943 | 0.097406 | 0.169396 |
| 11734034_FPR2      | -0.11648 | 0.097456 | 0.169477 |
| 11748531_CACFD1    | -0.10062 | 0.097503 | 0.169551 |
| 11731558_WNT2      | -0.12131 | 0.097506 | 0.169551 |
| 11761808_SFPQ      | -0.14126 | 0.097515 | 0.169556 |
| 11723218_GPN1      | 0.073296 | 0.097515 | 0.169556 |
| 11721890_ADGRL1    | -0.07807 | 0.097536 | 0.169585 |
| 11746871_GATAD2A   | -0.0739  | 0.097539 | 0.169585 |
| 11730153_CCDC114   | -0.11391 | 0.097569 | 0.16963  |
| 11730418_PRND      | -0.11365 | 0.097586 | 0.169655 |
| 11755741_MED16     | -0.06724 | 0.097605 | 0.169682 |
| 11731464_CPM       | -0.07825 | 0.097619 | 0.169699 |
| 11751583_LOC100288 | -0.12391 | 0.097624 | 0.169702 |
| 11751786_CRNN      | -0.14135 | 0.097636 | 0.169712 |
| 11752567_TP63      | -0.15739 | 0.097637 | 0.169712 |
| 11745466_CDADC1    | 0.124729 | 0.097647 | 0.169724 |
| 11728219_BCLAF1    | -0.07635 | 0.097657 | 0.169735 |
| 11753866_CTLA4     | -0.09157 | 0.097684 | 0.169776 |
| 11739521_ST8SIA4   | 0.075039 | 0.097724 | 0.169839 |
| 11753778_KCNMB2    | -0.14144 | 0.097743 | 0.169866 |
| 11750474_CABP4     | -0.09869 | 0.097762 | 0.169894 |
| 11733991_ANGEL2    | 0.093391 | 0.097776 | 0.169913 |
| 11749380_WDR74     | -0.07353 | 0.097793 | 0.169936 |
| 11739701_B3GNT2    | -0.09536 | 0.097806 | 0.169949 |
| 11759586_RAB18     | -0.0911  | 0.097808 | 0.169949 |
| 11753236_GPER1     | -0.07596 | 0.097811 | 0.169949 |
| 11724574_ECE2      | -0.07519 | 0.09782  | 0.169959 |
| 11730348_TLDC1     | -0.08935 | 0.097832 | 0.169973 |
| 11731656_VAV3      | -0.11351 | 0.097838 | 0.169978 |
| 11760568_EPGN      | 0.142574 | 0.097896 | 0.170072 |
| 11716444_KEAP1     | -0.06806 | 0.097915 | 0.1701   |
| 11716701_CCNDBP1   | 0.063751 | 0.097925 | 0.170104 |
| 11729814_ZADH2     | -0.09419 | 0.097925 | 0.170104 |
| 11732558_TEX37     | -0.07888 | 0.097967 | 0.170172 |
| 11715823_SYPL1     | -0.07146 | 0.097973 | 0.170175 |
| 11753855_CD28      | -0.13429 | 0.097989 | 0.170198 |
| 11762459_XRCC1     | -0.09791 | 0.098025 | 0.17025  |
| 11748432_ARMC6     | -0.07779 | 0.098026 | 0.17025  |
| 11754749_TEX35     | -0.09996 | 0.098061 | 0.170299 |
| 11734592_SLC10A7   | -0.16326 | 0.098061 | 0.170299 |
| 11742525_OR52B6    | -0.10346 | 0.098073 | 0.170312 |
| 11731156_APAF1     | -0.13869 | 0.098076 | 0.170312 |
| 11763118_C7orf34   | -0.06576 | 0.098082 | 0.170317 |
| 11745777_TTC31     | -0.08962 | 0.098108 | 0.170356 |
| 11724504_SPON1     | -0.08886 | 0.098116 | 0.170364 |
| 11725936_CAMK2A    | -0.08645 | 0.098127 | 0.170376 |
| 11754165_LRRK1     | -0.12851 | 0.098142 | 0.170396 |
| 11733260_TNPO2     | -0.07052 | 0.098164 | 0.170429 |
| 11760259_SRSF9     | 0.106659 | 0.098173 | 0.170439 |



|                    |          |          |          |
|--------------------|----------|----------|----------|
| 11754126_CFLAR     | 0.088306 | 0.098262 | 0.170586 |
| 11725331_USP9X     | 0.07486  | 0.098275 | 0.170604 |
| 11726674_ASCL1     | -0.11669 | 0.09835  | 0.170727 |
| 11748640_DLGAP1    | -0.20047 | 0.098359 | 0.170737 |
| 11759965_ANKDD1A   | 0.131271 | 0.098387 | 0.17078  |
| 11732512_CD1       | -0.08659 | 0.0984   | 0.170788 |
| 11727758_SYCP3     | 0.097707 | 0.098401 | 0.170788 |
| 11761386_ZNF599    | -0.16555 | 0.098402 | 0.170788 |
| 11763389_LINC00906 | -0.15273 | 0.098408 | 0.170791 |
| 11734887_SEMA3G    | -0.10119 | 0.098447 | 0.170853 |
| 11748183_PLEKHH1   | 0.139502 | 0.098457 | 0.170865 |
| 11744104_TMC5      | 0.188092 | 0.098474 | 0.170884 |
| 11724541_VWF       | -0.13521 | 0.098475 | 0.170884 |
| 11731463_CPM       | 0.100637 | 0.0985   | 0.17092  |
| 11742916_LMTK2     | 0.067868 | 0.098539 | 0.170983 |
| 11735189_H2AFY     | -0.07598 | 0.098567 | 0.171024 |
| 11763047_AMELY     | -0.11525 | 0.098595 | 0.171066 |
| 11752749_SYCP2L    | 0.271624 | 0.098598 | 0.171066 |
| 11725011_CEP78     | -0.06625 | 0.098632 | 0.17112  |
| 11723834_TAPT1     | -0.13117 | 0.098654 | 0.171152 |
| 11719163_CLCN5     | -0.12362 | 0.098664 | 0.171164 |
| 11753043_DBF4      | -0.09035 | 0.098669 | 0.171165 |
| 11758853_ARPC5L    | 0.081655 | 0.09868  | 0.171179 |
| 11720023_FAM118A   | 0.150929 | 0.098691 | 0.171191 |
| 11761063_SPDYE2B   | 0.103566 | 0.098696 | 0.171191 |
| 11737359_MYOZ3     | -0.12603 | 0.098697 | 0.171191 |
| 11760570_SNX14     | -0.08937 | 0.098723 | 0.171228 |
| 11726993_GFAP      | -0.11199 | 0.098734 | 0.171242 |
| 11763695_ABTB1     | 0.102936 | 0.098775 | 0.171308 |
| 11756496_SERPINA6  | -0.08537 | 0.098797 | 0.171338 |
| 11738429_POU1F1    | 0.216603 | 0.098804 | 0.171346 |
| 11760235_CBR1      | -0.11129 | 0.098811 | 0.171352 |
| 11736694_TRIM38    | 0.071923 | 0.098859 | 0.171428 |
| 200057_PMNONO      | -0.06451 | 0.098867 | 0.171437 |
| 11750038_MECR      | -0.08728 | 0.098906 | 0.171497 |
| 11731056_CTAGE5    | 0.116295 | 0.098964 | 0.171593 |
| 11737948_C5        | -0.10424 | 0.098988 | 0.171626 |
| 11743124_TLN1      | -0.08083 | 0.098997 | 0.171626 |
| 11751042_F5        | -0.16166 | 0.099    | 0.171626 |
| 11734522_CHRDL2    | -0.09126 | 0.099007 | 0.171626 |
| 11722480_FGR       | -0.13945 | 0.099008 | 0.171626 |
| 11723822_ZNF862    | 0.125116 | 0.099009 | 0.171626 |
| 11727127_TYRP1     | 0.231519 | 0.09901  | 0.171626 |
| 11728015_TRIM66    | -0.14119 | 0.099012 | 0.171626 |
| 11743999_SSBP4     | -0.0752  | 0.099031 | 0.171653 |
| 11763900_SNORA80A  | -0.0997  | 0.099045 | 0.171672 |
| 11722779_SLC6A19   | -0.10835 | 0.099068 | 0.171705 |
| 11760005_DNAJA1    | 0.097404 | 0.099086 | 0.17173  |
| 11729117_PRKCG     | 0.107106 | 0.099103 | 0.171753 |
| 11751029_VIPR1     | -0.06639 | 0.099146 | 0.171821 |
| 11720911_CAPN6     | -0.15177 | 0.099149 | 0.171821 |

|                    |          |          |          |
|--------------------|----------|----------|----------|
| 11727601_WFDC1     | -0.15697 | 0.09917  | 0.171851 |
| 11760007_ROPN1 /// | -0.09631 | 0.099222 | 0.171935 |
| 11731163_VIPR2     | 0.075648 | 0.099252 | 0.171981 |
| 11756253_LGI4      | -0.09867 | 0.099263 | 0.171995 |
| 11761945_ALPK1     | -0.09071 | 0.099277 | 0.172012 |
| 11740414_TLE1      | -0.10892 | 0.099291 | 0.172031 |
| 11758755_MPC2      | -0.10689 | 0.099298 | 0.172037 |
| 11725612_ATP5J2    | -0.06629 | 0.099328 | 0.172083 |
| 11741842_CST11     | -0.10975 | 0.099334 | 0.172087 |
| 11739580_TCTN2     | 0.173429 | 0.099345 | 0.172099 |
| 11720887_PLXNA3    | 0.120127 | 0.099379 | 0.172153 |
| 11722055_PLSCR3 // | 0.065542 | 0.099391 | 0.172159 |
| 11762677_ZCCHC2    | -0.20721 | 0.099391 | 0.172159 |
| 11741689_SUMF2     | 0.075468 | 0.099393 | 0.172159 |
| 11721965_NOTCH4    | -0.19444 | 0.0994   | 0.172165 |
| 11735160_KCNAB3    | -0.12076 | 0.09945  | 0.172245 |
| 11726909_ZBED2     | -0.14548 | 0.099475 | 0.172282 |
| 11737034_RBBP6     | -0.07426 | 0.099487 | 0.172297 |
| 11725404_RPL13     | 0.06611  | 0.099509 | 0.17232  |
| 11753526_MED25     | -0.08944 | 0.09951  | 0.17232  |
| 11742150_OR2B3     | -0.09872 | 0.099516 | 0.17232  |
| 11741212_GPN1      | 0.067353 | 0.099517 | 0.17232  |
| 11750560_FAM168B   | 0.071696 | 0.099518 | 0.17232  |
| 11737018_AGAP2     | -0.10063 | 0.099549 | 0.172368 |
| 11749040_PGM2      | 0.070165 | 0.099554 | 0.17237  |
| 11741834_KIR2DS4   | -0.10365 | 0.0996   | 0.172444 |
| 11715372_MDH1      | -0.07885 | 0.099616 | 0.172466 |
| 11733657_HMX1      | -0.10485 | 0.099621 | 0.172469 |
| 11762421_FBXO11    | 0.090461 | 0.099626 | 0.172471 |
| 11761852_NVL       | -0.12648 | 0.099633 | 0.172476 |
| 11757288_CST3      | 0.08557  | 0.099654 | 0.172506 |
| 11756851_SUN1      | 0.13124  | 0.099686 | 0.172556 |
| 11717772_OTUB1     | -0.09322 | 0.099693 | 0.172562 |
| 11754262_CHD9      | -0.0974  | 0.099696 | 0.172562 |
| 11758987_PF4       | -0.11011 | 0.099703 | 0.172567 |
| 11760302_HEXAM     | -0.07891 | 0.099728 | 0.172604 |
| 11719931_ARGLU1    | 0.081066 | 0.099743 | 0.172624 |
| 11737679_KREMEN1   | -0.16809 | 0.099754 | 0.172638 |
| 11755530_ZNF34     | 0.163265 | 0.099781 | 0.172677 |
| 11730384_GREM2     | 0.093892 | 0.099848 | 0.172787 |
| 11762304_CCND3     | 0.213131 | 0.099868 | 0.172816 |
| 11715525_ATP6V1G2- | -0.09701 | 0.099892 | 0.172851 |
| 11736411_NUP62     | -0.08759 | 0.099955 | 0.172954 |
| 11748283_MAVS      | -0.08018 | 0.099969 | 0.172972 |
| 11735984_OR2B6     | -0.11796 | 0.099988 | 0.172998 |
| 11762253_LMO3      | -0.18368 | 0.099991 | 0.172998 |
| 11730372_FYB       | 0.121153 | 0.100004 | 0.173015 |
| 11739207_TCAF1     | -0.12067 | 0.100023 | 0.173042 |
| 11746993_PRSS8     | -0.08347 | 0.100035 | 0.173057 |
| 11735645_MASP2     | -0.15998 | 0.100063 | 0.173099 |
| 11741067_SUMF2     | 0.083343 | 0.100076 | 0.173114 |

|                    |          |          |          |
|--------------------|----------|----------|----------|
| 11715542_THY1      | 0.073607 | 0.100089 | 0.173131 |
| 11735783_CLVS2     | -0.09865 | 0.100116 | 0.173164 |
| 11746750_MAPKBP1   | -0.14768 | 0.100119 | 0.173164 |
| 11718582_PSM1      | -0.06444 | 0.100119 | 0.173164 |
| 11752564_ADIPOQ    | -0.12993 | 0.100143 | 0.173201 |
| 11739515_CA8       | 0.098465 | 0.100156 | 0.173215 |
| 11723729_KREMEN1   | -0.26316 | 0.100159 | 0.173215 |
| 11758823_PINX1     | -0.06562 | 0.100162 | 0.173215 |
| 11729518_C1QL2     | 0.171151 | 0.100179 | 0.173238 |
| 11747776_TOP3A     | 0.108306 | 0.100192 | 0.173254 |
| 11753121_CYP4Z1 // | -0.08532 | 0.100206 | 0.173273 |
| 11757731_RAB31     | 0.085906 | 0.100237 | 0.17332  |
| 11761919_PABPN1L   | -0.1242  | 0.100252 | 0.17334  |
| 11717766_MGLL      | -0.07841 | 0.100257 | 0.173342 |
| 11734832_GPR22     | -0.13137 | 0.100262 | 0.173344 |
| 11738613_OR2J3     | -0.12519 | 0.100267 | 0.173347 |
| 11741630_C3orf58   | -0.10112 | 0.100276 | 0.173356 |
| 11725600_SOWAHA    | -0.09091 | 0.100313 | 0.173415 |
| 11752857_GPT       | -0.0929  | 0.10032  | 0.17342  |
| 11738858_CSF2RA    | -0.10419 | 0.100341 | 0.173446 |
| 11720362_PHIP      | -0.09208 | 0.100345 | 0.173446 |
| 11761408_RBM42     | -0.29981 | 0.100345 | 0.173446 |
| 11741668_NONO      | 0.06166  | 0.100351 | 0.17345  |
| 11718983_CCL4 ///  | 0.076442 | 0.100356 | 0.173452 |
| 11746508_ZFYVE27   | -0.127   | 0.100434 | 0.173581 |
| 11749149_ODF2      | -0.09854 | 0.100441 | 0.173587 |
| 11737288_TIRAP     | 0.084943 | 0.100448 | 0.173592 |
| 11744553_ZFYVE28   | 0.130293 | 0.10047  | 0.173624 |
| 11719151_FAM83H    | -0.23304 | 0.100479 | 0.173633 |
| 11720988_SEC22A    | 0.185511 | 0.100482 | 0.173633 |
| 11763709_ARL6IP4   | -0.09049 | 0.100491 | 0.173641 |
| 11718499_MRPL54    | -0.0763  | 0.100494 | 0.173642 |
| 11735275_IL18R1    | 0.247793 | 0.100499 | 0.173644 |
| 11753025_TNFRSF1B  | -0.1449  | 0.100506 | 0.17365  |
| 11754380_SOSTDC1   | 0.086287 | 0.10051  | 0.173651 |
| 11720831_C1orf21   | -0.12425 | 0.100518 | 0.173659 |
| 11740755_LYNX1     | -0.16043 | 0.10053  | 0.173673 |
| 11726144_NUDT18    | -0.0809  | 0.100536 | 0.173677 |
| 11745807_AMMECR1L  | 0.080925 | 0.100542 | 0.173682 |
| 11734429_DACT2     | -0.14733 | 0.100552 | 0.173692 |
| 11731577_SLC22A1   | 0.099939 | 0.100574 | 0.173725 |
| 11753217_KCNJ3     | -0.08808 | 0.100608 | 0.173777 |
| 11751462_SYT4      | -0.12677 | 0.100625 | 0.173794 |
| 11719221_CD79B     | 0.094579 | 0.100625 | 0.173794 |
| 11762144_EPHA6     | 0.126828 | 0.100647 | 0.173826 |
| 11752440_IL12RB1   | -0.08387 | 0.100662 | 0.173844 |
| 11735114_CN0T4     | -0.13094 | 0.100665 | 0.173844 |
| 11752906_TEL02     | -0.1169  | 0.100673 | 0.173853 |
| 11762884_HSP90AB6P | -0.14193 | 0.100684 | 0.173858 |
| 11757418_PMEL      | -0.12211 | 0.100684 | 0.173858 |
| 11736895_SOCS4     | 0.072409 | 0.100773 | 0.174007 |

|                    |          |          |          |
|--------------------|----------|----------|----------|
| 11739496_SLC29A4   | -0.10194 | 0.1008   | 0.174047 |
| 11724233_HGSNAT    | -0.13153 | 0.100806 | 0.174051 |
| 11763242_GOS2      | 0.168892 | 0.100836 | 0.174097 |
| 11748494_FAM230A / | -0.14684 | 0.100842 | 0.174101 |
| 11724825_DOLK      | 0.0935   | 0.100887 | 0.174172 |
| 11746941_FAM138A / | -0.11729 | 0.100894 | 0.174178 |
| 11735183_FFAR2     | -0.17305 | 0.100906 | 0.174192 |
| 11727162_NFIX      | -0.06806 | 0.10095  | 0.174263 |
| 11732244_APOL6     | -0.09747 | 0.10096  | 0.174273 |
| 11756284_RNF43     | 0.076237 | 0.10099  | 0.174319 |
| 11731668_SGCA      | -0.13433 | 0.101007 | 0.174344 |
| 11722058_ATL2      | -0.06918 | 0.101014 | 0.174349 |
| 11748510_KIF13B    | -0.09556 | 0.101055 | 0.174413 |
| 11752218_NPC1L1    | -0.09066 | 0.101076 | 0.174443 |
| 11728737_PPP1R17   | -0.10362 | 0.101095 | 0.174469 |
| 11741282_AKAP7     | -0.13332 | 0.101106 | 0.174482 |
| 11747971_RBSN      | 0.080526 | 0.101112 | 0.174486 |
| 11753521_RAB5C     | -0.10015 | 0.101138 | 0.174526 |
| 11740616_PARK2     | -0.15289 | 0.101153 | 0.174545 |
| 11746907_PDE4D     | 0.170415 | 0.101186 | 0.174597 |
| 11743261_ANXA11    | 0.067253 | 0.101228 | 0.174663 |
| 11750274_TTC6      | -0.07437 | 0.101232 | 0.174663 |
| 11730034_CDHR2     | -0.15363 | 0.101235 | 0.174663 |
| 11740226_PRR18     | -0.08792 | 0.101247 | 0.174674 |
| 11724624_CLEC1A    | -0.15445 | 0.101249 | 0.174674 |
| 11720577_ARFGEF1   | 0.070839 | 0.101255 | 0.174677 |
| 11745881_GUCA1A    | -0.10062 | 0.101271 | 0.1747   |
| 11723499_PCSK9     | -0.14752 | 0.101285 | 0.174718 |
| 11738394_RAD54L2   | -0.07796 | 0.101324 | 0.174778 |
| 11754805_SPIDR     | -0.10504 | 0.101331 | 0.174784 |
| 11740357_MLPH      | -0.1176  | 0.101334 | 0.174784 |
| 11753250_BMP1      | 0.233012 | 0.101345 | 0.174797 |
| 11755507_PICALM    | 0.071239 | 0.101349 | 0.174797 |
| 11757505_HDLBP     | -0.0696  | 0.101353 | 0.174797 |
| 11716349_TMEM214   | 0.067963 | 0.101393 | 0.17486  |
| 11756681_CCDC86    | 0.078924 | 0.101408 | 0.17488  |
| 11736717_RAPGEF4   | 0.070172 | 0.101468 | 0.174975 |
| 11727095_TMEM19    | -0.10912 | 0.10147  | 0.174975 |
| 11745448_SLC22A10  | -0.12131 | 0.10148  | 0.174986 |
| 11734021_SHANK2    | -0.08845 | 0.101507 | 0.175026 |
| 11742721_LRRC58    | 0.096262 | 0.101533 | 0.175065 |
| 11749596_LOC100287 | -0.18933 | 0.101551 | 0.175089 |
| 11760542_GAS8      | -0.10835 | 0.101568 | 0.175107 |
| 11740830_EPHA6     | 0.141957 | 0.101568 | 0.175107 |
| 11720692_DIRAS1    | 0.093909 | 0.101633 | 0.175213 |
| 11745948_CHEK1     | -0.0975  | 0.101665 | 0.175262 |
| 11751290_BCL2L2    | -0.12826 | 0.101681 | 0.175283 |
| 11721008_MED1      | -0.08095 | 0.101687 | 0.175288 |
| 11763578_GLI2      | 0.131476 | 0.101698 | 0.1753   |
| 11724743_ZBTB17    | 0.118088 | 0.101723 | 0.175337 |
| 11723836_SPNS2     | -0.09151 | 0.10173  | 0.175343 |

|                    |          |          |          |
|--------------------|----------|----------|----------|
| 11755597_SLC25A47  | -0.12723 | 0.101746 | 0.175364 |
| 11754641_SFTPC     | -0.09636 | 0.101751 | 0.175366 |
| 11744042_MGAT4B    | -0.06278 | 0.101755 | 0.175367 |
| 11763858_UTY       | 0.130677 | 0.10182  | 0.175473 |
| 11725777_PRDM2     | -0.08593 | 0.101839 | 0.175496 |
| 11749945_CCDC162P  | 0.172294 | 0.10184  | 0.175496 |
| 11718021_SSFA2     | 0.075567 | 0.101845 | 0.175498 |
| 11728324_PPP3R2    | 0.068524 | 0.101875 | 0.175543 |
| 11717710_MTFP1     | -0.0941  | 0.101904 | 0.175588 |
| 11749650_A2ML1     | 0.160967 | 0.101963 | 0.175683 |
| 11719228_CAMK1     | -0.1256  | 0.102005 | 0.175749 |
| 11715272_UGT2B11   | 0.079157 | 0.102033 | 0.175792 |
| 11730761_CRIPT     | 0.071963 | 0.102127 | 0.175946 |
| 11729941_TMEM56    | -0.16165 | 0.102157 | 0.175991 |
| 11745376_APOL6     | 0.087883 | 0.102165 | 0.175999 |
| 11731868_BICD2     | 0.080203 | 0.102173 | 0.176007 |
| 11733476_KCNJ6     | -0.07826 | 0.102182 | 0.176011 |
| 11721954_RNF41     | 0.091519 | 0.102183 | 0.176011 |
| 11718766_PRSS23    | -0.07305 | 0.102192 | 0.176021 |
| 11739575_CABLES1   | 0.136176 | 0.102201 | 0.17603  |
| 11743850_PDGFR     | 0.120201 | 0.102215 | 0.176048 |
| 11719893_VASH1     | -0.08829 | 0.102244 | 0.176092 |
| 11752787_TP73      | -0.17502 | 0.102258 | 0.176106 |
| 11733286_CYP20A1   | -0.10191 | 0.102259 | 0.176106 |
| 11717614_KIF13B    | 0.071077 | 0.102263 | 0.176107 |
| 11724518_GUF1      | 0.083029 | 0.102305 | 0.176171 |
| 11749272_PALM      | -0.07549 | 0.102308 | 0.176171 |
| 11733124_PEX19     | -0.07398 | 0.102356 | 0.176246 |
| 11725209_LETM1     | -0.0814  | 0.102358 | 0.176246 |
| 11746308_LINC00494 | -0.12701 | 0.102383 | 0.176279 |
| 11725230_CEP290    | -0.06951 | 0.102385 | 0.176279 |
| 11730253_AHCTF1    | -0.08436 | 0.102389 | 0.17628  |
| 11729142_KDM5C     | 0.065178 | 0.102401 | 0.176294 |
| 11722316_SNX13     | -0.07593 | 0.102411 | 0.176306 |
| 11737691_ESRRG     | 0.168898 | 0.102424 | 0.176321 |
| 11749816_ULK3      | 0.079225 | 0.102428 | 0.176322 |
| 11731293_SLITRK1   | 0.104964 | 0.102435 | 0.176326 |
| 11741404_MAS1L     | -0.09097 | 0.102442 | 0.176326 |
| 11754993_PXDN      | -0.07687 | 0.102443 | 0.176326 |
| 11747118_BRINP1    | -0.18087 | 0.102445 | 0.176326 |
| 11729459_BNIPL     | -0.11217 | 0.102469 | 0.176362 |
| 11746011_METTL15   | 0.108086 | 0.102502 | 0.176412 |
| 11740739_ZC3H12D   | -0.12198 | 0.10251  | 0.176419 |
| 11723779_CYP2U1    | 0.195361 | 0.102513 | 0.176419 |
| 11741987_TSGA13    | -0.09858 | 0.102523 | 0.17643  |
| 11745089_NR2C2     | 0.124639 | 0.102534 | 0.176443 |
| 11737712_ABCC12    | -0.09538 | 0.10254  | 0.176447 |
| 11744912_NFATC4    | 0.129251 | 0.102556 | 0.176468 |
| 11717576_SFN       | -0.11033 | 0.10261  | 0.176555 |
| 11741837_KRTAP9-2  | -0.13212 | 0.102617 | 0.17656  |
| 11735554_PPP1R42   | 0.157568 | 0.102652 | 0.176614 |

|                    |          |          |          |
|--------------------|----------|----------|----------|
| 11747678_BZW2      | 0.063255 | 0.102658 | 0.176619 |
| 11759485_GBPB1     | -0.13284 | 0.102664 | 0.176623 |
| 11745060_RIN1      | -0.0784  | 0.102668 | 0.176623 |
| 11763892_SNORD17   | 0.115099 | 0.102717 | 0.176702 |
| 11755751_DEFEB108B | -0.07389 | 0.102734 | 0.176719 |
| 11745269_CHD9      | 0.092203 | 0.102735 | 0.176719 |
| 11762572_MTHFD2L   | -0.07253 | 0.102741 | 0.176725 |
| 11757848_CTSD      | -0.06223 | 0.102755 | 0.176741 |
| 11727323_NAGS      | -0.09671 | 0.102759 | 0.176743 |
| 11738599_KRTAP15-1 | -0.12001 | 0.102768 | 0.176746 |
| 11745316_FAM25A    | 0.08919  | 0.102768 | 0.176746 |
| 11730900_MBOAT2    | -0.06949 | 0.102776 | 0.176753 |
| 11751873_DEFEB133  | -0.10837 | 0.102786 | 0.176764 |
| 11757617_ZNF672    | -0.12654 | 0.10279  | 0.176765 |
| 11755041_ARHGAP33  | -0.12712 | 0.102804 | 0.176783 |
| 11762689_TRIM72    | -0.09903 | 0.10282  | 0.176804 |
| 11753540_CHN2 ///  | -0.09226 | 0.102872 | 0.176887 |
| 11744218_SNAI2     | -0.12947 | 0.102877 | 0.17689  |
| 11719144_C2CD2     | -0.17953 | 0.102931 | 0.176977 |
| 11751893_COL4A6    | 0.219616 | 0.102936 | 0.176979 |
| 11734623_CRYGN     | 0.131511 | 0.102952 | 0.176993 |
| 11740331_RTP3      | -0.07642 | 0.102954 | 0.176993 |
| 11730459_C1orf74   | -0.13243 | 0.102955 | 0.176993 |
| 11755320_ANKRD13D  | 0.101855 | 0.102967 | 0.177007 |
| 11715475_DDX17     | -0.08728 | 0.102973 | 0.177011 |
| 11717831	EIF4E2    | 0.070801 | 0.102982 | 0.17702  |
| 11741093_GPD2      | -0.08175 | 0.102989 | 0.177026 |
| 11750893_LMOD1     | -0.0719  | 0.102995 | 0.17703  |
| 11737031_KLK13     | 0.107815 | 0.103021 | 0.177069 |
| 11748447_IL17RC    | -0.10641 | 0.103042 | 0.177099 |
| 11760157_GUCA1A    | -0.1446  | 0.103057 | 0.177118 |
| 11763114_IGHG1     | 0.113359 | 0.103075 | 0.177143 |
| 11751941_CNGB1     | -0.09502 | 0.103112 | 0.177201 |
| 11719176_GPRC5B    | -0.07707 | 0.103126 | 0.177215 |
| 11739358_ERG       | -0.07872 | 0.103128 | 0.177215 |
| 11721679_RBM17     | -0.08358 | 0.103152 | 0.17725  |
| 11731985_HGFAC     | -0.08367 | 0.103158 | 0.177254 |
| 11744164_VRK3      | 0.086213 | 0.103225 | 0.177363 |
| 11725076_FAM126A   | 0.21615  | 0.103238 | 0.177375 |
| 11757974_POLK      | 0.12725  | 0.103239 | 0.177375 |
| 11748364_ANK2      | -0.17199 | 0.103255 | 0.177396 |
| 11737026_IRX4      | -0.1227  | 0.103305 | 0.177476 |
| 11716398_MRPL1     | 0.067117 | 0.103324 | 0.177502 |
| 11752998_NXF5      | -0.14094 | 0.103354 | 0.177547 |
| 11762241_PTK6      | 0.074458 | 0.103358 | 0.177547 |
| 11723965_AGA       | -0.12131 | 0.103369 | 0.17756  |
| 11746968_CCDC178   | -0.14257 | 0.103383 | 0.177578 |
| 11749160_SPHK2     | -0.10921 | 0.103484 | 0.177746 |
| 11761567_FXYD5     | -0.09419 | 0.103503 | 0.177771 |
| 11733740_HIST1H2BM | -0.18722 | 0.10352  | 0.177795 |
| 11738694_OR51G1    | -0.13436 | 0.103535 | 0.177814 |

|                    |          |          |          |
|--------------------|----------|----------|----------|
| 11716741_SLC6A8    | 0.07262  | 0.103549 | 0.177822 |
| 11743438_AP1AR     | -0.11205 | 0.103549 | 0.177822 |
| 11752007_RECQL5    | -0.0941  | 0.10355  | 0.177822 |
| 11718837_NDUFS2    | -0.06601 | 0.103554 | 0.177822 |
| 11720869_SMG6      | -0.09476 | 0.103564 | 0.177833 |
| 11763104_SKAP2     | -0.17276 | 0.103573 | 0.177843 |
| 11716318_MAP2K2    | -0.09174 | 0.103601 | 0.177885 |
| 11753552_KDM8      | -0.11797 | 0.103607 | 0.177888 |
| 11738126_SARDH     | -0.12158 | 0.103621 | 0.177907 |
| 11755954_ZBTB49    | 0.084041 | 0.103658 | 0.177963 |
| 11733493_IL17RE    | -0.07385 | 0.103691 | 0.178013 |
| 11758824_NOL6      | 0.149279 | 0.103708 | 0.178037 |
| 11742236_SUPT20HL1 | -0.10917 | 0.103723 | 0.178052 |
| 11761329_NME9      | -0.13594 | 0.10373  | 0.178052 |
| 11753972_COL6A3    | -0.10279 | 0.103731 | 0.178052 |
| 11735841_KRTAP3-2  | -0.15539 | 0.103735 | 0.178052 |
| 11760792_ENPP3     | -0.20913 | 0.103735 | 0.178052 |
| 11731584_FCRLA     | 0.066767 | 0.103745 | 0.178058 |
| 11732264_OLFM2     | -0.08619 | 0.103746 | 0.178058 |
| 11719869_MYCN      | -0.12087 | 0.103778 | 0.178106 |
| 11730996_AMICA1    | -0.14577 | 0.103791 | 0.178123 |
| 11755692_MTMR8     | 0.104259 | 0.103812 | 0.178152 |
| 11749824_RUFY2     | 0.123347 | 0.10384  | 0.178195 |
| 11746566_RBM39     | 0.068204 | 0.10387  | 0.17824  |
| 11754872_E4F1      | 0.064507 | 0.10388  | 0.178245 |
| 11726194_RTN2      | -0.06535 | 0.103883 | 0.178245 |
| 11750118_ADRBK2    | -0.22772 | 0.103884 | 0.178245 |
| 11740149_CTXN3     | -0.09456 | 0.103909 | 0.178281 |
| 11738290_KRTAP10-1 | -0.08702 | 0.103921 | 0.178296 |
| 11761002_RHD       | -0.08556 | 0.103962 | 0.178361 |
| 11763845_SPATA20   | 0.166975 | 0.104005 | 0.178428 |
| 11733793_STX7      | -0.08664 | 0.104011 | 0.178431 |
| 11758711_YWHAZ     | -0.06472 | 0.104143 | 0.178652 |
| 11759661_MYO10     | 0.11395  | 0.104154 | 0.178664 |
| 11725438_HBD /// H | -0.1398  | 0.104213 | 0.178757 |
| 11737254_ZCWPW2    | 0.143725 | 0.104219 | 0.178757 |
| 11745606_LRRC18    | -0.11629 | 0.10422  | 0.178757 |
| 11763549_JRKL      | -0.09291 | 0.104223 | 0.178757 |
| 11729695_MVD       | -0.09553 | 0.104287 | 0.17886  |
| 11763651_GET4 ///  | -0.16052 | 0.104293 | 0.178862 |
| 11736296_SLC5A1    | 0.127762 | 0.104297 | 0.178862 |
| 11754102_TMED3     | -0.07266 | 0.104299 | 0.178862 |
| 11749104_HMHA1     | -0.10548 | 0.104334 | 0.178917 |
| 11737870_FAM78A    | -0.11203 | 0.104348 | 0.178931 |
| 11736991_ZNF846    | 0.108082 | 0.10435  | 0.178931 |
| 11716907_PITHD1    | -0.07758 | 0.104363 | 0.178948 |
| 11730596_NR1I3     | 0.066234 | 0.104376 | 0.178962 |
| 11747066_EIF4B     | 0.068164 | 0.104385 | 0.178962 |
| 11716618_SS18L2    | 0.063109 | 0.104386 | 0.178962 |
| 11748031_ALPL      | 0.10229  | 0.104386 | 0.178962 |
| 11717024_LOC102724 | 0.0665   | 0.10446  | 0.179076 |

|                    |          |          |          |
|--------------------|----------|----------|----------|
| 11735549_ASBI5     | -0.12868 | 0.10446  | 0.179076 |
| 11749491_PLOD1     | -0.07095 | 0.104474 | 0.179093 |
| 11756115_SRP19     | -0.06487 | 0.104492 | 0.179118 |
| 11736105_ZNF750    | 0.143421 | 0.104496 | 0.179118 |
| 11733301_GNGT1     | 0.11079  | 0.104503 | 0.179118 |
| 11751045_ADGRG5    | -0.08686 | 0.104504 | 0.179118 |
| 11763470_ARHGAP8   | -0.16181 | 0.104507 | 0.179118 |
| 11763621_OPRK1     | -0.13592 | 0.10451  | 0.179118 |
| 11734208_CNTF ///  | 0.09615  | 0.104515 | 0.179119 |
| 11718369_GALNT14   | 0.064987 | 0.10455  | 0.179174 |
| 11757216_LOC100268 | -0.17137 | 0.104565 | 0.179194 |
| 11734118_BTN3A3    | -0.10788 | 0.104576 | 0.179205 |
| 11751664_KCNIP2    | -0.10951 | 0.104625 | 0.179284 |
| 11735585_ZNF208    | 0.100764 | 0.104637 | 0.179298 |
| 11731794_CDAN1     | -0.08672 | 0.104675 | 0.179357 |
| 11751961_MTR       | 0.086239 | 0.104697 | 0.179388 |
| 11745932_TMSB10    | -0.06538 | 0.104729 | 0.179437 |
| 11738099_GPR25     | -0.1227  | 0.104746 | 0.179458 |
| 11731590_ZNF576    | -0.10907 | 0.104773 | 0.179499 |
| 11742768_FLRT3     | 0.092115 | 0.104808 | 0.179553 |
| 11737222_MAGIX     | -0.11135 | 0.104822 | 0.17957  |
| 11732038_RDH16     | -0.19674 | 0.104826 | 0.17957  |
| 11741444_RBM1A1 /  | -0.10682 | 0.104839 | 0.179585 |
| 11729198_MAP4      | 0.150371 | 0.104842 | 0.179585 |
| 11753844_NDUFA3    | 0.0645   | 0.104882 | 0.179648 |
| 11752383_COL6A1    | 0.083254 | 0.104891 | 0.179657 |
| 11749738_PIGS      | -0.06096 | 0.104909 | 0.179681 |
| 11750469_FAM109A   | -0.151   | 0.104944 | 0.179735 |
| 11734262_AK8       | 0.086447 | 0.105003 | 0.17983  |
| 11738362_ANKUB1    | -0.10947 | 0.105018 | 0.179846 |
| 11731815_ISL2      | 0.139509 | 0.10502  | 0.179846 |
| 11734319_SLC17A4   | -0.11429 | 0.105025 | 0.179848 |
| 200024_PMRPS5      | 0.061295 | 0.10505  | 0.179886 |
| 11741333_KIF18B    | -0.08522 | 0.105072 | 0.179917 |
| 11749359_BBS1      | 0.077354 | 0.105082 | 0.179927 |
| 11745732_SLC20A2   | 0.084147 | 0.105104 | 0.179959 |
| 11718585_SAP30BP   | 0.074681 | 0.10512  | 0.17998  |
| 11746301_LTB4R2    | 0.088481 | 0.105129 | 0.179989 |
| 11740819_TCP10     | -0.23891 | 0.105154 | 0.180019 |
| 11718462_ELMOD3    | 0.109355 | 0.105154 | 0.180019 |
| 11737858_ELMOD3    | 0.108848 | 0.105199 | 0.18009  |
| 11742381_OR5H1     | -0.1387  | 0.105212 | 0.180106 |
| 11733449_UNC45B    | -0.1084  | 0.105224 | 0.18012  |
| 11739881_GLIS3     | 0.075523 | 0.105248 | 0.180155 |
| 11760931_AQP3      | -0.09341 | 0.105256 | 0.180163 |
| 11743049_DNAJC15   | -0.11707 | 0.105284 | 0.180204 |
| 11722834_CCNY      | -0.06654 | 0.105307 | 0.180237 |
| 11755991_CELF3     | 0.071204 | 0.105328 | 0.180267 |
| 11740557_TLX1      | -0.11878 | 0.105373 | 0.180337 |
| 11721707_GPAM      | -0.18521 | 0.105412 | 0.180397 |
| 11749256_RRP1      | 0.100433 | 0.105447 | 0.180451 |



|                    |          |          |          |
|--------------------|----------|----------|----------|
| 11762172_ETV7      | 0.114184 | 0.105452 | 0.180453 |
| 11731791_SLC27A6   | 0.158213 | 0.105457 | 0.180454 |
| 11742439_ADAL      | -0.20855 | 0.10546  | 0.180454 |
| 11729255_GIPC1     | 0.064339 | 0.105463 | 0.180454 |
| 11761305_FAXDC2    | -0.17292 | 0.105467 | 0.180455 |
| 11742842_FAM217B   | -0.07257 | 0.105481 | 0.180472 |
| 11761777_ITGAX     | -0.10536 | 0.105508 | 0.180512 |
| 11758399_LPAR4     | -0.11083 | 0.105527 | 0.180537 |
| 11727329_SOST      | -0.06896 | 0.105577 | 0.180616 |
| 11734702_DKK3      | -0.16901 | 0.105581 | 0.180617 |
| 11724398_RHCG      | -0.08597 | 0.105621 | 0.180679 |
| 11715374_CALR      | -0.06908 | 0.10563  | 0.180688 |
| 11733526_GABRR1    | 0.187822 | 0.105637 | 0.180694 |
| 11723249_EML2      | -0.10157 | 0.105648 | 0.180702 |
| 11716999_RASA1     | -0.07626 | 0.105649 | 0.180702 |
| 11752525_USP28     | -0.1237  | 0.105656 | 0.180708 |
| 11751936_CDK12     | 0.063124 | 0.105692 | 0.180763 |
| 11722133_MGAT3     | -0.10192 | 0.105729 | 0.180815 |
| 11728027_CCDC58    | -0.079   | 0.10573  | 0.180815 |
| 11731912_GPR12     | -0.09681 | 0.10574  | 0.180826 |
| 11749555_MAP2K1    | -0.06485 | 0.105749 | 0.180835 |
| 11755470_G2E3      | -0.06304 | 0.105775 | 0.180867 |
| 11753078_GLS2      | -0.11517 | 0.105782 | 0.180867 |
| 11720371_RTCA      | 0.070146 | 0.105782 | 0.180867 |
| 11751405_MCHR2     | -0.15408 | 0.105782 | 0.180867 |
| 11730939_ZBTB8A    | -0.08708 | 0.105798 | 0.180888 |
| 11723877_KCNK5     | -0.1771  | 0.105842 | 0.180957 |
| 11733548_TEC /// T | 0.099141 | 0.105956 | 0.181145 |
| 11736499_TMEM38A   | -0.10682 | 0.105992 | 0.181201 |
| 11716919_PDIA5     | 0.078825 | 0.105997 | 0.181202 |
| 11761995_IL1RAP    | -0.10473 | 0.106003 | 0.181205 |
| 11719946_PKNOX1    | -0.11428 | 0.106006 | 0.181205 |
| 11738411_C1QTNF7   | -0.1239  | 0.106027 | 0.181234 |
| 11747621_LIMK1     | -0.07289 | 0.10607  | 0.181302 |
| 11742088_ANKK1     | 0.127473 | 0.10608  | 0.181312 |
| 11738293_KCNK10    | -0.13325 | 0.106086 | 0.181316 |
| 11755697_LGR6      | 0.131215 | 0.106095 | 0.181325 |
| 11720506_RAB6B     | 0.072715 | 0.106127 | 0.181373 |
| 11749547_TMEM129   | -0.06626 | 0.106156 | 0.181417 |
| 11731370_NODAL     | -0.10427 | 0.106169 | 0.181432 |
| 11720270_IBTK      | 0.068911 | 0.106175 | 0.181436 |
| 11748019_ZNF346    | 0.145012 | 0.106206 | 0.181484 |
| 11760373_RBBP5     | 0.07753  | 0.106225 | 0.181509 |
| 11755672_GRIK5     | -0.07743 | 0.106244 | 0.181536 |
| 11755327_LOC154761 | -0.11367 | 0.10627  | 0.181574 |
| 11760862_OLA1      | -0.22137 | 0.106324 | 0.181659 |
| 11738332_B3GALT5   | 0.128076 | 0.106352 | 0.181701 |
| 11747169_MOG       | 0.065301 | 0.106367 | 0.18172  |
| 11735188_TMEM74    | -0.10612 | 0.106414 | 0.181795 |
| 11752547_IGF2-AS   | -0.10485 | 0.106433 | 0.181814 |
| 11720851_NFIA      | -0.12016 | 0.106433 | 0.181814 |

|                    |          |          |          |
|--------------------|----------|----------|----------|
| 11740466_TCP11L1   | 0.072472 | 0.10646  | 0.181854 |
| 11762793_YWHAE     | -0.12069 | 0.106577 | 0.182041 |
| 11735736_CREB3L3   | -0.07855 | 0.106577 | 0.182041 |
| 11739480_NINL      | -0.12693 | 0.106593 | 0.182062 |
| 11750700_ACSL1     | 0.084091 | 0.106636 | 0.182128 |
| 11757324_LSM12     | 0.069665 | 0.106687 | 0.18221  |
| 11725421_ARHGAP35  | 0.067081 | 0.106745 | 0.182303 |
| 11739053_SLC02B1   | -0.13423 | 0.106754 | 0.182311 |
| 11732372_CLIC5     | -0.21732 | 0.106757 | 0.182311 |
| 11732929_KBTBD12   | 0.207288 | 0.106767 | 0.18232  |
| 11752893_SHISA9    | -0.08005 | 0.106784 | 0.182343 |
| 11755840_CLCN1     | -0.07642 | 0.106793 | 0.182352 |
| 11750365_AGER      | -0.1532  | 0.106854 | 0.18245  |
| 11734147_SLC6A4    | -0.11725 | 0.1069   | 0.182523 |
| 11729810_WFIKKN2   | -0.11386 | 0.106912 | 0.182536 |
| 11738908_OR2F1     | -0.1069  | 0.106922 | 0.182547 |
| 11757363_RPS15A    | 0.061028 | 0.106936 | 0.182563 |
| 11715583_HLA-DPA1  | -0.07343 | 0.106939 | 0.182563 |
| 11718937_WDYHV1    | 0.068989 | 0.106968 | 0.182607 |
| 11735934_WNT9A     | -0.12606 | 0.107082 | 0.182796 |
| 11745698_HAND2     | -0.14853 | 0.107089 | 0.182801 |
| 11762734_GCKR      | -0.1552  | 0.107094 | 0.182803 |
| 11731796_FAM47B    | 0.114869 | 0.107104 | 0.182813 |
| 11757961_MAGI2     | 0.122364 | 0.107116 | 0.182828 |
| 11725522_MESP1     | -0.08305 | 0.107125 | 0.182837 |
| 11747360_TSSK1B    | -0.07643 | 0.107137 | 0.182851 |
| 11752706_SEC14L4   | -0.08101 | 0.107151 | 0.182868 |
| 11740212_PIK3CG    | 0.102837 | 0.107159 | 0.182875 |
| 11753347_NMUR1     | -0.1269  | 0.107181 | 0.182907 |
| 11733171_FBXO45    | 0.110731 | 0.107196 | 0.182924 |
| 11738615_KRTAP10-2 | -0.10044 | 0.107199 | 0.182924 |
| 11746335_RAB11FIP3 | -0.07463 | 0.107211 | 0.182938 |
| 11758999_UBE2H     | -0.10161 | 0.107253 | 0.183004 |
| 11749795_NFIX      | -0.06675 | 0.107326 | 0.183121 |
| 11729411_AKR7A3    | -0.13831 | 0.107337 | 0.183134 |
| 11757979_DEGS1     | 0.09443  | 0.107347 | 0.183144 |
| 11738955_XAGE5     | -0.1237  | 0.107382 | 0.183197 |
| 11744971_PSORS1C3  | -0.17322 | 0.107386 | 0.183197 |
| 11719074_REEP1     | -0.10795 | 0.107389 | 0.183197 |
| 11734074_RBFOX1    | 0.128081 | 0.107433 | 0.183266 |
| 11741481_GDF2      | -0.09919 | 0.107444 | 0.183279 |
| 11754912_GAPDH     | -0.06215 | 0.107458 | 0.183297 |
| 11758270_DBNDD1    | 0.060535 | 0.107499 | 0.18336  |
| 11726051_FMO3      | 0.079514 | 0.107522 | 0.183393 |
| 11753200_SEC24C    | -0.07826 | 0.107537 | 0.183411 |
| 11742034_ERG       | -0.10892 | 0.107541 | 0.183411 |
| 11759795_SLC22A2   | -0.13693 | 0.107576 | 0.183465 |
| 11734791_SEPT6     | -0.11157 | 0.107628 | 0.183548 |
| 11738733_OR2T10    | -0.09638 | 0.107632 | 0.183549 |
| 11734088_CBFA2T3   | -0.07787 | 0.107674 | 0.183613 |
| 11733561_ARHGAP28  | 0.131833 | 0.10772  | 0.183684 |

|                    |          |          |          |
|--------------------|----------|----------|----------|
| 11731575_CTBS      | 0.225882 | 0.107726 | 0.183689 |
| 11763902_SNORA60   | 0.1323   | 0.107739 | 0.183705 |
| 11739835_GLTSCR1L  | -0.14888 | 0.107766 | 0.183745 |
| 11738178_IL1RL1    | 0.098857 | 0.107777 | 0.183757 |
| 11733589_RAX       | -0.09287 | 0.107813 | 0.183811 |
| 11715253_KRTAP10-1 | -0.108   | 0.107817 | 0.183812 |
| 11724312_SH3BP2    | -0.08624 | 0.107891 | 0.183932 |
| 11729921_KMT5C     | -0.14307 | 0.107905 | 0.183949 |
| 11756006_LCK       | -0.14694 | 0.107925 | 0.183971 |
| 11758479_ANGPTL1   | 0.118771 | 0.107925 | 0.183971 |
| 11730125_ADAMTSL2  | -0.10477 | 0.107931 | 0.183974 |
| 11724827_BORCS6    | 0.080479 | 0.107938 | 0.18398  |
| 11744127_CXCL2     | 0.106915 | 0.107972 | 0.184031 |
| 11749377_CECR1     | 0.105047 | 0.107978 | 0.184036 |
| 11751888_COL4A6    | 0.207205 | 0.108004 | 0.184066 |
| 11717157_ACP1      | -0.05952 | 0.108004 | 0.184066 |
| 11752511_HTR1E     | -0.14247 | 0.108048 | 0.184135 |
| 11728976_ZNF792    | 0.20398  | 0.10806  | 0.184141 |
| 11741001_FAM13A    | -0.09892 | 0.108061 | 0.184141 |
| 11740810_OR7E24    | -0.07333 | 0.108063 | 0.184141 |
| 11744958_CPSF6     | -0.09496 | 0.108067 | 0.184142 |
| 11727390_STEAP2    | -0.21554 | 0.108084 | 0.184165 |
| 11754280_TSC22D4   | -0.09887 | 0.10809  | 0.184165 |
| 200084_PMC11orf58  | 0.064741 | 0.108092 | 0.184165 |
| 11762407_IL18BP    | -0.11279 | 0.108104 | 0.184173 |
| 11747020_HMHA1     | -0.11575 | 0.108104 | 0.184173 |
| 11760299_SPR       | -0.14092 | 0.108138 | 0.184224 |
| 11760748_PRDM1     | 0.125929 | 0.108148 | 0.184234 |
| 11738648_AIRE      | -0.09446 | 0.108155 | 0.184241 |
| 11732881_TBX1      | -0.20931 | 0.108205 | 0.184319 |
| 11740545_ADAM22    | 0.138482 | 0.108218 | 0.184335 |
| 11739048_ACPP      | 0.1842   | 0.108244 | 0.18436  |
| 11735072_PCDHB9    | -0.13776 | 0.108244 | 0.18436  |
| 11738734_OR51A7    | -0.11737 | 0.108244 | 0.18436  |
| 11747641_USB1      | -0.11279 | 0.108278 | 0.184411 |
| 11731539_SESTD1    | -0.07851 | 0.108305 | 0.184451 |
| 11746877_MXD3      | -0.072   | 0.10831  | 0.184452 |
| 11752078_AP2A1     | -0.0799  | 0.108358 | 0.184528 |
| 11715434_PDIA6     | -0.06463 | 0.108369 | 0.18454  |
| 11726177_LOC105369 | 0.088686 | 0.108381 | 0.184554 |
| 11748110_LGMN      | -0.06015 | 0.108428 | 0.184628 |
| 11738883_TNFSF14   | -0.09451 | 0.108445 | 0.18465  |
| 11731414_GALM      | -0.11529 | 0.108459 | 0.184668 |
| 11763158_MKNK2     | -0.09098 | 0.108472 | 0.184682 |
| 11741041_DPP7      | -0.1012  | 0.108474 | 0.184682 |
| 11744642_TRMU      | 0.107833 | 0.10852  | 0.184753 |
| 11739084_FKBP5     | -0.07968 | 0.108531 | 0.184764 |
| 11715417_SKP1 ///  | -0.07337 | 0.108536 | 0.184768 |
| 11734170_LINC00632 | 0.098426 | 0.108573 | 0.184824 |
| 11741768_VNN2      | -0.21114 | 0.108583 | 0.184835 |
| 11746781_SNCAIP    | -0.14931 | 0.108591 | 0.184841 |

|                    |          |          |          |
|--------------------|----------|----------|----------|
| 11719948_GCC1      | -0.07063 | 0.108603 | 0.184856 |
| 11755193_CP        | 0.102453 | 0.10861  | 0.184859 |
| 11759371_PCDHGA12  | 0.117616 | 0.108612 | 0.184859 |
| 11754981_TIGD6     | 0.111044 | 0.108634 | 0.18489  |
| 11748749_GTPBP4    | -0.07046 | 0.108642 | 0.184896 |
| 11740355_GPR137C   | -0.13188 | 0.108666 | 0.184931 |
| 11761747_ZNF527    | 0.20196  | 0.108673 | 0.184935 |
| 11744238_SERPINF2  | -0.0746  | 0.108718 | 0.185006 |
| 11719499_MAOB      | -0.11324 | 0.108751 | 0.185056 |
| 11743678_PCDH17    | 0.084745 | 0.108765 | 0.185073 |
| 11737903_AR        | -0.19149 | 0.108774 | 0.185082 |
| 11721122_SPNS1     | -0.08005 | 0.108799 | 0.185117 |
| 11729537_PEX11G    | -0.08821 | 0.108829 | 0.185163 |
| 11751169_PGAP3     | -0.09922 | 0.108839 | 0.185174 |
| 11757249_INGX      | -0.16045 | 0.108849 | 0.185184 |
| 11730671_OPHN1     | 0.07836  | 0.108856 | 0.185189 |
| 11717502_NUB1      | 0.102037 | 0.108866 | 0.185199 |
| 11742604_OR6C70    | -0.13625 | 0.108871 | 0.185202 |
| 11748342_TPP1      | 0.102483 | 0.108876 | 0.185204 |
| 11726197_SYN2      | -0.07839 | 0.108892 | 0.185224 |
| 11745568_NPAS3     | -0.09295 | 0.108904 | 0.185238 |
| 11722373_GGA2      | 0.07723  | 0.108927 | 0.185271 |
| 11752713_CEP128    | -0.30122 | 0.10897  | 0.185338 |
| 11756758_SPECC1    | 0.091137 | 0.108979 | 0.18534  |
| 11736851_TMEM107   | -0.17852 | 0.108981 | 0.18534  |
| 11738539_DISC1 /// | 0.16009  | 0.108983 | 0.18534  |
| 11741361_ZNF26     | 0.099148 | 0.109009 | 0.185379 |
| 11752761_EMSY      | -0.09969 | 0.10904  | 0.185425 |
| 11739294_SLC29A3   | 0.065725 | 0.109051 | 0.185438 |
| 11740555_POU5F2    | -0.09954 | 0.109067 | 0.185453 |
| 11730976_NSUN7     | 0.082807 | 0.109068 | 0.185453 |
| 11728596_FAM180A   | -0.09309 | 0.109086 | 0.185475 |
| 11730137_NXF2 ///  | -0.15387 | 0.109088 | 0.185475 |
| 11763936_KRT17P5   | -0.14641 | 0.109114 | 0.185512 |
| 11716663_GDF15     | -0.07243 | 0.109147 | 0.185561 |
| 11740590_RPS24     | 0.090222 | 0.10918  | 0.185612 |
| 11731512_DYRK4     | 0.094908 | 0.109225 | 0.185681 |
| 11728940_KCNIP1    | -0.14946 | 0.109244 | 0.185703 |
| 11725855_XAGE1B // | 0.061686 | 0.109245 | 0.185703 |
| 11730006_C19orf18  | -0.10631 | 0.109251 | 0.185706 |
| 11762628_CTCFL     | 0.079389 | 0.109277 | 0.185744 |
| 11751565_RASSF3    | -0.09121 | 0.109282 | 0.185746 |
| 11763815_ZNF551    | 0.156291 | 0.10931  | 0.185788 |
| 11725938_DIRAS2    | -0.10252 | 0.10934  | 0.185831 |
| 11722200_ADAM12    | -0.13586 | 0.109365 | 0.185868 |
| 11736855_ATP6V1C2  | -0.11402 | 0.109407 | 0.185932 |
| 11733341_CLEC4M    | -0.09058 | 0.109411 | 0.185933 |
| 11753883_IL2RG     | 0.074416 | 0.109419 | 0.185941 |
| 11745787_MUC12     | 0.115803 | 0.10945  | 0.185986 |
| 11719562_SOX4      | 0.09501  | 0.109478 | 0.186028 |
| 11752057_VPS35     | -0.1082  | 0.10949  | 0.186036 |

|                    |          |          |          |
|--------------------|----------|----------|----------|
| 11736500_TMEM38A   | -0.14655 | 0.109491 | 0.186036 |
| 11744680_SLC7A11   | 0.076923 | 0.109552 | 0.186134 |
| 11736251_MUC21     | 0.130178 | 0.109592 | 0.186195 |
| 11721330_RNGTT     | 0.111704 | 0.109622 | 0.186239 |
| 11756198_SEC11A    | -0.06161 | 0.10964  | 0.186264 |
| 11715247_DEPDC5    | -0.06747 | 0.109645 | 0.186266 |
| 11744716_PFN2      | -0.06677 | 0.10966  | 0.186285 |
| 11755367_DNAAF3    | -0.07687 | 0.109674 | 0.186302 |
| 11718145_DGCR14    | -0.06366 | 0.109688 | 0.186319 |
| 11720552_IFFO1     | -0.10673 | 0.109697 | 0.186326 |
| 11715319_MAGEA1    | -0.07224 | 0.1097   | 0.186326 |
| 11756636_PCED1A    | 0.095957 | 0.10974  | 0.186388 |
| 11759909_GATS      | -0.09695 | 0.109767 | 0.186427 |
| 11732229_NEUROD6   | -0.11522 | 0.109789 | 0.186458 |
| 11741707_PCDHGC3   | -0.1158  | 0.109826 | 0.186515 |
| 11737083_ZNF490 // | 0.113109 | 0.109846 | 0.186542 |
| 11754220_PWP1      | 0.066563 | 0.109873 | 0.186581 |
| 11762236_LOC100287 | -0.13546 | 0.109943 | 0.186689 |
| 11757136_SNORA2C   | -0.10355 | 0.109944 | 0.186689 |
| 11720455_CAPRIN1   | 0.061456 | 0.109948 | 0.186669 |
| 11716749_CD99L2    | -0.08249 | 0.109979 | 0.186735 |
| 11726021_EEPD1     | -0.12233 | 0.109991 | 0.186746 |
| 11747832_FBXO21    | -0.06322 | 0.109994 | 0.186746 |
| 11739617_CD44      | 0.072451 | 0.109997 | 0.186746 |
| 11730326_LOC105375 | -0.10363 | 0.110007 | 0.186758 |
| 11748383_PAPD7     | -0.1088  | 0.11002  | 0.186773 |
| 11725720_CDC42     | -0.06719 | 0.11003  | 0.186783 |
| 11760372_PRKACA    | -0.07079 | 0.110044 | 0.1868   |
| 11758917_TMEM204   | 0.093041 | 0.110071 | 0.186839 |
| 11752539_PSG1      | -0.09695 | 0.110121 | 0.186919 |
| 11745519_ABI1      | 0.097975 | 0.110143 | 0.186949 |
| 11744271_ULK1      | -0.09119 | 0.110154 | 0.186962 |
| 11746627_RIC3      | -0.1605  | 0.110163 | 0.186969 |
| 11730722_NCAM1     | 0.110505 | 0.110175 | 0.186984 |
| 11762915_ESAM      | -0.12555 | 0.11019  | 0.187002 |
| 11733723_HMP19     | 0.111861 | 0.110222 | 0.187051 |
| 11754623_CHPT1     | -0.06482 | 0.110237 | 0.187067 |
| 11716271_POLR2E    | -0.13109 | 0.110239 | 0.187067 |
| 11752576_ANKLE1    | -0.09472 | 0.110248 | 0.187075 |
| 200013_PMRPL24     | -0.05983 | 0.11029  | 0.187134 |
| 11753542_FLT4      | -0.14983 | 0.110291 | 0.187134 |
| 11746245_IL17RC    | -0.07631 | 0.110294 | 0.187134 |
| 11762648_CGB /// C | -0.09951 | 0.110307 | 0.18715  |
| 11759877_MYO5C     | -0.16549 | 0.110325 | 0.187174 |
| 11724864_GJB1      | -0.18912 | 0.110373 | 0.187249 |
| 11761805_CALCB     | -0.09547 | 0.110383 | 0.18726  |
| 11746702_NKAIN3    | -0.09116 | 0.110443 | 0.187354 |
| 11732546_DEFA4     | -0.1357  | 0.110478 | 0.187408 |
| 11750956_GABRR1    | -0.10672 | 0.110526 | 0.187482 |
| 11748216_STAU2     | -0.06699 | 0.110536 | 0.187491 |
| 11718732_MAPT      | -0.08565 | 0.110539 | 0.187491 |

|                    |          |          |          |
|--------------------|----------|----------|----------|
| 11762305_ERG       | -0.14828 | 0.110561 | 0.187522 |
| 11760420_GALNT16   | -0.11448 | 0.110607 | 0.187589 |
| 11727419_CNBP      | 0.074016 | 0.110608 | 0.187589 |
| 11756515_EXOSC1    | -0.07155 | 0.110612 | 0.18759  |
| 11754323_PIGT      | -0.07022 | 0.110648 | 0.187644 |
| 11740549_ALOX12B   | -0.12183 | 0.110657 | 0.187653 |
| 11752894_CCDC33    | -0.09473 | 0.110676 | 0.187675 |
| 11751881_CACNA1E   | 0.15843  | 0.110678 | 0.187675 |
| 11754971_TARBP1    | -0.06786 | 0.110708 | 0.187719 |
| 11753824_FXYD1     | 0.119138 | 0.110747 | 0.187779 |
| 11741729_LRTOMT    | -0.15491 | 0.11076  | 0.187794 |
| 11723996_GLCCI1    | -0.07108 | 0.110776 | 0.187815 |
| 11733993_TMEM150C  | -0.19078 | 0.110783 | 0.187821 |
| 11730315_RGS7BP    | 0.147924 | 0.110814 | 0.187864 |
| 11758730_DUSP1     | 0.104607 | 0.110817 | 0.187864 |
| 11732864_TAS1R1    | -0.09907 | 0.11083  | 0.187876 |
| 11729587_KLK2      | -0.08167 | 0.110831 | 0.187876 |
| 11757094_LRRD1     | 0.122357 | 0.110865 | 0.187927 |
| 11733609_TRIM73 // | -0.0781  | 0.110885 | 0.187954 |
| 11722974_WDR90     | -0.07235 | 0.110904 | 0.18798  |
| 11737340_DBF4B     | -0.09456 | 0.110956 | 0.188056 |
| 11747281_FAM65B    | 0.08268  | 0.110958 | 0.188056 |
| 11749017_CARD14    | -0.14896 | 0.110961 | 0.188056 |
| 11748951_CTNNB1    | -0.0742  | 0.110971 | 0.188068 |
| 11724719_DEXI      | 0.070604 | 0.110981 | 0.188075 |
| 11756371_VSIG4     | -0.19821 | 0.110983 | 0.188075 |
| 11717649_SMG9      | -0.08633 | 0.11103  | 0.188142 |
| 11738546_KRT26     | 0.11781  | 0.11103  | 0.188142 |
| 11752946_MAPRE2    | 0.086855 | 0.111082 | 0.188209 |
| 11716202_PFKM      | -0.07953 | 0.111083 | 0.188209 |
| 200007_PMSRP14     | 0.065988 | 0.111085 | 0.188209 |
| 11733722_MAX       | 0.076916 | 0.111086 | 0.188209 |
| 11757393_SI        | -0.10301 | 0.111089 | 0.188209 |
| 11720525_HPS4      | -0.10882 | 0.111107 | 0.188232 |
| 11736836_TPCN2     | -0.08851 | 0.111153 | 0.1883   |
| 11729667_NOL3      | -0.06833 | 0.111154 | 0.1883   |
| 11762117_DBT       | -0.1659  | 0.111158 | 0.1883   |
| 11741343_DMTN      | -0.12821 | 0.111166 | 0.188306 |
| 11763011_IGKC      | 0.136449 | 0.111173 | 0.188311 |
| 11754772_NR4A1     | -0.08379 | 0.111183 | 0.188322 |
| 11725878_DEFB119   | -0.12292 | 0.111188 | 0.188324 |
| 11754239_DYDC2     | -0.16132 | 0.111215 | 0.188363 |
| 11760167_STK25     | -0.12139 | 0.111226 | 0.188375 |
| 11740966_LOC391322 | -0.10562 | 0.111244 | 0.188399 |
| 11741178_UPB1      | -0.11085 | 0.111264 | 0.188427 |
| 11726937_ST18      | 0.117444 | 0.11128  | 0.188447 |
| 11729646_TM4SF4    | -0.18304 | 0.111297 | 0.188469 |
| 11715343_MUC16     | -0.08299 | 0.111325 | 0.18851  |
| 11761084_RABGAP1L  | 0.166384 | 0.111351 | 0.188548 |
| 11730096_BCL2A1    | 0.10373  | 0.111366 | 0.188567 |
| 11744941_AQP7      | -0.15338 | 0.111373 | 0.188569 |

|                    |          |          |          |
|--------------------|----------|----------|----------|
| 11739245_ANKFY1    | -0.08457 | 0.111375 | 0.188569 |
| 11762670_DBIL5P2   | -0.13912 | 0.111394 | 0.188595 |
| 11755380_WDR92     | -0.11055 | 0.111433 | 0.188654 |
| 11757782_RPL15 /// | 0.060505 | 0.111459 | 0.188691 |
| 11736087_FAM171A1  | -0.06818 | 0.111469 | 0.188703 |
| 11758427_ENTHD1    | -0.08547 | 0.111534 | 0.188806 |
| 11737493_DGKK      | -0.07048 | 0.111568 | 0.188852 |
| 11744811_C14orf159 | -0.13663 | 0.111569 | 0.188852 |
| 11741359_RALGDS    | 0.164678 | 0.111576 | 0.188856 |
| 11734115_SLC10A1   | -0.08485 | 0.111606 | 0.188901 |
| 11715213_DUX1 ///  | -0.11052 | 0.111636 | 0.188945 |
| 11733820_CHRNA2    | 0.093881 | 0.111654 | 0.188969 |
| 11760337_MAPK12    | -0.0922  | 0.11166  | 0.188973 |
| 11744496_PCAT4     | 0.140016 | 0.11168  | 0.189    |
| 11737939_RIPK1     | -0.07663 | 0.111687 | 0.189005 |
| 11746358_MTA1      | -0.06906 | 0.111715 | 0.189046 |
| 11746918_L2HGDH    | 0.082737 | 0.111769 | 0.189131 |
| 11743726_RHOA      | 0.063549 | 0.111776 | 0.189137 |
| 11717440_EPS8      | 0.06484  | 0.111799 | 0.189169 |
| 11742139_BTNL2     | -0.13912 | 0.111858 | 0.189261 |
| 11730718_PFKFB4 // | -0.11959 | 0.111875 | 0.189284 |
| 11741559_ANXA13    | 0.123375 | 0.111888 | 0.1893   |
| 11744438_SRI       | -0.08409 | 0.111923 | 0.189353 |
| 11750219_NUP43     | -0.0732  | 0.111929 | 0.189357 |
| 11742560_ORGN2     | -0.08306 | 0.111938 | 0.189365 |
| 11741779_HSD11B1   | 0.151593 | 0.111945 | 0.189371 |
| 11733865_RPP30     | -0.09431 | 0.111968 | 0.189402 |
| 11749488_PCDHB6    | 0.070685 | 0.112017 | 0.189478 |
| 11721336_LDOC1     | 0.098809 | 0.112041 | 0.189513 |
| 11760300_PNISR     | 0.106652 | 0.112096 | 0.189599 |
| 11754458_ACRBP     | -0.12019 | 0.112114 | 0.189623 |
| 11725406_HERC3 /// | -0.12475 | 0.112131 | 0.189645 |
| 11732001_PDE11A    | 0.189701 | 0.112139 | 0.189652 |
| 11722867_CDCP1     | -0.12037 | 0.112147 | 0.18966  |
| 11737638_ATP8B2    | -0.09319 | 0.112158 | 0.189672 |
| 11758503_ZNF529    | -0.09739 | 0.112185 | 0.18971  |
| 11737887_NRL       | -0.14243 | 0.112214 | 0.189753 |
| 11748613_FNBP1L    | 0.11258  | 0.112235 | 0.189777 |
| 11764257_LOC102723 | -0.12746 | 0.112236 | 0.189777 |
| 11741958_IL6R      | 0.104684 | 0.112243 | 0.189783 |
| 11741983_ESR2      | -0.08812 | 0.112264 | 0.189811 |
| 11754230_DBIL5P    | -0.13478 | 0.112328 | 0.189899 |
| 11761029_SLC11A1   | -0.15881 | 0.11233  | 0.189899 |
| 11725055_HNMT      | 0.11459  | 0.112331 | 0.189899 |
| 11732966_MIA       | -0.06316 | 0.112333 | 0.189899 |
| 11732107_CYP1A2    | 0.186117 | 0.112335 | 0.189899 |
| 11731766_SETD3     | -0.09787 | 0.11234  | 0.1899   |
| 11733517_KCNK10    | -0.11663 | 0.112356 | 0.189921 |
| 11751309_DNAJA3    | 0.070066 | 0.112389 | 0.189964 |
| 11716829_ABCB6 /// | 0.062836 | 0.11239  | 0.189964 |
| 11727467_IL10RB    | -0.10913 | 0.112401 | 0.189977 |

|                    |          |          |          |
|--------------------|----------|----------|----------|
| 11742957_SMARCA4   | 0.071661 | 0.112411 | 0.189987 |
| 11722468_CACNG4    | -0.14885 | 0.112423 | 0.19     |
| 11732041_MMD2 ///  | -0.11925 | 0.112429 | 0.190005 |
| 11755619_D2HGDH    | -0.08433 | 0.112457 | 0.190045 |
| 11759007_HAMP      | -0.14185 | 0.112476 | 0.190068 |
| 11753202_SERPINB3  | -0.11695 | 0.112478 | 0.190068 |
| 11737100_SLC5A7    | -0.16165 | 0.112506 | 0.190108 |
| 11749800_BAIAP2    | -0.06992 | 0.112535 | 0.190151 |
| 11737457_USP29     | 0.129759 | 0.112552 | 0.190173 |
| 11761536_TM2D3     | 0.418548 | 0.1126   | 0.190247 |
| 11740908_PMS2P9    | -0.06925 | 0.112625 | 0.190283 |
| 11721224_MPPED2    | -0.28164 | 0.112636 | 0.190294 |
| 11729032_RPGRIP1   | -0.15715 | 0.112643 | 0.190294 |
| 11743908_CTPS1     | -0.07687 | 0.112643 | 0.190294 |
| 11722301_ETS1      | 0.121828 | 0.112648 | 0.190296 |
| 11755354_RFNG      | 0.07182  | 0.112664 | 0.190313 |
| 11750381_ZNF423    | -0.10194 | 0.112666 | 0.190313 |
| 11741205_GABRA1    | 0.139707 | 0.112723 | 0.190391 |
| 11737088_TLL1      | 0.111077 | 0.112723 | 0.190391 |
| 11734646_TBL1Y     | -0.08987 | 0.112724 | 0.190391 |
| 11750964_CHRFAM7A  | -0.11468 | 0.112744 | 0.190418 |
| 11735224_KLRG1     | 0.0907   | 0.112748 | 0.190418 |
| 11750581_FBXO3     | 0.085861 | 0.112752 | 0.190419 |
| 11723961_PTN       | 0.105063 | 0.112774 | 0.190443 |
| 11748287_ENDOU     | -0.1315  | 0.112774 | 0.190443 |
| 11721328_RNGTT     | -0.11217 | 0.112787 | 0.190455 |
| 11755012_CDC42SE2  | 0.07656  | 0.112789 | 0.190455 |
| 11759021_LNX1      | -0.07175 | 0.112806 | 0.190465 |
| 11738265_SHH       | -0.09722 | 0.112807 | 0.190465 |
| 11737413_MICALCL   | -0.16446 | 0.112807 | 0.190465 |
| 11751680_UQCRB     | 0.084515 | 0.112816 | 0.190474 |
| 11757023_RPS12 /// | 0.066119 | 0.112827 | 0.190486 |
| 11749603_HPN-AS1   | -0.0922  | 0.112862 | 0.190539 |
| 11735668_SLC34A3   | -0.07488 | 0.112885 | 0.190571 |
| 11759629_TRAC ///  | -0.09595 | 0.11291  | 0.190607 |
| 11744806_PPY2P     | -0.09488 | 0.112947 | 0.190662 |
| 11738635_SLC06A1   | -0.09404 | 0.113011 | 0.190764 |
| 11728869_ELAVL3    | 0.144044 | 0.113022 | 0.190775 |
| 11724467_KRT12     | -0.14536 | 0.113058 | 0.19083  |
| 11746348_PNN       | 0.069823 | 0.113084 | 0.190868 |
| 11755943_VIM       | -0.05867 | 0.113096 | 0.190881 |
| 11753536_LOC105372 | -0.11387 | 0.113122 | 0.190918 |
| 11726383_OLFM1     | -0.09479 | 0.113157 | 0.190971 |
| 11752191_SALL2     | -0.10322 | 0.11317  | 0.190987 |
| 11718754_CAPN5     | -0.12656 | 0.113228 | 0.191077 |
| 11735998_APOL1     | -0.07731 | 0.113255 | 0.191116 |
| 11730832_RANBP10   | 0.080751 | 0.113279 | 0.19115  |
| 11734500_PABPC1L2B | -0.093   | 0.113327 | 0.191225 |
| 11747633_GLS2      | -0.0822  | 0.113332 | 0.191226 |
| 11717970_FAM20B    | 0.061341 | 0.11335  | 0.191251 |
| 11722741_DDC       | -0.07296 | 0.113402 | 0.191331 |



|                    |          |          |          |
|--------------------|----------|----------|----------|
| 11758146_GORASP1   | 0.080781 | 0.113412 | 0.191332 |
| 11751126_ABCC6 /// | -0.07352 | 0.113413 | 0.191332 |
| 11747065_NUP88     | 0.067486 | 0.113414 | 0.191332 |
| 11760662_HLA-DOA   | 0.077477 | 0.11344  | 0.191368 |
| 11745276_SOAT1     | 0.078034 | 0.113446 | 0.191372 |
| 11744933_ASXL1     | 0.077511 | 0.11345  | 0.191372 |
| AFFX-HSACTB        | 0.058499 | 0.113456 | 0.191372 |
| 11739886_DSG1      | -0.11884 | 0.113457 | 0.191372 |
| 11754938_CDK5      | -0.1194  | 0.113469 | 0.191385 |
| 11744086_PRR15L    | -0.10828 | 0.113505 | 0.191439 |
| 11742458_C2orf81   | -0.11591 | 0.113509 | 0.191439 |
| 11731130_SPANXC // | 0.118797 | 0.113575 | 0.191544 |
| 11727139_MYH7B     | 0.09295  | 0.11359  | 0.191556 |
| 11762805_UCKL1     | -0.08104 | 0.113591 | 0.191556 |
| 11718864_SEC63     | -0.07415 | 0.113594 | 0.191556 |
| 11733594_SLC26A1   | -0.12435 | 0.113604 | 0.191567 |
| 11717135_PCSK1N    | 0.101884 | 0.113612 | 0.191573 |
| 11740307_SLC5A12   | 0.205449 | 0.113617 | 0.191575 |
| 11744031_MMP7      | 0.108382 | 0.113629 | 0.191589 |
| 11730683_TSHR      | -0.14335 | 0.113637 | 0.191596 |
| 11733610_C9orf173  | -0.14438 | 0.113644 | 0.1916   |
| 11736399_RFT1      | -0.1054  | 0.113655 | 0.191613 |
| 11743596_PTPRE     | 0.074907 | 0.113692 | 0.191669 |
| 11733749_TNNI2     | -0.16471 | 0.113702 | 0.191679 |
| 11761347_CLCN2     | -0.14858 | 0.113715 | 0.191694 |
| 11722045_SLC52A3   | -0.11009 | 0.113735 | 0.191717 |
| 11748168_FAM227A   | -0.13925 | 0.113737 | 0.191717 |
| 11755884_SLC25A43  | 0.07442  | 0.11376  | 0.191749 |
| 11732424_ANKRD22   | -0.16117 | 0.11378  | 0.191777 |
| 11746104_PLEKHM1 / | 0.081944 | 0.113804 | 0.191809 |
| 11751705_NOTCH4    | -0.1872  | 0.113807 | 0.191809 |
| 11750595_KIF5A     | -0.12988 | 0.113827 | 0.191837 |
| 11761410_CD7       | 0.078006 | 0.113861 | 0.191886 |
| 11736650_CD5L      | -0.12922 | 0.113872 | 0.191894 |
| 11739068_KIFAP3    | -0.06939 | 0.113875 | 0.191894 |
| 11735150_NXPE3     | -0.10322 | 0.113877 | 0.191894 |
| 11737729_ZNF705A / | -0.16799 | 0.113902 | 0.191929 |
| 11741626_MALT1     | 0.092492 | 0.113905 | 0.191929 |
| 11750310_SLC17A3   | -0.08352 | 0.11394  | 0.19198  |
| 11747993_CALCRL    | 0.156892 | 0.113947 | 0.191983 |
| 11733713_DMP1      | -0.21662 | 0.113951 | 0.191983 |
| 11761057_PDPK1     | 0.096177 | 0.113953 | 0.191983 |
| 11757872_PLSCR1    | -0.16037 | 0.11396  | 0.191988 |
| 11734374_CPXCR1    | -0.17504 | 0.113985 | 0.192024 |
| 11735656_ATOH7     | -0.09647 | 0.114005 | 0.192051 |
| 11761461_FAM73B    | 0.094823 | 0.114021 | 0.19207  |
| 11760573_FOSL1     | 0.080474 | 0.114028 | 0.192075 |
| 11754698_PLAC8L1   | -0.14226 | 0.114041 | 0.192091 |
| 11737656_LCE5A     | -0.12001 | 0.114047 | 0.192095 |
| 11738486_DNASE1L2  | -0.07763 | 0.114056 | 0.192099 |
| 11717525_RDX       | 0.059241 | 0.114057 | 0.192099 |

|                    |          |          |          |
|--------------------|----------|----------|----------|
| 11756234_DTNB      | -0.0671  | 0.114083 | 0.192132 |
| 11752711_TNR       | 0.130454 | 0.114085 | 0.192132 |
| 11746545_DAPK1     | 0.128153 | 0.114107 | 0.192162 |
| 11740370_RASGRP1   | 0.125783 | 0.114115 | 0.19217  |
| 11735255_RNF122    | -0.13712 | 0.114142 | 0.192209 |
| 11749855_SH2B1     | -0.11971 | 0.114179 | 0.192263 |
| 11746380_PHLDB1    | 0.171757 | 0.114183 | 0.192264 |
| 11759972_SYT9      | -0.11672 | 0.114205 | 0.192291 |
| 11721363_IREB2     | -0.0656  | 0.114207 | 0.192291 |
| 11722968_TRPV4     | -0.10398 | 0.114295 | 0.192433 |
| 11734104_PNMAL2    | -0.14505 | 0.114299 | 0.192433 |
| 11753909_BANP      | 0.066681 | 0.114305 | 0.192437 |
| 11763749_MLPH      | -0.08274 | 0.11433  | 0.192459 |
| 11730678_NOXRED1   | 0.109674 | 0.114331 | 0.192459 |
| 11733747_MCHR2     | 0.111648 | 0.114331 | 0.192459 |
| 11735540_WEE2      | -0.13873 | 0.114334 | 0.192459 |
| 11762221_ZNF333    | -0.0816  | 0.114355 | 0.192487 |
| 11748739_NT5C1B    | -0.08566 | 0.114401 | 0.192558 |
| 11719876_CKMT2     | -0.08928 | 0.114408 | 0.192563 |
| 11718872_DHRS1     | 0.082304 | 0.114415 | 0.192568 |
| 11724618_MOCS1     | -0.11116 | 0.114442 | 0.192606 |
| 11721047_SEPT8     | -0.15812 | 0.114453 | 0.192615 |
| 11730806_BTN3A2    | -0.06793 | 0.114455 | 0.192615 |
| 11760532_SLC34A1   | -0.07918 | 0.114488 | 0.192665 |
| 11717526_RDX       | 0.060313 | 0.114506 | 0.192688 |
| 11733833_MAP2      | -0.06672 | 0.11451  | 0.192688 |
| 11739742_B3GNT6    | -0.10928 | 0.114532 | 0.192719 |
| 11743427_AHCYL1    | -0.07148 | 0.114541 | 0.192728 |
| 11754557_PRKCA     | 0.080723 | 0.114556 | 0.192745 |
| 11762379_NOS1      | -0.17611 | 0.114559 | 0.192745 |
| 11730079_SHF       | -0.14273 | 0.114628 | 0.192853 |
| 11729433_BEND4     | -0.17027 | 0.11464  | 0.192867 |
| 11733515_DGKB      | -0.07255 | 0.114673 | 0.192916 |
| 11731117_PLEKHA8P1 | -0.09159 | 0.114709 | 0.192971 |
| 11722536_CCNYL1    | 0.130209 | 0.11474  | 0.193016 |
| 11761962_KIF25-AS1 | 0.118057 | 0.114761 | 0.193045 |
| 11736593_LDB3      | -0.10939 | 0.114783 | 0.193076 |
| 11751015_GLYATL1 / | -0.1352  | 0.114807 | 0.193108 |
| 11725684_PTPRO     | 0.124062 | 0.114824 | 0.19313  |
| 11719426_CHST14    | -0.0627  | 0.114864 | 0.193191 |
| 11736301_HM13      | 0.084301 | 0.114914 | 0.193268 |
| 11740340_F2RL3     | 0.103105 | 0.114925 | 0.193281 |
| 11763584_MAP2K5    | 0.136793 | 0.11494  | 0.1933   |
| 11727527_TNNT2     | -0.14404 | 0.114945 | 0.193301 |
| 11720924_TCAP      | -0.07863 | 0.114961 | 0.19332  |
| 11760016_GALNT1    | -0.19192 | 0.115006 | 0.19339  |
| 11755101_CEP76     | -0.0761  | 0.115016 | 0.193399 |
| 11736442_SPINK7    | 0.15557  | 0.115019 | 0.193399 |
| 11726826_VPS37D    | -0.07314 | 0.115031 | 0.193413 |
| 11753426_SLC25A45  | -0.08877 | 0.115086 | 0.193498 |
| 11729463_H1FNT     | -0.11515 | 0.115136 | 0.193575 |

|                    |          |          |          |
|--------------------|----------|----------|----------|
| 11723700_OAS3      | 0.078121 | 0.115147 | 0.193588 |
| 11730930_IKBB      | -0.08982 | 0.115156 | 0.193593 |
| 11758257_SLC19A1   | -0.0639  | 0.115159 | 0.193593 |
| 11755421_LYSMD4    | 0.068335 | 0.115164 | 0.193596 |
| 11763115_IGHG1     | 0.33959  | 0.115204 | 0.193657 |
| 11763891_SNORA78   | -0.12963 | 0.11521  | 0.19366  |
| 11756151_B2M       | 0.067517 | 0.11522  | 0.19367  |
| 11753215_CDC88C    | -0.08766 | 0.115258 | 0.193727 |
| 11733763_ADAMTSL1  | 0.079824 | 0.115269 | 0.193738 |
| 11753201_SERPINB3  | 0.072592 | 0.115288 | 0.193764 |
| 11752345_CADM2     | 0.071059 | 0.115296 | 0.193771 |
| 11729543_MAGEC1    | -0.13089 | 0.115342 | 0.193841 |
| 11750979_ADGRG3    | -0.10251 | 0.115352 | 0.193853 |
| 11749877_MKNK2     | -0.10462 | 0.115367 | 0.19387  |
| 11762966_OBP2B     | -0.1154  | 0.115422 | 0.193956 |
| 11758954_ENPP5     | 0.131392 | 0.115477 | 0.194042 |
| 11739132_NOL10     | -0.0752  | 0.115482 | 0.194043 |
| 11727902_EPB41L2   | 0.11212  | 0.115507 | 0.194079 |
| 11734934_FGD2      | -0.15547 | 0.115542 | 0.194132 |
| 11742949_CNOT8     | -0.08896 | 0.115582 | 0.194191 |
| 11752544_GPNMB     | -0.05799 | 0.115616 | 0.194243 |
| 11723428_RPL13 /// | 0.058989 | 0.115673 | 0.194331 |
| 11752772_KLHL3     | -0.13103 | 0.115678 | 0.194334 |
| 11728062_SH3BP1    | -0.07515 | 0.115698 | 0.194359 |
| 11763447_TRDC      | -0.1215  | 0.115721 | 0.194386 |
| 11751617_ODF2L     | 0.070789 | 0.115722 | 0.194386 |
| 11749933_KIF26B    | -0.13849 | 0.115734 | 0.1944   |
| 11747789_ZNF394    | 0.077017 | 0.115774 | 0.194461 |
| 11720559_FMO1      | -0.11102 | 0.115781 | 0.194463 |
| 11722247_RASSF1    | -0.08522 | 0.115783 | 0.194463 |
| 11726090_VPS53     | -0.08063 | 0.115795 | 0.194475 |
| 11753322_DPH5      | -0.09493 | 0.115824 | 0.194519 |
| 11757925_ZSCAN12   | 0.091826 | 0.115854 | 0.194562 |
| 11715190_FAM221A   | -0.14236 | 0.115867 | 0.194577 |
| 11759058_MED6      | -0.07727 | 0.115888 | 0.194606 |
| 11763550_IGK /// I | -0.21308 | 0.115914 | 0.194639 |
| 11753467_AMT       | -0.13247 | 0.115917 | 0.194639 |
| 11733296_CYP4F2 // | 0.092731 | 0.11592  | 0.194639 |
| 11760046_LOC338797 | -0.09836 | 0.115944 | 0.194655 |
| 11744954_ANXA1     | 0.059817 | 0.115944 | 0.194655 |
| 11732262_FSCN3     | -0.10675 | 0.115945 | 0.194655 |
| 11737263_HRK       | -0.1711  | 0.115947 | 0.194655 |
| 11749080_ARSA      | -0.1215  | 0.115949 | 0.194655 |
| 11733062_GABRA6    | -0.14739 | 0.115962 | 0.19467  |
| 11727746_WDR93     | -0.10167 | 0.115977 | 0.194682 |
| 11743646_C17orf105 | -0.15971 | 0.115977 | 0.194682 |
| 11751108_MRC2      | -0.09747 | 0.115986 | 0.19469  |
| 11753768_ZBTB4     | -0.08249 | 0.115991 | 0.194691 |
| 11718202_BTD       | -0.07496 | 0.115998 | 0.194697 |
| 11728149_NPM2      | -0.07503 | 0.116017 | 0.194722 |
| 11763448_LINC01193 | -0.14527 | 0.116056 | 0.19478  |

|                   |          |          |          |
|-------------------|----------|----------|----------|
| 11732297_KIAA1715 | -0.07488 | 0.11607  | 0.194797 |
| 11744814_PCM1     | 0.075085 | 0.116107 | 0.194853 |
| 11732452_MS4A3    | 0.137614 | 0.116161 | 0.194936 |
| 11748343_IFT22    | 0.073941 | 0.116176 | 0.194956 |
| 11736990_LPAL2    | 0.091793 | 0.116183 | 0.19496  |
| 11716401_SELENBP1 | -0.09945 | 0.116188 | 0.194962 |
| 11743779_HERC2    | -0.07743 | 0.116199 | 0.194973 |
| 11734581_CBLN2    | -0.13538 | 0.116246 | 0.195046 |
| 11759415_SLC51B   | -0.1243  | 0.116269 | 0.195077 |
| 11734152_ABRA     | -0.10692 | 0.116289 | 0.195102 |
| 11737734_CAPS2    | 0.120238 | 0.116292 | 0.195102 |
| 11755431_ANKRD34C | -0.0872  | 0.116315 | 0.195134 |
| 11737259_FRMPD4   | 0.144744 | 0.116335 | 0.19516  |
| 11729652_CYP11A1  | -0.14303 | 0.116338 | 0.19516  |
| 11739966_GPR39    | -0.07252 | 0.11635  | 0.195173 |
| 11759400_PSMF1    | 0.098033 | 0.116401 | 0.195251 |
| 11726565_COL17A1  | 0.083949 | 0.116423 | 0.195282 |
| 11715529_ATP6V1G2 | -0.07137 | 0.11646  | 0.195338 |
| 11758003_MUC20    | 0.157419 | 0.116473 | 0.195352 |
| 11745477_TTYH1    | -0.1061  | 0.116488 | 0.195371 |
| 11737584_ALX4     | -0.09452 | 0.11654  | 0.195451 |
| 11751156_CABLES1  | 0.137993 | 0.116561 | 0.195481 |
| 11752907_DAOA     | 0.14435  | 0.116592 | 0.195525 |
| 11731001_AP5B1    | 0.100516 | 0.116601 | 0.19553  |
| 11739203_PLA2G6   | -0.08485 | 0.116603 | 0.19553  |
| 11736094_DCTD     | 0.073472 | 0.116667 | 0.195626 |
| 11759474_NT5C1A   | -0.1059  | 0.116668 | 0.195626 |
| 11737717_SLC26A1  | -0.1466  | 0.116677 | 0.195634 |
| 11756302_CD37     | -0.10028 | 0.116763 | 0.195772 |
| 11748844_BCCIP    | -0.09271 | 0.116773 | 0.195778 |
| 11745016_C1orf43  | 0.066765 | 0.116774 | 0.195778 |
| 11730626_KLB      | -0.11544 | 0.116783 | 0.195786 |
| 11753499_KRTAP1-1 | -0.20139 | 0.116816 | 0.195834 |
| 11749982_PIP4K2B  | 0.070748 | 0.116828 | 0.195847 |
| 11749083_CRCP     | 0.068594 | 0.116837 | 0.195856 |
| 11719767_TPPP3    | -0.17278 | 0.116894 | 0.195945 |
| 11727541_MPDZ     | 0.065586 | 0.1169   | 0.195948 |
| 11749850_RAB37    | 0.086913 | 0.11697  | 0.196058 |
| 11754578_C1orf101 | -0.06913 | 0.116983 | 0.196073 |
| 11761383_SPATA9   | -0.08566 | 0.117037 | 0.196158 |
| 11747275_SLC8B1   | -0.19956 | 0.117075 | 0.196214 |
| 11730223_PNPLA2   | -0.10174 | 0.117086 | 0.196223 |
| 11752881_RHCE /// | -0.19959 | 0.117088 | 0.196223 |
| 11743730_TNFSF10  | 0.116015 | 0.117133 | 0.196291 |
| 11735310_GIPC1    | 0.062537 | 0.117141 | 0.196298 |
| 11757255_FKSG29   | -0.13504 | 0.117159 | 0.196322 |
| 11752143_ABCB11   | -0.13899 | 0.117171 | 0.196334 |
| 11749734_JRKL     | -0.11314 | 0.117174 | 0.196334 |
| 11750243_PPARGC1A | -0.20295 | 0.117188 | 0.196349 |
| 11728683_KRR1     | 0.066696 | 0.117201 | 0.196366 |
| 11728016_TRIM66   | -0.11058 | 0.117211 | 0.196375 |

|                    |          |          |          |
|--------------------|----------|----------|----------|
| 11758460_FAAH2     | -0.11294 | 0.117215 | 0.196376 |
| 11736572_TIGD6     | -0.09073 | 0.117226 | 0.196386 |
| 11742389_OR8G1     | -0.08087 | 0.117262 | 0.19644  |
| 11734643_PLA2G4F   | -0.07977 | 0.117283 | 0.196465 |
| 11749679_ELN       | -0.10231 | 0.117285 | 0.196465 |
| 11737711_SAP30L    | -0.08682 | 0.117293 | 0.196472 |
| 11738565_TMEM14EP  | -0.08995 | 0.1173   | 0.196478 |
| 11736012_MGAT2     | 0.092482 | 0.117354 | 0.19656  |
| 11715376_RPS11     | 0.06912  | 0.117358 | 0.196561 |
| 11728158_EDA       | -0.10304 | 0.117379 | 0.196579 |
| 11731908_C19orf71  | -0.11831 | 0.11738  | 0.196579 |
| 11716052_LAMC1     | 0.066366 | 0.117381 | 0.196579 |
| 11716396_WBP1L     | 0.065725 | 0.117407 | 0.196616 |
| 11722282_LAMA4     | -0.08833 | 0.117427 | 0.196643 |
| 11741684_RABL6     | -0.09516 | 0.117446 | 0.196668 |
| 11730796_PSPH      | -0.07796 | 0.117452 | 0.196671 |
| 11721258_KRT5      | -0.08269 | 0.117458 | 0.196673 |
| 11719405_HIPK2     | 0.096267 | 0.117462 | 0.196673 |
| 11753298_BIRC7     | -0.11281 | 0.117473 | 0.196685 |
| 11752158_MYBPC3    | -0.12465 | 0.117514 | 0.196748 |
| 11749071_FAM172A   | -0.08909 | 0.117524 | 0.196758 |
| 11756855_GCNT2     | 0.205911 | 0.117533 | 0.196764 |
| 11746456_GPR155    | -0.14997 | 0.117536 | 0.196764 |
| 11735742_TEX101    | -0.15517 | 0.117601 | 0.196866 |
| 11726381_TMEM41B   | 0.113189 | 0.117606 | 0.196868 |
| 11762057_MTHFD2L   | -0.23472 | 0.117617 | 0.19688  |
| 11756422_RAPGEF1   | 0.081388 | 0.117667 | 0.196951 |
| 11721163_KHNYN     | 0.07686  | 0.117668 | 0.196951 |
| 11745502_GALNT9    | -0.08859 | 0.117684 | 0.196971 |
| 11746667_BHMT2     | -0.1244  | 0.117737 | 0.197048 |
| 11723182_CNOT6L    | 0.117373 | 0.117738 | 0.197048 |
| 11738463_FLJ33360  | -0.08469 | 0.117774 | 0.197102 |
| 11759081_TCEB1     | -0.21128 | 0.117796 | 0.197132 |
| 11758161_MAGEH1    | -0.17128 | 0.11781  | 0.197145 |
| 11756562_PDCD10    | -0.11046 | 0.117812 | 0.197145 |
| 11761476_ERG       | -0.12212 | 0.117852 | 0.197205 |
| 11758497_NANP      | 0.131865 | 0.11786  | 0.197212 |
| 11733640_C6orf10   | -0.1565  | 0.117902 | 0.197276 |
| 11751339_PSG9      | 0.077132 | 0.117977 | 0.197395 |
| 11763976_MRPS11    | 0.111634 | 0.117999 | 0.197425 |
| 11730588_GATA5     | -0.12179 | 0.118012 | 0.19744  |
| 11728367_AARSD1 // | 0.068288 | 0.118053 | 0.197501 |
| 11747611_TMC06     | -0.07652 | 0.118064 | 0.197513 |
| 11762701_WNT8A     | 0.105352 | 0.118101 | 0.197568 |
| 11757776_ARG2      | -0.07596 | 0.118148 | 0.19764  |
| 11736034_EXOSC2    | -0.07814 | 0.118183 | 0.197692 |
| 11734257_PRKAG3    | -0.09765 | 0.118224 | 0.197753 |
| 11761698_TEKT1     | 0.134473 | 0.118245 | 0.197774 |
| 11727072_ENPP6     | 0.131558 | 0.118245 | 0.197774 |
| 11751012_RIPK3     | -0.11884 | 0.118249 | 0.197774 |
| 11761878_PARD3B    | 0.151216 | 0.118254 | 0.197775 |

|                    |          |          |          |
|--------------------|----------|----------|----------|
| 11738603_LCE3C     | -0.09949 | 0.118257 | 0.197775 |
| 11736826_DHH       | -0.09339 | 0.118303 | 0.197845 |
| 11752244_KIRREL3   | -0.08644 | 0.118309 | 0.197849 |
| 11721251_MFAP1     | -0.05958 | 0.118318 | 0.197857 |
| 11754776_CCDC74A   | -0.07405 | 0.118323 | 0.197859 |
| 11742509_OR4C15    | -0.09269 | 0.118333 | 0.197865 |
| 11729907_METTL15   | 0.078755 | 0.118335 | 0.197865 |
| 11732411_GPER1     | -0.10109 | 0.118354 | 0.19789  |
| 11738051_MAGEB1    | -0.08756 | 0.118366 | 0.197904 |
| 11757446_MINOS1 // | 0.064045 | 0.118397 | 0.197948 |
| 11722054_CYP4X1    | 0.078965 | 0.118412 | 0.197966 |
| 11759120_LGR5      | -0.14164 | 0.118433 | 0.197994 |
| 11725940_DIRAS2    | -0.11563 | 0.11844  | 0.198    |
| 11737462_EPHA10    | -0.13593 | 0.118449 | 0.198007 |
| 11718815_PVRL1     | -0.181   | 0.11846  | 0.198019 |
| 11733639_CHM       | 0.101524 | 0.11851  | 0.19809  |
| 11740926_SATL1     | 0.101171 | 0.11851  | 0.19809  |
| 11739422_LOC102724 | -0.11628 | 0.118554 | 0.19815  |
| 11729779_CDH17     | -0.19109 | 0.118554 | 0.19815  |
| 11761079_PIGH      | -0.07013 | 0.118581 | 0.198182 |
| 11736392_IRGC      | -0.07762 | 0.118585 | 0.198182 |
| 11721975_TPSAB1 // | 0.091708 | 0.118586 | 0.198182 |
| 11748769_POLL      | -0.06146 | 0.11859  | 0.198182 |
| 11715489_PGRMC1    | -0.08446 | 0.118613 | 0.198214 |
| 11735187_F9        | -0.16136 | 0.118627 | 0.19823  |
| 11755549_SEMA6D    | -0.09775 | 0.118649 | 0.198256 |
| 11735949_GPR142    | -0.2511  | 0.11865  | 0.198256 |
| 11749239_ZNF672    | -0.07822 | 0.11868  | 0.198295 |
| 11733485_CACNA1C   | -0.08598 | 0.118682 | 0.198295 |
| 11746286_BTN3A1 // | -0.09109 | 0.118689 | 0.198301 |
| 11762909_LOC100127 | -0.09587 | 0.118701 | 0.198313 |
| 11735049_PCDHB3    | -0.21308 | 0.11871  | 0.198321 |
| 11719097_TAF10     | 0.065504 | 0.118715 | 0.198324 |
| 11749885_ACADS     | -0.11644 | 0.118731 | 0.198344 |
| 11752553_FBXW12    | -0.12071 | 0.118768 | 0.198397 |
| 11753465_CMTM5     | -0.13096 | 0.118771 | 0.198397 |
| 11742911_IGSF6     | 0.121976 | 0.118803 | 0.198444 |
| 11733699_TEAD4     | 0.067749 | 0.118842 | 0.198496 |
| 11729849_MLLT10    | 0.108648 | 0.118843 | 0.198496 |
| 11762149_TMEM241   | -0.08313 | 0.118879 | 0.198549 |
| 11762026_LRBA      | -0.06271 | 0.118912 | 0.198598 |
| 11719883_APOLD1    | 0.139299 | 0.118957 | 0.198661 |
| 11738485_TBPL2     | -0.12986 | 0.118959 | 0.198661 |
| 11725307_CALU      | 0.079441 | 0.118962 | 0.198661 |
| 11723948_SLC3A1    | 0.169602 | 0.118975 | 0.198677 |
| 11763948_CDRT15P1  | -0.13237 | 0.119024 | 0.198751 |
| 11760135_LRCH3     | 0.074559 | 0.119034 | 0.198761 |
| 11728205_FAM120A   | -0.06738 | 0.119044 | 0.198771 |
| 11732912_ODF4      | -0.13992 | 0.119083 | 0.198829 |
| 11760904_FARP2     | -0.07278 | 0.119091 | 0.198837 |
| 11744527_RNFT2     | -0.07711 | 0.119101 | 0.198845 |

|                    |          |          |          |
|--------------------|----------|----------|----------|
| 11719810_RRS1      | 0.057803 | 0.119146 | 0.198914 |
| 11760933_HSD17B7P2 | -0.20276 | 0.119157 | 0.198926 |
| 11725437_SPRYD7    | -0.08788 | 0.119199 | 0.19899  |
| 11724935_THAP7     | -0.07645 | 0.11921  | 0.199001 |
| 11725487_ATG14     | 0.084527 | 0.119216 | 0.199004 |
| 11721034_PPP1R3B   | 0.112859 | 0.119271 | 0.199089 |
| 11737542_GOT1L1    | 0.120393 | 0.119335 | 0.199189 |
| 11759275_OR2M3     | -0.14585 | 0.119375 | 0.199249 |
| 11761927_DPY19L3   | 0.19367  | 0.119381 | 0.199252 |
| 11730556_TRIM34 // | 0.103024 | 0.119399 | 0.199275 |
| 11716847_SLC43A3   | -0.06604 | 0.11942  | 0.199304 |
| 11746678_RBM11     | -0.13005 | 0.11943  | 0.199313 |
| 11725547_OPCML     | -0.1464  | 0.119478 | 0.199386 |
| 11718532_SIK3      | -0.08718 | 0.119495 | 0.199408 |
| 11744437_ADH6      | -0.1211  | 0.119504 | 0.199417 |
| 11720363_PHIP      | 0.065961 | 0.119509 | 0.199419 |
| 11747139_RASA1     | 0.074943 | 0.119532 | 0.19945  |
| 11737960_PDS5A     | 0.076596 | 0.119552 | 0.199477 |
| 11744613_SLC6A13   | -0.12235 | 0.11965  | 0.199628 |
| 11716969_NRP2      | 0.072856 | 0.119652 | 0.199628 |
| 11762110_SH3GL2    | -0.11903 | 0.119655 | 0.199628 |
| 11742628_OR2T6     | -0.08963 | 0.119672 | 0.19965  |
| 11741598_SMR3A     | -0.07521 | 0.119703 | 0.199694 |
| 11735372_GSG1L     | -0.1297  | 0.119763 | 0.199788 |
| 11737460_ADARB2    | -0.15022 | 0.119771 | 0.19979  |
| 11735740_RASA3     | 0.06841  | 0.119772 | 0.19979  |
| 11762748_TRA2A     | -0.06116 | 0.119818 | 0.19986  |
| 11736912_CCDC33    | 0.067384 | 0.119839 | 0.199884 |
| 11753063_SIDT2     | 0.074637 | 0.119841 | 0.199884 |
| 11727502_ALDH3B2   | -0.13567 | 0.119864 | 0.199915 |
| 11756767_PIF0      | -0.165   | 0.119871 | 0.19992  |
| 11730747_PAIP2     | 0.071951 | 0.119883 | 0.199932 |
| 11727297_TGFB3     | -0.1152  | 0.11989  | 0.199938 |
| 11749618_LILRA2    | 0.14413  | 0.119909 | 0.199962 |
| 11738196_SLC13A4   | -0.11302 | 0.119926 | 0.199985 |
| 11750068_ZNF138    | 0.164158 | 0.119934 | 0.199991 |
| 11741000_GAP43     | 0.110103 | 0.119966 | 0.200034 |
| 11761672_SLC16A5   | -0.13138 | 0.119968 | 0.200034 |
| 11761474_ULBP3     | 0.122151 | 0.119979 | 0.200045 |
| 11761297_TSPAN16   | -0.10981 | 0.119991 | 0.200058 |
| 11737777_TNFSF8    | -0.11213 | 0.120002 | 0.200067 |
| 11756484_UVSSA     | -0.07538 | 0.120004 | 0.200067 |
| 11723932_PNMA3     | -0.12716 | 0.120026 | 0.200097 |
| 11739170_G2E3      | -0.06181 | 0.120057 | 0.200131 |
| 11747682_RAPGEFL1  | -0.10796 | 0.12006  | 0.200131 |
| 11741066_SUMF2     | 0.073572 | 0.120065 | 0.200131 |
| 11726973_GH1       | 0.065921 | 0.120065 | 0.200131 |
| 11737097_DSC2      | 0.164255 | 0.120067 | 0.200131 |
| 11734187_GP6       | -0.09792 | 0.120079 | 0.200143 |
| 11742908_SLF1      | -0.07644 | 0.120099 | 0.20017  |
| 11740011_ZFP14     | 0.154638 | 0.120132 | 0.200207 |

|                    |          |          |          |
|--------------------|----------|----------|----------|
| 11741397_DNAI2     | -0.16287 | 0.120133 | 0.200207 |
| 11729957_KNG1      | -0.06865 | 0.120133 | 0.200207 |
| 11760296_NTMT1     | 0.07527  | 0.120153 | 0.200233 |
| 11737962_AUTS2     | 0.105442 | 0.120186 | 0.200281 |
| 11732368_FGF14     | -0.09287 | 0.120207 | 0.200309 |
| 11734302_MBL2      | 0.157561 | 0.120239 | 0.200357 |
| 11720953_PDCD5     | -0.08023 | 0.120286 | 0.200428 |
| 11717102_SLC38A1   | -0.10451 | 0.120301 | 0.200444 |
| 11739257_FAM63A    | 0.060943 | 0.120304 | 0.200444 |
| 11722393_TMEM126B  | 0.063208 | 0.120318 | 0.200461 |
| 11743411_RBM25     | 0.060215 | 0.120323 | 0.200462 |
| 11718205_TOE1      | -0.06534 | 0.120345 | 0.200491 |
| 11741810_BIN1      | 0.113179 | 0.120356 | 0.200504 |
| 11742117_LYSMD1    | -0.10311 | 0.120387 | 0.200549 |
| 11755813_SLC26A9   | -0.13624 | 0.120429 | 0.20061  |
| 11762510_ABCB9     | -0.12963 | 0.12048  | 0.200689 |
| 11747432_ADAM12    | 0.114908 | 0.12049  | 0.200698 |
| 11741809_HIST1H3J  | -0.07632 | 0.120502 | 0.200713 |
| 11716533_PPT1      | 0.063692 | 0.120582 | 0.200838 |
| 11756378_RUVBL2    | -0.06066 | 0.120598 | 0.200859 |
| 11756752_OSBP15    | -0.11278 | 0.120614 | 0.200877 |
| 11737094_SLC6A20   | -0.20709 | 0.120639 | 0.200913 |
| 11742661_SCT       | -0.0979  | 0.120647 | 0.200919 |
| 11719652_SPAG6     | -0.06558 | 0.12066  | 0.200935 |
| 11730116_CACNA2D2  | 0.114773 | 0.120671 | 0.200946 |
| 11725824_ENTPD3    | -0.07735 | 0.120678 | 0.20095  |
| 11719559_SOX4      | -0.13719 | 0.120699 | 0.200979 |
| 11730771_NAPG      | 0.101189 | 0.12072  | 0.201007 |
| 11751465_GRB14     | -0.13126 | 0.120731 | 0.201013 |
| 11760105_RPL7L1    | -0.17612 | 0.120732 | 0.201013 |
| 11736103_SPECC1L   | -0.07027 | 0.120747 | 0.201031 |
| 11752935_INTS4 /// | -0.06017 | 0.120812 | 0.201132 |
| 11734606_CXCR3     | -0.11295 | 0.120822 | 0.201143 |
| 11731227_MATK      | -0.1516  | 0.120838 | 0.201155 |
| 11753331_CLCNKA // | -0.10725 | 0.120838 | 0.201155 |
| 11744064_MUC5B     | -0.09767 | 0.120872 | 0.201205 |
| 11737835_CD58      | -0.14947 | 0.120885 | 0.201214 |
| 11753441_HILS1     | -0.20766 | 0.120886 | 0.201214 |
| 11732766_ALOXE3    | 0.120478 | 0.120896 | 0.201224 |
| 11760000_INVS      | -0.13071 | 0.120917 | 0.201252 |
| 11750896_F2        | -0.07361 | 0.120938 | 0.201281 |
| 11750030_SULT1C2   | -0.08001 | 0.121007 | 0.201389 |
| 11749261_TBCE      | -0.06127 | 0.12102  | 0.201398 |
| 11761822_STXBP4    | 0.085764 | 0.121021 | 0.201398 |
| 11726310_GLRB      | 0.10116  | 0.121043 | 0.201424 |
| 11749733_JRKL      | -0.12714 | 0.121045 | 0.201424 |
| 11716313_MRPS21    | -0.07237 | 0.121073 | 0.201463 |
| 11731275_CLEC4G    | -0.13518 | 0.121086 | 0.201479 |
| 11749576_FA2H      | -0.06876 | 0.121115 | 0.20152  |
| 11758750_YWHAZ     | -0.07063 | 0.121165 | 0.201597 |
| 11755099_WWTR1     | 0.060014 | 0.121205 | 0.201656 |



|                    |          |          |          |
|--------------------|----------|----------|----------|
| 11740520_SERPINA11 | -0.14285 | 0.121217 | 0.201669 |
| 11751199_MKNK2     | -0.0907  | 0.121255 | 0.201725 |
| 11754310_HDHD3     | -0.08102 | 0.121276 | 0.201753 |
| 11748932_CCDC150   | -0.14381 | 0.121298 | 0.201783 |
| 11724787_KIF3A     | 0.104068 | 0.121324 | 0.20182  |
| 11730675_C17orf50  | -0.09152 | 0.121333 | 0.201829 |
| 11747397_CCHCR1    | -0.11879 | 0.121339 | 0.201832 |
| 11718919_ATP6V1B1  | -0.14609 | 0.121388 | 0.201905 |
| 11727611_SCN2B     | 0.082676 | 0.121428 | 0.201966 |
| 11739962_B3GAT2    | -0.16603 | 0.121449 | 0.20198  |
| 11743642_TFAP2A    | 0.099198 | 0.121449 | 0.20198  |
| 11749845_TBC1D22A  | -0.09388 | 0.121449 | 0.20198  |
| 11735905_PNPLA1    | -0.0751  | 0.121476 | 0.202018 |
| 11747031_DMPK      | 0.084185 | 0.121508 | 0.202058 |
| 11746729_LRMP      | 0.098776 | 0.121511 | 0.202058 |
| 11763199_PCBP2     | 0.101445 | 0.121512 | 0.202058 |
| 11744192_CASKIN1   | -0.09465 | 0.12154  | 0.202097 |
| 11737538_NETO1     | -0.13339 | 0.121558 | 0.202119 |
| 11763023_OR5G5P    | -0.10412 | 0.12157  | 0.202132 |
| 11756333_CROCC     | 0.091101 | 0.121582 | 0.202146 |
| 11756710_MPP3      | -0.0754  | 0.121595 | 0.202157 |
| 11759716_NPIPA5 // | 0.107839 | 0.121597 | 0.202157 |
| 11757764_MSMO1     | -0.07851 | 0.121611 | 0.202173 |
| 11728878_ARID1B    | -0.12095 | 0.121621 | 0.202183 |
| 11759616_VASH1     | -0.08589 | 0.121644 | 0.202215 |
| 11743233_C16orf96  | -0.08656 | 0.121678 | 0.202264 |
| 11745697_CHN2 ///  | -0.09597 | 0.121691 | 0.202278 |
| 11758153_FAM83H    | -0.07258 | 0.121781 | 0.202422 |
| 11726575_CYP2A6 // | -0.07881 | 0.121793 | 0.202428 |
| 11739493_MGAT4A    | -0.18349 | 0.121793 | 0.202428 |
| 11724923_PPP1R9A   | -0.07694 | 0.1218   | 0.202432 |
| 11729065_SPPL2C    | 0.082147 | 0.121832 | 0.202479 |
| 11753751_SH3TC1    | 0.088162 | 0.121843 | 0.20248  |
| 11753727_RPL28     | 0.057356 | 0.121844 | 0.20248  |
| 11750569_IARS      | 0.058808 | 0.121845 | 0.20248  |
| 11734224_CTCFL     | -0.12263 | 0.121855 | 0.202488 |
| 11750018_HIST2H2BF | 0.098502 | 0.121858 | 0.202488 |
| 11738217_RELL1     | 0.136224 | 0.121873 | 0.202505 |
| 11759089_P2RX6     | -0.10768 | 0.121902 | 0.202546 |
| 11737373_TCP11L2   | -0.06415 | 0.121914 | 0.20256  |
| 11758880_RPS15A    | -0.08745 | 0.12195  | 0.202614 |
| 11753395_CDKN2B-AS | -0.09373 | 0.121959 | 0.202621 |
| 11737842_SNX29P1 / | -0.07822 | 0.121994 | 0.202672 |
| 11722467_PAX6      | -0.11199 | 0.122019 | 0.202707 |
| 11749203_CLEC4M    | 0.101632 | 0.122097 | 0.20283  |
| 11735185_F9        | -0.10931 | 0.122138 | 0.20289  |
| 11736400_DTX3      | 0.1119   | 0.122145 | 0.202896 |
| 11728063_SH3BP1    | -0.06773 | 0.122156 | 0.202906 |
| 11728252_NMNAT2    | 0.081028 | 0.122173 | 0.202928 |
| 11723079_C2orf47 / | -0.09619 | 0.12219  | 0.202949 |
| 11716498_ADRM1     | -0.06924 | 0.122209 | 0.202974 |

|                    |          |          |          |
|--------------------|----------|----------|----------|
| 11719669_SMYD5     | 0.08603  | 0.122225 | 0.202994 |
| 11720789_ASF1A     | 0.059659 | 0.122246 | 0.203022 |
| 11756487_TSN       | -0.06322 | 0.122285 | 0.203079 |
| 11751727_TYW3      | 0.064161 | 0.122307 | 0.203104 |
| 11743702_THUMPD3   | -0.07835 | 0.122308 | 0.203104 |
| 11760869_ACOT8     | -0.09086 | 0.122342 | 0.203154 |
| 11748480_TTYH2     | -0.09489 | 0.122408 | 0.203237 |
| 11729054_B3GNT8    | -0.06422 | 0.122409 | 0.203237 |
| 11758680_UCHL1     | 0.115508 | 0.122414 | 0.203237 |
| 11734503_ALOX15    | -0.11071 | 0.122416 | 0.203237 |
| 11733288_CXorf36   | -0.08511 | 0.122416 | 0.203237 |
| 11717875_PPFIA1    | 0.101135 | 0.122417 | 0.203237 |
| 11729960_DHFRL1    | -0.10746 | 0.122425 | 0.203244 |
| 11754970_EXO5      | -0.09444 | 0.122459 | 0.203292 |
| 11739295_ICOSLG // | -0.10753 | 0.122465 | 0.203297 |
| 11749830_IDH3A     | -0.06124 | 0.122471 | 0.2033   |
| 11742894_DRG2      | 0.061003 | 0.122481 | 0.203309 |
| 11725807_SNCAIP    | -0.11059 | 0.122498 | 0.20333  |
| 11754410_APLNR     | -0.10249 | 0.122503 | 0.203332 |
| 11736529_KCND2     | 0.160498 | 0.122511 | 0.203338 |
| 11739688_FAM107B   | 0.083215 | 0.122525 | 0.203354 |
| 11732339_BCL11A    | 0.199579 | 0.122549 | 0.203387 |
| 11740252_CWC27     | -0.0743  | 0.122575 | 0.203419 |
| 11732061_RPA4      | 0.234125 | 0.122582 | 0.203419 |
| 11722327_PGBD5     | 0.063977 | 0.122583 | 0.203419 |
| 11721197_DCHS1     | -0.10489 | 0.122585 | 0.203419 |
| 11762916_IZUMO1    | -0.08992 | 0.122615 | 0.20346  |
| 11749505_PLOD3     | -0.08435 | 0.122618 | 0.20346  |
| 11739523_ST8SIA4   | 0.09181  | 0.122623 | 0.203462 |
| 11732548_MYO1A     | -0.11517 | 0.122629 | 0.203465 |
| 11738964_ANP32D    | -0.11911 | 0.122637 | 0.203465 |
| 11716411_RPS4Y1    | -0.09697 | 0.122638 | 0.203465 |
| 11727245_LGI3      | -0.06922 | 0.122675 | 0.203521 |
| 11745677_LRIT2     | 0.109092 | 0.122718 | 0.203584 |
| 11723434_TBC1D22A  | -0.10302 | 0.122791 | 0.203699 |
| 11743703_THUMPD3   | 0.086165 | 0.122873 | 0.203821 |
| 11735195_ZFP28     | 0.129172 | 0.122877 | 0.203821 |
| 11727711_C1QTNF2   | -0.11429 | 0.122877 | 0.203821 |
| 11754167_ZNF148    | -0.09314 | 0.122912 | 0.203872 |
| 11755116_ABHD11    | -0.07317 | 0.122918 | 0.203874 |
| 11756547_CLU       | 0.059572 | 0.122963 | 0.203942 |
| 11750563_TRPM1     | -0.07492 | 0.122974 | 0.203954 |
| 11741828_OR2A1 /// | -0.13363 | 0.122984 | 0.203957 |
| 11737513_GALNTL6   | 0.082547 | 0.122985 | 0.203957 |
| 11761128_YME1L1    | -0.11833 | 0.123006 | 0.203987 |
| 11761060_TMEM175   | -0.15953 | 0.123014 | 0.203991 |
| 11756967_SUCLG2    | 0.085509 | 0.123017 | 0.203991 |
| 11763807_MAP2K5    | -0.2162  | 0.123089 | 0.204102 |
| 11757308_PPP1CB    | 0.070764 | 0.123115 | 0.204139 |
| 11752186_SLC27A1   | -0.08855 | 0.123184 | 0.204246 |
| 11744505_TP53I11   | -0.1683  | 0.123201 | 0.204268 |

|                    |          |          |          |
|--------------------|----------|----------|----------|
| 11752929_SIDT1     | -0.07702 | 0.123293 | 0.204413 |
| 11715896_SCARB2    | -0.06254 | 0.123307 | 0.20443  |
| 11750248_SNX19     | 0.122548 | 0.123312 | 0.204431 |
| 11732878_CNTRLN    | 0.07926  | 0.123322 | 0.204441 |
| 11748537_LMOD3     | -0.13216 | 0.123339 | 0.20446  |
| 11754448_TDRD5     | -0.12386 | 0.123342 | 0.20446  |
| 11761782_IRF1      | -0.10158 | 0.123382 | 0.204516 |
| 11741876_IL9R      | -0.08342 | 0.123384 | 0.204516 |
| 11729946_STX1B     | -0.09953 | 0.123396 | 0.204529 |
| 11717152_APMAP     | -0.09461 | 0.1234   | 0.204529 |
| 11749520_GPR21 /// | 0.091902 | 0.123428 | 0.204569 |
| 11738680_OR56B4    | -0.08516 | 0.123486 | 0.204657 |
| 11763146_HSP90AB5P | -0.06502 | 0.123499 | 0.204671 |
| 11749302_SRSF2     | -0.07662 | 0.123515 | 0.20469  |
| 11732346_ZNF33A    | -0.05876 | 0.123518 | 0.20469  |
| 11756663_NSUN2     | 0.080682 | 0.123526 | 0.204696 |
| 11746126_STAG3 /// | 0.076795 | 0.123565 | 0.204753 |
| 11735954_MRGRD     | -0.10808 | 0.123598 | 0.204802 |
| 11755214_TMTC1     | -0.06143 | 0.123608 | 0.20481  |
| 11729422_POPDC3    | -0.06247 | 0.123632 | 0.204843 |
| 11720487_HEBP2     | -0.06976 | 0.123648 | 0.204862 |
| 11720811_PAMR1     | -0.10742 | 0.123652 | 0.204862 |
| 11729663_CHEK1     | -0.07994 | 0.123667 | 0.204881 |
| 11723618_SNAP91    | -0.12677 | 0.12368  | 0.204896 |
| 11734102_ZNF578    | -0.09455 | 0.123689 | 0.204902 |
| 11754881_SIRPG     | -0.08067 | 0.123708 | 0.204928 |
| 11720213_PPAN      | -0.0727  | 0.123733 | 0.204952 |
| 11752987_EPN2      | 0.091305 | 0.123734 | 0.204952 |
| 11745092_MY016     | 0.093082 | 0.123735 | 0.204952 |
| 11763465_CABLES1   | -0.09665 | 0.123743 | 0.204958 |
| 11749001_ZGRF1     | -0.11876 | 0.123789 | 0.205025 |
| 11731872_CD209     | -0.09793 | 0.123792 | 0.205025 |
| 11759593_UROD      | -0.13734 | 0.123806 | 0.205041 |
| 11715214_MARK4     | -0.11054 | 0.123864 | 0.20513  |
| 11722774_DIDO1     | 0.100867 | 0.123888 | 0.205163 |
| 11716215_E2F4      | 0.073948 | 0.123916 | 0.205202 |
| 11731920_RSG1      | -0.13736 | 0.123966 | 0.205278 |
| 11727665_HA02      | -0.11234 | 0.123991 | 0.205313 |
| 11742076_PROX2     | -0.06741 | 0.124    | 0.205321 |
| 11749508_PAPPA     | -0.10234 | 0.124026 | 0.205351 |
| 11720885_ACACB     | -0.13756 | 0.124029 | 0.205351 |
| 11756950_CELF6     | -0.06076 | 0.124033 | 0.205351 |
| 11747043_ADAMTSL4- | -0.17158 | 0.124035 | 0.205351 |
| 11716761_PGC       | 0.11073  | 0.124065 | 0.205394 |
| 11737257_ANKS4B    | 0.08956  | 0.124079 | 0.20541  |
| 11741390_NSFL1C    | -0.07526 | 0.124096 | 0.205431 |
| 11749540_DLD       | 0.059847 | 0.124105 | 0.205439 |
| 11728260_DIEXF     | -0.07643 | 0.124126 | 0.205466 |
| 11731813_GATA1     | -0.11032 | 0.124156 | 0.205509 |
| 11744330_DNAJC8    | -0.06142 | 0.124163 | 0.205509 |
| 11758037_MTMR12    | -0.08501 | 0.124164 | 0.205509 |

|                    |          |          |          |
|--------------------|----------|----------|----------|
| 11724763_DEPTOR    | -0.0775  | 0.124185 | 0.205537 |
| 11716945_TWF1      | -0.09225 | 0.124198 | 0.205552 |
| 11737694_LOC391343 | 0.12723  | 0.124216 | 0.205572 |
| 11723990_ALG6      | -0.11683 | 0.124219 | 0.205572 |
| 11743966_CERCAM    | -0.06562 | 0.124254 | 0.205623 |
| 11732935_CT83      | -0.08792 | 0.124271 | 0.205644 |
| 11728664_HSD3B2    | -0.19389 | 0.124305 | 0.205693 |
| 11731783_RASAL3    | -0.08158 | 0.124315 | 0.205702 |
| 11741807_CMPK1     | 0.070885 | 0.124337 | 0.205732 |
| 11756120_IKKBG     | -0.08942 | 0.124356 | 0.205757 |
| 11725400_TTLL1     | -0.11887 | 0.124361 | 0.205757 |
| 11730351_ANKRD52   | -0.08411 | 0.124367 | 0.205757 |
| 11749076_SLAMF1    | 0.129246 | 0.124368 | 0.205757 |
| 11761150_GALK1     | -0.09823 | 0.124381 | 0.205771 |
| 11752682_CHRDL2    | -0.1286  | 0.124385 | 0.205771 |
| 11715591_DYNC1H1   | 0.078967 | 0.124411 | 0.205806 |
| 11724866_SCGB3A1   | -0.05756 | 0.124418 | 0.205811 |
| 11746904_RGL2      | 0.067788 | 0.124427 | 0.205818 |
| 11738636_PCDHGA3   | -0.08807 | 0.124435 | 0.205825 |
| 11733508_RLN1      | 0.11424  | 0.124446 | 0.205836 |
| 11749503_RELN      | 0.082863 | 0.124465 | 0.205861 |
| 11715219_HIST1H2AI | 0.189168 | 0.124491 | 0.205896 |
| 11737404_GREB1     | 0.105264 | 0.124564 | 0.206011 |
| 11746228_AHNAK2    | 0.089938 | 0.124572 | 0.206017 |
| 11759233_PLA2R1    | 0.210889 | 0.124612 | 0.206071 |
| 11758568_SLF1      | -0.08078 | 0.124613 | 0.206071 |
| 11719239_PANX1     | 0.082449 | 0.12462  | 0.206075 |
| 11734219_MARVELD2  | -0.14766 | 0.124698 | 0.206198 |
| 11742297_FBXO24    | -0.12196 | 0.124708 | 0.206206 |
| 11737158_SLC9A2    | -0.16416 | 0.124715 | 0.206212 |
| 11726312_TBL1X     | 0.090785 | 0.124734 | 0.206233 |
| 11715871_UFD1L     | 0.142968 | 0.124737 | 0.206233 |
| 11756916_ABCG5     | -0.0774  | 0.124753 | 0.206253 |
| 11750071_ATG2A     | -0.07917 | 0.124765 | 0.206267 |
| 11716820_PRSS1     | 0.096544 | 0.124783 | 0.206284 |
| 11750113_EP400     | -0.11086 | 0.124784 | 0.206284 |
| 11738159_COX6B2    | -0.10994 | 0.124815 | 0.206328 |
| 11720633_FLNC      | -0.07394 | 0.12484  | 0.206355 |
| 11757483_VWA1      | -0.10894 | 0.12484  | 0.206355 |
| 11746780_RASSF6    | 0.156583 | 0.124861 | 0.206383 |
| 11760614_SKIV2L    | -0.10062 | 0.124869 | 0.20639  |
| 11737367_DYDC1     | 0.074661 | 0.124918 | 0.206464 |
| 11733850_GTF3A     | 0.061076 | 0.124955 | 0.206518 |
| 11762153_MRPL9     | -0.06728 | 0.124963 | 0.206523 |
| 11716377_GRN       | 0.071398 | 0.124985 | 0.206553 |
| 11755545_EXD1      | -0.07451 | 0.124991 | 0.206555 |
| 11724856_CEP63     | -0.12481 | 0.125    | 0.206564 |
| 11761611_DDX11     | 0.128661 | 0.125005 | 0.206565 |
| 11741287_HTR3B     | 0.05636  | 0.12501  | 0.206566 |
| 11730727_OMG       | -0.11784 | 0.125019 | 0.20657  |
| 11755411_IKBB      | -0.07012 | 0.125021 | 0.20657  |

|                    |          |          |          |
|--------------------|----------|----------|----------|
| 11763126_IGKC      | -0.11669 | 0.125035 | 0.206581 |
| 11760900_UBXN1     | -0.09987 | 0.125036 | 0.206581 |
| 11758028_FOXQ1     | -0.09058 | 0.12508  | 0.206641 |
| 11739133_NOL10     | -0.15084 | 0.125081 | 0.206641 |
| 11760273_TRGV3     | -0.14879 | 0.125085 | 0.206641 |
| 11734950_MTMR7     | -0.11413 | 0.125115 | 0.206682 |
| 11719090_TAB1      | -0.08795 | 0.125118 | 0.206682 |
| 11757305_RPSA ///  | 0.056183 | 0.12515  | 0.206728 |
| 11744964_MIR17HG / | 0.105416 | 0.125216 | 0.206829 |
| 11743143_COX11     | -0.06222 | 0.125232 | 0.206849 |
| 11737889_HRH4      | -0.15514 | 0.125274 | 0.206912 |
| 11751120_OSBPL7    | -0.11021 | 0.12529  | 0.206932 |
| 11715184_RPL38     | -0.0785  | 0.125304 | 0.206947 |
| 11721834_GET4 ///  | 0.066507 | 0.125315 | 0.206958 |
| 11748099_PHACTR3   | -0.17343 | 0.125322 | 0.206964 |
| 11721813_VWA1      | -0.07212 | 0.12533  | 0.206969 |
| 11732709_SGCA      | -0.12642 | 0.125336 | 0.206971 |
| 11733620_BCL11B    | -0.19232 | 0.125388 | 0.207051 |
| 11722820_GGT7      | -0.08371 | 0.12542  | 0.207097 |
| 11753107_MOGAT3    | -0.10952 | 0.125425 | 0.207098 |
| 11745693_DFFB      | -0.15245 | 0.125441 | 0.207113 |
| 11725263_PNCK      | -0.13074 | 0.125442 | 0.207113 |
| 11754207_UBE3D     | 0.108105 | 0.125462 | 0.207139 |
| 11732615_TCEAL5    | -0.10787 | 0.12549  | 0.207178 |
| 11751784_HCN3      | -0.16727 | 0.125496 | 0.20718  |
| 11757460_ADAM12    | -0.0965  | 0.125502 | 0.207183 |
| 11755990_CAPN12    | -0.08514 | 0.125542 | 0.207242 |
| 11748998_SORCS2    | -0.09132 | 0.125569 | 0.20728  |
| 11744760_TSLP      | 0.121059 | 0.125599 | 0.207323 |
| 11715822_SYPL1     | -0.06895 | 0.125616 | 0.207343 |
| 11725091_RFX5      | 0.067456 | 0.12562  | 0.207343 |
| 11761699_MAD2L1    | 0.150419 | 0.125663 | 0.207406 |
| 11744972_MYO15A    | -0.1356  | 0.12567  | 0.207411 |
| 11748886_FKBP7     | 0.076777 | 0.125692 | 0.207441 |
| 11746028_NMI       | 0.086507 | 0.125744 | 0.20752  |
| 11748026_PPFIA4    | 0.067711 | 0.12575  | 0.207523 |
| 11756724_PPT1      | 0.069703 | 0.125757 | 0.207527 |
| 11719905_ENGASE    | -0.09312 | 0.125777 | 0.207552 |
| 11759011_PRPF4     | -0.09427 | 0.1258   | 0.20758  |
| 200018_PMRPS13     | 0.057281 | 0.125802 | 0.20758  |
| 11749202_ME3       | 0.083279 | 0.125835 | 0.207626 |
| 11752082_CDH12     | 0.110305 | 0.125838 | 0.207626 |
| 11735637_LRRC23    | -0.12995 | 0.125847 | 0.207634 |
| 11763754_RASSF1    | -0.07576 | 0.125853 | 0.207636 |
| 11750781_CDH17     | -0.14924 | 0.125858 | 0.207637 |
| 11759276_OR2M3     | -0.15483 | 0.125862 | 0.207637 |
| 11761839_RFC3      | -0.13173 | 0.125873 | 0.207649 |
| 11723366_SYCP1     | -0.08969 | 0.125902 | 0.207688 |
| 11759940_SLC3A1    | -0.21821 | 0.12591  | 0.207695 |
| 11729558_PRSS53    | -0.1059  | 0.125917 | 0.2077   |
| 11756532_PIK3CD    | 0.07446  | 0.125944 | 0.207738 |

|                   |     |          |          |          |
|-------------------|-----|----------|----------|----------|
| 11744079_PRSS2    | /// | -0.09871 | 0.125968 | 0.20777  |
| 11742970_KCTD7    | /// | -0.06463 | 0.125978 | 0.20778  |
| 11719296_MAPKAP1  |     | -0.07483 | 0.125985 | 0.207783 |
| 11746784_C9orf84  |     | 0.113933 | 0.126003 | 0.207807 |
| 11728178_SIRT4    |     | 0.062793 | 0.126028 | 0.207841 |
| 11732022_TTC25    |     | 0.143883 | 0.126041 | 0.207856 |
| 11729175_KLHL4    |     | -0.12535 | 0.126051 | 0.207866 |
| 11725827_CD1D     |     | 0.112894 | 0.126102 | 0.207943 |
| 11724165_GPR146   |     | -0.12354 | 0.126122 | 0.207968 |
| 11727594_KIAA2026 |     | 0.073789 | 0.126148 | 0.208004 |
| 11749728_KIAA1715 |     | 0.068936 | 0.126163 | 0.208022 |
| 11720989_SLC7A7   |     | -0.11204 | 0.12622  | 0.208109 |
| 11729340_CRYGD    |     | -0.13663 | 0.126237 | 0.208129 |
| 11761115_MTCH1    |     | -0.10111 | 0.126249 | 0.208142 |
| 11749251_REXO4    |     | -0.09038 | 0.126256 | 0.208147 |
| 11728140_SHISA2   |     | -0.07156 | 0.126276 | 0.208173 |
| 11759933_C22orf15 |     | -0.15553 | 0.126304 | 0.20821  |
| 11758541_CFAP47   |     | -0.0785  | 0.126308 | 0.20821  |
| 11737361_CDRT1    |     | 0.105855 | 0.126312 | 0.20821  |
| 11729367_PRKAA2   |     | 0.143931 | 0.126317 | 0.208213 |
| 11761357_CELF4    |     | -0.11898 | 0.126327 | 0.208221 |
| 11722662_HPSE     |     | 0.120455 | 0.126358 | 0.208265 |
| 11742204_MAPK14   |     | -0.19898 | 0.126377 | 0.20829  |
| 11723640_C11orf58 |     | 0.095269 | 0.126429 | 0.208368 |
| 11726773_PRKCI    |     | -0.08819 | 0.126461 | 0.208415 |
| 11739495_SLC29A4  |     | 0.095017 | 0.126541 | 0.208539 |
| 11739766_PNPLA3   |     | -0.07761 | 0.126574 | 0.208586 |
| 11761545_FAM216A  |     | -0.12383 | 0.126604 | 0.208629 |
| 11755018_PPP1CC   |     | -0.06011 | 0.126661 | 0.208716 |
| 11731470_AKT2     |     | -0.15844 | 0.126676 | 0.208734 |
| 11724242_TCF4     |     | 0.08518  | 0.126685 | 0.208742 |
| 11743665_SPEN     |     | 0.091073 | 0.126697 | 0.208754 |
| 11725312_TMED7    |     | 0.062878 | 0.126707 | 0.208764 |
| 11735051_KIAA1211 |     | 0.082477 | 0.126718 | 0.208775 |
| 11738891_KRTAP5-4 |     | -0.08225 | 0.126728 | 0.208784 |
| 11764060_GJC2     |     | -0.09386 | 0.126757 | 0.208825 |
| 11741539_DMKN     |     | -0.10905 | 0.126763 | 0.208827 |
| 11721079_PNISR    |     | 0.058698 | 0.126769 | 0.20883  |
| 11741656_SLC01C1  |     | -0.06978 | 0.126791 | 0.208859 |
| 11753051_ZNF483   |     | -0.12363 | 0.126813 | 0.208889 |
| 11745847_TACC1    |     | 0.074282 | 0.126823 | 0.208898 |
| 11754104_TMED3    |     | -0.06608 | 0.126828 | 0.2089   |
| 11737176_C9orf72  |     | -0.09798 | 0.126833 | 0.2089   |
| 11752618_MED24    |     | -0.07444 | 0.126884 | 0.208977 |
| 11731546_SIK2     |     | 0.097125 | 0.12689  | 0.208977 |
| 11754796_SLC03A1  |     | 0.081941 | 0.126892 | 0.208977 |
| 11744066_PRDM6    |     | 0.130832 | 0.126907 | 0.208994 |
| 11743234_NPBWR1   |     | -0.11212 | 0.126961 | 0.20907  |
| 11746435_TANGO2   |     | -0.07769 | 0.126962 | 0.20907  |
| 11743627_IRS1     |     | 0.0992   | 0.127028 | 0.209173 |
| 11732871_LCN6     |     | 0.098982 | 0.127038 | 0.209182 |

|                    |          |          |          |
|--------------------|----------|----------|----------|
| 11738357_OR4N3P    | -0.15164 | 0.127083 | 0.20925  |
| 11740898_NOVA1     | -0.0971  | 0.127152 | 0.209355 |
| 11737183_EXOC3L2   | -0.06525 | 0.12718  | 0.209394 |
| 11763457_RPL41 /// | 0.069582 | 0.127204 | 0.209423 |
| 11730041_SMARCC2   | -0.12882 | 0.127206 | 0.209423 |
| 11717018_ATP1A1    | 0.058734 | 0.127211 | 0.209425 |
| 11762860_CD300C    | -0.13225 | 0.127231 | 0.209451 |
| 11716586_AXL       | -0.06073 | 0.127246 | 0.209468 |
| 11749954_CLEC1A    | -0.12301 | 0.127266 | 0.209494 |
| 11723021_BCKDHB    | 0.098752 | 0.12727  | 0.209494 |
| 11716343_JUP       | -0.08127 | 0.127279 | 0.209501 |
| 11748487_RGL2      | 0.075613 | 0.127301 | 0.20953  |
| 11717760_GMFG      | -0.10329 | 0.127311 | 0.20954  |
| 11716798_NDN       | -0.06198 | 0.127352 | 0.2096   |
| 11755703_ZNF287    | -0.07192 | 0.127356 | 0.2096   |
| 11753137_LDLRAD2   | -0.11533 | 0.127439 | 0.209729 |
| 11740602_APH1B     | 0.103446 | 0.127443 | 0.209729 |
| 11729986_ROBO2     | -0.14827 | 0.127451 | 0.209735 |
| 11716211_HIBADH    | 0.073159 | 0.127457 | 0.209738 |
| 11717692_ANKRD13A  | 0.105949 | 0.127476 | 0.209762 |
| 11729002_CDK13     | 0.08068  | 0.127486 | 0.209767 |
| 11749543_HABP2     | -0.09825 | 0.12749  | 0.209767 |
| 11749785_CDKL3     | 0.173917 | 0.127492 | 0.209767 |
| 11763583_MAN1C1    | -0.1283  | 0.127534 | 0.209828 |
| 11761958_TRAV12-3  | -0.13826 | 0.127573 | 0.209887 |
| 11756325_CUTA      | 0.063391 | 0.127581 | 0.209891 |
| 11759977_LOC399886 | -0.21583 | 0.1276   | 0.20991  |
| 11717632_KLHL9     | 0.070172 | 0.127604 | 0.20991  |
| 11715632_MAF1      | -0.06401 | 0.127605 | 0.20991  |
| 11747639_NRCAM     | 0.269986 | 0.127629 | 0.209942 |
| 11728736_ZBTB38    | -0.1555  | 0.127641 | 0.209956 |
| 11748165_LOC100507 | 0.073152 | 0.127648 | 0.209961 |
| 11755634_PNISR     | 0.062308 | 0.127679 | 0.209993 |
| 11760131_ACSM2A // | -0.1435  | 0.127679 | 0.209993 |
| 11755085_KIR3DL2   | -0.09606 | 0.127681 | 0.209993 |
| 11739706_FETUB     | -0.08544 | 0.127707 | 0.210025 |
| 11730161_TEX14     | -0.06854 | 0.127709 | 0.210025 |
| 11755604_RPL7A     | -0.05649 | 0.127758 | 0.210099 |
| 11721937_CHN2 ///  | -0.07191 | 0.127793 | 0.210148 |
| 11724050_TRIM68    | -0.11762 | 0.127864 | 0.210259 |
| 11754096_TAGLN     | -0.12332 | 0.127881 | 0.210279 |
| 11753386_ST13 ///  | 0.065026 | 0.127978 | 0.210433 |
| 11717092_EIF4G2    | 0.063236 | 0.127983 | 0.210433 |
| 11761799_TMC6      | -0.10883 | 0.127995 | 0.210445 |
| 11733569_C1QL4     | -0.26797 | 0.128009 | 0.210458 |
| 11724508_FGG       | -0.10386 | 0.128011 | 0.210458 |
| 11744356_TACC1     | 0.113943 | 0.128035 | 0.210491 |
| 11738527_TP73      | -0.09297 | 0.128071 | 0.210543 |
| 11757408_RPS20     | 0.060468 | 0.128081 | 0.210552 |
| 11741760_SLA2      | -0.05793 | 0.128093 | 0.210561 |
| 11762879_NARF      | -0.07132 | 0.128095 | 0.210561 |

|                    |          |          |          |
|--------------------|----------|----------|----------|
| 11758415_CLEC12B   | 0.154285 | 0.128122 | 0.210598 |
| 11753671_DSTN      | -0.06268 | 0.128181 | 0.210685 |
| 11757615_MAP6      | -0.10226 | 0.128183 | 0.210685 |
| 11723476_SLC17A5   | 0.064768 | 0.128198 | 0.210701 |
| 11746424_ZSCAN2    | 0.167995 | 0.128228 | 0.210743 |
| 11750097_CTND2     | 0.138426 | 0.128234 | 0.210746 |
| 11738609_SYT10     | -0.08918 | 0.128244 | 0.210756 |
| 11738266_GPR101    | -0.05813 | 0.128251 | 0.21076  |
| 11717595_ELF3      | -0.10874 | 0.128286 | 0.210811 |
| 11732671_CCDC107   | 0.1181   | 0.128313 | 0.210847 |
| 11736789_FBXO4     | -0.09434 | 0.128316 | 0.210847 |
| 11754382_SMIM5     | -0.08824 | 0.128365 | 0.210909 |
| 11748090_NPR1      | -0.14459 | 0.128367 | 0.210909 |
| 11722819_GGT7      | 0.08519  | 0.128367 | 0.210909 |
| 11736972_KLRG2     | -0.08973 | 0.128376 | 0.210916 |
| 11750388_HSF5      | -0.07428 | 0.128464 | 0.21105  |
| 11730257_EPN3      | -0.07679 | 0.128466 | 0.21105  |
| 11754406_LONP2     | -0.05976 | 0.128548 | 0.211174 |
| 11750260_SYNJ2     | 0.1177   | 0.12855  | 0.211174 |
| 11748842_RAB3A     | -0.09545 | 0.128555 | 0.211175 |
| 11760322_ZSCAN18   | -0.11783 | 0.128564 | 0.211181 |
| 11721045_UNC50     | 0.0767   | 0.128569 | 0.211181 |
| 11759492_RPS27L    | 0.226678 | 0.128572 | 0.211181 |
| 11732472_DCAF4L2   | -0.14904 | 0.12858  | 0.211188 |
| 11731911_GPR12     | -0.11891 | 0.128598 | 0.211209 |
| 11756837_CLEC5A    | -0.07684 | 0.128611 | 0.211218 |
| 11754930_ATP1A1    | 0.057554 | 0.128612 | 0.211218 |
| 11715635_TMEM14C   | -0.06944 | 0.128631 | 0.211241 |
| 11747003_LRRC31    | 0.087761 | 0.128634 | 0.211241 |
| 11744963_SUFU      | -0.12026 | 0.128641 | 0.211242 |
| 11731340_NOD2      | 0.084177 | 0.128646 | 0.211242 |
| 11734560_ADIPOQ    | -0.11008 | 0.128648 | 0.211242 |
| 11734475_ZIM2      | -0.11487 | 0.128665 | 0.211263 |
| 11741468_SOX6      | -0.12902 | 0.12867  | 0.211264 |
| 11748437_SUSD4     | 0.138578 | 0.128676 | 0.211267 |
| 11748464_CORIN     | 0.129629 | 0.128684 | 0.211272 |
| 11756560_NDP       | -0.17154 | 0.128696 | 0.211286 |
| 11722504_CYYR1     | -0.09992 | 0.128713 | 0.211306 |
| 11719908_GBA /// G | 0.105105 | 0.128725 | 0.211319 |
| 11737316_LOC102724 | -0.10846 | 0.128808 | 0.211447 |
| 11716005_HYOU1     | -0.0926  | 0.12883  | 0.211478 |
| 11752764_BCR       | -0.08225 | 0.128854 | 0.21151  |
| 11731395_PPP1CC    | -0.06171 | 0.128863 | 0.211517 |
| 11733567_L3MBTL1   | 0.128314 | 0.128869 | 0.211521 |
| 11738719_OR5K1 /// | -0.1248  | 0.12889  | 0.211547 |
| 11739950_CASC5     | -0.06719 | 0.128902 | 0.21156  |
| 11760401_INADL     | 0.127789 | 0.128908 | 0.211562 |
| 11736742_C1orf168  | -0.07392 | 0.128928 | 0.211589 |
| 11742413_HECTD4    | -0.06087 | 0.12894  | 0.2116   |
| 11760906_GPR162    | -0.17458 | 0.128944 | 0.2116   |
| 11745275_ITCH      | 0.069675 | 0.128983 | 0.211652 |



|                    |          |          |          |
|--------------------|----------|----------|----------|
| 11735898_TOM1      | 0.077037 | 0.128984 | 0.211652 |
| 11739238_SNAPC3    | -0.06796 | 0.129023 | 0.211709 |
| 11745393_APOC2     | 0.135381 | 0.129028 | 0.211709 |
| 11737625_PAPPA2    | -0.10962 | 0.129058 | 0.211752 |
| 11748321_STARD4    | 0.112596 | 0.129065 | 0.211756 |
| 11757175_SNORA35   | 0.064571 | 0.12907  | 0.211758 |
| 11716537_SZRD1     | 0.130399 | 0.129091 | 0.211784 |
| 11738162_XCR1      | -0.09599 | 0.129142 | 0.211862 |
| 11734644_PWWP2B    | -0.1073  | 0.129156 | 0.211877 |
| 11761840_TFDP1     | -0.08724 | 0.129171 | 0.211894 |
| 11730611_MCOLN2    | -0.07601 | 0.129182 | 0.211906 |
| 11752771_CHST15    | 0.17589  | 0.129196 | 0.211921 |
| 11760392_SUGP2     | -0.07337 | 0.129275 | 0.212044 |
| 11763243_GOS2      | -0.09664 | 0.129295 | 0.21207  |
| 11747824_USP10     | 0.060999 | 0.129485 | 0.212374 |
| 11727261_ENTPD7    | 0.105095 | 0.129559 | 0.212489 |
| 11723695_HSF1      | 0.061901 | 0.129565 | 0.212491 |
| 11753006_BCR       | -0.13605 | 0.129588 | 0.212516 |
| 11749279_ARHGAP9   | -0.17764 | 0.129589 | 0.212516 |
| 11715533_LRP1      | -0.06292 | 0.129606 | 0.212536 |
| 11729588_KLK2      | -0.12955 | 0.12961  | 0.212536 |
| 11735723_RBCK1     | 0.088462 | 0.129615 | 0.212538 |
| 11758771_HLA-DPB1  | -0.07589 | 0.129625 | 0.212546 |
| 11718413_C14orf166 | -0.066   | 0.129633 | 0.212551 |
| 11717672_ENPP2     | 0.062095 | 0.129636 | 0.212551 |
| 11744908_SVBP      | -0.05693 | 0.129691 | 0.212633 |
| 11759243_EPPIN-WFD | -0.11923 | 0.12971  | 0.212657 |
| 11754899_CEP89     | 0.082449 | 0.12973  | 0.212683 |
| 11760494_LINC01549 | -0.18022 | 0.12976  | 0.212726 |
| 11728522_MYCL      | -0.07134 | 0.129783 | 0.212756 |
| 11759270_IFNA5     | -0.15009 | 0.129818 | 0.212806 |
| 11730892_ACTL7A    | -0.10454 | 0.129831 | 0.212819 |
| 11746924_SHROOM4   | -0.09865 | 0.129857 | 0.212854 |
| 11730779_ADH1C     | -0.14791 | 0.129867 | 0.212854 |
| 11720021_RTEL1 /// | -0.12254 | 0.129868 | 0.212854 |
| 11741922_LCE2C     | 0.156912 | 0.129869 | 0.212854 |
| 11762786_COL9A1    | -0.17751 | 0.129875 | 0.212856 |
| 11721185_MEGF8     | -0.09268 | 0.129903 | 0.212895 |
| 11715907_FAM96B    | -0.05758 | 0.129932 | 0.212936 |
| 11740064_SFR1      | -0.10146 | 0.129949 | 0.212956 |
| 11743845_TMEM102   | -0.05995 | 0.129987 | 0.213011 |
| 11757132_SNORA29 / | 0.088517 | 0.130024 | 0.213065 |
| 11748495_OSR2      | 0.181055 | 0.130076 | 0.21313  |
| 11720050_PTPRN     | -0.10913 | 0.130077 | 0.21313  |
| 11737919_GUCA1C    | -0.0904  | 0.130077 | 0.21313  |
| 11721773_LOC339166 | -0.13097 | 0.130086 | 0.213139 |
| 11741006_PARG      | -0.09128 | 0.130115 | 0.213168 |
| 11732100_MRAP      | -0.10137 | 0.130117 | 0.213168 |
| 11722059_ZG16      | -0.08149 | 0.130117 | 0.213168 |
| 11725808_SNCAIP    | -0.09401 | 0.130129 | 0.213176 |
| 11751957_HERC4     | 0.103539 | 0.130131 | 0.213176 |

|                    |          |          |          |
|--------------------|----------|----------|----------|
| 11746900_PPEF2     | -0.113   | 0.130153 | 0.213204 |
| 11736809_VAV2      | -0.10074 | 0.130161 | 0.213211 |
| 11736481_TREML2    | -0.0813  | 0.130205 | 0.213275 |
| 11760355_PMPCB     | -0.08972 | 0.130209 | 0.213275 |
| 11730471_SCGB2A2   | -0.09731 | 0.130221 | 0.213287 |
| 11758861_ZG16      | -0.1443  | 0.130249 | 0.213326 |
| 11748176_RPS6KA4   | -0.08564 | 0.130278 | 0.213366 |
| 11759526_MGAT4B    | -0.10301 | 0.130328 | 0.213441 |
| 11732834_ZKSCAN7   | 0.085281 | 0.130354 | 0.213477 |
| 11723859_DDR2      | -0.07128 | 0.130375 | 0.213504 |
| 11761700_RANBP10   | -0.07837 | 0.13038  | 0.213505 |
| 11737643_OR10AD1   | -0.08145 | 0.130387 | 0.213509 |
| 11733791_SLC25A12  | -0.09731 | 0.130439 | 0.213586 |
| 11762568_TP63      | -0.17925 | 0.130443 | 0.213586 |
| 11726495_ARMC12    | -0.1163  | 0.130489 | 0.213655 |
| 11745618_RAB40A // | -0.12638 | 0.130495 | 0.213657 |
| 11756901_MASP1     | -0.17253 | 0.1305   | 0.213657 |
| 11726109_HOMEZ     | 0.139323 | 0.130503 | 0.213657 |
| 11752034_ABCA8     | -0.10501 | 0.130524 | 0.213684 |
| 11732686_PIWIL2    | -0.08898 | 0.130537 | 0.213697 |
| 11761420_RGS11     | -0.16219 | 0.130602 | 0.213794 |
| 11748745_SF1       | -0.06697 | 0.130604 | 0.213794 |
| 11737529_RPTN      | 0.12543  | 0.130647 | 0.213856 |
| 11741869_PARK2     | -0.09414 | 0.130671 | 0.213885 |
| 11734532_SGCZ      | -0.06703 | 0.130673 | 0.213885 |
| 11726684_CDIP1     | 0.074929 | 0.130678 | 0.213886 |
| 11758426_B3GLCT    | -0.1518  | 0.130701 | 0.213917 |
| 11755632_MYH14     | -0.12555 | 0.130737 | 0.213967 |
| 11753079_DPF2      | -0.07022 | 0.130748 | 0.213979 |
| 11750382_ACIN1     | -0.09363 | 0.130764 | 0.213994 |
| 11738374_KIR3DL3   | 0.092802 | 0.130766 | 0.213994 |
| 11764025_LOC100507 | -0.10488 | 0.130773 | 0.213998 |
| 11738535_WNT1      | -0.08822 | 0.13078  | 0.214002 |
| 11718804_PDCD10    | 0.062661 | 0.130786 | 0.214004 |
| 11724806_CIR1      | 0.132963 | 0.130815 | 0.214045 |
| 11746645_AP2M1     | -0.06624 | 0.130883 | 0.214147 |
| 11726598_PLPPR1    | -0.16335 | 0.130886 | 0.214147 |
| 11736619_ALDH5A1   | -0.07496 | 0.130922 | 0.214195 |
| 11760312_NAMPT     | 0.133022 | 0.130924 | 0.214195 |
| 11759179_TMEM38B   | -0.05864 | 0.130945 | 0.214222 |
| 11751443_SH3BP5L   | -0.13863 | 0.131012 | 0.214325 |
| 11763799_FAM71F1   | 0.247303 | 0.131053 | 0.214385 |
| 11739988_ZNF823    | 0.106075 | 0.131062 | 0.214392 |
| 11757409_TMSB10    | -0.06051 | 0.131075 | 0.214405 |
| 11730235_MYADM     | 0.061526 | 0.131082 | 0.214405 |
| 11727416_CRYL1     | 0.101862 | 0.131083 | 0.214405 |
| 11748703_C1D       | -0.08095 | 0.131133 | 0.21448  |
| 11724281_SUGT1     | 0.068205 | 0.131148 | 0.214496 |
| 11728913_C8B       | -0.06829 | 0.131157 | 0.214504 |
| 11744520_PCGF1     | -0.06829 | 0.131164 | 0.21451  |
| 11750207_HSD17B12  | -0.06131 | 0.131171 | 0.214513 |

|                    |          |          |          |
|--------------------|----------|----------|----------|
| 11757692_APC       | -0.07175 | 0.13133  | 0.214765 |
| 11753026_PRLR      | -0.14869 | 0.131352 | 0.214794 |
| 11740573_BEND7     | 0.154512 | 0.131377 | 0.214828 |
| 11751453_MRRF      | 0.074969 | 0.131385 | 0.214834 |
| 11760053_TIRAP     | 0.175075 | 0.131398 | 0.214848 |
| 11729807_COX6B1    | -0.06016 | 0.131414 | 0.214867 |
| 11760959_RABGAP1L  | 0.138579 | 0.131425 | 0.214878 |
| 11763089_VEGFA     | -0.07078 | 0.131448 | 0.214908 |
| 11746262_MAPK12    | -0.06736 | 0.13147  | 0.214936 |
| 11730544_TEX38     | -0.10043 | 0.131502 | 0.214983 |
| 11763541_SLC25A47  | -0.09591 | 0.131507 | 0.214983 |
| 11732745_SYT3      | -0.07434 | 0.131541 | 0.215032 |
| 11723053_SZT2      | -0.0769  | 0.131552 | 0.215039 |
| 11742084_PCDHA1    | -0.11336 | 0.131555 | 0.215039 |
| 11762604_GTF2IRD2B | 0.159843 | 0.131559 | 0.215039 |
| 11740384_KSR1      | 0.108281 | 0.131625 | 0.21514  |
| 11718074_IL4R      | 0.112091 | 0.131644 | 0.215165 |
| 11734632_RNF180    | 0.175714 | 0.131685 | 0.215223 |
| 11752805_SERPINB3  | -0.14347 | 0.131699 | 0.21524  |
| 11745616_TRIM15    | -0.16082 | 0.131715 | 0.215258 |
| 11721921_SENP5     | -0.06332 | 0.1318   | 0.215385 |
| 11753673_PLA2G2D   | -0.12475 | 0.131801 | 0.215385 |
| 11743052_CHORDC1   | 0.111915 | 0.131808 | 0.21539  |
| 11721353_GALNT3    | -0.08818 | 0.131824 | 0.215408 |
| 11743246_DEFB114   | 0.078742 | 0.13183  | 0.215411 |
| 11727435_AIPL1     | -0.05958 | 0.131872 | 0.215464 |
| 11728778_RPAP2     | 0.142112 | 0.131872 | 0.215464 |
| 11735657_KCNC3     | -0.09731 | 0.131884 | 0.215475 |
| 11737739_GPR27     | -0.06643 | 0.131887 | 0.215475 |
| 11723193_LTF       | 0.10445  | 0.131909 | 0.215504 |
| 11745398_NF1       | 0.136602 | 0.131914 | 0.215504 |
| 11722833_CCNY      | -0.06628 | 0.131953 | 0.21556  |
| 11719577_AMT       | -0.08584 | 0.131958 | 0.215562 |
| 11758128_LOC101929 | -0.08703 | 0.132006 | 0.215633 |
| 11755031_CENPP     | 0.083502 | 0.132013 | 0.215638 |
| 11721569_ANG       | -0.19743 | 0.132044 | 0.215675 |
| 11747351_ZSCAN32   | 0.067015 | 0.132045 | 0.215675 |
| 11747331_AHCYL1    | -0.07095 | 0.132049 | 0.215675 |
| 11761285_ASRGL1    | -0.19884 | 0.132071 | 0.215703 |
| 11723444_CRTAC1    | 0.144574 | 0.13214  | 0.215809 |
| 11733708_CADPS     | 0.125546 | 0.13216  | 0.215834 |
| 11738465_TPH2      | 0.07992  | 0.132207 | 0.215904 |
| 11747774_SLC11A1   | -0.08887 | 0.132212 | 0.215904 |
| 11757275_ARGLU1    | 0.065585 | 0.132221 | 0.215906 |
| 11718652_STAT2     | -0.10815 | 0.132221 | 0.215906 |
| 11764019_NAB1      | 0.07768  | 0.132243 | 0.215934 |
| 11757116_SNORA26   | -0.07447 | 0.132276 | 0.21598  |
| 11758703_MAFK      | -0.08752 | 0.132297 | 0.216007 |
| 11743855_TFE3      | -0.08726 | 0.132308 | 0.216019 |
| 11716276_CBX5      | 0.059688 | 0.132314 | 0.216021 |
| 11715560_PGA3 ///  | -0.07558 | 0.13237  | 0.216105 |

|                    |          |          |          |
|--------------------|----------|----------|----------|
| 11742107_PPT1      | 0.062947 | 0.13244  | 0.216211 |
| 11740403_SMC03     | 0.129143 | 0.132483 | 0.216274 |
| 11721709_UBN1      | -0.11604 | 0.132496 | 0.216288 |
| 11751340_KRT85     | -0.1087  | 0.1325   | 0.216288 |
| 11734597_KCNG4     | 0.118441 | 0.132511 | 0.2163   |
| 11736863_EMC6      | 0.070594 | 0.13252  | 0.216307 |
| 11762606_LOC645261 | 0.15106  | 0.132527 | 0.216308 |
| 11716871_GAA       | 0.071719 | 0.13253  | 0.216308 |
| 11734926_ZDHC15    | -0.13779 | 0.132546 | 0.216328 |
| 11734313_OBSCN     | -0.13821 | 0.132561 | 0.216342 |
| 11717779_DHX35     | -0.08623 | 0.132564 | 0.216342 |
| 11745123_TMEM198B  | -0.08185 | 0.132574 | 0.216351 |
| 11763397_TARID     | -0.16    | 0.132596 | 0.21638  |
| 11749704_SLC9A1    | 0.074177 | 0.132603 | 0.216384 |
| 11755427_GUCY1A2   | -0.15935 | 0.132607 | 0.216384 |
| 11749152_TBRG1     | -0.10319 | 0.132619 | 0.216395 |
| 11751191_LIPG      | -0.10301 | 0.132649 | 0.216437 |
| 11734845_TAF1B     | -0.09132 | 0.13266  | 0.216447 |
| 11723628_FAM162B   | -0.11571 | 0.132665 | 0.216447 |
| 11745489_GOLGA8CP  | -0.11619 | 0.132668 | 0.216447 |
| 11763370_CHORDC1   | -0.07364 | 0.132695 | 0.216484 |
| 11722607_UFSP2     | 0.112945 | 0.132823 | 0.216682 |
| 11761539_C2orf96   | 0.069691 | 0.132826 | 0.216682 |
| 11741569_SLC26A1   | -0.09204 | 0.132895 | 0.216789 |
| 11723330_DNAJB12   | -0.08711 | 0.13291  | 0.216806 |
| 11715302_NT5C1A    | -0.11186 | 0.13292  | 0.216815 |
| 11754818_CATSPER2  | -0.14637 | 0.132935 | 0.216833 |
| 11720873_MINK1     | 0.085003 | 0.132941 | 0.216834 |
| 11720857_INSR      | -0.11482 | 0.132957 | 0.216853 |
| 11718784_TCEA2     | -0.17844 | 0.132981 | 0.216886 |
| 11726946_PPM1A     | 0.087162 | 0.133017 | 0.216933 |
| 11734818_APBB2     | -0.09167 | 0.133021 | 0.216933 |
| 11720949_PFDN4     | 0.113719 | 0.133024 | 0.216933 |
| 11762672_CNOT4     | -0.23023 | 0.133059 | 0.216983 |
| 11757875_LIME1 /// | 0.091325 | 0.133093 | 0.217032 |
| 11720101_SPIN1     | 0.06584  | 0.133099 | 0.217034 |
| 11732610_ZNF385D   | 0.100213 | 0.13312  | 0.217062 |
| 11733681_TMEM132D  | -0.06268 | 0.13313  | 0.21707  |
| 11730680_MC3R      | -0.14502 | 0.133169 | 0.217127 |
| 11725279_IHH       | 0.114982 | 0.133216 | 0.217197 |
| 11740189_UBAC2     | -0.05815 | 0.13324  | 0.217228 |
| 11750558_ZNF271P   | 0.091153 | 0.133264 | 0.21726  |
| 11749005_CTNNA1    | 0.075009 | 0.133327 | 0.217355 |
| 11760717_RPS6KC1   | 0.190081 | 0.133335 | 0.217356 |
| 11726955_CASZ1     | -0.06923 | 0.133337 | 0.217356 |
| 11729181_DHRX      | 0.081677 | 0.133381 | 0.217422 |
| 11743902_PSMD1     | -0.07066 | 0.133473 | 0.217565 |
| 11749165_GLT1D1    | -0.12856 | 0.133496 | 0.217586 |
| 11730152_TMEM207   | -0.1099  | 0.133496 | 0.217586 |
| 11732214_ZKSCAN1   | 0.064338 | 0.1335   | 0.217586 |
| 11735182_TTC7A     | -0.05811 | 0.133545 | 0.217653 |

|                    |          |          |          |
|--------------------|----------|----------|----------|
| 11758252_HSD3B7    | -0.07047 | 0.133601 | 0.217737 |
| 11735071_PCDHB9    | -0.1536  | 0.13361  | 0.217744 |
| 11737059_MMP26     | -0.14137 | 0.133633 | 0.217773 |
| 11759775_SLC9B2    | -0.10142 | 0.133649 | 0.217793 |
| 11724329_DGCR8     | -0.10914 | 0.133665 | 0.217807 |
| 11719437_ZNF746    | 0.086602 | 0.133667 | 0.217807 |
| 11716212_HIBADH    | 0.058491 | 0.133679 | 0.21782  |
| 11729624_DCAF7     | -0.08381 | 0.133691 | 0.217832 |
| 11740482_PAQR5     | 0.112646 | 0.133722 | 0.217876 |
| 11720853_NFIA      | -0.13643 | 0.133751 | 0.217916 |
| 11715203_ATP13A5   | -0.08789 | 0.133757 | 0.217917 |
| 11757583_TRIL      | -0.13289 | 0.133761 | 0.217917 |
| 11757582_USP9X     | 0.072869 | 0.133798 | 0.217971 |
| 11736455_UGT2B10   | -0.08506 | 0.133838 | 0.218028 |
| 11742915_LMTK2     | 0.144048 | 0.133857 | 0.218052 |
| 11761372_TNRC18    | -0.10442 | 0.133872 | 0.218069 |
| 11737342_C20orf166 | 0.089521 | 0.133895 | 0.218099 |
| 11758835_SKIV2L2   | -0.08686 | 0.133911 | 0.218112 |
| 11730026_PQBP1     | 0.073333 | 0.133912 | 0.218112 |
| 11742288_PTX4      | -0.07127 | 0.133919 | 0.218112 |
| 11733625_MYO15A    | 0.132998 | 0.133921 | 0.218112 |
| 11716289_BLOC1S1   | -0.06533 | 0.133945 | 0.218144 |
| 11744253_ODF3L1    | -0.11019 | 0.133961 | 0.218158 |
| 11758894_PARD3     | 0.105906 | 0.133963 | 0.218158 |
| 11743705_ETAA1     | -0.07649 | 0.133967 | 0.218158 |
| 11739600_AASS      | -0.06091 | 0.133991 | 0.21819  |
| 11743225_C9orf172  | -0.11415 | 0.134    | 0.218197 |
| 11725060_USP7      | 0.063597 | 0.134009 | 0.218205 |
| 11729880_ZNF445    | 0.225109 | 0.134068 | 0.218278 |
| 11751274_OLFML1    | -0.16149 | 0.134069 | 0.218278 |
| 11726950_FAM131B   | -0.14101 | 0.13407  | 0.218278 |
| 11731459_PRH2      | -0.12303 | 0.134072 | 0.218278 |
| 11724867_GAB2      | -0.07052 | 0.134103 | 0.218321 |
| 11722544_EYA2      | 0.102657 | 0.134147 | 0.218386 |
| 11740631_MYF5      | 0.083835 | 0.134171 | 0.218419 |
| 11749327_CD99L2    | -0.11959 | 0.134204 | 0.218464 |
| 11730663_LRRC24    | 0.082006 | 0.13422  | 0.218483 |
| 11755534_ADCY7     | -0.08505 | 0.134266 | 0.218551 |
| 11760873_TTC26     | 0.160882 | 0.134277 | 0.218561 |
| 11734484_GRIK1     | -0.08765 | 0.134296 | 0.218583 |
| 11752691_STPG1     | -0.15243 | 0.134299 | 0.218583 |
| 11759904_TIE1      | -0.16348 | 0.134319 | 0.218607 |
| 11752910_ARL6IP1   | -0.05947 | 0.134326 | 0.218612 |
| 11721044_ERI1      | 0.086055 | 0.134357 | 0.218655 |
| 11755068_BODIL1    | -0.06644 | 0.134407 | 0.218729 |
| 11725479_OVOL1     | -0.07821 | 0.134415 | 0.218735 |
| 11754074_GOS2      | -0.12885 | 0.134435 | 0.21876  |
| 11755684_CMPK1     | 0.060733 | 0.134441 | 0.218763 |
| 11752340_LMNA      | -0.06235 | 0.134452 | 0.218773 |
| 11720057_POLR1D    | -0.0696  | 0.13449  | 0.218827 |
| 11744722_RHCE ///  | 0.11646  | 0.134504 | 0.218843 |

|                    |          |          |          |
|--------------------|----------|----------|----------|
| 11748072_HSPH1     | 0.058302 | 0.134531 | 0.21888  |
| 11730158_RBM20     | -0.10547 | 0.13455  | 0.218904 |
| 11756514_TEKT5     | -0.13913 | 0.134581 | 0.218946 |
| 11740018_INSR      | 0.138911 | 0.134622 | 0.219006 |
| 11743748_LAT       | 0.130611 | 0.13465  | 0.219044 |
| 11719818_PIP       | -0.08581 | 0.134667 | 0.219065 |
| 11761335_TROAP     | -0.10877 | 0.134675 | 0.219071 |
| 11760547_POLM      | 0.110426 | 0.134684 | 0.219077 |
| 11738451_ZCCHC16   | -0.13587 | 0.134754 | 0.219185 |
| 11756293_UFSP2     | 0.058294 | 0.13476  | 0.219185 |
| 11744290_BRMS1     | -0.07256 | 0.134763 | 0.219185 |
| 11718991_NDUFB7    | -0.06409 | 0.134772 | 0.219192 |
| 11718434_NPNT      | 0.063014 | 0.134859 | 0.219326 |
| 11757278_ASS1      | -0.08399 | 0.134886 | 0.219363 |
| 11724408_STAC2     | -0.07258 | 0.134908 | 0.219392 |
| 11752697_PCED1A    | 0.064141 | 0.134938 | 0.219432 |
| 11753455_RETNLB    | -0.11059 | 0.134988 | 0.219507 |
| 11734131_SLC2A4    | -0.10079 | 0.134994 | 0.219509 |
| 11732516_CERS4     | -0.09311 | 0.134999 | 0.21951  |
| 11732030_SPEM1     | -0.08426 | 0.135018 | 0.219533 |
| 11724671_AMDHD1    | -0.13573 | 0.135023 | 0.219533 |
| 11727030_MAP1A     | -0.07753 | 0.13504  | 0.219554 |
| 11755568_SLC47A2   | -0.06453 | 0.135044 | 0.219554 |
| 11730560_GCKR      | -0.07867 | 0.135111 | 0.219651 |
| 11738709_OR56A1    | -0.07453 | 0.135113 | 0.219651 |
| 11755878_TESK1     | 0.065434 | 0.135135 | 0.219679 |
| 11721168_EPB41L1   | 0.069439 | 0.135156 | 0.219704 |
| 11742226_AIPL1     | -0.11145 | 0.135159 | 0.219704 |
| 11716209_VPS28     | 0.065625 | 0.135169 | 0.219712 |
| 11735386_DACT1     | -0.08685 | 0.135299 | 0.219917 |
| 11717598_SMPD1     | 0.069252 | 0.135323 | 0.219949 |
| 11761528_SEPT10    | -0.0594  | 0.135358 | 0.219998 |
| 11754801_PLPP1     | 0.073865 | 0.135402 | 0.220063 |
| 11730984_ZFYVE9    | 0.082005 | 0.135449 | 0.220132 |
| 11736516_SERAC1    | 0.190513 | 0.135461 | 0.220143 |
| 11744174_UBQLN4    | -0.07633 | 0.135478 | 0.220164 |
| 11724694_ETV7      | -0.11445 | 0.135512 | 0.220212 |
| 11723195_HLA-E     | 0.070289 | 0.13554  | 0.220243 |
| 11762294_TRBC1 /// | -0.07342 | 0.13554  | 0.220243 |
| 11762097_WNK4      | -0.10681 | 0.13556  | 0.220268 |
| 11719854_TBCE      | -0.06715 | 0.135585 | 0.220294 |
| 11747930_UBAP1     | -0.07867 | 0.135586 | 0.220294 |
| 11751313_MANEAL    | 0.078862 | 0.135597 | 0.220294 |
| 11741595_TSHB      | -0.0899  | 0.135599 | 0.220294 |
| 11731199_LHFPL3    | 0.120883 | 0.135602 | 0.220294 |
| 11749022_CTNNB1    | -0.08408 | 0.135603 | 0.220294 |
| 11736070_C8orf33   | -0.08452 | 0.135608 | 0.220295 |
| 11751119_OSBPL7    | -0.09268 | 0.135629 | 0.22032  |
| 11763302_LOC100128 | -0.1211  | 0.135633 | 0.22032  |
| 11751738_PPP1R3E   | 0.212461 | 0.135652 | 0.220344 |
| 11749265_AQP7      | -0.08757 | 0.135678 | 0.220379 |

|                    |          |          |          |
|--------------------|----------|----------|----------|
| 11721484_CCDC85B   | 0.067493 | 0.13574  | 0.220468 |
| 11734271_CDH18     | -0.18303 | 0.135742 | 0.220468 |
| 11733660_CHIA      | 0.118509 | 0.13576  | 0.220491 |
| 11748300_LHX6      | -0.14104 | 0.135765 | 0.220492 |
| 11719673_THBD      | -0.09269 | 0.135802 | 0.220543 |
| 11717302_TACSTD2   | -0.10925 | 0.135813 | 0.220555 |
| 11734052_ZMYM6     | 0.116994 | 0.135841 | 0.220588 |
| 11743945_ZNF839    | 0.065463 | 0.135842 | 0.220588 |
| 11738424_BMP10     | -0.14262 | 0.135882 | 0.220645 |
| 11717015_CLDN7     | -0.08385 | 0.135918 | 0.220696 |
| 11720596_CSRNP2    | -0.07379 | 0.135947 | 0.220735 |
| 11758301_KRT8      | 0.067609 | 0.135968 | 0.220752 |
| 11728113_MBD5      | 0.124254 | 0.135969 | 0.220752 |
| 11731714_CACNB2    | -0.10198 | 0.135971 | 0.220752 |
| 11738989_GANAB     | -0.06516 | 0.135976 | 0.220753 |
| 11728490_NAA38     | -0.06336 | 0.135991 | 0.220768 |
| 11717324_EZH1      | 0.075411 | 0.135994 | 0.220768 |
| 11724956_C14orf169 | 0.063098 | 0.136014 | 0.220793 |
| 11734760_HIP1      | -0.1235  | 0.136071 | 0.220879 |
| 11763249_IGH /// I | -0.07494 | 0.136089 | 0.2209   |
| 11745270_RHBDL2    | 0.137861 | 0.136095 | 0.220903 |
| 11744983_NRG2      | -0.09209 | 0.136105 | 0.220911 |
| 11717055_CORO1C    | 0.067703 | 0.136122 | 0.220931 |
| 11736349_ZNF366    | 0.121187 | 0.136147 | 0.220964 |
| 11741934_IL25      | -0.07744 | 0.136171 | 0.220997 |
| 11755043_GSAP      | 0.090223 | 0.136182 | 0.221006 |
| 11761445_PATL1     | -0.15388 | 0.136188 | 0.221007 |
| 11757196_TMEM51-AS | 0.121314 | 0.136194 | 0.221007 |
| 11761976_PDS5B     | 0.059019 | 0.136196 | 0.221007 |
| 11726952_FAM131B   | -0.09301 | 0.136203 | 0.221012 |
| 11741720_ADAR      | -0.06981 | 0.136243 | 0.22107  |
| 11734542_TDRD12    | -0.10026 | 0.136275 | 0.221114 |
| 11736620_CCR6      | 0.125641 | 0.136305 | 0.221156 |
| 11734460_RFPL2 /// | -0.06735 | 0.136383 | 0.221275 |
| 11738427_KRTAP4-1  | -0.081   | 0.13641  | 0.22131  |
| 11722951_GAL3ST1   | -0.21145 | 0.136442 | 0.221356 |
| 11715139_IFNA10    | -0.07412 | 0.136459 | 0.221374 |
| 11735023_ZBTB7B    | -0.08059 | 0.136463 | 0.221374 |
| 11744138_CAMK1D    | -0.08799 | 0.1365   | 0.221427 |
| 11759116_VTI1B     | 0.099615 | 0.136504 | 0.221427 |
| 11724207_MAD1L1    | -0.06334 | 0.136575 | 0.221535 |
| 11729571_FAM83A    | -0.11076 | 0.136588 | 0.221549 |
| 11733651_FAM228B   | -0.11684 | 0.136628 | 0.221601 |
| 11750666_VPS39     | 0.102828 | 0.136634 | 0.221601 |
| 11727129_MAGEB2    | -0.08746 | 0.136634 | 0.221601 |
| 11754953_C1orf198  | -0.08972 | 0.136642 | 0.221605 |
| 11730066_MAPK10    | 0.180354 | 0.136663 | 0.221633 |
| 11733682_ITSN2     | -0.14328 | 0.136696 | 0.221678 |
| 11737488_PI4KB     | 0.063666 | 0.136751 | 0.221761 |
| 11759705_IGLV3-10  | -0.1086  | 0.136779 | 0.221798 |
| 11747046_CAPZA2    | 0.077059 | 0.136786 | 0.221803 |

|                    |          |          |          |
|--------------------|----------|----------|----------|
| 11746950_NUPL2     | 0.097551 | 0.136828 | 0.221863 |
| 11741253_MGAT4C    | -0.10497 | 0.136877 | 0.221935 |
| 11760292_NAA10     | -0.07683 | 0.136965 | 0.222071 |
| 11756965_RRP1      | -0.07981 | 0.137003 | 0.222126 |
| 11734466_COL6A5    | 0.087927 | 0.137017 | 0.222134 |
| 11721324_TBC1D10B  | -0.07716 | 0.137017 | 0.222134 |
| 11733586_NPFF      | -0.07588 | 0.137057 | 0.222191 |
| 11762486_FUT6      | -0.10107 | 0.137085 | 0.222229 |
| 11718507_PSMG2     | -0.06142 | 0.137124 | 0.222285 |
| 11763042_LOC646813 | 0.146096 | 0.137147 | 0.222308 |
| 11754628_FBRS      | 0.118645 | 0.137148 | 0.222308 |
| 11729789_DOHH      | -0.08097 | 0.137154 | 0.222311 |
| 11719623_GTPBP1    | -0.06707 | 0.137181 | 0.222347 |
| 11755273_C16orf71  | -0.086   | 0.137236 | 0.222429 |
| 11759711_RBM25     | 0.133212 | 0.137306 | 0.222533 |
| 11745324_NELL1     | -0.09163 | 0.137309 | 0.222533 |
| 11729362_DIO1      | -0.11431 | 0.137319 | 0.222542 |
| 11755452_HTRA2     | -0.07633 | 0.137379 | 0.222632 |
| 11754354_PROM1     | -0.1036  | 0.137408 | 0.222671 |
| 11719808_BLOC1S6   | 0.109784 | 0.137416 | 0.222671 |
| 11725934_HSPA5     | -0.06378 | 0.137417 | 0.222671 |
| 11727954_PACS2     | 0.068158 | 0.137459 | 0.222732 |
| 11725504_GDF11     | -0.06749 | 0.137474 | 0.222748 |
| 11743555_QTRTD1    | 0.07064  | 0.137543 | 0.222852 |
| 11741830_RFPL4A // | -0.09944 | 0.137585 | 0.222913 |
| 11732932_SAXO2     | 0.070876 | 0.137616 | 0.222957 |
| 11741881_DMKN      | -0.12081 | 0.137709 | 0.2231   |
| 11721296_NDUFB1    | 0.059897 | 0.137714 | 0.2231   |
| 11728801_PRSS54    | -0.13708 | 0.137736 | 0.223122 |
| 11742384_OR4E2     | -0.08124 | 0.137736 | 0.223122 |
| 11758996_FAM120A   | 0.156579 | 0.137746 | 0.22313  |
| 11719579_TACO1     | -0.06084 | 0.137765 | 0.223154 |
| 11738699_OR4D5     | -0.06978 | 0.137781 | 0.223172 |
| 11745521_ABI1      | 0.071731 | 0.137807 | 0.223207 |
| 11753690_CBX7      | -0.11932 | 0.137833 | 0.223232 |
| 11730578_ADM2      | -0.11303 | 0.137835 | 0.223232 |
| 11743846_CFH /// C | 0.175993 | 0.137836 | 0.223232 |
| 11746714_NUP43     | -0.09237 | 0.137869 | 0.223278 |
| 11725904_ZNF502    | -0.10366 | 0.137955 | 0.22341  |
| 11749413_ABLIM3    | 0.06094  | 0.137962 | 0.223414 |
| 11728808_CHAC2     | -0.06381 | 0.137991 | 0.223454 |
| 11757057_PLA2G2A   | -0.13568 | 0.138014 | 0.223483 |
| 11742862_ADGRF5    | 0.20392  | 0.13803  | 0.223501 |
| 11757811_CHURC1-FN | -0.08446 | 0.138044 | 0.223516 |
| 11742250_PDE11A    | 0.121854 | 0.138048 | 0.223516 |
| 11729513_CSF3      | -0.06566 | 0.138058 | 0.223525 |
| 11723081_DVL1      | -0.07374 | 0.138068 | 0.223533 |
| 11737556_TLX3      | -0.17028 | 0.138079 | 0.223543 |
| 11750138_POGK      | 0.057681 | 0.138096 | 0.223564 |
| 11744894_FAM20A    | 0.086174 | 0.138101 | 0.223564 |
| 11744415_MFSD6     | 0.105589 | 0.13811  | 0.223566 |



|                    |          |          |          |
|--------------------|----------|----------|----------|
| 11762166_ATAT1     | 0.098361 | 0.138111 | 0.223566 |
| 11750603_PLEKHG5   | -0.06373 | 0.13813  | 0.223589 |
| 11756716_FBXL15    | -0.06873 | 0.138134 | 0.223589 |
| 11754140_KCNIP2    | -0.10877 | 0.13815  | 0.223607 |
| 11763413_ASAP1-IT2 | 0.093866 | 0.138175 | 0.22363  |
| 11725942_WNT7B     | -0.07274 | 0.138175 | 0.22363  |
| 11757790_PCDH17    | 0.119159 | 0.138178 | 0.22363  |
| 11730109_NLRC3     | 0.093485 | 0.13819  | 0.223642 |
| 11762913_BAK1      | -0.143   | 0.138197 | 0.223647 |
| 11738608_SYT10     | 0.148104 | 0.138204 | 0.22365  |
| 11719458_EXOC5     | 0.071719 | 0.138216 | 0.223661 |
| 11746960_ABCF3     | -0.08943 | 0.138236 | 0.223687 |
| 11760266_ATPAF2    | -0.09853 | 0.138277 | 0.223737 |
| 11735405_ANKS1B    | -0.134   | 0.138277 | 0.223737 |
| 11760523_COL4A5    | 0.170104 | 0.138281 | 0.223737 |
| 11739161_IP6K1     | -0.06637 | 0.138287 | 0.22374  |
| 11748829_TUBB4A    | -0.08317 | 0.138304 | 0.223753 |
| 11756924_ATP6V1A   | 0.05908  | 0.138305 | 0.223753 |
| 11733756_VWC2L     | -0.18336 | 0.138348 | 0.223813 |
| 11729573_KHDC1L    | -0.07834 | 0.138351 | 0.223813 |
| 11752651_PPP1R12B  | 0.102532 | 0.138363 | 0.223823 |
| 11749557_APOL6     | -0.10042 | 0.138366 | 0.223823 |
| 11738352_SCN1B     | -0.07782 | 0.13844  | 0.223932 |
| 11759077_HIST1H3A  | -0.08423 | 0.138443 | 0.223932 |
| 11739386_CDC73     | -0.066   | 0.138459 | 0.223951 |
| 11748816_UGT2A3    | 0.072941 | 0.138466 | 0.223955 |
| 11736707_ZNF547    | 0.069231 | 0.138523 | 0.22404  |
| 11738726_OR2T2 /// | -0.11326 | 0.138559 | 0.224091 |
| 11759609_SLC18A2   | -0.08166 | 0.138582 | 0.22412  |
| 11746893_MPP1      | -0.09662 | 0.138607 | 0.224154 |
| 11725459_S100A7 // | -0.1244  | 0.138654 | 0.224221 |
| 11738693_ORI3C3    | 0.083904 | 0.138668 | 0.224237 |
| 11735616_PRR35     | -0.108   | 0.138693 | 0.224271 |
| 11748737_ARNT2     | -0.06722 | 0.138705 | 0.224278 |
| 11762137_ACTG2     | 0.065551 | 0.138707 | 0.224278 |
| 11730601_INO80B    | -0.05738 | 0.138716 | 0.224285 |
| 11737292_GLYCTK    | -0.13165 | 0.138741 | 0.224319 |
| 11728828_F2RL1     | 0.128079 | 0.138762 | 0.224344 |
| 11753567_CKLF-CMTM | -0.08457 | 0.138782 | 0.22437  |
| 11734541_IL5RA     | 0.086727 | 0.138828 | 0.224436 |
| 11743833_RSN1L     | 0.065159 | 0.13886  | 0.224481 |
| 11756947_CTSB      | -0.0549  | 0.138866 | 0.224482 |
| 11751002_DLAT      | -0.07251 | 0.138896 | 0.224522 |
| 11723404_PPARGC1A  | 0.212355 | 0.138899 | 0.224522 |
| 11747576_GGNBP2    | -0.06279 | 0.138909 | 0.22453  |
| 11746385_GAPVD1    | -0.07482 | 0.138923 | 0.224538 |
| 11746978_GAPVD1    | -0.07482 | 0.138923 | 0.224538 |
| 11742958_SMARCA4   | 0.058954 | 0.138942 | 0.224562 |
| 11760698_AGBL2     | -0.16735 | 0.138955 | 0.224574 |
| 11723301_RPS6KB1   | 0.086488 | 0.138984 | 0.224615 |
| 11757256_LINC00235 | -0.11648 | 0.13899  | 0.224616 |

|                    |          |          |          |
|--------------------|----------|----------|----------|
| 11719912_KDM1B     | -0.10835 | 0.138994 | 0.224616 |
| 11741260_VSTM2A    | -0.14159 | 0.139014 | 0.22464  |
| 11731693_HIST1H2AE | -0.0815  | 0.139018 | 0.22464  |
| 11732904_CLEC1B    | -0.10453 | 0.139045 | 0.224676 |
| 11751205_DOK5      | -0.08321 | 0.139054 | 0.224682 |
| 11750122_DNMT3B    | -0.06883 | 0.139061 | 0.224686 |
| 11733015_DALRD3    | -0.07891 | 0.139111 | 0.224761 |
| 11728900_ARHGAP6   | -0.15568 | 0.139158 | 0.224829 |
| 11739640_DIP2A     | 0.05715  | 0.139188 | 0.224869 |
| 11744269_GIPC1     | 0.071079 | 0.139201 | 0.224871 |
| 11742237_KNCN      | -0.0705  | 0.139206 | 0.224871 |
| 11748484_KRT6A     | -0.10411 | 0.139206 | 0.224871 |
| 11738716_OR6C1     | -0.06276 | 0.139207 | 0.224871 |
| 11715242_LCE3D     | -0.11934 | 0.139212 | 0.224871 |
| 11725100_ESF1      | 0.106556 | 0.139239 | 0.224907 |
| 11740205_RPH3A     | -0.12881 | 0.139256 | 0.224921 |
| 11749961_MDH1      | -0.05745 | 0.139256 | 0.224921 |
| 11719886_IFI44     | -0.06288 | 0.139293 | 0.224973 |
| 11722472_PEG3      | -0.19084 | 0.139332 | 0.225029 |
| 11728436_BRWD1     | 0.106094 | 0.139356 | 0.225059 |
| 11723515_CAB39L    | -0.1002  | 0.139411 | 0.22514  |
| 11750825_ADAMDEC1  | -0.12931 | 0.139429 | 0.225162 |
| 11738837_NPAS1     | 0.057803 | 0.13948  | 0.225237 |
| 11762803_APP       | 0.157082 | 0.139504 | 0.225269 |
| 11754546_TMEM25    | 0.062287 | 0.13954  | 0.225319 |
| 11754291_ARHGEF2   | 0.060169 | 0.13955  | 0.225328 |
| 11750809_ARHGAP6   | -0.07464 | 0.139579 | 0.225367 |
| 11730149_PAX1      | -0.10559 | 0.139584 | 0.225367 |
| 11751848_HCG9      | -0.10333 | 0.13965  | 0.225462 |
| 11734579_TAS2R14   | 0.1288   | 0.139652 | 0.225462 |
| 11764260_FAM124A   | -0.10358 | 0.139691 | 0.225519 |
| 11735662_P2RY2     | -0.10277 | 0.139713 | 0.225547 |
| 11741992_FAM170A   | -0.11437 | 0.139722 | 0.225554 |
| 11731119_TEFM      | -0.06568 | 0.139745 | 0.225583 |
| 11746611_KIFAP3    | 0.055058 | 0.139796 | 0.225659 |
| 11738289_KRTAP10-1 | -0.0662  | 0.139804 | 0.225659 |
| 11719277_MRPL17    | 0.05758  | 0.139806 | 0.225659 |
| 11754050_CXADR     | 0.079972 | 0.139845 | 0.225715 |
| 11727720_BCAP29    | 0.081831 | 0.139851 | 0.225717 |
| 11749917_HEY2      | -0.10349 | 0.139918 | 0.225818 |
| 11728583_RHOXF2 // | -0.07737 | 0.139975 | 0.225903 |
| 11761479_HSP90B2P  | -0.09254 | 0.140027 | 0.225979 |
| 11728684_KRR1      | -0.09373 | 0.14007  | 0.226041 |
| 11747737_CNN1      | -0.08119 | 0.140129 | 0.226129 |
| 11751926_MAPKBP1   | 0.068384 | 0.14014  | 0.226138 |
| 11760584_TRDC      | 0.119052 | 0.14016  | 0.226163 |
| 11735383_LDLRAD4   | -0.12946 | 0.140244 | 0.226289 |
| 11721177_PITX1     | -0.09674 | 0.140247 | 0.226289 |
| 11718558_MKRN1     | 0.076987 | 0.140322 | 0.226403 |
| 11735974_NEU2      | -0.09371 | 0.140363 | 0.226462 |
| 11759591_ATAT1     | -0.16585 | 0.140369 | 0.226464 |

|                    |          |          |          |
|--------------------|----------|----------|----------|
| 11738282_CCNK      | -0.07069 | 0.140383 | 0.226479 |
| 11741896_RPLP1     | 0.056614 | 0.140397 | 0.226493 |
| 11760522_SHROOM3   | -0.07659 | 0.140406 | 0.226501 |
| 11716619_TNPO1     | -0.05876 | 0.140414 | 0.226506 |
| 11721725_PSKH1     | -0.07029 | 0.140435 | 0.226532 |
| 11763258_CALM2     | -0.05542 | 0.140484 | 0.226604 |
| 11757891_SCAND2P   | 0.161535 | 0.140505 | 0.22663  |
| 11739056_GPM6A     | 0.08802  | 0.140528 | 0.226659 |
| 11729078_SLC26A7   | 0.107519 | 0.140577 | 0.226732 |
| 11746156_IRF9      | -0.08186 | 0.140641 | 0.226827 |
| 11752341_F8        | -0.0766  | 0.140658 | 0.226847 |
| 11763188_SNX5      | -0.08375 | 0.140695 | 0.226885 |
| 11729024_KCNA5     | -0.1851  | 0.140696 | 0.226885 |
| 11735561_ZNF192P1  | -0.15673 | 0.140696 | 0.226885 |
| 11753239_SCARA5    | -0.07725 | 0.1407   | 0.226885 |
| 11745199_ANKRD9    | -0.07346 | 0.140713 | 0.226898 |
| 11725734_NFYA      | -0.11004 | 0.140728 | 0.226915 |
| 11746200_EHD2      | 0.062635 | 0.140734 | 0.226917 |
| 11721055_PRKX      | 0.099547 | 0.140762 | 0.226956 |
| 11719759_ARF1      | -0.05656 | 0.140774 | 0.226967 |
| 11743829_PAM       | 0.065244 | 0.140791 | 0.226987 |
| 11734293_KCNJ11    | 0.078012 | 0.140844 | 0.227065 |
| 11731270_MGAM      | -0.0878  | 0.140859 | 0.227081 |
| 11721962_SLC4A8    | 0.114091 | 0.140866 | 0.227084 |
| 11716002_FAF2      | 0.071876 | 0.14087  | 0.227084 |
| 11729042_DLEC1     | -0.13571 | 0.1409   | 0.227125 |
| 11755441_MED15     | -0.06243 | 0.14093  | 0.227166 |
| 11716922_CLEC11A   | -0.06021 | 0.140939 | 0.227173 |
| 11751634_ACAD9     | -0.06811 | 0.140951 | 0.227184 |
| 11763384_FBN2      | 0.106798 | 0.14096  | 0.227191 |
| 11736767_LOC101929 | -0.08982 | 0.140995 | 0.227241 |
| 11737798_PROCR     | 0.065227 | 0.141031 | 0.227291 |
| 11760849_INADL     | -0.1417  | 0.141099 | 0.227388 |
| 11725875_WDR66     | -0.13133 | 0.1411   | 0.227388 |
| 11756596_PDPR      | 0.095719 | 0.141113 | 0.227401 |
| 11720497_MED4      | -0.07297 | 0.141129 | 0.227419 |
| 11715912_EFNB1     | -0.09394 | 0.141156 | 0.227455 |
| 11723204_NOL7      | -0.05572 | 0.141172 | 0.227474 |
| 11735290_TNIP2     | -0.0734  | 0.141208 | 0.227524 |
| 11740020_OTC       | -0.11056 | 0.141263 | 0.227604 |
| 11737596_ACOXL     | 0.106749 | 0.141283 | 0.227629 |
| 11728154_FUT4      | 0.093211 | 0.141307 | 0.22766  |
| 11756617_TAPBP     | 0.070218 | 0.141324 | 0.227679 |
| 11746278_PLG       | -0.15496 | 0.141328 | 0.227679 |
| 11739892_ARPC4-TTL | 0.081266 | 0.141353 | 0.227705 |
| 11734272_RPS6KA6   | -0.12154 | 0.141353 | 0.227705 |
| 11727830_SNAP29    | -0.08117 | 0.141373 | 0.227729 |
| 11759783_CLASP2    | -0.06411 | 0.1414   | 0.227765 |
| 11751127_SHISA5    | -0.0638  | 0.14144  | 0.227819 |
| 11715209_SCAND1    | 0.071189 | 0.141444 | 0.227819 |
| 11752659_ANGPT4    | 0.072951 | 0.141448 | 0.227819 |

|                    |          |          |          |
|--------------------|----------|----------|----------|
| 11754684_SRL       | -0.1114  | 0.141459 | 0.227819 |
| 11734531_TNFSF11   | -0.15477 | 0.141464 | 0.227819 |
| 11741855_ARGFX     | -0.14084 | 0.141465 | 0.227819 |
| 11727952_CBX8      | -0.07567 | 0.141466 | 0.227819 |
| 11744842_LINC00474 | -0.15853 | 0.141477 | 0.22783  |
| 11730496_NUDT19    | 0.064652 | 0.141548 | 0.227936 |
| 11730101_CRYGA     | -0.11288 | 0.141556 | 0.227943 |
| 11718583_CNPY2     | -0.05649 | 0.141567 | 0.227947 |
| 11732917_DZIP1L    | -0.09895 | 0.141569 | 0.227947 |
| 11752014_IKZF2     | 0.263286 | 0.141603 | 0.227991 |
| 11730894_UBA6      | 0.071584 | 0.141605 | 0.227991 |
| 11761309_PIH1D1    | -0.06276 | 0.141612 | 0.227995 |
| 11762952_PMS1      | -0.07572 | 0.141687 | 0.2281   |
| 11738865_CYP26C1   | -0.09556 | 0.141692 | 0.2281   |
| 11732885_CCDC158   | -0.17281 | 0.141692 | 0.2281   |
| 11753811_ENY2      | -0.05808 | 0.141701 | 0.228108 |
| 11750179_ECHDC2    | 0.068429 | 0.141715 | 0.228117 |
| 11744577_EVC2      | 0.102339 | 0.141719 | 0.228117 |
| 11759684_IGKC      | -0.135   | 0.14172  | 0.228117 |
| 11717913_CDO1      | -0.07968 | 0.141755 | 0.228158 |
| 11736835_TPCN2     | -0.09488 | 0.14176  | 0.228158 |
| 11735704_MT1A ///  | -0.07796 | 0.14176  | 0.228158 |
| 11716972_NSF       | -0.06302 | 0.141767 | 0.228161 |
| 11746284_NFATC4    | -0.08131 | 0.14178  | 0.228175 |
| 11737179_SLC25A21  | -0.09377 | 0.141789 | 0.228182 |
| 11723085_IL17RB    | 0.084355 | 0.141797 | 0.228186 |
| 11761278_FLT3LG    | -0.16245 | 0.141812 | 0.228204 |
| 11757688_ANKHD1    | -0.0584  | 0.141841 | 0.228243 |
| 11757559_MAML1     | -0.06925 | 0.14186  | 0.228266 |
| 11719175_GPRC5B    | -0.05483 | 0.141872 | 0.228278 |
| 11758695_C1QTNF7   | 0.076553 | 0.141908 | 0.228329 |
| 11717351_RPRD1A    | 0.083505 | 0.141935 | 0.228364 |
| 11740428_PSAPL1    | -0.09228 | 0.141956 | 0.228391 |
| 11745192_EPB41L3   | 0.142267 | 0.142012 | 0.228473 |
| 11729757_RHAG      | -0.1125  | 0.142027 | 0.228489 |
| 11736917_LYPD2     | -0.0995  | 0.142041 | 0.228504 |
| 11744978_ORC4      | -0.08356 | 0.142045 | 0.228504 |
| 11727531_PHF20L1   | -0.05926 | 0.142063 | 0.228525 |
| 11734062_CD200R1   | 0.123396 | 0.14208  | 0.228544 |
| 11737194_UTS2B     | 0.147271 | 0.142094 | 0.228553 |
| 11763868_PDZD11    | 0.103919 | 0.142094 | 0.228553 |
| 11728366_LBP       | -0.0864  | 0.142163 | 0.228655 |
| 11755487_KIF13A    | 0.180323 | 0.142195 | 0.228698 |
| 11745111_DLGAP1    | -0.11503 | 0.142198 | 0.228698 |
| 11722897_REV1      | 0.089457 | 0.142212 | 0.228711 |
| 11725359_ACAN      | -0.1257  | 0.142236 | 0.228743 |
| 11750767_SLC17A7   | -0.09488 | 0.142249 | 0.228756 |
| 11731049_RIMKLA    | -0.1263  | 0.142281 | 0.2288   |
| 11732369_FGF14     | 0.167964 | 0.142292 | 0.22881  |
| 11746561_ZFP36L1   | -0.08798 | 0.142328 | 0.228861 |
| 11747569_CLCNKA // | -0.08701 | 0.142346 | 0.228883 |

|                    |          |          |          |
|--------------------|----------|----------|----------|
| 11741187_APOL1     | -0.11169 | 0.14236  | 0.228897 |
| 11722482_MFF       | 0.066231 | 0.142365 | 0.228898 |
| 11737833_IL12B     | 0.21471  | 0.142418 | 0.228976 |
| 11750718_RGS22     | 0.059747 | 0.14246  | 0.229035 |
| 11748315_PRNP      | 0.060363 | 0.142494 | 0.229082 |
| 11743897_KIAA1257  | -0.11935 | 0.142511 | 0.229094 |
| 11751068_KIAA1257  | -0.11935 | 0.142511 | 0.229094 |
| 11734210_TMPRSS11B | -0.06962 | 0.142558 | 0.229163 |
| 11754014_LOC100129 | -0.09879 | 0.142582 | 0.229194 |
| 11716976_GLRX3     | 0.087152 | 0.142592 | 0.229202 |
| 11722841_TFB2M     | 0.055945 | 0.142611 | 0.229225 |
| 11728680_PAIP1     | -0.08066 | 0.142682 | 0.229332 |
| 11753108_MOGAT3    | 0.059607 | 0.142731 | 0.229403 |
| 11718762_POMP      | 0.075632 | 0.142774 | 0.229462 |
| 11746188_RPL14 /// | 0.055864 | 0.142777 | 0.229462 |
| 11744867_LYPD6     | -0.06904 | 0.142797 | 0.229487 |
| 11763741_ACTR6     | -0.07793 | 0.142843 | 0.229552 |
| 11730463_SYN3      | -0.12564 | 0.142857 | 0.229568 |
| 11725173_MN1       | -0.11277 | 0.142872 | 0.229585 |
| 11716383_CCT3      | 0.057064 | 0.142885 | 0.229598 |
| 11744548_RPL29     | 0.054451 | 0.142902 | 0.22961  |
| 11746168_SHROOM2   | 0.070945 | 0.142902 | 0.22961  |
| 11763882_LOC51145  | -0.08998 | 0.14291  | 0.229616 |
| 11751606_SP140     | 0.085772 | 0.142915 | 0.229616 |
| 11745959_RGP1      | 0.113026 | 0.142951 | 0.229666 |
| 11754347_DBNDD1    | 0.093767 | 0.142966 | 0.229682 |
| 11723150_SUGCT     | -0.05686 | 0.142987 | 0.22971  |
| 11757437_PODN      | -0.07857 | 0.143002 | 0.229726 |
| 11728895_HES2      | -0.07986 | 0.143035 | 0.229771 |
| 11756455_CLPS      | -0.08584 | 0.143056 | 0.229797 |
| 11749534_ICK       | 0.31887  | 0.143071 | 0.229814 |
| 11757949_NINL      | -0.10227 | 0.143096 | 0.229845 |
| 11760314_CLK4      | 0.119251 | 0.143101 | 0.229845 |
| 11754704_DNAJC11   | 0.062974 | 0.143105 | 0.229845 |
| 11746540_CAMK2D    | -0.09361 | 0.143114 | 0.229852 |
| 11725604_HOXA9     | -0.12054 | 0.143158 | 0.229916 |
| 11758732_STARD10   | -0.06059 | 0.143181 | 0.229937 |
| 11748567_FGF11     | -0.1284  | 0.143185 | 0.229937 |
| 11746801_IRF5      | -0.07889 | 0.143186 | 0.229937 |
| 11755422_CD6       | -0.10821 | 0.143208 | 0.229966 |
| 11761665_LINC00311 | -0.236   | 0.143277 | 0.230069 |
| 11744291_BRMS1     | -0.06279 | 0.143317 | 0.230125 |
| 11747513_GUSBP1    | 0.094473 | 0.143334 | 0.230145 |
| 11752579_TBXA2R    | -0.07113 | 0.143346 | 0.230157 |
| 11757637_MUS81     | 0.086726 | 0.143363 | 0.230177 |
| 11751143_ABI1      | 0.067867 | 0.143372 | 0.230183 |
| 11741580_TOM1      | 0.112327 | 0.143384 | 0.230195 |
| 11736609_MSX1      | 0.068692 | 0.143391 | 0.230199 |
| 11754275_ST6GALNAC | 0.063616 | 0.143473 | 0.230316 |
| 11716190_VWA9      | -0.06176 | 0.143473 | 0.230316 |
| 11727515_TTC9      | -0.15086 | 0.143496 | 0.230345 |

|                    |          |          |          |
|--------------------|----------|----------|----------|
| 11751871_EPGN      | -0.09037 | 0.143523 | 0.23038  |
| 11760774_GNL1      | -0.09754 | 0.143528 | 0.230381 |
| 11727934_ACTR5     | -0.0825  | 0.143608 | 0.230502 |
| 11738830_ADRA1A    | -0.13986 | 0.143705 | 0.23065  |
| 11736248_AMIGO2    | -0.12308 | 0.14374  | 0.230698 |
| 11736754_PCDHB13   | 0.075395 | 0.143757 | 0.230718 |
| 11741459_CYP4A11 / | -0.09379 | 0.143762 | 0.230719 |
| 11757761_LOC101929 | -0.05309 | 0.14378  | 0.230737 |
| 11748242_CORO7 /// | -0.06284 | 0.143782 | 0.230737 |
| 11738798_PCDH15    | -0.13738 | 0.143824 | 0.230796 |
| 11755820_KBTBD3    | -0.07908 | 0.143843 | 0.230818 |
| 11755580_CYLC1     | -0.09086 | 0.143891 | 0.230887 |
| 11729508_ATP8B3    | -0.13124 | 0.143898 | 0.230892 |
| 11763154_THPO      | -0.15258 | 0.143912 | 0.230906 |
| 11742258_CCT8L2    | -0.06969 | 0.143925 | 0.230919 |
| 11718972_LPL       | -0.10514 | 0.14393  | 0.230919 |
| 11721035_PPP1R3B   | 0.1244   | 0.143935 | 0.23092  |
| 11727912_ANKRD23 / | -0.07441 | 0.143942 | 0.230924 |
| 11734091_AATK      | -0.06553 | 0.143965 | 0.230954 |
| 11757178_SNORD67   | -0.22912 | 0.144091 | 0.231148 |
| 11736873_ZNF514    | 0.074291 | 0.14411  | 0.231171 |
| 11733801_CPPED1    | 0.084272 | 0.144117 | 0.231175 |
| 11732591_INSC      | 0.082125 | 0.144158 | 0.231225 |
| 11755455_GFAP      | -0.10836 | 0.144158 | 0.231225 |
| 11732279_FOXP1     | 0.161116 | 0.144199 | 0.231284 |
| 11734084_SUSD3     | -0.08799 | 0.144218 | 0.231306 |
| 11732141_COX16     | -0.05993 | 0.144226 | 0.231311 |
| 11745057_KLF12     | 0.088179 | 0.144243 | 0.231331 |
| 11760927_LRCH3     | 0.081622 | 0.144274 | 0.231373 |
| 11733691_SIGLEC7   | 0.110425 | 0.144309 | 0.231422 |
| 11748240_NFATC4    | -0.08058 | 0.144327 | 0.231442 |
| 11749182_NCSTN     | 0.072393 | 0.144332 | 0.231442 |
| 11746538_SPATA31C1 | -0.12504 | 0.144336 | 0.231442 |
| 11755696_PRDM11    | -0.11351 | 0.144374 | 0.231496 |
| 11717747_MCTS1 /// | -0.07047 | 0.144404 | 0.231536 |
| 11738665_GPX5      | -0.14256 | 0.14444  | 0.231585 |
| 11741976_OR11A1    | 0.095206 | 0.144444 | 0.231585 |
| 11763623_FKBP9     | -0.11715 | 0.144449 | 0.231586 |
| 11759508_PCDH17    | 0.071921 | 0.144493 | 0.231649 |
| 200066_PMIK        | 0.058482 | 0.144522 | 0.231688 |
| 11760204_CKMT1B    | -0.12344 | 0.144528 | 0.23169  |
| 11759413_CDH11     | -0.12903 | 0.14455  | 0.231718 |
| 11754237_TMEM53    | -0.06403 | 0.144562 | 0.231728 |
| 11726557_GSDMB     | 0.06924  | 0.144594 | 0.231772 |
| 11737212_PLEKHA8   | 0.117342 | 0.144668 | 0.231883 |
| 11743793_ZNF280B   | 0.080342 | 0.144687 | 0.2319   |
| 11735912_WDFY3     | -0.0885  | 0.144689 | 0.2319   |
| 11734462_CCDC105   | -0.07253 | 0.144693 | 0.2319   |
| 11735814_RAD21L1   | -0.07173 | 0.144716 | 0.231931 |
| 11742410_HIST2H3A  | 0.195143 | 0.144726 | 0.231932 |
| 11750448_SLC8A2    | -0.10793 | 0.144729 | 0.231932 |

|                    |          |          |          |
|--------------------|----------|----------|----------|
| 11738406_KRTAP1-1  | -0.08805 | 0.144731 | 0.231932 |
| 11741736_CENPN     | -0.13145 | 0.144749 | 0.231953 |
| 11732669_CORT      | -0.10694 | 0.144776 | 0.231988 |
| 11718373_DHRS7B    | -0.08372 | 0.144787 | 0.231999 |
| 11743401_CDC27     | -0.05453 | 0.144794 | 0.232001 |
| 11739751_SLC25A16  | 0.110458 | 0.144858 | 0.232097 |
| 11741552_GOLGA6D   | 0.062751 | 0.144867 | 0.232103 |
| 11726874_IFT140    | -0.06639 | 0.144916 | 0.232175 |
| 11760497_TBC1D8    | -0.07388 | 0.144971 | 0.232255 |
| 11738816_CDH7      | -0.15448 | 0.14501  | 0.23231  |
| 11746903_DNM1P46   | -0.12579 | 0.14507  | 0.232398 |
| 11738973_DEFB115   | -0.09885 | 0.145165 | 0.232542 |
| 11736122_GOLIM4    | 0.055743 | 0.145198 | 0.232587 |
| 11756375_ETV7      | -0.07485 | 0.145219 | 0.232614 |
| 11757137_EIF4A2 // | -0.09161 | 0.145226 | 0.232618 |
| 11723137_CTXN1     | 0.05848  | 0.145254 | 0.232655 |
| 11718223_GSPT1     | 0.080574 | 0.14528  | 0.23269  |
| 11753701_MED24     | -0.06705 | 0.145305 | 0.232721 |
| 11719874_PPP2R5B   | -0.12155 | 0.145311 | 0.232724 |
| 11740231_CCNT1     | 0.061298 | 0.145395 | 0.232851 |
| 11761286_TMA16     | -0.1549  | 0.145441 | 0.232917 |
| 11751316_EPS8L1    | -0.06786 | 0.14547  | 0.232955 |
| 11741795_TECTA     | -0.16783 | 0.145478 | 0.232961 |
| 11755854_KCNQ5     | -0.08418 | 0.145557 | 0.233079 |
| 11759917_ZNF808    | 0.099674 | 0.14562  | 0.233172 |
| 11762667_AP5M1     | -0.09527 | 0.145641 | 0.233198 |
| 11752084_KLHL6     | -0.16258 | 0.145653 | 0.233209 |
| 11723111_EMILIN2   | 0.08928  | 0.145661 | 0.233216 |
| 11719166_DAB2IP    | 0.073413 | 0.145667 | 0.233218 |
| 11721401_NCOA3     | 0.121873 | 0.145731 | 0.233306 |
| 11720718_C22orf29  | -0.08166 | 0.145732 | 0.233306 |
| 11745935_ITIH4     | -0.0832  | 0.14574  | 0.233311 |
| 11762206_DRD5P2 // | -0.11433 | 0.145746 | 0.233312 |
| 11745681_FUT11     | 0.089179 | 0.145799 | 0.23339  |
| 11734432_CELF5     | 0.155485 | 0.14583  | 0.233429 |
| 11751228_ZNF76     | -0.11891 | 0.145835 | 0.233429 |
| 11729359_RFTN2     | 0.095132 | 0.145838 | 0.233429 |
| 11737357_CNGA3     | -0.14232 | 0.14588  | 0.233489 |
| 11716853_IMPAD1    | -0.07098 | 0.145917 | 0.233541 |
| 11745643_F9        | -0.1093  | 0.145951 | 0.233588 |
| 11733910_UTP15     | 0.076582 | 0.145992 | 0.233643 |
| 11758239_C9orf72   | -0.06629 | 0.145995 | 0.233643 |
| 11745741_HBS1L     | -0.07959 | 0.146005 | 0.23365  |
| 11718282_NDUFV2    | -0.05594 | 0.146052 | 0.233718 |
| 11747205_PDK2      | -0.08218 | 0.146088 | 0.233768 |
| 11739649_DLL4      | -0.14469 | 0.146122 | 0.233815 |
| 11759367_KIF18B    | -0.09342 | 0.146132 | 0.233817 |
| 11760511_KIF18B    | -0.09342 | 0.146132 | 0.233817 |
| 11756319_ANO8      | -0.10662 | 0.146138 | 0.233819 |
| 11750158_DTNA      | -0.09    | 0.146163 | 0.233851 |
| 11726569_SPOCK3    | 0.122937 | 0.146176 | 0.233863 |

|                    |          |          |          |
|--------------------|----------|----------|----------|
| 11737710_LFNG      | -0.07513 | 0.146195 | 0.233886 |
| 11747718_SPINT1    | -0.09768 | 0.14623  | 0.233928 |
| 11746635_LEF1      | -0.15733 | 0.146231 | 0.233928 |
| 11725225_CHP2      | -0.08923 | 0.146249 | 0.233942 |
| 11745484_PGC       | -0.13098 | 0.146249 | 0.233942 |
| 11761712_FAH       | 0.103058 | 0.146268 | 0.233965 |
| 11761602_LILRB3    | -0.18609 | 0.146284 | 0.233983 |
| 11760066_NPSR1-AS1 | -0.07734 | 0.146312 | 0.23402  |
| 11735548_SLC36A2   | -0.10177 | 0.14635  | 0.234073 |
| 11747159_NGFR      | -0.06465 | 0.146419 | 0.234176 |
| 11715217_MOGAT2    | 0.081827 | 0.146426 | 0.23418  |
| 11722274_ZBED4     | -0.11028 | 0.146434 | 0.234185 |
| 11743301_SRP72     | -0.05778 | 0.146447 | 0.234197 |
| 11733402_CLEC7A    | 0.12244  | 0.146453 | 0.234199 |
| 11722598_ACKR3     | -0.10247 | 0.146462 | 0.234201 |
| 11764048_AASDH     | -0.0704  | 0.146464 | 0.234201 |
| 11737431_PAPL      | 0.104893 | 0.146504 | 0.234257 |
| 11741904_IZUMO1R   | -0.09387 | 0.146531 | 0.234294 |
| 11716161_LBH       | -0.12352 | 0.146538 | 0.234297 |
| 11728534_SPSB2     | -0.07024 | 0.14656  | 0.234324 |
| 11744632_COX11     | 0.084633 | 0.146565 | 0.234324 |
| 11727564_GYG2      | -0.06671 | 0.146597 | 0.234369 |
| 11759620_ATAT1     | -0.06954 | 0.14662  | 0.234398 |
| 11741045_DGKZ      | -0.08543 | 0.146656 | 0.234441 |
| 11763898_SNORA37   | -0.08523 | 0.146657 | 0.234441 |
| 11760968_NTN5      | -0.14272 | 0.146715 | 0.234527 |
| 11723376_GCOM1 /// | 0.116657 | 0.146722 | 0.23453  |
| 11720144_CCSAP     | -0.06815 | 0.14673  | 0.234535 |
| 11729988_ROBO2     | -0.188   | 0.146802 | 0.234642 |
| 11721489_TRIP10    | -0.10098 | 0.146845 | 0.234697 |
| 11726390_MZF1      | -0.0589  | 0.146846 | 0.234697 |
| 11739691_LAGE3     | -0.16552 | 0.146857 | 0.234707 |
| 11735612_GOLGA8CP  | -0.07238 | 0.146864 | 0.234711 |
| 11748611_CARF      | 0.132047 | 0.146882 | 0.234732 |
| 11721166_APOM      | 0.069086 | 0.146887 | 0.234732 |
| 11716361_FAF1      | -0.06883 | 0.146894 | 0.234736 |
| 11735629_ANKMY1    | -0.10876 | 0.146924 | 0.234776 |
| 11741969_TRPV5     | -0.12116 | 0.146944 | 0.2348   |
| 11740143_BEND6     | -0.11994 | 0.146959 | 0.234816 |
| 11759053_ZNF333    | -0.23168 | 0.146989 | 0.234857 |
| 11735625_UTY       | -0.08588 | 0.147062 | 0.234966 |
| 11731917_KCNA3     | -0.08156 | 0.147099 | 0.235016 |
| 11727555_GNB5      | -0.06155 | 0.14712  | 0.235042 |
| 11721595_ARHGAP39  | -0.11871 | 0.147138 | 0.235064 |
| 11727892_PRELP     | -0.10652 | 0.147148 | 0.235068 |
| 11755967_KRT25     | 0.099439 | 0.14715  | 0.235068 |
| 11724163_HLA-DOB   | -0.07915 | 0.147172 | 0.235094 |
| 11724005_FYB       | 0.08482  | 0.147176 | 0.235094 |
| 11739961_VPS36     | 0.083935 | 0.147195 | 0.235116 |
| 11745184_MFF       | -0.06363 | 0.147202 | 0.235119 |
| 11750146_TKTL1     | 0.089852 | 0.147234 | 0.235164 |



|                     |          |          |          |
|---------------------|----------|----------|----------|
| 11721165_KHNYN      | 0.074737 | 0.147254 | 0.235185 |
| 11739266_GPR61      | -0.12056 | 0.147257 | 0.235185 |
| 11724074_SMARCAD1   | -0.06734 | 0.147303 | 0.23525  |
| 11753723_PAX5       | 0.078312 | 0.147313 | 0.235258 |
| 11730450_NEURL2     | -0.06656 | 0.147326 | 0.235272 |
| 11738619_SCN10A     | -0.11014 | 0.147391 | 0.235369 |
| 11727193_MMP23A //  | -0.0961  | 0.147526 | 0.235576 |
| 11753286_SETD3      | 0.083722 | 0.147615 | 0.235711 |
| 11763533_ZDHHHC19   | 0.087876 | 0.147705 | 0.235846 |
| 11724877_AEBP2      | 0.100911 | 0.147724 | 0.235868 |
| 11734188_GP6        | -0.07465 | 0.147728 | 0.235868 |
| 11733319_TRPC4      | 0.177084 | 0.147736 | 0.235872 |
| 11733667_PCBP3      | -0.13341 | 0.147756 | 0.235898 |
| 11728723_VPS29      | 0.053135 | 0.147854 | 0.236046 |
| 11754459_FAM184A    | -0.15613 | 0.147863 | 0.236049 |
| 11728123_KCTD13     | 0.058806 | 0.147866 | 0.236049 |
| 11762242_PTK6       | 0.062398 | 0.14792  | 0.236129 |
| 11762774_BLOC1S1-R  | -0.11847 | 0.147926 | 0.236129 |
| 11730329_DIO3       | -0.08552 | 0.147934 | 0.236136 |
| 11741370_ATP6V1E1   | 0.061801 | 0.147971 | 0.236186 |
| 11742495_SFTPA1 //  | -0.09415 | 0.147986 | 0.236203 |
| 11761042_MBP        | -0.08749 | 0.148003 | 0.236221 |
| 11720126_BCARI      | 0.066038 | 0.148011 | 0.236227 |
| 11734453_C11orf86   | -0.08765 | 0.148119 | 0.236392 |
| 11741389_NSFL1C     | -0.07325 | 0.148152 | 0.236436 |
| 11754139_TNFRSF25   | -0.09657 | 0.148232 | 0.236554 |
| 11735015_GPR137     | -0.05717 | 0.148235 | 0.236554 |
| 11745320_ANKRD36    | -0.1088  | 0.148241 | 0.236556 |
| 11740016_SLC6A11    | -0.09268 | 0.148269 | 0.236593 |
| 11734198_LUZIP2     | -0.07068 | 0.148309 | 0.236648 |
| 11742356_OR4C11     | 0.057746 | 0.148379 | 0.236753 |
| 11762813_PABPN1L    | 0.153027 | 0.148415 | 0.2368   |
| 11715688_CTRB2      | 0.073952 | 0.148431 | 0.2368   |
| 11717574_PFN1       | -0.05553 | 0.148434 | 0.2368   |
| 11761812_WDR86      | 0.093555 | 0.148436 | 0.2368   |
| 11764235_ZHX1-C8orf | 0.06578  | 0.148437 | 0.2368   |
| 11742342_OR4A16     | -0.1124  | 0.148438 | 0.2368   |
| 11716413_MT1E       | -0.08735 | 0.148461 | 0.236829 |
| 11747448_BTN3A2     | -0.07518 | 0.148492 | 0.236871 |
| 11753136_ADGRB2     | -0.09071 | 0.148508 | 0.236883 |
| 11749941_FCRL6      | -0.09449 | 0.148509 | 0.236883 |
| 11762827_TAC3       | -0.18081 | 0.148521 | 0.236893 |
| 11715936_NBEAL2     | -0.10559 | 0.148528 | 0.236898 |
| 11753931_ABCC8      | -0.11283 | 0.148538 | 0.236906 |
| 11751503_FGF17      | 0.097417 | 0.148559 | 0.236926 |
| 11762013_DHX58      | -0.14531 | 0.14856  | 0.236926 |
| 11730330_DIO3       | -0.09192 | 0.14861  | 0.236997 |
| 11730809_LRRTM2     | -0.10091 | 0.148618 | 0.237002 |
| 11755708_SLC9B1     | 0.167259 | 0.148645 | 0.237038 |
| 11727551_ADAMTS10   | -0.1018  | 0.148707 | 0.237128 |
| 11761293_EIF4E      | 0.054568 | 0.148807 | 0.23728  |

|                   |          |          |          |
|-------------------|----------|----------|----------|
| 11750502_NXF3     | -0.13292 | 0.148823 | 0.237297 |
| 11715628_FGB      | -0.11504 | 0.148837 | 0.237313 |
| 11732090_IZUMO1   | -0.18433 | 0.148851 | 0.237327 |
| 11718486_EI24     | 0.057893 | 0.148903 | 0.237402 |
| 11745522_UNC50    | 0.07385  | 0.148916 | 0.237415 |
| 11728927_DDX43    | -0.08323 | 0.148952 | 0.237465 |
| 11725440_LPAR2    | 0.095076 | 0.148977 | 0.237496 |
| 11749326_OLFML2B  | -0.12107 | 0.149034 | 0.237579 |
| 11729130_ANAPC16  | -0.08757 | 0.149038 | 0.237579 |
| 11715681_CREG1    | -0.08114 | 0.149077 | 0.237634 |
| 11736624_LRTOMT   | -0.09522 | 0.149097 | 0.237658 |
| 11728099_NXPH3    | -0.11439 | 0.149103 | 0.237659 |
| 11738050_RASGEF1C | -0.10666 | 0.149109 | 0.237659 |
| 11738038_KLHL38   | -0.12753 | 0.149112 | 0.237659 |
| 11744260_CD63     | 0.061257 | 0.149126 | 0.237673 |
| 11751129_MAPK4    | -0.05542 | 0.149141 | 0.237688 |
| 11748233_RBM25    | 0.060264 | 0.149149 | 0.237694 |
| 11723326_CA9      | -0.11486 | 0.14916  | 0.237704 |
| 11740858_PKLR     | -0.10532 | 0.149195 | 0.237751 |
| 11745226_SEPT4    | -0.12567 | 0.149207 | 0.237762 |
| 11715707_MGEA5    | -0.06842 | 0.149237 | 0.237803 |
| 11750613_GRIN1    | 0.080801 | 0.14929  | 0.237879 |
| 11734003_ACTN2    | -0.17215 | 0.149328 | 0.237933 |
| 11741202_XAF1     | 0.160342 | 0.149369 | 0.23798  |
| 11756443_PROM2    | -0.11436 | 0.149371 | 0.23798  |
| 11738355_NRII3    | 0.131894 | 0.149372 | 0.23798  |
| 11755945_YPEL4    | -0.13441 | 0.149437 | 0.238075 |
| 11734218_ZNF681   | -0.09247 | 0.149461 | 0.238106 |
| 11731240_GRHL2    | -0.08246 | 0.149474 | 0.238119 |
| 11724007_ENTPD1   | -0.0942  | 0.149486 | 0.238131 |
| 11761143_TP53     | -0.09197 | 0.149533 | 0.238196 |
| 11752275_SLC15A1  | -0.11964 | 0.149543 | 0.238206 |
| 11725888_MCEMP1   | 0.084345 | 0.149592 | 0.238276 |
| 11760054_TIRAP    | 0.166975 | 0.149626 | 0.238321 |
| 11735643_RARRES1  | -0.0977  | 0.14964  | 0.238336 |
| 11735604_OSBPL7   | 0.064023 | 0.149653 | 0.238349 |
| 11728472_PLPPR5   | 0.104981 | 0.149658 | 0.23835  |
| 11737642_RFPL2    | -0.07275 | 0.149686 | 0.23838  |
| 11721191_CHST3    | 0.070539 | 0.149687 | 0.23838  |
| 11717785_CLUH     | -0.08257 | 0.149702 | 0.238396 |
| 11744012_WIZ      | -0.12026 | 0.149706 | 0.238396 |
| 11763616_TRBV10-2 | -0.13147 | 0.149783 | 0.23851  |
| 11731555_SYNPO2   | -0.1017  | 0.149837 | 0.238588 |
| 11750025_MYO15A   | -0.05972 | 0.149863 | 0.238617 |
| 11729482_KRTCAP3  | -0.07205 | 0.149865 | 0.238617 |
| 11756084_PHF8     | 0.076884 | 0.149873 | 0.238622 |
| 11736030_SLC16A3  | 0.079601 | 0.149913 | 0.238678 |
| 11736580_GCNT1    | -0.16293 | 0.149921 | 0.238683 |
| 11755860_MME      | -0.07127 | 0.149931 | 0.238692 |
| 11726338_ALOX5    | -0.15898 | 0.14996  | 0.238729 |
| 11755529_ZNF322   | -0.07813 | 0.149995 | 0.238778 |

|                    |          |          |          |
|--------------------|----------|----------|----------|
| 11734322_BMP3      | 0.070369 | 0.150053 | 0.238862 |
| 11760939_S SX2IP   | -0.08927 | 0.150117 | 0.238956 |
| 11738235_GCNT4     | -0.13825 | 0.150129 | 0.238967 |
| 11735529_KLK14     | -0.10005 | 0.150155 | 0.239002 |
| 11740298_LEPROTL1  | 0.061601 | 0.150187 | 0.239044 |
| 11724041_SPESP1    | -0.08682 | 0.150217 | 0.239083 |
| 11760293_LOC100129 | -0.08382 | 0.15029  | 0.239185 |
| 11731732_CD1B      | -0.09997 | 0.15029  | 0.239185 |
| 11742593_OR14C36   | -0.083   | 0.150373 | 0.239309 |
| 11763036_ZNF761    | 0.135156 | 0.150393 | 0.239334 |
| 11756017_LOC105377 | 0.107851 | 0.150404 | 0.239343 |
| 11761462_FABP7     | -0.07537 | 0.150417 | 0.239355 |
| 11728761_LOC100506 | -0.06426 | 0.150426 | 0.239362 |
| 11751602_SRSF7     | 0.060831 | 0.150447 | 0.23938  |
| 11739620_VSTM4     | -0.14132 | 0.150447 | 0.23938  |
| 11725943_WNT7B     | -0.0782  | 0.150498 | 0.239454 |
| 11743028_SPIRE2    | -0.09532 | 0.150509 | 0.239463 |
| 11749960_PSMF1     | -0.08785 | 0.150515 | 0.239465 |
| 11731251_EPHA8     | -0.11346 | 0.150598 | 0.239589 |
| 11762668_NAIF1     | 0.08379  | 0.150604 | 0.23959  |
| 11754522_SUGT1     | 0.083772 | 0.150675 | 0.239693 |
| 11761397_TMEM138   | 0.061392 | 0.150678 | 0.239693 |
| 11739572_ZNF532    | 0.058983 | 0.150713 | 0.239735 |
| 11731210_C2orf57   | 0.078035 | 0.150715 | 0.239735 |
| 11750460_ZFYVE27   | -0.06902 | 0.150727 | 0.239747 |
| 11724714_STK32B    | 0.070629 | 0.150733 | 0.239749 |
| 11724341_PRIMA1    | -0.13251 | 0.150739 | 0.23975  |
| 11718822_DOK4      | -0.08711 | 0.150756 | 0.23977  |
| 11734552_CX3CL1    | -0.08712 | 0.150766 | 0.239778 |
| 11752592_CEP170    | 0.064921 | 0.15078  | 0.239792 |
| 11762887_DIO3OS    | -0.06429 | 0.150797 | 0.239813 |
| 11732981_USP26     | 0.099409 | 0.150809 | 0.239822 |
| 11757834_AFF1      | 0.066946 | 0.150854 | 0.239886 |
| 11744633_BRAT1     | -0.07112 | 0.150876 | 0.239914 |
| 11723619_SNAP91    | 0.107878 | 0.150885 | 0.239921 |
| 11732787_TXLNGY    | -0.05523 | 0.15089  | 0.239921 |
| 11726036_TRNAU1AP  | 0.084421 | 0.150916 | 0.239954 |
| 11733608_LRRC34    | -0.12097 | 0.150954 | 0.240006 |
| 11752778_TTC31     | -0.06488 | 0.150989 | 0.240054 |
| 200081_PMRPS6      | 0.052764 | 0.151025 | 0.240104 |
| 11737569_YIPF7     | -0.08811 | 0.151041 | 0.240121 |
| 11750919_ALPL      | 0.070216 | 0.151071 | 0.240162 |
| 11738505_KRTAP13-1 | -0.13227 | 0.151099 | 0.240198 |
| 11738513_GADL1     | 0.098722 | 0.151117 | 0.24022  |
| 11760383_KIAA0513  | 0.17856  | 0.151142 | 0.24025  |
| 11761787_CD1E      | -0.14537 | 0.151153 | 0.24026  |
| 11742583_OR10G3    | -0.12256 | 0.151209 | 0.240342 |
| 11734487_C5orf52   | -0.10387 | 0.151234 | 0.240372 |
| 11728157_EDA       | -0.14902 | 0.151238 | 0.240372 |
| 11733299_CLDN5     | 0.153775 | 0.151263 | 0.240405 |
| 11748093_RIMS1     | 0.212075 | 0.151405 | 0.240623 |

|                   |          |          |          |
|-------------------|----------|----------|----------|
| 11742357_OR10Q1   | -0.09316 | 0.151528 | 0.240798 |
| 11719500_SMN1 /// | 0.097909 | 0.151529 | 0.240798 |
| 11744803_MDK      | -0.06058 | 0.151533 | 0.240798 |
| 11734216_MPP7     | 0.114093 | 0.151535 | 0.240798 |
| 11736744_C1orf168 | 0.125791 | 0.15155  | 0.240813 |
| 11731637_GAB1     | -0.19282 | 0.151558 | 0.240813 |
| 11729594_PRPF4    | -0.05765 | 0.15156  | 0.240813 |
| 11731695_CXXC4    | -0.1155  | 0.151582 | 0.24084  |
| 11728409_TRIM31   | -0.07705 | 0.151625 | 0.240901 |
| 11734391_FAM124A  | -0.15116 | 0.151668 | 0.240962 |
| 11762951_MAGEC3   | -0.09557 | 0.151683 | 0.240978 |
| 11750100_ST3GAL3  | -0.13672 | 0.15169  | 0.240982 |
| 11755496_RITA1    | -0.067   | 0.151702 | 0.240992 |
| 11729085_ZFY      | -0.09101 | 0.15177  | 0.241093 |
| 11738172_DIP2A    | -0.07121 | 0.151881 | 0.241251 |
| 11733216_USP53    | 0.089425 | 0.151886 | 0.241251 |
| 11733596_TMEM52B  | -0.06085 | 0.151889 | 0.241251 |
| 11733661_C1orf105 | -0.07284 | 0.15189  | 0.241251 |
| 11760898_CCDC40   | 0.150041 | 0.151962 | 0.241358 |
| 11731500_KRT19    | -0.13155 | 0.152025 | 0.241443 |
| 11760211_CD48     | -0.13415 | 0.152025 | 0.241443 |
| 11746828_SUMO1    | -0.0569  | 0.152037 | 0.241453 |
| 11727304_TIGD3    | 0.130109 | 0.152065 | 0.241491 |
| 11746664_C16orf58 | -0.06384 | 0.152074 | 0.241497 |
| 11727771_KIRREL2  | 0.105878 | 0.152091 | 0.241517 |
| 11759918_SPATA6   | -0.09264 | 0.152195 | 0.241673 |
| 11724942_MAPK8IP2 | 0.10062  | 0.152201 | 0.241676 |
| 11740199_ARHGDIG  | -0.10401 | 0.152241 | 0.24173  |
| 11748579_COMMD1   | -0.08874 | 0.152271 | 0.24177  |
| 11749093_PAPLN    | -0.11644 | 0.152303 | 0.241813 |
| 11734618_ALOX15B  | 0.074257 | 0.152308 | 0.241813 |
| 11763544_ZNF81    | -0.10797 | 0.152313 | 0.241814 |
| 11745866_PSEN2    | 0.116595 | 0.152384 | 0.241918 |
| 11721899_FAM216A  | -0.06764 | 0.152394 | 0.241922 |
| 11763501_RBM8A    | -0.11694 | 0.152396 | 0.241922 |
| 11762749_NPSA     | -0.10619 | 0.152457 | 0.242011 |
| 11719668_SMYD5    | 0.097135 | 0.152485 | 0.242045 |
| 11721694_WAS      | -0.07525 | 0.152488 | 0.242045 |
| 11745823_ACAA1    | -0.10399 | 0.152498 | 0.242052 |
| 11736151_PRMT7    | 0.065375 | 0.15257  | 0.242157 |
| 11753532_KCNIP3   | 0.134289 | 0.152574 | 0.242157 |
| 11760652_PNLIPRP1 | -0.09781 | 0.152586 | 0.242168 |
| 11729926_ZNF510   | 0.083564 | 0.152606 | 0.242193 |
| 11752917_SLC27A1  | -0.08166 | 0.152622 | 0.24221  |
| 11715893_IFI27    | -0.18354 | 0.152677 | 0.24229  |
| 11741907_DRGX     | -0.1666  | 0.152747 | 0.242392 |
| 11733641_KLC4     | -0.07916 | 0.152752 | 0.242392 |
| 11753238_ANKRD36  | -0.11181 | 0.152757 | 0.242392 |
| 11715539_RPLP1    | 0.05301  | 0.152772 | 0.242408 |
| 11722899_REV1     | -0.06421 | 0.152811 | 0.242457 |
| 11761988_GALNTL6  | -0.1051  | 0.152813 | 0.242457 |

|                    |          |          |          |
|--------------------|----------|----------|----------|
| 11736004_PRH2      | -0.19813 | 0.152869 | 0.242539 |
| 11757078_LOC101929 | -0.11397 | 0.152889 | 0.242563 |
| 11761183_ZNF250    | -0.13185 | 0.152895 | 0.242564 |
| 11743199_C8A       | -0.0874  | 0.152947 | 0.24264  |
| 11756848_MCHR1     | -0.09529 | 0.152972 | 0.24267  |
| 11742564_LOC101927 | 0.127085 | 0.152984 | 0.242683 |
| 11722878_TBC1D17   | -0.08126 | 0.152998 | 0.242697 |
| 11744419_MFF       | -0.08515 | 0.15301  | 0.242707 |
| 11733853_INTS9     | -0.08614 | 0.153075 | 0.242803 |
| 11756031_KRTAP2-2  | 0.092241 | 0.153095 | 0.242823 |
| 11725184_KLF12     | 0.094443 | 0.153098 | 0.242823 |
| 11757806_PRDX6     | 0.055438 | 0.153167 | 0.242925 |
| 11721720_CELA2A    | -0.11731 | 0.153225 | 0.24301  |
| 11758118_YARS      | -0.05472 | 0.153231 | 0.24301  |
| 11731354_VCX       | -0.0989  | 0.153279 | 0.243076 |
| 11726220_SYPL2     | 0.124953 | 0.153282 | 0.243076 |
| 11735365_OCM       | -0.10303 | 0.15331  | 0.243103 |
| 11760756_AMBP      | -0.07642 | 0.153312 | 0.243103 |
| 11745753_KLK3      | -0.13197 | 0.153314 | 0.243103 |
| 11764033_RFC5      | -0.07372 | 0.153337 | 0.243131 |
| 11751198_DIS3L     | -0.10123 | 0.153347 | 0.24314  |
| 11755014_AP2A2     | -0.06906 | 0.153355 | 0.243145 |
| 11753520_EPHB1     | -0.12706 | 0.153371 | 0.243162 |
| 11718973_LPL       | -0.06548 | 0.153379 | 0.243167 |
| 11760797_LOC100499 | -0.12363 | 0.153403 | 0.243197 |
| 11747892_TOMM40L   | 0.084043 | 0.153415 | 0.243207 |
| 11731916_KCNA3     | -0.15321 | 0.153481 | 0.243304 |
| 11753871_GNG7      | -0.07957 | 0.153564 | 0.243428 |
| 11735007_FCHSD1    | -0.10778 | 0.153592 | 0.243465 |
| 11760811_PSMC6     | -0.17548 | 0.153611 | 0.243487 |
| 11758782_KLHL9     | -0.10669 | 0.153617 | 0.243489 |
| 11754100_SEC16A    | -0.08501 | 0.153651 | 0.243535 |
| 11752871_ACE       | -0.10026 | 0.153673 | 0.243561 |
| 11762995_TRAV5     | 0.075055 | 0.153703 | 0.2436   |
| 11727619_EFNA3     | -0.10574 | 0.153723 | 0.243624 |
| 11755074_PLA2G4F   | -0.08789 | 0.153727 | 0.243624 |
| 11762662_SLC15A1   | 0.104729 | 0.153749 | 0.243651 |
| 11723663_HNRNPU    | -0.05286 | 0.153761 | 0.243662 |
| 11741430_KCTD15    | -0.09289 | 0.153863 | 0.243816 |
| 11736948_TEX26     | 0.079111 | 0.153883 | 0.24384  |
| 11721605_ZFYVE26   | 0.078799 | 0.153913 | 0.243878 |
| 11735626_UTY       | -0.10763 | 0.153948 | 0.243927 |
| 11741861_AGER      | -0.06615 | 0.153989 | 0.243984 |
| 11739901_SLC19A3   | 0.06777  | 0.154018 | 0.244022 |
| 11736242_ORMDL2    | -0.06478 | 0.15404  | 0.244042 |
| 11739724_ATP2B2    | -0.18424 | 0.154041 | 0.244042 |
| 11736692_TNFRSF18  | -0.09575 | 0.154066 | 0.244071 |
| 11737544_TMEM202   | -0.16513 | 0.154069 | 0.244071 |
| 11724636_ABCC10    | 0.063576 | 0.154078 | 0.244077 |
| 11737921_MILR1     | 0.080152 | 0.154083 | 0.244077 |
| 11752151_OR2C3     | -0.0799  | 0.154089 | 0.244078 |

|                    |          |          |          |
|--------------------|----------|----------|----------|
| 11762086_GTPBP8    | 0.154581 | 0.154098 | 0.244084 |
| 11720253_TOB1      | -0.07231 | 0.154118 | 0.244103 |
| 11726468_C1orf106  | -0.07043 | 0.154121 | 0.244103 |
| 11755550_POU2F3    | 0.078359 | 0.154125 | 0.244103 |
| 11754686_LRRC56    | 0.076779 | 0.154143 | 0.244121 |
| 11744508_CCDC146   | -0.08383 | 0.154146 | 0.244121 |
| 11761171_SPHK2     | -0.0763  | 0.154165 | 0.244138 |
| 11734038_ARFGAP2   | -0.06016 | 0.154167 | 0.244138 |
| 11718010_SLC25A22  | -0.05726 | 0.154172 | 0.244138 |
| 11730190_OLA1      | -0.09879 | 0.154185 | 0.244152 |
| 11743317_ZFC3H1    | 0.059407 | 0.154241 | 0.244231 |
| 11762066_POLR3A    | -0.15083 | 0.154245 | 0.244231 |
| 11721662_HDAC11    | -0.10071 | 0.154271 | 0.244264 |
| 11762325_GLI2      | -0.15439 | 0.15428  | 0.244269 |
| 11734952_MBNL3     | 0.095578 | 0.154306 | 0.244304 |
| 11747036_ZNF385B   | -0.09236 | 0.154326 | 0.244324 |
| 11764236_ZFP41     | 0.15904  | 0.154329 | 0.244324 |
| 11726180_SOX6      | -0.13965 | 0.154369 | 0.24438  |
| 11747010_VSIG4     | -0.19751 | 0.154377 | 0.244384 |
| 11715505_IARS      | 0.056811 | 0.154426 | 0.244453 |
| 11730518_PLXNB3 // | -0.08894 | 0.154479 | 0.244529 |
| 11724692_CAPN13    | -0.08206 | 0.154506 | 0.244564 |
| 11743638_DIS3L2    | 0.076581 | 0.154513 | 0.244567 |
| 11721374_BCL2      | -0.11244 | 0.154535 | 0.244595 |
| 11747863_MED15     | -0.08531 | 0.154597 | 0.244684 |
| 11737906_FOXO3     | 0.056284 | 0.154613 | 0.244702 |
| 11758465_ZBTB41    | -0.05528 | 0.154623 | 0.24471  |
| 11738509_CPSF4L    | -0.0776  | 0.154637 | 0.244714 |
| 11748022_TNNT3     | 0.113126 | 0.154638 | 0.244714 |
| 11733236_TAMM41    | 0.063384 | 0.154644 | 0.244714 |
| 11752641_PTK7      | -0.1835  | 0.154655 | 0.244714 |
| 11724929_EVI5L     | -0.07741 | 0.154655 | 0.244714 |
| 11751324_HARS      | -0.08119 | 0.154656 | 0.244714 |
| 11760562_AS1       | 0.134004 | 0.15467  | 0.244729 |
| 11745973_DLG5      | 0.073424 | 0.154731 | 0.244817 |
| 11748145_HNRNPUL1  | -0.06167 | 0.154751 | 0.244842 |
| 11746372_NUDT6     | 0.071427 | 0.154791 | 0.244895 |
| 11729010_CDH22     | -0.07326 | 0.154797 | 0.244895 |
| 11762825_PLA2G4C   | 0.16284  | 0.1548   | 0.244895 |
| 11726489_SLC4A1    | -0.11195 | 0.154839 | 0.244949 |
| 11750959_FAM129C   | -0.08372 | 0.154851 | 0.244959 |
| 11747808_WIPI1     | -0.09163 | 0.154894 | 0.245019 |
| 11719194_DFNA5     | -0.06562 | 0.154914 | 0.245044 |
| 11740543_ADAMTSL5  | 0.08328  | 0.154963 | 0.245114 |
| 11747095_SNCAIP    | -0.15915 | 0.154976 | 0.245125 |
| 11718418_TST       | 0.066938 | 0.154993 | 0.245144 |
| 11718842_C16orf62  | -0.07024 | 0.155    | 0.245147 |
| 11748504_PPM1F     | -0.06591 | 0.155019 | 0.245171 |
| 11755646_SIGLEC1   | -0.11723 | 0.15503  | 0.245179 |
| 11715414_COL3A1    | 0.104903 | 0.155072 | 0.245239 |
| 11748401_TPM4      | -0.06893 | 0.155098 | 0.245272 |

|                    |          |          |          |
|--------------------|----------|----------|----------|
| 11741593_LENEP     | -0.14088 | 0.155112 | 0.245286 |
| 11761841_HSF4      | 0.064339 | 0.155126 | 0.245299 |
| 11727825_TPMT      | -0.08191 | 0.155147 | 0.24532  |
| 11715833_RUVBL1    | -0.07528 | 0.155149 | 0.24532  |
| 11730511_MAMSTR    | -0.10267 | 0.155171 | 0.245347 |
| 11764072_GPR17     | 0.145125 | 0.155185 | 0.245362 |
| 11755194_CCNL2     | -0.14863 | 0.155194 | 0.245367 |
| 11759949_COBL      | -0.17778 | 0.1552   | 0.245369 |
| 11748644_BCARI     | 0.084225 | 0.155257 | 0.245451 |
| 11757188_TMEN254-A | -0.12959 | 0.155284 | 0.245486 |
| 11742296_POUIF1    | -0.12626 | 0.155291 | 0.245489 |
| 11746290_SLC12A5   | -0.10158 | 0.155306 | 0.245504 |
| 11734303_SPTBN4    | -0.07974 | 0.155325 | 0.245527 |
| 11735994_USP14     | 0.054873 | 0.155403 | 0.245643 |
| 11734370_CTAGE1    | -0.07265 | 0.155429 | 0.245675 |
| 11763068_BCL2L11   | -0.1348  | 0.155451 | 0.245702 |
| 11737530_STOX1     | -0.18214 | 0.155458 | 0.245705 |
| 11760571_LOC100506 | -0.14942 | 0.155496 | 0.245757 |
| 11717131_AHNAK2    | 0.125149 | 0.155505 | 0.245764 |
| 11733592_LCA5      | 0.116839 | 0.155512 | 0.245764 |
| 11724795_ZG16B     | -0.12406 | 0.155515 | 0.245764 |
| 11763085_RPS15     | -0.13555 | 0.155523 | 0.245768 |
| 11742670_CXCL6     | 0.088793 | 0.155592 | 0.245862 |
| 11761375_TRMU      | -0.10904 | 0.155595 | 0.245862 |
| 11751188_SYT4      | -0.07599 | 0.155598 | 0.245862 |
| 11757678_EEF2      | 0.053126 | 0.155604 | 0.245865 |
| 11739676_PRR27     | 0.098041 | 0.155631 | 0.2459   |
| 11739102_SYF2      | 0.076347 | 0.155655 | 0.24593  |
| 11756367_SLC25A4   | 0.079477 | 0.155678 | 0.245957 |
| 11750247_GPER1     | -0.18174 | 0.155701 | 0.245986 |
| 11746830_AGR2      | 0.074733 | 0.155711 | 0.245994 |
| 11719455_BBS1      | 0.069584 | 0.155719 | 0.245996 |
| 11739059_OCIAD1    | 0.057232 | 0.155723 | 0.245996 |
| 11732543_RSPH6A    | -0.10438 | 0.155744 | 0.246021 |
| 11736168_CCDC34    | -0.14549 | 0.155773 | 0.24606  |
| 11734275_HNF1A     | -0.194   | 0.155809 | 0.246104 |
| 11758702_PSM2      | -0.0598  | 0.155815 | 0.246104 |
| 11754555_CEP68     | -0.07452 | 0.155816 | 0.246104 |
| 11740795_SPTBN4    | -0.08833 | 0.155821 | 0.246104 |
| 11736857_ODF1      | -0.08851 | 0.155836 | 0.24612  |
| 11750470_EVX1      | -0.06042 | 0.155856 | 0.246143 |
| 11716400_TP53INP2  | -0.0764  | 0.155861 | 0.246143 |
| 11737227_PPP1R27   | -0.09858 | 0.15587  | 0.246149 |
| 11717579_VPS26A    | 0.069982 | 0.155878 | 0.246154 |
| 11759393_KRTAP19-2 | -0.17223 | 0.156058 | 0.246431 |
| 11757665_NDUFS5    | -0.05723 | 0.156066 | 0.246435 |
| 11720142_ASTN1     | -0.12008 | 0.156091 | 0.246461 |
| 11740599_GPR20     | -0.11739 | 0.156092 | 0.246461 |
| 11759589_DSCR9     | -0.07924 | 0.156101 | 0.246466 |
| 11741074_METTL18   | 0.081194 | 0.156109 | 0.24647  |
| 11719862_TREM1     | -0.0874  | 0.156113 | 0.24647  |

|                    |          |          |          |
|--------------------|----------|----------|----------|
| 11748109_FAM69A    | -0.12744 | 0.156158 | 0.246532 |
| 11746341_CLTC      | -0.07615 | 0.156163 | 0.246533 |
| 11735988_DEFEB136  | -0.13981 | 0.156193 | 0.246571 |
| 11747194_EVC       | -0.13434 | 0.1562   | 0.246571 |
| 11731165_FGF19     | -0.14509 | 0.156203 | 0.246571 |
| 11742624_OR5AC2    | -0.10395 | 0.156219 | 0.246589 |
| 11742311_DUX1      | -0.06961 | 0.156238 | 0.246609 |
| 11730633_MAK       | -0.05815 | 0.156242 | 0.246609 |
| 11752533_DCST1     | -0.06847 | 0.156248 | 0.246611 |
| 11761586_RHBG      | -0.06702 | 0.156277 | 0.246649 |
| 11726844_PLXDC1    | -0.10888 | 0.156295 | 0.246665 |
| 11725000_DUOXA2    | -0.09794 | 0.156298 | 0.246665 |
| 11755589_DHRS2     | 0.07453  | 0.156357 | 0.246751 |
| 11738723_ORZ1      | -0.07651 | 0.156379 | 0.246771 |
| 11716047_C2orf33   | -0.06636 | 0.15638  | 0.246771 |
| 11729999_B3GNT7    | 0.070535 | 0.156407 | 0.246806 |
| 11734598_SLC25A52  | -0.08413 | 0.156457 | 0.246878 |
| 11762725_SIGLEC8   | -0.11004 | 0.156493 | 0.246925 |
| 11759682_PDLIM5    | -0.13138 | 0.156509 | 0.246938 |
| 11751489_TSPAN7    | 0.108908 | 0.156511 | 0.246938 |
| 11717176_SNX27     | 0.057532 | 0.156517 | 0.24694  |
| 11759321_MPZL3     | 0.082144 | 0.156535 | 0.24696  |
| 11736781_RAB11FIP1 | 0.07287  | 0.156551 | 0.246978 |
| 11737154_CRYGB     | -0.16605 | 0.156582 | 0.247019 |
| 11754391_CCDC51    | 0.056327 | 0.156626 | 0.247072 |
| 11720438_ACVR1B    | -0.06808 | 0.156626 | 0.247072 |
| 11762382_PER2      | 0.060764 | 0.156679 | 0.247148 |
| 11733114_MANBAL    | 0.052108 | 0.156691 | 0.247159 |
| 11735983_OR10H3    | -0.06348 | 0.1567   | 0.247165 |
| 11757012_RHOA      | 0.069493 | 0.156727 | 0.247196 |
| 11752879_SMTN      | -0.07961 | 0.156734 | 0.247196 |
| 11752925_NPY5R     | -0.09065 | 0.156735 | 0.247196 |
| 11730519_ABCA9     | -0.08035 | 0.156755 | 0.247219 |
| 11745688_AVPR2     | -0.08548 | 0.156798 | 0.247279 |
| 11727974_FAM171A2  | -0.06364 | 0.15683  | 0.247321 |
| 11735099_C2orf73   | 0.103649 | 0.15684  | 0.247325 |
| 11763225_IGLV1-41  | 0.155043 | 0.156842 | 0.247325 |
| 11733252_UACA      | -0.08436 | 0.156906 | 0.247418 |
| 11748704_C1D       | -0.07168 | 0.156944 | 0.247469 |
| 11753040_MECOM     | 0.116292 | 0.15695  | 0.247472 |
| 11743661_MBNL1     | 0.083768 | 0.156957 | 0.247474 |
| 11721670_RPS6KA4   | -0.06281 | 0.156983 | 0.247507 |
| 11723827_TOP3B     | 0.061851 | 0.156992 | 0.247513 |
| 11719576_AMT       | 0.071831 | 0.156997 | 0.247513 |
| 11738757_OR2A25    | -0.10689 | 0.157139 | 0.247729 |
| 11744732_ZNF610    | 0.16395  | 0.157155 | 0.247746 |
| 11758065_KCNIP4    | -0.09674 | 0.157198 | 0.247804 |
| 11723780_DYRK1B    | -0.08497 | 0.157202 | 0.247804 |
| 11751403_ABI2      | -0.05432 | 0.15726  | 0.247884 |
| 11758549_POM121L2  | -0.1159  | 0.157262 | 0.247884 |
| 11731553_SYNPO2    | -0.07416 | 0.157292 | 0.247922 |



|                    |          |          |          |
|--------------------|----------|----------|----------|
| 11751788_DBF4B     | -0.08429 | 0.157343 | 0.247995 |
| 11728546_BTBD9     | -0.1065  | 0.1574   | 0.248076 |
| 11724885_CLIC3     | -0.11277 | 0.15747  | 0.24818  |
| 11754414_C1orf159  | -0.07    | 0.157503 | 0.248215 |
| 11745712_ZNF365    | 0.153523 | 0.157503 | 0.248215 |
| 11749209_IKZF1     | -0.10828 | 0.157516 | 0.24822  |
| 11732094_PYY       | 0.073441 | 0.157518 | 0.24822  |
| 11727075_PLAC4     | -0.07139 | 0.157521 | 0.24822  |
| 11762841_CYP4Z2P   | -0.151   | 0.157529 | 0.248223 |
| 11738296_CNGA2     | -0.12447 | 0.157558 | 0.248261 |
| 11754692_AFG3L2    | -0.07006 | 0.157576 | 0.248282 |
| 11718660_NENF      | 0.05801  | 0.157583 | 0.248285 |
| 11753783_CIB3      | -0.09309 | 0.157659 | 0.248396 |
| 11731020_CCDC62    | 0.100179 | 0.157672 | 0.248409 |
| 11748346_FKBP9 /// | -0.13987 | 0.157701 | 0.248446 |
| 11725439_HBD /// H | -0.1021  | 0.157706 | 0.248446 |
| 11727728_DMRT2     | -0.06531 | 0.157713 | 0.24845  |
| 11762639_DNAJA1P5  | 0.093768 | 0.157763 | 0.248521 |
| 11728585_FAM189A1  | 0.162876 | 0.1578   | 0.248571 |
| 11732475_C14orf180 | -0.12188 | 0.157817 | 0.24859  |
| 11737727_XKR6      | 0.128003 | 0.157822 | 0.24859  |
| 11740153_ZNF384    | 0.118957 | 0.157853 | 0.24863  |
| 11729295_TANGO6    | 0.083476 | 0.157947 | 0.24877  |
| 11762374_COL25A1   | 0.141079 | 0.157981 | 0.248816 |
| 11749231_CAMKV     | -0.08459 | 0.158072 | 0.248951 |
| 11735906_PNPLA1    | -0.06588 | 0.158086 | 0.248965 |
| 11732235_GYPA      | -0.07601 | 0.158094 | 0.248969 |
| 11724256_OAS1      | -0.11174 | 0.158104 | 0.248977 |
| 11719745_ARHGAP27  | 0.074483 | 0.15813  | 0.249002 |
| 11731097_TTC16     | -0.06137 | 0.158132 | 0.249002 |
| 11728201_LOX       | 0.063242 | 0.158135 | 0.249002 |
| 200031_PMRPS11     | 0.051913 | 0.158158 | 0.249031 |
| 11722545_EYA2      | -0.13657 | 0.15817  | 0.249041 |
| 11762868_LOC100289 | -0.08508 | 0.158183 | 0.249053 |
| 11759955_CNOT10    | -0.12644 | 0.158238 | 0.249132 |
| 11726562_SAP18     | -0.08491 | 0.158336 | 0.249279 |
| 11736890_PTPRD     | 0.12221  | 0.15835  | 0.249293 |
| 11752381_TRIM67    | -0.08177 | 0.158376 | 0.249325 |
| 11715185_PRB1      | -0.07291 | 0.158426 | 0.249382 |
| 11754450_MTCL1     | 0.083409 | 0.158431 | 0.249382 |
| 11760842_CTAGE3P   | -0.08484 | 0.158432 | 0.249382 |
| 11761784_HPX       | -0.13051 | 0.158432 | 0.249382 |
| 11758077_BHMT      | -0.06149 | 0.158439 | 0.249384 |
| 11734053_ZMYM6     | 0.1248   | 0.158452 | 0.249396 |
| 11745237_B3GNT3    | -0.09707 | 0.158465 | 0.249408 |
| 11730486_SERPINA9  | -0.13954 | 0.158469 | 0.249408 |
| 11747644_LIMS1 /// | 0.26139  | 0.158489 | 0.249431 |
| 11732358_ZNRF1     | 0.052718 | 0.158561 | 0.249536 |
| 11723728_CXorf57   | -0.0851  | 0.15859  | 0.249575 |
| 11743384_PRRPF40A  | -0.13471 | 0.158682 | 0.24971  |
| 11745403_ZNF683    | -0.08211 | 0.158711 | 0.249748 |

|                    |          |          |          |
|--------------------|----------|----------|----------|
| 11752066_RAI1      | -0.11668 | 0.158735 | 0.249778 |
| 11729325_RAMP2     | -0.08741 | 0.158751 | 0.249795 |
| 11724114_UCKL1 /// | 0.076138 | 0.158801 | 0.249866 |
| 11748760_CLEC4F    | -0.10335 | 0.15886  | 0.249951 |
| 11728883_PRSS35    | -0.06266 | 0.158901 | 0.250007 |
| 11742396_PRSS42    | -0.08421 | 0.158924 | 0.250035 |
| 11739810_SIRT3     | 0.054032 | 0.158929 | 0.250035 |
| 11716672_PIGY ///  | -0.07198 | 0.158955 | 0.250067 |
| 11729376_TAC3      | -0.14535 | 0.158984 | 0.250106 |
| 11716523_S100A9    | 0.055313 | 0.159036 | 0.250179 |
| 11759418_CEMP1     | -0.12347 | 0.159042 | 0.250179 |
| 11762582_GINS4     | -0.17978 | 0.159046 | 0.250179 |
| 11724704_ST8SIA3   | 0.187064 | 0.159055 | 0.250186 |
| 11729467_RNF17     | 0.071493 | 0.159065 | 0.250193 |
| 11739302_FZD6      | -0.05164 | 0.159124 | 0.250278 |
| 11752501_ACKR3     | -0.08634 | 0.159145 | 0.250299 |
| 11747875_FNBP1L    | 0.07148  | 0.159148 | 0.250299 |
| 11720881_EHD4      | -0.09048 | 0.159168 | 0.250307 |
| 11743027_DPCR1     | 0.121647 | 0.159174 | 0.250307 |
| 11741071_ANK1      | 0.228115 | 0.159176 | 0.250307 |
| 11728267_LILRB1 // | -0.11288 | 0.159176 | 0.250307 |
| 11734398_PRSS55    | -0.12658 | 0.159179 | 0.250307 |
| 11746362_SPNS3     | -0.07379 | 0.159194 | 0.250323 |
| 11736852_LRRC19    | -0.08331 | 0.159216 | 0.25035  |
| 11757689_MIR7-3HG  | 0.073209 | 0.159234 | 0.250369 |
| 11721747_ANKRD12   | 0.07634  | 0.159251 | 0.250388 |
| 11740452_KLRD1     | 0.062844 | 0.159268 | 0.250406 |
| 11724764_TFCP2     | 0.071614 | 0.159272 | 0.250406 |
| 11741130_NLGN4X    | -0.06205 | 0.15936  | 0.250533 |
| 11726707_IL34      | 0.060959 | 0.159363 | 0.250533 |
| 11727334_ALPPL2    | -0.07768 | 0.159397 | 0.250578 |
| 11725859_APBA1 /// | -0.09898 | 0.159412 | 0.250594 |
| 11760865_MLH1      | -0.15202 | 0.159431 | 0.250615 |
| 11726064_RPE       | 0.064406 | 0.159495 | 0.250708 |
| 11747574_C1orf109  | 0.067766 | 0.159512 | 0.250726 |
| 11733193_GTF2A1L / | 0.094314 | 0.159591 | 0.250842 |
| 11730256_EPN3      | -0.0802  | 0.159607 | 0.250859 |
| 11730654_C15orf62  | 0.085307 | 0.159614 | 0.250863 |
| 11752183_DNAJA3    | 0.052847 | 0.159649 | 0.250901 |
| 11724303_COG8 ///  | 0.07129  | 0.159649 | 0.250901 |
| 11738013_CCDC7     | 0.092746 | 0.159663 | 0.250915 |
| 11730715_CSAG1     | 0.065399 | 0.159714 | 0.250988 |
| 11756660_PROM1     | -0.14942 | 0.159748 | 0.251033 |
| 11735322_MGAT5B    | -0.12788 | 0.159802 | 0.25111  |
| 11727600_TNFRSF4   | -0.06445 | 0.159859 | 0.251191 |
| 11738929_OR9G1 /// | -0.12641 | 0.159879 | 0.251215 |
| 11760848_ECE2      | -0.15218 | 0.159898 | 0.251236 |
| 11755958_ZNF691    | 0.061328 | 0.159904 | 0.251238 |
| 11717461_NSUN2     | -0.08084 | 0.15991  | 0.251239 |
| 11763459_CIDECP    | 0.10433  | 0.159918 | 0.251239 |
| 11744726_KLHL9     | 0.053493 | 0.15992  | 0.251239 |

|                    |          |          |          |
|--------------------|----------|----------|----------|
| 11730454_GLYCTK    | -0.19539 | 0.159932 | 0.251249 |
| 11746682_AACS      | 0.070088 | 0.159946 | 0.251259 |
| 11750227_RSAD1     | -0.06535 | 0.159949 | 0.251259 |
| 11752512_AFF1      | 0.081125 | 0.159982 | 0.251303 |
| 11730060_LAG3      | -0.13333 | 0.159999 | 0.251322 |
| 11728148_PRSS50    | -0.12001 | 0.160054 | 0.251394 |
| 11735109_FBXO3     | 0.052975 | 0.160055 | 0.251394 |
| 11736066_HYPK ///  | 0.107456 | 0.160085 | 0.251434 |
| 11723303_PDZK1IP1  | -0.08115 | 0.160094 | 0.251439 |
| 11743463_CHD4      | -0.0625  | 0.160102 | 0.251444 |
| 11747756_KRT13     | -0.11395 | 0.160109 | 0.251446 |
| 11719125_BRAT1     | -0.07294 | 0.160122 | 0.251458 |
| 11761414_ORM1      | -0.16305 | 0.160128 | 0.251459 |
| 11730619_ULBP1     | -0.12245 | 0.160132 | 0.251459 |
| 11741078_NXPE3     | -0.11658 | 0.160153 | 0.251482 |
| 11760893_SERGEF    | -0.08158 | 0.160175 | 0.251501 |
| 11762155_CACNB2    | -0.14008 | 0.160175 | 0.251501 |
| 11738359_LOC101805 | -0.08994 | 0.160182 | 0.251504 |
| 11746596_NADK      | -0.06644 | 0.1602   | 0.251525 |
| 11753573 EMC4      | -0.05803 | 0.160269 | 0.251625 |
| 11763698_MBIP      | -0.05756 | 0.160293 | 0.251655 |
| 11740131_KANSL1L   | -0.07764 | 0.160315 | 0.251681 |
| 11732183_SLC35E4   | 0.065141 | 0.160351 | 0.25173  |
| 11738370_SGK2      | -0.07409 | 0.160401 | 0.2518   |
| 11754841_AHRR      | -0.08852 | 0.160474 | 0.251906 |
| 11748643_MYO15A    | -0.14828 | 0.160503 | 0.251943 |
| 11726026_STAG3L4   | 0.09248  | 0.160508 | 0.251944 |
| 11759036_STT3B     | -0.05662 | 0.160535 | 0.251977 |
| 11758681_ASCC1     | 0.060939 | 0.16066  | 0.252166 |
| 11740254_UBE2NL    | -0.14501 | 0.160707 | 0.252231 |
| 11738340_LRRC74A   | -0.08837 | 0.160732 | 0.252263 |
| 11722856_PDGF      | 0.089398 | 0.160827 | 0.252404 |
| 11752406_SPATA13   | -0.05989 | 0.160839 | 0.252405 |
| 11744120_RPL8      | 0.054188 | 0.160843 | 0.252405 |
| 11743220_NKX6-1    | -0.10988 | 0.160844 | 0.252405 |
| 11758464_NAT16     | -0.11641 | 0.16088  | 0.252454 |
| 11724455_ZDHC1     | -0.11864 | 0.16092  | 0.252509 |
| 11738983_MAP1LC3B  | 0.059848 | 0.160925 | 0.252509 |
| 11715106_CTAGE15 / | -0.13864 | 0.160967 | 0.252566 |
| 11762851_HLA-B     | -0.0863  | 0.160988 | 0.252592 |
| 11759605_WFDC2     | -0.07521 | 0.161045 | 0.252672 |
| 11730210_TRIM46    | -0.07942 | 0.161072 | 0.252707 |
| 11729280_FAM175A   | 0.062645 | 0.161083 | 0.25271  |
| 11755162_ZNF620    | 0.072733 | 0.161084 | 0.25271  |
| 11745343_FAM53B    | -0.10752 | 0.16109  | 0.252711 |
| 11729246_GGCX      | 0.078792 | 0.161151 | 0.252789 |
| 11760739_LOC100289 | -0.10633 | 0.161154 | 0.252789 |
| 11740921_NKAIN3    | -0.07163 | 0.161157 | 0.252789 |
| 11755271_ZNF626    | 0.084439 | 0.161161 | 0.252789 |
| 11742494_SFTPA1    | -0.10945 | 0.161195 | 0.252836 |
| 11735151_NXPE3     | -0.10368 | 0.161208 | 0.252848 |

|                    |          |          |          |
|--------------------|----------|----------|----------|
| 11735264_CLEC4D    | -0.11178 | 0.161225 | 0.252866 |
| 11752566_WWP2      | 0.068517 | 0.161245 | 0.252888 |
| 11735779_CD101     | -0.10783 | 0.161296 | 0.252961 |
| 11752763_SLC25A35  | -0.10729 | 0.161355 | 0.253046 |
| 11761315_ORC3      | -0.06155 | 0.161365 | 0.25305  |
| 11738395_PCDH11X   | 0.081368 | 0.161368 | 0.25305  |
| 11730577_ZNF100    | -0.06269 | 0.161376 | 0.253054 |
| 11737397_LRRC52    | -0.12204 | 0.161392 | 0.253071 |
| 11749052_POU2F2    | 0.069285 | 0.161434 | 0.253128 |
| 11728980_KCNK12    | -0.14686 | 0.161472 | 0.25318  |
| 11751341_PRAMEF1 / | -0.07766 | 0.161503 | 0.253221 |
| 11758913_PCSK5     | -0.07542 | 0.161534 | 0.253253 |
| 11731323_AKAP14    | 0.101767 | 0.161534 | 0.253253 |
| 11737988_ECT2L     | -0.1248  | 0.161554 | 0.25327  |
| 11740424_PPP4R4    | -0.09398 | 0.161555 | 0.25327  |
| 11745499_IRF3      | 0.073119 | 0.161568 | 0.253281 |
| 11740425_PPP4R4    | 0.182189 | 0.161577 | 0.253288 |
| 11759863_PLB1      | 0.101591 | 0.1616   | 0.253316 |
| 11745583_BTBD18    | -0.17193 | 0.161611 | 0.253325 |
| 11728351_EFEMP2    | -0.056   | 0.161618 | 0.253327 |
| 11749290_SH3GL1    | -0.07912 | 0.161666 | 0.253395 |
| 11717523_TMEM50B   | -0.07721 | 0.161689 | 0.253423 |
| 11735000_SIPA1L3   | -0.06928 | 0.161698 | 0.253429 |
| 11753110_SNX32     | -0.06611 | 0.161714 | 0.253446 |
| 11731675_AGMAT     | -0.08564 | 0.161737 | 0.253474 |
| 11717248_SARAF     | 0.063984 | 0.161749 | 0.25348  |
| 11729625_DCAF7     | 0.06008  | 0.161751 | 0.25348  |
| 11751162_TTYH1     | -0.05937 | 0.161765 | 0.253494 |
| 11762124_GLS2      | 0.100883 | 0.161806 | 0.253549 |
| 11758743_RNF40     | -0.08936 | 0.161835 | 0.253586 |
| 11738862_GJA10     | 0.108358 | 0.161856 | 0.253605 |
| 11762358_CHD2      | -0.09294 | 0.161857 | 0.253605 |
| 11743545_QDPR      | -0.05444 | 0.16187  | 0.253617 |
| 11735417_IL36RN    | -0.11345 | 0.161916 | 0.25368  |
| 11758338_CRISPLD2  | -0.12884 | 0.161935 | 0.253702 |
| 11723674_PSEN2     | 0.094403 | 0.161961 | 0.253735 |
| 11759791_FILIP1    | 0.096481 | 0.161996 | 0.253781 |
| 11757002_CHRDL2    | -0.07286 | 0.162006 | 0.25379  |
| 11756075_BLK       | -0.10218 | 0.162015 | 0.253795 |
| 11731691_TTC30B    | 0.117757 | 0.162022 | 0.253798 |
| 11759481_COPB1     | -0.10076 | 0.162052 | 0.253837 |
| 11720883_UBALD1    | -0.0581  | 0.162066 | 0.253851 |
| 11752933_FCRL2     | -0.08677 | 0.162082 | 0.25386  |
| 11742579_OR9I1     | -0.1703  | 0.162082 | 0.25386  |
| 11747923_LAMC2     | -0.0987  | 0.1621   | 0.25388  |
| 11723558_MORF4L2   | 0.052846 | 0.16213  | 0.253919 |
| 11729724_ZBTB6     | -0.05552 | 0.162148 | 0.253939 |
| 11727087_PTS       | -0.06632 | 0.162193 | 0.254002 |
| 11722392_TMEM126B  | 0.062759 | 0.162234 | 0.254057 |
| 11747172_SPOCK3    | -0.12225 | 0.162247 | 0.254069 |
| 11738031_FAM153C   | -0.09899 | 0.16226  | 0.254081 |

|                    |          |          |          |
|--------------------|----------|----------|----------|
| 11735969_NKPD1     | -0.08635 | 0.162315 | 0.254159 |
| 11761598_MROH7     | 0.057589 | 0.162346 | 0.254199 |
| 11721102_SGSH      | 0.068092 | 0.162386 | 0.254255 |
| 11761650_CCDC129   | 0.161142 | 0.162421 | 0.254301 |
| 11731105_NR5A1     | -0.0944  | 0.162431 | 0.254308 |
| 11722388_MTF1      | -0.05909 | 0.162445 | 0.254323 |
| 11727080_NUFIP1    | 0.062867 | 0.162465 | 0.254345 |
| 11715637_UGP2      | -0.05794 | 0.162482 | 0.254364 |
| 11755765_TUBGCP6   | -0.06575 | 0.162491 | 0.25437  |
| 11735379_CEP162    | 0.075145 | 0.162527 | 0.254418 |
| 11758774_HACD2     | -0.09555 | 0.162534 | 0.254421 |
| 11737236_IGLON5    | -0.08298 | 0.162562 | 0.254456 |
| 11734701_DKK3      | -0.07226 | 0.162673 | 0.254621 |
| 11715371_UBA1      | 0.057183 | 0.162695 | 0.254648 |
| 11737408_TIRAP     | -0.08884 | 0.162702 | 0.254651 |
| 11739502_ABCA1     | -0.08261 | 0.162728 | 0.254683 |
| 11750631_MAP3K9    | -0.09476 | 0.162773 | 0.254746 |
| 11743422_BAG4      | 0.089491 | 0.162784 | 0.254754 |
| 11758553_DCT       | -0.0944  | 0.162795 | 0.254764 |
| 11726434_CHL1      | -0.10509 | 0.162814 | 0.254785 |
| 11740301_USP44     | 0.179929 | 0.162869 | 0.254859 |
| 11748065_LRRC49    | 0.081644 | 0.162872 | 0.254859 |
| 11745395_MYO5B     | 0.086203 | 0.162926 | 0.254918 |
| 11737520_KCNC1     | -0.14585 | 0.162929 | 0.254918 |
| 11740009_CHRFAM7A  | -0.06553 | 0.162931 | 0.254918 |
| 11732643_OR2C1     | -0.08097 | 0.162939 | 0.254918 |
| 11752128_IARS      | 0.052166 | 0.162942 | 0.254918 |
| 11759581_HLA-B /// | 0.117765 | 0.162945 | 0.254918 |
| 11761441_CEP78     | -0.17317 | 0.162946 | 0.254918 |
| 11724947_MAGI2     | -0.06164 | 0.162966 | 0.254942 |
| 11756845_LINCO0176 | -0.12879 | 0.163032 | 0.255037 |
| 11715676_NCSTN     | 0.054731 | 0.163069 | 0.255087 |
| 11740365_ZSWIM2    | -0.0781  | 0.163081 | 0.255097 |
| 11736172_KIAA0355  | 0.107117 | 0.163196 | 0.255269 |
| 11754909_C2orf88   | -0.0829  | 0.163246 | 0.255339 |
| 11730889_USF2      | -0.06814 | 0.163268 | 0.255365 |
| 11734237_OXLD1     | -0.06844 | 0.16328  | 0.255376 |
| 11738944_STARD6    | 0.126142 | 0.163308 | 0.255412 |
| 11718609_VPS72     | 0.05991  | 0.163455 | 0.255634 |
| 11739160_IP6K1     | -0.09542 | 0.163513 | 0.255716 |
| 11721200_TRIM62    | -0.07262 | 0.163549 | 0.255764 |
| 11743393_MATR3     | -0.05698 | 0.163558 | 0.255767 |
| 11729301_GLYAT     | 0.093084 | 0.163562 | 0.255767 |
| 11731964_PODNL1    | -0.11748 | 0.163573 | 0.255769 |
| 11727874_ZFYVE21   | 0.054099 | 0.163578 | 0.255769 |
| 11739453_ME2       | 0.062131 | 0.163579 | 0.255769 |
| 11734639_OR1A1     | -0.11953 | 0.16361  | 0.255809 |
| 11756889_SNAP91    | 0.102271 | 0.16364  | 0.255849 |
| 11763662_FMNL1     | -0.06598 | 0.16365  | 0.255856 |
| 11761996_DGKZ      | -0.06293 | 0.163655 | 0.255856 |
| 11738649_KCNA10    | -0.22297 | 0.163669 | 0.25587  |

|                    |          |          |          |
|--------------------|----------|----------|----------|
| 11721689_ID4       | -0.1077  | 0.163675 | 0.255871 |
| 11754848_ZNF169    | -0.11378 | 0.163681 | 0.255872 |
| 11735136_TLL2      | 0.110538 | 0.163689 | 0.255876 |
| 11731653_IVL       | 0.065219 | 0.163755 | 0.255971 |
| 11750296_CLEC11A   | -0.07336 | 0.163779 | 0.256    |
| 11741385_IP6K1     | -0.05608 | 0.163784 | 0.256    |
| 11743126_EIF3G     | 0.05404  | 0.163824 | 0.256055 |
| 11732869_BTBD16    | -0.14021 | 0.163841 | 0.256072 |
| 11759200_CNTN1     | -0.08555 | 0.163884 | 0.256133 |
| 11744625_NABP2     | 0.060097 | 0.16394  | 0.256212 |
| 11741328_GAGE1 /// | -0.10386 | 0.163975 | 0.256257 |
| 11733257_CFAP36    | 0.077453 | 0.163985 | 0.256265 |
| 11732115_KRTAP19-5 | -0.11437 | 0.164019 | 0.256311 |
| 11762811_FAM163A   | -0.10266 | 0.164025 | 0.256311 |
| 11748170_TRPM2     | -0.06839 | 0.164059 | 0.256356 |
| 11750455_ETV7      | -0.06617 | 0.164092 | 0.2564   |
| 11760665_ZKSCAN1   | -0.09279 | 0.164113 | 0.256411 |
| 11744102_ARSE      | 0.089839 | 0.164114 | 0.256411 |
| 11763418_C22orf29  | -0.11344 | 0.164115 | 0.256411 |
| 11746003_POLDIP2   | -0.05098 | 0.164168 | 0.256485 |
| 11752337_SLC05A1   | -0.07408 | 0.164173 | 0.256485 |
| 11750963_JPH2      | -0.11743 | 0.164187 | 0.256499 |
| 11723087_GAS2L1    | -0.07188 | 0.164205 | 0.256518 |
| 11734246_SLC5A11   | -0.13375 | 0.164253 | 0.256582 |
| 11751470_PLEKHS1   | -0.0751  | 0.164259 | 0.256582 |
| 11716222_RNASE1    | -0.10649 | 0.16427  | 0.256582 |
| 11750153_GIMAP6    | -0.26254 | 0.16427  | 0.256582 |
| 11736039_KIF1A     | -0.07662 | 0.164272 | 0.256582 |
| 11739909_CDK15     | -0.07429 | 0.164335 | 0.256668 |
| 11727801_POP4      | 0.091118 | 0.164337 | 0.256668 |
| 11734236_C16orf90  | -0.07565 | 0.164349 | 0.256678 |
| 11735649_LOC284009 | -0.15626 | 0.164356 | 0.256681 |
| 11730085_C10orf62  | -0.05726 | 0.164412 | 0.256761 |
| 11738921_NFE4      | -0.16662 | 0.164468 | 0.256839 |
| 11755654_PPP2R2C   | -0.11889 | 0.164491 | 0.256866 |
| 11721303_CLEC2B    | -0.06716 | 0.164499 | 0.256871 |
| 11749811_LUC7L3    | -0.06057 | 0.164549 | 0.256941 |
| 11720974_ASB8      | -0.09296 | 0.164578 | 0.256979 |
| 11729847_CCL7      | -0.07949 | 0.164657 | 0.257093 |
| 11759819_ABCA6     | 0.170895 | 0.164677 | 0.257117 |
| 11725068_CAMK2B    | -0.0756  | 0.164692 | 0.257132 |
| 11756748_LIPC      | 0.136623 | 0.164723 | 0.257171 |
| 11723550_ABHD6     | 0.067428 | 0.164774 | 0.257243 |
| 11727042_TTI2      | 0.056915 | 0.16479  | 0.257246 |
| 11758586_GGT6      | -0.08519 | 0.164791 | 0.257246 |
| 11745002_FEZF1     | -0.06392 | 0.164792 | 0.257246 |
| 11724828_CCL20     | 0.141345 | 0.164799 | 0.257247 |
| 11759055_TMEM72    | -0.13426 | 0.164803 | 0.257247 |
| 11762923_COX3 ///  | -0.0673  | 0.164826 | 0.257275 |
| 11725059_GNG3      | -0.06546 | 0.164836 | 0.257282 |
| 11736614_AVPR1A    | -0.08781 | 0.164854 | 0.257302 |

|                    |          |          |          |
|--------------------|----------|----------|----------|
| 11732750_MEGF11    | -0.08043 | 0.164868 | 0.257315 |
| 11744658_NRF1      | -0.09112 | 0.16495  | 0.257428 |
| 11736298_LPAR5     | -0.07171 | 0.16495  | 0.257428 |
| 11728771_CLCA4     | 0.080548 | 0.164961 | 0.257436 |
| 11724235_HGSNAT    | 0.066576 | 0.164983 | 0.257463 |
| 11742506_OR52R1    | -0.07263 | 0.165035 | 0.257536 |
| 11733356_C5AR1     | 0.104976 | 0.165075 | 0.257577 |
| 11715981_VPS11     | -0.06699 | 0.165075 | 0.257577 |
| 11737791_APOL1 /// | 0.106387 | 0.165077 | 0.257577 |
| 11755488_AQP6      | 0.096276 | 0.165113 | 0.257624 |
| 11726490_SLC4A1    | -0.20191 | 0.165135 | 0.257651 |
| 11733843_RBM17     | -0.07843 | 0.165178 | 0.257707 |
| 11743236_PRSS48    | 0.115781 | 0.165182 | 0.257707 |
| 11722345_CELSR3    | 0.057319 | 0.165204 | 0.257733 |
| 11737013_APLF ///  | -0.13496 | 0.165221 | 0.257752 |
| 11721531_AQP5      | -0.09015 | 0.165231 | 0.257758 |
| 11742371_OR2AG1    | 0.064967 | 0.165253 | 0.257785 |
| 11758210_TRMT10C   | -0.0573  | 0.165288 | 0.257831 |
| 11742474_CFAP157   | -0.11446 | 0.165316 | 0.257862 |
| 11741858_NYX       | -0.07266 | 0.165318 | 0.257862 |
| 11717349_RBP1      | -0.1163  | 0.165338 | 0.257879 |
| 11760397_SARS2     | -0.08605 | 0.165339 | 0.257879 |
| 11750653_SEC16B    | -0.09481 | 0.165381 | 0.257936 |
| 11751649_EFHD1     | -0.10834 | 0.165418 | 0.257985 |
| 11755916_OCRL      | -0.05489 | 0.165424 | 0.257986 |
| 11748538_GUSBP2    | 0.105065 | 0.165434 | 0.257988 |
| 11732018_HMGCLL1   | 0.110653 | 0.165436 | 0.257988 |
| 11731720_LURAP1    | -0.06759 | 0.165451 | 0.258003 |
| 11763192_GDPD1     | -0.07047 | 0.165478 | 0.258037 |
| 11716394_ADH5      | -0.06435 | 0.165501 | 0.258057 |
| 11738560_OR10W1    | -0.11368 | 0.165501 | 0.258057 |
| 11762853_SPATA21   | -0.18371 | 0.165523 | 0.258083 |
| 11755839_ARFGEF3   | 0.149758 | 0.16555  | 0.258117 |
| 11733244_DTNBP1    | -0.08364 | 0.165568 | 0.258136 |
| 11748138_SEC31B    | -0.06337 | 0.165577 | 0.258142 |
| 11717798_ZER1      | -0.07587 | 0.165651 | 0.258249 |
| 11735915_TREML4    | -0.09299 | 0.165707 | 0.258322 |
| 11725539_CACNA1H   | -0.10171 | 0.165708 | 0.258322 |
| 11747649_GPR132    | -0.11517 | 0.165731 | 0.258346 |
| 11762846_IYD       | -0.09025 | 0.165734 | 0.258346 |
| 11734197_LUZP2     | -0.14057 | 0.165771 | 0.258396 |
| 11748616_PLD2      | -0.09418 | 0.16578  | 0.258402 |
| 11737951_ZNF623    | -0.1025  | 0.165803 | 0.258428 |
| 11735412_RFESD     | 0.125751 | 0.165838 | 0.258476 |
| 11733583_PSORS1C2  | 0.143791 | 0.165864 | 0.258508 |
| 11728225_UBE2J1    | -0.06938 | 0.165879 | 0.258523 |
| 11757912_ACADL     | 0.142398 | 0.1659   | 0.258539 |
| 11753456_PDDC1     | 0.072682 | 0.1659   | 0.258539 |
| 11720425_PENK      | 0.182721 | 0.165927 | 0.258572 |
| 11752236_SPATA5    | -0.11309 | 0.165935 | 0.258577 |
| 11717938_SMIM3     | -0.08177 | 0.165955 | 0.2586   |

|                    |          |          |          |
|--------------------|----------|----------|----------|
| 11755124_SLC03A1   | -0.09374 | 0.165963 | 0.258603 |
| 11740017_INSR      | -0.07898 | 0.165975 | 0.258614 |
| 11748478_TAB1      | -0.06695 | 0.16599  | 0.258629 |
| 11749612_DVL2      | -0.11637 | 0.166015 | 0.258652 |
| 11734296_P2RY14    | 0.117941 | 0.16602  | 0.258652 |
| 11728924_NFAM1     | -0.06089 | 0.166023 | 0.258652 |
| 11730246_FMO2      | -0.13375 | 0.166026 | 0.258652 |
| 11731271_MGAM      | -0.11336 | 0.166044 | 0.258672 |
| 11718243_ITGA7     | -0.09462 | 0.166068 | 0.258701 |
| 11738401_GLP1R     | -0.06979 | 0.166111 | 0.258754 |
| 11738434_RNASE9    | 0.102874 | 0.166113 | 0.258754 |
| 11746916_SNX7      | 0.065152 | 0.166118 | 0.258754 |
| 11759648_CREB3L2   | 0.121043 | 0.166131 | 0.258767 |
| 11755794_CAPN14    | 0.265432 | 0.166145 | 0.25878  |
| 11715128_PCDHGB5   | -0.08542 | 0.166155 | 0.258787 |
| 11741989_P2RX2     | 0.075783 | 0.166203 | 0.258853 |
| 11720074_EIF3B     | 0.057218 | 0.166209 | 0.258856 |
| 11753199_SMARCA2   | 0.079991 | 0.166264 | 0.258932 |
| 11759109_KRIT1     | 0.059812 | 0.166294 | 0.25897  |
| 11749561_LOC388882 | -0.12941 | 0.166338 | 0.259031 |
| 11720984_NPTXR     | -0.08356 | 0.16636  | 0.259058 |
| 11742666_RPS28     | 0.051263 | 0.166367 | 0.259059 |
| 11719682_NSA2      | 0.055632 | 0.166388 | 0.259084 |
| 11763509_CD9       | -0.11216 | 0.166398 | 0.259091 |
| 11740605_TLX2      | -0.05952 | 0.166451 | 0.259165 |
| 11735092_SLC16A6   | 0.098021 | 0.166456 | 0.259165 |
| 11726152_ZBTB21    | 0.10363  | 0.166499 | 0.259223 |
| 11761771_ALDH1L1   | -0.05173 | 0.166518 | 0.259246 |
| 11715929_SH3GL1    | -0.05739 | 0.166534 | 0.259256 |
| 11752249_MCTP2     | 0.182246 | 0.166536 | 0.259256 |
| 11743599_OTUD5     | -0.07488 | 0.166585 | 0.259324 |
| 11735101_FAM228A   | -0.0786  | 0.166622 | 0.259375 |
| 11732716_C1QTNF9B  | -0.09119 | 0.166662 | 0.259429 |
| 11754736_EIF4E1B   | -0.09802 | 0.166694 | 0.259469 |
| 11736544_MACC1     | -0.06388 | 0.166825 | 0.259659 |
| 11746499_GSTO2     | -0.09281 | 0.166826 | 0.259659 |
| 11760374_CYP19A1   | -0.10209 | 0.166839 | 0.259671 |
| 11717291_MAP2K1    | -0.05264 | 0.166845 | 0.259671 |
| 11747974_MASP1     | -0.11259 | 0.166873 | 0.259702 |
| 11741964_VEGFA     | -0.05413 | 0.166875 | 0.259702 |
| 11753826_CTLA4     | -0.08025 | 0.166889 | 0.259715 |
| 11751159_PER3      | -0.16968 | 0.166939 | 0.259777 |
| 11763554_GLTSCR2   | -0.08991 | 0.166948 | 0.259777 |
| 11715111_CGB /// C | -0.08253 | 0.16695  | 0.259777 |
| 11741590_ICAM4     | -0.07313 | 0.16695  | 0.259777 |
| 11762000_CDHR1     | -0.12134 | 0.166979 | 0.259814 |
| 11743433_PGLS      | -0.05939 | 0.166988 | 0.259817 |
| 11726163_EPHA7     | -0.08498 | 0.166991 | 0.259817 |
| 11747273_BAIAP3    | -0.1445  | 0.167009 | 0.259837 |
| 11739924_ZNF37A    | 0.080941 | 0.167047 | 0.259887 |
| 11735126_N4BP3     | -0.06094 | 0.167054 | 0.259889 |



|                    |          |          |          |
|--------------------|----------|----------|----------|
| 11764016_TRAPPC2L  | -0.10881 | 0.167076 | 0.259916 |
| 11753119_CMTM5     | -0.10834 | 0.167146 | 0.260016 |
| 11741557_PCDHGA9   | -0.09463 | 0.167175 | 0.260053 |
| 11732238_TMEM259   | -0.06462 | 0.167191 | 0.260065 |
| 11744846_LCA5L     | 0.105545 | 0.167193 | 0.260065 |
| 11727723_DDN       | 0.104313 | 0.167219 | 0.260097 |
| 11760220_NUTF2     | 0.060672 | 0.167227 | 0.260101 |
| 11755237_PPM1M     | -0.06816 | 0.167249 | 0.260126 |
| 11728010_PRTG      | 0.087549 | 0.167316 | 0.260223 |
| 11742241_IKZF3     | -0.05528 | 0.167384 | 0.26032  |
| 11758095_FPR1      | -0.11784 | 0.167392 | 0.260324 |
| 11747176_VWF       | -0.08273 | 0.1674   | 0.260329 |
| 11748482_SRP54     | 0.057725 | 0.167426 | 0.26036  |
| 11763780_MBNL3     | -0.09185 | 0.167433 | 0.260363 |
| 11730589_KCTD21    | 0.069879 | 0.167453 | 0.260386 |
| 11724981_PCDH7     | 0.107419 | 0.167521 | 0.260483 |
| 11749748_SNW1      | 0.05651  | 0.167535 | 0.260498 |
| 11741899_FCGR2B    | -0.10242 | 0.167558 | 0.260525 |
| 11733190_ARSJ      | -0.07189 | 0.167627 | 0.260623 |
| 11723384_PRR3      | -0.09124 | 0.167637 | 0.260631 |
| 11716695_TSPAN6    | 0.053383 | 0.167684 | 0.260696 |
| 11738189_TP73      | -0.10194 | 0.167704 | 0.260715 |
| 11758908_ZNF827    | 0.060022 | 0.167707 | 0.260715 |
| 11738898_CLEC4C    | -0.10197 | 0.167741 | 0.260759 |
| 11726859_ZC3H12B   | -0.07277 | 0.167819 | 0.260871 |
| 11749849_CTNS      | -0.10818 | 0.167838 | 0.260894 |
| 11721058_ZNF189    | -0.0579  | 0.167855 | 0.260896 |
| 11719245_LARGE     | -0.1419  | 0.167855 | 0.260896 |
| 11742947_GTF2H3    | 0.05354  | 0.167856 | 0.260896 |
| 11728147_AQP11     | 0.076266 | 0.167914 | 0.260978 |
| 11749284_LOC100287 | -0.15147 | 0.167922 | 0.260982 |
| 11758423_ATP13A5   | 0.049591 | 0.167928 | 0.260983 |
| 11726816_GPRIN1    | -0.13401 | 0.16795  | 0.261009 |
| 11761196_SPNS1     | -0.11917 | 0.167957 | 0.261012 |
| 11732552_ENKUR     | -0.0849  | 0.167976 | 0.261033 |
| 11728096_STPG1     | -0.09371 | 0.167993 | 0.261052 |
| 11751988_NFE2L1    | -0.06346 | 0.168045 | 0.261122 |
| 11741932_KCNRG     | -0.13772 | 0.168052 | 0.261122 |
| 11762274_HLA-DMB   | -0.11314 | 0.168057 | 0.261122 |
| 11728191_CXCR4     | -0.09307 | 0.16806  | 0.261122 |
| 11738341_MAGEA10-M | -0.14681 | 0.168067 | 0.261125 |
| 11761456_AKAP13    | 0.184272 | 0.168075 | 0.261129 |
| 11736460_RNF168    | 0.128536 | 0.168089 | 0.261142 |
| 11743365	EIF5B     | 0.094635 | 0.168114 | 0.261173 |
| 11749299_WDR77     | 0.05362  | 0.168165 | 0.261245 |
| 11756668_FAM213A   | -0.05461 | 0.168177 | 0.261254 |
| 11745576_KIRREL3-A | -0.10301 | 0.16821  | 0.261296 |
| 11736006_MAPK1IP1L | -0.05627 | 0.168215 | 0.261296 |
| 11757193_JMJD7-PLA | -0.06843 | 0.168229 | 0.26131  |
| 11745093_LMOD2     | -0.09891 | 0.168279 | 0.26138  |
| 11754925_SYK       | -0.11671 | 0.168336 | 0.261459 |

|                    |          |          |          |
|--------------------|----------|----------|----------|
| 11729891_ZFP3      | -0.10613 | 0.16835  | 0.261474 |
| 11750191_PIGT      | -0.06287 | 0.168395 | 0.261535 |
| 11726172_SCARA3    | -0.10873 | 0.168429 | 0.261579 |
| 11762337_SNX32     | -0.13868 | 0.168436 | 0.261581 |
| 11737857_DNAAF1    | -0.11592 | 0.168448 | 0.261587 |
| 11760941_PLEKHM1P  | 0.123251 | 0.16845  | 0.261587 |
| 11752035_NOS2      | -0.07388 | 0.168516 | 0.261679 |
| 11741383_STARD8    | -0.05361 | 0.16852  | 0.261679 |
| 11761444_PSG9      | -0.06126 | 0.168552 | 0.26172  |
| 11750283_OFD1P6Y / | -0.08323 | 0.168562 | 0.261727 |
| 11741391_KIFC3     | -0.05038 | 0.168605 | 0.261785 |
| 11762736_BTNL9     | -0.11913 | 0.168614 | 0.261792 |
| 11736872_TRPC6     | -0.09226 | 0.168655 | 0.261841 |
| 11733391_AGTR2     | 0.109499 | 0.16866  | 0.261841 |
| 11730341_SLA2      | -0.11598 | 0.168662 | 0.261841 |
| 11733787_HSDL1     | 0.080553 | 0.168677 | 0.261855 |
| 11733345_GTSF1L    | -0.06489 | 0.168769 | 0.26199  |
| 11734037_GALC      | 0.142095 | 0.168804 | 0.262036 |
| 11734284_CSAG2 /// | 0.051751 | 0.16883  | 0.262062 |
| 11761157_NDUFS8    | -0.07234 | 0.168831 | 0.262062 |
| 11762207_PCOLCE-AS | -0.07628 | 0.168849 | 0.262075 |
| 11715997_NDUFC1    | 0.057356 | 0.16885  | 0.262075 |
| 11759253_HIST1H2AI | 0.080577 | 0.168871 | 0.262099 |
| 11743354_PDCD4     | -0.05607 | 0.168899 | 0.262134 |
| 11756486_EPHB6     | -0.06904 | 0.169002 | 0.262285 |
| 11764219_LINC00380 | -0.09458 | 0.169043 | 0.262341 |
| 11721945_MRVI1     | -0.07749 | 0.169057 | 0.262348 |
| 11759544_PRMT2     | 0.071948 | 0.169059 | 0.262348 |
| 11761147_TYMP      | -0.08093 | 0.169066 | 0.262351 |
| 11752460_NDST3     | 0.107357 | 0.169083 | 0.262369 |
| 11731180_PCDH11X / | -0.10049 | 0.169145 | 0.262457 |
| 11732855_CD300LG   | -0.10536 | 0.169187 | 0.262514 |
| 11733176_ZNF507    | -0.08032 | 0.169205 | 0.262534 |
| 11752283_ALOX15B   | -0.11556 | 0.169213 | 0.262538 |
| 11744110_TMEM101   | 0.100121 | 0.169228 | 0.262545 |
| 11749464_SEMA5B    | -0.08809 | 0.169228 | 0.262545 |
| 11759695_CNTN1     | 0.145847 | 0.169237 | 0.262551 |
| 11741421_SLC16A13  | -0.05998 | 0.169244 | 0.262552 |
| 11731551_AP5S1     | -0.07046 | 0.169267 | 0.262579 |
| 11759219_HIST1H2AK | 0.143565 | 0.169278 | 0.262579 |
| 11749117_CD84      | -0.0793  | 0.169281 | 0.262579 |
| 11719639_PLXNA1    | 0.078042 | 0.169282 | 0.262579 |
| 11736818_RPE65     | -0.10283 | 0.169291 | 0.262583 |
| 11750235_YWHAEP7   | -0.0893  | 0.169299 | 0.262588 |
| 11747363_CYB561A3  | -0.07128 | 0.169324 | 0.262613 |
| 11761251_PMM2      | 0.09672  | 0.169326 | 0.262613 |
| 11755389_NTNG2     | -0.08127 | 0.169416 | 0.262744 |
| 11759680_ATG3      | -0.09316 | 0.169432 | 0.262756 |
| 11761832_PI16      | -0.16534 | 0.169434 | 0.262756 |
| 11735337_CPLX4     | -0.174   | 0.169465 | 0.262796 |
| 11738105_IGSF9B    | -0.10526 | 0.169476 | 0.262805 |

|                    |          |          |          |
|--------------------|----------|----------|----------|
| 11748079_NEB       | 0.11712  | 0.169482 | 0.262806 |
| 11733070_WDR5B     | 0.07958  | 0.1695   | 0.262825 |
| 11719029_PIK3AP1   | 0.079029 | 0.169526 | 0.262857 |
| 11744966_INSL3     | -0.11855 | 0.169547 | 0.262881 |
| 11734149_PRRT3     | -0.11515 | 0.16957  | 0.262909 |
| 11739692_LAGE3     | -0.11019 | 0.169622 | 0.262981 |
| 11734411_SUMF2     | 0.061324 | 0.169702 | 0.263094 |
| 11720470_MED20     | -0.06833 | 0.169706 | 0.263094 |
| 11755081_ZCCHC14   | 0.083753 | 0.169739 | 0.263136 |
| 11727750_NR5A2     | 0.193158 | 0.169786 | 0.263201 |
| 11737284_TAS2R20   | -0.11216 | 0.16981  | 0.263231 |
| 11742164_MYEOV2    | -0.07389 | 0.169864 | 0.263306 |
| 11716298_CLPTM1    | 0.058376 | 0.169874 | 0.263313 |
| 11760486_PHF11     | 0.130394 | 0.16995  | 0.263415 |
| 11726324_CRLF3     | -0.05878 | 0.169951 | 0.263415 |
| 11727265_HAUS3     | 0.075584 | 0.169986 | 0.263462 |
| 11722132_MGAT3     | -0.11356 | 0.170002 | 0.263477 |
| 11735834_WBP2NL    | -0.0972  | 0.170045 | 0.263536 |
| 11728719_LTBP1     | -0.10126 | 0.170078 | 0.263568 |
| 11734518_PAGE2 /// | 0.08424  | 0.17008  | 0.263568 |
| 11751281_VWCE      | -0.12993 | 0.170082 | 0.263568 |
| 11727933_VTI1A     | 0.112129 | 0.170118 | 0.263615 |
| 11747815_SUMF1     | 0.083572 | 0.170134 | 0.263633 |
| 11732759_GAPT      | -0.15454 | 0.170182 | 0.263699 |
| 11749352_ABO       | -0.07547 | 0.170196 | 0.263712 |
| 11747467_PRKCQ     | -0.07806 | 0.170202 | 0.263712 |
| 11724147_RAB38     | -0.0779  | 0.170291 | 0.263841 |
| 11716076_HSBP1     | 0.061701 | 0.170344 | 0.263915 |
| 11753183_LGI4      | -0.05447 | 0.170349 | 0.263915 |
| 11753354_DAOA      | -0.13154 | 0.17037  | 0.263939 |
| 11719171_AKR1C1    | -0.0728  | 0.170385 | 0.263954 |
| 11733387_ZKSCAN3   | 0.122174 | 0.170409 | 0.263983 |
| 11741012_MSMO1     | 0.080671 | 0.170432 | 0.264011 |
| 11737372_NLRP10    | 0.07521  | 0.170467 | 0.264056 |
| 11743655_HPGD      | -0.07771 | 0.170498 | 0.264096 |
| 11719907_BCL7A     | -0.07642 | 0.170526 | 0.26413  |
| 11744282_PLBD1     | -0.08635 | 0.170539 | 0.264137 |
| 11758272_SLC34A2   | 0.078857 | 0.170541 | 0.264137 |
| 11750405_LRIG1     | -0.08453 | 0.170578 | 0.264187 |
| 11745985_SRRM1     | 0.051083 | 0.170625 | 0.264251 |
| 11751468_ABCB6 /// | -0.07237 | 0.170637 | 0.264261 |
| 11747848_STK11IP   | 0.117888 | 0.170657 | 0.264283 |
| 11722978_TAZ       | -0.05764 | 0.170732 | 0.264391 |
| 11715192_FAM221A   | -0.11596 | 0.170739 | 0.264393 |
| 11735499_GRM7      | -0.06186 | 0.170765 | 0.264425 |
| 11763840_MEGF10    | -0.05979 | 0.170803 | 0.264476 |
| 11730924_AICDA     | -0.13376 | 0.17081  | 0.264478 |
| 11756580_SCP2      | 0.06939  | 0.170831 | 0.264495 |
| 11726339_MAGEA3 // | 0.050914 | 0.170831 | 0.264495 |
| 11738295_ZNF804B   | -0.142   | 0.170839 | 0.264498 |
| 11737637_CFAP77    | 0.118404 | 0.170865 | 0.26453  |

|                    |          |          |          |
|--------------------|----------|----------|----------|
| 11733433_ODAM      | -0.11929 | 0.170878 | 0.264542 |
| 11750490_BEND4     | -0.12082 | 0.170939 | 0.264627 |
| 11737185_DUOX1     | -0.12165 | 0.171014 | 0.264733 |
| 11723734_OTUD6B    | 0.082862 | 0.171021 | 0.264733 |
| 11761967_ECI2      | -0.16296 | 0.171023 | 0.264733 |
| 11721924_PRKCB     | -0.11041 | 0.171034 | 0.264742 |
| 11736715_TMPRSS11E | -0.07389 | 0.171085 | 0.264812 |
| 11755769_C1QTNF6   | 0.070659 | 0.171101 | 0.264828 |
| 11743194_TNFRSF14  | 0.068193 | 0.171174 | 0.264924 |
| 11723373_EPHA1     | -0.12611 | 0.171174 | 0.264924 |
| 11761201_PMS1      | 0.104151 | 0.171263 | 0.26505  |
| 11730587_GATA5     | -0.08611 | 0.171266 | 0.26505  |
| 11729572_CNRIP1    | 0.058955 | 0.171289 | 0.265077 |
| 11732597_CIB4      | -0.09792 | 0.171296 | 0.26508  |
| 11738519_NBR1      | -0.06978 | 0.171315 | 0.265102 |
| 11732123_PEX19     | -0.06828 | 0.171406 | 0.265233 |
| 11742372_OR10P1    | -0.09103 | 0.171448 | 0.265289 |
| 11719068_GPATCH3   | -0.0782  | 0.171505 | 0.265369 |
| 11722613_KAT5      | -0.06443 | 0.171538 | 0.265413 |
| 11718310_TMUB1     | -0.05861 | 0.171551 | 0.265419 |
| 11735055_RAB3C     | -0.16266 | 0.171554 | 0.265419 |
| 11736561_TSLP      | 0.084069 | 0.171659 | 0.265574 |
| 11736746_ADAM28    | -0.11711 | 0.17172  | 0.26566  |
| 11751516_FAM71B    | -0.10836 | 0.171727 | 0.26566  |
| 11732827_RNLS      | -0.08825 | 0.171731 | 0.26566  |
| 11749884_TTC38     | -0.0556  | 0.171811 | 0.26577  |
| 11758837_LOC100506 | -0.0722  | 0.171815 | 0.26577  |
| 11739993_PDZD7     | -0.10215 | 0.171819 | 0.26577  |
| 11734846_TAF1B     | -0.07162 | 0.171826 | 0.26577  |
| 11726450_B3GAT1    | -0.0847  | 0.171829 | 0.26577  |
| 11755044_GSAP      | 0.130331 | 0.171904 | 0.265877 |
| 11751768_SNX19     | 0.077948 | 0.171922 | 0.265896 |
| 11748952_CTNNB1    | 0.057887 | 0.171932 | 0.265896 |
| 11733867_HLA-DOA   | -0.06146 | 0.171933 | 0.265896 |
| 11741788_FXYD3     | 0.081746 | 0.171937 | 0.265896 |
| 11719676_MAOA      | 0.094784 | 0.171944 | 0.265898 |
| 11763911_SNORA16B  | 0.094497 | 0.172013 | 0.265995 |
| 11733752_GPR50     | -0.08831 | 0.172096 | 0.266115 |
| 11731729_P2RY13    | -0.10235 | 0.172126 | 0.266154 |
| 11728458_STK32C    | -0.17249 | 0.17214  | 0.266167 |
| 11721380_GNPTAB    | 0.060264 | 0.172145 | 0.266167 |
| 11729494_TRH       | -0.22288 | 0.172182 | 0.266214 |
| 11757197_HNRNPU    | -0.05802 | 0.172191 | 0.266221 |
| 11726574_BAIAP2    | -0.09749 | 0.172221 | 0.266258 |
| 11751342_NDRG1     | -0.1009  | 0.172284 | 0.266348 |
| 11716499_ADRM1     | -0.0639  | 0.172333 | 0.266415 |
| 11747654_SGK2      | -0.08199 | 0.172345 | 0.266417 |
| 11717671_SF3B6     | 0.055008 | 0.172345 | 0.266417 |
| 11758547_EML1      | 0.149635 | 0.172366 | 0.26644  |
| 11761529_MUC1      | 0.064504 | 0.172376 | 0.266448 |
| 11716406_LGALS9    | -0.08089 | 0.172407 | 0.266485 |

|                   |          |          |          |
|-------------------|----------|----------|----------|
| 11732118_USP10    | 0.05449  | 0.172411 | 0.266485 |
| 11715556_QSOX1    | -0.05944 | 0.172438 | 0.266515 |
| 11742434_LRRC16B  | -0.14041 | 0.172441 | 0.266515 |
| 11752175_DBF4     | -0.05972 | 0.172473 | 0.266554 |
| 11731207_PTPRH    | 0.2208   | 0.172478 | 0.266554 |
| 11716872_ADCY3    | -0.05777 | 0.172491 | 0.266565 |
| 11750431_BMPR1B   | 0.060416 | 0.172554 | 0.266656 |
| 11761770_KIAA0754 | -0.07036 | 0.17256  | 0.266657 |
| 11729108_MBP      | 0.063769 | 0.172573 | 0.266659 |
| 11761715_CASC4    | 0.083386 | 0.172573 | 0.266659 |
| 11760554_MIER1    | 0.07839  | 0.172591 | 0.266678 |
| 11723924_NUP133   | -0.0837  | 0.172629 | 0.266728 |
| 11737238_EOMES    | -0.06565 | 0.172685 | 0.266807 |
| 11727071_ENPP6    | -0.09302 | 0.172758 | 0.266911 |
| 11732687_UBXN2A   | 0.082454 | 0.172776 | 0.266931 |
| 11760736_RBKS     | -0.0938  | 0.172789 | 0.266942 |
| 11737193_UTS2B    | -0.09626 | 0.172813 | 0.266971 |
| 11758728_FGB      | -0.12702 | 0.172821 | 0.266972 |
| 11753574_RAB9BP1  | 0.084097 | 0.172825 | 0.266972 |
| 11735572_SORBS2   | 0.064057 | 0.172872 | 0.267034 |
| 11745134_CCNY     | -0.06338 | 0.172876 | 0.267034 |
| 11743048_ACO2     | -0.06918 | 0.172909 | 0.267078 |
| 11726440_MALT1    | 0.065163 | 0.172965 | 0.267156 |
| 11716345_BACE2    | 0.067337 | 0.173041 | 0.267264 |
| 11736901_ANKRD45  | 0.08599  | 0.173047 | 0.267265 |
| 11729341_POU2F2   | -0.06818 | 0.173053 | 0.267266 |
| 11753724_SSPN     | -0.18223 | 0.173071 | 0.267284 |
| 11734183_CDH17    | -0.14961 | 0.173078 | 0.267288 |
| 11748957_CORO1C   | -0.04998 | 0.173087 | 0.267293 |
| 11745265_ZBTB46   | -0.08078 | 0.173094 | 0.267295 |
| 11750192_CAPZA2   | 0.084891 | 0.173118 | 0.267324 |
| 11752125_SRRT     | 0.06324  | 0.173147 | 0.26736  |
| 11738236_PCSK6    | -0.11004 | 0.173162 | 0.267374 |
| 11742331_EDA      | -0.14514 | 0.17318  | 0.26739  |
| 11735812_FFAR4    | -0.08854 | 0.173183 | 0.26739  |
| 11741415_IQCH     | -0.11039 | 0.173223 | 0.267439 |
| 11744186_C16orf70 | 0.063958 | 0.173229 | 0.267439 |
| 11722483_FAM57B   | -0.07743 | 0.173239 | 0.267439 |
| 11736360_LGI2     | 0.053089 | 0.173244 | 0.267439 |
| 11717581_CD52     | -0.1116  | 0.173245 | 0.267439 |
| 11758356_HIST3H2A | 0.070993 | 0.173248 | 0.267439 |
| 11727667_DNAH7    | 0.065933 | 0.173253 | 0.267439 |
| 11732618_SPATC1   | -0.07677 | 0.173307 | 0.267514 |
| 11743858_IL33     | 0.123696 | 0.173321 | 0.267528 |
| 11721136_CMC2     | -0.05288 | 0.173353 | 0.267568 |
| 11728887_GEMIN2   | 0.097112 | 0.173381 | 0.267603 |
| 11756316_CHI3L1   | -0.08807 | 0.173407 | 0.267634 |
| 11738007_BEND2    | -0.10224 | 0.173412 | 0.267634 |
| 11753711_DIO1     | -0.12597 | 0.173428 | 0.26765  |
| 11720162_CXCL13   | -0.1807  | 0.173434 | 0.26765  |
| 11718798_PPDC     | -0.09666 | 0.173447 | 0.267662 |

|                    |          |          |          |
|--------------------|----------|----------|----------|
| 11731085_CAPN3     | -0.10434 | 0.173471 | 0.267691 |
| 11734829_PRG4      | 0.109969 | 0.173537 | 0.267773 |
| 11760360_ADPGK     | -0.11315 | 0.173539 | 0.267773 |
| 11746700_ITM2A     | 0.102652 | 0.17354  | 0.267773 |
| 11746623_NR3C2     | -0.07053 | 0.173551 | 0.267776 |
| 11725381_RAPGEF3   | -0.06899 | 0.173554 | 0.267776 |
| 11715317_CGB /// C | -0.07722 | 0.173579 | 0.267807 |
| 11726820_ARHGAP9   | 0.107339 | 0.173602 | 0.267834 |
| 11759056_FAM71F2   | -0.05977 | 0.173616 | 0.267847 |
| 11753047_MTHFD2L   | 0.078429 | 0.173636 | 0.267866 |
| 11760136_GSTA1     | -0.07408 | 0.173639 | 0.267866 |
| 11724331_NACAD     | -0.07852 | 0.173666 | 0.267899 |
| 11722304_LRRFIP1   | -0.05836 | 0.173693 | 0.267933 |
| 11761320_BEST1     | 0.125638 | 0.173741 | 0.267994 |
| 11715538_RPLP1     | 0.053147 | 0.173744 | 0.267994 |
| 11728056_CASP10    | 0.171003 | 0.173752 | 0.267998 |
| 11734436_BRSK1     | 0.070114 | 0.173758 | 0.267999 |
| 11733322_TRDN      | 0.132815 | 0.173768 | 0.268006 |
| 11733128_SLC25A26  | -0.06876 | 0.173877 | 0.268159 |
| 11750326_LOC284912 | -0.08389 | 0.173878 | 0.268159 |
| 11749624_TYW1B     | -0.06989 | 0.173897 | 0.26818  |
| 11746062_PPY       | -0.0623  | 0.173953 | 0.268257 |
| 11729161_RPF2      | -0.05094 | 0.174019 | 0.26835  |
| 11746280_SYTL3     | 0.070454 | 0.174027 | 0.268355 |
| 11741874_SEPP1     | 0.154532 | 0.174073 | 0.268417 |
| 11754479_BEGAIN    | -0.10951 | 0.174082 | 0.268423 |
| 11761956_ABCA11P / | -0.06408 | 0.174101 | 0.268443 |
| 11733127_SLC25A26  | 0.101166 | 0.174131 | 0.26848  |
| 11763735_FCRL3     | 0.12264  | 0.174169 | 0.268531 |
| 11747399_PLAT      | 0.068802 | 0.174184 | 0.268545 |
| 11721427_FZD5      | -0.08657 | 0.174221 | 0.268594 |
| 11753412_C5orf60   | -0.08656 | 0.174255 | 0.268638 |
| 11750926_EFCAB5    | -0.06675 | 0.174346 | 0.26877  |
| 11723881_NFE2      | 0.12215  | 0.174375 | 0.268805 |
| 11733836_TRO       | 0.093345 | 0.174379 | 0.268805 |
| 11741871_FRG2 ///  | -0.05852 | 0.174421 | 0.26886  |
| 11737770_APOL4     | -0.16809 | 0.174455 | 0.268894 |
| 11732284_HSH2D     | -0.16821 | 0.174458 | 0.268894 |
| 11717110_REPIN1    | 0.061523 | 0.174459 | 0.268894 |
| 11721556_ROM1      | -0.0886  | 0.174476 | 0.268912 |
| 11760090_PPIAP30   | -0.10816 | 0.174484 | 0.268914 |
| 11744245_MASP1     | -0.12031 | 0.174528 | 0.268975 |
| 11762987_FGFR2     | -0.05758 | 0.174539 | 0.268983 |
| 11732943_C7orf66   | -0.11084 | 0.174563 | 0.26901  |
| 11739331_WDR82     | 0.079007 | 0.174587 | 0.269039 |
| 11729835_EIF5A2    | 0.196547 | 0.174616 | 0.269075 |
| 11732624_WFDC5     | 0.091178 | 0.174741 | 0.269255 |
| 11750886_CERCAM    | 0.055147 | 0.174748 | 0.269255 |
| 11756083_HLA-DQA1  | 0.094905 | 0.17475  | 0.269255 |
| 11737199_TMPRSS15  | -0.08778 | 0.174754 | 0.269255 |
| 11753193_CIITA     | -0.0891  | 0.174767 | 0.269261 |

|                    |          |          |          |
|--------------------|----------|----------|----------|
| 11762574_CMPK2     | -0.15703 | 0.174769 | 0.269261 |
| 11746971_NPY6R     | -0.09383 | 0.174829 | 0.269345 |
| 11736961_ZNF365    | 0.060905 | 0.174849 | 0.269367 |
| 11717194_RAB5B     | 0.061318 | 0.174893 | 0.269418 |
| 11719051_CEP350    | 0.071851 | 0.174893 | 0.269418 |
| 11718863_SEC63     | -0.07252 | 0.174899 | 0.269418 |
| 11718828_ITM2C     | 0.057227 | 0.174939 | 0.269464 |
| 11736690_CCDC89    | 0.065996 | 0.174939 | 0.269464 |
| 11764100_LOC105376 | -0.09628 | 0.174948 | 0.269468 |
| 11727324_NAGS      | 0.05181  | 0.174977 | 0.269505 |
| 11762269_ACBD7     | -0.08072 | 0.174986 | 0.26951  |
| 11729662_GLB1      | -0.05296 | 0.175001 | 0.269525 |
| 11731869_AZU1      | -0.0685  | 0.175014 | 0.269536 |
| 11718025_IL1R1     | 0.09826  | 0.175039 | 0.269567 |
| 11728943_ZNF404    | 0.063779 | 0.175091 | 0.269638 |
| 11744275_WDR12     | 0.053546 | 0.175126 | 0.269683 |
| 11733761_TMEM190   | -0.07116 | 0.175147 | 0.269707 |
| 11760850_INADL     | -0.15137 | 0.175163 | 0.269723 |
| 11731522_ZNF592    | 0.08829  | 0.175174 | 0.269732 |
| 11759220_HIST1H2AK | -0.07921 | 0.175195 | 0.269756 |
| 11725608_RTN4RL1   | -0.10636 | 0.175201 | 0.269756 |
| 11729863_EPN1      | -0.05305 | 0.175225 | 0.269784 |
| 11717180_OCRL      | -0.0534  | 0.175232 | 0.269787 |
| 11752373_SNAP91    | -0.0889  | 0.175247 | 0.269801 |
| 11729700_STXBP1    | -0.09284 | 0.175296 | 0.269869 |
| 11735963_SPANXN4   | 0.0705   | 0.175359 | 0.269958 |
| 11751083_MLC1      | -0.10213 | 0.175411 | 0.270028 |
| 11757677_UBE2F     | 0.066638 | 0.175485 | 0.270128 |
| 11750543_KLHL18    | -0.05619 | 0.175487 | 0.270128 |
| 11757798_MAFB      | -0.07362 | 0.175498 | 0.270137 |
| 11752263_FHAD1     | -0.10921 | 0.175511 | 0.270148 |
| 11749513_NEK8      | -0.06523 | 0.175538 | 0.270182 |
| 11738842_ADRA1A    | -0.07427 | 0.17555  | 0.270192 |
| 11738167_CBX2      | -0.12364 | 0.175559 | 0.270196 |
| 11724106_BATF2     | -0.05098 | 0.175582 | 0.270223 |
| 11745682_SERINC5   | 0.075958 | 0.175593 | 0.270232 |
| 11738277_PLA2G4D   | 0.177002 | 0.175619 | 0.270263 |
| 11732336_SLC31A1   | -0.11561 | 0.175649 | 0.270301 |
| 11745462_PRDX2     | 0.051479 | 0.175781 | 0.270496 |
| 11752500_MAN1A1    | -0.13569 | 0.175853 | 0.27059  |
| 11747478_ZNF503    | -0.069   | 0.175853 | 0.27059  |
| 11763738_AZIN2     | -0.11507 | 0.175876 | 0.270608 |
| 11736941_CHRNB4    | 0.059675 | 0.175876 | 0.270608 |
| 11754665_LEFTY2    | -0.06511 | 0.175922 | 0.270671 |
| 11741506_NREP      | 0.052408 | 0.175931 | 0.270675 |
| 11762877_TMEM9     | -0.19335 | 0.175936 | 0.270675 |
| 11723627_ERP27     | -0.10007 | 0.175955 | 0.270695 |
| 11759813_HOXB1     | -0.14776 | 0.176009 | 0.27077  |
| 11751645_PBXIP1    | -0.0692  | 0.176045 | 0.270816 |
| 11746482_PBRM1     | -0.12685 | 0.176066 | 0.27084  |
| 11738468_MS4A10    | -0.12587 | 0.176081 | 0.270855 |

|                    |          |          |          |
|--------------------|----------|----------|----------|
| 11729178_POLH      | 0.0823   | 0.176201 | 0.271031 |
| 11735673_ARL13A    | -0.1025  | 0.176225 | 0.27106  |
| 11744147_RPL18     | 0.054626 | 0.176231 | 0.27106  |
| 11732374_HSD17B7   | -0.06618 | 0.176246 | 0.271075 |
| 11740136_T         | 0.113947 | 0.176296 | 0.271136 |
| 11763066_GAFA3     | 0.106447 | 0.176297 | 0.271136 |
| 11744030_MMP7      | 0.114688 | 0.176307 | 0.271143 |
| 11732226_C10orf54  | 0.051081 | 0.176341 | 0.271187 |
| 11761336_SEMA4F    | -0.08763 | 0.176362 | 0.271211 |
| 11734862_TMLHE     | 0.076993 | 0.176407 | 0.271271 |
| 11753389_LOC439951 | -0.05562 | 0.176433 | 0.271302 |
| 11728503_CD300C    | -0.08785 | 0.176519 | 0.271427 |
| 11732051_C12orf77  | -0.12581 | 0.176527 | 0.271429 |
| 11757740_CTDNEP1   | -0.05393 | 0.176537 | 0.271436 |
| 11734311_CNN1      | 0.06378  | 0.176542 | 0.271436 |
| 11755342_NOP56     | 0.052656 | 0.176556 | 0.271449 |
| 11737692_PLEKHG4   | -0.08317 | 0.176574 | 0.271469 |
| 11757159_DKC1 ///  | -0.07314 | 0.176581 | 0.271471 |
| 11731273_KCNE1 /// | -0.15799 | 0.176599 | 0.27149  |
| 11731965_PODNL1    | -0.06635 | 0.176646 | 0.27155  |
| 11756124_IKBKG     | 0.08637  | 0.176649 | 0.27155  |
| 11715172_DEPDC5    | 0.072195 | 0.17671  | 0.271633 |
| 11737822_APOLD1    | -0.06759 | 0.176714 | 0.271633 |
| 11761040_UPP1      | 0.119365 | 0.176771 | 0.271711 |
| 11756750_TMEM30B   | -0.13765 | 0.176795 | 0.27174  |
| 11762844_ITFG2     | -0.077   | 0.176853 | 0.271821 |
| 11744354_TATDN2    | 0.093994 | 0.176866 | 0.271832 |
| 11746487_LINCO0638 | -0.09774 | 0.176878 | 0.271841 |
| 11762780_LOC102724 | -0.13899 | 0.176935 | 0.271921 |
| 11719890_7-Mar     | 0.06274  | 0.177011 | 0.272026 |
| 11737104_ARL17A    | 0.074526 | 0.177015 | 0.272026 |
| 11762588_CYP3A4    | 0.110867 | 0.177036 | 0.272045 |
| 11750511_EFNA3     | -0.1114  | 0.177038 | 0.272045 |
| 11719561_SOX4      | -0.06775 | 0.177083 | 0.272105 |
| 11725458_KLHDC8A   | -0.09477 | 0.177127 | 0.272163 |
| 11731768_ARSB      | -0.05615 | 0.177141 | 0.272177 |
| 11745785_LOC148413 | -0.10096 | 0.177152 | 0.272186 |
| 11725516_ABCG1     | -0.15222 | 0.177174 | 0.27221  |
| 11758912_CLEC1A    | 0.167499 | 0.17719  | 0.272227 |
| 11734051_TRAT1     | 0.118696 | 0.177222 | 0.272268 |
| 11736423_POSTN     | 0.103824 | 0.177238 | 0.272277 |
| 11745366_POMGNT1   | -0.05712 | 0.17724  | 0.272277 |
| 11720711_NEURL4    | 0.064122 | 0.177279 | 0.272321 |
| 11719558_SYS1      | 0.061317 | 0.177279 | 0.272321 |
| 11734233_TMEM253   | 0.055615 | 0.177308 | 0.272356 |
| 11743868_NGDN      | 0.069912 | 0.177338 | 0.272395 |
| 11740910_NELL2     | 0.053653 | 0.177354 | 0.272411 |
| 11726419_RNF112    | -0.12537 | 0.177369 | 0.272425 |
| 11730402_WNK4      | 0.057514 | 0.177401 | 0.272465 |
| 11743297_CNOT6     | -0.0676  | 0.177416 | 0.272475 |
| 11720119_GIGYF1    | -0.06695 | 0.177418 | 0.272475 |



|                    |          |          |          |
|--------------------|----------|----------|----------|
| 11755179_C3orf62   | 0.082759 | 0.177428 | 0.272481 |
| 11718683_AFP       | 0.157776 | 0.17745  | 0.272506 |
| 11737052_PLAGL1    | -0.10384 | 0.177503 | 0.27258  |
| 11733913_HS3ST1    | -0.07223 | 0.177509 | 0.27258  |
| 11753983_LINC00654 | -0.09981 | 0.177551 | 0.272624 |
| 11719139_TNP1      | -0.05312 | 0.177551 | 0.272624 |
| 11751285_MTF1      | 0.092599 | 0.177555 | 0.272624 |
| 11742460_CDC154    | -0.1036  | 0.177589 | 0.272668 |
| 11749224_TNFAIP1   | -0.05053 | 0.177621 | 0.27271  |
| 11751554_GSTM1 /// | -0.06558 | 0.177643 | 0.272734 |
| 11751903_COL11A1   | 0.068993 | 0.177664 | 0.272758 |
| 11733116_CXCR5     | -0.0656  | 0.177678 | 0.272768 |
| 11753168_MMP13     | -0.05939 | 0.177681 | 0.272768 |
| 11760965_TTC3P1    | -0.09625 | 0.177698 | 0.272784 |
| 11747366_CRTAM     | 0.083901 | 0.177739 | 0.272836 |
| 11723240_ARID4B // | 0.053419 | 0.177743 | 0.272836 |
| 11715338_DCAF12L2  | -0.07099 | 0.177757 | 0.27285  |
| 11763040_OFCC1     | 0.102348 | 0.177807 | 0.272917 |
| 11750570_PLCB2     | -0.09653 | 0.177817 | 0.272924 |
| 11736587_SPATA6    | 0.052593 | 0.177856 | 0.272968 |
| 11731529_SLC17A6   | -0.06479 | 0.177865 | 0.272968 |
| 11759901_CCPG1     | 0.097246 | 0.177866 | 0.272968 |
| 11762419_VASH2     | -0.10221 | 0.177868 | 0.272968 |
| 11719311_CRY2      | -0.06045 | 0.177892 | 0.272996 |
| 11732428_ADRB3     | 0.053349 | 0.177926 | 0.27304  |
| 11730869_PPY       | -0.08395 | 0.177938 | 0.27305  |
| 11753273_ZNF584    | 0.082672 | 0.178017 | 0.273163 |
| 11740164_TOM1      | 0.054255 | 0.178042 | 0.273185 |
| 11754506_FASTK     | -0.06966 | 0.178043 | 0.273185 |
| 11726940_SLC7A9    | -0.13193 | 0.178087 | 0.273242 |
| 11725026_SUMF2     | 0.054246 | 0.178091 | 0.273242 |
| 11717087_RBM39     | 0.052713 | 0.178177 | 0.27336  |
| 11749524_GNAZ      | -0.15287 | 0.178179 | 0.27336  |
| 11762062_HMGA2     | -0.09333 | 0.178228 | 0.273426 |
| 11762997_YME1L1    | 0.092625 | 0.178248 | 0.273449 |
| 11747957_LOC100287 | -0.05608 | 0.178254 | 0.27345  |
| 11751463_SYT4      | -0.13094 | 0.178263 | 0.273454 |
| 11717509_IRF4      | -0.06661 | 0.178289 | 0.273486 |
| 11746087_CD84      | -0.12728 | 0.178315 | 0.273517 |
| 11729212_SUPT5H    | 0.052586 | 0.178334 | 0.273537 |
| 11738667_MLNR      | -0.09912 | 0.178341 | 0.273539 |
| 11719781_EHD2      | -0.07924 | 0.17839  | 0.2736   |
| 11715856_PRCP      | 0.080349 | 0.178396 | 0.2736   |
| 11715462_LYZ       | 0.075015 | 0.178397 | 0.2736   |
| 11763547_ANKRD36BP | -0.10613 | 0.178409 | 0.27361  |
| 11716278_CBX5      | 0.061968 | 0.17842  | 0.273618 |
| 11730943_OSCAR     | -0.09159 | 0.178472 | 0.273688 |
| 11748937_TTL4      | -0.07519 | 0.178489 | 0.273707 |
| 11716559_TNS1      | -0.11973 | 0.178514 | 0.273736 |
| 11729620_CLCN4     | -0.09819 | 0.178521 | 0.273739 |
| 11739647_PRKAR2A   | -0.0614  | 0.178542 | 0.273762 |

|                    |          |          |          |
|--------------------|----------|----------|----------|
| 11742436_SLC6A15   | 0.083537 | 0.17858  | 0.273805 |
| 11764161_LOC105374 | 0.054322 | 0.178582 | 0.273805 |
| 11751990_LOC102723 | -0.06142 | 0.178589 | 0.273808 |
| 11719357_FAM109B   | -0.1093  | 0.1786   | 0.273816 |
| 11755880_SNX33     | -0.07379 | 0.178697 | 0.273956 |
| 11749496_CUX1      | 0.058608 | 0.178705 | 0.27396  |
| 11747764_DDR1      | -0.14424 | 0.178721 | 0.273977 |
| 11762132_AMICA1    | -0.09206 | 0.178754 | 0.274019 |
| 11753057_HSPB7     | 0.069746 | 0.178822 | 0.274114 |
| 11752855_PIGA      | 0.08735  | 0.178845 | 0.27414  |
| 11750205_BCAS1     | -0.06356 | 0.178898 | 0.274213 |
| 11762284_S SX8     | 0.13152  | 0.178931 | 0.274246 |
| 11762285_S SX8     | 0.13152  | 0.178931 | 0.274246 |
| 11733005_FCGR3B    | 0.086203 | 0.178936 | 0.274246 |
| 11740709_ACAD10    | -0.06679 | 0.178967 | 0.274284 |
| 11741081_HTR1A     | -0.05954 | 0.179028 | 0.27437  |
| 11742569_OR5M1 /// | -0.10767 | 0.179054 | 0.2744   |
| 11733908_CYP2D6 // | -0.06531 | 0.179078 | 0.274429 |
| 11728431_SCUBE3    | -0.08966 | 0.179127 | 0.274487 |
| 11733770_DEFB104A  | -0.19138 | 0.179128 | 0.274487 |
| 11738097_CATIP     | -0.13308 | 0.17916  | 0.274528 |
| 11760705_NDUFS2    | 0.149302 | 0.179208 | 0.274594 |
| 11729536_SYCE2     | 0.074649 | 0.179219 | 0.274601 |
| 11726044_AGER      | -0.08208 | 0.179254 | 0.274647 |
| 11727288_PROK1     | -0.07131 | 0.179268 | 0.274659 |
| 11741933_RFPL1     | -0.10344 | 0.179323 | 0.274736 |
| 11754166_ZNF148    | -0.05745 | 0.179339 | 0.274748 |
| 11742535_FAM58BP   | -0.07655 | 0.179343 | 0.274748 |
| 11738166_CBX2      | 0.088482 | 0.179402 | 0.27483  |
| 11738030_DLX4      | -0.08553 | 0.179446 | 0.274889 |
| 11744187_SBK1      | -0.0672  | 0.179504 | 0.274954 |
| 11731663_KIAA1217  | 0.140483 | 0.179505 | 0.274954 |
| 11736921_PCSK2     | 0.072025 | 0.17951  | 0.274954 |
| 11754528_TRAF7     | -0.05982 | 0.179511 | 0.274954 |
| 11738001_C16orf89  | -0.07626 | 0.17955  | 0.275005 |
| 11751518_CCDC148   | 0.106857 | 0.179566 | 0.275022 |
| 11729224_ZNF598    | -0.05686 | 0.179614 | 0.275086 |
| 11738596_PF4V1     | -0.06943 | 0.179637 | 0.275107 |
| 11734722_EDIL3     | 0.121548 | 0.179644 | 0.275107 |
| 11717191_TNNC2     | 0.113249 | 0.179645 | 0.275107 |
| 11763577_SLC25A23  | -0.11253 | 0.179654 | 0.275107 |
| 11729917_RET       | 0.128145 | 0.179656 | 0.275107 |
| 11762613_TMEM234   | 0.087059 | 0.179751 | 0.275244 |
| 11753126_GJC1      | 0.056445 | 0.179757 | 0.275245 |
| 11718833_LOXL2     | 0.071419 | 0.179772 | 0.275259 |
| 11718701_ARFIP1    | 0.058675 | 0.179815 | 0.275309 |
| 11749286_USF2      | -0.06984 | 0.179816 | 0.275309 |
| 11720676_CCS       | -0.07113 | 0.179827 | 0.275317 |
| 11734664_DDX3Y     | -0.06626 | 0.179872 | 0.275377 |
| 11735093_TOM1L2    | 0.067732 | 0.179885 | 0.275384 |
| 11746807_LOC100630 | 0.069984 | 0.179888 | 0.275384 |

|                    |          |          |          |
|--------------------|----------|----------|----------|
| 11735959_FIGLA     | -0.10255 | 0.179896 | 0.275389 |
| 11733034_C7orf73   | -0.05871 | 0.179912 | 0.275404 |
| 11729004_ADRB1     | -0.08102 | 0.179967 | 0.27548  |
| 11732913_SP140     | -0.11739 | 0.180095 | 0.275658 |
| 11720249_FBXL15    | -0.05493 | 0.180101 | 0.275658 |
| 11747456_GPT       | 0.129467 | 0.180104 | 0.275658 |
| 11756507_FAM188B / | 0.059177 | 0.180106 | 0.275658 |
| 11738948_C11orf40  | -0.22409 | 0.180118 | 0.275668 |
| 11741771_PSM13     | -0.06062 | 0.180126 | 0.275671 |
| 11762043_TOP1MT    | -0.06194 | 0.180135 | 0.275676 |
| 11731283_KLK8      | -0.05059 | 0.180208 | 0.27578  |
| 11751487_NAV3      | 0.056609 | 0.180251 | 0.275835 |
| 11735010_MEOX1     | -0.10896 | 0.180255 | 0.275835 |
| 11731638_GAB1      | 0.101346 | 0.180285 | 0.275872 |
| 11715571_CLSTN1    | 0.053007 | 0.180292 | 0.275874 |
| 11750174_SVILP1    | -0.19648 | 0.180332 | 0.275926 |
| 11748114_SYT12     | -0.08305 | 0.180367 | 0.275971 |
| 11754708_TTC41P    | 0.14094  | 0.180402 | 0.276016 |
| 11730573_PLCB1     | 0.100935 | 0.180452 | 0.276084 |
| 11731473_TMEM70    | -0.1569  | 0.180573 | 0.27626  |
| 11761239_ZDHHC20   | -0.09379 | 0.180592 | 0.276281 |
| 11742131_FBLIM1    | -0.0896  | 0.180614 | 0.276307 |
| 11742871_PIK3IP1   | -0.05958 | 0.180679 | 0.276395 |
| 11736534_NELL1     | 0.058913 | 0.180684 | 0.276395 |
| 11716546_DRAP1     | -0.07286 | 0.180699 | 0.27641  |
| 11732973_APLF ///  | -0.10794 | 0.180727 | 0.276444 |
| 11729780_FAM127C   | -0.06454 | 0.18075  | 0.276471 |
| 11742349_OR4A47    | 0.094173 | 0.180796 | 0.276533 |
| 11760905_FARP2     | 0.067307 | 0.180802 | 0.276534 |
| 11731702_CLEC2D    | 0.075867 | 0.180815 | 0.276544 |
| 11753639_C18orf12  | -0.08647 | 0.180865 | 0.276607 |
| 11721877_MT1F      | -0.08216 | 0.180868 | 0.276607 |
| 11734700_TBRG4     | -0.06518 | 0.180873 | 0.276607 |
| 11730755_TXNDC12   | 0.050096 | 0.180895 | 0.276629 |
| 11747779_RPS6KC1   | -0.07132 | 0.180899 | 0.276629 |
| 11718564_GJA4      | -0.08753 | 0.180925 | 0.276661 |
| 11729975_PTPRN2    | -0.08698 | 0.180947 | 0.276685 |
| 11724327_FASTKD3   | 0.059848 | 0.180957 | 0.276686 |
| 11758838_SPTLC2    | -0.06272 | 0.180961 | 0.276686 |
| 11723853_BCL11A    | -0.08842 | 0.180964 | 0.276686 |
| 11757135_SNORA49   | 0.079443 | 0.181005 | 0.27674  |
| 11758555_GPR183    | -0.07586 | 0.181031 | 0.27677  |
| 11715288_CASP14    | 0.073162 | 0.181108 | 0.27688  |
| 11718625_DGUOK     | 0.049924 | 0.181142 | 0.276913 |
| 11742421_GRM5      | 0.167404 | 0.181146 | 0.276913 |
| 11740711_SLC38A4   | 0.164363 | 0.181146 | 0.276913 |
| 11756043_LETMD1    | -0.05815 | 0.18121  | 0.277001 |
| 11757729_GDF15     | -0.07254 | 0.18124  | 0.277032 |
| 11725358_ACAN      | -0.05998 | 0.181241 | 0.277032 |
| 11763523_ATP6VOD1  | -0.06713 | 0.18126  | 0.277051 |
| 11742293_OR6C68    | -0.20694 | 0.181275 | 0.277066 |

|                    |          |          |          |
|--------------------|----------|----------|----------|
| 11747274_SEPT9     | -0.07978 | 0.181288 | 0.277076 |
| 11736993_DNAJB7    | 0.122525 | 0.181337 | 0.277143 |
| 11718687_WDTC1     | 0.053925 | 0.181361 | 0.277166 |
| 11761548_CLDN11    | -0.09594 | 0.181367 | 0.277166 |
| 11754668_BAIAP2    | -0.05762 | 0.181372 | 0.277166 |
| 11751121_PML       | -0.05938 | 0.181375 | 0.277166 |
| 11742375_LILRA5    | -0.11559 | 0.181395 | 0.277189 |
| 11759133_RAB40A    | 0.160125 | 0.181403 | 0.277191 |
| 11720194_CLPB      | -0.13095 | 0.181489 | 0.277315 |
| 11733022_BTG1      | -0.18765 | 0.181515 | 0.277346 |
| 11755767_RUSC2     | 0.08936  | 0.181533 | 0.277365 |
| 11715164_IGLL3P    | 0.150359 | 0.181593 | 0.277447 |
| 11760538_MRPL50    | -0.12449 | 0.181638 | 0.277508 |
| 11741288_NXPH4     | -0.0794  | 0.181647 | 0.277509 |
| 11743243_HOXD12    | -0.0945  | 0.18165  | 0.277509 |
| 11715817_ZFP36L2   | 0.089684 | 0.181671 | 0.277532 |
| 11739650_DLL4      | -0.11556 | 0.181687 | 0.277548 |
| 11758976_KIF5A     | -0.07632 | 0.181695 | 0.277551 |
| 11753146_FAM83A-AS | -0.08747 | 0.181702 | 0.277554 |
| 11750958_FAM129C   | -0.06798 | 0.181758 | 0.27763  |
| 11741737_SLC5A4    | -0.11607 | 0.181783 | 0.277659 |
| 11728440_CHD5      | -0.05759 | 0.181814 | 0.277698 |
| 11762726_CD55      | 0.078846 | 0.181864 | 0.277763 |
| 11746498_LZTS1     | -0.13609 | 0.181868 | 0.277763 |
| 11723471_CHM       | -0.05047 | 0.181876 | 0.277767 |
| 11749684_INTS9     | -0.08077 | 0.181885 | 0.277767 |
| 11756216_PTP4A1    | 0.056038 | 0.181887 | 0.277767 |
| 11732806_ARHGAP24  | 0.101446 | 0.181926 | 0.277818 |
| 11749322_ALPK3     | 0.079635 | 0.181971 | 0.277878 |
| 11721322_UNC93B1   | -0.05835 | 0.181979 | 0.277881 |
| 11752043_GRID1     | -0.11281 | 0.182004 | 0.277911 |
| 11762327_METTL2B   | -0.0783  | 0.182012 | 0.277915 |
| 11762925_TNIP3     | -0.15551 | 0.18203  | 0.277932 |
| 11757034_SEMA5B    | -0.05332 | 0.182045 | 0.277946 |
| 11744834_RPLP1     | 0.050507 | 0.182114 | 0.278043 |
| 11742482_ARPC4     | -0.06305 | 0.182119 | 0.278043 |
| 11761656_FANCD2    | -0.08928 | 0.182145 | 0.27807  |
| 11727612_SCN2B     | -0.08192 | 0.182148 | 0.27807  |
| 11749171_UPB1      | 0.076251 | 0.182228 | 0.278182 |
| 11734726_PNPT1     | -0.07419 | 0.182262 | 0.278222 |
| 11738093_CCDC172   | 0.089924 | 0.182265 | 0.278222 |
| 11737622_SLC6A6    | 0.12802  | 0.182304 | 0.278273 |
| 11763407_GTDC1     | -0.06016 | 0.182323 | 0.278292 |
| 11719075_REEP1     | -0.06732 | 0.182328 | 0.278292 |
| 11764291_LINC00570 | -0.11084 | 0.182348 | 0.278315 |
| 11741738_C3orf33   | 0.129565 | 0.182373 | 0.278344 |
| 11761199_SIMC1     | -0.09626 | 0.182424 | 0.278413 |
| 11762191_CA6       | 0.069381 | 0.182493 | 0.278509 |
| 11731690_PIK3C2G   | -0.07859 | 0.182539 | 0.278567 |
| 11763910_SNORA20 / | -0.2178  | 0.182542 | 0.278567 |
| 11734920_PCYOX1L   | 0.062481 | 0.182558 | 0.278583 |

|                    |          |          |          |
|--------------------|----------|----------|----------|
| 11720315_ATP6VOB   | 0.055386 | 0.182586 | 0.278617 |
| 11745294_OGFOD2    | -0.07589 | 0.1826   | 0.278629 |
| 11739686_EXOC6B    | 0.073155 | 0.182703 | 0.278778 |
| 11726200_CTF1      | -0.1081  | 0.182821 | 0.278949 |
| 11735496_SMC02     | 0.160957 | 0.182868 | 0.279006 |
| 11751745_PRSS3     | -0.11225 | 0.182873 | 0.279006 |
| 11755454_BRD7P3    | 0.122926 | 0.182883 | 0.279006 |
| 11734784_CLIC2     | 0.086879 | 0.182885 | 0.279006 |
| 11716522_C10orf10  | 0.06154  | 0.182887 | 0.279006 |
| 11735206_MMAA      | 0.069453 | 0.182921 | 0.279049 |
| 11725786_TMA16     | -0.07973 | 0.182938 | 0.279066 |
| 11738286_CLEC6A    | -0.13333 | 0.182946 | 0.27907  |
| 11728781_CD1C      | -0.10803 | 0.182986 | 0.279122 |
| 11744004_PIK3R2    | -0.06889 | 0.182998 | 0.279131 |
| 11717633_KLHL9     | 0.049851 | 0.183017 | 0.279152 |
| 11723637_C11orf58  | -0.0735  | 0.183024 | 0.279154 |
| 11715180_CGB1 ///  | 0.127882 | 0.183153 | 0.279342 |
| 11748003_IFI44     | -0.07911 | 0.183161 | 0.279346 |
| 11715670_IFITM1    | 0.050447 | 0.183173 | 0.279347 |
| 11739984_HAO1      | 0.130617 | 0.183174 | 0.279347 |
| 11730581_HECW2     | 0.097803 | 0.183239 | 0.279438 |
| 11742452_MAGED4 // | 0.145147 | 0.183248 | 0.279444 |
| 11747247_RAP1B     | 0.076659 | 0.183341 | 0.279576 |
| 11736886_PAPOLB    | -0.0663  | 0.183365 | 0.279604 |
| 11732464_WNT11     | -0.12154 | 0.183382 | 0.279622 |
| 11731127_GLIPR1L1  | 0.140677 | 0.18339  | 0.279625 |
| 11755890_ANO7      | 0.072471 | 0.183476 | 0.279748 |
| 11725898_TAL1      | -0.14614 | 0.18351  | 0.27979  |
| 11732219_TUBE1     | 0.055594 | 0.183523 | 0.279799 |
| 11761547_NOP16     | 0.10204  | 0.183527 | 0.279799 |
| 11728547_ZNF536    | -0.11273 | 0.183573 | 0.27986  |
| 11736812_PDCD1LG2  | 0.121324 | 0.183579 | 0.279861 |
| 11734867_TPRG1     | -0.15214 | 0.183617 | 0.27991  |
| 11723684_RPUSD2    | -0.05795 | 0.183644 | 0.279943 |
| 11729082_GIPC3     | -0.17583 | 0.183721 | 0.280051 |
| 11730208_TRIM46    | -0.06744 | 0.183799 | 0.280161 |
| 11735095_LEP       | 0.076125 | 0.183812 | 0.280167 |
| 11744311_PLIN1     | 0.122355 | 0.183814 | 0.280167 |
| 11722136_GUCY1A3   | -0.10684 | 0.183834 | 0.280185 |
| 11733607_LRRC34    | -0.10056 | 0.183838 | 0.280185 |
| 11731112_GNMT      | -0.09611 | 0.183844 | 0.280186 |
| 11715117_HIST1H2AJ | -0.11672 | 0.183857 | 0.280197 |
| 11756364_SLC22A2   | -0.05324 | 0.183879 | 0.280222 |
| 11732903_TBX10     | -0.11269 | 0.183897 | 0.28024  |
| 11740174_NRG3      | 0.155405 | 0.183912 | 0.280255 |
| 11759964_ZNF248    | -0.15378 | 0.183931 | 0.280262 |
| 11724168_COLGALT2  | 0.110017 | 0.183932 | 0.280262 |
| 11743700_EHMT1     | 0.068867 | 0.183934 | 0.280262 |
| 11755277_PSD       | -0.1256  | 0.183951 | 0.280279 |
| 11748229_IL15RA    | 0.081206 | 0.18402  | 0.280376 |
| 11759040_LILRB4    | 0.095602 | 0.184037 | 0.280393 |

|                    |          |          |          |
|--------------------|----------|----------|----------|
| 11735308_BARHL1    | 0.068283 | 0.184095 | 0.280472 |
| 11715151_PRB3      | 0.064405 | 0.184148 | 0.280538 |
| 11719020_WDFY1     | 0.069236 | 0.184155 | 0.280538 |
| 11721124_MMP11     | -0.06313 | 0.184156 | 0.280538 |
| 11735914_PLEKHG6   | -0.07474 | 0.184167 | 0.280547 |
| 11755013_TNFRSF1B  | -0.138   | 0.184183 | 0.280563 |
| 11758927_LANCL2    | -0.09562 | 0.184216 | 0.280605 |
| 11745595_MRI1      | 0.068106 | 0.184266 | 0.280671 |
| 11715231_RPL36     | -0.05532 | 0.184273 | 0.280674 |
| 11747782_CTBP2     | -0.04995 | 0.184321 | 0.280737 |
| 11760639_GAPVD1    | 0.172791 | 0.184347 | 0.280768 |
| 11747770_ARMC5     | -0.07576 | 0.184396 | 0.280835 |
| 11746253_LOC339166 | -0.06219 | 0.184403 | 0.280836 |
| 11759817_MCPH1     | -0.1067  | 0.184414 | 0.280845 |
| 11737102_RFX6      | -0.13414 | 0.184434 | 0.280867 |
| 11747450_LOC102724 | 0.070195 | 0.184485 | 0.280936 |
| 11744196_SEC61A2   | -0.06303 | 0.184492 | 0.280937 |
| 11762591_PPP2R3B   | 0.201897 | 0.184503 | 0.280946 |
| 11727947_MEGF6     | 0.124852 | 0.184516 | 0.280957 |
| 11757234_KCNIP4-IT | -0.09567 | 0.184542 | 0.280988 |
| 11720073_EIF3B     | 0.065548 | 0.184567 | 0.281016 |
| 11762179_UIMC1     | 0.119881 | 0.184661 | 0.281151 |
| 11738330_IL17REL   | -0.10789 | 0.184693 | 0.281191 |
| 11761132_AGXT      | -0.14068 | 0.184745 | 0.281262 |
| 11760772_AFMID     | -0.05593 | 0.184758 | 0.281271 |
| 11752969_URAHP     | -0.12198 | 0.184781 | 0.281298 |
| 11725782_ANXA2R    | -0.10062 | 0.184839 | 0.281378 |
| 11761146_EIF2D     | -0.08812 | 0.184851 | 0.281387 |
| 11733279_ACHE      | 0.127923 | 0.184866 | 0.281402 |
| 11733717_CALML6    | 0.089058 | 0.184894 | 0.281436 |
| 11744779_FAM13A    | 0.107257 | 0.184908 | 0.281444 |
| 11762899_APOBEC3G  | -0.05473 | 0.184911 | 0.281444 |
| 11717299_HLA-DPB1  | -0.1162  | 0.184944 | 0.281485 |
| 11733647_DCST1     | 0.128085 | 0.184976 | 0.281512 |
| 11747182_TMEM255B  | -0.11065 | 0.184976 | 0.281512 |
| 11727300_FGFR1     | 0.069746 | 0.184979 | 0.281512 |
| 11719884_KAZN      | 0.074975 | 0.184988 | 0.281517 |
| 11719684_NTS       | -0.10554 | 0.184995 | 0.281519 |
| 11718997_AHSP      | -0.11939 | 0.185011 | 0.281534 |
| 11742169_FAM27L    | -0.12612 | 0.185037 | 0.281565 |
| 11748095_PPFIBP2   | 0.085378 | 0.185061 | 0.281593 |
| 11751772_KLK2      | -0.09103 | 0.185075 | 0.281606 |
| 11733199_CCDC14    | -0.06053 | 0.185125 | 0.281667 |
| 11732659_LOC102723 | -0.15583 | 0.185127 | 0.281667 |
| 11743125_CRYAA /// | -0.10232 | 0.185172 | 0.281727 |
| 11716316_CYTH2     | -0.07509 | 0.185244 | 0.281827 |
| 11718709_TBC1D9B   | -0.06845 | 0.18526  | 0.281844 |
| 11716804_PLEKHA2   | -0.07388 | 0.185402 | 0.28205  |
| 11744455_UQCRH     | -0.05177 | 0.185423 | 0.282074 |
| 11727950_DHX33     | 0.055254 | 0.185433 | 0.282074 |
| 11763880_CCNT2-AS1 | -0.19108 | 0.185435 | 0.282074 |

|                    |          |          |          |
|--------------------|----------|----------|----------|
| 11744899_FADS2     | -0.15512 | 0.185458 | 0.282101 |
| 11715245_IGLL1     | -0.08014 | 0.185513 | 0.282176 |
| 11740598_WDR31     | -0.06022 | 0.185533 | 0.282197 |
| 11754820_RLTPR     | -0.06591 | 0.185544 | 0.282205 |
| 11716910_NR2F6     | 0.07299  | 0.185571 | 0.282231 |
| 11724850_DIXDC1    | 0.091265 | 0.185573 | 0.282231 |
| 11759314_CRHR2     | -0.13354 | 0.185602 | 0.282267 |
| 11722221_BFSP2     | -0.11773 | 0.185617 | 0.282281 |
| 11753278_AKR1E2    | -0.07146 | 0.185682 | 0.282371 |
| 11750508_PTPRN     | -0.09966 | 0.18569  | 0.282375 |
| 11742106_C11orf21  | -0.06518 | 0.18571  | 0.282396 |
| 11763734_UTY       | -0.13995 | 0.185734 | 0.282423 |
| 11763453_METTL12   | 0.10764  | 0.185759 | 0.282453 |
| 11728206_FAM120A   | -0.05246 | 0.185814 | 0.282528 |
| 11746955_SH3RF3-AS | 0.126815 | 0.185821 | 0.282529 |
| 11745547_C5orf42   | 0.092548 | 0.185845 | 0.282557 |
| 11731754_CDX2      | -0.15213 | 0.185875 | 0.282584 |
| 11762497_WISP3     | 0.123878 | 0.18588  | 0.282584 |
| 11763392_LOC100132 | -0.13529 | 0.18588  | 0.282584 |
| 11750680_CTNNB1    | 0.061823 | 0.185955 | 0.28269  |
| 11731012_SYN2      | 0.199832 | 0.185976 | 0.282712 |
| 11753767_ZBTB4     | -0.06427 | 0.185994 | 0.282732 |
| 11748890_CACFD1    | 0.05811  | 0.186008 | 0.282743 |
| 11734771_PHKG2     | 0.058014 | 0.186027 | 0.282764 |
| 11742067_LRRTM4    | -0.10626 | 0.186063 | 0.282809 |
| 11743327_RBBP6     | -0.06351 | 0.186083 | 0.282832 |
| 11724354_ATG16L2   | -0.05713 | 0.18609  | 0.282833 |
| 11728530_BLNK      | -0.11706 | 0.186104 | 0.282845 |
| 11728550_PIP5K1A   | 0.063046 | 0.186177 | 0.28294  |
| 11747204_GAS8      | -0.07161 | 0.186178 | 0.28294  |
| 11737065_COL9A2    | -0.0966  | 0.186206 | 0.282974 |
| 11733587_CR1       | 0.102558 | 0.186219 | 0.282985 |
| 11746683_NPR3      | 0.133427 | 0.186253 | 0.283029 |
| 11762837_ING5      | 0.067464 | 0.186309 | 0.283096 |
| 11738220_SLC50A1   | 0.098616 | 0.186313 | 0.283096 |
| 11758526_RELN      | 0.157082 | 0.186315 | 0.283096 |
| 11725692_VWA5A     | -0.12408 | 0.186336 | 0.283119 |
| 11735734_CREB3L3   | 0.095128 | 0.186343 | 0.28312  |
| 11716079_CALCOCO1  | -0.07792 | 0.186379 | 0.283167 |
| 11760580_TEKT4     | -0.07205 | 0.186401 | 0.283192 |
| 11743708_SYCP2     | -0.15957 | 0.186463 | 0.283261 |
| 11751194_TRIM54    | -0.09742 | 0.186464 | 0.283261 |
| 11743357_ZBTB40    | -0.06222 | 0.186469 | 0.283261 |
| 11747928_POSTN     | 0.117182 | 0.18647  | 0.283261 |
| 11737394_PATE2     | 0.18061  | 0.186494 | 0.283288 |
| 11721375_BCL2      | -0.07987 | 0.186512 | 0.283307 |
| 11749410_DMKN      | -0.12319 | 0.186523 | 0.283315 |
| 11735436_FHAD1     | -0.08997 | 0.186533 | 0.283321 |
| 11741156_VWA7      | -0.05464 | 0.186568 | 0.283365 |
| 11743690_PTCHD2    | -0.08944 | 0.1866   | 0.283406 |
| 11731375_CAMKK2    | -0.08163 | 0.18662  | 0.283427 |

|                    |          |          |          |
|--------------------|----------|----------|----------|
| 11763986_APOL1     | -0.06519 | 0.186638 | 0.283442 |
| 11745491_GOLGA8CP  | -0.14337 | 0.186641 | 0.283442 |
| 11763548_JRKL      | -0.16116 | 0.18667  | 0.283473 |
| 11740580_ASAH1     | 0.110266 | 0.186673 | 0.283473 |
| 11757191_AKR1C6P   | -0.13801 | 0.186718 | 0.283528 |
| 11737220_GALNT8 // | 0.159535 | 0.186721 | 0.283528 |
| 11732449_GTF2I /// | -0.04824 | 0.186733 | 0.283532 |
| 11743264_C14orf2   | -0.04797 | 0.186736 | 0.283532 |
| 11715309_MLXIPL    | -0.09022 | 0.186762 | 0.283563 |
| 11735916_TREML4    | 0.093783 | 0.186773 | 0.283564 |
| 11759064_AP5S1     | -0.1182  | 0.186778 | 0.283564 |
| 11724687_PCSK5     | 0.13257  | 0.18678  | 0.283564 |
| 11749741_DMGDH     | 0.078656 | 0.186815 | 0.283609 |
| 11745565_MYH7B     | -0.07559 | 0.18683  | 0.283615 |
| 11729889_ZFP3      | -0.09423 | 0.186831 | 0.283615 |
| 11726764_AQP8      | -0.1068  | 0.186861 | 0.283652 |
| 11727028_MAP1A     | -0.0886  | 0.186886 | 0.283681 |
| 11756323_F12       | -0.07365 | 0.186976 | 0.283804 |
| 11749381_ZNF343    | 0.096708 | 0.186978 | 0.283804 |
| 11762275_UQCRB     | 0.068644 | 0.186984 | 0.283804 |
| 11762935_HLA-DQB1  | -0.11892 | 0.187007 | 0.28383  |
| 11721743_TMEM150A  | 0.055849 | 0.187036 | 0.283864 |
| 11752722_FAM122A   | 0.108517 | 0.187073 | 0.283913 |
| 11727229_OAZ3      | 0.080709 | 0.187109 | 0.283957 |
| 11724755_ALG2      | 0.1018   | 0.187124 | 0.283972 |
| 11727243_WNT4      | -0.10612 | 0.187142 | 0.283991 |
| 11756034_RLN3      | -0.0984  | 0.187163 | 0.284013 |
| 11731477_CHMP1B    | -0.05246 | 0.187195 | 0.284053 |
| 11758373_NTF3      | -0.07132 | 0.187269 | 0.284156 |
| 11734117_BTN3A3    | 0.092827 | 0.187293 | 0.284185 |
| 11762381_PER2      | -0.16257 | 0.187331 | 0.284233 |
| 11732844_MICAL3    | 0.086784 | 0.187365 | 0.284276 |
| 11755788_KIF21A    | -0.06942 | 0.187392 | 0.284308 |
| 11750135_MAOB      | -0.08459 | 0.187421 | 0.284343 |
| 11741183_PROSER3   | -0.13692 | 0.187472 | 0.284406 |
| 11759390_OR2A14    | -0.0686  | 0.187481 | 0.284406 |
| 11750385_TMEM94    | -0.07042 | 0.187485 | 0.284406 |
| 11762638_SSH2      | 0.194402 | 0.187486 | 0.284406 |
| 11759717_FNDC5     | -0.0868  | 0.187505 | 0.284417 |
| 11757244_TFAMP1    | -0.08217 | 0.18751  | 0.284417 |
| 11752790_TNRC6B    | -0.13598 | 0.18751  | 0.284417 |
| 11715686_ARPC5     | 0.049914 | 0.187519 | 0.284421 |
| 11731694_HIST1H2AE | -0.12064 | 0.187556 | 0.284468 |
| 11720996_ADCY2     | -0.10941 | 0.187587 | 0.284507 |
| 11744856_ABCA3     | -0.07681 | 0.187605 | 0.284525 |
| 11756830_MAPKAP1   | 0.059155 | 0.187682 | 0.284632 |
| 11761795_ZNF138    | -0.18708 | 0.187687 | 0.284632 |
| 11737811_NNT       | -0.05093 | 0.187708 | 0.284654 |
| 11726779_IKBIP     | 0.05243  | 0.187733 | 0.284683 |
| 11734090_C5orf42   | 0.128607 | 0.187744 | 0.284692 |
| 11739838_KDM5A     | -0.10389 | 0.187765 | 0.284714 |



|                    |          |          |          |
|--------------------|----------|----------|----------|
| 11762018_DCLRE1C   | 0.087977 | 0.187803 | 0.284763 |
| 11759309_SNED1     | -0.18043 | 0.187826 | 0.284784 |
| 11715316_HLA-C     | 0.082389 | 0.187831 | 0.284784 |
| 11729447_ARMS2     | -0.06624 | 0.187834 | 0.284784 |
| 11735070_GNAL      | -0.08648 | 0.187874 | 0.284836 |
| 11756129_GSK3A     | -0.05018 | 0.187929 | 0.28491  |
| 11736951_RORB      | -0.08201 | 0.187947 | 0.284929 |
| 11728588_MFSD13A   | 0.08053  | 0.187957 | 0.284936 |
| 11721220_ZNF318    | 0.082601 | 0.188015 | 0.285014 |
| 11746675_ZNF232    | -0.10748 | 0.188026 | 0.28502  |
| 11761653_SEC16B    | -0.15219 | 0.18803  | 0.28502  |
| 11727613_SCN2B     | 0.054484 | 0.18805  | 0.28504  |
| 11735441_ABCB5     | -0.04924 | 0.188081 | 0.285079 |
| 11724494_SF3B4     | -0.0517  | 0.188105 | 0.285106 |
| 11750650_PAMR1     | 0.060505 | 0.18816  | 0.285182 |
| 11740849_C19orf35  | -0.05571 | 0.188176 | 0.285192 |
| 11743624_TIMM22    | 0.072115 | 0.188179 | 0.285192 |
| 11759468_LCE1A     | -0.15249 | 0.188218 | 0.28524  |
| 11727673_CDH24     | -0.07707 | 0.188223 | 0.28524  |
| 11716664_GDF15     | -0.09196 | 0.188286 | 0.285325 |
| 11716748_AFF1      | -0.06454 | 0.18829  | 0.285325 |
| 11737624_GAB2      | -0.11096 | 0.188327 | 0.285366 |
| 11722554_NUP88     | 0.05431  | 0.188329 | 0.285366 |
| 11734792_SNAPC1    | 0.074428 | 0.188365 | 0.285412 |
| 11752177_SIAH1     | 0.061814 | 0.188379 | 0.285425 |
| 11715843_MAPK1     | -0.05449 | 0.188392 | 0.285435 |
| 11758145_LIFR      | -0.16763 | 0.188469 | 0.285542 |
| 11740476_NOX4      | -0.0829  | 0.188477 | 0.285546 |
| 11750532_FAM215A   | -0.05247 | 0.188485 | 0.285549 |
| 11740165_CSH1 ///  | -0.06752 | 0.188507 | 0.285573 |
| 11736139_ITSN1     | -0.07188 | 0.188534 | 0.285606 |
| 11721686_SPINK6    | 0.106889 | 0.188685 | 0.285826 |
| 11750801_DLAT      | -0.05795 | 0.188691 | 0.285826 |
| 11745157_HELT      | -0.07508 | 0.188734 | 0.285882 |
| 11758698_HBG1 ///  | -0.09687 | 0.188746 | 0.285892 |
| 11735908_KRTAP4-12 | 0.119552 | 0.188773 | 0.285924 |
| 11726484_KRTDAP    | -0.05332 | 0.188788 | 0.285937 |
| 11751981_ZMYM1     | -0.04987 | 0.188821 | 0.285979 |
| 11735507_C14orf39  | -0.11082 | 0.188858 | 0.286026 |
| 11761937_GPR17     | 0.125318 | 0.188869 | 0.286034 |
| 11728578_PRELID3A  | 0.047697 | 0.188918 | 0.286099 |
| 11761915_FFAR4     | -0.09914 | 0.188949 | 0.286133 |
| 11723714_CPXM1     | -0.085   | 0.188952 | 0.286133 |
| 11740115_CGN       | 0.092549 | 0.189003 | 0.286201 |
| 11749903_GORASP1   | 0.085526 | 0.189042 | 0.286252 |
| 11743560_PTPRC     | 0.129104 | 0.189074 | 0.286291 |
| 11727235_EPG5      | -0.07938 | 0.189134 | 0.286372 |
| 11720572_JADE2     | -0.07828 | 0.189166 | 0.286412 |
| 11720876_CORO2B    | 0.084894 | 0.189223 | 0.28649  |
| 11749396_DEXI ///  | -0.06301 | 0.189231 | 0.286494 |
| 11754474_PLEK      | -0.17135 | 0.18925  | 0.286514 |

|                    |          |          |          |
|--------------------|----------|----------|----------|
| 11761731_SIRT6     | 0.067756 | 0.189263 | 0.286524 |
| 11740763_RGPD3 /// | 0.093728 | 0.189314 | 0.286592 |
| 11735784_NPY2R     | 0.066965 | 0.189385 | 0.28669  |
| 11752918_FCRL6     | -0.09845 | 0.189419 | 0.286734 |
| 11744537_PNPLA6    | 0.055849 | 0.189501 | 0.286839 |
| 11737868_PAPPA2    | -0.09372 | 0.189501 | 0.286839 |
| 11734338_POU3F1    | -0.06778 | 0.189648 | 0.287054 |
| 11763811_LHX1      | -0.13264 | 0.189676 | 0.287088 |
| 11755196_CORO6     | -0.08648 | 0.18969  | 0.287099 |
| 11737123_GPR82     | -0.10504 | 0.189725 | 0.287143 |
| 11733926_CTNS      | -0.0759  | 0.18974  | 0.287157 |
| 11737809_KCNH7     | -0.08166 | 0.18976  | 0.287179 |
| 11744769_CDKN2A-AS | -0.17079 | 0.189804 | 0.287236 |
| 11739327_RAB1A     | 0.051334 | 0.1899   | 0.287367 |
| 11733215_STAT4     | -0.06711 | 0.189902 | 0.287367 |
| 11740682_MC5R      | -0.12202 | 0.189953 | 0.287435 |
| 11742901_CGGBP1    | -0.05517 | 0.190008 | 0.287509 |
| 11747692_IQUB      | -0.13818 | 0.190025 | 0.287526 |
| 11744676_COL11A2   | -0.12526 | 0.190034 | 0.287531 |
| 11733325_FBXW8     | 0.093019 | 0.19004  | 0.287531 |
| 11717222_EXTL3     | 0.083978 | 0.190092 | 0.287601 |
| 11759292_FAM63A    | -0.08343 | 0.190145 | 0.287672 |
| 11725450_TMEM45B   | -0.06998 | 0.190197 | 0.287733 |
| 11726134_MYO7A     | 0.091308 | 0.190197 | 0.287733 |
| 11717345_FOSB      | 0.062593 | 0.190249 | 0.287802 |
| 11762190_CA6       | 0.128361 | 0.190285 | 0.287841 |
| 11717858_CD37      | -0.11538 | 0.190286 | 0.287841 |
| 11749541_SUSD4     | -0.0886  | 0.190301 | 0.287855 |
| 11729619_CLCN4     | 0.083103 | 0.190326 | 0.287883 |
| 11725494_RSPH9     | 0.112868 | 0.190356 | 0.28792  |
| 11724243_TCF4      | -0.06824 | 0.190407 | 0.287988 |
| 11750550_NOD1      | -0.06301 | 0.190427 | 0.28801  |
| 11759756_ERVK-4    | 0.184273 | 0.190457 | 0.288047 |
| 11754724_CCDC88B   | -0.08165 | 0.190486 | 0.288081 |
| 11739643_TULP3     | -0.06209 | 0.190525 | 0.288131 |
| 11759234_FABP12    | 0.071428 | 0.190532 | 0.288133 |
| 11744802_WFDC3     | 0.116229 | 0.190543 | 0.28814  |
| 11722320_EFNB3     | 0.066169 | 0.190559 | 0.288156 |
| 11747227_LINCO0598 | -0.13006 | 0.190572 | 0.288166 |
| 11746353_C1orf158  | -0.05762 | 0.190588 | 0.288182 |
| 11749342_C20orf96  | -0.0627  | 0.190619 | 0.28822  |
| 11716290_MRPL22    | -0.17787 | 0.190662 | 0.288276 |
| 11761192_TDG       | -0.08758 | 0.190681 | 0.288295 |
| 11749027_HERPUD2   | 0.055267 | 0.190705 | 0.288322 |
| 11724383_ST6GAL2   | 0.097305 | 0.19077  | 0.288412 |
| 11721982_PID1      | 0.08213  | 0.190822 | 0.288481 |
| 11756451_C1orf159  | -0.06834 | 0.190848 | 0.288513 |
| 11735244_TRPV3     | 0.049279 | 0.190908 | 0.288592 |
| 11730542_ACAA1     | 0.067864 | 0.190913 | 0.288592 |
| 11751263_PCBP3     | -0.1088  | 0.190919 | 0.288592 |
| 11763813_SAMD14    | -0.09436 | 0.190933 | 0.288601 |

|                    |          |          |          |
|--------------------|----------|----------|----------|
| 11763658_FMN1      | -0.12014 | 0.190936 | 0.288601 |
| 11750305_PPFIA2    | -0.09549 | 0.190962 | 0.288631 |
| 11754865_RBM45     | 0.065554 | 0.190977 | 0.288645 |
| 11737234_USP6      | -0.11127 | 0.191001 | 0.288673 |
| 11761327_NCAPG2    | -0.11399 | 0.191024 | 0.288698 |
| 11748669_PDCD2     | 0.081288 | 0.191202 | 0.288952 |
| 11753003_DMBT1     | -0.10725 | 0.191204 | 0.288952 |
| 11715293_TRPT1     | -0.18875 | 0.19123  | 0.288982 |
| 11763179_UBE2F     | -0.10152 | 0.191371 | 0.289181 |
| 11719689_TWSG1     | -0.05966 | 0.191373 | 0.289181 |
| 11722603_NEFH      | -0.14035 | 0.191398 | 0.28921  |
| 11730552_PRSS16    | 0.086037 | 0.191435 | 0.289255 |
| 11748164_VCAN      | 0.151365 | 0.191443 | 0.289255 |
| 11733687_STRAG     | 0.053348 | 0.191446 | 0.289255 |
| 11723522_PAEP      | 0.095994 | 0.191475 | 0.289291 |
| 11762954_KLRC2     | -0.0821  | 0.191489 | 0.289302 |
| 11734141_GK5       | -0.06685 | 0.191507 | 0.289321 |
| 11725113_SLC38A3   | -0.07423 | 0.191534 | 0.289352 |
| 11737355_FXYD2     | -0.09473 | 0.191549 | 0.289358 |
| 11725581_TNK1      | -0.06547 | 0.19155  | 0.289358 |
| 11732614_CELF3     | 0.074811 | 0.191579 | 0.289394 |
| 11754738_PDE2A     | 0.10896  | 0.19159  | 0.289402 |
| 11762730_SUMO1     | -0.13875 | 0.191664 | 0.289504 |
| 11758093_FBN1      | 0.123928 | 0.191709 | 0.289563 |
| 11750024_LMAN2L    | 0.066775 | 0.191748 | 0.289613 |
| 11753566_IL5RA     | -0.097   | 0.191769 | 0.289636 |
| 11740389_MYOCD     | -0.11609 | 0.191856 | 0.289758 |
| 11757334_UQCR11    | 0.046964 | 0.191925 | 0.289854 |
| 11734899_FAM71C    | -0.08499 | 0.191932 | 0.289855 |
| 11734472_TEX11     | 0.151697 | 0.192022 | 0.289982 |
| 11720994_CCL3      | 0.054557 | 0.19203  | 0.289985 |
| 11752136_MCC       | 0.084149 | 0.192062 | 0.290024 |
| 11750318_ERC2-IT1  | -0.09777 | 0.192117 | 0.290097 |
| 11726791_CNTN2     | -0.14396 | 0.192122 | 0.290097 |
| 11715961_ACTR10    | -0.05369 | 0.192158 | 0.290143 |
| 11754042_VPS29     | 0.057806 | 0.19218  | 0.290167 |
| 11738904_KRTAP4-4  | 0.089414 | 0.192198 | 0.290185 |
| 11739667_GALNT6    | 0.056523 | 0.192213 | 0.290199 |
| 11723624_PGM5      | -0.08794 | 0.192257 | 0.29025  |
| 11748207_RXFP1     | 0.083467 | 0.192259 | 0.29025  |
| 11732412_GPER1     | -0.10291 | 0.192283 | 0.290277 |
| 11741036_RPS6KA1   | -0.06266 | 0.192412 | 0.290464 |
| 11738071_ZNF519    | -0.12196 | 0.192452 | 0.290515 |
| 11735910_OR10H1 // | -0.12329 | 0.192481 | 0.29055  |
| 11722203_FBXO22    | 0.072168 | 0.192499 | 0.290558 |
| 11748598_LMOD1     | 0.123521 | 0.192499 | 0.290558 |
| 11715765_DUSP1     | 0.088161 | 0.192506 | 0.29056  |
| 11737714_CDY1 ///  | 0.092432 | 0.192548 | 0.290608 |
| 11727379_HDAC2     | -0.16475 | 0.192555 | 0.290608 |
| 11723263_AMN1      | -0.0704  | 0.192555 | 0.290608 |
| 11734076_TNRC6C    | -0.06567 | 0.192565 | 0.290612 |

|                    |          |          |          |
|--------------------|----------|----------|----------|
| 11756999_CYB561D2  | -0.05273 | 0.19257  | 0.290612 |
| 11741403_ARHGFEF38 | -0.19867 | 0.192592 | 0.290637 |
| 11733321_CRTC1     | -0.05522 | 0.192619 | 0.290668 |
| 11726817_GPRIN1    | -0.07527 | 0.192625 | 0.290668 |
| 11755911_ADGRG7    | -0.15358 | 0.192644 | 0.290688 |
| 11755789_HEATRI    | -0.05363 | 0.192662 | 0.290706 |
| 11742753_FGF12     | 0.115567 | 0.192678 | 0.290719 |
| 11757336_LIMCH1    | -0.0526  | 0.192682 | 0.290719 |
| 11748179_NEGR1     | 0.082797 | 0.192689 | 0.29072  |
| 11754662_ADAMTS1   | 0.082717 | 0.192718 | 0.290742 |
| 11729468_BZRAP1    | -0.06816 | 0.19272  | 0.290742 |
| 11732429_ADRB3     | -0.0752  | 0.192721 | 0.290742 |
| 11738358_PRR23C    | -0.08894 | 0.192728 | 0.290744 |
| 11732033_NAT8B     | 0.05513  | 0.192756 | 0.290777 |
| 11748340_LAIR1     | -0.07548 | 0.192769 | 0.290787 |
| 11733344_PTPRC     | 0.169127 | 0.192806 | 0.290834 |
| 11737936_RANBP3L   | 0.121805 | 0.192937 | 0.291017 |
| 11731931_KIAA1755  | -0.07273 | 0.192939 | 0.291017 |
| 11715107_F8A1 ///  | -0.07633 | 0.192971 | 0.291055 |
| 11717224_EXTL3     | -0.0576  | 0.192984 | 0.291067 |
| 11726418_ABI1      | 0.062219 | 0.193009 | 0.291095 |
| 11720159_DENND3    | 0.059862 | 0.19305  | 0.291148 |
| 11720160_DENND3    | -0.06992 | 0.193082 | 0.291187 |
| 11730163_SLC6A8    | 0.053856 | 0.193117 | 0.29123  |
| 11722353_LDB2      | 0.193138 | 0.19313  | 0.291241 |
| 11730333_DPYSL4    | -0.06657 | 0.19315  | 0.291262 |
| 11761495_HERC3 /// | 0.141573 | 0.193174 | 0.29129  |
| 11739291_EHF       | 0.139566 | 0.193187 | 0.291301 |
| 11721814_VWA1      | -0.0913  | 0.193198 | 0.291308 |
| 11751630_HDAC11    | -0.07476 | 0.193214 | 0.291324 |
| 11754103_TMED3     | -0.05443 | 0.193264 | 0.291373 |
| 11722065_C12orf49  | 0.060898 | 0.193264 | 0.291373 |
| 11729827_FAM110B   | 0.140312 | 0.19327  | 0.291373 |
| 11746844_TMEM143   | -0.09057 | 0.193271 | 0.291373 |
| 11717456_NLGN2     | -0.10308 | 0.193338 | 0.291466 |
| 11719870_MYCN      | -0.06723 | 0.193372 | 0.291507 |
| 11748334_RPAIN     | -0.06256 | 0.193414 | 0.291561 |
| 11742523_OR5T1 /// | -0.13803 | 0.19344  | 0.291592 |
| 11742467_CDCA4     | -0.07884 | 0.19346  | 0.291613 |
| 11747119_RGMA      | 0.079507 | 0.193518 | 0.291692 |
| 11756952_TKT       | -0.05544 | 0.193532 | 0.291704 |
| 11751823_PTPRF     | -0.13291 | 0.193568 | 0.291749 |
| 11736576_TMEM53    | -0.06054 | 0.193585 | 0.291766 |
| 11734609_KRTAP5-7  | -0.05907 | 0.193667 | 0.291881 |
| 11722656_STK17A    | 0.057956 | 0.193734 | 0.291973 |
| 11761162_LOC100507 | 0.06623  | 0.193766 | 0.292011 |
| 11745755_EPHB4     | -0.07239 | 0.193836 | 0.292108 |
| 11718263_ERF       | -0.05217 | 0.193855 | 0.292122 |
| 11762041_NCKAP5L   | -0.11873 | 0.193858 | 0.292122 |
| 11760926_CENPT     | 0.082891 | 0.193872 | 0.292136 |
| 11717510_EXOSC10   | -0.05504 | 0.19391  | 0.292175 |

|                    |          |          |          |
|--------------------|----------|----------|----------|
| 11723165_SPI1      | -0.09127 | 0.19391  | 0.292175 |
| 11745232_N6AMT1    | 0.073348 | 0.193917 | 0.292176 |
| 11715218_FAM127A   | 0.050708 | 0.193999 | 0.29229  |
| 11731545_SIK2      | 0.079416 | 0.194043 | 0.292347 |
| 11737232_ZNF696    | -0.05963 | 0.194108 | 0.292435 |
| 11720174_SF1       | -0.06208 | 0.194113 | 0.292435 |
| 11758530_KCNJ16    | 0.078986 | 0.194121 | 0.292438 |
| 11728574_TMEM151A  | -0.0726  | 0.194163 | 0.29249  |
| 11729582_CA1       | 0.059693 | 0.194168 | 0.29249  |
| 11741583_LILRA4    | -0.13527 | 0.194243 | 0.292594 |
| 11745494_ERCC8     | 0.062455 | 0.19427  | 0.292626 |
| 11734554_BCL7B     | 0.0564   | 0.194398 | 0.29281  |
| 11745691_SEMA4D    | -0.08611 | 0.194443 | 0.292869 |
| 11748369_CARNS1    | -0.06906 | 0.194478 | 0.292913 |
| 11730802_CRNN      | -0.05576 | 0.194506 | 0.292946 |
| 11718734_POGK      | 0.049097 | 0.194512 | 0.292946 |
| 11758169_HSPA5     | -0.05305 | 0.194524 | 0.292955 |
| 11736303_MIR22HG   | 0.065794 | 0.194621 | 0.293092 |
| 11732861_LYNX1     | -0.07589 | 0.194632 | 0.2931   |
| 11734334_LINC01559 | -0.06628 | 0.19465  | 0.293117 |
| 11735531_NPW       | -0.08127 | 0.194664 | 0.29313  |
| 11752740_NIPAL4    | -0.09989 | 0.194689 | 0.293157 |
| 11753425_SLC25A45  | -0.07806 | 0.194698 | 0.293163 |
| 11758002_SPHKAP    | -0.13221 | 0.194725 | 0.293194 |
| 11761430_PGAM5 /// | -0.07975 | 0.194756 | 0.293232 |
| 11733348_CNOT7     | 0.056922 | 0.194797 | 0.293284 |
| 11762831_TCHP      | -0.10038 | 0.194823 | 0.293315 |
| 11757847_UQCDFS1   | -0.05436 | 0.194845 | 0.293339 |
| 11723954_CLINT1    | -0.05419 | 0.194874 | 0.293374 |
| 11758466_DCLK1     | 0.083914 | 0.194896 | 0.293397 |
| 11746528_ATP2B4    | 0.105759 | 0.194909 | 0.293408 |
| 11730704_OR51E2    | -0.14493 | 0.194917 | 0.293411 |
| 11752808_EYA2      | -0.06211 | 0.195009 | 0.293541 |
| 11715797_WDR45B    | 0.052757 | 0.195016 | 0.293542 |
| 11763003_NPHP3     | -0.1443  | 0.195024 | 0.293545 |
| 11717872_IRF8      | -0.14466 | 0.195047 | 0.293571 |
| 11763595_PTPRK     | -0.14409 | 0.195082 | 0.293608 |
| 11761675_UTY       | -0.08252 | 0.195084 | 0.293608 |
| 11760378_PER1      | -0.12825 | 0.195093 | 0.293613 |
| 11742402_NKX2-6    | -0.0665  | 0.195117 | 0.29364  |
| 11728849_RAB39B    | 0.100482 | 0.195149 | 0.293678 |
| 11753341_ICAM2     | -0.07369 | 0.195235 | 0.293785 |
| 11761211_CYP4F12   | -0.0661  | 0.195237 | 0.293785 |
| 11721974_SUOX      | -0.05917 | 0.195238 | 0.293785 |
| 11730425_ZNF628    | 0.063907 | 0.195269 | 0.293824 |
| 11758429_MIR17HG / | 0.080472 | 0.195312 | 0.29388  |
| 11741323_XRCC4     | -0.07436 | 0.195321 | 0.293883 |
| 11757200_LOC285696 | 0.093411 | 0.195344 | 0.293901 |
| 11722983_NRK       | -0.11545 | 0.195345 | 0.293901 |
| 11731476_MYL1      | -0.10258 | 0.195417 | 0.294001 |
| 11753300_FCF1      | -0.07613 | 0.19543  | 0.294011 |

|                    |          |          |          |
|--------------------|----------|----------|----------|
| 11752657_DNMT3B    | -0.08931 | 0.195443 | 0.294015 |
| 11761746_KRT17P2   | 0.085007 | 0.195449 | 0.294015 |
| 11740477_SP8       | -0.09293 | 0.19545  | 0.294015 |
| 11720309_SERP1     | 0.050585 | 0.195477 | 0.294045 |
| 11745219_R3HDM1    | -0.0675  | 0.195484 | 0.294048 |
| 11764069_STK3      | -0.14742 | 0.195533 | 0.294112 |
| 11737274_CFAP44    | 0.09495  | 0.195542 | 0.294116 |
| 11738585_OR4D1     | -0.13075 | 0.195562 | 0.294137 |
| 11720176_NOL6      | -0.05833 | 0.195571 | 0.294142 |
| 11748692_IL9R      | -0.07159 | 0.195585 | 0.294155 |
| 11721316_RCVRN     | 0.093738 | 0.195652 | 0.294246 |
| 11760555_HADHA     | 0.147675 | 0.19567  | 0.294263 |
| 11730859_SLC6A7    | -0.08859 | 0.195684 | 0.294275 |
| 11724104_C8orf44-S | -0.09312 | 0.195741 | 0.294345 |
| 11750728_UGT2A1 // | 0.150332 | 0.195742 | 0.294345 |
| 11749527_POSTN     | -0.10018 | 0.195778 | 0.29439  |
| 11742175_TMEM88B   | -0.06636 | 0.195791 | 0.294401 |
| 11762388_LOC145783 | 0.176769 | 0.195883 | 0.29453  |
| 11731926_TRPM3     | -0.07576 | 0.195899 | 0.294542 |
| 11730279_SPATA16   | -0.1417  | 0.195903 | 0.294542 |
| 11740464_PLCH1     | -0.07449 | 0.19593  | 0.294573 |
| 11750953_CHRND     | -0.06967 | 0.195948 | 0.294591 |
| 11739313_PWP1      | -0.05233 | 0.195963 | 0.294605 |
| 11738378_IFNA2     | 0.113732 | 0.195974 | 0.294613 |
| 11741906_DRGX      | -0.14127 | 0.195984 | 0.294618 |
| 11733579_C19orf47  | 0.066614 | 0.196054 | 0.294714 |
| 11719798_MBD4      | -0.0654  | 0.1961   | 0.294775 |
| 11735920_MRGPPE    | -0.06335 | 0.19611  | 0.29478  |
| 11731314_PAXBP1    | 0.055017 | 0.196132 | 0.294804 |
| 11742094_SCLY ///  | 0.079755 | 0.196143 | 0.294812 |
| 11733540_CNPY1     | -0.05602 | 0.196161 | 0.294829 |
| 11740633_ABCA10    | 0.0876   | 0.196219 | 0.294908 |
| 11748961_MYOC      | -0.17692 | 0.196235 | 0.294923 |
| 11726663_ZMIZ2     | -0.06709 | 0.196339 | 0.295069 |
| 11723082_HEMK1     | 0.050997 | 0.196355 | 0.295085 |
| 11725218_TPSAB1 // | 0.099858 | 0.196374 | 0.295102 |
| 11715275_S SX1     | 0.0996   | 0.196378 | 0.295102 |
| 11760340_CHRND     | -0.14483 | 0.196391 | 0.295112 |
| 11729464_H1FNT     | 0.056009 | 0.196411 | 0.295133 |
| 11758740_EFTUD2    | -0.16951 | 0.196454 | 0.295188 |
| 11719953_FKBP15    | 0.065327 | 0.196465 | 0.295196 |
| 11731982_LYPD4     | -0.09575 | 0.196481 | 0.295211 |
| 11724348_ASTN2     | -0.06744 | 0.19653  | 0.295276 |
| 11745317_ALDH1A3 / | -0.1253  | 0.196558 | 0.295308 |
| 11747501_SMAD1     | 0.100608 | 0.196577 | 0.295327 |
| 11724474_TXNDC15   | 0.091968 | 0.196647 | 0.295411 |
| 11740455_GNRHR     | -0.07479 | 0.19665  | 0.295411 |
| 11757672_MRPS17    | 0.055105 | 0.196653 | 0.295411 |
| 11747198_LOC100288 | 0.060436 | 0.196657 | 0.295411 |
| 11742602_OR4P4     | -0.14116 | 0.196712 | 0.295485 |
| 11759987_LARP1B    | 0.119841 | 0.196737 | 0.295514 |

|                    |          |          |          |
|--------------------|----------|----------|----------|
| 11715457_SSR2      | 0.052282 | 0.196797 | 0.295595 |
| 11727905_IL13RA1   | 0.062002 | 0.196818 | 0.295616 |
| 11718173_PNKD      | -0.11134 | 0.196867 | 0.295682 |
| 11732837_IL37      | -0.0765  | 0.196874 | 0.295683 |
| 11745434_NRG3      | 0.149165 | 0.196941 | 0.295768 |
| 11720338_FIBIN     | -0.09234 | 0.196943 | 0.295768 |
| 11756715_PACRGL    | -0.09575 | 0.19697  | 0.295799 |
| 11750559_NIN       | -0.0719  | 0.196982 | 0.295809 |
| 11730506_RD3       | -0.11808 | 0.197    | 0.295825 |
| 11736608_TGM3      | -0.16299 | 0.197007 | 0.295825 |
| 11729692_SERPINB3  | -0.05247 | 0.197011 | 0.295825 |
| 11750144_CCT3      | 0.052722 | 0.197055 | 0.295882 |
| 11754768_SPATA13   | -0.05494 | 0.197102 | 0.295941 |
| 11763504_NF1       | -0.06754 | 0.197106 | 0.295941 |
| 11763656_VPS36     | -0.12402 | 0.197129 | 0.295965 |
| 11747804_CLK2      | -0.05333 | 0.197144 | 0.29598  |
| 11735503_BPIFA3    | -0.10597 | 0.197211 | 0.296071 |
| 11717357_RTF1      | -0.05562 | 0.197244 | 0.296112 |
| 11727732_LCN10     | -0.09594 | 0.197288 | 0.296161 |
| 11731756_KLHDC7B   | -0.11746 | 0.197289 | 0.296161 |
| 11733063_GABRA6    | 0.140274 | 0.197314 | 0.296189 |
| 11738005_NXNL1     | -0.08158 | 0.197332 | 0.296207 |
| 11741085_APLP2     | 0.065914 | 0.197399 | 0.296285 |
| 11737438_BMF       | -0.09708 | 0.197402 | 0.296285 |
| 11761161_EIF5A     | 0.202226 | 0.197402 | 0.296285 |
| 11729791_CARTPT    | -0.07712 | 0.197427 | 0.296314 |
| 11730318_RGS7BP    | -0.07132 | 0.197436 | 0.296317 |
| 11717683_MICU2     | -0.05508 | 0.197469 | 0.296358 |
| 11736138_CTNNA2    | -0.15178 | 0.197559 | 0.296484 |
| 11740516_FAM76A    | -0.06747 | 0.197644 | 0.296602 |
| 11734583_ZDHC14    | 0.049202 | 0.197681 | 0.296649 |
| 11759272_HIST1H2BI | -0.17984 | 0.19773  | 0.296714 |
| 11732333_NRIP2     | 0.058118 | 0.197748 | 0.296732 |
| 11721134_GFPT2     | -0.06145 | 0.197775 | 0.296756 |
| 11731189_KIAA2022  | -0.10285 | 0.197777 | 0.296756 |
| 11747817_ARFGAP1   | 0.066971 | 0.197813 | 0.296802 |
| 11759689_SIN3B     | -0.15367 | 0.197822 | 0.296806 |
| 11753314_CEACAM21  | -0.09403 | 0.197879 | 0.296882 |
| 11763391_COPE      | -0.10651 | 0.197957 | 0.296989 |
| 11751424_TRAF3IP3  | -0.06676 | 0.197963 | 0.296989 |
| 11763202_FAM65B    | -0.08985 | 0.197968 | 0.296989 |
| 11753186_RBSN      | -0.07234 | 0.197989 | 0.297011 |
| 11740650_SSH1      | 0.068344 | 0.197996 | 0.297013 |
| 11760185_ARRB1     | 0.148001 | 0.198005 | 0.297017 |
| 11724003_DPP6      | 0.109533 | 0.198042 | 0.297064 |
| 11743257_VAPA      | -0.12655 | 0.198049 | 0.297065 |
| 11726169_FLT4      | -0.09092 | 0.198146 | 0.297201 |
| 11762156_PRAMEF1   | -0.06572 | 0.198182 | 0.297246 |
| 11763290_MRPS5     | -0.14363 | 0.198196 | 0.297257 |
| 11720461_F11R      | -0.05222 | 0.198261 | 0.297346 |
| 11715497_OXA1L     | 0.062441 | 0.198376 | 0.297509 |

|                   |          |          |          |
|-------------------|----------|----------|----------|
| 11739110_MOCS1    | -0.08349 | 0.198458 | 0.297621 |
| 11760432_G RTP1   | -0.08925 | 0.198463 | 0.297621 |
| 11737421_SOWA HB  | -0.12605 | 0.19848  | 0.297638 |
| 11738674_UTF1     | -0.07808 | 0.198524 | 0.297695 |
| 11731601_SHCBP1L  | 0.105055 | 0.198533 | 0.297699 |
| 11743957_SERPINB6 | -0.05663 | 0.198588 | 0.297773 |
| 11740488_DSC1     | 0.057793 | 0.198613 | 0.2978   |
| 11732890_DEF B132 | -0.08753 | 0.19864  | 0.297832 |
| 11752072_ATP2C1   | 0.068203 | 0.198648 | 0.297835 |
| 11747552_TRIP10   | -0.06269 | 0.198655 | 0.297837 |
| 11756341_RBM23    | 0.049332 | 0.198671 | 0.297851 |
| 11731846_SYTL3    | -0.15418 | 0.198685 | 0.297854 |
| 11741173_PADI6    | -0.14884 | 0.198685 | 0.297854 |
| 11725620_PDHB     | 0.047445 | 0.198719 | 0.297895 |
| 11761619_ERG      | -0.07561 | 0.198764 | 0.297954 |
| 11726772_PRKCI    | 0.058425 | 0.198914 | 0.29817  |
| 11737968_CYP24A1  | -0.09937 | 0.198937 | 0.298194 |
| 11753792_NEK3     | 0.07178  | 0.19897  | 0.298235 |
| 11744984_LENEP    | -0.07436 | 0.198989 | 0.298253 |
| 11761587_PIGQ     | -0.11804 | 0.198997 | 0.298253 |
| 11756249_CDC42    | -0.05269 | 0.199    | 0.298253 |
| 11741314_OGDHL    | -0.12037 | 0.199015 | 0.298266 |
| 11739551_ASB6     | 0.05972  | 0.199071 | 0.29834  |
| 11733300_ELOVL3   | -0.0772  | 0.199092 | 0.298363 |
| 11738109_PIKFYVE  | 0.195805 | 0.199163 | 0.29846  |
| 11735279_LRRTM4   | -0.10869 | 0.19919  | 0.298493 |
| 11741243_NGEF     | -0.12    | 0.19924  | 0.298558 |
| 11750803_ALOX15B  | -0.05765 | 0.199277 | 0.298602 |
| 11745319_ANKRD36  | -0.07533 | 0.199282 | 0.298602 |
| 11738855_ACVR1B   | 0.065756 | 0.199368 | 0.298723 |
| 11746420_HORMAD1  | -0.10945 | 0.199377 | 0.298726 |
| 11754118_CACNB2   | -0.0572  | 0.199386 | 0.298731 |
| 11716732_CRYBA4   | -0.07228 | 0.199401 | 0.298738 |
| 11751679_RASL12   | -0.09141 | 0.199403 | 0.298738 |
| 11722426_FGL2     | 0.1389   | 0.199417 | 0.29875  |
| 11761575_NTHL1    | -0.0933  | 0.1995   | 0.298864 |
| 11728023_TFR2     | 0.057339 | 0.199513 | 0.298875 |
| 11748377_IL12RB2  | -0.11269 | 0.199542 | 0.29891  |
| 11729373_KCNIP2   | -0.11949 | 0.199581 | 0.298959 |
| 11736042_DCAF4    | 0.058933 | 0.199617 | 0.299004 |
| 11755540_PUS7     | 0.058705 | 0.199671 | 0.299071 |
| 11755946_MED24    | -0.05978 | 0.199674 | 0.299071 |
| 11761279_SIRT6    | 0.072558 | 0.19971  | 0.299116 |
| 11725744_SORBS1   | -0.09558 | 0.199794 | 0.299232 |
| 11758630_FGL2     | -0.1022  | 0.199834 | 0.299283 |
| 11752727_INPP5E   | -0.07444 | 0.199842 | 0.299286 |
| 11736967_RAD51B   | 0.069769 | 0.199914 | 0.299384 |
| 11733346_UAP1L1   | 0.084828 | 0.199955 | 0.299436 |
| 11725377_LIG3     | -0.05486 | 0.199978 | 0.299457 |
| 11751639_GTF2I    | 0.072594 | 0.199981 | 0.299457 |
| 11724356_TMEM177  | -0.05097 | 0.200003 | 0.29948  |



|                    |          |          |          |
|--------------------|----------|----------|----------|
| 11728999_GCNT2     | 0.1251   | 0.200025 | 0.299504 |
| 11763748_MLPH      | -0.14639 | 0.200034 | 0.299509 |
| 11716302_ACSL1     | -0.08134 | 0.200056 | 0.299532 |
| 11757349_FGA       | -0.06569 | 0.200066 | 0.299538 |
| 11731038_FIBCD1    | -0.06341 | 0.200084 | 0.299548 |
| 11753099_SORBS3    | -0.09967 | 0.200085 | 0.299548 |
| 11721548_CMYA5     | 0.059336 | 0.20013  | 0.299606 |
| 11754784_KIAA0895L | 0.051317 | 0.200217 | 0.299728 |
| 11726739_EARS2     | -0.06483 | 0.200243 | 0.299758 |
| 11730807_BTN3A2    | -0.07988 | 0.200281 | 0.299805 |
| 11756226_GRIPAP1   | 0.061735 | 0.2003   | 0.299825 |
| 11737171_CD80      | -0.07308 | 0.200443 | 0.30003  |
| 11727654_SRRM4     | -0.08391 | 0.200555 | 0.300187 |
| 11732845_PTCHD1    | -0.05564 | 0.200587 | 0.300227 |
| 11738748_OR52K1    | 0.10712  | 0.200608 | 0.300248 |
| 11756933_LRRC25    | -0.0624  | 0.200673 | 0.300337 |
| 11737249_C9orf43   | 0.049443 | 0.200686 | 0.300346 |
| 11729403_SLC30A3   | -0.06348 | 0.20071  | 0.300373 |
| 11736845_CEP44     | 0.095175 | 0.200719 | 0.300377 |
| 11723157_INHA      | -0.10852 | 0.200767 | 0.300441 |
| 11744385_C16orf91  | -0.05579 | 0.200784 | 0.300457 |
| 11751048_CASC4     | 0.09188  | 0.200796 | 0.300465 |
| 11749215_LIMS2     | -0.06512 | 0.200853 | 0.300541 |
| 11742720_LRRC58    | 0.056654 | 0.200866 | 0.300552 |
| 11750725_ZNF568    | 0.099822 | 0.200911 | 0.30061  |
| 11751322_PTCH1     | -0.06229 | 0.200947 | 0.300647 |
| 11761871_LOC100131 | 0.10394  | 0.200948 | 0.300647 |
| 11739543_C19orf12  | 0.094838 | 0.200983 | 0.30069  |
| 11730953_PEX26     | -0.07553 | 0.20099  | 0.300692 |
| 11759284_HIST2H2AB | 0.102489 | 0.201035 | 0.300749 |
| 11740571_ZNF665    | -0.09066 | 0.201063 | 0.300782 |
| 11761107_CYB561    | -0.09252 | 0.201075 | 0.300787 |
| 11761600_SPRNP1    | -0.07878 | 0.201079 | 0.300787 |
| 11728109_DNASE2B   | -0.07537 | 0.201197 | 0.300955 |
| 11763473_PPP1R1C   | 0.13473  | 0.201216 | 0.300973 |
| 11741612_CSRP1     | -0.07034 | 0.201256 | 0.301025 |
| 11727112_SIT1      | -0.07534 | 0.201279 | 0.30105  |
| 11738854_CSF1      | -0.06637 | 0.201306 | 0.30108  |
| 11761638_WRAP53    | -0.10845 | 0.201349 | 0.301133 |
| 11724931_MERTK     | -0.09682 | 0.201353 | 0.301133 |
| 11734217_ZNF681    | 0.079846 | 0.201372 | 0.301152 |
| 11756638_FBX038    | 0.072066 | 0.201453 | 0.301264 |
| 11759878_PPP1R12B  | -0.13559 | 0.201462 | 0.301269 |
| 11719186_N4BP2L2   | -0.05246 | 0.201483 | 0.30129  |
| 11750663_SLC8B1    | -0.10355 | 0.201523 | 0.301335 |
| 11722670_BAIAP2L1  | -0.07069 | 0.201527 | 0.301335 |
| 11717946_LOC101928 | 0.073177 | 0.201532 | 0.301335 |
| 11745961_MTG2      | 0.108771 | 0.201588 | 0.301411 |
| 11752118_TBXA2R    | -0.06887 | 0.201621 | 0.301449 |
| 11756204_TUBBP5    | 0.084859 | 0.20163  | 0.301449 |
| 11718741_FAM160B2  | -0.08691 | 0.201632 | 0.301449 |

|                    |          |          |          |
|--------------------|----------|----------|----------|
| 11739251_PSM12     | -0.05167 | 0.201663 | 0.301482 |
| 11747891_PDPR      | -0.08322 | 0.201667 | 0.301482 |
| 11745548_CHRD      | -0.08872 | 0.20169  | 0.301507 |
| 11735391_TH        | -0.06461 | 0.201728 | 0.301555 |
| 11732974_OR1D2     | -0.07241 | 0.201743 | 0.301569 |
| 11725460_S100A7    | -0.10879 | 0.201762 | 0.301588 |
| 11731176_BCL2L15   | -0.07261 | 0.201785 | 0.301612 |
| 11751323_CXCR1     | -0.08439 | 0.201842 | 0.30169  |
| 11720006_TPRN      | -0.07985 | 0.201855 | 0.301699 |
| 11745647_AS16      | -0.06475 | 0.201906 | 0.301766 |
| 11753651_MUC1      | -0.06217 | 0.20199  | 0.301883 |
| 11735148_SOCS2     | 0.048906 | 0.202007 | 0.301898 |
| 11758397_RNF170    | -0.12879 | 0.202019 | 0.301905 |
| 11742867_CDH6      | -0.07013 | 0.202024 | 0.301905 |
| 11743589_SNX29     | -0.04753 | 0.202039 | 0.301914 |
| 11738986_GABARAPL1 | 0.070967 | 0.202042 | 0.301914 |
| 11743003_CYP4B1    | -0.08185 | 0.202057 | 0.301927 |
| 11741669_ESR2      | -0.11232 | 0.202071 | 0.301939 |
| 11728839_TMCC3     | -0.0537  | 0.202082 | 0.301947 |
| 11759294_KMT2A     | 0.048902 | 0.202091 | 0.30195  |
| 11750989_FLII      | 0.049612 | 0.202141 | 0.302016 |
| 11753203_LOC102723 | -0.08034 | 0.202189 | 0.302079 |
| 11761158_LOC643276 | -0.11178 | 0.202207 | 0.302096 |
| 11760003_ING5      | -0.11287 | 0.202226 | 0.302115 |
| 11726411_ZBTB7C    | -0.05118 | 0.202306 | 0.302226 |
| 11738020_RXFP4     | -0.17258 | 0.202415 | 0.30238  |
| 11742585_NCR2      | -0.09343 | 0.202506 | 0.3025   |
| 11732895_SLC7A13   | -0.08199 | 0.202508 | 0.3025   |
| 11759500_TNPO3     | -0.06545 | 0.202561 | 0.302559 |
| 11715397_MAGED2    | 0.05287  | 0.202564 | 0.302559 |
| 11729022_CNTN4     | -0.05906 | 0.202567 | 0.302559 |
| 11744022_ZNF688    | 0.068457 | 0.20259  | 0.302585 |
| 11753657_BACE1     | 0.074235 | 0.202691 | 0.302726 |
| 11751385_MLC1      | -0.07662 | 0.202773 | 0.30284  |
| 11715149_HIST2H2AB | -0.08716 | 0.202812 | 0.302889 |
| 11734312_NRN1L     | -0.10179 | 0.202871 | 0.302967 |
| 11715153_PCDHGB1   | 0.087074 | 0.202887 | 0.302975 |
| 11729157_MFAP4     | -0.05328 | 0.202888 | 0.302975 |
| 11744417_UBXN4     | -0.04786 | 0.202916 | 0.303007 |
| 11761993_THRA      | -0.0863  | 0.202981 | 0.303095 |
| 11761323_COMMD9    | -0.12152 | 0.203033 | 0.303163 |
| 11738490_IL25      | -0.07019 | 0.203042 | 0.303167 |
| 11731797_RGS13     | 0.154153 | 0.203125 | 0.303282 |
| 11753182_LGI4      | -0.07575 | 0.203141 | 0.303297 |
| 11762150_HLA-A     | -0.07875 | 0.203151 | 0.303302 |
| 11737726_CNTN5     | -0.08168 | 0.203177 | 0.303326 |
| 11739024_ADAR      | -0.05869 | 0.203179 | 0.303326 |
| 11744121_LGALS4    | -0.08702 | 0.203217 | 0.303373 |
| 11719565_PNPLA6    | 0.056946 | 0.203231 | 0.30338  |
| 11718015_ZMAT5     | -0.05991 | 0.203234 | 0.30338  |
| 11755638_PAX3      | 0.072376 | 0.203242 | 0.303383 |

|                    |          |          |          |
|--------------------|----------|----------|----------|
| 11739860_ITGA6     | -0.06021 | 0.203296 | 0.303454 |
| 11743632_PDLIM5    | 0.073868 | 0.203322 | 0.303483 |
| 11737142_LIPT2     | 0.093164 | 0.203355 | 0.303523 |
| 11763950_FKSG29    | -0.06531 | 0.203376 | 0.303545 |
| 11761328_NCAPG2    | -0.05188 | 0.203401 | 0.303573 |
| 11759714_ANGEL2    | -0.05036 | 0.203486 | 0.303691 |
| 11719105_CPNE3     | 0.063518 | 0.203524 | 0.303738 |
| 11732323_FXN       | 0.089847 | 0.203565 | 0.30379  |
| 11726594_CTSZ      | 0.052366 | 0.203612 | 0.303851 |
| 11745668_BDP1      | 0.058631 | 0.203662 | 0.303917 |
| 11730095_KHDC3L    | -0.08665 | 0.203679 | 0.303933 |
| 11743361_ADSS      | -0.05626 | 0.203696 | 0.303949 |
| 11735375_MIXL1     | 0.047342 | 0.203737 | 0.304001 |
| 11748776_IGF2-AS   | -0.06194 | 0.203747 | 0.304007 |
| 11754413_DENND1C   | -0.11722 | 0.203789 | 0.304059 |
| 11762602_HOXD8     | 0.074895 | 0.203857 | 0.304151 |
| 11761607_ICK       | -0.08499 | 0.203865 | 0.304154 |
| 11741917_OR12D3    | -0.05517 | 0.203889 | 0.304181 |
| 11725537_ZNRF3     | -0.06044 | 0.203907 | 0.304196 |
| 11760352_SAFB2     | -0.14137 | 0.203912 | 0.304196 |
| 11761735_RXRB      | -0.19214 | 0.203939 | 0.304228 |
| 11740250_SPTLC1    | -0.06645 | 0.203949 | 0.304234 |
| 11750759_CES1P1    | 0.083609 | 0.20397  | 0.304256 |
| 11731065_GIMAP1    | -0.07698 | 0.204069 | 0.304393 |
| 11756439_ADHFE1    | -0.06492 | 0.204109 | 0.304444 |
| 11729490_ATP2B3    | -0.06722 | 0.204128 | 0.304463 |
| 11731412_SLC8A2    | -0.07951 | 0.204215 | 0.304584 |
| 11761925_FER1L6-AS | -0.10548 | 0.204252 | 0.304629 |
| 11753431_NDRG1     | -0.0969  | 0.204327 | 0.304732 |
| 11715163_DEFEB128  | -0.1049  | 0.204398 | 0.304826 |
| 11763755_GNLY      | -0.12882 | 0.204403 | 0.304826 |
| 11751515_ZNF330    | 0.048106 | 0.204427 | 0.304854 |
| 11752321_MIPOL1    | 0.121203 | 0.204471 | 0.304909 |
| 11726785_NKAPL     | -0.09281 | 0.20453  | 0.304989 |
| 11731728_P2RY13    | -0.12653 | 0.204543 | 0.304998 |
| 11723409_MKKS      | 0.049507 | 0.204678 | 0.30519  |
| 11717325_NUDT16L1  | -0.04583 | 0.204704 | 0.305219 |
| 11743872_SOX17     | -0.0851  | 0.204715 | 0.305224 |
| 11747842_MXRA8     | -0.11024 | 0.204719 | 0.305224 |
| 11739439_RREB1     | -0.0746  | 0.204752 | 0.305264 |
| 11728127_UCMA      | 0.108378 | 0.204783 | 0.3053   |
| 11761427_DOCK8     | -0.08844 | 0.204844 | 0.305381 |
| 11738239_PURG      | 0.135918 | 0.20486  | 0.305396 |
| 11736136_OAS2      | -0.08063 | 0.204877 | 0.305412 |
| 11733890_DNTT      | -0.06638 | 0.204892 | 0.305426 |
| 11741950_GRM6      | -0.11719 | 0.20494  | 0.305488 |
| 11761946_KIR2DL1   | -0.11149 | 0.204967 | 0.305519 |
| 11753303_TMEM63A   | 0.087696 | 0.205003 | 0.305564 |
| 11726905_ARHGAP20  | 0.066755 | 0.205013 | 0.305569 |
| 11732893_CDKL3     | 0.084503 | 0.205051 | 0.305616 |
| 11730622_DSEL      | 0.079111 | 0.205072 | 0.305637 |

|                    |          |          |          |
|--------------------|----------|----------|----------|
| 11738379_FGF23     | -0.10793 | 0.205081 | 0.305638 |
| 11755699_ACCSL     | -0.11662 | 0.205085 | 0.305638 |
| 11739887_DSG1      | -0.08183 | 0.20514  | 0.305711 |
| 11723429_TPP2      | 0.051929 | 0.20518  | 0.305758 |
| 11762182_PPP5C     | -0.18939 | 0.205184 | 0.305758 |
| 11761991_APOB      | -0.1512  | 0.205191 | 0.30576  |
| 11722866_CDCP1     | 0.090655 | 0.205231 | 0.30581  |
| 11720779_KLHL22    | -0.06914 | 0.205244 | 0.30582  |
| 11728797_LSM14A    | -0.05359 | 0.205306 | 0.305903 |
| 11733209_ZNF480    | 0.047336 | 0.205329 | 0.305928 |
| 11748664_ZKSCAN8   | -0.10256 | 0.205348 | 0.305946 |
| 11753139_ANXA8 /// | -0.14855 | 0.205358 | 0.305946 |
| 11750301_FAM92A1   | -0.04772 | 0.20536  | 0.305946 |
| 11720469_TSTD1     | -0.10741 | 0.205376 | 0.30596  |
| 11761842_PYCR1     | -0.09264 | 0.205505 | 0.306143 |
| 11738691_OR2F2     | -0.09436 | 0.205518 | 0.306153 |
| 11738805_NRII2     | -0.11602 | 0.205593 | 0.306255 |
| 11756812_ACBD4     | -0.10106 | 0.205659 | 0.306345 |
| 11727242_WNT4      | -0.09143 | 0.205675 | 0.306359 |
| 11744201_SNRNP200  | 0.053895 | 0.205684 | 0.306363 |
| 11751883_SPTBN4    | -0.0743  | 0.2057   | 0.306369 |
| 11738606_KCTD16    | -0.11484 | 0.2057   | 0.306369 |
| 11758409_RPL28     | 0.045621 | 0.205769 | 0.306461 |
| 11725597_SULT1C2   | 0.056482 | 0.205843 | 0.306564 |
| 11723826_C2orf88   | -0.06407 | 0.205918 | 0.306666 |
| 11733297_CYP4F3    | 0.16854  | 0.205948 | 0.306701 |
| 11732398_ZNF326    | 0.048417 | 0.205967 | 0.306713 |
| 11719251_PHLPP1    | -0.06081 | 0.205969 | 0.306713 |
| 11742556_OR13C9    | 0.052868 | 0.205993 | 0.306739 |
| 11749374_MSN       | -0.06154 | 0.206027 | 0.306781 |
| 11725433_PBX2      | -0.08638 | 0.20604  | 0.30679  |
| 11725895_RIN1      | -0.07263 | 0.20605  | 0.306797 |
| 11762526_ZNF658    | -0.08264 | 0.206117 | 0.306887 |
| 11727442_MPO       | -0.08257 | 0.206136 | 0.306905 |
| 11763777_THEMIS2   | -0.08717 | 0.206142 | 0.306905 |
| 11750261_RAB3GAP1  | 0.055874 | 0.20618  | 0.306953 |
| 11735296_RP1       | 0.12963  | 0.206201 | 0.306974 |
| 11730277_SULT2A1   | 0.123771 | 0.206223 | 0.306998 |
| 11728072_DEFEB123  | -0.10106 | 0.206314 | 0.307124 |
| 11743300_SRP72     | -0.05099 | 0.206384 | 0.307218 |
| 11726361_ATXN3     | -0.06984 | 0.206407 | 0.307243 |
| 11736015_ATP6V1G2- | -0.04925 | 0.206435 | 0.307276 |
| 11746407_TLR10     | -0.13226 | 0.206445 | 0.307278 |
| 11760027_SART3     | 0.124497 | 0.206449 | 0.307278 |
| 11747557_RPRD2     | -0.06494 | 0.206575 | 0.307456 |
| 11725285_ANKS6     | -0.05289 | 0.206599 | 0.307477 |
| 11756144	EIF4B     | 0.046061 | 0.206601 | 0.307477 |
| 11736536_LEAP2     | 0.053552 | 0.206648 | 0.307537 |
| 11716731_SPSB3     | -0.0476  | 0.206675 | 0.307562 |
| 11756834_PRKAG3    | -0.08421 | 0.206678 | 0.307562 |
| 11729734_VIL1      | -0.15379 | 0.206684 | 0.307562 |

|                    |          |          |          |
|--------------------|----------|----------|----------|
| 11736545_MACC1     | -0.10135 | 0.2067   | 0.307576 |
| 11720020_RTEL1-TNF | -0.06611 | 0.206763 | 0.307661 |
| 11749649_HIF1A     | -0.04728 | 0.206785 | 0.307684 |
| 11719588_OAS1      | -0.09005 | 0.206793 | 0.307687 |
| 11728518_HPR       | -0.08935 | 0.206892 | 0.307825 |
| 11760224_MBD4      | -0.07706 | 0.206928 | 0.307857 |
| 11729740_FAM151A   | -0.09545 | 0.206933 | 0.307857 |
| 11739441_CCDC71L   | 0.084057 | 0.206935 | 0.307857 |
| 11721041_TRAPPC11  | 0.106906 | 0.206939 | 0.307857 |
| 11753528_FGFR4     | -0.05911 | 0.206959 | 0.307878 |
| 11725617_HNRNPR    | -0.05126 | 0.20704  | 0.307982 |
| 11740876_ZBTB12    | -0.17056 | 0.207042 | 0.307982 |
| 11731129_ATPIF1    | -0.04613 | 0.207143 | 0.308124 |
| 11755961_POLL      | -0.05514 | 0.207157 | 0.308134 |
| 11728397_MT1M      | -0.09041 | 0.207234 | 0.308241 |
| 11758051_LMO3      | -0.08436 | 0.207279 | 0.308297 |
| 11730887_ACOT11    | -0.07136 | 0.207294 | 0.308311 |
| 11756414_MRPS18A   | -0.05717 | 0.207348 | 0.308381 |
| 11746662_ARMC3     | -0.10769 | 0.207354 | 0.308381 |
| 11726585_PIPOX     | -0.07008 | 0.207383 | 0.308414 |
| 11734266_PHOX2B    | -0.07237 | 0.207469 | 0.308533 |
| 11757859_DLK1      | -0.18217 | 0.207558 | 0.308655 |
| 11760063_CCL4L1 // | -0.09115 | 0.207579 | 0.308678 |
| 11763433_TTC39A    | 0.102944 | 0.207607 | 0.308711 |
| 11760666_ZKSCAN1   | -0.07239 | 0.207665 | 0.308787 |
| 11733522_RUNDC3B   | 0.05394  | 0.20768  | 0.3088   |
| 11715227_PCDHA7    | 0.077894 | 0.207721 | 0.308852 |
| 11734265_PHOX2B    | 0.139837 | 0.207763 | 0.308904 |
| 11726848_SEMA5B    | -0.06703 | 0.20777  | 0.308906 |
| 11728827_F2RL1     | 0.049952 | 0.207842 | 0.308998 |
| 11750772_PDGFR4    | -0.05093 | 0.207845 | 0.308998 |
| 11722890_SLC17A7   | -0.10126 | 0.207884 | 0.30904  |
| 11724800_LOC105369 | -0.06554 | 0.207891 | 0.30904  |
| 11753755_ATP5J2    | -0.05072 | 0.207892 | 0.30904  |
| 11734420_ACSM6     | -0.14325 | 0.207911 | 0.309058 |
| 11737768_PIAS1     | -0.05351 | 0.207917 | 0.309058 |
| 11738588_KCNK16    | -0.11554 | 0.207926 | 0.309062 |
| 11751736_GPR12     | -0.0929  | 0.20797  | 0.309112 |
| 11723825_PHYKPL    | 0.061851 | 0.207972 | 0.309112 |
| 11726842_PDS5A     | 0.047816 | 0.208056 | 0.309227 |
| 11729498_NMUR2     | -0.09447 | 0.208087 | 0.309264 |
| 11744952_LOC79160  | -0.0631  | 0.208099 | 0.309264 |
| 11735545_FAM177B   | -0.05189 | 0.208101 | 0.309264 |
| 11741117_GRM1      | -0.05924 | 0.20811  | 0.309264 |
| 11717855_TSSC4     | -0.05278 | 0.208112 | 0.309264 |
| 11762622_FPR1      | -0.12514 | 0.208128 | 0.309278 |
| 11729081_FAM155B   | 0.172857 | 0.208148 | 0.309291 |
| 11727975_ALDH8A1   | 0.080578 | 0.208149 | 0.309291 |
| 11759507_ZNF292    | 0.243775 | 0.208156 | 0.309292 |
| 11744820_LOC100130 | 0.072662 | 0.20819  | 0.309332 |
| 11723605_PCED1B    | -0.06093 | 0.208202 | 0.309334 |

|                    |          |          |          |
|--------------------|----------|----------|----------|
| 11738241_SNTG2     | 0.07475  | 0.208204 | 0.309334 |
| 11763699_CLASP2    | -0.05873 | 0.20825  | 0.309392 |
| 11751099_GBAP1     | 0.066453 | 0.208256 | 0.309392 |
| 11754601_SPON2     | -0.06501 | 0.208294 | 0.309439 |
| 11726033_CSNK1G3   | 0.077226 | 0.20836  | 0.309522 |
| 11758341_RPL37A    | 0.046569 | 0.208362 | 0.309522 |
| 11736751_HTR2A     | -0.06712 | 0.208372 | 0.309528 |
| 11762194_AGER      | -0.06634 | 0.208386 | 0.309539 |
| 11757897_SERPINB6  | -0.06678 | 0.208414 | 0.309571 |
| 11727672_MICAL2    | -0.10477 | 0.20853  | 0.309732 |
| 11751827_LRRC28    | 0.076908 | 0.208535 | 0.309732 |
| 11718281_PSG9      | 0.143448 | 0.208558 | 0.309756 |
| 11764106_ERGIC2    | -0.08161 | 0.208566 | 0.30976  |
| 11752093_MORC1     | 0.069629 | 0.208616 | 0.309822 |
| 11722658_CXCL17    | -0.07912 | 0.208621 | 0.309822 |
| 11731579_LYPD3     | 0.068014 | 0.208632 | 0.309828 |
| 11760069_SLC1A3    | 0.126764 | 0.208758 | 0.310007 |
| 11750060_BMF       | -0.13008 | 0.208785 | 0.310037 |
| 11760747_LETMD1    | -0.10044 | 0.208804 | 0.310056 |
| 11715528_ATP6V1G2  | -0.05617 | 0.208834 | 0.310091 |
| 11730004_SEMA4D    | -0.07765 | 0.208886 | 0.31016  |
| 11735361_FCRL2     | -0.12782 | 0.208946 | 0.310223 |
| 11732486_TRIM50    | -0.07613 | 0.208953 | 0.310223 |
| 11740596_TGFB2     | 0.091268 | 0.208955 | 0.310223 |
| 11736773_ZIC3      | 0.06956  | 0.208958 | 0.310223 |
| 11743621_MSRA      | 0.081282 | 0.208966 | 0.310223 |
| 11763539_KLK8      | -0.07752 | 0.208967 | 0.310223 |
| 11761903_DMD       | -0.07737 | 0.209    | 0.310262 |
| 11739670_GRAP ///  | -0.09929 | 0.209059 | 0.310335 |
| 11741449_CD99      | 0.049777 | 0.209061 | 0.310335 |
| 11738782_IGFL4     | -0.05045 | 0.20911  | 0.310397 |
| 11760282_TRADD     | 0.080385 | 0.209179 | 0.310488 |
| 11726657_ADORA1    | -0.06239 | 0.209184 | 0.310488 |
| 11745650_ADAMTSL1  | -0.15445 | 0.209198 | 0.310499 |
| 11758042_ACTG1     | 0.045215 | 0.209273 | 0.310596 |
| 11717064_CPQ       | 0.070313 | 0.209275 | 0.310596 |
| 11728199_LOX       | -0.07375 | 0.209294 | 0.310605 |
| 11717139_HARS      | 0.046005 | 0.209295 | 0.310605 |
| 11715168_POU3F3    | 0.078487 | 0.209335 | 0.310655 |
| 11739776_FNDC9     | 0.071719 | 0.209397 | 0.310739 |
| 11759781_TNS1      | -0.05596 | 0.209405 | 0.310741 |
| 11727356_SLC6A3    | -0.10442 | 0.209429 | 0.310767 |
| 11740902_PKD1L1    | -0.11036 | 0.209449 | 0.310787 |
| 11737467_TMCO5A    | -0.10004 | 0.209495 | 0.310846 |
| 11723878_ATP7B     | -0.1138  | 0.209577 | 0.310958 |
| 11720850_RAB23     | 0.072487 | 0.209592 | 0.310971 |
| 11755257_TRIM31    | -0.07634 | 0.209686 | 0.311102 |
| 11752634_KRT8      | 0.066903 | 0.209777 | 0.311226 |
| 11764205_LOC105377 | -0.14753 | 0.20981  | 0.311266 |
| 11735299_GLP2R     | -0.05909 | 0.209827 | 0.311281 |
| 11726184_ARSI      | -0.08232 | 0.209848 | 0.311304 |

|                    |          |          |          |
|--------------------|----------|----------|----------|
| 11721992_SLC6A6    | 0.11183  | 0.209927 | 0.311411 |
| 11750210_SYNPR     | -0.1022  | 0.209936 | 0.311415 |
| 11752968_DHX9      | 0.051605 | 0.20999  | 0.311486 |
| 11744707_ANGPTL1   | -0.1376  | 0.210017 | 0.311517 |
| 11718633_KIF1B     | 0.062389 | 0.21005  | 0.311556 |
| 11751400_TGFB3     | 0.057798 | 0.210107 | 0.311629 |
| 11744141_FOLR3     | -0.07649 | 0.210119 | 0.311629 |
| 11732291_FAM186B   | -0.09406 | 0.21012  | 0.311629 |
| 11738958_CARD17    | -0.09938 | 0.210138 | 0.311629 |
| 11760091_PPIAP30   | -0.09392 | 0.210141 | 0.311629 |
| 11751039_PRMT6     | -0.0483  | 0.210142 | 0.311629 |
| 11732332_NRIP2     | -0.07761 | 0.210144 | 0.311629 |
| 11729324_ASB5      | 0.138729 | 0.210201 | 0.311705 |
| 11753339_BNIPL     | 0.137486 | 0.210225 | 0.31173  |
| 11763086_C5orf17   | 0.092546 | 0.210231 | 0.31173  |
| 11715456_SSR2      | 0.050466 | 0.210251 | 0.31175  |
| 11725052_TOP1MT    | 0.053089 | 0.210263 | 0.311758 |
| 11729358_RFTN2     | 0.055416 | 0.210289 | 0.311786 |
| 11744647_PROM2     | -0.11268 | 0.210294 | 0.311786 |
| 11730721_NCAM1     | -0.07492 | 0.210351 | 0.311861 |
| 11758585_CEP44     | -0.05264 | 0.21036  | 0.311865 |
| 11756028_GDPD1     | 0.125752 | 0.210404 | 0.31192  |
| 11756708_CAMTA1    | -0.11023 | 0.210503 | 0.312057 |
| 11763454_METTL12   | 0.100711 | 0.210595 | 0.312184 |
| 11749095_ANKRD18A  | -0.10136 | 0.210724 | 0.312366 |
| 11763421_ABCC9     | -0.11491 | 0.210736 | 0.312375 |
| 11720979_ALKBH3    | 0.058559 | 0.210757 | 0.312397 |
| 11760116_TNFRSF14  | 0.060529 | 0.210791 | 0.312437 |
| 11732020_SPATA31D1 | -0.06095 | 0.210819 | 0.312467 |
| 11724762_DEPTOR    | -0.07721 | 0.210825 | 0.312467 |
| 11728502_CD300C    | -0.10777 | 0.21083  | 0.312467 |
| 11737399_C1orf185  | 0.089811 | 0.210862 | 0.312504 |
| 11753488_OTUB2     | -0.13211 | 0.210911 | 0.312567 |
| 11754046_SNX22     | -0.07505 | 0.21105  | 0.312764 |
| 11738698_LILRA5    | -0.07325 | 0.21113  | 0.312873 |
| 11760483_LY6D      | -0.08422 | 0.211145 | 0.312886 |
| 11738647_FAM153A   | -0.07168 | 0.211167 | 0.312909 |
| 11736271_NANP      | 0.05323  | 0.211202 | 0.312952 |
| 11737388_MTMR11    | 0.05737  | 0.211214 | 0.31296  |
| 11733855_APOL1     | -0.11377 | 0.211222 | 0.312963 |
| 11717570_MYH7      | -0.08585 | 0.211267 | 0.313019 |
| 11753790_ST3GAL3   | -0.12437 | 0.211282 | 0.313032 |
| 11737644_RNF183    | -0.1003  | 0.211305 | 0.313049 |
| 11746209_SCYL1     | -0.0697  | 0.211306 | 0.313049 |
| 11760132_ACSM2A    | 0.060291 | 0.211384 | 0.313146 |
| 11743216_OR10A6    | -0.08993 | 0.211386 | 0.313146 |
| 11754213_PPIG      | -0.05083 | 0.211391 | 0.313146 |
| 11762091_IGH /// I | -0.08289 | 0.211406 | 0.313159 |
| 11737997_LRRC3     | -0.12739 | 0.21142  | 0.31317  |
| 11722255_RRAD      | -0.06209 | 0.211427 | 0.313171 |
| 11732172_ABT1      | -0.05838 | 0.211443 | 0.313185 |

|                    |          |          |          |
|--------------------|----------|----------|----------|
| 11757170_SNORA71D  | -0.07247 | 0.211474 | 0.313213 |
| 11756993_TIAL1     | 0.070822 | 0.211475 | 0.313213 |
| 11738469_MS4A10    | -0.12659 | 0.211508 | 0.313246 |
| 11726799_SERPINA4  | -0.07731 | 0.211509 | 0.313246 |
| 11753345_CUTC      | 0.054108 | 0.211533 | 0.313271 |
| 11733487_AFF2      | -0.11751 | 0.21156  | 0.313301 |
| 11763783_LOC728613 | 0.060381 | 0.211598 | 0.313349 |
| 11746264_PLPP1     | 0.051733 | 0.211613 | 0.313361 |
| 11734366_ZFP42     | -0.0881  | 0.211619 | 0.313361 |
| 11752401_POTEG /// | 0.104852 | 0.211683 | 0.313446 |
| 11736232_ZNF362    | 0.057791 | 0.211723 | 0.313496 |
| 11732812_C11orf45  | -0.08568 | 0.211733 | 0.313501 |
| 200004_PMEIF4G2    | 0.047473 | 0.211763 | 0.313536 |
| 11736848_B4GALNT3  | -0.06556 | 0.211789 | 0.313565 |
| 11744195_FAT3      | 0.055168 | 0.211837 | 0.313617 |
| 11728318_FAM122A   | 0.107995 | 0.211838 | 0.313617 |
| 11716130_FSTL3     | 0.146818 | 0.211921 | 0.313729 |
| 11758561_MRAS      | 0.142327 | 0.211926 | 0.313729 |
| 11724700_ARHGEF37  | 0.094202 | 0.212005 | 0.313837 |
| 11735427_MRGPRX1   | -0.11281 | 0.212035 | 0.313871 |
| 11750398_HTR2A     | -0.11878 | 0.212041 | 0.313871 |
| 11752900_AZIN2     | -0.04556 | 0.212057 | 0.313886 |
| 11728070_LHFPL4    | -0.07813 | 0.212096 | 0.313933 |
| 11753190_KIR2DL2 / | -0.14325 | 0.212139 | 0.313987 |
| 11742021_UGGT1     | 0.059993 | 0.212173 | 0.314029 |
| 11715700_WDR6      | -0.07069 | 0.212203 | 0.314064 |
| 11737310_RHOXF1    | -0.10736 | 0.21223  | 0.314092 |
| 11738640_EFCAB12   | -0.06464 | 0.212236 | 0.314092 |
| 11733566_L3MBTL1   | 0.216107 | 0.212242 | 0.314092 |
| 11722232_PCP4      | -0.07376 | 0.212263 | 0.314114 |
| 11736681_SLC46A1   | 0.094019 | 0.212318 | 0.314186 |
| 11719824_ZAK       | 0.048732 | 0.212422 | 0.314331 |
| 11741671_CCDC36    | -0.058   | 0.21251  | 0.314451 |
| 11751240_PHYHIP    | -0.12681 | 0.212579 | 0.314543 |
| 11755647_DHX37     | -0.06522 | 0.212704 | 0.314719 |
| 11746835_HSPA12B   | -0.13875 | 0.212713 | 0.31472  |
| 11750699_ATP5J2-PT | -0.04835 | 0.212717 | 0.31472  |
| 11752226_SNRNP200  | -0.05348 | 0.212737 | 0.314739 |
| 11729786_SOX13     | -0.07711 | 0.212784 | 0.314799 |
| 11736584_TTC23     | -0.06394 | 0.212858 | 0.314899 |
| 11720545_ANGEL1    | -0.052   | 0.212879 | 0.31492  |
| 11752605_NRBP2     | -0.07898 | 0.212885 | 0.31492  |
| 11726865_FOXO4     | -0.07674 | 0.212935 | 0.314969 |
| 11759921_EEF1D     | -0.08291 | 0.212937 | 0.314969 |
| 11753770_XRN2      | 0.050735 | 0.212938 | 0.314969 |
| 11763496_POLE3     | 0.067059 | 0.21297  | 0.315008 |
| 11741538_KLHL30    | -0.09619 | 0.212992 | 0.315028 |
| 11739852_C17orf47  | -0.05961 | 0.212996 | 0.315028 |
| 11736348_HFE       | -0.15239 | 0.213031 | 0.315069 |
| 11741491_TMEM8B    | -0.0995  | 0.213075 | 0.315125 |
| 11722469_ACSL6     | -0.12088 | 0.213088 | 0.315134 |



|                    |          |          |          |
|--------------------|----------|----------|----------|
| 11729038_DCDC2     | 0.102001 | 0.213169 | 0.315234 |
| 11761673_AP1S3     | 0.13384  | 0.213175 | 0.315234 |
| 11732544_GPR18     | 0.139737 | 0.213175 | 0.315234 |
| 11732211_ZKSCAN1   | 0.087069 | 0.213182 | 0.315236 |
| 11737568_YIPF7     | -0.05328 | 0.213215 | 0.315274 |
| 11742366_OR10R2    | -0.05995 | 0.213228 | 0.315284 |
| 11736856_RASL11A   | -0.06338 | 0.213282 | 0.315354 |
| 11738533_KRT9      | -0.07838 | 0.213297 | 0.315367 |
| 11729053_PPFIBP1   | -0.05278 | 0.213316 | 0.315386 |
| 11743995_SYT5      | -0.07301 | 0.21333  | 0.315397 |
| 11742170_CDRT15 // | 0.076023 | 0.213399 | 0.31549  |
| 11761748_BCAS1     | -0.06161 | 0.213442 | 0.315544 |
| 11733821_CHRNA2    | -0.10561 | 0.213449 | 0.315544 |
| 11717873_IRF8      | -0.07428 | 0.213462 | 0.315555 |
| 11747602_MAP3K8    | -0.09795 | 0.213553 | 0.315678 |
| 11750275_CYTH4     | -0.08127 | 0.213584 | 0.315711 |
| 11736588_CTNNA3    | -0.10456 | 0.213587 | 0.315711 |
| 11747087_CFAP61    | -0.15998 | 0.213609 | 0.315733 |
| 11723639_C11orf58  | 0.048172 | 0.21363  | 0.315755 |
| 11726931_TET1      | 0.13311  | 0.213752 | 0.315925 |
| 11734750_LIN52     | -0.11986 | 0.213796 | 0.315981 |
| 11732991_DCHS2     | -0.15119 | 0.213829 | 0.31602  |
| 11738476_CFAP47    | -0.09134 | 0.213848 | 0.316038 |
| 11750479_PPARGC1A  | -0.04919 | 0.213868 | 0.316058 |
| 11736560_ASIC2     | -0.10836 | 0.213904 | 0.316102 |
| 11721193_CHST3     | -0.08134 | 0.213914 | 0.316106 |
| 11728717_CXCL5     | 0.12954  | 0.21392  | 0.316106 |
| 11723067_FAM21A // | 0.086001 | 0.213943 | 0.316126 |
| 11723223_CASQ2     | -0.09303 | 0.213946 | 0.316126 |
| 11736687_FGF5      | 0.171343 | 0.213981 | 0.316165 |
| 11721583_LRMP      | -0.08059 | 0.21399  | 0.316165 |
| 11761036_ANKRD44   | -0.08127 | 0.213992 | 0.316165 |
| 11730438_FBP2      | -0.06913 | 0.214007 | 0.316178 |
| 11747855_UQCRC1    | -0.04869 | 0.214098 | 0.316303 |
| 11726943_ZKSCAN2   | 0.150305 | 0.214126 | 0.316335 |
| 11744545_GTF2IRD2  | -0.05442 | 0.214133 | 0.316335 |
| 11759070_ZNF551    | 0.058825 | 0.214165 | 0.316373 |
| 11753849_COX7A2    | -0.05148 | 0.214205 | 0.316421 |
| 11725580_BEND3     | -0.08296 | 0.21421  | 0.316421 |
| 11753636_ZNF365    | 0.141115 | 0.214219 | 0.316424 |
| 11736965_FBXO40    | -0.21722 | 0.214282 | 0.316499 |
| 11759652_IGKV1-12  | 0.103349 | 0.214283 | 0.316499 |
| 11719352_GCC2      | -0.06768 | 0.214294 | 0.316506 |
| 11726613_SLC22A6   | -0.10495 | 0.214315 | 0.316521 |
| 11752663_FKTN      | 0.106454 | 0.214317 | 0.316521 |
| 11748400_TPM4      | -0.06053 | 0.214353 | 0.316555 |
| 11750294_LIG3      | -0.06775 | 0.214353 | 0.316555 |
| 11750184_LOC100287 | -0.06548 | 0.214409 | 0.316628 |
| 11754013_RPL15     | 0.044435 | 0.214518 | 0.316779 |
| 11717599_SLC20A2   | 0.083904 | 0.214534 | 0.316793 |
| 11732076_M1AP      | 0.066353 | 0.214578 | 0.316849 |

|                    |          |          |          |
|--------------------|----------|----------|----------|
| 11745705_GSTM2P1   | -0.08282 | 0.214594 | 0.316863 |
| 11725337_RLIM      | 0.047598 | 0.214605 | 0.316866 |
| 11730980_ZNF595    | 0.091901 | 0.214609 | 0.316866 |
| 11750343_MACC1     | 0.076783 | 0.214617 | 0.316869 |
| 11732953_SPINT3    | -0.0567  | 0.214703 | 0.316979 |
| 11738959_CARD17    | 0.088804 | 0.214705 | 0.316979 |
| 11717227_CBFA2T2   | 0.055805 | 0.2148   | 0.317105 |
| 11734054_ZMYM6     | 0.111941 | 0.214809 | 0.317105 |
| 11748415_DDR1      | -0.08615 | 0.21481  | 0.317105 |
| 11721514_NIT2      | 0.050385 | 0.214978 | 0.317335 |
| 11753745_CDKN2A    | -0.05939 | 0.214979 | 0.317335 |
| 11761969_KIAA2012  | -0.08109 | 0.215033 | 0.317406 |
| 11727164_ACVR2A    | 0.062596 | 0.215099 | 0.317494 |
| 11732055_CC2D2B    | -0.11083 | 0.215119 | 0.317514 |
| 11737631_SLC26A7   | 0.199293 | 0.215147 | 0.317536 |
| 11748784_BBS4      | 0.078762 | 0.215147 | 0.317536 |
| 11724690_RFX4      | 0.099703 | 0.215281 | 0.317723 |
| 11750990_RXFP1     | -0.1161  | 0.215291 | 0.317723 |
| 11722784_GRWD1     | 0.057983 | 0.215293 | 0.317723 |
| 11730159_RBM20     | -0.12501 | 0.215301 | 0.317725 |
| 11736415_MFI2      | -0.0915  | 0.215317 | 0.317739 |
| 11738222_RAET1L    | 0.100332 | 0.215377 | 0.317817 |
| 11750616_HYOU1     | 0.051847 | 0.215392 | 0.31783  |
| 11747564_HS6ST1    | -0.10195 | 0.215445 | 0.317899 |
| 11729378_PFKFB2    | 0.064575 | 0.215461 | 0.3179   |
| 11718849_CORO1B // | -0.06237 | 0.21547  | 0.3179   |
| 11739373_SYT7      | -0.08041 | 0.21547  | 0.3179   |
| 11719244_CNOT11    | -0.06461 | 0.215472 | 0.3179   |
| 11742575_OR5B3     | -0.17875 | 0.215496 | 0.317926 |
| 11759054_DEFB126   | -0.15115 | 0.215505 | 0.317929 |
| 11733277_SLC2A2    | -0.05343 | 0.215524 | 0.317948 |
| 11734783_CLIC2     | 0.142133 | 0.215578 | 0.31801  |
| 11719927_PSM13     | -0.05564 | 0.215579 | 0.31801  |
| 11756908_VPS50     | 0.059662 | 0.215601 | 0.318033 |
| 11720397_NBN       | -0.05856 | 0.215608 | 0.318033 |
| 11729371_ZBTB16    | -0.10976 | 0.215646 | 0.318081 |
| 11739326_PTPN2     | 0.142183 | 0.215664 | 0.318098 |
| 11746859_LPA       | 0.06319  | 0.215807 | 0.318292 |
| 11751912_CNTNAP2   | 0.104467 | 0.215809 | 0.318292 |
| 11751132_TAF7L     | -0.07317 | 0.215826 | 0.318307 |
| 11736770_ADAM23    | -0.12365 | 0.215924 | 0.318442 |
| 11759420_DOPEY1    | 0.084217 | 0.215961 | 0.318486 |
| 11741927_KCNIP4    | 0.082782 | 0.215976 | 0.3185   |
| 11734601_TAS2R43 / | 0.093744 | 0.216004 | 0.318531 |
| 11742398_HOXC12    | -0.14428 | 0.216045 | 0.318582 |
| 11724278_NCDN      | -0.06054 | 0.21608  | 0.318624 |
| 11725592_SPATA2    | 0.066989 | 0.216094 | 0.318636 |
| 11762934_CD300LG   | -0.15099 | 0.216102 | 0.318637 |
| 11734619_ALOX15B   | -0.10645 | 0.216112 | 0.318642 |
| 11715794_ACTG2     | 0.051195 | 0.216127 | 0.318656 |
| 11743636_TNFAIP6   | -0.13702 | 0.216206 | 0.318762 |

|                    |          |          |          |
|--------------------|----------|----------|----------|
| 11758078_SLC01A2   | -0.08951 | 0.216238 | 0.318799 |
| 11744300_CHST15    | 0.074711 | 0.216268 | 0.318834 |
| 11758281_CTBS      | -0.07662 | 0.2163   | 0.318872 |
| 11725242_PNOC      | -0.12313 | 0.216341 | 0.318922 |
| 11720481_ABCD3     | -0.05249 | 0.21638  | 0.318957 |
| 11734092_CCER1     | 0.107098 | 0.216381 | 0.318957 |
| 11736986_NUBPL     | 0.073618 | 0.216384 | 0.318957 |
| 11763056_SCAMPER   | -0.122   | 0.216419 | 0.318998 |
| 11737277_HTR7      | 0.110258 | 0.216439 | 0.319019 |
| 200038_PMC18orf32  | -0.04522 | 0.216455 | 0.319033 |
| 11753419_FAM172A   | -0.1207  | 0.216469 | 0.319044 |
| 11726972_HRCT1     | -0.0578  | 0.216508 | 0.319091 |
| 11738517_ZAN       | -0.07116 | 0.216534 | 0.31912  |
| 11720003_NRARP     | -0.07125 | 0.216563 | 0.319153 |
| 11753010_FHL1      | 0.084473 | 0.216648 | 0.319266 |
| 11762175_HSP90AB2P | -0.08108 | 0.216653 | 0.319266 |
| 11751721_ATP1A2    | -0.1124  | 0.216693 | 0.319316 |
| 11737956_C15orf40  | 0.05728  | 0.216736 | 0.31937  |
| 11731039_IL15RA    | 0.064189 | 0.216775 | 0.319417 |
| 11761144_DDX39B    | 0.053323 | 0.216833 | 0.319493 |
| 11750338_KLK2      | 0.057476 | 0.216843 | 0.319498 |
| 11743103_PTCD3     | 0.050536 | 0.216859 | 0.319501 |
| 11759426_FAM127A   | 0.047303 | 0.216864 | 0.319501 |
| 11732692_TLDC2     | 0.118076 | 0.216864 | 0.319501 |
| 11742632_OR4X1     | -0.09502 | 0.216902 | 0.319547 |
| 11761513_PLEKHM2   | -0.08589 | 0.216974 | 0.319644 |
| 11753846_KRTAP21-3 | -0.04839 | 0.217002 | 0.319676 |
| 11731419_UBE2G2    | 0.057996 | 0.217014 | 0.319682 |
| 11735826_VSX1      | -0.09209 | 0.217084 | 0.319776 |
| 11745445_LMO3      | 0.055369 | 0.217103 | 0.319794 |
| 11762032_LOC441242 | 0.135656 | 0.217148 | 0.319852 |
| 11737604_DNM1L     | -0.06982 | 0.217168 | 0.319872 |
| 11758068_WDFY3     | 0.11795  | 0.217209 | 0.319922 |
| 11731877_TAS2R5    | -0.05222 | 0.217219 | 0.319922 |
| 11742310_OR111     | -0.10394 | 0.217222 | 0.319922 |
| 11718444_MAPK8IP3  | -0.06092 | 0.21725  | 0.319953 |
| 11746048_ADAL      | 0.077914 | 0.217322 | 0.32005  |
| 11745465_METTL7A   | 0.116664 | 0.217399 | 0.320154 |
| 11728592_IPO11 /// | -0.12012 | 0.217475 | 0.320256 |
| 11732985_FERD3L    | -0.0779  | 0.217522 | 0.320315 |
| 11726129_HBZ       | -0.11353 | 0.217556 | 0.320356 |
| 11728826_TRNP1     | 0.049308 | 0.217602 | 0.320414 |
| 11735967_PBOV1     | -0.1413  | 0.217614 | 0.320422 |
| 11761635_CTSH      | -0.17798 | 0.217634 | 0.320437 |
| 11761118_SH3GLB2   | -0.08309 | 0.217641 | 0.320437 |
| 11727205_CBX4      | 0.125646 | 0.217644 | 0.320437 |
| 11746382_FBF1      | -0.05704 | 0.217652 | 0.320439 |
| 11740940_HMX3      | -0.09548 | 0.217687 | 0.320474 |
| 11716333_RPL28     | 0.044332 | 0.217689 | 0.320474 |
| 11761339_TCAF2     | -0.09859 | 0.217704 | 0.320487 |
| 11762570_OR4F13P   | 0.050495 | 0.217724 | 0.320507 |

|                    |          |          |          |
|--------------------|----------|----------|----------|
| 11758764_SNRPF     | -0.0757  | 0.217798 | 0.320606 |
| 11745835_SF3B1     | 0.046135 | 0.217807 | 0.320609 |
| 11742852_RPN1      | 0.051134 | 0.217836 | 0.32064  |
| 11719816_BET1      | 0.060089 | 0.217841 | 0.32064  |
| 11759145_IL1RL1    | -0.08609 | 0.217875 | 0.320676 |
| 11755035_MPDZ      | 0.050206 | 0.217879 | 0.320676 |
| 11715196_TMEM211   | -0.04828 | 0.217946 | 0.320767 |
| 11748106_HIF3A     | -0.06487 | 0.217965 | 0.320778 |
| 11743424_NSG1      | -0.08584 | 0.217968 | 0.320778 |
| 11723027_ITLN1     | -0.11041 | 0.218039 | 0.320874 |
| 11760934_HSD17B7P2 | -0.11314 | 0.218047 | 0.320876 |
| 11752214_NCAN      | 0.061538 | 0.218054 | 0.320876 |
| 11721909_CRAMP1    | 0.052299 | 0.218097 | 0.32093  |
| 11722580_CHMP4A    | 0.053817 | 0.218239 | 0.321129 |
| 11735029_CLASP1    | 0.055127 | 0.218273 | 0.32117  |
| 11745394_PDZD2     | -0.05378 | 0.218298 | 0.321196 |
| 11754582_RMND5B    | 0.067881 | 0.218308 | 0.321202 |
| 11748822_SH3BP5L   | -0.10835 | 0.218323 | 0.321214 |
| 11755826_SELPL     | 0.059903 | 0.218355 | 0.321251 |
| 11733082_UBXN1     | 0.07476  | 0.218375 | 0.321266 |
| 11763109_SYT8      | -0.07377 | 0.218378 | 0.321266 |
| 11721845_MFAP5     | 0.09733  | 0.218419 | 0.321317 |
| 11748633_VHL       | 0.049067 | 0.218473 | 0.321386 |
| 11736159_MPPE1     | 0.053728 | 0.218483 | 0.321392 |
| 11760428_CCNG2     | -0.12595 | 0.218534 | 0.321456 |
| 11723892_MTL5      | -0.09141 | 0.218554 | 0.321477 |
| 11762912_POMT1     | 0.177015 | 0.218567 | 0.321484 |
| 11741804_BACH1     | 0.104793 | 0.218572 | 0.321484 |
| 11723480_SAA1      | 0.047372 | 0.218639 | 0.321572 |
| 11734423_GPR26     | -0.11843 | 0.218665 | 0.321595 |
| 11740751_ZNF688    | -0.05434 | 0.218667 | 0.321595 |
| 11746491_PACRGL    | -0.05445 | 0.218796 | 0.321774 |
| 11741439_VPS53     | -0.06904 | 0.218848 | 0.321834 |
| 11762646_LRP11     | -0.13243 | 0.21885  | 0.321834 |
| 11759273_HIST1H2BI | -0.12861 | 0.218879 | 0.321868 |
| 11739850_CHRFAM7A  | -0.10346 | 0.218935 | 0.32194  |
| 11722060_PPP1R1A   | -0.06114 | 0.219035 | 0.322075 |
| 11727176_ENTPD5    | -0.06208 | 0.21904  | 0.322075 |
| 11740089_PIK3IP1   | -0.05033 | 0.219089 | 0.322138 |
| 11738347_GPX6      | -0.06973 | 0.219129 | 0.322183 |
| 11759736_BIRC5     | -0.11858 | 0.219133 | 0.322183 |
| 11718311_RBM33     | -0.06372 | 0.219143 | 0.322186 |
| 11759301_MAPRE2    | -0.08674 | 0.219148 | 0.322186 |
| 11735498_ANKAR     | 0.145425 | 0.219239 | 0.322309 |
| 11738520_NFATC1    | 0.084705 | 0.219251 | 0.322315 |
| 11760290_NAA10     | -0.10542 | 0.219256 | 0.322315 |
| 11720624_MYD88     | 0.045097 | 0.219272 | 0.322329 |
| 11727401_HOPX      | 0.097522 | 0.219285 | 0.322338 |
| 11735271_GCNT1     | 0.095201 | 0.219388 | 0.32248  |
| 11716246_WASF2     | -0.07988 | 0.219409 | 0.322502 |
| 11756243_DAPPI1    | 0.124387 | 0.219436 | 0.322527 |

|                    |          |          |          |
|--------------------|----------|----------|----------|
| 11750918_HEPACAM2  | -0.0638  | 0.219441 | 0.322527 |
| 11757407_FBLN1     | -0.0537  | 0.219446 | 0.322527 |
| 11745503_TSPO      | 0.044662 | 0.219491 | 0.322584 |
| 11720161_CXCL13    | 0.133795 | 0.219515 | 0.322609 |
| 11743044_ALDH1A1   | 0.103977 | 0.219552 | 0.322653 |
| 11745538_MAP7D2    | -0.10917 | 0.21958  | 0.322686 |
| 11736841_KLRAP1    | 0.070629 | 0.219594 | 0.322696 |
| 11756052_ADCYAP1R1 | -0.0793  | 0.219665 | 0.322791 |
| 11749579_SCARB2    | 0.057274 | 0.219687 | 0.322813 |
| 11730468_NTN1      | -0.06549 | 0.219705 | 0.322824 |
| 11729788_DOHH      | -0.07687 | 0.219708 | 0.322824 |
| 11733305_TFAP2B    | 0.139171 | 0.219724 | 0.322838 |
| 11724615_LIMK1     | -0.06291 | 0.219734 | 0.322844 |
| 11737846_FAM102A   | -0.04581 | 0.219747 | 0.322853 |
| 11728457_STK32C    | 0.054581 | 0.219768 | 0.322874 |
| 11732016_TTC23L    | 0.152957 | 0.219783 | 0.322886 |
| 11737975_PAK6      | -0.04516 | 0.2198   | 0.322901 |
| 11741787_ALG1L2    | -0.05522 | 0.219917 | 0.323064 |
| 11760298_AKIP1     | -0.10986 | 0.219934 | 0.323079 |
| 11750212_NOD2      | -0.08665 | 0.219965 | 0.323106 |
| 11730040_GNG13     | 0.105991 | 0.219971 | 0.323106 |
| 11735404_ANKS1B    | 0.082381 | 0.219972 | 0.323106 |
| 11721048_N6AMT2    | -0.05289 | 0.220009 | 0.323145 |
| 11737006_LRRC55    | -0.09438 | 0.220012 | 0.323145 |
| 11740803_LHCGR     | -0.08216 | 0.220076 | 0.323219 |
| 11716239_RAB6A /// | 0.05577  | 0.220081 | 0.323219 |
| 11763793_LOC728613 | -0.11309 | 0.220082 | 0.323219 |
| 11762187_CEP164    | -0.06567 | 0.220095 | 0.323228 |
| 11760579_LETM2     | 0.087942 | 0.220143 | 0.323289 |
| 11735153_COL4A3    | -0.05073 | 0.220153 | 0.323294 |
| 11756201_CHI3L2    | -0.07087 | 0.220246 | 0.32342  |
| 11723385_PCSK6     | -0.11296 | 0.220294 | 0.323481 |
| 11747949_DOK1      | -0.1022  | 0.22033  | 0.323524 |
| 11724304_TEF       | -0.06463 | 0.220402 | 0.32361  |
| 11735672_FAM183BP  | -0.11879 | 0.220405 | 0.32361  |
| 11757732_GNAI2     | -0.04537 | 0.220408 | 0.32361  |
| 11759639_CLEC16A   | 0.061313 | 0.220462 | 0.323667 |
| 11762818_LOC101927 | -0.11367 | 0.220465 | 0.323667 |
| 11724125_HSPB9     | -0.08687 | 0.220467 | 0.323667 |
| 11742279_KLK8 ///  | -0.07054 | 0.220495 | 0.323698 |
| 11717025_CXCL5 /// | 0.050732 | 0.220516 | 0.323719 |
| 11748620_SUCLA2    | -0.04608 | 0.220551 | 0.323761 |
| 11729556_EYA2      | 0.113856 | 0.22056  | 0.323765 |
| 11752819_UXT-AS1   | 0.195914 | 0.220567 | 0.323765 |
| 11722013_CWC15     | -0.06673 | 0.220634 | 0.323839 |
| 11756392_TRAPPC2L  | 0.052431 | 0.220637 | 0.323839 |
| 11750487_WISP1     | -0.10473 | 0.220637 | 0.323839 |
| 11732620_MIR1-1HG  | 0.062161 | 0.220667 | 0.323873 |
| 11730666_FOXP1     | -0.07833 | 0.220675 | 0.323876 |
| 11716279_CBX5      | 0.064237 | 0.220726 | 0.323941 |
| 11760812_CACUL1    | 0.096206 | 0.220742 | 0.323955 |

|                    |          |          |          |
|--------------------|----------|----------|----------|
| 11755001_ARHGAP32  | 0.052318 | 0.220758 | 0.323967 |
| 11734232_CSAD      | -0.09271 | 0.220795 | 0.324012 |
| 11734869_NADK      | -0.08139 | 0.220862 | 0.3241   |
| 11738531_PCDHGA6   | -0.07347 | 0.220909 | 0.32416  |
| 11754580_CCDC92    | -0.05419 | 0.22092  | 0.324166 |
| 11739747_KLHL7     | 0.080743 | 0.22094  | 0.324187 |
| 11722621_AQP4      | -0.09369 | 0.220959 | 0.324204 |
| 11739388_GGA3      | -0.05542 | 0.220974 | 0.324217 |
| 11724174_KIF12     | -0.05517 | 0.221053 | 0.324323 |
| 11731651_ARL2-SNX1 | -0.04604 | 0.221194 | 0.32452  |
| 11763113_IGHG1     | 0.067837 | 0.221215 | 0.324531 |
| 11731428_CYP3A4    | 0.056339 | 0.221219 | 0.324531 |
| 11752729_LZTS1     | -0.07467 | 0.221221 | 0.324531 |
| 11749937_ZFP36L1   | -0.07853 | 0.22124  | 0.324548 |
| 11717242_YTHDF2    | 0.054367 | 0.221351 | 0.324693 |
| 11751372_TP73      | -0.08859 | 0.221352 | 0.324693 |
| 11756277_YPEL1     | -0.14115 | 0.221365 | 0.324703 |
| 11756686_ACCS      | 0.091525 | 0.221382 | 0.324718 |
| 11755460_CAPN3     | 0.103901 | 0.221393 | 0.324724 |
| 11736756_GAL3ST3   | -0.06192 | 0.221419 | 0.324747 |
| 11745407_LOC441239 | -0.07651 | 0.221422 | 0.324747 |
| 11754051_BTF3      | 0.043857 | 0.221429 | 0.324748 |
| 11756913_NOD1      | -0.08466 | 0.221444 | 0.324758 |
| 11753140_LINCO0205 | -0.10673 | 0.221449 | 0.324758 |
| 11727352_RARA      | 0.074734 | 0.221489 | 0.324807 |
| 11752332_MEFV      | -0.10615 | 0.221506 | 0.324822 |
| 11715147_MAATS1    | 0.11104  | 0.221533 | 0.324852 |
| 11752268_CERKL     | 0.076233 | 0.221551 | 0.324864 |
| 11742821_OGN       | 0.064366 | 0.221557 | 0.324864 |
| 11748679_CLCN2     | -0.12021 | 0.221562 | 0.324864 |
| 11716068_VAMP2     | 0.074594 | 0.221591 | 0.324898 |
| 11720858_INSR      | -0.07509 | 0.221605 | 0.324907 |
| 11728363_IL2ORA    | 0.054566 | 0.221611 | 0.324907 |
| 11758849_NUP214    | 0.062509 | 0.221649 | 0.324953 |
| 11718470_GLIS2     | -0.08706 | 0.221684 | 0.324995 |
| 11722821_COCH      | 0.10838  | 0.221716 | 0.325032 |
| 11750428_LOC100128 | -0.05839 | 0.221744 | 0.325063 |
| 11729084_ZFY       | -0.09277 | 0.221808 | 0.325147 |
| 11721049_CCL26     | -0.13618 | 0.221819 | 0.325154 |
| 11732035_CFAP46    | -0.09792 | 0.221877 | 0.325229 |
| 11753094_FAM86B3P  | 0.101265 | 0.221896 | 0.325247 |
| 11734238_GIP       | 0.056066 | 0.221902 | 0.325247 |
| 11730070_NWD2      | 0.117005 | 0.221914 | 0.325254 |
| 11724943_CLSTN2    | -0.07442 | 0.221939 | 0.325281 |
| 11762821_LINCO0856 | -0.11956 | 0.221993 | 0.325351 |
| 11741645_ATXN7L1   | 0.088158 | 0.222018 | 0.325378 |
| 11744669_LINCO0158 | -0.08114 | 0.222043 | 0.325395 |
| 11750369_KRTAP5-2  | -0.07473 | 0.222043 | 0.325395 |
| 11735930_PRDM7 /// | -0.06468 | 0.222092 | 0.325456 |
| 11761268_TACC1     | -0.10335 | 0.222117 | 0.325483 |
| 11738042_TNIP3     | -0.11584 | 0.22214  | 0.325507 |

|                    |          |          |          |
|--------------------|----------|----------|----------|
| 11761796_CALCRL    | -0.06233 | 0.222154 | 0.325518 |
| 11732589_ZNF467    | 0.047218 | 0.222355 | 0.325803 |
| 11748404_CAMSAP2   | -0.05223 | 0.222368 | 0.325812 |
| 11754989_DMXL2     | -0.0692  | 0.222401 | 0.325843 |
| 11763771_BRMS1     | -0.13899 | 0.222402 | 0.325843 |
| 11722889_SLC17A7   | 0.074627 | 0.222419 | 0.325858 |
| 11736059_KIF5B     | 0.049887 | 0.222495 | 0.325959 |
| 11757153_SNHG12 // | -0.10253 | 0.222532 | 0.326004 |
| 11746257_DOCK9     | 0.102132 | 0.222545 | 0.326008 |
| 11759891_NAA15     | -0.0803  | 0.222548 | 0.326008 |
| 11720489_ACTC1     | -0.06781 | 0.222622 | 0.326107 |
| 11756181_YWHAZ     | -0.04384 | 0.22265  | 0.326138 |
| 11760331_GPALPP1   | -0.07557 | 0.222686 | 0.32618  |
| 11763753_KLK2      | 0.056262 | 0.222719 | 0.326219 |
| 11755551_MYO18B    | -0.09753 | 0.222727 | 0.326221 |
| 11726818_TMEM201   | -0.08246 | 0.222801 | 0.32632  |
| 11739046_MMRN2     | -0.06241 | 0.222871 | 0.326403 |
| 11763038_SUPT5H    | -0.11862 | 0.222872 | 0.326403 |
| 11741384_STARD8    | -0.06292 | 0.22293  | 0.326479 |
| 11732046_KRT85     | -0.04766 | 0.222943 | 0.326489 |
| 11761282_TUBGCP2   | -0.06919 | 0.222988 | 0.326545 |
| 11751441_SLC25A44  | 0.055735 | 0.223    | 0.326552 |
| 11716133_MTOR      | -0.06282 | 0.223019 | 0.326561 |
| 11761898_EPPIN-WFD | -0.12141 | 0.22302  | 0.326561 |
| 11758299_B2M       | 0.04758  | 0.223134 | 0.326719 |
| 11729967_CLYBL     | 0.118793 | 0.22321  | 0.32682  |
| 11729637_FAM134C   | -0.08901 | 0.223276 | 0.326907 |
| 11737192_DTHD1     | -0.14697 | 0.223282 | 0.326907 |
| 11753593_LETMD1    | 0.047356 | 0.223294 | 0.326911 |
| 11747760_POFUT2    | 0.04551  | 0.223305 | 0.326911 |
| 11724886_LRRN3     | -0.10287 | 0.223305 | 0.326911 |
| 11752708_CRKL      | 0.058715 | 0.223329 | 0.326935 |
| 11759045_EBAG9     | -0.12508 | 0.223365 | 0.326979 |
| 11732383_CDHR1     | -0.07367 | 0.223442 | 0.327082 |
| 11742558_OR52M1    | -0.09171 | 0.223463 | 0.327103 |
| 11745622_IL13      | -0.0893  | 0.223495 | 0.32714  |
| 11730244_FMO2      | -0.11221 | 0.223529 | 0.327179 |
| 11730020_ACSM2A    | -0.10851 | 0.223541 | 0.327188 |
| 11737268_RHCE ///  | -0.10664 | 0.223605 | 0.327271 |
| 11721129_HCFC1     | -0.10353 | 0.223644 | 0.327319 |
| 11739648_PRKAR2A   | 0.05932  | 0.223695 | 0.327377 |
| 11748505_NCALD     | 0.124069 | 0.223697 | 0.327377 |
| 11760408_TSC2      | -0.05296 | 0.22374  | 0.32743  |
| 11746083_SEC24D    | 0.06268  | 0.223756 | 0.327438 |
| 11735652_TMEM105   | -0.06926 | 0.223759 | 0.327438 |
| 11761774_CRYL1     | -0.09605 | 0.223846 | 0.327556 |
| 11737501_TRPC5     | -0.07225 | 0.223856 | 0.32756  |
| 11745629_LOC149950 | -0.0704  | 0.223871 | 0.327572 |
| 11742873_CDH11     | -0.09468 | 0.223909 | 0.327618 |
| 11745046_TMEM52B   | -0.10718 | 0.223944 | 0.32766  |
| 11740942_SALL3     | -0.06057 | 0.223954 | 0.327664 |

|                    |          |          |          |
|--------------------|----------|----------|----------|
| 11752168_LIN54     | 0.072484 | 0.223975 | 0.327685 |
| 11755351_TCF7      | -0.05839 | 0.223983 | 0.327688 |
| 11762051_SNX22     | -0.05992 | 0.223995 | 0.327695 |
| 11736355_MDN1      | 0.085074 | 0.224015 | 0.327714 |
| 11764035_CCDC92    | -0.06087 | 0.224144 | 0.327894 |
| 11759476_KRT33A    | -0.09548 | 0.2242   | 0.327965 |
| 11745312_SH3GLB2   | -0.05169 | 0.224212 | 0.327973 |
| 11740521_ALDH1L2   | -0.05574 | 0.224235 | 0.327997 |
| 11748750_GPNMB     | -0.06365 | 0.224245 | 0.327998 |
| 11753641_TTTY6 /// | -0.09239 | 0.224249 | 0.327998 |
| 11733053_SCAMP1    | 0.050112 | 0.224265 | 0.328012 |
| 11726868_ERCC8     | 0.05286  | 0.224297 | 0.328048 |
| 11728137_XK        | -0.10265 | 0.22431  | 0.328057 |
| 11756029_ASCC1     | 0.057803 | 0.224321 | 0.328064 |
| 11738367_GTSF1L    | -0.08934 | 0.224385 | 0.328148 |
| 11753255_KLK7      | -0.08124 | 0.224503 | 0.32831  |
| 11732679_ZNF471    | 0.072157 | 0.224546 | 0.328363 |
| 11721089_YLPM1     | -0.05317 | 0.224587 | 0.328414 |
| 11733151_COX18     | 0.07369  | 0.224601 | 0.328425 |
| 11757898_GAS2      | -0.11473 | 0.224685 | 0.328522 |
| 11732164_LMF1      | -0.08077 | 0.224687 | 0.328522 |
| 11728937_GFRA2     | 0.075853 | 0.224694 | 0.328522 |
| 11743174_TSHZ3     | -0.10666 | 0.224694 | 0.328522 |
| 11750936_HFM1      | 0.09919  | 0.224738 | 0.328568 |
| 11762717_PSTPIP1   | -0.08258 | 0.22474  | 0.328568 |
| 11759741_COMMD3    | 0.188911 | 0.224834 | 0.328694 |
| 11728441_CHD5      | -0.05432 | 0.224839 | 0.328694 |
| 11729621_CLCN4     | -0.09609 | 0.22486  | 0.328714 |
| 11723551_SH2D3A    | -0.06152 | 0.224888 | 0.328737 |
| 11731866_FCRLB     | -0.05139 | 0.224889 | 0.328737 |
| 11734978_BTNL3     | -0.06981 | 0.224896 | 0.328737 |
| 11761531_FCGRT     | -0.05254 | 0.224907 | 0.328744 |
| 11750901_PGR       | -0.10933 | 0.224994 | 0.328862 |
| 11757630_HERPUD2   | -0.04716 | 0.225085 | 0.328985 |
| 11734264_CERS3     | -0.12976 | 0.225164 | 0.32909  |
| 11763608_TVP23A    | -0.09472 | 0.225273 | 0.329239 |
| 11758041_PSMD12    | -0.0488  | 0.225297 | 0.329262 |
| 11742542_OR1S1 /// | -0.07723 | 0.225306 | 0.329262 |
| 11749571_ZNF692    | -0.04356 | 0.225309 | 0.329262 |
| 11728562_DUSP13    | -0.13288 | 0.225337 | 0.329294 |
| 11732916_KCNT2     | 0.10389  | 0.225392 | 0.329365 |
| 11744713_PITPNM2   | -0.07972 | 0.225478 | 0.32948  |
| 11740623_KCNH5     | 0.109183 | 0.225486 | 0.329482 |
| 11760866_CALCO1    | -0.07135 | 0.225567 | 0.32959  |
| 11723325_KCNQ1     | -0.09965 | 0.225583 | 0.329604 |
| 11717418_DNAL1     | 0.100515 | 0.225593 | 0.329609 |
| 11727116_PLA1A     | -0.04459 | 0.225601 | 0.32961  |
| 11744276_CAPG      | -0.04909 | 0.225842 | 0.329948 |
| 11727074_PLAC4     | -0.10742 | 0.225846 | 0.329948 |
| 11724927_PPP1R3D   | 0.061372 | 0.225853 | 0.329949 |
| 11721590_SLC17A9   | 0.045544 | 0.225868 | 0.329961 |



|                    |          |          |          |
|--------------------|----------|----------|----------|
| 11761198_TMEM161B  | -0.06707 | 0.225926 | 0.330036 |
| 11732225_ZNF664    | -0.04294 | 0.225958 | 0.330063 |
| 11761532_SLC1A7    | -0.08919 | 0.225961 | 0.330063 |
| 11715171_DEPDC5    | -0.10415 | 0.225965 | 0.330063 |
| 11756197_ATPIF1    | -0.04697 | 0.225977 | 0.330071 |
| 11746745_CHRM4     | -0.06837 | 0.22601  | 0.330109 |
| 11732654_MCM9      | -0.11877 | 0.226105 | 0.330239 |
| 11763160_OR6C4 /// | -0.12192 | 0.226171 | 0.330319 |
| 11742077_CHRNG     | -0.1364  | 0.226174 | 0.330319 |
| 11761679_PBX1      | -0.15312 | 0.226215 | 0.330368 |
| 11754094_LOC105369 | -0.17047 | 0.226221 | 0.330368 |
| 11715781_EEF2      | -0.04506 | 0.22624  | 0.330386 |
| 11760307_FAM216A   | -0.05049 | 0.226265 | 0.330413 |
| 11731905_CRISP1    | -0.08104 | 0.226287 | 0.330435 |
| 11741622_CYHR1     | -0.046   | 0.226309 | 0.330458 |
| 11731032_MSH3      | -0.04801 | 0.226336 | 0.330481 |
| 11748722_ZIK1      | -0.10493 | 0.22634  | 0.330481 |
| 11742820_OGN       | 0.055771 | 0.226346 | 0.330481 |
| 11715121_HIST1H3A  | -0.09764 | 0.226393 | 0.33054  |
| 11725109_FAM98C    | -0.07695 | 0.226428 | 0.330581 |
| 11755258_CCDC148   | -0.06935 | 0.226451 | 0.330605 |
| 11715699_SEC16A    | 0.047264 | 0.226537 | 0.330721 |
| 11749445_ARHGAP15  | 0.092837 | 0.226574 | 0.330757 |
| 11733794_STX7      | 0.048888 | 0.226575 | 0.330757 |
| 11715259_IFNA5     | -0.14295 | 0.226593 | 0.330773 |
| 11727335_ACMSD     | -0.12979 | 0.226608 | 0.330786 |
| 11723351_ABCA3     | -0.08061 | 0.226645 | 0.330829 |
| 11758447_NUP50     | 0.055524 | 0.226736 | 0.330953 |
| 11757553_LTBP4     | -0.06767 | 0.226877 | 0.331148 |
| 11756265_MTA2      | -0.04595 | 0.226889 | 0.331152 |
| 11721478_GOLPH3L   | 0.096422 | 0.226895 | 0.331152 |
| 11725493_BEX5      | -0.07036 | 0.2269   | 0.331152 |
| 11724796_DDIT4L    | -0.07205 | 0.226921 | 0.331164 |
| 11737165_RBPJL     | -0.07287 | 0.226922 | 0.331164 |
| 11720418_CUL2      | -0.0494  | 0.22695  | 0.331195 |
| 11724659_RBFOX3    | -0.06162 | 0.226956 | 0.331195 |
| 11749686_RFX4      | -0.11688 | 0.226964 | 0.331196 |
| 11721121_SPNS1     | -0.07126 | 0.227004 | 0.331237 |
| 11761521_DNMT3B    | -0.08933 | 0.227006 | 0.331237 |
| 11755201_TRPV6     | -0.05998 | 0.227017 | 0.331243 |
| 11736949_THEM5     | -0.07906 | 0.227043 | 0.331272 |
| 11741077_ABR       | -0.04358 | 0.227071 | 0.331302 |
| 11733737_IL22      | 0.087182 | 0.227125 | 0.331372 |
| 11724352_SMC6      | -0.06119 | 0.227152 | 0.331401 |
| 11740228_GSDMA     | -0.0831  | 0.227177 | 0.331418 |
| 11732165_LMF1      | -0.11193 | 0.227177 | 0.331418 |
| 11724502_SPON1     | -0.06447 | 0.227255 | 0.331521 |
| 11724760_CALM1 /// | -0.04461 | 0.227295 | 0.331565 |
| 11762538_ATP8A1    | -0.06056 | 0.227301 | 0.331565 |
| 11736676_DPP10     | -0.08444 | 0.227305 | 0.331565 |
| 11757480_IFI27     | -0.04881 | 0.227314 | 0.331565 |

|                    |          |          |          |
|--------------------|----------|----------|----------|
| 11719069_HSPA13    | -0.05529 | 0.227319 | 0.331565 |
| 11745644_C8orf49   | -0.0951  | 0.227453 | 0.331751 |
| 11737182_SLC22A13  | -0.08741 | 0.227514 | 0.331829 |
| 11729461_CTNS      | -0.09157 | 0.227529 | 0.331842 |
| 11729407_MYT1L     | -0.06641 | 0.227538 | 0.331845 |
| 11742303_ASPH      | -0.11527 | 0.227551 | 0.331853 |
| 11740668_KLRF1     | -0.10937 | 0.227557 | 0.331853 |
| 11746060_TNFAIP2   | -0.04837 | 0.227566 | 0.331856 |
| 11752462_ANKLE1    | -0.05146 | 0.227597 | 0.331891 |
| 11762975_TMEM64    | -0.12984 | 0.227638 | 0.331939 |
| 11742919_REG1B     | 0.097264 | 0.227643 | 0.331939 |
| 11733669_PAX3      | -0.05234 | 0.227651 | 0.331941 |
| 11746661_KMT2B     | 0.070405 | 0.227663 | 0.331948 |
| 11763906_CCT6A /// | -0.06375 | 0.227671 | 0.33195  |
| 11745662_GNRHR2    | -0.09868 | 0.227684 | 0.331959 |
| 11752415_BRSK2     | -0.08554 | 0.227712 | 0.33199  |
| 11736280_SLC22A3   | -0.07385 | 0.227885 | 0.332232 |
| 11737621_HEPN1     | -0.06412 | 0.227964 | 0.332337 |
| 11728953_ADGRV1    | 0.063479 | 0.228003 | 0.332385 |
| 11731200_TLR5      | -0.06032 | 0.228049 | 0.332441 |
| 11748197_MXRA8     | -0.08434 | 0.228065 | 0.332455 |
| 11753538_ZNF573    | 0.070263 | 0.228088 | 0.332478 |
| 11759538_RPS28     | 0.066202 | 0.228177 | 0.332598 |
| 11751963_MBD5      | 0.080661 | 0.228192 | 0.332601 |
| 11753938_FAM166B   | -0.07805 | 0.228192 | 0.332601 |
| 11750673_LZTR1     | -0.12531 | 0.228209 | 0.332615 |
| 11734050_TRAT1     | -0.13399 | 0.228248 | 0.332662 |
| 11743228_CR1L      | -0.09542 | 0.228257 | 0.332666 |
| 11763832_FAM47E    | -0.06848 | 0.228312 | 0.332735 |
| 11736875_ZNF514    | 0.063218 | 0.228333 | 0.332756 |
| 11717743_ACOT7     | -0.04581 | 0.228392 | 0.332823 |
| 11723502_PRLR      | 0.049547 | 0.228394 | 0.332823 |
| 11758832_COL6A2    | -0.14771 | 0.228399 | 0.332823 |
| 11727973_CENPN     | 0.045767 | 0.228435 | 0.332865 |
| 11735332_EXD3      | -0.07571 | 0.228446 | 0.332871 |
| 11759469_ASB4      | -0.13917 | 0.228455 | 0.332874 |
| 11728447_RAD54B    | -0.04834 | 0.228495 | 0.332923 |
| 11723894_TEP1      | -0.08626 | 0.228608 | 0.333077 |
| 11733524_PPP1R3A   | 0.101035 | 0.22863  | 0.3331   |
| 11715954_CNDP2     | -0.07484 | 0.228649 | 0.333118 |
| 11719377_CAP1      | 0.049167 | 0.22867  | 0.333138 |
| 11753259_CAPN11    | -0.0873  | 0.228729 | 0.333215 |
| 11747304_AKAP7     | -0.10018 | 0.228781 | 0.333281 |
| 11722471_PEG3      | -0.16222 | 0.228817 | 0.333321 |
| 11724259_COQ10B    | -0.0539  | 0.228823 | 0.333321 |
| 11728681_PAIP1     | -0.07647 | 0.228842 | 0.33334  |
| 11748330_PMM2      | 0.050917 | 0.228922 | 0.333446 |
| 11755328_IKKBG     | -0.0547  | 0.228995 | 0.333543 |
| 11724578_L1CAM     | -0.05395 | 0.229028 | 0.333568 |
| 11757590_ISY1-RAB4 | -0.06378 | 0.229036 | 0.333568 |
| 11716496_CHMP4B    | 0.056264 | 0.229038 | 0.333568 |

|                    |          |          |          |
|--------------------|----------|----------|----------|
| 11742533_OR10J3    | -0.09312 | 0.22904  | 0.333568 |
| 11727678_MTMR14    | -0.05303 | 0.229083 | 0.33362  |
| 11758363_SPTAN1    | -0.05994 | 0.229133 | 0.333674 |
| 11742487_MAPK14    | -0.07364 | 0.229143 | 0.333674 |
| 11763659_FMNL1     | -0.10571 | 0.229146 | 0.333674 |
| 11762950_MAGEC3    | -0.09813 | 0.229147 | 0.333674 |
| 11718748_C1QL1     | 0.070915 | 0.229159 | 0.333681 |
| 11737866_ITK       | -0.11746 | 0.229206 | 0.333741 |
| 11725017_MAP9      | -0.10212 | 0.229294 | 0.333851 |
| 11751376_LRP5L     | -0.09125 | 0.229296 | 0.333851 |
| 11731857_MTIH      | 0.056374 | 0.229323 | 0.333874 |
| 11740665_TBC1D8B   | -0.04712 | 0.229325 | 0.333874 |
| 11755655_MICAL3    | -0.09429 | 0.229333 | 0.333876 |
| 11756667_C6orf223  | -0.05713 | 0.229346 | 0.333884 |
| 11732425_ANKRD22   | 0.076387 | 0.229411 | 0.333969 |
| 11720207_IL2RG     | -0.06664 | 0.229446 | 0.33401  |
| 11749597_UBAC2     | -0.06112 | 0.229514 | 0.334099 |
| 11720776_RNF8      | -0.14466 | 0.229523 | 0.334102 |
| 11733739_B3GNTL1   | 0.053664 | 0.229607 | 0.334214 |
| 11735536_ZNF660    | -0.18536 | 0.229615 | 0.334217 |
| 11733019_PIK3R1    | -0.05708 | 0.229623 | 0.334218 |
| 11729995_GDF10     | -0.06275 | 0.229636 | 0.334227 |
| 11760534_NRG4      | 0.098337 | 0.229655 | 0.334244 |
| 11745631_NHS       | 0.141328 | 0.229712 | 0.334318 |
| 11750753_PRKCQ     | -0.07966 | 0.229721 | 0.334321 |
| 11748934_DFNB59    | -0.06358 | 0.229805 | 0.334433 |
| 11716123_NAT10     | 0.054136 | 0.229854 | 0.334495 |
| 11717061_PPP1R1B   | -0.05498 | 0.229892 | 0.334539 |
| 11747016_PGAP3     | -0.08611 | 0.230007 | 0.334696 |
| 11751688_GINMI     | 0.047457 | 0.230061 | 0.334765 |
| 11758546_VDR       | -0.08534 | 0.230143 | 0.334875 |
| 11728122_ADGRG2    | -0.0542  | 0.230162 | 0.334893 |
| 11762755_TM7SF2    | 0.074032 | 0.230244 | 0.335003 |
| 11751726_LOC155060 | -0.05473 | 0.230273 | 0.335031 |
| 11716320_RPS3A     | 0.046426 | 0.230279 | 0.335031 |
| 11738879_PSG1 ///  | -0.05457 | 0.230285 | 0.335031 |
| 11743827_LDLRAD4   | -0.07372 | 0.230303 | 0.335048 |
| 11720730_CSDC2     | -0.06858 | 0.230391 | 0.335166 |
| 11740255_UBE2NL    | -0.09551 | 0.230409 | 0.335183 |
| 11729206_PTPN11    | 0.05654  | 0.230452 | 0.335234 |
| 11726561_SAP18     | -0.04886 | 0.23046  | 0.335236 |
| 11715789_SLC40A1   | -0.07441 | 0.230467 | 0.335237 |
| 11721411_BSPRY     | -0.08029 | 0.230481 | 0.335247 |
| 11736939_ENDOV     | 0.075148 | 0.230522 | 0.335297 |
| 11715945_RALB      | 0.062179 | 0.230562 | 0.335345 |
| 11762259_HLA-G     | -0.07221 | 0.230617 | 0.335412 |
| 11761178_SLC51A    | -0.06747 | 0.230622 | 0.335412 |
| 11743581_ACTR2     | -0.04775 | 0.230667 | 0.335467 |
| 11738390_DEFB121   | -0.08928 | 0.230704 | 0.335506 |
| 11734526_PCSK6     | 0.072004 | 0.230707 | 0.335506 |
| 11746515_PDE7B     | 0.156032 | 0.230734 | 0.335535 |

|                    |          |          |          |
|--------------------|----------|----------|----------|
| 11722064_REEP3     | -0.09772 | 0.230744 | 0.33554  |
| 11757171_SNORA71D  | -0.05595 | 0.230769 | 0.335565 |
| 11747749_SMARCA2   | 0.061817 | 0.230869 | 0.335701 |
| 11731276_CLEC4G    | -0.12868 | 0.230921 | 0.335767 |
| 11737895_PCDHB11   | 0.076044 | 0.230955 | 0.335806 |
| 11751809_LINCO0671 | -0.08063 | 0.231001 | 0.335863 |
| 11759206_PON1      | -0.12301 | 0.231008 | 0.335863 |
| 11745851_HSPD1     | -0.0454  | 0.23102  | 0.335871 |
| 11727367_MED29     | -0.05413 | 0.231043 | 0.335894 |
| 11720325_POLR2F    | -0.07547 | 0.231072 | 0.335926 |
| 11747473_ITGB8     | -0.05781 | 0.231083 | 0.335932 |
| 11763946_TAF1      | -0.085   | 0.231089 | 0.335932 |
| 11736340_PCSK1     | 0.102331 | 0.23111  | 0.335952 |
| 11756896_COL6A6    | -0.08115 | 0.231151 | 0.336002 |
| 11737233_ZNF696    | -0.06726 | 0.231205 | 0.336069 |
| 11739412_MTR       | -0.05853 | 0.231211 | 0.336069 |
| 11718155_THTPA     | -0.09964 | 0.231223 | 0.336069 |
| 11750218_TSPAN6    | -0.06013 | 0.231225 | 0.336069 |
| 11732501_TMOD1     | 0.04996  | 0.231236 | 0.336075 |
| 11735108_DCTN3     | 0.050672 | 0.231258 | 0.336096 |
| 11760603_HES2      | -0.06215 | 0.231264 | 0.336096 |
| 11731021_MUCL1     | -0.04967 | 0.231338 | 0.336193 |
| 11732177_MYH11     | -0.13753 | 0.231509 | 0.336432 |
| 11754398_SMIM10    | 0.088034 | 0.231525 | 0.336441 |
| 11754955_P2RY11 // | -0.08679 | 0.231529 | 0.336441 |
| 11750617_MED24     | -0.0543  | 0.231583 | 0.336498 |
| 11762962_TBATA     | -0.12066 | 0.231586 | 0.336498 |
| 11740726_FAM9C     | 0.06515  | 0.231589 | 0.336498 |
| 11738048_ELOVL7    | -0.12512 | 0.231615 | 0.336526 |
| 11732321_PLAT      | -0.05128 | 0.231628 | 0.336535 |
| 11733155_COL9A1    | -0.06781 | 0.231695 | 0.336622 |
| 11723345_TMUB2     | -0.04789 | 0.231717 | 0.336644 |
| 11736306_GABRB1    | -0.10439 | 0.231727 | 0.336648 |
| 11753365_DCSTAMP   | -0.05867 | 0.23174  | 0.336658 |
| 11749106_PCDH1     | -0.07368 | 0.231765 | 0.336684 |
| 11741080_SARDH     | -0.06074 | 0.231779 | 0.336694 |
| 11750001_CLEC7A    | -0.07466 | 0.231824 | 0.33675  |
| 11726919_SRD5A2    | -0.07879 | 0.231844 | 0.33676  |
| 11760492_PRMT1     | -0.08529 | 0.231845 | 0.33676  |
| 11720344_C3orf62 / | -0.07397 | 0.231927 | 0.336869 |
| 11757655_TIMM10B   | 0.049717 | 0.231964 | 0.33691  |
| 11724317_FGF1      | 0.06174  | 0.231969 | 0.33691  |
| 11722269_SASH3     | 0.109309 | 0.23199  | 0.336931 |
| 11733981_PDK1      | -0.08706 | 0.232    | 0.336934 |
| 11754603_DUSP18    | -0.06857 | 0.23201  | 0.33694  |
| 11755535_SYNPO2L   | 0.118806 | 0.232065 | 0.337    |
| 11731111_CLEC3A    | 0.091266 | 0.232066 | 0.337    |
| 11759095_GNAQ      | 0.061755 | 0.232089 | 0.337025 |
| 11744774_FAM135B   | 0.128421 | 0.232142 | 0.337091 |
| 11735775_HIST1H4K  | 0.11586  | 0.232166 | 0.337116 |
| 11718964_NUFIP2    | 0.093354 | 0.232205 | 0.337163 |

|                    |          |          |          |
|--------------------|----------|----------|----------|
| 11726330_SLC23A1   | 0.103228 | 0.232249 | 0.337216 |
| 11733738_KRIT1     | 0.064629 | 0.232266 | 0.337231 |
| 11736372_MUC17     | -0.06185 | 0.232332 | 0.337317 |
| 11752352_SLC9C2    | 0.095333 | 0.232353 | 0.337338 |
| 11727204_CBX4      | -0.05701 | 0.232423 | 0.337429 |
| 11719514_ADNP2     | -0.04494 | 0.232582 | 0.337649 |
| 11755557_HACE1     | 0.079183 | 0.232592 | 0.337654 |
| 11721027_GAK       | -0.06653 | 0.23261  | 0.337671 |
| 11758884_AK3       | -0.10274 | 0.232687 | 0.337772 |
| 11759451_TRPC7     | -0.13642 | 0.232698 | 0.337778 |
| 11715294_HECTD2    | -0.06064 | 0.232715 | 0.337792 |
| 11763556_EIF4A1    | -0.05509 | 0.232738 | 0.337802 |
| 11729011_CDH22     | 0.055077 | 0.232739 | 0.337802 |
| 11762145_MAPK11    | -0.07615 | 0.232742 | 0.337802 |
| 11754895_SNX31     | -0.11033 | 0.232774 | 0.337838 |
| 11737970_PCDHGA7   | 0.064211 | 0.232783 | 0.337842 |
| 11735328_LMX1B     | -0.09274 | 0.232855 | 0.337936 |
| 11726942_ZKSCAN2   | 0.080957 | 0.2329   | 0.337985 |
| 11725589_RAB5C     | -0.06288 | 0.232902 | 0.337985 |
| 11719910_PICALM    | 0.059782 | 0.232916 | 0.337993 |
| 11723037_STX8      | -0.05082 | 0.232948 | 0.338031 |
| 11759858_CTAGE5    | -0.08781 | 0.233027 | 0.338135 |
| 11720008_STEAP4    | -0.11141 | 0.233055 | 0.338157 |
| 11737066_GCSAML    | -0.13618 | 0.233056 | 0.338157 |
| 11756701_ITGB7     | -0.09927 | 0.23307  | 0.338167 |
| 11763471_CEP192    | 0.130497 | 0.2331   | 0.338199 |
| 11718524_NIPA2     | 0.044512 | 0.233106 | 0.338199 |
| 11742471_AR        | -0.12129 | 0.233139 | 0.338237 |
| 11753306_EBF2      | -0.08758 | 0.233214 | 0.338336 |
| 11715156_KRTAP6-1  | -0.07604 | 0.233249 | 0.338377 |
| 11729107_HPCAL4    | 0.109189 | 0.233267 | 0.338392 |
| 11761773_PCOLCE    | -0.05431 | 0.233281 | 0.338403 |
| 11732021_SMTN      | -0.05897 | 0.233373 | 0.338523 |
| 11752089_MYO5C     | -0.09878 | 0.233378 | 0.338523 |
| 11763304_TJP2      | 0.071523 | 0.233389 | 0.338529 |
| 11748978_FAM109A   | -0.07632 | 0.2334   | 0.338535 |
| 11716827_RPS19BP1  | -0.06055 | 0.233413 | 0.338544 |
| 11760765_POM121L9P | -0.09205 | 0.233436 | 0.338568 |
| 11720560_ZNF76     | -0.04922 | 0.233493 | 0.33864  |
| 11757743_CAMSAP3   | 0.059508 | 0.2335   | 0.338641 |
| 11719549_RHOBTB1   | 0.091448 | 0.233579 | 0.338745 |
| 11730944_CCDC65    | -0.10181 | 0.233605 | 0.338773 |
| 11742576_OR5B17    | 0.131869 | 0.233662 | 0.338846 |
| 11730502_ACTRT3    | -0.14929 | 0.233692 | 0.338869 |
| 11716029_NDUFB9    | -0.04511 | 0.233692 | 0.338869 |
| 11736960_ZNF365    | -0.06462 | 0.233797 | 0.339011 |
| 11739195_PCGF3     | -0.06456 | 0.233815 | 0.339027 |
| 11735735_CREB3L3   | 0.112387 | 0.233861 | 0.339083 |
| 11742036_DNMT3B    | -0.06149 | 0.233902 | 0.339131 |
| 11757326_FTL       | 0.042347 | 0.233907 | 0.339131 |
| 11733289_CXorf36   | -0.05917 | 0.233948 | 0.339174 |

|                    |          |          |          |
|--------------------|----------|----------|----------|
| 11734124_FSTL4     | -0.07259 | 0.233951 | 0.339174 |
| 11762053_AKNAD1 // | 0.12859  | 0.233974 | 0.339197 |
| 11739374_SYT7      | -0.05845 | 0.233995 | 0.339218 |
| 11728176_BMP8A     | -0.08061 | 0.234004 | 0.33922  |
| 11759529_ZC3H15    | -0.09682 | 0.234015 | 0.339227 |
| 11745065_RNF126    | 0.056775 | 0.234027 | 0.339234 |
| 11760612_RPL5 ///  | 0.078883 | 0.234066 | 0.33928  |
| 11744555_CYP2B7P   | -0.08124 | 0.23409  | 0.339304 |
| 11736748_SLC22A9   | -0.14254 | 0.234152 | 0.339381 |
| 11724579_L1CAM     | 0.04314  | 0.234156 | 0.339381 |
| 11716441_USO1      | -0.04356 | 0.234166 | 0.339385 |
| 11763163_DNAJC9    | 0.085169 | 0.234177 | 0.33939  |
| 11726477_HS6ST3    | 0.046663 | 0.234188 | 0.339394 |
| 11727464_ZXDC      | 0.070367 | 0.234193 | 0.339394 |
| 11749253_CACNA2D4  | 0.066711 | 0.234202 | 0.339397 |
| 11721889_HSBP1L1   | -0.07146 | 0.23422  | 0.339412 |
| 11750438_PGAM1     | -0.04519 | 0.234233 | 0.339422 |
| 11728675_MED14     | -0.05438 | 0.234258 | 0.339448 |
| 11741342_COL9A1    | -0.04438 | 0.234287 | 0.339479 |
| 11730592_MCMDC2    | 0.099804 | 0.234311 | 0.339505 |
| 11756091_C11orf94  | -0.07167 | 0.23434  | 0.339536 |
| 11734251_SEPT14    | 0.112424 | 0.234352 | 0.339544 |
| 11733724_HMP19     | -0.07025 | 0.234435 | 0.339654 |
| 11737871_TMEFF2    | 0.085453 | 0.234493 | 0.339727 |
| 11727757_OSM       | -0.07039 | 0.234539 | 0.33978  |
| 11731739_PROX1     | 0.078739 | 0.234545 | 0.33978  |
| 11756385_IKKBG     | -0.06516 | 0.23455  | 0.33978  |
| 11731784_SNX9      | -0.09537 | 0.234582 | 0.339812 |
| 11716109_PIGR      | 0.133415 | 0.234586 | 0.339812 |
| 11715265_FIG4      | 0.047666 | 0.234632 | 0.339868 |
| 11757948_TBL1X     | 0.056217 | 0.234656 | 0.339894 |
| 11746338_RAB35     | -0.10022 | 0.234668 | 0.3399   |
| 11738310_SHANK2    | 0.080856 | 0.234688 | 0.339918 |
| 11727712_PLXNA4    | -0.06312 | 0.234694 | 0.339918 |
| 11738354_BTG4      | 0.076812 | 0.23471  | 0.339931 |
| 11739318_FAM114A1  | 0.08995  | 0.234726 | 0.339945 |
| 11761669_ARHGAP17  | -0.10836 | 0.234744 | 0.33996  |
| 11763295_COLGALT2  | -0.08618 | 0.234768 | 0.339985 |
| 11735900_HS3ST4    | -0.09045 | 0.234865 | 0.340115 |
| 11733759_LOC105369 | -0.05747 | 0.234879 | 0.340126 |
| 11735506_C14orf39  | -0.09413 | 0.23491  | 0.340161 |
| 11746558_LGALS9    | -0.07125 | 0.235011 | 0.340292 |
| 11721490_TRIP10    | -0.04485 | 0.235015 | 0.340292 |
| 11718495_SRP68     | 0.047494 | 0.235027 | 0.3403   |
| 11735528_IFT74     | 0.08187  | 0.235051 | 0.340324 |
| 11763784_MEI1      | -0.056   | 0.235064 | 0.340333 |
| 11752496_GAS7      | 0.060587 | 0.235073 | 0.340334 |
| 11763894_SNORA58   | 0.067646 | 0.235078 | 0.340334 |
| 11748311_VCAN      | 0.056854 | 0.235114 | 0.340376 |
| 11746305_NOP14     | 0.044019 | 0.23516  | 0.340432 |
| 11747000_LTA4H     | 0.047665 | 0.235176 | 0.340441 |

|                    |          |          |          |
|--------------------|----------|----------|----------|
| 11729547_AMH       | -0.05342 | 0.235181 | 0.340441 |
| 11724661_PAX8      | 0.053294 | 0.235194 | 0.340443 |
| 11732649_C21orf62  | -0.06164 | 0.235196 | 0.340443 |
| 11756610_CD226     | -0.1269  | 0.235212 | 0.340456 |
| 11738399_RGMA      | -0.07824 | 0.235266 | 0.340525 |
| 11718663_SRP14     | 0.057795 | 0.235305 | 0.340572 |
| 11758714_ITIH2     | -0.08329 | 0.235343 | 0.340616 |
| 11750177_CEACAM8   | 0.058355 | 0.235381 | 0.340661 |
| 11726892_SLC51A    | 0.062351 | 0.235426 | 0.340716 |
| 11750649_SMCR5     | -0.05377 | 0.235465 | 0.340762 |
| 11755463_TTC30A    | 0.084755 | 0.235475 | 0.340766 |
| 11749975_PGAP3     | -0.07248 | 0.235492 | 0.340781 |
| 11721729_ADGRB2    | -0.05771 | 0.23552  | 0.340811 |
| 11722794_GDE1      | -0.04839 | 0.235552 | 0.340848 |
| 11740537_KRTAP19-3 | -0.05756 | 0.235632 | 0.34095  |
| 11753691_RPL24     | -0.04264 | 0.235642 | 0.34095  |
| 11721269_SCG3      | 0.075221 | 0.235644 | 0.34095  |
| 11747973_TBR1      | 0.157253 | 0.235662 | 0.340958 |
| 11728179_CYP46A1   | -0.14139 | 0.235663 | 0.340958 |
| 11726810_SMIM24    | -0.12884 | 0.235709 | 0.341015 |
| 11746295_UQCC1     | 0.060696 | 0.235773 | 0.341096 |
| 11735164_OSBP15    | -0.06782 | 0.235813 | 0.341145 |
| 11737969_PCDHGA7   | 0.059975 | 0.235822 | 0.341148 |
| 11735845_CCDC144A  | 0.080016 | 0.235847 | 0.341174 |
| 11757225_LOC389705 | -0.12283 | 0.235858 | 0.341174 |
| 11733636_FAM92B    | 0.079492 | 0.235865 | 0.341174 |
| 11751482_BTN3A2    | -0.05925 | 0.235868 | 0.341174 |
| 11724422_GFRA3     | -0.1331  | 0.235938 | 0.341265 |
| 11739705_CRB1      | -0.05368 | 0.235973 | 0.341306 |
| 11721910_CRAMP1    | 0.059287 | 0.235988 | 0.341317 |
| 11752024_PCDH15    | -0.09903 | 0.236027 | 0.341364 |
| 11729855_CD3E      | -0.10424 | 0.236051 | 0.341388 |
| 11752844_PTGER3    | -0.06651 | 0.236077 | 0.341415 |
| 11728135_NIPAL4    | -0.04956 | 0.236114 | 0.341453 |
| 11752688_RREB1     | -0.05724 | 0.236117 | 0.341453 |
| 11753477_CCDC24    | 0.049916 | 0.236139 | 0.341465 |
| 11752963_SLC25A30  | -0.04771 | 0.23614  | 0.341465 |
| 11761368_SLC6A9    | -0.09978 | 0.236182 | 0.341517 |
| 11728868_ELAVL3    | 0.078191 | 0.236235 | 0.341583 |
| 11754649_ITK       | -0.06458 | 0.236284 | 0.341644 |
| 11727788_PIGS      | -0.04602 | 0.236352 | 0.341732 |
| 11745305_BIN3-IT1  | -0.11022 | 0.236373 | 0.341753 |
| 11729832_CLDN8     | 0.124988 | 0.236412 | 0.341799 |
| 11753759_HINT1     | 0.04422  | 0.236473 | 0.341877 |
| 11748922_NSMF      | -0.06755 | 0.236496 | 0.341899 |
| 11752484_TMEM209   | 0.069972 | 0.236559 | 0.341982 |
| 11763800_RSPH14    | -0.05424 | 0.236581 | 0.342003 |
| 11738753_OR4X2     | -0.05666 | 0.23661  | 0.342035 |
| 11721651_CDH5      | 0.0662   | 0.236637 | 0.342063 |
| 11749865_ABLIM2    | -0.0595  | 0.236699 | 0.342142 |
| 11751662_IYD       | -0.09509 | 0.236708 | 0.342145 |

|                    |          |          |          |
|--------------------|----------|----------|----------|
| 11742470_SLC35F4   | 0.065507 | 0.236752 | 0.342199 |
| 11743247_DEFB114   | -0.09186 | 0.236766 | 0.342209 |
| 11740285_EFCAB1    | 0.083836 | 0.236792 | 0.342237 |
| 11731061_ZNF516    | -0.10203 | 0.236806 | 0.342247 |
| 11740223_LRRC26    | -0.06876 | 0.236827 | 0.342267 |
| 11733350_ZNF287    | 0.12491  | 0.236835 | 0.342268 |
| 11735805_SPDYE4    | -0.07953 | 0.236853 | 0.342284 |
| 11722635_IL2RB     | -0.14396 | 0.236913 | 0.342361 |
| 11727384_ATP5J2-PT | -0.04342 | 0.236944 | 0.34239  |
| 11751082_MLC1      | -0.11145 | 0.236947 | 0.34239  |
| 11755642_KIF1A     | -0.05344 | 0.236971 | 0.342412 |
| 11749446_GFRA2     | -0.10717 | 0.236981 | 0.342412 |
| 11748366_ASAP3     | -0.11722 | 0.236983 | 0.342412 |
| 11720872_INPP5E    | 0.055905 | 0.237033 | 0.342465 |
| 11762383_TDRD1     | -0.0987  | 0.237034 | 0.342465 |
| 11739563_ITPR1     | -0.10384 | 0.237053 | 0.342469 |
| 11728613_TRIM10    | -0.10187 | 0.237061 | 0.342469 |
| 11734925_ZDHC15    | -0.08942 | 0.237062 | 0.342469 |
| 11742194_LGSN      | 0.120418 | 0.237065 | 0.342469 |
| 11752378_ZNF114    | -0.17028 | 0.237117 | 0.342524 |
| 11745177_TPD52L2   | -0.07365 | 0.237123 | 0.342524 |
| 11719385_MAPRE3    | 0.109571 | 0.237124 | 0.342524 |
| 11754538_SLC9A5    | -0.0519  | 0.237156 | 0.34256  |
| 11760780_ZAK       | -0.06941 | 0.237249 | 0.342685 |
| 11729577_ATP1A3    | -0.05285 | 0.237272 | 0.342698 |
| 11764247_WISP1     | -0.0752  | 0.237277 | 0.342698 |
| 11763760_PLVAP     | -0.0721  | 0.237279 | 0.342698 |
| 11760032_CRB1      | -0.12274 | 0.237312 | 0.342735 |
| 11736078_NEK9      | -0.06796 | 0.237369 | 0.342807 |
| 11732531_N4BP2L1   | -0.1323  | 0.237447 | 0.342897 |
| 11738915_CD200R1   | 0.060647 | 0.237447 | 0.342897 |
| 11738645_SLC26A5   | -0.08117 | 0.237452 | 0.342897 |
| 11731586_DOK3      | 0.078085 | 0.237477 | 0.342923 |
| 11742333_OR4M1 /// | 0.049099 | 0.2375   | 0.342946 |
| 11741903_LOC286238 | -0.14206 | 0.237511 | 0.342948 |
| 11730908_HRC       | -0.08173 | 0.237516 | 0.342948 |
| 11746054_TSC22D4   | 0.047574 | 0.237563 | 0.343006 |
| 11734405_SCRT2     | -0.07929 | 0.237662 | 0.343139 |
| 11761091_HEXDC     | -0.10435 | 0.237677 | 0.343151 |
| 11751574_TMEM119   | -0.05199 | 0.237738 | 0.343229 |
| 11730473_PDE3B     | 0.141644 | 0.23775  | 0.343235 |
| 11721101_SGSH      | -0.05388 | 0.237818 | 0.343317 |
| 11759856_SNRPG     | -0.12112 | 0.23782  | 0.343317 |
| 11740146_TRMT10A   | -0.11154 | 0.237837 | 0.34333  |
| 11732711_TVP23C    | -0.07407 | 0.237909 | 0.343425 |
| 11756960_ZC3HC1    | 0.052305 | 0.237918 | 0.343428 |
| 11739490_ATP10D    | 0.089102 | 0.237964 | 0.343482 |
| 11718350_NLRP2     | -0.12209 | 0.23797  | 0.343482 |
| 11744044_PCYT2     | -0.06896 | 0.237999 | 0.343514 |
| 11734477_SPATA9    | -0.06593 | 0.238009 | 0.343519 |
| 11750905_MOV10L1   | -0.0936  | 0.238088 | 0.343623 |



|                    |          |          |          |
|--------------------|----------|----------|----------|
| 11736657_REST      | -0.05509 | 0.238096 | 0.343624 |
| 11729045_TCERGIL   | -0.12059 | 0.238111 | 0.343635 |
| 11748289_SLC23A1   | -0.09437 | 0.238187 | 0.343724 |
| 11732565_SLC6A14   | -0.09299 | 0.238187 | 0.343724 |
| 11724697_PHF24     | -0.11296 | 0.238338 | 0.343932 |
| 11731325_CAPN8     | -0.12018 | 0.238364 | 0.34396  |
| 11746976_GAPVD1    | 0.048281 | 0.238372 | 0.34396  |
| 11728968_AASDHPPT  | 0.058776 | 0.238459 | 0.344076 |
| 11730284_SMU1      | 0.113084 | 0.23847  | 0.344082 |
| 11762333_NDUFA13   | -0.05181 | 0.238486 | 0.344095 |
| 11728247_TOP3A     | -0.05014 | 0.238585 | 0.344228 |
| 11732948_IDO2      | 0.122747 | 0.238601 | 0.344241 |
| 11718456_SLC43A2   | -0.07551 | 0.238615 | 0.34425  |
| 11730267_PPIG      | 0.043084 | 0.238631 | 0.344263 |
| 11760402_INADL     | -0.06469 | 0.23864  | 0.344266 |
| 11762722_CPA6      | -0.0838  | 0.238679 | 0.344312 |
| 11731523_ZNF592    | 0.056374 | 0.238741 | 0.344392 |
| 11732569_SLC01B3   | 0.052721 | 0.238806 | 0.344458 |
| 11725422_ARHGAP35  | 0.046541 | 0.238808 | 0.344458 |
| 11754501_SMIM6     | -0.0624  | 0.238808 | 0.344458 |
| 11748049_SUN2      | -0.08683 | 0.238845 | 0.344501 |
| 11763681_PPARA     | -0.09601 | 0.238857 | 0.344503 |
| 11735837_SPIC      | -0.10539 | 0.23887  | 0.344503 |
| 11726784_LRFN5     | 0.103479 | 0.238873 | 0.344503 |
| 11738456_C20orf197 | 0.158678 | 0.238874 | 0.344503 |
| 11747317_RFWD3     | -0.06476 | 0.238891 | 0.344516 |
| 11738388_IFNA1 /// | 0.087361 | 0.239017 | 0.344688 |
| 11737407_GLT8D1    | 0.055929 | 0.239051 | 0.344722 |
| 11741843_ACRC      | 0.058956 | 0.239055 | 0.344722 |
| 11757555_UBE2D2    | 0.049379 | 0.239073 | 0.344738 |
| 11761885_PPP1R1C   | 0.127346 | 0.239096 | 0.344761 |
| 11755734_CCDC107   | 0.086206 | 0.239105 | 0.344764 |
| 11735792_THOC5     | -0.05112 | 0.239135 | 0.344796 |
| 11762787_RPS3A     | -0.06805 | 0.239141 | 0.344796 |
| 11731386_HYAL4     | 0.052888 | 0.239178 | 0.344838 |
| 11756940_ZSCAN21   | -0.10305 | 0.239185 | 0.344838 |
| 11736362_MEDAG     | -0.10109 | 0.239257 | 0.344932 |
| 11762555_ERCC4     | -0.14219 | 0.239317 | 0.345    |
| 11731190_KIAA2022  | -0.08097 | 0.239318 | 0.345    |
| 11735335_CPLX4     | -0.20112 | 0.239338 | 0.345019 |
| 11728740_TBC1D20   | 0.053667 | 0.239348 | 0.345022 |
| 11747271_SAFB      | -0.09233 | 0.239362 | 0.345033 |
| 11731704_ADAMTS8   | -0.0843  | 0.239379 | 0.345037 |
| 11751785_CLDN22    | -0.10746 | 0.239379 | 0.345037 |
| 11721253_MYLPF     | -0.08883 | 0.239389 | 0.345041 |
| 11759264_KRTAP3-3  | -0.07147 | 0.239407 | 0.345057 |
| 11758992_MAN2B2    | -0.11624 | 0.239435 | 0.345087 |
| 11759698_STEAP1B   | 0.05131  | 0.239481 | 0.345135 |
| 11717081_VPS52     | -0.07959 | 0.239482 | 0.345135 |
| 11724175_TSPAN11   | -0.07731 | 0.239504 | 0.345156 |
| 11753845_CCL25     | -0.05702 | 0.239551 | 0.345213 |

|                    |          |          |          |
|--------------------|----------|----------|----------|
| 11751387_FAM69C    | -0.06463 | 0.23956  | 0.345216 |
| 11733896_TADA2B    | -0.05639 | 0.239583 | 0.345239 |
| 11763641_FMNL1     | -0.09648 | 0.239599 | 0.345252 |
| 11719198_CCND2     | -0.07148 | 0.239664 | 0.345335 |
| 11726517_WDR11     | -0.04289 | 0.239705 | 0.345385 |
| 11732710_FAM46D    | 0.058058 | 0.239768 | 0.345455 |
| 11762708_POTEC     | -0.09919 | 0.23977  | 0.345455 |
| 11717136_PCSK1N    | 0.08002  | 0.239775 | 0.345455 |
| 11760832_TBP       | -0.08378 | 0.239816 | 0.345504 |
| 11741364_KCNJ1     | -0.10016 | 0.239856 | 0.345545 |
| 11730995_ACTN3     | -0.05652 | 0.239858 | 0.345545 |
| 11737278_CYP7A1    | -0.11373 | 0.239924 | 0.345624 |
| 11759397_BTN2A3P   | 0.090877 | 0.239928 | 0.345624 |
| 11732187_PI4K2A    | -0.05176 | 0.239983 | 0.345693 |
| 11717980_C7        | -0.06392 | 0.240004 | 0.345713 |
| 11736969_TMEM213   | -0.12216 | 0.240018 | 0.345723 |
| 11721252_MYLPF     | -0.06499 | 0.240047 | 0.34575  |
| 11718851_SRPK1     | 0.047629 | 0.240051 | 0.34575  |
| 11715754_PRL       | -0.07401 | 0.240064 | 0.345757 |
| 11750254_LINC00575 | -0.106   | 0.24007  | 0.345757 |
| 11759169_CFAP74    | -0.11845 | 0.240105 | 0.34579  |
| 11722674_HIF3A     | -0.07944 | 0.240109 | 0.34579  |
| 11746375_NOVA1     | -0.06928 | 0.240124 | 0.34579  |
| 11751933_ZNF793    | 0.074068 | 0.240127 | 0.34579  |
| 11730347_PDE6H     | -0.09891 | 0.240128 | 0.34579  |
| 11722306_ARHGAP23  | 0.050389 | 0.240169 | 0.345839 |
| 11731046_RIMKLA    | -0.05804 | 0.240192 | 0.34586  |
| 11746263_FECH      | -0.05181 | 0.240198 | 0.34586  |
| 11741999_OR10J1    | -0.08447 | 0.240219 | 0.345881 |
| 11724559_GNA15     | 0.05788  | 0.24023  | 0.345886 |
| 11725258_FZD10     | 0.070983 | 0.240241 | 0.345892 |
| 11721972_JADE3     | 0.055157 | 0.24037  | 0.346067 |
| 11761683_PYHIN1    | -0.06179 | 0.240385 | 0.346079 |
| 11737037_TCEAL6    | 0.058479 | 0.240482 | 0.346209 |
| 11761601_LILRA6 // | -0.08416 | 0.240531 | 0.346269 |
| 11753501_PTCRA     | -0.09509 | 0.240551 | 0.346287 |
| 11746671_NKAIN1    | -0.14308 | 0.240559 | 0.346288 |
| 11758591_CXorf57   | -0.11668 | 0.240595 | 0.34633  |
| 11731960_LOC401052 | -0.05581 | 0.240646 | 0.346394 |
| 11750659_ABCG1     | -0.06421 | 0.24067  | 0.346418 |
| 11730881_NEBL      | -0.05987 | 0.240688 | 0.34643  |
| 11759154_STARD7-AS | 0.083704 | 0.240693 | 0.34643  |
| 11727326_GFI1      | -0.07604 | 0.240706 | 0.34643  |
| 11761722_CKMT1B    | -0.12008 | 0.240707 | 0.34643  |
| 11746045_ELF2      | 0.077357 | 0.240717 | 0.346434 |
| 11738673_UTF1      | -0.0985  | 0.24076  | 0.346486 |
| 11741854_CCDC140   | -0.05777 | 0.240792 | 0.346522 |
| 11750768_OSBPL6    | -0.06794 | 0.240809 | 0.346535 |
| 11744567_CD72      | 0.132702 | 0.240834 | 0.346561 |
| 11760840_KIAA2012  | -0.07935 | 0.240877 | 0.346614 |
| 11748376_DAZL      | -0.11148 | 0.240967 | 0.346733 |

|                    |          |          |          |
|--------------------|----------|----------|----------|
| 11736970_TM213     | -0.10674 | 0.240991 | 0.346757 |
| 11734040_ELK1      | -0.04467 | 0.241005 | 0.346766 |
| 11758207_PKN2      | -0.06205 | 0.241016 | 0.346773 |
| 11719081_CDC5L     | 0.044928 | 0.241075 | 0.346844 |
| 11737699_PCDHGB7   | -0.11547 | 0.24108  | 0.346844 |
| 11751093_CHODL     | 0.061604 | 0.241115 | 0.346884 |
| 11727110_WSCD2     | -0.05159 | 0.241155 | 0.346931 |
| 11727209_GLRX2     | -0.05103 | 0.241241 | 0.347045 |
| 11739858_PACSIN1   | -0.10343 | 0.241248 | 0.347045 |
| 11734156_PRDM14    | -0.0676  | 0.241269 | 0.347065 |
| 11732292_MTMR2     | -0.09045 | 0.241328 | 0.347141 |
| 11736425_STARD4    | 0.069847 | 0.241373 | 0.347195 |
| 11753803_CYCS      | 0.046906 | 0.241383 | 0.347198 |
| 11724575_ECE2      | -0.06074 | 0.241436 | 0.347264 |
| 11726957_TCF12     | 0.057993 | 0.241468 | 0.347291 |
| 11759472_SP9       | -0.07022 | 0.241468 | 0.347291 |
| 11744875_C11orf70  | -0.0993  | 0.24148  | 0.347298 |
| 11761579_DMKN      | 0.087321 | 0.241501 | 0.347312 |
| 11762373_TMC3      | -0.0763  | 0.241505 | 0.347312 |
| 11753281_RIC3      | -0.0979  | 0.241514 | 0.347316 |
| 11715328_SPATA31D3 | 0.058716 | 0.241539 | 0.347342 |
| 11753733_PAOX      | -0.11676 | 0.24162  | 0.347448 |
| 11731790_FGF11     | -0.06305 | 0.241628 | 0.347448 |
| 11716855_COPG1     | -0.04737 | 0.241682 | 0.347516 |
| 11750430_KBTBD11   | -0.05682 | 0.241714 | 0.347551 |
| 11750519_ASM1-AS1  | 0.064897 | 0.241752 | 0.347596 |
| 11723334_GMIP      | -0.08716 | 0.241776 | 0.347613 |
| 11744937_EGFL7     | 0.086778 | 0.241778 | 0.347613 |
| 11755666_PDE10A    | 0.135802 | 0.241796 | 0.347617 |
| 11733429_HCN3      | 0.04796  | 0.241799 | 0.347617 |
| 11751382_P2RY12    | -0.10901 | 0.241809 | 0.347617 |
| 11753124_ENDOU     | -0.11924 | 0.241809 | 0.347617 |
| 11747029_SDR16C5   | -0.0858  | 0.241842 | 0.347653 |
| 11746981_ARHGFE26  | 0.083748 | 0.241889 | 0.347709 |
| 11732269_CASD1     | 0.079433 | 0.241895 | 0.347709 |
| 11720242_TCN2      | -0.08134 | 0.241902 | 0.34771  |
| 11740904_TM236     | -0.09768 | 0.241933 | 0.347744 |
| 11715377_COX4I1    | -0.04564 | 0.241952 | 0.347761 |
| 11722956_GLTPD2    | -0.06682 | 0.241982 | 0.347784 |
| 11725305_CPSF6     | -0.05817 | 0.241984 | 0.347784 |
| 11716983_CDC34     | 0.057074 | 0.241989 | 0.347784 |
| 11763959_RPS2 ///  | 0.078056 | 0.242046 | 0.347856 |
| 11761881_ZNF33A    | -0.12682 | 0.242076 | 0.347888 |
| 11762914_RAP1B     | -0.08156 | 0.242084 | 0.34789  |
| 11730862_CTTNBP2NL | 0.084517 | 0.242213 | 0.348064 |
| 11730987_SBSPO1    | -0.08728 | 0.24222  | 0.348064 |
| 11762019_CENPI     | -0.13214 | 0.242245 | 0.34809  |
| 11737496_CD200R1   | 0.110212 | 0.242252 | 0.34809  |
| 11752992_HSP90B3P  | -0.09283 | 0.242279 | 0.348119 |
| 11763246_HLA-DQB1  | -0.06628 | 0.242303 | 0.348143 |
| 11754266_E2F3      | 0.060355 | 0.242324 | 0.348162 |

|                    |          |          |          |
|--------------------|----------|----------|----------|
| 11739031_ACTR2     | -0.04956 | 0.242335 | 0.348166 |
| 11761208_PSMB7     | -0.07142 | 0.242341 | 0.348166 |
| 11745590_UBXN1     | 0.045316 | 0.242367 | 0.348184 |
| 11748040_ATL2      | 0.063324 | 0.242373 | 0.348184 |
| 11729155_CEACAM6   | -0.09051 | 0.242374 | 0.348184 |
| 11736108_ARL8A     | -0.07272 | 0.2424   | 0.34821  |
| 11741900_KIR2DL1 / | -0.07225 | 0.242426 | 0.348219 |
| 11744719_C4BPA     | -0.07918 | 0.242432 | 0.348219 |
| 11754701_SLC5A2    | -0.06347 | 0.242435 | 0.348219 |
| 11731885_COX4I2    | -0.11356 | 0.242435 | 0.348219 |
| 11736755_PCDHB13   | 0.078069 | 0.242442 | 0.348219 |
| 11731359_FAM19A4   | 0.088916 | 0.242478 | 0.34826  |
| 11717402_ARF6      | -0.05595 | 0.242484 | 0.34826  |
| 11750267_INPP5J    | -0.07076 | 0.242493 | 0.348262 |
| 11735607_C1orf56   | 0.058067 | 0.242529 | 0.348304 |
| 11742865_TJP3      | -0.08573 | 0.242569 | 0.348332 |
| 11732667_RSPH10B / | 0.114571 | 0.24257  | 0.348332 |
| 11751418_PSD4      | -0.08271 | 0.242572 | 0.348332 |
| 11741994_SYNGR1    | -0.08087 | 0.242578 | 0.348332 |
| 11716378_TOMM20    | -0.09057 | 0.242642 | 0.348414 |
| 11763613_LINC00885 | -0.05872 | 0.242708 | 0.348491 |
| 11733595_PLEKHG6   | -0.06826 | 0.242709 | 0.348491 |
| 11737352_PNPLA5    | -0.07288 | 0.242809 | 0.348616 |
| 11753377_IL17RE    | -0.06385 | 0.242811 | 0.348616 |
| 11756018_C4orf22   | -0.05607 | 0.24283  | 0.348633 |
| 11730783_ORC4      | 0.057223 | 0.242855 | 0.348659 |
| 11740775_SOX1      | -0.07886 | 0.242867 | 0.348666 |
| 11740247_EXOSC3    | -0.04312 | 0.242892 | 0.348691 |
| 11761891_VCX       | -0.07591 | 0.242907 | 0.348703 |
| 11724554_PCGF5     | 0.054925 | 0.242933 | 0.34873  |
| 11736174_KIAA0355  | -0.12334 | 0.242992 | 0.348804 |
| 11720794_SRPX      | 0.05436  | 0.243113 | 0.348968 |
| 11758357_RPL9      | -0.04423 | 0.24312  | 0.348968 |
| 11755228_PTK6      | -0.09079 | 0.243145 | 0.348989 |
| 11741028_NDST4     | -0.06041 | 0.243149 | 0.348989 |
| 11730047_SLITRK5   | -0.07975 | 0.243183 | 0.349028 |
| 11731858_ZNF529    | -0.06496 | 0.243197 | 0.349038 |
| 11734534_MFSD6     | -0.09842 | 0.243219 | 0.349049 |
| 11722496_RPTOR     | -0.05617 | 0.243219 | 0.349049 |
| 11725203_ESCO1     | 0.049328 | 0.243255 | 0.34909  |
| 11761025_DMAP1     | -0.08387 | 0.243331 | 0.349183 |
| 11750517_HPGD      | -0.1159  | 0.243334 | 0.349183 |
| 11748569_IZUMO4    | 0.093319 | 0.243362 | 0.349213 |
| 11728112_SARM1     | -0.06059 | 0.243377 | 0.349223 |
| 11715300_SSX3      | 0.151174 | 0.243407 | 0.349256 |
| 11715257_XAGE3     | -0.10717 | 0.243438 | 0.349291 |
| 11724149_SKAP1     | -0.14886 | 0.243453 | 0.349302 |
| 11737609_GRIN3B    | 0.090838 | 0.243475 | 0.349324 |
| 11757886_SRBD1     | 0.050115 | 0.243493 | 0.349338 |
| 11733121_DAZL      | 0.117877 | 0.243575 | 0.349447 |
| 11751256_STOML1    | 0.080915 | 0.24361  | 0.349486 |

|                    |          |          |          |
|--------------------|----------|----------|----------|
| 11722330_MEX3A     | -0.06172 | 0.243637 | 0.349513 |
| 11743188_CFAP97    | 0.086509 | 0.243643 | 0.349513 |
| 11725447_PLD6      | -0.04195 | 0.243676 | 0.349551 |
| 11724625_SPATA7    | 0.093366 | 0.24372  | 0.349596 |
| 11737676_TSPEAR    | -0.11218 | 0.243722 | 0.349596 |
| 11733238_RPGRIP1L  | 0.047517 | 0.243748 | 0.349623 |
| 11737470_PRSS57    | -0.05089 | 0.24378  | 0.349658 |
| 11738661_C2orf27A  | 0.073842 | 0.2438   | 0.349677 |
| 11740460_C2orf78   | -0.08    | 0.243858 | 0.349749 |
| 11734622_KRTAP1-3  | 0.139819 | 0.243869 | 0.349755 |
| 11744476_TRABD     | -0.05914 | 0.243914 | 0.349809 |
| 11740931_SEZ6L2    | -0.05867 | 0.243934 | 0.349827 |
| 11739855_ZFYVE16   | -0.11247 | 0.243947 | 0.349836 |
| 11745273_ADGRL2    | 0.072724 | 0.244007 | 0.349912 |
| 11732839_ERC2      | -0.09022 | 0.244045 | 0.349957 |
| 11758712_SELT      | 0.05227  | 0.244103 | 0.350014 |
| 11728339_CENPBD1   | 0.068667 | 0.244109 | 0.350014 |
| 11759286_RRP1      | -0.06052 | 0.244115 | 0.350014 |
| 11735830_IL1RL2    | -0.07387 | 0.244116 | 0.350014 |
| 11738479_GLRA1     | -0.15903 | 0.244121 | 0.350014 |
| 11750848_TOMM70A   | 0.053945 | 0.244199 | 0.350116 |
| 11749915_SYNPR     | -0.09708 | 0.244285 | 0.35022  |
| 11755785_SEC31B    | 0.131085 | 0.244286 | 0.35022  |
| 11726070_MAP4K4    | -0.04849 | 0.2443   | 0.35023  |
| 11756998_GPR35     | -0.04668 | 0.244372 | 0.350322 |
| 11741247_CPS1      | 0.090075 | 0.244399 | 0.350351 |
| 11763205_KRT16P1   | -0.04492 | 0.244446 | 0.350406 |
| 11735510_CCDC149   | -0.05498 | 0.244452 | 0.350406 |
| 11728364_IL20RA    | -0.15097 | 0.244514 | 0.350485 |
| 11726508_CDKN2B    | -0.07794 | 0.244531 | 0.350499 |
| 11740480_GALNT8 // | -0.10558 | 0.244544 | 0.350508 |
| 11735191_ADGRE2    | -0.06112 | 0.244568 | 0.350524 |
| 11717604_TRIP4     | 0.049369 | 0.24457  | 0.350524 |
| 11734833_TAF9B     | 0.043515 | 0.244581 | 0.350529 |
| 200003_PMRPL28     | 0.041793 | 0.244594 | 0.350537 |
| 11725787_TMA16     | -0.05945 | 0.244628 | 0.350576 |
| 11738148_PREX2     | 0.160097 | 0.244657 | 0.350608 |
| 11724401_HS3ST2    | -0.05567 | 0.244692 | 0.350647 |
| 11729913_IBA57     | -0.06696 | 0.244706 | 0.350658 |
| 11734558_ADIPOQ    | 0.065108 | 0.244753 | 0.350715 |
| 11740243_TOX       | 0.099501 | 0.244771 | 0.35073  |
| 11718904_FILIP1L   | 0.144927 | 0.244799 | 0.350759 |
| 11727794_EIF3E     | 0.042051 | 0.244834 | 0.350799 |
| 11724965_BLOC1S1-R | 0.068579 | 0.244887 | 0.350865 |
| 11742403_CLLU1OS   | -0.07582 | 0.244937 | 0.350919 |
| 11738718_OR5K2     | -0.0686  | 0.244942 | 0.350919 |
| 11747313_OXA1L     | 0.0419   | 0.244946 | 0.350919 |
| 11755660_SCNN1D    | 0.059843 | 0.244987 | 0.350967 |
| 11746822_LOC100289 | 0.08858  | 0.245038 | 0.35103  |
| 11761263_LASP1     | -0.06548 | 0.245079 | 0.351078 |
| 11756669_HPN       | 0.067217 | 0.245153 | 0.351174 |

|                    |          |          |          |
|--------------------|----------|----------|----------|
| 11726651_GDAP1L1   | -0.07149 | 0.245176 | 0.351197 |
| 11748548_P2RX4     | -0.1188  | 0.245213 | 0.351225 |
| 11756339_SARDH     | -0.06853 | 0.245216 | 0.351225 |
| 11761624_SSU72     | -0.05822 | 0.245217 | 0.351225 |
| 11739518_FLRT3     | 0.061783 | 0.245228 | 0.351231 |
| 11729483_KLF8      | -0.07482 | 0.245265 | 0.351273 |
| 11715181_KRTAP10-9 | -0.0748  | 0.245283 | 0.351284 |
| 11715701_PFN2      | -0.04157 | 0.245287 | 0.351284 |
| 11721266_TMPRSS4   | -0.10112 | 0.245296 | 0.351287 |
| 11730413_CALCA     | -0.13475 | 0.245308 | 0.351294 |
| 11722152_EIF2AK3   | 0.077906 | 0.245333 | 0.351319 |
| 11752047_FERMT1    | -0.05387 | 0.245352 | 0.351335 |
| 11735755_PYHIN1    | -0.06369 | 0.245417 | 0.351419 |
| 11734063_CD200R1   | 0.104042 | 0.245468 | 0.351474 |
| 11745117_NAPA      | -0.04447 | 0.24547  | 0.351474 |
| 11733276_SLC2A2    | -0.09539 | 0.245536 | 0.351558 |
| 11737112_ZNF396    | -0.04693 | 0.245568 | 0.351593 |
| 11738068_SLC28A3   | 0.145942 | 0.245594 | 0.35162  |
| 11757969_JUND      | -0.04697 | 0.24567  | 0.351719 |
| 11736882_FCRL1     | -0.07797 | 0.245696 | 0.351737 |
| 11746579_ITIH1     | -0.19525 | 0.245706 | 0.351737 |
| 11763856_HOMER3    | -0.07965 | 0.245717 | 0.351737 |
| 11746996_CCDC7     | -0.10436 | 0.245719 | 0.351737 |
| 11762468_ESR2      | 0.084614 | 0.245719 | 0.351737 |
| 11736861_PIH1D3    | -0.0889  | 0.245777 | 0.35181  |
| 11743430_RBM27     | -0.05211 | 0.245789 | 0.351818 |
| 11748048_SUN2      | 0.085543 | 0.245806 | 0.351831 |
| 11751052_STRAP     | -0.04412 | 0.245879 | 0.351925 |
| 11759425_FAM127A   | 0.048449 | 0.245895 | 0.351937 |
| 11738091_ABTB1     | 0.05248  | 0.245972 | 0.352038 |
| 11735221_BTLA      | 0.126932 | 0.246005 | 0.352074 |
| 11754807_ZNF74     | 0.04954  | 0.246028 | 0.352098 |
| 11734635_KRTAP10-5 | -0.05805 | 0.24604  | 0.352105 |
| 11762246_PGAMIP4   | -0.07841 | 0.246047 | 0.352105 |
| 11729333_PADI1     | 0.092117 | 0.246084 | 0.352147 |
| 11752505_MAPK8IP1  | 0.068157 | 0.2461   | 0.352153 |
| 11734449_SOHLH1    | -0.07166 | 0.246103 | 0.352153 |
| 11732644_SYT6      | 0.089871 | 0.246178 | 0.352251 |
| 11738267_C7orf33   | -0.08062 | 0.246215 | 0.352284 |
| 11745247_PROB1     | -0.08339 | 0.246216 | 0.352284 |
| 11735601_CHRNE     | 0.132343 | 0.246269 | 0.35235  |
| 11746552_TMEM106A  | 0.065092 | 0.246283 | 0.352352 |
| 11762277_CYP2F1    | -0.07458 | 0.246285 | 0.352352 |
| 11722903_GSTT2 /// | -0.09802 | 0.246302 | 0.352365 |
| 11752812_TTYH1     | -0.08951 | 0.246423 | 0.352528 |
| 11719675_VCAM1     | 0.067492 | 0.246478 | 0.352597 |
| 11759060_C22orf39  | -0.12187 | 0.246499 | 0.352612 |
| 11731379_MED25     | -0.05112 | 0.246503 | 0.352612 |
| 11715285_C15orf40  | 0.079141 | 0.246519 | 0.352625 |
| 11751303_GORASP2   | 0.062483 | 0.246537 | 0.35264  |
| 11740427_PSAPL1    | -0.05982 | 0.246578 | 0.352688 |

|                    |          |          |          |
|--------------------|----------|----------|----------|
| 11727882_BBS12     | 0.155806 | 0.246663 | 0.352797 |
| 11756212_ELP3      | -0.05574 | 0.246668 | 0.352797 |
| 11722855_PDGF      | 0.061573 | 0.246692 | 0.352821 |
| 11759338_ELAVL4    | 0.07913  | 0.246707 | 0.352822 |
| 11762740_ABHD6     | -0.09429 | 0.246708 | 0.352822 |
| 11728077_PRKCQ     | -0.09431 | 0.246732 | 0.352846 |
| 11751892_NWD1      | 0.055969 | 0.246748 | 0.352849 |
| 11746413_ANKS3     | -0.06056 | 0.246748 | 0.352849 |
| 11731234_DEFB129   | -0.08584 | 0.246796 | 0.352907 |
| 11745239_ATP9B     | 0.042897 | 0.246828 | 0.352935 |
| 11726864_FOXO4     | -0.06325 | 0.24683  | 0.352935 |
| 11753102_MAP4K1    | -0.05251 | 0.246863 | 0.352972 |
| 11754837_LRRC69    | 0.099536 | 0.246885 | 0.352993 |
| 11737046_RASSF8    | -0.19287 | 0.24691  | 0.353018 |
| 11752295_SCN3A     | 0.079882 | 0.246947 | 0.353061 |
| 11739126_DNAJB2    | 0.064383 | 0.247078 | 0.353238 |
| 11763167_MARS      | -0.05662 | 0.247113 | 0.353278 |
| 11724456_FBXW4     | 0.048575 | 0.247164 | 0.35334  |
| 11743255_VAPA      | 0.071318 | 0.247243 | 0.35343  |
| 11752909_FAM66B // | -0.10225 | 0.247244 | 0.35343  |
| 11725810_GUCA1B    | -0.08904 | 0.247248 | 0.35343  |
| 11738825_PCDHA5    | -0.07506 | 0.247283 | 0.353465 |
| 11726442_YBX2      | -0.07251 | 0.247287 | 0.353465 |
| 11723097_VTCN1     | -0.12335 | 0.247302 | 0.353476 |
| 11716030_NDUFB9    | -0.04488 | 0.247348 | 0.353531 |
| 11760083_HYKK      | -0.0873  | 0.247361 | 0.35354  |
| 11726953_ADAMTS14  | -0.0657  | 0.247375 | 0.353548 |
| 11759209_AK9       | -0.07771 | 0.247389 | 0.353554 |
| 11737086_TLL1      | -0.114   | 0.247393 | 0.353554 |
| 11756762_GLMP      | -0.04765 | 0.247416 | 0.353577 |
| 11716650_UBE2Z     | 0.048766 | 0.247445 | 0.353607 |
| 11730664_PDCL2     | 0.12445  | 0.24747  | 0.353626 |
| 11750482_LOXHD1    | -0.0739  | 0.247472 | 0.353626 |
| 11746364_RNF207    | -0.08621 | 0.2475   | 0.353655 |
| 11760636_NAGPA     | -0.12937 | 0.247546 | 0.353707 |
| 11750564_TNRC6B    | 0.043915 | 0.247551 | 0.353707 |
| 11752279_TSPYL2    | -0.07356 | 0.247665 | 0.353859 |
| 11760526_LIG3      | -0.10229 | 0.247677 | 0.353866 |
| 11719237_INTS1     | -0.14218 | 0.247701 | 0.35389  |
| 11743496_NRBP2     | -0.08263 | 0.247733 | 0.353926 |
| 11748335_PRELID3B  | 0.047655 | 0.247746 | 0.353934 |
| 11736485_RASGEF1B  | -0.07865 | 0.247766 | 0.353952 |
| 11734786_OLFM3     | 0.079379 | 0.24778  | 0.353962 |
| 11757862_VTN       | -0.0495  | 0.247807 | 0.35399  |
| 11738324_USH2A     | -0.10175 | 0.247815 | 0.353991 |
| 11759925_PRDM5     | 0.089841 | 0.247837 | 0.354013 |
| 11752807_EYA2      | -0.05407 | 0.247927 | 0.35413  |
| 11749753_KIAA1328  | -0.04333 | 0.247983 | 0.354197 |
| 11741482_CLCN5     | -0.07488 | 0.247988 | 0.354197 |
| 11751209_LOC100129 | -0.06993 | 0.248002 | 0.354207 |
| 11747242_EFS       | 0.07671  | 0.248018 | 0.354219 |

|                    |          |          |          |
|--------------------|----------|----------|----------|
| 11760284_FOSL1     | 0.055614 | 0.248111 | 0.354334 |
| 11747131_REG4      | 0.094941 | 0.248118 | 0.354334 |
| 11763610_LOC101929 | -0.08732 | 0.248133 | 0.354334 |
| 11733815_RPL22L1   | -0.06241 | 0.248133 | 0.354334 |
| 11752554_VARS      | 0.057595 | 0.248134 | 0.354334 |
| 11741082_HTR1A     | -0.09231 | 0.248154 | 0.354351 |
| 11745172_SYNPR     | 0.063238 | 0.248176 | 0.354373 |
| 11738804_CACNA1G   | -0.05515 | 0.248259 | 0.354481 |
| 11751016_SOX7      | -0.06689 | 0.248277 | 0.354495 |
| 11721491_FBP1      | 0.062395 | 0.248374 | 0.354624 |
| 11736911_TRIM14    | 0.056593 | 0.248391 | 0.354637 |
| 11759263_KRTAP3-3  | -0.08924 | 0.248496 | 0.354778 |
| 11727228_FBXL8     | -0.11306 | 0.248541 | 0.354832 |
| 11735766_C16orf54  | -0.05253 | 0.248594 | 0.354897 |
| 11755045_ANKRD13A  | -0.05663 | 0.248626 | 0.354932 |
| 11756389_HAPLN2    | -0.05549 | 0.248638 | 0.354939 |
| 11737414_KIF6      | -0.06096 | 0.248676 | 0.354975 |
| 11738244_AKR1C1 // | -0.07611 | 0.248678 | 0.354975 |
| 11740831_EPHA6     | -0.09099 | 0.248736 | 0.355047 |
| 11728067_PTGDR2    | 0.053685 | 0.248762 | 0.355075 |
| 11736097_GGA1      | 0.055652 | 0.248771 | 0.355076 |
| 11764255_LOC105375 | 0.107278 | 0.248795 | 0.355082 |
| 11744251_ITGA8     | -0.13154 | 0.248796 | 0.355082 |
| 11753080_DPF2      | -0.05011 | 0.248796 | 0.355082 |
| 11722763_GATA2     | -0.0497  | 0.248815 | 0.355091 |
| 11760008_BIRC5     | -0.05529 | 0.248817 | 0.355091 |
| 11742774_CCDC112   | -0.04582 | 0.248954 | 0.355275 |
| 11727945_ARHGAP8 / | -0.04639 | 0.249023 | 0.355364 |
| 11763942_MT1DP     | -0.07869 | 0.249045 | 0.355385 |
| 11722450_POLR2D    | 0.069778 | 0.249054 | 0.355387 |
| 11753872_MT3       | -0.06286 | 0.249068 | 0.355392 |
| 11718337_LMOD1     | 0.048442 | 0.249072 | 0.355392 |
| 11728541_MDGA1     | 0.060754 | 0.249082 | 0.355395 |
| 11745960_MTG2      | 0.049442 | 0.249121 | 0.355442 |
| 11718255_ABHD4     | -0.05547 | 0.249182 | 0.355518 |
| 11757765_SGCD      | -0.05642 | 0.249219 | 0.35556  |
| 11751267_ADAMDEC1  | -0.04793 | 0.249406 | 0.355817 |
| 11722765_GIT2      | -0.0462  | 0.249473 | 0.355902 |
| 11730036_SP5       | -0.05634 | 0.249537 | 0.355983 |
| 11715295_CCL27     | -0.08049 | 0.249553 | 0.355995 |
| 11740628_CARD14    | -0.1145  | 0.24956  | 0.355996 |
| 11738977_KRTAP23-1 | -0.07055 | 0.249613 | 0.35606  |
| 11749836_CSMD2     | 0.058631 | 0.249633 | 0.356079 |
| 11733917_OGDH      | -0.06616 | 0.249728 | 0.356203 |
| 11728829_INHBB     | 0.099423 | 0.249778 | 0.356264 |
| 11746926_CCDC110   | 0.092014 | 0.249862 | 0.356372 |
| 11742322_OR2AK2    | -0.0763  | 0.249868 | 0.356372 |
| 11757141_SNORA25 / | 0.059032 | 0.24993  | 0.35645  |
| 11720654_BBX       | -0.0511  | 0.250024 | 0.356573 |
| 11750922_AMT       | 0.072718 | 0.250205 | 0.356822 |
| 11719887_GIGYF2    | -0.0571  | 0.25023  | 0.356847 |



|                    |          |          |          |
|--------------------|----------|----------|----------|
| 11741988_MBOAT4    | -0.06767 | 0.25024  | 0.35685  |
| 11719678_MED21     | -0.06389 | 0.250248 | 0.356851 |
| 11735638_KRTAP5-2  | -0.06503 | 0.250291 | 0.356902 |
| 11756682_INO80B-WE | -0.04598 | 0.250308 | 0.356913 |
| 11748765_CNOT6L    | 0.135592 | 0.250313 | 0.356913 |
| 11752966_ATF7      | 0.096587 | 0.250348 | 0.356952 |
| 11733280_ACHE      | -0.05328 | 0.250372 | 0.356976 |
| 11722083_RUFY3     | 0.09095  | 0.250394 | 0.356998 |
| 11723211_KCNJ10    | 0.052537 | 0.250413 | 0.357013 |
| 11744206_PAH       | -0.11123 | 0.250421 | 0.357014 |
| 11740609_RASSF6    | 0.079816 | 0.250436 | 0.357017 |
| 11747393_FRMD8     | -0.06405 | 0.250437 | 0.357017 |
| 11746872_COL1A1    | 0.102759 | 0.25047  | 0.35705  |
| 11760951_RPS6KB2   | -0.10668 | 0.250475 | 0.35705  |
| 11747129_SLC6A1    | -0.08465 | 0.250515 | 0.357097 |
| 11731011_B3GALNT1  | -0.12503 | 0.250547 | 0.357132 |
| 11752099_FOXP1     | 0.084201 | 0.250607 | 0.357206 |
| 11735013_GPR137    | 0.05679  | 0.250616 | 0.357209 |
| 11745032_ARSJ      | -0.04581 | 0.250625 | 0.357212 |
| 11753584_MADCAM1   | -0.06786 | 0.25066  | 0.357252 |
| 11757906_RPL10     | 0.040712 | 0.250715 | 0.357313 |
| 11740948_REXO1L1P  | -0.07327 | 0.250726 | 0.357313 |
| 11750755_OLFM3     | -0.06691 | 0.250726 | 0.357313 |
| 11758468_TSHZ2     | -0.0471  | 0.250732 | 0.357313 |
| 11744568_STGC3     | 0.083055 | 0.250749 | 0.357326 |
| 11742502_PRR25     | -0.08567 | 0.250767 | 0.357342 |
| 11749906_AQP9      | -0.12538 | 0.250779 | 0.357348 |
| 11731292_STXBP5L   | -0.06137 | 0.250812 | 0.357365 |
| 11716651_UBE2Z     | -0.0508  | 0.250813 | 0.357365 |
| 11745884_UBE2Z     | -0.0508  | 0.250813 | 0.357365 |
| 11717035_KIAA0141  | -0.11213 | 0.250836 | 0.357387 |
| 11735470_LGALS14   | -0.08006 | 0.250851 | 0.357398 |
| 11726729_KDM4A     | -0.05243 | 0.250982 | 0.357575 |
| 11762983_MED25     | -0.08097 | 0.251045 | 0.357654 |
| 11751190_DNMT3B    | -0.06027 | 0.251058 | 0.357662 |
| 11755752_IL16      | -0.04866 | 0.251075 | 0.357673 |
| 11724013_SOAT1     | 0.049092 | 0.25108  | 0.357673 |
| 11728871_ELAVL3    | -0.06349 | 0.251116 | 0.357713 |
| 11761023_COQ9      | 0.100969 | 0.251124 | 0.357714 |
| 11721898_FAM3D     | -0.09781 | 0.251165 | 0.357763 |
| 11727053_HOXB13    | -0.07504 | 0.251179 | 0.357764 |
| 11763194_LOC100506 | -0.17581 | 0.251181 | 0.357764 |
| 11733086_MAF       | -0.05549 | 0.251194 | 0.357773 |
| 11717011_ATP6V1E1  | 0.047583 | 0.251223 | 0.357803 |
| 11739795_RHBDF2    | -0.06742 | 0.251312 | 0.357912 |
| 11717067_GREM1     | -0.11717 | 0.251314 | 0.357912 |
| 11745079_TNKS      | 0.0925   | 0.251396 | 0.358018 |
| 11738538_STMN1     | 0.091398 | 0.251461 | 0.3581   |
| 11742490_INCA1     | -0.09717 | 0.25151  | 0.35816  |
| 11740697_MAGEB6    | -0.07417 | 0.251566 | 0.358226 |
| 11736127_DPPA4     | 0.089854 | 0.251571 | 0.358226 |

|                    |          |          |          |
|--------------------|----------|----------|----------|
| 11750171_TLE2      | -0.05866 | 0.251603 | 0.358252 |
| 11742136_HTR3D     | -0.04706 | 0.251604 | 0.358252 |
| 11735719_ALS2CR11  | 0.098283 | 0.251667 | 0.358331 |
| 11729311_SPX       | 0.086409 | 0.251679 | 0.358338 |
| 11719693_LARP7     | -0.05409 | 0.251736 | 0.358403 |
| 11745763_PAC SIN2  | -0.05669 | 0.25174  | 0.358403 |
| 11722170_CORO7     | -0.05573 | 0.251801 | 0.35848  |
| 11728629_PRR22     | 0.051925 | 0.25183  | 0.358504 |
| 11756292_CTSW      | -0.05641 | 0.251832 | 0.358504 |
| 11745974_ZFAT      | 0.130266 | 0.25187  | 0.358536 |
| 11726344_GPA33     | -0.06321 | 0.25187  | 0.358536 |
| 11746029_ZNF767P   | 0.06038  | 0.251877 | 0.358536 |
| 11761534_FANK1     | -0.10287 | 0.251951 | 0.358622 |
| 11749236_CYP46A1   | -0.06754 | 0.251952 | 0.358622 |
| 11731999_PDE11A    | 0.053022 | 0.251979 | 0.35865  |
| 11753642_TTTY6 /// | -0.08049 | 0.251993 | 0.35866  |
| 11728594_TDRD10    | -0.05398 | 0.252022 | 0.35869  |
| 11738851_MMP16     | 0.050765 | 0.252029 | 0.35869  |
| 11718289_APBB3     | 0.061493 | 0.252051 | 0.358711 |
| 11726043_PCCB      | 0.047771 | 0.252099 | 0.358769 |
| 11749458_RAP1GAP2  | 0.088367 | 0.252208 | 0.358905 |
| 11762491_AIFM2     | -0.06905 | 0.252209 | 0.358905 |
| 11756257_FLYWCH1   | 0.044769 | 0.252261 | 0.358968 |
| 11745441_TAF1A     | 0.050897 | 0.252352 | 0.359087 |
| 11744107_DLK1      | -0.05521 | 0.25239  | 0.359131 |
| 11746730_TRIM29    | -0.081   | 0.252414 | 0.359151 |
| 11752122_RALGDS    | 0.07455  | 0.252419 | 0.359151 |
| 11756825_SLC12A8   | 0.055112 | 0.252512 | 0.359273 |
| 11749720_OSBP L5   | -0.06932 | 0.252584 | 0.359358 |
| 11736380_ZNF697    | -0.09053 | 0.252587 | 0.359358 |
| 11720690_SLC35F6   | -0.06368 | 0.252771 | 0.359609 |
| 11736377_TM2D3     | -0.06641 | 0.252797 | 0.359636 |
| 11726843_MAPKBP1   | 0.086496 | 0.25286  | 0.35971  |
| 11748607_ARHG EF11 | -0.05917 | 0.252864 | 0.35971  |
| 11745045_PERM1     | -0.04995 | 0.252882 | 0.359723 |
| 11722250_MBD6      | 0.045203 | 0.252888 | 0.359723 |
| 11761381_SORBS2    | -0.04817 | 0.252895 | 0.359723 |
| 11742956_ITFG2 /// | 0.053774 | 0.252935 | 0.359761 |
| 11752030_SEMA6C    | -0.05319 | 0.252936 | 0.359761 |
| 11755615_JAKMIP3   | -0.08326 | 0.253014 | 0.359861 |
| 11757841_RANBP9    | -0.04757 | 0.253031 | 0.359869 |
| 11748397_TULP3     | 0.053069 | 0.253034 | 0.359869 |
| 11761815_LRRC8C    | -0.06706 | 0.253042 | 0.359869 |
| 11760245_CCDC163P  | 0.088223 | 0.253063 | 0.35989  |
| 11735252_SUPT3H    | -0.05115 | 0.253142 | 0.359991 |
| 11743157_ETFDH     | -0.09572 | 0.253164 | 0.360012 |
| 11718590_CHMP6     | -0.0589  | 0.253217 | 0.360077 |
| 11722350_DCLK2     | 0.073552 | 0.253245 | 0.360104 |
| 11746376_IL16      | 0.05641  | 0.253254 | 0.360104 |
| 11725513_SMAD7     | 0.102484 | 0.253258 | 0.360104 |
| 11728653_IGFBP5    | 0.096881 | 0.25328  | 0.360125 |

|                    |          |          |          |
|--------------------|----------|----------|----------|
| 11756412_NT5DC2    | 0.045045 | 0.253312 | 0.360151 |
| 11745386_ZNF638    | -0.06522 | 0.253314 | 0.360151 |
| 11722038_FES       | -0.05961 | 0.253465 | 0.360355 |
| 11762063_EPB41L5   | 0.173098 | 0.253488 | 0.360379 |
| 11763788_C14orf2   | -0.11105 | 0.253498 | 0.360382 |
| 11715446_DNAJB1    | -0.04448 | 0.253559 | 0.360458 |
| 11730904_APOBEC1   | -0.07787 | 0.253571 | 0.360465 |
| 11728591_SHISA9    | 0.054736 | 0.253621 | 0.360525 |
| 11725919_SOGA1     | -0.06471 | 0.253634 | 0.360533 |
| 11757772_RPLP0     | 0.040056 | 0.253674 | 0.36058  |
| 11737920_ZNF233    | -0.07091 | 0.253694 | 0.360597 |
| 11719504_DHX36     | -0.04462 | 0.253765 | 0.360684 |
| 11755833_GRM8      | -0.08751 | 0.253769 | 0.360684 |
| 11750341_RGAG1     | -0.08564 | 0.253792 | 0.360706 |
| 11747419_MOGS      | -0.06737 | 0.25381  | 0.36072  |
| 11743207_DEFB108B  | -0.07961 | 0.253828 | 0.360736 |
| 11736803_FGF9      | -0.08879 | 0.253836 | 0.360736 |
| 11722848_PPP3CA    | 0.056743 | 0.253876 | 0.360781 |
| 11761342_SLC9A1    | -0.05555 | 0.253882 | 0.360781 |
| 11759261_DCAF12L2  | -0.06713 | 0.253924 | 0.36083  |
| 11750157_CD4       | -0.07237 | 0.253984 | 0.360902 |
| 11762904_KRT17     | -0.11605 | 0.253997 | 0.360902 |
| 11730214_DUOX2     | -0.1094  | 0.253997 | 0.360902 |
| 11763776_THEMIS2   | -0.06927 | 0.254008 | 0.360908 |
| 11716935_SOD1      | -0.04364 | 0.254037 | 0.360939 |
| 11732777_PGLYRP4   | 0.057563 | 0.25405  | 0.360945 |
| 11732784_TRIM42    | -0.10284 | 0.254074 | 0.360969 |
| 11734505_ASPDH     | -0.07198 | 0.254098 | 0.360993 |
| 11740289_RGS9BP    | -0.13019 | 0.254124 | 0.361014 |
| 11739357_ERG       | -0.08775 | 0.254127 | 0.361014 |
| 11761418_IL23A     | -0.09463 | 0.254157 | 0.361046 |
| 11731950_SAMD3     | 0.126292 | 0.254209 | 0.361103 |
| 11763905_MAGED4 // | 0.09827  | 0.254212 | 0.361103 |
| 11750900_PGR       | -0.07715 | 0.254255 | 0.361153 |
| 11741204_PTPDC1    | -0.0847  | 0.254297 | 0.361202 |
| 11753708_CIDEA     | -0.0575  | 0.254366 | 0.36129  |
| 11754452_RRBP1     | -0.06119 | 0.254407 | 0.361337 |
| 11741025_PIP5K1A   | 0.079876 | 0.254416 | 0.36134  |
| 11743096_TMEM65    | 0.057188 | 0.254452 | 0.361375 |
| 11753260_HSP90B1   | -0.06174 | 0.254455 | 0.361375 |
| 11758469_PPP1R17   | -0.08757 | 0.254482 | 0.361403 |
| 11742459_ADGRF2    | -0.10062 | 0.254562 | 0.361505 |
| 11741902_SHBG      | -0.05781 | 0.254601 | 0.361551 |
| 11738084_SLC36A3   | -0.06759 | 0.254646 | 0.361604 |
| 11731782_CT45A1 // | 0.044574 | 0.254676 | 0.361635 |
| 11754679_AKT1S1    | -0.05534 | 0.254712 | 0.361676 |
| 11715118_HIST1H2BF | 0.07129  | 0.254809 | 0.361803 |
| 11725025_ISYNA1    | 0.054739 | 0.254874 | 0.361886 |
| 11745641_KDM4E     | -0.09628 | 0.254918 | 0.361932 |
| 11740626_TULP4     | 0.066187 | 0.254922 | 0.361932 |
| 11763287_OBSL1     | 0.057822 | 0.254973 | 0.361985 |

|                    |          |          |          |
|--------------------|----------|----------|----------|
| 11734879_TTLL2     | -0.07815 | 0.254974 | 0.361985 |
| 11757501_POLR2I    | -0.04424 | 0.254997 | 0.362008 |
| 11726471_SOCS7     | 0.085925 | 0.255057 | 0.362062 |
| 11727128_TYRP1     | 0.099657 | 0.255058 | 0.362062 |
| 11757262_SCARNA20  | 0.162121 | 0.255058 | 0.362062 |
| 11759929_NOX5      | -0.13698 | 0.255095 | 0.3621   |
| 11761508_FGF7      | -0.13492 | 0.2551   | 0.3621   |
| 11715501_IGFBP7    | 0.06971  | 0.255209 | 0.362245 |
| 11759537_RPS28     | -0.06351 | 0.255246 | 0.362287 |
| 11762484_TTF2      | -0.16271 | 0.25532  | 0.362379 |
| 11749471_MCF2      | 0.084391 | 0.255332 | 0.362379 |
| 11741496_PNMA5     | -0.0634  | 0.255336 | 0.362379 |
| 11750940_MKL1      | -0.05356 | 0.255342 | 0.362379 |
| 11733137_ETNPPL    | -0.05469 | 0.255348 | 0.362379 |
| 11762784_SCN5A     | -0.08954 | 0.255386 | 0.362422 |
| 11732852_ATP1B4    | -0.10573 | 0.255417 | 0.362457 |
| 11760630_RNF43     | -0.05634 | 0.255444 | 0.362484 |
| 11716685_MYO1D     | 0.181064 | 0.255498 | 0.36255  |
| 11743082_TAF3      | 0.054659 | 0.255549 | 0.362612 |
| 11726686_IRF5      | -0.04862 | 0.255638 | 0.362727 |
| 11724946_MAGI2     | 0.068705 | 0.255677 | 0.362773 |
| 11745414_SCD5      | -0.05548 | 0.255711 | 0.36281  |
| 11750352_KIAA0930  | -0.05309 | 0.255729 | 0.362826 |
| 11741894_DPH3P1    | -0.09054 | 0.255762 | 0.362861 |
| 11760720_SLC52A3   | -0.0477  | 0.255808 | 0.362917 |
| 11730520_ABCA9     | 0.131904 | 0.255833 | 0.362941 |
| 11737064_MTL5      | -0.07477 | 0.255864 | 0.362972 |
| 11742447_RNF222    | -0.08196 | 0.25587  | 0.362972 |
| 11737849_AMBN      | -0.06123 | 0.255891 | 0.362991 |
| 11757456_NACA      | -0.0411  | 0.255942 | 0.363054 |
| 11723397_ZNF385B   | -0.05785 | 0.255958 | 0.363066 |
| 11722178_DR1       | -0.06589 | 0.25598  | 0.363086 |
| 11750335_NRII3     | -0.04819 | 0.256004 | 0.363101 |
| 11723982_ARHGAP28  | 0.07864  | 0.256005 | 0.363101 |
| 11739737_DCUN1D2   | 0.065156 | 0.256039 | 0.363138 |
| 11720173_SF1       | 0.046095 | 0.256058 | 0.363155 |
| 11755511_MTL5      | -0.06789 | 0.256072 | 0.363161 |
| 11726867_ERCC8     | 0.06202  | 0.256077 | 0.363161 |
| 11744205_NPDC1     | -0.04391 | 0.256084 | 0.363161 |
| 11734944_SLAMF6    | -0.08053 | 0.256103 | 0.363163 |
| 11718750_SPG11     | 0.052527 | 0.256105 | 0.363163 |
| 11753349_NRG3      | -0.08224 | 0.256108 | 0.363163 |
| 11738382_HMHB1     | -0.08921 | 0.256168 | 0.363238 |
| 11756471_MFSD2A    | 0.095684 | 0.25624  | 0.363329 |
| 11716110_PIGR      | 0.091193 | 0.256271 | 0.363363 |
| 11734346_CEBPE     | -0.06692 | 0.256345 | 0.363456 |
| 11733621_NCMAP     | -0.05025 | 0.256382 | 0.363499 |
| 11754926_B3GALT5-A | 0.101076 | 0.256491 | 0.363642 |
| 11746641_GRM5      | -0.08924 | 0.256515 | 0.363666 |
| 11738143_S SX2IP   | 0.071454 | 0.256606 | 0.363784 |
| 11739252_HSD3B1    | -0.05168 | 0.25669  | 0.363891 |

|                    |          |          |          |
|--------------------|----------|----------|----------|
| 11748443_WNT7B     | -0.04062 | 0.256696 | 0.363891 |
| 11758271_CASK      | 0.066891 | 0.256719 | 0.363913 |
| 11734498_SNX22     | 0.079357 | 0.256748 | 0.363943 |
| 11758393_DNAJC30   | -0.06642 | 0.25677  | 0.363964 |
| 11722815_RANBP2    | 0.075492 | 0.256802 | 0.363999 |
| 11757245_TFAMP1    | -0.08079 | 0.256838 | 0.364039 |
| 11720196_CIPC      | -0.0634  | 0.256845 | 0.364039 |
| 11751410_CCDC64    | 0.066399 | 0.256908 | 0.364117 |
| 11722017_OLR1      | -0.12258 | 0.256935 | 0.364133 |
| 11736134_OAS2      | -0.06489 | 0.256938 | 0.364133 |
| 11743860_ANGPTL7   | -0.10445 | 0.256942 | 0.364133 |
| 11728175_BMP8A     | -0.0551  | 0.256954 | 0.364135 |
| 11740095_LRRC2     | 0.066951 | 0.256964 | 0.364135 |
| 11717467_TTC38     | 0.058924 | 0.256965 | 0.364135 |
| 11759956_ACTR3C    | 0.116269 | 0.257015 | 0.364187 |
| 11751839_MKL1      | 0.107862 | 0.257017 | 0.364187 |
| 11726771_XAF1      | -0.04685 | 0.257028 | 0.364193 |
| 11722640_SSBP3     | -0.06636 | 0.25706  | 0.364227 |
| 11724512_SULT4A1   | -0.06046 | 0.257082 | 0.364248 |
| 11752530_VPS53     | -0.04997 | 0.257095 | 0.364256 |
| 11739180_ST6GALNAC | -0.04909 | 0.257321 | 0.364566 |
| 11733342_IDI2      | -0.05808 | 0.257357 | 0.364593 |
| 11725621_TRMT2A    | -0.06489 | 0.257362 | 0.364593 |
| 11749266_PRRT2     | -0.07521 | 0.257363 | 0.364593 |
| 11720033_TRIM29    | -0.07485 | 0.257381 | 0.364608 |
| 11721557_ABCA8     | -0.09941 | 0.257406 | 0.364633 |
| 11743885_ADPRHL1   | -0.04459 | 0.257419 | 0.36464  |
| 11738316_GRK4      | -0.06168 | 0.257443 | 0.364664 |
| 11733333_NRP2      | -0.0853  | 0.257481 | 0.364708 |
| 11731269_KRT31     | -0.12908 | 0.25749  | 0.36471  |
| 11716964_PPM1F     | 0.06198  | 0.257556 | 0.364793 |
| 11761256_RABEP2    | -0.04394 | 0.257575 | 0.364809 |
| 11740713_ELAVL4    | -0.11181 | 0.257585 | 0.364812 |
| 11759365_GPR157    | 0.072488 | 0.2576   | 0.364821 |
| 11736935_POU2F3    | 0.07066  | 0.257611 | 0.364821 |
| 11741399_CLUL1     | -0.1076  | 0.257621 | 0.364821 |
| 11753823_S100A8    | -0.08891 | 0.257624 | 0.364821 |
| 11732208_MON2      | -0.09362 | 0.257632 | 0.364821 |
| 11738848_GFRAL     | 0.054169 | 0.257636 | 0.364821 |
| 11762143_RNH1      | -0.08557 | 0.257655 | 0.364838 |
| 11760986_CCDC22    | -0.07744 | 0.257676 | 0.364857 |
| 11719864_SMAGP     | 0.05533  | 0.257705 | 0.364877 |
| 11760335_EMG1      | 0.096005 | 0.257705 | 0.364877 |
| 11726153_POU2AF1   | 0.098352 | 0.257761 | 0.364946 |
| 11738131_RNF212    | 0.048487 | 0.257769 | 0.364946 |
| 11737392_PROKR2    | 0.057503 | 0.257817 | 0.365004 |
| 11754882_BRSK2     | -0.05289 | 0.257929 | 0.365148 |
| 11757416_ILKAP     | 0.04496  | 0.257934 | 0.365148 |
| 11740734_RBFOX1    | 0.105608 | 0.258022 | 0.365263 |
| 11739049_ACPP      | 0.118272 | 0.258124 | 0.365396 |
| 11737271_ZNF805    | -0.06602 | 0.258313 | 0.365653 |

|                    |          |          |          |
|--------------------|----------|----------|----------|
| 11722854_HABP4     | 0.051784 | 0.25836  | 0.365708 |
| 11728624_PAX2      | -0.07645 | 0.258378 | 0.365723 |
| 11734966_NFATC4    | -0.05775 | 0.258426 | 0.36578  |
| 11755187_ERMP1     | -0.06315 | 0.25851  | 0.36589  |
| 11750324_GAS7      | -0.05719 | 0.258522 | 0.365896 |
| 11746836_TMEFF2    | -0.07783 | 0.258559 | 0.36593  |
| 11739298_LRRFIP1   | -0.04902 | 0.258562 | 0.36593  |
| 11733676_TEKT4     | -0.06284 | 0.258568 | 0.36593  |
| 11731725_B4GALT7   | 0.060523 | 0.25861  | 0.365977 |
| 11718060_TTYH2     | -0.06074 | 0.258624 | 0.365988 |
| 11741687_RHBDL2    | 0.061461 | 0.25866  | 0.366027 |
| 11728657_IGFBP5    | -0.06392 | 0.258732 | 0.366118 |
| 11726687_IRF5      | -0.10574 | 0.258874 | 0.366309 |
| 11758235_SRRM1     | 0.049301 | 0.258938 | 0.366389 |
| 11760864_TMEFF2    | 0.084193 | 0.258996 | 0.366461 |
| 11724251_SLC39A8   | 0.069904 | 0.25901  | 0.366469 |
| 11723174_FNDC1     | 0.070159 | 0.25902  | 0.366474 |
| 11761631_JAK3      | -0.08055 | 0.259063 | 0.366523 |
| 11724891_POLRMT    | -0.06038 | 0.259097 | 0.366561 |
| 11735670_LINC00336 | -0.04191 | 0.259104 | 0.366561 |
| 11722707_MAP6      | -0.09683 | 0.259139 | 0.366598 |
| 11737645_FAM150A   | -0.07691 | 0.259145 | 0.366598 |
| 11755171_CAMSAP3   | -0.07373 | 0.259208 | 0.366675 |
| 11731825_GPR83     | 0.07494  | 0.259233 | 0.366701 |
| 11729693_SERPINB3  | -0.07104 | 0.259242 | 0.366703 |
| 11720891_USP20     | 0.063237 | 0.259346 | 0.366829 |
| 11754119_PLAU      | 0.059959 | 0.259347 | 0.366829 |
| 11734406_LRRC36    | -0.144   | 0.259424 | 0.366928 |
| 11750130_MRVI1     | -0.09439 | 0.259458 | 0.366966 |
| 11732742_ATP4B     | -0.10333 | 0.259493 | 0.367004 |
| 11749911_SFTPB     | -0.06001 | 0.259516 | 0.367026 |
| 11752408_R3HDM2    | -0.05545 | 0.259605 | 0.367141 |
| 11744703_SYDE1     | 0.0638   | 0.259667 | 0.367219 |
| 11763110_DEAR      | 0.084061 | 0.259677 | 0.367222 |
| 11731530_DOK1      | -0.09819 | 0.259702 | 0.367247 |
| 11763624_GADD45B   | 0.069952 | 0.259724 | 0.367267 |
| 11757536_ACADM     | 0.052142 | 0.259736 | 0.367273 |
| 11716478_LARP1     | -0.04022 | 0.259808 | 0.367365 |
| 11760349_UQCC1     | -0.07122 | 0.259826 | 0.367373 |
| 11747446_HLA-DOB   | -0.09928 | 0.259835 | 0.367373 |
| 11734524_C6orf15   | -0.10077 | 0.259837 | 0.367373 |
| 11749364_SAP30BP   | -0.04804 | 0.259888 | 0.367435 |
| 11738536_WNT1      | -0.13684 | 0.259901 | 0.367443 |
| 11723495_RNF166    | -0.05932 | 0.259915 | 0.367449 |
| 11723317_FAM234B   | -0.09725 | 0.25992  | 0.367449 |
| 11716479_F13A1     | -0.13073 | 0.260002 | 0.367544 |
| 11754453_NUDT4 /// | -0.04481 | 0.260002 | 0.367544 |
| 11761053_ROBO3     | -0.09558 | 0.260026 | 0.367566 |
| 11753784_RPL34     | 0.044285 | 0.260041 | 0.367578 |
| 11735307_C9orf139  | 0.06618  | 0.260111 | 0.367666 |
| 11750533_C1QL3     | 0.053701 | 0.260144 | 0.367696 |

|                    |          |          |          |
|--------------------|----------|----------|----------|
| 11746562_ZFP36L1   | -0.05592 | 0.260147 | 0.367696 |
| 11735613_ASIC4     | -0.05849 | 0.260186 | 0.36774  |
| 11734654_ATP5F1    | 0.069134 | 0.26025  | 0.367819 |
| 11735807_SPATA32   | 0.099408 | 0.260261 | 0.367824 |
| 11761719_HPS1      | 0.042806 | 0.260287 | 0.36785  |
| 11735550_LMNTD2    | -0.08495 | 0.260311 | 0.367869 |
| 11741573_ZNF219    | -0.04623 | 0.260315 | 0.367869 |
| 11732789_OOEP      | -0.04677 | 0.260325 | 0.367873 |
| 11731818_CD40      | -0.05597 | 0.260384 | 0.367945 |
| 11739533_PPIE      | -0.04665 | 0.260414 | 0.367973 |
| 11750691_ZMYM6     | 0.092792 | 0.260419 | 0.367973 |
| 11744009_LZTS3     | -0.056   | 0.260434 | 0.367984 |
| 11744836_RPL35     | -0.04189 | 0.260451 | 0.367997 |
| 11730951_TMEM151B  | -0.05817 | 0.260464 | 0.368005 |
| 11730025_UPK3A     | -0.09383 | 0.260476 | 0.368011 |
| 11752541_PPIL2     | -0.07437 | 0.260496 | 0.368028 |
| 11747033_LOC162137 | 0.073037 | 0.260511 | 0.36804  |
| 11728853_TUB       | -0.05512 | 0.260535 | 0.368063 |
| 11717458_NLGN2     | -0.07906 | 0.260596 | 0.368137 |
| 11723745_SLC13A5   | -0.08377 | 0.260603 | 0.368137 |
| 11750433_CCT3      | 0.042167 | 0.260662 | 0.368205 |
| 11727284_CUX2      | -0.09367 | 0.260668 | 0.368205 |
| 11738980_CD4       | -0.12501 | 0.260674 | 0.368205 |
| 11746811_KCTD3     | 0.046259 | 0.260819 | 0.368399 |
| 11739593_USH1C     | 0.048523 | 0.260833 | 0.368409 |
| 11761918_TRBC1 /// | 0.061206 | 0.260842 | 0.368411 |
| 11757899_PWP1      | 0.041851 | 0.260851 | 0.368411 |
| 11724962_SRGAP3    | -0.0642  | 0.260857 | 0.368411 |
| 11721801_ARL8B     | 0.052636 | 0.260883 | 0.368438 |
| 11734649_HNRNPCL2  | -0.16722 | 0.260945 | 0.368514 |
| 11731266_NXPH2     | -0.04859 | 0.261007 | 0.368592 |
| 11751044_FOXL2NB   | -0.06584 | 0.261046 | 0.368635 |
| 11741693_SERHL     | 0.05812  | 0.261107 | 0.368711 |
| 11753698_IL20      | 0.167766 | 0.261164 | 0.368778 |
| 11736974_SMURF1    | 0.051561 | 0.26117  | 0.368778 |
| 11746063_IKBKB     | -0.08584 | 0.261215 | 0.368831 |
| 11731670_PCDHB6    | 0.042445 | 0.261251 | 0.368872 |
| 11759600_PNISR     | 0.084418 | 0.261287 | 0.368912 |
| 11734886_SEMA3G    | -0.0607  | 0.261306 | 0.368928 |
| 11750454_ETV7      | 0.054284 | 0.261329 | 0.36895  |
| 11719294_AP3B1     | -0.04155 | 0.261429 | 0.369064 |
| 11754646_ERCC3     | 0.058197 | 0.261431 | 0.369064 |
| 11759351_RBP1      | -0.0998  | 0.261433 | 0.369064 |
| 11720284_TRAK1     | -0.04815 | 0.261489 | 0.369133 |
| 11738300_MCCD1     | -0.07624 | 0.261508 | 0.36915  |
| 11756632_GNLY      | 0.057463 | 0.261518 | 0.369152 |
| 11737595_LINCO1588 | -0.06517 | 0.26158  | 0.369228 |
| 11751166_TRIM5     | 0.073945 | 0.261586 | 0.369228 |
| 11735149_ANGPTL6   | -0.04698 | 0.261639 | 0.369292 |
| 11749853_DTNB      | 0.049121 | 0.26169  | 0.369353 |
| 11758419_TMEM106A  | 0.134198 | 0.261722 | 0.369383 |

|                    |          |          |          |
|--------------------|----------|----------|----------|
| 11764233_C1orf56   | 0.097869 | 0.261727 | 0.369383 |
| 11736598_DLG3      | -0.06589 | 0.261782 | 0.369451 |
| 11717825_STMN2     | 0.08255  | 0.261851 | 0.369538 |
| 11724588_ANKRD35   | 0.054094 | 0.261903 | 0.369601 |
| 11720606_SFRP2     | 0.092992 | 0.261946 | 0.36965  |
| 11763041_ANKRD18A  | 0.065797 | 0.262041 | 0.369773 |
| 11716706_TRIM44    | -0.04136 | 0.262072 | 0.369795 |
| 11719303 EMC8      | 0.043063 | 0.262075 | 0.369795 |
| 11751541_PDCD1     | 0.072663 | 0.262079 | 0.369795 |
| 11746966_DNASE1L3  | -0.08961 | 0.262096 | 0.369808 |
| 11760793_TBC1D26   | -0.11277 | 0.262164 | 0.369894 |
| 11736196_DCX       | -0.07795 | 0.262209 | 0.36994  |
| 11730591_MCMDC2    | 0.111235 | 0.262212 | 0.36994  |
| 11725742_SORBS1    | -0.06229 | 0.26229  | 0.370039 |
| 11762174_DDB1      | 0.100579 | 0.262331 | 0.370083 |
| 11721620_FOXJ1     | -0.04763 | 0.262336 | 0.370083 |
| 11759127_CD300E    | -0.07405 | 0.262352 | 0.370095 |
| 11715680_C12orf57  | 0.045657 | 0.262368 | 0.370106 |
| 11742738_BBS9      | 0.052147 | 0.262385 | 0.370108 |
| 11731150_CBLN3     | 0.066347 | 0.262392 | 0.370108 |
| 11722308_TP63      | -0.04974 | 0.262405 | 0.370108 |
| 11734528_ACPT      | -0.06545 | 0.262405 | 0.370108 |
| 11761363_DLC1      | 0.073275 | 0.262407 | 0.370108 |
| 11716386_RAB11FIP5 | -0.07289 | 0.262416 | 0.37011  |
| 11716040_RPS5      | 0.040175 | 0.262427 | 0.370115 |
| 11758129_CPLX3     | 0.07686  | 0.262461 | 0.370152 |
| 11754978_BMP1      | 0.065905 | 0.26247  | 0.370154 |
| 11733611_DOCK8     | 0.115271 | 0.262523 | 0.370218 |
| 11748836_PEX14     | -0.05761 | 0.262532 | 0.37022  |
| 11733957_SPRR2F    | -0.09713 | 0.262541 | 0.370223 |
| 11718817_MADD      | 0.053797 | 0.262557 | 0.370234 |
| 11758120_KCNB1     | -0.04271 | 0.262588 | 0.37026  |
| 11729453_CYP2B6 // | -0.07659 | 0.26259  | 0.37026  |
| 11727373_PAPSS1    | 0.043134 | 0.262618 | 0.370289 |
| 11748394_FMO1      | -0.05378 | 0.262634 | 0.3703   |
| 11735091_SLC16A6   | 0.070901 | 0.262646 | 0.370306 |
| 11731988_FAM19A3   | -0.07176 | 0.262654 | 0.370307 |
| 11753522_NKX3-1    | -0.0507  | 0.262742 | 0.370421 |
| 11760193_TMEM68    | 0.122313 | 0.262752 | 0.370424 |
| 11736391_ZNF662    | 0.134641 | 0.262774 | 0.370444 |
| 11737346_LINGO2    | 0.061553 | 0.262792 | 0.370459 |
| 11759455_TUBB7P // | -0.12383 | 0.262802 | 0.370462 |
| 11720017_CGNL1     | -0.09273 | 0.262828 | 0.370488 |
| 11740503_APOBEC3D  | -0.05841 | 0.262855 | 0.370516 |
| 11742599_OR6C76    | -0.11295 | 0.262869 | 0.370524 |
| 11748866_RPH3AL    | -0.12364 | 0.262903 | 0.370562 |
| 11727590_IL20RB    | -0.05865 | 0.262939 | 0.370602 |
| 11738870_GLT6D1    | 0.095039 | 0.262967 | 0.370631 |
| 11724550_RSBN1     | -0.05453 | 0.263008 | 0.370675 |
| 11723846_DEFBI     | 0.114562 | 0.263014 | 0.370675 |
| 11763697_SNHG9     | -0.09935 | 0.263036 | 0.37069  |



|                    |          |          |          |
|--------------------|----------|----------|----------|
| 11763130_IGKC      | 0.11474  | 0.263039 | 0.37069  |
| 11741703_HIST1H1T  | -0.06771 | 0.263221 | 0.370936 |
| 11760148_ISCU      | 0.071592 | 0.263279 | 0.371006 |
| 11762544_DNAJC24   | -0.07126 | 0.263452 | 0.371239 |
| 11760487_PDCL3     | -0.05097 | 0.263588 | 0.371421 |
| 11716612_ABCF3     | 0.06069  | 0.263672 | 0.371516 |
| 11717505_TRAM2     | -0.04243 | 0.263677 | 0.371516 |
| 11760152_LOC730098 | -0.16312 | 0.263679 | 0.371516 |
| 11758504_FAM216B   | 0.068961 | 0.263719 | 0.371551 |
| 11752195_TAX1BP1   | -0.04075 | 0.263719 | 0.371551 |
| 11721669_KLHDC4 // | 0.064033 | 0.263807 | 0.371664 |
| 11735575_ZNF296    | 0.06205  | 0.263879 | 0.371755 |
| 11726752_C9orf91   | -0.07148 | 0.263918 | 0.371789 |
| 11723490_GCLM      | 0.04515  | 0.263918 | 0.371789 |
| 11752717_CCNI      | -0.04381 | 0.264047 | 0.37196  |
| 11731534_CCDC85C   | -0.04661 | 0.264056 | 0.371962 |
| 11723447_MALL      | -0.05178 | 0.264078 | 0.371982 |
| 11754744_WDR88     | -0.10394 | 0.264116 | 0.372025 |
| 11738895_CAPN10    | -0.08701 | 0.264158 | 0.372073 |
| 11738488_GPR148    | -0.08144 | 0.264202 | 0.372125 |
| 11731909_KLK8      | 0.082055 | 0.264231 | 0.372154 |
| 11761627_WDR61     | 0.115237 | 0.264275 | 0.3722   |
| 11737994_LRRC3     | -0.04478 | 0.264279 | 0.3722   |
| 11742597_OR8H2 /// | -0.08907 | 0.26429  | 0.372205 |
| 11736757_GAL3ST3   | -0.05637 | 0.264314 | 0.372228 |
| 11736161_GBP6      | -0.08129 | 0.264375 | 0.3723   |
| 11727875_DLX3      | 0.091921 | 0.26439  | 0.3723   |
| 11759444_BAX       | 0.048    | 0.26439  | 0.3723   |
| 11741278_ZFYVE27   | 0.087465 | 0.264395 | 0.3723   |
| 11760022_IFT172    | -0.09682 | 0.264431 | 0.372339 |
| 11751562_C16orf45  | -0.04275 | 0.264467 | 0.37238  |
| 11718140_EMP3      | -0.04991 | 0.264483 | 0.372383 |
| 11719599_HOMER2    | -0.05508 | 0.264491 | 0.372383 |
| 11725269_SLC12A3   | -0.04485 | 0.264492 | 0.372383 |
| 11737558_PMS2P5    | -0.04129 | 0.264519 | 0.372407 |
| 11762808_MPZL1     | -0.05542 | 0.264525 | 0.372407 |
| 11726929_CACNA2D4  | 0.053919 | 0.264571 | 0.372462 |
| 11720001_SYNJ2BP   | 0.056423 | 0.264617 | 0.372515 |
| 11749629_ARHGAP33  | -0.08189 | 0.264652 | 0.372554 |
| 11721346_MPEG1     | -0.06509 | 0.264697 | 0.372602 |
| 11753870_ATOX1     | -0.04223 | 0.264701 | 0.372602 |
| 11746621_RBM46     | 0.054948 | 0.264754 | 0.372666 |
| 11756437_RPS18     | 0.044832 | 0.264776 | 0.372686 |
| 11752973_DDX23     | -0.05761 | 0.264836 | 0.37276  |
| 11718383_AIFM1     | 0.039502 | 0.264858 | 0.372763 |
| 11729931_ZNF496    | -0.06446 | 0.264861 | 0.372763 |
| 11719341_TMEM41A   | 0.049031 | 0.264861 | 0.372763 |
| 11733533_CYP4F22   | -0.17498 | 0.264924 | 0.372841 |
| 11735028_LRRC27    | -0.06481 | 0.264933 | 0.372842 |
| 11763254_BMS1P20 / | -0.08735 | 0.264949 | 0.372855 |
| 11739473_MAGI1     | 0.085837 | 0.264964 | 0.372865 |

|                    |          |          |          |
|--------------------|----------|----------|----------|
| 11727338_CARNS1    | 0.093822 | 0.264998 | 0.372901 |
| 11735714_OARD1     | -0.05621 | 0.265128 | 0.373074 |
| 11763979_SRRT      | 0.06077  | 0.26526  | 0.373249 |
| 11718740_FAM160B2  | 0.067108 | 0.265314 | 0.373314 |
| 11720330_BRIX1     | -0.0406  | 0.265329 | 0.373315 |
| 11725164_C7orf31   | 0.099594 | 0.26533  | 0.373315 |
| 11730018_PPP1R32   | -0.05972 | 0.265367 | 0.373357 |
| 11738604_DEFB107A  | 0.076931 | 0.265447 | 0.373458 |
| 11743093_LIN7A     | 0.08181  | 0.265466 | 0.373466 |
| 11751644_PBXIP1    | -0.042   | 0.265468 | 0.373466 |
| 11740777_FAM129C   | 0.057436 | 0.265482 | 0.373469 |
| 11763228_IGK /// I | -0.07553 | 0.265485 | 0.373469 |
| 11722264_MRPS10    | 0.050095 | 0.265521 | 0.373509 |
| 11759942_SLC2A13   | -0.11591 | 0.265546 | 0.373533 |
| 11740889_ATP2A1    | -0.07321 | 0.265601 | 0.3736   |
| 11762118_CHI3L2    | -0.07369 | 0.265647 | 0.373641 |
| 11744394_EGFL7     | 0.061972 | 0.265653 | 0.373641 |
| 11749719_C9orf91   | -0.06562 | 0.265655 | 0.373641 |
| 11721653_AGPAT4    | -0.09152 | 0.265661 | 0.373641 |
| 11725918_SOGA1     | -0.06417 | 0.265701 | 0.373687 |
| 11741387_ZNF530    | 0.086847 | 0.265721 | 0.373704 |
| 11742540_OR52E2    | -0.10201 | 0.265809 | 0.373816 |
| 11729256_KANSL3    | -0.05703 | 0.26585  | 0.373864 |
| 11738840_NUDT10    | -0.05159 | 0.265862 | 0.373869 |
| 11722556_TMEM35    | -0.11376 | 0.265894 | 0.373904 |
| 11737567_C1QTNF9B  | -0.08116 | 0.265948 | 0.373958 |
| 11746035_GPATCH11  | -0.05562 | 0.265952 | 0.373958 |
| 11757257_PISRT1    | -0.04713 | 0.265955 | 0.373958 |
| 11723370_SHANK3    | -0.06577 | 0.265968 | 0.373965 |
| 11735232_STARD7-AS | -0.05747 | 0.266015 | 0.37402  |
| 11722673_HIF3A     | -0.07456 | 0.266025 | 0.374024 |
| 11724424_GPR68     | 0.077437 | 0.266058 | 0.374057 |
| 11733046_ABI1      | 0.050184 | 0.266064 | 0.374057 |
| 11747909_KDM4B     | 0.065891 | 0.266084 | 0.374074 |
| 11731239_GRHL2     | -0.06617 | 0.266115 | 0.374107 |
| 11745147_ADCYAP1R1 | -0.05388 | 0.266175 | 0.374172 |
| 11752046_HDAC7     | -0.05092 | 0.266177 | 0.374172 |
| 11727734_CFAP126   | -0.06425 | 0.266194 | 0.374186 |
| 11750857_SYNJ2     | -0.06115 | 0.266212 | 0.3742   |
| 11727238_UST       | -0.06153 | 0.266298 | 0.37431  |
| 11729567_LINC00922 | -0.21071 | 0.266305 | 0.37431  |
| 11758340_HLA-DQA1  | -0.04279 | 0.266357 | 0.374372 |
| 11731104_ATF7      | -0.05326 | 0.266418 | 0.374446 |
| 11724829_STS       | -0.08076 | 0.266445 | 0.374474 |
| 11763288_OBSL1     | 0.07742  | 0.266462 | 0.374486 |
| 11729230_KLF3      | 0.056243 | 0.266469 | 0.374486 |
| 11762393_VEPHI     | 0.072853 | 0.266481 | 0.374492 |
| 11739629_DROSHA    | -0.05347 | 0.266493 | 0.374498 |
| 11727104_FGD5      | 0.06108  | 0.266511 | 0.374513 |
| 11732498_HCN2      | 0.095318 | 0.266522 | 0.374517 |
| 11760112_HCLS1     | 0.055821 | 0.266558 | 0.374557 |

|                    |          |          |          |
|--------------------|----------|----------|----------|
| 11737266_RHD       | 0.153732 | 0.2666   | 0.374606 |
| 11728942_CCNDP1    | -0.10533 | 0.266629 | 0.374636 |
| 11738534_KRT9      | -0.06675 | 0.266641 | 0.374643 |
| 11728590_MFSD13A   | -0.04189 | 0.266777 | 0.374813 |
| 11739869_LRRN4     | -0.08647 | 0.266778 | 0.374813 |
| 11734133_SLC2A4    | -0.05628 | 0.266786 | 0.374813 |
| 11755764_PKD1L2    | -0.07449 | 0.266798 | 0.374819 |
| 11715367_SEPT2     | -0.04395 | 0.266835 | 0.37486  |
| 11740494_SLC6A12   | -0.06867 | 0.26685  | 0.374871 |
| 11759528_MRPS31    | 0.166033 | 0.266965 | 0.375022 |
| 11746946_AGGF1     | 0.047811 | 0.267115 | 0.375222 |
| 11721071_DEF8      | 0.055576 | 0.267271 | 0.37543  |
| 11717045_C2        | -0.09572 | 0.267289 | 0.375444 |
| 11722612_TUBGCP5   | -0.05119 | 0.267305 | 0.375457 |
| 11733339_FANCE     | 0.068982 | 0.267335 | 0.375488 |
| 11752828_PXN       | -0.06306 | 0.267406 | 0.375576 |
| 11761917_OLFM1     | -0.07656 | 0.267436 | 0.375608 |
| 11721592_FANCC     | 0.046187 | 0.267459 | 0.37563  |
| 11732085_SLC13A2   | -0.09117 | 0.267519 | 0.375703 |
| 11725370_VEGFA     | -0.06199 | 0.267535 | 0.375714 |
| 11756042_ESR1      | -0.06449 | 0.267545 | 0.375718 |
| 11718197_LHFP      | 0.046759 | 0.267583 | 0.37576  |
| 11755750_MOG       | -0.04994 | 0.26761  | 0.375787 |
| 11750080_DDB2      | 0.042886 | 0.267644 | 0.375824 |
| 11734648_BPIFB3    | -0.07693 | 0.267664 | 0.375841 |
| 11721211_SCRIB     | -0.0502  | 0.267698 | 0.375879 |
| 11763940_LOC284441 | 0.049074 | 0.267712 | 0.375887 |
| 11743435_SEZ6L2    | -0.08834 | 0.267751 | 0.375932 |
| 11735179_MORC1     | -0.06254 | 0.267836 | 0.376039 |
| 11749591_GFAP      | -0.07674 | 0.26787  | 0.376077 |
| 11761191_USB1      | -0.05621 | 0.267917 | 0.376131 |
| 11749138_TRIM46    | -0.06728 | 0.268003 | 0.376243 |
| 11742048_ITGB1     | -0.08649 | 0.268025 | 0.376262 |
| 11750584_RNF17     | -0.06049 | 0.268106 | 0.376365 |
| 11755658_ZNF594    | 0.077866 | 0.268147 | 0.376411 |
| 11752983_GPR68     | -0.07936 | 0.268162 | 0.376414 |
| 11750067_SPIB      | -0.08524 | 0.268169 | 0.376414 |
| 11747869_POLR2A    | -0.05467 | 0.268172 | 0.376414 |
| 11734278_TSGA10    | 0.060073 | 0.268217 | 0.376466 |
| 11735858_RIIAD1    | -0.06185 | 0.268228 | 0.376472 |
| 11730068_HGF       | -0.0629  | 0.268241 | 0.376478 |
| 11736973_TBX5      | -0.08615 | 0.268375 | 0.376648 |
| 11719209_NPTN      | 0.050073 | 0.268377 | 0.376648 |
| 11742614_OR4C16    | -0.1488  | 0.268403 | 0.376669 |
| 11726889_ZFP36L1   | -0.0551  | 0.268408 | 0.376669 |
| 11760058_SLC3A1    | -0.08259 | 0.268429 | 0.376688 |
| 11749642_SLC4A10   | 0.068613 | 0.268454 | 0.376701 |
| 11745582_CFAP43    | 0.061066 | 0.268462 | 0.376701 |
| 11732866_MS4A4A    | -0.11136 | 0.268467 | 0.376701 |
| 11730334_ZSWIM1    | 0.072128 | 0.268469 | 0.376701 |
| 11741259_GREB1L    | 0.083629 | 0.268485 | 0.376713 |

|                    |          |          |          |
|--------------------|----------|----------|----------|
| 11754919_CAGE1     | -0.06193 | 0.268501 | 0.376725 |
| 11745369_ZFYVE27   | 0.057231 | 0.268527 | 0.376748 |
| 11738864_ABHD12B   | -0.12553 | 0.268533 | 0.376748 |
| 11723473_LYPLAL1   | 0.03942  | 0.268623 | 0.376863 |
| 11750850_FAM83F    | 0.069293 | 0.268675 | 0.376925 |
| 11746158_LINC00442 | -0.07421 | 0.268689 | 0.376925 |
| 11746764_SCEL      | 0.117238 | 0.26869  | 0.376925 |
| 11723216_SFXN3     | -0.0967  | 0.26871  | 0.376936 |
| 11754537_PHTF1     | 0.046123 | 0.268713 | 0.376936 |
| 11726296_ZNF500    | -0.06541 | 0.268792 | 0.377035 |
| 11722622_TMEM8A    | 0.048267 | 0.268827 | 0.377063 |
| 11755626_PNLDC1    | 0.083166 | 0.268827 | 0.377063 |
| 11762188_SUGCT     | -0.08119 | 0.268903 | 0.377145 |
| 11742256_SLC22A6   | 0.078792 | 0.268908 | 0.377145 |
| 11756702_CYP39A1   | -0.05555 | 0.268909 | 0.377145 |
| 11738311_C15orf53  | 0.083165 | 0.268936 | 0.377172 |
| 11737737_GLYATL3   | 0.054572 | 0.268977 | 0.377219 |
| 11759271_IFNA5     | -0.1757  | 0.269032 | 0.377286 |
| 11723852_BCL11A    | -0.09518 | 0.269041 | 0.377287 |
| 11740569_ZNF665    | 0.166773 | 0.269049 | 0.377288 |
| 11761877_NDUFS4    | 0.063172 | 0.269073 | 0.37731  |
| 11748064_UBAP2     | 0.05287  | 0.269115 | 0.377359 |
| 11716737_PDRG1     | -0.05894 | 0.269162 | 0.377414 |
| 11741847_C2orf83   | 0.07943  | 0.269188 | 0.37744  |
| 11739861_ITGA6     | -0.04161 | 0.269208 | 0.377451 |
| 11719413_PBX1      | -0.04395 | 0.269212 | 0.377451 |
| 11752972_RGS9      | -0.10117 | 0.269246 | 0.377488 |
| 11741741_SLC25A41  | 0.084805 | 0.269324 | 0.377587 |
| 11736162_GBP6      | -0.06262 | 0.269426 | 0.377719 |
| 11740925_FAM151B   | 0.102717 | 0.269437 | 0.377723 |
| 11746039_ZFHX2     | -0.14023 | 0.269477 | 0.377768 |
| 11752402_CLDN18    | -0.06857 | 0.26951  | 0.377804 |
| 11739982_ZBTB40    | -0.05015 | 0.269562 | 0.377866 |
| 11740073_HTATIP2   | 0.056599 | 0.269584 | 0.377886 |
| 11745364_STAT5A    | -0.08304 | 0.269733 | 0.378084 |
| 11736908_ZBTB3     | 0.068313 | 0.269839 | 0.378222 |
| 11731263_ZNF365    | -0.0876  | 0.269852 | 0.37823  |
| 11748904_DBF4B     | -0.11432 | 0.269877 | 0.378254 |
| 11741255_APOBEC3F  | 0.074872 | 0.269984 | 0.37839  |
| 11731809_FCRL4     | -0.04839 | 0.26999  | 0.37839  |
| 11748966_JARID2    | 0.062276 | 0.270045 | 0.378456 |
| 11749439_WWC3      | 0.049326 | 0.270071 | 0.378481 |
| 11747191_SLC52A1   | -0.08424 | 0.270092 | 0.378494 |
| 11751233_FIP1L1    | -0.04594 | 0.270095 | 0.378494 |
| 11736778_TCL6      | -0.09904 | 0.270105 | 0.378497 |
| 11749758_CYP4F2 // | 0.074576 | 0.270172 | 0.378581 |
| 11736630_BTBD17    | 0.075407 | 0.270209 | 0.378621 |
| 11731160_ITGA2B    | -0.0644  | 0.270217 | 0.378622 |
| 11760546_POLM      | 0.041751 | 0.270343 | 0.378788 |
| 11731162_VIPR2     | 0.047053 | 0.270385 | 0.378835 |
| 11759012_NCKAP1L   | -0.04008 | 0.270419 | 0.378872 |

|                    |          |          |          |
|--------------------|----------|----------|----------|
| 11733554_PAX7      | -0.08091 | 0.270533 | 0.37902  |
| 11762065_TBXAS1    | -0.13838 | 0.27057  | 0.379061 |
| 11764245_GPALPP1   | 0.078319 | 0.270622 | 0.379124 |
| 11750389_SLC26A7   | 0.084366 | 0.270666 | 0.379156 |
| 11757815_METTL7A   | 0.066898 | 0.270669 | 0.379156 |
| 11751708_FSCN3     | -0.06299 | 0.270674 | 0.379156 |
| 11723999_NRAP      | -0.042   | 0.270676 | 0.379156 |
| 11758305_OXCT2 /// | 0.050607 | 0.270714 | 0.379198 |
| 11750749_BCL6      | -0.04562 | 0.270734 | 0.379214 |
| 11735229_ZNF169    | -0.04955 | 0.270741 | 0.379214 |
| 11752955_CEACAM22P | -0.10446 | 0.270799 | 0.379284 |
| 11740828_HIST1H2BL | -0.0805  | 0.270806 | 0.379284 |
| 11716382_CCT3      | 0.04454  | 0.270888 | 0.379378 |
| 11716328_GJA1      | 0.055293 | 0.270889 | 0.379378 |
| 11747536_SARDH     | 0.055599 | 0.270906 | 0.379392 |
| 11721939_ADORA2A / | -0.05777 | 0.270975 | 0.379476 |
| 11750948_MYCN      | -0.05295 | 0.270991 | 0.379488 |
| 11746624_CPS1-IT1  | -0.05014 | 0.271025 | 0.379526 |
| 11725387_HOMER1    | 0.044046 | 0.271037 | 0.379531 |
| 11738418_CES5A     | -0.07481 | 0.271063 | 0.379556 |
| 11753620_TAC3      | -0.07553 | 0.271073 | 0.379559 |
| 11746576_PPP4R3B   | 0.05236  | 0.271094 | 0.379577 |
| 11724736_PDPN      | -0.05281 | 0.271104 | 0.379577 |
| 11729925_TET3      | 0.082507 | 0.271109 | 0.379577 |
| 11735521_LOC102723 | -0.04339 | 0.271166 | 0.379647 |
| 11763571_LOC105379 | -0.10676 | 0.271195 | 0.379676 |
| 11724880_ZNF217    | -0.0733  | 0.27123  | 0.379715 |
| 11742351_OR1L8     | -0.10371 | 0.271268 | 0.379757 |
| 11742636_INS-IGF2  | -0.04967 | 0.271288 | 0.379773 |
| 11737977_APBBI     | 0.040231 | 0.271297 | 0.379775 |
| 11762663_SEL1L     | -0.09339 | 0.271313 | 0.379787 |
| 11733965_SLC45A2   | -0.11028 | 0.271348 | 0.379825 |
| 11754079_NDUFA5    | -0.05276 | 0.271379 | 0.379857 |
| 11724363_FOXP4     | -0.08105 | 0.2714   | 0.379874 |
| 11723346_LYL1      | -0.04757 | 0.271406 | 0.379874 |
| 11753795_C1RL-AS1  | -0.11561 | 0.271449 | 0.379923 |
| 11733358_PDE1A     | -0.09843 | 0.271471 | 0.379942 |
| 11730692_TRIM7     | -0.06338 | 0.271494 | 0.379964 |
| 11738790_DEFEB110  | -0.13114 | 0.27152  | 0.379989 |
| 11747144_BRF1      | -0.09796 | 0.271572 | 0.380052 |
| 11739916_SERPINB11 | -0.10589 | 0.271601 | 0.380079 |
| 11752234_NID1      | 0.042966 | 0.271613 | 0.380079 |
| 11738521_SLC14A2   | -0.11157 | 0.271615 | 0.380079 |
| 11741305_8-Mar     | 0.086717 | 0.27175  | 0.380247 |
| 11734523_PPHLN1    | -0.05861 | 0.271751 | 0.380247 |
| 11740068_CCDC8     | 0.09668  | 0.271777 | 0.380266 |
| 11735318_CACNB4    | -0.11832 | 0.271784 | 0.380266 |
| 11727972_CENPN     | -0.0459  | 0.271787 | 0.380266 |
| 11721723_GYLTL1B   | 0.107662 | 0.271807 | 0.380282 |
| 11748831_RFPL2     | 0.084534 | 0.272021 | 0.380571 |
| 11723731_GNPAT1    | 0.05706  | 0.272118 | 0.380691 |

|                    |          |          |          |
|--------------------|----------|----------|----------|
| 11725066_CAMK2B    | 0.080326 | 0.272122 | 0.380691 |
| 11723175_PLEKHA6   | -0.07988 | 0.272156 | 0.380727 |
| 11746255_VPS29     | 0.040629 | 0.272195 | 0.380771 |
| 11762300_SLC35A1   | 0.116227 | 0.272244 | 0.380829 |
| 11739332_SSTR2     | -0.15485 | 0.272285 | 0.380875 |
| 11728786_BRF1      | -0.04528 | 0.272331 | 0.380924 |
| 11757246_MT1IP     | 0.04554  | 0.272336 | 0.380924 |
| 11756418_MEAF6     | 0.046869 | 0.272354 | 0.380939 |
| 11742015_PLET1     | 0.05321  | 0.272391 | 0.380979 |
| 11751135_CD86      | -0.0662  | 0.272406 | 0.380989 |
| 11741355_THRB      | 0.070467 | 0.272491 | 0.381098 |
| 11749428_CCDC125   | -0.07737 | 0.272512 | 0.381111 |
| 11725558_FBXL18    | -0.04107 | 0.272516 | 0.381111 |
| 11717740_FUCA2     | -0.06394 | 0.272581 | 0.38119  |
| 11745801_CAP1      | 0.039039 | 0.2726   | 0.381207 |
| 11746355_RAD9B     | -0.07065 | 0.272613 | 0.38121  |
| 11735899_C12orf71  | -0.12164 | 0.272618 | 0.38121  |
| 11744890_GTPBP4    | -0.04433 | 0.272688 | 0.381293 |
| 11727581_CRYGC     | -0.04068 | 0.272693 | 0.381293 |
| 11756900_CR2       | -0.08138 | 0.272707 | 0.381301 |
| 200022_PMRPL18     | 0.043143 | 0.272742 | 0.381335 |
| 11754502_C21orf59  | -0.03914 | 0.272747 | 0.381335 |
| 11734816_GSG1      | -0.10954 | 0.272754 | 0.381335 |
| 11752210_GGCX      | -0.08742 | 0.272772 | 0.381348 |
| 11750546_CHAT      | -0.04693 | 0.27282  | 0.381404 |
| 11763769_MAN2A2    | -0.06048 | 0.272875 | 0.38147  |
| 11737698_C6orf223  | -0.05192 | 0.272892 | 0.381483 |
| 11726108_HOMEZ     | 0.077108 | 0.272905 | 0.381491 |
| 11738814_NFATC2    | -0.08044 | 0.272934 | 0.381521 |
| 11745413_ICA1L     | -0.07614 | 0.272958 | 0.381542 |
| 11737180_SLC25A21  | -0.05502 | 0.272965 | 0.381542 |
| 11763928_FAM24B    | 0.139755 | 0.272993 | 0.38157  |
| 11745087_ABCC13    | 0.069132 | 0.273059 | 0.381652 |
| 11744756_LINC01561 | -0.1264  | 0.273137 | 0.381749 |
| 11736922_PCSK2     | 0.050914 | 0.273275 | 0.381931 |
| 11736433_FBXO44    | -0.05172 | 0.273294 | 0.381948 |
| 11762686_LOC100286 | -0.08975 | 0.27333  | 0.381987 |
| 11735376_MSTN      | -0.06918 | 0.273379 | 0.382044 |
| 11728893_TPPP      | -0.07021 | 0.273388 | 0.382045 |
| 11715947_KCTD12    | -0.14504 | 0.273527 | 0.382229 |
| 11736791_UNKL      | -0.05157 | 0.273549 | 0.382249 |
| 11753486_PPP1R3A   | 0.066987 | 0.273562 | 0.382256 |
| 11723767_GFER      | -0.07083 | 0.273582 | 0.382273 |
| 11715315_RABGEF1   | 0.091696 | 0.273609 | 0.382301 |
| 11748442_SART1     | -0.07732 | 0.273636 | 0.382325 |
| 11755971_SEPT12    | -0.09529 | 0.273642 | 0.382325 |
| 11759991_CFDPI     | -0.07113 | 0.273654 | 0.38233  |
| 11740551_ASPG      | 0.058713 | 0.273697 | 0.382379 |
| 11752989_BCR       | -0.11113 | 0.273741 | 0.38243  |
| 11761240_LSM14B    | -0.11088 | 0.273813 | 0.38252  |
| 11743710_RGS22     | -0.06628 | 0.273861 | 0.382576 |

|                    |          |          |          |
|--------------------|----------|----------|----------|
| 11732900_LHFPL1    | -0.09141 | 0.273879 | 0.38259  |
| 11738183_NLRP3     | -0.05622 | 0.273936 | 0.382659 |
| 11723076_BCL9L     | 0.049501 | 0.273973 | 0.38268  |
| 11716795_IFI16     | -0.0489  | 0.273974 | 0.38268  |
| 11722864_NETO2     | -0.05241 | 0.273975 | 0.38268  |
| 11759554_PAPOLA    | -0.08362 | 0.274003 | 0.382709 |
| 11740600_TRHR      | 0.119337 | 0.274086 | 0.382814 |
| 11741420_GPR75     | 0.051338 | 0.274284 | 0.383079 |
| 11754695_PLA2G5    | -0.06705 | 0.2743   | 0.383083 |
| 11749132_SLC02B1   | 0.04549  | 0.274303 | 0.383083 |
| 11735433_FER1L6    | -0.08397 | 0.274336 | 0.383118 |
| 11763633_SLC12A4   | -0.08144 | 0.274374 | 0.383156 |
| 11728064_GPER1     | -0.07372 | 0.274379 | 0.383156 |
| 11718611_TP53INP1  | 0.057965 | 0.274386 | 0.383156 |
| 11731280_IGFN1     | -0.09868 | 0.274401 | 0.383166 |
| 11723563_VWA5A     | -0.0558  | 0.274462 | 0.38323  |
| 11726427_GABBR2    | 0.099319 | 0.274463 | 0.38323  |
| 11725088_MYH1      | 0.089564 | 0.274481 | 0.383245 |
| 11759404_TSPAN5    | 0.072335 | 0.274585 | 0.383374 |
| 11721576_C1orf131  | -0.03989 | 0.274595 | 0.383374 |
| 11763657_DPP6      | 0.098904 | 0.2746   | 0.383374 |
| 11748078_SLC43A2   | -0.06645 | 0.274622 | 0.383374 |
| 11756154_HRG       | -0.13512 | 0.274625 | 0.383374 |
| 11753895_MPST      | -0.06057 | 0.274626 | 0.383374 |
| 11747897_NUPL2     | 0.056627 | 0.274629 | 0.383374 |
| 11758510_PLAC4     | 0.068256 | 0.274735 | 0.383512 |
| 11735664_SFTPA2    | 0.055345 | 0.274772 | 0.38355  |
| 11736163_CDKN2B    | 0.112471 | 0.274778 | 0.38355  |
| 11729826_ZSCAN2    | 0.0517   | 0.274805 | 0.383576 |
| 11728553_MMP25     | -0.05379 | 0.274814 | 0.383577 |
| 11741717_SOX6      | 0.065373 | 0.274821 | 0.383577 |
| 11755023_RER1      | -0.04285 | 0.274856 | 0.383615 |
| 11760456_SRCIN1    | -0.07748 | 0.2749   | 0.383665 |
| 11736579_GH2       | -0.10374 | 0.274928 | 0.383694 |
| 11725778_PRDM2     | -0.06164 | 0.274977 | 0.38375  |
| 11748070_WWP2      | 0.046122 | 0.274992 | 0.38375  |
| 11752425_UR11      | 0.051811 | 0.274992 | 0.38375  |
| 11764071_GCFC2     | -0.04273 | 0.275027 | 0.383787 |
| 11750658_KANSL3    | -0.04907 | 0.275146 | 0.383943 |
| 11720408_PPP6R2    | -0.05984 | 0.275162 | 0.383955 |
| 11723127_NOTUM     | -0.08779 | 0.275206 | 0.384003 |
| 11751849_PSORS1C1  | 0.076919 | 0.275213 | 0.384003 |
| 11759870_CCL4L1 // | -0.17647 | 0.275263 | 0.384048 |
| 11740993_PHAX      | 0.046181 | 0.275267 | 0.384048 |
| 11741782_TSPY1 /// | -0.08515 | 0.275269 | 0.384048 |
| 11743185_HLA-G     | -0.06374 | 0.275309 | 0.384088 |
| 11752376_GHR       | 0.070383 | 0.275313 | 0.384088 |
| 11760385_MYEF2     | -0.10236 | 0.275349 | 0.384128 |
| 11731267_NXPH2     | 0.135538 | 0.275397 | 0.384184 |
| 11746740_CTTN      | -0.0485  | 0.275575 | 0.38442  |
| 11728171_PRDM10    | -0.07557 | 0.275628 | 0.384475 |

|                    |          |          |          |
|--------------------|----------|----------|----------|
| 11729557_EYA2      | -0.05548 | 0.275634 | 0.384475 |
| 11754719_RAI2      | -0.11379 | 0.275638 | 0.384475 |
| 11748811_AP2A1     | -0.05711 | 0.275682 | 0.384516 |
| 11738566_ASTL      | -0.05278 | 0.275682 | 0.384516 |
| 11752206_OTOF      | -0.05537 | 0.275793 | 0.384658 |
| 11728054_DIAPH3    | -0.06406 | 0.27582  | 0.384686 |
| 11761269_TMC6      | -0.07892 | 0.275918 | 0.384811 |
| 11732259_SH2D4A    | 0.046389 | 0.275974 | 0.384878 |
| 11759210_AK9       | -0.08552 | 0.276022 | 0.384934 |
| 11747951_RIPK3     | -0.07537 | 0.276032 | 0.384938 |
| 11732162_ZCRB1     | -0.0784  | 0.276076 | 0.384988 |
| 11733715_EXOC4     | -0.04807 | 0.276131 | 0.385054 |
| 11726918_SRD5A2    | 0.119774 | 0.276149 | 0.385067 |
| 11738087_ZNF619    | -0.0651  | 0.276167 | 0.385075 |
| 11736416_CCDC82    | 0.048079 | 0.27617  | 0.385075 |
| 11725646_CACNG3    | -0.05217 | 0.276282 | 0.38522  |
| 11733677_C4orf50   | -0.10024 | 0.276291 | 0.385221 |
| 11727368_MED29     | -0.05076 | 0.276419 | 0.385389 |
| 11722270_SASH3     | -0.08301 | 0.27643  | 0.385394 |
| 11751623_AP4M1     | 0.054373 | 0.276453 | 0.385404 |
| 11751631_AP4M1     | 0.054373 | 0.276453 | 0.385404 |
| 11745952_E4F1      | -0.04686 | 0.276484 | 0.385436 |
| 11756061_RPS2      | -0.03832 | 0.276518 | 0.385472 |
| 11726095_RBMXL1    | -0.0546  | 0.27653  | 0.385478 |
| 11759143_TAF9B     | -0.05117 | 0.276562 | 0.385502 |
| 11734880_TTLL2     | -0.08743 | 0.276563 | 0.385502 |
| 11750077_SNAP25    | 0.118769 | 0.276571 | 0.385502 |
| 11742151_OR2AG2    | -0.06126 | 0.276612 | 0.385548 |
| 11735666_C1orf100  | -0.16476 | 0.276628 | 0.385555 |
| 11740295_ZNF30     | 0.045026 | 0.276633 | 0.385555 |
| 11737319_ZNF546    | -0.05058 | 0.276741 | 0.385695 |
| 11726447_KCNK3     | -0.0626  | 0.276764 | 0.385716 |
| 11726474_HES4      | -0.06447 | 0.276779 | 0.385726 |
| 11741062_LOC101928 | 0.069415 | 0.276857 | 0.385824 |
| 11762931_ZMIZ1     | 0.131415 | 0.2769   | 0.385872 |
| 11755492_SUCLA2    | 0.047424 | 0.27691  | 0.385875 |
| 11744439_SRI       | -0.0392  | 0.276924 | 0.385884 |
| 11716637 EMC7      | 0.044092 | 0.276943 | 0.385899 |
| 11761645_CASC5     | -0.13287 | 0.277007 | 0.385978 |
| 11742590_OR2M5     | 0.077213 | 0.27703  | 0.385999 |
| 11742392_OR1L4 /// | -0.07774 | 0.277067 | 0.38604  |
| 11726509_SMPD3     | 0.056546 | 0.277078 | 0.386043 |
| 11745821_PLAGL1    | -0.08781 | 0.277094 | 0.386055 |
| 11744124_SCYL1     | -0.04231 | 0.277133 | 0.386084 |
| 11737436_TXNRD3 // | 0.071162 | 0.277138 | 0.386084 |
| 11717832_MIIP      | -0.04891 | 0.277139 | 0.386084 |
| 11726337_ALOX5     | 0.077087 | 0.277158 | 0.3861   |
| 11723088_GAS2L1    | -0.06062 | 0.277182 | 0.386122 |
| 11724734_ABCB8     | 0.092163 | 0.277191 | 0.386123 |
| 11758759_GSTK1     | 0.074376 | 0.277224 | 0.386159 |
| 11741614_KLC2      | 0.053039 | 0.277263 | 0.386202 |



|                    |          |          |          |
|--------------------|----------|----------|----------|
| 11729106_HPCAL4    | -0.06104 | 0.277312 | 0.386259 |
| 11760394_SRGAP2    | -0.07569 | 0.277324 | 0.386265 |
| 11719578_AMT       | -0.06264 | 0.277357 | 0.3863   |
| 11752029_SGSM2     | -0.06257 | 0.277426 | 0.38638  |
| 11758754_FAF1      | -0.04767 | 0.27743  | 0.38638  |
| 11723369_SHANK3    | -0.10916 | 0.277452 | 0.3864   |
| 11741728_NFATC3    | 0.062438 | 0.277519 | 0.386482 |
| 11715170_HNRNPCL1  | -0.08648 | 0.277581 | 0.386558 |
| 11716018_RAB31     | 0.038586 | 0.277595 | 0.386565 |
| 11741233_CASC1     | -0.07342 | 0.277615 | 0.386577 |
| 11718102_CD59      | -0.08886 | 0.277619 | 0.386577 |
| 11738409_KRTAP3-2  | -0.07155 | 0.277703 | 0.386682 |
| 11750629_C1QTNF8   | -0.05098 | 0.277765 | 0.386758 |
| 11730997_LRRN1     | -0.0505  | 0.277794 | 0.386787 |
| 11720576_ARFGEF1   | 0.043495 | 0.277828 | 0.386824 |
| 11735416_DCLRE1C   | -0.04791 | 0.277854 | 0.386849 |
| 11758543_ARMCX6    | -0.04342 | 0.277881 | 0.386869 |
| 11755879_C1QTNF5 / | -0.04976 | 0.277884 | 0.386869 |
| 11741981_CLEC7A    | 0.088698 | 0.277913 | 0.386898 |
| 11740413_VCX /// V | -0.08376 | 0.277922 | 0.386899 |
| 11749536_SLC6A9    | -0.10411 | 0.277934 | 0.386905 |
| 11730568_PYDC1     | 0.065604 | 0.27795  | 0.386916 |
| 11760631_GIT2      | -0.08635 | 0.277972 | 0.386929 |
| 11750952_CHRND     | 0.049571 | 0.277975 | 0.386929 |
| 11730728_UBA3      | 0.039373 | 0.278021 | 0.386983 |
| 11732891_CHRNA10   | -0.05934 | 0.278079 | 0.387051 |
| 11755849_BAZ2A     | -0.04103 | 0.27814  | 0.387126 |
| 11715140_PCDHA13   | -0.11131 | 0.27817  | 0.387157 |
| 11735002_ST7L      | 0.146764 | 0.278245 | 0.38725  |
| 11721714_ATRX      | 0.053824 | 0.278295 | 0.387299 |
| 11761232_TRMU      | -0.0899  | 0.278296 | 0.387299 |
| 11746047_KGFLP2    | -0.08317 | 0.278335 | 0.387342 |
| 11740946_FAM153A / | -0.11122 | 0.278453 | 0.387495 |
| 11739014_UBAC2     | -0.04251 | 0.278519 | 0.387576 |
| 11734298_ETV3      | -0.05831 | 0.278553 | 0.387613 |
| 11732847_CABP7     | -0.07522 | 0.278569 | 0.387623 |
| 11752473_MED24     | -0.05808 | 0.278576 | 0.387623 |
| 11721673_GLRX5     | 0.046587 | 0.278597 | 0.387629 |
| 11759963_EFCAB13   | -0.10346 | 0.278597 | 0.387629 |
| 11754900_SAMD14    | 0.058302 | 0.278659 | 0.387705 |
| 11735571_SORBS2    | -0.044   | 0.278712 | 0.387767 |
| 11734276_HNF1A     | -0.0927  | 0.278898 | 0.388015 |
| 11756242_PSMF1     | -0.04356 | 0.278921 | 0.388036 |
| 11752353_NFATC4    | -0.05737 | 0.278954 | 0.388071 |
| 11761510_KIN       | 0.071245 | 0.278975 | 0.38809  |
| 11727558_TK2       | 0.078698 | 0.278992 | 0.388101 |
| 11740958_CEP63     | -0.05019 | 0.279036 | 0.388152 |
| 11748734_TBC1D25   | -0.0596  | 0.279097 | 0.388226 |
| 11763775_LOC100130 | -0.15511 | 0.279141 | 0.388272 |
| 11726917_KCNH3     | -0.06306 | 0.279146 | 0.388272 |
| 11734434_TUBGCP5   | -0.05096 | 0.279201 | 0.388337 |

|                    |          |          |          |
|--------------------|----------|----------|----------|
| 11735685_LCE1E     | -0.05413 | 0.279273 | 0.388426 |
| 11751409_RAB36     | -0.07841 | 0.279283 | 0.388429 |
| 11722932_CHML      | -0.05325 | 0.279325 | 0.388477 |
| 11764285_LOC102723 | -0.10574 | 0.279365 | 0.38852  |
| 11757644_PASD1     | 0.091824 | 0.279382 | 0.388521 |
| 11730711_TEX13A    | -0.09713 | 0.279384 | 0.388521 |
| 11738436_IFNA4     | -0.06589 | 0.279388 | 0.388521 |
| 11764056_FMR1      | 0.078589 | 0.279398 | 0.388523 |
| 11739167_GIMAP6    | -0.08561 | 0.279427 | 0.388541 |
| 11728495_GNRH1     | -0.11169 | 0.279427 | 0.388541 |
| 11734171_PRTN3     | -0.05202 | 0.279445 | 0.388556 |
| 11734048_PIH1D1    | -0.03975 | 0.279503 | 0.388614 |
| 11756539_TCTEX1D1  | -0.04511 | 0.279503 | 0.388614 |
| 11715157_KRTAP19-2 | -0.09692 | 0.279525 | 0.38863  |
| 11758833_COL6A2    | -0.12145 | 0.279531 | 0.38863  |
| 11736099_CCDC59    | -0.04457 | 0.279611 | 0.38873  |
| 11731126_GXYLT2    | -0.05223 | 0.279631 | 0.388746 |
| 11749569_CAPRIN1   | 0.039183 | 0.279638 | 0.388746 |
| 11727605_TMEM92    | 0.065534 | 0.27974  | 0.388876 |
| 11763493_KITLG     | 0.067383 | 0.279754 | 0.388885 |
| 11746544_IP08      | 0.049277 | 0.27981  | 0.38895  |
| 11752639_PRICKLE3  | -0.05095 | 0.279816 | 0.38895  |
| 11725530_DSC2      | 0.109722 | 0.279863 | 0.389003 |
| 11747791_TANGO2    | -0.07165 | 0.279898 | 0.389033 |
| 11760040_NDUFB4    | -0.07132 | 0.2799   | 0.389033 |
| 11731660_VWA3B     | -0.11457 | 0.279914 | 0.38904  |
| 11760194_LRRIQ3    | -0.15521 | 0.279973 | 0.389112 |
| 11754078_RAB11B    | -0.07745 | 0.280009 | 0.389148 |
| 11745500_CLEC10A   | -0.07452 | 0.280015 | 0.389148 |
| 11735922_AMELY     | -0.04142 | 0.280162 | 0.389339 |
| 11756992_MARC2     | -0.12257 | 0.280168 | 0.389339 |
| 11743944_ACSM2B    | -0.06374 | 0.280196 | 0.389367 |
| 11719181_CLCN7     | -0.05926 | 0.280215 | 0.389381 |
| 11741145_LMO3      | -0.06348 | 0.280226 | 0.389386 |
| 11726412_ZBTB7C    | 0.043478 | 0.280235 | 0.389388 |
| 11724152_TNS4      | -0.06287 | 0.280262 | 0.389415 |
| 11742598_OR8H3     | -0.06567 | 0.280286 | 0.389434 |
| 11732316_SGCD      | 0.091158 | 0.280293 | 0.389434 |
| 11749712_PDE1B     | -0.09749 | 0.28036  | 0.389516 |
| 11747177_AQP1      | -0.09728 | 0.280388 | 0.389545 |
| 11732897_SLAMF9    | -0.06267 | 0.280428 | 0.38959  |
| 11734426_CDH23     | -0.07241 | 0.280449 | 0.389607 |
| 11738966_KRTAP25-1 | 0.047801 | 0.280468 | 0.389622 |
| 11760585_EMSY      | 0.088948 | 0.280519 | 0.389674 |
| 11759339_NTRK2     | -0.07142 | 0.280521 | 0.389674 |
| 11753835_ECM1      | -0.06757 | 0.28057  | 0.38973  |
| 11728424_PILRA     | 0.110245 | 0.280579 | 0.389732 |
| 11758729_MT2A      | -0.05563 | 0.280618 | 0.389775 |
| 11721431_SYBU      | 0.058837 | 0.280664 | 0.389829 |
| 11752802_SP110     | 0.083187 | 0.280754 | 0.389937 |
| 11734661_CLSTN3    | -0.04785 | 0.280758 | 0.389937 |

|                   |          |          |          |
|-------------------|----------|----------|----------|
| 11726346_LAT2     | 0.043326 | 0.280792 | 0.38997  |
| 11736651_CD5L     | -0.10237 | 0.280798 | 0.38997  |
| 11723324_HOXC10   | 0.067642 | 0.280811 | 0.389977 |
| 11740622_ADGRF4   | -0.03916 | 0.280882 | 0.390064 |
| 11728677_CES2     | 0.043502 | 0.280902 | 0.390081 |
| 11751380_BEST1    | -0.06509 | 0.280943 | 0.390128 |
| 11720448_SOX9     | 0.060113 | 0.280958 | 0.390137 |
| 11740742_ZNF645   | 0.067202 | 0.280967 | 0.390138 |
| 11745518_ZNF365   | 0.053999 | 0.280984 | 0.390151 |
| 11744821_CDH23    | -0.0649  | 0.280995 | 0.390156 |
| 11754849_PAX6     | -0.08631 | 0.281019 | 0.390178 |
| 11755188_BRD9     | -0.05063 | 0.281142 | 0.390328 |
| 11754173_SNX3     | -0.04402 | 0.281144 | 0.390328 |
| 11732781_NME8     | -0.06442 | 0.281154 | 0.390332 |
| 11751781_APOL4    | -0.08351 | 0.281218 | 0.390409 |
| 11723665_PLPP1    | 0.05956  | 0.281264 | 0.390457 |
| 11737780_B3GALNT1 | 0.082759 | 0.281268 | 0.390457 |
| 11723294_SP3      | -0.06744 | 0.281289 | 0.390475 |
| 11721618_LRRC75B  | -0.04705 | 0.28135  | 0.390547 |
| 11739511_SNED1    | -0.06304 | 0.281362 | 0.390547 |
| 11741432_ZDHC3    | -0.06529 | 0.281365 | 0.390547 |
| 11755399_COL18A1  | 0.062009 | 0.281378 | 0.390554 |
| 11751757_LMO3     | -0.06906 | 0.281477 | 0.39068  |
| 11756798_ZSCAN23  | 0.098952 | 0.2815   | 0.390691 |
| 11726284_IGHMBP2  | -0.04078 | 0.281501 | 0.390691 |
| 11745371_LAMB4    | 0.080991 | 0.281528 | 0.390718 |
| 11736412_NHLH2    | -0.09803 | 0.281539 | 0.390721 |
| 11750106_ANKAR    | -0.10576 | 0.281547 | 0.390722 |
| 11749378_CLCF1    | 0.038822 | 0.281594 | 0.390775 |
| 11761400_NIFK     | 0.07359  | 0.281631 | 0.390816 |
| 11742347_FGF8     | -0.05892 | 0.281642 | 0.39082  |
| 11726061_LRRC4    | -0.13717 | 0.281654 | 0.390826 |
| 11721621_KATNAL1  | 0.051645 | 0.281671 | 0.390839 |
| 11733978_CD28     | -0.12237 | 0.28172  | 0.390896 |
| 11752347_OS9      | 0.065144 | 0.281767 | 0.390949 |
| 11761356_PQBP1    | 0.064024 | 0.281789 | 0.390969 |
| 11736892_ZSCAN20  | 0.089846 | 0.281835 | 0.391022 |
| 11715829_PLS3     | -0.03817 | 0.281935 | 0.391149 |
| 11738466_CLRN1    | -0.08285 | 0.281944 | 0.391151 |
| 11762653_SARDH    | -0.08141 | 0.281953 | 0.391152 |
| 11748896_ACKR4    | -0.0956  | 0.282012 | 0.391222 |
| 11722567_NT5C2    | -0.05234 | 0.282023 | 0.391226 |
| 11727161_NFIX     | -0.05205 | 0.282062 | 0.39127  |
| 11761794_FAM122C  | -0.04988 | 0.282123 | 0.391343 |
| 11739779_HFE2     | -0.11889 | 0.282133 | 0.391346 |
| 11747671_CRIP2    | -0.04884 | 0.282169 | 0.391385 |
| 11725391_CD6      | -0.04899 | 0.282271 | 0.391494 |
| 11733168_TSSK3    | -0.08108 | 0.282271 | 0.391494 |
| 11740873_MS4A7    | 0.044041 | 0.282272 | 0.391494 |
| 200083_PMUSP22    | -0.04324 | 0.282532 | 0.391844 |
| 11752115_FMR1-AS1 | -0.10866 | 0.282554 | 0.391864 |

|                    |          |          |          |
|--------------------|----------|----------|----------|
| 11761403_ISCU      | 0.047689 | 0.282593 | 0.391906 |
| 11763966_TRIM71    | -0.07163 | 0.282683 | 0.392002 |
| 11726219_DMTN      | -0.04595 | 0.282684 | 0.392002 |
| 11718493_SLC1A2    | -0.05943 | 0.282686 | 0.392002 |
| 11759894_GCLC      | 0.070691 | 0.282714 | 0.392021 |
| 11752982_CA9       | -0.10007 | 0.282723 | 0.392021 |
| 11749631_APOB      | -0.08644 | 0.282724 | 0.392021 |
| 11732635_HHIPL2    | 0.064832 | 0.282823 | 0.392137 |
| 11729293_SPPL2B    | -0.04375 | 0.282824 | 0.392137 |
| 11721872_FAM110A   | 0.057192 | 0.282842 | 0.392152 |
| 11764215_WT1-AS    | -0.09101 | 0.282938 | 0.392273 |
| 11736113_ARHGAP18  | 0.042717 | 0.282956 | 0.392287 |
| 11719523_TOR1B     | -0.04959 | 0.283085 | 0.392455 |
| 11751478_TSC22D4   | 0.055041 | 0.283111 | 0.39248  |
| 11720248_FBXL15    | -0.06919 | 0.283126 | 0.392489 |
| 11751420_ZCWPW1    | -0.06521 | 0.283249 | 0.392649 |
| 11752856_RNF17     | 0.084315 | 0.283278 | 0.392678 |
| 11740556_CCDC141   | -0.04722 | 0.283318 | 0.392723 |
| 11743391_VPS35     | -0.04188 | 0.283418 | 0.39285  |
| 11752380_CEP83     | -0.07224 | 0.283447 | 0.392878 |
| 11747538_MYD88     | 0.069916 | 0.2835   | 0.392942 |
| 11718628_BOK       | -0.05946 | 0.283512 | 0.392947 |
| 11748137_SEC31B    | -0.04828 | 0.283528 | 0.392957 |
| 11719586_TAGLN3    | -0.04754 | 0.283557 | 0.392986 |
| 11745734_CAMKV     | -0.07449 | 0.283576 | 0.393002 |
| 11744477_STK32C    | -0.08954 | 0.283592 | 0.393009 |
| 11736625_BAAT      | -0.06182 | 0.283597 | 0.393009 |
| 11730597_NRI13     | -0.04667 | 0.283621 | 0.393028 |
| 11757329_RPL26     | 0.045504 | 0.283627 | 0.393028 |
| 11717517_REX02     | 0.042065 | 0.283635 | 0.393028 |
| 11734382_AQP10     | -0.07313 | 0.283645 | 0.39303  |
| 11746307_LINCO0494 | 0.118722 | 0.283675 | 0.393058 |
| 11727249_ZSCAN22   | -0.08611 | 0.283681 | 0.393058 |
| 11729091_ZDHHC19   | 0.054224 | 0.283692 | 0.393063 |
| 11730713_KRT73     | -0.05445 | 0.283728 | 0.393101 |
| 11732064_C2orf82   | -0.05553 | 0.283761 | 0.393136 |
| 11731724_B4GALT7   | 0.071091 | 0.283782 | 0.393154 |
| 11720088_NUCB2     | -0.05512 | 0.283803 | 0.39317  |
| 11733712_LMX1A     | -0.10358 | 0.28381  | 0.39317  |
| 11762181_GTF2H4    | -0.11214 | 0.283825 | 0.393179 |
| 11738548_KCTD17    | -0.04893 | 0.28386  | 0.393217 |
| 11754597_DUS3L     | -0.04378 | 0.283878 | 0.39323  |
| 11747750_CLCNKB    | -0.04269 | 0.28389  | 0.393236 |
| 11758062_STK32B    | 0.039988 | 0.283933 | 0.393285 |
| 11756793_VNN2      | 0.084763 | 0.283948 | 0.393294 |
| 11753428_TATDN1    | -0.05599 | 0.28396  | 0.3933   |
| 11757140_RPLP2 /// | -0.06122 | 0.283978 | 0.393314 |
| 11761961_MT1DP     | -0.10956 | 0.284071 | 0.393431 |
| 11744558_VASH1     | -0.09531 | 0.284082 | 0.393433 |
| 11722680_HCST      | -0.04966 | 0.284088 | 0.393433 |
| 11724863_MEF2A     | 0.042402 | 0.284205 | 0.393583 |

|                    |          |          |          |
|--------------------|----------|----------|----------|
| 11760899_UBXN1     | -0.10738 | 0.2843   | 0.393703 |
| 11736711_TMIE      | -0.07605 | 0.284314 | 0.393712 |
| 11736632_APOBEC3H  | 0.095208 | 0.284325 | 0.393716 |
| 11763590_ZNF213    | 0.042713 | 0.284346 | 0.393723 |
| 11763506_N4BP3     | -0.11831 | 0.284346 | 0.393723 |
| 11722643_BRPF1     | 0.058334 | 0.28439  | 0.393773 |
| 11748817_SLC9A9    | 0.082537 | 0.284432 | 0.39382  |
| 11733805_AMN       | -0.06284 | 0.284493 | 0.393893 |
| 11753634_MED24     | -0.06861 | 0.284546 | 0.393956 |
| 11757673_RPL39     | 0.038242 | 0.284564 | 0.393969 |
| 11716134_MTOR      | -0.06912 | 0.284582 | 0.393982 |
| 11762106_LOC100289 | -0.07663 | 0.284649 | 0.394064 |
| 11750156_GABRG2    | -0.09956 | 0.284664 | 0.394074 |
| 11763309_TCF4      | -0.09863 | 0.284674 | 0.394077 |
| 11748036_ATP2A3    | 0.048128 | 0.28475  | 0.394171 |
| 11715232_RPL36     | 0.048822 | 0.284796 | 0.394223 |
| 11735371_GSG1L     | 0.064845 | 0.284921 | 0.394385 |
| 11742000_OR5K1     | -0.04115 | 0.284943 | 0.394393 |
| 11744247_TSHZ2     | -0.06701 | 0.284943 | 0.394393 |
| 11731808_CACNA1S   | -0.07419 | 0.285085 | 0.394579 |
| 11729401_ZNF285    | -0.08742 | 0.285145 | 0.39465  |
| 11756602_SYT4      | -0.05509 | 0.285158 | 0.39465  |
| 11737036_TCEAL6    | -0.11447 | 0.285161 | 0.39465  |
| 11763018_HSPD1     | 0.093686 | 0.285248 | 0.394759 |
| 11747738_USP39     | -0.04467 | 0.285278 | 0.394789 |
| 11725860_APB1 ///  | 0.11087  | 0.2853   | 0.394801 |
| 11757881_PRKACA    | -0.04237 | 0.285302 | 0.394801 |
| 11743308_COPS4     | 0.039996 | 0.285359 | 0.394868 |
| 11740757_SIM2      | -0.0504  | 0.285417 | 0.394933 |
| 11739637_CDK12     | 0.066474 | 0.285422 | 0.394933 |
| 11759158_ADAM7     | -0.12227 | 0.285454 | 0.394967 |
| 11753728_MED25     | -0.045   | 0.285516 | 0.395041 |
| 11737522_PDZD3     | 0.112389 | 0.285569 | 0.395103 |
| 11715114_FAM86C1   | 0.044353 | 0.285591 | 0.395122 |
| 11762440_LRRTM1    | -0.09599 | 0.285704 | 0.395253 |
| 11757959_GOT2      | -0.04564 | 0.285709 | 0.395253 |
| 11718017_ADARB1    | -0.06519 | 0.28572  | 0.395253 |
| 11757000_STYXL1    | -0.05875 | 0.285726 | 0.395253 |
| 11746386_SPIDR     | -0.04465 | 0.285726 | 0.395253 |
| 11743375_FRYL      | 0.046229 | 0.285755 | 0.39528  |
| 11762896_LAS1L     | -0.10283 | 0.285762 | 0.39528  |
| 11751566_FADS6     | -0.06631 | 0.285786 | 0.395302 |
| 11762829_LOC100506 | -0.07514 | 0.285804 | 0.395313 |
| 11760171_UQCC2     | -0.05089 | 0.28581  | 0.395313 |
| 11734310_CNN1      | -0.07193 | 0.285819 | 0.395315 |
| 11742675_LCE3B     | -0.05033 | 0.285834 | 0.395315 |
| 11743884_ADPRHL1   | -0.0469  | 0.285835 | 0.395315 |
| 11740812_VAMP1     | -0.05663 | 0.285851 | 0.395325 |
| 11733250_ARHGAP31  | 0.094944 | 0.285871 | 0.395342 |
| 11746905_RGL2      | 0.042617 | 0.285918 | 0.395387 |
| 11731090_CACHD1    | 0.084357 | 0.28592  | 0.395387 |

|                    |          |          |          |
|--------------------|----------|----------|----------|
| 11737781_ARMCX2    | 0.054861 | 0.285975 | 0.395451 |
| 11727949_DHX33     | 0.042235 | 0.286061 | 0.395559 |
| 11748710_GPATCH8   | 0.082949 | 0.286092 | 0.395592 |
| 11718573_SERBP1    | -0.04561 | 0.286111 | 0.395597 |
| 11738074_PDE4A     | -0.0475  | 0.286112 | 0.395597 |
| 11741125_HDGFL1    | -0.09811 | 0.286147 | 0.395634 |
| 11760004_LOC100508 | 0.049417 | 0.28622  | 0.395724 |
| 11741510_HERPUD1   | -0.04233 | 0.286242 | 0.395743 |
| 11718451_AXIN2     | 0.116756 | 0.286303 | 0.395809 |
| 11758292_PTGIR     | -0.06659 | 0.286308 | 0.395809 |
| 11730562_GRIA4     | 0.102018 | 0.286314 | 0.395809 |
| 11751845_SERPING1  | -0.148   | 0.286334 | 0.395819 |
| 11747216_LOC100130 | -0.06072 | 0.286338 | 0.395819 |
| 11755117_FBXL22    | 0.071931 | 0.286529 | 0.396072 |
| 11725741_SMPDL3B   | -0.06856 | 0.286541 | 0.396077 |
| 11734452_LEPR      | -0.08837 | 0.286599 | 0.396147 |
| 11746617_CNOT6     | -0.06698 | 0.286663 | 0.396223 |
| 11748812_SLC30A8   | -0.06821 | 0.286685 | 0.396244 |
| 11736203_PLEKHB1   | -0.06409 | 0.286694 | 0.396245 |
| 11762316_GLYATL1   | -0.04869 | 0.286791 | 0.396364 |
| 11750150_ZNF815P / | -0.08424 | 0.286797 | 0.396364 |
| 11740720_IKZF3     | -0.11532 | 0.286826 | 0.396394 |
| 11752590_CCR2      | -0.1019  | 0.28688  | 0.396457 |
| 11723462_PHKB      | 0.08153  | 0.286933 | 0.396519 |
| 11716571_RPA1      | -0.06637 | 0.286957 | 0.396536 |
| 11740868_LDLRAD1   | -0.09083 | 0.286962 | 0.396536 |
| 11747068_CCT5      | -0.03769 | 0.286978 | 0.396548 |
| 11759146_PPP2R2B   | -0.0821  | 0.287009 | 0.396579 |
| 11734511_ASCL4     | 0.069619 | 0.287027 | 0.396593 |
| 11759727_C14orf159 | 0.065714 | 0.287108 | 0.396684 |
| 11735876_PCDHGA4   | -0.07469 | 0.28711  | 0.396684 |
| 11748163_WDR81     | -0.04481 | 0.287128 | 0.396699 |
| 11738679_NCR1      | -0.08074 | 0.28729  | 0.396911 |
| 11748257_NPRL3     | -0.06459 | 0.287315 | 0.396935 |
| 11743982_SH3GLB2   | -0.05232 | 0.287344 | 0.396963 |
| 11720265_SLC8B1    | -0.05159 | 0.287396 | 0.397013 |
| 11743171_RCSL1     | 0.076362 | 0.287396 | 0.397013 |
| 11762202_RARA      | 0.065058 | 0.287419 | 0.397033 |
| 11729725_ZBTB6     | 0.047922 | 0.287434 | 0.397043 |
| 11753020_CACNB1    | -0.07154 | 0.287448 | 0.397051 |
| 11752623_PXK       | -0.05932 | 0.287466 | 0.397064 |
| 11749854_MOG       | -0.06078 | 0.287486 | 0.397081 |
| 11751361_CASQ2     | 0.103865 | 0.287521 | 0.397117 |
| 11732633_HOXA7     | -0.1381  | 0.28753  | 0.397119 |
| 11762924_GUSBP1    | 0.160508 | 0.287539 | 0.39712  |
| 11752589_CH17-360D | 0.060517 | 0.287572 | 0.397154 |
| 11727935_MGARP     | 0.044866 | 0.287631 | 0.397225 |
| 11734837_ZNF710    | -0.05181 | 0.287656 | 0.397248 |
| 11725507_SPTBN2    | -0.05537 | 0.287697 | 0.397293 |
| 11732975_OR1A2     | -0.08731 | 0.287738 | 0.397339 |
| 11760936_CMTM5     | 0.061246 | 0.28776  | 0.397358 |

|                    |          |          |          |
|--------------------|----------|----------|----------|
| 11738942_KRTAP27-1 | -0.13945 | 0.287777 | 0.39737  |
| 11731425_CXCR2     | 0.047469 | 0.287869 | 0.397478 |
| 11727206_ZMAT4     | -0.06998 | 0.287876 | 0.397478 |
| 11732528_TBX5      | -0.11133 | 0.287889 | 0.397478 |
| 11759873_FAM175A   | 0.059946 | 0.287894 | 0.397478 |
| 11761906_MGAT4C    | -0.09789 | 0.287896 | 0.397478 |
| 11761493_C14orf159 | -0.08215 | 0.287918 | 0.397497 |
| 11762464_TARSL2    | -0.07255 | 0.288075 | 0.397704 |
| 11734143_METTL8    | -0.08699 | 0.288198 | 0.397862 |
| 11744498_TRO       | 0.061952 | 0.288257 | 0.397932 |
| 11726048_ASXL2     | 0.061433 | 0.288275 | 0.397945 |
| 11760056_VCAN      | 0.12203  | 0.2883   | 0.397968 |
| 11757060_RPL10     | 0.037233 | 0.28835  | 0.398027 |
| 11736032_VAMP1     | -0.06754 | 0.288401 | 0.398085 |
| 11733427_GRIN1     | -0.05363 | 0.288431 | 0.398116 |
| 11728919_LRRC73    | 0.069049 | 0.288473 | 0.398162 |
| 11742335_OR2D2     | -0.09133 | 0.288543 | 0.398245 |
| 11748144_MED15     | -0.05355 | 0.288549 | 0.398245 |
| 11756893_RAB11B    | -0.04059 | 0.28858  | 0.398277 |
| 11739342_TNFRSF10C | -0.08471 | 0.288593 | 0.398283 |
| 11739658_LTB       | -0.04933 | 0.288618 | 0.398307 |
| 11744008_LZTS3     | -0.04402 | 0.288668 | 0.398356 |
| 11749648_HIF1A     | -0.04261 | 0.28867  | 0.398356 |
| 11753326_GPR157    | 0.049396 | 0.288719 | 0.398412 |
| 11724415_DISP1     | -0.05558 | 0.288815 | 0.398525 |
| 11733039_DPH3      | -0.11851 | 0.288817 | 0.398525 |
| 11722979_F8        | -0.04633 | 0.288833 | 0.398536 |
| 11738303_TMC3      | -0.05298 | 0.288861 | 0.398556 |
| 11734746_CDKN2AIPN | -0.06584 | 0.288864 | 0.398556 |
| 11718993_CRKL      | 0.068106 | 0.288921 | 0.398624 |
| 11746155_IRF9      | -0.04803 | 0.288996 | 0.398715 |
| 11761720_HPS1      | 0.047333 | 0.28912  | 0.398875 |
| 11736063_SEPT7     | 0.039565 | 0.289137 | 0.398887 |
| 11748479_RAPGEF1   | -0.0479  | 0.289265 | 0.399053 |
| 11718658_CD34      | -0.0809  | 0.289416 | 0.39925  |
| 11729708_CSMD1     | -0.08917 | 0.289557 | 0.399434 |
| 11754128_BRMS1     | -0.04581 | 0.289605 | 0.399488 |
| 11743989_VARS      | 0.041393 | 0.28962  | 0.399497 |
| 11728107_SLC23A3   | -0.05042 | 0.289634 | 0.399506 |
| 11736150_LYRM2     | 0.096914 | 0.289646 | 0.399511 |
| 11752944_WDR27     | 0.042218 | 0.289665 | 0.399525 |
| 11750531_PYCARD    | 0.059994 | 0.289711 | 0.399579 |
| 11760757_SLC18B1   | -0.05872 | 0.289728 | 0.39959  |
| 11731745_ARHGEF16  | -0.07174 | 0.289767 | 0.399632 |
| 11716036_BST2      | -0.06043 | 0.289906 | 0.399797 |
| 11742184_LAMA3     | -0.07393 | 0.289909 | 0.399797 |
| 11744762_FAM53A    | -0.06613 | 0.28991  | 0.399797 |
| 11753606_CDC42     | -0.04097 | 0.289928 | 0.39981  |
| 11749959_TK2       | -0.07178 | 0.289979 | 0.399868 |
| 11762918_CCDC159   | 0.039126 | 0.290007 | 0.399895 |
| 11735964_GNG8      | -0.06847 | 0.29002  | 0.399902 |

|                    |          |          |          |
|--------------------|----------|----------|----------|
| 11753335_TMEM177   | 0.054647 | 0.290082 | 0.399977 |
| 11731540_SESTD1    | -0.08985 | 0.290125 | 0.400024 |
| 11723120_DSTYK     | 0.064459 | 0.290151 | 0.400047 |
| 11747884_TAF1C     | -0.09928 | 0.290158 | 0.400047 |
| 11745346_TMEM266   | 0.06221  | 0.290263 | 0.400173 |
| 11762116_DDI2      | -0.10359 | 0.290265 | 0.400173 |
| 11752560_SUSD4     | -0.06275 | 0.290286 | 0.40019  |
| 11736716_TMPRSS11E | 0.061695 | 0.290331 | 0.40024  |
| 11764065_LOC105375 | -0.08549 | 0.290346 | 0.40024  |
| 11736494_TNRC6B    | 0.050882 | 0.290347 | 0.40024  |
| 11737548_PCDHAC1   | -0.05271 | 0.290387 | 0.400285 |
| 11751934_PNPLA6    | 0.03987  | 0.290401 | 0.400293 |
| 11728124_BRICD5    | -0.05512 | 0.29041  | 0.400294 |
| 11749575_LOC100287 | -0.07938 | 0.29051  | 0.40042  |
| 11759315_RIMS3     | -0.07881 | 0.29052  | 0.400423 |
| 11749185_RHBG      | -0.09734 | 0.290539 | 0.400437 |
| 11740886_SMARCA4   | 0.041737 | 0.290559 | 0.400444 |
| 11730398_RUVBL2    | -0.04565 | 0.29056  | 0.400444 |
| 11739682_PHF2      | -0.03964 | 0.290591 | 0.400475 |
| 11758185_TWF1      | 0.03807  | 0.290719 | 0.40064  |
| 11763284_RPS28     | 0.05393  | 0.290772 | 0.400702 |
| 11740418_PLA2R1    | 0.102302 | 0.290792 | 0.400718 |
| 11731642_LOC102724 | 0.067405 | 0.290839 | 0.400772 |
| 11737242_TMEM233   | -0.08054 | 0.290908 | 0.400855 |
| 11744701_DRD3      | -0.11848 | 0.291003 | 0.400975 |
| 11749980_HOPX      | 0.099262 | 0.291023 | 0.400991 |
| 11744727_GPR137    | 0.047821 | 0.29104  | 0.401004 |
| 11747145_BRF1      | -0.11088 | 0.291083 | 0.401051 |
| 11755131_PRR26     | 0.108818 | 0.291148 | 0.40113  |
| 11725966_ITGB7     | -0.08421 | 0.291183 | 0.401166 |
| 11722227_DNAJC30   | -0.05102 | 0.291234 | 0.401222 |
| 11741808_LTK       | -0.04021 | 0.29124  | 0.401222 |
| 11747535_UQCC1     | 0.042756 | 0.29127  | 0.401253 |
| 11750499_ZNF705A / | 0.067914 | 0.291302 | 0.401285 |
| 11751675_AK2       | 0.044041 | 0.291313 | 0.40129  |
| 11759188_ADCYAP1R1 | -0.06347 | 0.291328 | 0.401299 |
| 11750136_ARHGAP36  | -0.10638 | 0.2914   | 0.401387 |
| 11729176_KLHL4     | 0.103264 | 0.291517 | 0.401537 |
| 11737085_ZNF490    | 0.056576 | 0.291534 | 0.401548 |
| 11762836_ING5      | -0.0382  | 0.291581 | 0.401602 |
| 11716763_NSMF      | 0.040179 | 0.291593 | 0.401604 |
| 11737148_CLEC7A    | 0.113375 | 0.291609 | 0.401604 |
| 11732915_KCNT2     | -0.09411 | 0.291618 | 0.401604 |
| 11750991_UBQLN4    | 0.083975 | 0.291622 | 0.401604 |
| 11757350_FGA       | 0.099366 | 0.291623 | 0.401604 |
| 11716520_C10orf10  | 0.123887 | 0.291693 | 0.401688 |
| 11760625_SLC35B3   | -0.05569 | 0.291787 | 0.401807 |
| 11735785_NPY2R     | -0.07913 | 0.291797 | 0.401807 |
| 11724580_ZNF827    | 0.067372 | 0.291815 | 0.401807 |
| 11762595_FBN2      | 0.072184 | 0.291819 | 0.401807 |
| 11751160_LPAR4     | -0.10443 | 0.29182  | 0.401807 |



|                    |          |          |          |
|--------------------|----------|----------|----------|
| 11759173_KRTAP20-1 | 0.095062 | 0.291846 | 0.401831 |
| 11762481_LAMB4     | 0.041376 | 0.2919   | 0.401895 |
| 11724844_ABHD17A   | 0.046081 | 0.291915 | 0.401895 |
| 11755340_SPSB3     | -0.04813 | 0.291924 | 0.401895 |
| 11744513_WFDC2     | -0.07141 | 0.291925 | 0.401895 |
| 11740649_IRAK4     | 0.070143 | 0.292091 | 0.402111 |
| 11762079_NIT2      | -0.05652 | 0.2921   | 0.402112 |
| 11740042_MTFMT     | 0.121057 | 0.292168 | 0.402186 |
| 11746074_OXNAD1    | 0.039691 | 0.292174 | 0.402186 |
| 11726866_FOXO4     | -0.06853 | 0.292186 | 0.402186 |
| 11742914_GLOD5     | -0.07434 | 0.292187 | 0.402186 |
| 11726226_CASR      | -0.07677 | 0.292226 | 0.40223  |
| 11721542_9-Mar     | -0.05443 | 0.292246 | 0.402246 |
| 11733412_ZC4H2     | -0.06949 | 0.292296 | 0.402304 |
| 11730092_KCNK17    | -0.11021 | 0.292354 | 0.402372 |
| 11751394_PIK3IP1   | -0.04239 | 0.292385 | 0.402404 |
| 11746529_TNFRSF14  | 0.066539 | 0.292411 | 0.40242  |
| 11732970_C3orf36   | -0.04925 | 0.292414 | 0.40242  |
| 11716921_CLEC11A   | -0.04116 | 0.292495 | 0.402521 |
| 11733488_AFF2      | -0.06133 | 0.292537 | 0.402555 |
| 11755920_SLC22A14  | -0.05503 | 0.292537 | 0.402555 |
| 11738528_IL31RA    | -0.08626 | 0.292559 | 0.402574 |
| 11717112_REPIN1    | 0.049364 | 0.292626 | 0.402647 |
| 11750721_ARHGFEF15 | -0.05639 | 0.292635 | 0.402647 |
| 11752769_PGBD5     | -0.06571 | 0.292637 | 0.402647 |
| 11744988_HECTD4    | 0.062113 | 0.292649 | 0.402652 |
| 11730521_SLITRK2   | -0.05439 | 0.292669 | 0.40267  |
| 11745607_FCRL2     | -0.06789 | 0.29269  | 0.402683 |
| 11750954_PODNL1    | -0.0839  | 0.292695 | 0.402683 |
| 11748508_NMUR1     | -0.03886 | 0.292723 | 0.402709 |
| 11733132_OLFML1    | 0.074713 | 0.292732 | 0.402709 |
| 11728777_VDR       | -0.0864  | 0.292739 | 0.402709 |
| 11749112_RB1       | -0.05408 | 0.292766 | 0.402734 |
| 11752193_RGL4      | -0.08062 | 0.292784 | 0.402748 |
| 11727845_HSPA14    | -0.03936 | 0.292806 | 0.402767 |
| 11758733_RPL35A    | -0.13162 | 0.292884 | 0.402863 |
| 11742990_EZR       | 0.042689 | 0.292915 | 0.402894 |
| 11751811_CCDC13    | -0.04983 | 0.293089 | 0.403122 |
| 11750847_ANKRD44   | 0.078064 | 0.293155 | 0.403193 |
| 11753469_FLJ42393  | 0.095729 | 0.293157 | 0.403193 |
| 11739168_GIMAP6    | -0.08589 | 0.293186 | 0.403219 |
| 11759030_MSX2      | 0.045101 | 0.293192 | 0.403219 |
| 11734289_DLGAP2    | -0.08243 | 0.293235 | 0.403267 |
| 11733772_ASB11     | -0.06719 | 0.293293 | 0.403335 |
| 11732772_NLRP11    | -0.04974 | 0.29333  | 0.403374 |
| 11716555_PSMG3     | -0.05162 | 0.293348 | 0.403388 |
| 11754711_C1orf123  | -0.03959 | 0.293396 | 0.403442 |
| 11727955_ABCD1     | -0.05579 | 0.293448 | 0.403502 |
| 11760217_PIK3CB    | 0.047691 | 0.293466 | 0.403516 |
| 11742397_ANP32C    | 0.047065 | 0.293501 | 0.403548 |
| 11735357_CXorf58   | -0.05488 | 0.293506 | 0.403548 |

|                     |          |          |          |
|---------------------|----------|----------|----------|
| 11743058_RHO        | 0.094036 | 0.293564 | 0.403613 |
| 11731974_SCNN1G     | 0.084095 | 0.293569 | 0.403613 |
| 11716998_RHBDD3     | -0.05935 | 0.293687 | 0.403755 |
| 11735674_AKAP14     | 0.140446 | 0.293697 | 0.403755 |
| 11724322_CST6       | -0.10997 | 0.293698 | 0.403755 |
| 11745660_POM121C    | 0.051203 | 0.293768 | 0.40384  |
| 11748860_APOBEC2    | 0.140054 | 0.293799 | 0.403872 |
| 11755379_SMPDL3B    | -0.07139 | 0.293824 | 0.403895 |
| 11749125_FZD6       | 0.040565 | 0.293887 | 0.40397  |
| 11732825_SPATA19    | -0.09779 | 0.293908 | 0.403987 |
| 11745304_PFN1P2     | -0.09292 | 0.29395  | 0.404033 |
| 11737489_ODF3       | 0.048071 | 0.293958 | 0.404033 |
| 11734812_TMEM86A    | -0.06739 | 0.29402  | 0.404107 |
| 11742963_ITPR3      | 0.075309 | 0.294064 | 0.404156 |
| 11749939_AIF1L      | -0.07035 | 0.294113 | 0.404212 |
| 11752646_KCNJ5      | -0.08668 | 0.294141 | 0.404239 |
| 11738314_SLC35G3    | -0.06582 | 0.294168 | 0.404265 |
| 11756350_TADA2A     | -0.04779 | 0.294268 | 0.404391 |
| 11737035_EBF2       | 0.057827 | 0.294286 | 0.404404 |
| 11750908_ESR2       | -0.05629 | 0.294327 | 0.404449 |
| 11723839_FKBP1B     | 0.055729 | 0.294348 | 0.404466 |
| 11716473_PUM1       | 0.037731 | 0.294414 | 0.404546 |
| 11718892_FOXO3 ///  | 0.051968 | 0.294453 | 0.404582 |
| 11735490_EMX1       | -0.05225 | 0.294457 | 0.404582 |
| 11736199_DCX        | -0.10235 | 0.29447  | 0.404588 |
| 11740761_PRKG2      | -0.06036 | 0.294481 | 0.404588 |
| 11740026_LOC200726  | -0.07541 | 0.294486 | 0.404588 |
| 11747882_DEF8       | -0.06346 | 0.294501 | 0.404589 |
| 11756269_ATXN7L2    | 0.044641 | 0.294511 | 0.404589 |
| 11752045_SH3TC2     | 0.053271 | 0.294512 | 0.404589 |
| 11762483_TIGD7      | -0.07822 | 0.294546 | 0.404625 |
| 11721614_KIT        | -0.07183 | 0.294567 | 0.404643 |
| 11726954_ADAMTS14   | -0.10621 | 0.294618 | 0.404701 |
| 11736256_INPP4A     | -0.06618 | 0.294639 | 0.404719 |
| 11716660_GRAMD4     | -0.05297 | 0.294648 | 0.40472  |
| 11740733_SLC9C1     | -0.08529 | 0.294657 | 0.404721 |
| 11733648_CCDC116    | -0.0576  | 0.294704 | 0.404773 |
| 11728155_FUT4       | -0.12239 | 0.294715 | 0.404773 |
| 11740058_TMPRSS11A  | -0.04204 | 0.29472  | 0.404773 |
| 11715254_DEFEB134 / | -0.06331 | 0.294787 | 0.40485  |
| 11730388_RYR1       | -0.06845 | 0.294793 | 0.40485  |
| 11723653_MUT        | -0.06231 | 0.29484  | 0.404892 |
| 11718070_NCOR2      | -0.06309 | 0.294843 | 0.404892 |
| 11752826_RORC       | -0.05016 | 0.294848 | 0.404892 |
| 11754152_MCF2       | 0.062686 | 0.294868 | 0.404908 |
| 11752515_ODC1       | 0.046396 | 0.294922 | 0.40497  |
| 11749101_UBAP2      | 0.041175 | 0.295049 | 0.405133 |
| 11751709_GNA15      | -0.06001 | 0.295089 | 0.405177 |
| 11757119_RPSA ///   | -0.05164 | 0.295098 | 0.405178 |
| 11761820_EDEM2      | -0.13335 | 0.295129 | 0.405207 |
| 200002_PMRPL35      | -0.03974 | 0.29514  | 0.405207 |

|                    |          |          |          |
|--------------------|----------|----------|----------|
| 11725226_CHP2      | -0.13231 | 0.295144 | 0.405207 |
| 11748151_LOC653712 | -0.05769 | 0.295192 | 0.405262 |
| 11750410_UGT1A1 // | 0.101398 | 0.295264 | 0.405339 |
| 11745544_TICAM2 // | 0.052704 | 0.295265 | 0.405339 |
| 11726719_GEMIN7    | 0.049366 | 0.29538  | 0.405486 |
| 11761505_USB1      | 0.059524 | 0.295406 | 0.405508 |
| 11718335_LMOD1     | 0.077355 | 0.295413 | 0.405508 |
| 11721900_FCN1      | 0.075537 | 0.29546  | 0.40555  |
| 11717312_IKKBAP    | 0.131811 | 0.29546  | 0.40555  |
| 11718169_AZGP1     | 0.04522  | 0.295508 | 0.405605 |
| 11728136_XK        | -0.07368 | 0.295582 | 0.405694 |
| 11753496_CSN1S2AP  | 0.050943 | 0.295602 | 0.405705 |
| 11752658_DNMT3B    | 0.042434 | 0.295606 | 0.405705 |
| 11748727_SIGLEC10  | -0.08378 | 0.295633 | 0.405731 |
| 11750777_FAAP20    | 0.080125 | 0.295651 | 0.405744 |
| 11757589_NDUFA12   | -0.03781 | 0.295709 | 0.405812 |
| 11762034_TTL9      | -0.09807 | 0.295805 | 0.405932 |
| 11726811_GPR143    | 0.097872 | 0.295828 | 0.405953 |
| 11745292_C22orf15  | -0.06032 | 0.295876 | 0.406008 |
| 11744219_GOS2      | -0.05488 | 0.295905 | 0.406036 |
| 11735105_CD40LG    | -0.08679 | 0.295917 | 0.406038 |
| 11736524_DCSTAMP   | -0.09331 | 0.295933 | 0.406038 |
| 11735671_OC90      | -0.08139 | 0.295938 | 0.406038 |
| 11754904_ZFAND4    | 0.061602 | 0.29594  | 0.406038 |
| 11751657_C1orf159  | -0.06297 | 0.295955 | 0.406047 |
| 11759048_ABCB1     | -0.08381 | 0.296027 | 0.406135 |
| 11740994_GLUL      | 0.043509 | 0.29604  | 0.406141 |
| 11738233_ROS1      | -0.1132  | 0.296061 | 0.406158 |
| 11757346_FTL       | 0.037993 | 0.296103 | 0.406205 |
| 11748141_CRIP2     | -0.04265 | 0.296143 | 0.406249 |
| 11731716_ACKR2     | 0.147461 | 0.296157 | 0.406256 |
| 11735509_RTP5      | -0.05892 | 0.296216 | 0.406325 |
| 11750391_IL17RE    | -0.07314 | 0.29623  | 0.406334 |
| 11738098_MYBPHL    | -0.10374 | 0.296271 | 0.406376 |
| 11740373_TMEM130   | 0.066141 | 0.296278 | 0.406376 |
| 11747412_ATF7IP    | 0.05703  | 0.296437 | 0.406583 |
| 11757129_RPS3 ///  | 0.047503 | 0.296463 | 0.406607 |
| 11753633_TTTY8 /// | -0.09213 | 0.296492 | 0.406635 |
| 11728582_C9orf50   | -0.09158 | 0.296502 | 0.406638 |
| 11738160_NANOS2    | -0.06049 | 0.296522 | 0.406654 |
| 11731863_NKX2-2    | -0.07016 | 0.296558 | 0.406691 |
| 11737937_RANBP3L   | 0.088418 | 0.296664 | 0.406826 |
| 11752990_SERTM1    | -0.18053 | 0.296682 | 0.406828 |
| 11718555_CREB3L2   | 0.044753 | 0.296683 | 0.406828 |
| 11742838_ARRB1     | 0.080709 | 0.296782 | 0.406953 |
| 11747151_GORASP2   | 0.040991 | 0.296861 | 0.407041 |
| 11722008_PRKARIA   | 0.041362 | 0.296863 | 0.407041 |
| 11745605_GNB1L     | -0.08387 | 0.296912 | 0.40709  |
| 11758918_TFCP2     | -0.03809 | 0.296915 | 0.40709  |
| 11724090_EDN3      | 0.101399 | 0.296961 | 0.407142 |
| 11727355_CALN1     | -0.10905 | 0.29698  | 0.407156 |

|                    |          |          |          |
|--------------------|----------|----------|----------|
| 11735461_SPRR2B    | -0.06688 | 0.297008 | 0.407181 |
| 11743595_C5orf49   | -0.10394 | 0.297015 | 0.407181 |
| 11752751_MIF-AS1   | 0.043142 | 0.297035 | 0.407197 |
| 11742122_GABRG3    | 0.064468 | 0.297052 | 0.407207 |
| 11762357_RGPD4     | -0.05892 | 0.297059 | 0.407207 |
| 11760055_KCNG4     | 0.133401 | 0.297153 | 0.407325 |
| 11743240_LY6G6D    | -0.06942 | 0.2972   | 0.407377 |
| 11740715_ARIH2OS   | -0.0634  | 0.297287 | 0.407478 |
| 11741849_KRTAP17-1 | -0.03991 | 0.29729  | 0.407478 |
| 11739827_HTR3A     | -0.07014 | 0.297322 | 0.4075   |
| 11743832_RALGPS1   | -0.11146 | 0.297325 | 0.4075   |
| 11749861_SERPINF2  | -0.08289 | 0.297331 | 0.4075   |
| 11741322_CCR3      | -0.0632  | 0.297371 | 0.407544 |
| 11743572_ANKRD17   | -0.04019 | 0.297403 | 0.407575 |
| 11755899_ANKRD36   | -0.05477 | 0.297411 | 0.407575 |
| 11737444_GPR156    | -0.08874 | 0.297425 | 0.407584 |
| 11763271_PEX11A    | 0.054662 | 0.297514 | 0.407694 |
| 11763300_RBM4      | 0.069129 | 0.297672 | 0.407888 |
| 11759457_LOC650293 | -0.09245 | 0.297673 | 0.407888 |
| 11759827_ZNF154    | 0.088682 | 0.298028 | 0.408364 |
| 11723205_PGD       | 0.047962 | 0.298067 | 0.408406 |
| 11743531_USP27X    | 0.041958 | 0.298092 | 0.408421 |
| 11739660_PPCS      | 0.04344  | 0.298095 | 0.408421 |
| 11731968_CACNA1I   | 0.068083 | 0.298191 | 0.408541 |
| 11727961_ING1      | 0.047428 | 0.298247 | 0.408599 |
| 11721750_FZD7      | -0.05504 | 0.298252 | 0.408599 |
| 11721327_DFN31     | 0.077138 | 0.298258 | 0.408599 |
| 11719706_RNF113A   | 0.048559 | 0.298288 | 0.408628 |
| 11749913_HSPA13    | 0.044195 | 0.2983   | 0.408628 |
| 11762465_LOC101060 | 0.1247   | 0.298312 | 0.408628 |
| 11738312_C15orf53  | -0.06397 | 0.298318 | 0.408628 |
| 11752286_DPP6      | -0.06753 | 0.298322 | 0.408628 |
| 11729363_ZBPB      | 0.041168 | 0.29833  | 0.408628 |
| 11726011_KIAA1683  | 0.058684 | 0.298429 | 0.408753 |
| 11745442_ACTR2     | -0.04646 | 0.298443 | 0.40876  |
| 11742793_SBDS      | -0.04597 | 0.298503 | 0.408831 |
| 11721412_BSPRY     | 0.052555 | 0.29852  | 0.408844 |
| 11718294_NME1-NME2 | -0.03877 | 0.298603 | 0.408946 |
| 11729095_KRTAP1-5  | -0.0491  | 0.29863  | 0.408971 |
| 11720629_KIAA0196  | -0.03966 | 0.29868  | 0.409028 |
| 11739777_FNDC9     | 0.048581 | 0.298735 | 0.409092 |
| 11727753_GRIK3     | -0.06107 | 0.298746 | 0.409095 |
| 11743937_SLC7A14   | -0.09025 | 0.298788 | 0.409141 |
| 11761798_TMC6      | -0.03964 | 0.298878 | 0.409253 |
| 11741334_ERN1      | -0.09575 | 0.299003 | 0.409413 |
| 11754574_C6orf52   | -0.07572 | 0.299041 | 0.409454 |
| 11741683_ATG4A     | 0.050531 | 0.299065 | 0.409474 |
| 11755020_SLC46A3   | -0.05322 | 0.299121 | 0.409541 |
| 11753432_FLT4      | -0.11441 | 0.29916  | 0.409582 |
| 11758186_ENSA      | 0.070007 | 0.299175 | 0.409591 |
| 11742486_PRAMEF19  | -0.07416 | 0.299202 | 0.409607 |

|                    |          |          |          |
|--------------------|----------|----------|----------|
| 11749809_PLAT      | 0.040066 | 0.299203 | 0.409607 |
| 11747646_MST01 /// | -0.0646  | 0.299269 | 0.409685 |
| 11740315_FAM83G    | -0.06323 | 0.299283 | 0.409687 |
| 11760947_POLK      | 0.09728  | 0.29929  | 0.409687 |
| 11723773_ABHD12    | 0.056551 | 0.299295 | 0.409687 |
| 11734369_CTAGE1    | -0.08225 | 0.299316 | 0.409703 |
| 11748868_ACCS      | 0.042564 | 0.299361 | 0.409753 |
| 11750303_B3GALT5-A | 0.12421  | 0.299375 | 0.409762 |
| 11737314_HIST1H4B  | -0.0739  | 0.299453 | 0.409857 |
| 11761422_CCDC12    | -0.0953  | 0.299524 | 0.409943 |
| 11724382_ST6GAL2   | -0.11566 | 0.299566 | 0.409988 |
| 11745792_LOC100288 | -0.04634 | 0.299602 | 0.410026 |
| 11749166_TTC23     | -0.05012 | 0.29961  | 0.410026 |
| 11738617_MY07A     | -0.04288 | 0.299651 | 0.41007  |
| 11736957_TRIM72    | -0.12305 | 0.299702 | 0.410128 |
| 11745454_CCL28     | 0.053541 | 0.299733 | 0.410159 |
| 11726742_OXNAD1    | -0.06636 | 0.299799 | 0.410238 |
| 11741956_LRRIQ1    | -0.08565 | 0.29983  | 0.41027  |
| 11721713_EID2      | 0.043182 | 0.299852 | 0.410289 |
| 11738867_GFOD1     | 0.072148 | 0.299866 | 0.410296 |
| 11729297_MMP13     | 0.100778 | 0.299891 | 0.410311 |
| 11737974_PLEKHG5   | -0.08411 | 0.299894 | 0.410311 |
| 11731168_IGFL1     | -0.10631 | 0.299908 | 0.410318 |
| 11761281_TUBGCP2   | -0.04651 | 0.299921 | 0.410325 |
| 11719229_URI1      | 0.042572 | 0.299945 | 0.410347 |
| 11753581_PAOX      | 0.110562 | 0.300029 | 0.410443 |
| 11715671_IFITM1    | 0.038887 | 0.300033 | 0.410443 |
| 11718758_HIF1A     | -0.06231 | 0.300063 | 0.410473 |
| 11759248_HIST1H2AL | -0.10186 | 0.300229 | 0.410689 |
| 11743657_HPGD      | -0.09874 | 0.300278 | 0.410718 |
| 11757691_KAT7      | 0.055656 | 0.300278 | 0.410718 |
| 11744088_TYMSOS    | 0.04268  | 0.300283 | 0.410718 |
| 11760599_HIP1      | -0.08041 | 0.300284 | 0.410718 |
| 11763486_MAPT      | 0.049098 | 0.300351 | 0.410799 |
| 11746430_SLC16A7   | 0.036625 | 0.300386 | 0.410834 |
| 11736569_PON1      | 0.112099 | 0.300417 | 0.410866 |
| 11762542_TMPRSS13  | -0.05252 | 0.300472 | 0.41093  |
| 11740809_PRAMEF13  | -0.04667 | 0.300492 | 0.410945 |
| 11758052_COMMD5    | -0.05257 | 0.300539 | 0.410998 |
| 11743394_AIG1      | 0.049002 | 0.300598 | 0.411064 |
| 11753337_TFAP2A    | 0.055508 | 0.300604 | 0.411064 |
| 11729825_BMPER     | 0.063324 | 0.300685 | 0.411163 |
| 11760210_RGP1      | -0.04632 | 0.300737 | 0.411222 |
| 11745064_GNPTAB    | -0.04458 | 0.3008   | 0.411297 |
| 11763728_FKBP9     | -0.04151 | 0.300808 | 0.411297 |
| 11715920_PGRMC2    | 0.044796 | 0.300838 | 0.411327 |
| 11745672_NFATC4    | -0.06943 | 0.300873 | 0.411362 |
| 11734404_PABPC4L   | 0.051373 | 0.300885 | 0.411367 |
| 11747084_TRNAU1AP  | 0.040904 | 0.300907 | 0.411386 |
| 11759690_SLC11A2   | -0.08047 | 0.300979 | 0.411472 |
| 11735811_FFAR4     | 0.071364 | 0.301066 | 0.41158  |

|                    |          |          |          |
|--------------------|----------|----------|----------|
| 11760411_AIDA      | -0.13099 | 0.301127 | 0.411653 |
| 11720025_FAM118A   | 0.05126  | 0.301263 | 0.411827 |
| 11735793_GPR132    | -0.05756 | 0.301281 | 0.411839 |
| 11748009_RHBDL2    | 0.090315 | 0.301298 | 0.411852 |
| 11763867_POLE3     | 0.099034 | 0.301342 | 0.411887 |
| 11746534_TLR10     | -0.05089 | 0.301344 | 0.411887 |
| 11762392_MY09A     | 0.055586 | 0.30135  | 0.411887 |
| 11739444_DPF2      | -0.04073 | 0.301382 | 0.41192  |
| 11744310_DIS3L     | 0.065992 | 0.301433 | 0.411963 |
| 11755713_CLEC17A   | -0.05028 | 0.301436 | 0.411963 |
| 11736794_GNAT2     | -0.06609 | 0.301439 | 0.411963 |
| 11745068_ZNF833P   | -0.1249  | 0.301469 | 0.411993 |
| 11759020_RNF187    | -0.0885  | 0.301509 | 0.412037 |
| 11741512_SEC14L3   | -0.05652 | 0.301566 | 0.412097 |
| 11749707_HECTD3    | -0.04338 | 0.30157  | 0.412097 |
| 11735351_EPO       | -0.06686 | 0.301629 | 0.412165 |
| 11723765_KCTD7     | -0.0867  | 0.301639 | 0.412167 |
| 11762386_MY03B     | -0.13005 | 0.301672 | 0.412201 |
| 11729781_FAM127C   | -0.05067 | 0.301748 | 0.412293 |
| 11750513_OLR1      | -0.0382  | 0.301782 | 0.412329 |
| 11732655_RAX2      | -0.06176 | 0.301805 | 0.412346 |
| 11717034_KIAA0141  | -0.05367 | 0.301816 | 0.412346 |
| 11718924_WWP2      | -0.04082 | 0.30182  | 0.412346 |
| 11721600_BRPF3     | 0.051219 | 0.301844 | 0.412367 |
| 11732703_TAS2R1    | -0.05592 | 0.301863 | 0.412381 |
| 11750714_CHD3      | 0.080154 | 0.30188  | 0.412388 |
| 11754069_CD79A     | -0.06659 | 0.301884 | 0.412388 |
| 11747006_INSC      | 0.069954 | 0.301929 | 0.412437 |
| 11757164_SNORA32 / | -0.06133 | 0.301952 | 0.412457 |
| 11720164_FKBPL     | -0.04948 | 0.301964 | 0.412462 |
| 11731980_FNDC7     | -0.07914 | 0.301999 | 0.412499 |
| 11741670_ESR2      | -0.10317 | 0.302117 | 0.412648 |
| 11723030_CRISPLD2  | 0.06855  | 0.302134 | 0.412659 |
| 11745924_ZEB1-AS1  | 0.055823 | 0.302148 | 0.412668 |
| 11742521_OR4K17    | -0.08371 | 0.302202 | 0.412729 |
| 11761477_LOC105369 | -0.04335 | 0.302254 | 0.412778 |
| 11731696_MDH1B     | 0.076946 | 0.302255 | 0.412778 |
| 11759958_GTF2IRD2  | 0.056012 | 0.302268 | 0.412785 |
| 11723143_NALCN     | 0.047104 | 0.30231  | 0.412823 |
| 11717774_PLEKHB1   | -0.06925 | 0.302313 | 0.412823 |
| 11748396_MYADM     | 0.037659 | 0.302334 | 0.41284  |
| 11737831_FNBP1L    | 0.041909 | 0.302378 | 0.412889 |
| 11720394_RAB11FIP4 | -0.09394 | 0.302396 | 0.412902 |
| 11736160_GBP6      | -0.05232 | 0.302422 | 0.412919 |
| 11735556_AMZ1      | 0.060014 | 0.302426 | 0.412919 |
| 11761485_FAM162A   | 0.109694 | 0.302493 | 0.413    |
| 11747755_KRT13     | -0.0926  | 0.302517 | 0.413021 |
| 11730369	EIF4E3    | -0.10352 | 0.302559 | 0.413067 |
| 11743170_RCS1      | -0.11858 | 0.302647 | 0.413175 |
| 11761054_TBC1D16   | -0.05413 | 0.302664 | 0.413186 |
| 11715169_PLEKHG2   | -0.04479 | 0.302672 | 0.413186 |

|                    |          |          |          |
|--------------------|----------|----------|----------|
| 11736351_TM220     | -0.04411 | 0.302737 | 0.413263 |
| 11728304_SYNDIG1   | -0.06667 | 0.302752 | 0.413273 |
| 11760826_GALNT3    | 0.125399 | 0.302807 | 0.413337 |
| 11744149_LPIN2     | -0.03798 | 0.302882 | 0.413427 |
| 11751831_ELK1      | 0.05357  | 0.302907 | 0.413449 |
| 11738309_SHANK2    | -0.07819 | 0.302965 | 0.413504 |
| 11740836_NUGGC     | 0.088454 | 0.302965 | 0.413504 |
| 11746629_KIF18B    | -0.0591  | 0.302972 | 0.413504 |
| 11729283_MEF2B /// | -0.08105 | 0.302986 | 0.413512 |
| 11746410_SLC7A8    | -0.05008 | 0.303015 | 0.41354  |
| 11732681_ZNF471    | -0.06434 | 0.30303  | 0.413549 |
| 11725338_NOL12     | 0.036499 | 0.303052 | 0.413567 |
| 11725871_ZNF616    | 0.069492 | 0.303098 | 0.413617 |
| 11724583_HDAC10    | -0.05056 | 0.303106 | 0.413618 |
| 11721405_NCOA3     | 0.044569 | 0.303176 | 0.413702 |
| 11732596_SIGLEC15  | -0.05733 | 0.30323  | 0.413756 |
| 11736786_CATSPER2  | 0.109181 | 0.303233 | 0.413756 |
| 11747462_SNX32     | -0.06602 | 0.303302 | 0.413839 |
| 11734072_RBFOX1    | -0.09065 | 0.303423 | 0.413991 |
| 11735577_IL27      | -0.05515 | 0.30351  | 0.414093 |
| 11742902_AP3S1     | 0.041636 | 0.303515 | 0.414093 |
| 11745591_NOS3      | -0.05684 | 0.303522 | 0.414093 |
| 11730673_OPRK1     | 0.048303 | 0.303535 | 0.414098 |
| 11723740_WDR36     | -0.04271 | 0.303587 | 0.414158 |
| 11734027_ZNF440    | 0.065698 | 0.303652 | 0.414235 |
| 11759003_SLC33A1   | -0.05556 | 0.303686 | 0.414263 |
| 11746782_FKBP9 /// | -0.05004 | 0.30369  | 0.414263 |
| 11726297_ZNF500    | -0.09685 | 0.303716 | 0.414288 |
| 11741803_FAM76A    | -0.08995 | 0.303917 | 0.414551 |
| 11742626_OR14A16   | 0.090589 | 0.303996 | 0.414647 |
| 11716544_TNNI1     | -0.07306 | 0.304022 | 0.414671 |
| 11740678_TBXAS1    | -0.07265 | 0.304065 | 0.414715 |
| 11729522_CA5B      | 0.055463 | 0.304071 | 0.414715 |
| 11723539_KNOP1     | 0.047909 | 0.304081 | 0.414716 |
| 11724030_HIC2      | 0.04137  | 0.304123 | 0.414762 |
| 11745033_LINCO0313 | 0.044061 | 0.304161 | 0.414802 |
| 11716587_AXL       | 0.03694  | 0.304224 | 0.414876 |
| 11735353_SLC37A2   | -0.07465 | 0.304257 | 0.414909 |
| 11744600_TESPA1    | -0.12796 | 0.304283 | 0.414933 |
| 11731674_AGMAT     | -0.0746  | 0.304295 | 0.414938 |
| 11761664_RIN1      | -0.03944 | 0.304309 | 0.414946 |
| 11752411_CCDC8     | -0.08381 | 0.304382 | 0.415034 |
| 11728422_GRASP     | -0.06719 | 0.304422 | 0.415078 |
| 11754549_AGTPBP1   | 0.065932 | 0.304447 | 0.4151   |
| 11742130_HTR4      | -0.06198 | 0.304502 | 0.415163 |
| 11747035_IL7       | -0.0563  | 0.304521 | 0.415177 |
| 11760683_SH3PXD2A  | 0.086691 | 0.304612 | 0.41529  |
| 11718662_NENF      | 0.045637 | 0.304632 | 0.415305 |
| 11725556_PRRX2     | -0.05482 | 0.30465  | 0.415318 |
| 11720191_NDUFAF4   | 0.083433 | 0.304676 | 0.415337 |
| 11762531_MEGF9     | -0.09572 | 0.304681 | 0.415337 |

|                    |          |          |          |
|--------------------|----------|----------|----------|
| 11756751_UBE2F     | 0.039429 | 0.304699 | 0.415342 |
| 11721553_GABBR1    | 0.047095 | 0.304702 | 0.415342 |
| 11761274_ENPP3     | 0.107426 | 0.304716 | 0.41535  |
| 11727504_SOX7      | -0.09293 | 0.304813 | 0.415462 |
| 11720916_HSPA8     | -0.03802 | 0.304815 | 0.415462 |
| 11735838_MADCAM1   | -0.09068 | 0.304869 | 0.415525 |
| 11729392_TRIM3     | -0.09438 | 0.305005 | 0.415697 |
| 11754740_UMODL1    | -0.11765 | 0.305081 | 0.415779 |
| 11746381_PHLDB1    | 0.071337 | 0.305081 | 0.415779 |
| 11752124_SRRT      | 0.041306 | 0.305124 | 0.415825 |
| 11716687_ABR       | -0.03697 | 0.305133 | 0.415826 |
| 11747904_PIP5K1C   | -0.06137 | 0.305179 | 0.415878 |
| 11752008_C DAN1    | -0.04926 | 0.305197 | 0.41589  |
| 11729079_ESRRG     | -0.16367 | 0.305265 | 0.415972 |
| 11730907_ABCB1     | -0.0496  | 0.305313 | 0.416025 |
| 11729529_KRT86     | 0.07147  | 0.305332 | 0.416039 |
| 11720212_PPAN ///  | -0.06205 | 0.305343 | 0.416042 |
| 11755739_SLC35A1   | 0.043221 | 0.305359 | 0.416053 |
| 11760203_IGFBP7    | -0.0658  | 0.305369 | 0.416055 |
| 11750426_MPPED1    | -0.08196 | 0.305383 | 0.416062 |
| 11755239_ELL2      | 0.045721 | 0.305564 | 0.416291 |
| 11753305_DLG4      | -0.04448 | 0.305568 | 0.416291 |
| 11739804_RASAL2    | -0.05917 | 0.305633 | 0.416369 |
| 11751789_UBASH3A   | -0.04268 | 0.305651 | 0.416381 |
| 11724443_MEF2B /// | -0.10489 | 0.305678 | 0.416407 |
| 11745078_SYCP1     | 0.07547  | 0.305758 | 0.416494 |
| 11762783_RPL18A    | 0.085237 | 0.305759 | 0.416494 |
| 11730842_POLR3F    | -0.04203 | 0.305769 | 0.416495 |
| 11737716_ICAM4     | -0.09582 | 0.305803 | 0.41653  |
| 11744432_KANSL1    | 0.041065 | 0.305824 | 0.416546 |
| 11726787_TMEM100   | -0.07429 | 0.305847 | 0.416567 |
| 11743505_NARS2     | -0.04554 | 0.305931 | 0.41667  |
| 11715375_CALR      | 0.049478 | 0.305959 | 0.416692 |
| 11763828_DPEP1     | -0.05955 | 0.305965 | 0.416692 |
| 11729973_PRSS36    | -0.05971 | 0.30599  | 0.416714 |
| 11717005_POLDIP3   | -0.04448 | 0.306013 | 0.416732 |
| 11724498_MFNG      | 0.048216 | 0.306019 | 0.416732 |
| 11728812_OTUD7B    | -0.0907  | 0.306038 | 0.416745 |
| 11728272_ZNF330    | 0.043968 | 0.306053 | 0.416754 |
| 11721421_RAP1GAP2  | -0.04795 | 0.306107 | 0.416815 |
| 11743390_VPS35     | -0.03955 | 0.306114 | 0.416815 |
| 11740837_TCEANC    | 0.125756 | 0.306169 | 0.416878 |
| 11752824_PLSCR3 // | 0.03778  | 0.306261 | 0.416991 |
| 11738171_C10orf111 | -0.0868  | 0.306273 | 0.416995 |
| 11741266_UGT2B15   | -0.07371 | 0.306363 | 0.417107 |
| 11749199_STAC      | -0.05676 | 0.30642  | 0.417165 |
| 11741480_HFE       | -0.0562  | 0.306427 | 0.417165 |
| 11728466_GLDC      | 0.113239 | 0.306433 | 0.417165 |
| 11723775_ZNF580    | -0.0438  | 0.306442 | 0.417165 |
| 11721167_EPB41L1   | -0.07707 | 0.306448 | 0.417165 |
| 11756826_ENTPD3    | -0.11499 | 0.306475 | 0.417189 |



|                    |          |          |          |
|--------------------|----------|----------|----------|
| 11731380_FIGNL2    | 0.051296 | 0.306484 | 0.417189 |
| 11742024_TBL1X     | 0.061519 | 0.306658 | 0.417415 |
| 11743083_TDRP      | 0.047725 | 0.30675  | 0.417529 |
| 11732299_KIAA1715  | -0.06284 | 0.306821 | 0.417605 |
| 11735790_PTPN18    | -0.06218 | 0.306823 | 0.417605 |
| 11735459_FBXO39    | -0.03918 | 0.30685  | 0.417629 |
| 11731385_GJC2      | 0.041319 | 0.306887 | 0.417668 |
| 11727886_ZNF25     | -0.08657 | 0.306895 | 0.417668 |
| 11762184_SLC25A42  | 0.047409 | 0.306907 | 0.417673 |
| 11763446_TRDC ///  | 0.06211  | 0.306919 | 0.417677 |
| 11745806_AMMECR1L  | 0.038198 | 0.306957 | 0.417717 |
| 11732748_DNAH6     | -0.06066 | 0.307043 | 0.417823 |
| 11738622_XKR5      | -0.08531 | 0.30709  | 0.417876 |
| 11734716_CBL1      | -0.0502  | 0.307218 | 0.418037 |
| 11732601_CEP135    | 0.063819 | 0.307354 | 0.418211 |
| 11731305_ABCC11    | 0.062651 | 0.307372 | 0.418222 |
| 11759952_TCFL5     | -0.05055 | 0.307379 | 0.418222 |
| 11739382_GPR85     | 0.100581 | 0.307449 | 0.418306 |
| 11749168_KRT6A     | -0.04776 | 0.307481 | 0.418337 |
| 11753180_CARF      | 0.046863 | 0.307529 | 0.418384 |
| 11740362_FOXN3     | 0.052396 | 0.307539 | 0.418384 |
| 11741565_C1QTNF7   | 0.060037 | 0.307541 | 0.418384 |
| 11728505_ZNF524    | -0.05044 | 0.307555 | 0.418391 |
| 11762875_RPL4      | 0.041201 | 0.307578 | 0.41841  |
| 11737206_SPOCK2    | -0.06165 | 0.307586 | 0.41841  |
| 11762814_PABPN1L   | -0.0523  | 0.307602 | 0.41842  |
| 11748185_CCDC57    | -0.04455 | 0.307618 | 0.418431 |
| 11749743_MST1R     | -0.04471 | 0.307658 | 0.418473 |
| 11753440_GBA       | 0.051348 | 0.307688 | 0.418503 |
| 11754162_IL7       | 0.054699 | 0.307766 | 0.41859  |
| 11762750_ERG       | -0.05419 | 0.307769 | 0.41859  |
| 11729785_SOX13     | -0.07322 | 0.307821 | 0.418649 |
| 11723286_FIS1      | 0.038087 | 0.307831 | 0.418651 |
| 11759534_TP53I11   | 0.060216 | 0.307871 | 0.418693 |
| 11742594_OR8K3     | -0.15048 | 0.307897 | 0.418716 |
| 11739615_CD3EAP    | -0.04398 | 0.307905 | 0.418716 |
| 11760975_SP2       | -0.09419 | 0.307976 | 0.418802 |
| 11747214_LOC105377 | 0.05957  | 0.308046 | 0.418884 |
| 11756929_CXXC1     | -0.05956 | 0.308112 | 0.418962 |
| 11742329_OR51D1    | 0.040592 | 0.30813  | 0.418975 |
| 11745967_BCLAF1    | -0.0472  | 0.30816  | 0.419005 |
| 11717724_RAB1A     | 0.037237 | 0.30818  | 0.41902  |
| 11763885_LINCO1193 | -0.07927 | 0.30821  | 0.419044 |
| 11731811_FCRL4     | 0.066764 | 0.308215 | 0.419044 |
| 11759985_TMEM161B  | 0.060746 | 0.308232 | 0.419056 |
| 11722619_AQP4      | -0.06163 | 0.308243 | 0.419059 |
| 11721562_FAM189B   | 0.035828 | 0.308271 | 0.419075 |
| 11745051_GRIA3     | 0.055388 | 0.308272 | 0.419075 |
| 11740872_MS4A7     | 0.057744 | 0.308316 | 0.419123 |
| 11715178_OR2A14    | -0.05485 | 0.308467 | 0.419307 |
| 11733307_TFAP2B    | -0.0377  | 0.308468 | 0.419307 |

|                    |          |          |          |
|--------------------|----------|----------|----------|
| 11732309_ZNF777    | -0.04443 | 0.308516 | 0.41936  |
| 11761563_HEATR1    | 0.05919  | 0.308531 | 0.419369 |
| 11758576_CDC59     | 0.119494 | 0.308571 | 0.419411 |
| 11745281_LOC100287 | -0.08768 | 0.308612 | 0.419457 |
| 11740729_KRTAP5-8  | 0.074216 | 0.308625 | 0.419463 |
| 11754640_EPHX2     | -0.08307 | 0.308645 | 0.419478 |
| 11734307_IL10      | -0.04719 | 0.308715 | 0.419561 |
| 11728991_IGDCC4    | 0.106293 | 0.308736 | 0.419575 |
| 11738090_C5orf56   | 0.041883 | 0.308743 | 0.419575 |
| 11747431_SPSB2     | -0.08004 | 0.308766 | 0.419595 |
| 11736201_GLUD2     | -0.07092 | 0.308794 | 0.419622 |
| 11724547_RSBN1     | 0.061087 | 0.308827 | 0.419644 |
| 11754011_GPC3      | -0.06152 | 0.308838 | 0.419644 |
| 11724655_SON       | 0.048875 | 0.308844 | 0.419644 |
| 11751271_PKNOX1    | -0.04098 | 0.308845 | 0.419644 |
| 11742161_C22orf42  | -0.08134 | 0.308864 | 0.419658 |
| 11735982_KRTAP9-9  | -0.05614 | 0.308896 | 0.41969  |
| 11738002_SLC35E2   | -0.06644 | 0.30891  | 0.419697 |
| 11752522_ST8SIA5   | -0.0636  | 0.308936 | 0.41972  |
| 11719356_FAM109B   | -0.0701  | 0.308944 | 0.41972  |
| 11753921_C7orf13   | -0.05185 | 0.308965 | 0.419728 |
| 11733591_C1orf204  | 0.069061 | 0.30898  | 0.419728 |
| 11720980_PTK2B     | -0.12766 | 0.308994 | 0.419728 |
| 11752107_FBF1      | -0.05268 | 0.308999 | 0.419728 |
| 11751249_SPATA20   | 0.049132 | 0.309001 | 0.419728 |
| 11762448_FNDC3B    | 0.078512 | 0.309001 | 0.419728 |
| 11735712_CSNK1G2   | -0.05075 | 0.30904  | 0.419769 |
| 11745711_ZNF365    | -0.09241 | 0.30905  | 0.41977  |
| 11725235_ZBTB39    | 0.054018 | 0.309063 | 0.419777 |
| 11763497_POLE3     | -0.04523 | 0.309077 | 0.419778 |
| 11740137_MCTP2     | 0.095538 | 0.309081 | 0.419778 |
| 11746655_ACAA1     | 0.04224  | 0.309099 | 0.419791 |
| 11755393_HHLA2     | 0.131979 | 0.30911  | 0.419794 |
| 11757636_ATP5L     | -0.04083 | 0.309149 | 0.419835 |
| 11730443_CCNJ      | 0.043816 | 0.30924  | 0.419947 |
| 11763187_LOC105376 | 0.044789 | 0.309325 | 0.420052 |
| 11729538_LYPD8     | -0.06938 | 0.309352 | 0.420077 |
| 11727722_MYB       | -0.03668 | 0.309368 | 0.420079 |
| 11740892_KCNK7     | 0.065605 | 0.309391 | 0.420079 |
| 11751844_STMN2     | -0.05097 | 0.309392 | 0.420079 |
| 11715205_PSG4      | 0.048549 | 0.309397 | 0.420079 |
| 11715206_PSG4      | 0.048549 | 0.309397 | 0.420079 |
| 11749952_CFAP46    | 0.099145 | 0.309481 | 0.420179 |
| 11758412_ALAS2     | -0.05334 | 0.309488 | 0.420179 |
| 11752277_STON2     | 0.134453 | 0.309497 | 0.42018  |
| 11732432_GK        | 0.071909 | 0.309597 | 0.420303 |
| 11755987_ANKRD44   | 0.115256 | 0.309627 | 0.420331 |
| 11747373_DPF3      | 0.119852 | 0.309634 | 0.420331 |
| 11721267_TMPRSS4   | 0.079276 | 0.309705 | 0.420415 |
| 11720607_SFRP2     | -0.06065 | 0.30972  | 0.420424 |
| 11751880_PIK3C2B   | -0.0534  | 0.309824 | 0.420549 |

|                    |          |          |          |
|--------------------|----------|----------|----------|
| 11752813_MSC-AS1   | 0.118524 | 0.309829 | 0.420549 |
| 11734194_UNC5D     | -0.11247 | 0.309917 | 0.420645 |
| 11733556_CCDC67    | 0.13223  | 0.309921 | 0.420645 |
| 11733377_DCAF4L1   | 0.090627 | 0.309927 | 0.420645 |
| 11728406_DERL3     | -0.04905 | 0.309934 | 0.420645 |
| 11740996_SPAG6     | 0.060493 | 0.309946 | 0.42065  |
| 11723886_NATD1     | -0.07962 | 0.310034 | 0.420757 |
| 11749216_HAVCR1    | -0.1582  | 0.310065 | 0.420787 |
| 11741819_TGM1      | -0.0801  | 0.310087 | 0.420805 |
| 11763917_MED24 /// | -0.06492 | 0.310096 | 0.420805 |
| 11733627_FAM196A   | 0.050013 | 0.310181 | 0.42091  |
| 11732455_KCNJ15    | 0.054839 | 0.310233 | 0.420968 |
| 11763237_IGLV1-41  | -0.0526  | 0.31028  | 0.42102  |
| 11740015_RPL28     | -0.04057 | 0.310318 | 0.42106  |
| 11742767_PANK2     | 0.072131 | 0.310441 | 0.421215 |
| 11747809_PFKFB4    | 0.056059 | 0.310498 | 0.421281 |
| 11747077_EEF1A1 // | 0.035863 | 0.310539 | 0.421325 |
| 11741963_GLRA3     | -0.08008 | 0.310573 | 0.421359 |
| 11760883_FADD      | 0.089542 | 0.310583 | 0.421362 |
| 11763644_FMNL1     | -0.11166 | 0.310627 | 0.421409 |
| 11732363_ZNF2      | 0.109133 | 0.310668 | 0.421454 |
| 11722187_AKT1      | -0.04613 | 0.310683 | 0.421457 |
| 11721301_RAB4A     | 0.040807 | 0.310688 | 0.421457 |
| 11757867_BZW1      | 0.044931 | 0.310719 | 0.421488 |
| 11727289_LIM2      | -0.09526 | 0.310749 | 0.421517 |
| 11731058_RASAL1    | -0.04959 | 0.31077  | 0.421532 |
| 11723372 DOCK11    | 0.051929 | 0.310784 | 0.421532 |
| 11745976_ANXA11    | -0.04609 | 0.31079  | 0.421532 |
| 11752725_GNB2L1    | 0.037194 | 0.310795 | 0.421532 |
| 11750472_PCK1      | -0.09782 | 0.310814 | 0.421545 |
| 11741517_FCGR2B    | -0.06055 | 0.31084  | 0.42157  |
| 11731312_WISP3     | 0.111798 | 0.31085  | 0.421571 |
| 11732069_GPR88     | -0.06617 | 0.310892 | 0.421615 |
| 11734695_PPP4C     | 0.041792 | 0.3109   | 0.421615 |
| 11736386_LHX2      | -0.0497  | 0.310949 | 0.421671 |
| 11762306_IRF5      | -0.07736 | 0.311017 | 0.421751 |
| 11717057_CORO1C    | 0.046042 | 0.311033 | 0.421761 |
| 11717050_DES       | -0.0496  | 0.311063 | 0.421791 |
| 11742383_OR5H1     | -0.0538  | 0.311083 | 0.421805 |
| 11727664_STOX1     | -0.13004 | 0.311102 | 0.421815 |
| 11739935_TSC1      | 0.05483  | 0.311107 | 0.421815 |
| 11718744_CXCL12    | 0.070737 | 0.311132 | 0.421837 |
| 11753801_LOC100128 | -0.08964 | 0.311153 | 0.421854 |
| 11753613_LCN10     | -0.07695 | 0.311197 | 0.421902 |
| 11726873_LIPE      | -0.06076 | 0.311217 | 0.421917 |
| 11724730_YY1       | -0.04365 | 0.311244 | 0.421942 |
| 11762362_TDRD6     | -0.13428 | 0.311271 | 0.421967 |
| 11763564_ATP10B    | -0.06027 | 0.311316 | 0.422016 |
| 11762797_SMARCB1   | -0.04324 | 0.311338 | 0.422035 |
| 11726521_SPATA17   | 0.115527 | 0.31135  | 0.422038 |
| 11745306_STAM      | 0.037915 | 0.311379 | 0.422066 |

|                    |          |          |          |
|--------------------|----------|----------|----------|
| 11753230_GATS      | -0.04846 | 0.31145  | 0.42215  |
| 11718061_PVALB     | 0.099459 | 0.311553 | 0.422279 |
| 11742336_ORI3D1    | -0.09141 | 0.311563 | 0.422281 |
| 11749184_DTNA      | 0.096391 | 0.311661 | 0.422401 |
| 11756215_UBA52     | 0.03607  | 0.311733 | 0.422466 |
| 11730472_PDE3B     | -0.0593  | 0.311737 | 0.422466 |
| 11737350_STAG3L2   | 0.053705 | 0.311739 | 0.422466 |
| 11718933_FKBP1A-SD | -0.04728 | 0.311747 | 0.422466 |
| 11755238_AFMID     | 0.057884 | 0.311752 | 0.422466 |
| 11733689_PANX3     | -0.10358 | 0.311834 | 0.42256  |
| 11735879_BHLHE23   | -0.04833 | 0.311838 | 0.42256  |
| 11762360_CACNA1I   | -0.09884 | 0.311904 | 0.422637 |
| 11728621_FNDC8     | 0.053793 | 0.311958 | 0.422699 |
| 11761928_CPED1     | 0.096912 | 0.311984 | 0.422722 |
| 11760781_DCAF5     | 0.095174 | 0.312018 | 0.422757 |
| 11733523_PPP1R3A   | 0.057505 | 0.312254 | 0.423064 |
| 11760089_PMCHL1    | 0.071538 | 0.3124   | 0.423243 |
| 11740724_MOGAT3    | 0.048874 | 0.312403 | 0.423243 |
| 11751208_SLC02A1   | -0.05861 | 0.31257  | 0.423457 |
| 11743026_11-Mar    | 0.055525 | 0.31261  | 0.423499 |
| 11737351_ANO7      | 0.067303 | 0.312624 | 0.423499 |
| 11741164_CST5      | -0.04987 | 0.312626 | 0.423499 |
| 11739598_ZNF398    | 0.055269 | 0.312656 | 0.423527 |
| 11750317_KCNS1     | -0.05458 | 0.31278  | 0.423683 |
| 11730615_PLCD4     | 0.14411  | 0.312791 | 0.423687 |
| 11727342_ATG9B     | 0.051914 | 0.312838 | 0.423739 |
| 11730688_FOXP3     | -0.08551 | 0.313026 | 0.42397  |
| 11742652_SPANXN1   | 0.100744 | 0.313026 | 0.42397  |
| 11754952_PLCD3     | -0.05735 | 0.31304  | 0.423977 |
| 11749277_C14orf180 | -0.05288 | 0.313133 | 0.424091 |
| 11741647_ESRRG     | -0.06337 | 0.313169 | 0.424128 |
| 11760582_NOSIP     | 0.059362 | 0.313189 | 0.424144 |
| 11721107_TRABD     | -0.04742 | 0.313202 | 0.42415  |
| 11761126_ZNF396    | 0.082365 | 0.313249 | 0.4242   |
| 11731193_UNC13C    | -0.05233 | 0.313276 | 0.424226 |
| 11746007_SEC16A    | 0.041315 | 0.31335  | 0.424314 |
| 11761220_CRACR2B   | -0.06669 | 0.31337  | 0.42432  |
| 11739504_NICN1     | 0.093613 | 0.313372 | 0.42432  |
| 11737214_LINCO1465 | -0.08375 | 0.31339  | 0.424327 |
| 11732568_MBP       | -0.06529 | 0.313394 | 0.424327 |
| 11753943_MICAL2    | -0.06925 | 0.313424 | 0.424356 |
| 11763100_MT1JP     | 0.10011  | 0.313468 | 0.424398 |
| 11722869_RAD1      | -0.03919 | 0.313472 | 0.424398 |
| 11739127_DNAJB2    | -0.08582 | 0.313485 | 0.424404 |
| 11732513_CDX1      | -0.08062 | 0.313513 | 0.42443  |
| 11729109_MBP       | 0.068416 | 0.313604 | 0.42454  |
| 11753474_BRF1      | 0.060465 | 0.313624 | 0.424556 |
| 11759763_ODF3B     | -0.06535 | 0.313642 | 0.424569 |
| 11736644_G6PC2     | -0.09473 | 0.313681 | 0.42461  |
| 11718954_FBLIM1    | 0.055019 | 0.313697 | 0.424613 |
| 11729383_DMRTB1    | -0.0493  | 0.313701 | 0.424613 |

|                    |          |          |          |
|--------------------|----------|----------|----------|
| 11734935_ARID5A    | 0.053227 | 0.313713 | 0.424618 |
| 11759713_RAB6A     | 0.103186 | 0.313737 | 0.424638 |
| 11760985_EMC4      | 0.142491 | 0.313768 | 0.42466  |
| 11735021_ZNF462    | -0.04199 | 0.313779 | 0.42466  |
| 11750660_TEP1      | 0.039234 | 0.313779 | 0.42466  |
| 11746912_TNIP3     | -0.0965  | 0.313884 | 0.424791 |
| 11727241_WNT4      | -0.07449 | 0.313922 | 0.42483  |
| 11725147_MCHR1     | -0.0389  | 0.314    | 0.424924 |
| 11722740_DDC       | 0.087671 | 0.314022 | 0.424938 |
| 11746317_CFAP20    | -0.04745 | 0.314028 | 0.424938 |
| 11722780_SLC6A19   | 0.052176 | 0.31407  | 0.424984 |
| 11719218_SOCS3     | 0.065749 | 0.314088 | 0.424996 |
| 11738806_DNMT3B    | -0.04564 | 0.314102 | 0.425003 |
| 11727143_EPB41L3   | 0.127327 | 0.314153 | 0.42506  |
| 11750520_ASMTL-AS1 | 0.036654 | 0.314219 | 0.425138 |
| 11742674_LCE3B     | -0.05048 | 0.314265 | 0.425189 |
| 11760868_ACOT8     | -0.11778 | 0.31429  | 0.425199 |
| 11746334_SV2B      | -0.062   | 0.314291 | 0.425199 |
| 11719058_FAM53C    | 0.063424 | 0.3143   | 0.425199 |
| 11744318_CCDC85A   | 0.081758 | 0.314311 | 0.425199 |
| 11738886_ASMT      | 0.0564   | 0.314317 | 0.425199 |
| 11753743_PAIP2     | 0.041338 | 0.314355 | 0.425239 |
| 11743400_CDC27     | -0.03806 | 0.314369 | 0.425247 |
| 11750453_PARK2     | -0.04895 | 0.314557 | 0.425489 |
| 11737914_GPR15     | -0.06158 | 0.314605 | 0.425541 |
| 11738697_OR1N2     | -0.05324 | 0.314613 | 0.425541 |
| 11746773_SLC27A1   | -0.04853 | 0.314623 | 0.425542 |
| 11758470_ACTN2     | -0.05787 | 0.314631 | 0.425542 |
| 11738786_LOC105369 | 0.043781 | 0.314728 | 0.425661 |
| 11740409_FGFR2     | 0.084576 | 0.314812 | 0.425764 |
| 11753037_ANKS1B    | -0.04846 | 0.314869 | 0.425828 |
| 11726676_APOBEC2   | 0.067889 | 0.31494  | 0.425913 |
| 11753324_MYO5C     | 0.064176 | 0.315008 | 0.425993 |
| 11733506_MAGEB4    | -0.10336 | 0.315026 | 0.426006 |
| 11744363_INPP5D    | -0.04743 | 0.315037 | 0.426009 |
| 11725796_S1PR2     | -0.03559 | 0.315074 | 0.426047 |
| 11720746_BCL6      | -0.04397 | 0.315234 | 0.426251 |
| 11725957_TIMM17A   | 0.039191 | 0.315265 | 0.426279 |
| 11719031_PIP5K1C   | 0.043162 | 0.315272 | 0.426279 |
| 11748821_SORBS2    | 0.048699 | 0.315281 | 0.42628  |
| 11747716_PMFBP1    | -0.06549 | 0.315359 | 0.426373 |
| 11750412_HAS3      | -0.12413 | 0.315379 | 0.426388 |
| 11735396_ZNF70     | -0.04636 | 0.315484 | 0.426518 |
| 11742353_OR11L1    | -0.06897 | 0.315506 | 0.42653  |
| 11760281_H3F3A     | -0.14658 | 0.31551  | 0.42653  |
| 11717359_RTF1      | 0.038681 | 0.31554  | 0.42656  |
| 11750464_CLEC4M    | -0.07142 | 0.315593 | 0.426619 |
| 11739773_SNX20     | -0.05418 | 0.315606 | 0.426625 |
| 11727967_MSMB      | -0.04947 | 0.315667 | 0.426695 |
| 11720046_DNAJC10   | 0.045601 | 0.315734 | 0.426774 |
| 11716712_TCEAL8    | -0.03708 | 0.315743 | 0.426775 |

|                    |          |          |          |
|--------------------|----------|----------|----------|
| 11753707_CCDC17    | -0.0725  | 0.315766 | 0.426784 |
| 11749126_HTR2C     | -0.07096 | 0.315768 | 0.426784 |
| 11751611_TRAFD1    | 0.072683 | 0.315806 | 0.426824 |
| 11732356_ZNRF1     | -0.05601 | 0.31586  | 0.426886 |
| 11748853_EFCAB1    | 0.177444 | 0.315956 | 0.427003 |
| 11733241_IRAK2     | -0.07861 | 0.316063 | 0.427136 |
| 11731025_DAB1      | -0.0982  | 0.316171 | 0.42727  |
| 11759608_EPB41L5   | 0.081299 | 0.316233 | 0.427342 |
| 200042_PMRTCB      | -0.04416 | 0.316261 | 0.427368 |
| 11760707 EIF4A2    | 0.05224  | 0.316292 | 0.427399 |
| 11756165_GLDC      | -0.09036 | 0.316305 | 0.427403 |
| 11725926_CLIC4     | -0.0596  | 0.316328 | 0.427424 |
| 11724674_FAM149B1  | -0.06672 | 0.316452 | 0.427572 |
| 11721349_LOC102725 | -0.05305 | 0.316469 | 0.427572 |
| 11730963_LOC145783 | 0.092922 | 0.316472 | 0.427572 |
| 11754758_MKRN1     | 0.038638 | 0.316473 | 0.427572 |
| 11756372_APOOL     | -0.05346 | 0.31649  | 0.427583 |
| 11727534_AKAP3     | 0.068871 | 0.316635 | 0.427767 |
| 11761621_TIPIN     | -0.04821 | 0.316658 | 0.427787 |
| 11723968_PPCS      | 0.048487 | 0.316671 | 0.427792 |
| 11751033_ABHD8     | -0.05531 | 0.31671  | 0.427832 |
| 11726520_RNF32     | -0.04052 | 0.31673  | 0.427848 |
| 11763005_YME1L1    | -0.09017 | 0.316741 | 0.427851 |
| 11740069_KRT222    | 0.090361 | 0.316767 | 0.427866 |
| 11746909_A1CF      | -0.07706 | 0.31677  | 0.427866 |
| 11748008_CMAHP     | 0.073318 | 0.316822 | 0.427925 |
| 11749825_SEPT6     | -0.04817 | 0.316858 | 0.427954 |
| 11732161_ZCRB1     | -0.03801 | 0.316861 | 0.427954 |
| 11741851_INS /// I | -0.03936 | 0.31691  | 0.428008 |
| 11744334_RPS17     | -0.0357  | 0.316941 | 0.428034 |
| 11754381_TMOD1     | -0.0385  | 0.316946 | 0.428034 |
| 11748096_THUMPD3   | 0.04024  | 0.316966 | 0.428048 |
| 11742361_OR4C13    | 0.103588 | 0.316974 | 0.428048 |
| 11761797_C19orf45  | -0.07669 | 0.317042 | 0.428128 |
| 11754775_H3F3B     | 0.035765 | 0.317078 | 0.428164 |
| 11731051_CEP126    | -0.05334 | 0.317124 | 0.428207 |
| 11748310_PDDC1     | -0.04176 | 0.317127 | 0.428207 |
| 11719815_BET1      | -0.04601 | 0.317186 | 0.428274 |
| 11737705_LOC105370 | 0.083433 | 0.317274 | 0.428382 |
| 11727953_PACS2     | -0.08791 | 0.317343 | 0.428463 |
| 11755729_CCDC163P  | 0.067654 | 0.317388 | 0.428506 |
| 11744328_RPL17 /// | -0.03501 | 0.317398 | 0.428506 |
| 11762527_LINC00315 | -0.07878 | 0.317401 | 0.428506 |
| 11753059_UGGT2     | 0.0585   | 0.317418 | 0.428517 |
| 11763923_RPL32 /// | -0.04549 | 0.317451 | 0.42855  |
| 11725432_PBX2      | 0.053474 | 0.317508 | 0.428612 |
| 11728998_GCNT2     | 0.066041 | 0.317514 | 0.428612 |
| 11739764_KIAA0895L | -0.07578 | 0.317548 | 0.428631 |
| 11747293_CD1B      | -0.08056 | 0.317553 | 0.428631 |
| 11732586_GRID1     | -0.06404 | 0.317555 | 0.428631 |
| 11757870_NEURL1    | -0.04892 | 0.317577 | 0.428641 |

|                    |          |          |          |
|--------------------|----------|----------|----------|
| 11760328_MRPL9     | -0.07056 | 0.31758  | 0.428641 |
| 11736153_XPR1      | 0.040056 | 0.317602 | 0.428659 |
| 11733729_LGMN      | -0.0419  | 0.317627 | 0.428681 |
| 11725897_TUBB1     | 0.038698 | 0.317704 | 0.428772 |
| 11741483_CACNB4    | 0.062382 | 0.317712 | 0.428772 |
| 11759112_LOC100506 | -0.07524 | 0.317755 | 0.428818 |
| 11722154_SGMS2     | 0.08523  | 0.317791 | 0.428854 |
| 11745323_GMIP      | -0.06878 | 0.317811 | 0.42887  |
| 11742141_OR1C1     | -0.07739 | 0.317905 | 0.428984 |
| 11722732_APPL1     | -0.04179 | 0.317954 | 0.429039 |
| 11738168_BATF3     | -0.06915 | 0.318057 | 0.429163 |
| 11722630_ICE2      | -0.06468 | 0.318063 | 0.429163 |
| 200087_PMTMED2     | -0.0368  | 0.318075 | 0.429166 |
| 11716543_TNNI1     | -0.05452 | 0.318214 | 0.429342 |
| 11758361_VNN1      | -0.0728  | 0.318233 | 0.429351 |
| 11716506_CUL3      | 0.040022 | 0.318238 | 0.429351 |
| 11731929_DEFB127   | -0.0634  | 0.318298 | 0.42942  |
| 11723164_LRRC15    | -0.10485 | 0.318335 | 0.429458 |
| 11750096_CTND2     | 0.117666 | 0.318364 | 0.429486 |
| 11745639_GRIK4     | -0.08044 | 0.318411 | 0.429538 |
| 11735327_LMX1B     | -0.05721 | 0.318433 | 0.429555 |
| 11760118_CNKSR2    | -0.0879  | 0.318463 | 0.429582 |
| 11727693_SDR42E1   | -0.13223 | 0.318471 | 0.429582 |
| 11724121_TRIM59    | -0.06643 | 0.318492 | 0.429599 |
| 11727691_IL11      | -0.05746 | 0.318548 | 0.429663 |
| 11729769_CD38      | -0.05242 | 0.318558 | 0.429665 |
| 11733425_PMCH      | -0.04764 | 0.318595 | 0.429702 |
| 11739510_SNED1     | 0.093165 | 0.318605 | 0.429704 |
| 11748444_PRTFDC1   | -0.08799 | 0.31864  | 0.429739 |
| 11738745_OR1M1     | -0.06259 | 0.318651 | 0.429742 |
| 11733555_PAX7      | 0.070552 | 0.318786 | 0.429908 |
| 11760346_HES1      | -0.07488 | 0.318792 | 0.429908 |
| 11725012_KCNIP3    | -0.07671 | 0.318815 | 0.429928 |
| 11745151_ARFGAP1   | 0.040466 | 0.318833 | 0.42994  |
| 11758607_VWA8      | 0.054112 | 0.318845 | 0.429945 |
| 11738700_OR51S1    | -0.08704 | 0.318904 | 0.430012 |
| 11761838_AFF1      | 0.091034 | 0.318914 | 0.430013 |
| 11740890_ADAM28    | -0.07845 | 0.31901  | 0.430131 |
| 11738039_PCDHAC2   | 0.044805 | 0.319061 | 0.430189 |
| 11764172_LOC102724 | -0.11581 | 0.3191   | 0.430229 |
| 11721225_MTSS1L    | -0.09334 | 0.319171 | 0.430313 |
| 11750894_TBX5      | 0.12183  | 0.319198 | 0.430338 |
| 11761509_KRT87P    | -0.0872  | 0.319224 | 0.430358 |
| 11726096_RBMXL1    | -0.05387 | 0.319231 | 0.430358 |
| 11732010_TNFAIP8L3 | -0.07264 | 0.31925  | 0.430372 |
| 11715187_PRB1      | -0.10732 | 0.319286 | 0.430408 |
| 11746526_PITRM1    | 0.054079 | 0.319385 | 0.430525 |
| 11717889_GNAI2     | -0.04173 | 0.31939  | 0.430525 |
| 11717865_PSME4     | 0.045845 | 0.319427 | 0.430563 |
| 11721118_ANKHD1-EI | 0.078372 | 0.319464 | 0.430601 |
| 11721979_SLC36A1   | 0.067959 | 0.319475 | 0.430604 |

|                    |          |          |          |
|--------------------|----------|----------|----------|
| 11751853_MTAP      | 0.054095 | 0.319539 | 0.430678 |
| 11761862_SCN11A    | -0.06683 | 0.31959  | 0.430736 |
| 11759752_GALNT5    | 0.106251 | 0.319623 | 0.43076  |
| 11759908_ITGBL1    | 0.043724 | 0.319626 | 0.43076  |
| 11742181_LCE3A     | -0.04655 | 0.319648 | 0.430778 |
| 11727070_ORC5      | 0.038507 | 0.31968  | 0.430809 |
| 11742167_BSX       | -0.07495 | 0.319896 | 0.431084 |
| 11761359_UBE2E1    | -0.08179 | 0.319901 | 0.431084 |
| 11715474_DDX17     | -0.0458  | 0.319932 | 0.431112 |
| 11725584_HAS3      | 0.058357 | 0.319941 | 0.431114 |
| 11738397_LHX6      | -0.0842  | 0.319959 | 0.431116 |
| 11749976_DSE       | 0.052084 | 0.319961 | 0.431116 |
| 11753120_MADCAM1   | -0.05108 | 0.319973 | 0.431121 |
| 11733769_RAB40A // | -0.07009 | 0.32     | 0.431143 |
| 11736218_GPR153    | -0.11461 | 0.320011 | 0.431143 |
| 11758663_MATR3     | -0.03484 | 0.320016 | 0.431143 |
| 11758985_ABHD15    | 0.074203 | 0.320053 | 0.431181 |
| 11753097_ACAD10    | -0.07145 | 0.3201   | 0.431232 |
| 11760577_ZNF610    | -0.07571 | 0.320152 | 0.43129  |
| 11751766_ECHDC2    | -0.05488 | 0.320226 | 0.431378 |
| 11754862_RARRES2   | -0.04291 | 0.320243 | 0.43139  |
| 11722340_PRR12     | 0.054105 | 0.320279 | 0.431426 |
| 11762601_SEC31B    | 0.081887 | 0.320307 | 0.431452 |
| 11752348_TBC1D30   | -0.07713 | 0.320397 | 0.431561 |
| 11730067_GZMM      | 0.037288 | 0.320438 | 0.431605 |
| 11719197_CCND2     | -0.0544  | 0.320518 | 0.431701 |
| 11727051_HOXB13    | -0.08947 | 0.320609 | 0.431799 |
| 11737670_POLN      | -0.05307 | 0.320609 | 0.431799 |
| 11751830_BCL2L11   | -0.06067 | 0.32063  | 0.431816 |
| 11763952_PISRT1    | -0.10002 | 0.320666 | 0.431851 |
| 11761639_HLA-DQB1  | -0.06493 | 0.32073  | 0.431926 |
| 11718596_CCDC12    | 0.044905 | 0.320786 | 0.43199  |
| 11760980_PLA2G6    | 0.067016 | 0.320805 | 0.432003 |
| 11761398_TMEM138   | 0.039069 | 0.320818 | 0.432009 |
| 11742538_OR9G4     | -0.08799 | 0.320871 | 0.432069 |
| 11742967_MTERF4    | 0.105629 | 0.320993 | 0.432221 |
| 11730167_GAST      | -0.12991 | 0.321016 | 0.43224  |
| 11756759_IFT172    | -0.0796  | 0.321189 | 0.43246  |
| 11752365_XRCC6P5   | -0.09116 | 0.321295 | 0.432592 |
| 200036_PMRPL10A    | 0.039711 | 0.321327 | 0.432623 |
| 11750231_IGHG1 /// | -0.11193 | 0.3214   | 0.432704 |
| 11730291_ARHGAP5   | -0.04058 | 0.321405 | 0.432704 |
| 11732515_BAK1      | -0.14143 | 0.321427 | 0.432721 |
| 11761757_FXYD7     | -0.07463 | 0.321437 | 0.432724 |
| 11726232_PRX       | 0.041106 | 0.321473 | 0.43276  |
| 11741083	EIF4G2    | 0.03793  | 0.321563 | 0.432869 |
| 11727635_SERPINI2  | -0.08971 | 0.321659 | 0.432986 |
| 11723534_BRMS1L    | -0.04309 | 0.321688 | 0.433013 |
| 11729958_SDK2      | 0.065437 | 0.321712 | 0.433028 |
| 11763006_TRAV21    | -0.04508 | 0.321717 | 0.433028 |
| 11756802_RD3       | -0.0637  | 0.321735 | 0.433041 |



|                    |          |          |          |
|--------------------|----------|----------|----------|
| 11735552_FCRL6     | -0.08514 | 0.321768 | 0.433073 |
| 11753869_AICDA     | -0.08378 | 0.321809 | 0.433117 |
| 11760042_NPAS3     | 0.140575 | 0.321906 | 0.433235 |
| 11762458_SIGLEC6   | 0.069788 | 0.321972 | 0.433312 |
| 11726753_C9orf91   | -0.06517 | 0.322032 | 0.433381 |
| 11741379_BACH2     | -0.07828 | 0.32207  | 0.433421 |
| 11734456_SLC17A8   | -0.10469 | 0.322099 | 0.433447 |
| 11724691_RIBC2     | -0.06824 | 0.322115 | 0.433457 |
| 11733269_NAT8L     | 0.046168 | 0.322134 | 0.433471 |
| 200012_PMRPL21     | 0.035395 | 0.32215  | 0.43348  |
| 11758807_ECD       | 0.047697 | 0.322172 | 0.433497 |
| 11731898_ACTL10    | -0.06859 | 0.322191 | 0.433503 |
| 11742179_HIGD1C    | -0.07026 | 0.322194 | 0.433503 |
| 11728244_SLC12A1   | 0.105788 | 0.32223  | 0.43354  |
| 11741940_KRTAP11-1 | -0.06529 | 0.322259 | 0.433567 |
| 11750920_CDC7      | -0.07109 | 0.322298 | 0.433608 |
| 11727222_EVI5      | -0.05477 | 0.32243  | 0.433773 |
| 11758410_SMC03     | -0.14427 | 0.322439 | 0.433774 |
| 11746073_TRPM2     | -0.04879 | 0.322452 | 0.433779 |
| 11764140_ZDHC11    | 0.045853 | 0.322472 | 0.433794 |
| 11749784_CDKL3     | 0.05527  | 0.322516 | 0.433842 |
| 11748001_SLC35F6   | -0.05087 | 0.322598 | 0.43394  |
| 11720682_TIFA      | 0.054376 | 0.322622 | 0.433954 |
| 11761280_ACAT1     | 0.121105 | 0.322627 | 0.433954 |
| 11735641_HMSD      | -0.05443 | 0.322645 | 0.433968 |
| 11761701_AP4B1     | 0.075526 | 0.322673 | 0.433993 |
| 11753796_C1RL-AS1  | -0.08438 | 0.322684 | 0.433996 |
| 11730978_GAD2      | 0.101555 | 0.322737 | 0.434055 |
| 11734940_SLC16A9   | -0.08656 | 0.322797 | 0.434124 |
| 11751706_CLN6      | -0.03831 | 0.322888 | 0.434222 |
| 11753969_LILRA4    | -0.06145 | 0.322888 | 0.434222 |
| 11743455_AP5M1     | -0.05149 | 0.323071 | 0.434452 |
| 11751973_LZTS3     | -0.04438 | 0.323076 | 0.434452 |
| 11722401_PAGE4     | -0.04186 | 0.323134 | 0.434517 |
| 11725112_NDE1      | -0.05671 | 0.323197 | 0.43459  |
| 11738261_ZNF493    | 0.050669 | 0.32324  | 0.434636 |
| 11731812_FCRL4     | -0.12744 | 0.323254 | 0.434643 |
| 11736473_TCF7      | 0.057754 | 0.323277 | 0.434662 |
| 11751909_LAMC3     | 0.064498 | 0.323345 | 0.434741 |
| 11734656_MAG       | 0.057145 | 0.323368 | 0.43476  |
| 11753924_ATG3      | 0.051351 | 0.323393 | 0.434778 |
| 11726499_ANO5      | -0.06355 | 0.323399 | 0.434778 |
| 11742489_ASB18     | -0.07657 | 0.323533 | 0.434944 |
| 11738435_CD74      | -0.04367 | 0.323541 | 0.434944 |
| 11734547_TGM4      | -0.05872 | 0.323563 | 0.434962 |
| 11758394_PARM1     | 0.046913 | 0.323588 | 0.434984 |
| 11736317_STAP2     | 0.038853 | 0.323619 | 0.435014 |
| 11737063_MTL5      | -0.05861 | 0.323722 | 0.43514  |
| 11751344_LEFTY2    | 0.047185 | 0.323748 | 0.435163 |
| 11747475_SPIDR     | -0.04416 | 0.32378  | 0.435194 |
| 11744321_TLE6      | -0.06735 | 0.323799 | 0.435209 |

|                    |          |          |          |
|--------------------|----------|----------|----------|
| 11730538_ZSCAN10   | -0.06335 | 0.323818 | 0.435214 |
| 11732005_ADAL      | -0.05217 | 0.323824 | 0.435214 |
| 11750742_DHX58     | -0.09189 | 0.323831 | 0.435214 |
| 11724043_PDZD4     | 0.051865 | 0.323922 | 0.435325 |
| 11738085_SLC36A3   | -0.06088 | 0.324014 | 0.435437 |
| 11758302_LINC01001 | -0.03521 | 0.324032 | 0.435449 |
| 11730117_TEX33     | -0.06862 | 0.324041 | 0.435449 |
| 11752674_SPDEF     | -0.09029 | 0.324072 | 0.435479 |
| 11724158_ECSCR     | 0.071289 | 0.324095 | 0.435498 |
| 11737455_FBX047    | 0.074729 | 0.324128 | 0.435522 |
| 11750468_NUP35     | 0.046919 | 0.324142 | 0.435522 |
| 11730610_MCOLN2    | -0.05026 | 0.324155 | 0.435522 |
| 11738796_PKHD1     | 0.053495 | 0.324156 | 0.435522 |
| 11718953_EPB41L5   | -0.06509 | 0.324157 | 0.435522 |
| 11742097_SEC61A2   | 0.061139 | 0.324187 | 0.435547 |
| 11722718_BAIAP2    | 0.079484 | 0.324194 | 0.435547 |
| 11744191_SPNS3     | 0.044534 | 0.324228 | 0.435575 |
| 11755216_CDH16     | -0.05047 | 0.324232 | 0.435575 |
| 11750820_MIPOL1    | 0.060223 | 0.324306 | 0.435657 |
| 11756281_CD7       | -0.04312 | 0.324312 | 0.435657 |
| 11736615_AVPR1A    | 0.051256 | 0.324354 | 0.435702 |
| 11715721_GOLM1     | 0.069584 | 0.324433 | 0.435786 |
| 11720769_PPIF      | 0.055519 | 0.324435 | 0.435786 |
| 11724698_PHF24     | 0.048179 | 0.324465 | 0.435815 |
| 11759337_ATP10A    | 0.046222 | 0.324513 | 0.435857 |
| 11736343_OPA3      | -0.05128 | 0.324513 | 0.435857 |
| 11732384_FBX046    | -0.05109 | 0.324869 | 0.436321 |
| 11717919_SRRT      | -0.05732 | 0.324877 | 0.436321 |
| 11730495_TYR       | -0.05023 | 0.324953 | 0.43641  |
| 11718301_PLAC9     | -0.07599 | 0.324978 | 0.436432 |
| 11733174_ZNF507    | 0.047147 | 0.325032 | 0.436489 |
| 11732992_DCHS2     | 0.047006 | 0.325038 | 0.436489 |
| 11726631_TRIM8     | 0.061191 | 0.325112 | 0.436577 |
| 11736684_FGF5      | 0.107553 | 0.32514  | 0.436594 |
| 11763737_MBNL3     | -0.07622 | 0.325143 | 0.436594 |
| 11724713_FAM212A   | 0.061497 | 0.325232 | 0.436679 |
| 11748981_NAT1      | 0.053162 | 0.325234 | 0.436679 |
| 11753029_TMEM178A  | 0.049328 | 0.325238 | 0.436679 |
| 11741652_PAX8      | -0.04177 | 0.325242 | 0.436679 |
| 11735276_IL18R1    | 0.09801  | 0.325302 | 0.436739 |
| 11735356_HTR4      | 0.063317 | 0.325305 | 0.436739 |
| 11759349_F2RL3     | -0.09821 | 0.325344 | 0.43678  |
| 11737661_B4GALT2   | -0.03884 | 0.325358 | 0.436786 |
| 11757059_RPL36A // | 0.035321 | 0.325436 | 0.43688  |
| 11741527_GAGE1 /// | 0.150637 | 0.325461 | 0.436901 |
| 11729049_SLC10A2   | 0.061056 | 0.325506 | 0.43695  |
| 11755473_ZNF250    | 0.049651 | 0.325526 | 0.436965 |
| 11743993_KCTD5     | -0.0403  | 0.325642 | 0.437097 |
| 11756563_RCBTB2    | -0.04647 | 0.325643 | 0.437097 |
| 11758988_SYT17     | -0.05089 | 0.325675 | 0.437128 |
| 11753881_FXYD2 /// | -0.05021 | 0.325691 | 0.437138 |

|                    |          |          |          |
|--------------------|----------|----------|----------|
| 11749297_MAPK14    | -0.04377 | 0.325737 | 0.437187 |
| 11751808_P3H3      | -0.04995 | 0.325773 | 0.437224 |
| 11739178_ISM2      | 0.078338 | 0.325794 | 0.43724  |
| 11729428_ARHGAP36  | 0.101442 | 0.325819 | 0.437261 |
| 11719103_CPNE3     | -0.03883 | 0.325962 | 0.437442 |
| 11738104_PPM1L     | 0.067449 | 0.325976 | 0.437449 |
| 11746415_ABCB5     | -0.04485 | 0.325995 | 0.437462 |
| 11720981_PTK2B     | 0.061828 | 0.326032 | 0.4375   |
| 11734376_POU4F2    | -0.08009 | 0.326078 | 0.437527 |
| 11758124_RCBTB2    | -0.10647 | 0.326085 | 0.437527 |
| 11761733_KIF26B    | 0.109333 | 0.326085 | 0.437527 |
| 11746590_RGS8      | -0.05408 | 0.326089 | 0.437527 |
| 11734260_TRIML1    | -0.05644 | 0.326101 | 0.437532 |
| 11727404_GPC4      | -0.07006 | 0.326168 | 0.437609 |
| 11722907_MIA3      | 0.041658 | 0.326195 | 0.437634 |
| 11725671_IPO7      | 0.035262 | 0.32621  | 0.437642 |
| 11716704_TRIM44    | 0.037984 | 0.326262 | 0.4377   |
| 11761277_LRRC37A4P | -0.05793 | 0.326313 | 0.437756 |
| 11745584_ZFP57     | 0.08092  | 0.326359 | 0.437806 |
| 11759350_METTL20   | -0.12318 | 0.326403 | 0.437849 |
| 11738913_CD200R1   | -0.05185 | 0.326409 | 0.437849 |
| 11759043_VKORC1L1  | 0.046841 | 0.326434 | 0.437871 |
| 11734414_CALCB     | -0.06055 | 0.326457 | 0.43789  |
| 11727124_LRP2      | -0.0724  | 0.326699 | 0.438195 |
| 11755378_WNK2      | 0.085501 | 0.326703 | 0.438195 |
| 11733380_SPZ1      | 0.047691 | 0.326722 | 0.438206 |
| 11763087_C5orf17 / | 0.101207 | 0.326729 | 0.438206 |
| 11731764_CD3G      | -0.08728 | 0.326824 | 0.438321 |
| 11737025_FAM83E    | 0.049995 | 0.326888 | 0.43838  |
| 11723133_RGS9      | -0.07677 | 0.326892 | 0.43838  |
| 11715357_RPS21     | 0.034083 | 0.326894 | 0.43838  |
| 11761732_PILRA     | -0.04496 | 0.326914 | 0.438394 |
| 11748553_UQCC1     | 0.068239 | 0.326928 | 0.438401 |
| 11732440_BPTF      | 0.040641 | 0.326954 | 0.438423 |
| 11737244_ALS2CR12  | 0.06666  | 0.326997 | 0.438469 |
| 11757150_EEF1B2 // | -0.06618 | 0.327037 | 0.438511 |
| 11743707_EXOC1     | 0.049956 | 0.327053 | 0.43852  |
| 11744240_SNTN      | 0.046302 | 0.327084 | 0.438549 |
| 11752311_CEP68     | -0.04441 | 0.327146 | 0.438621 |
| 11749392_ATP5C1    | -0.03691 | 0.327198 | 0.438679 |
| 11763147_BCL2L11   | -0.12086 | 0.327231 | 0.43871  |
| 11737838_NSMF      | -0.04585 | 0.32725  | 0.438724 |
| 11762039_ADAM17    | -0.06498 | 0.327283 | 0.438757 |
| 11758545_RHAG      | -0.05928 | 0.327332 | 0.43881  |
| 11734553_ANXA8 /// | -0.08993 | 0.327356 | 0.43883  |
| 11721038_SUFU      | -0.04296 | 0.327394 | 0.438863 |
| 11726506_FUT9      | -0.0963  | 0.327398 | 0.438863 |
| 11761129_ADIRF-AS1 | -0.10483 | 0.32741  | 0.438866 |
| 11718575_SERBP1    | -0.03936 | 0.327437 | 0.438885 |
| 11732632_HOXA7     | -0.05845 | 0.327441 | 0.438885 |
| 11756754_PLSCR5    | -0.04932 | 0.327487 | 0.438923 |

|                    |          |          |          |
|--------------------|----------|----------|----------|
| 11748474_HOXB3     | 0.041338 | 0.327488 | 0.438923 |
| 11720495_YME1L1    | 0.039533 | 0.327656 | 0.439136 |
| 11737934_RUSC2     | 0.059546 | 0.327762 | 0.439266 |
| 11720521_ARHGEF17  | -0.04453 | 0.327812 | 0.439321 |
| 11741413_FAM101A / | 0.132079 | 0.327836 | 0.43934  |
| 11738510_NPPC      | -0.06104 | 0.327869 | 0.439374 |
| 11753644_ADM2      | 0.049668 | 0.327889 | 0.439387 |
| 11748979_TIAL1     | 0.040891 | 0.327897 | 0.439387 |
| 11746125_NUP50     | -0.03821 | 0.327921 | 0.439407 |
| 11719505_DHX36     | 0.04883  | 0.327935 | 0.439413 |
| 11739947_PFKFB2    | -0.05486 | 0.327949 | 0.43942  |
| 11749654_BCARI     | 0.050213 | 0.327965 | 0.43943  |
| 11746709_MAML1     | -0.0524  | 0.327975 | 0.439431 |
| 11738751_OR13C2    | -0.07122 | 0.328001 | 0.439449 |
| 11760078_NLN       | 0.056941 | 0.328007 | 0.439449 |
| 11717820_SLC4A4    | -0.07301 | 0.328037 | 0.439478 |
| 11747211_PKD1L1    | -0.05105 | 0.328107 | 0.439547 |
| 11717881_ATXN7L3   | -0.04952 | 0.328111 | 0.439547 |
| 11747237_MCMDC2    | 0.119304 | 0.328116 | 0.439547 |
| 11754238_DYDC2     | -0.05594 | 0.328206 | 0.439656 |
| 11760692_TRDMT1    | 0.075579 | 0.328328 | 0.439808 |
| 11720388_C1QC      | -0.05475 | 0.328362 | 0.43984  |
| 11762162_LMNA      | -0.05273 | 0.328473 | 0.439978 |
| 11736988_NT5C1B    | -0.05632 | 0.328482 | 0.439978 |
| 11735617_SLC5A10   | -0.04063 | 0.328506 | 0.439997 |
| 11755930_ZC3H7B    | 0.042714 | 0.328567 | 0.440068 |
| 11755034_REXO4     | -0.05626 | 0.328641 | 0.440154 |
| 11729154_CEACAM6   | -0.06399 | 0.328683 | 0.440198 |
| 11738690_OR52I1 // | -0.041   | 0.32876  | 0.44029  |
| 11725911_ERBB4     | -0.10152 | 0.32877  | 0.44029  |
| 11764130_IGH /// I | 0.085602 | 0.328841 | 0.440374 |
| 11738288_IFNW1     | 0.076451 | 0.328869 | 0.440399 |
| 11761388_COQ2      | -0.1024  | 0.328914 | 0.440447 |
| 11734032_C15orf61  | 0.091678 | 0.328941 | 0.440472 |
| 11734105_PNMAL2    | -0.11641 | 0.328951 | 0.440473 |
| 11719834_MPZL2     | 0.043591 | 0.329118 | 0.440681 |
| 11732522_CHST9     | -0.08218 | 0.329124 | 0.440681 |
| 11723387_PTAR1     | 0.046285 | 0.329185 | 0.44075  |
| 11761755_DPPA4     | 0.058231 | 0.329208 | 0.440765 |
| 11717582_RGCC      | 0.12323  | 0.329214 | 0.440765 |
| 11731347_PRR32     | -0.06746 | 0.32925  | 0.440801 |
| 11758194_DPP4      | -0.05853 | 0.32934  | 0.44091  |
| 11744180_TCIRG1    | 0.049518 | 0.329409 | 0.44099  |
| 11760147_ISCU      | 0.055165 | 0.329448 | 0.44103  |
| 11760885_RXRB      | 0.076725 | 0.329514 | 0.441105 |
| 11723661_UBIAD1    | 0.051143 | 0.32953  | 0.441115 |
| 11759845_C17orf99  | -0.05842 | 0.329582 | 0.441164 |
| 11750866_CORIN     | -0.08874 | 0.329584 | 0.441164 |
| 11755842_RBBP6     | -0.0494  | 0.329597 | 0.441166 |
| 11763380_FAAP20    | 0.054305 | 0.329604 | 0.441166 |
| 11740593_HOXD4     | -0.04152 | 0.329696 | 0.441266 |

|                    |          |          |          |
|--------------------|----------|----------|----------|
| 11756335_CARD19    | 0.04436  | 0.329702 | 0.441266 |
| 11744157_CHKB ///  | -0.0434  | 0.329706 | 0.441266 |
| 11752752_ZNF793    | 0.074886 | 0.329715 | 0.441267 |
| 11752582_KIR3DL1   | -0.05432 | 0.329775 | 0.441334 |
| 11724423_GPR68     | 0.058397 | 0.329837 | 0.441406 |
| 11751603_SRSF7     | 0.034293 | 0.329859 | 0.441422 |
| 11722140_GUCY1A3   | 0.130247 | 0.329873 | 0.441429 |
| 11730396_DDI1      | -0.09013 | 0.329938 | 0.441505 |
| 11749049_TFAP2A    | 0.126251 | 0.329979 | 0.441547 |
| 11738024_CRACR2A   | 0.082196 | 0.329988 | 0.441547 |
| 11752834_BTNL8     | 0.061691 | 0.330043 | 0.441609 |
| 11749680_CASS4     | -0.09361 | 0.330067 | 0.441628 |
| 11762141_LOC105372 | 0.046164 | 0.330077 | 0.44163  |
| 11727824_TPMT      | 0.05145  | 0.330089 | 0.441634 |
| 11755480_MYOCD     | -0.0939  | 0.3301   | 0.441637 |
| 11742277_ASIC5     | 0.059271 | 0.330133 | 0.441669 |
| 11743219_GRID2     | -0.06879 | 0.330156 | 0.441687 |
| 11745291_AFF2      | -0.16643 | 0.330208 | 0.441744 |
| 11746075_ZNF511    | -0.05397 | 0.330257 | 0.441798 |
| 11734914_UBQLNL    | -0.05321 | 0.330336 | 0.441891 |
| 11738079_NR2E3     | -0.07285 | 0.33035  | 0.441899 |
| 11761283_SMYD3     | 0.107548 | 0.330372 | 0.441916 |
| 11716051_LAMC1     | 0.036001 | 0.330418 | 0.441959 |
| 11759497_CHST11    | 0.058655 | 0.330422 | 0.441959 |
| 11734107_LSM11     | -0.08574 | 0.330433 | 0.441961 |
| 11723933_PNMA3     | 0.043643 | 0.330461 | 0.441986 |
| 11715575_PPM1G     | -0.03794 | 0.330475 | 0.441992 |
| 11757163_SNORA54   | -0.07466 | 0.330484 | 0.441992 |
| 11736894_STAG3L1 / | 0.040777 | 0.330501 | 0.442003 |
| 11753981_VEPH1     | 0.136548 | 0.330546 | 0.442051 |
| 11738337_SHISA6    | -0.04352 | 0.33059  | 0.442093 |
| 11761561_REEP6     | -0.09725 | 0.330595 | 0.442093 |
| 11756945_PIK3C2A   | 0.086602 | 0.330612 | 0.442104 |
| 11732521_CHST9     | -0.05505 | 0.330638 | 0.442127 |
| 11738163_OR8A1     | 0.079937 | 0.330664 | 0.442149 |
| 11746569_SLC35C2   | 0.036269 | 0.3307   | 0.442185 |
| 11719670_RCAN2     | -0.07569 | 0.330856 | 0.442372 |
| 11763660_FMNL1     | -0.06671 | 0.330858 | 0.442372 |
| 11735253_NEK8      | -0.0702  | 0.330898 | 0.442414 |
| 11747218_LOC442028 | -0.12167 | 0.330917 | 0.442427 |
| 11756842_TMEM217   | 0.080639 | 0.330961 | 0.442474 |
| 11762565_ANKRD20A5 | -0.05617 | 0.331033 | 0.442557 |
| 11735828_VSX1      | -0.05917 | 0.33105  | 0.442568 |
| 11753769_SBNO2     | 0.070792 | 0.33108  | 0.442596 |
| 11728644_MLC1      | -0.09727 | 0.331089 | 0.442597 |
| 11735314_TMPRSS12  | -0.06429 | 0.331115 | 0.442613 |
| 11717907_FAM136A   | 0.03812  | 0.33112  | 0.442613 |
| 11741882_ARTN      | -0.04741 | 0.331186 | 0.442678 |
| 11752891_TYR       | -0.08353 | 0.331187 | 0.442678 |
| 11724855_RND2      | 0.047461 | 0.331215 | 0.442704 |
| 11728855_SCRT1     | -0.07046 | 0.331228 | 0.442709 |

|                    |          |          |          |
|--------------------|----------|----------|----------|
| 11715356_COL1A2    | 0.04635  | 0.331264 | 0.442746 |
| 11755005_ERBB2     | -0.04259 | 0.331274 | 0.442747 |
| 11715313_LHB       | -0.04858 | 0.331298 | 0.442766 |
| 11734130_SLC30A4   | -0.06836 | 0.33131  | 0.442771 |
| 11753408_FUT6      | 0.086228 | 0.33134  | 0.442798 |
| 11734167_NT5C1B    | 0.071461 | 0.331362 | 0.442816 |
| 11754627_RAB37     | 0.076052 | 0.331435 | 0.442901 |
| 11729240_SLC35E3   | -0.03404 | 0.331458 | 0.442911 |
| 11761617_SMS       | -0.08252 | 0.331461 | 0.442911 |
| 11763253_IGKV2-28  | 0.059182 | 0.331518 | 0.442966 |
| 11740727_SYCE1     | -0.04218 | 0.33152  | 0.442966 |
| 11747378_ATP6AP2   | 0.05156  | 0.331613 | 0.443078 |
| 11742872_PIK3IP1   | -0.03965 | 0.331624 | 0.443081 |
| 11742212_VEGFA     | -0.04735 | 0.331663 | 0.443121 |
| 11752513_DACH2     | -0.06355 | 0.331754 | 0.44323  |
| 11750345_IKKB      | -0.07576 | 0.331763 | 0.44323  |
| 11744785_SCRIB     | 0.036745 | 0.331774 | 0.443233 |
| 11742536_OR5D16    | -0.0676  | 0.331819 | 0.443281 |
| 11763912_KANSL2 // | 0.085567 | 0.331857 | 0.44331  |
| 11734065_AMPD3     | 0.083057 | 0.331859 | 0.44331  |
| 11741796_SH3BP2    | -0.03435 | 0.331869 | 0.443311 |
| 11715380_LAPTM4B   | -0.03404 | 0.331887 | 0.443323 |
| 11743137_NID1      | 0.038314 | 0.331989 | 0.44344  |
| 11763625_ZNF384    | 0.039564 | 0.331992 | 0.44344  |
| 11762656_TXNDC11   | -0.06498 | 0.33201  | 0.443451 |
| 11735333_EXD3      | -0.07182 | 0.332067 | 0.443515 |
| 11740615_KANSL1    | -0.04163 | 0.332162 | 0.443619 |
| 11732567_MBP       | 0.100424 | 0.332163 | 0.443619 |
| 11761175_SLC17A9   | -0.06653 | 0.332196 | 0.443652 |
| 11742110_FBLN7     | -0.07051 | 0.332224 | 0.443676 |
| 11734602_TAS2R43 / | 0.130781 | 0.332252 | 0.443702 |
| 11763557_TRBC1 /// | -0.06017 | 0.332275 | 0.44372  |
| 11723031_CRISPLD2  | -0.0851  | 0.33231  | 0.443754 |
| 11737666_HHLA1     | 0.093765 | 0.332331 | 0.443771 |
| 11760426_EPS15L1   | -0.04839 | 0.332376 | 0.443819 |
| 11745832_NFKBIB    | 0.095497 | 0.332418 | 0.443862 |
| 11750461_NUBPL     | -0.05016 | 0.332459 | 0.443905 |
| 11734730_MRPS12    | -0.05008 | 0.33258  | 0.444054 |
| 11738376_GNAT3     | 0.058116 | 0.332589 | 0.444054 |
| 11737311_PAGE3     | 0.076253 | 0.332656 | 0.444133 |
| 11750687_ADAM28    | -0.0624  | 0.332684 | 0.444158 |
| 11730702_LOC729966 | -0.07767 | 0.332695 | 0.44416  |
| 11724909_TMPRSS2   | -0.08456 | 0.332749 | 0.444216 |
| 11753015_NR2C1     | 0.047001 | 0.332755 | 0.444216 |
| 11742304_SSX5      | -0.05602 | 0.332814 | 0.444282 |
| 11743309_ARMC7     | 0.067703 | 0.332838 | 0.444291 |
| 11749030_POLL      | -0.06269 | 0.332839 | 0.444291 |
| 11716315_MRPL15    | -0.0366  | 0.332876 | 0.444323 |
| 11760404_DYNLRB1   | -0.05402 | 0.332881 | 0.444323 |
| 11718426_HSDL2     | -0.03884 | 0.33293  | 0.444377 |
| 11753609_GPER1     | -0.06584 | 0.33297  | 0.444417 |

|                    |          |          |          |
|--------------------|----------|----------|----------|
| 11718380_DGKZ      | -0.05188 | 0.333024 | 0.444478 |
| 11760695_CLDN15    | 0.071407 | 0.333081 | 0.444542 |
| 11734897_MATN1     | 0.057704 | 0.333105 | 0.444557 |
| 11747583_PNCK      | -0.04458 | 0.333111 | 0.444557 |
| 11734508_FOXI2     | -0.04    | 0.333171 | 0.444625 |
| 11751535_CA3       | 0.077663 | 0.333263 | 0.444736 |
| 11721046_SERINC2   | -0.03823 | 0.333334 | 0.444808 |
| 11721050_TUBGCP6   | 0.034844 | 0.333342 | 0.444808 |
| 11752785_ZBTB7C    | -0.06587 | 0.333345 | 0.444808 |
| 11721763_ADRBK2    | -0.08264 | 0.333386 | 0.444851 |
| 11763985_LOC101928 | -0.15464 | 0.333423 | 0.444889 |
| 11738687_OR5T1     | 0.068558 | 0.333453 | 0.444916 |
| 11728305_GULP1     | -0.10156 | 0.333564 | 0.445053 |
| 11729753_ULK2      | -0.07438 | 0.333605 | 0.445096 |
| 11741619_SCN7A     | -0.03813 | 0.333699 | 0.4452   |
| 11750983_VDR       | -0.04823 | 0.333702 | 0.4452   |
| 11729776_TMTC2     | 0.047048 | 0.333723 | 0.445216 |
| 11733665_NRP2      | -0.06892 | 0.333736 | 0.445222 |
| 11717696_TYSND1    | -0.06857 | 0.333781 | 0.44527  |
| 11729159_UCP2      | -0.05979 | 0.333792 | 0.445272 |
| 11734301_MBL2      | 0.125136 | 0.333818 | 0.445295 |
| 11748198_NSGL      | -0.04054 | 0.333864 | 0.445343 |
| 11724528_GCNT3     | 0.090978 | 0.333943 | 0.445437 |
| 11723545_PLD1      | 0.046144 | 0.334049 | 0.445566 |
| 11719674_REG3A     | -0.05043 | 0.334074 | 0.445582 |
| 11725887_FAM167B   | -0.04852 | 0.334103 | 0.445582 |
| 11715355_COL1A2    | -0.08875 | 0.334107 | 0.445582 |
| 11761855_DPF1      | -0.04058 | 0.334111 | 0.445582 |
| 11740634_FOXP2     | -0.07576 | 0.334112 | 0.445582 |
| 11748872_PIANP     | -0.0459  | 0.334116 | 0.445582 |
| 11751551_KRTAP5-5  | 0.046379 | 0.334173 | 0.445645 |
| 11715284_C15orf40  | -0.03938 | 0.334224 | 0.445702 |
| 11734043_KIAA0408  | -0.07873 | 0.334279 | 0.445759 |
| 11737709_ORC5      | 0.062412 | 0.334288 | 0.445759 |
| 11758191_MEX3C     | -0.03591 | 0.334294 | 0.445759 |
| 11763778_MCM3AP-AS | -0.10228 | 0.33431  | 0.445768 |
| 11762394_AR        | -0.06294 | 0.334401 | 0.445876 |
| 11726921_ARSG      | 0.070167 | 0.334446 | 0.445925 |
| 11747257_GRWD1     | 0.039554 | 0.33456  | 0.446065 |
| 11753562_LUZP2     | -0.03525 | 0.334609 | 0.446111 |
| 11752895_SLC22A17  | -0.05501 | 0.334613 | 0.446111 |
| 11736905_ROR2      | -0.04978 | 0.33468  | 0.446189 |
| 11721784_SLC9A8    | 0.058269 | 0.334711 | 0.446217 |
| 11752941_PRKCG     | -0.09008 | 0.334757 | 0.446267 |
| 11751023_ALG6      | -0.10387 | 0.334773 | 0.446276 |
| 11748763_EEF2      | -0.038   | 0.335011 | 0.446581 |
| 11752571_ARHGEF7   | -0.06499 | 0.335066 | 0.446642 |
| 11752253_PLEKHN1   | -0.03363 | 0.335095 | 0.446669 |
| 11737689_SPDYE2 // | 0.067052 | 0.33512  | 0.44669  |
| 11731134_LTB4R     | 0.065957 | 0.335182 | 0.44676  |
| 11762222_GOLGA6L7P | 0.061621 | 0.335327 | 0.446941 |

|                   |          |          |          |
|-------------------|----------|----------|----------|
| 11727913_FMNL1    | -0.03472 | 0.335396 | 0.44702  |
| 11739353_CHDH     | -0.09935 | 0.335424 | 0.447046 |
| 11725281_PRDM8    | -0.11197 | 0.335508 | 0.447145 |
| 11751860_HYAL1    | -0.1     | 0.335552 | 0.447192 |
| 11750942_JAKMIP1  | -0.12203 | 0.335561 | 0.447192 |
| 11738549_OTUD6A   | -0.03597 | 0.33558  | 0.447203 |
| 11756466_PLEKHB1  | -0.04571 | 0.335587 | 0.447203 |
| 11748619_SUCLA2   | 0.038336 | 0.335672 | 0.447304 |
| 11735154_COL4A3   | 0.093992 | 0.335729 | 0.447367 |
| 11755006_BCAR3    | 0.056824 | 0.335926 | 0.447618 |
| 11735508_AKR1D1   | 0.111251 | 0.335939 | 0.447622 |
| 11736697_ERN2     | -0.06419 | 0.336136 | 0.447873 |
| 11761064_SPDYE2B  | -0.03962 | 0.336148 | 0.447877 |
| 11725961_TCHH     | -0.04861 | 0.336182 | 0.44791  |
| 11716247_TOP2B    | 0.034506 | 0.336221 | 0.447949 |
| 11749878_CNOT1    | 0.067191 | 0.336239 | 0.447961 |
| 11754337_NDRG1    | 0.041033 | 0.336301 | 0.448031 |
| 11756150_B2M      | 0.038198 | 0.33648  | 0.448258 |
| 11727423_CANX     | 0.038178 | 0.336546 | 0.448333 |
| 11740561_HTR1F    | 0.046353 | 0.336651 | 0.448461 |
| 11716897_PPIE     | -0.04639 | 0.336669 | 0.448473 |
| 11722719_BAIAP2   | 0.049815 | 0.336693 | 0.448493 |
| 11715782_EEF2     | 0.039183 | 0.336704 | 0.448494 |
| 11740504_ZNF680   | 0.075517 | 0.336712 | 0.448494 |
| 11753443_SSTR1    | -0.06337 | 0.336801 | 0.4486   |
| 11752521_F11      | -0.10233 | 0.336843 | 0.448644 |
| 11756457_ARMC7    | -0.05753 | 0.336931 | 0.448748 |
| 11734476_SPATA9   | 0.056056 | 0.336953 | 0.448765 |
| 11762453_CSNK1A1  | -0.09059 | 0.336981 | 0.448791 |
| 11741870_PARK2    | -0.0843  | 0.336994 | 0.448795 |
| 11751552_RNF223   | -0.06977 | 0.337078 | 0.448895 |
| 11746821_ETNPPL   | -0.06777 | 0.337163 | 0.448997 |
| 11727822_TPMT     | 0.044392 | 0.337194 | 0.449025 |
| 11755198_SNAI3    | -0.05771 | 0.337254 | 0.449093 |
| 11752116_FGFR2    | -0.0589  | 0.337266 | 0.449097 |
| 11739457_SYNC     | 0.052685 | 0.337329 | 0.449169 |
| 11731322_C22orf31 | -0.06446 | 0.337343 | 0.449174 |
| 11733003_CXCR1    | -0.08306 | 0.337358 | 0.449183 |
| 11736088_FAM171A1 | 0.04917  | 0.337405 | 0.449233 |
| 11721127_ENPEP    | -0.06472 | 0.337462 | 0.449296 |
| 11721746_ANKRD12  | -0.10114 | 0.337498 | 0.449323 |
| 11729225_SLC33A1  | 0.055312 | 0.3375   | 0.449323 |
| 11761008_TASP1    | 0.095685 | 0.337598 | 0.449442 |
| 11740167_HUNK     | 0.06241  | 0.337678 | 0.449535 |
| 11741621_LRIT1    | -0.06957 | 0.337708 | 0.449563 |
| 11730694_GJB7     | -0.07009 | 0.337766 | 0.449628 |
| 11733668_WDR78    | 0.077568 | 0.337778 | 0.449631 |
| 11742269_CLEC4M   | -0.10099 | 0.337791 | 0.449633 |
| 11753041_GYS1     | -0.05835 | 0.337798 | 0.449633 |
| 11716408_MET      | 0.037953 | 0.337828 | 0.449661 |
| 11717138_CDC42EP4 | -0.06112 | 0.337858 | 0.449689 |



|                   |          |          |          |
|-------------------|----------|----------|----------|
| 11743763_GTF3C3   | 0.036693 | 0.337888 | 0.449717 |
| 11740667_TPRX1    | -0.04731 | 0.337952 | 0.44979  |
| 11742472_SLC9B1   | 0.055607 | 0.338021 | 0.44987  |
| 11762753_LETM2    | 0.082289 | 0.338032 | 0.449872 |
| 11763797_EPHB1    | 0.086245 | 0.338056 | 0.449892 |
| 11758166_ANOS1    | -0.0897  | 0.338079 | 0.44991  |
| 11747071_UGT2B4   | 0.091463 | 0.338117 | 0.449948 |
| 11742360_OR5A2    | -0.04645 | 0.338197 | 0.450042 |
| 11716810_SIN3B    | 0.042858 | 0.338235 | 0.45008  |
| 11762802_PRRT3    | -0.06622 | 0.338295 | 0.450148 |
| 11748809_ARID3B   | -0.03539 | 0.338328 | 0.450179 |
| 11729243_FBN2     | 0.093035 | 0.338358 | 0.450208 |
| 11730642_CT55     | -0.08956 | 0.338443 | 0.450308 |
| 11757258_PRG1     | -0.08616 | 0.338518 | 0.450396 |
| 11734653_ATP5F1   | -0.03496 | 0.338533 | 0.450404 |
| 11732405_NOL9     | 0.053992 | 0.338655 | 0.450554 |
| 11763156_SHBG     | -0.06724 | 0.338685 | 0.450563 |
| 11759642_HLA-DRB1 | 0.038403 | 0.338688 | 0.450563 |
| 11720580_TCF12    | 0.049552 | 0.33869  | 0.450563 |
| 11762479_EGFR     | -0.08591 | 0.338854 | 0.450769 |
| 11762763_DUOXA2   | -0.04631 | 0.33891  | 0.450832 |
| 11748305_TTC41P   | 0.055947 | 0.338946 | 0.45086  |
| 11718206_TOE1     | -0.0409  | 0.33895  | 0.45086  |
| 11761215_BEST1    | -0.04772 | 0.339001 | 0.450916 |
| 11739098_ARFIP2   | -0.06696 | 0.339012 | 0.450919 |
| 11745332_KCNT2    | -0.10088 | 0.339026 | 0.450925 |
| 11751422_CHDH     | -0.08468 | 0.339038 | 0.450929 |
| 11727322_EMILIN3  | -0.06943 | 0.339062 | 0.450947 |
| 11745128_CDH5     | -0.06526 | 0.339103 | 0.450989 |
| 11746135_NOP56    | 0.036207 | 0.339168 | 0.451065 |
| 11723316_DUSP16   | 0.061971 | 0.339278 | 0.451199 |
| 11718671_C11orf49 | -0.05311 | 0.339326 | 0.45125  |
| 11755391_H2AFY    | -0.03821 | 0.33944  | 0.451377 |
| 11717453_SPOCK2   | -0.09118 | 0.33944  | 0.451377 |
| 11738271_KCNIP2   | 0.045097 | 0.339498 | 0.451441 |
| 11756024_FAM19A3  | -0.12068 | 0.339547 | 0.451484 |
| 11745656_PAX5     | -0.0503  | 0.339549 | 0.451484 |
| 11743967_CERCAM   | 0.047314 | 0.339607 | 0.45155  |
| 11745528_GOLGA3   | -0.08136 | 0.339642 | 0.451584 |
| 11725144_ZNF784   | -0.05551 | 0.339672 | 0.451606 |
| 11734801_WIPI2    | 0.045104 | 0.339677 | 0.451606 |
| 11752654_GNPTAB   | -0.05153 | 0.339715 | 0.451645 |
| 11752447_TBR1     | -0.09816 | 0.339855 | 0.451818 |
| 11738838_IL5RA    | -0.0466  | 0.339912 | 0.451873 |
| 11747028_HMCN2    | -0.08022 | 0.339914 | 0.451873 |
| 11757048	EIF3B    | 0.045453 | 0.339948 | 0.451903 |
| 11756078_ARHGEF37 | 0.065007 | 0.339956 | 0.451903 |
| 11747563_PLOD3    | -0.04497 | 0.340038 | 0.451999 |
| 11755716_RNF157   | 0.056176 | 0.340115 | 0.45209  |
| 11761760_LMF1     | -0.04284 | 0.340163 | 0.452142 |
| 11739498_NPTX1    | -0.05431 | 0.340196 | 0.452173 |

|                    |          |          |          |
|--------------------|----------|----------|----------|
| 11736486_RASGEF1B  | -0.07934 | 0.340226 | 0.452201 |
| 11750665_CHRNA2    | -0.07166 | 0.340306 | 0.452294 |
| 11720166_CDC42EP5  | -0.03616 | 0.340334 | 0.45232  |
| 11742089_KRT76     | -0.06181 | 0.340355 | 0.45233  |
| 11752943_CATSPER2  | -0.07605 | 0.34036  | 0.45233  |
| 11729796_SP2       | 0.040073 | 0.34043  | 0.45241  |
| 11751890_SCN5A     | -0.04065 | 0.34044  | 0.452411 |
| 11740570_ZNF665    | -0.06338 | 0.340454 | 0.452418 |
| 11731475_SFRP4     | -0.08416 | 0.340468 | 0.452423 |
| 11738415_TBR1      | -0.09001 | 0.340495 | 0.452448 |
| 11726171_SCARA3    | -0.10246 | 0.340528 | 0.452479 |
| 11751497_MFSD13A   | -0.03762 | 0.340614 | 0.452581 |
| 11735555_AMZ1      | -0.04411 | 0.340656 | 0.452624 |
| 11748326_GORASP1   | -0.03874 | 0.340691 | 0.452658 |
| 11764092_ACO1      | -0.14465 | 0.340711 | 0.452672 |
| 11730674_MAP3K15   | -0.08741 | 0.340736 | 0.452684 |
| 11751960_PAPLN     | 0.078386 | 0.340738 | 0.452684 |
| 11758890_FAM46A    | 0.079304 | 0.340795 | 0.452732 |
| 11733518_KCNK10    | -0.08283 | 0.340799 | 0.452732 |
| 11728055_GHR       | 0.076772 | 0.340802 | 0.452732 |
| 11740577_VWA5B1    | -0.1348  | 0.340933 | 0.452894 |
| 11757450_MSL1      | -0.04476 | 0.340985 | 0.45295  |
| 11730698_FOXR1     | -0.0731  | 0.340998 | 0.452955 |
| 11758150_ARSE      | 0.058775 | 0.341006 | 0.452955 |
| 11763460_GPRIN3    | 0.070511 | 0.341166 | 0.453154 |
| 11740566_ATXN3L    | 0.102139 | 0.341188 | 0.45317  |
| 11716632_FXR2      | -0.06638 | 0.341244 | 0.453233 |
| 11745240_TIE1      | -0.05962 | 0.34131  | 0.453308 |
| 11750761_PLXNB3    | -0.03893 | 0.341335 | 0.453329 |
| 11736802_FGF9      | -0.0535  | 0.341404 | 0.453409 |
| 11762769_ZNF215    | -0.09697 | 0.341437 | 0.45344  |
| 11720024_FAM118A   | 0.077102 | 0.341475 | 0.453478 |
| 11717613_KLHDC8B   | -0.05167 | 0.341528 | 0.453537 |
| 11745429_MYBBP1A   | 0.034839 | 0.341743 | 0.453801 |
| 11759776_GTDC1     | 0.060133 | 0.341746 | 0.453801 |
| 11721334_PLOD2     | 0.042648 | 0.341765 | 0.453814 |
| 11733813_GNAO1     | -0.05615 | 0.341788 | 0.453832 |
| 11722309_TRPM4     | 0.036734 | 0.341804 | 0.453841 |
| 11718391_PREPL     | -0.03732 | 0.341888 | 0.453941 |
| 11750832_SLC12A1   | -0.06011 | 0.34191  | 0.453957 |
| 11760506_NCAM1-AS1 | -0.08456 | 0.342047 | 0.454127 |
| 11726098_NKAIN1    | 0.065536 | 0.34208  | 0.454158 |
| 11747962_RFNG      | 0.055239 | 0.342211 | 0.45432  |
| 11720990_MED8      | 0.041723 | 0.34232  | 0.454452 |
| 11754756_FGD5      | -0.07047 | 0.342331 | 0.454454 |
| 11739340_FAM46C    | 0.037362 | 0.342347 | 0.454464 |
| 11760419_JAM2      | -0.0694  | 0.34237  | 0.454481 |
| 11729134_STK24     | 0.039292 | 0.342414 | 0.454528 |
| 11724316_LUZP1     | -0.04307 | 0.342451 | 0.454558 |
| 11721981_SLC36A1   | -0.10393 | 0.342456 | 0.454558 |
| 11732642_PGLYRP1   | -0.08009 | 0.342466 | 0.454559 |

|                    |          |          |          |
|--------------------|----------|----------|----------|
| 11746698_GNAS      | -0.03306 | 0.34258  | 0.454698 |
| 11756755_CSH1 ///  | 0.070523 | 0.342598 | 0.45471  |
| 11724119_SAMD9L    | 0.035452 | 0.342631 | 0.454721 |
| 11763809_SFTPC     | -0.05511 | 0.342652 | 0.454721 |
| 11732969_MYBPC1    | 0.046508 | 0.342655 | 0.454721 |
| 11755168_CENPL     | -0.03529 | 0.34266  | 0.454721 |
| 11740960_DMD       | 0.135194 | 0.342663 | 0.454721 |
| 11730625_KLB       | -0.04147 | 0.34267  | 0.454721 |
| 11739356_ERG       | -0.07677 | 0.342671 | 0.454721 |
| 11743965_CERCAM    | -0.03773 | 0.342761 | 0.454828 |
| 11744953_ANXA1     | 0.035726 | 0.342811 | 0.454881 |
| 11758471_SPATA2    | -0.04229 | 0.342872 | 0.45495  |
| 11760686_OBSL1     | -0.06043 | 0.342904 | 0.454976 |
| 11739816_DLG4      | 0.097809 | 0.342917 | 0.454976 |
| 11727802_GJA9-MYCE | 0.038769 | 0.342919 | 0.454976 |
| 11756824_SLC8B1    | -0.05559 | 0.342967 | 0.455027 |
| 11731196_PRR5L     | 0.051203 | 0.343033 | 0.455102 |
| 11758705_PTPDC1    | 0.050548 | 0.343056 | 0.45512  |
| 11731886_SCGB1D2   | -0.1329  | 0.343086 | 0.455147 |
| 11761039_TMX1      | 0.057621 | 0.343109 | 0.455167 |
| 11762902_C7orf55   | 0.080683 | 0.343202 | 0.455277 |
| 11741746_LIN54     | -0.07126 | 0.343261 | 0.455341 |
| 11733716_EXOC4     | 0.039623 | 0.343269 | 0.455341 |
| 11728780_ZAP70     | -0.06223 | 0.343282 | 0.455347 |
| 11756528_GNAO1     | -0.05486 | 0.343399 | 0.455489 |
| 11759992_DLEU7     | 0.048486 | 0.34346  | 0.455557 |
| 11723484_PDCL3     | -0.03679 | 0.34347  | 0.455559 |
| 11745052_TMEM132B  | -0.04736 | 0.343605 | 0.455724 |
| 11715166_DNAJC12   | 0.081773 | 0.343613 | 0.455724 |
| 11732045_KRT85     | -0.08537 | 0.343638 | 0.455743 |
| 11739032_ACTR2     | -0.03322 | 0.343687 | 0.455796 |
| 11744382_WDR74     | -0.04045 | 0.343697 | 0.455797 |
| 11716980_SLC35A4   | -0.04596 | 0.343734 | 0.455823 |
| 11730309_RIC3      | 0.081738 | 0.343735 | 0.455823 |
| 11764109_LOC105378 | -0.17891 | 0.343761 | 0.455834 |
| 11724407_CCNE1     | -0.03693 | 0.343762 | 0.455834 |
| 11745063_LRRC8B    | -0.04547 | 0.343855 | 0.455945 |
| 11721169_PYCARD    | 0.052221 | 0.343894 | 0.455985 |
| 11741594_LST1      | 0.052312 | 0.343993 | 0.456103 |
| 11734737_FAR1      | -0.04825 | 0.344051 | 0.456168 |
| 11747187_PTGES     | 0.042668 | 0.344096 | 0.456215 |
| 11717846_PLEKHJ1   | 0.041031 | 0.34412  | 0.456234 |
| 11747413_KANSL1    | -0.04488 | 0.34414  | 0.456248 |
| 11723536_SPATA8    | -0.09035 | 0.344168 | 0.456273 |
| 11744037_CMIP      | -0.03662 | 0.344186 | 0.456285 |
| 11742229_SUPT20HL1 | 0.066636 | 0.344219 | 0.456309 |
| 11737044_FAM184B   | 0.044973 | 0.344228 | 0.456309 |
| 11763632_SLC12A4   | 0.0372   | 0.344232 | 0.456309 |
| 11736074_KCTD3     | 0.035091 | 0.344318 | 0.45641  |
| 11746399_PIGT      | -0.03737 | 0.344365 | 0.45646  |
| 11751758_GPR85     | 0.053792 | 0.3444   | 0.456495 |

|                    |          |          |          |
|--------------------|----------|----------|----------|
| 11723803_TREM2     | 0.057221 | 0.344434 | 0.456528 |
| 11761830_HERC2P4 / | 0.056081 | 0.344479 | 0.456575 |
| 11751006_ATL2      | -0.04634 | 0.344527 | 0.456616 |
| 11738386_ATOH1     | -0.05056 | 0.344529 | 0.456616 |
| 11749600_PRG2 ///  | -0.03528 | 0.344557 | 0.456664 |
| 11724872_CLDN2     | -0.06119 | 0.344574 | 0.456664 |
| 11759386_OR5T2     | -0.1021  | 0.344575 | 0.456664 |
| 11762103_ZNF274    | 0.084508 | 0.344587 | 0.456643 |
| 11722648_TNNI3     | -0.06824 | 0.34461  | 0.456661 |
| 11743959_SLC16A3   | -0.06153 | 0.344695 | 0.456761 |
| 11752325_NTRK3     | -0.04719 | 0.344713 | 0.456771 |
| 11756413_ASTN2     | 0.081857 | 0.344721 | 0.456771 |
| 11758786_ARIH1     | -0.10499 | 0.344794 | 0.45685  |
| 11760937_CYP19A1   | 0.111862 | 0.344799 | 0.45685  |
| 11747846_KHDRBS2   | 0.117161 | 0.344849 | 0.456903 |
| 11742531_OR6B3     | 0.064912 | 0.344858 | 0.456904 |
| 11715281_ASIP      | 0.100937 | 0.344923 | 0.456977 |
| 11718545_SGSM2     | -0.04252 | 0.344988 | 0.457051 |
| 11734770_NEGR1     | -0.11096 | 0.345043 | 0.457111 |
| 11723318_FAM234B   | -0.07876 | 0.345061 | 0.457123 |
| 11725199_BTBD7     | 0.089291 | 0.345109 | 0.45717  |
| 11733886_FXR1      | 0.036302 | 0.345126 | 0.45717  |
| 11752538_GABRG1    | -0.08225 | 0.345127 | 0.45717  |
| 11740827_HES3      | -0.06871 | 0.345138 | 0.45717  |
| 11739829_CYS1      | 0.072932 | 0.345144 | 0.45717  |
| 11726054_MUC4      | 0.098046 | 0.345166 | 0.457172 |
| 11759410_KCNV2     | 0.088555 | 0.34517  | 0.457172 |
| 11763490_STK35     | 0.058711 | 0.345173 | 0.457172 |
| 11763841_LOC101930 | -0.0952  | 0.345251 | 0.457262 |
| 11715510_NDFIP1    | -0.03741 | 0.345276 | 0.457277 |
| 11737304_BRS3      | -0.09066 | 0.34528  | 0.457277 |
| 11737837_NSMF      | -0.03438 | 0.345356 | 0.457365 |
| 11754401_SHE       | -0.05875 | 0.345448 | 0.457474 |
| 11745772_TNFRSF14  | 0.052379 | 0.345555 | 0.457603 |
| 11753814_IL2RG     | 0.064144 | 0.345586 | 0.457632 |
| 11732762_GRIN3A    | -0.15018 | 0.345726 | 0.457805 |
| 11740129_CACNA1B   | -0.08806 | 0.345802 | 0.457893 |
| 11755758_NLRC5     | 0.036249 | 0.345864 | 0.457963 |
| 11739720_GIMAP8    | -0.1359  | 0.345873 | 0.457963 |
| 11751964_SRCIN1    | -0.0639  | 0.345889 | 0.457972 |
| 11722646_MYL1      | -0.07421 | 0.345928 | 0.45801  |
| 11760549_PPP1CB    | -0.0405  | 0.346016 | 0.458114 |
| 11748268_ZNF282    | 0.056952 | 0.34609  | 0.4582   |
| 11731867_BICD2     | -0.04172 | 0.346108 | 0.458205 |
| 11742228_SUPT20HL1 | -0.06077 | 0.346112 | 0.458205 |
| 11734773_SFTPB     | -0.04657 | 0.346228 | 0.458345 |
| 11740601_APH1B     | -0.04439 | 0.346252 | 0.458365 |
| 11748412_FUT10     | 0.054358 | 0.34635  | 0.458478 |
| 11752441_GPR35     | -0.07534 | 0.346356 | 0.458478 |
| 11752839_ZNF185    | -0.06831 | 0.346385 | 0.458499 |
| 11728599_PHOSPHO2  | -0.06179 | 0.346397 | 0.458499 |

|                    |          |          |          |
|--------------------|----------|----------|----------|
| 11742629_OR4D2     | -0.07126 | 0.3464   | 0.458499 |
| 11727779_GHITM     | 0.081873 | 0.34643  | 0.458526 |
| 11720279_FAM174B   | -0.05071 | 0.346513 | 0.458623 |
| 11756483_CSHL1     | -0.05592 | 0.346538 | 0.45863  |
| 11725613_PITRM1    | 0.038132 | 0.346542 | 0.45863  |
| 11737686_C2orf48   | -0.05475 | 0.346546 | 0.45863  |
| 11745994_MAP7      | -0.12839 | 0.34658  | 0.458663 |
| 11748292_GBA /// G | 0.036543 | 0.346601 | 0.458678 |
| 11751331_DEPTOR    | -0.06733 | 0.346614 | 0.458683 |
| 11726161_EPHA7     | -0.04828 | 0.346628 | 0.458688 |
| 11732243_APOL6     | -0.07834 | 0.346654 | 0.458711 |
| 11717235_RPS7 ///  | -0.03353 | 0.346679 | 0.458731 |
| 11748279_TM7SF2    | 0.04233  | 0.346718 | 0.45877  |
| 11747539_MYD88     | 0.053505 | 0.346729 | 0.458772 |
| 11735331_RUNDC3B   | 0.062407 | 0.346799 | 0.458849 |
| 11733167_LRRN4CL   | -0.04198 | 0.346805 | 0.458849 |
| 11745883_SEPT9     | -0.04339 | 0.346877 | 0.458931 |
| 11751992_MOV10L1   | -0.07033 | 0.34696  | 0.45902  |
| 11725609_DTNA      | -0.05308 | 0.346963 | 0.45902  |
| 11742498_FAM86B1 / | 0.094398 | 0.347014 | 0.459075 |
| 11729797_SP2       | -0.04353 | 0.347038 | 0.459083 |
| 11740833_DST       | 0.06483  | 0.347039 | 0.459083 |
| 11760002_RNF212    | 0.047832 | 0.347057 | 0.459095 |
| 11763412_EPHA10    | -0.0882  | 0.347122 | 0.459169 |
| 11761555_CFB       | -0.09725 | 0.3472   | 0.459259 |
| 11740394_FGFR2     | -0.05276 | 0.347216 | 0.459264 |
| 11723717_FTSJ2     | 0.037128 | 0.347223 | 0.459264 |
| 11759743_ZNF75A    | 0.057881 | 0.347302 | 0.459357 |
| 11738910_OR51B2    | -0.08069 | 0.347408 | 0.459485 |
| 11751833_BCHE      | -0.05044 | 0.347435 | 0.459508 |
| 11744948_SEMA3F    | -0.06342 | 0.34747  | 0.459542 |
| 11746721_TREM1     | 0.057918 | 0.347545 | 0.459629 |
| 11738428_POU1F1    | -0.06203 | 0.347573 | 0.459653 |
| 11723964_AGA       | -0.04314 | 0.347613 | 0.459681 |
| 11762147_HMGA2     | -0.0604  | 0.347618 | 0.459681 |
| 11750004_MAMLD1    | -0.11409 | 0.347622 | 0.459681 |
| 11719187_MYOZ1     | -0.05092 | 0.34764  | 0.459692 |
| 11725241_HOXD9     | -0.06284 | 0.347654 | 0.459698 |
| 11729008_MYLK4     | -0.077   | 0.34768  | 0.459715 |
| 11744481_OPN3      | 0.03764  | 0.347692 | 0.459715 |
| 11757071_STEAP1 // | -0.03686 | 0.347695 | 0.459715 |
| 11741102_PTPN22    | 0.086704 | 0.347783 | 0.459807 |
| 11731973_SCNN1G    | 0.080868 | 0.347783 | 0.459807 |
| 11728413_SERPINB8  | 0.057528 | 0.347794 | 0.459809 |
| 11723848_ZNF18     | -0.06318 | 0.347812 | 0.459819 |
| 11724211_LMAN1     | -0.03644 | 0.347861 | 0.459861 |
| 11763121_LOC100132 | -0.05687 | 0.347867 | 0.459861 |
| 11725485_DIRC2     | -0.11612 | 0.347871 | 0.459861 |
| 11756970_CHIT1     | -0.06374 | 0.347909 | 0.459898 |
| 11748351_THBS3     | 0.048789 | 0.347951 | 0.459942 |
| 11741251_SIRPB2    | -0.08469 | 0.348003 | 0.459997 |

|                    |          |          |          |
|--------------------|----------|----------|----------|
| 11762575_LOC643733 | -0.11674 | 0.348015 | 0.460001 |
| 11741217_EDARADD   | -0.14038 | 0.348087 | 0.460083 |
| 11762263_FGD2      | 0.06097  | 0.348112 | 0.460104 |
| 11736210_MRPL57    | 0.035202 | 0.348139 | 0.460127 |
| 11733711_COL25A1   | 0.113886 | 0.348153 | 0.460134 |
| 11762764_DUOXA2    | -0.04301 | 0.348186 | 0.460165 |
| 11751862_KDM1B     | -0.10812 | 0.348196 | 0.460166 |
| 11737465_IL11RA    | 0.043228 | 0.348244 | 0.460217 |
| 11722972_FOXK1     | -0.06339 | 0.348277 | 0.460247 |
| 11742214_DAZ1 ///  | 0.068561 | 0.348362 | 0.460348 |
| 11743402_CDC27     | -0.05365 | 0.348431 | 0.460426 |
| 11717758_RALA      | 0.042362 | 0.34845  | 0.460431 |
| 11726004_LAYN      | -0.06056 | 0.348453 | 0.460431 |
| 11723537_HMHA1     | -0.11605 | 0.348495 | 0.460473 |
| 11738413_PUS10     | 0.072465 | 0.34858  | 0.460574 |
| 11724056_CAMTA2    | -0.05563 | 0.348623 | 0.46061  |
| 11739832_RIN3      | 0.066487 | 0.348626 | 0.46061  |
| 11742104_CASP10    | -0.03633 | 0.34879  | 0.460814 |
| 11720566_BCAT1     | -0.03506 | 0.348819 | 0.46083  |
| 11757728_FTL       | 0.033008 | 0.348822 | 0.46083  |
| 11735517_TRIM60    | 0.109193 | 0.348833 | 0.460833 |
| 11718889_PIP5K1A   | 0.035299 | 0.348853 | 0.460847 |
| 11763877_LOC100128 | -0.06117 | 0.348903 | 0.460901 |
| 11761081_PEF1      | -0.06699 | 0.349076 | 0.461116 |
| 11716416_C1QA      | -0.05176 | 0.349134 | 0.461181 |
| 11730784_ORC4      | 0.037017 | 0.349166 | 0.46121  |
| 11751863_PLAG1     | -0.07556 | 0.349184 | 0.46121  |
| 11726410_GID4      | -0.05075 | 0.349193 | 0.46121  |
| 11751499_ZNF846    | 0.142942 | 0.349194 | 0.46121  |
| 11762886_OR13H1    | 0.088928 | 0.349204 | 0.461211 |
| 11725150_HR        | -0.05031 | 0.349233 | 0.46123  |
| 11753863_BCL2L11   | -0.05109 | 0.349237 | 0.46123  |
| 11754260_NBR2      | -0.04116 | 0.349276 | 0.461268 |
| 11726547_PITPNM3   | -0.07071 | 0.349303 | 0.461292 |
| 11758978_ERGIC2    | -0.06755 | 0.349318 | 0.4613   |
| 11731376_KRT27     | 0.054965 | 0.349397 | 0.461392 |
| 11761486_PSMD8     | -0.05765 | 0.349455 | 0.461446 |
| 11715188_H3F3C     | 0.036127 | 0.349458 | 0.461446 |
| 11730009_MTUS2     | 0.053027 | 0.349528 | 0.461525 |
| 11748308_SGSM2     | -0.05256 | 0.349543 | 0.461525 |
| 11752448_P4HB      | -0.04411 | 0.349546 | 0.461525 |
| 11749979_GTF2H2 // | 0.038157 | 0.349598 | 0.461582 |
| 11741151_ZNF154    | 0.08503  | 0.349687 | 0.461675 |
| 11757062_CDC26     | -0.04168 | 0.349688 | 0.461675 |
| 11762107_CAST      | 0.115407 | 0.349727 | 0.461714 |
| 11739447_PAK7      | -0.12434 | 0.349768 | 0.461756 |
| 11721748_INF2      | -0.041   | 0.349875 | 0.461885 |
| 11736944_C2orf15   | -0.09394 | 0.349885 | 0.461886 |
| 11715788_SLC40A1   | -0.07131 | 0.349954 | 0.461964 |
| 11731197_PRR5L     | 0.097858 | 0.349992 | 0.462002 |
| 11728236_CD5       | -0.10702 | 0.350022 | 0.462029 |

|                    |          |          |          |
|--------------------|----------|----------|----------|
| 11731925_CRCT1     | -0.07656 | 0.350041 | 0.462041 |
| 11748597_BCLAF1    | 0.044663 | 0.350197 | 0.462235 |
| 11763605_WNT11     | -0.10738 | 0.350247 | 0.462289 |
| 11732379_DXO       | 0.03996  | 0.350315 | 0.462366 |
| 11730792_SVIP      | 0.048373 | 0.350408 | 0.462476 |
| 11758828_TOMM40L   | 0.129931 | 0.350435 | 0.462499 |
| 11729942_TMEM56    | 0.063344 | 0.350487 | 0.462556 |
| 11716617_MRPL36    | -0.0362  | 0.350504 | 0.462556 |
| 11763921_NCL /// S | -0.04889 | 0.350506 | 0.462556 |
| 11747807_RNGTT     | 0.078155 | 0.350518 | 0.462559 |
| 11759927_ADAM22    | 0.106677 | 0.350589 | 0.462639 |
| 11735278_LRRTM4    | -0.05514 | 0.350656 | 0.462717 |
| 11756847_CX3CR1    | 0.062345 | 0.35073  | 0.462801 |
| 11744753_LRRC28    | 0.071211 | 0.350793 | 0.462872 |
| 11734288_RBPMS     | 0.038988 | 0.350866 | 0.462956 |
| 11723610_HABP2     | -0.08042 | 0.350913 | 0.463005 |
| 11724849_DIXDC1    | 0.079545 | 0.350962 | 0.463058 |
| 11759445_SNAPC5    | -0.04834 | 0.351017 | 0.463098 |
| 11759470_LCE1F     | -0.05269 | 0.351017 | 0.463098 |
| 11737680_GPR149    | -0.07593 | 0.351021 | 0.463098 |
| 11750947_P2RX6     | -0.04094 | 0.351032 | 0.4631   |
| 11750938_HIPK4     | -0.03792 | 0.351146 | 0.463238 |
| 11759461_ZNF836    | -0.06055 | 0.351169 | 0.463256 |
| 11719266_MLPH      | 0.107507 | 0.3512   | 0.463284 |
| 11720973_ASB8      | -0.0555  | 0.351315 | 0.463423 |
| 11744857_MOV10L1   | -0.04863 | 0.351382 | 0.463499 |
| 11734497_C6orf222  | -0.04275 | 0.351406 | 0.463518 |
| 11742314_SLC35G6   | -0.0858  | 0.35146  | 0.463575 |
| 11727925_PLD4      | -0.0754  | 0.351469 | 0.463575 |
| 11715280_KRT17     | 0.068786 | 0.351534 | 0.46364  |
| 11756485_TXLNA     | -0.03787 | 0.351537 | 0.46364  |
| 11761806_NDUFA3    | 0.048995 | 0.351608 | 0.463722 |
| 11744139_TPGS1     | 0.043362 | 0.351662 | 0.463781 |
| 11744608_PARP3     | 0.047304 | 0.35169  | 0.463793 |
| 11734766_THOC2     | -0.041   | 0.351691 | 0.463793 |
| 11751650_GIGYF2    | -0.05526 | 0.351704 | 0.463793 |
| 11723398_NGFR      | -0.03615 | 0.35171  | 0.463793 |
| 11741543_ZNF577    | -0.06666 | 0.351808 | 0.463911 |
| 11741891_EVX2      | -0.05988 | 0.351918 | 0.464042 |
| 11736285_CHKA      | 0.045882 | 0.351947 | 0.464068 |
| 11737985_TENM1     | 0.118604 | 0.352017 | 0.46414  |
| 11747128_PHTF2     | -0.04541 | 0.35202  | 0.46414  |
| 11738760_OR2M7     | -0.05754 | 0.352049 | 0.464166 |
| 11739345_CLGN      | -0.06726 | 0.352148 | 0.464279 |
| 11742955_KRT6A     | -0.0907  | 0.352154 | 0.464279 |
| 11725988_MMP14     | -0.04574 | 0.352204 | 0.464323 |
| 11729234_E2F6      | 0.051448 | 0.352206 | 0.464323 |
| 11738671_SZT2      | -0.0538  | 0.352261 | 0.464374 |
| 11753065_LOC101928 | -0.04114 | 0.352267 | 0.464374 |
| 11745080_RASGEF1B  | 0.07655  | 0.352273 | 0.464374 |
| 11724954_MRC1      | 0.062415 | 0.352308 | 0.464406 |

|                    |          |          |          |
|--------------------|----------|----------|----------|
| 11727312_BHLHE22   | -0.09503 | 0.352327 | 0.464419 |
| 11724145_SLC37A1   | 0.061056 | 0.352375 | 0.464471 |
| 11743848_SLC2A5    | -0.07534 | 0.35239  | 0.464478 |
| 11757712_L3MBTL4   | 0.102264 | 0.352433 | 0.464521 |
| 11747991_TMEM106A  | -0.04019 | 0.3526   | 0.464719 |
| 11746279_TAX1BP1   | -0.03464 | 0.352602 | 0.464719 |
| 11730243_FMO2      | -0.06589 | 0.352652 | 0.464772 |
| 11762231_BBS1      | 0.04469  | 0.35269  | 0.46481  |
| 11731233_NTF4      | -0.06416 | 0.352782 | 0.464898 |
| 11735829_CHAT      | 0.04187  | 0.352785 | 0.464898 |
| 11762675_FCGR1A    | 0.050941 | 0.352786 | 0.464898 |
| 11726456_MYO5B     | 0.065496 | 0.352795 | 0.464898 |
| 11752424_SREK1IP1  | 0.051325 | 0.352872 | 0.464977 |
| 11738831_HSD17B13  | 0.09117  | 0.352873 | 0.464977 |
| 11759755_DMKN      | 0.054003 | 0.352898 | 0.464997 |
| 11761156_AKR1C3    | -0.15418 | 0.352937 | 0.465036 |
| 11760318_CYP4V2    | 0.037864 | 0.352947 | 0.465036 |
| 11750055_CEP76     | 0.068992 | 0.352959 | 0.465039 |
| 11733483_RNF113B   | -0.06219 | 0.352987 | 0.465064 |
| 11720725_ZYG11B    | -0.06502 | 0.353004 | 0.465074 |
| 11737409_BTF3      | -0.04016 | 0.353041 | 0.465109 |
| 11760953_UBXN11    | 0.060896 | 0.353127 | 0.465207 |
| 11741063_LOC101928 | 0.041077 | 0.353134 | 0.465207 |
| 11756973_RAD18     | -0.04446 | 0.353144 | 0.465208 |
| 11748237_GLTSCR1L  | -0.04642 | 0.353211 | 0.465276 |
| 11751238_HINFP     | 0.042303 | 0.353215 | 0.465276 |
| 11737324_LAMC2     | -0.06066 | 0.353226 | 0.465278 |
| 11761189_APBB1     | 0.04513  | 0.353359 | 0.46544  |
| 11750685_GALNT6    | 0.055533 | 0.353369 | 0.465441 |
| 11721086_YLPM1     | -0.0941  | 0.353381 | 0.465445 |
| 11740106_RGS3      | -0.07743 | 0.353505 | 0.465595 |
| 11730620_IP6K3     | 0.072951 | 0.353518 | 0.465595 |
| 11746550_C17orf99  | -0.05392 | 0.353523 | 0.465595 |
| 11722258_FAM174A   | 0.04082  | 0.353579 | 0.465654 |
| 11754921_TMEM168   | 0.064972 | 0.353588 | 0.465654 |
| 11731592_STAM2     | 0.04438  | 0.353628 | 0.465695 |
| 11721033_FAM107A   | -0.06219 | 0.353687 | 0.46576  |
| 11758008_PNPLA4    | -0.07755 | 0.353745 | 0.465823 |
| 11720748_LTBP4     | -0.05751 | 0.353773 | 0.465848 |
| 11717749_MCTS1     | -0.03694 | 0.353794 | 0.465863 |
| 11754650_ATP10B    | 0.081331 | 0.353872 | 0.465954 |
| 11759102_UBXN10    | 0.048377 | 0.353962 | 0.466059 |
| 11762917_CCDC159   | 0.034711 | 0.353994 | 0.466089 |
| 11735530_PIH1D2    | 0.073968 | 0.354076 | 0.466184 |
| 11727572_KLHL6     | -0.06099 | 0.35413  | 0.466234 |
| 11723237_POC5      | -0.04124 | 0.354133 | 0.466234 |
| 11735791_PTPN18    | -0.04567 | 0.354158 | 0.466255 |
| 11718586_SAP30BP   | -0.03447 | 0.354228 | 0.466335 |
| 11756622_HSPA8     | 0.034222 | 0.354267 | 0.466373 |
| 11717776_KIF1C     | 0.043116 | 0.354292 | 0.466381 |
| 11748803_RERG      | 0.083146 | 0.354293 | 0.466381 |



|                    |          |          |          |
|--------------------|----------|----------|----------|
| 11743029_SPIRE2    | -0.05564 | 0.354366 | 0.466465 |
| 11742938_ASCL2     | -0.04743 | 0.354378 | 0.466469 |
| 11742149_KRTAP10-1 | -0.06713 | 0.35439  | 0.466472 |
| 11757319_HINT1     | 0.033048 | 0.354406 | 0.46648  |
| 11729090_FAM178B   | 0.063196 | 0.354427 | 0.466496 |
| 11744220_C9orf114  | -0.05915 | 0.354553 | 0.466644 |
| 11743244_DBX1      | -0.05402 | 0.354559 | 0.466644 |
| 11757016_ZNF727 // | -0.05206 | 0.354601 | 0.466687 |
| 11729919_ADAMTS18  | -0.07206 | 0.354623 | 0.466704 |
| 11762794_DAGLB     | -0.09368 | 0.354666 | 0.466745 |
| 11743128_CD82      | 0.049145 | 0.354674 | 0.466745 |
| 11753876_POLR2L    | -0.03913 | 0.354689 | 0.466752 |
| 11753315_CELF2     | 0.057561 | 0.354717 | 0.466777 |
| 11716264_LEPROTL1  | 0.034631 | 0.354783 | 0.46685  |
| 11760260_ROGDI     | 0.071476 | 0.354798 | 0.466854 |
| 11720703_MYL4      | -0.05847 | 0.354804 | 0.466854 |
| 11753128_MIF-AS1   | -0.07729 | 0.354821 | 0.466863 |
| 11742722_LRRC58    | -0.0422  | 0.354853 | 0.466893 |
| 11754669_ARG1      | -0.08481 | 0.354896 | 0.466937 |
| 11748642_AGAP1     | -0.10415 | 0.354947 | 0.466991 |
| 11741049_TMEM100   | 0.073043 | 0.354986 | 0.46703  |
| 11727718_ZBTB42    | -0.05476 | 0.355011 | 0.467051 |
| 11759160_IFT81     | 0.055623 | 0.355089 | 0.46714  |
| 11748623_SLC7A8    | -0.05764 | 0.355099 | 0.46714  |
| 11752645_P4HB      | 0.039491 | 0.355162 | 0.467211 |
| 11744798_OGT       | -0.04603 | 0.355202 | 0.46724  |
| 11741258_AGBL1     | -0.07127 | 0.355203 | 0.46724  |
| 11736975_DNMT3B    | -0.05578 | 0.355285 | 0.467335 |
| 11761998_HDAC4     | -0.04371 | 0.355317 | 0.467355 |
| 11748906_NPM2      | -0.07131 | 0.355319 | 0.467355 |
| 11763671_A4GALT    | -0.06465 | 0.355343 | 0.467373 |
| 11750250_PPP1R13L  | -0.04947 | 0.355495 | 0.467561 |
| 11748849_BAK1      | -0.05144 | 0.355537 | 0.467587 |
| 11732138_TIMM13    | -0.04928 | 0.355556 | 0.467587 |
| 11756188_PSMC13    | -0.03252 | 0.355561 | 0.467587 |
| 11726155_FAM19A5   | 0.037318 | 0.355562 | 0.467587 |
| 11760417_DUOXA1    | 0.137314 | 0.355562 | 0.467587 |
| 11760609_RAPGEF3   | -0.08588 | 0.355575 | 0.467587 |
| 11730811_LRRTM2    | 0.093152 | 0.35559  | 0.467587 |
| 11752612_TSPAN15   | -0.07085 | 0.355591 | 0.467587 |
| 11753444_HLA-G     | -0.03759 | 0.355605 | 0.467593 |
| 11741702_ABHD11    | -0.04305 | 0.355708 | 0.467715 |
| 11719250_PHLPP1    | -0.03821 | 0.355779 | 0.467792 |
| 11758947_CPNE4     | -0.06722 | 0.355785 | 0.467792 |
| 11732639_NOVA2     | -0.06322 | 0.35582  | 0.467825 |
| 11733477_SUCNR1    | -0.05956 | 0.355842 | 0.467841 |
| 11735859_TAS2R7    | -0.07975 | 0.355886 | 0.467886 |
| 11761616_CLCA4     | 0.045491 | 0.356057 | 0.468099 |
| 11715256_XAGE3     | -0.07999 | 0.356128 | 0.468169 |
| 11757248_RPSAP9    | 0.051933 | 0.35613  | 0.468169 |
| 11722427_FGL2      | 0.117542 | 0.356298 | 0.468378 |

|                    |          |          |          |
|--------------------|----------|----------|----------|
| 11731356_IP6K3     | 0.045032 | 0.356328 | 0.468405 |
| 11762331_ACP2      | -0.04745 | 0.356365 | 0.46844  |
| 11762615_TRIM63    | -0.13109 | 0.356512 | 0.468622 |
| 11761503_KCNA2     | -0.11014 | 0.356561 | 0.468673 |
| 11741925_LOC101928 | 0.075317 | 0.356593 | 0.468703 |
| 11748115_PKNOX2    | -0.06839 | 0.356657 | 0.468774 |
| 11759482_WWTR1     | -0.03519 | 0.356692 | 0.468807 |
| 11733472_CSMD2     | 0.053919 | 0.356708 | 0.468816 |
| 11753635_MED24     | -0.03826 | 0.356727 | 0.468829 |
| 11723464_CELF2     | -0.04699 | 0.356739 | 0.468831 |
| 11744611_PEG3      | -0.05368 | 0.356757 | 0.468843 |
| 11729110_ADAMDEC1  | -0.0714  | 0.356846 | 0.468947 |
| 11753948_FBXW8     | 0.045668 | 0.356872 | 0.468969 |
| 11740474_PTPRO     | 0.08075  | 0.356913 | 0.46901  |
| 11720820_FUNDC2    | 0.058488 | 0.356928 | 0.469017 |
| 11761034_APBBIIP   | 0.085454 | 0.356953 | 0.469021 |
| 11715925_TRAM1     | -0.05577 | 0.356959 | 0.469021 |
| 11747874_BTN2A1    | -0.05239 | 0.356961 | 0.469021 |
| 11719428_BTBD7     | 0.058529 | 0.35697  | 0.469021 |
| 11751749_CUX1      | 0.045408 | 0.357009 | 0.46906  |
| 11755610_PGPEP1L   | -0.04429 | 0.357097 | 0.469163 |
| 11728551_TULP1     | 0.047342 | 0.357112 | 0.46917  |
| 11735475_HBQ1      | -0.06899 | 0.357196 | 0.469268 |
| 11749365_SAP3OBP   | -0.0415  | 0.357229 | 0.469299 |
| 11742505_CEACAM18  | -0.06963 | 0.357356 | 0.469452 |
| 11753610_VTCN1     | -0.06629 | 0.357378 | 0.46947  |
| 11758354_RNPC3     | -0.04193 | 0.357388 | 0.46947  |
| 11729114_PSM7      | -0.03389 | 0.357465 | 0.469558 |
| 11758791_C14orf1   | 0.129561 | 0.357502 | 0.469585 |
| 11736799_PDE10A    | 0.084848 | 0.357504 | 0.469585 |
| 11728552_MMP25     | -0.06655 | 0.357563 | 0.469649 |
| 11734463_QRFP      | -0.09131 | 0.357595 | 0.469678 |
| 11762768_ZNF215    | -0.08241 | 0.357638 | 0.469719 |
| 11719915_AIF1L     | 0.064837 | 0.357645 | 0.469719 |
| 11749745_SRP68     | 0.039674 | 0.357686 | 0.469761 |
| 11762710_PARK2     | 0.076695 | 0.357705 | 0.469772 |
| 11750833_GTPBP2    | 0.058656 | 0.357736 | 0.4698   |
| 11727315_EFCAB1    | -0.04762 | 0.357798 | 0.469859 |
| 11738421_OR4C6     | -0.0543  | 0.3578   | 0.469859 |
| 11719797_ASM1L     | 0.040347 | 0.35781  | 0.469859 |
| 11759764_ODF3B     | -0.05229 | 0.357889 | 0.469951 |
| 11716894_TOX4      | -0.03758 | 0.357899 | 0.469952 |
| 11738185_PDE8B     | -0.05657 | 0.357961 | 0.470021 |
| 11732954_CCDC153   | -0.05696 | 0.357997 | 0.470055 |
| 11728782_CD1C      | -0.07486 | 0.358029 | 0.470084 |
| 11759171_OFCC1     | 0.096801 | 0.358091 | 0.470154 |
| 11756143_ADPRH     | -0.04178 | 0.358152 | 0.470198 |
| 11735541_CCDC122   | 0.080756 | 0.358153 | 0.470198 |
| 11732801_SIRPB1    | -0.06226 | 0.358161 | 0.470198 |
| 11755554_LRIT3     | 0.084446 | 0.358164 | 0.470198 |
| 11730462_OTX2      | -0.08833 | 0.358198 | 0.470231 |

|                    |            |          |          |
|--------------------|------------|----------|----------|
| 11761947_KIR2DL1   | -0.06693   | 0.358254 | 0.470282 |
| 11739114_TSPYL1    | 0.078967   | 0.358257 | 0.470282 |
| 11756817_FCER2     | -0.04918   | 0.358284 | 0.470306 |
| 11754842_MEI1      | -0.04423   | 0.35832  | 0.470341 |
| 11735997_APOL1     | -0.03447   | 0.358368 | 0.47039  |
| 11741318_KCNJ1     | -0.03575   | 0.35849  | 0.470537 |
| 11736297_SLC5A1    | -0.0521    | 0.358517 | 0.47056  |
| 11754281_TECPR2    | 0.053582   | 0.35855  | 0.470592 |
| 11755153_MKL1      | 0.060317   | 0.358622 | 0.470664 |
| 11740299_HOXA1     | 0.127307   | 0.358625 | 0.470664 |
| 11743337_PLPP6     | 0.038694   | 0.358652 | 0.470687 |
| 11735970_DNAJB13   | 0.04838    | 0.358706 | 0.470746 |
| 11740113_NIPSNAP3B | 0.047916   | 0.358753 | 0.470795 |
| 11752260_TMC3      | -0.05688   | 0.358797 | 0.470839 |
| 11732637_ANXA13    | 0.045681   | 0.358905 | 0.470969 |
| 11756809_EFHC2     | 0.074336   | 0.358965 | 0.471035 |
| 11756938_TMEM199   | -0.03845   | 0.359085 | 0.47118  |
| 11759305_ZMYM2     | 0.039818   | 0.359137 | 0.471236 |
| 11759268_DEFEB134  | / -0.05618 | 0.359172 | 0.471268 |
| 11747316_TRIM46    | 0.038928   | 0.359236 | 0.47134  |
| 11750140_TOP1MT    | 0.058483   | 0.359265 | 0.471351 |
| 11735186_F9        | 0.099011   | 0.359273 | 0.471351 |
| 11727014_PAPPA     | -0.08722   | 0.35928  | 0.471351 |
| 11759226_BCL2L14   | -0.0918    | 0.359283 | 0.471351 |
| 11719262_SMTN      | -0.03546   | 0.359316 | 0.471381 |
| 11761592_KIN       | 0.064593   | 0.359378 | 0.471451 |
| 11762979_MDM4      | -0.0374    | 0.359431 | 0.471507 |
| 11750826_ADAMDEC1  | -0.09304   | 0.359502 | 0.471587 |
| 11751681_DUS3L     | -0.04029   | 0.359643 | 0.471753 |
| 11752169_ALDHIL2   | -0.07595   | 0.359647 | 0.471753 |
| 11731383_DFFB      | -0.09979   | 0.359658 | 0.471754 |
| 11738130_ZFYVE9    | -0.05435   | 0.359754 | 0.471867 |
| 11764242_GTSCR1    | -0.0981    | 0.359778 | 0.471886 |
| 11735207_MDGA2     | -0.05712   | 0.359869 | 0.471993 |
| 11718227_BCS1L     | -0.036     | 0.359882 | 0.471997 |
| 11761758_P SMB9    | 0.081279   | 0.359912 | 0.472024 |
| 11732738_CECR2     | 0.060131   | 0.359953 | 0.472065 |
| 11741264_LTBP1     | -0.07092   | 0.360133 | 0.472288 |
| 11731128_SLC25A51  | -0.0599    | 0.360157 | 0.472308 |
| 11753271_MAGEB1    | -0.08151   | 0.36024  | 0.472404 |
| 11741692_CDKL1     | 0.051688   | 0.360265 | 0.472424 |
| 11727760_CTXN3     | 0.103301   | 0.360445 | 0.472638 |
| 11741785_SBK2      | -0.09544   | 0.360447 | 0.472638 |
| 11733525_C2orf71   | -0.07924   | 0.360516 | 0.472715 |
| 11733534_ARHGAP27  | 0.067863   | 0.360566 | 0.472768 |
| 11751703_MCF2L2    | 0.062049   | 0.360633 | 0.472843 |
| 11750810_PTPN5     | -0.06115   | 0.360684 | 0.472896 |
| 11736798_RUNX1T1   | -0.06384   | 0.360693 | 0.472896 |
| 11761549_TMED3     | -0.0437    | 0.360716 | 0.472912 |
| 11722173_UQCC1     | -0.06001   | 0.360724 | 0.472912 |
| 11735689_DDX41     | 0.048726   | 0.360791 | 0.472987 |

|                    |          |          |          |
|--------------------|----------|----------|----------|
| 11740057_TMPRSS11A | -0.09666 | 0.360825 | 0.473019 |
| 11720386_MRC2      | -0.06855 | 0.360928 | 0.473136 |
| 11752391_RNF17     | -0.09627 | 0.360934 | 0.473136 |
| 11737009_ABCD2     | -0.07813 | 0.361015 | 0.473229 |
| 11725991_RMDN1     | -0.03593 | 0.361104 | 0.473323 |
| 11715504_LASP1     | 0.032544 | 0.361106 | 0.473323 |
| 11727232_ZNF19     | 0.066656 | 0.361132 | 0.473343 |
| 11751471_LOC729966 | -0.04811 | 0.36114  | 0.473343 |
| 11735144_YBEY      | 0.052526 | 0.361174 | 0.473375 |
| 11725482_MATN3     | -0.05861 | 0.361223 | 0.473426 |
| 11739491_MGAT4A    | 0.093849 | 0.361257 | 0.473458 |
| 11736920_ZBTB10    | 0.067575 | 0.36134  | 0.473554 |
| 11749963_FGA       | 0.082422 | 0.361539 | 0.473802 |
| 11724737_PDPN      | -0.03931 | 0.361637 | 0.473918 |
| 11724637_TEX40     | -0.06298 | 0.36176  | 0.474055 |
| 11727966_MSMB      | 0.080401 | 0.361766 | 0.474055 |
| 11719488_EDNRA     | -0.08816 | 0.361771 | 0.474055 |
| 11739253_SLC35E1   | 0.036617 | 0.36179  | 0.474067 |
| 11747372_SYBU      | 0.039319 | 0.361808 | 0.474078 |
| 11721802_ARL8B     | 0.037889 | 0.361832 | 0.474097 |
| 11725053_TOP1MT    | 0.049645 | 0.361917 | 0.474187 |
| 11763425_ARRDC3-AS | -0.13147 | 0.36192  | 0.474187 |
| 11729471_FAM181B   | -0.05461 | 0.361992 | 0.474264 |
| 11718525_NIPA2     | 0.036033 | 0.361998 | 0.474264 |
| 11730308_RIC3      | -0.0376  | 0.36202  | 0.47428  |
| 11753838_SNN       | -0.06535 | 0.362099 | 0.474369 |
| 11744179_TM7SF2    | -0.06009 | 0.362108 | 0.474369 |
| 11746547_SLC2A5    | -0.06837 | 0.362225 | 0.47451  |
| 11732636_HHIPL2    | -0.04727 | 0.36224  | 0.474517 |
| 11730765_CD177     | -0.08117 | 0.36225  | 0.474518 |
| 11735157_CYSLTR1   | -0.07352 | 0.362285 | 0.47455  |
| 11735600_AKR7L     | -0.12739 | 0.36235  | 0.474623 |
| 11758997_SYNPO     | 0.03645  | 0.362388 | 0.474653 |
| 11741794_HIST4H4   | 0.099654 | 0.362392 | 0.474653 |
| 11755362_IFT172    | -0.0489  | 0.36246  | 0.474728 |
| 11717247_EIF1B     | 0.04408  | 0.362476 | 0.474737 |
| 11739555_FAM171B   | -0.04358 | 0.362488 | 0.47474  |
| 11732826_ESX1      | -0.07214 | 0.362627 | 0.474909 |
| 11738677_OR8G1 /// | -0.05671 | 0.362637 | 0.474909 |
| 11721011_SMOC1     | -0.05777 | 0.362646 | 0.474909 |
| 11716379_TOMM20    | 0.03479  | 0.362659 | 0.474909 |
| 11733507_MAGEB4    | -0.04612 | 0.36267  | 0.474909 |
| 11760455_PPP2R4    | -0.05941 | 0.362675 | 0.474909 |
| 11724964_SAMD10    | -0.0505  | 0.362731 | 0.47496  |
| 11748924_KMT2D     | 0.074872 | 0.362743 | 0.47496  |
| 11758827_INTS3 /// | -0.07405 | 0.362743 | 0.47496  |
| 11718603_MTURN     | 0.078786 | 0.36282  | 0.475048 |
| 11752528_RASGRP1   | -0.04975 | 0.362833 | 0.475051 |
| 11740088_PIK3IP1   | 0.082965 | 0.362906 | 0.475123 |
| 11735230_SPATA12   | 0.072437 | 0.362914 | 0.475123 |
| 11723696_FLI1      | 0.061464 | 0.362917 | 0.475123 |

|                    |          |          |          |
|--------------------|----------|----------|----------|
| 11753008_IL36G     | -0.05874 | 0.362937 | 0.475137 |
| 11735869_TRIM64 // | -0.06149 | 0.362954 | 0.47514  |
| 11731901_SESN3     | 0.124    | 0.362958 | 0.47514  |
| 11733099_ITGB4     | -0.03221 | 0.363037 | 0.47523  |
| 11740695_C7orf71   | 0.038641 | 0.363056 | 0.475233 |
| 11752178_SEMA4D    | -0.08849 | 0.363059 | 0.475233 |
| 11741196_SIGLEC14  | 0.06094  | 0.363098 | 0.475272 |
| 11747867_TFEB      | 0.102609 | 0.363112 | 0.475278 |
| 11723899_DHRS9     | -0.11623 | 0.363128 | 0.475283 |
| 11745148_MID1      | 0.033029 | 0.363136 | 0.475283 |
| 11763607_MEI1      | -0.06159 | 0.363152 | 0.475284 |
| 11727706_BBC3      | -0.05545 | 0.363156 | 0.475284 |
| 11758830_SLA       | 0.040546 | 0.363196 | 0.475324 |
| 11721902_SERPINI1  | 0.103954 | 0.363214 | 0.475335 |
| 11733439_GBP5      | -0.06744 | 0.363272 | 0.475397 |
| 11730981_ZNF595    | -0.05183 | 0.363285 | 0.475401 |
| 11737118_PABPC5    | -0.04055 | 0.363331 | 0.47545  |
| 11753963_LAMP1     | -0.03377 | 0.363354 | 0.475467 |
| 11734340_FAM124B   | -0.08882 | 0.363401 | 0.475515 |
| 11740275_LRRC25    | -0.0454  | 0.36349  | 0.475619 |
| 11747189_BCL11A    | -0.06597 | 0.363529 | 0.47565  |
| 11761736_HDAC8     | -0.07646 | 0.363533 | 0.47565  |
| 11739464_SUSD4     | -0.06347 | 0.363568 | 0.475683 |
| 11754685_RGS14     | -0.03578 | 0.363636 | 0.475758 |
| 11740381_OR1G1     | -0.05795 | 0.363673 | 0.475795 |
| 11753504_ACTA1     | -0.05342 | 0.363686 | 0.475798 |
| 11752455_ARHGEF10L | 0.033257 | 0.363695 | 0.475798 |
| 11763827_MS4A8     | 0.081612 | 0.363714 | 0.47581  |
| 11754715_STK31     | 0.058126 | 0.363828 | 0.475947 |
| 11750912_SP8       | -0.07964 | 0.363895 | 0.476022 |
| 11726396_ANOS1     | -0.09114 | 0.363936 | 0.476057 |
| 11763393_RNF207    | -0.09654 | 0.363941 | 0.476057 |
| 11742129_CD82      | 0.048327 | 0.363986 | 0.476103 |
| 11734807_DTNA      | 0.119629 | 0.364067 | 0.476174 |
| 200058_PMSNRNP200  | 0.032957 | 0.364069 | 0.476174 |
| 11763851_CRHBP     | 0.053591 | 0.364073 | 0.476174 |
| 11722769_MMP24     | 0.050576 | 0.36408  | 0.476174 |
| 11734283_PDILT     | 0.067694 | 0.36411  | 0.476201 |
| 11761843_TTL9      | 0.106624 | 0.364145 | 0.476234 |
| 11725815_SLC30A8   | -0.06357 | 0.364356 | 0.476497 |
| 11737208_MACROD2   | -0.07681 | 0.364419 | 0.476555 |
| 11760139_C9orf3    | -0.0804  | 0.36442  | 0.476555 |
| 11733728_LGMN      | -0.04769 | 0.364445 | 0.476576 |
| 11726202_BHLHB9    | -0.05397 | 0.364462 | 0.476584 |
| 11746078_NARFL     | -0.09948 | 0.364474 | 0.476588 |
| 11747559_PDZRN3    | -0.0427  | 0.364566 | 0.476692 |
| 11723784_LIMCH1    | -0.05874 | 0.364573 | 0.476692 |
| 11752699_ARHGEF4   | 0.038077 | 0.364611 | 0.476729 |
| 11738047_ELOVL7    | -0.06327 | 0.364646 | 0.476762 |
| 11715946_RALB      | 0.039645 | 0.364988 | 0.477196 |
| 11745253_PITRM1    | 0.044343 | 0.365031 | 0.477239 |

|                    |          |          |          |
|--------------------|----------|----------|----------|
| 11754394_SYNJ2     | -0.03702 | 0.365088 | 0.477301 |
| 11734953_MBNL3     | 0.108186 | 0.365098 | 0.477301 |
| 11741274_KCNAB1    | -0.0665  | 0.365173 | 0.477378 |
| 11747916_PI4KB     | -0.03777 | 0.365176 | 0.477378 |
| 11735024_ZBTB7B    | -0.04978 | 0.36529  | 0.477514 |
| 11721059_ZNF189    | -0.05194 | 0.365326 | 0.477548 |
| 11735655_ATOH7     | -0.05019 | 0.365405 | 0.477639 |
| 11755635_CDK11A // | 0.039817 | 0.365418 | 0.477642 |
| 11747186_PTGES     | 0.045197 | 0.365435 | 0.477653 |
| 11737162_FAM83B    | 0.059689 | 0.365455 | 0.477666 |
| 11762590_OR4D2     | -0.07463 | 0.365658 | 0.477916 |
| 11715410_PRDX2     | 0.033038 | 0.365666 | 0.477916 |
| 11763306_FCRL5     | -0.05413 | 0.365686 | 0.477929 |
| 11729783_BOLL      | -0.04404 | 0.3657   | 0.477935 |
| 11736273_TLR2      | -0.06064 | 0.3659   | 0.478155 |
| 11734345_TRIM10    | 0.065881 | 0.365907 | 0.478155 |
| 11758919_TFCP2     | -0.05176 | 0.365911 | 0.478155 |
| 11717918_SRRT      | 0.041218 | 0.365913 | 0.478155 |
| 11730015_NEUROD2   | -0.07542 | 0.365917 | 0.478155 |
| 11729690_PGLYRP2   | -0.06576 | 0.365968 | 0.478208 |
| 11741519_CD14      | -0.05303 | 0.366001 | 0.478239 |
| 11716263_LEPROTL1  | -0.03724 | 0.36604  | 0.47827  |
| 11727340_ZBTB2     | 0.052895 | 0.366045 | 0.47827  |
| 11748235_MMRN1     | -0.06156 | 0.366063 | 0.478282 |
| 11758063_DCLK2     | -0.03457 | 0.366095 | 0.47831  |
| 11759852_IGHG1 /// | -0.11352 | 0.366114 | 0.478322 |
| 11734357_ARHGEF33  | -0.06489 | 0.366148 | 0.478354 |
| 11742343_OR4K5     | -0.03658 | 0.366253 | 0.478478 |
| 11755374_HERC5     | -0.0315  | 0.366266 | 0.478483 |
| 11741048_KCNK2     | -0.06903 | 0.366322 | 0.478543 |
| 11740447_BTN3A1    | 0.075147 | 0.366455 | 0.478705 |
| 11733392_UBL4B     | -0.06971 | 0.366472 | 0.478714 |
| 11724255_OAS1      | -0.05944 | 0.366622 | 0.478897 |
| 11736616_AVPR1A    | -0.09423 | 0.366645 | 0.478914 |
| 11740856_GYG2      | 0.090784 | 0.366681 | 0.478933 |
| 11740916_PCDHA9    | 0.033937 | 0.366687 | 0.478933 |
| 11716893_TOX4      | 0.03449  | 0.366689 | 0.478933 |
| 11758502_EHF       | 0.061913 | 0.366827 | 0.4791   |
| 11718994_CRKL      | 0.056187 | 0.36685  | 0.479118 |
| 11762005_ECE2      | -0.10371 | 0.366909 | 0.479181 |
| 11717841_ETNK1     | -0.05502 | 0.366922 | 0.479186 |
| 11742102_DPF1      | -0.05666 | 0.366956 | 0.479218 |
| 11751432_ADAP1 /// | 0.061122 | 0.367069 | 0.479346 |
| 11764028_LOC105375 | -0.08338 | 0.367074 | 0.479346 |
| 11760184_KIZ       | -0.06701 | 0.367083 | 0.479346 |
| 11763893_SNORA59A  | 0.076468 | 0.367097 | 0.47935  |
| 11757003_RPL6      | -0.03759 | 0.36715  | 0.479407 |
| 11749468_TRIM24    | 0.034215 | 0.367204 | 0.479464 |
| 11736844_CEP44     | -0.07398 | 0.367238 | 0.479489 |
| 11745920_CSH1 ///  | 0.092138 | 0.367242 | 0.479489 |
| 11745579_TTTY14    | -0.05843 | 0.367296 | 0.479547 |

|                    |          |          |          |
|--------------------|----------|----------|----------|
| 11730238_ABHD10    | -0.03704 | 0.367362 | 0.47961  |
| 11747032_SLC52A3   | -0.03792 | 0.367364 | 0.47961  |
| 11741467_LHX5      | -0.0469  | 0.367422 | 0.47966  |
| 11725588_CBLC      | -0.04458 | 0.36744  | 0.47966  |
| 11731106_NR5A1     | -0.04414 | 0.367463 | 0.47966  |
| 11762226_CYTH4     | 0.064905 | 0.367468 | 0.47966  |
| 11763873_LOC100128 | -0.06339 | 0.367475 | 0.47966  |
| 11723622_PHYHIP    | -0.03417 | 0.367477 | 0.47966  |
| 11721042_NSMCE2    | 0.03582  | 0.367479 | 0.47966  |
| 11727149_CCDC87    | -0.11145 | 0.367481 | 0.47966  |
| 11718934_C4A /// S | 0.037    | 0.367491 | 0.47966  |
| 11747618_ADCK3     | -0.06086 | 0.367503 | 0.479663 |
| 11735145_YBEY      | -0.07598 | 0.367562 | 0.479727 |
| 11728618_SLC1A7    | -0.06644 | 0.367607 | 0.479773 |
| 11731780_GSTA3     | 0.044144 | 0.367716 | 0.479899 |
| 11744101_NAPA      | -0.04837 | 0.367723 | 0.479899 |
| 11718982_CCL4 ///  | 0.094405 | 0.367753 | 0.479926 |
| 11760844_RPN2      | 0.036398 | 0.367787 | 0.479957 |
| 11762543_LRP1      | -0.08945 | 0.367865 | 0.480046 |
| 11762461_SEPT5-GP1 | -0.05235 | 0.367978 | 0.480177 |
| 11745490_GOLGA8CP  | -0.07164 | 0.367985 | 0.480177 |
| 11717904_STAU1     | 0.042205 | 0.368002 | 0.480185 |
| 11735087_SLFN13    | 0.051801 | 0.368057 | 0.480245 |
| 11736288_TAF8      | 0.058284 | 0.368139 | 0.480339 |
| 11726398_SPTB      | -0.03469 | 0.36821  | 0.480419 |
| 11749305_ETNK2     | -0.0398  | 0.368274 | 0.480489 |
| 11717725_RAB1A     | 0.034856 | 0.368373 | 0.480606 |
| 11755829_ATP13A4   | 0.07409  | 0.368485 | 0.480739 |
| 11738702_OR11H4    | -0.06801 | 0.368549 | 0.48081  |
| 11740912_BANK1     | -0.05663 | 0.368588 | 0.480847 |
| 11737931_STMN4     | -0.03596 | 0.368603 | 0.480854 |
| 11759742_TSHZ2     | -0.06576 | 0.368665 | 0.480915 |
| 11757130_RPS3 ///  | 0.044469 | 0.368669 | 0.480915 |
| 11751147_MOCS1     | -0.05391 | 0.368692 | 0.480932 |
| 11728831_RAB3IP    | -0.04302 | 0.36882  | 0.481087 |
| 11743385_PRPF40A   | -0.03579 | 0.368842 | 0.481103 |
| 11719858_ARID1A    | -0.03529 | 0.368898 | 0.481162 |
| 11723375_GLI3      | 0.049141 | 0.368982 | 0.481259 |
| 11750053_SLC37A2   | 0.040317 | 0.369058 | 0.481346 |
| 11755558_DRC7      | -0.05347 | 0.36907  | 0.481348 |
| 11757744_FAM171A1  | -0.04008 | 0.369182 | 0.481482 |
| 11740505_GPR62     | -0.05105 | 0.3692   | 0.481492 |
| 11729050_SLC10A2   | -0.05681 | 0.369277 | 0.481579 |
| 11761506_ME3       | 0.046221 | 0.369407 | 0.481736 |
| 11757028_RPS5      | 0.035483 | 0.369482 | 0.481811 |
| 11750481_PPBP2     | -0.05021 | 0.369484 | 0.481811 |
| 11761407_C6orf201  | -0.04574 | 0.369553 | 0.481888 |
| 11756629_MTHFSD    | -0.05556 | 0.369607 | 0.481945 |
| 11760775_RNF220    | 0.04195  | 0.369634 | 0.481968 |
| 11755905_ST8SIA5   | -0.13961 | 0.369667 | 0.481998 |
| 11727631_APBA2     | 0.043277 | 0.369765 | 0.482113 |

|                    |          |          |          |
|--------------------|----------|----------|----------|
| 11731030_CCDC64B   | -0.06093 | 0.369842 | 0.4822   |
| 11728120_KHDC1     | -0.06452 | 0.369934 | 0.482308 |
| 11752088_MY05C     | 0.070309 | 0.369993 | 0.482372 |
| 11741230_TMEM169   | 0.100749 | 0.37001  | 0.482381 |
| 11760778_API52     | 0.075037 | 0.370027 | 0.48239  |
| 11762586_IL17RE    | -0.06355 | 0.370059 | 0.482419 |
| 11753330_NAP1L1    | 0.045018 | 0.370098 | 0.482449 |
| 11723549_UPF3B     | 0.037497 | 0.370102 | 0.482449 |
| 11760969_IP6K2     | -0.05878 | 0.370159 | 0.482511 |
| 11743460_GPM6B     | 0.092637 | 0.370199 | 0.482551 |
| 11727422_CANX      | -0.03501 | 0.370352 | 0.482736 |
| 11715409_PRDX2     | 0.035567 | 0.370367 | 0.482743 |
| 11720764_TOR1A     | 0.043914 | 0.370425 | 0.482807 |
| 11723943_PTTG1IP   | 0.044908 | 0.37046  | 0.482839 |
| 11763843_UACA      | -0.03406 | 0.370619 | 0.483034 |
| 11747714_ABCA8     | -0.08751 | 0.370643 | 0.483051 |
| 11717885_CCDC3     | -0.06925 | 0.370704 | 0.483119 |
| 11761649_ACSL6     | -0.09992 | 0.370828 | 0.483267 |
| 11740584_PACRGL    | -0.03825 | 0.37085  | 0.483283 |
| 11732054_CLEC4F    | -0.07933 | 0.37093  | 0.483375 |
| 11741639_DIO2      | 0.034568 | 0.371001 | 0.483454 |
| 11761729_ZNF765    | -0.10923 | 0.371071 | 0.483526 |
| 11750932_EPHX2     | -0.1072  | 0.371076 | 0.483526 |
| 11724020_C21orf2   | -0.07596 | 0.371101 | 0.483546 |
| 11740723_LGALS9B   | -0.06906 | 0.37114  | 0.483575 |
| 11731300_TBX6      | 0.060519 | 0.371149 | 0.483575 |
| 11727106_BAD       | -0.04859 | 0.371153 | 0.483575 |
| 11734882_ARID2     | 0.035398 | 0.37117  | 0.483584 |
| 11726658_ADORA1    | -0.05409 | 0.37122  | 0.483636 |
| 11758522_CREM      | 0.051306 | 0.371282 | 0.483702 |
| 11757604_SAMM50    | -0.03396 | 0.371306 | 0.483702 |
| 11761204_TM7SF2    | -0.04998 | 0.371307 | 0.483702 |
| 11724670_LRTM1     | -0.0494  | 0.37131  | 0.483702 |
| 11747822_KLHL21    | -0.04185 | 0.371354 | 0.483744 |
| 11728496_GNRH1     | -0.07549 | 0.371362 | 0.483744 |
| 11731345_UFSP1     | -0.03833 | 0.37141  | 0.48378  |
| 11750813_RIPK4     | -0.08622 | 0.37141  | 0.48378  |
| 11763614_FMN1      | 0.051313 | 0.371485 | 0.483866 |
| 11755021_MAP3K14-A | 0.034307 | 0.371496 | 0.483867 |
| 11753959_PROCA1    | -0.06653 | 0.371546 | 0.483919 |
| 11734041_ANKRD9    | -0.05132 | 0.371573 | 0.483928 |
| 11749700_ZNF503    | -0.05692 | 0.371573 | 0.483928 |
| 11745474_CTCFL     | 0.109454 | 0.371607 | 0.48396  |
| 11754639_GAS8      | 0.050956 | 0.371728 | 0.484105 |
| 11715124_CACNG8    | -0.04354 | 0.371809 | 0.484196 |
| 11760309_SCYL1     | 0.047743 | 0.371819 | 0.484197 |
| 11741472_RAB11FIP3 | -0.03487 | 0.371829 | 0.484197 |
| 11740269_TTLL11    | -0.05373 | 0.371912 | 0.484292 |
| 11726439_MALT1     | 0.034398 | 0.371933 | 0.484307 |
| 11715986_YPEL5     | 0.040342 | 0.371951 | 0.484317 |
| 11764125_LINC00700 | 0.048075 | 0.371973 | 0.484333 |



|                    |          |          |          |
|--------------------|----------|----------|----------|
| 11748798_PIK3AP1   | 0.083187 | 0.372038 | 0.484405 |
| 11754396_MLLT3     | -0.06818 | 0.37207  | 0.484434 |
| 11745170_DIAPH1    | -0.03407 | 0.37212  | 0.484463 |
| 11754123_HADHA     | 0.036088 | 0.372121 | 0.484463 |
| 11716568_PRRC2C    | -0.03831 | 0.372122 | 0.484463 |
| 11728224_UBE2J1    | 0.046293 | 0.372152 | 0.484488 |
| 11750048_LILRB5    | -0.07796 | 0.372271 | 0.484617 |
| 11734513_LRRC18    | 0.07594  | 0.372271 | 0.484617 |
| 11724591_TCP10L    | 0.066727 | 0.372323 | 0.484672 |
| 11736641_MECR      | 0.074889 | 0.37236  | 0.484708 |
| 11750273_ZPLD1     | 0.05856  | 0.372401 | 0.484718 |
| 11735768_C16orf54  | -0.03693 | 0.372408 | 0.484718 |
| 11740595_EDDM3B    | 0.101376 | 0.372409 | 0.484718 |
| 11763398_LINC01013 | 0.092332 | 0.372411 | 0.484718 |
| 11732006_ADAL      | 0.058722 | 0.372417 | 0.484718 |
| 11754703_SLC22A16  | -0.04242 | 0.372436 | 0.484729 |
| 11728856_SCRT1     | -0.03891 | 0.372461 | 0.484749 |
| 11739683_PHF2      | -0.04996 | 0.37253  | 0.484825 |
| 11739794_LRFN2     | -0.04898 | 0.372555 | 0.484846 |
| 11738960_CARD17    | -0.05924 | 0.372572 | 0.484852 |
| 11740141_EPB41L1   | 0.035389 | 0.37259  | 0.484852 |
| 11732715_SLC45A2   | -0.03365 | 0.372591 | 0.484852 |
| 11729454_CYP2B6    | -0.12963 | 0.3726   | 0.484852 |
| 11762314_C11orf74  | 0.051379 | 0.372659 | 0.484916 |
| 11750033_ITGAX     | -0.03548 | 0.372671 | 0.484919 |
| 11731518_MFAP3     | 0.032159 | 0.372697 | 0.484939 |
| 11738422_PRAMEF2   | -0.05054 | 0.372724 | 0.484962 |
| 11752138_WDR7      | 0.052578 | 0.372771 | 0.48501  |
| 11721268_TMPRSS4   | 0.048706 | 0.372825 | 0.485059 |
| 11762959_FAM198A / | -0.08301 | 0.372828 | 0.485059 |
| 11722390_MTF1      | 0.04863  | 0.372904 | 0.485136 |
| 11746810_KCTD3     | -0.04547 | 0.372908 | 0.485136 |
| 11757610_MPZL1     | -0.0752  | 0.372952 | 0.485182 |
| 11734977_PCDHB12   | -0.07514 | 0.373054 | 0.485301 |
| 11759453_OR1E1     | -0.07985 | 0.373074 | 0.485314 |
| 11745581_GRM7      | 0.059893 | 0.373091 | 0.485324 |
| 11760977_TYMP      | 0.049575 | 0.373201 | 0.485453 |
| 11726903_TRIL      | -0.07463 | 0.373294 | 0.485551 |
| 11746030_SPATA33   | -0.042   | 0.373296 | 0.485551 |
| 11741412_LHX9      | 0.095851 | 0.373368 | 0.485628 |
| 11733458_INTS2     | 0.03636  | 0.373375 | 0.485628 |
| 11724753_TMF1      | 0.041051 | 0.373456 | 0.485721 |
| 11763207_SH3RF2    | -0.06258 | 0.373502 | 0.485767 |
| 11726519_TINAG     | 0.067699 | 0.373625 | 0.485914 |
| 11743559_PTPRC     | 0.10371  | 0.373683 | 0.485977 |
| 11761243_CARKD     | -0.08259 | 0.373747 | 0.486047 |
| 11730567_MROH7     | -0.08489 | 0.373798 | 0.486101 |
| 11750347_HOOK1     | -0.06919 | 0.373819 | 0.486115 |
| 11748796_PXN       | 0.080875 | 0.373835 | 0.486123 |
| 11756065_APOD      | 0.045719 | 0.373944 | 0.486252 |
| 11744878_ITIH4     | -0.0904  | 0.373976 | 0.48628  |

|                    |          |          |          |
|--------------------|----------|----------|----------|
| 11740326_SORBS2    | 0.048253 | 0.37403  | 0.486331 |
| 11757222_HINT1     | 0.053988 | 0.374035 | 0.486331 |
| 11751712_ULBP3     | 0.069031 | 0.374058 | 0.486348 |
| 11740194_ATP6VOB   | -0.03928 | 0.374149 | 0.486445 |
| 11750669_ZCCHC11   | 0.037563 | 0.374152 | 0.486445 |
| 11755438_PSG3      | -0.08463 | 0.374227 | 0.486529 |
| 11729511_HOXB8     | 0.06555  | 0.374301 | 0.486613 |
| 11759896_OFD1      | -0.12052 | 0.374323 | 0.486628 |
| 11719595_GMEB2     | 0.048444 | 0.374334 | 0.486629 |
| 11743818_CILP      | -0.0534  | 0.374435 | 0.486747 |
| 11748772_POTEG /// | 0.039188 | 0.374449 | 0.486753 |
| 11743223_SSTR5     | 0.050905 | 0.374513 | 0.486809 |
| 11715793_ACTG2     | 0.079172 | 0.374529 | 0.486809 |
| 11716259_RHEB      | 0.044401 | 0.374535 | 0.486809 |
| 11729115_PRKCG     | -0.04496 | 0.374539 | 0.486809 |
| 11742417_ZNF737    | 0.058271 | 0.374542 | 0.486809 |
| 11753668_CRIP3     | -0.05364 | 0.374563 | 0.486823 |
| 11754026_CXCL8     | 0.032369 | 0.374605 | 0.486861 |
| 11732952_TCTEX1D4  | -0.04778 | 0.374612 | 0.486861 |
| 11724678_LY86      | -0.0453  | 0.374743 | 0.487018 |
| 11747983_ICE2      | -0.04322 | 0.374765 | 0.487022 |
| 11753742_PAIP2     | 0.038344 | 0.374766 | 0.487022 |
| 11762152_MRPL9     | 0.038425 | 0.374873 | 0.487148 |
| 11729612_LRTM2     | 0.072404 | 0.374884 | 0.48715  |
| 11716513_MOCS2     | -0.04097 | 0.374995 | 0.487281 |
| 11752309_GRHL1     | 0.067858 | 0.375043 | 0.48733  |
| 11728926_NFAM1     | 0.10023  | 0.375061 | 0.487341 |
| 11759691_SLC11A2   | -0.04969 | 0.375198 | 0.487498 |
| 11763665_CA6       | -0.0621  | 0.375202 | 0.487498 |
| 11735082_GALNT13   | 0.137748 | 0.375224 | 0.487514 |
| 11762276_GINM1     | -0.05516 | 0.375251 | 0.487536 |
| 11759117_FBXO42    | -0.05206 | 0.375263 | 0.487538 |
| 11737685_OR13A1    | -0.0621  | 0.375347 | 0.487635 |
| 11717569_HTN1      | -0.07255 | 0.375369 | 0.48765  |
| 11730605_CNNM1     | -0.10441 | 0.375412 | 0.487693 |
| 11716004_FAF2      | 0.057444 | 0.375536 | 0.487841 |
| 11734905_NOVA1     | -0.06132 | 0.375556 | 0.487854 |
| 11748102_RUNX1T1   | 0.068703 | 0.375598 | 0.487885 |
| 11735693_SPRR2E    | -0.05255 | 0.375599 | 0.487885 |
| 11721831_CHURC1    | 0.061855 | 0.375682 | 0.48798  |
| 11747899_CPLX2     | -0.03531 | 0.375779 | 0.488092 |
| 11761088_RIPK3     | -0.04451 | 0.375829 | 0.488141 |
| 11720691_DIRAS1    | -0.04444 | 0.375837 | 0.488141 |
| 11738956_XAGE5     | -0.0359  | 0.375874 | 0.488177 |
| 11733786_EVC       | 0.054785 | 0.375972 | 0.488291 |
| 11728860_RPL10L    | -0.07546 | 0.375987 | 0.488298 |
| 11728437_BRWD1     | -0.08434 | 0.376185 | 0.488542 |
| 11751148_STRN4     | 0.044351 | 0.376249 | 0.488612 |
| 11747715_SULT1C4   | 0.07047  | 0.376318 | 0.488688 |
| 11743307_COPS4     | 0.033656 | 0.376526 | 0.488945 |
| 11724826_BORCS6    | -0.05831 | 0.376625 | 0.489061 |

|                    |          |          |          |
|--------------------|----------|----------|----------|
| 11762852_FCRL2     | 0.054027 | 0.376702 | 0.489149 |
| 11736191_OGN       | -0.05302 | 0.376741 | 0.489186 |
| 11754217_ACTG1     | 0.031037 | 0.376879 | 0.489352 |
| 11726221_SYPL2     | -0.06983 | 0.377003 | 0.4895   |
| 11729533_REM2      | 0.045247 | 0.377021 | 0.4895   |
| 11746165_R3HDM2    | -0.04264 | 0.377023 | 0.4895   |
| 11735747_PSG7      | -0.07162 | 0.377059 | 0.489533 |
| 11734151_ABRA      | 0.080519 | 0.377082 | 0.489544 |
| 11716464_SIAE      | 0.033166 | 0.377087 | 0.489544 |
| 11735265_CLEC4D    | -0.0813  | 0.377124 | 0.489571 |
| 11729019_SPRV3     | -0.0591  | 0.377128 | 0.489571 |
| 11726812_TFF1      | -0.07975 | 0.377216 | 0.489673 |
| 11757186_HK3       | -0.04128 | 0.37728  | 0.489742 |
| 11742630_OR8K5     | -0.08707 | 0.377334 | 0.489799 |
| 11715224_ACOXL     | -0.04961 | 0.377364 | 0.489807 |
| 11742617_OR5H14    | 0.091596 | 0.37737  | 0.489807 |
| 11730985_SBSPON    | -0.06141 | 0.377372 | 0.489807 |
| 11746088_IFI44     | -0.05964 | 0.377379 | 0.489807 |
| 11738135_LRRC31    | -0.10357 | 0.377419 | 0.489838 |
| 11729266_SPRR2D    | -0.06376 | 0.377423 | 0.489838 |
| 11736189_ORMDL3    | 0.044682 | 0.377455 | 0.489866 |
| 11724496_NPRL3     | -0.05102 | 0.377472 | 0.489875 |
| 11739906_CLDN16    | 0.059701 | 0.377503 | 0.489902 |
| 11759330_B3GAT2    | 0.089297 | 0.377549 | 0.489949 |
| 11755585_AZI2      | -0.04511 | 0.377623 | 0.49003  |
| 11730317_RGS7BP    | -0.08121 | 0.377632 | 0.49003  |
| 11752152_OR2C3     | 0.078538 | 0.377751 | 0.490166 |
| 11732109_FGF10     | 0.055582 | 0.377756 | 0.490166 |
| 11727857_NUP50     | -0.03254 | 0.377801 | 0.49021  |
| 11741097_WBP1L     | 0.092686 | 0.377811 | 0.49021  |
| 11762027_CCDC40    | 0.097698 | 0.377821 | 0.49021  |
| 11751691_TMEM214   | -0.03193 | 0.377858 | 0.490245 |
| 11737610_GRIN3B    | 0.060989 | 0.377962 | 0.490368 |
| 11760425_IL6       | -0.04834 | 0.378007 | 0.490413 |
| 11747695_DLGAP1    | -0.04016 | 0.378064 | 0.490465 |
| 11752774_RGS6      | -0.08373 | 0.378067 | 0.490465 |
| 11745628_GPR6      | -0.0866  | 0.378081 | 0.490469 |
| 11721183_PLPPR4    | -0.06865 | 0.378109 | 0.490493 |
| 11736463_LILRA2    | -0.05607 | 0.378174 | 0.490565 |
| 11759496_CHST11    | 0.093505 | 0.378236 | 0.490631 |
| 11749570_LINC01126 | 0.060063 | 0.378245 | 0.490631 |
| 11723048_CX3CR1    | 0.055651 | 0.378429 | 0.490855 |
| 11717784_THYN1     | -0.04415 | 0.378504 | 0.49094  |
| 11762352_MT1IP     | -0.08057 | 0.378555 | 0.490981 |
| 11761396_EIF4A1    | 0.037128 | 0.378556 | 0.490981 |
| 11744388_ARFRP1    | -0.07706 | 0.378628 | 0.49106  |
| 11723307_ACACA     | 0.043198 | 0.378637 | 0.49106  |
| 11731256_HYPM      | -0.07    | 0.378684 | 0.491108 |
| 11732559_RBM12B    | -0.03371 | 0.378733 | 0.491159 |
| 11742697_ITM2A     | 0.050944 | 0.378902 | 0.491365 |
| 11747050_GPR137    | -0.0375  | 0.378916 | 0.49137  |

|                    |          |          |          |
|--------------------|----------|----------|----------|
| 11762659_MPP4      | 0.080517 | 0.379012 | 0.491482 |
| 11757015_ODF3L2    | -0.07761 | 0.379027 | 0.491488 |
| 11758923_LMO2      | -0.09147 | 0.379151 | 0.491636 |
| 11744039_TMEM8B    | -0.06848 | 0.379195 | 0.49168  |
| 11730746_PAIP2     | 0.036213 | 0.379246 | 0.491733 |
| 11742433_ABCC9     | -0.08602 | 0.379275 | 0.491757 |
| 11751975_SGIP1     | -0.0446  | 0.379343 | 0.491832 |
| 11754143_EIF1      | 0.03287  | 0.379377 | 0.491863 |
| 11744076_OLAH      | 0.043855 | 0.379401 | 0.491875 |
| 11748879_TNFRSF13B | -0.0508  | 0.379407 | 0.491875 |
| 11755893_PIGN      | 0.040397 | 0.379416 | 0.491875 |
| 11752479_GPC3      | -0.05565 | 0.379426 | 0.491875 |
| 11733726_SNAP25    | 0.031527 | 0.379442 | 0.491883 |
| 11763655_VPS36     | 0.091474 | 0.379611 | 0.492089 |
| 11720417_CAMSAP1   | -0.10984 | 0.379675 | 0.492159 |
| 11724182_ATCAY     | -0.05972 | 0.379724 | 0.492209 |
| 11738802_EYS       | 0.134221 | 0.379777 | 0.492265 |
| 11751386_RPE       | -0.0384  | 0.379792 | 0.492272 |
| 11744509_RER1      | 0.032452 | 0.379876 | 0.492368 |
| 11737262_CABP5     | -0.07964 | 0.379906 | 0.492393 |
| 11763127_IGKC      | -0.04225 | 0.380011 | 0.492516 |
| 11741052_HMGCLL1   | 0.037098 | 0.380082 | 0.492593 |
| 11745945_CHPF      | -0.04086 | 0.380091 | 0.492593 |
| 11715917_CD44      | 0.03786  | 0.380136 | 0.492638 |
| 11741886_FAM47A    | -0.06996 | 0.380151 | 0.492645 |
| 11744659_CASC1     | -0.10006 | 0.380205 | 0.492702 |
| 11742515_OR51T1    | 0.044291 | 0.380252 | 0.492737 |
| 11732349_LILRA6 // | -0.05275 | 0.380253 | 0.492737 |
| 11749084_VWCE      | -0.06392 | 0.380388 | 0.492899 |
| 11730194_SEC14L2   | 0.035102 | 0.380439 | 0.492952 |
| 11761641_OGFOD2    | -0.08703 | 0.38056  | 0.493096 |
| 11721980_SLC36A1   | 0.052253 | 0.380626 | 0.493169 |
| 11755732_SAMD3     | -0.0893  | 0.380712 | 0.493268 |
| 11750971_CACTIN    | 0.069742 | 0.380776 | 0.493338 |
| 11761110_RBCK1     | -0.04759 | 0.380791 | 0.493343 |
| 11739833_HSPE1-MOB | 0.070195 | 0.380855 | 0.493413 |
| 11741767_DNAH12    | 0.042531 | 0.380916 | 0.493479 |
| 11748799_POU2F2    | 0.05691  | 0.380955 | 0.493517 |
| 11753973_MUC1      | 0.055784 | 0.381069 | 0.493651 |
| 11726466_C20orf141 | 0.069872 | 0.381084 | 0.493658 |
| 11737817_CDKL5     | -0.07568 | 0.381096 | 0.49366  |
| 11725019_MST1R     | 0.047961 | 0.381244 | 0.493816 |
| 11761931_MTMR1     | 0.04639  | 0.381245 | 0.493816 |
| 11736300_ORMDL1    | -0.07987 | 0.381246 | 0.493816 |
| 11760528_RDM1      | -0.07535 | 0.381281 | 0.493847 |
| 11753887_TOMM5     | 0.030969 | 0.381312 | 0.493875 |
| 11734291_ADAMTS17  | 0.056092 | 0.381349 | 0.49391  |
| 11721009_MED1      | 0.03549  | 0.381366 | 0.493918 |
| 11756273_RBM12B    | 0.058658 | 0.381383 | 0.493928 |
| 11745955_CLSTN1    | 0.033114 | 0.381428 | 0.493972 |
| 11728042_PANX2     | -0.04932 | 0.381479 | 0.494012 |

|                   |          |          |          |
|-------------------|----------|----------|----------|
| 11742706_RAB8A    | -0.03592 | 0.381484 | 0.494012 |
| 11751538_AGGF1    | -0.0435  | 0.381489 | 0.494012 |
| 11741485_SLITRK3  | -0.04776 | 0.381588 | 0.494127 |
| 11738559_ABHD12B  | -0.03717 | 0.381621 | 0.494157 |
| 11735847_CPA5     | -0.0662  | 0.381692 | 0.494224 |
| 11757606_ECHS1    | -0.03321 | 0.381695 | 0.494224 |
| 11721836_TMEM14B  | -0.03927 | 0.381703 | 0.494224 |
| 11749519_VPS45    | -0.03779 | 0.381796 | 0.49432  |
| 11738151_OPRM1    | 0.059725 | 0.381798 | 0.49432  |
| 11763919_SNORA19  | -0.0686  | 0.381817 | 0.494332 |
| 11761344_NDST3    | 0.068371 | 0.381905 | 0.494433 |
| 11759441_C16orf72 | -0.07703 | 0.381937 | 0.494462 |
| 11742876_SGSM3    | -0.04962 | 0.38199  | 0.494517 |
| 11741993_R3HDML   | -0.0952  | 0.382005 | 0.494524 |
| 11759627_USP15    | -0.05981 | 0.382066 | 0.494588 |
| 11739051_SLCO2B1  | -0.05824 | 0.382119 | 0.494645 |
| 11746757_KY       | -0.07804 | 0.38219  | 0.494724 |
| 11737007_LRRC55   | 0.04505  | 0.382362 | 0.494933 |
| 11760875_RARG     | -0.05684 | 0.382418 | 0.494993 |
| 11727917_ACTL7B   | 0.054014 | 0.382531 | 0.49512  |
| 200005_PMEIF3D    | -0.03303 | 0.382544 | 0.49512  |
| 11719119_NUPL2    | 0.034653 | 0.382547 | 0.49512  |
| 11738301_KRTAP3-1 | -0.05688 | 0.382642 | 0.495229 |
| 11738323_OR5AP2   | 0.067021 | 0.382693 | 0.495283 |
| 11748181_SULT4A1  | -0.06497 | 0.382716 | 0.495299 |
| 11759745_HLA-DQB1 | -0.05289 | 0.382729 | 0.495303 |
| 11730008_RETN     | -0.04505 | 0.38283  | 0.49542  |
| 11763338_BOD1L2   | -0.0396  | 0.382914 | 0.495516 |
| 11727840_HPD      | 0.079206 | 0.382925 | 0.495518 |
| 11722456_C3orf58  | 0.043039 | 0.382949 | 0.495535 |
| 11746478_PRKAR2A  | -0.06484 | 0.383026 | 0.495605 |
| 11739202_ATP5G3   | -0.07339 | 0.383032 | 0.495605 |
| 11748117_FDXR     | 0.038791 | 0.383035 | 0.495605 |
| 11744684_CCNL2    | 0.047413 | 0.383044 | 0.495605 |
| 11740053_CENPP    | -0.06255 | 0.383063 | 0.495617 |
| 11727067_SLIT3    | -0.10391 | 0.38309  | 0.495639 |
| 11753069_PFKFB2   | -0.03803 | 0.383128 | 0.495675 |
| 11729712_SPRR2A   | -0.09522 | 0.383156 | 0.495698 |
| 11716175_P4HB     | 0.034309 | 0.383201 | 0.495743 |
| 11752892_LILRA2   | -0.0622  | 0.383218 | 0.495752 |
| 11728785_BRF1     | -0.03797 | 0.383295 | 0.495838 |
| 11719480_CSTA     | 0.03554  | 0.383389 | 0.495947 |
| 11737363_RPRML    | -0.0843  | 0.383619 | 0.496231 |
| 11748044_SCEL     | -0.05726 | 0.383655 | 0.496265 |
| 11737333_SIM1     | -0.07905 | 0.383756 | 0.496382 |
| 11742427_STRC /// | -0.06214 | 0.383766 | 0.496382 |
| 11755537_HBG1 /// | -0.03608 | 0.383802 | 0.496415 |
| 11755776_C9orf84  | 0.051885 | 0.383836 | 0.496446 |
| 11752278_PABPC1   | 0.034033 | 0.383896 | 0.496511 |
| 11730397_DDI1     | -0.07766 | 0.383964 | 0.496586 |
| 11721378_FBXL7    | 0.057508 | 0.384064 | 0.496702 |

|                     |          |          |          |
|---------------------|----------|----------|----------|
| 11747604_WDR97      | -0.03649 | 0.384082 | 0.496712 |
| 11746490_TRIM50     | -0.04135 | 0.384114 | 0.49674  |
| 11727498_ZRANB1     | -0.04655 | 0.384251 | 0.496904 |
| 11729339_ZNF771     | -0.04382 | 0.384264 | 0.496908 |
| 11744748_FGFR10P2   | -0.03894 | 0.384315 | 0.49696  |
| 11723413_CYP17A1    | -0.07489 | 0.384341 | 0.496981 |
| 11740217_LMOD3      | 0.08909  | 0.384375 | 0.497    |
| 11733489_ZNF704     | 0.039933 | 0.384376 | 0.497    |
| 11760771_PRLR       | -0.06009 | 0.384543 | 0.497201 |
| 11747258_LOC100288  | 0.035103 | 0.384551 | 0.497201 |
| 11739626_ZNF740     | -0.04634 | 0.384579 | 0.497223 |
| 11752952_GRAP2      | -0.03635 | 0.384621 | 0.497264 |
| 11745791_LOC100288  | 0.076274 | 0.384672 | 0.497317 |
| 11749148_PEX5L      | -0.10402 | 0.38469  | 0.497327 |
| 11717303_PDAP1      | -0.0311  | 0.384746 | 0.497386 |
| 11753837_DEFEB109P1 | -0.03837 | 0.384789 | 0.497428 |
| 11737600_GDPD1      | 0.046954 | 0.384843 | 0.497486 |
| 11762324_RPL3       | -0.06538 | 0.38488  | 0.49752  |
| 11756734_SPATA13    | -0.05577 | 0.384917 | 0.497555 |
| 11756867_TNFSF13B   | 0.072958 | 0.384961 | 0.497599 |
| 11746922_TNNT3      | 0.063505 | 0.384976 | 0.497605 |
| 11739803_RASAL2     | -0.05476 | 0.385105 | 0.497758 |
| 11749351_ABCA7      | -0.05038 | 0.385274 | 0.497957 |
| 11752339_ADGRF4     | -0.13461 | 0.385279 | 0.497957 |
| 11732696_DCST2      | 0.043033 | 0.385291 | 0.497959 |
| 11755108_LVRN       | -0.07539 | 0.38532  | 0.49798  |
| 11720436_CLCN6      | -0.08495 | 0.385331 | 0.49798  |
| 11762021_DYNC1I1    | 0.085273 | 0.385338 | 0.49798  |
| 11760889_LOC220729  | -0.11281 | 0.385422 | 0.498076 |
| 11750909_SLC16A7    | 0.040485 | 0.385487 | 0.498146 |
| 11726751_MAP6D1     | -0.04936 | 0.385502 | 0.498152 |
| 11728306_GULP1      | -0.03571 | 0.385529 | 0.498174 |
| 11754893_KCTD19     | 0.058018 | 0.385539 | 0.498175 |
| 11725674_HINT3      | 0.032927 | 0.385583 | 0.498205 |
| 11749678_FAM120B    | 0.068834 | 0.385583 | 0.498205 |
| 11754750_NLGN4X     | 0.046286 | 0.385737 | 0.498391 |
| 11727677_BLOC1S3    | 0.038481 | 0.385777 | 0.498421 |
| 11732595_FAM47C     | -0.06791 | 0.385781 | 0.498421 |
| 11715291_TBX5       | -0.05505 | 0.385797 | 0.498424 |
| 11718667_ENY2       | -0.03341 | 0.385804 | 0.498424 |
| 11757269_FTL        | 0.030524 | 0.385882 | 0.498511 |
| 11733224_ZNF71      | 0.047402 | 0.385891 | 0.498511 |
| 11749897_FMOD       | -0.0828  | 0.385946 | 0.498569 |
| 11723818_PM20D2     | 0.058027 | 0.386077 | 0.498724 |
| 11760914_TAF1A      | -0.04294 | 0.386157 | 0.498793 |
| 11729265_SPRR2D     | 0.051802 | 0.386169 | 0.498793 |
| 11741601_EDN3       | -0.06715 | 0.386173 | 0.498793 |
| 11730700_C11orf49   | 0.051887 | 0.386181 | 0.498793 |
| 11761395_NINJ2      | -0.03816 | 0.386187 | 0.498793 |
| 11723675_CASQ1      | 0.139029 | 0.386191 | 0.498793 |
| 11726896_IRAK3      | 0.0519   | 0.386233 | 0.498833 |

|                    |          |          |          |
|--------------------|----------|----------|----------|
| 11747660_DMTN      | -0.03752 | 0.386281 | 0.498882 |
| 11738029_SERINC4   | -0.0504  | 0.386308 | 0.498904 |
| 11732028_AVP       | -0.06925 | 0.386348 | 0.498943 |
| 11752526_GLRA2     | -0.04408 | 0.386363 | 0.498948 |
| 11751486_CPNE6     | -0.08601 | 0.386423 | 0.499013 |
| 11740845_ZNF662    | -0.11589 | 0.386435 | 0.499015 |
| 11748384_TRIP10    | -0.0381  | 0.386549 | 0.499149 |
| 11733678_C4orf50   | -0.07154 | 0.386582 | 0.499178 |
| 11741853_P2RX2     | 0.054128 | 0.386594 | 0.499182 |
| 11759267_OR2L3     | -0.12671 | 0.386631 | 0.499215 |
| 11726777_LAT       | 0.049613 | 0.386671 | 0.499254 |
| 11723492_ARHGEF3   | -0.03442 | 0.386684 | 0.499258 |
| 11753592_EEF1G     | 0.030654 | 0.386699 | 0.499261 |
| 11736945_HIPK4     | -0.04326 | 0.386707 | 0.499261 |
| 11744229_RASL11B   | 0.062314 | 0.386838 | 0.499417 |
| 11732217_BID       | 0.03798  | 0.38693  | 0.499523 |
| 11721475_GPM6B     | 0.054122 | 0.386947 | 0.499532 |
| 11760651_DLX5      | -0.0608  | 0.386963 | 0.499539 |
| 11738998_ZDHC9     | 0.062834 | 0.38701  | 0.499586 |
| 11744278_APBB1     | -0.03679 | 0.387025 | 0.499593 |
| 11720080_NTRK2     | 0.038025 | 0.387098 | 0.499673 |
| 11725384_C15orf39  | 0.065579 | 0.387115 | 0.499681 |
| 11717890_GNAI2     | -0.03079 | 0.387134 | 0.499681 |
| 11737432_PAPL      | 0.075378 | 0.387134 | 0.499681 |
| 11718242_PRUNE2    | 0.070837 | 0.38722  | 0.499778 |
| 11722395_RWDD4     | -0.0356  | 0.387238 | 0.499788 |
| 11731389_DRICH1    | -0.09548 | 0.387284 | 0.499834 |
| 11731817_RAB17     | 0.039971 | 0.387338 | 0.49989  |
| 11761244_CHRD      | -0.06255 | 0.387391 | 0.499946 |
| 11755508_SFTPB     | -0.03271 | 0.387476 | 0.500033 |
| 11731588_UGT2B4    | -0.0696  | 0.387479 | 0.500033 |
| 11719805_ASPN      | 0.070191 | 0.387525 | 0.500079 |
| 11742178_KRTAP12-4 | -0.04867 | 0.387695 | 0.500285 |
| 11731329_GNRH2     | -0.03152 | 0.387807 | 0.500417 |
| 11760449_TXLNGY    | -0.08768 | 0.387884 | 0.500504 |
| 11730979_AFM       | 0.095915 | 0.387928 | 0.500541 |
| 11746676_REX01     | 0.033361 | 0.387934 | 0.500541 |
| 11760351_UBXN11    | 0.042954 | 0.38796  | 0.500562 |
| 11761360_VPS72     | -0.06808 | 0.388071 | 0.500683 |
| 11759789_NLGN4Y    | -0.03384 | 0.388074 | 0.500683 |
| 11741546_ECHDC1    | -0.03976 | 0.388091 | 0.500691 |
| 11727548_NOL4      | -0.08935 | 0.388122 | 0.500702 |
| 11741672_ANKS3     | -0.04961 | 0.388131 | 0.500702 |
| 11755057_ATP2C1    | -0.04771 | 0.388136 | 0.500702 |
| 11727325_GFI1      | -0.03962 | 0.388146 | 0.500702 |
| 11738525_CTNNA3    | 0.042417 | 0.388151 | 0.500702 |
| 11718225_SMIM12    | -0.04725 | 0.388167 | 0.500709 |
| 11753533_TP73-AS1  | -0.03823 | 0.388196 | 0.500733 |
| 11719532_MMP19     | -0.03568 | 0.388297 | 0.500845 |
| 11733397_TSHR      | -0.04737 | 0.388303 | 0.500845 |
| 11762777_NAP1L1    | 0.030988 | 0.388318 | 0.500852 |

|                    |          |          |          |
|--------------------|----------|----------|----------|
| 11756870_MY03A     | 0.047617 | 0.388369 | 0.500904 |
| 11737877_VNN3      | -0.0765  | 0.388433 | 0.500973 |
| 11732136_SHC1      | 0.040126 | 0.388444 | 0.500975 |
| 11760369_NPC2      | 0.088853 | 0.388489 | 0.501017 |
| 11761306_HLA-DPB1  | -0.07455 | 0.388497 | 0.501017 |
| 11734256_PRKAG3    | -0.05821 | 0.388537 | 0.501055 |
| 11752911_EIF3M     | -0.04102 | 0.388572 | 0.501087 |
| 11761810_FUK       | -0.05811 | 0.388616 | 0.50113  |
| 11762703_FAM83A-AS | -0.06289 | 0.388683 | 0.50119  |
| 11726199_AGAP4 /// | 0.032857 | 0.388683 | 0.50119  |
| 11718176_B3GNT9    | -0.05185 | 0.388725 | 0.501231 |
| 11731241_GRHL2     | -0.0697  | 0.388752 | 0.501253 |
| 11759247_PCDHGA1   | 0.048393 | 0.388978 | 0.501531 |
| 11758818_RRP7A     | -0.04216 | 0.38901  | 0.501559 |
| 11737819_LOXHD1    | -0.08393 | 0.389035 | 0.501578 |
| 11738322_LINC00552 | -0.04787 | 0.389073 | 0.501614 |
| 11719412_PBX1      | -0.03589 | 0.389085 | 0.501616 |
| 11716787_B4GAT1    | 0.035909 | 0.389135 | 0.501668 |
| 11761113_USP54     | -0.05075 | 0.389195 | 0.50173  |
| 11725265_COL4A4    | -0.10994 | 0.389226 | 0.501758 |
| 11761550_C20orf96  | 0.042179 | 0.389264 | 0.501781 |
| 11743338_MEGF9     | 0.108547 | 0.389275 | 0.501781 |
| 11716979_SLC35A4   | -0.03202 | 0.389275 | 0.501781 |
| 11732621_CRB3      | 0.044966 | 0.389302 | 0.501796 |
| 11739150_MTG2      | 0.046578 | 0.389307 | 0.501796 |
| 11719054_CEP350    | 0.052596 | 0.389327 | 0.501808 |
| 11745638_CADM2     | -0.06727 | 0.389415 | 0.501908 |
| 11757774_MTA1      | -0.04322 | 0.38943  | 0.501915 |
| 11745663_TP53AIP1  | 0.039985 | 0.389457 | 0.501931 |
| 11754367_LIMS2     | -0.04228 | 0.38947  | 0.501931 |
| 11737959_SCGB1D4   | -0.08822 | 0.389473 | 0.501931 |
| 11734889_MRPL43    | 0.071567 | 0.389542 | 0.502006 |
| 11751610_DPYSL3    | -0.10361 | 0.38957  | 0.502029 |
| 11747278_MDH2      | -0.03101 | 0.389608 | 0.502065 |
| 11735715_IFT81     | -0.03949 | 0.389649 | 0.502098 |
| 11752912_EIF3M     | 0.036438 | 0.389654 | 0.502098 |
| 11761152_DENND1C   | -0.07295 | 0.389667 | 0.502101 |
| 11716564_SDCCAG3   | -0.03364 | 0.389715 | 0.502149 |
| 11732143_TSR1      | -0.03783 | 0.38974  | 0.502169 |
| 11719321_DNALI1    | 0.100046 | 0.389757 | 0.502178 |
| 11753873_BCL2L15   | 0.111605 | 0.38978  | 0.502191 |
| 11734274_LOC101930 | 0.079732 | 0.389788 | 0.502191 |
| 11748217_NRBP2     | -0.05205 | 0.389837 | 0.502241 |
| 11715679_PRNP      | 0.033508 | 0.389965 | 0.50238  |
| 11763053_KIF25-AS1 | -0.06992 | 0.389966 | 0.50238  |
| 11752569_LCK       | -0.06251 | 0.389982 | 0.502387 |
| 11732266_LILRB1    | -0.09228 | 0.390046 | 0.502457 |
| 11731769_CES2      | 0.037338 | 0.390145 | 0.502572 |
| 11760974_SP2       | -0.06256 | 0.390229 | 0.502666 |
| 11731225_ELFN2     | 0.068323 | 0.390469 | 0.502962 |
| 11723915_CACTIN    | -0.0657  | 0.390488 | 0.502973 |



|                    |          |          |          |
|--------------------|----------|----------|----------|
| 11744561_AGAP3     | -0.04772 | 0.390505 | 0.502982 |
| 11730087_DLGA3     | 0.037263 | 0.390624 | 0.503123 |
| 11720104_PAK1      | 0.045616 | 0.390778 | 0.503308 |
| 11738420_LOC101930 | -0.05722 | 0.390853 | 0.503367 |
| 11744646_CREB3L2   | 0.099187 | 0.390853 | 0.503367 |
| 11727168_STRIP2    | -0.07113 | 0.390855 | 0.503367 |
| 11741700_HIST1H2BJ | 0.056382 | 0.390883 | 0.503373 |
| 11760219_NUTF2     | 0.030182 | 0.390891 | 0.503373 |
| 11723491_ARHGEF3   | -0.07704 | 0.390891 | 0.503373 |
| 11751279_SLC38A7   | 0.037761 | 0.390967 | 0.503458 |
| 11754043_RHOA      | 0.029963 | 0.391044 | 0.503543 |
| 11760752_WDR27     | -0.0958  | 0.391075 | 0.50357  |
| 11730039_GNG13     | -0.03215 | 0.391211 | 0.503732 |
| 11762633_LOC100287 | 0.130447 | 0.391312 | 0.503848 |
| 11726100_LOC102724 | -0.0342  | 0.391324 | 0.503852 |
| 11762737_PTGER3    | 0.087589 | 0.391397 | 0.503921 |
| 11732755_FAM205A   | -0.08044 | 0.391399 | 0.503921 |
| 11753262_CREB3L2   | -0.07709 | 0.391413 | 0.503925 |
| 11747426_CCDC120   | 0.082356 | 0.391488 | 0.504009 |
| 11720959_ABCF1     | 0.038949 | 0.391531 | 0.504051 |
| 11745264_RAD23B    | -0.03993 | 0.391631 | 0.504167 |
| 11742847_PPP1R13B  | 0.033862 | 0.391665 | 0.504197 |
| 11733390_AGTR2     | -0.06843 | 0.391702 | 0.504231 |
| 11740530_TBX22     | 0.048559 | 0.39177  | 0.504305 |
| 11723516_CAB39L    | 0.044757 | 0.391804 | 0.504336 |
| 11743447_BICD2     | -0.02988 | 0.391873 | 0.504411 |
| 11732096_TIFAB     | -0.07216 | 0.391925 | 0.504465 |
| 11733629_MANEAL    | -0.03428 | 0.39195  | 0.504484 |
| 11722245_PTSS2     | 0.040952 | 0.392021 | 0.504562 |
| 11754996_C18orf32  | -0.02976 | 0.392096 | 0.504645 |
| 11725630	EIF3B     | 0.041971 | 0.392149 | 0.5047   |
| 11763405_LINC00466 | -0.07996 | 0.392181 | 0.504728 |
| 11740712_ZNF483    | -0.05918 | 0.392242 | 0.504793 |
| 11736185_DDX51     | 0.036123 | 0.392272 | 0.504819 |
| 11740432_TTPA      | -0.0568  | 0.392355 | 0.504913 |
| 11762810_CASP8     | 0.092518 | 0.392382 | 0.504934 |
| 11736482_TREML2    | -0.05172 | 0.39258  | 0.505176 |
| 11751512_HEG1      | 0.038727 | 0.392702 | 0.505319 |
| 11740535_PTGES3L   | -0.06647 | 0.392718 | 0.505326 |
| 11756976_LONRF2    | 0.065411 | 0.392743 | 0.505344 |
| 11732778_PGLYRP4   | -0.04584 | 0.392752 | 0.505344 |
| 11732918_CORIN     | -0.04184 | 0.392767 | 0.505349 |
| 11732767_ALOXE3    | -0.05184 | 0.392867 | 0.505465 |
| 11738819_LINC01565 | 0.076121 | 0.392887 | 0.505478 |
| 11751842_NACA      | 0.031464 | 0.39294  | 0.505532 |
| 11728090_SHISA7    | -0.09891 | 0.392971 | 0.505559 |
| 11716362_FAF1      | 0.041268 | 0.393025 | 0.505615 |
| 11718453_AXIN2     | -0.10054 | 0.393053 | 0.505638 |
| 11752171_SPTLC1    | -0.03106 | 0.393085 | 0.505665 |
| 11744864_MALRD1    | 0.054536 | 0.393205 | 0.505807 |
| 11756007_HHIP      | -0.0679  | 0.393217 | 0.505808 |

|                    |          |          |          |
|--------------------|----------|----------|----------|
| 11755822_TD02      | -0.07384 | 0.39329  | 0.50589  |
| 11745340_NUMBL     | -0.05159 | 0.393381 | 0.505993 |
| 11738433_MAP1LC3C  | 0.077018 | 0.393415 | 0.506023 |
| 11738321_OR7D2     | -0.05491 | 0.393462 | 0.506071 |
| 11730883_ANGPTL1   | 0.055724 | 0.393583 | 0.506213 |
| 11749617_LILRA2    | -0.04708 | 0.393599 | 0.50622  |
| 11725647_ASPSCR1   | 0.038118 | 0.393689 | 0.506309 |
| 11756706_DPP4      | -0.05442 | 0.393697 | 0.506309 |
| 11722491_SEZ6L2    | -0.03508 | 0.393699 | 0.506309 |
| 11727257_JAK3      | -0.04184 | 0.393743 | 0.506352 |
| 11750640_CLCN2     | 0.037091 | 0.393766 | 0.506369 |
| 11734351_SPINT4    | -0.09375 | 0.393779 | 0.506372 |
| 11723054_SZT2      | -0.04621 | 0.39382  | 0.506411 |
| 11759377_KRTAP19-7 | -0.09982 | 0.393911 | 0.506515 |
| 11755973_TNFAIP2   | -0.04716 | 0.394005 | 0.506623 |
| 11724083_RPP40     | 0.031682 | 0.394056 | 0.506675 |
| 11723455_PI16      | -0.03517 | 0.39407  | 0.50668  |
| 11738287_CLEC6A    | -0.06353 | 0.394113 | 0.506721 |
| 11734024_CCDC144A  | -0.04504 | 0.394164 | 0.506773 |
| 11732946_EFCC1     | 0.087492 | 0.39419  | 0.506794 |
| 11738127_SARDH     | -0.06936 | 0.394237 | 0.50684  |
| 11731067_CCDC155   | 0.045741 | 0.394304 | 0.506913 |
| 11750116_WDR11     | -0.03758 | 0.394321 | 0.506922 |
| 11751273_GPR34     | 0.075662 | 0.394652 | 0.507334 |
| 11753479_SUMO1     | -0.03247 | 0.394701 | 0.507383 |
| 11742549_OR5K3     | -0.0303  | 0.394737 | 0.507407 |
| 11722259_FAM174A   | -0.04968 | 0.39474  | 0.507407 |
| 11760350_UBXN11    | 0.05502  | 0.394777 | 0.507442 |
| 11749336_MRPL47    | 0.03303  | 0.394906 | 0.507594 |
| 11750262_BRSK2     | -0.05866 | 0.394939 | 0.507619 |
| 11731124_FBXO36    | -0.08239 | 0.394946 | 0.507619 |
| 11745897_CD19      | -0.05394 | 0.394991 | 0.507663 |
| 11723851_ODF2L     | 0.051134 | 0.395003 | 0.507665 |
| 11761032_CCNG2     | 0.059664 | 0.395085 | 0.50775  |
| 11725167_MOB3B     | -0.06524 | 0.39509  | 0.50775  |
| 11734790_SRR       | -0.05362 | 0.395104 | 0.507755 |
| 11738055_C8orf22   | 0.140227 | 0.395122 | 0.507761 |
| 11728423_PILRA     | -0.05833 | 0.395139 | 0.507761 |
| 11759520_SPCS1     | -0.08833 | 0.39514  | 0.507761 |
| 11733760_EGFR      | -0.03383 | 0.395179 | 0.507798 |
| 11743790_FRS2      | 0.03948  | 0.395321 | 0.507967 |
| 11727012_CELF4     | -0.0582  | 0.395364 | 0.508009 |
| 11736966_FBXO40    | -0.10558 | 0.395389 | 0.508028 |
| 11751825_SNX32     | -0.05832 | 0.395413 | 0.508046 |
| 11724996_LAMP5     | -0.05377 | 0.395483 | 0.508121 |
| 11747295_PRF1      | -0.08126 | 0.395508 | 0.508129 |
| 11754828_BTN2A2    | 0.06208  | 0.39551  | 0.508129 |
| 11734155_CSRNP3    | 0.086531 | 0.395546 | 0.508162 |
| 11738668_VN1R5     | 0.052194 | 0.395664 | 0.508301 |
| 11726225_KEL       | 0.073288 | 0.395713 | 0.508351 |
| 11725129_VARS2     | -0.049   | 0.39578  | 0.508423 |

|                    |          |          |          |
|--------------------|----------|----------|----------|
| 11755512_ZFAT      | 0.05048  | 0.395793 | 0.508427 |
| 11759493_RBM25     | -0.0706  | 0.395882 | 0.508527 |
| 11756001_SLC35E1   | -0.03378 | 0.395893 | 0.508528 |
| 11732036_C1QTNF7   | 0.055208 | 0.395908 | 0.508534 |
| 11748414_NLGN4Y    | -0.04135 | 0.39593  | 0.508545 |
| 11726143_DAZ1 ///  | -0.06676 | 0.395937 | 0.508545 |
| 11733072_PKN1      | -0.03493 | 0.395957 | 0.508549 |
| 11715323_NKX1-2    | -0.0434  | 0.395961 | 0.508549 |
| 11730493_KCNK2     | 0.047369 | 0.395992 | 0.508575 |
| 11729660_AIFM3     | -0.06137 | 0.396045 | 0.50863  |
| 11759983_VTI1A     | -0.05669 | 0.396067 | 0.508645 |
| 11724865_OSRI      | -0.11577 | 0.396084 | 0.508654 |
| 11762605_LOC645261 | 0.044512 | 0.396099 | 0.508659 |
| 11753923_MBNL1-AS1 | -0.05616 | 0.39622  | 0.508801 |
| 11735106_CD40LG    | -0.05878 | 0.396241 | 0.508802 |
| 11740292_FLT4      | -0.03979 | 0.396242 | 0.508802 |
| 11761857_ADAM33    | -0.06899 | 0.396272 | 0.508828 |
| 11760919_CTNNA3    | 0.072265 | 0.396317 | 0.508872 |
| 11756119_IKKBG     | 0.057683 | 0.396327 | 0.508872 |
| 11754472_CALB1     | -0.12654 | 0.39635  | 0.508888 |
| 11729966_FER       | 0.053082 | 0.396371 | 0.508901 |
| 11720178_DDX28     | -0.03601 | 0.396389 | 0.50891  |
| 11742437_UNK       | -0.03303 | 0.396442 | 0.508966 |
| 11747259_NOV       | -0.06692 | 0.396464 | 0.508981 |
| 11735424_MAPK8IP2  | 0.034352 | 0.396557 | 0.509086 |
| 11752292_KAT7      | 0.04743  | 0.396625 | 0.50916  |
| 11726581_GUCY1B3   | -0.05947 | 0.396742 | 0.509297 |
| 11761179_FANCL     | -0.05362 | 0.396787 | 0.509342 |
| 11716254_RBFOX2    | -0.03037 | 0.396819 | 0.50937  |
| 11758792_C14orf1   | 0.123518 | 0.396901 | 0.509461 |
| 11751140_IL1RAPL2  | -0.06652 | 0.396956 | 0.509494 |
| 11715851_CLU       | 0.068743 | 0.396956 | 0.509494 |
| 11731969_SPCS2     | 0.060703 | 0.396958 | 0.509494 |
| 11761226_GIF       | 0.058023 | 0.397013 | 0.509551 |
| 11762635_IGF1R     | 0.070126 | 0.397069 | 0.50961  |
| 11743094_SPRR4     | -0.06979 | 0.3971   | 0.509636 |
| 11721577_TNF       | 0.052666 | 0.39721  | 0.50976  |
| 11736900_COL27A1   | 0.045174 | 0.397217 | 0.50976  |
| 11716091_PRG2      | -0.05565 | 0.397262 | 0.509805 |
| 11723293_GPX7      | -0.07057 | 0.397287 | 0.509822 |
| 11715687_ARPC5     | 0.031059 | 0.397297 | 0.509823 |
| 11723202_MTMR6     | -0.07184 | 0.397344 | 0.509856 |
| 11737424_MS4A2     | -0.05413 | 0.397344 | 0.509856 |
| 11721582_LRMP      | 0.07019  | 0.397571 | 0.510133 |
| 11740456_GNRHR     | -0.03844 | 0.397618 | 0.510181 |
| 11732479_ITGAM     | -0.06593 | 0.39766  | 0.510222 |
| 11756866_GPR78     | -0.05928 | 0.397725 | 0.510292 |
| 11749699_SGSM3     | -0.04335 | 0.397794 | 0.510362 |
| 11724577_CCK       | 0.057171 | 0.397801 | 0.510362 |
| 11733268_PIRT      | 0.038996 | 0.397852 | 0.510415 |
| 11740848_SLC30A10  | -0.07532 | 0.397876 | 0.510431 |

|                    |          |          |          |
|--------------------|----------|----------|----------|
| 11762779_MAPRE2    | -0.06617 | 0.397931 | 0.510488 |
| 11740297_C10orf128 | -0.09524 | 0.397974 | 0.510522 |
| 11762215_ARNT2     | -0.05038 | 0.397978 | 0.510522 |
| 11751131_RARB      | 0.044131 | 0.397994 | 0.510529 |
| 11760621_KLK2      | -0.10276 | 0.398005 | 0.51053  |
| 11751280_SLC38A7   | -0.04045 | 0.398019 | 0.510535 |
| 11746474_AHSG      | 0.082589 | 0.39804  | 0.510548 |
| 11727369_TSN       | -0.03418 | 0.398095 | 0.510605 |
| 11736640_ESRP2     | -0.07558 | 0.398109 | 0.510609 |
| 11716836_CTDNEP1   | -0.03271 | 0.398131 | 0.510624 |
| 11736646_WWP2      | 0.040211 | 0.398277 | 0.510798 |
| 11720393_RAB11FIP4 | 0.084973 | 0.398298 | 0.510812 |
| 11722632_ICE2      | -0.03955 | 0.398332 | 0.510841 |
| 11727636_RERGL     | -0.0469  | 0.398366 | 0.510868 |
| 11755418_HTR2C     | 0.132596 | 0.398374 | 0.510868 |
| 11730537_LTA       | -0.09115 | 0.398392 | 0.510879 |
| 11734315_KIAA1456  | 0.04298  | 0.398519 | 0.511029 |
| 11737178_SLC25A21  | -0.06861 | 0.398579 | 0.511092 |
| 11741265_UGT2B15   | 0.046409 | 0.398603 | 0.511104 |
| 11741033_FBXO44    | -0.0339  | 0.398609 | 0.511104 |
| 11726563_MRPL49    | 0.034448 | 0.398666 | 0.511163 |
| 11760230_TDGFIP3   | -0.0698  | 0.398843 | 0.511376 |
| 11738208_ALAS2     | -0.04846 | 0.398859 | 0.511383 |
| 11751197_PZP       | 0.079341 | 0.398904 | 0.511427 |
| 11740804_FBXL13    | -0.04116 | 0.398914 | 0.511427 |
| 11751780_AGA       | 0.035236 | 0.398928 | 0.511431 |
| 11725233_ATP8B2    | -0.03854 | 0.398945 | 0.511432 |
| 11716265_UBE2A     | -0.03155 | 0.398951 | 0.511432 |
| 11737616_ARSH      | 0.047835 | 0.398959 | 0.511432 |
| 11760591_C9orf84   | -0.08442 | 0.399128 | 0.511635 |
| 11759857_HLA-V /// | 0.061336 | 0.399156 | 0.511657 |
| 11739694_ATL1      | 0.066945 | 0.399273 | 0.511781 |
| 11745348_TMEM266   | -0.03516 | 0.399274 | 0.511781 |
| 11762815_MFAP2     | -0.05178 | 0.399309 | 0.511814 |
| 11741486_SLITRK3   | -0.05968 | 0.399404 | 0.511922 |
| 11743316_CTBP2     | -0.03326 | 0.399454 | 0.511972 |
| 11726649_GDAP1L1   | -0.0416  | 0.399491 | 0.512006 |
| 11730093_FTCD      | -0.06115 | 0.399585 | 0.512113 |
| 11716774_RAI14     | 0.050041 | 0.399613 | 0.512135 |
| 11727266_HAUS3     | 0.037498 | 0.39963  | 0.512144 |
| 11755649_SCN4B     | -0.0812  | 0.39981  | 0.512362 |
| 11753030_NLGN3     | -0.07438 | 0.399822 | 0.512363 |
| 11743464_CHD4      | -0.03215 | 0.399925 | 0.512474 |
| 11733881_TTF1      | 0.032463 | 0.399929 | 0.512474 |
| 11734368_DMRTC1 // | -0.05363 | 0.399942 | 0.512477 |
| 11735338_LINC00482 | -0.06558 | 0.399979 | 0.512511 |
| 11728068_SASS6     | -0.04336 | 0.400143 | 0.512707 |
| 11739786_IGF2 ///  | -0.04004 | 0.400165 | 0.512709 |
| 11755712_PLPPR3    | -0.06636 | 0.400165 | 0.512709 |
| 11744277_CAPG      | -0.03287 | 0.400229 | 0.512777 |
| 11733999_THRB      | -0.05655 | 0.400241 | 0.512779 |

|                    |          |          |          |
|--------------------|----------|----------|----------|
| 11734240_MROH8     | -0.03243 | 0.400339 | 0.51289  |
| 11759939_LOC100131 | 0.051844 | 0.400349 | 0.51289  |
| 11763166_MARS      | -0.0687  | 0.400373 | 0.512908 |
| 11762528_SLC5A12   | -0.03567 | 0.400429 | 0.512966 |
| 11760830_FAHD2A // | 0.035041 | 0.40047  | 0.513005 |
| 11734440_JPH2      | -0.05423 | 0.400527 | 0.513065 |
| 11748430_ARMC5     | 0.039695 | 0.400571 | 0.513108 |
| 11762920_ULBP2     | 0.078422 | 0.400637 | 0.513178 |
| 11745592_WDR59     | -0.04696 | 0.40066  | 0.513194 |
| 11755538_RPAP1     | 0.031581 | 0.400721 | 0.513259 |
| 11733848_CC2D1B    | 0.068046 | 0.40074  | 0.51327  |
| 11725532_DSC2      | 0.067693 | 0.400766 | 0.51329  |
| 11722223_NPR1      | -0.0747  | 0.40085  | 0.513385 |
| 11738666_CD300LD   | 0.053802 | 0.400891 | 0.513423 |
| 11748089_IL16      | -0.04923 | 0.400907 | 0.51343  |
| 11754982_EWSR1     | -0.03188 | 0.400947 | 0.513468 |
| 11731265_KY        | -0.06264 | 0.400964 | 0.513476 |
| 11751100_ESRRB     | -0.04769 | 0.401046 | 0.513568 |
| 11721532_EIF4G3    | 0.037931 | 0.401152 | 0.51369  |
| 11761916_IAH1      | 0.053546 | 0.401177 | 0.513696 |
| 11743987_VARS      | 0.037204 | 0.401177 | 0.513696 |
| 11739704_TAT       | -0.0341  | 0.401218 | 0.51373  |
| 11730464_SYN3      | -0.05007 | 0.401225 | 0.51373  |
| 11733996_NADK2     | 0.05348  | 0.401286 | 0.513794 |
| 11731320_C3orf22   | -0.08481 | 0.401331 | 0.513839 |
| 11744847_PLEKHA5   | 0.065572 | 0.401478 | 0.514014 |
| 11751585_ASBS      | -0.03138 | 0.401494 | 0.51402  |
| 11762204_ACOT8     | 0.093839 | 0.401551 | 0.51408  |
| 11750229_TMEM25    | 0.099788 | 0.401568 | 0.514088 |
| 11762643_TSTD2     | -0.05346 | 0.401579 | 0.514089 |
| 11717575_PPP1R3C   | -0.08674 | 0.401651 | 0.514168 |
| 11742620_OR4B1     | -0.05329 | 0.401673 | 0.514182 |
| 11737810_RPS20     | -0.04599 | 0.401762 | 0.514283 |
| 11729043_OR51E1    | -0.0448  | 0.401799 | 0.514307 |
| 11728467_MAST1     | 0.05996  | 0.401802 | 0.514307 |
| 11755889_ZNF407    | -0.09536 | 0.401833 | 0.514333 |
| 11745747_AHCYL1    | -0.03272 | 0.401921 | 0.51441  |
| 11739401_CD74      | -0.03179 | 0.401923 | 0.51441  |
| 11741522_RGR       | -0.04602 | 0.401929 | 0.51441  |
| 11739904_ABCA6     | 0.064046 | 0.401935 | 0.51441  |
| 11730233_CTNN2     | -0.03976 | 0.401947 | 0.514411 |
| 11763004_NPHP3     | -0.04948 | 0.401992 | 0.514456 |
| 11762788_ERVK3-2 / | 0.0588   | 0.402096 | 0.514575 |
| 11729636_NRSN1     | 0.049374 | 0.402116 | 0.514587 |
| 11732848_PRELID2   | 0.043986 | 0.402162 | 0.514625 |
| 11735746_SERPINA10 | 0.059299 | 0.402166 | 0.514625 |
| 11728537_MCC       | 0.032458 | 0.402202 | 0.514658 |
| 11732765_RUFY2     | 0.054062 | 0.402299 | 0.514768 |
| 11732042_MMD2 ///  | -0.04483 | 0.402317 | 0.514778 |
| 11749235_CYP46A1   | -0.04606 | 0.402338 | 0.514781 |
| 11725906_C9orf47   | -0.04013 | 0.402341 | 0.514781 |

|                    |          |          |          |
|--------------------|----------|----------|----------|
| 11751939_ZBTB40    | 0.039375 | 0.40236  | 0.514792 |
| 11743715_ATP5J2    | 0.032428 | 0.402381 | 0.514806 |
| 11716770_CHERP     | 0.033125 | 0.402434 | 0.514859 |
| 11720342_NDUFA13   | 0.032252 | 0.402457 | 0.514875 |
| 11758424_UNC119B   | -0.03146 | 0.402637 | 0.515093 |
| 11731851_SLC30A5   | -0.03864 | 0.402679 | 0.515133 |
| 11750427_LOC100128 | -0.04705 | 0.402738 | 0.515191 |
| 11734714_DBF4      | -0.0483  | 0.402751 | 0.515191 |
| 11757080_RPS29     | -0.03548 | 0.402756 | 0.515191 |
| 11728514_NDUFAF6   | 0.117686 | 0.402771 | 0.515197 |
| 11747056_ASXL1     | -0.05287 | 0.402802 | 0.515222 |
| 11731957_GUCA2A    | -0.05124 | 0.402852 | 0.515274 |
| 11717704_KIFC3     | 0.038727 | 0.402876 | 0.515291 |
| 11729918_ADAMTS18  | -0.08441 | 0.402903 | 0.515311 |
| 11725257_FZD10     | -0.04576 | 0.402926 | 0.515323 |
| 11760790_ACOT9     | -0.03    | 0.402933 | 0.515323 |
| 11737173_CD80      | -0.03724 | 0.40295  | 0.515331 |
| 11725821_PAQR3     | -0.03992 | 0.402985 | 0.515362 |
| 11738550_OR9A4     | -0.09123 | 0.40312  | 0.515521 |
| 11751798_CTSO      | 0.062451 | 0.403135 | 0.515527 |
| 11751414_EHF       | 0.053427 | 0.403149 | 0.515532 |
| 11733024_BTG1      | 0.033724 | 0.403161 | 0.515534 |
| 11750934_LOC100499 | -0.03977 | 0.403198 | 0.51556  |
| 11758519_PLOD3     | -0.0315  | 0.403203 | 0.51556  |
| 11718115_METTL13   | -0.02957 | 0.403219 | 0.515568 |
| 11736363_MEDAG     | 0.077932 | 0.403254 | 0.515598 |
| 11725997_DDX25     | -0.05987 | 0.40327  | 0.515603 |
| 11722004_CYCS      | -0.03064 | 0.403278 | 0.515603 |
| 11736402_GABRA3    | 0.039746 | 0.403325 | 0.515649 |
| 11737971_ZNF321P   | 0.054546 | 0.403412 | 0.515734 |
| 11748539_NOTCH4    | -0.09556 | 0.403413 | 0.515734 |
| 11746429_MDM1      | 0.12271  | 0.403576 | 0.51593  |
| 11729329_EPB41L4B  | -0.04992 | 0.403597 | 0.51594  |
| 11751232_RNF112    | 0.058065 | 0.403606 | 0.51594  |
| 11724631_SYT13     | -0.06375 | 0.403646 | 0.515976 |
| 11761478_HSP90B2P  | -0.04789 | 0.403655 | 0.515976 |
| 11756833_TRIQK     | -0.03495 | 0.403683 | 0.515999 |
| 11749730_PTGS1     | -0.05068 | 0.403731 | 0.516046 |
| 11725481_CD27      | -0.05398 | 0.403748 | 0.516054 |
| 11731798_LGALS2    | -0.05259 | 0.403823 | 0.516127 |
| 11739614_CD3EAP    | -0.04012 | 0.403831 | 0.516127 |
| 11737736_EFCAB5    | -0.08037 | 0.403836 | 0.516127 |
| 11721780_LLGL2     | -0.0618  | 0.403953 | 0.516263 |
| 11752219_CDH6      | -0.09781 | 0.403975 | 0.516277 |
| 11753364_PLXNB3    | -0.05844 | 0.404023 | 0.516324 |
| 11723109_GBPB1     | 0.034787 | 0.404111 | 0.516412 |
| 11741991_PRAMEF16  | -0.07526 | 0.404113 | 0.516412 |
| 11726930_CACNA2D4  | 0.042227 | 0.404134 | 0.516427 |
| 11730689_FOXP3     | -0.03519 | 0.404146 | 0.516428 |
| 11759802_SUFU      | -0.0455  | 0.404156 | 0.516428 |
| 11733757_MAGEB10   | -0.07029 | 0.40421  | 0.516483 |

|                    |          |          |          |
|--------------------|----------|----------|----------|
| 11761457_RAB11FIP1 | 0.05656  | 0.40425  | 0.516512 |
| 11723893_CREBBP    | 0.082314 | 0.404261 | 0.516512 |
| 11753787_MSMB      | 0.059842 | 0.404264 | 0.516512 |
| 11750615_ADGRF5    | 0.044596 | 0.404302 | 0.516547 |
| 11744980_TMEM185A  | -0.04252 | 0.404368 | 0.516617 |
| 11720228_STAT5B    | 0.044726 | 0.404381 | 0.51662  |
| 11733618_ACVR1C    | -0.03638 | 0.404435 | 0.516675 |
| 11756250_HMGCL     | 0.037042 | 0.404493 | 0.516733 |
| 11760737_CD8B      | -0.05841 | 0.404509 | 0.516733 |
| 11760305_LOC100287 | -0.04838 | 0.404511 | 0.516733 |
| 11723875_TMEM104   | -0.03885 | 0.404592 | 0.516822 |
| 11755070_CARD8     | 0.05274  | 0.404636 | 0.516865 |
| 11734353_ANK1      | 0.063808 | 0.404746 | 0.516992 |
| 11744193_SUMO1     | -0.02988 | 0.40484  | 0.517098 |
| 11715244_LCE1A     | -0.03198 | 0.404979 | 0.517263 |
| 11733202_SH3TC2    | 0.030407 | 0.405081 | 0.517375 |
| 11735370_IQSEC2    | -0.04085 | 0.405088 | 0.517375 |
| 11738797_PCDH15    | 0.07168  | 0.405136 | 0.517422 |
| 11754583_SLC38A7   | -0.06315 | 0.405248 | 0.517552 |
| 11734386_SOX5      | 0.04867  | 0.405261 | 0.517555 |
| 11729628_AP3M1     | -0.03218 | 0.405379 | 0.517692 |
| 11742022_IKZF1     | -0.09931 | 0.405508 | 0.517844 |
| 11750228_RSAD1     | -0.05149 | 0.405559 | 0.517883 |
| 11734160_CARF      | -0.04621 | 0.40556  | 0.517883 |
| 11744576_EVC2      | 0.04424  | 0.405576 | 0.51789  |
| 11715243_LCE1F     | -0.04422 | 0.405593 | 0.517898 |
| 11723650_CIAO1     | -0.03422 | 0.405706 | 0.518029 |
| 11746303_SORBS1    | -0.0376  | 0.405752 | 0.518074 |
| 11725941_WNT7B     | -0.03972 | 0.405796 | 0.518116 |
| 11742634_PABPN1L   | -0.06049 | 0.405855 | 0.518178 |
| 11728144_TOR2A     | 0.055949 | 0.405913 | 0.518231 |
| 11749285_IL12RB2   | 0.057474 | 0.405917 | 0.518231 |
| 11741667_LAX1      | -0.03153 | 0.405931 | 0.518235 |
| 11716006_HYOU1     | 0.032963 | 0.405964 | 0.518264 |
| 11742520_OR4A15    | -0.06649 | 0.405984 | 0.518275 |
| 11743992_UBE2O     | 0.028991 | 0.406063 | 0.518363 |
| 11728972_PTPRJ     | 0.033779 | 0.406079 | 0.51837  |
| 11731949_SAMD3     | 0.071403 | 0.406118 | 0.518406 |
| 11746958_ASIC1     | -0.09397 | 0.406148 | 0.518425 |
| 11729432_PALD1     | -0.04888 | 0.406154 | 0.518425 |
| 11763972_SSR1      | -0.06434 | 0.406184 | 0.518443 |
| 11756788_GLT8D1    | 0.031559 | 0.406189 | 0.518443 |
| 11734377_POU4F2    | -0.07031 | 0.406259 | 0.518518 |
| 11760198	EIF4E2    | 0.048944 | 0.406441 | 0.518737 |
| 11759834_CHST15    | -0.07213 | 0.406474 | 0.518766 |
| 11735234_SLC38A5   | -0.05694 | 0.406493 | 0.518777 |
| 11762278_CYP2F1    | -0.06976 | 0.406646 | 0.518954 |
| 11729058_NR4A3     | 0.058198 | 0.406653 | 0.518954 |
| 11719871_TMEM176B  | -0.05288 | 0.406758 | 0.519074 |
| 11715620_CRYAB     | -0.03267 | 0.40677  | 0.519075 |
| 11744418_PLPP5     | 0.0323   | 0.40678  | 0.519075 |

|                    |          |          |          |
|--------------------|----------|----------|----------|
| 11751193_TRIL      | -0.04001 | 0.406798 | 0.519084 |
| 11762664_MGAT5B    | -0.11734 | 0.40683  | 0.519111 |
| 11749926_C4A /// C | -0.06923 | 0.406893 | 0.519178 |
| 11730373_FYB       | -0.04695 | 0.407008 | 0.519312 |
| 11744751_SERPINB9  | -0.08238 | 0.407042 | 0.519342 |
| 11747992_WDR20     | 0.039659 | 0.407079 | 0.519375 |
| 11720948_CA12      | -0.0814  | 0.407229 | 0.519553 |
| 11732856_CDHR4     | -0.04888 | 0.407258 | 0.519577 |
| 11727661_TMPRSS13  | -0.03835 | 0.407292 | 0.519606 |
| 11754874_LGI1      | -0.04366 | 0.407408 | 0.51974  |
| 11756731_RAPGEF4   | 0.039362 | 0.407431 | 0.519756 |
| 11730239_SLC2A12   | 0.076007 | 0.407476 | 0.519799 |
| 11719629_BRD2      | -0.05045 | 0.407516 | 0.519838 |
| 11762427_LRRC37A11 | 0.048998 | 0.407538 | 0.51984  |
| 11726110_FBXL19    | -0.0519  | 0.407539 | 0.51984  |
| 11720900_GRAMD1C   | -0.04921 | 0.407558 | 0.51985  |
| 11730419_PRND      | -0.06767 | 0.40757  | 0.51985  |
| 11763519_SLC4A4    | -0.05619 | 0.407579 | 0.51985  |
| 11763973_CFAP157   | -0.06404 | 0.407603 | 0.519867 |
| 11738755_OR1J1     | -0.04125 | 0.407631 | 0.51989  |
| 11757100_POTEE /// | 0.116245 | 0.407706 | 0.519971 |
| 11730416_ACTRT2    | -0.04415 | 0.407846 | 0.520136 |
| 11734438_STKLD1    | -0.03801 | 0.407892 | 0.520177 |
| 11736574_FAM20A    | 0.044135 | 0.407906 | 0.520177 |
| 11736533_LRRFIP1   | -0.05867 | 0.40792  | 0.520177 |
| 11729105_HPCAL4    | 0.053105 | 0.407921 | 0.520177 |
| 11761142_TP53      | -0.0814  | 0.407997 | 0.52026  |
| 11733166_LRRN4CL   | 0.055117 | 0.40803  | 0.520281 |
| 11719473_IRF2BP2   | 0.036277 | 0.408034 | 0.520281 |
| 11734949_MTMR7     | 0.051025 | 0.408045 | 0.520282 |
| 11718241_PRUNE2    | 0.083818 | 0.408075 | 0.520306 |
| 11724433_ZCCHC18   | -0.04957 | 0.408094 | 0.520317 |
| 11751447_NXPH1     | -0.03344 | 0.408157 | 0.520383 |
| 11724103_C8orf44-S | -0.06145 | 0.408171 | 0.520388 |
| 11736183_ZNF747    | 0.038623 | 0.408237 | 0.520459 |
| 11749843_BRMS1L    | 0.046567 | 0.408272 | 0.520489 |
| 11747802_SRBD1     | 0.038196 | 0.408306 | 0.52052  |
| 200091_PMRPS25     | -0.03922 | 0.408439 | 0.520676 |
| 11738611_CCL14 /// | 0.054411 | 0.408451 | 0.520677 |
| 11733278_SLC2A2    | -0.04422 | 0.408515 | 0.520733 |
| 11729824_BMPER     | 0.071932 | 0.408516 | 0.520733 |
| 11737744_LRRC43    | -0.07651 | 0.408535 | 0.520744 |
| 11755825_CAMKV     | -0.05149 | 0.408717 | 0.520961 |
| 11720945_SNRPA1    | -0.03096 | 0.408728 | 0.520962 |
| 11761038_MYD88     | -0.04533 | 0.408774 | 0.521003 |
| 11729204_DTNA      | -0.05981 | 0.408781 | 0.521003 |
| 11741454_JAKMIP1   | -0.07186 | 0.408814 | 0.521031 |
| 11754500_SMIM6     | -0.05732 | 0.408879 | 0.5211   |
| 11728080_TBC1D22B  | 0.061143 | 0.408939 | 0.521158 |
| 11751719_AGPAT4    | 0.045069 | 0.408946 | 0.521158 |
| 11737515_MEFV      | 0.065301 | 0.408994 | 0.521206 |



|                    |          |          |          |
|--------------------|----------|----------|----------|
| 11735428_NLRX1     | 0.031653 | 0.409018 | 0.521223 |
| 11740523_CCDC112   | -0.03945 | 0.409236 | 0.521487 |
| 11747797_MS4A14    | -0.0709  | 0.409297 | 0.521551 |
| 11726222_GCK       | -0.06644 | 0.409332 | 0.521582 |
| 11759946_MAPK14    | -0.03902 | 0.409347 | 0.521584 |
| 11739997_SMARCA2   | 0.032894 | 0.409355 | 0.521584 |
| 11763591_ZDHC8     | -0.03467 | 0.409387 | 0.521612 |
| 11719312_MAP2K5    | -0.02924 | 0.409448 | 0.52167  |
| 11735043_CDRT1 /// | 0.031993 | 0.409454 | 0.52167  |
| 11761737_FCRL6     | -0.03798 | 0.409564 | 0.521796 |
| 11750056_CEP76     | -0.04407 | 0.409597 | 0.521824 |
| 11716590_BTBD1     | -0.03287 | 0.409609 | 0.521826 |
| 11729554_CFAP73    | -0.05971 | 0.409619 | 0.521826 |
| 11723359_MAP4K2    | 0.032348 | 0.409727 | 0.52195  |
| 11734517_HCRT      | -0.04827 | 0.409876 | 0.522126 |
| 11726353_CD180     | 0.041474 | 0.409974 | 0.522221 |
| 11738004_GRAPL     | -0.04434 | 0.409987 | 0.522221 |
| 11756658_MZB1      | -0.04806 | 0.409991 | 0.522221 |
| 11751216_BPIFC     | -0.06547 | 0.409994 | 0.522221 |
| 11747851_GPS2      | 0.033    | 0.410044 | 0.522264 |
| 11730089_HAS1      | 0.049646 | 0.410049 | 0.522264 |
| 11725157_CCDC91    | -0.03272 | 0.410294 | 0.522562 |
| 11750856_CCR2      | 0.040121 | 0.410305 | 0.522563 |
| 11757641_PFDN5     | 0.034215 | 0.410358 | 0.522617 |
| 11748782_CASP9     | 0.032379 | 0.410385 | 0.522637 |
| 11737540_LIPJ      | -0.0778  | 0.410443 | 0.522692 |
| 11763787_ITGAX     | -0.06241 | 0.410449 | 0.522692 |
| 11738508_C7orf69   | -0.05049 | 0.410483 | 0.522721 |
| 11754518_NEIL1     | -0.06138 | 0.410521 | 0.522747 |
| 11763035_TNAP      | -0.05299 | 0.410524 | 0.522747 |
| 11729639_RAB25     | -0.07491 | 0.410566 | 0.522786 |
| 11749062_ERG       | 0.042149 | 0.410588 | 0.522801 |
| 11726823_ADORA3    | -0.04419 | 0.410632 | 0.522838 |
| 11762139_ADAM7     | -0.05701 | 0.410639 | 0.522838 |
| 11727118_CFP       | 0.030145 | 0.41066  | 0.52285  |
| 11750473_WNT5B     | -0.07614 | 0.41068  | 0.52285  |
| 11725925_MYBPH     | 0.0329   | 0.410695 | 0.52285  |
| 11738481_FCAR      | -0.09643 | 0.410697 | 0.52285  |
| 11726056_PPP4R3B   | 0.029915 | 0.410701 | 0.52285  |
| 11761389_CD3G      | 0.041629 | 0.410712 | 0.52285  |
| 11722075_HEYL      | -0.05246 | 0.410737 | 0.522868 |
| 200041_PMATP6V1G2- | 0.030463 | 0.410766 | 0.522891 |
| 11739017_USP22     | -0.03441 | 0.410813 | 0.522937 |
| 11716800_FADD      | 0.03832  | 0.410858 | 0.522982 |
| 11748212_DLD       | 0.037382 | 0.410878 | 0.522992 |
| 11757314_RPL10     | 0.030058 | 0.410888 | 0.522992 |
| 11745869_MPC2      | -0.03235 | 0.410898 | 0.522992 |
| 11762082_ARL10     | -0.05642 | 0.41091  | 0.522992 |
| 11734599_LOC105369 | 0.098273 | 0.410933 | 0.523008 |
| 11763756_GNLY      | -0.10918 | 0.410943 | 0.523008 |
| 11727894_GKAP1     | -0.03502 | 0.410998 | 0.523064 |

|                    |          |          |          |
|--------------------|----------|----------|----------|
| 11731571_CCDC106   | -0.03425 | 0.411011 | 0.523064 |
| 11752343_XKRX      | -0.05524 | 0.41102  | 0.523064 |
| 11719302_PYGL      | -0.03061 | 0.411061 | 0.523098 |
| 11742124_CACNG6    | -0.04951 | 0.411067 | 0.523098 |
| 11757147_SNHG15 // | 0.068092 | 0.411097 | 0.523122 |
| 11749227_PLEKHM2   | -0.03794 | 0.411126 | 0.523145 |
| 11757842_MIEF1     | -0.04255 | 0.411141 | 0.523151 |
| 11741868_P2RX2     | -0.06505 | 0.411162 | 0.523163 |
| 11733860_CLASP2    | -0.03204 | 0.411213 | 0.523215 |
| 11760626_DYRK3     | -0.04891 | 0.411232 | 0.523224 |
| 11743147_ZNF22     | -0.03606 | 0.411241 | 0.523224 |
| 11733940_RPE /// R | 0.036409 | 0.411307 | 0.523294 |
| 11740454_GNRHR     | -0.05171 | 0.411333 | 0.523305 |
| 11762943_KCTD9     | 0.067953 | 0.411337 | 0.523305 |
| 11753138_GDF6      | -0.08343 | 0.411364 | 0.523325 |
| 11734415_ZNF718    | -0.04156 | 0.411394 | 0.52335  |
| 11725894_TXLNB     | -0.08825 | 0.411507 | 0.52348  |
| 11722349_LIME1     | 0.046004 | 0.411535 | 0.523503 |
| 11764034_LOC728392 | -0.05378 | 0.411582 | 0.523548 |
| 11720354_INTS3     | -0.04224 | 0.411608 | 0.523568 |
| 11739749_SPTLC3    | 0.071112 | 0.41168  | 0.523646 |
| 11729559_FOXL1     | -0.03382 | 0.4117   | 0.523648 |
| 11736182_ZNF747    | 0.031261 | 0.411703 | 0.523648 |
| 11749556_GALNS     | -0.02931 | 0.411748 | 0.523691 |
| 11749169_KRT6A /// | 0.032969 | 0.411784 | 0.523724 |
| 11727759_CTXN3     | -0.09032 | 0.411953 | 0.523925 |
| 11734951_MTMR7     | -0.06962 | 0.412056 | 0.524043 |
| 11747064_ANXA11    | 0.033646 | 0.412133 | 0.524127 |
| 11716995_WSB2      | -0.03698 | 0.412145 | 0.524129 |
| 11752743_LOC729815 | -0.03262 | 0.412161 | 0.524135 |
| 11729466_TMEM150A  | 0.043108 | 0.412286 | 0.52428  |
| 11722224_NPR1      | -0.04374 | 0.412383 | 0.524389 |
| 11727280_KCNH2     | 0.052701 | 0.412423 | 0.524428 |
| 11719963_HOMER3    | 0.04473  | 0.41245  | 0.524448 |
| 11744957_CPSF6     | -0.0357  | 0.412474 | 0.524465 |
| 11728335_ELL       | 0.040442 | 0.412622 | 0.524639 |
| 11727413_CLN8      | 0.048708 | 0.412642 | 0.524651 |
| 11732791_PRDM16    | -0.04516 | 0.412674 | 0.524678 |
| 11726981_CP        | 0.060686 | 0.412728 | 0.524717 |
| 11732417_FAM105A   | -0.08104 | 0.412745 | 0.524717 |
| 11719524_GATSL3    | -0.04092 | 0.412745 | 0.524717 |
| 11746712_IQSEC1    | -0.02962 | 0.412748 | 0.524717 |
| 11722037_CRYBA2    | -0.04637 | 0.412838 | 0.524808 |
| 11755536_LDB3      | 0.042533 | 0.412841 | 0.524808 |
| 11733975_DDHD2     | -0.03471 | 0.4129   | 0.52487  |
| 11760589_RGS12     | 0.042375 | 0.413045 | 0.52504  |
| 11718751_NPR2      | -0.03959 | 0.413094 | 0.525088 |
| 11739963_FDXACB1   | -0.0426  | 0.413198 | 0.525207 |
| 11745993_MAP7      | 0.050167 | 0.413274 | 0.525291 |
| 11725571_TAOK2     | -0.03821 | 0.413327 | 0.525344 |
| 11747625_NRK       | 0.041631 | 0.413356 | 0.525367 |

|                    |          |          |          |
|--------------------|----------|----------|----------|
| 11728685_FAM83A    | -0.03881 | 0.413404 | 0.525415 |
| 11738132_RNF212    | 0.039806 | 0.4135   | 0.525523 |
| 11742779_HIBCH     | -0.03324 | 0.413532 | 0.525541 |
| 11758651_SH3GL3    | -0.07122 | 0.413551 | 0.525541 |
| 11737471_ZNF213    | 0.060281 | 0.413552 | 0.525541 |
| 11736629_BTBD17    | -0.03751 | 0.413557 | 0.525541 |
| 11753218_PAXBP1    | 0.03272  | 0.413573 | 0.525547 |
| 11748767_TAGAP     | -0.03849 | 0.413608 | 0.525578 |
| 11740436_GRPR      | 0.100131 | 0.41378  | 0.525783 |
| 11742098_SEC61A2   | 0.081007 | 0.413824 | 0.525825 |
| 11752083_NLRP8     | -0.04903 | 0.413883 | 0.525886 |
| 11760333_ZFAND2B   | -0.06512 | 0.413965 | 0.525977 |
| 11725311_TMED7     | 0.030318 | 0.413991 | 0.525997 |
| 11760030_WDR90     | 0.038522 | 0.414049 | 0.526056 |
| 11751377_MBOAT2    | -0.03395 | 0.414087 | 0.526092 |
| 11736331_SLC2A11   | 0.047261 | 0.414197 | 0.526217 |
| 11758211_PM2OD2    | -0.03132 | 0.41424  | 0.526249 |
| 11728906_SATB2     | 0.052822 | 0.414244 | 0.526249 |
| 11757183_P3H3      | 0.032619 | 0.414351 | 0.526371 |
| 11740768_AGBL3     | -0.03667 | 0.41443  | 0.526458 |
| 11730703_LOC729966 | -0.03068 | 0.414443 | 0.526461 |
| 11760484_BTN2A2    | -0.03408 | 0.41484  | 0.526952 |
| 11746936_FKBP9     | -0.05267 | 0.414925 | 0.527046 |
| 11733983_GIF       | -0.05621 | 0.414986 | 0.527109 |
| 11762930_DKK4      | -0.08918 | 0.415097 | 0.527237 |
| 11761341_SLC9A1    | -0.05856 | 0.415176 | 0.527324 |
| 11746539_SPATA31C2 | 0.048653 | 0.415307 | 0.527476 |
| 11753656_RPS15A    | 0.028429 | 0.415352 | 0.52752  |
| 11736879_GPLD1     | 0.093534 | 0.415372 | 0.527524 |
| 11724565_TLN2      | -0.04086 | 0.415382 | 0.527524 |
| 11751047_CASC4     | -0.05772 | 0.415388 | 0.527524 |
| 11762094_ERMAP     | 0.048878 | 0.415426 | 0.52755  |
| 11737749_SGK1      | -0.04248 | 0.41543  | 0.52755  |
| 11748417_PROX1     | 0.098887 | 0.41547  | 0.527575 |
| 11720998_BIN2      | -0.05931 | 0.415471 | 0.527575 |
| 11750626_PREX2     | -0.07018 | 0.415493 | 0.527589 |
| 11759306_ZMYM2     | -0.05778 | 0.415678 | 0.52781  |
| 11747343_LOC105369 | -0.03711 | 0.415741 | 0.527877 |
| 11744645_TCN2      | -0.05816 | 0.415808 | 0.527948 |
| 11721844_MFAP5     | -0.07824 | 0.415822 | 0.527953 |
| 11745463_PRDX2     | 0.031385 | 0.415841 | 0.527963 |
| 11755234_CIDEA     | -0.05216 | 0.41591  | 0.528036 |
| 11722052_PLLP      | 0.059576 | 0.415975 | 0.528097 |
| 11764225_LOC102724 | 0.054242 | 0.415979 | 0.528097 |
| 11747515_SLC38A2   | 0.035726 | 0.416    | 0.52811  |
| 11758843_LOC101929 | -0.06834 | 0.416104 | 0.528229 |
| 11726673_ASCL1     | -0.07338 | 0.416217 | 0.528357 |
| 11746366_EPB41     | -0.03078 | 0.416269 | 0.52841  |
| 11744152_FBLN1     | -0.03206 | 0.416305 | 0.528442 |
| 11749920_RAB3B     | 0.05594  | 0.416358 | 0.528496 |
| 11732178_MYH11     | -0.08122 | 0.416407 | 0.528544 |

|                    |          |          |          |
|--------------------|----------|----------|----------|
| 11730143_EPHA5     | -0.08807 | 0.416428 | 0.528547 |
| 11738350_BCL2      | -0.04532 | 0.416431 | 0.528547 |
| 11762049_ZFYVE28   | 0.034123 | 0.416442 | 0.528547 |
| 11723749_FPGT-TNNI | -0.05685 | 0.416459 | 0.528549 |
| 11748530_CACFD1    | -0.05208 | 0.416474 | 0.528549 |
| 11721640_ABHD8     | -0.036   | 0.416476 | 0.528549 |
| 11752573_ZNF500    | -0.03161 | 0.416508 | 0.528576 |
| 11746501_ANKRD30BP | -0.04269 | 0.416639 | 0.528719 |
| 11738974_DEFB113   | -0.03552 | 0.416642 | 0.528719 |
| 11728150_MAX       | -0.06994 | 0.416659 | 0.528726 |
| 11731520_ZNF592    | 0.033759 | 0.416678 | 0.528737 |
| 11751170_BZW2      | -0.03191 | 0.416772 | 0.528842 |
| 11716702_SEMG1     | -0.10321 | 0.416798 | 0.528861 |
| 11758484_TEX36     | -0.03627 | 0.416826 | 0.528884 |
| 11730155_SGCD      | -0.03218 | 0.416865 | 0.528919 |
| 11733531_SLC35G1   | 0.042112 | 0.416913 | 0.528967 |
| 11758575_SFRP4     | 0.058768 | 0.416933 | 0.528978 |
| 11743696_CLEC14A   | -0.0412  | 0.417024 | 0.52908  |
| 11732181_PTAFR     | -0.03562 | 0.417048 | 0.529097 |
| 11740276_ACOT12    | -0.0366  | 0.417184 | 0.529255 |
| 11751539_LOC100134 | 0.038297 | 0.41724  | 0.529313 |
| 11719479_ALOX5AP   | -0.04263 | 0.417258 | 0.529322 |
| 11762159_EHBP1     | 0.083356 | 0.417423 | 0.529518 |
| 11756388_TRMT10C   | 0.030895 | 0.41748  | 0.529576 |
| 11748422_MAP1LC3B  | 0.029555 | 0.417504 | 0.52959  |
| 11726852_CECR6     | -0.05845 | 0.417516 | 0.52959  |
| 11761015_NDUFB9    | -0.03987 | 0.417523 | 0.52959  |
| 11743973_MRPL38    | -0.02995 | 0.417633 | 0.529715 |
| 11736702_MAP3K9    | -0.0579  | 0.417681 | 0.529762 |
| 11740107_ENAH      | -0.03333 | 0.417753 | 0.529839 |
| 11732471_DCAF4L2   | 0.085718 | 0.417769 | 0.529846 |
| 11742090_KDM8      | -0.04552 | 0.417865 | 0.529954 |
| 11755204_CTAG2     | -0.04449 | 0.418006 | 0.53012  |
| 11757527_ANAPC7    | 0.031893 | 0.418084 | 0.530204 |
| 11761597_TDRD1     | 0.068422 | 0.41811  | 0.530224 |
| 11740752_FOLR2     | -0.06347 | 0.418139 | 0.530246 |
| 11745623_FRMPD4    | -0.04105 | 0.418165 | 0.530265 |
| 11716835_DHRS3     | -0.03729 | 0.418197 | 0.530293 |
| 11716879_B4GALT5   | -0.0388  | 0.418267 | 0.530368 |
| 11760721_TRIM61    | 0.057277 | 0.418316 | 0.530416 |
| 11752285_TBC1D1    | -0.03443 | 0.418382 | 0.530486 |
| 11720091_MINPP1    | 0.036178 | 0.418432 | 0.530536 |
| 11742257_PTGER3    | 0.091252 | 0.418443 | 0.530536 |
| 11737980_DAND5     | -0.04652 | 0.418515 | 0.530613 |
| 11722950_CIART     | 0.058638 | 0.418654 | 0.530776 |
| 11735808_VPREB1    | 0.084616 | 0.418709 | 0.530826 |
| 11737187_ADGRF3    | 0.075367 | 0.418715 | 0.530826 |
| 11731332_ZIC1      | -0.04813 | 0.418833 | 0.530961 |
| 11753049_VPS53     | 0.048607 | 0.418848 | 0.530967 |
| 11720568_PPFIA3    | -0.04358 | 0.418936 | 0.531065 |
| 11723423_IFNAR1    | -0.03674 | 0.418952 | 0.531067 |

|                    |          |          |          |
|--------------------|----------|----------|----------|
| 11739678_NTRK2     | -0.03596 | 0.418966 | 0.531067 |
| 11761190_SDHAP1 // | -0.04996 | 0.418971 | 0.531067 |
| 11729773_PPEF1     | 0.065187 | 0.418988 | 0.531076 |
| 11750618_CORO7     | -0.03274 | 0.419035 | 0.531121 |
| 11720834_APIP      | -0.03153 | 0.41907  | 0.531151 |
| 11764026_PPARG     | -0.05027 | 0.419108 | 0.531186 |
| 11747623_ARHGAP25  | 0.039098 | 0.419145 | 0.531207 |
| 11719482_MRPL21    | -0.02817 | 0.419146 | 0.531207 |
| 11752106_CEACAM5   | 0.091786 | 0.419186 | 0.531243 |
| 11718076_MAPKAPK3  | -0.04063 | 0.419224 | 0.531278 |
| 11715348_HBB       | -0.04376 | 0.419259 | 0.531309 |
| 11719083_TRUB2     | -0.03272 | 0.419283 | 0.531325 |
| 11752070_KCNQ5     | -0.05897 | 0.419438 | 0.531508 |
| 11735025_ZBTB7B    | 0.034479 | 0.419597 | 0.531685 |
| 11726092_PLBD2     | -0.06279 | 0.419599 | 0.531685 |
| 11744125_SCYL1     | -0.04655 | 0.419637 | 0.531718 |
| 11722233_PIAS4     | 0.040546 | 0.419651 | 0.531722 |
| 11729650_TXN2      | 0.029262 | 0.419671 | 0.531734 |
| 11730701_C11orf49  | 0.057365 | 0.419755 | 0.531826 |
| 11726391_MZF1      | -0.03631 | 0.419787 | 0.531854 |
| 11756683_CD1E      | 0.072603 | 0.419839 | 0.531903 |
| 11732473_CIDEA     | -0.04967 | 0.419848 | 0.531903 |
| 11754001_SUN3      | 0.048199 | 0.419866 | 0.531913 |
| 11728115_ZNF213    | 0.039776 | 0.419925 | 0.531968 |
| 11754968_PITPNM2   | -0.03589 | 0.419932 | 0.531968 |
| 11757580_UBXN1     | -0.02866 | 0.419969 | 0.532002 |
| 11718713_SFSWAP    | 0.032915 | 0.42003  | 0.532065 |
| 11741218_EDARADD   | -0.07155 | 0.420085 | 0.532121 |
| 11741220_MYOT      | 0.063058 | 0.420116 | 0.532133 |
| 11742781_SMARCC1   | 0.031706 | 0.420117 | 0.532133 |
| 11715137_SRX2B /// | 0.046305 | 0.420236 | 0.53227  |
| 11752640_CDH23     | -0.07909 | 0.420268 | 0.532298 |
| 11718515_SQRDL     | 0.031666 | 0.420301 | 0.532326 |
| 11735901_PRAMEF11  | 0.056174 | 0.420382 | 0.532414 |
| 11758910_RTKN      | -0.09119 | 0.420396 | 0.532418 |
| 11737475_MAB21L3   | 0.065392 | 0.420419 | 0.532422 |
| 11744731_FLVCR1-AS | -0.03104 | 0.420421 | 0.532422 |
| 11762474_PTPRG     | 0.101254 | 0.420552 | 0.532574 |
| 11735877_NR2C1     | 0.029507 | 0.420641 | 0.532673 |
| 11749760_GABRB3    | 0.080914 | 0.420708 | 0.532744 |
| 11741529_ACP1      | -0.05485 | 0.420742 | 0.532763 |
| 11733968_ELF5      | -0.03788 | 0.420754 | 0.532763 |
| 11728606_GRIN2D    | -0.05091 | 0.420755 | 0.532763 |
| 11752716_CCNI      | -0.03054 | 0.420801 | 0.532799 |
| 11746688_LOC100288 | -0.07314 | 0.420806 | 0.532799 |
| 11731040_MAGEA8    | -0.04577 | 0.42095  | 0.532966 |
| 11758331_LINC00266 | -0.04287 | 0.42096  | 0.532966 |
| 11747481_BRD9      | 0.039291 | 0.421019 | 0.533028 |
| 11742625_OR10V1    | -0.04542 | 0.421076 | 0.533066 |
| 11745244_IGHG1 /// | -0.03676 | 0.42109  | 0.533066 |
| 11734451_SULT1B1   | 0.052314 | 0.421104 | 0.533066 |

|                    |          |          |          |
|--------------------|----------|----------|----------|
| 11733135_HNRNPLL   | 0.050829 | 0.421107 | 0.533066 |
| 11738735_VN1R4     | -0.08185 | 0.421112 | 0.533066 |
| 11759375_ASBI1     | 0.054375 | 0.421115 | 0.533066 |
| 11728416_ELMOD1 // | -0.04885 | 0.421151 | 0.533098 |
| 11761369_RAPGEF5   | -0.07404 | 0.421175 | 0.533115 |
| 11733323_TRDN      | 0.130927 | 0.421222 | 0.53316  |
| 11761814_TRAPPC8   | -0.13315 | 0.421255 | 0.533188 |
| 11746957_TNFRSF10C | -0.1285  | 0.421274 | 0.533199 |
| 11753595_GPRI82 // | -0.07877 | 0.421313 | 0.533229 |
| 11740945_TAS1R3    | -0.02835 | 0.42132  | 0.533229 |
| 11737362_IL23R     | 0.055621 | 0.421401 | 0.533318 |
| 11725130_TCEAL3 // | -0.0392  | 0.42148  | 0.533404 |
| 11741790_ABHD11    | 0.037485 | 0.421499 | 0.533414 |
| 11731556_SYNPO2    | -0.05915 | 0.421532 | 0.533442 |
| 11715468_TUFM      | -0.03105 | 0.421632 | 0.533555 |
| 11746789_WDR12     | 0.030522 | 0.421705 | 0.53363  |
| 11758019_NEURL1    | -0.04951 | 0.421713 | 0.53363  |
| 11733150_COX18     | -0.03412 | 0.421762 | 0.533678 |
| 11731765_LGALS12   | -0.07559 | 0.421785 | 0.533693 |
| 11727177_TMCO2     | 0.041321 | 0.421858 | 0.533753 |
| 11722698_STUB1     | 0.02939  | 0.421861 | 0.533753 |
| 11720466_ARL6IP1   | -0.02843 | 0.421869 | 0.533753 |
| 11715332_NXNL2     | 0.075311 | 0.421876 | 0.533753 |
| 11739760_ASBI0     | -0.04627 | 0.422013 | 0.533912 |
| 11716806_PLEKHA2   | 0.040515 | 0.422047 | 0.533938 |
| 11729651_GABRD     | -0.05879 | 0.422055 | 0.533938 |
| 11762752_LETM2     | 0.062151 | 0.422105 | 0.533988 |
| 11734119_THRA      | -0.03456 | 0.422128 | 0.534003 |
| 11741786_TSPAN16   | -0.07049 | 0.422285 | 0.534188 |
| 11727274_SHROOM2   | 0.033593 | 0.422308 | 0.534202 |
| 11724780_MRPS17    | 0.032527 | 0.422446 | 0.534363 |
| 11750867_ZNF852    | 0.042909 | 0.422459 | 0.534366 |
| 11762782_RPL18A    | -0.04109 | 0.422542 | 0.534457 |
| 11715148_HIST2H2AB | 0.065618 | 0.42258  | 0.534477 |
| 11720644_PECAM1    | -0.03222 | 0.422587 | 0.534477 |
| 11733950_GBP4      | 0.040643 | 0.42259  | 0.534477 |
| 11735801_DDX53     | 0.062963 | 0.422614 | 0.53448  |
| 11750458_CA3       | 0.07983  | 0.422615 | 0.53448  |
| 11741757_SCARF1    | -0.06949 | 0.42266  | 0.534524 |
| 11750316_AACSP1    | 0.070076 | 0.42283  | 0.534713 |
| 11742546_OR52I1    | -0.08489 | 0.422832 | 0.534713 |
| 11752306_AGTPBP1   | -0.05466 | 0.422957 | 0.534836 |
| 11741604_HIVEP3    | -0.04271 | 0.42296  | 0.534836 |
| 11745809_KIAA0040  | -0.04194 | 0.422966 | 0.534836 |
| 11746417_FASTK     | -0.04798 | 0.422973 | 0.534836 |
| 11750591_PPL       | -0.04191 | 0.423017 | 0.534878 |
| 11736497_TNRC6B    | 0.031629 | 0.423106 | 0.534977 |
| 11758326_THEM4     | 0.033143 | 0.423142 | 0.535009 |
| 11757103_ADGRF5    | -0.04879 | 0.423183 | 0.535046 |
| 11715303_CEMP1     | 0.05051  | 0.423211 | 0.535068 |
| 11725663_SLC16A14  | 0.086412 | 0.423312 | 0.535182 |

|                    |          |          |          |
|--------------------|----------|----------|----------|
| 11724534_DOK5      | -0.07807 | 0.423392 | 0.535269 |
| 11743010_NFIL3     | -0.0404  | 0.423408 | 0.535276 |
| 11731743_TRDMT1    | 0.047456 | 0.42347  | 0.53534  |
| 11749007_RIMS1     | 0.058658 | 0.423557 | 0.535436 |
| 11744279_REG4      | 0.067423 | 0.423702 | 0.535605 |
| 11726935_HOXB4     | 0.034906 | 0.423753 | 0.535644 |
| 11738475_PARP15    | 0.052522 | 0.423754 | 0.535644 |
| 11748025_GJB2      | -0.0796  | 0.4238   | 0.535682 |
| 11743180_NPAT      | 0.037335 | 0.423806 | 0.535682 |
| 11744571_PDSS2     | -0.06494 | 0.423841 | 0.535707 |
| 11717442_ARFGAP3   | -0.03116 | 0.423848 | 0.535707 |
| 11731527_TRIM63    | -0.05957 | 0.423876 | 0.535729 |
| 11740774_MCF2L2    | 0.044015 | 0.423995 | 0.535866 |
| 11719253_CDK19     | -0.04881 | 0.424054 | 0.535912 |
| 11735100_C2orf73   | -0.08622 | 0.424054 | 0.535912 |
| 11735739_RASA3     | 0.033566 | 0.424097 | 0.535952 |
| 11744453_TMBIM4    | 0.031216 | 0.424143 | 0.535987 |
| 11721561_AHCYL2    | 0.035197 | 0.424146 | 0.535987 |
| 11715454_KISS1     | 0.043043 | 0.424259 | 0.536113 |
| 11734308_IL10      | 0.045141 | 0.424268 | 0.536113 |
| 11730426_ZNRF4     | -0.04719 | 0.424305 | 0.536146 |
| 11724513_SULT4A1   | -0.05889 | 0.42435  | 0.536189 |
| 11729487_RGS6      | -0.03228 | 0.424365 | 0.536194 |
| 11761266_HAVCR2    | 0.063213 | 0.424465 | 0.536307 |
| 11756873_ALDH8A1   | 0.082428 | 0.424488 | 0.536322 |
| 11754357_FLNBB     | 0.037784 | 0.424502 | 0.536326 |
| 11745529_WDR90     | 0.02869  | 0.424601 | 0.536438 |
| 11741905_DEFB105A  | -0.07714 | 0.424632 | 0.536463 |
| 11720072_RING1     | 0.059987 | 0.424757 | 0.536607 |
| 11745099_DHX38     | 0.032117 | 0.424792 | 0.536637 |
| 11729268_STAC3     | -0.03517 | 0.424845 | 0.53669  |
| 11724437_CCDC24    | 0.03752  | 0.424857 | 0.536691 |
| 11748591_COPB2     | 0.032572 | 0.424895 | 0.536725 |
| 11742463_VAX1      | 0.051206 | 0.424915 | 0.536736 |
| 11751086_GBA       | 0.041048 | 0.424929 | 0.53674  |
| 11753437_MED25     | -0.07979 | 0.425009 | 0.536827 |
| 11735987_MT4       | -0.07307 | 0.42503  | 0.53684  |
| 11749797_MLH3      | 0.062806 | 0.425059 | 0.536863 |
| 11719375_METTL7A   | -0.07533 | 0.425101 | 0.536902 |
| 11752959_ACTG1     | 0.033154 | 0.425191 | 0.537002 |
| 11724046_BID       | 0.033659 | 0.425293 | 0.537109 |
| 11756101_FAM120C   | -0.07123 | 0.425298 | 0.537109 |
| 11762707_LINCO1588 | -0.0438  | 0.425313 | 0.537115 |
| 11724960_CDK14     | -0.03365 | 0.425349 | 0.537146 |
| 11748691_KIAA0319L | 0.04152  | 0.425401 | 0.537197 |
| 11719076_REEP1     | -0.0576  | 0.425421 | 0.537209 |
| 11750835_PHACTR1   | 0.059218 | 0.425443 | 0.537213 |
| 11761213_FIBP      | -0.04582 | 0.425446 | 0.537213 |
| 11759462_ZNF883    | 0.099995 | 0.425713 | 0.537527 |
| 11762101_CLEC12A   | -0.05351 | 0.42572  | 0.537527 |
| 11718626_TRAK1     | -0.03555 | 0.425727 | 0.537527 |

|                    |          |          |          |
|--------------------|----------|----------|----------|
| 11735451_UCP3      | 0.075803 | 0.425793 | 0.537595 |
| 11744213_TRAFD1    | 0.0325   | 0.425821 | 0.537617 |
| 11743979_UQCRC1    | -0.03272 | 0.425842 | 0.537629 |
| 11728456_RAB33B    | 0.063781 | 0.425919 | 0.537704 |
| 11744959_SCAF8     | -0.03724 | 0.425923 | 0.537704 |
| 11756648_SLC25A14  | 0.030038 | 0.42597  | 0.537749 |
| 11720524_HPS4      | -0.04735 | 0.42611  | 0.537913 |
| 11742066_FZR1      | -0.05631 | 0.426172 | 0.537951 |
| 11726786_NKAPL     | -0.03391 | 0.426173 | 0.537951 |
| 11759279_OR10G8    | 0.078593 | 0.426184 | 0.537951 |
| 11751978_ZNF280B   | 0.068231 | 0.426185 | 0.537951 |
| 11754561_MRPL28    | -0.03133 | 0.426236 | 0.538002 |
| 11737570_S100A5    | 0.047958 | 0.426279 | 0.538042 |
| 11733285_DERL3     | -0.03535 | 0.426386 | 0.538163 |
| 11737285_SDR9C7    | -0.05482 | 0.426415 | 0.538186 |
| 11744920_ODF3B     | -0.05097 | 0.426518 | 0.538301 |
| 11721952_MRAP2     | -0.03766 | 0.426528 | 0.538301 |
| 11752981_WBP2      | -0.03107 | 0.426584 | 0.538358 |
| 11746180_CD55      | 0.034845 | 0.426642 | 0.538408 |
| 11763262_DCN       | -0.04761 | 0.426656 | 0.538408 |
| 11750955_GABRR1    | -0.05817 | 0.426657 | 0.538408 |
| 11745813_DBNDD1    | 0.045117 | 0.426674 | 0.538415 |
| 11741562_MME       | -0.03775 | 0.42671  | 0.538447 |
| 11761518_AIG1      | -0.04904 | 0.426802 | 0.538549 |
| 11721976_TPSAB1 // | -0.0393  | 0.426844 | 0.538589 |
| 11716505_CUL3      | -0.04898 | 0.426865 | 0.5386   |
| 11725417_LPCAT2    | 0.044806 | 0.426875 | 0.5386   |
| 11717908_FAM136A   | 0.030809 | 0.426969 | 0.538704 |
| 11738730_OR5A1     | -0.07269 | 0.427006 | 0.538738 |
| 11750878_ISM2      | 0.03062  | 0.427077 | 0.538813 |
| 11736046_ANTXR2    | 0.061193 | 0.427138 | 0.538876 |
| 11735884_NF2       | 0.037711 | 0.427156 | 0.538884 |
| 11719464_RPS6      | 0.030327 | 0.427209 | 0.538938 |
| 11748363_CELSR1    | -0.09152 | 0.427233 | 0.538954 |
| 11736294_FGFBP3    | -0.07528 | 0.427262 | 0.538966 |
| 11762566_BTC       | -0.06804 | 0.427266 | 0.538966 |
| 11732795_TMEM184A  | 0.037934 | 0.427275 | 0.538966 |
| 11740578_C4orf19   | 0.089021 | 0.427288 | 0.538968 |
| 11735147_MMEL1     | 0.062702 | 0.427504 | 0.539226 |
| 11752329_DNAI2     | 0.038729 | 0.427526 | 0.539241 |
| 11750049_LILRB5    | -0.05551 | 0.427627 | 0.539354 |
| 11738339_DYNAP     | -0.09629 | 0.427641 | 0.539357 |
| 11758418_FAM219B   | 0.04369  | 0.427709 | 0.539429 |
| 11750432_CCT3      | 0.030717 | 0.427735 | 0.539448 |
| 11740468_MAGIX     | -0.06588 | 0.42775  | 0.539452 |
| 11747109_CDH23     | -0.03577 | 0.42776  | 0.539452 |
| 11735648_FAM186A   | -0.03797 | 0.427786 | 0.53946  |
| 11747132_LOC101927 | -0.0438  | 0.427789 | 0.53946  |
| 11755601_CCL13     | -0.04981 | 0.427815 | 0.539479 |
| 11726857_ADAMTS5   | 0.060532 | 0.427871 | 0.539536 |
| 11760014_PTPN7     | -0.0565  | 0.427951 | 0.539609 |



|                    |          |          |          |
|--------------------|----------|----------|----------|
| 11761387_CREB3L4   | -0.06755 | 0.427951 | 0.539609 |
| 11754927_PRKACB    | 0.071676 | 0.427999 | 0.539656 |
| 11745118_SLC45A2   | -0.06989 | 0.428011 | 0.539657 |
| 11741739_KRT37     | -0.03754 | 0.42803  | 0.539657 |
| 11760759_UCHL5     | 0.072699 | 0.428033 | 0.539657 |
| 11746082_ANO4      | 0.066603 | 0.428067 | 0.539686 |
| 11731041_FBXO24    | -0.05062 | 0.428225 | 0.539866 |
| 11728468_MAST1     | -0.04561 | 0.428232 | 0.539866 |
| 11726586_MAGEE1    | -0.07815 | 0.428259 | 0.539886 |
| 11752027_DLEC1     | -0.05894 | 0.428292 | 0.539913 |
| 11716111_PIGR      | 0.045944 | 0.428372 | 0.539983 |
| 11760076_FMN2      | -0.0568  | 0.428378 | 0.539983 |
| 11719900_TRRAP     | 0.049031 | 0.42838  | 0.539983 |
| 11729147_SMDT1     | -0.0393  | 0.42843  | 0.540032 |
| 11736472_ERBB2     | -0.03766 | 0.42845  | 0.540043 |
| 11741998_OR5L1 /// | -0.06757 | 0.428461 | 0.540043 |
| 11758258_MYPOP     | 0.02828  | 0.428495 | 0.540072 |
| 11735321_MGAT5B    | -0.04483 | 0.42854  | 0.540115 |
| 11757667_APOA2     | -0.04722 | 0.428596 | 0.540172 |
| 11754543_CH507-42P | 0.053073 | 0.428667 | 0.540246 |
| 11723645_PLN       | -0.07529 | 0.428771 | 0.540364 |
| 11760910_ZSCAN16   | 0.106816 | 0.428813 | 0.540401 |
| 11719392_RNF14     | 0.033763 | 0.428822 | 0.540401 |
| 11746398_PIGT      | 0.033326 | 0.428852 | 0.540424 |
| 11761401_NIFK      | 0.032436 | 0.429218 | 0.540872 |
| 11740402_SMC03     | -0.07026 | 0.429288 | 0.540946 |
| 11730430_DUSP18    | -0.07933 | 0.42936  | 0.541023 |
| 11737235_USP6      | -0.03495 | 0.429465 | 0.541141 |
| 11748800_POU2F2    | 0.075249 | 0.429512 | 0.541187 |
| 11736505_TECL      | 0.050248 | 0.429524 | 0.541187 |
| 11741563_AMBRA1    | -0.0354  | 0.429629 | 0.541294 |
| 11754850_RTN4IP1   | -0.04388 | 0.429631 | 0.541294 |
| 11743328_RBBP6     | -0.03823 | 0.429671 | 0.541331 |
| 11728116_DNAH10    | -0.05909 | 0.429687 | 0.541337 |
| 11740914_LINGO3    | 0.044495 | 0.429711 | 0.541354 |
| 11728341_CTRL      | 0.057224 | 0.429779 | 0.541426 |
| 11758722_DCTN2     | -0.08295 | 0.429842 | 0.54149  |
| 11750819_PODN      | -0.02822 | 0.429879 | 0.541523 |
| 11753884_ENTPD6    | 0.031895 | 0.429892 | 0.541525 |
| 11758180_LOC100128 | 0.039308 | 0.42991  | 0.541525 |
| 11737502_TRPC5     | -0.08486 | 0.429914 | 0.541525 |
| 11721416_KMT5B     | -0.03472 | 0.429966 | 0.541577 |
| 11743740_LIN7C     | -0.03452 | 0.429993 | 0.541597 |
| 11748944_KIF21A    | -0.03067 | 0.430062 | 0.541665 |
| 11737213_LINC01465 | 0.117588 | 0.43007  | 0.541665 |
| 11755318_CDK13     | -0.03147 | 0.430086 | 0.541665 |
| 11749768_UVSSA     | 0.039091 | 0.430091 | 0.541665 |
| 11725443_TCEAL7    | -0.0895  | 0.430162 | 0.54174  |
| 11736180_RBBP5     | 0.040874 | 0.430202 | 0.541776 |
| 11732553_ENKUR     | -0.07474 | 0.430264 | 0.54183  |
| 11722267_EXOC2     | -0.03707 | 0.430266 | 0.54183  |

|                   |          |          |          |
|-------------------|----------|----------|----------|
| 11717322_UPF1     | -0.03913 | 0.430379 | 0.541957 |
| 11723498_RHBDD1   | -0.04754 | 0.430428 | 0.542005 |
| 11739585_PRKD3    | 0.042279 | 0.430464 | 0.542037 |
| 11761435_CIAPIN1  | -0.05073 | 0.430505 | 0.542074 |
| 11730224_POLDIP2  | 0.027467 | 0.430587 | 0.542163 |
| 11731617_SIDT1    | -0.05173 | 0.430606 | 0.542173 |
| 11720168_SELL     | -0.03115 | 0.430662 | 0.542226 |
| 11759370_CYP4A11  | -0.05653 | 0.43067  | 0.542226 |
| 11762233_ICAM3    | -0.05098 | 0.430689 | 0.542236 |
| 11736689_TDRD1    | 0.050582 | 0.430702 | 0.542239 |
| 11745909_AKIP1    | -0.03579 | 0.430729 | 0.542243 |
| 11723100_CA14     | -0.06197 | 0.430734 | 0.542243 |
| 11739657_LTB      | 0.046492 | 0.430739 | 0.542243 |
| 11754523_DPM1     | -0.03319 | 0.430763 | 0.542259 |
| 11749198_PCSK4    | -0.05184 | 0.430799 | 0.542291 |
| 11726080_GALNT15  | -0.04729 | 0.430877 | 0.542372 |
| 11718152_PPFIBP2  | 0.055165 | 0.430886 | 0.542372 |
| 11722987_ZMYND15  | -0.03142 | 0.430908 | 0.542386 |
| 11760521_ATPAF2   | -0.05668 | 0.430992 | 0.542473 |
| 11732354_HLA-F    | 0.08667  | 0.430999 | 0.542473 |
| 11737607_C9orf170 | -0.03328 | 0.431045 | 0.542517 |
| 11720287_CDC42BPA | 0.045563 | 0.431109 | 0.542583 |
| 11728005_CDKL2    | 0.045594 | 0.43112  | 0.542584 |
| 11721812_VWA1     | -0.02993 | 0.431176 | 0.54264  |
| 11725465_LRRC28   | -0.06012 | 0.43119  | 0.542644 |
| 11728057_CASP10   | -0.05266 | 0.431236 | 0.542688 |
| 11742318_OR6K6    | -0.06291 | 0.431343 | 0.542808 |
| 11760311_SCLY     | 0.038517 | 0.431396 | 0.542859 |
| 11760168_NPC2     | -0.02862 | 0.431406 | 0.542859 |
| 11741524_C22orf24 | 0.054464 | 0.431439 | 0.542887 |
| 11762090_HLA-F    | 0.052045 | 0.431485 | 0.542918 |
| 11717560_SLC02A1  | -0.0305  | 0.431486 | 0.542918 |
| 11734831_SUV39H2  | -0.03753 | 0.431556 | 0.542986 |
| 11730172_GRM3     | -0.05472 | 0.431572 | 0.542986 |
| 11760578_LETM2    | 0.073949 | 0.431579 | 0.542986 |
| 11746095_PPIG     | -0.03823 | 0.431585 | 0.542986 |
| 11723339_CTSG     | -0.05299 | 0.431681 | 0.543093 |
| 11735885_KCNH7    | -0.06012 | 0.431737 | 0.54315  |
| 11728209_PPP2R2C  | -0.03441 | 0.431838 | 0.543254 |
| 11724305_TEF      | -0.03623 | 0.431842 | 0.543254 |
| 11751690_AQP7     | -0.05656 | 0.431855 | 0.543257 |
| 11736725_SPECC1   | -0.06158 | 0.431905 | 0.543305 |
| 11718079_BCL2L11  | -0.03974 | 0.431985 | 0.543377 |
| 11720329_RNMTL1   | -0.03752 | 0.432001 | 0.543377 |
| 11751530_RASA3    | -0.03746 | 0.432003 | 0.543377 |
| 11754748_GFAP     | -0.04213 | 0.432007 | 0.543377 |
| 11758814_NSA2     | 0.027739 | 0.432075 | 0.543449 |
| 11742188_SLC4A4   | -0.11295 | 0.43218  | 0.543561 |
| 11748398_RUNDC1   | 0.044226 | 0.432186 | 0.543561 |
| 11729112_GP2      | -0.04706 | 0.432269 | 0.54364  |
| 11759152_CYSLTR1  | -0.05148 | 0.432271 | 0.54364  |

|                    |          |          |          |
|--------------------|----------|----------|----------|
| 11733590_SV2C      | -0.0636  | 0.432368 | 0.543743 |
| 11760145_DRG2      | -0.04541 | 0.43239  | 0.543743 |
| 11721152_STK3      | 0.037835 | 0.432392 | 0.543743 |
| 11760457_CEP41     | -0.03504 | 0.432398 | 0.543743 |
| 11746273_DUS4L     | 0.034535 | 0.432485 | 0.543825 |
| 11746923_HSPB6     | -0.04074 | 0.432485 | 0.543825 |
| 11750497_ZP2       | -0.03447 | 0.432574 | 0.543923 |
| 11752809_PPFIA2    | -0.04655 | 0.432594 | 0.543934 |
| 11734562_WBSCR17   | -0.05455 | 0.432635 | 0.543971 |
| 11760859_SAFB      | -0.06522 | 0.432664 | 0.543994 |
| 11760930_ACAD8     | -0.03992 | 0.432718 | 0.544048 |
| 11744530_SEMA4G    | -0.04214 | 0.432833 | 0.544178 |
| 11741319_TCP1      | -0.04268 | 0.433081 | 0.544477 |
| 11721623_MEOX1     | -0.08744 | 0.433101 | 0.544487 |
| 11762288_FSCN3     | -0.0616  | 0.433154 | 0.54454  |
| 11740758_MIR99AHG  | -0.07903 | 0.43326  | 0.544659 |
| 11726078_GALNT15   | -0.07252 | 0.433301 | 0.544697 |
| 11732608_NBPF3     | -0.04088 | 0.433334 | 0.544717 |
| 11741831_C10orf53  | -0.09278 | 0.433348 | 0.544717 |
| 11716534_PPT1      | 0.02744  | 0.433351 | 0.544717 |
| 11748599_TP53      | 0.032869 | 0.433404 | 0.544763 |
| 11735125_CNKSR3 // | -0.03821 | 0.433409 | 0.544763 |
| 11748794_IL23R     | 0.051765 | 0.433456 | 0.544808 |
| 11732507_ESYT3     | 0.096274 | 0.433549 | 0.54491  |
| 11740091_TMEM163   | 0.051478 | 0.433562 | 0.544912 |
| 11753794_NCMAP     | -0.04178 | 0.43359  | 0.544915 |
| 11727185_DRC1      | -0.08751 | 0.433595 | 0.544915 |
| 11728382_CRX       | 0.052098 | 0.433597 | 0.544915 |
| 11761210_SDS       | -0.04661 | 0.433618 | 0.544927 |
| 11738653_KRTAP24-1 | 0.062203 | 0.433677 | 0.544983 |
| 11744970_CD1A      | -0.07205 | 0.433685 | 0.544983 |
| 11742999_PRDX6     | 0.032668 | 0.433715 | 0.544994 |
| 11730913_ARHGAP12  | -0.03392 | 0.433716 | 0.544994 |
| 11760703_ZFAND2B   | -0.05087 | 0.43373  | 0.544998 |
| 11727870_PPM1K     | 0.049712 | 0.433745 | 0.545002 |
| 11735711_CSNK1G2   | -0.02882 | 0.433783 | 0.545027 |
| 11717929_FOLR1     | -0.04553 | 0.433787 | 0.545027 |
| 11716491_SERPINA3  | -0.03247 | 0.433804 | 0.545035 |
| 11724130_GFRA1     | 0.0614   | 0.43382  | 0.54504  |
| 11761691_OSGEPL1   | -0.04038 | 0.433915 | 0.545138 |
| 11728628_DACH2     | -0.07981 | 0.43392  | 0.545138 |
| 11732265_LILRB1    | -0.08379 | 0.433995 | 0.545219 |
| 11762830_PARPBP    | -0.07402 | 0.434067 | 0.545295 |
| 11736558_TMEM121   | -0.02959 | 0.43411  | 0.545334 |
| 11732879_DPF1      | 0.032453 | 0.434211 | 0.545448 |
| 11760166_GPC6      | 0.055015 | 0.434265 | 0.545501 |
| 11736721_RPL32     | 0.050314 | 0.434318 | 0.545548 |
| 11738094_ST8SIA6   | 0.064951 | 0.434324 | 0.545548 |
| 11742064_SLC01C1   | 0.046064 | 0.434337 | 0.54555  |
| 11721786_ESR1      | 0.060403 | 0.434377 | 0.545573 |
| 11723379_CEP170B   | -0.03037 | 0.434378 | 0.545573 |

|                    |          |          |          |
|--------------------|----------|----------|----------|
| 11739321_ATG12     | -0.03977 | 0.434473 | 0.545679 |
| 11725227_P2RY6     | -0.04941 | 0.434488 | 0.545683 |
| 11733404_CLDN19    | -0.0656  | 0.43475  | 0.545994 |
| 11734332_LINC01559 | -0.04055 | 0.434763 | 0.545994 |
| 11755275_WHSC1L1   | -0.0371  | 0.434769 | 0.545994 |
| 11763934_LILRP2    | -0.06329 | 0.434786 | 0.546002 |
| 11742012_SLC05A1   | 0.067996 | 0.434953 | 0.546197 |
| 11730122_TACR1     | -0.06875 | 0.435047 | 0.546299 |
| 11718078_BCL2L11   | 0.046427 | 0.435056 | 0.546299 |
| 11740397_SSTR3     | -0.05114 | 0.435197 | 0.546462 |
| 11758746_MGP       | 0.044659 | 0.43522  | 0.546477 |
| 11762289_HSPA14    | -0.04457 | 0.435329 | 0.5466   |
| 11752762_LOC100288 | 0.037389 | 0.43539  | 0.546661 |
| 11763733_FMNL1     | 0.037723 | 0.435508 | 0.546796 |
| 11718803_PDCD10    | 0.030687 | 0.435547 | 0.546829 |
| 11762547_AGAP1     | 0.070319 | 0.435557 | 0.546829 |
| 11718903_FILIP1L   | 0.050972 | 0.435621 | 0.546895 |
| 11757035_ACKR1     | 0.061983 | 0.435686 | 0.546951 |
| 11747615_KANSL3    | -0.05289 | 0.435688 | 0.546951 |
| 11751995_ADGRG2    | 0.072391 | 0.435768 | 0.547026 |
| 11759046_ABCB1     | -0.02713 | 0.43577  | 0.547026 |
| 11720450_RNF43     | 0.055038 | 0.435891 | 0.547165 |
| 11720896_SEMA4C    | -0.04787 | 0.435934 | 0.547204 |
| 11755287_KRT8      | 0.035943 | 0.435989 | 0.547239 |
| 11749018_CCDC120   | -0.05585 | 0.435989 | 0.547239 |
| 11732740_ARSB      | -0.03568 | 0.435996 | 0.547239 |
| 11721202_RNASE6    | 0.063547 | 0.436007 | 0.547239 |
| 11734603_CYSRT1    | 0.045283 | 0.436017 | 0.547239 |
| 11743378_NIN       | -0.05809 | 0.436035 | 0.547246 |
| 11737725_CNTN5     | 0.069116 | 0.436131 | 0.547354 |
| 11742508_MSANTD1   | -0.04658 | 0.436185 | 0.547407 |
| 11725544_SP6       | -0.0526  | 0.436203 | 0.547416 |
| 11738832_RIPPLY3   | -0.02796 | 0.43623  | 0.547435 |
| 11758289_RPS16     | 0.02725  | 0.436288 | 0.547481 |
| 11725394_LRCH4 /// | -0.03164 | 0.436289 | 0.547481 |
| 11750322_BPIFA4P   | -0.04901 | 0.436301 | 0.547482 |
| 11756786_SLC38A9   | 0.038058 | 0.43633  | 0.547493 |
| 11733673_TMPPE     | -0.04308 | 0.436332 | 0.547493 |
| 11727025_FLAD1     | 0.033818 | 0.436411 | 0.547578 |
| 11724179_DNAJB5    | -0.0311  | 0.436531 | 0.547714 |
| 200061_PMRPS24     | 0.027196 | 0.436547 | 0.547721 |
| 11726397_ANOS1     | -0.04451 | 0.43657  | 0.547735 |
| 11737752_PGK2      | 0.067367 | 0.436581 | 0.547735 |
| 11751987_STXBP5L   | -0.07169 | 0.436599 | 0.547743 |
| 11763540_SLC25A47  | -0.04505 | 0.43664  | 0.547781 |
| 11753901_NSUN5P1   | 0.045528 | 0.436663 | 0.547795 |
| 11731298_NEUROD4   | 0.030374 | 0.436761 | 0.547905 |
| 11735280_HOXA3     | -0.05887 | 0.436818 | 0.54796  |
| 11735165_OSBPL5    | -0.05341 | 0.436828 | 0.54796  |
| 11733753_PGLYRP3   | 0.039169 | 0.436941 | 0.548089 |
| 11725545_OPCML     | 0.045965 | 0.436961 | 0.548099 |

|                    |          |          |          |
|--------------------|----------|----------|----------|
| 11750586_CSMD1     | 0.040057 | 0.437166 | 0.548334 |
| 11760610_KIAA0895  | 0.067221 | 0.43717  | 0.548334 |
| 11760117_SSU72     | 0.054434 | 0.437216 | 0.548377 |
| 11752776_ANKS1A    | -0.03349 | 0.437258 | 0.548408 |
| 11763252_PSPH      | -0.05511 | 0.437263 | 0.548408 |
| 11724539_CABS1     | 0.063972 | 0.437304 | 0.548445 |
| 11752954_RUNX3     | -0.04295 | 0.437352 | 0.548491 |
| 11755173_THG1L     | 0.032475 | 0.437378 | 0.548507 |
| 11734331_TNN       | -0.04669 | 0.437396 | 0.548507 |
| 11722217_GPR108    | 0.028977 | 0.437398 | 0.548507 |
| 11727650_MFSD7     | -0.04358 | 0.43742  | 0.548513 |
| 11715534_LRP1      | 0.046477 | 0.437426 | 0.548513 |
| 11759099_NOP9      | -0.07381 | 0.437456 | 0.548537 |
| 11716360_CNIH1     | -0.02803 | 0.437546 | 0.548636 |
| 11742976_GNAO1     | 0.050213 | 0.437617 | 0.548711 |
| 11735935_USP17L10  | -0.07473 | 0.437631 | 0.548714 |
| 11755227_ANK1      | 0.051104 | 0.437654 | 0.548729 |
| 11733889_DNTT      | 0.052093 | 0.437673 | 0.548739 |
| 11758588_SORCS2    | 0.035424 | 0.437701 | 0.548748 |
| 11735352_SLC37A2   | 0.04616  | 0.43771  | 0.548748 |
| 11748192_ATCAY     | -0.05998 | 0.437714 | 0.548748 |
| 11715327_CBWD1 /// | -0.05668 | 0.437821 | 0.548868 |
| 11751307_C1orf44   | -0.06202 | 0.437868 | 0.548896 |
| 11748189_ERF       | 0.036871 | 0.437872 | 0.548896 |
| 11738769_OR4F15    | -0.08396 | 0.437877 | 0.548896 |
| 11741004_CARF      | 0.055324 | 0.437891 | 0.5489   |
| 11740659_LRIT2     | -0.06362 | 0.43791  | 0.548901 |
| 11735686_ADHG      | -0.06111 | 0.437918 | 0.548901 |
| 11744342_ZNF664    | -0.02762 | 0.437926 | 0.548901 |
| 11726167_PGR       | 0.099254 | 0.437979 | 0.548953 |
| 11748241_ABCC13    | -0.05049 | 0.438011 | 0.548967 |
| 11732007_GLIS1     | -0.04157 | 0.438012 | 0.548967 |
| 11761975_LINC00114 | 0.051591 | 0.438029 | 0.548973 |
| 11758752_YWHAZ     | 0.032029 | 0.43805  | 0.548986 |
| 11721638_CES1 ///  | -0.045   | 0.438078 | 0.548998 |
| 11717363_C9orf69   | 0.03169  | 0.438082 | 0.548998 |
| 11737535_SAMD12    | 0.074362 | 0.438095 | 0.549    |
| 11760174_UQCC2     | 0.03934  | 0.438137 | 0.549039 |
| 11730184_CST1      | 0.076863 | 0.43816  | 0.549048 |
| 11741845_RXFP2     | 0.058547 | 0.438166 | 0.549048 |
| 11746649_SHROOM3   | -0.02975 | 0.438209 | 0.549087 |
| 11745788_MUC12     | -0.06656 | 0.438272 | 0.549152 |
| 11746065_KIT       | -0.08735 | 0.438332 | 0.549213 |
| 11753806_IRF3      | 0.041562 | 0.438371 | 0.549248 |
| 11730412_ARHGAP33  | -0.04562 | 0.438441 | 0.549315 |
| 11732070_KCNK13    | -0.05285 | 0.438447 | 0.549315 |
| 11760823_SCN1B     | -0.08185 | 0.438498 | 0.549364 |
| 11762020_UGGT2     | 0.057    | 0.438639 | 0.549513 |
| 11737525_CEACAM4   | 0.063278 | 0.438639 | 0.549513 |
| 11761423_GPD1      | -0.03979 | 0.438707 | 0.549585 |
| 11753534_KLRD1     | -0.04761 | 0.43881  | 0.549689 |

|                    |          |          |          |
|--------------------|----------|----------|----------|
| 11735473_CCDC169   | -0.06009 | 0.438813 | 0.549689 |
| 11746803_DPPA3 /// | -0.06527 | 0.438925 | 0.549815 |
| 11738120_TAF1 ///  | -0.04933 | 0.439023 | 0.549923 |
| 11742659_URAD      | -0.03854 | 0.439046 | 0.549929 |
| 11756959_PRKD2     | -0.0452  | 0.43905  | 0.549929 |
| 11730668_IQCF5     | 0.037113 | 0.439078 | 0.549951 |
| 11729948_KLHL14    | -0.04358 | 0.439134 | 0.550007 |
| 11738939_MS4A13    | 0.055182 | 0.439166 | 0.550032 |
| 11716086_PXDN      | -0.02904 | 0.439214 | 0.550078 |
| 11744081_FBXW5     | -0.0269  | 0.439249 | 0.550107 |
| 11736263_SNX20     | -0.02779 | 0.439289 | 0.550144 |
| 11727434_AIPL1     | -0.08056 | 0.439322 | 0.550171 |
| 11733693_PATE3     | 0.055519 | 0.439348 | 0.55019  |
| 11737524_CCDC183   | 0.055904 | 0.4394   | 0.55024  |
| 11756814_ABCB8 /// | 0.031866 | 0.439463 | 0.550306 |
| 11761861_ABHD14A-A | -0.06447 | 0.439534 | 0.55038  |
| 11719220_UNC119    | -0.03007 | 0.439555 | 0.550393 |
| 11741972_UNC80     | -0.07517 | 0.439577 | 0.550406 |
| 11745690_CHST13    | -0.03758 | 0.439595 | 0.55041  |
| 11735979_OR52N4    | -0.04282 | 0.439603 | 0.55041  |
| 11738111_LOXHD1    | 0.068892 | 0.439619 | 0.550416 |
| 11747251_CCDC125   | -0.02764 | 0.439661 | 0.550455 |
| 11721229_LEMD3     | -0.03952 | 0.439727 | 0.550523 |
| 11741864_OR7C1     | 0.053376 | 0.439772 | 0.550565 |
| 11747406_HDAC1     | -0.0316  | 0.439796 | 0.550581 |
| 11724773_ITIH4     | -0.06672 | 0.439837 | 0.550619 |
| 11741171_MC2R      | -0.07797 | 0.439954 | 0.550751 |
| 11734721_EDIL3     | -0.06922 | 0.439967 | 0.550754 |
| 11761355_PQBP1     | 0.078959 | 0.440063 | 0.55086  |
| 11734800_SLC39A8   | -0.04157 | 0.440087 | 0.550876 |
| 11749344_DHRS3     | 0.044631 | 0.440122 | 0.550905 |
| 11761901_CYP4F8    | -0.0441  | 0.440134 | 0.550906 |
| 11742453_PHF20L1   | -0.03932 | 0.440176 | 0.550944 |
| 11752209_ANKS1B    | 0.052139 | 0.440228 | 0.550996 |
| 11760704_C9orf153  | 0.069861 | 0.440264 | 0.551018 |
| 11716697_FABP4     | 0.047538 | 0.440269 | 0.551018 |
| 11749403_LTA       | -0.04945 | 0.440362 | 0.55112  |
| 11754752_ODF3B     | -0.03078 | 0.440511 | 0.551293 |
| 11730128_SETD9     | 0.033353 | 0.440526 | 0.551298 |
| 11732908_FAM183A   | 0.031961 | 0.440606 | 0.551383 |
| 11734998_SIPA1L3   | 0.083802 | 0.440685 | 0.551468 |
| 11747425_NUP214    | -0.04409 | 0.440699 | 0.551471 |
| 11744484_HLA-DRA   | -0.02758 | 0.440725 | 0.55149  |
| 11715109_SAMD7     | -0.08911 | 0.440857 | 0.551641 |
| 11715764_PODXL     | 0.043212 | 0.440912 | 0.551692 |
| 11739782_SNCA      | -0.03185 | 0.440936 | 0.551692 |
| 11727239_C4orf19   | -0.06662 | 0.44094  | 0.551692 |
| 11756785_SFXN5     | 0.02913  | 0.440943 | 0.551692 |
| 11721241_OLIG1     | -0.04803 | 0.441029 | 0.551786 |
| 11734042_APOC2 /// | -0.03063 | 0.441072 | 0.551826 |
| 11740771_KALRN     | 0.030374 | 0.441111 | 0.551861 |

|                    |          |          |          |
|--------------------|----------|----------|----------|
| 11726121_NEURL1    | -0.0489  | 0.44116  | 0.551907 |
| 11728560_GZMK      | 0.072465 | 0.441185 | 0.551918 |
| 11738852_ACVR1B    | 0.04715  | 0.441192 | 0.551918 |
| 11734827_SPRED1    | -0.03475 | 0.44121  | 0.551918 |
| 11728380_NACA2     | -0.03445 | 0.441214 | 0.551918 |
| 11728888_SERF1A // | 0.062233 | 0.441244 | 0.551942 |
| 11739399_C20orf194 | 0.029954 | 0.441383 | 0.552101 |
| 11758325_TOB1      | 0.042989 | 0.441444 | 0.552164 |
| 11741351_ANXA11    | -0.04229 | 0.441462 | 0.552173 |
| 11753155_IKBB      | -0.05932 | 0.441578 | 0.552303 |
| 11740233_KAT6B     | 0.033404 | 0.441651 | 0.55238  |
| 11747195_AP2M1     | -0.02938 | 0.441707 | 0.552437 |
| 11752885_TPP1      | 0.041504 | 0.441732 | 0.552453 |
| 11745687_LOC254896 | -0.05959 | 0.441829 | 0.552561 |
| 11756584_TOX4      | 0.027984 | 0.441847 | 0.552569 |
| 11742206_CLLU1     | 0.049582 | 0.44188  | 0.552596 |
| 11719978_MMP15     | -0.05464 | 0.44196  | 0.552682 |
| 11749194_COBL      | -0.07617 | 0.442018 | 0.55274  |
| 11723395_SNX33     | -0.05964 | 0.442118 | 0.552851 |
| 11763411_PRR5      | -0.07751 | 0.442153 | 0.55288  |
| 11759976_GABRA2    | 0.040506 | 0.442249 | 0.552986 |
| 11760978_SUGP1     | -0.08277 | 0.44234  | 0.553086 |
| 11731884_PTCRA     | -0.04837 | 0.442412 | 0.553162 |
| 11744911_RIC3      | -0.04458 | 0.442471 | 0.553221 |
| 11763895_SNORA58   | 0.038305 | 0.442491 | 0.553228 |
| 11734775_SFTPB     | -0.10127 | 0.442499 | 0.553228 |
| 11760453_CFHR3     | 0.10709  | 0.442541 | 0.553267 |
| 11750009_POLR2E    | -0.03069 | 0.442553 | 0.553267 |
| 11717095_COX6A1    | 0.029032 | 0.442606 | 0.55332  |
| 11763224_GAP43     | 0.063134 | 0.442623 | 0.553327 |
| 11754564_TMEM130   | -0.04042 | 0.442689 | 0.553395 |
| 11738791_DEFEB110  | 0.035472 | 0.44272  | 0.55342  |
| 11729202_KAZALD1   | -0.04321 | 0.442748 | 0.553429 |
| 11752575_SYNC      | 0.048084 | 0.442757 | 0.553429 |
| 11735301_ADGRA1    | 0.038502 | 0.442761 | 0.553429 |
| 11717343_SUPT4H1   | 0.03394  | 0.442814 | 0.55348  |
| 11753744_CDKN2A    | -0.04747 | 0.442923 | 0.553602 |
| 11737715_NFKBID    | -0.06215 | 0.442997 | 0.553681 |
| 11745187_BET1L     | -0.03047 | 0.44302  | 0.553695 |
| 11736883_FCRL1     | -0.07623 | 0.443076 | 0.553752 |
| 11743515_LAMC2     | 0.039773 | 0.443094 | 0.55376  |
| 11761117_CAPN10    | 0.037809 | 0.443172 | 0.553843 |
| 11761200_PTPN11    | -0.0611  | 0.443277 | 0.553961 |
| 11725717_CDC42     | 0.075029 | 0.443351 | 0.554028 |
| 11761135_SPTLC3    | 0.066662 | 0.443354 | 0.554028 |
| 11752838_CIDEB     | -0.04853 | 0.443461 | 0.554148 |
| 11743610_LRRC42    | -0.03314 | 0.443558 | 0.554255 |
| 11739722_ATP2B2    | -0.07228 | 0.443691 | 0.554407 |
| 11722328_PGBD5     | -0.03584 | 0.443706 | 0.554412 |
| 11740901_MUC5B     | 0.071521 | 0.443724 | 0.554419 |
| 11762248_BCAP29    | 0.031031 | 0.443747 | 0.554425 |

|                    |          |          |          |
|--------------------|----------|----------|----------|
| 11734724_IRF6      | -0.05693 | 0.443751 | 0.554425 |
| 11760462_LOC105372 | -0.04098 | 0.443784 | 0.554443 |
| 11752127_OTUD7B    | 0.033174 | 0.443788 | 0.554443 |
| 11764240_WDR31     | -0.13015 | 0.443851 | 0.554507 |
| 11750662_SLC8B1    | -0.04774 | 0.443871 | 0.554519 |
| 11739582_PRKD3     | -0.05359 | 0.444041 | 0.554716 |
| 11726145_CA6       | 0.058856 | 0.444085 | 0.554752 |
| 11751595_PAPSS1    | 0.039376 | 0.444092 | 0.554752 |
| 11734605_UTS2      | -0.07256 | 0.444152 | 0.554812 |
| 11759129_ZNF677    | 0.092966 | 0.44426  | 0.554933 |
| 11732771_FOXD4     | 0.038526 | 0.444293 | 0.55496  |
| 11762834_NKAIN2    | -0.05428 | 0.444359 | 0.555026 |
| 11725368_LRG1      | -0.05793 | 0.444368 | 0.555026 |
| 11745169_DIAPH1    | -0.04125 | 0.444404 | 0.555057 |
| 11735889_PRAMEF12  | -0.08528 | 0.444528 | 0.555198 |
| 11764237_LOC101060 | 0.056142 | 0.444567 | 0.555231 |
| 11717048_DES       | -0.07693 | 0.444617 | 0.55528  |
| 11731330_ZNF81     | 0.084552 | 0.444629 | 0.555281 |
| 11753587_TBC1D29   | -0.03479 | 0.444673 | 0.555321 |
| 11747228_ATP1A1    | 0.028013 | 0.444698 | 0.555339 |
| 11746731_TRIM29    | -0.03522 | 0.444784 | 0.555432 |
| 11754764_RAB7B     | 0.053828 | 0.444866 | 0.55552  |
| 11757452_INO80B    | 0.033146 | 0.444922 | 0.555576 |
| 11729726_GPC5      | 0.041787 | 0.444942 | 0.555586 |
| 11739466_ECHDC1    | -0.02682 | 0.444965 | 0.55559  |
| 11722167_CTNNB1    | 0.027595 | 0.444968 | 0.55559  |
| 11736796_RUNX1T1   | 0.052405 | 0.444992 | 0.555606 |
| 11751078_CYP2F1    | -0.08639 | 0.445023 | 0.555631 |
| 11755939_BCAM      | -0.04339 | 0.445054 | 0.555655 |
| 11755725_KIR3DX1   | -0.05781 | 0.445087 | 0.555682 |
| 11735005_JADE1     | -0.0507  | 0.445212 | 0.555824 |
| 11723843_ADGB      | -0.05587 | 0.445239 | 0.555844 |
| 11741623_NAAA      | 0.049916 | 0.445262 | 0.555858 |
| 11742157_OR1J4     | 0.062496 | 0.445324 | 0.555921 |
| 11761227_ADSL      | 0.079299 | 0.445376 | 0.555967 |
| 11762711_SORBS2    | -0.0581  | 0.445383 | 0.555967 |
| 11725143_ATOH8     | 0.037867 | 0.445527 | 0.556133 |
| 11755208_DNASE1L1  | -0.03342 | 0.445568 | 0.556169 |
| 11761574_CD3E      | -0.03141 | 0.445684 | 0.5563   |
| 11749670_DNAJC14   | 0.037295 | 0.445723 | 0.556334 |
| 11731687_SLC25A31  | 0.055046 | 0.44592  | 0.556565 |
| 11729968_CLYBL     | -0.05706 | 0.445947 | 0.556585 |
| 11730417_PRND      | -0.03763 | 0.44599  | 0.556624 |
| 11717792_FAM219A   | -0.03006 | 0.446125 | 0.556779 |
| 11761684_FHIT      | -0.04539 | 0.446179 | 0.556832 |
| 11728916_SLC7A4    | -0.04114 | 0.4462   | 0.556844 |
| 11759407_FAM217B   | -0.03836 | 0.446222 | 0.556858 |
| 11741410_ERC1      | -0.05285 | 0.446335 | 0.556976 |
| 11724284_FRMD4A    | -0.02636 | 0.44634  | 0.556976 |
| 11756968_RBM28     | 0.028218 | 0.446393 | 0.557028 |
| 11759199_CNTN1     | -0.08675 | 0.446442 | 0.557076 |



|                    |          |          |          |
|--------------------|----------|----------|----------|
| 11753971_LAMB1     | 0.034758 | 0.446583 | 0.557237 |
| 11762489_SIGLEC6   | 0.0469   | 0.446796 | 0.557489 |
| 11742284_LINCO1205 | -0.04279 | 0.446881 | 0.557581 |
| 11725036_SEC23IP   | 0.030783 | 0.44691  | 0.557602 |
| 11735919_RNASE10   | -0.04274 | 0.446937 | 0.55761  |
| 11731928_IZUMO2    | 0.065357 | 0.446939 | 0.55761  |
| 11736923_LRRIQ1    | 0.070605 | 0.447024 | 0.557692 |
| 11761337_TRMT2A    | 0.028847 | 0.447028 | 0.557692 |
| 11719925_RBM12     | 0.03199  | 0.44706  | 0.557718 |
| 11729015_SCN1A     | 0.058774 | 0.447076 | 0.557724 |
| 11735418_HTR1D     | 0.039349 | 0.447103 | 0.557743 |
| 11753208_EGFL7     | -0.04636 | 0.447124 | 0.557756 |
| 11734294_KCNJ11    | -0.0337  | 0.447174 | 0.557804 |
| 11727679_SF1       | 0.056628 | 0.447254 | 0.557889 |
| 11762838_GOSR1     | 0.078794 | 0.447297 | 0.557922 |
| 11726160_UPP2      | -0.04844 | 0.447303 | 0.557922 |
| 11735887_NEK11     | -0.0527  | 0.447326 | 0.557935 |
| 11748485_CYSLTR2   | -0.06406 | 0.447342 | 0.557942 |
| 11720403_EFNB2     | 0.038696 | 0.447362 | 0.557953 |
| 11722157_CCNO      | -0.02958 | 0.447412 | 0.558    |
| 11743210_TAAAR9    | -0.04072 | 0.447445 | 0.558027 |
| 11755539_DISC1     | -0.06219 | 0.447484 | 0.558062 |
| 11728293_SH2D1A    | -0.02718 | 0.447497 | 0.558064 |
| 11716275_CBX5      | 0.039902 | 0.447553 | 0.558109 |
| 11756193_TMEM42    | -0.03333 | 0.447556 | 0.558109 |
| 11728190_CXCR4     | -0.04652 | 0.447617 | 0.55817  |
| 11738477_HTR3E     | -0.03262 | 0.447746 | 0.558317 |
| 11734754_TATDN3    | 0.057273 | 0.447773 | 0.558337 |
| 11728491_KANK4     | 0.069805 | 0.447819 | 0.55838  |
| 11724861_THNSL1    | -0.05078 | 0.447839 | 0.55839  |
| 11753908_APBB1     | 0.048678 | 0.44785  | 0.55839  |
| 11762004_ECE2      | -0.05168 | 0.447862 | 0.55839  |
| 11722347_REPS2     | 0.058213 | 0.447998 | 0.558547 |
| 11738713_OR52K2    | -0.07041 | 0.44805  | 0.558597 |
| 11740951_HRH2      | -0.03974 | 0.4481   | 0.558644 |
| 11717554_SETD7     | 0.040891 | 0.448111 | 0.558644 |
| 11734390_ABLIM2    | -0.07494 | 0.448305 | 0.558872 |
| 11738669_EDA       | -0.05142 | 0.448393 | 0.558964 |
| 11733684_FRMD7     | 0.036613 | 0.448418 | 0.558964 |
| 11746766_TEKT4     | 0.099868 | 0.448418 | 0.558964 |
| 11758493_NHLH1     | -0.04858 | 0.448425 | 0.558964 |
| 11735928_PRDM7     | 0.057041 | 0.448623 | 0.559197 |
| 11737587_KCNA7     | -0.07112 | 0.448636 | 0.559199 |
| 11739738_DCUN1D2   | -0.03461 | 0.448723 | 0.559293 |
| 11722278_SMUG1     | 0.035967 | 0.448808 | 0.559364 |
| 11763402_LINCO1069 | 0.032306 | 0.448812 | 0.559364 |
| 11743057_RHO       | -0.06797 | 0.448814 | 0.559364 |
| 11749837_ZFAT      | 0.033803 | 0.448844 | 0.559387 |
| 11750360_FGD3      | -0.05394 | 0.448878 | 0.559415 |
| 11748797_AGPAT4    | 0.051438 | 0.4489   | 0.559428 |
| 11744452_DHX38     | 0.029491 | 0.449033 | 0.559579 |

|                   |          |          |          |
|-------------------|----------|----------|----------|
| 11740293_PRKG1    | 0.060209 | 0.449044 | 0.55958  |
| 11721635_DERL1    | 0.036903 | 0.449201 | 0.55976  |
| 11735395_PPARD    | -0.05136 | 0.449321 | 0.559891 |
| 11749807_KCNN1    | -0.03779 | 0.449329 | 0.559891 |
| 11726103_PPP2R3A  | -0.0431  | 0.44942  | 0.55999  |
| 11723862_SLC6A1   | -0.06476 | 0.449433 | 0.559992 |
| 11720348_GGNBP2   | -0.03551 | 0.449463 | 0.560015 |
| 11718882_PSMC4    | 0.03033  | 0.44954  | 0.560097 |
| 11715450_RPL10    | 0.056121 | 0.449572 | 0.560123 |
| 11725345_PRMT6    | -0.03406 | 0.4496   | 0.560144 |
| 11730623_DSEL     | -0.04138 | 0.449654 | 0.560197 |
| 11760791_HLA-L    | -0.06846 | 0.449737 | 0.560285 |
| 11716220_EIF2S1   | 0.029621 | 0.449767 | 0.560309 |
| 11727708_C6orf201 | 0.035876 | 0.449789 | 0.560321 |
| 11724085_DAPL1    | -0.04208 | 0.449806 | 0.560323 |
| 11729281_PTP4A3   | -0.03639 | 0.449813 | 0.560323 |
| 11734012_MLANA    | -0.04541 | 0.44987  | 0.560368 |
| 11760685_BRIX1    | -0.02645 | 0.44988  | 0.560368 |
| 11722742_DDC      | -0.04452 | 0.449884 | 0.560368 |
| 11736067_HYPK /// | -0.02932 | 0.449923 | 0.560403 |
| 11744531_EIF5B    | -0.02996 | 0.449964 | 0.56044  |
| 11722134_TNFRSF25 | -0.03294 | 0.449979 | 0.560444 |
| 11737038_C19orf38 | -0.04307 | 0.450028 | 0.560482 |
| 11750380_ZNF423   | -0.0331  | 0.450032 | 0.560482 |
| 11752804_SERPINB3 | -0.04943 | 0.450141 | 0.560603 |
| 11747572_TMPRSS4  | -0.03755 | 0.45017  | 0.560618 |
| 11752898_PPIL6    | 0.088023 | 0.450176 | 0.560618 |
| 11729853_PADI4    | -0.05092 | 0.450246 | 0.560678 |
| 11762378_VPRBP    | 0.031385 | 0.450247 | 0.560678 |
| 11741457_ALOX12   | -0.05544 | 0.450344 | 0.560785 |
| 11740234_KAT6B    | -0.04814 | 0.450394 | 0.560833 |
| 11735611_CCDC187  | -0.02915 | 0.450419 | 0.560849 |
| 11758677_GNPAT    | -0.02904 | 0.450433 | 0.560852 |
| 11740312_HAS2     | 0.044658 | 0.45054  | 0.560971 |
| 11724029_HIC2     | -0.03037 | 0.450557 | 0.560978 |
| 11748272_FRMD1    | -0.03353 | 0.450582 | 0.560981 |
| 11722942_ATXN1    | 0.052183 | 0.450582 | 0.560981 |
| 11725753_GRIA3    | 0.06747  | 0.45067  | 0.561076 |
| 11730975_SGF29    | -0.02893 | 0.450691 | 0.561088 |
| 11750945_CYP4F3   | 0.064768 | 0.450724 | 0.561114 |
| 11721520_ZDHHC17  | -0.03579 | 0.450768 | 0.561155 |
| 11763347_CYP3A7   | 0.041728 | 0.450783 | 0.56116  |
| 11725176_AGTR1    | -0.09732 | 0.450811 | 0.56118  |
| 11761454_FAM193A  | -0.07346 | 0.450908 | 0.561286 |
| 11758798_PCIF1    | -0.08573 | 0.45095  | 0.561325 |
| 11747794_NLGN4X   | 0.038645 | 0.451091 | 0.561485 |
| 11725743_SORBS1   | -0.05657 | 0.451127 | 0.561516 |
| 11718077_MAPKAPK3 | 0.037018 | 0.451301 | 0.561719 |
| 11752926_KIF3B    | 0.069213 | 0.451326 | 0.561736 |
| 11723360_MAP4K2   | -0.02706 | 0.451489 | 0.561924 |
| 11738229_DCAF8L2  | -0.0681  | 0.451603 | 0.562051 |

|                    |          |          |          |
|--------------------|----------|----------|----------|
| 11717596_GNAS      | -0.02674 | 0.451645 | 0.56209  |
| 11720712_KCNE3     | 0.037919 | 0.45171  | 0.562155 |
| 11743921_TMEM125   | -0.08266 | 0.451751 | 0.562193 |
| 11748873_CD33      | 0.032418 | 0.451775 | 0.562199 |
| 11755172_CDKN2B-AS | 0.052562 | 0.451789 | 0.562199 |
| 11730263_SERPINB4  | 0.085249 | 0.451797 | 0.562199 |
| 11720790_ASF1A     | 0.03142  | 0.451802 | 0.562199 |
| 11758950_GALNT15   | 0.054797 | 0.451865 | 0.562254 |
| 11735663_KHDRBS2   | 0.061653 | 0.451871 | 0.562254 |
| 11720151_C1orf116  | -0.08188 | 0.451881 | 0.562254 |
| 11738875_SPATA22   | 0.037996 | 0.451918 | 0.562286 |
| 11721061_IQGAP2    | -0.06493 | 0.451984 | 0.562353 |
| 11732234_RND1      | 0.052608 | 0.452003 | 0.562363 |
| 11728455_RAB33B    | -0.08412 | 0.452028 | 0.56238  |
| 11726425_SCN3B     | 0.064286 | 0.452157 | 0.562522 |
| 11745546_ATM       | 0.051274 | 0.452166 | 0.562522 |
| 11763255_IGLJ3 /// | -0.06244 | 0.452353 | 0.562741 |
| 11748309_PDDC1     | -0.04981 | 0.452418 | 0.562808 |
| 11721544_TMEM186   | -0.03451 | 0.452453 | 0.562837 |
| 11752323_TSPEAR    | -0.0705  | 0.452488 | 0.562866 |
| 11744019_CAMSAP3   | -0.0578  | 0.452542 | 0.562919 |
| 11725256_FZD10     | -0.04342 | 0.452644 | 0.563031 |
| 11760382_U2AF1L4   | 0.058756 | 0.452739 | 0.563136 |
| 11737505_SLC22A10  | 0.086669 | 0.452754 | 0.56314  |
| 11742044_CCSE1     | 0.077849 | 0.452768 | 0.563143 |
| 11735680_PPP4R4    | -0.06912 | 0.452931 | 0.563331 |
| 11759675_NDST1     | -0.03224 | 0.45295  | 0.56334  |
| 11724393_KIAA1211L | -0.02937 | 0.452978 | 0.56336  |
| 11739644_TULP3     | 0.031574 | 0.453048 | 0.563434 |
| 11735535_ZNF660    | -0.05039 | 0.453069 | 0.563438 |
| 11740850_C1orf35   | 0.028784 | 0.453085 | 0.563438 |
| 11729943_B4GALNT4  | 0.063788 | 0.453086 | 0.563438 |
| 11761124_RNGTT     | 0.038855 | 0.453117 | 0.563462 |
| 11748023_WBP2      | 0.035789 | 0.453243 | 0.563585 |
| 11745349_PROC      | 0.071009 | 0.453245 | 0.563585 |
| 11760763_RBFOX3    | -0.04085 | 0.45325  | 0.563585 |
| 11723609_HABP2     | -0.05564 | 0.453273 | 0.563598 |
| 11760807_LOC100287 | 0.050487 | 0.453319 | 0.563642 |
| 11752269_UGT1A1 // | -0.06533 | 0.453366 | 0.56368  |
| 11763358_DGCR9     | 0.058184 | 0.453373 | 0.56368  |
| 11759427_COMMD10   | 0.06536  | 0.453409 | 0.563709 |
| 11734383_AQP10     | -0.02972 | 0.453438 | 0.563709 |
| 11755348_CLCNKB    | -0.0463  | 0.453442 | 0.563709 |
| 11748614_EPN3      | 0.051614 | 0.453443 | 0.563709 |
| 11760386_IL16      | -0.05295 | 0.453454 | 0.563709 |
| 11741872_ERLEC1    | -0.06374 | 0.453473 | 0.563717 |
| 11743454_ST13 ///  | -0.03706 | 0.453484 | 0.563717 |
| 11742954_KRT6A     | -0.04379 | 0.453709 | 0.563983 |
| 11737636_DOC2B     | -0.06206 | 0.453749 | 0.564018 |
| 11753519_GSAP      | 0.062662 | 0.45376  | 0.564018 |
| 11732843_KCNS2     | 0.080338 | 0.453786 | 0.564024 |

|                    |          |          |          |
|--------------------|----------|----------|----------|
| 11756735_SPATA13   | -0.0312  | 0.453788 | 0.564024 |
| 11736752_HTR2A     | 0.054557 | 0.453805 | 0.564031 |
| 11756280_NUDT5     | 0.028216 | 0.453868 | 0.564081 |
| 11750336_LRRC74A   | -0.06524 | 0.45387  | 0.564081 |
| 11731430_CYP27A1   | 0.03376  | 0.453881 | 0.564081 |
| 11759913_YJEFN3    | 0.043079 | 0.453931 | 0.564129 |
| 11748339_LAIR1     | -0.07472 | 0.453943 | 0.56413  |
| 11735862_DLEU7     | -0.05127 | 0.453974 | 0.564147 |
| 11751930_KDM5C     | 0.030188 | 0.45398  | 0.564147 |
| 11757107_GTF3C6    | -0.03082 | 0.45412  | 0.564304 |
| 11722893_HOXB7     | 0.035602 | 0.454138 | 0.564304 |
| 11743943_RSPH4A    | -0.04389 | 0.454141 | 0.564304 |
| 11760671_KLHL7     | 0.063773 | 0.454163 | 0.564318 |
| 11759032_SDHAF4    | -0.05272 | 0.454269 | 0.564435 |
| 11756321_USP21     | -0.0424  | 0.454345 | 0.564515 |
| 11725746_PITPNC1   | 0.036905 | 0.454404 | 0.564564 |
| 11760871_PMPCA     | 0.061247 | 0.454408 | 0.564564 |
| 11761492_C14orf159 | 0.061487 | 0.454452 | 0.564606 |
| 11723336_GMIP      | 0.033989 | 0.454599 | 0.564774 |
| 11741280_CASC1     | 0.038196 | 0.454614 | 0.564777 |
| 11715279_PGAM4     | -0.07267 | 0.454637 | 0.564789 |
| 11751185_SMAD3     | -0.0466  | 0.454646 | 0.564789 |
| 11727554_PKIB      | 0.101413 | 0.454691 | 0.564819 |
| 11756038_ATP2B4    | 0.078388 | 0.454696 | 0.564819 |
| 11741518_FCGR2B    | -0.06698 | 0.454705 | 0.564819 |
| 11731535_CCDC85C   | -0.06655 | 0.454724 | 0.564819 |
| 11754511_AXIN1     | -0.03659 | 0.454729 | 0.564819 |
| 11727316_KCNE5     | -0.02826 | 0.454819 | 0.564897 |
| 11718449_AGBL5     | 0.027827 | 0.454835 | 0.564897 |
| 11727742_NKX2-1    | 0.04223  | 0.454844 | 0.564897 |
| 11751066_NAP1L1    | -0.04673 | 0.454847 | 0.564897 |
| 11752731_ILDR1     | 0.041679 | 0.454848 | 0.564897 |
| 11720424_MEX3C     | 0.044384 | 0.454991 | 0.56506  |
| 11742964_ITPR3     | 0.028109 | 0.455091 | 0.565169 |
| 11723514_CDC14B    | 0.043577 | 0.455111 | 0.56518  |
| 11757037_H3F3B     | 0.032457 | 0.455207 | 0.565284 |
| 11742479_SULT1C4   | -0.03982 | 0.455253 | 0.565327 |
| 11747185_ANK1      | 0.041115 | 0.455269 | 0.565333 |
| 11749544_PGM5      | -0.04594 | 0.455296 | 0.565352 |
| 11749938_AIF1L     | 0.048763 | 0.455316 | 0.565362 |
| 11716414_NDUFB8    | 0.035859 | 0.455374 | 0.565419 |
| 11738620_NLGN4Y    | -0.06364 | 0.455483 | 0.565529 |
| 11762340_PINLYP    | 0.083298 | 0.455485 | 0.565529 |
| 11762126_DPCD      | -0.03887 | 0.455499 | 0.565532 |
| 11736634_AAK1      | 0.116434 | 0.455547 | 0.565577 |
| 11733527_GABRR1    | -0.0821  | 0.455607 | 0.565627 |
| 11762505_ZIC4      | -0.05078 | 0.45561  | 0.565627 |
| 11728108_GHRL      | -0.04646 | 0.455687 | 0.565708 |
| 11727083_MINA      | -0.02719 | 0.45574  | 0.565759 |
| 11722501_PAK6      | -0.03358 | 0.455786 | 0.565802 |
| 11754963_SPINK5    | -0.05233 | 0.455876 | 0.5659   |

|                    |          |          |          |
|--------------------|----------|----------|----------|
| 11731821_ADAM11    | -0.04481 | 0.455907 | 0.565917 |
| 11721858_PIGK      | -0.06188 | 0.455918 | 0.565917 |
| 11756821_PPM1L     | 0.028807 | 0.455925 | 0.565917 |
| 11721947_MRVI1     | -0.09503 | 0.455938 | 0.565919 |
| 11754864_LRRC71    | -0.04914 | 0.456026 | 0.566009 |
| 11725434_RUNDC3A   | 0.028976 | 0.456039 | 0.566009 |
| 11723456_PI16      | -0.05926 | 0.456045 | 0.566009 |
| 11732807_MAGEB3    | 0.05606  | 0.456085 | 0.566044 |
| 11760115_HERC2P2 / | 0.031253 | 0.456237 | 0.566218 |
| 11757335_MTIF3     | 0.032016 | 0.456289 | 0.566269 |
| 11723419_COL9A3    | 0.028915 | 0.456409 | 0.566394 |
| 11737401_H2BFWT    | -0.05052 | 0.456413 | 0.566394 |
| 11739078_NFE2L1    | 0.027089 | 0.456494 | 0.566476 |
| 11718111_DLD       | -0.04174 | 0.456503 | 0.566476 |
| 11717192_TNNC2     | 0.039066 | 0.456541 | 0.566509 |
| 11758033_APOB      | 0.046503 | 0.456613 | 0.566584 |
| 11729361_DIO1      | 0.04189  | 0.456631 | 0.566592 |
| 11730336_CA10      | -0.0775  | 0.456806 | 0.566795 |
| 11753321_TNFSF12-T | -0.04795 | 0.456825 | 0.566804 |
| 11736853_LRRC19    | 0.048851 | 0.456892 | 0.566873 |
| 11755423_CERS3     | 0.053305 | 0.456995 | 0.566986 |
| 11737965_MIA2      | 0.098203 | 0.457017 | 0.566989 |
| 11715859_RIC8A     | -0.03443 | 0.457029 | 0.566989 |
| 11732575_FAM65B    | 0.035669 | 0.457032 | 0.566989 |
| 11758244_AKAP6     | 0.042383 | 0.457045 | 0.566991 |
| 11748358_MAN2C1    | -0.04975 | 0.457057 | 0.566991 |
| 11719799_MBD4      | -0.03161 | 0.457144 | 0.567084 |
| 11744512_TRABD2A   | 0.067244 | 0.457352 | 0.567328 |
| 11744322_ABLIM2    | -0.04814 | 0.457395 | 0.567367 |
| 11731452_SEC62     | 0.045532 | 0.457435 | 0.567402 |
| 11729343_POU2F2    | 0.065862 | 0.457502 | 0.567471 |
| 11738701_OR11H1 // | -0.08427 | 0.457556 | 0.567523 |
| 11724265_IFT22     | 0.047284 | 0.457615 | 0.567583 |
| 11739319_CDH8      | -0.05803 | 0.457672 | 0.567639 |
| 11729061_DNAH5     | 0.054337 | 0.457712 | 0.567673 |
| 11733934_PIF0      | 0.042031 | 0.457724 | 0.567674 |
| 11741919_IFNA17    | -0.0383  | 0.457774 | 0.567706 |
| 11732047_MMP17     | -0.04124 | 0.457783 | 0.567706 |
| 11730104_PKLR      | 0.054149 | 0.457795 | 0.567706 |
| 11753309_ATXN7L1   | -0.05794 | 0.457805 | 0.567706 |
| 11740417_PLA2R1    | 0.045278 | 0.457807 | 0.567706 |
| 11749531_TOP2B     | 0.03196  | 0.457872 | 0.567771 |
| 11760971_TMC06     | -0.06715 | 0.457919 | 0.567816 |
| 11732538_TBX21     | -0.05037 | 0.458024 | 0.567931 |
| 11729504_AOC2      | 0.062774 | 0.458056 | 0.567957 |
| 11738438_HIST1H1B  | -0.04874 | 0.458076 | 0.567967 |
| 11754590_SMARCA4   | 0.026305 | 0.458128 | 0.568017 |
| 11721444_CDC23     | 0.032604 | 0.458206 | 0.568099 |
| 11742446_FOXP4L5   | -0.04928 | 0.458308 | 0.568211 |
| 11755931_DUSP8     | -0.04239 | 0.458369 | 0.568272 |
| 11748288_RASL12    | -0.06373 | 0.458547 | 0.568478 |

|                    |          |          |          |
|--------------------|----------|----------|----------|
| 11740519_PSMB11    | 0.034301 | 0.458686 | 0.568625 |
| 11728407_DERL3     | -0.02859 | 0.458689 | 0.568625 |
| 11746654_HIF3A     | 0.050115 | 0.458821 | 0.568776 |
| 11749507_KIF9      | -0.06519 | 0.458991 | 0.568951 |
| 11756404_TXNL4A    | 0.027658 | 0.458992 | 0.568951 |
| 11736260_SSPN      | -0.04027 | 0.458998 | 0.568951 |
| 11741633_HEATR9    | 0.054715 | 0.459038 | 0.568986 |
| 11719826_ZAK       | -0.04245 | 0.459087 | 0.569033 |
| 11750670_ZNF214    | 0.0425   | 0.459106 | 0.569041 |
| 11761651_LOC403312 | 0.042559 | 0.459117 | 0.569041 |
| 11717028_BAP1      | -0.03296 | 0.459194 | 0.569122 |
| 11732808_PROK2     | 0.047375 | 0.459232 | 0.569145 |
| 11736978_PADI3     | -0.04662 | 0.459236 | 0.569145 |
| 11721394_DTNBP1    | -0.03284 | 0.459318 | 0.569232 |
| 11715158_KRTAP19-4 | 0.044982 | 0.459369 | 0.569277 |
| 11734287_HBM       | -0.05052 | 0.459378 | 0.569277 |
| 11756822_LYVE1     | -0.07295 | 0.45939  | 0.569279 |
| 11735250_HECW1     | -0.06597 | 0.459458 | 0.569348 |
| 11722473_DGKQ      | -0.06927 | 0.459471 | 0.569349 |
| 11742780_SMARCC1   | 0.030335 | 0.459483 | 0.569351 |
| 11751694_ATF1      | 0.026994 | 0.459495 | 0.569351 |
| 11716355_NDUFA11   | 0.027496 | 0.459524 | 0.569372 |
| 11749542_SLC38A11  | -0.05402 | 0.45959  | 0.56944  |
| 11744740_BHLHE41   | -0.02896 | 0.459668 | 0.569521 |
| 11754194_XIST      | 0.028145 | 0.459823 | 0.56969  |
| 11732650_HEXDC     | 0.040269 | 0.459851 | 0.56969  |
| 11722714_STK35     | -0.0502  | 0.459859 | 0.56969  |
| 11729122_MKKS      | -0.02791 | 0.459865 | 0.56969  |
| 11731831_HOGA1     | -0.03451 | 0.459868 | 0.56969  |
| 11753423_XG /// XG | -0.07226 | 0.459881 | 0.56969  |
| 11738106_EFCAB13   | -0.06757 | 0.459886 | 0.56969  |
| 11758685_CEACAM8   | 0.055366 | 0.459897 | 0.56969  |
| 11761273_ANKRD19P  | 0.058724 | 0.460066 | 0.569885 |
| 11748983_TOP3B     | -0.0265  | 0.460081 | 0.569889 |
| 11760996_TRAPPC4   | 0.072626 | 0.460107 | 0.569906 |
| 11752086_TEAD1     | -0.05333 | 0.460182 | 0.569985 |
| 11719563_SOX4      | -0.05199 | 0.460231 | 0.570031 |
| 11731718_PCDHB4    | -0.05155 | 0.460307 | 0.570111 |
| 11755866_OLFM1     | -0.07122 | 0.46036  | 0.570163 |
| 11717491_DYNLRB1   | 0.03024  | 0.46041  | 0.570203 |
| 11739645_TULP3     | -0.0283  | 0.460416 | 0.570203 |
| 11759787_INPP4B    | -0.09011 | 0.460496 | 0.570288 |
| 11752759_MARVELD2  | -0.05702 | 0.460515 | 0.570296 |
| 11744329_RPS27A    | 0.028828 | 0.460567 | 0.570347 |
| 11746536_WSB2      | -0.04172 | 0.46059  | 0.57036  |
| 11733700_LCE6A     | 0.039349 | 0.460651 | 0.570415 |
| 11749630_KRR1      | 0.02637  | 0.460667 | 0.570415 |
| 11763767_MSMO1     | 0.030112 | 0.460676 | 0.570415 |
| 11735799_SOX14     | -0.04863 | 0.460681 | 0.570415 |
| 11717934_DNAL4     | -0.03407 | 0.46072  | 0.570449 |
| 11732059_LARP1B    | -0.05217 | 0.46077  | 0.570493 |

|                    |          |          |          |
|--------------------|----------|----------|----------|
| 11723452_RIOK2     | 0.036542 | 0.460778 | 0.570493 |
| 11762131_6-Mar     | 0.042607 | 0.460855 | 0.570574 |
| 11749044_ZC3H14    | -0.02934 | 0.460923 | 0.570634 |
| 11744935_LINGO2    | 0.054983 | 0.460928 | 0.570634 |
| 11726825_VPS37D    | -0.04136 | 0.460975 | 0.570678 |
| 11740753_RAB41     | -0.04789 | 0.460988 | 0.57068  |
| 11749337_CYTH1     | -0.04918 | 0.461049 | 0.570734 |
| 11745758_DCLK1     | 0.046956 | 0.461055 | 0.570734 |
| 11738571_OSTCP1    | -0.05158 | 0.461087 | 0.570758 |
| 11730424_APCDD1L   | -0.03271 | 0.461135 | 0.570798 |
| 11755500_EFHC2     | -0.05659 | 0.461142 | 0.570798 |
| 11749804_CELF6     | 0.044602 | 0.461268 | 0.570939 |
| 11722423_NEDD4L    | -0.03788 | 0.461315 | 0.570983 |
| 11729950_TTLL6     | 0.07554  | 0.461346 | 0.571007 |
| 11762405_ZYG11A    | -0.06665 | 0.461398 | 0.571056 |
| 11720897_SEMA4C    | -0.07255 | 0.46141  | 0.571056 |
| 11717238_AMD1      | 0.028057 | 0.46142  | 0.571056 |
| 11722433_PEX16     | -0.04039 | 0.461464 | 0.571095 |
| 11736102_MAN1A1    | -0.04617 | 0.461518 | 0.571121 |
| 11738291_VPS50     | -0.02887 | 0.461521 | 0.571121 |
| 11742414_MYO10     | -0.04626 | 0.461525 | 0.571121 |
| 11731174_CNNM2     | -0.02923 | 0.461531 | 0.571121 |
| 11752266_TACC1     | 0.030702 | 0.461565 | 0.571148 |
| 11752953_SLC30A8   | 0.038388 | 0.461653 | 0.571229 |
| 11759311_IGFBPL1   | 0.043572 | 0.46166  | 0.571229 |
| 200026_PMRPL34     | 0.026607 | 0.461666 | 0.571229 |
| 11741008_FGF12     | -0.04702 | 0.461699 | 0.571256 |
| 11754735_ABCA13    | -0.08997 | 0.461865 | 0.571447 |
| 11753340_ICAM2     | 0.030136 | 0.461909 | 0.571487 |
| 11724272_HLF       | -0.05192 | 0.462085 | 0.57169  |
| 11760504_LOC100506 | 0.046528 | 0.462242 | 0.57187  |
| 11735080_AHDC1     | 0.032332 | 0.462268 | 0.571887 |
| 11738225_IQCF1     | -0.0619  | 0.462313 | 0.571929 |
| 11763013_H6PD      | 0.058237 | 0.462387 | 0.571978 |
| 11763014_H6PD      | 0.058237 | 0.462387 | 0.571978 |
| 11762050_ZFYVE28   | 0.030935 | 0.462388 | 0.571978 |
| 11745910_CDK18     | 0.040478 | 0.462435 | 0.572022 |
| 11745218_TRMU      | 0.037343 | 0.462501 | 0.572089 |
| 11715511_NDFIP1    | -0.0265  | 0.462525 | 0.572101 |
| 11742390_OR5L2     | 0.031179 | 0.462534 | 0.572101 |
| 11757992_SLC12A5   | -0.05815 | 0.462707 | 0.572291 |
| 11718959_FAM160A2  | 0.032021 | 0.462711 | 0.572291 |
| 11742449_APOL1     | -0.02785 | 0.46282  | 0.572412 |
| 11715337_GH1 /// G | -0.04797 | 0.462834 | 0.572413 |
| 11760384_PPP2R5C   | -0.04442 | 0.462858 | 0.572413 |
| 11742441_FAM169B   | -0.05458 | 0.46287  | 0.572413 |
| 11746298_KIFC3     | -0.0502  | 0.462879 | 0.572413 |
| 11760250_SDHA      | -0.06366 | 0.46288  | 0.572413 |
| 11759230_NBPF4     | 0.047284 | 0.462928 | 0.572457 |
| 11730966_MAPK11    | -0.04185 | 0.462942 | 0.572461 |
| 11740664_GPRC6A    | -0.06172 | 0.463073 | 0.572608 |

|                    |          |          |          |
|--------------------|----------|----------|----------|
| 11757444_EGLN3     | -0.06466 | 0.463152 | 0.572667 |
| 11732658_CFAP221   | -0.04789 | 0.463165 | 0.572667 |
| 11725405_GMPR2     | -0.03529 | 0.463173 | 0.572667 |
| 11759798_LOC541472 | -0.0593  | 0.463174 | 0.572667 |
| 11728945_LST1      | 0.054595 | 0.463179 | 0.572667 |
| 11745439_PRMT7     | 0.032646 | 0.46331  | 0.572815 |
| 11728275_PLA2G12A  | -0.02993 | 0.463331 | 0.572826 |
| 11724557_NEUROD1   | -0.05312 | 0.463348 | 0.572833 |
| 11753360_MAGEC3    | -0.08163 | 0.463364 | 0.572837 |
| 11761652_COL14A1   | -0.07531 | 0.46339  | 0.572855 |
| 11720067_APH1B     | -0.03033 | 0.463515 | 0.57296  |
| 11724898_SNPB      | -0.04141 | 0.463517 | 0.57296  |
| 11740318_KCNJ3     | -0.05971 | 0.463524 | 0.57296  |
| 11745234_HACD4     | 0.071878 | 0.463558 | 0.57296  |
| 11756813_MEPE      | -0.08269 | 0.463564 | 0.57296  |
| 11720128_SETD1A    | -0.03165 | 0.463569 | 0.57296  |
| 11744749_DNAJC11   | 0.037958 | 0.463576 | 0.57296  |
| 11742712_THBS2     | -0.09865 | 0.463586 | 0.57296  |
| 11762081_DMC1      | -0.10374 | 0.463586 | 0.57296  |
| 11761681_ADCY6     | 0.055279 | 0.463592 | 0.57296  |
| 11729092_IGF2-AS   | -0.03902 | 0.463631 | 0.572993 |
| 11741332_TMEM150B  | -0.03992 | 0.463685 | 0.573047 |
| 11726285_IGHMBP2   | -0.03973 | 0.463741 | 0.5731   |
| 11721433_CRBN      | -0.03363 | 0.463793 | 0.57315  |
| 11738506_AMELX     | -0.04345 | 0.463849 | 0.573206 |
| 11729012_CFAP65    | -0.04331 | 0.463891 | 0.573243 |
| 11759183_FAM168A   | -0.03184 | 0.463907 | 0.573248 |
| 11735057_MFSD9     | 0.083586 | 0.463938 | 0.573269 |
| 11732862_C2orf74   | 0.037877 | 0.463947 | 0.573269 |
| 11738158_GALNT9    | -0.08141 | 0.463978 | 0.573293 |
| 11733133_ZNF703    | 0.034337 | 0.464029 | 0.573341 |
| 11754579_PAPPA     | 0.059468 | 0.464097 | 0.57341  |
| 200093_PMHINT1     | 0.02806  | 0.464413 | 0.573786 |
| 11731970_HORMAD2   | -0.04406 | 0.464424 | 0.573786 |
| 11721770_CCDC64    | -0.03273 | 0.4645   | 0.573865 |
| 11718436_ATPAF2    | 0.028556 | 0.464566 | 0.573931 |
| 11744907_ASUN      | -0.02753 | 0.464713 | 0.574099 |
| 11734464_ANO7      | -0.04003 | 0.464749 | 0.574115 |
| 11720878_ABTB2     | 0.029747 | 0.46475  | 0.574115 |
| 11725596_ZDHHC23   | 0.045877 | 0.464769 | 0.574117 |
| 11726947_TLR8      | -0.05696 | 0.464775 | 0.574117 |
| 11738044_LRAT      | -0.04245 | 0.464879 | 0.574231 |
| 11716946_TM9SF3    | 0.035771 | 0.464892 | 0.574233 |
| 11719172_AKR1C1    | -0.05865 | 0.464934 | 0.574271 |
| 11741721_POLR1B    | -0.04195 | 0.464971 | 0.574301 |
| 11722520_HKDC1     | -0.0527  | 0.465117 | 0.574459 |
| 11727692_SDR42E1   | -0.06686 | 0.465122 | 0.574459 |
| 11736204_RSU1      | -0.02952 | 0.465187 | 0.574524 |
| 11745599_ANXA2P3   | 0.027519 | 0.465226 | 0.574558 |
| 11759769_PPP4R3B   | -0.04866 | 0.46525  | 0.574574 |
| 11752307_ITGA9     | -0.03999 | 0.465397 | 0.574741 |



|                    |          |          |          |
|--------------------|----------|----------|----------|
| 11717877_PPFIA1    | 0.028442 | 0.465632 | 0.575016 |
| 11737279_CYP7A1    | 0.04144  | 0.465697 | 0.575082 |
| 11750494_ESP33     | -0.04417 | 0.465891 | 0.575307 |
| 11758241_DYNC1I2   | 0.027219 | 0.465929 | 0.57534  |
| 11760359_PIK3C2A   | 0.119792 | 0.465966 | 0.575371 |
| 11760935_KRT6B     | -0.05828 | 0.466097 | 0.575518 |
| 11729497_NMUR2     | 0.047306 | 0.466162 | 0.575583 |
| 11738946_MRAP      | 0.073513 | 0.466212 | 0.575631 |
| 11755199_LMNTD2    | 0.04412  | 0.46624  | 0.57565  |
| 11748546_OGN       | -0.10287 | 0.466327 | 0.575744 |
| 11722908_KLHL13    | 0.034102 | 0.466364 | 0.575755 |
| 11743656_HPGD      | 0.054084 | 0.466367 | 0.575755 |
| 11744320_PIGZ      | -0.05868 | 0.466372 | 0.575755 |
| 11742800_E2F3      | 0.032358 | 0.466415 | 0.575783 |
| 11750898_HOXB3     | -0.04155 | 0.466427 | 0.575783 |
| 11740772_LIN54     | -0.09009 | 0.466439 | 0.575783 |
| 11749859_MED29     | -0.04637 | 0.466442 | 0.575783 |
| 11724135_ADGRB3    | -0.03515 | 0.466489 | 0.575827 |
| 11754960_PRRT2     | -0.04007 | 0.466589 | 0.575936 |
| 11760427_ANKS1B    | 0.028863 | 0.466646 | 0.575972 |
| 11732873_MTRF1     | -0.04698 | 0.466646 | 0.575972 |
| 11732721_MAP3K10   | 0.037492 | 0.466658 | 0.575972 |
| 11718472_ABHD2     | 0.044501 | 0.466673 | 0.575972 |
| 11741962_GLRA3     | 0.043668 | 0.466677 | 0.575972 |
| 11746289_LOC100289 | 0.048556 | 0.466715 | 0.576005 |
| 11735713_CSNK1G2   | 0.026534 | 0.466745 | 0.576019 |
| 11755998_HLA-DRB4  | 0.028912 | 0.466751 | 0.576019 |
| 11728851_RAB39B    | 0.097397 | 0.467048 | 0.576372 |
| 11759241_FCN2      | -0.02621 | 0.467102 | 0.576423 |
| 11750902_NFIX      | -0.02575 | 0.467159 | 0.576479 |
| 11756461_LCN8      | -0.03691 | 0.467212 | 0.576531 |
| 11764108_LOC105372 | -0.09231 | 0.467359 | 0.576696 |
| 11748100_DPYSL2    | 0.04442  | 0.467426 | 0.576765 |
| 11722966_PLEKHA1   | 0.034463 | 0.467439 | 0.576767 |
| 11755506_PICALM    | 0.04359  | 0.467529 | 0.576863 |
| 11760126_THOC3     | -0.06785 | 0.467548 | 0.576869 |
| 11717678_AVPI1     | 0.025955 | 0.467557 | 0.576869 |
| 11734270_HYDIN     | -0.02952 | 0.467607 | 0.576916 |
| 11735102_FAM228A   | -0.07955 | 0.46766  | 0.576967 |
| 11721599_EFS       | 0.056898 | 0.467761 | 0.577077 |
| 11750476_CSMD3     | -0.06601 | 0.467781 | 0.577086 |
| 11728184_PLEKHA7   | 0.079984 | 0.467816 | 0.577113 |
| 11730447_IGDCC3    | -0.06007 | 0.467826 | 0.577113 |
| 11734195_UNC5D     | -0.04975 | 0.467894 | 0.577182 |
| 11717590_CNOT1     | -0.03258 | 0.46794  | 0.577215 |
| 11761604_RBFOX1    | -0.07596 | 0.467944 | 0.577215 |
| 11730777_CEP68     | 0.060276 | 0.467962 | 0.577223 |
| 11735343_SOX3      | -0.07621 | 0.467999 | 0.577253 |
| 11730458_AIM2      | 0.039041 | 0.468068 | 0.577324 |
| 11763388_LOC100996 | 0.039313 | 0.46811  | 0.577361 |
| 11721629_MAFB      | -0.04481 | 0.468143 | 0.577387 |

|                    |          |          |          |
|--------------------|----------|----------|----------|
| 11747701_SLC34A1   | -0.03144 | 0.46823  | 0.57748  |
| 11747580_PGS1      | 0.029914 | 0.468257 | 0.577499 |
| 11733764_PFN3      | -0.03552 | 0.468274 | 0.577505 |
| 11724696_JPH3      | -0.07458 | 0.468313 | 0.577539 |
| 11726728_NABP1     | 0.041622 | 0.468434 | 0.577673 |
| 11738285_CLNK      | -0.02804 | 0.468573 | 0.57783  |
| 11730962_CEPT1     | -0.03194 | 0.468619 | 0.577873 |
| 11749050_MAMSTR    | -0.07767 | 0.468669 | 0.57792  |
| 11756780_MS4A7     | 0.045694 | 0.468801 | 0.578067 |
| 11759360_HIST2H3A  | 0.057054 | 0.468898 | 0.578173 |
| 11764005_PANK2     | 0.05866  | 0.468923 | 0.578189 |
| 11758523_SMC5      | 0.027517 | 0.469102 | 0.578395 |
| 11751529_TF        | -0.04032 | 0.469124 | 0.578408 |
| 11741531_ITGAD     | -0.07454 | 0.469146 | 0.57842  |
| 11731793_DOK7      | 0.045541 | 0.469158 | 0.57842  |
| 11755052_GYPE      | -0.07892 | 0.469218 | 0.57848  |
| 11732898_LIPI      | 0.070771 | 0.469358 | 0.578638 |
| 11759506_TM9SF2    | 0.037436 | 0.469374 | 0.578643 |
| 11764050_CDH11     | -0.04666 | 0.46941  | 0.578672 |
| 11738920_STRA8     | 0.079308 | 0.469467 | 0.578718 |
| 11741229_FAM111A   | -0.03862 | 0.469475 | 0.578718 |
| 11739616_CD3EAP    | -0.02809 | 0.469482 | 0.578718 |
| 11733606_PLPPR3    | -0.05813 | 0.469505 | 0.578731 |
| 11728291_SH2D1A    | 0.029283 | 0.46962  | 0.578853 |
| 200017_PMRPS27A    | 0.02662  | 0.469631 | 0.578853 |
| 11738129_SARDH     | -0.03504 | 0.469639 | 0.578853 |
| 11727427_ACSM3     | 0.067022 | 0.469702 | 0.578915 |
| 11734129_SLC30A4   | 0.063475 | 0.469731 | 0.578937 |
| 11725278_IHH       | -0.03138 | 0.469822 | 0.579035 |
| 11724835_HCAR2 /// | -0.03803 | 0.46988  | 0.579091 |
| 11746862_ARSJ      | -0.0286  | 0.469916 | 0.579121 |
| 11762365_AP5Z1     | 0.052011 | 0.469934 | 0.579129 |
| 11761187_VIL1      | 0.06943  | 0.469975 | 0.579165 |
| 11738179_CLDN20    | -0.03927 | 0.470108 | 0.579313 |
| 11742637_IGF2 ///  | -0.03744 | 0.470165 | 0.579369 |
| 11728716_CXCL5     | -0.05853 | 0.470386 | 0.579627 |
| 11728620_SPRN      | -0.02564 | 0.470419 | 0.579653 |
| 11750319_CES4A     | 0.031012 | 0.470537 | 0.579774 |
| 11761663_CCDC191   | 0.064081 | 0.470541 | 0.579774 |
| 11736672_MRPL22    | -0.07242 | 0.470561 | 0.579776 |
| 11722201_EIF6      | 0.02718  | 0.470576 | 0.579776 |
| 11755272_FAM90A1 / | -0.03732 | 0.470578 | 0.579776 |
| 11733775_UMOD      | 0.04455  | 0.470609 | 0.5798   |
| 11719974_AKAP17A   | -0.04187 | 0.470793 | 0.579998 |
| 11725250_PTPDC1    | -0.04089 | 0.470793 | 0.579998 |
| 11748320_NRII3     | 0.060326 | 0.470948 | 0.580169 |
| 11716097_RAP1A     | 0.034721 | 0.470956 | 0.580169 |
| 11720689_FAM195A / | 0.03968  | 0.471016 | 0.580214 |
| 11763095_IGHG1     | 0.046255 | 0.471017 | 0.580214 |
| 11731206_SPATA33   | -0.04316 | 0.471042 | 0.580231 |
| 11750160_LSM14A    | 0.02566  | 0.471079 | 0.580246 |

|                    |          |          |          |
|--------------------|----------|----------|----------|
| 11740592_KRT72     | -0.03868 | 0.471082 | 0.580246 |
| 11738993_SYT4      | -0.04036 | 0.47109  | 0.580246 |
| 11759047_ABCB1     | -0.03407 | 0.471296 | 0.58048  |
| 11756513_SFXN5     | 0.058735 | 0.471304 | 0.58048  |
| 11753697_FCRLA     | 0.027119 | 0.471393 | 0.580575 |
| 200099_PMRPS3A /// | 0.025911 | 0.471456 | 0.580639 |
| 11731606_SCIN      | 0.062908 | 0.471526 | 0.58071  |
| 11764103_LOC105369 | 0.049719 | 0.471579 | 0.580761 |
| 11742554_OR13C4    | -0.06028 | 0.471603 | 0.580774 |
| 11730091_BEST4     | 0.06115  | 0.471614 | 0.580774 |
| 11726795_ITGB4     | 0.035368 | 0.47167  | 0.580819 |
| 11715235_UQCRHL    | -0.03618 | 0.471674 | 0.580819 |
| 11728343_DCLK1     | -0.03414 | 0.471687 | 0.58082  |
| 11746444_RPS20     | -0.08702 | 0.471809 | 0.580939 |
| 11746715_KIRREL3   | -0.07706 | 0.47181  | 0.580939 |
| 11755726_TMEM30B   | 0.039852 | 0.471819 | 0.580939 |
| 11735560_ZNF192P1  | -0.05904 | 0.471833 | 0.580941 |
| 11753756_ZFYVE21   | 0.034589 | 0.471861 | 0.580957 |
| 11726123_EVPL      | 0.031503 | 0.471874 | 0.580957 |
| 11749047_EYA3      | 0.047053 | 0.471892 | 0.580957 |
| 11749993_CCDC78    | -0.03916 | 0.471893 | 0.580957 |
| 11757546_MICALL2   | 0.032714 | 0.471958 | 0.581011 |
| 11740947_REXO1L1P  | 0.028707 | 0.471961 | 0.581011 |
| 11722080_KCTD9     | 0.030652 | 0.472011 | 0.581058 |
| 11732634_TSGA10    | 0.039557 | 0.472044 | 0.581085 |
| 11760766_ZSCAN20   | -0.04401 | 0.472102 | 0.58114  |
| 11757168_EIF4G2 // | 0.07322  | 0.472322 | 0.581397 |
| 11718905_FILIP1L   | -0.04589 | 0.472344 | 0.58141  |
| 11726053_C19orf24  | -0.02745 | 0.472371 | 0.581429 |
| 11737099_SLC5A7    | -0.02818 | 0.472386 | 0.581432 |
| 11762203_CLEC18B   | -0.05134 | 0.472432 | 0.581474 |
| 11736237_ABCA5     | 0.061033 | 0.472454 | 0.581486 |
| 11751996_HIRA      | 0.029394 | 0.472494 | 0.581522 |
| 11750311_GRM4      | -0.04055 | 0.472516 | 0.581534 |
| 11759051_SPANXD    | 0.041699 | 0.472585 | 0.581603 |
| 11721570_FAM173B   | 0.034157 | 0.472787 | 0.581837 |
| 11749598_IL18RAP   | -0.06131 | 0.472815 | 0.581857 |
| 11762475_FOXJ2     | -0.05658 | 0.47286  | 0.581898 |
| 11761489_SDF4      | 0.037537 | 0.472885 | 0.581914 |
| 11736918_HIST1H2AH | -0.05581 | 0.472937 | 0.581963 |
| 11746891_RPS6KL1   | -0.04735 | 0.472959 | 0.581976 |
| 11724503_SPON1     | -0.06144 | 0.472981 | 0.581984 |
| 11751383_PLA2G15   | -0.04071 | 0.47299  | 0.581984 |
| 11763953_PRG1      | 0.070435 | 0.473043 | 0.582025 |
| 11731856_PAGE1     | -0.03694 | 0.473046 | 0.582025 |
| 11720852_NFIA      | 0.074071 | 0.473108 | 0.582086 |
| 11749204_LGI1      | -0.0736  | 0.473177 | 0.582157 |
| 11735623_PSMB9     | 0.037599 | 0.473221 | 0.582196 |
| 11743869_RBBP9     | -0.03554 | 0.473275 | 0.582248 |
| 11758763_GLRX3     | -0.11221 | 0.473294 | 0.582257 |
| 11727772_PITPNM2   | -0.04944 | 0.473437 | 0.582417 |

|                    |          |          |          |
|--------------------|----------|----------|----------|
| 11727105_FGD5      | 0.050159 | 0.473605 | 0.582609 |
| 11751053_SERPINB13 | 0.041404 | 0.473624 | 0.582612 |
| 11715113_FAM86C1   | -0.03184 | 0.47363  | 0.582612 |
| 11731390_DRICH1    | -0.04112 | 0.473655 | 0.582621 |
| 11757169	EIF4G2 // | -0.06667 | 0.473662 | 0.582621 |
| 11742849_RGL3      | -0.03262 | 0.473711 | 0.582667 |
| 11722608_MT3       | -0.05366 | 0.473767 | 0.582721 |
| 11729493_TRH       | -0.08513 | 0.473789 | 0.582733 |
| 11743461_GPM6B     | 0.069933 | 0.473954 | 0.582908 |
| 11762189_MTFMT     | -0.07524 | 0.473955 | 0.582908 |
| 11734544_UBAP1     | -0.02647 | 0.47405  | 0.583011 |
| 11763824_SERPINB9  | -0.07209 | 0.47408  | 0.583033 |
| 11755616_SLC8B1    | -0.03014 | 0.474189 | 0.583152 |
| 11723941_PTTG1IP   | 0.037569 | 0.474205 | 0.583156 |
| 11747798_SPIDR     | -0.02622 | 0.474286 | 0.583242 |
| 11726000_CPNE4     | 0.088751 | 0.474299 | 0.583243 |
| 11736043_DCAF4     | 0.046098 | 0.474388 | 0.583334 |
| 11756258_RPL8      | 0.02478  | 0.474408 | 0.583334 |
| 11734994_SKI       | 0.026254 | 0.474409 | 0.583334 |
| 11735287_HS3ST5    | 0.048215 | 0.474439 | 0.583356 |
| 11738670_TARM1     | -0.05009 | 0.474467 | 0.583376 |
| 11739128_CDH3      | -0.03056 | 0.474501 | 0.583404 |
| 11733541_C1orf53   | -0.04146 | 0.474527 | 0.58342  |
| 11726255_CD74      | -0.03105 | 0.474626 | 0.583528 |
| 11734387_PKD1L2    | 0.063532 | 0.474814 | 0.583724 |
| 11755501_PLSCR2    | -0.05275 | 0.47482  | 0.583724 |
| 11728984_MTHFD1L   | 0.028737 | 0.474821 | 0.583724 |
| 11725921_C1orf64   | 0.054236 | 0.474854 | 0.583749 |
| 11733271_NAT8L     | 0.043227 | 0.475032 | 0.583953 |
| 11747581_APCDD1L   | -0.0387  | 0.475057 | 0.583969 |
| 11725319_ZC3H14    | -0.02805 | 0.475107 | 0.584016 |
| 11718419_FCER1G    | -0.056   | 0.47516  | 0.584066 |
| 11750327_BNC2      | 0.056397 | 0.475229 | 0.584118 |
| 11754168_SVEP1     | -0.0338  | 0.475234 | 0.584118 |
| 11732508_ESYT3     | -0.0582  | 0.475238 | 0.584118 |
| 11756549_SPECC1L   | 0.03095  | 0.475279 | 0.584155 |
| 11745097_FAM135B   | -0.09281 | 0.475531 | 0.584449 |
| 11750712_SEMA4A    | -0.037   | 0.475557 | 0.584467 |
| 11762061_HMGA2     | -0.04984 | 0.475676 | 0.584595 |
| 11737001_CHRNA4 // | 0.030961 | 0.475686 | 0.584595 |
| 11728026_IGLL1     | -0.06717 | 0.475701 | 0.584599 |
| 11754012_USF2      | -0.02825 | 0.475728 | 0.584618 |
| 11759739_SNHG11    | -0.03912 | 0.475744 | 0.584623 |
| 11734150_PLAGL1    | 0.04043  | 0.475806 | 0.584655 |
| 11746121_LMAN1L    | -0.04245 | 0.475806 | 0.584655 |
| 11735233_IQCC      | -0.03746 | 0.475806 | 0.584655 |
| 11734665_DDX3Y     | -0.07648 | 0.475874 | 0.584707 |
| 11721474_GPM6B     | -0.08221 | 0.475874 | 0.584707 |
| 11760376_DNAJB14   | 0.032052 | 0.475886 | 0.584707 |
| 11754427_CC SER2   | -0.02999 | 0.475896 | 0.584707 |
| 11761603_STAU2     | -0.07379 | 0.475984 | 0.5848   |

|                    |          |          |          |
|--------------------|----------|----------|----------|
| 11752071_SLC4A9    | 0.058306 | 0.476039 | 0.584845 |
| 11725045_UAP1      | -0.03036 | 0.476045 | 0.584845 |
| 11762272_CKMT1B    | -0.05955 | 0.476136 | 0.584943 |
| 11745144_CLEC4E    | -0.05747 | 0.476296 | 0.585125 |
| 11742517_OR2M2     | -0.04931 | 0.476318 | 0.585137 |
| 11762112_HLA-F     | 0.071368 | 0.476368 | 0.585184 |
| 11735425_MAPK8IP2  | 0.040551 | 0.476433 | 0.585249 |
| 11742529_OR6B3     | 0.047236 | 0.476484 | 0.585289 |
| 11759250_SGSM1     | -0.05388 | 0.47649  | 0.585289 |
| 11745760_RSL24D1   | -0.02624 | 0.476612 | 0.585424 |
| 11760867_OXA1L     | -0.07019 | 0.476768 | 0.585602 |
| 11729006_OVOL2     | -0.07174 | 0.476899 | 0.585748 |
| 11730720_NCAM1     | 0.059849 | 0.477077 | 0.585952 |
| 11731830_HOGA1     | -0.02652 | 0.477168 | 0.586037 |
| 11730059_HNF4A     | 0.106454 | 0.47717  | 0.586037 |
| 11749163_FARP2     | -0.04373 | 0.477183 | 0.586037 |
| 11752568_LCK       | 0.032658 | 0.477201 | 0.586045 |
| 11735034_GCSAM     | 0.06209  | 0.477221 | 0.586055 |
| 11759628_WIPF1     | -0.02909 | 0.477324 | 0.586166 |
| 11733453_IRX5      | -0.08908 | 0.477337 | 0.586167 |
| 11754270_C4A /// C | 0.046676 | 0.477438 | 0.586277 |
| 11737067_TGM5      | -0.03394 | 0.477491 | 0.586315 |
| 11742762_GCG       | 0.068127 | 0.4775   | 0.586315 |
| 11742337_OR6C74    | -0.07969 | 0.477505 | 0.586315 |
| 11735659_AGBL4     | -0.08552 | 0.477597 | 0.586404 |
| 11731630_SOX30     | -0.05172 | 0.477607 | 0.586404 |
| 11761045_KLHL17    | -0.05563 | 0.477613 | 0.586404 |
| 11731870_NOXA1     | -0.05576 | 0.477646 | 0.586429 |
| 11750409_TMTC2     | 0.032694 | 0.47769  | 0.586469 |
| 11761595_CD1E      | -0.03268 | 0.477742 | 0.586507 |
| 11730644_SP7       | 0.044205 | 0.477745 | 0.586507 |
| 11723212_KCNJ10    | 0.036288 | 0.477772 | 0.586525 |
| 11754903_RGS11     | -0.03897 | 0.477807 | 0.586549 |
| 11758871_NUP88     | 0.031189 | 0.477816 | 0.586549 |
| 11726912_FAT2      | 0.09552  | 0.477885 | 0.586619 |
| 11740325_SLC6A2    | 0.080057 | 0.477921 | 0.586649 |
| 11749688_HYOU1     | 0.041921 | 0.47794  | 0.586658 |
| 11717047_CLDND1    | 0.027015 | 0.477971 | 0.586681 |
| 11761050_FGR       | -0.05583 | 0.478023 | 0.58673  |
| 11717154_PLAU      | 0.10738  | 0.478043 | 0.58674  |
| 11761193_LINC00839 | -0.04731 | 0.478103 | 0.586799 |
| 11738544_SLFNL1    | 0.031929 | 0.478154 | 0.586844 |
| 11755737_HIF1A     | -0.0313  | 0.478164 | 0.586844 |
| 11760548_LMCD1     | -0.03484 | 0.478277 | 0.586968 |
| 11738062_S100A7A   | -0.07143 | 0.478395 | 0.587099 |
| 11756519_LMO3      | -0.04611 | 0.478428 | 0.587124 |
| 11740305_KIAA0319  | 0.030469 | 0.478561 | 0.587272 |
| 11730482_ARR3      | -0.05974 | 0.478595 | 0.5873   |
| 11757685_FA2H      | -0.03348 | 0.478625 | 0.587322 |
| 11754886_SEPT11 // | -0.04197 | 0.478673 | 0.587365 |
| 11724263_SHARPIN   | -0.03278 | 0.478745 | 0.587439 |

|                    |     |          |          |          |
|--------------------|-----|----------|----------|----------|
| 11762011_SLC01B3   | /   | 0.066066 | 0.478907 | 0.587623 |
| 11749249_PI4K2B    |     | -0.03907 | 0.47901  | 0.587735 |
| 11760847_KCNMB1    |     | -0.09579 | 0.479036 | 0.587752 |
| 11760828_RPL36AP33 |     | -0.05833 | 0.479077 | 0.587788 |
| 11753555_CD53      |     | -0.06273 | 0.479099 | 0.5878   |
| 11747449_D2HGDH    |     | -0.02608 | 0.479134 | 0.587829 |
| 11737732_AQP6      |     | 0.050203 | 0.479168 | 0.587854 |
| 11727344_ZNF354C   |     | 0.1147   | 0.479199 | 0.587878 |
| 11734085_NKX2-3    |     | 0.037754 | 0.479257 | 0.587935 |
| 11719972_SC02      |     | -0.03641 | 0.479282 | 0.587951 |
| 11740607_HYKK      |     | -0.02833 | 0.479309 | 0.587969 |
| 11739583_PRKD3     |     | 0.025145 | 0.479341 | 0.587993 |
| 11749777_TRIM16    | //  | 0.043101 | 0.479482 | 0.588152 |
| 11761504_SOHLH2    |     | 0.041153 | 0.479562 | 0.588235 |
| 11742565_OR51L1    |     | -0.08354 | 0.479626 | 0.588299 |
| 11756770_TRIM29    |     | -0.065   | 0.479678 | 0.588337 |
| 11741637_TMEM95    |     | -0.03301 | 0.479691 | 0.588337 |
| 11752073_C2Oorf194 |     | -0.10296 | 0.479694 | 0.588337 |
| 11761837_RALGPS1   |     | -0.04778 | 0.479711 | 0.588344 |
| 11763812_UTY       |     | -0.03067 | 0.479733 | 0.588356 |
| 11763390_LINC00906 |     | -0.09292 | 0.479792 | 0.588414 |
| 11729535_TNMD      |     | -0.1149  | 0.47983  | 0.588446 |
| 11730453_KIF24     |     | -0.04871 | 0.480038 | 0.588663 |
| 11734617_HCG9      |     | 0.031473 | 0.480042 | 0.588663 |
| 11731229_ALX1      |     | -0.02948 | 0.480044 | 0.588663 |
| 11744140_FOLR3     |     | -0.02707 | 0.480139 | 0.588765 |
| 11736728_GEN1      |     | -0.02721 | 0.480188 | 0.588811 |
| 11720076_CDK3      | /// | -0.02817 | 0.480234 | 0.588846 |
| 11761856_GTF2IP20  |     | 0.03923  | 0.480241 | 0.588846 |
| 11734223_ZNF543    |     | -0.08309 | 0.480321 | 0.588929 |
| 11749657_NAV2      |     | 0.04542  | 0.480477 | 0.589106 |
| 11729388_MIER1     |     | -0.04373 | 0.480512 | 0.589133 |
| 11719330_FNDC4     |     | -0.03548 | 0.480534 | 0.589147 |
| 11762369_BNC1      |     | -0.05283 | 0.480577 | 0.589185 |
| 11742249_FSHR      |     | -0.05425 | 0.4806   | 0.589198 |
| 11722421_TMEM168   |     | -0.03395 | 0.480619 | 0.589206 |
| 11737356_PQLC2L    |     | -0.0547  | 0.48065  | 0.589224 |
| 11731682_CD70      |     | -0.02697 | 0.480665 | 0.589224 |
| 11740262_ETV3      |     | 0.051668 | 0.48067  | 0.589224 |
| 11730764_CD177     |     | 0.046945 | 0.480706 | 0.589254 |
| 11742496_FOXB2     |     | 0.034652 | 0.480744 | 0.589285 |
| 11717316_RPL38     |     | -0.02787 | 0.480975 | 0.589554 |
| 11762102_ZNF346    |     | -0.03611 | 0.480997 | 0.589566 |
| 11741930_ACSM4     |     | -0.06087 | 0.481116 | 0.589697 |
| 11733023_BTG1      |     | 0.026535 | 0.481129 | 0.589698 |
| 11736449_GIN1      |     | -0.06632 | 0.481201 | 0.589771 |
| 11731360_ICOS      |     | -0.06038 | 0.481221 | 0.589781 |
| 11728197_PMP2      |     | 0.052271 | 0.481249 | 0.589801 |
| 11746853_POMGNT1   |     | -0.02727 | 0.48134  | 0.589897 |
| 11739022_ADAR      |     | -0.04224 | 0.481419 | 0.589979 |
| 11727655_DST       |     | 0.063897 | 0.481445 | 0.589997 |

|                    |          |          |          |
|--------------------|----------|----------|----------|
| 11744992_ZNF189    | -0.03869 | 0.481525 | 0.59008  |
| 11735574_MAGEB18   | 0.033947 | 0.481604 | 0.590162 |
| 11730965_MAPK11    | -0.0301  | 0.481644 | 0.590196 |
| 11740532_BTC       | -0.06221 | 0.481675 | 0.590219 |
| 11763586_ATF2      | 0.046704 | 0.481727 | 0.590266 |
| 11742510_OR2T1     | -0.03378 | 0.481737 | 0.590266 |
| 11737806_PIWIL2    | -0.03502 | 0.481798 | 0.590318 |
| 11735172_TM4SF20   | 0.060629 | 0.481804 | 0.590318 |
| 11741723_DENND2C   | -0.04262 | 0.481822 | 0.590325 |
| 11715672_WDR83OS   | 0.025802 | 0.481868 | 0.590367 |
| 11730640_GCM2      | -0.03808 | 0.481891 | 0.590369 |
| 11726756_CDC25A    | -0.03835 | 0.481894 | 0.590369 |
| 11751459_LRG1      | -0.06458 | 0.481967 | 0.590444 |
| 11728270_ZNF330    | -0.03513 | 0.482015 | 0.590488 |
| 11763386_BMS1P21   | -0.06138 | 0.48207  | 0.590541 |
| 11737420_WNT16     | 0.062055 | 0.482267 | 0.590768 |
| 11745153_GABRB2    | 0.048979 | 0.482292 | 0.590783 |
| 11761074_SEPT4     | 0.035058 | 0.48238  | 0.590875 |
| 11760012 DOCK2     | -0.08246 | 0.482541 | 0.59105  |
| 11726887_SOX15     | -0.05049 | 0.482546 | 0.59105  |
| 11727472_CYP2C9    | -0.05336 | 0.482583 | 0.59108  |
| 11724830_STS       | -0.06425 | 0.482598 | 0.591083 |
| 11729945_STX1B     | 0.041092 | 0.482621 | 0.591089 |
| 11757778_EIF4H     | 0.02551  | 0.482627 | 0.591089 |
| 11733467_KCNMB2    | -0.05294 | 0.482685 | 0.591146 |
| 11737713_SIGLEC11  | -0.03623 | 0.482706 | 0.591156 |
| 11724365_FOXP4     | -0.03015 | 0.482737 | 0.59118  |
| 11729030_SPATS1    | -0.0646  | 0.482761 | 0.591189 |
| 11737563_KLF14     | 0.041104 | 0.482769 | 0.591189 |
| 11721558_FBXO41    | -0.03052 | 0.482826 | 0.591233 |
| 11716260_RHEB      | -0.03055 | 0.482829 | 0.591233 |
| 11749791_CRB1      | -0.05247 | 0.482865 | 0.591263 |
| 11728623_PAX2      | -0.05641 | 0.482908 | 0.5913   |
| 11728894_HES2      | -0.02811 | 0.483195 | 0.591625 |
| 11729393_TRIM3     | -0.02633 | 0.483197 | 0.591625 |
| 11724961_SRGAP3    | 0.031054 | 0.483245 | 0.591657 |
| 11737892_PAX5      | -0.05374 | 0.483248 | 0.591657 |
| 11758701_METTL13   | -0.03079 | 0.483274 | 0.591668 |
| 11731758_RAD52     | -0.03483 | 0.483281 | 0.591668 |
| 11753874_BCL2L15   | 0.04484  | 0.483299 | 0.59167  |
| 11719764_CDK18     | 0.030278 | 0.483306 | 0.59167  |
| 11730255_EPN3      | -0.0548  | 0.483406 | 0.59177  |
| 11748551_ADAM3A    | -0.04247 | 0.483412 | 0.59177  |
| 11722011_GIMAP4    | -0.05306 | 0.48351  | 0.591875 |
| 11759378_NHSL2     | 0.055897 | 0.483569 | 0.591932 |
| 11722412_SLC7A1    | -0.04089 | 0.483861 | 0.592274 |
| 11750572_NPAT      | 0.032134 | 0.483925 | 0.592338 |
| 11715115_HIST1H2BI | -0.07743 | 0.483967 | 0.592368 |
| 11750798_TECPR2    | 0.04043  | 0.483974 | 0.592368 |
| 11741955_GRIK2     | -0.04946 | 0.484152 | 0.592571 |
| 11723271_KPNA6     | -0.03705 | 0.484322 | 0.59274  |

|                    |          |          |          |
|--------------------|----------|----------|----------|
| 11762665_MGAT5B    | -0.06556 | 0.484325 | 0.59274  |
| 11757530_C19orf53  | -0.02878 | 0.484326 | 0.59274  |
| 11740839_CLEC4M    | -0.05865 | 0.484421 | 0.592841 |
| 11728041_SSTR1     | 0.057238 | 0.484473 | 0.592884 |
| 11758259_SLC02B1   | 0.065042 | 0.484483 | 0.592884 |
| 11738448_RUNX2     | -0.07694 | 0.484492 | 0.592884 |
| 11737128_C9orf47   | -0.11111 | 0.48452  | 0.592903 |
| 11738412_CCDC171   | -0.05898 | 0.484546 | 0.592919 |
| 11761111_SMARCD1   | -0.03115 | 0.484584 | 0.592951 |
| 11736457_KCNK6     | 0.056502 | 0.484626 | 0.592983 |
| 11718445_SH3BGRL2  | 0.075426 | 0.484637 | 0.592983 |
| 11758141_CPLX1     | 0.033675 | 0.484646 | 0.592983 |
| 11727224_GALNT16   | -0.04583 | 0.48466  | 0.592983 |
| 11733582_MGAT5B    | 0.028755 | 0.48467  | 0.592983 |
| 11760617_HDAC5     | -0.02486 | 0.484694 | 0.592997 |
| 11733808_GABRA1    | -0.04646 | 0.484759 | 0.593054 |
| 11763768_SYNJ2     | 0.033942 | 0.484766 | 0.593054 |
| 11748719_SLC14A2   | 0.057031 | 0.484783 | 0.593054 |
| 11723302_CHGA      | -0.05202 | 0.484789 | 0.593054 |
| 11753245_ZIC2      | -0.03708 | 0.484848 | 0.593092 |
| 11729514_CSF3      | 0.044199 | 0.484863 | 0.593092 |
| 11715110_ARRDC5    | -0.03762 | 0.484863 | 0.593092 |
| 11743867_NGDN      | -0.03268 | 0.484869 | 0.593092 |
| 11758038_RPL35A // | -0.02512 | 0.484903 | 0.593119 |
| 11722336_TBC1D9B   | 0.042842 | 0.485121 | 0.593371 |
| 11721347_MPEG1     | -0.05667 | 0.485184 | 0.593433 |
| 11748935_POMT1     | 0.046907 | 0.48541  | 0.593694 |
| 11763475_RALGAPA1  | 0.042664 | 0.48547  | 0.593741 |
| 11727327_FAM131C   | -0.02687 | 0.485473 | 0.593741 |
| 11743988_VARS      | 0.028093 | 0.485487 | 0.593745 |
| 11742492_TRIM77    | 0.032871 | 0.485503 | 0.593749 |
| 11745525_C14orf105 | 0.042076 | 0.485647 | 0.593911 |
| 11748353_TMCC2     | -0.04577 | 0.485677 | 0.593919 |
| 11745480_GLYCTK    | -0.02958 | 0.485678 | 0.593919 |
| 11743898_ZBTB80S   | 0.030139 | 0.485698 | 0.593928 |
| 11763612_GLI2      | -0.08301 | 0.485755 | 0.593971 |
| 11733423_CCBE1     | -0.03385 | 0.485757 | 0.593971 |
| 11760388_WDR20     | 0.055417 | 0.485847 | 0.594065 |
| 11736942_DUOXA1    | -0.03923 | 0.485882 | 0.594093 |
| 11763772_AMH       | 0.041573 | 0.48591  | 0.594113 |
| 11727928_FOXO1     | 0.048682 | 0.485978 | 0.594177 |
| 11738197_SLC13A4   | -0.04201 | 0.485986 | 0.594177 |
| 11753076_AIF1      | -0.06678 | 0.486008 | 0.594188 |
| 11748083_DNALI1    | 0.033386 | 0.486076 | 0.594257 |
| 11738999_SLC38A2   | -0.02726 | 0.486108 | 0.594281 |
| 11731948_AADACL2   | -0.0787  | 0.486179 | 0.594352 |
| 11748006_PHF24     | -0.07536 | 0.486281 | 0.594463 |
| 11747702_RASSF8    | 0.037053 | 0.4864   | 0.594593 |
| 11733407_CLDN19    | -0.04931 | 0.48645  | 0.594633 |
| 11747117_FOLH1 /// | 0.063608 | 0.486464 | 0.594633 |
| 11737426_RASGRP4   | -0.03925 | 0.48647  | 0.594633 |



|                    |          |          |          |
|--------------------|----------|----------|----------|
| 11735408_SIAH3     | -0.06061 | 0.486513 | 0.594665 |
| 11735871_CCR8      | -0.0415  | 0.48652  | 0.594665 |
| 11738182_PRDM15    | 0.04212  | 0.486538 | 0.594672 |
| 11742981_FABP3     | -0.0583  | 0.486602 | 0.594735 |
| 11763568_NXPE2     | 0.082864 | 0.486613 | 0.594735 |
| 11731633_HPGDS     | 0.080485 | 0.486641 | 0.594754 |
| 11717612_MAST2     | -0.03303 | 0.486679 | 0.594785 |
| 11728938_GFRA2     | -0.04618 | 0.486761 | 0.594871 |
| 11741616_GPRIN3    | 0.035671 | 0.486805 | 0.594894 |
| 11750350_CAMK1G    | 0.023856 | 0.486811 | 0.594894 |
| 11720177_NOL6      | -0.03257 | 0.486817 | 0.594894 |
| 11716916_PGAP3     | 0.032859 | 0.486871 | 0.594946 |
| 11745296_ANKRD66   | -0.0438  | 0.486905 | 0.594964 |
| 11728981_ERICH5    | -0.07511 | 0.48691  | 0.594964 |
| 11764271_LOC105372 | 0.090437 | 0.487003 | 0.595063 |
| 11763055_EEF1A1    | -0.03115 | 0.487139 | 0.595214 |
| 11715786_PLOD3     | -0.03236 | 0.487286 | 0.595379 |
| 11747107_RREB1     | 0.037563 | 0.487303 | 0.595385 |
| 11738576_OR10A3    | -0.10032 | 0.487331 | 0.595404 |
| 11737745_OVGP1     | 0.025828 | 0.487394 | 0.595465 |
| 11759919_PHC3      | -0.13905 | 0.487418 | 0.595479 |
| 11737283_ZNF833P   | -0.03825 | 0.487434 | 0.595485 |
| 11736530_KCND2     | -0.06397 | 0.487455 | 0.595496 |
| 11761756_GSTO2     | -0.03576 | 0.487545 | 0.59559  |
| 11734112_TIGIT     | -0.09316 | 0.487607 | 0.595647 |
| 11757577_TMEM134   | -0.04005 | 0.487616 | 0.595647 |
| 11745456_RPTOR     | -0.03125 | 0.487637 | 0.595659 |
| 11746677_REXO1     | 0.041641 | 0.487667 | 0.59568  |
| 11737682_CCNI2     | -0.02949 | 0.487687 | 0.59569  |
| 11723756_ZFR       | 0.025398 | 0.487801 | 0.595814 |
| 11750730_SNCAIP    | -0.05816 | 0.487875 | 0.595889 |
| 11764117_SMARCA5   | 0.025996 | 0.487898 | 0.595902 |
| 11715616_NDUFB1    | -0.02685 | 0.488029 | 0.596048 |
| 11760472_BCL3      | 0.030876 | 0.488063 | 0.596074 |
| 11750771_FOLH1 /// | 0.066336 | 0.488167 | 0.596186 |
| 11721389_SCGN      | 0.042375 | 0.488235 | 0.596254 |
| 11759319_VCPIP1    | -0.05787 | 0.488248 | 0.596255 |
| 11721788_C1orf226  | -0.03697 | 0.488264 | 0.59626  |
| 11750527_HLA-DQA1  | -0.03015 | 0.488279 | 0.596263 |
| 11730094_FTCD      | 0.038747 | 0.488328 | 0.596295 |
| 11737594_CFAP54    | -0.07104 | 0.488335 | 0.596295 |
| 11721970_BDP1      | 0.039916 | 0.488341 | 0.596295 |
| 11723465_CELF2     | -0.07688 | 0.488359 | 0.596302 |
| 11730342_SLA2      | 0.052084 | 0.488421 | 0.596362 |
| 11759888_PGLYRP2   | -0.03526 | 0.488479 | 0.596419 |
| 11759880_STARD13   | 0.025179 | 0.488543 | 0.596482 |
| 11738284_KRTAP13-2 | 0.034353 | 0.488626 | 0.596568 |
| 11717400_FAH       | 0.045419 | 0.488756 | 0.596711 |
| 11754630_MLKL      | 0.047694 | 0.4888   | 0.596751 |
| 11721344_CTRC      | -0.05565 | 0.488821 | 0.596761 |
| 11734075_FBXL17    | 0.032509 | 0.488843 | 0.596761 |

|                    |          |          |          |
|--------------------|----------|----------|----------|
| 11747665_LYSMD4    | -0.04195 | 0.488845 | 0.596761 |
| 11739494_MGAT4A    | -0.04037 | 0.488921 | 0.596838 |
| 11733098_ITGB4     | 0.026468 | 0.488946 | 0.596854 |
| 11729499_SPG7      | 0.038855 | 0.489009 | 0.596911 |
| 11760640_KCNQ2     | -0.07121 | 0.489017 | 0.596911 |
| 11748682_NXN       | -0.03337 | 0.489052 | 0.596939 |
| 11754498_FBRS      | 0.042007 | 0.489067 | 0.596942 |
| 11738304_VAX1      | -0.04429 | 0.489099 | 0.596967 |
| 11746460_ZNF711    | 0.035088 | 0.489142 | 0.597004 |
| 11746944_AGXT2     | 0.04252  | 0.489191 | 0.597049 |
| 11718463_ELMOD3    | 0.031209 | 0.489243 | 0.597098 |
| 11725590_NUDT6     | 0.032498 | 0.489435 | 0.597303 |
| 11720476_PLG       | -0.08228 | 0.489436 | 0.597303 |
| 11722722_UNC13D    | -0.05966 | 0.489472 | 0.597332 |
| 11747631_XAF1      | -0.04505 | 0.489523 | 0.59738  |
| 11717583_VAPB      | -0.02638 | 0.489535 | 0.59738  |
| 11731975_IGSF9     | -0.043   | 0.489569 | 0.597398 |
| 11749638_SCAF8 /// | -0.03971 | 0.489575 | 0.597398 |
| 11732099_RTBDN     | -0.0512  | 0.489591 | 0.597402 |
| 11731444_ARHGEF12  | 0.024138 | 0.489632 | 0.597438 |
| 11751741_ACER3     | 0.032097 | 0.489684 | 0.597486 |
| 11730850_CDSN      | -0.05018 | 0.489749 | 0.597551 |
| 11732182_SLC35E4   | 0.031356 | 0.49     | 0.597842 |
| 11726340_NUDT14    | -0.03584 | 0.49009  | 0.597937 |
| 11722068_EPS8L1    | -0.06802 | 0.490136 | 0.597978 |
| 11761433_CCDC150   | 0.05667  | 0.490149 | 0.59798  |
| 11736334_SCRN3     | -0.04763 | 0.490184 | 0.597995 |
| 11740913_SKOR1     | -0.03098 | 0.490186 | 0.597995 |
| 11749560_CIAO1     | 0.033791 | 0.490207 | 0.598006 |
| 11756941_CCDC151   | 0.043176 | 0.49032  | 0.598128 |
| 11752254_DNAH3     | 0.054422 | 0.490345 | 0.598144 |
| 11744863_VPS29     | 0.029292 | 0.490423 | 0.598224 |
| 11738351_BCL2      | -0.03781 | 0.490453 | 0.598246 |
| 11758407_SLC34A2   | -0.03085 | 0.490481 | 0.598265 |
| 11725272_P4HA3     | -0.06894 | 0.490584 | 0.598376 |
| 11729056_IQCF2     | -0.0635  | 0.490631 | 0.598418 |
| 11725563_C12orf60  | -0.06297 | 0.49066  | 0.598438 |
| 11726198_SYN2      | 0.061294 | 0.490684 | 0.598441 |
| 11738483_TNFRSF13B | -0.02841 | 0.490686 | 0.598441 |
| 11735491_MEF2A     | 0.035934 | 0.490765 | 0.598522 |
| 11755366_SLC24A1   | -0.05782 | 0.490983 | 0.598773 |
| 11740821_CD1E      | -0.04081 | 0.491011 | 0.598792 |
| 11736669_SPRY4     | 0.036482 | 0.491029 | 0.598799 |
| 11728308_KRT20     | 0.03192  | 0.491101 | 0.598862 |
| 11754312_PI4KB     | 0.027243 | 0.491105 | 0.598862 |
| 11732605_CBLN4     | -0.02446 | 0.491163 | 0.598917 |
| 11716484_UNC119B   | 0.025256 | 0.491207 | 0.598956 |
| 11750601_ZC3H12D   | 0.026925 | 0.49127  | 0.599017 |
| 11722659_PEBP4     | 0.06461  | 0.491344 | 0.599094 |
| 11756476_RPL19     | 0.023623 | 0.491509 | 0.599279 |
| 11719049_RASSF5    | -0.03051 | 0.491552 | 0.599317 |

|                    |          |          |          |
|--------------------|----------|----------|----------|
| 11716100_ATG3      | 0.027625 | 0.491617 | 0.599381 |
| 11745680_DMRTA2    | 0.060563 | 0.491734 | 0.599508 |
| 11735882_KCNH4     | -0.05498 | 0.491784 | 0.599554 |
| 11740329_RBML2     | -0.03943 | 0.491795 | 0.599554 |
| 11734767_THOC2     | 0.024641 | 0.491828 | 0.599579 |
| 11731935_KCNN1     | 0.076142 | 0.491887 | 0.599631 |
| 11742613_OR10G7    | -0.05001 | 0.491896 | 0.599631 |
| 11741369_UGT1A1 // | 0.040084 | 0.491933 | 0.599662 |
| 11739278_PPHLN1    | 0.027905 | 0.491971 | 0.59968  |
| 11737080_PTPRQ     | -0.04528 | 0.491972 | 0.59968  |
| 11757783_VCAN      | 0.034396 | 0.492099 | 0.59982  |
| 11716167_MX1       | -0.0534  | 0.492184 | 0.59989  |
| 11729908_IQCA1     | -0.06696 | 0.492193 | 0.59989  |
| 11756019_KDELR2    | 0.028192 | 0.492194 | 0.59989  |
| 11739677_NTRK2     | 0.032222 | 0.492283 | 0.599984 |
| 11737400_EPPIN-WFD | -0.03631 | 0.492299 | 0.599988 |
| 11729436_LY6H      | 0.068563 | 0.492351 | 0.600037 |
| 11739539_PIK3R1    | -0.0284  | 0.492442 | 0.600133 |
| 11723396_B9D2      | -0.03367 | 0.49253  | 0.600225 |
| 11760632_KCTD21-AS | -0.06082 | 0.492592 | 0.600286 |
| 11736617_AVPR1A    | -0.09476 | 0.492701 | 0.600404 |
| 11734615_NRG2      | 0.051101 | 0.492791 | 0.600494 |
| 11757311_POMP      | 0.024983 | 0.492801 | 0.600494 |
| 11757926_SLC9A9    | 0.063227 | 0.492817 | 0.600494 |
| 11746339_MTSS1     | 0.030034 | 0.492824 | 0.600494 |
| 11761120_TARBP2    | 0.041176 | 0.492947 | 0.600629 |
| 11740708_ACAD10    | -0.04602 | 0.493012 | 0.600693 |
| 11745426_UHRF1BP1  | -0.04705 | 0.493043 | 0.600715 |
| 11737265_CCDC30    | 0.054284 | 0.493188 | 0.600861 |
| 11750525_KIAA1522  | -0.0337  | 0.493199 | 0.600861 |
| 11747490_PDE1B     | -0.0561  | 0.493202 | 0.600861 |
| 11762678_CDK16     | -0.05908 | 0.493212 | 0.600861 |
| 11759632_CCDC183   | -0.04444 | 0.49328  | 0.600929 |
| 11758921_MRPS17    | 0.036068 | 0.493331 | 0.600976 |
| 11731852_LOR       | -0.06912 | 0.493381 | 0.601022 |
| 11736450_GIN1      | 0.024113 | 0.493393 | 0.601022 |
| 11742033_LOXHD1    | -0.0303  | 0.493421 | 0.601041 |
| 11759697_SLITRK3   | -0.08576 | 0.493433 | 0.601041 |
| 11754894_UNC79     | -0.03158 | 0.493457 | 0.601055 |
| 11753265_DPY19L2P2 | 0.030185 | 0.493483 | 0.601072 |
| 11723146_RANBP17   | 0.051719 | 0.493535 | 0.601108 |
| 11746336_CNOT8     | -0.03016 | 0.493542 | 0.601108 |
| 11750779_SLC2A5    | -0.06361 | 0.49355  | 0.601108 |
| 11735056_ZNF785    | 0.052489 | 0.493571 | 0.601119 |
| 11732390_CCR9      | -0.0341  | 0.493599 | 0.601127 |
| 11742513_OR1L1     | -0.03499 | 0.493603 | 0.601127 |
| 11742442_USH1C     | 0.032046 | 0.493631 | 0.601141 |
| 11735978_OR2S2     | -0.03045 | 0.493639 | 0.601141 |
| 11751435_SIGLEC8   | -0.03686 | 0.49368  | 0.601176 |
| 11720734_INPPL1    | -0.0331  | 0.493747 | 0.601239 |
| 11759681_C21orf2   | -0.03473 | 0.493756 | 0.601239 |

|                    |          |          |          |
|--------------------|----------|----------|----------|
| 11731712_CACNB2    | 0.03567  | 0.493867 | 0.601359 |
| 11758339_LINCO1001 | -0.02748 | 0.493963 | 0.601461 |
| 11730415_CALCA     | -0.03845 | 0.493994 | 0.601476 |
| 11745478_GRIK1-AS1 | -0.02537 | 0.494001 | 0.601476 |
| 11728046_C1QTNF4   | -0.04303 | 0.494012 | 0.601476 |
| 11721785_ESR1      | -0.03599 | 0.494083 | 0.601548 |
| 11759549_MICAL2    | -0.04804 | 0.494106 | 0.601558 |
| 11750930_RGS6      | 0.055004 | 0.494116 | 0.601558 |
| 11721868_POP5      | -0.02865 | 0.494131 | 0.601561 |
| 11717356_RTF1      | 0.025512 | 0.494165 | 0.601588 |
| 11753388_TBATA     | -0.05902 | 0.494235 | 0.601648 |
| 11758274_AMMECR1L  | -0.0422  | 0.494239 | 0.601648 |
| 11743263_ATG13     | -0.02608 | 0.494252 | 0.601648 |
| 11759059_ZNF134    | -0.03294 | 0.494302 | 0.601695 |
| 11717264_ATPAF1    | -0.02524 | 0.494384 | 0.601779 |
| 11736104_ZNF750    | -0.0672  | 0.494409 | 0.601783 |
| 11737702_CFAP65    | -0.06242 | 0.494412 | 0.601783 |
| 11715412_EPAS1     | -0.05201 | 0.494439 | 0.601801 |
| 11730356_KCNE4     | 0.04805  | 0.494544 | 0.601903 |
| 11760413_COPS6     | 0.090661 | 0.494548 | 0.601903 |
| 11735111_PTGER3    | -0.03847 | 0.494661 | 0.602026 |
| 11752297_CIITA     | 0.040807 | 0.494699 | 0.60204  |
| 11717815_ZBTB5     | 0.030109 | 0.494701 | 0.60204  |
| 11763794_DUSP22    | 0.063119 | 0.494709 | 0.60204  |
| 11734286_COX7B2    | 0.045309 | 0.494782 | 0.602114 |
| 11761185_ZNF274    | 0.042143 | 0.494815 | 0.602139 |
| 11719656_SEMG2     | -0.04854 | 0.494844 | 0.602144 |
| 11759871_TWIST2    | -0.04979 | 0.494844 | 0.602144 |
| 11751302_TWF1      | 0.025589 | 0.494989 | 0.602305 |
| 11734937_CNOT2     | -0.04858 | 0.495014 | 0.602321 |
| 11755823_SYT9      | -0.0507  | 0.495029 | 0.602324 |
| 11754819_GBA /// G | 0.0374   | 0.495085 | 0.602377 |
| 11738676_OR6K2     | -0.04841 | 0.49514  | 0.602429 |
| 11731861_ZNF720    | -0.03938 | 0.495154 | 0.602432 |
| 11738188_TP73      | -0.05805 | 0.495231 | 0.60251  |
| 11736200_GLUD2     | 0.037278 | 0.495269 | 0.602542 |
| 11729323_ASB5      | -0.07051 | 0.495334 | 0.602606 |
| 11719646_EHBP1     | 0.025104 | 0.495369 | 0.602618 |
| 11756442_ANKZF1    | -0.02485 | 0.495369 | 0.602618 |
| 11717780_DHX35     | -0.03816 | 0.495414 | 0.602657 |
| 11734285_CSAG2 /// | 0.027826 | 0.495469 | 0.60271  |
| 11742574_OR4D9     | -0.02849 | 0.495486 | 0.602715 |
| 11754212_PPIG      | -0.03344 | 0.4955   | 0.602717 |
| 11726642_PEX3      | 0.043925 | 0.495535 | 0.602745 |
| 11759704_TSL       | 0.066943 | 0.495594 | 0.602801 |
| 11740826_TBATA     | 0.037312 | 0.495633 | 0.602833 |
| 11724910_TMPRSS2   | -0.04171 | 0.495691 | 0.602889 |
| 11730479_DRD2      | 0.031084 | 0.495789 | 0.602994 |
| 11760275_ADAM18    | 0.091744 | 0.495802 | 0.602995 |
| 11745374_PCDH19    | -0.06337 | 0.495855 | 0.603032 |
| 11749592_GFAP      | 0.034815 | 0.495858 | 0.603032 |

|                    |          |          |          |
|--------------------|----------|----------|----------|
| 11738500_OR8B8     | -0.05085 | 0.495877 | 0.603037 |
| 11755805_ZNF407    | -0.053   | 0.495886 | 0.603037 |
| 11738045_LRAT      | 0.040547 | 0.496123 | 0.60331  |
| 11760751_CD2       | -0.06275 | 0.496186 | 0.603371 |
| 11737697_LEKR1     | -0.06089 | 0.49626  | 0.603447 |
| 11739913_CRADD     | 0.035687 | 0.496286 | 0.603463 |
| 11754002_ATP5J2 // | -0.02687 | 0.496353 | 0.60353  |
| 11718143_LOC81691  | -0.04561 | 0.496407 | 0.60358  |
| 11742588_OR6C2     | -0.04818 | 0.496426 | 0.603588 |
| 11727864_SLC25A27  | -0.08901 | 0.496489 | 0.603649 |
| 11751646_MAT2B     | 0.02595  | 0.496525 | 0.603678 |
| 11762524_SLC01A2   | 0.044448 | 0.496571 | 0.603719 |
| 11721650_PI3       | 0.062115 | 0.496641 | 0.603789 |
| 11731733_SLC17A1   | -0.04177 | 0.496665 | 0.603803 |
| 11719092_DUSP26    | -0.0348  | 0.496681 | 0.603808 |
| 11747589_GOT2      | -0.02653 | 0.49676  | 0.603883 |
| 11729881_ZNF445    | -0.04613 | 0.496778 | 0.603883 |
| 11754867_U2AF1L4   | -0.02822 | 0.49678  | 0.603883 |
| 11750524_FAM71F1   | 0.041186 | 0.496864 | 0.603962 |
| 11746693_COBL      | -0.06613 | 0.496869 | 0.603962 |
| 11717492_DYNLRB1   | -0.02424 | 0.49692  | 0.604009 |
| 11754794_NAV1      | 0.040372 | 0.496997 | 0.604087 |
| 11757714_DNAJB13   | 0.043859 | 0.497062 | 0.604151 |
| 11724406_CCNE1     | -0.02963 | 0.497101 | 0.604183 |
| 11723732_GNP NAT1  | 0.04078  | 0.497119 | 0.604191 |
| 11759050_DAB1      | -0.0442  | 0.497178 | 0.604235 |
| 11756850_CCT8      | 0.024931 | 0.497189 | 0.604235 |
| 11749363_COPS8     | -0.03377 | 0.497193 | 0.604235 |
| 11726544_PCXL3     | 0.033285 | 0.497317 | 0.60437  |
| 11754054_RPL3      | -0.0249  | 0.497334 | 0.604376 |
| 11741714_C1orf77   | -0.076   | 0.497355 | 0.604387 |
| 11757192_LRRC75A-A | -0.04356 | 0.497381 | 0.604404 |
| 11752517_CDC23     | 0.030866 | 0.497407 | 0.60442  |
| 11758084_SFMBT2    | 0.032442 | 0.497542 | 0.604569 |
| 11719246_GSTT1     | 0.029441 | 0.497564 | 0.60458  |
| 11737108_ACKR4     | 0.031011 | 0.49761  | 0.60461  |
| 11730606_CNNM1     | 0.044398 | 0.497625 | 0.60461  |
| 11736050_FAM229B   | 0.028775 | 0.497633 | 0.60461  |
| 11758995_LOX       | 0.097834 | 0.497638 | 0.60461  |
| 11737481_CDR1      | 0.062023 | 0.497654 | 0.604614 |
| 11738859_UBXN6     | 0.02443  | 0.497681 | 0.60462  |
| 11760493_ENOSF1    | -0.03175 | 0.497683 | 0.60462  |
| 11726303_MFSD4     | -0.02928 | 0.497714 | 0.604643 |
| 11759890_RPL9 ///  | -0.04591 | 0.497783 | 0.604712 |
| 11746296_SNW1      | 0.026026 | 0.497805 | 0.604723 |
| 11750344_ALOX15    | -0.05125 | 0.497864 | 0.604779 |
| 11738003_SLC35E2 / | -0.03007 | 0.497904 | 0.604801 |
| 11750403_LARP7     | -0.02716 | 0.497906 | 0.604801 |
| 11753458_AMACR     | 0.024804 | 0.498001 | 0.604877 |
| 11733578_SLC34A1   | 0.040069 | 0.498001 | 0.604877 |
| 11724450_ZDHHC22   | 0.027598 | 0.498006 | 0.604877 |

|                   |          |          |          |
|-------------------|----------|----------|----------|
| 11724469_SLU7     | 0.026639 | 0.498018 | 0.604877 |
| 11760761_CCDC73   | -0.04603 | 0.498067 | 0.604911 |
| 11722127_SEZ6     | -0.03044 | 0.498071 | 0.604911 |
| 11763093_GYPB     | -0.04024 | 0.498118 | 0.604943 |
| 11747706_PAQR6    | -0.0488  | 0.498122 | 0.604943 |
| 11742548_OR51V1   | -0.06292 | 0.498194 | 0.605015 |
| 11742773_GSTM5    | 0.061335 | 0.498271 | 0.605079 |
| 11716354_NDUFA11  | 0.024505 | 0.498276 | 0.605079 |
| 11733985_SLC5A8   | 0.03947  | 0.498284 | 0.605079 |
| 11757928_TMEM178A | -0.06361 | 0.498344 | 0.605128 |
| 11741185_TBCCD1   | 0.046832 | 0.498349 | 0.605128 |
| 11763838_SYCP1    | -0.05943 | 0.498365 | 0.605132 |
| 11723949_C4BPA    | 0.030812 | 0.49838  | 0.605136 |
| 11736206_OSBP2    | 0.03047  | 0.498481 | 0.605241 |
| 11736506_TECRL    | -0.06637 | 0.498501 | 0.605241 |
| 11754055_MRPL28   | -0.02427 | 0.498504 | 0.605241 |
| 11763825_P2RX6    | -0.04839 | 0.498536 | 0.605261 |
| 11745982_GRIA1    | -0.04243 | 0.498545 | 0.605261 |
| 11756510_FAN1     | 0.043667 | 0.498643 | 0.605365 |
| 11716565_SDCCAG3  | -0.03636 | 0.498764 | 0.605497 |
| 11735068_CES3     | -0.03683 | 0.498779 | 0.6055   |
| 11762556_ERCC4    | -0.04318 | 0.498914 | 0.605648 |
| 11738953_GHRL     | 0.025955 | 0.498928 | 0.60565  |
| 11752625_ABCD4    | 0.026549 | 0.49897  | 0.605686 |
| 11750242_KLK13    | -0.04246 | 0.498998 | 0.605703 |
| 11723134_SLC22A17 | -0.04266 | 0.499008 | 0.605703 |
| 11761519_TMEM165  | -0.05852 | 0.499027 | 0.605711 |
| 11734703_DKK3     | -0.03322 | 0.499061 | 0.605737 |
| 11720209_IRF9     | -0.02889 | 0.499203 | 0.605895 |
| 11744478_HBG1 /// | -0.03829 | 0.499353 | 0.606061 |
| 11730182_SH3GL2   | 0.042948 | 0.499381 | 0.60608  |
| 11733963_CYP4F11  | -0.05688 | 0.499403 | 0.606092 |
| 11739492_MGAT4A   | -0.05358 | 0.499416 | 0.606093 |
| 11743060_COMMD10  | 0.037926 | 0.499441 | 0.606107 |
| 11730042_C19orf45 | -0.03686 | 0.499466 | 0.606124 |
| 11722901_RARA     | -0.03947 | 0.499567 | 0.60623  |
| 11747511_HLA-DQB1 | -0.03338 | 0.499607 | 0.606265 |
| 11754454_RAB13    | 0.02322  | 0.499662 | 0.606316 |
| 11728655_IGFBP5   | -0.03241 | 0.499724 | 0.606376 |
| 11761449_TMEM161B | 0.081825 | 0.499748 | 0.606386 |
| 11740941_GRIN2A   | -0.04942 | 0.499766 | 0.606386 |
| 11749523_DNAJC11  | 0.027132 | 0.499769 | 0.606386 |
| 11760638_LOC84843 | -0.04526 | 0.499863 | 0.606484 |
| 11747741_SLC25A22 | -0.02956 | 0.499907 | 0.606523 |
| 11755262_AP4M1    | -0.02435 | 0.499928 | 0.606534 |
| 11740550_GPR135   | 0.043569 | 0.500101 | 0.606728 |
| 11728325_TTC30A   | 0.072064 | 0.500115 | 0.60673  |
| 11726242_TKTL1    | 0.072119 | 0.500191 | 0.606807 |
| 11732919_CORIN    | -0.09836 | 0.500226 | 0.606834 |
| 11763002_TRBV9    | -0.03447 | 0.500258 | 0.606856 |
| 11757963_SYNPR    | 0.037799 | 0.500268 | 0.606856 |

|                    |          |          |          |
|--------------------|----------|----------|----------|
| 11740588_BDKRB2    | -0.06879 | 0.500339 | 0.606909 |
| 11759396_BTN2A3P   | -0.04577 | 0.500341 | 0.606909 |
| 11731873_CD209     | -0.07013 | 0.500349 | 0.606909 |
| 11743873_SOX17     | -0.03514 | 0.500393 | 0.606947 |
| 11753372_CYP4F2    | 0.065731 | 0.500417 | 0.606953 |
| 11722590_BCAP29    | -0.05371 | 0.500423 | 0.606953 |
| 11758944_NFYA      | -0.02436 | 0.500475 | 0.606999 |
| 11731731_CD1B      | 0.052273 | 0.500486 | 0.606999 |
| 11734947_FGF7      | -0.05817 | 0.500505 | 0.607007 |
| 11732084_TFEC      | 0.037809 | 0.500527 | 0.607018 |
| 11734023_CCDC144A  | 0.041662 | 0.500544 | 0.607024 |
| 11740625_FRMD1     | -0.03414 | 0.500566 | 0.607036 |
| 11717808_EXD2      | 0.024319 | 0.50068  | 0.607159 |
| 11760833_TMEM136   | 0.11038  | 0.500755 | 0.607235 |
| 11720110_SNTB2     | -0.03715 | 0.500779 | 0.60725  |
| 11760880_STAT2     | -0.03844 | 0.500827 | 0.607292 |
| 11720593_DLG3      | -0.0412  | 0.500853 | 0.607309 |
| 11761909_TMPRSS5   | -0.06367 | 0.501031 | 0.607509 |
| 11741347_PTCH2     | -0.03669 | 0.501135 | 0.607612 |
| 11750875_PKNOX2    | -0.07113 | 0.50114  | 0.607612 |
| 11751046_DOK1      | -0.0589  | 0.501242 | 0.60772  |
| 11755491_DCDC2B    | -0.05804 | 0.501266 | 0.607734 |
| 11763935_DISC1 /// | -0.04519 | 0.50136  | 0.607833 |
| 11731289_MBD2      | 0.036114 | 0.501435 | 0.607904 |
| 11721425_FZD5      | -0.03842 | 0.501443 | 0.607904 |
| 11753463_SLC2A5    | -0.0358  | 0.501482 | 0.607935 |
| 11723523_PAEP      | 0.034354 | 0.501508 | 0.607953 |
| 11727695_KLRC4-KLR | -0.02968 | 0.501538 | 0.607974 |
| 11739265_TYW3      | -0.02756 | 0.501574 | 0.608002 |
| 11751715_SLC23A1   | -0.04131 | 0.501614 | 0.608031 |
| 11738877_IQCJ      | -0.07233 | 0.501632 | 0.608031 |
| 11721481_GOLPH3L   | 0.025988 | 0.501635 | 0.608031 |
| 11756267_C14orf166 | 0.027183 | 0.501655 | 0.60804  |
| 11761980_SP3       | -0.04936 | 0.501771 | 0.608166 |
| 11733406_CLDN19    | -0.02429 | 0.501813 | 0.608202 |
| 11731075_ISLR2     | -0.04505 | 0.501847 | 0.608228 |
| 11761159_LOC100505 | -0.0434  | 0.501917 | 0.608298 |
| 11751375_LRP5L     | -0.04277 | 0.501983 | 0.608362 |
| 11742282_CD40      | -0.04206 | 0.502027 | 0.6084   |
| 11728526_PEX5L     | -0.044   | 0.502066 | 0.608432 |
| 11750655_CDHR1     | 0.046454 | 0.502188 | 0.608565 |
| 11732677_PKHD1     | -0.06388 | 0.50223  | 0.608601 |
| 11732263_RAB11FIP3 | -0.02924 | 0.502262 | 0.608624 |
| 11736887_WNK2      | -0.05023 | 0.502325 | 0.608666 |
| 11752477_MAP4K2    | 0.039675 | 0.502329 | 0.608666 |
| 11743302_AUTS2     | -0.06008 | 0.502334 | 0.608666 |
| 11751442_SLC25A44  | 0.054875 | 0.502346 | 0.608666 |
| 11744742_LIMS2     | -0.03471 | 0.502367 | 0.608676 |
| 11736854_FRMPD2 // | -0.04382 | 0.502387 | 0.608683 |
| 11740151_CYP7B1    | 0.096343 | 0.502397 | 0.608683 |
| 11763260_PIGP      | -0.02519 | 0.502421 | 0.608697 |

|                    |          |          |          |
|--------------------|----------|----------|----------|
| 11734457_WDPCP     | 0.065617 | 0.502445 | 0.60871  |
| 11732073_ARL6      | 0.029858 | 0.502463 | 0.608717 |
| 11744281_FAM53B    | -0.04374 | 0.502582 | 0.608846 |
| 11738770_OR2K2     | -0.03578 | 0.502659 | 0.608924 |
| 11740563_EVPLL     | -0.07287 | 0.502696 | 0.608954 |
| 11715379_LAPTM4B   | -0.02657 | 0.502726 | 0.608974 |
| 11716381_MPC2      | -0.02419 | 0.502737 | 0.608974 |
| 11761099_UBR2      | -0.03929 | 0.502761 | 0.608988 |
| 11756537_ECM2      | 0.035936 | 0.502794 | 0.609013 |
| 11751472_LOC729966 | -0.05865 | 0.502858 | 0.609075 |
| 11741035_RPS6KA1   | -0.02934 | 0.502892 | 0.609101 |
| 11733961_USH1G     | -0.04786 | 0.502972 | 0.609136 |
| 11741912_HSP90B1   | -0.02755 | 0.502974 | 0.609136 |
| 11746967_CDKL2     | -0.05022 | 0.502975 | 0.609136 |
| 11730429_DUSP18    | -0.03234 | 0.502979 | 0.609136 |
| 11724065_IBSP      | -0.06564 | 0.502994 | 0.609136 |
| 11735683_TP63      | -0.0803  | 0.503003 | 0.609136 |
| 11745086_TP53AIP1  | -0.02709 | 0.503025 | 0.609136 |
| 11726372_STAU2     | -0.02701 | 0.503028 | 0.609136 |
| 11763994_LOC100507 | 0.08965  | 0.503033 | 0.609136 |
| 11749762_CHURC1-FN | -0.02684 | 0.503064 | 0.609159 |
| 11740909_DOCK1     | 0.027175 | 0.503107 | 0.609195 |
| 11755098_KHK       | 0.061968 | 0.503202 | 0.609295 |
| 11738193_PITX3     | -0.0643  | 0.503289 | 0.609385 |
| 11740621_KDM2B     | -0.03235 | 0.503462 | 0.60958  |
| 11763364_LINC01118 | -0.04022 | 0.503495 | 0.609605 |
| 11722777_ENPP2     | 0.061567 | 0.503538 | 0.609641 |
| 11734469_TMEM215   | -0.04298 | 0.503618 | 0.609723 |
| 11756909_PIWIL4    | 0.043034 | 0.503773 | 0.609896 |
| 11735677_DYX1C1    | 0.072086 | 0.503813 | 0.609924 |
| 11762651_TRDN      | -0.09697 | 0.503821 | 0.609924 |
| 11763082_LSM12     | -0.05409 | 0.503867 | 0.609965 |
| 11760552_MROH1     | -0.0446  | 0.50388  | 0.609966 |
| 11742653_CSH1 ///  | -0.06513 | 0.504034 | 0.610136 |
| 11763445_SNAPC4    | -0.04858 | 0.504119 | 0.61022  |
| 11724551_TMEM55A   | -0.02578 | 0.504128 | 0.61022  |
| 11719015_TOMM70A   | -0.03193 | 0.504158 | 0.610241 |
| 11724784_MRPS18C   | -0.02681 | 0.504257 | 0.610347 |
| 11754032_IGHG1 /// | -0.03094 | 0.504346 | 0.610438 |
| 11718492_SLC1A2    | -0.03383 | 0.504365 | 0.610446 |
| 11725605_FKBP6     | -0.05858 | 0.50438  | 0.610449 |
| 11735380_LOC102725 | 0.02852  | 0.504398 | 0.610456 |
| 11743201_IGF1      | 0.037464 | 0.504485 | 0.610545 |
| 11725826_CD1D      | -0.03668 | 0.504496 | 0.610545 |
| 11727888_CPNE5     | -0.05412 | 0.504537 | 0.610579 |
| 11743749_FAM169A   | 0.038203 | 0.504618 | 0.610663 |
| 11724959_CDK14     | -0.02955 | 0.504722 | 0.610773 |
| 11746570_FRYL      | -0.02555 | 0.504777 | 0.61081  |
| 11742642_ANKRD20A2 | 0.036249 | 0.504778 | 0.61081  |
| 11748754_LOC728175 | 0.048655 | 0.504871 | 0.610907 |
| 11762933_CMTM1     | -0.04919 | 0.504909 | 0.610923 |



|                    |          |          |          |
|--------------------|----------|----------|----------|
| 11754709_SLC25A34  | -0.04638 | 0.504913 | 0.610923 |
| 11742147_OR52B4    | -0.08808 | 0.504928 | 0.610923 |
| 11748635_STAG3L1 / | -0.02384 | 0.50494  | 0.610923 |
| 11730882_NEBL      | -0.08235 | 0.504946 | 0.610923 |
| 11733417_PAGE5     | 0.028771 | 0.505005 | 0.61098  |
| 11719977_MMP15     | -0.02439 | 0.505042 | 0.611009 |
| 11734480_LINCO1600 | -0.02952 | 0.50508  | 0.61104  |
| 11735646_ZNF90     | -0.03169 | 0.505107 | 0.611045 |
| 11741395_ZSCAN18   | -0.02997 | 0.50511  | 0.611045 |
| 11724899_TMEM198   | 0.034915 | 0.505193 | 0.611096 |
| 11743871_TENM4     | 0.068621 | 0.505203 | 0.611096 |
| 11718022_SSFA2     | 0.064288 | 0.505205 | 0.611096 |
| 11730624_KLB       | 0.058309 | 0.505207 | 0.611096 |
| 11733692_TSSK4     | 0.065415 | 0.505214 | 0.611096 |
| 11755334_TNPO2     | 0.025026 | 0.505232 | 0.611103 |
| 11760735_GRK6P1    | -0.04622 | 0.505314 | 0.611186 |
| 11744780_MOBP      | -0.0433  | 0.505351 | 0.611196 |
| 11760731_NUP88     | 0.048552 | 0.505355 | 0.611196 |
| 11715175_KRTAP10-3 | 0.02577  | 0.505359 | 0.611196 |
| 11737942_HDHD2     | 0.033297 | 0.50543  | 0.611267 |
| 11721527_PROSER1   | -0.03161 | 0.50553  | 0.611372 |
| 11748354_NBPF3     | 0.056589 | 0.505585 | 0.611424 |
| 11725457_FBXO33    | 0.033615 | 0.505627 | 0.611459 |
| 11753363_ZSCAN2    | -0.03662 | 0.505671 | 0.611488 |
| 11759807_TXLNGY    | 0.069726 | 0.505676 | 0.611488 |
| 11762661_ZNF248    | 0.074615 | 0.505691 | 0.611491 |
| 11730386_GREM2     | -0.07269 | 0.505728 | 0.611521 |
| 11728985_MTHFD1L   | -0.02656 | 0.505784 | 0.611573 |
| 11746017_C1QTNF1   | 0.060661 | 0.505847 | 0.611634 |
| 11753766_CHN2 ///  | 0.034141 | 0.505994 | 0.611797 |
| 11724630_SYT13     | 0.052896 | 0.506044 | 0.611842 |
| 11742621_OR5B21    | -0.0293  | 0.506141 | 0.611944 |
| 11740448_SLC01C1   | 0.045775 | 0.506171 | 0.611966 |
| 11760161_USP42     | -0.06355 | 0.506239 | 0.612032 |
| 11725151_MYBPC3    | -0.03768 | 0.506345 | 0.612136 |
| 11741640_ZFX       | 0.047042 | 0.50635  | 0.612136 |
| 11727844_KRT81     | 0.025107 | 0.506426 | 0.612214 |
| 11762833_LOC642846 | -0.04172 | 0.506497 | 0.612284 |
| 11728188_DHRS12    | -0.04917 | 0.506611 | 0.612407 |
| 11738689_OR5T1     | -0.06825 | 0.506757 | 0.612567 |
| 11741210_HSPA8     | -0.02377 | 0.506821 | 0.61263  |
| 11746306_LINCO0494 | -0.09092 | 0.506841 | 0.612639 |
| 11740783_OPN4      | 0.034182 | 0.506857 | 0.612644 |
| 11734355_DRP2      | -0.03943 | 0.506887 | 0.612665 |
| 11726063_C2orf40   | -0.06208 | 0.5069   | 0.612665 |
| 11740302_PARVG     | -0.03246 | 0.506931 | 0.612687 |
| 11728007_FUT3      | -0.03499 | 0.506978 | 0.612729 |
| 11724878_AEBP2     | 0.066066 | 0.507032 | 0.612779 |
| 11739693_HORMAD1   | 0.036656 | 0.507181 | 0.612944 |
| 11754244_INO80B    | -0.03152 | 0.507219 | 0.612975 |
| 11761963_DKK3      | 0.063769 | 0.507287 | 0.613041 |

|                    |          |          |          |
|--------------------|----------|----------|----------|
| 11748161_KLC1      | -0.05033 | 0.507329 | 0.613077 |
| 11761689_BOC       | -0.04127 | 0.507534 | 0.61331  |
| 11746258_SP8       | -0.06627 | 0.507609 | 0.613376 |
| 11736462_LILRA2    | -0.05025 | 0.507615 | 0.613376 |
| 11753035_LINC00470 | -0.04767 | 0.507626 | 0.613376 |
| 11748949_STRN4     | 0.026531 | 0.507692 | 0.61344  |
| 11729469_FAM181B   | -0.03428 | 0.507712 | 0.61345  |
| 11744800_FLT3LG    | -0.06606 | 0.507798 | 0.613538 |
| 11745299_GYPB      | -0.03892 | 0.507835 | 0.613567 |
| 11725939_DIRAS2    | 0.042736 | 0.507857 | 0.613579 |
| 11734080_ZNF667    | 0.046468 | 0.507947 | 0.613673 |
| 11754088_PLEKHF1   | 0.024966 | 0.508    | 0.613721 |
| 11763024_OFCC1     | -0.07997 | 0.508029 | 0.613742 |
| 11754540_ZNF814    | 0.067573 | 0.508167 | 0.613892 |
| 11728187_SLC35D3   | -0.04476 | 0.508191 | 0.613907 |
| 11759910_COQ9      | -0.03997 | 0.50826  | 0.613975 |
| 11730723_NCAM1     | 0.032879 | 0.508326 | 0.614039 |
| 11753816_ECM1      | -0.02756 | 0.508425 | 0.614139 |
| 11757380_TMEM126B  | 0.029399 | 0.508434 | 0.614139 |
| 11736320_ANKRD26   | 0.036652 | 0.508627 | 0.614357 |
| 11757108_GSTTP1 // | -0.05095 | 0.508652 | 0.614372 |
| 11719040_CYGB      | -0.03795 | 0.508711 | 0.614428 |
| 11753342_EEF1G     | 0.023854 | 0.508997 | 0.614753 |
| 11725119_BORCS5    | -0.06265 | 0.509005 | 0.614753 |
| 200034_PMRPL6 ///  | 0.022873 | 0.509022 | 0.614757 |
| 11758762_RPLP2     | 0.030304 | 0.509033 | 0.614757 |
| 11746588_ALDH1B1   | 0.028939 | 0.509078 | 0.614795 |
| 11740102_DCC       | -0.08364 | 0.509128 | 0.614814 |
| 11724708_SOX11     | -0.03284 | 0.509141 | 0.614814 |
| 11724598_ASPRV1    | -0.02689 | 0.509143 | 0.614814 |
| 11738919_TAS2R50   | 0.07558  | 0.509155 | 0.614814 |
| 11748699_RGS14     | 0.029667 | 0.509156 | 0.614814 |
| 11757277_HP        | 0.030641 | 0.5092   | 0.614828 |
| 11731844_DNASE1    | -0.03167 | 0.509204 | 0.614828 |
| 11759498_FAM49A    | 0.031631 | 0.509205 | 0.614828 |
| 11738787_DEFEB119  | -0.02617 | 0.509253 | 0.61487  |
| 11719947_PKNOX1    | 0.035909 | 0.509335 | 0.614954 |
| 11758875_C17orf51  | -0.05868 | 0.509379 | 0.614961 |
| 11738688_OR5T1     | -0.0451  | 0.509386 | 0.614961 |
| 11742307_OR5T2     | -0.0451  | 0.509386 | 0.614961 |
| 11716236_RAE1      | -0.03148 | 0.509391 | 0.614961 |
| 11724977_ITGB4     | 0.035461 | 0.509446 | 0.615012 |
| 11737867_PAPPA2    | -0.04319 | 0.509469 | 0.615024 |
| 11735952_CPO       | 0.050662 | 0.509482 | 0.615025 |
| 11731147_TLR7      | -0.07477 | 0.509542 | 0.615082 |
| 11719257_LRP6      | -0.02749 | 0.509599 | 0.615136 |
| 11723935_PNMA3     | -0.04364 | 0.509624 | 0.615142 |
| 11760251_PPP1R2    | 0.060758 | 0.509629 | 0.615142 |
| 11720027_VGF       | 0.024399 | 0.509657 | 0.615161 |
| 11737117_PABPC5    | 0.037302 | 0.509678 | 0.615171 |
| 11723013_CAPZA2    | -0.03861 | 0.509772 | 0.615269 |

|                    |       |          |          |          |
|--------------------|-------|----------|----------|----------|
| 11755570_HSFY1     | ///   | 0.059115 | 0.509793 | 0.615279 |
| 11735708_MPPED1    |       | 0.0376   | 0.509895 | 0.615387 |
| 11752827_PXN       |       | -0.07951 | 0.509988 | 0.615484 |
| 11728529_NGB       |       | -0.04894 | 0.510262 | 0.615799 |
| 11730855_HMGN3     |       | -0.04743 | 0.510323 | 0.615846 |
| 11759712_RAB6A     |       | 0.065018 | 0.510326 | 0.615846 |
| 11730559_BCO2      |       | 0.031643 | 0.510345 | 0.615855 |
| 11753945_TRA2B     |       | -0.02395 | 0.510375 | 0.615876 |
| 11757271_LOC105370 |       | -0.02521 | 0.510399 | 0.615889 |
| 11730957_NEU4      |       | -0.03348 | 0.510444 | 0.615928 |
| 11753370_FGFR2     |       | -0.06049 | 0.510493 | 0.615972 |
| 11734114_ADAMTS19  |       | 0.036566 | 0.510532 | 0.616004 |
| 11758351_LINC01000 |       | 0.043905 | 0.510552 | 0.616013 |
| 11762281_GSTO2     |       | -0.05687 | 0.510572 | 0.616021 |
| 11756607_ZNF85     |       | 0.04141  | 0.510663 | 0.616116 |
| 11757489_RPL22     |       | 0.025323 | 0.510719 | 0.616168 |
| 11742069_LTK       |       | -0.06052 | 0.510749 | 0.61619  |
| 11752996_OPRM1     |       | -0.03599 | 0.510802 | 0.61621  |
| 11726564_COL17A1   |       | 0.02666  | 0.510809 | 0.61621  |
| 11722860_TRIM2     |       | 0.031946 | 0.510819 | 0.61621  |
| 11729075_LTC4S     | ///   | -0.03814 | 0.510829 | 0.61621  |
| 11747196_CR1       | /// C | 0.038354 | 0.510831 | 0.61621  |
| 11743425_NSG1      |       | -0.05524 | 0.510841 | 0.61621  |
| 11735033_SNF8      |       | -0.027   | 0.511143 | 0.616559 |
| 11728947_BC01      |       | 0.034267 | 0.511172 | 0.616575 |
| 11760601_LASP1     |       | -0.07471 | 0.511182 | 0.616575 |
| 11718497_EXOC1     |       | 0.035266 | 0.511203 | 0.616585 |
| 11719447_GBP2      |       | -0.04299 | 0.511221 | 0.616589 |
| 11753970_MRFAP1    |       | -0.02361 | 0.511231 | 0.616589 |
| 11752026_CEP164    |       | -0.03987 | 0.51136  | 0.616725 |
| 11745167_DIAPH1    |       | -0.0262  | 0.51137  | 0.616725 |
| 11748271_GDF5OS    |       | -0.04934 | 0.511543 | 0.616915 |
| 11733112_TLK1      |       | -0.04089 | 0.511552 | 0.616915 |
| 11734022_HS3ST3B1  |       | 0.041637 | 0.511576 | 0.616929 |
| 11732894_CDKL3     |       | -0.05405 | 0.511615 | 0.61696  |
| 11723349_GAPVD1    |       | 0.025452 | 0.511642 | 0.616977 |
| 11756546_EIF6      |       | 0.034297 | 0.511673 | 0.616999 |
| 11752971_TMEM159   |       | -0.03208 | 0.511704 | 0.617022 |
| 11739186_CCDC142   |       | 0.030549 | 0.511735 | 0.617043 |
| 11747287_ZC3H18    |       | -0.02626 | 0.511807 | 0.617116 |
| 11728986_MTHFD1L   |       | 0.02989  | 0.511844 | 0.617145 |
| 11759380_KRTAP6-2  |       | -0.05378 | 0.511925 | 0.617227 |
| 11759157_HIST1H2BF |       | -0.04739 | 0.511952 | 0.617245 |
| 11743981_FOLR2     |       | -0.04194 | 0.511996 | 0.617283 |
| 11745703_RCAN3     |       | -0.04586 | 0.512075 | 0.617363 |
| 11747894_SPOCK2    |       | -0.03409 | 0.512159 | 0.617448 |
| 11716970_NRP2      |       | -0.03129 | 0.512286 | 0.617586 |
| 11722934_CHML      |       | -0.02546 | 0.512347 | 0.617645 |
| 11755122_PALLD     |       | 0.03117  | 0.512384 | 0.617674 |
| 11745287_SLFN13    |       | -0.06185 | 0.512502 | 0.617777 |
| 11741250_SH2D3C    |       | -0.0401  | 0.512512 | 0.617777 |

|                    |          |          |          |
|--------------------|----------|----------|----------|
| 11742561_OR2G2     | -0.06109 | 0.512515 | 0.617777 |
| 11734647_NTN5      | -0.03327 | 0.51252  | 0.617777 |
| 11755195_NXPE1     | 0.05076  | 0.512582 | 0.617836 |
| 11727868_GALK2     | -0.02842 | 0.512598 | 0.617841 |
| 11726263_DFFA      | -0.0286  | 0.512627 | 0.61786  |
| 11734593_SLC10A7   | 0.032565 | 0.512662 | 0.617887 |
| 11717003_FKBP9 /// | -0.03615 | 0.512679 | 0.617893 |
| 11727651_SRRM4     | -0.05557 | 0.512792 | 0.618014 |
| 11746738_RILPL1    | -0.03863 | 0.5129   | 0.618128 |
| 11736643_G6PC2     | 0.046798 | 0.512985 | 0.618216 |
| 11732158_ADAMTS1   | 0.028448 | 0.512998 | 0.618216 |
| 11762271_KCNIP2    | -0.04838 | 0.513132 | 0.618362 |
| 11740075_DMGDH     | -0.07786 | 0.513164 | 0.618386 |
| 11733804_AMN       | -0.05912 | 0.513233 | 0.618454 |
| 11740666_PTCHD3    | -0.0496  | 0.51326  | 0.618471 |
| 11755817_GPI       | -0.02657 | 0.51329  | 0.618492 |
| 11733593_PZP       | 0.033785 | 0.513317 | 0.618509 |
| 11751391_FYTTD1    | 0.029283 | 0.513394 | 0.618586 |
| 11747534_RSU1      | 0.027918 | 0.513461 | 0.618652 |
| 11760725_PINK1-AS  | -0.04284 | 0.513496 | 0.618679 |
| 11763751_C14orf2   | -0.0319  | 0.513784 | 0.61901  |
| 11740453_ZNF454    | 0.059975 | 0.513825 | 0.619045 |
| 11748795_HEXDC     | 0.026311 | 0.513898 | 0.619118 |
| 11761930_OK/SW-CL. | -0.05172 | 0.513934 | 0.619146 |
| 11747893_AGPAT4    | 0.022374 | 0.513954 | 0.619154 |
| 11730310_TFCP2L1   | -0.0529  | 0.513998 | 0.619192 |
| 11738692_OR5H6     | -0.07459 | 0.514046 | 0.619224 |
| 11728886_GEMIN2    | 0.034831 | 0.51405  | 0.619224 |
| 11761726_ANKRD30BP | 0.061504 | 0.51425  | 0.61945  |
| 11722676_CCAR2     | -0.02405 | 0.514428 | 0.61965  |
| 11747042_CNTNAP2   | 0.046659 | 0.51458  | 0.619816 |
| 11751022_EEF2      | 0.025897 | 0.514801 | 0.620068 |
| 11752529_C16orf71  | -0.0456  | 0.515135 | 0.620455 |
| 11738320_SHE       | 0.060784 | 0.515242 | 0.620568 |
| 11756840_ZFP1      | 0.07241  | 0.515367 | 0.620703 |
| 11734089_CBFA2T3   | 0.029331 | 0.515423 | 0.620756 |
| 11758196_IGFBP5    | 0.026833 | 0.51554  | 0.620881 |
| 11751333_KCNMB2    | -0.03198 | 0.515627 | 0.620971 |
| 11748091_EPS8      | -0.02708 | 0.51565  | 0.620983 |
| 11717587_GC        | 0.051817 | 0.515709 | 0.621039 |
| 11735580_TSSK1B    | -0.03814 | 0.515759 | 0.621084 |
| 11728229_HAVCR2    | -0.04243 | 0.515796 | 0.621113 |
| 11734447_PDCD1     | 0.034088 | 0.515986 | 0.621314 |
| 11719289_TMEM63A   | -0.03622 | 0.515988 | 0.621314 |
| 11739124_AGK       | -0.03522 | 0.516028 | 0.621343 |
| 11737614_DMP1      | 0.050941 | 0.516038 | 0.621343 |
| 11759672_UGGT2     | 0.029188 | 0.516101 | 0.621404 |
| 11760255_LTBP4     | -0.02829 | 0.516146 | 0.621443 |
| 11749658_COL14A1   | -0.09173 | 0.516404 | 0.621738 |
| 11762218_TF        | -0.05443 | 0.516608 | 0.621968 |
| 11762963_TAGLN2    | -0.06489 | 0.516795 | 0.622163 |

|                    |          |          |          |
|--------------------|----------|----------|----------|
| 11760172_UQCC2     | -0.05975 | 0.516795 | 0.622163 |
| 11735254_NEK8      | -0.03742 | 0.51682  | 0.622177 |
| 11742266_C3orf35   | 0.042677 | 0.516843 | 0.622183 |
| 11762376_ARID4B    | 0.071061 | 0.51685  | 0.622183 |
| 11727032_NSG1      | -0.0475  | 0.516957 | 0.622296 |
| 11753912_NPRL3     | -0.03109 | 0.517183 | 0.622546 |
| 11740213_TBL1X     | 0.024865 | 0.517189 | 0.622546 |
| 11726209_LRRC75A   | 0.069226 | 0.517203 | 0.622547 |
| 11738987_GABARAPL1 | 0.031892 | 0.517225 | 0.622558 |
| 11740970_NUTM2D    | -0.05493 | 0.517285 | 0.622601 |
| 11720347_GGNBP2    | 0.027989 | 0.517287 | 0.622601 |
| 11715100_HIST1H3G  | -0.04112 | 0.517336 | 0.622646 |
| 11724279_NCDN      | -0.02901 | 0.517368 | 0.622668 |
| 11747435_OCLN      | 0.025724 | 0.517399 | 0.622691 |
| 11746592_LOC102724 | -0.06211 | 0.51742  | 0.622701 |
| 11763570_SLC38A7   | -0.0454  | 0.517452 | 0.622723 |
| 11730332_DPYSL4    | 0.059034 | 0.517465 | 0.622724 |
| 11736409_NUP62     | -0.02403 | 0.517609 | 0.622878 |
| 11756652_NTMT1     | 0.023162 | 0.517619 | 0.622878 |
| 11735654_FAM53A    | -0.02883 | 0.517646 | 0.622896 |
| 11727526_TNNT2     | -0.0356  | 0.51776  | 0.623018 |
| 11742359_OR52N2    | 0.071267 | 0.517774 | 0.62302  |
| 11716762_PGC       | -0.05324 | 0.517796 | 0.623026 |
| 11754057_CRABP2    | 0.031572 | 0.517805 | 0.623026 |
| 11738231_MYH13     | -0.04088 | 0.517972 | 0.623212 |
| 11763426_TRAF3IP3  | 0.07539  | 0.517995 | 0.623224 |
| 11725607_RTN4RL1   | 0.063943 | 0.518028 | 0.623248 |
| 11763157_SHBG      | 0.057726 | 0.518059 | 0.62327  |
| 11721261_ETNK2     | -0.0346  | 0.518103 | 0.623292 |
| 11757635_TYROBP    | -0.04976 | 0.518103 | 0.623292 |
| 11763378_ZNF302    | -0.02559 | 0.518189 | 0.623381 |
| 11755396_PLA2G15   | -0.0271  | 0.518231 | 0.623416 |
| 11746699_TAGLN     | -0.03017 | 0.51826  | 0.623435 |
| 11756050_CD1E      | -0.0638  | 0.518286 | 0.623451 |
| 11727175_CPB2      | -0.0351  | 0.518336 | 0.623496 |
| 11754542_ZNF594    | 0.029817 | 0.518355 | 0.623503 |
| 11747546_PIP5K1B   | -0.05724 | 0.518465 | 0.62362  |
| 11727582_EPHA3     | 0.033388 | 0.518494 | 0.62364  |
| 11750602_ZC3H12D   | 0.040665 | 0.518594 | 0.623745 |
| 11760876_ADD2      | 0.035169 | 0.518609 | 0.623747 |
| 11750181_PFKFB1    | -0.05367 | 0.518628 | 0.623755 |
| 11763989_LOC101927 | -0.0742  | 0.518933 | 0.624106 |
| 11740426_CDC42BPG  | -0.04518 | 0.518986 | 0.624155 |
| 11734144_LRRC37A   | 0.032297 | 0.519008 | 0.624166 |
| 11749341_C1orf131  | -0.02911 | 0.519024 | 0.62417  |
| 11730142_EPHA5     | 0.040645 | 0.519052 | 0.624186 |
| 11738682_OR13C5    | -0.02789 | 0.519063 | 0.624186 |
| 11746728_LINC00941 | -0.03545 | 0.519122 | 0.624242 |
| 11762329_TRAV17    | -0.06878 | 0.51926  | 0.624392 |
| 11724373_GSK3A     | -0.02503 | 0.519319 | 0.624448 |
| 11762186_SLC39A3   | 0.029216 | 0.519344 | 0.624462 |

|                    |          |          |          |
|--------------------|----------|----------|----------|
| 11753280_SSH1      | 0.050733 | 0.519412 | 0.624529 |
| 11730376_SURF2     | 0.024269 | 0.519472 | 0.624585 |
| 11739090_LUC7L3    | 0.024549 | 0.519636 | 0.624753 |
| 11720670_SNX7      | -0.02977 | 0.519637 | 0.624753 |
| 11760283_ALKBH6    | -0.0356  | 0.519664 | 0.624771 |
| 11725779_CADPS     | -0.08227 | 0.519785 | 0.624901 |
| 11724499_MFNG      | 0.0241   | 0.520139 | 0.62531  |
| 11743888_ZNF10     | -0.03937 | 0.520165 | 0.625326 |
| 11730282_RAD50     | -0.02601 | 0.520233 | 0.625363 |
| 11752606_NRBP2     | -0.04017 | 0.520233 | 0.625363 |
| 11755578_SRRM5     | 0.062732 | 0.520234 | 0.625363 |
| 11752065_CD6       | -0.03141 | 0.520314 | 0.625444 |
| 11753484_KLRD1     | 0.062163 | 0.520343 | 0.625464 |
| 11730653_C15orf62  | 0.055353 | 0.520473 | 0.625604 |
| 11756049_TOMM20L   | -0.04338 | 0.520618 | 0.625764 |
| 11716312_MRPS21    | -0.0275  | 0.520769 | 0.62593  |
| 11747377_SPATA18   | 0.029276 | 0.520879 | 0.626047 |
| 11746658_CD86      | 0.052575 | 0.520963 | 0.626132 |
| 11759326_AMER2     | -0.04195 | 0.521052 | 0.626224 |
| 11737650_ANKFY1    | 0.055101 | 0.521066 | 0.626225 |
| 200089_PMRPL4      | 0.022063 | 0.521082 | 0.626228 |
| 11717161_RRAS      | 0.027788 | 0.521103 | 0.626238 |
| 11720611_NAP1L5    | 0.061604 | 0.52112  | 0.626244 |
| 11745699_KLRF1     | -0.03665 | 0.521204 | 0.626329 |
| 11744302_VAV2      | -0.02503 | 0.521255 | 0.626361 |
| 11726278_SNN       | -0.03909 | 0.521256 | 0.626361 |
| 11752775_IL2RA     | -0.04622 | 0.521462 | 0.626583 |
| 11741578_SLC30A2   | -0.05732 | 0.521467 | 0.626583 |
| 11721675_GLRX5     | 0.024466 | 0.521517 | 0.626629 |
| 11742009_SLURP1    | -0.04962 | 0.521539 | 0.626639 |
| 11717279_URM1      | 0.029403 | 0.52157  | 0.626661 |
| 200035_PMCTDNEP1   | -0.03384 | 0.521585 | 0.626664 |
| 11724894_GATAD2B   | -0.05186 | 0.521618 | 0.626677 |
| 11739438_PPTC7     | 0.058749 | 0.521628 | 0.626677 |
| 11756982_AP3S2 /// | -0.02657 | 0.521635 | 0.626677 |
| 11761236_STKLD1    | 0.029374 | 0.521688 | 0.626726 |
| 11754809_UBAP2L    | -0.02535 | 0.521731 | 0.626758 |
| 11718502_GPCPD1    | 0.036038 | 0.52174  | 0.626758 |
| 11745989_HLA-DMA   | -0.02623 | 0.521827 | 0.626847 |
| 11718136_HID1      | 0.02866  | 0.521857 | 0.626867 |
| 11745103_NOX4      | 0.046194 | 0.521881 | 0.62688  |
| 11734350_TRIM11    | 0.031397 | 0.521963 | 0.626964 |
| 11720982_PTK2B     | -0.03951 | 0.52201  | 0.627005 |
| 11736202_CDKAL1    | 0.037593 | 0.522059 | 0.627048 |
| 11761055_PDCD5     | 0.036832 | 0.522238 | 0.627245 |
| 11733725_CFB       | 0.031201 | 0.522249 | 0.627245 |
| 11747014_TP53TG5   | -0.0518  | 0.522295 | 0.627285 |
| 11735460_CNBD1     | -0.05282 | 0.52239  | 0.627384 |
| 11750583_ZFAT      | 0.03391  | 0.52242  | 0.627404 |
| 11726478_HS6ST3    | -0.04646 | 0.522451 | 0.627414 |
| 11755371_ANKS3     | 0.034892 | 0.522453 | 0.627414 |

|                    |          |          |          |
|--------------------|----------|----------|----------|
| 11732113_IL17A     | -0.04438 | 0.522474 | 0.627424 |
| 11740263_ETV3      | 0.031848 | 0.522563 | 0.627514 |
| 11724075_DDX3Y     | -0.03524 | 0.52262  | 0.627567 |
| 11762417_PLA2G4D   | 0.026275 | 0.522693 | 0.62764  |
| 11759831_KMT2E     | 0.032138 | 0.522731 | 0.62767  |
| 11756501_TMEM38B   | -0.02877 | 0.522767 | 0.627697 |
| 11745995_ADARB2    | 0.02688  | 0.522797 | 0.627718 |
| 11764189_LOC105376 | -0.02586 | 0.522825 | 0.627736 |
| 11741898_KIR2DS3 / | -0.06336 | 0.522838 | 0.627737 |
| 11737561_TEDDM1    | 0.077584 | 0.52288  | 0.627772 |
| 11732499_CACNG1    | -0.02781 | 0.522911 | 0.627794 |
| 11729657_SP110     | -0.02994 | 0.523126 | 0.628036 |
| 11725552_UGT2A3    | -0.02741 | 0.523162 | 0.62806  |
| 11734604_WFDC11    | -0.05632 | 0.523171 | 0.62806  |
| 11762268_KIAA1456  | -0.05571 | 0.523332 | 0.628231 |
| 11755319_ANKRD13D  | 0.027014 | 0.523339 | 0.628231 |
| 11723206_TCL1A     | -0.07342 | 0.523415 | 0.628306 |
| 11719991_TNKS1BP1  | 0.0272   | 0.523507 | 0.628401 |
| 11728039_CCL8      | 0.039347 | 0.523575 | 0.628463 |
| 11762177_C11orf65  | -0.03944 | 0.523594 | 0.628463 |
| 11761275_PHKG1     | 0.024683 | 0.523597 | 0.628463 |
| 11730281_RAD50     | 0.030194 | 0.52365  | 0.628511 |
| 11730583_VWA5B2    | -0.02502 | 0.523698 | 0.62853  |
| 11732551_PTGER2    | 0.048321 | 0.523711 | 0.62853  |
| 11729720_TXLNA     | 0.042611 | 0.523713 | 0.62853  |
| 11760677_JPH3      | 0.067856 | 0.523717 | 0.62853  |
| 11740784_ALS2CR12  | 0.049212 | 0.523862 | 0.628688 |
| 11730820_PCDHB10   | -0.06819 | 0.523888 | 0.628704 |
| 11763437_P2RY8     | -0.03194 | 0.52394  | 0.628748 |
| 11756254_GGT5      | -0.0261  | 0.52395  | 0.628748 |
| 11745339_PCDHB17P  | 0.023375 | 0.524008 | 0.628802 |
| 11717204_SEL1L     | 0.025101 | 0.524122 | 0.628923 |
| 11736665_PTPRO     | -0.06786 | 0.52418  | 0.628977 |
| 11715729_CYP19A1   | 0.032035 | 0.524444 | 0.629278 |
| 11722256_SCRN2     | -0.03139 | 0.524627 | 0.629477 |
| 11762691_EXOSC1    | 0.087726 | 0.524647 | 0.629477 |
| 11758848_TMEM97    | -0.0221  | 0.524648 | 0.629477 |
| 11740327_CEP128    | -0.04069 | 0.524677 | 0.629497 |
| 11748513_HPGD      | -0.05847 | 0.524729 | 0.629535 |
| 11742578_OR5H2     | 0.044679 | 0.52475  | 0.629535 |
| 11746172_KLHL17    | -0.03194 | 0.524759 | 0.629535 |
| 11737264_CCDC30    | 0.034683 | 0.52476  | 0.629535 |
| 11755720_PRSS27    | -0.06999 | 0.524856 | 0.629626 |
| 11726139_MTMR9     | 0.036594 | 0.524862 | 0.629626 |
| 11756112_DCAF7     | -0.02292 | 0.524938 | 0.629701 |
| 11737299_RAB42     | 0.025949 | 0.524969 | 0.629723 |
| 11733535_NUDT7     | -0.04914 | 0.525102 | 0.629867 |
| 11742527_OR6S1     | 0.067833 | 0.525166 | 0.629923 |
| 11761366_PKD2L2    | -0.04934 | 0.525174 | 0.629923 |
| 11723493_SYNGAP1 / | -0.0275  | 0.525202 | 0.629924 |
| 11752389_HTR3E     | 0.050766 | 0.525217 | 0.629924 |

|                    |          |          |          |
|--------------------|----------|----------|----------|
| 11730467_NTN1      | -0.06175 | 0.525223 | 0.629924 |
| 11761831_HERC2P4   | 0.053662 | 0.525227 | 0.629924 |
| 11732453_HGD       | 0.055708 | 0.525338 | 0.630042 |
| 11736595_ZBTB24    | 0.021999 | 0.525357 | 0.630047 |
| 11745824_ACAA1     | 0.032251 | 0.525368 | 0.630047 |
| 11753725_SSPN      | -0.03888 | 0.525466 | 0.630149 |
| 11716756_RNF7      | 0.041559 | 0.52554  | 0.630221 |
| 11755896_PLAG1     | 0.09474  | 0.525552 | 0.630221 |
| 11735382_MARVELD3  | 0.026756 | 0.525634 | 0.630304 |
| 11724048_COG6      | 0.025646 | 0.525653 | 0.630312 |
| 11737957_DUSP15    | -0.03391 | 0.525708 | 0.630359 |
| 11764088_LINC01424 | 0.083544 | 0.525718 | 0.630359 |
| 11742839_HSD17B1   | 0.026941 | 0.525788 | 0.630427 |
| 11726970_USP35     | -0.03865 | 0.525862 | 0.630494 |
| 11728821_HEPACAM2  | -0.0357  | 0.52587  | 0.630494 |
| 11761707_HACD1     | 0.063411 | 0.525911 | 0.630525 |
| 11740953_HDAC11    | -0.02557 | 0.52593  | 0.630525 |
| 11726375_GPR34     | -0.05043 | 0.525934 | 0.630525 |
| 11738932_RPS4Y2    | -0.08372 | 0.526058 | 0.630655 |
| 11762409_CTCFL     | 0.060089 | 0.526068 | 0.630655 |
| 11734492_H2AFB1 // | -0.05841 | 0.526125 | 0.630707 |
| 11719867_SVEP1     | -0.0426  | 0.526214 | 0.63079  |
| 11763732_PPM1F     | 0.042334 | 0.52622  | 0.63079  |
| 11717823_TNFAIP2   | -0.03497 | 0.526249 | 0.630809 |
| 11738752_OR1K1     | -0.04566 | 0.526326 | 0.630887 |
| 11736443_SPINK7    | 0.079773 | 0.526402 | 0.630962 |
| 11749868_VTCN1     | -0.03647 | 0.526424 | 0.630971 |
| 11724978_ITGB4     | 0.031044 | 0.526446 | 0.630971 |
| 11738507_INSL5     | -0.08252 | 0.526449 | 0.630971 |
| 11724715_PJA1      | -0.02497 | 0.526575 | 0.631107 |
| 11742274_TBXA2R    | -0.02477 | 0.52663  | 0.631157 |
| 11738149_TOX3      | 0.047853 | 0.526686 | 0.631206 |
| 11715834_RUVBL1    | -0.02484 | 0.526699 | 0.631206 |
| 11736535_NELL1     | 0.098218 | 0.526709 | 0.631206 |
| 11741286_ACKR4     | -0.02503 | 0.526751 | 0.631241 |
| 11763474_STARD4    | 0.039584 | 0.526805 | 0.63129  |
| 11735288_AP4S1     | 0.06099  | 0.526829 | 0.631303 |
| 11741935_LBX1      | -0.06132 | 0.526878 | 0.631347 |
| 11745720_PDIA6     | -0.02187 | 0.526971 | 0.631443 |
| 11754205_KAT6B     | -0.02908 | 0.527069 | 0.631545 |
| 11740995_GLUL      | -0.06368 | 0.527128 | 0.6316   |
| 11727363_SHC1      | -0.03149 | 0.527157 | 0.631619 |
| 11760635_COL1A1    | -0.0443  | 0.527182 | 0.631634 |
| 11737925_CTAG2     | -0.03852 | 0.527251 | 0.6317   |
| 11732910_FAM183A   | -0.06237 | 0.527304 | 0.631748 |
| 11748345_FKBP9P1   | 0.053572 | 0.527322 | 0.631755 |
| 11759198_RAB9B     | -0.06786 | 0.527348 | 0.631771 |
| 11761265_HAVCR2    | -0.04231 | 0.527416 | 0.631837 |
| 11718556_CREB3L2   | -0.02413 | 0.527431 | 0.631839 |
| 11736281_SLC22A3   | 0.032897 | 0.527487 | 0.631891 |
| 11751576_NPY1R     | -0.03436 | 0.527627 | 0.632043 |



|                    |          |          |          |
|--------------------|----------|----------|----------|
| 11728639_ADH1A     | -0.04065 | 0.527655 | 0.63206  |
| 11738654_LOC101930 | -0.0455  | 0.527697 | 0.632095 |
| 11760495_MCOLN3    | 0.042117 | 0.52775  | 0.632136 |
| 11754181_IL2RG     | 0.055378 | 0.527757 | 0.632136 |
| 11731946_PAQR9     | 0.044068 | 0.527794 | 0.632165 |
| 11743771_GIMAP7    | -0.03576 | 0.527815 | 0.632175 |
| 11720256_SEPT4     | 0.070217 | 0.528063 | 0.632456 |
| 11719427_BTBD7     | 0.042963 | 0.528224 | 0.632634 |
| 11737651_USP50     | 0.036422 | 0.528264 | 0.632653 |
| 11760434_B9D1      | 0.02578  | 0.528265 | 0.632653 |
| 11731676_CCR2      | -0.04149 | 0.52829  | 0.632666 |
| 11761083_CBLB      | 0.077267 | 0.528304 | 0.632667 |
| 11735017_EPN2      | 0.039789 | 0.528344 | 0.6327   |
| 11717026_GLYR1     | -0.03156 | 0.528403 | 0.632755 |
| 11755543_TMC5      | -0.05108 | 0.528431 | 0.632773 |
| 11734850_CELSR2    | 0.02911  | 0.528499 | 0.632835 |
| 11728506_SLC39A2   | -0.04699 | 0.52853  | 0.632835 |
| 11724794_PGS1      | -0.02423 | 0.528532 | 0.632835 |
| 11747898_PPFIA3    | -0.04516 | 0.528534 | 0.632835 |
| 11718142_TTC27     | 0.028226 | 0.528596 | 0.632885 |
| 11760412_EIF3K     | -0.04077 | 0.528602 | 0.632885 |
| 11715131_KRTAP20-1 | -0.09986 | 0.528666 | 0.632946 |
| 11718443_MAPK8IP3  | -0.04137 | 0.528682 | 0.63295  |
| 11761978_ARHGEF12  | 0.056901 | 0.528747 | 0.633012 |
| 11748752_RAPGEF5   | 0.062824 | 0.528837 | 0.633104 |
| 11764040_TKTL1     | 0.059945 | 0.528866 | 0.633124 |
| 11737317_C1orf95   | 0.038267 | 0.528928 | 0.633168 |
| 11718831_NDUFA2    | -0.02215 | 0.528929 | 0.633168 |
| 11741406_ZNF813    | -0.03065 | 0.528982 | 0.633202 |
| 11727828_SNAP29    | -0.05714 | 0.528984 | 0.633202 |
| 11759754_LINCO0943 | 0.082056 | 0.529073 | 0.633293 |
| 11736937_AMMECR1L  | 0.023031 | 0.529127 | 0.633343 |
| 11736115_BLZF1     | 0.038163 | 0.52924  | 0.633463 |
| 11720920_EIF1      | 0.022994 | 0.529325 | 0.633549 |
| 11759352_FCRL3     | -0.03947 | 0.529363 | 0.633578 |
| 11748881_DPPA4     | 0.051372 | 0.529502 | 0.63373  |
| 11737248_HTR6      | 0.031788 | 0.529657 | 0.6339   |
| 11749611_DVL2      | 0.032159 | 0.529747 | 0.633991 |
| 11727082_NPEPL1 // | -0.03128 | 0.529759 | 0.633991 |
| 11734854_VSIG1     | -0.04637 | 0.529835 | 0.634067 |
| 11717065_GREM1     | 0.050019 | 0.529851 | 0.63407  |
| 11762893_FCRL2     | -0.04435 | 0.529918 | 0.634134 |
| 11763759_SPRR1A // | -0.06873 | 0.529942 | 0.634148 |
| 11757622_TSPYL5    | -0.05159 | 0.529956 | 0.634149 |
| 11760684_SH3PXD2A  | -0.0357  | 0.529974 | 0.634154 |
| 11727931_PSG11     | 0.024826 | 0.530013 | 0.634186 |
| 11743118_XRN2      | 0.036616 | 0.53008  | 0.634251 |
| 11760972_C9orf9    | 0.042725 | 0.530129 | 0.634287 |
| 11754997_ARFGAP1   | 0.031631 | 0.530136 | 0.634287 |
| 11759336_TMEM200C  | -0.05585 | 0.530161 | 0.634301 |
| 11739753_SLAMF8    | -0.03431 | 0.53021  | 0.634328 |

|                    |          |          |          |
|--------------------|----------|----------|----------|
| 11733090_ZNF277    | -0.05516 | 0.530214 | 0.634328 |
| 11746332_PRDM15    | -0.02579 | 0.530222 | 0.634328 |
| 11760845_GABARAPL3 | 0.051439 | 0.530317 | 0.634425 |
| 11751014_CES4A     | -0.02344 | 0.530335 | 0.634431 |
| 11762429_METTL2B   | -0.0297  | 0.530587 | 0.634717 |
| 11733516_DGKB      | -0.05426 | 0.530693 | 0.634828 |
| 11722364_COX6A2    | 0.043676 | 0.530734 | 0.634862 |
| 11747632_SUGP1     | -0.02529 | 0.530852 | 0.634976 |
| 200032_PMRPL9 ///  | -0.0218  | 0.530855 | 0.634976 |
| 11717968_TMEM216   | -0.02546 | 0.530929 | 0.635034 |
| 11732380_NPFFR1    | -0.02685 | 0.53093  | 0.635034 |
| 11738912_TAS2R43 / | 0.029411 | 0.531024 | 0.635131 |
| 11720035_CASP2     | 0.026299 | 0.531077 | 0.635179 |
| 11715753_TSPAN7    | -0.05745 | 0.531102 | 0.635179 |
| 11735393_FMR1NB    | 0.040755 | 0.531103 | 0.635179 |
| 11754512_ANO9      | -0.04258 | 0.531384 | 0.635499 |
| 11734559_ADIPOQ    | -0.0455  | 0.531481 | 0.6356   |
| 11730098_ELSPBP1   | -0.04774 | 0.531495 | 0.635601 |
| 11741088_GUCY1A3   | -0.03337 | 0.531624 | 0.63574  |
| 11759785_SVIL      | -0.06677 | 0.531653 | 0.63576  |
| 11756718_PRR5      | 0.044979 | 0.531708 | 0.635807 |
| 11729321_MUC6      | 0.031026 | 0.531719 | 0.635807 |
| 11734431_BP1FC     | 0.065126 | 0.531743 | 0.635821 |
| 11737778_TNFSF8    | -0.05328 | 0.531804 | 0.635878 |
| 11762773_KIF25-AS1 | 0.059791 | 0.531892 | 0.635968 |
| 11724928_PPP1R3D   | -0.03033 | 0.531914 | 0.635978 |
| 11740343_GNAT1     | -0.07798 | 0.53193  | 0.635982 |
| 11759178_ENTPD4    | 0.027299 | 0.532119 | 0.63618  |
| 11750413_LILRA1    | 0.038416 | 0.532122 | 0.63618  |
| 11731781_GSTA3     | 0.032228 | 0.532155 | 0.636203 |
| 11753684_RB1       | -0.03408 | 0.532262 | 0.636317 |
| 11740277_ACOT12    | 0.066483 | 0.532306 | 0.636348 |
| 11734360_CCDC7     | 0.032756 | 0.532315 | 0.636348 |
| 11731788_NCKAP5L   | 0.028451 | 0.532364 | 0.636392 |
| 11742218_SLC13A5   | -0.03921 | 0.532452 | 0.636481 |
| 11723613_SERHL /// | -0.04586 | 0.532475 | 0.636493 |
| 11729269_ZNF414    | -0.03309 | 0.532506 | 0.636514 |
| 11753565_RPL8      | 0.021759 | 0.532521 | 0.636516 |
| 11752161_MYH8      | 0.0326   | 0.532533 | 0.636516 |
| 11744705_GOLGA3    | 0.026954 | 0.532612 | 0.63659  |
| 11716918_NAGK      | -0.0341  | 0.532626 | 0.63659  |
| 11761415_CTHRC1    | 0.027193 | 0.532635 | 0.63659  |
| 11736984_UBASH3A   | -0.04448 | 0.532853 | 0.636835 |
| 11731284_NR2E3     | -0.03773 | 0.532877 | 0.636849 |
| 11758969_ING2      | 0.037248 | 0.533061 | 0.637047 |
| 11753611_DFFB      | -0.05179 | 0.533071 | 0.637047 |
| 11738725_OR5B12    | 0.053377 | 0.533082 | 0.637047 |
| 11748226_CCDC64    | -0.07542 | 0.533165 | 0.637131 |
| 11743955_ALKBH7    | -0.0679  | 0.533196 | 0.637152 |
| 11728269_MS4A1     | -0.03991 | 0.533217 | 0.637161 |
| 11723225_CLDN11    | 0.088121 | 0.533377 | 0.637335 |

|                    |          |          |          |
|--------------------|----------|----------|----------|
| 11759471_LCE1F     | -0.03891 | 0.533388 | 0.637335 |
| 11761362_RC3H2     | -0.04766 | 0.53342  | 0.637358 |
| 11742145_LOC105369 | -0.03396 | 0.533463 | 0.637393 |
| 11736642_SLC4A3    | -0.02718 | 0.533522 | 0.637449 |
| 11737964_BSDC1     | 0.032373 | 0.533587 | 0.63751  |
| 11746642_GRM5      | -0.04801 | 0.533722 | 0.637656 |
| 11731914_AMIGO1    | 0.044216 | 0.533781 | 0.637697 |
| 11761294_COQ6      | 0.092165 | 0.533782 | 0.637697 |
| 11722604_NEFH      | -0.06869 | 0.533873 | 0.637789 |
| 11732437_RHOV      | 0.040876 | 0.534064 | 0.637989 |
| 11750252_LOC102724 | -0.03523 | 0.534066 | 0.637989 |
| 11732909_FAM183A   | -0.05402 | 0.534103 | 0.638017 |
| 11733685_FRMD7     | 0.024061 | 0.534116 | 0.638017 |
| 11741298_AMER2     | 0.023777 | 0.534219 | 0.638125 |
| 11716412_ALDH18A1  | -0.02146 | 0.534273 | 0.638174 |
| 11748253_SLC5A1    | -0.0269  | 0.534304 | 0.638196 |
| 11738405_KRTAP1-1  | -0.02838 | 0.534363 | 0.63825  |
| 11726518_PBX4      | 0.027312 | 0.534464 | 0.638356 |
| 11761940_CLVS2     | 0.038853 | 0.534492 | 0.638369 |
| 11758803_SSBP2     | -0.11131 | 0.534502 | 0.638369 |
| 11719536_CPXM2     | 0.048016 | 0.534547 | 0.638408 |
| 11759499_FAM49A    | -0.04021 | 0.534623 | 0.638483 |
| 11737125_CHRM2     | -0.0485  | 0.534655 | 0.638505 |
| 11742081_NAALADL1  | -0.06402 | 0.534767 | 0.638624 |
| 11721174_PYM1      | -0.0246  | 0.53486  | 0.638719 |
| 11730912_NPM1      | 0.02188  | 0.534904 | 0.638738 |
| 11762848_HEX A     | 0.02589  | 0.534904 | 0.638738 |
| 11724664_TMEM120B  | 0.036535 | 0.534927 | 0.638738 |
| 11716950_SRXN1     | 0.023901 | 0.534928 | 0.638738 |
| 11735448_THAP3     | 0.02599  | 0.534976 | 0.638764 |
| 11754372_CERS4     | -0.05044 | 0.534983 | 0.638764 |
| 11717432_ECHDC1    | 0.023027 | 0.534993 | 0.638764 |
| 11749404_IFT172    | -0.0291  | 0.535003 | 0.638764 |
| 11760080_CEACAM1   | -0.02767 | 0.535074 | 0.638834 |
| 11742514_OR8S1     | -0.02888 | 0.535113 | 0.638865 |
| 11752950_OPRK1     | -0.03007 | 0.535174 | 0.638921 |
| 11733081_ATP2A3    | 0.027332 | 0.535186 | 0.638921 |
| 11751841_TNFRSF17  | 0.039168 | 0.535245 | 0.638976 |
| 11762280	EIF4A1    | -0.03941 | 0.535297 | 0.639022 |
| 11760574_FOSL1     | -0.02866 | 0.535367 | 0.63909  |
| 11745037_FRAT1     | 0.026693 | 0.535438 | 0.639159 |
| 11741241_APAF1     | -0.03056 | 0.535513 | 0.639233 |
| 11729595_PRRPF4    | -0.024   | 0.535601 | 0.639323 |
| 11749315_HMP19     | 0.029087 | 0.535629 | 0.639341 |
| 11764110_ID4       | -0.04934 | 0.535644 | 0.639342 |
| 11761778_WDR45     | -0.04157 | 0.535672 | 0.639361 |
| 11722981_CSPG5     | -0.06887 | 0.535759 | 0.639448 |
| 11736092_GCA       | -0.02208 | 0.535832 | 0.639521 |
| 11730561_FAM110D   | 0.034055 | 0.535897 | 0.639582 |
| 11715567_COPZ1     | 0.022505 | 0.535959 | 0.63964  |
| 11748589_EFCAB6    | 0.048769 | 0.536054 | 0.639738 |

|                    |          |          |          |
|--------------------|----------|----------|----------|
| 11750637_SIGLEC8   | -0.04968 | 0.536116 | 0.639797 |
| 11723168_EPHB2     | -0.04026 | 0.536202 | 0.639873 |
| 11757698_MIG7      | -0.03759 | 0.536206 | 0.639873 |
| 11747060_MGAT4A    | -0.03958 | 0.536223 | 0.639878 |
| 11753892_COX7A2    | 0.023444 | 0.536239 | 0.639881 |
| 11732622_CRB3      | -0.02603 | 0.536384 | 0.640039 |
| 11724937_DLL1      | -0.02489 | 0.53643  | 0.640077 |
| 11738965_ANP32D    | -0.02885 | 0.536445 | 0.64008  |
| 11749079_GTF2E1    | 0.042167 | 0.53647  | 0.640089 |
| 11759123_TMEM150C  | -0.06101 | 0.536479 | 0.640089 |
| 11750589_HFM1      | -0.03424 | 0.536498 | 0.640097 |
| 11727725_SCNN1D    | -0.0352  | 0.536546 | 0.640138 |
| 11750194_NFATC4    | 0.022437 | 0.536618 | 0.640208 |
| 11720477_PLG       | -0.04511 | 0.536675 | 0.640251 |
| 11748013_ARL13A    | 0.037708 | 0.53668  | 0.640251 |
| 11763363_ZKSCAN5   | 0.027469 | 0.536757 | 0.640327 |
| 11737724_TFDP3     | -0.06647 | 0.536907 | 0.640491 |
| 11736749_SLC22A9   | 0.041248 | 0.536979 | 0.640561 |
| 11733624_ZNF831    | -0.05434 | 0.537013 | 0.640586 |
| 11740565_PNLIPRP3  | -0.04175 | 0.53705  | 0.640614 |
| 11720095_CUL4B     | -0.03152 | 0.537185 | 0.640759 |
| 11754803_UCHL1     | 0.04274  | 0.537202 | 0.640765 |
| 11732938_STRA6     | -0.02631 | 0.53725  | 0.640806 |
| 11747940_PODN      | -0.05402 | 0.537339 | 0.640897 |
| 11741634_GPR6      | 0.025716 | 0.53738  | 0.640928 |
| 11743230_CCL24     | 0.033632 | 0.537392 | 0.640928 |
| 11729456_BCL6B     | -0.05683 | 0.537424 | 0.64095  |
| 11748941_TOM1L2    | 0.038983 | 0.537473 | 0.640985 |
| 11747124_LOC100293 | -0.05194 | 0.537479 | 0.640985 |
| 11740498_OCSTAMP   | -0.04949 | 0.5375   | 0.640994 |
| 11740169_ARHGAP42  | -0.02548 | 0.537557 | 0.641047 |
| 11761367_PKD2L2    | -0.03781 | 0.537571 | 0.641047 |
| 11745970_SFXN5     | -0.03028 | 0.537641 | 0.641106 |
| 11745303_PFN1P2    | -0.04842 | 0.537646 | 0.641106 |
| 11762994_YME1L1    | -0.0766  | 0.537662 | 0.641109 |
| 11730097_DUSP21    | 0.053487 | 0.537697 | 0.641124 |
| 11722497_RPTOR     | 0.028751 | 0.5377   | 0.641124 |
| 11735860_IL13      | 0.04845  | 0.53773  | 0.641144 |
| 11738940_SPAG11A / | -0.02622 | 0.537786 | 0.641191 |
| 11762812_IL31RA    | 0.09824  | 0.537796 | 0.641191 |
| 11733364_ZFP64     | 0.033737 | 0.53782  | 0.641204 |
| 11748493_FAM230A / | -0.08779 | 0.537921 | 0.641308 |
| 11749588_ALG3      | 0.029771 | 0.538202 | 0.641628 |
| 11733448_UNC45B    | -0.03866 | 0.538219 | 0.641633 |
| 11761487_PDS5B     | -0.04598 | 0.538236 | 0.641637 |
| 11758076_ADCY9     | -0.02427 | 0.538291 | 0.641669 |
| 11727230_FCRL5     | -0.03125 | 0.538307 | 0.641669 |
| 11738563_KAAG1     | -0.06546 | 0.538314 | 0.641669 |
| 11748427_MFN2      | 0.027808 | 0.538315 | 0.641669 |
| 11753594_LETMD1    | 0.02481  | 0.538373 | 0.641722 |
| 11721120_NUDT5     | 0.022734 | 0.538456 | 0.64179  |

|                    |          |          |          |
|--------------------|----------|----------|----------|
| 11724189_PARP10    | 0.044358 | 0.538456 | 0.64179  |
| 11752888_ACSBG1    | 0.062501 | 0.538539 | 0.641873 |
| 11743711_C22orf23  | -0.0355  | 0.538616 | 0.641949 |
| 11720661_CDK9      | -0.04679 | 0.538936 | 0.642315 |
| 11726638_MIB1      | 0.029734 | 0.538982 | 0.642354 |
| 11741540_CDC42BPA  | 0.033887 | 0.539048 | 0.642403 |
| 11760776_DMKN      | 0.030385 | 0.539049 | 0.642403 |
| 11731213_CCL25     | 0.027286 | 0.539112 | 0.642462 |
| 11761313_D2HGDH    | -0.04816 | 0.539157 | 0.642493 |
| 11742623_OR7A10    | 0.03758  | 0.539167 | 0.642493 |
| 11748902_CAMTA2    | -0.03779 | 0.539177 | 0.642493 |
| 11738834_TCL6      | 0.039993 | 0.539204 | 0.64251  |
| 11750895_GUCY1B2   | -0.0409  | 0.539235 | 0.642531 |
| 11739389_OXTR      | -0.04265 | 0.539485 | 0.642802 |
| 11735769_CTAGE15 / | 0.040552 | 0.539489 | 0.642802 |
| 11750657_NRP1      | 0.041188 | 0.539556 | 0.642865 |
| 11747712_LOC101060 | -0.03479 | 0.539629 | 0.642938 |
| 11762001_MLLT6     | 0.046402 | 0.539646 | 0.642941 |
| 11761123_RNGTT     | -0.05649 | 0.539894 | 0.643222 |
| 11715312_FOXC2     | -0.02972 | 0.540012 | 0.643346 |
| 11726009_CBR4      | 0.029757 | 0.540034 | 0.643357 |
| 11745594_GPT       | -0.049   | 0.540232 | 0.643578 |
| 11741895_OTUD4     | -0.02557 | 0.540337 | 0.643681 |
| 11717225_CBFA2T2   | -0.03652 | 0.540354 | 0.643681 |
| 11734853_SCEL      | 0.063396 | 0.540359 | 0.643681 |
| 11735014_GPRI37    | -0.02511 | 0.54039  | 0.643703 |
| 11735317_CACNB4    | -0.04055 | 0.540421 | 0.643711 |
| 11760086_ZSWIM8    | 0.058665 | 0.540423 | 0.643711 |
| 11758819_RRP7A     | 0.031001 | 0.540442 | 0.643718 |
| 11745714_KCNAB2    | -0.04786 | 0.540493 | 0.64375  |
| 11743213_TAAR6     | 0.06315  | 0.540496 | 0.64375  |
| 11757287_CSTB      | -0.02354 | 0.540556 | 0.643806 |
| 11760019_GALNT9    | -0.02654 | 0.540573 | 0.643811 |
| 11740778_KIAA0825  | -0.03014 | 0.540672 | 0.643913 |
| 11763763_DGKA      | 0.024772 | 0.540848 | 0.644107 |
| 11730185_CST1      | -0.04266 | 0.54087  | 0.644117 |
| 11754570_GNB3      | -0.02597 | 0.5409   | 0.644125 |
| 11746874_GNAI2     | -0.02388 | 0.540903 | 0.644125 |
| 11748086_PIK3CG    | 0.04846  | 0.540965 | 0.644183 |
| 11724908_DYNC1I1   | -0.02779 | 0.541026 | 0.644205 |
| 11757145_SNORA13   | -0.03903 | 0.541028 | 0.644205 |
| 11759885_RIMS1     | -0.04769 | 0.541037 | 0.644205 |
| 11726424_SCN3B     | -0.05376 | 0.541044 | 0.644205 |
| 11762629_ZNF367    | -0.0615  | 0.541049 | 0.644205 |
| 11763837_UTY       | -0.05505 | 0.541321 | 0.644513 |
| 11734640_PTH2      | -0.04079 | 0.541388 | 0.644577 |
| 11763789_APOC1P1   | -0.03711 | 0.541416 | 0.644595 |
| 11727011_CELF4     | -0.03419 | 0.541486 | 0.644662 |
| 11739248_FAM208B   | 0.026998 | 0.541501 | 0.644665 |
| 11756874_GRP       | -0.05534 | 0.541556 | 0.644714 |
| 11762476_PTPRB     | 0.03461  | 0.541597 | 0.644742 |

|                    |          |          |          |
|--------------------|----------|----------|----------|
| 11753355_VPS45     | 0.02412  | 0.541605 | 0.644742 |
| 11735142_SORCS3    | 0.04732  | 0.541689 | 0.644812 |
| 11731819_TBC1D8B   | 0.061913 | 0.541691 | 0.644812 |
| 11747887_SLC22A7   | -0.0313  | 0.541765 | 0.644885 |
| 11733123_INPP5D    | -0.03522 | 0.541967 | 0.645098 |
| 11746804_HLA-DQB1  | -0.028   | 0.541973 | 0.645098 |
| 11736198_DCX       | -0.07075 | 0.541984 | 0.645098 |
| 11730362_KIAA1107  | -0.04121 | 0.542042 | 0.645143 |
| 11715638_LPCAT1    | -0.0219  | 0.542048 | 0.645143 |
| 11748463_ITGB6 /// | 0.057654 | 0.542087 | 0.645174 |
| 11749992_SIGLEC15  | 0.026418 | 0.542107 | 0.645182 |
| 11743087_PPBP      | 0.060604 | 0.542128 | 0.645191 |
| 11715855_PRCP      | -0.03467 | 0.54216  | 0.645213 |
| 11736219_TANGO2    | -0.03945 | 0.542185 | 0.645228 |
| 11729121_MKKS      | -0.02241 | 0.542241 | 0.645278 |
| 11736040_KIF1A     | -0.04693 | 0.542267 | 0.645294 |
| 11717056_CORO1C    | -0.02765 | 0.542484 | 0.645536 |
| 11743333_MRPL35    | -0.02604 | 0.542561 | 0.645613 |
| 11725020_GYS2      | 0.049529 | 0.542577 | 0.645616 |
| 11721007_MED1      | 0.024702 | 0.542689 | 0.645732 |
| 11732124_PEX19     | 0.022674 | 0.542703 | 0.645732 |
| 11735767_C16orf54  | 0.042131 | 0.542725 | 0.645732 |
| 11748805_SLC13A5   | -0.02964 | 0.542728 | 0.645732 |
| 11729929_AQP2      | 0.028893 | 0.542801 | 0.645794 |
| 11716681_SLC39A9   | -0.02807 | 0.542806 | 0.645794 |
| 11739045_SLC15A2   | 0.035183 | 0.542849 | 0.645829 |
| 11723727_CXorf57   | -0.05312 | 0.542896 | 0.645851 |
| 11762612_FEZ2      | -0.05402 | 0.542909 | 0.645851 |
| 11744765_ARHGEF16  | -0.04342 | 0.542911 | 0.645851 |
| 11739354_CHDH      | -0.02775 | 0.54292  | 0.645851 |
| 11753853_NNAT      | -0.03371 | 0.542945 | 0.645865 |
| 11737665_IRS4      | -0.04799 | 0.543024 | 0.645929 |
| 11757519_CAPG      | -0.02556 | 0.543026 | 0.645929 |
| 11720007_STEAP4    | 0.033294 | 0.543059 | 0.645953 |
| 11747707_PAQR6     | -0.02627 | 0.54311  | 0.645998 |
| 11756096_SLC25A4   | -0.02555 | 0.543265 | 0.646167 |
| 11760183_KIZ       | -0.05334 | 0.543325 | 0.646217 |
| 11754839_USP54     | -0.03771 | 0.543334 | 0.646217 |
| 11733226_RLTPR     | -0.02912 | 0.543348 | 0.646218 |
| 11749655_ZNF304    | -0.05291 | 0.543458 | 0.646333 |
| 11759348_ETV3      | -0.02206 | 0.543503 | 0.646371 |
| 11731779_C11orf70  | -0.0332  | 0.543532 | 0.646388 |
| 11722845_UBE2R2    | 0.022493 | 0.543544 | 0.646388 |
| 11762315_C11orf74  | -0.02953 | 0.543616 | 0.646458 |
| 11744906_ERICH2    | -0.03987 | 0.543662 | 0.646497 |
| 11752038_LVRN      | -0.06374 | 0.543887 | 0.646749 |
| 11725033_SYP       | -0.03459 | 0.5439   | 0.646749 |
| 11763267_FAM120B   | 0.033174 | 0.543932 | 0.646771 |
| 11756657_RPS6KA2   | -0.0659  | 0.543955 | 0.646783 |
| 11748864_SUGP1     | -0.0252  | 0.544163 | 0.647015 |
| 11727503_SOX7      | 0.049899 | 0.544216 | 0.647041 |

|                    |          |          |          |
|--------------------|----------|----------|----------|
| 11723608_AGFG1     | -0.0234  | 0.544217 | 0.647041 |
| 11747180_OPA3      | 0.025481 | 0.544225 | 0.647041 |
| 11741166_DPP10     | 0.029598 | 0.544325 | 0.647144 |
| 11721597_MDFI      | -0.0366  | 0.544382 | 0.647196 |
| 11722235_FBX02     | -0.05104 | 0.544475 | 0.64729  |
| 11733984_SLC5A8    | 0.026694 | 0.544574 | 0.647392 |
| 11742609_OR4D11    | -0.04144 | 0.544622 | 0.647435 |
| 11715496_CTSK      | 0.055805 | 0.544699 | 0.64751  |
| 11744403_SAP30BP   | -0.03032 | 0.544739 | 0.647542 |
| 11748929_DENND1A   | 0.040196 | 0.544763 | 0.647555 |
| 11725414_USP16     | 0.025361 | 0.544868 | 0.647664 |
| 11750754_KLHL32    | -0.03589 | 0.544971 | 0.64777  |
| 11756946_TBC1D10C  | 0.054688 | 0.54502  | 0.647812 |
| 11735309_MYCL      | -0.02532 | 0.545065 | 0.64785  |
| 11716277_CBX5      | 0.029579 | 0.5451   | 0.647872 |
| 11730484_PTGER3    | 0.057906 | 0.54511  | 0.647872 |
| 11730927_FUT2      | 0.052792 | 0.545131 | 0.647881 |
| 11746663_C16orf58  | -0.03028 | 0.54534  | 0.648114 |
| 11737309_C14orf2   | 0.025339 | 0.545376 | 0.648141 |
| 11740661_CAMK1D    | 0.051414 | 0.54541  | 0.648166 |
| 11736839_FAM198A   | 0.038245 | 0.545459 | 0.648197 |
| 11730934_AKNA      | -0.03897 | 0.545462 | 0.648197 |
| 11738023_MEIOC     | 0.060367 | 0.545504 | 0.64823  |
| 11763887_PAQR3     | 0.064586 | 0.545551 | 0.64827  |
| 11738710_OR2AE1    | -0.05447 | 0.545612 | 0.648327 |
| 11731244_LGSN      | 0.036131 | 0.54563  | 0.648332 |
| 11752494_AMBRA1    | -0.02348 | 0.545694 | 0.648378 |
| 11761847_TSPAN32   | 0.045137 | 0.545695 | 0.648378 |
| 11738407_CSAG2 /// | -0.03952 | 0.545728 | 0.648402 |
| 11725829_TM4SF5    | -0.04493 | 0.545759 | 0.648423 |
| 11761075_SCP2      | -0.05437 | 0.545797 | 0.648453 |
| 11762295_NXN       | 0.059068 | 0.545825 | 0.64847  |
| 11736062_SEPT7     | 0.031437 | 0.545901 | 0.648544 |
| 11738292_VPS50     | 0.038479 | 0.545936 | 0.648566 |
| 11743359_PLEKHG5   | -0.02644 | 0.545946 | 0.648566 |
| 11726794_ITGB4     | -0.0253  | 0.545991 | 0.648604 |
| 11752503_ALDH7A1   | -0.05812 | 0.54601  | 0.648611 |
| 11735426_MRGPRX1   | -0.03442 | 0.546145 | 0.64875  |
| 11742815_SEMA6A    | -0.04015 | 0.546153 | 0.64875  |
| 11726027_STAG3L4   | 0.025513 | 0.546193 | 0.648755 |
| 11735245_SPATA22 / | -0.04335 | 0.546199 | 0.648755 |
| 11748666_ZNF558    | 0.051551 | 0.546201 | 0.648755 |
| 11741392_CCDC178   | 0.05395  | 0.546222 | 0.648755 |
| 11727570_MARK1     | -0.05658 | 0.546225 | 0.648755 |
| 11722194_NDUFS8    | -0.02088 | 0.546272 | 0.648781 |
| 11763978_SRRT      | 0.024329 | 0.54628  | 0.648781 |
| 11760854_ZCCHC7    | 0.066583 | 0.546286 | 0.648781 |
| 11716673_ACIN1     | 0.02536  | 0.546319 | 0.648804 |
| 11753022_CD84      | -0.05531 | 0.546391 | 0.648874 |
| 11762122_GLS2      | 0.026772 | 0.546528 | 0.649021 |
| 11729055_SLC28A1   | -0.05176 | 0.546605 | 0.649096 |

|                    |          |          |          |
|--------------------|----------|----------|----------|
| 11743556_EBF4      | 0.053291 | 0.546662 | 0.649149 |
| 11750661_RGS22     | -0.03443 | 0.546769 | 0.649248 |
| 11738579_OR10A2 // | -0.02459 | 0.546784 | 0.649248 |
| 11735161_DLX4      | -0.03203 | 0.546819 | 0.649248 |
| 11719441_WNT5B     | -0.05057 | 0.546823 | 0.649248 |
| 11749269_PTPN7     | 0.025352 | 0.546824 | 0.649248 |
| 11753882_IL2RG     | 0.075837 | 0.546825 | 0.649248 |
| 11737492_CCL23     | 0.052752 | 0.54688  | 0.649297 |
| 11720013_ATM       | -0.02575 | 0.546973 | 0.649379 |
| 11735810_A4GNT     | -0.05897 | 0.546976 | 0.649379 |
| 11743514_LAMC2     | -0.03492 | 0.547006 | 0.649399 |
| 11732530_N4BP2L1   | -0.05435 | 0.547048 | 0.649433 |
| 11725352_KIAA0930  | -0.0303  | 0.547061 | 0.649433 |
| 11757734_APOA1     | 0.047351 | 0.547122 | 0.64949  |
| 11725415_USP16     | 0.025164 | 0.54716  | 0.649519 |
| 11759861_ARHGEF10  | -0.0486  | 0.547269 | 0.649629 |
| 11748333_RPAIN     | -0.02077 | 0.547279 | 0.649629 |
| 11761955_YJEFN3    | 0.053465 | 0.54734  | 0.649686 |
| 11743016_DIP2C     | 0.023974 | 0.547376 | 0.649711 |
| 11744421_CRADD     | -0.02148 | 0.547389 | 0.649711 |
| 11722514_IDNK      | -0.03153 | 0.547438 | 0.649754 |
| 11756616_CNNM1     | -0.02739 | 0.547567 | 0.649891 |
| 11736648_UGT2B15 / | 0.03158  | 0.547592 | 0.649906 |
| 11762745_FGFR2     | -0.02792 | 0.547684 | 0.649999 |
| 11734201_GK        | 0.047363 | 0.547729 | 0.650037 |
| 11754707_CUEDC2    | -0.02967 | 0.547762 | 0.650061 |
| 11760406_HLA-G     | -0.04941 | 0.547785 | 0.650072 |
| 11761071_HLA-DOB   | 0.024638 | 0.547882 | 0.650171 |
| 11763050_LOC100128 | 0.025151 | 0.548002 | 0.650297 |
| 11762721_CYP2C9    | 0.03268  | 0.548086 | 0.650382 |
| 11740641_NEK3      | -0.04683 | 0.548146 | 0.650434 |
| 11735219_COL10A1   | -0.04768 | 0.548157 | 0.650434 |
| 11755352_ZSCAN2    | 0.034994 | 0.548185 | 0.650439 |
| 11727381_FYTTD1    | -0.02546 | 0.548188 | 0.650439 |
| 11756444_SFMBT1    | 0.02201  | 0.548203 | 0.650441 |
| 11758604_GNPAT1    | 0.020872 | 0.548314 | 0.650557 |
| 11756782_SEL1L2    | -0.04001 | 0.548344 | 0.650572 |
| 11726211_DKKL1     | 0.024477 | 0.548353 | 0.650572 |
| 11763638_RALGAPA1  | -0.04991 | 0.548373 | 0.650579 |
| 11763072_OCR1      | -0.04146 | 0.548539 | 0.650761 |
| 11728642_DEFA5     | 0.037025 | 0.548574 | 0.650786 |
| 11741058_SATB1     | -0.02362 | 0.548855 | 0.651104 |
| 11729486_RGS6      | -0.0414  | 0.548877 | 0.651115 |
| 11747603_EHD2      | -0.02786 | 0.548908 | 0.651135 |
| 11758866_UQCC3     | 0.031781 | 0.548921 | 0.651135 |
| 11740268_CCDC18    | -0.0298  | 0.5491   | 0.651332 |
| 11727995_SPINK5    | -0.03673 | 0.549165 | 0.651384 |
| 11743857_KRT28     | 0.060261 | 0.549171 | 0.651384 |
| 11719332_ARHGAP15  | -0.04758 | 0.549204 | 0.651407 |
| 11726318_EEF1G     | 0.02124  | 0.549219 | 0.651409 |
| 11740539_SCGB1C1 / | 0.051633 | 0.549285 | 0.651472 |



|                    |          |          |          |
|--------------------|----------|----------|----------|
| 11761789_ACE       | -0.04213 | 0.549313 | 0.65149  |
| 11733131_CCT8 ///  | -0.02986 | 0.549414 | 0.651594 |
| 11717662_PIEZO1    | 0.022379 | 0.549483 | 0.65166  |
| 11735159_ZNF501    | 0.044863 | 0.549567 | 0.651739 |
| 11753206_EPHA6     | -0.02917 | 0.549577 | 0.651739 |
| 11763745_STYXL1    | -0.05545 | 0.549601 | 0.651752 |
| 11742426_PCDH15    | -0.02988 | 0.549652 | 0.651797 |
| 11743492_KTN1      | 0.039576 | 0.549682 | 0.651804 |
| 11727086_RXRG      | -0.04396 | 0.549685 | 0.651804 |
| 11721370_TCF7L1    | -0.03237 | 0.5497   | 0.651806 |
| 11742654_SPACA5 // | -0.03066 | 0.549759 | 0.651861 |
| 11751010_IK        | 0.021829 | 0.549854 | 0.651958 |
| 11734060_PSTK      | 0.036192 | 0.54989  | 0.651984 |
| 11720538_FLVCR2    | 0.026802 | 0.549943 | 0.652031 |
| 11760257_ANKZF1    | 0.039899 | 0.550034 | 0.65212  |
| 11715216_UGT2B28   | 0.047963 | 0.550056 | 0.65212  |
| 11759610_HOXB-AS3  | -0.04081 | 0.550063 | 0.65212  |
| 11726730_KDM4A     | 0.0219   | 0.550071 | 0.65212  |
| 11758079_KMO       | -0.03152 | 0.550241 | 0.652305 |
| 11724706_ST8SIA3   | 0.044142 | 0.550414 | 0.652494 |
| 11742616_OR5W2     | 0.026899 | 0.550586 | 0.652682 |
| 11731103_ATF7      | 0.027628 | 0.550747 | 0.652857 |
| 11761089_PRTFDC1   | -0.07557 | 0.550855 | 0.65297  |
| 11730884_GPATCH1   | -0.02319 | 0.550881 | 0.652982 |
| 11763483_ATP10B    | 0.051893 | 0.550892 | 0.652982 |
| 11735573_MMP21     | 0.050607 | 0.551201 | 0.653333 |
| 11759385_OR5T2     | -0.06217 | 0.551262 | 0.653388 |
| 11739333_SSTR2     | 0.031126 | 0.551309 | 0.653428 |
| 11758761_PDZD11    | 0.026622 | 0.551396 | 0.653516 |
| 11753438_MED25     | -0.0314  | 0.551454 | 0.653568 |
| 11728484_OCLN      | 0.044557 | 0.551539 | 0.653647 |
| 11760755_LOC100506 | -0.03325 | 0.551553 | 0.653647 |
| 11719519_SEMA5A    | 0.056112 | 0.55156  | 0.653647 |
| 11753111_IL1ORB    | -0.03117 | 0.551583 | 0.653658 |
| 11749187_ATF7      | -0.02259 | 0.551619 | 0.653684 |
| 11734929_LRRTM3    | 0.02272  | 0.551632 | 0.653684 |
| 11748645_RASA3     | -0.02253 | 0.551672 | 0.653716 |
| 11735143_SLC15A1   | 0.033584 | 0.551717 | 0.653753 |
| 11731955_CEACAM19  | 0.033297 | 0.551735 | 0.653759 |
| 11738684_RAB34     | -0.02352 | 0.551843 | 0.653859 |
| 11716244_WASF2     | 0.028066 | 0.551846 | 0.653859 |
| 11753576_PXT1      | -0.04543 | 0.551881 | 0.653864 |
| 11729418_TEKT2     | 0.02659  | 0.551897 | 0.653864 |
| 11735227_FAM71E2   | 0.034967 | 0.5519   | 0.653864 |
| 11760119_GABARAPL1 | -0.08129 | 0.551904 | 0.653864 |
| 11743175_TSHZ3     | 0.070532 | 0.551938 | 0.653876 |
| 11748374_ARHGAP35  | 0.030555 | 0.551941 | 0.653876 |
| 11729028_CAPZA3    | 0.063218 | 0.551981 | 0.653894 |
| 11738758_OR2A5     | -0.03681 | 0.551983 | 0.653894 |
| 11723189_ADAM19    | 0.054671 | 0.552103 | 0.65402  |
| 11719255_CDK19     | 0.025059 | 0.552161 | 0.654074 |

|                    |          |          |          |
|--------------------|----------|----------|----------|
| 11724082_TOR2A     | 0.024092 | 0.552271 | 0.654183 |
| 11762391_PAPPA2    | -0.05036 | 0.55228  | 0.654183 |
| 11733605_RNF148    | 0.052503 | 0.552341 | 0.654239 |
| 11730769_PODN      | -0.03866 | 0.552366 | 0.654253 |
| 11741624_VSTM2B    | -0.04264 | 0.552384 | 0.654258 |
| 11760749_DACH2     | 0.057557 | 0.552487 | 0.654364 |
| 11747896_NUPL2     | -0.02247 | 0.552566 | 0.654436 |
| 11740465_GPR171    | 0.02262  | 0.552574 | 0.654436 |
| 11727701_FAM185A   | 0.046969 | 0.552599 | 0.65445  |
| 11737552_B3GALT1   | 0.040294 | 0.552626 | 0.654466 |
| 11749057_RCS1      | 0.032441 | 0.552664 | 0.654494 |
| 11739750_SPTLC3    | -0.02369 | 0.552698 | 0.654519 |
| 11761186_DDX31     | 0.061897 | 0.552854 | 0.654688 |
| 11741019_MAPK10    | -0.06032 | 0.552889 | 0.654713 |
| 11763711_ITGA4     | 0.089509 | 0.552941 | 0.654759 |
| 11735445_NEU3      | -0.05167 | 0.552991 | 0.654803 |
| 11731036_FIBCD1    | 0.03446  | 0.553046 | 0.654853 |
| 11716112_PIGR      | 0.050102 | 0.553088 | 0.654886 |
| 11729944_B4GALNT4  | -0.02583 | 0.553191 | 0.654992 |
| 11762636_EXOG      | 0.06615  | 0.553299 | 0.655104 |
| 11719180	EIF3D     | -0.02085 | 0.553364 | 0.655158 |
| 11741817_SLC12A5   | -0.06607 | 0.553372 | 0.655158 |
| 11721865_ZNF689    | -0.03619 | 0.553386 | 0.655159 |
| 11748359_BCR       | 0.054521 | 0.553433 | 0.655199 |
| 11721835_TMEM14B   | -0.02104 | 0.553449 | 0.655202 |
| 11746939_ZNRF1     | 0.026812 | 0.553466 | 0.655207 |
| 11741926_FUT5      | -0.02635 | 0.553495 | 0.655225 |
| 11750062_UBXN1     | -0.02737 | 0.55352  | 0.65523  |
| 11729842_VNN1      | 0.045422 | 0.553526 | 0.65523  |
| 11751437_CYP4F8    | 0.060292 | 0.553552 | 0.655245 |
| 11743109_ACTA1     | 0.048092 | 0.553634 | 0.655313 |
| 11731373_SUN5      | -0.04331 | 0.553637 | 0.655313 |
| 11715522_HADHA     | 0.021236 | 0.55377  | 0.655455 |
| 11762857_CD274     | 0.034239 | 0.553922 | 0.655619 |
| 11732072_ARL6      | -0.03359 | 0.554002 | 0.655698 |
| 11750817_RAPGEFL1  | -0.02729 | 0.554029 | 0.655714 |
| 11742224_CDC20B    | -0.06436 | 0.554184 | 0.655882 |
| 11746551_SEMA6C    | -0.04702 | 0.554253 | 0.655947 |
| 11751767_CKM       | -0.02721 | 0.55444  | 0.656147 |
| 11720295_KIAA1671  | 0.064123 | 0.554448 | 0.656147 |
| 11760716_CIITA     | 0.04758  | 0.554553 | 0.656255 |
| 11723156_LSP1      | -0.07227 | 0.554617 | 0.656314 |
| 11740877_GDF7      | 0.023184 | 0.554644 | 0.656331 |
| 11721210_SCRIB     | 0.028902 | 0.554762 | 0.656449 |
| 11735590_PRR34     | -0.03359 | 0.55477  | 0.656449 |
| 11749545_RAI2      | -0.02696 | 0.554844 | 0.656519 |
| 11745081_CLEC4M    | 0.046443 | 0.554875 | 0.656527 |
| 11741530_EFCAB8    | -0.02363 | 0.554877 | 0.656527 |
| 11715162_HIST1H2AK | -0.04313 | 0.554939 | 0.656584 |
| 11747015_PGAP3     | -0.02466 | 0.555008 | 0.656651 |
| 11723744_SLC13A5   | -0.02651 | 0.55513  | 0.656779 |

|                    |          |          |          |
|--------------------|----------|----------|----------|
| 11760882_SIVA1     | -0.02358 | 0.555166 | 0.656799 |
| 11718364_ST6GALNAC | -0.04455 | 0.555185 | 0.656799 |
| 11757218_ATXN8OS   | 0.044993 | 0.555188 | 0.656799 |
| 11756511_SLCO2A1   | 0.035922 | 0.55522  | 0.656822 |
| 11741203_DNASE1L1  | -0.02351 | 0.555379 | 0.656993 |
| 11721701_MAP1LC3A  | -0.02956 | 0.555437 | 0.657019 |
| 11760690_VWA2      | -0.08493 | 0.55544  | 0.657019 |
| 11722977_HOXB5     | -0.03107 | 0.555441 | 0.657019 |
| 11732025_ANGPTL5   | 0.070933 | 0.5555   | 0.657065 |
| 11736181_ZNF747    | 0.026235 | 0.555506 | 0.657065 |
| 11726313_TBL1X     | -0.05746 | 0.55561  | 0.657171 |
| 11728032_TMEM174   | -0.06142 | 0.555639 | 0.65719  |
| 11735432_OBP2B     | -0.0467  | 0.555676 | 0.657201 |
| 11763810_AKAP11    | -0.0379  | 0.55568  | 0.657201 |
| 11722995_ADH1B     | 0.033347 | 0.555689 | 0.657201 |
| 11758812_C7orf76 / | 0.041943 | 0.555888 | 0.657421 |
| 11751007_EDAR      | -0.03858 | 0.555929 | 0.657439 |
| 11733315_AMER3     | -0.03665 | 0.55593  | 0.657439 |
| 11738580_OR8D2     | 0.037042 | 0.556077 | 0.657596 |
| 11748701_FUT6      | -0.06165 | 0.556105 | 0.657614 |
| 11740358_LILRB5    | 0.04945  | 0.556129 | 0.657624 |
| 11760732_TUBB6     | -0.03169 | 0.556141 | 0.657624 |
| 11752212_NYAP2     | 0.07353  | 0.556245 | 0.657732 |
| 11747148_FAM13C    | -0.06224 | 0.556276 | 0.657752 |
| 11749636_DROSHA    | -0.02675 | 0.556312 | 0.657764 |
| 11736738_CLEC5A    | -0.0278  | 0.556326 | 0.657764 |
| 11717948_COA5      | -0.03049 | 0.556326 | 0.657764 |
| 11742248_DPF1      | 0.030183 | 0.556422 | 0.65785  |
| 11762209_FAM71B    | -0.0559  | 0.556426 | 0.65785  |
| 11719322_DNALI1    | -0.03812 | 0.556456 | 0.65787  |
| 11728542_MRO       | -0.03185 | 0.556558 | 0.657974 |
| 11740033_PPIE      | -0.02364 | 0.556575 | 0.657979 |
| 11739584_PRKD3     | -0.02095 | 0.556753 | 0.658173 |
| 11759683_SPATA42   | 0.054652 | 0.556788 | 0.658198 |
| 11740116_SSBP3     | -0.04723 | 0.556865 | 0.658274 |
| 11727652_SRRM4     | -0.03724 | 0.556931 | 0.658336 |
| 11742251_CYP2A13 / | -0.03833 | 0.556975 | 0.658372 |
| 11741193_ACP2      | -0.03502 | 0.557019 | 0.658408 |
| 11751771_KLK2      | 0.030888 | 0.557076 | 0.658454 |
| 11718722_PSCA      | -0.03489 | 0.557085 | 0.658454 |
| 11735827_VSX1      | 0.044964 | 0.557116 | 0.658472 |
| 11730160_RBM20     | -0.08146 | 0.557127 | 0.658472 |
| 11737345_CNTNAP5   | -0.06286 | 0.55717  | 0.658491 |
| 11720677_C1QTNF1   | 0.04586  | 0.55717  | 0.658491 |
| 11732775_DNMT3A    | -0.06796 | 0.557225 | 0.658533 |
| 11724693_TRPV6     | 0.028057 | 0.557233 | 0.658533 |
| 11763582_RALGAPA1  | 0.073855 | 0.557343 | 0.658647 |
| 11761951_VPS50     | -0.05969 | 0.557382 | 0.658678 |
| 11739404_KMT5B     | 0.045657 | 0.557479 | 0.658764 |
| 11746898_ADH1B     | 0.038578 | 0.557482 | 0.658764 |
| 11751604_OPALIN    | -0.05088 | 0.557503 | 0.658773 |

|                    |          |          |          |
|--------------------|----------|----------|----------|
| 11759353_ZNF157    | 0.063727 | 0.55761  | 0.658883 |
| 11751653_RNF144B   | -0.0375  | 0.557788 | 0.659078 |
| 11740408_TTC22     | 0.029671 | 0.557951 | 0.659254 |
| 11746849_C8orf34   | -0.02478 | 0.55798  | 0.659271 |
| 11741942_OCM /// C | -0.06599 | 0.557992 | 0.659271 |
| 11730799_CRTC1     | -0.02515 | 0.55801  | 0.659275 |
| 11748626_SEMA4F    | 0.040694 | 0.558023 | 0.659275 |
| 11761836_ABCA9     | 0.037771 | 0.558082 | 0.659329 |
| 11740496_ST3GAL2   | -0.02372 | 0.55813  | 0.65937  |
| 11720044_SKAP2     | -0.02398 | 0.558159 | 0.659376 |
| 11748668_PDCD2     | 0.044756 | 0.558165 | 0.659376 |
| 11734954_KCNJ13    | -0.04023 | 0.558182 | 0.659376 |
| 11751947_SPTAN1    | 0.037262 | 0.558189 | 0.659376 |
| 11755989_INF2      | -0.02512 | 0.558214 | 0.65939  |
| 11737353_CDC20B    | 0.049946 | 0.558273 | 0.659444 |
| 11729607_PGM2      | 0.056542 | 0.558317 | 0.65948  |
| 11728654_IGFBP5    | 0.05002  | 0.558615 | 0.659815 |
| 11752837_ADGRE2    | 0.02723  | 0.558678 | 0.659875 |
| 11723655_DNAJB11   | 0.023269 | 0.558767 | 0.659963 |
| 11763597_HNF4A     | 0.039499 | 0.558818 | 0.660008 |
| 11721247_MRGPRF    | -0.04714 | 0.558877 | 0.660062 |
| 11727167_STRIP2    | -0.04916 | 0.558905 | 0.660078 |
| 11723890_ANKRD13B  | 0.030399 | 0.558932 | 0.660094 |
| 11763818_PRR5      | -0.06211 | 0.559035 | 0.6602   |
| 11751343_NDRG1     | -0.02552 | 0.55906  | 0.660213 |
| 11741177_KIR2DL4   | 0.070572 | 0.559075 | 0.660216 |
| 11760923_HSH2D     | 0.063157 | 0.5591   | 0.660229 |
| 11752498_NUP54     | -0.02092 | 0.559128 | 0.660246 |
| 11716359_FAM96A    | 0.019999 | 0.559161 | 0.660269 |
| 11752457_ITIH2     | 0.060361 | 0.559297 | 0.660414 |
| 11752364_NKX2-1    | -0.03518 | 0.559345 | 0.660455 |
| 11717441_EPS8      | 0.024472 | 0.559376 | 0.660475 |
| 11733637_MORN3     | -0.02449 | 0.559411 | 0.660501 |
| 11732019_IL15RA    | -0.02655 | 0.55944  | 0.660519 |
| 11749661_PODN      | -0.02834 | 0.55952  | 0.660597 |
| 11753815_ECM1      | -0.02237 | 0.559567 | 0.660636 |
| 11757207_CNKSR1    | 0.034356 | 0.559609 | 0.660671 |
| 11761533_WARS2     | -0.03987 | 0.559631 | 0.660681 |
| 11733710_ZP1       | -0.03279 | 0.559722 | 0.660772 |
| 11732068_CAPN14    | -0.02749 | 0.559802 | 0.66085  |
| 11747434_LOC647859 | 0.033809 | 0.559824 | 0.660861 |
| 11762637_SSH2      | -0.07555 | 0.559882 | 0.660913 |
| 11739762_CLDN10    | -0.04325 | 0.559984 | 0.661018 |
| 11744905_ORM1      | -0.04252 | 0.560025 | 0.661042 |
| 11715386_REG1A     | -0.04635 | 0.560032 | 0.661042 |
| 11754613_ABCB8     | -0.03186 | 0.56007  | 0.661071 |
| 11722587_EXOSC3    | 0.023257 | 0.560255 | 0.66126  |
| 11755892_LOC339166 | -0.04838 | 0.560265 | 0.66126  |
| 11729067_PM20D1    | -0.049   | 0.560271 | 0.66126  |
| 11756774_SPATA18   | -0.04164 | 0.560359 | 0.661348 |
| 11761270_CARS2     | -0.05452 | 0.560387 | 0.661365 |

|                    |          |          |          |
|--------------------|----------|----------|----------|
| 11734036_SAX01     | -0.04008 | 0.560532 | 0.661521 |
| 11716521_C10orf10  | 0.03805  | 0.560596 | 0.661569 |
| 11744578_DNAJC10   | -0.02592 | 0.560601 | 0.661569 |
| 11738375_KIR3DL3   | 0.07028  | 0.560756 | 0.661737 |
| 11755579_LOC653786 | -0.05226 | 0.560818 | 0.661794 |
| 11742600_OR7G3     | 0.058167 | 0.560892 | 0.661865 |
| 11746277_RGS12     | -0.02847 | 0.560989 | 0.661957 |
| 11732673_KCNK16    | -0.03236 | 0.561003 | 0.661957 |
| 11720313_ATP6VOB   | -0.02487 | 0.56101  | 0.661957 |
| 11761964_DKK3      | -0.03469 | 0.561054 | 0.661983 |
| 11760446_ENGASE    | -0.03178 | 0.56106  | 0.661983 |
| 11726486_CPED1     | -0.02032 | 0.561081 | 0.661992 |
| 11737984_TENM1     | 0.064953 | 0.561254 | 0.66218  |
| 11718549_ILF3      | -0.02169 | 0.561352 | 0.662265 |
| 11717947_LOC101928 | -0.02168 | 0.561352 | 0.662265 |
| 11718392_PREPL     | -0.02205 | 0.561374 | 0.662274 |
| 11737322_PLD1      | 0.042726 | 0.561423 | 0.662316 |
| 11744119_ELOVL1    | -0.03086 | 0.561439 | 0.662319 |
| 11734082_CPSF4     | 0.020605 | 0.561453 | 0.662319 |
| 11739058_CHID1     | 0.033318 | 0.561484 | 0.66234  |
| 11730528_ZNF324B   | -0.03862 | 0.5615   | 0.662343 |
| 11731922_MARVELD3  | -0.05238 | 0.56154  | 0.662375 |
| 11734005_TMEM192   | -0.0459  | 0.561637 | 0.662472 |
| 11739679_NTRK2     | -0.07239 | 0.561666 | 0.662491 |
| 11735293_TNFRSF11A | -0.0551  | 0.561822 | 0.662659 |
| 11736627_BAAT      | 0.038203 | 0.561929 | 0.662769 |
| 11735240_ACYP2     | -0.05157 | 0.562    | 0.662836 |
| 11757174_SNORA5B   | 0.027232 | 0.562022 | 0.662847 |
| 11761678_PKNOX1    | -0.0289  | 0.562208 | 0.663044 |
| 11738518_KCNH1     | -0.03017 | 0.562216 | 0.663044 |
| 11729546_ZFPM1     | -0.02285 | 0.56226  | 0.66307  |
| 11732817_MVB12B    | -0.04779 | 0.562265 | 0.66307  |
| 11733437_SYCP2L    | 0.026135 | 0.562297 | 0.663091 |
| 11751682_RNASEH2C  | -0.02653 | 0.56237  | 0.663161 |
| 11727542_MPDZ      | 0.031726 | 0.562391 | 0.66317  |
| 11747037_TRPM2     | -0.02342 | 0.56249  | 0.66327  |
| 11745805_AMMECR1L  | 0.047812 | 0.56255  | 0.663325 |
| 11754691_C2orf70   | -0.05299 | 0.562594 | 0.663361 |
| 11755185_RFX2      | -0.02349 | 0.562657 | 0.663411 |
| 11724521_DNAJC5    | 0.03259  | 0.562664 | 0.663411 |
| 11731029_SLC25A18  | -0.05286 | 0.562767 | 0.663517 |
| 11732523_TMEM232   | 0.030944 | 0.562793 | 0.663532 |
| 11762123_GLS2      | 0.068853 | 0.562811 | 0.663537 |
| 11741254_FXYD3     | -0.03924 | 0.562904 | 0.66363  |
| 11746175_APOL4     | -0.04588 | 0.562956 | 0.663676 |
| 11722511_SAG       | 0.025435 | 0.56297  | 0.663676 |
| 11740187_ARL11     | -0.05337 | 0.563003 | 0.6637   |
| 11725511_SLC38A4   | 0.030087 | 0.563029 | 0.663701 |
| 11720513_SNAI1     | 0.022312 | 0.563032 | 0.663701 |
| 11735953_OR2L2     | -0.04727 | 0.563063 | 0.663722 |
| 11732828_BSND      | 0.036492 | 0.563091 | 0.663739 |

|                    |          |          |          |
|--------------------|----------|----------|----------|
| 11738843_POTEA     | -0.02928 | 0.563169 | 0.663815 |
| 11752041_C2CD2L    | -0.0246  | 0.563193 | 0.663827 |
| 11734425_CDH23     | -0.0505  | 0.563266 | 0.663897 |
| 11728903_CTIF      | 0.035871 | 0.563304 | 0.663926 |
| 11757719_NDUFA13   | 0.022158 | 0.563434 | 0.664064 |
| 11760075_RBM15     | 0.022332 | 0.563562 | 0.664198 |
| 11733424_ARPP21    | 0.035264 | 0.563659 | 0.664287 |
| 11727703_C9orf152  | -0.03352 | 0.563665 | 0.664287 |
| 11739064_GNG12     | 0.020332 | 0.563838 | 0.664475 |
| 11734747_C4A /// C | -0.02692 | 0.56387  | 0.664497 |
| 11740813_HIST1H2AA | -0.05913 | 0.563951 | 0.664569 |
| 11757063_CDC26 /// | 0.022718 | 0.563958 | 0.664569 |
| 11752170_HDAC4     | 0.050798 | 0.564053 | 0.664656 |
| 11759731_CLIC5     | -0.0404  | 0.564059 | 0.664656 |
| 11758986_ZNF48     | -0.03512 | 0.564142 | 0.664737 |
| 11741588_RTEL1-TNF | -0.03041 | 0.564345 | 0.664961 |
| 11748542_KCNIP1    | 0.03673  | 0.564408 | 0.665018 |
| 11735975_TAS2R38   | -0.03484 | 0.564433 | 0.665032 |
| 11723969_PPCS      | 0.024121 | 0.564458 | 0.665046 |
| 11762862_PGC       | -0.03981 | 0.564503 | 0.665083 |
| 11760796_CEP85L    | 0.044431 | 0.564557 | 0.66513  |
| 11738336_C7orf65   | -0.02746 | 0.564577 | 0.665138 |
| 11763081_ZNF578    | -0.04079 | 0.564766 | 0.665344 |
| 11727476_SAP30     | 0.021853 | 0.564787 | 0.665353 |
| 11727795_EIF3E     | 0.021053 | 0.564867 | 0.665431 |
| 11739819_MPZL3     | -0.03269 | 0.564917 | 0.665465 |
| 11746369_CPSF6     | -0.02235 | 0.564929 | 0.665465 |
| 11722724_CSF2RB    | -0.022   | 0.564936 | 0.665465 |
| 11749989_ST6GALNAC | -0.0354  | 0.565052 | 0.665585 |
| 11749577_PAQR6     | -0.03647 | 0.565152 | 0.66568  |
| 11739179_ST6GALNAC | -0.03746 | 0.56516  | 0.66568  |
| 11762157_PTPRJ     | 0.038397 | 0.565198 | 0.665709 |
| 11754468_PLXDC1    | 0.051908 | 0.565364 | 0.665888 |
| 11752229_CWF19L2   | -0.02664 | 0.565381 | 0.665893 |
| 11733902_UQCRQ     | 0.031165 | 0.565488 | 0.666003 |
| 11757093_GIMAP5    | -0.03096 | 0.565512 | 0.666015 |
| 11752033_HYOU1     | 0.019543 | 0.565557 | 0.666052 |
| 11737657_NRG4      | 0.041195 | 0.565634 | 0.666116 |
| 11756948_FEZF2     | 0.043555 | 0.565639 | 0.666116 |
| 11734035_FPR2      | -0.06683 | 0.565735 | 0.666204 |
| 11730819_TMEM230   | -0.02081 | 0.565741 | 0.666204 |
| 11720995_ADCY2     | -0.0582  | 0.565756 | 0.666206 |
| 11740479_GALNT8 // | -0.03105 | 0.565805 | 0.666247 |
| 11734810_DTNA      | 0.047969 | 0.565826 | 0.666256 |
| 11728196_TRO       | -0.0507  | 0.566027 | 0.666475 |
| 11759996_UGT3A1    | -0.03166 | 0.56604  | 0.666475 |
| 11750289_ALDOB     | -0.04757 | 0.566154 | 0.666583 |
| 11752469_SIAE      | -0.02784 | 0.566158 | 0.666583 |
| 11735938_C6orf25   | 0.030412 | 0.5662   | 0.666589 |
| 11739208_DTNB      | -0.02627 | 0.566207 | 0.666589 |
| 11748584_EDC4      | 0.030296 | 0.566217 | 0.666589 |

|                    |          |          |          |
|--------------------|----------|----------|----------|
| 11753393_CA6       | 0.05282  | 0.566218 | 0.666589 |
| 11761753_SYF2      | -0.03287 | 0.566425 | 0.666816 |
| 11762500_WWC1      | -0.0654  | 0.566461 | 0.666842 |
| 11730508_NROB1     | 0.080582 | 0.566558 | 0.666941 |
| 11755256_GYG2      | -0.03277 | 0.566622 | 0.66699  |
| 11758847_9-Mar     | 0.05095  | 0.566627 | 0.66699  |
| 11752042_BRINP2    | -0.04754 | 0.566685 | 0.667042 |
| 11742532_OR11H6    | -0.04237 | 0.566798 | 0.667149 |
| 11754914_PGAP3     | 0.02526  | 0.566803 | 0.667149 |
| 11731057_CLCNKA // | -0.03429 | 0.566856 | 0.667195 |
| 11758074_VGLL3     | 0.077116 | 0.566903 | 0.667234 |
| 11755125_PODNL1    | -0.032   | 0.566917 | 0.667235 |
| 11753376_IQCC      | -0.0513  | 0.566978 | 0.66729  |
| 11738137_MRGPRX2   | 0.066429 | 0.567045 | 0.667353 |
| 11745526_C14orf105 | -0.0368  | 0.567102 | 0.667405 |
| 11751371_TP73      | -0.05971 | 0.567117 | 0.667406 |
| 11741337_CACNG7    | -0.03938 | 0.567156 | 0.667426 |
| 11746349_TOB2P1    | -0.03746 | 0.567161 | 0.667426 |
| 11717430_COX7A1    | 0.046251 | 0.567218 | 0.667477 |
| 11760681_PPM1K     | -0.02561 | 0.567318 | 0.667567 |
| 11725168_MOB3B     | -0.02224 | 0.567322 | 0.667567 |
| 11762873_BAGE      | -0.04841 | 0.567341 | 0.667568 |
| 11749372_PARG ///  | -0.06248 | 0.56735  | 0.667568 |
| 11757127_SNORA23   | -0.04384 | 0.567392 | 0.667598 |
| 11715134_GLIPR1L2  | 0.040273 | 0.567403 | 0.667598 |
| 11758199_RAD23B    | -0.02257 | 0.567525 | 0.667725 |
| 11718234_PRPF4B    | -0.03407 | 0.56759  | 0.667771 |
| 11743218_RAET1K // | 0.061295 | 0.567591 | 0.667771 |
| 11730273_MYOD1     | -0.04301 | 0.567642 | 0.667815 |
| 11738605_KRTAP22-1 | 0.020947 | 0.567687 | 0.667851 |
| 11763536_TAF8      | -0.03746 | 0.5677   | 0.667851 |
| 11723882_CECR1     | -0.0472  | 0.567722 | 0.667861 |
| 11741752_NLRP14    | 0.056135 | 0.567742 | 0.667868 |
| 11730793_MRPL4     | -0.05075 | 0.567758 | 0.667871 |
| 11715292_ST8SIA1   | -0.03486 | 0.567791 | 0.667893 |
| 11752252_RPTOR     | -0.03404 | 0.567898 | 0.668003 |
| 11756349_PDCL      | -0.03083 | 0.567981 | 0.668085 |
| 11737603_NLGN1     | -0.03849 | 0.568036 | 0.668134 |
| 11725839_TCF21     | 0.048707 | 0.568079 | 0.668169 |
| 11734652_ATP5F1    | -0.02088 | 0.568134 | 0.668217 |
| 11719113_PJA2      | -0.02178 | 0.568154 | 0.668225 |
| 11745975_ANXA11    | 0.02451  | 0.568189 | 0.668249 |
| 11741586_ERLIN2    | -0.02961 | 0.568264 | 0.668321 |
| 11737385_C17orf102 | -0.04085 | 0.568324 | 0.668376 |
| 11728174_AMIGO3 // | 0.027028 | 0.568386 | 0.668433 |
| 11758358_C4orf32 / | 0.043666 | 0.568418 | 0.668455 |
| 11716654_EML4      | 0.048171 | 0.568471 | 0.6685   |
| 11742156_GPR31     | -0.0363  | 0.568534 | 0.668549 |
| 11746251_CLIC1     | -0.02084 | 0.56854  | 0.668549 |
| 11738046_LRAT      | 0.050723 | 0.568588 | 0.66859  |
| 11759246_PCDHGA1   | -0.04347 | 0.568623 | 0.668615 |

|                    |          |          |          |
|--------------------|----------|----------|----------|
| 11736190_OGN       | -0.04192 | 0.568694 | 0.668682 |
| 11740229_GSDMA     | 0.044717 | 0.568733 | 0.668712 |
| 11737494_GLRA3     | -0.03632 | 0.568843 | 0.668825 |
| 11748604_DAPK2     | -0.02469 | 0.568936 | 0.668919 |
| 11750377_ADGRE2    | 0.045353 | 0.568999 | 0.668976 |
| 11739661_SIAH1     | 0.020952 | 0.569089 | 0.669054 |
| 11734876_TMEM30B   | -0.0484  | 0.569092 | 0.669054 |
| 11734774_SFTPB     | -0.02941 | 0.569136 | 0.669089 |
| 11722139_GUCY1A3   | 0.052169 | 0.569227 | 0.66918  |
| 11724368_KIAA1644  | -0.04631 | 0.569253 | 0.669195 |
| 11726182_CILP2     | 0.034585 | 0.569311 | 0.669247 |
| 11737096_DSC2      | 0.036136 | 0.56934  | 0.669265 |
| 11744605_THOC2     | 0.021294 | 0.56937  | 0.669275 |
| 11719730_INA       | -0.04028 | 0.569376 | 0.669275 |
| 11756920_FRMD1     | -0.02019 | 0.56948  | 0.66937  |
| 11751557_MED27     | 0.034346 | 0.569484 | 0.66937  |
| 11717876_PPFIA1    | 0.024031 | 0.569523 | 0.669399 |
| 11751889_KDM3B     | -0.02027 | 0.569578 | 0.669449 |
| 11735211_STYK1     | -0.04759 | 0.5696   | 0.669458 |
| 11752194_TAX1BP1   | 0.020033 | 0.569617 | 0.669462 |
| 11754362_TTC7A     | -0.06373 | 0.569775 | 0.669632 |
| 11723093_CYLD      | -0.02969 | 0.569865 | 0.669721 |
| 11748058_NAA60     | -0.02314 | 0.56993  | 0.669781 |
| 11737308_C14orf2   | 0.025879 | 0.569955 | 0.669795 |
| 11755651_SLC22A25  | -0.03686 | 0.570133 | 0.669975 |
| 11742647_MORF4L1   | 0.026069 | 0.570149 | 0.669975 |
| 11749346_C11orf49  | 0.025343 | 0.57015  | 0.669975 |
| 11720919	EIF1      | -0.01994 | 0.570234 | 0.670058 |
| 11742708_P4HTM     | -0.04588 | 0.570266 | 0.67008  |
| 11720849_RAB23     | 0.022823 | 0.570325 | 0.670132 |
| 11738482_OR6B2 /// | -0.04416 | 0.570359 | 0.670141 |
| 11742530_OR6B2 /// | -0.04416 | 0.570359 | 0.670141 |
| 11760467_LOC613206 | 0.030084 | 0.570396 | 0.670167 |
| 200019_PMFAU       | -0.01996 | 0.570452 | 0.670218 |
| 11763428_FAAP20    | -0.03069 | 0.57049  | 0.670245 |
| 11742260_SIGLEC6   | -0.05039 | 0.570529 | 0.670276 |
| 11730156_WWOX      | -0.02926 | 0.570628 | 0.67036  |
| 11731427_CYP3A4    | -0.04174 | 0.570628 | 0.67036  |
| 11760033_CRB1      | -0.02468 | 0.570699 | 0.670427 |
| 11760092_C7orf76 / | -0.04462 | 0.570882 | 0.670626 |
| 11751137_DPF1      | -0.0373  | 0.570928 | 0.670663 |
| 11750505_PTPN7     | -0.03915 | 0.570983 | 0.670707 |
| 11758789_TNFAIP2   | -0.03201 | 0.571015 | 0.670707 |
| 11762905_KRT17     | -0.04788 | 0.571018 | 0.670707 |
| 11725956_TIMM17A   | -0.02035 | 0.57102  | 0.670707 |
| 11726845_PLXDC1    | -0.03815 | 0.571034 | 0.670707 |
| 11756672_APOA5     | -0.05205 | 0.571138 | 0.670807 |
| 11739851_HTRA4     | -0.07113 | 0.571146 | 0.670807 |
| 11738810_TCL6      | -0.05915 | 0.571277 | 0.670945 |
| 11731823_WISP1     | 0.023644 | 0.571291 | 0.670946 |
| 11725181_ARHGEF4   | -0.02767 | 0.571306 | 0.670946 |



|                    |          |          |          |
|--------------------|----------|----------|----------|
| 11743418_P3H2      | -0.04402 | 0.571474 | 0.671128 |
| 11737203_8-Mar     | -0.03436 | 0.571492 | 0.671133 |
| 11734906_NOVA1     | 0.028753 | 0.571571 | 0.671209 |
| 11717401_ARF6      | -0.02262 | 0.571697 | 0.671341 |
| 11732008_FOXH1     | -0.03665 | 0.571758 | 0.671391 |
| 11732089_ISX       | -0.06119 | 0.571767 | 0.671391 |
| 11757495_LRRC37B / | 0.027601 | 0.571822 | 0.67144  |
| 11733324_DOPEY2    | 0.058124 | 0.571842 | 0.671447 |
| 11751946_ARHGAP21  | 0.020836 | 0.571914 | 0.671515 |
| 11721418_SH3RF3    | -0.03767 | 0.572035 | 0.671642 |
| 11732444_RBPMS     | 0.033119 | 0.572147 | 0.671757 |
| 11733290_TRPM1     | -0.04061 | 0.572273 | 0.671889 |
| 11764254_LOC105375 | -0.03137 | 0.57231  | 0.671916 |
| 11745140_NOL6      | -0.03699 | 0.572367 | 0.671953 |
| 11759135_NR4A1     | -0.02312 | 0.572369 | 0.671953 |
| 11740215_KCNC2     | -0.03018 | 0.572413 | 0.671964 |
| 11730798_FAM114A2  | -0.02139 | 0.572414 | 0.671964 |
| 11755552_BBOF1     | 0.051079 | 0.57242  | 0.671964 |
| 11722361_LMBR1L    | -0.03119 | 0.572438 | 0.671969 |
| 11726577_PEX14     | -0.02982 | 0.57248  | 0.672002 |
| 11730919_SLC10A7   | -0.03852 | 0.572604 | 0.672131 |
| 11762738_ASB14     | 0.062354 | 0.572647 | 0.672166 |
| 11753495_CNOT6L    | 0.033948 | 0.572689 | 0.672199 |
| 11737560_XKR9      | 0.060798 | 0.572714 | 0.672212 |
| 11763222_IGK /// I | 0.025995 | 0.572796 | 0.672293 |
| 11718151_HDAC3     | 0.027311 | 0.572901 | 0.672399 |
| 11728575_CWH43     | -0.03906 | 0.573067 | 0.672578 |
| 11762522_ADAMTSL1  | 0.027042 | 0.573134 | 0.672641 |
| 11755698_PEX26 /// | 0.049824 | 0.573179 | 0.672646 |
| 11717756_RALA      | 0.022854 | 0.573182 | 0.672646 |
| 11728963_P2RY11 // | -0.02959 | 0.573187 | 0.672646 |
| 11722035_SLC12A4   | 0.030726 | 0.573193 | 0.672646 |
| 11763701_WDR48     | 0.019937 | 0.573255 | 0.672702 |
| 11725416_NKG7      | -0.02321 | 0.573385 | 0.672838 |
| 11744660_CCL4L1 // | 0.034526 | 0.573403 | 0.672843 |
| 11731285_PRSS58    | -0.02853 | 0.573506 | 0.672933 |
| 11748971_FOXA1     | -0.03349 | 0.573507 | 0.672933 |
| 11730857_ZC2HC1A   | -0.02578 | 0.573665 | 0.673102 |
| 11756836_GNA14     | 0.054369 | 0.573747 | 0.673182 |
| 11740046_ANKRD17   | -0.02061 | 0.57379  | 0.673216 |
| 11715199_DBET ///  | 0.027638 | 0.573842 | 0.673262 |
| 11750688_EFR3B     | -0.02547 | 0.573895 | 0.673307 |
| 11724900_GZMB      | 0.030489 | 0.57393  | 0.673326 |
| 11757936_GCSH ///  | -0.023   | 0.573947 | 0.673326 |
| 11737144_CAMK2B    | -0.02951 | 0.573952 | 0.673326 |
| 11755236_SLC17A2   | -0.03076 | 0.573998 | 0.673353 |
| 11725635_MRPS25    | 0.025729 | 0.574003 | 0.673353 |
| 11720507_FBN1      | 0.070588 | 0.574271 | 0.673647 |
| 11732532_JSRP1 /// | 0.020343 | 0.574281 | 0.673647 |
| 11764104_LOC105376 | -0.04417 | 0.574335 | 0.673694 |
| 11751425_TRAF3IP3  | -0.02939 | 0.574374 | 0.673724 |

|                    |          |          |          |
|--------------------|----------|----------|----------|
| 11750927_SLC2A4    | 0.044394 | 0.574403 | 0.673742 |
| 11740798_SUM04     | 0.04922  | 0.57454  | 0.673864 |
| 11733649_FAM228B   | 0.060313 | 0.574542 | 0.673864 |
| 11763299_UBE3B     | -0.03005 | 0.574549 | 0.673864 |
| 11754321_SLC12A9   | -0.02624 | 0.574614 | 0.673925 |
| 11725764_COL11A1   | 0.021063 | 0.574686 | 0.673993 |
| 11736381_ZNF697    | 0.057687 | 0.574767 | 0.674071 |
| 11736784_RAB11FIP1 | 0.038641 | 0.574787 | 0.674078 |
| 11732355_HLA-F     | 0.039011 | 0.574996 | 0.674308 |
| 11726227_CASR      | -0.05799 | 0.57514  | 0.67446  |
| 11742142_ZFP92     | -0.05995 | 0.575206 | 0.674522 |
| 11749533_GPR37L1   | -0.05828 | 0.575333 | 0.674654 |
| 11741916_OR12D3    | 0.030504 | 0.575366 | 0.674677 |
| 11725194_FCH01     | -0.03269 | 0.575388 | 0.674686 |
| 11761241_MAGED2    | -0.02734 | 0.57545  | 0.674727 |
| 11749263_SLC2A6    | -0.02279 | 0.575464 | 0.674727 |
| 11727592_PSG3 ///  | 0.049507 | 0.575468 | 0.674727 |
| 11742833_FAM149A   | -0.02606 | 0.575477 | 0.674727 |
| 11749583_FUT2      | 0.027956 | 0.575561 | 0.674808 |
| 11715541_THY1      | -0.04899 | 0.575581 | 0.674816 |
| 11738497_OR5P2     | 0.044775 | 0.575727 | 0.674971 |
| 11730276_SULT2A1   | 0.037596 | 0.575745 | 0.674976 |
| 11719954_POLR3H    | -0.02242 | 0.575913 | 0.675157 |
| 11753220_KCNMB1    | -0.04687 | 0.575982 | 0.675221 |
| 11763037_SUPT5H    | -0.03531 | 0.576037 | 0.675255 |
| 11745222_ATP2C1    | 0.029677 | 0.576038 | 0.675255 |
| 11753490_ST3GAL3   | -0.02963 | 0.57607  | 0.675271 |
| 11728941_CCDC169-S | -0.02331 | 0.57608  | 0.675271 |
| 11725873_ZPBP2     | 0.028253 | 0.576108 | 0.675288 |
| 11722965_PLEKHA1   | 0.022675 | 0.576161 | 0.675328 |
| 11739889_PRSS12    | -0.04639 | 0.57617  | 0.675328 |
| 11750628_CLCN6     | 0.047992 | 0.576316 | 0.675484 |
| 11755056_ANKRD54   | 0.023027 | 0.576359 | 0.675518 |
| 11752534_ARHGEF4   | 0.026317 | 0.576398 | 0.675546 |
| 11729375_TAC3      | 0.069819 | 0.576439 | 0.675578 |
| 11762694_DNAJB9    | -0.03847 | 0.576521 | 0.675659 |
| 11723392_ALPK3     | -0.06379 | 0.576738 | 0.675897 |
| 11745088_RPH3AL    | -0.02026 | 0.576856 | 0.676019 |
| 11748735_BZW1      | -0.02757 | 0.576897 | 0.676051 |
| 11727562_ABHD15    | -0.02144 | 0.576956 | 0.676104 |
| 11728619_SLC1A7    | -0.02881 | 0.577014 | 0.676155 |
| 11735621_SP011     | -0.03177 | 0.577138 | 0.676284 |
| 11744151_LPIN2     | 0.021197 | 0.57723  | 0.676376 |
| 11730387_CCKBR     | 0.048179 | 0.577275 | 0.676401 |
| 11751247_PIK3CD    | -0.04396 | 0.577291 | 0.676401 |
| 11753961_IGF2R     | 0.042112 | 0.577293 | 0.676401 |
| 11723210_PICK1     | -0.03404 | 0.577317 | 0.676406 |
| 11754626_ZIC4      | -0.03852 | 0.577345 | 0.676406 |
| 11737671_GLB1L3    | 0.039139 | 0.577352 | 0.676406 |
| 11726203_BANK1     | 0.044159 | 0.577356 | 0.676406 |
| 11716602_KBTBD2    | 0.025954 | 0.577366 | 0.676406 |

|                    |          |          |          |
|--------------------|----------|----------|----------|
| 11750892_SLC5A7    | -0.04352 | 0.577462 | 0.676502 |
| 11747556_SARM1     | -0.03316 | 0.577497 | 0.67652  |
| 11761105_GABRE     | 0.037591 | 0.577505 | 0.67652  |
| 11729767_DGAT1     | 0.022471 | 0.577533 | 0.676537 |
| 11760026_DLX2      | -0.04423 | 0.577603 | 0.676602 |
| 11727752_GRIK3     | 0.038537 | 0.577745 | 0.676741 |
| 11734239_PTPRT     | -0.03623 | 0.577749 | 0.676741 |
| 11728183_PLEKHA7   | -0.0322  | 0.578001 | 0.677019 |
| 11735409_ADAM7     | 0.030396 | 0.578029 | 0.677028 |
| 11762404_ADRA1A    | 0.035909 | 0.578047 | 0.677028 |
| 11744017_FERMT3    | -0.03668 | 0.57805  | 0.677028 |
| 11731255_SPAG16    | 0.05173  | 0.578179 | 0.677163 |
| 11736353_GABRA5    | 0.060334 | 0.578327 | 0.677314 |
| 11737688_TMEM145   | -0.03005 | 0.578335 | 0.677314 |
| 11735138_PDZRN4    | 0.040467 | 0.578368 | 0.677336 |
| 11735501_CDH23     | -0.03954 | 0.578407 | 0.677365 |
| 11721391_TBKBP1    | -0.04353 | 0.578441 | 0.677389 |
| 11741712_IGF2BP2   | 0.041151 | 0.578455 | 0.677389 |
| 11717634_COX6C     | -0.02057 | 0.578475 | 0.677396 |
| 11748266_RETSAT    | -0.03926 | 0.578554 | 0.677473 |
| 11727751_NR5A2     | -0.06445 | 0.578646 | 0.677565 |
| 11724540_VWF       | 0.060599 | 0.578665 | 0.677571 |
| 11739830_GUCY1A3   | 0.03074  | 0.578686 | 0.677579 |
| 11761228_SLC31A2   | 0.033917 | 0.578711 | 0.677592 |
| 11739970_FUT3      | 0.034317 | 0.578773 | 0.677648 |
| 11742016_ACVR1C    | -0.06491 | 0.578963 | 0.677841 |
| 11754202_CAPG      | -0.0205  | 0.578968 | 0.677841 |
| 11737482_CDR1      | 0.047915 | 0.578985 | 0.677841 |
| 11733416_PAGE5     | -0.02446 | 0.578993 | 0.677841 |
| 11749951_ITGA2B    | -0.02655 | 0.579026 | 0.677862 |
| 11737687_C2orf48   | -0.04282 | 0.579101 | 0.677935 |
| 11762488_ABCB9     | 0.055634 | 0.579196 | 0.678029 |
| 11762771_NUDT17    | 0.029612 | 0.579222 | 0.678043 |
| 11762192_ATP10A    | -0.02093 | 0.579289 | 0.678106 |
| 11737789_ACE       | -0.02518 | 0.579338 | 0.678137 |
| 11740862_TPH1      | 0.047082 | 0.579343 | 0.678137 |
| 11732691_TLDC2     | 0.048065 | 0.579419 | 0.6782   |
| 11722564_CYP51A1 / | -0.02768 | 0.579432 | 0.6782   |
| 11741686_FAM185A   | 0.031017 | 0.579439 | 0.6782   |
| 11756419_KRBA2     | 0.033505 | 0.579489 | 0.678242 |
| 11735492_ANKRD44   | -0.0535  | 0.579528 | 0.678272 |
| 11723938_GLOD4     | -0.02175 | 0.579564 | 0.678298 |
| 11734878_TMEM30B   | -0.03938 | 0.579684 | 0.678413 |
| 11742313_OR56A4    | -0.04568 | 0.579694 | 0.678413 |
| 11719722_CCDC93    | 0.034859 | 0.579704 | 0.678413 |
| 11734254_ZNF572    | -0.02811 | 0.57972  | 0.678416 |
| 11750083_FAM195A / | 0.035449 | 0.579779 | 0.678468 |
| 11742443_PRDM13    | -0.03607 | 0.579815 | 0.678494 |
| 11757950_CHSY1     | 0.021713 | 0.57983  | 0.678495 |
| 11756363_NCKAP1L   | 0.019746 | 0.579858 | 0.678498 |
| 11743487_IK        | -0.02227 | 0.57986  | 0.678498 |

|                    |          |          |          |
|--------------------|----------|----------|----------|
| 11748940_CCAR2     | 0.031484 | 0.579945 | 0.678571 |
| 11742280_NAF1      | 0.034578 | 0.57995  | 0.678571 |
| 11735856_GYPE      | -0.06301 | 0.58002  | 0.678637 |
| 11732537_MSS51     | -0.07878 | 0.5802   | 0.678831 |
| 11730449_DHRS12    | -0.04267 | 0.580223 | 0.678841 |
| 11749222_BANP ///  | 0.034164 | 0.58039  | 0.679005 |
| 11740923_IMPDPH2   | -0.02093 | 0.580391 | 0.679005 |
| 11726554_C1orf186  | 0.024882 | 0.580522 | 0.679125 |
| 11756707_UNC5C     | 0.024303 | 0.580529 | 0.679125 |
| 11728847_FAM179A   | -0.03212 | 0.580535 | 0.679125 |
| 11741915_ISM2      | -0.02384 | 0.580561 | 0.67914  |
| 11750984_MGAT2     | 0.02362  | 0.58062  | 0.679192 |
| 11759665_SLC1A6    | 0.038545 | 0.58069  | 0.679258 |
| 11759994_COL4A6    | 0.033098 | 0.580764 | 0.679327 |
| 11733952_GBP4      | 0.021235 | 0.580789 | 0.679341 |
| 11763175_TMEM242   | -0.05652 | 0.580807 | 0.679346 |
| 11751735_CNGA4     | -0.08124 | 0.580844 | 0.679366 |
| 11744838_DUSP28    | 0.033247 | 0.580852 | 0.679366 |
| 11737010_ABCD2     | 0.044714 | 0.580956 | 0.679464 |
| 11721175_RARRES1   | -0.04157 | 0.580963 | 0.679464 |
| 11757251_HPVC1     | -0.04789 | 0.58099  | 0.679468 |
| 11723755_TCF21     | 0.044908 | 0.580996 | 0.679468 |
| 11747238_PJA1      | -0.02253 | 0.581009 | 0.679468 |
| 11728166_CUTC      | -0.02134 | 0.581053 | 0.679504 |
| 11746214_AP3S2 /// | -0.02277 | 0.581088 | 0.679524 |
| 11742174_LCE3E     | -0.03045 | 0.581099 | 0.679524 |
| 11734433_RDH8      | -0.03121 | 0.581206 | 0.679633 |
| 11762770_RAPGEF1   | 0.028638 | 0.581363 | 0.6798   |
| 11737057_SSMEM1    | -0.04425 | 0.581404 | 0.679833 |
| 11730044_C9orf24   | 0.048012 | 0.581524 | 0.679956 |
| 11726863_FOXO4     | -0.02113 | 0.581625 | 0.680058 |
| 11727764_SYNGR4    | 0.027865 | 0.581727 | 0.68015  |
| 11730813_LILRB4    | 0.027277 | 0.581736 | 0.68015  |
| 11737720_COL25A1   | -0.03083 | 0.581746 | 0.68015  |
| 11763865_RALGAPA1  | 0.036684 | 0.581759 | 0.68015  |
| 11730248_TMEM25    | -0.02298 | 0.58179  | 0.68017  |
| 11763648_APOC1     | -0.03707 | 0.581804 | 0.68017  |
| 11724685_IFNAR2    | 0.040962 | 0.581863 | 0.680223 |
| 11743154_C16orf72  | -0.02024 | 0.581888 | 0.680236 |
| 11747102_SEC1P     | -0.03469 | 0.581927 | 0.680265 |
| 11757668_SERF1A // | -0.02318 | 0.581964 | 0.680292 |
| 11721309_SRSF10    | 0.020518 | 0.581989 | 0.680305 |
| 11725253_HNF1B     | -0.05129 | 0.582036 | 0.680344 |
| 11730031_RGPD1 /// | 0.024254 | 0.582083 | 0.680377 |
| 11720396_NBN       | -0.02337 | 0.582093 | 0.680377 |
| 11750098_JAK3      | 0.031126 | 0.582128 | 0.680402 |
| 11736166 EIF4E     | 0.019251 | 0.582194 | 0.680463 |
| 11738213_SLC17A3   | 0.043191 | 0.582233 | 0.680493 |
| 11721310_SRSF10    | 0.02516  | 0.582265 | 0.680502 |
| 11752227_SNRNP200  | 0.021216 | 0.582269 | 0.680502 |
| 11761439_NTNG2     | -0.04009 | 0.582374 | 0.680608 |

|                   |     |          |          |          |
|-------------------|-----|----------|----------|----------|
| 11735559_TBC1D26  | /   | 0.047569 | 0.582444 | 0.680674 |
| 11727308_GRAMD2   |     | -0.02949 | 0.58246  | 0.680677 |
| 11719868_MYCN     |     | 0.037724 | 0.582548 | 0.680754 |
| 11715461_LYZ      |     | 0.039087 | 0.582554 | 0.680754 |
| 11738743_OR8H1    |     | -0.04461 | 0.582581 | 0.680759 |
| 11731148_TLR7     |     | 0.058469 | 0.582586 | 0.680759 |
| 11735257_IL7      |     | 0.019157 | 0.582664 | 0.680834 |
| 11761380_MOGAT2   |     | 0.024732 | 0.582685 | 0.680842 |
| 11753953_GLB1L    |     | 0.056501 | 0.582858 | 0.681028 |
| 11762240_SHMT1    |     | -0.03221 | 0.583026 | 0.681208 |
| 11718871_PALMD    |     | -0.03965 | 0.583049 | 0.681219 |
| 11737243_FSD2     |     | -0.06266 | 0.583191 | 0.681367 |
| 200055_PMTAF10    |     | 0.023699 | 0.583318 | 0.6815   |
| 11759221_HIST1H4E |     | -0.02893 | 0.583369 | 0.681543 |
| 11746480_ADAP1    | /// | -0.05374 | 0.583459 | 0.681632 |
| 11720888_AGL      |     | 0.024689 | 0.583488 | 0.681642 |
| 11749369_VAPB     |     | -0.02704 | 0.583506 | 0.681642 |
| 11756566_RASSF2   |     | -0.02344 | 0.583509 | 0.681642 |
| 11721665_PLA2G16  |     | -0.02949 | 0.583718 | 0.681858 |
| 11745385_RNF170   |     | -0.03051 | 0.583724 | 0.681858 |
| 11748407_SCAF8    |     | 0.024494 | 0.583736 | 0.681858 |
| 11736075_KCTD3    |     | 0.021039 | 0.583771 | 0.681883 |
| 11763007_RPS6     |     | 0.028479 | 0.583831 | 0.681911 |
| 11717611_MAST2    |     | -0.01902 | 0.583834 | 0.681911 |
| 11754642_PRSS37   |     | -0.04032 | 0.583838 | 0.681911 |
| 11733542_TMED6    |     | 0.036543 | 0.583966 | 0.682045 |
| 11745054_MRPL43   |     | -0.02149 | 0.583983 | 0.682048 |
| 11761322_ANXA8    | /// | 0.034558 | 0.584075 | 0.68214  |
| 11732662_OTP      |     | 0.042754 | 0.584212 | 0.682275 |
| 11738425_SLC10A6  |     | -0.02841 | 0.584219 | 0.682275 |
| 11750885_CERCAM   |     | -0.02467 | 0.584329 | 0.682387 |
| 11751622_AP4M1    |     | 0.023549 | 0.584365 | 0.682413 |
| 11751684_MAFF     |     | 0.020325 | 0.58442  | 0.682461 |
| 11760838_FAM179B  |     | -0.06468 | 0.584486 | 0.682522 |
| 11756819_SLC13A3  |     | -0.05255 | 0.584571 | 0.682605 |
| 11756907_GMNC     |     | 0.038732 | 0.584585 | 0.682605 |
| 11732763_GRIN3A   |     | -0.03673 | 0.584654 | 0.682669 |
| 11735215_CHRNA5   |     | -0.04297 | 0.584916 | 0.682955 |
| 11742918_REG1B    |     | 0.037838 | 0.584927 | 0.682955 |
| 11755531_TBX15    |     | -0.03758 | 0.584957 | 0.682974 |
| 11743803_SEPHS2   |     | 0.020573 | 0.584997 | 0.683004 |
| 11722727_ZNF286A  | /   | 0.058353 | 0.585083 | 0.683088 |
| 11742317_PSG1     | /// | 0.033447 | 0.585097 | 0.683088 |
| 11749334_XRN1     |     | 0.032694 | 0.585125 | 0.683105 |
| 11725067_CAMK2B   |     | -0.03736 | 0.58516  | 0.683129 |
| 11742073_ENSA     |     | -0.04826 | 0.585229 | 0.683193 |
| 11761769_CD1E     |     | 0.036164 | 0.58531  | 0.683264 |
| 11744968_SEZ6     |     | -0.0291  | 0.585318 | 0.683264 |
| 11719852_SEPT10   |     | 0.023866 | 0.585376 | 0.683317 |
| 11748146_CD69     |     | -0.04376 | 0.585483 | 0.683425 |
| 11742511_IL4R     |     | 0.063812 | 0.585576 | 0.683517 |

|                    |          |          |          |
|--------------------|----------|----------|----------|
| 11740920_TSLP      | -0.0504  | 0.585627 | 0.68356  |
| 11723774_ABHD12    | 0.027096 | 0.585654 | 0.683575 |
| 11752222_ZNF137P   | -0.03714 | 0.58571  | 0.683624 |
| 11756014_ADARB2    | -0.02587 | 0.585736 | 0.683638 |
| 11742830_PHF3      | -0.01884 | 0.585768 | 0.683647 |
| 11757263_SCARNA20  | 0.046149 | 0.58578  | 0.683647 |
| 11734446_PDCD1     | 0.02982  | 0.585785 | 0.683647 |
| 11764168_SLC25A1   | -0.06781 | 0.585856 | 0.683713 |
| 11749947_DCAF7     | 0.0301   | 0.585905 | 0.683743 |
| 11715396_BLOC1S5-T | -0.02108 | 0.585909 | 0.683743 |
| 11715443_CPB1      | -0.04949 | 0.585968 | 0.683795 |
| 11729932_ZNF135    | 0.039365 | 0.586062 | 0.683888 |
| 11753038_BBS9      | 0.026054 | 0.586133 | 0.683954 |
| 11759170_OFCC1     | -0.04537 | 0.586158 | 0.683968 |
| 11729563_LRRC3B    | -0.05431 | 0.58622  | 0.684023 |
| 11717084_PRPS1     | -0.0198  | 0.586248 | 0.68404  |
| 11746577_CCDC191   | -0.0478  | 0.586294 | 0.684078 |
| 11751924_TRPM3     | -0.05455 | 0.586316 | 0.684087 |
| 11758313_RPS10 /// | 0.018894 | 0.586343 | 0.684102 |
| 11731904_CRISP1    | -0.0444  | 0.586366 | 0.684102 |
| 11755294_NEB       | -0.05212 | 0.586372 | 0.684102 |
| 11759565_LOC100996 | 0.057987 | 0.586493 | 0.684223 |
| 11754214_PPIG      | -0.04332 | 0.586503 | 0.684223 |
| 11724403_NOS2      | -0.03334 | 0.586575 | 0.684291 |
| 11717317_GPAT4     | -0.02144 | 0.586623 | 0.684318 |
| 11727798_CHRM1     | 0.043078 | 0.586627 | 0.684318 |
| 11753460_FBX044    | 0.058752 | 0.586656 | 0.684336 |
| 11718321_CD93      | 0.02334  | 0.586681 | 0.68435  |
| 11759372_PCDHGA12  | -0.02    | 0.586707 | 0.684361 |
| 11750217_PIP5K1A   | 0.037322 | 0.586719 | 0.684361 |
| 11750874_PKNOX2    | -0.06398 | 0.586794 | 0.684432 |
| 11758374_PLIN1     | -0.03752 | 0.586843 | 0.684473 |
| 11722342_PIEZO2    | 0.023349 | 0.586902 | 0.684525 |
| 11760802_SMAP1     | 0.043698 | 0.587087 | 0.684725 |
| 11727855_NUP50     | -0.02379 | 0.587142 | 0.684772 |
| 11757600_HSPG2     | 0.018505 | 0.587168 | 0.684787 |
| 11751161_TTYH1     | -0.03681 | 0.587238 | 0.68484  |
| 11753612_DFFB      | -0.03219 | 0.587242 | 0.68484  |
| 11724936_C10orf76  | -0.02462 | 0.587374 | 0.684978 |
| 11725455_CD247     | -0.05438 | 0.587497 | 0.685096 |
| 11731705_CCL22     | -0.02359 | 0.587504 | 0.685096 |
| 11728412_CASZ1     | -0.0345  | 0.587521 | 0.6851   |
| 11733795_STX7      | -0.03173 | 0.587567 | 0.685125 |
| 11736265_FBX044    | -0.03456 | 0.587571 | 0.685125 |
| 11736370_MBOAT1    | 0.047758 | 0.587593 | 0.685135 |
| 11738747_OR52N5    | -0.02624 | 0.587621 | 0.685145 |
| 11741273_KCNAB1    | -0.03165 | 0.587629 | 0.685145 |
| 11721468_EFHC1     | 0.03932  | 0.587704 | 0.685215 |
| 11740094_BEST1     | -0.02211 | 0.587772 | 0.685279 |
| 11737070_TRIM61    | 0.029954 | 0.587796 | 0.68529  |
| 11720578_PDE5A     | -0.04377 | 0.587819 | 0.685301 |

|                    |          |          |          |
|--------------------|----------|----------|----------|
| 11750999_TBXAS1    | 0.033267 | 0.587834 | 0.685302 |
| 11718457_STK11IP   | -0.02894 | 0.587856 | 0.685311 |
| 11742223_NOP14     | -0.02103 | 0.587894 | 0.685339 |
| 11732920_FOXN4     | -0.02399 | 0.587911 | 0.685342 |
| 11726230_AHI1      | -0.02642 | 0.587955 | 0.685377 |
| 11732457_ZCCHC4    | 0.03364  | 0.588037 | 0.685457 |
| 11727282_ADAMTS7   | -0.02424 | 0.588188 | 0.685606 |
| 11733435_MCF2      | 0.03288  | 0.588193 | 0.685606 |
| 11753177_CDKL4     | 0.032878 | 0.58828  | 0.685691 |
| 11763886_LOC100132 | -0.04063 | 0.588345 | 0.685751 |
| 11717391_HMCES     | -0.02117 | 0.588369 | 0.685762 |
| 11720278_OLFML2A   | -0.02903 | 0.588407 | 0.685789 |
| 11742782_SMARCC1   | 0.018811 | 0.58846  | 0.685828 |
| 11755674_RALGAPA1  | -0.02429 | 0.588468 | 0.685828 |
| 11763944_OR6W1P    | -0.04751 | 0.588501 | 0.68585  |
| 11752938_HTR5A-AS1 | -0.03798 | 0.588617 | 0.685956 |
| 11727659_KLK10     | -0.04071 | 0.58862  | 0.685956 |
| 11738136_LRRC31    | 0.035902 | 0.588654 | 0.68598  |
| 11755355_RCS1      | 0.04405  | 0.588746 | 0.686071 |
| 11730114_TRIM54    | -0.04111 | 0.588795 | 0.6861   |
| 11736992_PQLC2L    | -0.02939 | 0.588799 | 0.6861   |
| 11762309_LOC105377 | -0.03805 | 0.588899 | 0.686199 |
| 11730365_AMPD1     | -0.02988 | 0.588979 | 0.686261 |
| 11718237_C1orf115  | -0.04126 | 0.58898  | 0.686261 |
| 11740894_SPANXN2   | -0.02307 | 0.58905  | 0.686326 |
| 11763796_EPHB1     | -0.0344  | 0.589253 | 0.686546 |
| 11757702_DSC2      | 0.027855 | 0.589328 | 0.686617 |
| 11715127_GPR32     | 0.027649 | 0.589453 | 0.686746 |
| 11732972_TAS2R8    | -0.03289 | 0.589546 | 0.686834 |
| 11722495_MYBBP1A   | 0.019701 | 0.589556 | 0.686834 |
| 11755267_MRPL43    | -0.01879 | 0.589634 | 0.686908 |
| 11722862_TRIM2     | -0.02258 | 0.58966  | 0.686922 |
| 11744965_TMCC2     | -0.03682 | 0.589816 | 0.687042 |
| 11741764_GPN1      | -0.02039 | 0.589817 | 0.687042 |
| 11752375_TRPV6     | -0.02702 | 0.589817 | 0.687042 |
| 11725299_AOC3      | 0.074018 | 0.589819 | 0.687042 |
| 11753320_G2E3      | -0.0247  | 0.589882 | 0.687081 |
| 11754565_ANKRD6    | -0.05196 | 0.589888 | 0.687081 |
| 11741893_DPH3P1    | -0.03444 | 0.589894 | 0.687081 |
| 11731181_EPSTI1    | 0.033331 | 0.589936 | 0.687113 |
| 11720452_PLEKHH2   | 0.041436 | 0.58995  | 0.687113 |
| 11727099_NUMBL     | 0.03093  | 0.590015 | 0.687172 |
| 11731009_WDR89     | -0.03262 | 0.590064 | 0.687212 |
| 11720534_MFSD5     | 0.023091 | 0.590121 | 0.687262 |
| 11726500_ANO5      | 0.037317 | 0.590194 | 0.687331 |
| 11747679_BZW2      | 0.020604 | 0.590218 | 0.687343 |
| 11715266_PKD1L3    | -0.03707 | 0.590546 | 0.687696 |
| 11762878_MSRA      | -0.03328 | 0.590549 | 0.687696 |
| 11743306_FHDC1     | 0.036196 | 0.590664 | 0.687796 |
| 11739719_ZFP1      | -0.01849 | 0.590664 | 0.687796 |
| 11758349_RORC      | 0.023572 | 0.590726 | 0.687853 |

|                    |          |          |          |
|--------------------|----------|----------|----------|
| 11745266_TAP2      | 0.033398 | 0.590869 | 0.688003 |
| 11763604_GPT       | -0.03581 | 0.590964 | 0.688096 |
| 11760594_WDR12     | -0.03897 | 0.590977 | 0.688096 |
| 11720913_ACP2      | -0.0191  | 0.591037 | 0.688149 |
| 11762229_MED27     | 0.059194 | 0.591096 | 0.688202 |
| 11762584_GRIK2     | 0.054166 | 0.59113  | 0.688225 |
| 11724411_PPARA     | 0.020386 | 0.591153 | 0.688235 |
| 11754791_ZC3H18    | 0.022338 | 0.591237 | 0.688308 |
| 11753383_SULT1C4   | 0.032534 | 0.591243 | 0.688308 |
| 11718277_MYL2      | -0.037   | 0.59129  | 0.688345 |
| 11734507_MECOM     | 0.039287 | 0.591359 | 0.688409 |
| 11725912_ERBB4     | 0.06211  | 0.591414 | 0.688457 |
| 11733633_PLA2G3    | -0.04455 | 0.591511 | 0.688553 |
| 11750346_COL18A1-A | -0.03271 | 0.591524 | 0.688553 |
| 11734410_FOXD4 /// | 0.051793 | 0.591565 | 0.688579 |
| 11753865_GHRL      | -0.03964 | 0.591581 | 0.688579 |
| 11746644_FAM213B   | -0.03367 | 0.59159  | 0.688579 |
| 11728399_MDFIC     | -0.02074 | 0.591633 | 0.688614 |
| 11725642_EFHD2     | -0.02565 | 0.591736 | 0.688717 |
| 11723611_HABP2     | -0.01915 | 0.59176  | 0.688728 |
| 11757375_RPS15     | -0.01878 | 0.59182  | 0.688756 |
| 11762545_TCP10     | 0.024626 | 0.591823 | 0.688756 |
| 11737893_FPGT-TNNI | 0.032375 | 0.591826 | 0.688756 |
| 11756605_PCDHB2    | 0.020792 | 0.592017 | 0.688962 |
| 11733501_ADCY8     | -0.028   | 0.592049 | 0.688982 |
| 11745586_ZNF638    | -0.02412 | 0.592159 | 0.689095 |
| 11733330_CCDC170   | -0.03393 | 0.592241 | 0.689173 |
| 11759702_LCN12     | -0.02651 | 0.592289 | 0.689213 |
| 11737215_CRACR2B   | -0.03555 | 0.592425 | 0.689355 |
| 11723194_HLA-DRB1  | 0.019081 | 0.592444 | 0.68936  |
| 11732176_ALG8      | -0.02053 | 0.592524 | 0.689437 |
| 11748891_CACFD1    | -0.0208  | 0.592622 | 0.689534 |
| 11725179_COL26A1   | -0.02684 | 0.592736 | 0.689651 |
| 11763305_FCRL5     | -0.03864 | 0.592753 | 0.689655 |
| 11750429_CHRNA6    | -0.05467 | 0.59279  | 0.68968  |
| 11742615_OR5M9     | -0.0392  | 0.59287  | 0.689757 |
| 11723959_SCFD2     | -0.02996 | 0.592953 | 0.689838 |
| 11723167_EPHB2     | 0.041664 | 0.592981 | 0.689854 |
| 11730000_COLEC11   | -0.02676 | 0.59303  | 0.689894 |
| 11721262_MRPL50    | 0.028241 | 0.593053 | 0.689904 |
| 11761630_KATNBL1   | 0.065416 | 0.593083 | 0.689924 |
| 11734486_WFDC8     | 0.052146 | 0.593162 | 0.689998 |
| 11726030_UPK1B     | -0.01951 | 0.593362 | 0.690215 |
| 11726341_DPEP3     | -0.03302 | 0.593487 | 0.690344 |
| 11753605_CHN2 ///  | -0.04744 | 0.593564 | 0.690417 |
| 11750783_GALNT1    | -0.02137 | 0.593594 | 0.690436 |
| 11743933_VAV3      | 0.024846 | 0.593626 | 0.690457 |
| 11757286_CTRB1 /// | -0.03377 | 0.593798 | 0.690631 |
| 11746319_LINCO0940 | -0.02781 | 0.593805 | 0.690631 |
| 11731840_B4GALT6   | 0.024875 | 0.593831 | 0.690646 |
| 11739516_CA8       | -0.03122 | 0.593871 | 0.690676 |



|                    |          |          |          |
|--------------------|----------|----------|----------|
| 11755461_NXF3      | -0.02324 | 0.593993 | 0.690801 |
| 11757900_VTN       | 0.083593 | 0.594025 | 0.690818 |
| 11761326_PHF12     | 0.025816 | 0.594036 | 0.690818 |
| 11731847_RBM41     | 0.037707 | 0.594103 | 0.690866 |
| 11760669_CD9       | 0.041088 | 0.594105 | 0.690866 |
| 11741938_KRTAP5-11 | -0.02936 | 0.594256 | 0.691025 |
| 11740040_UBAP2L    | -0.02026 | 0.59428  | 0.691036 |
| 11744677_TMUB1     | -0.02231 | 0.594343 | 0.691093 |
| 11722101_TYRO3     | 0.032739 | 0.594378 | 0.691117 |
| 11722016_OLR1      | -0.02296 | 0.594486 | 0.691226 |
| 11716908_RNASET2   | 0.026862 | 0.594551 | 0.691286 |
| 11733011_SLC44A4   | 0.029841 | 0.594608 | 0.691335 |
| 11755979_CD244     | -0.03819 | 0.594799 | 0.69153  |
| 11746783_FKBP9     | -0.02854 | 0.594804 | 0.69153  |
| 11756121_DUSP7     | 0.045102 | 0.594858 | 0.691566 |
| 11760060_FCRL2     | 0.057878 | 0.594863 | 0.691566 |
| 11757705_APOA1     | -0.04265 | 0.594984 | 0.69169  |
| 11736878_GPLD1     | -0.03507 | 0.595013 | 0.691708 |
| 11747199_CHERP     | 0.021468 | 0.595108 | 0.691801 |
| 11734563_FRMPD2 // | -0.02431 | 0.5954   | 0.692125 |
| 11760727_FUCA2     | 0.032101 | 0.595435 | 0.692148 |
| 11759449_DEFB108B  | 0.025029 | 0.59545  | 0.692149 |
| 11751674_STOML1    | 0.021276 | 0.595499 | 0.69219  |
| 11730507_NROB1     | 0.057798 | 0.595585 | 0.692262 |
| 11715491_FSCN1     | 0.023606 | 0.59559  | 0.692262 |
| 11740374_BCL2L14   | 0.027407 | 0.595756 | 0.692439 |
| 11735675_EN1       | 0.019043 | 0.595779 | 0.69245  |
| 11722406_PFKFB4    | -0.02543 | 0.595795 | 0.692452 |
| 11752018_PIK3CD    | 0.059862 | 0.595879 | 0.692533 |
| 11718855 EMC4      | -0.01833 | 0.59597  | 0.692622 |
| 11719222_SPINK1    | 0.041849 | 0.596067 | 0.692716 |
| 11744638_SND1 ///  | 0.025502 | 0.596079 | 0.692716 |
| 11734685_PABPC3    | -0.02343 | 0.596097 | 0.69272  |
| 11738344_ARSD      | 0.045233 | 0.596169 | 0.692787 |
| 11758516_PTCD3     | 0.034686 | 0.596198 | 0.692805 |
| 11761785_ZNF544    | -0.02868 | 0.596239 | 0.692836 |
| 11742859_PLEK      | -0.02432 | 0.596381 | 0.692984 |
| 11743032_CGA       | -0.04171 | 0.596408 | 0.693    |
| 11734297_ZXDA ///  | 0.038266 | 0.596462 | 0.693045 |
| 11748350_USP7      | -0.02202 | 0.59668  | 0.693283 |
| 11720048_ARMCX1    | -0.07789 | 0.596716 | 0.693308 |
| 11740265_VPS9D1    | 0.032386 | 0.596884 | 0.69347  |
| 11715286_C15orf40  | 0.035298 | 0.596884 | 0.69347  |
| 11762820_PRR5-ARHG | -0.05875 | 0.597001 | 0.69359  |
| 11732438_FBN3      | -0.04389 | 0.597019 | 0.693594 |
| 11742547_SDR16C6P  | -0.04628 | 0.597056 | 0.69362  |
| 11761013_PCNA      | -0.06156 | 0.597107 | 0.693652 |
| 11752482_FBN2      | 0.024589 | 0.597111 | 0.693652 |
| 11735763_PRKACA    | -0.0214  | 0.597147 | 0.693677 |
| 11717978_C7        | -0.04114 | 0.597199 | 0.693721 |
| 11741747_LIN54     | 0.044793 | 0.597316 | 0.69384  |

|                    |          |          |          |
|--------------------|----------|----------|----------|
| 11726016_GPC6      | -0.03635 | 0.597355 | 0.693854 |
| 11738472_SLC01B7   | -0.02994 | 0.597363 | 0.693854 |
| 11722078_SEPT3 /// | 0.058412 | 0.59737  | 0.693854 |
| 11732949_NLRP5     | -0.04659 | 0.597409 | 0.693882 |
| 11723364_L1TD1     | -0.05525 | 0.597482 | 0.693945 |
| 11727633_SLC16A10  | -0.03508 | 0.597492 | 0.693945 |
| 11729484_KLF8      | -0.02663 | 0.597542 | 0.693987 |
| 11724131_GFRA1     | 0.038686 | 0.59766  | 0.694107 |
| 11729336_ALPL      | 0.024218 | 0.597731 | 0.694174 |
| 11751546_PACRG-AS3 | 0.033134 | 0.597757 | 0.694187 |
| 11754866_TNNT3     | 0.034359 | 0.597779 | 0.694197 |
| 11745814_DBNDD1    | 0.02457  | 0.597806 | 0.694201 |
| 11724702_ELF5      | 0.034971 | 0.597823 | 0.694201 |
| 11726901_PRDM15    | 0.025966 | 0.597826 | 0.694201 |
| 11756572_IRF3      | -0.02195 | 0.597936 | 0.694312 |
| 11736488_MXD4      | -0.04213 | 0.598011 | 0.694383 |
| 11751088_B3GAT1    | 0.025206 | 0.598046 | 0.694408 |
| 11742571_OR10T2    | 0.058961 | 0.598084 | 0.694434 |
| 11759477_ADAMTS15  | -0.01995 | 0.598131 | 0.694459 |
| 11737434_TMC5      | -0.04843 | 0.598138 | 0.694459 |
| 11717626_NDUFC2    | -0.01945 | 0.598147 | 0.694459 |
| 11755458_HDDC2     | -0.01945 | 0.598359 | 0.694675 |
| 11740679_OPRD1     | 0.041442 | 0.598362 | 0.694675 |
| 11718467_NCK2      | 0.028053 | 0.598478 | 0.694773 |
| 11717295_APOD      | -0.02775 | 0.598478 | 0.694773 |
| 11753852_NNAT      | 0.040607 | 0.598494 | 0.694773 |
| 11755598_PPP2R3C   | 0.020779 | 0.598503 | 0.694773 |
| 11716174_P4HB      | 0.018966 | 0.598624 | 0.694896 |
| 11758697_RPL10A    | 0.02174  | 0.598727 | 0.695    |
| 11728151_ASBI7     | -0.03203 | 0.598745 | 0.695004 |
| 11731335_KIAA1210  | -0.03369 | 0.598771 | 0.695018 |
| 11746176_MLLT10    | 0.033055 | 0.598894 | 0.695144 |
| 11749771_CAMK2B    | 0.037099 | 0.598963 | 0.695208 |
| 11725085_LANCL2    | 0.026587 | 0.599067 | 0.69531  |
| 11731913_GPR12     | 0.039795 | 0.599079 | 0.69531  |
| 11716557_TNS1      | 0.024847 | 0.599096 | 0.695313 |
| 11763141_KIAA0930  | -0.02745 | 0.599115 | 0.695319 |
| 11718759_HIF1A     | 0.021328 | 0.599179 | 0.695374 |
| 11752006_MCF2L     | 0.031941 | 0.599191 | 0.695374 |
| 11716693_TSPAN6    | -0.02089 | 0.599363 | 0.695557 |
| 11718655_CHMP5     | -0.01839 | 0.599477 | 0.695672 |
| 11727311_CEP83     | 0.049002 | 0.599564 | 0.695736 |
| 11733454_CEP83     | 0.049002 | 0.599564 | 0.695736 |
| 11741190_P2RY10    | 0.053909 | 0.599575 | 0.695736 |
| 11727776_GNAI3     | -0.02695 | 0.599636 | 0.69578  |
| 11763850_RAN       | -0.04642 | 0.599641 | 0.69578  |
| 11755126_AMD1 ///  | -0.02398 | 0.599705 | 0.695837 |
| 11754535_NAT16     | 0.043229 | 0.599735 | 0.695844 |
| 11738601_HIST1H4L  | -0.04955 | 0.59975  | 0.695844 |
| 11715116_HIST1H4E  | 0.075682 | 0.599753 | 0.695844 |
| 11750784_JPH3      | -0.03546 | 0.599961 | 0.696069 |

|                    |          |          |          |
|--------------------|----------|----------|----------|
| 11734402_TP53AIP1  | -0.03455 | 0.600072 | 0.696181 |
| 11719215_FAM47E-ST | -0.07019 | 0.600156 | 0.696262 |
| 11740037_ADCY5     | 0.044593 | 0.600199 | 0.69628  |
| 11716280_CBX5      | 0.023289 | 0.600201 | 0.69628  |
| 11753052_TNK2      | -0.02826 | 0.600253 | 0.696325 |
| 11729284_MEF2B /// | -0.02033 | 0.60029  | 0.696351 |
| 11749991_SIGLEC15  | 0.023371 | 0.600355 | 0.69641  |
| 11737476_KRT32     | -0.0316  | 0.60049  | 0.696551 |
| 11726035_PGAM2     | -0.04502 | 0.600525 | 0.696575 |
| 11722415_HBS1L     | -0.02792 | 0.600581 | 0.696622 |
| 11734921_ZNF276    | 0.059073 | 0.600595 | 0.696622 |
| 11725318_ATAT1     | 0.019052 | 0.600696 | 0.696723 |
| 11736827_RASSF9    | -0.0297  | 0.600737 | 0.696754 |
| 11754034_HRSP12    | -0.01828 | 0.600801 | 0.696799 |
| 11733447_SYNPO2L   | 0.037768 | 0.600816 | 0.696799 |
| 11753246_DDX43     | -0.05107 | 0.600819 | 0.696799 |
| 11731699_C12orf66  | -0.02074 | 0.600857 | 0.696827 |
| 11755413_DENND6B   | 0.043315 | 0.600882 | 0.696836 |
| 11763943_MT1DP     | -0.02487 | 0.600893 | 0.696836 |
| 11727500_ALDH3B2   | -0.03219 | 0.600922 | 0.696853 |
| 11743382_PRPF40A   | 0.022313 | 0.600937 | 0.696853 |
| 11753805_IRF3      | 0.021287 | 0.600957 | 0.69686  |
| 11738643_PAX4      | -0.02653 | 0.601036 | 0.696936 |
| 11762911_CEACAM3   | -0.04776 | 0.60116  | 0.697057 |
| 11735488_CASC1     | 0.031678 | 0.60117  | 0.697057 |
| 11746982_NOL6      | -0.02347 | 0.601259 | 0.697144 |
| 11759846_C17orf99  | -0.04432 | 0.601274 | 0.697146 |
| 11740198_USP2      | -0.04102 | 0.601389 | 0.697262 |
| 11735266_SIGLEC8   | -0.03622 | 0.601495 | 0.697369 |
| 11754843_TECPR1    | 0.025424 | 0.601513 | 0.697372 |
| 11727964_CYP4F2    | 0.040653 | 0.601534 | 0.697381 |
| 11737137_EQTN      | -0.03379 | 0.601618 | 0.697461 |
| 11744502_PNISR     | 0.025011 | 0.601701 | 0.69754  |
| 11739505_LMCD1     | 0.019113 | 0.601761 | 0.697594 |
| 11723386_PTAR1     | -0.01928 | 0.601822 | 0.697633 |
| 11717522_TMEM50B   | 0.022134 | 0.601824 | 0.697633 |
| 11739255_FAM84B    | -0.03687 | 0.601841 | 0.697637 |
| 11759792_SH3YL1    | 0.041146 | 0.601995 | 0.697797 |
| 11717883_ZHX3      | -0.02484 | 0.602007 | 0.697797 |
| 11727907_SLC9A3R2  | -0.02607 | 0.602192 | 0.697995 |
| 11727271_TRIM55    | 0.027003 | 0.602219 | 0.698009 |
| 11749037_CHRNA4 // | -0.03273 | 0.602321 | 0.698111 |
| 11729798_SP2       | -0.0306  | 0.602532 | 0.698339 |
| 11763792_UTY       | -0.02722 | 0.602613 | 0.698417 |
| 11733588_RAX       | 0.032311 | 0.60268  | 0.698477 |
| 11732074_CCDC7     | 0.043772 | 0.602838 | 0.698644 |
| 11751667_COQ5      | -0.02162 | 0.602864 | 0.698658 |
| 11741826_GSTZ1     | 0.038254 | 0.602889 | 0.69867  |
| 11761384_MPP3      | -0.03699 | 0.602916 | 0.698675 |
| 11721949_RAB3GAP2  | -0.02266 | 0.602925 | 0.698675 |
| 11748322_HEYL      | -0.03157 | 0.602937 | 0.698675 |

|                    |          |          |          |
|--------------------|----------|----------|----------|
| 11742731_SURF6     | 0.022954 | 0.603007 | 0.69874  |
| 11719817_BET1      | 0.023153 | 0.603081 | 0.698808 |
| 11740718_ENOX1     | 0.053762 | 0.603101 | 0.698808 |
| 11744166_FH        | -0.02248 | 0.603122 | 0.698808 |
| 11747103_AMBP      | 0.031494 | 0.603123 | 0.698808 |
| 11738498_OR52E8    | -0.02973 | 0.603188 | 0.698857 |
| 11754113_GNG2      | -0.04327 | 0.603194 | 0.698857 |
| 11746076_PRAP1 /// | -0.02233 | 0.603399 | 0.699078 |
| 11762579_DACT2     | -0.02975 | 0.603465 | 0.699139 |
| 11722583_IGFBP2    | -0.02914 | 0.60349  | 0.69915  |
| 11735360_FCRL2     | -0.01896 | 0.603525 | 0.699175 |
| 11744177_PPP1R9B   | -0.04649 | 0.603543 | 0.699179 |
| 11741884_SMOX      | -0.03219 | 0.603667 | 0.699306 |
| 11744475_TRABD     | -0.01899 | 0.603697 | 0.699324 |
| 11730543_KCNK9     | -0.03384 | 0.603733 | 0.69933  |
| 11760967_RGS1      | 0.036729 | 0.603743 | 0.69933  |
| 11745593_SNX15     | -0.01927 | 0.603745 | 0.69933  |
| 11760531_KMT2B     | -0.02038 | 0.603764 | 0.699335 |
| 11721020_MTMR3     | 0.041866 | 0.604019 | 0.699604 |
| 11761502_APOBEC3F  | -0.02489 | 0.604024 | 0.699604 |
| 11752092_ASIC1     | 0.024033 | 0.604164 | 0.699749 |
| 11715669_DCTN1     | -0.01798 | 0.604238 | 0.699818 |
| 11745360_CSAG2 /// | 0.019667 | 0.604295 | 0.699867 |
| 11741968_F7        | -0.01906 | 0.604348 | 0.699913 |
| 11753693_BRF1      | 0.041019 | 0.604381 | 0.699918 |
| 11750161_PLEKHA2   | 0.025996 | 0.604382 | 0.699918 |
| 11760789_BBS1      | 0.030006 | 0.604446 | 0.699976 |
| 11715853_PDGFRB    | -0.04959 | 0.604476 | 0.699995 |
| 11723912_MS4A8     | 0.03106  | 0.604597 | 0.700117 |
| 11742977_GNAO1     | -0.03346 | 0.604653 | 0.700166 |
| 11725874_ZPBP2     | 0.039954 | 0.60476  | 0.700274 |
| 11715958_RPL7      | -0.02119 | 0.604827 | 0.700335 |
| 11752110_OPHN1     | -0.06583 | 0.604886 | 0.700372 |
| 11733201_SH3TC2    | 0.0386   | 0.604907 | 0.700372 |
| 11764073_CNTNAP5   | -0.03097 | 0.604909 | 0.700372 |
| 11738198_PDE6B     | -0.0456  | 0.604916 | 0.700372 |
| 11759009_CA1       | 0.055017 | 0.605159 | 0.700636 |
| 11723673_PSEN2     | 0.071101 | 0.605245 | 0.700719 |
| 11751189_RIMS1     | -0.03343 | 0.605293 | 0.700757 |
| 11743769_COL11A2   | 0.025446 | 0.605314 | 0.700765 |
| 11750702_PAPPA-AS1 | -0.0268  | 0.605377 | 0.700821 |
| 11731508_ZNF649    | 0.036844 | 0.605406 | 0.700838 |
| 11719671_RCAN2     | 0.041177 | 0.605489 | 0.700919 |
| 11738319_TAL2      | -0.02386 | 0.605582 | 0.701002 |
| 11730801_CXCL6     | 0.032735 | 0.605592 | 0.701002 |
| 11759692_TRNT1     | 0.029185 | 0.605604 | 0.701002 |
| 11741262_SORBS2    | 0.027759 | 0.605668 | 0.701059 |
| 11760347_HES1      | 0.027747 | 0.605764 | 0.701144 |
| 11741606_CHD3      | 0.021948 | 0.60577  | 0.701144 |
| 11735061_LY6D      | -0.02787 | 0.605893 | 0.70127  |
| 11732233_RND1      | -0.08286 | 0.605988 | 0.70135  |

|                    |          |          |          |
|--------------------|----------|----------|----------|
| 11730056_MSII      | -0.02423 | 0.605991 | 0.70135  |
| 11739475_NAB1      | 0.02747  | 0.606118 | 0.70148  |
| 11743843_DNAJC28   | -0.05502 | 0.606206 | 0.701565 |
| 11760566_LINC00260 | -0.03644 | 0.606337 | 0.7017   |
| 11763879_LOC105369 | 0.060983 | 0.606553 | 0.701934 |
| 11758903_PPARA     | -0.05873 | 0.606579 | 0.701947 |
| 11759452_TMPRSS9   | -0.02437 | 0.606866 | 0.702263 |
| 11760535_VNN3      | -0.02046 | 0.606947 | 0.70234  |
| 11720962_ATF6B     | -0.02211 | 0.606975 | 0.702355 |
| 11741281_AKAP7     | -0.02312 | 0.607119 | 0.702505 |
| 11740188_ARL11     | -0.0394  | 0.607143 | 0.702517 |
| 11744951_SLC22A2   | -0.02959 | 0.607191 | 0.702539 |
| 11732221_CRH       | 0.038955 | 0.607191 | 0.702539 |
| 11751124_KLHL10    | -0.03728 | 0.607209 | 0.702543 |
| 11737673_PABPC1L2A | -0.03132 | 0.607247 | 0.702556 |
| 11751910_DUOX1     | -0.03959 | 0.607261 | 0.702556 |
| 11717690_MED27     | -0.02385 | 0.607263 | 0.702556 |
| 11731334_GPR55     | -0.0407  | 0.607333 | 0.70262  |
| 11745055_MRPL43    | -0.01907 | 0.607363 | 0.702638 |
| 11750733_SLC44A4   | 0.045726 | 0.607402 | 0.702666 |
| 11745670_LRCH1     | -0.02711 | 0.607476 | 0.702736 |
| 11732509_C10orf25  | -0.01931 | 0.607527 | 0.702778 |
| 11718175_DDX50     | 0.025322 | 0.607563 | 0.702786 |
| 11752313_TDRD1     | -0.05823 | 0.607582 | 0.702786 |
| 11731618_SP3       | 0.019183 | 0.607591 | 0.702786 |
| 11762567_ALDOAP2   | -0.0327  | 0.607598 | 0.702786 |
| 11744706_GOLGA3    | -0.02413 | 0.607606 | 0.702786 |
| 11740185_KCNJ4     | -0.04668 | 0.607738 | 0.702922 |
| 11730600_AQP7 ///  | -0.04639 | 0.607776 | 0.702927 |
| 11718792_EXOC4     | -0.02781 | 0.607776 | 0.702927 |
| 11750232_GGTA1P    | 0.031379 | 0.607785 | 0.702927 |
| 11751858_RNF7      | 0.018658 | 0.607805 | 0.702933 |
| 11754084_MYL9      | 0.025941 | 0.607886 | 0.70301  |
| 11748092_ZNF74     | 0.047341 | 0.607948 | 0.70305  |
| 11733033_FAM32A    | 0.021858 | 0.607949 | 0.70305  |
| 11731895_EPS8L1    | 0.025268 | 0.60797  | 0.703057 |
| 11719141_INSIG2    | -0.03836 | 0.608047 | 0.703116 |
| 11724566_TLN2      | 0.027555 | 0.608049 | 0.703116 |
| 11761411_ACD       | -0.03962 | 0.60811  | 0.70317  |
| 11718952_EPB41L5   | -0.03969 | 0.608142 | 0.703189 |
| 11739185_MGAT4B    | -0.01957 | 0.608197 | 0.703237 |
| 11728119_EXOC3L4   | -0.01845 | 0.608224 | 0.703251 |
| 11715494_HBG1 ///  | -0.0393  | 0.608366 | 0.70339  |
| 11737106_ARL17A // | -0.02254 | 0.608373 | 0.70339  |
| 11728746_CLCA1     | 0.020422 | 0.608415 | 0.703423 |
| 11732173_FANCF     | 0.025457 | 0.60849  | 0.703492 |
| 11745542_NXN       | 0.03451  | 0.608544 | 0.703522 |
| 11751055_NAGS      | -0.03625 | 0.608544 | 0.703522 |
| 11745658_PAX5      | 0.027117 | 0.608619 | 0.703591 |
| 11738801_MYH4      | 0.049243 | 0.608647 | 0.703601 |
| 11715395_BLOC1S5-T | 0.019735 | 0.608656 | 0.703601 |

|                    |          |          |          |
|--------------------|----------|----------|----------|
| 11752245_KIRREL3   | 0.037788 | 0.608689 | 0.703623 |
| 11749399_FAM195A / | -0.02092 | 0.608715 | 0.703636 |
| 11752563_DZIP3     | 0.028844 | 0.608789 | 0.703697 |
| 11730879_MYCT1     | -0.04009 | 0.608796 | 0.703697 |
| 11717455_SPOCK2    | -0.03682 | 0.60884  | 0.70373  |
| 11736235_RARA      | 0.023829 | 0.608896 | 0.703779 |
| 11741838_NPB       | -0.02061 | 0.609007 | 0.70389  |
| 11763063_TTTY8 /// | 0.058621 | 0.609064 | 0.703935 |
| 11742320_EDA       | -0.02359 | 0.609074 | 0.703935 |
| 11733654_SLC12A9   | -0.0215  | 0.609165 | 0.704023 |
| 11718033_CHURC1-FN | 0.023567 | 0.609208 | 0.704056 |
| 11738962_HIST1H2BE | -0.03881 | 0.609232 | 0.704067 |
| 11723142_CARD11    | 0.028748 | 0.609316 | 0.704147 |
| 11725695_SDPR      | -0.02737 | 0.60933  | 0.704147 |
| 11752927_BRD9      | 0.021633 | 0.609375 | 0.704182 |
| 11738123_NOS1AP    | 0.033722 | 0.609548 | 0.704366 |
| 11731371_NODAL     | 0.026019 | 0.609619 | 0.704431 |
| 11720217_TMEM176A  | -0.02908 | 0.609662 | 0.704453 |
| 11732086_OTOF      | -0.02144 | 0.609667 | 0.704453 |
| 11728240_RRAGD     | 0.049157 | 0.609798 | 0.704588 |
| 11730503_SLC25A47  | -0.02033 | 0.609838 | 0.704618 |
| 11746390_LINC01002 | -0.02512 | 0.609896 | 0.704667 |
| 11762554_CPAMD8    | -0.04722 | 0.609931 | 0.704691 |
| 200082_PMRPS7      | 0.0182   | 0.610073 | 0.704839 |
| 11761291_RGL3      | -0.04208 | 0.610161 | 0.704924 |
| 11729087_TBX19     | -0.01849 | 0.610203 | 0.704956 |
| 11737280_IFIT1B    | -0.02814 | 0.610258 | 0.705003 |
| 11732134_PLRG1     | 0.023435 | 0.610341 | 0.705082 |
| 11730672_WNK3      | -0.05367 | 0.610468 | 0.705211 |
| 11715708_MB        | -0.03404 | 0.610516 | 0.705251 |
| 11743736_MOSPD2    | -0.01798 | 0.610579 | 0.705307 |
| 11744348_COL6A2    | 0.024383 | 0.610671 | 0.705397 |
| 11762980_AMACR     | -0.02472 | 0.610795 | 0.705523 |
| 11754901_MYOCD     | -0.04252 | 0.610881 | 0.705606 |
| 11762562_TRPM3     | 0.058295 | 0.611056 | 0.705792 |
| 11731261_SLC4A5    | -0.03105 | 0.611096 | 0.705821 |
| 11755594_KRT71     | 0.034591 | 0.611306 | 0.706046 |
| 11745012_KDM5D     | -0.02344 | 0.611321 | 0.706048 |
| 11746309_SLC15A3   | -0.02763 | 0.611384 | 0.706104 |
| 11723300_RPS6KB1   | 0.017465 | 0.611425 | 0.706121 |
| 11763636_LOC100130 | -0.0306  | 0.611428 | 0.706121 |
| 11720598_SUB1      | 0.023395 | 0.611479 | 0.706162 |
| 11730400_RASGRF1   | -0.08475 | 0.611679 | 0.706349 |
| 11757403_PLG       | 0.027361 | 0.611682 | 0.706349 |
| 11718080_BCL2L11   | -0.02228 | 0.6117   | 0.706349 |
| 11721547_ZEB1      | -0.02122 | 0.6117   | 0.706349 |
| 11755919_SLC5A9    | 0.018918 | 0.611713 | 0.706349 |
| 11747941_PODN      | -0.02755 | 0.611801 | 0.706435 |
| 11724231_AP2M1     | -0.02157 | 0.611823 | 0.706443 |
| 11753710_BCL2L11   | 0.040011 | 0.611859 | 0.706469 |
| 11715645_RTCB      | -0.01815 | 0.611931 | 0.706501 |

|                    |          |          |          |
|--------------------|----------|----------|----------|
| 11752604_RTCB      | -0.01815 | 0.611931 | 0.706501 |
| 11748748_LOC645202 | 0.027903 | 0.611933 | 0.706501 |
| 11731672_PHLDB3    | -0.04782 | 0.611945 | 0.706501 |
| 11731279_IGFN1     | -0.03009 | 0.611997 | 0.706544 |
| 11748191_ATCAY     | -0.03256 | 0.612016 | 0.706549 |
| 11763371_FAAP20    | 0.0229   | 0.612057 | 0.706574 |
| 11753936_TRPM2     | -0.03708 | 0.612074 | 0.706574 |
| 11755970_CHRNB3    | 0.086002 | 0.61208  | 0.706574 |
| 11755030_PRRT4     | -0.03537 | 0.612106 | 0.706585 |
| 11725995_XXYLT1    | -0.02722 | 0.61212  | 0.706585 |
| 11737495_GLRA3     | -0.04308 | 0.612149 | 0.706603 |
| 11720803_S100A14   | -0.02334 | 0.612181 | 0.706622 |
| 11737071_DIRC1     | -0.02772 | 0.612222 | 0.70665  |
| 11755576_TRPM6     | 0.034378 | 0.612233 | 0.70665  |
| 11760452_CFHR3     | 0.058953 | 0.612276 | 0.706683 |
| 11744764_WHSC1     | 0.026407 | 0.612322 | 0.706719 |
| 11757915_UCHL1     | 0.041542 | 0.612374 | 0.706763 |
| 11756772_INTS8     | 0.019347 | 0.612517 | 0.706896 |
| 11761140_DNAI1     | -0.04442 | 0.612519 | 0.706896 |
| 11762096_KCNQ2     | 0.037239 | 0.612543 | 0.706908 |
| 11758501_NMNAT1    | -0.02728 | 0.612588 | 0.706942 |
| 11751624_UEVLD     | -0.02653 | 0.612638 | 0.706971 |
| 11734877_TMEM30B   | 0.031192 | 0.612641 | 0.706971 |
| 11740997_TRAFD1    | -0.02642 | 0.612672 | 0.706982 |
| 11747850_CPSF1     | 0.01916  | 0.612684 | 0.706982 |
| 11740270_ZNF786    | 0.025029 | 0.612695 | 0.706982 |
| 11728126_PHGR1     | -0.0263  | 0.612743 | 0.707021 |
| 11735339_LINCO0482 | -0.01773 | 0.612804 | 0.707075 |
| 11719497_PIK3CD    | -0.0379  | 0.612851 | 0.707112 |
| 11717912_CXCL14    | -0.04924 | 0.612878 | 0.707127 |
| 11723831_RNF157    | -0.02391 | 0.612905 | 0.707142 |
| 11737017_PPP1R12B  | 0.065814 | 0.612926 | 0.707149 |
| 11756047_LCN10     | 0.038217 | 0.612953 | 0.707163 |
| 11735665_GORAB     | -0.04395 | 0.613058 | 0.707268 |
| 11735141_SORCS3    | -0.02913 | 0.613107 | 0.707308 |
| 11745486_CENPT     | 0.024113 | 0.61319  | 0.707386 |
| 11728134_ARVCF     | -0.02417 | 0.613255 | 0.707445 |
| 11742693_WAC       | -0.0209  | 0.613376 | 0.707568 |
| 11731028_MYOM3     | -0.07042 | 0.6134   | 0.707579 |
| 11722945_GLT1D1    | -0.0363  | 0.613416 | 0.707581 |
| 11727513_TTC9      | -0.04698 | 0.613462 | 0.707617 |
| 11747895_TCTN1     | 0.029253 | 0.613485 | 0.707626 |
| 11737683_CCNI2     | -0.05013 | 0.61381  | 0.707985 |
| 11735362_AKTIP     | -0.02664 | 0.613864 | 0.708004 |
| 11742581_OR10Z1    | 0.056979 | 0.613867 | 0.708004 |
| 11729044_OR51E1    | 0.04455  | 0.61387  | 0.708004 |
| 11726966_CXCR5     | 0.039795 | 0.613891 | 0.708012 |
| 11745472_FCHSD2    | 0.020752 | 0.613911 | 0.708017 |
| 11757453_CEP68     | -0.03781 | 0.614009 | 0.708093 |
| 11733994_TMEM150C  | 0.039479 | 0.614014 | 0.708093 |
| 11747327_TIMM23 // | 0.02173  | 0.61402  | 0.708093 |

|                    |          |          |          |
|--------------------|----------|----------|----------|
| 11762869_LRRC37A5P | -0.0487  | 0.614175 | 0.708256 |
| 11738218_GPR151    | -0.0337  | 0.61421  | 0.708279 |
| 11741701_HIST1H2BJ | 0.04224  | 0.614259 | 0.708319 |
| 11738736_OR5M8     | -0.03291 | 0.614289 | 0.708336 |
| 11721470	EIF3A     | 0.021385 | 0.614315 | 0.70835  |
| 11730108_ZNF793    | -0.02856 | 0.61439  | 0.70842  |
| 11745725_GRN       | 0.018605 | 0.614417 | 0.708434 |
| 11740398_FRK       | 0.053436 | 0.614459 | 0.708466 |
| 11752485_USP7      | -0.03775 | 0.614525 | 0.708525 |
| 11716532_EGFL6     | 0.043718 | 0.614568 | 0.708558 |
| 11718315_SLC16A2   | -0.03439 | 0.614589 | 0.708566 |
| 11726473_DOK3      | 0.031461 | 0.614609 | 0.708573 |
| 11747423_CDH18     | -0.04077 | 0.614774 | 0.708726 |
| 11750363_GSG1      | 0.035462 | 0.614778 | 0.708726 |
| 11742641_RAB19     | -0.03207 | 0.61479  | 0.708726 |
| 11763908_SNORD8    | 0.018333 | 0.6148   | 0.708726 |
| 11722617_RIPK4     | -0.02132 | 0.614896 | 0.70881  |
| 11727573_RBP5      | -0.03541 | 0.614902 | 0.70881  |
| 11716480_SPINT1    | 0.027443 | 0.61492  | 0.708814 |
| 11732360_CTPS2     | -0.02163 | 0.614961 | 0.708845 |
| 11753960_PPIE      | -0.01938 | 0.615025 | 0.708901 |
| 11759740_CDC23     | 0.021943 | 0.615102 | 0.708973 |
| 11761537_TM2D3     | 0.020638 | 0.615127 | 0.708985 |
| 11761324_LOC100507 | -0.03807 | 0.615209 | 0.709032 |
| 11718627_TRAK1     | -0.02313 | 0.61521  | 0.709032 |
| 11762449_FNDC3B    | 0.033232 | 0.615211 | 0.709032 |
| 11735419_HTR1D     | -0.0506  | 0.615274 | 0.709088 |
| 11716965_ATN1      | -0.04405 | 0.615336 | 0.709143 |
| 11754550_LOC100233 | -0.02131 | 0.615366 | 0.709145 |
| 11752221_UNC45B    | -0.03427 | 0.615367 | 0.709145 |
| 11729552_SLC5A9    | 0.02065  | 0.615451 | 0.709225 |
| 11730870_MTMR12    | -0.01971 | 0.615468 | 0.709228 |
| 11738981_CD4       | 0.032692 | 0.615592 | 0.709354 |
| 11741677_MANEAL    | -0.02106 | 0.615627 | 0.709377 |
| 11761718_TMEM135   | 0.028946 | 0.615665 | 0.709404 |
| 11732587_GRID1     | -0.02242 | 0.615755 | 0.709492 |
| 11740244_PHOSPHO1  | -0.02675 | 0.615819 | 0.709549 |
| 11723708_AIFM2     | 0.021486 | 0.616056 | 0.709805 |
| 11729262_SERPINB9  | 0.027507 | 0.616153 | 0.7099   |
| 11752811_TTYH1     | 0.020614 | 0.616221 | 0.709961 |
| 11725907_SIX2      | 0.022626 | 0.616288 | 0.710011 |
| 11754045_NFATC4    | -0.0501  | 0.616293 | 0.710011 |
| 11749690_LARGE     | 0.037756 | 0.616441 | 0.710165 |
| 11750854_STK32C    | 0.040389 | 0.616487 | 0.710202 |
| 11726094_KANK3     | 0.022761 | 0.61651  | 0.710211 |
| 11727170_TRPS1     | 0.024736 | 0.616617 | 0.710317 |
| 11749150_ABCD3     | 0.018135 | 0.616751 | 0.710455 |
| 11746479_ADAP1 /// | -0.0249  | 0.616971 | 0.710691 |
| 11746196_PNISR     | -0.02219 | 0.617031 | 0.710744 |
| 11725477_OVOL1     | 0.019158 | 0.617062 | 0.710762 |
| 11759570_RPLP2     | 0.035947 | 0.617094 | 0.710783 |



|                    |          |          |          |
|--------------------|----------|----------|----------|
| 11725599_BEAN1     | 0.028878 | 0.617175 | 0.710838 |
| 11756674_STRBP     | -0.01797 | 0.617183 | 0.710838 |
| 11742788_DHX34     | 0.026716 | 0.617193 | 0.710838 |
| 11735553_CCDC189   | -0.02847 | 0.6172   | 0.710838 |
| 11715611_PLOD1     | -0.01959 | 0.61733  | 0.710971 |
| 11752427_MAPK8IP2  | -0.03721 | 0.617428 | 0.711067 |
| 11729874_SIGLEC9   | -0.04614 | 0.617456 | 0.711083 |
| 11723489_GCLM      | -0.04078 | 0.617552 | 0.711173 |
| 11737677_BTBD18    | -0.04925 | 0.617573 | 0.711173 |
| 11716812_SIN3B     | -0.02228 | 0.617586 | 0.711173 |
| 11741460_CYP4A11   | -0.02749 | 0.617592 | 0.711173 |
| 11748646_BRD1      | 0.023673 | 0.617655 | 0.711224 |
| 11762006_SUFU      | 0.045085 | 0.617666 | 0.711224 |
| 11744824_NAPA      | -0.03294 | 0.617682 | 0.711226 |
| 11720097_LIMD2     | -0.02997 | 0.617802 | 0.711347 |
| 11737648_MMP20     | -0.08156 | 0.617845 | 0.711138 |
| 11738850_BCL2L14   | 0.049484 | 0.61787  | 0.711392 |
| 11718989_OS9       | -0.01756 | 0.617911 | 0.711423 |
| 11735040_RPL3L     | 0.034809 | 0.617933 | 0.71143  |
| 11755266_SUCLA2    | -0.01956 | 0.618125 | 0.711635 |
| 11736837_TPCN2     | 0.019722 | 0.618225 | 0.711734 |
| 11762223_GOLGA6L7P | -0.04505 | 0.618264 | 0.711761 |
| 11738223_IL17F     | 0.020688 | 0.618295 | 0.711781 |
| 11756613_SEMAGA    | 0.044243 | 0.618339 | 0.711811 |
| 11749685_FAM13A    | 0.019454 | 0.618351 | 0.711811 |
| 11762354_NPSR1-AS1 | -0.04741 | 0.618387 | 0.711826 |
| 11736788_SIGLEC11  | -0.02779 | 0.618402 | 0.711826 |
| 11730322_CLEC2D    | 0.024192 | 0.618407 | 0.711826 |
| 11754185_TRAF2     | -0.01941 | 0.618451 | 0.71186  |
| 11731713_CACNB2    | 0.046824 | 0.61852  | 0.711922 |
| 11722838_GABRP     | -0.0623  | 0.618677 | 0.712086 |
| 11716993_CSF1R     | -0.02366 | 0.618702 | 0.712098 |
| 11735753_HIST1H4A  | -0.02949 | 0.618836 | 0.712236 |
| 11725294_USP9Y     | 0.032811 | 0.6189   | 0.712292 |
| 11730817_CTDSPL2   | -0.01782 | 0.618995 | 0.712385 |
| 11724834_MUC13     | -0.02142 | 0.61916  | 0.712558 |
| 11761884_RAD51C    | 0.024848 | 0.619206 | 0.712595 |
| 11747847_MRPS28    | 0.018424 | 0.61923  | 0.712603 |
| 11748118_ZKSCAN7   | -0.01888 | 0.619243 | 0.712603 |
| 11747447_HCN3      | -0.02706 | 0.61929  | 0.712641 |
| 11735937_CD48      | -0.02688 | 0.619307 | 0.712643 |
| 11741378_BACH2     | -0.04213 | 0.619327 | 0.712643 |
| 11732802_GRIK1     | -0.027   | 0.619341 | 0.712643 |
| 11729836_EIF5A2    | -0.03676 | 0.61935  | 0.712643 |
| 11737398_TSP02     | -0.02401 | 0.619439 | 0.712728 |
| 11731441_IFT57     | -0.03181 | 0.61949  | 0.71277  |
| 11735957_C14orf178 | -0.04028 | 0.6196   | 0.71288  |
| 11740816_IL5RA     | -0.03724 | 0.619773 | 0.713063 |
| 11726223_FBLN7     | 0.044488 | 0.619812 | 0.713091 |
| 11763706_CCDC93    | 0.026117 | 0.619845 | 0.7131   |
| 11740952_OTUD7A    | -0.03577 | 0.619849 | 0.7131   |

|                    |          |          |          |
|--------------------|----------|----------|----------|
| 11763637_RALGAPA1  | 0.053377 | 0.619985 | 0.713239 |
| 11756644_ARRDC1    | -0.02395 | 0.620019 | 0.713249 |
| 11761490_HIST1H2BK | 0.021748 | 0.620023 | 0.713249 |
| 11729426_XAGE3     | -0.04842 | 0.620038 | 0.713249 |
| 11741597_SMR3A /// | -0.03455 | 0.620075 | 0.713275 |
| 11739052_SLC02B1   | 0.02169  | 0.620158 | 0.713354 |
| 11759249_C17orf67  | -0.0529  | 0.620344 | 0.713552 |
| 11750535_OBP2A /// | 0.035278 | 0.620416 | 0.713617 |
| 11731647_SLC6A12   | 0.046116 | 0.620441 | 0.71363  |
| 11732296_CER1      | -0.05723 | 0.620478 | 0.713641 |
| 11738930_FRG2 ///  | 0.038051 | 0.62048  | 0.713641 |
| 11753213_GNAI2     | -0.0198  | 0.620618 | 0.713782 |
| 11755165_METTL12   | 0.021021 | 0.620693 | 0.713851 |
| 11726854_ADAMTS5   | -0.04514 | 0.620774 | 0.713928 |
| 11762431_RSPH10B / | -0.02283 | 0.620847 | 0.713996 |
| 11746051_HP1BP3    | 0.020429 | 0.621041 | 0.714195 |
| 11741681_EI24      | -0.02139 | 0.621053 | 0.714195 |
| 11748963_ASPCR1    | -0.01786 | 0.621065 | 0.714195 |
| 11751619_APOL1     | 0.025892 | 0.621094 | 0.714212 |
| 11726025_STAG3L4   | 0.029761 | 0.621308 | 0.714442 |
| 11728951_GSDMC     | 0.037481 | 0.621325 | 0.714444 |
| 11748856_PRR29     | 0.026626 | 0.621347 | 0.714452 |
| 11733878_LMO7      | -0.03515 | 0.621411 | 0.714509 |
| 11725724_FABP6     | -0.03645 | 0.621474 | 0.714564 |
| 11737196_GALNTL5   | -0.035   | 0.621503 | 0.714582 |
| 11763058_TAC3      | -0.0701  | 0.62153  | 0.714596 |
| 11743148_ZNF22     | -0.01938 | 0.621568 | 0.714623 |
| 11746436_TM2D3     | 0.022942 | 0.621764 | 0.714831 |
| 11749230_LOC100129 | 0.024344 | 0.621816 | 0.714875 |
| 11717905_STAU1     | 0.01777  | 0.621859 | 0.714907 |
| 11752597_SLC12A1   | -0.03048 | 0.621992 | 0.715043 |
| 11727606_TMEM92    | -0.03555 | 0.622034 | 0.715074 |
| 11755255_BAG1      | 0.021282 | 0.622063 | 0.715091 |
| 11750088_BAD       | 0.022393 | 0.622144 | 0.715167 |
| 11731342_CLDN9     | 0.033893 | 0.622253 | 0.715275 |
| 11756766_CD74      | -0.02006 | 0.622279 | 0.715289 |
| 11734540_C1GALT1C1 | 0.036634 | 0.622343 | 0.715345 |
| 11747700_UBAP1     | 0.021879 | 0.622362 | 0.715346 |
| 11738774_CLEC2A    | 0.046414 | 0.622372 | 0.715346 |
| 11721406_FLYWCH1   | 0.020444 | 0.622471 | 0.715442 |
| 11732378_C5orf47   | 0.044784 | 0.622521 | 0.715483 |
| 11759245_GALNTL6   | 0.026311 | 0.622544 | 0.715491 |
| 11737484_C9orf129  | 0.021359 | 0.622558 | 0.715491 |
| 11718899_POLG      | 0.017108 | 0.622642 | 0.715572 |
| 11762845_LOC400943 | 0.024047 | 0.622674 | 0.715591 |
| 11749749_MPPED1    | 0.025273 | 0.622714 | 0.715604 |
| 11755862_LOC101930 | -0.04906 | 0.622715 | 0.715604 |
| 11715730_CYP19A1   | -0.03126 | 0.622769 | 0.71565  |
| 11723427_OGFOD1    | 0.017771 | 0.622882 | 0.715752 |
| 11738696_OR10G2    | 0.03133  | 0.622887 | 0.715752 |
| 11752714_C11orf49  | 0.020569 | 0.622921 | 0.715758 |

|                    |          |          |          |
|--------------------|----------|----------|----------|
| 11729360_DI01      | -0.03479 | 0.622929 | 0.715758 |
| 11734205_SIGLEC6   | -0.03181 | 0.622936 | 0.715758 |
| 11762072_FOXL2NB   | -0.0314  | 0.622989 | 0.715802 |
| 11743842_PLB1      | 0.021241 | 0.623005 | 0.715803 |
| 11726654_PARVB     | 0.024004 | 0.623033 | 0.715818 |
| 11755103_CDA       | 0.066061 | 0.623106 | 0.715881 |
| 11741453_SPINK4    | -0.03078 | 0.623117 | 0.715881 |
| 11734611_GUCY2D    | -0.02353 | 0.623153 | 0.715906 |
| 11742945_EBNA1BP2  | 0.023795 | 0.623438 | 0.716216 |
| 11743506_ARHGAP26  | 0.055275 | 0.623474 | 0.716241 |
| 11715438_DAP       | 0.020083 | 0.623509 | 0.716263 |
| 11734855_VSIG1     | 0.045548 | 0.623528 | 0.716263 |
| 11738878_CLRN1     | 0.072965 | 0.623537 | 0.716263 |
| 11733314_AMER3     | -0.04465 | 0.623575 | 0.716285 |
| 11761499_TRPV5     | 0.027629 | 0.623586 | 0.716285 |
| 11760044_DPY19L1   | -0.04673 | 0.623601 | 0.716285 |
| 11759505_C5orf49   | 0.052177 | 0.623646 | 0.716321 |
| 11738133_ZNF80     | -0.03173 | 0.62371  | 0.716377 |
| 11752655_SERPINA13 | -0.04899 | 0.623734 | 0.716388 |
| 11729347_ZNF513    | 0.022585 | 0.623825 | 0.716474 |
| 11752495_PRMT2     | -0.0172  | 0.623838 | 0.716474 |
| 11735917_CDY1 ///  | -0.05274 | 0.623868 | 0.716491 |
| 11729909_IQCA1     | 0.039558 | 0.623895 | 0.716506 |
| 11749347_C11orf49  | 0.017823 | 0.623975 | 0.716581 |
| 11739664_RIMS3     | 0.035212 | 0.62405  | 0.71665  |
| 11720612_NAPIL5    | -0.04599 | 0.624087 | 0.716676 |
| 11761788_UBXN1     | -0.02863 | 0.624206 | 0.716796 |
| 11738333_TMPRSS11B | -0.02771 | 0.624281 | 0.716851 |
| 11760715_PPA2      | -0.0254  | 0.624283 | 0.716851 |
| 11752621_ADAMTS7   | 0.025752 | 0.624357 | 0.716919 |
| 11737348_ASB16     | -0.0221  | 0.624469 | 0.717013 |
| 11748781_FBXO24    | -0.02463 | 0.624469 | 0.717013 |
| 11745752_MSL1      | -0.02137 | 0.624505 | 0.717027 |
| 11739458_SYNC      | -0.02231 | 0.624529 | 0.717027 |
| 11760770_RPRD1B    | -0.0429  | 0.62454  | 0.717027 |
| 11733967_VIP       | 0.041468 | 0.624564 | 0.717027 |
| 11738431_IFNA8     | 0.026217 | 0.624568 | 0.717027 |
| 11737664_LRRC15    | -0.01842 | 0.62458  | 0.717027 |
| 11717650_SMG9      | -0.02476 | 0.624584 | 0.717027 |
| 11735196_PACSIN2   | 0.025236 | 0.624798 | 0.717256 |
| 11746071_LOC100288 | -0.02507 | 0.624821 | 0.717266 |
| 11734689_CYTIP     | 0.05271  | 0.624878 | 0.717315 |
| 11752075_ABCA4     | -0.04804 | 0.62493  | 0.717358 |
| 11729721_LILRA6 // | 0.040657 | 0.624966 | 0.717382 |
| 11755560_PDE6A     | 0.077655 | 0.624982 | 0.717383 |
| 11742987_EZR       | -0.02114 | 0.625094 | 0.717496 |
| 11718357_USF2      | 0.024597 | 0.625136 | 0.717526 |
| 11732944_EFCC1     | 0.023314 | 0.625171 | 0.717549 |
| 11738628_PNPLA8    | 0.022117 | 0.62524  | 0.717584 |
| 11750348_GRID1     | -0.02345 | 0.62525  | 0.717584 |
| 11751461_C11orf65  | 0.042546 | 0.625258 | 0.717584 |

|                    |          |          |          |
|--------------------|----------|----------|----------|
| 11747676_LETMD1    | 0.02504  | 0.62526  | 0.717584 |
| 11724326_ARHGAP25  | 0.022661 | 0.625284 | 0.717595 |
| 11733572_DMRT3     | 0.03802  | 0.625324 | 0.717624 |
| 11749875_LAMP1     | -0.01672 | 0.625375 | 0.717666 |
| 11736313_C3orf30   | -0.04279 | 0.625405 | 0.717684 |
| 11734991_WNT3A     | -0.03315 | 0.625427 | 0.717691 |
| 11750521_KCNIP4    | 0.029739 | 0.625461 | 0.717702 |
| 11723408_MKKS      | -0.01891 | 0.625465 | 0.717702 |
| 11730667_PPP1R14D  | 0.017131 | 0.625516 | 0.717736 |
| 11739890_PRSS12    | -0.02016 | 0.625536 | 0.717736 |
| 11735960_FGF6      | 0.024629 | 0.625539 | 0.717736 |
| 11762688_MORN1     | -0.03284 | 0.625623 | 0.717807 |
| 11724648_VANGL1    | -0.03908 | 0.62563  | 0.717807 |
| 11731343_MAGEA9 // | 0.022465 | 0.625722 | 0.717879 |
| 11726793_ITGB4     | -0.01894 | 0.625723 | 0.717879 |
| 11740220_SMAD9     | -0.03923 | 0.625737 | 0.717879 |
| 11763186_CASP1     | 0.029128 | 0.625915 | 0.718066 |
| 11728487_PIWIL1    | 0.040207 | 0.626072 | 0.718218 |
| 11762955_FOXP2     | -0.04183 | 0.626076 | 0.718218 |
| 11723768_SNX24     | -0.01862 | 0.626101 | 0.718229 |
| 11762842_PLEKHB2   | -0.02778 | 0.626133 | 0.71825  |
| 11749714_GGA3      | -0.02128 | 0.626211 | 0.718322 |
| 11734097_C14orf37  | 0.023895 | 0.626279 | 0.718371 |
| 11737204_8-Mar     | 0.056828 | 0.626293 | 0.718371 |
| 11738392_LIPN      | -0.04598 | 0.62631  | 0.718371 |
| 11731701_NTSR2     | 0.044784 | 0.626313 | 0.718371 |
| 11722629_NGDN      | -0.02009 | 0.626364 | 0.718413 |
| 11744652_HAPLN2    | -0.04054 | 0.626442 | 0.718468 |
| 11731238_GRHL2     | 0.048094 | 0.626444 | 0.718468 |
| 11756956_SPEF1     | 0.017066 | 0.626456 | 0.718468 |
| 11756473_CELF2     | 0.048521 | 0.626476 | 0.718473 |
| 11748724_IL4R      | 0.029787 | 0.626649 | 0.718656 |
| 11721787_C1orf226  | -0.04411 | 0.626693 | 0.71868  |
| 11740725_POU3F4    | -0.04126 | 0.6267   | 0.71868  |
| 11742171_ASCL3     | 0.042445 | 0.626832 | 0.718815 |
| 11715321_KRTAP10-8 | -0.01909 | 0.626933 | 0.718913 |
| 11736768_USP45     | 0.038844 | 0.626962 | 0.71893  |
| 11730286_SMU1      | 0.020295 | 0.627005 | 0.71896  |
| 11745058_CDYL      | 0.017137 | 0.627017 | 0.71896  |
| 11742861_ADGRF5    | -0.04877 | 0.627096 | 0.71903  |
| 11762364_AKAP9     | 0.068273 | 0.627108 | 0.71903  |
| 11718190_C14orf159 | -0.02812 | 0.62734  | 0.719279 |
| 11725124_CST7      | -0.01762 | 0.627383 | 0.719312 |
| 11731350_SCN5A     | -0.02809 | 0.627585 | 0.719526 |
| 11735537_MROH6     | 0.020699 | 0.6276   | 0.719527 |
| 11755802_FBLN2     | 0.039578 | 0.627721 | 0.719649 |
| 11752213_NOS2      | -0.03059 | 0.62777  | 0.719677 |
| 11733849_GTF3A     | 0.017007 | 0.627776 | 0.719677 |
| 11730057_MSI1      | 0.02244  | 0.628062 | 0.719988 |
| 11734372_MBLAC1    | -0.01904 | 0.628152 | 0.720075 |
| 11718091_RAB11FIP1 | -0.02306 | 0.628177 | 0.720086 |

|                    |          |          |          |
|--------------------|----------|----------|----------|
| 11716842_CD53      | 0.071481 | 0.62821  | 0.720092 |
| 11719990_TNKS1BP1  | 0.025393 | 0.628211 | 0.720092 |
| 11747582_NFATC4    | -0.02445 | 0.628377 | 0.720265 |
| 11741010_MFN2      | -0.01977 | 0.628442 | 0.720312 |
| 11738054_ITGB1BP2  | -0.03776 | 0.628447 | 0.720312 |
| 11750899_MYOM1     | 0.035416 | 0.628512 | 0.720369 |
| 11722089_EML3      | -0.01782 | 0.628584 | 0.720434 |
| 11733547_HCN1      | -0.03249 | 0.628616 | 0.720455 |
| 11734785_CLIC2     | -0.04945 | 0.628667 | 0.720483 |
| 11736390_ZNF662    | -0.02058 | 0.62867  | 0.720483 |
| 11739485_SUZ12     | 0.017471 | 0.628701 | 0.720502 |
| 11760215_CLEC7A    | 0.033257 | 0.628736 | 0.720519 |
| 11734073_RBFOX1    | 0.032362 | 0.628745 | 0.720519 |
| 11745894_TNFRSF14  | -0.02183 | 0.628788 | 0.720543 |
| 11736165	EIF4E     | -0.0394  | 0.628797 | 0.720543 |
| 11739344_CLGN      | 0.018084 | 0.628812 | 0.720545 |
| 11730905_PDS5B     | 0.01785  | 0.628829 | 0.720546 |
| 11729291_SLC25A37  | -0.02357 | 0.628848 | 0.720552 |
| 11737512_GALNTL6   | 0.033676 | 0.629015 | 0.720726 |
| 11718770_SELK      | -0.01662 | 0.629107 | 0.720811 |
| 11740313_MYH6 ///  | -0.0384  | 0.629118 | 0.720811 |
| 11743086_POLR3A    | 0.018982 | 0.629182 | 0.720866 |
| 11732319_GPR1      | -0.04693 | 0.629204 | 0.720874 |
| 11743905_SPCS1     | 0.017761 | 0.629222 | 0.720874 |
| 11758395_F5        | -0.04486 | 0.629233 | 0.720874 |
| 11756599_ANAPC16   | -0.01721 | 0.629262 | 0.720891 |
| 11742608_OR10G9    | -0.05204 | 0.629308 | 0.720927 |
| 11735453_NHLRC1    | -0.03684 | 0.629361 | 0.720953 |
| 11720907_SEMA3F    | -0.02376 | 0.629389 | 0.720953 |
| 11740717_GRIK4     | -0.03351 | 0.629391 | 0.720953 |
| 11741754_SLC4A5    | 0.02012  | 0.629393 | 0.720953 |
| 11738396_COL28A1   | -0.06786 | 0.629405 | 0.720953 |
| 11761467_IGHG3     | -0.05561 | 0.629427 | 0.720962 |
| 11721126_ENPEP     | -0.04244 | 0.629515 | 0.721045 |
| 11747790_TANGO2    | -0.01838 | 0.629622 | 0.721151 |
| 11716256_ECE1      | 0.020878 | 0.629654 | 0.721155 |
| 11734946_CNTROB    | -0.01856 | 0.629655 | 0.721155 |
| 11747173_SPOCK3    | -0.04324 | 0.629708 | 0.721199 |
| 11735401_SCN4A     | -0.0256  | 0.62979  | 0.721276 |
| 11752742_LOC729815 | -0.01937 | 0.629823 | 0.721297 |
| 11739846_MSRI      | -0.03907 | 0.629922 | 0.721394 |
| 11717236_RPS7 ///  | 0.016381 | 0.629955 | 0.721399 |
| 11742051_TCHHL1    | -0.02826 | 0.629957 | 0.721399 |
| 11732694_PTH2R     | 0.027944 | 0.630003 | 0.721436 |
| 11716442_POLR2L    | -0.02037 | 0.630029 | 0.721445 |
| 11752876_MMP13     | 0.035432 | 0.630041 | 0.721445 |
| 11749225_BTN2A2    | -0.0323  | 0.630079 | 0.721472 |
| 11759465_MAFK      | -0.02144 | 0.630186 | 0.721577 |
| 11730456_CCDC96    | 0.03603  | 0.630372 | 0.721773 |
| 11731563_EXOSC7    | -0.02584 | 0.630442 | 0.721837 |
| 11757260_SCARNA10  | 0.02281  | 0.630487 | 0.721871 |

|                    |          |          |          |
|--------------------|----------|----------|----------|
| 11734306_TNFSF11   | -0.0406  | 0.630559 | 0.721937 |
| 11763795_PICK1     | 0.01735  | 0.630649 | 0.722022 |
| 11727035_USP11     | -0.01717 | 0.630699 | 0.722063 |
| 11751971_PAPPA2    | 0.020531 | 0.630751 | 0.722106 |
| 11733922_GJB6      | 0.021721 | 0.630826 | 0.722161 |
| 11745004_HOPX      | 0.036694 | 0.630829 | 0.722161 |
| 11754896_MYOM3     | 0.016698 | 0.630883 | 0.722206 |
| 11757323_TOP2B     | 0.018059 | 0.631076 | 0.722367 |
| 11740110_ATXN7L1   | -0.02486 | 0.631084 | 0.722367 |
| 11741293_CHD3      | 0.038584 | 0.631094 | 0.722367 |
| 11731344_OBSCN     | -0.02387 | 0.631097 | 0.722367 |
| 11763951_LINCO0235 | -0.0312  | 0.6311   | 0.722367 |
| 11718439_NSUN4     | -0.02343 | 0.631112 | 0.722367 |
| 11756972_YBX1      | -0.01676 | 0.631165 | 0.72241  |
| 11758601_WNT2      | 0.021135 | 0.631395 | 0.722653 |
| 11717742_GPRC5C    | 0.039453 | 0.631406 | 0.722653 |
| 11726241_RYR3      | -0.0266  | 0.631445 | 0.722672 |
| 11756983_F11R      | -0.0184  | 0.631452 | 0.722672 |
| 11740392_CACNG2    | 0.043014 | 0.631499 | 0.722708 |
| 11735796_SIGLEC12  | -0.0549  | 0.631521 | 0.722716 |
| 11761325_ARHGAP21  | -0.03673 | 0.631546 | 0.722728 |
| 11735956_METTL11B  | 0.048808 | 0.631595 | 0.722768 |
| 11737908_GUCA1A    | -0.04312 | 0.631721 | 0.72288  |
| 11737576_NPHS1     | -0.02565 | 0.631723 | 0.72288  |
| 11731277_LYZL6     | -0.02781 | 0.63176  | 0.722906 |
| 11721875_SLC7A11   | -0.02217 | 0.631831 | 0.72297  |
| 11728446_PLCH1     | -0.02014 | 0.631955 | 0.723087 |
| 11724309_PHOX2A    | -0.03291 | 0.631963 | 0.723087 |
| 11729930_AQP2      | -0.03787 | 0.63212  | 0.723239 |
| 11747322_PCYT2     | -0.02939 | 0.632125 | 0.723239 |
| 11728345_GTF2E1    | 0.018952 | 0.63219  | 0.723296 |
| 11744168_DPT       | -0.04398 | 0.63222  | 0.723313 |
| 11756611_PPP1R7    | 0.022567 | 0.632267 | 0.723334 |
| 11755891_ERVFRD-1  | -0.04531 | 0.632268 | 0.723334 |
| 11725446_BCL3      | -0.01841 | 0.632289 | 0.723341 |
| 11761393_CCDC144CP | 0.028276 | 0.632303 | 0.723341 |
| 11755407_OR7A5     | -0.02187 | 0.632331 | 0.723356 |
| 11735579_TSSK1B    | -0.04059 | 0.63244  | 0.723464 |
| 11737447_YY2       | 0.022762 | 0.632631 | 0.723665 |
| 11729555_SUSD4     | -0.02957 | 0.632674 | 0.723692 |
| 11761557_DDX47     | 0.024682 | 0.632685 | 0.723692 |
| 11750278_HCAR1     | -0.02938 | 0.632708 | 0.723702 |
| 11758975_KIF5A     | -0.04363 | 0.632732 | 0.723713 |
| 11761776_SPICE1    | 0.046406 | 0.632781 | 0.723752 |
| 11744292_NAB2      | 0.01988  | 0.632835 | 0.723791 |
| 11746356_VNN2      | 0.044971 | 0.632845 | 0.723791 |
| 11761583_UPF3A     | 0.032104 | 0.632878 | 0.723812 |
| 11762789_LPEQ6126  | -0.03386 | 0.633008 | 0.723936 |
| 11727569_OTULIN    | 0.027165 | 0.633025 | 0.723936 |
| 11741660_TAGAP     | 0.033581 | 0.633031 | 0.723936 |
| 11715755_ATIC      | 0.018862 | 0.633064 | 0.723957 |

|                    |          |          |          |
|--------------------|----------|----------|----------|
| 11748293_B4GALT7   | -0.02254 | 0.633116 | 0.723994 |
| 11738240_EPHA3     | -0.04063 | 0.633153 | 0.723994 |
| 11724750_CSTF2T    | -0.01709 | 0.633157 | 0.723994 |
| 11738274_PSMG4     | -0.02525 | 0.633167 | 0.723994 |
| 11725430_LIN28A    | -0.04222 | 0.633171 | 0.723994 |
| 11738441_CCL17     | -0.02962 | 0.633199 | 0.72401  |
| 11757252_CDRT15P1  | -0.04799 | 0.633347 | 0.724162 |
| 11721371_TCF7L1    | -0.02271 | 0.63344  | 0.724251 |
| 11736410_NUP62     | -0.0278  | 0.633495 | 0.724297 |
| 11760642_TRY2P     | 0.02992  | 0.633577 | 0.724374 |
| 11754336_DOCK1     | 0.01809  | 0.633612 | 0.724397 |
| 11730878_MYCT1     | -0.03005 | 0.633628 | 0.724397 |
| 11745405_ADAMTSL5  | 0.023121 | 0.633648 | 0.724397 |
| 11761892_LINC00334 | -0.0187  | 0.633656 | 0.724397 |
| 11717128_CLN6      | -0.01849 | 0.633691 | 0.724419 |
| 11750950_CACNA1D   | -0.02633 | 0.633732 | 0.724449 |
| 11731388_TMPRSS6   | 0.027428 | 0.633806 | 0.724516 |
| 11748167_FAM227A   | -0.08107 | 0.633822 | 0.724518 |
| 11746713_SLC35F6   | -0.02222 | 0.633977 | 0.724679 |
| 11752934_GRHL2     | -0.0433  | 0.634009 | 0.724698 |
| 11720574_ATP8B1    | -0.0472  | 0.634054 | 0.724733 |
| 11738175_CAMKK1    | -0.03235 | 0.634255 | 0.724931 |
| 11744556_CYP2B7P   | -0.03131 | 0.634257 | 0.724931 |
| 11730174_C4orf3    | 0.037824 | 0.634353 | 0.725024 |
| 11716784_TRAK2     | 0.024467 | 0.634471 | 0.725138 |
| 11748833_SLC30A3   | -0.02637 | 0.634483 | 0.725138 |
| 11727371_NEFM      | 0.023655 | 0.634499 | 0.72514  |
| 11756894_SPIN3     | 0.025394 | 0.63456  | 0.725192 |
| 11756361_ABCF3     | 0.024381 | 0.634577 | 0.725195 |
| 11757235_DNM1P35   | -0.03964 | 0.634667 | 0.725281 |
| 11717916_CKMT1A // | -0.03073 | 0.634688 | 0.725288 |
| 11719351_GCC2      | 0.021733 | 0.634734 | 0.725323 |
| 11745530_MCTP2     | 0.022371 | 0.634966 | 0.725572 |
| 11737608_C9orf170  | 0.026164 | 0.635004 | 0.725598 |
| 11746021_MTURN     | 0.041998 | 0.635105 | 0.725682 |
| 11715339_TTN       | -0.06585 | 0.635107 | 0.725682 |
| 11724070_PHF10     | 0.035177 | 0.635148 | 0.725711 |
| 11759155_TRPV3     | -0.03348 | 0.635178 | 0.725729 |
| 11726363_ATXN3     | -0.04025 | 0.635332 | 0.725888 |
| 11745501_ECSCR     | -0.02228 | 0.635454 | 0.726011 |
| 11731242_LGSN      | 0.041601 | 0.63547  | 0.726012 |
| 11739765_KIAA0895L | 0.031613 | 0.635554 | 0.726081 |
| 11758284_KCTD9     | -0.01745 | 0.63556  | 0.726081 |
| 11762772_KIF25-AS1 | 0.06603  | 0.635602 | 0.726111 |
| 11723552_FXYD1     | -0.06677 | 0.635638 | 0.726136 |
| 11739276_SDC3      | 0.029767 | 0.635655 | 0.726139 |
| 11724529_FBXO8     | -0.06791 | 0.635682 | 0.726152 |
| 11752330_SCYL1     | 0.020347 | 0.635987 | 0.726475 |
| 11723367_RAB26     | 0.022776 | 0.635995 | 0.726475 |
| 11749008_RIMS1     | 0.047479 | 0.636091 | 0.726568 |
| 11754309_PTPRN2    | 0.029836 | 0.63613  | 0.726596 |

|                    |          |          |          |
|--------------------|----------|----------|----------|
| 11741299_SCNN1D    | -0.02687 | 0.63617  | 0.726619 |
| 11745630_LYG2      | 0.036508 | 0.63618  | 0.726619 |
| 11749554_LRP11     | 0.017345 | 0.636195 | 0.726619 |
| 11755202_VTCN1     | 0.024043 | 0.636294 | 0.726716 |
| 11732724_GCM1      | 0.024089 | 0.636321 | 0.726728 |
| 11747658_CDK10     | -0.02605 | 0.636349 | 0.726744 |
| 11727724_DDN       | 0.016398 | 0.636474 | 0.726843 |
| 11738201_EYA2      | 0.037443 | 0.636476 | 0.726843 |
| 11751704_OS9       | 0.017439 | 0.63648  | 0.726843 |
| 11760701_LSAMP     | 0.021605 | 0.636522 | 0.726864 |
| 11743767_DLGAP4    | -0.02175 | 0.636546 | 0.726864 |
| 11760785_GRK5      | -0.02461 | 0.636554 | 0.726864 |
| 11724364_FOXP4     | 0.018572 | 0.636576 | 0.726864 |
| 11736084_FAM120B   | 0.018504 | 0.636587 | 0.726864 |
| 11737516_OPN5      | 0.020645 | 0.636588 | 0.726864 |
| 11763048_GTSCR1    | -0.04549 | 0.636644 | 0.726911 |
| 11742121_ANKRD53   | -0.0405  | 0.636786 | 0.727056 |
| 11738514_OR2W5     | -0.01678 | 0.636858 | 0.727121 |
| 11741744_CACNA1C   | -0.04892 | 0.63693  | 0.727187 |
| 11745333_VPS4A     | -0.01926 | 0.636973 | 0.727219 |
| 11747626_KLHL3     | -0.03408 | 0.637036 | 0.727274 |
| 11733353_CRTAM     | -0.03033 | 0.637161 | 0.727384 |
| 11734177_SLC2A9    | 0.037733 | 0.637172 | 0.727384 |
| 11762297_LOC102724 | -0.03521 | 0.637178 | 0.727384 |
| 11724640_ARHGAP44  | -0.04199 | 0.637215 | 0.72741  |
| 11745325_ZNF497    | -0.02834 | 0.637295 | 0.727484 |
| 11726769_XAF1      | -0.03102 | 0.637337 | 0.727515 |
| 11725506_GDF11     | -0.02393 | 0.637361 | 0.727526 |
| 11742631_OR4C45    | -0.04551 | 0.637432 | 0.72758  |
| 11739625_ZNF740    | 0.046639 | 0.637438 | 0.72758  |
| 11758486_BACE2     | 0.020211 | 0.637502 | 0.727635 |
| 11747226_ADCY10    | 0.022153 | 0.637521 | 0.727641 |
| 11742586_ARL5C     | -0.02357 | 0.63754  | 0.727645 |
| 11718577_NET1      | 0.017537 | 0.637748 | 0.727866 |
| 11756816_EPS8L3    | 0.031316 | 0.637781 | 0.727886 |
| 11749752_WIPF1     | 0.022344 | 0.637831 | 0.727927 |
| 11727449_TMOD4 /// | 0.068452 | 0.637887 | 0.727956 |
| 11731399_FGA       | -0.02413 | 0.637887 | 0.727956 |
| 11764044_ABTB1     | 0.022505 | 0.637913 | 0.727968 |
| 11725132_GCOM1 /// | -0.01854 | 0.638065 | 0.728126 |
| 11746493_PIP4K2A   | 0.031815 | 0.6381   | 0.728138 |
| 11749433_KIAA1324  | 0.056398 | 0.638106 | 0.728138 |
| 11734596_ATP4A     | -0.02306 | 0.638161 | 0.728183 |
| 11758751_YWHAZ     | 0.024587 | 0.63818  | 0.728189 |
| 11722785_GRWD1     | 0.021552 | 0.638204 | 0.728199 |
| 11728891_SLIT1     | -0.02844 | 0.638334 | 0.728331 |
| 11755909_SAXO2     | 0.031087 | 0.63836  | 0.728334 |
| 11729294_TANGO6    | 0.052467 | 0.638367 | 0.728334 |
| 11745165_TRAF3IP3  | 0.033264 | 0.638476 | 0.728442 |
| 11731167_FAM71F1   | -0.02932 | 0.638526 | 0.728476 |
| 11724969_USP31     | -0.02469 | 0.638536 | 0.728476 |



|                    |          |          |          |
|--------------------|----------|----------|----------|
| 11761973_LINC00114 | 0.023521 | 0.638651 | 0.728584 |
| 11726847_SEMA5B    | -0.03525 | 0.638661 | 0.728584 |
| 11725478_OVOL1     | -0.01895 | 0.638699 | 0.728611 |
| 11727010_CELF4     | -0.04166 | 0.638836 | 0.72875  |
| 11740147_NRG2      | 0.021786 | 0.639068 | 0.728997 |
| 11750811_EOMES     | 0.023921 | 0.639158 | 0.729083 |
| 11750271_PANX2     | 0.027651 | 0.639182 | 0.729093 |
| 11715325_VSTM5     | 0.02223  | 0.639256 | 0.72916  |
| 11760987_SLC17A3   | -0.03336 | 0.639321 | 0.729218 |
| 11762198_JAZF1-AS1 | -0.04456 | 0.639383 | 0.729272 |
| 11718002_C10orf54  | 0.026232 | 0.639491 | 0.729372 |
| 11752753_FAM234B   | -0.02131 | 0.639507 | 0.729372 |
| 11742917_FCAMR     | -0.02046 | 0.639516 | 0.729372 |
| 11729589_KLK2      | 0.052993 | 0.639548 | 0.729392 |
| 11749613_OCIAD1    | -0.01716 | 0.639584 | 0.729416 |
| 11745388_MEGF8     | -0.05617 | 0.639715 | 0.729534 |
| 11736261_GABRG2    | 0.020778 | 0.639718 | 0.729534 |
| 11738414_VEGFA     | -0.02348 | 0.639748 | 0.729552 |
| 11743104_PTCD3     | 0.020662 | 0.639779 | 0.72957  |
| 11761098_AKNAD1    | -0.05326 | 0.639887 | 0.729676 |
| 11716887_EPCAM     | 0.048788 | 0.639947 | 0.729692 |
| 11728753_ADH7      | -0.03766 | 0.639957 | 0.729692 |
| 11758979_GPC4      | 0.030765 | 0.639958 | 0.729692 |
| 11738727_OR6M1     | -0.04366 | 0.639961 | 0.729692 |
| 11720200_CERS2     | 0.020259 | 0.640005 | 0.729726 |
| 11715176_TDRKH     | -0.01697 | 0.640038 | 0.729746 |
| 11747936_DYSF      | -0.02647 | 0.640296 | 0.730023 |
| 11733134_MRPS33    | 0.016132 | 0.640354 | 0.730059 |
| 11727285_HSF5      | 0.04411  | 0.640369 | 0.730059 |
| 11722362_LMBR1L    | 0.01815  | 0.640377 | 0.730059 |
| 11758453_ZXDC      | -0.01754 | 0.640387 | 0.730059 |
| 11741112_POMT1     | 0.026511 | 0.640417 | 0.730066 |
| 11719235_ZNF692    | -0.02099 | 0.640423 | 0.730066 |
| 11735471_GUCY1A3   | 0.03781  | 0.640454 | 0.730084 |
| 11761043_HLA-H     | 0.028045 | 0.640524 | 0.730147 |
| 11756518_LMO3      | -0.0222  | 0.640596 | 0.730212 |
| 11728656_IGFBP5    | 0.028047 | 0.640698 | 0.730311 |
| 11745539_ANK2      | -0.05682 | 0.64079  | 0.730383 |
| 11764263_TRPV3     | -0.02506 | 0.640808 | 0.730383 |
| 11734421_WBSCR28   | -0.02402 | 0.640813 | 0.730383 |
| 11720918_EIF1      | 0.017419 | 0.64082  | 0.730383 |
| 11735598_MROH5     | -0.02375 | 0.640884 | 0.730438 |
| 11742393_TAS2R46   | 0.032124 | 0.640936 | 0.730481 |
| 11718848_BEX2      | -0.02506 | 0.640967 | 0.730498 |
| 11753103_NXF2 ///  | 0.023261 | 0.640997 | 0.730516 |
| 11741408_NEFM      | -0.03038 | 0.641145 | 0.730668 |
| 11754175_IGHV3-13  | 0.046702 | 0.641205 | 0.730719 |
| 11758608_CSF2RB    | -0.03852 | 0.641246 | 0.730748 |
| 11716125_ZYX       | -0.01839 | 0.641311 | 0.730774 |
| 11746639_RASSF2    | 0.025627 | 0.641313 | 0.730774 |
| 11735848_CABP2     | -0.04824 | 0.641313 | 0.730774 |

|                    |          |          |          |
|--------------------|----------|----------|----------|
| 11722513_EMID1     | -0.03364 | 0.641426 | 0.730885 |
| 11744221_ASUN      | -0.01704 | 0.641521 | 0.730977 |
| 11752053_KIAA1211  | 0.01802  | 0.641559 | 0.731003 |
| 11723468_LPGAT1    | -0.03088 | 0.641648 | 0.731084 |
| 11763233_TRAC ///  | 0.02071  | 0.641673 | 0.731084 |
| 11737443_LRCH1     | -0.03446 | 0.641675 | 0.731084 |
| 11763088_C5orf17   | -0.02667 | 0.641742 | 0.731137 |
| 11722416_HBS1L     | -0.07482 | 0.641752 | 0.731137 |
| 11744156_RPS6KA1   | -0.02009 | 0.641827 | 0.731206 |
| 11746157_ALKBH6    | 0.018516 | 0.641902 | 0.731274 |
| 11752123_LRP2      | 0.03196  | 0.642019 | 0.73139  |
| 11751171_BZW2      | -0.02017 | 0.642034 | 0.731391 |
| 11747418_NAPSB     | 0.023354 | 0.64211  | 0.73146  |
| 11749092_NLRX1     | 0.024447 | 0.642154 | 0.731494 |
| 11747224_EDNRB /// | 0.046197 | 0.642229 | 0.731561 |
| 11751931_KDM5C     | 0.017372 | 0.642265 | 0.731585 |
| 11742154_OR5AK2    | -0.02726 | 0.642305 | 0.731614 |
| 11749627_ZNF574    | 0.034462 | 0.642385 | 0.731688 |
| 11754945_TKT       | 0.020346 | 0.642457 | 0.731753 |
| 11735566_C5orf64   | 0.025331 | 0.642472 | 0.731754 |
| 11759266_OR6B2     | -0.02414 | 0.64254  | 0.731814 |
| 11758310_WSB2      | -0.01618 | 0.642607 | 0.731872 |
| 11737930_FSHB      | 0.018312 | 0.64263  | 0.731882 |
| 11738995_DPYSL2    | -0.01691 | 0.642661 | 0.7319   |
| 11738387_IFNL2 /// | 0.026755 | 0.642734 | 0.731966 |
| 11729025_ILDR1     | -0.0352  | 0.642748 | 0.731966 |
| 11739192_RPF1      | 0.023473 | 0.642823 | 0.732034 |
| 11735602_TCL6      | 0.055384 | 0.642845 | 0.732041 |
| 11738572_CLDN17    | -0.02709 | 0.642867 | 0.73205  |
| 11761564_CEP70     | -0.04319 | 0.642953 | 0.73213  |
| 11758993_TRIM52    | -0.03116 | 0.643042 | 0.732215 |
| 11762022_CDC20B    | 0.023856 | 0.643104 | 0.732269 |
| 11742207_VCAN      | -0.03222 | 0.64316  | 0.732315 |
| 11739662_SIAH1     | 0.016109 | 0.64326  | 0.732412 |
| 11727122_LRP2      | -0.02809 | 0.643296 | 0.732435 |
| 11737574_LCE2D     | -0.03405 | 0.643437 | 0.732579 |
| 11723070_CYTL1     | -0.02592 | 0.64354  | 0.73268  |
| 11751433_ADAP1     | -0.01726 | 0.643587 | 0.732716 |
| 11761829_PRR14L    | 0.043038 | 0.643619 | 0.73272  |
| 11746405_CCDC177   | -0.02991 | 0.643621 | 0.73272  |
| 11720500_LYRM5     | 0.018224 | 0.643691 | 0.732783 |
| 11736350_ZNF366    | -0.01948 | 0.643743 | 0.732812 |
| 11761000_ANKMY1    | -0.03705 | 0.643746 | 0.732812 |
| 11740541_CNGB3     | -0.04384 | 0.643801 | 0.732857 |
| 11720208_IRF9      | 0.028617 | 0.643826 | 0.732868 |
| 11730071_CNGA1     | 0.02042  | 0.643988 | 0.733036 |
| 11752932_FCRL2     | 0.031185 | 0.644051 | 0.73309  |
| 11760604_IFT22     | 0.027689 | 0.644098 | 0.733127 |
| 11721903_JOSD2     | -0.01916 | 0.644346 | 0.733392 |
| 11724068_PELI2     | 0.037077 | 0.644642 | 0.733698 |
| 11722225_ADAM8     | 0.029855 | 0.644645 | 0.733698 |

|                    |          |          |          |
|--------------------|----------|----------|----------|
| 11757203_CHIAP2    | 0.017783 | 0.644694 | 0.733734 |
| 11756399_CCDC189   | -0.02156 | 0.644706 | 0.733734 |
| 11753143_PDZRN3    | -0.09155 | 0.644734 | 0.733748 |
| 11718881_PSMC4     | 0.021579 | 0.644749 | 0.733748 |
| 11748053_SERINC2   | -0.02084 | 0.644766 | 0.733751 |
| 11733943_IL2       | -0.02414 | 0.644873 | 0.733855 |
| 11737101_PPARGC1B  | 0.062035 | 0.644898 | 0.733867 |
| 11735133_TLL2      | -0.06616 | 0.644982 | 0.733946 |
| 11759419_GTF2H3    | -0.0268  | 0.645116 | 0.73408  |
| 11722976_HOXB5     | -0.0253  | 0.645201 | 0.73416  |
| 11733122_DAZL      | -0.04397 | 0.645233 | 0.734179 |
| 11750234_DSCR10    | 0.027032 | 0.645271 | 0.734206 |
| 11760422_HSF4      | -0.01885 | 0.645459 | 0.734402 |
| 11757086_SMIM5     | 0.019367 | 0.645495 | 0.734427 |
| 11745694_DFFB      | 0.026357 | 0.645581 | 0.734507 |
| 11753472_GEMIN2    | -0.03149 | 0.645684 | 0.734607 |
| 11760306_MRPS18A   | -0.0197  | 0.645708 | 0.734618 |
| 11726900_SLC6A17   | 0.018357 | 0.645747 | 0.734645 |
| 11751426_IL33      | -0.0312  | 0.645765 | 0.734648 |
| 11755705_SMIM5     | -0.02513 | 0.645823 | 0.734696 |
| 11738470_KRT84     | -0.02201 | 0.645874 | 0.734738 |
| 11739020_MFN2      | 0.021434 | 0.645911 | 0.734763 |
| 11757474_CLIC1     | -0.01785 | 0.645967 | 0.734809 |
| 11737313_TXNDC8    | -0.02738 | 0.645992 | 0.734821 |
| 11737354_CDC20B    | -0.03946 | 0.646107 | 0.734934 |
| 11737132_PCDHGA10  | -0.02282 | 0.646182 | 0.735003 |
| 11738393_OPRM1     | -0.06415 | 0.646222 | 0.735031 |
| 11730124_ADAMTSL2  | 0.018561 | 0.646297 | 0.735099 |
| 11725172_DMWD      | -0.02217 | 0.646415 | 0.735216 |
| 11733270_NAT8L     | -0.02987 | 0.646497 | 0.735291 |
| 11730297_ZC3H18    | 0.020903 | 0.646511 | 0.735291 |
| 11739497_SLC29A4   | 0.022035 | 0.646568 | 0.735338 |
| 11725889_MCEMP1    | -0.04138 | 0.646627 | 0.735378 |
| 11729402_ZNF285    | 0.024514 | 0.646632 | 0.735378 |
| 11734330_TNN       | -0.0403  | 0.646744 | 0.735488 |
| 11738759_OR8I2     | -0.04311 | 0.646862 | 0.735605 |
| 11728040_PRDX5     | -0.01616 | 0.647048 | 0.7358   |
| 11733557_SHISA9    | 0.035458 | 0.647072 | 0.735806 |
| 11737826_GSTM2     | -0.02262 | 0.647084 | 0.735806 |
| 11757182_UHMK1     | -0.01751 | 0.647101 | 0.735808 |
| 11734499_PARD6G-AS | -0.02527 | 0.64713  | 0.735824 |
| 11738224_IQCF1     | -0.05159 | 0.647147 | 0.735826 |
| 11737440_BMF       | 0.019315 | 0.647199 | 0.735868 |
| 11749385_SPRYD3    | -0.03554 | 0.647227 | 0.735883 |
| 11759749_KLF3      | 0.032038 | 0.647248 | 0.73589  |
| 11754003_ATP5J2    | -0.01811 | 0.647542 | 0.736206 |
| 11717580_CD52      | -0.0608  | 0.647611 | 0.736268 |
| 11740907_RTL1      | 0.027696 | 0.647655 | 0.736301 |
| 11748467_ALDH18A1  | -0.02078 | 0.647677 | 0.736309 |
| 11716272_POLR2E    | 0.01708  | 0.647729 | 0.736351 |
| 11744230_RASL11B   | -0.02336 | 0.647756 | 0.736364 |

|                    |          |          |          |
|--------------------|----------|----------|----------|
| 11727319_DTNB      | -0.04022 | 0.647904 | 0.736516 |
| 11761181_EXOC4     | -0.02024 | 0.648522 | 0.737201 |
| 11749238_FOXO4     | 0.017941 | 0.648574 | 0.737241 |
| 11751537_TP53      | 0.023641 | 0.648587 | 0.737241 |
| 11736677_DPP10     | -0.05227 | 0.648668 | 0.737315 |
| 11735840_KRTAP3-2  | -0.0264  | 0.64875  | 0.737391 |
| 11716942_ADPRHL2   | -0.02053 | 0.64886  | 0.737499 |
| 11730392_GPR4      | 0.016653 | 0.648875 | 0.737499 |
| 11735595_SH2D4B    | -0.02502 | 0.648917 | 0.73753  |
| 11715906_FAM96B    | -0.01785 | 0.648943 | 0.737542 |
| 11730123_TACR1     | -0.01575 | 0.64903  | 0.737624 |
| 11718567_KIAA1147  | 0.025035 | 0.649046 | 0.737625 |
| 11722778_ENPP2     | 0.015652 | 0.649157 | 0.737734 |
| 11721619_FOXJ1     | 0.040906 | 0.649336 | 0.737917 |
| 11745378_ZC3H14    | -0.0163  | 0.649358 | 0.737917 |
| 11745095_EPN3      | -0.03889 | 0.649363 | 0.737917 |
| 11715198_DBET ///  | 0.02331  | 0.649383 | 0.737922 |
| 11731893_CHADL     | -0.03331 | 0.64943  | 0.737942 |
| 11744883_LINCO1547 | -0.02767 | 0.649431 | 0.737942 |
| 11735539_EN2       | 0.017987 | 0.649495 | 0.737998 |
| 11724129_RNF186    | 0.041852 | 0.649533 | 0.738025 |
| 11759700_COX6A1    | 0.016002 | 0.649577 | 0.738039 |
| 11731692_BPIFB2    | 0.02923  | 0.649584 | 0.738039 |
| 11726986_ATP1B2    | -0.01669 | 0.649593 | 0.738039 |
| 11728408_DERL3     | -0.01813 | 0.649607 | 0.738039 |
| 11757751_NRP1      | 0.020788 | 0.649653 | 0.738075 |
| 11753875_POLR2L    | -0.01872 | 0.649712 | 0.738119 |
| 11748540_MOB2      | 0.025467 | 0.649723 | 0.738119 |
| 11740433_SIX3      | 0.019756 | 0.649785 | 0.738174 |
| 11738117_TBX20     | 0.042871 | 0.64985  | 0.738217 |
| 11752995_DLAT      | 0.020073 | 0.649854 | 0.738217 |
| 11758206_WASF2     | -0.02611 | 0.649971 | 0.738333 |
| 11740077_DLG2      | -0.05199 | 0.650082 | 0.738433 |
| 11760553_PLEKHA8   | -0.03084 | 0.650098 | 0.738433 |
| 11737370_TAAR1     | 0.019517 | 0.650104 | 0.738433 |
| 11738602_SPINK9    | -0.02116 | 0.650211 | 0.738537 |
| 11755628_HNF4G     | 0.029114 | 0.650449 | 0.73879  |
| 11740988_PHKG1     | -0.03118 | 0.650464 | 0.73879  |
| 11747853_SCAMP5    | -0.01601 | 0.650496 | 0.738802 |
| 11753077_CBFA2T2   | 0.025182 | 0.650505 | 0.738802 |
| 11735514_ZCCHC5    | 0.029565 | 0.650598 | 0.73889  |
| 11733543_SFTA2     | -0.03135 | 0.650635 | 0.738916 |
| 11745406_MICALL2   | 0.016441 | 0.650703 | 0.738975 |
| 11761999_HDAC4     | -0.02994 | 0.650857 | 0.739133 |
| 11731231_ZFR2      | -0.01917 | 0.650897 | 0.739161 |
| 11733431_ZNF382    | -0.04159 | 0.651022 | 0.739286 |
| 11750008_POLR2E    | -0.01756 | 0.651138 | 0.739401 |
| 11747950_DMRTC2    | -0.01944 | 0.651182 | 0.739433 |
| 11748067_CCPG1 /// | 0.023488 | 0.651224 | 0.739446 |
| 11752835_AKT1S1    | 0.021871 | 0.651232 | 0.739446 |
| 11739420_AMPD3     | -0.02847 | 0.651238 | 0.739446 |

|                    |          |          |          |
|--------------------|----------|----------|----------|
| 11742485_PRAMEF10  | -0.02216 | 0.651317 | 0.739518 |
| 11757118_SNORA2A   | -0.04266 | 0.651368 | 0.739558 |
| 11755648_MICAL2    | -0.01582 | 0.651386 | 0.739562 |
| 11724603_ZNF219    | 0.024094 | 0.651443 | 0.739609 |
| 11760767_ALG9      | -0.08978 | 0.651512 | 0.739671 |
| 11741602_EDN3      | -0.03596 | 0.651605 | 0.739759 |
| 11759412_CDH11     | 0.042417 | 0.651647 | 0.73979  |
| 11716427_POMC      | -0.04246 | 0.651709 | 0.739841 |
| 11734437_BRSK1     | -0.01959 | 0.651727 | 0.739841 |
| 11759995_TP53BP1   | -0.03103 | 0.651737 | 0.739841 |
| 11763239_BMS1P20 / | -0.03774 | 0.651757 | 0.739846 |
| 11752504_DUSP16    | -0.01819 | 0.65182  | 0.7399   |
| 11733819_KLHL32    | 0.033476 | 0.651897 | 0.73997  |
| 11740617_PARK2     | -0.02626 | 0.651979 | 0.74003  |
| 11741699_HIST1H2BJ | 0.034016 | 0.65198  | 0.74003  |
| 11732734_IL36RN    | -0.02172 | 0.651996 | 0.740031 |
| 11727428_GPR183    | -0.03759 | 0.652357 | 0.7404   |
| 11727883_AP3M2     | 0.021516 | 0.652363 | 0.7404   |
| 11753541_CHN2 ///  | 0.030462 | 0.652366 | 0.7404   |
| 11747613_ALOXE3    | -0.03611 | 0.652385 | 0.740404 |
| 11753561_LOC646813 | -0.04188 | 0.652429 | 0.740436 |
| 11751492_DNAI1     | 0.026468 | 0.652456 | 0.74045  |
| 11753329_ATP5A1    | -0.01666 | 0.652527 | 0.740477 |
| 11716502_CRMP1     | 0.026731 | 0.652556 | 0.740477 |
| 11737514_MEFV      | -0.0301  | 0.652562 | 0.740477 |
| 11758449_OGFOD1    | 0.016323 | 0.652565 | 0.740477 |
| 11759376_CCL27     | -0.02775 | 0.652568 | 0.740477 |
| 11763715_GNLY      | 0.021811 | 0.652596 | 0.740477 |
| 11763652_GET4      | 0.05173  | 0.6526   | 0.740477 |
| 11749799_PACS1     | -0.03626 | 0.652601 | 0.740477 |
| 11730063_INSM2     | -0.02204 | 0.652626 | 0.740489 |
| 11721604_SYNPO2    | -0.02623 | 0.652667 | 0.740512 |
| 11756880_ZNF638    | -0.01589 | 0.652679 | 0.740512 |
| 11763152_CA6       | 0.052287 | 0.652697 | 0.740512 |
| 11737597_DLGAP1    | -0.04365 | 0.652707 | 0.740512 |
| 11746397_PIGT      | -0.01552 | 0.652726 | 0.740515 |
| 11721986_PRICKLE2  | -0.03197 | 0.652742 | 0.740517 |
| 11732593_SMC1B     | -0.02617 | 0.652767 | 0.740528 |
| 11763328_GET4 ///  | 0.022327 | 0.652858 | 0.740614 |
| 11730058_HNF4A     | 0.046517 | 0.652908 | 0.740654 |
| 11723224_ARMT1     | 0.019945 | 0.653002 | 0.740742 |
| 11722012_GIMAP4    | 0.024766 | 0.653047 | 0.740777 |
| 11760734_GULP1     | 0.029642 | 0.65307  | 0.740781 |
| 11756978_KCNN2     | -0.03573 | 0.653088 | 0.740781 |
| 11755901_AHCYL1    | -0.0165  | 0.653096 | 0.740781 |
| 11728990_ANAPC11   | -0.03404 | 0.65312  | 0.740791 |
| 11755976_CASP12    | -0.02919 | 0.65315  | 0.740808 |
| 11738294_KCNK10    | 0.031218 | 0.653226 | 0.740873 |
| 11757493_HTN3      | 0.025982 | 0.653239 | 0.740873 |
| 11738070_HAS3      | -0.02283 | 0.65326  | 0.740873 |
| 11741128_CAPN2     | 0.017219 | 0.653268 | 0.740873 |

|                    |          |          |          |
|--------------------|----------|----------|----------|
| 11733901_UQCRQ     | -0.01746 | 0.653339 | 0.740936 |
| 11745676_NFATC4    | 0.045462 | 0.653377 | 0.740962 |
| 11740104_APOBEC4   | -0.04634 | 0.653394 | 0.740964 |
| 11760510_LOC105369 | 0.03627  | 0.653532 | 0.74106  |
| 11757716_MIR205HG  | -0.02035 | 0.653534 | 0.74106  |
| 11750221_MY01H     | -0.03614 | 0.653537 | 0.74106  |
| 11757694_EIF4E3    | -0.02236 | 0.653539 | 0.74106  |
| 11737517_SNX18     | 0.018563 | 0.653582 | 0.741091 |
| 11763639_RALGAPA1  | -0.03507 | 0.653694 | 0.741201 |
| 11715179_KRTAP19-1 | 0.036635 | 0.653731 | 0.741219 |
| 11763535_LINCO1102 | -0.04058 | 0.65374  | 0.741219 |
| 11727645_MECOM     | 0.019977 | 0.653881 | 0.741362 |
| 11742123_FBXL21    | 0.040449 | 0.653962 | 0.741432 |
| 11717610_SUCLG2    | -0.01826 | 0.653974 | 0.741432 |
| 11719757_SMCR8     | -0.0272  | 0.654109 | 0.741568 |
| 11748757_CECR1     | -0.03837 | 0.654171 | 0.741615 |
| 11755191_ITFG2 /// | -0.02084 | 0.654188 | 0.741615 |
| 11760804_RBFOX1    | 0.024432 | 0.654196 | 0.741615 |
| 11726550_CCNB3     | 0.031936 | 0.654405 | 0.741812 |
| 11723511_SHD       | -0.01876 | 0.654408 | 0.741812 |
| 11724775_FDX1      | -0.02183 | 0.654428 | 0.741812 |
| 11746813_PRKG2     | -0.04672 | 0.654441 | 0.741812 |
| 11761608_PGM5      | -0.04112 | 0.654446 | 0.741812 |
| 11727821_CISD1     | 0.037392 | 0.654475 | 0.741829 |
| 11760656_NCKIPSD   | 0.021294 | 0.654553 | 0.7419   |
| 11738458_ZIM3      | 0.023338 | 0.654612 | 0.741949 |
| 11759111_HIST1H2BH | -0.02955 | 0.654635 | 0.741958 |
| 11749072_FAM172A   | 0.034512 | 0.65471  | 0.742026 |
| 11737330_ZNF345    | 0.028818 | 0.654726 | 0.742027 |
| 11761246_RGS6      | -0.02045 | 0.654761 | 0.742049 |
| 11757840_XKRX      | -0.0261  | 0.654867 | 0.742123 |
| 11750522_CEACAM4   | -0.0169  | 0.654871 | 0.742123 |
| 11742761_GORASP2   | 0.015768 | 0.654872 | 0.742123 |
| 11726238_TRIM36    | -0.02966 | 0.655006 | 0.742256 |
| 11721766_ADRBK2    | 0.038216 | 0.655019 | 0.742256 |
| 11745139_NOL6      | -0.03757 | 0.655201 | 0.742444 |
| 11718046_ITPK1     | -0.02458 | 0.655224 | 0.742453 |
| 11759126_THRA      | -0.01992 | 0.655246 | 0.742461 |
| 11749483_PTPRR     | -0.04569 | 0.655313 | 0.74252  |
| 11751584_TATDN3    | -0.02699 | 0.655348 | 0.742542 |
| 11730088_DLGAP3    | 0.029507 | 0.655431 | 0.742619 |
| 11754364_FAM78A    | -0.02259 | 0.655474 | 0.742651 |
| 11759283_LCA10     | -0.03899 | 0.655518 | 0.742683 |
| 11723086_GAS2L1    | -0.02664 | 0.655556 | 0.742709 |
| 11725691_VWA5A     | -0.04957 | 0.65559  | 0.74273  |
| 11718114_SRP54     | 0.016369 | 0.655667 | 0.7428   |
| 11717019_ATP1A1    | 0.017109 | 0.655784 | 0.742916 |
| 11722129_FAM102B   | 0.018229 | 0.655823 | 0.742943 |
| 11760361_SULT1C4   | 0.046981 | 0.655903 | 0.742997 |
| 11763515_DLGAP2    | 0.01564  | 0.655909 | 0.742997 |
| 11725264_BTNL9     | 0.044251 | 0.655916 | 0.742997 |

|                    |          |          |          |
|--------------------|----------|----------|----------|
| 11737258_ANKS4B    | -0.03479 | 0.656002 | 0.743077 |
| 11761059_TMEMI75   | -0.03646 | 0.65606  | 0.743125 |
| 11762534_MLPH      | -0.04235 | 0.656224 | 0.743293 |
| 11762903_LAPTM4A   | 0.026114 | 0.656267 | 0.743311 |
| 11762506_PP2672    | 0.040717 | 0.65627  | 0.743311 |
| 11762403_LUZP1     | -0.03314 | 0.65642  | 0.743464 |
| 11723722_SLAIN2    | 0.016242 | 0.656452 | 0.74347  |
| 11715875_COMMD7    | -0.01511 | 0.656455 | 0.74347  |
| 11728549_ZNF536    | 0.028402 | 0.656492 | 0.743494 |
| 11753487_CSPG4P1Y  | -0.03104 | 0.65656  | 0.743554 |
| 11755993_SLC25A30  | -0.02969 | 0.656654 | 0.743642 |
| 11730531_ZGLP1     | 0.025776 | 0.6567   | 0.743678 |
| 11756977_PHYHD1    | -0.03022 | 0.656718 | 0.743681 |
| 11727372_PAPSS1    | 0.018    | 0.656804 | 0.743761 |
| 11755783_IKZF4     | -0.01831 | 0.65683  | 0.743766 |
| 11741163_CHRNA1    | 0.053337 | 0.656838 | 0.743766 |
| 11729977_CXCR6     | 0.039086 | 0.656864 | 0.743777 |
| 11749783_NDST2     | 0.024416 | 0.656895 | 0.743795 |
| 11720724_ZYG11B    | 0.017055 | 0.656954 | 0.743845 |
| 11751407_CHRND     | -0.03536 | 0.656978 | 0.743854 |
| 11754485_SERHL     | -0.0336  | 0.657101 | 0.743977 |
| 11738923_TAS2R42   | 0.05302  | 0.657139 | 0.744002 |
| 11749026_PTPRA     | 0.020863 | 0.65718  | 0.744032 |
| 11717926_FOXK2     | 0.016894 | 0.657206 | 0.744044 |
| 11762866_LINC00476 | -0.05019 | 0.657263 | 0.744091 |
| 11750679_TEK       | 0.016506 | 0.657314 | 0.744124 |
| 11744340_YWHAG     | -0.02019 | 0.657323 | 0.744124 |
| 11762335_CDKN2AIPN | -0.02974 | 0.657447 | 0.744248 |
| 11738681_OR13C5    | -0.01523 | 0.657488 | 0.744277 |
| 11761233_PTOV1     | 0.02035  | 0.657505 | 0.744279 |
| 11716121_API5      | -0.01671 | 0.657608 | 0.744379 |
| 11732426_GNA14     | -0.02561 | 0.657646 | 0.744404 |
| 11736378_MSL2      | -0.02062 | 0.657686 | 0.744432 |
| 11718791_EXOC4     | 0.017214 | 0.65771  | 0.744442 |
| 11749051_CORO7 /// | -0.0178  | 0.657734 | 0.744451 |
| 11759658_RECK      | 0.029336 | 0.657748 | 0.744451 |
| 11733262_CELF2     | 0.02347  | 0.657772 | 0.744461 |
| 11720004_MISP      | -0.01938 | 0.657859 | 0.744542 |
| 11721369_TRAPPC9   | 0.018685 | 0.65791  | 0.744574 |
| 11755503_UBC       | 0.015421 | 0.657918 | 0.744574 |
| 11753920_APOL1     | 0.020481 | 0.657984 | 0.744631 |
| 11748571_NAA40     | -0.02018 | 0.658028 | 0.744664 |
| 11739023_ADAR      | 0.016406 | 0.658169 | 0.744806 |
| 11744075_UBE2QL1   | 0.029068 | 0.658228 | 0.744853 |
| 11742176_HIST1H2BC | -0.02763 | 0.658253 | 0.744853 |
| 11757405_MS RB2    | 0.022149 | 0.658263 | 0.744853 |
| 11742254_ZNF534    | 0.029789 | 0.658271 | 0.744853 |
| 11718034_APOA2     | 0.020977 | 0.658338 | 0.744912 |
| 11764049_DP YSL4   | -0.02778 | 0.658376 | 0.744937 |
| 11763569_RALGAPA1  | 0.025526 | 0.658502 | 0.745046 |
| 11735981_OR3A3     | -0.01914 | 0.658503 | 0.745046 |

|                    |          |          |          |
|--------------------|----------|----------|----------|
| 11756099_LDHB      | -0.01557 | 0.658534 | 0.745064 |
| 11752686_AQP4      | 0.019716 | 0.658635 | 0.745144 |
| 11724153_CELF6     | -0.01565 | 0.658635 | 0.745144 |
| 11757421_RPL31     | -0.01549 | 0.658681 | 0.745179 |
| 11715238_RPL9      | 0.016377 | 0.658961 | 0.745479 |
| 11727914_NCAM1     | 0.014884 | 0.658994 | 0.745498 |
| 11755728_PBX4      | -0.03198 | 0.659031 | 0.745523 |
| 11733956_SPRR2F    | -0.02741 | 0.659047 | 0.745524 |
| 11756688_EFCAB1    | 0.055393 | 0.659142 | 0.745614 |
| 11736132_DCBLD2    | 0.016621 | 0.659433 | 0.745926 |
| 11756567_VPS28     | 0.018666 | 0.659652 | 0.746156 |
| 11726542_TMEM132C  | -0.03909 | 0.659722 | 0.746218 |
| 11753394_BSDC1     | -0.02106 | 0.659749 | 0.746229 |
| 11735878_FRMPD2 // | 0.030457 | 0.659762 | 0.746229 |
| 11740060_FABP2     | -0.01728 | 0.659861 | 0.746323 |
| 11716166_NUDC      | 0.016755 | 0.65989  | 0.746339 |
| 11750645_NFIX      | -0.02866 | 0.660082 | 0.746533 |
| 11720862_PNPLA4    | -0.06183 | 0.660092 | 0.746533 |
| 11719446_CPA1      | -0.02974 | 0.660197 | 0.746634 |
| 11746578_LINC01623 | -0.05376 | 0.66033  | 0.746767 |
| 11748562_B4GALNT1  | -0.03217 | 0.660368 | 0.746793 |
| 11733239_RPGRIP1L  | 0.016923 | 0.660414 | 0.746827 |
| 11763029_PPP1R2P1  | 0.021728 | 0.660441 | 0.746827 |
| 11737550_LHFPL5    | 0.047812 | 0.660444 | 0.746827 |
| 11735018_EPN2      | -0.02436 | 0.660485 | 0.746849 |
| 11738205_SPAM1     | -0.02128 | 0.660494 | 0.746849 |
| 11722122_CYP27B1   | 0.023768 | 0.660516 | 0.746857 |
| 11749461_CDH11     | -0.04224 | 0.660554 | 0.746883 |
| 11744506_KLHL3     | -0.02734 | 0.660574 | 0.746888 |
| 11753709_CIDEA     | 0.040161 | 0.660628 | 0.746929 |
| 11733972_PCDH18    | -0.02421 | 0.660641 | 0.746929 |
| 11751098_GBA /// G | 0.017373 | 0.660747 | 0.747032 |
| 11748662_CNOT3     | 0.022708 | 0.660818 | 0.747088 |
| 11738614_KRTAP10-2 | 0.020734 | 0.660827 | 0.747088 |
| 11762014_PTCHD1    | -0.03642 | 0.660865 | 0.747113 |
| 11716429_USP39     | 0.016147 | 0.660939 | 0.74718  |
| 11726482_CES4A     | -0.02165 | 0.66096  | 0.747187 |
| 11735986_KRTAP13-3 | -0.03611 | 0.660983 | 0.747195 |
| 11761648_ACSL6     | -0.0336  | 0.661064 | 0.747269 |
| 11734166_PGBD2     | 0.024352 | 0.661133 | 0.74733  |
| 11738659_PROP1     | 0.031733 | 0.661156 | 0.747338 |
| 11729851_RADIL     | 0.030528 | 0.661174 | 0.747342 |
| 11715455_KISS1     | 0.025637 | 0.661473 | 0.747662 |
| 11725092_RFX5      | 0.016131 | 0.661543 | 0.747724 |
| 11721028_MLYCD     | 0.016441 | 0.661649 | 0.747819 |
| 11757389_PLEKHA1   | 0.017148 | 0.661657 | 0.747819 |
| 11733690_SEC11A    | 0.017103 | 0.661699 | 0.747849 |
| 11760719_SAMD4A    | -0.02276 | 0.661801 | 0.747946 |
| 11731232_TUSC5     | 0.038077 | 0.661827 | 0.747959 |
| 11736713_LMOD2     | 0.020539 | 0.661901 | 0.748025 |
| 11730636_CTLA4     | -0.05504 | 0.661999 | 0.748118 |



|                    |          |          |          |
|--------------------|----------|----------|----------|
| 11738616_ADGRG4    | 0.036863 | 0.662026 | 0.748132 |
| 11732325_ZKSCAN7   | -0.03037 | 0.662089 | 0.748185 |
| 11760702_ZFAND2B   | -0.01957 | 0.66212  | 0.748187 |
| 11762317_HLA-DQB1  | -0.017   | 0.662128 | 0.748187 |
| 11762046_ESR2      | -0.032   | 0.662136 | 0.748187 |
| 11733538_KLK15     | -0.03868 | 0.662172 | 0.748205 |
| 11760094_LOC57399  | 0.056019 | 0.662183 | 0.748205 |
| 11716554_HLA-DMA   | -0.01816 | 0.662215 | 0.748217 |
| 11736959_TNFSF15   | -0.04783 | 0.662235 | 0.748217 |
| 11734582_CBLN2     | -0.03033 | 0.662239 | 0.748217 |
| 11728189_CXCR4     | -0.02573 | 0.662268 | 0.748232 |
| 11726505_FUT9      | -0.05721 | 0.662374 | 0.748318 |
| 11758977_ERGIC2    | 0.021472 | 0.662385 | 0.748318 |
| 11744189_ACE       | -0.03749 | 0.6624   | 0.748318 |
| 11739454_C1QTNF9   | -0.02668 | 0.662405 | 0.748318 |
| 11760212_SPAG9     | -0.06041 | 0.662506 | 0.748415 |
| 11758319_UBC       | 0.014842 | 0.66254  | 0.748435 |
| 11715828_M6PR      | 0.028343 | 0.66261  | 0.748498 |
| 11744249_GSX2      | -0.02386 | 0.662841 | 0.748741 |
| 11747648_TCAIM     | 0.020592 | 0.662889 | 0.748777 |
| 11738889_IQCD      | 0.041087 | 0.662903 | 0.748777 |
| 11718019_ADARB1    | 0.023237 | 0.662977 | 0.748843 |
| 11738721_OR51M1    | -0.05202 | 0.663008 | 0.748861 |
| 11730302_FAM71B    | 0.029817 | 0.663072 | 0.748915 |
| 11758359_SLC5A12   | -0.02264 | 0.663136 | 0.748954 |
| 11763477_MED25     | 0.068079 | 0.66315  | 0.748954 |
| 11731328_GALR2     | 0.035061 | 0.663157 | 0.748954 |
| 11756147_TMED2     | -0.0157  | 0.663167 | 0.748954 |
| 11754786_MXRA8     | 0.017985 | 0.663209 | 0.748983 |
| 11738452_PCDHGC5   | 0.028313 | 0.663357 | 0.749123 |
| 11734851_KIAA0226L | -0.04254 | 0.663363 | 0.749123 |
| 11715289_AGRP      | -0.02359 | 0.663414 | 0.749163 |
| 11729521_CA5B      | 0.02122  | 0.663451 | 0.749186 |
| 11720808_RABEPK    | -0.01513 | 0.663464 | 0.749186 |
| 11756631_TXNDC15   | 0.020206 | 0.663525 | 0.749237 |
| 11732418_FAM105A   | 0.038578 | 0.663581 | 0.74928  |
| 11735485_DMRTA2    | -0.02897 | 0.663594 | 0.74928  |
| 11721312_ATOX1     | -0.01623 | 0.663628 | 0.7493   |
| 11764041_ZNF467    | 0.02764  | 0.66371  | 0.749354 |
| 11716101_ATG3      | 0.016188 | 0.663719 | 0.749354 |
| 11745651_EPCAM     | -0.03003 | 0.663722 | 0.749354 |
| 11732928_LHX3      | 0.047006 | 0.663741 | 0.749354 |
| 11758958_DEFA1 /// | -0.03403 | 0.663752 | 0.749354 |
| 11749214_SELPLG    | -0.01989 | 0.663804 | 0.749381 |
| 11750597_KIDINS220 | 0.021823 | 0.663806 | 0.749381 |
| 11739514_CNTN6     | -0.02947 | 0.663828 | 0.749384 |
| 11741335_ERN1      | -0.0236  | 0.663846 | 0.749384 |
| 11745729_CARKD     | -0.01832 | 0.663859 | 0.749384 |
| 11732798_MIPOL1    | 0.035785 | 0.663885 | 0.749384 |
| 11736128_DPPA4     | -0.03084 | 0.663886 | 0.749384 |
| 11761004_NDUFS2    | 0.023973 | 0.663904 | 0.749386 |

|                    |   |          |          |          |
|--------------------|---|----------|----------|----------|
| 11753439_GBA ///   | G | 0.019685 | 0.663918 | 0.749386 |
| 11751857_GNLY      |   | 0.023624 | 0.663985 | 0.749445 |
| 11759830_KMT2E     |   | 0.021249 | 0.664034 | 0.749482 |
| 11735702_CD151     |   | -0.0177  | 0.664102 | 0.749541 |
| 11733266_PIRT      |   | 0.029318 | 0.664222 | 0.74966  |
| 11760661_PDE4D     |   | -0.05392 | 0.664371 | 0.749811 |
| 11732485_BTNL8     |   | -0.02362 | 0.664458 | 0.749891 |
| 11738512_GADL1     |   | 0.023079 | 0.664605 | 0.750025 |
| 11759911_COQ9      |   | -0.02986 | 0.664607 | 0.750025 |
| 11762597_LAMA5     |   | 0.036225 | 0.664645 | 0.750051 |
| 11735586_ZNF208    |   | -0.04753 | 0.66484  | 0.750253 |
| 11762254_DMAP1     |   | -0.03815 | 0.66486  | 0.750259 |
| 11726261_DFFA      |   | -0.02156 | 0.664883 | 0.750268 |
| 11715189_H3F3B /// |   | 0.017023 | 0.664914 | 0.750269 |
| 11743168_IDO1      |   | -0.03581 | 0.664915 | 0.750269 |
| 11753141_TAF8      |   | -0.04304 | 0.664952 | 0.750293 |
| 11722322_NFASC     |   | 0.029499 | 0.664998 | 0.750328 |
| 11727272_TRIM55    |   | 0.041044 | 0.665132 | 0.750462 |
| 11717677_CYFIP2    |   | -0.01596 | 0.665165 | 0.750467 |
| 11746599_NRIP3     |   | 0.046079 | 0.665169 | 0.750467 |
| 11721745_APC2      |   | -0.01744 | 0.665182 | 0.750467 |
| 11744643_LINC01554 |   | -0.04203 | 0.665228 | 0.750501 |
| 11757090_GJC3      |   | -0.02588 | 0.665277 | 0.750539 |
| 11734967_THEMIS    |   | -0.03    | 0.665325 | 0.750573 |
| 11734176_CFAP52    |   | -0.04043 | 0.665338 | 0.750573 |
| 11729677_SLC26A8   |   | 0.026686 | 0.665389 | 0.750613 |
| 11741990_CCRL2     |   | 0.037119 | 0.665432 | 0.750642 |
| 11732851_CDC60     |   | -0.031   | 0.665445 | 0.750642 |
| 11721105_RAB3GAP1  |   | -0.02306 | 0.665479 | 0.750644 |
| 11748256_LOC202181 |   | -0.02155 | 0.665484 | 0.750644 |
| 11734761_HIP1      |   | -0.02255 | 0.665493 | 0.750644 |
| 11719736_FAM134B   |   | -0.02394 | 0.665517 | 0.750654 |
| 11742619_OR4C46    |   | -0.03732 | 0.665607 | 0.750737 |
| 11729425_SPP2      |   | -0.01765 | 0.665641 | 0.750747 |
| 11724481_NREP      |   | 0.017361 | 0.665646 | 0.750747 |
| 11725857_SLC2A13   |   | -0.02378 | 0.665737 | 0.750832 |
| 11741603_HIVEP3    |   | -0.02282 | 0.665804 | 0.75089  |
| 11732988_DEFA6     |   | -0.02197 | 0.665823 | 0.750895 |
| 11737674_LRRIQ4    |   | -0.06116 | 0.66589  | 0.750953 |
| 11729634_PRR30     |   | -0.03326 | 0.665946 | 0.750969 |
| 11754222_CFAP221   |   | -0.01886 | 0.665948 | 0.750969 |
| 11731634_HPGDS     |   | -0.03451 | 0.66595  | 0.750969 |
| 11723876_KCNK5     |   | -0.02657 | 0.665989 | 0.750995 |
| 11724453_KCNJ1     |   | -0.04408 | 0.666045 | 0.751041 |
| 11716688_GOLGA3    |   | 0.01952  | 0.666082 | 0.751057 |
| 11733504_GPR182    |   | -0.0354  | 0.66609  | 0.751057 |
| 11740101_CNR2      |   | -0.02879 | 0.666142 | 0.751098 |
| 11754226_WHSC1L1   |   | -0.02786 | 0.666169 | 0.751112 |
| 11738570_BMP15     |   | 0.043087 | 0.666194 | 0.751122 |
| 11753937_LINC00473 |   | 0.020034 | 0.666252 | 0.75117  |
| 11745042_JRK       |   | 0.024932 | 0.666328 | 0.751239 |

|                   |     |          |          |          |
|-------------------|-----|----------|----------|----------|
| 11728636_DPPA3    | /// | 0.037285 | 0.666446 | 0.751355 |
| 11760272_LMAN1L   |     | 0.045646 | 0.666466 | 0.75136  |
| 11732484_DAB2IP   |     | -0.02223 | 0.666519 | 0.751402 |
| 11760710_MS4A6A   |     | -0.02163 | 0.666562 | 0.751433 |
| 11740401_THAP5    |     | -0.02599 | 0.666623 | 0.751485 |
| 11725468_LIPG     |     | -0.02743 | 0.666871 | 0.751747 |
| 11763495_BZRAP1   |     | -0.02478 | 0.666908 | 0.751771 |
| 11721274_NR2C1    |     | 0.020834 | 0.666926 | 0.751774 |
| 11732722_MAP3K10  |     | -0.01853 | 0.666975 | 0.751812 |
| 11761520_ZNF587B  |     | -0.03864 | 0.667086 | 0.751919 |
| 11724629_TUSC1    |     | 0.015748 | 0.667113 | 0.751933 |
| 11732761_GRIN3A   |     | 0.041452 | 0.667197 | 0.75201  |
| 11762735_BEST3    |     | -0.0451  | 0.667247 | 0.752049 |
| 11743777_BPHL     |     | 0.021928 | 0.667318 | 0.752112 |
| 11732248_NR2F1    |     | -0.02293 | 0.667457 | 0.752235 |
| 11728726_CEACAM7  |     | 0.01705  | 0.667463 | 0.752235 |
| 11759928_B3GNTL1  |     | 0.042582 | 0.667473 | 0.752235 |
| 11729744_SLC39A5  |     | -0.01902 | 0.66755  | 0.752293 |
| 11728859_NKX2-5   |     | -0.01628 | 0.667555 | 0.752293 |
| 11718579_GSTM3    |     | -0.02138 | 0.667579 | 0.752302 |
| 11725131_TCEAL3   |     | 0.016759 | 0.667629 | 0.752341 |
| 11756110_LEFTY2   |     | 0.04612  | 0.667648 | 0.752345 |
| 11735647_ZNF90    |     | 0.024394 | 0.667669 | 0.752351 |
| 11759224_EDF1     |     | -0.01642 | 0.667741 | 0.752401 |
| 11742868_CDH6     |     | 0.030273 | 0.667744 | 0.752401 |
| 11726762_SLC03A1  |     | -0.05642 | 0.667768 | 0.752411 |
| 11758744_FARSB    |     | 0.03338  | 0.667811 | 0.752442 |
| 11733953_GBP4     |     | 0.017364 | 0.667947 | 0.752562 |
| 11762642_DMRT1    |     | -0.04431 | 0.667948 | 0.752562 |
| 11747188_LAMB4    |     | -0.0344  | 0.668002 | 0.752605 |
| 11746486_PTPRE    |     | -0.03122 | 0.668135 | 0.752738 |
| 11741118_GRM1     |     | -0.03989 | 0.668173 | 0.752753 |
| 11738824_DNAJB8   |     | -0.02627 | 0.668183 | 0.752753 |
| 11762250_FAM3B    |     | -0.04183 | 0.668195 | 0.752753 |
| 11737177_SLC25A21 |     | -0.02158 | 0.668267 | 0.752817 |
| 11745559_C2orf73  |     | -0.04842 | 0.668402 | 0.752951 |
| 11738885_WFDC13   |     | -0.01968 | 0.668444 | 0.752982 |
| 11737207_C1orf189 |     | -0.03296 | 0.668541 | 0.753074 |
| 11746211_CPNE9    |     | 0.046866 | 0.668788 | 0.753318 |
| 11760150_PRSS1    |     | -0.0271  | 0.668788 | 0.753318 |
| 11744917_LRRIQ3   |     | 0.045304 | 0.668846 | 0.753365 |
| 11759945_ZFP28    |     | -0.02863 | 0.668867 | 0.753371 |
| 11735596_PCDH15   |     | -0.03185 | 0.668917 | 0.753387 |
| 11755564_CCL3L1   | //  | -0.02665 | 0.668917 | 0.753387 |
| 11726393_FGD4     |     | -0.01756 | 0.668927 | 0.753387 |
| 11741666_LAX1     |     | 0.016652 | 0.668998 | 0.753449 |
| 11731304_SPDYA    |     | 0.02294  | 0.669065 | 0.753508 |
| 11754441_AGAP3    |     | 0.02028  | 0.669134 | 0.753568 |
| 11757567_NDUFB5   |     | -0.01662 | 0.669157 | 0.753576 |
| 11727574_RBP5     |     | -0.02695 | 0.669218 | 0.753593 |
| 11721270_SCG3     |     | 0.024049 | 0.669219 | 0.753593 |

|                   |          |          |          |
|-------------------|----------|----------|----------|
| 11743276_STAG1    | 0.025512 | 0.669225 | 0.753593 |
| 11737003_PDE3A    | -0.04125 | 0.669233 | 0.753593 |
| 11759069_CXXC4    | 0.023588 | 0.669303 | 0.753641 |
| 11750590_HFM1     | -0.05173 | 0.669307 | 0.753641 |
| 11723252_SERPINC1 | 0.028641 | 0.669365 | 0.75369  |
| 11738462_FLJ33360 | 0.056772 | 0.669396 | 0.753707 |
| 11734013_BMP4     | -0.01965 | 0.669418 | 0.753715 |
| 11718271_TAX1BP1  | -0.0181  | 0.669523 | 0.753814 |
| 11730131_CT62     | -0.02271 | 0.669537 | 0.753814 |
| 11748827_LMBR1L   | 0.017522 | 0.669579 | 0.753843 |
| 11740319_KCNJ3    | 0.025168 | 0.669727 | 0.753978 |
| 11763606_VAV1     | -0.05649 | 0.66973  | 0.753978 |
| 11749128_MAP7     | 0.052732 | 0.669756 | 0.75399  |
| 11744546_PROZ     | -0.01548 | 0.669829 | 0.754039 |
| 11742440_OVCH1    | 0.035827 | 0.66983  | 0.754039 |
| 11760485_BTN2A2   | 0.029062 | 0.669867 | 0.754064 |
| 11726534_DPPA2    | -0.02076 | 0.669914 | 0.754099 |
| 11715495_RPS25    | 0.014434 | 0.66995  | 0.754122 |
| 11729249_ZNF205   | 0.016208 | 0.670033 | 0.754198 |
| 11757097_SMIM6    | -0.03581 | 0.670101 | 0.754257 |
| 11732407_PRPH2    | -0.01954 | 0.670156 | 0.754302 |
| 11758481_RAB3IP   | -0.03592 | 0.670209 | 0.754344 |
| 11759098_NOP9     | 0.024653 | 0.670225 | 0.754344 |
| 11747260_ACVRL1   | 0.015163 | 0.670259 | 0.754366 |
| 11752395_NFATC1   | -0.03028 | 0.670291 | 0.754384 |
| 11729694_SERPINB3 | -0.027   | 0.670373 | 0.754459 |
| 11732470_C12orf50 | -0.01956 | 0.670411 | 0.754483 |
| 11732782_DSCR4    | -0.01918 | 0.670425 | 0.754483 |
| 11760334_EMG1     | 0.03719  | 0.670454 | 0.754498 |
| 11763957_SCARNA20 | 0.015414 | 0.670507 | 0.75454  |
| 11731998_CCDC88C  | -0.02454 | 0.670576 | 0.754601 |
| 11746979_TMC2     | 0.050884 | 0.6706   | 0.75461  |
| 11727518_PNMA6A   | 0.024473 | 0.670654 | 0.754653 |
| 11748379_SPATA13  | -0.02307 | 0.670698 | 0.754686 |
| 11758845_COX7A2   | -0.03261 | 0.670742 | 0.754712 |
| 11754787_ATF7IP2  | 0.018306 | 0.670752 | 0.754712 |
| 11726956_FOXS1    | 0.040473 | 0.670955 | 0.754923 |
| 11722071_MESDC1   | 0.030187 | 0.671177 | 0.755155 |
| 11747608_P2RX7    | -0.0379  | 0.671234 | 0.755187 |
| 11763441_WNK4     | 0.022693 | 0.671236 | 0.755187 |
| 11723115_MTX3     | 0.016264 | 0.671252 | 0.755187 |
| 11760280_EPS15L1  | -0.02591 | 0.671327 | 0.755255 |
| 11732283_SLC30A5  | -0.01626 | 0.671508 | 0.755441 |
| 11724412_PPARA    | -0.04324 | 0.67157  | 0.755493 |
| 11738259_CXorf49  | 0.025453 | 0.671678 | 0.755597 |
| 11757176_SNORA35  | 0.031978 | 0.671719 | 0.755611 |
| 11750495_KLRAP1   | -0.0526  | 0.671722 | 0.755611 |
| 11738511_DEFBA4   | -0.01963 | 0.671775 | 0.75563  |
| 11731727_CASP5    | 0.027983 | 0.671776 | 0.75563  |
| 11718643_OSBP18   | -0.04378 | 0.671784 | 0.75563  |
| 11724184_ATCAY    | -0.02312 | 0.671821 | 0.755654 |

|                    |          |          |          |
|--------------------|----------|----------|----------|
| 11747573_TMPRSS4   | -0.03029 | 0.671907 | 0.75572  |
| 11738564_OR8D4     | -0.017   | 0.671925 | 0.75572  |
| 11740766_NRXN1     | 0.017254 | 0.671941 | 0.75572  |
| 11736344_OPA3      | 0.019782 | 0.671941 | 0.75572  |
| 11727739_CD300LF   | -0.03966 | 0.671977 | 0.755742 |
| 11753621_SNX20     | -0.04415 | 0.672051 | 0.755793 |
| 11760539_IBTK      | -0.05019 | 0.672053 | 0.755793 |
| 11734439_BSDC1     | -0.02007 | 0.672076 | 0.755802 |
| 11736312_FCGR1A // | -0.05247 | 0.67211  | 0.755822 |
| 11749479_SUN2      | 0.034263 | 0.672302 | 0.755971 |
| 11733964_CYP4F11   | -0.03551 | 0.672303 | 0.755971 |
| 11746033_SFSWAP    | 0.01639  | 0.672316 | 0.755971 |
| 11753925_ATG3      | 0.016088 | 0.672322 | 0.755971 |
| 11758756_ATP5J2    | 0.070994 | 0.672347 | 0.755971 |
| 11715476_DDX17     | 0.018413 | 0.67235  | 0.755971 |
| 11726463_ZCCHC10   | 0.030964 | 0.672351 | 0.755971 |
| 11729640_C12orf43  | 0.02607  | 0.672391 | 0.755999 |
| 11749107_SLC4A11   | 0.023944 | 0.672435 | 0.756031 |
| 11725238_RBPM2     | -0.03379 | 0.67247  | 0.756041 |
| 11740884_C1orf146  | -0.05814 | 0.672474 | 0.756041 |
| 11724287_CAPN10    | -0.01902 | 0.672504 | 0.756057 |
| 11728169_LCA5      | 0.025777 | 0.672606 | 0.756145 |
| 11740936_ABHD16B   | 0.018329 | 0.672623 | 0.756145 |
| 11751899_DLG5      | 0.016501 | 0.672629 | 0.756145 |
| 11728531_TLE6      | -0.03813 | 0.672676 | 0.75618  |
| 11738954_NMS       | 0.060728 | 0.67279  | 0.756291 |
| 11725135_VPS16     | 0.019788 | 0.672822 | 0.75631  |
| 11716939_HMOX1     | 0.020073 | 0.672842 | 0.756315 |
| 11733317_AK2       | 0.016228 | 0.672901 | 0.756364 |
| 11721691_CYB561    | -0.0202  | 0.672941 | 0.756391 |
| 11755577_MEI1      | -0.03028 | 0.673007 | 0.756448 |
| 11722091_PRR5      | -0.0254  | 0.673054 | 0.756483 |
| 11737926_QKI       | 0.025489 | 0.673172 | 0.756599 |
| 11738627_ARHGAP6   | -0.0185  | 0.673228 | 0.756644 |
| 11716321_CARKD     | 0.015241 | 0.673516 | 0.756951 |
| 11737305_FAM166A   | 0.031397 | 0.673538 | 0.756958 |
| 11763634_SLC12A4   | 0.024437 | 0.673631 | 0.757027 |
| 11736314_POU5F1    | -0.01671 | 0.673631 | 0.757027 |
| 11760287_TBC1D9B   | 0.017429 | 0.6737   | 0.757087 |
| 11738860_FCAR      | -0.03628 | 0.673893 | 0.757288 |
| 11737641_RFPL1 /// | 0.020924 | 0.673951 | 0.757321 |
| 11733778_DUSP3     | -0.01885 | 0.673959 | 0.757321 |
| 11742253_ZNF534    | -0.02984 | 0.67397  | 0.757321 |
| 11741818_C9orf131  | -0.04635 | 0.674044 | 0.757387 |
| 11715122_RAB3D     | -0.02234 | 0.674108 | 0.757432 |
| 11744093_EEF1A2    | 0.017905 | 0.67413  | 0.757432 |
| 11719065_GNPAT     | 0.018063 | 0.674131 | 0.757432 |
| 11745957_REXO1     | 0.026515 | 0.674173 | 0.757462 |
| 11761225_COQ4      | -0.02936 | 0.674296 | 0.757583 |
| 11731243_LGSN      | 0.038288 | 0.674641 | 0.757953 |
| 11734230_LOC145783 | -0.01861 | 0.674721 | 0.758025 |

|                    |          |          |          |
|--------------------|----------|----------|----------|
| 11741402_C21orf33  | -0.02412 | 0.674791 | 0.758087 |
| 11748284_CHN2      | 0.033026 | 0.674871 | 0.75816  |
| 11762619_BMP5      | -0.03873 | 0.675004 | 0.758292 |
| 11750224_CCDC117   | 0.042051 | 0.675062 | 0.758327 |
| 11732092_FOXE3     | -0.01511 | 0.67508  | 0.758327 |
| 11737528_PGBD2     | 0.032779 | 0.675082 | 0.758327 |
| 11748676_MAPK13    | 0.027261 | 0.675164 | 0.758401 |
| 11735609_FER1L5    | 0.029176 | 0.67526  | 0.758492 |
| 11734327_CHRM5     | -0.01656 | 0.675468 | 0.758702 |
| 11748409_PLEKHG3   | -0.01891 | 0.67549  | 0.758702 |
| 11715385_C4orf46 / | -0.01562 | 0.675494 | 0.758702 |
| 11731871_CD209     | -0.03425 | 0.675576 | 0.758777 |
| 11727006_TAGAP     | 0.024041 | 0.67582  | 0.759021 |
| 11741937_KRTAP5-11 | 0.027032 | 0.675824 | 0.759021 |
| 11747421_TG        | 0.053657 | 0.67584  | 0.759021 |
| 11736982_COLEC10   | -0.03202 | 0.67587  | 0.759037 |
| 11756123_IKBKG     | 0.018253 | 0.675912 | 0.759055 |
| 11758869_ACTA2     | 0.020101 | 0.675916 | 0.759055 |
| 11730457_AIM2      | -0.01856 | 0.675968 | 0.759095 |
| 11746527_EIF4ENIF1 | -0.0162  | 0.67599  | 0.759102 |
| 11727662_FOXA3     | 0.01842  | 0.676064 | 0.759168 |
| 11756807_RIPK1     | -0.02665 | 0.67611  | 0.759203 |
| 11758973_RPL36     | 0.020867 | 0.676163 | 0.759245 |
| 11758204_PPP2R5A   | 0.016766 | 0.676184 | 0.759251 |
| 11728336_LINGO1    | -0.03415 | 0.676228 | 0.759275 |
| 11728218_BCLAF1    | -0.01938 | 0.676243 | 0.759275 |
| 11739112_GRPEL1    | -0.0154  | 0.676252 | 0.759275 |
| 11744607_SCEL      | -0.04312 | 0.676295 | 0.759306 |
| 11761636_SLAMF6    | -0.0491  | 0.676327 | 0.759324 |
| 11728475_CLHC1     | -0.06171 | 0.676458 | 0.759454 |
| 11741401_CASP9     | 0.01846  | 0.676584 | 0.759572 |
| 11741100_RBP1      | 0.049972 | 0.676594 | 0.759572 |
| 11719996_TLE4      | 0.01826  | 0.676731 | 0.759707 |
| 11754948_HECTD3    | 0.018072 | 0.676753 | 0.759715 |
| 11723741_CADM3     | -0.01932 | 0.676966 | 0.759936 |
| 11761566_GAFA2     | -0.02787 | 0.676991 | 0.759947 |
| 11728630_DHDH      | -0.0235  | 0.677126 | 0.760078 |
| 11737153_NUPR2     | -0.017   | 0.677138 | 0.760078 |
| 11718428_SOD3      | -0.02609 | 0.677177 | 0.7601   |
| 11762270_MAPRE3    | -0.02273 | 0.67719  | 0.7601   |
| 11737368_ADRA1B    | -0.02073 | 0.677254 | 0.760154 |
| 11725662_SLC16A14  | 0.031523 | 0.677268 | 0.760154 |
| 11730046_DSCAML1   | -0.03426 | 0.677298 | 0.76017  |
| 11740677_GDI2      | 0.014202 | 0.677361 | 0.760223 |
| 11755437_TCERG1    | -0.01913 | 0.677564 | 0.760433 |
| 11759961_AGFG2     | -0.03455 | 0.677583 | 0.760437 |
| 11726273_PCK1      | -0.02286 | 0.677615 | 0.760455 |
| 11722086_SEPT1     | 0.036851 | 0.677652 | 0.760479 |
| 11740851_TCTN3     | 0.014992 | 0.677859 | 0.760679 |
| 11755329_IKBKG     | -0.01917 | 0.677861 | 0.760679 |
| 11755154_STK11IP   | 0.016377 | 0.677897 | 0.760699 |

|                    |          |          |          |
|--------------------|----------|----------|----------|
| 11724668_INSL4     | -0.03112 | 0.677912 | 0.760699 |
| 11724920_EFCAB7    | -0.02284 | 0.677925 | 0.760699 |
| 11761078_PIGH      | -0.01959 | 0.677953 | 0.760713 |
| 11757264_RPS3      | 0.014198 | 0.677988 | 0.760734 |
| 11731726_CASP5     | 0.023271 | 0.67803  | 0.760748 |
| 11752259_FBXL7     | -0.05302 | 0.678032 | 0.760748 |
| 11746643_SLC35B1   | -0.01852 | 0.678084 | 0.76079  |
| 11737202_F13B      | -0.04798 | 0.678144 | 0.760835 |
| 11738142_S SX2IP   | 0.01675  | 0.678155 | 0.760835 |
| 11750320_MED26     | 0.028515 | 0.678419 | 0.761114 |
| 11747944_PPFAA2    | -0.01889 | 0.678438 | 0.761117 |
| 11735006_JADE1     | 0.021549 | 0.67846  | 0.761119 |
| 11725435_RUNDC3A   | 0.023659 | 0.678499 | 0.761119 |
| 11719856_FAAH      | -0.02154 | 0.678511 | 0.761119 |
| 11750944_EXOC2     | 0.017229 | 0.678513 | 0.761119 |
| 11724501_SPON1     | 0.03486  | 0.678518 | 0.761119 |
| 11761391_MTTP      | -0.01885 | 0.678536 | 0.761122 |
| 11760113_CS        | 0.018287 | 0.678556 | 0.761127 |
| 11722985_UBOX5     | 0.022894 | 0.678572 | 0.761128 |
| 11742900_CGGBP1    | 0.017811 | 0.678661 | 0.761203 |
| 11751359_REXO2     | -0.0147  | 0.678682 | 0.761203 |
| 11756314_GADD45G   | -0.03014 | 0.678704 | 0.761203 |
| 11759435_HECTD2    | -0.05106 | 0.678711 | 0.761203 |
| 11735113_PTGER3    | -0.04822 | 0.678718 | 0.761203 |
| 11738473_SLC01B7   | -0.01907 | 0.678734 | 0.761204 |
| 11737349_FGF20     | 0.050719 | 0.678809 | 0.761271 |
| 11756391_MITD1     | 0.016771 | 0.678863 | 0.761311 |
| 11753323_WBP2NL    | -0.01947 | 0.678876 | 0.761311 |
| 11727567_OTULIN    | -0.01746 | 0.678928 | 0.761353 |
| 11756357_NAALADL1  | -0.03785 | 0.67898  | 0.761393 |
| 11762395_KIAA1324  | -0.03432 | 0.679005 | 0.761404 |
| 11722633_ICE2      | -0.01933 | 0.679102 | 0.761478 |
| 11762692_FLJ33534  | 0.042133 | 0.679103 | 0.761478 |
| 11750270_LINC00612 | -0.01916 | 0.679159 | 0.761488 |
| 11745808_KIAA0040  | 0.049612 | 0.679168 | 0.761488 |
| 11735750_GEMIN8    | 0.041688 | 0.679171 | 0.761488 |
| 11742765_RGS1      | 0.023753 | 0.679174 | 0.761488 |
| 11720475_SFPQ ///  | 0.016271 | 0.67919  | 0.761489 |
| 11726405_ASPA      | -0.02539 | 0.679362 | 0.761651 |
| 11716529_ELAVL1    | 0.018747 | 0.679366 | 0.761651 |
| 11747461_GNPAT     | 0.016194 | 0.679412 | 0.761685 |
| 11740655_GRIN2C    | -0.03252 | 0.679471 | 0.761734 |
| 11737092_KCNS1     | 0.020847 | 0.679542 | 0.761795 |
| 11728579_PRELID3A  | -0.049   | 0.679557 | 0.761795 |
| 11726754_C9orf91   | 0.020048 | 0.679573 | 0.761795 |
| 11741475_MAP3K7    | 0.019064 | 0.679636 | 0.761832 |
| 11748920_SLC11A1   | 0.015834 | 0.679636 | 0.761832 |
| 11754602_CYB5RL    | -0.02825 | 0.679692 | 0.761876 |
| 11763335_MDH2      | -0.01472 | 0.67974  | 0.761905 |
| 11717385_MT1G      | -0.02155 | 0.679754 | 0.761905 |
| 11762002_NCOA7     | 0.024804 | 0.679764 | 0.761905 |

|                    |          |          |          |
|--------------------|----------|----------|----------|
| 11723003_F2        | -0.02691 | 0.679787 | 0.761914 |
| 11763766_STYXL1    | -0.04469 | 0.679892 | 0.761989 |
| 11760454_CASZ1     | 0.021347 | 0.679899 | 0.761989 |
| 11746272_DUS4L     | 0.022785 | 0.679902 | 0.761989 |
| 11756609_CA10      | 0.042785 | 0.679931 | 0.762005 |
| 11756756_BLVRB     | -0.02285 | 0.680008 | 0.762074 |
| 11741549_GRHL1     | 0.025202 | 0.680079 | 0.762136 |
| 11743217_PRM3      | 0.038401 | 0.680112 | 0.762156 |
| 11724069_PELI2     | 0.040009 | 0.68013  | 0.762156 |
| 11751905_NID1      | -0.0174  | 0.680144 | 0.762156 |
| 11728241_RRAGD     | -0.0145  | 0.680203 | 0.762204 |
| 11734709_CSH1 ///  | 0.048705 | 0.68032  | 0.762319 |
| 11752726_GNB2L1    | 0.014053 | 0.680361 | 0.762347 |
| 11749415_ALS2CL    | 0.022464 | 0.680403 | 0.762363 |
| 11762328_YME1L1    | -0.02567 | 0.680406 | 0.762363 |
| 11731286_EDN2      | -0.0199  | 0.680437 | 0.762379 |
| 11737023_DRD1      | 0.022108 | 0.680491 | 0.762409 |
| 11730526_DAPK2     | -0.01763 | 0.680495 | 0.762409 |
| 11762171_SERPINB5  | 0.041637 | 0.68057  | 0.762469 |
| 11763967_LINC01193 | 0.022387 | 0.680579 | 0.762469 |
| 11754682_PLA2G6    | 0.021493 | 0.680644 | 0.762508 |
| 11750748_TULP4     | -0.03052 | 0.680646 | 0.762508 |
| 11724319_DMTN      | 0.017235 | 0.680678 | 0.762527 |
| 11752937_NOL4L     | 0.035783 | 0.680708 | 0.762541 |
| 11749296_GDAP1L1   | 0.021814 | 0.680721 | 0.762541 |
| 11724286_FRMD4A    | 0.018104 | 0.680861 | 0.762679 |
| 11727900_DMRT1     | 0.038194 | 0.680934 | 0.762715 |
| 11754706_HHIP      | -0.01813 | 0.680938 | 0.762715 |
| 11722706_MAP6      | -0.0272  | 0.680939 | 0.762715 |
| 11726765_ARFGEF3   | -0.04991 | 0.680996 | 0.762761 |
| 11752164_KDM2B     | 0.018777 | 0.681028 | 0.762764 |
| 11761739_LOC100288 | -0.027   | 0.68103  | 0.762764 |
| 11741953_PCDH11X / | 0.038385 | 0.681208 | 0.762946 |
| 11745746_AHCYL1    | -0.02248 | 0.68128  | 0.76301  |
| 11717605_FHOD1     | 0.027917 | 0.681382 | 0.763106 |
| 11743552_ACAP3     | 0.026091 | 0.681429 | 0.763125 |
| 11754149_CALM2     | -0.01667 | 0.68143  | 0.763125 |
| 11759650_PROM2     | 0.014835 | 0.681497 | 0.763182 |
| 11742092_FBLN1     | -0.01515 | 0.681644 | 0.76332  |
| 11728658_RPL22     | 0.014797 | 0.681652 | 0.76332  |
| 11725701_AQP9      | -0.03463 | 0.681679 | 0.763334 |
| 11752163_KDM2B     | 0.022408 | 0.681696 | 0.763335 |
| 11751956_MYH14     | 0.021164 | 0.681725 | 0.76335  |
| 11744035_ZNF358    | -0.01932 | 0.681761 | 0.763373 |
| 11726535_MORN5     | 0.037693 | 0.681778 | 0.763374 |
| 11741211_HSPA8     | -0.0146  | 0.681793 | 0.763374 |
| 11751163_PSEN2     | 0.01639  | 0.681831 | 0.763388 |
| 11762377_AREL1     | -0.04435 | 0.681837 | 0.763388 |
| 11755743_ECRP ///  | -0.02769 | 0.681858 | 0.763395 |
| 11752393_COL5A2    | -0.02689 | 0.681893 | 0.763416 |
| 11743209_GJA8      | -0.03334 | 0.681991 | 0.763508 |



|                    |          |          |          |
|--------------------|----------|----------|----------|
| 11740905_CCDC129   | 0.022799 | 0.682021 | 0.763524 |
| 11732986_OR3A1     | -0.03207 | 0.682056 | 0.763546 |
| 11719567_TUT1      | 0.016    | 0.682083 | 0.763558 |
| 11761706_HACD1     | 0.043313 | 0.682105 | 0.763566 |
| 11731944_IGSF5     | -0.03386 | 0.682273 | 0.763737 |
| 11759104_SNRNP35   | 0.045672 | 0.682312 | 0.763762 |
| 11756684_DYNLRB2   | -0.03358 | 0.682338 | 0.763774 |
| 11718014_CELA2B    | 0.017011 | 0.682529 | 0.76397  |
| 11742584_OR56A5    | 0.040308 | 0.682595 | 0.764027 |
| 11742001_OR5K1     | 0.028652 | 0.682612 | 0.764028 |
| 11745158_MUC1      | 0.019991 | 0.682663 | 0.764067 |
| 11756202_FOXJ3     | 0.016831 | 0.682699 | 0.764091 |
| 11742475_KRT36     | -0.02902 | 0.682755 | 0.764136 |
| 11754754_ADAMTS18  | 0.02113  | 0.682841 | 0.764215 |
| 11745580_GOLGA6L9  | 0.024247 | 0.682937 | 0.764305 |
| 11762074_SCML4     | 0.038726 | 0.683292 | 0.764671 |
| 11761540_C20orf96  | 0.021982 | 0.683295 | 0.764671 |
| 11750619_BBS9      | 0.023323 | 0.683346 | 0.764701 |
| 11738086_MROH9     | -0.02401 | 0.683354 | 0.764701 |
| 11763640_IGKV1-39  | 0.039302 | 0.683424 | 0.764762 |
| 11735050_PCDHB3    | 0.023553 | 0.683602 | 0.764934 |
| 11718144_DGCR14    | 0.016428 | 0.683615 | 0.764934 |
| 11752795_STAT2     | 0.019621 | 0.683624 | 0.764934 |
| 11718235_PRPF4B    | -0.01878 | 0.68364  | 0.764934 |
| 11762438_CP        | -0.02987 | 0.683736 | 0.765024 |
| 11758968_UNC5B     | -0.02512 | 0.683883 | 0.765166 |
| 11756189_SAMD10    | 0.023785 | 0.683895 | 0.765166 |
| 11731967_CACNA1I   | -0.01672 | 0.683943 | 0.765203 |
| 11746988_TRDMT1    | -0.02523 | 0.684041 | 0.765295 |
| 11759075_PDZD9     | -0.02314 | 0.684233 | 0.765492 |
| 11718417_ECSIT     | -0.01515 | 0.684269 | 0.765514 |
| 11763404_LOC100507 | 0.028061 | 0.684398 | 0.76563  |
| 11729976_PTFRN2    | -0.04216 | 0.684404 | 0.76563  |
| 11750047_HPX       | 0.040106 | 0.68454  | 0.765745 |
| 11751544_MYO1F     | -0.05628 | 0.684553 | 0.765745 |
| 11749355_CFB       | -0.03115 | 0.684553 | 0.765745 |
| 11729506_NPAS3     | -0.01954 | 0.68457  | 0.765746 |
| 11717103_SLC38A1   | -0.01385 | 0.684639 | 0.76579  |
| 11734902_CYP4V2 // | -0.02289 | 0.68464  | 0.76579  |
| 11737386_C17orf102 | 0.022323 | 0.684704 | 0.765844 |
| 11732797_KIAA1841  | -0.02956 | 0.684736 | 0.765862 |
| 11762561_SLC35E4   | -0.02772 | 0.684766 | 0.765868 |
| 11728346_PRMT8     | -0.0354  | 0.684773 | 0.765868 |
| 11734408_RAD9B     | -0.03176 | 0.684833 | 0.765915 |
| 11745017_C1orf43   | 0.014894 | 0.684846 | 0.765915 |
| 11717906_STAU1     | 0.015635 | 0.684958 | 0.766023 |
| 11734739_PHYHIPL   | -0.02886 | 0.684994 | 0.766046 |
| 11738211_DCDC1 /// | -0.0356  | 0.685145 | 0.766196 |
| 11725955_TIMM17A   | -0.02333 | 0.685238 | 0.766283 |
| 11735744_RAB34     | -0.01849 | 0.685267 | 0.766299 |
| 11738979_CD4       | -0.02553 | 0.685337 | 0.766359 |

|                    |          |          |          |
|--------------------|----------|----------|----------|
| 11753991_MYL6B     | 0.018227 | 0.685426 | 0.766441 |
| 11742611_OR10G4    | -0.03165 | 0.685466 | 0.766468 |
| 11746902_PKNOX1    | 0.048283 | 0.685494 | 0.766481 |
| 11761016_ICAM2     | -0.02809 | 0.685519 | 0.766483 |
| 11729890_LOC105376 | 0.015706 | 0.685526 | 0.766483 |
| 11753192_CLEC11A   | -0.01565 | 0.685582 | 0.766527 |
| 11753473_MFSD13A   | -0.01592 | 0.685664 | 0.766587 |
| 11739739_IL21R     | -0.02779 | 0.685667 | 0.766587 |
| 11735557_KRT18P55  | -0.02487 | 0.685748 | 0.76666  |
| 11754851_LIMS2     | -0.02071 | 0.685796 | 0.76667  |
| 11755158_CATSPERG  | 0.020373 | 0.685798 | 0.76667  |
| 11737801_ECE1      | -0.0384  | 0.685804 | 0.76667  |
| 11762551_IYD       | -0.04812 | 0.68587  | 0.766713 |
| 11750537_SHBG      | -0.03985 | 0.685873 | 0.766713 |
| 11723503_PRLR      | -0.0386  | 0.685895 | 0.76672  |
| 11719403_RAP2A     | -0.01377 | 0.685918 | 0.766728 |
| 11742810_SOX10     | -0.01629 | 0.685939 | 0.766733 |
| 11748254_MSL3      | 0.016811 | 0.686133 | 0.766933 |
| 11734516_APOL5     | -0.0277  | 0.686233 | 0.767027 |
| 11725962_TCHH      | -0.02166 | 0.686299 | 0.767083 |
| 11722481_MFF       | -0.01511 | 0.686367 | 0.767142 |
| 11750941_PMCHL2    | 0.032814 | 0.686427 | 0.767192 |
| 11742650_DPRX      | -0.02812 | 0.686482 | 0.767236 |
| 11744714_LINCO0310 | -0.0258  | 0.686535 | 0.767277 |
| 11754559_SBSN      | -0.03616 | 0.686559 | 0.767287 |
| 11750711_ACOX1     | 0.023882 | 0.686582 | 0.767295 |
| 11733974_DDHD2     | -0.0195  | 0.686745 | 0.767459 |
| 11752594_PPEF2     | 0.035352 | 0.68697  | 0.767693 |
| 11761379_MOGAT2    | 0.019903 | 0.687    | 0.767709 |
| 11725783_ERI2      | 0.020433 | 0.687147 | 0.767855 |
| 11731120_PDE6A     | 0.050349 | 0.687164 | 0.767857 |
| 11761203_LRRC28    | -0.02629 | 0.687244 | 0.767929 |
| 11733718_LAIR2     | -0.02513 | 0.687363 | 0.768044 |
| 11715324_LOC105371 | -0.02112 | 0.687419 | 0.76809  |
| 11746061_EHD3      | 0.013835 | 0.687438 | 0.768093 |
| 11752112_SALL3     | 0.013751 | 0.687671 | 0.768336 |
| 11762585_IL17RE    | -0.07007 | 0.687721 | 0.768374 |
| 11749189_HOXB3     | -0.02284 | 0.687892 | 0.768548 |
| 11763567_DNAH6     | 0.035926 | 0.687935 | 0.768573 |
| 11724887_CARD10    | -0.02169 | 0.687946 | 0.768573 |
| 11725689_RHPN2     | 0.027311 | 0.688016 | 0.768633 |
| 11742323_OR51F2    | -0.03963 | 0.688072 | 0.768679 |
| 11721678_RBM17     | -0.01973 | 0.688146 | 0.768744 |
| 11750444_CACNA1D   | 0.021809 | 0.688186 | 0.768758 |
| 11730038_GNG13     | 0.01524  | 0.688191 | 0.768758 |
| 11751972_ZNF638    | -0.01437 | 0.68825  | 0.768807 |
| 11745648_EEF1A1    | -0.01437 | 0.688366 | 0.768919 |
| 11761298_CYTH2     | -0.03896 | 0.688409 | 0.768949 |
| 11742319_KLK15     | -0.03044 | 0.688496 | 0.769025 |
| 11746250_PIF0      | -0.02367 | 0.688508 | 0.769025 |
| 11746879_ZNF80     | 0.024173 | 0.688654 | 0.769171 |

|                    |          |          |          |
|--------------------|----------|----------|----------|
| 11724253_B3GNT3    | -0.03847 | 0.688735 | 0.769243 |
| 11735751_SLC43A3   | 0.014733 | 0.688778 | 0.769273 |
| 11753344_CASC15    | 0.030587 | 0.688844 | 0.769321 |
| 11732723_PNPLA7    | 0.02265  | 0.688852 | 0.769321 |
| 11731310_C12orf42  | 0.028661 | 0.688877 | 0.769331 |
| 11755977_HSF4      | -0.02019 | 0.688926 | 0.769352 |
| 11718056_BTBD3     | -0.02143 | 0.688931 | 0.769352 |
| 11740950_HRH2      | -0.03642 | 0.688943 | 0.769352 |
| 11758102_TMEM163   | -0.02762 | 0.688964 | 0.769359 |
| 11739908_BANP      | -0.02232 | 0.688986 | 0.769366 |
| 11735208_MDGA2     | 0.013763 | 0.689111 | 0.769487 |
| 11717202_NDUFA4L2  | 0.028057 | 0.689182 | 0.769549 |
| 11726738_EARS2     | -0.01463 | 0.689272 | 0.769632 |
| 11727697_TPFP2     | 0.030695 | 0.689441 | 0.769803 |
| 11732744_C17orf107 | 0.030868 | 0.689468 | 0.769813 |
| 11761764_MMP7      | 0.045944 | 0.689481 | 0.769813 |
| 11721637_DERL1     | 0.015456 | 0.689525 | 0.769838 |
| 11748429_USP35     | -0.02242 | 0.689535 | 0.769838 |
| 11761558_BBS1      | -0.04188 | 0.689603 | 0.769896 |
| 11732860_LINC00518 | 0.055405 | 0.689672 | 0.769956 |
| 11725577_ASTE1     | 0.02482  | 0.689729 | 0.769973 |
| 11736525_ADAM29    | 0.023413 | 0.68974  | 0.769973 |
| 11725814_SLC30A8   | -0.0289  | 0.689748 | 0.769973 |
| 11744190_SPNS3     | -0.01974 | 0.689751 | 0.769973 |
| 11720915_PGAM1     | -0.01363 | 0.689839 | 0.770039 |
| 11758691_PGAM1     | -0.01365 | 0.689841 | 0.770039 |
| 11724738_CD36      | 0.033005 | 0.689912 | 0.7701   |
| 11724181_SPACA4    | -0.01935 | 0.689949 | 0.770124 |
| 11720255_SEPT4     | -0.03418 | 0.69     | 0.770164 |
| 11759228_KLRG2     | 0.015815 | 0.690067 | 0.77022  |
| 11724353_ATG16L2   | -0.02475 | 0.690165 | 0.770302 |
| 11737549_GAS2L2    | -0.02708 | 0.690172 | 0.770302 |
| 11747769_KRT6A     | 0.025662 | 0.690237 | 0.770357 |
| 11715182_FAM86C1   | -0.01602 | 0.69034  | 0.770455 |
| 11737504_SIRPB2    | 0.016903 | 0.690373 | 0.770465 |
| 11730470_CALML5    | -0.02202 | 0.690381 | 0.770465 |
| 11727943_FPR3      | 0.018885 | 0.690456 | 0.770531 |
| 11762564_LRRD1     | 0.036186 | 0.690498 | 0.77055  |
| 11760001_BTG4      | -0.03178 | 0.690504 | 0.77055  |
| 11759874_FAM175A   | -0.03755 | 0.690575 | 0.770599 |
| 11718938_WDYHV1    | -0.01779 | 0.69058  | 0.770599 |
| 11761670_EPHA7     | -0.03355 | 0.690659 | 0.770669 |
| 11758706_SGK494    | 0.037929 | 0.690834 | 0.770833 |
| 11716122_API5      | 0.014055 | 0.690837 | 0.770833 |
| 11738459_ZIM3      | 0.032422 | 0.690875 | 0.770859 |
| 11727166_FBXO15    | 0.037323 | 0.690928 | 0.770885 |
| 11735325_CNBD2     | -0.02821 | 0.69093  | 0.770885 |
| 11727253_TCEAL2    | -0.01895 | 0.690948 | 0.770887 |
| 11737474_MAB21L3   | -0.02292 | 0.69098  | 0.770905 |
| 11753197_PRDM6     | 0.041096 | 0.691009 | 0.77092  |
| 11747243_EFS       | -0.03509 | 0.691042 | 0.770939 |

|                    |          |          |          |
|--------------------|----------|----------|----------|
| 11742047_ERMN      | 0.024451 | 0.691155 | 0.771047 |
| 11721233_ZNF75D    | 0.024495 | 0.691172 | 0.771049 |
| 11759363_ZNF391    | 0.040447 | 0.691229 | 0.771095 |
| 11748681_TMPRSS4   | 0.034313 | 0.691343 | 0.771204 |
| 11736393_IRGC      | -0.02637 | 0.691396 | 0.771246 |
| 11735420_SOAT2     | -0.02341 | 0.691422 | 0.771257 |
| 11727957_DNAI1     | 0.014944 | 0.69145  | 0.771271 |
| 11741157_MB21D1    | 0.041266 | 0.691485 | 0.771292 |
| 11723020_RIPK3     | -0.03899 | 0.691618 | 0.771423 |
| 11751072_SPATA2    | 0.014184 | 0.69167  | 0.771464 |
| 11745709_IDO2      | 0.016281 | 0.691771 | 0.771558 |
| 11738781_AMELX     | -0.02152 | 0.691841 | 0.771619 |
| 11747917_ITGA11    | 0.020839 | 0.691874 | 0.771638 |
| 11740055_RAB37     | 0.028757 | 0.691915 | 0.771666 |
| 11739306_ZNF770    | 0.026628 | 0.692018 | 0.771753 |
| 11735402_SCN4A     | -0.0503  | 0.692024 | 0.771753 |
| 11738658_TBX1      | -0.01811 | 0.692118 | 0.771839 |
| 11735972_VN1R2     | 0.029179 | 0.692143 | 0.771841 |
| 11744006_VCL       | 0.024801 | 0.692151 | 0.771841 |
| 11722135_MCAT      | -0.02837 | 0.692205 | 0.771884 |
| 11749689_HYOU1     | 0.014837 | 0.692223 | 0.771886 |
| 11728373_ERG       | -0.05913 | 0.692297 | 0.771952 |
| 11718305_PDLIM2    | -0.01462 | 0.692367 | 0.772012 |
| 11723011_CAPZA2    | 0.015281 | 0.692415 | 0.772048 |
| 11752923_LOC100287 | 0.027051 | 0.692473 | 0.772094 |
| 11741753_SLC4A5    | 0.014195 | 0.692506 | 0.772108 |
| 11735955_GALP      | 0.016005 | 0.692516 | 0.772108 |
| 11723850_ODF2L     | -0.02397 | 0.692549 | 0.772127 |
| 11722041_TEX2      | 0.023935 | 0.692619 | 0.772184 |
| 11722092_PRR5      | 0.019277 | 0.69265  | 0.772184 |
| 11731951_B3GNT4    | -0.04579 | 0.692652 | 0.772184 |
| 11729949_KLHL14    | -0.04671 | 0.692664 | 0.772184 |
| 11742491_KBTBD13   | -0.02625 | 0.692721 | 0.772215 |
| 11751111_KCNQ2     | -0.02796 | 0.692738 | 0.772215 |
| 11749702_WDR81     | -0.02005 | 0.692739 | 0.772215 |
| 11734228_PRDM9     | -0.04221 | 0.692823 | 0.772279 |
| 11752546_NSD1      | -0.02762 | 0.692828 | 0.772279 |
| 11743488_IK        | 0.014587 | 0.692877 | 0.772317 |
| 11762035_LOC339059 | -0.03539 | 0.692908 | 0.772333 |
| 11716459_TUBA4A    | -0.02759 | 0.692956 | 0.772369 |
| 11757663_APOA1     | -0.02263 | 0.692998 | 0.772398 |
| 11744357_TACC1     | 0.019095 | 0.693031 | 0.772417 |
| 200094_PMEEF2      | 0.014623 | 0.693097 | 0.772473 |
| 11740694_FAM83C    | -0.02785 | 0.693115 | 0.772476 |
| 11757180_CSNK1G2   | -0.0162  | 0.693401 | 0.772776 |
| 11747691_GARNL3    | -0.02465 | 0.693423 | 0.772776 |
| 11734448_PDCD1     | -0.02523 | 0.693434 | 0.772776 |
| 11757438_DSTN      | -0.01471 | 0.693466 | 0.772776 |
| 11735398_CNGB1     | -0.02204 | 0.693477 | 0.772776 |
| 11759751_ZNF169    | -0.04321 | 0.693479 | 0.772776 |
| 11727781_SCARA5    | 0.024035 | 0.693548 | 0.772835 |

|                    |          |          |          |
|--------------------|----------|----------|----------|
| 11718092_BIVM      | 0.014057 | 0.69367  | 0.772944 |
| 11749097_ABCA8     | -0.02163 | 0.69368  | 0.772944 |
| 11758448_TICAM2 // | 0.014193 | 0.693693 | 0.772944 |
| 11750253_AP4M1     | -0.01966 | 0.693743 | 0.772978 |
| 11725136_MYOM2     | -0.02636 | 0.693755 | 0.772978 |
| 11740356_GPR137C   | -0.03608 | 0.693818 | 0.773014 |
| 11738799_NIN       | -0.01728 | 0.693819 | 0.773014 |
| 11732539_ASBI2     | -0.02306 | 0.693892 | 0.773078 |
| 11762620_TLL1      | -0.03693 | 0.69396  | 0.773136 |
| 11727346_BLK       | 0.022507 | 0.69398  | 0.77314  |
| 11739784_CACNA1G   | 0.021277 | 0.69401  | 0.773155 |
| 11737093_KCNS1     | 0.049141 | 0.69404  | 0.773171 |
| 11732941_U2AF1L4   | -0.01616 | 0.69419  | 0.773321 |
| 11743975_CHD8      | 0.013357 | 0.694229 | 0.773331 |
| 11727989_FAXC      | 0.022255 | 0.69423  | 0.773331 |
| 11760608_TCF25     | -0.03967 | 0.694328 | 0.773388 |
| 11715194_ZNF835    | -0.03687 | 0.694328 | 0.773388 |
| 11757297_RGS5      | -0.0467  | 0.694329 | 0.773388 |
| 11728011_PRTG      | 0.038636 | 0.694372 | 0.773418 |
| 11756801_PNLIPRP1  | 0.025992 | 0.694438 | 0.773474 |
| 11755814_CFAP43    | 0.020432 | 0.694545 | 0.773576 |
| 11762343_MKL1      | 0.021844 | 0.694593 | 0.773604 |
| 11742860_ADGRF5    | -0.01789 | 0.694602 | 0.773604 |
| 11759434_IL12RB1   | 0.03675  | 0.694687 | 0.773681 |
| 11760336_KIF5C     | -0.04072 | 0.694714 | 0.773694 |
| 11727252_KLKB1     | 0.026821 | 0.694827 | 0.773801 |
| 11745379_ZC3H14    | -0.02053 | 0.694975 | 0.773949 |
| 11736820_RASGRF2   | -0.02973 | 0.695004 | 0.773963 |
| 11730344_TSSK6     | -0.04727 | 0.695028 | 0.773973 |
| 11759953_LINC01270 | 0.034517 | 0.695046 | 0.773975 |
| 11740191_PRLHR     | 0.026192 | 0.695105 | 0.774023 |
| 11729485_RGS6      | -0.02648 | 0.695148 | 0.774053 |
| 11740342_ZNF491    | 0.02962  | 0.695294 | 0.774188 |
| 11740311_HAS2      | 0.044636 | 0.6953   | 0.774188 |
| 11752109_MAN2B2    | -0.02838 | 0.695505 | 0.774375 |
| 11729337_ALPL      | 0.01907  | 0.695507 | 0.774375 |
| 11741908_CACNB4    | 0.016669 | 0.695516 | 0.774375 |
| 11740891_OAS1      | 0.017258 | 0.695599 | 0.774447 |
| 11757529_LAMP1     | 0.014303 | 0.695612 | 0.774447 |
| 11722653_OBFC1     | 0.016042 | 0.695789 | 0.774587 |
| 11752413_BAK1      | -0.01785 | 0.695792 | 0.774587 |
| 11733440_TH        | 0.019514 | 0.6958   | 0.774587 |
| 11746117_SRF       | -0.02467 | 0.695802 | 0.774587 |
| 11763543_ZNF81     | 0.052481 | 0.695899 | 0.774664 |
| 11744023_ADAT3     | -0.0253  | 0.695919 | 0.774664 |
| 11751568_HSD17B1   | 0.018834 | 0.695919 | 0.774664 |
| 11749924_MRPS25    | 0.014125 | 0.695979 | 0.774714 |
| 11732905_CABLES1   | -0.02083 | 0.696014 | 0.774735 |
| 11715248_CRISP2    | 0.046744 | 0.69603  | 0.774735 |
| 11761139_ASPH      | -0.02816 | 0.696049 | 0.774739 |
| 11738328_HNMT      | 0.026092 | 0.696087 | 0.774763 |

|                    |          |          |          |
|--------------------|----------|----------|----------|
| 11738553_KRTAP10-7 | -0.01622 | 0.69612  | 0.774783 |
| 11734191_GPR119    | -0.02908 | 0.696241 | 0.774894 |
| 11753050_ANKMY1    | 0.031363 | 0.696252 | 0.774894 |
| 11747157_CDNF      | 0.030784 | 0.696301 | 0.774931 |
| 11737188_ADGRF3    | 0.021352 | 0.696346 | 0.774963 |
| 11761614_TTC16     | 0.025431 | 0.696429 | 0.775038 |
| 11763710_ATAT1     | 0.016912 | 0.696555 | 0.775161 |
| 11731141_NDST3     | -0.03112 | 0.696664 | 0.775264 |
| 11733371_INADL     | 0.063772 | 0.696742 | 0.775333 |
| 11762469_CALML3    | -0.04467 | 0.696832 | 0.775416 |
| 11719110_TMEM161A  | -0.02053 | 0.696896 | 0.775469 |
| 11747571_LINCO1061 | 0.017902 | 0.696972 | 0.775537 |
| 11758634_CASZ1     | -0.02178 | 0.697098 | 0.775659 |
| 11761374_AGPAT4    | -0.02542 | 0.697335 | 0.775905 |
| 11727133_CPD       | -0.01653 | 0.697363 | 0.775918 |
| 11750422_RHBG      | 0.01611  | 0.69739  | 0.775931 |
| 11739921_AMER2     | -0.04075 | 0.697436 | 0.775964 |
| 11751430_MRGRPF    | -0.02211 | 0.697525 | 0.776012 |
| 11719384_PRSS3     | 0.023263 | 0.697535 | 0.776012 |
| 11716363_FAF1      | 0.018394 | 0.697536 | 0.776012 |
| 11761615_TTC16     | -0.0235  | 0.697542 | 0.776012 |
| 11734354_ANK1      | 0.02667  | 0.697606 | 0.776065 |
| 11741455_ZNF717    | 0.022849 | 0.697659 | 0.776098 |
| 11747722_IQCC      | -0.03426 | 0.697667 | 0.776098 |
| 11715318_CYP2C19   | -0.02843 | 0.69771  | 0.776128 |
| 11723059_TAP2      | -0.02193 | 0.697749 | 0.776153 |
| 11757204_CHIAP2    | -0.03092 | 0.69786  | 0.776259 |
| 11737300_PPP1R14D  | 0.03913  | 0.697901 | 0.776272 |
| 11760929_IGHG1 /// | 0.033405 | 0.697924 | 0.776272 |
| 11744378_KRT4      | 0.01839  | 0.697929 | 0.776272 |
| 11737523_VSIG8     | -0.03315 | 0.697935 | 0.776272 |
| 11722647_MYL1      | 0.03189  | 0.698164 | 0.776509 |
| 11755186_H2AFJ     | 0.047874 | 0.6982   | 0.776532 |
| 11724980_PCGF6     | 0.021792 | 0.698262 | 0.776583 |
| 11718476_STAR      | 0.029723 | 0.698326 | 0.776628 |
| 11748500_ENPP5     | -0.01794 | 0.698335 | 0.776628 |
| 11759660_ZNF385C   | -0.03586 | 0.698432 | 0.776719 |
| 11754833_TLR2      | 0.018941 | 0.698452 | 0.776724 |
| 11757657_MLF2      | 0.013325 | 0.698474 | 0.776728 |
| 11762148_CDKL3     | -0.04745 | 0.698488 | 0.776728 |
| 11759651_PROM2     | -0.01899 | 0.698538 | 0.776766 |
| 11727885_ERAP1     | -0.02959 | 0.698604 | 0.776822 |
| 11759447_GJC3      | -0.05161 | 0.69865  | 0.776856 |
| 11750031_CRYL1     | 0.018979 | 0.698694 | 0.776887 |
| 11755996_LTF       | -0.0255  | 0.698742 | 0.776911 |
| 11732317_SGCD      | -0.02139 | 0.698747 | 0.776911 |
| 11755372_DIP2A     | 0.025308 | 0.69881  | 0.776962 |
| 11726588_NPTN      | 0.018349 | 0.69889  | 0.777034 |
| 11734984_ELK4      | -0.03672 | 0.699093 | 0.777242 |
| 11737320_RREB1     | 0.02266  | 0.699183 | 0.777312 |
| 11752685_AQP4      | 0.016845 | 0.699188 | 0.777312 |

|                    |          |          |          |
|--------------------|----------|----------|----------|
| 11761082_HINFP     | 0.033025 | 0.699269 | 0.777385 |
| 11739735_PCDH19    | -0.03237 | 0.699291 | 0.777391 |
| 11757575_HSD17B14  | 0.022896 | 0.699313 | 0.777398 |
| 11749002_HMHA1     | -0.03566 | 0.699395 | 0.777458 |
| 11719564_COA4      | -0.01416 | 0.699404 | 0.777458 |
| 11738744_OR4C3     | -0.01658 | 0.699414 | 0.777458 |
| 11753692_MUC1      | 0.019058 | 0.69947  | 0.777502 |
| 11761154_EXOSC7    | -0.06321 | 0.699489 | 0.777506 |
| 11738212_NOTO      | -0.02958 | 0.69951  | 0.777511 |
| 11715207_WDFY4     | -0.03357 | 0.699612 | 0.777606 |
| 11727109_DROSHA    | -0.04932 | 0.699688 | 0.777673 |
| 11750943_CDH9      | -0.02789 | 0.699704 | 0.777673 |
| 11750111_VCL       | 0.031528 | 0.699762 | 0.77772  |
| 11730245_FM02      | -0.02582 | 0.699812 | 0.777758 |
| 11749677_DZIP3     | -0.02719 | 0.699835 | 0.777762 |
| 11740273_TMEM242   | -0.01671 | 0.699847 | 0.777762 |
| 11725491_CNTFR     | 0.021817 | 0.699919 | 0.777824 |
| 11723554_F5        | -0.03689 | 0.699973 | 0.777866 |
| 11734290_DLGAP2    | -0.06041 | 0.700032 | 0.777914 |
| 11742233_TMPRSS7   | 0.047885 | 0.700107 | 0.777969 |
| 11735716_CD151     | -0.01646 | 0.700113 | 0.777969 |
| 11753371_CYP4F2    | -0.03286 | 0.700217 | 0.778066 |
| 11761207_P SMB7    | -0.03201 | 0.700247 | 0.778082 |
| 11739129_KNG1      | -0.01917 | 0.700304 | 0.778128 |
| 11730706_VGLL2     | 0.039522 | 0.700456 | 0.778279 |
| 11738656_PACRG     | -0.04215 | 0.700555 | 0.778372 |
| 11734375_HEATR4    | 0.030189 | 0.700574 | 0.778375 |
| 11760421_HSF4      | -0.02384 | 0.700812 | 0.778621 |
| 11753098_RFX4      | -0.01599 | 0.700858 | 0.778655 |
| 11749907_TRIM63    | 0.020386 | 0.70104  | 0.778839 |
| 11732794_EYA4      | 0.024869 | 0.701069 | 0.778854 |
| 11722378_PNPO      | -0.01457 | 0.701132 | 0.778907 |
| 11732648_C21orf62  | 0.036063 | 0.701179 | 0.77893  |
| 11741508_SMOX      | -0.02326 | 0.701185 | 0.77893  |
| 11763870_PROZ      | 0.029376 | 0.701322 | 0.779065 |
| 11733630_LRRC10    | -0.04027 | 0.701423 | 0.779135 |
| 11722207_MMADHC    | 0.014826 | 0.701428 | 0.779135 |
| 11743192_PARD6G    | -0.03205 | 0.701433 | 0.779135 |
| 11720928_SRM       | 0.016726 | 0.701475 | 0.779163 |
| 11761370_LOC728175 | 0.044226 | 0.701507 | 0.779181 |
| 11748835_PTK6      | 0.02428  | 0.701568 | 0.779224 |
| 11736299_LPAR5     | 0.016727 | 0.701577 | 0.779224 |
| 11732646_GUCY2C    | -0.05211 | 0.701645 | 0.779281 |
| 11728899_ARHGAP6   | -0.02014 | 0.701704 | 0.77933  |
| 11758488_SPATA16   | -0.01998 | 0.701755 | 0.779368 |
| 11748349_TGM4      | 0.026328 | 0.701895 | 0.779506 |
| 11732963_IL3       | 0.03177  | 0.701921 | 0.779517 |
| 11751725_TGM3      | -0.0233  | 0.701951 | 0.779532 |
| 11747952_TNFSF10   | 0.042352 | 0.70199  | 0.779558 |
| 11760143_HLA-F     | -0.01992 | 0.70204  | 0.779571 |
| 11745166_SFTPA1 // | 0.015594 | 0.702048 | 0.779571 |

|                    |          |          |          |
|--------------------|----------|----------|----------|
| 11737267_RHD       | 0.032071 | 0.70205  | 0.779571 |
| 11747978_MYRIP     | -0.01668 | 0.702145 | 0.779646 |
| 11731426_CXCR2 /// | -0.01973 | 0.702176 | 0.779646 |
| 11737069_TRIM61    | -0.01756 | 0.702205 | 0.779646 |
| 11762341_ZNF317    | 0.025964 | 0.702211 | 0.779646 |
| 11759136_PABPC3    | 0.039091 | 0.702217 | 0.779646 |
| 11722824_PSG3 ///  | -0.03064 | 0.702225 | 0.779646 |
| 11734588_SLC18A2   | 0.025624 | 0.702229 | 0.779646 |
| 11742405_EFNA2     | 0.032493 | 0.702248 | 0.77965  |
| 11718771_SELK      | -0.01385 | 0.702357 | 0.779753 |
| 11760458_EPS8L2    | -0.01375 | 0.702446 | 0.779834 |
| 11730838_NUDT16    | -0.02634 | 0.702603 | 0.779991 |
| 11739109_MOCS1     | -0.01964 | 0.702695 | 0.780075 |
| 11735258_IL7       | 0.021338 | 0.702735 | 0.780102 |
| 11720906_QSER1     | -0.01753 | 0.70282  | 0.780178 |
| 11744105_ATP9B     | 0.032148 | 0.702942 | 0.780283 |
| 11715996_NOSIP     | 0.017192 | 0.702949 | 0.780283 |
| 11753328_ATP5A1    | -0.01354 | 0.702962 | 0.780283 |
| 11730977_GAD2      | -0.02183 | 0.702999 | 0.780307 |
| 11728019_MOV10L1   | 0.033199 | 0.703018 | 0.780309 |
| 11754678_SLC25A43  | -0.01423 | 0.703036 | 0.780313 |
| 11763362_ZKSCAN5   | 0.024499 | 0.703056 | 0.780316 |
| 11750937_HIPK4     | 0.02817  | 0.703222 | 0.780483 |
| 11729964_MRI1      | 0.022315 | 0.703283 | 0.780534 |
| 11749416_MATR3     | 0.013526 | 0.70341  | 0.780656 |
| 11723052_SZT2      | 0.014037 | 0.703479 | 0.780715 |
| 11752416_LINC00598 | -0.01652 | 0.703525 | 0.780748 |
| 11755808_KIAA1462  | -0.03968 | 0.703631 | 0.780848 |
| 11756184_UNC5CL    | 0.055705 | 0.703654 | 0.780856 |
| 11759161_KRTAP19-1 | -0.04633 | 0.703674 | 0.78086  |
| 11736287_RNF135    | -0.01946 | 0.703796 | 0.780967 |
| 11738836_ZNF479    | -0.03022 | 0.703802 | 0.780967 |
| 11746970_NPY6R     | -0.02513 | 0.703918 | 0.781079 |
| 11728881_PPP3R1    | -0.01862 | 0.703947 | 0.781092 |
| 11755653_RFX2      | 0.041319 | 0.704125 | 0.78125  |
| 11747175_SSC4D     | 0.021461 | 0.704133 | 0.78125  |
| 11749274_RGL3      | 0.022456 | 0.704137 | 0.78125  |
| 11745640_PNPLA7    | 0.018961 | 0.704217 | 0.781321 |
| 11742404_CTSL3P    | -0.03793 | 0.704244 | 0.781333 |
| 11731892_MACROD2   | 0.017317 | 0.704303 | 0.781382 |
| 11752648_SPAG6     | -0.02216 | 0.704391 | 0.781461 |
| 11760990_ARMCX4    | -0.04626 | 0.70448  | 0.781542 |
| 11759218_ZIC3      | -0.03242 | 0.704642 | 0.781704 |
| 11735650_PKDREJ    | 0.016934 | 0.704723 | 0.781776 |
| 11734932_F11       | 0.030477 | 0.704928 | 0.781985 |
| 11732676_PKHD1     | -0.01659 | 0.704944 | 0.781985 |
| 11741708_ANKRD42   | -0.04642 | 0.705045 | 0.78208  |
| 11738423_HNF4A     | 0.027949 | 0.705123 | 0.782149 |
| 11730353_CYP26B1   | -0.03034 | 0.705155 | 0.782149 |
| 11750266_CTCFL     | -0.0177  | 0.705155 | 0.782149 |
| 11742369_OR51A2 // | 0.05025  | 0.705186 | 0.782165 |



|                    |          |          |          |
|--------------------|----------|----------|----------|
| 11741477_NPHP1     | -0.0205  | 0.705251 | 0.782202 |
| 11745201_SETD3     | 0.01797  | 0.705251 | 0.782202 |
| 11744461_PI4KB     | 0.012828 | 0.705328 | 0.782269 |
| 11737081_ASXL3     | 0.046644 | 0.70541  | 0.782326 |
| 11755338_SPAG7     | 0.016312 | 0.705411 | 0.782326 |
| 11750924_THSD7B    | 0.02363  | 0.705439 | 0.78234  |
| 11749765_ALPI      | 0.026263 | 0.705471 | 0.782358 |
| 11726235_ACY3      | 0.033977 | 0.705575 | 0.782455 |
| 11751277_AMHR2     | -0.01803 | 0.705601 | 0.782465 |
| 11742582_OR4Q3     | -0.02302 | 0.705624 | 0.782474 |
| 11728359_TSPYL6    | 0.019973 | 0.705673 | 0.782511 |
| 11715330_ZNF735    | 0.02175  | 0.705762 | 0.782591 |
| 11758013_C8orf4    | 0.04719  | 0.705908 | 0.782735 |
| 11758034_NUDT16L1  | 0.01397  | 0.70601  | 0.782831 |
| 11717770_LCMT1     | 0.018871 | 0.706115 | 0.7829   |
| 11728327_OMD       | 0.050684 | 0.706115 | 0.7829   |
| 11718159_NMI       | 0.019868 | 0.706121 | 0.7829   |
| 11746718_KDM4C     | -0.03061 | 0.706159 | 0.782925 |
| 11735635_LMNTD1    | -0.01888 | 0.706345 | 0.783113 |
| 11762167_TRDMT1    | 0.041145 | 0.706433 | 0.783192 |
| 11725470_IRF2BP1   | 0.013717 | 0.706448 | 0.783192 |
| 11750672_RNF43     | -0.02944 | 0.706493 | 0.783224 |
| 11730598_CCDC13    | 0.018323 | 0.706521 | 0.783233 |
| 11738467_EYS       | -0.03232 | 0.706533 | 0.783233 |
| 11738882_CATSPER4  | -0.03046 | 0.70655  | 0.783234 |
| 11759617_IGLJ3 /// | -0.04287 | 0.70663  | 0.783305 |
| 11761512_SLC10A7   | 0.031291 | 0.706662 | 0.783322 |
| 11742754_FGF12     | -0.02739 | 0.70677  | 0.783373 |
| 11731410_SLC8A2    | -0.01462 | 0.706788 | 0.783373 |
| 11752400_ZBTB7B    | -0.02457 | 0.706792 | 0.783373 |
| 11721957_YPEL2     | -0.02103 | 0.706793 | 0.783373 |
| 11740801_ACAD10    | -0.01627 | 0.706801 | 0.783373 |
| 11754488_GTF2H2 // | -0.01436 | 0.706804 | 0.783373 |
| 11729096_POLQ      | -0.01388 | 0.706867 | 0.78341  |
| 11719196_FAM127B   | -0.01423 | 0.706869 | 0.78341  |
| 11759703_LCN12     | 0.02259  | 0.706909 | 0.783416 |
| 11728292_SH2D1A    | -0.02337 | 0.706912 | 0.783416 |
| 11763913_SNORA80E  | -0.01489 | 0.706925 | 0.783416 |
| 11755667_SEC14L4   | -0.02488 | 0.706939 | 0.783416 |
| 11751774_AICDA     | 0.017579 | 0.706956 | 0.783418 |
| 11755066_MFGE8     | 0.018081 | 0.706995 | 0.783429 |
| 11749012_BRSK2     | -0.03304 | 0.706998 | 0.783429 |
| 11754618_SNX27     | -0.01607 | 0.707033 | 0.783436 |
| 11738315_SLC35G3   | 0.027404 | 0.707037 | 0.783436 |
| 11753737_DIO1      | 0.021045 | 0.707197 | 0.783595 |
| 11725543_SP6       | -0.01461 | 0.707259 | 0.783647 |
| 11745419_TTBK2     | 0.018197 | 0.707302 | 0.783661 |
| 11723824_MYO5C     | 0.022291 | 0.707313 | 0.783661 |
| 11749501_RHBDF2    | -0.03258 | 0.70732  | 0.783661 |
| 11742133_WNT9B     | -0.0133  | 0.707348 | 0.78367  |
| 11755815_CDH4      | -0.02202 | 0.707361 | 0.78367  |

|                    |          |          |          |
|--------------------|----------|----------|----------|
| 11724688_SAMD11    | -0.01537 | 0.707385 | 0.78368  |
| 11757516_CHN2 ///  | -0.03027 | 0.707472 | 0.783748 |
| 11746787_USP37     | 0.036847 | 0.707499 | 0.783748 |
| 11748758_SLC2A5    | -0.01775 | 0.707506 | 0.783748 |
| 11742377_OR7C2     | -0.02134 | 0.707511 | 0.783748 |
| 11757547_GET4 ///  | -0.01584 | 0.707537 | 0.78376  |
| 11743014_DIP2C     | 0.026151 | 0.707599 | 0.783811 |
| 11759903_SDCCAG8   | -0.03005 | 0.707689 | 0.783882 |
| 11727730_ABCC6 /// | 0.015481 | 0.707696 | 0.783882 |
| 11738982_CD4       | 0.017166 | 0.707717 | 0.783888 |
| 11736086_HHIP      | 0.030363 | 0.707737 | 0.783892 |
| 11720405_EFNB2     | 0.013328 | 0.707895 | 0.784049 |
| 11751522_SHF       | -0.02911 | 0.708079 | 0.784235 |
| 11732260_TOPORS    | 0.018199 | 0.70811  | 0.784252 |
| 11763334_RIN1      | -0.02269 | 0.708249 | 0.784381 |
| 11759971_NCR1      | 0.029241 | 0.708259 | 0.784381 |
| 11751073_POU2F3    | -0.0297  | 0.708334 | 0.784446 |
| 11759979_DENND5B   | -0.03558 | 0.708458 | 0.784566 |
| 11745437_EHF       | -0.04295 | 0.708504 | 0.784589 |
| 11733680_TMEM132D  | -0.03709 | 0.708511 | 0.784589 |
| 11729001_TBX15     | -0.05244 | 0.708533 | 0.784589 |
| 11720515_LURAP1L   | 0.033724 | 0.708543 | 0.784589 |
| 11755134_PLCH2     | -0.01481 | 0.708568 | 0.784599 |
| 11726060_LRRC4     | 0.029512 | 0.7086   | 0.784616 |
| 11752766_BTN2A2    | -0.02463 | 0.708633 | 0.784624 |
| 11759142_CASP14    | -0.03609 | 0.708639 | 0.784624 |
| 11756452_SIGLEC17P | -0.02842 | 0.70866  | 0.78463  |
| 11728789_SLC32A1   | -0.03622 | 0.70868  | 0.784635 |
| 11742270_TPTE2     | 0.035587 | 0.708703 | 0.784642 |
| 11741158_RNLS      | 0.020765 | 0.70876  | 0.784687 |
| 11745562_MIOX      | -0.03296 | 0.708789 | 0.784698 |
| 11747531_AIFM3     | 0.015199 | 0.708802 | 0.784698 |
| 11741261_SORBS2    | -0.01439 | 0.709046 | 0.78495  |
| 11757738_FAT1      | 0.012863 | 0.709134 | 0.78503  |
| 11759840_PLCB2     | -0.06108 | 0.709217 | 0.785105 |
| 11731934_KCNN1     | -0.02265 | 0.709261 | 0.785135 |
| 11748387_PP13      | -0.01787 | 0.709312 | 0.785173 |
| 11755203_RPL21     | 0.014435 | 0.709389 | 0.785242 |
| 11723025_FAM26F    | -0.03559 | 0.709425 | 0.785258 |
| 11725125_NEB       | 0.035344 | 0.709437 | 0.785258 |
| 11757608_HRASLS5   | 0.016986 | 0.709496 | 0.785306 |
| 11761971_VWA3B     | 0.044003 | 0.709555 | 0.785353 |
| 11732892_CHRNA10   | 0.014035 | 0.709603 | 0.785389 |
| 11760410_R3HDM1    | 0.036716 | 0.709787 | 0.785575 |
| 11760047_LINC00268 | 0.019153 | 0.709828 | 0.785602 |
| 11734161_CARF      | 0.069812 | 0.709951 | 0.78572  |
| 11751413_PI16      | -0.02541 | 0.709993 | 0.78575  |
| 11737672_CENPT     | -0.01852 | 0.710095 | 0.785844 |
| 11731013_SYN2      | -0.03252 | 0.710144 | 0.785881 |
| 11758324_PARK2     | 0.015447 | 0.710267 | 0.786    |
| 11763677_ACSL5     | -0.02961 | 0.71032  | 0.786034 |

|                    |          |          |          |
|--------------------|----------|----------|----------|
| 11737286_ITIH5     | -0.02141 | 0.71033  | 0.786034 |
| 11732819_ABCB4     | 0.039489 | 0.710376 | 0.786067 |
| 11729039_DCDC2     | -0.02428 | 0.710393 | 0.786067 |
| 11746908_LTBR      | 0.019165 | 0.71047  | 0.786135 |
| 11749831_LMO3      | 0.016067 | 0.710586 | 0.786246 |
| 11745363_LOC151121 | 0.025332 | 0.710613 | 0.786258 |
| 11728983_FILIP1    | -0.01715 | 0.710673 | 0.786307 |
| 11728586_FAM189A1  | 0.022263 | 0.710757 | 0.786382 |
| 11741984_PTGER3    | 0.018227 | 0.710823 | 0.786426 |
| 11758297_SHC1      | 0.013597 | 0.710829 | 0.786426 |
| 11738373_CA5A      | 0.021608 | 0.710889 | 0.786475 |
| 11751077_ALDH1A2   | 0.059209 | 0.710921 | 0.786491 |
| 11743831_RPS6KA2   | -0.01477 | 0.711018 | 0.786581 |
| 11729424_CCRL2     | -0.02276 | 0.711183 | 0.786746 |
| 11732048_RXFP3     | 0.015488 | 0.711229 | 0.786779 |
| 11718834_LOXL2     | -0.02577 | 0.711257 | 0.786793 |
| 11759997_SLC22A25  | 0.015125 | 0.71133  | 0.786845 |
| 11737654_OR6F1     | 0.026523 | 0.711337 | 0.786845 |
| 11740294_PRKG1     | -0.03474 | 0.71137  | 0.786864 |
| 11741490_LRRFIP1   | 0.031581 | 0.711394 | 0.786872 |
| 11762618_ZBTB17    | 0.017125 | 0.711552 | 0.787023 |
| 11721940_CYP3A5    | -0.03164 | 0.711588 | 0.787023 |
| 11759057_UBE2G2    | 0.032844 | 0.711592 | 0.787023 |
| 11733125_PEX19     | -0.0143  | 0.711594 | 0.787023 |
| 11735513_ZCCHC5    | -0.02991 | 0.711648 | 0.787046 |
| 11716154_B4GALT1   | -0.01644 | 0.711649 | 0.787046 |
| 11715588_MYL9      | 0.017588 | 0.711672 | 0.787046 |
| 11732786_FFAR1     | 0.024393 | 0.71168  | 0.787046 |
| 11749932_ENOX1     | 0.038381 | 0.711899 | 0.787271 |
| 11763630_LIG3      | -0.02193 | 0.711942 | 0.787297 |
| 11717027_GLYR1     | 0.014793 | 0.711955 | 0.787297 |
| 11760496_RWDD3     | 0.033668 | 0.712039 | 0.787362 |
| 11731945_WDR38     | -0.01942 | 0.712062 | 0.787362 |
| 11727599_C9orf64   | 0.0234   | 0.712063 | 0.787362 |
| 11763654_TMC5      | 0.038585 | 0.71214  | 0.78743  |
| 11735313_CDC38     | 0.032494 | 0.712177 | 0.787453 |
| 11754172_PKIA      | 0.038604 | 0.71222  | 0.787483 |
| 11763111_NPSR1-AS1 | -0.05686 | 0.712349 | 0.787608 |
| 11752861_VWA7      | -0.02369 | 0.712515 | 0.787772 |
| 11742264_SHOX      | -0.01315 | 0.71253  | 0.787772 |
| 11742177_KRTAP12-4 | -0.0159  | 0.712623 | 0.787848 |
| 11740675_GNAL      | -0.0433  | 0.712631 | 0.787848 |
| 11747121_MFSD9     | -0.03258 | 0.712662 | 0.787865 |
| 11753285_SETD3     | 0.013572 | 0.712744 | 0.787933 |
| 11731219_TMEM132B  | 0.025223 | 0.712756 | 0.787933 |
| 11763341_GSTO2     | -0.05396 | 0.712813 | 0.787979 |
| 11737328_COL19A1   | -0.01766 | 0.712914 | 0.788045 |
| 11730676_RNF150    | -0.02149 | 0.712917 | 0.788045 |
| 11734633_RNF180    | -0.01852 | 0.712935 | 0.788045 |
| 11745531_3-Mar     | -0.0381  | 0.712938 | 0.788045 |
| 11730021_ACSM2A // | -0.01714 | 0.713    | 0.788091 |

|                    |          |          |          |
|--------------------|----------|----------|----------|
| 11735214_CCDC68    | -0.01915 | 0.713012 | 0.788091 |
| 11732760_GAPT      | 0.022377 | 0.713035 | 0.788099 |
| 11732034_GHRH      | -0.03717 | 0.713224 | 0.78829  |
| 11728162_BCAN      | 0.035364 | 0.713262 | 0.788314 |
| 11747494_AQP3      | -0.01713 | 0.713324 | 0.788365 |
| 11717910_CXCL14    | -0.03911 | 0.713355 | 0.788381 |
| 11719557_SYS1      | 0.018908 | 0.713423 | 0.788438 |
| 11762055_UBAP2     | -0.02458 | 0.713599 | 0.788615 |
| 11735505_NLRC4     | -0.02846 | 0.713681 | 0.788679 |
| 11739021_ADAR      | 0.014607 | 0.713689 | 0.788679 |
| 11761793_FAM122C   | 0.014573 | 0.71376  | 0.78874  |
| 11717636_RHOG      | -0.01312 | 0.713847 | 0.788818 |
| 11719527_FBXL16    | -0.01729 | 0.713916 | 0.788873 |
| 11746023_PGD       | -0.01414 | 0.713929 | 0.788873 |
| 11737999_GRM1      | -0.02722 | 0.713976 | 0.788907 |
| 11751304_ITGAL     | 0.014435 | 0.714044 | 0.788965 |
| 11733414_TTC36     | -0.03189 | 0.714131 | 0.78903  |
| 11732945_EFCC1     | -0.01532 | 0.714135 | 0.78903  |
| 11733256_KRT78     | -0.02857 | 0.71422  | 0.789106 |
| 11725105_RAI2      | -0.0285  | 0.714239 | 0.789109 |
| 11734146_NAALADL2  | -0.03642 | 0.714293 | 0.78915  |
| 11727397_CTNNA1    | 0.013832 | 0.714458 | 0.789309 |
| 11752986_SLC6A14   | -0.02931 | 0.714477 | 0.789309 |
| 11734636_KRTAP10-5 | 0.023283 | 0.714485 | 0.789309 |
| 11738016_LOC102030 | -0.02809 | 0.71452  | 0.789327 |
| 11720478_BCCIP     | 0.016786 | 0.714534 | 0.789327 |
| 11739817_C9        | -0.02708 | 0.714564 | 0.789338 |
| 11742055_PCDHA11   | -0.01863 | 0.714576 | 0.789338 |
| 11762216_ARNT2     | -0.05601 | 0.71462  | 0.789368 |
| 11741577_LEMD2     | 0.034121 | 0.714663 | 0.789378 |
| 200029_PMRPL19     | 0.012674 | 0.714686 | 0.789378 |
| 11762348_LOC642947 | 0.017023 | 0.714691 | 0.789378 |
| 11738243_C17orf82  | -0.01679 | 0.714693 | 0.789378 |
| 11757142_SNHG12 // | -0.0206  | 0.714831 | 0.789512 |
| 11741813_HINT1     | 0.012968 | 0.714879 | 0.789548 |
| 11760154_HAUS3     | -0.01795 | 0.714904 | 0.789558 |
| 11741716_HOXB1     | -0.02731 | 0.714945 | 0.789585 |
| 11719358_PTH       | 0.019738 | 0.714983 | 0.789606 |
| 11756352_PRSS22    | -0.01589 | 0.714996 | 0.789606 |
| 11747699_ADORA1    | -0.02402 | 0.71503  | 0.789625 |
| 11735166_OSBPL5    | 0.022034 | 0.715058 | 0.789638 |
| 11719327_CRELD2    | 0.013522 | 0.715108 | 0.78967  |
| 11722429_PPL       | 0.040048 | 0.715119 | 0.78967  |
| 11738194_TAS2R3    | 0.026884 | 0.715277 | 0.789827 |
| 11731016_KLK4      | -0.02305 | 0.71536  | 0.7899   |
| 11732747_HGF       | 0.02363  | 0.715422 | 0.789951 |
| 11750491_SEC14L1   | -0.01833 | 0.715479 | 0.789996 |
| 11717637_RHOG      | -0.01451 | 0.715519 | 0.790022 |
| 11758687_TMEM18    | -0.01334 | 0.715569 | 0.79006  |
| 11729749_SAA2-SAA4 | -0.02739 | 0.715588 | 0.790063 |
| 11734634_GPR152    | 0.018128 | 0.715931 | 0.790424 |

|                    |          |          |          |
|--------------------|----------|----------|----------|
| 11750159_BATF2     | -0.02883 | 0.716021 | 0.790505 |
| 11735127_N4BP3     | -0.03132 | 0.716104 | 0.79058  |
| 11757747_LPIN1     | 0.017625 | 0.716146 | 0.790585 |
| 11744930	EIF4G3    | -0.01821 | 0.716158 | 0.790585 |
| 11756158_LOC102724 | -0.05014 | 0.716158 | 0.790585 |
| 11732754_FAM205A / | -0.02424 | 0.716292 | 0.790715 |
| 11724409_2-Mar     | -0.01525 | 0.716345 | 0.790756 |
| 11755129_PCSK4     | -0.02091 | 0.716395 | 0.790776 |
| 11717094_TCTA      | 0.025405 | 0.716396 | 0.790776 |
| 11726928_IL18BP    | 0.03053  | 0.716476 | 0.790847 |
| 11760518_SEC11C    | 0.023879 | 0.716512 | 0.790869 |
| 11732108_CYP1A2    | -0.01957 | 0.716579 | 0.790899 |
| 11719039_CYGB      | -0.02089 | 0.716587 | 0.790899 |
| 11746541_RGS12     | -0.01933 | 0.716588 | 0.790899 |
| 11739277_SDC3      | 0.018647 | 0.716639 | 0.790921 |
| 11757781_MZF1      | -0.02295 | 0.71664  | 0.790921 |
| 11752549_ALDH1A1   | -0.01271 | 0.7168   | 0.791079 |
| 11758721_IGFBP7    | -0.01304 | 0.716817 | 0.79108  |
| 11752678_BRINP1    | 0.027492 | 0.716845 | 0.791093 |
| 11735756_DNAH14    | 0.047338 | 0.716893 | 0.791128 |
| 11761704_MTMR14    | 0.020312 | 0.716911 | 0.79113  |
| 11748655_FHL1      | 0.023784 | 0.716938 | 0.791143 |
| 11731448_SNCA      | -0.041   | 0.71696  | 0.791149 |
| 11741499_HPGD      | 0.028603 | 0.716981 | 0.791155 |
| 11749643_R3HDM1    | 0.021196 | 0.717092 | 0.791259 |
| 11755302_COL24A1   | 0.015739 | 0.717125 | 0.791278 |
| 11732790_PRDM16    | -0.03777 | 0.71724  | 0.791387 |
| 11755547_STK33     | 0.019343 | 0.717487 | 0.791641 |
| 11752220_VAV3      | 0.019763 | 0.717511 | 0.79165  |
| 11761594_CD1E      | -0.03746 | 0.717609 | 0.791736 |
| 11735644_TIPRL     | -0.01458 | 0.717623 | 0.791736 |
| 11758157_COQ10B    | 0.014308 | 0.717638 | 0.791736 |
| 11741827_GSTZ1     | 0.01781  | 0.717743 | 0.791834 |
| 11715142_GSC2      | -0.0393  | 0.717851 | 0.791914 |
| 11750998_LMNTD1    | 0.014943 | 0.717852 | 0.791914 |
| 11735298_IMPG2     | 0.023082 | 0.717864 | 0.791914 |
| 11759409_KCNV2     | 0.022703 | 0.717885 | 0.79192  |
| 11751250_HHLA2     | -0.01918 | 0.71795  | 0.791973 |
| 11763896_SNHG25 // | -0.02974 | 0.718072 | 0.792085 |
| 11756726_SOD3      | -0.02213 | 0.718083 | 0.792085 |
| 11747674_ATP1A2    | -0.02716 | 0.718127 | 0.792114 |
| 11738738_OR13G1    | -0.02323 | 0.718267 | 0.792241 |
| 11764045_ABTB1     | -0.03448 | 0.718274 | 0.792241 |
| 11738237_PURG      | -0.023   | 0.718345 | 0.792288 |
| 11717991_SIDT2     | -0.016   | 0.718361 | 0.792288 |
| 11759725_RDX       | 0.037995 | 0.718365 | 0.792288 |
| 11722652_OBFC1     | 0.02956  | 0.718388 | 0.792295 |
| 11734990_WNT3A     | -0.03519 | 0.718435 | 0.792329 |
| 11730910_CCR5      | 0.037677 | 0.718537 | 0.792424 |
| 11737260_BICC1     | 0.042186 | 0.718603 | 0.792479 |
| 11728161_WNT7A     | 0.021221 | 0.718642 | 0.792504 |

|                    |          |          |          |
|--------------------|----------|----------|----------|
| 11721573_ACVRL1    | -0.0183  | 0.71867  | 0.792517 |
| 11733355_C5AR1     | 0.039822 | 0.7187   | 0.792532 |
| 11738209_GPR17     | 0.021286 | 0.718748 | 0.792567 |
| 11730532_ELAVL4    | -0.03355 | 0.718822 | 0.792631 |
| 11753696_PATE1     | 0.021641 | 0.718862 | 0.792657 |
| 11748261_RINL      | 0.018937 | 0.718892 | 0.792672 |
| 11724811_ZNF346    | -0.02442 | 0.718917 | 0.792682 |
| 11735781_GPR45     | 0.026464 | 0.71899  | 0.792745 |
| 11750577_HEATR5A   | 0.016323 | 0.719073 | 0.792818 |
| 11764022_LOC105377 | -0.03444 | 0.719102 | 0.792832 |
| 11725908_LRRC10B   | -0.01854 | 0.719157 | 0.792875 |
| 11752019_MAP3K19   | -0.02529 | 0.719174 | 0.792876 |
| 11738817_ERVW-1    | 0.021966 | 0.719208 | 0.792892 |
| 11748747_ARHGAP25  | -0.01959 | 0.719232 | 0.792892 |
| 11738881_SLC26A5   | -0.03745 | 0.719238 | 0.792892 |
| 11730335_PARP3     | -0.01853 | 0.719289 | 0.792931 |
| 11738545_RGS21     | 0.017257 | 0.719347 | 0.792965 |
| 11742550_OR5K4     | 0.016873 | 0.719353 | 0.792965 |
| 11735378_CEP162    | -0.04507 | 0.719402 | 0.792999 |
| 11738685_OR10S1    | 0.021901 | 0.719416 | 0.792999 |
| 11742339_OR13F1    | 0.025425 | 0.71952  | 0.793083 |
| 11739267_GPR61     | 0.035099 | 0.71953  | 0.793083 |
| 11728133_ARVCF     | -0.02564 | 0.719555 | 0.793083 |
| 11735651_TOPAZ1    | -0.03555 | 0.719557 | 0.793083 |
| 11757469_TPP1      | -0.01328 | 0.71962  | 0.793135 |
| 11723094_CYLD      | -0.02501 | 0.719708 | 0.793214 |
| 11738417_DMBX1     | -0.03502 | 0.719878 | 0.793376 |
| 11732606_CBLN4     | -0.03421 | 0.719887 | 0.793376 |
| 11722009_CLIC1     | -0.01404 | 0.719966 | 0.793445 |
| 11749593_PPP1R3C   | 0.020782 | 0.720118 | 0.793595 |
| 11736621_CCR6      | -0.03375 | 0.720149 | 0.793611 |
| 11763372_LINCO0323 | 0.025871 | 0.720173 | 0.79362  |
| 11751311_BRF2      | 0.016647 | 0.72019  | 0.793621 |
| 11731721_LURAP1    | -0.0228  | 0.72027  | 0.79369  |
| 11758520_GUCY1A3   | -0.02597 | 0.720469 | 0.793886 |
| 11721192_CHST3     | 0.014692 | 0.720505 | 0.793886 |
| 11734244_ATG10     | -0.0229  | 0.720531 | 0.793886 |
| 11717017_OCIAD2    | -0.04037 | 0.720535 | 0.793886 |
| 11741047_VAV1      | -0.02391 | 0.720536 | 0.793886 |
| 11728523_MYCL      | 0.02977  | 0.720557 | 0.793886 |
| 11730956_P2RX1     | -0.03233 | 0.720562 | 0.793886 |
| 11740023_SLC28A1   | -0.0256  | 0.720639 | 0.79394  |
| 11741424_CMKLR1    | 0.028688 | 0.72065  | 0.79394  |
| 11758925_PSPC1     | -0.0572  | 0.720659 | 0.79394  |
| 11758643_ZNF883    | 0.015545 | 0.720687 | 0.793953 |
| 11740300_2-Mar     | -0.02248 | 0.72082  | 0.794081 |
| 11745267_RGAG4     | 0.029852 | 0.720897 | 0.794149 |
| 11732087_TRIM6     | -0.02387 | 0.721094 | 0.794348 |
| 11752520_ZNF385B   | -0.03231 | 0.721166 | 0.794409 |
| 11737406_C2orf66   | -0.02428 | 0.721283 | 0.79452  |
| 11754276_RAD23B    | -0.01229 | 0.72147  | 0.794702 |

|                    |          |          |          |
|--------------------|----------|----------|----------|
| 11735374_GDF5      | -0.02484 | 0.72148  | 0.794702 |
| 11762089_HLA-F     | 0.045129 | 0.721531 | 0.794739 |
| 11759204_SLC2A14   | 0.019734 | 0.721556 | 0.794749 |
| 11739646_TULP3     | -0.01935 | 0.721612 | 0.794793 |
| 11721574_ELF4      | -0.01656 | 0.721813 | 0.794996 |
| 11744962_ART5      | -0.02638 | 0.721862 | 0.795032 |
| 11760984_RGS3      | -0.02039 | 0.721925 | 0.795083 |
| 11735355_TSGA10IP  | -0.02464 | 0.721969 | 0.795114 |
| 11719906_BCL7A     | 0.026151 | 0.722003 | 0.795134 |
| 11758628_ULK2      | -0.02225 | 0.722056 | 0.795174 |
| 11734081_CCDC33    | 0.016737 | 0.722128 | 0.795236 |
| 11752863_HUWE1     | -0.015   | 0.722277 | 0.795382 |
| 11751652_PLSCR1    | 0.013257 | 0.722483 | 0.795591 |
| 11753338_FHL1      | -0.01829 | 0.722556 | 0.795653 |
| 11738338_GCNT7     | -0.02329 | 0.722718 | 0.795813 |
| 11723874_TMEM104   | -0.01465 | 0.72286  | 0.795953 |
| 11755325_NPTX1     | -0.01962 | 0.722982 | 0.796068 |
| 11732698_SERPINA7  | -0.02807 | 0.723052 | 0.79612  |
| 11740844_VWDE      | 0.020013 | 0.723062 | 0.79612  |
| 11742376_OR8U1 /// | -0.021   | 0.723095 | 0.796122 |
| 11760130_HDAC8     | -0.027   | 0.723096 | 0.796122 |
| 11738495_OR7A17    | 0.023171 | 0.723143 | 0.796156 |
| 11760317_CYP4V2    | -0.01656 | 0.723392 | 0.796412 |
| 11724367_SEMA6D    | 0.024999 | 0.72344  | 0.79644  |
| 11734202_MARVELD2  | -0.04    | 0.72345  | 0.79644  |
| 11745797_LINCO1000 | 0.018347 | 0.723564 | 0.796547 |
| 11738080_ANKRD20A1 | 0.023331 | 0.723611 | 0.796582 |
| 11742387_OR1D5     | 0.022983 | 0.723681 | 0.796638 |
| 11734536_GP1BA     | -0.03093 | 0.723695 | 0.796638 |
| 11749370_XAF1      | 0.024284 | 0.723808 | 0.796745 |
| 11732189_NOTCH2    | 0.013058 | 0.723905 | 0.796834 |
| 11730385_GREM2     | 0.027783 | 0.723944 | 0.796843 |
| 11740352_GABRB2    | -0.01388 | 0.723946 | 0.796843 |
| 11760018_CLEC10A   | 0.025341 | 0.724039 | 0.796928 |
| 11718130_OLFM4     | 0.023275 | 0.72415  | 0.797031 |
| 11741521_HAO2      | -0.03984 | 0.72421  | 0.79708  |
| 11748221_MUL1      | 0.02467  | 0.724274 | 0.797109 |
| 11761811_BABAM1    | -0.02882 | 0.724278 | 0.797109 |
| 11762594_UBA1      | 0.023638 | 0.724286 | 0.797109 |
| 11748475_TCERG1    | 0.017823 | 0.724408 | 0.797226 |
| 11748483_P2RX7     | -0.0236  | 0.724429 | 0.79723  |
| 11746808_LOC100630 | 0.012997 | 0.724509 | 0.797301 |
| 11720903_CACNB3    | -0.02276 | 0.724555 | 0.797334 |
| 11747235_KANSL1L   | 0.031414 | 0.724604 | 0.797355 |
| 11747651_CARNS1    | -0.01757 | 0.724607 | 0.797355 |
| 11715135_SNAPC5    | -0.01847 | 0.724629 | 0.797361 |
| 11715995_MRPL16    | -0.01465 | 0.724694 | 0.797415 |
| 11750692_TCAF1     | 0.017329 | 0.724723 | 0.797429 |
| 11737430_MSRI      | 0.040175 | 0.724791 | 0.797486 |
| 11753699_BRD7P3    | -0.01868 | 0.72512  | 0.797829 |
| 11745496_SPINT2    | 0.02785  | 0.725196 | 0.797896 |

|                    |          |          |          |
|--------------------|----------|----------|----------|
| 11742464_VAX1      | 0.030627 | 0.725267 | 0.797956 |
| 11738457_C20orf197 | -0.01285 | 0.725298 | 0.797957 |
| 11717251_NDUFB11   | 0.01355  | 0.725302 | 0.797957 |
| 11760709_B4GALT1   | -0.0163  | 0.725359 | 0.798002 |
| 11731311_SLC25A2   | 0.017275 | 0.725711 | 0.798372 |
| 11742367_OR4N2     | 0.016928 | 0.725848 | 0.798505 |
| 11736106_ZNF750    | 0.024791 | 0.725919 | 0.798565 |
| 11736406_XYLB      | 0.012778 | 0.725965 | 0.798597 |
| 11727471_CYP2C9    | -0.01726 | 0.725994 | 0.798612 |
| 11735297_C9orf66   | 0.032331 | 0.726077 | 0.798685 |
| 11752836_ADGRE2    | -0.01396 | 0.726151 | 0.798748 |
| 11753741_MLN       | -0.02717 | 0.726222 | 0.798791 |
| 11752080_RUSC2     | 0.015409 | 0.726236 | 0.798791 |
| 11741889_DUXA      | 0.019736 | 0.726246 | 0.798791 |
| 11729600_PPP6C     | -0.02083 | 0.726256 | 0.798791 |
| 11742587_ARL5C     | -0.0407  | 0.726477 | 0.799009 |
| 11747771_DGKB      | 0.035737 | 0.726487 | 0.799009 |
| 11755855_KIAA1211  | -0.02203 | 0.72658  | 0.799094 |
| 11731307_AMHR2     | 0.019333 | 0.726637 | 0.799122 |
| 11754136_BET1      | 0.021626 | 0.726644 | 0.799122 |
| 11761308_PIH1D1    | -0.01545 | 0.726654 | 0.799122 |
| 11761899_IGH /// I | -0.02333 | 0.726743 | 0.799201 |
| 11761813_PLEKHH2   | 0.018021 | 0.726778 | 0.799222 |
| 11760104_BNIP3     | -0.02619 | 0.726876 | 0.799304 |
| 11730421_FLVCR1    | -0.01384 | 0.726885 | 0.799304 |
| 11754931_GCLC      | -0.01569 | 0.726918 | 0.799321 |
| 11757868_PIK3IP1   | -0.03031 | 0.726951 | 0.79934  |
| 11728501_LRRN2     | 0.012839 | 0.726967 | 0.79934  |
| 11759417_HSPA9     | -0.01525 | 0.727008 | 0.799367 |
| 11720490_ACTC1     | 0.012941 | 0.727215 | 0.799577 |
| 11760744_PTMA      | -0.03251 | 0.727285 | 0.799635 |
| 11735447_TVP23A    | 0.028874 | 0.727412 | 0.799757 |
| 11735457_LENG9     | 0.014971 | 0.727626 | 0.799974 |
| 11729882_KNDC1     | -0.02143 | 0.727793 | 0.80014  |
| 11758952_AGR2      | 0.019665 | 0.727852 | 0.800187 |
| 11745217_MKL2      | 0.016038 | 0.727986 | 0.800316 |
| 11741857_NYX       | -0.01568 | 0.728026 | 0.800335 |
| 11735593_SLC24A4   | 0.02615  | 0.728036 | 0.800335 |
| 11738385_NEUROG3   | 0.018692 | 0.728085 | 0.800357 |
| 11759584_COX4I1    | -0.02479 | 0.728089 | 0.800357 |
| 11763256_IGKC ///  | -0.0468  | 0.728122 | 0.800366 |
| 11715365_SPDEF     | -0.03036 | 0.728144 | 0.800366 |
| 11743956_KLK3      | 0.035388 | 0.728146 | 0.800366 |
| 11749522_LAG3      | 0.02029  | 0.728296 | 0.80049  |
| 11741770_NOXRED1   | -0.02428 | 0.728306 | 0.80049  |
| 11763538_PRR5      | -0.02717 | 0.728308 | 0.80049  |
| 11736401_DTX3      | 0.0203   | 0.728344 | 0.800512 |
| 11756441_CSF3R     | 0.02058  | 0.728439 | 0.800598 |
| 11728540_MDGA1     | -0.01906 | 0.728563 | 0.800717 |
| 11760443_STEAP1    | 0.038815 | 0.728605 | 0.800744 |
| 11726452_SVOP      | -0.02976 | 0.728631 | 0.800755 |



|                    |          |          |          |
|--------------------|----------|----------|----------|
| 11757754_VEZF1     | 0.014785 | 0.728722 | 0.800837 |
| 11761443_KALRN     | 0.024182 | 0.728767 | 0.800868 |
| 11760440_TESK2     | 0.027191 | 0.729177 | 0.801302 |
| 11721943_STAP2     | -0.01473 | 0.729204 | 0.801313 |
| 11741020_PLA2G16   | 0.028524 | 0.729301 | 0.801393 |
| 11751986_MMP19     | -0.02681 | 0.72931  | 0.801393 |
| 11720999_BIN2      | -0.0171  | 0.729378 | 0.80145  |
| 11762704_FAM83A-AS | -0.02792 | 0.729477 | 0.801539 |
| 11724543_TKTL2     | -0.0144  | 0.729491 | 0.801539 |
| 11735239_PNMA5     | -0.0257  | 0.729577 | 0.801615 |
| 11737830_RAG1      | -0.02585 | 0.729626 | 0.801651 |
| 11742672_NPS       | 0.028882 | 0.729679 | 0.801691 |
| 11731799_UCN3      | -0.01998 | 0.729707 | 0.801694 |
| 11741665_PCDHGA11  | -0.03084 | 0.729726 | 0.801694 |
| 11745585_CCT6B     | -0.01961 | 0.729751 | 0.801694 |
| 11760205_GNL1      | -0.02901 | 0.729768 | 0.801694 |
| 11722161_TAF4      | -0.01246 | 0.729776 | 0.801694 |
| 11737653_FAM26D    | -0.03701 | 0.729787 | 0.801694 |
| 11735897_IL1F10    | 0.01517  | 0.729807 | 0.801694 |
| 11743205_ADAMTS2   | -0.01468 | 0.729814 | 0.801694 |
| 11733253_FBLN2     | -0.03526 | 0.729845 | 0.80171  |
| 11723694_GRB7      | 0.012958 | 0.729953 | 0.801811 |
| 11727084_GJB2      | -0.01529 | 0.729987 | 0.801831 |
| 11721082_C14orf119 | 0.025197 | 0.73019  | 0.802025 |
| 11755383_SEC24C    | 0.013725 | 0.730197 | 0.802025 |
| 11749644_ZEB1      | 0.014267 | 0.730224 | 0.802037 |
| 11715123_PDZD9     | -0.02584 | 0.730475 | 0.802279 |
| 11730236_MYADM     | -0.01326 | 0.730477 | 0.802279 |
| 11740177_AEBP2     | -0.02266 | 0.730516 | 0.802303 |
| 11755358_CPSF1     | 0.016852 | 0.730548 | 0.802321 |
| 11763400_MEI1      | 0.03092  | 0.730578 | 0.802335 |
| 11727756_OSM       | -0.02333 | 0.730629 | 0.802358 |
| 11728901_DAPP1     | 0.021405 | 0.730631 | 0.802358 |
| 11732272_ANGPTL3   | -0.03128 | 0.730718 | 0.80242  |
| 11724240_TCF4      | -0.02241 | 0.730721 | 0.80242  |
| 11749456_ESRRG     | 0.054512 | 0.730793 | 0.802482 |
| 11716292_G6PD      | -0.0169  | 0.730969 | 0.802656 |
| 11756095_HLA-DQA1  | -0.03463 | 0.731019 | 0.802693 |
| 11755042_RRN3P1    | -0.02738 | 0.731036 | 0.802694 |
| 11723051_FGFBP1    | 0.035087 | 0.731095 | 0.802741 |
| 11721182_PLPPR4    | -0.02265 | 0.731112 | 0.802741 |
| 11743519_DIDO1     | 0.011826 | 0.731149 | 0.802765 |
| 11750333_CDHR3     | -0.01886 | 0.73128  | 0.802889 |
| 11761134_KAT6A     | 0.04694  | 0.731298 | 0.802889 |
| 11720719_C22orf29  | -0.02966 | 0.731312 | 0.802889 |
| 11716219	EIF2S1    | 0.013865 | 0.731332 | 0.802893 |
| 11735020_IL4       | -0.02833 | 0.731367 | 0.802914 |
| 11747595_CD69      | 0.019839 | 0.73142  | 0.802943 |
| 11723363_L1TD1     | -0.02531 | 0.731427 | 0.802943 |
| 11720002_NRARP     | -0.01594 | 0.731451 | 0.802952 |
| 11748520_PTPN7     | -0.02236 | 0.731518 | 0.803007 |

|                    |          |          |          |
|--------------------|----------|----------|----------|
| 11742346_OR4A5     | 0.045401 | 0.731584 | 0.803061 |
| 11735980_OR5M11    | -0.03537 | 0.731701 | 0.803158 |
| 11728245_ANGPT2    | -0.01673 | 0.731712 | 0.803158 |
| 11727694_KLRC4-KLR | 0.013592 | 0.731721 | 0.803158 |
| 11718868_PALMD     | 0.026041 | 0.73181  | 0.803237 |
| 11762003_RGS12     | 0.042564 | 0.731881 | 0.803297 |
| 11761348_SPATA7    | -0.02989 | 0.731925 | 0.803327 |
| 11739959_FGF1      | 0.028966 | 0.731992 | 0.803383 |
| 11735291_LOC653513 | -0.0191  | 0.732105 | 0.803454 |
| 11761049_ZSCAN18   | 0.016433 | 0.732112 | 0.803454 |
| 11723505_ZNF609    | -0.01308 | 0.732115 | 0.803454 |
| 11749497_DHX58     | 0.019562 | 0.732122 | 0.803454 |
| 11733951_GBP4      | 0.012718 | 0.732187 | 0.803502 |
| 11721659_LMO4      | -0.01423 | 0.732199 | 0.803502 |
| 11725703_KLK6      | -0.0347  | 0.732234 | 0.803523 |
| 11741797_COL4A6    | 0.025194 | 0.732297 | 0.803573 |
| 11718595_FAU       | 0.012667 | 0.732318 | 0.803579 |
| 11746910_HTRA4     | 0.032879 | 0.732374 | 0.803621 |
| 11726770_XAF1      | 0.014693 | 0.732414 | 0.803647 |
| 11717957_PATL1     | 0.016508 | 0.732646 | 0.803885 |
| 11733565_C9orf163  | -0.02205 | 0.732678 | 0.803901 |
| 11760663_DDHD1     | 0.033784 | 0.732783 | 0.803984 |
| 11764262_FBXW8     | -0.012   | 0.732792 | 0.803984 |
| 11725696_PRR14     | 0.014129 | 0.732824 | 0.803984 |
| 11762142_CDKL3     | -0.02943 | 0.73283  | 0.803984 |
| 11732805_EPX       | -0.0168  | 0.732836 | 0.803984 |
| 11731554_SYNPO2    | -0.02879 | 0.732922 | 0.804052 |
| 11762200_LOC101929 | 0.03191  | 0.732931 | 0.804052 |
| 11730607_SERTM1    | -0.01946 | 0.732988 | 0.804097 |
| 11761033_SCARA5    | -0.02824 | 0.733026 | 0.80412  |
| 11753832_IGKV3-20  | -0.03858 | 0.733065 | 0.804146 |
| 11739519_TNPO2     | 0.015313 | 0.73314  | 0.804192 |
| 11753282_CMTM4     | 0.028897 | 0.73314  | 0.804192 |
| 11733194_FMNL3     | -0.02961 | 0.733323 | 0.804374 |
| 11749418_BAIAP3    | -0.04683 | 0.73338  | 0.804415 |
| 11745864_SAMD14    | -0.02054 | 0.733393 | 0.804415 |
| 11728287_RHOQ      | 0.011823 | 0.733515 | 0.804529 |
| 11729961_ADCYAP1   | -0.02612 | 0.73353  | 0.804529 |
| 11746542_SPIDR     | -0.01856 | 0.733563 | 0.804547 |
| 11746014_NCF1 ///  | -0.02199 | 0.73359  | 0.804558 |
| 11753827_GYPB      | 0.02327  | 0.7337   | 0.804662 |
| 11738245_AKR1C2    | 0.040395 | 0.733839 | 0.804796 |
| 11734525_C11orf88  | 0.02719  | 0.7339   | 0.804828 |
| 11757337_ELOVL1    | -0.019   | 0.733901 | 0.804828 |
| 11752205_IQCA1     | -0.04198 | 0.734043 | 0.804965 |
| 11739741_B3GNT6    | -0.01579 | 0.734071 | 0.804967 |
| 11732964_RIT2      | 0.015062 | 0.734082 | 0.804967 |
| 11757376_MAT2A     | 0.011737 | 0.734111 | 0.804967 |
| 11760711_TMEM14B   | -0.02018 | 0.734111 | 0.804967 |
| 11726470_PLS1      | -0.01259 | 0.734128 | 0.804968 |
| 11753106_TOM1L2    | 0.020655 | 0.734226 | 0.805057 |

|                    |          |          |          |
|--------------------|----------|----------|----------|
| 11718435_NPNT      | 0.017289 | 0.734272 | 0.805089 |
| 11738234_ZNF732    | 0.039185 | 0.734376 | 0.805186 |
| 11718153_HEPH      | -0.0171  | 0.734398 | 0.805192 |
| 11757468_NPPA      | 0.019595 | 0.734584 | 0.805378 |
| 11728352_EFEMP2    | 0.013916 | 0.73469  | 0.805476 |
| 11722631_ICE2      | -0.01293 | 0.734731 | 0.805503 |
| 11735809_OPN5      | -0.02403 | 0.734801 | 0.805562 |
| 11732527_TBX5      | -0.01461 | 0.734834 | 0.805579 |
| 11757227_LOC100288 | -0.02277 | 0.734875 | 0.805607 |
| 11752637_TMC6      | 0.016301 | 0.734898 | 0.805614 |
| 11758113_ARPC4     | -0.01205 | 0.73499  | 0.805696 |
| 11729828_FAM110B   | -0.01564 | 0.735212 | 0.805921 |
| 200076_PMKXD1      | 0.012322 | 0.735241 | 0.805935 |
| 11724430_RCAN3     | -0.01805 | 0.735372 | 0.806059 |
| 11732458_ZCCHC4    | -0.01383 | 0.735387 | 0.806059 |
| 11731171_GLDN      | -0.02285 | 0.735468 | 0.806128 |
| 11734269_HYDIN /// | 0.015883 | 0.735507 | 0.806128 |
| 11727119_ADAD1     | -0.04207 | 0.735516 | 0.806128 |
| 11757757_HOXD9     | 0.014574 | 0.735516 | 0.806128 |
| 11738348_MADCAM1   | -0.0368  | 0.735561 | 0.806153 |
| 11716230_TMEM167B  | 0.023642 | 0.735585 | 0.806153 |
| 11720071_RING1     | 0.014    | 0.735588 | 0.806153 |
| 11759189_NKX3-1    | 0.020532 | 0.735814 | 0.806383 |
| 11737660_B4GALT2   | -0.01425 | 0.735834 | 0.806386 |
| 11738361_CCDC157   | 0.01936  | 0.735851 | 0.806386 |
| 11763061_NPSR1-AS1 | -0.04661 | 0.735867 | 0.806386 |
| 11761295_LDB2      | -0.02896 | 0.735972 | 0.806484 |
| 11721933_DNAJC27   | 0.025979 | 0.736036 | 0.806535 |
| 11730571_AGRP      | -0.02052 | 0.736054 | 0.806537 |
| 11722753_ISY1-RAB4 | -0.01608 | 0.736079 | 0.806546 |
| 11727398_KIF5A     | 0.020914 | 0.736144 | 0.806581 |
| 11739279_MS4A1     | 0.012535 | 0.736144 | 0.806581 |
| 11762765_DAOA      | -0.02909 | 0.736179 | 0.806591 |
| 11758879_HLA-E     | -0.01217 | 0.736185 | 0.806591 |
| 11744072_MXRA5     | -0.03004 | 0.736216 | 0.806606 |
| 11736069_JMJD6     | -0.03524 | 0.736252 | 0.806627 |
| 11738575_TAS2R9    | -0.03742 | 0.736296 | 0.806658 |
| 11732865_MS4A4A    | -0.02486 | 0.736346 | 0.806695 |
| 11752782_DDHD2     | 0.021428 | 0.736416 | 0.806752 |
| 11730343_TSSK6     | -0.01888 | 0.736484 | 0.806789 |
| 11761879_EXOSC3    | 0.023106 | 0.736488 | 0.806789 |
| 11728607_GRIN2D    | 0.018653 | 0.736499 | 0.806789 |
| 11751351_MYADM     | -0.01181 | 0.736529 | 0.806795 |
| 11730420_FLVCR1    | -0.01815 | 0.736537 | 0.806795 |
| 11740314_MYH6      | -0.03017 | 0.736656 | 0.806908 |
| 11725009_EPB42     | 0.025504 | 0.736723 | 0.806962 |
| 11759726_C14orf159 | -0.01748 | 0.736747 | 0.806971 |
| 11729952_ZBTB37    | -0.0225  | 0.736774 | 0.806982 |
| 11737735_EFCAB5    | 0.014581 | 0.736803 | 0.806996 |
| 11733767_LILRA2    | -0.0319  | 0.736841 | 0.807004 |
| 11733474_SOX21     | -0.03828 | 0.736843 | 0.807004 |

|                    |          |          |          |
|--------------------|----------|----------|----------|
| 11735568_KRT33B    | -0.02083 | 0.736863 | 0.807007 |
| 11732043_DMBT1     | -0.01642 | 0.736893 | 0.807022 |
| 11744018_IDUA      | 0.028064 | 0.736967 | 0.807085 |
| 11754562_CRTC2     | 0.021461 | 0.737011 | 0.807112 |
| 11717468_TTC38     | -0.01196 | 0.737025 | 0.807112 |
| 11763603_LOC100128 | -0.02088 | 0.737062 | 0.807134 |
| 11757595_CRABP2    | 0.020401 | 0.737121 | 0.807176 |
| 11755482_GPR132    | -0.02451 | 0.737132 | 0.807176 |
| 11728601_COX8C     | -0.02151 | 0.737308 | 0.8073   |
| 11747766_ARID5A    | 0.01794  | 0.73731  | 0.8073   |
| 11757715_MIR205HG  | -0.02658 | 0.73731  | 0.8073   |
| 11759926_RP1       | 0.020501 | 0.73732  | 0.8073   |
| 11737045_PLA2R1    | 0.016793 | 0.737328 | 0.8073   |
| 11732186_CSRP3     | -0.01224 | 0.73739  | 0.807349 |
| 11746568_HIF3A     | 0.01292  | 0.737428 | 0.807372 |
| 11761392_AMY1A /// | -0.02415 | 0.737483 | 0.80741  |
| 11734261_TRPM5     | 0.020505 | 0.737495 | 0.80741  |
| 11737366_LRRC66    | 0.045022 | 0.737545 | 0.807446 |
| 11748032_ALPL      | 0.016601 | 0.737593 | 0.807481 |
| 11745107_STAP1     | 0.029448 | 0.737651 | 0.807527 |
| 11735526_C3orf35   | -0.03244 | 0.737821 | 0.807694 |
| 11720060_TTYH1     | 0.019131 | 0.737894 | 0.807755 |
| 11749105_PCDH1     | -0.01837 | 0.737909 | 0.807755 |
| 11723296_GSTM4     | -0.01376 | 0.737945 | 0.807777 |
| 11746673_TBL1Y     | -0.02898 | 0.73805  | 0.807868 |
| 11731158_ERCC4     | 0.014173 | 0.738067 | 0.807868 |
| 11728328_OMD       | -0.02467 | 0.738078 | 0.807868 |
| 11718753_CAPN5     | -0.01897 | 0.738124 | 0.807892 |
| 11755453_TDH       | -0.02466 | 0.738134 | 0.807892 |
| 11720912_CAPN6     | -0.01611 | 0.738153 | 0.807895 |
| 11731507_ZNF649    | 0.025131 | 0.738232 | 0.807964 |
| 11720567_PPFIA3    | -0.0206  | 0.738311 | 0.808006 |
| 11739397_MUC20     | -0.02173 | 0.738319 | 0.808006 |
| 11740820_TCP10 /// | -0.02806 | 0.73832  | 0.808006 |
| 11715485_MCL1      | -0.01808 | 0.738389 | 0.808063 |
| 11762302_HNMT      | 0.02332  | 0.738447 | 0.808084 |
| 11738853_CEACAM20  | -0.01201 | 0.738457 | 0.808084 |
| 11743615_USP47     | -0.01528 | 0.738458 | 0.808084 |
| 11741880_SERPINE3  | -0.01798 | 0.738614 | 0.808223 |
| 11726212_CCL15 /// | 0.027687 | 0.738618 | 0.808223 |
| 11720014_ATM       | 0.013744 | 0.738652 | 0.808242 |
| 11721030_PIP5K1B   | -0.02327 | 0.738717 | 0.808296 |
| 11725526_C19orf73  | 0.039117 | 0.738783 | 0.808349 |
| 11726266_IDH3G     | 0.012172 | 0.738836 | 0.80839  |
| 11727061_ALG3      | 0.012299 | 0.738902 | 0.808435 |
| 11742537_BAX       | 0.019046 | 0.738911 | 0.808435 |
| 11755210_SCNN1D    | -0.01884 | 0.738972 | 0.808481 |
| 11750052_ASGR2     | -0.01683 | 0.738986 | 0.808481 |
| 11725795_S1PR2     | -0.01464 | 0.739128 | 0.808618 |
| 11745540_ANK2      | 0.022086 | 0.739512 | 0.809016 |
| 11723501_PRLR      | -0.03095 | 0.739525 | 0.809016 |

|                    |          |          |          |
|--------------------|----------|----------|----------|
| 11754350_GPANK1    | 0.013291 | 0.739553 | 0.809023 |
| 11749826_DI02      | 0.043056 | 0.739564 | 0.809023 |
| 11754598_DNAJA3    | 0.012839 | 0.739584 | 0.809027 |
| 11752231_TBC1D3P5  | -0.01288 | 0.739618 | 0.809046 |
| 11746557_LGALS9 // | -0.01814 | 0.739709 | 0.809127 |
| 11756470_AP3B2     | 0.018091 | 0.739766 | 0.809161 |
| 11741877_IL9R      | -0.01716 | 0.739773 | 0.809161 |
| 11746026_MILR1     | 0.014588 | 0.739811 | 0.809184 |
| 11760338_C5orf45   | -0.01425 | 0.739952 | 0.80932  |
| 11743318_ZFC3H1    | 0.01339  | 0.740175 | 0.809544 |
| 11759398_FCGR1     | 0.025801 | 0.74019  | 0.809544 |
| 11716686_ABR       | -0.02127 | 0.740291 | 0.809636 |
| 11738313_PRR23B    | -0.03389 | 0.740412 | 0.809751 |
| 11731792_SLC27A6   | 0.02736  | 0.740543 | 0.809877 |
| 11732656_MFSD6L    | 0.020153 | 0.740586 | 0.809905 |
| 11760944_GAA       | -0.01855 | 0.740662 | 0.809945 |
| 11757309_COL2A1    | 0.042265 | 0.740671 | 0.809945 |
| 11740351_SEZ6L     | -0.01226 | 0.740672 | 0.809945 |
| 11756709_BTK       | -0.01832 | 0.740742 | 0.810003 |
| 11751534_CA3       | 0.031097 | 0.740829 | 0.81008  |
| 11753899_DLEU1     | -0.0123  | 0.740963 | 0.810209 |
| 11734231_CSAD      | 0.013552 | 0.74111  | 0.810352 |
| 11717153_APMAP     | -0.01329 | 0.741329 | 0.810572 |
| 11754324_KIF5C     | 0.028549 | 0.741443 | 0.810641 |
| 11752374_POLN      | -0.03397 | 0.741458 | 0.810641 |
| 11718405_BZW2      | -0.0158  | 0.741467 | 0.810641 |
| 11732000_PDE11A    | 0.042708 | 0.741481 | 0.810641 |
| 11732350_CCNA1     | 0.028709 | 0.741488 | 0.810641 |
| 11729446_DCT       | 0.019123 | 0.741498 | 0.810641 |
| 11751428_ARFIP2    | 0.017127 | 0.741507 | 0.810641 |
| 11754171_TMEM37    | 0.018596 | 0.741579 | 0.810701 |
| 11726283_ENPP5     | 0.029281 | 0.741678 | 0.810791 |
| 11752369_IMPDH2    | 0.011656 | 0.741704 | 0.810802 |
| 11745674_AKAP5     | 0.014726 | 0.741872 | 0.810966 |
| 11738494_OCLM      | 0.02536  | 0.741963 | 0.811048 |
| 11741733_CCDC79    | -0.01564 | 0.742091 | 0.81117  |
| 11725725_MICAL3    | 0.013715 | 0.74211  | 0.811173 |
| 11734795_MED31     | -0.02528 | 0.742135 | 0.811181 |
| 11740059_KIF9      | 0.017472 | 0.742167 | 0.811199 |
| 11716823_BDH2      | -0.01888 | 0.74219  | 0.811205 |
| 11753578_AZIN2     | -0.02252 | 0.742274 | 0.811279 |
| 11763562_BYSL      | -0.03369 | 0.742404 | 0.811403 |
| 11715682_CREG1     | 0.012613 | 0.742461 | 0.811429 |
| 11755633_UBXN8     | 0.012866 | 0.742461 | 0.811429 |
| 11732743_C20orf202 | -0.02103 | 0.742576 | 0.811537 |
| 11738260_SETBP1    | -0.03664 | 0.742751 | 0.811696 |
| 11728387_ADAM32    | 0.021951 | 0.742755 | 0.811696 |
| 11735534_HIVEP3    | -0.01373 | 0.742772 | 0.811697 |
| 11727638_AHI1      | -0.01846 | 0.742856 | 0.81177  |
| 11730061_KRT77     | -0.01292 | 0.743113 | 0.812009 |
| 11738763_OR8B12    | 0.054565 | 0.743114 | 0.812009 |

|                    |          |          |          |
|--------------------|----------|----------|----------|
| 11731488_NUP43     | -0.01191 | 0.743125 | 0.812009 |
| 11720453_YME1L1    | 0.011347 | 0.743149 | 0.812018 |
| 11717232_PNLIPRP2  | -0.02233 | 0.743176 | 0.812029 |
| 11759519_SUCLA2    | 0.011631 | 0.743258 | 0.8121   |
| 11762494_WDR19     | -0.02925 | 0.743289 | 0.812116 |
| 11742295_TEX14     | -0.0187  | 0.743503 | 0.812332 |
| 11724004_FYB       | 0.033645 | 0.743649 | 0.812458 |
| 11725768_CLCF1     | -0.0241  | 0.743652 | 0.812458 |
| 11744534_ANXA7     | -0.01144 | 0.74367  | 0.81246  |
| 11759399_FCGRT     | -0.02073 | 0.743765 | 0.812546 |
| 11756041_PAX5      | -0.02728 | 0.743978 | 0.812759 |
| 11760478_CFAP97    | 0.022014 | 0.744015 | 0.812766 |
| 11727045_CNIH3     | 0.013194 | 0.744017 | 0.812766 |
| 11727364_SHC1      | 0.014805 | 0.744095 | 0.812833 |
| 11728048_SMTNL2    | -0.02687 | 0.744143 | 0.812867 |
| 11760073_SLC2A11   | -0.01675 | 0.74425  | 0.812953 |
| 11730586_GATA5     | -0.03716 | 0.744255 | 0.812953 |
| 11756846_PRAM1     | 0.024523 | 0.744282 | 0.812956 |
| 11738928_STOX1     | 0.019554 | 0.744291 | 0.812956 |
| 11726677_P SMB9    | 0.017692 | 0.744391 | 0.813048 |
| 11737836_NSMF      | -0.01105 | 0.744413 | 0.813053 |
| 11759251_KCNT1     | -0.02856 | 0.744462 | 0.813088 |
| 11720449_RNF43     | -0.01673 | 0.744518 | 0.813131 |
| 11731557_SYNPO2    | -0.01818 | 0.744793 | 0.813414 |
| 11763817_SMARCD3   | -0.01194 | 0.744876 | 0.813487 |
| 11758674_PDE6B     | -0.01495 | 0.744934 | 0.813531 |
| 11745802_GRSF1     | 0.016405 | 0.745146 | 0.813745 |
| 11741534_SRMS      | -0.01779 | 0.745167 | 0.81375  |
| 11741862_AGER      | 0.02397  | 0.745308 | 0.813886 |
| 11761394_GLIPR2    | -0.01162 | 0.745348 | 0.813911 |
| 11722925_MMRN1     | -0.03573 | 0.74541  | 0.813961 |
| 11759265_H2AFB1 // | -0.03248 | 0.745519 | 0.814061 |
| 11755985_SMIM21    | -0.01272 | 0.745585 | 0.814115 |
| 11738442_KRTAP6-3  | -0.03107 | 0.745617 | 0.814132 |
| 11759757_SLC33A1   | 0.017872 | 0.745684 | 0.814187 |
| 11727351_RARA      | -0.01669 | 0.745751 | 0.814233 |
| 11717591_CNOT1     | -0.01751 | 0.745759 | 0.814233 |
| 11724226_TMEM179B  | 0.013073 | 0.745804 | 0.814264 |
| 11726492_ABCG1     | -0.01137 | 0.745861 | 0.814308 |
| 11740818_TCP10 /// | -0.02113 | 0.745892 | 0.814323 |
| 11724675_FAM149B1  | -0.02706 | 0.745989 | 0.814411 |
| 11757803_CNOT2     | 0.01351  | 0.746095 | 0.814492 |
| 11724735_PDPN      | 0.031147 | 0.746097 | 0.814492 |
| 11737546_ZNF648    | -0.02277 | 0.746204 | 0.814553 |
| 11730631_WDR72     | 0.020032 | 0.746216 | 0.814553 |
| 11746131_ADAM18    | 0.011008 | 0.746227 | 0.814553 |
| 11743221_GPR141    | 0.01778  | 0.746233 | 0.814553 |
| 11740756_SIM2      | -0.01769 | 0.746249 | 0.814553 |
| 11730539_ZSCAN10   | 0.02064  | 0.746253 | 0.814553 |
| 11744736_PYY2      | 0.023044 | 0.746292 | 0.814564 |
| 11733947_EIF5AL1   | 0.031251 | 0.746296 | 0.814564 |

|                    |          |          |          |
|--------------------|----------|----------|----------|
| 11762809_CASP8     | 0.040454 | 0.746317 | 0.814568 |
| 11737412_SCML4     | 0.028729 | 0.746363 | 0.814583 |
| 11761491_ITGB3     | 0.029801 | 0.746364 | 0.814583 |
| 11753535_KLRD1     | -0.01441 | 0.746431 | 0.814638 |
| 11730389_RYR1      | -0.0315  | 0.74645  | 0.814641 |
| 11745704_PMCHL1 // | 0.014237 | 0.74649  | 0.814666 |
| 11718154_HEPH      | -0.03108 | 0.746521 | 0.814682 |
| 11749293_MS4A6A    | -0.02462 | 0.746572 | 0.81472  |
| 11716104_MPZL1     | -0.01431 | 0.746716 | 0.814858 |
| 11724729_CD8A      | 0.012299 | 0.746854 | 0.814991 |
| 11747067_CCT5      | -0.01221 | 0.746885 | 0.814999 |
| 11728320_CSTB      | 0.012972 | 0.746895 | 0.814999 |
| 11734551_CX3CL1    | -0.0199  | 0.746931 | 0.81502  |
| 11743355_PDCD4     | -0.01227 | 0.74698  | 0.815055 |
| 11754608_HSP90B1   | 0.011765 | 0.747014 | 0.815075 |
| 11732201_TMEM39A   | -0.01429 | 0.747153 | 0.815208 |
| 11755959_NRG3      | 0.020569 | 0.747182 | 0.815222 |
| 11752974_IRF5      | 0.019429 | 0.747338 | 0.815373 |
| 11731820_ADAM11    | -0.01626 | 0.747396 | 0.81541  |
| 11742275_NXPE2     | -0.02143 | 0.747405 | 0.81541  |
| 11735864_CD160     | 0.015928 | 0.747424 | 0.815413 |
| 11761455_CDH7      | -0.02133 | 0.747691 | 0.815685 |
| 11717376_SLC25A25  | 0.026707 | 0.74772  | 0.815699 |
| 11763432_LOC100506 | -0.03188 | 0.747745 | 0.815709 |
| 11720706_CCDC22    | 0.016876 | 0.747849 | 0.815798 |
| 11745485_OPALIN    | -0.01955 | 0.747863 | 0.815798 |
| 11754285_TTR       | -0.01705 | 0.747878 | 0.815798 |
| 11759748_UCHL5     | 0.015236 | 0.747964 | 0.815867 |
| 11731956_CFAP100   | 0.023358 | 0.747983 | 0.815867 |
| 11736374_MLLT4-AS1 | -0.0212  | 0.747991 | 0.815867 |
| 11761442_CNP       | -0.02649 | 0.748034 | 0.815896 |
| 11754129_ACSM2A // | 0.015461 | 0.748144 | 0.815995 |
| 11761783_TTC21A    | -0.02696 | 0.748159 | 0.815995 |
| 11752732_DUS4L     | -0.0155  | 0.74823  | 0.816055 |
| 11740765_ZNF749    | 0.04607  | 0.748348 | 0.816166 |
| 11733235_SLC46A2   | -0.02158 | 0.748435 | 0.816242 |
| 11740400_MCTS1     | 0.018124 | 0.748468 | 0.81626  |
| 11758632_CXorf51A  | 0.032999 | 0.748511 | 0.816289 |
| 11763947_HPVC1     | 0.018013 | 0.748555 | 0.816313 |
| 11725295_USP9Y     | -0.0219  | 0.748567 | 0.816313 |
| 11760279_SRSF3     | 0.028479 | 0.748671 | 0.816408 |
| 11740348_TTC24     | 0.023543 | 0.748731 | 0.81645  |
| 11742244_CEACAM19  | -0.01505 | 0.748742 | 0.81645  |
| 11763231_CFLAR     | -0.0139  | 0.748785 | 0.816478 |
| 11738558_PROZ      | 0.01439  | 0.748906 | 0.816592 |
| 11758154_MANSC4    | 0.014455 | 0.748956 | 0.816629 |
| 200015_PMSEPT2     | -0.01172 | 0.749036 | 0.816697 |
| 11754855_MOBP      | 0.018429 | 0.749207 | 0.816853 |
| 11726233_DRC3      | -0.02538 | 0.749212 | 0.816853 |
| 11741532_MYO1H     | 0.043169 | 0.749248 | 0.816874 |
| 11760646_DGKE      | -0.02496 | 0.749359 | 0.816962 |

|                    |          |          |          |
|--------------------|----------|----------|----------|
| 11723510_PLEKHH3   | -0.01396 | 0.749363 | 0.816962 |
| 11738547_RNASE13   | -0.01942 | 0.749517 | 0.817098 |
| 11747086_GCA       | 0.012248 | 0.749521 | 0.817098 |
| 11733069_WDR5B     | 0.012103 | 0.749559 | 0.817117 |
| 11738317_RLN2      | 0.019424 | 0.749571 | 0.817117 |
| 11742216_KLRD1     | -0.01414 | 0.749589 | 0.817118 |
| 11752873_SKAP1     | 0.040071 | 0.749662 | 0.817169 |
| 11734168_NT5C1B    | -0.02167 | 0.749669 | 0.817169 |
| 11738306_FOXD4L3 / | -0.01452 | 0.749698 | 0.817182 |
| 11721280_CELA3A // | -0.03567 | 0.749727 | 0.817196 |
| 11750366_EPHA6     | -0.02005 | 0.749787 | 0.817243 |
| 11715129_ZNF600    | 0.012375 | 0.749887 | 0.817334 |
| 11719111_C11orf1   | 0.012611 | 0.749988 | 0.817419 |
| 11748380_SPATA13   | -0.02063 | 0.749999 | 0.817419 |
| 11747012_SPATA22   | 0.023562 | 0.750045 | 0.817447 |
| 11749887_VIPR1     | -0.01073 | 0.750058 | 0.817447 |
| 11721056_PRKX      | 0.015662 | 0.750126 | 0.817503 |
| 11742466_TRIM40    | -0.03145 | 0.750168 | 0.817514 |
| 11752215_GLOD4     | 0.016398 | 0.75017  | 0.817514 |
| 11752126_SPTBN2    | -0.01609 | 0.750287 | 0.817624 |
| 11755627_ANKRD34C  | 0.011528 | 0.750337 | 0.817659 |
| 11760498_TRDMT1    | -0.01892 | 0.750377 | 0.817685 |
| 11746244_IL17RC    | -0.02848 | 0.750469 | 0.817768 |
| 11757485_FAM129B   | 0.010699 | 0.750493 | 0.817775 |
| 11758215_TLE3      | -0.01873 | 0.750515 | 0.817781 |
| 11755264_CDK19     | -0.01893 | 0.750669 | 0.81793  |
| 11725594_SPATA2    | 0.020271 | 0.750771 | 0.818023 |
| 11715340_CT47A1 // | 0.03297  | 0.75084  | 0.81808  |
| 11736208_METTL2B   | -0.01391 | 0.751077 | 0.818321 |
| 11727609_KLRB1     | 0.035503 | 0.751126 | 0.818355 |
| 11733272_NAT8L     | -0.01868 | 0.751206 | 0.818421 |
| 11715877_CDK2AP1   | -0.01101 | 0.75122  | 0.818421 |
| 11716187_ABCB6 /// | 0.012034 | 0.751252 | 0.818427 |
| 11737669_KCNT1     | 0.011865 | 0.751262 | 0.818427 |
| 11726367_ERICH1    | -0.01498 | 0.75128  | 0.818427 |
| 11726774_RORC      | -0.02812 | 0.751293 | 0.818427 |
| 11737816_METTL21B  | -0.01324 | 0.75141  | 0.818535 |
| 11731802_C3orf70   | -0.02312 | 0.751425 | 0.818535 |
| 11759436_BCL2L10   | -0.01616 | 0.751472 | 0.818554 |
| 11740525_ARL10     | -0.01422 | 0.751476 | 0.818554 |
| 11724998_CD86      | 0.023878 | 0.751521 | 0.818572 |
| 11760569_EPGN      | 0.017187 | 0.751526 | 0.818572 |
| 11738578_OR10A5    | -0.01761 | 0.751612 | 0.818647 |
| 11755145_MTHFSD    | -0.01844 | 0.751668 | 0.818687 |
| 11734764_FGFR1     | -0.01364 | 0.751692 | 0.818687 |
| 11726101_CALML3    | -0.01775 | 0.751698 | 0.818687 |
| 11739656_RPL28     | -0.0204  | 0.751761 | 0.818737 |
| 11757270_SFTPC     | -0.01723 | 0.751791 | 0.818751 |
| 11736954_CLEC4C    | -0.02571 | 0.751843 | 0.818789 |
| 11763802_KCNT1     | 0.013441 | 0.751896 | 0.818829 |
| 11739299_CISD3     | 0.02212  | 0.751988 | 0.818901 |



|                    |          |          |          |
|--------------------|----------|----------|----------|
| 11748893_CD7       | -0.01536 | 0.751995 | 0.818901 |
| 11741978_RHCE ///  | -0.0203  | 0.752385 | 0.819287 |
| 11739703_TAT       | -0.025   | 0.752391 | 0.819287 |
| 11729901_AGFG2     | -0.0145  | 0.7524   | 0.819287 |
| 11748236_GRIA1     | -0.02124 | 0.752519 | 0.819398 |
| 11761981_FAM120A   | -0.04023 | 0.752646 | 0.819518 |
| 11737627_NEK5      | -0.02589 | 0.752704 | 0.819563 |
| 11741711_SLC01A2   | -0.02658 | 0.752835 | 0.819688 |
| 11752991_HSP90B3P  | -0.02128 | 0.752879 | 0.819702 |
| 11724646_VANGL1    | -0.0129  | 0.752882 | 0.819702 |
| 11761880_ACY1      | 0.028805 | 0.752918 | 0.819723 |
| 11759280_RNASE8    | 0.022185 | 0.752968 | 0.819759 |
| 11755675_SYT2      | -0.02286 | 0.752987 | 0.819762 |
| 11731064_SMOX      | -0.01262 | 0.753026 | 0.819769 |
| 11742302_1060P11.3 | -0.03054 | 0.753028 | 0.819769 |
| 11729586_KLK2      | 0.013626 | 0.753161 | 0.819881 |
| 11720093_CPSF1     | -0.01115 | 0.753164 | 0.819881 |
| 11737381_SPATA25   | 0.01924  | 0.753431 | 0.820147 |
| 11763675_THEMIS2   | -0.01883 | 0.753442 | 0.820147 |
| 11732660_HSFY1 /// | 0.019347 | 0.753471 | 0.820158 |
| 11739158_USP46     | -0.01448 | 0.753485 | 0.820158 |
| 11738961_HIST1H2BE | 0.030127 | 0.753509 | 0.820162 |
| 11762258_SPOCK3    | 0.026364 | 0.753522 | 0.820162 |
| 11726573_SEMA7A    | -0.01547 | 0.753623 | 0.820252 |
| 11761137_CLYBL     | 0.021952 | 0.753639 | 0.820252 |
| 11754353_RNF213    | -0.01618 | 0.753786 | 0.820394 |
| 11736674_KLHL35    | 0.019131 | 0.753811 | 0.820403 |
| 11747083_AMACR /// | -0.01806 | 0.753839 | 0.820415 |
| 11730014_MYO3A     | 0.014433 | 0.753912 | 0.820453 |
| 11731125_FBXO36    | -0.01163 | 0.753922 | 0.820453 |
| 11751628_TMEM140   | -0.03548 | 0.753924 | 0.820453 |
| 11739136_COL5A2    | -0.02026 | 0.754018 | 0.820536 |
| 11720564_NAV2      | 0.016805 | 0.754101 | 0.820608 |
| 11744145_MUL1      | 0.011785 | 0.754154 | 0.820648 |
| 11760470_DAPK1     | -0.03413 | 0.754195 | 0.820675 |
| 11720274_ALKBH6    | -0.02086 | 0.754298 | 0.820757 |
| 11727024_SPATA2    | 0.012153 | 0.754318 | 0.820757 |
| 11761221_MTMR9LP   | 0.017768 | 0.754321 | 0.820757 |
| 11738931_RPS4Y2    | 0.035038 | 0.754373 | 0.820795 |
| 11724006_ENTPD1    | 0.022877 | 0.754426 | 0.820834 |
| 11735218_COL10A1   | -0.02576 | 0.754492 | 0.820886 |
| 11728138_XK        | -0.0285  | 0.754507 | 0.820886 |
| 11743549_SLC22A23  | -0.02245 | 0.754552 | 0.820917 |
| 11732125_COPA      | -0.01816 | 0.754617 | 0.820969 |
| 11731528_TRIM63    | -0.0214  | 0.754826 | 0.821176 |
| 11736695_SLC18A1   | -0.02369 | 0.754847 | 0.821176 |
| 11725357_PRTFDC1   | -0.0211  | 0.754857 | 0.821176 |
| 11748601_APBB3     | -0.01699 | 0.755133 | 0.821457 |
| 11724666_ZC3H4     | -0.01237 | 0.755235 | 0.821544 |
| 11736205_OSBP2     | -0.01357 | 0.755247 | 0.821544 |
| 11762870_PAX5      | -0.02065 | 0.75527  | 0.821551 |

|                    |          |          |          |
|--------------------|----------|----------|----------|
| 11725048_S100A1    | -0.02205 | 0.755303 | 0.821569 |
| 11761629_SLC43A3   | -0.01198 | 0.755321 | 0.821571 |
| 11740654_CD8B      | -0.02096 | 0.755381 | 0.821614 |
| 11734031_THAP5 /// | 0.035935 | 0.755395 | 0.821614 |
| 11738543_TFAP2D    | -0.01805 | 0.755473 | 0.821677 |
| 11750195_UEVLD     | -0.02075 | 0.7555   | 0.821677 |
| 11750643_SLC12A5   | 0.033583 | 0.755503 | 0.821677 |
| 11725549_PDE4A     | 0.027776 | 0.75559  | 0.821753 |
| 11734985_ELK4      | 0.022158 | 0.755622 | 0.82177  |
| 11763272_UBR5      | -0.01718 | 0.755669 | 0.821803 |
| 200086_PMCOX4I1    | -0.01099 | 0.755725 | 0.821845 |
| 11746323_FAM227B   | 0.033185 | 0.755808 | 0.821917 |
| 11745733_CAMKV     | -0.01236 | 0.755837 | 0.821931 |
| 11723757_ZFR       | 0.016727 | 0.755864 | 0.821941 |
| 11754358_MATR3     | -0.01083 | 0.755918 | 0.821964 |
| 11734212_CT45A10 / | -0.01168 | 0.755919 | 0.821964 |
| 11726850_ZC3H3     | -0.01581 | 0.755979 | 0.822011 |
| 11727399_C16orf82  | -0.02086 | 0.756032 | 0.822051 |
| 11748875_EIF4A1 // | 0.012407 | 0.756095 | 0.822101 |
| 11754870_MB21D1    | -0.01626 | 0.756179 | 0.822174 |
| 11763458_LINC00906 | 0.030955 | 0.756292 | 0.822254 |
| 11759082_DCT       | 0.021827 | 0.7563   | 0.822254 |
| 11751043_RALGPS1   | 0.032288 | 0.756302 | 0.822254 |
| 11760912_PPP1R18   | 0.011189 | 0.756337 | 0.822273 |
| 11715105_C17orf78  | 0.020316 | 0.756401 | 0.822324 |
| 11752806_SERPINB3  | -0.02518 | 0.756461 | 0.82237  |
| 11759626_USP15     | 0.01189  | 0.756479 | 0.82237  |
| 11747249_ADSS      | -0.01065 | 0.756494 | 0.82237  |
| 11763076_DEFT1P // | 0.01208  | 0.756602 | 0.822455 |
| 11729017_SYT2      | 0.028704 | 0.756606 | 0.822455 |
| 11730480_DRD2      | 0.01875  | 0.756646 | 0.82248  |
| 11751028_VIPR1     | 0.011885 | 0.75671  | 0.822533 |
| 11749136_ZEB1      | 0.017819 | 0.756754 | 0.822562 |
| 11752056_APOBR     | 0.016677 | 0.756811 | 0.822585 |
| 11751513_NME9      | 0.011987 | 0.756812 | 0.822585 |
| 11719866_SVEP1     | -0.01639 | 0.756826 | 0.822585 |
| 11715177_TDRKH     | -0.01513 | 0.757004 | 0.822761 |
| 11742146_OR51Q1    | -0.02569 | 0.757068 | 0.822811 |
| 11729429_KIF26A    | -0.02526 | 0.757253 | 0.822995 |
| 11727292_C1orf162  | -0.03281 | 0.757352 | 0.823083 |
| 11739848_SLC01B1   | -0.02077 | 0.75753  | 0.823259 |
| 11730954_PEX26     | -0.01607 | 0.757831 | 0.823567 |
| 11747753_CPSF4     | -0.01235 | 0.757971 | 0.823701 |
| 11730822_COX19     | 0.028187 | 0.757999 | 0.823713 |
| 11717691_ANKRD13A  | -0.01299 | 0.758188 | 0.823901 |
| 11741428_RBFOX1    | 0.016166 | 0.758222 | 0.823919 |
| 11735210_SGPP2     | 0.020216 | 0.758398 | 0.824092 |
| 11744024_MARS      | -0.01263 | 0.758429 | 0.824108 |
| 11762990_YME1L1    | 0.020453 | 0.758447 | 0.824108 |
| 11731865_IGSF1     | 0.017251 | 0.758471 | 0.824117 |
| 11744293_CYTH1     | 0.013003 | 0.758501 | 0.824131 |

|                    |          |          |          |
|--------------------|----------|----------|----------|
| 11733486_CACNA1C   | 0.029517 | 0.758696 | 0.824321 |
| 11728210_PPP2R2C   | -0.02196 | 0.75871  | 0.824321 |
| 11736636_AAK1      | -0.01774 | 0.758745 | 0.82434  |
| 11745981_GRAMD1C   | -0.03025 | 0.758844 | 0.82443  |
| 11727624_ASCC1     | -0.01415 | 0.758872 | 0.824438 |
| 11735990_JCHAIN    | 0.023592 | 0.758885 | 0.824438 |
| 11733570_NKX2-8    | 0.019362 | 0.758943 | 0.824482 |
| 11756588_ST6GALNAC | 0.034536 | 0.759014 | 0.824537 |
| 11744945_NLGN4Y    | -0.02546 | 0.759027 | 0.824537 |
| 11751157_SMTN      | -0.01595 | 0.759165 | 0.824669 |
| 11734675_ITIH5     | 0.025156 | 0.759297 | 0.824794 |
| 11760981_CDK10     | -0.0353  | 0.759427 | 0.824917 |
| 11764134_LOC101928 | -0.02876 | 0.759745 | 0.825231 |
| 11722984_NRK       | -0.02901 | 0.759756 | 0.825231 |
| 11746747_COQ2      | -0.01993 | 0.759767 | 0.825231 |
| 11715574_KDELR2    | -0.01161 | 0.759804 | 0.825237 |
| 11720750_INMT      | 0.019067 | 0.759819 | 0.825237 |
| 11747485_U2SURP    | 0.013728 | 0.759824 | 0.825237 |
| 11728480_JAKMIP1   | 0.035116 | 0.75992  | 0.825324 |
| 11724414_ZNF711    | -0.02807 | 0.759942 | 0.825329 |
| 11746778_ITSN1     | 0.014715 | 0.759962 | 0.825333 |
| 11717097_NAA20     | 0.012716 | 0.759981 | 0.825335 |
| 11753557_CCDC7     | 0.031485 | 0.760077 | 0.82542  |
| 11761463_SLC22A7   | 0.024722 | 0.760216 | 0.825543 |
| 11738445_GAS8-AS1  | 0.022709 | 0.76023  | 0.825543 |
| 11728083_DGKE      | 0.01449  | 0.76024  | 0.825543 |
| 11759033_C4orf26   | -0.01963 | 0.76029  | 0.825579 |
| 11753274_ZNF584    | -0.01906 | 0.760341 | 0.825601 |
| 11760593_USP37     | 0.023432 | 0.760345 | 0.825601 |
| 11740740_ADAM21    | -0.01437 | 0.760397 | 0.82564  |
| 11740853_ALK       | 0.01663  | 0.760469 | 0.825691 |
| 11737575_USH2A     | -0.03376 | 0.760477 | 0.825691 |
| 11754657_JPH2      | 0.019258 | 0.760514 | 0.825712 |
| 11723864_MTMR11    | 0.016015 | 0.760773 | 0.825975 |
| 11756479_RNASET2   | 0.012433 | 0.760877 | 0.82607  |
| 11735564_SPRED3    | -0.01182 | 0.760961 | 0.826142 |
| 11753850_COX7A2    | 0.010586 | 0.76103  | 0.826199 |
| 11738154_ZNF843    | 0.012275 | 0.761047 | 0.826199 |
| 11729220_CMBL      | 0.013431 | 0.761072 | 0.826207 |
| 11757748_RPL23A    | -0.01076 | 0.761089 | 0.826207 |
| 11739442_CCDC71L   | 0.015713 | 0.76113  | 0.826224 |
| 11750776_LOC102724 | 0.017004 | 0.761137 | 0.826224 |
| 11741344_DMTN      | 0.021687 | 0.76121  | 0.826284 |
| 11740272_MAP10     | 0.033907 | 0.761316 | 0.826381 |
| 11734884_IL1RL1    | 0.018453 | 0.761423 | 0.826461 |
| 11745596_IL1RL1    | 0.018453 | 0.761423 | 0.826461 |
| 11735116_MET       | -0.01042 | 0.761543 | 0.826559 |
| 11754813_SLC35B1   | 0.011073 | 0.761548 | 0.826559 |
| 11724402_HS3ST2    | -0.03003 | 0.761817 | 0.826833 |
| 11747510_HLA-DQB1  | -0.01507 | 0.761836 | 0.826835 |
| 11750182_TRIM62    | -0.0172  | 0.762063 | 0.827063 |

|                    |          |          |          |
|--------------------|----------|----------|----------|
| 11727726_DMRT2     | -0.0138  | 0.76218  | 0.827158 |
| 11749696_PCDH8     | -0.01593 | 0.762185 | 0.827158 |
| 11759674_CAPS2     | 0.031641 | 0.762389 | 0.827362 |
| 11745298_ITFG2 /// | 0.013656 | 0.762425 | 0.827383 |
| 11741567_SLCO2B1   | -0.01255 | 0.762506 | 0.827452 |
| 11729510_WDR33     | 0.025259 | 0.762565 | 0.827497 |
| 11738165_CNTD2     | -0.02407 | 0.762597 | 0.827514 |
| 11734047_SDR16C5   | -0.02608 | 0.762665 | 0.82757  |
| 11741657_SYDE1     | 0.014226 | 0.762732 | 0.827624 |
| 11744250_TTLL10    | -0.02459 | 0.762788 | 0.827667 |
| 11726755_CLASP1    | -0.01204 | 0.762939 | 0.827812 |
| 11720113_SNTB2     | -0.01134 | 0.763048 | 0.82791  |
| 11753927_FAU       | 0.010554 | 0.763063 | 0.82791  |
| 11745113_FBXO18    | 0.012857 | 0.763112 | 0.827944 |
| 11763000_TRAV2     | 0.025915 | 0.763209 | 0.828031 |
| 11717433_ECHDC1    | -0.01135 | 0.763254 | 0.828061 |
| 11731326_RNF39     | -0.01658 | 0.763391 | 0.828192 |
| 11752303_ZYG11B    | 0.010399 | 0.763455 | 0.828243 |
| 11734001_ACTN2     | -0.04124 | 0.763483 | 0.828254 |
| 11737487_PI4KB     | -0.01418 | 0.76359  | 0.828342 |
| 11739280_CXCL16    | 0.015853 | 0.763597 | 0.828342 |
| 11726480_FATE1     | -0.01206 | 0.763679 | 0.828412 |
| 11758938_SAA1 ///  | 0.025124 | 0.763702 | 0.828419 |
| 11734710_HAP1      | 0.018826 | 0.763766 | 0.828469 |
| 11763189_SNAPC3    | 0.010724 | 0.763839 | 0.828512 |
| 11750785_EIF3B     | 0.01217  | 0.763839 | 0.828512 |
| 11753678_MUC1      | -0.01918 | 0.763962 | 0.828625 |
| 11738404_KRT40     | 0.0153   | 0.763977 | 0.828625 |
| 11753968_SVEP1     | -0.0373  | 0.764015 | 0.828647 |
| 11722430_PPL       | 0.016187 | 0.764093 | 0.828714 |
| 11745953_C1orf65   | 0.023732 | 0.764139 | 0.828729 |
| 11743783_KIAA1462  | -0.02615 | 0.76414  | 0.828729 |
| 11746994_PRSS8     | 0.014233 | 0.764158 | 0.82873  |
| 11734836_ZNF710    | 0.020237 | 0.76418  | 0.828735 |
| 11739568_ZCCHC7    | -0.01289 | 0.764352 | 0.828903 |
| 11730926_SLC4A10   | 0.042425 | 0.764461 | 0.829003 |
| 11725300_AOC3      | 0.024863 | 0.764664 | 0.829205 |
| 11738749_OR52E4    | 0.020634 | 0.764802 | 0.829336 |
| 11736352_TMEM220   | 0.022349 | 0.764857 | 0.829377 |
| 11745557_GYPB      | -0.01714 | 0.765158 | 0.829681 |
| 11737859_SEPT9     | -0.01829 | 0.765175 | 0.829681 |
| 11732469_IL3RA     | -0.02744 | 0.765189 | 0.829681 |
| 11726015_GPC6      | 0.011671 | 0.765249 | 0.829728 |
| 11748726_FAM107A   | 0.010482 | 0.76527  | 0.829731 |
| 11741329_GAGE1 /// | -0.02912 | 0.765285 | 0.829731 |
| 11742462_CLEC17A   | -0.01098 | 0.765457 | 0.829878 |
| 11730550_IKZF2     | 0.016033 | 0.765467 | 0.829878 |
| 11738788_DEFEB119  | 0.020356 | 0.765472 | 0.829878 |
| 11724405_KCTD14 // | -0.0215  | 0.765544 | 0.829938 |
| 11742301_KIR2DL3   | 0.012855 | 0.76557  | 0.829945 |
| 11725043_YWHAB     | -0.01319 | 0.765591 | 0.829945 |

|                    |          |          |          |
|--------------------|----------|----------|----------|
| 11761835_ABCA9     | 0.017624 | 0.765602 | 0.829945 |
| 11721771_INO80D    | -0.01981 | 0.765621 | 0.829948 |
| 11725893_TXLNB     | -0.0276  | 0.765646 | 0.829956 |
| 11747984_ICE2      | -0.01186 | 0.765691 | 0.829987 |
| 11728854_CCDC173   | -0.03634 | 0.765722 | 0.830002 |
| 11732066_C1orf94   | -0.016   | 0.765761 | 0.830026 |
| 11762785_ACTG1     | 0.0105   | 0.765921 | 0.830181 |
| 11741172_CASS4     | 0.034429 | 0.766015 | 0.830264 |
| 11736910_CYB561D1  | 0.026835 | 0.766061 | 0.830282 |
| 11735292_FAM135B   | 0.027945 | 0.766065 | 0.830282 |
| 11742007_KRTAP12-2 | -0.01717 | 0.766092 | 0.830282 |
| 11728250_CYP2C8    | -0.02117 | 0.766099 | 0.830282 |
| 11744038_NKAIN4    | -0.01433 | 0.766154 | 0.830324 |
| 11728995_KCNA1     | -0.03935 | 0.76623  | 0.830387 |
| 11743590_SNX29     | -0.01198 | 0.766253 | 0.830394 |
| 11752720_TMEM249   | -0.01487 | 0.766286 | 0.830411 |
| 11732053_CLEC4F    | -0.02302 | 0.766306 | 0.830414 |
| 11762180_LPO       | 0.025411 | 0.766497 | 0.830592 |
| 11763151_CA6       | -0.04672 | 0.766504 | 0.830592 |
| 11738880_PSG8      | 0.019117 | 0.766581 | 0.830657 |
| 11719744_ARHGAP27  | -0.01202 | 0.766646 | 0.830709 |
| 11728277_PLA2G12A  | -0.01109 | 0.766708 | 0.830758 |
| 11761613_SHANK2-AS | 0.020254 | 0.7668   | 0.830839 |
| 11751257_UPF3B     | 0.013002 | 0.766869 | 0.830895 |
| 11738432_MAP1LC3C  | 0.012673 | 0.766908 | 0.830911 |
| 11724987_CCDC113   | -0.02595 | 0.766917 | 0.830911 |
| 11754112_UBE2V2    | 0.010761 | 0.766966 | 0.830945 |
| 11738766_OR5D18    | -0.01877 | 0.767033 | 0.830988 |
| 11726964_SYNGAP1   | 0.015209 | 0.767039 | 0.830988 |
| 11749981_TECRL     | -0.02656 | 0.76711  | 0.831045 |
| 11741943_C1orf113  | 0.024844 | 0.767205 | 0.831116 |
| 11733622_NCMAP     | 0.023256 | 0.767209 | 0.831116 |
| 11732657_CYP26A1   | 0.035525 | 0.767319 | 0.831217 |
| 11753154_LHFPL1    | -0.01361 | 0.767347 | 0.831228 |
| 11757730_GDF15     | -0.0356  | 0.767432 | 0.831296 |
| 11745613_HIC1      | 0.021351 | 0.767443 | 0.831296 |
| 11744961_IQCE      | -0.0305  | 0.767483 | 0.831321 |
| 11762267_ADAMTS3   | 0.025716 | 0.767694 | 0.831516 |
| 11737360_MYOZ3     | 0.023811 | 0.767709 | 0.831516 |
| 11734378_LRRC27    | -0.01654 | 0.767714 | 0.831516 |
| 11735366_OCM /// C | -0.05991 | 0.767744 | 0.83152  |
| 11720432_TFEB      | 0.016541 | 0.767752 | 0.83152  |
| 11720573_ATP8B1    | 0.031809 | 0.767797 | 0.831551 |
| 11733463_DIO2      | -0.03562 | 0.768094 | 0.831854 |
| 11736272_THUMPD3   | -0.01816 | 0.76821  | 0.83196  |
| 11743859_IL33      | -0.03214 | 0.76838  | 0.832118 |
| 11718410_CRYBA1    | -0.0405  | 0.768389 | 0.832118 |
| 11759478_GSC2      | -0.01494 | 0.768434 | 0.832148 |
| 11727777_GNAI3     | -0.01218 | 0.768561 | 0.832262 |
| 11761863_PIGG      | 0.015888 | 0.768573 | 0.832262 |
| 11740687_IQCH      | 0.026311 | 0.768653 | 0.83233  |

|                    |          |          |          |
|--------------------|----------|----------|----------|
| 11756055_DSCR8     | 0.010671 | 0.768729 | 0.832371 |
| 11730136_C2orf27A  | -0.01572 | 0.768741 | 0.832371 |
| 11746152_VWA3B     | -0.01936 | 0.768742 | 0.832371 |
| 11756195_RPF1      | -0.01235 | 0.768796 | 0.832411 |
| 11740457_ZNF554    | -0.02516 | 0.769031 | 0.832637 |
| 11754107	EIF1B     | 0.015005 | 0.769039 | 0.832637 |
| 11729519_PPIL2     | -0.01534 | 0.769207 | 0.832787 |
| 11750706_SLC13A1   | 0.014222 | 0.769211 | 0.832787 |
| 11761628_MME       | 0.024762 | 0.769253 | 0.832813 |
| 11720917_BPIFB1    | -0.03025 | 0.769361 | 0.832912 |
| 11716933_CCDC80    | 0.028799 | 0.76939  | 0.832925 |
| 11733398_GABRG1    | 0.010226 | 0.769513 | 0.833017 |
| 11740491_FAM110C   | -0.01121 | 0.769517 | 0.833017 |
| 11739622_VSTM4     | 0.022435 | 0.769541 | 0.833017 |
| 11748016_ACTG2     | 0.014404 | 0.769547 | 0.833017 |
| 11749358_ACADL     | -0.01398 | 0.769564 | 0.833017 |
| 11745141_PADI2     | 0.014229 | 0.769577 | 0.833017 |
| 11762095_HLA-DPB2  | 0.034078 | 0.769652 | 0.833074 |
| 11744938_BRF1      | -0.02444 | 0.769664 | 0.833074 |
| 11733419_RET       | -0.0208  | 0.769828 | 0.833233 |
| 11747308_VTA1      | -0.02566 | 0.769862 | 0.833252 |
| 11728266_LILRB2    | -0.01399 | 0.769909 | 0.833284 |
| 11761333_CDK11A    | 0.012882 | 0.769988 | 0.833351 |
| 11748406_SCAF8     | 0.014767 | 0.770073 | 0.833425 |
| 11730681_PLPP5     | 0.014643 | 0.770148 | 0.833472 |
| 11745575_TEX36     | 0.011939 | 0.770151 | 0.833472 |
| 11730260_PRKAR2B   | 0.014376 | 0.770201 | 0.833502 |
| 11740086_CSNK2A1   | 0.010449 | 0.770213 | 0.833502 |
| 11733242_UBXN10    | -0.01475 | 0.770395 | 0.833678 |
| 11749827_CYBB      | -0.03141 | 0.77041  | 0.833678 |
| 11749846_AP2M1     | -0.0105  | 0.77053  | 0.833783 |
| 11724044_USP2      | 0.012779 | 0.770541 | 0.833783 |
| 11717976_METTL3    | -0.01116 | 0.770617 | 0.833839 |
| 11726481_CES4A     | 0.033334 | 0.770627 | 0.833839 |
| 11749646_CCDC129   | -0.01614 | 0.770746 | 0.833947 |
| 11736031_DHX16     | 0.01029  | 0.770761 | 0.833947 |
| 11758147_MAPK13    | 0.026862 | 0.770857 | 0.834032 |
| 11716580_CYSTM1    | 0.010175 | 0.770888 | 0.834042 |
| 11741734_TMEM235   | -0.02531 | 0.7709   | 0.834042 |
| 11758717_NDUFA4    | -0.01017 | 0.770969 | 0.834098 |
| 11731059_NUP35     | 0.013746 | 0.770995 | 0.834109 |
| 11749919_GUCY1A3   | -0.02691 | 0.771098 | 0.834201 |
| 11715236_PCDHGA12  | -0.01423 | 0.771152 | 0.834241 |
| 11743150_ZNF143    | -0.01112 | 0.771291 | 0.834373 |
| 11761332_SGCE      | -0.04938 | 0.771329 | 0.834396 |
| 11742461_PRAMEF19  | -0.02215 | 0.77135  | 0.8344   |
| 11737834_IL12B     | -0.02645 | 0.771407 | 0.834443 |
| 11751582_MBD6      | -0.01635 | 0.771449 | 0.83447  |
| 11720392_RAB11FIP4 | -0.02253 | 0.771508 | 0.834515 |
| 11759361_SHOX      | 0.018253 | 0.771536 | 0.834527 |
| 11746507_ZFYVE27   | -0.01689 | 0.771639 | 0.83462  |

|                    |          |          |          |
|--------------------|----------|----------|----------|
| 11739842_TAF4B     | -0.01976 | 0.771759 | 0.834731 |
| 11739016_ERMN      | 0.015057 | 0.771846 | 0.834792 |
| 11752139_TRAK1     | 0.010074 | 0.771852 | 0.834792 |
| 11761610_DDX11     | 0.014199 | 0.771876 | 0.834792 |
| 11755738_MACROD2   | -0.02581 | 0.771883 | 0.834792 |
| 11730699_PLA2G10   | 0.019648 | 0.771939 | 0.834834 |
| 11757205_GUCY2EP   | 0.01632  | 0.771995 | 0.834876 |
| 11716912_NR2F6     | 0.011793 | 0.772045 | 0.834907 |
| 11719217_SOCS3     | 0.012573 | 0.772079 | 0.834907 |
| 11738978_KRTAP23-1 | -0.01265 | 0.772084 | 0.834907 |
| 11735565_C5orf64   | 0.028641 | 0.772092 | 0.834907 |
| 11751252_GNB4      | -0.01342 | 0.772158 | 0.834935 |
| 11729530_ENTPD2    | 0.017444 | 0.772168 | 0.834935 |
| 11736929_G6PC      | 0.020454 | 0.772202 | 0.834935 |
| 11720705_USE1      | -0.01268 | 0.772214 | 0.834935 |
| 11730105_PKLR      | -0.0173  | 0.772217 | 0.834935 |
| 11716490_SERPINA3  | -0.0135  | 0.772234 | 0.834935 |
| 11715656_COX5A     | -0.01016 | 0.772237 | 0.834935 |
| 11740451_KLRD1     | -0.016   | 0.772327 | 0.835013 |
| 11748120_LCP2      | 0.024721 | 0.772374 | 0.835046 |
| 11720192_NDUFAF4   | 0.011191 | 0.772606 | 0.835278 |
| 11728452_LM01      | -0.01084 | 0.772627 | 0.835282 |
| 11738228_ERV3-1 // | 0.012333 | 0.77269  | 0.835332 |
| 11725390_CD6       | 0.023745 | 0.772735 | 0.835362 |
| 11716102_ATG3      | -0.01051 | 0.772788 | 0.835393 |
| 11746593_PDXDC2P   | 0.010966 | 0.772798 | 0.835393 |
| 11760358_SRGAP3-AS | 0.032706 | 0.772879 | 0.835462 |
| 11731706_CCL22     | -0.01521 | 0.772953 | 0.835512 |
| 11727093_UBE2V2    | -0.01104 | 0.772967 | 0.835512 |
| 11740450_KLRD1     | 0.016777 | 0.77298  | 0.835512 |
| 11740515_CACNB2    | 0.01231  | 0.772993 | 0.835512 |
| 11760468_REV1      | -0.02266 | 0.773074 | 0.835581 |
| 11756348_ERCC3     | 0.01737  | 0.773211 | 0.835681 |
| 11738011_MYLK2     | -0.01069 | 0.773217 | 0.835681 |
| 11760181_CSNK2B    | -0.01647 | 0.773219 | 0.835681 |
| 11721535_APIG2 /// | -0.01747 | 0.773305 | 0.835757 |
| 11744923_RBM15     | -0.01362 | 0.773424 | 0.835866 |
| 11759008_TBX4      | -0.01379 | 0.773452 | 0.835878 |
| 11735312_KIRREL3   | -0.01636 | 0.773508 | 0.835897 |
| 11763101_NDUFB9    | -0.00973 | 0.773509 | 0.835897 |
| 11716839_RASD1     | -0.01677 | 0.773521 | 0.835897 |
| 11740800_SCN11A    | -0.0139  | 0.773539 | 0.835898 |
| 11758865_PIAS4     | -0.01143 | 0.773599 | 0.835945 |
| 11759391_KRTAP6-1  | -0.01751 | 0.773616 | 0.835945 |
| 11732776_DNMT3A    | 0.028957 | 0.773725 | 0.836038 |
| 11745495_BTBD3     | -0.01163 | 0.773736 | 0.836038 |
| 11718602_MTURN     | -0.01088 | 0.77379  | 0.836062 |
| 11756081_LINC00161 | -0.01739 | 0.773794 | 0.836062 |
| 11730768_PODN      | 0.017591 | 0.773944 | 0.836206 |
| 11762158_PPA2      | 0.028216 | 0.774007 | 0.836256 |
| 11738900_RPL3      | 0.009986 | 0.774053 | 0.836256 |

|                    |          |          |          |
|--------------------|----------|----------|----------|
| 11750139_GRIA3     | 0.025045 | 0.774053 | 0.836256 |
| 11742292_DRD4      | 0.024431 | 0.774068 | 0.836256 |
| 11758636_ASPN      | 0.014437 | 0.774076 | 0.836256 |
| 11725251_PTPDC1    | 0.013957 | 0.774274 | 0.836453 |
| 11728989_MSL1      | 0.011383 | 0.774316 | 0.836479 |
| 11759889_BCL2L11   | -0.02913 | 0.774379 | 0.836501 |
| 11727698_VMO1      | 0.011218 | 0.774384 | 0.836501 |
| 11737269_RHD       | 0.015125 | 0.774388 | 0.836501 |
| 11761382_SORBS2    | -0.01425 | 0.774542 | 0.836649 |
| 11746453_DPY19L2 / | 0.018066 | 0.77492  | 0.837011 |
| 11759501_PIN4      | 0.02134  | 0.774939 | 0.837011 |
| 11729955_FHIT      | 0.016768 | 0.774945 | 0.837011 |
| 11729152{EIF3M     | 0.011633 | 0.774946 | 0.837011 |
| 11759590_ATAT1     | -0.01588 | 0.775057 | 0.837113 |
| 11727405_APCS      | -0.01822 | 0.775088 | 0.837127 |
| 11723236_IFI44L    | -0.02251 | 0.775117 | 0.837141 |
| 11761974_LINCO0114 | 0.022246 | 0.775189 | 0.8372   |
| 11723065_ENDOG     | 0.013313 | 0.775208 | 0.837202 |
| 11761646_SRGAP3    | -0.01713 | 0.77524  | 0.837218 |
| 11723126_NOTUM     | -0.01763 | 0.775269 | 0.837231 |
| 11734341_UBE2U     | 0.027863 | 0.775632 | 0.837604 |
| 11740644_CYP4F8    | 0.024527 | 0.775833 | 0.837803 |
| 11759159_ABCB5     | 0.021568 | 0.775854 | 0.837807 |
| 11729713_SPRR2A    | 0.023045 | 0.775953 | 0.837895 |
| 11754409_LDB2      | -0.01989 | 0.776023 | 0.837935 |
| 11738190_STPG2     | 0.018933 | 0.77603  | 0.837935 |
| 11735035_GCSAM     | -0.02095 | 0.776041 | 0.837935 |
| 11739259_USP21     | -0.01016 | 0.776118 | 0.837989 |
| 11741336_CACNG7    | -0.01117 | 0.77613  | 0.837989 |
| 11747883_SEPT9     | -0.01588 | 0.776157 | 0.837989 |
| 11747111_ESR2      | -0.0165  | 0.77616  | 0.837989 |
| 11762706_LCA5      | 0.043162 | 0.776193 | 0.838006 |
| 11744406_NADK      | -0.01446 | 0.776216 | 0.838012 |
| 11717305_ADIRF     | -0.02635 | 0.776341 | 0.838129 |
| 11756587_PTGDS     | -0.02251 | 0.776437 | 0.83821  |
| 11740490_KRT75     | -0.02838 | 0.77645  | 0.83821  |
| 11735462_SPRR2B    | -0.01399 | 0.776503 | 0.838248 |
| 11750573_JAK3      | -0.01215 | 0.776534 | 0.838264 |
| 11751775_DCD       | -0.02988 | 0.77657  | 0.838265 |
| 11717427_GNB1      | -0.01087 | 0.776582 | 0.838265 |
| 11763201_FAM65B    | -0.01276 | 0.776587 | 0.838265 |
| 11731218_RNF151    | -0.01264 | 0.776712 | 0.838381 |
| 11733826_MYOZ2     | -0.01735 | 0.776779 | 0.838432 |
| 11737033_SLC41A3   | 0.013262 | 0.776793 | 0.838432 |
| 11758961_FUT9      | 0.039162 | 0.776837 | 0.838462 |
| 11742003_TAS2R39   | 0.018073 | 0.776927 | 0.838539 |
| 11732921_FOXL2NB   | -0.01976 | 0.776988 | 0.838579 |
| 11718245_SLC25A42  | 0.011674 | 0.776998 | 0.838579 |
| 11747600_WWP2      | 0.013284 | 0.777039 | 0.838605 |
| 11752793_TACC1     | 0.013042 | 0.77706  | 0.838609 |
| 11737917_PDLIM2    | 0.018105 | 0.77714  | 0.838677 |



|                    |          |          |          |
|--------------------|----------|----------|----------|
| 11747873_SIGLEC10  | -0.01415 | 0.777207 | 0.838731 |
| 11751718_C22orf24  | 0.018099 | 0.777235 | 0.838743 |
| 11724933_FAM173A   | 0.01271  | 0.77729  | 0.838783 |
| 11738633_GPAT2     | -0.01451 | 0.777344 | 0.838823 |
| 11731084_ST8SIA2   | 0.015697 | 0.777381 | 0.838844 |
| 11761526_ARHGAP9   | -0.03205 | 0.777575 | 0.839036 |
| 11751851_ZNF169    | 0.017337 | 0.777714 | 0.839151 |
| 11738924_KRTAP4-5  | -0.01609 | 0.777716 | 0.839151 |
| 11763286_TMEM53    | -0.02236 | 0.777849 | 0.839276 |
| 11722596_AKAP13    | 0.016231 | 0.777869 | 0.839278 |
| 11747938_LETMD1    | 0.010973 | 0.777891 | 0.839284 |
| 11734279_RBMXL3    | -0.01777 | 0.777944 | 0.839322 |
| 11758132_TMLHE     | 0.010756 | 0.778004 | 0.839369 |
| 11732849_PRELID2   | 0.01051  | 0.778234 | 0.839598 |
| 11737382_GALR3     | -0.01321 | 0.778377 | 0.839734 |
| 11734732_CRP       | -0.02142 | 0.778456 | 0.839801 |
| 11724374_BATF      | 0.026402 | 0.778554 | 0.839874 |
| 11720496_GZMA      | -0.03354 | 0.778559 | 0.839874 |
| 11756737_C2orf61   | -0.01975 | 0.778677 | 0.83995  |
| 11758710_C2orf61   | -0.01975 | 0.778677 | 0.83995  |
| 11734803_ZC3H13    | -0.02089 | 0.77868  | 0.83995  |
| 11750855_STK32C    | -0.01361 | 0.778815 | 0.840077 |
| 11743654_APOH      | 0.028905 | 0.778851 | 0.840096 |
| 11719743_ARHGAP27  | -0.01948 | 0.778871 | 0.8401   |
| 11725498_TMEM117   | 0.015712 | 0.778941 | 0.84015  |
| 11739891_ARPC4-TTL | 0.022169 | 0.778953 | 0.84015  |
| 11718158_NMI       | 0.012084 | 0.778969 | 0.84015  |
| 11759448_DEFB108B  | 0.015477 | 0.779026 | 0.840192 |
| 11727731_RASGEF1A  | -0.01795 | 0.779101 | 0.840255 |
| 11760277_AKT2      | -0.028   | 0.779257 | 0.840404 |
| 11758920_MRPS17    | -0.02123 | 0.77929  | 0.840421 |
| 11758183_KRT8      | 0.013042 | 0.779326 | 0.840427 |
| 11738119_TAF1 ///  | -0.01855 | 0.779329 | 0.840427 |
| 11742877_SGSM3     | 0.01165  | 0.779391 | 0.840476 |
| 11755442_WHSC1L1   | -0.01078 | 0.779415 | 0.840483 |
| 11721424_FZD5      | 0.020472 | 0.779439 | 0.84049  |
| 11750715_MASP1     | -0.01926 | 0.779507 | 0.840529 |
| 11749368_RTCB      | -0.01276 | 0.779527 | 0.840529 |
| 11720043_ABHD16A   | 0.010178 | 0.779527 | 0.840529 |
| 11750420_APPL2     | 0.012917 | 0.779602 | 0.840574 |
| 11748428_PGS1      | 0.011333 | 0.779603 | 0.840574 |
| 11750125_GRAMD1B   | 0.012116 | 0.779685 | 0.840644 |
| 11719696_LARP7     | -0.01202 | 0.779789 | 0.840738 |
| 11731301_HIC1      | 0.021469 | 0.779947 | 0.840866 |
| 11732341_BCL11A    | 0.031682 | 0.779957 | 0.840866 |
| 11715381_LAPTM4B   | -0.01087 | 0.779967 | 0.840866 |
| 11742173_LST1      | -0.01345 | 0.779977 | 0.840866 |
| 11718843_DNAJC25-G | -0.00993 | 0.780009 | 0.840882 |
| 200088_PMRPL12     | -0.0104  | 0.780111 | 0.840973 |
| 11743448_BICD2     | -0.01124 | 0.780271 | 0.841127 |
| 11737573_LCE2D     | -0.02613 | 0.780298 | 0.841138 |

|                    |          |          |          |
|--------------------|----------|----------|----------|
| 11738067_Clorf101  | 0.021214 | 0.780374 | 0.841197 |
| 11737987_ECT2L     | 0.016842 | 0.780387 | 0.841197 |
| 11729423_CD244     | 0.016727 | 0.780475 | 0.841273 |
| 11737251_CD226     | 0.017748 | 0.78068  | 0.841475 |
| 11738618_MY016     | -0.02174 | 0.780706 | 0.841485 |
| 11719501_NFATC3    | -0.01119 | 0.780733 | 0.841496 |
| 11715215_GRK7      | -0.02631 | 0.78078  | 0.841521 |
| 11715351_COL1A1    | -0.01706 | 0.780791 | 0.841521 |
| 11743088_PDE8B     | 0.022845 | 0.780815 | 0.841528 |
| 11761657_KCNAB2    | 0.017672 | 0.780859 | 0.841537 |
| 11717300_HLA-DPB1  | -0.02508 | 0.780863 | 0.841537 |
| 11757966_ZNF75D    | 0.012027 | 0.780875 | 0.841537 |
| 11759110_HIST1H2BH | -0.03498 | 0.781137 | 0.841801 |
| 11759093_GNAQ      | 0.011079 | 0.78119  | 0.84184  |
| 11740443_CCDC39 // | 0.033542 | 0.781334 | 0.841976 |
| 11752085_GREB1L    | 0.015489 | 0.781355 | 0.84198  |
| 11726589_NPTN      | 0.009965 | 0.781474 | 0.842085 |
| 11732911_PRSS45    | -0.02875 | 0.781487 | 0.842085 |
| 11734318_DCLK3     | -0.01556 | 0.781512 | 0.842094 |
| 11760822_SCN1B     | -0.02329 | 0.781533 | 0.842098 |
| 11751545_RPL34-AS1 | 0.029766 | 0.781583 | 0.842133 |
| 11753241_CLEC12A   | -0.02131 | 0.781644 | 0.84218  |
| 11741541_EYA4      | -0.01784 | 0.781731 | 0.842255 |
| 11750206_TMEM214   | -0.01253 | 0.781825 | 0.842338 |
| 11751293_CYP2B6    | -0.01012 | 0.781871 | 0.842369 |
| 11716440_USO1      | -0.01056 | 0.781931 | 0.842415 |
| 11756529_HYDIN /// | 0.014317 | 0.782202 | 0.842685 |
| 11761750_CCDC78    | 0.019082 | 0.782216 | 0.842685 |
| 11750735_COMP      | -0.0229  | 0.782282 | 0.842737 |
| 11759618_SLC25A37  | 0.012004 | 0.78235  | 0.842792 |
| 11760088_LINC00266 | 0.024646 | 0.782474 | 0.842907 |
| 11749407_ZNF667-AS | 0.023528 | 0.7825   | 0.842916 |
| 11747558_RASGRP1   | -0.01825 | 0.782563 | 0.842966 |
| 11730880_NEBL      | 0.020711 | 0.78271  | 0.843106 |
| 11752392_COL5A2    | 0.017214 | 0.782772 | 0.843154 |
| 11736253_NUP160    | 0.011319 | 0.782831 | 0.843198 |
| 11749085_CACNA1C   | 0.013143 | 0.782912 | 0.843268 |
| 11717464_LXN       | -0.03448 | 0.782941 | 0.84328  |
| 11761626_RFC4      | -0.02999 | 0.782962 | 0.843284 |
| 11719033_CCDC94    | -0.01359 | 0.783066 | 0.84337  |
| 11758882_CD3D      | -0.02087 | 0.783076 | 0.84337  |
| 11732853_ATP1B4    | 0.01908  | 0.783195 | 0.843479 |
| 11724188_PARP10    | 0.015591 | 0.783222 | 0.84349  |
| 11741997_CEACAM3   | 0.009565 | 0.783468 | 0.843736 |
| 11734123_FSTL4     | -0.01741 | 0.783508 | 0.843757 |
| 11755263_LINC00652 | 0.016199 | 0.783522 | 0.843757 |
| 11737419_WNT16     | -0.01833 | 0.783671 | 0.84389  |
| 11748337_PIH1D1    | -0.01126 | 0.783734 | 0.84389  |
| 11722505_CYYR1     | -0.02696 | 0.783738 | 0.84389  |
| 11726272_ATP1B1    | 0.009745 | 0.78375  | 0.84389  |
| 11747375_TMEM134   | -0.01137 | 0.78376  | 0.84389  |

|                    |          |          |          |
|--------------------|----------|----------|----------|
| 11731921_MARVELD3  | -0.02348 | 0.783764 | 0.84389  |
| 11738949_FGF16     | 0.011132 | 0.783766 | 0.84389  |
| 11737306_GPLD1     | -0.02244 | 0.78384  | 0.84395  |
| 11742567_OR56A3    | 0.016747 | 0.783868 | 0.843962 |
| 11734204_SLC18A3   | 0.014587 | 0.783887 | 0.843962 |
| 11729434_REM1      | -0.02288 | 0.783903 | 0.843962 |
| 11730726_AGT       | -0.03115 | 0.783944 | 0.843989 |
| 11716126_ZYX       | 0.01123  | 0.784037 | 0.844068 |
| 11742555_OR13C9    | -0.02285 | 0.784053 | 0.844068 |
| 11722360_SAFB      | -0.01502 | 0.784236 | 0.844247 |
| 11721603_SYNPO2    | -0.01267 | 0.784321 | 0.84432  |
| 11756862_DCLK1     | 0.023504 | 0.784361 | 0.844329 |
| 11753014_RYR2      | -0.0123  | 0.784364 | 0.844329 |
| 11755940_SLC38A9   | 0.009403 | 0.78442  | 0.844371 |
| 11751958_ARHGEF10L | -0.01211 | 0.784548 | 0.844474 |
| 11729879_ZNF445    | 0.04984  | 0.78455  | 0.844474 |
| 11717383_FOPNL     | 0.014362 | 0.784611 | 0.84452  |
| 11763221_IGLV8-61  | 0.019289 | 0.784905 | 0.844818 |
| 11747098_ATRNL1    | 0.019162 | 0.784966 | 0.844851 |
| 11728024_KLK5      | 0.011526 | 0.78497  | 0.844851 |
| 11745227_SEPT4     | -0.02662 | 0.785002 | 0.844867 |
| 11729845_VNN1      | 0.019609 | 0.785036 | 0.844884 |
| 11747017_TRPV3     | -0.01852 | 0.785079 | 0.844912 |
| 11741954_PCDH11X / | 0.011047 | 0.785155 | 0.844961 |
| 11746458_LOC102724 | 0.016271 | 0.785159 | 0.844961 |
| 11758637_AMY1A /// | -0.01278 | 0.785295 | 0.845089 |
| 11752914_RBM44     | 0.018156 | 0.785322 | 0.8451   |
| 11753357_PFKFB4    | 0.024389 | 0.78539  | 0.845149 |
| 11743662_NUP54     | 0.013864 | 0.785405 | 0.845149 |
| 11739836_GLTSCR1L  | -0.02776 | 0.78542  | 0.845149 |
| 11763761_TIMP1     | 0.012708 | 0.78548  | 0.845195 |
| 11752994_COL8A2    | 0.036696 | 0.785511 | 0.84521  |
| 11761052_ROBO3     | -0.01723 | 0.785536 | 0.845218 |
| 11730432_ZDHHC7    | -0.01161 | 0.785572 | 0.845239 |
| 11761730_SIRT6     | -0.01334 | 0.785616 | 0.845267 |
| 11755668_ATP5J2-PT | 0.009925 | 0.785697 | 0.845336 |
| 11747554_TANGO2    | 0.011839 | 0.785741 | 0.845364 |
| 11749869_VTCN1     | -0.02102 | 0.785842 | 0.845454 |
| 11763251_GYPA ///  | 0.025709 | 0.785864 | 0.845459 |
| 11729135_STK24     | 0.015168 | 0.785912 | 0.845492 |
| 11740574_ZNF157    | 0.010809 | 0.785964 | 0.84553  |
| 11745341_NUMBL     | -0.01716 | 0.786115 | 0.845674 |
| 11753294_COL1A2    | 0.022963 | 0.786157 | 0.845686 |
| 11762713_BMP8B     | 0.015576 | 0.786179 | 0.845686 |
| 11737818_LOXHD1    | 0.014763 | 0.786201 | 0.845686 |
| 11734178_NCR3      | 0.013031 | 0.786207 | 0.845686 |
| 11734235_PLA2G12B  | -0.02698 | 0.786214 | 0.845686 |
| 11757021_RPS24     | 0.009446 | 0.786231 | 0.845686 |
| 11745082_CLEC4M    | 0.022127 | 0.786333 | 0.845778 |
| 11719962_AOC1      | -0.01063 | 0.786403 | 0.845834 |
| 11731749_SNX32     | -0.01077 | 0.786453 | 0.84587  |

|                    |          |          |          |
|--------------------|----------|----------|----------|
| 11752443_FCRL5     | 0.022    | 0.786569 | 0.84596  |
| 11720440_OLFML2B   | -0.01536 | 0.786571 | 0.84596  |
| 11750523_CEACAM4   | 0.014517 | 0.786678 | 0.846056 |
| 11749089_ZNF532    | -0.01114 | 0.786701 | 0.846062 |
| 11729548_AMH       | 0.0133   | 0.78676  | 0.846107 |
| 11722351_SRSF8     | 0.011698 | 0.786779 | 0.846109 |
| 11729080_ESRRG     | -0.0108  | 0.786854 | 0.84617  |
| 11749750_WIPF1     | 0.014883 | 0.786892 | 0.846177 |
| 11738157_GALNT9    | -0.0201  | 0.786895 | 0.846177 |
| 11748867_PTPN7     | -0.01681 | 0.786975 | 0.846245 |
| 11732804_VSX2      | -0.01377 | 0.787    | 0.846253 |
| 11759288_TMX4      | -0.01054 | 0.787086 | 0.846327 |
| 11750076_SNAP25    | -0.02049 | 0.787148 | 0.84635  |
| 11738650_OTOP1     | -0.01947 | 0.787157 | 0.84635  |
| 11727062_FIGF ///  | -0.0143  | 0.787159 | 0.84635  |
| 11751521_GRAMD1C   | 0.011422 | 0.787239 | 0.846417 |
| 11738010_DGKB      | -0.02695 | 0.787345 | 0.846512 |
| 11761458_DNAH2     | 0.018998 | 0.787367 | 0.846518 |
| 11738489_GPR174    | 0.018666 | 0.787502 | 0.846632 |
| 11731066_GIMAP1    | -0.01321 | 0.787509 | 0.846632 |
| 11751782_EFHC2     | -0.0173  | 0.787539 | 0.846646 |
| 11726907_TRIM15    | -0.01307 | 0.78761  | 0.846704 |
| 11730947_IFNG      | -0.02296 | 0.787652 | 0.846731 |
| 11755845_MARS      | -0.01055 | 0.787699 | 0.846746 |
| 11759774_LOC102723 | 0.038412 | 0.787705 | 0.846746 |
| 11758492_BTBD7     | 0.011078 | 0.787718 | 0.846746 |
| 11747329_FHL1      | -0.01399 | 0.787859 | 0.846878 |
| 11762052_RARB      | 0.02166  | 0.787883 | 0.846886 |
| 11725021_COL23A1   | -0.01945 | 0.78792  | 0.846907 |
| 11750536_MUC1      | 0.01624  | 0.788042 | 0.84702  |
| 11758739_TMEM258   | 0.019066 | 0.788089 | 0.84703  |
| 11738439_IFNA7     | -0.0185  | 0.788101 | 0.84703  |
| 11731010_WDR89     | -0.01825 | 0.788107 | 0.84703  |
| 11760357_CSAD      | -0.02543 | 0.788121 | 0.84703  |
| 11731080_HCAR1     | 0.016417 | 0.788164 | 0.847049 |
| 11740651_KLHL34    | -0.01586 | 0.788173 | 0.847049 |
| 11744507_KLHL3     | 0.015664 | 0.788274 | 0.847104 |
| 11748740_HGS       | -0.01026 | 0.788275 | 0.847104 |
| 11721379_P3H3      | -0.01356 | 0.788277 | 0.847104 |
| 11723642_BPIFA1    | 0.017975 | 0.788431 | 0.847252 |
| 11723754_TCF21     | -0.01668 | 0.7886   | 0.847415 |
| 11749397_YWHAG     | 0.02084  | 0.788647 | 0.847446 |
| 11722380_NUDT3 /// | -0.0106  | 0.78874  | 0.84752  |
| 11724269_CACNB1    | 0.01282  | 0.788753 | 0.84752  |
| 11742054_ANO6      | -0.0265  | 0.78878  | 0.84752  |
| 11726545_GOLGA2P5  | 0.01373  | 0.788785 | 0.84752  |
| 11750032_MYBBP1A   | 0.013026 | 0.788854 | 0.847575 |
| 11722861_TRIM2     | -0.01049 | 0.789039 | 0.847756 |
| 11734986_ZNF418    | 0.020932 | 0.789115 | 0.84781  |
| 11759614_ECHDC2    | 0.026815 | 0.789138 | 0.84781  |
| 11753449_ABHD16A   | -0.01278 | 0.789158 | 0.84781  |

|                    |          |          |          |
|--------------------|----------|----------|----------|
| 11727455_SCGB1A1   | -0.01073 | 0.789159 | 0.84781  |
| 11726162_EPHA7     | 0.015382 | 0.78921  | 0.847846 |
| 11763466_NF1       | -0.03611 | 0.789309 | 0.847925 |
| 11758083_HPGD      | 0.012365 | 0.789318 | 0.847925 |
| 11753067_ANKDD1A   | -0.01252 | 0.789371 | 0.847963 |
| 11747398_PLAT      | 0.012473 | 0.789391 | 0.847966 |
| 11742853_RPN1      | 0.01071  | 0.789447 | 0.848007 |
| 11737109_OR2H1     | 0.01568  | 0.789478 | 0.848022 |
| 11737696_C10orf67  | -0.02558 | 0.789516 | 0.848041 |
| 11724660_PAX8      | -0.01363 | 0.78953  | 0.848041 |
| 11731719_CD34      | -0.0264  | 0.789574 | 0.848069 |
| 11732971_SERPINB10 | -0.0142  | 0.789619 | 0.848099 |
| 11761544_DYDC1     | -0.01869 | 0.789671 | 0.848125 |
| 11715901_PSMC2     | -0.01183 | 0.789678 | 0.848125 |
| 11759777_PRMT2     | -0.03862 | 0.789726 | 0.848158 |
| 11752298_KLHL13    | 0.011746 | 0.789811 | 0.848231 |
| 11756126_HAMP      | -0.01726 | 0.789851 | 0.848256 |
| 11748787_MS4A15    | -0.02325 | 0.789875 | 0.848262 |
| 11741345_SNX31     | 0.016179 | 0.7899   | 0.848263 |
| 11758960_EMSY      | 0.012427 | 0.789911 | 0.848263 |
| 11761212_CDC20     | 0.013516 | 0.789998 | 0.848338 |
| 11745400_ARSE      | 0.009339 | 0.790064 | 0.848391 |
| 11727561_TCF7      | -0.02932 | 0.790086 | 0.848395 |
| 11742298_FBXO24    | -0.00967 | 0.790141 | 0.848436 |
| 11764079_LOC105378 | -0.02486 | 0.790171 | 0.848449 |
| 11750087_CALCB     | -0.017   | 0.790286 | 0.848555 |
| 11730274_CALCRL    | 0.033428 | 0.790417 | 0.848676 |
| 11726894_IRAK3     | -0.00955 | 0.79046  | 0.848697 |
| 11736216_DHDDS     | 0.011286 | 0.790477 | 0.848697 |
| 11751974_MTR       | 0.010322 | 0.790488 | 0.848697 |
| 11722451_POLR2D    | -0.0121  | 0.790508 | 0.848699 |
| 11762901_C7orf55   | 0.024287 | 0.790815 | 0.84901  |
| 11749946_FLVCR2    | -0.01332 | 0.790932 | 0.849118 |
| 11760949_UROD      | 0.035674 | 0.791006 | 0.849178 |
| 11742394_TAS2R46   | 0.018592 | 0.791267 | 0.84944  |
| 11728515_SP140     | -0.02438 | 0.791342 | 0.849502 |
| 11734769_THOC2     | -0.01334 | 0.791373 | 0.849516 |
| 11758260_B2M       | 0.016707 | 0.791416 | 0.849544 |
| 11734268_HOXC11    | 0.015228 | 0.79146  | 0.849573 |
| 11750104_FUK       | 0.015876 | 0.791496 | 0.849587 |
| 11715223_RNASE8    | -0.02008 | 0.791509 | 0.849587 |
| 11742287_CHAC1     | 0.012348 | 0.791584 | 0.849649 |
| 11759335_CPEB3     | -0.02388 | 0.79179  | 0.849852 |
| 11755837_ARHGEF5   | -0.02847 | 0.79194  | 0.849994 |
| 11730816_CTDSPL2   | 0.010229 | 0.792044 | 0.850087 |
| 11729270_ZNF414    | 0.015229 | 0.792087 | 0.850115 |
| 11733468_RBM46     | 0.01619  | 0.792162 | 0.850177 |
| 11740283_TMED8     | -0.01512 | 0.792317 | 0.850324 |
| 11740524_CCDC112   | -0.0106  | 0.792451 | 0.850449 |
| 11750063_ANKRD35   | 0.02428  | 0.792626 | 0.850615 |
| 11740291_CYP4A11   | 0.01328  | 0.79264  | 0.850615 |

|                    |          |          |          |
|--------------------|----------|----------|----------|
| 11727362_TUBA1A    | -0.00935 | 0.792732 | 0.850695 |
| 11726317_SELE      | 0.02233  | 0.792781 | 0.850718 |
| 11758946_FAM163A   | 0.022639 | 0.792789 | 0.850718 |
| 11732678_DNAH12    | -0.02789 | 0.792829 | 0.850743 |
| 11742801_MAP2K3    | 0.011251 | 0.792934 | 0.850837 |
| 11737855_P2RY1     | 0.029829 | 0.792963 | 0.850849 |
| 11743130_SORL1     | 0.019307 | 0.793011 | 0.850883 |
| 11760624_CHMP5     | -0.03009 | 0.793057 | 0.850913 |
| 11760730_CDH23     | -0.01586 | 0.793112 | 0.850953 |
| 11753277_AKR1E2    | -0.01412 | 0.793201 | 0.85103  |
| 11736888_ITGAL     | 0.009176 | 0.793295 | 0.851112 |
| 11730974_CST2      | -0.01878 | 0.79334  | 0.851141 |
| 11745545_DENND3    | -0.01371 | 0.793403 | 0.851191 |
| 11746411_PABPC1P2  | 0.018136 | 0.793519 | 0.851296 |
| 11763359_DOC2B     | 0.017503 | 0.79355  | 0.851309 |
| 11749511_ZNF595    | 0.011116 | 0.793566 | 0.851309 |
| 11738567_OR5C1     | 0.010607 | 0.793606 | 0.851334 |
| 11737115_ZNF483    | -0.0209  | 0.793748 | 0.851453 |
| 11728231_RNF2      | -0.02964 | 0.793752 | 0.851453 |
| 11759459_LOC100996 | 0.016152 | 0.793829 | 0.851513 |
| 11745947_PER3      | 0.0213   | 0.793843 | 0.851513 |
| 11744895_FAM20A    | -0.02331 | 0.793979 | 0.85164  |
| 11732623_EDDM3A    | -0.02328 | 0.793999 | 0.851643 |
| 11752097_CBFA2T3   | 0.023388 | 0.794091 | 0.851722 |
| 11752438_SAP30BP   | -0.01261 | 0.794131 | 0.851747 |
| 11760196_RNFT1     | -0.01368 | 0.794155 | 0.851752 |
| 11731855_C10orf107 | 0.014009 | 0.79417  | 0.851752 |
| 11751091_NUP205    | -0.01651 | 0.794266 | 0.851834 |
| 11720856_INSR      | -0.02033 | 0.794282 | 0.851834 |
| 11729379_CASK      | -0.01112 | 0.794328 | 0.851865 |
| 11730603_FAM13C    | 0.020515 | 0.794507 | 0.85201  |
| 11715723_ITM2B     | -0.01452 | 0.794528 | 0.85201  |
| 11743360_PLEKHG5   | -0.01832 | 0.794544 | 0.85201  |
| 11746954_CCL4 ///  | -0.01807 | 0.79455  | 0.85201  |
| 11733532_CYP4F22   | 0.013498 | 0.794553 | 0.85201  |
| 11752841_TM7SF2    | 0.027522 | 0.794567 | 0.85201  |
| 11737856_OPCLM     | 0.013836 | 0.79459  | 0.852015 |
| 11757522_C6orf47   | 0.012803 | 0.794622 | 0.852031 |
| 11751917_MTMR12    | -0.01075 | 0.794702 | 0.852098 |
| 11756914_NTRK2     | -0.0194  | 0.794728 | 0.852104 |
| 11721148_SYNGR1    | -0.01784 | 0.794743 | 0.852104 |
| 11760993_SDCBP2    | 0.008935 | 0.794763 | 0.852108 |
| 11761584_DNM1      | -0.02075 | 0.794947 | 0.852286 |
| 11757233_TSIX      | 0.011884 | 0.794984 | 0.852307 |
| 11717120_C6orf106  | -0.0164  | 0.795095 | 0.852407 |
| 11718505_SRSF10    | 0.010138 | 0.795131 | 0.852427 |
| 11736838_HDAC9     | 0.020931 | 0.795237 | 0.852499 |
| 11726916_SLC04C1   | -0.02264 | 0.795257 | 0.852499 |
| 11746917_ANXA8 /// | 0.009914 | 0.795264 | 0.852499 |
| 11734956_CNTNAP2   | -0.03443 | 0.795268 | 0.852499 |
| 11748492_LAYN      | -0.01119 | 0.795311 | 0.852526 |

|                    |          |          |          |
|--------------------|----------|----------|----------|
| 11759869_PJA1      | 0.01407  | 0.795365 | 0.852566 |
| 11762945_LOC100133 | 0.024052 | 0.795408 | 0.852593 |
| 11741913_HSP90B1   | 0.008849 | 0.795427 | 0.852595 |
| 11754169_PPMIM     | -0.00898 | 0.795496 | 0.85265  |
| 11742568_OR5M1     | 0.009056 | 0.795523 | 0.852654 |
| 11722315_PLAC1     | -0.02663 | 0.795535 | 0.852654 |
| 11752032_SH3PXD2A  | -0.01113 | 0.795606 | 0.852711 |
| 11723654_CFC1 ///  | -0.01265 | 0.795723 | 0.852818 |
| 11742341_OR8K1     | -0.01487 | 0.795811 | 0.852894 |
| 11715201_DBET ///  | 0.010241 | 0.795836 | 0.852902 |
| 11730621_SCYL1     | -0.01204 | 0.795901 | 0.852944 |
| 11753429_WBP2      | -0.01127 | 0.79591  | 0.852944 |
| 11732270_CASD1     | 0.010128 | 0.795954 | 0.852957 |
| 11733163_CAPN11    | 0.010618 | 0.795957 | 0.852957 |
| 11762513_PTK7      | -0.03631 | 0.796002 | 0.852987 |
| 11763452_DPH6      | -0.02068 | 0.79606  | 0.85303  |
| 11732574_FAM43B    | -0.01117 | 0.79608  | 0.853031 |
| 11743462_SLC2A8    | -0.01638 | 0.796096 | 0.853031 |
| 11727462_ZXDC      | 0.025936 | 0.796187 | 0.85311  |
| 11756498_GLS2      | 0.041026 | 0.796312 | 0.853225 |
| 11718110_DLD       | 0.009218 | 0.796366 | 0.853262 |
| 11715378_TG        | -0.0148  | 0.796381 | 0.853262 |
| 11740339_F2RL3     | -0.01718 | 0.79641  | 0.853274 |
| 11747395_MOBP      | -0.01392 | 0.796529 | 0.853383 |
| 11750393_MED15     | -0.01245 | 0.796608 | 0.853448 |
| 11738554_XKRY ///  | 0.020727 | 0.796744 | 0.853576 |
| 11723682_ALYREF    | -0.01123 | 0.796782 | 0.853598 |
| 11732733_IL36RN    | 0.012261 | 0.796877 | 0.85368  |
| 11721482_GOLPH3L   | 0.009698 | 0.796937 | 0.853726 |
| 11763429_MOK       | 0.010445 | 0.79709  | 0.853871 |
| 11730634_MAK       | 0.022516 | 0.797193 | 0.853963 |
| 11722557_TMEM35    | -0.02315 | 0.797245 | 0.854    |
| 11748348_TGM4      | 0.01744  | 0.797291 | 0.85403  |
| 11753225_RPAIN     | 0.019015 | 0.797381 | 0.854108 |
| 11740469_RFPL1 /// | 0.023839 | 0.797459 | 0.854173 |
| 11720579_PDE5A     | -0.01646 | 0.797508 | 0.854207 |
| 11761096_ARL2      | 0.036566 | 0.797666 | 0.85433  |
| 11752262_MNT       | -0.01338 | 0.797671 | 0.85433  |
| 11748575_NUP43     | -0.0114  | 0.797679 | 0.85433  |
| 11716481_SPINT1    | 0.010619 | 0.797693 | 0.85433  |
| 11732800_SIRPB1    | -0.02492 | 0.797793 | 0.854417 |
| 11744424_KRT23     | 0.022456 | 0.797809 | 0.854417 |
| 11762312_STK32B    | 0.009578 | 0.797963 | 0.854557 |
| 11750220_NUP43     | -0.01582 | 0.797975 | 0.854557 |
| 11748566_FGF11     | -0.01915 | 0.798029 | 0.854597 |
| 11741814_HINT1     | -0.01052 | 0.798082 | 0.85463  |
| 11758518_CDKL2     | 0.012547 | 0.798095 | 0.85463  |
| 11725598_SULT1C2   | -0.02512 | 0.79822  | 0.854733 |
| 11749453_ZFYVE27   | 0.018255 | 0.798227 | 0.854733 |
| 11715132_HIST1H2BH | -0.01648 | 0.798261 | 0.854751 |
| 11729883_KNDC1     | -0.01221 | 0.798341 | 0.854818 |

|                    |          |          |          |
|--------------------|----------|----------|----------|
| 11720472_GPD1      | -0.01233 | 0.798456 | 0.854923 |
| 11759706_ANKS1B    | 0.022706 | 0.798634 | 0.855094 |
| 11732888_VENTX     | -0.0139  | 0.798739 | 0.855189 |
| 11737160_PLIN5     | -0.01519 | 0.798805 | 0.85524  |
| 11726532_CYTH4     | -0.01573 | 0.798888 | 0.855294 |
| 11731659_ZNF132    | -0.02924 | 0.798895 | 0.855294 |
| 11738430_1-Dec     | 0.014652 | 0.798908 | 0.855294 |
| 11733087_MAF       | 0.00902  | 0.798935 | 0.855305 |
| 11747597_CLEC2D    | 0.014405 | 0.79906  | 0.855419 |
| 11764064_TXLNGY    | -0.02782 | 0.799111 | 0.855455 |
| 11761217_CORO1B    | 0.029816 | 0.799158 | 0.855487 |
| 11729005_ADAD2     | -0.01733 | 0.799223 | 0.855537 |
| 11736750_HTR2A     | -0.02417 | 0.79937  | 0.855676 |
| 11749086_CACNA1C   | 0.01357  | 0.799508 | 0.855805 |
| 11725427_ABLIM3    | -0.01782 | 0.79972  | 0.856014 |
| 11742093_FBLN1     | -0.01045 | 0.799766 | 0.856034 |
| 11747229_ANKS1A    | -0.01439 | 0.799775 | 0.856034 |
| 11731211_ARX       | 0.008843 | 0.799962 | 0.856216 |
| 11760831_FAHD2B    | -0.01529 | 0.800057 | 0.85627  |
| 11761623_DDTL      | -0.02747 | 0.800058 | 0.85627  |
| 11734983_GPRASP1   | -0.0161  | 0.800065 | 0.85627  |
| 11762482_LAMB4     | -0.01546 | 0.800099 | 0.856287 |
| 11744795_TMEM196   | -0.01927 | 0.800119 | 0.856291 |
| 11724785_MRPS18C   | -0.00874 | 0.800166 | 0.856322 |
| 11733362_PKHD1L1   | 0.019379 | 0.80033  | 0.856479 |
| 11731396_PPP1CC    | -0.00874 | 0.800414 | 0.856523 |
| 11734494_EPHA8     | -0.00966 | 0.800418 | 0.856523 |
| 11745116_NAPA      | -0.00975 | 0.800424 | 0.856523 |
| 11738594_DUPD1     | -0.02726 | 0.800473 | 0.856557 |
| 11718949_MPP5      | 0.011433 | 0.800577 | 0.85665  |
| 11745917_PRR29     | -0.01796 | 0.800646 | 0.856704 |
| 11760271_BEND6     | -0.03098 | 0.800707 | 0.856751 |
| 11743105_PTCO3     | -0.00955 | 0.800732 | 0.856755 |
| 11749323_ARHGAP25  | -0.01953 | 0.800746 | 0.856755 |
| 11740608_DEFB125   | 0.024088 | 0.800831 | 0.856828 |
| 11756145_SLC25A15  | 0.012189 | 0.800873 | 0.856853 |
| 11750923_BC01      | -0.0314  | 0.800916 | 0.856859 |
| 11739047_MMRN2     | -0.01559 | 0.800918 | 0.856859 |
| 11720193_NDUFAF4   | 0.008954 | 0.800931 | 0.856859 |
| 11754148_APOBEC3H  | -0.00897 | 0.801075 | 0.85698  |
| 11731524_ZNF592    | 0.017753 | 0.801079 | 0.85698  |
| 11740080_CXorf21   | -0.01834 | 0.801126 | 0.857012 |
| 11749154_MAP7D2    | -0.01447 | 0.801191 | 0.857062 |
| 11715509_NDFIP1    | -0.00855 | 0.801287 | 0.857147 |
| 11762219_ZBTB17    | -0.01181 | 0.80141  | 0.857241 |
| 11740842_CCSE1     | 0.01512  | 0.801411 | 0.857241 |
| 11744521_USP39     | -0.01005 | 0.801468 | 0.857284 |
| 11761307_HLA-DPB1  | 0.014896 | 0.801549 | 0.857352 |
| 11739928_PDE6B     | 0.015344 | 0.80165  | 0.85744  |
| 11739849_POLR2J3   | -0.01133 | 0.801685 | 0.85746  |
| 11740928_C10orf131 | -0.03026 | 0.801729 | 0.857487 |



|                    |          |          |          |
|--------------------|----------|----------|----------|
| 11737344_SLC13A1   | 0.011584 | 0.801797 | 0.857537 |
| 11758749_KRTCAP2   | -0.0134  | 0.801811 | 0.857537 |
| 11735430_BEST2     | 0.017512 | 0.80183  | 0.85754  |
| 11720189_AP3S2 /// | 0.009886 | 0.801852 | 0.857544 |
| 11721057_ANO10     | -0.01336 | 0.801872 | 0.857546 |
| 11727537_CPA3      | 0.014029 | 0.801907 | 0.857555 |
| 11729437_LY6H      | 0.01985  | 0.801915 | 0.857555 |
| 11752472_MED24     | -0.01633 | 0.801966 | 0.857585 |
| 11750760_CES5A     | 0.018039 | 0.801994 | 0.857585 |
| 11739307_ZNF770    | 0.009271 | 0.801996 | 0.857585 |
| 11728449_SPTSSB    | 0.020512 | 0.802014 | 0.857586 |
| 11742541_OR1S2     | 0.027706 | 0.80219  | 0.857756 |
| 11733575_STOX1     | 0.026955 | 0.802243 | 0.857786 |
| 11730127_SPICE1    | -0.02052 | 0.802254 | 0.857786 |
| 11759738_TMED4     | 0.010228 | 0.80234  | 0.857859 |
| 11731504_C2orf39   | -0.01637 | 0.802477 | 0.857987 |
| 11743862_TRIM39 // | 0.013867 | 0.802597 | 0.858096 |
| 11756582_TRNAU1AP  | 0.010916 | 0.80268  | 0.858162 |
| 11747609_P2RX7     | 0.016554 | 0.802693 | 0.858162 |
| 11718923_IQSEC1    | 0.01462  | 0.802762 | 0.858217 |
| 11716721_PHF1      | -0.01445 | 0.803083 | 0.858542 |
| 11737230_ADIG      | 0.021096 | 0.803105 | 0.858546 |
| 11727625_ASCC1     | 0.010134 | 0.803141 | 0.858566 |
| 11721636_DERL1     | 0.010904 | 0.803226 | 0.85863  |
| 11761413_ORM1      | 0.025901 | 0.803236 | 0.85863  |
| 11754415_TMEM86B   | 0.020889 | 0.803299 | 0.85867  |
| 11744208_MRPL28    | 0.009261 | 0.803308 | 0.85867  |
| 11738221_C2orf50   | -0.01667 | 0.803344 | 0.858689 |
| 11730789_KLHL10    | -0.01641 | 0.803378 | 0.858706 |
| 11754490_IMPG1     | 0.020102 | 0.803417 | 0.858729 |
| 11740027_LOC200726 | 0.012424 | 0.803453 | 0.858749 |
| 11749063_CTNS      | 0.012251 | 0.803689 | 0.858969 |
| 11756980_HS3ST2    | 0.028957 | 0.80371  | 0.858969 |
| 11737140_MURC      | -0.01704 | 0.803711 | 0.858969 |
| 11744233_FZD8      | 0.010717 | 0.803742 | 0.858982 |
| 11755152_DUOX1     | -0.01287 | 0.803768 | 0.858992 |
| 11733331_CCDC170   | -0.01615 | 0.803825 | 0.859019 |
| 11738537_STMN1     | 0.017837 | 0.803829 | 0.859019 |
| 11746414_FAM107B   | -0.01193 | 0.803888 | 0.859035 |
| 11717977_C7        | 0.020305 | 0.803896 | 0.859035 |
| 11741646_ATXN7L1   | -0.01092 | 0.803897 | 0.859035 |
| 11762452_CASS4     | 0.01013  | 0.803924 | 0.859046 |
| 11763016_RPS6      | 0.023308 | 0.803988 | 0.859095 |
| 11754028_RHEB      | -0.009   | 0.804018 | 0.859109 |
| 11757965_C7orf62   | -0.01703 | 0.804108 | 0.859186 |
| 11755040_CRYGS     | 0.027121 | 0.804198 | 0.859264 |
| 11753147_GATA1     | -0.01427 | 0.804397 | 0.859458 |
| 11731740_SLC25A25  | -0.01381 | 0.804435 | 0.859479 |
| 11724087_FIZ1      | -0.01466 | 0.804461 | 0.859488 |
| 11726254_CD74      | 0.008949 | 0.804581 | 0.859598 |
| 11751142_APBB1     | -0.00912 | 0.804921 | 0.859942 |

|                    |          |          |          |
|--------------------|----------|----------|----------|
| 11746964_BRIX1     | 0.00837  | 0.805031 | 0.86004  |
| 11721704_CRIP1     | -0.02197 | 0.805423 | 0.860434 |
| 11762437_AGPAT3    | 0.018605 | 0.805434 | 0.860434 |
| 11759720_LOC400590 | -0.01908 | 0.805501 | 0.860486 |
| 11736591_BODIL1    | 0.010438 | 0.805557 | 0.860528 |
| 11726467_C2orf141  | -0.01626 | 0.805623 | 0.86058  |
| 11763904_SNORA50A  | -0.01269 | 0.805742 | 0.860688 |
| 11737226_MAST4     | -0.02016 | 0.805801 | 0.860731 |
| 11742040_CAMSAP3   | -0.01368 | 0.805879 | 0.860796 |
| 11758288_TRMT1L    | -0.01125 | 0.806138 | 0.861054 |
| 11751506_ZNF471    | -0.02648 | 0.806176 | 0.861075 |
| 11718016_ADARB1    | -0.01203 | 0.806345 | 0.861237 |
| 11758935_C2orf49   | -0.01142 | 0.806368 | 0.86124  |
| 11731646_USHBP1    | 0.021307 | 0.806383 | 0.86124  |
| 11762467_ASBI1     | -0.01785 | 0.806448 | 0.861274 |
| 11756739_C2orf68   | -0.00885 | 0.80645  | 0.861274 |
| 11741977_RHD       | -0.02521 | 0.80656  | 0.861357 |
| 11745492_CCNO      | -0.0118  | 0.806575 | 0.861357 |
| 11752550_CCT8      | 0.008368 | 0.80658  | 0.861357 |
| 11720016_CGNL1     | -0.01167 | 0.806601 | 0.86136  |
| 11732731_HOXD3 /// | 0.008869 | 0.806642 | 0.861382 |
| 11738353_KRTAP5-5  | 0.016198 | 0.806657 | 0.861382 |
| 11722040_EIF2B3    | 0.010336 | 0.806706 | 0.861416 |
| 11729162_RPF2      | 0.010856 | 0.806819 | 0.861514 |
| 11735797_B4GALNT2  | 0.024055 | 0.806833 | 0.861514 |
| 11743215_PRSS41    | -0.01141 | 0.806975 | 0.861646 |
| 11734349_TRIM11    | 0.010236 | 0.807008 | 0.861663 |
| 11720323_AK2       | -0.00935 | 0.807049 | 0.861688 |
| 11729124_RCN2      | 0.009122 | 0.807086 | 0.861697 |
| 11747744_CKMT1A // | 0.012732 | 0.807093 | 0.861697 |
| 11746652_SETD6     | 0.013571 | 0.807386 | 0.861992 |
| 11715847_PLAT      | -0.00895 | 0.807514 | 0.862093 |
| 11757838_CDC23     | 0.008887 | 0.807517 | 0.862093 |
| 11759687_SNAPC5    | -0.00903 | 0.807588 | 0.86215  |
| 11738598_RNASE12   | 0.021322 | 0.807635 | 0.862182 |
| 11729242_FBN2      | -0.01289 | 0.807671 | 0.862202 |
| 11745773_TNFRSF14  | 0.01377  | 0.807697 | 0.86221  |
| 11722042_PDSS2     | 0.012024 | 0.80775  | 0.86222  |
| 11723500_ZBTB45    | 0.011046 | 0.807751 | 0.86222  |
| 11759240_PCDHGA8   | 0.017696 | 0.807759 | 0.86222  |
| 11739874_ATAD3C    | 0.015065 | 0.807902 | 0.862354 |
| 11725453_NAT8      | 0.013598 | 0.808024 | 0.862465 |
| 11727544_BCAT2     | -0.01111 | 0.808077 | 0.862501 |
| 11763680_PPARA     | -0.01833 | 0.808093 | 0.862501 |
| 11737532_FMO5      | 0.025246 | 0.808173 | 0.862568 |
| 11736187_DDX51     | -0.00974 | 0.808226 | 0.862588 |
| 11722386_MIDN      | -0.01816 | 0.808227 | 0.862588 |
| 11745142_CEP89     | -0.01295 | 0.808385 | 0.862738 |
| 11732245_APOL6     | 0.010744 | 0.808429 | 0.862765 |
| 11762247_PGAMIP4   | -0.00866 | 0.80849  | 0.862812 |
| 11762502_DAOA-AS1  | -0.01069 | 0.80852  | 0.862819 |

|                    |          |          |          |
|--------------------|----------|----------|----------|
| 11751284_KCNIP2    | -0.01672 | 0.808544 | 0.862819 |
| 11728194_CPSF3L    | -0.012   | 0.808549 | 0.862819 |
| 11733399_XG        | -0.02197 | 0.808592 | 0.862845 |
| 11733497_COMMD6    | 0.014877 | 0.808664 | 0.862903 |
| 11724594_HRASLS    | 0.017559 | 0.808722 | 0.862946 |
| 11747140_SLC22A23  | 0.015352 | 0.808781 | 0.862985 |
| 11726560_SAP18     | 0.008669 | 0.808806 | 0.862985 |
| 11738281_IL5       | 0.010593 | 0.808811 | 0.862985 |
| 11738742_OR2AT4    | 0.023837 | 0.808844 | 0.863001 |
| 11736214_STAG3L1 / | 0.009703 | 0.808974 | 0.863106 |
| 11745743_UBE2B     | -0.01575 | 0.808977 | 0.863106 |
| 11734794_MED31     | 0.008216 | 0.808999 | 0.86311  |
| 11720147_DAPK1     | 0.009549 | 0.809051 | 0.863147 |
| 11728381_CRX       | -0.0132  | 0.809184 | 0.86327  |
| 11742645_CSHL1     | -0.01799 | 0.809265 | 0.863338 |
| 11734400_CBARP     | -0.01232 | 0.809372 | 0.863427 |
| 11753228_FCAR      | 0.025368 | 0.809384 | 0.863427 |
| 11718072_NCOR2     | 0.016706 | 0.809403 | 0.863428 |
| 11760829_FAHD2B    | -0.01325 | 0.809427 | 0.863434 |
| 11737738_AADACL4   | -0.02578 | 0.809494 | 0.863447 |
| 11721466_COX7A2    | 0.00857  | 0.8095   | 0.863447 |
| 11740478_FCRL3     | -0.01107 | 0.809506 | 0.863447 |
| 11753005_ITGAD     | -0.01752 | 0.809509 | 0.863447 |
| 11763890_EIF5 ///  | -0.03692 | 0.80956  | 0.863483 |
| 11752558_ATP7B     | -0.01419 | 0.809765 | 0.863682 |
| 11718763_POMP      | -0.0089  | 0.809796 | 0.863688 |
| 11752233_CPNE4     | 0.017891 | 0.809805 | 0.863688 |
| 11742739_MIOX      | -0.016   | 0.809897 | 0.863766 |
| 11740643_CYP4F8    | -0.01525 | 0.810061 | 0.863922 |
| 11753626_CDA       | 0.015807 | 0.810171 | 0.863989 |
| 11762817_NLGN3     | -0.02285 | 0.810179 | 0.863989 |
| 11750148_SNED1     | -0.01183 | 0.81019  | 0.863989 |
| 11726277_SNN       | 0.016787 | 0.810194 | 0.863989 |
| 11735726_SERPINB13 | -0.01518 | 0.810218 | 0.86399  |
| 11741724_FLJ45079  | -0.01363 | 0.81023  | 0.86399  |
| 11719901_TRRAP     | -0.00942 | 0.810318 | 0.864065 |
| 11734111_TIGIT     | -0.01589 | 0.810407 | 0.86414  |
| 11745251_CNTNAP2   | -0.01793 | 0.810557 | 0.864282 |
| 11745944_CHPF      | -0.00916 | 0.810657 | 0.864352 |
| 11736633_AAK1      | -0.00931 | 0.810658 | 0.864352 |
| 11731264_NUP210L   | -0.01338 | 0.810746 | 0.864419 |
| 11715942_AQP1      | 0.021088 | 0.810769 | 0.864419 |
| 11742808_METTL14   | -0.01332 | 0.810774 | 0.864419 |
| 11759235_LCE3D     | -0.01345 | 0.810847 | 0.864478 |
| 11740636_ZNF774    | 0.011959 | 0.810911 | 0.864508 |
| 11740825_TBATA     | 0.016308 | 0.810921 | 0.864508 |
| 11751660_TULP3     | 0.01209  | 0.810928 | 0.864508 |
| 11744604_ERVMER34- | -0.02285 | 0.811006 | 0.864572 |
| 11763909_SNORD8    | -0.01037 | 0.811083 | 0.864635 |
| 11742294_TEX14     | -0.01494 | 0.811292 | 0.864839 |
| 11748663_CNOT3     | 0.016101 | 0.811426 | 0.864963 |

|                    |          |          |          |
|--------------------|----------|----------|----------|
| 11752643_MPL       | 0.014305 | 0.811556 | 0.865083 |
| 11753403_RAB35     | -0.01605 | 0.811617 | 0.865129 |
| 11723861_ATP8A1    | -0.02001 | 0.811636 | 0.86513  |
| 11738207_ERMARD    | -0.00941 | 0.811733 | 0.865215 |
| 11740155_SH2D1B    | 0.014788 | 0.811772 | 0.865237 |
| 11744016_SYT12     | -0.01909 | 0.811853 | 0.865305 |
| 11731936_KCNN1     | -0.01446 | 0.811905 | 0.865341 |
| 11750506_PTPN7     | -0.01809 | 0.811947 | 0.86536  |
| 11762671_C2        | -0.01462 | 0.811971 | 0.86536  |
| 11744524_SMAD5-AS1 | -0.01915 | 0.811975 | 0.86536  |
| 11757570_PRR15     | 0.041082 | 0.812039 | 0.865409 |
| 11736913_FADS6     | -0.01165 | 0.81206  | 0.865412 |
| 11743968_CYBA      | 0.010443 | 0.8121   | 0.865436 |
| 11742503_PON3      | -0.01541 | 0.812297 | 0.865627 |
| 11753984_LINC00654 | -0.01899 | 0.812328 | 0.865635 |
| 11730517_MAST4     | 0.011586 | 0.812349 | 0.865635 |
| 11727493_KRT6C     | -0.01415 | 0.812357 | 0.865635 |
| 11749535_SIRPA     | 0.015792 | 0.812432 | 0.865692 |
| 11738683_RAB34     | -0.00867 | 0.812446 | 0.865692 |
| 11758318_CSTB      | -0.01013 | 0.812496 | 0.865725 |
| 11752449_P4HB      | -0.00874 | 0.812566 | 0.865781 |
| 11733814_GNAO1     | -0.0141  | 0.812625 | 0.865817 |
| 11738066_PCDH10    | -0.01175 | 0.812635 | 0.865817 |
| 11727137_HSPA12B   | -0.01992 | 0.812666 | 0.865831 |
| 11744314_ST20      | 0.017089 | 0.812742 | 0.865894 |
| 11745372_SYT9      | -0.02259 | 0.812823 | 0.865948 |
| 11722805_RAB35     | -0.01109 | 0.812828 | 0.865948 |
| 11739232_RASSF2    | -0.02621 | 0.812907 | 0.866013 |
| 11764167_LINC00570 | 0.022991 | 0.812966 | 0.866057 |
| 11727013_CELF4     | 0.018813 | 0.812998 | 0.866071 |
| 11756186_LOC100233 | -0.01398 | 0.813029 | 0.866071 |
| 11761205_NUDT16    | -0.02442 | 0.813032 | 0.866071 |
| 11763601_WDR62     | -0.00825 | 0.813065 | 0.866087 |
| 11746425_ZSCAN2    | 0.011287 | 0.813167 | 0.866164 |
| 11738063_S100A7A   | 0.025509 | 0.813173 | 0.866164 |
| 11723183_CNOT6L    | 0.015096 | 0.813367 | 0.866352 |
| 11719210_VPS18     | -0.00804 | 0.813541 | 0.866518 |
| 11761983_IQCF1     | 0.028087 | 0.81362  | 0.866584 |
| 11733916_OGDH      | -0.01431 | 0.81369  | 0.866606 |
| 11735124_IPCEF1    | 0.014859 | 0.813691 | 0.866606 |
| 11728561_TSNAXIP1  | -0.02417 | 0.813694 | 0.866606 |
| 11750286_PGAM1     | -0.00797 | 0.813744 | 0.86664  |
| 11755864_PDE11A    | 0.015974 | 0.813981 | 0.866874 |
| 11734459_EDN3      | 0.015693 | 0.814168 | 0.867054 |
| 11756010_NRII3     | -0.0242  | 0.814229 | 0.867084 |
| 11742005_TPSD1     | -0.01101 | 0.814232 | 0.867084 |
| 11732117_KAT7      | 0.008403 | 0.81426  | 0.867087 |
| 11726789_CNTN2     | 0.011704 | 0.81427  | 0.867087 |
| 11732758_POF1B     | -0.01527 | 0.814304 | 0.867104 |
| 11730629_SRCIN1    | -0.01381 | 0.814416 | 0.867205 |
| 11737116_PABPC5    | 0.011658 | 0.814436 | 0.867207 |

|                   |     |          |          |          |
|-------------------|-----|----------|----------|----------|
| 11738356_OR4N2    | /// | -0.02959 | 0.814513 | 0.86727  |
| 11717185_MEF2D    |     | -0.02056 | 0.814546 | 0.867287 |
| 11727291_CDK3     | /// | 0.0096   | 0.814636 | 0.867363 |
| 11735079_RNASE3   |     | -0.01749 | 0.814753 | 0.867469 |
| 11751564_TSPAN6   |     | 0.013817 | 0.814776 | 0.867475 |
| 11733944_RAP2B    |     | 0.022657 | 0.81492  | 0.867609 |
| 11744198_CALM2    |     | -0.00845 | 0.814955 | 0.867627 |
| 11742989_EZR      |     | 0.012772 | 0.814983 | 0.867638 |
| 11742751_ITIH3    |     | 0.016269 | 0.815192 | 0.867837 |
| 11740072_MIER1    |     | 0.01088  | 0.81521  | 0.867837 |
| 11743321_CTSO     |     | 0.01063  | 0.815223 | 0.867837 |
| 11755898_TMEM184A |     | 0.011697 | 0.81536  | 0.867936 |
| 11758966_SPANXA1  | /   | -0.01345 | 0.815361 | 0.867936 |
| 11761426_PHLDB1   |     | -0.02116 | 0.81537  | 0.867936 |
| 11719177_PVR      |     | -0.01168 | 0.815581 | 0.868143 |
| 11723196_MRPL30   |     | -0.01231 | 0.815825 | 0.868383 |
| 11740567_C16orf46 |     | -0.0159  | 0.815965 | 0.868513 |
| 11743752_NELFA    |     | 0.012978 | 0.81606  | 0.868595 |
| 11763937_BRD7P3   |     | 0.013812 | 0.81611  | 0.86863  |
| 11728902_CTIF     |     | 0.011424 | 0.816151 | 0.868654 |
| 11716542_PRSS8    |     | -0.01241 | 0.816255 | 0.868746 |
| 11725340_RNASEH1  |     | -0.00902 | 0.816411 | 0.868893 |
| 11734673_NFATC4   |     | 0.009529 | 0.816498 | 0.868967 |
| 11759285_TRAF2    |     | -0.01984 | 0.816622 | 0.86908  |
| 11735855_TNP2     |     | 0.017942 | 0.816699 | 0.869144 |
| 11741979_RHD      |     | -0.02219 | 0.816761 | 0.869191 |
| 11756222_NR1H4    |     | -0.01592 | 0.816788 | 0.8692   |
| 11761658_ACOT11   |     | -0.01533 | 0.816819 | 0.869215 |
| 11750372_MBP      |     | -0.0255  | 0.81684  | 0.869218 |
| 11760200_SAT1     |     | -0.00961 | 0.816865 | 0.869226 |
| 11746684_PXK      |     | -0.00949 | 0.816926 | 0.869272 |
| 11720889_AGL      |     | 0.011124 | 0.817028 | 0.869342 |
| 11759368_CCL28    |     | -0.00989 | 0.817042 | 0.869342 |
| 11751020_RHCG     |     | -0.01891 | 0.817046 | 0.869342 |
| 11744386_RHOT2    |     | -0.00924 | 0.817101 | 0.869382 |
| 11724799_HLA-DQA1 |     | 0.015247 | 0.817145 | 0.869409 |
| 11746495_CARD10   |     | -0.01131 | 0.817164 | 0.869411 |
| 11750287_DYX1C1   |     | 0.028484 | 0.817228 | 0.869451 |
| 11731789_FGF11    |     | -0.01449 | 0.817238 | 0.869451 |
| 11761018_ACAD8    |     | -0.01207 | 0.817274 | 0.869471 |
| 11718807_TNFRSF1B |     | -0.01192 | 0.81733  | 0.869512 |
| 11745282_AK9      |     | 0.013175 | 0.81741  | 0.869578 |
| 11719088_MMG1     |     | -0.00796 | 0.817608 | 0.869727 |
| 11735907_GJD2     |     | 0.017097 | 0.81761  | 0.869727 |
| 11758672_UCHL1    |     | 0.015854 | 0.81762  | 0.869727 |
| 11734868_TPRG1    |     | 0.024215 | 0.817636 | 0.869727 |
| 11752265_AR       |     | 0.010373 | 0.817639 | 0.869727 |
| 11759820_ABCA6    |     | -0.01623 | 0.817695 | 0.869768 |
| 11724031_HIC2     |     | -0.01146 | 0.817911 | 0.869978 |
| 11733318_TACR2    |     | -0.01278 | 0.817966 | 0.870018 |
| 11720149_C1orf116 |     | 0.016256 | 0.817985 | 0.87002  |

|                    |          |          |          |
|--------------------|----------|----------|----------|
| 11719522_SEMA5A    | 0.016213 | 0.818048 | 0.870065 |
| 11749701_WDR81     | -0.01561 | 0.818064 | 0.870065 |
| 11733334_NRP2      | 0.012616 | 0.818112 | 0.870098 |
| 11736980_CALCR     | -0.01209 | 0.818256 | 0.870227 |
| 11717405_FAM120AOS | 0.010044 | 0.818269 | 0.870227 |
| 11749140_RCBTB2    | -0.0125  | 0.818345 | 0.870269 |
| 11739148_SAMHD1    | 0.013008 | 0.818368 | 0.870269 |
| 11737730_ZNF705A / | 0.010822 | 0.818372 | 0.870269 |
| 11731899_PPAT      | -0.00895 | 0.818397 | 0.870269 |
| 11728066_PTGDR2    | -0.03051 | 0.818398 | 0.870269 |
| 11739428_GPD2      | -0.01052 | 0.818431 | 0.870276 |
| 11740823_LPA /// L | 0.014451 | 0.81844  | 0.870276 |
| 11731894_KCNN3     | -0.01042 | 0.818521 | 0.870343 |
| 11750272_LARS      | -0.00864 | 0.818637 | 0.870448 |
| 11747838_ZSCAN18   | 0.009568 | 0.818706 | 0.870502 |
| 11753829_PLAT      | -0.00806 | 0.818772 | 0.870553 |
| 11733510_GPRIN2    | 0.015633 | 0.818795 | 0.870559 |
| 11751866_GAGE1 /// | -0.02958 | 0.818964 | 0.870716 |
| 11726388_SMCP      | -0.02165 | 0.818979 | 0.870716 |
| 11730652_SYTL4     | 0.014215 | 0.819034 | 0.870756 |
| 11724419_ZC3H6     | 0.014294 | 0.819132 | 0.870841 |
| 11759052_ZBTB46    | -0.02025 | 0.819168 | 0.87086  |
| 11744333_CD151     | 0.009206 | 0.819196 | 0.870871 |
| 11751887_COL4A6    | 0.024765 | 0.819254 | 0.870898 |
| 11741061_SYBU      | -0.01192 | 0.819257 | 0.870898 |
| 11748490_ZNF462    | 0.010563 | 0.819284 | 0.870908 |
| 11724323_SLC12A6   | 0.011053 | 0.819321 | 0.870929 |
| 11737989_ECT2L     | 0.016137 | 0.819557 | 0.871161 |
| 11724154_SULT1E1   | -0.01346 | 0.81962  | 0.871208 |
| 11721123_MMP11     | -0.01169 | 0.819686 | 0.87126  |
| 11732236_GYPA      | 0.010586 | 0.819719 | 0.871273 |
| 11736483_TREML2    | 0.011542 | 0.819734 | 0.871273 |
| 11753272_MIOX      | -0.01291 | 0.820023 | 0.871549 |
| 11738371_CSN1S1    | 0.014591 | 0.82003  | 0.871549 |
| 11748101_RUNX1T1   | 0.011285 | 0.820137 | 0.871644 |
| 11762183_CR1       | -0.02733 | 0.820155 | 0.871644 |
| 11726872_LIPE      | -0.0117  | 0.820189 | 0.871661 |
| 11726207_SH2D5     | -0.02139 | 0.820236 | 0.871692 |
| 11729100_CFAP70    | -0.01463 | 0.820279 | 0.871719 |
| 200092_PMRPL37     | 0.008319 | 0.820455 | 0.871888 |
| 11747053_BHMT      | 0.008613 | 0.820504 | 0.871921 |
| 11720474_SFPQ ///  | -0.00882 | 0.820524 | 0.871922 |
| 11760991_CKMT1A // | 0.014304 | 0.820705 | 0.872096 |
| 11717119_C6orf106  | 0.010422 | 0.820807 | 0.872185 |
| 11751493_PRKG1     | 0.019395 | 0.820879 | 0.872234 |
| 11754390_CARMN     | -0.02713 | 0.820899 | 0.872234 |
| 11722457_L3MBTL2   | 0.009504 | 0.820906 | 0.872234 |
| 11729745_DNAJC17   | -0.01037 | 0.82093  | 0.87224  |
| 11723778_CYP2U1    | 0.017121 | 0.821076 | 0.872376 |
| 11744587_TMEM57    | -0.01168 | 0.82114  | 0.872425 |
| 11725467_NOS3      | -0.01412 | 0.821195 | 0.872456 |

|                    |          |          |          |
|--------------------|----------|----------|----------|
| 11721083_C14orf119 | -0.02501 | 0.821204 | 0.872456 |
| 11758971_FAM131C   | 0.01701  | 0.821226 | 0.87246  |
| 11760728_HLA-DQA1  | 0.024841 | 0.82132  | 0.872541 |
| 11737551_B3GALT1   | 0.019474 | 0.821404 | 0.872611 |
| 11715783_EEF2      | -0.00825 | 0.821427 | 0.872617 |
| 11759686_GPR137    | 0.009846 | 0.821447 | 0.872619 |
| 11734019_URB1      | -0.00984 | 0.821606 | 0.872769 |
| 11724051_TRIM68    | -0.00862 | 0.821711 | 0.872855 |
| 11755518_RNF165    | -0.01603 | 0.821737 | 0.872855 |
| 11735710_SAMSN1    | 0.013616 | 0.821741 | 0.872855 |
| 11732814_DCANP1 // | -0.01451 | 0.821833 | 0.872934 |
| 11760403_SPTAN1    | -0.01362 | 0.821878 | 0.872963 |
| 11732557_XKR3      | 0.016216 | 0.821922 | 0.872991 |
| 11732146_PSMD8     | -0.00851 | 0.821959 | 0.872992 |
| 11753013_AFAP1L1   | 0.017863 | 0.821962 | 0.872992 |
| 11731657_VAV3      | -0.01041 | 0.821977 | 0.872992 |
| 11758022_TNNI2     | -0.01808 | 0.822017 | 0.873    |
| 11728069_LHFPL4    | 0.008328 | 0.82202  | 0.873    |
| 11741698_LCN12     | -0.00982 | 0.822063 | 0.873007 |
| 11745094_EPN3      | -0.00878 | 0.822074 | 0.873007 |
| 11738874_WNT8A     | -0.02955 | 0.822097 | 0.873007 |
| 11748448_CTTN      | 0.010479 | 0.822098 | 0.873007 |
| 11742792_ARL9      | 0.010993 | 0.822216 | 0.873114 |
| 11745515_A1CF      | -0.0139  | 0.822259 | 0.87314  |
| 11719190_STXBP3    | -0.01324 | 0.822278 | 0.873141 |
| 11755937_AKAP4     | -0.01431 | 0.822348 | 0.873196 |
| 11763092_GYPB      | 0.018527 | 0.822456 | 0.873293 |
| 11733452_IRX5      | 0.013682 | 0.822484 | 0.873303 |
| 11742481_PRAMEF20  | -0.0265  | 0.82254  | 0.873343 |
| 11726548_PITPNM3   | 0.015533 | 0.822698 | 0.873492 |
| 11732301_IL23A     | -0.01336 | 0.822729 | 0.873506 |
| 11746831_CDK11A // | -0.00927 | 0.822766 | 0.873527 |
| 11749984_PSTPIP1   | 0.016988 | 0.822812 | 0.873549 |
| 11727773_LARP6     | -0.0091  | 0.822823 | 0.873549 |
| 11738641_ADRA1A    | 0.010764 | 0.823022 | 0.873741 |
| 11761062_DISP1     | -0.0108  | 0.823101 | 0.873806 |
| 11729578_ATP1A3    | 0.012698 | 0.823135 | 0.873824 |
| 11742246_ATP11AUN  | -0.00852 | 0.823214 | 0.873889 |
| 11736891_ZSCAN20   | 0.01892  | 0.823233 | 0.87389  |
| 11716811_SIN3B     | 0.00924  | 0.823418 | 0.874058 |
| 11724076_DDX3Y     | 0.02302  | 0.823427 | 0.874058 |
| 11718639_SEC24C    | -0.02841 | 0.823495 | 0.874111 |
| 11724195_SERF2     | -0.02213 | 0.823588 | 0.874179 |
| 11741618_ATP2B3    | 0.023133 | 0.823595 | 0.874179 |
| 11751427_DNAJB1    | 0.008173 | 0.823745 | 0.874319 |
| 11721630_MAFB      | -0.01987 | 0.823827 | 0.874387 |
| 11732680_ZNF471    | -0.0161  | 0.823853 | 0.874396 |
| 11732308_ZNF777    | 0.011533 | 0.823907 | 0.874434 |
| 11717369_ARSD      | 0.011657 | 0.823929 | 0.874438 |
| 11755414_PRG4      | -0.02618 | 0.824031 | 0.874496 |
| 11745314_SMG6      | 0.008699 | 0.824032 | 0.874496 |

|                    |          |          |          |
|--------------------|----------|----------|----------|
| 11749985_MINOS1-NE | 0.012622 | 0.824049 | 0.874496 |
| 11726435_DAGLA     | 0.010884 | 0.824057 | 0.874496 |
| 11762576_BCL2L11   | -0.01701 | 0.824073 | 0.874496 |
| 11736454_UGT2B10 / | 0.022444 | 0.824176 | 0.874587 |
| 11733233_HPS1      | 0.011045 | 0.824196 | 0.874589 |
| 11744312_OIT3      | -0.00981 | 0.824227 | 0.874603 |
| 11722898_REV1      | 0.009828 | 0.824251 | 0.874609 |
| 11730860_SLC6A7    | 0.015541 | 0.824299 | 0.874641 |
| 11730839_NUDT16    | 0.010702 | 0.824325 | 0.87465  |
| 11721959_YPEL2     | 0.014001 | 0.824431 | 0.874743 |
| 11747911_LOC102724 | -0.00907 | 0.824462 | 0.874756 |
| 11752104_C22orf39  | -0.00967 | 0.824542 | 0.874823 |
| 11762227_CYTH4     | 0.009885 | 0.824629 | 0.874896 |
| 11726365_ERICH1    | 0.008414 | 0.824694 | 0.874946 |
| 11727357_SLC6A3    | -0.01397 | 0.824741 | 0.874977 |
| 11724770_FCGR2A // | -0.00887 | 0.824912 | 0.875139 |
| 11720821_FUNDC2    | -0.0091  | 0.824957 | 0.875166 |
| 11757089_LOC101929 | -0.01052 | 0.824972 | 0.875166 |
| 11731142_NDST3     | 0.022432 | 0.825039 | 0.875217 |
| 11726271_ATP1B1    | -0.00759 | 0.825105 | 0.875268 |
| 11761977_CCDC171   | -0.01538 | 0.825172 | 0.875321 |
| 11728020_MOV10L1   | -0.0089  | 0.825193 | 0.875324 |
| 11734968_THEMIS    | 0.009665 | 0.825267 | 0.875383 |
| 11762319_MPDU1     | 0.013322 | 0.825385 | 0.875481 |
| 11749923_LBHD1     | 0.008729 | 0.825396 | 0.875481 |
| 11730535_TCAF2 /// | -0.01251 | 0.825446 | 0.875516 |
| 11720854_NFIA      | 0.012437 | 0.825534 | 0.875588 |
| 11724391_ASPHD2    | 0.007583 | 0.825566 | 0.875588 |
| 11725444_CCR1      | -0.0149  | 0.825567 | 0.875588 |
| 11745627_LOC400661 | -0.01492 | 0.825601 | 0.875595 |
| 11755690_C11orf85  | 0.011177 | 0.825611 | 0.875595 |
| 11748823_SH3BP5L   | -0.01139 | 0.825686 | 0.875656 |
| 11738343_TMC1      | 0.021092 | 0.82587  | 0.875827 |
| 11743920_AGXT2     | 0.0149   | 0.825899 | 0.875827 |
| 11716777_EPS8L2    | -0.00961 | 0.8259   | 0.875827 |
| 11753653_CEACAM7   | -0.02282 | 0.825945 | 0.875855 |
| 11755382_IGLL5 /// | 0.014045 | 0.826021 | 0.875917 |
| 11738523_NLRP3     | -0.02271 | 0.826043 | 0.875917 |
| 11758389_TSPAN18   | 0.01255  | 0.826057 | 0.875917 |
| 11735045_ATP6VOD2  | 0.013946 | 0.826109 | 0.875953 |
| 11727816_UBASH3B   | 0.008661 | 0.826157 | 0.875985 |
| 11730024_TIMD4     | 0.021331 | 0.826385 | 0.876208 |
| 11736722_XCL1      | 0.013815 | 0.826597 | 0.876413 |
| 11729370_GANC      | -0.01725 | 0.826696 | 0.876448 |
| 11733159_FAM84A    | -0.02463 | 0.8267   | 0.876448 |
| 11755835_GATS      | 0.013249 | 0.826716 | 0.876448 |
| 11757122_RPL32     | -0.0122  | 0.826719 | 0.876448 |
| 11726133_SYN1      | -0.01109 | 0.826723 | 0.876448 |
| 11728500_IL1R2     | 0.013601 | 0.826745 | 0.876448 |
| 11759811_LINC01121 | -0.02083 | 0.826755 | 0.876448 |
| 11752818_C8orf86   | 0.01356  | 0.826813 | 0.87649  |



|                    |          |          |          |
|--------------------|----------|----------|----------|
| 11751870_GYPA      | 0.029542 | 0.826909 | 0.876573 |
| 11716273_POLR2E    | -0.00934 | 0.826934 | 0.876581 |
| 11750364_ANKRD33   | -0.01974 | 0.826989 | 0.87662  |
| 11725496_GPAT3     | -0.00802 | 0.827071 | 0.87667  |
| 11738714_OR2T12 // | 0.010571 | 0.827073 | 0.87667  |
| 11742407_NKX6-3    | 0.010281 | 0.82709  | 0.87667  |
| 11750568_SALL1     | 0.009579 | 0.827115 | 0.876678 |
| 11759805_WBSCR16   | -0.03756 | 0.827159 | 0.876705 |
| 11752486_G6PD      | -0.00915 | 0.82724  | 0.876772 |
| 11760045_LOC100131 | 0.013942 | 0.827471 | 0.876997 |
| 11764169_LINCO1388 | 0.015626 | 0.827503 | 0.877013 |
| 11736743_C1orf168  | -0.01272 | 0.827662 | 0.877162 |
| 11746701_LINC00654 | 0.009317 | 0.82769  | 0.877172 |
| 11763162_DNAJC9    | 0.019536 | 0.827732 | 0.877198 |
| 11715952_MBTPS1    | -0.00923 | 0.827917 | 0.877375 |
| 11761109_FIBP      | 0.022819 | 0.82805  | 0.877497 |
| 11723849_MS4A6A    | -0.01862 | 0.828162 | 0.877588 |
| 11746864_CSMD2     | -0.00884 | 0.828172 | 0.877588 |
| 11724200_PYGM      | -0.02193 | 0.828221 | 0.877621 |
| 11762197_TONSL-AS1 | -0.01944 | 0.828278 | 0.877644 |
| 11749999_TMEM150B  | -0.01239 | 0.828279 | 0.877644 |
| 11757347_RNF144A   | -0.01144 | 0.828533 | 0.877895 |
| 11761591_TMEM143   | 0.007754 | 0.82857  | 0.877915 |
| 11716740_SLC6A8    | -0.00739 | 0.828601 | 0.877929 |
| 11726778_OAS2      | -0.01417 | 0.828695 | 0.87801  |
| 11746852_PCDHB12   | -0.01132 | 0.828782 | 0.878076 |
| 11738307_C8orf86   | -0.01302 | 0.828794 | 0.878076 |
| 11761882_SMIM2     | -0.02184 | 0.828863 | 0.878129 |
| 11763216_DMKN      | -0.01574 | 0.82888  | 0.878129 |
| 11738114_MUSK      | 0.010047 | 0.828992 | 0.878229 |
| 11746919_TPM3      | -0.01168 | 0.829012 | 0.878231 |
| 11748680_TMPRSS4   | -0.01173 | 0.829091 | 0.878295 |
| 11737472_ZNF213    | -0.01089 | 0.829215 | 0.878407 |
| 11743578_TOMM5     | -0.00786 | 0.829269 | 0.878446 |
| 11761041_TBATA     | -0.01219 | 0.829289 | 0.878448 |
| 11760888_TMEM134   | -0.01049 | 0.829478 | 0.878629 |
| 11728962_CTU1      | -0.01001 | 0.829512 | 0.87863  |
| 11732114_CYP2A13   | -0.01644 | 0.829533 | 0.87863  |
| 11730466_KCNJ2     | 0.021762 | 0.829549 | 0.87863  |
| 11740495_SLC6A12   | 0.010683 | 0.829551 | 0.87863  |
| 11730697_DCAF12L1  | -0.01601 | 0.829586 | 0.878631 |
| 11722477_CUL5      | -0.00812 | 0.829599 | 0.878631 |
| 11734443_C1orf42   | -0.01921 | 0.829611 | 0.878631 |
| 11747100_SPTBN4    | 0.007496 | 0.829636 | 0.878631 |
| 11744859_NICN1     | -0.00754 | 0.829657 | 0.878631 |
| 11734595_HIST3H3   | 0.02604  | 0.829659 | 0.878631 |
| 11757955_RALYL     | 0.013394 | 0.829724 | 0.878667 |
| 11722447_SIRT3     | 0.007788 | 0.829729 | 0.878667 |
| 11733686_STRA6     | -0.00909 | 0.82981  | 0.878734 |
| 11759325_MAX       | -0.0127  | 0.829848 | 0.878754 |
| 11734693_NECAB1    | -0.01469 | 0.830053 | 0.878953 |

|                    |     |          |          |          |
|--------------------|-----|----------|----------|----------|
| 11746680_ACSM2A    | //  | 0.008391 | 0.830182 | 0.87907  |
| 11733006_AMOTL2    |     | 0.012521 | 0.830254 | 0.879127 |
| 11748786_TESPA1    |     | -0.01585 | 0.830284 | 0.87914  |
| 11747877_AMD1      |     | -0.00921 | 0.830393 | 0.879208 |
| 11726841_DLX5      |     | 0.01009  | 0.830417 | 0.879208 |
| 11729730_TPD52L3   |     | -0.01119 | 0.830417 | 0.879208 |
| 11740407_HTR1B     |     | -0.01225 | 0.83042  | 0.879208 |
| 11719185_N4BP2L2   |     | 0.011984 | 0.83045  | 0.87922  |
| 11762600_SEC31B    |     | -0.01568 | 0.830483 | 0.879236 |
| 11723644_PLN       |     | 0.013859 | 0.830605 | 0.879347 |
| 11763678_IGHM      | /// | -0.00831 | 0.830654 | 0.87938  |
| 11740350_RNASE7    |     | 0.01311  | 0.830742 | 0.879453 |
| 11738646_FAM153A   | /   | 0.017261 | 0.830925 | 0.879627 |
| 11718672_IRF3      |     | 0.008375 | 0.830942 | 0.879627 |
| 11737923_SERPINB8  |     | 0.014607 | 0.831057 | 0.87973  |
| 11741820_KCNH5     |     | 0.016172 | 0.831122 | 0.87977  |
| 11747267_TNNC2     |     | -0.01361 | 0.831131 | 0.87977  |
| 11739740_IL21R     |     | -0.01941 | 0.83136  | 0.879988 |
| 11732175_FANCF     |     | -0.01309 | 0.831373 | 0.879988 |
| 11751695_EHD2      |     | -0.01321 | 0.831475 | 0.880077 |
| 11763150_GYPB      |     | 0.011347 | 0.831598 | 0.880188 |
| 11724620_WDR78     |     | 0.008772 | 0.831734 | 0.880313 |
| 11758430_SLC4A1    |     | 0.014976 | 0.831792 | 0.880355 |
| 11753772_SPCS2     | /// | 0.010607 | 0.83181  | 0.880355 |
| 11752147_STXBP4    |     | -0.00845 | 0.831917 | 0.88045  |
| 11763311_CSNK1D    |     | -0.00875 | 0.831969 | 0.880468 |
| 11755307_MEP1A     |     | 0.009181 | 0.831971 | 0.880468 |
| 11761867_LINCO0272 |     | -0.01214 | 0.832146 | 0.880635 |
| 11735048_PCDHB3    |     | -0.00923 | 0.832169 | 0.88064  |
| 11737110_ILDR2     |     | 0.013538 | 0.832224 | 0.880669 |
| 11735874_ADAMTSL4  |     | 0.023207 | 0.832232 | 0.880669 |
| 11762985_PAFAH1B2  |     | 0.037545 | 0.832286 | 0.880706 |
| 11762077_CARD9     |     | 0.016193 | 0.832312 | 0.880715 |
| 11736008_MAPK1IP1L |     | 0.007538 | 0.832359 | 0.880743 |
| 11736775_ZIC3      |     | 0.017953 | 0.832374 | 0.880743 |
| 11761317_LOC101929 |     | -0.00815 | 0.832438 | 0.880791 |
| 11723967_TNNT3     |     | -0.0125  | 0.832513 | 0.880851 |
| 11733783_CSNK2A1   |     | 0.008086 | 0.832683 | 0.881012 |
| 11743801_DNAH2     |     | 0.01317  | 0.832734 | 0.881047 |
| 11741466_KCND3     |     | 0.019293 | 0.832797 | 0.881092 |
| 11759836_RHOBTB1   |     | -0.02138 | 0.832819 | 0.881092 |
| 11720458_CAPRIN1   |     | 0.007386 | 0.832831 | 0.881092 |
| 11756719_COQ10B    |     | 0.013482 | 0.832849 | 0.881092 |
| 11761103_CASP1     |     | -0.01801 | 0.832992 | 0.881212 |
| 11741132_TP63      |     | 0.022313 | 0.832998 | 0.881212 |
| 11725982_ZCCHC12   |     | -0.02298 | 0.833139 | 0.881342 |
| 11744759_LCN12     |     | 0.009573 | 0.833164 | 0.881349 |
| 11756122_MLLT4     |     | -0.01183 | 0.833351 | 0.881529 |
| 11724658_RBFOX3    |     | -0.0114  | 0.833377 | 0.881537 |
| 11749747_SNW1      |     | 0.007204 | 0.833595 | 0.881748 |
| 11749621_TRIM41    |     | -0.01417 | 0.833812 | 0.881959 |

|                    |          |          |          |
|--------------------|----------|----------|----------|
| 11760471_BCL3      | -0.01047 | 0.83394  | 0.882063 |
| 11739163_ALDOB     | -0.00726 | 0.833947 | 0.882063 |
| 11715902_DDX23     | -0.00788 | 0.834007 | 0.882095 |
| 11763574_LINC01118 | 0.01184  | 0.834013 | 0.882095 |
| 11759855_LOC102724 | 0.015165 | 0.834091 | 0.882158 |
| 11756733_LRRTM2    | -0.01447 | 0.834179 | 0.882232 |
| 11725310_CRISP3    | -0.01467 | 0.834261 | 0.882283 |
| 11730925_AICDA     | -0.02144 | 0.834279 | 0.882283 |
| 11726699_ZBTB7A    | -0.0153  | 0.834281 | 0.882283 |
| 11751325_FYCO1     | -0.01163 | 0.834461 | 0.882454 |
| 11747906_LOC101060 | -0.01998 | 0.83461  | 0.882592 |
| 11728825_TRNP1     | -0.01322 | 0.834731 | 0.882691 |
| 11741465_CASKIN2   | -0.00781 | 0.834739 | 0.882691 |
| 11747550_RBM23     | 0.007619 | 0.835072 | 0.883024 |
| 11749298_LINC00663 | 0.012994 | 0.835146 | 0.883083 |
| 11762676_FCGR1A    | -0.01047 | 0.835181 | 0.883084 |
| 11749770_PAX1      | -0.03357 | 0.835192 | 0.883084 |
| 11750652_FRK       | -0.02247 | 0.835201 | 0.883084 |
| 11753694_RPS15A    | 0.007156 | 0.835271 | 0.883138 |
| 11750463_CLEC4M    | 0.010444 | 0.835315 | 0.883166 |
| 11728775_TXLNGY    | -0.01247 | 0.835441 | 0.88328  |
| 11719489_EDNRA     | 0.010652 | 0.835486 | 0.883308 |
| 11739140_FPR2      | -0.0171  | 0.835509 | 0.883309 |
| 11752704_ADAMTS18  | 0.018916 | 0.835523 | 0.883309 |
| 11751393_PIK3IP1   | -0.00924 | 0.835688 | 0.883462 |
| 11750356_FAM163A   | -0.02167 | 0.835705 | 0.883462 |
| 11736688_FGF5      | 0.02318  | 0.835721 | 0.883462 |
| 11759277_OR2T34    | -0.01122 | 0.83581  | 0.883536 |
| 11753153_ADGRL3    | 0.020558 | 0.835911 | 0.883624 |
| 11729526_SLC37A2   | 0.015752 | 0.835979 | 0.883677 |
| 11718471_GLIS2     | 0.008684 | 0.836198 | 0.883889 |
| 11763333_ZNF316    | -0.00848 | 0.83627  | 0.883932 |
| 11724621_WDR78     | 0.01426  | 0.836274 | 0.883932 |
| 11760808_LMAN1     | 0.017574 | 0.836321 | 0.883962 |
| 11748986_SMAD7     | -0.00834 | 0.83641  | 0.884031 |
| 11724667_ENPP3     | -0.01208 | 0.836423 | 0.884031 |
| 11738586_HGC6.3    | 0.011166 | 0.836595 | 0.884184 |
| 11747527_ZNF275    | -0.0099  | 0.836603 | 0.884184 |
| 11737325_LAMC2     | -0.01321 | 0.83666  | 0.884207 |
| 11738950_SPANXN5   | 0.01613  | 0.836661 | 0.884207 |
| 11760268_NAALAD2   | 0.020821 | 0.83671  | 0.884239 |
| 11731451_SEC62     | -0.00962 | 0.836776 | 0.88429  |
| 11757173_SNORD94   | 0.008159 | 0.836945 | 0.884449 |
| 11727123_LRP2      | 0.013338 | 0.836983 | 0.88447  |
| 11750370_TNPO1     | -0.00937 | 0.837016 | 0.884487 |
| 11731341_AGBL2     | 0.019873 | 0.83704  | 0.884493 |
| 11755781_MEGF6     | -0.01054 | 0.837078 | 0.88451  |
| 11763669_SIVA1     | -0.01293 | 0.837093 | 0.88451  |
| 11744653_UBC       | 0.007362 | 0.837122 | 0.884522 |
| 11715191_FAM221A   | -0.00816 | 0.837189 | 0.884573 |
| 11759649_CREB3L2   | -0.0134  | 0.837218 | 0.884585 |

|                    |          |          |          |
|--------------------|----------|----------|----------|
| 11761666_TTLL3     | -0.02039 | 0.837289 | 0.884641 |
| 11730406_PAK7      | 0.018082 | 0.837376 | 0.884713 |
| 11749724_MEGF9     | -0.01586 | 0.83744  | 0.884752 |
| 11755617_EPHB1     | -0.00923 | 0.837449 | 0.884752 |
| 11729214_SLC26A3   | 0.015263 | 0.837479 | 0.884764 |
| 11718244_SLC25A42  | -0.01186 | 0.837611 | 0.884886 |
| 11739086_MESDC2    | -0.00869 | 0.837635 | 0.884891 |
| 11762471_MAF       | -0.01874 | 0.83772  | 0.884961 |
| 11716920_PLVAP     | -0.01946 | 0.837737 | 0.884961 |
| 11752105_CCR6      | 0.013416 | 0.83776  | 0.884966 |
| 11723208_MBTPS2    | 0.010013 | 0.837832 | 0.885024 |
| 11722067_CTNN1 //  | -0.00829 | 0.838006 | 0.885188 |
| 11756113_TEX13B    | 0.010161 | 0.838116 | 0.885284 |
| 11761378_NAALADL2  | 0.018993 | 0.838443 | 0.885611 |
| 11741537_KIF13A    | -0.01522 | 0.838587 | 0.885744 |
| 11764076_FLJ16779  | -0.01793 | 0.838682 | 0.885808 |
| 11754696_CENPN     | 0.007597 | 0.838685 | 0.885808 |
| 11752181_ZNF185    | 0.014807 | 0.838702 | 0.885808 |
| 11732850_CTAGE4 // | -0.00757 | 0.83878  | 0.885872 |
| 11744809_AS3MT /// | 0.014925 | 0.838946 | 0.886028 |
| 11758416_UGT3A1    | -0.01046 | 0.839024 | 0.886091 |
| 11760696_TTC23L    | 0.011775 | 0.839385 | 0.886453 |
| 11735989_JCHAIN    | -0.01748 | 0.839404 | 0.886453 |
| 11728557_PML       | -0.01212 | 0.839458 | 0.886473 |
| 11732836_LINC01587 | -0.01263 | 0.839459 | 0.886473 |
| 11723676_CASQ1     | 0.01516  | 0.83954  | 0.886539 |
| 11755448_CAPRIN2   | -0.00796 | 0.839592 | 0.886575 |
| 11749127_MAP7      | -0.00949 | 0.839904 | 0.886885 |
| 11762819_KLK14     | 0.009738 | 0.839997 | 0.886965 |
| 11727799_CHRM1     | -0.01413 | 0.840105 | 0.88706  |
| 11741574_APIAR     | 0.008178 | 0.840155 | 0.887094 |
| 11737452_SLC5A5    | 0.009938 | 0.84025  | 0.887175 |
| 11740458_TRIM39 // | 0.009326 | 0.840305 | 0.8872   |
| 11748697_PDSS2     | 0.013539 | 0.840359 | 0.8872   |
| 11734321_BMP3      | -0.02201 | 0.840364 | 0.8872   |
| 11736508_MAGEE2    | 0.017987 | 0.840366 | 0.8872   |
| 11724823_CWF19L2   | -0.00809 | 0.840378 | 0.8872   |
| 11715891_PNLIP     | -0.01859 | 0.840383 | 0.8872   |
| 11744025_EGLN2 /// | -0.00831 | 0.840462 | 0.887264 |
| 11756023_GDNF      | -0.01804 | 0.840486 | 0.88727  |
| 11717708_PTPN18    | -0.00732 | 0.840638 | 0.887386 |
| 11759274_CD300LD   | -0.01145 | 0.840647 | 0.887386 |
| 11757217_ATXN8OS   | 0.01476  | 0.84065  | 0.887386 |
| 11752600_IL22RA1   | -0.01377 | 0.840753 | 0.887476 |
| 11731188_SLC01A2   | 0.011216 | 0.840817 | 0.887509 |
| 11715271_DBET ///  | 0.010602 | 0.840821 | 0.887509 |
| 11746400_MYLK3     | -0.01703 | 0.840879 | 0.887536 |
| 11721457_SERPINA1  | -0.01759 | 0.840883 | 0.887536 |
| 11755426_SEC61A1   | -0.00819 | 0.840991 | 0.887631 |
| 11716700_SNAPIN    | 0.007451 | 0.841072 | 0.887697 |
| 11745468_GABBR2    | -0.01426 | 0.841114 | 0.887723 |

|                    |          |          |          |
|--------------------|----------|----------|----------|
| 11716033_SLPI      | -0.01042 | 0.841224 | 0.88782  |
| 11728772_CAAP1     | -0.00929 | 0.841348 | 0.887931 |
| 11727424_CANX      | 0.007874 | 0.841414 | 0.887982 |
| 11742400_CGB1      | 0.011057 | 0.841449 | 0.888    |
| 11760795_CELF4     | -0.01344 | 0.841581 | 0.888113 |
| 11724792_PGS1      | -0.012   | 0.841593 | 0.888113 |
| 11734158_HACE1     | 0.01665  | 0.841644 | 0.888132 |
| 11741279_CASC1     | -0.01748 | 0.841651 | 0.888132 |
| 11740982_C1orf68   | 0.009297 | 0.841675 | 0.888132 |
| 11747468_KDM2B     | 0.010527 | 0.841684 | 0.888132 |
| 11732442_BPTF      | -0.00707 | 0.841869 | 0.888302 |
| 11760575_ERGIC1    | -0.02123 | 0.841892 | 0.888302 |
| 11760620_KLK2      | 0.015471 | 0.841899 | 0.888302 |
| 11758370_ETS2      | -0.01226 | 0.841979 | 0.888361 |
| 11736231_ZNF362    | 0.008715 | 0.842013 | 0.888361 |
| 11721846_MFAP5     | 0.020998 | 0.842014 | 0.888361 |
| 11741939_IFNA14    | -0.01151 | 0.842028 | 0.888361 |
| 11751152_ARFGAP1   | -0.01259 | 0.842073 | 0.888389 |
| 11732012_TNFAIP8L3 | -0.01581 | 0.842122 | 0.888422 |
| 11747496_USP19     | -0.00713 | 0.842158 | 0.888441 |
| 11755403_CHST9     | -0.01224 | 0.842189 | 0.888454 |
| 11735780_CYB561D1  | 0.015225 | 0.8424   | 0.888639 |
| 11731071_NOXO1     | -0.01149 | 0.842401 | 0.888639 |
| 11738308_C8orf86   | 0.012672 | 0.842546 | 0.888755 |
| 11761749_IGHV7-81  | -0.02476 | 0.842547 | 0.888755 |
| 11740716_DCHS2     | -0.02118 | 0.842604 | 0.888796 |
| 11730259_ZC2HC1C   | 0.016116 | 0.842744 | 0.888924 |
| 11731393_OR1E1 /// | -0.01097 | 0.842795 | 0.888959 |
| 11727210_PCP2      | -0.01461 | 0.84282  | 0.888966 |
| 11761662_LIN9      | -0.00984 | 0.842857 | 0.888987 |
| 11738771_OR1F1     | -0.01449 | 0.842971 | 0.889083 |
| 11727377_TBC1D15   | -0.01108 | 0.842985 | 0.889083 |
| 11728663_HSD3B2    | -0.01182 | 0.843012 | 0.889092 |
| 11726503_ARSA      | -0.01397 | 0.843031 | 0.889093 |
| 11721768_ATAD3B    | 0.009325 | 0.843203 | 0.889255 |
| 11727192_ACOT4     | 0.011886 | 0.843275 | 0.88931  |
| 11760366_DLGAP1    | 0.010924 | 0.843305 | 0.88931  |
| 11715627_ALDH2     | -0.00777 | 0.84331  | 0.88931  |
| 11750251_MPP7      | -0.00855 | 0.843455 | 0.889444 |
| 11763664_CA6       | 0.019462 | 0.843633 | 0.889613 |
| 11750099_UNC80     | 0.01709  | 0.843768 | 0.889735 |
| 11743108_ACTA1     | 0.014327 | 0.843789 | 0.889738 |
| 11716326_GJA1      | 0.016419 | 0.84385  | 0.889784 |
| 11743203_TMEM257   | 0.012054 | 0.843874 | 0.88979  |
| 11744956_PBRM1     | -0.0079  | 0.843895 | 0.889793 |
| 11725407_HERC3 /// | -0.01178 | 0.843938 | 0.889819 |
| 11737659_ZNF676    | 0.014268 | 0.843957 | 0.88982  |
| 11738750_OR13C2 // | 0.009925 | 0.844198 | 0.890055 |
| 11745401_ARSE      | 0.00873  | 0.844301 | 0.890144 |
| 11739621_VSTM4     | 0.014476 | 0.844331 | 0.890156 |
| 11737731_DCAF8L1   | 0.024902 | 0.844376 | 0.890168 |

|                    |          |          |          |
|--------------------|----------|----------|----------|
| 11734479_PLXNA4    | -0.01534 | 0.844378 | 0.890168 |
| 11760724_TBX3      | -0.02048 | 0.844444 | 0.890195 |
| 11722757_CFTR      | -0.03081 | 0.844453 | 0.890195 |
| 11759359_HIST2H3A  | 0.014003 | 0.844459 | 0.890195 |
| 11738761_OR2M7     | -0.01543 | 0.844486 | 0.890205 |
| 11718320_CD93      | -0.00893 | 0.844509 | 0.89021  |
| 11763172_PGM3      | -0.02438 | 0.844539 | 0.890222 |
| 11731217_INSL6     | 0.015554 | 0.844596 | 0.890246 |
| 11757109_GSTTP1 // | -0.01747 | 0.844608 | 0.890246 |
| 11740372_TMEM130   | -0.00967 | 0.844617 | 0.890246 |
| 11718343_TUBGCP2   | -0.00933 | 0.844665 | 0.890279 |
| 11761987_RPL15     | 0.008526 | 0.844826 | 0.890428 |
| 11754552_MRPL27    | 0.007417 | 0.844856 | 0.890441 |
| 11728173_AMIGO3 // | -0.00857 | 0.844917 | 0.890486 |
| 11756315_LRRC34    | 0.030013 | 0.844967 | 0.890502 |
| 11723041_FABP1 /// | 0.031539 | 0.844968 | 0.890502 |
| 11732555_FASLG     | 0.016623 | 0.845096 | 0.890578 |
| 11728420_CDC134    | -0.01486 | 0.845105 | 0.890578 |
| 11732573_P2RX6     | 0.014806 | 0.845116 | 0.890578 |
| 11720829_S100BPB   | 0.008074 | 0.845131 | 0.890578 |
| 11763679_PPARA     | 0.012433 | 0.845132 | 0.890578 |
| 11741497_PNMA5     | 0.024329 | 0.845173 | 0.890602 |
| 11760048_LINCO1558 | -0.00934 | 0.845212 | 0.890624 |
| 11747021_MCF2      | 0.010722 | 0.845318 | 0.890713 |
| 11741153_NCF2      | 0.017937 | 0.845332 | 0.890713 |
| 11731816_FAM78B    | 0.015292 | 0.845414 | 0.89078  |
| 11737327_COL19A1   | 0.015767 | 0.845496 | 0.890847 |
| 11751345_GOLGA8J / | 0.011896 | 0.845564 | 0.890899 |
| 11742378_AKR1B10 / | 0.01235  | 0.845583 | 0.8909   |
| 11756140_RPL4      | 0.008169 | 0.845676 | 0.890979 |
| 11741848_KRTAP9-4  | 0.010693 | 0.845707 | 0.890992 |
| 11725436_SCGB3A2   | -0.00809 | 0.845812 | 0.891083 |
| 11754255_WDR59     | 0.009174 | 0.845845 | 0.891099 |
| 11748684_ADAM8     | -0.01379 | 0.846302 | 0.891561 |
| 11763687_FMNL1     | -0.01437 | 0.84636  | 0.891598 |
| 11760267_NAALAD2   | 0.02098  | 0.846392 | 0.891598 |
| 11736091_GCA       | -0.01799 | 0.846392 | 0.891598 |
| 11718131_OLFM4     | 0.011648 | 0.846762 | 0.891942 |
| 11744176_PPP1R9B   | -0.00747 | 0.846767 | 0.891942 |
| 11730566_C4orf26   | 0.015864 | 0.846773 | 0.891942 |
| 11742217_PTPRA     | -0.00885 | 0.846856 | 0.891996 |
| 11748122_KCNAB1    | 0.006826 | 0.846861 | 0.891996 |
| 11736514_HTR5A     | 0.016464 | 0.847044 | 0.89217  |
| 11755863_IL12RB2   | 0.012367 | 0.84713  | 0.892241 |
| 11745536_FAM83A-AS | 0.007808 | 0.847157 | 0.89225  |
| 11720175_NOL6      | 0.007993 | 0.847305 | 0.892388 |
| 11718651_TMTC1     | 0.008361 | 0.847404 | 0.892463 |
| 11756000_SHBG      | -0.0066  | 0.847426 | 0.892463 |
| 11739698_AFF3      | 0.012621 | 0.847436 | 0.892463 |
| 11754560_POM121L8P | -0.01055 | 0.84745  | 0.892463 |
| 11747045_PRRT3     | -0.01126 | 0.847489 | 0.892472 |

|                    |          |          |          |
|--------------------|----------|----------|----------|
| 11716892_TOX4      | 0.016467 | 0.847495 | 0.892472 |
| 11747960_GTF3A     | -0.00819 | 0.847589 | 0.892552 |
| 11725248_ZSCAN25   | 0.022828 | 0.84771  | 0.89266  |
| 11758834_RNF43     | -0.01534 | 0.847844 | 0.892781 |
| 11727343_ATG9B     | -0.00975 | 0.847884 | 0.892786 |
| 11723184_CNOT6L    | -0.01289 | 0.847896 | 0.892786 |
| 11756329_EEFSEC    | 0.009177 | 0.847903 | 0.892786 |
| 11758609_KCNJ10    | -0.01783 | 0.847942 | 0.892808 |
| 11739506_LONRF2    | -0.01343 | 0.84799  | 0.892839 |
| 11733581_CA7       | 0.015731 | 0.848009 | 0.89284  |
| 11720788_ASF1A     | 0.008648 | 0.848093 | 0.892909 |
| 11735289_SLC6A5    | -0.00858 | 0.848203 | 0.892992 |
| 11737634_UGT2A1 // | -0.01432 | 0.848208 | 0.892992 |
| 11722460_PCDH12    | 0.015348 | 0.848343 | 0.893114 |
| 11738822_OR9Q1     | -0.02521 | 0.848368 | 0.893114 |
| 11743141_COX11     | 0.007569 | 0.848379 | 0.893114 |
| 11738298_SLC10A5   | 0.011358 | 0.848411 | 0.893129 |
| 11753868_LST1      | 0.013082 | 0.848525 | 0.893221 |
| 11731604_BIRC8     | 0.014251 | 0.848535 | 0.893221 |
| 11761772_PCOLCE    | 0.008085 | 0.848723 | 0.893399 |
| 11739717_KIAA0556  | 0.009242 | 0.848764 | 0.893422 |
| 11740568_ZNF665    | 0.018223 | 0.848781 | 0.893422 |
| 11763663_IGKC ///  | -0.01966 | 0.848904 | 0.893518 |
| 11745365_KLHL29    | 0.013593 | 0.848909 | 0.893518 |
| 11734805_ATG13     | -0.00737 | 0.848981 | 0.893563 |
| 11761093_DHRS4 /// | -0.02581 | 0.849006 | 0.893563 |
| 11751357_MEI1      | -0.01248 | 0.849007 | 0.893563 |
| 11761572_PTCRA     | -0.00765 | 0.849045 | 0.893584 |
| 11751561_SLC12A5   | -0.01075 | 0.849167 | 0.893693 |
| 11732768_RNF152    | -0.02177 | 0.849211 | 0.893704 |
| 11755046_SPHK1     | -0.00735 | 0.849216 | 0.893704 |
| 11750015_COL4A6    | 0.007175 | 0.849232 | 0.893704 |
| 11747852_ISLR      | -0.0176  | 0.849338 | 0.893779 |
| 11753348_SAMSN1    | -0.01218 | 0.849339 | 0.893779 |
| 11740619_ADRA1D    | -0.01506 | 0.849433 | 0.893814 |
| 11752428_CFLAR     | 0.015077 | 0.849436 | 0.893814 |
| 11734809_DTNA      | 0.0083   | 0.849441 | 0.893814 |
| 11736072_C8orf33   | -0.00854 | 0.849446 | 0.893814 |
| 11736649_UGT2B15 / | 0.010592 | 0.84948  | 0.89383  |
| 11736259_SSPN      | 0.028414 | 0.849566 | 0.893901 |
| 11758216_SOX9      | 0.015418 | 0.849666 | 0.893987 |
| 11727669_ROPN1     | -0.01005 | 0.849744 | 0.894051 |
| 11760633_RNF32     | 0.021597 | 0.849769 | 0.894058 |
| 11750507_RNASE11   | -0.00811 | 0.849798 | 0.894068 |
| 11751184_HEATR9    | -0.00765 | 0.849879 | 0.894134 |
| 11721993_SLC6A6    | -0.0065  | 0.84991  | 0.894148 |
| 11732967_GAGE12B / | -0.00811 | 0.849952 | 0.894159 |
| 11729965_ACADL     | -0.02187 | 0.849957 | 0.894159 |
| 11721338_WDR26     | -0.01019 | 0.850013 | 0.894198 |
| 11741599_LCE2A     | 0.008958 | 0.850031 | 0.894198 |
| 11734584_TAAR2     | 0.009622 | 0.850198 | 0.894355 |

|                   |          |          |          |
|-------------------|----------|----------|----------|
| 11725023_SPARCL1  | 0.026827 | 0.850237 | 0.894376 |
| 11733332_NRP2     | -0.01362 | 0.850267 | 0.894386 |
| 11748590_EFCAB6   | 0.018663 | 0.850283 | 0.894386 |
| 11726722_WDFY2    | 0.010238 | 0.850416 | 0.894508 |
| 11732023_KCNK15   | 0.01745  | 0.850443 | 0.894516 |
| 11763028_PPP1R2P1 | 0.009493 | 0.850755 | 0.894801 |
| 11758614_FAM19A5  | 0.017294 | 0.850762 | 0.894801 |
| 11760189_ZSCAN30  | 0.007594 | 0.850768 | 0.894801 |
| 11743423_NSIG1    | 0.011448 | 0.850848 | 0.894865 |
| 11759558_THAP3    | -0.01447 | 0.850943 | 0.894946 |
| 11732700_PKIB     | 0.022632 | 0.851001 | 0.894988 |
| 11743844_PROC     | 0.014257 | 0.851122 | 0.895095 |
| 11717172_BCL2L2   | 0.023657 | 0.851143 | 0.895098 |
| 11740589_RYK      | -0.00692 | 0.851247 | 0.895172 |
| 11717301_TACSTD2  | 0.014008 | 0.85125  | 0.895172 |
| 11750304_EOMES    | -0.01602 | 0.851418 | 0.89533  |
| 11725309_CRISP3   | 0.008648 | 0.85153  | 0.895429 |
| 11741781_CLEC2L   | -0.00881 | 0.851735 | 0.895625 |
| 11752398_C1orf228 | 0.007749 | 0.851791 | 0.895657 |
| 11750419_WDR93    | 0.010442 | 0.851803 | 0.895657 |
| 11740964_MTHFD2L  | 0.014116 | 0.852023 | 0.895869 |
| 11739725_TC2N     | -0.03307 | 0.852055 | 0.895884 |
| 11746607_UBN1     | -0.00966 | 0.852161 | 0.895975 |
| 11717951_ZDHC18   | -0.00665 | 0.852193 | 0.895975 |
| 11725328_USP9X    | 0.010465 | 0.852196 | 0.895975 |
| 11744405_C2orf76  | 0.022483 | 0.852249 | 0.89601  |
| 11725239_ASB2     | 0.01139  | 0.852266 | 0.89601  |
| 11729604_GPC3     | 0.016282 | 0.852363 | 0.896092 |
| 11761580_MPHOSPH6 | 0.00977  | 0.852445 | 0.896141 |
| 11759257_TMEM211  | 0.009941 | 0.852446 | 0.896141 |
| 11751508_FGFR2    | 0.02172  | 0.852533 | 0.896214 |
| 11763108_ERVH-6   | 0.019216 | 0.852673 | 0.896341 |
| 11755806_ZNF407   | 0.009422 | 0.852778 | 0.896433 |
| 11751507_TNS3     | -0.01564 | 0.852833 | 0.89647  |
| 11751944_COL22A1  | 0.013058 | 0.852968 | 0.896594 |
| 11755676_IPCEF1   | -0.01603 | 0.852988 | 0.896595 |
| 11733473_ANKRD24  | -0.00801 | 0.853094 | 0.896673 |
| 11753839_APOA2    | -0.0106  | 0.853098 | 0.896673 |
| 11742115_GLYATL1  | -0.00627 | 0.853143 | 0.8967   |
| 11736388_TRIM4    | -0.01155 | 0.853254 | 0.896797 |
| 11749100_UBAP2    | -0.00746 | 0.853309 | 0.896826 |
| 11732062_CDCP1    | 0.023724 | 0.853318 | 0.896826 |
| 11759841_NALCN    | -0.02163 | 0.853359 | 0.896833 |
| 11738772_IFNA16   | -0.01838 | 0.853361 | 0.896833 |
| 11763949_DAD1P1   | 0.011824 | 0.853414 | 0.896869 |
| 11748723_HLCS     | 0.011022 | 0.853485 | 0.896924 |
| 11759369_MOGAT2   | 0.016731 | 0.853535 | 0.896958 |
| 11737002_PDE3A    | -0.01377 | 0.85358  | 0.896986 |
| 11763180_UBE2F    | -0.01288 | 0.853719 | 0.897112 |
| 11748898_TANGO2   | -0.01194 | 0.853804 | 0.897182 |
| 11723823_MYO5C    | 0.018916 | 0.853919 | 0.897276 |



|                    |             |          |          |
|--------------------|-------------|----------|----------|
| 11737218_HHLA3     | -0.01566    | 0.853938 | 0.897276 |
| 11739893_CNTD1     | 0.021179    | 0.853948 | 0.897276 |
| 11757019_G2E3      | -0.00796    | 0.854057 | 0.897336 |
| 11722863_SCGB2A1   | -0.01483    | 0.854068 | 0.897336 |
| 11736284_NKX3-1    | 0.018736    | 0.854074 | 0.897336 |
| 11739123_AGK       | -0.00806    | 0.85408  | 0.897336 |
| 11761073_SEPT4     | 0.015782    | 0.854097 | 0.897336 |
| 11742898_MYH2      | -0.02395    | 0.854155 | 0.897377 |
| 11743764_RRBP1     | 0.010048    | 0.854264 | 0.897473 |
| 11715334_NXNL2     | -0.00792    | 0.854286 | 0.897476 |
| 11728975_ZNF792    | -0.0093     | 0.854329 | 0.897503 |
| 11733655_SLC12A9   | 0.009158    | 0.854351 | 0.897506 |
| 11745573_LOC646938 | -0.01347    | 0.854372 | 0.897509 |
| 11740204_RPH3A     | 0.008414    | 0.854428 | 0.897549 |
| 11739159_FAM8A1    | -0.00857    | 0.854489 | 0.897579 |
| 11744130_VGLL1     | -0.00909    | 0.854493 | 0.897579 |
| 11716608_PFDN5     | 0.008862    | 0.854537 | 0.897606 |
| 11729635_NRSN1     | -0.02406    | 0.854581 | 0.897632 |
| 11737566_C1QTNF9   | / 0.013197  | 0.854647 | 0.897683 |
| 11747872_DSG1      | -0.0127     | 0.854706 | 0.897724 |
| 11747403_PTPN5     | 0.021071    | 0.854723 | 0.897724 |
| 11745987_GUCY1B3   | -0.00638    | 0.854748 | 0.897731 |
| 11758011_EEF1A1    | 0.00705     | 0.854845 | 0.897813 |
| 11732106_UGT1A1    | // -0.00758 | 0.854985 | 0.897941 |
| 11724183_ATCAY     | 0.013857    | 0.855134 | 0.898078 |
| 11728044_DTD2      | 0.006481    | 0.855172 | 0.898099 |
| 11747985_SGIP1     | -0.0107     | 0.855354 | 0.898254 |
| 11761939_PLPP4     | -0.01719    | 0.855364 | 0.898254 |
| 11739573_ZNF532    | -0.01122    | 0.855375 | 0.898254 |
| 11742023_RAPGEF1   | 0.009356    | 0.8554   | 0.898261 |
| 11736467_TAGAP     | -0.01767    | 0.855435 | 0.898262 |
| 11760173_UQCC2     | -0.00703    | 0.85544  | 0.898262 |
| 11748323_FCRLA     | 0.008814    | 0.855456 | 0.898262 |
| 11749226_BTN2A2    | 0.007558    | 0.85553  | 0.89832  |
| 11731757_KLHDC7B   | 0.009515    | 0.855567 | 0.89834  |
| 11738610_OR10C1    | -0.01437    | 0.855612 | 0.898368 |
| 11755934_FGB       | 0.008966    | 0.855633 | 0.898371 |
| 11734686_ZEB1      | 0.007448    | 0.855683 | 0.898404 |
| 11727909_SLC7A3    | 0.01376     | 0.855709 | 0.898412 |
| 11735516_CPA6      | -0.01763    | 0.85581  | 0.898498 |
| 11743938_SLC7A14   | 0.025645    | 0.855871 | 0.898543 |
| 11757736_APCDD1    | -0.01479    | 0.856017 | 0.898677 |
| 11752467_INPP5D    | 0.011429    | 0.856047 | 0.89869  |
| 11758877_ADH1B     | 0.014956    | 0.85607  | 0.898694 |
| 11757027_RPL31     | -0.00621    | 0.856158 | 0.898767 |
| 11726111_FBXL19    | -0.00681    | 0.856213 | 0.898799 |
| 11742290_GABRR3    | -0.02101    | 0.856245 | 0.898799 |
| 11729470_FAM181B   | 0.008528    | 0.856246 | 0.898799 |
| 11737087_TLL1      | -0.01185    | 0.856262 | 0.898799 |
| 11736375_CD86      | -0.02499    | 0.856334 | 0.898854 |
| 11760852_TRIML1    | 0.008267    | 0.856351 | 0.898854 |

|                    |          |          |          |
|--------------------|----------|----------|----------|
| 11728271_ZNF330    | -0.00882 | 0.856391 | 0.898877 |
| 11740001_CTBP2     | -0.00676 | 0.856442 | 0.898911 |
| 11749041_USP39     | -0.00657 | 0.85646  | 0.898911 |
| 11733914_BAG5      | -0.00794 | 0.856481 | 0.898913 |
| 11738522_TRPV1     | 0.021705 | 0.856566 | 0.898983 |
| 11725178_KCTD11    | 0.010253 | 0.856628 | 0.899011 |
| 11755459_PRDM10    | -0.01114 | 0.856656 | 0.899011 |
| 11761069_THAP6     | 0.020239 | 0.856673 | 0.899011 |
| 11736490_KCNJ5     | -0.00893 | 0.856679 | 0.899011 |
| 11752638_TMC6      | 0.010522 | 0.856701 | 0.899011 |
| 11737632_SLC26A7   | -0.01309 | 0.856703 | 0.899011 |
| 11762679_LITAF     | -0.01195 | 0.856753 | 0.899032 |
| 11761276_CES4A     | -0.01009 | 0.85676  | 0.899032 |
| 11751005_SEMA3B    | 0.008892 | 0.856785 | 0.89904  |
| 11733316_AMER3     | 0.011655 | 0.856813 | 0.899049 |
| 11720643_IVD       | 0.00836  | 0.856936 | 0.89915  |
| 11715626_RPL11     | 0.006198 | 0.856946 | 0.89915  |
| 11763472_ZC3H12D   | 0.013416 | 0.857006 | 0.899194 |
| 11753617_DUSP3     | 0.006483 | 0.857088 | 0.89926  |
| 11727791_DLAT      | -0.00764 | 0.857114 | 0.899262 |
| 11747800_HIF1A     | 0.007024 | 0.857126 | 0.899262 |
| 11749250_ZMYND12   | 0.012587 | 0.857153 | 0.899271 |
| 11763801_NACC2     | 0.015966 | 0.857197 | 0.899298 |
| 11735169_C6orf118  | -0.01136 | 0.857311 | 0.899399 |
| 11715854_PDGFRB    | 0.007411 | 0.857413 | 0.899475 |
| 11763420_LINC01102 | -0.01783 | 0.857421 | 0.899475 |
| 11734964_ADAM33    | -0.01038 | 0.857518 | 0.899558 |
| 11719608_BCAR3     | 0.011288 | 0.85761  | 0.899634 |
| 11757807_ACTG1     | 0.006037 | 0.857781 | 0.899795 |
| 11738938_KRTAP2-1  | 0.011147 | 0.857818 | 0.899814 |
| 11735667_CCDC62    | 0.013994 | 0.857854 | 0.899832 |
| 11753257_CXCL12    | 0.017469 | 0.857898 | 0.899859 |
| 11741429_RBFOX1    | 0.010156 | 0.857952 | 0.899896 |
| 11740070_KRT222    | 0.009374 | 0.857987 | 0.899897 |
| 11761056_TPD52     | -0.01335 | 0.858001 | 0.899897 |
| 11736899_NAIP      | -0.00919 | 0.85802  | 0.899897 |
| 11727921_TEKT1     | 0.008978 | 0.858029 | 0.899897 |
| 11750844_SLC17A4   | -0.01334 | 0.858053 | 0.899897 |
| 11735204_MMAA      | -0.01654 | 0.858063 | 0.899897 |
| 11717826_STMN2     | -0.01125 | 0.858117 | 0.899923 |
| 11745350_FCRLA     | -0.00609 | 0.858124 | 0.899923 |
| 11758878_FABP1     | -0.02535 | 0.858165 | 0.899946 |
| 11750237_EPS8L1    | 0.010997 | 0.858218 | 0.899977 |
| 11729770_BPIFA2    | -0.00616 | 0.858236 | 0.899977 |
| 11742729_LARP4B    | -0.00664 | 0.85825  | 0.899977 |
| 11761809_ST3GAL3   | -0.00681 | 0.858318 | 0.900029 |
| 11727138_HSPA1L    | -0.00818 | 0.858395 | 0.900091 |
| 11742354_OR5M10    | 0.02369  | 0.85855  | 0.900234 |
| 11762716_MEIS3     | -0.00947 | 0.858576 | 0.900243 |
| 11717757_RALA      | -0.0093  | 0.858614 | 0.900258 |
| 11756240_SHISA4    | 0.007701 | 0.858628 | 0.900258 |

|                    |          |          |          |
|--------------------|----------|----------|----------|
| 11743099_HNRNPH1   | 0.006615 | 0.858672 | 0.90028  |
| 11750592_TSHZ2     | 0.008378 | 0.858686 | 0.90028  |
| 11762024_STXBP5    | 0.012428 | 0.858734 | 0.900311 |
| 11756044_PAX5      | -0.01253 | 0.858772 | 0.900332 |
| 11726107_LRFN3     | -0.00839 | 0.858822 | 0.900351 |
| 11747054_FAM167A   | -0.01375 | 0.858833 | 0.900351 |
| 11759108_KRIT1     | 0.020699 | 0.858862 | 0.900351 |
| 11738569_ERAS      | -0.00794 | 0.858864 | 0.900351 |
| 11738941_TBC1D29   | -0.00872 | 0.858942 | 0.900402 |
| 11756384_IKBKG     | 0.007334 | 0.85895  | 0.900402 |
| 11731391_TGM7      | 0.009095 | 0.858977 | 0.900411 |
| 11728170_LCA5      | 0.008497 | 0.859029 | 0.900447 |
| 11741180_A1BG      | -0.00954 | 0.859061 | 0.90046  |
| 11722822_SKP1      | -0.0124  | 0.85908  | 0.900461 |
| 11760197_EIF4E2    | 0.0159   | 0.859172 | 0.900521 |
| 11729911_IBA57     | 0.010578 | 0.859178 | 0.900521 |
| 11717771_OTUB1     | 0.007579 | 0.859192 | 0.900521 |
| 11760572_AMT       | -0.0123  | 0.859211 | 0.900521 |
| 11730414_CALCA     | 0.016494 | 0.859244 | 0.900537 |
| 11759163_CDH23     | -0.01385 | 0.859285 | 0.900561 |
| 11745186_BET1L     | 0.008624 | 0.859386 | 0.900647 |
| 11721761_PIK3R5    | 0.0078   | 0.859461 | 0.900706 |
| 11762516_LAMC1     | -0.01533 | 0.85951  | 0.900728 |
| 11764055_FMR1      | -0.00978 | 0.859519 | 0.900728 |
| 11732027_CRIP3     | 0.010638 | 0.859671 | 0.900869 |
| 11721179_FAM175B   | -0.0072  | 0.859704 | 0.900884 |
| 11734255_ADAM20    | 0.010982 | 0.859729 | 0.90089  |
| 11739612_CALML4    | -0.01003 | 0.859855 | 0.900986 |
| 11756608_STARD9    | -0.01842 | 0.859857 | 0.900986 |
| 11745619_ST18      | 0.007293 | 0.860027 | 0.901145 |
| 11740646_CCR3      | 0.011533 | 0.860045 | 0.901145 |
| 11757138_EIF4A2 // | -0.01382 | 0.860142 | 0.901227 |
| 11745578_TSPEAR-AS | -0.00758 | 0.860173 | 0.90124  |
| 11750155_PER2      | -0.00845 | 0.860212 | 0.901262 |
| 11738861_FCAR      | 0.014739 | 0.860314 | 0.901349 |
| 11752831_ZNF747 // | -0.01369 | 0.860574 | 0.901598 |
| 11728622_KLHL17    | -0.00665 | 0.860608 | 0.901598 |
| 11756844_KCNK2     | 0.012499 | 0.86062  | 0.901598 |
| 11761786_RGR       | 0.008127 | 0.860626 | 0.901598 |
| 11729288_MSL3      | 0.007566 | 0.860669 | 0.901624 |
| 11753712_HBB       | -0.00826 | 0.860717 | 0.901655 |
| 11757565_SPIN2A // | 0.007618 | 0.860752 | 0.901672 |
| 11761231_FRMD8     | -0.00886 | 0.860966 | 0.901877 |
| 11740500_SPECC1L   | 0.008712 | 0.860994 | 0.901887 |
| 11747018_MCTP2     | 0.009182 | 0.861067 | 0.901944 |
| 11734016_UBQLN1    | -0.00667 | 0.861127 | 0.901988 |
| 11751984_DSTYK     | 0.012212 | 0.86137  | 0.902214 |
| 11717741_FUCA2     | -0.00801 | 0.861379 | 0.902214 |
| 11742760_GORASP2   | 0.006656 | 0.861408 | 0.902225 |
| 11737869_C5AR2     | 0.007024 | 0.861473 | 0.902258 |
| 11742840_HSD17B1   | -0.0089  | 0.86148  | 0.902258 |

|                    |          |          |          |
|--------------------|----------|----------|----------|
| 11738587_OR10A4    | -0.01645 | 0.861495 | 0.902258 |
| 11715941_AQP1      | 0.011601 | 0.861541 | 0.902286 |
| 11757802_NRK       | 0.008628 | 0.8616   | 0.902311 |
| 11751026_CHRNA2    | -0.01544 | 0.861602 | 0.902311 |
| 11717487_CORO1B    | -0.00737 | 0.861688 | 0.902382 |
| 11739938_ATP8A2    | 0.015729 | 0.861781 | 0.90246  |
| 11763690_FMNL1     | 0.009556 | 0.861807 | 0.902468 |
| 11749594_ZNF213    | 0.011291 | 0.861963 | 0.902613 |
| 11758287_TMEM236   | 0.014264 | 0.862047 | 0.902681 |
| 11746142_ZNF611    | 0.01341  | 0.862265 | 0.902868 |
| 11738901_IL36B     | -0.01449 | 0.862272 | 0.902868 |
| 11748456_MCF2L     | -0.0125  | 0.862281 | 0.902868 |
| 11760799_HLA-DPB1  | -0.01857 | 0.862319 | 0.90287  |
| 11735171_TM4SF20   | -0.01126 | 0.86232  | 0.90287  |
| 11723790_SNCB      | -0.01479 | 0.862359 | 0.902872 |
| 11739785_SNCB      | -0.01479 | 0.862359 | 0.902872 |
| 11731133_ZBTB46    | -0.00705 | 0.862397 | 0.902893 |
| 11739131_BSDC1     | 0.014031 | 0.86257  | 0.903039 |
| 11747099_ATRNL1    | -0.01282 | 0.862573 | 0.903039 |
| 11761249_RUNDC1    | -0.01541 | 0.862615 | 0.903063 |
| 11745156_OR13A1    | -0.01099 | 0.862659 | 0.903086 |
| 11732924_ENAM      | 0.017878 | 0.862674 | 0.903086 |
| 11763600_WDR62     | -0.00758 | 0.862741 | 0.903108 |
| 11740306_KIAA0319  | -0.00853 | 0.862747 | 0.903108 |
| 11759722_XRCC4     | -0.01273 | 0.862751 | 0.903108 |
| 11751948_NOS1      | 0.011278 | 0.862941 | 0.903277 |
| 11715352_COL1A1    | -0.00969 | 0.862957 | 0.903277 |
| 11741654_LRIT3     | 0.021442 | 0.862996 | 0.903277 |
| 11736825_EPN2      | 0.006995 | 0.862996 | 0.903277 |
| 11760616_CYP4A11   | 0.013386 | 0.863004 | 0.903277 |
| 11757935_KIAA1551  | -0.00704 | 0.863096 | 0.903353 |
| 11735631_TNFRSF13C | -0.0116  | 0.863147 | 0.903385 |
| 11732718_EREG      | 0.009292 | 0.863163 | 0.903385 |
| 11740296_SIRPG     | -0.00886 | 0.863299 | 0.903508 |
| 11761573_PTCRA     | 0.012966 | 0.863322 | 0.903513 |
| 11737298_TMPRSS11F | 0.013522 | 0.863352 | 0.903525 |
| 11725169_MOB3B     | -0.00985 | 0.863482 | 0.903641 |
| 11737909_SLC39A14  | 0.025775 | 0.863569 | 0.903713 |
| 11739258_VWA5A     | -0.01455 | 0.863651 | 0.90378  |
| 11759960_TXLNGY    | 0.008555 | 0.863824 | 0.903941 |
| 11747438_GIMAP4    | -0.012   | 0.863975 | 0.90408  |
| 11762252_DAPP1     | -0.01164 | 0.864012 | 0.904099 |
| 11753232_NDRG1     | 0.020644 | 0.864032 | 0.904101 |
| 11740701_SYNE4     | 0.012858 | 0.864053 | 0.904103 |
| 11736679_TMC5      | 0.01255  | 0.864121 | 0.904156 |
| 11732110_IL4I1     | 0.009639 | 0.864245 | 0.904254 |
| 11745152_ARFGAP1   | 0.006343 | 0.864252 | 0.904254 |
| 11747577_LAMP5     | 0.019103 | 0.864357 | 0.904344 |
| 11745257_RBM14     | -0.00649 | 0.864415 | 0.904375 |
| 11715439_DAP       | 0.006251 | 0.864423 | 0.904375 |
| 11761941_CCSAP     | 0.010198 | 0.864586 | 0.904526 |

|                    |          |          |          |
|--------------------|----------|----------|----------|
| 11739623_VSTM4     | -0.01341 | 0.86462  | 0.904542 |
| 11751278_AMHR2     | -0.00743 | 0.864696 | 0.904602 |
| 11724338_SLC35F1   | -0.01329 | 0.864805 | 0.904665 |
| 11750620_ALDH1A2   | 0.011625 | 0.864806 | 0.904665 |
| 11762800_ZNF496    | 0.008723 | 0.864811 | 0.904665 |
| 11729732_FXYD2 /// | -0.00637 | 0.864831 | 0.904666 |
| 11753502_PTCRA     | 0.007444 | 0.86487  | 0.904687 |
| 11722553_NUP88     | 0.008059 | 0.864891 | 0.904689 |
| 11724831_STS       | -0.01527 | 0.864924 | 0.904704 |
| 11750246_GPER1     | -0.00692 | 0.864942 | 0.904704 |
| 11736345_OPA3      | -0.00628 | 0.864981 | 0.904711 |
| 11735053_AKAP6     | 0.010583 | 0.864991 | 0.904711 |
| 11739945_PKP1      | 0.016328 | 0.865004 | 0.904711 |
| 11745707_EPGN      | -0.01644 | 0.865099 | 0.904792 |
| 11716665_GDF15     | 0.014448 | 0.865145 | 0.90482  |
| 11737273_USP49     | -0.01772 | 0.865506 | 0.905164 |
| 11754614_PCK1      | 0.009473 | 0.865511 | 0.905164 |
| 11722246_PTSS2     | -0.00612 | 0.865639 | 0.905278 |
| 11763563_BYSL      | 0.015319 | 0.865673 | 0.905294 |
| 11728544_SMYD1     | -0.01099 | 0.865721 | 0.90532  |
| 11749572_ZNF692    | -0.00772 | 0.865735 | 0.90532  |
| 11738672_C5orf60   | -0.00757 | 0.865887 | 0.905461 |
| 11757882_GSTA2     | -0.01062 | 0.865908 | 0.905463 |
| 11750544_COL13A1   | 0.00897  | 0.865971 | 0.905509 |
| 11732664_KRTAP26-1 | 0.010579 | 0.86602  | 0.905541 |
| 11763308_TSC22D4   | 0.019164 | 0.866146 | 0.905653 |
| 11748718_INVS      | 0.009468 | 0.866254 | 0.90574  |
| 11736389_TRIM4     | 0.010265 | 0.866266 | 0.90574  |
| 11759181_ITSN1     | -0.01272 | 0.866289 | 0.905745 |
| 11740322_KLK3      | -0.01113 | 0.866317 | 0.905755 |
| 11740807_POTEC     | 0.007686 | 0.86635  | 0.905759 |
| 11728489_CLEC4A    | -0.00751 | 0.866368 | 0.905759 |
| 11746708_LOC389834 | 0.008237 | 0.866377 | 0.905759 |
| 11725061_USP7      | 0.007465 | 0.866505 | 0.905874 |
| 11738711_OR51B5    | -0.01128 | 0.866588 | 0.905941 |
| 11728361_CHCHD7    | -0.00641 | 0.866755 | 0.906097 |
| 11737011_APLF ///  | -0.02043 | 0.866785 | 0.906109 |
| 11721203_SCARF2    | -0.00935 | 0.866806 | 0.906111 |
| 11756435_GLMP      | 0.006477 | 0.866893 | 0.906179 |
| 11732169_PTPN7     | 0.00912  | 0.866908 | 0.906179 |
| 11723144_NALCN     | -0.00808 | 0.866957 | 0.906211 |
| 11723562_VWA5A     | 0.010338 | 0.866985 | 0.906221 |
| 11746457_RNPC3     | 0.010415 | 0.867067 | 0.906286 |
| 11737378_LOC100233 | -0.00836 | 0.867098 | 0.9063   |
| 11762840_TRAPPC10  | -0.0137  | 0.867172 | 0.906344 |
| 11752756_TBC1D26 / | -0.00603 | 0.867177 | 0.906344 |
| 11761026_MBD1      | 0.009001 | 0.867338 | 0.906492 |
| 11746503_EHF       | 0.011152 | 0.867408 | 0.906546 |
| 11733909_FAM216B   | -0.01178 | 0.867616 | 0.906744 |
| 11758696_HBG1 ///  | -0.02371 | 0.867643 | 0.906753 |
| 11747849_CPSF1     | 0.007331 | 0.867741 | 0.906837 |

|                    |          |          |          |
|--------------------|----------|----------|----------|
| 11762012_MYH11     | -0.014   | 0.867883 | 0.906956 |
| 11752642_KCNH6     | -0.00814 | 0.867911 | 0.906956 |
| 11740640_CDY1 ///  | -0.00816 | 0.867911 | 0.906956 |
| 11737089_TLL1      | -0.01908 | 0.867938 | 0.906964 |
| 11755932_HCLS1     | -0.01386 | 0.867961 | 0.906969 |
| 11738869_TBX1      | -0.01072 | 0.868029 | 0.907021 |
| 11743248_ONECUT3   | 0.010884 | 0.868169 | 0.907148 |
| 11726932_TET1      | 0.019816 | 0.868286 | 0.907243 |
| 11738626_FOXP2     | 0.008679 | 0.868298 | 0.907243 |
| 11745048_ACSBG1    | 0.016456 | 0.868363 | 0.907293 |
| 11753476_IQCH      | 0.01238  | 0.868436 | 0.907349 |
| 11740738_ECE2      | -0.0101  | 0.868693 | 0.907598 |
| 11719182_CLCN7     | -0.00759 | 0.868735 | 0.907623 |
| 11724804_LAIR1     | -0.00953 | 0.868792 | 0.907646 |
| 11755282_SCNN1A    | 0.009994 | 0.868795 | 0.907646 |
| 11748658_RGS12     | -0.01782 | 0.868879 | 0.907715 |
| 11730766_NGLY1     | 0.009407 | 0.868946 | 0.907765 |
| 11722470_ACSL6     | -0.01133 | 0.869007 | 0.90781  |
| 11735532_C3orf84   | 0.01607  | 0.869127 | 0.907916 |
| 11725767_CLCF1     | -0.00553 | 0.869295 | 0.908072 |
| 11743911_PLSCR1    | 0.006368 | 0.869466 | 0.908231 |
| 11748462_NSF       | -0.00785 | 0.869663 | 0.908418 |
| 11734589_NR6A1     | -0.01266 | 0.86975  | 0.908489 |
| 11750459_ZFYVE27   | 0.007321 | 0.869818 | 0.908534 |
| 11738173_TMC2      | 0.009717 | 0.869831 | 0.908534 |
| 11743249_PLA2G2C   | 0.009592 | 0.869955 | 0.908645 |
| 11724726_EIF5      | -0.00681 | 0.869987 | 0.908659 |
| 11762655_RSPH10B2  | 0.017962 | 0.870022 | 0.908676 |
| 11741094_CFAP206   | 0.014969 | 0.870085 | 0.908723 |
| 11727876_CYBB      | -0.00736 | 0.870161 | 0.908783 |
| 11762741_LECT1     | 0.017431 | 0.870187 | 0.908784 |
| 11750390_IL17RD    | 0.013942 | 0.8702   | 0.908784 |
| 11728722_VPS29     | -0.00837 | 0.870237 | 0.908804 |
| 11755888_RGN       | -0.00584 | 0.870371 | 0.908924 |
| 11715299_PRAMEF8   | 0.008964 | 0.870453 | 0.908982 |
| 11723099_CA14      | -0.01546 | 0.870464 | 0.908982 |
| 11744339_PRMT2     | -0.00988 | 0.870598 | 0.909102 |
| 11741822_MAGEC3    | 0.014954 | 0.870776 | 0.909269 |
| 11748469_VPS53     | -0.01271 | 0.870874 | 0.909352 |
| 11715246_ADGRB1    | -0.00979 | 0.870914 | 0.909364 |
| 11727560_FKBP7     | 0.010814 | 0.870922 | 0.909364 |
| 11763214_RAPGEF6   | -0.01365 | 0.87097  | 0.909394 |
| 11760596_CHURC1 // | 0.006388 | 0.871029 | 0.909436 |
| 11724599_DCAF10    | 0.006494 | 0.871049 | 0.909438 |
| 11720357_SMAP1     | 0.007277 | 0.871072 | 0.909442 |
| 11721572_C10orf99  | -0.00961 | 0.871094 | 0.909446 |
| 11732011_TNFAIP8L3 | 0.011001 | 0.871207 | 0.909544 |
| 11719280_ARHGAP4 / | 0.006396 | 0.871375 | 0.909692 |
| 11748915_GPT       | 0.013498 | 0.871402 | 0.909692 |
| 11758699_FAM25BP / | -0.0089  | 0.871404 | 0.909692 |
| 11749653_ARMC5     | -0.00666 | 0.871492 | 0.909752 |

|                    |          |          |          |
|--------------------|----------|----------|----------|
| 11747283_NDRG4     | -0.01095 | 0.871499 | 0.909752 |
| 11762946_EPWW6493  | 0.015717 | 0.871534 | 0.909769 |
| 11754387_DCTN5     | 0.006204 | 0.871609 | 0.909817 |
| 11751877_ZNF236    | 0.014692 | 0.871617 | 0.909817 |
| 11737323_LAMC2     | -0.01266 | 0.871669 | 0.909851 |
| 11732796_KIAA1841  | 0.008788 | 0.871759 | 0.909915 |
| 11761242_MAGED2    | 0.006585 | 0.871767 | 0.909915 |
| 11729818_IGF1      | 0.011944 | 0.871862 | 0.909994 |
| 11758090_IL16      | 0.007936 | 0.871906 | 0.910021 |
| 11731060_NUP35     | -0.01021 | 0.871963 | 0.910061 |
| 11738089_C5orf56   | 0.007482 | 0.872015 | 0.910096 |
| 11752271_CMKLR1    | -0.00963 | 0.872157 | 0.910208 |
| 11746494_PIP4K2A   | 0.008489 | 0.872159 | 0.910208 |
| 11728933_SPACA7    | -0.01497 | 0.87225  | 0.910283 |
| 11741515_GGA1      | -0.01025 | 0.872328 | 0.910335 |
| 11739934_SLC39A12  | -0.01339 | 0.872337 | 0.910335 |
| 11742573_OR5D13    | -0.01247 | 0.872392 | 0.910373 |
| 11764178_CNTNAP5   | -0.01296 | 0.872545 | 0.910508 |
| 11755718_HDAC1     | 0.005421 | 0.872559 | 0.910508 |
| 11753084_SLC22A16  | -0.01093 | 0.872586 | 0.910517 |
| 11735493_C10orf55  | 0.009028 | 0.872723 | 0.91064  |
| 11728759_PPHLN1    | 0.010119 | 0.872834 | 0.910737 |
| 11720009_ZNF174    | -0.00684 | 0.872916 | 0.910789 |
| 11718783_HPX       | 0.010025 | 0.872921 | 0.910789 |
| 11723377_MYZAP     | -0.02114 | 0.872953 | 0.910803 |
| 11725784_ERI2      | 0.005526 | 0.872998 | 0.91083  |
| 11723568_CAPN7     | -0.00821 | 0.873045 | 0.91086  |
| 11717211_NEO1      | -0.0143  | 0.873104 | 0.910902 |
| 11726982_CP        | 0.029328 | 0.87314  | 0.91092  |
| 11759458_LINC01098 | 0.022365 | 0.873164 | 0.910926 |
| 11734668_KPNA1     | -0.00941 | 0.87319  | 0.910934 |
| 11744387_ARFRP1    | -0.01135 | 0.87329  | 0.911018 |
| 11759744_MEIOC     | 0.014428 | 0.873439 | 0.911154 |
| 11740014_RPL28     | -0.01376 | 0.873581 | 0.911283 |
| 11742694_WAC       | 0.005958 | 0.873637 | 0.91132  |
| 11742305_THEG      | -0.00975 | 0.873656 | 0.91132  |
| 11735311_KIRREL3   | -0.01441 | 0.873672 | 0.91132  |
| 11741852_PLCXD2    | 0.00728  | 0.873734 | 0.911364 |
| 11715540_RPS14     | -0.00538 | 0.873842 | 0.911458 |
| 11754726_AGGF1     | -0.00632 | 0.873879 | 0.911477 |
| 11763424_ARRDC3-AS | -0.01999 | 0.874035 | 0.911606 |
| 11751222_ZIC4      | 0.008701 | 0.87404  | 0.911606 |
| 11755824_CAMKV     | -0.00828 | 0.874062 | 0.91161  |
| 11718551_OTUD4     | -0.00644 | 0.87409  | 0.911619 |
| 11720387_MRC2      | 0.006636 | 0.874154 | 0.911649 |
| 11747659_ARMCX4    | -0.01823 | 0.874156 | 0.911649 |
| 11731433_SEPPI1    | -0.01058 | 0.874284 | 0.911763 |
| 11749402_ITGAL     | -0.01358 | 0.874321 | 0.911783 |
| 11755004_PCF11     | 0.013977 | 0.874406 | 0.911852 |
| 11759153_KCNAB3    | 0.013361 | 0.874524 | 0.91195  |
| 11726007_DPY19L2 / | 0.006053 | 0.874537 | 0.91195  |

|                    |          |          |          |
|--------------------|----------|----------|----------|
| 11760583_PELI3     | -0.01502 | 0.874591 | 0.911976 |
| 11735213_CCDC68    | 0.012381 | 0.8746   | 0.911976 |
| 11749948_HSD17B1   | 0.008405 | 0.874625 | 0.911983 |
| 11756935_MY07A     | 0.011762 | 0.874678 | 0.912019 |
| 11751225_CSF2RA    | -0.0151  | 0.874742 | 0.912066 |
| 11761763_CD9       | 0.015827 | 0.8748   | 0.912101 |
| 11742134_GPR150    | -0.00669 | 0.874813 | 0.912101 |
| 11734885_IL1RL1    | -0.01538 | 0.874982 | 0.912257 |
| 11753507_SCAF1     | -0.01067 | 0.87507  | 0.91233  |
| 11719167_TACC1     | -0.00634 | 0.875112 | 0.912354 |
| 11757042_PDYN      | -0.00529 | 0.875131 | 0.912355 |
| 11721024_IL11RA    | -0.00819 | 0.875169 | 0.912375 |
| 11724369_KIAA1644  | 0.012117 | 0.875188 | 0.912375 |
| 11738947_BSPH1     | -0.00853 | 0.875217 | 0.912386 |
| 11761080_SGSH      | 0.006446 | 0.875264 | 0.912415 |
| 11752850_CWC27     | -0.00581 | 0.875294 | 0.912427 |
| 11746656_ACAA1     | -0.00727 | 0.875467 | 0.912584 |
| 11753821_OAZ1      | 0.005485 | 0.875481 | 0.912584 |
| 11745061_ARHGAP20  | 0.014135 | 0.875574 | 0.91266  |
| 11719263_SMTN      | -0.00689 | 0.875591 | 0.91266  |
| 11744733_UBE2CP5 / | 0.007947 | 0.875623 | 0.912673 |
| 11729900_CCR10     | -0.00835 | 0.875657 | 0.912689 |
| 11756239_MRPS35    | -0.00562 | 0.87569  | 0.912696 |
| 11725780_CADPS     | 0.011219 | 0.875701 | 0.912696 |
| 11763765_MEI1      | -0.01408 | 0.875756 | 0.912724 |
| 11756469_POLR2J2 / | -0.00687 | 0.875777 | 0.912724 |
| 11759989_SCD5      | 0.014773 | 0.875784 | 0.912724 |
| 11751570_MS4A4A    | -0.0071  | 0.875883 | 0.912808 |
| 11753101_FAM180A   | 0.0102   | 0.875925 | 0.912818 |
| 11741034_FBXO44    | 0.009236 | 0.87593  | 0.912818 |
| 11760481_CIDECP    | 0.012288 | 0.876018 | 0.912871 |
| 11761035_ZNF394    | -0.00673 | 0.87603  | 0.912871 |
| 11752491_TOM1      | -0.00677 | 0.876037 | 0.912871 |
| 11754223_ZMYM6NB   | -0.00719 | 0.876072 | 0.912879 |
| 11737121_SYNRG     | 0.010014 | 0.876083 | 0.912879 |
| 11749529_SYMPK     | -0.00581 | 0.876227 | 0.913001 |
| 11723553_F5        | -0.01568 | 0.876237 | 0.913001 |
| 11752975_NPSR1     | 0.009867 | 0.876311 | 0.913059 |
| 11753508_ZC3H12D   | -0.01078 | 0.876469 | 0.913204 |
| 11737503_ITIH6     | -0.00655 | 0.876562 | 0.913281 |
| 11716288_ESYT1     | -0.00618 | 0.876581 | 0.913282 |
| 11727867_CLEC3B // | -0.00889 | 0.876613 | 0.913296 |
| 11735802_KCND3     | 0.012422 | 0.876671 | 0.913336 |
| 11762361_WDFY3-AS2 | -0.01643 | 0.876735 | 0.913384 |
| 11720754_ACTB      | -0.0072  | 0.876861 | 0.913496 |
| 11760647_DGKE      | -0.01382 | 0.876884 | 0.913501 |
| 11719423_PHF8      | 0.006632 | 0.876955 | 0.913555 |
| 11728165_EPPIN     | -0.01507 | 0.877029 | 0.913613 |
| 11730474_PDE3B     | 0.014461 | 0.877119 | 0.913687 |
| 11726987_ATP1B2    | -0.01106 | 0.877163 | 0.913713 |
| 11743437_EXO5      | 0.005682 | 0.877203 | 0.913735 |



|                    |          |          |          |
|--------------------|----------|----------|----------|
| 11723934_PNMA3     | -0.0098  | 0.877256 | 0.913768 |
| 11731429_CYP3A4    | 0.006514 | 0.877272 | 0.913768 |
| 11724707_ST8SIA3   | 0.007539 | 0.877331 | 0.91381  |
| 11757146_SNORA84   | -0.00566 | 0.877422 | 0.913875 |
| 11734733_SLC13A3   | 0.006674 | 0.87743  | 0.913875 |
| 11745554_ASGR1     | -0.0056  | 0.87752  | 0.913933 |
| 11722323_NFASC     | 0.008809 | 0.877524 | 0.913933 |
| 11741487_C19orf12  | 0.011652 | 0.877572 | 0.913964 |
| 11753343_CASP5     | 0.008597 | 0.87768  | 0.914057 |
| 11727860_TMEM209   | -0.00519 | 0.877714 | 0.914073 |
| 11752474_SFRP5     | -0.00859 | 0.877763 | 0.914105 |
| 11727454_SCGB1A1   | 0.006066 | 0.877814 | 0.914138 |
| 11718641_NDST2     | -0.00627 | 0.877987 | 0.914298 |
| 11734719_DNAJC14   | 0.005419 | 0.878045 | 0.914339 |
| 11734471_LCE1C     | -0.01066 | 0.878126 | 0.914404 |
| 11745479_GLYCTK    | 0.008986 | 0.878159 | 0.914406 |
| 11730660_LY9       | -0.01052 | 0.878165 | 0.914406 |
| 11739445_DPF2      | -0.01101 | 0.878199 | 0.914422 |
| 11750169_SPDYE2 // | 0.008578 | 0.878236 | 0.914423 |
| 11724192_COPS2     | 0.005256 | 0.878238 | 0.914423 |
| 11715160_LOC650293 | 0.00967  | 0.878353 | 0.914524 |
| 11724997_CD86      | -0.00683 | 0.878424 | 0.914579 |
| 11756094_HLA-DQA1  | 0.015288 | 0.878454 | 0.914589 |
| 11749301_DUS3L     | -0.00831 | 0.878471 | 0.914589 |
| 11724939_CDHR3     | 0.013086 | 0.87853  | 0.91463  |
| 11744982_FCRLB     | -0.0115  | 0.878573 | 0.914655 |
| 11744241_HOXC9     | -0.00591 | 0.878645 | 0.914668 |
| 11759005_SPX       | 0.028289 | 0.878651 | 0.914668 |
| 11739609_ZNF805    | -0.0066  | 0.878659 | 0.914668 |
| 11750636_ACACB     | -0.01156 | 0.87866  | 0.914668 |
| 11763069_BCL2L11   | 0.009928 | 0.878745 | 0.914737 |
| 11722770_MMP24     | -0.01276 | 0.879017 | 0.914993 |
| 11732102_PROL1     | 0.013246 | 0.879028 | 0.914993 |
| 11759835_PCID2     | 0.010656 | 0.87905  | 0.914996 |
| 11750440_SLC17A1   | -0.00704 | 0.879144 | 0.915066 |
| 11738812_NLRP13    | -0.01107 | 0.879154 | 0.915066 |
| 11735707_NABP2     | 0.006312 | 0.879179 | 0.915071 |
| 11721415_TMEM62    | -0.01322 | 0.879244 | 0.91512  |
| 11756390_MATR3     | -0.00603 | 0.879344 | 0.915204 |
| 11754969_GRM4      | 0.007094 | 0.879466 | 0.915305 |
| 11741320_DIABLO    | -0.00537 | 0.879477 | 0.915305 |
| 11762128_CELF2     | 0.016418 | 0.879506 | 0.915315 |
| 11744773_DSCR8     | 0.006951 | 0.87955  | 0.915341 |
| 11763148_EPGN      | 0.01148  | 0.879587 | 0.91536  |
| 11737915_ZFAT      | -0.00913 | 0.879653 | 0.915409 |
| 11752537_MROH7 /// | 0.011184 | 0.879799 | 0.915541 |
| 11742160_KLK12     | -0.01404 | 0.880084 | 0.915819 |
| 11723963_AGA       | -0.00623 | 0.880117 | 0.915831 |
| 11729372_LRRC37A3  | -0.00972 | 0.880133 | 0.915831 |
| 11742605_OR52J3    | -0.0165  | 0.880246 | 0.915897 |
| 11758689_CSTF1     | 0.015601 | 0.880277 | 0.915897 |

|                    |          |          |          |
|--------------------|----------|----------|----------|
| 11755209_PDE1B     | 0.007764 | 0.880284 | 0.915897 |
| 11753249_TPP1      | 0.007433 | 0.88029  | 0.915897 |
| 11736475_TCF7      | -0.01735 | 0.88029  | 0.915897 |
| 11727069_UNC5B     | 0.008399 | 0.880381 | 0.915972 |
| 11747596_MAP7      | -0.01493 | 0.880521 | 0.916088 |
| 11746067_CAAP1     | -0.00533 | 0.88053  | 0.916088 |
| 11759446_ACOXL     | -0.01302 | 0.880598 | 0.916139 |
| 11715241_LCE1D     | 0.007261 | 0.880711 | 0.916237 |
| 11742011_INSRR     | -0.00965 | 0.880803 | 0.916313 |
| 11727762_CKLF-CMTM | 0.008468 | 0.880984 | 0.916457 |
| 11723479_NFKBIL1   | -0.00738 | 0.880985 | 0.916457 |
| 11716905_CDH1      | -0.0122  | 0.881005 | 0.916457 |
| 11735962_AKRIC8P   | -0.01237 | 0.881025 | 0.916457 |
| 11757236_LILRP2    | 0.017659 | 0.881035 | 0.916457 |
| 11750437_HHAT      | 0.009055 | 0.881171 | 0.916569 |
| 11757215_FKBP1AP1  | 0.007071 | 0.88118  | 0.916569 |
| 11746532_BDKRB2    | -0.00976 | 0.881261 | 0.91662  |
| 11749143_TESK2     | -0.00891 | 0.881267 | 0.91662  |
| 11744768_ZBP1      | -0.01202 | 0.881301 | 0.916636 |
| 11734401_TMEM26    | 0.011998 | 0.881386 | 0.916693 |
| 11759988_TMX3      | 0.026591 | 0.881393 | 0.916693 |
| 11761924_CTNNA1    | -0.01398 | 0.881454 | 0.916737 |
| 11740832_PLEKHG7   | 0.0182   | 0.881628 | 0.916898 |
| 11734963_ADAM33    | 0.006236 | 0.88175  | 0.917006 |
| 11745684_WNT3A     | -0.01032 | 0.881857 | 0.917078 |
| 11749056_RCSA1     | -0.00779 | 0.881857 | 0.917078 |
| 11742368_OR4N2     | -0.00707 | 0.882034 | 0.917229 |
| 11761751_GABRB2    | -0.01183 | 0.88204  | 0.917229 |
| 11735483_LANCL3    | 0.010557 | 0.882165 | 0.917323 |
| 11736914_FADS6     | -0.01439 | 0.882168 | 0.917323 |
| 11737933_TSPAN18   | -0.0067  | 0.882201 | 0.917326 |
| 11736466_FBXO18    | -0.00645 | 0.88222  | 0.917326 |
| 11743890_ZNF10     | 0.010782 | 0.882227 | 0.917326 |
| 11728987_RNPC3     | 0.00808  | 0.882536 | 0.917628 |
| 11748746_DCAF8     | 0.011978 | 0.882561 | 0.917634 |
| 11746270_SLC19A1   | 0.012611 | 0.88258  | 0.917634 |
| 11762447_PIBF1     | -0.0087  | 0.882989 | 0.91798  |
| 11724843_CISH      | 0.012408 | 0.88301  | 0.91798  |
| 11715144_KRTAP19-7 | 0.010245 | 0.883014 | 0.91798  |
| 11723931_CCT5      | 0.005342 | 0.883017 | 0.91798  |
| 11724745_C8orf46   | -0.01044 | 0.883028 | 0.91798  |
| 11739954_IL2RA     | 0.010902 | 0.883037 | 0.91798  |
| 11715668_PSMA5     | 0.005234 | 0.883044 | 0.91798  |
| 11731209_C15orf59  | -0.01034 | 0.88325  | 0.918175 |
| 11732188_PI4K2A    | -0.00564 | 0.8835   | 0.918416 |
| 11754056_CSTB      | 0.005776 | 0.883669 | 0.918571 |
| 11729520_CXorf65   | 0.011486 | 0.883717 | 0.918597 |
| 11723158_TMEM229B  | 0.013416 | 0.883731 | 0.918597 |
| 11748880_AZIN2     | 0.013554 | 0.883762 | 0.91861  |
| 11740932_CSF3R     | 0.007174 | 0.883821 | 0.918651 |
| 11718870_PALMD     | -0.0125  | 0.883904 | 0.918718 |

|                    |          |          |          |
|--------------------|----------|----------|----------|
| 11715119_C2CD4B    | 0.005706 | 0.884028 | 0.918827 |
| 11719695_LARP7     | 0.007249 | 0.884083 | 0.918846 |
| 11730632_OCA2      | -0.00596 | 0.884084 | 0.918846 |
| 11717342_SUPT4H1   | 0.005077 | 0.884211 | 0.918959 |
| 11729125_RCN2      | 0.011157 | 0.884233 | 0.918962 |
| 11735075_ST20-AS1  | 0.006903 | 0.884273 | 0.918984 |
| 11747123_COCH      | 0.007803 | 0.884312 | 0.919005 |
| 11739141_LILRB5    | -0.01441 | 0.884389 | 0.919066 |
| 11761346_ZNF812P   | 0.008253 | 0.884483 | 0.919141 |
| 11724511_AMBP      | -0.00687 | 0.884505 | 0.919141 |
| 11752867_PNPLA6    | 0.006529 | 0.884518 | 0.919141 |
| 11735925_KRTAP12-1 | -0.00965 | 0.884585 | 0.919191 |
| 11718051_RPL27     | 0.005622 | 0.884659 | 0.919224 |
| 11749411_SPIDR     | -0.00836 | 0.884682 | 0.919224 |
| 11736361_MEDAG     | -0.01584 | 0.884685 | 0.919224 |
| 11760819_IGHG1 /// | -0.01294 | 0.884708 | 0.919224 |
| 11762460_SEPT5-GP1 | -0.00724 | 0.88471  | 0.919224 |
| 11741013_LRRN3     | -0.009   | 0.884767 | 0.919263 |
| 11729048_ANXA9     | -0.00778 | 0.8848   | 0.919277 |
| 11736158_MPPE1     | 0.015328 | 0.884829 | 0.919289 |
| 11740317_MIP       | 0.009115 | 0.884876 | 0.919308 |
| 11728918_TIGD2     | 0.00687  | 0.884885 | 0.919308 |
| 11750407_FLT4      | -0.01393 | 0.884946 | 0.919351 |
| 11725591_SPATA2    | -0.00816 | 0.884999 | 0.919368 |
| 11715354_COL1A2    | 0.014892 | 0.884999 | 0.919368 |
| 11735047_APOA5     | -0.00942 | 0.885026 | 0.919371 |
| 11734690_CYTIP     | 0.008398 | 0.88504  | 0.919371 |
| 11757214_FKBP1AP1  | 0.00698  | 0.885294 | 0.919615 |
| 11754825_FAM84B    | -0.00749 | 0.885403 | 0.919702 |
| 11732510_C10orf25  | -0.0082  | 0.885415 | 0.919702 |
| 11762136_ACTG2     | -0.00602 | 0.885472 | 0.919719 |
| 11734651_PRLH      | -0.00893 | 0.885497 | 0.919719 |
| 11732939_HS3ST6    | -0.00727 | 0.885506 | 0.919719 |
| 11721575_C1orf131  | 0.005017 | 0.885507 | 0.919719 |
| 11732237_GYPA      | -0.00898 | 0.88568  | 0.919844 |
| 11728330_MTERF1    | 0.005642 | 0.885683 | 0.919844 |
| 11763032_AAMDC     | -0.00755 | 0.885684 | 0.919844 |
| 11753252_CFLAR     | -0.00751 | 0.885819 | 0.919946 |
| 11731299_TBX6      | 0.005771 | 0.885831 | 0.919946 |
| 11735888_NTN3      | -0.00698 | 0.885839 | 0.919946 |
| 11720364_GIMAP1-GI | 0.00582  | 0.885862 | 0.919951 |
| 11752574_DHFRL1    | -0.00631 | 0.885921 | 0.919992 |
| 11733744_MS4A12    | -0.00879 | 0.885989 | 0.920044 |
| 11747528_CALCOO1   | -0.01573 | 0.88605  | 0.920087 |
| 11716856_B4GALT3   | -0.0055  | 0.88607  | 0.920089 |
| 11722745_BORCS8 // | -0.00624 | 0.886162 | 0.920155 |
| 11738195_FGF1      | 0.013466 | 0.886172 | 0.920155 |
| 11754573_LPIN1     | -0.00536 | 0.886236 | 0.920198 |
| 11753503_CD80      | -0.01126 | 0.88625  | 0.920198 |
| 11716966_ATN1      | -0.01204 | 0.886283 | 0.920212 |
| 11735069_MYOZ3     | -0.01126 | 0.886417 | 0.920314 |

|                    |          |          |          |
|--------------------|----------|----------|----------|
| 11744870_SLC1A6    | -0.01092 | 0.88642  | 0.920314 |
| 11727383_DYM       | -0.00578 | 0.886437 | 0.920314 |
| 11743663_NUP54     | 0.005163 | 0.886484 | 0.920342 |
| 11759140_ITGB6 /// | -0.01727 | 0.886547 | 0.920389 |
| 11758233_VNN1      | 0.013905 | 0.886642 | 0.920468 |
| 11758500_TMEM140   | -0.00765 | 0.886764 | 0.92057  |
| 11729221_HSD11B1   | -0.00752 | 0.886778 | 0.92057  |
| 11735134_TLL2      | -0.01306 | 0.886856 | 0.920612 |
| 11735851_OR10H1    | 0.011786 | 0.886856 | 0.920612 |
| 11763319_CSNK1A1   | -0.00648 | 0.886967 | 0.920708 |
| 11717417_RHOU      | 0.013048 | 0.887002 | 0.920724 |
| 11735966_NUTM2A // | -0.00735 | 0.887165 | 0.920874 |
| 11756936_MBD4      | 0.005018 | 0.887237 | 0.920929 |
| 11734671_KPNA1     | -0.00516 | 0.887273 | 0.920947 |
| 11728450_ARMC3     | -0.00972 | 0.887328 | 0.920984 |
| 11735251_HECW1     | -0.01602 | 0.887401 | 0.92104  |
| 11725719_CDC42     | 0.008602 | 0.887449 | 0.921071 |
| 11743887_RAB4A /// | -0.00659 | 0.88747  | 0.921073 |
| 11761957_ABCA11P / | 0.009896 | 0.887623 | 0.921198 |
| 11750556_CACNA1C   | -0.00819 | 0.887647 | 0.921198 |
| 11754545_PLAT      | -0.00486 | 0.887657 | 0.921198 |
| 11760637_ID2B      | 0.013352 | 0.887666 | 0.921198 |
| 11737490_IL36B     | 0.009561 | 0.887703 | 0.921207 |
| 11735563_ACR       | -0.01626 | 0.887713 | 0.921207 |
| 11725774_TBC1D24   | -0.00727 | 0.888071 | 0.92156  |
| 11727919_MUC20     | -0.00998 | 0.888307 | 0.921785 |
| 11750678_ALK       | 0.006961 | 0.888329 | 0.921786 |
| 11717621_FOXN3     | -0.00542 | 0.888346 | 0.921786 |
| 11729452_C2CD3     | 0.007229 | 0.888398 | 0.921821 |
| 11722165_RGS5      | -0.00587 | 0.88849  | 0.921878 |
| 11732359_ZNRF1     | 0.004988 | 0.888491 | 0.921878 |
| 11735770_WFDC8     | 0.013401 | 0.888552 | 0.921922 |
| 11760658_COA1      | -0.01368 | 0.888642 | 0.921985 |
| 11761791_ZNF417 // | -0.00657 | 0.88865  | 0.921985 |
| 11762168_DYX1C1    | 0.02155  | 0.888813 | 0.922133 |
| 11745392_APOC2 /// | -0.00889 | 0.889006 | 0.922314 |
| 11753686_AGTRAP    | -0.00624 | 0.88907  | 0.922361 |
| 11749904_GORASP1   | -0.00672 | 0.889128 | 0.922388 |
| 11757983_TRAM1     | -0.00512 | 0.889134 | 0.922388 |
| 11760973_ARHGAP25  | -0.00923 | 0.889387 | 0.922631 |
| 11747138_DCC       | -0.00876 | 0.889405 | 0.922631 |
| 11742004_CELA1     | -0.00796 | 0.889568 | 0.922772 |
| 11725858_SLC2A13   | -0.01097 | 0.889584 | 0.922772 |
| 11748918_BRIX1     | 0.006041 | 0.889608 | 0.922772 |
| 11746426_FGF7 ///  | -0.00774 | 0.889617 | 0.922772 |
| 11735423_PPP1R36   | 0.011814 | 0.889793 | 0.922935 |
| 11761997_ADGRA3    | -0.00632 | 0.889899 | 0.923026 |
| 11732029_SPEM1     | -0.00731 | 0.889958 | 0.923067 |
| 11738262_AUTS2     | -0.01641 | 0.89015  | 0.923246 |
| 11751254_PPP3CA    | 0.008948 | 0.890195 | 0.923255 |
| 11738972_KRTAP20-3 | -0.00905 | 0.890196 | 0.923255 |

|                    |          |          |          |
|--------------------|----------|----------|----------|
| 11761802_RGS11     | -0.01449 | 0.890251 | 0.923292 |
| 11745310_SLC3A1    | -0.01522 | 0.890289 | 0.923305 |
| 11745901_CDK20     | 0.007294 | 0.890301 | 0.923305 |
| 11748850_FLT3LG    | -0.01076 | 0.890461 | 0.92345  |
| 11745268_TNS1      | -0.01192 | 0.890504 | 0.92345  |
| 11753685_AGTRAP    | 0.004833 | 0.890505 | 0.92345  |
| 11761318_FAM96A    | 0.008338 | 0.890516 | 0.92345  |
| 11716447_COMT      | 0.006728 | 0.890567 | 0.923483 |
| 11715860_RIC8A     | -0.00747 | 0.890634 | 0.923521 |
| 11732075_LOC105369 | -0.01251 | 0.890655 | 0.923521 |
| 11738215_ZNF397    | 0.006736 | 0.890664 | 0.923521 |
| 11743880_MAML3     | 0.01066  | 0.890679 | 0.923521 |
| 11746120_HSD17B1   | -0.00986 | 0.890794 | 0.92362  |
| 11738437_SRY       | -0.00651 | 0.890827 | 0.923635 |
| 11761542_USP41     | -0.01466 | 0.890861 | 0.92365  |
| 11747825_ACAD11 // | -0.0071  | 0.890904 | 0.923658 |
| 11733670_ZCCHC13   | -0.00903 | 0.890913 | 0.923658 |
| 11745825_ACSM2A // | 0.011153 | 0.890925 | 0.923658 |
| 11728948_BC01      | 0.017987 | 0.891035 | 0.923753 |
| 11761258_EDIL3     | -0.00826 | 0.891071 | 0.92377  |
| 11739907_CLDN16    | 0.009605 | 0.891152 | 0.923835 |
| 11728559_ASGR1     | -0.00908 | 0.891273 | 0.923936 |
| 11716380_MPC2      | -0.00552 | 0.891287 | 0.923936 |
| 11735444_NEU3      | 0.01375  | 0.891444 | 0.924079 |
| 11760653_PKNOX1    | 0.01733  | 0.891595 | 0.924215 |
| 11760943_TPCN1     | -0.00852 | 0.891649 | 0.924252 |
| 11734655_ATP5F1    | -0.00898 | 0.891702 | 0.924288 |
| 11760645_GABRB1    | -0.00839 | 0.891787 | 0.924356 |
| 11737519_KIAA1841  | 0.011238 | 0.891806 | 0.924356 |
| 11731717_PCDHB4    | -0.00894 | 0.891872 | 0.924388 |
| 11720243_TCN2      | 0.009459 | 0.891875 | 0.924388 |
| 11737949_CNNM2     | -0.00539 | 0.892211 | 0.924717 |
| 11751536_TP53      | -0.00531 | 0.892277 | 0.924766 |
| 11735222_BTLA      | -0.01137 | 0.892415 | 0.924889 |
| 11718521_SMG7      | -0.00518 | 0.892477 | 0.924932 |
| 11757392_LAMTOR4   | 0.004984 | 0.892494 | 0.924932 |
| 11745096_FAM135B   | -0.0073  | 0.892794 | 0.925223 |
| 11715141_PCDHGB3   | -0.01266 | 0.892931 | 0.925342 |
| 11758852_ATAD3C // | 0.007934 | 0.892947 | 0.925342 |
| 11725922_CLIC6     | -0.00961 | 0.893049 | 0.925429 |
| 11735853_OR10H1    | 0.010845 | 0.893205 | 0.925571 |
| 11736635_AAK1      | 0.005318 | 0.893359 | 0.925711 |
| 11730062_KRT77     | 0.017127 | 0.893432 | 0.925767 |
| 11725872_ZNF616    | -0.00822 | 0.893491 | 0.925794 |
| 11732129_BRD8      | 0.008653 | 0.893496 | 0.925794 |
| 11730866_GALNT18   | 0.011271 | 0.893577 | 0.925858 |
| 11740284_ZFP2      | -0.01073 | 0.893645 | 0.925909 |
| 11746146_LOC101928 | -0.00695 | 0.893746 | 0.925946 |
| 11727459_KRT14     | 0.006927 | 0.893749 | 0.925946 |
| 11717479_LAMP2     | -0.00462 | 0.893759 | 0.925946 |
| 11717145_LANCL1    | -0.00901 | 0.893761 | 0.925946 |

|                    |          |          |          |
|--------------------|----------|----------|----------|
| 11760595_RBPMS     | -0.01639 | 0.893776 | 0.925946 |
| 11750565_FHOD3     | -0.01154 | 0.893825 | 0.925977 |
| 11737635_RHOT2     | -0.00509 | 0.893846 | 0.92598  |
| 11736112_ARHGAP18  | -0.00595 | 0.893865 | 0.92598  |
| 11727255_LYZL4     | -0.00759 | 0.89393  | 0.926027 |
| 11756902_SGSM1     | -0.00556 | 0.893981 | 0.926044 |
| 11744303_TFB1M     | -0.00575 | 0.893984 | 0.926044 |
| 11727068_UNC5B     | -0.00916 | 0.894254 | 0.926304 |
| 11757195_TMEM51-AS | -0.01475 | 0.894343 | 0.926377 |
| 11753461_FBXO44    | 0.00718  | 0.894422 | 0.926427 |
| 11719754_IL1RN     | 0.018105 | 0.89443  | 0.926427 |
| 11725388_HOMER1    | -0.00771 | 0.894492 | 0.926472 |
| 11718838_MON1B     | 0.004863 | 0.894555 | 0.926518 |
| 11741610_IL16      | -0.00894 | 0.894584 | 0.926528 |
| 11742358_OR5AN1    | -0.01987 | 0.894704 | 0.926632 |
| 11727492_KRT6C     | -0.0094  | 0.894729 | 0.926639 |
| 11719778_FOXC1     | 0.004847 | 0.894834 | 0.926728 |
| 11745230_TCAIM     | 0.004483 | 0.89504  | 0.926907 |
| 11726839_RELL1     | -0.00477 | 0.895045 | 0.926907 |
| 11731278_LRRC29    | 0.006025 | 0.895254 | 0.927091 |
| 11740328_RBML2     | -0.01246 | 0.895261 | 0.927091 |
| 11718341_RPS9      | -0.00467 | 0.895471 | 0.927284 |
| 11726960_GRIN2A    | -0.01478 | 0.895511 | 0.927284 |
| 11751897_EIF4G3    | 0.006863 | 0.895512 | 0.927284 |
| 11731392_IL20      | -0.00865 | 0.895522 | 0.927284 |
| 11745588_TTTY5     | 0.013185 | 0.895554 | 0.927297 |
| 11759794_HSD17B12  | -0.01289 | 0.895602 | 0.927327 |
| 11762532_MIPOL1    | -0.00637 | 0.89566  | 0.927367 |
| 11730461_OTX2      | 0.010073 | 0.89571  | 0.927379 |
| 11753700_RNF180    | 0.010755 | 0.895718 | 0.927379 |
| 11752985_NPSR1     | 0.01011  | 0.895728 | 0.927379 |
| 11726183_ARS1      | 0.011789 | 0.8959   | 0.927537 |
| 11730377_PHF14     | 0.005458 | 0.895964 | 0.927576 |
| 11756149_PSG6      | -0.01113 | 0.895975 | 0.927576 |
| 11743874_SOX17     | 0.01326  | 0.896002 | 0.927584 |
| 11727281_MMP28     | 0.00724  | 0.896096 | 0.927662 |
| 11757777_KL        | -0.02032 | 0.896204 | 0.927754 |
| 11757177_RNF149 // | 0.006432 | 0.896227 | 0.927758 |
| 11741514_LDHAL6A   | -0.01108 | 0.896248 | 0.92776  |
| 11725360_SMAD4     | 0.004897 | 0.896422 | 0.927921 |
| 11727559_FKBP7     | -0.01003 | 0.896495 | 0.927957 |
| 11724906_MAP4K5    | 0.004991 | 0.896495 | 0.927957 |
| 11730035_FM04      | -0.00936 | 0.89657  | 0.928014 |
| 11730077_SHF       | -0.00839 | 0.896636 | 0.928063 |
| 11728098_CROCC     | -0.00899 | 0.896847 | 0.928262 |
| 11751855_GSG1L     | 0.004436 | 0.896866 | 0.928262 |
| 11740703_CSNK1G2-A | -0.00697 | 0.896964 | 0.928332 |
| 11761525_IL23A     | -0.0078  | 0.896972 | 0.928332 |
| 11738785_LOC105369 | 0.004844 | 0.897019 | 0.928361 |
| 11729709_CSMD1     | 0.018846 | 0.897146 | 0.928474 |
| 11749553_HAS2      | 0.007003 | 0.897237 | 0.928548 |

|                    |          |          |          |
|--------------------|----------|----------|----------|
| 11749276_C14orf180 | 0.00584  | 0.897266 | 0.928558 |
| 11762872_BAGE      | -0.00705 | 0.897323 | 0.928592 |
| 11745091_ZNF672    | -0.00523 | 0.897337 | 0.928592 |
| 11753223_ST8SIA2   | -0.01843 | 0.897393 | 0.92863  |
| 11717387_MT1G      | -0.0064  | 0.897447 | 0.928658 |
| 11747135_CNTRL     | 0.006316 | 0.897458 | 0.928658 |
| 11732497_HCN2      | -0.00775 | 0.897521 | 0.928704 |
| 11737029_LCT       | 0.013758 | 0.89756  | 0.928724 |
| 11735727_SERPINB13 | 0.008792 | 0.897619 | 0.928753 |
| 11763653_TMC5      | -0.01215 | 0.897625 | 0.928753 |
| 11739184_MGAT4B    | 0.004839 | 0.897702 | 0.928813 |
| 11757391_MRPL1     | -0.00496 | 0.897752 | 0.928845 |
| 11720395_NBN       | -0.00534 | 0.897863 | 0.92894  |
| 11721545_ZEB1      | 0.004846 | 0.897888 | 0.928946 |
| 11753570_LZTS1     | -0.00951 | 0.897965 | 0.929006 |
| 11763589_ZNF213    | 0.005652 | 0.89806  | 0.929084 |
| 11729335_ART4      | -0.01044 | 0.898183 | 0.929192 |
| 11748187_STRC ///  | -0.00762 | 0.898262 | 0.929245 |
| 11746567_HIF3A     | 0.011274 | 0.898273 | 0.929245 |
| 11727309_GRAMD2    | 0.005058 | 0.898394 | 0.929351 |
| 11757993_KATNAL2   | -0.0106  | 0.898518 | 0.92946  |
| 11742522_OR5T3     | 0.005571 | 0.898716 | 0.929645 |
| 11754897_ACSF3     | -0.00588 | 0.898857 | 0.929772 |
| 11763546_ATP10B    | 0.004922 | 0.898902 | 0.929798 |
| 11721762_PIK3R5    | -0.01106 | 0.898944 | 0.929822 |
| 11719718_SYK       | 0.008855 | 0.899005 | 0.929851 |
| 11739969_MIER1     | -0.00731 | 0.899023 | 0.929851 |
| 11730086_KCNQ2     | 0.006792 | 0.899045 | 0.929851 |
| 11724999_GLTSCR1   | 0.008218 | 0.899048 | 0.929851 |
| 11748751_GPNMB     | -0.00488 | 0.89907  | 0.929854 |
| 11762824_PLA2G4C   | 0.007233 | 0.899101 | 0.929867 |
| 11741285_ACKR4     | 0.01261  | 0.899124 | 0.929871 |
| 11723368_ARHGEF6   | 0.009088 | 0.899251 | 0.929966 |
| 11742783_SMARCC1   | -0.00491 | 0.899255 | 0.929966 |
| 11759278_OR2T2     | 0.009612 | 0.89947  | 0.930169 |
| 11747972_ADGRB3    | -0.00711 | 0.899521 | 0.930188 |
| 11743262_ANXA11    | -0.00499 | 0.899538 | 0.930188 |
| 11734417_MAMDC2    | -0.00688 | 0.899548 | 0.930188 |
| 11760294_CD55      | 0.006661 | 0.899564 | 0.930188 |
| 11719202_MORN2     | 0.007302 | 0.899611 | 0.930204 |
| 11761155_DNALI1    | 0.006536 | 0.899622 | 0.930204 |
| 11745921_ZSCAN30   | -0.00846 | 0.899636 | 0.930204 |
| 11719878_UBXN2B    | 0.004714 | 0.899702 | 0.930251 |
| 11746819_FGB       | 0.011811 | 0.899818 | 0.930352 |
| 11730337_SMAD6     | 0.006451 | 0.899845 | 0.930361 |
| 11747828_AMD1      | -0.00511 | 0.899925 | 0.930423 |
| 11722955_REN       | -0.01076 | 0.899993 | 0.930465 |
| 11737107_ARL17A // | -0.01293 | 0.900003 | 0.930465 |
| 11736843_KLRAP1    | -0.01202 | 0.900032 | 0.930475 |
| 11763431_ARHGAP8 / | -0.00709 | 0.90025  | 0.930667 |
| 11734485_PRDM12    | -0.0058  | 0.900259 | 0.930667 |

|                    |          |          |          |
|--------------------|----------|----------|----------|
| 11732968_HIST1H3B  | -0.00909 | 0.900275 | 0.930667 |
| 11717448_MRPS2     | 0.00523  | 0.900341 | 0.930703 |
| 11736902_ANKRD45   | -0.00921 | 0.900361 | 0.930703 |
| 11744817_KCNE3     | -0.00571 | 0.900367 | 0.930703 |
| 11763277_DDX19B    | 0.006461 | 0.900443 | 0.930729 |
| 11727683_AP3B2     | 0.010421 | 0.900467 | 0.930729 |
| 11742172_KRTAP13-4 | 0.013072 | 0.900478 | 0.930729 |
| 11761585_NDUFAF6   | -0.01083 | 0.900484 | 0.930729 |
| 11748764_EEF2      | -0.00443 | 0.900488 | 0.930729 |
| 11751797_IL11      | -0.00793 | 0.900605 | 0.930831 |
| 11757543_MYADM     | 0.004661 | 0.90075  | 0.930961 |
| 11742017_IRAK3     | 0.012801 | 0.900878 | 0.931073 |
| 11764213_LOC102724 | -0.00644 | 0.900995 | 0.931175 |
| 11728121_ADGRG2    | 0.010028 | 0.901021 | 0.931182 |
| 11726688_CAMP      | -0.00713 | 0.90116  | 0.931306 |
| 11759130_UNC5D     | -0.00744 | 0.901199 | 0.931327 |
| 11760667_TBXAS1    | 0.006773 | 0.901455 | 0.931572 |
| 11745749_ARPC3     | -0.0048  | 0.901607 | 0.931709 |
| 11740673_ZFY       | -0.00813 | 0.901631 | 0.931714 |
| 11721596_CDYL      | 0.004428 | 0.901672 | 0.931737 |
| 11743478_FYTTD1    | 0.004806 | 0.901838 | 0.931888 |
| 11753543_KLK9      | 0.008419 | 0.901865 | 0.931897 |
| 11716794_MYL6      | -0.00438 | 0.901925 | 0.931939 |
| 11762390_LRRTM1    | 0.012627 | 0.901988 | 0.931984 |
| 11733966_VIP       | 0.006277 | 0.902029 | 0.932004 |
| 11736631_APOBEC3H  | -0.00525 | 0.902045 | 0.932004 |
| 11763631_LIG3      | -0.00904 | 0.902092 | 0.932032 |
| 11761800_MAP4K2    | -0.01074 | 0.902128 | 0.932042 |
| 11745262_IGHV5-78  | 0.007736 | 0.902139 | 0.932042 |
| 11738792_DEFB135   | 0.011695 | 0.902267 | 0.932148 |
| 11735226_CDH20     | -0.01284 | 0.902281 | 0.932148 |
| 11741778_HSD11B1   | -0.01207 | 0.902299 | 0.932148 |
| 11752565_SLC4A10   | 0.011718 | 0.902555 | 0.932393 |
| 11724416_DISP1     | 0.006622 | 0.902786 | 0.932612 |
| 11734046_SDR16C5   | 0.009578 | 0.902885 | 0.932695 |
| 11749321_MICU1     | 0.007894 | 0.902912 | 0.932702 |
| 11738577_OR2B11    | 0.011425 | 0.902933 | 0.932704 |
| 11741431_KCNJ16    | 0.010592 | 0.902953 | 0.932706 |
| 11758435_OGFOD1    | -0.00428 | 0.903039 | 0.932774 |
| 11728319_TUBA3C    | 0.008802 | 0.903114 | 0.932832 |
| 11727227_NAALAD2   | 0.016399 | 0.903156 | 0.932856 |
| 11743239_CLCN6     | -0.00755 | 0.903206 | 0.93286  |
| 11727670_ROPN1 /// | 0.005362 | 0.903216 | 0.93286  |
| 11754890_CPSF3L    | 0.004559 | 0.90322  | 0.93286  |
| 11723820_SMURF2    | -0.01268 | 0.903236 | 0.93286  |
| 11752653_KRT83     | -0.00623 | 0.903269 | 0.932874 |
| 11744325_STRIP2    | 0.007785 | 0.903294 | 0.932881 |
| 11734787_OLFM3     | -0.00551 | 0.903438 | 0.933009 |
| 11761819_RDX       | -0.00816 | 0.903535 | 0.933089 |
| 11715108_LINC01098 | -0.00607 | 0.903648 | 0.933187 |
| 11732145_PSMD8     | 0.004777 | 0.903919 | 0.933446 |



|                    |          |          |          |
|--------------------|----------|----------|----------|
| 11742291_KCNG2     | 0.005979 | 0.90398  | 0.933491 |
| 11745577_C3orf56   | 0.013698 | 0.904019 | 0.933511 |
| 11731959_FOLH1 /// | 0.0054   | 0.90411  | 0.933585 |
| 11729029_C17orf64  | 0.008641 | 0.904143 | 0.933599 |
| 11732556_FASLG     | -0.00942 | 0.90439  | 0.933834 |
| 11724219_GSTA1     | -0.00666 | 0.904415 | 0.933834 |
| 11751392_ANXA2P1   | 0.009152 | 0.904446 | 0.933834 |
| 11751898_SCN8A     | -0.00448 | 0.904461 | 0.933834 |
| 11725901_RWDD3     | 0.007494 | 0.904478 | 0.933834 |
| 11715200_DBET ///  | -0.0051  | 0.904493 | 0.933834 |
| 11755744_IQCF3     | -0.00829 | 0.904504 | 0.933834 |
| 11734738_PHYHIPL   | 0.010502 | 0.904563 | 0.933875 |
| 11756906_POMGNT1   | 0.005109 | 0.904708 | 0.933986 |
| 11726915_SLC04C1   | 0.004427 | 0.904732 | 0.933986 |
| 11754025_ATP5E     | -0.00456 | 0.904739 | 0.933986 |
| 11745417_NOTCH2    | 0.012787 | 0.904747 | 0.933986 |
| 11747261_LOC389199 | 0.005984 | 0.904832 | 0.934054 |
| 11734100_ZNF578    | 0.006105 | 0.904854 | 0.934057 |
| 11747303_BANP      | -0.00617 | 0.904876 | 0.934059 |
| 11753229_OR13H1    | -0.00493 | 0.904931 | 0.934097 |
| 11718708_TBC1D9B   | -0.00456 | 0.904958 | 0.934105 |
| 11728411_CASZ1     | -0.01191 | 0.905237 | 0.934364 |
| 11720738_ITPKB     | -0.00638 | 0.905247 | 0.934364 |
| 11723918_CCNI      | -0.00409 | 0.905312 | 0.934411 |
| 11764015_LOC100507 | -0.00729 | 0.905425 | 0.934502 |
| 11728803_PAPD5     | 0.006926 | 0.905438 | 0.934502 |
| 11737741_GAGE1 /// | -0.00432 | 0.905481 | 0.934526 |
| 11748172_NKAIN2    | -0.01039 | 0.905501 | 0.934527 |
| 11748814_ARHGAP17  | 0.005264 | 0.905543 | 0.934544 |
| 11719259_SPSB1     | -0.0086  | 0.905555 | 0.934544 |
| 11740854_SLC6A20   | -0.0089  | 0.905729 | 0.934687 |
| 11739675_PRR27     | 0.006499 | 0.905732 | 0.934687 |
| 11764063_WDR48     | 0.005514 | 0.905757 | 0.934693 |
| 11751840_GOLGA2P11 | 0.016964 | 0.905837 | 0.934756 |
| 11745347_TMEM266   | -0.00517 | 0.905911 | 0.934812 |
| 11730446_IGDCC3    | 0.007785 | 0.905934 | 0.934817 |
| 11751626_PFN1P2    | -0.00505 | 0.905959 | 0.934822 |
| 11728239_RRAGD     | -0.00575 | 0.906014 | 0.934852 |
| 11734930_LRRTM3    | 0.011705 | 0.906044 | 0.934852 |
| 11740025_C12orf73  | 0.010566 | 0.906045 | 0.934852 |
| 11715987_GH1       | 0.006279 | 0.906118 | 0.934908 |
| 11741473_RAB11FIP3 | 0.008219 | 0.906256 | 0.935028 |
| 11747843_MXRA8     | -0.01633 | 0.906273 | 0.935028 |
| 11742591_OR2M1P // | -0.01936 | 0.906312 | 0.935049 |
| 11745420_C3orf35   | -0.01041 | 0.906431 | 0.935152 |
| 11748184_NLGN3     | 0.011615 | 0.906518 | 0.935221 |
| 11758980_LINCO1590 | 0.009768 | 0.906819 | 0.935512 |
| 11721685_CCL19     | 0.009213 | 0.906875 | 0.935534 |
| 11720346_GGNBP2    | -0.00392 | 0.906878 | 0.935534 |
| 11748876_RCBTB2    | 0.009294 | 0.906948 | 0.935587 |
| 11738826_PCDHA5    | 0.004512 | 0.907054 | 0.935676 |

|                    |          |          |          |
|--------------------|----------|----------|----------|
| 11763346_LINC01102 | -0.01648 | 0.907096 | 0.935699 |
| 11735943_KRTAP19-6 | -0.00829 | 0.907444 | 0.936039 |
| 11754393_MRFAP1    | 0.004736 | 0.907495 | 0.936059 |
| 11727865_SLC25A27  | 0.010658 | 0.907502 | 0.936059 |
| 11742267_PRAMEF8   | -0.01115 | 0.907593 | 0.936133 |
| 11731294_SLITRK1   | -0.00659 | 0.907635 | 0.936157 |
| 11736434_SEMA3E    | -0.00835 | 0.907693 | 0.936197 |
| 11719942_MINOS1    | -0.00742 | 0.907794 | 0.936281 |
| 11755231_LCK       | 0.012985 | 0.907881 | 0.936351 |
| 11721029_PIP5K1B   | 0.006614 | 0.90794  | 0.936392 |
| 11753060_BANK1     | -0.01006 | 0.907982 | 0.936415 |
| 11740501_SPECC1L   | -0.00778 | 0.908039 | 0.936441 |
| 11738894_CAPN10 // | -0.00569 | 0.908045 | 0.936441 |
| 11745331_NLGN4X // | 0.009581 | 0.90815  | 0.936527 |
| 11763245_C4orf3    | 0.01097  | 0.908167 | 0.936527 |
| 11725456_FBXO33    | 0.005208 | 0.908335 | 0.936681 |
| 11719115_GOT2      | 0.003984 | 0.908358 | 0.936685 |
| 11724847_GBA3      | -0.01468 | 0.908475 | 0.936786 |
| 11730209_TRIM46    | -0.00698 | 0.908501 | 0.936793 |
| 11717422_RBM8A     | 0.004201 | 0.908566 | 0.93684  |
| 11751436_SIGLEC8   | 0.003947 | 0.908892 | 0.937156 |
| 11733192_GAPDHS    | 0.011813 | 0.908989 | 0.937211 |
| 11755449_COL20A1   | -0.00469 | 0.908996 | 0.937211 |
| 11731235_AURKC     | 0.004912 | 0.909006 | 0.937211 |
| 11752111_HIPK2     | -0.01596 | 0.90904  | 0.937211 |
| 11734533_SGCZ      | 0.007449 | 0.909041 | 0.937211 |
| 11723350_ABCA3     | 0.004544 | 0.909303 | 0.937461 |
| 11748471_CTNNA2    | -0.00543 | 0.909338 | 0.937478 |
| 11734163_MLLT4     | -0.00885 | 0.909417 | 0.93754  |
| 11743625_LGR4      | -0.00584 | 0.909559 | 0.937666 |
| 11723176_PLEKHA6   | -0.00927 | 0.909613 | 0.937702 |
| 11755514_CTCF      | -0.00422 | 0.909665 | 0.937736 |
| 11737453_LRGUK     | -0.00985 | 0.909892 | 0.93795  |
| 11716994_WSB2      | 0.004284 | 0.909967 | 0.938008 |
| 11747927_POSTN     | -0.01476 | 0.910038 | 0.938061 |
| 11740446_BTN3A1    | 0.006542 | 0.910135 | 0.938141 |
| 11762088_FBXL2     | 0.014974 | 0.910216 | 0.938204 |
| 11756604_PCDHB2    | -0.00518 | 0.910305 | 0.938261 |
| 11737297_TCEB3B    | 0.005297 | 0.910325 | 0.938261 |
| 11725593_SPATA2    | -0.00539 | 0.910332 | 0.938261 |
| 11752858_EDA       | 0.017151 | 0.910361 | 0.938261 |
| 11732617_TTLL10    | 0.007544 | 0.910388 | 0.938261 |
| 11735865_AIRE      | -0.00459 | 0.910389 | 0.938261 |
| 11742283_FGF3      | -0.00822 | 0.910405 | 0.938261 |
| 11742740_GEMIN5    | -0.00414 | 0.910653 | 0.938497 |
| 11718688_NES       | -0.00426 | 0.910725 | 0.938535 |
| 11715237_RPL9 ///  | -0.0041  | 0.91075  | 0.938535 |
| 11763379_FAAP20    | 0.006259 | 0.91076  | 0.938535 |
| 11763684_IGKV1-5   | -0.0091  | 0.910767 | 0.938535 |
| 11744433_AMY2B     | -0.00729 | 0.910802 | 0.938552 |
| 11754847_SDK2      | -0.00477 | 0.910845 | 0.938576 |

|                    |          |          |          |
|--------------------|----------|----------|----------|
| 11749383_BCORP1    | 0.009083 | 0.910905 | 0.938619 |
| 11729862_ATP2B2    | 0.007643 | 0.910929 | 0.938623 |
| 11753890_KAT7      | 0.004632 | 0.910965 | 0.938641 |
| 11738504_OR4F16 // | 0.013161 | 0.911096 | 0.938756 |
| 11758810_COL14A1   | -0.00909 | 0.911146 | 0.938782 |
| 11750149_ZNF815P   | 0.007473 | 0.91116  | 0.938782 |
| 11760581_ZCCHC4    | -0.00583 | 0.911231 | 0.938835 |
| 11726239_PAX3      | 0.005997 | 0.911274 | 0.93886  |
| 11749273_PCK1      | 0.007905 | 0.911683 | 0.939261 |
| 11749339_PHKB      | -0.00507 | 0.911731 | 0.939291 |
| 11762976_XAGE5     | -0.00913 | 0.911758 | 0.939299 |
| 11716327_GJA1      | 0.011175 | 0.911826 | 0.939349 |
| 11735909_OR10H2    | -0.00962 | 0.911969 | 0.939477 |
| 11742483_CCDC190   | -0.00626 | 0.912012 | 0.939499 |
| 11734510_PXT1      | -0.00947 | 0.912039 | 0.939499 |
| 11727908_ELMO3     | 0.006405 | 0.912049 | 0.939499 |
| 11717911_CXCL14    | -0.01245 | 0.912198 | 0.939634 |
| 11751677_CLDN18    | 0.010604 | 0.912263 | 0.939681 |
| 11757487_ESRRA     | -0.00467 | 0.912326 | 0.939726 |
| 11742445_MSLNL     | -0.00878 | 0.912474 | 0.939849 |
| 11745105_MEI1      | -0.0066  | 0.912495 | 0.939849 |
| 11762641_HLA-DQB1  | 0.008945 | 0.912503 | 0.939849 |
| 11719389_MAFK      | -0.0075  | 0.912606 | 0.939935 |
| 11761106_CCM2      | -0.0078  | 0.912763 | 0.940061 |
| 11720625_MAT2B     | -0.00426 | 0.912767 | 0.940061 |
| 11752519_EHD2      | -0.01044 | 0.912806 | 0.940082 |
| 11748426_OLFM3     | 0.007446 | 0.912863 | 0.94012  |
| 11750605_ATF6B /// | -0.00484 | 0.912946 | 0.940186 |
| 11761500_CYP2F1    | -0.00664 | 0.912994 | 0.940207 |
| 11742205_CCDC68    | 0.007091 | 0.91301  | 0.940207 |
| 11734910_WDR26     | -0.00494 | 0.913024 | 0.940207 |
| 11757110_MRVI1-AS1 | -0.00504 | 0.913059 | 0.940223 |
| 11732940_U2AF1L4   | -0.00502 | 0.913341 | 0.940494 |
| 11761024_CCDC12    | -0.00553 | 0.913594 | 0.940735 |
| 11750675_TMEM236   | 0.008809 | 0.913662 | 0.940784 |
| 11761172_CCDC57    | -0.00842 | 0.913745 | 0.940847 |
| 11750399_RXFP1     | -0.00826 | 0.913761 | 0.940847 |
| 11740793_TTL9      | 0.009515 | 0.913806 | 0.940874 |
| 11715963_SPTAN1    | -0.00463 | 0.913826 | 0.940875 |
| 11727755_ZNF653    | -0.0066  | 0.913877 | 0.940907 |
| 11740159_FGFR2     | 0.00523  | 0.91426  | 0.941282 |
| 11742412_SSPO      | -0.00642 | 0.914316 | 0.941319 |
| 11740860_ZNF384    | 0.004011 | 0.914383 | 0.941355 |
| 11718820_TSC1      | 0.004806 | 0.914404 | 0.941355 |
| 11731236_SCGB2B2   | -0.00488 | 0.914408 | 0.941355 |
| 11757031_CCT8      | -0.00463 | 0.914455 | 0.941383 |
| 11741338_STK32A    | -0.00864 | 0.914491 | 0.9414   |
| 11715130_KRTAP6-2  | 0.009855 | 0.91457  | 0.941456 |
| 11725075_FAM126A   | -0.00391 | 0.914599 | 0.941456 |
| 11735367_BANF2     | 0.004811 | 0.914603 | 0.941456 |
| 11745043_PCYT1B    | 0.01426  | 0.914728 | 0.941565 |

|                    |          |          |          |
|--------------------|----------|----------|----------|
| 11763876_LOC100506 | -0.00929 | 0.914794 | 0.941613 |
| 11723604_INPP5J    | -0.00534 | 0.914911 | 0.941698 |
| 11736241_ORMDL2    | -0.00511 | 0.914935 | 0.941698 |
| 11751702_INADL     | -0.00435 | 0.914947 | 0.941698 |
| 11742477_TRIM53AP  | -0.01119 | 0.914954 | 0.941698 |
| 11741801_DAZ1 ///  | 0.008525 | 0.915095 | 0.941824 |
| 11756088_LRP2BP    | -0.00869 | 0.91517  | 0.941881 |
| 11733243_GABRB2    | 0.007534 | 0.915267 | 0.941961 |
| 11754397_SMIM10    | 0.011216 | 0.91538  | 0.942045 |
| 11744316_MSH4      | -0.00692 | 0.915387 | 0.942045 |
| 11755978_GPR139    | 0.01141  | 0.91541  | 0.942049 |
| 11723361_MED12     | -0.00394 | 0.91545  | 0.94207  |
| 11717942_EIF2B1    | -0.00672 | 0.915563 | 0.942166 |
| 11756497_VWCE      | -0.00393 | 0.915623 | 0.942187 |
| 11727400_GSTZ1     | -0.00857 | 0.915635 | 0.942187 |
| 11727328_SOST      | 0.007235 | 0.915641 | 0.942187 |
| 11736777_CBLN1     | 0.006399 | 0.915673 | 0.942201 |
| 11718139_PDXK      | 0.005512 | 0.915745 | 0.942252 |
| 11763070_LOC102723 | 0.006607 | 0.915762 | 0.942252 |
| 11737450_C15orf43  | 0.012549 | 0.915883 | 0.942357 |
| 11750814_BEND2     | 0.009615 | 0.915921 | 0.942376 |
| 11763848_TRIM35    | 0.006367 | 0.915944 | 0.942377 |
| 11721578_WTIP      | 0.004138 | 0.91596  | 0.942377 |
| 11759850_MYO3A     | 0.0099   | 0.916009 | 0.942407 |
| 11718612_ABCD4     | -0.00497 | 0.916028 | 0.942407 |
| 11721540_MAPK13    | 0.009082 | 0.916108 | 0.942469 |
| 11739574_ZNF532    | -0.00482 | 0.916162 | 0.942505 |
| 11762640_VASH2     | 0.008161 | 0.916214 | 0.94253  |
| 11720251_CCL18     | -0.00839 | 0.916225 | 0.94253  |
| 11748331_PMM2      | 0.005476 | 0.916346 | 0.942633 |
| 11736474_TCF7      | -0.01212 | 0.916382 | 0.942633 |
| 11724035_CD2AP     | -0.00739 | 0.916394 | 0.942633 |
| 11724441_PTGIS     | 0.007503 | 0.916402 | 0.942633 |
| 11749548_KCTD1     | 0.006685 | 0.916437 | 0.942649 |
| 11740690_PREX2     | -0.01027 | 0.916502 | 0.942691 |
| 11729036_PRKY      | 0.007035 | 0.916516 | 0.942691 |
| 11742680_HNRNPA2B1 | 0.003998 | 0.916564 | 0.94272  |
| 11725177_KCTD11    | 0.006807 | 0.91659  | 0.942727 |
| 11727320_IGFL2     | 0.007952 | 0.916745 | 0.942867 |
| 11735929_PRDM7     | -0.00681 | 0.916826 | 0.94293  |
| 11762042_UGT3A1    | -0.00585 | 0.916934 | 0.943022 |
| 11760674_CCDC74A / | -0.00812 | 0.917031 | 0.943101 |
| 11747617_ABCD3     | -0.00381 | 0.917091 | 0.943143 |
| 11738101_C12orf54  | 0.006422 | 0.917152 | 0.943169 |
| 11720700_C1orf101  | 0.010438 | 0.917155 | 0.943169 |
| 11757913_TUBA1A    | -0.00388 | 0.917239 | 0.943236 |
| 11760821_LOC100996 | -0.01247 | 0.917296 | 0.943274 |
| 11752134_MED12L    | -0.00603 | 0.917318 | 0.943277 |
| 11750806_ACER2     | 0.005144 | 0.91748  | 0.943424 |
| 11735599_PIK3R6    | 0.006    | 0.917607 | 0.943535 |
| 11740979_LCK       | 0.006131 | 0.917712 | 0.943623 |

|                    |          |          |          |
|--------------------|----------|----------|----------|
| 11751320_POLL      | 0.005052 | 0.917756 | 0.943648 |
| 11756294_JAM2      | -0.00446 | 0.917872 | 0.943747 |
| 11721915_MDM4      | -0.00357 | 0.91806  | 0.943921 |
| 11719694_LARP7     | -0.0047  | 0.918138 | 0.943981 |
| 11745062_IRGQ      | 0.007135 | 0.918269 | 0.944096 |
| 11725174_ADAP2     | -0.00738 | 0.918351 | 0.944142 |
| 11751305_B4GAT1    | -0.00446 | 0.918352 | 0.944142 |
| 11739169_CPSF4     | -0.00595 | 0.918403 | 0.944174 |
| 11715364_SPDEF     | 0.004385 | 0.918445 | 0.944197 |
| 11738145_ARHGEF10L | -0.00547 | 0.918567 | 0.944294 |
| 11731439_IFT57     | 0.006948 | 0.918577 | 0.944294 |
| 11735921_C5orf38   | -0.00716 | 0.918605 | 0.944303 |
| 11722503_ITGB8     | 0.004833 | 0.918684 | 0.944356 |
| 11730861_EXTL1     | 0.004899 | 0.918695 | 0.944356 |
| 11762697_INPP5E    | 0.008788 | 0.918811 | 0.944436 |
| 11719825_ZAK       | -0.0056  | 0.918812 | 0.944436 |
| 11738927_OR5P3     | -0.00697 | 0.918914 | 0.944521 |
| 11737241_TEX15     | -0.00628 | 0.918944 | 0.944532 |
| 11754635_SPATA31D5 | 0.007635 | 0.918977 | 0.944536 |
| 11758243_APOA4     | 0.004778 | 0.918989 | 0.944536 |
| 11719466_C1QB      | 0.003886 | 0.919032 | 0.944536 |
| 11723264_CD3D      | -0.00899 | 0.919043 | 0.944536 |
| 11715549_DAG1      | 0.004731 | 0.919048 | 0.944536 |
| 11728770_CFHR2     | -0.00754 | 0.919064 | 0.944536 |
| 11762849_PDPN      | 0.014159 | 0.919259 | 0.944717 |
| 11755465_ZNF517    | -0.0051  | 0.919285 | 0.944723 |
| 11760074_NBEAL1    | 0.008254 | 0.919312 | 0.944732 |
| 11722508_CLIC5     | 0.004732 | 0.919341 | 0.944741 |
| 11726650_GDAP1L1   | 0.00954  | 0.919378 | 0.944759 |
| 11760853_LOC105376 | -0.01268 | 0.919547 | 0.944914 |
| 11747469_KDM2B     | -0.00578 | 0.919584 | 0.944931 |
| 11738582_OR8G2     | 0.007451 | 0.91965  | 0.94498  |
| 11751421_ZCWPW1    | 0.005025 | 0.919789 | 0.945102 |
| 11723378_CNTRL     | 0.005183 | 0.919872 | 0.945168 |
| 11736833_ZNF619    | -0.01155 | 0.919963 | 0.945241 |
| 11752315_DIS3L2    | -0.00354 | 0.920104 | 0.945367 |
| 11760052_CNTN5     | -0.00701 | 0.920153 | 0.945397 |
| 11738108_KCNJ9     | -0.00509 | 0.920285 | 0.945513 |
| 11734538_TEX36     | 0.009889 | 0.920438 | 0.94565  |
| 11741312_CLCC1     | -0.00427 | 0.920498 | 0.945671 |
| 11737507_GPBAR1    | 0.005142 | 0.920503 | 0.945671 |
| 11749262_MST1R     | 0.005928 | 0.920517 | 0.945671 |
| 11728075_PLEKHM3   | -0.00543 | 0.92055  | 0.945686 |
| 11731220_TMEM132B  | -0.01111 | 0.920587 | 0.945704 |
| 11734214_MPP7      | 0.007905 | 0.920724 | 0.945819 |
| 11754277_ADH4      | 0.008545 | 0.920738 | 0.945819 |
| 11749335_LIMS2     | -0.00407 | 0.920767 | 0.945829 |
| 11732003_CRHR1 /// | -0.00519 | 0.920924 | 0.945959 |
| 11735197_C2orf96   | -0.00577 | 0.920932 | 0.945959 |
| 11763361_VSIG2     | 0.008053 | 0.920959 | 0.945963 |
| 11741951_PCDH9     | -0.00374 | 0.920975 | 0.945963 |

|                    |          |          |          |
|--------------------|----------|----------|----------|
| 11750528_HLA-DQA1  | 0.003817 | 0.921042 | 0.946012 |
| 11745922_MAOA      | -0.00643 | 0.921093 | 0.946044 |
| 11735389_CYLC2     | -0.00731 | 0.921197 | 0.94613  |
| 11762064_RICTOR    | -0.01198 | 0.921215 | 0.94613  |
| 11740897_TREX2     | -0.00634 | 0.921301 | 0.94619  |
| 11750705_OSBP2     | 0.007549 | 0.921312 | 0.94619  |
| 11760718_ITFG2 /// | -0.00646 | 0.921351 | 0.94621  |
| 11757424_RPL37     | 0.004087 | 0.921404 | 0.946211 |
| 11747765_PPP2R5A   | -0.00567 | 0.921409 | 0.946211 |
| 11721776_SSH2      | 0.003589 | 0.921427 | 0.946211 |
| 11740227_AGTR1     | -0.01004 | 0.921429 | 0.946211 |
| 11752617_MED24     | -0.00542 | 0.921458 | 0.94622  |
| 11752848_DMKN      | 0.009573 | 0.921489 | 0.946233 |
| 11762119_HLA-A     | 0.006153 | 0.921521 | 0.946245 |
| 11732519_CH25H     | 0.010778 | 0.921572 | 0.946277 |
| 11719223_DYSF      | -0.00687 | 0.92159  | 0.946277 |
| 11734365_GGA3      | 0.005129 | 0.921657 | 0.946326 |
| 11731018_SIX6      | 0.01404  | 0.921803 | 0.946455 |
| 11732477_XAGE2     | 0.005027 | 0.921825 | 0.946458 |
| 11749729_KLHL7     | -0.00614 | 0.921851 | 0.946465 |
| 11737225_MAST4     | 0.00727  | 0.921967 | 0.946564 |
| 11753433_C1orf216  | -0.00921 | 0.922012 | 0.946591 |
| 11755679_CATSPERB  | 0.010451 | 0.922131 | 0.946645 |
| 11733628_FAM196A   | 0.006692 | 0.922142 | 0.946645 |
| 11749839_VSIG1     | 0.004264 | 0.922154 | 0.946645 |
| 11737129_SPACA1    | 0.005698 | 0.922156 | 0.946645 |
| 11737585_DBX2      | -0.00373 | 0.922162 | 0.946645 |
| 11755588_SLC5A5    | -0.01078 | 0.922273 | 0.946739 |
| 11742769_FLRT3     | -0.0045  | 0.92239  | 0.946839 |
| 11729795_UGGT1     | 0.005337 | 0.922418 | 0.94684  |
| 200025_PMRPL27     | 0.00327  | 0.92243  | 0.94684  |
| 11738729_OR5M3     | 0.00682  | 0.922469 | 0.94686  |
| 11762273_RAD51D    | 0.004066 | 0.922546 | 0.94692  |
| 11736217_MAP3K8    | 0.007415 | 0.922578 | 0.946931 |
| 11762558_C10orf53  | 0.006334 | 0.922595 | 0.946931 |
| 11762698_CYP3A7-CY | -0.01094 | 0.92262  | 0.946936 |
| 11736952_RORB      | -0.0049  | 0.922699 | 0.946996 |
| 11731997_TRIM58    | -0.00344 | 0.922738 | 0.946996 |
| 11733537_KCNG3     | -0.01017 | 0.922746 | 0.946996 |
| 11715527_ATP6V1G2- | -0.00365 | 0.922756 | 0.946996 |
| 11731290_PYHIN1    | 0.00661  | 0.922809 | 0.947031 |
| 11731587_SEPT4     | -0.00729 | 0.92301  | 0.947217 |
| 11751327_FAM114A2  | 0.004184 | 0.92306  | 0.94723  |
| 11738102_MIR99AHG  | 0.007161 | 0.923062 | 0.94723  |
| 11746143_ZNF611    | 0.00577  | 0.923087 | 0.947237 |
| 11738916_TAS2R31   | 0.008029 | 0.92314  | 0.947271 |
| 11759935_CCDC116   | -0.00795 | 0.923162 | 0.947274 |
| 11730090_TNFSF12-T | -0.00366 | 0.923337 | 0.947433 |
| 11737275_CFAP44    | 0.00802  | 0.923437 | 0.947516 |
| 11741111_POMT1     | -0.00327 | 0.923475 | 0.947535 |
| 11723228_SGCB      | 0.003951 | 0.923622 | 0.947666 |

|                    |          |          |          |
|--------------------|----------|----------|----------|
| 11762791_ASAH2 /// | -0.00746 | 0.923644 | 0.947669 |
| 11752450_UNC13B    | -0.0109  | 0.923724 | 0.947719 |
| 11733284_MYBPC1    | -0.00566 | 0.923732 | 0.947719 |
| 11762234_MAX       | -0.00495 | 0.923811 | 0.94778  |
| 11755119_SYT8      | -0.00522 | 0.92383  | 0.94778  |
| 11763920_SNORA71A  | -0.00747 | 0.923909 | 0.947788 |
| 11759676_BEST3     | 0.004919 | 0.923909 | 0.947788 |
| 11758631_FOXO4     | 0.005124 | 0.923911 | 0.947788 |
| 11734363_GDF6      | 0.00831  | 0.923916 | 0.947788 |
| 11739322_WDR4      | -0.00599 | 0.923949 | 0.947803 |
| 11728996_KCNA1     | -0.0047  | 0.923975 | 0.947809 |
| 11736955_MAEL      | 0.011362 | 0.924023 | 0.947838 |
| 11752135_DENND5A   | 0.005113 | 0.924083 | 0.94788  |
| 11753627_TAGLN     | 0.005339 | 0.924168 | 0.947929 |
| 11763084_PEX26     | -0.00511 | 0.924169 | 0.947929 |
| 11759156_HIST1H2BF | -0.00936 | 0.92428  | 0.948023 |
| 11740085_CTBP2     | 0.003657 | 0.924343 | 0.948068 |
| 11724458_HCN4      | -0.00397 | 0.924505 | 0.948214 |
| 11760915_CYP3A5    | 0.009532 | 0.924655 | 0.948333 |
| 11731835_RAPSN     | 0.003731 | 0.92466  | 0.948333 |
| 11756568_MEST      | -0.00534 | 0.924715 | 0.948369 |
| 11762895_GHRHR     | -0.00411 | 0.924747 | 0.948382 |
| 11740770_PCDH11X / | -0.00706 | 0.924805 | 0.94841  |
| 11754465_LOC100233 | 0.004154 | 0.924813 | 0.94841  |
| 11749841_DDX3Y     | 0.005283 | 0.924922 | 0.948488 |
| 11756362_FCGR1B    | -0.00947 | 0.924944 | 0.948488 |
| 11734888_IGSF1     | 0.008251 | 0.924961 | 0.948488 |
| 11747775_RUVBL1    | 0.003787 | 0.924966 | 0.948488 |
| 11762133_SCGB2B3P  | 0.007969 | 0.92516  | 0.948643 |
| 11730529_ZNF324B   | 0.007577 | 0.92516  | 0.948643 |
| 11762478_AGXT      | -0.00973 | 0.925176 | 0.948643 |
| 11733615_SEMA6D    | 0.007493 | 0.925357 | 0.948809 |
| 11763561_CCDC146   | -0.0099  | 0.925501 | 0.948907 |
| 11749833_AGT       | 0.005402 | 0.925523 | 0.948907 |
| 11741267_UGT2B15   | -0.00908 | 0.925526 | 0.948907 |
| 11724459_MCAM      | 0.003382 | 0.925534 | 0.948907 |
| 11763440_MLPH      | 0.004208 | 0.92555  | 0.948907 |
| 11749180_MBD1      | -0.00536 | 0.92571  | 0.949052 |
| 11736090_OLIG2     | -0.00387 | 0.925747 | 0.94907  |
| 11759539_PSG1 ///  | 0.005682 | 0.925781 | 0.949084 |
| 11729821_IL27RA    | -0.00341 | 0.925821 | 0.949103 |
| 11747821_LINC00470 | -0.00952 | 0.925838 | 0.949103 |
| 11732962_RAB33A    | -0.00674 | 0.925981 | 0.949217 |
| 11752508_HNRNPLL   | 0.00323  | 0.925997 | 0.949217 |
| 11743017_PMS2 ///  | 0.003321 | 0.926008 | 0.949217 |
| 11716694_TSPAN6    | 0.00374  | 0.926163 | 0.949356 |
| 11734220_CREG2     | -0.00568 | 0.926211 | 0.949386 |
| 11731198_LHFPL3    | -0.00499 | 0.926417 | 0.949577 |
| 11744877_ITIH4     | 0.007354 | 0.926451 | 0.949581 |
| 11740160_GIPC1     | -0.00491 | 0.92646  | 0.949581 |
| 11753369_FOXP2     | 0.004229 | 0.926595 | 0.949681 |

|                    |          |          |          |
|--------------------|----------|----------|----------|
| 11741918_ART1      | -0.00382 | 0.926596 | 0.949681 |
| 11755386_HDC       | -0.00684 | 0.926653 | 0.949719 |
| 11715490_AMY1A /// | -0.01045 | 0.926736 | 0.949775 |
| 11746144_PTPRZ1    | -0.00523 | 0.926751 | 0.949775 |
| 11756178_CMTM6     | 0.003343 | 0.926766 | 0.949775 |
| 11740859_G6PC2     | -0.00464 | 0.926865 | 0.949857 |
| 11754300_TOM1      | 0.00334  | 0.927015 | 0.94999  |
| 11754577_ANKRD34C  | 0.006162 | 0.927052 | 0.950009 |
| 11760688_NRP1      | -0.00891 | 0.927077 | 0.950014 |
| 11755219_THBD      | -0.00871 | 0.927136 | 0.950036 |
| 11762941_QIQN5815  | -0.00484 | 0.927137 | 0.950036 |
| 11736081_CAMLG     | 0.011176 | 0.927271 | 0.950146 |
| 11742580_PRB4      | 0.009303 | 0.927283 | 0.950146 |
| 11762279_HS6ST1    | -0.00695 | 0.927312 | 0.950154 |
| 11735078_CYP2C18   | 0.006419 | 0.92733  | 0.950154 |
| 11727684_NTRK3     | 0.009975 | 0.927475 | 0.95025  |
| 11729759_RGS18     | 0.007591 | 0.927495 | 0.95025  |
| 11741215_HIST1H2AB | 0.006369 | 0.927506 | 0.95025  |
| 11758605_KCNC2     | -0.01088 | 0.927519 | 0.95025  |
| 11720655_BBX       | -0.00356 | 0.92752  | 0.95025  |
| 11759212_CYFIP1    | 0.005264 | 0.927785 | 0.9505   |
| 11729111_ADAMDEC1  | 0.008454 | 0.927953 | 0.950653 |
| 11732714_CMA1      | 0.007719 | 0.928121 | 0.950806 |
| 11756493_AZIN2     | -0.00602 | 0.928151 | 0.950816 |
| 11761364_NPLOC4    | 0.005881 | 0.928236 | 0.950883 |
| 11762318_IL23A     | -0.00832 | 0.928309 | 0.950938 |
| 11735588_FOXE1     | 0.007871 | 0.928358 | 0.950968 |
| 11719766_CDK18     | 0.00822  | 0.928557 | 0.951152 |
| 11738187_PHF12     | -0.00367 | 0.928617 | 0.951194 |
| 11759172_KRTAP19-4 | 0.007503 | 0.928653 | 0.95121  |
| 11728798_LSM14A    | 0.003731 | 0.928724 | 0.951263 |
| 11732199_PLAGL2    | -0.00419 | 0.928764 | 0.951284 |
| 11737946_XPNPEP2   | 0.004773 | 0.928857 | 0.951352 |
| 11740333_NRII2     | -0.0055  | 0.928869 | 0.951352 |
| 11760516_SETD3     | -0.00477 | 0.928908 | 0.951357 |
| 11735993_MOG       | 0.006963 | 0.928913 | 0.951357 |
| 11749435_SLC38A3   | -0.0074  | 0.929167 | 0.951598 |
| 11743798_ANKRD33   | -0.00665 | 0.929226 | 0.951623 |
| 11733829_HP        | -0.01057 | 0.92924  | 0.951623 |
| 11755476_NMNAT3    | 0.004968 | 0.929251 | 0.951623 |
| 11751770_FER       | -0.00371 | 0.929275 | 0.951627 |
| 11744615_KLHDC9    | 0.005095 | 0.929294 | 0.951627 |
| 11742221_KCNH5     | -0.00762 | 0.929324 | 0.951638 |
| 11741114_PDCD4     | -0.00306 | 0.929465 | 0.951763 |
| 11744158_GAP43     | -0.00843 | 0.929532 | 0.951812 |
| 11750298_LMCD1     | 0.004593 | 0.929631 | 0.95188  |
| 11758335_FDX1      | -0.00391 | 0.929637 | 0.95188  |
| 11752962_ANO4      | 0.003045 | 0.929787 | 0.951977 |
| 11731482_CSDE1     | -0.00342 | 0.929788 | 0.951977 |
| 11731035_NLRP7     | 0.00532  | 0.929791 | 0.951977 |
| 11728405_NRR0S     | 0.004931 | 0.929849 | 0.952003 |



|                   |          |          |          |
|-------------------|----------|----------|----------|
| 11763217_MICA     | 0.004251 | 0.929862 | 0.952003 |
| 11738768_OR4F6    | -0.00733 | 0.929875 | 0.952003 |
| 11739870_DNAJB2   | 0.00789  | 0.929901 | 0.95201  |
| 11735839_STX19    | 0.002954 | 0.929932 | 0.952022 |
| 11730661_CCDC78   | 0.006287 | 0.929975 | 0.952031 |
| 11720634_LRRC61   | 0.003285 | 0.92998  | 0.952031 |
| 11752493_KCNK3    | 0.003496 | 0.930036 | 0.952069 |
| 11720539_FLVCR2   | -0.00699 | 0.930099 | 0.952113 |
| 11763750_C14orf2  | -0.00772 | 0.930182 | 0.952178 |
| 11716293_G6PD     | 0.005394 | 0.930222 | 0.952199 |
| 11732410_GPER1    | -0.00386 | 0.930397 | 0.952353 |
| 11732846_PTCHD1   | -0.00952 | 0.930411 | 0.952353 |
| 11721358_ITIH1    | 0.008636 | 0.930433 | 0.952355 |
| 11751661_TULP3    | -0.00387 | 0.930552 | 0.952457 |
| 11748834_CRBN     | -0.00339 | 0.930656 | 0.952544 |
| 11755957_GNRHR2   | -0.00417 | 0.930722 | 0.952591 |
| 11751723_KRT5     | 0.005536 | 0.930744 | 0.952594 |
| 11747439_MYL6     | -0.0032  | 0.930796 | 0.952627 |
| 11759227_CLEC4C   | -0.00915 | 0.930815 | 0.952627 |
| 11737027_FLT3     | 0.004047 | 0.930869 | 0.952662 |
| 11753012_GLOD4    | -0.00333 | 0.930918 | 0.952692 |
| 11747106_RREB1    | 0.003796 | 0.931048 | 0.952805 |
| 11729380_CASK     | 0.004245 | 0.931082 | 0.95282  |
| 11728002_MS4A6E   | -0.00884 | 0.931305 | 0.953022 |
| 11763829_PAFAH1B2 | -0.0057  | 0.931319 | 0.953022 |
| 11755701_AMPH     | -0.00344 | 0.931406 | 0.953092 |
| 11751136_CCDC30   | 0.008901 | 0.931556 | 0.953199 |
| 11723222_MYOT     | -0.01007 | 0.931564 | 0.953199 |
| 11747290_OLA1     | 0.003717 | 0.931569 | 0.953199 |
| 11761028_GTF3C5   | 0.005929 | 0.931637 | 0.953248 |
| 11730320_NEDD9    | -0.00524 | 0.931687 | 0.95328  |
| 11753410_RHOA     | -0.00368 | 0.93173  | 0.953304 |
| 11730349_TLDC1    | -0.00392 | 0.931775 | 0.95333  |
| 11748653_ADAM8    | 0.005225 | 0.931912 | 0.953449 |
| 11722509_CRTC3    | 0.0039   | 0.931999 | 0.953519 |
| 11744336_RPL32    | 0.002892 | 0.932031 | 0.953531 |
| 11740653_HCRTR1   | 0.00495  | 0.932119 | 0.953602 |
| 11735272_SHROOM1  | -0.00462 | 0.9322   | 0.953665 |
| 11729997_CYP21A1P | 0.00687  | 0.932234 | 0.95368  |
| 11717821_SLC4A4   | -0.01164 | 0.932319 | 0.953727 |
| 11749537_C7       | 0.003358 | 0.932331 | 0.953727 |
| 11747803_CLK2     | 0.003871 | 0.932359 | 0.953727 |
| 11731047_RIMKLA   | 0.003979 | 0.932359 | 0.953727 |
| 11724544_POLR1A   | 0.003036 | 0.932576 | 0.953929 |
| 11721652_AGPAT4   | -0.00556 | 0.932596 | 0.953929 |
| 11737526_CEACAM4  | 0.006029 | 0.932626 | 0.953941 |
| 11758815_KDM5B    | -0.00503 | 0.932813 | 0.954112 |
| 11763938_TFAMP1   | 0.009308 | 0.932857 | 0.954112 |
| 11739774_SNX20    | -0.00428 | 0.932869 | 0.954112 |
| 11751464_H2AFJ    | 0.010024 | 0.932872 | 0.954112 |
| 11738731_OR10J5   | 0.012886 | 0.932917 | 0.954139 |

|                    |     |          |          |          |
|--------------------|-----|----------|----------|----------|
| 11757088_FAM157A   | /   | -0.00508 | 0.9331   | 0.954305 |
| 11756911_C1QTNF3   |     | -0.00765 | 0.933156 | 0.954343 |
| 11760146_ADHFE1    |     | 0.002853 | 0.933216 | 0.954368 |
| 11737358_CNGA3     |     | -0.00477 | 0.933237 | 0.954368 |
| 11733771_RNASE9    |     | -0.00793 | 0.933253 | 0.954368 |
| 11758647_C2CD5     |     | -0.00372 | 0.933258 | 0.954368 |
| 11751908_ZMAT1     |     | 0.005027 | 0.933301 | 0.954391 |
| 11719431_TMC6      |     | 0.004589 | 0.933478 | 0.954553 |
| 11717824_TNFAIP2   |     | -0.00582 | 0.933564 | 0.95462  |
| 11763842_FAM47E    |     | -0.00986 | 0.933676 | 0.954714 |
| 11743780_VIMP      |     | 0.004312 | 0.933702 | 0.954722 |
| 11736542_NRXN1     |     | 0.00453  | 0.933949 | 0.954954 |
| 11762071_RALGPS1   |     | 0.004736 | 0.93397  | 0.954956 |
| 11728682_KRR1      |     | 0.003678 | 0.934176 | 0.955146 |
| 11725107_CDKN2D    |     | -0.00366 | 0.93437  | 0.955325 |
| 11763729_FKBP9     |     | -0.00728 | 0.934447 | 0.955383 |
| 200049_PMKAT7      |     | 0.003987 | 0.934574 | 0.955493 |
| 11732699_PKIB      |     | 0.006895 | 0.934615 | 0.955507 |
| 11756783_TF        |     | -0.00555 | 0.934627 | 0.955507 |
| 11752865_ACTB      |     | -0.00422 | 0.93466  | 0.955521 |
| 11758443_GPR21     | /// | 0.005309 | 0.934706 | 0.955548 |
| 11756142_ADPRH     |     | -0.01014 | 0.934969 | 0.955785 |
| 11734628_IL36A     |     | 0.006577 | 0.934977 | 0.955785 |
| 11730475_GRIA4     |     | 0.016419 | 0.935101 | 0.955881 |
| 11722428_PPL       |     | 0.003719 | 0.935123 | 0.955881 |
| 11732063_C22orf15  |     | 0.005721 | 0.93513  | 0.955881 |
| 11760784_GRK5      |     | 0.005442 | 0.935263 | 0.955996 |
| 11740152_REPS1     |     | -0.00786 | 0.935281 | 0.955996 |
| 11746297_LOC102724 |     | -0.00647 | 0.935371 | 0.956068 |
| 11717398_ZNF212    |     | 0.004518 | 0.93542  | 0.956098 |
| 11752924_LOC100287 |     | -0.00736 | 0.935543 | 0.956203 |
| 11741806_WNT2B     |     | 0.007871 | 0.935597 | 0.956239 |
| 11730324_SLC38A9   |     | 0.003187 | 0.935624 | 0.95624  |
| 11758784_UBE3A     |     | -0.00382 | 0.935638 | 0.95624  |
| 11726832_SPDYA     |     | -0.00489 | 0.935784 | 0.95637  |
| 11744094_EEF1A2    |     | 0.003444 | 0.93598  | 0.956551 |
| 11722438_FLYWCH2   |     | 0.003436 | 0.936053 | 0.956581 |
| 11743439_SORCS2    |     | 0.003977 | 0.936064 | 0.956581 |
| 11744893_FAM20A    |     | -0.01078 | 0.936087 | 0.956581 |
| 11752068_UBAP2     |     | 0.003003 | 0.9361   | 0.956581 |
| 11748069_PTH2R     |     | 0.007299 | 0.936136 | 0.956581 |
| 11718659_MOV10     |     | 0.003016 | 0.93614  | 0.956581 |
| 11749434_LMOD2     |     | 0.00644  | 0.936177 | 0.956581 |
| 11724772_ITIH4     |     | -0.00544 | 0.936179 | 0.956581 |
| 11719023_ZNF652    |     | 0.004803 | 0.936186 | 0.956581 |
| 11742994_CSH1      | /// | 0.008139 | 0.936228 | 0.956604 |
| 11751299_APOL2     |     | -0.0059  | 0.936395 | 0.956755 |
| 11760777_TINAGL1   |     | 0.004534 | 0.936488 | 0.956815 |
| 11750787_SLC24A2   |     | -0.00547 | 0.936506 | 0.956815 |
| 11762307_PPOX      |     | -0.00752 | 0.936521 | 0.956815 |
| 11752799_LOC100131 |     | -0.01041 | 0.936532 | 0.956815 |

|                    |          |          |          |
|--------------------|----------|----------|----------|
| 11729816_TRIM24    | 0.003695 | 0.9366   | 0.956864 |
| 11747408_FBLIM1    | -0.00448 | 0.936752 | 0.956999 |
| 11735410_PLD5      | -0.0045  | 0.936843 | 0.957072 |
| 11758565_CDK19     | 0.003632 | 0.93691  | 0.95712  |
| 11738706_OR6C65    | 0.004364 | 0.936976 | 0.957168 |
| 11721687_ID4       | 0.005872 | 0.937037 | 0.957211 |
| 11759403_VCAN      | 0.004944 | 0.937127 | 0.957282 |
| 11747612_PTPRN     | -0.0029  | 0.937289 | 0.957417 |
| 11740349_RNASE7    | -0.00473 | 0.937298 | 0.957417 |
| 11753083_ZDHC15    | -0.0064  | 0.937394 | 0.957494 |
| 11742155_ELMOD1 // | -0.00984 | 0.937427 | 0.957504 |
| 11733939_RPEL1     | 0.003568 | 0.937442 | 0.957504 |
| 11762238_TMEM128   | 0.007495 | 0.937541 | 0.957582 |
| 11749619_VBP1      | 0.003052 | 0.937564 | 0.957582 |
| 11752480_HNF1B     | -0.00597 | 0.937577 | 0.957582 |
| 11733598_AWAT2     | -0.011   | 0.937607 | 0.957592 |
| 11742382_OR5H1 /// | -0.00461 | 0.937829 | 0.957794 |
| 11750178_ECHDC2    | -0.00317 | 0.937844 | 0.957794 |
| 11751429_CYB561    | 0.00477  | 0.937878 | 0.957799 |
| 11737707_ZSCAN5B   | 0.005288 | 0.937888 | 0.957799 |
| 11748759_GBP6      | -0.00502 | 0.938085 | 0.957956 |
| 11754480_DLG5-AS1  | 0.006038 | 0.938095 | 0.957956 |
| 11733265_PIRT      | -0.00736 | 0.9381   | 0.957956 |
| 11744904_ORM1 ///  | 0.005037 | 0.938212 | 0.95805  |
| 11720271_RIMS4     | 0.004577 | 0.938617 | 0.958444 |
| 11762326_CRISPLD2  | 0.008975 | 0.938727 | 0.958536 |
| 11743795_LACE1     | 0.005683 | 0.938809 | 0.958565 |
| 11725231_CEP290    | 0.003348 | 0.93881  | 0.958565 |
| 11723332_VAT1L     | 0.007676 | 0.938814 | 0.958565 |
| 11752880_RHD       | 0.006142 | 0.938841 | 0.958573 |
| 11743030_DNAH3     | -0.01003 | 0.938913 | 0.958618 |
| 11761148_MSL3      | -0.00781 | 0.938929 | 0.958618 |
| 11745972_EIF3B     | -0.00286 | 0.938945 | 0.958618 |
| 11739902_ENOX2     | -0.0063  | 0.938999 | 0.958653 |
| 11752322_PANX2     | 0.002851 | 0.939128 | 0.958758 |
| 11728833_DSG3      | -0.00686 | 0.939173 | 0.958758 |
| 11761310_TRMO      | 0.004027 | 0.939191 | 0.958758 |
| 11748581_EQTN      | -0.00965 | 0.9392   | 0.958758 |
| 11758413_ZC3H12B   | -0.0074  | 0.9392   | 0.958758 |
| 11735011_DYNLL2    | 0.003742 | 0.939224 | 0.958758 |
| 11760726_ROPN1 /// | -0.00754 | 0.939241 | 0.958758 |
| 11728774_TXLNGY    | -0.0073  | 0.939258 | 0.958758 |
| 11739542_C19orf12  | -0.00339 | 0.939501 | 0.958986 |
| 11763250_CXCL1 /// | 0.003187 | 0.939557 | 0.959022 |
| 11753387_NRK       | -0.00377 | 0.939722 | 0.959171 |
| 11754835_IGSF21    | 0.004497 | 0.939749 | 0.959179 |
| 11762251_FAM3B     | 0.005775 | 0.939931 | 0.959345 |
| 11737464_IL11RA    | -0.00658 | 0.940034 | 0.95943  |
| 11731570_CCDC106   | 0.002942 | 0.940094 | 0.959461 |
| 11735591_MYO3B     | 0.008105 | 0.940115 | 0.959461 |
| 11734292_ZNF417    | 0.005397 | 0.940124 | 0.959461 |

|                    |          |          |          |
|--------------------|----------|----------|----------|
| 11730986_SBSPON    | 0.003326 | 0.940198 | 0.959498 |
| 11737449_C15orf43  | -0.00811 | 0.9402   | 0.959498 |
| 11759190_PTPRG     | -0.00278 | 0.940255 | 0.959535 |
| 11756634_GSR       | -0.00382 | 0.940366 | 0.959628 |
| 11740767_CCDC73    | -0.00481 | 0.940497 | 0.959742 |
| 11752596_TPP1      | -0.00408 | 0.940653 | 0.959881 |
| 11760087_TAC3      | -0.00557 | 0.940783 | 0.959994 |
| 11740871_MS4A7     | 0.003346 | 0.940809 | 0.96     |
| 11757144_SNORA13   | 0.00536  | 0.940847 | 0.960019 |
| 200010_PMRPL11     | -0.00274 | 0.941075 | 0.960231 |
| 11724892_NCAN      | -0.00275 | 0.941247 | 0.960387 |
| 11753864_PAX5      | 0.005129 | 0.941368 | 0.96049  |
| 11732351_HGF       | 0.003638 | 0.941399 | 0.960502 |
| 11758474_COLCA1    | -0.00592 | 0.941447 | 0.960526 |
| 11753687_AGTRAP    | -0.00259 | 0.941462 | 0.960526 |
| 11742473_ZNF878    | 0.00622  | 0.941538 | 0.960584 |
| 11735088_SLFN13    | -0.00336 | 0.941601 | 0.960628 |
| 11731619_SP3       | -0.00259 | 0.941642 | 0.96065  |
| 11755080_DAAM1     | 0.003925 | 0.941795 | 0.960784 |
| 11718508_UBE2L3    | -0.00478 | 0.941813 | 0.960784 |
| 11734974_L2HGDH    | 0.009704 | 0.941852 | 0.960786 |
| 11728146_AQP11     | 0.004168 | 0.941855 | 0.960786 |
| 11736753_PCDHB13   | 0.010332 | 0.941903 | 0.960815 |
| 11728516_CTIF      | 0.002927 | 0.941941 | 0.960834 |
| 11753242_SUN1      | 0.005216 | 0.942134 | 0.961011 |
| 11719278_ZNF444    | -0.00298 | 0.94218  | 0.961038 |
| 11743374_FRYL      | -0.00361 | 0.942255 | 0.961094 |
| 11731961_TRIM36    | 0.004369 | 0.942358 | 0.96116  |
| 11756453_SH2D3C    | 0.004571 | 0.942359 | 0.96116  |
| 11737343_C20orf166 | 0.00695  | 0.942384 | 0.961165 |
| 11728038_CCL8      | 0.007098 | 0.942432 | 0.961194 |
| 11735971_ZNF829    | 0.003674 | 0.942528 | 0.961273 |
| 11733571_NKX2-8    | 0.003745 | 0.942606 | 0.961332 |
| 11730554_IRX6      | 0.003209 | 0.942663 | 0.961337 |
| 11758027_HOOK1     | 0.003926 | 0.942673 | 0.961337 |
| 11732288_TRMT61A   | 0.004718 | 0.942683 | 0.961337 |
| 11741084_GABRA1    | 0.004541 | 0.942689 | 0.961337 |
| 11715508_MFGE8     | -0.00286 | 0.942729 | 0.961357 |
| 11759637_ULK4      | 0.005991 | 0.94277  | 0.961379 |
| 11729727_GPC5      | -0.00729 | 0.94285  | 0.961421 |
| 11764000_C5orf63   | -0.0055  | 0.942857 | 0.961421 |
| 11754022_GAP43     | 0.006002 | 0.942871 | 0.961421 |
| 11761469_POU2F2    | -0.00387 | 0.9429   | 0.961431 |
| 11758251_HOXB3     | 0.002672 | 0.942953 | 0.961455 |
| 11736739_CLEC5A    | -0.00646 | 0.942963 | 0.961455 |
| 11730027_GPHA2     | -0.00368 | 0.943018 | 0.961492 |
| 11735344_SOX3      | 0.005391 | 0.94304  | 0.961492 |
| 11752750_LCA5      | -0.00514 | 0.943058 | 0.961492 |
| 11729327_ZFHX4     | 0.003514 | 0.943118 | 0.961523 |
| 11736407_XYLB      | -0.00355 | 0.943132 | 0.961523 |
| 11726994_GFAP      | -0.00311 | 0.943148 | 0.961523 |

|                    |          |          |          |
|--------------------|----------|----------|----------|
| 11732529_TBX5      | -0.00747 | 0.943263 | 0.961615 |
| 11749438_GTF3C3    | 0.003606 | 0.943278 | 0.961615 |
| 11752724_ADAMTSL1  | -0.00379 | 0.94332  | 0.961638 |
| 11744536_TCEB1 /// | -0.00239 | 0.943441 | 0.961741 |
| 11747854_ATF6B     | 0.00473  | 0.943473 | 0.961755 |
| 11753888_SMAGP     | 0.002974 | 0.943513 | 0.96177  |
| 11745620_AGER      | 0.002941 | 0.943528 | 0.96177  |
| 11723920_KLHL41    | -0.00448 | 0.943557 | 0.96178  |
| 11750342_FRMPD1    | -0.00308 | 0.943674 | 0.961879 |
| 11728228_HAVCR2    | 0.004585 | 0.943761 | 0.961948 |
| 11726992_GFAP      | -0.00302 | 0.943838 | 0.961994 |
| 11740323_TCTEX1D1  | 0.003091 | 0.943846 | 0.961994 |
| 11715767_ACAA2     | -0.00302 | 0.943954 | 0.962068 |
| 11737485_C11orf65  | -0.00434 | 0.943962 | 0.962068 |
| 11730375_ENDOU     | 0.006404 | 0.943982 | 0.962068 |
| 11733502_CDC83     | -0.0081  | 0.943997 | 0.962068 |
| 11742524_A3GALT2   | 0.003252 | 0.944045 | 0.962097 |
| 11753391_CLEC4G    | -0.00579 | 0.944105 | 0.962138 |
| 11715557_FLJ23867  | -0.00586 | 0.944198 | 0.962204 |
| 11726570_SPOCK3    | 0.011725 | 0.944209 | 0.962204 |
| 11761264_TARP      | -0.004   | 0.944269 | 0.962245 |
| 11759527_SLC11A2   | 0.00629  | 0.944319 | 0.962276 |
| 11748169_FAM227A   | 0.011422 | 0.944346 | 0.962279 |
| 11730179_SPOP      | -0.00328 | 0.944362 | 0.962279 |
| 11741161_SWT1      | 0.002818 | 0.944462 | 0.962361 |
| 11732874_UCP1      | 0.007316 | 0.944508 | 0.962388 |
| 11760207_RPL37A    | -0.00258 | 0.944584 | 0.962445 |
| 11735824_RRH       | 0.004596 | 0.944658 | 0.962499 |
| 11723800_PYROXD1   | -0.00245 | 0.944684 | 0.962499 |
| 11750379_TXLNA     | -0.00281 | 0.944696 | 0.962499 |
| 11748127_MFSD6     | -0.00728 | 0.944991 | 0.96278  |
| 11737231_LALBA     | 0.005342 | 0.945025 | 0.962782 |
| 11761419_RARRES3   | -0.00652 | 0.945033 | 0.962782 |
| 11727481_TPR       | 0.009068 | 0.945052 | 0.962782 |
| 11756020_LY6G5C    | 0.005038 | 0.945215 | 0.962927 |
| 11738248_C11orf71  | -0.00284 | 0.945401 | 0.963097 |
| 11763839_CYP2U1    | 0.003491 | 0.945485 | 0.963163 |
| 11738360_PPIAL4C   | -0.00303 | 0.945519 | 0.963177 |
| 11751651_PLSCR1    | -0.00248 | 0.945566 | 0.963205 |
| 11733234_PTGER1    | -0.00453 | 0.945609 | 0.963205 |
| 11760586_DHX57     | -0.00428 | 0.945625 | 0.963205 |
| 11760587_DHX57     | -0.00428 | 0.945625 | 0.963205 |
| 11723940_GKN1      | 0.005083 | 0.945646 | 0.963207 |
| 11761759_CAMK2G    | -0.00485 | 0.945696 | 0.963237 |
| 11739718_ZFP1      | -0.0026  | 0.945858 | 0.963382 |
| 11730154_ACSM3     | -0.00429 | 0.945994 | 0.963479 |
| 11716846_MS4A6A    | 0.003504 | 0.945998 | 0.963479 |
| 11732427_ZCWPW1    | 0.00369  | 0.946013 | 0.963479 |
| 11740246_L3MBTL3   | 0.00509  | 0.946177 | 0.963627 |
| 11748154_ULK3      | 0.002694 | 0.946212 | 0.963643 |
| 11751149_STRN4     | 0.004389 | 0.946262 | 0.963672 |

|                    |          |          |          |
|--------------------|----------|----------|----------|
| 11729974_FAM187B   | 0.005163 | 0.946316 | 0.963678 |
| 11747234_DTHD1     | -0.00529 | 0.946321 | 0.963678 |
| 11727626_CLOCK     | 0.00378  | 0.946326 | 0.963678 |
| 11751533_FRK       | -0.00706 | 0.946363 | 0.963695 |
| 11750447_THPO      | 0.003773 | 0.946447 | 0.963761 |
| 11728581_ZNF497    | 0.006519 | 0.946512 | 0.9638   |
| 11719064_GNPAT     | -0.00301 | 0.946527 | 0.9638   |
| 11751069_GLMP      | 0.002345 | 0.946545 | 0.9638   |
| 11716245_WASF2     | 0.0027   | 0.946568 | 0.963804 |
| 11731513_XPO4      | 0.002499 | 0.94682  | 0.964041 |
| 11755218_ZNF135    | -0.00578 | 0.946841 | 0.964042 |
| 11739540_PIK3R1    | -0.00378 | 0.946923 | 0.964083 |
| 11755091_ABCA7     | 0.005961 | 0.946925 | 0.964083 |
| 11728625_SLC22A12  | -0.00255 | 0.94694  | 0.964083 |
| 11735500_BTNI1A1   | 0.00817  | 0.947006 | 0.964129 |
| 11762201_CDHR4     | -0.00558 | 0.94717  | 0.964258 |
| 11717551_LOXL1     | -0.00886 | 0.947174 | 0.964258 |
| 11755055_SCAMP2    | -0.0035  | 0.947192 | 0.964258 |
| 11754114_CXCL1     | 0.002432 | 0.947264 | 0.964312 |
| 11729296_MMP13     | 0.004471 | 0.94738  | 0.964397 |
| 11733659_TRIM69    | 0.004039 | 0.947387 | 0.964397 |
| 11740076_DLG2      | 0.004851 | 0.94744  | 0.964431 |
| 11756974_PLA2G4E   | 0.00588  | 0.947476 | 0.964447 |
| 11763442_NR2C1     | -0.00231 | 0.947542 | 0.964495 |
| 11745726_GRN       | 0.002286 | 0.947569 | 0.964502 |
| 11760310_SCYL1     | 0.00398  | 0.947675 | 0.964589 |
| 11737950_POFUT1    | 0.006106 | 0.947704 | 0.964599 |
| 11760176_PML       | -0.0042  | 0.947755 | 0.96463  |
| 11740376_WFDC10A   | -0.00457 | 0.947815 | 0.964662 |
| 11727431_PCDHB2 // | -0.00278 | 0.947825 | 0.964662 |
| 11721927_TMC8      | -0.00424 | 0.947905 | 0.964723 |
| 11739638_CDK12     | -0.0034  | 0.947929 | 0.964727 |
| 11718729_CCDC97    | 0.002885 | 0.948099 | 0.96488  |
| 11758844_RAB4A     | 0.005692 | 0.948276 | 0.965038 |
| 11729076_LTC4S     | -0.00426 | 0.948294 | 0.965038 |
| 11725353_EPM2AIP1  | 0.00327  | 0.948347 | 0.965072 |
| 11759166_DDX53     | 0.003061 | 0.948543 | 0.965225 |
| 11726620_ANAPC7    | 0.003717 | 0.948546 | 0.965225 |
| 11760643_CDH26     | -0.00425 | 0.948556 | 0.965225 |
| 11740918_PHYHIPL   | 0.008388 | 0.948609 | 0.965255 |
| 11723524_AGR3      | 0.004399 | 0.948625 | 0.965255 |
| 11726908_ANO2      | -0.0031  | 0.948697 | 0.965288 |
| 11748753_TBC1D25   | 0.003263 | 0.948701 | 0.965288 |
| 11750183_SLC25A27  | -0.00707 | 0.948717 | 0.965288 |
| 11752432_ALPP      | -0.00267 | 0.94877  | 0.965322 |
| 11743358_PLEKHG5   | 0.002367 | 0.948982 | 0.965494 |
| 11762535_STK39     | -0.00747 | 0.948986 | 0.965494 |
| 11743784_KIAA1462  | -0.00493 | 0.948999 | 0.965494 |
| 11745329_HDAC8     | 0.003407 | 0.949124 | 0.965602 |
| 11759092_USP12     | 0.002886 | 0.949201 | 0.965637 |
| 11733444_LCE2B     | -0.00309 | 0.949211 | 0.965637 |

|                    |          |          |          |
|--------------------|----------|----------|----------|
| 11748965_ETV1      | 0.003364 | 0.949218 | 0.965637 |
| 11759999_CRISPLD2  | -0.00309 | 0.949314 | 0.965698 |
| 11737458_USP29     | -0.00502 | 0.949336 | 0.965698 |
| 11741722_PCDH7     | 0.005536 | 0.949337 | 0.965698 |
| 11731002_RSP02     | -0.00301 | 0.949438 | 0.96578  |
| 11763869_PROZ      | 0.003557 | 0.949461 | 0.965784 |
| 11719620_GTPBP1    | -0.00228 | 0.949508 | 0.965811 |
| 11744040_COA3      | 0.002896 | 0.949593 | 0.965878 |
| 11761873_ASIC4     | -0.0054  | 0.949647 | 0.965881 |
| 11756835_NUP54     | -0.00283 | 0.94965  | 0.965881 |
| 11727710_C1QTNF2   | -0.0044  | 0.949656 | 0.965881 |
| 11729438_WDR4      | -0.00321 | 0.949676 | 0.965882 |
| 11718264_ACACA     | -0.00299 | 0.949862 | 0.966032 |
| 11746686_GKAP1     | -0.00816 | 0.949863 | 0.966032 |
| 11737598_C1orf67   | 0.003376 | 0.949976 | 0.966127 |
| 11763941_MT1IP     | 0.003464 | 0.950105 | 0.966231 |
| 11719135_PKP1      | 0.003485 | 0.950118 | 0.966231 |
| 11736269_RPAIN     | 0.002095 | 0.950373 | 0.96647  |
| 11733768_LILRA2    | -0.00345 | 0.950423 | 0.966476 |
| 11724063_FA2H      | 0.003882 | 0.95043  | 0.966476 |
| 11758611_TRIM10    | -0.00301 | 0.950438 | 0.966476 |
| 11717495_TMEM129   | 0.002192 | 0.950501 | 0.966519 |
| 11761087_MROH1     | 0.002972 | 0.950591 | 0.966591 |
| 11752904_DMKN      | -0.005   | 0.950678 | 0.966659 |
| 11759217_LOC101929 | -0.00426 | 0.950702 | 0.966664 |
| 11724813_ZNF346    | -0.00387 | 0.950722 | 0.966664 |
| 11760962_LPXN      | -0.00728 | 0.950789 | 0.96671  |
| 11761942_ATF2      | -0.01247 | 0.950807 | 0.96671  |
| 11728715_CXCL5     | -0.00318 | 0.950836 | 0.96672  |
| 11742363_OR6N1     | -0.00342 | 0.950867 | 0.966731 |
| 11741248_PPP2R3A   | 0.002214 | 0.950902 | 0.966746 |
| 11752288_MVB12B    | 0.003163 | 0.950973 | 0.966799 |
| 11740572_SYNE3     | 0.002851 | 0.95101  | 0.966816 |
| 11760082_SOGA1     | 0.004051 | 0.951047 | 0.966834 |
| 11744346_MYO10     | 0.003562 | 0.951081 | 0.966844 |
| 11733960_USH1G     | 0.005067 | 0.951097 | 0.966844 |
| 11752902_PLP1      | -0.00271 | 0.951144 | 0.966872 |
| 11740286_ZNF626    | 0.003065 | 0.951293 | 0.967003 |
| 11719672_RCAN2     | -0.0058  | 0.951316 | 0.967006 |
| 11729097_ZNF30     | -0.00217 | 0.951365 | 0.967036 |
| 11752647_TMPRSS6   | -0.00472 | 0.951386 | 0.967037 |
| 11746755_SLC28A3   | 0.003042 | 0.951451 | 0.967083 |
| 11762937_WBP2      | -0.00416 | 0.951475 | 0.967088 |
| 11732267_SNX6      | -0.0023  | 0.951598 | 0.967193 |
| 11745025_ERLIN2    | 0.002522 | 0.951642 | 0.967217 |
| 11719786_MIEF1     | 0.002992 | 0.951755 | 0.967312 |
| 11721990_LECT1     | 0.003468 | 0.951821 | 0.967359 |
| 11717323_EZH1      | -0.00572 | 0.95194  | 0.967441 |
| 11725215_FCN3      | 0.003831 | 0.951942 | 0.967441 |
| 11722620_AQP4      | 0.005962 | 0.95202  | 0.967482 |
| 11738639_RFX4      | -0.00495 | 0.952033 | 0.967482 |

|                    |          |          |          |
|--------------------|----------|----------|----------|
| 11740843_VWDE      | 0.002853 | 0.952049 | 0.967482 |
| 11740620_CHRM2     | 0.006077 | 0.952061 | 0.967482 |
| 11757659_RPL12     | 0.002093 | 0.952113 | 0.967515 |
| 11757711_SETDB1    | -0.00279 | 0.952217 | 0.967571 |
| 11741735_CENPN     | -0.00283 | 0.952228 | 0.967571 |
| 11738403_KRT40     | 0.003773 | 0.952228 | 0.967571 |
| 11761304_CCK       | 0.004866 | 0.952287 | 0.967611 |
| 11731875_LOC100506 | 0.004494 | 0.952394 | 0.9677   |
| 11736422_POSTN     | 0.004191 | 0.952488 | 0.967756 |
| 11736274_TLR2      | -0.00526 | 0.95249  | 0.967756 |
| 11718430_ZNF32     | 0.002543 | 0.952527 | 0.967774 |
| 11756132_DHX16     | -0.00263 | 0.952666 | 0.967895 |
| 11745560_DOCK8     | 0.00361  | 0.952892 | 0.968091 |
| 11726406_TTC9B     | -0.00406 | 0.952929 | 0.968091 |
| 11732780_TAS2R13   | -0.00816 | 0.952933 | 0.968091 |
| 11736654_NKX6-2    | -0.00353 | 0.952937 | 0.968091 |
| 11758587_RPL5      | 0.002393 | 0.953061 | 0.968177 |
| 11749098_CAPRIN2   | 0.002119 | 0.953062 | 0.968177 |
| 11751555_GSTM4     | -0.00204 | 0.953088 | 0.968183 |
| 11763220_GABARAP   | 0.002799 | 0.953148 | 0.968224 |
| 11737468_PDC       | 0.005432 | 0.953196 | 0.968253 |
| 11726643_PEX3      | 0.002068 | 0.953249 | 0.968287 |
| 11729251_MNDA      | -0.00469 | 0.95358  | 0.968603 |
| 11721923_PRKCB     | 0.006896 | 0.953676 | 0.96868  |
| 11731173_TMEM196   | -0.00271 | 0.953722 | 0.968691 |
| 11741069_C1orf174  | -0.00213 | 0.953732 | 0.968691 |
| 11756027_MYOZ2     | -0.00323 | 0.953747 | 0.968691 |
| 11735176_NOS1      | -0.00278 | 0.953974 | 0.968902 |
| 11752599_RBM1A1    | 0.003177 | 0.954029 | 0.968938 |
| 11744459_TDRG1     | -0.00331 | 0.954064 | 0.968943 |
| 11748084_MFGE8     | 0.004053 | 0.954074 | 0.968943 |
| 11750417_PRG4      | -0.00451 | 0.954148 | 0.968985 |
| 11756462_TCP10L    | -0.00712 | 0.954154 | 0.968985 |
| 11731033_MSH3      | -0.00258 | 0.954184 | 0.968994 |
| 11753629_ABHD11    | -0.00351 | 0.954308 | 0.969077 |
| 11731952_ODF3L2    | -0.00308 | 0.954318 | 0.969077 |
| 11722296_LRFN4     | 0.003305 | 0.954324 | 0.969077 |
| 11747225_SLC30A5   | 0.005934 | 0.954383 | 0.969117 |
| 11762176_AGAP11    | 0.005085 | 0.95448  | 0.969194 |
| 11748507_VWA5A     | -0.00336 | 0.954516 | 0.969211 |
| 11760285_PPA2      | 0.003001 | 0.954604 | 0.96928  |
| 11741507_SMOX      | 0.004939 | 0.954633 | 0.96929  |
| 11738449_ZFYVE28   | -0.00391 | 0.954681 | 0.969317 |
| 11722746_BORCS8    | 0.002628 | 0.9547   | 0.969317 |
| 11735628_TFAP2E    | 0.003273 | 0.954728 | 0.969326 |
| 11757427_IMPDPH2   | 0.001988 | 0.95483  | 0.969386 |
| 11719937_CAND1     | 0.00273  | 0.954839 | 0.969386 |
| 11723917	EIF2S2    | 0.002054 | 0.954847 | 0.969386 |
| 11742897_MYH2      | -0.00448 | 0.954874 | 0.969393 |
| 11733441_SGK2      | 0.006368 | 0.954945 | 0.969433 |
| 11758671_IKZF1     | 0.003735 | 0.954953 | 0.969433 |



|                    |          |          |          |
|--------------------|----------|----------|----------|
| 11738249_ZFYVE27   | 0.005711 | 0.954991 | 0.969452 |
| 11759214_RBM43     | 0.002946 | 0.955015 | 0.969456 |
| 200095_PMRPS10     | -0.00193 | 0.955083 | 0.969496 |
| 11762225_PDCD1     | -0.00201 | 0.955094 | 0.969496 |
| 11728104_HTR2B     | 0.005803 | 0.955155 | 0.969524 |
| 11759066_SP3       | 0.002547 | 0.955162 | 0.969524 |
| 11727260_IZUM04    | -0.00508 | 0.955262 | 0.969595 |
| 11715543_RPS8      | -0.00203 | 0.955271 | 0.969595 |
| 11730814_LILRB4    | -0.00378 | 0.955323 | 0.969627 |
| 11746520_EVI5L     | -0.00203 | 0.955475 | 0.969762 |
| 11740875_KCNA2     | 0.00326  | 0.955495 | 0.969762 |
| 11757475_CENPT     | -0.00453 | 0.955531 | 0.969775 |
| 11730682_PLPP5     | 0.002171 | 0.955548 | 0.969775 |
| 11735924_KRTAP12-1 | 0.005354 | 0.955559 | 0.969798 |
| 11732207_GLRA2     | -0.00481 | 0.955626 | 0.969814 |
| 11751580_PLPP6     | 0.00276  | 0.955683 | 0.969852 |
| 11730693_FAM217A   | -0.00607 | 0.955713 | 0.969862 |
| 11723448_MALL      | -0.00402 | 0.955783 | 0.969904 |
| 11751816_TEX35     | -0.006   | 0.955794 | 0.969904 |
| 11735456_OPN1LW // | -0.00442 | 0.955864 | 0.969955 |
| 11731559_WNT2      | -0.0027  | 0.955929 | 0.97     |
| 11717121_C6orf106  | -0.00296 | 0.955976 | 0.970028 |
| 11749431_PIGQ      | 0.003315 | 0.956112 | 0.970146 |
| 11747299_CALCOCO1  | -0.00347 | 0.956208 | 0.970224 |
| 11728085_BMPRI1B   | 0.003783 | 0.956288 | 0.970284 |
| 11729263_SERPINB9  | -0.00452 | 0.956316 | 0.970293 |
| 11737374_WNT8B     | -0.00341 | 0.956337 | 0.970294 |
| 11737463_MYCL      | 0.002546 | 0.956375 | 0.970312 |
| 11752889_HSD3B7    | 0.002837 | 0.956486 | 0.970404 |
| 11760214_CDK11A    | -0.00246 | 0.956717 | 0.970619 |
| 11761744_TPO       | -0.00607 | 0.956755 | 0.970638 |
| 11720022_MME       | -0.00343 | 0.956825 | 0.970689 |
| 11740321_KLK3      | 0.003347 | 0.956913 | 0.970751 |
| 11761160_CCDC82    | 0.008905 | 0.956939 | 0.970751 |
| 11752882_GLB1L3    | -0.00421 | 0.95696  | 0.970751 |
| 11747217_DEFEB123  | -0.00501 | 0.956966 | 0.970751 |
| 11763954_SCARNA9L  | -0.00503 | 0.956996 | 0.970752 |
| 11730313_ERMAP     | -0.00334 | 0.957007 | 0.970752 |
| 11732792_PRDM16    | -0.00377 | 0.957077 | 0.970803 |
| 11719999_SYNJ2BP   | 0.002134 | 0.957319 | 0.971028 |
| 11756794_ASZ1      | 0.004187 | 0.957401 | 0.971078 |
| 11735815_VWC2      | -0.00299 | 0.957408 | 0.971078 |
| 11762625_WWP2      | -0.00193 | 0.957429 | 0.971079 |
| 11716342_LOC101060 | -0.00201 | 0.957566 | 0.971198 |
| 11735054_ARHGEF10L | 0.004812 | 0.957731 | 0.971345 |
| 11721878_MT1F      | 0.003251 | 0.957757 | 0.971351 |
| 11743765_RRBP1     | -0.00197 | 0.957812 | 0.971361 |
| 11737341_C2orf166  | -0.00324 | 0.957821 | 0.971361 |
| 11742180_LCE3A     | 0.002623 | 0.957826 | 0.971361 |
| 11739038_CEACAM5   | -0.00377 | 0.957935 | 0.971452 |
| 11738369_C9orf153  | 0.003252 | 0.957976 | 0.971473 |

|                    |          |          |          |
|--------------------|----------|----------|----------|
| 11736936_CDNF      | -0.0034  | 0.958103 | 0.971582 |
| 11716267_AK1       | -0.00239 | 0.95815  | 0.971609 |
| 11722248_RASSF1    | -0.00181 | 0.958307 | 0.971737 |
| 11763998_ST6GALNAC | -0.00371 | 0.958316 | 0.971737 |
| 11754492_PLCB2     | -0.00229 | 0.958361 | 0.971759 |
| 11729226_ITGAL     | -0.00287 | 0.958378 | 0.971759 |
| 11762681_LOC280665 | 0.004427 | 0.958428 | 0.97179  |
| 11761661_STXBP5L   | -0.00403 | 0.958459 | 0.971801 |
| 11728595_CAV3      | 0.003519 | 0.958521 | 0.971844 |
| 11749376_ABHD4     | 0.005587 | 0.958566 | 0.971869 |
| 11754379_PARP9     | -0.00188 | 0.958629 | 0.971912 |
| 11740822_LPAL2     | 0.00537  | 0.958659 | 0.971912 |
| 11761448_ACCS      | 0.007228 | 0.95867  | 0.971912 |
| 11724077_DDX3Y     | 0.005523 | 0.958687 | 0.971912 |
| 11744099_HSD17B2   | -0.00327 | 0.958827 | 0.972033 |
| 11737170_LRFN1     | 0.002612 | 0.958865 | 0.972052 |
| 11737223_ARTN      | 0.002758 | 0.959018 | 0.972186 |
| 11720817_BAALC     | 0.005862 | 0.959147 | 0.972297 |
| 11723131_WDR70     | 0.001779 | 0.959193 | 0.9723   |
| 11716711_TCEAL8    | -0.00306 | 0.959208 | 0.9723   |
| 11754617_UPF1      | 0.00237  | 0.95921  | 0.9723   |
| 11741719_ADAR      | -0.00176 | 0.959322 | 0.972394 |
| 11751915_ADARB1    | 0.002706 | 0.959377 | 0.972412 |
| 11757733_XIST      | -0.00181 | 0.95938  | 0.972412 |
| 11736140_ITSN1     | -0.00484 | 0.9594   | 0.972412 |
| 11718479_STAR      | 0.003858 | 0.95942  | 0.972412 |
| 11761803_WBSCR27   | -0.00374 | 0.959463 | 0.972436 |
| 11741175_KCNMB1    | 0.003962 | 0.959538 | 0.972491 |
| 11724360_BTRC      | 0.002589 | 0.959659 | 0.972594 |
| 11760291_NAA10     | -0.00293 | 0.959686 | 0.972601 |
| 11730833_RANBP10   | -0.00436 | 0.959727 | 0.972623 |
| 11755811_ZNF266    | -0.00247 | 0.959996 | 0.972876 |
| 11745260_SLC12A2   | 0.003902 | 0.960124 | 0.972985 |
| 11725290_FUT1      | 0.003689 | 0.960154 | 0.972995 |
| 11741682_C2orf61   | -0.00248 | 0.960302 | 0.973109 |
| 11756440_KLHL24    | -0.00189 | 0.960306 | 0.973109 |
| 11760922_HAND2-AS1 | -0.00341 | 0.96034  | 0.973123 |
| 11757533_PLSCR1    | -0.0017  | 0.960451 | 0.973203 |
| 11761464_EDEM3     | -0.00367 | 0.960458 | 0.973203 |
| 11742187_PRDM16    | 0.001939 | 0.960606 | 0.973332 |
| 11723132_RGS9      | 0.003845 | 0.960743 | 0.97345  |
| 11723715_CYB5D1    | 0.005923 | 0.960763 | 0.97345  |
| 11762164_ZNF160    | -0.00737 | 0.960782 | 0.97345  |
| 11756673_MRPL30    | -0.00183 | 0.960808 | 0.973456 |
| 11736604_GLG1      | 0.001851 | 0.960871 | 0.973499 |
| 11738765_OR2G3     | 0.004564 | 0.960994 | 0.973605 |
| 11751790_UBASH3A   | -0.00296 | 0.961036 | 0.973627 |
| 11723069_GABBR1 // | -0.00494 | 0.961057 | 0.973627 |
| 11752358_MYH13     | 0.004605 | 0.961083 | 0.973633 |
| 11727258_DHRS7C    | -0.00371 | 0.961189 | 0.973721 |
| 11720816_BAALC     | -0.00229 | 0.9613   | 0.973809 |

|                    |          |          |          |
|--------------------|----------|----------|----------|
| 11763581_SLC30A6   | -0.00185 | 0.961319 | 0.973809 |
| 11743634_MLLT4     | -0.00213 | 0.961336 | 0.973809 |
| 11742707_APOC2 /// | 0.002411 | 0.961372 | 0.973825 |
| 11753680_RPL21     | 0.001782 | 0.961403 | 0.973837 |
| 11760563_RUVBL2    | -0.00305 | 0.961622 | 0.974038 |
| 11745488_LILRA6 // | 0.004958 | 0.96181  | 0.974201 |
| 11729245_GGCX      | -0.00304 | 0.961822 | 0.974201 |
| 11742807_WIF1      | 0.004436 | 0.961884 | 0.974243 |
| 11726526_MFAP3L    | 0.003163 | 0.961917 | 0.974257 |
| 11746189_XIRP2     | 0.00317  | 0.961994 | 0.974314 |
| 11750625_GUCY1B2   | -0.00301 | 0.962048 | 0.974349 |
| 11745742_FGD3      | -0.00292 | 0.962094 | 0.974359 |
| 11720350_FAM129B   | 0.001927 | 0.962098 | 0.974359 |
| 11726922_EFCAB6    | -0.00311 | 0.962152 | 0.974394 |
| 11756320_NUDT13    | 0.002617 | 0.962187 | 0.974404 |
| 11727259_IZUMO4    | 0.003274 | 0.962202 | 0.974404 |
| 11746748_ERG       | 0.003659 | 0.962233 | 0.974415 |
| 11737613_GAD2      | -0.00328 | 0.96227  | 0.974418 |
| 11720815_BAALC     | -0.0021  | 0.962276 | 0.974418 |
| 11763001_DMKN      | -0.00464 | 0.962308 | 0.974426 |
| 11746521_EVI5L     | 0.002756 | 0.962324 | 0.974426 |
| 11732560_RBM12B    | -0.00183 | 0.962348 | 0.97443  |
| 11742213_CDH24     | -0.00258 | 0.962433 | 0.974496 |
| 11733580_TSPAN10   | -0.00229 | 0.962524 | 0.974549 |
| 11747551_RBM23     | -0.00167 | 0.962539 | 0.974549 |
| 11723047_CRABP1    | 0.004141 | 0.962545 | 0.974549 |
| 11746670_TMEM120A  | -0.00202 | 0.962585 | 0.974569 |
| 11741800_DIS3L     | 0.00276  | 0.962668 | 0.974634 |
| 11742271_KCNK4     | 0.003347 | 0.96274  | 0.974686 |
| 11751485_RAD51D    | -0.00167 | 0.962895 | 0.974817 |
| 11745342_ACSL4     | -0.00308 | 0.96291  | 0.974817 |
| 11730177_SPOP      | -0.00166 | 0.963006 | 0.974895 |
| 11729743_GRM8      | -0.00359 | 0.963067 | 0.974927 |
| 11718477_STAR      | -0.00457 | 0.963078 | 0.974927 |
| 11717836_AIF1      | 0.002841 | 0.963263 | 0.975094 |
| 11737630_OPRM1     | 0.00348  | 0.963298 | 0.975106 |
| 11732101_IQCF6     | 0.00362  | 0.963315 | 0.975106 |
| 11736701_RBM43     | -0.00355 | 0.963432 | 0.975185 |
| 11719914_AIF1L     | -0.00424 | 0.96345  | 0.975185 |
| 11747495_USP19     | 0.00175  | 0.963452 | 0.975185 |
| 11744423_IMP DH2   | -0.00168 | 0.963508 | 0.975206 |
| 11745692_KRTAP4-11 | 0.002952 | 0.963513 | 0.975206 |
| 11753773_SPCS2     | -0.00185 | 0.96362  | 0.975294 |
| 11746725_BTN2A3P   | 0.002271 | 0.96388  | 0.97551  |
| 11725896_RIN1      | -0.002   | 0.963885 | 0.97551  |
| 11736638_DENND4A   | -0.00367 | 0.963905 | 0.97551  |
| 11749870_MTM R14   | 0.003732 | 0.963923 | 0.97551  |
| 11721354_GALNT3    | 0.00413  | 0.963933 | 0.97551  |
| 11725316_VAPA      | -0.00237 | 0.963998 | 0.975551 |
| 11722549_ARHG EF11 | -0.00192 | 0.964013 | 0.975551 |
| 11720087_NUCB2     | -0.00201 | 0.964057 | 0.975571 |

|                    |          |          |          |
|--------------------|----------|----------|----------|
| 11736618_ABCF2     | 0.001831 | 0.964073 | 0.975571 |
| 11717375_SLC25A25  | 0.001593 | 0.964153 | 0.975632 |
| 11738037_PDE6C     | 0.002384 | 0.964211 | 0.97567  |
| 11730514_C16orf78  | 0.001589 | 0.964252 | 0.975689 |
| 11733251_ARHGAP31  | -0.00204 | 0.96427  | 0.975689 |
| 11727446_PTPN5     | 0.004745 | 0.96432  | 0.975689 |
| 11742662_S100A7L2  | 0.001818 | 0.964339 | 0.975689 |
| 11753316_KCNH8     | 0.002335 | 0.964343 | 0.975689 |
| 11716588_TMEM165   | 0.002209 | 0.96435  | 0.975689 |
| 11728220_NRIP3     | -0.00437 | 0.964409 | 0.975729 |
| 11738134_ZNF80     | 0.004741 | 0.964441 | 0.975741 |
| 11741965_VEGFA     | -0.00179 | 0.964525 | 0.975806 |
| 11742374_LINC01599 | 0.001692 | 0.964686 | 0.975943 |
| 11754962_KAZN      | 0.002193 | 0.964701 | 0.975943 |
| 11739992_PDZD7     | -0.00549 | 0.964787 | 0.975952 |
| 11739761_CLDN10    | 0.002076 | 0.964791 | 0.975952 |
| 11753093_TPTE2P1   | 0.003985 | 0.964813 | 0.975952 |
| 11738318_ICAIL     | 0.003916 | 0.964817 | 0.975952 |
| 11749268_PTPN7     | -0.00484 | 0.964829 | 0.975952 |
| 11722639_SSBP3     | 0.002698 | 0.964829 | 0.975952 |
| 11728160_KALRN     | 0.0032   | 0.964867 | 0.97597  |
| 11722961_VCY /// V | 0.002075 | 0.964935 | 0.976018 |
| 11735481_NYAP1     | 0.003768 | 0.965166 | 0.976232 |
| 11717508_IRF4      | -0.00367 | 0.965231 | 0.976246 |
| 11745589_ADAMTS9   | -0.00154 | 0.965238 | 0.976246 |
| 11742998_PRDX6     | 0.001713 | 0.96526  | 0.976246 |
| 11726741_OXNAD1    | 0.002337 | 0.965267 | 0.976246 |
| 11747161_TXNDC2    | 0.00207  | 0.96528  | 0.976246 |
| 11747284_NDRG4     | 0.002416 | 0.965314 | 0.97626  |
| 11738416_NTNG1     | -0.00265 | 0.96536  | 0.976287 |
| 11724495_TMED4     | 0.002026 | 0.965396 | 0.976302 |
| 11733505_C2orf80   | -0.00281 | 0.965415 | 0.976302 |
| 11735992_LARS      | 0.00174  | 0.965503 | 0.976371 |
| 11758382_ABCC9     | -0.00194 | 0.965551 | 0.976399 |
| 11762724_CFAP221   | 0.006805 | 0.965728 | 0.976553 |
| 11736904_ESR1      | 0.00226  | 0.965743 | 0.976553 |
| 11749595_GBP4      | 0.003908 | 0.965899 | 0.976691 |
| 11755339_ATRNL1    | -0.00307 | 0.965964 | 0.976736 |
| 11716843_CASC4     | 0.00271  | 0.966108 | 0.97684  |
| 11737904_CASC4     | 0.00271  | 0.966108 | 0.97684  |
| 11726157_SPIN4     | 0.002714 | 0.966147 | 0.97684  |
| 11731787_ERC1      | 0.002166 | 0.966153 | 0.97684  |
| 11749064_CTNS      | -0.00361 | 0.966167 | 0.97684  |
| 11727649_TOMM5     | -0.00157 | 0.966222 | 0.976875 |
| 11759839_SPAG9     | 0.004831 | 0.966382 | 0.977017 |
| 11732813_DCANP1 // | 0.002604 | 0.966505 | 0.977113 |
| 11733938_LYPLA2    | 0.001565 | 0.966517 | 0.977113 |
| 11750966_SYT16     | 0.003367 | 0.966567 | 0.977143 |
| 11760803_RBFOX1    | 0.002328 | 0.966659 | 0.977216 |
| 11747656_MYEOV     | 0.003105 | 0.966918 | 0.977458 |
| 11751105_WFS1      | -0.00163 | 0.966971 | 0.977491 |

|                    |          |          |          |
|--------------------|----------|----------|----------|
| 11749628_ARHGAP33  | 0.003277 | 0.967245 | 0.977748 |
| 11742373_KRTAP4-7  | 0.002618 | 0.967368 | 0.977853 |
| 11756736_C2orf61   | -0.00357 | 0.967421 | 0.977886 |
| 11738722_OR6X1     | 0.001667 | 0.967454 | 0.977892 |
| 11746741_HRH3      | -0.0026  | 0.967491 | 0.977892 |
| 11750265_CTBP2     | -0.00153 | 0.967504 | 0.977892 |
| 11736983_NMBR      | -0.00224 | 0.967529 | 0.977892 |
| 11716173_P4HB      | -0.00171 | 0.96753  | 0.977892 |
| 11753105_GGT7      | -0.00188 | 0.967547 | 0.977892 |
| 11736503_IL17RC    | -0.00194 | 0.967728 | 0.978054 |
| 11760657_LINCO1602 | 0.002124 | 0.967782 | 0.978089 |
| 11748451_PVRL4     | 0.002934 | 0.967829 | 0.978116 |
| 11738491_KRTAP5-10 | 0.002946 | 0.967862 | 0.978127 |
| 11740359_HOXD10 // | 0.003328 | 0.96788  | 0.978127 |
| 11761667_C9orf62   | -0.00284 | 0.968041 | 0.97827  |
| 11739843_TAF4B     | -0.00277 | 0.968099 | 0.978308 |
| 11719984_BLOC1S2   | 0.004279 | 0.96813  | 0.978319 |
| 11750724_LRRTM3    | -0.00194 | 0.968199 | 0.978368 |
| 11722138_GUCY1A3   | -0.00232 | 0.968249 | 0.978399 |
| 11732476_NAT2      | 0.003327 | 0.968383 | 0.978509 |
| 11730370	EIF4E3    | 0.001979 | 0.968399 | 0.978509 |
| 11743512_KDM4B     | 0.001663 | 0.968444 | 0.978509 |
| 11738140_BTBD8     | -0.00235 | 0.968452 | 0.978509 |
| 11744028_SLC35A1   | 0.001966 | 0.968474 | 0.978509 |
| 11745661_GYPA      | -0.00293 | 0.968478 | 0.978509 |
| 11746826_YWHAG     | -0.00169 | 0.968513 | 0.978515 |
| 11744781_MOBP      | -0.00194 | 0.96854  | 0.978515 |
| 11738279_KLK12     | -0.00191 | 0.968553 | 0.978515 |
| 11748557_APIP      | -0.00152 | 0.968564 | 0.978515 |
| 11761717_SERHL2    | 0.002199 | 0.968632 | 0.978564 |
| 11751075_TSHR      | 0.003908 | 0.968708 | 0.978601 |
| 11740508_ARHGAP26  | -0.00209 | 0.968711 | 0.978601 |
| 11729345_ZNF513    | 0.001852 | 0.96873  | 0.978601 |
| 11758173_SPCS2     | 0.001835 | 0.968842 | 0.978695 |
| 11723315_CAPN3     | -0.00341 | 0.968898 | 0.978731 |
| 11734419_ACSM6     | 0.003218 | 0.969047 | 0.978846 |
| 11722405_PFKFB4    | 0.001815 | 0.969052 | 0.978846 |
| 11753361_SCLT1     | 0.002379 | 0.9691   | 0.978874 |
| 11738590_IL31      | 0.002392 | 0.969189 | 0.978944 |
| 11763107_ERVH-6    | -0.00264 | 0.969258 | 0.978983 |
| 11735392_TH        | -0.00269 | 0.969268 | 0.978983 |
| 11737886_MEP1B     | -0.00199 | 0.969427 | 0.979123 |
| 11755612_SNRPA1    | -0.00158 | 0.969548 | 0.979226 |
| 11723570_SLC12A5   | 0.004346 | 0.969576 | 0.979233 |
| 11744693_GLYR1     | 0.001768 | 0.969603 | 0.979241 |
| 11747143_ACSL6     | 0.003134 | 0.969646 | 0.979264 |
| 11737633_GAB4      | -0.00195 | 0.969828 | 0.979427 |
| 11734388_RAB40A    | -0.00382 | 0.969851 | 0.97943  |
| 11729878_ZNF445    | -0.00198 | 0.969926 | 0.979486 |
| 11738139_KLHL33    | 0.001296 | 0.970054 | 0.979577 |
| 11718968_DDX6      | -0.00216 | 0.970057 | 0.979577 |

|                   |          |          |          |
|-------------------|----------|----------|----------|
| 11715548_DAG1     | 0.001434 | 0.970124 | 0.979606 |
| 11748516_NAP1L5   | 0.002616 | 0.970125 | 0.979606 |
| 11736940_CHRNB4   | 0.001832 | 0.970163 | 0.979624 |
| 11744610_PEG3     | -0.003   | 0.970296 | 0.979737 |
| 11716896_PPIE     | 0.001388 | 0.970379 | 0.979802 |
| 11745231_TCAIM    | -0.00146 | 0.970501 | 0.979875 |
| 11752157_RAPGEF3  | -0.00158 | 0.970511 | 0.979875 |
| 11746314_TCF7L2   | 0.001273 | 0.970512 | 0.979875 |
| 11762290_RAB37    | -0.00266 | 0.970533 | 0.979876 |
| 11728186_SLC35D3  | -0.00399 | 0.97067  | 0.979994 |
| 11721639_ABHD8    | 0.001659 | 0.970917 | 0.980224 |
| 11740846_C10orf71 | 0.001918 | 0.970963 | 0.98025  |
| 11742418_SETD1B   | 0.001273 | 0.971015 | 0.980282 |
| 11749778_PDIA6    | -0.00151 | 0.971091 | 0.980338 |
| 11760263_STARD3   | 0.001615 | 0.971217 | 0.980445 |
| 11743267_SMIM20   | 0.00153  | 0.97138  | 0.98059  |
| 11760858_KLC1     | -0.00269 | 0.971444 | 0.980634 |
| 11717434_ECHDC1   | -0.00145 | 0.971505 | 0.980668 |
| 11763373_APELA    | 0.002103 | 0.971527 | 0.980668 |
| 11751354_PUDP     | 0.002738 | 0.971581 | 0.980668 |
| 11729844_VNN1     | -0.00166 | 0.971598 | 0.980668 |
| 11730010_MTUS2    | 0.002473 | 0.971608 | 0.980668 |
| 11752792_TACC1    | 0.001992 | 0.971612 | 0.980668 |
| 11732607_NBPF3    | 0.003027 | 0.971619 | 0.980668 |
| 11740977_ZNF574   | 0.001404 | 0.971658 | 0.980688 |
| 11758390_AAK1     | 0.004304 | 0.971683 | 0.980693 |
| 11749662_KIFC3    | 0.001871 | 0.971887 | 0.980878 |
| 11744056_MNT      | 0.00133  | 0.97194  | 0.980912 |
| 11735543_CDC14A   | 0.002072 | 0.972064 | 0.981013 |
| 11729762_PLA2G2D  | 0.001656 | 0.972101 | 0.981013 |
| 11734918_TCEA1    | 0.001244 | 0.972101 | 0.981013 |
| 11733719_FAM24A   | 0.001398 | 0.97214  | 0.981032 |
| 11749081_ARSA     | -0.00307 | 0.972164 | 0.981037 |
| 11731453_SEC62    | -0.00176 | 0.972274 | 0.981128 |
| 11744226_SPA17    | -0.00156 | 0.972325 | 0.981155 |
| 11753205_DMKN     | -0.00263 | 0.972342 | 0.981155 |
| 11762757_BAIAP2   | -0.00172 | 0.972363 | 0.981156 |
| 11761167_SIRPB2   | 0.002567 | 0.972465 | 0.981239 |
| 11755243_SMG7     | 0.001302 | 0.972493 | 0.981246 |
| 11741244_OTUD5    | 0.001147 | 0.97264  | 0.981375 |
| 11745574_TBC1D2B  | -0.00226 | 0.972691 | 0.981406 |
| 11717037_HDAC5    | 0.00256  | 0.972909 | 0.981591 |
| 11754444_COX6C    | 0.001195 | 0.972915 | 0.981591 |
| 11757971_THAP5    | -0.00134 | 0.973111 | 0.981769 |
| 11724081_TOR2A    | -0.00146 | 0.973193 | 0.981831 |
| 11720311_XRCC5    | 0.001239 | 0.973223 | 0.981841 |
| 11735622_TM6SF2   | 0.001469 | 0.973246 | 0.981844 |
| 11762015_EPB41L4A | 0.002885 | 0.973316 | 0.981891 |
| 11729758_RGS18    | -0.00231 | 0.973332 | 0.981891 |
| 11735489_TIGD4    | 0.003054 | 0.97336  | 0.981899 |
| 11728114_ZNF213   | 0.001374 | 0.973384 | 0.981903 |

|                    |          |          |          |
|--------------------|----------|----------|----------|
| 11762699_CYP3A7-CY | -0.00312 | 0.973553 | 0.982053 |
| 11731172_GLDN      | -0.00126 | 0.97358  | 0.98206  |
| 11750915_SLC17A6   | -0.00151 | 0.973692 | 0.982152 |
| 11731665_PDGFB     | -0.0023  | 0.973711 | 0.982152 |
| 11759962_TPRKB     | 0.002548 | 0.973975 | 0.982397 |
| 11746763_MOG       | 0.001904 | 0.974015 | 0.9824   |
| 11734175_CCDC169   | -0.0029  | 0.974018 | 0.9824   |
| 11727689_SLC4A3    | -0.00151 | 0.974078 | 0.98241  |
| 11726088_PHACTR3   | -0.00149 | 0.974081 | 0.98241  |
| 11764192_LOC105374 | 0.003586 | 0.974088 | 0.98241  |
| 11738334_TMPRSS11B | 0.002855 | 0.974117 | 0.982419 |
| 11747007_ZC3H18    | 0.00135  | 0.974213 | 0.982495 |
| 11729568_LINC00922 | -0.00539 | 0.974246 | 0.982508 |
| 11755914_COL11A2   | -0.00189 | 0.974327 | 0.982553 |
| 11731374_IL22RA2   | 0.001766 | 0.974331 | 0.982553 |
| 11718922_IQSEC1    | -0.00126 | 0.974353 | 0.982556 |
| 11734304_SPTBN4    | 0.002419 | 0.974418 | 0.982593 |
| 11742980_ANKS1B    | -0.00411 | 0.97443  | 0.982593 |
| 11758114_SKAP2     | 0.001544 | 0.974468 | 0.982595 |
| 11733306_TFAP2B    | -0.00266 | 0.974472 | 0.982595 |
| 11735868_PRB2      | 0.001698 | 0.974601 | 0.982704 |
| 11759341_RGR       | -0.00221 | 0.974699 | 0.982783 |
| 11740163_FUT7      | -0.00203 | 0.974775 | 0.982824 |
| 11741179_ABTB1     | -0.00131 | 0.97478  | 0.982824 |
| 11738827_SCEL      | -0.00378 | 0.974953 | 0.982978 |
| 11737617_ZSCAN1    | -0.00316 | 0.975091 | 0.983097 |
| 11760958_C10orf128 | 0.002567 | 0.975138 | 0.983124 |
| 11740202_KISS1R    | 0.00143  | 0.975209 | 0.983176 |
| 11719660_ATP1A2    | -0.00253 | 0.975261 | 0.983192 |
| 11751732_FAM136A   | 0.001164 | 0.975266 | 0.983192 |
| 11763918_SNORA46   | 0.002872 | 0.975481 | 0.983389 |
| 11728106_TMPRSS3   | -0.0045  | 0.975525 | 0.983413 |
| 11762017_SCUBE1    | -0.00186 | 0.975566 | 0.983434 |
| 11721676_C12orf10  | -0.00164 | 0.97559  | 0.983437 |
| 11740721_ONECUT1   | 0.002425 | 0.975664 | 0.983479 |
| 11719100_FAM234A   | 0.001238 | 0.975671 | 0.983479 |
| 11726846_PLXDC1    | 0.001357 | 0.975846 | 0.983621 |
| 11715870_UFD1L     | 0.001314 | 0.975853 | 0.983621 |
| 11749914_SMC01     | 0.00267  | 0.975873 | 0.983621 |
| 11715644_ATP6AP2   | 0.001343 | 0.975896 | 0.983624 |
| 11746865_SFSWAP    | -0.00164 | 0.975976 | 0.983685 |
| 11729016_SCN1A     | 0.002827 | 0.975999 | 0.983686 |
| 11762581_NEK10     | 0.002049 | 0.976017 | 0.983686 |
| 11739949_PFKFB2    | 0.002947 | 0.97615  | 0.983792 |
| 11733142_IMPA1     | 0.001914 | 0.97617  | 0.983792 |
| 11733817_FHL1      | -0.00159 | 0.976183 | 0.983792 |
| 11743398_STARD3NL  | -0.00113 | 0.976376 | 0.983966 |
| 11744672_MORN4     | -0.00145 | 0.976407 | 0.983977 |
| 11734277_ENOSF1    | 0.001196 | 0.976482 | 0.984032 |
| 11732324_ZKSCAN7   | 0.00356  | 0.976698 | 0.984218 |
| 11734418_MAMDC2    | -0.00173 | 0.976721 | 0.984218 |

|                    |          |          |          |
|--------------------|----------|----------|----------|
| 11738496_OR13J1    | -0.00151 | 0.976727 | 0.984218 |
| 11753346_TTC23L    | -0.00257 | 0.976752 | 0.98422  |
| 11761272_BCL2A1    | -0.00377 | 0.976769 | 0.98422  |
| 11746833_CASC2     | 0.002288 | 0.976794 | 0.984225 |
| 11718990_OS9       | -0.00115 | 0.97699  | 0.984402 |
| 11758813_MED21     | -0.00138 | 0.977101 | 0.984494 |
| 11716925_PURB      | -0.00144 | 0.97716  | 0.984515 |
| 11722312_CLDN18    | -0.00182 | 0.977162 | 0.984515 |
| 11745798_LINC01000 | 0.001711 | 0.977206 | 0.984532 |
| 11753601_HPGD      | -0.00233 | 0.97722  | 0.984532 |
| 11733498_LPAR4     | 0.001257 | 0.977293 | 0.984586 |
| 11740869_NLRP9     | 0.00204  | 0.977379 | 0.984652 |
| 11755118_MYOZ3     | -0.00119 | 0.977505 | 0.984759 |
| 11751834_CLEC2A    | -0.00167 | 0.977529 | 0.984763 |
| 11758437_SNRNP48   | 0.00159  | 0.977642 | 0.984856 |
| 11736876_DTWD2     | 0.002056 | 0.97772  | 0.984915 |
| 11728813_OTUD7B    | -0.00128 | 0.977752 | 0.984926 |
| 11761300_NKX2-5    | -0.00133 | 0.977835 | 0.98499  |
| 11746890_RPS6KL1   | -0.00167 | 0.977888 | 0.984994 |
| 11719279_ZNF444    | 0.00114  | 0.977893 | 0.984994 |
| 11749217_TMPRSS4   | 0.002975 | 0.977899 | 0.984994 |
| 11737072_DIRC1     | -0.00261 | 0.977942 | 0.985016 |
| 11738917_TAS2R31   | -0.00253 | 0.978051 | 0.985106 |
| 11763144_IGKV3-11  | -0.00289 | 0.978079 | 0.985113 |
| 11751360_REXO2     | 0.001221 | 0.978134 | 0.985149 |
| 11723393_ALPK3     | 0.001262 | 0.978239 | 0.985205 |
| 11759862_NRXN1     | -0.00267 | 0.97824  | 0.985205 |
| 11749669_RPH3A     | -0.0025  | 0.97825  | 0.985205 |
| 11762487_GATA2     | 0.001424 | 0.978344 | 0.985267 |
| 11756777_HCRTR2    | -0.00224 | 0.978352 | 0.985267 |
| 11734227_PRDM9     | 0.00159  | 0.978425 | 0.98532  |
| 11763974_LOC105371 | -0.00126 | 0.978483 | 0.985358 |
| 11731677_AKR1C4    | 0.002233 | 0.978555 | 0.985411 |
| 11725631_NR4A2     | 0.001062 | 0.978625 | 0.985455 |
| 11726855_ADAMTS5   | 0.003234 | 0.97864  | 0.985455 |
| 11751796_KLK6      | 0.002035 | 0.978784 | 0.985579 |
| 11735945_UTY       | 0.001323 | 0.978803 | 0.985579 |
| 11731711_CACNB2    | -0.00343 | 0.978829 | 0.985582 |
| 11744967_HSD11B1L  | -0.00126 | 0.978846 | 0.985582 |
| 11759535_MRPS12    | 0.002048 | 0.978929 | 0.985645 |
| 11762370_BNC1      | -0.00114 | 0.979007 | 0.985654 |
| 11745399_HPSE2     | 0.002647 | 0.979025 | 0.985654 |
| 11752020_MAP3K19   | -0.00281 | 0.979028 | 0.985654 |
| 11722449_TYMP      | 0.000995 | 0.979033 | 0.985654 |
| 11716089_SNW1      | -0.0011  | 0.979047 | 0.985654 |
| 11731703_ZNF551    | 0.001817 | 0.97906  | 0.985654 |
| 11758606_RSBN1     | 0.001125 | 0.979188 | 0.985764 |
| 11731616_SIDT1     | 0.002703 | 0.979341 | 0.985881 |
| 11739181_ST6GALNAC | 0.000895 | 0.979345 | 0.985881 |
| 11721602_SYNPO2    | -0.00213 | 0.979629 | 0.986133 |
| 11736862_PIH1D3    | -0.00213 | 0.979636 | 0.986133 |



|                    |          |          |          |
|--------------------|----------|----------|----------|
| 11759812_HOXB1     | -0.00169 | 0.979743 | 0.986196 |
| 11741181_SCGB1D1   | 0.00274  | 0.979748 | 0.986196 |
| 11725562_C2orf85   | 0.001479 | 0.979759 | 0.986196 |
| 11738818_ERVW-1    | -0.00136 | 0.979996 | 0.986414 |
| 11736586_KCTD4     | 0.001747 | 0.980026 | 0.986424 |
| 11729804_LYPD5     | 0.001697 | 0.980051 | 0.986429 |
| 11749110_BNC1      | 0.002198 | 0.980249 | 0.986598 |
| 11723098_VTCN1     | 0.001473 | 0.980259 | 0.986598 |
| 11735939_KRTAP2-4  | 0.001569 | 0.980322 | 0.986623 |
| 11736934_POU2F3    | 0.002794 | 0.980325 | 0.986623 |
| 11763647_APOC1     | 0.000988 | 0.980443 | 0.986722 |
| 11728143_TOR2A     | -0.00148 | 0.980526 | 0.986785 |
| 11729673_FAM200B   | 0.001509 | 0.980547 | 0.986786 |
| 11751864_PLAG1     | -0.00184 | 0.980632 | 0.986833 |
| 11734948_FGF7      | 0.001619 | 0.980634 | 0.986833 |
| 11727142_EPB41L3   | 0.000964 | 0.98066  | 0.986838 |
| 11734627_MOS       | -0.00148 | 0.98078  | 0.986939 |
| 11751406_RABGGTA   | -0.00101 | 0.980834 | 0.986974 |
| 11751548_C1orf10   | -0.00225 | 0.980914 | 0.987033 |
| 11736981_CALCR     | -0.0022  | 0.981012 | 0.987111 |
| 11729342_POU2F2    | -0.00153 | 0.981034 | 0.987114 |
| 11749742_KLHL3     | 0.001689 | 0.981062 | 0.987121 |
| 11748779_ABHD16A   | -0.0009  | 0.981219 | 0.987259 |
| 11734280_RBXL3     | 0.00183  | 0.98131  | 0.987331 |
| 11728118_EXOC3L4   | -0.00131 | 0.981367 | 0.987368 |
| 11728674_MRFAP1    | -0.0008  | 0.981405 | 0.987385 |
| 11749829_SKIDA1    | 0.001631 | 0.981443 | 0.987387 |
| 11727859_NTRK2     | 0.001276 | 0.981447 | 0.987387 |
| 11724205_SUMO1     | -0.00078 | 0.981511 | 0.987431 |
| 11749898_SCAMP1    | -0.00079 | 0.981602 | 0.987502 |
| 11751300_CASQ1     | -0.00228 | 0.981728 | 0.987583 |
| 11761948_LOC100133 | -0.00219 | 0.981735 | 0.987583 |
| 11716060_PRDX4     | 0.000819 | 0.981743 | 0.987583 |
| 11753662_GYPB      | -0.00168 | 0.981764 | 0.987583 |
| 11755749_C5orf38   | 0.000905 | 0.981812 | 0.987593 |
| 11732179_MYH11     | 0.001259 | 0.981813 | 0.987593 |
| 11740949_KCNJ14    | 0.001096 | 0.981834 | 0.987594 |
| 11762078_CARD9     | -0.00159 | 0.981892 | 0.987631 |
| 11741675_GBP7      | -0.00181 | 0.981925 | 0.987631 |
| 11761405_HIST2H2BF | 0.001629 | 0.981933 | 0.987631 |
| 11732889_DEFB132   | -0.00149 | 0.981964 | 0.987636 |
| 11749361_PEX3      | -0.00111 | 0.981977 | 0.987636 |
| 11749922_TAGLN     | 0.001386 | 0.982017 | 0.987655 |
| 11726421_APBB1IP   | -0.00115 | 0.982316 | 0.987936 |
| 11738820_PCDHA2    | 0.001527 | 0.982507 | 0.988107 |
| 11749563_TMC8      | 0.001548 | 0.982571 | 0.988136 |
| 11727524_ACSM5     | 0.001503 | 0.982576 | 0.988136 |
| 11732081_STOML3    | 0.001164 | 0.982647 | 0.988187 |
| 11732588_KCNB1     | 0.00213  | 0.982687 | 0.988207 |
| 11762023_PDGFRA    | 0.002795 | 0.982795 | 0.988289 |
| 11727838_MSTO1 /// | -0.00081 | 0.98282  | 0.988289 |

|                    |          |          |          |
|--------------------|----------|----------|----------|
| 11737255_PCDHGA8   | 0.001468 | 0.982835 | 0.988289 |
| 11738492_KRTAP5-10 | 0.001959 | 0.982849 | 0.988289 |
| 11719483_P2RX4     | -0.00088 | 0.982971 | 0.988391 |
| 11758461_OPN1MW // | -0.0024  | 0.983017 | 0.988417 |
| 11735388_CYLC2     | 0.001386 | 0.983206 | 0.988586 |
| 11740741_GRK1      | -0.00173 | 0.983241 | 0.988602 |
| 11735817_ALX3      | -0.00139 | 0.983277 | 0.988617 |
| 11755147_STAT2     | 0.000834 | 0.983299 | 0.988619 |
| 11743719_C7orf62   | -0.00116 | 0.983425 | 0.988725 |
| 11735589_PTGDR     | -0.0017  | 0.983508 | 0.988789 |
| 11761100_CARD8     | -0.00186 | 0.983562 | 0.988822 |
| 11763430_LOC100131 | -0.00103 | 0.983582 | 0.988822 |
| 11738025_LRP5L     | -0.00111 | 0.983704 | 0.988924 |
| 11748245_APPL2     | 0.000756 | 0.983734 | 0.988935 |
| 11730609_EFCAB5    | 0.001489 | 0.983801 | 0.988981 |
| 11749626_LDB3      | -0.00136 | 0.983826 | 0.988986 |
| 11731365_CNTD2     | 0.001288 | 0.983962 | 0.989101 |
| 11725395_TWISTNB   | -0.00079 | 0.983981 | 0.989101 |
| 11717429_PRDX5     | 0.000771 | 0.984081 | 0.989174 |
| 11726939_MAGEL2    | 0.001441 | 0.984094 | 0.989174 |
| 11757784_RPL22     | 0.000741 | 0.984115 | 0.989175 |
| 11742234_ACOXL     | 0.001736 | 0.984291 | 0.989331 |
| 11755656_ZDHC5     | -0.00079 | 0.984342 | 0.989343 |
| 11735547_SLC36A2   | 0.001184 | 0.984345 | 0.989343 |
| 11726836_SCAI      | -0.00181 | 0.984363 | 0.989343 |
| 11724556_NEUROD1   | -0.00126 | 0.984514 | 0.989475 |
| 11759232_C6orf25   | -0.00143 | 0.984573 | 0.989486 |
| 11738478_HTR3E     | -0.00114 | 0.984592 | 0.989486 |
| 11762399_RIMBP2    | -0.00182 | 0.984612 | 0.989486 |
| 11763408_ANKRD36BP | -0.00195 | 0.984613 | 0.989486 |
| 11730129_HOXD10    | 0.000957 | 0.984627 | 0.989486 |
| 11731015_C2CD4A    | 0.001407 | 0.984773 | 0.989593 |
| 11758263_CYBB      | 0.000891 | 0.984774 | 0.989593 |
| 11719465_C1QB      | 0.000913 | 0.984814 | 0.989613 |
| 11715307_MLXIPL    | -0.00094 | 0.984849 | 0.989625 |
| 11752757_EIF4B     | 0.000817 | 0.984866 | 0.989625 |
| 11751158_SMTN      | 0.000789 | 0.984931 | 0.98967  |
| 11722043_THBS3     | -0.00083 | 0.98496  | 0.989678 |
| 11719582_RPP30     | -0.00113 | 0.985072 | 0.98977  |
| 11739797_RFX2      | 0.000773 | 0.985121 | 0.989799 |
| 11752936_RBM28     | -0.00076 | 0.985167 | 0.989825 |
| 11760409_MDM1      | -0.00164 | 0.985197 | 0.989835 |
| 11753054_AGVR6190  | 0.001615 | 0.985396 | 0.990014 |
| 11732576_NANOG /// | -0.00105 | 0.985434 | 0.990032 |
| 11747508_EPB41L3   | -0.00146 | 0.985469 | 0.990035 |
| 11747929_UBAP1     | -0.00093 | 0.985477 | 0.990035 |
| 11735431_TMBIM4    | 0.000666 | 0.985512 | 0.990047 |
| 11729445_FAM150B   | 0.002384 | 0.985529 | 0.990047 |
| 11722074_HEYL      | 0.002387 | 0.985556 | 0.990053 |
| 11745612_TREM2     | -0.00201 | 0.985628 | 0.990105 |
| 11743819_INIP      | 0.000745 | 0.985721 | 0.990179 |

|                    |          |          |          |
|--------------------|----------|----------|----------|
| 11719013_FZD4      | 0.001474 | 0.985835 | 0.990273 |
| 11758599_RAD51AP2  | -0.00208 | 0.985901 | 0.990309 |
| 11755881_EXOC3L1   | -0.00071 | 0.985912 | 0.990309 |
| 11736950_APOF      | 0.001598 | 0.986071 | 0.990449 |
| 11741505_NREP      | -0.00094 | 0.986299 | 0.990652 |
| 11738828_C1orf109  | -0.00103 | 0.986314 | 0.990652 |
| 11733894_TADA2B    | -0.00087 | 0.986388 | 0.990706 |
| 11742385_OR8B2 /// | -0.00081 | 0.986449 | 0.990747 |
| 11737875_KIR3DS1   | -0.00187 | 0.986471 | 0.990748 |
| 11724500_CRYBB1    | 0.00065  | 0.986648 | 0.990906 |
| 11758256_PDX1      | 0.000708 | 0.986719 | 0.990955 |
| 11764143_LOC105371 | 0.000944 | 0.986737 | 0.990955 |
| 11738499_OR9A2     | 0.001093 | 0.986782 | 0.990979 |
| 11744671_CTBP2     | 0.000592 | 0.986815 | 0.990992 |
| 11746291_SLC12A5   | 0.001776 | 0.986911 | 0.991068 |
| 11757091_POM121L2  | -0.00066 | 0.986959 | 0.99109  |
| 11747965_SKIDA1    | 0.001718 | 0.986983 | 0.99109  |
| 11730770_NAPG      | -0.00087 | 0.986994 | 0.99109  |
| 11746354_C1orf158  | -0.00147 | 0.987099 | 0.991164 |
| 11760605_TRBV7-1   | -0.00188 | 0.987108 | 0.991164 |
| 11722153_SGMS2     | 0.000758 | 0.987131 | 0.991167 |
| 11720713_KCNE3     | -0.00219 | 0.987271 | 0.991287 |
| 11761792_NR2F1-AS1 | 0.001399 | 0.987417 | 0.991398 |
| 11732446_RBPMS     | 0.00079  | 0.987422 | 0.991398 |
| 11742526_OR7G1     | -0.0014  | 0.987445 | 0.991401 |
| 11720473_COX14 /// | -0.00092 | 0.987522 | 0.991457 |
| 11756080_NUS1 ///  | -0.0008  | 0.987637 | 0.991552 |
| 11717473_IGFBP1    | 0.000866 | 0.987725 | 0.991621 |
| 11739362_FKRP      | 0.001048 | 0.987746 | 0.991622 |
| 11721539_RAB15     | 0.000704 | 0.98779  | 0.991645 |
| 11742979_ANKS1B    | 0.000901 | 0.987911 | 0.991724 |
| 11736079_NEK9      | 0.000973 | 0.987911 | 0.991724 |
| 11729417_KRT24     | 0.001567 | 0.987933 | 0.991724 |
| 11760946_PSMC2     | -0.00131 | 0.987964 | 0.991724 |
| 11715953_MBTPS1    | 0.000531 | 0.98799  | 0.991724 |
| 11747810_SLC22A8   | 0.00069  | 0.988006 | 0.991724 |
| 11762919_ULBP2     | 0.001101 | 0.98801  | 0.991724 |
| 11738006_NXNL1     | 0.000662 | 0.988071 | 0.991765 |
| 11757496_RAPGEFL1  | 0.000695 | 0.988177 | 0.991842 |
| 11724832_STS       | 0.00074  | 0.988189 | 0.991842 |
| 11738777_NANOGNB   | -0.00149 | 0.988511 | 0.992145 |
| 11741615_KPNA7     | 0.00081  | 0.988589 | 0.992202 |
| 11740334_TUBAL3    | 0.000723 | 0.98868  | 0.992273 |
| 11761972_USP19     | 0.000665 | 0.988732 | 0.992288 |
| 11757934_KIAA1551  | 0.000492 | 0.988735 | 0.992288 |
| 11733672_TMPPE     | 0.000934 | 0.988773 | 0.992305 |
| 11761352_CCM2      | -0.00086 | 0.98881  | 0.992323 |
| 11748132_SLC2A11   | -0.00063 | 0.988869 | 0.992343 |
| 11744974_LCN15     | -0.0007  | 0.988884 | 0.992343 |
| 11726216_C1orf25   | -0.00065 | 0.988891 | 0.992343 |
| 11759320_MPZL3     | 0.001304 | 0.988987 | 0.992419 |

|                    |          |          |          |
|--------------------|----------|----------|----------|
| 11733519_KCNK10    | 0.000558 | 0.989226 | 0.992638 |
| 11735326_MYH15     | 0.001292 | 0.989493 | 0.992886 |
| 11755274_CATSPERD  | -0.00147 | 0.989595 | 0.992955 |
| 11757328_RPL27     | 0.00046  | 0.989603 | 0.992955 |
| 11752216_VWF       | -0.00061 | 0.989732 | 0.993065 |
| 11726404_IL17RC    | 0.000478 | 0.989786 | 0.993091 |
| 11761934_NANOGP1   | -0.00109 | 0.989802 | 0.993091 |
| 11742085_PCDHA1    | -0.00126 | 0.98982  | 0.993091 |
| 11739460_COX20     | -0.00049 | 0.989875 | 0.993126 |
| 11762922_COX3 ///  | -0.00043 | 0.989901 | 0.993132 |
| 11737133_PCDHGA10  | 0.000932 | 0.990026 | 0.993218 |
| 11743214_OVCH2     | 0.001655 | 0.990027 | 0.993218 |
| 11739844_UTY       | -0.00092 | 0.990052 | 0.993222 |
| 11747826_KCNV2     | 0.000552 | 0.990186 | 0.993323 |
| 11715297_FXN       | -0.00066 | 0.990193 | 0.993323 |
| 11722443_CDC43     | -0.00043 | 0.990372 | 0.993483 |
| 11754656_MYRFL     | -0.00217 | 0.990395 | 0.993485 |
| 11762178_CD3G      | 0.000953 | 0.990498 | 0.993567 |
| 11722541_HIVEP2    | 0.001037 | 0.990538 | 0.993587 |
| 11725204_RPH3AL    | -0.00098 | 0.990595 | 0.993624 |
| 11760469_UGT1A1 // | 0.000758 | 0.990615 | 0.993624 |
| 11763120_IGKC      | -0.00125 | 0.99064  | 0.993628 |
| 11727391_COX15     | 0.001003 | 0.990669 | 0.993638 |
| 11737929_FSHB      | 0.000784 | 0.990743 | 0.993691 |
| 11744791_FNDC5     | -0.00076 | 0.990839 | 0.993756 |
| 11734740_LIMK2     | -0.0007  | 0.990864 | 0.993756 |
| 11744041_MGAT4B    | 0.000403 | 0.990868 | 0.993756 |
| 11754351_CYTH1     | -0.00048 | 0.990891 | 0.993758 |
| 11743211_TAA8      | -0.00089 | 0.990912 | 0.993759 |
| 11739162_ALDOB     | -0.00093 | 0.990973 | 0.993799 |
| 11740954_HDAC11    | -0.00063 | 0.991039 | 0.993846 |
| 11726685_IRF5      | 0.000664 | 0.991104 | 0.99389  |
| 11756033_AGER      | -0.00065 | 0.991339 | 0.994082 |
| 11753436_BRF1      | -0.00039 | 0.991349 | 0.994082 |
| 11762926_CELF2     | 0.000674 | 0.991356 | 0.994082 |
| 11722910_CYP2R1    | -0.00066 | 0.991385 | 0.99409  |
| 11753240_PHF21B    | -0.00053 | 0.991501 | 0.994186 |
| 11745695_TTC36     | -0.00064 | 0.991545 | 0.99421  |
| 11718326_WWC3      | -0.00045 | 0.991579 | 0.994224 |
| 11761447_POFUT2    | -0.00036 | 0.991616 | 0.994238 |
| 11750515_LAMA4     | -0.00063 | 0.991634 | 0.994238 |
| 11730810_LRRTM2    | 0.000618 | 0.99174  | 0.994274 |
| 11726132_MYOM1     | -0.00059 | 0.991759 | 0.994274 |
| 11733614_SEMA6D    | -0.00101 | 0.991767 | 0.994274 |
| 11753135_DIAPH1    | -0.00068 | 0.991768 | 0.994274 |
| 11723845_DEFBI     | 0.000977 | 0.991772 | 0.994274 |
| 11760375_MRPS15    | 0.000847 | 0.991911 | 0.994393 |
| 11760339_TBCA      | 0.001069 | 0.99195  | 0.994412 |
| 11746758_KANSL3    | -0.00045 | 0.992067 | 0.994509 |
| 11733705_TMEM229A  | -0.00103 | 0.992353 | 0.994775 |
| 11731655_VAV3      | -0.00065 | 0.992416 | 0.994818 |

|                    |          |          |          |
|--------------------|----------|----------|----------|
| 11760269_WBSCR22   | -0.00036 | 0.992558 | 0.994939 |
| 11745053_C14orf105 | 0.001225 | 0.992588 | 0.99495  |
| 11747436_NELL2     | -0.00049 | 0.992611 | 0.994952 |
| 11741931_FCAR      | 0.000817 | 0.99269  | 0.995011 |
| 11744588_CCDC17    | -0.00065 | 0.992817 | 0.995118 |
| 11735699_STK11     | -0.00031 | 0.99285  | 0.99513  |
| 11728511_FKTN      | -0.00044 | 0.992884 | 0.995144 |
| 11719208_NPTN      | 0.000383 | 0.992966 | 0.995206 |
| 11760353_SAFB2     | -0.00067 | 0.993078 | 0.995298 |
| 11740341_ZNF491    | 0.00069  | 0.993121 | 0.99532  |
| 11735009_MEOX1     | 0.000482 | 0.993291 | 0.99547  |
| 11729756_ULK2      | 0.000449 | 0.993376 | 0.995529 |
| 11746443_HARS      | -0.00039 | 0.99339  | 0.995529 |
| 11760524_VSTM2A    | -0.00038 | 0.993468 | 0.995586 |
| 11752370_IMP DH2   | -0.0003  | 0.993511 | 0.995609 |
| 11742192_CMKLR1    | -0.00056 | 0.993624 | 0.995676 |
| 11759269_KRTAP9-8  | 0.000369 | 0.993635 | 0.995676 |
| 11749893_CA14      | 0.000381 | 0.993639 | 0.995676 |
| 11719729_INA       | 0.000733 | 0.993716 | 0.995733 |
| 11738540_HHIPL1    | 0.000517 | 0.993774 | 0.995751 |
| 11721995_LRRC32    | 0.000653 | 0.993775 | 0.995751 |
| 11730516_ATRNL1    | -0.00061 | 0.993839 | 0.995787 |
| 11742379_AKR1B15   | 0.000494 | 0.993851 | 0.995787 |
| 11753226_WASF2     | -0.00042 | 0.993967 | 0.995882 |
| 11759762_ODF3B     | 0.000352 | 0.993992 | 0.995887 |
| 11726168_PGR       | 0.000752 | 0.994014 | 0.995889 |
| 11724938_DLL1      | -0.00054 | 0.994128 | 0.995982 |
| 11763524_PPARA     | 0.000368 | 0.994287 | 0.996121 |
| 11741550_OSBPL6    | 0.000295 | 0.994312 | 0.996126 |
| 11734140_RALGAPA2  | -0.00042 | 0.994466 | 0.996222 |
| 11735822_LGALS17A  | -0.00035 | 0.994481 | 0.996222 |
| 11752261_BEST1     | -0.00067 | 0.994491 | 0.996222 |
| 11759837_ERLIN2    | -0.00028 | 0.994495 | 0.996222 |
| 11749668_PDZRN4    | 0.000295 | 0.99451  | 0.996222 |
| 11757165_SNORA53   | 0.000887 | 0.994617 | 0.996305 |
| 11723220_IAPP      | 0.000486 | 0.994633 | 0.996305 |
| 11745721_CYP1B1    | -0.00041 | 0.994722 | 0.996373 |
| 11745121_PPP1R12B  | 0.0008   | 0.994762 | 0.996393 |
| 11761417_ICAM5     | -0.00045 | 0.994822 | 0.996433 |
| 11749860_SMTN      | -0.00047 | 0.99485  | 0.99644  |
| 11737024_DRD1      | 0.000664 | 0.994979 | 0.996549 |
| 11729902_AGFG2     | -0.00037 | 0.995066 | 0.996615 |
| 11718616_RABEP1    | -0.00029 | 0.995158 | 0.996682 |
| 11737478_RBMY1A1 / | -0.00031 | 0.995179 | 0.996682 |
| 11747113_CD160     | -0.00041 | 0.995193 | 0.996682 |
| 11727321_EMILIN3   | -0.00036 | 0.995216 | 0.996684 |
| 11761543_CDK20     | -0.00048 | 0.995248 | 0.996694 |
| 11723009_CCPG1     | 0.000886 | 0.995279 | 0.996694 |
| 11728992_IGDCC4    | 0.000345 | 0.995286 | 0.996694 |
| 11735546_SLC9C2    | -0.00037 | 0.995321 | 0.996707 |
| 11734474_C12orf40  | 0.000295 | 0.995358 | 0.996724 |

|                    |          |          |          |
|--------------------|----------|----------|----------|
| 11753454_PRKG1     | 0.000321 | 0.995389 | 0.996724 |
| 11763049_LOC646813 | -0.00042 | 0.995399 | 0.996724 |
| 11738484_TNFRSF13B | -0.00024 | 0.99545  | 0.996755 |
| 11735634_RPS6KA5   | -0.00037 | 0.995766 | 0.997051 |
| 11740696_ACSM1     | -0.00047 | 0.995826 | 0.997074 |
| 11736763_ZNF347    | -0.00044 | 0.99583  | 0.997074 |
| 11762593_NUMA1     | 0.000273 | 0.995911 | 0.997136 |
| 11722958_ABLIM2    | 0.000338 | 0.99595  | 0.997154 |
| 11737898_TRIM17    | -0.00025 | 0.995995 | 0.997178 |
| 11734314_SPTA1     | 0.000215 | 0.996063 | 0.997226 |
| 11727660_TMPRS13   | -0.00028 | 0.996208 | 0.997347 |
| 11723847_ATP11C    | 0.000189 | 0.996244 | 0.997347 |
| 11738957_PSPN      | -0.00022 | 0.996245 | 0.997347 |
| 11723930_CCT5      | 0.00027  | 0.996391 | 0.997473 |
| 11715677_NCSTN     | 0.000182 | 0.996488 | 0.99755  |
| 11719765_CDK18     | -0.0002  | 0.996555 | 0.997596 |
| 11726408_SPPL2B    | 0.000261 | 0.996644 | 0.997665 |
| 11744046_RPS19     | 0.000417 | 0.9967   | 0.997691 |
| 11732594_FAM47C    | -0.00021 | 0.996711 | 0.997691 |
| 11736532_LRRFIP1   | -0.00018 | 0.996773 | 0.997712 |
| 11733564_C9orf163  | 0.000174 | 0.996773 | 0.997712 |
| 11745072_CCDC149   | -0.00032 | 0.996816 | 0.997735 |
| 11722502_PAK6      | 0.000359 | 0.996856 | 0.997754 |
| 11715146_SXX2B /// | -0.0003  | 0.996899 | 0.997776 |
| 11735130_GRIPAP1   | 0.000196 | 0.996974 | 0.997832 |
| 11758538_MAFG      | -0.00015 | 0.997057 | 0.997894 |
| 11747717_MMP14     | 0.000256 | 0.997174 | 0.997991 |
| 11736458_KCNK6     | -0.00029 | 0.997258 | 0.998054 |
| 11747736_CNN1      | 0.000186 | 0.997299 | 0.998076 |
| 11740924_IMPDPH2   | -0.00011 | 0.997538 | 0.998285 |
| 11725672_IPO7      | -0.00011 | 0.997549 | 0.998285 |
| 11725229_HEATR5A   | -0.00018 | 0.997611 | 0.998326 |
| 11761655_NPCDR1    | -0.00038 | 0.997638 | 0.998326 |
| 11742013_CDCP2     | 0.000199 | 0.997651 | 0.998326 |
| 11762580_LOC102723 | 0.000228 | 0.997726 | 0.998377 |
| 11720491_ITIH2     | -0.00021 | 0.997744 | 0.998377 |
| 11721571_FAM173B   | -0.00015 | 0.997802 | 0.998415 |
| 11742183_NOBOX     | 0.000281 | 0.997832 | 0.998425 |
| 11759231_KCNQ4     | 0.000134 | 0.997871 | 0.998443 |
| 11735724_TP53BP1   | 0.000194 | 0.997974 | 0.99852  |
| 11718363_ST6GALNAC | 0.000219 | 0.998004 | 0.99852  |
| 11719219_UNC119    | 0.000126 | 0.99801  | 0.99852  |
| 11759000_MED14     | 0.000267 | 0.998064 | 0.998555 |
| 11718682_AFP       | -0.00013 | 0.998197 | 0.998667 |
| 11717386_MT1G      | #####    | 0.998411 | 0.998861 |
| 11715752_TSPAN7    | -0.00016 | 0.998488 | 0.998917 |
| 11745261_KCTD8     | -0.00012 | 0.998769 | 0.999178 |
| 11758236_FOXP1     | #####    | 0.998984 | 0.999372 |
| 11750466_SLC41A3   | 4.56E-05 | 0.999244 | 0.999612 |
| 11756436_GLMP      | #####    | 0.999358 | 0.999706 |
| 11715350_COL1A1    | 6.42E-05 | 0.999474 | 0.999784 |

|                    |          |          |          |
|--------------------|----------|----------|----------|
| 11744849_SETD6     | #####    | 0.999481 | 0.999784 |
| 11763414_STBD1     | #####    | 0.999512 | 0.999784 |
| 11741471_ZNF808    | #####    | 0.999544 | 0.999784 |
| 11745132_LGALS8-AS | 2.40E-05 | 0.999554 | 0.999784 |
| 11727004_KXD1      | #####    | 0.999559 | 0.999784 |
| 11758533_CNCA1     | 2.09E-05 | 0.999682 | 0.999886 |
| 11727382_FYTTD1    | #####    | 0.99974  | 0.999908 |
| 11760754_TNFRSF13B | 2.01E-05 | 0.999758 | 0.999908 |
| 11732720_EREG      | #####    | 0.999777 | 0.999908 |
| 11726323_ACOX1     | #####    | 0.999785 | 0.999908 |
| 11735950_BPY2 ///  | #####    | 0.999847 | 0.999945 |
| 11755605_MALAT1    | 5.96E-06 | 0.999876 | 0.999945 |
| 11760326_LOC643406 | #####    | 0.999897 | 0.999945 |
| 11761708_CCDC150   | #####    | 0.999904 | 0.999945 |
| 11758438_CD36      | #####    | 1        | 1        |
| 11762546_FOXP2     | 0        | 1        | 1        |

## Gene chip analysis\_Diff\_mRNA\_FDR0.05

| genesymbol | logFC    | AveExpr  | t        | P.Value  | adj.P.Val | B        |
|------------|----------|----------|----------|----------|-----------|----------|
| CCDC109B   | -2.85304 | 7.155145 | -30.9611 | 5.02E-09 | 1.24E-06  | 11.73549 |
| ICT1       | -2.74337 | 7.43405  | -37.2992 | 1.29E-09 | 7.65E-07  | 13.02705 |
| NUDT15     | -2.71292 | 8.092794 | -43.2598 | 4.40E-10 | 6.43E-07  | 13.99602 |
| HNRNPA3 /  | -2.45409 | 8.44056  | -47.8424 | 2.11E-10 | 5.84E-07  | 14.61817 |
| IAH1       | -2.43885 | 7.021789 | -44.7783 | 3.42E-10 | 6.02E-07  | 14.2127  |
| RAD51AP1   | -2.34297 | 6.996998 | -56.0763 | 6.62E-11 | 5.84E-07  | 15.5314  |
| GLE1       | -2.25634 | 7.440865 | -30.7147 | 5.32E-09 | 1.25E-06  | 11.67851 |
| UBE2N      | -2.13635 | 9.404209 | -42.5311 | 4.98E-10 | 6.43E-07  | 13.88804 |
| ALDOC      | -2.09317 | 6.831378 | -30.5955 | 5.47E-09 | 1.25E-06  | 11.65075 |
| NMU        | -2.09142 | 6.64301  | -44.2603 | 3.72E-10 | 6.06E-07  | 14.14001 |
| KIAA0101 ( | -2.08538 | 6.439176 | -33.2505 | 2.99E-09 | 1.04E-06  | 12.23881 |
| SPOPL      | -2.06986 | 5.636912 | -19.7391 | 1.30E-07 | 6.53E-06  | 8.387726 |
| FAM208A    | -2.06598 | 7.023759 | -40.2922 | 7.38E-10 | 7.06E-07  | 13.53888 |
| LSM6       | -2.02355 | 8.475213 | -47.9731 | 2.07E-10 | 5.84E-07  | 14.63458 |
| FKBP4      | -2.00882 | 9.081366 | -57.0898 | 5.81E-11 | 5.84E-07  | 15.62877 |
| LANCL1     | -1.99671 | 6.767526 | -35.6959 | 1.78E-09 | 8.64E-07  | 12.72916 |
| ITGB1BP1   | -1.98742 | 6.14754  | -51.6188 | 1.21E-10 | 5.84E-07  | 15.06602 |
| MDC1       | -1.92731 | 7.185024 | -38.7076 | 9.88E-10 | 7.26E-07  | 13.27473 |
| DUT        | -1.87905 | 6.381067 | -54.2274 | 8.46E-11 | 5.84E-07  | 15.34599 |
| CPD        | -1.86291 | 7.250423 | -45.3704 | 3.11E-10 | 5.84E-07  | 14.29426 |
| POLR2G     | -1.8429  | 9.763465 | -39.2901 | 8.86E-10 | 7.22E-07  | 13.37355 |
| FAR1       | -1.82599 | 6.630408 | -33.1385 | 3.06E-09 | 1.04E-06  | 12.21522 |
| NUDCD3     | -1.8247  | 8.305361 | -34.925  | 2.09E-09 | 9.04E-07  | 12.57947 |
| TIMP3      | -1.82034 | 7.892569 | -35.1969 | 1.97E-09 | 8.83E-07  | 12.63276 |
| TMEM50A    | -1.81101 | 6.060811 | -29.9368 | 6.40E-09 | 1.29E-06  | 11.49483 |
| TPD52      | -1.78977 | 8.843283 | -37.3532 | 1.28E-09 | 7.65E-07  | 13.03678 |
| ISCA1      | -1.78934 | 7.168337 | -50.3332 | 1.46E-10 | 5.84E-07  | 14.9195  |
| FNBP1      | -1.7203  | 5.670088 | -42.5078 | 5.00E-10 | 6.43E-07  | 13.88454 |
| IMPAD1     | -1.70444 | 8.93537  | -35.9245 | 1.70E-09 | 8.64E-07  | 12.77272 |
| GALNT1     | -1.69803 | 6.966518 | -39.7189 | 8.19E-10 | 7.06E-07  | 13.44501 |
| TMEM261    | -1.69424 | 9.864563 | -39.8311 | 8.02E-10 | 7.06E-07  | 13.46353 |
| C14orf142  | -1.68807 | 7.384039 | -35.6386 | 1.80E-09 | 8.64E-07  | 12.71817 |
| VAMP3      | -1.68183 | 8.905722 | -39.7949 | 8.08E-10 | 7.06E-07  | 13.45757 |
| CKAP4      | -1.66332 | 9.585868 | -47.2227 | 2.32E-10 | 5.84E-07  | 14.53939 |
| CAMK2N1    | -1.65666 | 6.781061 | -38.8774 | 9.57E-10 | 7.26E-07  | 13.30375 |
| LY6K       | -1.64638 | 8.952413 | -28.3694 | 9.46E-09 | 1.57E-06  | 11.10612 |
| ASF1B      | -1.63621 | 7.891814 | -37.2796 | 1.30E-09 | 7.65E-07  | 13.02352 |
| ESYT2      | -1.60356 | 7.910866 | -40.8841 | 6.64E-10 | 7.06E-07  | 13.63383 |
| TKT        | -1.59986 | 6.072687 | -12.7432 | 2.94E-06 | 4.45E-05  | 5.003206 |
| HSPB11     | -1.59826 | 8.9119   | -40.0459 | 7.72E-10 | 7.06E-07  | 13.49879 |
| AAED1      | -1.59724 | 7.495538 | -42.7079 | 4.83E-10 | 6.43E-07  | 13.91449 |
| HSPA4      | -1.58876 | 6.706637 | -22.3617 | 5.30E-08 | 3.83E-06  | 9.337884 |
| MEX3D      | -1.58483 | 6.307256 | -28.954  | 8.16E-09 | 1.44E-06  | 11.25411 |
| AKR1A1     | -1.56912 | 7.797532 | -33.9397 | 2.57E-09 | 9.45E-07  | 12.38169 |
| FAM45A //  | -1.53299 | 8.57835  | -39.7603 | 8.13E-10 | 7.06E-07  | 13.45185 |
| LOC100128  | -1.53268 | 9.90301  | -34.9672 | 2.07E-09 | 9.04E-07  | 12.58777 |
| MTDH       | -1.52273 | 7.576764 | -34.3967 | 2.33E-09 | 9.22E-07  | 12.47435 |
| FKBP10     | -1.5071  | 7.812545 | -37.8773 | 1.16E-09 | 7.44E-07  | 13.13024 |
| MCM6       | -1.49277 | 8.768004 | -40.758  | 6.79E-10 | 7.06E-07  | 13.61377 |
| EEF1E1     | -1.48121 | 8.916516 | -38.9528 | 9.44E-10 | 7.26E-07  | 13.31659 |



|           |          |          |          |          |          |          |
|-----------|----------|----------|----------|----------|----------|----------|
| PNMA2     | -1.48003 | 5.948503 | -14.4906 | 1.19E-06 | 2.42E-05 | 5.999369 |
| RCC2      | -1.46826 | 10.1148  | -44.5138 | 3.57E-10 | 6.02E-07 | 14.17573 |
| LOC145783 | -1.46007 | 6.301408 | -13.3396 | 2.13E-06 | 3.57E-05 | 5.357511 |
| SFRP1     | -1.4532  | 7.880684 | -30.5018 | 5.59E-09 | 1.26E-06 | 11.62881 |
| MAPKAPK2  | -1.45042 | 8.262437 | -29.1725 | 7.73E-09 | 1.40E-06 | 11.3085  |
| UBE2D3    | -1.44519 | 9.325486 | -36.1427 | 1.63E-09 | 8.64E-07 | 12.81396 |
| AKAP7     | -1.44219 | 5.775557 | -23.1176 | 4.17E-08 | 3.41E-06 | 9.588884 |
| CDIPT     | -1.4334  | 7.262127 | -35.1302 | 2.00E-09 | 8.83E-07 | 12.61973 |
| SDC1      | -1.42937 | 7.994719 | -36.942  | 1.39E-09 | 7.89E-07 | 12.9622  |
| TXNRD1    | -1.42105 | 9.053341 | -30.7161 | 5.31E-09 | 1.25E-06 | 11.67883 |
| LOC100128 | -1.41945 | 9.796947 | -39.6176 | 8.34E-10 | 7.06E-07 | 13.42823 |
| SLC37A4   | -1.41901 | 8.542141 | -31.8238 | 4.11E-09 | 1.15E-06 | 11.93056 |
| NEDD8     | -1.41674 | 10.38026 | -35.7646 | 1.76E-09 | 8.64E-07 | 12.74229 |
| HNRNPAO   | -1.41591 | 8.410029 | -36.6244 | 1.48E-09 | 8.21E-07 | 12.90382 |
| ALG10B    | -1.40639 | 5.385553 | -12.6605 | 3.08E-06 | 4.59E-05 | 4.952784 |
| CDCA7     | -1.39805 | 8.516894 | -31.0399 | 4.92E-09 | 1.23E-06 | 11.7536  |
| PNP       | -1.39573 | 8.676663 | -34.3935 | 2.34E-09 | 9.22E-07 | 12.47369 |
| C4orf46   | -1.38944 | 6.43146  | -18.2434 | 2.29E-07 | 9.04E-06 | 7.782143 |
| SRI       | -1.37923 | 7.188201 | -25.7433 | 1.91E-08 | 2.27E-06 | 10.39291 |
| SP4       | -1.37495 | 6.917577 | -33.3148 | 2.95E-09 | 1.04E-06 | 12.25231 |
| AIDA      | -1.37495 | 9.12481  | -32.5165 | 3.51E-09 | 1.08E-06 | 12.08239 |
| NEURL1B   | -1.36334 | 4.428875 | -17.8758 | 2.65E-07 | 9.86E-06 | 7.625171 |
| GNS       | -1.36042 | 8.004864 | -32.1282 | 3.83E-09 | 1.12E-06 | 11.99779 |
| GPT2      | -1.3541  | 7.939615 | -29.3185 | 7.45E-09 | 1.38E-06 | 11.34454 |
| KDM4D     | -1.35229 | 5.402146 | -10.2475 | 1.34E-05 | 0.000131 | 3.325934 |
| ARF3      | -1.35197 | 8.574769 | -26.7501 | 1.45E-08 | 2.00E-06 | 10.67619 |
| NUP58     | -1.34441 | 8.063731 | -24.9853 | 2.38E-08 | 2.52E-06 | 10.17088 |
| PXYLP1    | -1.34024 | 7.843643 | -40.6145 | 6.96E-10 | 7.06E-07 | 13.59082 |
| CRNDE     | -1.33543 | 8.652431 | -29.919  | 6.43E-09 | 1.29E-06 | 11.49055 |
| COX7A2 // | -1.33362 | 7.824957 | -24.3023 | 2.90E-08 | 2.88E-06 | 9.964039 |
| SOS1      | -1.32808 | 7.964516 | -39.1964 | 9.02E-10 | 7.23E-07 | 13.35779 |
| METTL21A  | -1.32253 | 6.130145 | -10.2689 | 1.32E-05 | 0.000129 | 3.341873 |
| ZCCHC17   | -1.32097 | 9.181859 | -35.3293 | 1.92E-09 | 8.83E-07 | 12.65852 |
| FANCI     | -1.32094 | 7.558017 | -20.6413 | 9.44E-08 | 5.37E-06 | 8.729492 |
| BUB3      | -1.31157 | 8.02037  | -32.8314 | 3.28E-09 | 1.06E-06 | 12.15005 |
| GSPT1     | -1.30231 | 6.132355 | -10.2167 | 1.37E-05 | 0.000133 | 3.303008 |
| TBC1D13   | -1.30133 | 7.289816 | -29.8044 | 6.61E-09 | 1.31E-06 | 11.46297 |
| IRAK1     | -1.29992 | 9.325278 | -30.1737 | 6.05E-09 | 1.27E-06 | 11.55139 |
| ARHGAP5   | -1.29745 | 4.91355  | -15.6839 | 6.76E-07 | 1.68E-05 | 6.613129 |
| TMPO      | -1.29629 | 8.853994 | -23.5991 | 3.59E-08 | 3.19E-06 | 9.743939 |
| MEOX2     | -1.29207 | 9.503249 | -33.6506 | 2.74E-09 | 9.77E-07 | 12.32222 |
| METTL9    | -1.29076 | 7.033569 | -26.7315 | 1.46E-08 | 2.00E-06 | 10.67106 |
| CHST1     | -1.28854 | 6.166768 | -18.8365 | 1.82E-07 | 7.93E-06 | 8.028401 |
| BCAP31    | -1.2857  | 10.43088 | -32.5818 | 3.46E-09 | 1.08E-06 | 12.09648 |
| PDCD6IP   | -1.27571 | 6.620303 | -22.0544 | 5.86E-08 | 4.08E-06 | 9.233111 |
| YKT6      | -1.27342 | 8.331352 | -33.7123 | 2.70E-09 | 9.71E-07 | 12.33497 |
| PDZD2     | -1.26781 | 7.778707 | -32.0338 | 3.92E-09 | 1.13E-06 | 11.97701 |
| RRM2      | -1.26332 | 9.525977 | -27.8704 | 1.08E-08 | 1.67E-06 | 10.97687 |
| CDCA8     | -1.25974 | 8.209832 | -34.4009 | 2.33E-09 | 9.22E-07 | 12.47518 |
| EYA1      | -1.25716 | 7.189215 | -31.3882 | 4.54E-09 | 1.20E-06 | 11.83291 |
| RMND5A    | -1.25632 | 5.932966 | -16.4097 | 4.90E-07 | 1.38E-05 | 6.963641 |

|           |          |          |          |          |          |          |
|-----------|----------|----------|----------|----------|----------|----------|
| METTL10   | -1.24872 | 5.183702 | -11.6485 | 5.52E-06 | 6.87E-05 | 4.309231 |
| RPP25L    | -1.24775 | 8.044545 | -15.5183 | 7.29E-07 | 1.75E-05 | 6.530877 |
| TNFRSF19  | -1.24193 | 7.969007 | -19.9131 | 1.22E-07 | 6.27E-06 | 8.454927 |
| CTNND1 // | -1.23713 | 6.461762 | -30.5383 | 5.54E-09 | 1.26E-06 | 11.63737 |
| MLLT1     | -1.22383 | 8.190378 | -28.5229 | 9.10E-09 | 1.54E-06 | 11.14535 |
| PLAA      | -1.2163  | 6.860089 | -27.6925 | 1.13E-08 | 1.72E-06 | 10.9301  |
| NIPA1     | -1.21203 | 6.891681 | -17.1895 | 3.51E-07 | 1.15E-05 | 7.322871 |
| PREX1     | -1.21003 | 6.131939 | -17.9026 | 2.63E-07 | 9.79E-06 | 7.636763 |
| SAPCD2    | -1.20987 | 7.098826 | -9.39422 | 2.44E-05 | 0.000203 | 2.665454 |
| LOC728715 | -1.2035  | 10.73896 | -33.4101 | 2.88E-09 | 1.02E-06 | 12.27223 |
| ATG4B     | -1.20183 | 6.355847 | -30.7907 | 5.22E-09 | 1.25E-06 | 11.69614 |
| RDM1      | -1.2009  | 4.850296 | -6.26017 | 0.000352 | 0.00162  | -0.29579 |
| TMEM68    | -1.19856 | 6.184791 | -21.2302 | 7.71E-08 | 4.79E-06 | 8.94388  |
| CD109     | -1.19402 | 9.468016 | -30.3595 | 5.78E-09 | 1.27E-06 | 11.59537 |
| BRI3BP // | -1.19118 | 6.244298 | -19.2107 | 1.58E-07 | 7.28E-06 | 8.179563 |
| TMEM106B  | -1.19012 | 5.204334 | -15.9016 | 6.13E-07 | 1.57E-05 | 6.720017 |
| RNPEP     | -1.18903 | 9.460552 | -32.0068 | 3.94E-09 | 1.13E-06 | 11.97106 |
| RABL3     | -1.18837 | 6.250793 | -12.8971 | 2.70E-06 | 4.18E-05 | 5.096174 |
| DHCR24    | -1.18701 | 8.364872 | -29.6661 | 6.84E-09 | 1.33E-06 | 11.4295  |
| AP1M1     | -1.18684 | 7.076514 | -31.3792 | 4.55E-09 | 1.20E-06 | 11.83088 |
| WLS       | -1.18656 | 6.162499 | -31.3204 | 4.61E-09 | 1.21E-06 | 11.81755 |
| SACM1L    | -1.18623 | 8.671404 | -28.0902 | 1.02E-08 | 1.64E-06 | 11.03415 |
| MCM2      | -1.18464 | 7.676541 | -33.7615 | 2.67E-09 | 9.68E-07 | 12.3451  |
| PSME3     | -1.18409 | 7.640726 | -26.1519 | 1.71E-08 | 2.17E-06 | 10.50942 |
| NUDT12    | -1.18286 | 5.106607 | -32.1236 | 3.84E-09 | 1.12E-06 | 11.99677 |
| AGPS      | -1.17977 | 6.749602 | -17.0403 | 3.74E-07 | 1.20E-05 | 7.255467 |
| PACSIN3   | -1.17956 | 6.031834 | -19.3178 | 1.52E-07 | 7.09E-06 | 8.222276 |
| HMGB3     | -1.17726 | 8.544535 | -23.7683 | 3.41E-08 | 3.13E-06 | 9.797575 |
| TM9SF3    | -1.17454 | 8.252321 | -30.2705 | 5.91E-09 | 1.27E-06 | 11.57434 |
| IGFBP4    | -1.17264 | 6.059667 | -13.7586 | 1.71E-06 | 3.09E-05 | 5.597251 |
| CENPH     | -1.17033 | 8.352179 | -26.2709 | 1.65E-08 | 2.12E-06 | 10.54294 |
| DHFR      | -1.16739 | 9.242593 | -22.8468 | 4.54E-08 | 3.58E-06 | 9.500049 |
| SMARCE1   | -1.15897 | 7.870956 | -26.7625 | 1.44E-08 | 2.00E-06 | 10.6796  |
| EFTUD2    | -1.15491 | 8.758476 | -28.0639 | 1.02E-08 | 1.64E-06 | 11.02731 |
| PCGF2     | -1.15431 | 7.985474 | -32.1525 | 3.81E-09 | 1.12E-06 | 12.00311 |
| GNB1      | -1.15239 | 8.460217 | -30.6961 | 5.34E-09 | 1.25E-06 | 11.6742  |
| RBM12     | -1.15036 | 6.427033 | -26.0248 | 1.77E-08 | 2.21E-06 | 10.4734  |
| INCENP    | -1.14893 | 7.581452 | -23.1805 | 4.09E-08 | 3.39E-06 | 9.609346 |
| PSAT1     | -1.14679 | 8.259757 | -26.8178 | 1.42E-08 | 1.99E-06 | 10.69479 |
| UNG       | -1.14636 | 7.5509   | -31.0668 | 4.89E-09 | 1.23E-06 | 11.75974 |
| HNRNPA3   | -1.14543 | 7.952751 | -32.4023 | 3.60E-09 | 1.10E-06 | 12.05764 |
| MPRIP     | -1.145   | 8.685435 | -28.5643 | 9.00E-09 | 1.54E-06 | 11.15589 |
| LMNB1     | -1.14449 | 5.042816 | -23.5691 | 3.62E-08 | 3.20E-06 | 9.734379 |
| C9orf40   | -1.14268 | 6.138532 | -24.9974 | 2.37E-08 | 2.52E-06 | 10.17449 |
| KIAA1549L | -1.13948 | 6.869775 | -26.4192 | 1.59E-08 | 2.06E-06 | 10.58448 |
| AIMP2     | -1.13779 | 9.590713 | -21.4426 | 7.17E-08 | 4.59E-06 | 9.019619 |
| POLE2     | -1.1375  | 7.286726 | -31.3893 | 4.54E-09 | 1.20E-06 | 11.83314 |
| SPC25     | -1.13324 | 6.276569 | -13.985  | 1.53E-06 | 2.86E-05 | 5.723844 |
| TMX1      | -1.12998 | 6.692653 | -21.8775 | 6.21E-08 | 4.22E-06 | 9.172064 |
| SMAD5     | -1.12908 | 7.102751 | -29.0813 | 7.91E-09 | 1.42E-06 | 11.28584 |
| ENAH      | -1.12792 | 6.775682 | -22.3205 | 5.37E-08 | 3.84E-06 | 9.32395  |

|           |          |          |          |          |          |          |
|-----------|----------|----------|----------|----------|----------|----------|
| DCAF16    | -1.1263  | 7.336499 | -18.2319 | 2.30E-07 | 9.05E-06 | 7.777275 |
| COPS7A    | -1.12318 | 8.200862 | -25.9781 | 1.79E-08 | 2.22E-06 | 10.46011 |
| SUDS3     | -1.12141 | 6.412435 | -30.3121 | 5.85E-09 | 1.27E-06 | 11.58417 |
| NUS1      | -1.11976 | 5.377572 | -13.655  | 1.81E-06 | 3.21E-05 | 5.538671 |
| HIST1H1A  | -1.11758 | 5.780962 | -10.7334 | 9.75E-06 | 0.000103 | 3.680321 |
| DHCR7     | -1.11543 | 6.699579 | -24.2281 | 2.97E-08 | 2.93E-06 | 9.941168 |
| GSTCD     | -1.11541 | 7.233425 | -24.3862 | 2.83E-08 | 2.85E-06 | 9.989797 |
| FBXL17    | -1.11442 | 7.661265 | -21.0937 | 8.07E-08 | 4.87E-06 | 8.894779 |
| FAM122B   | -1.11028 | 7.389056 | -19.1342 | 1.63E-07 | 7.43E-06 | 8.148944 |
| ABCC6 /// | -1.10497 | 3.882352 | -11.3979 | 6.42E-06 | 7.64E-05 | 4.141733 |
| ADCY9     | -1.10179 | 6.813996 | -18.0618 | 2.46E-07 | 9.42E-06 | 7.705026 |
| TMEM14A   | -1.10077 | 8.138499 | -31.6859 | 4.24E-09 | 1.17E-06 | 11.89983 |
| MSL3P1    | -1.1004  | 6.57318  | -12.1823 | 4.04E-06 | 5.52E-05 | 4.655053 |
| NCBP2     | -1.1002  | 7.713599 | -27.9916 | 1.04E-08 | 1.65E-06 | 11.0085  |
| LARP4     | -1.09913 | 7.993239 | -24.017  | 3.16E-08 | 3.03E-06 | 9.875636 |
| MZT1      | -1.09645 | 8.529879 | -32.6848 | 3.38E-09 | 1.07E-06 | 12.11865 |
| HNRNPDL   | -1.09364 | 7.881862 | -22.319  | 5.37E-08 | 3.84E-06 | 9.323449 |
| RBMS2     | -1.09223 | 6.916106 | -28.1749 | 9.95E-09 | 1.62E-06 | 11.05606 |
| KIAA0430  | -1.09164 | 8.165916 | -25.2225 | 2.22E-08 | 2.44E-06 | 10.24119 |
| NEIL2     | -1.08929 | 6.628639 | -10.4743 | 1.15E-05 | 0.000117 | 3.493234 |
| AGMO      | -1.08685 | 4.590954 | -11.0972 | 7.74E-06 | 8.74E-05 | 3.936104 |
| ABHD3     | -1.08607 | 6.560769 | -17.1683 | 3.54E-07 | 1.15E-05 | 7.313316 |
| ANO1      | -1.08525 | 6.909182 | -18.3282 | 2.22E-07 | 8.86E-06 | 7.817856 |
| PTRHD1    | -1.08438 | 8.848056 | -29.9383 | 6.40E-09 | 1.29E-06 | 11.49519 |
| PAPOLA    | -1.08228 | 7.894603 | -29.1451 | 7.78E-09 | 1.41E-06 | 11.3017  |
| LMNB1 /// | -1.08037 | 6.054423 | -13.2294 | 2.26E-06 | 3.71E-05 | 5.293181 |
| CHD6      | -1.07831 | 6.66234  | -28.2229 | 9.83E-09 | 1.61E-06 | 11.06846 |
| POT1      | -1.0756  | 3.200421 | -12.6079 | 3.17E-06 | 4.68E-05 | 4.920566 |
| KIAA1143  | -1.07493 | 8.050372 | -29.2059 | 7.66E-09 | 1.40E-06 | 11.31676 |
| TBL1XR1   | -1.06582 | 9.495852 | -26.6234 | 1.50E-08 | 2.03E-06 | 10.64122 |
| SPRED1    | -1.06536 | 6.203591 | -17.8634 | 2.67E-07 | 9.87E-06 | 7.619846 |
| ATG5      | -1.06369 | 5.14435  | -19.0701 | 1.67E-07 | 7.50E-06 | 8.123169 |
| ATAD2     | -1.06149 | 6.942474 | -26.8593 | 1.41E-08 | 1.99E-06 | 10.70615 |
| MRPL45    | -1.06001 | 8.641619 | -26.9442 | 1.38E-08 | 1.95E-06 | 10.72934 |
| OVOS ///  | -1.05931 | 7.493819 | -19.1026 | 1.65E-07 | 7.46E-06 | 8.136246 |
| GRINA     | -1.05439 | 7.148643 | -19.6976 | 1.32E-07 | 6.59E-06 | 8.371575 |
| MCM7      | -1.05215 | 8.170481 | -20.3229 | 1.06E-07 | 5.76E-06 | 8.610781 |
| GUCD1     | -1.04824 | 7.259185 | -24.8833 | 2.45E-08 | 2.57E-06 | 10.1404  |
| FST       | -1.04777 | 8.106753 | -18.9297 | 1.76E-07 | 7.75E-06 | 8.066352 |
| PPM1A     | -1.04767 | 6.532947 | -23.8701 | 3.31E-08 | 3.08E-06 | 9.829632 |
| RNF26     | -1.04692 | 8.11679  | -18.6025 | 1.99E-07 | 8.37E-06 | 7.932258 |
| SNRPD1    | -1.04448 | 7.546978 | -17.1104 | 3.63E-07 | 1.17E-05 | 7.287185 |
| NDUFS7    | -1.04333 | 8.755968 | -26.2211 | 1.67E-08 | 2.14E-06 | 10.52893 |
| STYX      | -1.03868 | 6.366501 | -30.1105 | 6.14E-09 | 1.28E-06 | 11.53634 |
| CTSV      | -1.03491 | 4.424962 | -19.6353 | 1.35E-07 | 6.65E-06 | 8.347291 |
| CBS ///   | -1.03463 | 8.287265 | -28.0154 | 1.04E-08 | 1.65E-06 | 11.0147  |
| SLC6A15   | -1.03451 | 7.022032 | -19.5077 | 1.42E-07 | 6.80E-06 | 8.297334 |
| DUSP9     | -1.03309 | 6.563446 | -19.9815 | 1.19E-07 | 6.21E-06 | 8.481176 |
| INSIG1    | -1.03015 | 7.46649  | -18.2753 | 2.26E-07 | 8.97E-06 | 7.795587 |
| GPD1L     | -1.02847 | 6.829244 | -20.5537 | 9.73E-08 | 5.43E-06 | 8.697027 |
| MAP3K3    | -1.02686 | 6.94011  | -19.8457 | 1.25E-07 | 6.36E-06 | 8.42897  |

|           |          |          |          |          |          |          |
|-----------|----------|----------|----------|----------|----------|----------|
| KCTD10    | -1.02549 | 8.194777 | -26.4995 | 1.55E-08 | 2.05E-06 | 10.60687 |
| EID1      | -1.02521 | 9.75263  | -23.8741 | 3.30E-08 | 3.08E-06 | 9.830882 |
| CDKN3     | -1.02445 | 6.637894 | -18.8295 | 1.83E-07 | 7.93E-06 | 8.025577 |
| GINS4     | -1.02277 | 7.498871 | -22.6332 | 4.86E-08 | 3.67E-06 | 9.429127 |
| JADE2     | -1.022   | 8.397352 | -21.5881 | 6.83E-08 | 4.45E-06 | 9.070996 |
| 6-Mar     | -1.01995 | 7.747885 | -19.9228 | 1.22E-07 | 6.27E-06 | 8.458675 |
| EAPP      | -1.01959 | 7.41781  | -17.7021 | 2.85E-07 | 1.01E-05 | 7.549854 |
| MND1      | -1.01792 | 6.974638 | -24.4001 | 2.82E-08 | 2.85E-06 | 9.994072 |
| ASPH      | -1.01647 | 6.398345 | -28.6326 | 8.85E-09 | 1.52E-06 | 11.17322 |
| CDC25C    | -1.01581 | 6.751084 | -16.1547 | 5.48E-07 | 1.47E-05 | 6.842344 |
| SDHD      | -1.01572 | 9.131845 | -27.6397 | 1.14E-08 | 1.73E-06 | 10.91614 |
| YY1       | -1.01409 | 7.141217 | -21.1739 | 7.86E-08 | 4.83E-06 | 8.923686 |
| MIS18BP1  | -1.01262 | 6.404696 | -9.47375 | 2.30E-05 | 0.000194 | 2.729217 |
| GINS1     | -1.01129 | 9.199028 | -27.7709 | 1.10E-08 | 1.69E-06 | 10.95075 |
| ARHGEF9   | -1.00319 | 5.322395 | -6.83285 | 0.000202 | 0.001035 | 0.320573 |
| CDC45     | -1.00309 | 6.561671 | -24.3182 | 2.89E-08 | 2.87E-06 | 9.968913 |
| MTHFD2    | -1.00254 | 9.688871 | -23.3627 | 3.86E-08 | 3.27E-06 | 9.66826  |
| NFATC2IP  | -1.00252 | 6.570945 | -13.9844 | 1.53E-06 | 2.86E-05 | 5.723551 |
| PRIM1     | -1.00147 | 8.337731 | -25.8615 | 1.85E-08 | 2.25E-06 | 10.42683 |
| MTMR4     | -1.00074 | 7.381837 | -22.529  | 5.02E-08 | 3.70E-06 | 9.394244 |
| EIF5      | -1.00048 | 5.1223   | -21.3008 | 7.52E-08 | 4.71E-06 | 8.969154 |
| POLR3G    | -0.99836 | 7.280109 | -23.4699 | 3.74E-08 | 3.26E-06 | 9.702692 |
| HK2       | -0.998   | 8.268683 | -21.7566 | 6.46E-08 | 4.31E-06 | 9.130027 |
| CDCA5     | -0.99564 | 8.904509 | -26.8385 | 1.41E-08 | 1.99E-06 | 10.70046 |
| DSN1      | -0.99546 | 8.540448 | -25.5896 | 2.00E-08 | 2.32E-06 | 10.3485  |
| NUCKS1    | -0.99361 | 8.397515 | -17.3978 | 3.22E-07 | 1.10E-05 | 7.415939 |
| COQ10A    | -0.98965 | 7.608255 | -21.9598 | 6.04E-08 | 4.16E-06 | 9.20053  |
| STK38L    | -0.98778 | 4.809942 | -11.1426 | 7.52E-06 | 8.57E-05 | 3.967454 |
| CYB5B     | -0.98677 | 5.444476 | -15.1788 | 8.53E-07 | 1.94E-05 | 6.359336 |
| RBL2      | -0.98253 | 7.358935 | -22.6861 | 4.78E-08 | 3.64E-06 | 9.44675  |
| SPC24     | -0.9782  | 7.742512 | -18.9284 | 1.76E-07 | 7.75E-06 | 8.065848 |
| APTX      | -0.97586 | 6.712787 | -20.0748 | 1.15E-07 | 6.07E-06 | 8.516844 |
| DNA2      | -0.9726  | 6.548208 | -23.0897 | 4.20E-08 | 3.41E-06 | 9.579777 |
| PSMD12    | -0.97257 | 9.092268 | -24.3763 | 2.84E-08 | 2.85E-06 | 9.986772 |
| MKI67     | -0.97229 | 8.370412 | -26.6026 | 1.51E-08 | 2.03E-06 | 10.63548 |
| FBX05     | -0.97187 | 8.273413 | -26.5953 | 1.51E-08 | 2.03E-06 | 10.63344 |
| POLR2C    | -0.96881 | 8.610615 | -25.3384 | 2.15E-08 | 2.39E-06 | 10.27528 |
| MLLT6     | -0.96881 | 6.837496 | -21.5939 | 6.82E-08 | 4.45E-06 | 9.073026 |
| NEIL3     | -0.9682  | 4.793602 | -6.50868 | 0.000275 | 0.001327 | -0.02353 |
| MRE11A    | -0.9679  | 4.540039 | -14.9546 | 9.49E-07 | 2.09E-05 | 6.243905 |
| PLCXD1    | -0.96779 | 7.749308 | -24.3671 | 2.85E-08 | 2.85E-06 | 9.983944 |
| EEF1E1 // | -0.96732 | 8.712025 | -24.7273 | 2.56E-08 | 2.64E-06 | 10.09352 |
| ALDH5A1   | -0.96678 | 5.497921 | -12.1715 | 4.06E-06 | 5.54E-05 | 4.648234 |
| CAMK2G    | -0.96605 | 6.855297 | -17.8579 | 2.67E-07 | 9.87E-06 | 7.61745  |
| TOR3A     | -0.96563 | 6.319196 | -14.2153 | 1.36E-06 | 2.66E-05 | 5.850554 |
| SMCO4     | -0.96487 | 5.00407  | -8.28556 | 5.69E-05 | 0.000384 | 1.724383 |
| CCDC85B   | -0.96408 | 7.044767 | -16.1298 | 5.54E-07 | 1.48E-05 | 6.830395 |
| GMNN      | -0.96387 | 9.144834 | -19.6853 | 1.33E-07 | 6.60E-06 | 8.366788 |
| CHAF1A    | -0.96364 | 8.551816 | -22.988  | 4.34E-08 | 3.48E-06 | 9.546514 |
| PDIK1L    | -0.95999 | 6.913322 | -15.142  | 8.68E-07 | 1.97E-05 | 6.340503 |
| MARCKS    | -0.95854 | 7.109073 | -18.5486 | 2.04E-07 | 8.50E-06 | 7.909914 |

|           |          |          |          |          |          |          |
|-----------|----------|----------|----------|----------|----------|----------|
| FBXW11    | -0.9584  | 7.285345 | -23.9028 | 3.27E-08 | 3.08E-06 | 9.839913 |
| CIB1      | -0.95754 | 8.960934 | -22.0198 | 5.92E-08 | 4.11E-06 | 9.221223 |
| DTL       | -0.95741 | 8.159361 | -27.5306 | 1.18E-08 | 1.76E-06 | 10.88722 |
| SMC2      | -0.95517 | 6.265971 | -16.9279 | 3.92E-07 | 1.23E-05 | 7.204263 |
| SRSF11    | -0.95516 | 7.928267 | -28.0762 | 1.02E-08 | 1.64E-06 | 11.03051 |
| MCM10     | -0.9546  | 7.137054 | -23.0807 | 4.22E-08 | 3.42E-06 | 9.576849 |
| TBCA      | -0.95343 | 10.93744 | -27.6644 | 1.14E-08 | 1.72E-06 | 10.92267 |
| UMAD1     | -0.95287 | 5.905799 | -16.5637 | 4.58E-07 | 1.33E-05 | 7.035972 |
| EIF4EBP2  | -0.95113 | 7.402723 | -21.0296 | 8.25E-08 | 4.94E-06 | 8.871586 |
| RFC4      | -0.95103 | 9.311752 | -17.5817 | 2.99E-07 | 1.05E-05 | 7.497166 |
| NCS1      | -0.94988 | 5.567931 | -8.46157 | 4.94E-05 | 0.000345 | 1.880657 |
| FOCAD     | -0.94904 | 7.823717 | -25.2188 | 2.22E-08 | 2.44E-06 | 10.24011 |
| NAA50     | -0.94764 | 9.465213 | -20.5806 | 9.64E-08 | 5.40E-06 | 8.707003 |
| RCC1      | -0.94571 | 6.892248 | -25.5733 | 2.01E-08 | 2.33E-06 | 10.34376 |
| GART      | -0.94555 | 8.287799 | -27.1193 | 1.31E-08 | 1.91E-06 | 10.77692 |
| TBRG1     | -0.94413 | 5.208781 | -16.7565 | 4.22E-07 | 1.27E-05 | 7.125534 |
| ZBED8     | -0.94257 | 5.889195 | -14.0175 | 1.50E-06 | 2.83E-05 | 5.741846 |
| ABAT      | -0.93793 | 4.783613 | -8.31134 | 5.57E-05 | 0.000378 | 1.747439 |
| ASNS      | -0.9364  | 9.687037 | -26.4137 | 1.59E-08 | 2.06E-06 | 10.58296 |
| DSCC1     | -0.93451 | 8.001705 | -13.2481 | 2.24E-06 | 3.68E-05 | 5.304164 |
| SKA1      | -0.93433 | 7.058646 | -17.5848 | 2.99E-07 | 1.05E-05 | 7.498516 |
| PEG10     | -0.93354 | 3.90353  | -5.47472 | 0.000803 | 0.003188 | -1.20786 |
| HIST2H2AC | -0.93252 | 8.163812 | -16.0115 | 5.83E-07 | 1.53E-05 | 6.773352 |
| LSM5      | -0.93165 | 6.14755  | -13.5788 | 1.88E-06 | 3.30E-05 | 5.495253 |
| CNTLN     | -0.93077 | 4.258327 | -5.57526 | 0.000719 | 0.002918 | -1.08657 |
| ACSL3     | -0.92933 | 8.479381 | -19.7881 | 1.28E-07 | 6.47E-06 | 8.406714 |
| CDT1      | -0.92786 | 6.22029  | -14.4071 | 1.24E-06 | 2.49E-05 | 5.954529 |
| GPSM3     | -0.92671 | 6.226647 | -17.7599 | 2.78E-07 | 1.00E-05 | 7.575001 |
| TLCD1     | -0.92433 | 6.591396 | -16.7537 | 4.22E-07 | 1.27E-05 | 7.124241 |
| FADS1     | -0.92421 | 6.084483 | -15.7415 | 6.59E-07 | 1.65E-05 | 6.641545 |
| NCAPH     | -0.92369 | 7.538653 | -20.8603 | 8.75E-08 | 5.14E-06 | 8.810018 |
| E2F8      | -0.92349 | 5.29841  | -12.9266 | 2.66E-06 | 4.14E-05 | 5.11385  |
| AK6 /// T | -0.92341 | 8.81436  | -10.4514 | 1.17E-05 | 0.000118 | 3.476484 |
| PRRC2B    | -0.92006 | 8.683046 | -20.3088 | 1.06E-07 | 5.77E-06 | 8.605453 |
| ZDBF2     | -0.91955 | 6.988513 | -11.5551 | 5.84E-06 | 7.14E-05 | 4.24724  |
| VASH2     | -0.91844 | 4.087184 | -9.35652 | 2.50E-05 | 0.000206 | 2.635062 |
| TMEM17    | -0.9158  | 6.063293 | -16.0317 | 5.78E-07 | 1.52E-05 | 6.783153 |
| THOC6     | -0.91467 | 7.881983 | -25.5111 | 2.04E-08 | 2.35E-06 | 10.32572 |
| FAM133A   | -0.91444 | 4.971091 | -12.651  | 3.10E-06 | 4.61E-05 | 4.947015 |
| SLC47A1   | -0.91346 | 3.52401  | -11.4486 | 6.23E-06 | 7.47E-05 | 4.175901 |
| PPP1CB    | -0.91228 | 8.349967 | -17.379  | 3.25E-07 | 1.10E-05 | 7.407601 |
| CNNM3     | -0.91209 | 5.971354 | -10.7814 | 9.45E-06 | 0.000101 | 3.714496 |
| IGF1R     | -0.91002 | 8.31932  | -17.235  | 3.45E-07 | 1.14E-05 | 7.343285 |
| GRSF1     | -0.90966 | 5.83814  | -12.8032 | 2.85E-06 | 4.35E-05 | 5.03955  |
| HMG2      | -0.90692 | 6.653688 | -25.2039 | 2.23E-08 | 2.44E-06 | 10.23571 |
| EEF2K /// | -0.90434 | 7.555448 | -23.5569 | 3.64E-08 | 3.20E-06 | 9.730496 |
| VDAC3     | -0.90416 | 10.2188  | -24.3287 | 2.88E-08 | 2.87E-06 | 9.972155 |
| IGSF3     | -0.90144 | 6.264991 | -18.2861 | 2.26E-07 | 8.95E-06 | 7.800145 |
| EBP       | -0.8999  | 8.330438 | -22.718  | 4.73E-08 | 3.63E-06 | 9.457379 |
| BCR /// E | -0.89913 | 4.498557 | -15.8157 | 6.37E-07 | 1.61E-05 | 6.678025 |
| RPRD1A    | -0.8984  | 7.311954 | -18.7309 | 1.90E-07 | 8.11E-06 | 7.985175 |

|           |          |          |          |          |          |          |
|-----------|----------|----------|----------|----------|----------|----------|
| WHSC1     | -0.89559 | 7.272374 | -21.4301 | 7.20E-08 | 4.60E-06 | 9.01518  |
| RNASEH2A  | -0.89559 | 8.692794 | -20.6032 | 9.57E-08 | 5.39E-06 | 8.715416 |
| MBLAC2    | -0.89544 | 6.705192 | -12.7087 | 3.00E-06 | 4.51E-05 | 4.982237 |
| HSP90AA1  | -0.89534 | 9.417236 | -16.5075 | 4.69E-07 | 1.35E-05 | 7.009687 |
| BAZ2A     | -0.89472 | 8.490462 | -19.7484 | 1.30E-07 | 6.52E-06 | 8.391315 |
| CCNY      | -0.89459 | 7.752616 | -22.1641 | 5.65E-08 | 3.98E-06 | 9.270699 |
| SPIRE1    | -0.89429 | 7.075829 | -16.3863 | 4.95E-07 | 1.39E-05 | 6.952605 |
| CDC20     | -0.89363 | 9.249598 | -16.2511 | 5.25E-07 | 1.43E-05 | 6.88847  |
| FASTKD2   | -0.89315 | 6.79795  | -23.0252 | 4.29E-08 | 3.46E-06 | 9.558698 |
| BANF1     | -0.89099 | 5.448353 | -7.77235 | 8.70E-05 | 0.000534 | 1.252552 |
| MAD2L1    | -0.8898  | 9.494983 | -22.3224 | 5.37E-08 | 3.84E-06 | 9.324582 |
| FAM111B   | -0.88807 | 6.038844 | -10.6401 | 1.04E-05 | 0.000108 | 3.61345  |
| AHNAK     | -0.88765 | 10.60853 | -23.112  | 4.17E-08 | 3.41E-06 | 9.587031 |
| IPO5      | -0.88597 | 9.057497 | -21.1353 | 7.96E-08 | 4.86E-06 | 8.909799 |
| MSH2      | -0.88482 | 8.214822 | -19.2551 | 1.56E-07 | 7.22E-06 | 8.197311 |
| ATP9A     | -0.88413 | 6.320806 | -16.885  | 3.99E-07 | 1.23E-05 | 7.184661 |
| TMEM147   | -0.88309 | 9.685797 | -24.0779 | 3.11E-08 | 3.00E-06 | 9.894586 |
| TCF3      | -0.8806  | 6.980797 | -23.3726 | 3.85E-08 | 3.27E-06 | 9.671447 |
| TEX261    | -0.87966 | 8.161239 | -15.5075 | 7.33E-07 | 1.76E-05 | 6.525464 |
| CENPF     | -0.87817 | 9.591237 | -17.3514 | 3.29E-07 | 1.11E-05 | 7.395281 |
| COPG2     | -0.87813 | 6.466585 | -17.6437 | 2.91E-07 | 1.03E-05 | 7.524329 |
| ATP6V1C1  | -0.87788 | 6.841867 | -16.4636 | 4.78E-07 | 1.37E-05 | 6.98906  |
| RAB22A    | -0.87778 | 7.529688 | -18.3285 | 2.22E-07 | 8.86E-06 | 7.817987 |
| IER3IP1   | -0.87732 | 8.831859 | -26.4727 | 1.56E-08 | 2.06E-06 | 10.59942 |
| TTLL12    | -0.87634 | 7.626052 | -20.2889 | 1.07E-07 | 5.79E-06 | 8.59797  |
| THOC1     | -0.875   | 6.526228 | -23.3712 | 3.85E-08 | 3.27E-06 | 9.670992 |
| HN1L      | -0.87243 | 6.450352 | -11.6607 | 5.48E-06 | 6.83E-05 | 4.317338 |
| TCOF1     | -0.87238 | 6.90247  | -14.367  | 1.26E-06 | 2.52E-05 | 5.932883 |
| TGM2      | -0.87143 | 5.968664 | -17.9907 | 2.53E-07 | 9.61E-06 | 7.674596 |
| MYO19     | -0.86947 | 7.836751 | -22.0451 | 5.87E-08 | 4.08E-06 | 9.229919 |
| SPTBN1    | -0.86881 | 7.934611 | -21.9913 | 5.98E-08 | 4.13E-06 | 9.211397 |
| COTL1     | -0.86667 | 10.15965 | -22.828  | 4.56E-08 | 3.58E-06 | 9.493811 |
| PPP1R8    | -0.86656 | 8.393218 | -17.0147 | 3.78E-07 | 1.20E-05 | 7.243833 |
| CMPK2     | -0.86614 | 5.209511 | -14.185  | 1.38E-06 | 2.68E-05 | 5.834002 |
| USP13     | -0.86583 | 7.373397 | -19.6748 | 1.33E-07 | 6.60E-06 | 8.362698 |
| PPP2R2A   | -0.86381 | 8.892175 | -19.6006 | 1.37E-07 | 6.70E-06 | 8.333739 |
| SYNCRIP   | -0.8623  | 7.70739  | -20.5996 | 9.58E-08 | 5.39E-06 | 8.714066 |
| MEN1      | -0.8623  | 8.530883 | -20.8274 | 8.85E-08 | 5.19E-06 | 8.797959 |
| TCF19     | -0.86167 | 6.373026 | -14.4562 | 1.21E-06 | 2.45E-05 | 5.980931 |
| SRSF10    | -0.85957 | 6.956175 | -8.55351 | 4.59E-05 | 0.000326 | 1.961204 |
| HACD2     | -0.85922 | 8.328794 | -16.8573 | 4.04E-07 | 1.24E-05 | 7.171969 |
| BUB1      | -0.85758 | 8.146529 | -18.2741 | 2.27E-07 | 8.97E-06 | 7.795087 |
| UHRF1     | -0.85701 | 9.422097 | -23.6258 | 3.56E-08 | 3.18E-06 | 9.752429 |
| SEC63     | -0.85537 | 5.049    | -8.84374 | 3.67E-05 | 0.000275 | 2.210784 |
| TRIM49 // | -0.85482 | 4.038932 | -7.22237 | 0.000141 | 0.000779 | 0.718315 |
| ERGIC1    | -0.84992 | 6.347434 | -8.70885 | 4.07E-05 | 0.000298 | 2.095666 |
| IRS2      | -0.84833 | 7.613427 | -16.9834 | 3.83E-07 | 1.21E-05 | 7.229582 |
| BIRC5     | -0.84761 | 7.958068 | -17.86   | 2.67E-07 | 9.87E-06 | 7.618342 |
| NAV1      | -0.84624 | 6.054752 | -18.1241 | 2.40E-07 | 9.31E-06 | 7.73156  |
| CENPA     | -0.84613 | 8.339079 | -17.732  | 2.81E-07 | 1.01E-05 | 7.562847 |
| KIF2C     | -0.84484 | 8.133665 | -18.2868 | 2.25E-07 | 8.95E-06 | 7.800445 |

|           |          |          |          |          |          |          |
|-----------|----------|----------|----------|----------|----------|----------|
| SEC62     | -0.84465 | 6.309032 | -18.0789 | 2.45E-07 | 9.40E-06 | 7.712329 |
| QKI       | -0.84448 | 9.326289 | -21.5611 | 6.89E-08 | 4.46E-06 | 9.061494 |
| DHTKD1    | -0.84389 | 7.003602 | -13.1402 | 2.37E-06 | 3.83E-05 | 5.240763 |
| KLF13     | -0.8436  | 6.022677 | -9.97241 | 1.62E-05 | 0.00015  | 3.11856  |
| VPS26B    | -0.83976 | 7.974286 | -23.0908 | 4.20E-08 | 3.41E-06 | 9.580127 |
| TIFA      | -0.837   | 3.52236  | -6.90539 | 0.000188 | 0.000982 | 0.395922 |
| NUSAP1    | -0.8351  | 8.56151  | -19.7736 | 1.29E-07 | 6.48E-06 | 8.401114 |
| RMI1      | -0.83453 | 7.942474 | -16.8244 | 4.10E-07 | 1.25E-05 | 7.156845 |
| RRP1B     | -0.83409 | 9.290522 | -16.9698 | 3.85E-07 | 1.22E-05 | 7.223389 |
| INHBE     | -0.83364 | 3.370562 | -8.48274 | 4.86E-05 | 0.00034  | 1.899265 |
| PPIP5K1   | -0.83301 | 4.253437 | -14.1482 | 1.41E-06 | 2.71E-05 | 5.813844 |
| GINS2     | -0.83002 | 7.903851 | -18.422  | 2.14E-07 | 8.68E-06 | 7.857198 |
| TMEM182   | -0.82898 | 4.143399 | -8.15685 | 6.31E-05 | 0.000415 | 1.608342 |
| ZNF148    | -0.82745 | 5.630242 | -11.0885 | 7.78E-06 | 8.77E-05 | 3.930095 |
| DYNLT3    | -0.8274  | 9.034366 | -20.863  | 8.74E-08 | 5.14E-06 | 8.810991 |
| HMG20B    | -0.82717 | 8.401553 | -18.8294 | 1.83E-07 | 7.93E-06 | 8.025509 |
| ITGAV     | -0.82652 | 8.584247 | -21.1092 | 8.03E-08 | 4.87E-06 | 8.90039  |
| WBCR27    | -0.82632 | 7.299384 | -15.509  | 7.32E-07 | 1.76E-05 | 6.526229 |
| ARL1      | -0.82631 | 8.045961 | -19.3723 | 1.49E-07 | 7.02E-06 | 8.243898 |
| IGIP      | -0.82608 | 5.363229 | -11.9379 | 4.65E-06 | 6.08E-05 | 4.49859  |
| NDFIP1    | -0.82606 | 7.302933 | -20.1176 | 1.14E-07 | 6.02E-06 | 8.533138 |
| FOXRED1   | -0.82599 | 7.579684 | -17.9901 | 2.54E-07 | 9.61E-06 | 7.674345 |
| TUB       | -0.82421 | 6.159846 | -13.5147 | 1.94E-06 | 3.36E-05 | 5.458602 |
| PLSCR1    | -0.82345 | 5.176888 | -6.92398 | 0.000185 | 0.000969 | 0.415133 |
| HAUS4     | -0.82331 | 7.723968 | -14.48   | 1.19E-06 | 2.43E-05 | 5.993703 |
| IRAK1 /// | -0.82061 | 7.169834 | -14.6229 | 1.11E-06 | 2.32E-05 | 6.069899 |
| KCTD18    | -0.81957 | 6.247391 | -9.77438 | 1.86E-05 | 0.000166 | 2.96606  |
| C1GALT1C1 | -0.81951 | 6.447605 | -13.7602 | 1.71E-06 | 3.09E-05 | 5.598171 |
| PIM1      | -0.81901 | 3.590117 | -7.89245 | 7.86E-05 | 0.000493 | 1.365193 |
| IDS       | -0.81884 | 7.817422 | -18.9991 | 1.71E-07 | 7.62E-06 | 8.094501 |
| RAD1      | -0.81751 | 5.686059 | -22.1345 | 5.70E-08 | 4.01E-06 | 9.260589 |
| PSMB6     | -0.81709 | 9.949221 | -19.6098 | 1.37E-07 | 6.69E-06 | 8.337355 |
| CDK1      | -0.81374 | 8.894987 | -20.0939 | 1.15E-07 | 6.06E-06 | 8.524103 |
| SMC1A     | -0.81348 | 4.91183  | -5.42679 | 0.000846 | 0.00333  | -1.26617 |
| ATF4      | -0.8126  | 11.27337 | -24.7547 | 2.54E-08 | 2.64E-06 | 10.10177 |
| PPP2R1A   | -0.81216 | 9.51313  | -24.0687 | 3.11E-08 | 3.00E-06 | 9.891725 |
| ETV1      | -0.81211 | 5.208026 | -13.505  | 1.95E-06 | 3.37E-05 | 5.452996 |
| MTBP      | -0.8113  | 6.730927 | -17.9297 | 2.60E-07 | 9.71E-06 | 7.648406 |
| BNC2      | -0.81088 | 7.018767 | -19.2926 | 1.54E-07 | 7.14E-06 | 8.212226 |
| OLFML2A   | -0.80905 | 7.080962 | -15.621  | 6.96E-07 | 1.70E-05 | 6.582012 |
| SMAD2     | -0.8089  | 6.168956 | -14.0352 | 1.49E-06 | 2.80E-05 | 5.75163  |
| APITD1 // | -0.80753 | 7.62355  | -20.2775 | 1.07E-07 | 5.79E-06 | 8.593669 |
| IQGAP1    | -0.80735 | 8.824142 | -19.9543 | 1.20E-07 | 6.23E-06 | 8.470778 |
| MLLT10    | -0.80722 | 6.351448 | -8.31929 | 5.53E-05 | 0.000376 | 1.754543 |
| ZNF726    | -0.80648 | 5.960217 | -16.8077 | 4.13E-07 | 1.26E-05 | 7.149148 |
| PCGF3     | -0.80581 | 8.038519 | -18.073  | 2.45E-07 | 9.40E-06 | 7.709795 |
| TIMP2     | -0.80532 | 8.959328 | -17.8015 | 2.73E-07 | 9.97E-06 | 7.59305  |
| SGPL1     | -0.80524 | 5.976107 | -17.8597 | 2.67E-07 | 9.87E-06 | 7.618231 |
| ATP2A2    | -0.80484 | 9.261006 | -19.1988 | 1.59E-07 | 7.30E-06 | 8.174823 |
| GLG1      | -0.80298 | 7.630974 | -21.1242 | 7.99E-08 | 4.86E-06 | 8.905789 |
| NRM       | -0.80098 | 7.851435 | -19.0474 | 1.68E-07 | 7.54E-06 | 8.113997 |

|           |          |          |          |          |          |          |
|-----------|----------|----------|----------|----------|----------|----------|
| ETF1      | -0.80003 | 9.940874 | -20.7262 | 9.16E-08 | 5.30E-06 | 8.760809 |
| B4GALT1   | -0.7999  | 7.306069 | -20.9079 | 8.61E-08 | 5.09E-06 | 8.82737  |
| HNRNPR    | -0.79974 | 6.039367 | -15.8253 | 6.34E-07 | 1.61E-05 | 6.682707 |
| PARP1     | -0.79936 | 6.238501 | -21.6981 | 6.59E-08 | 4.36E-06 | 9.109575 |
| HNRNPU    | -0.79931 | 5.974793 | -14.2193 | 1.36E-06 | 2.66E-05 | 5.85273  |
| FMN1      | -0.79803 | 8.213279 | -20.1531 | 1.12E-07 | 5.97E-06 | 8.546619 |
| PGK1      | -0.79738 | 9.597633 | -17.0073 | 3.79E-07 | 1.21E-05 | 7.240469 |
| CTSC      | -0.79684 | 7.501192 | -17.7435 | 2.80E-07 | 1.00E-05 | 7.567879 |
| NEDD1     | -0.79667 | 8.208457 | -18.886  | 1.79E-07 | 7.83E-06 | 8.048603 |
| GCH1      | -0.79644 | 5.195773 | -10.5236 | 1.12E-05 | 0.000115 | 3.529176 |
| GCAT      | -0.79608 | 6.210713 | -10.5118 | 1.13E-05 | 0.000115 | 3.520549 |
| FN3KRP    | -0.79513 | 8.040892 | -18.8268 | 1.83E-07 | 7.93E-06 | 8.024437 |
| BCCIP     | -0.79504 | 7.847608 | -15.4547 | 7.51E-07 | 1.78E-05 | 6.499031 |
| MTFR1L    | -0.79494 | 7.317146 | -18.2404 | 2.30E-07 | 9.04E-06 | 7.780873 |
| CCNF      | -0.79475 | 7.09924  | -18.1477 | 2.38E-07 | 9.25E-06 | 7.741603 |
| CEP57L1   | -0.79464 | 4.991859 | -7.69801 | 9.27E-05 | 0.000561 | 1.182124 |
| ROB04     | -0.7945  | 8.098378 | -14.3462 | 1.27E-06 | 2.54E-05 | 5.921643 |
| CENPU     | -0.79288 | 9.295792 | -22.1893 | 5.60E-08 | 3.96E-06 | 9.279334 |
| GTPBP3    | -0.79229 | 8.51673  | -22.0633 | 5.84E-08 | 4.07E-06 | 9.236189 |
| MYO6      | -0.79123 | 5.656354 | -6.92672 | 0.000185 | 0.000967 | 0.417956 |
| PDXP ///  | -0.7912  | 7.793389 | -16.2921 | 5.15E-07 | 1.42E-05 | 6.907965 |
| CBX6      | -0.79118 | 8.735424 | -22.7073 | 4.74E-08 | 3.63E-06 | 9.453799 |
| CCDC28A   | -0.79031 | 7.173048 | -18.2689 | 2.27E-07 | 8.97E-06 | 7.792887 |
| IMPDH1    | -0.79001 | 9.606353 | -19.2501 | 1.56E-07 | 7.22E-06 | 8.19532  |
| MLF1      | -0.78943 | 5.479468 | -8.39515 | 5.21E-05 | 0.000359 | 1.821999 |
| NUFIP2    | -0.78831 | 7.619659 | -17.5387 | 3.04E-07 | 1.06E-05 | 7.478249 |
| PHC1      | -0.78252 | 7.937295 | -16.9595 | 3.87E-07 | 1.22E-05 | 7.218682 |
| KCNS3     | -0.78245 | 6.083885 | -12.1079 | 4.21E-06 | 5.68E-05 | 4.607714 |
| SDC4      | -0.78237 | 9.343345 | -18.8846 | 1.79E-07 | 7.83E-06 | 8.048036 |
| LARS      | -0.77993 | 7.724303 | -14.6188 | 1.11E-06 | 2.32E-05 | 6.067676 |
| RFC5      | -0.77985 | 8.375468 | -18.2224 | 2.31E-07 | 9.07E-06 | 7.773271 |
| ACER3     | -0.77962 | 6.407764 | -13.0116 | 2.54E-06 | 4.02E-05 | 5.164607 |
| ZBED1     | -0.77923 | 6.160234 | -16.1721 | 5.43E-07 | 1.46E-05 | 6.850691 |
| PNKD      | -0.77837 | 8.394336 | -16.0902 | 5.63E-07 | 1.50E-05 | 6.811356 |
| ACAT2     | -0.77685 | 8.905508 | -19.869  | 1.24E-07 | 6.34E-06 | 8.437967 |
| LOC105369 | -0.77578 | 9.321249 | -19.3024 | 1.53E-07 | 7.12E-06 | 8.216145 |
| VRK1      | -0.77517 | 7.970664 | -15.6692 | 6.81E-07 | 1.68E-05 | 6.605889 |
| CDC42EP3  | -0.77485 | 8.506    | -17.404  | 3.21E-07 | 1.09E-05 | 7.418674 |
| VKORC1    | -0.77365 | 9.92382  | -19.4548 | 1.45E-07 | 6.89E-06 | 8.276503 |
| HMGB1     | -0.77345 | 10.7388  | -19.6396 | 1.35E-07 | 6.65E-06 | 8.348976 |
| SUC0      | -0.77319 | 6.768146 | -16.36   | 5.00E-07 | 1.40E-05 | 6.94015  |
| NAP1L1    | -0.7722  | 6.269746 | -17.4201 | 3.19E-07 | 1.09E-05 | 7.425824 |
| FOXM1     | -0.77206 | 7.681517 | -19.5934 | 1.37E-07 | 6.70E-06 | 8.330928 |
| CDCA3     | -0.77048 | 7.869755 | -15.6125 | 6.98E-07 | 1.71E-05 | 6.57778  |
| MIB1      | -0.76996 | 5.52318  | -10.9531 | 8.47E-06 | 9.28E-05 | 3.835729 |
| PHF19     | -0.7689  | 9.13073  | -19.2071 | 1.58E-07 | 7.28E-06 | 8.178151 |
| CTPS2     | -0.76787 | 6.790915 | -6.78084 | 0.000212 | 0.001076 | 0.26618  |
| TIMELESS  | -0.76712 | 7.748697 | -13.6574 | 1.80E-06 | 3.21E-05 | 5.540018 |
| PFDN1     | -0.76632 | 9.151035 | -20.6296 | 9.48E-08 | 5.37E-06 | 8.725186 |
| ADD1      | -0.76629 | 8.821218 | -23.0755 | 4.22E-08 | 3.42E-06 | 9.575124 |
| HNRNPC    | -0.76611 | 8.146801 | -17.6724 | 2.88E-07 | 1.02E-05 | 7.536883 |



|           |          |          |          |          |          |          |
|-----------|----------|----------|----------|----------|----------|----------|
| CCNE2     | -0.76542 | 7.180634 | -21.4623 | 7.13E-08 | 4.57E-06 | 9.026564 |
| SCCPDH    | -0.76509 | 6.953969 | -7.12399 | 0.000154 | 0.000836 | 0.61943  |
| FBX011    | -0.76399 | 5.386211 | -5.19896 | 0.001093 | 0.004114 | -1.5477  |
| SH3PXD2B  | -0.76336 | 7.129197 | -11.9394 | 4.65E-06 | 6.07E-05 | 4.499546 |
| PLK1      | -0.76267 | 7.956632 | -15.3266 | 7.97E-07 | 1.85E-05 | 6.434448 |
| LSM2      | -0.76262 | 8.922496 | -14.201  | 1.37E-06 | 2.67E-05 | 5.842775 |
| NCAPD3    | -0.76262 | 9.258002 | -18.3557 | 2.19E-07 | 8.83E-06 | 7.829423 |
| CEP55     | -0.76241 | 8.582489 | -22.3617 | 5.30E-08 | 3.83E-06 | 9.337909 |
| EFCAB2    | -0.76241 | 5.702347 | -8.19454 | 6.12E-05 | 0.000406 | 1.642475 |
| VPS13D    | -0.75965 | 5.454949 | -12.1157 | 4.19E-06 | 5.67E-05 | 4.612737 |
| KIAA0368  | -0.75879 | 4.323399 | -6.71601 | 0.000225 | 0.00113  | 0.197954 |
| PRC1      | -0.75765 | 7.91827  | -16.5723 | 4.56E-07 | 1.33E-05 | 7.039982 |
| LINC00341 | -0.7576  | 7.666558 | -10.6845 | 1.01E-05 | 0.000106 | 3.645347 |
| TRIM25    | -0.75747 | 7.967077 | -17.6544 | 2.90E-07 | 1.03E-05 | 7.529014 |
| BRCA1     | -0.75733 | 7.49655  | -15.632  | 6.92E-07 | 1.70E-05 | 6.587431 |
| RAD18     | -0.75671 | 6.928102 | -14.947  | 9.52E-07 | 2.09E-05 | 6.239956 |
| CD200     | -0.75606 | 5.689324 | -12.1704 | 4.06E-06 | 5.54E-05 | 4.647529 |
| PIF1      | -0.75597 | 6.945413 | -15.5824 | 7.08E-07 | 1.72E-05 | 6.562799 |
| MMS22L    | -0.75526 | 6.821217 | -10.245  | 1.34E-05 | 0.000131 | 3.324127 |
| HOXA13    | -0.75517 | 3.517043 | -8.0116  | 7.12E-05 | 0.000455 | 1.475577 |
| ANP32E    | -0.75479 | 10.18728 | -17.1601 | 3.56E-07 | 1.16E-05 | 7.30961  |
| TTI1      | -0.75384 | 8.61034  | -23.2709 | 3.97E-08 | 3.32E-06 | 9.638639 |
| SHISA3    | -0.75288 | 4.167811 | -9.42091 | 2.39E-05 | 0.000199 | 2.686905 |
| TUBGCP3   | -0.75231 | 6.72315  | -15.4905 | 7.39E-07 | 1.76E-05 | 6.516929 |
| BLM       | -0.75211 | 7.062403 | -21.3827 | 7.32E-08 | 4.64E-06 | 8.998332 |
| KIF20B    | -0.75121 | 7.842611 | -12.6906 | 3.03E-06 | 4.55E-05 | 4.97119  |
| STRADA    | -0.75041 | 6.455012 | -17.3004 | 3.35E-07 | 1.12E-05 | 7.372567 |
| ZBTB14    | -0.74904 | 3.994349 | -7.82756 | 8.30E-05 | 0.000515 | 1.304503 |
| ORC2      | -0.74899 | 7.326543 | -18.9914 | 1.72E-07 | 7.63E-06 | 8.091359 |
| PTPRF     | -0.74854 | 8.789303 | -20.8671 | 8.73E-08 | 5.14E-06 | 8.812485 |
| BABAM1    | -0.74798 | 9.554399 | -17.3604 | 3.27E-07 | 1.11E-05 | 7.399301 |
| BARD1     | -0.74797 | 6.380659 | -9.58181 | 2.13E-05 | 0.000183 | 2.815099 |
| NAGA      | -0.74781 | 6.429031 | -8.27767 | 5.72E-05 | 0.000385 | 1.71731  |
| TMEM127   | -0.74699 | 4.613444 | -21.5934 | 6.82E-08 | 4.45E-06 | 9.072872 |
| WIPF2     | -0.74671 | 5.622371 | -13.6764 | 1.79E-06 | 3.19E-05 | 5.550795 |
| UBTF      | -0.74567 | 7.549574 | -11.1716 | 7.39E-06 | 8.46E-05 | 3.987489 |
| GNG4      | -0.74502 | 6.902734 | -16.6669 | 4.38E-07 | 1.30E-05 | 7.084047 |
| DCLRE1B   | -0.74363 | 7.067508 | -16.9193 | 3.93E-07 | 1.23E-05 | 7.200367 |
| TUBB8     | -0.74325 | 4.022382 | -6.23632 | 0.00036  | 0.001651 | -0.32232 |
| BUB1B     | -0.74309 | 8.34029  | -13.3057 | 2.17E-06 | 3.61E-05 | 5.337774 |
| NUF2      | -0.74308 | 8.473241 | -12.6715 | 3.06E-06 | 4.58E-05 | 4.959515 |
| NDC80     | -0.74244 | 8.31507  | -13.3533 | 2.12E-06 | 3.56E-05 | 5.365466 |
| SLC5A3    | -0.74229 | 9.909124 | -20.6221 | 9.50E-08 | 5.37E-06 | 8.722402 |
| ASPM      | -0.74208 | 9.435465 | -20.487  | 9.96E-08 | 5.55E-06 | 8.672207 |
| DET1      | -0.74184 | 6.701467 | -11.2258 | 7.14E-06 | 8.25E-05 | 4.024645 |
| IL12A     | -0.74121 | 5.541105 | -8.23488 | 5.93E-05 | 0.000396 | 1.678866 |
| C11orf96  | -0.74115 | 5.729164 | -17.4751 | 3.12E-07 | 1.08E-05 | 7.450158 |
| DLGAP5    | -0.74036 | 8.874298 | -16.1083 | 5.59E-07 | 1.49E-05 | 6.820075 |
| CBX2      | -0.73954 | 6.968586 | -13.9783 | 1.53E-06 | 2.87E-05 | 5.720144 |
| TMEM41B   | -0.738   | 7.756453 | -13.1212 | 2.39E-06 | 3.85E-05 | 5.229566 |
| B4GALT6   | -0.73699 | 8.630083 | -19.2888 | 1.54E-07 | 7.14E-06 | 8.210724 |

|           |          |          |          |          |          |          |
|-----------|----------|----------|----------|----------|----------|----------|
| TMEM107   | -0.73527 | 7.539593 | -17.3513 | 3.29E-07 | 1.11E-05 | 7.39525  |
| SEL1L3    | -0.73523 | 7.13273  | -14.0433 | 1.48E-06 | 2.80E-05 | 5.756121 |
| MDP1 ///  | -0.73523 | 7.484356 | -9.23729 | 2.73E-05 | 0.00022  | 2.538242 |
| DEK       | -0.73481 | 8.842182 | -20.579  | 9.65E-08 | 5.40E-06 | 8.706418 |
| FANCB     | -0.73461 | 6.86616  | -13.5299 | 1.93E-06 | 3.34E-05 | 5.467308 |
| COR01A    | -0.73347 | 6.306824 | -13.6219 | 1.84E-06 | 3.24E-05 | 5.519864 |
| TRIM7     | -0.73157 | 6.198693 | -9.64619 | 2.03E-05 | 0.000177 | 2.865868 |
| SH3KBP1   | -0.73102 | 6.872387 | -12.3659 | 3.63E-06 | 5.13E-05 | 4.770678 |
| ARPC1B    | -0.73023 | 8.003472 | -17.8206 | 2.71E-07 | 9.93E-06 | 7.601331 |
| CENPW     | -0.72987 | 9.198403 | -17.2384 | 3.44E-07 | 1.14E-05 | 7.344815 |
| TROAP     | -0.72979 | 7.713801 | -12.5407 | 3.29E-06 | 4.80E-05 | 4.879252 |
| NFIB      | -0.72947 | 6.967253 | -21.0204 | 8.28E-08 | 4.94E-06 | 8.868261 |
| ARL6IP6   | -0.72944 | 8.763265 | -17.1699 | 3.54E-07 | 1.15E-05 | 7.314013 |
| ERCC6L    | -0.72844 | 7.273212 | -13.1465 | 2.36E-06 | 3.82E-05 | 5.24453  |
| IDH2      | -0.72832 | 7.156627 | -13.5933 | 1.87E-06 | 3.28E-05 | 5.503572 |
| EARS2     | -0.72786 | 7.693703 | -16.7152 | 4.29E-07 | 1.28E-05 | 7.106443 |
| NPL       | -0.72756 | 4.149968 | -9.81826 | 1.80E-05 | 0.000162 | 3.000083 |
| ISOC1     | -0.72752 | 8.263997 | -14.5443 | 1.16E-06 | 2.37E-05 | 6.028076 |
| TMEM185B  | -0.72692 | 6.787718 | -14.8062 | 1.02E-06 | 2.19E-05 | 6.166505 |
| FAM83D    | -0.72685 | 9.287813 | -17.7903 | 2.75E-07 | 1.00E-05 | 7.588177 |
| NAA15     | -0.72653 | 8.53837  | -21.1792 | 7.84E-08 | 4.83E-06 | 8.925567 |
| CCDC50    | -0.72511 | 7.009928 | -21.1439 | 7.94E-08 | 4.85E-06 | 8.912884 |
| LOC105369 | -0.72376 | 8.736524 | -17.7129 | 2.83E-07 | 1.01E-05 | 7.554561 |
| RBM15B    | -0.72353 | 7.775047 | -18.3973 | 2.16E-07 | 8.74E-06 | 7.846871 |
| GAS7      | -0.72101 | 8.021585 | -20.0759 | 1.15E-07 | 6.07E-06 | 8.517261 |
| DYNC1LI2  | -0.72098 | 9.854824 | -18.3269 | 2.22E-07 | 8.86E-06 | 7.817303 |
| ZC3H6     | -0.72005 | 4.538303 | -16.4214 | 4.87E-07 | 1.37E-05 | 6.969162 |
| SLC04A1   | -0.71957 | 9.032318 | -16.5893 | 4.53E-07 | 1.32E-05 | 7.047914 |
| NFYA      | -0.71951 | 7.263784 | -14.3538 | 1.27E-06 | 2.54E-05 | 5.925757 |
| MAPKAP1   | -0.71941 | 5.882717 | -9.71549 | 1.94E-05 | 0.000171 | 2.920179 |
| APITD1    | -0.71933 | 8.303835 | -19.5912 | 1.37E-07 | 6.70E-06 | 8.330064 |
| RSRC1     | -0.71866 | 7.799462 | -16.8017 | 4.14E-07 | 1.26E-05 | 7.146404 |
| CD68      | -0.71843 | 6.801085 | -15.0365 | 9.13E-07 | 2.04E-05 | 6.286245 |
| B4GALT5   | -0.71842 | 9.736283 | -21.46   | 7.13E-08 | 4.57E-06 | 9.025757 |
| LOC728026 | -0.71829 | 10.84628 | -15.7857 | 6.46E-07 | 1.62E-05 | 6.663283 |
| RAD54L    | -0.7181  | 6.731423 | -16.2948 | 5.15E-07 | 1.42E-05 | 6.909253 |
| TMEM128   | -0.71804 | 7.94809  | -14.6417 | 1.10E-06 | 2.30E-05 | 6.079841 |
| IGFBP6    | -0.7179  | 6.491173 | -17.1549 | 3.56E-07 | 1.16E-05 | 7.307299 |
| EHHADH    | -0.71776 | 4.872721 | -5.51854 | 0.000765 | 0.003064 | -1.15482 |
| PLIN2     | -0.71691 | 7.625922 | -10.9838 | 8.31E-06 | 9.16E-05 | 3.857232 |
| TTK       | -0.71686 | 8.089151 | -17.863  | 2.67E-07 | 9.87E-06 | 7.61967  |
| SRP19     | -0.71667 | 7.923386 | -16.6329 | 4.45E-07 | 1.31E-05 | 7.068262 |
| MKRN1     | -0.71644 | 7.701488 | -19.3483 | 1.50E-07 | 7.06E-06 | 8.234378 |
| PRMT3     | -0.71628 | 8.22425  | -14.6243 | 1.11E-06 | 2.32E-05 | 6.070645 |
| CACUL1    | -0.71609 | 8.21413  | -14.5604 | 1.15E-06 | 2.36E-05 | 6.036641 |
| BDH1      | -0.71591 | 6.43611  | -11.3181 | 6.75E-06 | 7.92E-05 | 4.087626 |
| NCAPG2    | -0.71527 | 7.391594 | -11.4848 | 6.09E-06 | 7.35E-05 | 4.200236 |
| SUB1      | -0.71483 | 7.331544 | -11.7251 | 5.27E-06 | 6.66E-05 | 4.359771 |
| DOCK5     | -0.71363 | 7.777182 | -18.6169 | 1.98E-07 | 8.36E-06 | 7.938209 |
| CLSPN     | -0.71132 | 6.106134 | -14.7638 | 1.04E-06 | 2.21E-05 | 6.144292 |
| MCM4      | -0.71051 | 8.504481 | -18.7624 | 1.88E-07 | 8.07E-06 | 7.998118 |

|          |          |          |          |          |          |          |
|----------|----------|----------|----------|----------|----------|----------|
| HADH     | -0.71049 | 8.264461 | -21.2786 | 7.58E-08 | 4.74E-06 | 8.96122  |
| ZGRF1    | -0.70882 | 4.935644 | -11.5102 | 6.00E-06 | 7.27E-05 | 4.21722  |
| HAUS6    | -0.70857 | 8.540168 | -16.741  | 4.24E-07 | 1.27E-05 | 7.118369 |
| HDAC6    | -0.70827 | 5.346144 | -7.01744 | 0.00017  | 0.000905 | 0.511139 |
| MAZ      | -0.70813 | 7.958477 | -13.9957 | 1.52E-06 | 2.85E-05 | 5.729793 |
| NUDT11   | -0.70808 | 5.572822 | -6.96178 | 0.000179 | 0.000943 | 0.454084 |
| POLDIP3  | -0.70784 | 7.90749  | -16.0934 | 5.63E-07 | 1.50E-05 | 6.812897 |
| SDF2L1   | -0.7078  | 7.698587 | -17.987  | 2.54E-07 | 9.61E-06 | 7.67302  |
| PRPF40A  | -0.70773 | 6.481286 | -13.1505 | 2.36E-06 | 3.82E-05 | 5.246872 |
| CUX1     | -0.70746 | 7.57288  | -18.0985 | 2.43E-07 | 9.35E-06 | 7.720656 |
| EXOC7    | -0.70734 | 6.228524 | -11.9666 | 4.57E-06 | 6.01E-05 | 4.51708  |
| HDLBP    | -0.70688 | 7.776739 | -11.8147 | 5.00E-06 | 6.40E-05 | 4.418542 |
| ARHGEF39 | -0.70649 | 6.836748 | -15.8322 | 6.32E-07 | 1.61E-05 | 6.68609  |
| PAICS    | -0.70539 | 10.31971 | -20.7516 | 9.08E-08 | 5.28E-06 | 8.770151 |
| KCTD2    | -0.70507 | 6.236758 | -12.5439 | 3.29E-06 | 4.80E-05 | 4.881207 |
| PARP2    | -0.70497 | 7.898263 | -14.7039 | 1.07E-06 | 2.25E-05 | 6.112729 |
| TMEM123  | -0.70482 | 9.941138 | -8.16823 | 6.26E-05 | 0.000413 | 1.618666 |
| IKZF5    | -0.70306 | 6.103756 | -9.32099 | 2.57E-05 | 0.00021  | 2.606328 |
| HS6ST2   | -0.70282 | 5.707148 | -9.11922 | 2.98E-05 | 0.000235 | 2.441284 |
| CKAP2    | -0.70279 | 8.680273 | -13.4928 | 1.97E-06 | 3.38E-05 | 5.445997 |
| KCTD12   | -0.70249 | 4.185147 | -6.65337 | 0.000239 | 0.001185 | 0.131565 |
| SDHAF3   | -0.70249 | 7.968555 | -11.0308 | 8.07E-06 | 8.99E-05 | 3.890001 |
| RAB2A    | -0.70248 | 5.716798 | -12.5414 | 3.29E-06 | 4.80E-05 | 4.879667 |
| CKS2     | -0.70239 | 10.78181 | -18.2996 | 2.24E-07 | 8.92E-06 | 7.80585  |
| RBM8A    | -0.70192 | 6.528971 | -11.7614 | 5.16E-06 | 6.56E-05 | 4.383624 |
| ZFAS1    | -0.70105 | 7.866913 | -11.5705 | 5.79E-06 | 7.10E-05 | 4.257503 |
| UBE2L3   | -0.69922 | 7.220929 | -9.78769 | 1.84E-05 | 0.000165 | 2.976394 |
| CDCA7L   | -0.69885 | 8.220934 | -13.9058 | 1.59E-06 | 2.94E-05 | 5.679832 |
| MRPL12   | -0.69873 | 8.479877 | -17.2043 | 3.49E-07 | 1.15E-05 | 7.329524 |
| HOOK3    | -0.69859 | 6.141455 | -14.6761 | 1.08E-06 | 2.28E-05 | 6.098035 |
| FAM20C   | -0.69852 | 6.166267 | -11.4322 | 6.29E-06 | 7.52E-05 | 4.164842 |
| FANCG    | -0.69846 | 7.084071 | -11.5571 | 5.83E-06 | 7.14E-05 | 4.248552 |
| TMEM248  | -0.69834 | 7.597425 | -17.167  | 3.55E-07 | 1.15E-05 | 7.31274  |
| CHRD1    | -0.69814 | 6.751063 | -15.3005 | 8.06E-07 | 1.86E-05 | 6.421235 |
| RMI2     | -0.69793 | 8.103485 | -17.7732 | 2.77E-07 | 1.00E-05 | 7.580786 |
| CAMK2D   | -0.69761 | 7.293606 | -15.9634 | 5.96E-07 | 1.55E-05 | 6.75005  |
| FGFR3    | -0.69663 | 6.173031 | -16.0189 | 5.81E-07 | 1.52E-05 | 6.776949 |
| MANEA    | -0.69528 | 5.877007 | -14.2056 | 1.37E-06 | 2.67E-05 | 5.845264 |
| HIST1H1E | -0.69476 | 5.740918 | -8.59574 | 4.44E-05 | 0.000318 | 1.997965 |
| MAD2L2   | -0.6947  | 8.690465 | -19.2385 | 1.57E-07 | 7.22E-06 | 8.190678 |
| SND1     | -0.69344 | 8.287296 | -15.5907 | 7.05E-07 | 1.72E-05 | 6.56696  |
| KIF20A   | -0.69306 | 9.347535 | -15.9762 | 5.93E-07 | 1.54E-05 | 6.756251 |
| CCDC25   | -0.69284 | 7.124543 | -17.5884 | 2.98E-07 | 1.05E-05 | 7.500086 |
| SHOX2    | -0.69268 | 6.988756 | -11.3283 | 6.70E-06 | 7.90E-05 | 4.094575 |
| PCYOX1   | -0.6915  | 7.944422 | -18.1476 | 2.38E-07 | 9.25E-06 | 7.741554 |
| WRB      | -0.69128 | 8.149895 | -18.3396 | 2.21E-07 | 8.86E-06 | 7.822639 |
| C10orf2  | -0.6899  | 7.358201 | -15.9388 | 6.03E-07 | 1.56E-05 | 6.738127 |
| CEP44    | -0.68979 | 6.501852 | -11.9591 | 4.59E-06 | 6.02E-05 | 4.512279 |
| SRPR     | -0.68968 | 9.411231 | -19.4053 | 1.47E-07 | 6.98E-06 | 8.256934 |
| RPL7L1   | -0.6889  | 7.419453 | -9.88766 | 1.72E-05 | 0.000157 | 3.05363  |
| DDOST    | -0.68862 | 9.313185 | -16.7608 | 4.21E-07 | 1.27E-05 | 7.127509 |

|           |          |          |          |          |          |          |
|-----------|----------|----------|----------|----------|----------|----------|
| ATXN3     | -0.68753 | 5.997339 | -14.8397 | 1.00E-06 | 2.17E-05 | 6.184044 |
| PAK4      | -0.68709 | 7.585981 | -14.3172 | 1.29E-06 | 2.57E-05 | 5.905972 |
| MEST      | -0.68701 | 5.798058 | -13.4104 | 2.05E-06 | 3.48E-05 | 5.398502 |
| ARL6IP4   | -0.68645 | 8.105584 | -16.4331 | 4.85E-07 | 1.37E-05 | 6.9747   |
| PMVK      | -0.68461 | 4.433707 | -8.87203 | 3.59E-05 | 0.000271 | 2.234732 |
| RBM47     | -0.68431 | 6.654556 | -18.8262 | 1.83E-07 | 7.93E-06 | 8.024216 |
| ERP29     | -0.68418 | 4.52352  | -11.0647 | 7.90E-06 | 8.85E-05 | 3.913553 |
| SF3A3     | -0.68394 | 8.868018 | -17.9705 | 2.56E-07 | 9.64E-06 | 7.665959 |
| SIKE1     | -0.68373 | 7.880821 | -14.428  | 1.22E-06 | 2.47E-05 | 5.965778 |
| LOC102724 | -0.6834  | 5.866943 | -14.1528 | 1.40E-06 | 2.71E-05 | 5.816358 |
| AP3S2 /// | -0.68326 | 6.970627 | -13.9445 | 1.56E-06 | 2.91E-05 | 5.701353 |
| LOC150776 | -0.68282 | 7.678802 | -15.8316 | 6.32E-07 | 1.61E-05 | 6.685796 |
| RCAN1     | -0.68264 | 9.563612 | -18.421  | 2.14E-07 | 8.68E-06 | 7.856774 |
| FXVD6 /// | -0.68218 | 4.481711 | -10.76   | 9.58E-06 | 0.000102 | 3.699307 |
| AGPAT3    | -0.68143 | 6.89985  | -14.3181 | 1.29E-06 | 2.57E-05 | 5.906433 |
| FIP1L1    | -0.68113 | 6.86442  | -10.9803 | 8.33E-06 | 9.17E-05 | 3.854767 |
| RHCE ///  | -0.68088 | 3.254624 | -5.57194 | 0.000722 | 0.002926 | -1.09054 |
| KHDRBS1   | -0.68029 | 8.931036 | -13.8605 | 1.63E-06 | 2.99E-05 | 5.654474 |
| NEK2      | -0.6801  | 7.818622 | -9.85992 | 1.75E-05 | 0.000159 | 3.032266 |
| FAM64A    | -0.67979 | 7.965623 | -12.0426 | 4.37E-06 | 5.84E-05 | 4.565956 |
| RRP15     | -0.67977 | 6.584635 | -14.0526 | 1.48E-06 | 2.79E-05 | 5.761274 |
| UBE2K     | -0.67819 | 6.558827 | -16.0596 | 5.71E-07 | 1.51E-05 | 6.796619 |
| CRLS1     | -0.6777  | 8.770426 | -16.396  | 4.93E-07 | 1.38E-05 | 6.95719  |
| MAP3K6    | -0.6768  | 5.933015 | -11.9711 | 4.56E-06 | 6.00E-05 | 4.519971 |
| DLX1      | -0.67637 | 7.903502 | -16.3475 | 5.03E-07 | 1.40E-05 | 6.934239 |
| KIF15     | -0.67605 | 7.421118 | -15.9339 | 6.04E-07 | 1.56E-05 | 6.735711 |
| CASC5     | -0.67591 | 7.171456 | -12.8864 | 2.72E-06 | 4.20E-05 | 5.089733 |
| DUSP3     | -0.67547 | 7.642704 | -19.6785 | 1.33E-07 | 6.60E-06 | 8.364136 |
| PURA      | -0.67528 | 8.478956 | -15.0969 | 8.87E-07 | 2.00E-05 | 6.317355 |
| EXO1      | -0.67433 | 7.286167 | -18.4736 | 2.10E-07 | 8.60E-06 | 7.878717 |
| CKS1B     | -0.67402 | 9.695955 | -17.1851 | 3.52E-07 | 1.15E-05 | 7.320859 |
| THEMIS2   | -0.67396 | 6.002909 | -10.2709 | 1.32E-05 | 0.000129 | 3.343391 |
| MAP2K6    | -0.67383 | 4.731268 | -8.00545 | 7.15E-05 | 0.000457 | 1.469913 |
| PAQR4     | -0.67354 | 7.157771 | -17.3124 | 3.34E-07 | 1.12E-05 | 7.377936 |
| PCK2      | -0.67327 | 5.645188 | -11.9627 | 4.58E-06 | 6.01E-05 | 4.514587 |
| SMARCA1   | -0.67283 | 8.349179 | -17.6594 | 2.90E-07 | 1.03E-05 | 7.531205 |
| MED14     | -0.67197 | 7.303609 | -16.9024 | 3.96E-07 | 1.23E-05 | 7.192632 |
| CMTM4     | -0.67069 | 6.527561 | -11.5008 | 6.03E-06 | 7.30E-05 | 4.210939 |
| RRM1      | -0.67009 | 9.580552 | -17.6813 | 2.87E-07 | 1.02E-05 | 7.540778 |
| NUDT21    | -0.67004 | 9.97852  | -19.2423 | 1.56E-07 | 7.22E-06 | 8.192208 |
| TTC17     | -0.66989 | 7.070241 | -15.0789 | 8.95E-07 | 2.01E-05 | 6.308087 |
| SLC35F3   | -0.66954 | 4.674011 | -5.42705 | 0.000846 | 0.00333  | -1.26586 |
| NCAPD2    | -0.66836 | 8.68005  | -12.4669 | 3.43E-06 | 4.93E-05 | 4.83362  |
| DEPDC1    | -0.66832 | 8.014889 | -20.028  | 1.17E-07 | 6.14E-06 | 8.49897  |
| SERBP1    | -0.66806 | 8.214268 | -12.1289 | 4.16E-06 | 5.64E-05 | 4.621159 |
| IFFO2     | -0.66801 | 6.26357  | -16.4268 | 4.86E-07 | 1.37E-05 | 6.97171  |
| CBR3      | -0.66733 | 6.778453 | -15.8298 | 6.33E-07 | 1.61E-05 | 6.68494  |
| RPA3      | -0.66725 | 8.991005 | -17.1115 | 3.63E-07 | 1.17E-05 | 7.287675 |
| SSX2IP    | -0.66665 | 5.688874 | -11.4418 | 6.25E-06 | 7.49E-05 | 4.171323 |
| SMC6      | -0.66644 | 7.467168 | -19.3636 | 1.50E-07 | 7.04E-06 | 8.240414 |
| CENPN     | -0.66626 | 9.825304 | -15.5475 | 7.19E-07 | 1.74E-05 | 6.545432 |

|           |          |          |          |          |          |          |
|-----------|----------|----------|----------|----------|----------|----------|
| COASY     | -0.66595 | 8.286626 | -16.6107 | 4.49E-07 | 1.32E-05 | 7.057928 |
| MECP2     | -0.66586 | 7.450154 | -14.3758 | 1.26E-06 | 2.52E-05 | 5.937685 |
| ADORA2B   | -0.66547 | 8.63809  | -14.3736 | 1.26E-06 | 2.52E-05 | 5.936456 |
| PBK       | -0.66519 | 9.169786 | -16.5778 | 4.55E-07 | 1.33E-05 | 7.042584 |
| CRACR2A   | -0.66507 | 5.586336 | -11.8122 | 5.01E-06 | 6.41E-05 | 4.416876 |
| DLST      | -0.66413 | 6.663438 | -12.9158 | 2.68E-06 | 4.15E-05 | 5.10738  |
| TARS2     | -0.66398 | 7.612007 | -11.3348 | 6.68E-06 | 7.87E-05 | 4.099001 |
| RBMX2     | -0.66394 | 7.800573 | -17.6754 | 2.88E-07 | 1.02E-05 | 7.538201 |
| FOXRED2   | -0.66328 | 8.305232 | -16.2309 | 5.29E-07 | 1.44E-05 | 6.878796 |
| Clorf106  | -0.6628  | 7.434649 | -9.47086 | 2.30E-05 | 0.000194 | 2.726906 |
| WDR5      | -0.66259 | 7.263368 | -19.9885 | 1.19E-07 | 6.20E-06 | 8.483881 |
| SH3BGRL2  | -0.66248 | 5.124809 | -10.2335 | 1.36E-05 | 0.000132 | 3.315562 |
| SDHC      | -0.66245 | 9.088075 | -11.5674 | 5.80E-06 | 7.11E-05 | 4.255442 |
| PAFAH1B2  | -0.66163 | 8.678871 | -17.1978 | 3.50E-07 | 1.15E-05 | 7.326602 |
| MCM3      | -0.66141 | 8.292152 | -15.8124 | 6.38E-07 | 1.61E-05 | 6.676424 |
| AURKA /// | -0.66085 | 9.386721 | -16.5211 | 4.66E-07 | 1.35E-05 | 7.016057 |
| RPL22L1   | -0.6603  | 11.47731 | -19.0259 | 1.70E-07 | 7.59E-06 | 8.105306 |
| CDK2      | -0.65969 | 7.92402  | -16.6315 | 4.45E-07 | 1.31E-05 | 7.067577 |
| TK1       | -0.65929 | 9.234916 | -15.9209 | 6.07E-07 | 1.56E-05 | 6.729404 |
| GTF3C2    | -0.65924 | 6.672435 | -17.4462 | 3.16E-07 | 1.08E-05 | 7.437376 |
| PIGX      | -0.65922 | 6.374811 | -9.86407 | 1.74E-05 | 0.000159 | 3.03547  |
| KBTD6     | -0.6592  | 7.177551 | -15.7064 | 6.69E-07 | 1.66E-05 | 6.624283 |
| ABL1      | -0.65885 | 8.395589 | -11.1462 | 7.50E-06 | 8.55E-05 | 3.969988 |
| BRD3      | -0.65827 | 8.14117  | -14.9046 | 9.72E-07 | 2.12E-05 | 6.217929 |
| PPP2R3A   | -0.6581  | 6.762182 | -12.8894 | 2.71E-06 | 4.19E-05 | 5.091524 |
| APOC1     | -0.65695 | 5.995317 | -10.829  | 9.17E-06 | 9.84E-05 | 3.748298 |
| SUV39H1   | -0.65607 | 8.049854 | -11.5496 | 5.86E-06 | 7.15E-05 | 4.243541 |
| CHTF18    | -0.65603 | 7.868573 | -17.367  | 3.26E-07 | 1.11E-05 | 7.402246 |
| CDK9      | -0.65325 | 6.90247  | -15.5592 | 7.16E-07 | 1.73E-05 | 6.551272 |
| AURKB     | -0.65277 | 8.81829  | -16.9459 | 3.89E-07 | 1.22E-05 | 7.212486 |
| IMPA2     | -0.65244 | 7.738829 | -16.3013 | 5.13E-07 | 1.42E-05 | 6.912345 |
| GAL       | -0.65229 | 8.140002 | -16.5032 | 4.70E-07 | 1.35E-05 | 7.007652 |
| ATP6V1E2  | -0.65204 | 5.981419 | -7.89831 | 7.82E-05 | 0.000491 | 1.370652 |
| SPATS2L   | -0.65197 | 5.567715 | -14.7256 | 1.06E-06 | 2.23E-05 | 6.124166 |
| TMED9     | -0.65186 | 7.095409 | -16.4897 | 4.73E-07 | 1.36E-05 | 7.001327 |
| ALDH1A3   | -0.65167 | 9.426    | -17.8807 | 2.65E-07 | 9.86E-06 | 7.627306 |
| GNG7 ///  | -0.65155 | 5.719194 | -8.70999 | 4.07E-05 | 0.000298 | 2.096647 |
| TWIST1    | -0.65149 | 7.830816 | -16.8082 | 4.12E-07 | 1.26E-05 | 7.149364 |
| POLI      | -0.65127 | 4.372234 | -6.98845 | 0.000174 | 0.000925 | 0.481467 |
| CCNB1     | -0.65108 | 10.37265 | -18.0741 | 2.45E-07 | 9.40E-06 | 7.710253 |
| SLC44A1   | -0.64985 | 9.11503  | -13.7171 | 1.75E-06 | 3.14E-05 | 5.573855 |
| ARRDC4    | -0.64974 | 5.942942 | -9.47428 | 2.30E-05 | 0.000194 | 2.729636 |
| KLHL23 // | -0.64919 | 6.435455 | -9.85704 | 1.75E-05 | 0.000159 | 3.030044 |
| ZNF826P   | -0.64878 | 3.710762 | -8.99041 | 3.28E-05 | 0.000252 | 2.334263 |
| PPP1R11   | -0.648   | 8.394815 | -11.4894 | 6.08E-06 | 7.33E-05 | 4.203282 |
| RNF175    | -0.64764 | 4.880869 | -10.0248 | 1.56E-05 | 0.000146 | 3.158484 |
| APPBP2    | -0.64678 | 6.034246 | -13.3219 | 2.15E-06 | 3.59E-05 | 5.347179 |
| FDFT1     | -0.64672 | 9.844734 | -18.2042 | 2.33E-07 | 9.11E-06 | 7.765564 |
| POLQ      | -0.64641 | 6.704646 | -9.79922 | 1.83E-05 | 0.000164 | 2.98534  |
| RCCD1     | -0.64624 | 8.210479 | -15.0897 | 8.90E-07 | 2.00E-05 | 6.313636 |
| SESTD1    | -0.6461  | 4.572193 | -7.13947 | 0.000152 | 0.000827 | 0.635057 |

|           |          |          |          |          |          |          |
|-----------|----------|----------|----------|----------|----------|----------|
| STIL      | -0.64593 | 8.773148 | -14.1658 | 1.39E-06 | 2.70E-05 | 5.823478 |
| HAUS7 /// | -0.64586 | 6.754603 | -12.4976 | 3.37E-06 | 4.87E-05 | 4.852622 |
| CD44      | -0.6455  | 10.81637 | -17.9707 | 2.56E-07 | 9.64E-06 | 7.666047 |
| TMEM39A   | -0.64532 | 6.79394  | -13.3744 | 2.09E-06 | 3.52E-05 | 5.377678 |
| CENPI     | -0.64524 | 5.350454 | -7.22727 | 0.00014  | 0.000776 | 0.723214 |
| WRNIP1    | -0.64507 | 8.489389 | -13.8331 | 1.65E-06 | 3.02E-05 | 5.639133 |
| HIST1H1D  | -0.64495 | 6.869438 | -6.62845 | 0.000245 | 0.001208 | 0.105029 |
| USP47     | -0.64482 | 5.122163 | -8.39859 | 5.19E-05 | 0.000358 | 1.825048 |
| SIX5      | -0.64407 | 6.537567 | -13.5123 | 1.95E-06 | 3.36E-05 | 5.457229 |
| CASK      | -0.64315 | 5.493803 | -10.567  | 1.09E-05 | 0.000112 | 3.560658 |
| HNRNPD    | -0.64306 | 7.465381 | -14.5309 | 1.16E-06 | 2.38E-05 | 6.020894 |
| TOM1L2    | -0.64273 | 7.756044 | -14.9228 | 9.63E-07 | 2.11E-05 | 6.227383 |
| UBE2C     | -0.64249 | 9.957516 | -18.4511 | 2.11E-07 | 8.63E-06 | 7.869348 |
| KNSTRN    | -0.64215 | 9.419954 | -15.3431 | 7.91E-07 | 1.84E-05 | 6.442797 |
| EMX1 ///  | -0.64173 | 7.615479 | -13.7551 | 1.72E-06 | 3.10E-05 | 5.595308 |
| ITSN1     | -0.64157 | 5.839115 | -8.07536 | 6.75E-05 | 0.000437 | 1.534099 |
| DXO ///   | -0.64109 | 7.240352 | -15.4223 | 7.62E-07 | 1.80E-05 | 6.48276  |
| PPP1R14C  | -0.64071 | 6.376722 | -14.1952 | 1.37E-06 | 2.67E-05 | 5.839571 |
| Clorf112  | -0.64044 | 7.181918 | -15.207  | 8.42E-07 | 1.92E-05 | 6.373709 |
| EMP1      | -0.63973 | 5.901569 | -8.54466 | 4.63E-05 | 0.000328 | 1.95349  |
| GPR155    | -0.63902 | 3.851096 | -6.01246 | 0.000452 | 0.001997 | -0.57479 |
| TCF20     | -0.63886 | 7.711993 | -18.6249 | 1.98E-07 | 8.36E-06 | 7.941494 |
| RALBP1    | -0.63872 | 8.299442 | -16.1548 | 5.47E-07 | 1.47E-05 | 6.842418 |
| CTCFL /// | -0.63859 | 11.61977 | -16.9187 | 3.94E-07 | 1.23E-05 | 7.200064 |
| SLC29A1   | -0.63831 | 7.031071 | -9.86121 | 1.75E-05 | 0.000159 | 3.033259 |
| PCMTD2    | -0.63825 | 8.466887 | -17.8599 | 2.67E-07 | 9.87E-06 | 7.618337 |
| CSRP2     | -0.63732 | 8.189174 | -11.7117 | 5.32E-06 | 6.70E-05 | 4.350982 |
| FGFBP2    | -0.63729 | 5.637314 | -13.7416 | 1.73E-06 | 3.11E-05 | 5.587685 |
| IMP4      | -0.63728 | 8.876299 | -16.4085 | 4.90E-07 | 1.38E-05 | 6.963095 |
| PCNX      | -0.63661 | 5.852871 | -8.7757  | 3.87E-05 | 0.000287 | 2.152907 |
| PRKAR1B   | -0.63644 | 6.617156 | -11.0625 | 7.91E-06 | 8.86E-05 | 3.912011 |
| PPIH      | -0.63632 | 9.235227 | -16.2918 | 5.15E-07 | 1.42E-05 | 6.907809 |
| CARHSP1   | -0.63617 | 7.886581 | -15.6744 | 6.79E-07 | 1.68E-05 | 6.608474 |
| EMG1      | -0.63585 | 9.682935 | -19.1166 | 1.64E-07 | 7.44E-06 | 8.141853 |
| CRTAP     | -0.63561 | 7.349156 | -8.56898 | 4.54E-05 | 0.000323 | 1.974688 |
| SMC4      | -0.63549 | 10.48864 | -13.5472 | 1.91E-06 | 3.33E-05 | 5.477199 |
| LRPPRC    | -0.6354  | 5.942526 | -11.4058 | 6.39E-06 | 7.61E-05 | 4.147095 |
| RHOF      | -0.63527 | 7.044035 | -12.3149 | 3.74E-06 | 5.24E-05 | 4.738723 |
| WDHD1     | -0.63518 | 5.895624 | -6.04612 | 0.000437 | 0.00194  | -0.53642 |
| MAP4      | -0.63511 | 6.468652 | -14.4427 | 1.21E-06 | 2.46E-05 | 5.973701 |
| KCNK1     | -0.63481 | 7.666735 | -14.5633 | 1.15E-06 | 2.36E-05 | 6.038193 |
| SNORA33   | -0.63471 | 6.68946  | -6.93992 | 0.000182 | 0.000958 | 0.431571 |
| TRIM14    | -0.63461 | 7.66412  | -17.5205 | 3.06E-07 | 1.06E-05 | 7.470209 |
| AIMP1     | -0.6344  | 6.060853 | -14.0893 | 1.45E-06 | 2.77E-05 | 5.781512 |
| AURKA     | -0.6343  | 9.911263 | -15.0172 | 9.21E-07 | 2.05E-05 | 6.276266 |
| TRIP13    | -0.63415 | 8.612675 | -17.7207 | 2.83E-07 | 1.01E-05 | 7.557937 |
| SHPK      | -0.63414 | 6.958181 | -7.47166 | 0.000113 | 0.000653 | 0.964297 |
| UBE2W     | -0.63408 | 7.52964  | -18.0953 | 2.43E-07 | 9.36E-06 | 7.719318 |
| UBE2S     | -0.63403 | 10.41804 | -17.3371 | 3.30E-07 | 1.11E-05 | 7.388934 |
| SCD       | -0.6337  | 10.06819 | -17.7192 | 2.83E-07 | 1.01E-05 | 7.557266 |
| KIF11     | -0.63368 | 8.296644 | -13.2073 | 2.29E-06 | 3.74E-05 | 5.280279 |

|           |          |          |          |          |          |          |
|-----------|----------|----------|----------|----------|----------|----------|
| TRMT10A   | -0.63326 | 5.458681 | -12.6257 | 3.14E-06 | 4.65E-05 | 4.931483 |
| IQGAP3    | -0.63279 | 6.957423 | -10.5102 | 1.13E-05 | 0.000115 | 3.519397 |
| H1FO      | -0.63265 | 9.658553 | -17.4342 | 3.17E-07 | 1.08E-05 | 7.432068 |
| TRERF1    | -0.63184 | 5.248595 | -7.49975 | 0.00011  | 0.000642 | 0.991607 |
| SLC25A11  | -0.63167 | 8.28657  | -16.3652 | 4.99E-07 | 1.39E-05 | 6.942611 |
| TNFRSF10E | -0.63124 | 9.35803  | -15.8315 | 6.32E-07 | 1.61E-05 | 6.685769 |
| OBSL1     | -0.63114 | 8.259651 | -13.046  | 2.49E-06 | 3.96E-05 | 5.185022 |
| ADH5      | -0.63085 | 7.894481 | -12.1181 | 4.19E-06 | 5.66E-05 | 4.614274 |
| TRAPPC4   | -0.63084 | 9.432756 | -16.1731 | 5.43E-07 | 1.46E-05 | 6.851199 |
| KIAA1524  | -0.63053 | 7.122018 | -13.3325 | 2.14E-06 | 3.58E-05 | 5.353383 |
| CCNA2     | -0.63034 | 8.85977  | -16.6272 | 4.46E-07 | 1.31E-05 | 7.06559  |
| UBE2D1    | -0.63022 | 6.355376 | -9.11401 | 2.99E-05 | 0.000235 | 2.436983 |
| POLD3     | -0.63014 | 7.616769 | -13.9418 | 1.56E-06 | 2.91E-05 | 5.699855 |
| XRCC2     | -0.62962 | 6.190081 | -8.60288 | 4.42E-05 | 0.000317 | 2.004166 |
| MT1X      | -0.62948 | 7.993126 | -14.6148 | 1.12E-06 | 2.32E-05 | 6.065601 |
| RPA2      | -0.62869 | 8.470024 | -17.9811 | 2.54E-07 | 9.63E-06 | 7.670499 |
| TNFRSF21  | -0.6282  | 10.31657 | -15.0867 | 8.91E-07 | 2.00E-05 | 6.3121   |
| PHGDH     | -0.62774 | 9.936995 | -16.0393 | 5.76E-07 | 1.52E-05 | 6.786802 |
| COPRS     | -0.62773 | 8.920899 | -16.9901 | 3.82E-07 | 1.21E-05 | 7.232643 |
| SLF1      | -0.62758 | 6.870157 | -10.1783 | 1.41E-05 | 0.000135 | 3.27426  |
| EIF1AX    | -0.62666 | 8.472756 | -17.2873 | 3.37E-07 | 1.12E-05 | 7.366711 |
| OIP5      | -0.62658 | 8.633663 | -13.8336 | 1.65E-06 | 3.02E-05 | 5.639416 |
| PAQR5     | -0.62538 | 4.457062 | -9.68884 | 1.97E-05 | 0.000173 | 2.899333 |
| TRAPPC13  | -0.62468 | 5.953353 | -18.5204 | 2.06E-07 | 8.54E-06 | 7.898198 |
| AIF1L     | -0.62449 | 6.935241 | -16.8054 | 4.13E-07 | 1.26E-05 | 7.148093 |
| NUP210    | -0.6225  | 6.093979 | -16.7413 | 4.24E-07 | 1.27E-05 | 7.118525 |
| GINS3     | -0.62243 | 6.718449 | -12.4834 | 3.40E-06 | 4.90E-05 | 4.843811 |
| THRA      | -0.62215 | 7.00131  | -10.2462 | 1.34E-05 | 0.000131 | 3.324985 |
| KRAS      | -0.62205 | 9.160511 | -14.5142 | 1.17E-06 | 2.40E-05 | 6.011972 |
| ISPD      | -0.622   | 3.29264  | -4.65873 | 0.002064 | 0.006996 | -2.24455 |
| ASXL1     | -0.62197 | 7.406335 | -13.5998 | 1.86E-06 | 3.27E-05 | 5.50727  |
| PTPN3     | -0.62171 | 5.175872 | -7.75474 | 8.83E-05 | 0.00054  | 1.235919 |
| FOXC1     | -0.62157 | 4.961301 | -5.9359  | 0.00049  | 0.002133 | -0.6626  |
| PKMYT1    | -0.62153 | 6.340764 | -7.9616  | 7.42E-05 | 0.000471 | 1.42942  |
| E2F1      | -0.62139 | 6.531727 | -12.9484 | 2.63E-06 | 4.10E-05 | 5.126915 |
| APPL1     | -0.62132 | 7.850733 | -15.1504 | 8.65E-07 | 1.96E-05 | 6.34479  |
| FZD4      | -0.62124 | 6.437283 | -9.93123 | 1.67E-05 | 0.000153 | 3.087074 |
| KIF4A /// | -0.62053 | 8.092642 | -11.1715 | 7.39E-06 | 8.46E-05 | 3.987366 |
| TMEM154   | -0.62033 | 5.146196 | -10.0014 | 1.59E-05 | 0.000148 | 3.140669 |
| TMSB4X    | -0.6197  | 8.999988 | -11.5584 | 5.83E-06 | 7.14E-05 | 4.249436 |
| C16orf59  | -0.6189  | 5.989459 | -14.1053 | 1.44E-06 | 2.75E-05 | 5.79029  |
| CBR1      | -0.61847 | 8.63409  | -16.7995 | 4.14E-07 | 1.26E-05 | 7.145384 |
| FEN1      | -0.61844 | 8.357185 | -15.6808 | 6.77E-07 | 1.68E-05 | 6.611626 |
| PPP4R2    | -0.61837 | 6.720441 | -14.1213 | 1.43E-06 | 2.74E-05 | 5.799085 |
| SRCAP     | -0.61835 | 6.649919 | -15.9454 | 6.01E-07 | 1.55E-05 | 6.7413   |
| GALNT4 // | -0.6183  | 6.978688 | -10.563  | 1.09E-05 | 0.000112 | 3.557767 |
| TMEM201   | -0.61814 | 6.844729 | -11.6325 | 5.57E-06 | 6.92E-05 | 4.298683 |
| CNNM4     | -0.6178  | 6.530912 | -7.76659 | 8.74E-05 | 0.000536 | 1.24711  |
| EOMES     | -0.61778 | 3.579838 | -8.46401 | 4.93E-05 | 0.000344 | 1.882802 |
| APOBEC3A  | -0.61753 | 8.383756 | -14.1827 | 1.38E-06 | 2.69E-05 | 5.832774 |
| PKN3      | -0.61669 | 7.029654 | -10.1717 | 1.41E-05 | 0.000136 | 3.269332 |

|           |          |          |          |          |          |          |
|-----------|----------|----------|----------|----------|----------|----------|
| GPALPP1   | -0.61661 | 7.150085 | -13.9063 | 1.59E-06 | 2.94E-05 | 5.680064 |
| KNTC1     | -0.61638 | 7.867373 | -13.2229 | 2.27E-06 | 3.72E-05 | 5.289377 |
| SPAG5     | -0.6155  | 8.114418 | -14.6938 | 1.08E-06 | 2.26E-05 | 6.107387 |
| GPD2      | -0.61531 | 7.716487 | -16.6629 | 4.39E-07 | 1.30E-05 | 7.082219 |
| MED30     | -0.61492 | 7.759812 | -18.0477 | 2.48E-07 | 9.45E-06 | 7.699011 |
| CORO1C    | -0.6145  | 9.612788 | -16.6228 | 4.46E-07 | 1.31E-05 | 7.063542 |
| FTO       | -0.61427 | 8.923173 | -15.3865 | 7.75E-07 | 1.82E-05 | 6.464709 |
| NCAPG     | -0.61403 | 9.359357 | -15.9512 | 5.99E-07 | 1.55E-05 | 6.744139 |
| CAPZA1    | -0.61398 | 9.849625 | -15.8587 | 6.25E-07 | 1.59E-05 | 6.699076 |
| NSFL1C    | -0.61363 | 7.353431 | -12.4157 | 3.53E-06 | 5.03E-05 | 4.801741 |
| ARIH2     | -0.61343 | 8.093548 | -13.1949 | 2.30E-06 | 3.76E-05 | 5.272976 |
| PLEKHF2   | -0.61335 | 5.480427 | -15.8871 | 6.17E-07 | 1.58E-05 | 6.712951 |
| ZWINT     | -0.61271 | 9.96707  | -17.5604 | 3.02E-07 | 1.05E-05 | 7.48778  |
| MYBL2     | -0.61242 | 7.608029 | -9.93269 | 1.66E-05 | 0.000153 | 3.088188 |
| NHEJ1     | -0.61197 | 5.533498 | -10.4268 | 1.19E-05 | 0.00012  | 3.458498 |
| TWSG1     | -0.61153 | 8.369397 | -9.99187 | 1.60E-05 | 0.000148 | 3.133405 |
| IPP       | -0.61133 | 6.17061  | -9.13356 | 2.95E-05 | 0.000233 | 2.453119 |
| CKLF ///  | -0.61132 | 9.05514  | -16.3591 | 5.00E-07 | 1.40E-05 | 6.939743 |
| CENPE     | -0.61119 | 8.209509 | -13.204  | 2.29E-06 | 3.74E-05 | 5.278319 |
| KBTBD7    | -0.61032 | 5.80962  | -13.6027 | 1.86E-06 | 3.27E-05 | 5.508901 |
| FANCD2 // | -0.61017 | 6.170745 | -7.80796 | 8.44E-05 | 0.000521 | 1.286095 |
| SPAG4     | -0.60985 | 6.097287 | -7.39343 | 0.000121 | 0.00069  | 0.8878   |
| MAST3     | -0.60919 | 6.372659 | -11.7443 | 5.21E-06 | 6.61E-05 | 4.372407 |
| CDC6      | -0.609   | 8.19127  | -17.4441 | 3.16E-07 | 1.08E-05 | 7.436476 |
| PIGK      | -0.60864 | 7.11039  | -10.9879 | 8.29E-06 | 9.14E-05 | 3.860086 |
| CEP70     | -0.60842 | 7.147391 | -12.399  | 3.57E-06 | 5.06E-05 | 4.791383 |
| RAB3A     | -0.60824 | 6.338341 | -5.76067 | 0.000589 | 0.002479 | -0.86644 |
| NUP37     | -0.60812 | 9.031555 | -17.1216 | 3.61E-07 | 1.17E-05 | 7.292271 |
| NOLC1     | -0.60758 | 10.36085 | -14.889  | 9.79E-07 | 2.14E-05 | 6.209789 |
| TRAPPC1   | -0.60744 | 8.766773 | -14.0697 | 1.46E-06 | 2.78E-05 | 5.770676 |
| ZNF714    | -0.6071  | 3.4714   | -5.82372 | 0.000551 | 0.002349 | -0.79263 |
| SGOL1     | -0.60699 | 6.23175  | -14.6284 | 1.11E-06 | 2.31E-05 | 6.072815 |
| HARS2     | -0.6064  | 7.57711  | -15.5341 | 7.24E-07 | 1.74E-05 | 6.538731 |
| GIT2      | -0.60577 | 7.945406 | -11.4135 | 6.36E-06 | 7.58E-05 | 4.152288 |
| FLOT1     | -0.60557 | 7.420114 | -11.627  | 5.59E-06 | 6.93E-05 | 4.295034 |
| ORC1      | -0.60506 | 6.538909 | -10.4486 | 1.17E-05 | 0.000118 | 3.47444  |
| NCAPH2    | -0.60501 | 7.396626 | -11.3816 | 6.49E-06 | 7.70E-05 | 4.130691 |
| LOC102724 | -0.60498 | 6.186934 | -8.31707 | 5.54E-05 | 0.000376 | 1.752562 |
| SMIM15    | -0.60446 | 6.36863  | -10.5171 | 1.12E-05 | 0.000115 | 3.524378 |
| C18orf54  | -0.60445 | 5.722096 | -9.47871 | 2.29E-05 | 0.000193 | 2.733178 |
| NSUN5     | -0.60439 | 7.683301 | -15.9659 | 5.95E-07 | 1.55E-05 | 6.751298 |
| SREBF2    | -0.60418 | 7.668498 | -11.8042 | 5.03E-06 | 6.43E-05 | 4.411637 |
| RPS2      | -0.60243 | 7.932866 | -12.4835 | 3.40E-06 | 4.90E-05 | 4.843908 |
| ARHGAP19  | -0.60198 | 7.175993 | -15.3144 | 8.01E-07 | 1.85E-05 | 6.428266 |
| CISD2     | -0.60168 | 7.802937 | -18.1039 | 2.42E-07 | 9.34E-06 | 7.722986 |
| LEF1      | -0.60164 | 5.543957 | -9.39481 | 2.43E-05 | 0.000203 | 2.665931 |
| CCNB2     | -0.60122 | 9.074853 | -13.9312 | 1.57E-06 | 2.92E-05 | 5.69394  |
| PRIMPOL   | -0.60078 | 7.781201 | -16.4436 | 4.82E-07 | 1.37E-05 | 6.979622 |
| PSIP1     | -0.60051 | 7.636675 | -14.4385 | 1.22E-06 | 2.46E-05 | 5.971427 |
| TRA2B     | -0.60036 | 9.277574 | -15.6541 | 6.85E-07 | 1.69E-05 | 6.598384 |
| KIF14     | -0.59969 | 8.071911 | -16.0018 | 5.86E-07 | 1.53E-05 | 6.76869  |



|           |          |          |          |          |          |          |
|-----------|----------|----------|----------|----------|----------|----------|
| DNAJC10   | -0.59944 | 5.874805 | -7.73516 | 8.98E-05 | 0.000547 | 1.21738  |
| OAS2      | -0.5994  | 4.816892 | -8.41746 | 5.12E-05 | 0.000354 | 1.841751 |
| KAT6A     | -0.59928 | 7.845333 | -12.466  | 3.43E-06 | 4.93E-05 | 4.83306  |
| NASP      | -0.59879 | 6.510347 | -10.6584 | 1.02E-05 | 0.000107 | 3.626548 |
| TOP2A     | -0.59866 | 10.58359 | -16.0165 | 5.82E-07 | 1.53E-05 | 6.775809 |
| PLCE1     | -0.59853 | 5.446204 | -10.0379 | 1.55E-05 | 0.000145 | 3.168384 |
| IDI1      | -0.59822 | 8.014976 | -14.2377 | 1.34E-06 | 2.64E-05 | 5.862769 |
| FAM72A // | -0.59808 | 8.852775 | -14.7983 | 1.02E-06 | 2.19E-05 | 6.162354 |
| TUBB      | -0.59749 | 10.90292 | -17.0427 | 3.74E-07 | 1.19E-05 | 7.25655  |
| BMP7      | -0.59709 | 4.550226 | -8.40633 | 5.16E-05 | 0.000357 | 1.831902 |
| HDGF      | -0.59687 | 8.162343 | -12.0529 | 4.35E-06 | 5.82E-05 | 4.572567 |
| DNAJC9    | -0.59679 | 9.540605 | -12.1315 | 4.16E-06 | 5.63E-05 | 4.622785 |
| WIPF1     | -0.59669 | 6.744368 | -13.3727 | 2.09E-06 | 3.53E-05 | 5.3767   |
| COX16 /// | -0.59669 | 5.720368 | -7.35425 | 0.000125 | 0.000709 | 0.849248 |
| ATPAF1    | -0.59635 | 7.101999 | -10.5335 | 1.11E-05 | 0.000114 | 3.536356 |
| IRX3      | -0.59622 | 7.449043 | -9.37379 | 2.47E-05 | 0.000204 | 2.648998 |
| CKAP2L    | -0.59539 | 6.965407 | -8.47794 | 4.88E-05 | 0.000341 | 1.895049 |
| DERA      | -0.59519 | 8.913362 | -16.2585 | 5.23E-07 | 1.43E-05 | 6.891965 |
| PRR11     | -0.59498 | 7.525227 | -12.4218 | 3.52E-06 | 5.01E-05 | 4.805547 |
| INTS7     | -0.5949  | 6.176369 | -6.19911 | 0.000374 | 0.001703 | -0.36385 |
| TMEM129   | -0.59489 | 6.486884 | -7.89033 | 7.87E-05 | 0.000493 | 1.363211 |
| TMEM183A  | -0.59488 | 6.154594 | -12.7012 | 3.01E-06 | 4.53E-05 | 4.977633 |
| KIF22     | -0.59373 | 7.969045 | -15.3654 | 7.82E-07 | 1.83E-05 | 6.454089 |
| KIFC1     | -0.59366 | 6.844573 | -9.47212 | 2.30E-05 | 0.000194 | 2.727911 |
| MKNK2     | -0.59337 | 7.606889 | -14.8314 | 1.01E-06 | 2.17E-05 | 6.17972  |
| TTF2      | -0.59336 | 8.535073 | -14.2128 | 1.36E-06 | 2.66E-05 | 5.849194 |
| SIVA1     | -0.59323 | 7.755565 | -16.7448 | 4.24E-07 | 1.27E-05 | 7.12014  |
| LDLR      | -0.59274 | 9.734871 | -14.3843 | 1.25E-06 | 2.51E-05 | 5.942256 |
| MAMLD1    | -0.5927  | 4.811186 | -12.0809 | 4.28E-06 | 5.74E-05 | 4.590495 |
| KDELR2    | -0.59256 | 9.458594 | -16.1248 | 5.55E-07 | 1.48E-05 | 6.828027 |
| DDX5      | -0.59241 | 6.799736 | -11.2772 | 6.92E-06 | 8.07E-05 | 4.059806 |
| ZFHX3     | -0.5924  | 7.579058 | -9.37813 | 2.46E-05 | 0.000204 | 2.6525   |
| STK26     | -0.59217 | 7.42518  | -14.6863 | 1.08E-06 | 2.27E-05 | 6.103452 |
| FYCO1     | -0.59175 | 6.899927 | -14.3113 | 1.30E-06 | 2.57E-05 | 5.902791 |
| ZMYM3     | -0.59161 | 7.551248 | -14.6791 | 1.08E-06 | 2.27E-05 | 6.09962  |
| RAVER2    | -0.59122 | 6.546061 | -7.60662 | 0.0001   | 0.000596 | 1.094796 |
| TMEM141   | -0.59049 | 6.457758 | -11.0541 | 7.95E-06 | 8.90E-05 | 3.906192 |
| CENPP     | -0.59041 | 5.848143 | -10.6908 | 1.00E-05 | 0.000106 | 3.649841 |
| LZTS1     | -0.59036 | 6.35345  | -10.0744 | 1.51E-05 | 0.000142 | 3.196016 |
| SGOL2     | -0.58975 | 7.091407 | -13.9688 | 1.54E-06 | 2.87E-05 | 5.714853 |
| CPT1C     | -0.58974 | 6.325415 | -14.7481 | 1.05E-06 | 2.22E-05 | 6.136022 |
| HDAC11    | -0.58928 | 5.554558 | -6.73927 | 0.00022  | 0.00111  | 0.222487 |
| LSM14B    | -0.58893 | 4.022582 | -7.16541 | 0.000148 | 0.000812 | 0.66119  |
| ANP32A    | -0.58889 | 7.511662 | -14.8699 | 9.88E-07 | 2.15E-05 | 6.199826 |
| SLAIN2    | -0.58693 | 6.057345 | -11.3916 | 6.45E-06 | 7.66E-05 | 4.137453 |
| CIQBP     | -0.58692 | 11.38579 | -17.1346 | 3.59E-07 | 1.17E-05 | 7.298129 |
| BRCA2     | -0.58638 | 5.633993 | -8.12717 | 6.47E-05 | 0.000423 | 1.581371 |
| ITGB3BP   | -0.58612 | 8.592218 | -15.6357 | 6.91E-07 | 1.70E-05 | 6.589296 |
| SUMO3     | -0.58486 | 8.544836 | -12.0615 | 4.33E-06 | 5.80E-05 | 4.578067 |
| SPRYD4    | -0.58486 | 5.42514  | -10.1834 | 1.40E-05 | 0.000135 | 3.278121 |
| MRPL2     | -0.58475 | 5.350551 | -9.88351 | 1.72E-05 | 0.000157 | 3.050436 |

|           |          |          |          |          |          |          |
|-----------|----------|----------|----------|----------|----------|----------|
| ILVBL     | -0.58398 | 7.003675 | -17.7096 | 2.84E-07 | 1.01E-05 | 7.553119 |
| B3GLCT    | -0.58176 | 5.383191 | -9.85345 | 1.76E-05 | 0.000159 | 3.027278 |
| JRKL      | -0.5815  | 5.79986  | -9.07688 | 3.08E-05 | 0.00024  | 2.406254 |
| DARS2     | -0.58145 | 8.501691 | -16.9536 | 3.88E-07 | 1.22E-05 | 7.216013 |
| MALAT1    | -0.5812  | 7.14102  | -14.7898 | 1.03E-06 | 2.20E-05 | 6.157911 |
| HAUS7     | -0.58113 | 7.25991  | -11.2441 | 7.06E-06 | 8.18E-05 | 4.037186 |
| TSMF      | -0.58078 | 5.009538 | -8.61909 | 4.36E-05 | 0.000314 | 2.018218 |
| OPA1      | -0.58027 | 5.195218 | -7.21952 | 0.000141 | 0.00078  | 0.715466 |
| TAX1BP1   | -0.58023 | 7.246972 | -9.42654 | 2.38E-05 | 0.000199 | 2.69142  |
| LRR1      | -0.58017 | 8.759896 | -12.8074 | 2.84E-06 | 4.34E-05 | 5.042118 |
| ISOC2     | -0.5799  | 7.469219 | -12.4954 | 3.38E-06 | 4.88E-05 | 4.85128  |
| TMC01     | -0.57989 | 3.631725 | -3.92665 | 0.005225 | 0.015268 | -3.25507 |
| CPSF6     | -0.57959 | 7.070079 | -12.5258 | 3.32E-06 | 4.82E-05 | 4.870047 |
| CREB3L4   | -0.57938 | 6.851712 | -9.72092 | 1.93E-05 | 0.000171 | 2.924413 |
| POLD1     | -0.57915 | 7.542372 | -9.52302 | 2.22E-05 | 0.000189 | 2.768481 |
| PFKFB2    | -0.57896 | 5.025684 | -8.96484 | 3.35E-05 | 0.000256 | 2.312861 |
| DNAAF2    | -0.57895 | 6.029718 | -7.69071 | 9.33E-05 | 0.000564 | 1.175179 |
| KIF4A     | -0.57864 | 8.099502 | -9.70463 | 1.95E-05 | 0.000172 | 2.911689 |
| PLK4      | -0.57762 | 7.627995 | -12.1797 | 4.04E-06 | 5.53E-05 | 4.653415 |
| UBE2I     | -0.57647 | 6.96038  | -8.32699 | 5.50E-05 | 0.000374 | 1.76141  |
| ATF5      | -0.57626 | 5.015938 | -11.7103 | 5.32E-06 | 6.70E-05 | 4.35005  |
| FAM104B   | -0.57614 | 5.503747 | -10.44   | 1.18E-05 | 0.000119 | 3.468123 |
| NDC1      | -0.57533 | 8.683064 | -16.3231 | 5.08E-07 | 1.41E-05 | 6.922685 |
| HSPE1 /// | -0.57509 | 8.205825 | -11.4577 | 6.19E-06 | 7.45E-05 | 4.182034 |
| C4orf27 / | -0.57485 | 7.437357 | -15.8086 | 6.39E-07 | 1.61E-05 | 6.674538 |
| CENPK     | -0.57448 | 8.088618 | -15.5963 | 7.04E-07 | 1.71E-05 | 6.569751 |
| PECR      | -0.57422 | 5.926527 | -15.3724 | 7.80E-07 | 1.83E-05 | 6.457582 |
| CAPRIN1   | -0.5739  | 5.779426 | -6.4314  | 0.000297 | 0.001411 | -0.1074  |
| TUBD1     | -0.57229 | 5.43103  | -9.04428 | 3.15E-05 | 0.000245 | 2.379177 |
| SERPINB5  | -0.57206 | 3.410741 | -5.43792 | 0.000836 | 0.003295 | -1.2526  |
| SYNJ2BP   | -0.5716  | 7.321361 | -12.1141 | 4.20E-06 | 5.67E-05 | 4.61169  |
| NSL1      | -0.57145 | 8.74603  | -17.0368 | 3.74E-07 | 1.20E-05 | 7.253873 |
| MUC15     | -0.57143 | 6.46475  | -8.03042 | 7.01E-05 | 0.00045  | 1.492886 |
| UCP2      | -0.57024 | 7.491727 | -15.7373 | 6.60E-07 | 1.65E-05 | 6.639476 |
| DTYMK     | -0.56919 | 8.564306 | -12.355  | 3.66E-06 | 5.16E-05 | 4.763886 |
| RACGAP1   | -0.56908 | 9.071587 | -8.09094 | 6.66E-05 | 0.000433 | 1.548342 |
| VOPP1     | -0.56894 | 8.879695 | -14.1002 | 1.44E-06 | 2.76E-05 | 5.7875   |
| SF3B5     | -0.56827 | 10.4452  | -13.1521 | 2.36E-06 | 3.82E-05 | 5.247815 |
| C20orf24  | -0.56799 | 10.7818  | -16.1883 | 5.39E-07 | 1.46E-05 | 6.858465 |
| TNKS      | -0.56767 | 7.156645 | -14.974  | 9.40E-07 | 2.08E-05 | 6.253946 |
| TMEM45A   | -0.56763 | 6.596445 | -15.2282 | 8.34E-07 | 1.91E-05 | 6.384512 |
| SEN2      | -0.56753 | 7.438027 | -11.141  | 7.53E-06 | 8.57E-05 | 3.966369 |
| CEP85     | -0.56748 | 7.403201 | -12.2085 | 3.97E-06 | 5.46E-05 | 4.671648 |
| STAM2     | -0.56711 | 5.636789 | -12.5099 | 3.35E-06 | 4.85E-05 | 4.860232 |
| ZWILCH    | -0.56674 | 7.610607 | -16.1854 | 5.40E-07 | 1.46E-05 | 6.857052 |
| EEF1A1    | -0.56557 | 7.564389 | -12.4812 | 3.40E-06 | 4.90E-05 | 4.842475 |
| TTC33     | -0.56547 | 6.574463 | -9.34764 | 2.52E-05 | 0.000207 | 2.627889 |
| TSNAX     | -0.56525 | 9.443059 | -9.58313 | 2.13E-05 | 0.000183 | 2.816147 |
| MRPL35    | -0.56521 | 6.421989 | -11.9011 | 4.75E-06 | 6.17E-05 | 4.474728 |
| PPP2R5E   | -0.5649  | 6.844542 | -14.5224 | 1.17E-06 | 2.39E-05 | 6.016348 |
| DDIAS     | -0.56414 | 7.356438 | -15.5495 | 7.19E-07 | 1.74E-05 | 6.54642  |

|           |          |          |          |          |          |          |
|-----------|----------|----------|----------|----------|----------|----------|
| RNFT2     | -0.56378 | 5.869979 | -12.2345 | 3.92E-06 | 5.40E-05 | 4.688132 |
| GNG2      | -0.56361 | 8.110263 | -15.6757 | 6.79E-07 | 1.68E-05 | 6.609094 |
| ALDH6A1   | -0.5636  | 6.005051 | -9.11993 | 2.98E-05 | 0.000234 | 2.441868 |
| BCL2      | -0.56337 | 5.252805 | -6.77779 | 0.000212 | 0.001079 | 0.262985 |
| ID1       | -0.56335 | 9.117432 | -15.0624 | 9.02E-07 | 2.02E-05 | 6.299578 |
| FAM101B   | -0.5633  | 6.048476 | -7.55976 | 0.000104 | 0.000616 | 1.049688 |
| PTGES2    | -0.56311 | 6.90431  | -10.989  | 8.28E-06 | 9.14E-05 | 3.860841 |
| LYRM7     | -0.56288 | 7.308614 | -13.6442 | 1.82E-06 | 3.22E-05 | 5.532517 |
| CASP6 /// | -0.56264 | 5.953779 | -9.58855 | 2.12E-05 | 0.000182 | 2.820434 |
| MOCOS     | -0.56242 | 9.287463 | -16.868  | 4.02E-07 | 1.24E-05 | 7.176877 |
| SAMD1     | -0.56215 | 7.123197 | -9.54416 | 2.19E-05 | 0.000187 | 2.785275 |
| FAAP20    | -0.56207 | 5.633628 | -5.26486 | 0.001014 | 0.003866 | -1.46553 |
| KIF21B    | -0.56082 | 6.471189 | -12.3846 | 3.59E-06 | 5.09E-05 | 4.782391 |
| GTSE1     | -0.56074 | 6.930618 | -13.5295 | 1.93E-06 | 3.34E-05 | 5.467072 |
| TSPAN13   | -0.56071 | 9.202149 | -10.2723 | 1.32E-05 | 0.000129 | 3.344399 |
| FDPS      | -0.56058 | 9.412233 | -14.4228 | 1.23E-06 | 2.48E-05 | 5.962976 |
| PARG      | -0.56053 | 6.882319 | -8.63397 | 4.31E-05 | 0.000311 | 2.031103 |
| LIAS      | -0.56036 | 6.079249 | -9.79978 | 1.82E-05 | 0.000164 | 2.985773 |
| FAM76B    | -0.56009 | 7.170867 | -8.09012 | 6.67E-05 | 0.000434 | 1.54759  |
| UBR7      | -0.56007 | 7.352057 | -11.7217 | 5.28E-06 | 6.67E-05 | 4.35757  |
| ADRBK1    | -0.55992 | 5.675229 | -10.1245 | 1.46E-05 | 0.000139 | 3.23384  |
| UFL1      | -0.55989 | 7.154951 | -12.5122 | 3.35E-06 | 4.85E-05 | 4.861671 |
| TMEM237   | -0.55972 | 5.123767 | -10.1544 | 1.43E-05 | 0.000137 | 3.256376 |
| FBXW2     | -0.55971 | 6.046562 | -10.9531 | 8.47E-06 | 9.28E-05 | 3.835722 |
| TRUB1     | -0.55949 | 8.618498 | -13.8708 | 1.62E-06 | 2.98E-05 | 5.660246 |
| NDUFA9    | -0.55945 | 9.296711 | -12.1265 | 4.17E-06 | 5.64E-05 | 4.619627 |
| TM2D2     | -0.55924 | 7.442078 | -11.1625 | 7.43E-06 | 8.48E-05 | 3.981221 |
| CDK8      | -0.55915 | 8.228193 | -14.1067 | 1.44E-06 | 2.75E-05 | 5.791079 |
| CSTF3     | -0.55902 | 8.897286 | -12.3541 | 3.66E-06 | 5.16E-05 | 4.763322 |
| EIF2S2    | -0.55873 | 7.300387 | -12.0887 | 4.26E-06 | 5.72E-05 | 4.595489 |
| MTHFD1L   | -0.55871 | 7.333109 | -11.4754 | 6.13E-06 | 7.38E-05 | 4.193933 |
| BRIP1     | -0.55851 | 5.097772 | -6.79538 | 0.000209 | 0.001065 | 0.281415 |
| TMEM222   | -0.55826 | 8.087188 | -13.5087 | 1.95E-06 | 3.36E-05 | 5.455138 |
| TBC1D2B   | -0.55822 | 7.589298 | -16.6313 | 4.45E-07 | 1.31E-05 | 7.067493 |
| C6orf62   | -0.55806 | 8.989447 | -12.7819 | 2.88E-06 | 4.38E-05 | 5.026705 |
| SYNE2     | -0.55801 | 5.575901 | -11.8203 | 4.98E-06 | 6.39E-05 | 4.422196 |
| CENPM     | -0.55796 | 7.75881  | -12.6417 | 3.11E-06 | 4.62E-05 | 4.94129  |
| TGS1      | -0.55771 | 8.048518 | -13.6956 | 1.77E-06 | 3.16E-05 | 5.561692 |
| PRELP     | -0.55739 | 5.641852 | -8.00862 | 7.13E-05 | 0.000456 | 1.472835 |
| CDCA2     | -0.55734 | 6.353976 | -8.94238 | 3.40E-05 | 0.00026  | 2.294016 |
| SC5D      | -0.55729 | 5.338797 | -5.48463 | 0.000794 | 0.003159 | -1.19584 |
| PTGES3L   | -0.55693 | 4.467104 | -9.39162 | 2.44E-05 | 0.000203 | 2.663365 |
| NPL0C4    | -0.55635 | 8.976631 | -13.1528 | 2.35E-06 | 3.82E-05 | 5.2482   |
| TPR       | -0.55453 | 4.916941 | -9.37149 | 2.48E-05 | 0.000205 | 2.647141 |
| C15orf41  | -0.55437 | 6.897701 | -12.3831 | 3.60E-06 | 5.10E-05 | 4.78144  |
| HCG22 /// | -0.55431 | 5.441199 | -9.82326 | 1.80E-05 | 0.000162 | 3.003957 |
| RARG      | -0.55424 | 7.092215 | -9.14227 | 2.93E-05 | 0.000232 | 2.460297 |
| FANCC     | -0.55416 | 5.725197 | -8.20487 | 6.07E-05 | 0.000403 | 1.651814 |
| GLUL      | -0.55412 | 5.755558 | -11.3565 | 6.59E-06 | 7.80E-05 | 4.113691 |
| SOX6      | -0.55402 | 6.04284  | -9.18297 | 2.84E-05 | 0.000226 | 2.493771 |
| CORO2A    | -0.55399 | 6.727699 | -9.03384 | 3.18E-05 | 0.000246 | 2.370491 |

|           |          |          |          |          |          |          |
|-----------|----------|----------|----------|----------|----------|----------|
| H6PD      | -0.55393 | 5.303573 | -13.1322 | 2.38E-06 | 3.84E-05 | 5.23604  |
| HCP5      | -0.55372 | 3.99127  | -5.42806 | 0.000845 | 0.003327 | -1.26462 |
| TBC1D31   | -0.55363 | 6.579387 | -14.9749 | 9.40E-07 | 2.08E-05 | 6.254412 |
| UBE2T     | -0.55261 | 10.32027 | -12.1319 | 4.15E-06 | 5.63E-05 | 4.623034 |
| RBBP4     | -0.55247 | 7.230397 | -14.1332 | 1.42E-06 | 2.72E-05 | 5.805655 |
| PENT      | -0.55241 | 8.504571 | -12.9137 | 2.68E-06 | 4.16E-05 | 5.106116 |
| FARP1     | -0.55186 | 6.778614 | -12.0414 | 4.38E-06 | 5.85E-05 | 4.565205 |
| BMP8B     | -0.55166 | 7.003208 | -8.95741 | 3.37E-05 | 0.000258 | 2.306629 |
| MMAB      | -0.55147 | 5.888801 | -12.0035 | 4.48E-06 | 5.94E-05 | 4.540863 |
| SLC39A6   | -0.55083 | 8.794769 | -13.9285 | 1.57E-06 | 2.92E-05 | 5.692478 |
| STEAP2    | -0.55082 | 3.127453 | -8.01781 | 7.08E-05 | 0.000454 | 1.48129  |
| HAND2     | -0.55026 | 6.489609 | -7.84359 | 8.19E-05 | 0.000509 | 1.319528 |
| PER3      | -0.55013 | 4.800869 | -8.64212 | 4.29E-05 | 0.00031  | 2.038158 |
| RPL15     | -0.54995 | 10.35167 | -13.2116 | 2.28E-06 | 3.73E-05 | 5.282797 |
| CD302 /// | -0.54952 | 6.856378 | -9.12891 | 2.96E-05 | 0.000233 | 2.449282 |
| MAVS      | -0.5488  | 6.413888 | -8.17851 | 6.20E-05 | 0.00041  | 1.627975 |
| ENPP1     | -0.54875 | 3.212162 | -5.47421 | 0.000803 | 0.00319  | -1.20848 |
| SLTM      | -0.54854 | 8.062791 | -12.5705 | 3.24E-06 | 4.75E-05 | 4.897607 |
| CHSY3     | -0.54812 | 3.887578 | -5.1417  | 0.001167 | 0.004348 | -1.6196  |
| TNFAIP8   | -0.54803 | 4.275474 | -8.28916 | 5.67E-05 | 0.000383 | 1.727603 |
| MAGEA4    | -0.54786 | 10.76306 | -13.3168 | 2.16E-06 | 3.60E-05 | 5.344225 |
| BTBD2     | -0.54778 | 6.201153 | -10.5639 | 1.09E-05 | 0.000112 | 3.558368 |
| IDH3A     | -0.54773 | 7.776967 | -12.8119 | 2.83E-06 | 4.33E-05 | 5.044839 |
| MAP2K7    | -0.54762 | 9.404805 | -12.2544 | 3.87E-06 | 5.36E-05 | 4.700649 |
| NRSN2     | -0.54718 | 7.139195 | -8.64422 | 4.28E-05 | 0.000309 | 2.039972 |
| LOC102724 | -0.54717 | 4.524854 | -4.85385 | 0.001633 | 0.005752 | -1.98806 |
| APOBEC3B  | -0.54639 | 8.498169 | -12.4761 | 3.41E-06 | 4.91E-05 | 4.839291 |
| RFC3      | -0.54637 | 8.540362 | -14.3606 | 1.27E-06 | 2.53E-05 | 5.929469 |
| EIF2S1    | -0.54615 | 8.376134 | -13.6964 | 1.77E-06 | 3.16E-05 | 5.56214  |
| MLEC      | -0.54611 | 8.118107 | -12.3171 | 3.74E-06 | 5.24E-05 | 4.740136 |
| TTPAL     | -0.54569 | 7.867869 | -12.6874 | 3.03E-06 | 4.55E-05 | 4.969245 |
| COL8A2    | -0.54549 | 4.477079 | -7.52398 | 0.000108 | 0.00063  | 1.015109 |
| ZMYND8    | -0.54525 | 8.608078 | -11.8783 | 4.82E-06 | 6.23E-05 | 4.45991  |
| COL4A3BP  | -0.54521 | 7.666315 | -12.3421 | 3.68E-06 | 5.18E-05 | 4.755823 |
| ENO2      | -0.54506 | 7.200401 | -11.7717 | 5.13E-06 | 6.53E-05 | 4.390353 |
| ALPK1     | -0.54487 | 4.693545 | -9.29662 | 2.62E-05 | 0.000213 | 2.586555 |
| CPOX      | -0.54391 | 9.280598 | -13.3104 | 2.16E-06 | 3.60E-05 | 5.340498 |
| RHBDD1    | -0.54384 | 5.992837 | -11.3009 | 6.82E-06 | 7.99E-05 | 4.075969 |
| CLVS1     | -0.54355 | 5.192837 | -10.5942 | 1.07E-05 | 0.000111 | 3.580334 |
| BRI3BP    | -0.54353 | 7.450598 | -12.1815 | 4.04E-06 | 5.52E-05 | 4.654542 |
| YWHAE     | -0.54335 | 9.571653 | -15.3404 | 7.92E-07 | 1.84E-05 | 6.441451 |
| H2AFV     | -0.54272 | 7.601203 | -14.054  | 1.47E-06 | 2.79E-05 | 5.762022 |
| CREB1     | -0.5426  | 6.832347 | -9.87354 | 1.73E-05 | 0.000158 | 3.042765 |
| CD99L2    | -0.54211 | 8.160826 | -14.0701 | 1.46E-06 | 2.78E-05 | 5.770927 |
| NAT6      | -0.54199 | 6.177305 | -12.9793 | 2.59E-06 | 4.06E-05 | 5.145339 |
| ZNF629    | -0.54166 | 5.963193 | -6.80326 | 0.000207 | 0.001058 | 0.289668 |
| HINT2     | -0.54125 | 9.246103 | -12.1566 | 4.10E-06 | 5.57E-05 | 4.638776 |
| RPL39L    | -0.54094 | 8.4998   | -12.0426 | 4.37E-06 | 5.84E-05 | 4.565981 |
| SHMT1     | -0.54089 | 7.701811 | -15.7755 | 6.49E-07 | 1.63E-05 | 6.658304 |
| PXDC1     | -0.5408  | 7.15255  | -15.6704 | 6.80E-07 | 1.68E-05 | 6.606458 |
| LMO4      | -0.54027 | 4.149105 | -8.3278  | 5.50E-05 | 0.000374 | 1.762135 |

|           |          |          |          |          |          |          |
|-----------|----------|----------|----------|----------|----------|----------|
| CTBP1     | -0.54014 | 8.830181 | -13.7683 | 1.70E-06 | 3.09E-05 | 5.602759 |
| TMEM241   | -0.53998 | 6.315805 | -13.5742 | 1.88E-06 | 3.30E-05 | 5.492647 |
| SEMA4F    | -0.53987 | 6.815033 | -9.69663 | 1.96E-05 | 0.000172 | 2.905428 |
| SNRNP25   | -0.53955 | 9.08392  | -13.1538 | 2.35E-06 | 3.82E-05 | 5.248782 |
| VAC14     | -0.53886 | 7.019263 | -9.42082 | 2.39E-05 | 0.000199 | 2.686836 |
| KPNB1     | -0.53841 | 8.949172 | -12.1805 | 4.04E-06 | 5.52E-05 | 4.65396  |
| POLA2     | -0.53814 | 7.951147 | -14.0891 | 1.45E-06 | 2.77E-05 | 5.781381 |
| KIF24     | -0.53723 | 5.361724 | -4.74183 | 0.001866 | 0.006438 | -2.13464 |
| CUL4A     | -0.53715 | 9.011825 | -8.30491 | 5.60E-05 | 0.000379 | 1.741697 |
| MXD3      | -0.53683 | 7.250903 | -11.6916 | 5.38E-06 | 6.76E-05 | 4.33772  |
| PARN      | -0.53681 | 6.908056 | -9.61121 | 2.08E-05 | 0.00018  | 2.83832  |
| CCDC47    | -0.5368  | 7.998928 | -13.2829 | 2.20E-06 | 3.64E-05 | 5.324456 |
| PPIA      | -0.5368  | 9.30769  | -13.9296 | 1.57E-06 | 2.92E-05 | 5.693085 |
| SRSF1     | -0.53599 | 7.522105 | -9.91839 | 1.68E-05 | 0.000154 | 3.077232 |
| FREM2     | -0.53591 | 4.33566  | -3.84416 | 0.00583  | 0.016705 | -3.37354 |
| PTCH1     | -0.5358  | 8.127653 | -11.6258 | 5.60E-06 | 6.93E-05 | 4.294203 |
| ELMO1     | -0.53545 | 6.399276 | -8.8954  | 3.53E-05 | 0.000267 | 2.254469 |
| SOX2      | -0.53545 | 7.392308 | -11.4764 | 6.12E-06 | 7.38E-05 | 4.194566 |
| AKT2      | -0.53504 | 5.54442  | -7.48148 | 0.000112 | 0.000649 | 0.973855 |
| VPS37A    | -0.53446 | 5.756699 | -5.37129 | 0.0009   | 0.003504 | -1.3341  |
| BEND3     | -0.53413 | 6.899355 | -7.95492 | 7.46E-05 | 0.000473 | 1.423232 |
| CHMP3 /// | -0.53365 | 8.435054 | -12.1323 | 4.15E-06 | 5.63E-05 | 4.62329  |
| ECI1      | -0.53322 | 9.034951 | -11.0893 | 7.78E-06 | 8.77E-05 | 3.930595 |
| RNF141    | -0.53305 | 7.283983 | -14.0892 | 1.45E-06 | 2.77E-05 | 5.781435 |
| PTTG1 /// | -0.53303 | 10.95362 | -14.8596 | 9.93E-07 | 2.16E-05 | 6.194437 |
| DHRS11    | -0.53289 | 6.134234 | -13.2501 | 2.24E-06 | 3.68E-05 | 5.305328 |
| ME1       | -0.53282 | 7.912663 | -11.5841 | 5.74E-06 | 7.05E-05 | 4.266554 |
| LSM3      | -0.53249 | 10.08588 | -15.0332 | 9.14E-07 | 2.04E-05 | 6.284567 |
| DUSP22    | -0.53144 | 7.071493 | -8.63553 | 4.31E-05 | 0.000311 | 2.032461 |
| MELK      | -0.53073 | 8.235162 | -13.4352 | 2.03E-06 | 3.45E-05 | 5.412852 |
| CAMSAP1   | -0.53053 | 6.737952 | -8.66429 | 4.21E-05 | 0.000306 | 2.057306 |
| ARNT2     | -0.53026 | 8.136905 | -11.3833 | 6.48E-06 | 7.69E-05 | 4.131875 |
| SF3B3     | -0.53025 | 7.107049 | -11.9361 | 4.66E-06 | 6.08E-05 | 4.497382 |
| MGC27345  | -0.53019 | 6.832724 | -9.97058 | 1.62E-05 | 0.00015  | 3.117166 |
| LIG1      | -0.52962 | 7.182905 | -10.3003 | 1.30E-05 | 0.000127 | 3.365176 |
| ZNF385A   | -0.52962 | 6.307863 | -9.04659 | 3.15E-05 | 0.000245 | 2.381098 |
| SLFN11    | -0.52956 | 7.646593 | -11.2695 | 6.95E-06 | 8.10E-05 | 4.054518 |
| WBP5      | -0.52878 | 7.012823 | -8.13268 | 6.44E-05 | 0.000422 | 1.586386 |
| ADH5 ///  | -0.52858 | 8.135167 | -12.2328 | 3.92E-06 | 5.41E-05 | 4.687016 |
| CANX      | -0.52847 | 7.681874 | -10.6307 | 1.04E-05 | 0.000109 | 3.606618 |
| MSH6      | -0.52826 | 9.759219 | -16.0537 | 5.73E-07 | 1.51E-05 | 6.793765 |
| CIT       | -0.52754 | 7.827925 | -9.16484 | 2.88E-05 | 0.000229 | 2.478879 |
| SS18      | -0.52725 | 8.26389  | -11.8163 | 5.00E-06 | 6.40E-05 | 4.419539 |
| CHEK1     | -0.52716 | 8.255837 | -15.7341 | 6.61E-07 | 1.65E-05 | 6.637906 |
| SORBS3    | -0.52714 | 7.323695 | -9.75524 | 1.88E-05 | 0.000168 | 2.951176 |
| SIAH2     | -0.52692 | 8.204481 | -14.8157 | 1.01E-06 | 2.18E-05 | 6.171474 |
| C19orf54  | -0.52686 | 7.642682 | -9.34573 | 2.52E-05 | 0.000207 | 2.626343 |
| NARS      | -0.52669 | 10.17283 | -15.7205 | 6.65E-07 | 1.66E-05 | 6.631236 |
| WDR46     | -0.52616 | 6.940631 | -11.9742 | 4.55E-06 | 6.00E-05 | 4.522009 |
| C3orf58   | -0.52588 | 6.149905 | -11.2749 | 6.93E-06 | 8.08E-05 | 4.058262 |
| OSBPL2    | -0.52565 | 6.572975 | -10.3154 | 1.28E-05 | 0.000126 | 3.376373 |

|           |          |          |          |          |          |          |
|-----------|----------|----------|----------|----------|----------|----------|
| CIZ1      | -0.52547 | 8.00407  | -13.784  | 1.69E-06 | 3.07E-05 | 5.611589 |
| GPR160    | -0.5254  | 5.812404 | -8.588   | 4.47E-05 | 0.00032  | 1.991236 |
| RNASEH2B  | -0.52516 | 8.304314 | -12.4032 | 3.56E-06 | 5.05E-05 | 4.793964 |
| KIAA1804  | -0.52493 | 7.023682 | -9.70777 | 1.95E-05 | 0.000172 | 2.914141 |
| HACD4     | -0.52457 | 5.673675 | -10.6104 | 1.06E-05 | 0.00011  | 3.592018 |
| CDC7      | -0.524   | 7.195126 | -13.6837 | 1.78E-06 | 3.18E-05 | 5.554968 |
| CARNMT1   | -0.52385 | 6.860934 | -9.74917 | 1.89E-05 | 0.000168 | 2.946447 |
| FAM131A   | -0.52367 | 6.543183 | -10.3843 | 1.23E-05 | 0.000122 | 3.42727  |
| USP9X     | -0.52351 | 6.324603 | -6.96048 | 0.000179 | 0.000944 | 0.452739 |
| RBPJ      | -0.52343 | 8.840519 | -10.8601 | 8.99E-06 | 9.70E-05 | 3.770279 |
| TACC3     | -0.52325 | 8.189026 | -10.1967 | 1.39E-05 | 0.000134 | 3.28808  |
| LRRC14    | -0.52249 | 6.359085 | -9.27397 | 2.66E-05 | 0.000216 | 2.568145 |
| SSX2 ///  | -0.52175 | 8.645601 | -14.5645 | 1.14E-06 | 2.36E-05 | 6.03885  |
| MCM5      | -0.52138 | 6.089876 | -11.7855 | 5.09E-06 | 6.49E-05 | 4.399431 |
| OCEL1     | -0.52127 | 6.923073 | -10.5873 | 1.07E-05 | 0.000111 | 3.575292 |
| ACSS1     | -0.52096 | 6.558016 | -14.2135 | 1.36E-06 | 2.66E-05 | 5.849579 |
| NCAM2     | -0.52081 | 5.646311 | -6.81416 | 0.000205 | 0.001049 | 0.301065 |
| GNA12     | -0.52076 | 7.995809 | -11.9715 | 4.56E-06 | 6.00E-05 | 4.520252 |
| MYEF2     | -0.52073 | 6.174633 | -8.44439 | 5.01E-05 | 0.000349 | 1.865521 |
| SMAD4     | -0.52071 | 6.500538 | -10.5033 | 1.13E-05 | 0.000116 | 3.514384 |
| CD47      | -0.52071 | 7.681994 | -10.5899 | 1.07E-05 | 0.000111 | 3.577181 |
| AGFG1     | -0.52042 | 5.792299 | -7.70489 | 9.21E-05 | 0.000559 | 1.18866  |
| ITGB1     | -0.52031 | 9.321681 | -13.0938 | 2.43E-06 | 3.89E-05 | 5.2134   |
| MSH5 ///  | -0.52027 | 6.802196 | -12.6744 | 3.06E-06 | 4.57E-05 | 4.96131  |
| DZIP3     | -0.52021 | 4.760722 | -4.22068 | 0.003563 | 0.01108  | -2.8402  |
| CNOT6L    | -0.52014 | 5.57684  | -11.0739 | 7.85E-06 | 8.82E-05 | 3.919971 |
| USP1      | -0.51992 | 8.954861 | -13.9979 | 1.52E-06 | 2.85E-05 | 5.731026 |
| HAUS1     | -0.51913 | 8.681365 | -13.3379 | 2.13E-06 | 3.57E-05 | 5.356526 |
| XPO4      | -0.51879 | 4.764386 | -6.78516 | 0.000211 | 0.001073 | 0.270716 |
| COMMD4 // | -0.51866 | 9.512456 | -12.9481 | 2.63E-06 | 4.10E-05 | 5.126723 |
| BORA      | -0.51834 | 5.25124  | -6.82771 | 0.000202 | 0.001039 | 0.315215 |
| DAZAP2    | -0.51829 | 4.110495 | -6.96119 | 0.000179 | 0.000943 | 0.453478 |
| ADAMTS4   | -0.51807 | 8.125434 | -11.4314 | 6.29E-06 | 7.52E-05 | 4.164337 |
| FANCA     | -0.51805 | 5.18885  | -5.79462 | 0.000568 | 0.002409 | -0.82663 |
| TMEM19    | -0.51794 | 7.262684 | -10.1204 | 1.46E-05 | 0.000139 | 3.230802 |
| HAPLN3    | -0.51771 | 6.334314 | -11.3476 | 6.62E-06 | 7.82E-05 | 4.107717 |
| HP1BP3    | -0.51717 | 10.06013 | -15.236  | 8.31E-07 | 1.90E-05 | 6.38847  |
| NR2F2     | -0.51681 | 5.40505  | -5.07899 | 0.001254 | 0.004623 | -1.69887 |
| MPP2      | -0.51661 | 5.611956 | -10.19   | 1.40E-05 | 0.000135 | 3.283036 |
| RBM42     | -0.5166  | 7.767339 | -10.4753 | 1.15E-05 | 0.000117 | 3.493924 |
| HNRNPH2 / | -0.51624 | 8.276389 | -11.9301 | 4.67E-06 | 6.10E-05 | 4.493524 |
| FOXJ2     | -0.51607 | 6.778443 | -13.811  | 1.67E-06 | 3.04E-05 | 5.626729 |
| PPP2R5D   | -0.516   | 6.462627 | -7.53036 | 0.000107 | 0.000628 | 1.021281 |
| KDM2A     | -0.51586 | 5.472244 | -6.08932 | 0.000418 | 0.001869 | -0.48739 |
| SPR       | -0.51564 | 7.988163 | -13.7405 | 1.73E-06 | 3.11E-05 | 5.587082 |
| CDC25B    | -0.51518 | 8.245578 | -9.65229 | 2.02E-05 | 0.000176 | 2.870659 |
| C5orf34   | -0.51491 | 6.103276 | -5.58416 | 0.000712 | 0.002896 | -1.07589 |
| LAMP3     | -0.51487 | 4.096013 | -6.1261  | 0.000403 | 0.001812 | -0.44583 |
| SLF2      | -0.51458 | 6.92483  | -11.9959 | 4.50E-06 | 5.95E-05 | 4.535971 |
| LOC102724 | -0.51456 | 5.89708  | -9.34351 | 2.53E-05 | 0.000207 | 2.624553 |
| HSPA12A   | -0.51415 | 6.165273 | -7.74155 | 8.93E-05 | 0.000544 | 1.223437 |

|           |          |          |          |          |          |          |
|-----------|----------|----------|----------|----------|----------|----------|
| RRP7A     | -0.51403 | 8.04208  | -10.1636 | 1.42E-05 | 0.000136 | 3.263252 |
| NMRAL1    | -0.51379 | 7.917103 | -9.94404 | 1.65E-05 | 0.000152 | 3.09688  |
| NEUROG2   | -0.51362 | 5.882288 | -9.22847 | 2.75E-05 | 0.000221 | 2.531033 |
| RRP7A /// | -0.51306 | 8.418565 | -10.4574 | 1.17E-05 | 0.000118 | 3.480906 |
| SLC25A10  | -0.51302 | 6.097147 | -7.35037 | 0.000126 | 0.000711 | 0.845427 |
| E2F2      | -0.51284 | 6.951326 | -13.1971 | 2.30E-06 | 3.75E-05 | 5.274267 |
| STK24     | -0.51261 | 4.098809 | -4.31381 | 0.003165 | 0.010039 | -2.71128 |
| DBT       | -0.51257 | 4.962807 | -9.11199 | 3.00E-05 | 0.000236 | 2.435315 |
| ARHGAP11A | -0.51162 | 4.907338 | -5.06478 | 0.001275 | 0.004683 | -1.71691 |
| NR2C1     | -0.51134 | 4.892011 | -7.03981 | 0.000166 | 0.00089  | 0.533977 |
| KDELC2    | -0.51109 | 7.51587  | -9.06152 | 3.11E-05 | 0.000242 | 2.393508 |
| MTFR2     | -0.51051 | 6.558039 | -10.3288 | 1.27E-05 | 0.000125 | 3.386281 |
| YEATS4    | -0.51038 | 8.382304 | -9.56288 | 2.16E-05 | 0.000185 | 2.800118 |
| HSDL2     | -0.5098  | 7.937038 | -10.3351 | 1.27E-05 | 0.000125 | 3.390997 |
| PTGES3    | -0.50978 | 10.85547 | -14.2289 | 1.35E-06 | 2.65E-05 | 5.857992 |
| GMFB      | -0.50903 | 9.032712 | -11.1688 | 7.40E-06 | 8.46E-05 | 3.985559 |
| GPN3      | -0.5086  | 8.230398 | -8.84755 | 3.66E-05 | 0.000275 | 2.214015 |
| CSRP2BP   | -0.50824 | 6.655405 | -10.371  | 1.24E-05 | 0.000123 | 3.417449 |
| ATP5G1    | -0.50681 | 8.439801 | -13.8204 | 1.66E-06 | 3.03E-05 | 5.632014 |
| NDUFS3    | -0.50542 | 10.13231 | -12.7392 | 2.95E-06 | 4.46E-05 | 5.000784 |
| ALPP      | -0.50516 | 5.1505   | -5.28691 | 0.00099  | 0.003784 | -1.43817 |
| MUT       | -0.50474 | 6.219008 | -5.90773 | 0.000504 | 0.002186 | -0.69509 |
| VAPB      | -0.50453 | 5.719044 | -5.53322 | 0.000753 | 0.003024 | -1.13712 |
| DEPDC1B   | -0.5045  | 8.963063 | -11.6781 | 5.42E-06 | 6.79E-05 | 4.32882  |
| CCNG2     | -0.50433 | 4.895011 | -9.54874 | 2.18E-05 | 0.000186 | 2.788911 |
| HMMR      | -0.50378 | 8.760308 | -13.1575 | 2.35E-06 | 3.81E-05 | 5.250993 |
| SAYSD1    | -0.50348 | 5.893731 | -11.1432 | 7.52E-06 | 8.56E-05 | 3.967918 |
| AMOTL1    | -0.50343 | 8.51896  | -9.6109  | 2.08E-05 | 0.00018  | 2.838078 |
| LEPROT    | -0.503   | 9.104264 | -13.3767 | 2.09E-06 | 3.52E-05 | 5.379016 |
| SRD5A3    | -0.50262 | 7.858562 | -12.5595 | 3.26E-06 | 4.77E-05 | 4.890834 |
| FPGT      | -0.50224 | 3.050705 | -6.59835 | 0.000252 | 0.001236 | 0.072878 |
| GGH       | -0.5022  | 9.370282 | -9.80542 | 1.82E-05 | 0.000164 | 2.99014  |
| SIK2      | -0.50196 | 5.789863 | -12.1903 | 4.02E-06 | 5.50E-05 | 4.660148 |
| SMG8      | -0.50174 | 8.170862 | -12.2876 | 3.80E-06 | 5.29E-05 | 4.721565 |
| GPRIN1    | -0.50127 | 5.668503 | -6.21179 | 0.000369 | 0.001686 | -0.34968 |
| CLCN5     | -0.50085 | 5.361759 | -8.34069 | 5.44E-05 | 0.000371 | 1.773619 |
| MRPS36    | -0.50077 | 9.468238 | -11.007  | 8.19E-06 | 9.07E-05 | 3.873421 |
| SLC7A2    | -0.50062 | 5.255319 | -6.74605 | 0.000219 | 0.001105 | 0.229631 |
| MPDU1     | -0.50015 | 7.596523 | -9.5014  | 2.25E-05 | 0.000191 | 2.751271 |
| MBOAT2    | -0.4999  | 5.792028 | -11.7802 | 5.10E-06 | 6.50E-05 | 4.395975 |
| EVA1C     | -0.49986 | 5.848161 | -6.48343 | 0.000282 | 0.001354 | -0.05086 |
| ARMCX5-GF | -0.49974 | 5.145347 | -7.81208 | 8.41E-05 | 0.000519 | 1.289963 |
| ODF2      | -0.49964 | 7.911916 | -10.5258 | 1.12E-05 | 0.000114 | 3.530724 |
| RHEBL1    | -0.49955 | 5.834508 | -6.4819  | 0.000282 | 0.001356 | -0.05252 |
| RAB27A    | -0.49927 | 5.350029 | -5.62023 | 0.000685 | 0.002801 | -1.03275 |
| HLCS      | -0.49922 | 5.95966  | -8.17389 | 6.23E-05 | 0.000411 | 1.623791 |
| SPTSSA    | -0.49894 | 5.717334 | -7.26612 | 0.000135 | 0.000755 | 0.76195  |
| FCF1      | -0.4989  | 6.397513 | -10.2764 | 1.32E-05 | 0.000129 | 3.347437 |
| CPED1     | -0.49881 | 4.210587 | -3.21925 | 0.013818 | 0.034321 | -4.29715 |
| GPR3      | -0.49871 | 5.615613 | -7.44904 | 0.000115 | 0.000664 | 0.942243 |
| MKL2      | -0.49868 | 7.528449 | -14.3762 | 1.26E-06 | 2.52E-05 | 5.937873 |

|          |          |          |          |          |          |          |
|----------|----------|----------|----------|----------|----------|----------|
| RNF125   | -0.49805 | 7.699902 | -10.8356 | 9.13E-06 | 9.81E-05 | 3.752929 |
| METTL16  | -0.49797 | 7.760169 | -13.6522 | 1.81E-06 | 3.21E-05 | 5.537095 |
| KIAA1549 | -0.49768 | 6.198801 | -8.22188 | 5.99E-05 | 0.000399 | 1.667157 |
| CEMIP    | -0.49731 | 10.57156 | -13.1127 | 2.41E-06 | 3.86E-05 | 5.224549 |
| CEP57    | -0.49694 | 6.166786 | -9.05495 | 3.13E-05 | 0.000243 | 2.388051 |
| NIF3L1   | -0.49686 | 7.380412 | -11.6815 | 5.41E-06 | 6.78E-05 | 4.331094 |
| TOR4A    | -0.49653 | 6.335729 | -9.51361 | 2.23E-05 | 0.00019  | 2.760998 |
| ASB13    | -0.49644 | 5.264914 | -6.68722 | 0.000231 | 0.001154 | 0.167502 |
| EIF4E    | -0.49643 | 6.514204 | -11.1    | 7.72E-06 | 8.73E-05 | 3.938007 |
| SRSF3    | -0.4962  | 6.414923 | -12.9443 | 2.63E-06 | 4.11E-05 | 5.124435 |
| NR3C1    | -0.49608 | 7.08045  | -13.2715 | 2.21E-06 | 3.65E-05 | 5.317841 |
| ASB7     | -0.49575 | 6.88895  | -13.8311 | 1.65E-06 | 3.02E-05 | 5.638016 |
| AP2S1    | -0.49568 | 11.25412 | -13.364  | 2.10E-06 | 3.54E-05 | 5.371643 |
| FAM134C  | -0.49561 | 5.681849 | -11.0697 | 7.87E-06 | 8.83E-05 | 3.917053 |
| SNX10    | -0.49539 | 9.076939 | -11.8496 | 4.90E-06 | 6.31E-05 | 4.44124  |
| AKAP12   | -0.49488 | 7.71895  | -13.9886 | 1.52E-06 | 2.86E-05 | 5.725841 |
| BCLAF1   | -0.49475 | 4.613182 | -3.92602 | 0.005229 | 0.015277 | -3.25598 |
| ATP6V1G1 | -0.49449 | 9.088313 | -14.8848 | 9.81E-07 | 2.14E-05 | 6.207611 |
| PSMD3    | -0.49436 | 7.875647 | -13.7863 | 1.69E-06 | 3.07E-05 | 5.612873 |
| FKBP2    | -0.49429 | 7.262679 | -8.84835 | 3.66E-05 | 0.000275 | 2.21469  |
| PTPN9    | -0.49412 | 7.065747 | -13.5401 | 1.92E-06 | 3.34E-05 | 5.473128 |
| TXNIP    | -0.49407 | 8.38976  | -11.0399 | 8.02E-06 | 8.97E-05 | 3.896333 |
| ATP5S    | -0.49397 | 7.088973 | -8.25375 | 5.84E-05 | 0.000392 | 1.695839 |
| LRRC8C   | -0.49305 | 5.936652 | -7.35796 | 0.000125 | 0.000707 | 0.852907 |
| PPIL2    | -0.49279 | 3.632842 | -4.48517 | 0.002554 | 0.008367 | -2.47728 |
| PCNA     | -0.4927  | 11.06338 | -14.3149 | 1.29E-06 | 2.57E-05 | 5.904711 |
| TIPRL    | -0.49229 | 7.93859  | -11.6251 | 5.60E-06 | 6.93E-05 | 4.293759 |
| ARID2    | -0.49225 | 5.936192 | -6.3383  | 0.000325 | 0.00152  | -0.20939 |
| PAFAH1B1 | -0.49219 | 8.568126 | -9.59813 | 2.10E-05 | 0.000181 | 2.827998 |
| AKNA     | -0.49202 | 3.586524 | -5.89508 | 0.000511 | 0.002209 | -0.70972 |
| ATP6V1G2 | -0.49188 | 5.433262 | -8.03363 | 6.99E-05 | 0.000449 | 1.495843 |
| HLTF     | -0.49184 | 8.588588 | -12.772  | 2.90E-06 | 4.40E-05 | 5.020663 |
| PROSER1  | -0.49184 | 7.300556 | -10.5003 | 1.13E-05 | 0.000116 | 3.512182 |
| ARMC1    | -0.49181 | 9.681253 | -12.6223 | 3.15E-06 | 4.66E-05 | 4.929449 |
| AFAP1    | -0.49129 | 9.033434 | -12.3399 | 3.69E-06 | 5.19E-05 | 4.754421 |
| MAGOH    | -0.49121 | 8.664644 | -12.2825 | 3.81E-06 | 5.30E-05 | 4.718387 |
| PRKD3    | -0.49075 | 4.301145 | -6.78218 | 0.000211 | 0.001075 | 0.267589 |
| SWI5     | -0.49063 | 8.204351 | -8.49662 | 4.81E-05 | 0.000337 | 1.911453 |
| SEPHS1   | -0.49045 | 6.875608 | -8.74772 | 3.95E-05 | 0.000292 | 2.128995 |
| UMPS     | -0.49016 | 9.536686 | -11.8588 | 4.87E-06 | 6.28E-05 | 4.447254 |
| UVRAG    | -0.49001 | 5.953368 | -10.9176 | 8.67E-06 | 9.45E-05 | 3.810793 |
| TPX2     | -0.48997 | 9.658161 | -13.6524 | 1.81E-06 | 3.21E-05 | 5.53721  |
| TRIOBP   | -0.48993 | 7.166653 | -8.17918 | 6.20E-05 | 0.00041  | 1.628586 |
| SHPK /// | -0.48891 | 5.424889 | -5.63122 | 0.000677 | 0.002775 | -1.01964 |
| AARS     | -0.4888  | 9.169841 | -14.6064 | 1.12E-06 | 2.32E-05 | 6.061134 |
| FOXF1    | -0.48855 | 5.133049 | -7.10982 | 0.000156 | 0.000845 | 0.605092 |
| TMEM256  | -0.4885  | 9.266749 | -13.7147 | 1.75E-06 | 3.14E-05 | 5.572486 |
| FBXO4    | -0.48847 | 6.915052 | -8.95704 | 3.37E-05 | 0.000258 | 2.306318 |
| LRRC20   | -0.48807 | 6.471648 | -9.05948 | 3.12E-05 | 0.000243 | 2.391814 |
| SNRPF    | -0.48799 | 10.41415 | -9.86136 | 1.75E-05 | 0.000159 | 3.033381 |
| ABHD14B  | -0.48737 | 8.170275 | -12.6841 | 3.04E-06 | 4.56E-05 | 4.967238 |



|           |          |          |          |          |          |          |
|-----------|----------|----------|----------|----------|----------|----------|
| NIN       | -0.48733 | 5.453004 | -5.893   | 0.000512 | 0.002213 | -0.71213 |
| MNS1      | -0.48719 | 6.272465 | -10.0824 | 1.50E-05 | 0.000142 | 3.202076 |
| PNN       | -0.487   | 8.027254 | -9.35318 | 2.51E-05 | 0.000207 | 2.632368 |
| ARRB2     | -0.4865  | 6.770755 | -7.544   | 0.000106 | 0.000622 | 1.034473 |
| PHKA1     | -0.48645 | 4.679031 | -6.77446 | 0.000213 | 0.001082 | 0.259494 |
| HENMT1    | -0.48637 | 6.671458 | -10.6269 | 1.04E-05 | 0.000109 | 3.603888 |
| PALM3     | -0.48613 | 6.194819 | -4.96107 | 0.001439 | 0.005177 | -1.84943 |
| S1PR5     | -0.48607 | 5.2797   | -7.83684 | 8.24E-05 | 0.000511 | 1.313209 |
| MAN2A2    | -0.48562 | 5.184978 | -7.93269 | 7.60E-05 | 0.00048  | 1.402623 |
| CHRFAM7A  | -0.48542 | 5.055401 | -7.79435 | 8.54E-05 | 0.000526 | 1.273289 |
| CIAPIN1   | -0.48533 | 9.273933 | -10.2068 | 1.38E-05 | 0.000134 | 3.295611 |
| RAB35     | -0.48528 | 7.066128 | -12.3012 | 3.77E-06 | 5.27E-05 | 4.73015  |
| DFFB      | -0.48519 | 5.012444 | -6.92378 | 0.000185 | 0.000969 | 0.414927 |
| POFUT1    | -0.48515 | 6.57945  | -9.91219 | 1.69E-05 | 0.000155 | 3.072476 |
| PAQR8     | -0.48502 | 5.768078 | -9.27134 | 2.66E-05 | 0.000216 | 2.566001 |
| CEBPG     | -0.48473 | 8.026924 | -9.51619 | 2.23E-05 | 0.00019  | 2.763046 |
| UBE2R2    | -0.48443 | 7.767499 | -12.2751 | 3.83E-06 | 5.32E-05 | 4.713695 |
| ANKRD36 / | -0.48437 | 4.052476 | -5.68833 | 0.000636 | 0.002643 | -0.95178 |
| CSR2BP /  | -0.48423 | 7.103282 | -9.56208 | 2.16E-05 | 0.000185 | 2.799488 |
| HLA-DOA   | -0.48418 | 6.176765 | -10.8731 | 8.91E-06 | 9.64E-05 | 3.779442 |
| PWAR6     | -0.48397 | 5.861205 | -10.0521 | 1.53E-05 | 0.000144 | 3.179195 |
| CLDN4     | -0.48381 | 6.178048 | -9.08848 | 3.05E-05 | 0.000239 | 2.415867 |
| FAIM      | -0.48372 | 7.74172  | -7.90667 | 7.77E-05 | 0.000488 | 1.378434 |
| ATP11A    | -0.48362 | 7.827263 | -11.7716 | 5.13E-06 | 6.53E-05 | 4.39035  |
| WDR83     | -0.48357 | 6.376566 | -10.1361 | 1.45E-05 | 0.000138 | 3.242562 |
| SOX12     | -0.48315 | 5.582945 | -6.62926 | 0.000245 | 0.001207 | 0.105897 |
| CAPS      | -0.48314 | 8.237272 | -10.3068 | 1.29E-05 | 0.000127 | 3.37     |
| ADCY6     | -0.48258 | 6.224225 | -11.3077 | 6.79E-06 | 7.97E-05 | 4.080563 |
| HS2ST1    | -0.48239 | 6.629235 | -9.46803 | 2.31E-05 | 0.000194 | 2.724644 |
| TIE1      | -0.48231 | 4.178132 | -4.66114 | 0.002058 | 0.00698  | -2.24135 |
| DHX15     | -0.48225 | 10.90675 | -13.9226 | 1.58E-06 | 2.93E-05 | 5.689173 |
| TCFL5     | -0.48178 | 7.762386 | -12.1787 | 4.04E-06 | 5.53E-05 | 4.65278  |
| SLC25A6   | -0.48161 | 9.577926 | -11.6038 | 5.67E-06 | 7.00E-05 | 4.279622 |
| HS3ST3A1  | -0.48138 | 6.48576  | -8.58306 | 4.49E-05 | 0.000321 | 1.986939 |
| PPP2R4    | -0.48108 | 8.720782 | -10.6843 | 1.01E-05 | 0.000106 | 3.645167 |
| G2E3      | -0.48047 | 6.576471 | -8.3429  | 5.43E-05 | 0.000371 | 1.775595 |
| SMARCA2   | -0.48038 | 6.333649 | -12.9603 | 2.61E-06 | 4.09E-05 | 5.133998 |
| AUNIP     | -0.47946 | 6.279107 | -8.19716 | 6.11E-05 | 0.000405 | 1.644848 |
| FAM76A    | -0.47899 | 5.174031 | -3.98964 | 0.004808 | 0.014249 | -3.16521 |
| FAM98B    | -0.4787  | 9.516943 | -12.7015 | 3.01E-06 | 4.53E-05 | 4.977819 |
| PDLIM3    | -0.47808 | 6.189916 | -9.39248 | 2.44E-05 | 0.000203 | 2.664052 |
| SEH1L     | -0.47799 | 8.2884   | -10.5418 | 1.10E-05 | 0.000114 | 3.54239  |
| GLUD1     | -0.47798 | 7.90757  | -5.51866 | 0.000765 | 0.003064 | -1.15468 |
| HPSE      | -0.47743 | 5.264008 | -7.31652 | 0.000129 | 0.000729 | 0.811981 |
| PANK4     | -0.47715 | 7.313179 | -9.58236 | 2.13E-05 | 0.000183 | 2.815533 |
| RTN3      | -0.47696 | 9.979286 | -13.4897 | 1.97E-06 | 3.38E-05 | 5.444222 |
| LMNB2     | -0.47686 | 8.539573 | -13.1238 | 2.39E-06 | 3.85E-05 | 5.231137 |
| DBF4B     | -0.47681 | 7.164162 | -8.03055 | 7.00E-05 | 0.00045  | 1.493014 |
| CDK2AP2   | -0.47659 | 8.51261  | -12.7903 | 2.87E-06 | 4.37E-05 | 5.031752 |
| AKR1C1 // | -0.47594 | 6.435901 | -8.44715 | 5.00E-05 | 0.000348 | 1.867956 |
| HACD3     | -0.47526 | 10.77435 | -13.3249 | 2.15E-06 | 3.59E-05 | 5.348964 |

|           |          |          |          |          |          |          |
|-----------|----------|----------|----------|----------|----------|----------|
| PTDSS1    | -0.47519 | 7.754685 | -9.25117 | 2.70E-05 | 0.000218 | 2.549568 |
| SLC1A5    | -0.47483 | 9.516181 | -12.0079 | 4.46E-06 | 5.92E-05 | 4.543713 |
| MIS18A    | -0.4747  | 6.902949 | -9.34039 | 2.53E-05 | 0.000208 | 2.622025 |
| PPP1R35   | -0.4744  | 9.082622 | -12.0588 | 4.33E-06 | 5.81E-05 | 4.576332 |
| C11orf95  | -0.47426 | 7.698727 | -13.1318 | 2.38E-06 | 3.84E-05 | 5.235812 |
| ACKR3     | -0.47424 | 4.150227 | -5.72139 | 0.000614 | 0.002568 | -0.91269 |
| C4orf33   | -0.47415 | 6.635145 | -11.8778 | 4.82E-06 | 6.23E-05 | 4.459604 |
| ANKRD28   | -0.47407 | 8.344027 | -13.3146 | 2.16E-06 | 3.60E-05 | 5.342937 |
| MIPOL1    | -0.47393 | 3.397363 | -7.30442 | 0.000131 | 0.000735 | 0.799994 |
| NXT1      | -0.47391 | 8.980925 | -12.0278 | 4.41E-06 | 5.88E-05 | 4.556503 |
| LPCAT3    | -0.47387 | 7.840653 | -10.8206 | 9.22E-06 | 9.89E-05 | 3.742329 |
| HFE       | -0.47383 | 6.323852 | -5.75219 | 0.000594 | 0.002498 | -0.87641 |
| VTI1B     | -0.47376 | 6.392313 | -4.66865 | 0.002039 | 0.00693  | -2.23137 |
| HOXC5     | -0.47354 | 6.863653 | -11.0762 | 7.84E-06 | 8.81E-05 | 3.921513 |
| TTC32     | -0.4734  | 7.476901 | -9.22644 | 2.75E-05 | 0.000221 | 2.52938  |
| LAMP2     | -0.47336 | 4.867859 | -12.4353 | 3.49E-06 | 4.99E-05 | 4.813947 |
| TUBB4A    | -0.47321 | 5.97079  | -4.2643  | 0.00337  | 0.010575 | -2.77967 |
| PRRX1     | -0.47316 | 8.173082 | -10.2711 | 1.32E-05 | 0.000129 | 3.343555 |
| GTPBP6    | -0.4729  | 7.063293 | -11.9035 | 4.75E-06 | 6.17E-05 | 4.476283 |
| CCDC77    | -0.47252 | 7.434972 | -12.4092 | 3.55E-06 | 5.04E-05 | 4.797697 |
| ATXN1L    | -0.47231 | 7.902366 | -11.8228 | 4.98E-06 | 6.38E-05 | 4.42383  |
| INPP5A    | -0.47217 | 7.752987 | -10.9789 | 8.34E-06 | 9.17E-05 | 3.853783 |
| AAAS      | -0.47208 | 7.858409 | -11.5169 | 5.98E-06 | 7.25E-05 | 4.221685 |
| SSSCA1    | -0.47171 | 9.941124 | -10.1371 | 1.45E-05 | 0.000138 | 3.243331 |
| PTTG2     | -0.47169 | 5.328659 | -5.87559 | 0.000522 | 0.002248 | -0.7323  |
| NHSL1     | -0.47156 | 8.037083 | -12.0076 | 4.46E-06 | 5.92E-05 | 4.543485 |
| TULP4     | -0.47144 | 7.209988 | -6.62163 | 0.000246 | 0.001214 | 0.097759 |
| VSIG10    | -0.47113 | 5.707945 | -4.75633 | 0.001834 | 0.006342 | -2.11558 |
| CWF19L1   | -0.47107 | 7.267875 | -9.81128 | 1.81E-05 | 0.000163 | 2.994679 |
| LAMTOR3   | -0.47105 | 5.213657 | -7.74101 | 8.93E-05 | 0.000545 | 1.222921 |
| BCL9      | -0.47092 | 6.159792 | -11.5634 | 5.81E-06 | 7.12E-05 | 4.252745 |
| ITGA9     | -0.47091 | 4.279564 | -9.14203 | 2.93E-05 | 0.000232 | 2.460102 |
| DNAH11    | -0.47087 | 7.444753 | -10.4901 | 1.14E-05 | 0.000116 | 3.504759 |
| ICAM5     | -0.4702  | 5.751199 | -6.81946 | 0.000204 | 0.001046 | 0.306602 |
| NBN       | -0.47008 | 7.997699 | -7.27216 | 0.000135 | 0.000752 | 0.767963 |
| THEM4     | -0.47    | 7.523807 | -11.6677 | 5.46E-06 | 6.82E-05 | 4.321984 |
| LAS1L     | -0.46991 | 7.899781 | -11.0012 | 8.22E-06 | 9.10E-05 | 3.869372 |
| RILP      | -0.46989 | 6.660033 | -7.27923 | 0.000134 | 0.000748 | 0.774994 |
| LOC286052 | -0.46978 | 5.40807  | -10.1099 | 1.47E-05 | 0.00014  | 3.22283  |
| EME1      | -0.46971 | 8.205088 | -10.7907 | 9.40E-06 | 0.0001   | 3.721085 |
| ADD2      | -0.46924 | 6.518536 | -8.41912 | 5.11E-05 | 0.000354 | 1.843211 |
| CDKN2C    | -0.46882 | 8.094511 | -9.08143 | 3.07E-05 | 0.00024  | 2.410019 |
| TMEM187   | -0.46882 | 5.772849 | -5.29465 | 0.000981 | 0.003759 | -1.42858 |
| FAM161A   | -0.46875 | 5.944988 | -9.39299 | 2.44E-05 | 0.000203 | 2.664466 |
| POR       | -0.46853 | 6.982587 | -8.61332 | 4.38E-05 | 0.000315 | 2.013224 |
| C1orf21   | -0.46838 | 4.808286 | -8.79076 | 3.82E-05 | 0.000284 | 2.165744 |
| TNFAIP1   | -0.46825 | 7.829133 | -11.7607 | 5.16E-06 | 6.56E-05 | 4.383169 |
| ATP8B2    | -0.46822 | 7.579969 | -12.1974 | 4.00E-06 | 5.49E-05 | 4.664666 |
| CDK16     | -0.46818 | 7.662818 | -10.3956 | 1.22E-05 | 0.000121 | 3.435596 |
| BPTF      | -0.46809 | 4.742282 | -5.69755 | 0.00063  | 0.002621 | -0.94085 |
| HLA-DPB1  | -0.46767 | 7.705549 | -10.9896 | 8.28E-06 | 9.14E-05 | 3.861241 |

|           |          |          |          |          |          |          |
|-----------|----------|----------|----------|----------|----------|----------|
| CD83      | -0.46759 | 6.453049 | -6.33485 | 0.000326 | 0.001523 | -0.21318 |
| TYW1      | -0.46743 | 8.132115 | -11.1773 | 7.36E-06 | 8.43E-05 | 3.991378 |
| PTTG3P    | -0.46685 | 6.528364 | -12.5784 | 3.22E-06 | 4.73E-05 | 4.902479 |
| ZBTB42    | -0.46661 | 4.44676  | -5.13473 | 0.001176 | 0.004375 | -1.62839 |
| PITPNA    | -0.46655 | 9.010657 | -9.73486 | 1.91E-05 | 0.00017  | 2.935296 |
| HEXIM1    | -0.46649 | 7.3282   | -11.5551 | 5.84E-06 | 7.14E-05 | 4.247237 |
| PREB      | -0.46624 | 6.70538  | -10.1875 | 1.40E-05 | 0.000135 | 3.281181 |
| RAD51     | -0.46619 | 7.569714 | -12.3346 | 3.70E-06 | 5.20E-05 | 4.75107  |
| C17orf96  | -0.46597 | 5.4897   | -6.68806 | 0.000231 | 0.001153 | 0.168392 |
| LOC44004C | -0.46569 | 5.208514 | -5.34423 | 0.000928 | 0.003592 | -1.36736 |
| EP400     | -0.46568 | 7.634486 | -9.76175 | 1.87E-05 | 0.000167 | 2.956236 |
| MINOS1-NE | -0.46554 | 7.810223 | -12.1591 | 4.09E-06 | 5.57E-05 | 4.640345 |
| EDEM2     | -0.46524 | 6.897345 | -11.1775 | 7.36E-06 | 8.43E-05 | 3.991515 |
| ZNF90     | -0.46515 | 3.240126 | -4.30302 | 0.003209 | 0.010154 | -2.72616 |
| C19orf25  | -0.46396 | 6.903103 | -11.2633 | 6.98E-06 | 8.12E-05 | 4.050329 |
| HIRIP3    | -0.4637  | 7.764818 | -12.3186 | 3.73E-06 | 5.24E-05 | 4.741033 |
| SLC39A7   | -0.46352 | 4.677517 | -7.96707 | 7.38E-05 | 0.000469 | 1.434482 |
| NT5M      | -0.46352 | 5.238414 | -9.39319 | 2.44E-05 | 0.000203 | 2.664623 |
| NSMCE4A   | -0.46345 | 9.14663  | -13.4624 | 2.00E-06 | 3.42E-05 | 5.428525 |
| NRGN      | -0.46338 | 7.255198 | -12.089  | 4.26E-06 | 5.72E-05 | 4.595694 |
| IDH1      | -0.4631  | 8.383369 | -11.9793 | 4.54E-06 | 5.99E-05 | 4.525316 |
| TARDBP    | -0.46309 | 7.197663 | -9.49656 | 2.26E-05 | 0.000192 | 2.747419 |
| ELAVL1    | -0.46296 | 5.261187 | -7.76365 | 8.76E-05 | 0.000537 | 1.244338 |
| PSMC2     | -0.46267 | 5.698346 | -7.17153 | 0.000147 | 0.000809 | 0.667344 |
| RTFDC1    | -0.46264 | 9.266984 | -11.0408 | 8.02E-06 | 8.96E-05 | 3.896936 |
| ZIC5      | -0.46259 | 3.599527 | -3.24869 | 0.013252 | 0.033124 | -4.25275 |
| TMED10    | -0.46216 | 7.703675 | -11.3184 | 6.74E-06 | 7.92E-05 | 4.087866 |
| KCTD15    | -0.46135 | 7.595382 | -12.813  | 2.83E-06 | 4.33E-05 | 5.045487 |
| MAGOHB    | -0.46112 | 4.459107 | -4.51003 | 0.002476 | 0.00815  | -2.44369 |
| GBAS      | -0.46079 | 8.664054 | -9.55924 | 2.16E-05 | 0.000185 | 2.797234 |
| APLP1     | -0.46074 | 5.536013 | -4.66815 | 0.00204  | 0.006932 | -2.23203 |
| XYLT1     | -0.46073 | 3.434749 | -5.57933 | 0.000716 | 0.002908 | -1.08168 |
| MAU2      | -0.46057 | 8.568154 | -11.8718 | 4.83E-06 | 6.25E-05 | 4.455739 |
| EIF2D     | -0.46057 | 8.926502 | -11.6354 | 5.56E-06 | 6.91E-05 | 4.300581 |
| TENM3     | -0.46025 | 4.798453 | -8.07321 | 6.76E-05 | 0.000438 | 1.532136 |
| HSPE1     | -0.46017 | 8.605344 | -13.8028 | 1.67E-06 | 3.05E-05 | 5.622124 |
| PRAME     | -0.45995 | 8.838501 | -12.2065 | 3.98E-06 | 5.46E-05 | 4.670428 |
| SCARA3    | -0.45992 | 5.109729 | -7.26355 | 0.000136 | 0.000756 | 0.759395 |
| RPS25     | -0.45975 | 8.876377 | -8.60779 | 4.40E-05 | 0.000316 | 2.008421 |
| COX15     | -0.45973 | 6.470025 | -6.56007 | 0.000261 | 0.001273 | 0.03184  |
| CASP7     | -0.45972 | 6.854635 | -9.75683 | 1.88E-05 | 0.000168 | 2.952413 |
| COQ7      | -0.45957 | 6.918687 | -9.43286 | 2.37E-05 | 0.000198 | 2.69649  |
| C7orf73   | -0.45951 | 6.013572 | -6.75813 | 0.000216 | 0.001095 | 0.242338 |
| SLC35B2   | -0.45936 | 6.704976 | -7.9004  | 7.81E-05 | 0.00049  | 1.372599 |
| HAUS5     | -0.45933 | 5.578091 | -7.54682 | 0.000106 | 0.000621 | 1.037197 |
| SIRT5     | -0.45919 | 5.466083 | -7.41426 | 0.000119 | 0.00068  | 0.908232 |
| NAP1L4    | -0.45913 | 8.095358 | -10.3718 | 1.24E-05 | 0.000123 | 3.41802  |
| METTL20   | -0.45896 | 3.874875 | -11.0346 | 8.05E-06 | 8.98E-05 | 3.892621 |
| GABPA     | -0.45875 | 7.420614 | -8.0776  | 6.74E-05 | 0.000437 | 1.536148 |
| WIZ       | -0.45853 | 6.118728 | -7.37583 | 0.000123 | 0.000697 | 0.870505 |
| TBL3      | -0.45841 | 7.580825 | -10.0136 | 1.57E-05 | 0.000147 | 3.149965 |

|           |          |          |          |          |          |          |
|-----------|----------|----------|----------|----------|----------|----------|
| NDUFA10   | -0.4582  | 6.283401 | -6.64926 | 0.00024  | 0.001188 | 0.1272   |
| GTF3C3    | -0.45786 | 4.613736 | -5.9563  | 0.00048  | 0.002095 | -0.63912 |
| FXYD3     | -0.45776 | 6.02823  | -10.2638 | 1.33E-05 | 0.000129 | 3.338073 |
| CCDC88A   | -0.45774 | 6.625815 | -8.46687 | 4.92E-05 | 0.000344 | 1.885319 |
| HTRA3     | -0.45769 | 5.694757 | -6.18469 | 0.000379 | 0.001725 | -0.37998 |
| CERK      | -0.45744 | 7.846428 | -9.15258 | 2.91E-05 | 0.00023  | 2.468793 |
| FUBP3     | -0.4574  | 6.812013 | -8.17629 | 6.21E-05 | 0.00041  | 1.625969 |
| MED9      | -0.45715 | 5.258196 | -4.54071 | 0.002384 | 0.007893 | -2.40234 |
| SMIM14    | -0.45714 | 6.490745 | -8.59467 | 4.45E-05 | 0.000318 | 1.997034 |
| PIGM      | -0.45678 | 7.571828 | -11.1339 | 7.56E-06 | 8.60E-05 | 3.961475 |
| FAHD2A    | -0.45655 | 7.674141 | -11.7807 | 5.10E-06 | 6.50E-05 | 4.396282 |
| BAZ1B     | -0.45641 | 9.111603 | -12.7501 | 2.93E-06 | 4.44E-05 | 5.007387 |
| PTPMT1    | -0.45638 | 8.530386 | -8.57661 | 4.51E-05 | 0.000322 | 1.981335 |
| RBL1      | -0.4563  | 5.204544 | -7.89308 | 7.86E-05 | 0.000492 | 1.365779 |
| IMPACT    | -0.45575 | 5.9995   | -8.12825 | 6.46E-05 | 0.000423 | 1.582361 |
| RGMA      | -0.45539 | 6.604102 | -8.93368 | 3.43E-05 | 0.000261 | 2.286707 |
| DPYSL5    | -0.45513 | 5.072553 | -8.98041 | 3.31E-05 | 0.000254 | 2.325899 |
| ADAMTS16  | -0.45447 | 4.034963 | -4.9976  | 0.001379 | 0.004991 | -1.80258 |
| HNRNPF    | -0.45446 | 7.346617 | -5.9065  | 0.000505 | 0.002187 | -0.69651 |
| STX10     | -0.45441 | 8.833252 | -13.722  | 1.75E-06 | 3.14E-05 | 5.576641 |
| CXorf40A  | -0.45438 | 6.733535 | -8.98192 | 3.30E-05 | 0.000254 | 2.327166 |
| NFYC      | -0.45437 | 7.703494 | -10.8791 | 8.88E-06 | 9.61E-05 | 3.783712 |
| SNHG12 // | -0.45432 | 7.402561 | -11.6727 | 5.44E-06 | 6.81E-05 | 4.325277 |
| TFAP2C    | -0.45423 | 8.891697 | -12.263  | 3.85E-06 | 5.34E-05 | 4.706068 |
| ALG10 /// | -0.45419 | 5.825175 | -13.8185 | 1.66E-06 | 3.03E-05 | 5.630938 |
| LDLRAD3   | -0.45409 | 8.972505 | -12.2954 | 3.78E-06 | 5.28E-05 | 4.726463 |
| GPAM      | -0.45397 | 6.709133 | -8.05221 | 6.88E-05 | 0.000444 | 1.51289  |
| PPIP5K2   | -0.45362 | 8.149221 | -10.4975 | 1.14E-05 | 0.000116 | 3.510129 |
| PXMP4     | -0.45352 | 6.79043  | -7.64169 | 9.73E-05 | 0.000582 | 1.128404 |
| SLC20A1   | -0.45351 | 10.906   | -13.7417 | 1.73E-06 | 3.11E-05 | 5.587768 |
| MYH10     | -0.4534  | 8.49062  | -12.0445 | 4.37E-06 | 5.84E-05 | 4.5672   |
| PPM1F     | -0.4534  | 8.508487 | -11.4878 | 6.08E-06 | 7.34E-05 | 4.202195 |
| OAS2 ///  | -0.45337 | 7.956019 | -9.93442 | 1.66E-05 | 0.000153 | 3.089514 |
| UBALD2    | -0.45313 | 7.690703 | -9.42195 | 2.39E-05 | 0.000199 | 2.687737 |
| OTX1      | -0.45311 | 6.084848 | -5.74633 | 0.000598 | 0.002511 | -0.88331 |
| PAGR1     | -0.45302 | 6.903923 | -7.59146 | 0.000102 | 0.000603 | 1.080223 |
| FADS2     | -0.45301 | 6.791145 | -10.2723 | 1.32E-05 | 0.000129 | 3.344397 |
| EID2B     | -0.45278 | 5.185652 | -3.89098 | 0.005478 | 0.015872 | -3.30619 |
| HMG20A    | -0.45264 | 8.161804 | -12.4941 | 3.38E-06 | 4.88E-05 | 4.850453 |
| MPLKIP    | -0.45212 | 9.732175 | -10.0835 | 1.50E-05 | 0.000142 | 3.202899 |
| WDR34     | -0.452   | 7.651154 | -11.6901 | 5.38E-06 | 6.76E-05 | 4.336714 |
| NUDT1     | -0.45198 | 7.952148 | -8.85023 | 3.65E-05 | 0.000274 | 2.216284 |
| CMTR1     | -0.45191 | 7.488257 | -10.4033 | 1.21E-05 | 0.000121 | 3.441216 |
| ALG14     | -0.45171 | 7.14654  | -10.7737 | 9.50E-06 | 0.000101 | 3.709005 |
| VAPA      | -0.45108 | 7.603566 | -8.99505 | 3.27E-05 | 0.000252 | 2.33814  |
| THAP10    | -0.45036 | 7.154888 | -11.0557 | 7.94E-06 | 8.89E-05 | 3.907291 |
| THOP1     | -0.45023 | 7.2766   | -11.0996 | 7.73E-06 | 8.73E-05 | 3.937778 |
| ZBTB44    | -0.45001 | 8.195727 | -8.84176 | 3.68E-05 | 0.000276 | 2.209102 |
| CDON      | -0.44998 | 6.291135 | -12.0985 | 4.23E-06 | 5.70E-05 | 4.60177  |
| DCXR      | -0.44926 | 8.67584  | -9.54675 | 2.18E-05 | 0.000186 | 2.787332 |
| BCORL1    | -0.44888 | 6.350405 | -9.49361 | 2.27E-05 | 0.000192 | 2.745069 |

|           |          |          |          |          |          |          |
|-----------|----------|----------|----------|----------|----------|----------|
| CIB2      | -0.44878 | 4.836579 | -3.3313  | 0.01179  | 0.03009  | -4.12854 |
| ST6GAL1   | -0.44846 | 8.291274 | -10.5225 | 1.12E-05 | 0.000115 | 3.52835  |
| POMK      | -0.44825 | 5.949162 | -7.5356  | 0.000107 | 0.000626 | 1.026354 |
| PNKP      | -0.44822 | 8.004557 | -10.4708 | 1.16E-05 | 0.000117 | 3.490654 |
| LHX6      | -0.44799 | 5.205696 | -3.38517 | 0.01093  | 0.028269 | -4.04788 |
| NXT2      | -0.44792 | 5.591824 | -6.05733 | 0.000432 | 0.001921 | -0.52367 |
| CLIP2     | -0.44737 | 6.126121 | -6.66728 | 0.000236 | 0.001172 | 0.146346 |
| CAND2     | -0.44714 | 5.544262 | -4.81632 | 0.001707 | 0.005969 | -2.03698 |
| NDUFS3 // | -0.44683 | 8.766045 | -11.2617 | 6.99E-06 | 8.13E-05 | 4.049194 |
| TWF2      | -0.44679 | 8.49869  | -11.2823 | 6.90E-06 | 8.05E-05 | 4.063309 |
| RNPS1     | -0.44674 | 7.986746 | -7.99038 | 7.24E-05 | 0.000462 | 1.45602  |
| UBE2J1    | -0.44668 | 6.54445  | -9.78752 | 1.84E-05 | 0.000165 | 2.976263 |
| PIN4      | -0.4466  | 8.644049 | -9.9604  | 1.63E-05 | 0.000151 | 3.109393 |
| H2AFZ     | -0.44659 | 11.93843 | -13.0189 | 2.53E-06 | 4.00E-05 | 5.168963 |
| FRMD4A    | -0.44643 | 7.490131 | -11.6754 | 5.43E-06 | 6.80E-05 | 4.327039 |
| LMAN1     | -0.44617 | 7.573802 | -9.7757  | 1.86E-05 | 0.000166 | 2.967085 |
| GTSE1 /// | -0.44617 | 7.149295 | -7.94884 | 7.50E-05 | 0.000475 | 1.417605 |
| GRK6      | -0.4458  | 6.135358 | -9.41795 | 2.39E-05 | 0.0002   | 2.68453  |
| SERPINH1  | -0.44574 | 7.107373 | -12.245  | 3.89E-06 | 5.38E-05 | 4.694739 |
| PAQR9     | -0.44534 | 4.130838 | -8.63823 | 4.30E-05 | 0.000311 | 2.034792 |
| AKIRIN2   | -0.44511 | 7.736798 | -11.2625 | 6.98E-06 | 8.12E-05 | 4.049761 |
| PCM1      | -0.44489 | 4.596852 | -12.3387 | 3.69E-06 | 5.19E-05 | 4.753654 |
| ICMT      | -0.44375 | 8.036585 | -12.5392 | 3.30E-06 | 4.80E-05 | 4.87835  |
| FANCD2    | -0.4433  | 7.626696 | -13.1138 | 2.40E-06 | 3.86E-05 | 5.225222 |
| PDIA4     | -0.44303 | 8.525994 | -10.8648 | 8.96E-06 | 9.67E-05 | 3.773608 |
| GPX8      | -0.44276 | 8.176736 | -9.48262 | 2.29E-05 | 0.000193 | 2.736301 |
| NOTCH1    | -0.44255 | 7.384025 | -11.1658 | 7.41E-06 | 8.47E-05 | 3.98348  |
| PDCL      | -0.4425  | 6.998187 | -10.1747 | 1.41E-05 | 0.000135 | 3.271597 |
| AP1S1     | -0.44238 | 7.662902 | -10.2935 | 1.30E-05 | 0.000128 | 3.360153 |
| ZZZ3      | -0.44237 | 7.37083  | -8.68178 | 4.16E-05 | 0.000303 | 2.072381 |
| TSEN2     | -0.44232 | 3.861127 | -5.58307 | 0.000713 | 0.002899 | -1.07719 |
| RPL31     | -0.44224 | 6.570421 | -9.77258 | 1.86E-05 | 0.000166 | 2.964656 |
| C19orf60  | -0.44195 | 8.592696 | -11.0107 | 8.17E-06 | 9.06E-05 | 3.875975 |
| EHMT2     | -0.44185 | 7.308125 | -7.68532 | 9.37E-05 | 0.000566 | 1.170047 |
| COMMD4    | -0.44166 | 9.261844 | -11.7286 | 5.26E-06 | 6.65E-05 | 4.362071 |
| ACLY      | -0.44157 | 8.49431  | -8.28567 | 5.69E-05 | 0.000384 | 1.724481 |
| LOC101929 | -0.44151 | 3.519625 | -7.68812 | 9.35E-05 | 0.000565 | 1.17271  |
| BET1      | -0.44144 | 4.263849 | -4.59155 | 0.00224  | 0.007488 | -2.33412 |
| SLC10A4   | -0.44101 | 4.624176 | -9.44814 | 2.34E-05 | 0.000197 | 2.708739 |
| SMARCAL1  | -0.44076 | 7.046118 | -8.71499 | 4.05E-05 | 0.000297 | 2.100941 |
| ATP5C1    | -0.44075 | 6.686514 | -5.49829 | 0.000782 | 0.003119 | -1.1793  |
| SOBP      | -0.44045 | 4.635193 | -7.94449 | 7.52E-05 | 0.000476 | 1.413569 |
| DDX11     | -0.44026 | 7.533475 | -8.89403 | 3.53E-05 | 0.000267 | 2.253321 |
| REEP4     | -0.44013 | 7.0892   | -6.26384 | 0.00035  | 0.001615 | -0.29171 |
| MAP3K4    | -0.4401  | 7.078159 | -9.25252 | 2.70E-05 | 0.000218 | 2.550671 |
| HOXA2     | -0.43962 | 3.900296 | -6.11607 | 0.000407 | 0.001828 | -0.45715 |
| SLC25A37  | -0.43938 | 7.539644 | -8.61049 | 4.39E-05 | 0.000316 | 2.01077  |
| SREK1IP1  | -0.43906 | 6.599297 | -8.93366 | 3.43E-05 | 0.000261 | 2.286689 |
| LAPTM4A   | -0.43874 | 10.01872 | -8.81124 | 3.76E-05 | 0.000281 | 2.183182 |
| UQCRC2    | -0.43828 | 8.543806 | -11.5069 | 6.01E-06 | 7.28E-05 | 4.21503  |
| USP14     | -0.4381  | 7.793204 | -9.79309 | 1.83E-05 | 0.000164 | 2.980584 |

|           |          |          |          |          |          |          |
|-----------|----------|----------|----------|----------|----------|----------|
| SRGAP2    | -0.43809 | 8.113726 | -9.50241 | 2.25E-05 | 0.000191 | 2.752079 |
| VEGFB     | -0.43796 | 8.655681 | -11.5364 | 5.91E-06 | 7.19E-05 | 4.234773 |
| RHCE      | -0.43782 | 4.521315 | -5.97481 | 0.00047  | 0.002062 | -0.61787 |
| ANKH      | -0.43769 | 2.946664 | -3.13173 | 0.015659 | 0.038004 | -4.42959 |
| COR07-PAM | -0.43766 | 8.411149 | -9.94393 | 1.65E-05 | 0.000152 | 3.096798 |
| DNMT1     | -0.43725 | 9.700472 | -9.51917 | 2.23E-05 | 0.000189 | 2.765423 |
| SORD      | -0.437   | 8.701917 | -7.952   | 7.48E-05 | 0.000474 | 1.420525 |
| BAG5      | -0.43682 | 5.685287 | -12.7183 | 2.98E-06 | 4.50E-05 | 4.988047 |
| VANGL2    | -0.43634 | 6.486774 | -9.31653 | 2.58E-05 | 0.00021  | 2.602712 |
| NCOR2     | -0.43628 | 8.347291 | -13.0225 | 2.53E-06 | 4.00E-05 | 5.171074 |
| BGN       | -0.43587 | 7.221108 | -9.95066 | 1.64E-05 | 0.000152 | 3.101946 |
| AK2       | -0.4358  | 9.276829 | -11.2925 | 6.85E-06 | 8.01E-05 | 4.070256 |
| P3H4      | -0.43575 | 6.553062 | -7.70453 | 9.22E-05 | 0.000559 | 1.188322 |
| DNAJC24   | -0.43573 | 5.313602 | -4.65802 | 0.002065 | 0.007001 | -2.24549 |
| STK25     | -0.43561 | 7.966095 | -10.0683 | 1.52E-05 | 0.000143 | 3.191457 |
| MF12      | -0.4354  | 7.094315 | -11.5465 | 5.87E-06 | 7.16E-05 | 4.241458 |
| SLC4A5    | -0.43522 | 3.593539 | -3.12934 | 0.015713 | 0.038111 | -4.43321 |
| LOC10537C | -0.43518 | 8.394956 | -12.3757 | 3.61E-06 | 5.11E-05 | 4.776818 |
| DLX6      | -0.43513 | 4.053715 | -3.44555 | 0.010046 | 0.026394 | -3.95782 |
| TMEM97    | -0.4349  | 8.463801 | -11.4503 | 6.22E-06 | 7.47E-05 | 4.177064 |
| PDE7A     | -0.43442 | 3.904036 | -3.33149 | 0.011787 | 0.030085 | -4.12825 |
| DHRS13    | -0.4342  | 6.458057 | -9.53723 | 2.20E-05 | 0.000187 | 2.779775 |
| MRPS34    | -0.43415 | 10.03068 | -11.6764 | 5.43E-06 | 6.80E-05 | 4.327733 |
| SOX18     | -0.43394 | 6.765527 | -9.3928  | 2.44E-05 | 0.000203 | 2.664313 |
| BOK       | -0.43384 | 6.096583 | -4.82613 | 0.001687 | 0.005911 | -2.02416 |
| SMARCAD1  | -0.43382 | 8.049253 | -7.99664 | 7.20E-05 | 0.00046  | 1.461795 |
| HELLS     | -0.43376 | 8.068338 | -11.7323 | 5.25E-06 | 6.64E-05 | 4.364556 |
| KLF11     | -0.43332 | 6.525535 | -8.38961 | 5.23E-05 | 0.00036  | 1.817092 |
| HMGB2     | -0.43329 | 10.96045 | -10.1873 | 1.40E-05 | 0.000135 | 3.281043 |
| MYO18A    | -0.4332  | 5.425594 | -7.49376 | 0.000111 | 0.000644 | 0.985795 |
| CENPJ     | -0.43293 | 7.174604 | -8.93963 | 3.41E-05 | 0.00026  | 2.291706 |
| ANKRD27   | -0.43291 | 8.489631 | -12.5918 | 3.20E-06 | 4.70E-05 | 4.91073  |
| CANT1     | -0.43291 | 8.165909 | -13.2319 | 2.26E-06 | 3.71E-05 | 5.294691 |
| RABEP2    | -0.43269 | 3.967994 | -5.27304 | 0.001005 | 0.003836 | -1.45537 |
| MBOAT7    | -0.4326  | 8.210717 | -9.00545 | 3.25E-05 | 0.00025  | 2.346827 |
| ICAM3     | -0.43252 | 7.407851 | -9.77112 | 1.86E-05 | 0.000166 | 2.963522 |
| LHX1      | -0.43234 | 7.339938 | -7.32267 | 0.000129 | 0.000725 | 0.818062 |
| CTDSPL    | -0.43209 | 6.760133 | -5.90868 | 0.000504 | 0.002184 | -0.694   |
| ZNF85     | -0.43159 | 7.167696 | -5.94276 | 0.000486 | 0.002121 | -0.65469 |
| AAMP      | -0.43159 | 6.846575 | -5.87092 | 0.000524 | 0.002256 | -0.73772 |
| FAM192A   | -0.43146 | 7.457471 | -6.90398 | 0.000189 | 0.000983 | 0.394462 |
| HYLS1     | -0.43134 | 8.545592 | -11.2567 | 7.01E-06 | 8.14E-05 | 4.045792 |
| SPATC1L   | -0.43097 | 6.179046 | -8.52989 | 4.68E-05 | 0.00033  | 1.940584 |
| HNRNPL    | -0.43036 | 9.156212 | -11.0955 | 7.75E-06 | 8.75E-05 | 3.934946 |
| NATD1     | -0.43031 | 6.217685 | -10.2023 | 1.38E-05 | 0.000134 | 3.292231 |
| TM6SF1    | -0.43008 | 5.580772 | -7.26672 | 0.000135 | 0.000755 | 0.762553 |
| RAD21     | -0.42997 | 9.241996 | -9.3505  | 2.51E-05 | 0.000207 | 2.630202 |
| HSPA2     | -0.42996 | 5.741825 | -5.63666 | 0.000673 | 0.002762 | -1.01315 |
| IKBKB     | -0.42992 | 6.61833  | -8.90695 | 3.50E-05 | 0.000265 | 2.264214 |
| FBXO3     | -0.42982 | 5.527438 | -3.87668 | 0.005583 | 0.016125 | -3.32673 |
| PAPD7     | -0.42977 | 8.848902 | -11.6683 | 5.46E-06 | 6.82E-05 | 4.322356 |

|           |          |          |          |          |          |          |
|-----------|----------|----------|----------|----------|----------|----------|
| DEPDC4    | -0.4291  | 4.803337 | -3.299   | 0.01234  | 0.031261 | -4.17703 |
| MASTL     | -0.42906 | 7.343034 | -10.843  | 9.09E-06 | 9.77E-05 | 3.758219 |
| HEBP1     | -0.42904 | 6.95487  | -7.47161 | 0.000113 | 0.000653 | 0.964251 |
| TSHZ1     | -0.42904 | 7.669992 | -9.77583 | 1.86E-05 | 0.000166 | 2.967182 |
| BCL7C     | -0.42845 | 8.458253 | -10.8494 | 9.05E-06 | 9.75E-05 | 3.762738 |
| ECT2      | -0.42841 | 8.787102 | -11.2974 | 6.83E-06 | 7.99E-05 | 4.073601 |
| PAK2      | -0.42831 | 7.013636 | -11.0844 | 7.80E-06 | 8.78E-05 | 3.927254 |
| THBS4     | -0.42792 | 4.410801 | -9.62845 | 2.06E-05 | 0.000178 | 2.85191  |
| PAK1      | -0.4279  | 7.959007 | -12.1235 | 4.17E-06 | 5.65E-05 | 4.617662 |
| SLITRK3   | -0.42783 | 4.195401 | -3.28987 | 0.0125   | 0.031573 | -4.19076 |
| RASSF8    | -0.42675 | 6.853017 | -7.03884 | 0.000166 | 0.00089  | 0.532994 |
| ZNF670-ZN | -0.42654 | 6.964783 | -6.04638 | 0.000437 | 0.001939 | -0.53613 |
| TPM4      | -0.4263  | 8.566273 | -12.6072 | 3.17E-06 | 4.68E-05 | 4.920172 |
| TMEM251   | -0.42624 | 7.73293  | -9.18951 | 2.83E-05 | 0.000226 | 2.499137 |
| ZNF599    | -0.42619 | 4.804374 | -6.60591 | 0.00025  | 0.001228 | 0.080971 |
| CGREF1    | -0.42574 | 4.977343 | -4.33253 | 0.003091 | 0.009849 | -2.68552 |
| POM121    | -0.42558 | 8.859616 | -9.66137 | 2.01E-05 | 0.000176 | 2.877792 |
| CAPN1     | -0.42521 | 6.09047  | -7.20494 | 0.000143 | 0.000789 | 0.700865 |
| ACD       | -0.4251  | 8.336841 | -10.9919 | 8.27E-06 | 9.13E-05 | 3.862846 |
| WDR54     | -0.42433 | 9.598628 | -10.4395 | 1.18E-05 | 0.000119 | 3.467749 |
| HILPDA    | -0.42397 | 6.572462 | -9.40643 | 2.41E-05 | 0.000201 | 2.675276 |
| ATAD3A    | -0.4238  | 7.425983 | -9.50696 | 2.25E-05 | 0.000191 | 2.7557   |
| KLHL24    | -0.42372 | 6.079412 | -7.14128 | 0.000152 | 0.000826 | 0.636883 |
| NDRG3     | -0.42332 | 8.912253 | -10.5399 | 1.11E-05 | 0.000114 | 3.540984 |
| DAZAP1    | -0.42332 | 9.442462 | -11.014  | 8.15E-06 | 9.04E-05 | 3.878273 |
| USP43     | -0.42326 | 5.454639 | -4.48416 | 0.002557 | 0.008375 | -2.47865 |
| SCAMP1    | -0.42324 | 4.584853 | -8.01378 | 7.10E-05 | 0.000455 | 1.477587 |
| UBA52     | -0.42317 | 6.327138 | -7.34545 | 0.000126 | 0.000713 | 0.840576 |
| IRF2BP2   | -0.42298 | 6.941714 | -6.35075 | 0.000321 | 0.001504 | -0.19568 |
| ZDHHC12   | -0.42298 | 7.624787 | -11.5321 | 5.92E-06 | 7.20E-05 | 4.231844 |
| CTBP2     | -0.42281 | 7.146267 | -6.65295 | 0.000239 | 0.001185 | 0.131119 |
| VMA21     | -0.4227  | 9.4483   | -10.4574 | 1.17E-05 | 0.000118 | 3.480894 |
| FAM210A   | -0.42269 | 6.382463 | -6.73218 | 0.000222 | 0.001116 | 0.215024 |
| TFAP4     | -0.42243 | 7.18601  | -10.8182 | 9.23E-06 | 9.90E-05 | 3.740635 |
| SLC33A1   | -0.42238 | 6.141429 | -5.88626 | 0.000516 | 0.002226 | -0.71993 |
| IPW       | -0.42236 | 3.834469 | -6.42439 | 0.000299 | 0.001418 | -0.11503 |
| SPICE1    | -0.42155 | 6.299633 | -7.81626 | 8.38E-05 | 0.000518 | 1.293893 |
| GSG2      | -0.42142 | 6.243209 | -9.18629 | 2.84E-05 | 0.000226 | 2.496498 |
| LRRFIP1   | -0.42128 | 6.3594   | -4.79665 | 0.001748 | 0.00609  | -2.06268 |
| MATR3     | -0.42112 | 6.74191  | -10.3073 | 1.29E-05 | 0.000127 | 3.370425 |
| GAS1      | -0.42101 | 6.944997 | -8.71684 | 4.05E-05 | 0.000297 | 2.102524 |
| PXMP2     | -0.42096 | 8.086275 | -10.8706 | 8.93E-06 | 9.64E-05 | 3.777709 |
| PERP      | -0.42095 | 3.59191  | -5.36175 | 0.00091  | 0.003536 | -1.34582 |
| SNORD12B  | -0.42079 | 4.624776 | -4.76968 | 0.001805 | 0.006263 | -2.09803 |
| LACTB2    | -0.42076 | 8.260763 | -7.46782 | 0.000113 | 0.000655 | 0.960553 |
| PEF1      | -0.42049 | 8.641998 | -9.83448 | 1.78E-05 | 0.000161 | 3.012629 |
| SCAF11    | -0.42025 | 7.788767 | -12.29   | 3.79E-06 | 5.29E-05 | 4.723086 |
| SPINK2    | -0.41881 | 4.026417 | -5.48475 | 0.000794 | 0.003159 | -1.1957  |
| RPRD2     | -0.41867 | 6.831334 | -6.9019  | 0.000189 | 0.000984 | 0.392305 |
| PEX5      | -0.41848 | 8.120347 | -10.0026 | 1.59E-05 | 0.000148 | 3.141565 |
| POU3F2    | -0.41839 | 6.456178 | -8.22618 | 5.97E-05 | 0.000398 | 1.671031 |

|          |          |          |          |          |          |          |
|----------|----------|----------|----------|----------|----------|----------|
| TMEM242  | -0.41795 | 5.593543 | -6.68947 | 0.000231 | 0.001152 | 0.169884 |
| KAT8     | -0.41775 | 7.499735 | -8.48904 | 4.83E-05 | 0.000339 | 1.904801 |
| HNRNPCL2 | -0.41756 | 3.242622 | -9.95456 | 1.64E-05 | 0.000151 | 3.104927 |
| FLJ10038 | -0.41754 | 6.065824 | -5.15477 | 0.00115  | 0.004295 | -1.60314 |
| FSD1     | -0.41742 | 7.274084 | -10.8574 | 9.00E-06 | 9.71E-05 | 3.768371 |
| SGCB     | -0.41718 | 5.749594 | -10.1747 | 1.41E-05 | 0.000135 | 3.271546 |
| JPH1     | -0.41647 | 7.196538 | -11.4159 | 6.35E-06 | 7.57E-05 | 4.153889 |
| CEP152   | -0.41641 | 6.868451 | -9.28582 | 2.64E-05 | 0.000214 | 2.57778  |
| RAB6B    | -0.41616 | 5.953022 | -10.7924 | 9.39E-06 | 0.0001   | 3.722337 |
| SCD5     | -0.41596 | 6.270314 | -6.39886 | 0.000306 | 0.001447 | -0.14292 |
| KIAA0586 | -0.41596 | 6.845555 | -8.83474 | 3.69E-05 | 0.000277 | 2.20315  |
| BARX1    | -0.41575 | 6.544941 | -10.9008 | 8.76E-06 | 9.53E-05 | 3.799004 |
| FKBP5    | -0.41567 | 7.147685 | -9.66754 | 2.00E-05 | 0.000175 | 2.882637 |
| SHMT2    | -0.41564 | 9.656261 | -10.0501 | 1.53E-05 | 0.000144 | 3.177684 |
| CBX1     | -0.4151  | 9.07772  | -10.7946 | 9.37E-06 | 0.0001   | 3.723883 |
| LONP2    | -0.41485 | 8.033395 | -10.966  | 8.40E-06 | 9.24E-05 | 3.844731 |
| OGFOD3   | -0.41462 | 6.073678 | -7.11294 | 0.000155 | 0.000843 | 0.608256 |
| RASSF4   | -0.41461 | 5.312886 | -5.72824 | 0.00061  | 0.002552 | -0.90461 |
| POLA1    | -0.41461 | 7.910484 | -11.0944 | 7.75E-06 | 8.75E-05 | 3.934161 |
| PMS1     | -0.41459 | 7.319699 | -10.7841 | 9.44E-06 | 0.000101 | 3.716445 |
| KIF5C    | -0.41451 | 5.404023 | -3.80472 | 0.006147 | 0.017461 | -3.4305  |
| IDH3B    | -0.41449 | 8.975997 | -10.5284 | 1.11E-05 | 0.000114 | 3.532638 |
| PYCR1    | -0.4143  | 6.453751 | -7.39048 | 0.000121 | 0.000691 | 0.884909 |
| TIA1     | -0.41412 | 5.956485 | -9.32977 | 2.55E-05 | 0.000209 | 2.613436 |
| DOK4     | -0.41343 | 6.47519  | -8.88398 | 3.56E-05 | 0.000269 | 2.244835 |
| DHX40    | -0.41337 | 9.097528 | -9.91331 | 1.69E-05 | 0.000154 | 3.073337 |
| RPS14    | -0.41265 | 10.30496 | -9.91497 | 1.68E-05 | 0.000154 | 3.074609 |
| PHF5A    | -0.41258 | 4.022465 | -5.11598 | 0.001202 | 0.004455 | -1.65204 |
| CDKL3    | -0.41251 | 3.89276  | -4.0171  | 0.004638 | 0.01382  | -3.1262  |
| CCM2     | -0.41238 | 7.533414 | -10.3646 | 1.24E-05 | 0.000123 | 3.412705 |
| IFNA21   | -0.41194 | 3.883726 | -4.44558 | 0.002682 | 0.008728 | -2.53097 |
| ANAPC10  | -0.41185 | 7.309817 | -8.42739 | 5.08E-05 | 0.000352 | 1.850522 |
| SLC29A2  | -0.41145 | 5.916191 | -6.17632 | 0.000383 | 0.001737 | -0.38937 |
| PKNOX2   | -0.4114  | 5.354641 | -8.1187  | 6.51E-05 | 0.000426 | 1.573663 |
| TADA3    | -0.41127 | 5.02144  | -6.23623 | 0.00036  | 0.001651 | -0.32242 |
| RPS27A   | -0.4111  | 6.178407 | -7.3355  | 0.000127 | 0.000719 | 0.830749 |
| CARM1    | -0.4108  | 9.860764 | -11.791  | 5.07E-06 | 6.47E-05 | 4.403043 |
| MXI1     | -0.41059 | 4.738332 | -3.59883 | 0.008127 | 0.022097 | -3.73095 |
| UBQLN1   | -0.41027 | 10.28579 | -11.5053 | 6.02E-06 | 7.29E-05 | 4.213926 |
| SSR1     | -0.41016 | 7.857814 | -11.2008 | 7.25E-06 | 8.35E-05 | 4.00751  |
| CCDC102B | -0.41014 | 7.009093 | -7.83723 | 8.23E-05 | 0.000511 | 1.313571 |
| UQCC2    | -0.41    | 8.808921 | -7.99171 | 7.23E-05 | 0.000461 | 1.45724  |
| PPP2CA   | -0.40967 | 6.16286  | -9.01427 | 3.22E-05 | 0.000249 | 2.354183 |
| CSTF2    | -0.40949 | 6.715697 | -9.32872 | 2.55E-05 | 0.000209 | 2.612588 |
| SIN3A    | -0.40944 | 7.157047 | -9.4939  | 2.27E-05 | 0.000192 | 2.745299 |
| ALDH4A1  | -0.40943 | 5.304743 | -6.53991 | 0.000267 | 0.001293 | 0.010152 |
| FOXD3    | -0.4093  | 5.950345 | -7.9682  | 7.38E-05 | 0.000469 | 1.435527 |
| SUMO1    | -0.40928 | 6.811028 | -8.63773 | 4.30E-05 | 0.000311 | 2.03436  |
| SNN      | -0.40894 | 5.767252 | -5.15496 | 0.001149 | 0.004295 | -1.60291 |
| NRF1     | -0.40884 | 6.353018 | -7.54445 | 0.000106 | 0.000622 | 1.034906 |
| PPARG    | -0.4086  | 7.79437  | -7.83909 | 8.22E-05 | 0.000511 | 1.315317 |



|           |          |          |          |          |          |          |
|-----------|----------|----------|----------|----------|----------|----------|
| CLMP      | -0.4085  | 6.3226   | -6.06595 | 0.000428 | 0.001908 | -0.51388 |
| RTTN      | -0.40842 | 6.085687 | -7.48462 | 0.000112 | 0.000648 | 0.976911 |
| ST5       | -0.40838 | 7.210182 | -7.93571 | 7.58E-05 | 0.000479 | 1.405421 |
| SLITRK4   | -0.40811 | 6.724734 | -6.59754 | 0.000252 | 0.001236 | 0.072015 |
| N4BP2L1   | -0.40808 | 3.691517 | -11.301  | 6.82E-06 | 7.99E-05 | 4.075994 |
| PSMB2     | -0.40802 | 7.721765 | -7.952   | 7.48E-05 | 0.000474 | 1.420526 |
| CTDSP1    | -0.40794 | 5.229736 | -5.40861 | 0.000864 | 0.003388 | -1.28837 |
| TIMM21    | -0.40788 | 8.674531 | -9.34555 | 2.52E-05 | 0.000207 | 2.626205 |
| HAT1      | -0.40747 | 8.974266 | -7.68961 | 9.34E-05 | 0.000565 | 1.174127 |
| CSNK1E // | -0.40675 | 8.196096 | -8.27127 | 5.75E-05 | 0.000387 | 1.711572 |
| CD81      | -0.40672 | 9.824623 | -11.48   | 6.11E-06 | 7.37E-05 | 4.196963 |
| CDC42EP4  | -0.40665 | 7.830096 | -5.82542 | 0.00055  | 0.002346 | -0.79065 |
| HIST1H4I  | -0.40648 | 4.751723 | -4.3053  | 0.003199 | 0.010127 | -2.72302 |
| ATG4D     | -0.40639 | 6.881134 | -10.0322 | 1.55E-05 | 0.000145 | 3.164042 |
| CLASP2    | -0.40638 | 5.368984 | -9.15525 | 2.90E-05 | 0.00023  | 2.470984 |
| FOXG1     | -0.40615 | 3.179067 | -3.90184 | 0.005399 | 0.015689 | -3.29061 |
| ATP6AP1L  | -0.40614 | 5.194772 | -9.50864 | 2.24E-05 | 0.00019  | 2.757039 |
| RABAC1    | -0.40604 | 8.531539 | -10.8954 | 8.79E-06 | 9.54E-05 | 3.795155 |
| FAM156A / | -0.4055  | 6.023586 | -7.84351 | 8.19E-05 | 0.000509 | 1.319453 |
| GOLPH3    | -0.40531 | 9.259895 | -10.4542 | 1.17E-05 | 0.000118 | 3.478525 |
| PLEKHA8P1 | -0.4052  | 3.729373 | -3.84076 | 0.005857 | 0.016765 | -3.37845 |
| PITPNM1   | -0.40505 | 6.819881 | -9.63726 | 2.05E-05 | 0.000178 | 2.858843 |
| SAE1      | -0.40438 | 6.628117 | -10.4231 | 1.19E-05 | 0.00012  | 3.455734 |
| EED       | -0.40432 | 9.22054  | -11.0783 | 7.83E-06 | 8.80E-05 | 3.923005 |
| TMEM8B    | -0.40403 | 6.645364 | -8.2591  | 5.81E-05 | 0.00039  | 1.70065  |
| CRISPLD1  | -0.40392 | 6.410497 | -8.37553 | 5.29E-05 | 0.000363 | 1.804605 |
| MLST8     | -0.40391 | 7.883526 | -10.2471 | 1.34E-05 | 0.000131 | 3.325646 |
| FGFR1     | -0.4037  | 7.203068 | -9.40924 | 2.41E-05 | 0.000201 | 2.677534 |
| H3F3B     | -0.4037  | 8.76468  | -8.84523 | 3.67E-05 | 0.000275 | 2.212042 |
| FIGNL1    | -0.4036  | 8.116979 | -10.4783 | 1.15E-05 | 0.000117 | 3.496115 |
| CETN3     | -0.40307 | 9.597069 | -9.47198 | 2.30E-05 | 0.000194 | 2.727803 |
| FAM213B   | -0.40298 | 6.367555 | -4.64519 | 0.002098 | 0.007087 | -2.26255 |
| EFNA5     | -0.40287 | 7.280911 | -9.10575 | 3.01E-05 | 0.000236 | 2.430157 |
| SYNPO     | -0.40217 | 7.35244  | -9.43101 | 2.37E-05 | 0.000198 | 2.695011 |
| DCP1A     | -0.40198 | 8.529611 | -11.3245 | 6.72E-06 | 7.91E-05 | 4.091992 |
| SLC36A4   | -0.40169 | 7.955889 | -7.95819 | 7.44E-05 | 0.000472 | 1.426262 |
| DDX11 /// | -0.40168 | 5.295451 | -4.55441 | 0.002344 | 0.00778  | -2.38391 |
| HSPA8     | -0.40139 | 6.720958 | -8.16496 | 6.27E-05 | 0.000413 | 1.615704 |
| TBC1D22A  | -0.40135 | 5.368039 | -8.8872  | 3.55E-05 | 0.000268 | 2.247551 |
| HMCES     | -0.40129 | 5.04792  | -7.46321 | 0.000114 | 0.000657 | 0.956069 |
| NT5DC1    | -0.40127 | 6.273401 | -7.99464 | 7.22E-05 | 0.000461 | 1.459943 |
| CCSAP     | -0.40123 | 8.09034  | -8.14229 | 6.39E-05 | 0.000419 | 1.595125 |
| SLC35B4   | -0.40117 | 6.74689  | -9.58342 | 2.13E-05 | 0.000183 | 2.816373 |
| KHSRP     | -0.40106 | 9.772484 | -10.0421 | 1.54E-05 | 0.000145 | 3.171566 |
| HEATR5B   | -0.40075 | 7.096659 | -6.91384 | 0.000187 | 0.000977 | 0.404653 |
| MEAF6     | -0.40035 | 4.429747 | -6.50443 | 0.000276 | 0.001332 | -0.02813 |
| ARFGAP2   | -0.40033 | 5.661542 | -5.34635 | 0.000926 | 0.003584 | -1.36475 |
| PLAGL1    | -0.40029 | 5.181727 | -5.77044 | 0.000583 | 0.002459 | -0.85497 |
| PCYT1B    | -0.4002  | 4.329245 | -4.70341 | 0.001955 | 0.006693 | -2.18534 |
| SSNA1     | -0.39982 | 8.721739 | -8.18287 | 6.18E-05 | 0.000409 | 1.631925 |
| EFCAB11   | -0.39961 | 6.436258 | -7.98413 | 7.28E-05 | 0.000464 | 1.450246 |

|           |          |          |          |          |          |          |
|-----------|----------|----------|----------|----------|----------|----------|
| ZNF331    | -0.39951 | 6.064297 | -11.8545 | 4.88E-06 | 6.30E-05 | 4.44447  |
| UGT8      | -0.39947 | 6.957285 | -7.81204 | 8.41E-05 | 0.000519 | 1.289925 |
| PRPS2     | -0.39925 | 9.531598 | -11.9159 | 4.71E-06 | 6.13E-05 | 4.484349 |
| LDHAL6B   | -0.39914 | 5.81246  | -7.69979 | 9.25E-05 | 0.000561 | 1.183812 |
| ASRGL1    | -0.39912 | 6.342423 | -7.64638 | 9.69E-05 | 0.00058  | 1.132891 |
| DBI       | -0.39907 | 9.352183 | -10.1456 | 1.44E-05 | 0.000138 | 3.249758 |
| ELP6      | -0.39895 | 8.582648 | -11.194  | 7.28E-06 | 8.37E-05 | 4.002873 |
| LRRRC8A   | -0.39894 | 9.775429 | -10.469  | 1.16E-05 | 0.000117 | 3.489317 |
| PDS5B     | -0.39877 | 6.258691 | -9.45925 | 2.32E-05 | 0.000195 | 2.717625 |
| ALG11 /// | -0.39863 | 6.837284 | -8.26928 | 5.76E-05 | 0.000387 | 1.709789 |
| SLC16A1   | -0.39862 | 8.375532 | -9.67405 | 1.99E-05 | 0.000175 | 2.887738 |
| ANK2      | -0.39856 | 5.599014 | -7.8549  | 8.11E-05 | 0.000505 | 1.330119 |
| RPA1      | -0.39854 | 10.33233 | -10.5934 | 1.07E-05 | 0.000111 | 3.579764 |
| ACP6      | -0.39847 | 8.632794 | -8.34267 | 5.43E-05 | 0.000371 | 1.77539  |
| NMT1      | -0.39815 | 7.320805 | -7.6163  | 9.94E-05 | 0.000592 | 1.104082 |
| PCDHB16   | -0.39764 | 4.825892 | -9.63015 | 2.06E-05 | 0.000178 | 2.85325  |
| SKA2      | -0.3976  | 8.367525 | -11.3521 | 6.61E-06 | 7.80E-05 | 4.110723 |
| PHF20     | -0.39744 | 6.243844 | -10.8394 | 9.11E-06 | 9.79E-05 | 3.755657 |
| SNRPB2    | -0.39721 | 11.08441 | -10.6152 | 1.05E-05 | 0.00011  | 3.595492 |
| MYDGF     | -0.39709 | 6.495391 | -10.9259 | 8.62E-06 | 9.42E-05 | 3.816622 |
| ATXN2L    | -0.39699 | 6.818721 | -7.14162 | 0.000151 | 0.000826 | 0.63722  |
| ZIC2      | -0.39686 | 8.33591  | -8.76008 | 3.91E-05 | 0.00029  | 2.139568 |
| PEBP1     | -0.3964  | 9.314948 | -8.86587 | 3.61E-05 | 0.000272 | 2.229527 |
| CBX3      | -0.39621 | 10.83754 | -10.6827 | 1.01E-05 | 0.000106 | 3.644029 |
| CMTM8     | -0.39618 | 6.738732 | -10.4819 | 1.15E-05 | 0.000117 | 3.498784 |
| PRRC2A    | -0.39618 | 7.356767 | -11.5485 | 5.86E-06 | 7.15E-05 | 4.242847 |
| GMEB2     | -0.39589 | 7.702599 | -9.55377 | 2.17E-05 | 0.000186 | 2.792901 |
| ITGA10    | -0.39584 | 4.158637 | -7.22875 | 0.00014  | 0.000775 | 0.724693 |
| PFDN6     | -0.39567 | 8.097475 | -8.43335 | 5.05E-05 | 0.000351 | 1.855785 |
| ACVR1     | -0.39556 | 7.522459 | -10.0739 | 1.51E-05 | 0.000142 | 3.195694 |
| IQSEC3    | -0.39537 | 4.551379 | -5.13896 | 0.001171 | 0.00436  | -1.62305 |
| DNM1      | -0.39523 | 8.312606 | -7.88909 | 7.88E-05 | 0.000494 | 1.36206  |
| C6orf89   | -0.39497 | 6.797254 | -6.91376 | 0.000187 | 0.000977 | 0.404577 |
| ARAF      | -0.39483 | 7.16122  | -11.6058 | 5.66E-06 | 6.99E-05 | 4.280938 |
| TNNT1     | -0.39474 | 7.725095 | -10.813  | 9.26E-06 | 9.93E-05 | 3.736979 |
| TBC1D25   | -0.39472 | 6.109262 | -5.71121 | 0.000621 | 0.002591 | -0.92471 |
| FAM195B   | -0.39467 | 8.411412 | -8.61361 | 4.38E-05 | 0.000315 | 2.01347  |
| SENPA8    | -0.39458 | 5.560306 | -11.3789 | 6.50E-06 | 7.71E-05 | 4.128855 |
| SMPD4     | -0.39442 | 6.230343 | -7.87049 | 8.01E-05 | 0.0005   | 1.3447   |
| SNORA15   | -0.39433 | 4.917584 | -3.29022 | 0.012494 | 0.03156  | -4.19023 |
| GALNT12   | -0.39432 | 3.700978 | -4.74364 | 0.001862 | 0.006428 | -2.13227 |
| BCAP29    | -0.39423 | 5.883522 | -7.11533 | 0.000155 | 0.000842 | 0.610674 |
| BIN3      | -0.39392 | 9.00511  | -11.5527 | 5.85E-06 | 7.15E-05 | 4.24564  |
| ACTL6A    | -0.39378 | 9.589529 | -11.0243 | 8.10E-06 | 9.01E-05 | 3.885485 |
| DDX42     | -0.39324 | 5.15286  | -4.59965 | 0.002218 | 0.007425 | -2.32328 |
| CD9       | -0.39308 | 10.01324 | -10.8469 | 9.06E-06 | 9.75E-05 | 3.760928 |
| ACTN4     | -0.39251 | 9.068655 | -10.1161 | 1.47E-05 | 0.00014  | 3.227523 |
| PC        | -0.39233 | 4.377116 | -2.90713 | 0.021678 | 0.049717 | -4.77176 |
| PAPSS2    | -0.39232 | 7.627341 | -9.57348 | 2.14E-05 | 0.000184 | 2.808509 |
| LOC339803 | -0.3922  | 8.466999 | -7.97774 | 7.32E-05 | 0.000465 | 1.444346 |
| AKR7A2    | -0.39218 | 8.837299 | -6.59962 | 0.000252 | 0.001235 | 0.074241 |

|           |          |          |          |          |          |          |
|-----------|----------|----------|----------|----------|----------|----------|
| RTN4R     | -0.39201 | 5.138352 | -4.33362 | 0.003087 | 0.009837 | -2.68402 |
| DCTN2     | -0.39128 | 8.11977  | -7.18263 | 0.000146 | 0.000802 | 0.678487 |
| PSMC3IP   | -0.39117 | 8.018334 | -7.43084 | 0.000117 | 0.000672 | 0.924457 |
| ST8SIA4   | -0.39105 | 6.472946 | -9.30236 | 2.60E-05 | 0.000212 | 2.591216 |
| C5orf30   | -0.39088 | 7.645235 | -7.09445 | 0.000158 | 0.000855 | 0.589531 |
| C4orf27   | -0.39088 | 8.224111 | -9.1574  | 2.90E-05 | 0.000229 | 2.472758 |
| NDE1      | -0.39067 | 8.027686 | -11.2019 | 7.25E-06 | 8.34E-05 | 4.00828  |
| LBX2      | -0.39055 | 6.403512 | -8.23913 | 5.90E-05 | 0.000395 | 1.682692 |
| FKBP11    | -0.39036 | 9.236604 | -9.82515 | 1.79E-05 | 0.000162 | 3.005418 |
| ATF7      | -0.39014 | 6.963727 | -6.55916 | 0.000262 | 0.001274 | 0.030856 |
| GEMIN6    | -0.39009 | 8.668677 | -9.57588 | 2.14E-05 | 0.000183 | 2.810409 |
| ORC3      | -0.39005 | 6.973044 | -10.5672 | 1.09E-05 | 0.000112 | 3.560803 |
| AGPAT1    | -0.38986 | 6.642087 | -7.63164 | 9.81E-05 | 0.000586 | 1.118785 |
| CNOT8     | -0.38971 | 8.23936  | -6.79977 | 0.000208 | 0.001061 | 0.286015 |
| TYMS      | -0.38971 | 10.06419 | -10.6676 | 1.02E-05 | 0.000107 | 3.633185 |
| SLC35A2   | -0.38966 | 5.346245 | -4.86142 | 0.001618 | 0.005707 | -1.97822 |
| NUP93     | -0.38937 | 9.389134 | -9.8725  | 1.73E-05 | 0.000158 | 3.041961 |
| ACTR1A    | -0.38873 | 8.396938 | -11.0379 | 8.03E-06 | 8.97E-05 | 3.894907 |
| LAP3      | -0.3887  | 8.214563 | -11.7611 | 5.16E-06 | 6.56E-05 | 4.383425 |
| ADGRA2    | -0.38856 | 6.050259 | -6.84412 | 0.000199 | 0.001027 | 0.332322 |
| SHKBP1    | -0.38851 | 6.792441 | -5.14552 | 0.001162 | 0.004332 | -1.61479 |
| SKIV2L    | -0.38831 | 7.383688 | -9.66991 | 2.00E-05 | 0.000175 | 2.884491 |
| ATRN      | -0.38812 | 6.195886 | -5.45858 | 0.000817 | 0.003236 | -1.22746 |
| DNAJC19   | -0.38795 | 8.717352 | -10.0018 | 1.59E-05 | 0.000148 | 3.140953 |
| ZNF592    | -0.38792 | 6.264673 | -7.11555 | 0.000155 | 0.000842 | 0.610894 |
| PALD1     | -0.38779 | 5.63573  | -4.94095 | 0.001473 | 0.005282 | -1.87532 |
| SNTA1     | -0.38763 | 5.188741 | -5.65387 | 0.00066  | 0.002722 | -0.99268 |
| ZNF326    | -0.38752 | 8.138194 | -10.6253 | 1.05E-05 | 0.000109 | 3.602774 |
| ESPL1     | -0.38744 | 8.383671 | -10.1881 | 1.40E-05 | 0.000135 | 3.281597 |
| SLC1A4    | -0.38733 | 5.909315 | -10.1816 | 1.40E-05 | 0.000135 | 3.276754 |
| GPKOW     | -0.38693 | 8.109326 | -7.14553 | 0.000151 | 0.000824 | 0.641166 |
| HSP90AA4F | -0.38688 | 12.22419 | -11.5898 | 5.72E-06 | 7.04E-05 | 4.270346 |
| YWHAQ     | -0.3867  | 10.79863 | -8.51559 | 4.73E-05 | 0.000333 | 1.928075 |
| HIP1R     | -0.38661 | 6.867811 | -8.3112  | 5.57E-05 | 0.000378 | 1.747312 |
| ZNF507    | -0.38657 | 4.171758 | -3.46006 | 0.009845 | 0.025964 | -3.93624 |
| NPY1R     | -0.38644 | 3.120112 | -5.05385 | 0.001291 | 0.004732 | -1.7308  |
| HSPA1A // | -0.38612 | 9.811346 | -11.2607 | 6.99E-06 | 8.13E-05 | 4.048515 |
| USMG5     | -0.38604 | 5.276467 | -9.38372 | 2.45E-05 | 0.000203 | 2.657002 |
| PRPS1L1   | -0.38549 | 3.115433 | -4.33206 | 0.003093 | 0.009853 | -2.68617 |
| ENSA      | -0.38542 | 7.710694 | -8.7014  | 4.09E-05 | 0.000299 | 2.089263 |
| NUDT8     | -0.38531 | 7.146959 | -9.38791 | 2.45E-05 | 0.000203 | 2.660372 |
| HGSNAT    | -0.38504 | 4.592932 | -10.256  | 1.34E-05 | 0.00013  | 3.332288 |
| ZMAT2     | -0.38489 | 8.856411 | -9.8111  | 1.81E-05 | 0.000163 | 2.994544 |
| PHB2      | -0.38459 | 11.3693  | -9.77447 | 1.86E-05 | 0.000166 | 2.966127 |
| ATAD3A // | -0.38452 | 8.294428 | -10.2339 | 1.35E-05 | 0.000132 | 3.315865 |
| PREPL     | -0.38422 | 8.382093 | -8.94423 | 3.40E-05 | 0.00026  | 2.295571 |
| NELFB     | -0.3842  | 7.419628 | -7.41063 | 0.000119 | 0.000681 | 0.904671 |
| EXOSC8    | -0.38417 | 9.597971 | -10.7215 | 9.83E-06 | 0.000104 | 3.671775 |
| SAMD4B    | -0.3841  | 7.679579 | -9.74913 | 1.89E-05 | 0.000168 | 2.946418 |
| TMEM167B  | -0.384   | 3.534586 | -3.30482 | 0.012239 | 0.031049 | -4.16828 |
| PRKDC     | -0.38394 | 9.183016 | -10.8581 | 9.00E-06 | 9.71E-05 | 3.768897 |

|           |          |          |          |          |          |          |
|-----------|----------|----------|----------|----------|----------|----------|
| SALL2     | -0.38378 | 4.38691  | -10.7285 | 9.78E-06 | 0.000104 | 3.67682  |
| ITPK1     | -0.38359 | 7.87759  | -8.3724  | 5.30E-05 | 0.000364 | 1.801827 |
| LRRCC1    | -0.38351 | 4.662175 | -5.43467 | 0.000839 | 0.003306 | -1.25656 |
| MTRF1     | -0.3834  | 5.858906 | -9.73706 | 1.91E-05 | 0.00017  | 2.937011 |
| MBOAT1    | -0.38333 | 3.231866 | -3.45368 | 0.009933 | 0.026149 | -3.94573 |
| SEMA6B    | -0.3833  | 5.765849 | -7.80111 | 8.49E-05 | 0.000523 | 1.279645 |
| SKA3      | -0.38327 | 7.759775 | -9.67476 | 1.99E-05 | 0.000175 | 2.888295 |
| GPX6      | -0.38318 | 5.303901 | -5.56629 | 0.000726 | 0.00294  | -1.09733 |
| RPS2 ///  | -0.38303 | 11.35123 | -3.83863 | 0.005874 | 0.016805 | -3.38151 |
| CCDC14    | -0.38291 | 8.646878 | -10.9612 | 8.43E-06 | 9.25E-05 | 3.84137  |
| NID2      | -0.38288 | 3.734403 | -5.56054 | 0.000731 | 0.002953 | -1.10423 |
| TLE2      | -0.38271 | 3.628183 | -4.57957 | 0.002273 | 0.007584 | -2.35016 |
| TAGLN2    | -0.38269 | 9.899612 | -7.97988 | 7.31E-05 | 0.000465 | 1.446318 |
| SMARCC2   | -0.38243 | 8.137892 | -9.70562 | 1.95E-05 | 0.000172 | 2.912459 |
| BLID      | -0.38241 | 6.608822 | -8.9914  | 3.28E-05 | 0.000252 | 2.335093 |
| FAM71A    | -0.3823  | 4.23572  | -3.89802 | 0.005427 | 0.015747 | -3.2961  |
| CHMP7     | -0.38227 | 7.548637 | -7.90009 | 7.81E-05 | 0.00049  | 1.372307 |
| ALG6      | -0.38217 | 7.830674 | -8.11458 | 6.54E-05 | 0.000427 | 1.569913 |
| USP7      | -0.38193 | 5.933282 | -3.76929 | 0.006446 | 0.018177 | -3.48183 |
| HIST1H2AM | -0.3819  | 4.230673 | -4.76265 | 0.00182  | 0.006304 | -2.10726 |
| RPL37A    | -0.3818  | 6.543904 | -6.80836 | 0.000206 | 0.001054 | 0.295001 |
| DPY30     | -0.38174 | 10.48896 | -10.3691 | 1.24E-05 | 0.000123 | 3.416055 |
| SSU72     | -0.38172 | 8.488947 | -9.71593 | 1.94E-05 | 0.000171 | 2.92052  |
| KBTBD11   | -0.38141 | 3.89479  | -3.6946  | 0.007132 | 0.019813 | -3.59055 |
| AGAP2-AS1 | -0.38138 | 5.117836 | -4.89139 | 0.001562 | 0.005541 | -1.93934 |
| RPL26L1   | -0.38134 | 10.4444  | -10.8717 | 8.92E-06 | 9.64E-05 | 3.778469 |
| ARF6      | -0.38118 | 9.052151 | -9.89073 | 1.71E-05 | 0.000156 | 3.055986 |
| PARPBP    | -0.38109 | 6.47421  | -7.46036 | 0.000114 | 0.000659 | 0.953285 |
| G3BP1     | -0.38109 | 10.10967 | -9.1353  | 2.95E-05 | 0.000232 | 2.454556 |
| UNKL      | -0.38101 | 6.301768 | -7.29356 | 0.000132 | 0.00074  | 0.789222 |
| MCM8      | -0.381   | 7.373373 | -9.10549 | 3.01E-05 | 0.000236 | 2.429937 |
| CEP128    | -0.381   | 3.554814 | -4.1457  | 0.003924 | 0.012007 | -2.94487 |
| RAP1GDS1  | -0.38088 | 6.974182 | -6.7354  | 0.000221 | 0.001113 | 0.218414 |
| PSMB5     | -0.38086 | 8.650315 | -9.39895 | 2.43E-05 | 0.000202 | 2.669262 |
| TIMM17B   | -0.38061 | 9.415528 | -9.7421  | 1.90E-05 | 0.000169 | 2.94094  |
| MICALL1   | -0.38057 | 9.616142 | -10.2244 | 1.36E-05 | 0.000132 | 3.30873  |
| ZNF772    | -0.3805  | 7.629122 | -8.69432 | 4.12E-05 | 0.000301 | 2.083175 |
| PATZ1     | -0.38041 | 7.554244 | -10.2712 | 1.32E-05 | 0.000129 | 3.34363  |
| AHCY      | -0.3795  | 7.7785   | -7.48877 | 0.000111 | 0.000646 | 0.980943 |
| TSEN34    | -0.37929 | 9.409256 | -11.0306 | 8.07E-06 | 8.99E-05 | 3.889835 |
| RBM17     | -0.37919 | 6.657385 | -8.59459 | 4.45E-05 | 0.000318 | 1.996968 |
| ALDH16A1  | -0.379   | 6.935978 | -6.36955 | 0.000315 | 0.001481 | -0.17503 |
| CBR4      | -0.37886 | 7.708669 | -9.87155 | 1.74E-05 | 0.000158 | 3.04123  |
| MRPL17    | -0.37883 | 5.616562 | -6.54604 | 0.000265 | 0.001287 | 0.016749 |
| ZBED4     | -0.37879 | 6.207919 | -6.18216 | 0.00038  | 0.001729 | -0.38282 |
| SEPT6     | -0.37877 | 5.302011 | -8.29806 | 5.63E-05 | 0.000381 | 1.735571 |
| CYB5R3    | -0.37874 | 7.881778 | -9.24889 | 2.71E-05 | 0.000218 | 2.547707 |
| WDR24     | -0.37863 | 6.675559 | -6.67278 | 0.000235 | 0.001167 | 0.152188 |
| TNS2      | -0.37858 | 7.150189 | -11.2135 | 7.20E-06 | 8.30E-05 | 4.016234 |
| SLC24A5   | 0.378715 | 4.341699 | 7.9107   | 7.74E-05 | 0.000487 | 1.382186 |
| FAM206A   | 0.378726 | 9.017654 | 7.273415 | 0.000134 | 0.000751 | 0.769212 |

|           |          |          |          |          |          |          |
|-----------|----------|----------|----------|----------|----------|----------|
| ZNF7      | 0.378837 | 8.208378 | 10.47106 | 1.16E-05 | 0.000117 | 3.490856 |
| USP44     | 0.378878 | 2.709992 | 4.834456 | 0.001671 | 0.005864 | -2.01331 |
| PAXBP1    | 0.379027 | 4.009601 | 5.535975 | 0.000751 | 0.003017 | -1.13379 |
| FHL3      | 0.379154 | 8.209879 | 10.39148 | 1.22E-05 | 0.000122 | 3.432531 |
| PLEKHA3   | 0.379163 | 7.572195 | 7.098113 | 0.000158 | 0.000853 | 0.593241 |
| SEMA3A    | 0.379393 | 9.953208 | 10.97865 | 8.34E-06 | 9.17E-05 | 3.853604 |
| RWDD3     | 0.379471 | 4.370743 | 3.109299 | 0.016172 | 0.039037 | -4.46363 |
| PRPF4B    | 0.379657 | 7.873726 | 10.44825 | 1.17E-05 | 0.000118 | 3.474179 |
| LIMK2     | 0.380105 | 5.782155 | 5.480827 | 0.000797 | 0.00317  | -1.20045 |
| CNKS2R2   | 0.38013  | 6.252299 | 7.495662 | 0.00011  | 0.000643 | 0.987641 |
| TEC /// T | 0.380148 | 4.228371 | 5.128237 | 0.001185 | 0.004403 | -1.63657 |
| TAF13     | 0.38018  | 5.253313 | 5.930841 | 0.000492 | 0.002143 | -0.66842 |
| TMCC1     | 0.380233 | 6.249129 | 4.438011 | 0.002708 | 0.008801 | -2.54127 |
| ELP2      | 0.380268 | 8.874152 | 9.491774 | 2.27E-05 | 0.000192 | 2.743601 |
| NKIRAS1   | 0.38035  | 7.423247 | 10.22294 | 1.37E-05 | 0.000132 | 3.307655 |
| PTRH2     | 0.380374 | 9.69238  | 11.17517 | 7.37E-06 | 8.44E-05 | 3.989915 |
| CNTF ///  | 0.380394 | 5.25054  | 5.564354 | 0.000728 | 0.002944 | -1.09965 |
| TLK1      | 0.380473 | 6.135207 | 6.163168 | 0.000388 | 0.001755 | -0.40412 |
| CCBE1     | 0.38066  | 5.114184 | 2.920895 | 0.021247 | 0.048946 | -4.75071 |
| JOSD1     | 0.380687 | 8.220326 | 9.1077   | 3.01E-05 | 0.000236 | 2.431767 |
| TTC21B    | 0.380722 | 7.163554 | 8.709906 | 4.07E-05 | 0.000298 | 2.096573 |
| PLXNB2    | 0.380848 | 8.904118 | 9.635916 | 2.05E-05 | 0.000178 | 2.857785 |
| PDE1C     | 0.381162 | 7.495736 | 6.945506 | 0.000181 | 0.000955 | 0.437331 |
| DCAF7     | 0.381202 | 9.075203 | 9.366436 | 2.49E-05 | 0.000205 | 2.643068 |
| C7orf60   | 0.381246 | 7.446894 | 7.89186  | 7.86E-05 | 0.000493 | 1.36464  |
| PAFAH2    | 0.381467 | 4.620943 | 4.841536 | 0.001657 | 0.005822 | -2.00409 |
| KIAA0922  | 0.381472 | 6.841312 | 6.87921  | 0.000193 | 0.001    | 0.368795 |
| LYSMD2    | 0.381475 | 7.907153 | 8.411122 | 5.14E-05 | 0.000355 | 1.836143 |
| MTMR1     | 0.381553 | 5.88683  | 6.902749 | 0.000189 | 0.000983 | 0.393186 |
| IFIT5     | 0.381554 | 8.161843 | 8.820802 | 3.73E-05 | 0.000279 | 2.191312 |
| DCAF10    | 0.381573 | 8.333939 | 8.874115 | 3.59E-05 | 0.00027  | 2.236498 |
| PEX12     | 0.382232 | 7.79464  | 10.00653 | 1.58E-05 | 0.000147 | 3.144563 |
| IQCH      | 0.382376 | 3.836555 | 5.453876 | 0.000821 | 0.003248 | -1.23318 |
| ESM1      | 0.382691 | 6.680589 | 8.051103 | 6.89E-05 | 0.000444 | 1.51188  |
| PRPF39    | 0.382899 | 6.258754 | 7.220362 | 0.000141 | 0.00078  | 0.716304 |
| NIPBL     | 0.382934 | 7.757832 | 9.41998  | 2.39E-05 | 0.000199 | 2.686159 |
| PUS7L     | 0.382954 | 5.835992 | 7.207983 | 0.000143 | 0.000787 | 0.703915 |
| HEG1      | 0.383244 | 8.198187 | 9.282691 | 2.64E-05 | 0.000214 | 2.575238 |
| DVL3      | 0.383246 | 7.031173 | 7.440467 | 0.000116 | 0.000668 | 0.933872 |
| ATP6V1D   | 0.383877 | 9.68963  | 9.707317 | 1.95E-05 | 0.000172 | 2.913788 |
| USP6NL    | 0.383954 | 6.292853 | 5.11631  | 0.001202 | 0.004454 | -1.65163 |
| ZNF37A    | 0.384007 | 7.708067 | 11.03651 | 8.04E-06 | 8.97E-05 | 3.89397  |
| WASL      | 0.384132 | 6.524672 | 6.790333 | 0.00021  | 0.001069 | 0.276134 |
| C1orf198  | 0.384153 | 7.477601 | 8.432247 | 5.06E-05 | 0.000351 | 1.854809 |
| PARP6     | 0.384555 | 7.537824 | 7.591068 | 0.000102 | 0.000603 | 1.07985  |
| MORC4     | 0.384664 | 5.549442 | 7.491758 | 0.000111 | 0.000645 | 0.983847 |
| MBNL2     | 0.384688 | 7.858191 | 8.880248 | 3.57E-05 | 0.000269 | 2.241681 |
| MKNK1     | 0.385007 | 7.512589 | 9.482612 | 2.29E-05 | 0.000193 | 2.736292 |
| PDK4      | 0.385139 | 6.319462 | 6.848074 | 0.000199 | 0.001024 | 0.336435 |
| GCOM1 /// | 0.385231 | 8.489418 | 9.907236 | 1.69E-05 | 0.000155 | 3.068672 |
| RAF1      | 0.385448 | 8.556587 | 9.897736 | 1.70E-05 | 0.000156 | 3.061374 |

|           |          |          |          |          |          |          |
|-----------|----------|----------|----------|----------|----------|----------|
| NRG1      | 0.385449 | 7.180442 | 6.866486 | 0.000195 | 0.00101  | 0.355584 |
| FAM200B   | 0.385846 | 8.520328 | 10.7503  | 9.64E-06 | 0.000102 | 3.692362 |
| SLC25A46  | 0.385853 | 8.587393 | 9.278018 | 2.65E-05 | 0.000215 | 2.571437 |
| RAPGEF4   | 0.386099 | 4.02003  | 3.50971  | 0.009189 | 0.024498 | -3.86254 |
| AUP1      | 0.38612  | 9.263882 | 10.41727 | 1.20E-05 | 0.00012  | 3.451478 |
| RFESD     | 0.386327 | 5.186859 | 6.20816  | 0.00037  | 0.001692 | -0.35373 |
| ABCA1     | 0.386419 | 4.945847 | 3.76147  | 0.006515 | 0.018338 | -3.49318 |
| TMEM159   | 0.38642  | 3.298201 | 5.056376 | 0.001288 | 0.004721 | -1.72759 |
| FAM63B    | 0.386459 | 5.434833 | 11.58288 | 5.74E-06 | 7.06E-05 | 4.265725 |
| RAP2B     | 0.386576 | 9.961989 | 11.34857 | 6.62E-06 | 7.82E-05 | 4.108345 |
| PARP4     | 0.3867   | 7.065984 | 8.406639 | 5.16E-05 | 0.000357 | 1.832176 |
| PDE4D     | 0.386733 | 6.101907 | 5.837587 | 0.000543 | 0.002324 | -0.77647 |
| THAP9     | 0.387116 | 5.817746 | 6.519189 | 0.000272 | 0.001316 | -0.01218 |
| RIOK2     | 0.387181 | 7.768638 | 11.12613 | 7.60E-06 | 8.63E-05 | 3.956106 |
| IL4R      | 0.387337 | 6.965472 | 9.586214 | 2.12E-05 | 0.000182 | 2.818584 |
| MAN2B1    | 0.387477 | 7.38016  | 7.634823 | 9.79E-05 | 0.000585 | 1.121832 |
| GON4L /// | 0.387779 | 8.610302 | 11.29024 | 6.86E-06 | 8.02E-05 | 4.068694 |
| FAM98A    | 0.387986 | 9.376782 | 11.07709 | 7.84E-06 | 8.81E-05 | 3.922162 |
| EMB       | 0.388014 | 7.822094 | 9.745282 | 1.90E-05 | 0.000169 | 2.943417 |
| PBDC1     | 0.388431 | 8.826827 | 10.29799 | 1.30E-05 | 0.000127 | 3.363488 |
| ZUFSP     | 0.388469 | 7.206576 | 10.65937 | 1.02E-05 | 0.000107 | 3.627274 |
| PHEX      | 0.388994 | 5.365014 | 6.294216 | 0.00034  | 0.001577 | -0.25805 |
| NSUN3     | 0.389254 | 7.645849 | 8.653598 | 4.25E-05 | 0.000308 | 2.048075 |
| SHROOM3   | 0.389563 | 8.028594 | 9.464092 | 2.32E-05 | 0.000195 | 2.721498 |
| TMEM43    | 0.389579 | 8.942072 | 9.151055 | 2.91E-05 | 0.00023  | 2.467534 |
| ZBTB41    | 0.38963  | 7.089977 | 8.455567 | 4.96E-05 | 0.000346 | 1.875369 |
| MIER3     | 0.389638 | 7.348004 | 9.65578  | 2.02E-05 | 0.000176 | 2.873402 |
| ACOT9     | 0.389661 | 8.902454 | 9.729212 | 1.92E-05 | 0.00017  | 2.930888 |
| CAB39     | 0.389919 | 6.775042 | 7.302176 | 0.000131 | 0.000736 | 0.797769 |
| SH3TC1    | 0.389984 | 6.447694 | 8.930133 | 3.44E-05 | 0.000262 | 2.283726 |
| TAF1      | 0.390001 | 6.922477 | 8.211195 | 6.04E-05 | 0.000402 | 1.657522 |
| CSF2      | 0.390284 | 5.126127 | 5.737912 | 0.000604 | 0.002529 | -0.89321 |
| CBFB      | 0.390576 | 7.667671 | 10.00924 | 1.58E-05 | 0.000147 | 3.146627 |
| URB2      | 0.390856 | 7.682725 | 9.178619 | 2.85E-05 | 0.000227 | 2.490197 |
| GNAQ      | 0.39093  | 8.300575 | 8.591007 | 4.46E-05 | 0.000319 | 1.993852 |
| IFT80     | 0.390937 | 7.92355  | 9.847422 | 1.77E-05 | 0.00016  | 3.022626 |
| PPM1H     | 0.391167 | 6.200792 | 7.104439 | 0.000157 | 0.000849 | 0.599649 |
| RHBDF1    | 0.391396 | 6.341351 | 8.802617 | 3.79E-05 | 0.000282 | 2.175847 |
| SFXN1     | 0.391679 | 8.963724 | 9.938372 | 1.66E-05 | 0.000153 | 3.092543 |
| KLF17     | 0.391839 | 4.317473 | 6.676335 | 0.000234 | 0.001164 | 0.155961 |
| ZNF625 // | 0.391881 | 5.415457 | 8.99736  | 3.27E-05 | 0.000251 | 2.34007  |
| SAA1 ///  | 0.392267 | 3.953568 | 5.370097 | 0.000901 | 0.003508 | -1.33556 |
| HLA-F     | 0.392495 | 5.922274 | 9.275868 | 2.66E-05 | 0.000215 | 2.569688 |
| FAM73B    | 0.392931 | 6.790537 | 8.506745 | 4.77E-05 | 0.000335 | 1.920326 |
| DMKN      | 0.392948 | 5.213087 | 5.239315 | 0.001044 | 0.003961 | -1.49731 |
| SNAP25    | 0.393199 | 3.44522  | 4.649453 | 0.002087 | 0.00706  | -2.25688 |
| TLDC1     | 0.393529 | 7.682246 | 7.338803 | 0.000127 | 0.000717 | 0.834011 |
| FYN       | 0.393644 | 8.073104 | 10.31311 | 1.28E-05 | 0.000126 | 3.374693 |
| BCL2L2    | 0.39366  | 7.947998 | 9.03115  | 3.18E-05 | 0.000247 | 2.368254 |
| TRPS1     | 0.393711 | 6.21785  | 10.60138 | 1.06E-05 | 0.00011  | 3.585504 |
| SLC25A16  | 0.393815 | 6.144185 | 7.000427 | 0.000172 | 0.000916 | 0.493737 |

|           |          |          |          |          |          |          |
|-----------|----------|----------|----------|----------|----------|----------|
| NAB1      | 0.394052 | 6.147886 | 8.07729  | 6.74E-05 | 0.000437 | 1.535864 |
| KLC1      | 0.394069 | 7.262294 | 6.907009 | 0.000188 | 0.00098  | 0.397593 |
| GCFC2     | 0.3942   | 7.577154 | 10.34337 | 1.26E-05 | 0.000125 | 3.397071 |
| NCK1      | 0.39428  | 7.440256 | 9.542337 | 2.19E-05 | 0.000187 | 2.783828 |
| CHM       | 0.394427 | 4.991811 | 8.647279 | 4.27E-05 | 0.000309 | 2.042616 |
| LOC102723 | 0.394567 | 6.627855 | 7.994055 | 7.22E-05 | 0.000461 | 1.459407 |
| MBD1      | 0.394582 | 7.303382 | 8.154632 | 6.33E-05 | 0.000416 | 1.606333 |
| ASPN      | 0.394802 | 2.826329 | 4.956135 | 0.001447 | 0.005201 | -1.85578 |
| LIMS1     | 0.394896 | 8.628135 | 9.423779 | 2.38E-05 | 0.000199 | 2.689208 |
| YTHDF1    | 0.395101 | 7.60645  | 9.294162 | 2.62E-05 | 0.000213 | 2.58456  |
| TTC26     | 0.395267 | 6.176761 | 6.745006 | 0.000219 | 0.001106 | 0.228531 |
| CCDC6     | 0.395957 | 6.738984 | 5.895348 | 0.000511 | 0.002209 | -0.70941 |
| TRAPPC8   | 0.396007 | 7.716864 | 5.723555 | 0.000613 | 0.002563 | -0.91014 |
| WDR89     | 0.396113 | 6.417774 | 8.057749 | 6.85E-05 | 0.000442 | 1.517973 |
| ID4       | 0.396127 | 3.981934 | 9.219523 | 2.77E-05 | 0.000222 | 2.523721 |
| ZNF569    | 0.396374 | 5.744855 | 8.517296 | 4.73E-05 | 0.000333 | 1.929566 |
| ELOVL2    | 0.396806 | 4.846376 | 6.423459 | 0.000299 | 0.001419 | -0.11605 |
| FGF2      | 0.397211 | 7.944621 | 8.893901 | 3.53E-05 | 0.000267 | 2.253209 |
| SDHAF2    | 0.397265 | 9.837021 | 10.50882 | 1.13E-05 | 0.000115 | 3.518391 |
| LCTL      | 0.397345 | 7.814336 | 10.68893 | 1.00E-05 | 0.000106 | 3.648488 |
| TLR1      | 0.397394 | 3.83713  | 5.862981 | 0.000529 | 0.002272 | -0.74693 |
| KDM5A     | 0.397797 | 8.809161 | 12.09579 | 4.24E-06 | 5.71E-05 | 4.600016 |
| TPST2     | 0.398086 | 6.590964 | 9.315024 | 2.58E-05 | 0.000211 | 2.601489 |
| KLHL31    | 0.398156 | 6.29545  | 10.1408  | 1.44E-05 | 0.000138 | 3.246125 |
| ZNF142    | 0.398168 | 5.952985 | 4.453446 | 0.002656 | 0.008656 | -2.52029 |
| FAM89A    | 0.398296 | 7.441829 | 7.449409 | 0.000115 | 0.000664 | 0.942604 |
| DUSP6     | 0.398365 | 10.39288 | 10.77493 | 9.49E-06 | 0.000101 | 3.709901 |
| CHPF2     | 0.398482 | 7.376474 | 9.938883 | 1.66E-05 | 0.000153 | 3.092934 |
| DCAF6     | 0.398539 | 9.179842 | 9.689796 | 1.97E-05 | 0.000173 | 2.900079 |
| PPP2R1B   | 0.398671 | 6.771689 | 5.865071 | 0.000528 | 0.002269 | -0.74451 |
| NFXL1     | 0.398753 | 7.097561 | 11.19708 | 7.27E-06 | 8.36E-05 | 4.004971 |
| TASP1     | 0.39879  | 6.761775 | 7.517874 | 0.000108 | 0.000633 | 1.009191 |
| PIK3C2A   | 0.398899 | 6.537915 | 5.847544 | 0.000537 | 0.002304 | -0.76488 |
| GABPB2    | 0.39898  | 5.6234   | 6.85577  | 0.000197 | 0.001018 | 0.344443 |
| RANBP2 // | 0.399187 | 8.551906 | 10.93642 | 8.56E-06 | 9.37E-05 | 3.824019 |
| STX4      | 0.399321 | 7.982948 | 7.414966 | 0.000119 | 0.00068  | 0.908924 |
| PHACTR4   | 0.39937  | 6.41326  | 8.046442 | 6.91E-05 | 0.000446 | 1.507604 |
| SLC12A6   | 0.399537 | 5.555775 | 6.767521 | 0.000214 | 0.001088 | 0.252206 |
| VRK2      | 0.399577 | 5.878332 | 4.503516 | 0.002496 | 0.008204 | -2.45248 |
| UBXN4     | 0.399886 | 8.095237 | 7.655391 | 9.61E-05 | 0.000577 | 1.1415   |
| TCEB3     | 0.399954 | 8.583551 | 11.32259 | 6.73E-06 | 7.91E-05 | 4.090712 |
| SLC44A3   | 0.400118 | 5.423157 | 6.312975 | 0.000333 | 0.001552 | -0.23731 |
| UCA1      | 0.400261 | 5.957767 | 6.88904  | 0.000191 | 0.000993 | 0.378988 |
| CDRT4 /// | 0.400624 | 6.557405 | 11.49193 | 6.07E-06 | 7.33E-05 | 4.20499  |
| TEAD1     | 0.400735 | 4.199612 | 4.241477 | 0.00347  | 0.010833 | -2.81131 |
| TPK1      | 0.400764 | 5.386794 | 7.721077 | 9.09E-05 | 0.000552 | 1.204032 |
| SLC22A5   | 0.400864 | 6.216412 | 4.745085 | 0.001859 | 0.006419 | -2.13036 |
| ZNF343    | 0.401    | 6.988122 | 10.89016 | 8.82E-06 | 9.56E-05 | 3.79149  |
| LTV1      | 0.401278 | 8.36612  | 8.548949 | 4.61E-05 | 0.000327 | 1.957229 |
| ESCO1     | 0.40147  | 8.20829  | 10.53456 | 1.11E-05 | 0.000114 | 3.537102 |
| DNAJC21   | 0.401784 | 8.242098 | 9.783033 | 1.85E-05 | 0.000165 | 2.972778 |

|           |          |          |          |          |          |          |
|-----------|----------|----------|----------|----------|----------|----------|
| WDR43     | 0.402848 | 9.052048 | 11.31141 | 6.77E-06 | 7.95E-05 | 4.083108 |
| TMEM138   | 0.402875 | 9.063267 | 10.47477 | 1.15E-05 | 0.000117 | 3.493561 |
| CSNK1G3   | 0.403108 | 8.45078  | 8.705295 | 4.08E-05 | 0.000299 | 2.092611 |
| C1GALT1   | 0.403366 | 7.375184 | 11.59956 | 5.68E-06 | 7.00E-05 | 4.276811 |
| WDR60     | 0.403556 | 6.869254 | 9.198735 | 2.81E-05 | 0.000225 | 2.5067   |
| LONRF3    | 0.403826 | 6.214284 | 8.389486 | 5.23E-05 | 0.00036  | 1.816984 |
| ADGRL4    | 0.404217 | 6.369283 | 8.73973  | 3.97E-05 | 0.000293 | 2.122152 |
| SHTN1     | 0.404317 | 6.1109   | 7.576325 | 0.000103 | 0.000609 | 1.065661 |
| DPYD      | 0.404334 | 7.207256 | 11.17075 | 7.39E-06 | 8.46E-05 | 3.986871 |
| FCAR      | 0.404335 | 2.374554 | 5.698922 | 0.000629 | 0.002619 | -0.93924 |
| C8orf31   | 0.404479 | 4.16889  | 9.196109 | 2.82E-05 | 0.000225 | 2.504548 |
| SSR3      | 0.404523 | 10.29643 | 10.8875  | 8.83E-06 | 9.57E-05 | 3.789615 |
| PRPF38B   | 0.404618 | 8.32005  | 9.606638 | 2.09E-05 | 0.00018  | 2.834714 |
| P2RX5     | 0.404634 | 7.242057 | 6.336894 | 0.000326 | 0.001521 | -0.21093 |
| ATP6V1G3  | 0.405255 | 3.405775 | 5.208229 | 0.001082 | 0.004078 | -1.53611 |
| NEFL      | 0.405463 | 8.334725 | 9.245967 | 2.71E-05 | 0.000219 | 2.545325 |
| DSCR3     | 0.405489 | 7.115    | 9.648085 | 2.03E-05 | 0.000177 | 2.867355 |
| LIPT1     | 0.405494 | 6.409695 | 6.437646 | 0.000295 | 0.001404 | -0.10059 |
| TJP2      | 0.405499 | 8.959313 | 9.933125 | 1.66E-05 | 0.000153 | 3.088524 |
| ANO6      | 0.405523 | 8.694904 | 10.45206 | 1.17E-05 | 0.000118 | 3.476965 |
| UBIAD1    | 0.405668 | 7.2107   | 8.316327 | 5.55E-05 | 0.000376 | 1.751894 |
| SQSTM1    | 0.405854 | 10.88328 | 10.99829 | 8.23E-06 | 9.11E-05 | 3.86733  |
| MAML3     | 0.405997 | 7.199059 | 9.291521 | 2.63E-05 | 0.000213 | 2.582415 |
| CERS5     | 0.406313 | 7.749726 | 9.17571  | 2.86E-05 | 0.000227 | 2.487808 |
| CFLAR     | 0.406441 | 5.16662  | 6.770996 | 0.000214 | 0.001085 | 0.255856 |
| CHRNB1    | 0.406648 | 6.693676 | 8.334649 | 5.47E-05 | 0.000373 | 1.76824  |
| TBC1D20   | 0.40695  | 7.970159 | 12.09274 | 4.25E-06 | 5.71E-05 | 4.598065 |
| MOB1A     | 0.407172 | 10.30847 | 11.81099 | 5.01E-06 | 6.41E-05 | 4.416087 |
| ARL13B    | 0.407192 | 8.000591 | 11.14329 | 7.52E-06 | 8.56E-05 | 3.967951 |
| ATF7IP2   | 0.407292 | 6.556351 | 9.465738 | 2.31E-05 | 0.000195 | 2.722814 |
| APC       | 0.407687 | 6.432861 | 8.698367 | 4.10E-05 | 0.0003   | 2.086656 |
| UNC13A    | 0.407877 | 5.753301 | 6.17785  | 0.000382 | 0.001735 | -0.38765 |
| EHD1      | 0.407961 | 7.339473 | 7.531563 | 0.000107 | 0.000627 | 1.022447 |
| TRIM44    | 0.408184 | 9.908413 | 11.23501 | 7.10E-06 | 8.22E-05 | 4.030976 |
| AFAP1L2   | 0.408271 | 6.981565 | 12.28785 | 3.80E-06 | 5.29E-05 | 4.721738 |
| CDH2      | 0.408399 | 9.033652 | 11.32447 | 6.72E-06 | 7.91E-05 | 4.091983 |
| INADL     | 0.408509 | 4.362291 | 4.194647 | 0.003684 | 0.011391 | -2.87645 |
| PLEKHH1   | 0.409176 | 4.551944 | 5.136551 | 0.001174 | 0.004369 | -1.62609 |
| EPS15     | 0.409234 | 7.080282 | 9.368198 | 2.48E-05 | 0.000205 | 2.64449  |
| TMEM47    | 0.409404 | 6.831796 | 6.910543 | 0.000187 | 0.000978 | 0.401247 |
| DERL2     | 0.409519 | 9.441974 | 12.18993 | 4.02E-06 | 5.50E-05 | 4.659908 |
| SPATS2    | 0.409677 | 7.135835 | 7.860896 | 8.07E-05 | 0.000503 | 1.33573  |
| DNAJB14 / | 0.409827 | 8.120577 | 10.77907 | 9.47E-06 | 0.000101 | 3.712848 |
| STAT1     | 0.409964 | 7.562738 | 9.222703 | 2.76E-05 | 0.000222 | 2.526322 |
| AHR       | 0.410021 | 8.025912 | 9.065929 | 3.10E-05 | 0.000242 | 2.397167 |
| HERC4     | 0.410063 | 8.215724 | 10.9109  | 8.70E-06 | 9.48E-05 | 3.806094 |
| NGF       | 0.410164 | 4.323184 | 9.478484 | 2.29E-05 | 0.000193 | 2.732997 |
| FNBP4     | 0.410255 | 8.410509 | 10.6511  | 1.03E-05 | 0.000108 | 3.621331 |
| GALNT10   | 0.410411 | 7.0482   | 8.844683 | 3.67E-05 | 0.000275 | 2.211581 |
| C1S /// E | 0.410442 | 3.775793 | 4.098454 | 0.004171 | 0.01265  | -3.01123 |
| C5orf22   | 0.410575 | 8.286876 | 8.392143 | 5.22E-05 | 0.00036  | 1.819339 |



|           |          |          |          |          |          |          |
|-----------|----------|----------|----------|----------|----------|----------|
| UBE2J2    | 0.410617 | 8.046012 | 11.10094 | 7.72E-06 | 8.73E-05 | 3.938689 |
| NAMPT     | 0.410641 | 8.91133  | 9.291468 | 2.63E-05 | 0.000213 | 2.582372 |
| LAMB2     | 0.410886 | 7.413616 | 7.227326 | 0.00014  | 0.000776 | 0.723266 |
| TRIM35    | 0.410992 | 6.322462 | 5.603487 | 0.000697 | 0.002845 | -1.05275 |
| ZNF77     | 0.411406 | 6.240904 | 6.963631 | 0.000178 | 0.000942 | 0.455983 |
| IGFBP3    | 0.411509 | 7.575904 | 8.439211 | 5.03E-05 | 0.00035  | 1.860954 |
| POLR1D    | 0.411765 | 9.471861 | 8.703252 | 4.09E-05 | 0.000299 | 2.090855 |
| LMBR1     | 0.412074 | 6.761737 | 10.46447 | 1.16E-05 | 0.000118 | 3.486037 |
| KRT34 /// | 0.412292 | 5.288442 | 8.371463 | 5.31E-05 | 0.000364 | 1.800993 |
| SDCBP     | 0.412464 | 10.28347 | 10.59887 | 1.06E-05 | 0.00011  | 3.583691 |
| FBXO30    | 0.412622 | 7.707104 | 9.475201 | 2.30E-05 | 0.000194 | 2.730375 |
| KPNA4     | 0.412645 | 7.51992  | 9.831756 | 1.78E-05 | 0.000161 | 3.010524 |
| LYRM2     | 0.412686 | 6.35448  | 8.35342  | 5.39E-05 | 0.000368 | 1.784955 |
| CCNJ      | 0.413021 | 6.18156  | 7.745717 | 8.90E-05 | 0.000543 | 1.22738  |
| USP36     | 0.413063 | 7.180733 | 9.099249 | 3.03E-05 | 0.000237 | 2.424777 |
| ORAOV1    | 0.413213 | 4.83616  | 6.439918 | 0.000294 | 0.001401 | -0.09812 |
| COG1      | 0.413419 | 8.82165  | 8.930341 | 3.44E-05 | 0.000262 | 2.283901 |
| COL4A6    | 0.413703 | 2.98186  | 3.284456 | 0.012596 | 0.031781 | -4.1989  |
| TPBG      | 0.413725 | 7.319283 | 7.763089 | 8.77E-05 | 0.000537 | 1.243805 |
| TRNT1     | 0.413902 | 7.855696 | 9.501978 | 2.25E-05 | 0.000191 | 2.751735 |
| CFHR3     | 0.414048 | 5.503885 | 3.637641 | 0.007707 | 0.021132 | -3.67392 |
| DENND4C   | 0.414062 | 6.544717 | 7.693432 | 9.31E-05 | 0.000563 | 1.177767 |
| MYCBP2    | 0.414321 | 8.815066 | 11.35333 | 6.60E-06 | 7.80E-05 | 4.111571 |
| ZNF626    | 0.414384 | 7.142418 | 10.88188 | 8.86E-06 | 9.60E-05 | 3.785653 |
| ZCCHC10   | 0.414604 | 7.876387 | 11.62705 | 5.59E-06 | 6.93E-05 | 4.295054 |
| KBTBD3    | 0.415113 | 4.285693 | 3.276255 | 0.012744 | 0.032077 | -4.21123 |
| DDX19A    | 0.415413 | 8.079063 | 11.19663 | 7.27E-06 | 8.36E-05 | 4.004659 |
| JAK1      | 0.415449 | 8.045807 | 11.13862 | 7.54E-06 | 8.58E-05 | 3.964732 |
| ATAD1     | 0.415538 | 8.832164 | 12.11092 | 4.20E-06 | 5.68E-05 | 4.609672 |
| ADNP      | 0.415565 | 9.776232 | 12.60553 | 3.18E-06 | 4.68E-05 | 4.919137 |
| NGRN      | 0.415758 | 10.34432 | 10.58264 | 1.08E-05 | 0.000111 | 3.571956 |
| ASH1L     | 0.415779 | 7.601416 | 9.968167 | 1.62E-05 | 0.00015  | 3.115323 |
| TNFRSF9   | 0.415914 | 4.685777 | 7.855742 | 8.11E-05 | 0.000505 | 1.33091  |
| ZNF324    | 0.416138 | 7.094456 | 9.955254 | 1.64E-05 | 0.000151 | 3.105457 |
| RNF115    | 0.416234 | 8.083424 | 10.92571 | 8.62E-06 | 9.42E-05 | 3.816498 |
| MAX       | 0.416456 | 6.576991 | 7.389608 | 0.000121 | 0.000691 | 0.884048 |
| GFM1      | 0.416602 | 9.111458 | 10.00282 | 1.59E-05 | 0.000148 | 3.141741 |
| EXOC6B    | 0.416816 | 4.393876 | 2.957059 | 0.020156 | 0.046808 | -4.69546 |
| EPM2AIP1  | 0.41693  | 5.40535  | 7.068033 | 0.000162 | 0.000872 | 0.562713 |
| MTG2      | 0.417363 | 7.914761 | 8.819981 | 3.74E-05 | 0.000279 | 2.190615 |
| RPS6KA5   | 0.417363 | 4.813621 | 4.922968 | 0.001505 | 0.005374 | -1.89851 |
| SMNDC1    | 0.417455 | 6.44836  | 8.788675 | 3.83E-05 | 0.000284 | 2.163971 |
| PPHLN1    | 0.417536 | 6.326998 | 8.458551 | 4.95E-05 | 0.000345 | 1.877997 |
| RFTN1     | 0.417562 | 7.925998 | 8.474797 | 4.89E-05 | 0.000342 | 1.892288 |
| ANKLE2    | 0.417679 | 7.287322 | 8.324797 | 5.51E-05 | 0.000375 | 1.759454 |
| ZNF528    | 0.417837 | 2.298401 | 6.692695 | 0.00023  | 0.00115  | 0.1733   |
| ANKRD40   | 0.418144 | 6.670065 | 9.2406   | 2.73E-05 | 0.000219 | 2.540945 |
| UBE2Q2    | 0.418199 | 7.273092 | 9.976474 | 1.61E-05 | 0.00015  | 3.121663 |
| ADM       | 0.418429 | 8.838574 | 12.8761  | 2.73E-06 | 4.22E-05 | 5.083529 |
| PRH1-PRR4 | 0.418524 | 6.325659 | 10.33156 | 1.27E-05 | 0.000125 | 3.388348 |
| COL6A1    | 0.418601 | 9.993228 | 11.69957 | 5.35E-06 | 6.73E-05 | 4.342986 |

|           |          |          |          |          |          |          |
|-----------|----------|----------|----------|----------|----------|----------|
| KCNV1     | 0.418654 | 2.821027 | 6.545244 | 0.000265 | 0.001288 | 0.015896 |
| C7orf43   | 0.418756 | 6.026098 | 9.00931  | 3.24E-05 | 0.00025  | 2.350048 |
| TANC1     | 0.418787 | 9.06557  | 12.61323 | 3.16E-06 | 4.67E-05 | 4.923863 |
| KLHDC3    | 0.41934  | 9.91898  | 9.839435 | 1.78E-05 | 0.00016  | 3.016458 |
| LRIG2     | 0.419556 | 5.781016 | 8.659273 | 4.23E-05 | 0.000307 | 2.052975 |
| MSANTD2   | 0.420322 | 6.584099 | 8.03192  | 7.00E-05 | 0.000449 | 1.494269 |
| ATF2      | 0.420581 | 7.421123 | 6.291457 | 0.000341 | 0.001581 | -0.2611  |
| PLD6      | 0.420598 | 7.061714 | 9.066925 | 3.10E-05 | 0.000242 | 2.397994 |
| AVIL      | 0.420687 | 4.529225 | 3.927766 | 0.005217 | 0.015249 | -3.25348 |
| LOC10106C | 0.420839 | 9.032497 | 8.660986 | 4.22E-05 | 0.000307 | 2.054454 |
| ACTN1     | 0.420869 | 9.634886 | 10.32752 | 1.27E-05 | 0.000125 | 3.38536  |
| SVIL      | 0.420949 | 8.317081 | 10.02397 | 1.56E-05 | 0.000146 | 3.157823 |
| SCLT1     | 0.420986 | 5.891628 | 7.20745  | 0.000143 | 0.000787 | 0.703382 |
| SAT2      | 0.421067 | 8.998416 | 7.075656 | 0.000161 | 0.000867 | 0.570459 |
| ASAP2     | 0.42129  | 8.410342 | 11.0511  | 7.96E-06 | 8.91E-05 | 3.904115 |
| SAR1B     | 0.421854 | 8.868142 | 10.48747 | 1.14E-05 | 0.000116 | 3.502832 |
| SENP6     | 0.422111 | 8.30168  | 10.13702 | 1.45E-05 | 0.000138 | 3.243282 |
| ITIH5     | 0.422129 | 3.612007 | 4.671775 | 0.002031 | 0.006908 | -2.22723 |
| ADSSL1    | 0.422181 | 5.59824  | 5.150157 | 0.001156 | 0.004314 | -1.60895 |
| ZRSR2     | 0.422181 | 5.796399 | 8.270768 | 5.76E-05 | 0.000387 | 1.71112  |
| ZBTB38    | 0.422353 | 8.674339 | 11.25691 | 7.01E-06 | 8.14E-05 | 4.045956 |
| ACBD5     | 0.422469 | 7.927274 | 8.514072 | 4.74E-05 | 0.000333 | 1.926743 |
| FAM234B   | 0.422798 | 7.223204 | 5.49273  | 0.000787 | 0.003135 | -1.18603 |
| MAP3K13   | 0.423099 | 5.754225 | 8.677745 | 4.17E-05 | 0.000303 | 2.068905 |
| NIT1      | 0.423452 | 5.344744 | 8.35654  | 5.37E-05 | 0.000367 | 1.787731 |
| GOSR2     | 0.423546 | 7.321467 | 10.46041 | 1.17E-05 | 0.000118 | 3.483072 |
| EDRF1     | 0.423597 | 8.064725 | 8.499739 | 4.79E-05 | 0.000337 | 1.914185 |
| SPRED2    | 0.423693 | 8.86783  | 11.97529 | 4.55E-06 | 6.00E-05 | 4.522701 |
| UTP15     | 0.423993 | 8.107924 | 9.712105 | 1.94E-05 | 0.000171 | 2.917531 |
| GPN2      | 0.424152 | 8.246692 | 10.15714 | 1.43E-05 | 0.000137 | 3.2584   |
| SNAP23    | 0.424188 | 7.732526 | 10.64354 | 1.03E-05 | 0.000108 | 3.615894 |
| ARMCX3    | 0.424239 | 7.78123  | 9.422017 | 2.39E-05 | 0.000199 | 2.687794 |
| CEP63     | 0.424282 | 5.525422 | 5.715195 | 0.000618 | 0.002582 | -0.92    |
| CEP95     | 0.424358 | 7.669138 | 11.41555 | 6.36E-06 | 7.57E-05 | 4.153642 |
| LOC100996 | 0.42464  | 10.03689 | 11.99357 | 4.50E-06 | 5.96E-05 | 4.534481 |
| MAGI1     | 0.425218 | 5.878612 | 6.964496 | 0.000178 | 0.000941 | 0.456873 |
| USP8      | 0.425232 | 8.517329 | 10.13963 | 1.44E-05 | 0.000138 | 3.245241 |
| DYX1C1    | 0.425385 | 6.123205 | 6.361645 | 0.000318 | 0.001491 | -0.18371 |
| SEPW1     | 0.425431 | 9.259948 | 12.23026 | 3.93E-06 | 5.41E-05 | 4.685429 |
| DNAJC25   | 0.425638 | 6.396426 | 8.839303 | 3.68E-05 | 0.000276 | 2.207019 |
| EXOC8     | 0.425955 | 7.987618 | 10.91092 | 8.70E-06 | 9.48E-05 | 3.806104 |
| DCUN1D1   | 0.426035 | 7.967489 | 7.918409 | 7.69E-05 | 0.000485 | 1.389355 |
| CAMKMT    | 0.4261   | 4.258902 | 7.495989 | 0.00011  | 0.000643 | 0.987958 |
| PLEKHA8 / | 0.426291 | 5.421713 | 8.487728 | 4.84E-05 | 0.000339 | 1.903647 |
| ELMOD2    | 0.426418 | 6.779001 | 9.87294  | 1.73E-05 | 0.000158 | 3.0423   |
| GRK5      | 0.42656  | 7.144877 | 9.646578 | 2.03E-05 | 0.000177 | 2.866171 |
| CCDC113   | 0.426569 | 5.789365 | 10.10237 | 1.48E-05 | 0.00014  | 3.217176 |
| PIK3R3    | 0.426829 | 7.635    | 10.05116 | 1.53E-05 | 0.000144 | 3.178453 |
| ACAP2     | 0.426857 | 6.423399 | 5.243259 | 0.00104  | 0.003946 | -1.4924  |
| PLEKHB2   | 0.426955 | 8.248758 | 9.877764 | 1.73E-05 | 0.000157 | 3.046014 |
| ADAM9     | 0.426956 | 9.276774 | 11.97236 | 4.56E-06 | 6.00E-05 | 4.520812 |

|           |          |          |          |          |          |          |
|-----------|----------|----------|----------|----------|----------|----------|
| RHOBTB1   | 0.426979 | 4.927198 | 6.559202 | 0.000262 | 0.001274 | 0.030906 |
| MGEA5     | 0.427035 | 8.726328 | 7.630257 | 9.82E-05 | 0.000586 | 1.11746  |
| PALM2     | 0.427155 | 4.267173 | 4.476347 | 0.002582 | 0.008446 | -2.48923 |
| ZNF410    | 0.42734  | 8.323595 | 10.91609 | 8.67E-06 | 9.46E-05 | 3.809743 |
| ZNF8      | 0.427351 | 7.54311  | 12.29048 | 3.79E-06 | 5.29E-05 | 4.723396 |
| ZNF560    | 0.428105 | 4.606753 | 3.92786  | 0.005216 | 0.015248 | -3.25334 |
| POLR1B    | 0.428125 | 8.175706 | 9.065189 | 3.10E-05 | 0.000242 | 2.396553 |
| PTPRE     | 0.428324 | 4.47307  | 6.381242 | 0.000312 | 0.001468 | -0.16221 |
| TFPI2     | 0.428482 | 3.355394 | 5.767889 | 0.000585 | 0.002464 | -0.85796 |
| THSD4     | 0.428537 | 5.839865 | 10.34254 | 1.26E-05 | 0.000125 | 3.396464 |
| ARHGAP10  | 0.428763 | 7.563545 | 5.959532 | 0.000478 | 0.002089 | -0.63541 |
| FEM1C     | 0.428951 | 7.061071 | 9.654795 | 2.02E-05 | 0.000176 | 2.872628 |
| QPCT      | 0.4291   | 8.233992 | 8.558799 | 4.58E-05 | 0.000325 | 1.965819 |
| ZNF701    | 0.429137 | 4.258005 | 5.683173 | 0.00064  | 0.002653 | -0.95789 |
| NIFK      | 0.429229 | 8.549506 | 11.28769 | 6.87E-06 | 8.03E-05 | 4.06696  |
| SEL1L     | 0.42923  | 7.267762 | 8.953865 | 3.37E-05 | 0.000258 | 2.303658 |
| YY1AP1    | 0.429287 | 6.962103 | 10.45318 | 1.17E-05 | 0.000118 | 3.477785 |
| CARS2     | 0.429384 | 8.689604 | 12.71364 | 2.99E-06 | 4.51E-05 | 4.985224 |
| RALGAPB   | 0.429752 | 7.059789 | 12.74127 | 2.94E-06 | 4.46E-05 | 5.00203  |
| KAZN      | 0.429784 | 6.349349 | 5.608553 | 0.000694 | 0.002831 | -1.04669 |
| RAB14     | 0.429826 | 9.4665   | 9.405309 | 2.42E-05 | 0.000201 | 2.674373 |
| KCNMA1    | 0.429989 | 4.446417 | 6.332133 | 0.000327 | 0.001527 | -0.21618 |
| LST1      | 0.430045 | 5.210545 | 7.903024 | 7.79E-05 | 0.000489 | 1.375041 |
| AREL1     | 0.430139 | 7.435571 | 11.45397 | 6.21E-06 | 7.46E-05 | 4.179513 |
| FRMD6     | 0.430548 | 7.825818 | 10.96151 | 8.43E-06 | 9.25E-05 | 3.841608 |
| ACTA2     | 0.430677 | 8.143156 | 11.81701 | 4.99E-06 | 6.40E-05 | 4.420017 |
| MED13L    | 0.430709 | 8.45103  | 9.849243 | 1.76E-05 | 0.00016  | 3.024031 |
| KPNA5     | 0.430726 | 6.136693 | 9.238146 | 2.73E-05 | 0.00022  | 2.538941 |
| TUBG2     | 0.431083 | 8.649704 | 10.62011 | 1.05E-05 | 0.000109 | 3.599019 |
| CCNH      | 0.4315   | 10.06855 | 9.687395 | 1.97E-05 | 0.000173 | 2.898199 |
| CDH12     | 0.431636 | 6.862977 | 10.08739 | 1.50E-05 | 0.000141 | 3.205872 |
| PCSK1     | 0.431691 | 3.661619 | 6.840738 | 0.0002   | 0.00103  | 0.328795 |
| TRPM7     | 0.431772 | 7.725664 | 9.768352 | 1.87E-05 | 0.000167 | 2.961373 |
| NOX4      | 0.431784 | 5.497986 | 8.305432 | 5.60E-05 | 0.000379 | 1.742161 |
| TIMM8B    | 0.431816 | 7.627596 | 7.314741 | 0.00013  | 0.000729 | 0.810218 |
| FHL1      | 0.432267 | 5.978643 | 5.518994 | 0.000765 | 0.003063 | -1.15427 |
| FAR2P1 // | 0.432326 | 4.588452 | 5.38619  | 0.000885 | 0.003457 | -1.31582 |
| MAK16     | 0.432969 | 8.837157 | 11.22114 | 7.16E-06 | 8.27E-05 | 4.021474 |
| SH3BGRL   | 0.433042 | 8.12069  | 8.538284 | 4.65E-05 | 0.000329 | 1.947918 |
| SH2D1B    | 0.433274 | 5.086631 | 6.178337 | 0.000382 | 0.001734 | -0.3871  |
| SNAPC3    | 0.433297 | 7.771665 | 10.33285 | 1.27E-05 | 0.000125 | 3.389297 |
| CCDC28B   | 0.433309 | 7.290667 | 9.860313 | 1.75E-05 | 0.000159 | 3.03257  |
| NCOA7     | 0.433338 | 6.68344  | 9.37472  | 2.47E-05 | 0.000204 | 2.649749 |
| PDP2      | 0.43339  | 6.861167 | 8.065046 | 6.81E-05 | 0.00044  | 1.524659 |
| DPY19L3   | 0.433676 | 5.649024 | 3.60353  | 0.008075 | 0.02198  | -3.72403 |
| TNRC6C    | 0.433741 | 6.64611  | 7.885012 | 7.91E-05 | 0.000495 | 1.358254 |
| WARS2     | 0.433773 | 7.605494 | 7.567933 | 0.000104 | 0.000612 | 1.057575 |
| CHKB-CPT1 | 0.433799 | 6.006318 | 9.936214 | 1.66E-05 | 0.000153 | 3.09089  |
| ZDHHHC2   | 0.433824 | 7.572597 | 8.146674 | 6.37E-05 | 0.000418 | 1.599108 |
| YTHDC2    | 0.433914 | 5.923855 | 5.067632 | 0.001271 | 0.004671 | -1.71329 |
| ARPP19    | 0.434193 | 8.001837 | 8.62197  | 4.35E-05 | 0.000314 | 2.020717 |

|           |          |          |          |          |          |          |
|-----------|----------|----------|----------|----------|----------|----------|
| PM20D2    | 0.434423 | 5.751827 | 4.442177 | 0.002694 | 0.008759 | -2.5356  |
| MYO1C     | 0.434578 | 9.009892 | 10.12364 | 1.46E-05 | 0.000139 | 3.23321  |
| PITPNB    | 0.43475  | 8.583871 | 11.53053 | 5.93E-06 | 7.21E-05 | 4.230822 |
| RMDN2     | 0.434753 | 5.876086 | 7.688929 | 9.34E-05 | 0.000565 | 1.173482 |
| RSRP1     | 0.434921 | 6.103279 | 7.27647  | 0.000134 | 0.00075  | 0.772249 |
| CYBRD1    | 0.434944 | 6.410595 | 12.09174 | 4.25E-06 | 5.71E-05 | 4.597429 |
| TSC22D1   | 0.434995 | 9.424084 | 11.80631 | 5.02E-06 | 6.43E-05 | 4.413032 |
| FIBP      | 0.435092 | 3.631652 | 4.659522 | 0.002062 | 0.006991 | -2.2435  |
| INPP5B    | 0.435355 | 6.801795 | 10.835   | 9.13E-06 | 9.81E-05 | 3.752536 |
| USP3      | 0.43559  | 8.574173 | 11.32282 | 6.73E-06 | 7.91E-05 | 4.090865 |
| LINC00597 | 0.435614 | 4.943741 | 5.492616 | 0.000787 | 0.003135 | -1.18617 |
| TRPM8     | 0.435759 | 3.659969 | 4.71404  | 0.00193  | 0.006619 | -2.17129 |
| DNMT3A    | 0.435952 | 6.471785 | 7.885235 | 7.91E-05 | 0.000495 | 1.358462 |
| DDRK1     | 0.436018 | 8.537178 | 9.186804 | 2.84E-05 | 0.000226 | 2.496916 |
| PPP4R3A   | 0.436089 | 8.859118 | 11.71206 | 5.31E-06 | 6.70E-05 | 4.351215 |
| PIGH      | 0.436154 | 6.328599 | 7.523168 | 0.000108 | 0.000631 | 1.01432  |
| CEP350    | 0.436174 | 8.546747 | 8.605596 | 4.41E-05 | 0.000316 | 2.00652  |
| ZNF880    | 0.436592 | 4.314557 | 5.713966 | 0.000619 | 0.002586 | -0.92145 |
| C12orf76  | 0.436905 | 6.251853 | 8.89762  | 3.52E-05 | 0.000267 | 2.256346 |
| DENND5B   | 0.43707  | 6.586812 | 8.71972  | 4.04E-05 | 0.000297 | 2.104998 |
| ANKRD50   | 0.437179 | 8.644824 | 12.04512 | 4.37E-06 | 5.84E-05 | 4.567596 |
| OSR2      | 0.437191 | 4.886805 | 8.41539  | 5.13E-05 | 0.000355 | 1.839917 |
| CCNB1IP1  | 0.437512 | 9.581569 | 12.78087 | 2.88E-06 | 4.39E-05 | 5.026053 |
| B3GAT3    | 0.437669 | 8.52934  | 10.29431 | 1.30E-05 | 0.000128 | 3.360763 |
| RC3H2     | 0.437824 | 8.826338 | 10.48051 | 1.15E-05 | 0.000117 | 3.497756 |
| MXD4      | 0.437845 | 6.756226 | 10.30052 | 1.30E-05 | 0.000127 | 3.365368 |
| MSI2      | 0.437858 | 6.892751 | 7.619136 | 9.92E-05 | 0.000591 | 1.106803 |
| MAP9      | 0.437912 | 7.189027 | 8.706524 | 4.08E-05 | 0.000299 | 2.093668 |
| CADPS2    | 0.437967 | 5.298726 | 5.029787 | 0.001328 | 0.004839 | -1.76145 |
| BACE1     | 0.437998 | 7.429396 | 8.56527  | 4.55E-05 | 0.000324 | 1.971459 |
| BBS12     | 0.438165 | 6.191585 | 10.40714 | 1.21E-05 | 0.000121 | 3.44404  |
| RPUSD4    | 0.438945 | 8.328005 | 7.934493 | 7.59E-05 | 0.000479 | 1.404295 |
| WDR44     | 0.439125 | 6.987395 | 11.0057  | 8.20E-06 | 9.07E-05 | 3.872501 |
| TM7SF3    | 0.439211 | 10.71556 | 11.97006 | 4.56E-06 | 6.00E-05 | 4.519331 |
| LYRM1     | 0.43932  | 7.657356 | 8.113458 | 6.54E-05 | 0.000427 | 1.568887 |
| NFKBIA    | 0.439356 | 8.514998 | 11.20167 | 7.25E-06 | 8.34E-05 | 4.008123 |
| DDX49     | 0.43945  | 9.429379 | 11.30498 | 6.80E-06 | 7.97E-05 | 4.078734 |
| PHLDB3    | 0.439618 | 7.505518 | 10.73767 | 9.72E-06 | 0.000103 | 3.683354 |
| TMEM170A  | 0.439703 | 5.031535 | 5.290368 | 0.000986 | 0.003773 | -1.43388 |
| RAB20     | 0.439761 | 9.10266  | 9.461067 | 2.32E-05 | 0.000195 | 2.71908  |
| BTAF1     | 0.440008 | 6.676921 | 7.043202 | 0.000166 | 0.000888 | 0.537437 |
| RANBP17   | 0.440244 | 5.786839 | 5.825505 | 0.00055  | 0.002346 | -0.79055 |
| ZKSCAN5   | 0.440347 | 7.178921 | 8.18464  | 6.17E-05 | 0.000408 | 1.633527 |
| TIMP1     | 0.440372 | 10.58546 | 12.6259  | 3.14E-06 | 4.65E-05 | 4.931631 |
| WWP1      | 0.440396 | 8.212434 | 12.89429 | 2.71E-06 | 4.19E-05 | 5.094456 |
| MYO1B     | 0.440558 | 8.197657 | 12.09456 | 4.24E-06 | 5.71E-05 | 4.599228 |
| DOPEY1    | 0.440652 | 5.707518 | 6.801232 | 0.000208 | 0.00106  | 0.287545 |
| CHST11    | 0.440677 | 5.627008 | 7.551802 | 0.000105 | 0.000619 | 1.042011 |
| LCLAT1    | 0.440997 | 5.88157  | 6.439459 | 0.000294 | 0.001401 | -0.09862 |
| CDKN1A    | 0.441157 | 11.34701 | 11.78761 | 5.08E-06 | 6.48E-05 | 4.400806 |
| NAA16     | 0.441265 | 6.467242 | 8.180616 | 6.19E-05 | 0.00041  | 1.629885 |

|           |          |          |          |          |          |          |
|-----------|----------|----------|----------|----------|----------|----------|
| BAG1      | 0.44153  | 8.938341 | 11.10545 | 7.70E-06 | 8.71E-05 | 3.941812 |
| PIK3C3    | 0.441623 | 8.810263 | 12.16911 | 4.07E-06 | 5.54E-05 | 4.646703 |
| RBM48     | 0.441766 | 4.874067 | 5.821233 | 0.000552 | 0.002354 | -0.79553 |
| AGL       | 0.441794 | 6.489435 | 9.175954 | 2.86E-05 | 0.000227 | 2.488009 |
| LRIF1     | 0.442329 | 7.865968 | 10.99259 | 8.26E-06 | 9.13E-05 | 3.863346 |
| PEAR1     | 0.442329 | 4.419741 | 5.434614 | 0.000839 | 0.003306 | -1.25663 |
| ANGPTL2   | 0.442346 | 7.113205 | 7.184839 | 0.000146 | 0.000801 | 0.68071  |
| CTNNAL1   | 0.442589 | 9.75478  | 12.11011 | 4.21E-06 | 5.68E-05 | 4.609152 |
| SH3GLB1   | 0.442663 | 8.603478 | 12.64281 | 3.11E-06 | 4.62E-05 | 4.941989 |
| NDEL1     | 0.442958 | 8.989883 | 12.52865 | 3.31E-06 | 4.82E-05 | 4.87181  |
| TP53I3    | 0.443179 | 8.814678 | 11.25771 | 7.00E-06 | 8.14E-05 | 4.046498 |
| SLC35D2   | 0.443221 | 7.338188 | 8.247874 | 5.86E-05 | 0.000393 | 1.69056  |
| UBE2Q1    | 0.443374 | 10.39302 | 13.0979  | 2.42E-06 | 3.88E-05 | 5.215807 |
| ME3       | 0.443398 | 5.776317 | 9.188567 | 2.83E-05 | 0.000226 | 2.498362 |
| UBE4A     | 0.443451 | 8.099278 | 10.7138  | 9.87E-06 | 0.000104 | 3.666294 |
| ZFAND3    | 0.443452 | 8.071029 | 10.17848 | 1.41E-05 | 0.000135 | 3.274405 |
| MCTP1     | 0.443706 | 6.665562 | 8.978157 | 3.31E-05 | 0.000254 | 2.324013 |
| HELQ      | 0.443707 | 6.459593 | 7.081704 | 0.00016  | 0.000863 | 0.5766   |
| ZNF33A    | 0.443775 | 5.05824  | 10.58147 | 1.08E-05 | 0.000111 | 3.571113 |
| LRRFIP2   | 0.444127 | 6.967447 | 9.084668 | 3.06E-05 | 0.000239 | 2.412706 |
| ELF1      | 0.444488 | 6.844059 | 8.351006 | 5.40E-05 | 0.000369 | 1.782808 |
| NDUFAF7   | 0.444706 | 8.750633 | 10.78717 | 9.42E-06 | 0.000101 | 3.718606 |
| PMP22     | 0.444816 | 10.48195 | 12.53307 | 3.31E-06 | 4.81E-05 | 4.874537 |
| ZNF284    | 0.444885 | 6.62981  | 4.399213 | 0.002842 | 0.009173 | -2.59414 |
| SULF1     | 0.445029 | 6.981684 | 8.274141 | 5.74E-05 | 0.000386 | 1.714145 |
| TRIAP1    | 0.445043 | 9.65506  | 11.83233 | 4.95E-06 | 6.35E-05 | 4.430012 |
| HSD17B10  | 0.445118 | 9.810753 | 11.42179 | 6.33E-06 | 7.55E-05 | 4.157848 |
| SRPK2     | 0.445227 | 8.176789 | 10.23756 | 1.35E-05 | 0.000131 | 3.318566 |
| DDX3X     | 0.445381 | 8.677706 | 11.69191 | 5.38E-06 | 6.76E-05 | 4.337935 |
| COL15A1   | 0.445428 | 3.202331 | 5.375641 | 0.000896 | 0.00349  | -1.32875 |
| ZNF440    | 0.445464 | 6.771134 | 10.33317 | 1.27E-05 | 0.000125 | 3.389539 |
| ZNF274    | 0.445465 | 8.184711 | 8.568348 | 4.54E-05 | 0.000323 | 1.97414  |
| LINS1     | 0.44549  | 6.630328 | 9.387442 | 2.45E-05 | 0.000203 | 2.659998 |
| GPR19     | 0.445605 | 6.713703 | 7.832951 | 8.26E-05 | 0.000513 | 1.309561 |
| SESN3     | 0.445918 | 2.468626 | 5.703481 | 0.000626 | 0.002609 | -0.93384 |
| ZNF518B   | 0.445976 | 6.956493 | 7.509427 | 0.000109 | 0.000637 | 1.001001 |
| CCDC90B   | 0.44598  | 8.937439 | 13.1405  | 2.37E-06 | 3.83E-05 | 5.240967 |
| GZF1      | 0.446405 | 7.998855 | 9.181637 | 2.85E-05 | 0.000227 | 2.492675 |
| OTUD6B    | 0.446419 | 6.927037 | 11.8985  | 4.76E-06 | 6.18E-05 | 4.473049 |
| CPE       | 0.4465   | 6.594168 | 11.47148 | 6.14E-06 | 7.40E-05 | 4.191276 |
| FSTL1     | 0.446575 | 7.257696 | 10.15282 | 1.43E-05 | 0.000137 | 3.255156 |
| TVP23B // | 0.446594 | 9.698849 | 12.51811 | 3.33E-06 | 4.83E-05 | 4.865297 |
| POLH      | 0.446714 | 6.874807 | 8.637726 | 4.30E-05 | 0.000311 | 2.034357 |
| MTHFR     | 0.446804 | 6.679551 | 11.22652 | 7.14E-06 | 8.25E-05 | 4.025164 |
| ZMYND11   | 0.446835 | 5.487292 | 7.455332 | 0.000114 | 0.000661 | 0.948384 |
| AKAP2 /// | 0.446925 | 8.480766 | 11.15475 | 7.46E-06 | 8.52E-05 | 3.975851 |
| ARL15     | 0.44715  | 5.240429 | 6.964425 | 0.000178 | 0.000941 | 0.4568   |
| DOCK7     | 0.447437 | 6.01649  | 7.058374 | 0.000163 | 0.000878 | 0.552888 |
| OR2W3 /// | 0.447836 | 5.147547 | 5.135038 | 0.001176 | 0.004374 | -1.62799 |
| LRRC27    | 0.447862 | 5.028342 | 4.956972 | 0.001446 | 0.005197 | -1.8547  |
| SERTAD2   | 0.447917 | 8.963505 | 12.13488 | 4.15E-06 | 5.63E-05 | 4.624938 |

|           |          |          |          |          |          |          |
|-----------|----------|----------|----------|----------|----------|----------|
| PHLDA2    | 0.448111 | 8.2912   | 13.29876 | 2.18E-06 | 3.62E-05 | 5.333732 |
| LZTFL1    | 0.448195 | 7.6391   | 11.03447 | 8.05E-06 | 8.98E-05 | 3.89255  |
| NLRP1     | 0.448276 | 4.885911 | 5.620751 | 0.000685 | 0.0028   | -1.03213 |
| METTL15   | 0.448582 | 4.322039 | 5.054827 | 0.00129  | 0.004728 | -1.72956 |
| GTF2IRD2  | 0.44867  | 3.429469 | 8.542772 | 4.63E-05 | 0.000328 | 1.951838 |
| C4orf32   | 0.448802 | 7.587528 | 9.32863  | 2.56E-05 | 0.000209 | 2.612513 |
| CHN1      | 0.44905  | 7.011007 | 7.486803 | 0.000111 | 0.000647 | 0.979031 |
| SPECC1    | 0.449205 | 4.676677 | 7.375079 | 0.000123 | 0.000698 | 0.869767 |
| C14orf28  | 0.449288 | 5.069746 | 4.401412 | 0.002835 | 0.009152 | -2.59114 |
| RAB11FIP2 | 0.449362 | 5.636583 | 7.530411 | 0.000107 | 0.000628 | 1.021332 |
| MITF      | 0.449379 | 8.087001 | 8.840475 | 3.68E-05 | 0.000276 | 2.208014 |
| PROS1     | 0.449414 | 6.272088 | 9.270408 | 2.67E-05 | 0.000216 | 2.565245 |
| TCEA3     | 0.449481 | 5.689991 | 6.248811 | 0.000356 | 0.001635 | -0.30842 |
| FZD3      | 0.449789 | 5.627562 | 10.92767 | 8.61E-06 | 9.41E-05 | 3.817879 |
| LOC100996 | 0.450006 | 4.872358 | 7.136868 | 0.000152 | 0.000828 | 0.632429 |
| C8orf48   | 0.450051 | 5.528994 | 7.355062 | 0.000125 | 0.000709 | 0.850053 |
| NSUN5P1 / | 0.450285 | 6.169643 | 8.827616 | 3.72E-05 | 0.000278 | 2.1971   |
| BCDIN3D   | 0.450557 | 7.053135 | 10.66902 | 1.02E-05 | 0.000107 | 3.634209 |
| SHOC2     | 0.450601 | 9.630587 | 11.77652 | 5.11E-06 | 6.52E-05 | 4.393541 |
| YAE1D1    | 0.450613 | 7.969508 | 10.33328 | 1.27E-05 | 0.000125 | 3.389618 |
| FOXP1     | 0.450657 | 7.094769 | 10.61566 | 1.05E-05 | 0.00011  | 3.595804 |
| SLC39A10  | 0.450888 | 6.201419 | 8.385792 | 5.25E-05 | 0.000361 | 1.813708 |
| SLC25A32  | 0.450994 | 7.901161 | 11.97041 | 4.56E-06 | 6.00E-05 | 4.519555 |
| ZNF765    | 0.451383 | 5.296861 | 6.910202 | 0.000187 | 0.000978 | 0.400895 |
| COL7A1    | 0.451494 | 7.054527 | 7.524631 | 0.000108 | 0.00063  | 1.015736 |
| ZNF17     | 0.451589 | 7.00865  | 8.820288 | 3.74E-05 | 0.000279 | 2.190876 |
| ECD       | 0.45175  | 9.094555 | 13.26979 | 2.21E-06 | 3.66E-05 | 5.316831 |
| STAT5B    | 0.451888 | 6.36833  | 6.742715 | 0.000219 | 0.001107 | 0.226119 |
| CTR9      | 0.45189  | 8.547242 | 11.01526 | 8.15E-06 | 9.04E-05 | 3.879172 |
| CGN       | 0.452078 | 3.655722 | 4.448493 | 0.002673 | 0.008699 | -2.52702 |
| ZNF624    | 0.452264 | 4.696177 | 6.97138  | 0.000177 | 0.000936 | 0.463946 |
| TRAK2     | 0.452408 | 5.523305 | 6.224877 | 0.000364 | 0.001667 | -0.33507 |
| MRPS31P5  | 0.452601 | 6.361577 | 8.713241 | 4.06E-05 | 0.000298 | 2.099437 |
| SP140L    | 0.452742 | 2.703091 | 6.133072 | 0.0004   | 0.001801 | -0.43797 |
| IFT20     | 0.453025 | 8.679201 | 11.75562 | 5.18E-06 | 6.57E-05 | 4.379842 |
| SMG7      | 0.453206 | 7.227703 | 9.420425 | 2.39E-05 | 0.000199 | 2.686516 |
| IRF2      | 0.453337 | 7.527855 | 10.90785 | 8.72E-06 | 9.49E-05 | 3.803947 |
| ZNF214    | 0.453387 | 5.327378 | 4.655221 | 0.002072 | 0.007021 | -2.24921 |
| MEF2C     | 0.453518 | 6.348689 | 7.845132 | 8.18E-05 | 0.000509 | 1.320977 |
| PSEN2     | 0.453717 | 7.38339  | 8.530805 | 4.68E-05 | 0.00033  | 1.941383 |
| ZNF223    | 0.45402  | 6.551268 | 10.11587 | 1.47E-05 | 0.00014  | 3.227356 |
| TMEM65    | 0.454166 | 5.921405 | 10.27196 | 1.32E-05 | 0.000129 | 3.344164 |
| SNX11     | 0.454236 | 7.872716 | 10.50487 | 1.13E-05 | 0.000115 | 3.515509 |
| DST       | 0.454492 | 7.668069 | 7.244622 | 0.000138 | 0.000766 | 0.740535 |
| NIPAL2    | 0.45479  | 6.828564 | 11.98591 | 4.52E-06 | 5.98E-05 | 4.529546 |
| CXCL10    | 0.454888 | 5.894119 | 4.920005 | 0.00151  | 0.00539  | -1.90234 |
| CREBL2    | 0.455034 | 9.386686 | 10.50393 | 1.13E-05 | 0.000116 | 3.514826 |
| VKORC1L1  | 0.455145 | 7.620697 | 13.8978  | 1.60E-06 | 2.95E-05 | 5.675345 |
| TLR6      | 0.455591 | 4.017681 | 8.670275 | 4.19E-05 | 0.000305 | 2.062467 |
| LRIG3     | 0.455827 | 6.517359 | 12.29716 | 3.78E-06 | 5.28E-05 | 4.727594 |
| ZNF767P   | 0.45584  | 6.098148 | 9.674382 | 1.99E-05 | 0.000175 | 2.888001 |

|           |          |          |          |          |          |          |
|-----------|----------|----------|----------|----------|----------|----------|
| AMIG02    | 0.455852 | 8.734464 | 11.77125 | 5.13E-06 | 6.53E-05 | 4.390088 |
| TNFSF9    | 0.455915 | 7.36179  | 9.554764 | 2.17E-05 | 0.000185 | 2.793686 |
| PISD      | 0.455957 | 5.682144 | 8.401412 | 5.18E-05 | 0.000358 | 1.827549 |
| SRFBP1    | 0.456354 | 7.66705  | 9.971544 | 1.62E-05 | 0.00015  | 3.117901 |
| LYSMD3    | 0.456377 | 6.146055 | 11.95694 | 4.60E-06 | 6.03E-05 | 4.510862 |
| TNKS2     | 0.456463 | 6.666488 | 9.502104 | 2.25E-05 | 0.000191 | 2.751835 |
| RPL23 /// | 0.456569 | 6.242342 | 8.368802 | 5.32E-05 | 0.000365 | 1.798629 |
| SCRG1     | 0.456934 | 3.925954 | 7.043908 | 0.000166 | 0.000887 | 0.538157 |
| RFX3      | 0.457359 | 5.21642  | 4.834741 | 0.00167  | 0.005863 | -2.01294 |
| PIP4K2B   | 0.457702 | 7.400098 | 10.48047 | 1.15E-05 | 0.000117 | 3.497723 |
| C15orf48  | 0.457711 | 4.334721 | 4.079926 | 0.004273 | 0.012906 | -3.03733 |
| DEDD      | 0.457946 | 7.732884 | 8.947907 | 3.39E-05 | 0.000259 | 2.298658 |
| DCAF5     | 0.458337 | 7.418224 | 11.02016 | 8.12E-06 | 9.03E-05 | 3.882586 |
| MPI       | 0.458488 | 5.932836 | 6.465553 | 0.000287 | 0.001373 | -0.07024 |
| SLC25A24  | 0.458558 | 8.789745 | 11.41573 | 6.35E-06 | 7.57E-05 | 4.153765 |
| BRWD1     | 0.458676 | 4.5388   | 4.743931 | 0.001862 | 0.006426 | -2.13188 |
| CYTH2     | 0.458863 | 7.673722 | 9.911137 | 1.69E-05 | 0.000155 | 3.071666 |
| RSF1      | 0.459002 | 7.319867 | 8.299491 | 5.62E-05 | 0.00038  | 1.736848 |
| YBX3      | 0.459033 | 11.27987 | 10.58881 | 1.07E-05 | 0.000111 | 3.576416 |
| TRIM38    | 0.459376 | 7.284842 | 6.225619 | 0.000364 | 0.001666 | -0.33424 |
| ACTR8     | 0.459403 | 7.213107 | 10.64906 | 1.03E-05 | 0.000108 | 3.619864 |
| ITPKC     | 0.459662 | 6.001012 | 5.115401 | 0.001203 | 0.004458 | -1.65278 |
| TSC1      | 0.459744 | 5.331657 | 10.59457 | 1.07E-05 | 0.000111 | 3.580579 |
| NDUFV3    | 0.459765 | 5.592994 | 9.531194 | 2.21E-05 | 0.000188 | 2.774979 |
| RNF214    | 0.459822 | 6.944312 | 8.997817 | 3.26E-05 | 0.000251 | 2.340452 |
| MIA3      | 0.460011 | 9.03127  | 11.55113 | 5.85E-06 | 7.15E-05 | 4.244571 |
| ZNF292    | 0.46034  | 7.662594 | 8.833607 | 3.70E-05 | 0.000277 | 2.202187 |
| SUSD6     | 0.460466 | 7.514114 | 9.796121 | 1.83E-05 | 0.000164 | 2.982934 |
| KLHL5     | 0.460623 | 8.223503 | 11.38618 | 6.47E-06 | 7.68E-05 | 4.133808 |
| VIPAS39   | 0.460636 | 7.603499 | 11.84119 | 4.92E-06 | 6.33E-05 | 4.435793 |
| PHTF1     | 0.460721 | 7.55055  | 11.69105 | 5.38E-06 | 6.76E-05 | 4.337369 |
| CWC25     | 0.460869 | 7.558913 | 7.960773 | 7.42E-05 | 0.000471 | 1.428653 |
| NP1PB6    | 0.460891 | 5.448075 | 7.799486 | 8.50E-05 | 0.000524 | 1.278122 |
| CGRRF1    | 0.460977 | 6.688566 | 11.26264 | 6.98E-06 | 8.12E-05 | 4.04987  |
| ID2       | 0.461059 | 5.242411 | 12.10102 | 4.23E-06 | 5.69E-05 | 4.603353 |
| CBX5      | 0.461853 | 8.616481 | 11.80301 | 5.03E-06 | 6.43E-05 | 4.410876 |
| PPP2R3C   | 0.461923 | 3.406767 | 5.40045  | 0.000872 | 0.003413 | -1.29835 |
| OLR1      | 0.46211  | 3.628207 | 6.916807 | 0.000186 | 0.000975 | 0.407722 |
| OTUD3     | 0.462168 | 4.567535 | 5.774905 | 0.00058  | 0.00245  | -0.84973 |
| MCCC1     | 0.462848 | 7.653589 | 8.772731 | 3.87E-05 | 0.000287 | 2.15037  |
| DR1       | 0.462965 | 8.365624 | 11.55392 | 5.84E-06 | 7.15E-05 | 4.246436 |
| PRDM2     | 0.463213 | 7.690283 | 10.36755 | 1.24E-05 | 0.000123 | 3.414909 |
| LIPH      | 0.463406 | 3.410679 | 4.045106 | 0.004471 | 0.013415 | -3.08652 |
| ZNF570    | 0.463822 | 5.451572 | 10.38715 | 1.22E-05 | 0.000122 | 3.429345 |
| CLTA      | 0.463994 | 4.754877 | 10.54079 | 1.11E-05 | 0.000114 | 3.541631 |
| TNPO1     | 0.464017 | 9.904728 | 12.79184 | 2.86E-06 | 4.37E-05 | 5.032697 |
| ZNF439    | 0.464069 | 4.499421 | 6.846696 | 0.000199 | 0.001025 | 0.335    |
| ADAM22    | 0.46459  | 5.376144 | 5.387247 | 0.000884 | 0.003453 | -1.31452 |
| TXLNG     | 0.46468  | 6.497804 | 11.53283 | 5.92E-06 | 7.20E-05 | 4.232358 |
| RIPK2     | 0.464873 | 8.18085  | 8.574621 | 4.52E-05 | 0.000322 | 1.979601 |
| BAZ1A     | 0.464973 | 7.583591 | 11.01661 | 8.14E-06 | 9.04E-05 | 3.880108 |

|           |          |          |          |          |          |          |
|-----------|----------|----------|----------|----------|----------|----------|
| COL6A3    | 0.465053 | 6.421246 | 6.800988 | 0.000208 | 0.00106  | 0.28729  |
| GPR89B    | 0.465158 | 4.19734  | 10.51861 | 1.12E-05 | 0.000115 | 3.525513 |
| TMEM161B  | 0.465172 | 9.680639 | 11.8011  | 5.04E-06 | 6.44E-05 | 4.409624 |
| KIAA0408  | 0.465198 | 4.817401 | 7.23353  | 0.000139 | 0.000772 | 0.729464 |
| BRAP      | 0.465249 | 6.726899 | 6.402399 | 0.000305 | 0.001442 | -0.13905 |
| NADSYN1   | 0.465501 | 6.587406 | 6.435799 | 0.000295 | 0.001406 | -0.1026  |
| CMBL      | 0.465515 | 9.521081 | 10.85312 | 9.03E-06 | 9.73E-05 | 3.765351 |
| ERLIN2    | 0.465596 | 6.66181  | 9.741436 | 1.90E-05 | 0.000169 | 2.94042  |
| TRIP11    | 0.465834 | 6.94037  | 11.50185 | 6.03E-06 | 7.30E-05 | 4.21164  |
| ZMPSTE24  | 0.465851 | 9.110342 | 10.73165 | 9.76E-06 | 0.000103 | 3.679051 |
| DUSP4     | 0.466005 | 9.527182 | 13.31226 | 2.16E-06 | 3.60E-05 | 5.341599 |
| PHTF2     | 0.466113 | 6.589342 | 10.08316 | 1.50E-05 | 0.000142 | 3.202676 |
| SCYL3     | 0.466509 | 7.294826 | 9.2175   | 2.77E-05 | 0.000222 | 2.522066 |
| ANKRD42   | 0.466549 | 6.986136 | 8.461371 | 4.94E-05 | 0.000345 | 1.88048  |
| SGMS1     | 0.466953 | 6.795303 | 11.4228  | 6.33E-06 | 7.55E-05 | 4.158529 |
| ZNF263    | 0.467222 | 8.10712  | 8.645194 | 4.28E-05 | 0.000309 | 2.040814 |
| MTERF4    | 0.468276 | 6.757403 | 6.860449 | 0.000196 | 0.001015 | 0.349309 |
| SLC18B1   | 0.468406 | 6.654807 | 6.10511  | 0.000411 | 0.001844 | -0.46953 |
| MAPRE1    | 0.468757 | 9.814838 | 11.83455 | 4.94E-06 | 6.35E-05 | 4.431464 |
| TET2      | 0.468824 | 6.816824 | 7.294824 | 0.000132 | 0.00074  | 0.790478 |
| LSG1      | 0.469125 | 7.545116 | 14.07149 | 1.46E-06 | 2.78E-05 | 5.771683 |
| GRHL3     | 0.469257 | 4.380814 | 5.399941 | 0.000872 | 0.003414 | -1.29898 |
| BRAF ///  | 0.469621 | 7.056779 | 7.330741 | 0.000128 | 0.000721 | 0.826045 |
| IQCG      | 0.469956 | 5.778505 | 6.739502 | 0.00022  | 0.00111  | 0.222735 |
| WNT5A     | 0.470334 | 7.899455 | 13.32493 | 2.15E-06 | 3.59E-05 | 5.348967 |
| CTSE      | 0.471189 | 5.523351 | 3.851995 | 0.00577  | 0.016571 | -3.36225 |
| HBS1L     | 0.471194 | 5.046351 | 8.434619 | 5.05E-05 | 0.000351 | 1.856902 |
| PUS3      | 0.471304 | 8.65467  | 13.64635 | 1.82E-06 | 3.22E-05 | 5.53375  |
| AADAC     | 0.471379 | 2.669076 | 4.74033  | 0.00187  | 0.006448 | -2.13662 |
| CHIC1     | 0.471394 | 3.517112 | 4.435014 | 0.002718 | 0.008827 | -2.54534 |
| CTNNBIP1  | 0.47147  | 8.522492 | 10.02468 | 1.56E-05 | 0.000146 | 3.158361 |
| MTMR3     | 0.471667 | 7.34694  | 13.05586 | 2.48E-06 | 3.94E-05 | 5.1909   |
| FUT10     | 0.471704 | 4.736728 | 8.570863 | 4.53E-05 | 0.000323 | 1.97633  |
| PHLDA3    | 0.471739 | 8.780934 | 10.70635 | 9.92E-06 | 0.000105 | 3.660964 |
| EXT1      | 0.471878 | 8.648296 | 12.50805 | 3.35E-06 | 4.85E-05 | 4.859077 |
| WDR20     | 0.472044 | 5.434698 | 10.22833 | 1.36E-05 | 0.000132 | 3.311681 |
| LGALS8    | 0.472044 | 7.962967 | 12.54358 | 3.29E-06 | 4.80E-05 | 4.881021 |
| STX17     | 0.472219 | 6.334574 | 4.477699 | 0.002577 | 0.008433 | -2.4874  |
| LOC441155 | 0.472312 | 8.616932 | 10.63842 | 1.04E-05 | 0.000108 | 3.612204 |
| GOLGA1    | 0.472568 | 5.043519 | 8.91384  | 3.48E-05 | 0.000264 | 2.270016 |
| HIST1H2AC | 0.472629 | 4.290974 | 8.66606  | 4.21E-05 | 0.000306 | 2.058831 |
| SPAST     | 0.472882 | 5.595925 | 7.215732 | 0.000142 | 0.000782 | 0.711672 |
| RAD51L3-R | 0.473211 | 8.006695 | 12.57326 | 3.23E-06 | 4.74E-05 | 4.899305 |
| WDR55     | 0.473383 | 7.838413 | 10.63134 | 1.04E-05 | 0.000109 | 3.607108 |
| ZMYM6     | 0.473397 | 5.999225 | 8.816839 | 3.75E-05 | 0.00028  | 2.187945 |
| TMOD3     | 0.473504 | 7.196374 | 11.90264 | 4.75E-06 | 6.17E-05 | 4.475735 |
| ADGRE5    | 0.47365  | 9.310969 | 13.39212 | 2.07E-06 | 3.51E-05 | 5.387953 |
| UBR2      | 0.473694 | 6.251355 | 6.138515 | 0.000398 | 0.001792 | -0.43184 |
| MBNL3     | 0.474037 | 3.194393 | 7.587204 | 0.000102 | 0.000604 | 1.076133 |
| TAF11     | 0.474306 | 6.845075 | 10.46468 | 1.16E-05 | 0.000118 | 3.486195 |
| CCDC66    | 0.474513 | 6.940966 | 6.822256 | 0.000204 | 0.001044 | 0.309519 |



|           |          |          |          |          |          |          |
|-----------|----------|----------|----------|----------|----------|----------|
| C3        | 0.474747 | 4.950688 | 6.084034 | 0.00042  | 0.001877 | -0.49337 |
| ZNF12     | 0.474759 | 7.751914 | 12.66302 | 3.08E-06 | 4.59E-05 | 4.954348 |
| KLHL20    | 0.474793 | 7.6701   | 9.831726 | 1.78E-05 | 0.000161 | 3.010501 |
| OASL      | 0.475096 | 7.527276 | 12.71248 | 2.99E-06 | 4.51E-05 | 4.984522 |
| FRMD4B    | 0.475199 | 5.182665 | 8.171434 | 6.24E-05 | 0.000412 | 1.621569 |
| BCAT1     | 0.475202 | 8.686573 | 12.30063 | 3.77E-06 | 5.27E-05 | 4.729774 |
| LRRC57    | 0.475312 | 7.398858 | 9.943189 | 1.65E-05 | 0.000152 | 3.09623  |
| LOC105379 | 0.475336 | 6.845583 | 8.131603 | 6.45E-05 | 0.000422 | 1.585408 |
| DSC3      | 0.475545 | 4.277158 | 4.871931 | 0.001598 | 0.005649 | -1.96457 |
| LOC100996 | 0.475654 | 9.818469 | 13.63646 | 1.82E-06 | 3.23E-05 | 5.52813  |
| DNAJC27   | 0.475763 | 5.509743 | 10.43065 | 1.19E-05 | 0.000119 | 3.461286 |
| LUC7L     | 0.475885 | 7.071527 | 7.743755 | 8.91E-05 | 0.000544 | 1.225523 |
| MTRF1L    | 0.4761   | 8.618948 | 12.39052 | 3.58E-06 | 5.08E-05 | 4.786064 |
| SERTAD4   | 0.476101 | 9.51056  | 12.21978 | 3.95E-06 | 5.43E-05 | 4.678808 |
| RBFOX2    | 0.476184 | 8.933474 | 13.44746 | 2.01E-06 | 3.43E-05 | 5.41992  |
| CCDC93    | 0.476369 | 5.961995 | 6.088992 | 0.000418 | 0.001869 | -0.48776 |
| ZMYM2     | 0.476432 | 8.511864 | 10.34888 | 1.25E-05 | 0.000124 | 3.401144 |
| PDLIM1    | 0.476775 | 8.941596 | 11.61944 | 5.62E-06 | 6.94E-05 | 4.29001  |
| DKK2      | 0.477233 | 2.652414 | 7.958567 | 7.44E-05 | 0.000472 | 1.426611 |
| KMT2A     | 0.47726  | 7.963834 | 14.268   | 1.32E-06 | 2.61E-05 | 5.879266 |
| NUAK2     | 0.477403 | 5.949269 | 10.58343 | 1.07E-05 | 0.000111 | 3.572526 |
| CD46      | 0.477522 | 8.878474 | 12.17075 | 4.06E-06 | 5.54E-05 | 4.647741 |
| REL       | 0.477691 | 4.99197  | 6.276798 | 0.000346 | 0.001598 | -0.27734 |
| MYL12B    | 0.477811 | 10.83501 | 13.76787 | 1.71E-06 | 3.09E-05 | 5.602498 |
| BIRC2     | 0.477866 | 8.696162 | 12.53766 | 3.30E-06 | 4.81E-05 | 4.877373 |
| DUSP14    | 0.478214 | 9.282307 | 13.16109 | 2.34E-06 | 3.81E-05 | 5.253096 |
| PRRG4     | 0.478406 | 3.786596 | 3.458483 | 0.009867 | 0.026009 | -3.93858 |
| DEPDC7    | 0.478462 | 3.503768 | 4.829606 | 0.00168  | 0.005892 | -2.01963 |
| LOXL3     | 0.478543 | 6.204588 | 9.306273 | 2.60E-05 | 0.000212 | 2.594393 |
| ELL       | 0.478574 | 6.762638 | 7.57972  | 0.000103 | 0.000607 | 1.06893  |
| PHF21B    | 0.478868 | 4.378802 | 7.153175 | 0.00015  | 0.00082  | 0.648869 |
| KIDINS22C | 0.479026 | 8.43566  | 14.08845 | 1.45E-06 | 2.77E-05 | 5.781027 |
| CYB5R4    | 0.479126 | 8.196856 | 12.26743 | 3.84E-06 | 5.33E-05 | 4.708885 |
| GNG11     | 0.479138 | 9.996707 | 13.92038 | 1.58E-06 | 2.93E-05 | 5.687936 |
| ZNF585A / | 0.479293 | 6.521159 | 9.367049 | 2.48E-05 | 0.000205 | 2.643562 |
| PARP11    | 0.47935  | 4.249087 | 6.635821 | 0.000243 | 0.001201 | 0.112888 |
| DNAJC3    | 0.47943  | 7.126764 | 9.347005 | 2.52E-05 | 0.000207 | 2.627377 |
| IQCK      | 0.479432 | 5.952509 | 10.51809 | 1.12E-05 | 0.000115 | 3.525135 |
| PHF10     | 0.479615 | 6.264881 | 6.830141 | 0.000202 | 0.001038 | 0.317748 |
| ZNF621    | 0.479666 | 6.728755 | 13.33841 | 2.13E-06 | 3.57E-05 | 5.356804 |
| ENO3      | 0.479708 | 6.269578 | 6.285483 | 0.000343 | 0.001587 | -0.26771 |
| SRSF6     | 0.479825 | 9.200135 | 12.49979 | 3.37E-06 | 4.87E-05 | 4.853969 |
| ATE1      | 0.479924 | 7.479863 | 11.84218 | 4.92E-06 | 6.33E-05 | 4.436438 |
| PWWP2A    | 0.479934 | 5.43435  | 6.311489 | 0.000334 | 0.001554 | -0.23895 |
| RAB5A     | 0.480105 | 7.39699  | 14.35615 | 1.27E-06 | 2.53E-05 | 5.927049 |
| AGO4      | 0.480463 | 4.973732 | 5.038392 | 0.001315 | 0.0048   | -1.75048 |
| RAD52     | 0.480528 | 5.693091 | 8.991966 | 3.28E-05 | 0.000252 | 2.335563 |
| LARP6     | 0.480589 | 6.000604 | 7.179155 | 0.000146 | 0.000804 | 0.675002 |
| LAMP2 /// | 0.480808 | 7.165507 | 11.40647 | 6.39E-06 | 7.61E-05 | 4.147517 |
| KIF3B     | 0.480881 | 7.535799 | 12.1881  | 4.02E-06 | 5.51E-05 | 4.658747 |
| SDSL      | 0.481225 | 6.877002 | 9.910656 | 1.69E-05 | 0.000155 | 3.071296 |

|           |          |          |          |          |          |          |
|-----------|----------|----------|----------|----------|----------|----------|
| ZNF41     | 0.481337 | 6.132406 | 7.176182 | 0.000147 | 0.000806 | 0.672016 |
| TRMT44    | 0.481835 | 5.228238 | 7.96712  | 7.38E-05 | 0.000469 | 1.434526 |
| GAB1      | 0.482042 | 5.338811 | 4.218482 | 0.003573 | 0.011104 | -2.84326 |
| FOLR1     | 0.482087 | 3.736224 | 4.723019 | 0.001909 | 0.006557 | -2.15944 |
| CCDC126   | 0.482557 | 6.27758  | 14.15766 | 1.40E-06 | 2.70E-05 | 5.819043 |
| PLCL1     | 0.482727 | 4.266796 | 5.779611 | 0.000577 | 0.00244  | -0.84421 |
| PLPP3     | 0.482794 | 6.803525 | 10.58046 | 1.08E-05 | 0.000111 | 3.570381 |
| C12orf4   | 0.482855 | 7.648266 | 10.57134 | 1.08E-05 | 0.000112 | 3.563778 |
| N4BP2     | 0.483431 | 6.683143 | 7.583679 | 0.000102 | 0.000606 | 1.072741 |
| ZNF782    | 0.483571 | 3.019482 | 7.52018  | 0.000108 | 0.000632 | 1.011425 |
| SNX24     | 0.483659 | 8.22604  | 10.36948 | 1.24E-05 | 0.000123 | 3.416336 |
| ERVK3-1 / | 0.48399  | 10.02677 | 13.42575 | 2.04E-06 | 3.46E-05 | 5.407395 |
| RAB3GAP2  | 0.484182 | 8.356337 | 11.70981 | 5.32E-06 | 6.70E-05 | 4.349731 |
| TXNRD2    | 0.484238 | 7.894415 | 11.43416 | 6.28E-06 | 7.51E-05 | 4.16618  |
| DAPK3     | 0.484365 | 5.968535 | 8.528949 | 4.68E-05 | 0.000331 | 1.93976  |
| GOLGB1    | 0.484498 | 8.971157 | 12.22392 | 3.94E-06 | 5.43E-05 | 4.681425 |
| CD59      | 0.4848   | 11.00839 | 14.32279 | 1.29E-06 | 2.57E-05 | 5.909    |
| ZNF202    | 0.484998 | 7.088608 | 11.23008 | 7.12E-06 | 8.24E-05 | 4.027599 |
| S100A16   | 0.485025 | 10.98707 | 13.20682 | 2.29E-06 | 3.74E-05 | 5.279974 |
| PCDH18    | 0.485119 | 7.410786 | 10.41116 | 1.20E-05 | 0.000121 | 3.446989 |
| NCOA1     | 0.485197 | 5.70115  | 7.257892 | 0.000136 | 0.000759 | 0.753762 |
| PSD3      | 0.485504 | 7.025499 | 12.94133 | 2.64E-06 | 4.11E-05 | 5.122655 |
| ZNF675    | 0.485995 | 4.04955  | 4.022668 | 0.004604 | 0.013741 | -3.1183  |
| ARHGDIB   | 0.486082 | 7.408251 | 12.86856 | 2.75E-06 | 4.23E-05 | 5.078989 |
| LOC441155 | 0.486458 | 8.472329 | 10.13018 | 1.45E-05 | 0.000139 | 3.238134 |
| ZNRF2     | 0.486532 | 5.646314 | 7.15316  | 0.00015  | 0.00082  | 0.648854 |
| ARL14EP   | 0.486644 | 8.775134 | 11.06748 | 7.88E-06 | 8.84E-05 | 3.915499 |
| FAM103A1  | 0.486665 | 9.755517 | 12.43761 | 3.49E-06 | 4.98E-05 | 4.815397 |
| PAPD4     | 0.486776 | 8.006263 | 13.54076 | 1.92E-06 | 3.34E-05 | 5.473523 |
| SPARC     | 0.486836 | 11.04929 | 12.35593 | 3.65E-06 | 5.16E-05 | 4.76445  |
| RSPRY1    | 0.486904 | 7.88667  | 14.09611 | 1.44E-06 | 2.76E-05 | 5.785245 |
| ATP6V1B2  | 0.486973 | 8.517794 | 11.0209  | 8.12E-06 | 9.03E-05 | 3.883104 |
| ZNF3      | 0.48698  | 7.812175 | 12.4551  | 3.45E-06 | 4.95E-05 | 4.826267 |
| WWP2      | 0.487075 | 6.827421 | 8.96792  | 3.34E-05 | 0.000256 | 2.315441 |
| PLK2      | 0.487089 | 10.44157 | 14.84736 | 9.99E-07 | 2.17E-05 | 6.188053 |
| GPATCH4   | 0.487334 | 10.08815 | 13.3093  | 2.17E-06 | 3.60E-05 | 5.339873 |
| SETD2     | 0.487355 | 8.362427 | 8.914104 | 3.48E-05 | 0.000264 | 2.270238 |
| RHOJ      | 0.487656 | 5.971269 | 7.73205  | 9.00E-05 | 0.000548 | 1.214437 |
| IPPK      | 0.487987 | 8.351176 | 9.9224   | 1.68E-05 | 0.000154 | 3.080305 |
| SLC7A6OS  | 0.48811  | 6.67691  | 11.20231 | 7.25E-06 | 8.34E-05 | 4.00856  |
| GABARAPL1 | 0.488118 | 6.844678 | 8.634073 | 4.31E-05 | 0.000311 | 2.031196 |
| MOAP1     | 0.488415 | 7.640532 | 12.26684 | 3.84E-06 | 5.33E-05 | 4.708515 |
| KIF2A     | 0.488577 | 9.094922 | 11.96828 | 4.57E-06 | 6.01E-05 | 4.518183 |
| RALGAPA1  | 0.48886  | 5.497582 | 8.108507 | 6.57E-05 | 0.000429 | 1.564374 |
| GPR180    | 0.489086 | 8.72445  | 10.79038 | 9.40E-06 | 0.0001   | 3.720887 |
| DNAJB6    | 0.489097 | 8.280697 | 14.5968  | 1.13E-06 | 2.33E-05 | 6.056016 |
| SLC26A4   | 0.48931  | 3.332703 | 4.313759 | 0.003165 | 0.010039 | -2.71136 |
| ZNF415    | 0.489348 | 4.858382 | 5.926326 | 0.000495 | 0.002151 | -0.67363 |
| ND1       | 0.489389 | 12.29984 | 14.7772  | 1.03E-06 | 2.20E-05 | 6.151311 |
| GUF1      | 0.489526 | 7.000783 | 10.61052 | 1.06E-05 | 0.00011  | 3.592099 |
| ZC3HAV1L  | 0.48978  | 3.598749 | 3.861833 | 0.005695 | 0.01639  | -3.34809 |

|           |          |          |          |          |          |          |
|-----------|----------|----------|----------|----------|----------|----------|
| KIAA0907  | 0.489797 | 9.522394 | 11.98638 | 4.52E-06 | 5.98E-05 | 4.529847 |
| LYPD6B    | 0.490021 | 4.365398 | 7.307    | 0.00013  | 0.000733 | 0.802551 |
| FGF14     | 0.490063 | 3.472377 | 8.872657 | 3.59E-05 | 0.000271 | 2.235265 |
| MYOF      | 0.490149 | 10.87626 | 11.49402 | 6.06E-06 | 7.32E-05 | 4.206391 |
| ZFP28     | 0.490182 | 4.813973 | 5.571972 | 0.000722 | 0.002926 | -1.0905  |
| NXF1      | 0.490248 | 8.068094 | 11.10801 | 7.69E-06 | 8.71E-05 | 3.943579 |
| ZNF550    | 0.4903   | 6.379727 | 9.093125 | 3.04E-05 | 0.000238 | 2.419709 |
| PPP1R21   | 0.490421 | 6.385094 | 8.645314 | 4.28E-05 | 0.000309 | 2.040917 |
| DPP8      | 0.490824 | 9.754228 | 13.58668 | 1.87E-06 | 3.29E-05 | 5.499773 |
| TMCC3     | 0.491003 | 3.471263 | 9.320622 | 2.57E-05 | 0.00021  | 2.606027 |
| MEF2A     | 0.491164 | 6.698182 | 11.26486 | 6.97E-06 | 8.12E-05 | 4.051381 |
| MIER1     | 0.4914   | 7.17815  | 10.50603 | 1.13E-05 | 0.000115 | 3.516354 |
| ALG13     | 0.491616 | 8.154151 | 11.51313 | 5.99E-06 | 7.26E-05 | 4.219189 |
| C6orf48   | 0.491707 | 10.56755 | 14.4     | 1.24E-06 | 2.50E-05 | 5.950709 |
| LMOD3     | 0.492037 | 3.656852 | 6.199544 | 0.000374 | 0.001703 | -0.36336 |
| ZNF763    | 0.492079 | 3.953846 | 6.877577 | 0.000193 | 0.001001 | 0.3671   |
| BCL2L13   | 0.492212 | 6.360745 | 6.830859 | 0.000202 | 0.001037 | 0.318497 |
| DDX31     | 0.492222 | 7.430509 | 9.941235 | 1.65E-05 | 0.000152 | 3.094734 |
| FAM133B / | 0.49223  | 8.313787 | 11.869   | 4.84E-06 | 6.25E-05 | 4.453888 |
| SCRN1     | 0.492292 | 7.736325 | 9.930252 | 1.67E-05 | 0.000153 | 3.086324 |
| WASF3     | 0.492789 | 4.991312 | 8.668267 | 4.20E-05 | 0.000305 | 2.060735 |
| IRS1      | 0.492902 | 6.989139 | 9.939523 | 1.66E-05 | 0.000153 | 3.093423 |
| P4HA2     | 0.493045 | 8.64932  | 12.66801 | 3.07E-06 | 4.58E-05 | 4.9574   |
| WAPL      | 0.493144 | 9.227338 | 13.61446 | 1.85E-06 | 3.25E-05 | 5.51561  |
| EPHA2     | 0.493163 | 8.94232  | 11.59365 | 5.71E-06 | 7.02E-05 | 4.272888 |
| TRIT1     | 0.493258 | 6.472061 | 12.88044 | 2.73E-06 | 4.21E-05 | 5.086137 |
| NHLRC2    | 0.493615 | 7.455598 | 12.59736 | 3.19E-06 | 4.69E-05 | 4.914122 |
| NMNAT2    | 0.49387  | 7.887436 | 12.80885 | 2.84E-06 | 4.34E-05 | 5.042984 |
| POLR3C    | 0.493999 | 9.139446 | 13.30102 | 2.18E-06 | 3.61E-05 | 5.335051 |
| MRPL20    | 0.494147 | 8.64585  | 4.994898 | 0.001383 | 0.005005 | -1.80604 |
| EXOC5     | 0.494394 | 8.161892 | 13.55433 | 1.90E-06 | 3.33E-05 | 5.481286 |
| TRAF4     | 0.494491 | 7.351926 | 8.887399 | 3.55E-05 | 0.000268 | 2.24772  |
| GRAMD1B   | 0.494853 | 6.867019 | 7.17422  | 0.000147 | 0.000807 | 0.670044 |
| PRKAA2    | 0.495309 | 5.860657 | 8.178008 | 6.21E-05 | 0.00041  | 1.627524 |
| HSPB3     | 0.495407 | 4.94268  | 8.465735 | 4.92E-05 | 0.000344 | 1.88432  |
| DDI2      | 0.495586 | 6.164573 | 7.617044 | 9.94E-05 | 0.000592 | 1.104796 |
| RPRD1B    | 0.495656 | 3.975271 | 5.2212   | 0.001066 | 0.004029 | -1.5199  |
| FAM133B / | 0.496018 | 7.159004 | 10.39941 | 1.21E-05 | 0.000121 | 3.438357 |
| RAB9A     | 0.496223 | 8.596268 | 12.66492 | 3.07E-06 | 4.58E-05 | 4.955512 |
| ZNF546    | 0.496534 | 4.004926 | 5.399337 | 0.000873 | 0.003415 | -1.29972 |
| RAB27B    | 0.496689 | 5.075744 | 3.712782 | 0.006958 | 0.019407 | -3.56402 |
| TMEM192 / | 0.496704 | 8.850035 | 13.65538 | 1.81E-06 | 3.21E-05 | 5.538877 |
| ZNF585A   | 0.496764 | 6.467162 | 9.490783 | 2.27E-05 | 0.000192 | 2.742811 |
| PIBF1     | 0.497394 | 7.774614 | 12.24643 | 3.89E-06 | 5.38E-05 | 4.695644 |
| FAM200A   | 0.497416 | 7.128308 | 14.20438 | 1.37E-06 | 2.67E-05 | 5.844602 |
| SLC25A20  | 0.497577 | 7.748565 | 14.50732 | 1.18E-06 | 2.40E-05 | 6.008313 |
| C5orf15   | 0.49767  | 9.078743 | 14.48897 | 1.19E-06 | 2.42E-05 | 5.998494 |
| ICAM1     | 0.497768 | 6.656581 | 7.483901 | 0.000112 | 0.000648 | 0.97621  |
| MRPL43    | 0.498023 | 7.880397 | 12.67837 | 3.05E-06 | 4.57E-05 | 4.963723 |
| RBM14-RBM | 0.498161 | 9.979927 | 13.51042 | 1.95E-06 | 3.36E-05 | 5.456134 |
| RRP8      | 0.498198 | 7.637129 | 14.88587 | 9.80E-07 | 2.14E-05 | 6.208149 |

|           |          |          |          |          |          |          |
|-----------|----------|----------|----------|----------|----------|----------|
| KIAA1109  | 0.498267 | 7.309439 | 9.263778 | 2.68E-05 | 0.000217 | 2.559846 |
| ABLIM3    | 0.498422 | 4.519881 | 4.079786 | 0.004274 | 0.012907 | -3.03753 |
| ARNTL2    | 0.49895  | 6.792877 | 10.92241 | 8.64E-06 | 9.43E-05 | 3.814184 |
| IBTK      | 0.499116 | 7.555391 | 14.17391 | 1.39E-06 | 2.69E-05 | 5.827943 |
| NAA25     | 0.499315 | 9.324027 | 12.63693 | 3.12E-06 | 4.63E-05 | 4.938389 |
| XPA       | 0.499339 | 7.698269 | 13.7994  | 1.68E-06 | 3.05E-05 | 5.620237 |
| BAGE2 /// | 0.499735 | 7.635721 | 11.64095 | 5.55E-06 | 6.90E-05 | 4.304266 |
| BMX       | 0.499776 | 5.473872 | 5.928238 | 0.000494 | 0.002147 | -0.67142 |
| RNF145    | 0.499797 | 8.554956 | 11.08914 | 7.78E-06 | 8.77E-05 | 3.930517 |
| RUNX2     | 0.499851 | 6.13551  | 7.379473 | 0.000122 | 0.000696 | 0.874088 |
| UBR3      | 0.500433 | 5.341519 | 6.959904 | 0.000179 | 0.000944 | 0.452151 |
| ZNF180    | 0.500446 | 7.184985 | 9.852946 | 1.76E-05 | 0.000159 | 3.026889 |
| MR1       | 0.50054  | 6.030568 | 6.694589 | 0.00023  | 0.001149 | 0.175305 |
| VIT       | 0.500656 | 6.553301 | 11.08656 | 7.79E-06 | 8.78E-05 | 3.92873  |
| NKIRAS2   | 0.501218 | 8.306641 | 13.25858 | 2.23E-06 | 3.67E-05 | 5.310281 |
| SPAG9     | 0.501287 | 8.102675 | 10.28436 | 1.31E-05 | 0.000128 | 3.353382 |
| CSNK1A1   | 0.501359 | 10.8602  | 14.9597  | 9.46E-07 | 2.08E-05 | 6.246529 |
| ETV6      | 0.501439 | 6.37812  | 9.661975 | 2.01E-05 | 0.000176 | 2.878266 |
| PMS2CL    | 0.501447 | 6.397624 | 6.453649 | 0.00029  | 0.001386 | -0.08318 |
| ZNF652    | 0.501614 | 7.400354 | 8.848352 | 3.66E-05 | 0.000275 | 2.214692 |
| PGM2L1    | 0.501685 | 5.927792 | 7.811083 | 8.42E-05 | 0.00052  | 1.289028 |
| PLXNA2    | 0.502211 | 4.907792 | 6.099667 | 0.000414 | 0.001853 | -0.47568 |
| R3HCC1L   | 0.502266 | 7.135295 | 10.99654 | 8.24E-06 | 9.11E-05 | 3.866105 |
| ZNF606    | 0.502271 | 5.729892 | 8.630036 | 4.33E-05 | 0.000312 | 2.027702 |
| ZNF106    | 0.502616 | 7.513879 | 9.042738 | 3.16E-05 | 0.000245 | 2.377897 |
| LDAH      | 0.502812 | 6.286892 | 7.551012 | 0.000105 | 0.000619 | 1.041248 |
| SCML1     | 0.502937 | 7.273091 | 9.63628  | 2.05E-05 | 0.000178 | 2.858071 |
| HOXC8     | 0.503128 | 6.443841 | 12.72505 | 2.97E-06 | 4.49E-05 | 4.99217  |
| CDKN1B    | 0.503252 | 8.673632 | 11.34593 | 6.63E-06 | 7.82E-05 | 4.106555 |
| SLC35B3   | 0.503315 | 7.461209 | 10.65553 | 1.03E-05 | 0.000107 | 3.624517 |
| USP24     | 0.503675 | 8.713133 | 10.51487 | 1.12E-05 | 0.000115 | 3.522789 |
| MYLK      | 0.50379  | 5.701875 | 12.23602 | 3.91E-06 | 5.40E-05 | 4.68907  |
| RNF13     | 0.503814 | 8.744455 | 12.26438 | 3.85E-06 | 5.34E-05 | 4.706963 |
| GAS6-AS1  | 0.503817 | 7.032167 | 10.62212 | 1.05E-05 | 0.000109 | 3.600464 |
| RCOR3     | 0.503909 | 6.884465 | 12.14547 | 4.12E-06 | 5.60E-05 | 4.63168  |
| ABI2      | 0.503936 | 7.318738 | 12.11453 | 4.20E-06 | 5.67E-05 | 4.611972 |
| ZPR1      | 0.504091 | 8.560842 | 10.66871 | 1.02E-05 | 0.000107 | 3.633984 |
| KIAA1468  | 0.50421  | 5.722215 | 8.081862 | 6.71E-05 | 0.000436 | 1.540046 |
| YTHDF3    | 0.504227 | 7.976218 | 13.06132 | 2.47E-06 | 3.94E-05 | 5.194141 |
| GOLGA8A / | 0.504265 | 5.853415 | 9.239025 | 2.73E-05 | 0.00022  | 2.539659 |
| ZNF329    | 0.504664 | 6.893623 | 10.58107 | 1.08E-05 | 0.000111 | 3.570818 |
| ZNF181    | 0.504817 | 5.769643 | 10.49602 | 1.14E-05 | 0.000116 | 3.509066 |
| BAGE      | 0.505035 | 8.076961 | 7.756255 | 8.82E-05 | 0.000539 | 1.237347 |
| RAET1E    | 0.505099 | 2.555508 | 4.489234 | 0.002541 | 0.00833  | -2.47178 |
| PKD2      | 0.505228 | 6.500366 | 11.07053 | 7.87E-06 | 8.83E-05 | 3.917615 |
| C16orf87  | 0.505422 | 8.189571 | 11.46701 | 6.16E-06 | 7.41E-05 | 4.188272 |
| RALGPS2   | 0.505444 | 6.456208 | 12.68293 | 3.04E-06 | 4.56E-05 | 4.96651  |
| SERPINB2  | 0.505469 | 3.998511 | 7.341688 | 0.000127 | 0.000715 | 0.836859 |
| SUPT3H    | 0.505783 | 6.687104 | 7.738667 | 8.95E-05 | 0.000545 | 1.220706 |
| ABL2      | 0.50636  | 5.874016 | 5.982758 | 0.000467 | 0.002048 | -0.60876 |
| HSPA4L    | 0.506395 | 7.604666 | 10.45923 | 1.17E-05 | 0.000118 | 3.482212 |

|            |          |          |          |          |          |          |
|------------|----------|----------|----------|----------|----------|----------|
| ANGPT1     | 0.506406 | 7.449737 | 9.611149 | 2.08E-05 | 0.00018  | 2.838273 |
| ANXA4      | 0.506617 | 9.407528 | 13.30981 | 2.17E-06 | 3.60E-05 | 5.34017  |
| SERINC3    | 0.506639 | 9.777566 | 13.75025 | 1.72E-06 | 3.11E-05 | 5.592567 |
| TRIM33     | 0.506938 | 7.48111  | 14.67497 | 1.08E-06 | 2.28E-05 | 6.097452 |
| DIP2B      | 0.506957 | 7.992715 | 9.620036 | 2.07E-05 | 0.000179 | 2.845279 |
| ZNF615     | 0.507056 | 4.548437 | 9.89531  | 1.71E-05 | 0.000156 | 3.05951  |
| TSPAN14    | 0.507183 | 9.456448 | 11.97734 | 4.54E-06 | 6.00E-05 | 4.524026 |
| DYNC2LI1   | 0.507219 | 5.034059 | 8.63959  | 4.30E-05 | 0.00031  | 2.035969 |
| RBM3       | 0.507281 | 5.465338 | 4.894883 | 0.001555 | 0.005522 | -1.93481 |
| WSB1       | 0.507412 | 8.422897 | 9.440546 | 2.36E-05 | 0.000197 | 2.702653 |
| PSEN1      | 0.507702 | 8.101718 | 11.64014 | 5.55E-06 | 6.90E-05 | 4.303729 |
| CAST       | 0.507713 | 8.804159 | 11.94689 | 4.63E-06 | 6.05E-05 | 4.504373 |
| ZNF527     | 0.508216 | 5.137717 | 6.498612 | 0.000278 | 0.001338 | -0.03442 |
| NEMF       | 0.508304 | 7.491865 | 12.33223 | 3.70E-06 | 5.20E-05 | 4.749607 |
| MCOLN3     | 0.508448 | 5.548523 | 9.850247 | 1.76E-05 | 0.000159 | 3.024806 |
| SH2D2A     | 0.508509 | 6.753045 | 6.814736 | 0.000205 | 0.001049 | 0.301666 |
| MAPK8      | 0.508518 | 5.729899 | 8.949083 | 3.39E-05 | 0.000259 | 2.299645 |
| SPG20      | 0.50868  | 9.379151 | 15.12652 | 8.75E-07 | 1.98E-05 | 6.332551 |
| ING5       | 0.508931 | 5.572712 | 6.885961 | 0.000192 | 0.000995 | 0.375796 |
| ZRANB1     | 0.509389 | 7.456496 | 13.50325 | 1.96E-06 | 3.37E-05 | 5.452014 |
| PLGLB2     | 0.509544 | 6.102688 | 9.938837 | 1.66E-05 | 0.000153 | 3.092898 |
| ZNF433     | 0.509697 | 7.144512 | 12.37346 | 3.62E-06 | 5.11E-05 | 4.775411 |
| FM05       | 0.509943 | 4.332752 | 8.30486  | 5.60E-05 | 0.000379 | 1.741649 |
| SNX25      | 0.510011 | 6.001032 | 9.247943 | 2.71E-05 | 0.000219 | 2.546937 |
| ZMYM4      | 0.510206 | 7.821836 | 13.19336 | 2.30E-06 | 3.76E-05 | 5.272072 |
| RHOQ       | 0.510581 | 7.868165 | 11.06126 | 7.91E-06 | 8.87E-05 | 3.911176 |
| ERAP1      | 0.510816 | 6.891699 | 9.473907 | 2.30E-05 | 0.000194 | 2.729342 |
| KDM4C      | 0.511135 | 6.776923 | 9.982802 | 1.61E-05 | 0.000149 | 3.12649  |
| MMP2       | 0.5112   | 6.690106 | 5.770856 | 0.000583 | 0.002458 | -0.85448 |
| TICAM1     | 0.511217 | 7.709591 | 10.44827 | 1.17E-05 | 0.000118 | 3.474197 |
| LOC101060C | 0.511347 | 7.835648 | 9.883035 | 1.72E-05 | 0.000157 | 3.050071 |
| PCDH20     | 0.511604 | 4.036301 | 7.629057 | 9.83E-05 | 0.000587 | 1.11631  |
| ENTPD4     | 0.511646 | 5.390349 | 7.088165 | 0.000159 | 0.000859 | 0.583156 |
| PAPD5      | 0.511846 | 8.81297  | 12.74601 | 2.94E-06 | 4.45E-05 | 5.00491  |
| WDR33      | 0.512125 | 3.786891 | 6.087871 | 0.000419 | 0.001871 | -0.48903 |
| SUSD2      | 0.51216  | 8.133252 | 9.906459 | 1.69E-05 | 0.000155 | 3.068075 |
| ZNF682     | 0.513344 | 4.877756 | 13.46144 | 2.00E-06 | 3.42E-05 | 5.427973 |
| TIAL1      | 0.513471 | 7.268754 | 13.2126  | 2.28E-06 | 3.73E-05 | 5.283362 |
| IGSF10     | 0.513849 | 3.66559  | 5.830587 | 0.000547 | 0.002337 | -0.78462 |
| CHFR       | 0.514114 | 8.095589 | 10.03095 | 1.56E-05 | 0.000146 | 3.163124 |
| ZNF674     | 0.514267 | 5.038644 | 4.507155 | 0.002485 | 0.008173 | -2.44756 |
| MGLL       | 0.514367 | 7.849569 | 10.96118 | 8.43E-06 | 9.25E-05 | 3.84138  |
| SATB1      | 0.51442  | 6.25538  | 8.619705 | 4.36E-05 | 0.000314 | 2.018755 |
| KLHL36     | 0.514513 | 7.092389 | 8.020125 | 7.07E-05 | 0.000453 | 1.483424 |
| TAP1       | 0.515423 | 8.157681 | 11.82527 | 4.97E-06 | 6.37E-05 | 4.42541  |
| SNAPC4     | 0.516081 | 8.567056 | 9.705104 | 1.95E-05 | 0.000172 | 2.912058 |
| ANKRA2     | 0.516507 | 7.425354 | 9.476514 | 2.30E-05 | 0.000194 | 2.731424 |
| PPP4R1     | 0.51663  | 8.169102 | 14.77468 | 1.03E-06 | 2.20E-05 | 6.149986 |
| AKR1B10 /  | 0.51681  | 3.196969 | 4.341597 | 0.003056 | 0.009757 | -2.67306 |
| NAV3       | 0.516893 | 6.746954 | 14.27128 | 1.32E-06 | 2.61E-05 | 5.88105  |
| SAMD9L     | 0.517066 | 5.713151 | 5.662981 | 0.000654 | 0.002701 | -0.98184 |

|           |          |          |          |          |          |          |
|-----------|----------|----------|----------|----------|----------|----------|
| SNIP1     | 0.517108 | 7.503136 | 11.00989 | 8.17E-06 | 9.06E-05 | 3.875423 |
| POFUT2    | 0.517188 | 7.13132  | 13.79667 | 1.68E-06 | 3.05E-05 | 5.618706 |
| MAP4K4    | 0.517722 | 8.191393 | 15.21363 | 8.40E-07 | 1.92E-05 | 6.377087 |
| ACSS3     | 0.51781  | 6.026538 | 7.53621  | 0.000107 | 0.000625 | 1.026943 |
| TBC1D26 / | 0.51807  | 5.686053 | 8.980965 | 3.31E-05 | 0.000254 | 2.326363 |
| SNRNP48   | 0.518229 | 6.938058 | 8.101516 | 6.61E-05 | 0.000431 | 1.557997 |
| AP4E1     | 0.518238 | 3.771927 | 5.280836 | 0.000996 | 0.003807 | -1.4457  |
| NBPF4     | 0.518696 | 2.533593 | 5.001244 | 0.001373 | 0.004975 | -1.79792 |
| SENP7     | 0.51929  | 5.707587 | 6.979588 | 0.000176 | 0.000931 | 0.472374 |
| RBM18     | 0.519306 | 7.902687 | 11.8047  | 5.03E-06 | 6.43E-05 | 4.411979 |
| ANKRD6    | 0.519463 | 4.858743 | 3.581667 | 0.008321 | 0.02254  | -3.75622 |
| SLC30A6   | 0.519543 | 6.742662 | 11.54999 | 5.86E-06 | 7.15E-05 | 4.243816 |
| PTP4A1    | 0.519796 | 9.253244 | 13.22121 | 2.27E-06 | 3.72E-05 | 5.288409 |
| GRPEL2    | 0.519891 | 7.985463 | 9.609825 | 2.09E-05 | 0.00018  | 2.837229 |
| VPS13A    | 0.520613 | 5.667897 | 8.32718  | 5.50E-05 | 0.000374 | 1.76158  |
| RGPD1 /// | 0.520831 | 6.316197 | 6.810306 | 0.000206 | 0.001052 | 0.297035 |
| NFKBIB    | 0.520947 | 8.217663 | 10.38925 | 1.22E-05 | 0.000122 | 3.430894 |
| NPHP3     | 0.521041 | 7.900323 | 10.5918  | 1.07E-05 | 0.000111 | 3.578582 |
| DIMT1     | 0.521197 | 5.720879 | 9.416225 | 2.40E-05 | 0.0002   | 2.683144 |
| HN1       | 0.521228 | 8.946455 | 11.29912 | 6.83E-06 | 7.99E-05 | 4.074742 |
| SLC19A3   | 0.521407 | 4.284521 | 5.105559 | 0.001217 | 0.004504 | -1.66522 |
| DNAJC16   | 0.521427 | 5.379508 | 11.1     | 7.72E-06 | 8.73E-05 | 3.938038 |
| FAM46A    | 0.521656 | 6.959262 | 9.251619 | 2.70E-05 | 0.000218 | 2.549935 |
| IFI44L    | 0.521986 | 4.992054 | 6.745408 | 0.000219 | 0.001106 | 0.228954 |
| VTI1A     | 0.522233 | 5.75643  | 7.398213 | 0.00012  | 0.000687 | 0.892497 |
| PAG1      | 0.522365 | 6.839971 | 8.568632 | 4.54E-05 | 0.000323 | 1.974387 |
| LIG4      | 0.522375 | 7.679137 | 10.52575 | 1.12E-05 | 0.000114 | 3.530707 |
| SPATA6L   | 0.522467 | 4.905668 | 6.540547 | 0.000266 | 0.001293 | 0.01084  |
| BROX      | 0.522597 | 6.811964 | 10.45509 | 1.17E-05 | 0.000118 | 3.47918  |
| TRANK1    | 0.522848 | 6.624945 | 14.97509 | 9.40E-07 | 2.08E-05 | 6.254503 |
| EXOG      | 0.522998 | 7.243066 | 12.85456 | 2.77E-06 | 4.25E-05 | 5.070561 |
| TRIM51 // | 0.523024 | 4.771881 | 8.511751 | 4.75E-05 | 0.000334 | 1.924711 |
| SH3BP4    | 0.523241 | 6.162988 | 7.919767 | 7.68E-05 | 0.000484 | 1.390617 |
| IFNAR2    | 0.523696 | 6.829571 | 13.06325 | 2.47E-06 | 3.94E-05 | 5.195286 |
| RELL2     | 0.523869 | 7.196081 | 11.09227 | 7.76E-06 | 8.76E-05 | 3.932687 |
| SYNRG     | 0.523979 | 7.535726 | 15.04156 | 9.10E-07 | 2.04E-05 | 6.288859 |
| CD2AP     | 0.524221 | 6.244826 | 7.817282 | 8.37E-05 | 0.000518 | 1.294853 |
| MSR1      | 0.524254 | 4.587682 | 9.192626 | 2.82E-05 | 0.000225 | 2.501692 |
| DCUN1D4   | 0.524276 | 7.172626 | 11.05901 | 7.92E-06 | 8.88E-05 | 3.909614 |
| TRIM37    | 0.524366 | 7.341316 | 14.2052  | 1.37E-06 | 2.67E-05 | 5.845047 |
| TRAF6     | 0.524526 | 7.16781  | 9.335212 | 2.54E-05 | 0.000208 | 2.61784  |
| THRB      | 0.524582 | 6.030866 | 8.105312 | 6.59E-05 | 0.00043  | 1.56146  |
| SEPSECS   | 0.52459  | 6.852919 | 11.61056 | 5.65E-06 | 6.98E-05 | 4.284118 |
| NT5C2     | 0.524596 | 7.801098 | 14.16802 | 1.39E-06 | 2.70E-05 | 5.824716 |
| EPC2      | 0.524848 | 6.785643 | 9.510028 | 2.24E-05 | 0.00019  | 2.758145 |
| GPHN      | 0.525691 | 7.272707 | 9.619692 | 2.07E-05 | 0.000179 | 2.845009 |
| CERKL     | 0.525695 | 4.791199 | 7.866613 | 8.03E-05 | 0.000501 | 1.341076 |
| STRN3     | 0.5257   | 7.131113 | 11.7446  | 5.21E-06 | 6.61E-05 | 4.372609 |
| ENC1      | 0.52607  | 7.325392 | 11.23461 | 7.10E-06 | 8.22E-05 | 4.030699 |
| ZCCHC3    | 0.526129 | 8.074061 | 10.45248 | 1.17E-05 | 0.000118 | 3.477273 |
| GRIA2     | 0.526159 | 5.087336 | 10.19154 | 1.39E-05 | 0.000135 | 3.284189 |

|           |          |          |          |          |          |          |
|-----------|----------|----------|----------|----------|----------|----------|
| C19orf12  | 0.526166 | 8.771877 | 15.69996 | 6.71E-07 | 1.66E-05 | 6.621086 |
| FMR1      | 0.526196 | 7.700933 | 14.88472 | 9.81E-07 | 2.14E-05 | 6.207552 |
| WDR41     | 0.526256 | 8.139884 | 9.595103 | 2.11E-05 | 0.000182 | 2.825608 |
| PATL1     | 0.526305 | 8.371779 | 11.28898 | 6.87E-06 | 8.03E-05 | 4.06784  |
| PN01      | 0.526514 | 9.13183  | 14.58798 | 1.13E-06 | 2.34E-05 | 6.051329 |
| CXCL3     | 0.526517 | 3.595533 | 4.189049 | 0.003711 | 0.011454 | -2.88426 |
| Clorf50   | 0.526577 | 7.939837 | 12.99766 | 2.56E-06 | 4.04E-05 | 5.156298 |
| CHIC2     | 0.526625 | 9.108554 | 14.28757 | 1.31E-06 | 2.60E-05 | 5.889902 |
| DNMBP     | 0.526739 | 8.271318 | 12.38939 | 3.59E-06 | 5.08E-05 | 4.785359 |
| COL5A2    | 0.527265 | 10.04998 | 12.53285 | 3.31E-06 | 4.81E-05 | 4.874402 |
| ZNF708    | 0.527385 | 6.287377 | 8.994905 | 3.27E-05 | 0.000252 | 2.338019 |
| SCG2      | 0.52739  | 7.732537 | 13.89352 | 1.60E-06 | 2.96E-05 | 5.672959 |
| PKP4      | 0.527568 | 7.752777 | 10.91682 | 8.67E-06 | 9.45E-05 | 3.810256 |
| PGGT1B    | 0.527649 | 6.316542 | 11.34669 | 6.63E-06 | 7.82E-05 | 4.107068 |
| DOCK2     | 0.527713 | 4.94352  | 7.985516 | 7.27E-05 | 0.000463 | 1.451526 |
| PPIC      | 0.52789  | 8.274891 | 9.661196 | 2.01E-05 | 0.000176 | 2.877655 |
| GALNT11   | 0.52796  | 3.952018 | 3.215132 | 0.013899 | 0.034472 | -4.30338 |
| ANXA3     | 0.527968 | 4.934852 | 7.575553 | 0.000103 | 0.000609 | 1.064917 |
| LINC01588 | 0.527987 | 5.740085 | 8.005262 | 7.15E-05 | 0.000457 | 1.469739 |
| INTS4     | 0.528036 | 5.800689 | 10.94734 | 8.50E-06 | 9.31E-05 | 3.831678 |
| TTC8      | 0.528068 | 7.355587 | 12.26852 | 3.84E-06 | 5.33E-05 | 4.709569 |
| ZDHHC17   | 0.528234 | 5.489229 | 5.092651 | 0.001235 | 0.004563 | -1.68155 |
| TAOK3     | 0.528266 | 6.916603 | 9.645472 | 2.03E-05 | 0.000177 | 2.865301 |
| SLC22A4   | 0.528469 | 6.868496 | 13.79801 | 1.68E-06 | 3.05E-05 | 5.619455 |
| ASB1      | 0.528602 | 7.853544 | 14.61178 | 1.12E-06 | 2.32E-05 | 6.063977 |
| SUCLG2    | 0.528685 | 4.557105 | 3.482386 | 0.009544 | 0.025281 | -3.90307 |
| HELB      | 0.528917 | 5.665631 | 6.920047 | 0.000186 | 0.000972 | 0.41107  |
| RPS6KB1   | 0.52971  | 8.891203 | 13.11754 | 2.40E-06 | 3.85E-05 | 5.227414 |
| HIPK2     | 0.529752 | 9.400246 | 13.14706 | 2.36E-06 | 3.82E-05 | 5.244834 |
| ZFP69B    | 0.53031  | 7.065344 | 11.447   | 6.23E-06 | 7.48E-05 | 4.174823 |
| PABPC1L   | 0.53056  | 9.629913 | 13.30665 | 2.17E-06 | 3.61E-05 | 5.338331 |
| FIGN      | 0.53064  | 4.863607 | 13.04131 | 2.50E-06 | 3.97E-05 | 5.182262 |
| MAP4K5    | 0.530862 | 8.351345 | 14.15869 | 1.40E-06 | 2.70E-05 | 5.819608 |
| PPP2R2B   | 0.53142  | 4.327815 | 11.44724 | 6.23E-06 | 7.48E-05 | 4.174985 |
| SLMAP     | 0.531688 | 6.757012 | 12.84678 | 2.78E-06 | 4.27E-05 | 5.065873 |
| CDS2      | 0.531722 | 7.504298 | 12.59238 | 3.20E-06 | 4.70E-05 | 4.911062 |
| ATP6VOE1  | 0.532057 | 10.04197 | 14.95132 | 9.50E-07 | 2.09E-05 | 6.242181 |
| KHDRBS3   | 0.532374 | 6.614798 | 11.83973 | 4.93E-06 | 6.33E-05 | 4.434839 |
| SORL1     | 0.532435 | 3.157859 | 4.409171 | 0.002807 | 0.009075 | -2.58055 |
| DNHD1     | 0.532777 | 4.670636 | 5.930499 | 0.000493 | 0.002143 | -0.66882 |
| LOC102724 | 0.533138 | 6.223991 | 9.757625 | 1.88E-05 | 0.000168 | 2.953028 |
| AGPAT5    | 0.533403 | 8.172253 | 12.44758 | 3.47E-06 | 4.96E-05 | 4.821593 |
| MFS11     | 0.534022 | 7.225314 | 11.71969 | 5.29E-06 | 6.67E-05 | 4.356238 |
| IL13RA1   | 0.534139 | 4.678193 | 6.287086 | 0.000342 | 0.001586 | -0.26594 |
| PLEKHS1   | 0.534477 | 4.287818 | 3.663437 | 0.00744  | 0.020518 | -3.63612 |
| ZNF28     | 0.53516  | 4.92102  | 8.260645 | 5.80E-05 | 0.00039  | 1.702035 |
| SPTBN5    | 0.535266 | 5.758866 | 8.059939 | 6.84E-05 | 0.000442 | 1.51998  |
| DZANK1    | 0.535298 | 5.690268 | 11.16343 | 7.42E-06 | 8.48E-05 | 3.981833 |
| SLK       | 0.535465 | 7.677833 | 11.31254 | 6.77E-06 | 7.95E-05 | 4.083876 |
| LPGAT1    | 0.535661 | 7.836516 | 14.41267 | 1.23E-06 | 2.49E-05 | 5.95753  |
| NETO1     | 0.536294 | 5.920785 | 7.751297 | 8.86E-05 | 0.000541 | 1.232659 |

|           |          |          |          |          |          |          |
|-----------|----------|----------|----------|----------|----------|----------|
| MAP3K1    | 0.536394 | 8.497639 | 11.24634 | 7.05E-06 | 8.18E-05 | 4.038725 |
| CSGALNACT | 0.53656  | 8.507869 | 10.64976 | 1.03E-05 | 0.000108 | 3.620364 |
| TRIM32    | 0.536685 | 8.032854 | 12.89013 | 2.71E-06 | 4.19E-05 | 5.091959 |
| UBXN7     | 0.536782 | 7.291932 | 12.24532 | 3.89E-06 | 5.38E-05 | 4.69494  |
| CCDC186   | 0.536849 | 6.714516 | 8.227385 | 5.96E-05 | 0.000398 | 1.67212  |
| CASP3     | 0.537387 | 7.923155 | 14.03633 | 1.49E-06 | 2.80E-05 | 5.752276 |
| DECR1     | 0.537407 | 8.270378 | 13.51354 | 1.95E-06 | 3.36E-05 | 5.457924 |
| FBX025    | 0.537462 | 5.565009 | 9.951573 | 1.64E-05 | 0.000152 | 3.102643 |
| SLC25A13  | 0.537485 | 8.390259 | 13.87616 | 1.61E-06 | 2.98E-05 | 5.663261 |
| MOSPD1    | 0.537917 | 6.129211 | 8.416947 | 5.12E-05 | 0.000354 | 1.841293 |
| MED6      | 0.537921 | 5.50782  | 11.63329 | 5.57E-06 | 6.92E-05 | 4.299189 |
| STK10     | 0.538111 | 7.952338 | 13.76959 | 1.70E-06 | 3.09E-05 | 5.603466 |
| AKR1B10   | 0.538307 | 5.076933 | 11.67891 | 5.42E-06 | 6.79E-05 | 4.329362 |
| C2orf42   | 0.53853  | 7.647356 | 13.4224  | 2.04E-06 | 3.47E-05 | 5.40546  |
| UBXN2B    | 0.538881 | 3.985612 | 5.169508 | 0.001131 | 0.004234 | -1.58463 |
| AMOT      | 0.538894 | 3.296438 | 4.45166  | 0.002662 | 0.008671 | -2.52272 |
| TMEM131   | 0.538909 | 7.227077 | 15.06349 | 9.01E-07 | 2.02E-05 | 6.300163 |
| Clorf27   | 0.539108 | 5.545642 | 10.75295 | 9.63E-06 | 0.000102 | 3.694248 |
| RGS3      | 0.539705 | 7.369523 | 13.3331  | 2.14E-06 | 3.58E-05 | 5.353722 |
| SH3D19    | 0.540319 | 7.294596 | 14.55969 | 1.15E-06 | 2.36E-05 | 6.036269 |
| MATN2     | 0.540388 | 4.381746 | 8.668487 | 4.20E-05 | 0.000305 | 2.060925 |
| FAM19A1   | 0.540436 | 3.89103  | 7.161815 | 0.000149 | 0.000814 | 0.657569 |
| EPC1      | 0.540457 | 6.164901 | 10.04012 | 1.55E-05 | 0.000145 | 3.170087 |
| ZNF224    | 0.540813 | 7.079928 | 13.21673 | 2.28E-06 | 3.72E-05 | 5.285784 |
| ZNF670    | 0.541002 | 7.199826 | 12.37584 | 3.61E-06 | 5.11E-05 | 4.776898 |
| C8orf59   | 0.541039 | 6.058997 | 7.428029 | 0.000117 | 0.000673 | 0.921712 |
| ANO3      | 0.541082 | 3.764841 | 9.125818 | 2.97E-05 | 0.000234 | 2.446732 |
| TRIM9     | 0.541693 | 5.583329 | 6.032338 | 0.000443 | 0.001963 | -0.55211 |
| ZNF609    | 0.541743 | 8.852316 | 13.0945  | 2.43E-06 | 3.88E-05 | 5.213796 |
| VCPIP1    | 0.542006 | 6.663954 | 11.73059 | 5.26E-06 | 6.64E-05 | 4.363403 |
| ATP8A2    | 0.542499 | 6.431746 | 14.44372 | 1.21E-06 | 2.46E-05 | 5.974226 |
| ARL4C     | 0.542609 | 8.51936  | 8.895682 | 3.53E-05 | 0.000267 | 2.254711 |
| SLC38A4   | 0.542653 | 3.949581 | 10.34383 | 1.26E-05 | 0.000125 | 3.397414 |
| CRK       | 0.543203 | 9.107784 | 14.38987 | 1.25E-06 | 2.51E-05 | 5.945251 |
| N4BP1     | 0.543344 | 8.552306 | 14.70489 | 1.07E-06 | 2.25E-05 | 6.113252 |
| RC3H1     | 0.543447 | 6.962153 | 14.32546 | 1.29E-06 | 2.56E-05 | 5.910448 |
| ITPR2     | 0.543756 | 7.187887 | 13.8283  | 1.65E-06 | 3.02E-05 | 5.636465 |
| FAM188A   | 0.543939 | 7.655633 | 11.45647 | 6.20E-06 | 7.45E-05 | 4.18119  |
| RUFY3     | 0.54416  | 6.026065 | 7.529467 | 0.000107 | 0.000628 | 1.020419 |
| C5orf45   | 0.544564 | 8.147265 | 13.42347 | 2.04E-06 | 3.47E-05 | 5.406077 |
| IKBKE     | 0.544911 | 5.971732 | 8.097882 | 6.63E-05 | 0.000431 | 1.554681 |
| ABHD17B   | 0.545183 | 6.289451 | 13.85892 | 1.63E-06 | 2.99E-05 | 5.653618 |
| ZNF367    | 0.545297 | 7.565773 | 13.30828 | 2.17E-06 | 3.60E-05 | 5.339281 |
| ZNF607    | 0.545807 | 5.65246  | 14.2717  | 1.32E-06 | 2.61E-05 | 5.881279 |
| EXD3      | 0.545906 | 7.096198 | 5.562059 | 0.00073  | 0.00295  | -1.10241 |
| BTN2A2    | 0.54611  | 5.604383 | 5.93883  | 0.000488 | 0.002128 | -0.65922 |
| GPR89A // | 0.546291 | 8.700744 | 13.70435 | 1.76E-06 | 3.16E-05 | 5.566639 |
| VSTM1     | 0.546581 | 5.990633 | 8.45891  | 4.95E-05 | 0.000345 | 1.878313 |
| RBMS3     | 0.546661 | 7.422499 | 9.832481 | 1.78E-05 | 0.000161 | 3.011085 |
| SETX      | 0.546789 | 7.791393 | 10.52936 | 1.11E-05 | 0.000114 | 3.533331 |
| FAM65B    | 0.547382 | 4.422012 | 9.780055 | 1.85E-05 | 0.000166 | 2.970466 |



|           |          |          |          |          |          |          |
|-----------|----------|----------|----------|----------|----------|----------|
| FMNL2     | 0.547395 | 7.45079  | 15.03463 | 9.13E-07 | 2.04E-05 | 6.285284 |
| COMMD2    | 0.547602 | 7.051502 | 14.81365 | 1.01E-06 | 2.18E-05 | 6.170419 |
| RBKS      | 0.547947 | 5.905255 | 7.721346 | 9.09E-05 | 0.000552 | 1.204288 |
| MTMR2     | 0.548157 | 9.048445 | 15.36608 | 7.82E-07 | 1.83E-05 | 6.454417 |
| ZNF398    | 0.548505 | 5.666463 | 12.66889 | 3.07E-06 | 4.58E-05 | 4.957935 |
| HHEX      | 0.548944 | 9.223062 | 13.7646  | 1.71E-06 | 3.09E-05 | 5.600653 |
| MTUS1     | 0.549471 | 4.617165 | 5.038531 | 0.001315 | 0.0048   | -1.75031 |
| HIST1H2BC | 0.549824 | 4.018604 | 4.94852  | 0.00146  | 0.005241 | -1.86558 |
| BVES      | 0.550017 | 5.144787 | 8.17632  | 6.21E-05 | 0.00041  | 1.625995 |
| UST       | 0.55055  | 4.107804 | 5.448204 | 0.000827 | 0.003264 | -1.24008 |
| BIVM-ERCC | 0.550831 | 8.04602  | 9.002199 | 3.25E-05 | 0.000251 | 2.344112 |
| IL1RAP    | 0.55088  | 5.719142 | 6.573378 | 0.000258 | 0.00126  | 0.046126 |
| RIMKLB    | 0.551172 | 6.474283 | 10.02376 | 1.56E-05 | 0.000146 | 3.157664 |
| PTGFRN    | 0.551346 | 8.111968 | 14.72758 | 1.06E-06 | 2.23E-05 | 6.125218 |
| PID1      | 0.551385 | 6.114585 | 8.435772 | 5.04E-05 | 0.000351 | 1.85792  |
| ZNF200    | 0.551405 | 8.028116 | 12.30897 | 3.75E-06 | 5.26E-05 | 4.735011 |
| IL6R      | 0.551528 | 5.426083 | 8.234915 | 5.92E-05 | 0.000396 | 1.678901 |
| SVIL ///  | 0.55169  | 7.833962 | 11.23898 | 7.08E-06 | 8.20E-05 | 4.033692 |
| KIF27     | 0.55335  | 3.823406 | 7.131952 | 0.000153 | 0.000831 | 0.627467 |
| WVOX      | 0.553422 | 7.086468 | 12.91077 | 2.68E-06 | 4.16E-05 | 5.104346 |
| DCUN1D3   | 0.553831 | 6.310608 | 8.547613 | 4.62E-05 | 0.000327 | 1.956063 |
| VGLL4     | 0.554127 | 6.932031 | 9.216217 | 2.77E-05 | 0.000222 | 2.521016 |
| FAM168B   | 0.55424  | 6.160085 | 7.134309 | 0.000152 | 0.00083  | 0.629846 |
| MAPK1     | 0.554379 | 7.358094 | 12.99129 | 2.57E-06 | 4.05E-05 | 5.1525   |
| ZNF451    | 0.554392 | 7.299158 | 14.44964 | 1.21E-06 | 2.46E-05 | 5.977408 |
| RBAK      | 0.554429 | 7.755936 | 14.25736 | 1.33E-06 | 2.62E-05 | 5.873481 |
| LAMC1     | 0.554594 | 10.49748 | 13.55116 | 1.91E-06 | 3.33E-05 | 5.479477 |
| FLCN      | 0.554631 | 5.437757 | 10.48594 | 1.15E-05 | 0.000116 | 3.501718 |
| ANK3      | 0.554869 | 6.423288 | 12.17723 | 4.05E-06 | 5.53E-05 | 4.651856 |
| MOK       | 0.555934 | 7.494031 | 13.29575 | 2.18E-06 | 3.62E-05 | 5.331978 |
| TNFRSF10A | 0.556016 | 6.925456 | 8.772949 | 3.87E-05 | 0.000287 | 2.150556 |
| CCDC174   | 0.556439 | 7.507784 | 13.8791  | 1.61E-06 | 2.97E-05 | 5.6649   |
| USP46     | 0.556544 | 7.397591 | 12.10595 | 4.22E-06 | 5.69E-05 | 4.606503 |
| MAN2A1    | 0.556793 | 8.147328 | 16.19462 | 5.38E-07 | 1.46E-05 | 6.861478 |
| ZNF33A // | 0.557769 | 6.86089  | 9.819495 | 1.80E-05 | 0.000162 | 3.001042 |
| ZNF805    | 0.558053 | 5.638238 | 8.686808 | 4.14E-05 | 0.000302 | 2.07671  |
| KIAA1217  | 0.558158 | 4.611226 | 8.034396 | 6.98E-05 | 0.000449 | 1.496544 |
| NMD3      | 0.558692 | 9.089008 | 15.04074 | 9.11E-07 | 2.04E-05 | 6.288436 |
| SLC48A1   | 0.55871  | 8.601947 | 12.90099 | 2.70E-06 | 4.17E-05 | 5.098477 |
| PCNXL4    | 0.55889  | 8.285602 | 12.35333 | 3.66E-06 | 5.16E-05 | 4.762827 |
| OPTN      | 0.559734 | 7.618558 | 14.66856 | 1.09E-06 | 2.28E-05 | 6.094065 |
| TEX9      | 0.559911 | 2.49154  | 6.405088 | 0.000304 | 0.001439 | -0.13611 |
| SESN2     | 0.559983 | 7.370001 | 12.35107 | 3.66E-06 | 5.16E-05 | 4.761411 |
| RNF111    | 0.560381 | 6.83056  | 11.86689 | 4.85E-06 | 6.26E-05 | 4.452518 |
| RERE      | 0.560466 | 7.523378 | 11.44426 | 6.24E-06 | 7.48E-05 | 4.172982 |
| PLAU      | 0.560484 | 5.00697  | 8.107717 | 6.57E-05 | 0.000429 | 1.563653 |
| NFAT5     | 0.560563 | 7.764206 | 10.01734 | 1.57E-05 | 0.000147 | 3.152788 |
| PON2      | 0.560589 | 9.441931 | 16.14414 | 5.50E-07 | 1.48E-05 | 6.837295 |
| OXSR1     | 0.560655 | 9.314672 | 14.83121 | 1.01E-06 | 2.17E-05 | 6.179611 |
| RARRES3   | 0.561592 | 4.019745 | 7.757208 | 8.81E-05 | 0.000539 | 1.238248 |
| VEZT      | 0.561758 | 8.774808 | 13.58733 | 1.87E-06 | 3.29E-05 | 5.500142 |

|          |          |          |          |          |          |          |
|----------|----------|----------|----------|----------|----------|----------|
| DPCD     | 0.561989 | 8.889464 | 14.08693 | 1.45E-06 | 2.77E-05 | 5.780189 |
| COL8A1   | 0.562241 | 6.977201 | 9.361313 | 2.49E-05 | 0.000206 | 2.638934 |
| TTC29    | 0.562316 | 2.636456 | 10.61045 | 1.06E-05 | 0.00011  | 3.592052 |
| EME2     | 0.56244  | 6.281325 | 9.334679 | 2.54E-05 | 0.000208 | 2.617408 |
| MIR22HG  | 0.562608 | 7.246825 | 10.36054 | 1.24E-05 | 0.000124 | 3.409743 |
| CHORDC1  | 0.562621 | 9.523878 | 12.59751 | 3.19E-06 | 4.69E-05 | 4.914216 |
| SPOCK1   | 0.562989 | 8.20836  | 12.94806 | 2.63E-06 | 4.10E-05 | 5.126681 |
| SSBP2    | 0.563106 | 7.001764 | 16.38936 | 4.94E-07 | 1.39E-05 | 6.954055 |
| DLC1     | 0.563153 | 9.197223 | 14.18096 | 1.38E-06 | 2.69E-05 | 5.831797 |
| AKIRIN1  | 0.563196 | 8.521811 | 11.30017 | 6.82E-06 | 7.99E-05 | 4.075461 |
| PDE12    | 0.563208 | 7.005301 | 11.42612 | 6.31E-06 | 7.53E-05 | 4.160768 |
| CALD1    | 0.563215 | 7.69488  | 14.8357  | 1.00E-06 | 2.17E-05 | 6.181961 |
| SPP1     | 0.563414 | 7.494288 | 11.55382 | 5.84E-06 | 7.15E-05 | 4.246367 |
| MDM4     | 0.563453 | 7.838502 | 12.83312 | 2.80E-06 | 4.29E-05 | 5.057638 |
| ZNF493   | 0.564024 | 5.431226 | 11.02872 | 8.08E-06 | 9.00E-05 | 3.888546 |
| ZNF544   | 0.564029 | 6.901824 | 10.64812 | 1.03E-05 | 0.000108 | 3.619186 |
| VPS4B    | 0.564078 | 5.722885 | 8.382688 | 5.26E-05 | 0.000362 | 1.810956 |
| AADAT    | 0.564489 | 7.41143  | 14.19013 | 1.38E-06 | 2.68E-05 | 5.836813 |
| CNR1     | 0.564844 | 6.353617 | 11.25521 | 7.01E-06 | 8.14E-05 | 4.044792 |
| NUDT13   | 0.564934 | 4.476223 | 6.320539 | 0.000331 | 0.001542 | -0.22896 |
| STAC     | 0.565044 | 4.58206  | 7.763883 | 8.76E-05 | 0.000536 | 1.244555 |
| ZNF622   | 0.565326 | 9.427044 | 14.38625 | 1.25E-06 | 2.51E-05 | 5.9433   |
| FNIP2    | 0.565417 | 6.08974  | 11.44283 | 6.25E-06 | 7.49E-05 | 4.172022 |
| MFAP3    | 0.565556 | 7.038176 | 10.71597 | 9.86E-06 | 0.000104 | 3.667847 |
| SNRK     | 0.56558  | 8.421742 | 14.15944 | 1.40E-06 | 2.70E-05 | 5.820015 |
| ARID3A   | 0.565923 | 6.696542 | 13.92964 | 1.57E-06 | 2.92E-05 | 5.693096 |
| TAB2     | 0.566015 | 8.501737 | 13.80833 | 1.67E-06 | 3.04E-05 | 5.625258 |
| SORBS1   | 0.56615  | 3.865382 | 7.034584 | 0.000167 | 0.000893 | 0.528649 |
| ZNF84    | 0.566236 | 7.356356 | 11.95288 | 4.61E-06 | 6.04E-05 | 4.50824  |
| ZNF394   | 0.566872 | 6.280265 | 13.6237  | 1.84E-06 | 3.24E-05 | 5.520868 |
| ACE2     | 0.567195 | 4.382601 | 9.441554 | 2.35E-05 | 0.000197 | 2.70346  |
| SLC17A5  | 0.567304 | 5.72138  | 9.108446 | 3.01E-05 | 0.000236 | 2.432383 |
| ZNF141   | 0.567317 | 5.050825 | 8.370179 | 5.31E-05 | 0.000365 | 1.799853 |
| RAB18    | 0.567844 | 8.503951 | 15.76837 | 6.51E-07 | 1.63E-05 | 6.654787 |
| SPACA6   | 0.568138 | 6.518261 | 11.98592 | 4.52E-06 | 5.98E-05 | 4.529551 |
| XPNPEP3  | 0.568409 | 5.869992 | 8.830245 | 3.71E-05 | 0.000277 | 2.199333 |
| PPME1    | 0.568443 | 9.144669 | 13.97296 | 1.54E-06 | 2.87E-05 | 5.717182 |
| ATP6VOA4 | 0.568629 | 4.849032 | 12.98744 | 2.57E-06 | 4.05E-05 | 5.1502   |
| CFH      | 0.568998 | 4.751077 | 5.707093 | 0.000624 | 0.0026   | -0.92957 |
| SUGCT    | 0.56906  | 7.110532 | 8.884524 | 3.56E-05 | 0.000269 | 2.245293 |
| LYN      | 0.569257 | 7.016041 | 10.69986 | 9.96E-06 | 0.000105 | 3.656321 |
| TEX10    | 0.569462 | 8.089752 | 15.42471 | 7.61E-07 | 1.80E-05 | 6.483949 |
| COL4A5   | 0.569598 | 6.605499 | 7.679689 | 9.42E-05 | 0.000568 | 1.164682 |
| MORC3    | 0.569612 | 6.880842 | 10.07065 | 1.51E-05 | 0.000143 | 3.193214 |
| RASGRF1  | 0.5697   | 4.675632 | 4.039353 | 0.004505 | 0.013493 | -3.09466 |
| GSPT2    | 0.569734 | 6.572409 | 9.502442 | 2.25E-05 | 0.000191 | 2.752105 |
| PRPF3    | 0.569777 | 8.601939 | 11.77349 | 5.12E-06 | 6.52E-05 | 4.391559 |
| GALNT7   | 0.570081 | 7.305919 | 14.29392 | 1.31E-06 | 2.59E-05 | 5.893347 |
| ZHX1     | 0.570214 | 7.76624  | 15.56972 | 7.12E-07 | 1.72E-05 | 6.556505 |
| GPR176   | 0.570372 | 6.53392  | 7.59159  | 0.000102 | 0.000603 | 1.080352 |
| ZNF235   | 0.571042 | 6.017015 | 9.89642  | 1.71E-05 | 0.000156 | 3.060364 |

|           |          |          |          |          |          |          |
|-----------|----------|----------|----------|----------|----------|----------|
| ADAM17    | 0.571315 | 8.767341 | 11.77069 | 5.13E-06 | 6.53E-05 | 4.389724 |
| CADM1     | 0.571324 | 7.992748 | 9.661878 | 2.01E-05 | 0.000176 | 2.878191 |
| CHD1      | 0.571384 | 9.031526 | 13.11135 | 2.41E-06 | 3.86E-05 | 5.223761 |
| GOLGA4    | 0.571417 | 9.132769 | 16.13814 | 5.52E-07 | 1.48E-05 | 6.834416 |
| ZNF548    | 0.571903 | 4.975119 | 9.434118 | 2.37E-05 | 0.000198 | 2.697501 |
| CDC42SE1  | 0.572099 | 7.007631 | 14.85556 | 9.95E-07 | 2.16E-05 | 6.19234  |
| ZNF264    | 0.572133 | 4.809113 | 11.98068 | 4.54E-06 | 5.99E-05 | 4.526175 |
| GALK2     | 0.572232 | 8.116815 | 10.20496 | 1.38E-05 | 0.000134 | 3.294229 |
| ZNF248    | 0.572264 | 4.512552 | 6.31437  | 0.000333 | 0.00155  | -0.23577 |
| NAA35     | 0.572444 | 8.275101 | 14.16588 | 1.39E-06 | 2.70E-05 | 5.823544 |
| JAK2      | 0.572478 | 6.143973 | 13.59151 | 1.87E-06 | 3.28E-05 | 5.502529 |
| PARD3     | 0.572686 | 8.406805 | 15.89508 | 6.15E-07 | 1.58E-05 | 6.716822 |
| NME7      | 0.572691 | 9.198091 | 13.79205 | 1.68E-06 | 3.06E-05 | 5.616107 |
| IL18      | 0.572755 | 4.040237 | 5.570853 | 0.000723 | 0.002928 | -1.09185 |
| PCID2     | 0.572824 | 8.837021 | 13.38749 | 2.08E-06 | 3.51E-05 | 5.385276 |
| EBI3      | 0.573175 | 6.8651   | 9.358693 | 2.50E-05 | 0.000206 | 2.636818 |
| OGT       | 0.573335 | 8.94116  | 15.70326 | 6.70E-07 | 1.66E-05 | 6.622717 |
| ZNF566    | 0.573632 | 6.671822 | 12.14136 | 4.13E-06 | 5.61E-05 | 4.629066 |
| STRN      | 0.573694 | 6.364007 | 11.60263 | 5.67E-06 | 7.00E-05 | 4.278851 |
| TPST1     | 0.574439 | 9.545385 | 15.35004 | 7.88E-07 | 1.84E-05 | 6.446319 |
| KLHL15    | 0.575238 | 8.245782 | 15.99267 | 5.88E-07 | 1.53E-05 | 6.764257 |
| PLGLB1 // | 0.575773 | 5.642714 | 6.685498 | 0.000232 | 0.001155 | 0.165676 |
| NR1D2     | 0.576135 | 4.934598 | 8.335072 | 5.46E-05 | 0.000372 | 1.768617 |
| TRIM4     | 0.576291 | 7.880466 | 13.69402 | 1.77E-06 | 3.16E-05 | 5.560791 |
| TRIM23    | 0.576643 | 6.494765 | 15.22531 | 8.35E-07 | 1.91E-05 | 6.383042 |
| RYBP      | 0.576753 | 9.121821 | 13.6447  | 1.82E-06 | 3.22E-05 | 5.532812 |
| NMT2      | 0.57743  | 6.807007 | 9.195337 | 2.82E-05 | 0.000225 | 2.503915 |
| ADAMTS6   | 0.577739 | 5.981731 | 9.735784 | 1.91E-05 | 0.00017  | 2.936015 |
| PGPEP1    | 0.577777 | 5.461534 | 7.55613  | 0.000105 | 0.000617 | 1.046189 |
| FLI1      | 0.577857 | 6.790753 | 11.03759 | 8.03E-06 | 8.97E-05 | 3.894721 |
| ZNF506    | 0.578042 | 6.57342  | 13.40251 | 2.06E-06 | 3.49E-05 | 5.393968 |
| TGFA      | 0.578118 | 7.846119 | 13.69165 | 1.77E-06 | 3.17E-05 | 5.559448 |
| NF2       | 0.578342 | 7.043206 | 10.62351 | 1.05E-05 | 0.000109 | 3.601469 |
| ZNF69     | 0.57865  | 6.815571 | 9.568359 | 2.15E-05 | 0.000184 | 2.804457 |
| BCL2L1    | 0.578892 | 6.632437 | 15.50854 | 7.32E-07 | 1.76E-05 | 6.525975 |
| ITGB8     | 0.579662 | 4.874841 | 10.56376 | 1.09E-05 | 0.000112 | 3.558289 |
| RELB      | 0.579995 | 7.579075 | 12.69783 | 3.02E-06 | 4.53E-05 | 4.975593 |
| CFHR3 /// | 0.580427 | 5.339705 | 7.191175 | 0.000145 | 0.000797 | 0.687069 |
| FAM209A   | 0.580452 | 2.913185 | 6.745053 | 0.000219 | 0.001106 | 0.228581 |
| ZNF197    | 0.580687 | 6.596488 | 11.13023 | 7.58E-06 | 8.61E-05 | 3.958941 |
| PSME4     | 0.580694 | 8.670366 | 15.14948 | 8.65E-07 | 1.96E-05 | 6.344312 |
| CXorf38   | 0.580767 | 7.838982 | 16.17218 | 5.43E-07 | 1.46E-05 | 6.850736 |
| MOB1B     | 0.581278 | 5.272133 | 7.076079 | 0.000161 | 0.000867 | 0.570889 |
| ZNF346    | 0.581317 | 6.539596 | 7.408903 | 0.000119 | 0.000682 | 0.902982 |
| FAM126A   | 0.581458 | 8.552104 | 16.63484 | 4.44E-07 | 1.31E-05 | 7.069151 |
| TANK      | 0.581525 | 7.431711 | 12.17385 | 4.05E-06 | 5.53E-05 | 4.649707 |
| MID1      | 0.581568 | 6.557685 | 15.708   | 6.69E-07 | 1.66E-05 | 6.625057 |
| TGFBR1    | 0.58201  | 4.548258 | 5.816946 | 0.000555 | 0.002363 | -0.80053 |
| CNTNAP3   | 0.582015 | 5.322382 | 10.40675 | 1.21E-05 | 0.000121 | 3.443754 |
| RNFT1     | 0.582059 | 7.770717 | 15.97983 | 5.92E-07 | 1.54E-05 | 6.758033 |
| ZDHHC9    | 0.582177 | 7.199428 | 12.58031 | 3.22E-06 | 4.73E-05 | 4.903646 |

|           |          |          |          |          |          |          |
|-----------|----------|----------|----------|----------|----------|----------|
| EMCN      | 0.582387 | 2.576377 | 7.444679 | 0.000115 | 0.000666 | 0.937986 |
| ALDH3B1   | 0.582835 | 7.191805 | 12.43909 | 3.49E-06 | 4.98E-05 | 4.816317 |
| STC2      | 0.583304 | 6.440794 | 4.717574 | 0.001922 | 0.006594 | -2.16662 |
| NOC3L     | 0.583683 | 8.615172 | 16.37756 | 4.96E-07 | 1.39E-05 | 6.94848  |
| AJAP1     | 0.583726 | 7.540911 | 9.514379 | 2.23E-05 | 0.00019  | 2.761608 |
| PEX13     | 0.583882 | 7.122842 | 9.160115 | 2.89E-05 | 0.000229 | 2.474989 |
| VPS13B    | 0.583934 | 6.226565 | 12.92854 | 2.66E-06 | 4.13E-05 | 5.114997 |
| CSNK1G1   | 0.584113 | 7.874318 | 14.53515 | 1.16E-06 | 2.38E-05 | 6.02318  |
| DCBLD1    | 0.584113 | 5.828384 | 8.445877 | 5.00E-05 | 0.000348 | 1.866832 |
| GFRA1     | 0.584327 | 6.13909  | 10.17498 | 1.41E-05 | 0.000135 | 3.271784 |
| ZKSCAN8   | 0.58447  | 5.406267 | 5.030262 | 0.001327 | 0.004837 | -1.76085 |
| PDZD8     | 0.584781 | 7.086948 | 9.973889 | 1.62E-05 | 0.00015  | 3.11969  |
| FAM73A    | 0.585232 | 6.492647 | 13.97488 | 1.53E-06 | 2.87E-05 | 5.718245 |
| BBS7      | 0.585414 | 6.134722 | 9.625267 | 2.06E-05 | 0.000179 | 2.849401 |
| OTUD4     | 0.585801 | 5.177395 | 8.802627 | 3.79E-05 | 0.000282 | 2.175855 |
| TRIO      | 0.585933 | 7.088688 | 12.7201  | 2.98E-06 | 4.50E-05 | 4.989161 |
| BTRC      | 0.586063 | 6.769563 | 10.07512 | 1.51E-05 | 0.000142 | 3.196593 |
| ITGA1     | 0.586146 | 6.861874 | 12.50961 | 3.35E-06 | 4.85E-05 | 4.860041 |
| SETDB2    | 0.586534 | 5.488094 | 5.255981 | 0.001025 | 0.003897 | -1.47656 |
| FAM91A1   | 0.586832 | 7.831956 | 15.56263 | 7.14E-07 | 1.73E-05 | 6.55297  |
| LOC105376 | 0.586932 | 8.05495  | 14.29382 | 1.31E-06 | 2.59E-05 | 5.893292 |
| SEC22C    | 0.586999 | 6.964434 | 12.30821 | 3.75E-06 | 5.26E-05 | 4.734534 |
| XRN1      | 0.587306 | 4.975879 | 6.343947 | 0.000323 | 0.001512 | -0.20317 |
| DDA1      | 0.587372 | 9.802421 | 17.0784  | 3.68E-07 | 1.18E-05 | 7.272728 |
| HIVEP1    | 0.587437 | 5.121782 | 5.072552 | 0.001264 | 0.004649 | -1.70704 |
| HNRNPLL   | 0.58789  | 5.459852 | 10.65694 | 1.02E-05 | 0.000107 | 3.625526 |
| IKBIP     | 0.588113 | 7.972479 | 11.38518 | 6.47E-06 | 7.68E-05 | 4.133134 |
| C7orf57   | 0.588149 | 2.488119 | 4.634141 | 0.002126 | 0.007167 | -2.27726 |
| TMEM234   | 0.588153 | 5.828066 | 13.84341 | 1.64E-06 | 3.01E-05 | 5.644934 |
| SAA1      | 0.588526 | 3.33087  | 6.773046 | 0.000213 | 0.001083 | 0.258008 |
| KIAA1919  | 0.588568 | 5.743988 | 6.800493 | 0.000208 | 0.001061 | 0.286773 |
| SPTLC2    | 0.589804 | 7.997065 | 12.75563 | 2.92E-06 | 4.43E-05 | 5.010747 |
| PCDHB14   | 0.590093 | 5.017087 | 13.80394 | 1.67E-06 | 3.05E-05 | 5.622788 |
| TNC       | 0.590299 | 9.9203   | 14.61897 | 1.11E-06 | 2.32E-05 | 6.067792 |
| C6orf58   | 0.5908   | 5.138669 | 7.128817 | 0.000153 | 0.000833 | 0.624301 |
| EFTUD1    | 0.591261 | 7.304756 | 15.50424 | 7.34E-07 | 1.76E-05 | 6.523828 |
| C3orf17   | 0.591504 | 8.056572 | 14.36364 | 1.26E-06 | 2.53E-05 | 5.931097 |
| CLN8      | 0.591868 | 7.076765 | 9.354225 | 2.51E-05 | 0.000207 | 2.633211 |
| RNF11     | 0.591903 | 7.705194 | 12.8874  | 2.72E-06 | 4.20E-05 | 5.090316 |
| INO80     | 0.5922   | 6.165158 | 12.98376 | 2.58E-06 | 4.06E-05 | 5.148008 |
| GEM       | 0.592415 | 4.473384 | 9.01833  | 3.21E-05 | 0.000248 | 2.357571 |
| TMC7      | 0.592473 | 5.17476  | 6.732065 | 0.000222 | 0.001116 | 0.214897 |
| PCNXL2    | 0.592483 | 7.360081 | 12.96057 | 2.61E-06 | 4.09E-05 | 5.134162 |
| ZNF542P   | 0.592533 | 5.530813 | 12.17399 | 4.05E-06 | 5.53E-05 | 4.649799 |
| HIST1H3H  | 0.592648 | 4.041385 | 11.57834 | 5.76E-06 | 7.07E-05 | 4.262704 |
| SRPX2     | 0.592942 | 6.382732 | 12.73248 | 2.96E-06 | 4.47E-05 | 4.996685 |
| SLC39A9   | 0.593128 | 6.006161 | 9.14721  | 2.92E-05 | 0.000231 | 2.464368 |
| ARID5B    | 0.593132 | 9.048605 | 15.20937 | 8.41E-07 | 1.92E-05 | 6.374915 |
| KLF6      | 0.59353  | 8.273884 | 14.84241 | 1.00E-06 | 2.17E-05 | 6.185469 |
| KRCC1     | 0.593672 | 5.497889 | 11.92862 | 4.68E-06 | 6.10E-05 | 4.492561 |
| ADGRE1    | 0.593883 | 8.144818 | 17.45587 | 3.15E-07 | 1.08E-05 | 7.441674 |

|           |          |          |          |          |          |          |
|-----------|----------|----------|----------|----------|----------|----------|
| RPL28     | 0.594121 | 9.588036 | 16.78443 | 4.17E-07 | 1.26E-05 | 7.138433 |
| WDR37     | 0.594725 | 4.498975 | 8.518627 | 4.72E-05 | 0.000333 | 1.930731 |
| ARIH1     | 0.596229 | 8.724752 | 14.5785  | 1.14E-06 | 2.35E-05 | 6.046285 |
| NDFIP2    | 0.596533 | 8.391197 | 12.21948 | 3.95E-06 | 5.43E-05 | 4.678618 |
| CCDC130   | 0.59656  | 7.776934 | 11.99754 | 4.49E-06 | 5.95E-05 | 4.53703  |
| CNEP1R1   | 0.596834 | 6.059369 | 12.13974 | 4.14E-06 | 5.61E-05 | 4.62803  |
| RRP12     | 0.597022 | 7.987758 | 11.50432 | 6.02E-06 | 7.29E-05 | 4.21329  |
| CTTNBP2NL | 0.597094 | 7.039804 | 9.634448 | 2.05E-05 | 0.000178 | 2.856629 |
| HNRNPM    | 0.597214 | 11.53776 | 14.03629 | 1.49E-06 | 2.80E-05 | 5.752254 |
| ZNF271P   | 0.597579 | 6.274541 | 8.764934 | 3.90E-05 | 0.000289 | 2.143711 |
| CERS6     | 0.597747 | 4.693745 | 6.74201  | 0.00022  | 0.001108 | 0.225376 |
| LRBA      | 0.597875 | 5.33553  | 4.563026 | 0.00232  | 0.007709 | -2.37235 |
| BTBD10    | 0.598186 | 8.463242 | 13.94278 | 1.56E-06 | 2.91E-05 | 5.700408 |
| HMCN1     | 0.598543 | 7.008393 | 12.7054  | 3.00E-06 | 4.52E-05 | 4.980211 |
| FAM179B   | 0.598712 | 6.900293 | 10.51354 | 1.13E-05 | 0.000115 | 3.521823 |
| IL1RAPL1  | 0.598733 | 7.484688 | 11.18074 | 7.34E-06 | 8.42E-05 | 3.993741 |
| LDB1      | 0.598737 | 8.095804 | 14.83303 | 1.01E-06 | 2.17E-05 | 6.180563 |
| NANOS1    | 0.598828 | 7.055162 | 10.05621 | 1.53E-05 | 0.000144 | 3.182284 |
| PCMTD1    | 0.599012 | 7.808093 | 7.5608   | 0.000104 | 0.000615 | 1.050696 |
| KCTD7 /// | 0.599787 | 8.6763   | 15.85538 | 6.26E-07 | 1.60E-05 | 6.697442 |
| DDO       | 0.599818 | 4.599964 | 9.245444 | 2.72E-05 | 0.000219 | 2.544898 |
| ZNF460    | 0.599913 | 4.270631 | 6.593645 | 0.000253 | 0.00124  | 0.067846 |
| RPS6KA3   | 0.600063 | 9.582433 | 16.42293 | 4.87E-07 | 1.37E-05 | 6.9699   |
| ACAD8     | 0.600233 | 7.555508 | 12.6535  | 3.09E-06 | 4.60E-05 | 4.94853  |
| ZNF780B   | 0.601015 | 5.267222 | 6.180134 | 0.000381 | 0.001732 | -0.38509 |
| CDK6      | 0.601222 | 8.32842  | 11.24441 | 7.06E-06 | 8.18E-05 | 4.037409 |
| HDX       | 0.601391 | 3.94504  | 4.819339 | 0.001701 | 0.005951 | -2.03303 |
| BCL10     | 0.601599 | 7.646074 | 14.40538 | 1.24E-06 | 2.49E-05 | 5.953608 |
| MSANTD3   | 0.601956 | 9.213575 | 12.51855 | 3.33E-06 | 4.83E-05 | 4.865569 |
| KDM6A     | 0.602077 | 7.263234 | 15.17425 | 8.55E-07 | 1.95E-05 | 6.356985 |
| STAMBPL1  | 0.602185 | 7.892213 | 11.84732 | 4.90E-06 | 6.32E-05 | 4.439785 |
| PNISR     | 0.602193 | 7.306429 | 14.15751 | 1.40E-06 | 2.70E-05 | 5.818959 |
| FER1L4    | 0.602413 | 5.557713 | 6.554846 | 0.000263 | 0.001278 | 0.026224 |
| GADD45B   | 0.602636 | 8.007962 | 12.64151 | 3.11E-06 | 4.62E-05 | 4.941191 |
| CCDC80    | 0.602695 | 5.718668 | 6.441028 | 0.000294 | 0.0014   | -0.09691 |
| CAMK4     | 0.602734 | 7.199799 | 14.9826  | 9.36E-07 | 2.07E-05 | 6.258394 |
| PRRG1     | 0.602883 | 8.284027 | 16.0469  | 5.74E-07 | 1.51E-05 | 6.790489 |
| C15orf57  | 0.603097 | 7.877535 | 12.60205 | 3.18E-06 | 4.68E-05 | 4.917004 |
| HIC2      | 0.603379 | 6.939139 | 13.2743  | 2.21E-06 | 3.65E-05 | 5.319465 |
| BMP2K     | 0.6034   | 5.261431 | 8.159699 | 6.30E-05 | 0.000415 | 1.610931 |
| TAF1D     | 0.603402 | 9.378238 | 14.80605 | 1.02E-06 | 2.19E-05 | 6.166442 |
| ZNF605    | 0.603405 | 7.127931 | 9.657779 | 2.02E-05 | 0.000176 | 2.874972 |
| SGK223    | 0.603444 | 6.586136 | 11.21588 | 7.19E-06 | 8.29E-05 | 4.017873 |
| USP25     | 0.603575 | 7.224035 | 10.92318 | 8.63E-06 | 9.43E-05 | 3.81472  |
| KCNJ12    | 0.603857 | 6.102208 | 7.72748  | 9.04E-05 | 0.00055  | 1.210105 |
| GALNT2    | 0.604089 | 7.462773 | 17.64449 | 2.91E-07 | 1.03E-05 | 7.524668 |
| SMPX      | 0.604172 | 3.664269 | 11.90809 | 4.73E-06 | 6.16E-05 | 4.479265 |
| USP38     | 0.604328 | 7.484201 | 13.74804 | 1.72E-06 | 3.11E-05 | 5.59132  |
| TPD52L1   | 0.604422 | 8.203154 | 16.13047 | 5.53E-07 | 1.48E-05 | 6.830731 |
| CPPED1    | 0.604519 | 7.463204 | 15.29311 | 8.09E-07 | 1.87E-05 | 6.417498 |
| JAKMIP2   | 0.604852 | 5.562168 | 16.15348 | 5.48E-07 | 1.47E-05 | 6.841774 |

|           |          |          |          |          |          |          |
|-----------|----------|----------|----------|----------|----------|----------|
| IGF2 ///  | 0.604954 | 3.552962 | 10.02311 | 1.56E-05 | 0.000146 | 3.157174 |
| GPR107    | 0.605122 | 7.11557  | 9.890447 | 1.71E-05 | 0.000156 | 3.055772 |
| DTX3L     | 0.605833 | 5.216082 | 9.049865 | 3.14E-05 | 0.000244 | 2.383824 |
| RBM5      | 0.606021 | 8.72277  | 12.46339 | 3.44E-06 | 4.93E-05 | 4.831416 |
| STK40     | 0.606085 | 6.28388  | 11.11074 | 7.67E-06 | 8.70E-05 | 3.945467 |
| SP100     | 0.606298 | 6.183666 | 10.87155 | 8.92E-06 | 9.64E-05 | 3.778367 |
| TRPV2     | 0.606604 | 8.493244 | 15.36732 | 7.82E-07 | 1.83E-05 | 6.45504  |
| TGIF1     | 0.607695 | 7.967394 | 16.77093 | 4.19E-07 | 1.27E-05 | 7.132203 |
| LEMD1     | 0.607954 | 6.550368 | 17.17242 | 3.54E-07 | 1.15E-05 | 7.315172 |
| ATP7A     | 0.607985 | 6.604373 | 11.09965 | 7.73E-06 | 8.73E-05 | 3.937794 |
| TP53INP1  | 0.608393 | 7.317665 | 11.16698 | 7.41E-06 | 8.47E-05 | 3.984274 |
| NPAS2     | 0.609128 | 7.823826 | 15.4562  | 7.50E-07 | 1.78E-05 | 6.499764 |
| HECW2     | 0.609185 | 5.211062 | 7.93972  | 7.55E-05 | 0.000478 | 1.409145 |
| GTF2H1    | 0.609208 | 8.272695 | 14.94421 | 9.53E-07 | 2.10E-05 | 6.238494 |
| TMTC3     | 0.609546 | 7.688618 | 11.66942 | 5.45E-06 | 6.82E-05 | 4.323093 |
| NEDD9     | 0.610467 | 7.082466 | 13.58324 | 1.88E-06 | 3.29E-05 | 5.497805 |
| UBR1      | 0.611075 | 7.717419 | 14.85743 | 9.94E-07 | 2.16E-05 | 6.193316 |
| TBK1      | 0.611259 | 8.152781 | 15.25546 | 8.23E-07 | 1.89E-05 | 6.398385 |
| VPS13C    | 0.611275 | 5.727199 | 8.569816 | 4.54E-05 | 0.000323 | 1.975418 |
| KPNA6     | 0.611293 | 7.89125  | 13.26115 | 2.22E-06 | 3.67E-05 | 5.311782 |
| ZSCAN26   | 0.611522 | 5.7448   | 10.39609 | 1.22E-05 | 0.000121 | 3.435919 |
| SLC23A2   | 0.612167 | 6.576776 | 12.81793 | 2.82E-06 | 4.32E-05 | 5.048468 |
| PTPRO     | 0.612646 | 3.480602 | 5.820304 | 0.000553 | 0.002356 | -0.79662 |
| CLDN22    | 0.612671 | 5.595348 | 17.96797 | 2.56E-07 | 9.64E-06 | 7.664856 |
| RRN3 ///  | 0.613001 | 8.252919 | 16.86375 | 4.03E-07 | 1.24E-05 | 7.174908 |
| STXBP5    | 0.613339 | 6.574742 | 11.00866 | 8.18E-06 | 9.06E-05 | 3.874564 |
| ARHGAP24  | 0.613452 | 7.073277 | 11.48966 | 6.08E-06 | 7.33E-05 | 4.203473 |
| PPIF      | 0.613768 | 8.543576 | 16.29262 | 5.15E-07 | 1.42E-05 | 6.908208 |
| TIMM23 // | 0.613842 | 5.892454 | 7.825017 | 8.32E-05 | 0.000515 | 1.302116 |
| ALKBH8    | 0.613927 | 6.401491 | 13.81998 | 1.66E-06 | 3.03E-05 | 5.631798 |
| PTBP2     | 0.614489 | 8.541014 | 17.14389 | 3.58E-07 | 1.16E-05 | 7.302316 |
| BEST3     | 0.614571 | 4.624881 | 6.699348 | 0.000229 | 0.001145 | 0.180341 |
| FAR2      | 0.615162 | 8.031074 | 13.5559  | 1.90E-06 | 3.33E-05 | 5.482189 |
| ASCC3     | 0.615254 | 7.935511 | 15.91858 | 6.08E-07 | 1.56E-05 | 6.728274 |
| EFCAB14   | 0.615458 | 7.798418 | 11.95284 | 4.61E-06 | 6.04E-05 | 4.508216 |
| ITGA5     | 0.616174 | 8.670407 | 14.44512 | 1.21E-06 | 2.46E-05 | 5.974981 |
| TMEM255A  | 0.616729 | 3.169113 | 6.029566 | 0.000444 | 0.001967 | -0.55527 |
| STK4      | 0.61678  | 5.777955 | 8.478878 | 4.87E-05 | 0.000341 | 1.895875 |
| TNFSF18   | 0.617255 | 4.365951 | 5.818478 | 0.000554 | 0.00236  | -0.79875 |
| CCNJL     | 0.61727  | 7.937743 | 17.95596 | 2.57E-07 | 9.65E-06 | 7.6597   |
| PTEN      | 0.617378 | 8.592136 | 15.14869 | 8.66E-07 | 1.96E-05 | 6.343909 |
| MCFD2     | 0.617462 | 10.02752 | 15.91527 | 6.09E-07 | 1.56E-05 | 6.726662 |
| BLOC1S2   | 0.618353 | 8.500552 | 18.90504 | 1.78E-07 | 7.81E-06 | 8.056344 |
| ZNF623    | 0.618422 | 7.248641 | 13.915   | 1.58E-06 | 2.93E-05 | 5.684936 |
| CARD9     | 0.618464 | 5.010829 | 10.17462 | 1.41E-05 | 0.000135 | 3.271513 |
| ZNF75A    | 0.61853  | 6.713011 | 9.103136 | 3.02E-05 | 0.000237 | 2.427993 |
| RPL23AP82 | 0.618587 | 5.098924 | 8.003735 | 7.16E-05 | 0.000458 | 1.468332 |
| C15orf40  | 0.618807 | 6.772528 | 9.176972 | 2.86E-05 | 0.000227 | 2.488845 |
| ARHGAP28  | 0.619319 | 5.767011 | 10.24908 | 1.34E-05 | 0.00013  | 3.327148 |
| LINC01119 | 0.619801 | 6.135731 | 10.84809 | 9.06E-06 | 9.75E-05 | 3.761796 |
| LOC100133 | 0.619856 | 6.888398 | 7.478553 | 0.000112 | 0.00065  | 0.971007 |

|           |          |          |          |          |          |          |
|-----------|----------|----------|----------|----------|----------|----------|
| PPP1R12A  | 0.619876 | 8.249694 | 17.74907 | 2.79E-07 | 1.00E-05 | 7.570287 |
| CLHC1     | 0.62023  | 6.381199 | 10.31997 | 1.28E-05 | 0.000126 | 3.379775 |
| SLC37A3   | 0.620971 | 6.893893 | 11.70841 | 5.33E-06 | 6.71E-05 | 4.348812 |
| ZNF432    | 0.62119  | 5.449063 | 9.833352 | 1.78E-05 | 0.000161 | 3.011758 |
| TMEM265   | 0.621303 | 6.599978 | 6.172667 | 0.000384 | 0.001742 | -0.39346 |
| TIGAR     | 0.621628 | 8.60514  | 15.85624 | 6.25E-07 | 1.60E-05 | 6.697862 |
| EML4      | 0.621759 | 6.883569 | 9.964767 | 1.63E-05 | 0.000151 | 3.112726 |
| ARSK      | 0.6218   | 5.130542 | 8.566054 | 4.55E-05 | 0.000324 | 1.972142 |
| NSAP11    | 0.62247  | 3.050796 | 11.62503 | 5.60E-06 | 6.93E-05 | 4.293717 |
| LRCH1     | 0.623022 | 6.446259 | 17.98598 | 2.54E-07 | 9.61E-06 | 7.672584 |
| CLCA2     | 0.623138 | 3.469457 | 6.007187 | 0.000455 | 0.002005 | -0.58081 |
| IFT88     | 0.623182 | 6.550044 | 14.54163 | 1.16E-06 | 2.37E-05 | 6.026638 |
| SNAPC1    | 0.623234 | 11.0399  | 14.15391 | 1.40E-06 | 2.71E-05 | 5.816985 |
| ZFP82     | 0.623492 | 7.502938 | 14.54756 | 1.15E-06 | 2.37E-05 | 6.029803 |
| SLC35D1   | 0.623645 | 5.644211 | 8.989389 | 3.29E-05 | 0.000253 | 2.333408 |
| THAP1     | 0.623725 | 7.463409 | 16.24054 | 5.27E-07 | 1.44E-05 | 6.883414 |
| RIN2      | 0.62382  | 8.482605 | 17.54434 | 3.03E-07 | 1.06E-05 | 7.480722 |
| NHLRC3    | 0.624408 | 5.881362 | 16.03592 | 5.77E-07 | 1.52E-05 | 6.785185 |
| CDC42EP2  | 0.624625 | 7.784    | 16.96287 | 3.86E-07 | 1.22E-05 | 7.22024  |
| BFSP1     | 0.624783 | 5.807653 | 6.640373 | 0.000242 | 0.001196 | 0.117738 |
| SLAMF7    | 0.62504  | 5.091037 | 6.708735 | 0.000227 | 0.001136 | 0.190269 |
| MPZL1     | 0.62504  | 7.192725 | 12.67476 | 3.06E-06 | 4.57E-05 | 4.961525 |
| RND3      | 0.625228 | 8.401437 | 16.03381 | 5.78E-07 | 1.52E-05 | 6.784164 |
| VGLL2     | 0.625586 | 6.708983 | 7.27067  | 0.000135 | 0.000753 | 0.766481 |
| LGALSL    | 0.625858 | 6.861972 | 12.50494 | 3.36E-06 | 4.86E-05 | 4.857157 |
| DPH3      | 0.626179 | 9.066395 | 14.9908  | 9.33E-07 | 2.07E-05 | 6.26264  |
| KIAA1586  | 0.627479 | 7.140754 | 14.03571 | 1.49E-06 | 2.80E-05 | 5.751937 |
| DCAF4L1   | 0.627845 | 4.681927 | 7.703334 | 9.23E-05 | 0.000559 | 1.187183 |
| C9orf85   | 0.62841  | 7.908894 | 12.90144 | 2.70E-06 | 4.17E-05 | 5.098749 |
| RECK      | 0.628488 | 5.913806 | 12.02053 | 4.43E-06 | 5.89E-05 | 4.551817 |
| ZBTB48    | 0.628598 | 7.251216 | 8.915548 | 3.47E-05 | 0.000264 | 2.271454 |
| SEC24A    | 0.62892  | 8.227007 | 14.3354  | 1.28E-06 | 2.55E-05 | 5.915828 |
| CCNG1     | 0.629058 | 9.131485 | 12.40591 | 3.55E-06 | 5.05E-05 | 4.795665 |
| ACPP      | 0.629135 | 4.13745  | 8.092163 | 6.66E-05 | 0.000433 | 1.549458 |
| CELF1     | 0.630136 | 8.313036 | 17.94151 | 2.59E-07 | 9.68E-06 | 7.65349  |
| PHF20L1   | 0.630167 | 6.349981 | 11.01676 | 8.14E-06 | 9.04E-05 | 3.880213 |
| RAB39A    | 0.63072  | 3.767395 | 8.887116 | 3.55E-05 | 0.000268 | 2.247481 |
| EGR3      | 0.631582 | 6.465892 | 11.11639 | 7.65E-06 | 8.68E-05 | 3.949378 |
| DDX60L    | 0.63174  | 5.895261 | 12.92918 | 2.66E-06 | 4.13E-05 | 5.11538  |
| PPM1B     | 0.631806 | 7.302417 | 13.10789 | 2.41E-06 | 3.86E-05 | 5.221714 |
| ABCC2     | 0.631884 | 9.055247 | 17.75938 | 2.78E-07 | 1.00E-05 | 7.574767 |
| RPGR      | 0.632422 | 6.621226 | 10.44811 | 1.17E-05 | 0.000118 | 3.474075 |
| ZSCAN16   | 0.632617 | 6.066323 | 11.7473  | 5.20E-06 | 6.60E-05 | 4.374381 |
| ZNF470    | 0.632664 | 6.386872 | 11.11569 | 7.65E-06 | 8.68E-05 | 3.948895 |
| PHLDA1    | 0.633062 | 9.101309 | 15.97821 | 5.92E-07 | 1.54E-05 | 6.757246 |
| TINAGL1   | 0.633518 | 6.822221 | 13.23117 | 2.26E-06 | 3.71E-05 | 5.294246 |
| FNDC3B    | 0.633574 | 8.670207 | 18.4987  | 2.08E-07 | 8.56E-06 | 7.889177 |
| ANKRD10   | 0.633809 | 8.649941 | 13.7079  | 1.76E-06 | 3.15E-05 | 5.568645 |
| NAA30     | 0.633819 | 6.915115 | 13.55349 | 1.91E-06 | 3.33E-05 | 5.480805 |
| RNASEL    | 0.633995 | 6.472329 | 16.58731 | 4.53E-07 | 1.32E-05 | 7.047004 |
| LOC100128 | 0.634076 | 7.303289 | 8.318278 | 5.54E-05 | 0.000376 | 1.753637 |

|           |          |          |          |          |          |          |
|-----------|----------|----------|----------|----------|----------|----------|
| UHRF1BP1L | 0.634114 | 7.338245 | 10.13556 | 1.45E-05 | 0.000138 | 3.242186 |
| C2orf49   | 0.634461 | 7.73831  | 16.66658 | 4.38E-07 | 1.30E-05 | 7.083909 |
| LHFP      | 0.634711 | 7.559049 | 15.39549 | 7.72E-07 | 1.81E-05 | 6.469244 |
| SENP5     | 0.635176 | 7.299925 | 11.73477 | 5.24E-06 | 6.64E-05 | 4.36615  |
| C1orf52   | 0.635305 | 9.202532 | 18.52631 | 2.05E-07 | 8.54E-06 | 7.900658 |
| HSPB8     | 0.635608 | 6.559155 | 9.844998 | 1.77E-05 | 0.00016  | 3.020755 |
| TMEM71    | 0.635923 | 3.707501 | 5.151653 | 0.001154 | 0.004308 | -1.60707 |
| CSMD3     | 0.636114 | 4.483018 | 9.594564 | 2.11E-05 | 0.000182 | 2.825182 |
| CHD7      | 0.63659  | 8.486823 | 15.8667  | 6.22E-07 | 1.59E-05 | 6.702975 |
| BMP1      | 0.636595 | 6.056518 | 9.209285 | 2.79E-05 | 0.000223 | 2.515342 |
| ARPP21    | 0.637727 | 6.560046 | 10.32886 | 1.27E-05 | 0.000125 | 3.386351 |
| OSBP      | 0.638212 | 7.344872 | 13.8339  | 1.65E-06 | 3.02E-05 | 5.639603 |
| ERBB2IP   | 0.639254 | 7.582518 | 16.90749 | 3.95E-07 | 1.23E-05 | 7.194943 |
| WWC2      | 0.63948  | 8.557384 | 18.7367  | 1.89E-07 | 8.10E-06 | 7.987558 |
| EDIL3     | 0.639799 | 4.621828 | 8.034295 | 6.98E-05 | 0.000449 | 1.496451 |
| LINC01605 | 0.639991 | 5.637294 | 9.854504 | 1.76E-05 | 0.000159 | 3.028091 |
| ARAP2     | 0.640034 | 4.549559 | 8.846453 | 3.66E-05 | 0.000275 | 2.213082 |
| NFX1      | 0.640839 | 6.850614 | 12.76513 | 2.91E-06 | 4.41E-05 | 5.016512 |
| GON4L     | 0.641017 | 8.075907 | 11.27508 | 6.93E-06 | 8.08E-05 | 4.058358 |
| FBN1      | 0.641087 | 4.008511 | 11.97492 | 4.55E-06 | 6.00E-05 | 4.522463 |
| C8orf58   | 0.641259 | 7.949662 | 15.03714 | 9.12E-07 | 2.04E-05 | 6.286583 |
| TBCEL     | 0.641458 | 4.236661 | 6.822995 | 0.000203 | 0.001043 | 0.310291 |
| AKAP8L    | 0.641798 | 6.365227 | 12.98193 | 2.58E-06 | 4.06E-05 | 5.146917 |
| DNAJC1    | 0.64212  | 8.253117 | 14.80351 | 1.02E-06 | 2.19E-05 | 6.165111 |
| NEK6      | 0.642158 | 6.690478 | 13.13519 | 2.38E-06 | 3.83E-05 | 5.237833 |
| ZNF443 // | 0.642159 | 7.753825 | 12.23158 | 3.92E-06 | 5.41E-05 | 4.686266 |
| SBN01     | 0.642368 | 8.342335 | 15.48513 | 7.40E-07 | 1.76E-05 | 6.514262 |
| PTPN21    | 0.643442 | 5.828163 | 12.71349 | 2.99E-06 | 4.51E-05 | 4.985137 |
| XDH       | 0.644215 | 6.609515 | 15.40779 | 7.67E-07 | 1.81E-05 | 6.475436 |
| ST3GAL5   | 0.644316 | 8.292024 | 15.76707 | 6.51E-07 | 1.63E-05 | 6.654149 |
| CLDN12    | 0.644875 | 8.345734 | 16.0724  | 5.68E-07 | 1.51E-05 | 6.802789 |
| FGFR10P   | 0.645181 | 6.511521 | 10.84075 | 9.10E-06 | 9.78E-05 | 3.756603 |
| KMT5B     | 0.64612  | 8.518586 | 17.35362 | 3.28E-07 | 1.11E-05 | 7.39629  |
| IER2      | 0.646209 | 8.980488 | 13.88794 | 1.60E-06 | 2.96E-05 | 5.66984  |
| PDE9A     | 0.646696 | 6.223834 | 12.98816 | 2.57E-06 | 4.05E-05 | 5.150634 |
| CDK5R1    | 0.646921 | 6.992004 | 14.96249 | 9.45E-07 | 2.08E-05 | 6.247974 |
| RNF20     | 0.647316 | 9.893754 | 18.0081  | 2.52E-07 | 9.57E-06 | 7.682061 |
| DUSP5     | 0.647323 | 8.177906 | 12.97837 | 2.59E-06 | 4.06E-05 | 5.144793 |
| DCBLD2    | 0.647341 | 9.797774 | 19.75557 | 1.29E-07 | 6.51E-06 | 8.394106 |
| RNF149    | 0.647341 | 8.352738 | 15.2699  | 8.18E-07 | 1.88E-05 | 6.405723 |
| ALPK2     | 0.647631 | 7.256291 | 15.2477  | 8.26E-07 | 1.90E-05 | 6.394435 |
| MYC       | 0.64764  | 8.07045  | 18.04283 | 2.48E-07 | 9.45E-06 | 7.696919 |
| SLC12A2   | 0.647855 | 7.535172 | 15.30347 | 8.05E-07 | 1.86E-05 | 6.422752 |
| FAM8A1    | 0.648016 | 6.600388 | 12.19147 | 4.01E-06 | 5.50E-05 | 4.660887 |
| ZC3H8     | 0.648039 | 7.464156 | 13.36891 | 2.10E-06 | 3.53E-05 | 5.374507 |
| MCC       | 0.648419 | 5.204482 | 11.37283 | 6.52E-06 | 7.73E-05 | 4.124779 |
| ABHD13    | 0.648901 | 8.000032 | 13.87988 | 1.61E-06 | 2.97E-05 | 5.665339 |
| NR2F1-AS1 | 0.649109 | 6.916242 | 12.7764  | 2.89E-06 | 4.39E-05 | 5.023341 |
| KLHL18    | 0.649373 | 7.870984 | 14.88975 | 9.78E-07 | 2.14E-05 | 6.210174 |
| TGFBR3    | 0.649536 | 6.742368 | 8.2879   | 5.68E-05 | 0.000383 | 1.726475 |
| C15orf52  | 0.649875 | 9.692118 | 18.92726 | 1.76E-07 | 7.75E-06 | 8.065375 |



|           |          |          |          |          |          |          |
|-----------|----------|----------|----------|----------|----------|----------|
| KLF3      | 0.6499   | 6.621027 | 11.63574 | 5.56E-06 | 6.91E-05 | 4.300814 |
| BACH1 /// | 0.650177 | 3.236334 | 4.442571 | 0.002692 | 0.008756 | -2.53506 |
| KCTD8     | 0.650463 | 3.462216 | 8.658935 | 4.23E-05 | 0.000307 | 2.052683 |
| TRAPPC6B  | 0.650537 | 7.001    | 13.2584  | 2.23E-06 | 3.67E-05 | 5.310178 |
| C2orf69   | 0.650617 | 9.039362 | 13.86307 | 1.62E-06 | 2.99E-05 | 5.655937 |
| ZNF644    | 0.650891 | 5.804305 | 14.0786  | 1.46E-06 | 2.78E-05 | 5.775602 |
| SOWAHC    | 0.651072 | 6.002864 | 9.743077 | 1.90E-05 | 0.000169 | 2.9417   |
| PRKCH     | 0.651189 | 6.572141 | 8.590115 | 4.46E-05 | 0.000319 | 1.993077 |
| LRTOMT    | 0.651521 | 3.914613 | 6.093676 | 0.000416 | 0.001862 | -0.48246 |
| TNFRSF11E | 0.651942 | 7.133538 | 14.58392 | 1.13E-06 | 2.34E-05 | 6.049171 |
| ZBED9     | 0.651949 | 5.572426 | 8.539033 | 4.65E-05 | 0.000329 | 1.948572 |
| SCN3A     | 0.652069 | 3.807853 | 8.18335  | 6.18E-05 | 0.000409 | 1.632359 |
| MTX3      | 0.652141 | 4.802912 | 11.48196 | 6.10E-06 | 7.36E-05 | 4.198305 |
| ZC3H12C   | 0.652649 | 6.925224 | 12.58672 | 3.21E-06 | 4.72E-05 | 4.907582 |
| EOGT      | 0.652997 | 6.17988  | 11.30623 | 6.80E-06 | 7.97E-05 | 4.079586 |
| ENTPD7    | 0.653275 | 5.662493 | 12.00004 | 4.48E-06 | 5.94E-05 | 4.538643 |
| POGLUT1   | 0.653795 | 7.354712 | 10.09243 | 1.49E-05 | 0.000141 | 3.209674 |
| ZDHHC20   | 0.653924 | 6.632545 | 11.54589 | 5.87E-06 | 7.16E-05 | 4.241077 |
| CD22      | 0.654169 | 4.515437 | 9.375085 | 2.47E-05 | 0.000204 | 2.650043 |
| CDC42SE2  | 0.654439 | 6.923849 | 9.374126 | 2.47E-05 | 0.000204 | 2.64927  |
| C3orf38   | 0.654676 | 8.845577 | 16.3672  | 4.99E-07 | 1.39E-05 | 6.943578 |
| GNE       | 0.654879 | 8.355783 | 15.3894  | 7.74E-07 | 1.82E-05 | 6.466177 |
| LY96      | 0.654931 | 5.504299 | 8.078242 | 6.73E-05 | 0.000437 | 1.536735 |
| DENND4A   | 0.654949 | 6.213688 | 13.1179  | 2.40E-06 | 3.85E-05 | 5.227626 |
| BIVM      | 0.655111 | 7.863513 | 13.8268  | 1.65E-06 | 3.02E-05 | 5.635624 |
| DCTN5     | 0.655156 | 7.317008 | 17.73232 | 2.81E-07 | 1.01E-05 | 7.562999 |
| LRRK2     | 0.655301 | 4.514003 | 5.795524 | 0.000568 | 0.002408 | -0.82557 |
| MAB21L1 / | 0.655489 | 6.113448 | 12.99878 | 2.56E-06 | 4.04E-05 | 5.156962 |
| TNFRSF12A | 0.65551  | 7.967228 | 10.00108 | 1.59E-05 | 0.000148 | 3.140418 |
| TM4SF18   | 0.655824 | 8.831355 | 15.63754 | 6.90E-07 | 1.70E-05 | 6.590201 |
| ZNF44     | 0.655837 | 7.023142 | 14.82422 | 1.01E-06 | 2.18E-05 | 6.175955 |
| SNX5      | 0.655962 | 8.221387 | 12.97789 | 2.59E-06 | 4.06E-05 | 5.144503 |
| EDNRB     | 0.656485 | 7.312722 | 10.28017 | 1.31E-05 | 0.000129 | 3.350264 |
| RLF       | 0.656676 | 7.121867 | 19.34924 | 1.50E-07 | 7.06E-06 | 8.234738 |
| RAB11FIP1 | 0.656928 | 4.228924 | 10.03232 | 1.55E-05 | 0.000145 | 3.164164 |
| PEA15     | 0.657963 | 9.34453  | 17.50013 | 3.09E-07 | 1.07E-05 | 7.461234 |
| WDR26     | 0.658173 | 10.07529 | 19.08159 | 1.66E-07 | 7.49E-06 | 8.127781 |
| TAPBPL    | 0.658634 | 6.126979 | 9.717761 | 1.93E-05 | 0.000171 | 2.921949 |
| GPATCH2L  | 0.658645 | 6.669699 | 13.52423 | 1.93E-06 | 3.35E-05 | 5.464053 |
| CASP8     | 0.65906  | 7.222195 | 11.5524  | 5.85E-06 | 7.15E-05 | 4.245417 |
| TRIM36    | 0.659253 | 6.58819  | 14.9422  | 9.54E-07 | 2.10E-05 | 6.23745  |
| SPAG1     | 0.659455 | 7.120614 | 14.61734 | 1.12E-06 | 2.32E-05 | 6.066926 |
| ZSCAN29   | 0.660048 | 5.743019 | 10.72518 | 9.80E-06 | 0.000104 | 3.674431 |
| ZNF28 /// | 0.660552 | 6.472229 | 8.567754 | 4.54E-05 | 0.000323 | 1.973623 |
| RSRC2     | 0.660576 | 9.882603 | 15.32523 | 7.97E-07 | 1.85E-05 | 6.433773 |
| SLC36A1   | 0.660915 | 6.337945 | 13.13519 | 2.38E-06 | 3.83E-05 | 5.237833 |
| CCL3P1 // | 0.661097 | 6.576774 | 11.51738 | 5.97E-06 | 7.25E-05 | 4.222029 |
| ZNF468    | 0.661803 | 5.122736 | 8.286435 | 5.68E-05 | 0.000384 | 1.725163 |
| HPS5      | 0.661822 | 7.495248 | 12.30008 | 3.77E-06 | 5.27E-05 | 4.729428 |
| RPL27A    | 0.662123 | 6.572467 | 12.24144 | 3.90E-06 | 5.38E-05 | 4.692491 |
| ATP6V1A   | 0.66308  | 7.326781 | 17.41195 | 3.20E-07 | 1.09E-05 | 7.422215 |

|           |          |          |          |          |          |          |
|-----------|----------|----------|----------|----------|----------|----------|
| LHX4      | 0.663091 | 5.367383 | 15.59664 | 7.03E-07 | 1.71E-05 | 6.5699   |
| DACT1     | 0.663361 | 3.977221 | 8.546442 | 4.62E-05 | 0.000327 | 1.955041 |
| TAPT1     | 0.663388 | 6.60381  | 11.54966 | 5.86E-06 | 7.15E-05 | 4.243591 |
| NAP1L2    | 0.663461 | 2.808066 | 5.785898 | 0.000574 | 0.002427 | -0.83684 |
| ITSN2     | 0.663508 | 6.975417 | 14.63203 | 1.11E-06 | 2.31E-05 | 6.07472  |
| SH3RF1    | 0.663697 | 6.850513 | 15.48538 | 7.40E-07 | 1.76E-05 | 6.514391 |
| ZNF184    | 0.664003 | 7.008007 | 15.73227 | 6.61E-07 | 1.65E-05 | 6.637021 |
| CROT      | 0.664661 | 6.050275 | 9.660914 | 2.01E-05 | 0.000176 | 2.877434 |
| ZNF337    | 0.664831 | 7.680891 | 11.97891 | 4.54E-06 | 5.99E-05 | 4.525037 |
| ARHGAP23  | 0.664835 | 9.023671 | 17.61318 | 2.95E-07 | 1.04E-05 | 7.510957 |
| ATP2B1    | 0.665056 | 8.21737  | 16.38363 | 4.95E-07 | 1.39E-05 | 6.95135  |
| MMP8      | 0.665073 | 5.120816 | 8.011463 | 7.12E-05 | 0.000455 | 1.475451 |
| VPS36     | 0.665706 | 7.777541 | 13.54918 | 1.91E-06 | 3.33E-05 | 5.478344 |
| UPP1      | 0.665722 | 8.521144 | 16.35173 | 5.02E-07 | 1.40E-05 | 6.936259 |
| RNF128    | 0.665724 | 5.898931 | 13.53868 | 1.92E-06 | 3.34E-05 | 5.472333 |
| FGD6      | 0.665812 | 5.092652 | 14.55102 | 1.15E-06 | 2.37E-05 | 6.031646 |
| PTPN14    | 0.666038 | 7.0002   | 12.94203 | 2.64E-06 | 4.11E-05 | 5.123074 |
| AKAP10    | 0.666041 | 7.133073 | 14.53956 | 1.16E-06 | 2.38E-05 | 6.025534 |
| LATS1     | 0.666219 | 5.048919 | 9.664517 | 2.01E-05 | 0.000176 | 2.880262 |
| FAM24B    | 0.666315 | 6.375072 | 12.3794  | 3.61E-06 | 5.10E-05 | 4.779122 |
| CHML      | 0.666562 | 6.514026 | 11.44212 | 6.25E-06 | 7.49E-05 | 4.171544 |
| DNAJC6    | 0.666844 | 5.852598 | 8.685215 | 4.15E-05 | 0.000302 | 2.07534  |
| PPM1K     | 0.667072 | 5.313456 | 10.06426 | 1.52E-05 | 0.000143 | 3.18838  |
| ZNF816    | 0.667144 | 5.902496 | 8.817362 | 3.74E-05 | 0.00028  | 2.188389 |
| CYFIP2    | 0.667413 | 7.431298 | 13.25468 | 2.23E-06 | 3.67E-05 | 5.308004 |
| ZNF776    | 0.667583 | 3.525134 | 5.907638 | 0.000504 | 0.002186 | -0.6952  |
| DDI2 ///  | 0.667675 | 6.294196 | 9.776826 | 1.85E-05 | 0.000166 | 2.967958 |
| NPAS3     | 0.668003 | 4.610648 | 8.748994 | 3.95E-05 | 0.000292 | 2.130083 |
| EDEM1     | 0.668003 | 6.665168 | 14.39074 | 1.25E-06 | 2.51E-05 | 5.945721 |
| BHLHE41   | 0.668647 | 6.367037 | 10.96812 | 8.39E-06 | 9.23E-05 | 3.846242 |
| RMND1     | 0.668895 | 4.815044 | 14.06004 | 1.47E-06 | 2.79E-05 | 5.765371 |
| STX1A     | 0.669265 | 5.235815 | 5.541467 | 0.000746 | 0.003002 | -1.12718 |
| ZNF354B   | 0.669688 | 5.356278 | 11.10209 | 7.71E-06 | 8.73E-05 | 3.939487 |
| DNAL1     | 0.669789 | 6.179949 | 10.87215 | 8.92E-06 | 9.64E-05 | 3.778789 |
| LGALS3    | 0.67019  | 10.11141 | 17.3182  | 3.33E-07 | 1.12E-05 | 7.380505 |
| NOL4L     | 0.670327 | 7.937434 | 16.23062 | 5.29E-07 | 1.44E-05 | 6.878681 |
| MPZ       | 0.670576 | 4.77944  | 10.08807 | 1.50E-05 | 0.000141 | 3.206386 |
| LACTB     | 0.671777 | 6.867992 | 14.57867 | 1.14E-06 | 2.35E-05 | 6.046376 |
| ADGRE2    | 0.671933 | 4.981251 | 14.97077 | 9.41E-07 | 2.08E-05 | 6.252267 |
| KIAA0754  | 0.672669 | 5.923004 | 8.266229 | 5.78E-05 | 0.000388 | 1.707048 |
| PRKAA1    | 0.673653 | 6.216511 | 11.94832 | 4.62E-06 | 6.05E-05 | 4.505297 |
| MEGF10    | 0.673935 | 3.886048 | 6.258061 | 0.000352 | 0.001623 | -0.29813 |
| KCNJ2     | 0.673947 | 6.143096 | 9.642151 | 2.04E-05 | 0.000177 | 2.86269  |
| DDHD1     | 0.675971 | 6.167976 | 10.84801 | 9.06E-06 | 9.75E-05 | 3.76174  |
| TPTE      | 0.675993 | 6.735243 | 12.42125 | 3.52E-06 | 5.01E-05 | 4.805222 |
| PGAP1     | 0.676174 | 6.985791 | 15.08841 | 8.91E-07 | 2.00E-05 | 6.312981 |
| PVRL4     | 0.676183 | 5.599765 | 4.317813 | 0.003149 | 0.009996 | -2.70577 |
| KAT2B     | 0.676412 | 6.231997 | 13.6488  | 1.81E-06 | 3.22E-05 | 5.535141 |
| RBM14 /// | 0.676416 | 6.491278 | 17.6829  | 2.87E-07 | 1.02E-05 | 7.541459 |
| MARS2     | 0.676505 | 7.755946 | 15.9168  | 6.09E-07 | 1.56E-05 | 6.727408 |
| ZDHHC11 / | 0.677186 | 4.856134 | 8.323484 | 5.52E-05 | 0.000375 | 1.758283 |

|           |          |          |          |          |          |          |
|-----------|----------|----------|----------|----------|----------|----------|
| ZC3H7A    | 0.677325 | 9.593466 | 17.31982 | 3.33E-07 | 1.12E-05 | 7.381226 |
| KYNU      | 0.678303 | 3.799813 | 6.713773 | 0.000226 | 0.001132 | 0.195592 |
| YRDC      | 0.678643 | 9.811292 | 15.94994 | 6.00E-07 | 1.55E-05 | 6.743526 |
| PMAIP1    | 0.678898 | 9.243578 | 16.80508 | 4.13E-07 | 1.26E-05 | 7.147945 |
| PLK3      | 0.679369 | 7.152299 | 15.41138 | 7.66E-07 | 1.80E-05 | 6.477244 |
| CXorf23   | 0.679481 | 6.163562 | 10.60872 | 1.06E-05 | 0.00011  | 3.590798 |
| ZNF23     | 0.680048 | 6.603443 | 14.83812 | 1.00E-06 | 2.17E-05 | 6.183227 |
| VEGFC     | 0.680581 | 8.337633 | 18.29877 | 2.24E-07 | 8.92E-06 | 7.805483 |
| DYRK1A    | 0.680632 | 4.657001 | 13.95049 | 1.55E-06 | 2.90E-05 | 5.704696 |
| ANKRD55   | 0.681105 | 6.027205 | 6.029489 | 0.000445 | 0.001967 | -0.55536 |
| SLC16A6   | 0.681248 | 4.91015  | 5.00698  | 0.001364 | 0.004947 | -1.79058 |
| FAM13A    | 0.681386 | 6.691114 | 17.29148 | 3.37E-07 | 1.12E-05 | 7.36857  |
| CAV2      | 0.681611 | 8.818432 | 18.41627 | 2.14E-07 | 8.69E-06 | 7.854787 |
| DGKA      | 0.681816 | 7.461788 | 15.28173 | 8.13E-07 | 1.87E-05 | 6.411725 |
| ALG9      | 0.682788 | 6.504819 | 9.252684 | 2.70E-05 | 0.000218 | 2.550804 |
| ALS2      | 0.682974 | 6.970587 | 15.18644 | 8.50E-07 | 1.94E-05 | 6.363216 |
| CNTNAP3 / | 0.683324 | 5.692913 | 14.71063 | 1.07E-06 | 2.25E-05 | 6.116279 |
| ZNF641    | 0.68375  | 5.752561 | 14.39938 | 1.24E-06 | 2.50E-05 | 5.950375 |
| CITED4    | 0.683764 | 8.214338 | 17.28843 | 3.37E-07 | 1.12E-05 | 7.367208 |
| ARL14     | 0.683864 | 3.603989 | 3.828552 | 0.005953 | 0.01699  | -3.39606 |
| MEF2D     | 0.685368 | 8.187603 | 18.12323 | 2.40E-07 | 9.31E-06 | 7.7312   |
| MYNN      | 0.685489 | 7.611776 | 18.61534 | 1.98E-07 | 8.36E-06 | 7.937559 |
| ZNF256    | 0.686273 | 6.664242 | 11.01873 | 8.13E-06 | 9.03E-05 | 3.881586 |
| SDK1      | 0.686469 | 3.69465  | 10.38264 | 1.23E-05 | 0.000122 | 3.42603  |
| TFPI      | 0.686546 | 6.51655  | 13.54172 | 1.92E-06 | 3.34E-05 | 5.474074 |
| BAGE ///  | 0.686763 | 9.992857 | 18.39297 | 2.16E-07 | 8.75E-06 | 7.845037 |
| PHACTR2   | 0.686769 | 6.91357  | 12.64072 | 3.11E-06 | 4.62E-05 | 4.940708 |
| RAPGEF2   | 0.686804 | 8.848326 | 17.82125 | 2.71E-07 | 9.93E-06 | 7.601606 |
| DAB2      | 0.686916 | 7.691661 | 9.295947 | 2.62E-05 | 0.000213 | 2.586011 |
| EVA1A     | 0.687025 | 8.020488 | 17.76564 | 2.77E-07 | 1.00E-05 | 7.577488 |
| CDC42BPA  | 0.68811  | 6.785166 | 13.65221 | 1.81E-06 | 3.21E-05 | 5.537078 |
| ZNF529    | 0.688528 | 7.953686 | 17.71952 | 2.83E-07 | 1.01E-05 | 7.557426 |
| ADAM12    | 0.688824 | 5.222004 | 12.91673 | 2.67E-06 | 4.15E-05 | 5.107924 |
| MPP5      | 0.689263 | 7.79551  | 14.03122 | 1.49E-06 | 2.81E-05 | 5.749453 |
| EFNA1     | 0.689315 | 7.780324 | 14.4236  | 1.23E-06 | 2.48E-05 | 5.963411 |
| AP1G1     | 0.689674 | 6.757547 | 10.86506 | 8.96E-06 | 9.67E-05 | 3.773784 |
| PIKFYVE   | 0.689748 | 6.247261 | 7.495255 | 0.00011  | 0.000644 | 0.987245 |
| GFPT1     | 0.689855 | 7.758571 | 16.68954 | 4.34E-07 | 1.29E-05 | 7.094561 |
| RNF38     | 0.690353 | 6.82722  | 11.53403 | 5.91E-06 | 7.20E-05 | 4.233161 |
| COBLL1    | 0.690404 | 6.525757 | 18.66673 | 1.95E-07 | 8.26E-06 | 7.958775 |
| ADPRM     | 0.69065  | 8.138835 | 13.52499 | 1.93E-06 | 3.35E-05 | 5.464487 |
| GRIK2     | 0.690755 | 5.715746 | 10.75039 | 9.64E-06 | 0.000102 | 3.692425 |
| RRAS2     | 0.69147  | 8.42153  | 17.83588 | 2.70E-07 | 9.91E-06 | 7.607935 |
| PPARGC1A  | 0.691622 | 3.473078 | 3.912275 | 0.005325 | 0.015511 | -3.27565 |
| ZNF26     | 0.692862 | 5.650175 | 10.95427 | 8.47E-06 | 9.28E-05 | 3.836539 |
| NCOA3     | 0.69354  | 6.558614 | 10.74669 | 9.67E-06 | 0.000103 | 3.68979  |
| RNF213    | 0.693593 | 6.62492  | 18.97945 | 1.73E-07 | 7.64E-06 | 8.086537 |
| TRMT13    | 0.694065 | 6.280251 | 18.44525 | 2.12E-07 | 8.63E-06 | 7.866896 |
| SMG1 ///  | 0.694421 | 5.906305 | 12.2963  | 3.78E-06 | 5.28E-05 | 4.727053 |
| PCDHA1 // | 0.694576 | 7.070269 | 12.43594 | 3.49E-06 | 4.99E-05 | 4.814359 |
| NLK       | 0.695018 | 6.281546 | 14.56566 | 1.14E-06 | 2.36E-05 | 6.039447 |

|           |          |          |          |          |          |          |
|-----------|----------|----------|----------|----------|----------|----------|
| CCDC84    | 0.695194 | 8.066541 | 21.14602 | 7.93E-08 | 4.85E-06 | 8.913643 |
| PAPLN     | 0.695821 | 5.822585 | 14.58917 | 1.13E-06 | 2.34E-05 | 6.051961 |
| EDEM3     | 0.696254 | 8.08836  | 19.52133 | 1.41E-07 | 6.80E-06 | 8.302673 |
| CMAHP     | 0.696285 | 3.825248 | 6.87748  | 0.000193 | 0.001001 | 0.366999 |
| ING3      | 0.696925 | 6.596811 | 14.00491 | 1.51E-06 | 2.84E-05 | 5.734894 |
| KLF2      | 0.696949 | 8.652588 | 17.00399 | 3.80E-07 | 1.21E-05 | 7.238962 |
| AP1S2     | 0.697006 | 6.879434 | 13.6614  | 1.80E-06 | 3.20E-05 | 5.542296 |
| CNOT4     | 0.697849 | 6.749295 | 10.11743 | 1.47E-05 | 0.000139 | 3.228535 |
| SYT1      | 0.697985 | 6.2971   | 11.67566 | 5.43E-06 | 6.80E-05 | 4.327215 |
| SMAD7     | 0.698282 | 6.890801 | 12.65092 | 3.10E-06 | 4.61E-05 | 4.946952 |
| KIAA1033  | 0.698322 | 7.514782 | 15.56944 | 7.12E-07 | 1.72E-05 | 6.556364 |
| ANKEF1    | 0.698834 | 4.226937 | 7.046786 | 0.000165 | 0.000886 | 0.541089 |
| TRMT10B   | 0.6994   | 6.227532 | 19.50495 | 1.42E-07 | 6.80E-06 | 8.296235 |
| TMX3      | 0.699467 | 7.211614 | 19.82641 | 1.26E-07 | 6.40E-06 | 8.421529 |
| FERMT2    | 0.699472 | 7.333229 | 16.62159 | 4.47E-07 | 1.31E-05 | 7.062987 |
| CCSER2    | 0.699975 | 6.718078 | 11.36254 | 6.56E-06 | 7.77E-05 | 4.117812 |
| CDK17     | 0.700196 | 4.515298 | 13.63178 | 1.83E-06 | 3.23E-05 | 5.525465 |
| EPS15L1   | 0.70042  | 6.284213 | 11.9396  | 4.65E-06 | 6.07E-05 | 4.49966  |
| FMN2      | 0.702249 | 7.563213 | 16.29127 | 5.16E-07 | 1.42E-05 | 6.907569 |
| ZNF226    | 0.702321 | 7.489705 | 13.90174 | 1.59E-06 | 2.95E-05 | 5.677542 |
| FAT4      | 0.702718 | 4.551231 | 7.017045 | 0.00017  | 0.000905 | 0.510738 |
| SNX4      | 0.702961 | 8.182468 | 16.63906 | 4.43E-07 | 1.31E-05 | 7.071114 |
| PHLDB2    | 0.70355  | 9.340647 | 19.51197 | 1.42E-07 | 6.80E-06 | 8.298994 |
| CCL5      | 0.703822 | 7.786475 | 17.95318 | 2.57E-07 | 9.65E-06 | 7.658506 |
| LGR4      | 0.703829 | 6.574386 | 16.53141 | 4.64E-07 | 1.34E-05 | 7.020876 |
| ZNF671    | 0.704697 | 6.937022 | 7.878009 | 7.96E-05 | 0.000497 | 1.35172  |
| GPNMB     | 0.704768 | 7.368209 | 15.04307 | 9.10E-07 | 2.04E-05 | 6.289637 |
| RRAGB     | 0.705079 | 6.897227 | 10.58003 | 1.08E-05 | 0.000111 | 3.570067 |
| ZMYM5     | 0.705577 | 4.765893 | 17.03413 | 3.75E-07 | 1.20E-05 | 7.252659 |
| WDR63     | 0.706964 | 4.150378 | 8.270245 | 5.76E-05 | 0.000387 | 1.710651 |
| YAF2      | 0.707132 | 7.724439 | 13.36949 | 2.10E-06 | 3.53E-05 | 5.374845 |
| ZEB2      | 0.707234 | 6.27466  | 11.49093 | 6.07E-06 | 7.33E-05 | 4.204323 |
| E2F5      | 0.708556 | 8.919551 | 19.99125 | 1.19E-07 | 6.20E-06 | 8.484923 |
| CRIM1     | 0.710431 | 10.74099 | 17.54245 | 3.04E-07 | 1.06E-05 | 7.479887 |
| MAN1A2    | 0.710467 | 6.509091 | 11.73325 | 5.25E-06 | 6.64E-05 | 4.365154 |
| SLC30A7   | 0.711265 | 6.778917 | 16.9117  | 3.95E-07 | 1.23E-05 | 7.196868 |
| IL17RD    | 0.711641 | 5.857771 | 9.239307 | 2.73E-05 | 0.00022  | 2.539889 |
| LOC100996 | 0.711866 | 5.402331 | 18.22908 | 2.31E-07 | 9.05E-06 | 7.776081 |
| RASA2     | 0.712064 | 5.622847 | 16.84102 | 4.07E-07 | 1.25E-05 | 7.164475 |
| CLTCL1    | 0.712274 | 6.20229  | 12.61966 | 3.15E-06 | 4.66E-05 | 4.927805 |
| ZBTB18    | 0.713232 | 8.265995 | 17.39074 | 3.23E-07 | 1.10E-05 | 7.412797 |
| AASS      | 0.714557 | 6.604357 | 18.8996  | 1.78E-07 | 7.81E-06 | 8.054131 |
| FRS2      | 0.71498  | 6.376291 | 16.67951 | 4.36E-07 | 1.29E-05 | 7.089909 |
| MANSC1    | 0.71501  | 5.65946  | 10.64839 | 1.03E-05 | 0.000108 | 3.619383 |
| HIST2H2BE | 0.715182 | 5.30168  | 5.83563  | 0.000544 | 0.002327 | -0.77875 |
| INPP4B    | 0.715503 | 8.904899 | 17.76811 | 2.77E-07 | 1.00E-05 | 7.57856  |
| EPG5      | 0.715813 | 6.557916 | 13.93209 | 1.57E-06 | 2.92E-05 | 5.694458 |
| LPXN      | 0.716444 | 9.24044  | 17.74435 | 2.80E-07 | 1.00E-05 | 7.568232 |
| GNA13     | 0.716953 | 6.208086 | 13.4112  | 2.05E-06 | 3.48E-05 | 5.398989 |
| STAT3     | 0.717009 | 8.838733 | 18.20789 | 2.33E-07 | 9.10E-06 | 7.767121 |
| ZNF317    | 0.717012 | 6.235894 | 15.60129 | 7.02E-07 | 1.71E-05 | 6.572207 |

|           |          |          |          |          |          |          |
|-----------|----------|----------|----------|----------|----------|----------|
| ITGB3     | 0.717398 | 6.669513 | 12.77472 | 2.89E-06 | 4.40E-05 | 5.022326 |
| ADAM10    | 0.71808  | 8.540512 | 16.7801  | 4.17E-07 | 1.26E-05 | 7.136435 |
| ZNF557    | 0.718785 | 6.998228 | 16.32866 | 5.07E-07 | 1.41E-05 | 6.925321 |
| REV3L     | 0.71883  | 9.471118 | 19.51122 | 1.42E-07 | 6.80E-06 | 8.2987   |
| LRP6      | 0.71925  | 6.666347 | 10.64064 | 1.04E-05 | 0.000108 | 3.613802 |
| SLC35G2   | 0.719678 | 9.234542 | 18.10437 | 2.42E-07 | 9.34E-06 | 7.723171 |
| POC1B     | 0.720002 | 7.606963 | 13.1883  | 2.31E-06 | 3.76E-05 | 5.269098 |
| SYT14     | 0.72015  | 4.177927 | 6.704489 | 0.000228 | 0.00114  | 0.18578  |
| SNX18     | 0.720253 | 6.508908 | 12.81617 | 2.83E-06 | 4.32E-05 | 5.047402 |
| SHC4      | 0.720335 | 5.725967 | 16.67998 | 4.36E-07 | 1.29E-05 | 7.090125 |
| ITCH      | 0.720744 | 8.965359 | 18.8721  | 1.80E-07 | 7.85E-06 | 8.042934 |
| ZNF567    | 0.721636 | 6.20029  | 17.17716 | 3.53E-07 | 1.15E-05 | 7.317302 |
| ACTBL2    | 0.722181 | 3.282826 | 7.790983 | 8.56E-05 | 0.000527 | 1.270116 |
| SKI       | 0.722232 | 5.659899 | 13.37727 | 2.09E-06 | 3.52E-05 | 5.379355 |
| ARHGFE28  | 0.723161 | 5.915086 | 8.888667 | 3.55E-05 | 0.000268 | 2.248791 |
| EBNA1BP2  | 0.72319  | 5.505573 | 12.10906 | 4.21E-06 | 5.68E-05 | 4.608482 |
| ZNF253    | 0.724094 | 5.978525 | 9.565856 | 2.15E-05 | 0.000184 | 2.802475 |
| SLC12A4   | 0.724996 | 8.042512 | 17.83338 | 2.70E-07 | 9.91E-06 | 7.606856 |
| SNHG12    | 0.725296 | 10.46698 | 18.47473 | 2.10E-07 | 8.60E-06 | 7.879194 |
| PRKAB1    | 0.725451 | 7.031365 | 19.08088 | 1.66E-07 | 7.49E-06 | 8.127497 |
| CSGALNACT | 0.72556  | 5.812367 | 9.15963  | 2.89E-05 | 0.000229 | 2.474591 |
| AFTPH     | 0.7258   | 6.67187  | 19.62141 | 1.36E-07 | 6.67E-06 | 8.341883 |
| CNN2      | 0.726333 | 6.44444  | 11.24064 | 7.08E-06 | 8.20E-05 | 4.034827 |
| PVRL3     | 0.727919 | 8.485947 | 18.99319 | 1.72E-07 | 7.63E-06 | 8.0921   |
| RYR2      | 0.728089 | 5.683812 | 7.905309 | 7.78E-05 | 0.000489 | 1.377169 |
| ZFX       | 0.728132 | 6.159107 | 12.83296 | 2.80E-06 | 4.29E-05 | 5.057539 |
| AKT3      | 0.728427 | 8.215498 | 20.42306 | 1.02E-07 | 5.61E-06 | 8.648337 |
| ZNHIT6    | 0.728593 | 7.211774 | 16.54352 | 4.62E-07 | 1.34E-05 | 7.026544 |
| CPEB1     | 0.728803 | 4.883477 | 10.59746 | 1.06E-05 | 0.00011  | 3.58267  |
| C20orf194 | 0.729144 | 7.049185 | 13.07894 | 2.45E-06 | 3.91E-05 | 5.204582 |
| MIR21 /// | 0.72984  | 9.353656 | 21.4184  | 7.23E-08 | 4.61E-06 | 9.011018 |
| TMEM135   | 0.730445 | 7.670803 | 16.65204 | 4.41E-07 | 1.30E-05 | 7.07715  |
| DCLK1     | 0.730857 | 3.140798 | 6.764565 | 0.000215 | 0.00109  | 0.249101 |
| IRGQ      | 0.731705 | 4.675591 | 8.270098 | 5.76E-05 | 0.000387 | 1.710519 |
| GOLT1A    | 0.731927 | 4.950844 | 7.362993 | 0.000124 | 0.000704 | 0.857869 |
| MTMR10    | 0.73209  | 5.773205 | 10.75296 | 9.63E-06 | 0.000102 | 3.694254 |
| CLEC7A    | 0.733175 | 3.423314 | 6.706426 | 0.000227 | 0.001138 | 0.187828 |
| MPP4      | 0.733428 | 6.373802 | 20.25525 | 1.08E-07 | 5.82E-06 | 8.585283 |
| MAPK9     | 0.73376  | 4.877233 | 11.32639 | 6.71E-06 | 7.90E-05 | 4.093292 |
| ARFGEF2   | 0.734115 | 7.240769 | 12.42562 | 3.51E-06 | 5.01E-05 | 4.807941 |
| DPY19L4   | 0.734821 | 6.879953 | 15.60955 | 6.99E-07 | 1.71E-05 | 6.576311 |
| TROVE2    | 0.735122 | 8.352895 | 16.71065 | 4.30E-07 | 1.28E-05 | 7.104343 |
| ANTXR2    | 0.73515  | 6.91797  | 15.76252 | 6.52E-07 | 1.64E-05 | 6.651911 |
| USP32 /// | 0.735412 | 6.748593 | 12.49537 | 3.38E-06 | 4.88E-05 | 4.851236 |
| LPP       | 0.735727 | 7.21855  | 11.75671 | 5.17E-06 | 6.57E-05 | 4.380561 |
| SLC4A7    | 0.735893 | 9.329819 | 16.93348 | 3.91E-07 | 1.22E-05 | 7.206826 |
| ELOVL4    | 0.73647  | 7.235882 | 15.42507 | 7.61E-07 | 1.80E-05 | 6.484128 |
| ARMC8     | 0.737828 | 7.025163 | 14.98975 | 9.33E-07 | 2.07E-05 | 6.262096 |
| SNX13     | 0.738027 | 7.787199 | 19.40257 | 1.47E-07 | 6.98E-06 | 8.25586  |
| ARID4B    | 0.738348 | 7.205283 | 13.00032 | 2.56E-06 | 4.04E-05 | 5.157881 |
| ROCK2     | 0.73927  | 8.338941 | 14.21926 | 1.36E-06 | 2.66E-05 | 5.852722 |

|           |          |          |          |          |          |          |
|-----------|----------|----------|----------|----------|----------|----------|
| 1-Mar     | 0.739817 | 4.146333 | 10.89737 | 8.78E-06 | 9.54E-05 | 3.796567 |
| PILRB /// | 0.739999 | 8.713263 | 16.57834 | 4.55E-07 | 1.33E-05 | 7.042819 |
| SECISBP2L | 0.740089 | 5.340003 | 14.19981 | 1.37E-06 | 2.67E-05 | 5.842102 |
| MRGPRX3   | 0.740744 | 6.252124 | 16.4042  | 4.91E-07 | 1.38E-05 | 6.961066 |
| PDGFA     | 0.741345 | 6.937641 | 15.654   | 6.85E-07 | 1.69E-05 | 6.598359 |
| ZNF234    | 0.742315 | 7.565333 | 16.43536 | 4.84E-07 | 1.37E-05 | 6.97576  |
| EPB41L4A- | 0.742441 | 10.17707 | 18.06578 | 2.46E-07 | 9.41E-06 | 7.706719 |
| APBB2     | 0.743001 | 7.438293 | 12.53204 | 3.31E-06 | 4.81E-05 | 4.8739   |
| BAGE ///  | 0.743317 | 7.668991 | 13.03937 | 2.50E-06 | 3.97E-05 | 5.18111  |
| RSL1D1    | 0.743622 | 8.448205 | 21.97753 | 6.00E-08 | 4.14E-06 | 9.206662 |
| EBF1      | 0.743928 | 5.694805 | 11.57437 | 5.77E-06 | 7.08E-05 | 4.260061 |
| LPAR1     | 0.744102 | 4.455569 | 12.906   | 2.69E-06 | 4.17E-05 | 5.101484 |
| ZNF420    | 0.744543 | 6.259175 | 18.00051 | 2.52E-07 | 9.59E-06 | 7.678811 |
| MICAL3    | 0.744554 | 6.866963 | 14.81055 | 1.02E-06 | 2.18E-05 | 6.168799 |
| ITGAM     | 0.745656 | 3.543522 | 5.689596 | 0.000636 | 0.00264  | -0.95027 |
| REEP5     | 0.745782 | 9.728278 | 19.88155 | 1.24E-07 | 6.33E-06 | 8.442798 |
| ZNF419    | 0.745836 | 7.116703 | 16.78788 | 4.16E-07 | 1.26E-05 | 7.14002  |
| ZNF655    | 0.745975 | 8.464086 | 18.57266 | 2.02E-07 | 8.43E-06 | 7.919892 |
| CAP2      | 0.746556 | 6.134716 | 8.27369  | 5.74E-05 | 0.000386 | 1.713741 |
| ZCCHC6    | 0.747635 | 8.17897  | 18.98982 | 1.72E-07 | 7.63E-06 | 8.090735 |
| ZNF92     | 0.748376 | 7.449164 | 18.99931 | 1.71E-07 | 7.62E-06 | 8.094577 |
| SOGA3     | 0.748601 | 3.119425 | 4.240895 | 0.003472 | 0.010839 | -2.81212 |
| PAWR      | 0.748732 | 9.022189 | 19.181   | 1.60E-07 | 7.32E-06 | 8.167695 |
| MSRB3     | 0.748768 | 6.822143 | 15.39362 | 7.72E-07 | 1.81E-05 | 6.468302 |
| TMEM30A   | 0.748892 | 8.335304 | 22.07962 | 5.81E-08 | 4.05E-06 | 9.241788 |
| ZNF14     | 0.74895  | 4.769354 | 11.63569 | 5.56E-06 | 6.91E-05 | 4.30078  |
| PHF14     | 0.749221 | 5.426519 | 7.292348 | 0.000132 | 0.000741 | 0.78802  |
| UTRN      | 0.749433 | 6.837281 | 12.9781  | 2.59E-06 | 4.06E-05 | 5.144629 |
| DENND1B   | 0.749467 | 6.809277 | 12.91457 | 2.68E-06 | 4.16E-05 | 5.106628 |
| ARNTL     | 0.750012 | 6.753103 | 12.46286 | 3.44E-06 | 4.93E-05 | 4.831086 |
| COL4A1    | 0.750099 | 8.498693 | 12.10279 | 4.22E-06 | 5.69E-05 | 4.604484 |
| ABHD2     | 0.750206 | 6.746703 | 15.06141 | 9.02E-07 | 2.02E-05 | 6.299092 |
| CNOT6     | 0.75042  | 8.040084 | 17.63482 | 2.93E-07 | 1.03E-05 | 7.520438 |
| KRT15     | 0.750461 | 6.087273 | 10.96504 | 8.41E-06 | 9.24E-05 | 3.844083 |
| OSCP1     | 0.750628 | 4.158083 | 10.08959 | 1.49E-05 | 0.000141 | 3.207532 |
| SGTB      | 0.751514 | 6.104704 | 12.97907 | 2.59E-06 | 4.06E-05 | 5.145211 |
| ZNF195    | 0.751633 | 8.133231 | 20.3512  | 1.05E-07 | 5.71E-06 | 8.621407 |
| ARID4A    | 0.751634 | 8.144701 | 17.95223 | 2.57E-07 | 9.65E-06 | 7.658095 |
| VCPKMT    | 0.752943 | 6.157049 | 17.0197  | 3.77E-07 | 1.20E-05 | 7.246104 |
| SYT11     | 0.752997 | 6.024242 | 17.21828 | 3.47E-07 | 1.14E-05 | 7.335784 |
| KMT2C     | 0.753145 | 7.599745 | 15.32642 | 7.97E-07 | 1.85E-05 | 6.434372 |
| ERAP2     | 0.753154 | 3.696792 | 7.585679 | 0.000102 | 0.000605 | 1.074666 |
| SELM      | 0.753544 | 8.606961 | 18.60646 | 1.99E-07 | 8.37E-06 | 7.933889 |
| SERPIND1  | 0.753761 | 3.571594 | 8.360819 | 5.35E-05 | 0.000366 | 1.791536 |
| MTF2      | 0.754721 | 7.787086 | 19.89227 | 1.23E-07 | 6.31E-06 | 8.446925 |
| ZNF597    | 0.754758 | 5.348856 | 9.16011  | 2.89E-05 | 0.000229 | 2.474985 |
| CBLB      | 0.755029 | 7.228516 | 13.33287 | 2.14E-06 | 3.58E-05 | 5.353589 |
| ZBTB34    | 0.755692 | 7.189091 | 12.05145 | 4.35E-06 | 5.83E-05 | 4.571649 |
| C5orf58   | 0.756592 | 5.1758   | 10.17188 | 1.41E-05 | 0.000136 | 3.269461 |
| REST      | 0.757103 | 5.666391 | 12.24904 | 3.88E-06 | 5.38E-05 | 4.697289 |
| DOCK4     | 0.757189 | 7.052392 | 19.12617 | 1.63E-07 | 7.43E-06 | 8.145707 |

|           |          |          |          |          |          |          |
|-----------|----------|----------|----------|----------|----------|----------|
| RIC1      | 0.757414 | 6.704885 | 10.12073 | 1.46E-05 | 0.000139 | 3.231016 |
| KLF7      | 0.757529 | 6.128194 | 7.943334 | 7.53E-05 | 0.000477 | 1.412497 |
| HUS1      | 0.757589 | 5.755467 | 10.79531 | 9.37E-06 | 0.0001   | 3.724389 |
| N4BP2L2   | 0.757633 | 6.162701 | 13.82462 | 1.66E-06 | 3.03E-05 | 5.634398 |
| CPA2      | 0.757858 | 5.002963 | 9.235001 | 2.74E-05 | 0.00022  | 2.536373 |
| EGLN1     | 0.758103 | 8.381613 | 18.16607 | 2.36E-07 | 9.22E-06 | 7.749398 |
| TUFT1     | 0.759006 | 8.529944 | 17.55485 | 3.02E-07 | 1.05E-05 | 7.485345 |
| NAPG      | 0.759652 | 7.695756 | 14.81112 | 1.02E-06 | 2.18E-05 | 6.169094 |
| ZNF117    | 0.759721 | 5.829564 | 12.482   | 3.40E-06 | 4.90E-05 | 4.842956 |
| CCP110    | 0.759831 | 7.524214 | 16.95947 | 3.87E-07 | 1.22E-05 | 7.218688 |
| KDM6B     | 0.760262 | 6.424949 | 13.14709 | 2.36E-06 | 3.82E-05 | 5.24485  |
| BAGE2 /// | 0.760515 | 8.293122 | 18.49809 | 2.08E-07 | 8.56E-06 | 7.888923 |
| ERO1B     | 0.760545 | 6.062831 | 22.90916 | 4.45E-08 | 3.53E-06 | 9.520599 |
| LETM2     | 0.760564 | 6.228489 | 11.71698 | 5.30E-06 | 6.68E-05 | 4.354453 |
| USP15     | 0.760822 | 8.543913 | 18.49833 | 2.08E-07 | 8.56E-06 | 7.889021 |
| PDZK1 /// | 0.760996 | 3.947679 | 9.890678 | 1.71E-05 | 0.000156 | 3.05595  |
| ZNF227    | 0.761373 | 8.334922 | 20.7779  | 9.00E-08 | 5.26E-06 | 8.779821 |
| LNPEP     | 0.7617   | 6.538829 | 12.093   | 4.25E-06 | 5.71E-05 | 4.598231 |
| C5orf24   | 0.76301  | 7.713756 | 12.24944 | 3.88E-06 | 5.38E-05 | 4.697539 |
| ABCA5     | 0.763019 | 5.781571 | 11.03594 | 8.04E-06 | 8.98E-05 | 3.893573 |
| PPP1R15A  | 0.763096 | 9.09435  | 19.24534 | 1.56E-07 | 7.22E-06 | 8.193409 |
| CFAP69    | 0.763336 | 4.04044  | 13.66525 | 1.80E-06 | 3.20E-05 | 5.544484 |
| TOR1AIP2  | 0.763565 | 7.489154 | 13.89404 | 1.60E-06 | 2.96E-05 | 5.673248 |
| SGMS2     | 0.765495 | 3.026331 | 10.17081 | 1.41E-05 | 0.000136 | 3.26866  |
| SYNJ1     | 0.765677 | 4.163007 | 8.540907 | 4.64E-05 | 0.000329 | 1.950209 |
| RUFY2     | 0.766129 | 6.302287 | 12.06725 | 4.31E-06 | 5.78E-05 | 4.581771 |
| CNST      | 0.766833 | 7.495038 | 21.16822 | 7.87E-08 | 4.83E-06 | 8.92163  |
| RLIM      | 0.767242 | 7.709325 | 17.62604 | 2.94E-07 | 1.03E-05 | 7.516594 |
| IFIT2     | 0.767553 | 8.485684 | 20.4254  | 1.02E-07 | 5.61E-06 | 8.649213 |
| RICTOR    | 0.768259 | 6.942605 | 20.68173 | 9.31E-08 | 5.35E-06 | 8.744431 |
| DRAM1     | 0.769722 | 7.721401 | 18.71068 | 1.91E-07 | 8.15E-06 | 7.976867 |
| GJA5      | 0.770143 | 6.632496 | 19.81414 | 1.27E-07 | 6.42E-06 | 8.416785 |
| ZDHHC21   | 0.7705   | 7.332261 | 12.83562 | 2.80E-06 | 4.29E-05 | 5.059147 |
| NRIP1     | 0.770818 | 6.892154 | 13.14526 | 2.36E-06 | 3.82E-05 | 5.243768 |
| ACTN2     | 0.771496 | 6.579784 | 12.00004 | 4.48E-06 | 5.94E-05 | 4.538641 |
| RNF144B   | 0.771508 | 4.584487 | 7.813198 | 8.40E-05 | 0.000519 | 1.291017 |
| CDC14A    | 0.772131 | 6.08517  | 10.84433 | 9.08E-06 | 9.77E-05 | 3.759135 |
| C8orf34   | 0.772239 | 4.073567 | 7.241057 | 0.000138 | 0.000768 | 0.736978 |
| IGF2BP1   | 0.772539 | 7.117228 | 19.6438  | 1.35E-07 | 6.64E-06 | 8.350623 |
| KDM5B     | 0.772771 | 7.939816 | 20.67446 | 9.33E-08 | 5.36E-06 | 8.741748 |
| NAPB      | 0.773814 | 5.582672 | 10.45648 | 1.17E-05 | 0.000118 | 3.480199 |
| SMC5      | 0.774327 | 6.617497 | 12.67549 | 3.05E-06 | 4.57E-05 | 4.96197  |
| PTBP3     | 0.774515 | 7.519956 | 15.27411 | 8.16E-07 | 1.88E-05 | 6.407859 |
| SYNE1     | 0.77459  | 6.927672 | 13.12496 | 2.39E-06 | 3.85E-05 | 5.231797 |
| ANKRD12   | 0.77512  | 7.34674  | 14.21442 | 1.36E-06 | 2.66E-05 | 5.850079 |
| JAZF1     | 0.775199 | 6.295176 | 9.697116 | 1.96E-05 | 0.000172 | 2.905809 |
| CYTH3     | 0.775308 | 5.788687 | 9.294183 | 2.62E-05 | 0.000213 | 2.584578 |
| LOC100506 | 0.776191 | 7.106915 | 16.8939  | 3.98E-07 | 1.23E-05 | 7.188726 |
| MDM2      | 0.776491 | 8.826779 | 19.86211 | 1.25E-07 | 6.35E-06 | 8.435304 |
| ZNF134    | 0.778126 | 6.912342 | 17.52148 | 3.06E-07 | 1.06E-05 | 7.470652 |
| LIF       | 0.778338 | 8.781112 | 19.56849 | 1.39E-07 | 6.73E-06 | 8.321177 |

|           |          |          |          |          |          |          |
|-----------|----------|----------|----------|----------|----------|----------|
| MRS2      | 0.778551 | 7.506357 | 14.12647 | 1.42E-06 | 2.73E-05 | 5.801935 |
| ZBTB26    | 0.778943 | 5.706122 | 13.99542 | 1.52E-06 | 2.85E-05 | 5.729635 |
| TRPV1     | 0.779383 | 5.555859 | 9.140588 | 2.93E-05 | 0.000232 | 2.458912 |
| FHL5      | 0.780028 | 4.562297 | 8.617649 | 4.37E-05 | 0.000314 | 2.016973 |
| SYTL2     | 0.780082 | 8.110448 | 16.04687 | 5.74E-07 | 1.51E-05 | 6.790471 |
| PTPRM     | 0.780319 | 8.256661 | 15.82452 | 6.34E-07 | 1.61E-05 | 6.682342 |
| BAGE2     | 0.781783 | 8.216145 | 20.13144 | 1.13E-07 | 6.00E-06 | 8.538395 |
| LONRF1    | 0.782044 | 6.572934 | 14.72821 | 1.06E-06 | 2.23E-05 | 6.125546 |
| ASAP1     | 0.782181 | 8.918539 | 21.09688 | 8.06E-08 | 4.87E-06 | 8.895928 |
| DMRTA1    | 0.784063 | 5.639346 | 8.567163 | 4.55E-05 | 0.000323 | 1.973108 |
| FSD1L     | 0.784222 | 5.489745 | 15.40408 | 7.69E-07 | 1.81E-05 | 6.47357  |
| FAM199X   | 0.784992 | 7.987229 | 23.72527 | 3.45E-08 | 3.16E-06 | 9.783976 |
| MAP2K4    | 0.785509 | 6.384703 | 14.52836 | 1.17E-06 | 2.39E-05 | 6.019556 |
| C11orf63  | 0.786141 | 4.537012 | 10.95271 | 8.47E-06 | 9.28E-05 | 3.835445 |
| OSBPL10   | 0.787027 | 8.304595 | 23.82599 | 3.35E-08 | 3.10E-06 | 9.815762 |
| CFAP45    | 0.787353 | 5.428547 | 9.968436 | 1.62E-05 | 0.00015  | 3.115528 |
| NACC2     | 0.787757 | 6.776852 | 11.87969 | 4.81E-06 | 6.23E-05 | 4.460835 |
| FAM3C     | 0.787979 | 9.852762 | 15.82485 | 6.34E-07 | 1.61E-05 | 6.682505 |
| IFIT3     | 0.788126 | 7.529865 | 17.91063 | 2.62E-07 | 9.77E-06 | 7.6402   |
| EAF1      | 0.788652 | 7.100559 | 11.86304 | 4.86E-06 | 6.27E-05 | 4.450015 |
| TMF1      | 0.788721 | 7.836856 | 23.70147 | 3.48E-08 | 3.16E-06 | 9.776442 |
| EGFLAM    | 0.788987 | 4.953564 | 13.06834 | 2.46E-06 | 3.93E-05 | 5.198304 |
| SERPINA1  | 0.78905  | 4.545739 | 11.35425 | 6.60E-06 | 7.80E-05 | 4.1122   |
| ZFX /// Z | 0.789139 | 5.596205 | 18.4429  | 2.12E-07 | 8.63E-06 | 7.865914 |
| DNER      | 0.790547 | 5.901331 | 13.5236  | 1.93E-06 | 3.35E-05 | 5.463688 |
| KDM4B     | 0.79095  | 6.889053 | 17.93698 | 2.59E-07 | 9.69E-06 | 7.651542 |
| IFNL1     | 0.790951 | 6.08853  | 13.85542 | 1.63E-06 | 2.99E-05 | 5.651661 |
| MRGPRX4   | 0.791853 | 5.270948 | 10.68481 | 1.01E-05 | 0.000106 | 3.645534 |
| TMOD2     | 0.792125 | 4.616345 | 15.86712 | 6.22E-07 | 1.59E-05 | 6.70318  |
| USP32 /// | 0.792371 | 6.099308 | 13.62657 | 1.83E-06 | 3.24E-05 | 5.522503 |
| OSMR      | 0.794077 | 5.034294 | 7.713274 | 9.15E-05 | 0.000555 | 1.196627 |
| CCNL1     | 0.794526 | 9.458752 | 18.9743  | 1.73E-07 | 7.64E-06 | 8.084452 |
| STK17B    | 0.795261 | 5.890187 | 12.77374 | 2.89E-06 | 4.40E-05 | 5.021732 |
| KIAA0895  | 0.796145 | 6.459117 | 10.33359 | 1.27E-05 | 0.000125 | 3.38985  |
| CARD16 // | 0.796163 | 5.292528 | 7.381251 | 0.000122 | 0.000695 | 0.875837 |
| BTG2      | 0.79696  | 7.837733 | 22.35955 | 5.30E-08 | 3.83E-06 | 9.33717  |
| PPP1R1C   | 0.796987 | 7.62213  | 22.31401 | 5.38E-08 | 3.84E-06 | 9.321744 |
| MED28     | 0.797011 | 7.600452 | 17.44747 | 3.16E-07 | 1.08E-05 | 7.437959 |
| RBM24     | 0.797154 | 4.15346  | 10.3411  | 1.26E-05 | 0.000125 | 3.3954   |
| PDE4B     | 0.797279 | 6.046357 | 11.82583 | 4.97E-06 | 6.37E-05 | 4.425777 |
| ZNF322    | 0.797326 | 6.686004 | 17.56671 | 3.01E-07 | 1.05E-05 | 7.490561 |
| PANK3     | 0.797355 | 8.217233 | 14.98313 | 9.36E-07 | 2.07E-05 | 6.258669 |
| AGO3      | 0.79822  | 6.50986  | 12.83175 | 2.80E-06 | 4.29E-05 | 5.056813 |
| ZNF678    | 0.799373 | 3.182333 | 4.341464 | 0.003056 | 0.009757 | -2.67324 |
| ATG2B     | 0.800028 | 6.113219 | 18.86614 | 1.80E-07 | 7.86E-06 | 8.040508 |
| RARA      | 0.800396 | 8.067746 | 16.75323 | 4.22E-07 | 1.27E-05 | 7.124037 |
| PARP14    | 0.800574 | 5.565352 | 11.45143 | 6.22E-06 | 7.47E-05 | 4.177803 |
| ZNF416    | 0.800614 | 6.964376 | 15.96128 | 5.97E-07 | 1.55E-05 | 6.749033 |
| ZNF658 // | 0.800808 | 6.146577 | 12.3072  | 3.76E-06 | 5.26E-05 | 4.733901 |
| RNF6      | 0.804743 | 7.774442 | 22.23746 | 5.52E-08 | 3.92E-06 | 9.295735 |
| TBC1D19   | 0.805072 | 6.575148 | 10.18921 | 1.40E-05 | 0.000135 | 3.282445 |



|           |          |          |          |          |          |          |
|-----------|----------|----------|----------|----------|----------|----------|
| MKLN1     | 0.805135 | 8.15556  | 16.74024 | 4.25E-07 | 1.27E-05 | 7.118033 |
| FCH02     | 0.805243 | 6.454068 | 17.33908 | 3.30E-07 | 1.11E-05 | 7.389812 |
| ADGRF1    | 0.806004 | 5.785396 | 18.61239 | 1.99E-07 | 8.36E-06 | 7.936338 |
| NFKBIE    | 0.807027 | 8.308065 | 19.53348 | 1.40E-07 | 6.78E-06 | 8.307443 |
| AP2B1     | 0.807502 | 9.028393 | 22.24867 | 5.50E-08 | 3.91E-06 | 9.299551 |
| OTUD1     | 0.809036 | 7.767443 | 17.57107 | 3.00E-07 | 1.05E-05 | 7.492474 |
| LRRC1     | 0.81084  | 7.149143 | 18.30338 | 2.24E-07 | 8.92E-06 | 7.807423 |
| EGF       | 0.811556 | 4.799751 | 8.250469 | 5.85E-05 | 0.000392 | 1.692892 |
| AEN       | 0.811704 | 9.008625 | 20.61626 | 9.52E-08 | 5.37E-06 | 8.720235 |
| NHS       | 0.812326 | 5.434728 | 16.93749 | 3.90E-07 | 1.22E-05 | 7.208656 |
| TUSC2     | 0.812451 | 8.121429 | 21.1813  | 7.84E-08 | 4.83E-06 | 8.926333 |
| ZNF24     | 0.81338  | 7.665072 | 13.44934 | 2.01E-06 | 3.43E-05 | 5.421005 |
| ZC3HAV1   | 0.815329 | 6.589834 | 21.34391 | 7.42E-08 | 4.67E-06 | 8.984523 |
| NEK7      | 0.816275 | 7.913659 | 20.39511 | 1.03E-07 | 5.64E-06 | 8.637876 |
| ZNF791    | 0.816308 | 7.220297 | 13.64904 | 1.81E-06 | 3.22E-05 | 5.535279 |
| GDAP1     | 0.816567 | 8.166024 | 18.38271 | 2.17E-07 | 8.76E-06 | 7.840741 |
| SAMD4A    | 0.816942 | 6.185115 | 18.97799 | 1.73E-07 | 7.64E-06 | 8.085946 |
| ZNF773    | 0.818078 | 7.121537 | 13.12118 | 2.39E-06 | 3.85E-05 | 5.229564 |
| FOXN2     | 0.818576 | 5.823179 | 9.890988 | 1.71E-05 | 0.000156 | 3.056188 |
| DCAF8     | 0.819434 | 5.932784 | 14.7593  | 1.04E-06 | 2.21E-05 | 6.141904 |
| ZHX2      | 0.819777 | 5.811557 | 15.79275 | 6.44E-07 | 1.62E-05 | 6.666766 |
| GPRC5A    | 0.820324 | 8.29366  | 21.82245 | 6.32E-08 | 4.24E-06 | 9.15296  |
| DUSP10    | 0.820621 | 7.472396 | 20.88116 | 8.68E-08 | 5.13E-06 | 8.81762  |
| RGS5      | 0.820888 | 4.97896  | 10.24369 | 1.35E-05 | 0.000131 | 3.323135 |
| OGFRL1    | 0.820924 | 5.287849 | 13.05976 | 2.48E-06 | 3.94E-05 | 5.193214 |
| SLC14A1   | 0.821206 | 5.325057 | 12.541   | 3.29E-06 | 4.80E-05 | 4.87943  |
| ZNF484    | 0.82177  | 5.128139 | 9.961826 | 1.63E-05 | 0.000151 | 3.110479 |
| ADGRG1    | 0.822749 | 9.872562 | 18.81508 | 1.84E-07 | 7.94E-06 | 8.019666 |
| DDX58     | 0.822937 | 7.189409 | 15.445   | 7.54E-07 | 1.79E-05 | 6.494144 |
| ACER2     | 0.823084 | 4.145682 | 8.620305 | 4.36E-05 | 0.000314 | 2.019274 |
| CCND1     | 0.823197 | 9.640214 | 20.04608 | 1.17E-07 | 6.11E-06 | 8.505887 |
| SETBP1    | 0.82381  | 5.012918 | 16.43539 | 4.84E-07 | 1.37E-05 | 6.975776 |
| ZNF20 /// | 0.824177 | 7.344915 | 19.33268 | 1.51E-07 | 7.07E-06 | 8.228169 |
| GNAI1     | 0.824293 | 7.330863 | 21.08264 | 8.10E-08 | 4.88E-06 | 8.890785 |
| EVI2A     | 0.827009 | 5.476392 | 9.304768 | 2.60E-05 | 0.000212 | 2.593171 |
| ABCC5     | 0.827312 | 8.243491 | 19.59603 | 1.37E-07 | 6.70E-06 | 8.331961 |
| OSBPL3    | 0.827776 | 8.469201 | 21.41163 | 7.25E-08 | 4.61E-06 | 9.008613 |
| ZNF780A   | 0.827803 | 5.836133 | 10.28376 | 1.31E-05 | 0.000128 | 3.352934 |
| JMJD1C    | 0.82864  | 7.008752 | 18.59902 | 2.00E-07 | 8.37E-06 | 7.930808 |
| DYRK2     | 0.830598 | 8.556065 | 21.76248 | 6.45E-08 | 4.31E-06 | 9.132078 |
| STMN3     | 0.831578 | 7.239865 | 13.63082 | 1.83E-06 | 3.23E-05 | 5.524918 |
| IQCJ-SCHI | 0.83421  | 8.22145  | 21.99008 | 5.98E-08 | 4.13E-06 | 9.210991 |
| ZNF699    | 0.834921 | 5.691695 | 7.4887   | 0.000111 | 0.000646 | 0.980876 |
| HMGA2     | 0.834934 | 10.18782 | 23.62973 | 3.56E-08 | 3.18E-06 | 9.75368  |
| NBEAL1    | 0.835695 | 4.290816 | 18.32452 | 2.22E-07 | 8.86E-06 | 7.816318 |
| MAP4K3    | 0.835864 | 6.892166 | 13.88508 | 1.61E-06 | 2.97E-05 | 5.668242 |
| NRCAM     | 0.836592 | 4.777775 | 14.31298 | 1.30E-06 | 2.57E-05 | 5.903686 |
| KIAA0825  | 0.837663 | 3.181758 | 8.165515 | 6.27E-05 | 0.000413 | 1.616205 |
| FNIP1     | 0.838272 | 5.21673  | 16.18307 | 5.41E-07 | 1.46E-05 | 6.855952 |
| ITGA4     | 0.838409 | 5.567558 | 13.40461 | 2.06E-06 | 3.49E-05 | 5.39518  |
| C3orf62   | 0.839281 | 6.010072 | 9.030247 | 3.19E-05 | 0.000247 | 2.367501 |

|           |          |          |          |          |          |          |
|-----------|----------|----------|----------|----------|----------|----------|
| NSD1      | 0.83956  | 6.106508 | 19.33343 | 1.51E-07 | 7.07E-06 | 8.228464 |
| STC1      | 0.84001  | 6.095387 | 11.51473 | 5.98E-06 | 7.26E-05 | 4.220256 |
| MFS08     | 0.841169 | 6.242483 | 20.16673 | 1.12E-07 | 5.96E-06 | 8.551793 |
| ZBTB20    | 0.841266 | 7.975871 | 17.74222 | 2.80E-07 | 1.00E-05 | 7.567306 |
| LHX8      | 0.841877 | 6.233791 | 20.92417 | 8.56E-08 | 5.07E-06 | 8.833306 |
| TMTC1     | 0.842275 | 4.163412 | 12.36164 | 3.64E-06 | 5.14E-05 | 4.768026 |
| ATF3      | 0.842422 | 8.575632 | 21.56051 | 6.89E-08 | 4.46E-06 | 9.061278 |
| USP32     | 0.842581 | 8.484283 | 21.83648 | 6.29E-08 | 4.24E-06 | 9.157836 |
| MED13     | 0.843011 | 6.983159 | 16.27714 | 5.19E-07 | 1.42E-05 | 6.900847 |
| ZNF425    | 0.843043 | 5.62981  | 10.55716 | 1.09E-05 | 0.000113 | 3.553505 |
| ZNF136    | 0.843347 | 6.119803 | 16.06136 | 5.71E-07 | 1.51E-05 | 6.797466 |
| ZNF222    | 0.844072 | 6.335272 | 15.67186 | 6.80E-07 | 1.68E-05 | 6.6072   |
| FLT1      | 0.844076 | 4.857687 | 9.622222 | 2.07E-05 | 0.000179 | 2.847002 |
| SLC44A5   | 0.844843 | 5.25842  | 8.671695 | 4.19E-05 | 0.000305 | 2.063691 |
| LUM       | 0.84582  | 6.454023 | 15.80464 | 6.40E-07 | 1.62E-05 | 6.672598 |
| PTX3      | 0.846301 | 8.839493 | 14.14434 | 1.41E-06 | 2.71E-05 | 5.811742 |
| SCYL2     | 0.846999 | 8.318603 | 25.47413 | 2.06E-08 | 2.36E-06 | 10.31495 |
| RGL1      | 0.847207 | 6.457681 | 17.30476 | 3.35E-07 | 1.12E-05 | 7.374505 |
| SPTLC1    | 0.847484 | 5.411833 | 15.48918 | 7.39E-07 | 1.76E-05 | 6.516291 |
| DMD       | 0.84769  | 4.584531 | 14.99027 | 9.33E-07 | 2.07E-05 | 6.262367 |
| AFF3      | 0.848352 | 5.026496 | 11.30925 | 6.78E-06 | 7.96E-05 | 4.081642 |
| TRAF1     | 0.849065 | 5.885921 | 15.15526 | 8.63E-07 | 1.96E-05 | 6.347274 |
| UBASH3B   | 0.849949 | 8.44804  | 22.4134  | 5.21E-08 | 3.80E-06 | 9.355365 |
| CREBZF    | 0.850188 | 7.873594 | 21.40367 | 7.27E-08 | 4.61E-06 | 9.005784 |
| HIST2H4A  | 0.851367 | 8.319231 | 23.11491 | 4.17E-08 | 3.41E-06 | 9.587994 |
| PLCL2     | 0.851545 | 3.961208 | 7.123737 | 0.000154 | 0.000836 | 0.61917  |
| SAMD8     | 0.851587 | 6.869876 | 16.68948 | 4.34E-07 | 1.29E-05 | 7.094533 |
| CEACAM1   | 0.851714 | 5.935511 | 24.65302 | 2.62E-08 | 2.69E-06 | 10.07108 |
| TMED5     | 0.852585 | 9.959662 | 24.29128 | 2.91E-08 | 2.88E-06 | 9.960637 |
| 4-Mar     | 0.852631 | 7.996376 | 24.15206 | 3.04E-08 | 2.96E-06 | 9.917626 |
| FBX028    | 0.852652 | 8.024846 | 23.70889 | 3.47E-08 | 3.16E-06 | 9.778791 |
| PMEP1     | 0.852692 | 6.537471 | 18.24286 | 2.29E-07 | 9.04E-06 | 7.781907 |
| ZNF140    | 0.852956 | 7.547609 | 23.15    | 4.13E-08 | 3.39E-06 | 9.599417 |
| BLZF1     | 0.853133 | 4.505654 | 6.415143 | 0.000301 | 0.001429 | -0.12513 |
| DCN       | 0.853492 | 3.803768 | 12.64468 | 3.11E-06 | 4.62E-05 | 4.943135 |
| ZCCHC2    | 0.854665 | 6.859642 | 15.64716 | 6.87E-07 | 1.69E-05 | 6.594969 |
| AMMECR1   | 0.855155 | 8.374455 | 21.59411 | 6.82E-08 | 4.45E-06 | 9.073107 |
| ZNF155    | 0.855813 | 5.357347 | 20.3081  | 1.06E-07 | 5.77E-06 | 8.605203 |
| CEP85L    | 0.856324 | 4.979939 | 12.61894 | 3.15E-06 | 4.66E-05 | 4.927367 |
| ZSWIM4    | 0.856867 | 6.982271 | 11.56588 | 5.80E-06 | 7.11E-05 | 4.254405 |
| ARHGEF12  | 0.857404 | 6.327425 | 13.1667  | 2.34E-06 | 3.80E-05 | 5.256397 |
| MAP2K4 // | 0.857693 | 6.662286 | 16.13176 | 5.53E-07 | 1.48E-05 | 6.83135  |
| SLC30A1   | 0.858761 | 7.85486  | 22.09253 | 5.78E-08 | 4.04E-06 | 9.246214 |
| CFI       | 0.858805 | 4.649715 | 12.11392 | 4.20E-06 | 5.67E-05 | 4.611586 |
| CALB2     | 0.858912 | 7.309064 | 17.34433 | 3.29E-07 | 1.11E-05 | 7.392152 |
| DDIT3     | 0.860144 | 8.295065 | 18.12757 | 2.40E-07 | 9.30E-06 | 7.733044 |
| FBXL2     | 0.860294 | 5.720641 | 22.5053  | 5.06E-08 | 3.70E-06 | 9.386303 |
| SAV1      | 0.860331 | 8.930272 | 20.29816 | 1.07E-07 | 5.78E-06 | 8.601461 |
| TMEM245   | 0.862698 | 8.564932 | 16.46247 | 4.78E-07 | 1.37E-05 | 6.98852  |
| TSPAN12   | 0.862903 | 5.556391 | 9.84747  | 1.77E-05 | 0.00016  | 3.022663 |
| RORA      | 0.862936 | 4.593017 | 6.914665 | 0.000187 | 0.000976 | 0.405509 |

|           |          |          |          |          |          |          |
|-----------|----------|----------|----------|----------|----------|----------|
| ZNF564    | 0.862954 | 6.597175 | 16.4272  | 4.86E-07 | 1.37E-05 | 6.971917 |
| WDR73     | 0.863724 | 8.155665 | 23.79053 | 3.39E-08 | 3.11E-06 | 9.80459  |
| KIAA0226L | 0.864167 | 4.313841 | 14.24941 | 1.34E-06 | 2.63E-05 | 5.869152 |
| KITLG     | 0.864992 | 6.26785  | 12.00179 | 4.48E-06 | 5.94E-05 | 4.539765 |
| PLCB4     | 0.865589 | 6.747281 | 23.31791 | 3.92E-08 | 3.30E-06 | 9.653822 |
| ZNF804A   | 0.865929 | 7.207664 | 15.33437 | 7.94E-07 | 1.85E-05 | 6.438398 |
| PDGFC     | 0.866069 | 6.993845 | 13.90405 | 1.59E-06 | 2.95E-05 | 5.678833 |
| TMEM67    | 0.867772 | 5.762441 | 8.964365 | 3.35E-05 | 0.000256 | 2.312462 |
| CARD16    | 0.867789 | 3.596964 | 11.75473 | 5.18E-06 | 6.58E-05 | 4.379257 |
| HMBOX1    | 0.867937 | 5.668412 | 16.95442 | 3.88E-07 | 1.22E-05 | 7.216382 |
| PSPC1     | 0.869322 | 8.413566 | 24.13057 | 3.06E-08 | 2.96E-06 | 9.91096  |
| HIST2H2AA | 0.869414 | 8.78954  | 15.09095 | 8.89E-07 | 2.00E-05 | 6.31429  |
| MAFF      | 0.871881 | 6.944852 | 15.03872 | 9.12E-07 | 2.04E-05 | 6.287394 |
| GADD45A   | 0.872746 | 11.01821 | 23.90072 | 3.28E-08 | 3.08E-06 | 9.839251 |
| MXD1      | 0.875006 | 5.066495 | 6.269803 | 0.000348 | 0.001607 | -0.2851  |
| FLRT2     | 0.875329 | 7.117157 | 19.91256 | 1.22E-07 | 6.27E-06 | 8.454733 |
| LACC1     | 0.876558 | 5.983746 | 21.36055 | 7.37E-08 | 4.66E-06 | 8.990452 |
| ADAMTS12  | 0.877354 | 6.256579 | 17.43802 | 3.17E-07 | 1.08E-05 | 7.433771 |
| ZNF225    | 0.877931 | 5.661075 | 15.67934 | 6.77E-07 | 1.68E-05 | 6.610898 |
| HAPLN1    | 0.878046 | 8.378857 | 25.21111 | 2.23E-08 | 2.44E-06 | 10.23784 |
| TBC1D9    | 0.878556 | 8.485044 | 15.60038 | 7.02E-07 | 1.71E-05 | 6.571756 |
| ZSCAN9    | 0.878813 | 5.207251 | 15.34553 | 7.90E-07 | 1.84E-05 | 6.444036 |
| ZNF790    | 0.879114 | 4.004479 | 10.69923 | 9.97E-06 | 0.000105 | 3.655868 |
| FKTN      | 0.87944  | 5.477993 | 9.404833 | 2.42E-05 | 0.000201 | 2.673991 |
| SOCS4     | 0.879698 | 4.955717 | 11.5558  | 5.84E-06 | 7.14E-05 | 4.247685 |
| STX6      | 0.879829 | 8.004467 | 20.46438 | 1.00E-07 | 5.58E-06 | 8.663775 |
| HOXA1     | 0.880837 | 7.499762 | 16.47207 | 4.76E-07 | 1.36E-05 | 6.993035 |
| SNX16     | 0.88218  | 6.380799 | 22.95695 | 4.38E-08 | 3.49E-06 | 9.536314 |
| CASP4     | 0.882466 | 5.36078  | 11.44112 | 6.26E-06 | 7.49E-05 | 4.17087  |
| TENM2     | 0.882501 | 6.421359 | 16.45354 | 4.80E-07 | 1.37E-05 | 6.98432  |
| GATA3     | 0.883973 | 5.683177 | 16.98198 | 3.83E-07 | 1.21E-05 | 7.228945 |
| LAPTM5    | 0.884593 | 4.674047 | 8.603766 | 4.42E-05 | 0.000317 | 2.004932 |
| SEMA3D    | 0.885478 | 4.58812  | 11.66334 | 5.47E-06 | 6.83E-05 | 4.319077 |
| CD163L1   | 0.886182 | 5.774113 | 10.05422 | 1.53E-05 | 0.000144 | 3.180772 |
| ZNF35     | 0.886525 | 6.962619 | 12.5863  | 3.21E-06 | 4.72E-05 | 4.907328 |
| SLC31A2   | 0.887101 | 7.229725 | 22.84083 | 4.55E-08 | 3.58E-06 | 9.498067 |
| KLHDC10   | 0.889112 | 6.503111 | 19.09849 | 1.65E-07 | 7.46E-06 | 8.134584 |
| CCNT2     | 0.889534 | 5.464249 | 12.99477 | 2.56E-06 | 4.04E-05 | 5.154575 |
| ZNF485    | 0.890178 | 5.305884 | 13.99086 | 1.52E-06 | 2.86E-05 | 5.72711  |
| C6orf120  | 0.891614 | 8.243367 | 19.8504  | 1.25E-07 | 6.36E-06 | 8.43079  |
| PKP2      | 0.893293 | 4.850571 | 22.54932 | 4.99E-08 | 3.69E-06 | 9.401072 |
| ZNF45     | 0.894089 | 8.366438 | 25.60105 | 1.99E-08 | 2.32E-06 | 10.35182 |
| HCCS      | 0.895074 | 8.327408 | 22.59534 | 4.92E-08 | 3.68E-06 | 9.416479 |
| LYPD1     | 0.89587  | 8.301299 | 16.5538  | 4.60E-07 | 1.34E-05 | 7.031352 |
| SERTAD1   | 0.896049 | 8.016955 | 23.39998 | 3.82E-08 | 3.27E-06 | 9.680253 |
| TEK       | 0.896317 | 3.694593 | 7.02463  | 0.000169 | 0.0009   | 0.518488 |
| DSE       | 0.896461 | 7.374248 | 23.6334  | 3.55E-08 | 3.18E-06 | 9.754848 |
| ZNF844    | 0.898029 | 6.61658  | 16.87148 | 4.02E-07 | 1.24E-05 | 7.178453 |
| LMO7      | 0.899303 | 8.497299 | 21.42195 | 7.22E-08 | 4.61E-06 | 9.012275 |
| PPM1D     | 0.89941  | 7.424277 | 18.67539 | 1.94E-07 | 8.24E-06 | 7.962342 |
| IFIH1     | 0.899819 | 6.214164 | 16.36543 | 4.99E-07 | 1.39E-05 | 6.942742 |

|          |          |          |          |          |          |          |
|----------|----------|----------|----------|----------|----------|----------|
| AKNAD1   | 0.900849 | 4.815922 | 13.49615 | 1.96E-06 | 3.37E-05 | 5.447937 |
| WDR35    | 0.900969 | 7.284742 | 24.20704 | 2.99E-08 | 2.93E-06 | 9.934647 |
| KIF3A    | 0.901439 | 6.766786 | 15.06488 | 9.00E-07 | 2.02E-05 | 6.300879 |
| TRIML2   | 0.903259 | 6.331084 | 11.49985 | 6.04E-06 | 7.30E-05 | 4.210298 |
| IL31RA   | 0.904462 | 5.492453 | 13.92566 | 1.57E-06 | 2.92E-05 | 5.690876 |
| NUP98    | 0.905448 | 7.192206 | 15.80782 | 6.39E-07 | 1.61E-05 | 6.674155 |
| PTPRR    | 0.907143 | 3.40303  | 6.125589 | 0.000403 | 0.001812 | -0.44641 |
| ZNF608   | 0.909088 | 7.730415 | 21.02797 | 8.26E-08 | 4.94E-06 | 8.871011 |
| SLC22A15 | 0.909832 | 7.155023 | 22.22329 | 5.54E-08 | 3.93E-06 | 9.29091  |
| DNAJB4   | 0.910705 | 8.081339 | 24.40311 | 2.82E-08 | 2.85E-06 | 9.99498  |
| ARMC4    | 0.911533 | 4.963985 | 7.489077 | 0.000111 | 0.000646 | 0.981242 |
| GPCPD1   | 0.911564 | 8.23052  | 27.46907 | 1.20E-08 | 1.78E-06 | 10.87084 |
| HBEGF    | 0.911791 | 5.309394 | 13.07629 | 2.45E-06 | 3.92E-05 | 5.203012 |
| NEXN     | 0.912151 | 5.360218 | 20.55868 | 9.72E-08 | 5.43E-06 | 8.698884 |
| ETS1     | 0.91224  | 7.137117 | 16.27723 | 5.19E-07 | 1.42E-05 | 6.900891 |
| ZNF721   | 0.913515 | 7.832589 | 16.28206 | 5.18E-07 | 1.42E-05 | 6.903189 |
| GATA6    | 0.915352 | 5.922544 | 14.87966 | 9.83E-07 | 2.14E-05 | 6.204911 |
| MAPK6    | 0.91536  | 8.956014 | 23.56201 | 3.63E-08 | 3.20E-06 | 9.732122 |
| GLIPR1   | 0.915468 | 5.724152 | 18.76026 | 1.88E-07 | 8.07E-06 | 7.997227 |
| FCMR     | 0.916128 | 5.018125 | 13.66427 | 1.80E-06 | 3.20E-05 | 5.543927 |
| ANKRD46  | 0.917917 | 7.086714 | 23.26906 | 3.98E-08 | 3.32E-06 | 9.63804  |
| PRKACB   | 0.918436 | 6.514699 | 17.86108 | 2.67E-07 | 9.87E-06 | 7.618831 |
| HHAT     | 0.919216 | 6.161474 | 17.19617 | 3.50E-07 | 1.15E-05 | 7.325854 |
| RIT1     | 0.919395 | 7.611491 | 25.85118 | 1.86E-08 | 2.25E-06 | 10.42387 |
| MYO5A    | 0.92019  | 8.452843 | 26.44427 | 1.58E-08 | 2.06E-06 | 10.59148 |
| FAM126B  | 0.920564 | 5.186835 | 22.71759 | 4.73E-08 | 3.63E-06 | 9.457232 |
| FRAS1    | 0.920604 | 6.573077 | 16.89475 | 3.98E-07 | 1.23E-05 | 7.189115 |
| ZNF582   | 0.920623 | 5.618666 | 11.9815  | 4.53E-06 | 5.99E-05 | 4.526707 |
| COL5A1   | 0.921229 | 6.815933 | 10.19655 | 1.39E-05 | 0.000134 | 3.287937 |
| VEPH1    | 0.921763 | 4.945255 | 6.965518 | 0.000178 | 0.000941 | 0.457923 |
| NTM      | 0.921893 | 8.904725 | 21.88231 | 6.20E-08 | 4.22E-06 | 9.173738 |
| NEDD4L   | 0.922539 | 9.818061 | 27.70036 | 1.13E-08 | 1.72E-06 | 10.93216 |
| CDH19    | 0.922907 | 7.006235 | 22.79742 | 4.61E-08 | 3.60E-06 | 9.483711 |
| TLL11    | 0.923146 | 4.907622 | 13.00407 | 2.55E-06 | 4.03E-05 | 5.160115 |
| HCFC2    | 0.924039 | 6.906161 | 21.08849 | 8.09E-08 | 4.87E-06 | 8.8929   |
| GAN      | 0.924674 | 5.310625 | 10.9802  | 8.33E-06 | 9.17E-05 | 3.854689 |
| SLITRK6  | 0.924962 | 8.563022 | 25.3687  | 2.13E-08 | 2.39E-06 | 10.28415 |
| ZNF561   | 0.925129 | 6.644547 | 14.44184 | 1.22E-06 | 2.46E-05 | 5.97322  |
| HIST1H3D | 0.926532 | 6.410252 | 12.90928 | 2.69E-06 | 4.16E-05 | 5.103453 |
| COL11A1  | 0.926612 | 3.286929 | 12.49045 | 3.39E-06 | 4.89E-05 | 4.84819  |
| THUMP2   | 0.928389 | 7.824874 | 19.53335 | 1.40E-07 | 6.78E-06 | 8.307393 |
| PHLPP2   | 0.929372 | 7.868245 | 19.97654 | 1.19E-07 | 6.21E-06 | 8.479292 |
| ZNF654   | 0.930514 | 7.27008  | 21.27541 | 7.59E-08 | 4.74E-06 | 8.960071 |
| CHGB     | 0.931297 | 5.332882 | 5.882712 | 0.000518 | 0.002234 | -0.72404 |
| ZNF138   | 0.933162 | 5.692467 | 17.76617 | 2.77E-07 | 1.00E-05 | 7.577718 |
| ZNF720   | 0.933281 | 4.23497  | 6.567079 | 0.00026  | 0.001266 | 0.039367 |
| TSC22D2  | 0.93532  | 8.139293 | 21.14842 | 7.92E-08 | 4.85E-06 | 8.914506 |
| ELK4     | 0.935424 | 6.059243 | 14.77374 | 1.03E-06 | 2.20E-05 | 6.149494 |
| FAM91A1  | 0.935627 | 4.361203 | 6.631056 | 0.000244 | 0.001206 | 0.10781  |
| C21orf91 | 0.937217 | 5.960313 | 15.39927 | 7.70E-07 | 1.81E-05 | 6.471147 |
| KLF5     | 0.937221 | 8.014906 | 22.14761 | 5.68E-08 | 3.99E-06 | 9.265076 |

|           |          |          |          |          |          |          |
|-----------|----------|----------|----------|----------|----------|----------|
| CA13      | 0.937805 | 6.595897 | 20.15682 | 1.12E-07 | 5.97E-06 | 8.548032 |
| ZNF586    | 0.938875 | 6.653424 | 22.58572 | 4.93E-08 | 3.68E-06 | 9.413261 |
| RNF19A    | 0.938883 | 7.440563 | 19.08039 | 1.66E-07 | 7.49E-06 | 8.1273   |
| ZNF552    | 0.939967 | 5.458002 | 11.89393 | 4.77E-06 | 6.19E-05 | 4.47008  |
| CREBRF    | 0.940018 | 6.802353 | 23.69225 | 3.49E-08 | 3.16E-06 | 9.773522 |
| FAM43A    | 0.941903 | 6.372339 | 26.70172 | 1.47E-08 | 2.00E-06 | 10.66286 |
| SEMA3C    | 0.945301 | 8.02834  | 23.95799 | 3.22E-08 | 3.07E-06 | 9.857191 |
| KIAA0753  | 0.94531  | 7.648097 | 18.21872 | 2.32E-07 | 9.08E-06 | 7.771702 |
| ZNF442    | 0.945564 | 5.789652 | 21.35903 | 7.38E-08 | 4.66E-06 | 8.989911 |
| CASP1     | 0.945631 | 2.960301 | 11.24991 | 7.04E-06 | 8.16E-05 | 4.041171 |
| ZNF112    | 0.947539 | 5.685298 | 12.05774 | 4.34E-06 | 5.81E-05 | 4.575682 |
| PHC3      | 0.948275 | 5.74812  | 11.44487 | 6.24E-06 | 7.48E-05 | 4.173391 |
| NRXN3     | 0.950704 | 4.434607 | 16.54805 | 4.61E-07 | 1.34E-05 | 7.028663 |
| PHIP      | 0.951542 | 7.329002 | 21.52525 | 6.98E-08 | 4.50E-06 | 9.048838 |
| SMIM13    | 0.951836 | 6.188552 | 15.49712 | 7.36E-07 | 1.76E-05 | 6.520265 |
| TIPARP    | 0.953025 | 8.143299 | 23.39938 | 3.82E-08 | 3.27E-06 | 9.680058 |
| CTNNAL1 / | 0.953206 | 9.035164 | 26.24707 | 1.66E-08 | 2.13E-06 | 10.53625 |
| VGLL3     | 0.953312 | 4.542627 | 18.59922 | 2.00E-07 | 8.37E-06 | 7.93089  |
| YAP1      | 0.955398 | 9.361156 | 27.22695 | 1.27E-08 | 1.87E-06 | 10.80597 |
| WDR66     | 0.957632 | 6.00703  | 10.62144 | 1.05E-05 | 0.000109 | 3.599974 |
| FAM214A   | 0.957772 | 7.882708 | 22.5028  | 5.06E-08 | 3.70E-06 | 9.385465 |
| NT5E      | 0.958512 | 7.999674 | 23.8034  | 3.37E-08 | 3.11E-06 | 9.808648 |
| REEP3     | 0.958738 | 8.109742 | 23.80016 | 3.38E-08 | 3.11E-06 | 9.807627 |
| RNF217    | 0.959157 | 5.972398 | 15.1469  | 8.66E-07 | 1.96E-05 | 6.342992 |
| NR4A3     | 0.959415 | 4.704102 | 8.803816 | 3.78E-05 | 0.000282 | 2.176867 |
| RGS4      | 0.960799 | 4.99635  | 21.51873 | 6.99E-08 | 4.50E-06 | 9.046539 |
| RBMS1     | 0.961484 | 8.608983 | 18.45631 | 2.11E-07 | 8.62E-06 | 7.871514 |
| ERCC6-PGE | 0.961803 | 7.021262 | 17.21676 | 3.47E-07 | 1.14E-05 | 7.335101 |
| BAZ2B     | 0.963056 | 6.357154 | 22.50457 | 5.06E-08 | 3.70E-06 | 9.386058 |
| WDR4      | 0.963626 | 4.922258 | 17.22097 | 3.47E-07 | 1.14E-05 | 7.336991 |
| FOXO1     | 0.964529 | 6.210589 | 16.85018 | 4.05E-07 | 1.24E-05 | 7.168678 |
| ZNF461    | 0.964901 | 4.244308 | 7.652252 | 9.64E-05 | 0.000578 | 1.138501 |
| CPEB3     | 0.96889  | 6.654982 | 16.92324 | 3.93E-07 | 1.23E-05 | 7.202145 |
| CCL3P1 // | 0.968959 | 5.686342 | 8.150189 | 6.35E-05 | 0.000417 | 1.602299 |
| ZNF429    | 0.971848 | 6.445891 | 11.64166 | 5.54E-06 | 6.90E-05 | 4.304735 |
| EGR4      | 0.972983 | 5.219757 | 12.21147 | 3.97E-06 | 5.46E-05 | 4.673548 |
| SLC7A6    | 0.973411 | 6.99235  | 16.87983 | 4.00E-07 | 1.24E-05 | 7.182278 |
| CLK1      | 0.974544 | 7.840938 | 15.87165 | 6.21E-07 | 1.59E-05 | 6.705392 |
| SLC35F5   | 0.975612 | 7.342035 | 25.96405 | 1.80E-08 | 2.22E-06 | 10.45612 |
| NF1       | 0.975645 | 5.796952 | 24.56828 | 2.68E-08 | 2.75E-06 | 10.04538 |
| PKM       | 0.979853 | 5.957773 | 16.44534 | 4.82E-07 | 1.37E-05 | 6.980462 |
| ADGRG6    | 0.980665 | 5.288283 | 18.31783 | 2.23E-07 | 8.88E-06 | 7.813506 |
| INTS6     | 0.981334 | 5.889899 | 15.35399 | 7.87E-07 | 1.84E-05 | 6.448312 |
| SLC41A2   | 0.982619 | 5.991707 | 17.10631 | 3.64E-07 | 1.17E-05 | 7.28535  |
| TMEM87B   | 0.983153 | 6.955239 | 22.62145 | 4.87E-08 | 3.68E-06 | 9.425203 |
| AVL9      | 0.984884 | 8.476589 | 22.76042 | 4.66E-08 | 3.62E-06 | 9.471451 |
| CTSS      | 0.984982 | 5.830327 | 14.32534 | 1.29E-06 | 2.56E-05 | 5.910379 |
| PRKAB2    | 0.985242 | 6.653582 | 18.49996 | 2.07E-07 | 8.56E-06 | 7.889701 |
| ZNF860    | 0.985517 | 5.356819 | 13.64563 | 1.82E-06 | 3.22E-05 | 5.533342 |
| NIPAL1    | 0.987166 | 6.212983 | 16.53522 | 4.64E-07 | 1.34E-05 | 7.022659 |
| ZFP30     | 0.988552 | 4.441553 | 20.36058 | 1.04E-07 | 5.69E-06 | 8.624928 |

|          |          |          |          |          |          |          |
|----------|----------|----------|----------|----------|----------|----------|
| TCN1     | 0.991216 | 6.163121 | 13.30054 | 2.18E-06 | 3.61E-05 | 5.334772 |
| CDKN2A   | 0.993984 | 7.540405 | 20.65419 | 9.40E-08 | 5.36E-06 | 8.734261 |
| WWC1     | 0.995157 | 7.275088 | 16.22657 | 5.30E-07 | 1.44E-05 | 6.876745 |
| ZBTB10   | 0.995717 | 6.179161 | 25.45698 | 2.08E-08 | 2.37E-06 | 10.30995 |
| FUCA1    | 0.996978 | 6.662689 | 15.04231 | 9.10E-07 | 2.04E-05 | 6.289245 |
| CRY1     | 0.997313 | 9.04244  | 24.14108 | 3.05E-08 | 2.96E-06 | 9.914221 |
| XIAP     | 0.999035 | 6.35227  | 19.48231 | 1.43E-07 | 6.84E-06 | 8.287328 |
| MAP3K2   | 0.999171 | 6.950083 | 17.30251 | 3.35E-07 | 1.12E-05 | 7.373499 |
| EDN1     | 0.999449 | 4.433822 | 10.60895 | 1.06E-05 | 0.00011  | 3.590963 |
| GIMAP2   | 1.003606 | 5.454766 | 15.93418 | 6.04E-07 | 1.56E-05 | 6.735864 |
| CD164    | 1.003711 | 9.116975 | 27.5722  | 1.16E-08 | 1.75E-06 | 10.89826 |
| RSAD2    | 1.007799 | 4.672298 | 13.05841 | 2.48E-06 | 3.94E-05 | 5.192415 |
| ALCAM    | 1.008373 | 4.797999 | 14.28231 | 1.32E-06 | 2.60E-05 | 5.887041 |
| TES      | 1.008385 | 8.558847 | 22.28152 | 5.44E-08 | 3.88E-06 | 9.310718 |
| LIMA1    | 1.009432 | 9.593479 | 29.77185 | 6.67E-09 | 1.31E-06 | 11.45511 |
| UBA6     | 1.012167 | 5.788053 | 10.59801 | 1.06E-05 | 0.00011  | 3.583064 |
| INTU     | 1.012784 | 4.991987 | 9.8767   | 1.73E-05 | 0.000158 | 3.045195 |
| MB21D2   | 1.01291  | 6.843345 | 16.68417 | 4.35E-07 | 1.29E-05 | 7.092072 |
| EFR3A    | 1.01315  | 6.465446 | 13.70537 | 1.76E-06 | 3.16E-05 | 5.567213 |
| C18orf25 | 1.01599  | 6.780499 | 18.23562 | 2.30E-07 | 9.05E-06 | 7.778849 |
| IRF1     | 1.017819 | 7.300628 | 11.14946 | 7.49E-06 | 8.54E-05 | 3.972205 |
| ETNK1    | 1.018458 | 8.217728 | 25.73393 | 1.92E-08 | 2.27E-06 | 10.3902  |
| ST7L     | 1.018815 | 5.861218 | 17.05111 | 3.72E-07 | 1.19E-05 | 7.26036  |
| TNIK     | 1.019911 | 5.663517 | 15.16248 | 8.60E-07 | 1.96E-05 | 6.350966 |
| CXCL11   | 1.020751 | 5.51     | 11.47792 | 6.12E-06 | 7.38E-05 | 4.195598 |
| IKZF2    | 1.020939 | 4.71127  | 8.727273 | 4.01E-05 | 0.000295 | 2.111477 |
| PRKCA    | 1.021586 | 5.818821 | 20.42477 | 1.02E-07 | 5.61E-06 | 8.648978 |
| PRKCE    | 1.021814 | 7.526611 | 18.13306 | 2.40E-07 | 9.29E-06 | 7.735378 |
| FAM13B   | 1.022867 | 7.615256 | 29.53175 | 7.07E-09 | 1.36E-06 | 11.39681 |
| GRIP1    | 1.024709 | 5.346011 | 17.03237 | 3.75E-07 | 1.20E-05 | 7.251859 |
| PDP1     | 1.026887 | 9.674656 | 28.06552 | 1.02E-08 | 1.64E-06 | 11.02774 |
| ACSL5    | 1.027265 | 4.941057 | 13.25574 | 2.23E-06 | 3.67E-05 | 5.308625 |
| CSRNP1   | 1.027852 | 7.901196 | 15.44434 | 7.54E-07 | 1.79E-05 | 6.49381  |
| ZNF33B   | 1.028141 | 6.022277 | 25.16623 | 2.26E-08 | 2.45E-06 | 10.22459 |
| ELL2     | 1.02877  | 7.702728 | 21.06395 | 8.16E-08 | 4.90E-06 | 8.884031 |
| PDLIM5   | 1.029046 | 8.722086 | 29.40737 | 7.29E-09 | 1.37E-06 | 11.36639 |
| PER2     | 1.029533 | 6.459129 | 14.62535 | 1.11E-06 | 2.32E-05 | 6.071176 |
| ZFP36    | 1.029986 | 9.161267 | 24.53457 | 2.71E-08 | 2.77E-06 | 10.03512 |
| FGD4     | 1.03243  | 5.769726 | 14.15259 | 1.40E-06 | 2.71E-05 | 5.816263 |
| DGKH     | 1.035184 | 5.34037  | 14.03844 | 1.49E-06 | 2.80E-05 | 5.753446 |
| SULF2    | 1.035723 | 8.8781   | 25.66719 | 1.96E-08 | 2.30E-06 | 10.37095 |
| TAB3     | 1.03613  | 6.742058 | 22.93659 | 4.41E-08 | 3.51E-06 | 9.529622 |
| EPHX3    | 1.036245 | 7.598459 | 21.59499 | 6.82E-08 | 4.45E-06 | 9.073416 |
| SLFN12   | 1.036762 | 7.895664 | 31.29378 | 4.64E-09 | 1.21E-06 | 11.81151 |
| HRH1     | 1.036797 | 6.754712 | 9.938159 | 1.66E-05 | 0.000153 | 3.092379 |
| CD274    | 1.036855 | 5.549761 | 7.626221 | 9.86E-05 | 0.000588 | 1.113594 |
| GPR39    | 1.038702 | 4.742327 | 11.00841 | 8.18E-06 | 9.06E-05 | 3.874395 |
| IL15     | 1.038871 | 4.76686  | 14.78144 | 1.03E-06 | 2.20E-05 | 6.153537 |
| CHRM3    | 1.040894 | 6.587177 | 21.22636 | 7.72E-08 | 4.79E-06 | 8.942509 |
| HDAC9    | 1.04374  | 5.824772 | 11.6092  | 5.65E-06 | 6.98E-05 | 4.283213 |
| AJUBA    | 1.044404 | 8.672243 | 31.22616 | 4.71E-09 | 1.22E-06 | 11.79614 |

|          |          |          |          |          |          |          |
|----------|----------|----------|----------|----------|----------|----------|
| IL6ST    | 1.046682 | 6.207956 | 15.30668 | 8.04E-07 | 1.86E-05 | 6.424378 |
| P3H2     | 1.048931 | 6.184176 | 12.55734 | 3.26E-06 | 4.78E-05 | 4.889506 |
| SMURF2   | 1.049981 | 9.029209 | 29.81375 | 6.60E-09 | 1.31E-06 | 11.46522 |
| PARD6B   | 1.05063  | 6.757794 | 19.71156 | 1.32E-07 | 6.57E-06 | 8.377016 |
| CYP1B1   | 1.050988 | 5.629452 | 11.28411 | 6.89E-06 | 8.05E-05 | 4.06452  |
| C3orf52  | 1.051631 | 6.183887 | 15.41227 | 7.66E-07 | 1.80E-05 | 6.477694 |
| WHAMM    | 1.052752 | 8.176774 | 28.06977 | 1.02E-08 | 1.64E-06 | 11.02884 |
| ERCC6    | 1.054279 | 5.987339 | 15.52539 | 7.27E-07 | 1.75E-05 | 6.534398 |
| ZFC3H1   | 1.057971 | 4.267914 | 10.30449 | 1.29E-05 | 0.000127 | 3.368312 |
| CDC37L1  | 1.058229 | 8.375901 | 24.36999 | 2.85E-08 | 2.85E-06 | 9.984827 |
| ABCY9    | 1.059731 | 7.058628 | 30.32153 | 5.84E-09 | 1.27E-06 | 11.5864  |
| EPT1     | 1.059938 | 7.799939 | 28.27083 | 9.70E-09 | 1.59E-06 | 11.08081 |
| WDFY3    | 1.060438 | 6.968504 | 21.12372 | 7.99E-08 | 4.86E-06 | 8.905609 |
| DIAPH2   | 1.060706 | 5.214108 | 11.70708 | 5.33E-06 | 6.71E-05 | 4.347937 |
| ACVR2A   | 1.060883 | 6.953964 | 12.94099 | 2.64E-06 | 4.11E-05 | 5.122453 |
| FHL2     | 1.064084 | 8.322543 | 23.36643 | 3.86E-08 | 3.27E-06 | 9.669461 |
| RHOB     | 1.064641 | 8.481064 | 25.94123 | 1.81E-08 | 2.22E-06 | 10.44961 |
| DICER1   | 1.065973 | 7.720926 | 31.41583 | 4.51E-09 | 1.20E-06 | 11.83915 |
| SUSD1    | 1.066805 | 5.603744 | 14.77055 | 1.04E-06 | 2.20E-05 | 6.147815 |
| LAMB3    | 1.066992 | 6.914314 | 15.9761  | 5.93E-07 | 1.54E-05 | 6.756225 |
| GAD1     | 1.072038 | 4.349367 | 7.710148 | 9.17E-05 | 0.000556 | 1.193658 |
| ABCC3    | 1.075634 | 5.715964 | 21.47804 | 7.09E-08 | 4.55E-06 | 9.032154 |
| RAPH1    | 1.075754 | 7.454583 | 23.80037 | 3.38E-08 | 3.11E-06 | 9.807693 |
| RIOK3    | 1.07912  | 8.266679 | 19.91489 | 1.22E-07 | 6.27E-06 | 8.455626 |
| ZNF441   | 1.079458 | 8.041213 | 19.9482  | 1.21E-07 | 6.23E-06 | 8.468422 |
| RNMT     | 1.081597 | 7.314417 | 25.88741 | 1.84E-08 | 2.25E-06 | 10.43424 |
| PTPRG    | 1.081618 | 7.576899 | 28.68612 | 8.73E-09 | 1.50E-06 | 11.18676 |
| ARL5B    | 1.082724 | 7.524455 | 16.0384  | 5.76E-07 | 1.52E-05 | 6.78638  |
| EDA2R    | 1.083311 | 7.34307  | 23.8892  | 3.29E-08 | 3.08E-06 | 9.835634 |
| LTBP2    | 1.083372 | 6.448535 | 9.125337 | 2.97E-05 | 0.000234 | 2.446335 |
| THBS1    | 1.085016 | 9.250606 | 27.03944 | 1.34E-08 | 1.93E-06 | 10.75526 |
| DCAF17   | 1.086082 | 3.90023  | 15.93412 | 6.04E-07 | 1.56E-05 | 6.735836 |
| FNDC3A   | 1.08729  | 8.183668 | 30.4537  | 5.66E-09 | 1.26E-06 | 11.61753 |
| ZNF260   | 1.08892  | 5.5983   | 23.68624 | 3.50E-08 | 3.16E-06 | 9.771615 |
| LMBRD2   | 1.088938 | 5.460305 | 23.37221 | 3.85E-08 | 3.27E-06 | 9.67132  |
| SOCS5    | 1.088982 | 8.354675 | 20.92553 | 8.55E-08 | 5.07E-06 | 8.833799 |
| LPCAT2   | 1.090987 | 8.229087 | 28.44833 | 9.27E-09 | 1.54E-06 | 11.12633 |
| GBP1     | 1.092794 | 4.220379 | 13.18088 | 2.32E-06 | 3.77E-05 | 5.264736 |
| PCGF5    | 1.092947 | 5.680203 | 10.30167 | 1.29E-05 | 0.000127 | 3.366221 |
| ZNF79    | 1.095109 | 5.910673 | 9.313233 | 2.58E-05 | 0.000211 | 2.600038 |
| ZNF283   | 1.095933 | 7.175822 | 16.79972 | 4.14E-07 | 1.26E-05 | 7.145478 |
| LOXL4    | 1.097632 | 7.993761 | 25.52009 | 2.04E-08 | 2.35E-06 | 10.32832 |
| ZNF800   | 1.099422 | 6.815134 | 13.26205 | 2.22E-06 | 3.67E-05 | 5.312314 |
| FJX1     | 1.099549 | 8.486836 | 31.88549 | 4.05E-09 | 1.14E-06 | 11.94424 |
| EPHA4    | 1.099622 | 6.02464  | 22.61497 | 4.88E-08 | 3.68E-06 | 9.423038 |
| PELI1    | 1.101371 | 7.485687 | 27.02543 | 1.35E-08 | 1.93E-06 | 10.75146 |
| CLIP4    | 1.103416 | 7.95144  | 22.10746 | 5.75E-08 | 4.04E-06 | 9.251332 |
| CLDN1    | 1.103556 | 5.973061 | 9.566914 | 2.15E-05 | 0.000184 | 2.803314 |
| MAP3K7CL | 1.105299 | 5.730302 | 18.26795 | 2.27E-07 | 8.97E-06 | 7.792496 |
| BMP2     | 1.108692 | 5.637722 | 8.300312 | 5.62E-05 | 0.00038  | 1.737582 |
| IL24     | 1.108943 | 9.15045  | 31.17964 | 4.77E-09 | 1.22E-06 | 11.78554 |

|           |          |          |          |          |          |          |
|-----------|----------|----------|----------|----------|----------|----------|
| HIST1H2AC | 1.108971 | 5.041603 | 10.63576 | 1.04E-05 | 0.000109 | 3.61029  |
| PCL0      | 1.109097 | 9.332215 | 26.92594 | 1.38E-08 | 1.96E-06 | 10.72436 |
| SIPA1L2   | 1.110624 | 7.090008 | 29.02711 | 8.01E-09 | 1.43E-06 | 11.27236 |
| FDCSP     | 1.114679 | 5.683644 | 9.196524 | 2.82E-05 | 0.000225 | 2.504888 |
| MYO5B     | 1.116445 | 5.942122 | 11.70441 | 5.34E-06 | 6.72E-05 | 4.346176 |
| PTHLH     | 1.117356 | 4.010122 | 14.96033 | 9.46E-07 | 2.08E-05 | 6.246857 |
| ANKRD13C  | 1.119938 | 5.634855 | 18.48035 | 2.09E-07 | 8.60E-06 | 7.881537 |
| ZNF697    | 1.122436 | 8.72828  | 23.20963 | 4.05E-08 | 3.37E-06 | 9.61879  |
| FBXW7     | 1.12302  | 7.850536 | 32.51254 | 3.52E-09 | 1.08E-06 | 12.08153 |
| MCL1      | 1.123623 | 9.758774 | 26.44702 | 1.57E-08 | 2.06E-06 | 10.59225 |
| ZNF383    | 1.125698 | 5.277804 | 15.78865 | 6.45E-07 | 1.62E-05 | 6.664753 |
| CCDC148   | 1.125962 | 4.172786 | 28.48968 | 9.18E-09 | 1.54E-06 | 11.13688 |
| HIST1H2AC | 1.12649  | 7.509388 | 22.74694 | 4.68E-08 | 3.62E-06 | 9.46698  |
| THAP2     | 1.130866 | 6.009311 | 10.1297  | 1.45E-05 | 0.000139 | 3.237775 |
| COL12A1   | 1.134754 | 7.453023 | 16.52089 | 4.67E-07 | 1.35E-05 | 7.015946 |
| NTN4      | 1.135606 | 5.797693 | 14.11785 | 1.43E-06 | 2.74E-05 | 5.797198 |
| CLK4      | 1.136486 | 6.433267 | 27.80495 | 1.09E-08 | 1.69E-06 | 10.95969 |
| TNRC6A    | 1.138819 | 9.302565 | 33.21778 | 3.01E-09 | 1.04E-06 | 12.23193 |
| TYW5      | 1.13982  | 7.216238 | 24.1363  | 3.05E-08 | 2.96E-06 | 9.91274  |
| CEBPD     | 1.140837 | 7.34242  | 25.01984 | 2.35E-08 | 2.51E-06 | 10.18117 |
| ROPN1L    | 1.141913 | 4.985009 | 8.688629 | 4.13E-05 | 0.000302 | 2.078278 |
| EEA1      | 1.142218 | 7.281323 | 20.28112 | 1.07E-07 | 5.79E-06 | 8.595043 |
| PTGER4    | 1.142831 | 5.591072 | 16.00065 | 5.86E-07 | 1.53E-05 | 6.768123 |
| NHLH2     | 1.144577 | 5.459962 | 26.64608 | 1.49E-08 | 2.03E-06 | 10.6475  |
| NOCT      | 1.144651 | 5.658943 | 20.0828  | 1.15E-07 | 6.06E-06 | 8.519891 |
| RAB8B     | 1.145198 | 6.817066 | 23.31468 | 3.92E-08 | 3.30E-06 | 9.65278  |
| KLRC1     | 1.146818 | 4.668157 | 31.02971 | 4.94E-09 | 1.23E-06 | 11.75125 |
| TBC1D4    | 1.148723 | 7.342127 | 33.03293 | 3.13E-09 | 1.05E-06 | 12.19291 |
| ABHD5     | 1.149304 | 6.156987 | 15.01382 | 9.22E-07 | 2.05E-05 | 6.274544 |
| TNFSF4    | 1.150518 | 5.656394 | 6.846793 | 0.000199 | 0.001025 | 0.335101 |
| LIFR      | 1.153101 | 5.566078 | 14.63399 | 1.11E-06 | 2.31E-05 | 6.075756 |
| MYSM1     | 1.153593 | 6.276021 | 27.92379 | 1.06E-08 | 1.67E-06 | 10.99082 |
| F2R       | 1.15484  | 8.415607 | 28.90215 | 8.27E-09 | 1.44E-06 | 11.24114 |
| NCEH1     | 1.154974 | 6.829839 | 19.94921 | 1.21E-07 | 6.23E-06 | 8.46881  |
| STXBP6    | 1.155217 | 6.587449 | 18.49615 | 2.08E-07 | 8.56E-06 | 7.888116 |
| LATS2     | 1.155622 | 8.046345 | 21.20032 | 7.79E-08 | 4.82E-06 | 8.933164 |
| CYP1A1    | 1.155746 | 7.41075  | 24.83819 | 2.48E-08 | 2.59E-06 | 10.12689 |
| RCHY1     | 1.156946 | 7.870288 | 21.21671 | 7.74E-08 | 4.80E-06 | 8.939046 |
| C8orf46   | 1.161569 | 3.943741 | 13.16696 | 2.34E-06 | 3.80E-05 | 5.256551 |
| CCDC181   | 1.168326 | 6.640768 | 32.18795 | 3.78E-09 | 1.12E-06 | 12.01089 |
| HIVEP2    | 1.170123 | 6.394221 | 19.42331 | 1.46E-07 | 6.95E-06 | 8.26406  |
| FRMD5     | 1.170287 | 7.357529 | 23.45762 | 3.75E-08 | 3.27E-06 | 9.698751 |
| SEC14L1   | 1.172693 | 8.267894 | 30.20058 | 6.01E-09 | 1.27E-06 | 11.55777 |
| YOD1      | 1.172924 | 8.82795  | 27.20826 | 1.28E-08 | 1.87E-06 | 10.80094 |
| ARID3B    | 1.173994 | 6.597129 | 18.9629  | 1.74E-07 | 7.66E-06 | 8.079834 |
| C15orf54  | 1.17424  | 7.073696 | 18.61967 | 1.98E-07 | 8.36E-06 | 7.939349 |
| ARHGAP42  | 1.174878 | 5.292503 | 13.19319 | 2.30E-06 | 3.76E-05 | 5.271969 |
| ITGA2     | 1.176164 | 8.058606 | 29.83178 | 6.57E-09 | 1.31E-06 | 11.46957 |
| PAPPA     | 1.179784 | 4.417513 | 8.34852  | 5.41E-05 | 0.000369 | 1.780595 |
| NEDD4     | 1.184825 | 7.825126 | 32.57849 | 3.46E-09 | 1.08E-06 | 12.09577 |
| DNAJB9    | 1.188017 | 6.857947 | 25.84021 | 1.86E-08 | 2.25E-06 | 10.42073 |



|           |           |           |           |           |           |           |
|-----------|-----------|-----------|-----------|-----------|-----------|-----------|
| CFAP58    | 1. 189997 | 3. 873863 | 7. 018714 | 0. 000169 | 0. 000904 | 0. 512444 |
| PLCXD2    | 1. 190414 | 7. 889939 | 21. 62323 | 6. 75E-08 | 4. 44E-06 | 9. 083341 |
| ELAVL2    | 1. 193512 | 7. 282048 | 19. 32908 | 1. 51E-07 | 7. 07E-06 | 8. 226738 |
| OSTM1     | 1. 195785 | 8. 349806 | 23. 54269 | 3. 65E-08 | 3. 21E-06 | 9. 725957 |
| KLF10     | 1. 202342 | 9. 589437 | 24. 38136 | 2. 84E-08 | 2. 85E-06 | 9. 988315 |
| DDAH1     | 1. 202538 | 7. 319962 | 34. 78914 | 2. 15E-09 | 9. 09E-07 | 12. 55264 |
| RAB30     | 1. 204431 | 6. 03657  | 29. 44853 | 7. 22E-09 | 1. 36E-06 | 11. 37647 |
| SESN1     | 1. 204481 | 8. 192134 | 33. 97663 | 2. 55E-09 | 9. 45E-07 | 12. 38923 |
| IL32      | 1. 206563 | 7. 0784   | 28. 49829 | 9. 16E-09 | 1. 54E-06 | 11. 13908 |
| NAPEPLD   | 1. 215592 | 6. 592895 | 20. 97746 | 8. 40E-08 | 4. 99E-06 | 8. 852689 |
| KRT7      | 1. 21819  | 7. 017554 | 20. 37968 | 1. 03E-07 | 5. 67E-06 | 8. 632091 |
| GPATCH2   | 1. 22186  | 6. 935392 | 26. 83446 | 1. 42E-08 | 1. 99E-06 | 10. 69934 |
| TMEM2     | 1. 221994 | 9. 256671 | 29. 3715  | 7. 36E-09 | 1. 37E-06 | 11. 35758 |
| F2RL2     | 1. 224693 | 6. 86494  | 24. 59943 | 2. 66E-08 | 2. 73E-06 | 10. 05484 |
| CDS1      | 1. 22515  | 5. 926928 | 23. 42377 | 3. 79E-08 | 3. 27E-06 | 9. 687891 |
| RGS7      | 1. 230603 | 5. 136723 | 28. 94064 | 8. 19E-09 | 1. 44E-06 | 11. 25078 |
| ATP11B    | 1. 23195  | 7. 128431 | 23. 01821 | 4. 30E-08 | 3. 46E-06 | 9. 556403 |
| GPR37     | 1. 23251  | 5. 832138 | 23. 88669 | 3. 29E-08 | 3. 08E-06 | 9. 834848 |
| TLR3      | 1. 234569 | 4. 796387 | 20. 60255 | 9. 57E-08 | 5. 39E-06 | 8. 715156 |
| ZNF571    | 1. 234574 | 5. 538991 | 24. 94442 | 2. 40E-08 | 2. 54E-06 | 10. 15869 |
| HES1      | 1. 237302 | 6. 509787 | 19. 31431 | 1. 52E-07 | 7. 09E-06 | 8. 220871 |
| TLR4      | 1. 238289 | 8. 559171 | 30. 16698 | 6. 06E-09 | 1. 27E-06 | 11. 54979 |
| PDCD1LG2  | 1. 240966 | 4. 457855 | 10. 40894 | 1. 21E-05 | 0. 000121 | 3. 44536  |
| HIST1H2BE | 1. 243147 | 6. 921778 | 21. 91997 | 6. 12E-08 | 4. 19E-06 | 9. 186779 |
| GRAMD3    | 1. 245897 | 6. 772595 | 25. 69953 | 1. 94E-08 | 2. 29E-06 | 10. 38029 |
| CYLD      | 1. 250768 | 7. 75936  | 29. 94997 | 6. 38E-09 | 1. 29E-06 | 11. 49798 |
| TGFBR2    | 1. 252381 | 9. 087191 | 35. 20064 | 1. 97E-09 | 8. 83E-07 | 12. 63349 |
| BDNF      | 1. 252654 | 7. 698646 | 30. 34161 | 5. 81E-09 | 1. 27E-06 | 11. 59114 |
| XIRP2     | 1. 252929 | 4. 619924 | 16. 44427 | 4. 82E-07 | 1. 37E-05 | 6. 979958 |
| TBX3      | 1. 253106 | 7. 639444 | 31. 54711 | 4. 38E-09 | 1. 20E-06 | 11. 86872 |
| PTPRK     | 1. 25314  | 4. 64316  | 22. 75054 | 4. 68E-08 | 3. 62E-06 | 9. 468173 |
| CPEB4     | 1. 254328 | 7. 540452 | 26. 72525 | 1. 46E-08 | 2. 00E-06 | 10. 66934 |
| GGT1 ///  | 1. 257613 | 6. 900143 | 21. 09682 | 8. 06E-08 | 4. 87E-06 | 8. 895908 |
| CCL2      | 1. 258282 | 7. 420882 | 25. 4969  | 2. 05E-08 | 2. 35E-06 | 10. 32158 |
| MYPN      | 1. 258441 | 4. 445093 | 9. 868204 | 1. 74E-05 | 0. 000158 | 3. 038652 |
| NABP1     | 1. 261278 | 7. 340447 | 30. 15907 | 6. 07E-09 | 1. 27E-06 | 11. 54791 |
| PLAC8     | 1. 262131 | 7. 489463 | 16. 87802 | 4. 00E-07 | 1. 24E-05 | 7. 181448 |
| RRM2B     | 1. 266278 | 7. 29392  | 26. 06347 | 1. 75E-08 | 2. 20E-06 | 10. 48438 |
| TXK       | 1. 266624 | 5. 600074 | 16. 00968 | 5. 84E-07 | 1. 53E-05 | 6. 772494 |
| SERPINE1  | 1. 26718  | 5. 904413 | 13. 5733  | 1. 89E-06 | 3. 30E-05 | 5. 49213  |
| NUAK1     | 1. 273029 | 7. 552004 | 34. 69786 | 2. 19E-09 | 9. 15E-07 | 12. 53453 |
| UGCG      | 1. 274149 | 9. 729294 | 32. 68569 | 3. 38E-09 | 1. 07E-06 | 12. 11884 |
| ATAD2B    | 1. 276676 | 6. 01246  | 19. 95552 | 1. 20E-07 | 6. 23E-06 | 8. 47123  |
| SLC16A4   | 1. 277855 | 6. 54665  | 20. 73336 | 9. 14E-08 | 5. 30E-06 | 8. 763451 |
| FOS       | 1. 278136 | 6. 865856 | 25. 77618 | 1. 90E-08 | 2. 27E-06 | 10. 40235 |
| LRRC17    | 1. 28047  | 6. 231191 | 17. 43717 | 3. 17E-07 | 1. 08E-05 | 7. 433395 |
| SERPINB7  | 1. 283482 | 5. 991859 | 28. 9952  | 8. 08E-09 | 1. 44E-06 | 11. 26441 |
| IREB2     | 1. 283582 | 7. 770935 | 34. 22854 | 2. 42E-09 | 9. 31E-07 | 12. 44043 |
| LIMCH1    | 1. 285462 | 8. 570521 | 26. 45374 | 1. 57E-08 | 2. 06E-06 | 10. 59412 |
| IMMP2L    | 1. 289019 | 5. 002087 | 17. 32171 | 3. 33E-07 | 1. 12E-05 | 7. 382067 |
| HIST2H2BF | 1. 289553 | 5. 013995 | 16. 87322 | 4. 01E-07 | 1. 24E-05 | 7. 179251 |

|           |           |           |           |           |           |           |
|-----------|-----------|-----------|-----------|-----------|-----------|-----------|
| ST6GALNAC | 1. 290284 | 6. 224674 | 22. 03437 | 5. 89E-08 | 4. 09E-06 | 9. 226241 |
| CYR61     | 1. 294509 | 8. 809001 | 36. 02124 | 1. 67E-09 | 8. 64E-07 | 12. 79104 |
| ZNF562    | 1. 296589 | 7. 698559 | 22. 70776 | 4. 74E-08 | 3. 63E-06 | 9. 453964 |
| HIPK3     | 1. 297123 | 6. 260899 | 22. 41078 | 5. 22E-08 | 3. 80E-06 | 9. 35448  |
| GXYLT1    | 1. 298406 | 7. 129854 | 30. 09339 | 6. 17E-09 | 1. 28E-06 | 11. 53227 |
| SEMA3E    | 1. 29992  | 5. 167469 | 14. 92985 | 9. 60E-07 | 2. 11E-05 | 6. 231036 |
| C3AR1     | 1. 304435 | 6. 026264 | 18. 86453 | 1. 80E-07 | 7. 86E-06 | 8. 039851 |
| KLHL28    | 1. 314049 | 6. 598998 | 30. 82904 | 5. 17E-09 | 1. 25E-06 | 11. 70502 |
| MICU3     | 1. 314856 | 5. 104836 | 16. 68775 | 4. 34E-07 | 1. 29E-05 | 7. 093731 |
| SDC2      | 1. 315075 | 6. 565254 | 25. 18626 | 2. 24E-08 | 2. 45E-06 | 10. 2305  |
| IFNB1     | 1. 319853 | 6. 202609 | 16. 06622 | 5. 69E-07 | 1. 51E-05 | 6. 79981  |
| TMEM200A  | 1. 323521 | 5. 761404 | 16. 93528 | 3. 91E-07 | 1. 22E-05 | 7. 207646 |
| ARRDC3    | 1. 323833 | 6. 473989 | 26. 06994 | 1. 75E-08 | 2. 20E-06 | 10. 48622 |
| FAM19A2   | 1. 330388 | 4. 510795 | 19. 72418 | 1. 31E-07 | 6. 55E-06 | 8. 381921 |
| KRTAP2-3  | 1. 33942  | 8. 172764 | 20. 22597 | 1. 09E-07 | 5. 87E-06 | 8. 574222 |
| PTGS2     | 1. 340572 | 5. 046337 | 21. 59234 | 6. 82E-08 | 4. 45E-06 | 9. 072482 |
| AREG      | 1. 342219 | 4. 507481 | 14. 08327 | 1. 45E-06 | 2. 77E-05 | 5. 778175 |
| IL7R      | 1. 346633 | 7. 489855 | 28. 49856 | 9. 16E-09 | 1. 54E-06 | 11. 13914 |
| CPEB2     | 1. 347656 | 5. 922775 | 32. 75238 | 3. 33E-09 | 1. 07E-06 | 12. 13314 |
| MUC7      | 1. 349366 | 5. 048083 | 30. 77605 | 5. 24E-09 | 1. 25E-06 | 11. 69275 |
| GBP3      | 1. 354474 | 5. 178932 | 16. 29804 | 5. 14E-07 | 1. 42E-05 | 6. 910785 |
| ADRB2     | 1. 356087 | 7. 407406 | 14. 84692 | 9. 99E-07 | 2. 17E-05 | 6. 187826 |
| PLSCR4    | 1. 35747  | 5. 336749 | 20. 57185 | 9. 67E-08 | 5. 41E-06 | 8. 703775 |
| LRRC7     | 1. 359375 | 3. 912597 | 9. 506639 | 2. 25E-05 | 0. 000191 | 2. 755447 |
| TMEM27    | 1. 361277 | 6. 413557 | 25. 85151 | 1. 86E-08 | 2. 25E-06 | 10. 42397 |
| TNFAIP3   | 1. 363743 | 6. 63067  | 15. 62973 | 6. 93E-07 | 1. 70E-05 | 6. 586331 |
| RASGRP3   | 1. 369061 | 5. 762473 | 18. 48068 | 2. 09E-07 | 8. 60E-06 | 7. 881674 |
| RASAL2    | 1. 370064 | 7. 308131 | 35. 6177  | 1. 81E-09 | 8. 64E-07 | 12. 71417 |
| FOSL2     | 1. 370653 | 7. 318482 | 23. 51069 | 3. 69E-08 | 3. 24E-06 | 9. 715737 |
| PRR16     | 1. 372558 | 6. 085303 | 19. 68987 | 1. 33E-07 | 6. 59E-06 | 8. 368581 |
| GDA       | 1. 37844  | 8. 676201 | 29. 68796 | 6. 80E-09 | 1. 33E-06 | 11. 43481 |
| CITED2    | 1. 381797 | 8. 174544 | 37. 14682 | 1. 33E-09 | 7. 67E-07 | 12. 99949 |
| IL1A      | 1. 384836 | 6. 826967 | 22. 82486 | 4. 57E-08 | 3. 58E-06 | 9. 492788 |
| EFEMP1    | 1. 388333 | 6. 618355 | 22. 96301 | 4. 37E-08 | 3. 49E-06 | 9. 538305 |
| SLC1A3    | 1. 388772 | 5. 475261 | 13. 5021  | 1. 96E-06 | 3. 37E-05 | 5. 451355 |
| ANGPTL4   | 1. 394684 | 6. 313422 | 26. 36939 | 1. 61E-08 | 2. 08E-06 | 10. 57057 |
| PRICKLE1  | 1. 395967 | 6. 629544 | 37. 28504 | 1. 30E-09 | 7. 65E-07 | 13. 0245  |
| STX11     | 1. 400774 | 4. 742128 | 11. 66079 | 5. 48E-06 | 6. 83E-05 | 4. 31739  |
| FAM198B   | 1. 408044 | 4. 957651 | 13. 72469 | 1. 74E-06 | 3. 13E-05 | 5. 578139 |
| FAS       | 1. 410714 | 8. 504178 | 35. 45435 | 1. 87E-09 | 8. 72E-07 | 12. 68272 |
| LINC00472 | 1. 411086 | 4. 989781 | 21. 25752 | 7. 64E-08 | 4. 75E-06 | 8. 953672 |
| HIST1H4H  | 1. 418698 | 5. 583179 | 15. 58174 | 7. 08E-07 | 1. 72E-05 | 6. 562486 |
| C9orf135  | 1. 429245 | 5. 180909 | 33. 1578  | 3. 05E-09 | 1. 04E-06 | 12. 2193  |
| MMP3      | 1. 434931 | 4. 999248 | 8. 438093 | 5. 03E-05 | 0. 00035  | 1. 859968 |
| KLRC1 /// | 1. 442204 | 4. 493324 | 25. 64734 | 1. 97E-08 | 2. 31E-06 | 10. 36522 |
| CTGF      | 1. 464066 | 9. 316512 | 41. 15923 | 6. 32E-10 | 7. 06E-07 | 13. 67731 |
| AFF4      | 1. 477324 | 7. 867263 | 30. 73645 | 5. 29E-09 | 1. 25E-06 | 11. 68356 |
| SLC2A14 / | 1. 489045 | 8. 421832 | 27. 47468 | 1. 19E-08 | 1. 78E-06 | 10. 87233 |
| KBTBD8    | 1. 491232 | 5. 567571 | 38. 39371 | 1. 05E-09 | 7. 26E-07 | 13. 22061 |
| TPM1      | 1. 491381 | 6. 517214 | 20. 32016 | 1. 06E-07 | 5. 76E-06 | 8. 609742 |
| INHBA     | 1. 492949 | 7. 225174 | 32. 39272 | 3. 61E-09 | 1. 10E-06 | 12. 05556 |

|           |          |          |          |          |          |          |
|-----------|----------|----------|----------|----------|----------|----------|
| HNMT      | 1.49482  | 6.205198 | 38.35568 | 1.06E-09 | 7.26E-07 | 13.21401 |
| TMEM156   | 1.496244 | 4.653369 | 12.12919 | 4.16E-06 | 5.64E-05 | 4.621313 |
| AKIP1 /// | 1.498723 | 8.331416 | 31.27241 | 4.66E-09 | 1.21E-06 | 11.80666 |
| BRWD3     | 1.514104 | 6.397546 | 42.55401 | 4.96E-10 | 6.43E-07 | 13.89147 |
| KIAA1324  | 1.514912 | 4.717941 | 23.60056 | 3.59E-08 | 3.19E-06 | 9.744403 |
| ZNF540    | 1.521099 | 3.470736 | 10.94446 | 8.52E-06 | 9.33E-05 | 3.829661 |
| FN1       | 1.522518 | 8.810753 | 34.76983 | 2.16E-09 | 9.09E-07 | 12.54881 |
| ZNF91     | 1.535146 | 5.966308 | 23.37882 | 3.84E-08 | 3.27E-06 | 9.673447 |
| MGP       | 1.545092 | 6.043184 | 22.99735 | 4.33E-08 | 3.47E-06 | 9.549568 |
| TMEM64    | 1.565734 | 7.465172 | 22.72867 | 4.71E-08 | 3.63E-06 | 9.460912 |
| ROR1      | 1.566004 | 6.228678 | 13.5555  | 1.90E-06 | 3.33E-05 | 5.481959 |
| S1PR1     | 1.574513 | 6.42614  | 38.45137 | 1.04E-09 | 7.26E-07 | 13.2306  |
| A2M       | 1.578177 | 5.959559 | 17.96641 | 2.56E-07 | 9.64E-06 | 7.664185 |
| HIST2H2BC | 1.581778 | 5.51786  | 16.84947 | 4.05E-07 | 1.24E-05 | 7.168352 |
| TGFBI     | 1.590836 | 6.919162 | 45.39034 | 3.10E-10 | 5.84E-07 | 14.29697 |
| EGR1      | 1.59349  | 8.283771 | 28.28593 | 9.67E-09 | 1.59E-06 | 11.0847  |
| KLF4      | 1.600992 | 7.243236 | 31.49969 | 4.43E-09 | 1.20E-06 | 11.85806 |
| PI15      | 1.602631 | 6.722274 | 34.32959 | 2.37E-09 | 9.22E-07 | 12.46083 |
| HBB       | 1.619768 | 3.878631 | 21.55442 | 6.91E-08 | 4.46E-06 | 9.059129 |
| TRIM22    | 1.639501 | 6.059886 | 15.53531 | 7.23E-07 | 1.74E-05 | 6.539348 |
| TMEM40    | 1.642201 | 5.194636 | 38.55613 | 1.02E-09 | 7.26E-07 | 13.24869 |
| MMP19     | 1.647633 | 7.535345 | 26.17989 | 1.69E-08 | 2.16E-06 | 10.51732 |
| SKIL      | 1.681688 | 7.582764 | 36.12749 | 1.63E-09 | 8.64E-07 | 12.81109 |
| B3GALT2   | 1.704898 | 4.210109 | 25.33366 | 2.15E-08 | 2.39E-06 | 10.27388 |
| IL6       | 1.705973 | 6.681417 | 20.69758 | 9.26E-08 | 5.33E-06 | 8.750276 |
| JAG1      | 1.706518 | 4.599367 | 23.85606 | 3.32E-08 | 3.09E-06 | 9.825224 |
| FAM160B1  | 1.730976 | 7.185292 | 25.82073 | 1.87E-08 | 2.25E-06 | 10.41514 |
| CREB5     | 1.752915 | 4.468022 | 18.24212 | 2.29E-07 | 9.04E-06 | 7.781593 |
| MMP1      | 1.786453 | 5.92037  | 27.94584 | 1.06E-08 | 1.66E-06 | 10.99658 |
| RIMS2     | 1.800628 | 5.548801 | 30.40626 | 5.72E-09 | 1.27E-06 | 11.60638 |
| JUN       | 1.807433 | 7.469842 | 34.085   | 2.49E-09 | 9.45E-07 | 12.41132 |
| KMO       | 1.814892 | 5.380794 | 22.6343  | 4.85E-08 | 3.67E-06 | 9.429492 |
| LIN28B    | 1.830698 | 7.371936 | 40.7969  | 6.74E-10 | 7.06E-07 | 13.61997 |
| KLRC3     | 1.833703 | 4.096042 | 19.07173 | 1.67E-07 | 7.50E-06 | 8.123812 |
| CPA4      | 1.88552  | 8.050506 | 49.27531 | 1.70E-10 | 5.84E-07 | 14.79442 |
| DCP2      | 1.907338 | 4.852774 | 16.17434 | 5.43E-07 | 1.46E-05 | 6.851773 |
| SCN2A     | 1.965542 | 4.245939 | 10.31907 | 1.28E-05 | 0.000126 | 3.379109 |
| DNM3      | 2.008691 | 6.811923 | 22.31644 | 5.38E-08 | 3.84E-06 | 9.322567 |
| ZNF267    | 2.015084 | 7.380868 | 45.88024 | 2.86E-10 | 5.84E-07 | 14.36322 |
| TSPAN2    | 2.077624 | 6.401531 | 35.29099 | 1.94E-09 | 8.83E-07 | 12.65108 |
| ANKRD1    | 2.121436 | 6.814265 | 29.09274 | 7.88E-09 | 1.42E-06 | 11.2887  |
| FLG       | 2.12643  | 6.675174 | 30.16294 | 6.06E-09 | 1.27E-06 | 11.54883 |
| MAP3K14   | 2.131354 | 7.882143 | 27.22952 | 1.27E-08 | 1.87E-06 | 10.80666 |
| PRDM1     | 2.177436 | 6.651968 | 40.50844 | 7.10E-10 | 7.06E-07 | 13.5738  |
| BIRC3     | 2.213271 | 7.674406 | 47.98259 | 2.07E-10 | 5.84E-07 | 14.63577 |
| GLS       | 2.230645 | 6.121276 | 36.42359 | 1.54E-09 | 8.45E-07 | 12.86655 |
| F3        | 2.371637 | 6.542932 | 39.59737 | 8.38E-10 | 7.06E-07 | 13.42487 |
| SCG5      | 2.436254 | 6.759243 | 45.82116 | 2.89E-10 | 5.84E-07 | 14.35528 |
| RAP1A     | 2.560714 | 10.93026 | 68.28407 | 1.57E-11 | 4.66E-07 | 16.53415 |
| EGR2      | 2.805736 | 6.581188 | 66.36377 | 1.94E-11 | 4.66E-07 | 16.3984  |

# Gene chip analysis\_Diff\_mRNA\_FDR0.05\_exprs

| genesymb | shCtrl_1 | shCtrl_2 | shCtrl_3 | shALDOC_1 | shALDOC_2 | shALDOC_3 |
|----------|----------|----------|----------|-----------|-----------|-----------|
| CCDC109B | 8.561907 | 8.658225 | 8.524859 | 5.573114  | 5.672295  | 5.940468  |
| EGR2     | 5.11528  | 5.205475 | 5.214203 | 7.989031  | 7.948981  | 8.014155  |
| ICT1     | 8.773682 | 8.845049 | 8.798468 | 6.08604   | 5.901475  | 6.199585  |
| NUDT15   | 9.439858 | 9.444324 | 9.463576 | 6.784375  | 6.594165  | 6.830464  |
| RAP1A    | 9.668179 | 9.651013 | 9.630532 | 12.23313  | 12.16396  | 12.23478  |
| HNRNPA3  | 9.723568 | 9.658143 | 9.62111  | 7.155203  | 7.183786  | 7.30155   |
| IAH1     | 8.240434 | 8.233153 | 8.25005  | 5.747659  | 5.738994  | 5.920445  |
| SCG5     | 5.515898 | 5.609883 | 5.497567 | 8.06161   | 7.906453  | 7.964048  |
| F3       | 5.257837 | 5.408054 | 5.40545  | 7.758142  | 7.637166  | 7.790944  |
| RAD51AP1 | 8.233073 | 8.127314 | 8.145068 | 5.841107  | 5.839189  | 5.796238  |
| GLE1     | 8.536781 | 8.596035 | 8.574289 | 6.382825  | 6.138737  | 6.416526  |
| GLS      | 4.942228 | 4.937318 | 5.138313 | 7.275928  | 7.193619  | 7.240248  |
| BIRC3    | 6.608379 | 6.59445  | 6.500483 | 8.738706  | 8.836237  | 8.768182  |
| PRDM1    | 5.469494 | 5.593294 | 5.626961 | 7.798357  | 7.684385  | 7.739316  |
| UBE2N    | 10.54496 | 10.49363 | 10.37855 | 8.365569  | 8.30714   | 8.335399  |
| MAP3K14  | 6.650368 | 6.900855 | 6.898173 | 9.045662  | 8.895497  | 8.9023    |
| FLG      | 5.528232 | 5.531881 | 5.775765 | 7.736942  | 7.701571  | 7.776656  |
| ANKRD1   | 5.641954 | 5.700985 | 5.917702 | 7.905504  | 7.818931  | 7.900515  |
| ALDOC    | 7.934616 | 7.864102 | 7.835168 | 5.758445  | 5.668301  | 5.927634  |
| NMU      | 7.653512 | 7.653417 | 7.759234 | 5.555119  | 5.656596  | 5.580181  |
| KIAA0101 | 7.536931 | 7.427367 | 7.4813   | 5.352553  | 5.311665  | 5.52524   |
| TSPAN2   | 5.409419 | 5.410315 | 5.268421 | 7.487781  | 7.346408  | 7.486839  |
| SPOPL    | 6.68182  | 6.748657 | 6.585047 | 4.398973  | 4.573417  | 4.833557  |
| FAM208A  | 8.117209 | 8.020786 | 8.032247 | 6.005374  | 5.907558  | 6.059383  |
| LSM6     | 9.502665 | 9.460432 | 9.497862 | 7.529966  | 7.443623  | 7.416727  |
| ZNF267   | 6.432612 | 6.302917 | 6.38445  | 8.415302  | 8.370938  | 8.378992  |
| FKBP4    | 10.10066 | 10.09401 | 10.06266 | 8.060514  | 8.106437  | 8.063908  |
| DNM3     | 5.757128 | 5.728206 | 5.9374   | 7.827188  | 7.650248  | 7.971369  |
| LANCL1   | 7.797809 | 7.828554 | 7.671284 | 5.825435  | 5.787045  | 5.695029  |
| ITGB1BP1 | 7.143826 | 7.136096 | 7.143826 | 5.173678  | 5.189638  | 5.098179  |
| SCN2A    | 3.712151 | 3.035384 | 3.041967 | 5.390099  | 4.997783  | 5.298248  |
| MDC1     | 8.12606  | 8.138824 | 8.181146 | 6.278635  | 6.125035  | 6.260444  |
| DCP2     | 3.732766 | 4.178785 | 3.785763 | 5.841337  | 5.687613  | 5.890377  |
| CPA4     | 7.11933  | 7.077763 | 7.126144 | 8.983249  | 8.958959  | 9.03759   |
| DUT      | 7.309987 | 7.318596 | 7.33319  | 5.452569  | 5.410878  | 5.461179  |
| CPD      | 8.181274 | 8.159089 | 8.205271 | 6.380452  | 6.275801  | 6.300653  |
| POLR2G   | 10.69655 | 10.68738 | 10.67081 | 8.923308  | 8.766484  | 8.836255  |
| KLRC3    | 3.032961 | 3.317561 | 3.18705  | 4.888366  | 4.960873  | 5.189441  |
| LIN28B   | 6.414963 | 6.426903 | 6.527894 | 8.274639  | 8.256842  | 8.330373  |
| FAR1     | 7.551868 | 7.543457 | 7.534882 | 5.739412  | 5.603969  | 5.808863  |
| NUDCD3   | 9.215935 | 9.259034 | 9.178159 | 7.364291  | 7.323752  | 7.490994  |
| TIMP3    | 8.842227 | 8.841902 | 8.724095 | 7.052468  | 6.92233   | 6.972391  |
| KMO      | 4.338162 | 4.611159 | 4.470724 | 6.393642  | 6.184792  | 6.286286  |
| TMEM50A  | 6.934748 | 7.07097  | 6.893227 | 5.210834  | 5.069301  | 5.185783  |
| JUN      | 6.481056 | 6.66673  | 6.550591 | 8.356436  | 8.356038  | 8.408202  |
| RIMS2    | 4.633223 | 4.648455 | 4.663783 | 6.523058  | 6.316341  | 6.507948  |
| TPD52    | 9.776261 | 9.717993 | 9.720246 | 8.032797  | 7.927098  | 7.885299  |
| ISCA1    | 8.078208 | 8.052213 | 8.058594 | 6.282033  | 6.300653  | 6.23832   |
| MMP1     | 5.015447 | 4.981153 | 5.084831 | 6.947631  | 6.725889  | 6.767269  |
| CREB5    | 3.695909 | 3.358396 | 3.720387 | 5.271573  | 5.38493   | 5.376937  |

|           |          |          |          |          |          |          |
|-----------|----------|----------|----------|----------|----------|----------|
| FAM160B1  | 6.178806 | 6.364226 | 6.41638  | 8.107592 | 7.99209  | 8.052658 |
| FNBP1     | 6.535406 | 6.501001 | 6.554311 | 4.863066 | 4.763081 | 4.803661 |
| JAG1      | 3.771622 | 3.782554 | 3.684147 | 5.610522 | 5.400847 | 5.346509 |
| IL6       | 5.795268 | 6.013711 | 5.676312 | 7.548882 | 7.481322 | 7.573006 |
| B3GALT2   | 3.366135 | 3.487055 | 3.219791 | 5.071915 | 5.02408  | 5.09168  |
| IMPAD1    | 9.783837 | 9.784245 | 9.794695 | 8.030795 | 8.042021 | 8.176627 |
| GALNT1    | 7.753432 | 7.839594 | 7.853578 | 6.152483 | 6.079    | 6.121024 |
| TMEM261   | 10.71522 | 10.7127  | 10.70713 | 9.061692 | 8.943223 | 9.047421 |
| C14orf142 | 8.262404 | 8.175887 | 8.245938 | 6.612669 | 6.481056 | 6.52628  |
| VAMP3     | 9.748115 | 9.75878  | 9.733017 | 8.085067 | 7.9947   | 8.114654 |
| SKIL      | 6.695556 | 6.700381 | 6.829822 | 8.441823 | 8.403957 | 8.425044 |
| CKAP4     | 10.42647 | 10.44252 | 10.3836  | 8.760384 | 8.76225  | 8.739989 |
| CAMK2N1   | 7.607248 | 7.599422 | 7.621499 | 6.026762 | 5.915331 | 5.916106 |
| MMP19     | 6.567257 | 6.794666 | 6.772662 | 8.344284 | 8.356362 | 8.376837 |
| LY6K      | 9.754226 | 9.817889 | 9.754694 | 8.189019 | 8.005905 | 8.192745 |
| TMEM40    | 4.428874 | 4.314241 | 4.377492 | 6.04574  | 5.98479  | 6.016679 |
| TRIM22    | 5.321759 | 5.348652 | 5.049994 | 7.038419 | 6.704503 | 6.895987 |
| ASF1B     | 8.740433 | 8.699937 | 8.689382 | 7.072879 | 7.009977 | 7.138276 |
| HBB       | 3.139087 | 3.139087 | 2.928065 | 4.772139 | 4.718575 | 4.574832 |
| ESYT2     | 8.7489   | 8.697581 | 8.691462 | 7.140256 | 7.062036 | 7.124961 |
| PI15      | 5.967813 | 5.853863 | 5.9412   | 7.57831  | 7.516984 | 7.475474 |
| KLF4      | 6.391554 | 6.515108 | 6.421559 | 8.096101 | 7.970263 | 8.064833 |
| TKT       | 6.832945 | 6.870442 | 6.914463 | 5.288769 | 4.983891 | 5.545613 |
| HSPB11    | 9.709986 | 9.726504 | 9.696608 | 8.169881 | 8.06572  | 8.102702 |
| AAED1     | 8.338687 | 8.282303 | 8.261484 | 6.678771 | 6.716235 | 6.695749 |
| EGR1      | 7.397684 | 7.497599 | 7.565794 | 9.121962 | 9.002811 | 9.116774 |
| TGFBI     | 6.128473 | 6.138419 | 6.104341 | 7.731496 | 7.683958 | 7.728287 |
| HSPA4     | 7.501582 | 7.466216 | 7.535247 | 5.954091 | 5.751838 | 6.030849 |
| MEX3D     | 7.024579 | 7.084833 | 7.189604 | 5.518435 | 5.57409  | 5.451992 |
| HIST2H2BC | 4.584943 | 4.895718 | 4.700253 | 6.214633 | 6.249526 | 6.46209  |
| A2M       | 5.191788 | 5.00801  | 5.311613 | 6.832724 | 6.795581 | 6.617637 |
| S1PR1     | 5.573073 | 5.686371 | 5.657208 | 7.217345 | 7.211759 | 7.211086 |
| AKR1A1    | 8.537087 | 8.551595 | 8.657595 | 7.054576 | 6.972838 | 7.011503 |
| ROR1      | 5.723251 | 5.36324  | 5.250539 | 7.099744 | 6.94099  | 6.994307 |
| TMEM64    | 6.634144 | 6.761074 | 6.651697 | 8.363261 | 8.115461 | 8.265394 |
| MGP       | 5.237738 | 5.337212 | 5.236964 | 6.827818 | 6.684774 | 6.934597 |
| ZNF91     | 5.197203 | 5.331811 | 5.067189 | 6.749722 | 6.710741 | 6.741179 |
| FAM45A // | 9.319276 | 9.384123 | 9.331143 | 7.822202 | 7.772666 | 7.840694 |
| LOC100128 | 10.69537 | 10.69997 | 10.61271 | 9.182234 | 9.084805 | 9.142963 |
| MTDH      | 8.377446 | 8.369131 | 8.267803 | 6.776425 | 6.822252 | 6.847527 |
| FN1       | 8.010892 | 8.109518 | 8.028072 | 9.574134 | 9.526076 | 9.615826 |
| ZNF540    | 2.434967 | 2.912561 | 2.783033 | 4.299394 | 4.008137 | 4.386327 |
| KIAA1324  | 4.047969 | 3.879319 | 3.954167 | 5.584823 | 5.393181 | 5.448188 |
| BRWD3     | 5.621839 | 5.640747 | 5.658895 | 7.12408  | 7.156531 | 7.183182 |
| FKBP10    | 8.574478 | 8.579936 | 8.543866 | 7.104765 | 7.004327 | 7.067898 |
| AKIP1 /// | 7.576377 | 7.659376 | 7.510411 | 9.102123 | 9.039111 | 9.101097 |
| TMEM156   | 3.646679 | 4.011915 | 4.057148 | 5.387393 | 5.244376 | 5.572705 |
| HNMT      | 5.50829  | 5.448393 | 5.416681 | 6.976832 | 6.941995 | 6.938998 |
| INHBA     | 6.418154 | 6.46974  | 6.548204 | 8.003361 | 7.92605  | 7.985533 |
| MCM6      | 9.555588 | 9.493123 | 9.494463 | 8.030114 | 7.999885 | 8.034853 |
| TPM1      | 5.655006 | 5.74138  | 5.918186 | 7.309055 | 7.174793 | 7.304866 |

|           |           |           |           |           |           |           |
|-----------|-----------|-----------|-----------|-----------|-----------|-----------|
| KBTBD8    | 4. 851884 | 4. 820984 | 4. 792996 | 6. 307162 | 6. 356885 | 6. 275513 |
| SLC2A14 / | 7. 601169 | 7. 675524 | 7. 755235 | 9. 19901  | 9. 089598 | 9. 210455 |
| EEF1E1    | 9. 667693 | 9. 66907  | 9. 634604 | 8. 215808 | 8. 130821 | 8. 181103 |
| PNMA2     | 6. 798259 | 6. 802032 | 6. 465255 | 5. 254375 | 5. 073587 | 5. 297508 |
| AFF4      | 7. 079852 | 7. 129353 | 7. 176598 | 8. 609241 | 8. 536451 | 8. 672082 |
| RCC2      | 10. 83406 | 10. 8528  | 10. 85991 | 9. 38609  | 9. 384469 | 9. 371446 |
| CTGF      | 8. 599284 | 8. 605981 | 8. 548171 | 10. 05239 | 10. 03232 | 10. 06092 |
| LOC145783 | 7. 009316 | 7. 031576 | 7. 053429 | 5. 770958 | 5. 299442 | 5. 643723 |
| SFRP1     | 8. 586237 | 8. 65129  | 8. 584327 | 7. 111645 | 7. 112674 | 7. 237933 |
| MAPKAPK2  | 9. 069695 | 8. 943674 | 8. 949574 | 7. 490351 | 7. 527056 | 7. 594272 |
| UBE2D3    | 10. 06799 | 10. 03218 | 10. 04408 | 8. 569594 | 8. 576161 | 8. 662913 |
| KLRC1 /// | 3. 706672 | 3. 87235  | 3. 737644 | 5. 181011 | 5. 17614  | 5. 286127 |
| AKAP7     | 6. 555909 | 6. 429266 | 6. 504774 | 5. 142072 | 4. 934444 | 5. 086874 |
| MMP3      | 3. 919125 | 4. 497546 | 4. 428675 | 5. 615001 | 5. 554663 | 5. 980475 |
| CDIPT     | 7. 922751 | 8. 010673 | 8. 003057 | 6. 543323 | 6. 578593 | 6. 514367 |
| SDC1      | 8. 674756 | 8. 719367 | 8. 734094 | 7. 236512 | 7. 291211 | 7. 312376 |
| C9orf135  | 4. 509032 | 4. 474073 | 4. 415754 | 5. 870252 | 5. 866136 | 5. 950207 |
| TXNRD1    | 9. 801234 | 9. 75587  | 9. 734487 | 8. 418985 | 8. 282303 | 8. 327166 |
| LOC100128 | 10. 51439 | 10. 4913  | 10. 51434 | 9. 125841 | 9. 06337  | 9. 072453 |
| SLC37A4   | 9. 224791 | 9. 217338 | 9. 312806 | 7. 819808 | 7. 791739 | 7. 886366 |
| HIST1H4H  | 4. 828917 | 4. 798521 | 4. 99405  | 6. 121227 | 6. 296496 | 6. 459861 |
| NEDD8     | 11. 06007 | 11. 08786 | 11. 11797 | 9. 619708 | 9. 699285 | 9. 696679 |
| HNRNPA0   | 9. 146643 | 9. 130344 | 9. 076972 | 7. 726767 | 7. 663491 | 7. 71596  |
| LINC00472 | 4. 199446 | 4. 347189 | 4. 306079 | 5. 773535 | 5. 566529 | 5. 745908 |
| FAS       | 7. 850546 | 7. 772958 | 7. 772958 | 9. 245161 | 9. 1907   | 9. 192742 |
| FAM198B   | 4. 138026 | 4. 200688 | 4. 422174 | 5. 758767 | 5. 46261  | 5. 763644 |
| ALG10B    | 6. 114184 | 6. 014428 | 6. 137632 | 4. 62026  | 4. 947493 | 4. 479321 |
| STX11     | 3. 924566 | 4. 192554 | 4. 008103 | 5. 314218 | 5. 301023 | 5. 712306 |
| CDCA7     | 9. 234223 | 9. 154217 | 9. 259314 | 7. 812983 | 7. 869023 | 7. 771607 |
| PRICKLE1  | 5. 910783 | 5. 939862 | 5. 944038 | 7. 373557 | 7. 297645 | 7. 31138  |
| PNP       | 9. 360358 | 9. 380735 | 9. 382497 | 7. 92658  | 7. 971551 | 8. 038257 |
| ANGPTL4   | 5. 504623 | 5. 660918 | 5. 682697 | 7. 025111 | 6. 998074 | 7. 009106 |
| C4orf46   | 7. 168067 | 7. 047727 | 7. 16274  | 5. 669431 | 5. 635959 | 5. 904835 |
| SLC1A3    | 4. 690995 | 4. 798521 | 4. 85311  | 6. 406403 | 5. 992394 | 6. 110143 |
| EFEMP1    | 5. 798305 | 5. 950438 | 6. 023822 | 7. 349061 | 7. 303957 | 7. 284544 |
| IL1A      | 6. 091818 | 6. 155467 | 6. 156361 | 7. 645915 | 7. 423086 | 7. 489154 |
| CITED2    | 7. 448484 | 7. 498656 | 7. 503796 | 8. 864697 | 8. 835304 | 8. 896327 |
| SRI       | 7. 835395 | 7. 898571 | 7. 899484 | 6. 48643  | 6. 597185 | 6. 412143 |
| GDA       | 7. 908006 | 8. 003091 | 8. 049846 | 9. 375857 | 9. 332009 | 9. 388399 |
| SP4       | 7. 631757 | 7. 589444 | 7. 59396  | 6. 286838 | 6. 227506 | 6. 175957 |
| AIDA      | 9. 842555 | 9. 842581 | 9. 751721 | 8. 479441 | 8. 417792 | 8. 414773 |
| PRR16     | 5. 335282 | 5. 481896 | 5. 379893 | 6. 904066 | 6. 659306 | 6. 751373 |
| FOSL2     | 6. 504191 | 6. 687927 | 6. 707349 | 7. 984842 | 8. 02232  | 8. 004265 |
| RASAL2    | 6. 623085 | 6. 620087 | 6. 626124 | 8. 013501 | 7. 937474 | 8. 028513 |
| RASGRP3   | 5. 158734 | 4. 959813 | 5. 11528  | 6. 434167 | 6. 338017 | 6. 568828 |
| TNFAIP3   | 5. 782419 | 5. 933986 | 6. 12999  | 7. 367048 | 7. 226602 | 7. 343974 |
| NEURL1B   | 5. 085234 | 4. 984679 | 5. 261728 | 3. 69144  | 3. 710414 | 3. 839753 |
| TMEM27    | 5. 706157 | 5. 708769 | 5. 783831 | 7. 149999 | 6. 994154 | 7. 138435 |
| GNS       | 8. 708608 | 8. 706711 | 8. 6399   | 7. 380508 | 7. 281262 | 7. 312194 |
| LRRC7     | 3. 044617 | 3. 157423 | 3. 496689 | 4. 547693 | 4. 391907 | 4. 837253 |
| PLSCR4    | 4. 59173  | 4. 621077 | 4. 761234 | 6. 120023 | 5. 921281 | 6. 005147 |

|           |           |           |           |           |           |           |
|-----------|-----------|-----------|-----------|-----------|-----------|-----------|
| ADRB2     | 6. 820716 | 6. 528496 | 6. 838875 | 8. 173487 | 7. 979107 | 8. 103756 |
| GBP3      | 4. 518983 | 4. 533539 | 4. 452563 | 6. 041986 | 5. 829622 | 5. 6969   |
| GPT2      | 8. 607671 | 8. 591882 | 8. 650445 | 7. 296551 | 7. 180826 | 7. 310317 |
| KDM4D     | 6. 076719 | 5. 89461  | 6. 263541 | 4. 874244 | 4. 850109 | 4. 453655 |
| ARF3      | 9. 252377 | 9. 228517 | 9. 271373 | 7. 96133  | 7. 797566 | 7. 937449 |
| MUC7      | 4. 425844 | 4. 310746 | 4. 38361  | 5. 679176 | 5. 742336 | 5. 746786 |
| CPEB2     | 5. 20875  | 5. 308861 | 5. 22923  | 6. 628531 | 6. 579879 | 6. 5814   |
| IL7R      | 6. 89138  | 6. 735809 | 6. 822425 | 8. 171591 | 8. 178797 | 8. 139126 |
| NUP58     | 8. 817929 | 8. 711298 | 8. 678587 | 7. 426582 | 7. 436658 | 7. 311335 |
| AREG      | 3. 851361 | 3. 960197 | 3. 697557 | 5. 318085 | 5. 218823 | 4. 998865 |
| PTGS2     | 4. 436849 | 4. 259847 | 4. 431456 | 5. 7866   | 5. 641476 | 5. 721794 |
| PXYLP1    | 8. 496502 | 8. 522104 | 8. 522676 | 7. 175498 | 7. 167879 | 7. 177198 |
| KRTAP2-3  | 7. 591948 | 7. 469267 | 7. 447948 | 8. 808941 | 8. 752243 | 8. 966238 |
| CRNDE     | 9. 389674 | 9. 267851 | 9. 30291  | 8. 025838 | 7. 96262  | 7. 965695 |
| COX7A2 // | 8. 556421 | 8. 464252 | 8. 454632 | 7. 136871 | 7. 083362 | 7. 254204 |
| FAM19A2   | 3. 761918 | 3. 95409  | 3. 820796 | 5. 22478  | 5. 063547 | 5. 239641 |
| SOS1      | 8. 623043 | 8. 644921 | 8. 617705 | 7. 296804 | 7. 283489 | 7. 321134 |
| ARRDC3    | 5. 728728 | 5. 854747 | 5. 852742 | 7. 116796 | 7. 199641 | 7. 09128  |
| TMEM200A  | 4. 961848 | 5. 146598 | 5. 190485 | 6. 306178 | 6. 428807 | 6. 534508 |
| METTTL21A | 6. 895848 | 6. 767192 | 6. 711188 | 5. 694719 | 5. 160901 | 5. 551025 |
| ZCCHC17   | 9. 863096 | 9. 865568 | 9. 798364 | 8. 508153 | 8. 509    | 8. 546973 |
| FANCI     | 8. 172368 | 8. 282061 | 8. 201027 | 6. 924152 | 6. 770347 | 6. 998145 |
| IFNB1     | 5. 653894 | 5. 382122 | 5. 592034 | 6. 924235 | 6. 74141  | 6. 921963 |
| SDC2      | 5. 950877 | 5. 804649 | 5. 967623 | 7. 199861 | 7. 205996 | 7. 262518 |
| MICU3     | 4. 558975 | 4. 286246 | 4. 497003 | 5. 849716 | 5. 672117 | 5. 76496  |
| KLHL28    | 5. 99405  | 5. 909164 | 5. 922706 | 7. 250931 | 7. 304846 | 7. 21229  |
| BUB3      | 8. 681808 | 8. 693755 | 8. 652908 | 7. 410384 | 7. 309825 | 7. 373537 |
| C3AR1     | 5. 355505 | 5. 516346 | 5. 250289 | 6. 698783 | 6. 620998 | 6. 715665 |
| GSPT1     | 6. 713047 | 6. 79623  | 6. 84125  | 5. 427432 | 5. 23058  | 5. 785592 |
| TBC1D13   | 7. 871988 | 7. 95038  | 7. 999075 | 6. 659837 | 6. 611476 | 6. 646138 |
| SEMA3E    | 4. 505822 | 4. 463163 | 4. 583544 | 5. 942936 | 5. 61212  | 5. 897233 |
| IRAK1     | 10. 0044  | 9. 980999 | 9. 940316 | 8. 678203 | 8. 615582 | 8. 732171 |
| GXYLT1    | 6. 422795 | 6. 490448 | 6. 528712 | 7. 819195 | 7. 738944 | 7. 779032 |
| ARHGAP5   | 5. 699697 | 5. 60152  | 5. 385615 | 4. 202453 | 4. 240493 | 4. 351524 |
| HIPK3     | 5. 527424 | 5. 578057 | 5. 731534 | 6. 867446 | 6. 936071 | 6. 924866 |
| ZNF562    | 7. 018618 | 7. 022323 | 7. 109852 | 8. 388962 | 8. 235448 | 8. 41615  |
| TMPO      | 9. 590276 | 9. 507464 | 9. 408683 | 8. 224977 | 8. 244104 | 8. 148461 |
| CYR61     | 8. 140753 | 8. 193844 | 8. 150643 | 9. 482984 | 9. 437754 | 9. 448029 |
| MEOX2     | 10. 16436 | 10. 18231 | 10. 10118 | 8. 868021 | 8. 830391 | 8. 873233 |
| METTTL9   | 7. 698015 | 7. 637262 | 7. 701571 | 6. 467534 | 6. 316321 | 6. 380709 |
| ST6GALNAC | 5. 561982 | 5. 539276 | 5. 637338 | 6. 947108 | 6. 753907 | 6. 908435 |
| HIST2H2BF | 4. 397948 | 4. 238985 | 4. 470724 | 5. 677002 | 5. 54001  | 5. 759303 |
| IMMP2L    | 4. 429802 | 4. 350181 | 4. 29275  | 5. 61024  | 5. 527205 | 5. 802344 |
| CHST1     | 6. 803954 | 6. 794304 | 6. 834854 | 5. 375784 | 5. 537955 | 5. 653756 |
| BCAP31    | 11. 03486 | 11. 09776 | 11. 08858 | 9. 747065 | 9. 788431 | 9. 828598 |
| LIMCH1    | 7. 853396 | 7. 920782 | 8. 009193 | 9. 20766  | 9. 182892 | 9. 249205 |
| IREB2     | 7. 121819 | 7. 090139 | 7. 175473 | 8. 406548 | 8. 405833 | 8. 425795 |
| SERPINB7  | 5. 297508 | 5. 333187 | 5. 419658 | 6. 6611   | 6. 597242 | 6. 642457 |
| LRRC17    | 5. 653804 | 5. 432891 | 5. 686174 | 6. 93908  | 6. 799876 | 6. 875324 |
| FOS       | 6. 227149 | 6. 190491 | 6. 262725 | 7. 520765 | 7. 417821 | 7. 576186 |
| SLC16A4   | 5. 808355 | 5. 882376 | 6. 032436 | 7. 235422 | 7. 146012 | 7. 175298 |

|           |          |          |          |          |          |          |
|-----------|----------|----------|----------|----------|----------|----------|
| ATAD2B    | 5.435214 | 5.257457 | 5.429696 | 6.633917 | 6.579879 | 6.738598 |
| PDCD6IP   | 7.274536 | 7.200766 | 7.299172 | 5.926682 | 6.097937 | 5.922724 |
| UGCG      | 9.095733 | 9.127002 | 9.053922 | 10.40632 | 10.3547  | 10.33808 |
| YKT6      | 8.976226 | 8.968444 | 8.959518 | 7.742087 | 7.652386 | 7.689451 |
| NUAK1     | 6.943253 | 6.923358 | 6.879859 | 8.161538 | 8.194155 | 8.209863 |
| PDZD2     | 8.441584 | 8.388732 | 8.407521 | 7.116211 | 7.198293 | 7.119899 |
| SERPINE1  | 5.113128 | 5.435725 | 5.263614 | 6.639599 | 6.578253 | 6.396157 |
| TXK       | 5.131578 | 4.965741 | 4.802966 | 6.271135 | 6.191148 | 6.237874 |
| RRM2B     | 6.616617 | 6.618143 | 6.747584 | 7.924071 | 7.888993 | 7.968113 |
| RRM2      | 10.23671 | 10.14255 | 10.09364 | 8.892051 | 8.911387 | 8.879517 |
| PLAC8     | 6.736033 | 6.934284 | 6.904875 | 8.216966 | 7.991504 | 8.153115 |
| NABP1     | 6.765615 | 6.674519 | 6.68929  | 7.944126 | 7.954012 | 8.015119 |
| CDC48     | 8.832042 | 8.850535 | 8.836526 | 7.60301  | 7.534686 | 7.602194 |
| MYPN      | 3.850256 | 3.543066 | 4.054298 | 4.92261  | 5.149555 | 5.150776 |
| CCL2      | 6.728289 | 6.757438 | 6.889495 | 8.04354  | 8.038298 | 8.06823  |
| GGT1 ///  | 6.164953 | 6.263707 | 6.385349 | 7.528489 | 7.489419 | 7.56894  |
| EYA1      | 7.818921 | 7.80648  | 7.827986 | 6.618565 | 6.552671 | 6.510668 |
| RMND5A    | 6.550096 | 6.616955 | 6.516326 | 5.409232 | 5.127585 | 5.377605 |
| CPEB4     | 6.898786 | 6.927064 | 6.914014 | 8.222234 | 8.077689 | 8.202926 |
| PTPRK     | 3.981766 | 4.054991 | 4.013013 | 5.36907  | 5.26661  | 5.17351  |
| TBX3      | 7.03303  | 6.959722 | 7.045921 | 8.237099 | 8.268532 | 8.29236  |
| XIRP2     | 3.972849 | 3.981564 | 4.025964 | 5.112093 | 5.422086 | 5.204986 |
| BDNF      | 7.046308 | 7.039308 | 7.131342 | 8.290405 | 8.332087 | 8.352428 |
| TGFBR2    | 8.492975 | 8.44752  | 8.442507 | 9.721408 | 9.689441 | 9.729295 |
| CYLD      | 7.084635 | 7.164154 | 7.153139 | 8.429745 | 8.340635 | 8.383853 |
| METTL10   | 5.780899 | 5.693132 | 5.950158 | 4.445269 | 4.790986 | 4.441766 |
| RPP25L    | 8.608188 | 8.782628 | 8.614438 | 7.343329 | 7.335003 | 7.583682 |
| GRAMD3    | 6.103218 | 6.144567 | 6.201153 | 7.456512 | 7.32076  | 7.409359 |
| HIST1H2BE | 6.257444 | 6.225391 | 6.417779 | 7.583524 | 7.514114 | 7.532417 |
| TNFRSF19  | 8.623873 | 8.61269  | 8.533353 | 7.373557 | 7.222641 | 7.447929 |
| PDCD1LG2  | 3.89061  | 4.003216 | 3.618292 | 5.208467 | 4.870516 | 5.156032 |
| TLR4      | 7.955857 | 7.939326 | 7.924898 | 9.185905 | 9.117649 | 9.231393 |
| HES1      | 5.938337 | 5.918755 | 5.816317 | 7.238929 | 7.015428 | 7.130958 |
| CTNND1 // | 7.098504 | 7.026634 | 7.115837 | 5.866524 | 5.806395 | 5.856675 |
| ZNF571    | 4.944366 | 4.8725   | 4.948246 | 6.244676 | 6.106425 | 6.117732 |
| TLR3      | 4.054556 | 4.274404 | 4.208348 | 5.45243  | 5.38328  | 5.405304 |
| GPR37     | 5.211081 | 5.251517 | 5.185052 | 6.54093  | 6.438672 | 6.365578 |
| ATP11B    | 6.566585 | 6.416437 | 6.554346 | 7.683073 | 7.76042  | 7.789726 |
| RGS7      | 4.477675 | 4.510695 | 4.575893 | 5.787689 | 5.706965 | 5.761418 |
| CDS1      | 5.306766 | 5.265222 | 5.371073 | 6.529226 | 6.464903 | 6.624381 |
| F2RL2     | 6.249665 | 6.295328 | 6.212788 | 7.525338 | 7.519818 | 7.386702 |
| MLLT1     | 8.834684 | 8.784643 | 8.787554 | 7.631254 | 7.590724 | 7.513405 |
| TMEM2     | 8.611083 | 8.684133 | 8.641807 | 9.923771 | 9.83161  | 9.847622 |
| GPATCH2   | 6.300305 | 6.282069 | 6.391012 | 7.59507  | 7.50048  | 7.543416 |
| KRT7      | 6.428859 | 6.464808 | 6.331709 | 7.590573 | 7.554364 | 7.735009 |
| PLAA      | 7.412678 | 7.455391 | 7.536655 | 6.237298 | 6.232236 | 6.286277 |
| NAPEPLD   | 6.104768 | 5.957964 | 5.892564 | 7.22383  | 7.167124 | 7.211119 |
| NIPA1     | 7.472615 | 7.542849 | 7.477628 | 6.31971  | 6.130283 | 6.407    |
| PREX1     | 6.746802 | 6.710009 | 6.754049 | 5.42687  | 5.470795 | 5.683109 |
| SAPCD2    | 7.773054 | 7.694599 | 7.643623 | 6.446865 | 6.235708 | 6.799105 |
| IL32      | 6.438376 | 6.50365  | 6.483329 | 7.739515 | 7.630776 | 7.674752 |



|           |           |           |           |           |           |           |
|-----------|-----------|-----------|-----------|-----------|-----------|-----------|
| SESN1     | 7. 599014 | 7. 553128 | 7. 617539 | 8. 803541 | 8. 787347 | 8. 792235 |
| RAB30     | 5. 441379 | 5. 445461 | 5. 416224 | 6. 617098 | 6. 596268 | 6. 702991 |
| LOC728715 | 11. 37363 | 11. 31481 | 11. 3337  | 10. 14851 | 10. 15144 | 10. 11168 |
| DDAH1     | 6. 727863 | 6. 725592 | 6. 702624 | 7. 940643 | 7. 892776 | 7. 930274 |
| KLF10     | 9. 082967 | 8. 941532 | 8. 940298 | 10. 22501 | 10. 17433 | 10. 17249 |
| ATG4B     | 6. 986744 | 6. 927441 | 6. 956103 | 5. 787736 | 5. 70778  | 5. 76928  |
| RDM1      | 5. 420773 | 5. 442425 | 5. 489042 | 3. 787091 | 4. 29595  | 4. 666493 |
| TMEM68    | 6. 80473  | 6. 768933 | 6. 778551 | 5. 527876 | 5. 519861 | 5. 708797 |
| OSTM1     | 7. 835726 | 7. 729474 | 7. 690541 | 8. 886867 | 8. 980175 | 8. 976054 |
| CD109     | 10. 06902 | 10. 02225 | 10. 1038  | 8. 901482 | 8. 836049 | 8. 875488 |
| ELAVL2    | 6. 629553 | 6. 647206 | 6. 779117 | 7. 876209 | 7. 78788  | 7. 972322 |
| BRI3BP // | 6. 816329 | 6. 82413  | 6. 879197 | 5. 654349 | 5. 526862 | 5. 764918 |
| PLCXD2    | 7. 331869 | 7. 186782 | 7. 365546 | 8. 494089 | 8. 438047 | 8. 523304 |
| TMEM106B  | 5. 843756 | 5. 736841 | 5. 817586 | 4. 679035 | 4. 709473 | 4. 439312 |
| CFAP58    | 3. 16904  | 3. 182691 | 3. 484863 | 4. 534173 | 4. 094306 | 4. 778106 |
| RNPEP     | 10. 04006 | 10. 09071 | 10. 03443 | 8. 889587 | 8. 832616 | 8. 875903 |
| RABL3     | 6. 811435 | 6. 824699 | 6. 898803 | 5. 878962 | 5. 584823 | 5. 506038 |
| DNAJB9    | 6. 240029 | 6. 340639 | 6. 211146 | 7. 472732 | 7. 411146 | 7. 471988 |
| DHCR24    | 8. 927312 | 9. 014628 | 8. 933194 | 7. 778159 | 7. 793284 | 7. 742652 |
| AP1M1     | 7. 656401 | 7. 653417 | 7. 69998  | 6. 512647 | 6. 440253 | 6. 496385 |
| WLS       | 6. 727863 | 6. 7523   | 6. 787182 | 5. 606597 | 5. 535994 | 5. 565059 |
| SACM1L    | 9. 321679 | 9. 229866 | 9. 242012 | 8. 123696 | 8. 060454 | 8. 050719 |
| NEDD4     | 7. 231836 | 7. 222894 | 7. 243409 | 8. 426475 | 8. 376129 | 8. 450009 |
| MCM2      | 8. 256297 | 8. 265061 | 8. 285223 | 7. 110922 | 7. 054322 | 7. 08742  |
| PSME3     | 8. 300721 | 8. 179398 | 8. 218187 | 7. 05289  | 7. 00574  | 7. 08742  |
| NUDT12    | 5. 707913 | 5. 694596 | 5. 691606 | 4. 513251 | 4. 556566 | 4. 475711 |
| PAPPA     | 3. 815617 | 3. 786447 | 3. 880799 | 5. 247749 | 4. 64605  | 5. 128417 |
| AGPS      | 7. 333116 | 7. 246155 | 7. 439192 | 6. 266575 | 6. 054718 | 6. 157855 |
| PACSIN3   | 6. 603749 | 6. 597384 | 6. 663711 | 5. 442416 | 5. 326166 | 5. 557581 |
| HMGB3     | 9. 145886 | 9. 159904 | 9. 093699 | 7. 995139 | 7. 863073 | 8. 009511 |
| ITGA2     | 7. 422788 | 7. 498382 | 7. 490403 | 8. 632463 | 8. 623385 | 8. 684215 |
| ARHGAP42  | 4. 64264  | 4. 707528 | 4. 765024 | 5. 999898 | 5. 667527 | 5. 972399 |
| TM9SF3    | 8. 834465 | 8. 840226 | 8. 844086 | 7. 722674 | 7. 640675 | 7. 631797 |
| C15orf54  | 6. 34865  | 6. 561884 | 6. 549194 | 7. 659917 | 7. 703498 | 7. 619034 |
| ARID3B    | 5. 996136 | 5. 950561 | 6. 083699 | 7. 239959 | 7. 064643 | 7. 247774 |
| YOD1      | 8. 298749 | 8. 194991 | 8. 230724 | 9. 461086 | 9. 398627 | 9. 383523 |
| SEC14L1   | 7. 684487 | 7. 716018 | 7. 644137 | 8. 826915 | 8. 841681 | 8. 894126 |
| IGFBP4    | 6. 607253 | 6. 631721 | 6. 698993 | 5. 410934 | 5. 334416 | 5. 674686 |
| CENPH     | 8. 91411  | 8. 931869 | 8. 966051 | 7. 690003 | 7. 809567 | 7. 801473 |
| FRMD5     | 6. 713268 | 6. 76012  | 6. 843767 | 7. 995426 | 7. 877945 | 7. 954646 |
| HIVEP2    | 5. 94359  | 5. 725219 | 5. 75867  | 6. 99328  | 6. 986545 | 6. 958022 |
| CCDC181   | 6. 087585 | 6. 044346 | 6. 037884 | 7. 218906 | 7. 200662 | 7. 255228 |
| DHFR      | 9. 921561 | 9. 818797 | 9. 73851  | 8. 658997 | 8. 645507 | 8. 672186 |
| C8orf46   | 3. 378325 | 3. 518431 | 3. 192113 | 4. 623222 | 4. 421665 | 4. 528691 |
| SMARCE1   | 8. 509291 | 8. 391368 | 8. 450668 | 7. 269269 | 7. 275808 | 7. 329334 |
| RCHY1     | 7. 326091 | 7. 181609 | 7. 367745 | 8. 486022 | 8. 431656 | 8. 428604 |
| CYP1A1    | 6. 868786 | 6. 824908 | 6. 804939 | 8. 029787 | 7. 906281 | 8. 029802 |
| LATS2     | 7. 477385 | 7. 499743 | 7. 428472 | 8. 685789 | 8. 51336  | 8. 673319 |
| STXBP6    | 5. 883362 | 6. 051738 | 6. 094423 | 7. 193105 | 7. 099744 | 7. 202325 |
| NCEH1     | 6. 138468 | 6. 299901 | 6. 318687 | 7. 426077 | 7. 347126 | 7. 448776 |
| EFTUD2    | 9. 345774 | 9. 347251 | 9. 314769 | 8. 211569 | 8. 115461 | 8. 216032 |

|           |           |           |           |           |           |           |
|-----------|-----------|-----------|-----------|-----------|-----------|-----------|
| F2R       | 7. 823768 | 7. 847657 | 7. 843136 | 9. 051833 | 8. 946947 | 8. 9803   |
| PCGF2     | 8. 569125 | 8. 555834 | 8. 562922 | 7. 448118 | 7. 399052 | 7. 377794 |
| MYSM1     | 5. 684836 | 5. 680513 | 5. 732325 | 6. 912895 | 6. 832957 | 6. 8126   |
| LIFR      | 4. 837334 | 5. 11528  | 5. 015968 | 6. 24454  | 6. 118268 | 6. 065078 |
| GNB1      | 9. 029053 | 9. 042465 | 9. 037717 | 7. 892776 | 7. 836029 | 7. 923261 |
| TNFSF4    | 4. 772376 | 5. 48635  | 4. 984679 | 6. 325411 | 6. 275125 | 6. 094423 |
| RBM12     | 7. 055723 | 6. 962272 | 6. 988638 | 5. 858506 | 5. 797166 | 5. 899893 |
| ABHD5     | 5. 480976 | 5. 523416 | 5. 742614 | 6. 81417  | 6. 650442 | 6. 730307 |
| INCENP    | 8. 126245 | 8. 244317 | 8. 097193 | 7. 053929 | 6. 978357 | 6. 988669 |
| TBC1D4    | 6. 789736 | 6. 771178 | 6. 742381 | 7. 928746 | 7. 895311 | 7. 925408 |
| KLRC1     | 4. 0951   | 4. 062119 | 4. 127026 | 5. 272373 | 5. 227782 | 5. 224543 |
| PSAT1     | 8. 883839 | 8. 846887 | 8. 768725 | 7. 717672 | 7. 659927 | 7. 681494 |
| UNG       | 8. 16827  | 8. 089213 | 8. 114756 | 6. 971496 | 6. 990168 | 6. 971496 |
| HNRNPA3   | 8. 559644 | 8. 509565 | 8. 507192 | 7. 382582 | 7. 394492 | 7. 363032 |
| RAB8B     | 6. 302484 | 6. 234174 | 6. 196744 | 7. 447412 | 7. 40699  | 7. 314594 |
| MPRIP     | 9. 231773 | 9. 256804 | 9. 285234 | 8. 119272 | 8. 061355 | 8. 158174 |
| NOCT      | 5. 004439 | 5. 059203 | 5. 196211 | 6. 225523 | 6. 186048 | 6. 282234 |
| NHLH2     | 4. 865955 | 4. 876779 | 4. 920286 | 6. 099686 | 6. 011126 | 5. 985938 |
| LMNB1     | 5. 626199 | 5. 562279 | 5. 65671  | 4. 551273 | 4. 428561 | 4. 431877 |
| PTGER4    | 5. 124362 | 4. 985838 | 4. 948771 | 6. 281173 | 6. 047207 | 6. 159084 |
| C9orf40   | 6. 716475 | 6. 684634 | 6. 728506 | 5. 573611 | 5. 491923 | 5. 636043 |
| EEA1      | 6. 640384 | 6. 673159 | 6. 8171   | 7. 860892 | 7. 795439 | 7. 900965 |
| ROPN1L    | 4. 350599 | 4. 221141 | 4. 670419 | 5. 77033  | 5. 41588  | 5. 481688 |
| CEBPD     | 6. 782038 | 6. 802729 | 6. 731238 | 7. 914408 | 7. 846291 | 7. 977819 |
| TYW5      | 6. 593063 | 6. 631733 | 6. 714189 | 7. 758831 | 7. 753751 | 7. 845863 |
| KIAA1549L | 7. 366273 | 7. 46097  | 7. 491293 | 6. 317417 | 6. 291346 | 6. 291346 |
| TNRC6A    | 8. 717205 | 8. 726685 | 8. 755578 | 9. 8918   | 9. 856782 | 9. 86734  |
| AIMP2     | 10. 14841 | 10. 17837 | 10. 15204 | 9. 070524 | 8. 909868 | 9. 085064 |
| POLE2     | 7. 880897 | 7. 839332 | 7. 846193 | 6. 704998 | 6. 695216 | 6. 753719 |
| CLK4      | 5. 817579 | 5. 89486  | 5. 882632 | 7. 046952 | 6. 991628 | 6. 965948 |
| NTN4      | 5. 189638 | 5. 092468 | 5. 407565 | 6. 314016 | 6. 432998 | 6. 349474 |
| COL12A1   | 6. 844314 | 6. 844314 | 6. 968309 | 7. 968335 | 7. 932427 | 8. 160437 |
| SPC25     | 6. 852565 | 6. 745545 | 6. 931456 | 5. 822615 | 5. 543758 | 5. 763472 |
| THAP2     | 5. 186009 | 5. 554446 | 5. 59118  | 6. 571645 | 6. 464815 | 6. 687772 |
| TMX1      | 7. 230383 | 7. 226318 | 7. 316229 | 6. 175885 | 6. 035825 | 6. 171278 |
| SMAD5     | 7. 670486 | 7. 701599 | 7. 629786 | 6. 534275 | 6. 505036 | 6. 575323 |
| ENAH      | 7. 255985 | 7. 330975 | 7. 431962 | 6. 232654 | 6. 213741 | 6. 188776 |
| HIST1H2AC | 6. 883048 | 6. 910684 | 7. 044696 | 8. 09062  | 8. 060458 | 8. 066821 |
| DCAF16    | 7. 988474 | 7. 912227 | 7. 798251 | 6. 805152 | 6. 830153 | 6. 684736 |
| CCDC148   | 3. 667283 | 3. 582586 | 3. 579546 | 4. 755859 | 4. 733478 | 4. 717961 |
| ZNF383    | 4. 683448 | 4. 700253 | 4. 761163 | 5. 763644 | 5. 752505 | 6. 005811 |
| MCL1      | 9. 172572 | 9. 214197 | 9. 204118 | 10. 38511 | 10. 2642  | 10. 31244 |
| COPS7A    | 8. 738773 | 8. 736837 | 8. 811745 | 7. 678386 | 7. 580238 | 7. 659191 |
| FBXW7     | 7. 293256 | 7. 263646 | 7. 310174 | 8. 422068 | 8. 393268 | 8. 420802 |
| ZNF697    | 8. 160268 | 8. 179267 | 8. 161652 | 9. 324564 | 9. 194055 | 9. 349876 |
| SUDS3     | 7. 01734  | 6. 946371 | 6. 955714 | 5. 842424 | 5. 841187 | 5. 871574 |
| ANKRD13C  | 5. 189638 | 5. 019174 | 5. 015846 | 6. 218215 | 6. 118848 | 6. 24741  |
| NUS1      | 5. 919598 | 5. 922239 | 5. 970525 | 4. 869012 | 4. 623606 | 4. 960455 |
| HIST1H1A  | 6. 478288 | 6. 282234 | 6. 258733 | 5. 024128 | 5. 420181 | 5. 22221  |
| PTHLH     | 3. 403148 | 3. 398246 | 3. 552936 | 4. 703599 | 4. 442105 | 4. 560695 |
| MYO5B     | 5. 195973 | 5. 429019 | 5. 526706 | 6. 642583 | 6. 441094 | 6. 417358 |

|           |           |           |           |           |           |           |
|-----------|-----------|-----------|-----------|-----------|-----------|-----------|
| DHCR7     | 7. 212027 | 7. 260831 | 7. 299021 | 6. 168122 | 6. 187757 | 6. 069717 |
| GSTCD     | 7. 834218 | 7. 738638 | 7. 800531 | 6. 662093 | 6. 625422 | 6. 739646 |
| FDCSP     | 5. 156313 | 5. 149555 | 5. 073046 | 6. 435061 | 5. 933048 | 6. 354844 |
| FBXL17    | 8. 184323 | 8. 157653 | 8. 313456 | 7. 12408  | 7. 045645 | 7. 142436 |
| SIPA1L2   | 6. 523516 | 6. 510109 | 6. 570464 | 7. 668332 | 7. 603751 | 7. 663878 |
| FAM122B   | 7. 964848 | 7. 911766 | 7. 955968 | 6. 906967 | 6. 708318 | 6. 886468 |
| PCL0      | 8. 744266 | 8. 799256 | 8. 789477 | 9. 92505  | 9. 827345 | 9. 907895 |
| HIST1H2AC | 4. 405346 | 4. 374309 | 4. 681698 | 5. 440925 | 5. 588693 | 5. 758647 |
| IL24      | 8. 600721 | 8. 583413 | 8. 603802 | 9. 739927 | 9. 67423  | 9. 700607 |
| BMP2      | 5. 217146 | 4. 779539 | 5. 253441 | 6. 213719 | 6. 032143 | 6. 330342 |
| MAP3K7CL  | 5. 073046 | 5. 191257 | 5. 268655 | 6. 204432 | 6. 327542 | 6. 316882 |
| ABCC6 /// | 4. 357487 | 4. 506751 | 4. 440279 | 3. 131866 | 3. 324764 | 3. 532966 |
| CLDN1     | 5. 621974 | 5. 130384 | 5. 511491 | 6. 554335 | 6. 500255 | 6. 519927 |
| CLIP4     | 7. 36628  | 7. 38956  | 7. 443355 | 8. 550281 | 8. 410941 | 8. 548222 |
| ADCY9     | 7. 272306 | 7. 367119 | 7. 455242 | 6. 345301 | 6. 186648 | 6. 25736  |
| PELI1     | 6. 89356  | 6. 938547 | 6. 972897 | 8. 041704 | 7. 991504 | 8. 075908 |
| TMEM14A   | 8. 679664 | 8. 67847  | 8. 708523 | 7. 61578  | 7. 579882 | 7. 568672 |
| MSL3P1    | 7. 104603 | 7. 052555 | 7. 21298  | 6. 138481 | 5. 815799 | 6. 114663 |
| NCBP2     | 8. 278436 | 8. 279415 | 8. 233251 | 7. 197124 | 7. 111963 | 7. 181407 |
| EPHA4     | 5. 410568 | 5. 469754 | 5. 544164 | 6. 517719 | 6. 584133 | 6. 6215   |
| FJX1      | 7. 907923 | 7. 94372  | 7. 959541 | 9. 041226 | 9. 043394 | 9. 025211 |
| ZNF800    | 6. 318687 | 6. 130333 | 6. 34725  | 7. 438499 | 7. 209633 | 7. 446404 |
| LARP4     | 8. 551803 | 8. 568357 | 8. 508259 | 7. 446211 | 7. 373154 | 7. 511653 |
| LOXL4     | 7. 430753 | 7. 446994 | 7. 457087 | 8. 5491   | 8. 474398 | 8. 604232 |
| MZT1      | 9. 091046 | 9. 059948 | 9. 083325 | 7. 991804 | 7. 966163 | 7. 986989 |
| ZNF283    | 6. 532544 | 6. 645215 | 6. 705809 | 7. 647633 | 7. 687443 | 7. 83629  |
| ZNF79     | 5. 147745 | 5. 655539 | 5. 28607  | 6. 455562 | 6. 424886 | 6. 494236 |
| HNRNPDL   | 8. 436584 | 8. 427172 | 8. 422292 | 7. 369988 | 7. 237086 | 7. 398049 |
| PCGF5     | 5. 157881 | 4. 962994 | 5. 280316 | 6. 400232 | 6. 051468 | 6. 22833  |
| GBP1      | 3. 638267 | 3. 61573  | 3. 767949 | 4. 949315 | 4. 659951 | 4. 69106  |
| RBMS2     | 7. 494228 | 7. 412158 | 7. 480277 | 6. 342737 | 6. 377857 | 6. 389376 |
| KIAA0430  | 8. 72575  | 8. 704489 | 8. 704971 | 7. 670996 | 7. 545048 | 7. 644244 |
| LPCAT2    | 7. 652222 | 7. 676796 | 7. 721763 | 8. 780259 | 8. 73896  | 8. 804523 |
| NEIL2     | 7. 146117 | 7. 197496 | 7. 176247 | 6. 336802 | 5. 886851 | 6. 028324 |
| SOCS5     | 7. 747256 | 7. 781637 | 7. 90166  | 8. 901849 | 8. 847282 | 8. 948367 |
| LMBRD2    | 4. 92273  | 4. 931398 | 4. 893379 | 6. 063151 | 5. 918755 | 6. 032416 |
| ZNF260    | 5. 027046 | 4. 994356 | 5. 140119 | 6. 147618 | 6. 141176 | 6. 139488 |
| FNDC3A    | 7. 668468 | 7. 626339 | 7. 625263 | 8. 748212 | 8. 698628 | 8. 735098 |
| AGMO      | 5. 028739 | 5. 193645 | 5. 180755 | 4. 211507 | 3. 830202 | 4. 100877 |
| DCAF17    | 3. 384186 | 3. 384202 | 3. 303178 | 4. 505625 | 4. 533159 | 4. 291028 |
| ABHD3     | 7. 194556 | 7. 083215 | 7. 033644 | 6. 112985 | 5. 918805 | 6. 021408 |
| ANO1      | 7. 471485 | 7. 450164 | 7. 433776 | 6. 445836 | 6. 235064 | 6. 418764 |
| THBS1     | 8. 694331 | 8. 758217 | 8. 671747 | 9. 82963  | 9. 765053 | 9. 784658 |
| PTRHD1    | 9. 398216 | 9. 395748 | 9. 376774 | 8. 34292  | 8. 269903 | 8. 304774 |
| LTBP2     | 5. 614573 | 6. 014527 | 6. 091446 | 6. 951384 | 6. 939528 | 7. 079752 |
| EDA2R     | 6. 78196  | 6. 829957 | 6. 792328 | 7. 959343 | 7. 820183 | 7. 874652 |
| ARL5B     | 6. 953065 | 6. 904154 | 7. 09206  | 8. 097969 | 7. 954892 | 8. 144591 |
| PAPOLA    | 8. 47977  | 8. 419369 | 8. 408092 | 7. 340355 | 7. 345025 | 7. 375006 |
| PTPRG     | 6. 999373 | 7. 070048 | 7. 03885  | 8. 135462 | 8. 13297  | 8. 084692 |
| RNMT      | 6. 743909 | 6. 768679 | 6. 808269 | 7. 852105 | 7. 803956 | 7. 909588 |
| LMNB1 /// | 6. 579879 | 6. 65815  | 6. 545798 | 5. 524468 | 5. 343401 | 5. 67484  |

|          |          |          |          |          |          |          |
|----------|----------|----------|----------|----------|----------|----------|
| ZNF441   | 7.424895 | 7.538099 | 7.541458 | 8.669213 | 8.546395 | 8.527219 |
| RIOK3    | 7.622527 | 7.775985 | 7.782844 | 8.795497 | 8.766015 | 8.857205 |
| CHD6     | 7.244411 | 7.179304 | 7.180765 | 6.151583 | 6.091794 | 6.126184 |
| RAPH1    | 6.841189 | 6.937818 | 6.971111 | 7.984875 | 7.966515 | 8.025989 |
| ABCC3    | 5.243091 | 5.179458 | 5.111892 | 6.284108 | 6.183492 | 6.293743 |
| POT1     | 3.657238 | 3.86281  | 3.694607 | 2.531963 | 2.630974 | 2.824931 |
| KIAA1143 | 8.62456  | 8.560896 | 8.578049 | 7.503508 | 7.494069 | 7.541152 |
| GAD1     | 3.952304 | 3.765513 | 3.722229 | 5.210668 | 4.800357 | 4.645133 |
| LAMB3    | 6.37184  | 6.469021 | 6.301593 | 7.430648 | 7.349367 | 7.563415 |
| SUSD1    | 4.973868 | 5.056024 | 5.181132 | 6.210288 | 6.011216 | 6.189934 |
| DICER1   | 7.206757 | 7.170834 | 7.186228 | 8.272319 | 8.248095 | 8.241324 |
| TBL1XR1  | 10.03366 | 10.01852 | 10.03411 | 9.017196 | 8.907887 | 8.963742 |
| SPRED1   | 6.731617 | 6.633024 | 6.844166 | 5.614365 | 5.71424  | 5.684132 |
| RHOB     | 7.96743  | 7.976056 | 7.902745 | 9.05675  | 8.969377 | 9.014029 |
| FHL2     | 7.730991 | 7.808293 | 7.832219 | 8.89604  | 8.794325 | 8.873388 |
| ATG5     | 5.739422 | 5.671085 | 5.61808  | 4.650332 | 4.512549 | 4.674634 |
| ATAD2    | 7.500027 | 7.497793 | 7.421829 | 6.428351 | 6.377857 | 6.428985 |
| ACVR2A   | 6.402768 | 6.386743 | 6.481056 | 7.33231  | 7.454411 | 7.666495 |
| DIAPH2   | 4.526949 | 4.663613 | 4.860703 | 5.786748 | 5.624252 | 5.822382 |
| WDFY3    | 6.424276 | 6.394833 | 6.495745 | 7.525778 | 7.415499 | 7.554892 |
| MRPL45   | 9.159728 | 9.162808 | 9.192331 | 8.07738  | 8.089213 | 8.168252 |
| EPT1     | 7.29971  | 7.2514   | 7.258801 | 8.354367 | 8.288353 | 8.347004 |
| ABCY9    | 6.529374 | 6.527539 | 6.529374 | 7.60179  | 7.552835 | 7.610855 |
| OVOS /// | 8.087069 | 7.975874 | 8.007477 | 7.008648 | 6.862069 | 7.021777 |
| CDC37L1  | 7.891457 | 7.793132 | 7.855768 | 8.953915 | 8.861922 | 8.89921  |
| ZFC3H1   | 3.913167 | 3.697297 | 3.606323 | 4.977064 | 4.760841 | 4.652793 |
| GRINA    | 7.619582 | 7.729883 | 7.678046 | 6.637285 | 6.531314 | 6.695749 |
| ERCC6    | 5.370578 | 5.39076  | 5.619261 | 6.540115 | 6.500681 | 6.50264  |
| WHAMM    | 7.684059 | 7.667248 | 7.599886 | 8.704974 | 8.704271 | 8.700205 |
| MCM7     | 8.647145 | 8.695301 | 8.747221 | 7.661296 | 7.556848 | 7.715076 |
| C3orf52  | 5.808202 | 5.58926  | 5.576751 | 6.65169  | 6.757344 | 6.720073 |
| CYP1B1   | 5.302663 | 4.944166 | 5.065047 | 6.182258 | 6.051639 | 6.230942 |
| PARD6B   | 6.315439 | 6.126793 | 6.255205 | 7.261586 | 7.308951 | 7.278792 |
| SMURF2   | 8.525976 | 8.504354 | 8.482327 | 9.525863 | 9.568382 | 9.568354 |
| P3H2     | 5.4787   | 5.727796 | 5.772637 | 6.792193 | 6.714187 | 6.619546 |
| GUCD1    | 7.749464 | 7.784158 | 7.816297 | 6.699638 | 6.708602 | 6.796949 |
| FST      | 8.658204 | 8.585923 | 8.647793 | 7.610242 | 7.474352 | 7.664009 |
| PPM1A    | 7.077174 | 7.046146 | 7.047033 | 6.027174 | 5.934615 | 6.065543 |
| RNF26    | 8.694024 | 8.579339 | 8.647388 | 7.568642 | 7.516984 | 7.694363 |
| IL6ST    | 5.701916 | 5.744584 | 5.607345 | 6.811352 | 6.590345 | 6.792193 |
| SNRPD1   | 7.992865 | 8.106567 | 8.108225 | 7.111548 | 6.91284  | 7.049822 |
| AJUBA    | 8.164878 | 8.136349 | 8.148896 | 9.208863 | 9.180104 | 9.19437  |
| HDAC9    | 5.218087 | 5.285428 | 5.40519  | 6.513399 | 6.169562 | 6.356964 |
| NDUFS7   | 9.228817 | 9.329129 | 9.274959 | 8.210272 | 8.248705 | 8.243926 |
| CHRM3    | 6.061262 | 6.050684 | 6.088244 | 7.173464 | 7.012737 | 7.13667  |
| IL15     | 4.281111 | 4.263913 | 4.19725  | 5.330316 | 5.398286 | 5.130284 |
| GPR39    | 4.319723 | 3.995307 | 4.353897 | 5.260962 | 5.199213 | 5.324858 |
| STYX     | 6.898075 | 6.86888  | 6.890568 | 5.870252 | 5.848753 | 5.822481 |
| CD274    | 4.952054 | 4.937193 | 5.204756 | 5.91038  | 5.913879 | 6.380308 |
| HRH1     | 6.34865  | 6.030944 | 6.329347 | 7.422436 | 7.12408  | 7.272816 |
| SLFN12   | 7.376162 | 7.381721 | 7.373964 | 8.425008 | 8.394797 | 8.422329 |

|           |          |          |          |          |          |          |
|-----------|----------|----------|----------|----------|----------|----------|
| EPHX3     | 7.005931 | 7.076359 | 7.158719 | 8.138683 | 8.079229 | 8.131832 |
| TAB3      | 6.217164 | 6.188125 | 6.266688 | 7.329235 | 7.207997 | 7.243137 |
| SULF2     | 8.421895 | 8.342663 | 8.316158 | 9.411157 | 9.385719 | 9.391009 |
| DGKH      | 4.81708  | 4.700253 | 4.951002 | 5.958412 | 5.779589 | 5.835885 |
| CTSV      | 4.907167 | 4.890549 | 5.029539 | 3.900157 | 3.972107 | 3.850256 |
| CBS /// C | 8.819559 | 8.783636 | 8.810546 | 7.806308 | 7.731382 | 7.772159 |
| SLC6A15   | 7.486659 | 7.528261 | 7.602938 | 6.497786 | 6.429571 | 6.586973 |
| DUSP9     | 6.989214 | 7.175775 | 7.07499  | 6.051564 | 6.058796 | 6.030339 |
| FGD4      | 5.193272 | 5.149555 | 5.417706 | 6.225523 | 6.321848 | 6.310451 |
| INSIG1    | 8.026652 | 7.920829 | 7.997218 | 6.844792 | 7.018705 | 6.990747 |
| ZFP36     | 8.601839 | 8.621017 | 8.715966 | 9.686411 | 9.682615 | 9.659754 |
| PER2      | 5.784074 | 6.009189 | 6.039823 | 6.987139 | 6.92458  | 7.009965 |
| PDLIM5    | 8.196781 | 8.225357 | 8.20055  | 9.265772 | 9.211402 | 9.232652 |
| ELL2      | 7.232481 | 7.128142 | 7.204406 | 8.199658 | 8.160906 | 8.290774 |
| GPD1L     | 7.297944 | 7.387078 | 7.345412 | 6.358564 | 6.225425 | 6.361044 |
| ZNF33B    | 5.49974  | 5.524803 | 5.500078 | 6.558705 | 6.471793 | 6.578545 |
| CSRNP1    | 7.29802  | 7.442912 | 7.420878 | 8.28616  | 8.477934 | 8.481274 |
| ACSL5     | 4.57099  | 4.460956 | 4.250327 | 5.468396 | 5.424827 | 5.470844 |
| PDP1      | 9.173258 | 9.1747   | 9.13568  | 10.19702 | 10.15094 | 10.21635 |
| MAP3K3    | 7.409639 | 7.477533 | 7.473451 | 6.499459 | 6.330799 | 6.449776 |
| KCTD10    | 8.694157 | 8.70101  | 8.727397 | 7.725599 | 7.632713 | 7.687786 |
| EID1      | 10.2625  | 10.30611 | 10.22709 | 9.269076 | 9.272308 | 9.178697 |
| GRIP1     | 4.832017 | 4.765299 | 4.903653 | 5.747218 | 5.922741 | 5.905137 |
| CDKN3     | 7.208873 | 7.144618 | 7.096861 | 6.069489 | 6.224373 | 6.083149 |
| FAM13B    | 7.083507 | 7.112415 | 7.115547 | 8.09977  | 8.139887 | 8.140412 |
| GINS4     | 8.039751 | 7.990922 | 8.000089 | 6.98797  | 6.917946 | 7.05655  |
| JADE2     | 8.89758  | 8.905883 | 8.92159  | 7.934485 | 7.793857 | 7.930718 |
| PRKCE     | 6.978153 | 7.091086 | 6.977874 | 8.080625 | 7.938256 | 8.093673 |
| PRKCA     | 5.21829  | 5.36402  | 5.341773 | 6.286401 | 6.330379 | 6.372063 |
| IKZF2     | 3.980472 | 4.188548 | 4.43338  | 5.299097 | 5.067024 | 5.299097 |
| CXCL11    | 4.977107 | 4.859422 | 5.162345 | 6.039688 | 5.892145 | 6.129294 |
| 6-Mar     | 8.309085 | 8.214473 | 8.250018 | 7.307501 | 7.255426 | 7.150807 |
| TNIK      | 5.109327 | 5.074481 | 5.276875 | 6.075984 | 6.206113 | 6.23832  |
| EAPP      | 7.930122 | 7.934115 | 7.918583 | 7.003163 | 6.785486 | 6.935393 |
| ST7L      | 5.219788 | 5.427431 | 5.408213 | 6.340922 | 6.379753 | 6.391202 |
| ETNK1     | 7.715136 | 7.731765 | 7.678595 | 8.733389 | 8.677959 | 8.769523 |
| MND1      | 7.44756  | 7.474412 | 7.528828 | 6.422877 | 6.459991 | 6.51416  |
| IRF1      | 6.731531 | 6.989128 | 6.654496 | 7.899733 | 7.708068 | 7.820812 |
| ASPH      | 6.942586 | 6.885628 | 6.891532 | 5.901762 | 5.874017 | 5.894546 |
| C18orf25  | 6.179306 | 6.288667 | 6.34954  | 7.337835 | 7.218699 | 7.308949 |
| CDC25C    | 7.265946 | 7.24919  | 7.261837 | 6.324013 | 6.097937 | 6.307585 |
| SDHD      | 9.659232 | 9.660809 | 9.599078 | 8.647815 | 8.616346 | 8.607793 |
| YY1       | 7.557932 | 7.680628 | 7.706222 | 6.631721 | 6.611528 | 6.659269 |
| EFR3A     | 5.954091 | 5.941001 | 5.981522 | 7.095752 | 6.799057 | 7.021253 |
| MB21D2    | 6.45883  | 6.247871 | 6.30397  | 7.404147 | 7.30419  | 7.341062 |
| INTU      | 4.465351 | 4.335216 | 4.656218 | 5.606761 | 5.3135   | 5.574875 |
| MIS18BP1  | 7.138079 | 6.904045 | 6.69089  | 5.805764 | 5.966674 | 5.922724 |
| UBA6      | 5.109855 | 5.432327 | 5.303727 | 6.330554 | 6.145679 | 6.406177 |
| GINS1     | 9.726787 | 9.67388  | 9.713355 | 8.716938 | 8.662196 | 8.70101  |
| LIMA1     | 9.091129 | 9.108521 | 9.066638 | 10.11137 | 10.09444 | 10.08878 |
| TES       | 8.037301 | 8.02777  | 8.098893 | 9.09055  | 8.99053  | 9.108038 |

|          |           |           |           |           |           |           |
|----------|-----------|-----------|-----------|-----------|-----------|-----------|
| ALCAM    | 4. 340304 | 4. 140477 | 4. 400657 | 5. 364293 | 5. 284631 | 5. 257633 |
| RSAD2    | 4. 223311 | 4. 201768 | 4. 080117 | 5. 041447 | 5. 15773  | 5. 329416 |
| CD164    | 8. 603448 | 8. 64475  | 8. 59716  | 9. 636021 | 9. 584659 | 9. 635811 |
| GIMAP2   | 5. 055963 | 4. 834615 | 4. 968311 | 6. 006485 | 5. 889867 | 5. 973354 |
| ARHGEF9  | 5. 830717 | 5. 776522 | 5. 864733 | 4. 436904 | 5. 009172 | 5. 016324 |
| CDC45    | 7. 086766 | 7. 040592 | 7. 062288 | 6. 078885 | 5. 997732 | 6. 103762 |
| MTHFD2   | 10. 20666 | 10. 18596 | 10. 17781 | 9. 249015 | 9. 120475 | 9. 19331  |
| NFATC2IP | 7. 109172 | 6. 974748 | 7. 132691 | 6. 096761 | 5. 93509  | 6. 17721  |
| PRIM1    | 8. 843427 | 8. 817438 | 8. 854541 | 7. 84341  | 7. 78788  | 7. 879693 |
| MTMR4    | 7. 830758 | 7. 960948 | 7. 854911 | 6. 895672 | 6. 886662 | 6. 862069 |
| EIF5     | 5. 657725 | 5. 636033 | 5. 57387  | 4. 69824  | 4. 572583 | 4. 595352 |
| EDN1     | 3. 856317 | 3. 807831 | 4. 138145 | 4. 955982 | 4. 818552 | 5. 026106 |
| MAP3K2   | 6. 348648 | 6. 49198  | 6. 510864 | 7. 472619 | 7. 372589 | 7. 503796 |
| XIAP     | 5. 93063  | 5. 871773 | 5. 755854 | 6. 845438 | 6. 82737  | 6. 882553 |
| POLR3G   | 7. 725626 | 7. 814359 | 7. 797884 | 6. 832217 | 6. 754831 | 6. 755735 |
| HK2      | 8. 77372  | 8. 707122 | 8. 822208 | 7. 824171 | 7. 758319 | 7. 726559 |
| CRY1     | 8. 592448 | 8. 552986 | 8. 485917 | 9. 5687   | 9. 514462 | 9. 540128 |
| FUCA1    | 6. 083488 | 6. 161148 | 6. 247963 | 7. 258017 | 7. 045164 | 7. 180353 |
| ZBTB10   | 5. 653764 | 5. 709531 | 5. 680612 | 6. 700525 | 6. 626863 | 6. 703671 |
| CDCA5    | 9. 401747 | 9. 439484 | 9. 365754 | 8. 406548 | 8. 385203 | 8. 428319 |
| DSN1     | 9. 039001 | 9. 02334  | 9. 052187 | 8. 08833  | 7. 991504 | 8. 048326 |
| WWC1     | 6. 699077 | 6. 82211  | 6. 811342 | 7. 877701 | 7. 675532 | 7. 764768 |
| CDKN2A   | 7. 041939 | 6. 966352 | 7. 121947 | 8. 072339 | 8. 02306  | 8. 016791 |
| NUCKS1   | 8. 85398  | 8. 915888 | 8. 913091 | 8. 013089 | 7. 806139 | 7. 882903 |
| TCN1     | 5. 501371 | 5. 702616 | 5. 798554 | 6. 626847 | 6. 64343  | 6. 705911 |
| COQ10A   | 8. 108702 | 8. 096311 | 8. 104228 | 7. 17821  | 7. 033824 | 7. 128256 |
| ZFP30    | 3. 952035 | 3. 860876 | 4. 028919 | 4. 943658 | 4. 922769 | 4. 941059 |
| STK38L   | 5. 243226 | 5. 270093 | 5. 398171 | 4. 118345 | 4. 449729 | 4. 380089 |
| NIPAL1   | 5. 624323 | 5. 736211 | 5. 797665 | 6. 631721 | 6. 700381 | 6. 787596 |
| CYB5B    | 5. 847044 | 5. 957964 | 6. 008573 | 4. 989441 | 4. 834299 | 5. 029539 |
| ZNF860   | 4. 758892 | 4. 849441 | 4. 983847 | 5. 830967 | 5. 957964 | 5. 759801 |
| PRKAB2   | 6. 12576  | 6. 22243  | 6. 134693 | 7. 19895  | 7. 04988  | 7. 189781 |
| CTSS     | 5. 282242 | 5. 326485 | 5. 404782 | 6. 176611 | 6. 377857 | 6. 413986 |
| AVL9     | 8. 005037 | 7. 927373 | 8. 020033 | 9. 014867 | 8. 923823 | 8. 968403 |
| TMEM87B  | 6. 442694 | 6. 436303 | 6. 51199  | 7. 474209 | 7. 385039 | 7. 481198 |
| SLC41A2  | 5. 421589 | 5. 60552  | 5. 474083 | 6. 497349 | 6. 418893 | 6. 532808 |
| RBL2     | 7. 861168 | 7. 884    | 7. 805437 | 6. 805152 | 6. 899163 | 6. 898688 |
| INTS6    | 5. 414879 | 5. 41194  | 5. 370876 | 6. 457207 | 6. 234203 | 6. 450288 |
| ADGRG6   | 4. 886486 | 4. 711759 | 4. 795607 | 5. 800416 | 5. 812486 | 5. 722946 |
| PKM      | 5. 491441 | 5. 397871 | 5. 514229 | 6. 431773 | 6. 356887 | 6. 554439 |
| SPC24    | 8. 177507 | 8. 273008 | 8. 244323 | 7. 345531 | 7. 194718 | 7. 219985 |
| APTX     | 7. 108868 | 7. 256449 | 7. 236829 | 6. 229146 | 6. 194422 | 6. 25101  |
| NF1      | 5. 268733 | 5. 29043  | 5. 368224 | 6. 295983 | 6. 269448 | 6. 288893 |
| SLC35F5  | 6. 889027 | 6. 824344 | 6. 849316 | 7. 855887 | 7. 795673 | 7. 837961 |
| CLK1     | 7. 300502 | 7. 321438 | 7. 439058 | 8. 326623 | 8. 232172 | 8. 425835 |
| SLC7A6   | 6. 476904 | 6. 47144  | 6. 56859  | 7. 393022 | 7. 458931 | 7. 585215 |
| EGR4     | 4. 772376 | 4. 626032 | 4. 801389 | 5. 870252 | 5. 633921 | 5. 614573 |
| DNA2     | 7. 076772 | 6. 984981 | 7. 041769 | 6. 073152 | 6. 098323 | 6. 014248 |
| PSMD12   | 9. 623882 | 9. 571753 | 9. 540026 | 8. 603618 | 8. 572376 | 8. 641953 |
| MKI67    | 8. 867006 | 8. 851713 | 8. 850953 | 7. 899134 | 7. 840029 | 7. 91364  |
| FBX05    | 8. 742725 | 8. 749645 | 8. 785678 | 7. 789672 | 7. 753751 | 7. 819009 |

|           |           |           |           |           |           |           |
|-----------|-----------|-----------|-----------|-----------|-----------|-----------|
| ZNF429    | 5. 949271 | 5. 961269 | 5. 969361 | 7. 128395 | 6. 775049 | 6. 892001 |
| CCL3P1 // | 5. 129697 | 5. 433861 | 5. 042028 | 6. 08135  | 6. 062197 | 6. 368916 |
| CPEB3     | 6. 13946  | 6. 114355 | 6. 257797 | 7. 231523 | 7. 088254 | 7. 098504 |
| POLR2C    | 9. 074806 | 9. 145763 | 9. 064497 | 8. 146922 | 8. 119699 | 8. 112001 |
| MLLT6     | 7. 264921 | 7. 303748 | 7. 397035 | 6. 368337 | 6. 32241  | 6. 368524 |
| NEIL3     | 5. 280651 | 5. 426108 | 5. 126342 | 4. 634384 | 4. 02861  | 4. 265514 |
| MRE11A    | 5. 070186 | 4. 928735 | 5. 073046 | 4. 023707 | 3. 97399  | 4. 170569 |
| PLCXD1    | 8. 220029 | 8. 253055 | 8. 226524 | 7. 309513 | 7. 209258 | 7. 27747  |
| EEF1E1 // | 9. 201198 | 9. 194018 | 9. 191844 | 8. 285848 | 8. 186686 | 8. 212556 |
| ALDH5A1   | 5. 940074 | 5. 98949  | 6. 014367 | 4. 959808 | 5. 200666 | 4. 883123 |
| CAMK2G    | 7. 298871 | 7. 365703 | 7. 350397 | 6. 365116 | 6. 280644 | 6. 471053 |
| TOR3A     | 6. 679334 | 6. 859164 | 6. 867533 | 5. 810411 | 5. 761181 | 5. 937556 |
| ZNF461    | 3. 813122 | 3. 502987 | 3. 969463 | 4. 827328 | 4. 544038 | 4. 808909 |
| SMCO4     | 5. 512174 | 5. 461062 | 5. 486281 | 4. 604409 | 4. 229498 | 4. 730998 |
| FOXO1     | 5. 698669 | 5. 709531 | 5. 776775 | 6. 719565 | 6. 579879 | 6. 779117 |
| CCDC85B   | 7. 497379 | 7. 63458  | 7. 448461 | 6. 616781 | 6. 584397 | 6. 487005 |
| GMNN      | 9. 632753 | 9. 616565 | 9. 630995 | 8. 754314 | 8. 584327 | 8. 650047 |
| CHAF1A    | 9. 020513 | 9. 067751 | 9. 012642 | 8. 111115 | 8. 007513 | 8. 091364 |
| WDR4      | 4. 420206 | 4. 375346 | 4. 525782 | 5. 340161 | 5. 485249 | 5. 386803 |
| BAZ2B     | 5. 86422  | 5. 932407 | 5. 830249 | 6. 864952 | 6. 792434 | 6. 858659 |
| ERCC6-PGE | 6. 507696 | 6. 550571 | 6. 562815 | 7. 546866 | 7. 384638 | 7. 574986 |
| RBMS1     | 8. 113877 | 8. 054549 | 8. 216298 | 9. 143782 | 9. 046107 | 9. 079286 |
| RGS4      | 4. 526476 | 4. 546642 | 4. 474734 | 5. 510777 | 5. 40527  | 5. 514204 |
| PDIK1L    | 7. 346276 | 7. 416152 | 7. 417523 | 6. 423    | 6. 317726 | 6. 559255 |
| NR4A3     | 4. 331624 | 4. 1208   | 4. 220759 | 5. 141617 | 5. 421623 | 4. 988187 |
| RNF217    | 5. 497154 | 5. 404572 | 5. 576732 | 6. 51364  | 6. 34371  | 6. 49858  |
| REEP3     | 7. 613898 | 7. 691199 | 7. 586023 | 8. 576223 | 8. 586465 | 8. 604646 |
| MARCKS    | 7. 67293  | 7. 562408 | 7. 529688 | 6. 633104 | 6. 685445 | 6. 570864 |
| NT5E      | 7. 553372 | 7. 533597 | 7. 474284 | 8. 479924 | 8. 440028 | 8. 516838 |
| FBXW11    | 7. 735937 | 7. 806928 | 7. 750764 | 6. 827839 | 6. 758716 | 6. 831885 |
| FAM214A   | 7. 403649 | 7. 403601 | 7. 404216 | 8. 41133  | 8. 288178 | 8. 385274 |
| WDR66     | 5. 438291 | 5. 408512 | 5. 737841 | 6. 546414 | 6. 401368 | 6. 509756 |
| CIB1      | 9. 418943 | 9. 389814 | 9. 510352 | 8. 466589 | 8. 512545 | 8. 467358 |
| DTL       | 8. 671759 | 8. 628757 | 8. 613677 | 7. 679881 | 7. 68127  | 7. 680819 |
| YAP1      | 8. 896327 | 8. 875488 | 8. 878557 | 9. 847796 | 9. 805356 | 9. 863414 |
| SMC2      | 6. 618976 | 6. 814382 | 6. 797316 | 5. 785575 | 5. 785161 | 5. 794416 |
| SRSF11    | 8. 406417 | 8. 400868 | 8. 410249 | 7. 4587   | 7. 423164 | 7. 470203 |
| MCM10     | 7. 620373 | 7. 564355 | 7. 658329 | 6. 648623 | 6. 701795 | 6. 628847 |
| TBCA      | 11. 43791 | 11. 41678 | 11. 38777 | 10. 45017 | 10. 47455 | 10. 45745 |
| VGLL3     | 4. 067713 | 4. 051476 | 4. 078724 | 4. 935664 | 5. 118139 | 5. 004046 |
| CTNNA1 /  | 8. 530932 | 8. 570914 | 8. 573837 | 9. 528956 | 9. 476463 | 9. 529883 |
| TIPARP    | 7. 719782 | 7. 627704 | 7. 652873 | 8. 645196 | 8. 582092 | 8. 632147 |
| UMAD1     | 6. 491865 | 6. 299047 | 6. 355793 | 5. 385078 | 5. 48526  | 5. 417748 |
| SMIM13    | 5. 614465 | 5. 847767 | 5. 675671 | 6. 643783 | 6. 670807 | 6. 678822 |
| PHIP      | 6. 844432 | 6. 833705 | 6. 881554 | 7. 867457 | 7. 735786 | 7. 811076 |
| EIF4EBP2  | 7. 879495 | 7. 943039 | 7. 81233  | 6. 91389  | 6. 90075  | 6. 966835 |
| RFC4      | 9. 782449 | 9. 817932 | 9. 761417 | 8. 883085 | 8. 724138 | 8. 901492 |
| NRXN3     | 3. 964813 | 3. 991647 | 3. 921305 | 5. 029539 | 4. 830259 | 4. 870081 |
| NCS1      | 5. 954091 | 6. 021964 | 6. 152565 | 5. 138578 | 4. 842882 | 5. 297508 |
| FOCAD     | 8. 254327 | 8. 297466 | 8. 342912 | 7. 359301 | 7. 34626  | 7. 342036 |
| PHC3      | 5. 311291 | 5. 409718 | 5. 100937 | 6. 236761 | 6. 13196  | 6. 298053 |

|           |          |          |          |          |          |          |
|-----------|----------|----------|----------|----------|----------|----------|
| NAA50     | 9.969309 | 9.979943 | 9.867842 | 9.022364 | 9.012744 | 8.939077 |
| ZNF112    | 5.156313 | 5.183034 | 5.295238 | 6.142001 | 6.017606 | 6.317596 |
| RCC1      | 7.329326 | 7.365668 | 7.400317 | 6.393538 | 6.428442 | 6.436198 |
| CASP1     | 2.361788 | 2.672299 | 2.42837  | 3.398246 | 3.377086 | 3.524017 |
| ZNF442    | 5.328459 | 5.325064 | 5.297087 | 6.206113 | 6.339074 | 6.242117 |
| GART      | 8.78172  | 8.743676 | 8.756325 | 7.798026 | 7.804783 | 7.842264 |
| KIAA0753  | 7.194363 | 7.082901 | 7.249063 | 8.09977  | 8.091971 | 8.170514 |
| SEMA3C    | 7.550835 | 7.555358 | 7.560876 | 8.542808 | 8.441636 | 8.518526 |
| TBRG1     | 5.626856 | 5.638827 | 5.77686  | 4.753934 | 4.660888 | 4.795321 |
| ZBED8     | 6.325127 | 6.28483  | 6.47148  | 5.52324  | 5.331914 | 5.398581 |
| FAM43A    | 5.920562 | 5.887376 | 5.896226 | 6.874904 | 6.820022 | 6.834945 |
| CREBRF    | 6.375283 | 6.326919 | 6.294828 | 7.288325 | 7.231536 | 7.297225 |
| ZNF552    | 4.914661 | 4.890549 | 5.158846 | 6.015151 | 5.856008 | 5.912797 |
| RNF19A    | 6.994078 | 6.929724 | 6.989564 | 7.95235  | 7.818676 | 7.958989 |
| ZNF586    | 6.223877 | 6.159781 | 6.168303 | 7.172235 | 7.071452 | 7.124899 |
| ABAT      | 5.269799 | 5.129901 | 5.358031 | 4.421616 | 4.055446 | 4.466885 |
| CA13      | 6.097937 | 6.068312 | 6.214735 | 7.061665 | 7.078552 | 7.054181 |
| KLF5      | 7.56004  | 7.555711 | 7.523138 | 8.548171 | 8.42761  | 8.47477  |
| C21orf91  | 5.524115 | 5.443715 | 5.507284 | 6.497514 | 6.298358 | 6.490892 |
| ASNS      | 10.17766 | 10.13522 | 10.15283 | 9.215201 | 9.19411  | 9.247193 |
| FAM91A1   | 3.867425 | 3.606323 | 4.206422 | 4.795059 | 4.736051 | 4.955941 |
| ELK4      | 5.595001 | 5.513634 | 5.665958 | 6.553595 | 6.414011 | 6.613259 |
| TSC22D2   | 7.74612  | 7.646898 | 7.621882 | 8.579884 | 8.608771 | 8.632206 |
| DSCC1     | 8.548353 | 8.471726 | 8.3868   | 7.633234 | 7.397189 | 7.572927 |
| SKA1      | 7.493006 | 7.504238 | 7.580194 | 6.656    | 6.492963 | 6.625472 |
| PEG10     | 4.378831 | 4.261994 | 4.47007  | 3.87319  | 3.225536 | 3.211559 |
| ZNF720    | 3.716044 | 3.716044 | 3.872901 | 5.019357 | 4.688149 | 4.397324 |
| ZNF138    | 5.206573 | 5.277907 | 5.193177 | 6.210834 | 6.206113 | 6.060196 |
| HIST2H2AC | 8.589208 | 8.655688 | 8.645315 | 7.755744 | 7.763659 | 7.573257 |
| LSM5      | 6.572381 | 6.662952 | 6.604798 | 5.671432 | 5.553028 | 5.820709 |
| CHGB      | 4.657388 | 4.811803 | 5.132509 | 5.623149 | 5.662721 | 6.10972  |
| CNTLN     | 4.684751 | 4.413336 | 5.073046 | 3.943144 | 3.575346 | 3.86034  |
| ZNF654    | 6.81847  | 6.768882 | 6.827118 | 7.743689 | 7.670102 | 7.792222 |
| PHLPP2    | 7.38518  | 7.338301 | 7.487196 | 8.354582 | 8.321385 | 8.322825 |
| ACSL3     | 9.02126  | 8.888502 | 8.922381 | 7.981567 | 8.003148 | 8.059426 |
| THUMPD2   | 7.347336 | 7.362424 | 7.37228  | 8.331744 | 8.196018 | 8.339444 |
| CDT1      | 6.587599 | 6.745561 | 6.719506 | 5.64295  | 5.798559 | 5.827567 |
| GPSM3     | 6.624865 | 6.796007 | 6.649137 | 5.782958 | 5.772054 | 5.734862 |
| COL11A1   | 2.978196 | 2.780694 | 2.71198  | 3.712776 | 3.70329  | 3.834639 |
| HIST1H3D  | 5.795395 | 6.024438 | 6.021125 | 6.883832 | 6.79614  | 6.940583 |
| ZNF561    | 6.12905  | 6.15332  | 6.263577 | 7.092655 | 7.007156 | 7.221524 |
| SLITRK6   | 8.108416 | 8.070589 | 8.122619 | 9.025136 | 8.996639 | 9.054735 |
| GAN       | 4.824205 | 4.786461 | 4.934196 | 5.961059 | 5.706328 | 5.651498 |
| TLCD1     | 7.015276 | 7.129931 | 7.015481 | 6.073152 | 6.09215  | 6.222385 |
| FADS1     | 6.44356  | 6.663725 | 6.532483 | 5.647569 | 5.630782 | 5.588777 |
| HCFC2     | 6.49492  | 6.443143 | 6.394363 | 7.379185 | 7.315909 | 7.409449 |
| NCAPH     | 7.954258 | 8.044188 | 8.003053 | 7.138478 | 7.033675 | 7.058268 |
| E2F8      | 5.75065  | 5.894707 | 5.635109 | 4.836499 | 4.763553 | 4.90994  |
| AK6 /// T | 9.392219 | 9.253267 | 9.182711 | 8.478456 | 8.407502 | 8.172004 |
| TLL11     | 4.40462  | 4.536767 | 4.39676  | 5.409232 | 5.228638 | 5.469716 |
| CDH19     | 6.539374 | 6.504302 | 6.590669 | 7.510488 | 7.448376 | 7.444203 |



|           |          |          |          |          |          |          |
|-----------|----------|----------|----------|----------|----------|----------|
| NEDD4L    | 9.368086 | 9.357346 | 9.344942 | 10.29534 | 10.27705 | 10.2656  |
| NTM       | 8.487104 | 8.420548 | 8.423682 | 9.38636  | 9.307579 | 9.403075 |
| VEPH1     | 4.229475 | 4.468426 | 4.755219 | 5.280782 | 5.372571 | 5.565055 |
| COL5A1    | 6.209477 | 6.523369 | 6.333109 | 7.309958 | 7.144892 | 7.374791 |
| ZNF582    | 5.03318  | 5.322977 | 5.118908 | 6.152629 | 6.021391 | 6.062914 |
| FRAS1     | 6.080949 | 6.140274 | 6.117102 | 7.039618 | 6.932077 | 7.128442 |
| FAM126B   | 4.734394 | 4.717246 | 4.728021 | 5.709103 | 5.598082 | 5.634167 |
| MYO5A     | 8.020831 | 7.992049 | 7.965364 | 8.914084 | 8.924467 | 8.900263 |
| PRRC2B    | 9.104291 | 9.135655 | 9.189287 | 8.282208 | 8.160886 | 8.225948 |
| ZDBF2     | 7.504696 | 7.33637  | 7.503796 | 6.647314 | 6.564719 | 6.374186 |
| RIT1      | 7.146316 | 7.168638 | 7.140427 | 8.107221 | 8.048924 | 8.057423 |
| HHAT      | 5.76041  | 5.618432 | 5.726756 | 6.592553 | 6.573418 | 6.697274 |
| VASH2     | 4.673319 | 4.536292 | 4.429607 | 3.623998 | 3.450513 | 3.809375 |
| PRKACB    | 5.96526  | 6.059827 | 6.141354 | 6.943881 | 6.97059  | 7.007279 |
| ANKRD46   | 6.637377 | 6.584898 | 6.660993 | 7.586046 | 7.53395  | 7.517024 |
| FCMR      | 4.643727 | 4.458206 | 4.57825  | 5.56467  | 5.496828 | 5.36707  |
| TMEM17    | 6.414963 | 6.516839 | 6.63178  | 5.623651 | 5.583654 | 5.608868 |
| GLIPR1    | 5.220787 | 5.306314 | 5.272154 | 6.202478 | 6.099714 | 6.243466 |
| MAPK6     | 8.511449 | 8.470369 | 8.513185 | 9.441312 | 9.362542 | 9.437228 |
| GATA6     | 5.51373  | 5.36324  | 5.517634 | 6.433673 | 6.425199 | 6.281789 |
| THOC6     | 8.313166 | 8.326012 | 8.378773 | 7.4332   | 7.428293 | 7.412455 |
| FAM133A   | 5.441208 | 5.341373 | 5.502352 | 4.636448 | 4.52374  | 4.381423 |
| ZNF721    | 7.491558 | 7.283005 | 7.352932 | 8.274958 | 8.285558 | 8.307523 |
| SLC47A1   | 4.013564 | 3.895065 | 4.033593 | 3.192458 | 3.1135   | 2.89588  |
| PPP1CB    | 8.8232   | 8.815409 | 8.779713 | 7.788388 | 7.969241 | 7.92385  |
| ETS1      | 6.777278 | 6.611126 | 6.654589 | 7.666988 | 7.557252 | 7.555472 |
| NEXN      | 4.887769 | 4.916832 | 4.907827 | 5.770597 | 5.781818 | 5.896464 |
| CNNM3     | 6.523494 | 6.3342   | 6.424508 | 5.654684 | 5.345608 | 5.545629 |
| HBEGF     | 4.748389 | 4.798521 | 5.013585 | 5.736841 | 5.801663 | 5.757362 |
| GPCPD1    | 7.770786 | 7.767092 | 7.786337 | 8.670803 | 8.699639 | 8.688466 |
| ARMC4     | 4.565729 | 4.538833 | 4.420094 | 5.575314 | 5.11528  | 5.56866  |
| DNAJB4    | 7.605382 | 7.65912  | 7.613456 | 8.536906 | 8.503798 | 8.56937  |
| IGF1R     | 8.881567 | 8.718094 | 8.72333  | 7.834836 | 7.895936 | 7.862155 |
| SLC22A15  | 6.743801 | 6.663503 | 6.693018 | 7.658979 | 7.581423 | 7.589414 |
| GRSF1     | 6.337659 | 6.208882 | 6.332365 | 5.370034 | 5.261403 | 5.518498 |
| ZNF608    | 7.257675 | 7.333175 | 7.236765 | 8.138119 | 8.190773 | 8.225986 |
| PTPRR     | 2.953328 | 2.662375 | 3.232673 | 3.650262 | 3.996222 | 3.92332  |
| HMG2      | 7.099158 | 7.130126 | 7.092161 | 6.236061 | 6.1848   | 6.17982  |
| NUP98     | 6.700124 | 6.76858  | 6.749743 | 7.732125 | 7.528397 | 7.674268 |
| IL31RA    | 4.902604 | 5.069187 | 5.148875 | 5.910452 | 5.9345   | 5.989099 |
| EEF2K /// | 7.983254 | 8.016667 | 8.02293  | 7.146981 | 7.103148 | 7.059707 |
| VDAC3     | 10.67812 | 10.65465 | 10.67987 | 9.782279 | 9.720575 | 9.797294 |
| TRIML2    | 5.811535 | 5.848005 | 5.978824 | 6.937255 | 6.655768 | 6.755118 |
| KIF3A     | 6.31104  | 6.211844 | 6.425317 | 7.180936 | 7.197042 | 7.27454  |
| IGSF3     | 6.715498 | 6.639439 | 6.792193 | 5.82444  | 5.768022 | 5.850353 |
| WDR35     | 6.804924 | 6.867991 | 6.829858 | 7.748132 | 7.701571 | 7.755977 |
| AKNAD1    | 4.40462  | 4.455081 | 4.236791 | 5.269461 | 5.189638 | 5.339942 |
| EBP       | 8.732598 | 8.832491 | 8.776082 | 7.86885  | 7.869808 | 7.9028   |
| IFIH1     | 5.772038 | 5.761231 | 5.759495 | 6.780581 | 6.580682 | 6.630958 |
| PPM1D     | 7.018618 | 6.898803 | 7.006296 | 7.926345 | 7.872256 | 7.823346 |
| LMO7      | 8.078297 | 8.047979 | 8.016665 | 8.914824 | 9.010116 | 8.915912 |

|          |   |          |          |          |          |          |          |
|----------|---|----------|----------|----------|----------|----------|----------|
| BCR ///  | E | 4.881089 | 4.890549 | 5.072731 | 4.049627 | 4.067012 | 4.030332 |
| RPRD1A   |   | 7.834209 | 7.735892 | 7.713354 | 6.817996 | 6.849613 | 6.920657 |
| ZNF844   |   | 6.089519 | 6.139419 | 6.273759 | 7.092223 | 7.066583 | 7.037979 |
| DSE      |   | 6.944192 | 6.956086 | 6.877773 | 7.799799 | 7.834727 | 7.83291  |
| TEK      |   | 3.202003 | 3.268651 | 3.268651 | 4.321015 | 4.295017 | 3.812222 |
| SERTAD1  |   | 7.522072 | 7.577424 | 7.607293 | 8.47977  | 8.440713 | 8.474454 |
| LYPD1    |   | 7.742753 | 7.913723 | 7.903615 | 8.78083  | 8.713661 | 8.75321  |
| WHSC1    |   | 7.707335 | 7.72903  | 7.72414  | 6.86824  | 6.754831 | 6.850668 |
| RNASEH2A |   | 9.14608  | 9.189519 | 9.086162 | 8.295499 | 8.213928 | 8.225575 |
| MBLAC2   |   | 7.061842 | 7.142213 | 7.254687 | 6.215112 | 6.174825 | 6.382474 |
| HSP90AA1 |   | 9.854681 | 9.853889 | 9.886153 | 9.031843 | 8.853779 | 9.02307  |
| HCCS     |   | 7.859659 | 7.849645 | 7.930309 | 8.806749 | 8.745218 | 8.772867 |
| BAZ2A    |   | 8.993872 | 8.964818 | 8.854774 | 8.035027 | 8.057246 | 8.037037 |
| CCNY     |   | 8.261942 | 8.161407 | 8.176382 | 7.29827  | 7.324082 | 7.293613 |
| SPIRE1   |   | 7.523533 | 7.434652 | 7.610745 | 6.58394  | 6.614174 | 6.687933 |
| ZNF45    |   | 7.929012 | 7.897825 | 7.931344 | 8.825307 | 8.784981 | 8.830159 |
| CDC20    |   | 9.647566 | 9.793021 | 9.648645 | 8.866813 | 8.742721 | 8.798821 |
| PKP2     |   | 4.439605 | 4.350295 | 4.421872 | 5.281164 | 5.283921 | 5.326566 |
| FASTKD2  |   | 7.229227 | 7.219191 | 7.285161 | 6.392307 | 6.333837 | 6.327978 |
| C6orf120 |   | 7.842047 | 7.723289 | 7.827344 | 8.65988  | 8.681299 | 8.726342 |
| BANF1    |   | 5.880754 | 5.870252 | 5.930539 | 4.815693 | 4.898814 | 5.294062 |
| ZNF485   |   | 4.892171 | 4.86985  | 4.820365 | 5.808169 | 5.609778 | 5.834972 |
| MAD2L1   |   | 9.998985 | 9.923949 | 9.896718 | 9.034337 | 9.058046 | 9.05786  |
| CCNT2    |   | 5.160551 | 4.984679 | 4.913216 | 5.976388 | 5.856003 | 5.894656 |
| KLHDC10  |   | 6.102374 | 5.97443  | 6.09886  | 6.960959 | 6.914182 | 6.96786  |
| FAM111B  |   | 6.409247 | 6.510366 | 6.529029 | 5.679399 | 5.400956 | 5.704071 |
| AHNAK    |   | 11.08122 | 11.03366 | 11.0422  | 10.11765 | 10.18033 | 10.19614 |
| SLC31A2  |   | 6.789001 | 6.821497 | 6.748024 | 7.708485 | 7.671918 | 7.639422 |
| ZNF35    |   | 6.380495 | 6.532008 | 6.645567 | 7.409359 | 7.342537 | 7.46575  |
| CD163L1  |   | 5.340086 | 5.325201 | 5.32778  | 6.032579 | 6.203387 | 6.415647 |
| IPO5     |   | 9.539918 | 9.492565 | 9.468963 | 8.640564 | 8.647304 | 8.555666 |
| SEMA3D   |   | 4.035975 | 4.141682 | 4.258485 | 5.072409 | 4.899581 | 5.120586 |
| MSH2     |   | 8.693934 | 8.694302 | 8.583454 | 7.726257 | 7.782138 | 7.808844 |
| LAPTM5   |   | 3.995593 | 4.386409 | 4.313248 | 5.011258 | 5.140325 | 5.197447 |
| ATP9A    |   | 6.744108 | 6.752619 | 6.791882 | 5.861349 | 5.795578 | 5.979303 |
| GATA3    |   | 5.239267 | 5.276062 | 5.208243 | 6.134448 | 6.03152  | 6.209524 |
| TMEM147  |   | 10.09568 | 10.13315 | 10.1532  | 9.244007 | 9.216073 | 9.272679 |
| TENM2    |   | 5.962859 | 5.917369 | 6.060097 | 6.828471 | 6.817502 | 6.941855 |
| CASP4    |   | 4.76214  | 5.02692  | 4.969582 | 5.832393 | 5.704279 | 5.869366 |
| SNX16    |   | 5.891763 | 5.948361 | 5.979002 | 6.835353 | 6.79841  | 6.831903 |
| HOXA1    |   | 7.069276 | 7.00286  | 7.105894 | 7.865244 | 7.922679 | 8.032618 |
| TCF3     |   | 7.399263 | 7.445985 | 7.418041 | 6.496012 | 6.557781 | 6.567702 |
| STX6     |   | 7.538774 | 7.609163 | 7.545721 | 8.443393 | 8.39094  | 8.498812 |
| SOCS4    |   | 4.364828 | 4.597833 | 4.584943 | 5.409232 | 5.295063 | 5.482403 |
| TEX261   |   | 8.561834 | 8.615997 | 8.62537  | 7.777286 | 7.601778 | 7.785168 |
| FKTN     |   | 5.047702 | 4.88014  | 5.186979 | 6.018834 | 5.762422 | 5.971883 |
| ZNF790   |   | 3.436933 | 3.75408  | 3.503753 | 4.438032 | 4.389318 | 4.504759 |
| ZSCAN9   |   | 4.649317 | 4.831854 | 4.822362 | 5.661947 | 5.599878 | 5.678146 |
| TBC1D9   |   | 8.00782  | 7.989    | 8.140479 | 8.997096 | 8.858197 | 8.917675 |
| CENPF    |   | 10.02555 | 10.08963 | 9.975773 | 9.17679  | 9.071919 | 9.207755 |
| COPG2    |   | 6.921794 | 6.86769  | 6.927468 | 6.007464 | 5.957094 | 6.118    |

|           |          |          |          |          |          |          |
|-----------|----------|----------|----------|----------|----------|----------|
| HAPLN1    | 7.948348 | 7.911728 | 7.959425 | 8.817287 | 8.800706 | 8.835646 |
| ZNF225    | 5.165614 | 5.183034 | 5.317682 | 6.126032 | 6.023481 | 6.15061  |
| ATP6V1C1  | 7.305381 | 7.239128 | 7.297912 | 6.311362 | 6.496324 | 6.401094 |
| RAB22A    | 7.995443 | 7.972098 | 7.938187 | 7.113215 | 7.004421 | 7.154765 |
| ADAMTS12  | 5.877748 | 5.717359 | 5.858597 | 6.712911 | 6.702365 | 6.670493 |
| IER3IP1   | 9.275947 | 9.282261 | 9.253349 | 8.390684 | 8.402435 | 8.386475 |
| LACC1     | 5.569784 | 5.540146 | 5.526471 | 6.399469 | 6.48469  | 6.381918 |
| TTLL12    | 8.053106 | 8.06038  | 8.079185 | 7.228175 | 7.111963 | 7.223501 |
| FLRT2     | 6.651618 | 6.630463 | 6.756397 | 7.54119  | 7.547926 | 7.575349 |
| MXD1      | 4.459949 | 4.589189 | 4.837836 | 5.789957 | 5.307156 | 5.414879 |
| THOC1     | 6.963743 | 6.936097 | 6.991346 | 6.087469 | 6.05472  | 6.123991 |
| GADD45A   | 10.57931 | 10.60955 | 10.55666 | 11.43822 | 11.43661 | 11.48893 |
| HN1L      | 6.90903  | 6.789043 | 6.961632 | 6.041515 | 5.871625 | 6.129269 |
| TCOF1     | 7.397355 | 7.351472 | 7.267148 | 6.563079 | 6.362098 | 6.473667 |
| MAFF      | 6.572499 | 6.396566 | 6.55767  | 7.414922 | 7.411879 | 7.315578 |
| TGM2      | 6.422635 | 6.393121 | 6.397381 | 5.55877  | 5.59998  | 5.440095 |
| MYO19     | 8.28886  | 8.304024 | 8.221573 | 7.43559  | 7.391281 | 7.379181 |
| HIST2H2AA | 8.300721 | 8.322519 | 8.441258 | 9.192291 | 9.162794 | 9.317655 |
| PSPC1     | 7.950079 | 8.020954 | 7.965681 | 8.84849  | 8.845413 | 8.850777 |
| SPTBN1    | 8.386045 | 8.321543 | 8.399464 | 7.484166 | 7.478082 | 7.538365 |
| HMBX1     | 5.199833 | 5.249222 | 5.254276 | 6.050707 | 6.052432 | 6.204002 |
| CARD16    | 3.142833 | 3.15357  | 3.192806 | 4.047662 | 3.869916 | 4.174997 |
| TMEM67    | 5.524804 | 5.316025 | 5.144835 | 6.087081 | 6.22821  | 6.27369  |
| COTL1     | 10.61527 | 10.56011 | 10.60357 | 9.741214 | 9.684652 | 9.753074 |
| PPP1R8    | 8.807563 | 8.778974 | 8.892958 | 7.97753  | 7.882187 | 8.020097 |
| CMPK2     | 5.575214 | 5.575896 | 5.776637 | 4.784143 | 4.737877 | 4.807301 |
| PDGFC     | 6.554522 | 6.510546 | 6.617364 | 7.497157 | 7.297019 | 7.486465 |
| ZNF804A   | 6.815863 | 6.672365 | 6.83587  | 7.631929 | 7.583687 | 7.70627  |
| USP13     | 7.74284  | 7.860671 | 7.815428 | 6.982947 | 6.915711 | 6.922783 |
| PLCB4     | 6.349203 | 6.295021 | 6.299235 | 7.194112 | 7.145171 | 7.200943 |
| KITLG     | 5.828483 | 5.853268 | 5.824312 | 6.867667 | 6.655768 | 6.577604 |
| KIAA0226L | 3.92686  | 3.853891 | 3.864521 | 4.876143 | 4.667438 | 4.694191 |
| PPP2R2A   | 9.364792 | 9.319265 | 9.288187 | 8.515917 | 8.398946 | 8.465943 |
| WDR73     | 7.732426 | 7.719492 | 7.719492 | 8.623945 | 8.547995 | 8.590643 |
| ZNF564    | 6.160365 | 6.263577 | 6.073152 | 7.045098 | 7.009316 | 7.031541 |
| RORA      | 4.086582 | 4.009652 | 4.388413 | 5.219649 | 4.821708 | 5.032099 |
| TSPAN12   | 5.277696 | 5.124599 | 4.972524 | 6.060194 | 5.855813 | 6.047522 |
| TMEM245   | 8.124725 | 8.057007 | 8.219016 | 9.054498 | 8.953874 | 8.980471 |
| SYNCRIP   | 8.161368 | 8.135578 | 8.118679 | 7.342177 | 7.230464 | 7.256071 |
| MEN1      | 8.941375 | 8.962089 | 8.982634 | 8.047789 | 8.090654 | 8.160757 |
| TCF19     | 6.896383 | 6.709588 | 6.80561  | 5.878227 | 5.929786 | 6.018563 |
| SAV1      | 8.506652 | 8.530367 | 8.463301 | 9.417154 | 9.308408 | 9.355751 |
| FBXL2     | 5.294827 | 5.244188 | 5.332468 | 6.132005 | 6.168152 | 6.152207 |
| DDIT3     | 7.838147 | 7.859609 | 7.897223 | 8.762488 | 8.638015 | 8.774907 |
| SRSF10    | 7.358591 | 7.417241 | 7.382053 | 6.482593 | 6.33065  | 6.765921 |
| HACD2     | 8.767504 | 8.750924 | 8.756792 | 7.941518 | 7.793685 | 7.962344 |
| CALB2     | 6.89264  | 6.924646 | 6.82154  | 7.737319 | 7.668826 | 7.809416 |
| CFI       | 4.155956 | 4.178537 | 4.326443 | 4.966216 | 5.074655 | 5.196481 |
| SLC30A1   | 7.456666 | 7.382901 | 7.43687  | 8.318121 | 8.251655 | 8.282945 |
| MAP2K4 // | 6.156743 | 6.237373 | 6.306203 | 7.154677 | 7.025342 | 7.093379 |
| BUB1      | 8.578035 | 8.590415 | 8.557502 | 7.75515  | 7.628115 | 7.769957 |

|           |           |           |           |           |           |           |
|-----------|-----------|-----------|-----------|-----------|-----------|-----------|
| ARHGEF12  | 5. 894707 | 5. 837014 | 5. 964448 | 6. 799347 | 6. 624681 | 6. 844353 |
| UHRF1     | 9. 826095 | 9. 880061 | 9. 845645 | 9. 025136 | 8. 977627 | 8. 978016 |
| ZSWIM4    | 6. 532811 | 6. 426888 | 6. 701815 | 7. 482538 | 7. 338922 | 7. 410655 |
| CEP85L    | 4. 464172 | 4. 479693 | 4. 711464 | 5. 429214 | 5. 401637 | 5. 393451 |
| ZNF155    | 4. 892806 | 4. 993168 | 4. 902349 | 5. 755079 | 5. 784059 | 5. 816624 |
| SEC63     | 5. 473948 | 5. 329553 | 5. 626551 | 4. 755797 | 4. 454219 | 4. 653929 |
| AMMECR1   | 7. 959222 | 7. 965336 | 7. 916074 | 8. 840856 | 8. 750586 | 8. 814654 |
| TRIM49 // | 4. 482575 | 4. 383186 | 4. 533264 | 3. 708691 | 3. 321667 | 3. 804208 |
| ZCCHC2    | 6. 423423 | 6. 395369 | 6. 478137 | 7. 354603 | 7. 179411 | 7. 326911 |
| DCN       | 3. 290198 | 3. 306595 | 3. 534273 | 4. 218401 | 4. 259905 | 4. 213236 |
| BLZF1     | 3. 994571 | 3. 89756  | 4. 345131 | 4. 721894 | 4. 985628 | 5. 089139 |
| ZNF140    | 7. 156204 | 7. 122389 | 7. 084799 | 7. 990587 | 7. 950294 | 7. 981379 |
| PMEPA1    | 6. 146194 | 6. 047721 | 6. 13946  | 7. 004257 | 6. 898803 | 6. 988391 |
| FBX028    | 7. 629175 | 7. 559668 | 7. 606717 | 8. 451944 | 8. 440252 | 8. 461319 |
| 4-Mar     | 7. 591278 | 7. 552542 | 7. 566361 | 8. 401208 | 8. 413946 | 8. 45292  |
| TMED5     | 9. 538957 | 9. 4994   | 9. 561751 | 10. 39226 | 10. 38011 | 10. 38549 |
| CEACAM1   | 5. 52692  | 5. 520317 | 5. 481723 | 6. 377857 | 6. 348408 | 6. 357837 |
| SAMD8     | 6. 468444 | 6. 481056 | 6. 382748 | 7. 282188 | 7. 227848 | 7. 376974 |
| PLCL2     | 3. 600227 | 3. 747423 | 3. 258657 | 4. 308749 | 4. 353996 | 4. 498196 |
| HIST2H4A  | 7. 868287 | 7. 928362 | 7. 883992 | 8. 766136 | 8. 714106 | 8. 754501 |
| CREBZF    | 7. 403917 | 7. 474578 | 7. 467004 | 8. 300721 | 8. 259964 | 8. 335378 |
| UBASH3B   | 7. 986806 | 8. 057414 | 8. 024978 | 8. 883863 | 8. 838853 | 8. 896327 |
| ERGIC1    | 6. 653489 | 6. 777024 | 6. 886662 | 6. 099974 | 5. 930084 | 5. 737371 |
| TRAF1     | 5. 448676 | 5. 523416 | 5. 412071 | 6. 352273 | 6. 206113 | 6. 372974 |
| AFF3      | 4. 624969 | 4. 620101 | 4. 56189  | 5. 367603 | 5. 355326 | 5. 629087 |
| IRS2      | 7. 959017 | 8. 044377 | 8. 109379 | 7. 220743 | 7. 134385 | 7. 212661 |
| DMD       | 4. 169932 | 4. 063881 | 4. 248245 | 4. 967401 | 4. 984184 | 5. 073541 |
| BIRC5     | 8. 420701 | 8. 39571  | 8. 329209 | 7. 609738 | 7. 507547 | 7. 4855   |
| SPTLC1    | 5. 079458 | 4. 938827 | 4. 945987 | 5. 859747 | 5. 886616 | 5. 760361 |
| RGL1      | 5. 954091 | 6. 024628 | 6. 123513 | 6. 872093 | 6. 875068 | 6. 896692 |
| SCYL2     | 7. 886608 | 7. 905928 | 7. 892776 | 8. 759842 | 8. 73084  | 8. 735626 |
| PTX3      | 8. 485164 | 8. 357859 | 8. 406003 | 9. 192494 | 9. 375763 | 9. 219672 |
| NAV1      | 6. 508771 | 6. 439504 | 6. 48534  | 5. 572871 | 5. 611996 | 5. 710034 |
| CENPA     | 8. 771645 | 8. 79876  | 8. 716028 | 7. 949599 | 7. 963569 | 7. 834872 |
| LUM       | 6. 125472 | 5. 942414 | 6. 025453 | 6. 922783 | 6. 8512   | 6. 856816 |
| SLC44A5   | 4. 704884 | 4. 827211 | 4. 975902 | 5. 704106 | 5. 503327 | 5. 835093 |
| KIF2C     | 8. 508819 | 8. 614381 | 8. 545052 | 7. 683199 | 7. 67511  | 7. 77543  |
| SEC62     | 6. 692247 | 6. 770479 | 6. 731338 | 5. 852984 | 5. 8414   | 5. 965745 |
| QKI       | 9. 791668 | 9. 733005 | 9. 72092  | 8. 864697 | 8. 913901 | 8. 933544 |
| FLT1      | 4. 391604 | 4. 391604 | 4. 52374  | 5. 342408 | 5. 081887 | 5. 414879 |
| ZNF222    | 5. 837421 | 6. 018638 | 5. 883648 | 6. 79487  | 6. 722314 | 6. 75474  |
| DHTKD1    | 7. 351876 | 7. 462119 | 7. 462647 | 6. 634833 | 6. 451585 | 6. 658554 |
| KLF13     | 6. 495165 | 6. 383628 | 6. 454634 | 5. 711337 | 5. 400075 | 5. 691226 |
| ZNF136    | 5. 716334 | 5. 614589 | 5. 763465 | 6. 596963 | 6. 47767  | 6. 549795 |
| ZNF425    | 5. 235033 | 5. 029539 | 5. 360293 | 6. 086095 | 6. 012413 | 6. 055484 |
| MED13     | 6. 600695 | 6. 464815 | 6. 619451 | 7. 392285 | 7. 368988 | 7. 452722 |
| USP32     | 8. 075043 | 8. 051532 | 8. 062402 | 8. 931403 | 8. 850194 | 8. 935124 |
| ATF3      | 8. 115831 | 8. 183378 | 8. 164054 | 9. 033877 | 8. 958065 | 8. 998586 |
| TMTC1     | 3. 851065 | 3. 72717  | 3. 64859  | 4. 56501  | 4. 499263 | 4. 689377 |
| LHX8      | 5. 770736 | 5. 850227 | 5. 817596 | 6. 617098 | 6. 651266 | 6. 695824 |
| ZBTB20    | 7. 583098 | 7. 528989 | 7. 553627 | 8. 408214 | 8. 31468  | 8. 466618 |

|           |           |           |           |           |           |           |
|-----------|-----------|-----------|-----------|-----------|-----------|-----------|
| MFSD8     | 5. 820053 | 5. 868782 | 5. 77686  | 6. 689042 | 6. 615474 | 6. 684686 |
| STC1      | 5. 635622 | 5. 772371 | 5. 618154 | 6. 650247 | 6. 396022 | 6. 499908 |
| VPS26B    | 8. 382485 | 8. 393117 | 8. 406896 | 7. 511534 | 7. 57453  | 7. 577155 |
| NSD1      | 5. 753425 | 5. 622341 | 5. 684418 | 6. 538149 | 6. 505727 | 6. 53499  |
| C3orf62   | 5. 414879 | 5. 579556 | 5. 77686  | 6. 441697 | 6. 330411 | 6. 517031 |
| ITGA4     | 5. 156199 | 5. 183034 | 5. 105826 | 5. 954091 | 6. 118848 | 5. 887348 |
| FNIP1     | 4. 792275 | 4. 780323 | 4. 820185 | 5. 737945 | 5. 557256 | 5. 612397 |
| KIAA0825  | 2. 851572 | 2. 624263 | 2. 812946 | 3. 532752 | 3. 818248 | 3. 45077  |
| TIFA      | 3. 745568 | 3. 882089 | 4. 194918 | 2. 939085 | 3. 148354 | 3. 224148 |
| NRCAM     | 4. 452864 | 4. 233912 | 4. 39166  | 5. 201653 | 5. 178085 | 5. 208474 |
| MAP4K3    | 6. 399296 | 6. 589102 | 6. 434303 | 7. 375897 | 7. 250651 | 7. 303745 |
| NBEAL1    | 3. 850256 | 3. 889332 | 3. 879319 | 4. 636344 | 4. 708088 | 4. 781558 |
| NUSAP1    | 9. 007977 | 8. 980492 | 8. 948704 | 8. 207648 | 8. 100407 | 8. 12383  |
| HMGA2     | 9. 765293 | 9. 756096 | 9. 78967  | 10. 63812 | 10. 59262 | 10. 58512 |
| ZNF699    | 4. 995325 | 5. 453803 | 5. 373576 | 6. 151856 | 6. 053982 | 6. 121629 |
| RMI1      | 8. 432531 | 8. 296139 | 8. 350552 | 7. 587438 | 7. 506466 | 7. 481716 |
| IQCJ-SCHI | 7. 838868 | 7. 764682 | 7. 809485 | 8. 670569 | 8. 624732 | 8. 620363 |
| RRP1B     | 9. 756101 | 9. 697838 | 9. 668761 | 8. 901226 | 8. 789094 | 8. 930115 |
| INHBE     | 3. 835251 | 3. 57715  | 3. 949738 | 2. 834454 | 3. 000795 | 3. 025982 |
| PPIP5K1   | 4. 675254 | 4. 587618 | 4. 746957 | 3. 764455 | 3. 927789 | 3. 818547 |
| STMN3     | 6. 736963 | 6. 952182 | 6. 783084 | 7. 69418  | 7. 609214 | 7. 66357  |
| DYRK2     | 8. 105019 | 8. 173596 | 8. 143683 | 8. 943303 | 8. 963195 | 9. 007595 |
| GINS2     | 8. 301839 | 8. 351442 | 8. 3033   | 7. 566165 | 7. 438786 | 7. 461573 |
| TMEM182   | 4. 524569 | 4. 528407 | 4. 620689 | 3. 548297 | 3. 665892 | 3. 972537 |
| JMJD1C    | 6. 524209 | 6. 627365 | 6. 631721 | 7. 402517 | 7. 399533 | 7. 467165 |
| ZNF780A   | 5. 448306 | 5. 346032 | 5. 472356 | 6. 433542 | 6. 150247 | 6. 166315 |
| OSBPL3    | 8. 039326 | 8. 081597 | 8. 045017 | 8. 87204  | 8. 845536 | 8. 931693 |
| ZNF148    | 6. 034469 | 5. 957964 | 6. 13946  | 5. 358742 | 5. 182122 | 5. 108692 |
| DYNLT3    | 9. 414752 | 9. 45272  | 9. 476723 | 8. 619081 | 8. 577595 | 8. 665328 |
| ABCC5     | 7. 809292 | 7. 826216 | 7. 853998 | 8. 685935 | 8. 588705 | 8. 696802 |
| HMG20B    | 8. 815113 | 8. 80701  | 8. 823296 | 7. 940312 | 7. 956192 | 8. 067396 |
| EVI2A     | 5. 210655 | 5. 113778 | 4. 864228 | 5. 841502 | 5. 851577 | 5. 976611 |
| ITGAV     | 8. 980979 | 9. 044198 | 8. 967341 | 8. 168801 | 8. 140469 | 8. 203693 |
| WBSCR27   | 7. 651943 | 7. 72903  | 7. 756664 | 6. 881638 | 6. 805531 | 6. 971496 |
| ARL1      | 8. 505449 | 8. 482459 | 8. 389441 | 7. 65713  | 7. 626829 | 7. 61446  |
| IGIP      | 5. 729806 | 5. 785076 | 5. 813928 | 5. 064707 | 4. 798699 | 4. 987157 |
| NDFIP1    | 7. 694659 | 7. 712543 | 7. 740688 | 6. 837299 | 6. 886036 | 6. 946371 |
| FOXRED1   | 7. 946328 | 7. 992811 | 8. 038902 | 7. 096931 | 7. 194718 | 7. 208415 |
| GNAI1     | 6. 968197 | 6. 903526 | 6. 884427 | 7. 716598 | 7. 7707   | 7. 741729 |
| TUB       | 6. 586294 | 6. 502251 | 6. 627306 | 5. 742181 | 5. 647611 | 5. 853431 |
| ZNF20 /// | 6. 886662 | 6. 993907 | 6. 917911 | 7. 727383 | 7. 748485 | 7. 795143 |
| SETBP1    | 4. 646419 | 4. 641466 | 4. 515154 | 5. 38397  | 5. 409607 | 5. 480893 |
| PLSCR1    | 5. 53575  | 5. 431463 | 5. 798623 | 4. 970056 | 4. 595042 | 4. 730394 |
| HAUS4     | 8. 170196 | 8. 141291 | 8. 095382 | 7. 422549 | 7. 21883  | 7. 295562 |
| CCND1     | 9. 240316 | 9. 280886 | 9. 164644 | 10. 05589 | 10. 0441  | 10. 05545 |
| ACER2     | 3. 695831 | 3. 602745 | 3. 903844 | 4. 39198  | 4. 633376 | 4. 646318 |
| DDX58     | 6. 825316 | 6. 714666 | 6. 793839 | 7. 645551 | 7. 507119 | 7. 649961 |
| ADGRG1    | 9. 386659 | 9. 481369 | 9. 515534 | 10. 27972 | 10. 26892 | 10. 30316 |
| ZNF484    | 4. 687026 | 4. 636836 | 4. 8279   | 5. 416622 | 5. 49748  | 5. 702969 |
| SLC14A1   | 5. 005849 | 4. 822969 | 4. 914544 | 5. 814327 | 5. 627088 | 5. 765565 |
| OGFRL1    | 5. 022027 | 4. 789321 | 4. 820815 | 5. 701519 | 5. 69469  | 5. 698724 |

|           |          |          |          |          |          |          |
|-----------|----------|----------|----------|----------|----------|----------|
| RGS5      | 4.649    | 4.508505 | 4.548042 | 5.443437 | 5.213848 | 5.510926 |
| DUSP10    | 7.047928 | 7.108927 | 7.0294   | 7.867825 | 7.861001 | 7.919293 |
| IRAK1 /// | 7.470191 | 7.603677 | 7.666547 | 6.732585 | 6.742156 | 6.803847 |
| GPRC5A    | 7.837385 | 7.924023 | 7.889087 | 8.69134  | 8.713141 | 8.706987 |
| ZHX2      | 5.349796 | 5.349796 | 5.505411 | 6.213239 | 6.194998 | 6.256098 |
| KCTD18    | 6.724981 | 6.622718 | 6.623828 | 5.652945 | 5.991736 | 5.868139 |
| C1GALT1C1 | 6.823847 | 6.905268 | 6.84297  | 6.133205 | 5.918755 | 6.061587 |
| DCAF8     | 5.546155 | 5.444451 | 5.578595 | 6.401221 | 6.252316 | 6.373964 |
| PIM1      | 3.997141 | 3.906519 | 4.09521  | 3.127792 | 3.001227 | 3.412811 |
| IDS       | 8.232173 | 8.192194 | 8.256154 | 7.455773 | 7.342781 | 7.425455 |
| FOXN2     | 5.368169 | 5.34136  | 5.532144 | 6.206113 | 6.101911 | 6.389376 |
| ZNF773    | 6.705977 | 6.597189 | 6.83433  | 7.554313 | 7.485758 | 7.551658 |
| RAD1      | 6.060196 | 6.126743 | 6.097503 | 5.266046 | 5.306386 | 5.259482 |
| PSMB6     | 10.33338 | 10.38754 | 10.35238 | 9.525705 | 9.494542 | 9.601786 |
| SAMD4A    | 5.797622 | 5.75545  | 5.77686  | 6.646197 | 6.523472 | 6.611089 |
| GDAP1     | 7.728365 | 7.748169 | 7.796687 | 8.618007 | 8.503153 | 8.601762 |
| ZNF791    | 6.78533  | 6.865849 | 6.785251 | 7.619582 | 7.524839 | 7.740933 |
| NEK7      | 7.488448 | 7.487372 | 7.540745 | 8.293532 | 8.29679  | 8.375068 |
| ZC3HAV1   | 6.161621 | 6.209518 | 6.175369 | 7.04468  | 6.97515  | 6.972665 |
| CDK1      | 9.293087 | 9.340693 | 9.271791 | 8.52877  | 8.495845 | 8.439735 |
| SMC1A     | 5.411844 | 5.183418 | 5.360455 | 4.723453 | 4.655558 | 4.136253 |
| ZNF24     | 7.289063 | 7.157203 | 7.328881 | 8.133555 | 7.982551 | 8.099181 |
| ATF4      | 11.66934 | 11.68636 | 11.6833  | 10.86626 | 10.85732 | 10.87761 |
| TUSC2     | 7.701571 | 7.764012 | 7.680027 | 8.551879 | 8.513918 | 8.517166 |
| NHS       | 4.967166 | 5.050514 | 5.068016 | 5.781277 | 5.834319 | 5.907077 |
| PPP2R1A   | 9.918458 | 9.925062 | 9.914112 | 9.132514 | 9.092314 | 9.096324 |
| ETV1      | 5.661887 | 5.617853 | 5.562509 | 4.790001 | 4.700599 | 4.915307 |
| AEN       | 8.632588 | 8.59053  | 8.5852   | 9.399765 | 9.377763 | 9.465902 |
| EGF       | 4.584943 | 4.347189 | 4.249785 | 5.357734 | 5.113503 | 5.145349 |
| MTBP      | 7.123742 | 7.139923 | 7.146074 | 6.252076 | 6.325064 | 6.398684 |
| BNC2      | 7.405371 | 7.40323  | 7.464021 | 6.601466 | 6.567586 | 6.67093  |
| LRRC1     | 6.69158  | 6.739161 | 6.800428 | 7.554561 | 7.509147 | 7.59998  |
| OLFML2A   | 7.502471 | 7.528009 | 7.425979 | 6.76591  | 6.644619 | 6.618784 |
| OTUD1     | 7.35759  | 7.355614 | 7.375572 | 8.24908  | 8.097028 | 8.169777 |
| SMAD2     | 6.570693 | 6.554941 | 6.59458  | 5.72916  | 5.676537 | 5.887826 |
| APITD1 // | 8.037437 | 8.057472 | 7.98703  | 7.260491 | 7.179074 | 7.219795 |
| AP2B1     | 8.616977 | 8.616107 | 8.640842 | 9.427637 | 9.3985   | 9.470293 |
| IQGAP1    | 9.200662 | 9.280001 | 9.202789 | 8.396628 | 8.404367 | 8.460404 |
| MLLT10    | 6.764328 | 6.593024 | 6.907815 | 5.946432 | 5.803347 | 6.093739 |
| NFKBIE    | 7.873295 | 7.970586 | 7.869772 | 8.725587 | 8.689824 | 8.719324 |
| ZNF726    | 6.409716 | 6.392597 | 6.288061 | 5.615366 | 5.524487 | 5.531077 |
| ADGRF1    | 5.420565 | 5.324017 | 5.4026   | 6.202914 | 6.139101 | 6.22318  |
| PCGF3     | 8.475047 | 8.388703 | 8.460526 | 7.596154 | 7.612043 | 7.698641 |
| TIMP2     | 9.34144  | 9.359383 | 9.385143 | 8.598388 | 8.474869 | 8.596744 |
| FCH02     | 5.977176 | 6.048891 | 6.128273 | 6.873282 | 6.862069 | 6.834717 |
| SGPL1     | 6.440965 | 6.347634 | 6.347582 | 5.523528 | 5.623942 | 5.572991 |
| MKLN1     | 7.687793 | 7.735126 | 7.836057 | 8.589394 | 8.520222 | 8.564764 |
| TBC1D19   | 6.163516 | 6.11575  | 6.238571 | 7.002979 | 6.809446 | 7.120628 |
| ATP2A2    | 9.650301 | 9.661987 | 9.67799  | 8.798561 | 8.856668 | 8.920531 |
| RNF6      | 7.367004 | 7.347877 | 7.40133  | 8.174482 | 8.151126 | 8.204832 |
| GLG1      | 8.055517 | 8.020491 | 8.021391 | 7.222083 | 7.27515  | 7.191212 |

|           |           |           |           |           |           |           |
|-----------|-----------|-----------|-----------|-----------|-----------|-----------|
| NRM       | 8. 230549 | 8. 285101 | 8. 240126 | 7. 389099 | 7. 49794  | 7. 465795 |
| ZNF658 // | 5. 6811   | 5. 722505 | 5. 834916 | 6. 56979  | 6. 431773 | 6. 639381 |
| ZNF416    | 6. 520126 | 6. 567282 | 6. 604798 | 7. 452109 | 7. 297645 | 7. 344295 |
| PARP14    | 5. 163186 | 5. 032166 | 5. 299844 | 5. 993428 | 5. 900841 | 6. 002648 |
| RARA      | 7. 642762 | 7. 614161 | 7. 745723 | 8. 45314  | 8. 432411 | 8. 518282 |
| ETF1      | 10. 32313 | 10. 34816 | 10. 35137 | 9. 568775 | 9. 486595 | 9. 567207 |
| ATG2B     | 5. 693629 | 5. 694549 | 5. 751436 | 6. 576864 | 6. 478979 | 6. 483854 |
| B4GALT1   | 7. 656725 | 7. 717112 | 7. 744213 | 6. 889632 | 6. 924067 | 6. 904664 |
| HNRNPR    | 6. 371836 | 6. 422212 | 6. 52366  | 5. 634054 | 5. 59445  | 5. 68999  |
| ZNF678    | 3. 2128   | 2. 718332 | 2. 416807 | 3. 731133 | 3. 553    | 3. 461925 |
| PARP1     | 6. 605465 | 6. 62636  | 6. 682712 | 5. 850493 | 5. 828407 | 5. 837569 |
| HNRNPU    | 6. 34865  | 6. 352343 | 6. 422349 | 5. 68993  | 5. 51643  | 5. 519054 |
| AGO3      | 6. 131985 | 6. 00365  | 6. 196614 | 6. 988639 | 6. 836041 | 6. 902231 |
| FMN1      | 8. 62915  | 8. 626309 | 8. 581426 | 7. 836029 | 7. 760902 | 7. 845858 |
| PGK1      | 10. 06663 | 10. 00647 | 9. 915866 | 9. 225607 | 9. 179258 | 9. 191967 |
| PANK3     | 7. 898833 | 7. 797562 | 7. 759271 | 8. 635239 | 8. 67205  | 8. 540442 |
| ZNF322    | 6. 226979 | 6. 334326 | 6. 300716 | 7. 060872 | 7. 050346 | 7. 142783 |
| PDE4B     | 5. 666964 | 5. 656715 | 5. 619473 | 6. 485066 | 6. 293129 | 6. 556795 |
| RBM24     | 3. 757193 | 3. 806083 | 3. 701371 | 4. 668482 | 4. 375672 | 4. 611956 |
| MED28     | 7. 212661 | 7. 136096 | 7. 257084 | 8. 049831 | 7. 967608 | 7. 979432 |
| PPP1R1C   | 7. 238894 | 7. 24544  | 7. 186576 | 8. 037881 | 8. 009088 | 8. 014901 |
| BTG2      | 7. 457629 | 7. 400676 | 7. 459454 | 8. 244877 | 8. 223489 | 8. 240273 |
| CTSC      | 7. 946005 | 7. 836462 | 7. 916367 | 7. 151268 | 7. 059453 | 7. 097597 |
| NEDD1     | 8. 642464 | 8. 587303 | 8. 590606 | 7. 87061  | 7. 761585 | 7. 798175 |
| GCH1      | 5. 626119 | 5. 50913  | 5. 646732 | 4. 928602 | 4. 646548 | 4. 817506 |
| CARD16 // | 4. 853929 | 5. 096354 | 4. 733055 | 5. 772977 | 5. 512378 | 5. 786472 |
| KIAA0895  | 5. 993244 | 6. 021262 | 6. 168629 | 6. 943716 | 6. 702819 | 6. 925035 |
| GCAT      | 6. 644733 | 6. 543205 | 6. 638326 | 5. 985496 | 5. 716081 | 5. 736439 |
| STK17B    | 5. 444481 | 5. 483405 | 5. 549783 | 6. 26331  | 6. 189383 | 6. 41076  |
| FN3KRP    | 8. 40513  | 8. 455122 | 8. 455122 | 7. 687852 | 7. 579355 | 7. 662772 |
| BCCIP     | 8. 258753 | 8. 192586 | 8. 284043 | 7. 502152 | 7. 356762 | 7. 491352 |
| MTFR1L    | 7. 742992 | 7. 687345 | 7. 713508 | 6. 989945 | 6. 899223 | 6. 869866 |
| CCNF      | 7. 442912 | 7. 475844 | 7. 571093 | 6. 679911 | 6. 714552 | 6. 711125 |
| CEP57L1   | 5. 387473 | 5. 432542 | 5. 347526 | 4. 569404 | 4. 3825   | 4. 831708 |
| CCNL1     | 9. 04787  | 9. 041401 | 9. 095196 | 9. 879841 | 9. 793063 | 9. 895142 |
| ROB04     | 8. 473372 | 8. 464245 | 8. 549273 | 7. 694116 | 7. 610379 | 7. 798886 |
| OSMR      | 4. 470628 | 4. 746939 | 4. 694201 | 5. 523587 | 5. 228637 | 5. 541774 |
| CENPU     | 9. 701585 | 9. 691806 | 9. 683301 | 8. 939257 | 8. 880298 | 8. 878506 |
| USP32 /// | 5. 685401 | 5. 784682 | 5. 639284 | 6. 542691 | 6. 396847 | 6. 546942 |
| GTPBP3    | 8. 920179 | 8. 922534 | 8. 895911 | 8. 093331 | 8. 11025  | 8. 158174 |
| TMOD2     | 4. 157426 | 4. 275553 | 4. 22787  | 4. 935901 | 5. 045691 | 5. 055631 |
| MRGPRX4   | 4. 980941 | 4. 733786 | 4. 910337 | 5. 770922 | 5. 606023 | 5. 623679 |
| MYO6      | 6. 085641 | 5. 984997 | 6. 085266 | 5. 462268 | 4. 981008 | 5. 338943 |
| PDXP ///  | 8. 132756 | 8. 235234 | 8. 19897  | 7. 462381 | 7. 328309 | 7. 402681 |
| CBX6      | 9. 117395 | 9. 139975 | 9. 135677 | 8. 361301 | 8. 308007 | 8. 350191 |
| IFNL1     | 5. 643723 | 5. 781181 | 5. 654261 | 6. 502431 | 6. 397046 | 6. 55254  |
| KDM4B     | 6. 472603 | 6. 436366 | 6. 571764 | 7. 285686 | 7. 278733 | 7. 289164 |
| DNER      | 5. 47624  | 5. 426108 | 5. 615824 | 6. 289148 | 6. 242766 | 6. 357899 |
| CCDC28A   | 7. 583586 | 7. 567949 | 7. 553076 | 6. 774191 | 6. 714187 | 6. 8453   |
| IMPDH1    | 9. 99941  | 9. 999973 | 10. 00469 | 9. 262341 | 9. 225287 | 9. 146417 |
| MLF1      | 5. 913561 | 5. 71798  | 5. 991013 | 5. 209269 | 4. 915937 | 5. 129048 |

|           |          |          |          |          |          |          |
|-----------|----------|----------|----------|----------|----------|----------|
| ZFX /// Z | 5.208779 | 5.239813 | 5.156313 | 5.976831 | 5.94885  | 6.046643 |
| SERPINA1  | 4.276901 | 4.046319 | 4.130423 | 4.936223 | 5.026775 | 4.857793 |
| EGFLAM    | 4.58555  | 4.462494 | 4.629167 | 5.326417 | 5.278578 | 5.439177 |
| TMF1      | 7.428983 | 7.453887 | 7.444616 | 8.246796 | 8.220449 | 8.226405 |
| EAF1      | 6.637722 | 6.675824 | 6.805152 | 7.578733 | 7.378499 | 7.527421 |
| NUFIP2    | 8.015774 | 7.94668  | 8.078989 | 7.256553 | 7.194023 | 7.225934 |
| IFIT3     | 7.101028 | 7.141641 | 7.164737 | 7.872934 | 7.905768 | 7.993082 |
| FAM3C     | 9.495522 | 9.505719 | 9.375076 | 10.27543 | 10.27691 | 10.18792 |
| NACC2     | 6.366245 | 6.344639 | 6.438036 | 7.164867 | 7.04725  | 7.300075 |
| CFAP45    | 5.012363 | 5.169291 | 4.922957 | 5.869575 | 5.692405 | 5.904689 |
| OSBPL10   | 7.89655  | 7.913882 | 7.922813 | 8.703332 | 8.68766  | 8.703332 |
| C11orf63  | 4.10161  | 4.08856  | 4.241657 | 5.06115  | 4.815068 | 4.914031 |
| MAP2K4    | 6.000756 | 5.976251 | 5.998837 | 6.79197  | 6.670365 | 6.870036 |
| FAM199X   | 7.602707 | 7.580674 | 7.600818 | 8.37796  | 8.369273 | 8.391943 |
| FSD1L     | 5.058804 | 5.095962 | 5.138137 | 5.969576 | 5.804143 | 5.871851 |
| DMRTA1    | 5.160251 | 5.164839 | 5.416853 | 6.128954 | 5.875264 | 6.089913 |
| PHC1      | 8.326653 | 8.307123 | 8.351891 | 7.499896 | 7.507029 | 7.631177 |
| KCNS3     | 6.407038 | 6.495583 | 6.522713 | 5.578824 | 5.687883 | 5.811268 |
| SDC4      | 9.725368 | 9.771093 | 9.70713  | 8.991133 | 8.894397 | 8.970949 |
| ASAP1     | 8.483806 | 8.538126 | 8.560414 | 9.328314 | 9.299449 | 9.301125 |
| LONRF1    | 6.151875 | 6.134706 | 6.259157 | 6.994853 | 6.881601 | 7.015416 |
| BAGE2     | 7.781337 | 7.83544  | 7.858982 | 8.60364  | 8.577852 | 8.639618 |
| PTPRM     | 7.855886 | 7.81503  | 7.928589 | 8.705625 | 8.576048 | 8.658789 |
| SYTL2     | 7.686489 | 7.69986  | 7.774872 | 8.479855 | 8.442618 | 8.578994 |
| FHL5      | 4.079161 | 4.071291 | 4.366396 | 4.838327 | 4.974666 | 5.043937 |
| LARS      | 8.195425 | 8.142204 | 8.005169 | 7.343542 | 7.343542 | 7.315936 |
| RFC5      | 8.7343   | 8.826274 | 8.735605 | 8.005892 | 7.940285 | 8.010453 |
| ACER3     | 6.73798  | 6.850812 | 6.80393  | 6.121357 | 5.91394  | 6.018563 |
| TRPV1     | 5.285937 | 5.141225 | 5.071339 | 5.888259 | 5.83378  | 6.114611 |
| ZBED1     | 6.48001  | 6.569715 | 6.599817 | 5.769789 | 5.715132 | 5.826943 |
| ZBTB26    | 5.207743 | 5.416494 | 5.325716 | 6.083517 | 6.115863 | 6.087401 |
| MRS2      | 7.207665 | 7.112039 | 7.031541 | 7.947766 | 7.903103 | 7.836029 |
| PNKD      | 8.716918 | 8.847292 | 8.786357 | 7.99062  | 8.064363 | 7.960467 |
| LIF       | 8.395312 | 8.443185 | 8.337332 | 9.16933  | 9.182709 | 9.158805 |
| ZNF134    | 6.498509 | 6.541304 | 6.530023 | 7.308304 | 7.230383 | 7.365528 |
| ACAT2     | 9.269343 | 9.323065 | 9.289388 | 8.563826 | 8.510594 | 8.476833 |
| MDM2      | 8.45051  | 8.45973  | 8.405361 | 9.212423 | 9.173817 | 9.258834 |
| LOC100506 | 6.675811 | 6.768309 | 6.712338 | 7.466735 | 7.45361  | 7.564687 |
| LOC105369 | 9.666727 | 9.750455 | 9.710241 | 8.96734  | 8.893647 | 8.939085 |
| CYTH3     | 5.297508 | 5.34278  | 5.562813 | 6.300653 | 6.140949 | 6.087422 |
| JAZF1     | 5.90047  | 5.755005 | 6.067255 | 6.69414  | 6.607653 | 6.746534 |
| VRK1      | 8.367537 | 8.330935 | 8.376278 | 7.664767 | 7.588239 | 7.496225 |
| ANKRD12   | 6.921231 | 6.920058 | 7.036251 | 7.824588 | 7.684957 | 7.693354 |
| CDC42EP3  | 8.828286 | 8.90244  | 8.949545 | 8.161851 | 8.099512 | 8.094364 |
| SYNE1     | 6.485612 | 6.631721 | 6.503798 | 7.408598 | 7.246575 | 7.289727 |
| PTBP3     | 7.095439 | 7.100748 | 7.201907 | 7.962559 | 7.82971  | 7.92937  |
| SMC5      | 6.17765  | 6.241935 | 6.271415 | 7.088656 | 6.87807  | 7.047255 |
| NAPB      | 5.081067 | 5.176564 | 5.329663 | 5.995886 | 5.866583 | 6.046268 |
| VKORC1    | 10.27938 | 10.33419 | 10.31836 | 9.542116 | 9.488239 | 9.58063  |
| HMGB1     | 11.17967 | 11.11473 | 11.0822  | 10.35095 | 10.37051 | 10.33477 |
| SUCO      | 7.126471 | 7.098995 | 7.238752 | 6.357304 | 6.418256 | 6.369097 |



|           |          |          |          |          |          |          |
|-----------|----------|----------|----------|----------|----------|----------|
| KDM5B     | 7.530979 | 7.533919 | 7.595395 | 8.34418  | 8.297887 | 8.336537 |
| IGF2BP1   | 6.7541   | 6.681031 | 6.757745 | 7.470349 | 7.512199 | 7.527945 |
| C8orf34   | 3.800084 | 3.49305  | 3.769207 | 4.291403 | 4.461081 | 4.626574 |
| NAP1L1    | 6.61978  | 6.701508 | 6.646257 | 5.851874 | 5.84895  | 5.950108 |
| CDC14A    | 5.560182 | 5.783715 | 5.753417 | 6.56979  | 6.431773 | 6.412143 |
| FOXM1     | 8.024795 | 8.095456 | 8.082384 | 7.337945 | 7.269082 | 7.279442 |
| RNF144B   | 4.140412 | 4.389734 | 4.066053 | 5.065491 | 4.812094 | 5.033138 |
| ACTN2     | 6.228733 | 6.071622 | 6.281753 | 7.041706 | 6.901843 | 6.953046 |
| NRIP1     | 6.52203  | 6.547544 | 6.45066  | 7.303539 | 7.16403  | 7.365119 |
| ZDHC21    | 6.957226 | 6.896322 | 6.987484 | 7.80672  | 7.595982 | 7.74983  |
| CDCA3     | 8.318213 | 8.208627 | 8.238145 | 7.556922 | 7.426233 | 7.470389 |
| GJA5      | 6.263973 | 6.20715  | 6.27115  | 7.059671 | 6.994736 | 6.998295 |
| MIB1      | 5.85685  | 5.901632 | 5.966    | 5.153012 | 4.995857 | 5.265729 |
| DRAM1     | 7.394715 | 7.276068 | 7.338839 | 8.099445 | 8.109257 | 8.110085 |
| PHF19     | 9.509205 | 9.548804 | 9.487532 | 8.7602   | 8.695104 | 8.783538 |
| RICTOR    | 6.534842 | 6.57481  | 6.565774 | 7.368602 | 7.3153   | 7.296302 |
| CTPS2     | 7.20972  | 7.169436 | 7.145386 | 6.693996 | 6.221272 | 6.305678 |
| IFIT2     | 8.141894 | 8.072339 | 8.091488 | 8.882165 | 8.838426 | 8.88779  |
| RLIM      | 7.2785   | 7.358978 | 7.339634 | 8.131127 | 8.031303 | 8.116408 |
| TIMELESS  | 8.13458  | 8.081238 | 8.180956 | 7.329047 | 7.293098 | 7.473265 |
| CNST      | 7.131035 | 7.095372 | 7.108456 | 7.882679 | 7.842658 | 7.910026 |
| PFDN1     | 9.54818  | 9.522159 | 9.532251 | 8.81484  | 8.74018  | 8.748603 |
| ADD1      | 9.210229 | 9.19911  | 9.203754 | 8.457436 | 8.431804 | 8.424975 |
| RUFY2     | 5.878822 | 5.893885 | 5.984961 | 6.724472 | 6.556518 | 6.775064 |
| HNRNPC    | 8.519049 | 8.548171 | 8.522348 | 7.739639 | 7.7134   | 7.838198 |
| SYNJ1     | 3.743666 | 3.895684 | 3.701155 | 4.56831  | 4.368709 | 4.700518 |
| SGMS2     | 2.563965 | 2.633413 | 2.733372 | 3.415535 | 3.271441 | 3.540259 |
| CCNE2     | 7.577427 | 7.588687 | 7.523911 | 6.79098  | 6.797188 | 6.80561  |
| SCCPDH    | 7.296762 | 7.270939 | 7.441844 | 6.706422 | 6.315799 | 6.692051 |
| FBXO11    | 5.900821 | 5.738656 | 5.665141 | 5.227193 | 4.645935 | 5.139518 |
| TOR1AIP2  | 7.02865  | 7.124696 | 7.168768 | 7.869144 | 7.79629  | 7.947376 |
| SH3PXD2B  | 7.404757 | 7.589926 | 7.537947 | 6.688774 | 6.706254 | 6.847527 |
| CFAP69    | 3.607363 | 3.684618 | 3.684335 | 4.438093 | 4.318106 | 4.510125 |
| PPP1R15A  | 8.658334 | 8.748398 | 8.731672 | 9.502902 | 9.469968 | 9.454824 |
| ABCA5     | 5.531652 | 5.253344 | 5.415189 | 6.198888 | 6.144277 | 6.146076 |
| C5orf24   | 7.230383 | 7.37182  | 7.394549 | 8.06425  | 8.027545 | 8.193989 |
| PLK1      | 8.337691 | 8.35182  | 8.324384 | 7.587039 | 7.482442 | 7.656413 |
| LSM2      | 9.280383 | 9.334655 | 9.296384 | 8.560324 | 8.436525 | 8.626708 |
| NCAPD3    | 9.670704 | 9.655913 | 9.591319 | 8.900774 | 8.903722 | 8.825581 |
| CEP55     | 8.950319 | 8.984304 | 8.956464 | 8.221327 | 8.195957 | 8.186564 |
| EFCAB2    | 6.263577 | 6.021481 | 5.965602 | 5.216295 | 5.465374 | 5.281754 |
| LNPEP     | 6.278336 | 6.044295 | 6.151305 | 6.914473 | 6.970145 | 6.874418 |
| ZNF227    | 7.934819 | 7.95117  | 7.976717 | 8.720664 | 8.678796 | 8.747363 |
| PDZK1 /// | 3.506137 | 3.489769 | 3.705635 | 4.200688 | 4.38119  | 4.402653 |
| USP15     | 8.155031 | 8.203171 | 8.132305 | 8.939589 | 8.962191 | 8.871192 |
| LETM2     | 5.93063  | 5.838071 | 5.77592  | 6.704998 | 6.626863 | 6.494453 |
| ERO1B     | 5.700312 | 5.681517 | 5.665845 | 6.448388 | 6.441793 | 6.439129 |
| BAGE2 /// | 7.854214 | 7.945689 | 7.938691 | 8.678502 | 8.640237 | 8.701399 |
| KDM6B     | 5.9507   | 6.044295 | 6.13946  | 6.872367 | 6.789197 | 6.753675 |
| CCP110    | 7.132478 | 7.1005   | 7.199918 | 7.9268   | 7.844578 | 7.941009 |
| ZNF117    | 5.321759 | 5.469821 | 5.557531 | 6.220917 | 6.186438 | 6.220917 |

|           |           |           |           |           |           |           |
|-----------|-----------|-----------|-----------|-----------|-----------|-----------|
| VPS13D    | 5. 814694 | 5. 787829 | 5. 901803 | 5. 103787 | 4. 952744 | 5. 168839 |
| NAPG      | 7. 351475 | 7. 241258 | 7. 355058 | 8. 148885 | 8. 016791 | 8. 061072 |
| TUFT1     | 8. 159424 | 8. 100789 | 8. 191109 | 8. 905448 | 8. 862278 | 8. 960614 |
| KIAA0368  | 4. 772376 | 4. 692279 | 4. 643727 | 3. 663541 | 4. 117185 | 4. 051283 |
| EGLN1     | 8. 0206   | 8. 004671 | 7. 982412 | 8. 828143 | 8. 720202 | 8. 733648 |
| CPA2      | 4. 746088 | 4. 498786 | 4. 627228 | 5. 413224 | 5. 243    | 5. 489451 |
| PRC1      | 8. 304402 | 8. 332718 | 8. 254169 | 7. 561591 | 7. 466807 | 7. 589936 |
| N4BP2L2   | 5. 804918 | 5. 855674 | 5. 691061 | 6. 605925 | 6. 5324   | 6. 486227 |
| LINC00341 | 8. 022327 | 7. 948426 | 8. 165327 | 7. 354825 | 7. 174708 | 7. 333735 |
| HUS1      | 5. 414879 | 5. 322342 | 5. 392798 | 6. 133427 | 5. 997002 | 6. 272355 |
| KLF7      | 5. 630263 | 5. 724115 | 5. 893912 | 6. 624184 | 6. 321848 | 6. 574844 |
| TRIM25    | 8. 401003 | 8. 333782 | 8. 30265  | 7. 563486 | 7. 563585 | 7. 637958 |
| RIC1      | 6. 270604 | 6. 486271 | 6. 221659 | 7. 161745 | 7. 068939 | 7. 020092 |
| BRCA1     | 7. 83097  | 7. 852742 | 7. 94194  | 7. 103495 | 7. 065597 | 7. 184558 |
| DOCK4     | 6. 653899 | 6. 700381 | 6. 667111 | 7. 435588 | 7. 380907 | 7. 476465 |
| REST      | 5. 25948  | 5. 33633  | 5. 267708 | 6. 169009 | 5. 939238 | 6. 026578 |
| RAD18     | 7. 311183 | 7. 251116 | 7. 357077 | 6. 571746 | 6. 466996 | 6. 610494 |
| C5orf58   | 4. 68627  | 4. 828264 | 4. 877978 | 5. 690092 | 5. 456845 | 5. 515352 |
| CD200     | 6. 017669 | 6. 030424 | 6. 153963 | 5. 265161 | 5. 243908 | 5. 424817 |
| PIF1      | 7. 314797 | 7. 306287 | 7. 349108 | 6. 588085 | 6. 477401 | 6. 636801 |
| ZBTB34    | 6. 718289 | 6. 84083  | 6. 874616 | 7. 658609 | 7. 573784 | 7. 468417 |
| MMS22L    | 7. 256876 | 7. 22154  | 7. 118125 | 6. 484404 | 6. 555991 | 6. 29037  |
| HOXA13    | 3. 933424 | 3. 816937 | 3. 933525 | 2. 912932 | 3. 251278 | 3. 254165 |
| CBLB      | 6. 764762 | 6. 841709 | 6. 946534 | 7. 619582 | 7. 540913 | 7. 657596 |
| ANP32E    | 10. 62583 | 10. 55577 | 10. 51242 | 9. 844178 | 9. 765693 | 9. 819768 |
| ZNF597    | 4. 863667 | 5. 057969 | 4. 992794 | 5. 894707 | 5. 620746 | 5. 66325  |
| MTF2      | 7. 413099 | 7. 427904 | 7. 388173 | 8. 208232 | 8. 124386 | 8. 160721 |
| TTI1      | 8. 988448 | 8. 986448 | 8. 986877 | 8. 23272  | 8. 228333 | 8. 239213 |
| SERPIND1  | 3. 355844 | 3. 111911 | 3. 116387 | 4. 108602 | 3. 856026 | 3. 880795 |
| SELM      | 8. 179081 | 8. 26837  | 8. 243114 | 8. 990155 | 8. 947015 | 9. 014029 |
| ERAP2     | 3. 407289 | 3. 181939 | 3. 371417 | 4. 275553 | 3. 917221 | 4. 027332 |
| KMT2C     | 7. 239959 | 7. 177539 | 7. 252019 | 8. 065175 | 7. 933058 | 7. 930718 |
| SYT11     | 5. 626348 | 5. 617976 | 5. 698906 | 6. 343194 | 6. 412143 | 6. 446883 |
| VCPKMT    | 5. 756352 | 5. 798177 | 5. 787205 | 6. 610563 | 6. 504429 | 6. 485569 |
| SHISA3    | 4. 40462  | 4. 716297 | 4. 511837 | 3. 721487 | 3. 802367 | 3. 850256 |
| TUBGCP3   | 7. 086259 | 7. 067536 | 7. 144124 | 6. 375308 | 6. 261997 | 6. 403676 |
| BLM       | 7. 432403 | 7. 452878 | 7. 430093 | 6. 704342 | 6. 651634 | 6. 703066 |
| ARID4A    | 7. 744617 | 7. 82485  | 7. 737184 | 8. 560324 | 8. 519041 | 8. 482188 |
| ZNF195    | 7. 751052 | 7. 755238 | 7. 765954 | 8. 533569 | 8. 461469 | 8. 532103 |
| SGTB      | 5. 634391 | 5. 74574  | 5. 806709 | 6. 524649 | 6. 398643 | 6. 518091 |
| KIF20B    | 8. 290071 | 8. 188889 | 8. 175693 | 7. 556131 | 7. 362247 | 7. 482632 |
| OSCP1     | 3. 867709 | 3. 606323 | 3. 874277 | 4. 574646 | 4. 512646 | 4. 5129   |
| KRT15     | 5. 751333 | 5. 707791 | 5. 677002 | 6. 618734 | 6. 40082  | 6. 367956 |
| CNOT6     | 7. 637895 | 7. 629688 | 7. 727041 | 8. 401769 | 8. 388065 | 8. 456049 |
| STRADA    | 6. 84269  | 6. 846923 | 6. 801045 | 6. 009579 | 6. 098981 | 6. 130856 |
| ABHD2     | 6. 297306 | 6. 465446 | 6. 352048 | 7. 105295 | 7. 14811  | 7. 112012 |
| COL4A1    | 8. 115551 | 8. 114476 | 8. 140905 | 8. 972995 | 8. 736171 | 8. 912063 |
| ARNTL     | 6. 455748 | 6. 414963 | 6. 263577 | 7. 197997 | 7. 07811  | 7. 108219 |
| DENND1B   | 6. 357888 | 6. 448388 | 6. 497353 | 7. 285033 | 7. 12408  | 7. 142917 |
| UTRN      | 6. 398335 | 6. 465097 | 6. 524262 | 7. 267467 | 7. 104951 | 7. 263576 |
| PHF14     | 5. 106145 | 5. 162821 | 4. 88676  | 5. 992961 | 5. 762854 | 5. 647574 |

|           |           |           |           |           |           |           |
|-----------|-----------|-----------|-----------|-----------|-----------|-----------|
| ZBTB14    | 4. 532283 | 4. 247388 | 4. 326942 | 3. 754565 | 3. 456111 | 3. 648808 |
| ORC2      | 7. 672351 | 7. 696953 | 7. 73381  | 7. 001662 | 6. 925226 | 6. 929256 |
| ZNF14     | 4. 458597 | 4. 336998 | 4. 389043 | 5. 204238 | 5. 010944 | 5. 216306 |
| TMEM30A   | 7. 970505 | 7. 957872 | 7. 954197 | 8. 734905 | 8. 691034 | 8. 703312 |
| MSRB3     | 6. 494453 | 6. 362663 | 6. 486162 | 7. 230383 | 7. 148844 | 7. 210356 |
| PAWR      | 8. 680439 | 8. 591048 | 8. 671982 | 9. 411116 | 9. 395517 | 9. 383035 |
| SOGA3     | 2. 669294 | 2. 575946 | 2. 990133 | 3. 754809 | 3. 104568 | 3. 621798 |
| PTPRF     | 9. 154693 | 9. 161369 | 9. 174655 | 8. 404229 | 8. 386635 | 8. 45424  |
| ZNF92     | 7. 113704 | 7. 050138 | 7. 061087 | 7. 843079 | 7. 776894 | 7. 850084 |
| BABAM1    | 9. 925041 | 9. 935741 | 9. 924392 | 9. 22139  | 9. 103722 | 9. 216111 |
| BARD1     | 6. 729052 | 6. 770296 | 6. 764578 | 6. 071501 | 5. 819179 | 6. 129347 |
| NAGA      | 6. 705146 | 6. 851832 | 6. 851832 | 6. 244676 | 5. 890157 | 6. 030542 |
| ZCCHC6    | 7. 819093 | 7. 810353 | 7. 78601  | 8. 514628 | 8. 534563 | 8. 60917  |
| TMEM127   | 4. 992499 | 4. 984035 | 4. 984278 | 4. 221758 | 4. 272875 | 4. 225215 |
| WIPF2     | 5. 933635 | 6. 037542 | 6. 016001 | 5. 34929  | 5. 190004 | 5. 207751 |
| CAP2      | 5. 954091 | 5. 719136 | 5. 611088 | 6. 569301 | 6. 404092 | 6. 550589 |
| ZNF655    | 8. 122218 | 8. 050437 | 8. 100642 | 8. 874983 | 8. 844389 | 8. 791849 |
| ZNF419    | 6. 702691 | 6. 787253 | 6. 74141  | 7. 50409  | 7. 426233 | 7. 53854  |
| REEP5     | 9. 314503 | 9. 38815  | 9. 363508 | 10. 11363 | 10. 07322 | 10. 11666 |
| UBTF      | 7. 844424 | 7. 868815 | 8. 053991 | 7. 16243  | 7. 257559 | 7. 110224 |
| ITGAM     | 3. 206782 | 3. 306595 | 2. 998706 | 4. 043395 | 4. 080238 | 3. 625418 |
| GNG4      | 7. 279447 | 7. 245298 | 7. 300982 | 6. 523023 | 6. 600222 | 6. 467429 |
| MICAL3    | 6. 493189 | 6. 542718 | 6. 448151 | 7. 327929 | 7. 193644 | 7. 196146 |
| ZNF420    | 5. 945109 | 5. 836126 | 5. 879476 | 6. 646197 | 6. 602029 | 6. 646114 |
| LPAR1     | 4. 140287 | 3. 969536 | 4. 140733 | 4. 812496 | 4. 886118 | 4. 784247 |
| EBF1      | 5. 27973  | 5. 266109 | 5. 422684 | 6. 074351 | 5. 966175 | 6. 159781 |
| DCLRE1B   | 7. 446497 | 7. 399867 | 7. 471601 | 6. 665657 | 6. 657142 | 6. 764282 |
| RSL1D1    | 8. 084104 | 8. 062797 | 8. 082282 | 8. 808883 | 8. 807627 | 8. 843538 |
| BAGE ///  | 7. 23615  | 7. 273742 | 7. 382107 | 8. 059068 | 7. 953315 | 8. 109566 |
| TUBB8     | 4. 257616 | 4. 285247 | 4. 63916  | 3. 606323 | 3. 513447 | 3. 832499 |
| BUB1B     | 8. 66073  | 8. 699023 | 8. 775753 | 7. 932015 | 7. 903794 | 8. 070428 |
| NUF2      | 8. 955161 | 8. 816237 | 8. 762945 | 8. 142802 | 8. 126148 | 8. 036156 |
| APBB2     | 6. 965737 | 7. 115435 | 7. 119205 | 7. 741015 | 7. 795739 | 7. 892627 |
| NDC80     | 8. 710753 | 8. 695617 | 8. 652501 | 7. 826646 | 7. 99836  | 8. 006542 |
| EPB41L4A- | 9. 794763 | 9. 760296 | 9. 862476 | 10. 57569 | 10. 55114 | 10. 51803 |
| ZNF234    | 7. 207181 | 7. 212164 | 7. 16318  | 8. 015862 | 7. 900487 | 7. 893122 |
| SLC5A3    | 10. 29693 | 10. 24458 | 10. 29929 | 9. 540451 | 9. 516224 | 9. 557257 |
| ASPM      | 9. 788764 | 9. 811097 | 9. 81966  | 9. 09675  | 9. 02743  | 9. 06909  |
| DET1      | 7. 12807  | 7. 022323 | 7. 066762 | 6. 471586 | 6. 237827 | 6. 282234 |
| PDGFA     | 6. 525829 | 6. 570279 | 6. 604798 | 7. 345741 | 7. 226671 | 7. 352531 |
| IL12A     | 6. 050005 | 5. 969802 | 5. 715322 | 5. 267347 | 5. 08818  | 5. 155972 |
| C11orf96  | 6. 163643 | 6. 035404 | 6. 100174 | 5. 355387 | 5. 355387 | 5. 364989 |
| MRGPRX3   | 5. 835996 | 5. 926646 | 5. 882614 | 6. 61855  | 6. 682724 | 6. 566215 |
| DLGAP5    | 9. 311151 | 9. 238893 | 9. 183384 | 8. 547113 | 8. 463336 | 8. 501909 |
| SECISBP2L | 4. 947624 | 4. 93838  | 5. 023872 | 5. 769552 | 5. 614573 | 5. 746018 |
| PILRB /// | 8. 303477 | 8. 387606 | 8. 338707 | 9. 149321 | 9. 038124 | 9. 062342 |
| 1-Mar     | 3. 724636 | 3. 815508 | 3. 789131 | 4. 579916 | 4. 364689 | 4. 604121 |
| CBX2      | 7. 359158 | 7. 342095 | 7. 313814 | 6. 67434  | 6. 491578 | 6. 630534 |
| ROCK2     | 7. 972157 | 8. 046498 | 7. 889264 | 8. 738817 | 8. 646232 | 8. 74068  |
| ARID4B    | 6. 722368 | 6. 879127 | 6. 906833 | 7. 587313 | 7. 523862 | 7. 612198 |
| SNX13     | 7. 409233 | 7. 41781  | 7. 427513 | 8. 176293 | 8. 103446 | 8. 188899 |

|           |           |           |           |           |           |           |
|-----------|-----------|-----------|-----------|-----------|-----------|-----------|
| TMEM41B   | 8. 232807 | 8. 068879 | 8. 074675 | 7. 428869 | 7. 325631 | 7. 407857 |
| ARMC8     | 6. 595966 | 6. 719995 | 6. 652786 | 7. 449087 | 7. 32861  | 7. 404533 |
| B4GALT6   | 8. 994409 | 9. 010581 | 8. 990741 | 8. 310828 | 8. 218178 | 8. 255759 |
| ELOVL4    | 6. 813015 | 6. 89909  | 6. 890836 | 7. 674367 | 7. 540305 | 7. 597678 |
| SLC4A7    | 8. 958636 | 9. 021045 | 8. 905936 | 9. 705332 | 9. 658324 | 9. 72964  |
| LPP       | 6. 738934 | 6. 915308 | 6. 897818 | 7. 605015 | 7. 499298 | 7. 654928 |
| USP32 /// | 6. 420224 | 6. 42722  | 6. 295216 | 7. 21748  | 7. 056683 | 7. 074733 |
| TMEM107   | 7. 870604 | 7. 93892  | 7. 912156 | 7. 205871 | 7. 109422 | 7. 200584 |
| SEL1L3    | 7. 499456 | 7. 506443 | 7. 495136 | 6. 762529 | 6. 670107 | 6. 862705 |
| MDP1 ///  | 7. 832259 | 7. 918675 | 7. 804974 | 7. 144618 | 6. 944942 | 7. 260671 |
| ANTXR2    | 6. 539043 | 6. 632112 | 6. 480031 | 7. 288652 | 7. 266071 | 7. 301913 |
| TROVE2    | 7. 978839 | 7. 945771 | 8. 031393 | 8. 738085 | 8. 658791 | 8. 764493 |
| DPY19L4   | 6. 4835   | 6. 48952  | 6. 564609 | 7. 315186 | 7. 182807 | 7. 244097 |
| DEK       | 9. 193412 | 9. 213996 | 9. 221358 | 8. 4897   | 8. 437447 | 8. 497177 |
| FANCB     | 7. 145346 | 7. 217976 | 7. 337073 | 6. 522336 | 6. 461364 | 6. 512864 |
| ARFGEF2   | 6. 815901 | 6. 97914  | 6. 826092 | 7. 5857   | 7. 550383 | 7. 687396 |
| MAPK9     | 4. 498411 | 4. 581293 | 4. 451353 | 5. 331357 | 5. 11528  | 5. 285701 |
| CORO1A    | 6. 658035 | 6. 730926 | 6. 631721 | 5. 958978 | 6. 01591  | 5. 845375 |
| MPP4      | 5. 984126 | 6. 008458 | 6. 02868  | 6. 710832 | 6. 737796 | 6. 77292  |
| CLEC7A    | 3. 28674  | 2. 847776 | 3. 035664 | 3. 666971 | 3. 851367 | 3. 851367 |
| MTMR10    | 5. 37966  | 5. 556275 | 5. 285544 | 6. 155343 | 6. 106363 | 6. 156044 |
| GOLT1A    | 4. 539852 | 4. 407369 | 4. 80742  | 5. 345348 | 5. 222908 | 5. 382165 |
| IRGQ      | 4. 34679  | 4. 402979 | 4. 179445 | 4. 967154 | 4. 938744 | 5. 218432 |
| TRIM7     | 6. 609392 | 6. 643794 | 6. 440248 | 5. 937794 | 5. 704929 | 5. 856001 |
| SH3KBP1   | 7. 226854 | 7. 245315 | 7. 241529 | 6. 639288 | 6. 454833 | 6. 426503 |
| DCLK1     | 2. 81923  | 2. 901352 | 2. 605526 | 3. 297368 | 3. 658328 | 3. 562984 |
| TMEM135   | 7. 308304 | 7. 248146 | 7. 360293 | 8. 044377 | 7. 991504 | 8. 072197 |
| ARPC1B    | 8. 342396 | 8. 384061 | 8. 379311 | 7. 601885 | 7. 612227 | 7. 700951 |
| CENPW     | 9. 535508 | 9. 544413 | 9. 610085 | 8. 876833 | 8. 779551 | 8. 844025 |
| MIR21 /// | 8. 993295 | 8. 983429 | 8. 989483 | 9. 731168 | 9. 689908 | 9. 734652 |
| TROAP     | 7. 964803 | 8. 146839 | 8. 124439 | 7. 33333  | 7. 409763 | 7. 303629 |
| NFIB      | 7. 315656 | 7. 344748 | 7. 335557 | 6. 588522 | 6. 586868 | 6. 632164 |
| ARL6IP6   | 9. 150275 | 9. 117484 | 9. 116192 | 8. 463339 | 8. 391717 | 8. 34058  |
| C20orf194 | 6. 58965  | 6. 682339 | 6. 78185  | 7. 448298 | 7. 361985 | 7. 430988 |
| CPEB1     | 4. 553356 | 4. 474884 | 4. 528985 | 5. 300785 | 5. 092946 | 5. 349905 |
| ZNHIT6    | 6. 825523 | 6. 825086 | 6. 891825 | 7. 531625 | 7. 642544 | 7. 554043 |
| ERCC6L    | 7. 636499 | 7. 581173 | 7. 694623 | 6. 876037 | 7. 009634 | 6. 841303 |
| AKT3      | 7. 857075 | 7. 857517 | 7. 839264 | 8. 605415 | 8. 541382 | 8. 592339 |
| IDH2      | 7. 489348 | 7. 557361 | 7. 515653 | 6. 833674 | 6. 684842 | 6. 858886 |
| ZFX       | 5. 724455 | 5. 774617 | 5. 88605  | 6. 576429 | 6. 442076 | 6. 551013 |
| RYR2      | 5. 18177  | 5. 284979 | 5. 492554 | 6. 024399 | 5. 935726 | 6. 183446 |
| PVRL3     | 8. 164681 | 8. 090014 | 8. 111267 | 8. 856302 | 8. 818047 | 8. 875369 |
| EARS2     | 8. 031659 | 8. 081652 | 8. 059589 | 7. 32327  | 7. 269644 | 7. 396403 |
| NPL       | 4. 562674 | 4. 503849 | 4. 474719 | 3. 732588 | 3. 955241 | 3. 670738 |
| ISOC1     | 8. 644449 | 8. 548171 | 8. 690651 | 7. 896938 | 7. 849848 | 7. 953926 |
| TMEM185B  | 7. 21318  | 7. 08912  | 7. 15123  | 6. 44446  | 6. 356337 | 6. 471982 |
| FAM83D    | 9. 61808  | 9. 653348 | 9. 682285 | 8. 956307 | 8. 868011 | 8. 948849 |
| NAA15     | 8. 917296 | 8. 887908 | 8. 899708 | 8. 177197 | 8. 151517 | 8. 196596 |
| CNN2      | 6. 012048 | 6. 046329 | 6. 185441 | 6. 872367 | 6. 700381 | 6. 850071 |
| AFTPH     | 6. 271875 | 6. 3539   | 6. 301136 | 7. 04308  | 7. 031433 | 7. 029799 |
| CSGALNACT | 5. 388021 | 5. 441785 | 5. 518956 | 6. 352085 | 6. 056949 | 6. 116407 |

|           |           |           |           |           |           |           |
|-----------|-----------|-----------|-----------|-----------|-----------|-----------|
| PRKAB1    | 6. 653466 | 6. 672365 | 6. 680089 | 7. 426233 | 7. 342781 | 7. 413258 |
| SNHG12    | 10. 07226 | 10. 10611 | 10. 13463 | 10. 85444 | 10. 78127 | 10. 85318 |
| CCDC50    | 7. 357442 | 7. 372966 | 7. 387042 | 6. 672277 | 6. 641388 | 6. 628454 |
| SLC12A4   | 7. 673485 | 7. 639793 | 7. 726766 | 8. 438088 | 8. 364031 | 8. 412912 |
| ZNF253    | 5. 645992 | 5. 48635  | 5. 717093 | 6. 225523 | 6. 355484 | 6. 440709 |
| LOC105369 | 9. 064124 | 9. 112541 | 9. 118543 | 8. 385552 | 8. 319657 | 8. 418729 |
| RBM15B    | 8. 157571 | 8. 133501 | 8. 119364 | 7. 453926 | 7. 426832 | 7. 359091 |
| EBNA1BP2  | 5. 073046 | 5. 098757 | 5. 260132 | 5. 870252 | 5. 806043 | 5. 92521  |
| ARHGEF28  | 5. 510307 | 5. 602746 | 5. 547465 | 6. 344421 | 6. 084744 | 6. 400836 |
| SKI       | 5. 210741 | 5. 380866 | 5. 304743 | 5. 982272 | 6. 083707 | 5. 997066 |
| ACTBL2    | 2. 86602  | 2. 986279 | 2. 912906 | 3. 858497 | 3. 480039 | 3. 593213 |
| ZNF567    | 5. 900801 | 5. 806198 | 5. 811416 | 6. 524097 | 6. 589687 | 6. 569539 |
| GAS7      | 8. 349992 | 8. 396617 | 8. 399655 | 7. 676316 | 7. 633436 | 7. 673494 |
| DYNC1LI2  | 10. 20647 | 10. 19592 | 10. 24356 | 9. 535755 | 9. 444437 | 9. 502803 |
| ITCH      | 8. 565541 | 8. 65383  | 8. 595588 | 9. 328659 | 9. 308318 | 9. 340215 |
| SHC4      | 5. 422028 | 5. 334072 | 5. 341298 | 6. 060297 | 6. 058798 | 6. 139308 |
| SNX18     | 6. 041317 | 6. 183133 | 6. 221895 | 6. 922783 | 6. 822252 | 6. 862069 |
| SYT14     | 4. 004719 | 3. 629642 | 3. 819197 | 4. 650043 | 4. 595912 | 4. 368053 |
| ZC3H6     | 4. 894394 | 4. 967776 | 4. 832816 | 4. 16438  | 4. 195801 | 4. 174649 |
| POC1B     | 7. 213207 | 7. 233246 | 7. 294433 | 8. 014936 | 7. 858667 | 8. 02729  |
| SLC35G2   | 8. 854214 | 8. 89784  | 8. 872054 | 9. 600223 | 9. 5421   | 9. 640819 |
| SLC04A1   | 9. 397892 | 9. 417351 | 9. 361071 | 8. 726211 | 8. 605471 | 8. 68591  |
| NFYA      | 7. 557727 | 7. 601604 | 7. 711283 | 6. 940864 | 6. 85759  | 6. 913638 |
| MAPKAP1   | 6. 281221 | 6. 292003 | 6. 15404  | 5. 385075 | 5. 52721  | 5. 656754 |
| APITD1    | 8. 698619 | 8. 641752 | 8. 650135 | 7. 965876 | 7. 913969 | 7. 952661 |
| LRP6      | 6. 255372 | 6. 236699 | 6. 428096 | 7. 072356 | 6. 921603 | 7. 083957 |
| REV3L     | 9. 137717 | 9. 103534 | 9. 093857 | 9. 867098 | 9. 798586 | 9. 825915 |
| ZNF557    | 6. 662206 | 6. 574289 | 6. 680013 | 7. 402627 | 7. 321653 | 7. 348583 |
| RSRC1     | 8. 202605 | 8. 088333 | 8. 185445 | 7. 44337  | 7. 416017 | 7. 461002 |
| CD68      | 7. 190454 | 7. 105426 | 7. 185027 | 6. 4056   | 6. 400459 | 6. 519545 |
| B4GALT5   | 10. 10469 | 10. 0968  | 10. 08499 | 9. 397827 | 9. 36778  | 9. 365614 |
| LOC728026 | 11. 15423 | 11. 23712 | 11. 22492 | 10. 50369 | 10. 42034 | 10. 53738 |
| RAD54L    | 7. 049142 | 7. 134261 | 7. 088021 | 6. 432649 | 6. 322545 | 6. 361918 |
| ADAM10    | 8. 165502 | 8. 249481 | 8. 129433 | 8. 924331 | 8. 879045 | 8. 895282 |
| TMEM128   | 8. 384058 | 8. 282303 | 8. 25497  | 7. 632969 | 7. 604469 | 7. 529771 |
| IGFBP6    | 6. 835627 | 6. 862069 | 6. 85267  | 6. 168911 | 6. 061994 | 6. 165769 |
| EHHADH    | 5. 196246 | 5. 151409 | 5. 347143 | 4. 259533 | 4. 473507 | 4. 808488 |
| ITGB3     | 6. 328895 | 6. 223486 | 6. 380062 | 7. 049319 | 6. 947898 | 7. 08742  |
| ZNF317    | 5. 858984 | 5. 922758 | 5. 850422 | 6. 541157 | 6. 574405 | 6. 667639 |
| STAT3     | 8. 490325 | 8. 483111 | 8. 46725  | 9. 223948 | 9. 137982 | 9. 229783 |
| GNA13     | 5. 780083 | 5. 88756  | 5. 881186 | 6. 617156 | 6. 474957 | 6. 607575 |
| PLIN2     | 7. 902176 | 8. 042454 | 8. 008496 | 7. 310377 | 7. 141576 | 7. 350454 |
| TTK       | 8. 439671 | 8. 445694 | 8. 45737  | 7. 779366 | 7. 670996 | 7. 741808 |
| SRP19     | 8. 344639 | 8. 226396 | 8. 274124 | 7. 551485 | 7. 543871 | 7. 599804 |
| LPXN      | 8. 86593  | 8. 843269 | 8. 937456 | 9. 594255 | 9. 572827 | 9. 628903 |
| MKRN1     | 8. 074784 | 8. 041983 | 8. 062359 | 7. 357245 | 7. 373365 | 7. 299194 |
| PRMT3     | 8. 679713 | 8. 538347 | 8. 529112 | 7. 884514 | 7. 849478 | 7. 86434  |
| CACUL1    | 8. 534618 | 8. 591864 | 8. 590044 | 7. 825401 | 7. 79541  | 7. 947441 |
| BDH1      | 6. 763272 | 6. 752545 | 6. 866373 | 6. 077255 | 5. 967828 | 6. 189387 |
| EPG5      | 6. 149084 | 6. 219687 | 6. 231257 | 6. 889856 | 6. 849613 | 7. 007999 |
| INPP4B    | 8. 525207 | 8. 588146 | 8. 528091 | 9. 288865 | 9. 212234 | 9. 286854 |

|           |           |           |           |           |           |           |
|-----------|-----------|-----------|-----------|-----------|-----------|-----------|
| NCAPG2    | 7. 830758 | 7. 65243  | 7. 764496 | 6. 934625 | 7. 08877  | 7. 078487 |
| HIST2H2BE | 4. 971555 | 4. 698082 | 5. 162629 | 5. 824203 | 5. 53498  | 5. 618628 |
| MANSC1    | 5. 170835 | 5. 358613 | 5. 376415 | 6. 093839 | 5. 938492 | 6. 018563 |
| FRS2      | 5. 954091 | 6. 041606 | 6. 060704 | 6. 715452 | 6. 713436 | 6. 772454 |
| SUB1      | 7. 729035 | 7. 666981 | 7. 670866 | 7. 017977 | 6. 842593 | 7. 061811 |
| AASS      | 6. 226067 | 6. 269262 | 6. 245907 | 7. 008483 | 6. 936589 | 6. 939835 |
| DOCK5     | 8. 159726 | 8. 096211 | 8. 146055 | 7. 460613 | 7. 398585 | 7. 401902 |
| ZBTB18    | 7. 95008  | 7. 858588 | 7. 91947  | 8. 653012 | 8. 582126 | 8. 632695 |
| CLTCL1    | 5. 761805 | 5. 929833 | 5. 846823 | 6. 578851 | 6. 482044 | 6. 614387 |
| RASA2     | 5. 320658 | 5. 209919 | 5. 269868 | 6. 010427 | 5. 946909 | 5. 979302 |
| LOC100996 | 5. 103514 | 5. 00961  | 5. 026069 | 5. 745435 | 5. 763124 | 5. 766232 |
| IL17RD    | 5. 443417 | 5. 572098 | 5. 490336 | 6. 220996 | 6. 059765 | 6. 360013 |
| CLSPN     | 6. 373318 | 6. 492875 | 6. 519193 | 5. 754552 | 5. 717581 | 5. 779284 |
| SLC30A7   | 6. 464286 | 6. 378463 | 6. 427104 | 7. 086383 | 7. 178268 | 7. 138997 |
| MCM4      | 8. 855482 | 8. 905537 | 8. 818181 | 8. 158535 | 8. 157021 | 8. 132128 |
| HADH      | 8. 616798 | 8. 628188 | 8. 614133 | 7. 910273 | 7. 890415 | 7. 926962 |
| MAN1A2    | 6. 199732 | 6. 082227 | 6. 179612 | 6. 859464 | 6. 764671 | 6. 968837 |
| CRIM1     | 10. 38256 | 10. 41624 | 10. 35852 | 11. 15088 | 11. 05513 | 11. 0826  |
| ZGRF1     | 5. 246453 | 5. 341323 | 5. 282382 | 4. 516046 | 4. 515869 | 4. 711794 |
| HAUS6     | 8. 918606 | 8. 899665 | 8. 865084 | 8. 250648 | 8. 138683 | 8. 168322 |
| E2F5      | 8. 55146  | 8. 565877 | 8. 578482 | 9. 30543  | 9. 242729 | 9. 273328 |
| HDAC6     | 5. 694245 | 5. 637797 | 5. 7688   | 4. 945705 | 5. 225473 | 4. 804845 |
| MAZ       | 8. 321043 | 8. 315068 | 8. 301519 | 7. 70731  | 7. 536323 | 7. 5696   |
| NUDT11    | 6. 012114 | 5. 809796 | 5. 958678 | 5. 074724 | 5. 447231 | 5. 134389 |
| POLDIP3   | 8. 221686 | 8. 268213 | 8. 294325 | 7. 621462 | 7. 52835  | 7. 510903 |
| SDF2L1    | 8. 020265 | 8. 070358 | 8. 066837 | 7. 303627 | 7. 392102 | 7. 338331 |
| PRPF40A   | 6. 752719 | 6. 867475 | 6. 885261 | 6. 130409 | 6. 055348 | 6. 196502 |
| CUX1      | 7. 951124 | 7. 919105 | 7. 909598 | 7. 27188  | 7. 182886 | 7. 202688 |
| EXOC7     | 6. 668727 | 6. 570817 | 6. 507039 | 5. 879843 | 5. 789957 | 5. 95476  |
| ZEB2      | 5. 989215 | 5. 924361 | 5. 849551 | 6. 732604 | 6. 531314 | 6. 620913 |
| YAF2      | 7. 359016 | 7. 30634  | 7. 447263 | 8. 154417 | 8. 026698 | 8. 0529   |
| WDR63     | 3. 756935 | 3. 778891 | 3. 854861 | 4. 397487 | 4. 40462  | 4. 709473 |
| HDLBP     | 8. 156964 | 8. 161763 | 8. 071813 | 7. 445073 | 7. 307552 | 7. 51727  |
| ARHGEF39  | 7. 181857 | 7. 194251 | 7. 193864 | 6. 418424 | 6. 471641 | 6. 560449 |
| ZMYM5     | 4. 459949 | 4. 40462  | 4. 374744 | 5. 134568 | 5. 151091 | 5. 070386 |
| PAICS     | 10. 65793 | 10. 68792 | 10. 67135 | 9. 959849 | 9. 951919 | 9. 989274 |
| RRAGB     | 6. 494074 | 6. 458948 | 6. 681042 | 7. 205342 | 7. 21808  | 7. 325877 |
| KCTD2     | 6. 566733 | 6. 546933 | 6. 654209 | 5. 907453 | 5. 961731 | 5. 783489 |
| PARP2     | 8. 221064 | 8. 317467 | 8. 213712 | 7. 554561 | 7. 482442 | 7. 600331 |
| TMEM123   | 10. 43709 | 10. 29379 | 10. 14977 | 9. 573472 | 9. 715963 | 9. 476746 |
| GPNMB     | 7. 078262 | 6. 948314 | 7. 020901 | 7. 772567 | 7. 701571 | 7. 687642 |
| ZNF671    | 6. 701168 | 6. 435843 | 6. 61701  | 7. 40482  | 7. 132707 | 7. 330584 |
| LGR4      | 6. 291624 | 6. 193432 | 6. 18236  | 6. 897999 | 6. 941088 | 6. 939816 |
| CCL5      | 7. 439663 | 7. 452481 | 7. 411548 | 8. 152101 | 8. 085419 | 8. 177637 |
| PHLDB2    | 8. 963866 | 9. 025359 | 8. 977391 | 9. 693704 | 9. 672774 | 9. 710788 |
| IKZF5     | 6. 453025 | 6. 431773 | 6. 481056 | 5. 669273 | 5. 653304 | 5. 934105 |
| SNX4      | 7. 843682 | 7. 828747 | 7. 820533 | 8. 595412 | 8. 47013  | 8. 536304 |
| HS6ST2    | 6. 027527 | 6. 20157  | 5. 94658  | 5. 470518 | 5. 299183 | 5. 297508 |
| CKAP2     | 9. 102848 | 9. 025136 | 8. 967016 | 8. 260216 | 8. 394463 | 8. 33196  |
| FAT4      | 3. 957452 | 4. 321082 | 4. 321082 | 4. 848847 | 4. 874244 | 4. 984679 |
| KCTD12    | 4. 409345 | 4. 584943 | 4. 614887 | 3. 603619 | 3. 891359 | 4. 006727 |

|           |          |          |          |          |          |          |
|-----------|----------|----------|----------|----------|----------|----------|
| SDHAF3    | 8.444071 | 8.327166 | 8.188162 | 7.605663 | 7.620265 | 7.626003 |
| RAB2A     | 6.037675 | 6.077832 | 6.088613 | 5.354521 | 5.267759 | 5.474389 |
| CKS2      | 11.1655  | 11.1282  | 11.1053  | 10.46638 | 10.39097 | 10.43449 |
| ZNF226    | 7.138887 | 7.14496  | 7.131787 | 7.885771 | 7.736437 | 7.900388 |
| FMN2      | 7.248552 | 7.233112 | 7.154603 | 7.962562 | 7.903842 | 7.876609 |
| RBM8A     | 6.885924 | 6.861921 | 6.891947 | 6.265386 | 6.045807 | 6.222839 |
| ZFAS1     | 8.205673 | 8.298246 | 8.148399 | 7.580132 | 7.409359 | 7.559668 |
| EPS15L1   | 5.860886 | 5.929393 | 6.011729 | 6.733861 | 6.590455 | 6.578953 |
| CDK17     | 4.152045 | 4.100339 | 4.243215 | 4.851194 | 4.814502 | 4.930493 |
| CCSER2    | 6.34865  | 6.366245 | 6.389376 | 7.092436 | 6.936589 | 7.175172 |
| FERMT2    | 6.92285  | 7.01114  | 7.016487 | 7.715508 | 7.645963 | 7.687422 |
| TMX3      | 6.874418 | 6.824561 | 6.886662 | 7.566281 | 7.557445 | 7.560317 |
| TRMT10B   | 5.89218  | 5.849806 | 5.89151  | 6.554522 | 6.569828 | 6.607346 |
| UBE2L3    | 7.532718 | 7.492785 | 7.686119 | 6.876678 | 6.977413 | 6.75986  |
| CDCA7L    | 8.563662 | 8.609709 | 8.537714 | 7.842601 | 7.807388 | 7.964533 |
| ANKEF1    | 3.786267 | 3.88558  | 3.960714 | 4.80518  | 4.425911 | 4.497971 |
| MRPL12    | 8.832124 | 8.872799 | 8.782798 | 8.124091 | 8.098217 | 8.169231 |
| HOOK3     | 6.563829 | 6.446642 | 6.461772 | 5.851383 | 5.759257 | 5.765847 |
| FAM20C    | 6.388922 | 6.535104 | 6.622557 | 5.785734 | 5.823278 | 5.842007 |
| FANCG     | 7.369622 | 7.434597 | 7.495688 | 6.779117 | 6.618541 | 6.806864 |
| TMEM248   | 7.936487 | 7.938473 | 7.964819 | 7.29556  | 7.186871 | 7.26234  |
| KIAA1033  | 7.175589 | 7.108899 | 7.212376 | 7.903528 | 7.806954 | 7.881349 |
| SMAD7     | 6.52789  | 6.461728 | 6.635362 | 7.299445 | 7.184646 | 7.235735 |
| CHRD1     | 7.137133 | 7.054196 | 7.109065 | 6.418468 | 6.45469  | 6.332828 |
| SYT1      | 5.900301 | 6.059902 | 5.88412  | 6.663087 | 6.572604 | 6.702586 |
| RMI2      | 8.435504 | 8.431855 | 8.489983 | 7.801491 | 7.72668  | 7.735394 |
| CNOT4     | 6.310765 | 6.34865  | 6.541695 | 7.178051 | 7.042337 | 7.074269 |
| CAMK2D    | 7.591073 | 7.67917  | 7.656994 | 6.901794 | 6.930747 | 7.001857 |
| AP1S2     | 6.507726 | 6.539975 | 6.545091 | 7.141934 | 7.219982 | 7.321893 |
| KLF2      | 8.279325 | 8.29326  | 8.339756 | 9.028944 | 8.943463 | 9.030779 |
| ING3      | 6.213871 | 6.22014  | 6.311034 | 7.022805 | 6.886662 | 6.926353 |
| FGFR3     | 6.550884 | 6.480749 | 6.532404 | 5.872377 | 5.841187 | 5.760586 |
| CMAHP     | 3.54408  | 3.24154  | 3.645695 | 4.220058 | 4.081722 | 4.218391 |
| EDEM3     | 7.769407 | 7.749723 | 7.701571 | 8.429723 | 8.439128 | 8.440611 |
| PAPLN     | 5.425169 | 5.516099 | 5.482756 | 6.154263 | 6.111982 | 6.245242 |
| MANEA     | 6.274235 | 6.217244 | 6.182471 | 5.458493 | 5.526039 | 5.603563 |
| CCDC84    | 7.730386 | 7.713359 | 7.713088 | 8.409627 | 8.42589  | 8.406898 |
| NLK       | 5.950248 | 5.867208 | 5.984655 | 6.665068 | 6.564719 | 6.657379 |
| HIST1H1E  | 6.121356 | 6.067802 | 6.075734 | 5.531555 | 5.202096 | 5.446965 |
| MAD2L2    | 9.009263 | 9.076564 | 9.027624 | 8.360132 | 8.334296 | 8.33491  |
| PCDHA1 // | 6.66251  | 6.684239 | 6.822196 | 7.472818 | 7.349973 | 7.42988  |
| SMG1 ///  | 5.531693 | 5.472234 | 5.673357 | 6.217339 | 6.260975 | 6.282234 |
| TRMT13    | 5.894707 | 5.927764 | 5.977183 | 6.607013 | 6.640692 | 6.634144 |
| RNF213    | 6.296479 | 6.247275 | 6.290617 | 7.00592  | 6.955614 | 6.953617 |
| NCOA3     | 6.289931 | 6.169977 | 6.175623 | 7.032254 | 6.820312 | 6.863584 |
| SND1      | 8.64964  | 8.562085 | 8.690322 | 7.910416 | 7.967915 | 7.943396 |
| KIF20A    | 9.67249  | 9.718907 | 9.690793 | 9.054494 | 8.930608 | 9.017916 |
| ZNF26     | 5.26035  | 5.24165  | 5.409232 | 6.047202 | 5.894707 | 6.047909 |
| CCDC25    | 7.492021 | 7.489149 | 7.431716 | 6.774631 | 6.739616 | 6.820125 |
| SHOX2     | 7.33039  | 7.293969 | 7.380932 | 6.694519 | 6.512242 | 6.720488 |
| PPARGC1A  | 3.101023 | 3.125572 | 3.155205 | 3.570046 | 3.599017 | 4.287603 |

|           |           |           |           |           |           |           |
|-----------|-----------|-----------|-----------|-----------|-----------|-----------|
| PCYOX1    | 8. 288884 | 8. 251676 | 8. 329957 | 7. 595852 | 7. 573619 | 7. 626546 |
| RRAS2     | 8. 043466 | 8. 093621 | 8. 090297 | 8. 787209 | 8. 719417 | 8. 79517  |
| WRB       | 8. 504796 | 8. 482267 | 8. 49954  | 7. 756644 | 7. 843211 | 7. 812914 |
| GRIK2     | 5. 378356 | 5. 32462  | 5. 40813  | 6. 152974 | 5. 921368 | 6. 109029 |
| ADPRM     | 7. 754642 | 7. 754642 | 7. 871245 | 8. 47949  | 8. 423006 | 8. 549983 |
| COBLL1    | 6. 191339 | 6. 18341  | 6. 166918 | 6. 902098 | 6. 885329 | 6. 825451 |
| RNF38     | 6. 460961 | 6. 460961 | 6. 524207 | 7. 153455 | 7. 070851 | 7. 292883 |
| C10orf2   | 7. 731897 | 7. 730738 | 7. 646816 | 7. 062026 | 6. 969181 | 7. 008551 |
| GFPT1     | 7. 467449 | 7. 395788 | 7. 377695 | 8. 060569 | 8. 128408 | 8. 121518 |
| CEP44     | 6. 921397 | 6. 780029 | 6. 838813 | 6. 24884  | 6. 077112 | 6. 144925 |
| PIKFYVE   | 5. 963394 | 5. 72469  | 6. 019078 | 6. 665786 | 6. 444833 | 6. 665786 |
| SRPR      | 9. 730014 | 9. 780458 | 9. 757736 | 9. 090957 | 9. 064739 | 9. 043479 |
| AP1G1     | 6. 268704 | 6. 504611 | 6. 464815 | 7. 112615 | 7. 078552 | 7. 115984 |
| EFNA1     | 7. 388152 | 7. 474662 | 7. 444184 | 8. 167637 | 8. 044377 | 8. 16293  |
| MPP5      | 7. 413296 | 7. 408711 | 7. 530629 | 8. 192889 | 8. 088268 | 8. 139268 |
| RPL7L1    | 7. 778505 | 7. 81269  | 7. 700519 | 6. 922783 | 7. 136234 | 7. 165984 |
| ADAM12    | 4. 880067 | 4. 886687 | 4. 866023 | 5. 500987 | 5. 518179 | 5. 680083 |
| DDOST     | 9. 64783  | 9. 64393  | 9. 680732 | 9. 001135 | 8. 904314 | 9. 00117  |
| ZNF529    | 7. 634466 | 7. 580573 | 7. 613225 | 8. 294402 | 8. 257169 | 8. 342277 |
| CDC42BPA  | 6. 418308 | 6. 383628 | 6. 521395 | 7. 182978 | 7. 072201 | 7. 132484 |
| ATXN3     | 6. 314414 | 6. 296728 | 6. 412168 | 5. 612165 | 5. 704243 | 5. 644317 |
| PAK4      | 7. 881273 | 7. 930059 | 7. 977249 | 7. 313329 | 7. 235904 | 7. 17807  |
| EVA1A     | 7. 717648 | 7. 690879 | 7. 622399 | 8. 371503 | 8. 355441 | 8. 365057 |
| MEST      | 6. 159781 | 6. 104842 | 6. 160068 | 5. 545388 | 5. 370766 | 5. 447503 |
| DAB2      | 7. 339722 | 7. 230841 | 7. 474047 | 8. 049853 | 7. 931708 | 8. 123796 |
| RAPGEF2   | 8. 522792 | 8. 458694 | 8. 533285 | 9. 22366  | 9. 170573 | 9. 180951 |
| PHACTR2   | 6. 522856 | 6. 522754 | 6. 664946 | 7. 239955 | 7. 206162 | 7. 324748 |
| BAGE ///  | 9. 637275 | 9. 621882 | 9. 689271 | 10. 36534 | 10. 31534 | 10. 32803 |
| TFPI      | 6. 126445 | 6. 250566 | 6. 142819 | 6. 848546 | 6. 926552 | 6. 80437  |
| SDK1      | 3. 391746 | 3. 268871 | 3. 393629 | 4. 013098 | 3. 937656 | 4. 162898 |
| ARL6IP4   | 8. 436013 | 8. 506463 | 8. 403948 | 7. 769771 | 7. 726166 | 7. 79114  |
| ZNF256    | 6. 224939 | 6. 319105 | 6. 419273 | 6. 951002 | 7. 096609 | 6. 974525 |
| MYNN      | 7. 239682 | 7. 292044 | 7. 27537  | 7. 968987 | 7. 918294 | 7. 976282 |
| MEF2D     | 7. 81216  | 7. 894514 | 7. 828083 | 8. 520923 | 8. 522888 | 8. 547051 |
| PMVK      | 4. 792622 | 4. 779759 | 4. 755658 | 4. 044865 | 3. 956672 | 4. 272666 |
| RBM47     | 6. 990592 | 6. 967659 | 7. 031885 | 6. 325424 | 6. 287558 | 6. 324217 |
| ERP29     | 4. 751104 | 4. 966412 | 4. 87932  | 4. 129238 | 4. 245948 | 4. 1691   |
| SF3A3     | 9. 195159 | 9. 215421 | 9. 219392 | 8. 565662 | 8. 476663 | 8. 535812 |
| ARL14     | 3. 306978 | 3. 306595 | 3. 1726   | 4. 396746 | 3. 616261 | 3. 824756 |
| CITED4    | 7. 889783 | 7. 887362 | 7. 840222 | 8. 601052 | 8. 509985 | 8. 557622 |
| ZNF641    | 5. 32133  | 5. 459359 | 5. 451371 | 6. 066055 | 6. 114557 | 6. 102697 |
| SIKE1     | 8. 31156  | 8. 162291 | 8. 194208 | 7. 545202 | 7. 555484 | 7. 516179 |
| LOC102724 | 6. 242232 | 6. 160852 | 6. 222839 | 5. 584823 | 5. 546411 | 5. 444503 |
| CNTNAP3 / | 5. 406909 | 5. 319985 | 5. 326861 | 6. 032283 | 6. 097138 | 5. 974305 |
| AP3S2 /// | 7. 265188 | 7. 350169 | 7. 321422 | 6. 597953 | 6. 714187 | 6. 574844 |
| ALS2      | 6. 696442 | 6. 578454 | 6. 612404 | 7. 328396 | 7. 265436 | 7. 342389 |
| LOC150776 | 8. 001591 | 8. 066842 | 7. 992203 | 7. 33239  | 7. 286907 | 7. 392881 |
| ALG9      | 6. 031845 | 6. 29865  | 6. 159781 | 6. 921166 | 6. 762614 | 6. 854861 |
| RCAN1     | 9. 925523 | 9. 880118 | 9. 909157 | 9. 224332 | 9. 18555  | 9. 256993 |
| FXVD6 /// | 4. 762301 | 4. 737628 | 4. 968479 | 4. 1222   | 4. 151175 | 4. 148482 |
| DGKA      | 7. 121647 | 7. 060854 | 7. 180141 | 7. 837685 | 7. 758394 | 7. 812009 |



|           |           |           |           |           |           |           |
|-----------|-----------|-----------|-----------|-----------|-----------|-----------|
| CAV2      | 8. 515313 | 8. 462833 | 8. 454733 | 9. 179016 | 9. 128998 | 9. 169698 |
| AGPAT3    | 7. 203777 | 7. 262119 | 7. 255791 | 6. 502064 | 6. 530822 | 6. 644523 |
| FAM13A    | 6. 321387 | 6. 330108 | 6. 399769 | 7. 054337 | 7. 04435  | 6. 996735 |
| SLC16A6   | 4. 589965 | 4. 556637 | 4. 561976 | 5. 194549 | 4. 973703 | 5. 584069 |
| FIP1L1    | 7. 266659 | 7. 165118 | 7. 183182 | 6. 396574 | 6. 570188 | 6. 604798 |
| ANKRD55   | 5. 414879 | 5. 877004 | 5. 768075 | 6. 315145 | 6. 456011 | 6. 332118 |
| RHCE ///  | 3. 554842 | 3. 560007 | 3. 670344 | 2. 619756 | 2. 978223 | 3. 144569 |
| DYRK1A    | 4. 298296 | 4. 255492 | 4. 396268 | 5. 043731 | 4. 996669 | 4. 951552 |
| VEGFC     | 7. 995125 | 7. 996428 | 8. 000473 | 8. 686832 | 8. 631094 | 8. 715844 |
| KHDRBS1   | 9. 324282 | 9. 316193 | 9. 173064 | 8. 60802  | 8. 588081 | 8. 576576 |
| NEK2      | 8. 289896 | 8. 076471 | 8. 109652 | 7. 381562 | 7. 51584  | 7. 538314 |
| ZNF23     | 6. 348452 | 6. 229942 | 6. 211865 | 6. 932588 | 6. 963188 | 6. 934625 |
| FAM64A    | 8. 285829 | 8. 24345  | 8. 387279 | 7. 708359 | 7. 618633 | 7. 550186 |
| RRP15     | 6. 974006 | 6. 907825 | 6. 891727 | 6. 279225 | 6. 161802 | 6. 293226 |
| CXorf23   | 5. 912484 | 5. 69251  | 5. 86647  | 6. 539715 | 6. 436899 | 6. 533293 |
| PLK3      | 6. 882875 | 6. 747209 | 6. 807761 | 7. 473965 | 7. 492498 | 7. 509488 |
| PMAIP1    | 8. 928267 | 8. 929726 | 8. 854394 | 9. 60918  | 9. 599254 | 9. 540647 |
| YRDC      | 9. 50853  | 9. 416327 | 9. 491053 | 10. 13029 | 10. 12208 | 10. 19947 |
| KYNU      | 3. 601619 | 3. 365771 | 3. 414593 | 4. 199558 | 3. 929731 | 4. 287603 |
| UBE2K     | 6. 865685 | 6. 860792 | 6. 967283 | 6. 197416 | 6. 239224 | 6. 222562 |
| CRLS1     | 9. 09923  | 9. 112942 | 9. 115653 | 8. 470151 | 8. 362761 | 8. 461817 |
| ZC3H7A    | 9. 272446 | 9. 264194 | 9. 227768 | 9. 938481 | 9. 883469 | 9. 974435 |
| ZDHH11 /  | 4. 612411 | 4. 479212 | 4. 461001 | 5. 126284 | 5. 086684 | 5. 371214 |
| MAP3K6    | 6. 153334 | 6. 34207  | 6. 318839 | 5. 612122 | 5. 554446 | 5. 617277 |
| MARS2     | 7. 436289 | 7. 390559 | 7. 426233 | 8. 162328 | 8. 048924 | 8. 071344 |
| RBM14 /// | 6. 181148 | 6. 176292 | 6. 10177  | 6. 834954 | 6. 809446 | 6. 844058 |
| KAT2B     | 5. 937069 | 5. 898702 | 5. 845603 | 6. 50945  | 6. 547009 | 6. 654151 |
| DLX1      | 8. 246179 | 8. 226671 | 8. 252206 | 7. 590448 | 7. 497858 | 7. 607648 |
| PVRL4     | 5. 098916 | 5. 085202 | 5. 600904 | 5. 700216 | 6. 046641 | 6. 066714 |
| PGAP1     | 6. 685457 | 6. 630267 | 6. 627388 | 7. 378316 | 7. 251961 | 7. 341356 |
| KIF15     | 7. 773746 | 7. 74383  | 7. 75985  | 7. 118601 | 7. 010751 | 7. 119932 |
| TPTE      | 6. 450388 | 6. 428746 | 6. 312606 | 7. 133023 | 6. 994856 | 7. 09184  |
| DDHD1     | 5. 869938 | 5. 72987  | 5. 890165 | 6. 596103 | 6. 504027 | 6. 417756 |
| CASC5     | 7. 413901 | 7. 5482   | 7. 566126 | 6. 793877 | 6. 817718 | 6. 888913 |
| DUSP3     | 7. 962447 | 7. 992054 | 7. 986821 | 7. 292384 | 7. 292034 | 7. 330484 |
| PURA      | 8. 823932 | 8. 793664 | 8. 83219  | 8. 216732 | 8. 07967  | 8. 127549 |
| EXO1      | 7. 595075 | 7. 660324 | 7. 614594 | 6. 926481 | 6. 951222 | 6. 969307 |
| CKS1B     | 10. 03168 | 10. 05827 | 10. 00894 | 9. 307958 | 9. 372033 | 9. 396844 |
| THEMIS2   | 6. 305363 | 6. 247635 | 6. 466666 | 5. 610079 | 5. 745504 | 5. 642208 |
| KCNJ2     | 5. 755216 | 5. 694573 | 5. 968579 | 6. 45894  | 6. 495791 | 6. 485479 |
| MEGF10    | 3. 388093 | 3. 473423 | 3. 785726 | 4. 358554 | 4. 172435 | 4. 138059 |
| MAP2K6    | 4. 914661 | 5. 166887 | 5. 123004 | 4. 347189 | 4. 302551 | 4. 533319 |
| PRKAA1    | 5. 926492 | 5. 786303 | 5. 926259 | 6. 611444 | 6. 472904 | 6. 575665 |
| PAQR4     | 7. 461998 | 7. 474352 | 7. 547274 | 6. 845438 | 6. 806304 | 6. 81126  |
| PCK2      | 6. 089978 | 5. 965724 | 5. 889766 | 5. 29898  | 5. 350305 | 5. 276375 |
| SMARCA1   | 8. 67732  | 8. 688126 | 8. 691343 | 8. 060252 | 8. 011209 | 7. 966826 |
| KIAA0754  | 5. 436059 | 5. 627365 | 5. 696585 | 6. 361268 | 6. 140563 | 6. 276184 |
| MED14     | 7. 679661 | 7. 616954 | 7. 622173 | 6. 955498 | 7. 013984 | 6. 933386 |
| ADGRE2    | 4. 667851 | 4. 621979 | 4. 646023 | 5. 397209 | 5. 277221 | 5. 277221 |
| LACTB     | 6. 55768  | 6. 466312 | 6. 572319 | 7. 199899 | 7. 154778 | 7. 256966 |
| CMTM4     | 6. 904209 | 6. 759303 | 6. 925204 | 6. 112807 | 6. 225523 | 6. 23832  |

|          |           |           |           |           |           |           |
|----------|-----------|-----------|-----------|-----------|-----------|-----------|
| MPZ      | 4. 347189 | 4. 427046 | 4. 558222 | 5. 197588 | 5. 118145 | 5. 028453 |
| NOL4L    | 7. 551613 | 7. 638833 | 7. 616367 | 8. 310757 | 8. 231413 | 8. 275624 |
| LGALS3   | 9. 735437 | 9. 80291  | 9. 790613 | 10. 4582  | 10. 40756 | 10. 47377 |
| RRM1     | 9. 957169 | 9. 873703 | 9. 915925 | 9. 263659 | 9. 223594 | 9. 249263 |
| NUDT21   | 10. 31295 | 10. 30493 | 10. 32274 | 9. 674185 | 9. 616314 | 9. 640005 |
| TTC17    | 7. 387551 | 7. 423693 | 7. 404318 | 6. 660529 | 6. 796802 | 6. 748552 |
| DNAL1    | 5. 817719 | 5. 959747 | 5. 757698 | 6. 439201 | 6. 55874  | 6. 546589 |
| ZNF354B  | 5. 125639 | 4. 984679 | 4. 953982 | 5. 733742 | 5. 602782 | 5. 736841 |
| SLC35F3  | 5. 116535 | 4. 847169 | 5. 062637 | 4. 545859 | 4. 395423 | 4. 076446 |
| STX1A    | 5. 029539 | 4. 592228 | 5. 08178  | 5. 621199 | 5. 554446 | 5. 535697 |
| RMND1    | 4. 49453  | 4. 459949 | 4. 487312 | 5. 162324 | 5. 064119 | 5. 222033 |
| BHLHE41  | 5. 96534  | 6. 044295 | 6. 088505 | 6. 628188 | 6. 655768 | 6. 820125 |
| NCAPD2   | 8. 961507 | 9. 069873 | 9. 011311 | 8. 356007 | 8. 257004 | 8. 424597 |
| DEPDC1   | 8. 333381 | 8. 36456  | 8. 349208 | 7. 692568 | 7. 680707 | 7. 668906 |
| SERBP1   | 8. 564776 | 8. 520425 | 8. 559687 | 7. 944865 | 7. 7631   | 7. 932753 |
| IFFO2    | 6. 594882 | 6. 614507 | 6. 583336 | 5. 952302 | 5. 866136 | 5. 970257 |
| EDEM1    | 6. 244676 | 6. 379559 | 6. 369265 | 7. 016753 | 6. 975348 | 7. 005407 |
| NPAS3    | 4. 207268 | 4. 442589 | 4. 180083 | 4. 887183 | 5. 027607 | 4. 91916  |
| DDI2 /// | 5. 820062 | 6. 047701 | 6. 013311 | 6. 580872 | 6. 595644 | 6. 707584 |
| ZNF776   | 3. 109309 | 3. 408892 | 3. 055828 | 4. 041793 | 3. 712399 | 3. 822584 |
| CYFIP2   | 7. 089619 | 7. 136949 | 7. 066204 | 7. 854531 | 7. 690693 | 7. 749789 |
| CBR3     | 7. 111521 | 7. 174886 | 7. 049951 | 6. 438827 | 6. 457495 | 6. 438037 |
| RPA3     | 9. 295385 | 9. 349661 | 9. 328852 | 8. 699624 | 8. 613284 | 8. 659226 |
| ZNF816   | 5. 403541 | 5. 605125 | 5. 698104 | 6. 274232 | 6. 173256 | 6. 260715 |
| PPM1K    | 4. 884724 | 4. 940534 | 5. 114501 | 5. 660403 | 5. 578022 | 5. 702552 |
| DNAJC6   | 5. 405015 | 5. 574392 | 5. 578119 | 6. 247823 | 6. 03692  | 6. 273316 |
| CHML     | 6. 298877 | 6. 087367 | 6. 15599  | 6. 853878 | 6. 87888  | 6. 809161 |
| SSX2IP   | 6. 1051   | 5. 975942 | 5. 985333 | 5. 42588  | 5. 383751 | 5. 257238 |
| SMC6     | 7. 801753 | 7. 786409 | 7. 813005 | 7. 157403 | 7. 135702 | 7. 108734 |
| FAM24B   | 6. 13196  | 5. 975418 | 6. 018366 | 6. 732393 | 6. 639695 | 6. 752603 |
| CENPN    | 10. 18449 | 10. 18912 | 10. 10168 | 9. 505394 | 9. 443181 | 9. 527953 |
| LATS1    | 4. 596805 | 4. 849441 | 4. 701182 | 5. 424054 | 5. 307151 | 5. 414879 |
| AKAP10   | 6. 865094 | 6. 754999 | 6. 780063 | 7. 510918 | 7. 412871 | 7. 474491 |
| PTPN14   | 6. 656169 | 6. 647213 | 6. 698163 | 7. 390293 | 7. 229714 | 7. 379651 |
| COASY    | 8. 605262 | 8. 632496 | 8. 621052 | 7. 98466  | 7. 891413 | 7. 984875 |
| MECP2    | 7. 836163 | 7. 767871 | 7. 74522  | 7. 160074 | 7. 046553 | 7. 145043 |
| FGD6     | 4. 730444 | 4. 740201 | 4. 808592 | 5. 370096 | 5. 412794 | 5. 493783 |
| RNF128   | 5. 598766 | 5. 534127 | 5. 565315 | 6. 267997 | 6. 13946  | 6. 287924 |
| UPP1     | 8. 164015 | 8. 170226 | 8. 23061  | 8. 832422 | 8. 823998 | 8. 905596 |
| VPS36    | 7. 437635 | 7. 471807 | 7. 424623 | 8. 170131 | 8. 015357 | 8. 145693 |
| ADORA2B  | 8. 96971  | 8. 928154 | 9. 014615 | 8. 349975 | 8. 231368 | 8. 334718 |
| PBK      | 9. 552006 | 9. 47755  | 9. 477593 | 8. 878148 | 8. 818039 | 8. 815377 |
| MMP8     | 4. 772376 | 4. 700253 | 4. 892209 | 5. 419265 | 5. 322725 | 5. 618067 |
| CRACR2A  | 5. 915327 | 5. 888154 | 5. 953134 | 5. 194357 | 5. 194357 | 5. 372683 |
| ATP2B1   | 7. 886529 | 7. 883373 | 7. 884625 | 8. 615902 | 8. 510273 | 8. 523519 |
| ARHGAP23 | 8. 68637  | 8. 67748  | 8. 70991  | 9. 384924 | 9. 30723  | 9. 376111 |
| ZNF337   | 7. 372337 | 7. 299172 | 7. 373919 | 8. 124539 | 7. 949394 | 7. 965986 |
| CROT     | 5. 701996 | 5. 667795 | 5. 784042 | 6. 468104 | 6. 23408  | 6. 445632 |
| DLST     | 6. 976036 | 7. 019583 | 6. 990896 | 6. 407649 | 6. 23058  | 6. 355883 |
| ZNF184   | 6. 726053 | 6. 612556 | 6. 689408 | 7. 313331 | 7. 340784 | 7. 365912 |
| TARS2    | 7. 918796 | 7. 984427 | 7. 928768 | 7. 225979 | 7. 208763 | 7. 405311 |

|           |          |          |          |          |          |          |
|-----------|----------|----------|----------|----------|----------|----------|
| RBMX2     | 8.115441 | 8.112082 | 8.170099 | 7.458069 | 7.503379 | 7.444368 |
| SH3RF1    | 6.546709 | 6.467407 | 6.541877 | 7.173914 | 7.138401 | 7.234769 |
| ITSN2     | 6.667656 | 6.584898 | 6.678437 | 7.367847 | 7.290044 | 7.263624 |
| NAP1L2    | 2.352448 | 2.47103  | 2.605526 | 3.104009 | 3.379979 | 2.935401 |
| TAPT1     | 6.319767 | 6.159781 | 6.3368   | 6.959954 | 6.874418 | 6.97214  |
| DACT1     | 3.567474 | 3.812696 | 3.556451 | 4.297852 | 4.235392 | 4.393461 |
| FOXRED2   | 8.679517 | 8.641731 | 8.589366 | 7.983515 | 7.932405 | 8.004855 |
| LHX4      | 5.064424 | 5.011001 | 5.032088 | 5.64762  | 5.68596  | 5.763204 |
| ATP6V1A   | 6.984133 | 7.006716 | 6.994874 | 7.709669 | 7.621464 | 7.64383  |
| Clorf106  | 7.718617 | 7.765905 | 7.813625 | 7.222387 | 6.952907 | 7.134452 |
| WDR5      | 7.601165 | 7.586532 | 7.5963   | 6.9493   | 6.918527 | 6.928386 |
| SH3BGRL2  | 5.380659 | 5.453803 | 5.533689 | 4.67249  | 4.833827 | 4.874385 |
| SDHC      | 9.340412 | 9.442735 | 9.474758 | 8.729194 | 8.688404 | 8.852947 |
| RPL27A    | 6.158204 | 6.324542 | 6.241471 | 6.920822 | 6.951293 | 6.838471 |
| HPS5      | 7.139367 | 7.128366 | 7.225279 | 7.886095 | 7.728026 | 7.864356 |
| ZNF468    | 4.752721 | 4.68488  | 4.937901 | 5.580233 | 5.380659 | 5.400019 |
| PAFAH1B2  | 8.982278 | 9.052967 | 8.993806 | 8.358847 | 8.372128 | 8.3132   |
| MCM3      | 8.611742 | 8.667274 | 8.589559 | 8.015862 | 7.927227 | 7.941249 |
| CCL3P1 // | 6.29606  | 6.145095 | 6.297522 | 6.957068 | 6.93557  | 6.82933  |
| SLC36A1   | 5.975894 | 6.079527 | 5.967041 | 6.741227 | 6.615451 | 6.64853  |
| AURKA /// | 9.762146 | 9.729732 | 9.659561 | 9.046856 | 9.076356 | 9.045677 |
| RSRC2     | 9.513973 | 9.521508 | 9.621464 | 10.24176 | 10.18293 | 10.21398 |
| ZNF28 /// | 6.035157 | 6.122411 | 6.26829  | 6.893965 | 6.674714 | 6.838835 |
| RPL22L1   | 11.81002 | 11.82649 | 11.78589 | 11.12227 | 11.15902 | 11.1602  |
| ZSCAN29   | 5.494465 | 5.452719 | 5.2918   | 6.018644 | 6.063092 | 6.137391 |
| CDK2      | 8.23867  | 8.22763  | 8.295302 | 7.592698 | 7.555089 | 7.634733 |
| SPAG1     | 6.864188 | 6.737161 | 6.771311 | 7.412276 | 7.46374  | 7.475008 |
| TK1       | 9.519066 | 9.620221 | 9.554401 | 8.941144 | 8.878337 | 8.896327 |
| TRIM36    | 6.226406 | 6.238746 | 6.31054  | 6.97263  | 6.865202 | 6.915618 |
| GTF3C2    | 6.971413 | 7.014276 | 7.020472 | 6.321848 | 6.385917 | 6.320681 |
| PIGX      | 6.72218  | 6.607742 | 6.783347 | 6.067899 | 5.931657 | 6.136045 |
| KBTBD6    | 7.490687 | 7.494965 | 7.535803 | 6.819501 | 6.810116 | 6.914237 |
| CASP8     | 6.834026 | 6.837049 | 7.00692  | 7.561209 | 7.499355 | 7.594611 |
| ABL1      | 8.736993 | 8.721975 | 8.716076 | 8.125124 | 7.933156 | 8.140212 |
| GPATCH2L  | 6.327624 | 6.365464 | 6.328043 | 7.006856 | 6.91284  | 7.077369 |
| TAPBP1    | 5.665846 | 5.859834 | 5.867305 | 6.413861 | 6.406253 | 6.548774 |
| BRD3      | 8.442682 | 8.460519 | 8.50772  | 7.879501 | 7.75752  | 7.799078 |
| WDR26     | 9.72978  | 9.747214 | 9.761617 | 10.43113 | 10.38784 | 10.39415 |
| PPP2R3A   | 7.192724 | 7.032629 | 7.04834  | 6.465146 | 6.412761 | 6.421491 |
| PEA15     | 8.986746 | 9.063007 | 8.996894 | 9.693964 | 9.663916 | 9.662657 |
| APOC1     | 6.233791 | 6.312803 | 6.424783 | 5.750539 | 5.624995 | 5.624995 |
| RAB11FIP1 | 3.867895 | 3.786976 | 4.04651  | 4.552427 | 4.547911 | 4.571827 |
| RLF       | 6.792193 | 6.806861 | 6.781531 | 7.461703 | 7.426233 | 7.462679 |
| EDNRB     | 6.852562 | 7.085435 | 7.015441 | 7.678685 | 7.586022 | 7.658186 |
| SUV39H1   | 8.333316 | 8.40468  | 8.395668 | 7.618762 | 7.723353 | 7.823346 |
| CHTF18    | 8.195704 | 8.166478 | 8.227585 | 7.502082 | 7.552185 | 7.567405 |
| SNX5      | 7.822819 | 7.901436 | 7.955962 | 8.576218 | 8.478772 | 8.593112 |
| ZNF44     | 6.744387 | 6.654649 | 6.686636 | 7.348369 | 7.298207 | 7.406606 |
| TM4SF18   | 8.539864 | 8.520363 | 8.450103 | 9.206546 | 9.131401 | 9.139856 |
| TNFRSF12A | 7.561379 | 7.766619 | 7.590421 | 8.314704 | 8.212914 | 8.357332 |
| MAB21L1 / | 5.781407 | 5.794296 | 5.781407 | 6.523465 | 6.344449 | 6.455664 |

|           |          |          |          |          |          |          |
|-----------|----------|----------|----------|----------|----------|----------|
| LRRK2     | 4.146135 | 4.164082 | 4.248843 | 5.091117 | 4.595572 | 4.838273 |
| DCTN5     | 7.004457 | 6.984693 | 6.97914  | 7.687365 | 7.608588 | 7.637806 |
| BIVM      | 7.51822  | 7.536542 | 7.553111 | 8.16194  | 8.130479 | 8.280788 |
| DENND4A   | 5.958761 | 5.834122 | 5.865757 | 6.584898 | 6.471157 | 6.567433 |
| LY96      | 5.160999 | 5.297508 | 5.071994 | 5.698065 | 5.835188 | 5.962041 |
| GNE       | 8.02235  | 8.04589  | 8.016791 | 8.753935 | 8.633049 | 8.662685 |
| C3orf38   | 8.521318 | 8.515059 | 8.518339 | 9.203988 | 9.109239 | 9.205519 |
| CDC42SE2  | 6.48156  | 6.61919  | 6.68914  | 7.277376 | 7.14128  | 7.33455  |
| CD22      | 4.210727 | 4.148547 | 4.205782 | 4.742912 | 4.781203 | 5.003448 |
| ZDHHC20   | 6.362809 | 6.271707 | 6.282234 | 6.982947 | 6.853048 | 7.042527 |
| POGLUT1   | 6.971755 | 6.96891  | 7.14278  | 7.688028 | 7.592668 | 7.764134 |
| ENTPD7    | 5.316909 | 5.315302 | 5.375356 | 6.035555 | 5.877912 | 6.053924 |
| CDK9      | 7.192757 | 7.245896 | 7.248632 | 6.544694 | 6.544258 | 6.638584 |
| EOGT      | 5.861319 | 5.843605 | 5.855221 | 6.609486 | 6.387602 | 6.522049 |
| AURKB     | 9.129474 | 9.158433 | 9.146124 | 8.528071 | 8.438857 | 8.508782 |
| ZC3H12C   | 6.583855 | 6.53042  | 6.682425 | 7.289983 | 7.18795  | 7.276714 |
| IMPA2     | 8.061898 | 8.088684 | 8.044567 | 7.470945 | 7.387423 | 7.37946  |
| GAL       | 8.475723 | 8.456681 | 8.466042 | 7.874449 | 7.782957 | 7.784164 |
| MTX3      | 4.541048 | 4.413306 | 4.47617  | 5.231411 | 5.082488 | 5.073046 |
| SCN3A     | 3.424725 | 3.399074 | 3.621656 | 3.999293 | 4.174955 | 4.227415 |
| ATP6V1E2  | 6.232966 | 6.282582 | 6.406765 | 5.829371 | 5.599179 | 5.537648 |
| SPATS2L   | 5.846565 | 5.916146 | 5.918395 | 5.308624 | 5.210308 | 5.206256 |
| ZBED9     | 5.312393 | 5.262349 | 5.164611 | 5.98978  | 5.73296  | 5.97246  |
| TNFRSF11E | 6.790027 | 6.765434 | 6.867239 | 7.506965 | 7.462729 | 7.408834 |
| TMED9     | 7.469566 | 7.420959 | 7.373489 | 6.785383 | 6.742829 | 6.780228 |
| ALDH1A3   | 9.749262 | 9.756975 | 9.749262 | 9.123015 | 9.054838 | 9.122651 |
| GNG7 ///  | 6.126466 | 5.894707 | 6.113729 | 5.303029 | 5.48185  | 5.395382 |
| LRTOMT    | 3.533041 | 3.762898 | 3.470618 | 4.385974 | 4.035697 | 4.299451 |
| TWIST1    | 8.150264 | 8.171633 | 8.147791 | 7.551229 | 7.454672 | 7.50931  |
| POLI      | 4.866643 | 4.636302 | 4.590664 | 4.173843 | 3.894152 | 4.071803 |
| PRKCH     | 6.197486 | 6.241501 | 6.300653 | 7.007449 | 6.724171 | 6.961587 |
| CCNB1     | 10.69869 | 10.73187 | 10.66401 | 10.0377  | 10.06505 | 10.03857 |
| SOWAHC    | 5.622405 | 5.729067 | 5.680512 | 6.34783  | 6.19364  | 6.443728 |
| ZNF644    | 5.549427 | 5.469541 | 5.417609 | 6.144027 | 6.084689 | 6.160534 |
| C2orf69   | 8.782859 | 8.645809 | 8.713493 | 9.387053 | 9.317622 | 9.389335 |
| TRAPPC6B  | 6.688009 | 6.667608 | 6.671578 | 7.395051 | 7.230103 | 7.353652 |
| KCTD8     | 2.983038 | 3.137717 | 3.290198 | 3.802378 | 3.818411 | 3.741555 |
| BACH1 /// | 3.191105 | 2.57261  | 2.970024 | 3.573682 | 3.671202 | 3.439385 |
| KLF3      | 6.310068 | 6.279566 | 6.298596 | 6.984306 | 6.826568 | 7.027057 |
| C15orf52  | 9.365834 | 9.370323 | 9.365383 | 10.00188 | 10.00094 | 10.04834 |
| SLC44A1   | 9.43043  | 9.439711 | 9.449723 | 8.848643 | 8.698197 | 8.823475 |
| ARRDC4    | 6.226419 | 6.268268 | 6.308747 | 5.570936 | 5.51236  | 5.770922 |
| TGFBR3    | 6.441393 | 6.351334 | 6.460072 | 7.137996 | 6.887407 | 7.176005 |
| KLHL18    | 7.527936 | 7.571734 | 7.539222 | 8.239467 | 8.121305 | 8.226238 |
| KLHL23 // | 6.909199 | 6.678827 | 6.692127 | 6.13946  | 6.123542 | 6.069577 |
| NR2F1-AS1 | 6.598768 | 6.606996 | 6.569297 | 7.342629 | 7.173633 | 7.206128 |
| ABHD13    | 7.638451 | 7.65609  | 7.732204 | 8.387917 | 8.26512  | 8.32041  |
| ZNF826P   | 3.925191 | 4.015802 | 4.164457 | 3.398246 | 3.470677 | 3.290198 |
| MCC       | 4.964072 | 4.798521 | 4.878226 | 5.486851 | 5.486851 | 5.612374 |
| ZC3H8     | 7.184836 | 7.134586 | 7.100988 | 7.786792 | 7.715504 | 7.86223  |
| FAM8A1    | 6.238193 | 6.211878 | 6.379068 | 6.967979 | 6.918939 | 6.886269 |

|           |          |          |          |          |          |          |
|-----------|----------|----------|----------|----------|----------|----------|
| PPP1R11   | 8.680969 | 8.711535 | 8.763939 | 8.172573 | 7.973058 | 8.066815 |
| SLC12A2   | 7.238341 | 7.164867 | 7.230524 | 7.831459 | 7.82928  | 7.916559 |
| MYC       | 7.755179 | 7.745272 | 7.739438 | 8.393564 | 8.358863 | 8.430383 |
| RNF175    | 5.22221  | 5.314832 | 5.077016 | 4.618083 | 4.529086 | 4.523984 |
| ALPK2     | 6.92084  | 6.946276 | 6.930311 | 7.633747 | 7.5103   | 7.596272 |
| RNF149    | 8.041383 | 7.994134 | 8.051685 | 8.713496 | 8.611389 | 8.704341 |
| DCBLD2    | 9.478867 | 9.476477 | 9.466966 | 10.11485 | 10.13435 | 10.11514 |
| DUSP5     | 7.942495 | 7.796963 | 7.823276 | 8.521204 | 8.451524 | 8.531977 |
| RNF20     | 9.554854 | 9.576014 | 9.579419 | 10.2529  | 10.18414 | 10.2152  |
| CDK5R1    | 6.735146 | 6.615183 | 6.655301 | 7.34745  | 7.293749 | 7.305193 |
| APPBP2    | 6.318839 | 6.391278 | 6.362783 | 5.622955 | 5.745975 | 5.763644 |
| FDFT1     | 10.16502 | 10.15527 | 10.18399 | 9.552643 | 9.489883 | 9.521596 |
| PDE9A     | 5.817876 | 5.961996 | 5.921587 | 6.57571  | 6.491234 | 6.574602 |
| POLQ      | 6.955366 | 7.128494 | 6.999687 | 6.348458 | 6.301807 | 6.494066 |
| RCCD1     | 8.554191 | 8.479284 | 8.567313 | 7.937624 | 7.848602 | 7.875858 |
| IER2      | 8.70175  | 8.664841 | 8.605561 | 9.332705 | 9.232814 | 9.34526  |
| KMT5B     | 8.228446 | 8.163832 | 8.194299 | 8.874756 | 8.821611 | 8.828569 |
| SESTD1    | 4.930042 | 4.777618 | 4.978068 | 4.065175 | 4.39465  | 4.287603 |
| STIL      | 9.146082 | 9.104186 | 9.038078 | 8.462649 | 8.392969 | 8.494926 |
| HAUS7 /// | 7.082467 | 7.0423   | 7.10783  | 6.373158 | 6.388369 | 6.533493 |
| CD44      | 11.14125 | 11.12245 | 11.15366 | 10.52844 | 10.46222 | 10.49021 |
| TMEM39A   | 7.104867 | 7.093827 | 7.15111  | 6.554522 | 6.399238 | 6.460075 |
| CENPI     | 5.768063 | 5.609657 | 5.641506 | 5.053438 | 5.189638 | 4.840424 |
| FGFR10P   | 6.300653 | 6.086317 | 6.17982  | 6.883527 | 6.827464 | 6.791342 |
| WRNIP1    | 8.794713 | 8.805145 | 8.835909 | 8.129047 | 8.117404 | 8.254118 |
| HIST1H1D  | 7.164867 | 7.194549 | 7.216329 | 6.58442  | 6.317303 | 6.739161 |
| CLDN12    | 8.082623 | 7.973917 | 8.013348 | 8.66115  | 8.665328 | 8.678036 |
| USP47     | 5.506451 | 5.380107 | 5.447166 | 4.664931 | 4.961944 | 4.772376 |
| ST3GAL5   | 7.945365 | 8.028382 | 7.935851 | 8.623873 | 8.581514 | 8.63716  |
| XDH       | 6.230401 | 6.349586 | 6.282234 | 6.935664 | 6.91284  | 6.946363 |
| SIX5      | 6.880292 | 6.852777 | 6.845744 | 6.128109 | 6.285184 | 6.233298 |
| PTPN21    | 5.453334 | 5.610859 | 5.455132 | 6.154713 | 6.158893 | 6.136045 |
| CASK      | 5.734033 | 5.843212 | 5.86889  | 5.088631 | 5.149011 | 5.279042 |
| HNRNPD    | 7.826412 | 7.761374 | 7.77295  | 7.212483 | 7.092748 | 7.126321 |
| TOM1L2    | 8.046372 | 8.071798 | 8.114052 | 7.397784 | 7.405581 | 7.500679 |
| UBE2C     | 10.27653 | 10.25962 | 10.30013 | 9.654884 | 9.642852 | 9.611082 |
| SBN01     | 7.995278 | 8.04326  | 8.024916 | 8.599149 | 8.691155 | 8.700255 |
| ZNF443 // | 7.428873 | 7.42645  | 7.442912 | 8.175535 | 8.066072 | 7.983106 |
| NEK6      | 6.318577 | 6.338481 | 6.451139 | 7.05329  | 7.021829 | 6.959553 |
| KNSTRN    | 9.769373 | 9.744857 | 9.708853 | 9.140037 | 9.037236 | 9.119371 |
| DNAJC1    | 7.874449 | 7.916727 | 8.004995 | 8.576161 | 8.585681 | 8.56069  |
| AKAP8L    | 5.962772 | 6.087542 | 6.082672 | 6.693339 | 6.631055 | 6.733985 |
| EMX1 ///  | 7.896951 | 8.006952 | 7.90513  | 7.248865 | 7.287663 | 7.34731  |
| ITSN1     | 6.022714 | 6.187641 | 6.269338 | 5.391449 | 5.54949  | 5.614058 |
| TBCEL     | 3.848634 | 3.995824 | 3.903339 | 4.776984 | 4.415036 | 4.480151 |
| C8orf58   | 7.602408 | 7.637728 | 7.646961 | 8.322066 | 8.203325 | 8.285483 |
| FBN1      | 3.687347 | 3.670921 | 3.705635 | 4.227487 | 4.424095 | 4.335583 |
| DXO /// T | 7.509974 | 7.59346  | 7.579249 | 6.872367 | 6.951921 | 6.935139 |
| GON4L     | 7.80629  | 7.755527 | 7.704378 | 8.508048 | 8.332673 | 8.348526 |
| NFX1      | 6.505639 | 6.495046 | 6.589899 | 7.153248 | 7.108083 | 7.251768 |
| PPP1R14C  | 6.694281 | 6.683988 | 6.712963 | 6.073152 | 6.118848 | 5.977098 |

|           |          |          |          |          |          |          |
|-----------|----------|----------|----------|----------|----------|----------|
| Clorf112  | 7.53071  | 7.51381  | 7.461887 | 6.847004 | 6.818492 | 6.919603 |
| ARAP2     | 4.210461 | 4.139261 | 4.338905 | 4.896291 | 4.966747 | 4.745691 |
| LINC01605 | 5.257551 | 5.463076 | 5.231269 | 5.977176 | 5.915655 | 5.979039 |
| EDIL3     | 4.165931 | 4.39025  | 4.349605 | 5.07234  | 4.831888 | 4.920954 |
| EMP1      | 6.357952 | 6.172007 | 6.134341 | 5.496402 | 5.552012 | 5.696702 |
| WWC2      | 8.259249 | 8.240658 | 8.213026 | 8.886551 | 8.879957 | 8.864864 |
| ERBB2IP   | 7.257351 | 7.299172 | 7.232148 | 7.878787 | 7.890134 | 7.937514 |
| GPR155    | 4.025411 | 4.275553 | 4.210858 | 3.646496 | 3.645828 | 3.302428 |
| TCF20     | 8.032632 | 8.041537 | 8.020104 | 7.418555 | 7.389881 | 7.369252 |
| RALBP1    | 8.5819   | 8.608011 | 8.666489 | 8.015853 | 7.958443 | 7.965957 |
| CTCFL /// | 11.91477 | 11.97992 | 11.92248 | 11.28281 | 11.28504 | 11.33356 |
| SLC29A1   | 7.273268 | 7.456336 | 7.321074 | 6.812181 | 6.688304 | 6.63526  |
| PCMTD2    | 8.755452 | 8.781612 | 8.820973 | 8.162443 | 8.145981 | 8.134863 |
| OSBP      | 7.05776  | 6.969042 | 7.050496 | 7.665934 | 7.603664 | 7.722336 |
| ARPP21    | 6.287441 | 6.1185   | 6.317608 | 6.836139 | 6.852348 | 6.948242 |
| CSRP2     | 8.570115 | 8.53127  | 8.422119 | 7.898833 | 7.919837 | 7.792869 |
| FGFBP2    | 5.930904 | 5.912206 | 6.024765 | 5.354825 | 5.338733 | 5.262454 |
| IMP4      | 9.223626 | 9.210154 | 9.15104  | 8.580377 | 8.520384 | 8.572209 |
| PCNX      | 6.157083 | 6.104792 | 6.251657 | 5.386899 | 5.573072 | 5.643723 |
| BMP1      | 5.730077 | 5.638125 | 5.846461 | 6.367553 | 6.476155 | 6.280739 |
| CHD7      | 8.124726 | 8.163441 | 8.217417 | 8.811482 | 8.771815 | 8.832058 |
| PRKAR1B   | 7.029702 | 6.865575 | 6.910855 | 6.360404 | 6.317316 | 6.219082 |
| PPIH      | 9.53007  | 9.588403 | 9.541681 | 8.942999 | 8.869677 | 8.938533 |
| CARHSP1   | 8.182964 | 8.182333 | 8.248702 | 7.555812 | 7.616501 | 7.533173 |
| CSMD3     | 4.20309  | 4.092296 | 4.199498 | 4.782072 | 4.691608 | 4.929545 |
| TMEM71    | 3.239001 | 3.336066 | 3.593551 | 4.219658 | 3.801837 | 4.054893 |
| EMG1      | 10.00162 | 9.995042 | 10.00591 | 9.383221 | 9.347848 | 9.363961 |
| CRTAP     | 7.749912 | 7.68589  | 7.565087 | 7.011525 | 6.917349 | 7.165174 |
| HSPB8     | 6.195507 | 6.183133 | 6.345413 | 6.982947 | 6.800403 | 6.847527 |
| SMC4      | 10.8635  | 10.80911 | 10.74655 | 10.16592 | 10.22726 | 10.11951 |
| LRPPRC    | 6.293341 | 6.142866 | 6.344476 | 5.645328 | 5.614573 | 5.614573 |
| Clorf52   | 8.898649 | 8.889026 | 8.866962 | 9.544965 | 9.508785 | 9.506804 |
| RHOF      | 7.324069 | 7.455804 | 7.305135 | 6.749471 | 6.673178 | 6.75655  |
| WDHD1     | 6.136564 | 6.186754 | 6.316319 | 5.60173  | 5.352192 | 5.780185 |
| SENP5     | 6.95159  | 6.932401 | 7.063018 | 7.584604 | 7.566437 | 7.701497 |
| MAP4      | 6.779057 | 6.754129 | 6.825441 | 6.147081 | 6.212774 | 6.093428 |
| KCNK1     | 8.048777 | 7.959791 | 7.943859 | 7.34688  | 7.311864 | 7.38924  |
| SNORA33   | 7.174886 | 6.922783 | 6.922783 | 6.225523 | 6.498886 | 6.391898 |
| LHFP      | 7.221513 | 7.204337 | 7.299231 | 7.842047 | 7.881073 | 7.906093 |
| TRIM14    | 7.953143 | 8.010916 | 7.980213 | 7.326395 | 7.339049 | 7.375006 |
| C2orf49   | 7.421128 | 7.414638 | 7.427472 | 8.100925 | 8.007584 | 8.058113 |
| AIMP1     | 6.390554 | 6.377749 | 6.365859 | 5.785578 | 5.785345 | 5.660034 |
| AURKA     | 10.21958 | 10.22759 | 10.23807 | 9.596812 | 9.529756 | 9.655772 |
| TRIP13    | 8.933047 | 8.951182 | 8.905017 | 8.326147 | 8.272654 | 8.288006 |
| SHPK      | 7.376727 | 7.267186 | 7.181842 | 6.797972 | 6.638788 | 6.48657  |
| UHRF1BP1L | 7.012813 | 6.99132  | 7.05943  | 7.672682 | 7.526996 | 7.766226 |
| UBE2W     | 7.855886 | 7.81269  | 7.871463 | 7.214862 | 7.20256  | 7.220379 |
| LOC100128 | 7.049804 | 6.82371  | 7.085238 | 7.651176 | 7.53205  | 7.677753 |
| UBE2S     | 10.72007 | 10.75293 | 10.73217 | 10.12011 | 10.0589  | 10.12407 |
| RNASEL    | 6.151743 | 6.134431 | 6.17982  | 6.806806 | 6.74141  | 6.819762 |
| NAA30     | 6.594882 | 6.546452 | 6.653283 | 7.239959 | 7.170069 | 7.286046 |

|           |           |           |           |           |           |           |
|-----------|-----------|-----------|-----------|-----------|-----------|-----------|
| ANKRD10   | 8. 352721 | 8. 393737 | 8. 252652 | 8. 968182 | 8. 99327  | 8. 939085 |
| SCD       | 10. 37797 | 10. 40719 | 10. 36997 | 9. 771766 | 9. 716748 | 9. 765496 |
| KIF11     | 8. 683798 | 8. 590667 | 8. 565992 | 8. 040626 | 7. 933014 | 7. 965766 |
| FNDC3B    | 8. 362324 | 8. 339021 | 8. 358916 | 8. 982558 | 8. 966054 | 9. 012371 |
| TINAGL1   | 6. 513369 | 6. 43954  | 6. 563479 | 7. 127942 | 7. 090903 | 7. 198094 |
| TRMT10A   | 5. 775856 | 5. 724926 | 5. 825153 | 5. 204911 | 5. 161607 | 5. 059631 |
| PHLDA1    | 8. 745438 | 8. 79888  | 8. 810016 | 9. 396169 | 9. 392043 | 9. 465308 |
| IQGAP3    | 7. 291519 | 7. 154795 | 7. 375135 | 6. 647945 | 6. 595722 | 6. 67942  |
| ZNF470    | 6. 037532 | 6. 074021 | 6. 100067 | 6. 588652 | 6. 795367 | 6. 725592 |
| H1FO      | 9. 984739 | 10. 00714 | 9. 932764 | 9. 336877 | 9. 340307 | 9. 349497 |
| ZSCAN16   | 5. 768063 | 5. 768063 | 5. 713917 | 6. 379568 | 6. 288251 | 6. 480076 |
| RPGR      | 6. 412161 | 6. 22566  | 6. 277225 | 6. 956795 | 6. 858349 | 6. 997167 |
| ABCC2     | 8. 746947 | 8. 730827 | 8. 740142 | 9. 362794 | 9. 342207 | 9. 408566 |
| TRERF1    | 5. 514924 | 5. 559146 | 5. 619473 | 4. 76756  | 5. 11528  | 4. 915186 |
| PPM1B     | 7. 041651 | 7. 007832 | 6. 910059 | 7. 645545 | 7. 647058 | 7. 562356 |
| DDX60L    | 5. 524749 | 5. 585399 | 5. 628025 | 6. 245687 | 6. 255354 | 6. 132352 |
| SLC25A11  | 8. 591456 | 8. 637594 | 8. 578163 | 7. 952844 | 7. 944549 | 8. 014816 |
| EGR3      | 6. 040079 | 6. 200852 | 6. 209373 | 6. 773241 | 6. 839123 | 6. 732687 |
| TNFRSF10E | 9. 698387 | 9. 673016 | 9. 649553 | 9. 098906 | 9. 016488 | 9. 011833 |
| OBSL1     | 8. 49001  | 8. 602381 | 8. 633269 | 7. 954074 | 7. 90228  | 7. 97589  |
| ADH5      | 8. 167717 | 8. 15672  | 8. 305289 | 7. 619397 | 7. 52621  | 7. 591556 |
| TRAPPC4   | 9. 742943 | 9. 762371 | 9. 73922  | 9. 146084 | 9. 059992 | 9. 145929 |
| RAB39A    | 3. 421339 | 3. 421339 | 3. 513428 | 4. 003009 | 4. 003009 | 4. 242246 |
| KIAA1524  | 7. 434597 | 7. 38984  | 7. 487413 | 6. 792718 | 6. 750441 | 6. 8771   |
| CCNA2     | 9. 175493 | 9. 143877 | 9. 205445 | 8. 577329 | 8. 508057 | 8. 548416 |
| UBE2D1    | 6. 647988 | 6. 61995  | 6. 743525 | 6. 169403 | 5. 914051 | 6. 037338 |
| PHF20L1   | 5. 965991 | 6. 024879 | 6. 113823 | 6. 740549 | 6. 578218 | 6. 676427 |
| POLD3     | 7. 946305 | 7. 860395 | 7. 988818 | 7. 34097  | 7. 288727 | 7. 275402 |
| CELF1     | 7. 987372 | 8. 02898  | 7. 977551 | 8. 636298 | 8. 608336 | 8. 639676 |
| XRCC2     | 6. 430998 | 6. 412385 | 6. 671291 | 5. 867684 | 5. 826512 | 5. 931616 |
| MT1X      | 8. 329211 | 8. 355047 | 8. 239343 | 7. 700827 | 7. 647541 | 7. 686789 |
| ACPP      | 3. 686049 | 3. 800927 | 3. 981671 | 4. 403109 | 4. 535032 | 4. 41791  |
| CCNG1     | 8. 846287 | 8. 882919 | 8. 721662 | 9. 461299 | 9. 470894 | 9. 40585  |
| SEC24A    | 7. 881789 | 7. 892976 | 7. 962877 | 8. 50528  | 8. 515745 | 8. 603378 |
| RPA2      | 8. 794053 | 8. 773554 | 8. 785495 | 8. 18935  | 8. 133903 | 8. 143793 |
| ZBTB48    | 6. 837147 | 7. 067911 | 6. 905694 | 7. 533225 | 7. 499694 | 7. 663627 |
| RECK      | 5. 576427 | 5. 568244 | 5. 654016 | 6. 240784 | 6. 138566 | 6. 3048   |
| C9orf85   | 7. 681786 | 7. 523068 | 7. 579213 | 8. 223919 | 8. 194201 | 8. 251179 |
| TNFRSF21  | 10. 5921  | 10. 64545 | 10. 65446 | 10. 06186 | 9. 970588 | 9. 974968 |
| DCAF4L1   | 4. 456545 | 4. 200688 | 4. 446779 | 5. 029539 | 4. 884963 | 5. 073046 |
| PHGDH     | 10. 25355 | 10. 2897  | 10. 20935 | 9. 647043 | 9. 586088 | 9. 636238 |
| COPRS     | 9. 248444 | 9. 234013 | 9. 22183  | 8. 653011 | 8. 584327 | 8. 58377  |
| SLF1      | 7. 224551 | 7. 2426   | 7. 08469  | 6. 656831 | 6. 515631 | 6. 49664  |
| KIAA1586  | 6. 899031 | 6. 794196 | 6. 787818 | 7. 485623 | 7. 463663 | 7. 414195 |
| EIF1AX    | 8. 811323 | 8. 748745 | 8. 798196 | 8. 152718 | 8. 143793 | 8. 181763 |
| OIP5      | 8. 973735 | 8. 886852 | 8. 980276 | 8. 373774 | 8. 267782 | 8. 31956  |
| DPH3      | 8. 801273 | 8. 768878 | 8. 689765 | 9. 406559 | 9. 363522 | 9. 368372 |
| LGALS1    | 6. 527315 | 6. 472865 | 6. 64695  | 7. 177103 | 7. 164768 | 7. 182831 |
| VGLL2     | 6. 281791 | 6. 541325 | 6. 365454 | 7. 004816 | 6. 899399 | 7. 161113 |
| PAQR5     | 4. 741771 | 4. 860381 | 4. 707098 | 4. 055439 | 4. 120025 | 4. 257661 |
| RND3      | 8. 12135  | 8. 112683 | 8. 032437 | 8. 730592 | 8. 703073 | 8. 708488 |

|           |           |           |           |           |           |           |
|-----------|-----------|-----------|-----------|-----------|-----------|-----------|
| MPZL1     | 6. 882872 | 6. 856532 | 6. 901212 | 7. 539133 | 7. 409249 | 7. 567354 |
| SLAMF7    | 4. 941828 | 4. 591142 | 4. 802583 | 5. 304793 | 5. 511225 | 5. 394653 |
| BFSP1     | 5. 369507 | 5. 444366 | 5. 671911 | 6. 194325 | 5. 965027 | 6. 20078  |
| TRAPPC13  | 6. 263528 | 6. 253896 | 6. 279651 | 5. 630274 | 5. 662495 | 5. 630274 |
| CDC42EP2  | 7. 459517 | 7. 475216 | 7. 480329 | 8. 0844   | 8. 063684 | 8. 140854 |
| AIF1L     | 7. 244822 | 7. 249746 | 7. 24789  | 6. 657515 | 6. 574918 | 6. 636554 |
| NHLRC3    | 5. 532024 | 5. 566608 | 5. 608842 | 6. 231937 | 6. 177124 | 6. 171638 |
| RIN2      | 8. 160371 | 8. 168506 | 8. 183207 | 8. 790804 | 8. 763724 | 8. 829016 |
| THAP1     | 7. 104516 | 7. 151314 | 7. 19881  | 7. 780671 | 7. 783576 | 7. 761566 |
| SLC35D1   | 5. 220861 | 5. 352533 | 5. 42377  | 5. 999754 | 5. 841187 | 6. 027158 |
| ZFP82     | 7. 16293  | 7. 172278 | 7. 238367 | 7. 765031 | 7. 811029 | 7. 867991 |
| SNAPC1    | 10. 77903 | 10. 74296 | 10. 66285 | 11. 32623 | 11. 39407 | 11. 33425 |
| IFT88     | 6. 197264 | 6. 286222 | 6. 231873 | 6. 910843 | 6. 859887 | 6. 814174 |
| CLCA2     | 3. 150955 | 3. 136302 | 3. 186409 | 3. 745623 | 3. 571353 | 4. 026102 |
| LRCH1     | 6. 15572  | 6. 125456 | 6. 123067 | 6. 76743  | 6. 731597 | 6. 774281 |
| NUP210    | 6. 396806 | 6. 377563 | 6. 441318 | 5. 769541 | 5. 763644 | 5. 815001 |
| NSAP11    | 2. 680999 | 2. 70917  | 2. 828514 | 3. 39765  | 3. 398246 | 3. 290198 |
| GINS3     | 7. 031249 | 7. 056704 | 7. 001038 | 6. 401452 | 6. 325801 | 6. 494453 |
| THRA      | 7. 336716 | 7. 254576 | 7. 345866 | 6. 812692 | 6. 602062 | 6. 655948 |
| KRAS      | 9. 50242  | 9. 449836 | 9. 462344 | 8. 91088  | 8. 791054 | 8. 84653  |
| ISPD      | 3. 629906 | 3. 347484 | 3. 833525 | 2. 995975 | 2. 794671 | 3. 154281 |
| ASXL1     | 7. 670038 | 7. 688516 | 7. 793407 | 7. 089187 | 7. 134385 | 7. 062479 |
| ARSK      | 4. 736709 | 4. 759708 | 4. 962509 | 5. 460717 | 5. 345429 | 5. 518179 |
| EML4      | 6. 563755 | 6. 526105 | 6. 628207 | 7. 251976 | 7. 063295 | 7. 268074 |
| PTPN3     | 5. 396923 | 5. 554446 | 5. 508809 | 4. 904532 | 4. 697633 | 4. 992887 |
| TIGAR     | 8. 310914 | 8. 281197 | 8. 290865 | 8. 958114 | 8. 861065 | 8. 928682 |
| FOXC1     | 5. 197713 | 5. 460357 | 5. 15819  | 4. 57733  | 4. 84019  | 4. 534028 |
| PKMYT1    | 6. 706592 | 6. 614222 | 6. 633779 | 5. 9201   | 6. 212536 | 5. 957357 |
| E2F1      | 6. 758048 | 6. 85745  | 6. 911765 | 6. 188908 | 6. 244676 | 6. 229517 |
| APPL1     | 8. 19741  | 8. 109379 | 8. 177384 | 7. 579917 | 7. 533599 | 7. 506708 |
| TMEM265   | 6. 227662 | 6. 133122 | 6. 507196 | 7. 034412 | 6. 825812 | 6. 871665 |
| FZD4      | 6. 667068 | 6. 72228  | 6. 854362 | 6. 199831 | 6. 040449 | 6. 139709 |
| ZNF432    | 5. 186224 | 5. 226966 | 5. 002215 | 5. 795167 | 5. 712206 | 5. 771602 |
| SLC37A3   | 6. 594882 | 6. 627956 | 6. 527385 | 7. 288725 | 7. 120468 | 7. 203942 |
| KIF4A /// | 8. 386029 | 8. 380078 | 8. 442617 | 7. 863932 | 7. 670746 | 7. 812453 |
| TMEM154   | 5. 431661 | 5. 479081 | 5. 458338 | 4. 929244 | 4. 880511 | 4. 69834  |
| CLHC1     | 6. 02624  | 6. 158661 | 6. 028349 | 6. 630842 | 6. 646764 | 6. 796336 |
| PPP1R12A  | 7. 955605 | 7. 931207 | 7. 932455 | 8. 557128 | 8. 533098 | 8. 58867  |
| LOC100133 | 6. 418061 | 6. 74378  | 6. 573569 | 7. 155309 | 7. 156339 | 7. 283329 |
| LINC01119 | 5. 82457  | 5. 798336 | 5. 854585 | 6. 434879 | 6. 344692 | 6. 557324 |
| TMSB4X    | 9. 375685 | 9. 313297 | 9. 240525 | 8. 774294 | 8. 660546 | 8. 635581 |
| ARHGAP28  | 5. 408055 | 5. 492231 | 5. 471767 | 6. 198579 | 6. 050811 | 5. 980621 |
| C16orf59  | 6. 317655 | 6. 34289  | 6. 236189 | 5. 689603 | 5. 715916 | 5. 634503 |
| C15orf40  | 6. 397956 | 6. 471426 | 6. 519991 | 7. 202585 | 6. 954339 | 7. 088869 |
| RPL23AP82 | 4. 771259 | 4. 855846 | 4. 741786 | 5. 509474 | 5. 231703 | 5. 483476 |
| ZNF75A    | 6. 451616 | 6. 262504 | 6. 497117 | 7. 03683  | 6. 952049 | 7. 077949 |
| CBR1      | 8. 961441 | 8. 965387 | 8. 903146 | 8. 32049  | 8. 305118 | 8. 34896  |
| CARD9     | 4. 81516  | 4. 621487 | 4. 668144 | 5. 295153 | 5. 270375 | 5. 394656 |
| FEN1      | 8. 678859 | 8. 616445 | 8. 703911 | 8. 064976 | 8. 015764 | 8. 063154 |
| ZNF623    | 6. 956545 | 6. 985414 | 6. 876332 | 7. 545754 | 7. 521409 | 7. 606394 |
| PPP4R2    | 7. 065048 | 7. 022256 | 7. 001572 | 6. 444392 | 6. 34063  | 6. 448746 |



|           |          |          |          |          |          |          |
|-----------|----------|----------|----------|----------|----------|----------|
| BLOC1S2   | 8.199717 | 8.1931   | 8.18131  | 8.818143 | 8.803694 | 8.807349 |
| SRCAP     | 6.983568 | 6.922114 | 6.971601 | 6.376187 | 6.300207 | 6.345839 |
| GALNT4 // | 7.298757 | 7.315545 | 7.249211 | 6.779117 | 6.56113  | 6.668368 |
| TMEM201   | 7.110224 | 7.180479 | 7.170697 | 6.467534 | 6.639263 | 6.500178 |
| CNNM4     | 6.776267 | 6.858422 | 6.884743 | 6.347034 | 6.040921 | 6.278082 |
| EOMES     | 3.742476 | 3.969536 | 3.954167 | 3.176944 | 3.290198 | 3.345708 |
| APOBEC3A  | 8.767432 | 8.652184 | 8.657942 | 8.071724 | 8.097819 | 8.055433 |
| MCFD2     | 9.71938  | 9.68897  | 9.748012 | 10.35455 | 10.36464 | 10.28957 |
| PTEN      | 8.253806 | 8.249495 | 8.347038 | 8.908397 | 8.914515 | 8.879563 |
| CCNJL     | 7.627214 | 7.626375 | 7.633735 | 8.265725 | 8.215246 | 8.258163 |
| TNFSF18   | 3.993551 | 3.893435 | 4.284984 | 4.709782 | 4.53991  | 4.774043 |
| STK4      | 5.585774 | 5.419375 | 5.403546 | 6.153446 | 5.95413  | 6.151461 |
| TMEM255A  | 2.823457 | 2.823457 | 2.93533  | 3.284384 | 3.43427  | 3.713778 |
| PKN3      | 7.386483 | 7.346773 | 7.280735 | 6.724346 | 6.612191 | 6.827395 |
| GPALPP1   | 7.415688 | 7.494411 | 7.465077 | 6.872367 | 6.773802 | 6.879167 |
| KNTC1     | 8.153394 | 8.171182 | 8.202109 | 7.591504 | 7.473716 | 7.61233  |
| ITGA5     | 8.349818 | 8.426999 | 8.310144 | 8.950419 | 9.004106 | 8.980956 |
| SPAG5     | 8.449202 | 8.414468 | 8.402839 | 7.859504 | 7.745256 | 7.815241 |
| EFCAB14   | 7.441533 | 7.558315 | 7.472219 | 8.188816 | 8.059544 | 8.070081 |
| GPD2      | 8.012409 | 8.005607 | 8.05441  | 7.435462 | 7.37262  | 7.418416 |
| ASCC3     | 7.633744 | 7.660897 | 7.58901  | 8.25112  | 8.205923 | 8.27237  |
| FAR2      | 7.694936 | 7.718203 | 7.75734  | 8.361641 | 8.262504 | 8.391818 |
| MED30     | 8.082851 | 8.056404 | 8.062566 | 7.429452 | 7.456169 | 7.47143  |
| BEST3     | 4.275553 | 4.298711 | 4.378523 | 4.761198 | 4.892755 | 5.142547 |
| CORO1C    | 9.924772 | 9.941511 | 9.893826 | 9.345295 | 9.286433 | 9.284894 |
| PTBP2     | 8.255885 | 8.216324 | 8.229099 | 8.85973  | 8.871085 | 8.813959 |
| FTO       | 9.233149 | 9.246691 | 9.211086 | 8.665737 | 8.562165 | 8.620212 |
| NCAPG     | 9.695917 | 9.69111  | 9.612088 | 9.052651 | 9.065879 | 9.038495 |
| CAPZA1    | 10.21281 | 10.12263 | 10.1344  | 9.547202 | 9.549194 | 9.531508 |
| ALKBH8    | 6.097928 | 6.14651  | 6.039144 | 6.676236 | 6.686733 | 6.762395 |
| TIMM23 // | 5.493328 | 5.708645 | 5.554626 | 6.21501  | 6.066888 | 6.316227 |
| PPIF      | 8.209574 | 8.273767 | 8.226737 | 8.86772  | 8.814782 | 8.868879 |
| NSFL1C    | 7.68883  | 7.623836 | 7.668071 | 7.012966 | 6.987789 | 7.139095 |
| ARHGAP24  | 6.81461  | 6.65983  | 6.825215 | 7.356764 | 7.361008 | 7.422237 |
| ARIH2     | 8.374661 | 8.433373 | 8.39276  | 7.866761 | 7.725997 | 7.767737 |
| PLEKHF2   | 5.820062 | 5.768063 | 5.77318  | 5.139125 | 5.164047 | 5.218089 |
| STXBP5    | 6.291789 | 6.179864 | 6.332566 | 6.88887  | 6.806903 | 6.948463 |
| RRN3 ///  | 7.963859 | 7.924789 | 7.950609 | 8.542829 | 8.537354 | 8.598077 |
| ZWINT     | 10.28521 | 10.2472  | 10.28786 | 9.684459 | 9.652402 | 9.645285 |
| CLDN22    | 5.293976 | 5.280727 | 5.292335 | 5.91314  | 5.918362 | 5.873549 |
| PTPRO     | 3.33896  | 3.130846 | 3.053031 | 3.910876 | 3.577714 | 3.872185 |
| MYBL2     | 7.869979 | 7.990559 | 7.882183 | 7.227093 | 7.258336 | 7.420025 |
| SLC23A2   | 6.241716 | 6.223651 | 6.34671  | 6.878643 | 6.836409 | 6.933527 |
| NHEJ1     | 5.830077 | 5.884956 | 5.803408 | 5.202456 | 5.135301 | 5.344789 |
| TWSG1     | 8.760436 | 8.70222  | 8.562824 | 8.100007 | 8.104764 | 7.986128 |
| ZSCAN26   | 5.312983 | 5.474648 | 5.529487 | 6.02331  | 6.058796 | 6.069577 |
| IPP       | 6.328545 | 6.503768 | 6.596515 | 5.863239 | 5.847641 | 5.88395  |
| CKLF ///  | 9.352138 | 9.361268 | 9.368987 | 8.799328 | 8.725085 | 8.724034 |
| KPNA6     | 7.605949 | 7.570161 | 7.5807   | 8.211216 | 8.115986 | 8.263487 |
| VPS13C    | 5.389898 | 5.416091 | 5.458696 | 6.198915 | 5.932688 | 5.966907 |
| TBK1      | 7.848811 | 7.887505 | 7.805136 | 8.479469 | 8.415464 | 8.480298 |

|           |          |          |          |          |          |          |
|-----------|----------|----------|----------|----------|----------|----------|
| CENPE     | 8.532672 | 8.50005  | 8.512593 | 7.89302  | 7.83407  | 7.98465  |
| UBR1      | 7.41717  | 7.409238 | 7.409238 | 8.032705 | 7.959244 | 8.076922 |
| NEDD9     | 6.74141  | 6.795143 | 6.795143 | 7.392974 | 7.318944 | 7.45118  |
| KBTBD7    | 6.17364  | 6.060003 | 6.110694 | 5.45227  | 5.524727 | 5.536386 |
| FANCD2 // | 6.42733  | 6.445418 | 6.554735 | 5.898287 | 5.700266 | 5.998431 |
| SPAG4     | 6.447935 | 6.323807 | 6.434892 | 5.931463 | 5.611306 | 5.834322 |
| TMTC3     | 7.327415 | 7.335638 | 7.488483 | 8.025435 | 7.961772 | 7.992966 |
| GTF2H1    | 7.918126 | 7.995481 | 7.990666 | 8.621881 | 8.550318 | 8.559697 |
| MAST3     | 6.621989 | 6.763579 | 6.646189 | 6.011479 | 6.126313 | 6.066405 |
| HECW2     | 4.823989 | 5.004312 | 4.891106 | 5.49661  | 5.391047 | 5.659305 |
| NPAS2     | 7.458796 | 7.550175 | 7.548814 | 8.133238 | 8.12009  | 8.131841 |
| CDC6      | 8.494705 | 8.50792  | 8.484686 | 7.911481 | 7.855261 | 7.893566 |
| PIGK      | 7.49094  | 7.332772 | 7.420426 | 6.881439 | 6.744571 | 6.792193 |
| CEP70     | 7.427566 | 7.426643 | 7.500593 | 6.91654  | 6.765921 | 6.847083 |
| TP53INP1  | 6.998619 | 6.941357 | 7.100427 | 7.617126 | 7.560593 | 7.687864 |
| RAB3A     | 6.809069 | 6.537345 | 6.580971 | 5.863132 | 6.009391 | 6.230141 |
| NUP37     | 9.317015 | 9.320591 | 9.369242 | 8.744827 | 8.729706 | 8.707951 |
| ATP7A     | 6.198799 | 6.314617 | 6.387728 | 6.916065 | 6.864348 | 6.944684 |
| LEMD1     | 6.218377 | 6.241501 | 6.279296 | 6.845438 | 6.870837 | 6.846761 |
| TGIF1     | 7.632945 | 7.657206 | 7.70049  | 8.255874 | 8.267554 | 8.290297 |
| NOLC1     | 10.64768 | 10.68049 | 10.66574 | 10.0936  | 9.992556 | 10.08504 |
| TRAPPC1   | 9.026059 | 9.116242 | 9.069173 | 8.486902 | 8.405981 | 8.496283 |
| ZNF714    | 3.825087 | 3.560727 | 3.939035 | 3.205175 | 3.272395 | 3.025982 |
| SGOL1     | 6.593937 | 6.487793 | 6.524002 | 5.902319 | 5.958646 | 5.923805 |
| TRPV2     | 8.168239 | 8.177899 | 8.223689 | 8.818703 | 8.745761 | 8.825175 |
| HARS2     | 7.868397 | 7.92081  | 7.851728 | 7.25171  | 7.25394  | 7.316073 |
| SP100     | 5.934653 | 5.806251 | 5.900646 | 6.416897 | 6.464815 | 6.578733 |
| STK40     | 5.939092 | 5.934566 | 6.068855 | 6.591409 | 6.515631 | 6.653729 |
| RBM5      | 8.393737 | 8.380089 | 8.485454 | 9.070693 | 8.953844 | 9.052805 |
| DTX3L     | 4.966876 | 4.904159 | 4.868462 | 5.407674 | 5.490509 | 5.658814 |
| GIT2      | 8.252931 | 8.220244 | 8.27169  | 7.69485  | 7.532719 | 7.7      |
| FLOT1     | 7.69029  | 7.811859 | 7.666553 | 7.164867 | 7.056348 | 7.130765 |
| GPR107    | 6.741243 | 6.77523  | 6.922555 | 7.432931 | 7.337546 | 7.483917 |
| ORC1      | 6.885413 | 6.793278 | 6.845622 | 6.300843 | 6.118021 | 6.290279 |
| NCAPH2    | 7.627975 | 7.676073 | 7.79335  | 7.125727 | 7.036005 | 7.120628 |
| LOC102724 | 6.556555 | 6.420917 | 6.490803 | 5.882027 | 5.748923 | 6.022381 |
| IGF2 ///  | 3.299648 | 3.207229 | 3.244579 | 3.94609  | 3.733084 | 3.887144 |
| JAKMIP2   | 5.240846 | 5.290071 | 5.248309 | 5.892962 | 5.876072 | 5.824749 |
| CPPED1    | 7.189396 | 7.182619 | 7.110817 | 7.774682 | 7.731081 | 7.790627 |
| SMIM15    | 6.760312 | 6.549369 | 6.702892 | 6.085394 | 6.041711 | 6.0721   |
| C18orf54  | 5.952043 | 6.010025 | 6.110895 | 5.494483 | 5.305458 | 5.45967  |
| TPD52L1   | 7.876025 | 7.923249 | 7.903556 | 8.515179 | 8.463825 | 8.537092 |
| NSUN5     | 7.976772 | 7.994857 | 7.984852 | 7.377344 | 7.337794 | 7.428187 |
| USP38     | 7.190492 | 7.140146 | 7.215475 | 7.836356 | 7.722282 | 7.800458 |
| SREBF2    | 7.952714 | 8.066969 | 7.892076 | 7.383218 | 7.334611 | 7.3814   |
| SMPX      | 3.298319 | 3.360306 | 3.427924 | 3.892408 | 4.012954 | 3.993703 |
| GALNT2    | 7.17186  | 7.136393 | 7.173931 | 7.781445 | 7.763719 | 7.749287 |
| KCNJ12    | 5.687667 | 5.764886 | 5.948285 | 6.433312 | 6.293553 | 6.485542 |
| USP25     | 6.853752 | 6.956086 | 6.956904 | 7.530052 | 7.437153 | 7.610262 |
| SGK223    | 6.285565 | 6.330838 | 6.23684  | 6.982947 | 6.806211 | 6.874418 |
| ZNF605    | 6.793675 | 6.805674 | 6.879338 | 7.421207 | 7.317727 | 7.549968 |

|           |          |          |          |          |          |          |
|-----------|----------|----------|----------|----------|----------|----------|
| TAF1D     | 9.121878 | 9.0795   | 9.028233 | 9.711603 | 9.684957 | 9.643256 |
| BMP2K     | 4.996344 | 4.873756 | 5.009093 | 5.720946 | 5.487267 | 5.48118  |
| HIC2      | 6.688774 | 6.565403 | 6.658171 | 7.274226 | 7.198731 | 7.249528 |
| C15orf57  | 7.614724 | 7.506443 | 7.606793 | 8.119179 | 8.18658  | 8.23149  |
| PRRG1     | 8.017306 | 7.990559 | 7.939892 | 8.599904 | 8.560488 | 8.596012 |
| CAMK4     | 6.920673 | 6.878548 | 6.896074 | 7.557956 | 7.455864 | 7.489677 |
| CCDC80    | 5.317806 | 5.524923 | 5.409232 | 6.108408 | 5.815594 | 6.136045 |
| GADD45B   | 7.76266  | 7.641407 | 7.715865 | 8.344563 | 8.246162 | 8.337115 |
| RPS2      | 8.192278 | 8.300636 | 8.209333 | 7.574713 | 7.625136 | 7.695102 |
| FER1L4    | 5.198598 | 5.362266 | 5.208655 | 5.692008 | 5.836074 | 6.048676 |
| PNISR     | 6.980243 | 7.013645 | 7.02211  | 7.674955 | 7.556506 | 7.591115 |
| STAMBPL1  | 7.553874 | 7.609743 | 7.609743 | 8.278204 | 8.106123 | 8.195588 |
| KDM6A     | 6.970567 | 6.944997 | 6.971022 | 7.571093 | 7.509345 | 7.612379 |
| ARHGAP19  | 7.451948 | 7.474352 | 7.504653 | 6.839517 | 6.926012 | 6.859476 |
| MSANTD3   | 8.924038 | 8.950512 | 8.86324  | 9.496867 | 9.59211  | 9.454681 |
| CISD2     | 8.102664 | 8.089226 | 8.119438 | 7.509832 | 7.490498 | 7.505963 |
| LEF1      | 5.797651 | 5.837835 | 5.898848 | 5.287391 | 5.108283 | 5.333733 |
| BCL10     | 7.344174 | 7.332666 | 7.358984 | 7.992671 | 7.878204 | 7.969744 |
| HDX       | 3.380945 | 3.72988  | 3.822207 | 4.132309 | 4.17642  | 4.428478 |
| CDK6      | 8.03892  | 8.026836 | 8.017672 | 8.642397 | 8.523809 | 8.720888 |
| CCNB2     | 9.367075 | 9.408667 | 9.350643 | 8.817232 | 8.705728 | 8.799774 |
| ZNF780B   | 4.754748 | 4.984679 | 5.160716 | 5.646076 | 5.518179 | 5.538934 |
| PRIMPOL   | 8.094501 | 8.067256 | 8.08302  | 7.452495 | 7.466526 | 7.523409 |
| PSIP1     | 7.978343 | 7.964021 | 7.868431 | 7.325788 | 7.352153 | 7.331314 |
| TRA2B     | 9.580434 | 9.577058 | 9.575779 | 9.031222 | 8.937658 | 8.963296 |
| ACAD8     | 7.25119  | 7.299172 | 7.215812 | 7.931813 | 7.794848 | 7.840212 |
| RPS6KA3   | 9.295385 | 9.285786 | 9.266033 | 9.920126 | 9.846015 | 9.881252 |
| ZNF460    | 3.807656 | 4.028428 | 4.075939 | 4.726239 | 4.460833 | 4.524691 |
| DDO       | 4.29466  | 4.353016 | 4.25249  | 4.763553 | 4.938393 | 4.997675 |
| KCTD7 /// | 8.413055 | 8.374853 | 8.341312 | 9.001739 | 8.982039 | 8.944802 |
| KIF14     | 8.373515 | 8.386905 | 8.354851 | 7.752674 | 7.743838 | 7.81968  |
| DNAJC10   | 6.282234 | 6.09331  | 6.148031 | 5.672772 | 5.423221 | 5.62926  |
| OAS2      | 5.126744 | 5.095722 | 5.127317 | 4.552695 | 4.643727 | 4.355149 |
| KAT6A     | 8.140233 | 8.097682 | 8.197011 | 7.534135 | 7.485374 | 7.617566 |
| PCMTD1    | 7.523533 | 7.552423 | 7.449805 | 7.923091 | 8.180493 | 8.219213 |
| NANOS1    | 6.703966 | 6.709583 | 6.853696 | 7.401208 | 7.401208 | 7.261312 |
| NASP      | 6.756783 | 6.787192 | 6.885244 | 6.307252 | 6.174057 | 6.151551 |
| LDB1      | 7.765726 | 7.817184 | 7.806395 | 8.389441 | 8.348524 | 8.447553 |
| IL1RAPL1  | 7.191449 | 7.16255  | 7.201966 | 7.850775 | 7.671635 | 7.829754 |
| FAM179B   | 6.68764  | 6.481056 | 6.634114 | 7.201824 | 7.174768 | 7.222354 |
| TOP2A     | 10.85161 | 10.91398 | 10.88319 | 10.28413 | 10.25325 | 10.31541 |
| HMCN1     | 6.650905 | 6.676674 | 6.799786 | 7.317378 | 7.309674 | 7.295942 |
| PLCE1     | 5.691883 | 5.694967 | 5.849551 | 5.129108 | 5.08229  | 5.229425 |
| IDI1      | 8.362923 | 8.313381 | 8.265959 | 7.761919 | 7.697025 | 7.68865  |
| BTBD10    | 8.157612 | 8.137043 | 8.197792 | 8.817227 | 8.700869 | 8.768908 |
| FAM72A // | 9.192462 | 9.164473 | 9.09851  | 8.587211 | 8.52877  | 8.545223 |
| LRBA      | 5.073159 | 4.791536 | 5.245083 | 5.416139 | 5.727095 | 5.76017  |
| CERS6     | 4.406249 | 4.423204 | 4.355162 | 5.161215 | 4.786571 | 5.030071 |
| ZNF271P   | 6.058796 | 5.829832 | 6.038626 | 6.612004 | 6.503189 | 6.604798 |
| TUBB      | 11.22258 | 11.17729 | 11.20514 | 10.61337 | 10.5788  | 10.62036 |
| HNRNPM    | 11.18013 | 11.22969 | 11.30764 | 11.8276  | 11.83672 | 11.84479 |

|           |          |          |          |          |          |          |
|-----------|----------|----------|----------|----------|----------|----------|
| CTTNBP2NL | 6.695154 | 6.693017 | 6.8356   | 7.429169 | 7.24312  | 7.342764 |
| BMP7      | 4.867129 | 4.923858 | 4.755331 | 4.372831 | 4.251017 | 4.131192 |
| RRP12     | 7.664307 | 7.772567 | 7.630866 | 8.32589  | 8.217624 | 8.315292 |
| HDGF      | 8.430762 | 8.476055 | 8.47551  | 7.941518 | 7.774764 | 7.875447 |
| CNEP1R1   | 5.748212 | 5.71814  | 5.816505 | 6.321088 | 6.313023 | 6.439248 |
| DNAJC9    | 9.826021 | 9.835028 | 9.85595  | 9.313044 | 9.147202 | 9.266385 |
| WIPF1     | 7.011801 | 7.113208 | 7.003133 | 6.415446 | 6.488686 | 6.433932 |
| COX16 /// | 5.938946 | 5.925703 | 6.191488 | 5.496085 | 5.323019 | 5.446965 |
| CCDC130   | 7.405464 | 7.456605 | 7.573893 | 8.095972 | 8.057234 | 8.072436 |
| NDFIP2    | 8.139028 | 8.091591 | 8.048173 | 8.768127 | 8.624788 | 8.675474 |
| ATPAF1    | 7.37905  | 7.321749 | 7.499723 | 6.783862 | 6.756313 | 6.871296 |
| ARIH1     | 8.395402 | 8.422255 | 8.462257 | 9.062881 | 8.969431 | 9.036288 |
| IRX3      | 7.700846 | 7.665368 | 7.87525  | 7.13798  | 7.096405 | 7.218407 |
| CKAP2L    | 7.222236 | 7.260046 | 7.307019 | 6.78737  | 6.514143 | 6.701628 |
| DERA      | 9.202057 | 9.22462  | 9.206198 | 8.631775 | 8.571847 | 8.643674 |
| PRR11     | 7.787767 | 7.850677 | 7.829701 | 7.260491 | 7.140443 | 7.28228  |
| INTS7     | 6.333822 | 6.506103 | 6.581526 | 5.724598 | 5.852104 | 6.06006  |
| TMEM129   | 6.818902 | 6.863714 | 6.670372 | 6.168697 | 6.321848 | 6.077772 |
| TMEM183A  | 6.460057 | 6.394168 | 6.501875 | 5.85573  | 5.799917 | 5.915819 |
| WDR37     | 4.15128  | 4.198515 | 4.255041 | 4.876343 | 4.640089 | 4.872581 |
| RPL28     | 9.311325 | 9.290275 | 9.271327 | 9.914732 | 9.860851 | 9.879707 |
| ADGRE1    | 7.864612 | 7.838658 | 7.840358 | 8.435147 | 8.425555 | 8.464576 |
| KIF22     | 8.261381 | 8.308529 | 8.227813 | 7.688167 | 7.689277 | 7.639103 |
| KRCC1     | 5.224634 | 5.191134 | 5.18739  | 5.808943 | 5.872997 | 5.702233 |
| KIFC1     | 7.174886 | 7.090297 | 7.15903  | 6.61889  | 6.612191 | 6.412143 |
| KLF6      | 7.993445 | 7.970579 | 7.967335 | 8.629205 | 8.557884 | 8.524859 |
| MKNK2     | 7.8737   | 7.88749  | 7.949533 | 7.347499 | 7.272057 | 7.311056 |
| TTF2      | 8.903012 | 8.800781 | 8.791462 | 8.239599 | 8.239878 | 8.235709 |
| SIVA1     | 8.048214 | 8.061423 | 8.046897 | 7.492046 | 7.425859 | 7.458951 |
| ARID5B    | 8.771595 | 8.764312 | 8.720208 | 9.309599 | 9.333035 | 9.392878 |
| SLC39A9   | 5.790969 | 5.668027 | 5.669794 | 6.346254 | 6.17631  | 6.38561  |
| SRPX2     | 6.028024 | 6.089986 | 6.140773 | 6.683136 | 6.622727 | 6.731747 |
| LDLR      | 10.05642 | 10.03908 | 9.998227 | 9.43777  | 9.38694  | 9.490797 |
| MAMLD1    | 5.058231 | 5.168783 | 5.095596 | 4.443283 | 4.57244  | 4.528783 |
| HIST1H3H  | 3.679432 | 3.712494 | 3.843257 | 4.3591   | 4.29875  | 4.355278 |
| KDEL2     | 9.733059 | 9.75851  | 9.773053 | 9.174899 | 9.122049 | 9.189993 |
| ZNF542P   | 5.26035  | 5.183034 | 5.260255 | 5.873965 | 5.743377 | 5.863896 |
| PCNXL2    | 7.082492 | 7.033079 | 7.075946 | 7.737588 | 7.607616 | 7.623763 |
| TMC7      | 4.946643 | 4.746808 | 4.942119 | 5.638355 | 5.334972 | 5.439661 |
| GEM       | 4.213236 | 4.085453 | 4.232839 | 4.859184 | 4.650494 | 4.799095 |
| DDX5      | 7.090779 | 7.069848 | 7.127198 | 6.416197 | 6.493805 | 6.600586 |
| ZFH3      | 7.851507 | 7.891327 | 7.882938 | 7.341048 | 7.138943 | 7.368582 |
| INO80     | 5.820942 | 5.866753 | 5.919478 | 6.449551 | 6.410962 | 6.52326  |
| STK26     | 7.767011 | 7.732659 | 7.664126 | 7.121309 | 7.112888 | 7.153089 |
| RNF11     | 7.408485 | 7.408667 | 7.410577 | 8.060008 | 7.914736 | 8.028693 |
| CLN8      | 6.772271 | 6.8043   | 6.765921 | 7.367382 | 7.501024 | 7.249691 |
| FYC01     | 7.179086 | 7.19234  | 7.215976 | 6.646197 | 6.538572 | 6.627388 |
| ZMYM3     | 7.84846  | 7.8621   | 7.830597 | 7.196504 | 7.26675  | 7.30308  |
| C3orf17   | 7.732188 | 7.721169 | 7.829102 | 8.359145 | 8.344992 | 8.352833 |
| EFTUD1    | 7.057939 | 6.972653 | 6.996785 | 7.619256 | 7.598222 | 7.583682 |
| RAVER2    | 6.817334 | 6.915488 | 6.792193 | 6.360404 | 6.076719 | 6.314227 |

|           |          |          |          |          |          |          |
|-----------|----------|----------|----------|----------|----------|----------|
| C6orf58   | 4.911552 | 4.854702 | 4.763553 | 5.441137 | 5.268237 | 5.592832 |
| TMEM141   | 6.777592 | 6.661394 | 6.820029 | 6.225523 | 6.145348 | 6.11666  |
| CENPP     | 6.148605 | 6.149808 | 6.131633 | 5.511143 | 5.671775 | 5.475895 |
| LZTS1     | 6.646967 | 6.737568 | 6.561358 | 6.037777 | 6.13946  | 5.997568 |
| TNC       | 9.636525 | 9.674782 | 9.564147 | 10.21931 | 10.22063 | 10.20641 |
| PCDHB14   | 4.763967 | 4.738741 | 4.663412 | 5.357083 | 5.282818 | 5.296498 |
| SPTLC2    | 7.753321 | 7.713021 | 7.640148 | 8.325989 | 8.232007 | 8.317906 |
| SGOL2     | 7.398394 | 7.380228 | 7.380228 | 6.830726 | 6.724064 | 6.834802 |
| CPT1C     | 6.606146 | 6.670335 | 6.584368 | 5.994652 | 6.039427 | 6.057564 |
| HDAC11    | 5.745831 | 5.798541 | 6.003228 | 5.290853 | 5.114019 | 5.374876 |
| LSM14B    | 4.323575 | 4.313782 | 4.313782 | 3.674857 | 3.583947 | 3.925548 |
| ANP32A    | 7.777287 | 7.831461 | 7.809569 | 7.20809  | 7.176254 | 7.267314 |
| KIAA1919  | 5.448306 | 5.434006 | 5.4668   | 5.999898 | 5.873093 | 6.241826 |
| SAA1      | 2.975023 | 3.141072 | 2.993726 | 3.448051 | 3.776147 | 3.651202 |
| TMEM234   | 5.528561 | 5.571056 | 5.502352 | 6.089046 | 6.09229  | 6.185091 |
| C7orf57   | 2.172598 | 2.25484  | 2.154693 | 2.478143 | 2.83199  | 3.036447 |
| IKBIP     | 7.756227 | 7.604523 | 7.674517 | 8.296435 | 8.201817 | 8.301355 |
| HNRNPLL   | 5.078481 | 5.151965 | 5.267275 | 5.767232 | 5.704929 | 5.789232 |
| HIVEP1    | 5.01148  | 4.622971 | 4.84974  | 5.217316 | 5.531925 | 5.497259 |
| DDA1      | 9.490715 | 9.521928 | 9.513563 | 10.11252 | 10.07057 | 10.10523 |
| XRN1      | 4.491578 | 4.776775 | 4.778323 | 5.404866 | 5.219001 | 5.184728 |
| SEC22C    | 6.634144 | 6.703939 | 6.67472  | 7.280735 | 7.174886 | 7.318181 |
| SLAIN2    | 6.410858 | 6.323541 | 6.318035 | 5.673857 | 5.815799 | 5.801977 |
| LOC105376 | 7.70312  | 7.805448 | 7.775885 | 8.365751 | 8.31683  | 8.362668 |
| C1QBP     | 11.68298 | 11.69834 | 11.65643 | 11.08916 | 11.10985 | 11.07799 |
| FAM91A1 / | 7.558145 | 7.560317 | 7.497157 | 8.128408 | 8.095888 | 8.15182  |
| SETDB2    | 5.123438 | 5.22221  | 5.238833 | 5.956256 | 5.504819 | 5.883009 |
| BRCA2     | 5.845594 | 5.89829  | 6.037658 | 5.472362 | 5.27334  | 5.276712 |
| ITGA1     | 6.531813 | 6.56979  | 6.604798 | 7.188075 | 7.073864 | 7.202901 |
| ITGB3BP   | 8.929713 | 8.844453 | 8.881675 | 8.28616  | 8.300228 | 8.311079 |
| BTRC      | 6.489491 | 6.459047 | 6.481056 | 7.163392 | 6.941702 | 7.082688 |
| TRIO      | 6.757204 | 6.755528 | 6.874432 | 7.421833 | 7.369084 | 7.354047 |
| OTUD4     | 4.9576   | 4.767384 | 4.9285   | 5.430779 | 5.573121 | 5.406986 |
| BBS7      | 5.881803 | 5.819929 | 5.824312 | 6.310313 | 6.430418 | 6.541555 |
| FAM73A    | 6.20027  | 6.211174 | 6.18865  | 6.800609 | 6.717662 | 6.83752  |
| SUMO3     | 8.842709 | 8.806168 | 8.862924 | 8.292109 | 8.160697 | 8.304409 |
| SPRYD4    | 5.705389 | 5.655408 | 5.791911 | 5.170631 | 5.032996 | 5.194503 |
| PDZD8     | 6.736518 | 6.78564  | 6.861514 | 7.410477 | 7.271902 | 7.455636 |
| MRPL2     | 5.691001 | 5.536584 | 5.701196 | 4.977064 | 5.104668 | 5.092792 |
| ZKSCAN8   | 5.123036 | 4.955802 | 5.263258 | 5.816948 | 5.454567 | 5.823991 |
| GFRA1     | 5.893446 | 5.789256 | 5.858079 | 6.518294 | 6.325467 | 6.45     |
| DCBLD1    | 5.594399 | 5.548961 | 5.465623 | 6.180201 | 5.974074 | 6.207048 |
| CSNK1G1   | 7.54289  | 7.569807 | 7.634087 | 8.190545 | 8.13193  | 8.176647 |
| ILVBL     | 7.296777 | 7.286895 | 7.303328 | 6.726754 | 6.705059 | 6.703236 |
| VPS13B    | 6.00417  | 5.919079 | 5.880543 | 6.487228 | 6.507184 | 6.561184 |
| PEX13     | 6.834849 | 6.765921 | 6.891935 | 7.348522 | 7.351537 | 7.544292 |
| AJAP1     | 7.220846 | 7.30047  | 7.225829 | 7.962783 | 7.751732 | 7.783807 |
| NOC3L     | 8.309725 | 8.343204 | 8.317063 | 8.918969 | 8.872307 | 8.929766 |
| STC2      | 6.361336 | 6.009836 | 6.076254 | 6.910385 | 6.783197 | 6.503756 |
| ALDH3B1   | 6.838336 | 6.908254 | 6.954573 | 7.471614 | 7.436179 | 7.541872 |
| EMCN      | 2.215552 | 2.302219 | 2.33778  | 2.84006  | 2.728599 | 3.034053 |

|           |          |          |          |          |          |          |
|-----------|----------|----------|----------|----------|----------|----------|
| ZDHHC9    | 6.896736 | 6.844584 | 6.983698 | 7.506151 | 7.5127   | 7.452698 |
| RNFT1     | 7.462456 | 7.460002 | 7.516606 | 8.079344 | 8.03572  | 8.070177 |
| CNTNAP3   | 4.951834 | 5.010618 | 5.131669 | 5.555126 | 5.620642 | 5.664399 |
| TGFBR1    | 4.225972 | 4.054298 | 4.491488 | 4.869192 | 4.825688 | 4.822907 |
| B3GLCT    | 5.706116 | 5.560126 | 5.755968 | 5.113471 | 5.133719 | 5.029748 |
| MID1      | 6.293983 | 6.243142 | 6.263577 | 6.809561 | 6.865858 | 6.869987 |
| TANK      | 7.120023 | 7.091786 | 7.211039 | 7.702289 | 7.681549 | 7.783583 |
| JRKL      | 6.127842 | 6.158291 | 5.985694 | 5.486399 | 5.609432 | 5.431501 |
| FAM126A   | 8.256846 | 8.283201 | 8.244076 | 8.836606 | 8.822497 | 8.869395 |
| DARS2     | 8.803685 | 8.770432 | 8.803134 | 8.232764 | 8.197202 | 8.202926 |
| ZNF346    | 6.173171 | 6.327575 | 6.246065 | 6.851032 | 6.672365 | 6.967365 |
| MOB1B     | 4.899741 | 4.871922 | 5.172818 | 5.515331 | 5.542244 | 5.63074  |
| MALAT1    | 7.412063 | 7.423064 | 7.459741 | 6.900297 | 6.809446 | 6.84151  |
| HAUS7     | 7.512513 | 7.554661 | 7.584245 | 6.97184  | 6.880788 | 7.055413 |
| TSFM      | 5.395382 | 5.275757 | 5.228637 | 4.725915 | 4.607331 | 4.824205 |
| CXorf38   | 7.522302 | 7.572426 | 7.551067 | 8.157778 | 8.104625 | 8.125693 |
| PSME4     | 8.39551  | 8.389523 | 8.355022 | 9.004929 | 8.91884  | 8.958368 |
| ZNF197    | 6.375338 | 6.222306 | 6.320789 | 6.911298 | 6.822236 | 6.926961 |
| FAM209A   | 2.623845 | 2.588677 | 2.656354 | 3.381751 | 3.21374  | 3.01474  |
| CFHR3 /// | 5.030946 | 5.11174  | 5.005787 | 5.679402 | 5.44671  | 5.763644 |
| OPA1      | 5.355778 | 5.547376 | 5.552899 | 4.950919 | 4.757517 | 5.006819 |
| TAX1BP1   | 7.606144 | 7.555765 | 7.449356 | 6.924618 | 7.0617   | 6.884248 |
| LRR1      | 9.118824 | 8.995051 | 9.036065 | 8.514118 | 8.456825 | 8.438493 |
| RELB      | 7.294023 | 7.279187 | 7.294023 | 7.953229 | 7.845289 | 7.8087   |
| ISOC2     | 7.724243 | 7.768686 | 7.784581 | 7.14423  | 7.13205  | 7.261524 |
| TMC01     | 3.881273 | 3.878722 | 4.005013 | 3.576266 | 3.484281 | 2.964793 |
| ITGB8     | 4.467478 | 4.628421 | 4.659132 | 5.177183 | 5.149555 | 5.167278 |
| CPSF6     | 7.410817 | 7.303335 | 7.365465 | 6.831546 | 6.720929 | 6.788385 |
| CREB3L4   | 7.136889 | 7.249615 | 7.037704 | 6.505553 | 6.578916 | 6.601593 |
| POLD1     | 7.808741 | 7.829701 | 7.857401 | 7.119641 | 7.345273 | 7.293472 |
| PFKFB2    | 5.319756 | 5.282496 | 5.343233 | 4.594694 | 4.84155  | 4.772376 |
| DNAAF2    | 6.441558 | 6.285857 | 6.230157 | 5.658803 | 5.872514 | 5.689417 |
| BCL2L1    | 6.351443 | 6.32383  | 6.353701 | 6.918475 | 6.883181 | 6.963992 |
| ZNF69     | 6.490952 | 6.508959 | 6.578826 | 7.227756 | 7.014108 | 7.072823 |
| KIF4A     | 8.384366 | 8.425248 | 8.356854 | 7.796141 | 7.705642 | 7.928759 |
| NF2       | 6.804742 | 6.700381 | 6.756982 | 7.382321 | 7.230383 | 7.384428 |
| TGFA      | 7.557187 | 7.566026 | 7.547966 | 8.184583 | 8.064186 | 8.156764 |
| ZNF506    | 6.343752 | 6.288489 | 6.220956 | 6.876892 | 6.831979 | 6.87845  |
| FLI1      | 6.400645 | 6.541675 | 6.563154 | 7.12363  | 7.049433 | 7.065984 |
| PGPEP1    | 5.105641 | 5.249332 | 5.162962 | 5.735588 | 5.613092 | 5.902586 |
| ADAMTS6   | 5.672295 | 5.651525 | 5.754765 | 6.366373 | 6.161631 | 6.283796 |
| PLK4      | 7.872807 | 7.90861  | 7.968995 | 7.345741 | 7.270972 | 7.400847 |
| NMT2      | 6.553334 | 6.414963 | 6.586579 | 7.095418 | 7.008567 | 7.183182 |
| RYBP      | 8.797485 | 8.836871 | 8.865976 | 9.45415  | 9.350202 | 9.426241 |
| TRIM23    | 6.234414 | 6.22514  | 6.159775 | 6.796607 | 6.757578 | 6.795074 |
| UBE2I     | 7.240627 | 7.238204 | 7.267013 | 6.792193 | 6.514644 | 6.7096   |
| TRIM4     | 7.577159 | 7.638971 | 7.56083  | 8.221573 | 8.128447 | 8.155814 |
| ATF5      | 5.275195 | 5.395169 | 5.241845 | 4.738336 | 4.691343 | 4.753742 |
| FAM104B   | 5.774813 | 5.76948  | 5.831163 | 5.262705 | 5.101858 | 5.282463 |
| NR1D2     | 4.775967 | 4.62115  | 4.542475 | 5.305917 | 5.146781 | 5.2153   |
| PLGLB1 // | 5.251358 | 5.405958 | 5.407167 | 6.024449 | 5.741102 | 6.026252 |

|           |           |           |           |           |           |           |
|-----------|-----------|-----------|-----------|-----------|-----------|-----------|
| NDC1      | 8. 973477 | 8. 998023 | 8. 940685 | 8. 408738 | 8. 400066 | 8. 377397 |
| KLHL15    | 7. 99027  | 7. 930535 | 7. 953683 | 8. 554714 | 8. 533876 | 8. 511612 |
| HSPE1 /// | 8. 510649 | 8. 489198 | 8. 480263 | 7. 981408 | 7. 816988 | 7. 956442 |
| C4orf27 / | 7. 749343 | 7. 722776 | 7. 702232 | 7. 1149   | 7. 174523 | 7. 160366 |
| CENPK     | 8. 372128 | 8. 350122 | 8. 405319 | 7. 811062 | 7. 766959 | 7. 826117 |
| TPST1     | 9. 303647 | 9. 220418 | 9. 250431 | 9. 840743 | 9. 817101 | 9. 839969 |
| PECR      | 6. 223778 | 6. 211976 | 6. 205154 | 5. 682931 | 5. 597165 | 5. 638156 |
| CAPRIN1   | 6. 085236 | 5. 995039 | 6. 118848 | 5. 704845 | 5. 380659 | 5. 39193  |
| STRN      | 6. 088038 | 6. 100498 | 6. 042945 | 6. 690844 | 6. 556227 | 6. 705491 |
| ZNF566    | 6. 373029 | 6. 402692 | 6. 379298 | 7. 041696 | 6. 950296 | 6. 883922 |
| OGT       | 8. 640598 | 8. 692735 | 8. 630145 | 9. 230043 | 9. 205288 | 9. 24815  |
| EBI3      | 6. 481301 | 6. 554659 | 6. 699577 | 7. 119146 | 7. 126492 | 7. 209423 |
| PCID2     | 8. 494338 | 8. 605471 | 8. 552019 | 9. 145542 | 9. 083016 | 9. 14174  |
| IL18      | 3. 723428 | 3. 842885 | 3. 695265 | 4. 140108 | 4. 561397 | 4. 278337 |
| NME7      | 8. 931511 | 8. 923424 | 8. 880302 | 9. 546371 | 9. 44356  | 9. 46338  |
| PARD3     | 8. 092928 | 8. 134229 | 8. 134229 | 8. 725898 | 8. 672023 | 8. 681524 |
| JAK2      | 5. 908889 | 5. 840002 | 5. 824312 | 6. 473504 | 6. 384545 | 6. 432587 |
| NAA35     | 7. 980398 | 8. 016582 | 7. 969658 | 8. 61797  | 8. 518117 | 8. 547882 |
| TUBD1     | 5. 745831 | 5. 615382 | 5. 790317 | 5. 24156  | 5. 065512 | 5. 12758  |
| ZNF248    | 4. 347189 | 4. 126511 | 4. 20556  | 4. 843954 | 4. 935092 | 4. 617008 |
| GALK2     | 7. 782061 | 7. 797136 | 7. 912902 | 8. 429946 | 8. 312931 | 8. 465916 |
| ZNF264    | 4. 533633 | 4. 475174 | 4. 560333 | 5. 072919 | 5. 039108 | 5. 173511 |
| CDC42SE1  | 6. 696106 | 6. 74074  | 6. 727897 | 7. 308655 | 7. 327596 | 7. 244791 |
| SERPINB5  | 3. 600545 | 3. 573372 | 3. 916401 | 2. 972048 | 3. 234849 | 3. 16723  |
| ZNF548    | 4. 652289 | 4. 633671 | 4. 781543 | 5. 252267 | 5. 176651 | 5. 354293 |
| SYNJ2BP   | 7. 604835 | 7. 610843 | 7. 605807 | 7. 10064  | 6. 945564 | 7. 060476 |
| NSL1      | 9. 034713 | 9. 016163 | 9. 044388 | 8. 457375 | 8. 446465 | 8. 477073 |
| MUC15     | 6. 798961 | 6. 643794 | 6. 808633 | 6. 30553  | 6. 07714  | 6. 154441 |
| GOLGA4    | 8. 875764 | 8. 852328 | 8. 813088 | 9. 431488 | 9. 407253 | 9. 416691 |
| CHD1      | 8. 725093 | 8. 711533 | 8. 800877 | 9. 359182 | 9. 263773 | 9. 3287   |
| CADM1     | 7. 645618 | 7. 79331  | 7. 682331 | 8. 324419 | 8. 178235 | 8. 332577 |
| ADAM17    | 8. 530181 | 8. 492147 | 8. 422722 | 9. 085109 | 8. 978156 | 9. 095728 |
| ZNF235    | 5. 616783 | 5. 802397 | 5. 775303 | 6. 334955 | 6. 327541 | 6. 245113 |
| GPR176    | 6. 262831 | 6. 17211  | 6. 311261 | 6. 826956 | 6. 673038 | 6. 957324 |
| UCP2      | 7. 796931 | 7. 74227  | 7. 791341 | 7. 231095 | 7. 20545  | 7. 183273 |
| ZHX1      | 7. 485637 | 7. 482478 | 7. 475285 | 8. 096372 | 8. 037987 | 8. 019682 |
| GALNT7    | 6. 975137 | 7. 025232 | 7. 062268 | 7. 562725 | 7. 627219 | 7. 582935 |
| PRPF3     | 8. 338869 | 8. 356774 | 8. 255508 | 8. 928804 | 8. 812171 | 8. 919508 |
| GSPT2     | 6. 263255 | 6. 342654 | 6. 256717 | 6. 872207 | 6. 742391 | 6. 957229 |
| RASGRF1   | 4. 255064 | 4. 163124 | 4. 75416  | 5. 009613 | 4. 956867 | 4. 914968 |
| MORC3     | 6. 67907  | 6. 498348 | 6. 61069  | 7. 101871 | 7. 218698 | 7. 176374 |
| COL4A5    | 6. 251525 | 6. 229882 | 6. 480692 | 6. 966347 | 6. 824002 | 6. 880544 |
| TEX10     | 7. 806259 | 7. 842319 | 7. 766485 | 8. 394461 | 8. 36816  | 8. 36083  |
| LYN       | 6. 731769 | 6. 712101 | 6. 750369 | 7. 24101  | 7. 248243 | 7. 412756 |
| DTYMK     | 8. 807171 | 8. 929495 | 8. 81003  | 8. 313336 | 8. 248918 | 8. 276887 |
| RACGAP1   | 9. 520619 | 9. 29997  | 9. 247793 | 8. 806812 | 8. 789255 | 8. 765074 |
| SUGCT     | 6. 79776  | 6. 919159 | 6. 761088 | 7. 452826 | 7. 279969 | 7. 452391 |
| CFH       | 4. 335078 | 4. 540917 | 4. 52374  | 5. 216198 | 4. 839    | 5. 051529 |
| VOPP1     | 9. 145693 | 9. 157828 | 9. 188973 | 8. 602487 | 8. 539944 | 8. 643247 |
| ATP6VOA4  | 4. 566069 | 4. 632859 | 4. 495225 | 5. 139632 | 5. 125345 | 5. 135064 |
| PPME1     | 8. 831839 | 8. 88398  | 8. 865523 | 9. 480711 | 9. 377675 | 9. 428285 |

|          |           |           |           |           |           |           |
|----------|-----------|-----------|-----------|-----------|-----------|-----------|
| XPNPEP3  | 5. 528634 | 5. 638905 | 5. 589824 | 6. 17982  | 6. 025365 | 6. 257405 |
| SF3B5    | 10. 77718 | 10. 66978 | 10. 74105 | 10. 19922 | 10. 12108 | 10. 1629  |
| SPACA6   | 6. 285987 | 6. 179268 | 6. 237322 | 6. 866776 | 6. 744999 | 6. 795216 |
| C20orf24 | 11. 07068 | 11. 08871 | 11. 038   | 10. 49028 | 10. 48355 | 10. 51959 |
| RAB18    | 8. 232843 | 8. 239082 | 8. 188162 | 8. 764489 | 8. 785174 | 8. 813958 |
| TNKS     | 7. 387444 | 7. 469145 | 7. 464855 | 6. 874897 | 6. 878172 | 6. 865358 |
| TMEM45A  | 6. 850656 | 6. 875345 | 6. 914786 | 6. 339459 | 6. 281594 | 6. 316831 |
| SEN2     | 7. 696124 | 7. 653344 | 7. 815911 | 7. 176193 | 7. 110922 | 7. 175668 |
| CEP85    | 7. 694035 | 7. 713016 | 7. 653772 | 7. 146746 | 7. 037601 | 7. 174036 |
| ZNF141   | 4. 783375 | 4. 663387 | 4. 854737 | 5. 409901 | 5. 220231 | 5. 373319 |
| SLC17A5  | 5. 404188 | 5. 407228 | 5. 501768 | 5. 98547  | 5. 904406 | 6. 12522  |
| ACE2     | 4. 135506 | 3. 969536 | 4. 191969 | 4. 693859 | 4. 663767 | 4. 640969 |
| STAM2    | 5. 858464 | 5. 971939 | 5. 93063  | 5. 385651 | 5. 298795 | 5. 375253 |
| ZNF394   | 5. 954091 | 6. 005667 | 6. 030731 | 6. 565914 | 6. 515251 | 6. 60994  |
| ZWILCH   | 7. 901798 | 7. 905359 | 7. 874775 | 7. 30597  | 7. 318335 | 7. 357406 |
| ZNF84    | 7. 143404 | 7. 076358 | 6. 999954 | 7. 665311 | 7. 596012 | 7. 657099 |
| SORBS1   | 3. 718548 | 3. 446939 | 3. 581435 | 4. 270079 | 4. 071235 | 4. 104057 |
| TAB2     | 8. 186419 | 8. 210807 | 8. 258962 | 8. 81966  | 8. 732431 | 8. 80214  |
| ARID3A   | 6. 37267  | 6. 44858  | 6. 419491 | 6. 932159 | 6. 989715 | 7. 016637 |
| SNRK     | 8. 141635 | 8. 116767 | 8. 158453 | 8. 759187 | 8. 658583 | 8. 695824 |
| EEF1A1   | 7. 876601 | 7. 831832 | 7. 833085 | 7. 208031 | 7. 289609 | 7. 347178 |
| MFAP3    | 6. 71305  | 6. 699351 | 6. 853794 | 7. 364093 | 7. 27022  | 7. 328549 |
| TTC33    | 6. 850656 | 6. 81009  | 6. 910843 | 6. 322882 | 6. 171029 | 6. 38128  |
| FNIP2    | 5. 763818 | 5. 788393 | 5. 868883 | 6. 436315 | 6. 300653 | 6. 380377 |
| ZNF622   | 9. 113091 | 9. 170476 | 9. 149575 | 9. 703574 | 9. 669485 | 9. 756062 |
| TSNAX    | 9. 848532 | 9. 709024 | 9. 619496 | 9. 154888 | 9. 167003 | 9. 159408 |
| MRPL35   | 6. 627981 | 6. 716639 | 6. 769166 | 6. 159237 | 6. 093956 | 6. 164952 |
| STAC     | 4. 135506 | 4. 347189 | 4. 41592  | 4. 854827 | 4. 825886 | 4. 913033 |
| NUDT13   | 4. 105019 | 4. 200696 | 4. 275553 | 4. 857249 | 4. 556089 | 4. 862734 |
| PPP2R5E  | 7. 0828   | 7. 142922 | 7. 155252 | 6. 5458   | 6. 540686 | 6. 599789 |
| CNR1     | 6. 118848 | 6. 085654 | 6. 009085 | 6. 603028 | 6. 588478 | 6. 716612 |
| AADAT    | 7. 127007 | 7. 154778 | 7. 10577  | 7. 748775 | 7. 674757 | 7. 657491 |
| DDIAS    | 7. 61273  | 7. 625682 | 7. 677107 | 7. 087686 | 7. 053473 | 7. 081947 |
| VPS4B    | 5. 563936 | 5. 436676 | 5. 321926 | 6. 01488  | 5. 933729 | 6. 066165 |
| ZNF544   | 6. 540824 | 6. 621492 | 6. 697112 | 7. 214954 | 7. 115067 | 7. 221493 |
| ZNF493   | 5. 172241 | 5. 225232 | 5. 050168 | 5. 706683 | 5. 693486 | 5. 739546 |
| RNFT2    | 6. 158718 | 6. 1535   | 6. 143388 | 5. 559238 | 5. 53014  | 5. 674891 |
| GNG2     | 8. 377628 | 8. 367407 | 8. 431169 | 7. 844356 | 7. 818585 | 7. 822434 |
| ALDH6A1  | 6. 255409 | 6. 19037  | 6. 414773 | 5. 772521 | 5. 707212 | 5. 690021 |
| MDM4     | 7. 549043 | 7. 585445 | 7. 535838 | 8. 19074  | 8. 063509 | 8. 106436 |
| SPP1     | 7. 225701 | 7. 242072 | 7. 169969 | 7. 787996 | 7. 693952 | 7. 846038 |
| BCL2     | 5. 443034 | 5. 658079 | 5. 502352 | 5. 009541 | 4. 815046 | 5. 088776 |
| ID1      | 9. 41211  | 9. 374468 | 9. 410751 | 8. 868988 | 8. 793367 | 8. 844911 |
| FAM101B  | 6. 348072 | 6. 24563  | 6. 396669 | 5. 613668 | 5. 877958 | 5. 808858 |
| CALD1    | 7. 413497 | 7. 441931 | 7. 38439  | 8. 018195 | 7. 962582 | 7. 948685 |
| PDE12    | 6. 673928 | 6. 682445 | 6. 814717 | 7. 317378 | 7. 297645 | 7. 245692 |
| AKIRIN1  | 8. 308077 | 8. 19583  | 8. 216732 | 8. 86326  | 8. 73285  | 8. 814117 |
| DLC1     | 8. 91292  | 8. 89337  | 8. 94065  | 9. 470223 | 9. 435066 | 9. 53111  |
| PTGES2   | 7. 142058 | 7. 166904 | 7. 248629 | 6. 706998 | 6. 596371 | 6. 564897 |
| SSBP2    | 6. 693786 | 6. 725438 | 6. 74141  | 7. 296908 | 7. 281448 | 7. 271596 |
| SPOCK1   | 7. 927941 | 7. 891591 | 7. 961065 | 8. 496657 | 8. 428115 | 8. 544793 |



|           |           |           |           |           |           |           |
|-----------|-----------|-----------|-----------|-----------|-----------|-----------|
| LYRM7     | 7. 648978 | 7. 579727 | 7. 541454 | 6. 998289 | 7. 037802 | 7. 045435 |
| CASP6 /// | 6. 281094 | 6. 210878 | 6. 213329 | 5. 736841 | 5. 548255 | 5. 732276 |
| CHORDC1   | 9. 269943 | 9. 288672 | 9. 169087 | 9. 843024 | 9. 783884 | 9. 788658 |
| MIR22HG   | 6. 998875 | 6. 926721 | 6. 970966 | 7. 63841  | 7. 470589 | 7. 475389 |
| EME2      | 5. 920254 | 5. 979485 | 6. 100577 | 6. 646928 | 6. 540396 | 6. 500312 |
| MOCOS     | 9. 560815 | 9. 562678 | 9. 582524 | 9. 011782 | 8. 989159 | 9. 017821 |
| TTC29     | 2. 313091 | 2. 350108 | 2. 402695 | 2. 85115  | 2. 884957 | 3. 016736 |
| COL8A1    | 6. 591651 | 6. 757471 | 6. 739121 | 7. 327234 | 7. 176561 | 7. 27117  |
| SAMD1     | 7. 337315 | 7. 440695 | 7. 434814 | 6. 845205 | 6. 740941 | 6. 940214 |
| FAAP20    | 5. 724197 | 5. 986468 | 6. 033323 | 5. 505784 | 5. 382959 | 5. 169038 |
| DPCD      | 8. 585919 | 8. 619818 | 8. 619672 | 9. 162829 | 9. 123477 | 9. 225071 |
| VEZT      | 8. 5138   | 8. 534364 | 8. 433623 | 9. 026917 | 9. 056022 | 9. 084122 |
| RARRES3   | 3. 892651 | 3. 645349 | 3. 678847 | 4. 245569 | 4. 275479 | 4. 380575 |
| KIF21B    | 6. 727863 | 6. 747968 | 6. 778965 | 6. 265329 | 6. 127187 | 6. 17982  |
| GTSE1     | 7. 218857 | 7. 174886 | 7. 239227 | 6. 660106 | 6. 594882 | 6. 695749 |
| TSPAN13   | 9. 563121 | 9. 443624 | 9. 440774 | 8. 992303 | 8. 931422 | 8. 841652 |
| OXSR1     | 9. 023616 | 9. 050463 | 9. 028953 | 9. 625302 | 9. 544875 | 9. 614821 |
| PON2      | 9. 14339  | 9. 183531 | 9. 157989 | 9. 732867 | 9. 697125 | 9. 736685 |
| FDPS      | 9. 747675 | 9. 663981 | 9. 665907 | 9. 125248 | 9. 150968 | 9. 119621 |
| NFAT5     | 7. 444366 | 7. 466666 | 7. 540743 | 8. 069013 | 7. 940267 | 8. 124181 |
| PARG      | 7. 14265  | 7. 184836 | 7. 160271 | 6. 688774 | 6. 452359 | 6. 665025 |
| PLAU      | 4. 78453  | 4. 584943 | 4. 810711 | 5. 359822 | 5. 286794 | 5. 215021 |
| RERE      | 7. 206618 | 7. 294007 | 7. 22881  | 7. 859675 | 7. 720708 | 7. 830451 |
| RNF111    | 6. 587419 | 6. 468161 | 6. 595529 | 7. 154106 | 7. 085527 | 7. 092621 |
| LIAS      | 6. 301385 | 6. 486324 | 6. 29058  | 5. 792062 | 5. 810848 | 5. 794296 |
| FAM76B    | 7. 551472 | 7. 396346 | 7. 404917 | 6. 972111 | 6. 760684 | 6. 93967  |
| UBR7      | 7. 592189 | 7. 587182 | 7. 716906 | 7. 103416 | 7. 030673 | 7. 081974 |
| SESN2     | 7. 044391 | 7. 104914 | 7. 120725 | 7. 631237 | 7. 598841 | 7. 719901 |
| ADRBK1    | 5. 93063  | 6. 03333  | 5. 901601 | 5. 36907  | 5. 332561 | 5. 484181 |
| TEX9      | 2. 181658 | 2. 275033 | 2. 178061 | 2. 561428 | 2. 885253 | 2. 867806 |
| UFL1      | 7. 496536 | 7. 358167 | 7. 449979 | 6. 883309 | 6. 855053 | 6. 886662 |
| OPTN      | 7. 36289  | 7. 34815  | 7. 305033 | 7. 906335 | 7. 858257 | 7. 930683 |
| TMEM237   | 5. 521462 | 5. 34096  | 5. 348459 | 4. 856996 | 4. 856996 | 4. 817727 |
| FBXW2     | 6. 398145 | 6. 296272 | 6. 284829 | 5. 806038 | 5. 687485 | 5. 806604 |
| TRUB1     | 8. 953243 | 8. 874827 | 8. 86666  | 8. 363695 | 8. 347441 | 8. 30512  |
| NDUFA9    | 9. 53952  | 9. 60444  | 9. 585346 | 9. 088988 | 8. 950183 | 9. 011791 |
| TM2D2     | 7. 717204 | 7. 701272 | 7. 746612 | 7. 145631 | 7. 085423 | 7. 256327 |
| CDK8      | 8. 491346 | 8. 512926 | 8. 519024 | 7. 97344  | 7. 889098 | 7. 983322 |
| CSTF3     | 9. 220828 | 9. 173846 | 9. 135707 | 8. 62853  | 8. 552385 | 8. 672418 |
| PCNXL4    | 7. 953207 | 7. 98322  | 8. 082042 | 8. 574702 | 8. 530405 | 8. 590034 |
| EIF2S2    | 7. 575943 | 7. 576798 | 7. 586514 | 6. 957103 | 7. 106782 | 6. 999181 |
| MTHFD1L   | 7. 600069 | 7. 702025 | 7. 535304 | 7. 070627 | 7. 044468 | 7. 046161 |
| SLC48A1   | 8. 3174   | 8. 332223 | 8. 318154 | 8. 955645 | 8. 825466 | 8. 862794 |
| NMD3      | 8. 815377 | 8. 795032 | 8. 818576 | 9. 370336 | 9. 326405 | 9. 408322 |
| BRIP1     | 5. 367645 | 5. 283057 | 5. 480375 | 4. 760729 | 4. 709473 | 4. 985351 |
| TMEM222   | 8. 356468 | 8. 364914 | 8. 377576 | 7. 806398 | 7. 749486 | 7. 868287 |
| TBC1D2B   | 7. 847428 | 7. 880656 | 7. 877134 | 7. 306293 | 7. 322626 | 7. 301651 |
| KIAA1217  | 4. 324435 | 4. 275553 | 4. 396453 | 4. 805991 | 5. 04072  | 4. 824205 |
| C6orf62   | 9. 329735 | 9. 275195 | 9. 200495 | 8. 693785 | 8. 736461 | 8. 70101  |
| ZNF805    | 5. 297508 | 5. 426108 | 5. 354018 | 5. 95634  | 5. 789957 | 6. 005494 |
| SYNE2     | 5. 846737 | 5. 922609 | 5. 795369 | 5. 270081 | 5. 353466 | 5. 267143 |

|           |          |          |          |          |          |          |
|-----------|----------|----------|----------|----------|----------|----------|
| CENPM     | 7.981153 | 8.059488 | 8.072723 | 7.507988 | 7.421972 | 7.509534 |
| ZNF33A // | 6.491451 | 6.557078 | 6.697488 | 7.14575  | 7.107314 | 7.166259 |
| TGS1      | 8.322214 | 8.291948 | 8.367958 | 7.810097 | 7.723353 | 7.775538 |
| PRELP     | 5.939056 | 5.896826 | 5.925763 | 5.517603 | 5.236022 | 5.335839 |
| CDCA2     | 6.689169 | 6.604388 | 6.604388 | 6.130077 | 5.943331 | 6.152503 |
| SC5D      | 5.448148 | 5.736683 | 5.667498 | 5.2505   | 4.997312 | 4.93264  |
| PTGES3L   | 4.841115 | 4.679133 | 4.716456 | 4.277646 | 4.123433 | 4.16484  |
| MAN2A1    | 7.89687  | 7.864457 | 7.845469 | 8.436043 | 8.418637 | 8.422496 |
| USP46     | 7.135318 | 7.080842 | 7.141797 | 7.687642 | 7.601828 | 7.738118 |
| CCDC174   | 7.201554 | 7.199658 | 7.28748  | 7.758366 | 7.798197 | 7.801447 |
| NPLOC4    | 9.26209  | 9.218584 | 9.283749 | 8.730746 | 8.635336 | 8.729278 |
| TNFRSF10A | 6.551561 | 6.634995 | 6.755788 | 7.258062 | 7.116746 | 7.235586 |
| MOK       | 7.203402 | 7.195171 | 7.24962  | 7.799725 | 7.708867 | 7.807404 |
| ANK3      | 6.094835 | 6.202691 | 6.140033 | 6.757273 | 6.690678 | 6.654217 |
| FLCN      | 5.118802 | 5.247242 | 5.11528  | 5.645253 | 5.732325 | 5.76764  |
| LAMC1     | 10.21354 | 10.27903 | 10.16798 | 10.79102 | 10.77883 | 10.75448 |
| TPR       | 5.292096 | 5.067485 | 5.223043 | 4.65533  | 4.639732 | 4.623963 |
| RBAK      | 7.459187 | 7.457226 | 7.519752 | 8.072339 | 8.001118 | 8.025993 |
| ZNF451    | 7.027178 | 6.982721 | 7.055986 | 7.54905  | 7.56931  | 7.610701 |
| MAPK1     | 7.12282  | 7.064052 | 7.055841 | 7.6052   | 7.602883 | 7.697767 |
| C15orf41  | 7.118899 | 7.227025 | 7.178735 | 6.663761 | 6.568355 | 6.629429 |
| HCG22 /// | 5.765632 | 5.740905 | 5.648524 | 5.243082 | 5.067544 | 5.181504 |
| FAM168B   | 5.890813 | 5.877094 | 5.880989 | 6.615951 | 6.289783 | 6.405882 |
| RARG      | 7.329278 | 7.459401 | 7.319322 | 6.709926 | 6.873293 | 6.862069 |
| FANCC     | 5.881218 | 6.12203  | 6.003589 | 5.474477 | 5.50035  | 5.369519 |
| VGLL4     | 6.6438   | 6.677494 | 6.64361  | 7.11918  | 7.166521 | 7.341583 |
| GLUL      | 6.01561  | 5.964842 | 6.117398 | 5.505096 | 5.43747  | 5.492934 |
| SOX6      | 6.290744 | 6.300506 | 6.368298 | 5.702203 | 5.700582 | 5.894707 |
| CORO2A    | 6.978029 | 6.948679 | 7.087367 | 6.530187 | 6.341508 | 6.480422 |
| H6PD      | 5.594923 | 5.597646 | 5.549042 | 5.082439 | 5.029539 | 4.967848 |
| DCUN1D3   | 5.894802 | 6.112034 | 6.094241 | 6.599503 | 6.530054 | 6.633013 |
| HCP5      | 4.088449 | 4.368751 | 4.347189 | 3.629893 | 3.609454 | 3.903885 |
| TBC1D31   | 6.885522 | 6.851457 | 6.831624 | 6.335442 | 6.271338 | 6.300938 |
| WWOX      | 6.762255 | 6.800846 | 6.86617  | 7.337559 | 7.342781 | 7.409195 |
| KIF27     | 3.452038 | 3.488916 | 3.699239 | 4.103035 | 4.001099 | 4.196108 |
| UBE2T     | 10.57629 | 10.5833  | 10.63015 | 10.07513 | 9.964583 | 10.09219 |
| RBBP4     | 7.458539 | 7.54756  | 7.513793 | 6.983301 | 6.940268 | 6.938924 |
| PEMT      | 8.737218 | 8.848372 | 8.756734 | 8.224191 | 8.202576 | 8.258336 |
| FARP1     | 7.022197 | 7.011004 | 7.130436 | 6.492002 | 6.471133 | 6.544909 |
| SVIL ///  | 7.50067  | 7.620356 | 7.553323 | 8.134939 | 8.038754 | 8.155727 |
| BMP8B     | 7.243795 | 7.213493 | 7.379828 | 6.688666 | 6.668567 | 6.824896 |
| IL6R      | 5.039285 | 5.183034 | 5.228637 | 5.59166  | 5.753943 | 5.759937 |
| MMAB      | 6.189736 | 6.147599 | 6.156275 | 5.558193 | 5.584823 | 5.69618  |
| ZNF200    | 7.734777 | 7.690597 | 7.831867 | 8.303171 | 8.296382 | 8.311902 |
| PID1      | 5.807873 | 5.937445 | 5.771357 | 6.505546 | 6.321322 | 6.343964 |
| PTGFRN    | 7.874084 | 7.799824 | 7.834976 | 8.398892 | 8.35993  | 8.404101 |
| RIMKLB    | 6.165115 | 6.183133 | 6.247843 | 6.851333 | 6.663825 | 6.734448 |
| IL1RAP    | 5.335505 | 5.396608 | 5.598993 | 5.874564 | 6.000009 | 6.109173 |
| SLC39A6   | 9.096484 | 9.098468 | 9.015603 | 8.547142 | 8.499172 | 8.511743 |
| BIVM-ERCC | 7.718865 | 7.800762 | 7.792187 | 8.393737 | 8.191122 | 8.379448 |
| STEAP2    | 3.503753 | 3.306595 | 3.398246 | 2.941482 | 2.873895 | 2.740748 |

|           |          |          |          |          |          |          |
|-----------|----------|----------|----------|----------|----------|----------|
| UST       | 3.700262 | 4.02232  | 3.775003 | 4.539435 | 4.364433 | 4.245368 |
| HAND2     | 6.664916 | 6.777375 | 6.851931 | 6.118848 | 6.187785 | 6.3368   |
| PER3      | 4.95855  | 5.073046 | 5.196211 | 4.581278 | 4.489761 | 4.506365 |
| BVES      | 4.734108 | 4.890549 | 4.984679 | 5.396529 | 5.379731 | 5.483128 |
| RPL15     | 10.64109 | 10.62381 | 10.61503 | 10.10504 | 10.00773 | 10.1173  |
| HIST1H2BC | 3.731003 | 3.755581 | 3.744492 | 4.307352 | 4.0382   | 4.534997 |
| CD302 /// | 7.102841 | 7.135789 | 7.154778 | 6.660407 | 6.448388 | 6.636067 |
| MTUS1     | 4.100251 | 4.584943 | 4.342094 | 4.92261  | 4.885269 | 4.867823 |
| HHEX      | 8.979873 | 8.973916 | 8.891981 | 9.516188 | 9.470144 | 9.50627  |
| MAVS      | 6.610933 | 6.746382 | 6.707549 | 6.230483 | 6.005103 | 6.182875 |
| ENPP1     | 3.568212 | 3.315935 | 3.575468 | 2.899707 | 3.11952  | 2.794132 |
| SLTM      | 8.353377 | 8.335336 | 8.322468 | 7.768784 | 7.733681 | 7.863098 |
| ZNF398    | 5.460025 | 5.371302 | 5.345303 | 5.936245 | 5.912546 | 5.973354 |
| MTMR2     | 8.776975 | 8.776027 | 8.770096 | 9.347989 | 9.282308 | 9.337272 |
| CHSY3     | 4.046326 | 4.247184 | 4.191409 | 3.713677 | 3.367626 | 3.759246 |
| TNFAIP8   | 4.612588 | 4.459282 | 4.5766   | 4.102519 | 3.88638  | 4.015477 |
| RBKS      | 5.523141 | 5.595988 | 5.774714 | 6.136196 | 6.13946  | 6.262029 |
| MAGEA4    | 10.99248 | 11.08094 | 11.03755 | 10.53474 | 10.47286 | 10.45978 |
| BTBD2     | 6.443933 | 6.500144 | 6.481056 | 6.020044 | 5.83902  | 5.922724 |
| IDH3A     | 8.059778 | 8.064131 | 8.028589 | 7.46047  | 7.4738   | 7.575032 |
| MAP2K7    | 9.745806 | 9.64959  | 9.640444 | 9.179677 | 9.099945 | 9.113367 |
| COMMD2    | 6.759332 | 6.783431 | 6.790339 | 7.37007  | 7.30454  | 7.301298 |
| FMNL2     | 7.209376 | 7.163039 | 7.158863 | 7.709014 | 7.708122 | 7.756326 |
| FAM65B    | 4.180667 | 4.046629 | 4.217666 | 4.762166 | 4.655557 | 4.669385 |
| NRSN2     | 7.417821 | 7.470363 | 7.350169 | 6.971496 | 6.877583 | 6.747738 |
| LOC102724 | 4.725903 | 4.881404 | 4.788013 | 4.478601 | 3.999398 | 4.275804 |
| SETX      | 7.453966 | 7.498487 | 7.601542 | 8.099753 | 7.998102 | 8.096509 |
| RBMS3     | 7.058564 | 7.191934 | 7.197008 | 7.736703 | 7.613627 | 7.737159 |
| VSTM1     | 5.718619 | 5.634787 | 5.798623 | 6.374489 | 6.244676 | 6.172606 |
| APOBEC3B  | 8.824722 | 8.754881 | 8.734488 | 8.282133 | 8.206713 | 8.186075 |
| RFC3      | 8.778576 | 8.835392 | 8.826667 | 8.29013  | 8.225973 | 8.285436 |
| GPR89A // | 8.405046 | 8.414569 | 8.463181 | 8.994734 | 8.922317 | 9.004618 |
| EIF2S1    | 8.639766 | 8.676649 | 8.631212 | 8.118889 | 8.047962 | 8.142327 |
| MLEC      | 8.400003 | 8.436216 | 8.337272 | 7.898679 | 7.838122 | 7.798348 |
| BTN2A2    | 5.390624 | 5.152182 | 5.451178 | 6.021854 | 5.799531 | 5.810928 |
| EXD3      | 6.939087 | 6.712984 | 6.817664 | 7.211039 | 7.323446 | 7.572969 |
| ZNF607    | 5.379115 | 5.419158 | 5.340398 | 5.938066 | 5.893991 | 5.944034 |
| TTPAL     | 8.143793 | 8.098203 | 8.18014  | 7.610998 | 7.536585 | 7.637492 |
| COL8A2    | 4.703733 | 4.886094 | 4.65964  | 4.119611 | 4.304245 | 4.18915  |
| ZNF367    | 7.253933 | 7.35916  | 7.266281 | 7.828178 | 7.853399 | 7.833687 |
| ZMYND8    | 8.874271 | 8.935241 | 8.832593 | 8.329371 | 8.282454 | 8.394536 |
| COL4A3BP  | 7.950093 | 7.949321 | 7.917352 | 7.423338 | 7.315869 | 7.441917 |
| ABHD17B   | 5.97662  | 6.025662 | 6.048297 | 6.519553 | 6.575097 | 6.591477 |
| ENO2      | 7.496703 | 7.51135  | 7.410745 | 6.988302 | 6.879143 | 6.916164 |
| IKBKE     | 5.809558 | 5.730946 | 5.557325 | 6.26842  | 6.18717  | 6.276971 |
| ALPK1     | 4.990693 | 4.975006 | 4.932235 | 4.295681 | 4.46375  | 4.503904 |
| C5orf45   | 7.887368 | 7.874449 | 7.863133 | 8.482797 | 8.375461 | 8.400383 |
| RUFY3     | 5.737907 | 5.895854 | 5.628193 | 6.288104 | 6.234268 | 6.372063 |
| FAM188A   | 7.432098 | 7.348976 | 7.369917 | 7.979434 | 7.849182 | 7.954191 |
| CPOX      | 9.595337 | 9.538236 | 9.524089 | 9.059792 | 8.976007 | 8.990128 |
| RHBDD1    | 6.294594 | 6.283046 | 6.21663  | 5.643723 | 5.732325 | 5.786701 |

|          |          |          |          |          |          |          |
|----------|----------|----------|----------|----------|----------|----------|
| ITPR2    | 6.952287 | 6.909078 | 6.886662 | 7.440704 | 7.432263 | 7.50633  |
| CLVS1    | 5.507155 | 5.449123 | 5.437558 | 5.019148 | 4.861615 | 4.88242  |
| BRI3BP   | 7.685014 | 7.724664 | 7.757408 | 7.250656 | 7.146538 | 7.13931  |
| RC3H1    | 6.6885   | 6.672365 | 6.710423 | 7.235569 | 7.190578 | 7.275481 |
| YWHAE    | 9.852746 | 9.863058 | 9.814184 | 9.286556 | 9.287768 | 9.325606 |
| N4BP1    | 8.28451  | 8.265017 | 8.292376 | 8.847142 | 8.778288 | 8.846506 |
| CRK      | 8.802657 | 8.825088 | 8.880801 | 9.376878 | 9.359006 | 9.402272 |
| H2AFV    | 7.885843 | 7.839285 | 7.892559 | 7.31652  | 7.298033 | 7.374979 |
| SLC38A4  | 3.603857 | 3.723137 | 3.707768 | 4.281768 | 4.141649 | 4.239305 |
| ARL4C    | 8.254235 | 8.179154 | 8.310779 | 8.817744 | 8.678256 | 8.875993 |
| CREB1    | 7.131425 | 7.022725 | 7.156791 | 6.539034 | 6.498525 | 6.645579 |
| ATP8A2   | 6.187199 | 6.147412 | 6.146878 | 6.739234 | 6.662659 | 6.707092 |
| CD99L2   | 8.472974 | 8.42513  | 8.39754  | 7.920965 | 7.858958 | 7.889389 |
| VCPIP1   | 6.397956 | 6.332183 | 6.448715 | 6.95632  | 6.877055 | 6.971496 |
| NAT6     | 6.502279 | 6.457673 | 6.384941 | 5.911882 | 5.885954 | 5.921101 |
| ZNF609   | 8.574133 | 8.545076 | 8.625124 | 9.145424 | 9.071434 | 9.152705 |
| TRIM9    | 5.259264 | 5.264362 | 5.413822 | 5.708702 | 5.804727 | 6.049099 |
| ZNF629   | 6.25945  | 6.359101 | 6.083519 | 5.737409 | 5.759591 | 5.580087 |
| HINT2    | 9.503643 | 9.525528 | 9.521011 | 9.057086 | 8.939199 | 8.930148 |
| ANO3     | 3.400133 | 3.574094 | 3.508673 | 4.117795 | 4.02147  | 3.966881 |
| C8orf59  | 5.815345 | 5.751464 | 5.798623 | 6.421833 | 6.157307 | 6.409409 |
| ZNF670   | 6.93031  | 6.973124 | 6.884543 | 7.409297 | 7.499576 | 7.502109 |
| RPL39L   | 8.798196 | 8.796047 | 8.716563 | 8.231207 | 8.172036 | 8.284749 |
| SHMT1    | 7.956391 | 8.000081 | 7.960303 | 7.440877 | 7.418167 | 7.435049 |
| ZNF224   | 6.829102 | 6.747032 | 6.852432 | 7.365602 | 7.327869 | 7.357534 |
| PXDC1    | 7.442967 | 7.415351 | 7.410538 | 6.875855 | 6.863562 | 6.907026 |
| EPC1     | 5.815411 | 5.964839 | 5.903768 | 6.50142  | 6.36691  | 6.437058 |
| FAM19A1  | 3.649681 | 3.64967  | 3.563084 | 4.286537 | 3.992585 | 4.204622 |
| MATN2    | 4.139748 | 4.139748 | 4.055161 | 4.530884 | 4.759556 | 4.66538  |
| SH3D19   | 7.04693  | 7.025803 | 7.000576 | 7.606237 | 7.543426 | 7.544604 |
| LMO4     | 4.440576 | 4.485694 | 4.331447 | 3.836884 | 3.801297 | 3.998731 |
| CTBP1    | 9.063383 | 9.155203 | 9.082162 | 8.538088 | 8.570602 | 8.57165  |
| TMEM241  | 6.622282 | 6.55849  | 6.576609 | 6.000032 | 6.086102 | 6.051312 |
| SEMA4F   | 7.000246 | 7.073559 | 7.181101 | 6.485642 | 6.556024 | 6.593627 |
| RGS3     | 7.076772 | 7.140665 | 7.081573 | 7.626899 | 7.602253 | 7.688973 |
| SNRNP25  | 9.326662 | 9.379859 | 9.354564 | 8.867285 | 8.761527 | 8.813625 |
| C1orf27  | 5.364656 | 5.249225 | 5.214381 | 5.815017 | 5.858606 | 5.771964 |
| TMEM131  | 6.970923 | 6.947694 | 6.95425  | 7.532237 | 7.464672 | 7.492685 |
| AMOT     | 2.970652 | 3.139669 | 2.970652 | 3.818411 | 3.571208 | 3.308036 |
| UBXN2B   | 3.611001 | 3.841204 | 3.696309 | 4.256077 | 4.053692 | 4.455388 |
| VAC14    | 7.209886 | 7.375006 | 7.281182 | 6.831582 | 6.72771  | 6.690209 |
| C2orf42  | 7.345742 | 7.396246 | 7.392285 | 7.946744 | 7.861113 | 7.942007 |
| KPNB1    | 9.185286 | 9.230029 | 9.23982  | 8.746192 | 8.617556 | 8.676147 |
| AKR1B10  | 4.836921 | 4.836921 | 4.749496 | 5.285228 | 5.351949 | 5.401081 |
| POLA2    | 8.173246 | 8.229188 | 8.258223 | 7.693608 | 7.693985 | 7.658635 |
| STK10    | 7.661743 | 7.709148 | 7.678955 | 8.273928 | 8.197706 | 8.192545 |
| MED6     | 5.195918 | 5.26033  | 5.26033  | 5.733431 | 5.741787 | 5.855124 |
| MOSPD1   | 5.877368 | 5.76629  | 5.9371   | 6.402254 | 6.300452 | 6.491804 |
| SLC25A13 | 8.094501 | 8.153303 | 8.116746 | 8.670909 | 8.614096 | 8.692001 |
| FBX025   | 5.284212 | 5.336855 | 5.267768 | 5.74332  | 5.825645 | 5.932254 |
| DECR1    | 7.983272 | 8.031192 | 7.990559 | 8.565373 | 8.483923 | 8.567947 |

|           |           |           |           |           |           |           |
|-----------|-----------|-----------|-----------|-----------|-----------|-----------|
| CASP3     | 7. 632753 | 7. 631235 | 7. 699395 | 8. 198898 | 8. 160697 | 8. 21595  |
| KIF24     | 5. 731633 | 5. 590152 | 5. 569232 | 5. 36699  | 4. 981197 | 4. 931139 |
| CUL4A     | 9. 379888 | 9. 323024 | 9. 138292 | 8. 784217 | 8. 719615 | 8. 725915 |
| CCDC186   | 6. 434809 | 6. 525592 | 6. 377873 | 7. 018137 | 6. 85974  | 7. 070943 |
| MXD3      | 7. 535433 | 7. 554789 | 7. 467734 | 6. 916198 | 7. 036959 | 6. 994307 |
| PARN      | 7. 208988 | 7. 127761 | 7. 192641 | 6. 743645 | 6. 54983  | 6. 625473 |
| CCDC47    | 8. 244114 | 8. 234482 | 8. 323394 | 7. 69748  | 7. 741181 | 7. 752917 |
| PPIA      | 9. 561607 | 9. 59106  | 9. 575604 | 9. 069077 | 8. 985168 | 9. 063621 |
| UBXN7     | 7. 044419 | 7. 038685 | 6. 98752  | 7. 631583 | 7. 529779 | 7. 519607 |
| TRIM32    | 7. 770332 | 7. 770357 | 7. 752845 | 8. 306453 | 8. 238059 | 8. 359076 |
| CSGALNACT | 8. 296319 | 8. 278477 | 8. 143969 | 8. 739552 | 8. 778382 | 8. 810511 |
| MAP3K1    | 8. 220947 | 8. 163558 | 8. 30382  | 8. 727622 | 8. 758755 | 8. 811132 |
| NETO1     | 5. 622144 | 5. 573165 | 5. 762606 | 6. 16091  | 6. 101573 | 6. 304314 |
| SRSF1     | 7. 780334 | 7. 766614 | 7. 823346 | 7. 351751 | 7. 252921 | 7. 157666 |
| FREM2     | 4. 603074 | 4. 503168 | 4. 704597 | 4. 195527 | 3. 723634 | 4. 283958 |
| PTCH1     | 8. 468    | 8. 340994 | 8. 377671 | 7. 906664 | 7. 838155 | 7. 834432 |
| LPGAT1    | 7. 541552 | 7. 581173 | 7. 583332 | 8. 084771 | 8. 082334 | 8. 145935 |
| SLK       | 7. 348871 | 7. 416532 | 7. 464897 | 7. 97938  | 7. 880583 | 7. 976733 |
| ELMO1     | 6. 695802 | 6. 625861 | 6. 679343 | 6. 164988 | 6. 224264 | 6. 005397 |
| SOX2      | 7. 738973 | 7. 589353 | 7. 651772 | 7. 132621 | 7. 097762 | 7. 143369 |
| DZANK1    | 5. 355494 | 5. 397871 | 5. 514493 | 5. 947096 | 5. 967856 | 5. 958798 |
| SPTBN5    | 5. 395893 | 5. 592927 | 5. 484879 | 5. 922838 | 6. 104284 | 6. 052376 |
| ZNF28     | 4. 579385 | 4. 801885 | 4. 57905  | 5. 197969 | 5. 210475 | 5. 157356 |
| AKT2      | 5. 876243 | 5. 787121 | 5. 772447 | 5. 170049 | 5. 227314 | 5. 433343 |
| PLEKHS1   | 4. 000611 | 4. 355491 | 3. 705635 | 4. 502321 | 4. 636899 | 4. 525948 |
| VPS37A    | 5. 872661 | 6. 001571 | 6. 197555 | 5. 640787 | 5. 345608 | 5. 482012 |
| IL13RA1   | 4. 378203 | 4. 349705 | 4. 505461 | 5. 07475  | 4. 760448 | 5. 00059  |
| BEND3     | 7. 156464 | 7. 180493 | 7. 162299 | 6. 729973 | 6. 475316 | 6. 691583 |
| MFSD11    | 6. 959614 | 6. 94403  | 6. 971267 | 7. 477494 | 7. 426852 | 7. 572629 |
| CHMP3 /// | 8. 658224 | 8. 698665 | 8. 748751 | 8. 220505 | 8. 114125 | 8. 170054 |
| AGPAT5    | 7. 9453   | 7. 859779 | 7. 911575 | 8. 493721 | 8. 395992 | 8. 42715  |
| ECI1      | 9. 300257 | 9. 322552 | 9. 281881 | 8. 837304 | 8. 679301 | 8. 788414 |
| LOC102724 | 6. 051056 | 5. 966278 | 5. 854933 | 6. 510525 | 6. 45455  | 6. 506604 |
| RNF141    | 7. 545089 | 7. 54045  | 7. 565987 | 7. 042766 | 6. 966573 | 7. 043031 |
| PTTG1 /// | 11. 22745 | 11. 22343 | 11. 20952 | 10. 70385 | 10. 64656 | 10. 71088 |
| DHRS11    | 6. 448388 | 6. 356691 | 6. 396952 | 5. 845375 | 5. 853346 | 5. 904652 |
| ME1       | 8. 247123 | 8. 150156 | 8. 139946 | 7. 683024 | 7. 664841 | 7. 590888 |
| DNHD1     | 4. 379057 | 4. 518808 | 4. 314876 | 5. 008879 | 4. 746815 | 5. 055379 |
| LSM3      | 10. 33819 | 10. 36586 | 10. 35233 | 9. 840518 | 9. 834473 | 9. 783923 |
| SORL1     | 2. 95878  | 2. 908474 | 2. 807672 | 3. 722268 | 3. 31571  | 3. 234253 |
| KHDRBS3   | 6. 300653 | 6. 366245 | 6. 378935 | 6. 845438 | 6. 950265 | 6. 847251 |
| ATP6VOE1  | 9. 803731 | 9. 786169 | 9. 737915 | 10. 3163  | 10. 30097 | 10. 30671 |
| CDS2      | 7. 244073 | 7. 183282 | 7. 287956 | 7. 799799 | 7. 730163 | 7. 780516 |
| SLMAP     | 6. 474603 | 6. 488525 | 6. 510375 | 7. 007449 | 6. 974277 | 7. 086842 |
| DUSP22    | 7. 40058  | 7. 344193 | 7. 26687  | 6. 690947 | 6. 888803 | 6. 837565 |
| PPP2R2B   | 4. 115283 | 4. 069296 | 4. 001737 | 4. 594835 | 4. 539637 | 4. 646104 |
| MAP4K5    | 8. 101767 | 8. 101225 | 8. 05475  | 8. 656882 | 8. 603891 | 8. 589554 |
| MELK      | 8. 50514  | 8. 545318 | 8. 451121 | 7. 943219 | 7. 991504 | 7. 974669 |
| FIGN      | 4. 573228 | 4. 650107 | 4. 571526 | 5. 101075 | 5. 11528  | 5. 170427 |
| PABPC1L   | 9. 365211 | 9. 34445  | 9. 38424  | 9. 909667 | 9. 838536 | 9. 937376 |
| CAMSAP1   | 6. 952372 | 6. 998697 | 7. 058577 | 6. 399007 | 6. 420451 | 6. 59861  |

|           |          |          |          |          |          |          |
|-----------|----------|----------|----------|----------|----------|----------|
| ZFP69B    | 6.779444 | 6.753366 | 6.867758 | 7.379173 | 7.332187 | 7.280139 |
| ARNT2     | 8.333452 | 8.417615 | 8.455036 | 7.847085 | 7.841189 | 7.927051 |
| SF3B3     | 7.298321 | 7.439703 | 7.378492 | 6.836108 | 6.837904 | 6.851764 |
| MGC27345  | 7.10844  | 7.110619 | 7.074405 | 6.526904 | 6.49782  | 6.678156 |
| HIPK2     | 9.102793 | 9.124392 | 9.178927 | 9.687854 | 9.61834  | 9.689173 |
| RPS6KB1   | 8.671097 | 8.592736 | 8.61521  | 9.17347  | 9.110412 | 9.184292 |
| LIG1      | 7.40688  | 7.453517 | 7.482743 | 6.848691 | 6.891967 | 7.013633 |
| ZNF385A   | 6.576025 | 6.496849 | 6.645139 | 6.054243 | 6.123925 | 5.950997 |
| SLFN11    | 7.983964 | 7.837809 | 7.91234  | 7.359545 | 7.366977 | 7.418923 |
| HELB      | 5.268586 | 5.391627 | 5.543304 | 5.832988 | 5.996374 | 5.960908 |
| WBP5      | 7.270872 | 7.372613 | 7.188147 | 6.781106 | 6.822252 | 6.641946 |
| SUCLG2    | 4.454683 | 4.170168 | 4.253435 | 4.627692 | 4.651568 | 5.185082 |
| ASB1      | 7.61634  | 7.593094 | 7.558296 | 8.135011 | 8.128743 | 8.089782 |
| ADH5 ///  | 8.414826 | 8.385355 | 8.398187 | 7.927266 | 7.798936 | 7.886434 |
| SLC22A4   | 6.589464 | 6.596999 | 6.62632  | 7.133736 | 7.088162 | 7.176293 |
| CANX      | 7.974396 | 7.906764 | 7.957163 | 7.502922 | 7.408784 | 7.341218 |
| TAOK3     | 6.693034 | 6.710587 | 6.553788 | 7.158697 | 7.137123 | 7.246386 |
| MSH6      | 10.01766 | 10.03628 | 10.01611 | 9.503151 | 9.484745 | 9.497364 |
| ZDHH17    | 5.205144 | 5.33848  | 5.131714 | 5.796988 | 5.529339 | 5.933711 |
| TTC8      | 7.094081 | 7.130572 | 7.050005 | 7.67139  | 7.565449 | 7.622025 |
| INTS4     | 5.554446 | 5.489085 | 5.566483 | 5.98192  | 6.118848 | 6.093354 |
| LINC01588 | 5.340165 | 5.485476 | 5.602633 | 6.028882 | 5.97198  | 6.011373 |
| ANXA3     | 4.719075 | 4.649178 | 4.64435  | 5.187579 | 5.066347 | 5.34258  |
| GALNT11   | 3.82468  | 3.679491 | 3.559943 | 3.883644 | 4.177776 | 4.586573 |
| PPIC      | 7.942712 | 8.039203 | 8.050924 | 8.574703 | 8.442409 | 8.599398 |
| DOCK2     | 4.690995 | 4.71733  | 4.630666 | 5.094372 | 5.345608 | 5.18215  |
| PGGT1B    | 6.044381 | 5.978968 | 6.134802 | 6.576861 | 6.579879 | 6.584358 |
| PKP4      | 7.467178 | 7.534678 | 7.465124 | 8.001151 | 7.951181 | 8.097352 |
| CIT       | 8.058854 | 8.06975  | 8.146478 | 7.65659  | 7.579271 | 7.456607 |
| SCG2      | 7.451899 | 7.511716 | 7.442912 | 8.006901 | 7.964538 | 8.017258 |
| ZNF708    | 5.974175 | 6.117711 | 5.979166 | 6.48591  | 6.641193 | 6.526105 |
| COL5A2    | 9.829971 | 9.799214 | 9.729856 | 10.35335 | 10.28071 | 10.30677 |
| SS18      | 8.547786 | 8.452766 | 8.581991 | 7.984843 | 7.984843 | 8.031112 |
| CHEK1     | 8.529206 | 8.502323 | 8.526719 | 8.000397 | 7.975457 | 8.000921 |
| SORBS3    | 7.567288 | 7.672404 | 7.522095 | 7.059791 | 6.994379 | 7.12621  |
| SIAH2     | 8.44094  | 8.483638 | 8.479252 | 7.95064  | 7.960546 | 7.911871 |
| C19orf54  | 7.874513 | 7.960948 | 7.882876 | 7.476255 | 7.281977 | 7.37952  |
| DNMBP     | 8.0243   | 7.976028 | 8.023517 | 8.589237 | 8.472855 | 8.541972 |
| NARS      | 10.44634 | 10.43574 | 10.42644 | 9.908545 | 9.891727 | 9.928184 |
| CHIC2     | 8.855072 | 8.873841 | 8.806812 | 9.398446 | 9.359932 | 9.357223 |
| C1orf50   | 7.625682 | 7.69941  | 7.704554 | 8.243236 | 8.171909 | 8.194231 |
| CXCL3     | 3.2128   | 3.264406 | 3.519617 | 4.108602 | 3.818411 | 3.649363 |
| PN01      | 8.889731 | 8.846657 | 8.869331 | 9.430729 | 9.37914  | 9.375392 |
| PATL1     | 8.064577 | 8.087219 | 8.174085 | 8.652169 | 8.574997 | 8.67763  |
| WDR41     | 7.841659 | 7.80241  | 7.986197 | 8.413853 | 8.361261 | 8.433922 |
| FMR1      | 7.434824 | 7.420646 | 7.458034 | 7.979877 | 7.931909 | 7.980308 |
| C19orf12  | 8.487068 | 8.516487 | 8.522827 | 9.030848 | 9.044711 | 9.029319 |
| WDR46     | 7.164867 | 7.231081 | 7.215191 | 6.675462 | 6.618024 | 6.739161 |
| GRIA2     | 4.793896 | 4.86318  | 4.815693 | 5.349322 | 5.263555 | 5.438369 |
| ZCCHC3    | 7.833902 | 7.775272 | 7.823815 | 8.276607 | 8.300721 | 8.434048 |
| ENC1      | 6.980973 | 7.071714 | 7.134385 | 7.609148 | 7.572458 | 7.583677 |

|           |          |          |          |          |          |          |
|-----------|----------|----------|----------|----------|----------|----------|
| C3orf58   | 6.416181 | 6.360081 | 6.462271 | 5.944667 | 5.825065 | 5.891162 |
| STRN3     | 6.802647 | 6.887884 | 6.914256 | 7.408222 | 7.345479 | 7.428186 |
| CERKL     | 4.577388 | 4.55244  | 4.455226 | 5.180569 | 5.041778 | 4.939792 |
| GPHN      | 7.061222 | 6.937554 | 7.030807 | 7.591307 | 7.443077 | 7.572273 |
| OSBPL2    | 6.785426 | 6.86722  | 6.854758 | 6.371355 | 6.218163 | 6.340927 |
| CIZ1      | 8.249194 | 8.316388 | 8.234828 | 7.7289   | 7.732223 | 7.762887 |
| GPR160    | 5.976792 | 6.068697 | 6.17982  | 5.614573 | 5.553528 | 5.481013 |
| RNASEH2B  | 8.573244 | 8.555469 | 8.571964 | 8.067041 | 7.969667 | 8.088501 |
| KIAA1804  | 7.324121 | 7.283698 | 7.250618 | 6.852872 | 6.663829 | 6.766956 |
| EPC2      | 6.453625 | 6.541675 | 6.574358 | 7.021317 | 6.98053  | 7.142355 |
| NT5C2     | 7.51637  | 7.534075 | 7.565953 | 8.094155 | 8.026698 | 8.069335 |
| SEPSECS   | 6.631631 | 6.515609 | 6.624633 | 7.13348  | 7.074611 | 7.13755  |
| THRB      | 5.774958 | 5.786708 | 5.74406  | 6.301308 | 6.159784 | 6.41838  |
| HACD4     | 5.878049 | 6.000316 | 5.929518 | 5.370128 | 5.380659 | 5.483378 |
| TRAF6     | 6.87436  | 6.837049 | 7.005232 | 7.462131 | 7.359073 | 7.469017 |
| TRIM37    | 7.083901 | 7.037798 | 7.115699 | 7.613315 | 7.586631 | 7.61055  |
| DCUN1D4   | 6.882266 | 6.960247 | 6.88895  | 7.498658 | 7.36191  | 7.443723 |
| MSR1      | 4.214733 | 4.339122 | 4.422809 | 4.810675 | 4.866956 | 4.871795 |
| CD2AP     | 5.942084 | 5.887215 | 6.118848 | 6.579955 | 6.453304 | 6.48755  |
| CDC7      | 7.468817 | 7.438195 | 7.464364 | 6.985173 | 6.910781 | 6.903429 |
| SYNRG     | 7.290857 | 7.282408 | 7.247946 | 7.784742 | 7.787216 | 7.821189 |
| RELL2     | 6.983878 | 6.913773 | 6.904789 | 7.526793 | 7.390646 | 7.456607 |
| CARNMT1   | 7.202901 | 7.107279 | 7.058401 | 6.642963 | 6.519916 | 6.634144 |
| IFNAR2    | 6.628059 | 6.530855 | 6.544254 | 7.107698 | 7.094091 | 7.072467 |
| FAM131A   | 6.727016 | 6.840041 | 6.848003 | 6.337084 | 6.217201 | 6.289757 |
| USP9X     | 6.58266  | 6.570515 | 6.605893 | 6.073152 | 5.899892 | 6.215507 |
| RBPJ      | 9.088746 | 9.149232 | 9.068716 | 8.588141 | 8.502061 | 8.646217 |
| TACC3     | 8.436402 | 8.493243 | 8.422309 | 8.013317 | 7.842329 | 7.926557 |
| SH3BP4    | 5.887459 | 5.959179 | 5.857463 | 6.409429 | 6.308444 | 6.555952 |
| TRIM51 // | 4.469514 | 4.521819 | 4.539774 | 4.908141 | 5.052554 | 5.139482 |
| EXOG      | 7.003478 | 6.938544 | 7.002678 | 7.523216 | 7.453935 | 7.536542 |
| TRANK1    | 6.33278  | 6.369599 | 6.388185 | 6.884629 | 6.874418 | 6.90006  |
| BROX      | 6.578539 | 6.46801  | 6.605447 | 7.070088 | 7.023195 | 7.126504 |
| LRRC14    | 6.54193  | 6.642585 | 6.676474 | 6.119529 | 6.006764 | 6.167228 |
| SPATA6L   | 4.768292 | 4.624869 | 4.540144 | 5.115433 | 5.310925 | 5.074347 |
| LIG4      | 7.493641 | 7.42527  | 7.334938 | 7.899035 | 7.947918 | 7.97402  |
| PAG1      | 6.567257 | 6.579211 | 6.589899 | 7.118169 | 6.972995 | 7.212299 |
| VTI1A     | 5.516876 | 5.594186 | 5.374876 | 6.125404 | 5.986226 | 5.941008 |
| IFI44L    | 4.633813 | 4.652703 | 4.906668 | 5.280962 | 5.181446 | 5.296733 |
| SSX2 ///  | 8.924625 | 8.886933 | 8.907876 | 8.409644 | 8.35008  | 8.39445  |
| FAM46A    | 6.761532 | 6.691212 | 6.642561 | 7.283635 | 7.116839 | 7.259797 |
| DNAJC16   | 5.178081 | 5.04616  | 5.132141 | 5.668233 | 5.590063 | 5.662368 |
| SLC19A3   | 3.988693 | 4.186039 | 3.896721 | 4.590598 | 4.354929 | 4.690149 |
| MCM5      | 6.292472 | 6.427247 | 6.331978 | 5.844347 | 5.827774 | 5.815438 |
| OCEL1     | 7.247464 | 7.189519 | 7.114136 | 6.65732  | 6.720529 | 6.60947  |
| HN1       | 8.654761 | 8.764745 | 8.638016 | 9.24452  | 9.175832 | 9.200854 |
| DIMT1     | 5.452448 | 5.523525 | 5.404869 | 5.981634 | 5.894707 | 6.068092 |
| NPHP3     | 7.686411 | 7.548654 | 7.684343 | 8.159015 | 8.125495 | 8.198021 |
| ACSS1     | 6.784493 | 6.82936  | 6.841627 | 6.323037 | 6.300653 | 6.268924 |
| NFKB1B    | 7.997547 | 7.919041 | 7.954982 | 8.527158 | 8.38492  | 8.522333 |
| RGPD1 /// | 6.071779 | 6.183851 | 5.911717 | 6.646103 | 6.478375 | 6.605359 |

|           |           |           |           |           |           |           |
|-----------|-----------|-----------|-----------|-----------|-----------|-----------|
| NCAM2     | 5. 793288 | 5. 943712 | 5. 98315  | 5. 36907  | 5. 267559 | 5. 521089 |
| GNA12     | 8. 264022 | 8. 254228 | 8. 250315 | 7. 800249 | 7. 664891 | 7. 741151 |
| MYEF2     | 6. 444441 | 6. 33899  | 6. 521571 | 5. 820189 | 5. 971145 | 5. 951463 |
| SMAD4     | 6. 842918 | 6. 730735 | 6. 709031 | 6. 245405 | 6. 186844 | 6. 288298 |
| CD47      | 7. 901963 | 7. 944644 | 7. 980434 | 7. 485382 | 7. 335484 | 7. 444055 |
| VPS13A    | 5. 443969 | 5. 30322  | 5. 475582 | 5. 965561 | 5. 830465 | 5. 988583 |
| AGFG1     | 5. 990737 | 5. 978656 | 6. 188128 | 5. 53719  | 5. 455712 | 5. 603369 |
| ITGB1     | 9. 568303 | 9. 610229 | 9. 566981 | 9. 11665  | 9. 041219 | 9. 026703 |
| MSH5 ///  | 7. 064588 | 7. 066669 | 7. 055741 | 6. 598223 | 6. 547425 | 6. 48053  |
| DZIP3     | 4. 836705 | 4. 955899 | 5. 269883 | 4. 659084 | 4. 514675 | 4. 328088 |
| CNOT6L    | 5. 838892 | 5. 792831 | 5. 879013 | 5. 355572 | 5. 239158 | 5. 355572 |
| USP1      | 9. 242118 | 9. 193699 | 9. 208639 | 8. 691361 | 8. 66177  | 8. 731577 |
| GRPEL2    | 7. 741691 | 7. 668907 | 7. 765954 | 8. 265529 | 8. 148885 | 8. 321812 |
| PTP4A1    | 8. 967529 | 8. 959619 | 9. 052889 | 9. 518097 | 9. 502873 | 9. 518456 |
| SLC30A6   | 6. 452668 | 6. 461106 | 6. 534899 | 7. 067341 | 6. 957013 | 6. 982947 |
| ANKRD6    | 4. 459949 | 4. 52374  | 4. 813347 | 4. 936461 | 4. 987338 | 5. 431625 |
| RBM18     | 7. 645032 | 7. 644906 | 7. 639165 | 8. 231207 | 8. 09154  | 8. 164273 |
| SENP7     | 5. 487969 | 5. 460904 | 5. 394954 | 6. 001326 | 5. 803624 | 6. 096748 |
| HAUS1     | 8. 947161 | 8. 932627 | 8. 942995 | 8. 458654 | 8. 364517 | 8. 442235 |
| XPO4      | 5. 103853 | 4. 900076 | 5. 067418 | 4. 584943 | 4. 366316 | 4. 56371  |
| NBPF4     | 2. 170401 | 2. 515496 | 2. 136837 | 2. 758203 | 2. 902198 | 2. 71842  |
| COMMD4 // | 9. 728489 | 9. 800663 | 9. 7862   | 9. 299548 | 9. 228416 | 9. 23142  |
| BORA      | 5. 351326 | 5. 559559 | 5. 620349 | 5. 043573 | 4. 903097 | 5. 029539 |
| DAZAP2    | 4. 377081 | 4. 360832 | 4. 371004 | 4. 025148 | 3. 808753 | 3. 720151 |
| AP4E1     | 3. 395172 | 3. 620759 | 3. 522491 | 3. 960538 | 3. 891416 | 4. 241184 |
| SNRNP48   | 6. 802591 | 6. 570242 | 6. 663995 | 7. 260491 | 7. 158441 | 7. 172584 |
| ADAMTS4   | 8. 371314 | 8. 383993 | 8. 398101 | 7. 922072 | 7. 783448 | 7. 893674 |
| TBC1D26 / | 5. 527558 | 5. 344264 | 5. 409232 | 6. 016392 | 5. 900535 | 5. 918337 |
| FANCA     | 5. 427451 | 5. 314901 | 5. 601275 | 4. 933122 | 5. 059695 | 4. 796657 |
| TMEM19    | 7. 563226 | 7. 493245 | 7. 508489 | 7. 046499 | 6. 905411 | 7. 059232 |
| ACSS3     | 5. 828425 | 5. 737008 | 5. 737466 | 6. 236401 | 6. 434852 | 6. 185075 |
| MAP4K4    | 7. 930718 | 7. 926339 | 7. 940539 | 8. 440112 | 8. 433026 | 8. 477625 |
| HAPLN3    | 6. 609731 | 6. 602406 | 6. 567373 | 6. 13946  | 6. 08937  | 5. 997542 |
| POFUT2    | 6. 874418 | 6. 888889 | 6. 85487  | 7. 373557 | 7. 359477 | 7. 436707 |
| HP1BP3    | 10. 32537 | 10. 30778 | 10. 32298 | 9. 812881 | 9. 775688 | 9. 816071 |
| SNIP1     | 7. 238804 | 7. 184603 | 7. 310338 | 7. 803169 | 7. 707661 | 7. 774238 |
| SAMD9L    | 5. 325915 | 5. 509369 | 5. 52857  | 5. 780256 | 6. 070475 | 6. 06432  |
| NAV3      | 6. 487711 | 6. 461278 | 6. 516532 | 6. 990248 | 7. 036105 | 6. 989847 |
| AKR1B10 / | 3. 058754 | 2. 829855 | 2. 927084 | 3. 210674 | 3. 459824 | 3. 695624 |
| NR2F2     | 5. 720921 | 5. 600934 | 5. 66851  | 5. 102153 | 4. 954484 | 5. 383299 |
| PPP4R1    | 7. 898296 | 7. 902675 | 7. 931392 | 8. 457045 | 8. 411914 | 8. 413295 |
| MPP2      | 5. 786052 | 5. 878889 | 5. 945842 | 5. 343487 | 5. 401836 | 5. 315632 |
| RBM42     | 7. 975621 | 8. 002755 | 8. 098544 | 7. 550371 | 7. 441842 | 7. 534897 |
| ANKRA2    | 7. 282774 | 7. 117471 | 7. 101055 | 7. 708485 | 7. 66918  | 7. 673155 |
| HNRNPH2 / | 8. 520936 | 8. 549607 | 8. 532977 | 7. 960075 | 8. 004956 | 8. 089783 |
| SNAPC4    | 8. 343544 | 8. 297395 | 8. 286108 | 8. 8672   | 8. 717262 | 8. 890826 |
| FOXJ2     | 7. 033855 | 7. 00319  | 7. 072392 | 6. 544296 | 6. 525891 | 6. 491033 |
| PPP2R5D   | 6. 695451 | 6. 792086 | 6. 674341 | 6. 270831 | 6. 058375 | 6. 284679 |
| KDM2A     | 5. 914948 | 5. 672859 | 5. 602723 | 5. 119077 | 5. 259179 | 5. 26468  |
| SPR       | 8. 245269 | 8. 288282 | 8. 204401 | 7. 745942 | 7. 714919 | 7. 730163 |
| TAP1      | 7. 85452  | 7. 903113 | 7. 942275 | 8. 444396 | 8. 354709 | 8. 447073 |



|           |           |           |           |           |           |           |
|-----------|-----------|-----------|-----------|-----------|-----------|-----------|
| CDC25B    | 8. 439441 | 8. 561733 | 8. 508328 | 8. 073041 | 7. 91867  | 7. 972253 |
| C5orf34   | 6. 286422 | 6. 359729 | 6. 436034 | 5. 912656 | 5. 633605 | 5. 991207 |
| LAMP3     | 4. 413743 | 4. 229221 | 4. 417386 | 3. 971438 | 3. 862739 | 3. 681553 |
| SLF2      | 7. 170836 | 7. 171241 | 7. 204275 | 6. 630239 | 6. 631818 | 6. 74057  |
| LOC102724 | 6. 216321 | 6. 131622 | 6. 115135 | 5. 732382 | 5. 554318 | 5. 632702 |
| KLHL36    | 6. 962928 | 6. 767964 | 6. 774506 | 7. 426945 | 7. 300479 | 7. 321511 |
| SATB1     | 5. 970777 | 5. 932926 | 6. 090806 | 6. 601354 | 6. 434902 | 6. 501514 |
| MGLL      | 7. 581613 | 7. 540761 | 7. 654782 | 8. 122751 | 8. 045599 | 8. 151907 |
| ZNF674    | 5. 001051 | 4. 609918 | 4. 733561 | 5. 258428 | 5. 157366 | 5. 471537 |
| HSPA12A   | 6. 480015 | 6. 414963 | 6. 372063 | 6. 041573 | 5. 888152 | 5. 794871 |
| CHFR      | 7. 777797 | 7. 861234 | 7. 876565 | 8. 4115   | 8. 266108 | 8. 380329 |
| RRP7A     | 8. 245424 | 8. 340667 | 8. 311193 | 7. 868682 | 7. 717085 | 7. 769428 |
| IGSF10    | 3. 398246 | 3. 527341 | 3. 300411 | 3. 759838 | 4. 067713 | 3. 939993 |
| NMRAL1    | 8. 158058 | 8. 153959 | 8. 209983 | 7. 698076 | 7. 558393 | 7. 724147 |
| NEUROG2   | 6. 097937 | 6. 078494 | 6. 240857 | 5. 677002 | 5. 637338 | 5. 562103 |
| TIAL1     | 6. 986744 | 6. 99851  | 7. 050802 | 7. 549648 | 7. 482442 | 7. 544378 |
| ZNF682    | 4. 643935 | 4. 618632 | 4. 600685 | 5. 11007  | 5. 11007  | 5. 183144 |
| RRP7A /// | 8. 596618 | 8. 726051 | 8. 702609 | 8. 182621 | 8. 102706 | 8. 200785 |
| SLC25A10  | 6. 352319 | 6. 366245 | 6. 342411 | 5. 676991 | 5. 894707 | 5. 950207 |
| E2F2      | 7. 246321 | 7. 15451  | 7. 222404 | 6. 678647 | 6. 693462 | 6. 712615 |
| STK24     | 4. 390468 | 4. 147823 | 4. 527046 | 4. 024696 | 3. 851162 | 3. 65166  |
| DBT       | 5. 10933  | 5. 300834 | 5. 247116 | 4. 742977 | 4. 658641 | 4. 717943 |
| SUSD2     | 7. 965142 | 7. 810936 | 7. 85544  | 8. 330113 | 8. 421745 | 8. 416139 |
| WDR33     | 3. 603779 | 3. 571524 | 3. 417183 | 4. 166796 | 3. 873119 | 4. 088946 |
| PAPD5     | 8. 579307 | 8. 512018 | 8. 579817 | 9. 09055  | 9. 022733 | 9. 093396 |
| ENTPD4    | 5. 15458  | 5. 010122 | 5. 238876 | 5. 650929 | 5. 546548 | 5. 74104  |
| ARHGAP11A | 5. 236786 | 5. 111792 | 5. 140864 | 4. 759151 | 4. 40462  | 4. 790812 |
| PCDH20    | 3. 902302 | 3. 682148 | 3. 757046 | 4. 200688 | 4. 325679 | 4. 349942 |
| LOC10106C | 7. 6332   | 7. 544292 | 7. 562432 | 8. 133555 | 8. 143793 | 7. 996617 |
| NR2C1     | 5. 141918 | 5. 034508 | 5. 26661  | 4. 678002 | 4. 707284 | 4. 52374  |
| TICAM1    | 7. 465338 | 7. 429364 | 7. 467245 | 8. 036585 | 7. 873561 | 7. 985452 |
| MMP2      | 6. 414086 | 6. 550474 | 6. 338959 | 7. 014481 | 6. 762067 | 7. 06057  |
| KDM4C     | 6. 422091 | 6. 584898 | 6. 557078 | 7. 020472 | 7. 007451 | 7. 069548 |
| KDELC2    | 7. 816397 | 7. 730022 | 7. 767824 | 7. 148461 | 7. 294677 | 7. 337838 |
| ERAP1     | 6. 735782 | 6. 56979  | 6. 603299 | 7. 177441 | 7. 089187 | 7. 174692 |
| RHOQ      | 7. 571995 | 7. 661166 | 7. 605462 | 8. 195844 | 8. 089213 | 8. 085309 |
| MTFR2     | 6. 844919 | 6. 802963 | 6. 792001 | 6. 355711 | 6. 207076 | 6. 345565 |
| YEATS4    | 8. 710764 | 8. 594557 | 8. 607169 | 8. 102841 | 8. 212685 | 8. 06581  |
| ZMYM4     | 7. 554008 | 7. 583977 | 7. 562214 | 8. 110732 | 8. 022867 | 8. 097219 |
| SNX25     | 5. 787298 | 5. 778856 | 5. 671926 | 6. 200369 | 6. 216801 | 6. 350943 |
| FM05      | 4. 134316 | 4. 145188 | 3. 953838 | 4. 556261 | 4. 551838 | 4. 655072 |
| HSDL2     | 8. 174044 | 8. 277662 | 8. 124106 | 7. 692996 | 7. 639311 | 7. 714107 |
| PTGES3    | 11. 13593 | 11. 12343 | 11. 07173 | 10. 58672 | 10. 61114 | 10. 6039  |
| ZNF433    | 6. 921556 | 6. 872571 | 6. 874863 | 7. 338886 | 7. 438315 | 7. 420881 |
| PLGLB2    | 5. 805151 | 5. 882733 | 5. 855866 | 6. 39678  | 6. 26046  | 6. 415141 |
| ZRANB1    | 7. 208026 | 7. 166997 | 7. 230383 | 7. 743689 | 7. 678959 | 7. 710924 |
| GMFB      | 9. 368112 | 9. 267959 | 9. 225607 | 8. 78406  | 8. 792242 | 8. 75829  |
| ING5      | 5. 413633 | 5. 344444 | 5. 196661 | 5. 8204   | 5. 939754 | 5. 721378 |
| SPG20     | 9. 126823 | 9. 143452 | 9. 104159 | 9. 639643 | 9. 622621 | 9. 638209 |
| GPN3      | 8. 579307 | 8. 451125 | 8. 423656 | 8. 000655 | 8. 034869 | 7. 892776 |
| MAPK8     | 5. 358937 | 5. 510938 | 5. 557046 | 5. 976709 | 5. 953247 | 6. 022518 |

|           |           |           |           |           |           |           |
|-----------|-----------|-----------|-----------|-----------|-----------|-----------|
| SH2D2A    | 6. 517819 | 6. 3669   | 6. 611652 | 7. 111765 | 6. 992308 | 6. 917825 |
| MCOLN3    | 5. 266327 | 5. 225599 | 5. 39097  | 5. 841055 | 5. 764452 | 5. 802733 |
| NEMF      | 7. 220951 | 7. 273785 | 7. 218402 | 7. 80098  | 7. 699802 | 7. 737269 |
| CSRP2BP   | 6. 912387 | 6. 844596 | 6. 971593 | 6. 440175 | 6. 334125 | 6. 429551 |
| ZNF527    | 4. 889886 | 4. 870404 | 4. 890538 | 5. 548893 | 5. 40916  | 5. 217422 |
| CAST      | 8. 496074 | 8. 56433  | 8. 590505 | 9. 091679 | 9. 010278 | 9. 07209  |
| PSEN1     | 7. 805149 | 7. 832606 | 7. 905846 | 8. 375173 | 8. 304382 | 8. 387152 |
| WSB1      | 8. 128067 | 8. 157932 | 8. 221573 | 8. 694557 | 8. 580451 | 8. 754801 |
| RBM3      | 5. 097413 | 5. 302824 | 5. 234855 | 5. 660594 | 5. 548959 | 5. 947383 |
| DYNC2LI1  | 4. 684619 | 4. 867481 | 4. 789249 | 5. 367046 | 5. 24173  | 5. 25423  |
| TSPAN14   | 9. 19174  | 9. 162665 | 9. 254164 | 9. 733832 | 9. 659402 | 9. 736884 |
| ZNF615    | 4. 340809 | 4. 28368  | 4. 260239 | 4. 827395 | 4. 708775 | 4. 869725 |
| DIP2B     | 7. 633684 | 7. 768946 | 7. 815079 | 8. 236389 | 8. 274519 | 8. 227671 |
| TRIM33    | 7. 25267  | 7. 207006 | 7. 223248 | 7. 716096 | 7. 738457 | 7. 749184 |
| ATP5G1    | 8. 681231 | 8. 717739 | 8. 680645 | 8. 226398 | 8. 166435 | 8. 166359 |
| SERINC3   | 9. 534788 | 9. 52088  | 9. 517072 | 10. 00754 | 10. 00754 | 10. 07758 |
| ANXA4     | 9. 121839 | 9. 166181 | 9. 174638 | 9. 651463 | 9. 62875  | 9. 702297 |
| ANGPT1    | 7. 154736 | 7. 136096 | 7. 298769 | 7. 745258 | 7. 666454 | 7. 697108 |
| HSPA4L    | 7. 400847 | 7. 328661 | 7. 324896 | 7. 916878 | 7. 880216 | 7. 776496 |
| ABL2      | 5. 768063 | 5. 584823 | 5. 509623 | 6. 265474 | 6. 097552 | 6. 018563 |
| SUPT3H    | 6. 434274 | 6. 313461 | 6. 554902 | 6. 960362 | 6. 876679 | 6. 982947 |
| SERPINB2  | 3. 629131 | 3. 82818  | 3. 780019 | 4. 249481 | 4. 154705 | 4. 34955  |
| RALGPS2   | 6. 173171 | 6. 207754 | 6. 229533 | 6. 760785 | 6. 670256 | 6. 695749 |
| NDUFS3    | 10. 37504 | 10. 37611 | 10. 4039  | 9. 909146 | 9. 820245 | 9. 909396 |
| C16orf87  | 7. 991939 | 7. 960681 | 7. 85796  | 8. 44566  | 8. 437423 | 8. 443764 |
| PKD2      | 6. 206552 | 6. 29281  | 6. 243895 | 6. 76371  | 6. 686441 | 6. 808792 |
| ALPP      | 5. 428259 | 5. 454334 | 5. 326652 | 4. 999445 | 5. 026254 | 4. 668055 |
| RAET1E    | 2. 169435 | 2. 19502  | 2. 544422 | 2. 722002 | 2. 970559 | 2. 731612 |
| BAGE      | 7. 796504 | 7. 765954 | 7. 910873 | 8. 394458 | 8. 20463  | 8. 389347 |
| ZNF181    | 5. 495759 | 5. 560187 | 5. 495759 | 6. 023971 | 5. 946407 | 6. 095778 |
| MUT       | 6. 465929 | 6. 386274 | 6. 561935 | 6. 051674 | 5. 778659 | 6. 069577 |
| ZNF329    | 6. 56974  | 6. 695191 | 6. 658942 | 7. 15273  | 7. 09206  | 7. 193076 |
| VAPB      | 5. 999984 | 5. 997483 | 5. 91646  | 5. 67474  | 5. 290754 | 5. 434844 |
| DEPDC1B   | 9. 279371 | 9. 15135  | 9. 215223 | 8. 720892 | 8. 687356 | 8. 724185 |
| CCNG2     | 5. 077924 | 5. 172049 | 5. 191561 | 4. 700253 | 4. 555714 | 4. 672564 |
| GOLGA8A / | 5. 535945 | 5. 577826 | 5. 690078 | 6. 106533 | 6. 039758 | 6. 170352 |
| YTHDF3    | 7. 748442 | 7. 756224 | 7. 667646 | 8. 226799 | 8. 22258  | 8. 235615 |
| KIAA1468  | 5. 428385 | 5. 508109 | 5. 473835 | 5. 844407 | 6. 002277 | 6. 076276 |
| ZPR1      | 8. 318057 | 8. 35429  | 8. 254043 | 8. 875797 | 8. 750182 | 8. 812685 |
| ABI2      | 7. 029702 | 7. 10099  | 7. 069618 | 7. 587438 | 7. 514588 | 7. 610094 |
| RCOR3     | 6. 621979 | 6. 625539 | 6. 650012 | 7. 152318 | 7. 071067 | 7. 185873 |
| GAS6-AS1  | 6. 760376 | 6. 73737  | 6. 843029 | 7. 352577 | 7. 252828 | 7. 246822 |
| RNF13     | 8. 462511 | 8. 482462 | 8. 532671 | 9. 030187 | 8. 942479 | 9. 01642  |
| MYLK      | 5. 420366 | 5. 467767 | 5. 461808 | 5. 975376 | 5. 993535 | 5. 892398 |
| HMMR      | 8. 996234 | 9. 022392 | 9. 017968 | 8. 550552 | 8. 459259 | 8. 515441 |
| USP24     | 8. 507295 | 8. 43738  | 8. 439212 | 9. 034558 | 8. 9707   | 8. 889654 |
| SAYSD1    | 6. 118976 | 6. 162554 | 6. 154882 | 5. 707839 | 5. 568075 | 5. 65006  |
| AMOTL1    | 8. 78968  | 8. 75035  | 8. 771996 | 8. 326093 | 8. 158191 | 8. 317451 |
| SLC35B3   | 7. 164458 | 7. 239016 | 7. 22518  | 7. 749935 | 7. 631797 | 7. 756866 |
| CDKN1B    | 8. 497079 | 8. 407655 | 8. 361285 | 8. 910167 | 8. 944286 | 8. 921321 |
| HOXC8     | 6. 173171 | 6. 155817 | 6. 247843 | 6. 719758 | 6. 687036 | 6. 67942  |

|           |           |           |           |           |           |           |
|-----------|-----------|-----------|-----------|-----------|-----------|-----------|
| LEPROT    | 9. 313573 | 9. 358539 | 9. 395176 | 8. 861598 | 8. 830969 | 8. 865728 |
| SCML1     | 7. 023925 | 7. 020472 | 7. 020472 | 7. 496863 | 7. 445465 | 7. 631351 |
| LDAH      | 5. 971008 | 6. 038051 | 6. 0974   | 6. 523201 | 6. 425726 | 6. 665968 |
| SRD5A3    | 8. 067375 | 8. 096958 | 8. 16529  | 7. 588985 | 7. 599409 | 7. 633356 |
| ZNF106    | 7. 182614 | 7. 304029 | 7. 30107  | 7. 839077 | 7. 679969 | 7. 776515 |
| ZNF606    | 5. 52708  | 5. 453803 | 5. 455385 | 6. 098378 | 5. 894497 | 5. 950207 |
| R3HCC1L   | 6. 867945 | 6. 87885  | 6. 905691 | 7. 406206 | 7. 305489 | 7. 44759  |
| FPGT      | 3. 416733 | 3. 2128   | 3. 275938 | 2. 911372 | 2. 667634 | 2. 819752 |
| PLXNA2    | 4. 50381  | 4. 71984  | 4. 746408 | 5. 102417 | 5. 080532 | 5. 293743 |
| GGH       | 9. 615031 | 9. 715963 | 9. 533159 | 9. 137742 | 9. 114549 | 9. 10525  |
| SIK2      | 6. 021471 | 6. 036593 | 6. 064465 | 5. 602263 | 5. 497845 | 5. 51654  |
| SMG8      | 8. 419866 | 8. 389411 | 8. 455917 | 7. 973863 | 7. 881384 | 7. 904731 |
| PGM2L1    | 5. 697767 | 5. 638905 | 5. 694175 | 6. 167529 | 6. 058796 | 6. 309578 |
| ZNF652    | 7. 164025 | 7. 117127 | 7. 167489 | 7. 772634 | 7. 597239 | 7. 583611 |
| PMS2CL    | 6. 065233 | 6. 145542 | 6. 229926 | 6. 790426 | 6. 503339 | 6. 65128  |
| ETV6      | 6. 102666 | 6. 140221 | 6. 139313 | 6. 71876  | 6. 533613 | 6. 634144 |
| CSNK1A1   | 10. 60349 | 10. 62212 | 10. 60295 | 11. 10358 | 11. 09789 | 11. 13117 |
| SPAG9     | 7. 833575 | 7. 863684 | 7. 858836 | 8. 338507 | 8. 277767 | 8. 443681 |
| GPRIN1    | 5. 926072 | 5. 821458 | 6. 009881 | 5. 541324 | 5. 454397 | 5. 257884 |
| NKIRAS2   | 8. 043466 | 8. 049484 | 8. 075145 | 8. 594031 | 8. 567432 | 8. 510286 |
| CLCN5     | 5. 553589 | 5. 664506 | 5. 618455 | 5. 166431 | 4. 990656 | 5. 17692  |
| MRPS36    | 9. 747736 | 9. 769879 | 9. 638261 | 9. 235066 | 9. 230236 | 9. 188249 |
| VIT       | 6. 311368 | 6. 240311 | 6. 35724  | 6. 825091 | 6. 752336 | 6. 833461 |
| SLC7A2    | 5. 480976 | 5. 401219 | 5. 634689 | 4. 956486 | 4. 936345 | 5. 122201 |
| MR1       | 5. 867618 | 5. 832282 | 5. 640994 | 6. 31547  | 6. 167734 | 6. 35931  |
| ZNF180    | 6. 873212 | 6. 945625 | 6. 985448 | 7. 516861 | 7. 408108 | 7. 380655 |
| UBR3      | 4. 946946 | 5. 186622 | 5. 140339 | 5. 645817 | 5. 499293 | 5. 630098 |
| MPDU1     | 7. 823361 | 7. 830704 | 7. 885731 | 7. 41426  | 7. 242797 | 7. 382287 |
| MBOAT2    | 6. 027323 | 6. 065288 | 6. 033323 | 5. 506418 | 5. 612661 | 5. 507154 |
| EVA1C     | 6. 209366 | 6. 02646  | 6. 058443 | 5. 61427  | 5. 459266 | 5. 721158 |
| RUNX2     | 5. 894931 | 5. 89486  | 5. 866961 | 6. 467534 | 6. 225523 | 6. 463247 |
| RNF145    | 8. 320401 | 8. 324878 | 8. 269893 | 8. 837052 | 8. 72786  | 8. 849651 |
| BMX       | 5. 140535 | 5. 104183 | 5. 427235 | 5. 675345 | 5. 734129 | 5. 761806 |
| ARMCX5-GF | 5. 331275 | 5. 326605 | 5. 527765 | 4. 849063 | 4. 874818 | 4. 962555 |
| BAGE2 /// | 7. 414267 | 7. 350169 | 7. 393125 | 7. 903282 | 7. 821221 | 7. 932264 |
| ODF2      | 8. 159015 | 8. 110525 | 8. 215674 | 7. 613949 | 7. 640044 | 7. 732289 |
| RHEBL1    | 6. 125732 | 6. 03269  | 6. 094423 | 5. 614573 | 5. 724567 | 5. 415065 |
| XPA       | 7. 47841  | 7. 442912 | 7. 424476 | 7. 974462 | 7. 948034 | 7. 921319 |
| NAA25     | 9. 083546 | 9. 020191 | 9. 119373 | 9. 565149 | 9. 561767 | 9. 594138 |
| RAB27A    | 5. 61267  | 5. 638431 | 5. 547895 | 5. 078646 | 4. 924089 | 5. 298444 |
| HLCS      | 6. 220496 | 6. 123344 | 6. 283969 | 5. 655149 | 5. 81452  | 5. 660484 |
| IBTK      | 7. 317378 | 7. 289983 | 7. 31014  | 7. 82664  | 7. 771246 | 7. 816962 |
| ARNTL2    | 6. 507726 | 6. 548827 | 6. 573654 | 7. 007449 | 6. 998978 | 7. 120628 |
| SPTSSA    | 6. 040647 | 5. 932273 | 5. 927488 | 5. 441545 | 5. 356425 | 5. 605625 |
| FCF1      | 6. 689873 | 6. 558863 | 6. 692157 | 6. 142938 | 6. 11372  | 6. 187526 |
| CPED1     | 4. 432286 | 4. 570045 | 4. 377641 | 4. 192941 | 4. 120735 | 3. 569875 |
| GPR3      | 5. 869074 | 5. 941587 | 5. 78424  | 5. 248927 | 5. 376596 | 5. 473253 |
| MKL2      | 7. 78788  | 7. 800609 | 7. 74487  | 7. 284275 | 7. 277945 | 7. 275115 |
| ABLIM3    | 4. 166755 | 4. 380922 | 4. 264334 | 4. 906893 | 4. 924718 | 4. 475667 |
| KIAA1109  | 7. 04997  | 7. 01299  | 7. 117957 | 7. 594503 | 7. 460971 | 7. 620243 |
| RRP8      | 7. 395786 | 7. 388171 | 7. 380133 | 7. 904988 | 7. 867159 | 7. 886539 |

|           |           |           |           |           |           |           |
|-----------|-----------|-----------|-----------|-----------|-----------|-----------|
| RBM14-RBM | 9. 725801 | 9. 734779 | 9. 731962 | 10. 25073 | 10. 1813  | 10. 25499 |
| RNF125    | 7. 901167 | 7. 983761 | 7. 961846 | 7. 513281 | 7. 386316 | 7. 453042 |
| MRPL43    | 7. 597103 | 7. 652181 | 7. 644871 | 8. 178473 | 8. 098642 | 8. 11111  |
| METTL16   | 8. 015665 | 7. 975731 | 8. 036069 | 7. 522147 | 7. 482442 | 7. 52896  |
| ICAM1     | 6. 344541 | 6. 452097 | 6. 426454 | 6. 931997 | 6. 770304 | 7. 014096 |
| KIAA1549  | 6. 420464 | 6. 556916 | 6. 365535 | 5. 947535 | 5. 882918 | 6. 019435 |
| C5orf15   | 8. 824163 | 8. 843823 | 8. 821739 | 9. 329454 | 9. 302201 | 9. 351079 |
| SLC25A20  | 7. 495825 | 7. 514356 | 7. 489149 | 7. 987307 | 7. 980433 | 8. 024322 |
| FAM200A   | 6. 908368 | 6. 85314  | 6. 877294 | 7. 379376 | 7. 360639 | 7. 391034 |
| PIBF1     | 7. 579597 | 7. 520668 | 7. 477486 | 8. 053453 | 8. 00434  | 8. 012141 |
| CEMIP     | 10. 79642 | 10. 82828 | 10. 83595 | 10. 36275 | 10. 27986 | 10. 32611 |
| CEP57     | 6. 447703 | 6. 349373 | 6. 448686 | 5. 870252 | 5. 866136 | 6. 018563 |
| NIF3L1    | 7. 582428 | 7. 618421 | 7. 685683 | 7. 173552 | 7. 098702 | 7. 123685 |
| ZNF585A   | 6. 196839 | 6. 13832  | 6. 321183 | 6. 688774 | 6. 722199 | 6. 735659 |
| TMEM192 / | 8. 579072 | 8. 590568 | 8. 635408 | 9. 119392 | 9. 070118 | 9. 10565  |
| RAB27B    | 4. 584943 | 4. 890549 | 5. 006705 | 5. 102042 | 5. 345608 | 5. 524614 |
| ZNF546    | 3. 721014 | 3. 861061 | 3. 687901 | 4. 459753 | 4. 135132 | 4. 164694 |
| TOR4A     | 6. 663884 | 6. 523608 | 6. 564497 | 6. 153719 | 6. 027487 | 6. 081181 |
| ASB13     | 5. 577469 | 5. 48635  | 5. 475582 | 4. 912959 | 5. 183902 | 4. 953223 |
| EIF4E     | 6. 82364  | 6. 686441 | 6. 777179 | 6. 282751 | 6. 244676 | 6. 270536 |
| RAB9A     | 8. 384802 | 8. 312924 | 8. 346743 | 8. 856158 | 8. 802452 | 8. 874529 |
| SRSF3     | 6. 686063 | 6. 625434 | 6. 677573 | 6. 203708 | 6. 132969 | 6. 163789 |
| NR3C1     | 7. 308568 | 7. 299717 | 7. 377189 | 6. 834146 | 6. 819754 | 6. 843326 |
| FAM133B / | 6. 92782  | 6. 927588 | 6. 877577 | 7. 459422 | 7. 318705 | 7. 442912 |
| ASB7      | 7. 119741 | 7. 151762 | 7. 138971 | 6. 642477 | 6. 607803 | 6. 672947 |
| AP2S1     | 11. 47156 | 11. 5295  | 11. 50483 | 11. 01497 | 10. 97163 | 11. 03226 |
| RPRD1B    | 3. 618401 | 3. 873441 | 3. 69049  | 4. 331587 | 4. 036193 | 4. 301518 |
| FAM134C   | 5. 897402 | 5. 998777 | 5. 89278  | 5. 387265 | 5. 463787 | 5. 451085 |
| DDI2      | 5. 940304 | 5. 834201 | 5. 975833 | 6. 488021 | 6. 286368 | 6. 462708 |
| HSPB3     | 4. 736769 | 4. 647611 | 4. 700548 | 5. 311759 | 5. 130498 | 5. 128891 |
| SNX10     | 9. 363967 | 9. 298785 | 9. 311149 | 8. 882472 | 8. 825846 | 8. 779414 |
| PRKAA2    | 5. 533088 | 5. 619578 | 5. 68634  | 6. 080413 | 6. 033323 | 6. 211198 |
| AKAP12    | 7. 9472   | 7. 960291 | 7. 991674 | 7. 498272 | 7. 449148 | 7. 467117 |
| GRAMD1B   | 6. 559571 | 6. 624915 | 6. 674291 | 7. 183037 | 6. 963812 | 7. 196486 |
| BCLAF1    | 4. 736769 | 4. 996672 | 4. 848228 | 4. 073106 | 4. 52374  | 4. 500577 |
| TRAF4     | 7. 05885  | 7. 194957 | 7. 060234 | 7. 605832 | 7. 52435  | 7. 667331 |
| ATP6V1G1  | 9. 351641 | 9. 335082 | 9. 319947 | 8. 851137 | 8. 83722  | 8. 834852 |
| EXOC5     | 7. 929192 | 7. 943059 | 7. 871835 | 8. 395124 | 8. 41518  | 8. 416965 |
| PSMD3     | 8. 153079 | 8. 12817  | 8. 087228 | 7. 611252 | 7. 636344 | 7. 637806 |
| FKBP2     | 7. 539195 | 7. 561048 | 7. 429231 | 6. 941467 | 7. 100403 | 7. 004728 |
| MRPL20    | 8. 236045 | 8. 467452 | 8. 492834 | 8. 730036 | 9. 064051 | 8. 884683 |
| PTPN9     | 7. 330336 | 7. 285042 | 7. 323041 | 6. 854991 | 6. 800051 | 6. 80102  |
| TXNIP     | 8. 624264 | 8. 66592  | 8. 6202   | 8. 198463 | 8. 06699  | 8. 162722 |
| POLR3C    | 8. 883527 | 8. 902157 | 8. 891654 | 9. 391959 | 9. 342078 | 9. 425298 |
| ATP5S     | 7. 379157 | 7. 297901 | 7. 33081  | 6. 90736  | 6. 714187 | 6. 904424 |
| NMNAT2    | 7. 641531 | 7. 640798 | 7. 639172 | 8. 148377 | 8. 079605 | 8. 17513  |
| NHLRC2    | 7. 179748 | 7. 225015 | 7. 221608 | 7. 69105  | 7. 663754 | 7. 752412 |
| TRIT1     | 6. 24711  | 6. 208747 | 6. 22044  | 6. 76072  | 6. 673019 | 6. 722331 |
| EPHA2     | 8. 720773 | 8. 669702 | 8. 696742 | 9. 257599 | 9. 157418 | 9. 151688 |
| WAPL      | 8. 990573 | 8. 964818 | 8. 986907 | 9. 514839 | 9. 448804 | 9. 458087 |
| LRRC8C    | 6. 23712  | 6. 119139 | 6. 193277 | 5. 677002 | 5. 57331  | 5. 820062 |

|           |          |          |          |          |          |          |
|-----------|----------|----------|----------|----------|----------|----------|
| P4HA2     | 8.401774 | 8.394735 | 8.411885 | 8.919988 | 8.838242 | 8.929298 |
| IRS1      | 6.791621 | 6.744057 | 6.692387 | 7.289891 | 7.152849 | 7.26403  |
| WASF3     | 4.782231 | 4.63779  | 4.814729 | 5.221634 | 5.191529 | 5.299956 |
| PPIL2     | 3.761162 | 3.996057 | 3.880486 | 3.152549 | 3.428116 | 3.578685 |
| PCNA      | 11.30809 | 11.33281 | 11.28831 | 10.83619 | 10.80641 | 10.80849 |
| SCRN1     | 7.426697 | 7.515178 | 7.528661 | 8.041001 | 7.907168 | 7.999244 |
| TIPRL     | 8.182589 | 8.205233 | 8.166383 | 7.714306 | 7.623438 | 7.73959  |
| ARID2     | 6.145729 | 6.314483 | 6.086738 | 5.808378 | 5.684698 | 5.577127 |
| FAM133B / | 8.089419 | 8.019005 | 8.094594 | 8.599222 | 8.512549 | 8.567936 |
| DDX31     | 7.136096 | 7.19162  | 7.225479 | 7.74514  | 7.595826 | 7.688895 |
| BCL2L13   | 6.076719 | 6.040153 | 6.227044 | 6.631721 | 6.482687 | 6.706145 |
| PAFAH1B1  | 8.801713 | 8.821429 | 8.819528 | 8.360976 | 8.216275 | 8.388835 |
| ZNF763    | 3.628709 | 3.683419 | 3.81129  | 4.210364 | 4.078479 | 4.310812 |
| LMOD3     | 3.325748 | 3.323958 | 3.582795 | 3.990585 | 3.888688 | 3.82934  |
| AKNA      | 3.775115 | 3.879319 | 3.843163 | 3.507497 | 3.350708 | 3.163341 |
| ATP6V1G2  | 5.556807 | 5.768063 | 5.712743 | 5.209269 | 5.226121 | 5.126568 |
| HLTF      | 8.797938 | 8.849139 | 8.856453 | 8.355043 | 8.372232 | 8.300721 |
| PROSER1   | 7.604835 | 7.575416 | 7.459176 | 7.036236 | 7.074978 | 7.052699 |
| ARMC1     | 9.906713 | 9.931023 | 9.943738 | 9.490061 | 9.406092 | 9.409888 |
| C6orf48   | 10.33274 | 10.33128 | 10.30106 | 10.82459 | 10.79177 | 10.82384 |
| ALG13     | 7.854569 | 7.978185 | 7.892276 | 8.405535 | 8.381689 | 8.412653 |
| MIER1     | 6.965737 | 6.874418 | 6.957194 | 7.490445 | 7.370413 | 7.41069  |
| AFAP1     | 9.237565 | 9.29275  | 9.30692  | 8.831362 | 8.751748 | 8.78026  |
| MAGOH     | 8.94382  | 8.909244 | 8.877689 | 8.421249 | 8.373764 | 8.4621   |
| MEF2A     | 6.496942 | 6.458768 | 6.40209  | 6.922302 | 6.908886 | 7.000104 |
| TMCC3     | 3.264188 | 3.213492 | 3.199604 | 3.705403 | 3.813249 | 3.63164  |
| DPP8      | 9.483938 | 9.521015 | 9.521497 | 10.03503 | 9.976471 | 9.987418 |
| PRKD3     | 4.413483 | 4.53347  | 4.692603 | 4.022931 | 4.021368 | 4.123014 |
| SWI5      | 8.474842 | 8.428468 | 8.445694 | 8.059778 | 7.842292 | 7.975031 |
| SEPHS1    | 7.136055 | 7.075766 | 7.150681 | 6.579138 | 6.745292 | 6.566717 |
| PPP1R21   | 6.070639 | 6.165781 | 6.183231 | 6.592183 | 6.564719 | 6.734013 |
| ZNF550    | 6.139273 | 6.148493 | 6.115964 | 6.554522 | 6.581122 | 6.738985 |
| NXF1      | 7.784301 | 7.833839 | 7.850769 | 8.3364   | 8.243628 | 8.359626 |
| ZFP28     | 4.500349 | 4.575736 | 4.630561 | 4.904003 | 5.016498 | 5.25669  |
| UMPS      | 9.805938 | 9.745351 | 9.794009 | 9.339017 | 9.237396 | 9.298405 |
| MYOF      | 10.59889 | 10.68818 | 10.60649 | 11.12289 | 11.07816 | 11.16296 |
| FGF14     | 3.15231  | 3.31335  | 3.216378 | 3.794309 | 3.678085 | 3.679832 |
| LYPD6B    | 4.03303  | 4.205677 | 4.122456 | 4.518241 | 4.728043 | 4.584943 |
| UVRAG     | 6.228107 | 6.209907 | 6.15711  | 5.699224 | 5.775403 | 5.650455 |
| TPX2      | 9.924233 | 9.888958 | 9.896244 | 9.445387 | 9.382402 | 9.411741 |
| TRIOBP    | 7.412848 | 7.438336 | 7.383671 | 7.039131 | 6.809446 | 6.916484 |
| KIAA0907  | 9.319794 | 9.256091 | 9.2566   | 9.818981 | 9.732027 | 9.75087  |
| ZC3HAV1L  | 3.083136 | 3.479867 | 3.498574 | 3.802273 | 3.702542 | 4.026102 |
| GUF1      | 6.769871 | 6.732383 | 6.765807 | 7.326309 | 7.179947 | 7.230383 |
| ND1       | 12.04571 | 12.05066 | 12.06906 | 12.55755 | 12.54158 | 12.53446 |
| ZNF415    | 4.422046 | 4.649633 | 4.769447 | 5.112448 | 5.076659 | 5.120062 |
| SLC26A4   | 2.969082 | 3.004863 | 3.290198 | 3.491799 | 3.451621 | 3.788652 |
| DNAJB6    | 8.036001 | 8.038902 | 8.033544 | 8.540214 | 8.50169  | 8.533835 |
| GPR180    | 8.495385 | 8.507088 | 8.437249 | 9.039993 | 8.952598 | 8.914389 |
| SHPK ///  | 5.624839 | 5.604833 | 5.778361 | 5.33877  | 5.189638 | 5.012893 |
| RALGAPA1  | 5.174801 | 5.243948 | 5.340707 | 5.692713 | 5.692858 | 5.840464 |

|           |          |          |          |          |          |          |
|-----------|----------|----------|----------|----------|----------|----------|
| AARS      | 9.403146 | 9.427481 | 9.412101 | 8.912105 | 8.920568 | 8.943647 |
| KIF2A     | 8.798387 | 8.85425  | 8.899265 | 9.368586 | 9.309847 | 9.339198 |
| FOXF1     | 5.395395 | 5.403897 | 5.332679 | 4.840164 | 5.043046 | 4.783109 |
| TMEM256   | 9.481345 | 9.523522 | 9.528129 | 9.019587 | 9.000229 | 9.047685 |
| FBX04     | 7.193067 | 7.172808 | 7.111984 | 6.707075 | 6.564243 | 6.741134 |
| MOAP1     | 7.367859 | 7.365457 | 7.455657 | 7.896106 | 7.863808 | 7.894304 |
| GABARAPL1 | 6.564261 | 6.573797 | 6.663798 | 7.182271 | 7.089187 | 6.994752 |
| SLC7A6OS  | 6.437842 | 6.366245 | 6.494479 | 6.944618 | 6.920983 | 6.897295 |
| LRRC20    | 6.696117 | 6.746416 | 6.704521 | 6.259899 | 6.304681 | 6.118254 |
| SNRPF     | 10.66646 | 10.71051 | 10.59745 | 10.09737 | 10.18447 | 10.22862 |
| IPPK      | 8.123814 | 8.073919 | 8.123814 | 8.686259 | 8.571763 | 8.527486 |
| RHOJ      | 5.730236 | 5.620277 | 5.83181  | 6.225523 | 6.140446 | 6.279321 |
| ABHD14B   | 8.401039 | 8.438424 | 8.402413 | 7.887806 | 7.917776 | 7.974195 |
| SETD2     | 8.110519 | 8.115461 | 8.130269 | 8.669468 | 8.487503 | 8.661342 |
| GPATCH4   | 9.824669 | 9.865365 | 9.843419 | 10.3657  | 10.29607 | 10.33368 |
| NIN       | 5.830868 | 5.704696 | 5.554446 | 5.111354 | 5.33208  | 5.184578 |
| MNS1      | 6.492291 | 6.504197 | 6.55169  | 6.086356 | 5.939986 | 6.060273 |
| PLK2      | 10.198   | 10.20372 | 10.19237 | 10.69433 | 10.6896  | 10.67142 |
| WWP2      | 6.620045 | 6.564151 | 6.567453 | 7.009581 | 7.020111 | 7.183182 |
| PNN       | 8.265062 | 8.251983 | 8.295224 | 7.887829 | 7.708667 | 7.754762 |
| ZNF3      | 7.519818 | 7.575173 | 7.611066 | 8.045504 | 8.039063 | 8.082428 |
| ATP6V1B2  | 8.258201 | 8.264641 | 8.30008  | 8.800669 | 8.684028 | 8.799144 |
| RSPRY1    | 7.655197 | 7.630081 | 7.644375 | 8.157577 | 8.106612 | 8.126177 |
| SPARC     | 10.77885 | 10.83547 | 10.80331 | 11.32449 | 11.24179 | 11.31185 |
| PAPD4     | 7.727939 | 7.768877 | 7.79181  | 8.258076 | 8.229198 | 8.261678 |
| FAM103A1  | 9.531382 | 9.523702 | 9.481468 | 10.03899 | 9.951529 | 10.00603 |
| ARL14EP   | 8.532834 | 8.515845 | 8.546757 | 9.023618 | 8.947896 | 9.083853 |
| ZNRF2     | 5.336063 | 5.348935 | 5.524144 | 5.971773 | 5.788932 | 5.908033 |
| ARRB2     | 6.934708 | 7.09799  | 7.009316 | 6.599849 | 6.410827 | 6.571842 |
| LOC441155 | 8.193788 | 8.251983 | 8.241531 | 8.746275 | 8.627713 | 8.772687 |
| PHKA1     | 5.019594 | 4.763973 | 4.983209 | 4.480707 | 4.457245 | 4.369459 |
| HENMT1    | 6.839151 | 6.937068 | 6.967712 | 6.456167 | 6.388385 | 6.440266 |
| PALM3     | 6.490905 | 6.418908 | 6.403844 | 6.172308 | 5.750371 | 5.932579 |
| ARHGDI1B  | 7.147771 | 7.184238 | 7.163621 | 7.683868 | 7.603839 | 7.666168 |
| S1PR5     | 5.513378 | 5.459399 | 5.595421 | 5.01382  | 5.149555 | 4.946628 |
| ZNF675    | 3.980287 | 3.697813 | 3.741558 | 4.469821 | 4.370222 | 4.0376   |
| MAN2A2    | 5.448306 | 5.346836 | 5.488218 | 4.829587 | 4.994774 | 5.002146 |
| PSD3      | 6.751719 | 6.763306 | 6.833217 | 7.272024 | 7.272746 | 7.259985 |
| CHRFAM7A  | 5.189638 | 5.423706 | 5.280981 | 4.812477 | 4.853225 | 4.772376 |
| CIAPIN1   | 9.538807 | 9.580629 | 9.430357 | 9.057267 | 9.005811 | 9.03073  |
| RAB35     | 7.291519 | 7.299102 | 7.335684 | 6.779117 | 6.81779  | 6.873558 |
| NCOA1     | 5.554446 | 5.377903 | 5.443305 | 5.940851 | 5.841187 | 6.049208 |
| DFFB      | 5.151962 | 5.216319 | 5.396839 | 4.758686 | 4.70469  | 4.846169 |
| POFUT1    | 6.862069 | 6.872306 | 6.731692 | 6.371897 | 6.300653 | 6.338082 |
| PCDH18    | 7.183729 | 7.117214 | 7.203738 | 7.621946 | 7.610789 | 7.727302 |
| S100A16   | 10.74132 | 10.77752 | 10.71482 | 11.24856 | 11.19977 | 11.2404  |
| PAQR8     | 5.948711 | 5.998188 | 6.084863 | 5.59023  | 5.530683 | 5.455795 |
| ZNF202    | 6.779117 | 6.894427 | 6.864783 | 7.301319 | 7.330028 | 7.361974 |
| CD59      | 10.74882 | 10.78799 | 10.76117 | 11.26499 | 11.241   | 11.2464  |
| CEBPG     | 8.286945 | 8.262931 | 8.257997 | 7.823365 | 7.680662 | 7.849645 |
| GOLGB1    | 8.706874 | 8.736946 | 8.742905 | 9.245683 | 9.155578 | 9.238957 |

|           |          |          |          |          |          |          |
|-----------|----------|----------|----------|----------|----------|----------|
| UBE2R2    | 8.029026 | 7.990341 | 8.009775 | 7.473617 | 7.530095 | 7.572142 |
| ANKRD36 / | 4.381064 | 4.259788 | 4.243135 | 3.629878 | 3.963514 | 3.837479 |
| DAPK3     | 5.812322 | 5.686371 | 5.680365 | 6.290405 | 6.130224 | 6.211524 |
| TXNRD2    | 7.610509 | 7.666628 | 7.679749 | 8.124079 | 8.091337 | 8.194185 |
| CSRP2BP / | 7.340983 | 7.355705 | 7.339502 | 6.919504 | 6.756436 | 6.907564 |
| RAB3GAP2  | 8.076343 | 8.139376 | 8.127021 | 8.656597 | 8.569131 | 8.569556 |
| HLA-DOA   | 6.391864 | 6.374269 | 6.490434 | 5.943921 | 5.964233 | 5.895871 |
| ERVK3-1 / | 9.777257 | 9.806781 | 9.770298 | 10.2974  | 10.23412 | 10.27478 |
| PWAR6     | 6.158125 | 6.10542  | 6.046029 | 5.55933  | 5.683159 | 5.615169 |
| CLDN4     | 6.415052 | 6.497117 | 6.347695 | 5.999898 | 5.938492 | 5.870032 |
| FAIM      | 8.030177 | 7.960948 | 7.959608 | 7.388261 | 7.493723 | 7.617601 |
| SNX24     | 7.958248 | 8.005607 | 7.988777 | 8.526275 | 8.383222 | 8.494112 |
| ATP11A    | 8.066937 | 8.081686 | 8.0586   | 7.628965 | 7.608158 | 7.519231 |
| WDR83     | 6.57074  | 6.65815  | 6.626168 | 6.159428 | 6.056508 | 6.1884   |
| ZNF782    | 2.714639 | 2.714639 | 2.903814 | 3.292709 | 3.180072 | 3.311023 |
| N4BP2     | 6.326943 | 6.430964 | 6.566376 | 6.953166 | 6.87132  | 6.950088 |
| SOX12     | 5.723693 | 5.89951  | 5.850359 | 5.247749 | 5.480976 | 5.295385 |
| CAPS      | 8.461098 | 8.530987 | 8.444448 | 8.011028 | 7.924442 | 8.05163  |
| C12orf4   | 7.359624 | 7.380209 | 7.480684 | 7.931875 | 7.854847 | 7.88236  |
| PLPP3     | 6.510995 | 6.597156 | 6.578234 | 7.023882 | 6.997873 | 7.113011 |
| PLCL1     | 4.009142 | 4.21011  | 3.857045 | 4.478767 | 4.545932 | 4.499779 |
| ADCY6     | 6.505324 | 6.489101 | 6.402125 | 5.944402 | 6.010742 | 5.993654 |
| CCDC126   | 6.044792 | 6.037183 | 6.02693  | 6.542252 | 6.494638 | 6.519686 |
| HS2ST1    | 6.873921 | 6.879278 | 6.858085 | 6.412653 | 6.286637 | 6.464836 |
| TIE1      | 4.490399 | 4.39705  | 4.370404 | 3.875093 | 3.753058 | 4.182786 |
| DHX15     | 11.14691 | 11.14541 | 11.15131 | 10.66603 | 10.63633 | 10.69452 |
| FOLR1     | 3.361535 | 3.567107 | 3.5569   | 3.779595 | 3.982825 | 4.169383 |
| GAB1      | 5.016999 | 4.991048 | 5.285324 | 5.701167 | 5.350886 | 5.687444 |
| TRMT44    | 5.098918 | 4.950109 | 4.912934 | 5.519959 | 5.391625 | 5.495883 |
| TCFL5     | 8.062429 | 7.981625 | 7.965768 | 7.511118 | 7.517148 | 7.53623  |
| SLC25A6   | 9.82002  | 9.841848 | 9.794326 | 9.38924  | 9.277576 | 9.344546 |
| HS3ST3A1  | 6.742409 | 6.697573 | 6.739369 | 6.130102 | 6.271102 | 6.334005 |
| ZNF41     | 5.854677 | 5.822188 | 5.998348 | 6.393558 | 6.263577 | 6.46209  |
| SDSL      | 6.611036 | 6.58204  | 6.716094 | 7.158535 | 7.128425 | 7.065885 |
| PPP2R4    | 8.978325 | 8.939895 | 8.965745 | 8.54919  | 8.407727 | 8.483811 |
| KIF3B     | 7.311845 | 7.246503 | 7.327728 | 7.809244 | 7.771735 | 7.74774  |
| LAMP2 /// | 6.855993 | 6.938893 | 6.980422 | 7.407526 | 7.402568 | 7.407638 |
| LARP6     | 5.660877 | 5.759584 | 5.860467 | 6.276907 | 6.133868 | 6.31192  |
| RAD52     | 5.384299 | 5.502911 | 5.47127  | 6.015409 | 5.925775 | 5.85888  |
| G2E3      | 6.885991 | 6.722696 | 6.841437 | 6.406562 | 6.3415   | 6.26064  |
| AGO4      | 4.621005 | 4.728225 | 4.85127  | 5.392393 | 5.20845  | 5.041049 |
| SMARCA2   | 6.555361 | 6.56146  | 6.604693 | 6.108886 | 6.055594 | 6.115902 |
| RAB5A     | 7.174886 | 7.154652 | 7.141275 | 7.628859 | 7.632579 | 7.649689 |
| PWWP2A    | 5.029963 | 5.249498 | 5.303689 | 5.604746 | 5.672295 | 5.745911 |
| ATE1      | 7.215138 | 7.205049 | 7.299516 | 7.718338 | 7.696241 | 7.744895 |
| SRSF6     | 8.972194 | 8.93588  | 8.972592 | 9.481636 | 9.394428 | 9.444078 |
| ENO3      | 5.926718 | 6.090724 | 6.071731 | 6.662155 | 6.406867 | 6.459275 |
| ZNF621    | 6.507726 | 6.464815 | 6.494224 | 6.995514 | 6.936589 | 6.973659 |
| PHF10     | 5.976889 | 6.061771 | 6.03656  | 6.356651 | 6.524047 | 6.633366 |
| AUNIP     | 6.572418 | 6.50972  | 6.474365 | 5.986518 | 5.973721 | 6.157899 |
| IQCK      | 5.63312  | 5.750493 | 5.754765 | 6.225523 | 6.166899 | 6.184252 |

|           |           |           |           |           |           |           |
|-----------|-----------|-----------|-----------|-----------|-----------|-----------|
| DNAJC3    | 6. 861304 | 6. 862069 | 6. 937772 | 7. 362258 | 7. 286346 | 7. 450832 |
| PARP11    | 3. 923215 | 4. 009827 | 4. 095194 | 4. 536002 | 4. 347533 | 4. 582751 |
| ZNF585A / | 6. 306607 | 6. 324883 | 6. 213047 | 6. 697733 | 6. 747016 | 6. 837666 |
| GNG11     | 9. 738657 | 9. 760722 | 9. 772035 | 10. 25564 | 10. 24089 | 10. 2123  |
| CYB5R4    | 7. 954891 | 8. 000055 | 7. 916932 | 8. 466357 | 8. 405998 | 8. 436901 |
| KIDINS22C | 8. 201651 | 8. 184406 | 8. 202385 | 8. 666061 | 8. 658499 | 8. 70096  |
| FAM76A    | 5. 288446 | 5. 375732 | 5. 576404 | 4. 922065 | 4. 713989 | 5. 16755  |
| PHF21B    | 3. 997141 | 4. 165276 | 4. 255688 | 4. 585479 | 4. 663592 | 4. 605637 |
| FAM98B    | 9. 732683 | 9. 740644 | 9. 795559 | 9. 251737 | 9. 270683 | 9. 310352 |
| ELL       | 6. 470404 | 6. 563021 | 6. 536627 | 6. 985433 | 6. 893283 | 7. 12706  |
| LOXL3     | 6. 039704 | 5. 872367 | 5. 983877 | 6. 484775 | 6. 407107 | 6. 439696 |
| DEPDC7    | 3. 143034 | 3. 143034 | 3. 507541 | 3. 73707  | 3. 684318 | 3. 807607 |
| PRRG4     | 3. 83265  | 3. 30832  | 3. 501208 | 3. 833065 | 4. 089721 | 4. 154612 |
| DUSP14    | 9. 017843 | 9. 050457 | 9. 061302 | 9. 531445 | 9. 485903 | 9. 546895 |
| PDLIM3    | 6. 44303  | 6. 475602 | 6. 368232 | 5. 935446 | 5. 885943 | 6. 031241 |
| SEH1L     | 8. 501479 | 8. 508431 | 8. 572277 | 8. 07656  | 7. 976861 | 8. 094791 |
| GLUD1     | 8. 314665 | 8. 151567 | 7. 97344  | 7. 667175 | 7. 748636 | 7. 589936 |
| BIRC2     | 8. 467538 | 8. 438808 | 8. 465339 | 8. 937261 | 8. 889464 | 8. 97856  |
| MYL12B    | 10. 60481 | 10. 56404 | 10. 61946 | 11. 07548 | 11. 06571 | 11. 08056 |
| REL       | 4. 749541 | 4. 748977 | 4. 760857 | 5. 412085 | 5. 103326 | 5. 177037 |
| CD46      | 8. 67243  | 8. 632243 | 8. 614467 | 9. 135461 | 9. 068268 | 9. 147976 |
| HPSE      | 5. 547338 | 5. 432198 | 5. 528634 | 5. 029539 | 5. 14065  | 4. 905688 |
| NUAK2     | 5. 739876 | 5. 65793  | 5. 733898 | 6. 125459 | 6. 239697 | 6. 198755 |
| KMT2A     | 7. 708264 | 7. 725903 | 7. 741443 | 8. 209204 | 8. 188956 | 8. 209232 |
| DKK2      | 2. 524264 | 2. 292325 | 2. 424804 | 2. 888295 | 2. 871078 | 2. 913717 |
| PANK4     | 7. 562844 | 7. 587275 | 7. 505148 | 7. 156059 | 7. 00038  | 7. 067368 |
| RTN3      | 10. 20428 | 10. 24615 | 10. 20287 | 9. 738938 | 9. 718822 | 9. 764656 |
| LMNB2     | 8. 743354 | 8. 786263 | 8. 804397 | 8. 277301 | 8. 323468 | 8. 302652 |
| DBF4B     | 7. 344262 | 7. 451233 | 7. 412202 | 7. 007076 | 6. 809446 | 6. 960755 |
| PDLIM1    | 8. 716158 | 8. 739455 | 8. 654011 | 9. 224428 | 9. 148914 | 9. 166607 |
| CDK2AP2   | 8. 773678 | 8. 770933 | 8. 708099 | 8. 282314 | 8. 248705 | 8. 29193  |
| ZMYM2     | 8. 33648  | 8. 197499 | 8. 286966 | 8. 722137 | 8. 745251 | 8. 782853 |
| CCDC93    | 5. 777944 | 5. 702312 | 5. 691176 | 6. 263577 | 6. 018123 | 6. 318839 |
| RBFOX2    | 8. 688328 | 8. 724089 | 8. 673728 | 9. 175713 | 9. 147837 | 9. 191148 |
| SERTAD4   | 9. 223959 | 9. 322145 | 9. 271424 | 9. 756606 | 9. 732659 | 9. 756566 |
| MTRF1L    | 8. 352613 | 8. 364731 | 8. 425351 | 8. 84333  | 8. 837091 | 8. 890573 |
| AKR1C1 // | 6. 703682 | 6. 581506 | 6. 736423 | 6. 255739 | 6. 219193 | 6. 118861 |
| LUC7L     | 6. 751581 | 6. 779117 | 6. 970057 | 7. 317659 | 7. 277381 | 7. 333368 |
| DNAJC27   | 5. 228148 | 5. 232214 | 5. 355222 | 5. 728126 | 5. 771026 | 5. 743721 |
| LOC100996 | 9. 587999 | 9. 59825  | 9. 555675 | 10. 0494  | 10. 08023 | 10. 03926 |
| DSC3      | 4. 115787 | 3. 940869 | 4. 061503 | 4. 40674  | 4. 396558 | 4. 741495 |
| LOC105379 | 6. 596598 | 6. 566618 | 6. 660529 | 7. 170626 | 6. 968903 | 7. 110224 |
| LRRC57    | 7. 128004 | 7. 189992 | 7. 16561  | 7. 711883 | 7. 638511 | 7. 55915  |
| HACD3     | 10. 99863 | 11. 03434 | 11. 00298 | 10. 56688 | 10. 53548 | 10. 5078  |
| BCAT1     | 8. 405608 | 8. 479952 | 8. 461356 | 8. 930229 | 8. 890529 | 8. 951766 |
| FRMD4B    | 5. 040806 | 4. 896128 | 4. 898264 | 5. 403948 | 5. 50426  | 5. 352587 |
| PTDSS1    | 7. 940276 | 7. 978748 | 8. 057812 | 7. 497157 | 7. 457353 | 7. 596765 |
| OASL      | 7. 291519 | 7. 293104 | 7. 284563 | 7. 798564 | 7. 715366 | 7. 780543 |
| SLC1A5    | 9. 756232 | 9. 760555 | 9. 744    | 9. 328963 | 9. 223856 | 9. 283483 |
| KLHL20    | 7. 402611 | 7. 414127 | 7. 481373 | 7. 970919 | 7. 828442 | 7. 923131 |
| ZNF12     | 7. 474428 | 7. 520119 | 7. 549055 | 7. 967941 | 7. 984875 | 8. 015063 |



|           |           |           |           |           |           |           |
|-----------|-----------|-----------|-----------|-----------|-----------|-----------|
| C3        | 4. 789278 | 4. 759528 | 4. 591138 | 5. 277807 | 5. 042097 | 5. 244282 |
| MIS18A    | 7. 121885 | 7. 236636 | 7. 06237  | 6. 693693 | 6. 649262 | 6. 653851 |
| CCDC66    | 6. 563218 | 6. 711895 | 6. 836017 | 7. 223437 | 7. 180612 | 7. 13062  |
| PPP1R35   | 9. 308465 | 9. 35853  | 9. 292468 | 8. 842625 | 8. 807184 | 8. 886457 |
| TAF11     | 6. 665979 | 6. 530565 | 6. 627221 | 7. 065264 | 7. 112262 | 7. 069157 |
| C11orf95  | 7. 929801 | 7. 965042 | 7. 912727 | 7. 45168  | 7. 441177 | 7. 491938 |
| ACKR3     | 4. 453313 | 4. 488982 | 4. 219747 | 3. 891285 | 3. 822913 | 4. 025123 |
| C4orf33   | 6. 833955 | 6. 898803 | 6. 883902 | 6. 416461 | 6. 348764 | 6. 428985 |
| ANKRD28   | 8. 573394 | 8. 583741 | 8. 586048 | 8. 119461 | 8. 068094 | 8. 133424 |
| MBNL3     | 2. 931406 | 2. 912561 | 3. 028158 | 3. 48422  | 3. 503753 | 3. 306264 |
| MIPOL1    | 3. 690668 | 3. 550482 | 3. 661838 | 3. 034832 | 3. 215229 | 3. 231127 |
| NXT1      | 9. 192041 | 9. 219705 | 9. 241893 | 8. 770176 | 8. 690224 | 8. 771513 |
| LPCAT3    | 8. 080203 | 8. 033881 | 8. 118683 | 7. 665264 | 7. 560634 | 7. 585256 |
| HFE       | 6. 539092 | 6. 499321 | 6. 643889 | 6. 170177 | 5. 901358 | 6. 189273 |
| VTI1B     | 6. 586828 | 6. 559346 | 6. 74141  | 5. 926682 | 6. 22636  | 6. 313252 |
| UBR2      | 5. 92651  | 6. 068492 | 6. 048523 | 6. 499337 | 6. 337926 | 6. 627345 |
| ADGRE5    | 9. 075517 | 9. 0714   | 9. 075517 | 9. 552706 | 9. 51198  | 9. 578696 |
| HOXC5     | 7. 064648 | 7. 173038 | 7. 063579 | 6. 60629  | 6. 642493 | 6. 63187  |
| TMOD3     | 6. 94364  | 6. 972718 | 6. 962509 | 7. 490156 | 7. 387316 | 7. 421906 |
| TTC32     | 7. 750276 | 7. 727253 | 7. 663283 | 7. 326987 | 7. 16462  | 7. 22899  |
| ZMYM6     | 5. 808932 | 5. 694464 | 5. 784183 | 6. 242798 | 6. 152323 | 6. 312651 |
| WDR55     | 7. 669343 | 7. 602797 | 7. 533026 | 8. 088457 | 8. 049174 | 8. 087684 |
| LAMP2     | 5. 12858  | 5. 11801  | 5. 067031 | 4. 608128 | 4. 615465 | 4. 669941 |
| TUBB4A    | 6. 320717 | 6. 149473 | 6. 152002 | 5. 824358 | 5. 903799 | 5. 47439  |
| RAD51L3-R | 7. 799547 | 7. 779442 | 7. 731281 | 8. 248056 | 8. 212685 | 8. 269162 |
| PRRX1     | 8. 431141 | 8. 357785 | 8. 440065 | 7. 951696 | 7. 868038 | 7. 98977  |
| GTPBP6    | 7. 291069 | 7. 343176 | 7. 264978 | 6. 8585   | 6. 786608 | 6. 835429 |
| SPAST     | 5. 418792 | 5. 239218 | 5. 420441 | 5. 887773 | 5. 736224 | 5. 873101 |
| HIST1H2AC | 4. 158733 | 4. 008121 | 3. 997126 | 4. 552021 | 4. 470438 | 4. 559407 |
| GOLGA1    | 4. 811578 | 4. 742021 | 4. 868104 | 5. 309886 | 5. 193869 | 5. 335653 |
| CCDC77    | 7. 668986 | 7. 713641 | 7. 631076 | 7. 19696  | 7. 176817 | 7. 222354 |
| LOC441155 | 8. 347385 | 8. 402698 | 8. 392245 | 8. 89699  | 8. 778427 | 8. 883847 |
| ATXN1L    | 8. 114126 | 8. 11979  | 8. 181643 | 7. 711931 | 7. 651026 | 7. 635683 |
| STX17     | 6. 018563 | 6. 3271   | 5. 949731 | 6. 660732 | 6. 431773 | 6. 619546 |
| INPP5A    | 7. 941546 | 7. 982814 | 8. 042859 | 7. 527505 | 7. 469871 | 7. 553328 |
| AAAS      | 8. 055142 | 8. 128408 | 8. 099789 | 7. 664628 | 7. 573154 | 7. 62933  |
| LGALS8    | 7. 726378 | 7. 737014 | 7. 717443 | 8. 214902 | 8. 14911  | 8. 232955 |
| WDR20     | 5. 171383 | 5. 244867 | 5. 179778 | 5. 745867 | 5. 643405 | 5. 622886 |
| EXT1      | 8. 42794  | 8. 436165 | 8. 372967 | 8. 903398 | 8. 849632 | 8. 899675 |
| PHLDA3    | 8. 487091 | 8. 594237 | 8. 553864 | 9. 049202 | 8. 965828 | 9. 03538  |
| SSSCA1    | 10. 1549  | 10. 1818  | 10. 19424 | 9. 737738 | 9. 618622 | 9. 759449 |
| FUT10     | 4. 543436 | 4. 543436 | 4. 415754 | 4. 941736 | 4. 919134 | 5. 056869 |
| PTTG2     | 5. 667026 | 5. 486971 | 5. 53952  | 5. 239834 | 4. 949696 | 5. 088907 |
| MTMR3     | 7. 104243 | 7. 088321 | 7. 140757 | 7. 599647 | 7. 552021 | 7. 596654 |
| NHSL1     | 8. 286162 | 8. 252138 | 8. 280288 | 7. 762657 | 7. 784788 | 7. 856462 |
| CTNNBIP1  | 8. 322712 | 8. 221243 | 8. 316315 | 8. 770672 | 8. 696659 | 8. 807349 |
| TULP4     | 7. 379148 | 7. 430528 | 7. 527448 | 7. 067328 | 6. 828161 | 7. 027315 |
| CHIC1     | 3. 482398 | 3. 026471 | 3. 335374 | 3. 705635 | 3. 797114 | 3. 755677 |
| AADAC     | 2. 519797 | 2. 20757  | 2. 572792 | 2. 968965 | 2. 953171 | 2. 792158 |
| PUS3      | 8. 397361 | 8. 438711 | 8. 420983 | 8. 901623 | 8. 867589 | 8. 901753 |
| HBS1L     | 4. 774418 | 4. 833138 | 4. 824706 | 5. 333733 | 5. 164539 | 5. 347573 |

|           |          |          |          |          |          |          |
|-----------|----------|----------|----------|----------|----------|----------|
| CTSE      | 4.996469 | 5.347314 | 5.519488 | 5.676795 | 5.815799 | 5.784242 |
| VSIG10    | 5.932826 | 5.939692 | 5.958012 | 5.549969 | 5.225226 | 5.641946 |
| CWF19L1   | 7.567643 | 7.449288 | 7.4933   | 7.044666 | 6.969359 | 7.082991 |
| LAMTOR3   | 5.396889 | 5.391973 | 5.558681 | 5.05687  | 4.96941  | 4.90812  |
| BCL9      | 6.391206 | 6.43471  | 6.359839 | 5.918091 | 5.883524 | 5.971384 |
| ITGA9     | 4.539338 | 4.497469 | 4.508243 | 3.939017 | 4.105233 | 4.088082 |
| DNAH11    | 7.609926 | 7.725866 | 7.704777 | 7.252462 | 7.176904 | 7.198585 |
| WNT5A     | 7.661547 | 7.64998  | 7.681337 | 8.121952 | 8.113802 | 8.168111 |
| ICAM5     | 6.108581 | 5.8808   | 5.969522 | 5.419017 | 5.554446 | 5.574829 |
| NBN       | 8.278016 | 8.259456 | 8.160745 | 7.782617 | 7.638994 | 7.866364 |
| THEM4     | 7.815243 | 7.716225 | 7.744946 | 7.295099 | 7.309136 | 7.262194 |
| IQCG      | 5.44746  | 5.680769 | 5.502352 | 5.990868 | 5.949389 | 6.100194 |
| LAS1L     | 8.118759 | 8.162708 | 8.122738 | 7.715366 | 7.597405 | 7.681709 |
| RILP      | 6.886662 | 6.997441 | 6.800833 | 6.414963 | 6.344471 | 6.515831 |
| LOC286052 | 5.614573 | 5.669769 | 5.644531 | 5.252153 | 5.107649 | 5.159743 |
| EME1      | 8.425555 | 8.482462 | 8.411814 | 7.95151  | 8.034393 | 7.924793 |
| BRAF ///  | 6.769902 | 6.729    | 6.967005 | 7.27049  | 7.286049 | 7.31823  |
| GRHL3     | 3.983007 | 4.191719 | 4.26383  | 4.720787 | 4.484617 | 4.640923 |
| ADD2      | 6.70104  | 6.766239 | 6.792193 | 6.358723 | 6.176419 | 6.316603 |
| LSG1      | 7.296986 | 7.313228 | 7.321448 | 7.763274 | 7.784017 | 7.791746 |
| TET2      | 6.569561 | 6.571717 | 6.605957 | 7.141528 | 6.904103 | 7.108076 |
| CDKN2C    | 8.375928 | 8.296425 | 8.314414 | 7.924956 | 7.890929 | 7.764412 |
| TMEM187   | 6.047735 | 5.958007 | 6.016041 | 5.616211 | 5.324399 | 5.674704 |
| MAPRE1    | 9.62571  | 9.57554  | 9.540128 | 10.08631 | 10.03067 | 10.03067 |
| FAM161A   | 6.187534 | 6.196479 | 6.154078 | 5.712257 | 5.623563 | 5.796015 |
| POR       | 7.232772 | 7.23634  | 7.18144  | 6.859699 | 6.676533 | 6.708739 |
| SLC18B1   | 6.448336 | 6.338939 | 6.474538 | 7.04415  | 6.753633 | 6.869247 |
| C1orf21   | 5.075736 | 5.014521 | 5.037178 | 4.648039 | 4.606324 | 4.467916 |
| MTERF4    | 6.503522 | 6.635315 | 6.430957 | 7.014424 | 6.886786 | 7.073412 |
| TNFAIP1   | 8.033492 | 8.062976 | 8.093298 | 7.573256 | 7.564397 | 7.647375 |
| ATP8B2    | 7.839561 | 7.799641 | 7.803035 | 7.395426 | 7.316029 | 7.326122 |
| CDK16     | 7.899623 | 7.8621   | 7.929005 | 7.473147 | 7.459401 | 7.353634 |
| BPTF      | 5.086376 | 4.811657 | 5.030951 | 4.501105 | 4.612589 | 4.411011 |
| HLA-DPB1  | 7.926773 | 8.004116 | 7.887263 | 7.458239 | 7.455209 | 7.501692 |
| CD83      | 6.562971 | 6.729267 | 6.768298 | 6.342737 | 6.186438 | 6.128581 |
| TYW1      | 8.411501 | 8.34041  | 8.345576 | 7.938166 | 7.911853 | 7.845182 |
| ZNF263    | 7.853941 | 7.950358 | 7.816228 | 8.333096 | 8.270599 | 8.418497 |
| SGMS1     | 6.529717 | 6.564326 | 6.591436 | 7.086336 | 7.000446 | 6.999557 |
| PTTG3P    | 6.744515 | 6.768418 | 6.772438 | 6.323353 | 6.249139 | 6.312322 |
| ZBTB42    | 4.812584 | 4.643727 | 4.583884 | 4.134639 | 4.108464 | 4.39726  |
| ANKRD42   | 6.789974 | 6.689039 | 6.779573 | 7.320509 | 7.154542 | 7.183182 |
| PITPNA    | 9.208635 | 9.264743 | 9.258411 | 8.732422 | 8.73343  | 8.866302 |
| SCYL3     | 7.034411 | 7.099077 | 7.051226 | 7.564044 | 7.431165 | 7.589032 |
| HEXIM1    | 7.606299 | 7.514299 | 7.563741 | 7.066046 | 7.08776  | 7.131056 |
| PREB      | 6.932658 | 7.001304 | 6.881543 | 6.521614 | 6.429515 | 6.465647 |
| RAD51     | 7.792825 | 7.77352  | 7.842085 | 7.331008 | 7.310488 | 7.368359 |
| PHTF2     | 6.385839 | 6.397956 | 6.285062 | 6.849206 | 6.849206 | 6.768784 |
| DUSP4     | 9.288292 | 9.277703 | 9.316545 | 9.754839 | 9.738938 | 9.786777 |
| C17orf96  | 5.632466 | 5.820062 | 5.715528 | 5.36907  | 5.149555 | 5.251518 |
| ZMPSTE24  | 8.807242 | 8.904573 | 8.920436 | 9.373324 | 9.314907 | 9.341573 |
| TRIP11    | 6.720141 | 6.655517 | 6.746701 | 7.189192 | 7.135606 | 7.195062 |

|           |          |          |          |          |          |          |
|-----------|----------|----------|----------|----------|----------|----------|
| LOC44004C | 5.495393 | 5.453803 | 5.374876 | 5.17522  | 4.827771 | 4.924023 |
| EP400     | 7.937215 | 7.841338 | 7.823433 | 7.43023  | 7.338333 | 7.436369 |
| ERLIN2    | 6.481056 | 6.363917 | 6.442063 | 6.878133 | 6.847669 | 6.958022 |
| MINOS1-NE | 8.001859 | 8.083745 | 8.043376 | 7.58431  | 7.549435 | 7.598611 |
| CMBL      | 9.305982 | 9.327823 | 9.231166 | 9.734552 | 9.724515 | 9.802449 |
| NADSYN1   | 6.233569 | 6.47308  | 6.35732  | 6.906355 | 6.72179  | 6.832325 |
| BRAP      | 6.588213 | 6.484338 | 6.410271 | 7.055878 | 6.820298 | 7.002393 |
| EDEM2     | 7.10399  | 7.152907 | 7.133005 | 6.637154 | 6.627483 | 6.729531 |
| KIAA0408  | 4.459949 | 4.700253 | 4.594204 | 5.013901 | 5.029539 | 5.106563 |
| TMEM161B  | 9.399455 | 9.490517 | 9.454188 | 9.886867 | 9.913151 | 9.939659 |
| GPR89B    | 4.01464  | 3.901521 | 3.978124 | 4.47197  | 4.427426 | 4.390362 |
| ZNF90     | 3.509911 | 3.217691 | 3.690504 | 2.99537  | 2.977034 | 3.050245 |
| COL6A3    | 6.140105 | 6.324972 | 6.101081 | 6.672113 | 6.571332 | 6.717871 |
| BAZ1A     | 7.325332 | 7.333357 | 7.394624 | 7.848705 | 7.757198 | 7.842329 |
| RIPK2     | 7.930718 | 7.92229  | 7.992233 | 8.462547 | 8.304272 | 8.473041 |
| TXLNG     | 6.282234 | 6.279584 | 6.234574 | 6.783391 | 6.685178 | 6.721862 |
| ADAM22    | 5.025408 | 5.208342 | 5.197798 | 5.74719  | 5.43864  | 5.639487 |
| ZNF439    | 4.248924 | 4.317051 | 4.236184 | 4.884584 | 4.654812 | 4.654971 |
| TNP01     | 9.656822 | 9.667176 | 9.69416  | 10.15487 | 10.09809 | 10.15724 |
| CLTA      | 4.488967 | 4.557824 | 4.521849 | 4.977064 | 5.05216  | 4.931399 |
| C19orf25  | 7.164867 | 7.137382 | 7.103005 | 6.72953  | 6.649881 | 6.633951 |
| ZNF570    | 5.26035  | 5.183006 | 5.215626 | 5.696416 | 5.617186 | 5.736844 |
| HIRIP3    | 7.988246 | 8.027888 | 7.973876 | 7.557315 | 7.549435 | 7.492148 |
| SLC39A7   | 4.824205 | 4.89191  | 5.011719 | 4.415754 | 4.40462  | 4.516895 |
| NT5M      | 5.435374 | 5.500033 | 5.475113 | 5.093163 | 4.994327 | 4.932476 |
| NSMCE4A   | 9.38663  | 9.369939 | 9.378495 | 8.907676 | 8.892698 | 8.944345 |
| LIPH      | 3.20263  | 3.318733 | 3.015567 | 3.585916 | 3.469417 | 3.871813 |
| NRGN      | 7.488736 | 7.530471 | 7.441451 | 7.004808 | 7.042254 | 7.023465 |
| PRDM2     | 7.510942 | 7.423331 | 7.441755 | 7.871974 | 7.911875 | 7.981818 |
| IDH1      | 8.633214 | 8.612252 | 8.599284 | 8.205726 | 8.124513 | 8.125222 |
| TARDBP    | 7.403986 | 7.426428 | 7.457205 | 7.024821 | 6.87336  | 7.00018  |
| DR1       | 8.12911  | 8.152995 | 8.120318 | 8.655465 | 8.552364 | 8.58349  |
| ELAVL1    | 5.457859 | 5.418976 | 5.601162 | 4.96203  | 5.097304 | 5.029792 |
| MCCC1     | 7.407794 | 7.473493 | 7.385209 | 7.97344  | 7.801091 | 7.88051  |
| PSMC2     | 5.984072 | 5.939486 | 5.865483 | 5.364679 | 5.593445 | 5.442913 |
| RTFDC1    | 9.448804 | 9.539482 | 9.506621 | 9.075748 | 8.991251 | 9.039998 |
| ZIC5      | 3.929205 | 3.622781 | 3.940486 | 3.473617 | 3.061215 | 3.569862 |
| OTUD3     | 4.393108 | 4.431732 | 4.184514 | 4.682822 | 4.815693 | 4.897342 |
| TMED10    | 7.920123 | 7.956114 | 7.928032 | 7.535352 | 7.43076  | 7.451668 |
| OLR1      | 3.435372 | 3.364769 | 3.391315 | 3.847163 | 3.997141 | 3.733483 |
| PPP2R3C   | 3.035441 | 3.311902 | 3.180072 | 3.543159 | 3.777642 | 3.592384 |
| CBX5      | 8.387029 | 8.369046 | 8.400587 | 8.893621 | 8.79563  | 8.85297  |
| KCTD15    | 7.863941 | 7.798974 | 7.81526  | 7.374946 | 7.372444 | 7.346724 |
| MAGOHB    | 4.65551  | 4.484591 | 4.928904 | 4.200791 | 4.270974 | 4.213871 |
| ID2       | 5.034122 | 4.984679 | 5.016845 | 5.457403 | 5.44293  | 5.51849  |
| CGRRF1    | 6.398037 | 6.479274 | 6.49692  | 6.946347 | 6.916559 | 6.894257 |
| NP1PB6    | 5.287151 | 5.210341 | 5.155397 | 5.74984  | 5.570502 | 5.715221 |
| CWC25     | 7.416067 | 7.235641 | 7.333727 | 7.862531 | 7.774764 | 7.730748 |
| GBAS      | 8.95147  | 8.89994  | 8.831943 | 8.416292 | 8.498917 | 8.385764 |
| APLP1     | 5.685505 | 5.644124 | 5.969522 | 5.310749 | 5.175351 | 5.430829 |
| XYLT1     | 3.839273 | 3.553948 | 3.602114 | 3.144043 | 3.159576 | 3.309536 |

|          |          |          |          |          |          |          |
|----------|----------|----------|----------|----------|----------|----------|
| PHTF1    | 7.352678 | 7.313735 | 7.294155 | 7.777249 | 7.739194 | 7.826288 |
| VIPAS39  | 7.379048 | 7.341045 | 7.399449 | 7.81977  | 7.801476 | 7.880205 |
| KLHL5    | 8.017604 | 7.993912 | 7.968058 | 8.407157 | 8.508854 | 8.445433 |
| MAU2     | 8.812869 | 8.757499 | 8.824953 | 8.309843 | 8.326417 | 8.377342 |
| EIF2D    | 9.123182 | 9.192846 | 9.154329 | 8.66589  | 8.680363 | 8.742401 |
| SUSD6    | 7.239547 | 7.251121 | 7.360974 | 7.79331  | 7.709568 | 7.730163 |
| ZNF292   | 7.44014  | 7.431164 | 7.425966 | 7.988914 | 7.797922 | 7.891457 |
| TENM3    | 4.994856 | 4.948499 | 5.142378 | 4.520529 | 4.580402 | 4.604054 |
| HSPE1    | 8.851276 | 8.829046 | 8.825965 | 8.389441 | 8.362663 | 8.373671 |
| MIA3     | 8.82789  | 8.773171 | 8.802733 | 9.311994 | 9.253095 | 9.218737 |
| PRAME    | 9.047124 | 9.110081 | 9.04822  | 8.627516 | 8.576801 | 8.621264 |
| SCARA3   | 5.323856 | 5.321326 | 5.373887 | 5.01263  | 4.859714 | 4.766962 |
| RNF214   | 6.671915 | 6.728613 | 6.742673 | 7.199511 | 7.079614 | 7.243544 |
| NDUFV3   | 5.320389 | 5.397871 | 5.371076 | 5.845375 | 5.883121 | 5.740135 |
| RPS25    | 9.084905 | 9.144375 | 9.089469 | 8.736136 | 8.548746 | 8.654628 |
| TSC1     | 5.039248 | 5.147296 | 5.118811 | 5.520588 | 5.56746  | 5.59654  |
| COX15    | 6.621989 | 6.798526 | 6.67915  | 6.315448 | 6.108439 | 6.296598 |
| CASP7    | 7.050944 | 7.079603 | 7.122942 | 6.587722 | 6.57919  | 6.707408 |
| ITPKC    | 5.79256  | 5.739186 | 5.781797 | 6.453205 | 6.145916 | 6.093409 |
| COQ7     | 7.173279 | 7.129351 | 7.142793 | 6.71876  | 6.595735 | 6.752205 |
| C7orf73  | 6.331635 | 6.159781 | 6.23857  | 5.759688 | 5.687255 | 5.904503 |
| ACTR8    | 6.959188 | 6.978105 | 7.012924 | 7.421395 | 7.395231 | 7.5118   |
| TRIM38   | 6.981165 | 6.964859 | 7.219439 | 7.579917 | 7.50689  | 7.456785 |
| SLC35B2  | 7.040702 | 6.837229 | 6.926037 | 6.523809 | 6.425561 | 6.476517 |
| HAUS5    | 5.767428 | 5.839183 | 5.816661 | 5.219329 | 5.440362 | 5.385586 |
| SIRT5    | 5.636014 | 5.723212 | 5.727811 | 5.214175 | 5.358404 | 5.136881 |
| NAP1L4   | 8.309771 | 8.348171 | 8.316824 | 7.917067 | 7.788828 | 7.891488 |
| YBX3     | 11.06731 | 11.10654 | 10.97721 | 11.52501 | 11.50335 | 11.49981 |
| RSF1     | 7.162329 | 7.017564 | 7.091204 | 7.597433 | 7.461453 | 7.589217 |
| METTL20  | 4.137163 | 4.048086 | 4.12782  | 3.612223 | 3.685282 | 3.638674 |
| CYTH2    | 7.368122 | 7.473559 | 7.49119  | 7.912926 | 7.85912  | 7.937416 |
| GABPA    | 7.750611 | 7.593478 | 7.605883 | 7.267164 | 7.149634 | 7.156916 |
| BRWD1    | 4.392655 | 4.148918 | 4.386812 | 4.951213 | 4.709473 | 4.643727 |
| SLC25A24 | 8.561597 | 8.609639 | 8.510162 | 9.039883 | 9.026615 | 8.990573 |
| WIZ      | 6.32693  | 6.309217 | 6.407825 | 5.913962 | 5.766485 | 5.987946 |
| MPI      | 5.769346 | 5.584823 | 5.756608 | 6.122303 | 6.081703 | 6.282234 |
| TBL3     | 7.75931  | 7.842165 | 7.828612 | 7.398096 | 7.281739 | 7.375025 |
| DCAF5    | 7.235297 | 7.183178 | 7.148692 | 7.656079 | 7.600551 | 7.685549 |
| NDUFA10  | 6.522977 | 6.470666 | 6.543855 | 6.156993 | 5.898108 | 6.107805 |
| DEDD     | 7.422325 | 7.535042 | 7.554364 | 8.014    | 7.896815 | 7.974755 |
| GTF3C3   | 4.755571 | 4.892653 | 4.879777 | 4.395849 | 4.52374  | 4.234826 |
| FXVD3    | 6.232955 | 6.328025 | 6.210351 | 5.820062 | 5.757925 | 5.820062 |
| CCDC88A  | 6.932631 | 6.814156 | 6.817269 | 6.440721 | 6.440721 | 6.309394 |
| C15orf48 | 4.213236 | 4.02627  | 4.07809  | 4.700253 | 4.295266 | 4.695209 |
| PIP4K2B  | 7.14488  | 7.193227 | 7.175634 | 7.683628 | 7.645154 | 7.558066 |
| HTRA3    | 5.841794 | 5.836014 | 6.093003 | 5.409232 | 5.513695 | 5.474802 |
| CERK     | 8.056564 | 8.067765 | 8.101116 | 7.675354 | 7.518542 | 7.659229 |
| FUBP3    | 7.066636 | 7.069097 | 6.9864   | 6.631721 | 6.472678 | 6.645546 |
| RFX3     | 4.848343 | 4.910194 | 5.204686 | 5.506746 | 5.349006 | 5.479546 |
| MED9     | 5.415097 | 5.542862 | 5.502352 | 5.156313 | 4.783034 | 5.149516 |
| SMIM14   | 6.746892 | 6.66416  | 6.746892 | 6.33358  | 6.165742 | 6.287208 |

|           |          |          |          |          |          |          |
|-----------|----------|----------|----------|----------|----------|----------|
| SCRG1     | 3.730293 | 3.767586 | 3.594583 | 4.046469 | 4.190264 | 4.226531 |
| PIGM      | 7.796541 | 7.754613 | 7.849507 | 7.375778 | 7.305768 | 7.34876  |
| RPL23 /// | 5.948353 | 6.092177 | 6.001641 | 6.533737 | 6.390822 | 6.487319 |
| FAHD2A    | 7.942793 | 7.892367 | 7.872086 | 7.485603 | 7.424111 | 7.427887 |
| TNKS2     | 6.389536 | 6.419905 | 6.505328 | 6.838507 | 6.89185  | 6.953799 |
| BAZ1B     | 9.326928 | 9.335653 | 9.356843 | 8.87844  | 8.853492 | 8.918263 |
| PTPMT1    | 8.80941  | 8.794229 | 8.672089 | 8.355043 | 8.230547 | 8.320998 |
| LYSMD3    | 5.91433  | 5.887984 | 5.951284 | 6.412778 | 6.343081 | 6.36687  |
| SRFBP1    | 7.486101 | 7.351326 | 7.479192 | 7.892906 | 7.896126 | 7.89665  |
| RBL1      | 5.468629 | 5.427505 | 5.401942 | 5.056887 | 4.854809 | 5.017495 |
| PISD      | 5.409576 | 5.502251 | 5.45067  | 5.853072 | 5.862261 | 6.015034 |
| TNFSF9    | 7.214575 | 7.066046 | 7.120876 | 7.551195 | 7.611986 | 7.606061 |
| AMIG02    | 8.468069 | 8.548871 | 8.502674 | 8.95108  | 8.940439 | 8.995651 |
| ZNF767P   | 5.789314 | 5.875056 | 5.946313 | 6.307398 | 6.331854 | 6.338952 |
| LRIG3     | 6.299673 | 6.313048 | 6.255614 | 6.767544 | 6.710966 | 6.757306 |
| IMPACT    | 6.182041 | 6.320263 | 6.17982  | 5.693206 | 5.789957 | 5.831715 |
| TLR6      | 3.719321 | 3.869643 | 3.780693 | 4.25097  | 4.182017 | 4.303444 |
| RGMA      | 6.842797 | 6.81135  | 6.84125  | 6.327916 | 6.48097  | 6.320329 |
| VKORC1L1  | 7.380106 | 7.404489 | 7.394779 | 7.845269 | 7.850602 | 7.848938 |
| DPYSL5    | 5.27841  | 5.25851  | 5.363435 | 4.766975 | 4.857636 | 4.910349 |
| CREBL2    | 9.189822 | 9.160228 | 9.127456 | 9.678006 | 9.558998 | 9.605606 |
| CXCL10    | 5.68821  | 5.523416 | 5.788399 | 6.057958 | 6.011126 | 6.295605 |
| NIPAL2    | 6.632192 | 6.601552 | 6.569763 | 7.021899 | 7.054877 | 7.091099 |
| DST       | 7.331883 | 7.559668 | 7.430918 | 7.93852  | 7.836034 | 7.911393 |
| ADAMTS16  | 4.300992 | 4.156397 | 4.329199 | 3.611667 | 3.952824 | 3.858697 |
| HNRNPF    | 7.542891 | 7.65489  | 7.523765 | 7.187137 | 6.950265 | 7.220756 |
| STX10     | 9.05137  | 9.065553 | 9.064454 | 8.590643 | 8.620837 | 8.606653 |
| CXorf40A  | 6.965018 | 7.015201 | 6.901953 | 6.533063 | 6.425474 | 6.5605   |
| NFYC      | 7.942581 | 7.985248 | 7.864204 | 7.485739 | 7.474352 | 7.468839 |
| SNHG12 // | 7.633641 | 7.596163 | 7.659356 | 7.192699 | 7.130004 | 7.203501 |
| SNX11     | 7.676105 | 7.673251 | 7.587438 | 8.090321 | 8.06072  | 8.148461 |
| TFAP2C    | 9.105468 | 9.109846 | 9.141129 | 8.701923 | 8.626489 | 8.665328 |
| ALG10 /// | 6.057835 | 6.041148 | 6.057835 | 5.588104 | 5.608864 | 5.597266 |
| TMEM65    | 5.738872 | 5.646244 | 5.69785  | 6.17802  | 6.086923 | 6.180522 |
| LDLRAD3   | 9.238199 | 9.167769 | 9.192678 | 8.764026 | 8.721252 | 8.751104 |
| ZNF223    | 6.265419 | 6.302371 | 6.404985 | 6.782313 | 6.785409 | 6.767111 |
| GPAM      | 6.984805 | 6.863225 | 6.960317 | 6.572585 | 6.474909 | 6.398957 |
| PSEN2     | 7.242347 | 7.121916 | 7.105332 | 7.661138 | 7.537286 | 7.632323 |
| PPIP5K2   | 8.403029 | 8.388166 | 8.336899 | 7.988665 | 7.89399  | 7.884578 |
| MEF2C     | 6.064746 | 6.192983 | 6.108063 | 6.550775 | 6.49893  | 6.67664  |
| PXMP4     | 7.00206  | 7.055704 | 6.993804 | 6.493661 | 6.504919 | 6.692435 |
| SLC20A1   | 11.13562 | 11.12551 | 11.13713 | 10.68327 | 10.66319 | 10.69128 |
| MYH10     | 8.737027 | 8.720666 | 8.694265 | 8.293629 | 8.218725 | 8.279407 |
| PPM1F     | 8.686777 | 8.745445 | 8.773334 | 8.315804 | 8.264781 | 8.264781 |
| ZNF214    | 4.944023 | 5.070391 | 5.287639 | 5.540963 | 5.434237 | 5.687014 |
| OAS2 ///  | 8.203403 | 8.17909  | 8.165614 | 7.805344 | 7.659713 | 7.722948 |
| IRF2      | 7.28228  | 7.270548 | 7.350733 | 7.774838 | 7.704808 | 7.783925 |
| SMG7      | 6.982697 | 7.084245 | 6.936356 | 7.414047 | 7.480243 | 7.468628 |
| UBALD2    | 7.911647 | 7.944246 | 7.895908 | 7.52506  | 7.373918 | 7.493437 |
| OTX1      | 6.25628  | 6.189228 | 6.488696 | 5.854228 | 5.920917 | 5.79974  |
| IFT20     | 8.475248 | 8.412116 | 8.4707   | 8.915806 | 8.867422 | 8.933912 |

|           |          |          |          |          |          |          |
|-----------|----------|----------|----------|----------|----------|----------|
| PAGR1     | 7.052101 | 7.079709 | 7.259485 | 6.643579 | 6.710746 | 6.677917 |
| FADS2     | 6.955017 | 7.071469 | 7.02647  | 6.602337 | 6.566501 | 6.525073 |
| EID2B     | 5.502967 | 5.379364 | 5.353798 | 5.173875 | 4.685669 | 5.018238 |
| SP140L    | 2.552124 | 2.383539 | 2.494497 | 2.801886 | 3.061215 | 2.925285 |
| HMG20A    | 8.36246  | 8.424737 | 8.377173 | 7.957526 | 7.917352 | 7.931575 |
| MRPS31P5  | 6.20626  | 6.061825 | 6.137745 | 6.599849 | 6.520666 | 6.643119 |
| TRAK2     | 5.299046 | 5.325647 | 5.26661  | 5.722772 | 5.910661 | 5.615094 |
| ZNF624    | 4.421671 | 4.497232 | 4.491232 | 5.016896 | 4.780738 | 4.969293 |
| MPLKIP    | 10.00972 | 9.964543 | 9.900451 | 9.452032 | 9.542921 | 9.523384 |
| CGN       | 3.262389 | 3.341938 | 3.684722 | 3.860488 | 3.907376 | 3.877419 |
| WDR34     | 7.833995 | 7.910738 | 7.886733 | 7.400031 | 7.416235 | 7.459193 |
| NUDT1     | 8.186512 | 8.230138 | 8.117763 | 7.694926 | 7.673653 | 7.809898 |
| CMTR1     | 7.711699 | 7.647634 | 7.783297 | 7.260916 | 7.267289 | 7.258706 |
| CTR9      | 8.372572 | 8.273623 | 8.317694 | 8.810588 | 8.754964 | 8.754008 |
| STAT5B    | 6.058796 | 6.070933 | 6.297429 | 6.626935 | 6.571    | 6.584886 |
| ECD       | 8.844426 | 8.869881 | 8.891732 | 9.330002 | 9.313907 | 9.31738  |
| ALG14     | 7.343306 | 7.424807 | 7.349077 | 6.909179 | 6.884599 | 6.968273 |
| ZNF17     | 6.805577 | 6.70275  | 6.84024  | 7.302337 | 7.19131  | 7.209688 |
| COL7A1    | 6.765777 | 6.890864 | 6.829697 | 7.259125 | 7.389726 | 7.19197  |
| ZNF765    | 4.992253 | 5.107658 | 5.113597 | 5.39095  | 5.584823 | 5.591884 |
| VAPA      | 7.793978 | 7.817939 | 7.875405 | 7.41895  | 7.286409 | 7.428716 |
| SLC25A32  | 7.704585 | 7.646111 | 7.676297 | 8.162819 | 8.123593 | 8.093562 |
| SLC39A10  | 5.885541 | 6.00906  | 6.033323 | 6.48643  | 6.362557 | 6.431601 |
| FOXP1     | 6.835118 | 6.91626  | 6.856944 | 7.373664 | 7.277639 | 7.308991 |
| YAE1D1    | 7.740031 | 7.791503 | 7.701069 | 8.171332 | 8.253835 | 8.159276 |
| SHOC2     | 9.429058 | 9.390062 | 9.396741 | 9.897946 | 9.81153  | 9.858187 |
| BCDIN3D   | 6.842849 | 6.80174  | 6.838979 | 7.332643 | 7.214735 | 7.287862 |
| THAP10    | 7.351114 | 7.415056 | 7.374029 | 6.984536 | 6.910868 | 6.893725 |
| NSUN5P1 / | 6.034287 | 5.894707 | 5.904509 | 6.365673 | 6.366425 | 6.45226  |
| THOP1     | 7.477437 | 7.503386 | 7.524321 | 7.047583 | 7.105756 | 7.001118 |
| C8orf48   | 5.30777  | 5.291923 | 5.312214 | 5.812967 | 5.614573 | 5.834519 |
| ZBTB44    | 8.424735 | 8.397921 | 8.439546 | 8.00887  | 7.868287 | 8.035001 |
| LOC100996 | 4.566706 | 4.779437 | 4.595921 | 5.101938 | 5.04243  | 5.147715 |
| CDON      | 6.542815 | 6.48458  | 6.520976 | 6.044693 | 6.102413 | 6.051333 |
| FZD3      | 5.35069  | 5.397871 | 5.459442 | 5.871914 | 5.860347 | 5.825107 |
| TCEA3     | 5.499716 | 5.341809 | 5.554225 | 5.977176 | 5.796547 | 5.970472 |
| PROS1     | 5.973505 | 6.042285 | 6.126353 | 6.522365 | 6.455438 | 6.512582 |
| MITF      | 7.78788  | 7.950833 | 7.848222 | 8.358537 | 8.284283 | 8.292252 |
| RAB11FIP2 | 5.507647 | 5.356493 | 5.371566 | 5.956638 | 5.820958 | 5.806198 |
| C14orf28  | 4.979616 | 4.790438 | 4.76525  | 5.486802 | 5.098485 | 5.297882 |
| DCXR      | 8.884674 | 8.935062 | 8.881669 | 8.433558 | 8.38731  | 8.532765 |
| SPECC1    | 4.40664  | 4.511016 | 4.438566 | 5.010722 | 4.793812 | 4.899304 |
| CHN1      | 6.67673  | 6.868398 | 6.81432  | 7.255055 | 7.162857 | 7.288685 |
| BCORL1    | 6.518104 | 6.56979  | 6.636637 | 6.129226 | 6.179099 | 6.069577 |
| C4orf32   | 7.353814 | 7.324896 | 7.410671 | 7.888793 | 7.748272 | 7.79872  |
| CIB2      | 4.937853 | 5.19422  | 5.050839 | 4.873582 | 4.319994 | 4.642985 |
| GTF2IRD2  | 3.198806 | 3.236524 | 3.180072 | 3.578693 | 3.757302 | 3.625418 |
| METTTL15  | 4.213236 | 3.879319 | 4.200688 | 4.584943 | 4.503872 | 4.550174 |
| ST6GAL1   | 8.548171 | 8.502491 | 8.495845 | 8.132261 | 8.019032 | 8.049846 |
| NLRP1     | 4.681631 | 4.508404 | 4.795283 | 5.029539 | 5.091691 | 5.208918 |
| POMK      | 6.177386 | 6.148039 | 6.194433 | 5.768129 | 5.595134 | 5.811851 |

|           |          |          |          |          |          |          |
|-----------|----------|----------|----------|----------|----------|----------|
| PNKP      | 8.23993  | 8.239073 | 8.207    | 7.84117  | 7.715314 | 7.784854 |
| LZTFL1    | 7.432423 | 7.369671 | 7.442912 | 7.886146 | 7.814828 | 7.888618 |
| PHLDA2    | 8.072394 | 8.054444 | 8.074596 | 8.51965  | 8.493918 | 8.532199 |
| LHX6      | 5.274361 | 5.401627 | 5.61309  | 5.263536 | 4.879535 | 4.802026 |
| NXT2      | 5.855687 | 5.775402 | 5.816265 | 5.1942   | 5.448306 | 5.461083 |
| SERTAD2   | 8.727241 | 8.760505 | 8.730893 | 9.213324 | 9.20477  | 9.144296 |
| LRRC27    | 4.790362 | 4.798521 | 4.824349 | 5.462918 | 5.073046 | 5.220853 |
| OR2W3 /// | 4.730691 | 5.055516 | 4.984679 | 5.333733 | 5.314451 | 5.466211 |
| DOCK7     | 5.858796 | 5.65837  | 5.861147 | 6.300653 | 6.215389 | 6.204582 |
| CLIP2     | 6.318839 | 6.312803 | 6.417779 | 5.999898 | 5.76219  | 5.945219 |
| ARL15     | 4.918528 | 4.974076 | 5.157957 | 5.447486 | 5.503563 | 5.440964 |
| CAND2     | 5.925782 | 5.783799 | 5.593919 | 5.39623  | 5.380659 | 5.185182 |
| AKAP2 /// | 8.25505  | 8.295288 | 8.221573 | 8.713579 | 8.658899 | 8.740207 |
| ZMYND11   | 5.193129 | 5.333733 | 5.264764 | 5.647726 | 5.664341 | 5.820062 |
| NDUFS3 // | 8.981245 | 9.022319 | 8.964819 | 8.561539 | 8.491159 | 8.57519  |
| MTHFR     | 6.437493 | 6.508792 | 6.422163 | 6.893232 | 6.880325 | 6.935303 |
| TWF2      | 8.71824  | 8.762509 | 8.685512 | 8.311988 | 8.276295 | 8.237595 |
| RNPS1     | 8.291786 | 8.235249 | 8.103321 | 7.815388 | 7.743717 | 7.731017 |
| POLH      | 6.626711 | 6.683544 | 6.644094 | 7.1724   | 6.998074 | 7.124017 |
| UBE2J1    | 6.796484 | 6.757003 | 6.749888 | 6.401329 | 6.265384 | 6.296613 |
| PIN4      | 8.858494 | 8.942862 | 8.800692 | 8.436149 | 8.409394 | 8.416702 |
| TVP23B // | 9.499319 | 9.487862 | 9.439477 | 9.930363 | 9.904001 | 9.932075 |
| H2AFZ     | 12.17586 | 12.17004 | 12.13928 | 11.71685 | 11.69582 | 11.73275 |
| FSTL1     | 7.00327  | 6.994024 | 7.105932 | 7.514953 | 7.45118  | 7.476817 |
| CPE       | 6.397956 | 6.389293 | 6.325504 | 6.816884 | 6.849613 | 6.785754 |
| FRMD4A    | 7.679455 | 7.718981 | 7.741608 | 7.286837 | 7.225205 | 7.2887   |
| OTUD6B    | 6.681418 | 6.677461 | 6.752603 | 7.145441 | 7.166474 | 7.138825 |
| GZF1      | 7.764558 | 7.731054 | 7.831346 | 8.222548 | 8.153733 | 8.289893 |
| LMAN1     | 7.819093 | 7.805613 | 7.765954 | 7.326448 | 7.295793 | 7.429911 |
| GTSE1 /// | 7.357538 | 7.369492 | 7.390101 | 6.98053  | 6.803799 | 6.994307 |
| CCDC90B   | 8.711383 | 8.72417  | 8.707795 | 9.186079 | 9.142511 | 9.152698 |
| ZNF518B   | 6.665498 | 6.733179 | 6.801839 | 7.144764 | 7.106998 | 7.286683 |
| SESN3     | 2.145675 | 2.206879 | 2.384445 | 2.582782 | 2.686426 | 2.805546 |
| GRK6      | 6.312752 | 6.414963 | 6.347054 | 5.955165 | 5.841187 | 5.941029 |
| SERPINH1  | 7.347518 | 7.306208 | 7.337005 | 6.884135 | 6.851781 | 6.91759  |
| GPR19     | 6.415379 | 6.517095 | 6.540227 | 6.955721 | 6.841225 | 7.012569 |
| LINS1     | 6.438968 | 6.357594 | 6.426187 | 6.815677 | 6.811232 | 6.93231  |
| ZNF274    | 8.034971 | 7.95213  | 7.898833 | 8.465857 | 8.335378 | 8.421095 |
| ZNF440    | 6.556045 | 6.572533 | 6.516626 | 7.020472 | 6.924763 | 7.036362 |
| COL15A1   | 3.028525 | 2.84657  | 3.063758 | 3.571913 | 3.304977 | 3.398246 |
| DDX3X     | 8.456797 | 8.493808 | 8.414439 | 8.88911  | 8.882332 | 8.929747 |
| PAQR9     | 4.437284 | 4.337522 | 4.285717 | 3.84865  | 3.921697 | 3.954157 |
| SRPK2     | 7.926124 | 7.924261 | 8.012141 | 8.425555 | 8.346125 | 8.426526 |
| HSD17B10  | 9.546476 | 9.587552 | 9.630555 | 10.05446 | 10.00031 | 10.04516 |
| AKIRIN2   | 7.972078 | 7.931871 | 7.974105 | 7.54928  | 7.459919 | 7.533535 |
| TRIAP1    | 9.420663 | 9.452053 | 9.4249   | 9.904983 | 9.829501 | 9.89826  |
| SULF1     | 6.710022 | 6.730346 | 6.83714  | 7.230383 | 7.261584 | 7.120628 |
| PCM1      | 4.828788 | 4.814554 | 4.814554 | 4.392645 | 4.332279 | 4.398292 |
| ZNF284    | 6.338731 | 6.259969 | 6.623402 | 6.835764 | 6.743796 | 6.977197 |
| PMP22     | 10.25425 | 10.24921 | 10.27518 | 10.72676 | 10.66829 | 10.71803 |
| NDUFAF7   | 8.510123 | 8.541816 | 8.532901 | 8.994    | 8.907711 | 9.017245 |

|           |          |          |          |          |          |          |
|-----------|----------|----------|----------|----------|----------|----------|
| ELF1      | 6.559917 | 6.599011 | 6.706515 | 7.12408  | 6.998056 | 7.076772 |
| LRRFIP2   | 6.751033 | 6.706001 | 6.779117 | 7.278645 | 7.136798 | 7.153089 |
| ZNF33A    | 4.827276 | 4.900754 | 4.781027 | 5.290374 | 5.260896 | 5.289112 |
| ICMT      | 8.290002 | 8.239691 | 8.245692 | 7.803984 | 7.802652 | 7.837491 |
| HELQ      | 6.247339 | 6.254463 | 6.211416 | 6.810934 | 6.564719 | 6.668687 |
| MCTP1     | 6.494453 | 6.455823 | 6.380851 | 6.857715 | 6.841643 | 6.962886 |
| ZFAND3    | 7.856018 | 7.865436 | 7.826454 | 8.255802 | 8.254228 | 8.368235 |
| UBE4A     | 7.822719 | 7.928056 | 7.881885 | 8.311689 | 8.297035 | 8.354288 |
| ME3       | 5.624273 | 5.565919 | 5.473661 | 6.037415 | 5.967476 | 5.989155 |
| UBE2Q1    | 10.19247 | 10.17558 | 10.14596 | 10.61642 | 10.61583 | 10.61188 |
| FANCD2    | 7.855886 | 7.86298  | 7.826166 | 7.417821 | 7.404923 | 7.392402 |
| SLC35D2   | 7.174886 | 7.067381 | 7.107465 | 7.610209 | 7.462078 | 7.607108 |
| TP53I3    | 8.534699 | 8.622205 | 8.622361 | 9.035195 | 9.022034 | 9.051575 |
| PDIA4     | 8.739225 | 8.773244 | 8.730061 | 8.312201 | 8.247387 | 8.353848 |
| NDEL1     | 8.772502 | 8.765171 | 8.76754  | 9.247565 | 9.181648 | 9.204875 |
| GPX8      | 8.435838 | 8.380078 | 8.37843  | 8.038311 | 7.916125 | 7.911637 |
| SH3GLB1   | 8.41193  | 8.361201 | 8.373308 | 8.840331 | 8.806235 | 8.827863 |
| CTNNA1    | 9.572629 | 9.535035 | 9.49279  | 9.976959 | 9.973215 | 9.978048 |
| NOTCH1    | 7.571789 | 7.627741 | 7.616373 | 7.178787 | 7.112014 | 7.197444 |
| PDCL      | 7.29358  | 7.171999 | 7.192733 | 6.795266 | 6.754815 | 6.780731 |
| AP1S1     | 7.906871 | 7.893563 | 7.851843 | 7.463257 | 7.374069 | 7.48781  |
| ZZZ3      | 7.579855 | 7.524499 | 7.671695 | 7.154778 | 7.09258  | 7.201574 |
| ANGPTL2   | 6.865846 | 6.825982 | 6.984267 | 7.439479 | 7.284138 | 7.279515 |
| PEAR1     | 4.043787 | 4.314372 | 4.237571 | 4.749347 | 4.538199 | 4.635171 |
| LRIF1     | 7.667116 | 7.607216 | 7.66008  | 8.037713 | 8.095935 | 8.127752 |
| TSEN2     | 3.994395 | 4.119389 | 4.133079 | 3.595202 | 3.516188 | 3.80851  |
| RPL31     | 6.745557 | 6.752603 | 6.876466 | 6.339087 | 6.351409 | 6.357402 |
| C19orf60  | 8.811213 | 8.83906  | 8.790737 | 8.400088 | 8.313713 | 8.401364 |
| EHMT2     | 7.48781  | 7.517683 | 7.581655 | 7.165132 | 6.973713 | 7.122757 |
| AGL       | 6.223481 | 6.227596 | 6.354539 | 6.753875 | 6.684329 | 6.692793 |
| RBM48     | 4.649896 | 4.696297 | 4.61336  | 5.015734 | 4.995154 | 5.273962 |
| COMMD4    | 9.512809 | 9.500129 | 9.435086 | 9.053222 | 9.020661 | 9.049157 |
| PIK3C3    | 8.584085 | 8.606692 | 8.577576 | 9.068356 | 8.997492 | 9.027374 |
| ACLY      | 8.755183 | 8.71736  | 8.672742 | 8.279877 | 8.180229 | 8.360469 |
| BAG1      | 8.724529 | 8.742599 | 8.685599 | 9.211971 | 9.13154  | 9.133806 |
| LOC101929 | 3.864267 | 3.705635 | 3.65124  | 3.295509 | 3.310903 | 3.290198 |
| BET1      | 4.4349   | 4.493851 | 4.524955 | 3.830951 | 4.244738 | 4.053696 |
| NAA16     | 6.31888  | 6.185935 | 6.235014 | 6.733435 | 6.600601 | 6.729588 |
| CDKN1A    | 11.11258 | 11.1184  | 11.14832 | 11.54864 | 11.54072 | 11.61342 |
| SLC10A4   | 4.808572 | 4.874672 | 4.850806 | 4.484135 | 4.379253 | 4.347618 |
| LCLAT1    | 5.585873 | 5.59769  | 5.799652 | 6.186687 | 6.045827 | 6.073692 |
| SMARCA1   | 7.212043 | 7.307999 | 7.279451 | 6.865439 | 6.73736  | 6.874418 |
| ATP5C1    | 6.805921 | 6.905432 | 7.009316 | 6.306219 | 6.546828 | 6.545369 |
| CHST11    | 5.468697 | 5.375655 | 5.375655 | 5.895741 | 5.731977 | 5.914321 |
| DOPEY1    | 5.438723 | 5.551394 | 5.471458 | 5.873529 | 5.846694 | 6.063307 |
| MYO1B     | 7.995151 | 7.967008 | 7.969975 | 8.458715 | 8.389358 | 8.405734 |
| SOBP      | 4.833108 | 4.832649 | 4.900499 | 4.525248 | 4.337679 | 4.381975 |
| WWP1      | 8.010117 | 7.979169 | 7.987424 | 8.421394 | 8.420302 | 8.456201 |
| TIMP1     | 10.365   | 10.36602 | 10.3648  | 10.82243 | 10.77012 | 10.82439 |
| ZKSCAN5   | 6.923127 | 6.886662 | 7.066452 | 7.417821 | 7.360439 | 7.419024 |
| DDX11     | 7.749385 | 7.820628 | 7.690797 | 7.381189 | 7.273355 | 7.285496 |



|           |           |           |           |           |           |           |
|-----------|-----------|-----------|-----------|-----------|-----------|-----------|
| RANBP17   | 5. 630836 | 5. 438478 | 5. 630836 | 6. 109928 | 5. 882548 | 6. 028406 |
| REEP4     | 7. 232644 | 7. 373165 | 7. 321991 | 6. 768578 | 6. 826042 | 7. 012779 |
| MAP3K4    | 7. 274536 | 7. 242583 | 7. 377505 | 6. 877047 | 6. 810621 | 6. 886662 |
| BTAF1     | 6. 374899 | 6. 469845 | 6. 526008 | 6. 96645  | 6. 783261 | 6. 941064 |
| RAB20     | 8. 85169  | 8. 88056  | 8. 916087 | 9. 391052 | 9. 248716 | 9. 327853 |
| TMEM170A  | 4. 882956 | 4. 831899 | 4. 720197 | 5. 264715 | 5. 08627  | 5. 403175 |
| HOXA2     | 4. 236934 | 3. 969536 | 4. 153852 | 3. 701415 | 3. 729685 | 3. 610354 |
| PHLDB3    | 7. 238417 | 7. 35112  | 7. 26759  | 7. 730283 | 7. 717401 | 7. 728296 |
| DDX49     | 9. 195797 | 9. 241896 | 9. 191267 | 9. 682887 | 9. 601832 | 9. 662592 |
| SLC25A37  | 7. 703478 | 7. 774723 | 7. 799799 | 7. 310393 | 7. 24732  | 7. 402151 |
| NFKBIA    | 8. 28601  | 8. 313547 | 8. 286401 | 8. 681535 | 8. 742629 | 8. 779863 |
| LYRM1     | 7. 510608 | 7. 470697 | 7. 331783 | 7. 899124 | 7. 90032  | 7. 831606 |
| TM7SF3    | 10. 47577 | 10. 51164 | 10. 50045 | 10. 9717  | 10. 89894 | 10. 93485 |
| WDR44     | 6. 780697 | 6. 762072 | 6. 760728 | 7. 232159 | 7. 145296 | 7. 243416 |
| SREK1IP1  | 6. 825627 | 6. 895738 | 6. 735124 | 6. 40396  | 6. 343128 | 6. 392208 |
| RPUSD4    | 8. 11543  | 8. 035007 | 8. 175159 | 8. 630021 | 8. 474474 | 8. 537937 |
| LAPTM4A   | 10. 25526 | 10. 25526 | 10. 20376 | 9. 728569 | 9. 891612 | 9. 777878 |
| UQCRC2    | 8. 779152 | 8. 771263 | 8. 738423 | 8. 348821 | 8. 276137 | 8. 349039 |
| BBS12     | 5. 977176 | 5. 934566 | 6. 005766 | 6. 464026 | 6. 359915 | 6. 408062 |
| USP14     | 7. 984875 | 8. 030636 | 8. 021253 | 7. 649829 | 7. 516984 | 7. 555645 |
| SRGAP2    | 8. 30016  | 8. 392086 | 8. 306072 | 7. 954122 | 7. 839715 | 7. 890199 |
| BACE1     | 7. 188537 | 7. 21343  | 7. 229225 | 7. 659417 | 7. 552842 | 7. 732925 |
| CADPS2    | 5. 155391 | 4. 878679 | 5. 205157 | 5. 485438 | 5. 598244 | 5. 469446 |
| VEGFB     | 8. 898449 | 8. 87439  | 8. 851139 | 8. 465167 | 8. 39064  | 8. 454302 |
| MAP9      | 6. 966024 | 6. 994465 | 6. 949725 | 7. 507986 | 7. 346187 | 7. 369776 |
| MSI2      | 6. 58904  | 6. 692335 | 6. 740092 | 7. 166272 | 7. 019613 | 7. 149156 |
| MXD4      | 6. 481056 | 6. 589699 | 6. 541154 | 6. 938446 | 7. 008135 | 6. 978865 |
| RC3H2     | 8. 616541 | 8. 560097 | 8. 645641 | 9. 049045 | 8. 999245 | 9. 08746  |
| RHCE      | 4. 81329  | 4. 657881 | 4. 749497 | 4. 346387 | 4. 407606 | 4. 153226 |
| ANKH      | 3. 025716 | 3. 08829  | 3. 382519 | 2. 530075 | 3. 015901 | 2. 637482 |
| B3GAT3    | 8. 283725 | 8. 34013  | 8. 307662 | 8. 730079 | 8. 701156 | 8. 813288 |
| CORO7-PAM | 8. 605331 | 8. 695176 | 8. 589437 | 8. 223273 | 8. 146316 | 8. 207363 |
| CCNB1IP1  | 9. 365728 | 9. 360706 | 9. 362005 | 9. 804784 | 9. 771998 | 9. 824194 |
| DNMT1     | 9. 948755 | 9. 975373 | 9. 833156 | 9. 494856 | 9. 472992 | 9. 477699 |
| OSR2      | 4. 663213 | 4. 66631  | 4. 675105 | 5. 198201 | 5. 109825 | 5. 008174 |
| ANKRD50   | 8. 400498 | 8. 44676  | 8. 431445 | 8. 869988 | 8. 829906 | 8. 890347 |
| DENND5B   | 6. 465113 | 6. 294873 | 6. 344847 | 6. 795776 | 6. 791932 | 6. 828333 |
| SORD      | 8. 887713 | 8. 918377 | 8. 955161 | 8. 560521 | 8. 372462 | 8. 517271 |
| C12orf76  | 6. 098817 | 6. 057546 | 5. 943839 | 6. 454044 | 6. 449088 | 6. 507786 |
| BAG5      | 5. 88423  | 5. 920455 | 5. 906402 | 5. 483746 | 5. 47254  | 5. 444349 |
| ZNF880    | 3. 946978 | 4. 099347 | 4. 242457 | 4. 538792 | 4. 463245 | 4. 596521 |
| VANGL2    | 6. 66633  | 6. 720516 | 6. 727988 | 6. 351648 | 6. 228818 | 6. 225343 |
| NCOR2     | 8. 55394  | 8. 566656 | 8. 575702 | 8. 134133 | 8. 109523 | 8. 143793 |
| CEP350    | 8. 324604 | 8. 306609 | 8. 354768 | 8. 806033 | 8. 6636   | 8. 82487  |
| PIGH      | 6. 191146 | 6. 055334 | 6. 085087 | 6. 536714 | 6. 464815 | 6. 638501 |
| PPP4R3A   | 8. 642738 | 8. 646495 | 8. 633986 | 9. 104116 | 9. 027716 | 9. 099654 |
| DDRGK1    | 8. 291696 | 8. 392004 | 8. 273809 | 8. 796365 | 8. 698526 | 8. 770672 |
| DNMT3A    | 6. 174611 | 6. 244029 | 6. 342786 | 6. 7515   | 6. 62662  | 6. 691162 |
| BGN       | 7. 502058 | 7. 419791 | 7. 395284 | 7. 049722 | 6. 986744 | 6. 973051 |
| AK2       | 9. 449215 | 9. 499514 | 9. 535464 | 9. 064025 | 9. 03296  | 9. 079797 |
| TRPM8     | 3. 279338 | 3. 407833 | 3. 639097 | 3. 979201 | 3. 812724 | 3. 841621 |

|           |          |          |          |          |          |          |
|-----------|----------|----------|----------|----------|----------|----------|
| P3H4      | 6.6969   | 6.871956 | 6.743948 | 6.39222  | 6.272395 | 6.340952 |
| DNAJC24   | 5.568429 | 5.554446 | 5.471529 | 5.258832 | 4.874244 | 5.154134 |
| LINC00597 | 4.707676 | 4.718685 | 4.751441 | 4.976883 | 5.305702 | 5.20206  |
| STK25     | 8.149518 | 8.216616 | 8.18556  | 7.734799 | 7.697778 | 7.812301 |
| USP3      | 8.329897 | 8.340595 | 8.398643 | 8.809727 | 8.755013 | 8.811166 |
| MFI2      | 7.289357 | 7.332524 | 7.314161 | 6.860001 | 6.922319 | 6.847527 |
| INPP5B    | 6.582693 | 6.629447 | 6.540212 | 7.040838 | 6.980568 | 7.03701  |
| SLC4A5    | 3.704638 | 3.943346 | 3.785465 | 3.536568 | 3.038143 | 3.553076 |
| LOC10537C | 8.592141 | 8.601942 | 8.643548 | 8.197774 | 8.166603 | 8.167728 |
| DLX6      | 4.215291 | 4.105546 | 4.493    | 4.060689 | 3.787671 | 3.660095 |
| FIBP      | 3.216418 | 3.560195 | 3.465707 | 3.951182 | 3.745641 | 3.850771 |
| TSC22D1   | 9.225129 | 9.222352 | 9.172279 | 9.667214 | 9.610219 | 9.647312 |
| CYBRD1    | 6.17863  | 6.183133 | 6.217607 | 6.661709 | 6.602948 | 6.619546 |
| RSRP1     | 5.870252 | 5.911003 | 5.876201 | 6.364304 | 6.189574 | 6.408342 |
| TMEM97    | 8.692854 | 8.68112  | 8.669779 | 8.289984 | 8.19949  | 8.249577 |
| RMDN2     | 5.681013 | 5.570576 | 5.724537 | 6.04288  | 6.058796 | 6.178711 |
| PITPNB    | 8.383671 | 8.342581 | 8.373236 | 8.806626 | 8.758616 | 8.838496 |
| MYO1C     | 8.820922 | 8.792167 | 8.764721 | 9.255806 | 9.158288 | 9.267448 |
| PM20D2    | 5.34795  | 5.611253 | 5.644643 | 5.980421 | 5.821112 | 6.105582 |
| PDE7A     | 4.135506 | 4.226703 | 4.001523 | 3.819117 | 3.372499 | 3.86887  |
| DHRS13    | 6.685913 | 6.621209 | 6.718344 | 6.257056 | 6.178094 | 6.287725 |
| ARPP19    | 7.874603 | 7.734686 | 7.744933 | 8.204805 | 8.270203 | 8.181794 |
| MRPS34    | 10.22622 | 10.27758 | 10.23947 | 9.845623 | 9.778135 | 9.817052 |
| SOX18     | 6.952196 | 7.011182 | 6.98412  | 6.599864 | 6.46689  | 6.578909 |
| YTHDC2    | 5.849272 | 5.729763 | 5.541658 | 6.192928 | 6.20645  | 6.023058 |
| BOK       | 6.376966 | 6.142442 | 6.421096 | 6.025962 | 5.795627 | 5.817405 |
| ZDHHC2    | 7.380767 | 7.300301 | 7.385985 | 7.756077 | 7.724462 | 7.887987 |
| SMARCAD1  | 8.185931 | 8.235428 | 8.377131 | 7.842516 | 7.805024 | 7.849486 |
| CHKB-CPT1 | 5.812793 | 5.827007 | 5.728455 | 6.185567 | 6.270846 | 6.213242 |
| WARS2     | 7.378187 | 7.41622  | 7.371415 | 7.89132  | 7.69764  | 7.878182 |
| HELLS     | 8.264162 | 8.273869 | 8.317617 | 7.85038  | 7.821001 | 7.882998 |
| TNRC6C    | 6.483296 | 6.336571 | 6.467854 | 6.786619 | 6.901642 | 6.900682 |
| DPY19L3   | 5.552502 | 5.22221  | 5.521847 | 5.789957 | 5.713804 | 6.093825 |
| PDP2      | 6.605308 | 6.62421  | 6.703898 | 7.066046 | 6.998489 | 7.169051 |
| NCOA7     | 6.449637 | 6.526105 | 6.42457  | 6.876141 | 6.859486 | 6.964698 |
| KLF11     | 6.643567 | 6.768101 | 6.814924 | 6.342737 | 6.306257 | 6.277626 |
| CCDC28B   | 7.0461   | 7.126798 | 7.049139 | 7.563746 | 7.459401 | 7.498817 |
| SNAPC3    | 7.556295 | 7.536542 | 7.572212 | 8.054798 | 7.971998 | 7.938144 |
| HMGB2     | 11.22319 | 11.18451 | 11.12357 | 10.74063 | 10.70454 | 10.78624 |
| SH2D1B    | 4.776241 | 4.907938 | 4.925801 | 5.433882 | 5.195699 | 5.280222 |
| MYO18A    | 5.607506 | 5.589719 | 5.729354 | 5.213846 | 5.124036 | 5.289105 |
| SH3BGRL   | 7.98707  | 7.854851 | 7.870584 | 8.401323 | 8.295865 | 8.314446 |
| MAK16     | 8.594034 | 8.608687 | 8.659296 | 9.079947 | 9.013098 | 9.067879 |
| CENPJ     | 7.403401 | 7.42251  | 7.347291 | 7.044499 | 6.910715 | 6.919206 |
| ANKRD27   | 8.705298 | 8.708233 | 8.70472  | 8.30203  | 8.24732  | 8.270183 |
| CANT1     | 8.38771  | 8.381516 | 8.377861 | 7.937687 | 7.951135 | 7.959548 |
| RABEP2    | 4.188326 | 4.165845 | 4.198847 | 3.949975 | 3.690275 | 3.614697 |
| MBOAT7    | 8.425555 | 8.400868 | 8.454632 | 8.032488 | 7.903809 | 8.046949 |
| ICAM3     | 7.621048 | 7.627636 | 7.623647 | 7.166505 | 7.136754 | 7.271516 |
| LHX1      | 7.574874 | 7.489619 | 7.603837 | 7.192223 | 7.009806 | 7.16927  |
| FAR2P1 // | 4.440327 | 4.358507 | 4.318033 | 4.787324 | 4.653539 | 4.972984 |

|          |          |          |          |          |          |          |
|----------|----------|----------|----------|----------|----------|----------|
| FHL1     | 5.731557 | 5.676572 | 5.879397 | 6.232331 | 6.050036 | 6.301961 |
| CTDSPL   | 6.984667 | 6.970747 | 6.973123 | 6.666674 | 6.371955 | 6.59363  |
| TIMM8B   | 7.335356 | 7.435488 | 7.46422  | 7.934608 | 7.747051 | 7.848852 |
| NOX4     | 5.26035  | 5.246251 | 5.339683 | 5.711269 | 5.634195 | 5.796171 |
| TRPM7    | 7.497404 | 7.535807 | 7.496122 | 7.951518 | 7.870164 | 8.002968 |
| PCSK1    | 3.362335 | 3.520854 | 3.454132 | 3.920109 | 3.764369 | 3.947916 |
| CDH12    | 6.609731 | 6.642044 | 6.6897   | 7.125907 | 7.023057 | 7.08742  |
| ZNF85    | 7.359666 | 7.255563 | 7.535247 | 6.978622 | 6.886662 | 6.990418 |
| AAMP     | 7.0288   | 7.079259 | 7.079052 | 6.720599 | 6.45539  | 6.716349 |
| CCNH     | 9.870599 | 9.911566 | 9.776223 | 10.28173 | 10.30392 | 10.26724 |
| FAM192A  | 7.629725 | 7.583614 | 7.806259 | 7.205091 | 7.230383 | 7.289755 |
| HYLS1    | 8.750431 | 8.734498 | 8.798858 | 8.358768 | 8.291379 | 8.339617 |
| TUBG2    | 8.38081  | 8.432241 | 8.489437 | 8.851036 | 8.857895 | 8.886805 |
| SPATC1L  | 6.43155  | 6.397501 | 6.354539 | 5.876709 | 6.040622 | 5.973354 |
| KPNA5    | 6.009123 | 5.871446 | 5.883421 | 6.32969  | 6.360404 | 6.366075 |
| MED13L   | 8.278436 | 8.188825 | 8.239766 | 8.708464 | 8.607702 | 8.682987 |
| ACTA2    | 7.896832 | 7.918932 | 7.967688 | 8.376476 | 8.347439 | 8.351569 |
| FRMD6    | 7.58972  | 7.595445 | 7.646468 | 8.054361 | 7.994089 | 8.074827 |
| HNRNPL   | 9.362243 | 9.36577  | 9.386156 | 8.898788 | 8.930186 | 8.994126 |
| NATD1    | 6.431338 | 6.479786 | 6.387395 | 5.977593 | 6.052831 | 5.977164 |
| AREL1    | 7.176509 | 7.22896  | 7.256036 | 7.630715 | 7.65175  | 7.669457 |
| TM6SF1   | 5.862705 | 5.813723 | 5.711013 | 5.422771 | 5.266096 | 5.408323 |
| LST1     | 4.954457 | 4.983574 | 5.048535 | 5.421279 | 5.337243 | 5.518179 |
| KCNMA1   | 4.07974  | 4.284462 | 4.330065 | 4.694492 | 4.613657 | 4.676086 |
| RAD21    | 9.485009 | 9.504689 | 9.381243 | 8.987961 | 9.028336 | 9.064739 |
| HSPA2    | 5.975403 | 5.901293 | 5.993718 | 5.643723 | 5.351987 | 5.584823 |
| IKBKB    | 6.752603 | 6.852671 | 6.894599 | 6.380842 | 6.377857 | 6.451406 |
| RAB14    | 9.218349 | 9.220751 | 9.315662 | 9.718793 | 9.622684 | 9.702762 |
| FBX03    | 5.64777  | 5.631596 | 5.947677 | 5.480976 | 5.134798 | 5.32181  |
| KAZN     | 6.135785 | 6.020885 | 6.246702 | 6.483304 | 6.510768 | 6.698652 |
| PAPD7    | 9.043034 | 9.098668 | 9.049661 | 8.631775 | 8.60704  | 8.663233 |
| RALGAPB  | 6.844664 | 6.861462 | 6.828612 | 7.29066  | 7.25934  | 7.273994 |
| CARS2    | 8.455317 | 8.493695 | 8.475723 | 8.891859 | 8.903651 | 8.917377 |
| YY1AP1   | 6.750333 | 6.778883 | 6.713163 | 7.233548 | 7.1438   | 7.15289  |
| SEL1L    | 6.979738 | 7.096177 | 7.083525 | 7.472999 | 7.539348 | 7.434783 |
| NIFK     | 8.346679 | 8.291156 | 8.366839 | 8.787535 | 8.736302 | 8.768525 |
| ZNF701   | 4.068575 | 3.890958 | 4.170776 | 4.389639 | 4.532641 | 4.495439 |
| DEPDC4   | 4.914661 | 5.029539 | 5.109464 | 4.682001 | 4.27576  | 4.808596 |
| QPCT     | 8.078033 | 7.922013 | 8.05828  | 8.481514 | 8.437638 | 8.426474 |
| MASTL    | 7.582788 | 7.537415 | 7.552489 | 7.132061 | 7.078552 | 7.174898 |
| HEBP1    | 7.206143 | 7.190071 | 7.111963 | 6.767283 | 6.630542 | 6.823219 |
| TSHZ1    | 7.868287 | 7.904954 | 7.880291 | 7.525462 | 7.391888 | 7.449067 |
| FEM1C    | 6.886662 | 6.783396 | 6.869727 | 7.26866  | 7.234267 | 7.323712 |
| ARHGAP10 | 7.382733 | 7.378954 | 7.285804 | 7.636946 | 7.779504 | 7.917328 |
| THSD4    | 5.644802 | 5.615994 | 5.615994 | 6.118658 | 6.004745 | 6.038999 |
| TFPI2    | 3.215157 | 3.104151 | 3.104151 | 3.424725 | 3.710586 | 3.573593 |
| BCL7C    | 8.692618 | 8.68549  | 8.639325 | 8.240114 | 8.201479 | 8.290496 |
| ECT2     | 9.02062  | 9.024559 | 8.958739 | 8.594183 | 8.583709 | 8.540799 |
| PTPRE    | 4.373621 | 4.280648 | 4.122456 | 4.62999  | 4.695675 | 4.736033 |
| PAK2     | 7.20405  | 7.222174 | 7.257149 | 6.75339  | 6.810547 | 6.834506 |
| POLR1B   | 8.007665 | 7.988375 | 7.888889 | 8.417019 | 8.332666 | 8.419619 |

|           |           |           |           |           |           |           |
|-----------|-----------|-----------|-----------|-----------|-----------|-----------|
| ZNF560    | 4. 175099 | 4. 385824 | 4. 617181 | 4. 86724  | 4. 892084 | 4. 703093 |
| THBS4     | 4. 620536 | 4. 620536 | 4. 633207 | 4. 240989 | 4. 114813 | 4. 234724 |
| PAK1      | 8. 164033 | 8. 162888 | 8. 191948 | 7. 761579 | 7. 711641 | 7. 761952 |
| SLITRK3   | 4. 181634 | 4. 461618 | 4. 584691 | 3. 897916 | 4. 221118 | 3. 825428 |
| ZNF8      | 7. 333229 | 7. 324896 | 7. 330179 | 7. 788718 | 7. 751971 | 7. 729668 |
| ZNF410    | 8. 113726 | 8. 127232 | 8. 088817 | 8. 556497 | 8. 482655 | 8. 572644 |
| PALM2     | 3. 904011 | 4. 014215 | 4. 242561 | 4. 597063 | 4. 357297 | 4. 487891 |
| MGEA5     | 8. 576451 | 8. 397224 | 8. 564756 | 8. 95661  | 8. 896939 | 8. 965987 |
| RHOBTB1   | 4. 679757 | 4. 691159 | 4. 770208 | 5. 141835 | 5. 017261 | 5. 262966 |
| ADAM9     | 9. 039808 | 9. 069159 | 9. 08092  | 9. 522957 | 9. 474646 | 9. 473153 |
| PLEKHB2   | 8. 078248 | 8. 036198 | 7. 991396 | 8. 473511 | 8. 406182 | 8. 507014 |
| ACAP2     | 6. 108403 | 6. 224301 | 6. 297208 | 6. 737084 | 6. 46826  | 6. 705138 |
| PIK3R3    | 7. 486243 | 7. 360691 | 7. 417821 | 7. 834232 | 7. 847452 | 7. 863558 |
| RASSF8    | 7. 097302 | 7. 053148 | 7. 048729 | 6. 750403 | 6. 517055 | 6. 651462 |
| CCDC113   | 5. 517647 | 5. 626183 | 5. 584411 | 6. 037456 | 5. 997474 | 5. 973019 |
| GRK5      | 6. 954267 | 6. 86122  | 6. 979305 | 7. 394041 | 7. 327426 | 7. 353004 |
| ZNF670-ZN | 7. 170587 | 7. 182931 | 7. 18064  | 6. 817996 | 6. 583305 | 6. 853242 |
| ELMOD2    | 6. 580947 | 6. 497117 | 6. 619312 | 7. 020043 | 6. 973641 | 6. 982947 |
| TPM4      | 8. 795704 | 8. 754261 | 8. 788299 | 8. 344355 | 8. 358273 | 8. 356746 |
| PLEKHA8 / | 5. 236937 | 5. 21594  | 5. 172827 | 5. 71967  | 5. 633064 | 5. 551842 |
| TMEM251   | 7. 956304 | 7. 903862 | 7. 977982 | 7. 557984 | 7. 4413   | 7. 56015  |
| ZNF599    | 5. 030701 | 4. 919608 | 5. 102105 | 4. 614002 | 4. 489008 | 4. 670819 |
| CAMKMT    | 4. 079608 | 3. 950142 | 4. 107806 | 4. 495732 | 4. 527197 | 4. 392929 |
| DCUN1D1   | 7. 782732 | 7. 687719 | 7. 792962 | 8. 187721 | 8. 094756 | 8. 259043 |
| EXOC8     | 7. 776959 | 7. 799593 | 7. 74737  | 8. 251159 | 8. 180951 | 8. 169675 |
| CGREF1    | 5. 173333 | 5. 136341 | 5. 260969 | 4. 575977 | 4. 730259 | 4. 98718  |
| DNAJC25   | 6. 228733 | 6. 129882 | 6. 192204 | 6. 608403 | 6. 542617 | 6. 676714 |
| POM121    | 9. 04103  | 9. 059927 | 9. 116267 | 8. 702799 | 8. 58663  | 8. 651044 |
| SEPW1     | 9. 041118 | 9. 065367 | 9. 035215 | 9. 479443 | 9. 444324 | 9. 494224 |
| DYX1C1    | 5. 916641 | 5. 845375 | 5. 969522 | 6. 474943 | 6. 24586  | 6. 286889 |
| USP8      | 8. 26919  | 8. 31447  | 8. 330479 | 8. 776956 | 8. 671018 | 8. 741861 |
| MAGI1     | 5. 589715 | 5. 62586  | 5. 782435 | 6. 069068 | 6. 164442 | 6. 040154 |
| CAPN1     | 6. 186192 | 6. 350974 | 6. 372063 | 5. 815361 | 5. 89943  | 5. 918799 |
| ACD       | 8. 529266 | 8. 554752 | 8. 564156 | 8. 082774 | 8. 17439  | 8. 115706 |
| LOC100996 | 9. 840709 | 9. 817734 | 9. 815268 | 10. 21841 | 10. 24902 | 10. 2802  |
| CEP95     | 7. 441673 | 7. 505122 | 7. 424082 | 7. 87799  | 7. 877525 | 7. 888436 |
| WDR54     | 9. 785088 | 9. 851989 | 9. 795297 | 9. 401822 | 9. 335639 | 9. 421936 |
| CEP63     | 5. 398901 | 5. 166067 | 5. 374876 | 5. 784663 | 5. 63373  | 5. 794296 |
| ARMCX3    | 7. 534307 | 7. 569767 | 7. 603259 | 8. 009577 | 7. 921914 | 8. 048558 |
| SNAP23    | 7. 489455 | 7. 570479 | 7. 501362 | 7. 967497 | 7. 90708  | 7. 959284 |
| GPN2      | 8. 01234  | 8. 044377 | 8. 047131 | 8. 471665 | 8. 39451  | 8. 510127 |
| UTP15     | 7. 9039   | 7. 898899 | 7. 884983 | 8. 368329 | 8. 242088 | 8. 349345 |
| HILPDA    | 6. 765243 | 6. 75616  | 6. 831932 | 6. 316306 | 6. 335198 | 6. 42993  |
| ATAD3A    | 7. 611409 | 7. 660088 | 7. 642152 | 7. 241694 | 7. 13705  | 7. 263508 |
| KLHL24    | 6. 38403  | 6. 266602 | 6. 223185 | 5. 94238  | 5. 879772 | 5. 780503 |
| SPRED2    | 8. 683306 | 8. 642322 | 8. 642322 | 9. 072306 | 9. 060104 | 9. 106619 |
| EDRF1     | 7. 793095 | 7. 836487 | 7. 929198 | 8. 305435 | 8. 212685 | 8. 311451 |
| GOSR2     | 7. 085061 | 7. 126113 | 7. 117906 | 7. 570865 | 7. 472778 | 7. 556075 |
| NIT1      | 5. 136364 | 5. 094602 | 5. 168088 | 5. 604868 | 5. 459846 | 5. 604696 |
| NDRG3     | 9. 15505  | 9. 104761 | 9. 111934 | 8. 683563 | 8. 66256  | 8. 75565  |
| DAZAP1    | 9. 631296 | 9. 6961   | 9. 634973 | 9. 257705 | 9. 194755 | 9. 239945 |

|           |          |          |          |          |          |          |
|-----------|----------|----------|----------|----------|----------|----------|
| USP43     | 5.68813  | 5.559922 | 5.750755 | 5.312525 | 5.034864 | 5.381636 |
| SCAMP1    | 4.837411 | 4.833105 | 4.718898 | 4.33291  | 4.33144  | 4.455351 |
| UBA52     | 6.578429 | 6.510366 | 6.527369 | 6.225523 | 6.014135 | 6.107004 |
| MAP3K13   | 5.557401 | 5.551364 | 5.519262 | 5.976708 | 6.042803 | 5.877813 |
| IRF2BP2   | 7.094847 | 7.230383 | 7.134385 | 6.732393 | 6.611888 | 6.84639  |
| ZDHHC12   | 7.858049 | 7.832081 | 7.818695 | 7.402394 | 7.384622 | 7.452883 |
| CTBP2     | 7.301926 | 7.32959  | 7.441498 | 6.963296 | 6.81885  | 7.022446 |
| FAM234B   | 7.049804 | 6.925991 | 7.059621 | 7.277665 | 7.460552 | 7.565592 |
| VMA21     | 9.621395 | 9.661846 | 9.695709 | 9.28394  | 9.199415 | 9.227495 |
| FAM210A   | 6.523494 | 6.668867 | 6.589061 | 6.229251 | 6.052244 | 6.231857 |
| ACBD5     | 7.735956 | 7.739519 | 7.672644 | 8.221129 | 8.1325   | 8.061898 |
| TFAP4     | 7.424939 | 7.357382 | 7.409359 | 7.017483 | 6.948878 | 6.958022 |
| SLC33A1   | 6.287624 | 6.313228 | 6.45701  | 6.05575  | 5.916159 | 5.818803 |
| IPW       | 4.051353 | 4.009365 | 4.076229 | 3.672079 | 3.476184 | 3.721602 |
| ZBTB38    | 8.485274 | 8.448672 | 8.455542 | 8.909667 | 8.839076 | 8.907804 |
| ZRSR2     | 5.620318 | 5.631547 | 5.50406  | 6.032495 | 5.93916  | 6.050814 |
| ADSSL1    | 5.333854 | 5.460721 | 5.366872 | 5.67291  | 5.764193 | 5.990888 |
| ITIH5     | 3.518584 | 3.379215 | 3.305029 | 4.013147 | 3.713521 | 3.742547 |
| SENP6     | 8.147717 | 8.082553 | 8.041604 | 8.531    | 8.529534 | 8.477673 |
| SAR1B     | 8.674484 | 8.698767 | 8.598395 | 9.064073 | 9.071089 | 9.102046 |
| SPICE1    | 6.622651 | 6.457435 | 6.451139 | 6.057066 | 6.108527 | 6.100981 |
| GSG2      | 6.516909 | 6.387544 | 6.457309 | 6.060961 | 5.986337 | 6.050194 |
| ASAP2     | 8.228805 | 8.206233 | 8.164054 | 8.619242 | 8.587737 | 8.655983 |
| LRRFIP1   | 6.734938 | 6.59246  | 6.382726 | 6.212982 | 6.162548 | 6.070744 |
| MATR3     | 6.951408 | 6.960344 | 6.94566  | 6.596997 | 6.510548 | 6.4865   |
| SAT2      | 8.705871 | 8.857238 | 8.80054  | 9.245551 | 9.107893 | 9.273405 |
| GAS1      | 7.205568 | 7.091066 | 7.169874 | 6.672499 | 6.737985 | 6.792992 |
| SCLT1     | 5.734301 | 5.603211 | 5.705893 | 6.065193 | 6.035664 | 6.205507 |
| PXMP2     | 8.353212 | 8.27582  | 8.261232 | 7.867868 | 7.876598 | 7.882919 |
| PERP      | 3.706946 | 3.879319 | 3.820894 | 3.259658 | 3.345986 | 3.538659 |
| SVIL      | 8.092671 | 8.140025 | 8.087124 | 8.525163 | 8.473082 | 8.584422 |
| ACTN1     | 9.415417 | 9.470998 | 9.38694  | 9.888458 | 9.811039 | 9.836463 |
| LOC101060 | 8.830892 | 8.852757 | 8.782583 | 9.264091 | 9.15749  | 9.307166 |
| SNORD12B  | 4.868839 | 4.712211 | 4.924466 | 4.594721 | 4.302626 | 4.345796 |
| LACTB2    | 8.558776 | 8.477863 | 8.376792 | 7.992536 | 8.049873 | 8.108738 |
| AVIL      | 4.346897 | 4.139023 | 4.470724 | 4.92261  | 4.584943 | 4.711153 |
| PLD6      | 6.862069 | 6.843185 | 6.84899  | 7.195743 | 7.269864 | 7.350431 |
| ATF2      | 7.302825 | 7.093381 | 7.236293 | 7.718375 | 7.547129 | 7.628736 |
| PEF1      | 8.796519 | 8.917093 | 8.843118 | 8.415731 | 8.419425 | 8.460104 |
| MSANTD2   | 6.364109 | 6.373841 | 6.383862 | 6.898803 | 6.710315 | 6.773661 |
| SCAF11    | 8.005607 | 8.016791 | 7.974274 | 7.562636 | 7.589936 | 7.583356 |
| LRIG2     | 5.632514 | 5.598233 | 5.482968 | 5.961156 | 5.986737 | 6.024488 |
| KLHDC3    | 9.750284 | 9.696406 | 9.68124  | 10.14793 | 10.0676  | 10.17042 |
| SPINK2    | 4.397326 | 4.224241 | 4.085891 | 3.862558 | 3.813095 | 3.775388 |
| TANC1     | 8.847568 | 8.874646 | 8.846314 | 9.280033 | 9.265616 | 9.279242 |
| C7orf43   | 5.767482 | 5.788686 | 5.893994 | 6.258492 | 6.190235 | 6.257702 |
| RPRD2     | 7.042526 | 7.021118 | 7.058358 | 6.593002 | 6.520397 | 6.752603 |
| KCNV1     | 2.521143 | 2.605731 | 2.708226 | 2.962834 | 3.131363 | 2.996867 |
| COL6A1    | 9.754772 | 9.798665 | 9.798346 | 10.20195 | 10.22849 | 10.17714 |
| PRH1-PRR4 | 6.076249 | 6.158452 | 6.11449  | 6.558478 | 6.557323 | 6.488961 |
| PEX5      | 8.302195 | 8.300721 | 8.385851 | 7.941152 | 7.86736  | 7.924804 |

|          |          |          |          |          |          |          |
|----------|----------|----------|----------|----------|----------|----------|
| ADM      | 8.626274 | 8.624916 | 8.636887 | 9.044727 | 9.045121 | 9.053518 |
| POU3F2   | 6.609731 | 6.711895 | 6.674492 | 6.282234 | 6.159634 | 6.299081 |
| UBE2Q2   | 7.0793   | 7.011182 | 7.101496 | 7.506144 | 7.434597 | 7.505834 |
| ANKRD40  | 6.404197 | 6.480153 | 6.498628 | 6.935471 | 6.875922 | 6.826019 |
| TMEM242  | 5.761691 | 5.761691 | 5.884176 | 5.437153 | 5.265462 | 5.451086 |
| ZNF528   | 2.19897  | 2.092656 | 1.976821 | 2.572977 | 2.483323 | 2.465657 |
| KAT8     | 7.64512  | 7.783882 | 7.696823 | 7.327489 | 7.232114 | 7.312984 |
| ANKLE2   | 7.028617 | 7.072299 | 7.134533 | 7.579468 | 7.461268 | 7.447749 |
| RFTN1    | 7.728295 | 7.669703 | 7.753652 | 8.211063 | 8.059575 | 8.133698 |
| HNRNPCL2 | 3.492495 | 3.463458 | 3.398246 | 2.988103 | 3.051461 | 3.06197  |
| FLJ10038 | 6.333822 | 6.327822 | 6.162141 | 5.69783  | 5.894707 | 5.97862  |
| PPHLN1   | 6.134977 | 6.05153  | 6.168181 | 6.520878 | 6.481056 | 6.605363 |
| SMNDC1   | 6.193319 | 6.300653 | 6.224927 | 6.724561 | 6.637299 | 6.609403 |
| FSD1     | 7.447008 | 7.504758 | 7.49662  | 7.099076 | 7.024987 | 7.072058 |
| RPS6KA5  | 4.584943 | 4.595998 | 4.633879 | 5.232095 | 4.923294 | 4.911519 |
| MTG2     | 7.697793 | 7.685934 | 7.734511 | 8.116938 | 8.049981 | 8.203409 |
| SGCB     | 5.967932 | 5.985481 | 5.921136 | 5.484568 | 5.567964 | 5.570483 |
| EPM2AIP1 | 5.175688 | 5.2468   | 5.168168 | 5.505258 | 5.616699 | 5.71949  |
| EXOC6B   | 4.19714  | 3.860996 | 4.498269 | 4.57364  | 4.648578 | 4.584635 |
| GFM1     | 8.944128 | 8.90996  | 8.855382 | 9.362308 | 9.277783 | 9.319184 |
| JPH1     | 7.426242 | 7.404399 | 7.383671 | 7.018397 | 6.95221  | 6.994307 |
| MAX      | 6.389499 | 6.334008 | 6.382782 | 6.885526 | 6.678193 | 6.791937 |
| CEP152   | 7.119094 | 7.083851 | 7.027022 | 6.688774 | 6.595609 | 6.696358 |
| RNF115   | 7.882554 | 7.872021 | 7.871345 | 8.341252 | 8.248154 | 8.285216 |
| RAB6B    | 6.163975 | 6.120679 | 6.19865  | 5.725002 | 5.77955  | 5.730279 |
| ZNF324   | 6.903588 | 6.910843 | 6.844731 | 7.326395 | 7.24457  | 7.336612 |
| SCD5     | 6.575532 | 6.328104 | 6.531243 | 6.058357 | 6.058357 | 6.070293 |
| KIAA0586 | 7.130495 | 7.006036 | 7.024067 | 6.618808 | 6.60638  | 6.687543 |
| TNFRSF9  | 4.52176  | 4.414273 | 4.497427 | 4.853747 | 4.841094 | 4.986359 |
| ASH1L    | 7.347882 | 7.371095 | 7.461601 | 7.817619 | 7.792646 | 7.817651 |
| NGRN     | 10.16154 | 10.12087 | 10.12692 | 10.587   | 10.49803 | 10.57156 |
| BARX1    | 6.713258 | 6.788683 | 6.756501 | 6.369322 | 6.314514 | 6.327365 |
| FKBP5    | 7.368612 | 7.324896 | 7.373052 | 6.989586 | 6.871941 | 6.958022 |
| SHMT2    | 9.8352   | 9.90206  | 9.854991 | 9.494328 | 9.39552  | 9.455468 |
| ADNP     | 9.575185 | 9.560318 | 9.569847 | 9.992062 | 9.991447 | 9.968536 |
| ATAD1    | 8.621537 | 8.614729 | 8.63692  | 9.033039 | 9.019554 | 9.067207 |
| JAK1     | 7.807715 | 7.841313 | 7.865219 | 8.291202 | 8.232007 | 8.237385 |
| DDX19A   | 7.858636 | 7.859727 | 7.895707 | 8.321164 | 8.291789 | 8.247356 |
| KBTBD3   | 4.005734 | 3.99648  | 4.232198 | 4.407043 | 4.293566 | 4.77914  |
| CBX1     | 9.283071 | 9.305919 | 9.266827 | 8.867078 | 8.827059 | 8.916365 |
| LONP2    | 8.280273 | 8.213777 | 8.228411 | 7.817723 | 7.800878 | 7.85931  |
| OGFOD3   | 6.282234 | 6.295497 | 6.265237 | 5.992288 | 5.831552 | 5.77526  |
| RASSF4   | 5.478707 | 5.407164 | 5.674707 | 5.168717 | 5.045052 | 5.102969 |
| POLA1    | 8.1115   | 8.089112 | 8.152753 | 7.70833  | 7.671043 | 7.730163 |
| ZCCHC10  | 7.662319 | 7.641123 | 7.703815 | 8.083993 | 8.098797 | 8.068278 |
| PMS1     | 7.485689 | 7.572654 | 7.522634 | 7.112714 | 7.090407 | 7.134095 |
| KIF5C    | 5.6626   | 5.434351 | 5.736889 | 5.353516 | 4.991496 | 5.245285 |
| IDH3B    | 9.173578 | 9.212772 | 9.163378 | 8.803855 | 8.716956 | 8.785446 |
| ZNF626   | 6.89131  | 6.982807 | 6.931561 | 7.346946 | 7.361945 | 7.339938 |
| MYCBP2   | 8.621999 | 8.610687 | 8.591032 | 9.04518  | 8.980098 | 9.041402 |
| PYCR1    | 6.676738 | 6.618316 | 6.687654 | 6.282234 | 6.32455  | 6.133011 |

|           |          |          |          |          |          |          |
|-----------|----------|----------|----------|----------|----------|----------|
| TIA1      | 6.213079 | 6.183133 | 6.094423 | 5.754377 | 5.711502 | 5.782397 |
| DENND4C   | 6.402507 | 6.30142  | 6.309131 | 6.823391 | 6.659811 | 6.772042 |
| CFHR3     | 5.246093 | 5.298952 | 5.345536 | 5.546091 | 5.587168 | 5.999466 |
| TRNT1     | 7.646291 | 7.624307 | 7.675636 | 8.090228 | 7.990122 | 8.10759  |
| TPBG      | 7.044465 | 7.09821  | 7.194588 | 7.558422 | 7.452664 | 7.567351 |
| COL4A6    | 2.835682 | 2.751483 | 2.737861 | 2.870468 | 3.297422 | 3.398246 |
| DOK4      | 6.716592 | 6.653277 | 6.675852 | 6.300653 | 6.186438 | 6.318327 |
| COG1      | 8.659598 | 8.619863 | 8.565362 | 9.088961 | 8.965835 | 9.030284 |
| DHX40     | 9.310947 | 9.260173 | 9.341523 | 8.910533 | 8.838172 | 8.923818 |
| ORAOV1    | 4.612542 | 4.642538 | 4.633581 | 4.901879 | 5.15487  | 5.07155  |
| USP36     | 6.898803 | 7.020592 | 7.003208 | 7.407595 | 7.346603 | 7.407595 |
| CCNJ      | 6.058647 | 5.984539 | 5.881964 | 6.396388 | 6.339771 | 6.428054 |
| LYRM2     | 6.20438  | 6.058263 | 6.181769 | 6.525527 | 6.555164 | 6.601779 |
| RPS14     | 10.49678 | 10.48607 | 10.551   | 10.13154 | 10.04031 | 10.12405 |
| KPNA4     | 7.351641 | 7.340783 | 7.248367 | 7.744083 | 7.739194 | 7.695449 |
| FBX030    | 7.484308 | 7.476359 | 7.541713 | 7.961804 | 7.848602 | 7.92984  |
| PHF5A     | 4.189352 | 4.410419 | 4.086489 | 3.766045 | 3.86712  | 3.815364 |
| CDKL3     | 4.194234 | 3.84714  | 4.255671 | 3.740005 | 3.69784  | 3.621666 |
| SDCBP     | 10.11989 | 10.07807 | 10.03375 | 10.50925 | 10.5009  | 10.45895 |
| CCM2      | 7.715263 | 7.755384 | 7.748169 | 7.382962 | 7.312438 | 7.286266 |
| KRT34 /// | 5.149081 | 5.067441 | 5.030365 | 5.5305   | 5.422556 | 5.530708 |
| LMBR1     | 6.580572 | 6.567381 | 6.519148 | 6.966793 | 6.926615 | 7.009915 |
| IFNA21    | 4.11567  | 4.02548  | 4.127941 | 3.783924 | 3.797278 | 3.452062 |
| ANAPC10   | 7.604835 | 7.506668 | 7.43572  | 7.092714 | 7.117893 | 7.101071 |
| POLR1D    | 9.227935 | 9.252212 | 9.317788 | 9.688371 | 9.60679  | 9.738068 |
| IGFBP3    | 7.283784 | 7.435435 | 7.391231 | 7.798531 | 7.74126  | 7.805184 |
| SLC29A2   | 6.131814 | 6.064063 | 6.169878 | 5.672753 | 5.608156 | 5.850485 |
| ZNF77     | 6.003888 | 6.001815 | 6.099898 | 6.55353  | 6.35183  | 6.434461 |
| PKNOX2    | 5.614573 | 5.51916  | 5.547285 | 5.236169 | 5.089507 | 5.121155 |
| TADA3     | 5.234298 | 5.17105  | 5.275881 | 4.933796 | 4.826848 | 4.68677  |
| RPS27A    | 6.386407 | 6.300653 | 6.464815 | 6.051564 | 5.944283 | 5.922724 |
| TRIM35    | 6.128135 | 6.022422 | 6.200341 | 6.646197 | 6.396086 | 6.54159  |
| LAMB2     | 7.220743 | 7.226305 | 7.177469 | 7.682365 | 7.496386 | 7.678425 |
| CARM1     | 10.0606  | 10.07495 | 10.06295 | 9.668341 | 9.621526 | 9.67622  |
| NAMPT     | 8.708122 | 8.771692 | 8.638214 | 9.108215 | 9.098989 | 9.142747 |
| UBE2J2    | 7.866658 | 7.862142 | 7.79331  | 8.240353 | 8.256234 | 8.257374 |
| MXI1      | 4.742194 | 5.146169 | 4.942512 | 4.59263  | 4.652292 | 4.354197 |
| C5orf22   | 8.090477 | 8.060522 | 8.093767 | 8.582047 | 8.415441 | 8.479003 |
| C1S /// E | 3.51917  | 3.66492  | 3.527625 | 4.183089 | 3.77056  | 3.989392 |
| GALNT10   | 6.821618 | 6.854329 | 6.853035 | 7.339771 | 7.198026 | 7.222419 |
| UBQLN1    | 10.51592 | 10.48618 | 10.47068 | 10.10983 | 10.05694 | 10.0752  |
| FNBP4     | 8.184516 | 8.213695 | 8.217934 | 8.621728 | 8.567266 | 8.657916 |
| NGF       | 4.067713 | 4.193032 | 4.093562 | 4.513251 | 4.535774 | 4.535774 |
| SSR1      | 8.094501 | 8.060293 | 8.033892 | 7.683437 | 7.636956 | 7.637806 |
| CCDC102B  | 7.227729 | 7.16759  | 7.247162 | 6.902748 | 6.738319 | 6.771006 |
| HERC4     | 8.038199 | 7.997657 | 7.99622  | 8.387733 | 8.412025 | 8.462508 |
| AHR       | 7.807531 | 7.804829 | 7.850344 | 8.291291 | 8.154803 | 8.246674 |
| UQCC2     | 9.019101 | 9.064456 | 8.958202 | 8.668338 | 8.519195 | 8.624234 |
| STAT1     | 7.362391 | 7.330546 | 7.38033  | 7.842535 | 7.747051 | 7.713572 |
| DNAJB14 / | 7.963976 | 7.908875 | 7.87414  | 8.313441 | 8.338106 | 8.324926 |
| SPATS2    | 6.883045 | 6.942286 | 6.967659 | 7.438405 | 7.280629 | 7.302986 |

|           |          |          |          |          |          |          |
|-----------|----------|----------|----------|----------|----------|----------|
| PPP2CA    | 6.414963 | 6.353466 | 6.334658 | 5.960803 | 5.894707 | 6.018563 |
| DERL2     | 9.215785 | 9.24907  | 9.24679  | 9.659008 | 9.637937 | 9.643256 |
| CSTF2     | 6.928903 | 6.90883  | 6.923589 | 6.508362 | 6.443466 | 6.581034 |
| SIN3A     | 7.393293 | 7.374156 | 7.317855 | 6.983128 | 6.889721 | 6.984129 |
| ALDH4A1   | 5.490249 | 5.453803 | 5.58432  | 5.047652 | 5.030392 | 5.22204  |
| TMEM47    | 6.507726 | 6.6926   | 6.680956 | 7.066046 | 6.975323 | 7.068125 |
| FOXD3     | 6.223811 | 6.057527 | 6.183652 | 5.768007 | 5.705427 | 5.763644 |
| SUMO1     | 7.075048 | 6.929825 | 7.042136 | 6.622732 | 6.573865 | 6.622561 |
| EPS15     | 6.828186 | 6.886836 | 6.911973 | 7.327054 | 7.22431  | 7.303333 |
| PLEKHH1   | 4.425203 | 4.45531  | 4.161556 | 4.696444 | 4.802684 | 4.770469 |
| SNN       | 5.813793 | 6.131848 | 5.969522 | 5.614573 | 5.575511 | 5.498262 |
| NRF1      | 6.541578 | 6.62524  | 6.505501 | 6.081315 | 6.125522 | 6.23895  |
| PPARG     | 8.017023 | 7.980393 | 7.998602 | 7.665311 | 7.484643 | 7.62025  |
| INADL     | 4.183089 | 4.281148 | 4.009871 | 4.410315 | 4.549112 | 4.740209 |
| CLMP      | 6.683178 | 6.47453  | 6.422839 | 6.118848 | 6.105634 | 6.130572 |
| RTTN      | 6.280277 | 6.290557 | 6.29886  | 5.999898 | 5.824466 | 5.820062 |
| CDH2      | 8.798039 | 8.867239 | 8.823079 | 9.246053 | 9.222303 | 9.245196 |
| ST5       | 7.420597 | 7.408268 | 7.414253 | 7.058813 | 6.8979   | 7.06126  |
| AFAP1L2   | 6.783408 | 6.779665 | 6.769217 | 7.166761 | 7.197875 | 7.192467 |
| TRIM44    | 9.696882 | 9.677925 | 9.738156 | 10.12362 | 10.08517 | 10.12873 |
| SLITRK4   | 6.878628 | 6.845111 | 7.062624 | 6.52894  | 6.477836 | 6.555265 |
| N4BP2L1   | 3.89971  | 3.879319 | 3.907639 | 3.521596 | 3.451949 | 3.488888 |
| PSMB2     | 7.917128 | 7.854537 | 8.005654 | 7.580316 | 7.482413 | 7.490544 |
| EHD1      | 7.151518 | 7.043603 | 7.211358 | 7.504995 | 7.517598 | 7.607768 |
| CTDSP1    | 5.377787 | 5.353697 | 5.569632 | 5.047584 | 5.120322 | 4.909395 |
| TIMM21    | 8.956374 | 8.851886 | 8.827152 | 8.473528 | 8.465556 | 8.47269  |
| UNC13A    | 5.482058 | 5.604164 | 5.561866 | 5.999687 | 5.822039 | 6.049992 |
| APC       | 6.17577  | 6.233571 | 6.277712 | 6.704392 | 6.619458 | 6.586263 |
| HAT1      | 9.245032 | 9.217859 | 9.071114 | 8.779747 | 8.795266 | 8.736574 |
| ATF7IP2   | 6.325523 | 6.308575 | 6.424016 | 6.783491 | 6.7368   | 6.7597   |
| ARL13B    | 7.779866 | 7.808244 | 7.802874 | 8.239688 | 8.165771 | 8.207102 |
| MOB1A     | 10.07665 | 10.10722 | 10.13079 | 10.51915 | 10.51291 | 10.50411 |
| TBC1D20   | 7.785014 | 7.751066 | 7.763973 | 8.186367 | 8.158793 | 8.175743 |
| CSNK1E // | 8.393737 | 8.419834 | 8.384849 | 8.076666 | 7.906871 | 7.99462  |
| CD81      | 10.02834 | 10.03427 | 10.02135 | 9.650208 | 9.58465  | 9.628926 |
| CDC42EP4  | 8.005199 | 8.056169 | 8.038902 | 7.685005 | 7.464268 | 7.731034 |
| CHRNB1    | 6.511154 | 6.464385 | 6.495517 | 6.9804   | 6.815934 | 6.894667 |
| HIST1H4I  | 4.860349 | 5.138027 | 4.866508 | 4.43883  | 4.50838  | 4.698241 |
| CFLAR     | 5.029039 | 4.973268 | 4.887892 | 5.476136 | 5.294039 | 5.339347 |
| ATG4D     | 7.056256 | 7.12055  | 7.076181 | 6.713495 | 6.624877 | 6.695445 |
| CLASP2    | 5.524879 | 5.556963 | 5.634682 | 5.209269 | 5.165909 | 5.122201 |
| CERS5     | 7.566885 | 7.508817 | 7.564005 | 7.979169 | 7.88107  | 7.998407 |
| FOXG1     | 3.505481 | 3.121813 | 3.519136 | 3.037226 | 2.940253 | 2.950495 |
| ATP6AP1L  | 5.340193 | 5.446523 | 5.406808 | 5.033702 | 4.962176 | 4.979233 |
| RABAC1    | 8.747894 | 8.730467 | 8.725318 | 8.351098 | 8.2802   | 8.354256 |
| MAML3     | 7.040702 | 6.956086 | 6.991392 | 7.459449 | 7.351641 | 7.395081 |
| SQSTM1    | 10.67052 | 10.7216  | 10.64894 | 11.09336 | 11.06492 | 11.10034 |
| UBIAD1    | 7.014086 | 7.08963  | 6.919881 | 7.407305 | 7.408535 | 7.424762 |
| ANO6      | 8.47895  | 8.489768 | 8.507708 | 8.873753 | 8.866119 | 8.953124 |
| TJP2      | 8.780855 | 8.708678 | 8.780158 | 9.14253  | 9.134273 | 9.209387 |
| FAM156A / | 6.256785 | 6.249856 | 6.172364 | 5.726109 | 5.865057 | 5.871344 |



|           |          |          |          |          |          |          |
|-----------|----------|----------|----------|----------|----------|----------|
| LIPT1     | 6.181959 | 6.260417 | 6.178469 | 6.612308 | 6.494646 | 6.730373 |
| DSCR3     | 6.946919 | 6.933477 | 6.856369 | 7.319643 | 7.277122 | 7.356468 |
| NEFL      | 8.166287 | 8.115461 | 8.114233 | 8.572188 | 8.464982 | 8.575199 |
| GOLPH3    | 9.511455 | 9.444324 | 9.431867 | 9.043464 | 9.087478 | 9.040785 |
| ATP6V1G3  | 3.166282 | 3.24247  | 3.200691 | 3.747769 | 3.431645 | 3.645794 |
| PLEKHA8P1 | 3.869131 | 3.905225 | 4.021563 | 3.5333   | 3.302253 | 3.744768 |
| PITPNM1   | 6.987445 | 7.000767 | 7.078999 | 6.634898 | 6.644469 | 6.572706 |
| P2RX5     | 6.940957 | 7.084996 | 7.093268 | 7.431883 | 7.354762 | 7.546478 |
| PRPF38B   | 8.189315 | 8.075577 | 8.08833  | 8.52877  | 8.509537 | 8.52877  |
| SSR3      | 10.12691 | 10.10635 | 10.04925 | 10.5152  | 10.4855  | 10.49538 |
| C8orf31   | 3.9253   | 3.987256 | 3.987396 | 4.440422 | 4.338377 | 4.33459  |
| SAE1      | 6.81202  | 6.824184 | 6.854709 | 6.472748 | 6.382428 | 6.422611 |
| FCAR      | 2.150464 | 2.117191 | 2.249507 | 2.436757 | 2.69629  | 2.597118 |
| DPYD      | 6.998427 | 7.037552 | 6.979288 | 7.433609 | 7.38546  | 7.4092   |
| EED       | 9.450271 | 9.380989 | 9.436846 | 9.03582  | 9.011522 | 9.007792 |
| SHTN1     | 5.842162 | 5.941452 | 5.94261  | 6.321848 | 6.22795  | 6.389376 |
| ADGRL4    | 6.182452 | 6.183133 | 6.135938 | 6.554513 | 6.508673 | 6.65099  |
| TMEM8B    | 6.85846  | 6.807211 | 6.876466 | 6.520878 | 6.364544 | 6.444628 |
| CRISPLD1  | 6.569895 | 6.641339 | 6.626138 | 6.165406 | 6.165129 | 6.295075 |
| MLST8     | 8.027239 | 8.105398 | 8.12381  | 7.670006 | 7.679068 | 7.695635 |
| LONRF3    | 6.080504 | 6.01055  | 5.94606  | 6.37428  | 6.403307 | 6.471004 |
| FGFR1     | 7.38511  | 7.380784 | 7.448867 | 6.983031 | 6.958619 | 7.061998 |
| H3F3B     | 8.981217 | 8.935038 | 8.983329 | 8.558013 | 8.494961 | 8.635519 |
| FIGNL1    | 8.331472 | 8.282303 | 8.342562 | 7.942246 | 7.872746 | 7.930547 |
| WDR60     | 6.626336 | 6.665746 | 6.710347 | 7.0111   | 7.120286 | 7.081711 |
| C1GALT1   | 7.184836 | 7.165103 | 7.170565 | 7.546866 | 7.580497 | 7.603238 |
| CSNK1G3   | 8.242304 | 8.190463 | 8.314909 | 8.664084 | 8.601446 | 8.691472 |
| CETN3     | 9.87012  | 9.779519 | 9.746169 | 9.385504 | 9.396245 | 9.404858 |
| FAM213B   | 6.487499 | 6.628979 | 6.590658 | 6.036651 | 6.097937 | 6.363605 |
| TMEM138   | 8.844047 | 8.886325 | 8.855117 | 9.273062 | 9.217438 | 9.303612 |
| EFNA5     | 7.456666 | 7.433258 | 7.557116 | 7.076772 | 7.106856 | 7.054797 |
| WDR43     | 8.841323 | 8.885153 | 8.825396 | 9.266775 | 9.234896 | 9.258747 |
| SYNPO     | 7.560161 | 7.558707 | 7.541713 | 7.216056 | 7.087295 | 7.150707 |
| DCP1A     | 8.74028  | 8.710043 | 8.741482 | 8.34065  | 8.295023 | 8.350187 |
| DNAJC21   | 8.064846 | 7.980193 | 8.078579 | 8.46909  | 8.416623 | 8.443257 |
| SLC36A4   | 8.249357 | 8.134411 | 8.086442 | 7.716148 | 7.784849 | 7.76413  |
| DDX11 /// | 5.474059 | 5.549739 | 5.465076 | 5.229384 | 4.88176  | 5.172689 |
| ESCO1     | 7.99433  | 7.972848 | 8.055487 | 8.419871 | 8.421353 | 8.385851 |
| HSPA8     | 6.880518 | 6.944034 | 6.940413 | 6.593382 | 6.436268 | 6.531131 |
| TBC1D22A  | 5.578203 | 5.511958 | 5.615979 | 5.161374 | 5.118758 | 5.221964 |
| HMCES     | 5.203057 | 5.31055  | 5.232081 | 4.751611 | 4.908439 | 4.881782 |
| LTV1      | 8.190293 | 8.126308 | 8.179843 | 8.626368 | 8.486776 | 8.587135 |
| NT5DC1    | 6.495064 | 6.428668 | 6.498378 | 6.133542 | 5.980914 | 6.103843 |
| CCSAP     | 8.299366 | 8.259118 | 8.314382 | 7.820229 | 7.868287 | 7.980656 |
| SLC35B4   | 6.996558 | 6.884252 | 6.96162  | 6.528086 | 6.537094 | 6.573728 |
| KHSRP     | 10.00446 | 9.948972 | 9.965613 | 9.609208 | 9.519078 | 9.587573 |
| ZNF343    | 6.751044 | 6.810854 | 6.800967 | 7.216679 | 7.164886 | 7.184302 |
| SLC22A5   | 5.958442 | 6.138355 | 5.951143 | 6.556478 | 6.260095 | 6.433959 |
| TPK1      | 5.131403 | 5.289258 | 5.138574 | 5.620996 | 5.554446 | 5.586085 |
| HEATR5B   | 7.313182 | 7.350592 | 7.227336 | 6.948148 | 6.788528 | 6.95217  |
| TEAD1     | 3.952877 | 4.01257  | 4.032287 | 4.363819 | 4.216683 | 4.619437 |

CDRT4 /// 6. 344912 6. 341308 6. 385058 6. 778211 6. 741418 6. 753522  
MEAF6 4. 538258 4. 766559 4. 584943 4. 251894 4. 230048 4. 206779  
ARFGAP2 5. 824691 5. 867556 5. 892871 5. 442602 5. 31721 5. 624324  
PLAGL1 5. 416375 5. 447177 5. 282065 5. 004358 4. 858056 5. 082333  
UCA1 5. 741435 5. 782901 5. 748574 6. 141248 6. 276193 6. 056251  
PCYT1B 4. 706366 4. 374387 4. 507277 4. 039241 4. 170964 4. 177236  
SLC44A3 5. 096416 5. 336846 5. 236032 5. 624858 5. 664012 5. 58078  
TCEB3 8. 357674 8. 400855 8. 392193 8. 773058 8. 766064 8. 811464  
UBXN4 7. 956568 7. 838043 7. 891271 8. 378373 8. 230611 8. 276555  
SSNA1 8. 89126 8. 962407 8. 911285 8. 519261 8. 44552 8. 6007  
EFCAB11 6. 679893 6. 609062 6. 619229 6. 314346 6. 152794 6. 242222  
VRK2 5. 682989 5. 497425 5. 855217 6. 155489 6. 008588 6. 070284  
SLC12A6 5. 426372 5. 327899 5. 313748 5. 862423 5. 669489 5. 734718  
ZNF331 6. 269323 6. 266553 6. 256278 5. 878505 5. 875213 5. 839913  
UGT8 7. 138858 7. 141089 7. 191106 6. 662327 6. 774427 6. 835901  
PHACTR4 6. 242429 6. 159781 6. 238516 6. 694331 6. 546828 6. 597678  
STX4 7. 748294 7. 782107 7. 819461 8. 223133 8. 07468 8. 250011  
PRPS2 9. 732232 9. 721253 9. 740183 9. 352512 9. 326824 9. 316584  
RANBP2 // 8. 358381 8. 376392 8. 322164 8. 766877 8. 718452 8. 769169  
LDHAL6B 5. 923444 6. 044295 6. 068348 5. 592006 5. 571776 5. 674892  
ASRGL1 6. 553067 6. 554027 6. 518856 6. 204912 6. 034818 6. 188855  
DBI 9. 554849 9. 58277 9. 517531 9. 165826 9. 10656 9. 18556  
GABPB2 5. 471301 5. 439891 5. 360538 5. 935721 5. 759629 5. 773319  
ELP6 8. 812838 8. 783664 8. 749863 8. 390753 8. 393737 8. 365036  
LRRC8A 9. 993745 10. 00283 9. 928122 9. 603665 9. 560327 9. 563884  
PIK3C2A 6. 368699 6. 261092 6. 385604 6. 796503 6. 595465 6. 820125  
TASP1 6. 51371 6. 529783 6. 643647 6. 919655 6. 923617 7. 040238  
PDS5B 6. 428205 6. 437316 6. 508702 6. 082399 6. 006768 6. 088757  
NFXL1 6. 859083 6. 914988 6. 920483 7. 305291 7. 287751 7. 29777  
PPP2R1B 6. 701929 6. 431515 6. 583616 6. 934956 6. 97265 7. 005466  
ALG11 /// 7. 019468 7. 075699 7. 014638 6. 661508 6. 700053 6. 552339  
SLC16A1 8. 601951 8. 593801 8. 52877 8. 204557 8. 124936 8. 199175  
ANK2 5. 791217 5. 761659 5. 842006 5. 484731 5. 32079 5. 393679  
DCAF6 9. 047485 8. 93693 8. 957301 9. 389872 9. 371301 9. 376161  
RPA1 10. 52546 10. 52312 10. 54623 10. 15801 10. 08304 10. 15815  
CHPF2 7. 124467 7. 182641 7. 224592 7. 586549 7. 548469 7. 592128  
ACP6 8. 867788 8. 80649 8. 821814 8. 489426 8. 34705 8. 464195  
DUSP6 10. 16598 10. 21716 10. 19796 10. 61375 10. 55381 10. 60864  
FAM89A 7. 171098 7. 212661 7. 344285 7. 672158 7. 592935 7. 657838  
ZNF142 5. 912585 5. 652534 5. 696585 6. 239234 5. 994222 6. 222751  
KLHL31 6. 121625 6. 051345 6. 116145 6. 486125 6. 464815 6. 532643  
NMT1 7. 464855 7. 530033 7. 564757 7. 116176 7. 042828 7. 206178  
TPST2 6. 396967 6. 332585 6. 446211 6. 810036 6. 752683 6. 807301  
KDM5A 8. 615418 8. 61237 8. 603 9. 005066 8. 996941 9. 022171  
PCDHB16 5. 028299 5. 064914 4. 980916 4. 586182 4. 623034 4. 672007  
SKA2 8. 581042 8. 537371 8. 580567 8. 147862 8. 186138 8. 172168  
PHF20 6. 417302 6. 481596 6. 428797 6. 020377 6. 061338 6. 053657  
TLR1 3. 785349 3. 600779 3. 529171 3. 984869 4. 05361 4. 069  
LCTL 7. 650874 7. 603599 7. 592516 8. 033535 7. 978692 8. 026798  
SDHAF2 9. 607136 9. 680984 9. 627045 10. 06514 10. 01948 10. 02234  
FGF2 7. 74874 7. 748169 7. 741139 8. 129259 8. 079132 8. 221289

|           |          |          |          |          |          |          |
|-----------|----------|----------|----------|----------|----------|----------|
| SNRPB2    | 11.31111 | 11.29798 | 11.23996 | 10.86008 | 10.89364 | 10.9037  |
| MYDGF     | 6.668126 | 6.722475 | 6.691214 | 6.328371 | 6.275492 | 6.286669 |
| ATXN2L    | 7.125383 | 6.916575 | 7.009688 | 6.631721 | 6.600915 | 6.628041 |
| ZIC2      | 8.499315 | 8.549471 | 8.55423  | 8.120032 | 8.080031 | 8.212382 |
| ELOVL2    | 4.584943 | 4.658722 | 4.700253 | 5.161702 | 4.947015 | 5.02562  |
| PEBP1     | 9.521666 | 9.523084 | 9.494691 | 9.147609 | 9.03597  | 9.166667 |
| ZNF569    | 5.524827 | 5.589449 | 5.525729 | 5.974622 | 5.863735 | 5.990769 |
| CBX3      | 11.06936 | 10.99944 | 11.03813 | 10.65963 | 10.61237 | 10.6463  |
| CMTM8     | 6.891548 | 6.954213 | 6.964713 | 6.514445 | 6.559377 | 6.548099 |
| PRRC2A    | 7.550914 | 7.549539 | 7.564124 | 7.172913 | 7.128889 | 7.174223 |
| ID4       | 3.756935 | 3.757438 | 3.837238 | 4.135122 | 4.174955 | 4.229916 |
| WDR89     | 6.182239 | 6.226087 | 6.250825 | 6.635946 | 6.528173 | 6.683372 |
| TRAPPC8   | 7.517994 | 7.449913 | 7.588677 | 8.000942 | 7.771012 | 7.972649 |
| CCDC6     | 6.537088 | 6.541675 | 6.544254 | 6.872989 | 6.842701 | 7.095196 |
| GMEB2     | 7.86909  | 7.935435 | 7.897104 | 7.494899 | 7.459401 | 7.559668 |
| ITGA10    | 4.305272 | 4.459051 | 4.305355 | 4.012121 | 3.90562  | 3.964404 |
| PFDN6     | 8.297087 | 8.269009 | 8.319835 | 7.986414 | 7.863625 | 7.848877 |
| ACVR1     | 7.775793 | 7.708822 | 7.676095 | 7.335356 | 7.327351 | 7.311335 |
| IQSEC3    | 4.737929 | 4.673242 | 4.836021 | 4.491816 | 4.360261 | 4.209002 |
| TTC26     | 6.029374 | 5.918686 | 5.989324 | 6.44988  | 6.261162 | 6.412143 |
| DNM1      | 8.514247 | 8.463717 | 8.552702 | 8.102169 | 8.044409 | 8.198395 |
| YTHDF1    | 7.402962 | 7.4458   | 7.377937 | 7.867258 | 7.775403 | 7.76934  |
| C6orf89   | 6.956096 | 7.006286 | 7.021832 | 6.720857 | 6.540137 | 6.538314 |
| LIMS1     | 8.465345 | 8.361474 | 8.465244 | 8.805699 | 8.831301 | 8.839749 |
| ARAF      | 7.344947 | 7.368915 | 7.36205  | 6.953177 | 6.98878  | 6.949451 |
| ASPEN     | 2.670349 | 2.670349 | 2.546087 | 2.867473 | 3.026855 | 3.176863 |
| TNNT1     | 7.930521 | 7.9286   | 7.908273 | 7.558035 | 7.48529  | 7.539852 |
| TBC1D25   | 6.382983 | 6.30139  | 6.235494 | 5.811833 | 6.04859  | 5.875281 |
| FAM195B   | 8.657124 | 8.643202 | 8.525913 | 8.187101 | 8.220429 | 8.234704 |
| MBD1      | 7.146316 | 7.031264 | 7.140693 | 7.508629 | 7.44318  | 7.550211 |
| SENP8     | 5.752605 | 5.735444 | 5.784735 | 5.378832 | 5.362673 | 5.347546 |
| LOC102723 | 6.438804 | 6.39014  | 6.462771 | 6.835204 | 6.74141  | 6.898803 |
| CHM       | 4.854776 | 4.808163 | 4.720854 | 5.188669 | 5.156555 | 5.221849 |
| SMPD4     | 6.481056 | 6.34865  | 6.452947 | 6.006653 | 6.097937 | 5.994815 |
| SNORA15   | 5.197174 | 5.007966 | 5.139111 | 4.489983 | 4.990076 | 4.681196 |
| GALNT12   | 3.85829  | 3.976059 | 3.860065 | 3.372415 | 3.448373 | 3.690665 |
| NCK1      | 7.257893 | 7.220817 | 7.250636 | 7.701222 | 7.619582 | 7.591384 |
| BCAP29    | 6.058005 | 6.044443 | 6.13946  | 5.789957 | 5.613861 | 5.655409 |
| GCFC2     | 7.346072 | 7.401812 | 7.392277 | 7.810503 | 7.775316 | 7.736942 |
| KLC1      | 7.02355  | 7.141392 | 7.030835 | 7.497692 | 7.358495 | 7.521798 |
| NAB1      | 5.992352 | 6.002156 | 5.858073 | 6.330859 | 6.325457 | 6.378421 |
| BIN3      | 9.182927 | 9.227881 | 9.195401 | 8.80028  | 8.820296 | 8.803878 |
| SLC25A16  | 5.946294 | 5.861777 | 6.033763 | 6.415654 | 6.312192 | 6.295431 |
| ACTL6A    | 9.776159 | 9.793301 | 9.789796 | 9.431921 | 9.378855 | 9.367146 |
| TRPS1     | 6.036412 | 6.019237 | 6.007335 | 6.401519 | 6.382616 | 6.459983 |
| BCL2L2    | 7.765954 | 7.732816 | 7.754736 | 8.103892 | 8.109112 | 8.22148  |
| FYN       | 7.857097 | 7.908247 | 7.863501 | 8.285299 | 8.226006 | 8.298473 |
| TLDC1     | 7.381758 | 7.525336 | 7.54935  | 7.886628 | 7.832871 | 7.91753  |
| DDX42     | 5.358384 | 5.497332 | 5.192721 | 4.927522 | 5.073046 | 4.868152 |
| SNAP25    | 3.101023 | 3.242483 | 3.402354 | 3.606323 | 3.560398 | 3.758738 |
| CD9       | 10.24338 | 10.21725 | 10.16872 | 9.811862 | 9.814026 | 9.824212 |

|           |          |          |          |          |          |          |
|-----------|----------|----------|----------|----------|----------|----------|
| DMKN      | 5.008594 | 5.113029 | 4.928215 | 5.477359 | 5.261219 | 5.490105 |
| FAM73B    | 6.552427 | 6.597679 | 6.632108 | 7.037315 | 6.912014 | 7.011677 |
| ACTN4     | 9.23532  | 9.281549 | 9.277858 | 8.907632 | 8.824091 | 8.885482 |
| HLA-F     | 5.791194 | 5.717963 | 5.668921 | 6.11691  | 6.136879 | 6.101775 |
| PC        | 4.453004 | 4.8725   | 4.394342 | 4.149475 | 4.356169 | 4.037201 |
| PAPSS2    | 7.807516 | 7.855192 | 7.807799 | 7.445374 | 7.373263 | 7.474905 |
| SAA1 ///  | 3.756935 | 3.809732 | 3.705635 | 4.147117 | 4.295323 | 4.006663 |
| LOC339803 | 8.631792 | 8.628623 | 8.728879 | 8.287421 | 8.198764 | 8.326517 |
| AKR7A2    | 9.030502 | 9.036437 | 9.033233 | 8.719382 | 8.506966 | 8.697275 |
| RTN4R     | 5.376227 | 5.337665 | 5.289184 | 4.874244 | 5.160195 | 4.792594 |
| ZNF625 // | 5.199085 | 5.169195 | 5.29027  | 5.611503 | 5.637866 | 5.584823 |
| KLF17     | 4.132118 | 4.110086 | 4.122456 | 4.573582 | 4.381653 | 4.584943 |
| SFXN1     | 8.745997 | 8.739786 | 8.81787  | 9.189966 | 9.129588 | 9.159137 |
| RHBDF1    | 6.094496 | 6.135943 | 6.206521 | 6.568648 | 6.487148 | 6.555351 |
| DCTN2     | 8.262071 | 8.337715 | 8.346439 | 7.996995 | 7.821221 | 7.954177 |
| PSMC3IP   | 8.222146 | 8.211874 | 8.207736 | 7.923742 | 7.730163 | 7.814341 |
| PPM1H     | 5.970981 | 6.051549 | 5.993096 | 6.496153 | 6.30519  | 6.387785 |
| ST8SIA4   | 6.619398 | 6.704623 | 6.681387 | 6.306093 | 6.225523 | 6.300653 |
| IFT80     | 7.749278 | 7.712013 | 7.722955 | 8.133555 | 8.062813 | 8.160689 |
| GNAQ      | 8.103023 | 8.077689 | 8.134618 | 8.568086 | 8.429567 | 8.490468 |
| C5orf30   | 7.912783 | 7.792534 | 7.816714 | 7.356903 | 7.475981 | 7.516497 |
| C4orf27   | 8.419405 | 8.42582  | 8.413431 | 8.059778 | 7.95391  | 8.072321 |
| URB2      | 7.555731 | 7.476908 | 7.429252 | 7.864634 | 7.882727 | 7.887098 |
| NDE1      | 8.230356 | 8.21684  | 8.221866 | 7.852324 | 7.797853 | 7.846879 |
| CBFB      | 7.434597 | 7.461737 | 7.520816 | 7.847219 | 7.848507 | 7.893152 |
| LBX2      | 6.657808 | 6.60822  | 6.530338 | 6.1662   | 6.195388 | 6.263117 |
| FKBP11    | 9.401169 | 9.423588 | 9.470591 | 9.088309 | 9.0125   | 9.023469 |
| CSF2      | 4.792077 | 4.958972 | 5.041907 | 5.382954 | 5.26574  | 5.315111 |
| ATF7      | 7.123982 | 7.114044 | 7.238367 | 6.850242 | 6.790452 | 6.665275 |
| GEMIN6    | 8.809113 | 8.896112 | 8.885938 | 8.505326 | 8.438756 | 8.476818 |
| ORC3      | 7.130491 | 7.168661 | 7.205053 | 6.798376 | 6.760944 | 6.774736 |
| TAF1      | 6.645625 | 6.775808 | 6.760996 | 7.075877 | 7.154778 | 7.121776 |
| SH3TC1    | 6.283078 | 6.227372 | 6.247656 | 6.59596  | 6.618048 | 6.71405  |
| CAB39     | 6.637496 | 6.470145 | 6.632605 | 7.001918 | 6.94501  | 6.963076 |
| AGPAT1    | 6.747787 | 6.861271 | 6.901992 | 6.487694 | 6.395712 | 6.458063 |
| CNOT8     | 8.561361 | 8.363262 | 8.378018 | 8.032182 | 8.050798 | 8.050541 |
| TYMS      | 10.27402 | 10.2722  | 10.23092 | 9.904291 | 9.842628 | 9.8611   |
| SLC35A2   | 5.603258 | 5.573712 | 5.446263 | 4.980594 | 5.262787 | 5.210858 |
| ACOT9     | 8.691643 | 8.704473 | 8.726755 | 9.150324 | 9.045301 | 9.096228 |
| MIER3     | 7.120121 | 7.138778 | 7.200656 | 7.561542 | 7.499298 | 7.567629 |
| ZBTB41    | 6.867072 | 6.883301 | 6.935113 | 7.353574 | 7.217061 | 7.283742 |
| TMEM43    | 8.74859  | 8.719423 | 8.773832 | 9.15864  | 9.070118 | 9.181826 |
| SHROOM3   | 7.85205  | 7.859209 | 7.790179 | 8.276032 | 8.204038 | 8.190057 |
| NUP93     | 9.551709 | 9.60239  | 9.597363 | 9.235995 | 9.146592 | 9.200754 |
| NSUN3     | 7.426035 | 7.408023 | 7.519607 | 7.886692 | 7.803815 | 7.830921 |
| PHEX      | 5.064877 | 5.296671 | 5.150004 | 5.57846  | 5.51525  | 5.584823 |
| ACTR1A    | 8.574091 | 8.624641 | 8.575179 | 8.219566 | 8.188771 | 8.199381 |
| LAP3      | 8.412292 | 8.418421 | 8.396024 | 8.010212 | 8.017632 | 8.032795 |
| ADGRA2    | 6.268263 | 6.191801 | 6.273557 | 5.821575 | 5.778441 | 5.967918 |
| SHKBP1    | 6.996751 | 6.938294 | 7.025038 | 6.709729 | 6.423001 | 6.66183  |
| ZUFSP     | 6.994825 | 7.053562 | 6.988638 | 7.408744 | 7.3817   | 7.411988 |

|           |          |          |          |          |          |          |
|-----------|----------|----------|----------|----------|----------|----------|
| PBDC1     | 8.667367 | 8.600563 | 8.629905 | 9.039858 | 8.985318 | 9.037952 |
| SKIV2L    | 7.516825 | 7.619934 | 7.596773 | 7.187074 | 7.204528 | 7.176995 |
| ATRN      | 6.363994 | 6.492968 | 6.312877 | 5.990057 | 6.122997 | 5.892423 |
| EMB       | 7.639013 | 7.570047 | 7.675199 | 8.003601 | 8.02235  | 8.02235  |
| FAM98A    | 9.200253 | 9.186195 | 9.161918 | 9.595375 | 9.545263 | 9.571685 |
| DNAJC19   | 8.92755  | 8.924611 | 8.881826 | 8.538728 | 8.474512 | 8.556885 |
| ZNF592    | 6.506577 | 6.451726 | 6.417594 | 6.058664 | 5.98479  | 6.168688 |
| PALD1     | 5.836811 | 5.768771 | 5.883297 | 5.32268  | 5.382665 | 5.620156 |
| GON4L /// | 8.4141   | 8.425355 | 8.409783 | 8.802042 | 8.779232 | 8.831301 |
| SNTA1     | 5.35151  | 5.320579 | 5.475582 | 4.863271 | 5.07896  | 5.042544 |
| ZNF326    | 8.301411 | 8.339565 | 8.354881 | 7.949447 | 7.913746 | 7.970112 |
| MAN2B1    | 7.171973 | 7.230437 | 7.156855 | 7.61613  | 7.478242 | 7.627325 |
| ESPL1     | 8.547172 | 8.609673 | 8.575324 | 8.227853 | 8.158729 | 8.183277 |
| IL4R      | 6.791907 | 6.740659 | 6.782846 | 7.216336 | 7.125148 | 7.135938 |
| SLC1A4    | 6.061288 | 6.10819  | 6.13946  | 5.696947 | 5.704929 | 5.745078 |
| RIOK2     | 7.544913 | 7.60157  | 7.57866  | 7.973925 | 7.95805  | 7.954709 |
| THAP9     | 5.565647 | 5.57414  | 5.732778 | 6.010345 | 5.942825 | 6.080742 |
| GPKOW     | 8.275221 | 8.278214 | 8.354941 | 7.972711 | 7.810661 | 7.964208 |
| HSP90AA4F | 12.39734 | 12.42552 | 12.43003 | 12.0388  | 12.02177 | 12.03168 |
| PDE4D     | 5.794296 | 5.892922 | 6.038403 | 6.360404 | 6.253254 | 6.272161 |
| PARP4     | 6.844805 | 6.852182 | 6.920916 | 7.328554 | 7.201778 | 7.24767  |
| YWHAQ     | 10.97877 | 11.0699  | 10.92728 | 10.62139 | 10.58398 | 10.61049 |
| HIP1R     | 6.98043  | 7.102651 | 7.100262 | 6.634823 | 6.703261 | 6.685438 |
| RAP2B     | 9.760722 | 9.758749 | 9.786632 | 10.17787 | 10.14012 | 10.14784 |
| ZNF507    | 4.366679 | 4.459949 | 4.268503 | 4.200688 | 3.738722 | 3.996009 |
| FAM63B    | 5.235947 | 5.257518 | 5.231344 | 5.643723 | 5.618793 | 5.621671 |
| NPY1R     | 3.389759 | 3.296544 | 3.253694 | 2.852875 | 2.83199  | 3.09581  |
| TMEM159   | 3.056003 | 2.995647 | 3.263322 | 3.528432 | 3.547553 | 3.398246 |
| ABCA1     | 4.753034 | 4.661733 | 4.843146 | 5.343233 | 5.149555 | 4.924383 |
| RFESD     | 4.966513 | 5.048336 | 4.966237 | 5.465963 | 5.249079 | 5.425023 |
| HSPA1A // | 10.01858 | 10.00469 | 9.989947 | 9.637833 | 9.62377  | 9.593253 |
| AUP1      | 9.040286 | 9.104517 | 9.067665 | 9.476297 | 9.425101 | 9.469429 |
| RAPGEF4   | 3.872004 | 3.60743  | 4.001506 | 4.22408  | 4.065354 | 4.349803 |
| USMG5     | 5.490583 | 5.51092  | 5.406966 | 5.109694 | 5.072967 | 5.067674 |
| SLC25A46  | 8.457706 | 8.376628 | 8.349065 | 8.76211  | 8.771414 | 8.807433 |
| FAM200B   | 8.329884 | 8.346082 | 8.306248 | 8.744506 | 8.712023 | 8.683223 |
| PRPS1L1   | 3.384005 | 3.093648 | 3.446885 | 2.976683 | 2.89117  | 2.900208 |
| NRG1      | 6.961099 | 7.01364  | 6.988416 | 7.376839 | 7.267119 | 7.475543 |
| RAF1      | 8.333545 | 8.40001  | 8.358034 | 8.776723 | 8.705595 | 8.765614 |
| ENSA      | 7.887592 | 7.84196  | 7.98066  | 7.525312 | 7.513958 | 7.514682 |
| NUDT8     | 7.304252 | 7.405838 | 7.308753 | 6.960861 | 6.964776 | 6.937274 |
| GCOM1 /// | 8.296046 | 8.309354 | 8.285008 | 8.659023 | 8.648562 | 8.738517 |
| PDK4      | 6.117317 | 6.09049  | 6.172872 | 6.500043 | 6.419271 | 6.616781 |
| HGSNAT    | 4.737744 | 4.798521 | 4.82009  | 4.411343 | 4.40462  | 4.385273 |
| MKNK1     | 7.305882 | 7.310162 | 7.344213 | 7.732755 | 7.643277 | 7.739246 |
| ZMAT2     | 9.042854 | 9.063961 | 9.039755 | 8.60725  | 8.680867 | 8.703777 |
| MBNL2     | 7.665562 | 7.708424 | 7.623554 | 8.092487 | 7.991504 | 8.067614 |
| MORC4     | 5.331035 | 5.297508 | 5.442788 | 5.804246 | 5.705737 | 5.71534  |
| PHB2      | 11.54625 | 11.59122 | 11.54731 | 11.22328 | 11.13144 | 11.17628 |
| PARP6     | 7.396081 | 7.249846 | 7.39071  | 7.745543 | 7.686354 | 7.758406 |
| ATAD3A // | 8.502279 | 8.462833 | 8.494956 | 8.11217  | 8.058388 | 8.135943 |

|           |           |           |           |           |           |           |
|-----------|-----------|-----------|-----------|-----------|-----------|-----------|
| PREPL     | 8. 617505 | 8. 52995  | 8. 575151 | 8. 134593 | 8. 204289 | 8. 231068 |
| NELFB     | 7. 607052 | 7. 623674 | 7. 604454 | 7. 315379 | 7. 239481 | 7. 127727 |
| EXOSC8    | 9. 764639 | 9. 804398 | 9. 801131 | 9. 436933 | 9. 379985 | 9. 400738 |
| C1orf198  | 7. 248769 | 7. 237729 | 7. 370078 | 7. 685668 | 7. 652962 | 7. 670402 |
| WASL      | 6. 33493  | 6. 326089 | 6. 3368   | 6. 698691 | 6. 618277 | 6. 833247 |
| SAMD4B    | 7. 830758 | 7. 922434 | 7. 861692 | 7. 50512  | 7. 459181 | 7. 498288 |
| ZNF37A    | 7. 523533 | 7. 534557 | 7. 490101 | 7. 878631 | 7. 916716 | 7. 904866 |
| TMEM167B  | 3. 941541 | 3. 623375 | 3. 614849 | 3. 494268 | 3. 39485  | 3. 138636 |
| USP6NL    | 6. 255451 | 5. 999273 | 6. 047904 | 6. 390979 | 6. 524576 | 6. 538935 |
| PRKDC     | 9. 379159 | 9. 372885 | 9. 372908 | 9. 014339 | 8. 952694 | 9. 00611  |
| ATP6V1D   | 9. 477035 | 9. 525521 | 9. 490517 | 9. 934989 | 9. 845555 | 9. 86416  |
| SALL2     | 4. 576041 | 4. 609643 | 4. 550718 | 4. 215945 | 4. 174955 | 4. 194155 |
| ITPK1     | 8. 051388 | 8. 123359 | 8. 033406 | 7. 727456 | 7. 712106 | 7. 617827 |
| LRRCC1    | 5. 017428 | 4. 788128 | 4. 756241 | 4. 501994 | 4. 431336 | 4. 477925 |
| MTRF1     | 6. 068634 | 6. 062061 | 6. 021125 | 5. 687163 | 5. 699867 | 5. 614583 |
| MBOAT1    | 3. 278715 | 3. 301828 | 3. 690057 | 3. 129551 | 2. 945939 | 3. 045106 |
| SEMA6B    | 5. 945361 | 5. 961167 | 5. 965963 | 5. 59109  | 5. 650535 | 5. 480976 |
| SKA3      | 7. 967741 | 7. 919698 | 7. 966785 | 7. 591195 | 7. 515014 | 7. 598216 |
| DVL3      | 6. 7651   | 6. 889416 | 6. 864135 | 7. 220743 | 7. 156676 | 7. 290969 |
| HEG1      | 8. 04845  | 7. 947652 | 8. 023593 | 8. 404887 | 8. 355868 | 8. 408672 |
| GPX6      | 5. 452845 | 5. 498318 | 5. 535308 | 5. 056564 | 5. 267597 | 5. 012771 |
| RPS2 ///  | 11. 68764 | 11. 52283 | 11. 41777 | 11. 10558 | 11. 35468 | 11. 01887 |
| PUS7L     | 5. 637835 | 5. 629784 | 5. 665927 | 6. 050622 | 5. 92104  | 6. 110747 |
| NIPBL     | 7. 548948 | 7. 535194 | 7. 614951 | 7. 992381 | 7. 939158 | 7. 916357 |
| CCDC14    | 8. 828748 | 8. 840248 | 8. 846007 | 8. 447324 | 8. 430442 | 8. 4885   |
| PRPF39    | 6. 141014 | 6. 071012 | 5. 989888 | 6. 388097 | 6. 448263 | 6. 514252 |
| NID2      | 3. 848807 | 4. 055732 | 3. 872983 | 3. 607771 | 3. 576391 | 3. 444735 |
| TLE2      | 3. 790685 | 3. 962301 | 3. 705635 | 3. 513514 | 3. 293209 | 3. 503753 |
| ESM1      | 6. 414963 | 6. 557078 | 6. 495691 | 6. 917953 | 6. 849322 | 6. 848528 |
| TAGLN2    | 10. 06128 | 10. 11438 | 10. 0972  | 9. 682741 | 9. 645747 | 9. 796318 |
| SMARCC2   | 8. 290031 | 8. 344886 | 8. 352399 | 7. 949793 | 7. 904811 | 7. 985433 |
| BLID      | 6. 792193 | 6. 782721 | 6. 825162 | 6. 417801 | 6. 356691 | 6. 478362 |
| IQCH      | 3. 592257 | 3. 758014 | 3. 585829 | 3. 94648  | 4. 150593 | 3. 986157 |
| FAM71A    | 4. 504014 | 4. 424165 | 4. 352429 | 3. 881337 | 4. 272155 | 3. 980221 |
| CHMP7     | 7. 764869 | 7. 752169 | 7. 702281 | 7. 322359 | 7. 303668 | 7. 446473 |
| PEX12     | 7. 613926 | 7. 570373 | 7. 626275 | 7. 973441 | 7. 955822 | 8. 028006 |
| ALG6      | 7. 970161 | 8. 007203 | 8. 087912 | 7. 699807 | 7. 619357 | 7. 599606 |
| USP7      | 6. 050289 | 6. 095874 | 6. 226581 | 5. 745581 | 5. 946149 | 5. 535215 |
| HIST1H2AM | 4. 347189 | 4. 389508 | 4. 528176 | 3. 903093 | 4. 18918  | 4. 026895 |
| RPL37A    | 6. 727863 | 6. 656441 | 6. 820103 | 6. 326862 | 6. 300653 | 6. 431503 |
| DPY30     | 10. 66979 | 10. 67144 | 10. 69826 | 10. 33838 | 10. 29336 | 10. 26255 |
| SSU72     | 8. 651044 | 8. 724044 | 8. 664336 | 8. 313675 | 8. 257919 | 8. 322667 |
| DCAF10    | 8. 117332 | 8. 128408 | 8. 183717 | 8. 576474 | 8. 465032 | 8. 532671 |
| IFIT5     | 8. 020595 | 7. 937034 | 7. 955568 | 8. 296852 | 8. 363752 | 8. 397256 |
| MTMR1     | 5. 597492 | 5. 768659 | 5. 72201  | 6. 137448 | 6. 024883 | 6. 07049  |
| LYSMD2    | 7. 689107 | 7. 792097 | 7. 668041 | 8. 06126  | 8. 10415  | 8. 128262 |
| KIAA0922  | 6. 6685   | 6. 672365 | 6. 610863 | 7. 140953 | 6. 945013 | 7. 01018  |
| PAFAH2    | 4. 400996 | 4. 394012 | 4. 495622 | 4. 879878 | 4. 630539 | 4. 924613 |
| KBTBD11   | 4. 000285 | 3. 996977 | 4. 259227 | 3. 503753 | 3. 803538 | 3. 80496  |
| AGAP2-AS1 | 5. 314093 | 5. 179744 | 5. 431735 | 4. 917161 | 5. 040078 | 4. 824205 |
| RPL26L1   | 10. 64435 | 10. 65384 | 10. 60701 | 10. 24742 | 10. 23735 | 10. 27641 |

|          |           |           |           |           |           |           |
|----------|-----------|-----------|-----------|-----------|-----------|-----------|
| C7orf60  | 7. 166333 | 7. 300005 | 7. 302475 | 7. 632969 | 7. 671306 | 7. 608277 |
| DCAF7    | 8. 839032 | 8. 933155 | 8. 881619 | 9. 263498 | 9. 233258 | 9. 300657 |
| ARF6     | 9. 254557 | 9. 227166 | 9. 246495 | 8. 835189 | 8. 833492 | 8. 916009 |
| PDE1C    | 7. 339781 | 7. 312059 | 7. 263624 | 7. 740345 | 7. 574917 | 7. 743689 |
| PARBPB   | 6. 699985 | 6. 658861 | 6. 635417 | 6. 364001 | 6. 295269 | 6. 191728 |
| G3BP1    | 10. 35591 | 10. 27205 | 10. 27269 | 9. 958634 | 9. 917375 | 9. 881371 |
| UNKL     | 6. 447019 | 6. 552286 | 6. 477513 | 6. 061136 | 6. 202859 | 6. 069794 |
| MCM8     | 7. 603288 | 7. 59118  | 7. 497157 | 7. 208031 | 7. 164867 | 7. 175714 |
| CEP128   | 3. 751113 | 3. 888365 | 3. 596463 | 3. 284148 | 3. 284148 | 3. 524648 |
| RAP1GDS1 | 7. 23119  | 7. 177022 | 7. 085651 | 6. 860001 | 6. 7004   | 6. 790831 |
| PSMB5    | 8. 836061 | 8. 884377 | 8. 8018   | 8. 447627 | 8. 427957 | 8. 504069 |
| PLXNB2   | 8. 692695 | 8. 76594  | 8. 682447 | 9. 103932 | 9. 063308 | 9. 116388 |
| TTC21B   | 6. 937613 | 6. 936186 | 7. 045779 | 7. 356051 | 7. 324552 | 7. 381141 |
| JOSD1    | 7. 975171 | 8. 060727 | 8. 054049 | 8. 420255 | 8. 36682  | 8. 444934 |
| CCBE1    | 5. 060597 | 4. 871339 | 4. 839626 | 5. 048357 | 5. 587373 | 5. 27781  |
| TIMM17B  | 9. 599979 | 9. 617397 | 9. 600119 | 9. 232299 | 9. 271785 | 9. 171591 |
| MICALL1  | 9. 826934 | 9. 811864 | 9. 780484 | 9. 394105 | 9. 465337 | 9. 418128 |
| ZNF772   | 7. 766082 | 7. 849328 | 7. 842709 | 7. 451535 | 7. 382336 | 7. 482742 |
| TLK1     | 5. 86973  | 6. 00659  | 5. 958591 | 6. 321822 | 6. 225523 | 6. 428985 |
| PATZ1    | 7. 75931  | 7. 751817 | 7. 722214 | 7. 389681 | 7. 320868 | 7. 381575 |
| CNTF /// | 5. 156313 | 4. 907784 | 5. 116933 | 5. 486726 | 5. 4397   | 5. 395785 |
| PTRH2    | 9. 508003 | 9. 491218 | 9. 507359 | 9. 907994 | 9. 86246  | 9. 877248 |
| NKIRAS1  | 7. 230436 | 7. 222423 | 7. 246356 | 7. 637474 | 7. 637255 | 7. 565536 |
| ELP2     | 8. 647405 | 8. 736076 | 8. 668572 | 9. 097058 | 9. 059269 | 9. 03653  |
| TMCC1    | 5. 983611 | 5. 970868 | 6. 222556 | 6. 436176 | 6. 320635 | 6. 560925 |
| TAF13    | 5. 140864 | 4. 998143 | 5. 050663 | 5. 404854 | 5. 360254 | 5. 565103 |
| TEC ///  | 4. 023253 | 4. 012591 | 4. 079047 | 4. 585505 | 4. 381959 | 4. 287871 |
| CNKSR2   | 6. 040647 | 6. 017922 | 6. 128132 | 6. 493329 | 6. 361664 | 6. 472098 |
| LIMK2    | 5. 589006 | 5. 667517 | 5. 519784 | 6. 013941 | 6. 069194 | 5. 833487 |
| PRPF4B   | 7. 664046 | 7. 659223 | 7. 728423 | 8. 067588 | 8. 065123 | 8. 057953 |
| AHCY     | 7. 900367 | 8. 005607 | 7. 998781 | 7. 629095 | 7. 507963 | 7. 629184 |
| RWDD3    | 4. 017582 | 4. 14235  | 4. 383092 | 4. 515518 | 4. 383092 | 4. 782827 |
| SEMA3A   | 9. 784964 | 9. 739    | 9. 766571 | 10. 12343 | 10. 15022 | 10. 15507 |
| TSEN34   | 9. 591784 | 9. 59177  | 9. 613153 | 9. 238403 | 9. 19168  | 9. 228748 |
| RBM17    | 6. 875635 | 6. 837049 | 6. 828257 | 6. 467534 | 6. 402211 | 6. 533627 |
| PLEKHA3  | 7. 286695 | 7. 382501 | 7. 478643 | 7. 778606 | 7. 730906 | 7. 775817 |
| FHL3     | 8. 0558   | 8. 018132 | 7. 986975 | 8. 421226 | 8. 382694 | 8. 39445  |
| PAXBP1   | 3. 733382 | 3. 801454 | 3. 925428 | 4. 277402 | 4. 236861 | 4. 083081 |
| ALDH16A1 | 7. 030533 | 7. 107534 | 7. 238367 | 6. 798262 | 6. 745988 | 6. 695186 |
| USP44    | 2. 443462 | 2. 455843 | 2. 662355 | 2. 972445 | 2. 768849 | 2. 956998 |
| CBR4     | 7. 925298 | 7. 909873 | 7. 859122 | 7. 537837 | 7. 479999 | 7. 539881 |
| ZNF7     | 8. 020706 | 8. 014953 | 8. 021219 | 8. 438278 | 8. 362929 | 8. 392183 |
| MRPL17   | 5. 801915 | 5. 736841 | 5. 879175 | 5. 344823 | 5. 418439 | 5. 518179 |
| ZBED4    | 6. 471069 | 6. 381539 | 6. 339335 | 6. 05041  | 6. 100465 | 5. 904694 |
| SEPT6    | 5. 472809 | 5. 438674 | 5. 562696 | 5. 153269 | 5. 111301 | 5. 073314 |
| CYB5R3   | 8. 013165 | 8. 126956 | 8. 073322 | 7. 684155 | 7. 710013 | 7. 68306  |
| FAM206A  | 8. 811966 | 8. 824851 | 8. 848055 | 9. 112382 | 9. 208545 | 9. 300123 |
| SLC24A5  | 4. 07955  | 4. 240727 | 4. 136749 | 4. 523303 | 4. 52374  | 4. 546128 |
| WDR24    | 6. 779117 | 6. 88304  | 6. 932469 | 6. 398546 | 6. 523584 | 6. 536601 |
| TNS2     | 7. 320469 | 7. 362311 | 7. 335656 | 6. 95811  | 6. 953765 | 6. 970822 |

## Gene chip analysis\_RawData

| ProbeID   | shALDOC_1 | shALDOC_2 | shALDOC_3 | shCtrl_1 | shCtrl_2 | shCtrl_3 |
|-----------|-----------|-----------|-----------|----------|----------|----------|
| 11715100_ | 3.900311  | 4.067703  | 4.094919  | 3.997131 | 4.087615 | 4.101533 |
| 11715101_ | 6.331968  | 6.291816  | 6.298332  | 6.522692 | 6.587257 | 6.495361 |
| 11715102_ | 4.777655  | 4.912263  | 4.830145  | 4.848458 | 5.037371 | 5.034    |
| 11715103_ | 5.219129  | 4.991443  | 5.11186   | 5.358606 | 5.292468 | 5.193719 |
| 11715104_ | 5.368045  | 5.448992  | 5.414869  | 5.528624 | 5.625899 | 5.590161 |
| 11715105_ | 3.168893  | 3.105102  | 3.339324  | 3.156187 | 3.168893 | 3.227291 |
| 11715106_ | 3.492424  | 3.826462  | 3.628901  | 3.691924 | 3.785856 | 3.885919 |
| 11715107_ | 6.015845  | 5.983212  | 5.875082  | 5.95901  | 6.060464 | 6.083662 |
| 11715108_ | 3.614006  | 3.57716   | 3.531518  | 3.513095 | 3.659111 | 3.568684 |
| 11715109_ | 3.620979  | 4.031122  | 3.798611  | 4.029895 | 3.766207 | 3.921952 |
| 11715110_ | 5.958851  | 5.940678  | 5.831056  | 6.019142 | 5.906916 | 5.917395 |
| 11715111_ | 8.001519  | 8.166557  | 8.08611   | 8.128398 | 8.139794 | 8.233585 |
| 11715112_ | 2.622489  | 2.684924  | 2.54649   | 2.513247 | 2.503528 | 2.547612 |
| 11715113_ | 7.929993  | 7.974358  | 7.861008  | 7.96096  | 7.923155 | 7.976769 |
| 11715114_ | 8.207512  | 8.152561  | 8.126853  | 8.090276 | 8.143381 | 8.12021  |
| 11715115_ | 2.424054  | 2.517986  | 2.597053  | 2.517986 | 2.418488 | 2.834914 |
| 11715116_ | 4.050861  | 3.766202  | 3.824668  | 3.594706 | 3.702584 | 4.117396 |
| 11715117_ | 2.350445  | 2.145602  | 2.071469  | 2.403327 | 2.288359 | 2.225987 |
| 11715118_ | 3.397184  | 3.342456  | 3.196462  | 3.195226 | 3.248834 | 3.278172 |
| 11715119_ | 4.165787  | 4.219333  | 4.165787  | 4.216924 | 4.161207 | 4.155659 |
| 11715120_ | 5.226404  | 5.340211  | 5.266975  | 5.501743 | 5.569968 | 5.637789 |
| 11715121_ | 3.331865  | 3.474387  | 3.503491  | 3.606313 | 3.388994 | 3.607361 |
| 11715122_ | 5.47219   | 5.557582  | 5.393535  | 5.522186 | 5.520694 | 5.447456 |
| 11715123_ | 4.766266  | 4.940989  | 4.680856  | 4.879513 | 4.740303 | 4.84581  |
| 11715124_ | 8.18143   | 8.267544  | 8.17687   | 8.228798 | 8.316236 | 8.211428 |
| 11715125_ | 7.881798  | 7.808499  | 7.883747  | 8.006221 | 8.011812 | 8.022125 |
| 11715126_ | 6.831273  | 6.858994  | 6.831392  | 6.837927 | 6.644662 | 6.69388  |
| 11715127_ | 3.370244  | 3.438185  | 3.293114  | 3.343046 | 3.291212 | 3.384338 |
| 11715128_ | 6.426438  | 6.459202  | 6.270069  | 6.472432 | 6.438442 | 6.50109  |
| 11715129_ | 7.62277   | 7.681212  | 7.643325  | 7.674125 | 7.614484 | 7.621572 |
| 11715130_ | 6.296532  | 6.565194  | 6.297563  | 6.455953 | 6.243103 | 6.430667 |
| 11715131_ | 2.951769  | 3.369217  | 3.627176  | 3.359079 | 3.416869 | 3.471786 |
| 11715132_ | 3.385389  | 3.288948  | 3.141651  | 3.290188 | 3.307825 | 3.267417 |
| 11715133_ | 1.753122  | 1.682166  | 1.533764  | 1.80607  | 1.713514 | 1.936829 |
| 11715134_ | 1.600772  | 1.807368  | 1.551539  | 1.62509  | 1.583331 | 1.630441 |
| 11715135_ | 5.512912  | 5.55126   | 5.61016   | 5.494291 | 5.590217 | 5.645234 |
| 11715136_ | 4.655495  | 4.514638  | 4.553536  | 4.771951 | 4.771756 | 4.581959 |
| 11715137_ | 8.305195  | 8.469622  | 8.290719  | 8.293654 | 8.297598 | 8.335368 |
| 11715138_ | 8.040678  | 8.082391  | 8.065964  | 8.140234 | 8.17687  | 8.132033 |
| 11715139_ | 2.30146   | 2.292981  | 2.212607  | 2.334105 | 2.398432 | 2.29686  |
| 11715140_ | 4.861873  | 5.041857  | 5.211517  | 5.123886 | 5.049807 | 5.275483 |
| 11715141_ | 4.707589  | 4.869655  | 4.554001  | 4.773432 | 4.810871 | 4.584933 |
| 11715142_ | 3.458371  | 3.271125  | 3.717633  | 3.451214 | 3.575068 | 3.538753 |
| 11715143_ | 4.614412  | 4.487825  | 4.459939  | 4.794388 | 4.580881 | 4.597091 |
| 11715144_ | 4.989553  | 5.224315  | 5.12471   | 5.049039 | 5.184526 | 5.074277 |
| 11715145_ | 5.351806  | 5.490876  | 5.488531  | 5.869021 | 5.670637 | 5.66739  |
| 11715146_ | 6.281841  | 6.476263  | 6.175599  | 6.345067 | 6.30196  | 6.287567 |
| 11715147_ | 3.219824  | 3.487147  | 3.257067  | 3.09802  | 3.224816 | 3.308083 |
| 11715148_ | 2.988093  | 3.025963  | 2.948354  | 3.025972 | 3.001607 | 2.737978 |
| 11715149_ | 3.155906  | 3.287934  | 3.380812  | 3.301341 | 3.386541 | 3.398236 |



11715150\_ 6.17981 6.151177 6.136035 5.811273 5.912821 5.849541  
11715151\_ 4.643717 4.664305 4.771376 4.626377 4.6175 4.642307  
11715152\_ 3.149366 3.046796 2.948317 2.908582 2.902491 2.979546  
11715153\_ 4.247752 4.247601 4.214445 4.051732 4.108989 4.287855  
11715154\_ 4.469811 4.370212 4.03759 3.980277 3.697803 3.741548  
11715155\_ 7.657525 7.660455 7.66243 7.731471 7.75294 7.761108  
11715156\_ 10.70934 10.89167 10.75989 10.88141 10.791 10.91661  
11715157\_ 2.842048 3.032341 2.899504 3.193806 2.918683 2.952173  
11715158\_ 2.112388 2.286421 2.286297 2.216061 2.127222 2.206876  
11715159\_ 10.19463 10.09523 10.1966 10.09523 10.06302 10.05822  
11715160\_ 3.624724 3.580671 3.625408 3.476821 3.612007 3.712965  
11715161\_ 5.11527 5.159469 5.122191 5.37567 5.179646 5.307187  
11715162\_ 4.57803 4.746932 4.64596 4.567253 4.744672 4.788379  
11715163\_ 3.119106 3.239568 3.289167 3.260783 3.228348 3.473399  
11715164\_ 3.101809 2.760188 2.837608 2.685014 2.655335 2.908178  
11715165\_ 7.903509 7.882494 7.900893 7.687009 7.648526 7.680337  
11715166\_ 5.191303 5.318706 4.984669 5.096422 5.11527 5.037665  
11715167\_ 4.415744 4.527406 4.455524 4.547155 4.708069 4.584933  
11715168\_ 4.092631 4.067703 4.021837 4.099567 3.901295 3.945848  
11715169\_ 6.635494 6.674436 6.580726 6.639075 6.699522 6.686431  
11715170\_ 2.069881 2.376792 2.197339 2.317183 2.281926 2.304342  
11715171\_ 4.49882 4.592282 4.579755 4.584933 4.552932 4.845455  
11715172\_ 2.718322 2.855356 2.790653 2.718322 2.7633 2.666123  
11715173\_ 8.742862 8.904645 8.693923 8.877163 8.91544 8.883519  
11715174\_ 7.205107 7.421523 7.330872 7.487628 7.400837 7.41603  
11715175\_ 8.646587 8.656259 8.610073 8.5745 8.622749 8.638361  
11715176\_ 5.430275 5.398803 5.394815 5.450143 5.404275 5.420394  
11715177\_ 6.894298 6.790937 6.946638 6.905373 6.87908 6.892825  
11715178\_ 8.825366 8.937073 8.784286 8.883229 8.875478 8.952583  
11715179\_ 3.64498 3.746523 3.637544 3.476208 3.656665 3.78627  
11715180\_ 2.266291 2.068901 2.284606 2.155517 1.909748 2.170888  
11715181\_ 7.973783 7.988089 7.788075 7.999319 7.955685 8.019345  
11715182\_ 7.999079 8.013908 7.959555 7.959555 8.029073 8.031989  
11715183\_ 4.825337 4.672442 4.859783 4.645658 4.452824 4.546908  
11715184\_ 11.36213 11.49869 11.4038 11.5143 11.51553 11.4703  
11715185\_ 5.367512 5.467991 5.461223 5.447296 5.55488 5.513295  
11715186\_ 3.271649 3.350404 3.066557 3.507459 3.377811 3.35019  
11715187\_ 4.057327 4.280459 4.021497 4.236152 4.395379 4.049724  
11715188\_ 1.898324 1.837885 1.88157 1.847342 1.850494 1.811562  
11715189\_ 12.15445 12.17638 12.13459 12.18446 12.12087 12.10901  
11715190\_ 2.380895 2.470696 2.501594 2.501594 2.777086 2.501594  
11715191\_ 2.361778 2.368033 2.285081 2.361778 2.343014 2.334577  
11715192\_ 1.995297 2.191834 2.106995 2.359558 2.166552 2.11591  
11715193\_ 7.502944 7.650381 7.575712 7.724359 7.700837 7.654567  
11715194\_ 5.367932 5.756683 5.608135 5.62612 5.62612 5.591135  
11715195\_ 5.693196 5.789947 5.831705 6.182031 6.320253 6.17981  
11715196\_ 5.945051 5.989362 5.995007 6.013971 6.05195 6.008325  
11715197\_ 5.593637 5.571311 5.57787 5.267468 5.416673 5.291521  
11715198\_ 7.848592 7.971089 7.873745 7.85957 7.825457 7.93847  
11715199\_ 7.825869 7.930339 7.792965 7.788193 7.858072 7.819996  
11715200\_ 7.878433 7.910364 7.872556 7.828613 7.916241 7.931787

11715201\_ 7. 919165 7. 940475 7. 956326 7. 887405 7. 92333 7. 974508  
11715202\_ 8. 152503 8. 097576 8. 069418 8. 173449 8. 212447 8. 227151  
11715203\_ 3. 795986 3. 670013 3. 63234 3. 774081 3. 752739 3. 835181  
11715204\_ 3. 872095 4. 03725 3. 948431 4. 603507 4. 467479 4. 673793  
11715205\_ 2. 824956 2. 836865 2. 711877 2. 720946 2. 753553 2. 753553  
11715206\_ 2. 824956 2. 836865 2. 711877 2. 720946 2. 753553 2. 753553  
11715207\_ 4. 860106 4. 946758 4. 602319 4. 837952 4. 859284 4. 812653  
11715208\_ 5. 285218 5. 401747 5. 377379 5. 595704 5. 413656 5. 633948  
11715209\_ 10. 03123 10. 08251 10. 08271 9. 929128 10. 00585 10. 04791  
11715210\_ 8. 858823 8. 834756 8. 84965 9. 159748 9. 135785 9. 185888  
11715211\_ 6. 484799 6. 300643 6. 508088 6. 118838 6. 030303 6. 015621  
11715212\_ 9. 400113 9. 367013 9. 486084 9. 312269 9. 354832 9. 329762  
11715213\_ 3. 473316 3. 481679 3. 417996 3. 450099 3. 571492 3. 682968  
11715214\_ 4. 654415 4. 706928 4. 709463 4. 861044 4. 883679 4. 657694  
11715215\_ 3. 782673 3. 986991 3. 693479 3. 997447 3. 755798 3. 788822  
11715216\_ 2. 162718 1. 850781 2. 049025 1. 995297 1. 928044 1. 995297  
11715217\_ 4. 269733 4. 25436 4. 276807 4. 156819 4. 112944 4. 285656  
11715218\_ 9. 676196 9. 663494 9. 687184 9. 589344 9. 651783 9. 633622  
11715219\_ 4. 078587 4. 097708 4. 313898 3. 993332 3. 759406 4. 169952  
11715220\_ 6. 85683 6. 671386 6. 921156 6. 500957 6. 561214 6. 577193  
11715221\_ 7. 377334 7. 337784 7. 428177 7. 976762 7. 994847 7. 984842  
11715222\_ 5. 90487 5. 816785 5. 676746 6. 042826 6. 144938 6. 172368  
11715223\_ 4. 480444 4. 76941 4. 544738 4. 647394 4. 609167 4. 598262  
11715224\_ 4. 550519 4. 689365 4. 57706 4. 68343 4. 700641 4. 581702  
11715225\_ 7. 905578 7. 89911 7. 963702 7. 726214 7. 615076 7. 651895  
11715226\_ 5. 317952 5. 455048 5. 378539 5. 420773 5. 524668 5. 572103  
11715227\_ 5. 40369 5. 422 5. 449813 5. 425349 5. 389427 5. 227045  
11715228\_ 5. 333723 5. 426649 5. 234228 5. 588662 5. 495375 5. 554436  
11715229\_ 4. 949577 4. 981677 4. 930507 4. 988037 5. 020157 5. 104112  
11715230\_ 5. 46054 5. 456278 5. 561167 5. 571794 5. 596145 5. 562418  
11715231\_ 10. 8177 10. 84002 10. 81264 10. 8307 10. 89099 10. 91463  
11715232\_ 8. 271374 8. 248153 8. 238215 8. 166472 8. 27494 8. 169866  
11715233\_ 5. 876699 6. 040612 5. 973344 6. 43154 6. 397491 6. 354529  
11715234\_ 6. 449328 6. 508805 6. 419637 6. 300762 6. 27543 6. 351554  
11715235\_ 10. 54265 10. 69281 10. 63838 10. 69255 10. 65943 10. 6304  
11715236\_ 3. 276997 3. 290917 3. 40549 3. 364228 3. 357635 3. 294233  
11715237\_ 12. 42919 12. 4774 12. 42627 12. 46842 12. 43619 12. 44055  
11715238\_ 11. 95861 11. 98315 11. 94348 11. 97284 11. 94791 11. 91536  
11715239\_ 11. 45636 11. 41049 11. 44469 11. 19055 11. 21779 11. 20319  
11715240\_ 7. 313321 7. 340774 7. 365902 6. 726043 6. 612546 6. 689398  
11715241\_ 8. 303923 8. 429788 8. 408564 8. 337707 8. 364 8. 418784  
11715242\_ 5. 038538 5. 24423 4. 997979 5. 296156 5. 176541 5. 16606  
11715243\_ 7. 327541 7. 387496 7. 251581 7. 355585 7. 429493 7. 314206  
11715244\_ 8. 131431 8. 143829 8. 14461 8. 136316 8. 168447 8. 211053  
11715245\_ 5. 210463 5. 322217 5. 17639 5. 370386 5. 236868 5. 342236  
11715246\_ 5. 704919 5. 918745 5. 790071 5. 777076 5. 847339 5. 818688  
11715247\_ 5. 11527 5. 101806 5. 12018 5. 227104 5. 149545 5. 163009  
11715248\_ 3. 16257 2. 904713 2. 962223 2. 780828 2. 900646 3. 207801  
11715249\_ 7. 610988 7. 605613 7. 516936 7. 723741 7. 721155 7. 628133  
11715250\_ 3. 532742 3. 818238 3. 45076 2. 851562 2. 624253 2. 812936  
11715251\_ 6. 898046 6. 765911 6. 971486 6. 607204 6. 651226 6. 660519

11715252\_ 7. 44336 7. 416007 7. 460992 8. 202595 8. 088323 8. 185435  
11715253\_ 7. 596153 7. 674885 7. 459721 7. 658635 7. 729261 7. 666874  
11715254\_ 3. 567915 3. 662056 3. 563089 3. 709684 3. 718187 3. 555108  
11715255\_ 2. 820288 2. 892472 2. 779917 3. 056352 3. 051705 2. 839973  
11715256\_ 4. 453832 4. 52373 4. 222917 4. 480502 4. 40461 4. 555348  
11715257\_ 4. 786913 4. 889035 4. 538735 4. 874234 4. 849431 4. 812526  
11715258\_ 8. 182399 8. 130673 8. 14838 8. 432247 8. 51227 8. 442531  
11715259\_ 3. 114606 3. 217129 3. 219776 3. 174337 3. 20919 3. 596822  
11715260\_ 7. 32209 7. 217288 7. 191988 7. 52882 7. 474021 7. 487809  
11715261\_ 2. 988093 3. 051451 3. 06196 3. 492485 3. 463448 3. 398236  
11715262\_ 5. 682003 5. 75229 5. 598896 5. 725155 5. 781549 5. 869397  
11715263\_ 2. 874309 3. 009031 2. 894533 3. 239906 3. 177226 3. 001047  
11715264\_ 6. 586708 6. 689122 6. 684223 6. 707132 6. 92176 6. 723057  
11715265\_ 6. 659266 6. 689943 6. 616197 6. 624463 6. 588238 6. 609708  
11715266\_ 3. 555028 3. 555028 3. 473097 3. 555028 3. 695279 3. 444044  
11715267\_ 3. 381156 3. 414504 3. 638768 3. 219656 3. 2236 3. 138096  
11715268\_ 6. 353235 6. 452034 6. 419737 6. 532958 6. 482687 6. 478433  
11715269\_ 3. 803205 3. 765282 3. 846036 3. 913285 3. 870789 3. 967284  
11715270\_ 6. 084392 6. 118838 6. 260464 5. 533165 5. 657468 5. 561628  
11715271\_ 8. 111735 8. 25433 8. 12474 8. 105506 8. 201324 8. 152169  
11715272\_ 1. 719596 1. 710921 1. 615585 1. 571589 1. 625666 1. 611374  
11715273\_ 5. 183715 5. 359142 5. 146074 5. 117618 5. 10772 5. 021832  
11715274\_ 5. 137498 5. 333246 5. 242023 4. 891848 4. 963768 4. 950497  
11715275\_ 1. 69822 1. 713514 1. 94106 1. 715904 1. 713514 1. 624575  
11715276\_ 9. 011734 8. 952932 9. 103158 9. 174768 9. 256758 9. 169077  
11715277\_ 8. 937077 8. 925897 9. 027159 9. 183497 9. 201334 9. 117004  
11715278\_ 9. 024808 9. 083507 9. 104399 9. 251133 9. 264363 9. 173248  
11715279\_ 4. 12502 3. 867208 4. 015779 4. 215292 4. 101906 3. 908831  
11715280\_ 5. 156303 5. 196117 5. 15506 5. 152082 4. 940564 5. 208477  
11715281\_ 4. 788825 4. 492314 4. 644035 4. 469577 4. 423674 4. 729111  
11715282\_ 7. 988647 8. 037977 7. 941997 8. 033132 8. 108583 8. 131429  
11715283\_ 5. 03702 5. 105954 5. 105954 5. 156303 5. 206006 5. 297498  
11715284\_ 6. 263567 6. 302118 6. 313872 6. 320608 6. 376455 6. 300643  
11715285\_ 5. 765976 5. 918745 5. 709521 5. 669004 5. 79232 5. 695495  
11715286\_ 5. 753336 5. 673952 5. 767884 5. 590589 5. 824737 5. 673952  
11715287\_ 7. 202575 6. 954329 7. 088859 6. 397946 6. 471416 6. 519981  
11715288\_ 3. 763468 3. 738205 3. 637196 3. 607446 3. 705625 3. 606313  
11715289\_ 5. 650533 5. 709153 5. 699037 5. 630765 5. 690623 5. 808093  
11715290\_ 4. 634725 4. 691761 4. 584933 4. 736759 4. 706597 4. 758885  
11715291\_ 2. 912475 2. 964297 3. 025972 3. 021017 2. 920541 3. 126328  
11715292\_ 4. 08076 3. 884176 3. 885146 3. 979852 3. 97895 3. 995865  
11715293\_ 3. 753012 3. 320561 3. 662069 3. 982646 3. 70137 3. 617873  
11715294\_ 3. 282472 3. 415796 3. 374246 3. 395631 3. 395392 3. 463411  
11715295\_ 4. 918249 4. 857149 4. 722268 5. 00318 4. 838965 4. 896978  
11715296\_ 6. 631711 6. 7414 6. 535829 6. 887018 6. 776583 6. 853109  
11715297\_ 4. 877732 4. 846717 4. 721396 4. 871649 4. 788202 4. 787982  
11715298\_ 3. 393846 3. 417967 3. 502031 3. 061461 3. 081283 3. 116823  
11715299\_ 4. 680772 4. 652976 4. 558078 4. 64653 4. 537633 4. 680772  
11715300\_ 2. 150588 1. 958309 1. 941048 2. 12369 1. 64353 1. 829202  
11715301\_ 10. 11555 10. 03091 10. 0373 9. 936971 9. 95735 9. 856038  
11715302\_ 4. 511075 4. 372812 4. 409259 4. 674572 4. 464711 4. 489432

11715303\_ 6. 704988 6. 805491 6. 589365 6. 614742 6. 700371 6. 633202  
11715304\_ 5. 999888 5. 979793 5. 986099 6. 182148 6. 28688 6. 212275  
11715305\_ 7. 553448 7. 553448 7. 478392 7. 72237 7. 597721 7. 618471  
11715306\_ 5. 318075 5. 218813 4. 998855 3. 851351 3. 960187 3. 697547  
11715307\_ 6. 751124 6. 765375 6. 665628 6. 660558 6. 782984 6. 7414  
11715308\_ 6. 616593 6. 655725 6. 548019 6. 697799 6. 675436 6. 704046  
11715309\_ 6. 598123 6. 82569 6. 752593 6. 861061 6. 776358 6. 80965  
11715310\_ 6. 638427 6. 758472 6. 574834 6. 719492 6. 874408 6. 804517  
11715311\_ 2. 429749 2. 308144 2. 400028 2. 514336 2. 551522 2. 82057  
11715312\_ 6. 073142 6. 033954 5. 923769 6. 038292 6. 042039 6. 039686  
11715313\_ 8. 417426 8. 361613 8. 265055 8. 403256 8. 37721 8. 40937  
11715314\_ 4. 257614 4. 175435 4. 053185 4. 284518 4. 336189 4. 386397  
11715315\_ 6. 073142 6. 061033 6. 20841 5. 976058 5. 908284 6. 183155  
11715316\_ 5. 169877 5. 285664 5. 073036 5. 098641 5. 067499 5. 11527  
11715317\_ 8. 193935 8. 248919 8. 10321 8. 240309 8. 21408 8. 323339  
11715318\_ 3. 243612 3. 076462 3. 118868 3. 141013 3. 30573 3. 077484  
11715319\_ 2. 887432 2. 82229 2. 88196 2. 919277 2. 907196 2. 981937  
11715320\_ 3. 866652 3. 909593 3. 771184 4. 043787 4. 014384 3. 946129  
11715321\_ 8. 084004 8. 154793 8. 088202 8. 107571 8. 150698 8. 126001  
11715322\_ 2. 408203 2. 419411 2. 367778 2. 37022 2. 311261 2. 145773  
11715323\_ 6. 578675 6. 618215 6. 484734 6. 58045 6. 572474 6. 658886  
11715324\_ 2. 0517 2. 162302 2. 1242 2. 194787 2. 151247 2. 055534  
11715325\_ 7. 772762 7. 803932 7. 708475 7. 688466 7. 72902 7. 800995  
11715326\_ 5. 806317 5. 892958 5. 614563 5. 891805 6. 00364 5. 983805  
11715327\_ 7. 0172 7. 180211 6. 919466 7. 12385 7. 131535 7. 031531  
11715328\_ 6. 039507 5. 989023 5. 917289 5. 870242 5. 943126 5. 956304  
11715329\_ 6. 497776 6. 429561 6. 586963 7. 486649 7. 528251 7. 602928  
11715330\_ 4. 945616 5. 073485 4. 878067 4. 969744 4. 958598 4. 903577  
11715331\_ 8. 08832 7. 991494 8. 048316 9. 038991 9. 02333 9. 052177  
11715332\_ 4. 213995 4. 513913 4. 24344 4. 262225 4. 340543 4. 142647  
11715333\_ 5. 487373 5. 427659 5. 327892 5. 583281 5. 538454 5. 442778  
11715334\_ 3. 021045 3. 067411 3. 023904 3. 108868 3. 004853 3. 022392  
11715335\_ 3. 8873 3. 997131 3. 946871 4. 13742 4. 275543 4. 113027  
11715336\_ 5. 839706 6. 104933 6. 018553 6. 183129 6. 222296 6. 183821  
11715337\_ 6. 982709 7. 030938 6. 801265 6. 982085 7. 013421 6. 96331  
11715338\_ 5. 11527 5. 238743 5. 188537 5. 217107 5. 313364 5. 225056  
11715339\_ 3. 445543 3. 351873 3. 018963 3. 503743 3. 111961 3. 398236  
11715340\_ 3. 122393 3. 090933 2. 936843 3. 2456 2. 912551 2. 89311  
11715341\_ 3. 625389 3. 56287 3. 282878 3. 927336 3. 717954 3. 606313  
11715342\_ 4. 317595 4. 519704 4. 238078 4. 136878 4. 054288 4. 236007  
11715343\_ 4. 349798 4. 366602 4. 473027 4. 521686 4. 457914 4. 4588  
11715344\_ 11. 11033 11. 09072 11. 1058 11. 2821 11. 34505 11. 26738  
11715345\_ 5. 210964 5. 197375 5. 048396 5. 192016 5. 287547 5. 297368  
11715346\_ 7. 119136 7. 126482 7. 209413 6. 481291 6. 554649 6. 699567  
11715347\_ 4. 772129 4. 718565 4. 574822 3. 139077 3. 139077 2. 928055  
11715348\_ 6. 816351 6. 860546 6. 705306 6. 890101 6. 82473 6. 798647  
11715349\_ 12. 2938 12. 32152 12. 28322 12. 49457 12. 45702 12. 46378  
11715350\_ 5. 05199 4. 851101 5. 221245 5. 044545 4. 94672 5. 132878  
11715351\_ 5. 572158 5. 699849 5. 657829 5. 727341 5. 703191 5. 550493  
11715352\_ 3. 882915 4. 004131 3. 966383 4. 020832 3. 992751 3. 868909  
11715353\_ 4. 133658 4. 236502 4. 001979 4. 384348 4. 439156 4. 61529

11715354\_ 2.982544 2.736447 2.868863 3.051679 2.699351 2.792146  
11715355\_ 5.27956 5.033483 5.397874 5.338832 5.321676 5.316665  
11715356\_ 4.046925 4.086274 4.166295 4.097376 4.035345 4.027723  
11715357\_ 13.26131 13.25107 13.26183 13.22276 13.22771 13.2215  
11715358\_ 9.309604 9.228082 9.359823 9.140988 9.229185 9.20903  
11715359\_ 10.82242 10.77011 10.82438 10.36499 10.36601 10.36479  
11715360\_ 10.93254 10.8757 10.92358 10.4805 10.48192 10.45749  
11715361\_ 10.1723 10.16095 10.16259 9.665982 9.676474 9.586457  
11715362\_ 10.00753 9.974994 10.0219 9.463402 9.47876 9.470488  
11715363\_ 6.832714 6.795571 6.617627 5.191778 5.008 5.311603  
11715364\_ 7.461423 7.562038 7.484675 7.490889 7.472944 7.53115  
11715365\_ 5.808518 5.984584 5.670919 5.901067 5.746537 5.907494  
11715366\_ 9.282156 9.325506 9.295377 9.175928 9.20606 9.129424  
11715367\_ 10.62296 10.55525 10.62554 10.64729 10.63996 10.64835  
11715368\_ 2.718322 2.929529 2.743977 3.125591 2.95566 2.826959  
11715369\_ 11.69216 11.63096 11.68792 11.58617 11.59516 11.58758  
11715370\_ 10.12057 10.11807 10.1627 10.03112 10.08524 10.02385  
11715371\_ 10.64381 10.58464 10.63625 10.54079 10.59243 10.55993  
11715372\_ 11.18005 11.17363 11.10339 11.23234 11.27607 11.18521  
11715373\_ 9.818308 9.703359 9.791637 10.02446 10.12455 10.03606  
11715374\_ 9.292737 9.241682 9.267127 9.352284 9.361632 9.294862  
11715375\_ 8.068018 7.99602 8.116807 8.014073 7.968417 8.04992  
11715376\_ 12.57491 12.55054 12.5642 12.49077 12.54513 12.44639  
11715377\_ 11.65443 11.61729 11.59052 11.66732 11.68306 11.64879  
11715378\_ 4.784104 4.921836 4.758279 4.802676 4.902713 4.803226  
11715379\_ 10.67275 10.59589 10.67511 10.67134 10.68153 10.67058  
11715380\_ 11.11525 11.09753 11.10725 11.13742 11.1338 11.15091  
11715381\_ 10.26417 10.24003 10.32356 10.28417 10.2767 10.29949  
11715382\_ 6.692002 6.574715 6.634235 6.717181 6.702689 6.776438  
11715383\_ 11.09894 11.04835 11.09355 11.43978 11.48372 11.44198  
11715384\_ 11.22327 11.13143 11.17627 11.54624 11.59121 11.5473  
11715385\_ 11.73682 11.66575 11.71409 11.72124 11.72245 11.71984  
11715386\_ 5.164485 5.326369 5.048363 5.21858 5.309624 5.150074  
11715387\_ 9.98062 9.8874 9.971028 9.525177 9.547493 9.488335  
11715388\_ 11.54863 11.54071 11.61341 11.11257 11.11839 11.14831  
11715389\_ 10.89328 10.77436 10.92002 10.6087 10.68941 10.66667  
11715390\_ 10.29248 10.31459 10.28588 10.01724 10.03496 9.995371  
11715391\_ 9.877573 9.888503 9.924921 9.963981 9.972068 9.961656  
11715392\_ 9.336405 9.324544 9.35765 9.458121 9.47192 9.451888  
11715393\_ 5.277797 5.042087 5.244272 4.789268 4.759518 4.591128  
11715394\_ 9.650198 9.58464 9.628916 10.02833 10.03426 10.02134  
11715395\_ 10.63882 10.63189 10.61386 10.6246 10.63758 10.56319  
11715396\_ 9.939303 9.959112 10.0144 9.989201 10.00974 9.977121  
11715397\_ 8.133427 8.048559 8.109116 8.059768 8.039328 8.033396  
11715398\_ 9.908495 9.889086 9.911476 10.01398 10.04519 9.998856  
11715399\_ 12.28282 12.23347 12.24162 12.39542 12.42668 12.42077  
11715400\_ 12.06707 12.02558 12.03722 12.20742 12.22034 12.21981  
11715401\_ 11.71866 11.68675 11.68127 11.83881 11.86938 11.85122  
11715402\_ 11.24125 11.24073 11.26229 11.43136 11.43748 11.43154  
11715403\_ 6.448378 6.415007 6.551712 6.158643 6.197623 6.197142  
11715404\_ 7.459499 7.509076 7.519414 7.109244 7.081109 7.176325

11715405\_ 8. 491605 8. 565908 8. 542395 8. 132225 8. 11978 8. 194057  
11715406\_ 6. 86249 6. 898546 7. 003001 6. 837343 6. 669893 6. 653131  
11715407\_ 11. 47632 11. 42722 11. 47783 11. 66163 11. 69309 11. 66044  
11715408\_ 11. 50609 11. 46017 11. 50502 11. 70303 11. 69784 11. 67006  
11715409\_ 10. 45623 10. 39908 10. 46428 10. 38463 10. 39571 10. 43256  
11715410\_ 9. 920765 9. 908345 9. 940163 9. 875912 9. 914616 9. 879632  
11715411\_ 5. 591176 5. 584813 5. 619856 5. 352168 5. 397861 5. 470795  
11715412\_ 5. 313716 5. 593873 5. 547059 5. 525103 5. 524181 5. 561384  
11715413\_ 10. 81318 10. 86788 10. 83341 10. 55974 10. 51026 10. 46102  
11715414\_ 1. 898324 1. 809894 1. 886458 1. 786499 1. 871087 1. 622383  
11715415\_ 2. 704128 2. 909013 2. 704128 2. 549466 2. 47108 2. 398629  
11715416\_ 9. 703632 9. 70749 9. 742138 9. 892193 9. 973644 9. 862612  
11715417\_ 10. 37195 10. 3741 10. 38885 10. 50433 10. 45624 10. 39446  
11715418\_ 9. 862829 9. 910284 9. 852881 10. 01735 10. 05778 9. 902812  
11715419\_ 8. 153949 8. 210516 8. 257364 8. 293056 8. 313602 8. 255837  
11715420\_ 11. 54331 11. 49377 11. 5553 11. 40054 11. 4165 11. 41197  
11715421\_ 11. 55249 11. 5073 11. 54202 11. 46147 11. 4641 11. 43918  
11715422\_ 9. 751588 9. 685566 9. 732827 10. 91509 10. 97972 10. 98445  
11715423\_ 9. 747055 9. 788421 9. 828588 11. 03485 11. 09775 11. 08857  
11715424\_ 9. 690824 9. 690236 9. 751164 10. 92793 10. 95262 10. 96673  
11715425\_ 8. 93392 8. 918957 8. 944387 9. 099019 9. 146553 9. 104149  
11715426\_ 10. 75924 10. 70061 10. 68608 10. 79778 10. 79047 10. 78389  
11715427\_ 8. 610234 8. 553359 8. 58491 8. 727342 8. 765907 8. 806343  
11715428\_ 11. 32603 11. 28562 11. 33894 10. 95585 10. 9758 10. 95157  
11715429\_ 11. 00194 11. 00242 10. 9991 10. 88746 10. 81523 10. 82482  
11715430\_ 9. 965075 9. 927971 9. 982017 10. 14312 10. 22941 10. 18571  
11715431\_ 5. 717614 5. 745017 5. 597683 6. 042663 5. 90376 5. 85216  
11715432\_ 7. 056275 7. 12825 7. 121423 7. 220049 7. 247422 7. 4086  
11715433\_ 9. 559601 9. 466695 9. 483451 9. 855217 9. 843372 9. 772807  
11715434\_ 10. 62179 10. 57146 10. 61428 10. 6652 10. 68782 10. 64839  
11715435\_ 7. 052458 6. 92232 6. 972381 8. 842217 8. 841892 8. 724085  
11715436\_ 9. 317494 9. 252421 9. 325586 9. 856059 9. 883888 9. 876081  
11715437\_ 9. 806758 9. 755436 9. 831563 10. 45591 10. 50131 10. 50532  
11715438\_ 9. 675316 9. 58436 9. 643269 9. 597389 9. 603627 9. 64168  
11715439\_ 9. 507236 9. 45698 9. 506003 9. 474664 9. 503971 9. 472832  
11715440\_ 9. 826004 9. 799752 9. 854348 8. 441901 8. 430818 8. 38074  
11715441\_ 10. 05238 10. 03231 10. 06091 8. 599274 8. 605971 8. 548161  
11715442\_ 10. 60853 10. 60268 10. 58173 9. 450634 9. 426708 9. 339097  
11715443\_ 5. 281324 5. 089182 5. 088155 5. 356243 5. 050997 5. 199879  
11715444\_ 2. 845291 2. 892077 2. 905353 2. 740265 2. 748318 2. 634069  
11715445\_ 9. 022051 8. 971443 9. 010323 8. 898967 8. 878969 8. 841476  
11715446\_ 9. 310745 9. 259671 9. 246397 9. 331296 9. 304037 9. 314922  
11715447\_ 10. 5318 10. 49299 10. 55475 10. 61739 10. 64017 10. 60575  
11715448\_ 10. 4046 10. 32604 10. 39949 10. 14313 10. 18796 10. 19183  
11715449\_ 10. 33191 10. 26389 10. 32952 10. 05359 10. 11842 10. 12031  
11715450\_ 5. 701457 5. 764509 5. 503626 5. 641402 5. 540365 5. 619463  
11715451\_ 7. 828561 7. 776877 7. 738744 7. 60599 7. 58474 7. 574266  
11715452\_ 10. 32957 10. 28656 10. 29908 10. 02629 10. 02001 10. 03151  
11715453\_ 7. 011736 6. 966209 7. 007938 6. 83129 6. 855152 6. 961018  
11715454\_ 6. 394461 6. 274767 6. 441129 6. 288954 6. 349979 6. 342295  
11715455\_ 5. 939458 5. 739809 5. 780225 5. 769514 5. 806632 5. 806434

11715456\_ 11. 04221 10. 99446 11. 0449 10. 94349 11. 00026 10. 98643  
11715457\_ 11. 00211 10. 97944 11. 01239 10. 93063 10. 98868 10. 91778  
11715458\_ 11. 78198 11. 75102 11. 75869 12. 0068 12. 0488 12. 06846  
11715459\_ 11. 68219 11. 64587 11. 66207 11. 91286 11. 9588 11. 96843  
11715460\_ 7. 778149 7. 793274 7. 742642 8. 927302 9. 014618 8. 933184  
11715461\_ 3. 501673 3. 379336 3. 492303 3. 501673 3. 278068 3. 476309  
11715462\_ 5. 349985 5. 226098 5. 269605 5. 281041 5. 181238 5. 158365  
11715463\_ 5. 068946 5. 221337 5. 073036 5. 754386 5. 78113 5. 870242  
11715464\_ 7. 423248 7. 408572 7. 314764 7. 547 7. 401463 7. 556074  
11715465\_ 7. 67239 7. 481971 7. 63077 8. 636307 8. 724191 8. 655829  
11715466\_ 7. 683858 7. 603829 7. 666158 7. 147761 7. 184228 7. 163611  
11715467\_ 9. 004548 8. 946535 9. 012855 8. 525045 8. 471627 8. 588871  
11715468\_ 10. 93643 10. 88671 10. 95026 10. 93084 10. 96674 10. 96897  
11715469\_ 12. 20404 12. 26291 12. 18755 12. 43382 12. 3565 12. 35288  
11715470\_ 11. 87548 11. 86929 11. 86115 12. 03698 12. 00213 11. 98612  
11715471\_ 7. 157166 7. 25025 7. 346406 7. 914303 7. 718772 7. 82303  
11715472\_ 9. 957065 10. 01865 9. 907971 10. 26197 10. 34953 10. 30887  
11715473\_ 9. 70039 9. 595072 9. 679562 10. 29988 10. 29882 10. 33993  
11715474\_ 8. 635398 8. 544344 8. 57245 8. 57593 8. 661866 8. 651783  
11715475\_ 8. 127809 7. 97779 8. 065669 8. 159373 8. 158484 8. 115249  
11715476\_ 10. 81055 10. 76937 10. 86323 10. 81486 10. 74935 10. 82369  
11715477\_ 10. 31743 10. 25457 10. 34047 10. 3727 10. 40722 10. 36722  
11715478\_ 8. 564072 8. 504175 8. 550069 8. 42291 8. 341548 8. 33324  
11715479\_ 10. 65394 10. 69227 10. 68197 10. 5231 10. 55251 10. 60747  
11715480\_ 10. 19315 10. 21208 10. 22564 10. 06316 10. 08426 10. 14351  
11715481\_ 2. 409308 2. 550591 2. 534528 2. 592543 2. 580563 2. 596391  
11715482\_ 8. 834088 8. 82601 8. 779989 9. 095016 9. 020201 8. 986555  
11715483\_ 10. 27569 10. 19687 10. 27858 10. 12107 10. 15266 10. 14725  
11715484\_ 10. 3851 10. 26419 10. 31243 9. 172562 9. 214187 9. 204108  
11715485\_ 8. 736237 8. 917854 8. 774787 8. 826313 8. 826313 8. 830477  
11715486\_ 7. 333176 7. 428937 7. 581393 6. 921787 6. 892037 6. 812763  
11715487\_ 10. 11336 10. 14603 10. 0691 9. 229415 9. 219682 9. 112144  
11715488\_ 9. 997408 9. 944461 9. 969185 10. 02905 10. 03712 10. 0748  
11715489\_ 7. 684837 7. 573474 7. 682599 7. 707457 7. 791527 7. 695303  
11715490\_ 2. 993637 2. 932575 3. 225248 3. 279026 2. 92078 2. 983019  
11715491\_ 10. 66546 10. 56046 10. 66447 10. 59205 10. 63397 10. 59356  
11715492\_ 12. 14177 12. 13598 12. 13266 11. 87971 11. 84788 11. 87332  
11715493\_ 9. 482974 9. 437744 9. 448019 8. 140743 8. 193834 8. 150633  
11715494\_ 2. 430418 2. 326644 2. 235709 2. 361778 2. 25483 2. 494072  
11715495\_ 12. 94633 12. 93746 12. 94335 12. 91972 12. 93019 12. 93392  
11715496\_ 6. 711541 6. 479277 6. 380795 6. 55901 6. 382809 6. 462379  
11715497\_ 9. 584 9. 478132 9. 585579 9. 453478 9. 521918 9. 484993  
11715498\_ 9. 832859 9. 755436 9. 833299 9. 727763 9. 738241 9. 665617  
11715499\_ 10. 87767 10. 93084 10. 86286 11. 07874 11. 01812 10. 93304  
11715500\_ 10. 39897 10. 34193 10. 38844 10. 60284 10. 58759 10. 61656  
11715501\_ 10. 67775 10. 74619 10. 65778 10. 73294 10. 59718 10. 54247  
11715502\_ 13. 1954 13. 18128 13. 18552 13. 12822 13. 12854 13. 09947  
11715503\_ 9. 682986 9. 736222 9. 731915 9. 656605 9. 627516 9. 606471  
11715504\_ 6. 948156 6. 975213 6. 941895 6. 91545 6. 919299 6. 932883  
11715505\_ 11. 31414 11. 31104 11. 28172 11. 27796 11. 21573 11. 24277  
11715506\_ 10. 17855 10. 10316 10. 16533 10. 35738 10. 3311 10. 36129

11715507\_ 10. 01571 9. 951325 9. 94938 10. 13102 10. 21904 10. 15911  
11715508\_ 7. 583359 7. 587597 7. 60412 7. 598651 7. 544874 7. 640135  
11715509\_ 8. 211392 8. 218145 8. 202954 8. 228042 8. 207727 8. 222385  
11715510\_ 7. 042517 7. 056418 7. 083437 7. 113247 7. 125572 7. 055792  
11715511\_ 7. 517699 7. 501872 7. 470918 7. 53491 7. 521552 7. 513517  
11715512\_ 6. 837289 6. 886026 6. 946361 7. 694649 7. 712533 7. 740678  
11715513\_ 9. 480205 9. 412917 9. 470649 9. 6257 9. 583006 9. 603473  
11715514\_ 8. 751489 8. 761542 8. 80241 8. 887801 8. 917805 8. 936169  
11715515\_ 7. 892766 7. 864946 7. 892766 8. 261119 8. 261906 8. 147276  
11715516\_ 7. 65126 7. 612217 7. 563902 8. 005597 8. 003283 7. 990931  
11715517\_ 9. 001153 8. 93 8. 992731 9. 25732 9. 238768 9. 227406  
11715518\_ 8. 334074 8. 32187 8. 408242 8. 767064 8. 863037 8. 809848  
11715519\_ 7. 898669 7. 838112 7. 798338 8. 399993 8. 436206 8. 337262  
11715520\_ 9. 163323 9. 058671 9. 111543 9. 46266 9. 518028 9. 520486  
11715521\_ 8. 015247 8. 003163 8. 080323 8. 269314 8. 248824 8. 26171  
11715522\_ 9. 491464 9. 48716 9. 522928 9. 491433 9. 487637 9. 458773  
11715523\_ 10. 17299 10. 09515 10. 17358 10. 01478 10. 03646 10. 02504  
11715524\_ 9. 741204 9. 684642 9. 753064 10. 61526 10. 5601 10. 60356  
11715525\_ 10. 2852 10. 35085 10. 30106 10. 49985 10. 40315 10. 32514  
11715526\_ 10. 50357 10. 46805 10. 53148 10. 41342 10. 45798 10. 4218  
11715527\_ 10. 65396 10. 68306 10. 72645 10. 67803 10. 70606 10. 69033  
11715528\_ 7. 916197 7. 8368 7. 933017 7. 933639 7. 982983 7. 937913  
11715529\_ 9. 077566 8. 992096 9. 068807 9. 098219 9. 151756 9. 102614  
11715530\_ 10. 47545 10. 43144 10. 42952 10. 28054 10. 24306 10. 23461  
11715531\_ 10. 61878 10. 52393 10. 57722 10. 79336 10. 77966 10. 78174  
11715532\_ 9. 678528 9. 617496 9. 664961 9. 340368 9. 384409 9. 353076  
11715533\_ 7. 154676 7. 232305 7. 193066 7. 252178 7. 244065 7. 27257  
11715534\_ 7. 894084 8. 054602 8. 006532 7. 94835 8. 004315 7. 863123  
11715535\_ 9. 041404 8. 956824 9. 025778 9. 178944 9. 193075 9. 166328  
11715536\_ 6. 63964 6. 530702 6. 67941 7. 26048 7. 295787 7. 324886  
11715537\_ 6. 833664 6. 684832 6. 858876 7. 489338 7. 557351 7. 515643  
11715538\_ 13. 35283 13. 36628 13. 33638 13. 31762 13. 31381 13. 26462  
11715539\_ 13. 13009 13. 11453 13. 143 13. 086 13. 07865 13. 06393  
11715540\_ 13. 07648 13. 08369 13. 0605 13. 07862 13. 07811 13. 08007  
11715541\_ 3. 755852 4. 025009 3. 793208 3. 990067 3. 944195 3. 786777  
11715542\_ 4. 487136 4. 554748 4. 564466 4. 428921 4. 469333 4. 487275  
11715543\_ 12. 26215 12. 28186 12. 28256 12. 29582 12. 2931 12. 24374  
11715544\_ 9. 131129 9. 030186 9. 180835 8. 816081 8. 861071 8. 841699  
11715545\_ 7. 535342 7. 43075 7. 451658 7. 920113 7. 956104 7. 928022  
11715546\_ 8. 867068 8. 827049 8. 916355 9. 283061 9. 305909 9. 266817  
11715547\_ 8. 607115 8. 593376 8. 655434 8. 729353 8. 77444 8. 711287  
11715548\_ 7. 554551 7. 55003 7. 494237 7. 502032 7. 548117 7. 544367  
11715549\_ 7. 18604 7. 258547 7. 132927 7. 152985 7. 227165 7. 183172  
11715550\_ 9. 614272 9. 573417 9. 617521 9. 765396 9. 777941 9. 764376  
11715551\_ 5. 942683 5. 856272 6. 041543 5. 81437 5. 794286 5. 801912  
11715552\_ 10. 84541 10. 80022 10. 84295 11. 11225 11. 08788 11. 13888  
11715553\_ 9. 327026 9. 286844 9. 322526 9. 662611 9. 661175 9. 6257  
11715554\_ 7. 684145 7. 710003 7. 68305 8. 013155 8. 126946 8. 073312  
11715555\_ 8. 450845 8. 37332 8. 47756 8. 774578 8. 757734 8. 75306  
11715556\_ 8. 125527 8. 032478 8. 049995 8. 116883 8. 148875 8. 120567  
11715557\_ 6. 159771 5. 860066 6. 069567 6. 12153 6. 024122 5. 961327



11715558\_ 9. 273997 9. 254078 9. 276668 9. 092985 9. 081796 9. 035157  
11715559\_ 10. 63817 10. 73777 10. 69918 11. 02121 11. 0435 10. 95111  
11715560\_ 3. 440913 3. 503743 3. 363336 3. 496111 3. 510581 3. 528037  
11715561\_ 7. 849735 7. 834134 7. 874439 8. 323239 8. 36059 8. 281683  
11715562\_ 7. 969322 7. 929179 7. 972718 8. 314101 8. 407487 8. 304861  
11715563\_ 7. 819229 7. 649931 7. 858839 8. 153155 8. 122827 8. 135143  
11715564\_ 9. 66049 9. 629802 9. 71359 10. 04442 10. 00966 9. 986149  
11715565\_ 8. 048458 8. 088562 8. 123589 8. 248181 8. 179949 8. 17356  
11715566\_ 9. 878299 9. 75158 9. 854389 9. 564514 9. 566184 9. 55361  
11715567\_ 9. 257571 9. 258947 9. 299877 9. 241431 9. 238393 9. 269058  
11715568\_ 9. 811852 9. 814016 9. 824202 10. 24337 10. 21724 10. 16871  
11715569\_ 10. 50647 10. 46914 10. 48823 10. 87139 10. 8495 10. 83303  
11715570\_ 10. 12755 10. 04139 10. 1289 10. 50346 10. 44213 10. 46632  
11715571\_ 7. 95986 7. 907102 7. 954669 7. 881199 7. 911302 7. 870108  
11715572\_ 7. 487704 7. 482514 7. 498059 7. 66442 7. 709474 7. 693482  
11715573\_ 9. 952506 9. 879075 9. 980469 10. 0687 10. 06034 10. 15667  
11715574\_ 9. 875643 9. 804133 9. 828889 9. 829318 9. 863507 9. 850678  
11715575\_ 10. 27699 10. 23319 10. 29873 10. 32848 10. 28713 10. 30712  
11715576\_ 6. 14241 6. 040004 6. 259429 6. 272071 6. 322324 6. 357161  
11715577\_ 8. 55265 8. 548374 8. 670042 8. 684731 8. 73238 8. 752716  
11715578\_ 11. 26711 11. 19233 11. 25306 11. 39342 11. 4042 11. 41113  
11715579\_ 9. 542106 9. 488229 9. 58062 10. 27937 10. 33418 10. 31835  
11715580\_ 9. 866955 9. 797279 9. 882975 10. 06963 10. 0685 10. 1012  
11715581\_ 9. 539738 9. 488388 9. 555662 9. 623713 9. 664175 9. 591825  
11715582\_ 9. 50514 9. 490172 9. 500837 9. 662396 9. 731595 9. 598964  
11715583\_ 10. 45232 10. 37625 10. 45121 10. 47991 10. 48124 10. 53893  
11715584\_ 11. 55218 11. 53319 11. 54623 11. 38433 11. 38109 11. 33203  
11715585\_ 11. 30955 11. 26986 11. 29021 10. 98325 10. 99761 10. 9829  
11715586\_ 10. 0863 10. 03066 10. 03066 9. 6257 9. 57553 9. 540118  
11715587\_ 10. 75238 10. 68717 10. 74357 10. 42819 10. 46556 10. 48639  
11715588\_ 7. 935058 8. 022097 7. 906068 7. 88497 7. 952688 7. 9728  
11715589\_ 8. 079929 7. 967253 8. 088058 8. 206176 8. 251277 8. 234458  
11715590\_ 9. 456339 9. 416992 9. 513566 9. 325834 9. 410577 9. 390079  
11715591\_ 8. 845207 8. 739201 8. 81323 8. 673167 8. 775633 8. 711937  
11715592\_ 9. 595179 9. 565093 9. 634682 9. 492183 9. 510901 9. 538179  
11715593\_ 9. 605618 9. 492557 9. 540242 9. 757938 9. 781156 9. 744697  
11715594\_ 6. 446031 6. 327581 6. 271164 6. 501966 6. 576109 6. 4497  
11715595\_ 10. 48532 10. 44547 10. 52666 10. 64712 10. 67757 10. 57763  
11715596\_ 11. 46194 11. 44345 11. 46103 11. 54344 11. 54812 11. 55448  
11715597\_ 11. 10394 11. 11651 11. 14937 11. 22655 11. 24694 11. 22852  
11715598\_ 10. 00656 9. 957204 10. 00566 9. 697282 9. 711013 9. 674527  
11715599\_ 9. 983832 9. 904505 9. 983668 10. 08787 10. 1496 10. 1181  
11715600\_ 8. 172563 7. 973048 8. 066805 8. 680959 8. 711525 8. 763929  
11715601\_ 5. 483287 5. 182367 5. 307728 5. 943851 5. 894697 5. 942084  
11715602\_ 9. 296058 9. 25738 9. 317068 9. 590358 9. 652578 9. 626896  
11715603\_ 11. 75164 11. 73137 11. 79778 11. 42711 11. 45728 11. 48001  
11715604\_ 12. 29414 12. 27337 12. 27394 11. 96668 11. 98875 12. 02069  
11715605\_ 9. 540178 9. 48716 9. 603049 10. 05934 10. 11837 10. 07109  
11715606\_ 6. 804784 6. 698745 6. 760002 6. 726417 6. 635259 6. 615933  
11715607\_ 11. 78369 11. 75349 11. 79164 11. 60562 11. 61783 11. 59269  
11715608\_ 11. 77387 11. 74535 11. 78484 11. 60281 11. 62616 11. 6086

11715609\_ 8. 566315 8. 509729 8. 572526 8. 18237 8. 200815 8. 13994  
11715610\_ 9. 620516 9. 59982 9. 612113 9. 410145 9. 440778 9. 323424  
11715611\_ 8. 71138 8. 659789 8. 679463 8. 676931 8. 744817 8. 68765  
11715612\_ 10. 44527 10. 4374 10. 46706 10. 36595 10. 36059 10. 37849  
11715613\_ 6. 429887 6. 440695 6. 486035 6. 231962 5. 904966 6. 179801  
11715614\_ 7. 334181 7. 329299 7. 3976 6. 728673 6. 778524 6. 840592  
11715615\_ 8. 244867 8. 223479 8. 240263 7. 457619 7. 400666 7. 459444  
11715616\_ 11. 72955 11. 66952 11. 70333 11. 69953 11. 75574 11. 72769  
11715617\_ 8. 604532 8. 543698 8. 565207 8. 745372 8. 730376 8. 676864  
11715618\_ 8. 718071 8. 612216 8. 618705 8. 492471 8. 568878 8. 454492  
11715619\_ 9. 065088 8. 99972 8. 997971 8. 83045 8. 935663 8. 794897  
11715620\_ 6. 374329 6. 352442 6. 309537 6. 350084 6. 379577 6. 404654  
11715621\_ 9. 921433 9. 901549 9. 872154 10. 03155 10. 01815 9. 988174  
11715622\_ 8. 527847 8. 42491 8. 502599 8. 12729 8. 128879 8. 131982  
11715623\_ 9. 568422 9. 595239 9. 610461 9. 372194 9. 420934 9. 352438  
11715624\_ 8. 152225 8. 072329 8. 113859 7. 953002 8. 016781 8. 029545  
11715625\_ 7. 945726 7. 895787 7. 892474 7. 644319 7. 538192 7. 640602  
11715626\_ 13. 08716 13. 05897 13. 06875 13. 0768 13. 06378 13. 05571  
11715627\_ 7. 204206 7. 200374 7. 257556 7. 194505 7. 262117 7. 228816  
11715628\_ 2. 47102 2. 375434 2. 428051 2. 698033 2. 42751 2. 494072  
11715629\_ 10. 03262 9. 97369 9. 993098 10. 42423 10. 3783 10. 36524  
11715630\_ 9. 728559 9. 891602 9. 777868 10. 25525 10. 25525 10. 20375  
11715631\_ 10. 15418 10. 13206 10. 13609 10. 53006 10. 47525 10. 46827  
11715632\_ 8. 52746 8. 541756 8. 522882 8. 596171 8. 636261 8. 551686  
11715633\_ 8. 409546 8. 389899 8. 359668 8. 507499 8. 499979 8. 441749  
11715634\_ 10. 62962 10. 58455 10. 61381 10. 79807 10. 78509 10. 65488  
11715635\_ 10. 39347 10. 39068 10. 39865 10. 47298 10. 51573 10. 40242  
11715636\_ 6. 206373 6. 275469 6. 076363 5. 909877 5. 98134 6. 129839  
11715637\_ 10. 32542 10. 2507 10. 31373 10. 35448 10. 37168 10. 33751  
11715638\_ 7. 861242 7. 877593 7. 841033 7. 891807 7. 894268 7. 859505  
11715639\_ 8. 445079 8. 349371 8. 477191 8. 33683 8. 28975 8. 285  
11715640\_ 7. 528755 7. 386851 7. 539065 7. 266393 7. 382495 7. 26008  
11715641\_ 7. 495621 7. 42636 7. 582327 7. 317045 7. 34462 7. 365335  
11715642\_ 9. 058718 8. 997634 9. 029456 8. 884664 8. 845032 8. 874379  
11715643\_ 9. 796766 9. 754919 9. 755722 9. 690206 9. 688433 9. 628119  
11715644\_ 10. 53453 10. 54245 10. 51746 10. 59365 10. 53317 10. 46359  
11715645\_ 9. 17058 9. 142632 9. 189816 9. 199334 9. 175856 9. 18228  
11715646\_ 9. 867034 9. 938299 9. 897901 9. 758681 9. 722907 9. 780402  
11715647\_ 10. 18161 10. 13374 10. 16766 9. 993379 10. 03043 10. 05268  
11715648\_ 9. 849115 9. 736957 9. 799262 9. 634409 9. 634262 9. 648323  
11715649\_ 9. 542641 9. 492511 9. 533969 10. 82429 10. 86532 10. 8645  
11715650\_ 8. 418975 8. 282293 8. 327156 9. 801224 9. 75586 9. 734477  
11715651\_ 9. 664842 9. 573563 9. 65215 9. 27312 9. 266525 9. 273314  
11715652\_ 9. 016027 8. 970092 9. 006078 9. 217769 9. 262234 9. 223185  
11715653\_ 7. 968186 7. 888671 7. 836019 8. 352864 8. 373575 8. 264367  
11715654\_ 9. 621141 9. 540018 9. 647686 9. 95754 10. 00242 10. 0238  
11715655\_ 10. 76777 10. 79954 10. 76949 10. 8998 10. 91381 10. 80193  
11715656\_ 11. 46506 11. 4336 11. 47578 11. 4587 11. 47431 11. 47191  
11715657\_ 8. 807174 8. 677076 8. 766971 8. 857452 8. 876577 8. 821758  
11715658\_ 8. 562777 8. 455515 8. 487952 8. 64065 8. 683261 8. 797143  
11715659\_ 11. 10866 11. 06905 11. 09197 10. 79615 10. 80359 10. 78748

11715660\_ 11. 35991 11. 3207 11. 34765 11. 22966 11. 2289 11. 22362  
11715661\_ 9. 96376 9. 930976 9. 94945 9. 842289 9. 860549 9. 837969  
11715662\_ 9. 469604 9. 483793 9. 468614 9. 3396 9. 372631 9. 360105  
11715663\_ 8. 770711 8. 66986 8. 817699 8. 878577 8. 82879 8. 86546  
11715664\_ 9. 358523 9. 284442 9. 321051 9. 47483 9. 533261 9. 525389  
11715665\_ 8. 710703 8. 599594 8. 747617 8. 815367 8. 831718 8. 867793  
11715666\_ 6. 384247 6. 20834 6. 340429 6. 674791 6. 648423 6. 641642  
11715667\_ 11. 90015 11. 90039 11. 89667 11. 98523 11. 96896 11. 96072  
11715668\_ 10. 88858 10. 85827 10. 89302 10. 85204 10. 88321 10. 88892  
11715669\_ 8. 618491 8. 618883 8. 646595 8. 639695 8. 643656 8. 654545  
11715670\_ 8. 663182 8. 665631 8. 672738 8. 641339 8. 588471 8. 620402  
11715671\_ 8. 650447 8. 644067 8. 691053 8. 63188 8. 603191 8. 633835  
11715672\_ 10. 90807 10. 88147 10. 9201 10. 86057 10. 90384 10. 86783  
11715673\_ 7. 651142 7. 658503 7. 760725 7. 538274 7. 609527 7. 503786  
11715674\_ 10. 52364 10. 58908 10. 5419 10. 13574 10. 10759 9. 978542  
11715675\_ 10. 19078 10. 23885 10. 20821 9. 642001 9. 603853 9. 607725  
11715676\_ 8. 856465 8. 815797 8. 83024 8. 772019 8. 808469 8. 757822  
11715677\_ 8. 371392 8. 343792 8. 356554 8. 405642 8. 299978 8. 365572  
11715678\_ 9. 057028 9. 073111 9. 144582 9. 323095 9. 358018 9. 325138  
11715679\_ 11. 45009 11. 44873 11. 40913 11. 43442 11. 40506 11. 36795  
11715680\_ 10. 44432 10. 37369 10. 43566 10. 34679 10. 37721 10. 39271  
11715681\_ 9. 212966 9. 160087 9. 104285 9. 284999 9. 278825 9. 156947  
11715682\_ 8. 837924 8. 771733 8. 84652 8. 797442 8. 804587 8. 816309  
11715683\_ 7. 590563 7. 554354 7. 734999 6. 428849 6. 464798 6. 331699  
11715684\_ 10. 58901 10. 52675 10. 58465 10. 894 10. 87926 10. 8874  
11715685\_ 11. 38029 11. 40194 11. 36408 11. 47167 11. 48369 11. 45071  
11715686\_ 10. 18217 10. 21437 10. 19766 10. 12366 10. 15476 10. 16603  
11715687\_ 10. 11737 10. 08086 10. 08704 10. 08556 10. 06289 10. 04363  
11715688\_ 3. 273218 3. 373319 3. 293031 3. 214917 3. 301584 3. 201211  
11715689\_ 10. 23341 10. 17928 10. 2064 9. 277157 9. 205372 9. 275938  
11715690\_ 9. 636011 9. 584649 9. 635801 8. 603438 8. 64474 8. 59715  
11715691\_ 9. 686401 9. 682605 9. 659744 8. 601829 8. 621007 8. 715956  
11715692\_ 8. 889167 8. 755443 8. 895817 8. 965765 9. 062987 9. 01088  
11715693\_ 8. 622629 8. 456819 8. 593652 8. 738148 8. 669908 8. 742292  
11715694\_ 11. 29928 11. 25901 11. 26258 11. 45067 11. 46655 11. 43972  
11715695\_ 11. 38475 11. 36588 11. 35562 11. 52222 11. 53722 11. 51384  
11715696\_ 7. 805485 7. 710976 7. 829604 8. 063745 8. 170239 8. 044958  
11715697\_ 10. 09359 9. 992546 10. 08503 10. 64767 10. 68048 10. 66573  
11715698\_ 9. 132272 9. 100229 9. 113732 9. 383127 9. 345249 9. 315516  
11715699\_ 8. 828083 8. 815591 8. 832742 8. 813906 8. 743936 8. 77678  
11715700\_ 8. 489895 8. 407378 8. 539913 8. 626843 8. 514154 8. 508247  
11715701\_ 10. 84433 10. 81796 10. 82261 10. 8744 10. 86934 10. 86587  
11715702\_ 6. 881477 6. 752955 6. 790482 6. 431849 6. 373611 6. 401381  
11715703\_ 8. 950409 9. 004096 8. 980946 8. 349808 8. 426989 8. 310134  
11715704\_ 7. 417811 7. 31401 7. 460994 6. 828602 6. 874386 6. 85013  
11715705\_ 9. 024148 8. 975265 9. 068843 8. 642871 8. 597697 8. 655084  
11715706\_ 8. 9566 8. 896929 8. 965977 8. 576441 8. 397214 8. 564746  
11715707\_ 8. 996224 8. 963453 8. 978696 9. 057308 9. 105021 8. 981306  
11715708\_ 5. 318325 5. 431983 5. 393156 5. 548813 5. 349366 5. 347392  
11715709\_ 5. 195756 5. 322659 5. 264002 5. 570271 5. 351467 5. 30619  
11715710\_ 9. 422246 9. 334233 9. 476224 9. 932388 10. 01489 9. 9704

11715711\_ 7. 676176 7. 543957 7. 627424 7. 210306 7. 293826 7. 274692  
11715712\_ 9. 37648 9. 346367 9. 379232 9. 52527 9. 518141 9. 427345  
11715713\_ 7. 072199 7. 305501 7. 219817 7. 457155 7. 451167 7. 45374  
11715714\_ 6. 196083 6. 154699 6. 065577 6. 289995 6. 411565 6. 420243  
11715715\_ 6. 090536 6. 182918 6. 039955 6. 532287 6. 542092 6. 451471  
11715716\_ 9. 497429 9. 420301 9. 420995 9. 580711 9. 578876 9. 547742  
11715717\_ 9. 579779 9. 560333 9. 561038 9. 729896 9. 737528 9. 766038  
11715718\_ 10. 22809 10. 17966 10. 2556 9. 923778 9. 938603 9. 955687  
11715719\_ 10. 03214 9. 965215 10. 04087 9. 857533 9. 875374 9. 89551  
11715720\_ 11. 67363 11. 65502 11. 65304 11. 56525 11. 57657 11. 57255  
11715721\_ 6. 71875 6. 591836 6. 634386 6. 660881 6. 631711 6. 443628  
11715722\_ 8. 438563 8. 336773 8. 35157 8. 128602 8. 060151 8. 177779  
11715723\_ 9. 266687 9. 281698 9. 143344 9. 315159 9. 236011 9. 184111  
11715724\_ 11. 0556 11. 04564 11. 03773 10. 7523 10. 78641 10. 7556  
11715725\_ 11. 05449 11. 05936 11. 03902 10. 79869 10. 78312 10. 79079  
11715726\_ 6. 725885 6. 667575 6. 753366 6. 553815 6. 563114 6. 544703  
11715727\_ 5. 938936 5. 918745 5. 749647 6. 209356 6. 299028 6. 229613  
11715728\_ 9. 11664 9. 041209 9. 026693 9. 568293 9. 610219 9. 566971  
11715729\_ 3. 360676 3. 229725 3. 248097 3. 239542 3. 293907 3. 208943  
11715730\_ 3. 953585 3. 806606 3. 894685 3. 924435 3. 816787 4. 007439  
11715731\_ 2. 760385 2. 665848 2. 691272 2. 583383 2. 483694 2. 566467  
11715732\_ 11. 1136 11. 07282 11. 13482 11. 27624 11. 2932 11. 25411  
11715733\_ 7. 86852 7. 817567 7. 754858 7. 977656 7. 936236 7. 97343  
11715734\_ 7. 111953 7. 111953 7. 130948 7. 182967 7. 234046 7. 26697  
11715735\_ 9. 639993 9. 675508 9. 654043 10. 01312 9. 955433 9. 902467  
11715736\_ 8. 587023 8. 537209 8. 613968 8. 760575 8. 794548 8. 766665  
11715737\_ 7. 736494 7. 804115 7. 799662 7. 894603 7. 909863 7. 913283  
11715738\_ 10. 59906 10. 53399 10. 59712 10. 71141 10. 66898 10. 68979  
11715739\_ 7. 176135 7. 080535 7. 078971 6. 657025 6. 647787 6. 67158  
11715740\_ 6. 442035 6. 321157 6. 329904 7. 050244 7. 115314 7. 034149  
11715741\_ 6. 410441 6. 426075 6. 406187 7. 072342 7. 070071 7. 097123  
11715742\_ 9. 754622 9. 721803 9. 836732 11. 17029 11. 1798 11. 24232  
11715743\_ 9. 38608 9. 384459 9. 371436 10. 83405 10. 85279 10. 8599  
11715744\_ 10. 36087 10. 35048 10. 40785 10. 55696 10. 57049 10. 49762  
11715745\_ 10. 31893 10. 29662 10. 31223 10. 23099 10. 23872 10. 19412  
11715746\_ 7. 5843 7. 549425 7. 598601 8. 001849 8. 083735 8. 043366  
11715747\_ 5. 164364 5. 149545 5. 262118 5. 549347 5. 531955 5. 492426  
11715748\_ 10. 12388 10. 06046 10. 12139 10. 29174 10. 34341 10. 29635  
11715749\_ 10. 78929 10. 76557 10. 81667 11. 00409 11. 01093 11. 04559  
11715750\_ 9. 884044 9. 858567 9. 891914 10. 21731 10. 25627 10. 17259  
11715751\_ 7. 816787 7. 854055 7. 870866 8. 175056 8. 263158 8. 160366  
11715752\_ 4. 293857 4. 567139 4. 440422 4. 363731 4. 557959 4. 380205  
11715753\_ 3. 623766 3. 786483 3. 568186 3. 886207 3. 67491 3. 589668  
11715754\_ 4. 949776 5. 017251 4. 874179 5. 116907 4. 998457 4. 94787  
11715755\_ 10. 2974 10. 27098 10. 29436 10. 26049 10. 31622 10. 22944  
11715756\_ 10. 83595 10. 83558 10. 85006 10. 98071 10. 94043 10. 88674  
11715757\_ 8. 667261 8. 608257 8. 628116 8. 379258 8. 327449 8. 408933  
11715758\_ 9. 276189 9. 331206 9. 390389 9. 189885 9. 179502 9. 121723  
11715759\_ 10. 16292 10. 15439 10. 2258 10. 0453 10. 05964 10. 07028  
11715760\_ 10. 29907 10. 26276 10. 24447 10. 16674 10. 16623 10. 17986  
11715761\_ 9. 491962 9. 482601 9. 411021 9. 240024 9. 246882 9. 2548

11715762\_ 8. 388068 8. 282608 8. 442923 9. 32082 9. 442618 9. 443556  
11715763\_ 8. 24358 8. 189196 8. 237075 7. 917228 7. 935664 7. 977098  
11715764\_ 4. 505521 4. 409791 4. 559457 4. 455502 4. 507429 4. 382202  
11715765\_ 5. 535373 5. 635739 5. 593872 5. 381971 5. 515135 5. 603396  
11715766\_ 7. 285639 7. 174876 7. 20352 6. 799046 6. 894494 6. 868517  
11715767\_ 7. 98812 7. 888793 7. 977348 7. 926905 7. 953527 7. 982903  
11715768\_ 7. 444162 7. 460402 7. 449861 7. 30746 7. 417811 7. 364332  
11715769\_ 11. 39034 11. 37332 11. 36791 11. 55977 11. 5672 11. 57531  
11715770\_ 11. 79066 11. 77367 11. 77794 11. 87583 11. 9047 11. 87629  
11715771\_ 9. 265612 9. 232174 9. 250287 9. 440405 9. 456368 9. 352032  
11715772\_ 9. 820823 9. 853521 9. 861596 9. 912364 9. 985728 9. 919007  
11715773\_ 9. 688242 9. 584029 9. 720048 9. 329498 9. 358013 9. 360307  
11715774\_ 10. 27755 10. 22147 10. 27375 10. 01867 10. 00542 9. 990496  
11715775\_ 6. 360993 6. 437418 6. 58362 5. 879556 5. 970359 5. 998622  
11715776\_ 6. 982937 6. 800393 6. 847517 6. 195497 6. 183123 6. 345403  
11715777\_ 10. 9422 10. 93264 10. 97706 10. 8546 10. 84662 10. 81864  
11715778\_ 9. 660264 9. 645434 9. 667889 9. 758943 9. 767336 9. 694957  
11715779\_ 8. 882928 9. 008882 8. 986891 9. 537012 9. 43766 9. 383248  
11715780\_ 9. 060795 9. 184337 9. 207685 9. 713092 9. 606469 9. 558789  
11715781\_ 10. 18291 10. 21129 10. 21981 10. 25791 10. 26086 10. 23043  
11715782\_ 12. 06767 11. 99759 12. 04074 11. 96374 12. 02669 11. 99802  
11715783\_ 11. 93266 11. 89317 11. 94827 11. 91377 11. 93815 11. 94695  
11715784\_ 7. 071667 7. 055228 7. 065135 6. 804122 6. 831606 6. 753503  
11715785\_ 5. 978013 6. 119764 5. 89386 6. 147768 6. 143084 6. 115837  
11715786\_ 8. 320927 8. 296955 8. 408019 8. 343852 8. 419521 8. 359596  
11715787\_ 9. 910149 9. 837929 9. 897836 9. 965629 9. 950433 9. 986507  
11715788\_ 2. 957955 3. 228456 3. 077658 3. 211001 3. 176909 3. 090093  
11715789\_ 2. 617149 2. 729955 2. 536483 2. 645351 2. 743155 2. 718322  
11715790\_ 9. 74611 9. 696625 9. 690915 9. 920413 9. 953649 9. 914991  
11715791\_ 10. 36029 10. 28578 10. 32792 10. 61497 10. 62358 10. 59671  
11715792\_ 8. 636477 8. 587555 8. 698456 8. 513804 8. 531464 8. 509454  
11715793\_ 2. 271107 2. 217068 2. 158301 2. 214951 1. 93918 2. 25483  
11715794\_ 4. 498464 4. 573285 4. 50427 4. 465917 4. 459939 4. 496578  
11715795\_ 10. 9709 10. 89568 10. 89802 11. 04887 11. 03762 10. 97854  
11715796\_ 6. 922773 6. 85119 6. 856806 6. 125462 5. 942404 6. 025443  
11715797\_ 7. 560702 7. 523742 7. 531907 7. 45628 7. 473728 7. 528073  
11715798\_ 8. 388883 8. 373132 8. 358605 8. 257176 8. 310257 8. 311297  
11715799\_ 8. 282198 8. 160876 8. 225938 9. 104281 9. 135645 9. 189277  
11715800\_ 6. 206103 6. 225513 6. 199575 6. 344463 6. 345597 6. 555503  
11715801\_ 7. 871903 7. 807482 7. 828499 8. 182304 8. 210294 8. 254251  
11715802\_ 8. 289364 8. 148875 8. 241374 8. 673563 8. 744048 8. 70503  
11715803\_ 9. 423105 9. 399801 9. 481746 9. 243143 9. 332891 9. 245778  
11715804\_ 7. 817577 7. 821211 7. 774511 8. 168229 8. 034594 8. 074873  
11715805\_ 10. 348 10. 35003 10. 30092 10. 17059 10. 16709 10. 19563  
11715806\_ 9. 479433 9. 444314 9. 494214 9. 041108 9. 065357 9. 035205  
11715807\_ 6. 852249 6. 899569 6. 920289 6. 615712 6. 706912 6. 762451  
11715808\_ 9. 662605 9. 636606 9. 67312 9. 838371 9. 939573 9. 870226  
11715809\_ 9. 396449 9. 291147 9. 386338 9. 641981 9. 622618 9. 650031  
11715810\_ 9. 364246 9. 274701 9. 262051 9. 017898 8. 996985 9. 033889  
11715811\_ 7. 045427 6. 95464 6. 945847 7. 310912 7. 339861 7. 355586  
11715812\_ 6. 368327 6. 3224 6. 368514 7. 264911 7. 303738 7. 397025

11715813\_ 5.132792 5.095506 5.281341 5.329136 5.245712 5.483549  
11715814\_ 10.09779 9.976745 10.10823 10.20137 10.22581 10.16765  
11715815\_ 9.729121 9.641061 9.692661 9.97717 10.03554 9.975268  
11715816\_ 6.898793 6.853191 6.975747 6.713624 6.76662 6.888771  
11715817\_ 7.845957 7.693596 7.724398 7.754557 7.665121 7.575222  
11715818\_ 9.113889 8.995575 9.137786 8.864687 8.913764 8.916819  
11715819\_ 9.452773 9.40736 9.477974 9.162138 9.219223 9.118843  
11715820\_ 10.61293 10.55887 10.56776 10.37868 10.45368 10.40453  
11715821\_ 9.921681 9.88057 9.90928 9.658792 9.712666 9.700512  
11715822\_ 9.297287 9.354949 9.299107 9.436411 9.365947 9.355846  
11715823\_ 9.679117 9.73356 9.679164 9.806578 9.747627 9.752011  
11715824\_ 11.01591 10.97819 11.01169 10.93982 10.94349 10.84442  
11715825\_ 9.471127 9.412977 9.444534 9.689766 9.762584 9.72933  
11715826\_ 7.940302 7.956182 8.067386 8.815103 8.807 8.823286  
11715827\_ 9.980442 9.946507 9.994087 9.664249 9.640922 9.672711  
11715828\_ 8.220656 8.1318 8.360051 8.248122 8.15467 8.224686  
11715829\_ 9.045408 9.03975 9.04697 9.094944 9.083773 9.067921  
11715830\_ 9.773834 9.738928 9.763435 9.951015 9.907335 9.904125  
11715831\_ 9.575626 9.490172 9.559668 9.704021 9.753859 9.747315  
11715832\_ 8.678175 8.626897 8.620152 8.792823 8.833928 8.811479  
11715833\_ 10.24405 10.17177 10.23315 10.35936 10.29882 10.21663  
11715834\_ 10.2728 10.20715 10.24333 10.24451 10.2993 10.254  
11715835\_ 10.61945 10.58266 10.64317 10.75647 10.74118 10.73178  
11715836\_ 10.81221 10.76385 10.80297 10.89729 10.88154 10.91716  
11715837\_ 9.89759 9.820411 9.835796 9.779042 9.796526 9.704956  
11715838\_ 7.66602 7.544176 7.58191 7.37701 7.507394 7.509585  
11715839\_ 5.798656 5.660482 5.873984 6.336606 6.173908 6.357479  
11715840\_ 8.729184 8.688394 8.852937 9.340402 9.442725 9.474748  
11715841\_ 5.6954 5.639384 5.567294 5.769691 5.691344 5.724169  
11715842\_ 9.428881 9.314896 9.413202 8.89669 8.880103 8.907376  
11715843\_ 9.48078 9.441306 9.517003 9.529615 9.512678 9.560263  
11715844\_ 9.345231 9.224304 9.285124 9.80032 9.9034 9.833525  
11715845\_ 8.404219 8.386625 8.45423 9.154683 9.161359 9.174645  
11715846\_ 4.745108 4.510168 4.726185 4.178417 4.20525 4.200678  
11715847\_ 8.249698 8.25252 8.267608 8.230762 8.270338 8.295576  
11715848\_ 10.31088 10.28804 10.33497 10.4371 10.42729 10.42849  
11715849\_ 10.1542 10.14981 10.16827 9.982533 9.958897 9.980529  
11715850\_ 10.83533 10.77017 10.81884 10.33721 10.34382 10.30549  
11715851\_ 3.794353 3.637564 3.748589 3.576847 3.576847 3.820584  
11715852\_ 6.757198 6.615788 6.731307 6.77383 6.82879 6.894273  
11715853\_ 5.584813 5.86363 5.733701 5.660637 5.938665 5.731604  
11715854\_ 5.730959 5.779457 5.688205 5.745821 5.739303 5.691264  
11715855\_ 8.148412 8.097319 7.997273 8.192745 8.070441 8.083825  
11715856\_ 9.208729 9.019042 9.10048 8.995441 9.027055 9.064706  
11715857\_ 9.662956 9.633861 9.717177 9.45321 9.477844 9.526066  
11715858\_ 10.56154 10.48298 10.54708 10.38737 10.41529 10.32997  
11715859\_ 7.223402 7.121941 7.241693 7.256829 7.205612 7.227877  
11715860\_ 6.242399 6.208196 6.300375 6.211182 6.206492 6.355698  
11715861\_ 9.239631 9.268666 9.242039 9.504641 9.57651 9.576698  
11715862\_ 6.543313 6.578583 6.514357 7.922741 8.010663 8.003047  
11715863\_ 5.480966 5.498645 5.510491 5.668589 5.830008 5.975381

11715864\_ 9. 87523 9. 875751 9. 841737 10. 30392 10. 31065 10. 28405  
11715865\_ 10. 04809 9. 974739 10. 01131 9. 868291 9. 940399 9. 889863  
11715866\_ 10. 04201 9. 935907 9. 983816 9. 83921 9. 908546 9. 877137  
11715867\_ 8. 901766 8. 877507 8. 899342 9. 00402 9. 016421 9. 073937  
11715868\_ 7. 373547 7. 261335 7. 306555 7. 409349 7. 404386 7. 487332  
11715869\_ 8. 196886 8. 040653 8. 122572 8. 269103 8. 242621 8. 321879  
11715870\_ 9. 317899 9. 213497 9. 242765 9. 287828 9. 22355 9. 258841  
11715871\_ 5. 05363 4. 840075 4. 877979 4. 75547 4. 928242 4. 65907  
11715872\_ 8. 255792 8. 254218 8. 368225 7. 856008 7. 865426 7. 826444  
11715873\_ 7. 702566 7. 652855 7. 803009 7. 47764 7. 499922 7. 528449  
11715874\_ 10. 35885 10. 30095 10. 34268 10. 46063 10. 47974 10. 45134  
11715875\_ 9. 004012 8. 999859 8. 997868 9. 019272 9. 0049 9. 022884  
11715876\_ 10. 05669 10. 01353 10. 10261 10. 13609 10. 18612 10. 13525  
11715877\_ 11. 7681 11. 73756 11. 7466 11. 77642 11. 75288 11. 75599  
11715878\_ 6. 566316 6. 524066 6. 454056 6. 779599 6. 926532 6. 857557  
11715879\_ 8. 732412 8. 73342 8. 866292 9. 208625 9. 264733 9. 258401  
11715880\_ 8. 989551 8. 879256 8. 980417 8. 85732 8. 87051 8. 84508  
11715881\_ 10. 74354 10. 71736 10. 77809 10. 32077 10. 42602 10. 39498  
11715882\_ 11. 08792 11. 03572 11. 08668 10. 82707 10. 82044 10. 74997  
11715883\_ 10. 82622 10. 8015 10. 82023 10. 4619 10. 48333 10. 44831  
11715884\_ 10. 02947 9. 987837 10. 10844 9. 712809 9. 736675 9. 711301  
11715885\_ 7. 29555 7. 186861 7. 26233 7. 936477 7. 938463 7. 964809  
11715886\_ 6. 422743 6. 37804 6. 381902 5. 914416 5. 877682 6. 208959  
11715887\_ 7. 683618 7. 645144 7. 558056 7. 14487 7. 193217 7. 175624  
11715888\_ 7. 692282 7. 655964 7. 694613 7. 911179 7. 925432 7. 943653  
11715889\_ 11. 06923 11. 0858 11. 09424 11. 34448 11. 32507 11. 26114  
11715890\_ 11. 01371 11. 03765 11. 0445 11. 21125 11. 16402 11. 18063  
11715891\_ 3. 013671 2. 792471 2. 683717 2. 952016 2. 757741 2. 835885  
11715892\_ 9. 531797 9. 50234 9. 549555 9. 800763 9. 742083 9. 730341  
11715893\_ 4. 785322 5. 126418 5. 140108 5. 11702 5. 097283 5. 38815  
11715894\_ 10. 58699 10. 49802 10. 57155 10. 16153 10. 12086 10. 12691  
11715895\_ 5. 755019 5. 76646 5. 656503 5. 869598 5. 810773 5. 81349  
11715896\_ 6. 923984 6. 886652 6. 874408 6. 967639 6. 92788 6. 977148  
11715897\_ 9. 947062 9. 889535 9. 919148 10. 07903 10. 04497 10. 07336  
11715898\_ 7. 490695 7. 436725 7. 490366 7. 298836 7. 322776 7. 308294  
11715899\_ 7. 694535 7. 765423 7. 748329 8. 113263 8. 020717 7. 902811  
11715900\_ 8. 026611 7. 966019 8. 044435 8. 564555 8. 677115 8. 559018  
11715901\_ 10. 3453 10. 26006 10. 27655 10. 30827 10. 352 10. 25713  
11715902\_ 8. 684731 8. 65677 8. 729053 8. 685639 8. 69753 8. 711014  
11715903\_ 11. 4354 11. 43169 11. 38414 11. 28251 11. 24502 11. 27986  
11715904\_ 9. 025716 8. 980015 9. 019939 8. 663206 8. 788933 8. 673474  
11715905\_ 9. 679337 9. 603189 9. 670116 9. 297816 9. 303333 9. 280538  
11715906\_ 10. 04693 10. 02971 10. 10705 10. 06686 10. 10175 10. 06862  
11715907\_ 10. 71281 10. 66923 10. 6886 10. 74428 10. 75578 10. 74334  
11715908\_ 7. 411537 7. 491813 7. 422667 7. 07245 7. 019197 7. 156206  
11715909\_ 7. 049573 7. 06057 7. 058781 6. 74279 6. 646491 6. 7908  
11715910\_ 7. 961562 7. 846019 7. 997763 7. 7593 7. 848929 7. 740278  
11715911\_ 5. 462258 4. 980998 5. 338933 6. 085631 5. 984987 6. 085256  
11715912\_ 4. 915711 4. 848692 4. 824195 5. 044717 4. 849431 4. 976265  
11715913\_ 5. 09717 5. 175741 5. 26034 5. 360816 5. 34202 5. 228627  
11715914\_ 4. 250936 4. 204642 4. 226432 4. 3283 4. 332805 4. 463654

11715915\_ 10. 52843 10. 46221 10. 4902 11. 14124 11. 12244 11. 15365  
11715916\_ 11. 23329 11. 22962 11. 18722 11. 90555 11. 83631 11. 7665  
11715917\_ 11. 53132 11. 5712 11. 48492 11. 52255 11. 50195 11. 44935  
11715918\_ 5. 408397 5. 262197 5. 512244 5. 020918 5. 131816 4. 980261  
11715919\_ 10. 64309 10. 6165 10. 64809 10. 70273 10. 71409 10. 70428  
11715920\_ 7. 975666 7. 884408 7. 979787 7. 887643 7. 918862 7. 898967  
11715921\_ 11. 07502 11. 03123 11. 09022 10. 95649 10. 96747 10. 9731  
11715922\_ 11. 02051 10. 97271 11. 0301 10. 89347 10. 93513 10. 94707  
11715923\_ 7. 645447 7. 562155 7. 557488 7. 897838 7. 944683 7. 907753  
11715924\_ 9. 038526 9. 016645 9. 067124 8. 956574 8. 867713 8. 884664  
11715925\_ 9. 913996 10. 10802 10. 08203 10. 12173 10. 08493 10. 06469  
11715926\_ 10. 32925 10. 24512 10. 31186 10. 09443 10. 09054 10. 1114  
11715927\_ 8. 923523 8. 930586 8. 967597 9. 126359 9. 1301 9. 135002  
11715928\_ 7. 270069 7. 19031 7. 253426 7. 261512 7. 348805 7. 373638  
11715929\_ 6. 899125 6. 945498 6. 8799 6. 934975 6. 990427 6. 971293  
11715930\_ 10. 06513 10. 01947 10. 02233 9. 607126 9. 680974 9. 627035  
11715931\_ 8. 852505 8. 817073 8. 896878 8. 981288 9. 054747 8. 968807  
11715932\_ 11. 35695 11. 31423 11. 34817 11. 25898 11. 19977 11. 1272  
11715933\_ 7. 573705 7. 402717 7. 574705 7. 61842 7. 695274 7. 682577  
11715934\_ 6. 100057 6. 090962 5. 987367 5. 972704 5. 998442 5. 952904  
11715935\_ 5. 729049 5. 893212 5. 85474 6. 076128 6. 141662 6. 035501  
11715936\_ 5. 790305 5. 79222 5. 824147 5. 775645 5. 908594 6. 039204  
11715937\_ 8. 60801 8. 588071 8. 576566 9. 324272 9. 316183 9. 173054  
11715938\_ 10. 5577 10. 55298 10. 55065 11. 03437 11. 01437 11. 0126  
11715939\_ 7. 04623 6. 92459 6. 97133 7. 568552 7. 675205 7. 537537  
11715940\_ 10. 56132 10. 56474 10. 57003 11. 1452 11. 13003 11. 11376  
11715941\_ 4. 927838 4. 895713 4. 757231 4. 907133 4. 897598 4. 741248  
11715942\_ 3. 705625 3. 864104 3. 713693 3. 850246 3. 555395 3. 814517  
11715943\_ 11. 7156 11. 63944 11. 71127 11. 80605 11. 78833 11. 77388  
11715944\_ 9. 793917 9. 722919 9. 777663 9. 650881 9. 627913 9. 641459  
11715945\_ 7. 71492 7. 615771 7. 684105 7. 58498 7. 561199 7. 682081  
11715946\_ 8. 459213 8. 520169 8. 421341 8. 435307 8. 39188 8. 4546  
11715947\_ 5. 224761 5. 472822 5. 58932 5. 710236 5. 338461 5. 673325  
11715948\_ 2. 63034 2. 533367 2. 63034 2. 944017 3. 073624 2. 836092  
11715949\_ 3. 603609 3. 891349 4. 006717 4. 409335 4. 584933 4. 614877  
11715950\_ 5. 736831 5. 772358 5. 71722 5. 930679 5. 876355 6. 02975  
11715951\_ 4. 108592 4. 085672 4. 213226 4. 459939 4. 606879 4. 51754  
11715952\_ 7. 904022 7. 859583 7. 961599 7. 949851 7. 89218 7. 910863  
11715953\_ 7. 12407 7. 089915 7. 100641 7. 08391 7. 10959 7. 119534  
11715954\_ 6. 82379 6. 721442 6. 810867 6. 752593 6. 89707 6. 930968  
11715955\_ 10. 56797 10. 48032 10. 51496 10. 21208 10. 21886 10. 17605  
11715956\_ 9. 810586 9. 741261 9. 7604 9. 475852 9. 468226 9. 436833  
11715957\_ 7. 255294 7. 220321 7. 272972 7. 51854 7. 596255 7. 489061  
11715958\_ 11. 63239 11. 61848 11. 6026 11. 6919 11. 63202 11. 59311  
11715959\_ 7. 715502 7. 678368 7. 749056 7. 991376 8. 117953 8. 021043  
11715960\_ 8. 144967 8. 245281 8. 202856 8. 533698 8. 55265 8. 5874  
11715961\_ 9. 332464 9. 251517 9. 30886 9. 354183 9. 335851 9. 363879  
11715962\_ 5. 50489 5. 420303 5. 574176 5. 733496 5. 655347 5. 589814  
11715963\_ 6. 731506 6. 691939 6. 663877 6. 644825 6. 715676 6. 740695  
11715964\_ 6. 635497 6. 775965 6. 829372 6. 8536 6. 87377 6. 873283  
11715965\_ 4. 744623 4. 915567 4. 930507 4. 993712 5. 04662 5. 087801



11715966\_ 9. 341237 9. 321187 9. 287927 9. 216421 9. 263832 9. 220967  
11715967\_ 9. 646782 9. 693509 9. 67681 11. 05262 11. 06948 11. 11862  
11715968\_ 9. 182224 9. 084795 9. 142953 10. 69536 10. 69996 10. 6127  
11715969\_ 9. 56414 9. 617636 9. 598896 9. 795649 9. 803589 9. 746786  
11715970\_ 10. 03962 10. 02285 10. 06543 10. 1968 10. 19475 10. 18005  
11715971\_ 10. 06692 10. 03364 10. 12389 10. 25745 10. 30179 10. 26522  
11715972\_ 3. 241726 3. 165234 3. 290188 3. 324696 3. 324696 3. 313837  
11715973\_ 6. 989935 6. 899213 6. 869856 7. 742982 7. 687335 7. 713498  
11715974\_ 7. 191015 7. 099734 7. 109478 7. 833329 7. 86092 7. 941931  
11715975\_ 7. 508992 7. 442902 7. 43334 8. 11495 8. 074829 8. 078569  
11715976\_ 8. 281194 8. 176568 8. 286385 7. 837282 7. 884268 7. 823817  
11715977\_ 7. 998037 7. 848592 8. 05193 7. 750644 7. 699441 7. 792888  
11715978\_ 10. 82458 10. 79176 10. 82383 10. 33273 10. 33127 10. 30105  
11715979\_ 9. 201365 9. 214663 9. 197004 9. 029664 9. 110638 9. 008077  
11715980\_ 8. 914497 8. 822924 8. 877696 9. 000195 9. 043742 9. 089439  
11715981\_ 7. 440039 7. 375498 7. 481974 7. 545257 7. 489884 7. 463339  
11715982\_ 8. 29717 8. 319297 8. 26627 8. 130246 8. 233276 8. 196669  
11715983\_ 10. 23147 10. 20058 10. 30473 9. 869932 9. 861837 9. 860163  
11715984\_ 9. 992052 9. 991437 9. 968526 9. 575175 9. 560308 9. 569837  
11715985\_ 3. 204883 3. 239513 3. 211586 3. 329746 3. 452185 3. 311445  
11715986\_ 8. 013241 7. 910606 7. 91048 7. 933343 7. 891784 7. 888172  
11715987\_ 4. 681915 4. 578483 4. 703477 4. 708928 4. 578483 4. 657628  
11715988\_ 8. 226388 8. 166425 8. 166349 8. 681221 8. 717729 8. 680635  
11715989\_ 10. 79812 10. 80228 10. 83792 10. 65972 10. 70197 10. 66812  
11715990\_ 10. 26208 10. 24787 10. 24451 10. 0768 10. 10908 10. 10074  
11715991\_ 7. 242388 7. 1635 7. 334672 8. 390848 8. 434807 8. 434569  
11715992\_ 7. 832988 8. 034079 7. 902032 8. 674175 8. 680635 8. 711937  
11715993\_ 8. 69402 8. 627817 8. 708653 8. 36478 8. 420188 8. 427619  
11715994\_ 5. 457393 5. 44292 5. 51848 5. 034112 4. 984669 5. 016835  
11715995\_ 9. 611849 9. 531831 9. 584044 9. 578696 9. 632696 9. 560293  
11715996\_ 9. 724611 9. 718458 9. 812958 9. 71001 9. 783593 9. 710849  
11715997\_ 10. 996 10. 92163 10. 99635 10. 9268 10. 91399 10. 90112  
11715998\_ 9. 485716 9. 416456 9. 488674 9. 082727 9. 119699 9. 082662  
11715999\_ 7. 001908 6. 945 6. 963066 6. 637486 6. 470135 6. 632595  
11716000\_ 7. 928736 7. 82398 7. 854788 7. 72585 7. 626838 7. 718204  
11716001\_ 8. 230459 8. 243341 8. 309833 8. 109644 8. 04141 8. 099477  
11716002\_ 9. 591623 9. 68831 9. 715427 9. 612014 9. 596964 9. 570753  
11716003\_ 8. 107907 7. 993713 8. 058042 7. 921249 8. 017648 7. 866938  
11716004\_ 8. 138277 7. 973493 8. 145329 7. 978191 8. 110509 7. 996067  
11716005\_ 6. 715119 6. 662199 6. 792183 6. 728402 6. 877673 6. 84124  
11716006\_ 7. 084962 7. 120948 7. 165746 7. 076762 7. 110366 7. 085641  
11716007\_ 9. 716222 9. 656207 9. 756934 9. 124667 9. 179351 9. 181406  
11716008\_ 9. 650021 9. 638424 9. 678422 9. 156174 9. 185564 9. 150667  
11716009\_ 7. 027665 6. 91755 7. 031524 7. 644592 7. 637388 7. 568055  
11716010\_ 9. 535745 9. 444427 9. 502793 10. 20646 10. 19591 10. 24355  
11716011\_ 7. 973509 7. 816847 7. 921571 7. 780673 7. 843412 7. 802767  
11716012\_ 7. 573246 7. 564387 7. 647365 8. 033482 8. 062966 8. 093288  
11716013\_ 11. 31294 11. 29176 11. 31522 11. 38801 11. 39408 11. 40068  
11716014\_ 7. 15257 7. 09464 7. 200605 7. 457455 7. 425559 7. 520793  
11716015\_ 9. 225487 9. 208682 9. 244835 9. 032113 9. 092724 9. 036101  
11716016\_ 4. 711126 4. 900421 5. 016834 4. 584933 4. 735993 4. 546831

11716017\_ 2. 880307 3. 070731 3. 028778 2. 718322 2. 793327 2. 783762  
11716018\_ 6. 567162 6. 556645 6. 578809 6. 519199 6. 529716 6. 537942  
11716019\_ 6. 224767 6. 201823 6. 337029 5. 998919 6. 087277 5. 969512  
11716020\_ 9. 861449 9. 805638 9. 867428 9. 988155 10. 00213 9. 92993  
11716021\_ 10. 00874 9. 979976 9. 957573 10. 12296 10. 09464 10. 04533  
11716022\_ 5. 36906 5. 332551 5. 484171 5. 93062 6. 03332 5. 901591  
11716023\_ 6. 353056 6. 352541 6. 354156 6. 506272 6. 550574 6. 497107  
11716024\_ 7. 849698 7. 765987 7. 818017 7. 684079 7. 741182 7. 68445  
11716025\_ 8. 947944 8. 879936 8. 933672 8. 640908 8. 684565 8. 694632  
11716026\_ 10. 25191 10. 24037 10. 22683 10. 02487 9. 951779 9. 873693  
11716027\_ 8. 837225 8. 752189 8. 853346 8. 58557 8. 589296 8. 624623  
11716028\_ 8. 348995 8. 246611 8. 340742 8. 131534 8. 153287 8. 18785  
11716029\_ 11. 4476 11. 42947 11. 4115 11. 50227 11. 46148 11. 46015  
11716030\_ 11. 02296 10. 96481 11. 00386 11. 03452 11. 06441 11. 02734  
11716031\_ 7. 96132 7. 797556 7. 937439 9. 252367 9. 228507 9. 271363  
11716032\_ 9. 059824 9. 013555 9. 087431 9. 337294 9. 232814 9. 330168  
11716033\_ 5. 303127 5. 38299 5. 466072 5. 38299 5. 36323 5. 437238  
11716034\_ 1. 987352 2. 016444 2. 032918 2. 079884 2. 101031 2. 166092  
11716035\_ 3. 925181 3. 828821 3. 808924 3. 925181 3. 90901 4. 042228  
11716036\_ 3. 122119 3. 306744 3. 206642 3. 270287 3. 239765 3. 306744  
11716037\_ 8. 098991 8. 073113 8. 11701 8. 297306 8. 32284 8. 265825  
11716038\_ 5. 460978 5. 549073 5. 480966 5. 90119 5. 8017 5. 754755  
11716039\_ 9. 178237 9. 114196 9. 162857 9. 809415 9. 869089 9. 853059  
11716040\_ 13. 1149 13. 10317 13. 09653 13. 07218 13. 07328 13. 04863  
11716041\_ 8. 924303 8. 954097 8. 864064 9. 17097 9. 196559 9. 121677  
11716042\_ 9. 019577 8. 963363 8. 996433 9. 227823 9. 245145 9. 198736  
11716043\_ 6. 615941 6. 289773 6. 405872 5. 890803 5. 877084 5. 880979  
11716044\_ 9. 127654 9. 103712 9. 173796 8. 941192 8. 999046 9. 049576  
11716045\_ 9. 715692 9. 637823 9. 664735 9. 592923 9. 602049 9. 573296  
11716046\_ 7. 772255 7. 700966 7. 761936 7. 611131 7. 654558 7. 583271  
11716047\_ 8. 977297 8. 857239 8. 914869 8. 971699 8. 972337 9. 004441  
11716048\_ 8. 520417 8. 317991 8. 455307 8. 201532 8. 153802 8. 226388  
11716049\_ 6. 579031 6. 548945 6. 629447 6. 457659 6. 567651 6. 376356  
11716050\_ 7. 382706 7. 363564 7. 302796 7. 331341 7. 212651 7. 071018  
11716051\_ 9. 745667 9. 72038 9. 718192 9. 719142 9. 672674 9. 68442  
11716052\_ 10. 68149 10. 60952 10. 67348 10. 60981 10. 57082 10. 58476  
11716053\_ 10. 79101 10. 77882 10. 75447 10. 21353 10. 27902 10. 16797  
11716054\_ 8. 930898 8. 923689 8. 990815 8. 553157 8. 513625 8. 600297  
11716055\_ 7. 69417 7. 609204 7. 66356 6. 736953 6. 952172 6. 783074  
11716056\_ 4. 090276 4. 03063 3. 995429 3. 756925 3. 84546 3. 947956  
11716057\_ 4. 611481 4. 55019 4. 680892 4. 715201 4. 812212 4. 951237  
11716058\_ 8. 422582 8. 400765 8. 386909 9. 549914 9. 571618 9. 546577  
11716059\_ 8. 556723 8. 468781 8. 534123 9. 51073 9. 487297 9. 507311  
11716060\_ 10. 80914 10. 79796 10. 84984 10. 80893 10. 81819 10. 82736  
11716061\_ 9. 628466 9. 552281 9. 616733 9. 837982 9. 790155 9. 796918  
11716062\_ 10. 2193 10. 22062 10. 2064 9. 636515 9. 674772 9. 564137  
11716063\_ 10. 67853 10. 66896 10. 70886 10. 19313 10. 18268 10. 15059  
11716064\_ 7. 819798 7. 791729 7. 886356 9. 224781 9. 217328 9. 312796  
11716065\_ 7. 524759 7. 430214 7. 487548 8. 764274 8. 704095 8. 730749  
11716066\_ 7. 514346 7. 483546 7. 573878 8. 876939 8. 911876 8. 896183  
11716067\_ 5. 377932 5. 30235 5. 462825 5. 472367 5. 520707 5. 51653

11716068\_ 6. 868789 6. 969117 6. 798906 6. 750649 6. 787704 6. 874677  
11716069\_ 9. 976054 9. 933507 9. 938837 10. 11875 10. 1646 10. 18002  
11716070\_ 8. 762571 8. 667103 8. 713524 8. 900627 8. 982979 8. 932293  
11716071\_ 8. 203064 8. 163414 8. 269217 8. 425763 8. 452007 8. 445684  
11716072\_ 8. 864226 8. 781369 8. 867487 8. 669124 8. 612017 8. 62619  
11716073\_ 9. 223407 9. 118123 9. 157755 8. 757096 8. 720488 8. 73523  
11716074\_ 8. 901078 8. 835734 8. 83462 9. 21769 9. 136063 9. 06943  
11716075\_ 11. 12115 11. 07095 11. 13336 10. 86589 10. 97454 10. 92361  
11716076\_ 11. 1408 11. 1627 11. 13739 11. 14807 11. 06652 11. 04121  
11716077\_ 11. 17866 11. 1627 11. 18363 11. 03019 11. 05957 11. 03359  
11716078\_ 7. 954915 7. 914097 7. 903397 8. 225393 8. 13467 8. 19171  
11716079\_ 6. 997541 7. 150249 7. 000454 7. 103689 7. 09564 7. 182672  
11716080\_ 5. 36316 5. 461391 5. 367542 5. 494059 5. 597901 5. 570081  
11716081\_ 8. 683861 8. 644544 8. 722269 8. 587899 8. 608328 8. 635206  
11716082\_ 8. 867778 8. 911217 8. 7944 8. 98966 9. 054746 8. 972177  
11716083\_ 9. 683542 9. 644322 9. 679781 9. 847781 9. 896976 9. 850407  
11716084\_ 10. 64672 10. 61193 10. 66655 10. 52959 10. 58339 10. 53098  
11716085\_ 9. 115534 9. 076094 9. 109795 8. 958518 8. 99629 8. 963969  
11716086\_ 8. 893286 8. 831291 8. 87189 8. 879082 8. 906598 8. 897909  
11716087\_ 8. 645107 8. 535979 8. 62077 8. 698109 8. 708147 8. 774027  
11716088\_ 8. 914705 8. 973469 9. 007553 9. 075525 9. 094435 9. 050384  
11716089\_ 8. 736669 8. 655333 8. 640629 8. 704108 8. 65559 8. 676234  
11716090\_ 3. 846129 3. 818401 3. 941534 3. 756476 3. 794683 3. 777534  
11716091\_ 4. 801237 4. 597926 4. 740748 4. 845216 4. 725134 4. 73651  
11716092\_ 9. 307948 9. 372023 9. 396834 10. 03167 10. 05826 10. 00893  
11716093\_ 8. 400055 8. 376087 8. 410056 7. 829525 7. 966062 7. 822377  
11716094\_ 6. 257935 6. 13945 6. 179518 5. 768053 5. 811014 5. 771178  
11716095\_ 8. 629195 8. 557874 8. 524849 7. 993435 7. 970569 7. 967325  
11716096\_ 6. 752654 6. 678278 6. 756996 6. 820886 6. 877219 6. 925341  
11716097\_ 9. 343614 9. 441198 9. 448963 9. 411795 9. 395523 9. 322293  
11716098\_ 8. 663188 8. 610068 8. 645252 8. 491614 8. 463533 8. 462474  
11716099\_ 8. 731703 8. 714941 8. 791733 8. 596161 8. 600848 8. 602676  
11716100\_ 9. 749302 9. 69208 9. 758778 9. 728514 9. 718319 9. 67045  
11716101\_ 10. 56946 10. 60181 10. 57475 10. 60136 10. 54233 10. 55377  
11716102\_ 9. 588128 9. 634209 9. 576601 9. 621166 9. 604362 9. 604932  
11716103\_ 10. 83618 10. 8064 10. 80848 11. 30808 11. 3328 11. 2883  
11716104\_ 8. 148162 8. 04417 8. 12013 8. 090795 8. 104136 8. 160471  
11716105\_ 8. 000113 7. 929843 8. 036255 8. 204707 8. 285141 8. 065874  
11716106\_ 9. 395559 9. 358179 9. 494612 9. 654373 9. 64685 9. 639633  
11716107\_ 9. 661916 9. 686203 9. 722547 9. 858167 9. 86506 9. 889459  
11716108\_ 8. 844952 8. 833439 8. 840425 8. 444947 8. 53406 8. 478995  
11716109\_ 4. 037344 4. 04529 3. 765783 3. 976186 3. 824963 3. 647024  
11716110\_ 3. 824993 3. 956007 4. 116838 3. 81318 3. 893444 3. 917635  
11716111\_ 3. 932728 3. 938656 3. 833049 3. 953213 3. 815258 3. 798129  
11716112\_ 5. 260121 5. 523942 5. 31465 5. 409994 5. 206665 5. 331749  
11716113\_ 8. 966622 8. 946883 9. 045437 8. 842501 8. 81122 8. 832055  
11716114\_ 6. 820278 6. 800376 6. 848953 7. 214215 7. 196397 7. 246216  
11716115\_ 6. 305572 6. 331936 6. 316415 6. 2006 6. 208508 6. 263567  
11716116\_ 10. 17917 10. 11167 10. 16636 10. 33166 10. 36977 10. 32716  
11716117\_ 8. 312191 8. 247377 8. 353838 8. 739215 8. 773234 8. 730051  
11716118\_ 11. 12279 11. 07512 11. 12571 11. 18165 11. 18434 11. 16733

11716119\_ 10. 11768 10. 05712 10. 0998 10. 16295 10. 21367 10. 13527  
11716120\_ 7. 400021 7. 416225 7. 459183 7. 833985 7. 910728 7. 886723  
11716121\_ 9. 940551 9. 905991 9. 924411 9. 945437 9. 971515 9. 904125  
11716122\_ 7. 315073 7. 305446 7. 347023 7. 295488 7. 315853 7. 314037  
11716123\_ 8. 700979 8. 614332 8. 707917 8. 594725 8. 653906 8. 61219  
11716124\_ 9. 387792 9. 290674 9. 326663 9. 210144 9. 205685 9. 275442  
11716125\_ 7. 916407 7. 909619 7. 883267 7. 93199 7. 874439 7. 95804  
11716126\_ 8. 612869 8. 602885 8. 663727 8. 621472 8. 570463 8. 653855  
11716127\_ 8. 222757 8. 195768 8. 18489 7. 814377 7. 809066 7. 750731  
11716128\_ 8. 398328 8. 288476 8. 424644 8. 139736 8. 153949 8. 175336  
11716129\_ 8. 426468 8. 359448 8. 385712 8. 1231 8. 044438 8. 164044  
11716130\_ 3. 309155 2. 940988 3. 019276 3. 04184 3. 005521 2. 781607  
11716131\_ 6. 751927 6. 754821 6. 819597 6. 472575 6. 447346 6. 438978  
11716132\_ 8. 133545 8. 065462 8. 08524 8. 138673 8. 20437 8. 163356  
11716133\_ 7. 803169 7. 687632 7. 784602 7. 857259 7. 762487 7. 844122  
11716134\_ 8. 114121 7. 995817 8. 188469 8. 097345 8. 178012 8. 230397  
11716135\_ 7. 583834 7. 530724 7. 608105 7. 184636 7. 289973 7. 195244  
11716136\_ 7. 136861 7. 083352 7. 254194 8. 556411 8. 464242 8. 454622  
11716137\_ 8. 831161 8. 84608 8. 8382 8. 727861 8. 648639 8. 706284  
11716138\_ 8. 219226 8. 142487 8. 182805 7. 689599 7. 720119 7. 712161  
11716139\_ 11. 98706 11. 93129 11. 92243 11. 83997 11. 85119 11. 84447  
11716140\_ 12. 00269 11. 97925 11. 98026 11. 86726 11. 89961 11. 89355  
11716141\_ 7. 684139 7. 695471 7. 767199 7. 960316 7. 93608 7. 940663  
11716142\_ 8. 147503 8. 009158 8. 122684 8. 256609 8. 314421 8. 266649  
11716143\_ 9. 491441 9. 45103 9. 462504 9. 601485 9. 698461 9. 635045  
11716144\_ 5. 926672 6. 097927 5. 922714 7. 274526 7. 200756 7. 299162  
11716145\_ 10. 15842 10. 11945 10. 13416 9. 907247 9. 899401 9. 916489  
11716146\_ 5. 021661 5. 027179 5. 025998 5. 11527 5. 217778 5. 226216  
11716147\_ 7. 322349 7. 303658 7. 446463 7. 764859 7. 752159 7. 702271  
11716148\_ 8. 990563 8. 917621 8. 950717 8. 834455 8. 812249 8. 836898  
11716149\_ 6. 469805 6. 424256 6. 432543 6. 28275 6. 292905 6. 303976  
11716150\_ 6. 682473 6. 461004 6. 62723 5. 845365 6. 044285 6. 063563  
11716151\_ 7. 004247 6. 898793 6. 988381 6. 146184 6. 047711 6. 13945  
11716152\_ 8. 360966 8. 216265 8. 388825 8. 801703 8. 821419 8. 819518  
11716153\_ 9. 704997 9. 578678 9. 649276 9. 19966 9. 199564 9. 225166  
11716154\_ 7. 669941 7. 690067 7. 598802 7. 624645 7. 669044 7. 714452  
11716155\_ 6. 889622 6. 924057 6. 904654 7. 656715 7. 717102 7. 744203  
11716156\_ 5. 528869 5. 452508 5. 397185 5. 820312 5. 845365 5. 814665  
11716157\_ 8. 159005 8. 208617 8. 155838 8. 048914 8. 126033 8. 065302  
11716158\_ 9. 182721 9. 174289 9. 17198 9. 004545 9. 048233 8. 983939  
11716159\_ 6. 92265 6. 797368 6. 879484 6. 584938 6. 776979 6. 775604  
11716160\_ 3. 875665 3. 688416 4. 037107 4. 078231 4. 126001 3. 967751  
11716161\_ 5. 305951 5. 618732 5. 414869 5. 60257 5. 552687 5. 55485  
11716162\_ 4. 301828 4. 483169 4. 370337 4. 576534 4. 548909 4. 487261  
11716163\_ 9. 057257 9. 005801 9. 03072 9. 538797 9. 580619 9. 430347  
11716164\_ 8. 776965 8. 696257 8. 827348 9. 130519 9. 134243 9. 127275  
11716165\_ 9. 723359 9. 637057 9. 708526 9. 917489 9. 864996 9. 90374  
11716166\_ 10. 4831 10. 4771 10. 49708 10. 47954 10. 5013 10. 42617  
11716167\_ 5. 323012 5. 383934 5. 554436 5. 503922 5. 36323 5. 554436  
11716168\_ 8. 794024 8. 776102 8. 801926 9. 066658 9. 076034 9. 031939  
11716169\_ 6. 774181 6. 714177 6. 84529 7. 583576 7. 567939 7. 553066

11716170\_ 4.904253 4.532017 4.920445 5.050218 5.194461 5.388017  
11716171\_ 8.277291 8.323458 8.302642 8.743344 8.786253 8.804387  
11716172\_ 8.29912 8.286855 8.331641 8.074125 8.077679 8.064722  
11716173\_ 9.781457 9.670961 9.749971 9.728816 9.732287 9.746419  
11716174\_ 11.09317 11.06297 11.1073 11.08537 11.06937 11.05179  
11716175\_ 11.15013 11.0785 11.1409 11.08481 11.07514 11.10667  
11716176\_ 7.779194 7.709726 7.75031 7.956274 7.997672 7.971021  
11716177\_ 10.44637 10.40017 10.39103 10.7374 10.70891 10.62198  
11716178\_ 10.38501 10.35654 10.34772 10.04005 9.995524 9.983196  
11716179\_ 9.329444 9.302191 9.351069 8.824153 8.843813 8.821729  
11716180\_ 10.22408 10.19399 10.24082 10.0878 10.12842 10.08448  
11716181\_ 7.718664 7.726743 7.680652 7.80677 7.836369 7.841214  
11716182\_ 8.198581 8.239041 8.27921 7.779088 7.710581 7.575888  
11716183\_ 7.941508 7.919827 7.89488 7.235778 7.177181 7.211415  
11716184\_ 8.441804 8.386628 8.437783 7.789694 7.819835 7.794649  
11716185\_ 7.829389 7.796702 7.805878 7.079781 7.15438 7.074889  
11716186\_ 9.725324 9.676429 9.740841 9.28003 9.304814 9.277582  
11716187\_ 6.406883 6.41336 6.468716 6.403724 6.40706 6.442074  
11716188\_ 10.39961 10.31463 10.41938 10.54683 10.56543 10.54432  
11716189\_ 10.38446 10.36516 10.38385 10.48972 10.51669 10.50685  
11716190\_ 8.822368 8.734693 8.7944 8.851706 8.836693 8.84834  
11716191\_ 8.860256 8.781355 8.87109 9.047451 9.037048 8.953041  
11716192\_ 8.669458 8.487493 8.661332 8.110509 8.115451 8.130259  
11716193\_ 9.369549 9.394046 9.397397 8.950298 8.911876 8.907376  
11716194\_ 8.025575 7.941113 8.02234 7.702043 7.681523 7.648621  
11716195\_ 8.308723 8.270019 8.317378 8.745812 8.852914 8.779703  
11716196\_ 9.401934 9.364557 9.402979 9.822702 9.931046 9.925515  
11716197\_ 7.466906 7.347191 7.401791 7.310242 7.279619 7.307818  
11716198\_ 7.506134 7.434587 7.505824 7.07929 7.011172 7.101486  
11716199\_ 7.978791 7.938165 7.918207 7.550252 7.543238 7.599876  
11716200\_ 9.018953 8.953785 9.023508 8.715393 8.739519 8.606335  
11716201\_ 7.128164 7.194708 7.229983 6.874408 6.870785 6.858712  
11716202\_ 9.111533 8.986528 9.084589 9.114784 9.148456 9.157991  
11716203\_ 6.827808 6.684764 6.934587 5.237728 5.337202 5.236954  
11716204\_ 8.842925 8.770235 8.844955 8.921647 8.951502 9.036252  
11716205\_ 10.48313 10.43308 10.46841 10.51338 10.5444 10.55343  
11716206\_ 10.3469 10.35589 10.32587 10.58168 10.51054 10.54388  
11716207\_ 10.00847 9.968919 9.973125 10.08332 10.12605 10.09104  
11716208\_ 7.667165 7.748626 7.589926 8.314655 8.151557 7.97343  
11716209\_ 9.015645 8.962628 8.999865 8.898081 8.977387 8.905796  
11716210\_ 8.864687 8.835294 8.896317 7.448474 7.498646 7.503786  
11716211\_ 8.400018 8.296129 8.412902 8.284851 8.305347 8.299375  
11716212\_ 8.832861 8.798161 8.801268 8.754695 8.728735 8.773387  
11716213\_ 8.997678 8.936132 9.006581 8.587058 8.686483 8.60299  
11716214\_ 8.928794 8.812161 8.919498 8.338859 8.356764 8.255498  
11716215\_ 9.360749 9.434272 9.310475 9.274977 9.297984 9.310693  
11716216\_ 8.00845 7.950687 8.021976 7.877415 7.889077 7.962598  
11716217\_ 7.426223 7.342771 7.413248 6.653456 6.672355 6.680079  
11716218\_ 8.411443 8.401308 8.448262 7.949167 7.910536 7.970713  
11716219\_ 8.98616 8.932311 8.937755 8.942064 8.977141 8.895427  
11716220\_ 9.763768 9.697425 9.710085 9.710302 9.70576 9.666353

11716221\_ 8. 118879 8. 047952 8. 142317 8. 639756 8. 676639 8. 631202  
11716222\_ 4. 012227 4. 264179 4. 063737 4. 274382 4. 211802 4. 17344  
11716223\_ 11. 6659 11. 69367 11. 62459 11. 88549 11. 8484 11. 78052  
11716224\_ 9. 048215 9. 023603 9. 054365 9. 370906 9. 380281 9. 373462  
11716225\_ 4. 664623 4. 531041 4. 833509 4. 227133 4. 067751 4. 276077  
11716226\_ 10. 11136 10. 09443 10. 08877 9. 091119 9. 108511 9. 066628  
11716227\_ 7. 70895 7. 582516 7. 685251 8. 073076 8. 069121 8. 065654  
11716228\_ 7. 41425 7. 242787 7. 382277 7. 823351 7. 830694 7. 885721  
11716229\_ 7. 742582 7. 605837 7. 656968 7. 471453 7. 430641 7. 411029  
11716230\_ 5. 134068 5. 2822 5. 265865 5. 10359 5. 182644 5. 324973  
11716231\_ 8. 23333 8. 158274 8. 238792 8. 077448 8. 138733 8. 138943  
11716232\_ 7. 19071 7. 174679 7. 218922 7. 545023 7. 566895 7. 527991  
11716233\_ 6. 7637 6. 695298 6. 794285 6. 537096 6. 429267 6. 47313  
11716234\_ 8. 770662 8. 696649 8. 807339 8. 322702 8. 221233 8. 316305  
11716235\_ 9. 146617 9. 130489 9. 196183 9. 283257 9. 27931 9. 257215  
11716236\_ 10. 17925 10. 0478 10. 16995 10. 15059 10. 17855 10. 16231  
11716237\_ 8. 143786 8. 147665 8. 138538 8. 269103 8. 29248 8. 24376  
11716238\_ 8. 662949 8. 584312 8. 646674 8. 964011 8. 966203 9. 000879  
11716239\_ 8. 602049 8. 574819 8. 567531 8. 579007 8. 535105 8. 462976  
11716240\_ 8. 735601 8. 711658 8. 658194 8. 417128 8. 398376 8. 475713  
11716241\_ 8. 601507 8. 48645 8. 559028 8. 290381 8. 236925 8. 293412  
11716242\_ 8. 558551 8. 606303 8. 654896 8. 522473 8. 558439 8. 490845  
11716243\_ 7. 440781 7. 305747 7. 382607 7. 025037 7. 153735 7. 111953  
11716244\_ 7. 670679 7. 591918 7. 693691 7. 566702 7. 661269 7. 64412  
11716245\_ 7. 227924 7. 189277 7. 243171 7. 181575 7. 264546 7. 206151  
11716246\_ 6. 254187 6. 273664 6. 131727 6. 268194 6. 399257 6. 231775  
11716247\_ 10. 50219 10. 47555 10. 51399 10. 45535 10. 46993 10. 46294  
11716248\_ 6. 876916 6. 972285 6. 836544 7. 300171 7. 374996 7. 353136  
11716249\_ 6. 785373 6. 742819 6. 780218 7. 469556 7. 420949 7. 373479  
11716250\_ 9. 284186 9. 328496 9. 349329 8. 969432 8. 992618 9. 057063  
11716251\_ 9. 457644 9. 388695 9. 402033 9. 01471 9. 006161 9. 04974  
11716252\_ 5. 827049 5. 80356 5. 905277 5. 622805 5. 643431 5. 59914  
11716253\_ 8. 21862 8. 057578 8. 087851 8. 017579 8. 02514 8. 031727  
11716254\_ 8. 924303 8. 893977 8. 890702 8. 946788 8. 920113 8. 933184  
11716255\_ 5. 382782 5. 762232 5. 650173 5. 741581 5. 824849 5. 774833  
11716256\_ 6. 026094 6. 005388 5. 989619 5. 997525 6. 037814 5. 923127  
11716257\_ 7. 859665 7. 720698 7. 830441 7. 206608 7. 293997 7. 2288  
11716258\_ 6. 904324 6. 867566 6. 889728 7. 268256 7. 207665 7. 286401  
11716259\_ 4. 797374 4. 665446 4. 771061 4. 71176 4. 657119 4. 731799  
11716260\_ 10. 80208 10. 85317 10. 79138 10. 88989 10. 85761 10. 79078  
11716261\_ 8. 570871 8. 488857 8. 543594 8. 812851 8. 824146 8. 861168  
11716262\_ 9. 427627 9. 39849 9. 470283 8. 616967 8. 616097 8. 640832  
11716263\_ 8. 347903 8. 272995 8. 339823 8. 326407 8. 380473 8. 365572  
11716264\_ 8. 273257 8. 228363 8. 233917 8. 18773 8. 227191 8. 216722  
11716265\_ 9. 362189 9. 318714 9. 372257 9. 390304 9. 363651 9. 393862  
11716266\_ 9. 339911 9. 298601 9. 257471 9. 487329 9. 486825 9. 485517  
11716267\_ 7. 263098 7. 238968 7. 27925 7. 215044 7. 339095 7. 234334  
11716268\_ 8. 660945 8. 60964 8. 640417 8. 864663 8. 911593 8. 90022  
11716269\_ 10. 11344 10. 07793 10. 1247 10. 18428 10. 15757 10. 1843  
11716270\_ 11. 25563 11. 19311 11. 24039 11. 39916 11. 4199 11. 36358  
11716271\_ 5. 172119 5. 067237 5. 361243 5. 333126 5. 355358 5. 305377

11716272\_ 8. 952555 8. 976346 8. 939599 8. 903494 8. 962384 8. 95138  
11716273\_ 9. 074389 8. 982209 9. 034014 8. 997571 9. 072045 9. 049007  
11716274\_ 7. 525302 7. 513948 7. 514672 7. 887582 7. 84195 7. 98065  
11716275\_ 6. 224137 6. 215945 6. 33076 6. 287518 6. 17872 6. 184898  
11716276\_ 10. 30375 10. 23844 10. 26935 10. 21314 10. 21373 10. 20562  
11716277\_ 8. 181272 8. 089097 8. 188719 8. 170863 8. 137585 8. 061905  
11716278\_ 8. 81968 8. 790764 8. 790705 8. 681178 8. 734693 8. 799376  
11716279\_ 9. 038502 8. 877375 8. 987724 8. 915517 8. 900883 8. 894488  
11716280\_ 7. 712933 7. 636088 7. 700406 7. 619572 7. 644267 7. 71572  
11716281\_ 6. 266294 6. 189996 6. 138143 5. 937595 5. 882266 5. 879274  
11716282\_ 8. 210911 8. 227191 8. 143725 7. 996886 7. 94451 8. 048994  
11716283\_ 8. 631765 8. 60703 8. 663223 9. 043024 9. 098658 9. 049651  
11716284\_ 10. 36925 10. 31683 10. 33426 10. 47886 10. 44763 10. 45391  
11716285\_ 6. 613785 6. 377087 6. 590233 8. 169523 8. 20595 8. 189346  
11716286\_ 8. 085057 7. 99469 8. 114644 9. 748105 9. 75877 9. 733007  
11716287\_ 8. 351088 8. 28019 8. 354246 8. 747884 8. 730457 8. 725308  
11716288\_ 9. 762844 9. 708058 9. 725297 9. 780225 9. 733784 9. 700736  
11716289\_ 8. 538918 8. 463899 8. 549768 8. 562103 8. 59042 8. 596052  
11716290\_ 3. 095948 3. 498458 3. 265052 3. 46867 3. 270216 3. 65419  
11716291\_ 7. 726757 7. 663481 7. 71595 9. 146633 9. 130334 9. 076962  
11716292\_ 7. 304056 7. 423503 7. 458089 7. 417664 7. 409349 7. 409349  
11716293\_ 7. 350069 7. 241608 7. 360931 7. 281259 7. 420519 7. 234647  
11716294\_ 9. 551839 9. 502519 9. 545321 9. 135801 9. 201243 9. 175214  
11716295\_ 7. 990079 7. 965469 7. 96596 8. 154015 8. 12722 8. 222742  
11716296\_ 5. 714241 5. 76946 5. 870242 5. 977166 6. 014101 6. 073755  
11716297\_ 8. 179055 8. 079724 8. 060518 7. 985843 7. 925301 7. 946546  
11716298\_ 8. 434465 8. 401774 8. 460094 8. 329244 8. 396358 8. 395602  
11716299\_ 6. 676492 6. 632352 6. 675753 6. 830022 6. 788641 6. 814999  
11716300\_ 6. 120745 6. 457603 6. 341508 7. 092842 6. 896792 6. 836612  
11716301\_ 7. 191209 7. 089177 7. 084132 6. 586471 6. 554674 6. 617088  
11716302\_ 7. 373644 7. 335924 7. 451361 7. 555968 7. 482334 7. 366655  
11716303\_ 9. 210659 9. 191677 9. 240568 9. 52538 9. 538453 9. 473622  
11716304\_ 7. 887796 7. 917766 7. 974185 8. 401029 8. 438414 8. 402403  
11716305\_ 6. 62818 6. 545547 6. 562438 6. 779107 6. 643784 6. 894947  
11716306\_ 10. 3018 10. 21279 10. 25357 10. 00484 10. 02055 10. 03785  
11716307\_ 7. 427358 7. 398763 7. 320065 7. 158321 7. 299162 7. 280725  
11716308\_ 7. 544253 7. 524047 7. 537064 7. 21313 7. 299535 7. 318135  
11716309\_ 6. 515447 6. 373197 6. 450297 6. 13496 6. 183123 6. 171634  
11716310\_ 6. 524083 6. 564709 6. 515323 6. 173161 6. 194536 6. 28657  
11716311\_ 9. 59472 9. 585021 9. 609455 10. 09754 10. 12235 10. 10615  
11716312\_ 8. 410301 8. 318944 8. 334446 8. 404862 8. 345902 8. 395418  
11716313\_ 10. 05302 9. 943319 10. 02268 10. 06395 10. 07048 10. 10171  
11716314\_ 4. 718167 5. 129347 4. 743319 5. 103529 5. 26812 5. 199371  
11716315\_ 10. 07181 10. 02749 10. 00666 10. 06933 10. 07317 10. 07326  
11716316\_ 6. 856991 6. 862059 6. 908121 6. 884299 6. 916049 7. 052082  
11716317\_ 7. 912916 7. 85911 7. 937406 7. 368112 7. 473549 7. 49118  
11716318\_ 8. 41149 8. 292377 8. 456399 8. 480089 8. 456408 8. 499002  
11716319\_ 10. 44181 10. 31526 10. 4517 10. 18493 10. 17069 10. 18452  
11716320\_ 13. 00928 13. 0479 12. 99925 12. 98669 12. 98435 12. 94611  
11716321\_ 9. 651049 9. 61132 9. 613306 9. 603505 9. 594201 9. 632246  
11716322\_ 9. 067826 9. 001139 9. 057285 9. 22731 9. 276827 9. 122027

11716323\_ 7. 803974 7. 802642 7. 837481 8. 289992 8. 239681 8. 245682  
11716324\_ 8. 832821 8. 732252 8. 850932 9. 168124 9. 156473 9. 142333  
11716325\_ 8. 326613 8. 232162 8. 425825 7. 300492 7. 321428 7. 439048  
11716326\_ 4. 107918 4. 426286 4. 286658 4. 181811 4. 301952 4. 287843  
11716327\_ 3. 669208 3. 506906 3. 703837 3. 832614 3. 506906 3. 506906  
11716328\_ 5. 368055 5. 518557 5. 42904 5. 375539 5. 369113 5. 405122  
11716329\_ 2. 426838 2. 25483 2. 251284 2. 426838 2. 639198 2. 591697  
11716330\_ 8. 540204 8. 50168 8. 533825 8. 035991 8. 038892 8. 033534  
11716331\_ 9. 494028 9. 43257 9. 451704 9. 231224 9. 193908 9. 246849  
11716332\_ 9. 914722 9. 860841 9. 879697 9. 311315 9. 290265 9. 271317  
11716333\_ 12. 84164 12. 82297 12. 84521 12. 7841 12. 79347 12. 79926  
11716334\_ 9. 863028 9. 868522 9. 832896 10. 12128 10. 00987 10. 10835  
11716335\_ 9. 840508 9. 784035 9. 810083 9. 927305 9. 916934 9. 893547  
11716336\_ 8. 259417 8. 237529 8. 208948 7. 992351 8. 070353 8. 014847  
11716337\_ 6. 844782 7. 018695 6. 990737 8. 026642 7. 920819 7. 997208  
11716338\_ 6. 377847 6. 149332 6. 345759 7. 12598 7. 204522 7. 230373  
11716339\_ 6. 572631 6. 511793 6. 528855 7. 28032 7. 195425 7. 19803  
11716340\_ 10. 60053 10. 53383 10. 58516 10. 64156 10. 66859 10. 66221  
11716341\_ 8. 787583 8. 813824 8. 912097 8. 207831 8. 208753 8. 151147  
11716342\_ 10. 70475 10. 67591 10. 7019 10. 65399 10. 71489 10. 71971  
11716343\_ 6. 331832 6. 370582 6. 298711 6. 446046 6. 332325 6. 466578  
11716344\_ 8. 276597 8. 300711 8. 434038 7. 833892 7. 775262 7. 823805  
11716345\_ 7. 403873 7. 29512 7. 330739 7. 246318 7. 25253 7. 328872  
11716346\_ 7. 946766 7. 972177 7. 943918 7. 400557 7. 477403 7. 484244  
11716347\_ 7. 50511 7. 460218 7. 423986 6. 885404 6. 912042 6. 9181  
11716348\_ 8. 188806 8. 059534 8. 070071 7. 441523 7. 558305 7. 472209  
11716349\_ 7. 941976 7. 881245 7. 948773 7. 843727 7. 861729 7. 86265  
11716350\_ 7. 981398 7. 816978 7. 956432 8. 510639 8. 489188 8. 480253  
11716351\_ 10. 64346 10. 62996 10. 65144 11. 04034 11. 05783 10. 95706  
11716352\_ 9. 899046 9. 875226 9. 86054 10. 10891 10. 12635 10. 11634  
11716353\_ 7. 239386 7. 351631 7. 291357 7. 428022 7. 505041 7. 561461  
11716354\_ 11. 42115 11. 39922 11. 43641 11. 37473 11. 41541 11. 39312  
11716355\_ 10. 80565 10. 75496 10. 81055 10. 74966 10. 77088 10. 76813  
11716356\_ 8. 994651 8. 875348 8. 968463 8. 683774 8. 674977 8. 71823  
11716357\_ 4. 695523 4. 643118 4. 498389 4. 738359 4. 856411 4. 649208  
11716358\_ 10. 0925 10. 0328 10. 09432 10. 66578 10. 69177 10. 64806  
11716359\_ 9. 35869 9. 339798 9. 358515 9. 328664 9. 33688 9. 331461  
11716360\_ 10. 67259 10. 64483 10. 69423 10. 70689 10. 69621 10. 69264  
11716361\_ 8. 874928 8. 768156 8. 879978 8. 914964 8. 895469 8. 919122  
11716362\_ 7. 995655 7. 870389 7. 992687 7. 885789 7. 927066 7. 922071  
11716363\_ 7. 953224 7. 868277 7. 97894 7. 861101 7. 932678 7. 951481  
11716364\_ 8. 575367 8. 536172 8. 608912 9. 528329 9. 483295 9. 517552  
11716365\_ 9. 215191 9. 1941 9. 247183 10. 17765 10. 13521 10. 15282  
11716366\_ 3. 566433 3. 491943 3. 538425 3. 634454 3. 5597 3. 712847  
11716367\_ 10. 21908 10. 19719 10. 23414 10. 36236 10. 34764 10. 34035  
11716368\_ 10. 8376 10. 79651 10. 83419 10. 94436 10. 94705 10. 93874  
11716369\_ 11. 61284 11. 6127 11. 61254 11. 77188 11. 73389 11. 68657  
11716370\_ 8. 309904 8. 291532 8. 331505 8. 56176 8. 561412 8. 490128  
11716371\_ 6. 847884 6. 862674 6. 936911 7. 385143 7. 474342 7. 541627  
11716372\_ 7. 511524 7. 57452 7. 577145 8. 382475 8. 393107 8. 406886  
11716373\_ 8. 561324 8. 446994 8. 487409 8. 217303 8. 221385 8. 193343



11716374\_ 9.09812 9.101558 9.155697 8.94487 8.954707 8.869832  
11716375\_ 7.152681 7.14215 7.221161 7.036581 7.091612 7.081817  
11716376\_ 6.274827 6.343261 6.327611 6.454136 6.455496 6.506076  
11716377\_ 8.851927 8.822859 8.93361 8.782773 8.816711 8.794719  
11716378\_ 6.978736 6.745886 6.772782 6.897742 6.862059 7.009306  
11716379\_ 11.07277 11.05353 11.05099 11.01186 11.06311 10.99794  
11716380\_ 8.431954 8.444387 8.417778 8.42313 8.491754 8.395795  
11716381\_ 8.349003 8.326664 8.334255 8.33258 8.37206 8.377851  
11716382\_ 11.13323 11.08833 11.1645 11.09366 11.09972 11.05906  
11716383\_ 11.06936 11.03225 11.0779 10.99469 11.02316 10.99047  
11716384\_ 8.04353 8.038288 8.06822 6.728279 6.757428 6.889485  
11716385\_ 7.779447 7.708243 7.715356 7.903852 7.977703 7.957131  
11716386\_ 6.754378 6.874982 6.889844 6.952546 6.978297 6.807045  
11716387\_ 9.07337 9.029237 9.052549 9.19505 9.144375 9.193485  
11716388\_ 8.87843 8.853482 8.918253 9.326918 9.335643 9.356833  
11716389\_ 10.16045 10.1744 10.19718 10.29189 10.28102 10.29965  
11716390\_ 7.734828 7.747764 7.808051 7.32403 7.263745 7.45108  
11716391\_ 7.811187 7.849343 7.853264 7.537236 7.640374 7.587403  
11716392\_ 7.619387 7.5262 7.591546 8.167707 8.15671 8.305279  
11716393\_ 7.927256 7.798926 7.886424 8.414816 8.385345 8.398177  
11716394\_ 10.52216 10.44949 10.5693 10.57273 10.5671 10.59416  
11716395\_ 10.27971 10.26891 10.30315 9.386649 9.481359 9.515524  
11716396\_ 6.659428 6.583338 6.617727 6.548678 6.575291 6.53935  
11716397\_ 8.891935 8.812161 8.889676 9.201606 9.233604 9.187604  
11716398\_ 8.764975 8.692405 8.732657 8.673957 8.65774 8.65699  
11716399\_ 6.709071 6.81229 6.799193 6.946839 6.93896 6.944885  
11716400\_ 5.299967 5.419767 5.284448 5.425475 5.441783 5.366114  
11716401\_ 5.537389 5.485812 5.368283 5.630705 5.550657 5.508461  
11716402\_ 6.719682 6.590434 6.739593 6.790794 6.871399 6.810706  
11716403\_ 5.004738 4.893009 5.055756 5.67561 5.551228 5.540976  
11716404\_ 7.678483 7.631524 7.626258 8.123144 8.201443 8.127004  
11716405\_ 6.682772 6.671655 6.733159 6.970205 6.886705 6.880172  
11716406\_ 6.763183 6.837747 6.646239 6.858903 6.810786 6.820147  
11716407\_ 7.128777 7.116844 7.136184 6.961037 7.067956 7.070226  
11716408\_ 9.191252 9.144646 9.202301 9.170747 9.112394 9.141199  
11716409\_ 5.355842 5.39516 5.355842 5.619277 5.53364 5.554181  
11716410\_ 4.805179 4.79517 4.77393 4.898221 4.963248 4.816747  
11716411\_ 5.256648 5.359981 5.435567 5.470107 5.383875 5.489128  
11716412\_ 9.586518 9.572013 9.585188 9.603124 9.590266 9.6147  
11716413\_ 6.306521 6.391458 6.239783 6.4331 6.444289 6.322413  
11716414\_ 10.10376 10.0717 9.988678 10.04154 10.04893 9.966088  
11716415\_ 11.04339 10.97049 11.00843 10.89657 10.92657 10.89833  
11716416\_ 6.166811 6.098993 6.084093 6.240099 6.188781 6.076293  
11716417\_ 6.971486 6.990158 6.971486 8.16826 8.089203 8.114746  
11716418\_ 8.635398 8.600308 8.677764 8.933676 8.919114 8.880818  
11716419\_ 4.939273 4.874673 4.905758 5.240369 5.30466 5.099076  
11716420\_ 10.63379 10.54216 10.59908 10.70211 10.7483 10.73885  
11716421\_ 7.514346 7.399594 7.51013 7.638495 7.673568 7.567966  
11716422\_ 7.977228 7.869461 7.935406 8.070188 8.064355 8.022058  
11716423\_ 6.496499 6.630082 6.644259 6.792571 6.71383 6.767812  
11716424\_ 10.0525 9.975777 10.04719 10.12192 10.10659 10.07523

11716425\_ 7. 833906 7. 866841 7. 782699 7. 923486 8. 02234 7. 898823  
11716426\_ 9. 309895 9. 258947 9. 31543 9. 37251 9. 389108 9. 351489  
11716427\_ 3. 704058 4. 011463 3. 994921 3. 895044 4. 055666 3. 887098  
11716428\_ 8. 454922 8. 339608 8. 489032 8. 685257 8. 699335 8. 71759  
11716429\_ 9. 354973 9. 3108 9. 352448 9. 342943 9. 298676 9. 32816  
11716430\_ 7. 326385 7. 376176 7. 325479 7. 680566 7. 710365 7. 71848  
11716431\_ 7. 615105 7. 539781 7. 574583 7. 67239 7. 799789 7. 68296  
11716432\_ 8. 419146 8. 319042 8. 399462 8. 113716 8. 138673 8. 152759  
11716433\_ 6. 058347 6. 058347 6. 070283 6. 575522 6. 328094 6. 531233  
11716434\_ 4. 723465 4. 764104 4. 52373 4. 856603 4. 773382 4. 843573  
11716435\_ 6. 512905 6. 446345 6. 487792 6. 19429 6. 214133 6. 282557  
11716436\_ 10. 0869 10. 00725 10. 05725 10. 42864 10. 44225 10. 30768  
11716437\_ 8. 987951 9. 028326 9. 064729 9. 484999 9. 504679 9. 381233  
11716438\_ 9. 773268 9. 776323 9. 756773 10. 21089 10. 18479 10. 09165  
11716439\_ 10. 06361 9. 980521 10. 0273 10. 16419 10. 08414 10. 10878  
11716440\_ 9. 051988 9. 002196 9. 037258 9. 0492 9. 068317 9. 005597  
11716441\_ 8. 971888 8. 994989 8. 988777 9. 009156 9. 044381 9. 032791  
11716442\_ 11. 03976 10. 94681 10. 98105 10. 97895 11. 04421 11. 00557  
11716443\_ 9. 692539 9. 660508 9. 711482 9. 547609 9. 554404 9. 563063  
11716444\_ 7. 957827 7. 941265 7. 999884 8. 053535 8. 03707 8. 012542  
11716445\_ 9. 299538 9. 228406 9. 23141 9. 728479 9. 800653 9. 78619  
11716446\_ 7. 681806 7. 632134 7. 695497 7. 506543 7. 576532 7. 469792  
11716447\_ 6. 116267 6. 238539 6. 178078 6. 117048 6. 222296 6. 173356  
11716448\_ 8. 523542 8. 479438 8. 526234 8. 185142 8. 203928 8. 189284  
11716449\_ 9. 818087 9. 787299 9. 796628 9. 565783 9. 61206 9. 592606  
11716450\_ 8. 211053 8. 059565 8. 133688 7. 728285 7. 669693 7. 753642  
11716451\_ 6. 321838 6. 338058 6. 448156 6. 157172 6. 211804 6. 194606  
11716452\_ 8. 500579 8. 497067 8. 583064 8. 217109 8. 25195 8. 173019  
11716453\_ 9. 667469 9. 616268 9. 644539 9. 351515 9. 306394 9. 282955  
11716454\_ 8. 946567 8. 923982 8. 876025 8. 707776 8. 706179 8. 710009  
11716455\_ 8. 945851 8. 878643 8. 862917 8. 691974 8. 648706 8. 651638  
11716456\_ 7. 923538 7. 926761 7. 928336 7. 673879 7. 608456 7. 592608  
11716457\_ 7. 568265 7. 563505 7. 565263 7. 31009 7. 307842 7. 224172  
11716458\_ 9. 645064 9. 635164 9. 683532 9. 574566 9. 580806 9. 565992  
11716459\_ 5. 966277 6. 127832 6. 123216 5. 992361 6. 197079 6. 110668  
11716460\_ 5. 858903 5. 899064 5. 98139 6. 115995 6. 093471 6. 070944  
11716461\_ 7. 315369 7. 239471 7. 127717 7. 607042 7. 623664 7. 604444  
11716462\_ 8. 288486 8. 200001 8. 322535 8. 468264 8. 573053 8. 477125  
11716463\_ 6. 684621 6. 592216 6. 640534 6. 342054 6. 405365 6. 434545  
11716464\_ 6. 845989 6. 805884 6. 85492 6. 808894 6. 818856 6. 779543  
11716465\_ 7. 569838 7. 470922 7. 559709 7. 956296 7. 91715 7. 97343  
11716466\_ 7. 634982 7. 593653 7. 675404 7. 856928 7. 859535 7. 769317  
11716467\_ 8. 264203 8. 256261 8. 291224 8. 464185 8. 447055 8. 367964  
11716468\_ 6. 282023 6. 300643 6. 23831 8. 078198 8. 052203 8. 058584  
11716469\_ 9. 733236 9. 732613 9. 72459 9. 881537 9. 868 9. 774021  
11716470\_ 3. 361077 3. 350593 3. 343179 3. 457523 3. 495663 3. 712986  
11716471\_ 9. 627477 9. 564574 9. 597393 9. 710427 9. 767724 9. 708911  
11716472\_ 8. 776713 8. 705585 8. 765604 8. 333535 8. 4 8. 358024  
11716473\_ 9. 024685 9. 001197 9. 029291 8. 971953 8. 974349 8. 995676  
11716474\_ 9. 687777 9. 62874 9. 696991 9. 429048 9. 401701 9. 355472  
11716475\_ 10. 64136 10. 56396 10. 57388 10. 69575 10. 67014 10. 63876

11716476\_ 8. 673145 8. 687491 8. 654618 8. 729725 8. 808239 8. 785333  
11716477\_ 9. 120902 9. 0757 9. 10277 9. 213099 9. 224488 9. 220685  
11716478\_ 11. 13709 11. 11576 11. 10983 11. 15927 11. 1583 11. 16577  
11716479\_ 5. 442778 5. 377207 5. 06334 5. 463214 5. 283889 5. 528398  
11716480\_ 5. 652534 5. 725415 5. 554436 5. 570718 5. 657023 5. 622313  
11716481\_ 6. 398139 6. 428939 6. 344233 6. 348033 6. 416454 6. 374968  
11716482\_ 8. 31965 8. 306039 8. 350181 9. 049835 9. 197899 9. 243559  
11716483\_ 7. 550519 7. 529919 7. 472987 8. 515561 8. 48037 8. 485026  
11716484\_ 9. 180567 9. 140991 9. 164962 9. 116764 9. 131609 9. 162379  
11716485\_ 5. 294925 5. 483728 5. 136029 5. 6888 5. 648362 5. 585022  
11716486\_ 5. 190438 5. 108707 5. 147336 5. 225066 5. 311121 5. 352408  
11716487\_ 8. 407167 8. 323475 8. 382943 8. 262874 8. 247599 8. 243538  
11716488\_ 9. 178229 9. 123211 9. 155733 9. 230512 9. 272756 9. 215293  
11716489\_ 3. 658926 3. 744465 3. 598629 3. 823407 3. 710384 3. 969445  
11716490\_ 8. 457594 8. 35067 8. 36141 8. 361029 8. 401466 8. 447664  
11716491\_ 9. 247876 9. 169012 9. 215733 9. 206188 9. 251865 9. 271981  
11716492\_ 7. 492036 7. 425849 7. 458941 8. 048204 8. 061413 8. 046887  
11716493\_ 9. 005439 8. 985997 9. 003408 9. 109059 9. 167543 9. 145637  
11716494\_ 6. 147071 6. 212764 6. 093418 6. 779047 6. 754119 6. 825431  
11716495\_ 8. 148251 8. 116476 8. 233844 8. 62412 8. 648232 8. 52953  
11716496\_ 7. 278991 7. 194727 7. 16318 7. 146111 7. 134592 7. 187401  
11716497\_ 8. 774516 8. 72291 8. 780247 8. 959998 8. 932023 8. 915433  
11716498\_ 10. 45797 10. 38002 10. 40608 10. 47456 10. 52394 10. 4533  
11716499\_ 9. 569802 9. 479292 9. 514326 9. 575212 9. 633644 9. 546255  
11716500\_ 8. 689217 8. 649129 8. 669653 9. 011612 9. 005514 8. 96577  
11716501\_ 5. 453504 5. 596594 5. 444458 5. 562807 5. 669849 5. 729178  
11716502\_ 5. 576025 5. 628499 5. 529478 5. 552939 5. 452356 5. 648514  
11716503\_ 6. 233835 6. 207041 6. 108503 6. 249758 6. 334791 6. 337904  
11716504\_ 5. 784518 5. 708372 5. 831148 5. 898733 5. 990231 6. 020052  
11716505\_ 7. 396746 7. 490383 7. 405297 7. 557636 7. 515984 7. 365736  
11716506\_ 9. 669925 9. 644246 9. 704819 9. 665558 9. 631333 9. 602032  
11716507\_ 6. 228551 6. 266198 6. 410477 6. 530947 6. 46744 6. 532153  
11716508\_ 3. 398236 3. 353937 2. 960001 3. 398962 3. 506489 3. 479472  
11716509\_ 7. 054566 6. 972828 7. 011493 8. 537077 8. 551585 8. 657585  
11716510\_ 9. 198653 9. 177379 9. 208337 9. 089625 9. 089802 9. 107621  
11716511\_ 7. 641414 7. 518123 7. 579122 7. 826022 7. 778621 7. 81161  
11716512\_ 9. 31849 9. 203011 9. 280255 9. 422937 9. 438685 9. 398354  
11716513\_ 8. 724314 8. 72895 8. 649449 8. 783428 8. 757223 8. 684962  
11716514\_ 8. 457426 8. 431794 8. 424965 9. 210219 9. 1991 9. 203744  
11716515\_ 9. 121952 9. 096838 9. 085308 9. 769162 9. 757382 9. 799135  
11716516\_ 6. 704633 6. 714177 6. 769209 7. 139341 7. 27372 7. 118796  
11716517\_ 6. 611479 6. 546818 6. 633851 6. 932106 6. 91873 6. 988628  
11716518\_ 8. 717504 8. 712183 8. 673676 9. 07686 9. 080902 9. 022856  
11716519\_ 7. 945802 7. 796261 7. 887517 8. 072545 8. 148875 8. 08832  
11716520\_ 5. 784072 5. 327975 5. 599764 5. 448296 5. 36323 5. 528624  
11716521\_ 5. 613848 5. 841177 5. 757458 5. 755974 5. 665367 5. 676992  
11716522\_ 6. 319433 6. 377902 6. 318809 6. 285599 6. 324607 6. 221319  
11716523\_ 2. 858757 2. 875625 2. 874619 2. 831735 2. 833682 2. 777643  
11716524\_ 10. 38208 10. 36239 10. 39903 10. 5234 10. 58044 10. 46682  
11716525\_ 7. 493694 7. 428105 7. 45005 7. 544522 7. 581163 7. 624803  
11716526\_ 6. 672731 6. 666434 6. 557068 6. 80299 6. 755766 6. 784983

11716527\_ 9. 537922 9. 472794 9. 512274 9. 312346 9. 330421 9. 294866  
11716528\_ 6. 811936 6. 727126 6. 63626 7. 039437 7. 139451 7. 212536  
11716529\_ 9. 610941 9. 49558 9. 568222 9. 520009 9. 580877 9. 517615  
11716530\_ 9. 975114 9. 930872 9. 997735 10. 11473 10. 10881 10. 07729  
11716531\_ 4. 96202 5. 097294 5. 029782 5. 457849 5. 418966 5. 601152  
11716532\_ 3. 179758 3. 303658 3. 067659 3. 234726 2. 985243 3. 199952  
11716533\_ 10. 0711 10. 09274 10. 13884 10. 04275 10. 05076 10. 01809  
11716534\_ 10. 13641 10. 11772 10. 10372 10. 08922 10. 08978 10. 09653  
11716535\_ 9. 579267 9. 61224 9. 632404 9. 449817 9. 473909 9. 423504  
11716536\_ 7. 700624 7. 553606 7. 620143 7. 222652 7. 271087 7. 369045  
11716537\_ 7. 875461 7. 899251 7. 726118 7. 851271 7. 659366 7. 598997  
11716538\_ 7. 605113 7. 573609 7. 613768 7. 239949 7. 328524 7. 210923  
11716539\_ 6. 786683 6. 759238 6. 783142 7. 055019 7. 167508 7. 004569  
11716540\_ 7. 403096 7. 504012 7. 478555 7. 143479 7. 164857 7. 245487  
11716541\_ 5. 219499 5. 411505 5. 245234 5. 414869 5. 416107 5. 383578  
11716542\_ 5. 032364 5. 169273 5. 058821 5. 065822 5. 063696 5. 168177  
11716543\_ 7. 70006 7. 800927 7. 618017 7. 764999 7. 76779 7. 749767  
11716544\_ 4. 702933 4. 947607 4. 873598 4. 89527 4. 971161 4. 8769  
11716545\_ 9. 978474 9. 966979 10. 02025 10. 07503 10. 1175 10. 06369  
11716546\_ 9. 034327 9. 018151 9. 137897 9. 112427 9. 202359 9. 094167  
11716547\_ 5. 48324 5. 301439 5. 420735 5. 564503 5. 484963 5. 569304  
11716548\_ 6. 621519 6. 540499 6. 66107 6. 402295 6. 461047 6. 490562  
11716549\_ 3. 753751 3. 810859 3. 581381 3. 924375 3. 923665 3. 833868  
11716550\_ 7. 491056 7. 400837 7. 476718 6. 363889 6. 510356 6. 617088  
11716551\_ 7. 238919 7. 015418 7. 130948 5. 938327 5. 918745 5. 816307  
11716552\_ 6. 253039 6. 161053 6. 276824 6. 205566 6. 066841 6. 113734  
11716553\_ 8. 348706 8. 257066 8. 353347 8. 372118 8. 422044 8. 420872  
11716554\_ 7. 944928 7. 910898 7. 931103 7. 891609 7. 954865 7. 99493  
11716555\_ 7. 867208 7. 771706 7. 895396 7. 868925 7. 879938 7. 940297  
11716556\_ 6. 068866 6. 004627 6. 115374 5. 93401 5. 933178 6. 033313  
11716557\_ 5. 285787 5. 304028 5. 281598 5. 249665 5. 201762 5. 345446  
11716558\_ 4. 626304 4. 842315 4. 608704 4. 82558 4. 820942 4. 815683  
11716559\_ 5. 457117 5. 512622 5. 198143 5. 495113 5. 477688 5. 554267  
11716560\_ 9. 007938 8. 974851 8. 922304 8. 801334 8. 885332 8. 892116  
11716561\_ 8. 032615 7. 905096 8. 052541 7. 807095 7. 802427 7. 904856  
11716562\_ 8. 537888 8. 465546 8. 605461 9. 558303 9. 594626 9. 541732  
11716563\_ 9. 070514 8. 909858 9. 085054 10. 1484 10. 17836 10. 15203  
11716564\_ 9. 684665 9. 673328 9. 667486 9. 755196 9. 688848 9. 682356  
11716565\_ 9. 076995 8. 919849 9. 041298 9. 017886 9. 097498 9. 03183  
11716566\_ 7. 982651 7. 891805 7. 922852 8. 079064 8. 089339 8. 041284  
11716567\_ 9. 838494 9. 809887 9. 85454 9. 686075 9. 697196 9. 676625  
11716568\_ 7. 874439 7. 8402 7. 848133 7. 916022 7. 831356 7. 930317  
11716569\_ 5. 489038 5. 331043 5. 445732 5. 290236 5. 391172 5. 241969  
11716570\_ 6. 625864 6. 700089 6. 659406 6. 78218 6. 716586 6. 7496  
11716571\_ 6. 277364 6. 397357 6. 224901 6. 309226 6. 34636 6. 443138  
11716572\_ 10. 158 10. 08303 10. 15814 10. 52545 10. 52311 10. 54622  
11716573\_ 6. 899284 6. 665808 6. 859276 6. 68284 6. 690526 6. 647769  
11716574\_ 8. 749294 8. 752672 8. 793971 8. 39135 8. 3982 8. 393085  
11716575\_ 6. 872979 6. 842691 7. 095186 6. 537078 6. 541665 6. 544244  
11716576\_ 7. 948181 7. 830235 7. 902153 7. 588721 7. 549542 7. 606703  
11716577\_ 7. 338666 7. 244838 7. 365953 7. 770091 7. 796987 7. 773741

11716578\_ 9. 15863 9. 070108 9. 181816 8. 74858 8. 719413 8. 773822  
11716579\_ 10. 02205 9. 964246 10. 01712 9. 781896 9. 80052 9. 837258  
11716580\_ 8. 87345 8. 840444 8. 862105 8. 852439 8. 832402 8. 860633  
11716581\_ 8. 90986 8. 867869 8. 87189 8. 725065 8. 704234 8. 75654  
11716582\_ 9. 256 9. 265994 9. 179131 9. 472445 9. 376551 9. 387965  
11716583\_ 10. 83983 10. 79703 10. 86443 10. 47882 10. 45059 10. 4884  
11716584\_ 10. 65617 10. 57112 10. 62422 10. 27903 10. 23721 10. 27077  
11716585\_ 9. 527951 9. 453624 9. 5332 9. 68855 9. 751172 9. 637283  
11716586\_ 8. 480615 8. 425982 8. 460116 8. 495041 8. 5302 8. 523648  
11716587\_ 10. 80257 10. 76345 10. 78473 10. 74916 10. 74966 10. 74111  
11716588\_ 8. 798861 8. 871064 8. 794058 8. 899977 8. 783434 8. 773945  
11716589\_ 9. 704723 9. 722799 9. 682986 9. 585549 9. 614214 9. 591825  
11716590\_ 10. 21895 10. 19058 10. 2517 10. 28838 10. 22285 10. 24863  
11716591\_ 8. 264471 8. 266878 8. 362964 8. 149618 8. 129442 8. 119634  
11716592\_ 8. 454972 8. 36126 8. 46385 8. 091677 8. 197505 8. 155064  
11716593\_ 8. 398847 8. 31965 8. 393727 8. 191668 8. 212818 8. 124503  
11716594\_ 9. 082579 9. 144416 9. 140383 8. 890249 8. 925448 8. 8414  
11716595\_ 8. 970472 8. 890314 8. 972928 9. 481455 9. 409194 9. 428998  
11716596\_ 8. 848633 8. 698187 8. 823465 9. 43042 9. 439701 9. 449713  
11716597\_ 8. 669425 8. 717704 8. 639328 8. 494368 8. 481421 8. 44961  
11716598\_ 7. 778275 7. 70855 7. 7718 8. 059189 8. 015364 8. 077575  
11716599\_ 8. 599571 8. 606423 8. 645909 8. 884262 8. 855372 8. 884549  
11716600\_ 6. 48341 6. 573744 6. 407846 6. 667962 6. 663453 6. 655219  
11716601\_ 8. 019648 7. 980462 7. 962372 7. 791047 7. 823956 7. 692034  
11716602\_ 7. 619476 7. 746123 7. 70034 7. 679445 7. 625672 7. 68296  
11716603\_ 8. 819556 8. 734393 8. 802069 8. 391879 8. 461151 8. 464194  
11716604\_ 7. 993868 7. 949106 7. 950651 7. 702324 7. 681408 7. 698012  
11716605\_ 4. 763543 4. 769849 4. 730759 4. 914651 4. 937407 5. 021175  
11716606\_ 10. 38922 10. 27825 10. 36321 10. 46922 10. 5254 10. 50906  
11716607\_ 10. 83597 10. 79074 10. 85605 10. 94796 10. 97712 10. 96669  
11716608\_ 10. 32603 10. 2519 10. 23348 10. 3023 10. 29203 10. 1905  
11716609\_ 6. 027818 6. 033553 6. 02162 5. 892469 5. 96366 5. 865912  
11716610\_ 10. 9274 10. 85319 10. 91893 11. 32174 11. 35271 11. 31275  
11716611\_ 10. 61231 10. 55802 10. 59751 11. 04071 11. 07813 11. 06808  
11716612\_ 6. 762142 6. 630865 6. 752593 6. 682569 6. 594531 6. 686431  
11716613\_ 12. 78379 12. 76931 12. 77842 12. 69802 12. 71328 12. 67534  
11716614\_ 10. 4 10. 37263 10. 41972 10. 31186 10. 36969 10. 27108  
11716615\_ 7. 867248 7. 811447 7. 891443 8. 387518 8. 40937 8. 451603  
11716616\_ 10. 04074 10. 02494 10. 05422 9. 545904 9. 502807 9. 54056  
11716617\_ 11. 22421 11. 15655 11. 18073 11. 20593 11. 22204 11. 24214  
11716618\_ 9. 829355 9. 809614 9. 823854 9. 778164 9. 732846 9. 762484  
11716619\_ 9. 048685 9. 061927 9. 087082 9. 135132 9. 146676 9. 092176  
11716620\_ 9. 220899 9. 185679 9. 217063 9. 109623 9. 133916 9. 127158  
11716621\_ 10. 15486 10. 09808 10. 15723 9. 656812 9. 667166 9. 69415  
11716622\_ 8. 266254 8. 360122 8. 345013 8. 769664 8. 793316 8. 787224  
11716623\_ 9. 632745 9. 640361 9. 627159 9. 809175 9. 783632 9. 7577  
11716624\_ 10. 11026 10. 07207 9. 992663 10. 26755 10. 22933 10. 16961  
11716625\_ 10. 56744 10. 5832 10. 56527 10. 2932 10. 2441 10. 2798  
11716626\_ 7. 809234 7. 771725 7. 74773 7. 311835 7. 246493 7. 327718  
11716627\_ 6. 224475 6. 263567 6. 279598 5. 894697 6. 018189 5. 849521  
11716628\_ 9. 169596 9. 063933 9. 145906 8. 683258 8. 730224 8. 731751

11716629\_ 9. 150854 9. 142369 9. 199022 8. 833937 8. 847649 8. 788974  
11716630\_ 7. 025101 6. 998064 7. 009096 5. 504613 5. 660908 5. 682687  
11716631\_ 4. 249471 4. 154695 4. 34954 3. 629121 3. 82817 3. 780009  
11716632\_ 7. 665732 7. 725484 7. 48557 7. 659454 7. 743105 7. 673365  
11716633\_ 5. 210824 5. 069291 5. 185773 6. 934738 7. 07096 6. 893217  
11716634\_ 10. 09583 10. 06132 10. 08679 10. 37304 10. 29904 10. 30149  
11716635\_ 9. 580051 9. 568858 9. 581561 9. 801724 9. 741167 9. 796261  
11716636\_ 8. 782982 8. 761024 8. 797645 9. 206139 9. 260789 9. 25226  
11716637\_ 9. 805595 9. 732122 9. 761672 9. 715757 9. 750248 9. 70111  
11716638\_ 9. 982903 9. 926027 9. 946427 9. 405766 9. 440028 9. 463345  
11716639\_ 8. 972985 8. 736161 8. 912053 8. 115541 8. 114466 8. 140895  
11716640\_ 9. 004389 8. 952533 9. 041758 8. 890221 8. 925034 8. 863401  
11716641\_ 8. 72638 8. 59869 8. 679822 8. 405914 8. 518306 8. 458764  
11716642\_ 8. 313326 8. 248908 8. 276877 8. 807161 8. 929485 8. 81002  
11716643\_ 9. 067827 9. 051834 9. 046184 9. 226349 9. 211065 9. 280957  
11716644\_ 8. 700111 8. 718171 8. 647441 8. 873472 8. 837087 8. 813474  
11716645\_ 8. 316318 8. 180447 8. 283879 8. 179249 8. 12343 8. 202407  
11716646\_ 9. 090831 9. 082707 9. 12497 8. 908849 8. 943149 8. 830602  
11716647\_ 9. 323467 9. 307569 9. 378045 9. 143923 9. 212414 9. 069012  
11716648\_ 8. 910523 8. 838162 8. 923808 9. 310937 9. 260163 9. 341513  
11716649\_ 8. 842228 8. 830882 8. 921634 9. 212494 9. 248723 9. 197075  
11716650\_ 9. 316687 9. 251518 9. 268053 9. 191186 9. 265389 9. 233384  
11716651\_ 8. 756053 8. 647601 8. 716138 8. 779485 8. 744413 8. 748303  
11716652\_ 6. 002001 5. 998862 6. 040978 5. 522247 5. 453406 5. 639856  
11716653\_ 7. 251966 7. 063285 7. 268064 6. 563745 6. 526095 6. 628197  
11716654\_ 6. 665825 6. 519416 6. 849968 6. 646435 6. 573665 6. 670597  
11716655\_ 10. 10913 10. 08899 10. 10831 9. 597999 9. 639575 9. 594673  
11716656\_ 8. 70042 8. 626658 8. 591456 8. 193182 8. 131917 8. 165959  
11716657\_ 7. 742235 7. 620081 7. 755197 7. 365674 7. 323379 7. 445492  
11716658\_ 8. 231197 8. 209745 8. 152193 8. 456573 8. 451157 8. 462052  
11716659\_ 8. 532661 8. 498656 8. 50536 8. 851287 8. 807415 8. 845096  
11716660\_ 4. 404156 4. 380865 4. 280894 4. 395719 4. 458708 4. 370406  
11716661\_ 6. 236475 6. 250568 6. 177485 6. 328507 6. 379073 6. 329595  
11716662\_ 7. 7933 7. 709558 7. 730153 7. 239537 7. 251111 7. 360964  
11716663\_ 6. 329857 6. 312607 6. 368328 6. 409269 6. 363424 6. 455395  
11716664\_ 7. 424133 7. 211518 7. 39341 7. 370654 7. 466206 7. 468082  
11716665\_ 6. 474507 6. 211785 6. 468773 6. 343301 6. 474835 6. 293584  
11716666\_ 9. 624439 9. 585506 9. 604582 9. 944439 9. 90477 9. 819691  
11716667\_ 9. 002391 8. 989523 9. 027972 9. 243294 9. 270828 9. 265254  
11716668\_ 9. 448087 9. 382824 9. 439278 9. 504529 9. 5141 9. 555693  
11716669\_ 9. 420301 9. 373579 9. 381646 9. 475143 9. 502573 9. 538811  
11716670\_ 8. 094491 7. 997578 8. 100088 8. 182115 8. 244625 8. 206333  
11716671\_ 9. 734237 9. 700623 9. 772571 9. 893706 9. 883293 9. 883846  
11716672\_ 8. 342977 8. 311433 8. 361542 8. 340735 8. 484629 8. 406538  
11716673\_ 9. 737914 9. 670288 9. 738252 9. 659392 9. 676279 9. 734701  
11716674\_ 7. 526909 7. 429038 7. 475898 7. 624018 7. 655204 7. 697285  
11716675\_ 9. 420214 9. 287434 9. 348162 8. 989017 8. 968481 8. 983461  
11716676\_ 8. 996224 8. 948913 9. 020146 8. 597835 8. 568418 8. 596171  
11716677\_ 7. 839067 7. 679959 7. 776505 7. 182604 7. 304019 7. 30106  
11716678\_ 5. 881005 5. 714278 5. 79668 5. 429316 5. 48903 5. 493701  
11716679\_ 7. 365258 7. 414721 7. 45628 7. 186232 7. 22265 7. 190838

11716680\_ 6. 711721 6. 649168 6. 81425 6. 296662 6. 335448 6. 382567  
11716681\_ 7. 007441 6. 932951 6. 942028 6. 924837 7. 008306 7. 033482  
11716682\_ 7. 930972 7. 890394 7. 966314 8. 065169 8. 094504 8. 083432  
11716683\_ 8. 572663 8. 393727 8. 48155 8. 635398 8. 597438 8. 610789  
11716684\_ 5. 001861 4. 979472 5. 1157 4. 906718 4. 959363 4. 819161  
11716685\_ 3. 446509 3. 110469 3. 232954 3. 021299 2. 828575 3. 396864  
11716686\_ 5. 509722 5. 517279 5. 490291 5. 385883 5. 589556 5. 605652  
11716687\_ 8. 472931 8. 464974 8. 485887 8. 508145 8. 531174 8. 495376  
11716688\_ 8. 202168 8. 284606 8. 195582 8. 154354 8. 232283 8. 237158  
11716689\_ 7. 644208 7. 650248 7. 592891 7. 409641 7. 178412 7. 175171  
11716690\_ 8. 080048 8. 090391 8. 049722 7. 797325 7. 853187 7. 825306  
11716691\_ 8. 098747 8. 02574 8. 069788 7. 949613 7. 915678 7. 887958  
11716692\_ 9. 197262 9. 14742 9. 195087 9. 042417 9. 035313 9. 04062  
11716693\_ 7. 626652 7. 544294 7. 602478 7. 597493 7. 602866 7. 635749  
11716694\_ 7. 078516 7. 133566 7. 125989 7. 064566 7. 115425 7. 14686  
11716695\_ 7. 916159 7. 919777 7. 918327 7. 829369 7. 882373 7. 882373  
11716696\_ 7. 840096 7. 820037 7. 829166 7. 74242 7. 718875 7. 75227  
11716697\_ 3. 556966 3. 434076 3. 610288 3. 424971 3. 560598 3. 473146  
11716698\_ 8. 989899 8. 90038 8. 935016 8. 624598 8. 666589 8. 612986  
11716699\_ 9. 396984 9. 337846 9. 385603 9. 304056 9. 308618 9. 256718  
11716700\_ 9. 337972 9. 313148 9. 349823 9. 290353 9. 348049 9. 340187  
11716701\_ 9. 191689 9. 177581 9. 178505 9. 139229 9. 118622 9. 098672  
11716702\_ 3. 016488 3. 168586 3. 414733 3. 121298 3. 483458 3. 304672  
11716703\_ 9. 115949 9. 050421 9. 054966 8. 406243 8. 446693 8. 457687  
11716704\_ 7. 745931 7. 732148 7. 775747 7. 723252 7. 679095 7. 737527  
11716705\_ 10. 12361 10. 08516 10. 12872 9. 696872 9. 677915 9. 738146  
11716706\_ 9. 68653 9. 667108 9. 714978 9. 725804 9. 739119 9. 727788  
11716707\_ 8. 935135 8. 79809 8. 873872 8. 589239 8. 638418 8. 638625  
11716708\_ 6. 817144 6. 876786 6. 898895 7. 160248 7. 063492 7. 175242  
11716709\_ 8. 09603 8. 141767 8. 133634 8. 3417 8. 282084 8. 392259  
11716710\_ 9. 044717 9. 045111 9. 053508 8. 626264 8. 624906 8. 636877  
11716711\_ 8. 69388 8. 515124 8. 644914 8. 620644 8. 556919 8. 68555  
11716712\_ 7. 389643 7. 351108 7. 382344 7. 400837 7. 433269 7. 400216  
11716713\_ 7. 798346 7. 669321 7. 809249 7. 606475 7. 635459 7. 574191  
11716714\_ 7. 733088 7. 634411 7. 71934 7. 528296 7. 518477 7. 530188  
11716715\_ 9. 606603 9. 574055 9. 594135 9. 676315 9. 67475 9. 681055  
11716716\_ 7. 199933 7. 12681 7. 100121 7. 453177 7. 430843 7. 441597  
11716717\_ 8. 282935 8. 240998 8. 326002 8. 127841 8. 175725 8. 092251  
11716718\_ 7. 435754 7. 473014 7. 551595 7. 657532 7. 686003 7. 627537  
11716719\_ 8. 576151 8. 52848 8. 571414 8. 740492 8. 740439 8. 759872  
11716720\_ 6. 521056 6. 664365 6. 622905 6. 7414 6. 683925 6. 836142  
11716721\_ 5. 11527 4. 9694 5. 073474 5. 005921 5. 043523 5. 152044  
11716722\_ 6. 797861 6. 863513 6. 838833 6. 915558 6. 92619 6. 999944  
11716723\_ 7. 757248 7. 689568 7. 657922 7. 833075 7. 811281 7. 824722  
11716724\_ 8. 054969 8. 012897 8. 042814 8. 156941 8. 14146 8. 164065  
11716725\_ 5. 944392 6. 010732 5. 993644 6. 505314 6. 489091 6. 402115  
11716726\_ 7. 587029 7. 482432 7. 656403 8. 337681 8. 35181 8. 324374  
11716727\_ 7. 614849 7. 684576 7. 64382 8. 356466 8. 365572 8. 28824  
11716728\_ 11. 34879 11. 35388 11. 38424 10. 47235 10. 5014 10. 50481  
11716729\_ 8. 867323 8. 862134 8. 889293 8. 712554 8. 701 8. 681163  
11716730\_ 11. 19084 11. 16226 11. 15116 11. 36273 11. 37098 11. 37502

11716731\_ 7. 419353 7. 444068 7. 407452 7. 493952 7. 456219 7. 463504  
11716732\_ 3. 261454 3. 298942 3. 347604 3. 347604 3. 309573 3. 467663  
11716733\_ 7. 899723 7. 708058 7. 820802 6. 731521 6. 989118 6. 654486  
11716734\_ 6. 270895 6. 369578 6. 377504 5. 915493 5. 80476 5. 824302  
11716735\_ 7. 667631 7. 570159 7. 584892 7. 41543 7. 400589 7. 442902  
11716736\_ 7. 420749 7. 374027 7. 443453 7. 559267 7. 685574 7. 737984  
11716737\_ 8. 277693 8. 192969 8. 356955 8. 368791 8. 314011 8. 321636  
11716738\_ 8. 329155 8. 28845 8. 280292 8. 517217 8. 563954 8. 47877  
11716739\_ 7. 639233 7. 749217 7. 601602 7. 494109 7. 58194 7. 509499  
11716740\_ 8. 797614 8. 792232 8. 787085 8. 785686 8. 814001 8. 799419  
11716741\_ 8. 352658 8. 281533 8. 374507 8. 244274 8. 272016 8. 274549  
11716742\_ 9. 169689 9. 139734 9. 120104 8. 795741 8. 76187 8. 823289  
11716743\_ 8. 620809 8. 578486 8. 55057 8. 339833 8. 330903 8. 30528  
11716744\_ 9. 235289 9. 236009 9. 2726 8. 848057 8. 852619 8. 863173  
11716745\_ 9. 155574 9. 12497 9. 155227 8. 943707 8. 948568 8. 979173  
11716746\_ 10. 3072 10. 25016 10. 2823 9. 991826 9. 992864 9. 971628  
11716747\_ 5. 614563 5. 498968 5. 451026 5. 334308 5. 242653 5. 220085  
11716748\_ 4. 803836 4. 874234 4. 828956 4. 830516 4. 949584 4. 92053  
11716749\_ 4. 180694 4. 176203 4. 066881 4. 256067 4. 182603 4. 232581  
11716750\_ 8. 211053 8. 082936 8. 207044 8. 552765 8. 596165 8. 692936  
11716751\_ 6. 49776 6. 482156 6. 474945 6. 300643 6. 310243 6. 404756  
11716752\_ 8. 116299 7. 985253 8. 061513 7. 819453 7. 76995 7. 862504  
11716753\_ 7. 380498 7. 281252 7. 312184 8. 708598 8. 706701 8. 63989  
11716754\_ 8. 310503 8. 200209 8. 232765 8. 606514 8. 63735 8. 634396  
11716755\_ 9. 302809 9. 272873 9. 324248 9. 37507 9. 406669 9. 338574  
11716756\_ 3. 046327 2. 937086 2. 811016 2. 937086 2. 874532 2. 858135  
11716757\_ 9. 06921 9. 027275 9. 070697 8. 888179 8. 906643 8. 952513  
11716758\_ 9. 051828 8. 992615 9. 015657 8. 836978 8. 916735 8. 883362  
11716759\_ 8. 246321 8. 143102 8. 198011 7. 631362 7. 453539 7. 459174  
11716760\_ 9. 416786 9. 278825 9. 356808 8. 597037 8. 627183 8. 601496  
11716761\_ 6. 162584 6. 201036 5. 969403 6. 018553 6. 021157 5. 961123  
11716762\_ 5. 484336 5. 615483 5. 295091 5. 476651 5. 565877 5. 512106  
11716763\_ 7. 857364 7. 829188 7. 883873 7. 823698 7. 831676 7. 794513  
11716764\_ 6. 32871 6. 483637 6. 30286 6. 562268 6. 517385 6. 554445  
11716765\_ 8. 396618 8. 404357 8. 460394 9. 200652 9. 279991 9. 202779  
11716766\_ 8. 571408 8. 516456 8. 593663 9. 283159 9. 254654 9. 237004  
11716767\_ 8. 359505 8. 300711 8. 280828 8. 813866 8. 804587 8. 730975  
11716768\_ 7. 510776 7. 47778 7. 499454 7. 744594 7. 638721 7. 617352  
11716769\_ 6. 577398 6. 614473 6. 526803 6. 606076 6. 698946 6. 727853  
11716770\_ 9. 431835 9. 400768 9. 482115 9. 420771 9. 392133 9. 402441  
11716771\_ 5. 930224 6. 011116 5. 987801 5. 718633 5. 705576 5. 528624  
11716772\_ 7. 187301 7. 196662 7. 177725 7. 049794 7. 124669 7. 152362  
11716773\_ 7. 059781 6. 994369 7. 1262 7. 567278 7. 672394 7. 522085  
11716774\_ 7. 283792 7. 233247 7. 366279 7. 228269 7. 170339 7. 334587  
11716775\_ 7. 827482 7. 789203 7. 739673 7. 960288 8. 068515 8. 056136  
11716776\_ 5. 953114 6. 073365 6. 117553 6. 173161 6. 142856 6. 232427  
11716777\_ 6. 845428 6. 839543 6. 838864 6. 835034 6. 920584 6. 79704  
11716778\_ 8. 544805 8. 520926 8. 570319 8. 682959 8. 641899 8. 646841  
11716779\_ 8. 152708 8. 143783 8. 181753 8. 811313 8. 748735 8. 798186  
11716780\_ 5. 999888 5. 938482 5. 870022 6. 415042 6. 497107 6. 347685  
11716781\_ 9. 017186 8. 907877 8. 963732 10. 03365 10. 01851 10. 0341



11716782\_ 8. 303852 8. 222726 8. 271952 7. 748207 7. 724837 7. 699984  
11716783\_ 8. 915051 8. 814449 8. 897634 9. 257271 9. 309465 9. 268284  
11716784\_ 7. 144608 7. 13574 7. 221178 7. 136086 7. 072638 7. 2194  
11716785\_ 5. 722762 5. 910651 5. 615084 5. 299036 5. 325637 5. 2666  
11716786\_ 7. 662959 7. 555707 7. 615203 7. 164184 7. 166411 7. 210236  
11716787\_ 7. 23097 7. 232373 7. 280564 7. 165561 7. 252515 7. 218104  
11716788\_ 8. 639021 8. 582477 8. 665318 8. 490577 8. 570193 8. 482941  
11716789\_ 11. 0195 10. 97985 11. 00039 10. 7994 10. 81584 10. 79745  
11716790\_ 10. 65359 10. 60917 10. 62678 10. 5365 10. 50063 10. 46868  
11716791\_ 8. 800297 8. 840112 8. 85032 8. 581844 8. 650814 8. 535043  
11716792\_ 10. 18858 10. 13183 10. 10432 9. 829211 9. 883664 9. 785717  
11716793\_ 8. 817222 8. 705718 8. 799764 9. 367065 9. 408657 9. 350633  
11716794\_ 11. 71224 11. 67375 11. 69929 11. 71227 11. 70885 11. 67731  
11716795\_ 10. 0446 10. 07162 9. 974109 10. 08744 10. 10741 10. 04217  
11716796\_ 9. 850502 9. 834687 9. 854925 9. 942032 10. 00029 9. 976643  
11716797\_ 10. 02034 10. 03953 9. 99753 9. 931322 9. 919849 9. 821872  
11716798\_ 7. 044175 7. 009551 7. 052608 7. 063863 7. 120211 7. 108203  
11716799\_ 7. 500827 7. 470974 7. 451703 7. 545249 7. 566016 7. 547435  
11716800\_ 9. 026682 8. 976444 9. 099324 8. 960746 9. 02459 9. 002154  
11716801\_ 5. 558918 5. 499258 5. 584813 5. 369238 5. 399633 5. 388776  
11716802\_ 8. 507248 8. 450637 8. 594698 8. 11805 8. 159005 8. 185542  
11716803\_ 4. 872075 4. 9694 4. 981045 5. 103957 5. 008055 5. 011298  
11716804\_ 5. 072031 5. 071746 5. 003505 5. 156303 5. 029529 5. 183076  
11716805\_ 5. 767933 5. 617821 5. 782351 5. 798299 5. 823534 6. 057939  
11716806\_ 4. 24921 4. 267052 4. 245029 4. 119533 4. 258946 4. 261268  
11716807\_ 8. 680172 8. 635568 8. 734639 8. 4083 8. 521809 8. 472308  
11716808\_ 9. 400509 9. 349291 9. 407333 9. 268335 9. 289672 9. 212822  
11716809\_ 9. 368576 9. 371103 9. 362664 9. 140391 9. 134131 9. 076097  
11716810\_ 8. 844462 8. 795609 8. 88281 8. 748963 8. 81037 8. 834975  
11716811\_ 7. 45938 7. 389002 7. 447133 7. 37743 7. 435934 7. 454431  
11716812\_ 7. 127723 7. 037204 7. 15484 7. 151218 7. 106409 7. 128982  
11716813\_ 3. 478806 3. 450582 3. 340735 3. 243295 3. 176553 3. 092548  
11716814\_ 2. 669078 2. 426319 2. 62325 2. 327305 2. 370219 2. 193225  
11716815\_ 5. 092432 5. 073036 5. 08631 5. 26275 5. 392864 5. 297498  
11716816\_ 8. 002607 7. 941287 7. 998428 8. 172567 8. 158449 8. 196105  
11716817\_ 9. 35026 9. 228163 9. 234539 9. 554106 9. 572972 9. 511878  
11716818\_ 3. 58902 3. 398236 3. 312169 3. 690658 3. 784641 3. 466259  
11716819\_ 9. 791426 9. 688242 9. 792782 9. 569182 9. 596628 9. 603651  
11716820\_ 4. 432667 4. 465344 4. 31138 4. 317361 4. 233197 4. 369202  
11716821\_ 11. 31507 11. 32165 11. 33921 11. 4414 11. 40115 11. 36666  
11716822\_ 8. 449816 8. 403191 8. 432552 8. 574678 8. 576794 8. 566489  
11716823\_ 7. 197503 7. 064135 7. 21616 7. 203367 7. 104983 7. 22608  
11716824\_ 2. 775087 2. 740327 3. 141569 3. 083431 3. 141569 3. 16359  
11716825\_ 5. 118854 5. 118854 5. 086508 5. 409093 5. 170519 5. 165009  
11716826\_ 4. 415744 4. 335594 4. 138963 4. 083464 4. 139902 4. 214919  
11716827\_ 9. 022909 8. 955033 9. 032516 9. 067211 9. 128803 8. 996091  
11716828\_ 9. 347134 9. 366719 9. 405516 9. 313615 9. 283228 9. 288545  
11716829\_ 8. 129513 8. 173236 8. 138166 8. 061321 8. 097475 8. 093611  
11716830\_ 6. 801047 6. 765304 6. 792183 6. 594872 6. 609018 6. 521089  
11716831\_ 10. 5407 10. 53619 10. 43777 10. 69981 10. 5834 10. 57396  
11716832\_ 8. 01626 8. 016781 8. 001904 7. 903852 7. 881306 7. 876337

11716833\_ 10.97169 10.89893 10.93484 10.47576 10.51163 10.50044  
11716834\_ 7.885002 7.824915 7.994588 8.18237 8.249485 8.222192  
11716835\_ 5.410452 5.48947 5.445829 5.542653 5.483141 5.431838  
11716836\_ 9.716036 9.647299 9.697237 9.70227 9.719419 9.737007  
11716837\_ 8.017313 8.029268 8.019465 7.861294 7.960938 7.834966  
11716838\_ 8.824408 8.805998 8.866074 8.543207 8.567277 8.564131  
11716839\_ 4.329921 4.478774 4.446311 4.377803 4.409153 4.518356  
11716840\_ 9.616358 9.588043 9.608969 9.436789 9.355483 9.390875  
11716841\_ 8.095918 8.083283 8.145165 7.779948 7.7933 7.829689  
11716842\_ 2.716837 2.687801 2.501378 2.894294 2.490771 2.306508  
11716843\_ 8.835035 8.87076 8.737913 8.905295 8.827077 8.703208  
11716844\_ 7.89515 7.872142 7.885696 7.68687 7.653407 7.549462  
11716845\_ 6.293816 6.212079 6.250713 6.353389 6.31176 6.348387  
11716846\_ 1.961157 1.883843 1.915717 1.870278 2.009649 1.870278  
11716847\_ 9.42632 9.36321 9.421383 9.497218 9.468954 9.442858  
11716848\_ 7.183562 6.978111 7.152434 8.216802 8.216722 8.300064  
11716849\_ 5.42686 5.470785 5.683099 6.746792 6.709999 6.754039  
11716850\_ 9.13301 9.137352 9.120545 9.399817 9.394081 9.294669  
11716851\_ 8.549237 8.522273 8.580576 9.12331 9.113698 9.06552  
11716852\_ 8.554231 8.524849 8.586077 9.128301 9.111123 9.076072  
11716853\_ 7.484136 7.558383 7.593604 7.581449 7.607765 7.659841  
11716854\_ 7.211029 7.113556 7.230343 8.744256 8.726382 8.749568  
11716855\_ 9.571947 9.541583 9.593693 9.590266 9.655224 9.603837  
11716856\_ 8.559092 8.475038 8.507311 8.516783 8.522849 8.518302  
11716857\_ 6.043627 5.992703 6.048012 6.040637 6.155318 6.150581  
11716858\_ 11.17308 11.144 11.18223 11.44956 11.46605 11.43978  
11716859\_ 10.61025 10.53167 10.58989 10.40812 10.39835 10.36186  
11716860\_ 7.884091 7.900837 7.889273 8.003731 8.054018 8.090449  
11716861\_ 8.391087 8.331888 8.439129 8.556698 8.527596 8.555444  
11716862\_ 5.02865 4.819401 4.787638 5.074594 4.962818 5.069495  
11716863\_ 7.694613 7.651303 7.750979 7.602612 7.559617 7.596425  
11716864\_ 8.667037 8.680542 8.750703 8.496938 8.576251 8.565254  
11716865\_ 9.019577 8.960519 9.00116 9.463667 9.488834 9.429858  
11716866\_ 9.328953 9.223846 9.283473 9.756222 9.760545 9.74399  
11716867\_ 7.682545 7.632367 7.708475 8.003209 7.938468 7.958697  
11716868\_ 9.922976 9.908716 9.928153 9.760339 9.771013 9.781463  
11716869\_ 6.953258 6.89523 6.929948 6.628385 6.729485 6.723264  
11716870\_ 9.707926 9.631099 9.711467 9.778246 9.820224 9.813997  
11716871\_ 7.020462 7.023155 7.117273 6.958082 7.019489 6.96816  
11716872\_ 8.113279 8.100206 8.145675 8.221731 8.171774 8.138976  
11716873\_ 6.675452 6.618014 6.739151 7.164857 7.231071 7.215181  
11716874\_ 6.768143 6.655634 6.752201 7.232118 7.261553 7.246753  
11716875\_ 6.612659 6.481046 6.52627 8.262394 8.175877 8.245928  
11716876\_ 8.869887 8.945634 8.930928 8.675582 8.726959 8.706783  
11716877\_ 4.815167 4.84303 4.783047 4.826756 4.97662 5.000543  
11716878\_ 9.397817 9.36777 9.365604 10.10468 10.09679 10.08498  
11716879\_ 6.646187 6.646605 6.563147 6.683962 6.592564 6.695828  
11716880\_ 9.025356 8.95538 9.041074 8.767814 8.841322 8.822353  
11716881\_ 7.990549 7.953053 8.012209 7.72892 7.729296 7.763242  
11716882\_ 6.560316 6.809436 6.639588 6.589649 6.425566 6.538262  
11716883\_ 10.52745 10.5369 10.4986 10.36811 10.38188 10.30401

11716884\_ 9.498596 9.427088 9.607321 10.15272 10.17068 10.23692  
11716885\_ 9.554757 9.503497 9.589919 10.2203 10.25771 10.27312  
11716886\_ 8.144169 8.108324 8.102206 8.211002 8.223948 8.197119  
11716887\_ 3.48595 3.606313 3.749078 3.388978 3.745484 3.560517  
11716888\_ 8.764635 8.7238 8.809726 8.435629 8.484595 8.436621  
11716889\_ 4.611029 4.599447 4.851005 4.920433 4.947978 5.018626  
11716890\_ 8.901514 8.780538 8.895017 10.53409 10.52421 10.53539  
11716891\_ 4.9226 4.720116 4.870267 5.070802 4.953488 5.156303  
11716892\_ 6.724198 6.586488 6.937394 6.718889 6.721527 6.758264  
11716893\_ 6.996182 7.010027 6.955704 6.942332 6.97913 6.936981  
11716894\_ 7.418831 7.384493 7.42937 7.460592 7.401652 7.483181  
11716895\_ 7.904506 7.71806 7.77583 7.542694 7.619031 7.607253  
11716896\_ 9.580735 9.517426 9.521075 9.523569 9.542687 9.548816  
11716897\_ 9.261419 9.31761 9.381056 9.355959 9.413817 9.329482  
11716898\_ 3.069514 3.210778 3.20131 3.231342 3.316816 3.71528  
11716899\_ 5.90812 5.960593 6.011813 6.25957 6.423598 6.262765  
11716900\_ 9.15804 9.1705 9.245022 9.434156 9.360275 9.365533  
11716901\_ 6.732383 6.841071 6.782656 6.675151 6.518083 6.685194  
11716902\_ 7.409349 7.491869 7.469676 7.321283 7.393828 7.390854  
11716903\_ 9.381753 9.281338 9.379395 9.152968 9.187903 9.141398  
11716904\_ 10.49086 10.46428 10.47908 10.37963 10.30451 10.34024  
11716905\_ 4.417102 4.706369 4.643717 4.52373 4.615827 4.66423  
11716906\_ 2.537221 2.354039 2.421448 2.535599 2.542861 2.54905  
11716907\_ 6.394284 6.298839 6.405824 6.434747 6.467755 6.42919  
11716908\_ 6.870022 6.764521 6.894876 6.76426 6.826736 6.857837  
11716909\_ 7.619851 7.565767 7.555258 7.484844 7.516388 7.504065  
11716910\_ 6.329941 6.187954 6.347013 6.198371 6.234905 6.212661  
11716911\_ 7.719611 7.713746 7.736932 7.873226 7.921312 7.802484  
11716912\_ 9.004502 8.982305 9.073614 8.985545 9.01216 9.027336  
11716913\_ 7.18816 7.148497 7.12262 6.755885 6.769625 6.793863  
11716914\_ 6.997156 7.02818 6.983629 6.651419 6.720949 6.681728  
11716915\_ 5.376439 5.36019 5.451558 5.068668 5.09969 4.94619  
11716916\_ 6.318366 6.392775 6.370378 6.37626 6.257574 6.349108  
11716917\_ 7.559161 7.474553 7.542756 6.346882 6.424 6.425406  
11716918\_ 7.694452 7.619572 7.546925 7.589236 7.709902 7.664116  
11716919\_ 7.462259 7.340416 7.399974 7.30925 7.306764 7.350159  
11716920\_ 4.219082 4.238717 4.177798 4.427933 4.235275 4.030774  
11716921\_ 6.273492 6.299928 6.23644 6.299928 6.336405 6.29701  
11716922\_ 5.980521 6.003723 6.047952 6.047952 6.084389 6.080495  
11716923\_ 7.211029 7.250136 7.346392 7.086443 7.066036 7.083406  
11716924\_ 8.052365 7.946404 8.064869 7.678512 7.807758 7.759213  
11716925\_ 6.159771 6.013148 6.111905 6.055948 6.138795 6.094413  
11716926\_ 8.096688 8.113238 8.145101 7.801601 7.837519 7.884818  
11716927\_ 8.974978 8.953602 9.00753 8.811367 8.812161 8.813535  
11716928\_ 8.677031 8.57615 8.648014 8.512326 8.543808 8.545002  
11716929\_ 5.053605 4.807479 5.029529 4.860938 4.806936 4.582474  
11716930\_ 5.544167 5.426727 5.374866 5.348513 5.327393 5.205671  
11716931\_ 6.562826 6.742794 6.560358 6.868117 6.875626 6.83999  
11716932\_ 5.595773 5.564015 5.582885 5.361833 5.433615 5.264513  
11716933\_ 3.636454 3.323649 3.549207 3.626441 3.398236 3.398236  
11716934\_ 6.108398 5.815584 6.136035 5.317796 5.524913 5.409222

11716935\_ 11. 81413 11. 77862 11. 80314 11. 81076 11. 86235 11. 85371  
11716936\_ 7. 491813 7. 548921 7. 522164 7. 662061 7. 603589 7. 649142  
11716937\_ 4. 898267 4. 804616 4. 889097 5. 025161 5. 044402 5. 05975  
11716938\_ 11. 29939 11. 27324 11. 29753 11. 21137 11. 21875 11. 23619  
11716939\_ 6. 679744 6. 647331 6. 647912 6. 554512 6. 690238 6. 670019  
11716940\_ 7. 382221 7. 325842 7. 387789 7. 495815 7. 544282 7. 450476  
11716941\_ 9. 774594 9. 70291 9. 795001 9. 576883 9. 600384 9. 628412  
11716942\_ 8. 08832 8. 172111 8. 21434 8. 168611 8. 165374 8. 202372  
11716943\_ 9. 162111 9. 146612 9. 122386 9. 28914 9. 287699 9. 204677  
11716944\_ 6. 5527 6. 555314 6. 56051 6. 327052 6. 292945 6. 376521  
11716945\_ 8. 955048 8. 923266 8. 911084 9. 117113 9. 024115 8. 924909  
11716946\_ 9. 478906 9. 371631 9. 519655 9. 436197 9. 421271 9. 40541  
11716947\_ 10. 34761 10. 27941 10. 33072 9. 963199 9. 977432 9. 977914  
11716948\_ 9. 748934 9. 678734 9. 664919 9. 402764 9. 303175 9. 318998  
11716949\_ 7. 722664 7. 640665 7. 631787 8. 834455 8. 840216 8. 844076  
11716950\_ 8. 314372 8. 262067 8. 319014 8. 289506 8. 244737 8. 289506  
11716951\_ 9. 343479 9. 277933 9. 341477 9. 439575 9. 430405 9. 430136  
11716952\_ 9. 183298 9. 315123 9. 161705 9. 106442 9. 105686 9. 011679  
11716953\_ 10. 29618 10. 24206 10. 28586 10. 03614 10. 03975 10. 06756  
11716954\_ 8. 146743 7. 970328 8. 094734 8. 314677 8. 336513 8. 269705  
11716955\_ 9. 89271 9. 797281 9. 863259 10. 07097 10. 14336 10. 12803  
11716956\_ 7. 295157 7. 269192 7. 329405 6. 989178 7. 052649 6. 973805  
11716957\_ 8. 08928 8. 103337 8. 052541 7. 796267 7. 781389 7. 778143  
11716958\_ 7. 664618 7. 573144 7. 62932 8. 055132 8. 128398 8. 099779  
11716959\_ 7. 434712 7. 401302 7. 521895 7. 536955 7. 545104 7. 550703  
11716960\_ 7. 865024 7. 761979 7. 82926 8. 004431 7. 991259 8. 018855  
11716961\_ 7. 481014 7. 450157 7. 546665 7. 718629 7. 617624 7. 667125  
11716962\_ 7. 118233 7. 055228 7. 169464 6. 659854 6. 692921 6. 831647  
11716963\_ 8. 315794 8. 264771 8. 264771 8. 686767 8. 745435 8. 773324  
11716964\_ 5. 268837 5. 111189 5. 2213 5. 176024 5. 094077 5. 145286  
11716965\_ 6. 098699 6. 289812 6. 115374 6. 372873 6. 083344 6. 17981  
11716966\_ 5. 522224 5. 503936 5. 219347 5. 380012 5. 450801 5. 450801  
11716967\_ 5. 60023 5. 619205 5. 676992 5. 808721 5. 779903 5. 726887  
11716968\_ 3. 85135 4. 161965 4. 164488 4. 283535 4. 365678 4. 325565  
11716969\_ 5. 008457 4. 9694 5. 000624 4. 963421 4. 940826 4. 855666  
11716970\_ 4. 700243 4. 568224 4. 584933 4. 640539 4. 633986 4. 672737  
11716971\_ 5. 424317 5. 383398 5. 317509 5. 2222 5. 186052 5. 224397  
11716972\_ 9. 251533 9. 23013 9. 230291 9. 254935 9. 347778 9. 298307  
11716973\_ 7. 891204 7. 838029 7. 941977 7. 7178 7. 66064 7. 769676  
11716974\_ 6. 500033 6. 419261 6. 616771 6. 117307 6. 09048 6. 172862  
11716975\_ 4. 521324 4. 531498 4. 5225 3. 991358 4. 239544 4. 200678  
11716976\_ 9. 671191 9. 67149 9. 658021 9. 682986 9. 568897 9. 487364  
11716977\_ 7. 012956 6. 987779 7. 139085 7. 68882 7. 623826 7. 668061  
11716978\_ 9. 552316 9. 519646 9. 597189 9. 609492 9. 643242 9. 632943  
11716979\_ 8. 260621 8. 223602 8. 257519 8. 267597 8. 263485 8. 306731  
11716980\_ 7. 201618 7. 056126 7. 153857 7. 182912 7. 174078 7. 192496  
11716981\_ 9. 337741 9. 342604 9. 387999 9. 478564 9. 508247 9. 555665  
11716982\_ 8. 9452 8. 881918 8. 897152 8. 984194 9. 011964 8. 972551  
11716983\_ 7. 709044 7. 75141 7. 782138 7. 658176 7. 650265 7. 762929  
11716984\_ 8. 08194 8. 083751 8. 027256 8. 684092 8. 746348 8. 70834  
11716985\_ 7. 99061 8. 064353 7. 960457 8. 716908 8. 847282 8. 786347

11716986\_ 9. 516127 9. 472681 9. 529879 9. 153448 9. 126688 9. 150158  
11716987\_ 7. 822888 7. 810959 7. 849635 7. 635737 7. 590837 7. 586868  
11716988\_ 9. 965791 9. 969198 9. 984638 9. 755255 9. 735932 9. 727288  
11716989\_ 9. 200182 9. 248177 9. 175864 9. 14655 9. 113487 9. 102807  
11716990\_ 5. 811496 5. 725431 5. 59249 5. 555671 5. 481544 5. 541618  
11716991\_ 7. 630705 7. 65174 7. 669447 7. 176499 7. 22895 7. 256026  
11716992\_ 7. 283978 7. 343396 7. 275537 7. 49109 7. 521974 7. 453945  
11716993\_ 5. 094113 5. 084945 5. 071633 5. 133154 5. 02342 5. 165099  
11716994\_ 9. 503153 9. 452764 9. 515033 9. 479427 9. 467021 9. 51165  
11716995\_ 8. 235346 8. 122049 8. 205991 8. 210012 8. 256163 8. 208163  
11716996\_ 8. 692981 8. 690924 8. 734501 8. 412017 8. 445749 8. 474873  
11716997\_ 8. 677115 8. 632371 8. 731993 8. 439028 8. 496937 8. 44895  
11716998\_ 6. 410791 6. 595359 6. 521979 6. 549217 6. 599839 6. 557135  
11716999\_ 8. 738528 8. 77652 8. 688267 8. 856921 8. 796521 8. 778661  
11717000\_ 6. 699628 6. 708592 6. 796939 7. 749454 7. 784148 7. 816287  
11717001\_ 9. 903874 9. 803047 9. 891961 9. 543635 9. 466254 9. 488967  
11717002\_ 4. 527132 4. 549819 4. 556855 4. 690241 4. 814018 4. 598131  
11717003\_ 5. 789688 5. 787213 5. 681937 5. 830723 5. 702402 5. 834176  
11717004\_ 8. 412885 8. 396713 8. 39671 8. 541931 8. 531628 8. 505459  
11717005\_ 6. 758157 6. 772266 6. 815337 6. 792183 6. 881888 6. 805142  
11717006\_ 6. 206103 6. 225513 6. 226864 6. 319361 6. 397946 6. 290949  
11717007\_ 7. 020462 7. 038522 7. 024527 7. 087298 7. 188025 7. 218527  
11717008\_ 8. 55265 8. 476722 8. 523565 8. 444778 8. 444887 8. 389236  
11717009\_ 10. 35454 10. 36463 10. 28956 9. 71937 9. 68896 9. 748002  
11717010\_ 8. 945917 8. 984098 8. 990274 8. 709279 8. 638418 8. 612338  
11717011\_ 9. 890637 9. 800709 9. 833796 9. 78081 9. 792176 9. 809407  
11717012\_ 8. 306147 8. 236686 8. 358102 7. 985099 7. 925091 8. 005813  
11717013\_ 10. 09736 10. 18446 10. 22861 10. 66645 10. 7105 10. 59744  
11717014\_ 9. 808761 9. 83566 9. 842077 10. 20825 10. 27312 10. 25896  
11717015\_ 4. 511312 4. 434822 4. 463784 4. 643717 4. 487328 4. 530434  
11717016\_ 7. 338358 7. 302933 7. 387316 7. 607152 7. 665644 7. 646102  
11717017\_ 3. 498771 3. 462583 3. 303395 3. 714865 3. 322517 3. 348494  
11717018\_ 11. 57214 11. 53756 11. 5588 11. 47928 11. 51735 11. 49566  
11717019\_ 11. 35857 11. 34245 11. 39477 11. 37026 11. 36224 11. 31196  
11717020\_ 7. 806388 7. 749476 7. 868277 8. 356458 8. 364904 8. 377566  
11717021\_ 7. 473894 7. 53394 7. 468464 8. 021691 8. 061628 7. 892766  
11717022\_ 7. 819721 7. 808817 7. 760469 8. 28692 8. 323028 8. 345055  
11717023\_ 8. 871015 8. 804887 8. 895354 8. 589979 8. 631801 8. 638238  
11717024\_ 10. 00281 9. 961274 10. 02824 9. 916252 9. 944123 9. 932448  
11717025\_ 8. 157465 8. 200806 8. 229342 8. 127775 8. 178456 8. 129185  
11717026\_ 8. 506453 8. 625409 8. 534177 8. 638557 8. 590727 8. 531444  
11717027\_ 7. 477588 7. 442902 7. 4878 7. 409264 7. 459391 7. 495255  
11717028\_ 5. 150592 5. 099634 5. 05157 5. 117413 5. 104363 5. 178885  
11717029\_ 6. 950465 7. 000478 6. 86461 7. 132937 6. 979533 7. 048657  
11717030\_ 6. 580406 6. 709383 6. 577586 6. 926081 6. 829715 6. 890385  
11717031\_ 7. 015498 7. 084324 7. 133646 7. 265159 7. 233326 7. 352545  
11717032\_ 7. 144608 7. 120999 7. 08741 7. 303676 7. 265977 7. 40469  
11717033\_ 7. 572845 7. 556864 7. 57553 7. 80605 7. 803515 7. 809412  
11717034\_ 7. 160961 7. 293262 7. 284554 7. 284554 7. 269859 7. 345361  
11717035\_ 4. 039735 4. 31419 4. 100929 4. 363551 4. 315809 4. 111877  
11717036\_ 7. 59655 7. 498934 7. 520968 7. 658672 7. 697984 7. 651332

11717037\_ 5. 205457 5. 379933 5. 086037 5. 208723 5. 265395 5. 189628  
11717038\_ 9. 030177 8. 942469 9. 01641 8. 462501 8. 482452 8. 532661  
11717039\_ 11. 43821 11. 4366 11. 48892 10. 5793 10. 60954 10. 55665  
11717040\_ 5. 721239 5. 480966 5. 595016 6. 276997 6. 25431 6. 389366  
11717041\_ 6. 895662 6. 886652 6. 862059 7. 830748 7. 960938 7. 854901  
11717042\_ 8. 241562 8. 214715 8. 338122 8. 536451 8. 471647 8. 639173  
11717043\_ 7. 771838 7. 710352 7. 805391 7. 634634 7. 615462 7. 592193  
11717044\_ 8. 527588 8. 404218 8. 415675 8. 227128 8. 269103 8. 269742  
11717045\_ 5. 870242 6. 034414 5. 726922 6. 053174 5. 957954 5. 907622  
11717046\_ 7. 45167 7. 441167 7. 491928 7. 929791 7. 965032 7. 912717  
11717047\_ 10. 49598 10. 44996 10. 4973 10. 46483 10. 42376 10. 4736  
11717048\_ 4. 159492 4. 341447 4. 463029 4. 558097 4. 27939 4. 357277  
11717049\_ 7. 588562 7. 713652 7. 633393 7. 832667 7. 847987 7. 789539  
11717050\_ 6. 303093 6. 399083 6. 305961 6. 40836 6. 422244 6. 326321  
11717051\_ 9. 990287 9. 960779 10. 00385 9. 78606 9. 815222 9. 781829  
11717052\_ 7. 683427 7. 636946 7. 637796 8. 094491 8. 060283 8. 033882  
11717053\_ 9. 18799 9. 123449 9. 15759 8. 86805 8. 876605 8. 957312  
11717054\_ 7. 559401 7. 525556 7. 503151 7. 800091 7. 856887 7. 852943  
11717055\_ 8. 791557 8. 713083 8. 80975 8. 695952 8. 731302 8. 684027  
11717056\_ 8. 755929 8. 752365 8. 782692 8. 84014 8. 816864 8. 716947  
11717057\_ 9. 995455 9. 94073 9. 947145 9. 849827 9. 950289 9. 945086  
11717058\_ 11. 91216 11. 90481 11. 94595 11. 8225 11. 83457 11. 86708  
11717059\_ 8. 331703 8. 248212 8. 32237 8. 520926 8. 49996 8. 534363  
11717060\_ 8. 565363 8. 483913 8. 567937 7. 983262 8. 031182 7. 990549  
11717061\_ 5. 350115 5. 246101 5. 278968 5. 345887 5. 313759 5. 380482  
11717062\_ 7. 579907 7. 544359 7. 528741 7. 614825 7. 646668 7. 66581  
11717063\_ 6. 54565 6. 830505 6. 803238 6. 929371 7. 007942 7. 039814  
11717064\_ 5. 409222 5. 497649 5. 454651 5. 33692 5. 33612 5. 477543  
11717065\_ 4. 182711 4. 441089 4. 347164 4. 351084 4. 300006 4. 169819  
11717066\_ 3. 707386 3. 93472 3. 740892 4. 004469 3. 967766 4. 000642  
11717067\_ 2. 791264 2. 801753 2. 685903 3. 047212 2. 661488 2. 92174  
11717068\_ 8. 236379 8. 274509 8. 227661 7. 633674 7. 768936 7. 815069  
11717069\_ 7. 522236 7. 476823 7. 535417 7. 572182 7. 584902 7. 577759  
11717070\_ 10. 1971 10. 19317 10. 17281 10. 00383 9. 987614 9. 941396  
11717071\_ 7. 157313 7. 020462 6. 958012 6. 731677 6. 879482 6. 857435  
11717072\_ 10. 25437 10. 27806 10. 26633 9. 979253 9. 993011 9. 976455  
11717073\_ 8. 890249 8. 765614 8. 829786 8. 496832 8. 611568 8. 56569  
11717074\_ 6. 920301 6. 952121 6. 888395 7. 0152 7. 034045 7. 004236  
11717075\_ 9. 526199 9. 440367 9. 586366 9. 305991 9. 308669 9. 33532  
11717076\_ 9. 470597 9. 375989 9. 412716 9. 244456 9. 238236 9. 223017  
11717077\_ 9. 653135 9. 593792 9. 661175 9. 364853 9. 362641 9. 327984  
11717078\_ 10. 76066 10. 8096 10. 78095 10. 70072 10. 60399 10. 59595  
11717079\_ 8. 149749 8. 118026 8. 136744 8. 310971 8. 312579 8. 284053  
11717080\_ 7. 782903 7. 74834 7. 816952 7. 897181 7. 933075 7. 952227  
11717081\_ 5. 456978 5. 608308 5. 423993 5. 491258 5. 638895 5. 597897  
11717082\_ 7. 639915 7. 73922 7. 783018 7. 942485 7. 882419 7. 938304  
11717083\_ 6. 506784 6. 616599 6. 675095 6. 305971 6. 313997 6. 174045  
11717084\_ 8. 171381 8. 153774 8. 19309 8. 166417 8. 202075 8. 209157  
11717085\_ 8. 709067 8. 628595 8. 721259 8. 521726 8. 503074 8. 586445  
11717086\_ 8. 662353 8. 694953 8. 760667 8. 462253 8. 439721 8. 540571  
11717087\_ 9. 849879 9. 807502 9. 826495 9. 800487 9. 777365 9. 747886

11717088\_ 10.09035 10.04628 10.09293 10.0029 9.941663 9.956611  
11717089\_ 10.10239 10.13942 10.19647 10.04405 10.03349 10.02357  
11717090\_ 5.824193 5.53497 5.618618 4.971545 4.698072 5.162619  
11717091\_ 8.910157 8.944276 8.921311 8.497069 8.407645 8.361275  
11717092\_ 11.35473 11.31212 11.2886 11.27607 11.26136 11.22831  
11717093\_ 7.852558 7.786323 7.834483 7.61144 7.616578 7.666246  
11717094\_ 6.17981 6.362117 6.156121 6.171611 6.298849 6.151375  
11717095\_ 12.47919 12.43293 12.43438 12.39843 12.41438 12.44659  
11717096\_ 10.5367 10.47416 10.49367 10.42477 10.39446 10.40864  
11717097\_ 10.49617 10.48161 10.4874 10.53473 10.46672 10.42557  
11717098\_ 9.072343 8.994888 9.087824 9.555532 9.49955 9.518971  
11717099\_ 8.726036 8.681598 8.709364 8.388565 8.378053 8.347968  
11717100\_ 6.996182 6.91283 6.945467 7.110214 7.112317 7.147408  
11717101\_ 5.389347 5.419829 5.198531 5.446965 5.542077 5.571766  
11717102\_ 7.875692 7.806222 7.772501 8.015145 7.943314 7.809501  
11717103\_ 10.11506 10.09927 10.09955 10.12304 10.12455 10.10786  
11717104\_ 9.813403 9.740912 9.830978 9.591731 9.591596 9.599677  
11717105\_ 8.348706 8.351924 8.402034 8.727904 8.742338 8.687366  
11717106\_ 8.454901 8.454411 8.50307 8.863315 8.796023 8.844136  
11717107\_ 9.493622 9.43242 9.448819 9.257893 9.221345 9.233506  
11717108\_ 5.819284 5.73886 5.739067 5.919438 5.820052 5.819535  
11717109\_ 4.392635 4.332269 4.398282 4.828778 4.814544 4.814544  
11717110\_ 5.372977 5.365419 5.397035 5.252421 5.341642 5.356798  
11717111\_ 8.914491 8.946989 8.946508 8.809578 8.826539 8.78638  
11717112\_ 7.513406 7.634664 7.575904 7.490319 7.551559 7.534003  
11717113\_ 8.504384 8.474537 8.508266 8.436176 8.431943 8.383126  
11717114\_ 9.696876 9.619813 9.683464 9.931664 9.953444 9.948675  
11717115\_ 6.771692 6.780679 6.82711 7.058454 7.108269 7.095218  
11717116\_ 7.675344 7.518532 7.659219 8.056554 8.067755 8.101106  
11717117\_ 7.462371 7.328299 7.402671 8.132746 8.235224 8.19896  
11717118\_ 8.919978 8.838232 8.929288 8.401764 8.394725 8.411875  
11717119\_ 6.980919 6.870575 6.980981 6.968009 6.928468 6.904731  
11717120\_ 5.907071 5.91639 6.107141 5.963811 6.042848 5.973149  
11717121\_ 6.688764 6.592192 6.733458 6.605763 6.724716 6.692815  
11717122\_ 7.096306 7.150509 7.153079 6.844877 6.790012 6.950198  
11717123\_ 6.579648 6.603101 6.579016 6.426207 6.365933 6.514906  
11717124\_ 6.112056 6.035898 6.062017 6.397946 6.353441 6.431362  
11717125\_ 9.906995 9.898625 9.928635 10.2668 10.31975 10.28153  
11717126\_ 7.330045 7.26674 7.285095 7.434587 7.44695 7.452752  
11717127\_ 9.337876 9.302858 9.297669 9.246754 9.220769 9.163445  
11717128\_ 6.946613 6.936579 6.978595 6.93046 6.985354 7.001456  
11717129\_ 8.350759 8.348345 8.325795 8.543221 8.503077 8.428537  
11717130\_ 9.028183 8.927923 9.03184 8.750581 8.738335 8.722703  
11717131\_ 5.979529 5.984042 6.147963 6.070956 5.812819 5.852311  
11717132\_ 7.034259 7.098974 7.269975 6.945162 6.956076 6.990303  
11717133\_ 8.463341 8.425808 8.372027 8.247033 8.277554 8.314645  
11717134\_ 6.971486 7.070423 6.965165 7.095967 7.070612 7.107545  
11717135\_ 5.839832 5.968366 5.78451 5.779704 5.80651 5.70084  
11717136\_ 5.612123 5.808601 5.844504 5.68275 5.677021 5.665396  
11717137\_ 7.684995 7.464258 7.731024 8.005189 8.056159 8.038892  
11717138\_ 5.458791 5.322332 5.34498 5.400059 5.540833 5.368569

11717139\_ 9.90732 9.883085 9.902619 9.851507 9.867115 9.836386  
11717140\_ 8.582614 8.534292 8.585174 8.380625 8.392719 8.332768  
11717141\_ 8.347599 8.340529 8.396144 8.224984 8.254252 8.186759  
11717142\_ 6.225513 6.206103 6.222121 7.678246 7.680618 7.656505  
11717143\_ 5.825425 5.787035 5.695019 7.797799 7.828544 7.671274  
11717144\_ 7.230373 7.206798 7.255716 8.944717 8.949135 8.943477  
11717145\_ 7.32552 7.096927 7.265062 7.271403 7.169341 7.273805  
11717146\_ 10.03365 9.967539 10.02652 9.756998 9.819905 9.793948  
11717147\_ 8.682239 8.536805 8.658194 8.312171 8.309079 8.317504  
11717148\_ 11.3048 11.28784 11.27283 11.17703 11.18532 11.07717  
11717149\_ 7.215183 7.225146 7.129992 7.321981 7.443867 7.314351  
11717150\_ 7.919948 7.899162 8.001452 8.187781 8.207769 8.194944  
11717151\_ 6.777606 6.666867 6.851731 6.865579 6.99225 6.929906  
11717152\_ 7.038441 6.849603 6.984848 7.037245 7.088644 7.030824  
11717153\_ 9.75388 9.712285 9.764345 9.744656 9.722219 9.803518  
11717154\_ 5.47549 5.326504 4.896679 4.997719 5.119617 5.259198  
11717155\_ 10.66222 10.62471 10.6677 10.99885 10.97689 10.93566  
11717156\_ 9.698992 9.668499 9.677711 9.992949 9.932946 9.967107  
11717157\_ 10.50011 10.4912 10.48889 10.54694 10.55273 10.55908  
11717158\_ 9.124577 9.070237 9.128214 8.990009 9.071688 9.01047  
11717159\_ 7.461096 7.497584 7.579782 7.849483 7.802269 7.763288  
11717160\_ 10.80449 10.74784 10.77447 10.67701 10.68535 10.63861  
11717161\_ 8.018493 7.93955 8.02234 7.924783 7.973278 7.998958  
11717162\_ 6.812171 6.688294 6.63525 7.273258 7.456326 7.321064  
11717163\_ 10.03454 9.9875 10.0412 10.85201 10.87973 10.82197  
11717164\_ 8.354121 8.327458 8.328455 8.543181 8.515405 8.52713  
11717165\_ 7.115097 7.02865 7.073582 7.301104 7.307952 7.268989  
11717166\_ 6.26903 6.097927 6.177792 6.384519 6.383618 6.459793  
11717167\_ 5.119067 5.259169 5.26467 5.914938 5.672849 5.602713  
11717168\_ 6.238211 6.156263 6.194435 5.833661 5.903766 5.986489  
11717169\_ 8.639021 8.620608 8.666925 8.512294 8.516912 8.51765  
11717170\_ 8.312505 8.324823 8.341946 8.236376 8.179988 8.159005  
11717171\_ 8.103882 8.109102 8.22147 7.765944 7.732806 7.754726  
11717172\_ 4.079263 4.020712 4.505356 4.098702 4.245962 4.189698  
11717173\_ 6.525381 6.533644 6.467348 6.558501 6.601861 6.638858  
11717174\_ 8.125114 7.933146 8.140202 8.736983 8.721965 8.716066  
11717175\_ 5.0361 4.990671 5.10162 5.417007 5.284278 5.493281  
11717176\_ 8.48849 8.470545 8.544301 8.447005 8.450192 8.433543  
11717177\_ 6.118838 6.159771 6.16765 6.308746 6.297501 6.33679  
11717178\_ 5.695721 5.726702 5.667131 5.943125 6.042949 5.989934  
11717179\_ 8.471246 8.431432 8.481599 8.274681 8.346298 8.34239  
11717180\_ 7.133817 7.090052 7.152938 7.177522 7.19308 7.166415  
11717181\_ 6.353158 6.206924 6.273389 6.095528 6.02711 6.197839  
11717182\_ 8.741758 8.776464 8.71341 8.938082 8.951644 8.862975  
11717183\_ 8.920218 8.863915 8.931393 8.803956 8.794732 8.838514  
11717184\_ 8.439593 8.359712 8.482617 8.252373 8.193194 8.2401  
11717185\_ 5.815399 6.13512 6.016599 5.912064 6.043473 6.073255  
11717186\_ 7.453307 7.323755 7.406812 7.647961 7.517343 7.601899  
11717187\_ 7.70876 7.719029 7.688889 7.38397 7.511619 7.553131  
11717188\_ 10.3322 10.3178 10.3181 10.06194 10.10086 10.02232  
11717189\_ 10.97214 10.94867 10.94956 10.67676 10.71346 10.70713



11717190\_ 8.198453 8.06698 8.162712 8.624254 8.66591 8.62019  
11717191\_ 4.326837 4.086038 4.058877 4.002144 4.121196 4.008666  
11717192\_ 5.742283 5.610796 5.736831 5.646951 5.615914 5.709846  
11717193\_ 11.30451 11.27406 11.30799 11.1199 11.14338 11.12465  
11717194\_ 8.797558 8.808523 8.797955 8.673234 8.778748 8.768099  
11717195\_ 5.784188 5.825344 5.822741 5.694911 5.677909 5.648637  
11717196\_ 5.545378 5.370756 5.447493 6.159771 6.104832 6.160058  
11717197\_ 8.931925 8.96154 9.027491 8.80242 8.793891 8.71319  
11717198\_ 9.471531 9.398154 9.4721 9.282576 9.334635 9.330913  
11717199\_ 8.940273 8.904947 8.957161 8.870817 8.841351 8.739237  
11717200\_ 9.618645 9.569274 9.601536 9.667815 9.707486 9.687276  
11717201\_ 9.138339 9.025034 9.143742 8.724716 8.765178 8.700319  
11717202\_ 5.262438 5.150383 5.137531 5.017187 5.23693 5.212063  
11717203\_ 7.472989 7.539338 7.434773 6.979728 7.096167 7.083515  
11717204\_ 8.3663 8.353269 8.400613 8.317935 8.390138 8.336805  
11717205\_ 8.611312 8.553377 8.66085 8.685504 8.746024 8.713796  
11717206\_ 7.798263 7.828634 7.771245 7.913617 7.946559 7.919038  
11717207\_ 6.801349 6.814744 6.861706 6.577041 6.61627 6.650303  
11717208\_ 5.681091 5.80102 5.769148 6.05635 6.12529 6.184824  
11717209\_ 6.122445 6.076709 6.199575 6.459376 6.47561 6.44633  
11717210\_ 5.664451 5.629973 5.716207 5.53745 5.588909 5.401183  
11717211\_ 6.183908 6.519494 6.485286 6.378682 6.406099 6.446807  
11717212\_ 5.923651 5.689717 5.787807 5.933756 5.916134 6.046317  
11717213\_ 9.300265 9.281726 9.226416 9.124562 8.969503 9.089065  
11717214\_ 8.965129 8.920968 8.999591 8.669479 8.572817 8.657593  
11717215\_ 5.861339 5.795568 5.979293 6.744098 6.752609 6.791872  
11717216\_ 5.832362 5.716708 5.677692 5.88985 5.917995 5.861606  
11717217\_ 6.425764 6.474493 6.370891 6.75845 6.73561 6.829365  
11717218\_ 8.273918 8.197696 8.192535 7.661733 7.709138 7.678945  
11717219\_ 7.902122 7.81494 7.88234 8.151573 8.029718 8.140353  
11717220\_ 7.294838 7.247082 7.211977 7.702938 7.734676 7.639416  
11717221\_ 8.022289 7.871345 7.994227 8.122579 8.171577 8.16898  
11717222\_ 6.128575 6.03103 6.205472 5.958065 6.098032 6.057045  
11717223\_ 7.619663 7.514152 7.539656 7.786636 7.667926 7.792761  
11717224\_ 7.382227 7.306776 7.397499 7.409349 7.45117 7.398768  
11717225\_ 7.099734 6.976443 6.936643 7.001154 7.000545 7.120688  
11717226\_ 5.725526 5.774655 5.829918 5.833299 5.913497 5.884112  
11717227\_ 6.272352 6.195123 6.300643 6.175714 6.222543 6.202447  
11717228\_ 7.894763 7.891912 7.81161 7.531343 7.553715 7.60351  
11717229\_ 7.673281 7.642219 7.697043 7.335346 7.374996 7.458072  
11717230\_ 7.177977 7.122854 7.142907 7.385652 7.355066 7.435478  
11717231\_ 7.43022 7.338323 7.436359 7.937205 7.841328 7.823423  
11717232\_ 2.50639 2.25483 2.448742 2.419781 2.45073 2.406432  
11717233\_ 8.589384 8.520212 8.564754 7.687783 7.735116 7.836047  
11717234\_ 7.178578 7.139345 7.311977 7.549528 7.468267 7.447115  
11717235\_ 13.11278 13.11512 13.08994 13.15468 13.13408 13.12967  
11717236\_ 12.86222 12.85708 12.86359 12.83705 12.85504 12.84165  
11717237\_ 9.755157 9.747778 9.781558 9.909386 9.901729 9.896066  
11717238\_ 9.271257 9.223995 9.290713 9.234077 9.249541 9.218176  
11717239\_ 9.775441 9.743518 9.73242 9.980376 9.900333 9.937304  
11717240\_ 6.983291 6.940258 6.938914 7.458529 7.54755 7.513783

11717241\_ 9. 860029 9. 866087 9. 817444 9. 775988 9. 741459 9. 777548  
11717242\_ 9. 099448 9. 005221 9. 0709 8. 98763 9. 040839 8. 984  
11717243\_ 9. 396321 9. 389083 9. 390517 9. 301293 9. 338559 9. 304348  
11717244\_ 10. 10158 10. 03254 10. 1128 10. 40375 10. 39811 10. 37802  
11717245\_ 10. 42222 10. 42014 10. 38507 10. 72242 10. 72696 10. 7487  
11717246\_ 10. 39686 10. 36765 10. 36068 10. 70407 10. 73386 10. 72393  
11717247\_ 9. 472392 9. 470649 9. 383076 9. 425051 9. 433575 9. 335252  
11717248\_ 9. 910766 9. 880214 9. 858497 9. 829318 9. 866825 9. 761383  
11717249\_ 11. 18572 11. 18168 11. 19906 11. 051 11. 01823 11. 01884  
11717250\_ 10. 78504 10. 74309 10. 76316 10. 98234 10. 96181 10. 98871  
11717251\_ 9. 661816 9. 625375 9. 661957 9. 642069 9. 670037 9. 596393  
11717252\_ 9. 7062 9. 635356 9. 69321 9. 590991 9. 60954 9. 622608  
11717253\_ 4. 126979 4. 096944 4. 257254 4. 435618 4. 340682 4. 245314  
11717254\_ 9. 920667 9. 894819 9. 820882 10. 2216 10. 15224 10. 08511  
11717255\_ 10. 05349 10. 08878 10. 08041 10. 34553 10. 25207 10. 23919  
11717256\_ 3. 127782 3. 001217 3. 412801 3. 997131 3. 906509 4. 0952  
11717257\_ 7. 347601 7. 610642 7. 421992 7. 74988 7. 800323 7. 789315  
11717258\_ 4. 358205 4. 471863 4. 194592 4. 552434 4. 789192 4. 510712  
11717259\_ 7. 14952 7. 176662 7. 149847 7. 329968 7. 367735 7. 318542  
11717260\_ 10. 47963 10. 40938 10. 45333 10. 24353 10. 3324 10. 24552  
11717261\_ 9. 229961 9. 209924 9. 244298 9. 086379 9. 127637 9. 135986  
11717262\_ 8. 848794 8. 733492 8. 835078 8. 894179 8. 911239 8. 917747  
11717263\_ 6. 783852 6. 756303 6. 871286 7. 37904 7. 321739 7. 499713  
11717264\_ 8. 744615 8. 740114 8. 7571 8. 805087 8. 768849 8. 743614  
11717265\_ 5. 361445 4. 9694 5. 19517 6. 040637 5. 991187 6. 043731  
11717266\_ 5. 818897 5. 967432 5. 950197 6. 523356 6. 569905 6. 481993  
11717267\_ 5. 807868 5. 877941 5. 799081 6. 414559 6. 435149 6. 490526  
11717268\_ 6. 365106 6. 280634 6. 471043 7. 298861 7. 365693 7. 350387  
11717269\_ 7. 508812 7. 538003 7. 459026 7. 633924 7. 712024 7. 644295  
11717270\_ 5. 820052 5. 883709 5. 948332 6. 051814 6. 217793 6. 075742  
11717271\_ 8. 627506 8. 576791 8. 621254 9. 047114 9. 110071 9. 04821  
11717272\_ 6. 481036 6. 342648 6. 511885 5. 826977 5. 747241 5. 77001  
11717273\_ 5. 102035 5. 891406 5. 540543 4. 867759 4. 867995 4. 894535  
11717274\_ 6. 68133 6. 822242 6. 673994 6. 21247 6. 174701 6. 246687  
11717275\_ 7. 309948 7. 144882 7. 374781 6. 209467 6. 523359 6. 333099  
11717276\_ 8. 745535 8. 67449 8. 756013 8. 563106 8. 613197 8. 608129  
11717277\_ 5. 955938 6. 075533 5. 896569 6. 231824 6. 148603 6. 348287  
11717278\_ 8. 715945 8. 729223 8. 767064 8. 972691 8. 93858 8. 949003  
11717279\_ 5. 724541 5. 845023 5. 803684 5. 794984 5. 732291 5. 757764  
11717280\_ 9. 119361 9. 105954 9. 085797 9. 231209 9. 282538 9. 286073  
11717281\_ 8. 274382 8. 21608 8. 332644 7. 803784 7. 86209 7. 828659  
11717282\_ 9. 491449 9. 443535 9. 519504 9. 035464 8. 991958 9. 003395  
11717283\_ 9. 328304 9. 299439 9. 301115 8. 483796 8. 538116 8. 560404  
11717284\_ 8. 414305 8. 375757 8. 447401 8. 103498 8. 217262 8. 252771  
11717285\_ 6. 698681 6. 618267 6. 833237 6. 33492 6. 326079 6. 33679  
11717286\_ 8. 355033 8. 372222 8. 300711 8. 797928 8. 849129 8. 856443  
11717287\_ 7. 839169 7. 832149 7. 757169 7. 999417 7. 990903 7. 926361  
11717288\_ 7. 895407 7. 875867 7. 882165 7. 749281 7. 730147 7. 738379  
11717289\_ 8. 887111 8. 889063 8. 848355 8. 385304 8. 451717 8. 447388  
11717290\_ 10. 96909 11. 00477 11. 00344 10. 66909 10. 66431 10. 69438  
11717291\_ 9. 305816 9. 289941 9. 280155 9. 32269 9. 341463 9. 369693

11717292\_ 8. 24282 8. 173267 8. 243529 8. 266534 8. 295275 8. 392378  
11717293\_ 11. 58847 11. 56613 11. 57449 11. 47849 11. 48889 11. 45951  
11717294\_ 8. 318417 8. 237302 8. 274689 8. 485166 8. 481885 8. 476898  
11717295\_ 6. 379678 6. 430908 6. 291912 6. 423077 6. 433279 6. 329388  
11717296\_ 9. 21365 9. 105163 9. 199707 8. 96599 8. 975877 8. 998602  
11717297\_ 5. 645318 5. 614563 5. 614563 6. 293331 6. 142856 6. 344466  
11717298\_ 9. 978424 10. 02743 9. 998622 9. 75544 9. 753923 9. 650744  
11717299\_ 4. 800663 4. 989376 4. 675271 4. 989871 4. 869116 4. 954932  
11717300\_ 4. 808317 5. 060639 4. 75908 5. 008583 4. 87677 4. 817934  
11717301\_ 3. 769463 3. 97273 3. 757924 3. 856695 3. 885266 3. 716134  
11717302\_ 3. 402213 3. 564745 3. 416588 3. 652853 3. 46292 3. 595527  
11717303\_ 4. 923099 4. 904502 4. 88241 4. 943759 4. 9309 4. 928638  
11717304\_ 9. 958423 9. 92985 9. 950542 10. 06914 10. 06489 10. 00538  
11717305\_ 5. 845365 6. 100714 6. 199575 6. 1486 6. 01324 6. 062858  
11717306\_ 5. 614563 5. 710984 5. 655655 5. 901535 5. 887859 5. 840217  
11717307\_ 9. 767919 9. 699541 9. 714237 9. 894224 9. 898351 9. 935244  
11717308\_ 8. 138673 8. 204127 8. 180789 8. 462265 8. 331641 8. 188546  
11717309\_ 8. 769296 8. 746498 8. 751138 8. 919753 8. 866748 8. 788982  
11717310\_ 10. 06576 10. 05843 10. 10536 9. 940372 9. 9532 9. 883742  
11717311\_ 9. 468878 9. 418188 9. 469897 9. 658593 9. 68462 9. 630532  
11717312\_ 4. 329465 3. 997131 3. 861778 3. 859702 4. 053931 3. 879309  
11717313\_ 8. 143783 8. 190417 8. 274993 8. 04947 8. 066529 8. 04063  
11717314\_ 8. 458644 8. 364507 8. 442225 8. 947151 8. 932617 8. 942985  
11717315\_ 9. 706311 9. 63316 9. 690013 9. 95029 9. 942831 9. 940251  
11717316\_ 11. 73314 11. 8118 11. 78774 11. 82395 11. 80714 11. 78518  
11717317\_ 6. 256469 6. 246898 6. 271026 6. 281721 6. 234682 6. 3223  
11717318\_ 4. 795577 5. 02823 5. 011915 5. 146411 4. 984669 5. 193242  
11717319\_ 7. 216476 7. 154841 7. 122482 6. 943741 6. 922502 6. 903518  
11717320\_ 9. 766888 9. 73618 9. 790263 9. 945213 10. 03606 9. 947365  
11717321\_ 9. 601428 9. 590964 9. 640963 9. 841309 9. 828395 9. 797918  
11717322\_ 7. 755906 7. 723121 7. 841029 7. 774609 7. 792003 7. 870825  
11717323\_ 4. 200678 4. 062067 3. 811989 4. 062067 3. 984669 4. 045166  
11717324\_ 7. 916599 7. 843078 7. 906784 7. 834107 7. 862041 7. 74408  
11717325\_ 7. 613978 7. 619572 7. 614537 7. 645602 7. 673401 7. 666585  
11717326\_ 9. 114371 9. 085132 9. 115518 9. 372889 9. 399711 9. 443905  
11717327\_ 8. 329535 8. 266987 8. 317076 8. 542475 8. 573373 8. 624816  
11717328\_ 4. 884808 4. 960293 4. 978511 5. 023183 4. 978511 5. 086103  
11717329\_ 4. 555066 4. 396735 4. 416526 4. 700073 4. 476009 4. 667398  
11717330\_ 7. 951703 7. 90438 7. 929196 7. 763413 7. 830294 7. 813562  
11717331\_ 8. 877013 8. 78629 8. 814878 8. 655561 8. 644496 8. 685041  
11717332\_ 3. 153959 3. 236154 3. 031895 3. 50899 3. 403235 3. 403235  
11717333\_ 5. 927984 5. 855578 6. 037978 5. 991388 6. 087357 6. 059668  
11717334\_ 8. 048377 8. 041804 8. 056741 7. 805963 7. 843618 7. 887357  
11717335\_ 6. 890407 6. 79327 6. 832227 7. 177367 7. 214837 7. 189798  
11717336\_ 8. 301827 8. 23425 8. 284928 8. 119897 8. 113562 8. 059478  
11717337\_ 5. 399969 5. 232295 5. 309459 5. 236018 5. 174449 5. 09628  
11717338\_ 7. 528537 7. 550589 7. 483948 7. 157074 7. 226445 7. 270436  
11717339\_ 8. 373367 8. 365973 8. 281775 8. 632414 8. 670831 8. 6541  
11717340\_ 8. 785139 8. 686086 8. 709168 8. 456584 8. 400858 8. 527656  
11717341\_ 8. 398882 8. 35992 8. 404091 7. 874074 7. 799814 7. 834966  
11717342\_ 8. 698109 8. 658194 8. 665939 8. 675063 8. 670215 8. 661731

11717343\_ 9. 4873 9. 371504 9. 459934 9. 408721 9. 38975 9. 418448  
11717344\_ 7. 11241 7. 184826 7. 081842 7. 291509 7. 233931 7. 338233  
11717345\_ 6. 263567 6. 178653 6. 147415 6. 143137 6. 099193 6. 159524  
11717346\_ 9. 220678 9. 108471 9. 218938 9. 381409 9. 374569 9. 438389  
11717347\_ 8. 644262 8. 61467 8. 651785 8. 890039 8. 82325 8. 861731  
11717348\_ 8. 582419 8. 585413 8. 579837 9. 006476 8. 969409 8. 866634  
11717349\_ 2. 332713 2. 55779 2. 570738 2. 625583 2. 677277 2. 507269  
11717350\_ 7. 125717 7. 035995 7. 120618 7. 627965 7. 676063 7. 79334  
11717351\_ 8. 310819 8. 248776 8. 168263 8. 116515 8. 136541 8. 224289  
11717352\_ 6. 844736 6. 849603 6. 923962 7. 81922 7. 741433 7. 720783  
11717353\_ 7. 003153 6. 785476 6. 935383 7. 930112 7. 934105 7. 918573  
11717354\_ 7. 852143 7. 774267 7. 836919 8. 021005 8. 011199 7. 952227  
11717355\_ 8. 987701 8. 965688 9. 000636 8. 656997 8. 688108 8. 633659  
11717356\_ 9. 013595 8. 992449 9. 022578 8. 977552 9. 017272 8. 957263  
11717357\_ 8. 952438 8. 932453 9. 025546 9. 024712 9. 008791 9. 043782  
11717358\_ 9. 162403 9. 109186 9. 213527 9. 261158 9. 259028 9. 254694  
11717359\_ 7. 571083 7. 60615 7. 636326 7. 549649 7. 583012 7. 564855  
11717360\_ 8. 678755 8. 636051 8. 669622 9. 029043 8. 990737 9. 021113  
11717361\_ 8. 077493 8. 192574 8. 14343 8. 38009 8. 436983 8. 512076  
11717362\_ 6. 322987 6. 4507 6. 416526 6. 612504 6. 513851 6. 55725  
11717363\_ 8. 601547 8. 511022 8. 548258 8. 542197 8. 521161 8. 502398  
11717364\_ 9. 217537 9. 109432 9. 169352 9. 262702 9. 266495 9. 25787  
11717365\_ 5. 832002 6. 001191 5. 643713 6. 145475 6. 062712 6. 1798  
11717366\_ 8. 971 8. 837295 8. 890839 8. 564766 8. 5743 8. 648788  
11717367\_ 9. 037293 8. 998426 9. 047477 8. 628591 8. 620634 8. 692586  
11717368\_ 7. 317389 7. 124127 7. 118939 6. 886652 6. 77919 6. 923209  
11717369\_ 5. 333238 5. 483674 5. 341145 5. 408484 5. 373076 5. 341527  
11717370\_ 6. 330025 6. 196078 6. 374099 6. 018553 6. 03096 5. 946436  
11717371\_ 9. 371806 9. 310782 9. 432881 9. 196683 9. 197327 9. 237712  
11717372\_ 7. 362248 7. 286336 7. 450822 6. 861294 6. 862059 6. 937762  
11717373\_ 8. 192406 8. 15753 8. 192025 7. 992724 8. 018557 8. 018453  
11717374\_ 8. 402182 8. 345643 8. 453829 8. 192268 8. 13262 8. 153126  
11717375\_ 6. 899958 6. 937751 6. 903096 6. 913797 6. 89482 6. 927411  
11717376\_ 4. 510133 4. 355463 4. 47063 4. 275321 4. 576786 4. 403996  
11717377\_ 9. 576199 9. 46984 9. 554214 9. 427963 9. 33509 9. 406895  
11717378\_ 9. 48078 9. 39434 9. 461606 9. 298737 9. 255525 9. 248311  
11717379\_ 9. 982986 9. 984211 9. 972166 10. 06226 10. 10699 10. 0292  
11717380\_ 7. 719109 7. 665709 7. 711024 7. 894389 7. 886855 7. 917313  
11717381\_ 8. 488132 8. 453371 8. 571734 8. 774313 8. 75463 8. 742811  
11717382\_ 6. 95234 6. 986734 6. 993311 7. 088841 7. 034186 7. 083621  
11717383\_ 5. 670971 5. 635898 5. 574576 5. 70012 5. 584813 5. 553427  
11717384\_ 9. 361035 9. 292357 9. 295643 9. 215925 9. 205997 9. 223647  
11717385\_ 7. 169971 7. 196629 7. 169971 7. 177278 7. 125793 7. 29814  
11717386\_ 2. 805458 2. 68575 2. 742051 2. 692021 2. 801263 2. 740269  
11717387\_ 6. 8624 7. 002375 6. 863413 6. 912998 6. 896626 6. 937777  
11717388\_ 9. 060564 8. 995524 9. 047507 9. 227203 9. 218777 9. 202115  
11717389\_ 8. 645725 8. 576516 8. 626757 8. 298575 8. 263654 8. 298575  
11717390\_ 8. 560314 8. 436515 8. 626698 9. 280373 9. 334645 9. 296374  
11717391\_ 8. 802189 8. 778814 8. 854089 8. 855372 8. 812161 8. 83108  
11717392\_ 7. 687842 7. 579345 7. 662762 8. 40512 8. 455112 8. 455112  
11717393\_ 6. 331671 6. 381587 6. 23831 6. 74235 6. 787538 6. 876456

11717394\_ 7. 866751 7. 725987 7. 767727 8. 374651 8. 433363 8. 39275  
11717395\_ 9. 465216 9. 424344 9. 464812 9. 156963 9. 256076 9. 235032  
11717396\_ 9. 087892 8. 993657 9. 077132 9. 17444 9. 177044 9. 208629  
11717397\_ 8. 798403 8. 76445 8. 878021 8. 684731 8. 733799 8. 679758  
11717398\_ 7. 339401 7. 250563 7. 442902 7. 341419 7. 369416 7. 308479  
11717399\_ 10. 87659 10. 82415 10. 82602 9. 904749 9. 901451 9. 901451  
11717400\_ 7. 311582 7. 334557 7. 519799 7. 287333 7. 357016 7. 38533  
11717401\_ 8. 731265 8. 743873 8. 687197 8. 707795 8. 782326 8. 740069  
11717402\_ 7. 475476 7. 411644 7. 41198 7. 554399 7. 437975 7. 474569  
11717403\_ 10. 44608 10. 3938 10. 45546 10. 24254 10. 22703 10. 23217  
11717404\_ 7. 282383 7. 217273 7. 280614 7. 63031 7. 622675 7. 518853  
11717405\_ 7. 493997 7. 382221 7. 430558 7. 45117 7. 392865 7. 432607  
11717406\_ 5. 927485 5. 779775 6. 008381 5. 464824 5. 713699 5. 526507  
11717407\_ 7. 343319 7. 334993 7. 583672 8. 608178 8. 782618 8. 614428  
11717408\_ 7. 694368 7. 60847 7. 649893 7. 527561 7. 443215 7. 448256  
11717409\_ 10. 1442 10. 09781 10. 13805 9. 846244 9. 841168 9. 836984  
11717410\_ 8. 991996 9. 02856 8. 933608 8. 693945 8. 716827 8. 679804  
11717411\_ 8. 851894 8. 923041 8. 854333 8. 780552 8. 62592 8. 598489  
11717412\_ 9. 023823 9. 114411 9. 145175 8. 929913 8. 874563 8. 842343  
11717413\_ 7. 134175 7. 140079 7. 107642 7. 218427 7. 239316 7. 23001  
11717414\_ 7. 930683 8. 040268 7. 963888 8. 34533 8. 380552 8. 365353  
11717415\_ 8. 049435 8. 033962 8. 108877 8. 448302 8. 491876 8. 40599  
11717416\_ 4. 659993 4. 549123 4. 713448 4. 881886 4. 732722 4. 826284  
11717417\_ 5. 381879 5. 197701 5. 055266 5. 156303 5. 123436 5. 315961  
11717418\_ 5. 733665 5. 479648 5. 447066 5. 415892 5. 454929 5. 488012  
11717419\_ 6. 439191 6. 55873 6. 546579 5. 817709 5. 959737 5. 757688  
11717420\_ 8. 084066 8. 012857 8. 09185 8. 318306 8. 271859 8. 271859  
11717421\_ 7. 32145 7. 194708 7. 269332 7. 464845 7. 514373 7. 568993  
11717422\_ 8. 711937 8. 65916 8. 659512 8. 662086 8. 68884 8. 667079  
11717423\_ 10. 06487 10. 04256 10. 06486 10. 50641 10. 50427 10. 4924  
11717424\_ 8. 46822 8. 396877 8. 531527 8. 951181 8. 93403 8. 985388  
11717425\_ 9. 278968 9. 246256 9. 323188 9. 188668 9. 164438 9. 167505  
11717426\_ 8. 220495 8. 114115 8. 170044 8. 658214 8. 698655 8. 748741  
11717427\_ 9. 800108 9. 731309 9. 757206 9. 760965 9. 800595 9. 759671  
11717428\_ 7. 892766 7. 836019 7. 923251 9. 029043 9. 042455 9. 037707  
11717429\_ 10. 50604 10. 48934 10. 51337 10. 49705 10. 54648 10. 4629  
11717430\_ 4. 311627 4. 156398 4. 475338 4. 292889 4. 288722 4. 222999  
11717431\_ 10. 0257 9. 971675 10. 04225 10. 34143 10. 35341 10. 24491  
11717432\_ 8. 955251 8. 940574 8. 908663 8. 93527 8. 887452 8. 912683  
11717433\_ 8. 485582 8. 540432 8. 526178 8. 540487 8. 498523 8. 547241  
11717434\_ 8. 222968 8. 163566 8. 250256 8. 223976 8. 183197 8. 233958  
11717435\_ 7. 068066 6. 97192 7. 051042 7. 590841 7. 625672 7. 641593  
11717436\_ 7. 842591 7. 807378 7. 964523 8. 563652 8. 609699 8. 537704  
11717437\_ 10. 39534 10. 37815 10. 32297 10. 24901 10. 21329 10. 20683  
11717438\_ 10. 80475 10. 7778 10. 73979 10. 62164 10. 61711 10. 63031  
11717439\_ 8. 890404 8. 868531 8. 883583 8. 644807 8. 681647 8. 564582  
11717440\_ 10. 15414 10. 0875 10. 09895 10. 05689 10. 04088 10. 0483  
11717441\_ 8. 709271 8. 667293 8. 755314 8. 688816 8. 71823 8. 651417  
11717442\_ 7. 951047 7. 944698 7. 886682 7. 973335 7. 967931 7. 93463  
11717443\_ 9. 745076 9. 721091 9. 770987 9. 580877 9. 567089 9. 577486  
11717444\_ 8. 781406 8. 689642 8. 769882 8. 531095 8. 453291 8. 562309

11717445\_ 8. 319694 8. 313811 8. 363884 8. 507122 8. 581431 8. 48782  
11717446\_ 8. 237793 8. 078893 8. 166339 8. 442416 8. 421549 8. 445181  
11717447\_ 11. 67982 11. 67962 11. 67337 11. 78731 11. 75674 11. 75588  
11717448\_ 9. 266312 9. 184104 9. 249317 9. 240227 9. 256629 9. 187188  
11717449\_ 7. 007439 7. 04857 7. 059622 6. 868964 6. 849603 6. 828602  
11717450\_ 8. 293522 8. 29678 8. 375058 7. 488438 7. 487362 7. 540735  
11717451\_ 9. 862784 9. 865645 9. 767069 9. 400962 9. 317366 9. 2967  
11717452\_ 10. 16377 10. 13478 10. 11937 9. 63321 9. 607458 9. 570848  
11717453\_ 4. 864531 4. 546807 4. 645997 4. 862322 4. 656443 4. 812103  
11717454\_ 4. 828921 4. 82958 4. 859689 4. 913508 5. 000176 4. 882741  
11717455\_ 5. 676992 5. 772389 5. 748704 5. 908076 5. 758928 5. 641553  
11717456\_ 6. 561266 6. 685901 6. 387413 6. 631981 6. 652287 6. 659538  
11717457\_ 8. 532661 8. 511585 8. 449763 8. 762951 8. 797228 8. 688286  
11717458\_ 7. 066036 7. 146 6. 994297 7. 071355 7. 270909 7. 101262  
11717459\_ 8. 932584 8. 957954 8. 946579 9. 08945 9. 069392 9. 062034  
11717460\_ 7. 586539 7. 548459 7. 592118 7. 124457 7. 182631 7. 224582  
11717461\_ 7. 412226 7. 322736 7. 494435 7. 535215 7. 476217 7. 460487  
11717462\_ 10. 40225 10. 39324 10. 44354 10. 30488 10. 34196 10. 32898  
11717463\_ 8. 538222 8. 453846 8. 523302 8. 372092 8. 400858 8. 393231  
11717464\_ 2. 004748 2. 094958 1. 647428 1. 926769 1. 828862 2. 094958  
11717465\_ 2. 906995 2. 859516 2. 771116 2. 891956 3. 022305 3. 00421  
11717466\_ 8. 069003 7. 940257 8. 124171 7. 444356 7. 466656 7. 540733  
11717467\_ 6. 337993 6. 308536 6. 3869 6. 209356 6. 29277 6. 354529  
11717468\_ 7. 21665 7. 184826 7. 208742 7. 190885 7. 226549 7. 228673  
11717469\_ 6. 015586 5. 944025 5. 987412 5. 773206 5. 658069 5. 914401  
11717470\_ 9. 153525 9. 091675 9. 155227 9. 377114 9. 425989 9. 38315  
11717471\_ 7. 262479 7. 116676 7. 101686 6. 403515 6. 244972 6. 348546  
11717472\_ 6. 286391 6. 330369 6. 372053 5. 21828 5. 36401 5. 341763  
11717473\_ 2. 867066 2. 845691 2. 916056 2. 982607 2. 797796 2. 845813  
11717474\_ 4. 944225 4. 738608 4. 77 4. 544894 4. 529588 4. 609868  
11717475\_ 5. 623139 5. 662711 6. 10971 4. 657378 4. 811793 5. 132499  
11717476\_ 5. 133211 5. 392004 5. 073036 4. 992243 4. 938815 4. 9446  
11717477\_ 4. 808014 5. 121965 4. 716747 4. 638687 4. 700205 4. 700243  
11717478\_ 8. 067235 8. 046956 8. 074238 7. 918478 7. 877395 7. 953466  
11717479\_ 9. 087892 9. 06708 9. 106332 9. 090094 9. 095171 9. 089893  
11717480\_ 6. 64145 6. 59181 6. 467835 7. 535124 7. 571859 7. 586755  
11717481\_ 7. 104755 7. 004317 7. 067888 8. 574468 8. 579926 8. 543856  
11717482\_ 7. 347061 7. 366055 7. 319691 7. 707325 7. 739032 7. 669992  
11717483\_ 9. 325871 9. 375642 9. 365083 9. 520609 9. 566331 9. 537863  
11717484\_ 9. 300824 9. 252835 9. 332473 9. 594385 9. 60028 9. 597222  
11717485\_ 7. 018745 6. 93413 6. 984059 7. 093738 7. 241959 7. 166429  
11717486\_ 7. 2517 7. 25393 7. 316063 7. 868387 7. 9208 7. 851718  
11717487\_ 7. 736932 7. 72231 7. 788394 7. 723357 7. 810594 7. 735804  
11717488\_ 6. 510896 6. 483181 6. 325565 6. 597518 6. 568327 6. 734633  
11717489\_ 4. 91343 4. 891023 5. 052662 5. 137462 5. 108148 5. 155232  
11717490\_ 6. 56978 6. 481046 6. 644742 6. 466005 6. 464805 6. 448738  
11717491\_ 10. 51548 10. 45002 10. 50838 10. 42046 10. 47758 10. 48512  
11717492\_ 10. 95035 10. 90783 10. 94348 10. 95304 10. 9672 10. 95415  
11717493\_ 8. 184851 8. 076769 8. 216408 8. 516829 8. 529232 8. 604111  
11717494\_ 8. 05852 8. 037977 8. 127935 8. 369488 8. 418088 8. 352044  
11717495\_ 6. 212755 6. 202814 6. 216022 6. 221055 6. 224151 6. 17981

11717496\_ 7. 470935 7. 387413 7. 37945 8. 061888 8. 088674 8. 044557  
11717497\_ 9. 397238 9. 321216 9. 331704 9. 158764 9. 152596 9. 209218  
11717498\_ 8. 750651 8. 80118 8. 741638 8. 524947 8. 501689 8. 532615  
11717499\_ 8. 295764 8. 328178 8. 248048 8. 166031 8. 124096 8. 174375  
11717500\_ 5. 484305 5. 566827 5. 739268 5. 782928 5. 759972 5. 88508  
11717501\_ 8. 086681 8. 054351 8. 17956 8. 321906 8. 350067 8. 38536  
11717502\_ 6. 336605 6. 198301 6. 402543 6. 200462 6. 193629 6. 237248  
11717503\_ 8. 398562 8. 407591 8. 375567 8. 576078 8. 574933 8. 611034  
11717504\_ 7. 937677 7. 951125 7. 959538 8. 3877 8. 381506 8. 377851  
11717505\_ 7. 079917 7. 10781 7. 053419 7. 141769 7. 114814 7. 111847  
11717506\_ 8. 518215 8. 48755 8. 552598 8. 596681 8. 598262 8. 598262  
11717507\_ 9. 226143 9. 187828 9. 21485 9. 267404 9. 308989 9. 261474  
11717508\_ 4. 983003 5. 250758 4. 924774 5. 039477 5. 053507 5. 076559  
11717509\_ 2. 235709 2. 250678 2. 160665 2. 247439 2. 34461 2. 25483  
11717510\_ 8. 602753 8. 536284 8. 591192 8. 618933 8. 67004 8. 606385  
11717511\_ 10. 34884 10. 29721 10. 36541 10. 0989 10. 11087 10. 11504  
11717512\_ 8. 33051 8. 362809 8. 368502 7. 997116 7. 935937 8. 054351  
11717513\_ 8. 416658 8. 327521 8. 395955 8. 178688 8. 116679 8. 162686  
11717514\_ 12. 17626 12. 15317 12. 1208 12. 09966 12. 09162 12. 03197  
11717515\_ 10. 05445 10. 0003 10. 04515 9. 546466 9. 587542 9. 630545  
11717516\_ 3. 994031 3. 930407 3. 882307 4. 222326 4. 052645 4. 011667  
11717517\_ 10. 10406 10. 07159 10. 07117 10. 05682 10. 06292 10. 00089  
11717518\_ 10. 98479 10. 94376 10. 94221 10. 90981 10. 88742 10. 87121  
11717519\_ 8. 59411 8. 479943 8. 542095 8. 407903 8. 384894 8. 435671  
11717520\_ 7. 383609 7. 387086 7. 411169 7. 156444 7. 276247 7. 241854  
11717521\_ 10. 70384 10. 64655 10. 71087 11. 22744 11. 22342 11. 20951  
11717522\_ 6. 998898 6. 978558 7. 065275 6. 956076 7. 027015 6. 993238  
11717523\_ 5. 12504 5. 031229 5. 174471 5. 156303 5. 244865 5. 161203  
11717524\_ 8. 654853 8. 601461 8. 624365 8. 444994 8. 422087 8. 406538  
11717525\_ 9. 309167 9. 333623 9. 327116 9. 263578 9. 274066 9. 254539  
11717526\_ 9. 339259 9. 301133 9. 31027 9. 253875 9. 248383 9. 267466  
11717527\_ 7. 776289 7. 739184 7. 782992 7. 516322 7. 510513 7. 413076  
11717528\_ 7. 910593 7. 900609 7. 915342 7. 532868 7. 529402 7. 368744  
11717529\_ 7. 987297 7. 980423 8. 024312 7. 495815 7. 514346 7. 489139  
11717530\_ 9. 444622 9. 534199 9. 402612 9. 836025 9. 739652 9. 660379  
11717531\_ 9. 44738 9. 55261 9. 431151 9. 780637 9. 720053 9. 679988  
11717532\_ 4. 829577 4. 994764 5. 002136 5. 448296 5. 346826 5. 488208  
11717533\_ 6. 996182 6. 932023 6. 963777 6. 690841 6. 70426 6. 698147  
11717534\_ 6. 340418 6. 377738 6. 334478 6. 373675 6. 563145 6. 487565  
11717535\_ 5. 686 5. 614522 5. 735552 5. 938606 6. 065982 6. 10787  
11717536\_ 6. 15431 6. 100569 6. 199575 6. 34864 6. 40384 6. 314339  
11717537\_ 8. 465157 8. 39063 8. 454292 8. 898439 8. 87438 8. 851129  
11717538\_ 8. 949326 8. 887073 8. 94284 8. 468264 8. 424054 8. 415905  
11717539\_ 9. 254073 9. 170132 9. 217907 8. 903477 8. 857155 8. 856431  
11717540\_ 9. 45414 9. 350192 9. 426231 8. 797475 8. 836861 8. 865966  
11717541\_ 8. 129037 8. 117394 8. 254108 8. 794703 8. 805135 8. 835899  
11717542\_ 8. 740111 8. 692721 8. 746026 8. 830843 8. 789843 8. 792697  
11717543\_ 8. 196118 7. 995204 8. 084059 8. 459811 8. 436333 8. 42417  
11717544\_ 8. 121218 8. 17205 8. 136417 8. 309123 8. 314661 8. 265982  
11717545\_ 8. 599194 8. 537423 8. 622245 8. 764828 8. 794694 8. 811185  
11717546\_ 8. 773263 8. 721704 8. 797753 9. 85334 9. 879506 9. 8402

11717547\_ 8. 309702 8. 153731 8. 249443 7. 977617 8. 088471 8. 052972  
11717548\_ 9. 308043 9. 202634 9. 29897 8. 870316 8. 903252 8. 83893  
11717549\_ 9. 077248 8. 94318 9. 034135 8. 463552 8. 556555 8. 575479  
11717550\_ 9. 462446 9. 380638 9. 379499 8. 82622 8. 852868 8. 859641  
11717551\_ 4. 611926 4. 138547 4. 213285 4. 495198 4. 274489 4. 220658  
11717552\_ 8. 338147 8. 282879 8. 411797 8. 249576 8. 190792 8. 251241  
11717553\_ 9. 658998 9. 637927 9. 643246 9. 215775 9. 24906 9. 24678  
11717554\_ 4. 347179 4. 462144 4. 367442 4. 367442 4. 275543 4. 411107  
11717555\_ 8. 184507 8. 123233 8. 212462 8. 548895 8. 509078 8. 528924  
11717556\_ 6. 455895 6. 541739 6. 45005 6. 765722 6. 707062 6. 663882  
11717557\_ 9. 838802 9. 814412 9. 892489 10. 05575 10. 15473 10. 12347  
11717558\_ 9. 106355 9. 057789 9. 173243 9. 343583 9. 412912 9. 37744  
11717559\_ 8. 547077 8. 439813 8. 608862 8. 389549 8. 386486 8. 409637  
11717560\_ 5. 707216 5. 731192 5. 712204 5. 741461 5. 712204 5. 788455  
11717561\_ 7. 883308 7. 780133 7. 916887 7. 380431 7. 322339 7. 316596  
11717562\_ 7. 634242 7. 560627 7. 62892 6. 959303 6. 971261 7. 129197  
11717563\_ 5. 407664 5. 490499 5. 658804 4. 966866 4. 904149 4. 868452  
11717564\_ 5. 990591 5. 999423 6. 197454 6. 224915 6. 447161 6. 321988  
11717565\_ 10. 1158 10. 01513 10. 07984 9. 858005 9. 820685 9. 846397  
11717566\_ 8. 899029 8. 82398 8. 865751 8. 543278 8. 631746 8. 625545  
11717567\_ 11. 833 11. 81589 11. 84721 11. 74116 11. 76048 11. 75888  
11717568\_ 10. 30813 10. 22162 10. 31947 10. 41398 10. 44648 10. 43914  
11717569\_ 1. 949521 1. 799322 1. 919499 1. 993542 2. 086299 1. 806148  
11717570\_ 4. 039365 4. 133991 3. 998636 4. 21841 4. 023414 4. 187708  
11717571\_ 9. 665331 9. 647701 9. 678324 9. 921766 9. 941615 9. 914797  
11717572\_ 9. 140548 9. 105279 9. 116135 9. 001233 8. 972074 9. 079117  
11717573\_ 8. 362208 8. 33638 8. 431381 8. 220449 8. 278176 8. 227985  
11717574\_ 12. 19633 12. 18018 12. 20354 12. 27371 12. 24878 12. 22416  
11717575\_ 2. 834645 3. 017697 2. 782386 3. 061108 3. 072337 2. 761509  
11717576\_ 7. 215141 7. 290708 7. 404079 7. 349393 7. 409277 7. 482249  
11717577\_ 8. 026369 8. 073047 8. 046935 8. 340406 8. 289695 8. 255465  
11717578\_ 8. 314372 8. 296129 8. 364071 8. 260616 8. 186374 8. 275213  
11717579\_ 9. 063288 8. 983043 8. 998576 8. 997344 8. 884967 8. 952649  
11717580\_ 3. 258196 3. 278371 3. 270745 3. 53826 3. 451344 3. 000098  
11717581\_ 2. 518724 2. 64609 2. 364208 2. 545775 2. 649882 2. 668177  
11717582\_ 4. 422267 4. 094047 4. 393038 4. 403559 4. 066066 4. 070036  
11717583\_ 7. 835102 7. 823444 7. 894806 7. 876904 7. 88254 7. 873054  
11717584\_ 5. 576351 5. 600398 5. 618943 5. 876341 5. 81648 5. 846719  
11717585\_ 9. 112372 9. 055959 9. 102719 9. 45908 9. 44622 9. 47476  
11717586\_ 7. 071897 7. 125039 7. 162346 7. 29598 7. 384502 7. 274514  
11717587\_ 2. 714504 2. 605516 2. 874619 2. 657128 2. 775605 2. 606455  
11717588\_ 9. 00983 8. 986827 9. 024664 9. 095704 9. 108159 9. 100612  
11717589\_ 9. 436923 9. 379975 9. 400728 9. 764629 9. 804388 9. 801121  
11717590\_ 8. 145373 8. 166667 8. 160578 8. 244047 8. 206867 8. 119449  
11717591\_ 6. 293481 6. 305469 6. 366121 6. 337726 6. 427036 6. 252837  
11717592\_ 7. 94151 7. 936076 7. 874439 7. 990549 8. 033396 8. 033237  
11717593\_ 7. 443381 7. 41441 7. 321117 7. 497476 7. 539515 7. 520306  
11717594\_ 4. 034548 4. 192686 4. 047069 4. 441673 4. 353039 4. 175359  
11717595\_ 4. 289358 4. 251403 4. 213858 4. 500265 4. 305039 4. 275543  
11717596\_ 12. 74053 12. 72051 12. 72895 12. 73548 12. 7736 12. 76111  
11717597\_ 12. 2314 12. 20298 12. 21304 12. 27788 12. 28301 12. 28542



11717598\_ 7. 111953 7. 046561 7. 030555 6. 948721 7. 00106 7. 031531  
11717599\_ 6. 651062 6. 431763 6. 604175 6. 496574 6. 509344 6. 429369  
11717600\_ 7. 620103 7. 527682 7. 547281 7. 307717 7. 336054 7. 275814  
11717601\_ 7. 398715 7. 313105 7. 304073 7. 128181 7. 055228 7. 036984  
11717602\_ 8. 723709 8. 668867 8. 710816 8. 381192 8. 339828 8. 45736  
11717603\_ 6. 480524 6. 456106 6. 518166 6. 212872 6. 346256 6. 405516  
11717604\_ 7. 577451 7. 57996 7. 587143 7. 58848 7. 518827 7. 489139  
11717605\_ 5. 673187 5. 716922 5. 888829 5. 792973 5. 744357 5. 657858  
11717606\_ 9. 80326 9. 821766 9. 821193 10. 12989 10. 18331 10. 18212  
11717607\_ 5. 666152 5. 501196 5. 81126 5. 956048 5. 848161 5. 954231  
11717608\_ 9. 28393 9. 199405 9. 227485 9. 621385 9. 661836 9. 695699  
11717609\_ 8. 047779 8. 090644 8. 160747 8. 941365 8. 962079 8. 982624  
11717610\_ 7. 846748 7. 859502 7. 924032 7. 924492 7. 89731 7. 863268  
11717611\_ 6. 004893 6. 032495 6. 000376 6. 027978 6. 031144 6. 035694  
11717612\_ 6. 565145 6. 45014 6. 581971 6. 554456 6. 557068 6. 584832  
11717613\_ 6. 406263 6. 444018 6. 416091 6. 370596 6. 532928 6. 517844  
11717614\_ 6. 835066 6. 867588 6. 862059 6. 752593 6. 764986 6. 833903  
11717615\_ 6. 967868 6. 972639 6. 889649 6. 585107 6. 728616 6. 709596  
11717616\_ 9. 625292 9. 544865 9. 614811 9. 023606 9. 050453 9. 028943  
11717617\_ 8. 082577 8. 057092 8. 075898 7. 839026 7. 786135 7. 85935  
11717618\_ 9. 856271 9. 856811 9. 896021 9. 962655 9. 958855 9. 993858  
11717619\_ 9. 257589 9. 157408 9. 151678 8. 720763 8. 669692 8. 696732  
11717620\_ 6. 206954 6. 191718 6. 300643 6. 473334 6. 472539 6. 481697  
11717621\_ 5. 837628 5. 813043 5. 820052 5. 780899 5. 85655 5. 849541  
11717622\_ 7. 703399 7. 692606 7. 63512 8. 259016 8. 273475 8. 293685  
11717623\_ 7. 170856 7. 133802 7. 040979 7. 367297 7. 372178 7. 323125  
11717624\_ 7. 658176 7. 617552 7. 680852 7. 720125 7. 738637 7. 760601  
11717625\_ 8. 801013 8. 773854 8. 866873 8. 732629 8. 640055 8. 672649  
11717626\_ 11. 20395 11. 14785 11. 1966 11. 18665 11. 21134 11. 20876  
11717627\_ 10. 67354 10. 65894 10. 63297 10. 24524 10. 22286 10. 24231  
11717628\_ 8. 937251 8. 889454 8. 97855 8. 467528 8. 438798 8. 465329  
11717629\_ 8. 23799 8. 217587 8. 187448 8. 490472 8. 384292 8. 367571  
11717630\_ 7. 755763 7. 811477 7. 823168 7. 899649 7. 960938 7. 923815  
11717631\_ 9. 466852 9. 361223 9. 404365 9. 548665 9. 462758 9. 516869  
11717632\_ 8. 172877 8. 187327 8. 120409 8. 12877 8. 038128 8. 103198  
11717633\_ 8. 583461 8. 559381 8. 575541 8. 54449 8. 521003 8. 503336  
11717634\_ 11. 46674 11. 42303 11. 47234 11. 49475 11. 4751 11. 45398  
11717635\_ 8. 110399 7. 984478 8. 127699 8. 28992 8. 346243 8. 239177  
11717636\_ 8. 523071 8. 547734 8. 512284 8. 536181 8. 522614 8. 563642  
11717637\_ 8. 015852 7. 963212 8. 012131 7. 975577 8. 051695 8. 007467  
11717638\_ 9. 150149 9. 027403 9. 087496 9. 853762 9. 876175 9. 838146  
11717639\_ 8. 991123 8. 894387 8. 970939 9. 725358 9. 771083 9. 70712  
11717640\_ 9. 203391 9. 179692 9. 261808 9. 033822 9. 07559 9. 085612  
11717641\_ 10. 25167 10. 23492 10. 23148 10. 04564 10. 04621 9. 990348  
11717642\_ 9. 375207 9. 307569 9. 402968 9. 041894 9. 000756 9. 086565  
11717643\_ 10. 36005 10. 29977 10. 30676 10. 63451 10. 6585 10. 61525  
11717644\_ 6. 631042 6. 658668 6. 734987 6. 879368 6. 883232 6. 921429  
11717645\_ 7. 432921 7. 337536 7. 483907 6. 741233 6. 77522 6. 922545  
11717646\_ 9. 183636 9. 147455 9. 107875 9. 378829 9. 421181 9. 332399  
11717647\_ 9. 612128 9. 5725 9. 665874 9. 915374 9. 860267 9. 909193  
11717648\_ 8. 673204 8. 655754 8. 761501 9. 00457 8. 962799 9. 004007

11717649\_ 6. 88071 6. 838437 6. 910833 6. 965727 7. 035081 6. 888163  
11717650\_ 8. 286015 8. 360976 8. 24703 8. 252733 8. 369511 8. 346066  
11717651\_ 7. 538817 7. 541335 7. 555614 7. 741108 7. 67255 7. 66751  
11717652\_ 6. 220369 6. 085158 6. 133915 6. 404648 6. 439656 6. 493271  
11717653\_ 6. 48642 6. 55958 6. 595765 6. 834064 6. 768418 6. 793181  
11717654\_ 7. 257782 7. 167909 7. 227656 7. 282478 7. 337541 7. 316944  
11717655\_ 7. 6162 7. 524633 7. 587313 7. 136722 7. 170251 7. 157043  
11717656\_ 9. 072296 9. 060094 9. 106609 8. 683296 8. 642312 8. 642312  
11717657\_ 8. 684823 8. 682648 8. 699071 8. 922284 8. 968228 8. 858246  
11717658\_ 8. 901472 8. 836039 8. 875478 10. 06901 10. 02224 10. 10379  
11717659\_ 6. 942214 6. 88503 6. 917189 6. 723246 6. 696073 6. 812094  
11717660\_ 4. 867481 4. 891761 4. 706234 4. 966849 4. 967255 4. 984669  
11717661\_ 3. 137957 3. 237504 3. 159358 3. 201475 3. 403166 3. 409551  
11717662\_ 9. 04086 9. 005405 9. 022723 8. 98019 8. 985783 9. 035876  
11717663\_ 6. 849267 6. 74118 6. 793055 7. 068837 7. 174913 7. 174876  
11717664\_ 8. 835813 8. 742235 8. 8599 8. 920054 8. 889664 8. 931768  
11717665\_ 7. 552999 7. 509021 7. 555208 7. 478367 7. 378296 7. 43481  
11717666\_ 5. 373747 5. 475591 5. 444766 5. 257148 5. 335879 5. 384851  
11717667\_ 7. 540958 7. 691366 7. 667309 7. 850595 7. 925045 7. 865305  
11717668\_ 9. 469515 9. 520189 9. 440473 9. 7773 9. 734142 9. 768842  
11717669\_ 7. 858297 7. 754232 7. 856953 7. 997454 7. 997454 7. 971831  
11717670\_ 10. 28257 10. 23394 10. 25192 10. 4939 10. 5152 10. 50117  
11717671\_ 11. 46662 11. 44352 11. 40989 11. 39944 11. 40145 11. 35411  
11717672\_ 6. 321838 6. 390355 6. 336425 6. 271064 6. 290628 6. 300643  
11717673\_ 10. 21939 10. 1352 10. 17812 9. 977597 9. 972231 9. 967956  
11717674\_ 9. 78767 9. 696049 9. 779084 9. 552762 9. 539092 9. 575853  
11717675\_ 7. 393144 7. 443758 7. 523072 7. 54311 7. 615345 7. 611123  
11717676\_ 7. 843682 7. 683719 7. 749741 7. 091937 7. 138602 7. 063649  
11717677\_ 6. 094413 6. 042453 6. 081046 6. 11236 6. 075533 6. 077911  
11717678\_ 7. 95775 7. 939938 7. 982412 7. 945063 7. 933464 7. 923709  
11717679\_ 7. 736932 7. 619524 7. 710084 7. 585129 7. 56413 7. 557106  
11717680\_ 7. 618937 7. 561853 7. 592125 7. 366314 7. 404107 7. 40454  
11717681\_ 9. 673047 9. 664917 9. 645081 9. 490376 9. 425203 9. 453417  
11717682\_ 6. 617146 6. 474947 6. 607565 5. 780073 5. 88755 5. 881176  
11717683\_ 9. 950548 9. 99705 9. 934056 10. 05612 10. 0115 9. 979271  
11717684\_ 7. 197987 7. 230373 7. 26795 7. 480059 7. 55303 7. 496209  
11717685\_ 9. 468886 9. 361933 9. 410878 8. 985353 9. 044425 9. 021069  
11717686\_ 8. 774433 8. 766572 8. 795946 8. 52603 8. 533287 8. 506647  
11717687\_ 8. 291192 8. 231997 8. 237375 7. 807705 7. 841303 7. 865209  
11717688\_ 7. 978734 7. 898955 7. 90451 7. 245957 7. 259225 7. 171072  
11717689\_ 7. 95234 7. 818666 7. 958979 6. 994068 6. 929714 6. 989554  
11717690\_ 7. 086074 6. 998064 7. 135553 7. 101594 7. 110197 7. 079458  
11717691\_ 7. 898823 7. 794875 7. 860377 7. 850755 7. 850187 7. 892114  
11717692\_ 5. 858976 5. 624367 5. 787715 5. 675269 5. 624512 5. 653432  
11717693\_ 7. 823355 7. 680652 7. 849635 8. 286935 8. 262921 8. 257987  
11717694\_ 7. 416871 7. 29503 7. 333912 7. 177354 7. 08741 7. 072122  
11717695\_ 5. 476585 5. 459897 5. 337583 5. 651662 5. 686361 5. 719169  
11717696\_ 6. 297494 6. 538006 6. 453288 6. 518646 6. 431623 6. 544244  
11717697\_ 7. 288844 7. 154768 7. 298622 7. 527659 7. 510048 7. 563777  
11717698\_ 9. 062871 8. 969421 9. 036278 8. 395392 8. 422245 8. 462247  
11717699\_ 6. 884619 6. 815698 6. 734424 6. 481046 6. 370297 6. 408278

11717700\_ 6. 71875 6. 676152 6. 659804 6. 934649 6. 930607 6. 99889  
11717701\_ 6. 633938 6. 658393 6. 657248 6. 539082 6. 609061 6. 588502  
11717702\_ 7. 220733 7. 103005 7. 060671 7. 589202 7. 436924 7. 360532  
11717703\_ 8. 556222 8. 631386 8. 622504 8. 437 8. 432091 8. 447665  
11717704\_ 8. 582996 8. 54004 8. 654943 8. 532791 8. 596217 8. 532791  
11717705\_ 5. 771792 5. 569143 5. 636972 6. 102422 6. 045 6. 199791  
11717706\_ 5. 103777 4. 952734 5. 168829 5. 814684 5. 787819 5. 901793  
11717707\_ 5. 198845 5. 275317 5. 103486 5. 417451 5. 207047 5. 393521  
11717708\_ 6. 197375 6. 244444 6. 193669 6. 230044 6. 200878 6. 22654  
11717709\_ 7. 531919 7. 470047 7. 467879 7. 830748 7. 890809 7. 834966  
11717710\_ 8. 044361 7. 935459 7. 96583 7. 994416 8. 11227 8. 121249  
11717711\_ 6. 942118 6. 906465 7. 048323 7. 110964 7. 149353 7. 152037  
11717712\_ 7. 330369 7. 286897 7. 396683 7. 184704 7. 206045 7. 206804  
11717713\_ 6. 440818 6. 477877 6. 574834 6. 839141 6. 824674 6. 783697  
11717714\_ 6. 261856 6. 114586 6. 046441 6. 359333 6. 34864 6. 372984  
11717715\_ 8. 133545 8. 09507 8. 088509 7. 550498 7. 46493 7. 497231  
11717716\_ 8. 448789 8. 344274 8. 461017 7. 930708 7. 908 7. 932475  
11717717\_ 8. 982548 8. 966044 9. 012361 8. 362314 8. 339011 8. 358906  
11717718\_ 9. 305413 9. 31711 9. 35864 8. 847442 8. 865059 8. 909117  
11717719\_ 5. 571434 5. 642891 5. 488424 5. 636632 5. 796687 5. 687841  
11717720\_ 7. 649111 7. 622472 7. 634534 7. 942597 7. 965452 7. 981256  
11717721\_ 8. 132251 8. 019022 8. 049836 8. 548161 8. 502481 8. 495835  
11717722\_ 6. 657917 6. 697737 6. 69681 6. 499442 6. 449533 6. 453635  
11717723\_ 7. 305096 7. 184826 7. 350159 7. 582418 7. 632279 7. 513261  
11717724\_ 10. 76187 10. 72583 10. 74283 10. 7187 10. 7133 10. 68682  
11717725\_ 10. 29714 10. 25551 10. 23145 10. 24189 10. 23449 10. 20314  
11717726\_ 11. 38026 11. 34193 11. 37174 11. 09545 11. 1264 11. 11045  
11717727\_ 9. 24451 9. 175822 9. 200844 8. 654751 8. 764735 8. 638006  
11717728\_ 3. 866922 3. 862574 3. 743354 3. 943545 3. 969526 3. 973746  
11717729\_ 8. 197735 8. 061974 8. 256381 8. 507551 8. 430364 8. 489292  
11717730\_ 7. 333757 7. 249729 7. 341942 7. 718511 7. 622293 7. 673167  
11717731\_ 6. 819676 6. 7414 6. 934615 7. 202891 7. 169626 7. 231585  
11717732\_ 8. 685321 8. 642302 8. 733504 8. 431114 8. 409769 8. 498123  
11717733\_ 8. 805369 8. 675873 8. 733562 8. 933676 8. 898734 8. 946392  
11717734\_ 7. 54541 7. 549425 7. 459489 7. 710066 7. 777114 7. 705134  
11717735\_ 8. 874966 8. 892781 8. 855442 9. 151606 9. 144647 9. 166153  
11717736\_ 5. 620986 5. 476558 5. 612113 5. 884488 5. 91948 5. 893322  
11717737\_ 4. 949454 4. 920762 4. 898858 5. 654898 5. 431307 5. 521656  
11717738\_ 5. 342067 5. 440327 5. 541473 6. 061988 5. 942873 6. 042243  
11717739\_ 7. 595842 7. 573609 7. 626536 8. 288874 8. 251666 8. 329947  
11717740\_ 8. 394831 8. 25815 8. 367928 8. 476524 8. 400527 8. 335692  
11717741\_ 8. 31251 8. 282063 8. 333142 8. 246343 8. 37699 8. 328398  
11717742\_ 4. 780448 4. 803314 5. 0055 4. 782302 4. 952621 4. 73598  
11717743\_ 10. 55658 10. 50812 10. 54984 10. 59227 10. 59387 10. 56582  
11717744\_ 7. 307491 7. 255416 7. 150797 8. 309075 8. 214463 8. 250008  
11717745\_ 9. 005106 8. 925492 8. 969174 9. 970638 9. 863275 9. 809769  
11717746\_ 9. 893225 9. 870359 9. 888989 9. 747549 9. 729992 9. 750699  
11717747\_ 8. 508604 8. 594504 8. 532967 8. 672935 8. 59555 8. 578986  
11717748\_ 10. 7107 10. 64796 10. 66446 10. 80387 10. 76043 10. 74906  
11717749\_ 6. 257054 6. 183843 6. 21567 6. 278003 6. 230709 6. 258681  
11717750\_ 7. 693556 7. 612217 7. 677592 7. 932541 7. 984865 8. 002083

11717751\_ 9. 116395 9. 101155 9. 156309 9. 290798 9. 310812 9. 277754  
11717752\_ 8. 197021 8. 234734 8. 25052 8. 110324 8. 100695 8. 125734  
11717753\_ 8. 819723 8. 676864 8. 776085 8. 292141 8. 263781 8. 304339  
11717754\_ 8. 826905 8. 841671 8. 894116 7. 684477 7. 716008 7. 644127  
11717755\_ 8. 014795 8. 152223 8. 110111 7. 396107 7. 310631 7. 440751  
11717756\_ 8. 826003 8. 790073 8. 852254 8. 841648 8. 76372 8. 7944  
11717757\_ 8. 404263 8. 446924 8. 417952 8. 475351 8. 490618 8. 331086  
11717758\_ 8. 519019 8. 417376 8. 419941 8. 440849 8. 393727 8. 394675  
11717759\_ 8. 734693 8. 665552 8. 6906 9. 026049 9. 055679 9. 024855  
11717760\_ 3. 082643 3. 305534 3. 192046 3. 332093 3. 305513 3. 252497  
11717761\_ 8. 377269 8. 440192 8. 439959 8. 647801 8. 633023 8. 623843  
11717762\_ 6. 920735 6. 849918 6. 966494 7. 048719 7. 11837 7. 070398  
11717763\_ 7. 908127 7. 884428 7. 946945 7. 446666 7. 448199 7. 356461  
11717764\_ 8. 188402 8. 128398 8. 092827 7. 638241 7. 641695 7. 66885  
11717765\_ 8. 510201 8. 422626 8. 497648 7. 976475 8. 048685 8. 016761  
11717766\_ 7. 471246 7. 514809 7. 492499 7. 618937 7. 587787 7. 507048  
11717767\_ 9. 061487 8. 977072 8. 989162 8. 640826 8. 721082 8. 654174  
11717768\_ 6. 391221 6. 515335 6. 425386 6. 59807 6. 620179 6. 609566  
11717769\_ 8. 810578 8. 754954 8. 753998 8. 372562 8. 273613 8. 317684  
11717770\_ 8. 173077 8. 019423 8. 121508 8. 059768 8. 117632 8. 079993  
11717771\_ 9. 538503 9. 450068 9. 521591 9. 470905 9. 538892 9. 477626  
11717772\_ 7. 856448 7. 954178 8. 006048 7. 999028 8. 015371 8. 08194  
11717773\_ 6. 812682 6. 602052 6. 655938 7. 336706 7. 254566 7. 345856  
11717774\_ 5. 870242 5. 968809 5. 790782 5. 84618 5. 980301 6. 011116  
11717775\_ 7. 108463 7. 189062 7. 209879 6. 913793 6. 956076 6. 838224  
11717776\_ 7. 746593 7. 659116 7. 73584 7. 666339 7. 623813 7. 722049  
11717777\_ 8. 939579 8. 962181 8. 871182 8. 155021 8. 203161 8. 132295  
11717778\_ 7. 586286 7. 429965 7. 535988 7. 141082 7. 115106 7. 323091  
11717779\_ 7. 815619 7. 65457 7. 795159 7. 810786 7. 845242 7. 868019  
11717780\_ 5. 76057 5. 597879 5. 627539 5. 645512 5. 734592 5. 720364  
11717781\_ 6. 748064 6. 694534 6. 686126 6. 874857 6. 980566 7. 018074  
11717782\_ 9. 328226 9. 242068 9. 324613 9. 419361 9. 429571 9. 457789  
11717783\_ 8. 890743 8. 853754 8. 956676 9. 018476 9. 107036 9. 041296  
11717784\_ 8. 716209 8. 620129 8. 669976 8. 747617 8. 638725 8. 752408  
11717785\_ 6. 037842 6. 018167 6. 025218 6. 082673 6. 212957 6. 033313  
11717786\_ 5. 844338 5. 820047 5. 606096 5. 916251 5. 913675 5. 894226  
11717787\_ 7. 352698 7. 30164 7. 398474 7. 439626 7. 573609 7. 50409  
11717788\_ 9. 047316 9. 005941 9. 024222 8. 72627 8. 834612 8. 770816  
11717789\_ 7. 743679 7. 719181 7. 775765 7. 473015 7. 451315 7. 393249  
11717790\_ 7. 12503 7. 024411 7. 127965 7. 169826 7. 203576 7. 216667  
11717791\_ 6. 709593 6. 872945 6. 833143 6. 907391 6. 890821 6. 897843  
11717792\_ 6. 391479 6. 42125 6. 471065 6. 454367 6. 442606 6. 477009  
11717793\_ 8. 170016 8. 140378 8. 124779 8. 197873 8. 214845 8. 22328  
11717794\_ 6. 259464 6. 412133 6. 259229 6. 549052 6. 498261 6. 397657  
11717795\_ 6. 18454 6. 090957 6. 049247 6. 285823 6. 262839 6. 224702  
11717796\_ 8. 386761 8. 283008 8. 303191 8. 159005 8. 153949 8. 134401  
11717797\_ 6. 910474 6. 884057 7. 004334 6. 834114 6. 743087 6. 749794  
11717798\_ 5. 994731 6. 038769 6. 025961 6. 172232 6. 005601 6. 109251  
11717799\_ 6. 041714 5. 938482 5. 925112 6. 244945 6. 165924 6. 183145  
11717800\_ 5. 857562 5. 849164 5. 880877 6. 374962 6. 469644 6. 383455  
11717801\_ 4. 738326 4. 691333 4. 753732 5. 275185 5. 395159 5. 241835

11717802\_ 5.986574 6.144121 5.973344 6.37641 6.330828 6.270083  
11717803\_ 6.314006 6.432988 6.349464 5.189628 5.092458 5.407555  
11717804\_ 6.262202 6.116225 6.115016 5.694432 5.92665 5.817811  
11717805\_ 8.198888 8.160687 8.21594 7.632743 7.631225 7.699385  
11717806\_ 7.025415 6.91283 6.991876 6.7414 6.752212 6.744379  
11717807\_ 8.079911 8.120835 8.137779 7.897885 7.987213 8.021269  
11717808\_ 7.383008 7.422172 7.421033 7.401007 7.382255 7.369992  
11717809\_ 7.33326 7.278693 7.383661 7.686466 7.724515 7.701561  
11717810\_ 6.300643 6.140939 6.087412 5.297498 5.34277 5.562803  
11717811\_ 6.646187 6.579689 6.635319 6.672541 6.743869 6.700371  
11717812\_ 8.2939 8.246201 8.220904 8.535175 8.547536 8.564385  
11717813\_ 6.731784 6.659111 6.766642 6.95537 7.048426 6.94111  
11717814\_ 7.589404 7.619651 7.578482 7.847136 7.82658 7.838672  
11717815\_ 7.554551 7.465372 7.487325 7.446423 7.449984 7.520515  
11717816\_ 6.399301 6.480883 6.427785 6.25261 6.313153 6.269173  
11717817\_ 10.36862 10.40131 10.30634 9.362327 9.318936 9.320037  
11717818\_ 8.910667 8.806609 8.885925 8.198962 8.180096 8.248348  
11717819\_ 6.719253 6.627804 6.763989 6.898146 6.8546 6.849336  
11717820\_ 3.122936 2.942201 2.867247 3.031983 3.117769 3.001674  
11717821\_ 1.772409 2.348839 2.156593 2.150454 2.13295 2.029347  
11717822\_ 3.695771 3.723624 3.382755 3.874501 3.725312 3.906714  
11717823\_ 7.394969 7.364645 7.429331 7.453454 7.330696 7.509695  
11717824\_ 5.838984 5.863456 5.886477 5.747669 5.841615 6.017102  
11717825\_ 3.110783 2.865742 2.972851 2.844297 2.882888 2.97454  
11717826\_ 2.472604 2.437638 2.481427 2.348488 2.494324 2.582602  
11717827\_ 9.165816 9.10655 9.18555 9.554839 9.58276 9.517521  
11717828\_ 7.798085 7.753741 7.805251 7.625672 7.685053 7.656087  
11717829\_ 6.625829 6.524131 6.499584 6.287349 6.249249 6.274528  
11717830\_ 6.058242 6.244666 6.129794 6.058786 6.068011 5.807469  
11717831\_ 8.348706 8.393998 8.384444 8.298876 8.2679 8.347968  
11717832\_ 7.326385 7.264202 7.338321 7.31275 7.406702 7.356197  
11717833\_ 9.601092 9.630191 9.611539 9.040115 9.068847 9.03187  
11717834\_ 6.899504 6.81975 6.938935 7.018608 7.022677 6.964862  
11717835\_ 9.072358 9.043354 9.059989 9.28462 9.278156 9.292347  
11717836\_ 3.103179 2.969789 2.993937 3.049361 3.09421 2.914812  
11717837\_ 3.559108 3.290188 3.398236 3.533913 3.727352 3.555417  
11717838\_ 9.737285 9.753847 9.748464 9.801297 9.808688 9.817093  
11717839\_ 11.52994 11.51758 11.51122 11.36861 11.4038 11.38737  
11717840\_ 7.704625 7.626512 7.724794 7.522075 7.438618 7.531057  
11717841\_ 8.103114 8.024584 7.996421 8.206967 8.041035 8.041162  
11717842\_ 8.733379 8.677949 8.769513 7.715126 7.731755 7.678585  
11717843\_ 8.927575 8.967212 8.908529 7.97241 8.02234 7.98681  
11717844\_ 9.320103 9.269443 9.295655 8.278205 8.320885 8.330763  
11717845\_ 9.835261 9.765507 9.815589 9.588777 9.602951 9.572691  
11717846\_ 7.679186 7.719195 7.754906 7.645022 7.725969 7.659203  
11717847\_ 8.694621 8.678651 8.648047 8.958055 8.95942 8.938422  
11717848\_ 9.323026 9.268161 9.352506 9.407618 9.43301 9.450458  
11717849\_ 7.733006 7.673275 7.847718 8.016736 7.973722 8.025955  
11717850\_ 8.102162 8.068248 8.162066 7.864774 8.007196 7.970133  
11717851\_ 5.889975 6.034591 5.952735 5.768053 5.840533 5.722827  
11717852\_ 7.0301 6.980105 6.959217 6.835584 6.852131 6.853767

11717853\_ 4. 235702 4. 250934 4. 445176 4. 40461 4. 448508 4. 50043  
11717854\_ 5. 629567 5. 67151 5. 880425 5. 344808 5. 48634 5. 509745  
11717855\_ 6. 602256 6. 580455 6. 569586 6. 631842 6. 68406 6. 594726  
11717856\_ 8. 877013 8. 794383 8. 887205 9. 222783 9. 109387 9. 129228  
11717857\_ 8. 650376 8. 555117 8. 638746 8. 305323 8. 283913 8. 263447  
11717858\_ 3. 675298 3. 835686 3. 510003 3. 84816 3. 746033 3. 772944  
11717859\_ 7. 86884 7. 869798 7. 90279 8. 732588 8. 832481 8. 776072  
11717860\_ 9. 121952 9. 002801 9. 116764 7. 397674 7. 497589 7. 565784  
11717861\_ 7. 708621 7. 665518 7. 82223 6. 901813 6. 842483 6. 942908  
11717862\_ 8. 071747 8. 037923 7. 973344 7. 087552 7. 079643 6. 936861  
11717863\_ 8. 521194 8. 451514 8. 531967 7. 942485 7. 796953 7. 823266  
11717864\_ 7. 877764 7. 797313 7. 887583 7. 356114 7. 480115 7. 389008  
11717865\_ 7. 416509 7. 294773 7. 344767 7. 331146 7. 280732 7. 306635  
11717866\_ 10. 06481 9. 987345 10. 01915 9. 545562 9. 531136 9. 497375  
11717867\_ 8. 97946 8. 868412 8. 957938 8. 797772 8. 805162 8. 808215  
11717868\_ 7. 065068 7. 081051 7. 142417 6. 695564 6. 743109 6. 709961  
11717869\_ 8. 333086 8. 270589 8. 418487 7. 853931 7. 950348 7. 816218  
11717870\_ 7. 854837 7. 813693 7. 954552 7. 38879 7. 437289 7. 446861  
11717871\_ 9. 201851 9. 157867 9. 177413 9. 454483 9. 484056 9. 47561  
11717872\_ 4. 866756 4. 754226 4. 442203 4. 825758 4. 883632 4. 787777  
11717873\_ 4. 433783 4. 520502 4. 38948 4. 596873 4. 440673 4. 529067  
11717874\_ 5. 030425 5. 06483 4. 864659 5. 061793 5. 098846 5. 137353  
11717875\_ 7. 474165 7. 450179 7. 648449 7. 3876 7. 44494 7. 436848  
11717876\_ 7. 082541 7. 095428 6. 994297 7. 038196 7. 018223 7. 043753  
11717877\_ 9. 039243 8. 957725 9. 01446 8. 975057 8. 979955 8. 97109  
11717878\_ 9. 245461 9. 110829 9. 229867 9. 100115 9. 083257 9. 081626  
11717879\_ 7. 896878 7. 886682 7. 918834 7. 710155 7. 746647 7. 707095  
11717880\_ 5. 974501 5. 936459 5. 975096 6. 018553 6. 139287 6. 171122  
11717881\_ 8. 441899 8. 3808 8. 312597 8. 389956 8. 482452 8. 411448  
11717882\_ 6. 248625 6. 159593 6. 201791 6. 513237 6. 585666 6. 493387  
11717883\_ 6. 628146 6. 623487 6. 541665 6. 664558 6. 557068 6. 646187  
11717884\_ 5. 979093 5. 903992 6. 066977 6. 300387 6. 301098 6. 436685  
11717885\_ 4. 592249 4. 72954 4. 526185 4. 753442 4. 74574 4. 556537  
11717886\_ 5. 359812 5. 286784 5. 215011 4. 78452 4. 584933 4. 810701  
11717887\_ 11. 03527 11. 01557 11. 03259 10. 79647 10. 79464 10. 81996  
11717888\_ 8. 999046 8. 949216 9. 012145 9. 065605 9. 06079 9. 203334  
11717889\_ 9. 937366 9. 8938 9. 885695 9. 924787 9. 997257 9. 920009  
11717890\_ 9. 740897 9. 761987 9. 758368 9. 764973 9. 790998 9. 797653  
11717891\_ 8. 366195 8. 332248 8. 395687 8. 195889 8. 141938 8. 220212  
11717892\_ 9. 518087 9. 502863 9. 518446 8. 967519 8. 959609 9. 052879  
11717893\_ 8. 111526 8. 05482 8. 018803 7. 907364 7. 872445 7. 809449  
11717894\_ 8. 955635 8. 956891 8. 888995 8. 797774 8. 832973 8. 715351  
11717895\_ 9. 028717 8. 993396 8. 986361 8. 834455 8. 761011 8. 802001  
11717896\_ 10. 37437 10. 42206 10. 35995 10. 19335 10. 11243 10. 01215  
11717897\_ 9. 820171 9. 720723 9. 785657 9. 202533 9. 267293 9. 321779  
11717898\_ 7. 622618 7. 446912 7. 580103 7. 739334 7. 719295 7. 757942  
11717899\_ 7. 81885 7. 753983 7. 794523 7. 977584 7. 842715 7. 922945  
11717900\_ 7. 509041 7. 482432 7. 571023 9. 055675 9. 079045 9. 033936  
11717901\_ 7. 297167 7. 173072 7. 251841 8. 485878 8. 539947 8. 467699  
11717902\_ 8. 456776 8. 536957 8. 501887 8. 925681 8. 921643 8. 899515  
11717903\_ 8. 390674 8. 402425 8. 386465 9. 275937 9. 282251 9. 253339

11717904\_ 9. 051044 8. 948169 9. 066965 8. 978186 9. 00772 8. 953658  
11717905\_ 10. 68178 10. 63917 10. 66666 10. 66591 10. 63711 10. 63128  
11717906\_ 10. 8399 10. 78971 10. 8648 10. 82329 10. 79509 10. 82913  
11717907\_ 8. 814256 8. 782216 8. 802841 8. 723885 8. 797828 8. 76324  
11717908\_ 9. 244432 9. 264634 9. 269393 9. 239125 9. 186326 9. 260581  
11717909\_ 6. 168901 6. 061984 6. 165759 6. 835617 6. 862059 6. 85266  
11717910\_ 4. 921405 5. 066051 4. 643717 4. 958339 4. 828855 4. 961303  
11717911\_ 5. 020922 5. 045936 4. 643717 4. 958545 4. 80874 4. 980636  
11717912\_ 4. 26491 4. 390197 4. 22699 4. 553741 4. 200678 4. 275398  
11717913\_ 5. 347855 5. 242561 5. 304366 5. 453818 5. 340996 5. 339016  
11717914\_ 7. 341 7. 38299 7. 332402 7. 148226 7. 161149 7. 008563  
11717915\_ 8. 713311 8. 700092 8. 749394 8. 26445 8. 274516 8. 233489  
11717916\_ 5. 199635 5. 05554 4. 956807 5. 090532 5. 087871 5. 125766  
11717917\_ 4. 414139 4. 517793 4. 338345 4. 587857 4. 522123 4. 602433  
11717918\_ 8. 863835 8. 763749 8. 855398 8. 814001 8. 798282 8. 747046  
11717919\_ 5. 731291 5. 701875 5. 835179 5. 754957 5. 897357 5. 787999  
11717920\_ 10. 05904 10. 17038 10. 07724 10. 42323 10. 40714 10. 29611  
11717921\_ 9. 888989 9. 971392 9. 901387 10. 24529 10. 22233 10. 17523  
11717922\_ 4. 319002 4. 469244 4. 358685 4. 691323 4. 77538 4. 700243  
11717923\_ 9. 50219 9. 501317 9. 494048 9. 682336 9. 649761 9. 684166  
11717924\_ 9. 275509 9. 195749 9. 218346 8. 539578 8. 554429 8. 506303  
11717925\_ 9. 847786 9. 805346 9. 863404 8. 896317 8. 875478 8. 878547  
11717926\_ 7. 982968 7. 926542 7. 966273 7. 92491 7. 926761 7. 97343  
11717927\_ 7. 014504 7. 117298 7. 110384 7. 410673 7. 484918 7. 415237  
11717928\_ 3. 779585 3. 982815 4. 169373 3. 361525 3. 567097 3. 55689  
11717929\_ 6. 790254 6. 922946 6. 788045 6. 95892 6. 828123 6. 850782  
11717930\_ 4. 143941 4. 194675 4. 370337 3. 846718 4. 059517 4. 018443  
11717931\_ 9. 66376 9. 588022 9. 634707 8. 993396 9. 024129 9. 037179  
11717932\_ 8. 479459 8. 415454 8. 480288 7. 848801 7. 887495 7. 805126  
11717933\_ 5. 115428 5. 225079 5. 122191 5. 24082 5. 2222 5. 239122  
11717934\_ 7. 144608 7. 074654 7. 150127 7. 103562 7. 154768 7. 213281  
11717935\_ 7. 679612 7. 573043 7. 750661 7. 82302 7. 839247 7. 835982  
11717936\_ 7. 505094 7. 573609 7. 475476 7. 625672 7. 606565 7. 717393  
11717937\_ 5. 560782 5. 670274 5. 629778 5. 287358 5. 295457 5. 270231  
11717938\_ 5. 774649 5. 749367 5. 804709 5. 963733 5. 780264 5. 830049  
11717939\_ 10. 52186 10. 51367 10. 46227 10. 93091 10. 84781 10. 75943  
11717940\_ 9. 135791 9. 115131 9. 143549 9. 424928 9. 355883 9. 377991  
11717941\_ 2. 988093 3. 297139 3. 301478 3. 500145 3. 382851 3. 275224  
11717942\_ 8. 889978 9. 033794 8. 84477 9. 004395 8. 92185 8. 862448  
11717943\_ 9. 755054 9. 727698 9. 802391 9. 654333 9. 666922 9. 605592  
11717944\_ 9. 934822 9. 838593 9. 954967 9. 564872 9. 494783 9. 547274  
11717945\_ 8. 621718 8. 567256 8. 657906 8. 184506 8. 213685 8. 217924  
11717946\_ 6. 782128 6. 787868 6. 93312 6. 711469 6. 790062 6. 782052  
11717947\_ 7. 130963 7. 196027 7. 153742 7. 174876 7. 174876 7. 19601  
11717948\_ 6. 456341 6. 477659 6. 61483 6. 527066 6. 553779 6. 559455  
11717949\_ 5. 25049 4. 997302 4. 93263 5. 448138 5. 736673 5. 667488  
11717950\_ 8. 385127 8. 491083 8. 373432 8. 237037 8. 229705 8. 271493  
11717951\_ 7. 010051 7. 009649 7. 007439 7. 009306 7. 04632 6. 991461  
11717952\_ 7. 232286 7. 262777 7. 231326 7. 029692 7. 126722 7. 079004  
11717953\_ 8. 484359 8. 268383 8. 380246 8. 558056 8. 614252 8. 575618  
11717954\_ 7. 69666 7. 587468 7. 669723 7. 560932 7. 522236 7. 568936

11717955\_ 6. 252065 6. 12857 6. 204162 6. 076709 6. 048643 6. 071268  
11717956\_ 6. 044795 5. 853663 6. 068045 5. 619713 5. 772076 5. 880457  
11717957\_ 8. 383107 8. 263622 8. 312259 8. 347306 8. 248387 8. 31377  
11717958\_ 8. 652159 8. 574987 8. 67762 8. 064567 8. 087209 8. 174075  
11717959\_ 6. 496002 6. 557771 6. 567692 7. 399253 7. 445975 7. 418031  
11717960\_ 5. 442511 5. 673459 5. 504457 5. 970915 6. 103955 6. 041699  
11717961\_ 7. 820545 7. 741864 7. 838819 8. 072143 8. 05994 7. 980394  
11717962\_ 7. 238923 7. 133739 7. 222222 7. 541287 7. 536698 7. 483014  
11717963\_ 7. 942497 7. 933828 7. 937298 8. 34144 8. 288631 8. 347138  
11717964\_ 6. 998535 6. 961173 6. 896612 6. 866871 6. 853412 6. 898793  
11717965\_ 8. 91087 8. 791044 8. 84652 9. 50241 9. 449826 9. 462334  
11717966\_ 7. 814826 7. 77841 7. 779884 8. 173236 8. 143783 8. 183197  
11717967\_ 7. 938156 7. 911843 7. 845172 8. 411491 8. 3404 8. 345566  
11717968\_ 8. 068725 7. 971109 8. 026269 8. 037262 8. 057145 8. 048065  
11717969\_ 5. 397783 5. 184645 5. 333723 5. 412531 5. 407593 5. 499647  
11717970\_ 7. 326306 7. 330902 7. 314094 7. 273853 7. 234703 7. 278723  
11717971\_ 8. 6367 8. 587834 8. 666117 8. 83322 8. 783528 8. 791147  
11717972\_ 5. 871455 5. 794479 5. 830649 5. 737444 5. 599095 5. 520863  
11717973\_ 6. 938843 6. 822242 6. 745258 6. 617569 6. 599839 6. 589889  
11717974\_ 6. 405358 6. 264432 6. 238533 6. 010402 6. 048063 6. 140819  
11717975\_ 8. 131647 8. 064468 8. 092645 8. 192717 8. 202772 8. 132462  
11717976\_ 9. 184863 9. 111356 9. 166569 9. 150463 9. 162798 9. 183003  
11717977\_ 3. 93368 3. 818401 3. 612656 3. 818808 3. 742507 3. 742507  
11717978\_ 3. 787655 4. 026191 3. 940584 3. 84355 4. 009183 4. 02512  
11717979\_ 2. 821251 2. 736118 2. 856215 2. 901214 2. 969068 2. 924392  
11717980\_ 2. 933838 2. 77705 2. 896627 2. 912551 2. 912551 2. 974166  
11717981\_ 6. 890163 6. 950161 6. 820115 6. 959017 6. 974823 6. 989882  
11717982\_ 9. 382923 9. 355277 9. 382177 9. 173291 9. 136055 9. 179118  
11717983\_ 7. 224456 7. 128672 7. 19389 7. 385747 7. 266598 7. 247043  
11717984\_ 8. 935005 8. 840894 8. 892746 8. 645614 8. 604745 8. 675701  
11717985\_ 8. 806616 8. 758606 8. 838486 8. 383661 8. 342571 8. 373226  
11717986\_ 6. 566027 6. 626948 6. 596009 7. 118889 7. 170032 7. 07378  
11717987\_ 8. 993803 8. 953509 8. 978299 9. 043014 9. 105406 9. 063558  
11717988\_ 9. 088966 9. 013615 9. 113368 9. 235702 9. 340551 9. 313709  
11717989\_ 9. 307948 9. 290185 9. 312872 9. 159676 9. 152695 9. 131866  
11717990\_ 6. 33905 6. 306321 6. 162238 5. 958358 5. 984691 5. 958358  
11717991\_ 7. 197987 7. 174876 7. 208043 7. 202295 7. 150604 7. 275994  
11717992\_ 9. 328253 9. 295607 9. 389001 9. 141851 9. 155227 9. 171164  
11717993\_ 5. 661739 5. 76483 5. 888059 5. 968436 5. 998813 5. 948112  
11717994\_ 8. 627516 8. 584987 8. 61221 8. 657909 8. 78025 8. 660694  
11717995\_ 8. 690143 8. 683181 8. 682409 8. 741971 8. 771781 8. 795369  
11717996\_ 9. 71953 9. 668185 9. 628331 9. 951761 9. 92779 9. 909799  
11717997\_ 8. 24591 8. 205389 8. 294231 8. 55877 8. 591518 8. 559677  
11717998\_ 9. 37915 9. 334577 9. 444777 9. 655398 9. 710259 9. 698085  
11717999\_ 9. 452022 9. 542911 9. 523374 10. 00971 9. 964533 9. 900441  
11718000\_ 9. 322452 9. 383096 9. 370495 9. 820703 9. 779868 9. 739577  
11718001\_ 6. 32508 6. 486228 6. 453158 6. 176591 6. 186983 6. 11083  
11718002\_ 3. 948879 4. 005796 4. 13825 4. 029718 4. 005796 3. 978715  
11718003\_ 7. 196494 7. 26674 7. 30307 7. 84845 7. 86209 7. 830587  
11718004\_ 8. 096386 7. 927992 8. 040884 8. 148837 8. 133769 8. 116694  
11718005\_ 9. 276034 9. 197024 9. 284687 9. 773923 9. 754575 9. 764869



11718006\_ 7. 086118 6. 90662 6. 946175 7. 098051 7. 171734 7. 153407  
11718007\_ 5. 358117 5. 299247 5. 357698 5. 564863 5. 58402 5. 668751  
11718008\_ 7. 717314 7. 587136 7. 617341 7. 821478 7. 78066 7. 754946  
11718009\_ 7. 561343 7. 551876 7. 565023 7. 358486 7. 415419 7. 391398  
11718010\_ 9. 197391 9. 162636 9. 212001 9. 217425 9. 270507 9. 255873  
11718011\_ 8. 709024 8. 653092 8. 729047 8. 995312 9. 047327 9. 036428  
11718012\_ 10. 09553 10. 08539 10. 03177 9. 87634 9. 93365 9. 847311  
11718013\_ 7. 220733 7. 134375 7. 212651 7. 959007 8. 044367 8. 109369  
11718014\_ 4. 700243 4. 763134 4. 776594 4. 772366 4. 707097 4. 709476  
11718015\_ 6. 55819 6. 537714 6. 604788 6. 561751 6. 65814 6. 660519  
11718016\_ 7. 704014 7. 563421 7. 675325 7. 66728 7. 624056 7. 687527  
11718017\_ 5. 156303 5. 218011 5. 029529 5. 176744 5. 164241 5. 258413  
11718018\_ 6. 676172 6. 588416 6. 509041 6. 429728 6. 397946 6. 440603  
11718019\_ 6. 311893 6. 224758 6. 212871 6. 224758 6. 151913 6. 303141  
11718020\_ 6. 259889 6. 304671 6. 118244 6. 696107 6. 746406 6. 704511  
11718021\_ 10. 47511 10. 52109 10. 46366 10. 43117 10. 44575 10. 35623  
11718022\_ 9. 63238 9. 66594 9. 401983 9. 637823 9. 512759 9. 356855  
11718023\_ 9. 729592 9. 694315 9. 754334 9. 503645 9. 415189 9. 4892  
11718024\_ 8. 352565 8. 345273 8. 380464 8. 173236 8. 194694 8. 173267  
11718025\_ 3. 643063 3. 798358 3. 708467 3. 610274 3. 514569 3. 730265  
11718026\_ 6. 628195 6. 626853 6. 541665 6. 34864 6. 341005 6. 373234  
11718027\_ 8. 701578 8. 584787 8. 739322 8. 321906 8. 404394 8. 368561  
11718028\_ 8. 635567 8. 625335 8. 745154 8. 43775 8. 43775 8. 350638  
11718029\_ 10. 72011 10. 65874 10. 7124 10. 76498 10. 79319 10. 74456  
11718030\_ 8. 883315 8. 843568 8. 913882 8. 97783 8. 975789 9. 030359  
11718031\_ 6. 874211 6. 945464 6. 899803 6. 848854 6. 764584 6. 792183  
11718032\_ 7. 801728 7. 814818 7. 849688 7. 591756 7. 591756 7. 600124  
11718033\_ 6. 793687 6. 754821 6. 874408 6. 817368 6. 78762 6. 747228  
11718034\_ 2. 145703 2. 217759 2. 127294 2. 105965 2. 209416 2. 112443  
11718035\_ 8. 054351 8. 039249 8. 038105 8. 216738 8. 171554 8. 146522  
11718036\_ 8. 776492 8. 666652 8. 729669 8. 820244 8. 806045 8. 897256  
11718037\_ 9. 193244 9. 158371 9. 248014 9. 301155 9. 326399 9. 354154  
11718038\_ 8. 251064 8. 236002 8. 249817 8. 108916 8. 067231 8. 044857  
11718039\_ 7. 530042 7. 39141 7. 484422 7. 249867 7. 271886 7. 267027  
11718040\_ 11. 08247 11. 06953 11. 1095 11. 28706 11. 26742 11. 24911  
11718041\_ 3. 982238 3. 921256 3. 754905 4. 092933 4. 161485 4. 203562  
11718042\_ 6. 853744 6. 793918 6. 862059 6. 987341 6. 957428 7. 11686  
11718043\_ 9. 151322 9. 111645 9. 143519 8. 997653 8. 902435 8. 99113  
11718044\_ 6. 139239 6. 308356 6. 260434 6. 377707 6. 339837 6. 408105  
11718045\_ 9. 425823 9. 39482 9. 397321 9. 561015 9. 481028 9. 526191  
11718046\_ 3. 925181 3. 944344 4. 064019 4. 020094 3. 932899 4. 054288  
11718047\_ 7. 727446 7. 712096 7. 617817 8. 051378 8. 123349 8. 033396  
11718048\_ 7. 507462 7. 441019 7. 51649 7. 206547 7. 204522 7. 266573  
11718049\_ 7. 867044 7. 840367 7. 887035 7. 747394 7. 671227 7. 734931  
11718050\_ 4. 009735 3. 951003 4. 104718 4. 193334 4. 096706 4. 096706  
11718051\_ 12. 48254 12. 49613 12. 44877 12. 49891 12. 48312 12. 42854  
11718052\_ 7. 501949 7. 544309 7. 596868 7. 272041 7. 299254 7. 333247  
11718053\_ 8. 67073 8. 635816 8. 668867 8. 431072 8. 343333 8. 304528  
11718054\_ 8. 52342 8. 504046 8. 561678 8. 294311 8. 279649 8. 266105  
11718055\_ 7. 504007 7. 457675 7. 578375 7. 395936 7. 417973 7. 446164  
11718056\_ 9. 253187 9. 180827 9. 20055 9. 323891 9. 152935 9. 222038

11718057\_ 6. 271661 6. 206103 6. 210289 6. 438026 6. 308868 6. 44839  
11718058\_ 11. 06137 11. 04982 11. 06739 11. 40629 11. 37632 11. 37089  
11718059\_ 6. 579159 6. 700537 6. 428975 6. 711545 6. 763555 6. 693454  
11718060\_ 4. 80846 4. 725613 4. 66593 4. 79362 4. 845716 4. 742893  
11718061\_ 3. 670161 3. 379298 3. 426264 3. 456579 3. 247538 3. 47323  
11718062\_ 8. 809251 8. 761476 8. 842498 9. 100969 9. 162561 9. 151771  
11718063\_ 9. 581907 9. 503214 9. 539344 9. 70665 9. 801972 9. 719851  
11718064\_ 11. 55117 11. 56512 11. 55347 11. 41036 11. 40495 11. 43273  
11718065\_ 8. 720799 8. 663933 8. 700514 8. 425685 8. 329259 8. 398036  
11718066\_ 7. 121664 7. 038498 7. 136773 6. 888209 6. 835887 6. 895477  
11718067\_ 5. 924008 5. 865888 5. 910157 6. 097228 6. 225476 6. 03052  
11718068\_ 7. 550418 7. 521344 7. 59192 7. 602933 7. 681105 7. 718938  
11718069\_ 6. 249871 6. 463417 6. 408235 6. 498675 6. 463417 6. 53118  
11718070\_ 6. 349341 6. 53985 6. 427149 6. 511957 6. 450203 6. 543438  
11718071\_ 8. 134123 8. 109513 8. 143783 8. 55393 8. 566646 8. 575692  
11718072\_ 5. 854484 5. 785457 5. 660326 5. 660326 5. 739854 5. 849968  
11718073\_ 7. 216326 7. 125138 7. 135928 6. 791897 6. 740649 6. 782836  
11718074\_ 6. 555788 6. 752725 6. 499204 6. 498051 6. 46542 6. 507972  
11718075\_ 6. 41544 6. 294039 6. 308504 6. 098192 6. 024674 6. 24254  
11718076\_ 6. 586206 6. 594909 6. 491174 6. 581378 6. 550556 6. 662253  
11718077\_ 7. 364092 7. 424412 7. 50669 7. 377464 7. 374996 7. 43168  
11718078\_ 5. 678815 5. 832936 5. 857171 5. 793607 5. 699227 5. 736808  
11718079\_ 5. 516727 5. 424912 5. 402383 5. 424487 5. 50772 5. 531044  
11718080\_ 5. 937664 5. 921238 5. 957243 5. 935841 5. 917312 6. 029843  
11718081\_ 8. 762334 8. 737876 8. 761751 9. 125325 9. 066527 9. 045933  
11718082\_ 5. 247739 5. 116636 5. 21676 4. 968901 5. 146741 5. 053037  
11718083\_ 5. 973961 6. 089287 6. 026623 6. 263567 6. 299214 6. 279167  
11718084\_ 6. 821493 6. 841722 6. 907864 6. 339167 6. 335778 6. 338048  
11718085\_ 7. 241 7. 248233 7. 412746 6. 731759 6. 712091 6. 750359  
11718086\_ 6. 709719 6. 422991 6. 66182 6. 996741 6. 938284 7. 025028  
11718087\_ 7. 909181 7. 954037 7. 848073 8. 087936 8. 04269 8. 08832  
11718088\_ 6. 874887 6. 878162 6. 865348 7. 387434 7. 469135 7. 464845  
11718089\_ 6. 851149 6. 73041 6. 79718 6. 371232 6. 223224 6. 27276  
11718090\_ 7. 754432 7. 695022 7. 782416 7. 849989 7. 853688 7. 852335  
11718091\_ 6. 36243 6. 248018 6. 255641 6. 34864 6. 269047 6. 317596  
11718092\_ 7. 92061 7. 911277 7. 90114 7. 921842 7. 897504 7. 87151  
11718093\_ 8. 16193 8. 130469 8. 280778 7. 51821 7. 536532 7. 553101  
11718094\_ 8. 077679 8. 064644 8. 107107 8. 278426 8. 247512 8. 307938  
11718095\_ 8. 271959 8. 231495 8. 264059 7. 640492 7. 534815 7. 586096  
11718096\_ 6. 922292 6. 908876 7. 000094 6. 496932 6. 458758 6. 40208  
11718097\_ 7. 781235 7. 749052 7. 767069 7. 928696 7. 87994 7. 897953  
11718098\_ 5. 742998 5. 808631 5. 875901 5. 948339 6. 103409 6. 034141  
11718099\_ 8. 915796 8. 867412 8. 933902 8. 475238 8. 412106 8. 47069  
11718100\_ 11. 26498 11. 24099 11. 24639 10. 74881 10. 78798 10. 76116  
11718101\_ 9. 278642 9. 187946 9. 212613 9. 319856 9. 2992 9. 325015  
11718102\_ 4. 684209 4. 427942 4. 575381 4. 591052 4. 76209 4. 600967  
11718103\_ 6. 977742 6. 793548 6. 930518 6. 652606 6. 765046 6. 740861  
11718104\_ 7. 23554 7. 042586 7. 169196 6. 931193 7. 128055 6. 978407  
11718105\_ 7. 144608 7. 206152 7. 19875 7. 922842 7. 880753 7. 857907  
11718106\_ 8. 640554 8. 647294 8. 555656 9. 539908 9. 492555 9. 468953  
11718107\_ 10. 07034 10. 0056 10. 01439 10. 47174 10. 42975 10. 46433

11718108\_ 10.98172 10.9498 10.9661 10.89945 10.89489 10.90356  
11718109\_ 9.454336 9.390528 9.405502 9.320423 9.339186 9.268108  
11718110\_ 10.1021 10.12396 10.10372 10.12023 10.10959 10.0723  
11718111\_ 6.859991 6.988355 6.860267 7.014792 6.885786 6.933248  
11718112\_ 8.565652 8.476653 8.535802 9.195149 9.215411 9.219382  
11718113\_ 10.39783 10.35336 10.38621 10.26489 10.25604 10.27846  
11718114\_ 8.559544 8.565682 8.508435 8.531943 8.535393 8.517219  
11718115\_ 8.228267 8.227159 8.203554 8.264419 8.241473 8.241791  
11718116\_ 8.369481 8.344274 8.372071 8.515779 8.481362 8.481607  
11718117\_ 8.787607 8.683825 8.735293 9.00143 9.004236 9.064252  
11718118\_ 8.471242 8.441413 8.492068 8.125467 8.134325 8.085744  
11718119\_ 9.804085 9.749302 9.756987 9.404276 9.381587 9.416723  
11718120\_ 7.164857 7.083358 7.198366 6.600551 6.605741 6.611587  
11718121\_ 7.481087 7.400837 7.509004 6.953826 7.017094 7.107938  
11718122\_ 7.766395 7.619572 7.734729 7.076762 7.131074 7.087006  
11718123\_ 5.785568 5.785335 5.660024 6.390544 6.377739 6.365849  
11718124\_ 9.660627 9.659747 9.665758 9.764927 9.810616 9.716706  
11718125\_ 8.419124 8.41589 8.453209 8.889357 8.887713 8.841501  
11718126\_ 7.53701 7.551519 7.579292 8.043276 8.000911 7.975183  
11718127\_ 9.158204 9.059794 9.1087 9.700523 9.759517 9.723547  
11718128\_ 8.941134 8.878327 8.896317 9.519056 9.620211 9.554391  
11718129\_ 9.015177 8.957941 8.945404 9.217071 9.222015 9.230503  
11718130\_ 2.32631 2.086075 2.210756 2.229337 2.141599 2.18238  
11718131\_ 3.382306 3.277643 3.163614 3.279182 3.22872 3.28072  
11718132\_ 4.603291 4.373557 4.507148 4.774468 4.74948 4.808707  
11718133\_ 8.073449 7.951638 8.008596 8.072034 8.14832 8.132162  
11718134\_ 8.728822 8.694354 8.746774 9.087699 9.070054 9.119371  
11718135\_ 9.352502 9.326814 9.316574 9.732222 9.721243 9.740173  
11718136\_ 5.520263 5.547511 5.543013 5.439709 5.564802 5.520295  
11718137\_ 8.785296 8.703765 8.792486 8.943542 8.941928 8.943477  
11718138\_ 6.175085 6.100919 6.039713 6.450978 6.481162 6.507351  
11718139\_ 6.140615 6.1122 6.277634 6.185661 6.150151 6.1781  
11718140\_ 9.861624 9.78656 9.87523 9.871084 9.933503 9.868571  
11718141\_ 10.8391 10.76222 10.79728 10.68013 10.60046 10.64836  
11718142\_ 8.364567 8.272632 8.392391 8.336094 8.30354 8.305279  
11718143\_ 6.787298 6.657834 6.911026 6.855964 6.826485 6.810551  
11718144\_ 4.910821 4.850275 4.906746 4.915249 4.848833 4.854478  
11718145\_ 5.977487 5.956516 5.937811 6.041717 5.994229 6.026853  
11718146\_ 8.701096 8.629339 8.721829 8.81941 8.872901 8.858345  
11718147\_ 8.853563 8.763749 8.852254 8.385075 8.347952 8.407819  
11718148\_ 7.700569 7.604825 7.62932 8.018284 7.980325 7.968041  
11718149\_ 8.094491 8.030547 8.057032 8.361975 8.327156 8.394836  
11718150\_ 7.056881 6.951445 6.981236 7.224964 7.279451 7.261715  
11718151\_ 8.091035 8.039961 8.026838 8.03676 8.088684 7.950457  
11718152\_ 4.973097 5.021463 5.019983 4.946835 4.818681 5.083531  
11718153\_ 5.047835 5.144216 5.136841 5.069695 5.112003 5.198502  
11718154\_ 2.802367 3.051063 3.025972 3.133623 3.004853 2.83418  
11718155\_ 5.731729 5.471176 5.531996 5.655635 5.603848 5.774327  
11718156\_ 7.119109 7.077827 7.099232 7.115652 7.196898 7.248541  
11718157\_ 9.192484 9.375753 9.219662 8.485154 8.357849 8.405993  
11718158\_ 6.833175 6.792937 6.893094 6.854701 6.789019 6.839235

11718159\_ 5. 972079 6. 080032 6. 149692 6. 042762 6. 067907 6. 03153  
11718160\_ 6. 397946 6. 480752 6. 421691 7. 103627 7. 212651 7. 267226  
11718161\_ 5. 711327 5. 400065 5. 691216 6. 495155 6. 383618 6. 454624  
11718162\_ 8. 167269 8. 054351 8. 148451 8. 183337 8. 238231 8. 236219  
11718163\_ 2. 529428 2. 644216 2. 678503 2. 819634 2. 838078 2. 674942  
11718164\_ 9. 22979 9. 24085 9. 189027 8. 896773 8. 895731 8. 833517  
11718165\_ 6. 805142 6. 899153 6. 898678 7. 861158 7. 88399 7. 805427  
11718166\_ 6. 822999 6. 746496 6. 839211 7. 409349 7. 500657 7. 560601  
11718167\_ 8. 437658 8. 460702 8. 419 8. 326343 8. 31525 8. 370778  
11718168\_ 11. 00763 10. 98465 10. 93917 10. 58836 10. 60216 10. 5442  
11718169\_ 5. 357916 5. 343411 5. 335124 5. 309822 5. 349436 5. 241535  
11718170\_ 7. 21228 7. 220314 7. 251484 7. 131328 7. 128741 7. 158294  
11718171\_ 8. 528553 8. 481705 8. 495263 8. 387673 8. 319369 8. 25587  
11718172\_ 7. 509223 7. 509476 7. 473395 7. 695122 7. 598932 7. 605948  
11718173\_ 3. 96586 3. 88528 3. 789756 4. 113121 3. 835115 4. 026694  
11718174\_ 7. 918585 7. 992025 7. 893659 8. 184426 8. 15686 8. 12979  
11718175\_ 9. 040163 8. 915966 9. 037002 9. 016769 8. 952484 8. 947913  
11718176\_ 5. 354509 5. 548693 5. 434862 5. 548695 5. 452825 5. 492106  
11718177\_ 6. 036062 6. 08177 5. 945415 6. 554512 6. 558676 6. 529829  
11718178\_ 6. 112797 6. 225513 6. 23831 6. 904199 6. 759293 6. 925194  
11718179\_ 8. 145988 8. 08649 7. 996168 7. 616605 7. 712729 7. 617856  
11718180\_ 7. 715498 7. 645953 7. 687412 6. 92284 7. 01113 7. 016477  
11718181\_ 9. 394826 9. 315092 9. 403845 8. 812322 8. 781993 8. 82948  
11718182\_ 6. 845428 6. 725446 6. 932103 7. 640956 7. 68693 7. 79974  
11718183\_ 8. 406538 8. 385193 8. 428309 9. 401737 9. 439474 9. 365744  
11718184\_ 7. 462121 7. 456839 7. 511268 7. 847213 7. 814947 7. 826899  
11718185\_ 6. 342331 6. 071637 6. 172281 6. 395698 6. 42161 6. 45899  
11718186\_ 9. 765202 9. 757741 9. 743519 9. 587516 9. 558202 9. 636705  
11718187\_ 8. 334259 8. 324093 8. 33139 8. 49621 8. 446889 8. 495835  
11718188\_ 6. 544286 6. 525881 6. 491023 7. 033845 7. 00318 7. 072382  
11718189\_ 3. 12624 3. 221588 3. 3709 3. 756411 3. 763388 3. 689991  
11718190\_ 5. 542328 5. 428854 5. 465742 5. 407721 5. 5772 5. 536358  
11718191\_ 6. 959979 6. 883213 6. 878954 7. 244133 7. 17033 7. 210802  
11718192\_ 7. 9051 7. 818839 7. 880573 8. 105746 8. 124693 8. 16514  
11718193\_ 8. 722031 8. 691068 8. 577 8. 501112 8. 561628 8. 499871  
11718194\_ 9. 984341 9. 91868 9. 93961 9. 784018 9. 796779 9. 764882  
11718195\_ 9. 434863 9. 415549 9. 436578 9. 197957 9. 190201 9. 251016  
11718196\_ 9. 075997 9. 027267 9. 132048 8. 862925 8. 940297 8. 901637  
11718197\_ 5. 794521 5. 83876 5. 842182 5. 797656 5. 809009 5. 728521  
11718198\_ 7. 842037 7. 881063 7. 906083 7. 221503 7. 204327 7. 299221  
11718199\_ 8. 78173 8. 713676 8. 72798 9. 086331 9. 06324 9. 077993  
11718200\_ 9. 00615 8. 945784 9. 020864 9. 218159 9. 210918 9. 280135  
11718201\_ 4. 923379 4. 931056 4. 9577 5. 11138 5. 149688 5. 153648  
11718202\_ 6. 621324 6. 52719 6. 526095 6. 661829 6. 638011 6. 599638  
11718203\_ 10. 59519 10. 58629 10. 62052 10. 70786 10. 69249 10. 66439  
11718204\_ 5. 49137 5. 397212 5. 264103 5. 233471 5. 259705 5. 097688  
11718205\_ 8. 071246 8. 066314 7. 995268 8. 117514 8. 105669 8. 105669  
11718206\_ 8. 327894 8. 261382 8. 251473 8. 314286 8. 360359 8. 288799  
11718207\_ 7. 133904 6. 953297 7. 075561 6. 904105 6. 962628 6. 865548  
11718208\_ 8. 561952 8. 48794 8. 484467 8. 196808 8. 177101 8. 162141  
11718209\_ 9. 38693 9. 330259 9. 351654 9. 103276 9. 065789 9. 098891

11718210\_ 7. 35794 7. 346425 7. 382832 7. 736149 7. 765242 7. 714839  
11718211\_ 6. 282224 6. 32454 6. 133001 6. 676728 6. 618306 6. 687644  
11718212\_ 6. 435562 6. 521312 6. 301976 6. 556616 6. 541172 6. 608335  
11718213\_ 3. 122119 3. 075963 3. 006126 3. 167468 3. 202486 3. 180062  
11718214\_ 7. 020719 7. 015625 6. 993775 7. 054637 7. 125793 7. 192203  
11718215\_ 10. 11251 10. 07056 10. 10522 9. 490705 9. 521918 9. 513553  
11718216\_ 10. 28627 10. 21247 10. 27111 9. 651742 9. 696907 9. 687551  
11718217\_ 7. 113205 7. 004411 7. 154755 7. 995433 7. 972088 7. 938177  
11718218\_ 8. 849648 8. 798726 8. 871367 8. 2103 8. 290137 8. 224918  
11718219\_ 11. 06331 11. 00762 11. 00367 11. 36183 11. 38629 11. 36331  
11718220\_ 10. 44724 10. 38783 10. 4256 10. 76938 10. 79734 10. 75794  
11718221\_ 5. 427422 5. 23057 5. 785582 6. 713037 6. 79622 6. 84124  
11718222\_ 6. 300643 6. 086531 6. 188179 6. 892656 6. 891758 6. 956336  
11718223\_ 9. 080351 8. 993396 9. 018686 9. 015401 8. 967592 8. 867719  
11718224\_ 10. 12375 10. 05599 10. 09676 9. 96746 9. 948815 9. 96383  
11718225\_ 6. 505686 6. 478448 6. 634134 6. 55192 6. 635794 6. 572309  
11718226\_ 9. 161573 9. 029258 9. 141888 8. 969459 8. 960519 9. 032354  
11718227\_ 6. 704469 6. 750598 6. 687474 6. 753045 6. 774327 6. 723174  
11718228\_ 7. 517888 7. 49273 7. 515673 7. 295336 7. 330871 7. 18853  
11718229\_ 8. 382881 8. 360221 8. 318704 8. 175745 8. 275405 8. 274374  
11718230\_ 5. 395193 5. 417573 5. 226583 5. 189628 4. 970285 4. 992226  
11718231\_ 6. 116374 6. 074698 6. 094232 5. 801333 5. 877206 5. 757482  
11718232\_ 8. 129769 8. 100107 8. 112247 7. 799081 7. 854686 7. 875439  
11718233\_ 8. 067578 8. 065113 8. 057943 7. 664036 7. 659213 7. 728413  
11718234\_ 5. 974658 6. 03366 6. 104771 6. 173161 6. 031025 6. 011116  
11718235\_ 6. 036335 5. 969681 5. 926715 5. 954081 6. 042624 5. 992354  
11718236\_ 7. 071737 7. 060169 7. 094701 6. 983909 6. 953287 6. 961673  
11718237\_ 3. 941252 3. 764314 3. 799224 3. 736871 3. 959614 3. 932085  
11718238\_ 6. 560312 6. 386616 6. 504823 6. 213677 6. 158757 6. 178231  
11718239\_ 7. 364778 7. 286897 7. 304916 7. 181439 7. 194708 7. 097511  
11718240\_ 7. 980865 7. 968638 7. 842319 7. 74679 7. 786782 7. 76787  
11718241\_ 2. 557894 2. 356475 2. 372625 2. 162047 2. 518224 2. 355268  
11718242\_ 3. 530273 3. 681522 3. 357079 3. 439394 3. 477574 3. 439394  
11718243\_ 4. 977054 5. 029529 4. 899967 5. 11527 4. 943904 5. 131234  
11718244\_ 5. 154404 4. 967111 5. 028852 5. 079342 5. 008156 5. 098441  
11718245\_ 6. 330245 6. 315909 6. 239215 6. 263567 6. 308789 6. 277991  
11718246\_ 8. 709763 8. 687294 8. 690008 8. 843382 8. 795612 8. 778661  
11718247\_ 7. 670986 7. 545038 7. 644234 8. 72574 8. 704479 8. 704961  
11718248\_ 5. 625199 5. 534191 5. 494609 6. 169295 6. 135474 6. 106858  
11718249\_ 4. 551327 4. 468059 4. 590285 5. 00465 5. 07976 5. 11079  
11718250\_ 6. 659827 6. 611466 6. 646128 7. 871978 7. 95037 7. 999065  
11718251\_ 5. 916492 5. 95093 5. 811836 6. 231344 6. 244868 6. 329119  
11718252\_ 7. 650429 7. 554048 7. 736446 7. 476651 7. 524052 7. 543196  
11718253\_ 8. 542725 8. 45717 8. 551647 8. 26527 8. 337536 8. 310079  
11718254\_ 8. 045291 7. 992013 8. 082123 7. 874439 7. 945307 7. 915323  
11718255\_ 7. 324079 7. 428677 7. 459571 7. 457845 7. 461346 7. 459542  
11718256\_ 7. 193453 7. 142088 7. 255479 7. 039705 6. 927045 7. 020462  
11718257\_ 8. 661676 8. 579513 8. 550485 8. 255871 8. 267483 8. 216722  
11718258\_ 8. 30202 8. 24731 8. 270173 8. 705288 8. 708223 8. 70471  
11718259\_ 5. 578796 5. 554436 5. 556596 5. 675563 5. 700313 5. 598416  
11718260\_ 7. 178777 7. 112004 7. 197434 7. 571779 7. 627731 7. 616363

11718261\_ 6. 554512 6. 388099 6. 370212 6. 579869 6. 535645 6. 533615  
11718262\_ 6. 862585 6. 66027 6. 847034 6. 998064 7. 033368 7. 021937  
11718263\_ 5. 479885 5. 416046 5. 414869 5. 477513 5. 485635 5. 504168  
11718264\_ 9. 076323 8. 955151 9. 0779 9. 007895 9. 044344 9. 066092  
11718265\_ 7. 817211 7. 783092 7. 878008 7. 924547 7. 933626 7. 974897  
11718266\_ 7. 471607 7. 414613 7. 361629 7. 771457 7. 708635 7. 812352  
11718267\_ 6. 491656 6. 466938 6. 49705 6. 174181 6. 190505 6. 164265  
11718268\_ 7. 439469 7. 284128 7. 279505 6. 865836 6. 825972 6. 984257  
11718269\_ 6. 62086 6. 464805 6. 531377 6. 093605 6. 027463 6. 246409  
11718270\_ 9. 37287 9. 328546 9. 345061 9. 496041 9. 440302 9. 509049  
11718271\_ 9. 896417 9. 859405 9. 926643 9. 865832 9. 960444 9. 910503  
11718272\_ 6. 924608 7. 06169 6. 884238 7. 606134 7. 555755 7. 449346  
11718273\_ 11. 68672 11. 64326 11. 63962 11. 4897 11. 52163 11. 50616  
11718274\_ 10. 98179 10. 90756 10. 96241 10. 77803 10. 83154 10. 82915  
11718275\_ 11. 60665 11. 58898 11. 58418 11. 47189 11. 49319 11. 46047  
11718276\_ 8. 595006 8. 53434 8. 552304 8. 851748 8. 909316 8. 817298  
11718277\_ 4. 099774 4. 044481 4. 300186 4. 184914 4. 185613 4. 184914  
11718278\_ 10. 37612 10. 33798 10. 41417 10. 51619 10. 56909 10. 52206  
11718279\_ 8. 632567 8. 557125 8. 621502 8. 406557 8. 373421 8. 384892  
11718280\_ 9. 904973 9. 829491 9. 89825 9. 420653 9. 452043 9. 42489  
11718281\_ 2. 21842 2. 605516 2. 21842 2. 171482 2. 166552 2. 273978  
11718282\_ 10. 17592 10. 15517 10. 20747 10. 23057 10. 24519 10. 23062  
11718283\_ 9. 589523 9. 499172 9. 558654 9. 870119 9. 880585 9. 816033  
11718284\_ 10. 27991 10. 27267 10. 30307 10. 51325 10. 58857 10. 53227  
11718285\_ 8. 07737 8. 089203 8. 168242 9. 159718 9. 162798 9. 192321  
11718286\_ 7. 37336 7. 369978 7. 409349 7. 038578 7. 060014 7. 109404  
11718287\_ 7. 400837 7. 22511 7. 272358 7. 169088 7. 159431 7. 183172  
11718288\_ 8. 226388 8. 247729 8. 211546 7. 934206 7. 98808 7. 906411  
11718289\_ 6. 033825 6. 092569 5. 932617 5. 972702 5. 919538 5. 982292  
11718290\_ 10. 12718 10. 07236 10. 14024 9. 989089 10. 03754 9. 957496  
11718291\_ 9. 601637 9. 539287 9. 533553 9. 696168 9. 647377 9. 72196  
11718292\_ 10. 55204 10. 46083 10. 54065 10. 60205 10. 60463 10. 6035  
11718293\_ 8. 072329 8. 02305 8. 016781 7. 041929 6. 966342 7. 121937  
11718294\_ 11. 84596 11. 80914 11. 82794 11. 88423 11. 87444 11. 84068  
11718295\_ 5. 431416 5. 350373 5. 175338 5. 558452 5. 604981 5. 555489  
11718296\_ 7. 772623 7. 733703 7. 748779 7. 941069 7. 900561 8. 003905  
11718297\_ 8. 433782 8. 401521 8. 513784 8. 938129 8. 903386 8. 902581  
11718298\_ 9. 004645 8. 919828 8. 961534 8. 669877 8. 701644 8. 645555  
11718299\_ 6. 774621 6. 739606 6. 820115 7. 492011 7. 489139 7. 431706  
11718300\_ 7. 326385 7. 247972 7. 337745 7. 543896 7. 534936 7. 520006  
11718301\_ 4. 239583 4. 284043 4. 043945 4. 18157 4. 272787 4. 34118  
11718302\_ 5. 26749 5. 349304 5. 35983 5. 427395 5. 405695 5. 475572  
11718303\_ 8. 037977 8. 028724 8. 023702 8. 173236 8. 224282 8. 21833  
11718304\_ 6. 301684 6. 264813 6. 312904 6. 554582 6. 56607 6. 511804  
11718305\_ 8. 487151 8. 431354 8. 466813 8. 495846 8. 456171 8. 477157  
11718306\_ 7. 701908 7. 570079 7. 625636 7. 3851 7. 367495 7. 33453  
11718307\_ 6. 283709 6. 061007 6. 236751 6. 547175 6. 553712 6. 497789  
11718308\_ 8. 404877 8. 355858 8. 408662 8. 04844 7. 947642 8. 023583  
11718309\_ 8. 642635 8. 582439 8. 612163 8. 309553 8. 276946 8. 335232  
11718310\_ 8. 123233 8. 11797 8. 178225 8. 163189 8. 236862 8. 195223  
11718311\_ 5. 858255 5. 900639 5. 820052 5. 996126 5. 918745 5. 855227

11718312\_ 5. 465822 5. 507047 5. 313274 5. 847858 5. 664735 5. 663305  
11718313\_ 7. 477292 7. 387069 7. 475301 7. 565739 7. 555696 7. 611336  
11718314\_ 7. 668661 7. 604825 7. 608593 7. 754403 7. 761296 7. 81161  
11718315\_ 4. 054901 3. 982977 3. 88343 4. 067703 4. 065981 3. 890801  
11718316\_ 5. 676981 5. 894697 5. 950197 6. 352309 6. 366235 6. 342401  
11718317\_ 6. 957207 7. 040901 7. 08332 7. 535101 7. 316718 7. 472257  
11718318\_ 3. 977093 3. 813923 3. 850246 4. 057857 4. 222906 4. 053594  
11718319\_ 1. 984347 2. 34253 2. 140644 2. 361778 2. 283409 2. 446087  
11718320\_ 5. 015782 5. 142727 5. 029018 5. 073036 5. 073036 5. 068256  
11718321\_ 4. 667731 4. 637207 4. 561796 4. 624414 4. 593732 4. 578567  
11718322\_ 6. 611749 6. 571082 6. 527765 6. 963883 6. 861366 6. 923389  
11718323\_ 6. 737074 6. 46825 6. 705128 6. 108393 6. 224291 6. 297198  
11718324\_ 7. 809546 7. 753241 7. 881991 7. 242514 7. 331167 7. 23375  
11718325\_ 7. 631227 7. 598831 7. 719891 7. 044381 7. 104904 7. 120715  
11718326\_ 7. 848592 7. 773378 7. 829691 7. 811221 7. 865248 7. 776538  
11718327\_ 8. 128398 8. 146041 8. 233302 7. 985137 8. 038136 7. 977105  
11718328\_ 7. 577113 7. 617633 7. 585923 7. 692051 7. 704713 7. 696705  
11718329\_ 5. 995876 5. 866573 6. 046258 5. 081057 5. 176554 5. 329653  
11718330\_ 6. 450655 6. 358117 6. 448713 5. 882687 5. 924957 6. 007691  
11718331\_ 6. 197779 6. 052857 6. 182689 5. 680388 5. 531772 5. 502784  
11718332\_ 10. 47792 10. 41118 10. 46019 10. 22122 10. 19326 10. 20355  
11718333\_ 7. 870795 7. 998667 7. 996562 8. 09976 8. 044031 8. 0844  
11718334\_ 8. 957392 8. 952152 8. 96593 8. 705944 8. 786253 8. 703056  
11718335\_ 3. 824791 4. 06281 3. 863253 3. 870899 3. 768581 3. 879309  
11718336\_ 4. 807078 5. 011221 4. 71805 4. 982734 5. 025344 5. 055054  
11718337\_ 4. 413004 4. 498173 4. 420374 4. 413004 4. 381499 4. 391722  
11718338\_ 11. 16768 11. 14632 11. 16355 11. 24567 11. 24658 11. 21398  
11718339\_ 9. 493828 9. 436153 9. 55236 9. 620983 9. 634326 9. 62247  
11718340\_ 8. 767064 8. 860796 8. 859986 9. 232324 9. 190698 9. 130028  
11718341\_ 11. 78813 11. 77788 11. 78062 11. 76871 11. 81747 11. 77446  
11718342\_ 6. 966981 6. 925819 6. 950842 6. 754759 6. 921807 6. 831999  
11718343\_ 7. 331357 7. 388068 7. 313874 7. 300261 7. 333429 7. 427607  
11718344\_ 9. 152422 9. 126502 9. 194168 9. 499973 9. 514179 9. 479964  
11718345\_ 9. 827453 9. 747994 9. 79549 10. 01896 10. 03183 10. 00239  
11718346\_ 9. 785263 9. 710693 9. 760328 9. 946626 9. 983668 9. 968905  
11718347\_ 6. 596798 6. 700371 6. 598138 6. 879709 6. 933872 6. 986756  
11718348\_ 8. 296415 8. 257058 8. 364401 8. 039785 8. 096329 8. 048227  
11718349\_ 8. 551869 8. 513908 8. 517156 7. 701561 7. 764002 7. 680017  
11718350\_ 3. 968857 3. 84674 3. 578961 3. 931349 3. 977423 3. 852062  
11718351\_ 5. 704919 5. 851817 5. 680557 5. 820075 5. 936276 5. 907635  
11718352\_ 8. 06915 8. 041467 8. 083767 7. 908469 7. 894597 7. 889276  
11718353\_ 4. 757586 4. 745031 4. 750875 5. 04182 5. 110688 5. 040925  
11718354\_ 9. 624413 9. 576602 9. 616545 9. 43302 9. 348741 9. 362353  
11718355\_ 9. 435039 9. 388099 9. 398135 9. 198346 9. 114044 9. 123672  
11718356\_ 5. 562599 5. 724874 5. 599695 5. 870628 5. 800995 5. 902549  
11718357\_ 7. 986481 7. 938178 8. 093569 7. 950888 8. 000387 7. 993162  
11718358\_ 5. 512912 5. 235367 5. 329832 5. 59651 5. 58165 5. 573507  
11718359\_ 4. 546616 4. 427442 4. 436334 4. 601814 4. 752458 4. 63374  
11718360\_ 8. 150124 8. 125661 8. 242826 7. 858526 7. 835809 7. 753741  
11718361\_ 7. 211029 6. 927263 7. 051315 6. 732084 6. 799948 6. 761862  
11718362\_ 6. 396396 6. 29215 6. 33679 6. 607665 6. 654735 6. 638846

11718363\_ 4. 879559 5. 189628 4. 997089 4. 987901 4. 948626 5. 129091  
11718364\_ 4. 704445 4. 989396 4. 891171 4. 862682 4. 908285 4. 947697  
11718365\_ 8. 749827 8. 723541 8. 749666 8. 543137 8. 588364 8. 529749  
11718366\_ 9. 285326 9. 175745 9. 188363 9. 608715 9. 641441 9. 630865  
11718367\_ 9. 818572 9. 740988 9. 775827 9. 38257 9. 280726 9. 354499  
11718368\_ 8. 687787 8. 681029 8. 764742 8. 477286 8. 474298 8. 417744  
11718369\_ 7. 262328 7. 219522 7. 200246 7. 158222 7. 162883 7. 16603  
11718370\_ 7. 094093 7. 188154 7. 105145 7. 039143 6. 950088 6. 915413  
11718371\_ 8. 3663 8. 412902 8. 490102 8. 157356 8. 156591 8. 109369  
11718372\_ 7. 593907 7. 676297 7. 669708 7. 447072 7. 430897 7. 458024  
11718373\_ 6. 705817 6. 581789 6. 725234 6. 727808 6. 81402 6. 722179  
11718374\_ 6. 94929 6. 918517 6. 928376 7. 601155 7. 586522 7. 59629  
11718375\_ 7. 253769 7. 289327 7. 24205 7. 915718 7. 91975 7. 854453  
11718376\_ 8. 409439 8. 398722 8. 389431 8. 270638 8. 257479 8. 298557  
11718377\_ 6. 811865 6. 880534 6. 971486 6. 699321 6. 639925 6. 792183  
11718378\_ 6. 954614 6. 829676 6. 947129 6. 850793 6. 790012 6. 794831  
11718379\_ 7. 267188 7. 154768 7. 209227 7. 034021 7. 055052 7. 056928  
11718380\_ 5. 942487 6. 075249 6. 050364 6. 019163 6. 129387 6. 075186  
11718381\_ 5. 446422 5. 51869 5. 418405 5. 563241 5. 539096 5. 646135  
11718382\_ 8. 55327 8. 491833 8. 509184 8. 364113 8. 319572 8. 303526  
11718383\_ 9. 026862 9. 006867 9. 012901 8. 980485 8. 968712 8. 978927  
11718384\_ 6. 274564 6. 318023 6. 389366 6. 532625 6. 464805 6. 502143  
11718385\_ 7. 569389 7. 501284 7. 482 7. 248393 7. 360038 7. 247032  
11718386\_ 6. 213229 6. 194988 6. 256088 5. 349786 5. 349786 5. 505401  
11718387\_ 8. 464416 8. 446549 8. 455338 8. 106574 8. 099524 8. 178225  
11718388\_ 6. 152802 6. 021356 6. 093192 6. 327905 6. 382419 6. 31385  
11718389\_ 7. 623858 7. 723343 7. 722991 7. 439071 7. 527084 7. 535237  
11718390\_ 7. 714778 7. 724715 7. 750111 7. 519191 7. 509935 7. 600317  
11718391\_ 6. 862894 6. 798148 6. 787511 6. 854703 6. 850919 6. 854881  
11718392\_ 8. 118445 8. 066385 8. 069197 8. 135486 8. 093918 8. 090766  
11718393\_ 8. 134583 8. 204279 8. 231058 8. 617495 8. 52994 8. 575141  
11718394\_ 8. 356426 8. 356028 8. 408192 6. 481046 6. 66672 6. 550581  
11718395\_ 7. 184912 7. 150422 7. 28335 5. 743598 5. 734383 5. 636596  
11718396\_ 7. 090286 7. 080007 7. 171415 5. 794286 5. 759482 5. 871828  
11718397\_ 7. 71933 7. 638049 7. 682833 6. 053562 6. 065933 6. 106863  
11718398\_ 5. 55876 5. 59997 5. 440085 6. 422625 6. 393111 6. 397371  
11718399\_ 8. 77067 8. 692292 8. 784165 9. 662392 9. 601556 9. 571293  
11718400\_ 7. 92657 7. 971541 8. 038247 9. 360348 9. 380725 9. 382487  
11718401\_ 8. 022279 8. 022279 7. 959826 8. 288987 8. 206628 8. 194106  
11718402\_ 9. 885774 9. 829219 9. 886241 9. 7954 9. 811353 9. 758211  
11718403\_ 8. 29012 8. 225963 8. 285426 8. 778566 8. 835382 8. 826657  
11718404\_ 8. 997892 8. 945835 8. 943324 9. 482462 9. 473565 9. 503853  
11718405\_ 9. 339135 9. 368859 9. 399039 9. 466579 9. 348717 9. 339135  
11718406\_ 10. 54836 10. 50911 10. 53574 10. 30953 10. 37404 10. 3463  
11718407\_ 10. 85383 10. 8987 10. 80774 10. 72014 10. 67036 10. 63875  
11718408\_ 11. 01883 10. 99823 11. 00939 10. 7147 10. 74081 10. 71481  
11718409\_ 4. 97008 4. 937752 4. 960622 4. 988019 5. 047055 5. 060724  
11718410\_ 3. 416266 3. 973506 3. 828369 3. 801143 3. 687474 3. 851025  
11718411\_ 9. 803151 9. 749302 9. 811099 9. 862183 9. 925052 9. 84188  
11718412\_ 7. 972701 7. 810651 7. 964198 8. 275211 8. 278204 8. 354931  
11718413\_ 9. 351249 9. 290062 9. 34761 9. 429492 9. 399547 9. 357895



11718414\_ 11. 21942 11. 19223 11. 17917 11. 10038 11. 10358 11. 07183  
11718415\_ 11. 86477 11. 84169 11. 86589 11. 97709 11. 91691 11. 94645  
11718416\_ 2. 38133 2. 30318 2. 429964 2. 454024 2. 615725 2. 569817  
11718417\_ 7. 859449 7. 808382 7. 836166 7. 843366 7. 877928 7. 828158  
11718418\_ 7. 820776 7. 773061 7. 89015 7. 788145 7. 741746 7. 753282  
11718419\_ 5. 157254 5. 306598 4. 996094 5. 230355 5. 212618 5. 184967  
11718420\_ 10. 11785 9. 991054 10. 04018 10. 23127 10. 23372 10. 22132  
11718421\_ 8. 642635 8. 605829 8. 62304 8. 545532 8. 554632 8. 538283  
11718422\_ 9. 804774 9. 771988 9. 824184 9. 365718 9. 360696 9. 361995  
11718423\_ 9. 362298 9. 384585 9. 424252 9. 223932 9. 247344 9. 196831  
11718424\_ 8. 082764 8. 17438 8. 115696 8. 529256 8. 554742 8. 564146  
11718425\_ 8. 295299 8. 199426 8. 306101 8. 653708 8. 677635 8. 7285  
11718426\_ 8. 969001 8. 948839 9. 020401 8. 996798 9. 012656 9. 045296  
11718427\_ 7. 692986 7. 639301 7. 714097 8. 174034 8. 277652 8. 124096  
11718428\_ 7. 23223 7. 315961 7. 096663 7. 206488 7. 289945 7. 226679  
11718429\_ 7. 034444 6. 950255 7. 045041 7. 314698 7. 35243 7. 43378  
11718430\_ 7. 829554 7. 821211 7. 854182 7. 76581 7. 867105 7. 864402  
11718431\_ 7. 783155 7. 992217 7. 736647 8. 114759 8. 134427 8. 121623  
11718432\_ 9. 1255 9. 05698 9. 114297 8. 874719 8. 894521 8. 938916  
11718433\_ 7. 478921 7. 459391 7. 484669 7. 299162 7. 35594 7. 328785  
11718434\_ 4. 966715 4. 982534 4. 910648 4. 914651 4. 888759 4. 867445  
11718435\_ 1. 827092 1. 773429 1. 826475 1. 711639 1. 790513 1. 872976  
11718436\_ 7. 644534 7. 597395 7. 640262 7. 589857 7. 635712 7. 570955  
11718437\_ 6. 620333 6. 68028 6. 734761 6. 494964 6. 424233 6. 501843  
11718438\_ 6. 990338 6. 901021 6. 885204 7. 034029 6. 997189 6. 993688  
11718439\_ 6. 154468 6. 055523 6. 106168 6. 065916 6. 131002 6. 189523  
11718440\_ 7. 909334 7. 926761 7. 964431 7. 560932 7. 654167 7. 604871  
11718441\_ 6. 688764 6. 620658 6. 575781 6. 857635 6. 956076 7. 033242  
11718442\_ 7. 273719 7. 294089 7. 223809 7. 116005 6. 991787 7. 170396  
11718443\_ 6. 485482 6. 698967 6. 547511 6. 554856 6. 675586 6. 625623  
11718444\_ 5. 435437 5. 575867 5. 486129 5. 538664 5. 577292 5. 564242  
11718445\_ 4. 494213 4. 611265 4. 428011 4. 596059 4. 200678 4. 510474  
11718446\_ 4. 959561 5. 244498 4. 928374 5. 557293 5. 435478 5. 42584  
11718447\_ 4. 67248 4. 833817 4. 874375 5. 380649 5. 453793 5. 533679  
11718448\_ 4. 933152 5. 144131 4. 812922 5. 193069 5. 445232 5. 608412  
11718449\_ 7. 753695 7. 787405 7. 79485 7. 724382 7. 754537 7. 773549  
11718450\_ 6. 244666 5. 890147 6. 030532 6. 705136 6. 851822 6. 851822  
11718451\_ 3. 414536 3. 476538 3. 819193 3. 495894 3. 387913 3. 476192  
11718452\_ 3. 380534 3. 362185 3. 473958 3. 601764 3. 548999 3. 932137  
11718453\_ 3. 783906 4. 086313 4. 158764 4. 074683 3. 982632 4. 27328  
11718454\_ 7. 518199 7. 555112 7. 51752 7. 42602 7. 335911 7. 454538  
11718455\_ 7. 017243 7. 146733 7. 178021 6. 94948 6. 9124 6. 978663  
11718456\_ 5. 93441 5. 948913 5. 842265 6. 097927 5. 912989 5. 9412  
11718457\_ 4. 707862 4. 77789 4. 804641 4. 876526 4. 72256 4. 77812  
11718458\_ 7. 352243 7. 300915 7. 350159 7. 461279 7. 400365 7. 435757  
11718459\_ 6. 115113 6. 110288 6. 173889 5. 883048 5. 841435 5. 936867  
11718460\_ 7. 113528 7. 04434 7. 031469 6. 830111 6. 925973 6. 756331  
11718461\_ 8. 187332 8. 118786 8. 256181 7. 811591 7. 86237 7. 909083  
11718462\_ 5. 881912 5. 895832 5. 874289 5. 719166 5. 697328 5. 907475  
11718463\_ 6. 837852 6. 812251 6. 751522 6. 750233 6. 732887 6. 824879  
11718464\_ 3. 69143 3. 710404 3. 839743 5. 085224 4. 984669 5. 261718

11718465\_ 8. 804231 8. 691279 8. 750411 8. 584474 8. 536552 8. 561713  
11718466\_ 6. 093909 6. 11435 6. 080568 6. 013115 6. 026456 6. 000589  
11718467\_ 5. 547883 5. 519923 5. 402603 5. 489099 5. 403426 5. 493726  
11718468\_ 7. 189147 7. 221786 7. 184761 7. 32072 7. 376389 7. 361063  
11718469\_ 9. 325736 9. 319742 9. 33004 9. 184153 9. 127805 9. 091952  
11718470\_ 6. 286647 6. 058786 6. 108739 6. 293969 6. 240996 6. 180378  
11718471\_ 7. 499182 7. 440467 7. 554407 7. 494469 7. 491103 7. 482433  
11718472\_ 7. 472984 7. 262347 7. 308696 7. 320473 7. 310384 7. 279667  
11718473\_ 6. 0481 5. 917786 5. 868579 6. 133042 6. 072119 6. 127676  
11718474\_ 8. 220243 8. 172313 8. 222856 8. 626584 8. 636115 8. 532661  
11718475\_ 8. 205716 8. 124503 8. 125212 8. 633204 8. 612242 8. 599274  
11718476\_ 2. 157103 2. 065363 2. 095256 2. 150454 2. 172311 1. 905789  
11718477\_ 3. 372493 3. 659614 3. 623155 3. 398236 3. 602183 3. 668562  
11718478\_ 4. 932736 4. 943005 4. 9541 5. 113918 5. 211345 5. 053952  
11718479\_ 3. 804747 3. 978538 3. 75249 3. 953058 3. 804747 3. 766397  
11718480\_ 7. 29146 7. 167938 7. 300606 7. 512173 7. 525348 7. 596308  
11718481\_ 4. 966206 5. 074645 5. 196471 4. 155946 4. 178527 4. 326433  
11718482\_ 6. 061392 6. 065265 6. 149457 8. 128364 8. 15523 8. 146879  
11718483\_ 8. 365559 8. 30713 8. 335389 10. 54495 10. 49362 10. 37854  
11718484\_ 8. 93023 8. 903829 8. 902257 9. 466916 9. 551113 9. 507246  
11718485\_ 9. 891931 9. 836513 9. 947185 9. 787814 9. 78865 9. 783669  
11718486\_ 10. 06257 10. 04575 10. 09021 10. 04136 9. 987797 9. 995698  
11718487\_ 10. 20947 10. 20403 10. 17538 10. 11874 10. 11565 10. 10337  
11718488\_ 6. 798366 6. 760934 6. 774726 7. 130481 7. 168651 7. 205043  
11718489\_ 7. 006787 6. 992452 6. 952604 7. 387782 7. 303694 7. 302122  
11718490\_ 9. 51748 9. 497998 9. 514554 9. 841231 9. 819124 9. 776299  
11718491\_ 9. 336867 9. 248429 9. 219809 9. 667741 9. 605631 9. 520057  
11718492\_ 3. 219355 3. 243104 3. 286611 3. 338438 3. 315949 3. 196172  
11718493\_ 3. 705625 3. 87053 3. 803667 3. 875098 3. 803703 3. 879309  
11718494\_ 5. 53174 5. 505884 5. 643713 5. 826004 5. 677193 5. 745526  
11718495\_ 10. 33785 10. 2657 10. 33428 10. 26265 10. 26893 10. 26377  
11718496\_ 7. 276702 7. 277493 7. 307495 7. 658176 7. 602959 7. 632589  
11718497\_ 6. 750754 6. 655758 6. 807291 6. 738478 6. 726709 6. 642815  
11718498\_ 9. 225303 9. 16514 9. 175205 9. 255961 9. 265387 9. 305777  
11718499\_ 9. 194193 9. 102938 9. 179301 9. 211806 9. 26945 9. 224072  
11718500\_ 6. 937908 6. 963009 7. 007439 6. 660519 6. 772755 6. 747384  
11718501\_ 10. 61641 10. 61582 10. 61187 10. 19246 10. 17557 10. 14595  
11718502\_ 6. 721274 6. 543806 6. 598892 6. 537287 6. 603524 6. 615049  
11718503\_ 8. 670793 8. 699629 8. 688456 7. 770776 7. 767082 7. 786327  
11718504\_ 8. 919989 8. 792232 8. 87308 9. 185034 9. 220758 9. 123238  
11718505\_ 9. 862602 9. 810895 9. 803696 9. 849159 9. 811902 9. 785717  
11718506\_ 4. 836769 4. 851795 4. 802039 4. 944755 4. 932676 4. 891739  
11718507\_ 9. 93161 9. 861194 9. 908568 9. 961787 9. 982184 9. 941653  
11718508\_ 5. 757432 5. 648801 5. 584813 5. 745821 5. 694478 5. 565102  
11718509\_ 7. 842319 7. 800868 7. 82173 8. 399385 8. 420316 8. 411912  
11718510\_ 5. 637699 5. 732315 5. 870242 6. 265866 6. 31746 6. 026562  
11718511\_ 6. 876668 6. 977403 6. 75985 7. 532708 7. 492775 7. 686109  
11718512\_ 6. 718683 6. 588663 6. 597965 6. 755063 6. 864171 6. 83385  
11718513\_ 6. 734197 6. 623903 6. 685048 6. 7446 6. 831121 6. 805142  
11718514\_ 9. 733822 9. 659392 9. 736874 9. 19173 9. 162655 9. 254154  
11718515\_ 5. 365904 5. 448607 5. 418215 5. 38353 5. 369558 5. 38464

11718516\_ 8. 478446 8. 407492 8. 171994 9. 392209 9. 253257 9. 182701  
11718517\_ 8. 745425 8. 683819 8. 79246 9. 452034 9. 533279 9. 469985  
11718518\_ 9. 871207 9. 803219 9. 838014 9. 593208 9. 559034 9. 565148  
11718519\_ 5. 663071 5. 41809 5. 480966 5. 765876 5. 857975 5. 976252  
11718520\_ 6. 585559 6. 431749 6. 535348 6. 860494 6. 902896 6. 862244  
11718521\_ 8. 200262 8. 134359 8. 138428 8. 176229 8. 139079 8. 173281  
11718522\_ 7. 414037 7. 480233 7. 468618 6. 982687 7. 084235 6. 936346  
11718523\_ 8. 46246 8. 362034 8. 435732 8. 19532 8. 20442 8. 329662  
11718524\_ 10. 17701 10. 12828 10. 15525 10. 09786 10. 11883 10. 11032  
11718525\_ 10. 00981 9. 932235 9. 986548 9. 93072 9. 932293 9. 95748  
11718526\_ 4. 342327 4. 284938 4. 404877 4. 400044 4. 472709 4. 472021  
11718527\_ 5. 895139 6. 090805 5. 845365 6. 348006 6. 222296 6. 317924  
11718528\_ 5. 810401 5. 761171 5. 937546 6. 679324 6. 859154 6. 867523  
11718529\_ 7. 335346 7. 357922 7. 291509 7. 601543 7. 58032 7. 552533  
11718530\_ 6. 310991 6. 176441 6. 243969 6. 415905 6. 385528 6. 396388  
11718531\_ 9. 032899 8. 963465 9. 023223 9. 31566 9. 355524 9. 385967  
11718532\_ 6. 654872 6. 637474 6. 645554 6. 665726 6. 701979 6. 831742  
11718533\_ 6. 959413 7. 00216 7. 083146 6. 715975 6. 630816 6. 776733  
11718534\_ 9. 646205 9. 572799 9. 613945 9. 268469 9. 285776 9. 250055  
11718535\_ 8. 457296 8. 462849 8. 434638 8. 368083 8. 369939 8. 381068  
11718536\_ 8. 532371 8. 543137 8. 480434 8. 427377 8. 39961 8. 408322  
11718537\_ 6. 49759 6. 431763 6. 541776 6. 819042 6. 88231 6. 876456  
11718538\_ 7. 485593 7. 424101 7. 427877 7. 942783 7. 892357 7. 872076  
11718539\_ 5. 910552 5. 819471 5. 95406 5. 996126 6. 035764 6. 150051  
11718540\_ 8. 378007 8. 348706 8. 415403 8. 226526 8. 240108 8. 196781  
11718541\_ 3. 600061 3. 725425 3. 745202 4. 062207 3. 820242 4. 027504  
11718542\_ 7. 745533 7. 686344 7. 758396 7. 396071 7. 249836 7. 3907  
11718543\_ 8. 200597 8. 062121 8. 188307 7. 763813 7. 736294 7. 718742  
11718544\_ 8. 00886 7. 868277 8. 034991 8. 424725 8. 397911 8. 439536  
11718545\_ 5. 734122 5. 661186 5. 678431 5. 785041 5. 683952 5. 732315  
11718546\_ 10. 59953 10. 57074 10. 58933 10. 70508 10. 70239 10. 73165  
11718547\_ 8. 138673 8. 135696 8. 138327 8. 390332 8. 368636 8. 338288  
11718548\_ 9. 409435 9. 349542 9. 383399 9. 565255 9. 63472 9. 625257  
11718549\_ 10. 88071 10. 86206 10. 85102 10. 88905 10. 85298 10. 91685  
11718550\_ 8. 880099 8. 887164 8. 957239 8. 604123 8. 623863 8. 58629  
11718551\_ 7. 275675 7. 1894 7. 22842 7. 205841 7. 244081 7. 262879  
11718552\_ 7. 59028 7. 509102 7. 466497 7. 829593 7. 873897 7. 780545  
11718553\_ 5. 430769 5. 573111 5. 406976 4. 95759 4. 767374 4. 92849  
11718554\_ 6. 7367 6. 650548 6. 605032 6. 97721 6. 939381 6. 981648  
11718555\_ 5. 048366 4. 985211 4. 984669 4. 914651 4. 983583 4. 985754  
11718556\_ 8. 984722 8. 920927 8. 962885 8. 987724 8. 955635 8. 997563  
11718557\_ 4. 651442 4. 50146 4. 445508 4. 371296 4. 266646 4. 162677  
11718558\_ 7. 400837 7. 346784 7. 343385 7. 248621 7. 242163 7. 369261  
11718559\_ 8. 310747 8. 231403 8. 275614 7. 551603 7. 638823 7. 616357  
11718560\_ 8. 044916 7. 998092 8. 008368 8. 272581 8. 231997 8. 262064  
11718561\_ 6. 566426 6. 539861 6. 606815 6. 310473 6. 226089 6. 304689  
11718562\_ 6. 433724 6. 440823 6. 472766 6. 072823 6. 10901 6. 177534  
11718563\_ 8. 968172 8. 99326 8. 939075 8. 352711 8. 393727 8. 252642  
11718564\_ 4. 602371 4. 678572 4. 638776 4. 736759 4. 832216 4. 613338  
11718565\_ 5. 755605 5. 657665 5. 531014 5. 507816 5. 521406 5. 339011  
11718566\_ 7. 402625 7. 379075 7. 442197 7. 184826 7. 184826 7. 275572

11718567\_ 6. 025952 6. 203508 6. 085705 6. 051914 6. 122294 6. 065853  
11718568\_ 6. 206103 5. 905581 6. 12599 5. 808641 5. 774692 5. 796645  
11718569\_ 6. 606669 6. 486712 6. 53455 6. 689127 6. 704494 6. 680838  
11718570\_ 5. 209259 5. 319295 5. 334143 5. 43314 5. 354328 5. 652165  
11718571\_ 7. 504094 7. 524829 7. 450963 7. 691086 7. 716055 7. 688377  
11718572\_ 10. 86201 10. 85551 10. 89317 11. 09901 11. 08812 11. 08977  
11718573\_ 10. 65583 10. 70643 10. 65969 10. 76078 10. 72777 10. 67023  
11718574\_ 8. 082097 7. 979807 8. 033787 8. 557764 8. 535716 8. 587497  
11718575\_ 11. 62467 11. 59025 11. 63034 11. 63934 11. 69874 11. 62526  
11718576\_ 8. 903717 8. 848718 8. 723682 8. 630442 8. 61187 8. 57489  
11718577\_ 9. 130226 9. 126875 9. 103712 9. 130987 9. 110113 9. 067104  
11718578\_ 8. 71461 8. 636162 8. 668367 8. 556099 8. 551991 8. 502221  
11718579\_ 5. 604312 5. 694641 5. 544726 5. 619822 5. 613857 5. 674128  
11718580\_ 9. 151851 9. 07916 9. 1077 9. 052414 9. 01229 9. 03175  
11718581\_ 8. 471655 8. 3945 8. 510117 8. 01233 8. 044367 8. 047121  
11718582\_ 11. 17906 11. 13549 11. 15764 11. 2145 11. 23942 11. 21159  
11718583\_ 10. 32716 10. 28578 10. 32752 10. 38235 10. 36949 10. 3581  
11718584\_ 6. 489349 6. 651194 6. 576816 6. 504655 6. 451945 6. 404696  
11718585\_ 6. 74224 6. 724438 6. 798621 6. 718114 6. 687242 6. 635901  
11718586\_ 8. 723756 8. 725501 8. 757096 8. 742872 8. 789664 8. 777239  
11718587\_ 8. 657158 8. 615992 8. 656549 8. 730987 8. 715444 8. 717715  
11718588\_ 4. 574277 4. 663947 4. 708729 4. 902343 4. 759715 5. 13119  
11718589\_ 6. 655772 6. 513252 6. 631789 6. 765742 6. 752505 6. 744829  
11718590\_ 7. 021761 6. 887455 6. 978766 6. 998006 7. 072454 6. 994234  
11718591\_ 7. 303617 7. 392092 7. 338321 8. 020255 8. 070348 8. 066827  
11718592\_ 11. 37683 11. 46147 11. 34298 11. 65479 11. 56983 11. 46007  
11718593\_ 10. 86581 10. 87191 10. 87654 11. 15491 11. 1568 11. 19624  
11718594\_ 9. 713345 9. 692853 9. 698277 8. 939565 9. 014126 8. 932389  
11718595\_ 12. 73964 12. 70381 12. 72176 12. 67778 12. 71102 12. 73841  
11718596\_ 8. 708319 8. 664191 8. 717303 8. 630169 8. 716058 8. 608872  
11718597\_ 8. 796355 8. 698516 8. 770662 8. 291686 8. 391994 8. 273799  
11718598\_ 8. 727764 8. 674543 8. 666571 8. 349027 8. 482364 8. 4419  
11718599\_ 4. 108592 4. 203343 4. 064434 4. 402751 4. 426593 4. 402329  
11718600\_ 7. 322722 7. 289107 7. 393364 7. 859208 7. 874439 7. 92314  
11718601\_ 8. 156459 8. 078561 8. 06817 7. 898823 7. 882039 7. 956343  
11718602\_ 5. 736358 5. 786968 5. 718859 5. 741816 5. 777301 5. 755702  
11718603\_ 4. 454285 4. 454285 4. 623271 4. 598809 4. 347179 4. 349496  
11718604\_ 6. 940018 6. 634729 6. 816472 6. 57574 6. 509525 6. 713673  
11718605\_ 4. 046459 4. 190254 4. 226521 3. 730283 3. 767576 3. 594573  
11718606\_ 7. 671943 7. 627285 7. 668818 7. 369604 7. 429264 7. 3201  
11718607\_ 8. 520256 8. 535128 8. 52876 8. 276323 8. 31353 8. 17152  
11718608\_ 6. 526055 6. 590221 6. 501506 6. 379555 6. 322129 6. 448786  
11718609\_ 9. 478423 9. 418545 9. 51133 9. 400926 9. 399291 9. 42835  
11718610\_ 7. 617116 7. 560583 7. 687854 6. 998609 6. 941347 7. 100417  
11718611\_ 5. 352247 5. 517196 5. 409906 5. 349897 5. 36323 5. 392326  
11718612\_ 7. 320541 7. 310944 7. 263614 7. 351631 7. 333856 7. 224531  
11718613\_ 5. 878927 6. 011427 5. 834207 6. 122708 5. 999078 6. 010052  
11718614\_ 8. 393727 8. 33496 8. 388914 8. 051028 8. 110172 8. 102401  
11718615\_ 8. 688665 8. 640877 8. 759451 8. 409826 8. 403616 8. 412396  
11718616\_ 8. 905484 8. 850314 8. 859684 8. 904204 8. 791396 8. 920746  
11718617\_ 3. 511109 3. 564297 3. 558776 3. 644052 3. 643976 3. 669911

11718618\_ 3. 52615 3. 58361 3. 44777 3. 707438 3. 677542 3. 58361  
11718619\_ 3. 729485 4. 014764 4. 175688 4. 303969 4. 351035 4. 314105  
11718620\_ 6. 418458 6. 45468 6. 332818 7. 137123 7. 054186 7. 109055  
11718621\_ 10. 28807 10. 21674 10. 2425 10. 0133 10. 01443 9. 992977  
11718622\_ 7. 905124 7. 788284 7. 750849 8. 155397 8. 083201 8. 190984  
11718623\_ 4. 349281 4. 687525 4. 556084 4. 900851 4. 700243 4. 807044  
11718624\_ 3. 293428 3. 447308 3. 484648 4. 04535 3. 724903 3. 465552  
11718625\_ 10. 82563 10. 82228 10. 83758 10. 79956 10. 77987 10. 75629  
11718626\_ 6. 705384 6. 804439 6. 815156 6. 831736 6. 804679 6. 795219  
11718627\_ 5. 894697 5. 789947 5. 909874 5. 881546 5. 916304 5. 866053  
11718628\_ 6. 104642 6. 251421 6. 12922 6. 166616 6. 266933 6. 230127  
11718629\_ 6. 889539 6. 998064 6. 940586 7. 071213 7. 04506 7. 135119  
11718630\_ 6. 025952 5. 795617 5. 817395 6. 376956 6. 142432 6. 421086  
11718631\_ 8. 47976 8. 440703 8. 474444 7. 522062 7. 577414 7. 607283  
11718632\_ 8. 124223 8. 172919 8. 186479 8. 287223 8. 246382 8. 305279  
11718633\_ 7. 299162 7. 171502 7. 239473 7. 157559 7. 146743 7. 218667  
11718634\_ 8. 072882 8. 047438 8. 097019 8. 255184 8. 23583 8. 23543  
11718635\_ 8. 993642 8. 980655 9. 001818 9. 202867 9. 132285 9. 217703  
11718636\_ 7. 811134 7. 767444 7. 800266 7. 187944 7. 149835 7. 171265  
11718637\_ 8. 578394 8. 596387 8. 516337 7. 915502 7. 876826 7. 878676  
11718638\_ 8. 390743 8. 393727 8. 365026 8. 812828 8. 783654 8. 749853  
11718639\_ 4. 818441 4. 75524 5. 205654 4. 888838 5. 107701 4. 868021  
11718640\_ 7. 745932 7. 714909 7. 730153 8. 245259 8. 288272 8. 204391  
11718641\_ 6. 966217 7. 007293 6. 919213 6. 939776 6. 973128 6. 998635  
11718642\_ 8. 665848 8. 728061 8. 651034 8. 920786 8. 879547 8. 827793  
11718643\_ 6. 225935 6. 298722 6. 33499 6. 526374 6. 360262 6. 104355  
11718644\_ 7. 658739 7. 600823 7. 648271 7. 488384 7. 504962 7. 461899  
11718645\_ 7. 800595 7. 741629 7. 858042 7. 629368 7. 693831 7. 682004  
11718646\_ 9. 43215 9. 444087 9. 441788 9. 508531 9. 511413 9. 492845  
11718647\_ 6. 24163 6. 3273 6. 386658 6. 577125 6. 518558 6. 680318  
11718648\_ 7. 335346 7. 327341 7. 311325 7. 775783 7. 708812 7. 676085  
11718649\_ 7. 788075 7. 780139 7. 765856 8. 212107 8. 151859 8. 076009  
11718650\_ 4. 820057 4. 603429 4. 854594 4. 85081 4. 978685 4. 885499  
11718651\_ 4. 80777 4. 916779 4. 816853 4. 83619 4. 823946 4. 856182  
11718652\_ 5. 454903 5. 566374 5. 431053 5. 551765 5. 713403 5. 511599  
11718653\_ 6. 796799 6. 650855 6. 82686 6. 304067 6. 285513 6. 363237  
11718654\_ 8. 750026 8. 680474 8. 777002 8. 472665 8. 437586 8. 438179  
11718655\_ 11. 25424 11. 2488 11. 24063 11. 28897 11. 2563 11. 25357  
11718656\_ 9. 337401 9. 317188 9. 329616 9. 728949 9. 653433 9. 728957  
11718657\_ 10. 1795 10. 22351 10. 21858 9. 97565 9. 997908 9. 983077  
11718658\_ 5. 544167 5. 309674 5. 31955 5. 496264 5. 521343 5. 398499  
11718659\_ 7. 627822 7. 637117 7. 637117 7. 632559 7. 668979 7. 59147  
11718660\_ 8. 706837 8. 691145 8. 737287 8. 652389 8. 688648 8. 620202  
11718661\_ 8. 552937 8. 584141 8. 599295 8. 411449 8. 512072 8. 425685  
11718662\_ 8. 848322 8. 738161 8. 789617 8. 727804 8. 77449 8. 736893  
11718663\_ 11. 62118 11. 65382 11. 59514 11. 64185 11. 52508 11. 52983  
11718664\_ 4. 886254 4. 856617 4. 909355 5. 260621 5. 039463 5. 35245  
11718665\_ 9. 667366 9. 617813 9. 660274 9. 84658 9. 8208 9. 809325  
11718666\_ 11. 11408 11. 07335 11. 12463 11. 23986 11. 25238 11. 24326  
11718667\_ 10. 57569 10. 58049 10. 58257 10. 63661 10. 63344 10. 56891  
11718668\_ 5. 015854 4. 734073 5. 112742 5. 365641 5. 475326 5. 363812

11718669\_ 5. 156303 4. 783024 5. 149506 5. 415087 5. 542852 5. 502342  
11718670\_ 5. 633312 5. 542706 5. 734246 6. 099444 5. 972711 6. 03019  
11718671\_ 8. 395017 8. 253897 8. 334666 8. 313313 8. 389502 8. 440104  
11718672\_ 8. 179482 8. 136331 8. 173236 8. 148111 8. 197379 8. 118435  
11718673\_ 9. 061619 9. 012144 9. 056408 8. 406307 8. 370598 8. 442782  
11718674\_ 7. 53158 7. 558383 7. 458678 6. 574202 6. 526095 6. 720517  
11718675\_ 9. 528946 9. 476453 9. 529873 8. 530922 8. 570904 8. 573827  
11718676\_ 9. 054488 8. 953864 8. 980461 8. 124715 8. 056997 8. 219006  
11718677\_ 8. 924646 8. 813006 8. 919149 8. 139665 8. 105745 8. 135277  
11718678\_ 8. 375163 8. 304372 8. 387142 7. 805139 7. 832596 7. 905836  
11718679\_ 6. 536494 6. 648585 6. 474848 6. 828621 6. 792659 6. 857711  
11718680\_ 9. 552696 9. 51197 9. 578686 9. 075507 9. 07139 9. 075507  
11718681\_ 5. 744053 5. 720844 5. 734663 5. 643713 5. 554436 5. 411806  
11718682\_ 2. 268753 2. 301796 2. 240505 2. 209391 2. 394202 2. 207864  
11718683\_ 3. 265491 3. 573658 3. 272839 3. 034641 3. 331179 3. 272839  
11718684\_ 11. 24035 11. 21035 11. 23449 11. 37182 11. 35518 11. 33759  
11718685\_ 7. 771446 7. 659692 7. 861329 7. 32192 7. 317669 7. 296816  
11718686\_ 8. 08305 8. 058894 8. 115451 7. 695928 7. 714028 7. 616922  
11718687\_ 5. 520783 5. 584813 5. 520783 5. 481228 5. 505205 5. 478169  
11718688\_ 7. 645194 7. 669829 7. 625725 7. 622946 7. 689346 7. 641236  
11718689\_ 6. 80111 6. 773562 6. 811165 6. 862894 6. 934073 6. 948743  
11718690\_ 8. 258545 8. 264295 8. 291399 8. 111412 8. 066959 8. 116729  
11718691\_ 6. 851534 6. 700805 6. 715637 6. 491351 6. 651149 6. 605171  
11718692\_ 7. 978991 7. 910634 7. 931153 7. 632981 7. 807688 7. 693684  
11718693\_ 6. 668309 6. 599695 6. 655275 6. 872514 6. 950321 6. 783239  
11718694\_ 6. 859991 6. 896737 6. 934527 6. 898939 7. 060814 7. 119005  
11718695\_ 8. 101652 8. 016781 8. 058926 8. 250067 8. 33725 8. 279679  
11718696\_ 8. 159991 7. 986791 8. 040831 8. 273197 8. 335313 8. 345666  
11718697\_ 7. 434587 7. 45117 7. 544282 7. 251332 7. 306617 7. 256762  
11718698\_ 7. 519962 7. 506035 7. 511713 7. 330742 7. 212651 7. 398558  
11718699\_ 6. 720847 6. 540127 6. 538304 6. 956086 7. 006276 7. 021822  
11718700\_ 6. 18362 6. 317046 6. 454634 6. 637944 6. 679449 6. 710622  
11718701\_ 6. 474775 6. 412133 6. 389366 6. 397946 6. 337915 6. 364387  
11718702\_ 7. 895484 8. 026746 7. 930229 7. 788568 7. 741433 7. 822887  
11718703\_ 7. 852564 7. 797366 7. 903277 8. 045684 8. 032801 8. 015219  
11718704\_ 9. 126399 9. 018186 9. 171531 8. 421343 8. 377563 8. 379732  
11718705\_ 7. 834826 7. 895926 7. 862145 8. 881557 8. 718084 8. 72332  
11718706\_ 7. 42214 7. 251627 7. 466901 8. 053556 8. 106294 8. 017501  
11718707\_ 6. 924241 6. 858538 6. 914831 6. 268228 6. 211191 6. 307601  
11718708\_ 8. 082941 8. 105626 8. 076071 8. 072474 8. 137255 8. 068576  
11718709\_ 7. 419358 7. 39333 7. 446392 7. 506547 7. 55199 7. 405888  
11718710\_ 8. 220324 8. 206605 8. 217867 7. 919642 7. 949306 7. 984596  
11718711\_ 8. 180513 8. 311635 8. 313264 8. 06257 8. 129787 8. 15157  
11718712\_ 7. 936455 7. 910076 8. 00113 7. 845514 7. 840667 7. 916845  
11718713\_ 8. 837413 8. 743141 8. 810983 8. 765253 8. 771 8. 75654  
11718714\_ 6. 6934 6. 608097 6. 563839 6. 69773 6. 767216 6. 735704  
11718715\_ 6. 243033 6. 296691 6. 230381 6. 368165 6. 441862 6. 403637  
11718716\_ 7. 239949 7. 232407 7. 132118 7. 262363 7. 313044 7. 337111  
11718717\_ 6. 554512 6. 686431 6. 409912 6. 802911 6. 711885 6. 612486  
11718718\_ 7. 397774 7. 405571 7. 500669 8. 046362 8. 071788 8. 114042  
11718719\_ 7. 359291 7. 34625 7. 342026 8. 254317 8. 297456 8. 342902

11718720\_ 9.445154 9.387347 9.479079 9.792642 9.698106 9.698162  
11718721\_ 9.080609 9.043528 9.110728 9.308503 9.282267 9.345645  
11718722\_ 4.918675 4.911214 4.984669 4.946588 5.085088 4.887541  
11718723\_ 8.174949 8.091611 8.259517 6.769715 6.900349 6.975221  
11718724\_ 7.116786 7.199631 7.09127 5.728718 5.854737 5.852732  
11718725\_ 7.212454 7.177086 7.261404 6.804162 6.652922 6.701549  
11718726\_ 7.720012 7.550804 7.642977 7.042932 6.953792 7.095428  
11718727\_ 7.124581 7.152164 7.212253 6.858803 6.886887 6.834707  
11718728\_ 9.922461 9.813338 9.84422 9.372351 9.321915 9.368859  
11718729\_ 7.389247 7.480561 7.507712 7.476589 7.459386 7.432891  
11718730\_ 7.17714 7.244662 7.216428 7.122483 7.09798 7.152  
11718731\_ 5.314559 5.358026 5.318407 5.46866 5.484529 5.580193  
11718732\_ 6.159049 6.237809 6.07844 6.231363 6.254515 6.246359  
11718733\_ 5.808835 5.891979 5.863539 5.959687 6.17439 6.012736  
11718734\_ 9.36002 9.340083 9.393534 9.312484 9.321553 9.312308  
11718735\_ 8.806834 8.841377 8.817381 8.246357 8.235508 8.262048  
11718736\_ 7.923081 8.180483 8.219203 7.523523 7.552413 7.449795  
11718737\_ 5.933577 5.792846 5.820052 5.749529 5.748155 5.709436  
11718738\_ 6.743742 6.675613 6.791754 6.315551 6.406449 6.407218  
11718739\_ 5.346715 5.537987 5.390776 5.622202 5.487779 5.568233  
11718740\_ 6.44428 6.416371 6.594737 6.386248 6.397946 6.469872  
11718741\_ 5.461369 5.321382 5.333723 5.473101 5.547817 5.35628  
11718742\_ 9.87404 9.873806 9.88943 9.709116 9.744797 9.657818  
11718743\_ 5.442778 5.373992 5.322976 5.458251 5.631137 5.426189  
11718744\_ 3.254134 3.189751 3.071863 2.994193 3.13641 3.172933  
11718745\_ 5.069429 4.756322 5.042235 5.228556 5.355617 5.187423  
11718746\_ 6.638336 6.576779 6.617857 6.710783 6.733085 6.707308  
11718747\_ 7.448108 7.399042 7.377784 8.569115 8.555824 8.562912  
11718748\_ 10.43184 10.53267 10.34737 10.33074 10.357 10.4114  
11718749\_ 5.621175 5.839756 5.921262 5.954081 6.062705 6.062969  
11718750\_ 8.017531 7.91286 8.017317 7.908865 7.924307 7.956956  
11718751\_ 6.661231 6.648585 6.744477 6.662727 6.743803 6.766523  
11718752\_ 7.26959 7.203608 7.246955 7.13859 7.129334 7.007757  
11718753\_ 6.370675 6.515621 6.323377 6.401157 6.449358 6.416077  
11718754\_ 6.127504 6.046199 6.162425 6.084537 6.323801 6.30747  
11718755\_ 7.805837 7.808454 7.902368 7.273761 7.325831 7.239765  
11718756\_ 5.310739 5.175341 5.430819 5.685495 5.644114 5.969512  
11718757\_ 10.86866 10.85184 10.79604 10.9677 10.93435 10.93868  
11718758\_ 8.401528 8.534588 8.524033 8.547786 8.626652 8.472646  
11718759\_ 9.992173 9.930396 10.02676 9.960873 9.949502 9.974968  
11718760\_ 6.49203 6.407277 6.516977 6.850646 6.759514 6.798915  
11718761\_ 5.606587 5.535984 5.565049 6.727853 6.75229 6.787172  
11718762\_ 7.81851 7.747967 7.811391 7.745921 7.641053 7.763997  
11718763\_ 10.8872 10.87627 10.82308 10.88118 10.86799 10.86409  
11718764\_ 10.56126 10.516 10.543 10.64991 10.72904 10.61172  
11718765\_ 9.596185 9.557569 9.596771 9.800695 9.803078 9.850727  
11718766\_ 8.533025 8.493423 8.478923 8.597302 8.602371 8.524849  
11718767\_ 10.52511 10.48586 10.43065 10.30862 10.21453 10.21517  
11718768\_ 8.856106 8.784768 8.815367 8.513708 8.505854 8.497993  
11718769\_ 5.05686 4.9694 4.90811 5.396879 5.391963 5.558671  
11718770\_ 9.997944 9.976179 9.992829 10.01532 10.00718 9.994308

11718771\_ 9.998029 9.967555 10.00288 10.02716 9.97942 10.00344  
11718772\_ 7.269259 7.275798 7.329324 8.509281 8.391358 8.450658  
11718773\_ 8.19181 8.115034 8.122858 9.31273 9.298687 9.260486  
11718774\_ 8.658121 8.639969 8.648549 9.502848 9.522544 9.474366  
11718775\_ 8.808518 8.742615 8.853686 8.68362 8.696731 8.711937  
11718776\_ 9.546466 9.557747 9.542252 9.431289 9.505343 9.447578  
11718777\_ 9.346581 9.353369 9.34751 9.240569 9.253761 9.229075  
11718778\_ 9.180726 9.110011 9.176576 9.357071 9.299188 9.288116  
11718779\_ 7.746744 7.838666 7.832897 7.935969 7.948332 7.92739  
11718780\_ 6.192682 6.186052 6.219072 5.893986 5.670028 5.787968  
11718781\_ 7.36343 7.281945 7.389533 6.875461 6.803453 6.94409  
11718782\_ 8.260163 8.237585 8.262071 8.59911 8.594905 8.572318  
11718783\_ 5.186939 5.100963 5.058533 5.004824 5.205696 5.105839  
11718784\_ 3.919794 4.274477 4.134463 4.141339 4.447186 4.275543  
11718785\_ 7.561005 7.492074 7.527909 7.623176 7.588375 7.621767  
11718786\_ 7.126419 7.153408 7.237975 7.456959 7.516255 7.505738  
11718787\_ 7.004798 7.042244 7.023455 7.488726 7.530461 7.441441  
11718788\_ 7.978869 7.951088 7.974159 7.828408 7.848638 7.874989  
11718789\_ 7.520569 7.486083 7.546142 7.170836 7.150208 7.184625  
11718790\_ 6.031869 5.759253 5.984362 6.274127 6.226314 6.304747  
11718791\_ 8.224647 8.166485 8.217471 8.15183 8.208617 8.196513  
11718792\_ 6.628678 6.478339 6.513929 6.51078 6.616784 6.576823  
11718793\_ 8.059768 7.9539 8.072311 8.419395 8.42581 8.413421  
11718794\_ 7.030243 6.950255 6.999819 7.688673 7.689431 7.719426  
11718795\_ 7.042517 7.170632 7.104699 7.218327 7.289973 7.308741  
11718796\_ 6.079669 6.191067 6.070071 6.463703 6.353705 6.450885  
11718797\_ 6.845428 6.806294 6.81125 7.461988 7.474342 7.547264  
11718798\_ 4.267476 4.263776 4.110872 4.279702 4.236187 4.416202  
11718799\_ 6.497411 6.434141 6.568977 6.574397 6.662009 6.666873  
11718800\_ 5.442778 5.521206 5.354058 5.518278 5.558606 5.533133  
11718801\_ 6.001201 5.957954 5.868334 6.159771 6.262714 6.244149  
11718802\_ 7.488301 7.480305 7.460039 7.653745 7.687202 7.704155  
11718803\_ 8.39801 8.386328 8.318422 8.340333 8.331716 8.33865  
11718804\_ 10.0484 10.07161 10.05732 10.03968 9.961601 9.988061  
11718805\_ 8.010662 7.926761 8.055036 7.797511 7.854912 7.876818  
11718806\_ 9.022354 8.934001 9.077821 9.119966 9.068613 9.142888  
11718807\_ 4.275543 4.415016 4.436882 4.396121 4.370649 4.396444  
11718808\_ 7.531677 7.500939 7.524137 7.315752 7.35106 7.375616  
11718809\_ 5.851161 5.897386 5.882141 5.312397 5.262805 5.381741  
11718810\_ 7.007439 6.724161 6.961577 6.197476 6.241491 6.300643  
11718811\_ 8.462823 8.425545 8.52548 7.874553 7.791929 7.952659  
11718812\_ 7.916663 7.773757 7.852625 7.36919 7.514489 7.577947  
11718813\_ 7.892197 8.062089 7.857462 8.192976 8.112061 8.236745  
11718814\_ 7.96608 8.138075 7.959692 8.158147 8.19005 8.233708  
11718815\_ 4.237138 4.540612 4.295797 4.625645 4.35342 4.637476  
11718816\_ 6.445895 6.450531 6.240876 6.536956 6.516656 6.560648  
11718817\_ 8.345072 8.269734 8.408019 8.291854 8.300291 8.26929  
11718818\_ 7.597652 7.526322 7.64866 7.348682 7.354283 7.361896  
11718819\_ 5.520578 5.56745 5.59653 5.039238 5.147286 5.118801  
11718820\_ 7.642703 7.534822 7.560203 7.533084 7.588288 7.601938  
11718821\_ 9.515594 9.486895 9.511413 9.661175 9.624416 9.57437



11718822\_ 5. 644552 5. 59183 5. 590391 5. 714247 5. 783051 5. 590809  
11718823\_ 9. 334526 9. 27764 9. 322293 8. 91934 8. 936366 8. 9061  
11718824\_ 5. 064697 4. 798689 4. 987147 5. 729796 5. 785066 5. 813918  
11718825\_ 6. 548668 6. 460019 6. 474675 6. 665125 6. 663363 6. 596089  
11718826\_ 6. 031799 6. 091935 6. 180348 6. 340369 6. 29732 6. 243378  
11718827\_ 6. 012511 6. 136625 6. 133631 6. 290301 6. 377512 6. 338024  
11718828\_ 8. 72336 8. 646125 8. 651549 8. 594793 8. 622187 8. 632371  
11718829\_ 6. 206839 6. 112421 6. 149949 5. 929547 5. 845696 5. 869534  
11718830\_ 8. 946941 8. 933748 9. 005852 8. 571893 8. 658789 8. 642004  
11718831\_ 9. 903817 9. 86964 9. 895556 9. 903409 9. 923939 9. 908102  
11718832\_ 9. 098518 9. 043228 9. 122573 8. 879172 8. 906662 8. 892841  
11718833\_ 6. 284547 6. 238114 6. 37723 6. 194323 6. 2788 6. 21251  
11718834\_ 5. 846009 5. 889007 5. 864325 5. 775801 6. 041167 5. 859682  
11718835\_ 7. 206006 7. 078542 7. 066036 7. 365751 7. 289973 7. 327021  
11718836\_ 10. 37473 10. 29378 10. 35855 10. 54103 10. 52532 10. 48986  
11718837\_ 10. 67546 10. 6426 10. 66436 10. 70925 10. 76169 10. 70952  
11718838\_ 7. 042517 7. 032927 7. 010635 6. 992708 7. 052458 7. 026324  
11718839\_ 6. 859956 6. 886999 6. 855471 6. 898793 7. 014505 6. 982398  
11718840\_ 9. 941051 9. 966979 9. 992695 9. 637373 9. 620686 9. 613075  
11718841\_ 9. 439128 9. 379643 9. 407741 9. 261281 9. 239433 9. 227322  
11718842\_ 8. 130324 8. 034047 8. 120554 8. 199359 8. 184955 8. 111322  
11718843\_ 10. 43983 10. 42267 10. 41131 10. 45961 10. 4284 10. 4156  
11718844\_ 7. 594474 7. 554202 7. 556039 7. 771799 7. 822491 7. 886769  
11718845\_ 10. 6049 10. 5452 10. 58612 10. 43354 10. 4703 10. 45145  
11718846\_ 8. 840321 8. 806225 8. 827853 8. 41192 8. 361191 8. 373298  
11718847\_ 7. 043679 6. 891645 7. 041395 7. 317737 7. 250305 7. 201154  
11718848\_ 5. 734446 5. 573178 5. 700148 5. 697441 5. 652502 5. 733021  
11718849\_ 5. 372401 5. 387586 5. 305907 5. 357434 5. 483429 5. 412133  
11718850\_ 8. 051728 7. 945424 8. 024895 7. 73934 7. 727912 7. 767011  
11718851\_ 8. 841247 8. 775255 8. 814932 8. 74196 8. 794592 8. 751994  
11718852\_ 9. 184021 9. 219668 9. 201898 9. 302982 9. 284912 9. 23955  
11718853\_ 9. 485505 9. 415665 9. 4634 9. 305207 9. 231471 9. 223185  
11718854\_ 9. 834063 9. 743021 9. 838136 9. 648678 9. 640297 9. 620415  
11718855\_ 10. 47925 10. 46061 10. 45735 10. 47113 10. 49414 10. 48695  
11718856\_ 7. 364281 7. 323742 7. 490984 9. 215925 9. 259024 9. 178149  
11718857\_ 7. 260263 7. 222309 7. 071991 8. 285844 8. 256976 8. 335368  
11718858\_ 5. 862388 6. 069094 5. 901384 6. 705907 6. 636774 6. 561634  
11718859\_ 5. 097115 5. 117365 5. 064445 6. 429695 6. 385538 6. 372289  
11718860\_ 7. 989781 7. 934787 7. 991242 7. 840518 7. 852217 7. 782607  
11718861\_ 4. 278818 4. 40461 4. 243262 4. 216938 4. 039005 4. 131063  
11718862\_ 4. 755787 4. 454209 4. 653919 5. 473938 5. 329543 5. 626541  
11718863\_ 8. 435868 8. 540432 8. 47274 8. 627516 8. 500561 8. 538534  
11718864\_ 9. 115661 9. 012145 9. 102491 9. 14657 9. 13239 9. 173802  
11718865\_ 6. 734428 6. 722485 6. 648059 6. 805268 6. 787375 6. 769764  
11718866\_ 7. 205081 7. 230373 7. 289745 7. 629715 7. 583604 7. 806249  
11718867\_ 8. 174058 8. 135913 8. 097863 8. 374187 8. 344016 8. 309261  
11718868\_ 3. 363973 3. 343912 3. 147385 3. 364793 3. 176179 3. 236175  
11718869\_ 3. 278709 3. 448378 3. 503708 3. 523624 3. 740329 3. 762903  
11718870\_ 6. 61968 6. 928506 6. 709256 6. 754705 6. 689874 6. 85036  
11718871\_ 3. 777908 3. 837016 3. 623336 3. 862069 3. 68522 3. 809923  
11718872\_ 7. 974505 7. 880573 7. 866993 7. 76851 7. 848701 7. 85795

11718873\_ 7. 485289 7. 444631 7. 576083 8. 255792 8. 327156 8. 271081  
11718874\_ 8. 798551 8. 856658 8. 920521 9. 650291 9. 661977 9. 67798  
11718875\_ 7. 15056 7. 111582 7. 114079 7. 455498 7. 477328 7. 517094  
11718876\_ 6. 289138 6. 242756 6. 357889 5. 47623 5. 426098 5. 615814  
11718877\_ 7. 640782 7. 542683 7. 620525 7. 774734 7. 825096 7. 808105  
11718878\_ 5. 349698 5. 536639 5. 168825 6. 076709 5. 934556 6. 17981  
11718879\_ 9. 056882 8. 990563 9. 044277 9. 681203 9. 632045 9. 665482  
11718880\_ 7. 677985 7. 687632 7. 680618 7. 876364 7. 929051 7. 888227  
11718881\_ 9. 148159 9. 069692 9. 121246 9. 094302 9. 151112 9. 028946  
11718882\_ 9. 718857 9. 686498 9. 715827 9. 66561 9. 724367 9. 640213  
11718883\_ 8. 473932 8. 543882 8. 479688 8. 416277 8. 340869 8. 375547  
11718884\_ 9. 77336 9. 720688 9. 724686 9. 48 9. 439562 9. 414675  
11718885\_ 8. 8428 8. 843446 8. 89131 8. 468399 8. 47813 8. 539534  
11718886\_ 9. 119662 9. 19862 9. 094267 9. 624725 9. 467174 9. 377857  
11718887\_ 9. 581247 9. 594359 9. 549614 9. 841237 9. 815631 9. 701567  
11718888\_ 7. 177076 7. 257091 7. 217074 7. 283414 7. 47248 7. 31772  
11718889\_ 6. 95084 6. 89013 6. 898793 6. 881313 6. 872876 6. 879676  
11718890\_ 7. 12719 7. 204691 7. 184888 7. 051857 7. 024029 7. 096414  
11718891\_ 8. 484334 8. 340928 8. 448662 8. 31739 8. 280067 8. 351774  
11718892\_ 7. 941508 7. 852186 7. 835354 7. 81268 7. 880573 7. 779889  
11718893\_ 7. 560665 7. 52888 7. 589926 7. 770489 7. 815474 7. 888763  
11718894\_ 7. 23344 7. 248927 7. 202891 7. 461557 7. 547846 7. 417811  
11718895\_ 8. 059825 7. 9306 8. 012988 8. 23241 8. 256659 8. 223365  
11718896\_ 5. 970973 5. 91029 5. 814465 6. 21313 6. 18008 6. 274364  
11718897\_ 7. 754405 7. 701561 7. 802925 7. 835397 7. 789362 7. 907571  
11718898\_ 7. 911634 7. 916174 7. 890681 8. 040853 8. 047292 7. 970287  
11718899\_ 7. 848592 7. 885751 7. 868277 7. 849566 7. 847199 7. 854532  
11718900\_ 6. 700681 6. 680904 6. 826157 6. 228723 6. 270332 6. 442572  
11718901\_ 7. 137986 6. 887397 7. 175995 6. 441383 6. 351324 6. 460062  
11718902\_ 5. 799651 5. 946596 5. 792734 5. 542429 5. 584813 5. 682139  
11718903\_ 5. 687491 5. 625491 5. 463253 5. 5101 5. 523406 5. 589814  
11718904\_ 2. 488492 2. 384736 2. 748333 2. 262728 2. 596176 2. 327877  
11718905\_ 3. 508892 3. 466728 3. 395418 3. 622644 3. 424224 3. 461837  
11718906\_ 6. 581671 6. 606353 6. 621816 6. 74045 6. 78504 6. 754437  
11718907\_ 6. 86856 6. 789377 6. 926532 7. 03973 7. 108982 7. 152446  
11718908\_ 6. 448378 6. 408923 6. 590851 6. 70228 6. 64601 6. 691622  
11718909\_ 6. 780574 6. 753376 6. 820052 6. 914753 6. 933663 6. 923135  
11718910\_ 5. 9064 5. 970452 5. 851805 6. 137267 6. 110466 6. 106271  
11718911\_ 5. 600406 5. 549298 5. 820052 6. 60553 6. 564481 6. 647433  
11718912\_ 7. 601868 7. 503507 7. 564322 8. 486501 8. 57921 8. 550989  
11718913\_ 7. 116201 7. 198283 7. 119889 8. 441574 8. 388722 8. 407511  
11718914\_ 7. 491337 7. 436888 7. 503017 8. 457372 8. 483106 8. 5065  
11718915\_ 8. 07013 8. 008735 8. 114438 8. 363559 8. 344389 8. 38792  
11718916\_ 6. 447354 6. 326337 6. 422015 6. 571607 6. 545199 6. 614911  
11718917\_ 10. 23361 10. 36349 10. 20843 10. 55898 10. 5541 10. 62658  
11718918\_ 7. 313319 7. 235894 7. 17806 7. 881263 7. 930049 7. 977239  
11718919\_ 4. 609437 4. 695967 4. 874418 4. 920391 4. 96042 4. 737268  
11718920\_ 6. 398824 6. 424467 6. 401985 6. 810091 6. 69532 6. 650284  
11718921\_ 6. 963046 6. 936579 6. 987289 6. 817133 6. 886652 6. 799146  
11718922\_ 5. 643713 5. 661868 5. 601089 5. 614563 5. 676426 5. 619463  
11718923\_ 6. 365101 6. 465873 6. 381345 6. 284658 6. 466034 6. 417769

11718924\_ 9. 268203 9. 253836 9. 200551 9. 29031 9. 258472 9. 296278  
11718925\_ 7. 748088 7. 667044 7. 721878 7. 647593 7. 623883 7. 596689  
11718926\_ 9. 309589 9. 333025 9. 392868 8. 771585 8. 764302 8. 720198  
11718927\_ 9. 276113 9. 226531 9. 304731 8. 752575 8. 653613 8. 773592  
11718928\_ 7. 524377 7. 495373 7. 575829 7. 631747 7. 606769 7. 612498  
11718929\_ 8. 697066 8. 648499 8. 706203 8. 506767 8. 456091 8. 461638  
11718930\_ 8. 259769 8. 225968 8. 250365 8. 094942 8. 073788 8. 120013  
11718931\_ 7. 610199 7. 462068 7. 607098 7. 174876 7. 067371 7. 107455  
11718932\_ 5. 731766 5. 719829 5. 736831 5. 569794 5. 638895 5. 681691  
11718933\_ 4. 476671 4. 453391 4. 359523 4. 453391 4. 508853 4. 469186  
11718934\_ 6. 522839 6. 528498 6. 476788 6. 436675 6. 464623 6. 515826  
11718935\_ 7. 503487 7. 38153 7. 452956 7. 258036 7. 378575 7. 355696  
11718936\_ 7. 174849 7. 051632 7. 17175 7. 450255 7. 421203 7. 446499  
11718937\_ 6. 82003 6. 770883 6. 772141 6. 75296 6. 720117 6. 68301  
11718938\_ 7. 961237 7. 889905 7. 895117 7. 993096 7. 892455 7. 914066  
11718939\_ 7. 520346 7. 497383 7. 46264 6. 162764 6. 088347 6. 172783  
11718940\_ 7. 367038 7. 226592 7. 343964 5. 782409 5. 933976 6. 12998  
11718941\_ 3. 674847 3. 583937 3. 925538 4. 323565 4. 313772 4. 313772  
11718942\_ 8. 355554 8. 34058 8. 289304 8. 736393 8. 791946 8. 818566  
11718943\_ 9. 596802 9. 529746 9. 655762 10. 21957 10. 22758 10. 23806  
11718944\_ 5. 394714 5. 324183 5. 366778 5. 065173 5. 125828 5. 18538  
11718945\_ 5. 731429 5. 724236 5. 750086 5. 51642 5. 696325 5. 651281  
11718946\_ 6. 153881 6. 323021 6. 352201 6. 192345 6. 057279 6. 181209  
11718947\_ 8. 188797 8. 201304 8. 172236 7. 509076 7. 549481 7. 478386  
11718948\_ 7. 968142 7. 805103 7. 947474 7. 714392 7. 713868 7. 722204  
11718949\_ 8. 956259 8. 951249 8. 922834 9. 000182 8. 928146 8. 867717  
11718950\_ 8. 36145 8. 229047 8. 343892 8. 224115 8. 206003 8. 220418  
11718951\_ 8. 192879 8. 088258 8. 139258 7. 413286 7. 408701 7. 530619  
11718952\_ 6. 225513 6. 314137 6. 318829 6. 321461 6. 181001 6. 475085  
11718953\_ 5. 259278 5. 123652 5. 319829 5. 299542 5. 369872 5. 228627  
11718954\_ 4. 375378 4. 414794 4. 360887 4. 229767 4. 35944 4. 396795  
11718955\_ 6. 641827 6. 507172 6. 318829 6. 230069 6. 270923 6. 118838  
11718956\_ 7. 262122 7. 154768 7. 142907 6. 173161 6. 196221 6. 240786  
11718957\_ 7. 19894 7. 04987 7. 189771 6. 12575 6. 22242 6. 134683  
11718958\_ 8. 676644 8. 592511 8. 684703 7. 98024 7. 900581 7. 996266  
11718959\_ 6. 995884 7. 080608 6. 971486 6. 963893 7. 001725 6. 986296  
11718960\_ 7. 520821 7. 482823 7. 521915 7. 909968 7. 868092 7. 917549  
11718961\_ 6. 805142 6. 790518 6. 898793 6. 403684 6. 240479 6. 228055  
11718962\_ 9. 69652 9. 659647 9. 635369 9. 233608 9. 211628 9. 173125  
11718963\_ 8. 154676 8. 061066 8. 102389 8. 314248 8. 291164 8. 309423  
11718964\_ 6. 656852 6. 590294 6. 699615 6. 706135 6. 431192 6. 529372  
11718965\_ 7. 256543 7. 194013 7. 225924 8. 015764 7. 94667 8. 078979  
11718966\_ 9. 740061 9. 6733 9. 742862 9. 388207 9. 376481 9. 457291  
11718967\_ 8. 929194 8. 85965 8. 886665 8. 786915 8. 793086 8. 773729  
11718968\_ 6. 612986 6. 500348 6. 615172 6. 493686 6. 581863 6. 659427  
11718969\_ 7. 597539 7. 572808 7. 513306 7. 791124 7. 751526 7. 889784  
11718970\_ 11. 11106 11. 12224 11. 10186 10. 8975 10. 87772 10. 86219  
11718971\_ 10. 39953 10. 41034 10. 35406 10. 14593 10. 13289 10. 09337  
11718972\_ 6. 138139 6. 279615 6. 389366 6. 403604 6. 379737 6. 339209  
11718973\_ 6. 255726 6. 325446 6. 318829 6. 322945 6. 360165 6. 413331  
11718974\_ 6. 284837 6. 224089 6. 293054 6. 405585 6. 405963 6. 427345

11718975\_ 9. 856982 9. 831161 9. 897556 9. 918281 9. 953799 9. 951419  
11718976\_ 7. 742944 7. 854351 7. 848738 7. 438259 7. 363597 7. 413872  
11718977\_ 10. 12089 10. 13074 10. 15491 10. 06769 9. 982274 9. 89283  
11718978\_ 10. 8974 10. 84284 10. 89074 10. 67543 10. 67535 10. 65146  
11718979\_ 8. 803202 8. 854251 8. 842006 8. 795464 8. 714072 8. 711489  
11718980\_ 6. 436479 6. 341023 6. 513395 7. 05884 7. 04434 7. 106733  
11718981\_ 10. 51543 10. 43484 10. 52769 10. 79549 10. 81298 10. 78169  
11718982\_ 2. 823141 2. 817189 2. 805628 2. 5035 2. 720978 2. 938266  
11718983\_ 2. 78404 2. 717812 2. 760697 2. 731318 2. 643039 2. 658867  
11718984\_ 8. 009334 7. 953143 7. 9499 8. 11805 8. 115451 8. 083024  
11718985\_ 6. 973971 7. 447488 7. 480352 7. 101997 7. 040387 6. 772933  
11718986\_ 7. 578168 7. 53644 7. 575035 7. 45405 7. 484377 7. 409349  
11718987\_ 7. 865297 7. 874439 7. 892766 7. 97192 8. 067236 8. 083649  
11718988\_ 3. 049587 2. 671211 2. 842856 3. 287452 3. 130221 3. 138643  
11718989\_ 8. 803577 8. 800221 8. 772377 8. 822152 8. 793316 8. 813388  
11718990\_ 8. 66548 8. 670198 8. 746915 8. 674254 8. 710944 8. 700851  
11718991\_ 9. 844642 9. 774422 9. 833051 9. 867368 9. 914598 9. 862415  
11718992\_ 6. 941457 7. 100393 7. 004718 7. 539185 7. 561038 7. 429221  
11718993\_ 7. 77223 7. 613654 7. 771417 7. 678138 7. 567807 7. 707038  
11718994\_ 7. 274337 7. 377177 7. 442143 7. 392275 7. 242848 7. 289973  
11718995\_ 8. 728976 8. 612538 8. 694699 8. 48268 8. 422378 8. 496017  
11718996\_ 4. 027331 4. 023736 4. 252641 3. 821948 3. 724008 3. 926356  
11718997\_ 4. 329329 4. 373487 4. 26727 4. 520481 4. 556906 4. 250861  
11718998\_ 8. 658987 8. 645497 8. 672176 9. 921551 9. 818787 9. 7385  
11718999\_ 7. 252434 7. 256573 7. 240819 8. 448434 8. 358743 8. 237208  
11719000\_ 7. 646958 7. 746075 7. 605714 8. 495969 8. 431926 8. 35071  
11719001\_ 8. 882744 8. 855609 8. 883452 9. 060238 9. 075819 9. 071949  
11719002\_ 7. 880283 7. 768472 7. 896647 8. 229979 8. 190021 8. 167344  
11719003\_ 2. 530065 3. 015891 2. 637472 3. 025706 3. 08828 3. 382509  
11719004\_ 8. 789307 8. 721082 8. 773062 8. 587266 8. 59555 8. 630874  
11719005\_ 7. 308582 7. 205001 7. 254194 7. 190427 7. 174876 7. 131997  
11719006\_ 4. 933187 4. 756674 4. 702426 5. 120903 5. 086761 4. 89616  
11719007\_ 7. 674666 7. 603343 7. 709211 7. 777508 7. 777336 7. 801314  
11719008\_ 9. 479957 9. 421284 9. 44843 9. 71602 9. 683894 9. 682002  
11719009\_ 7. 340345 7. 345015 7. 374996 8. 47976 8. 419359 8. 408082  
11719010\_ 8. 569715 8. 528041 8. 615121 8. 451456 8. 481202 8. 455014  
11719011\_ 5. 658476 5. 622525 5. 664123 5. 949426 5. 888149 5. 867645  
11719012\_ 6. 199821 6. 040439 6. 139699 6. 667058 6. 72227 6. 854352  
11719013\_ 4. 874234 4. 554091 4. 756661 4. 65985 4. 759804 4. 760911  
11719014\_ 3. 898008 4. 037351 3. 925835 4. 202806 4. 112425 4. 259648  
11719015\_ 7. 179378 7. 238638 7. 223242 7. 320299 7. 186341 7. 230394  
11719016\_ 6. 099066 6. 086615 6. 067604 6. 010559 6. 024937 6. 009833  
11719017\_ 7. 847209 7. 848497 7. 893142 7. 434587 7. 461727 7. 520806  
11719018\_ 9. 08042 9. 069041 9. 014035 8. 881341 8. 817381 8. 839748  
11719019\_ 9. 469108 9. 363543 9. 423823 9. 529983 9. 465241 9. 523315  
11719020\_ 7. 588425 7. 651016 7. 715268 7. 568552 7. 637576 7. 540872  
11719021\_ 7. 1782 7. 248555 7. 175802 7. 506984 7. 527953 7. 411895  
11719022\_ 6. 646187 6. 495425 6. 596332 6. 415018 6. 256097 6. 354551  
11719023\_ 6. 732275 6. 939891 6. 823761 6. 839141 6. 779107 6. 86327  
11719024\_ 5. 580509 5. 554436 5. 824404 5. 294819 5. 180537 5. 186286  
11719025\_ 7. 772624 7. 597229 7. 583601 7. 164015 7. 117117 7. 167479

11719026\_ 6. 565474 6. 467503 6. 629316 6. 238194 6. 109249 6. 270421  
11719027\_ 5. 596195 5. 436127 5. 502683 5. 36321 5. 276364 5. 3718  
11719028\_ 5. 018671 5. 12208 5. 088715 5. 002003 4. 824623 4. 948121  
11719029\_ 5. 984564 6. 033313 6. 023982 5. 93481 5. 84356 6. 026403  
11719030\_ 5. 538656 5. 494453 5. 595497 5. 747211 5. 798635 5. 798015  
11719031\_ 7. 559348 7. 649232 7. 584879 7. 572852 7. 571524 7. 519597  
11719032\_ 9. 570163 9. 418734 9. 522296 9. 157503 9. 14168 9. 128411  
11719033\_ 7. 164159 7. 116972 7. 262123 7. 216724 7. 212612 7. 154679  
11719034\_ 10. 83004 10. 77098 10. 81349 10. 64817 10. 68618 10. 65901  
11719035\_ 7. 111953 7. 14038 7. 166709 7. 405052 7. 44449 7. 436754  
11719036\_ 5. 699214 5. 775393 5. 650445 6. 228097 6. 209897 6. 1571  
11719037\_ 7. 532855 7. 389196 7. 497362 7. 235953 7. 2565 7. 306641  
11719038\_ 7. 663402 7. 652922 7. 684583 7. 866091 7. 822265 7. 951172  
11719039\_ 7. 749171 7. 781327 7. 593947 7. 707905 7. 712922 7. 766297  
11719040\_ 5. 604428 5. 537784 5. 500581 5. 531574 5. 537068 5. 688015  
11719041\_ 6. 316155 6. 362335 6. 304179 6. 344412 6. 424065 6. 518589  
11719042\_ 7. 865473 7. 943462 7. 904735 8. 164573 8. 054842 8. 12459  
11719043\_ 5. 594896 5. 704919 5. 774283 5. 814982 5. 832206 5. 834508  
11719044\_ 8. 985031 8. 94767 9. 005108 9. 328796 9. 291024 9. 315053  
11719045\_ 4. 581268 4. 489751 4. 506355 4. 95854 5. 073036 5. 196201  
11719046\_ 8. 759177 8. 658573 8. 695814 8. 141625 8. 116757 8. 158443  
11719047\_ 8. 928551 8. 842335 8. 900105 8. 839838 8. 790061 8. 797376  
11719048\_ 10. 03654 10. 01099 10. 03237 9. 737364 9. 727196 9. 749144  
11719049\_ 5. 813664 5. 897377 5. 896888 5. 924435 5. 852312 5. 922714  
11719050\_ 7. 877628 7. 836019 7. 834541 7. 771118 7. 680875 7. 780234  
11719051\_ 7. 622974 7. 515777 7. 573887 7. 51463 7. 429908 7. 552546  
11719052\_ 8. 260731 8. 285996 8. 282259 7. 928619 7. 780152 7. 927059  
11719053\_ 8. 806023 8. 66359 8. 82486 8. 324594 8. 306599 8. 354758  
11719054\_ 7. 123233 6. 912451 7. 047268 6. 943433 7. 006732 6. 974999  
11719055\_ 7. 559371 7. 434587 7. 600299 7. 266475 7. 419366 7. 300847  
11719056\_ 8. 349311 8. 349458 8. 323739 8. 113492 8. 035572 8. 108445  
11719057\_ 8. 12893 8. 080148 8. 196275 7. 903551 7. 961825 7. 936013  
11719058\_ 6. 773261 6. 834586 6. 624292 6. 640387 6. 717166 6. 684314  
11719059\_ 5. 905833 5. 849856 5. 7665 6. 018553 6. 1381 6. 073142  
11719060\_ 6. 693229 6. 867975 6. 798661 6. 913235 6. 962705 6. 967281  
11719061\_ 7. 556119 7. 557971 7. 469101 7. 803056 7. 767772 7. 793604  
11719062\_ 8. 803531 8. 787337 8. 792225 7. 599004 7. 553118 7. 617529  
11719063\_ 8. 711694 8. 679451 8. 76759 7. 71552 7. 851392 7. 67624  
11719064\_ 8. 425545 8. 297003 8. 367986 8. 381506 8. 375018 8. 34303  
11719065\_ 9. 195551 9. 112452 9. 18081 9. 114025 9. 129784 9. 190813  
11719066\_ 10. 71136 10. 67646 10. 68224 10. 51689 10. 51349 10. 47899  
11719067\_ 9. 867294 9. 869275 9. 900373 9. 664667 9. 650941 9. 587705  
11719068\_ 6. 929876 6. 809436 6. 817525 6. 862059 6. 993507 6. 935877  
11719069\_ 7. 491771 7. 402482 7. 479321 7. 535128 7. 467105 7. 537207  
11719070\_ 7. 440578 7. 441127 7. 331656 7. 687244 7. 594893 7. 551561  
11719071\_ 8. 592839 8. 479904 8. 486698 8. 76075 8. 662382 8. 672834  
11719072\_ 8. 367427 8. 31753 8. 360459 8. 527479 8. 552395 8. 573641  
11719073\_ 9. 495004 9. 505471 9. 526424 9. 272378 9. 243397 9. 236661  
11719074\_ 5. 526498 5. 480966 5. 66023 5. 589636 5. 679619 5. 722283  
11719075\_ 5. 934014 5. 934014 5. 871968 5. 938267 5. 946204 6. 057485  
11719076\_ 5. 603799 5. 631232 5. 701945 5. 839342 5. 693249 5. 577173

11719077\_ 8. 630011 8. 474464 8. 537927 8. 11542 8. 034997 8. 175149  
11719078\_ 8. 898981 8. 868705 8. 862105 8. 600932 8. 659408 8. 697607  
11719079\_ 6. 111183 6. 043471 6. 205709 5. 9906 5. 961045 6. 025216  
11719080\_ 8. 503865 8. 516337 8. 50803 8. 625447 8. 716524 8. 706554  
11719081\_ 7. 916203 7. 922981 7. 892483 7. 898599 7. 846567 7. 851718  
11719082\_ 10. 01081 9. 935022 10. 01912 10. 11401 10. 13463 10. 09482  
11719083\_ 7. 951862 7. 891771 7. 94845 7. 980916 7. 985126 7. 924213  
11719084\_ 8. 063728 8. 003688 8. 049309 8. 128237 8. 154964 8. 163971  
11719085\_ 7. 949783 7. 904801 7. 985423 8. 290021 8. 344876 8. 352389  
11719086\_ 8. 32499 8. 412956 8. 311632 8. 614886 8. 543188 8. 566011  
11719087\_ 8. 702223 8. 553514 8. 65998 8. 752323 8. 808187 8. 788974  
11719088\_ 9. 079478 9. 055936 9. 068031 9. 075145 9. 061443 9. 090733  
11719089\_ 6. 554512 6. 590702 6. 633453 7. 023776 7. 08741 7. 105084  
11719090\_ 6. 972354 7. 098275 7. 14788 7. 145292 7. 160764 7. 176318  
11719091\_ 6. 416622 6. 433667 6. 449988 6. 666027 6. 571048 6. 561697  
11719092\_ 5. 064026 5. 219235 5. 179512 5. 220723 5. 175928 5. 170513  
11719093\_ 5. 681328 5. 7853 5. 660306 5. 901802 6. 009905 5. 95372  
11719094\_ 9. 73413 9. 582977 9. 678992 9. 844109 9. 879723 9. 924405  
11719095\_ 9. 616152 9. 582506 9. 690061 9. 832351 9. 83666 9. 828962  
11719096\_ 4. 989431 4. 834289 5. 029529 5. 847034 5. 957954 6. 008563  
11719097\_ 10. 4984 10. 46536 10. 49538 10. 38454 10. 46115 10. 41694  
11719098\_ 7. 451272 7. 498433 7. 589342 7. 645622 7. 621662 7. 666552  
11719099\_ 7. 896928 7. 849838 7. 953916 8. 644439 8. 548161 8. 690641  
11719100\_ 8. 290914 8. 220963 8. 190942 8. 222847 8. 241713 8. 234545  
11719101\_ 8. 53099 8. 529524 8. 477663 8. 147707 8. 082543 8. 041594  
11719102\_ 3. 656046 3. 837523 3. 802406 4. 106556 4. 035165 4. 008872  
11719103\_ 8. 662823 8. 594524 8. 612359 8. 679678 8. 669016 8. 637495  
11719104\_ 9. 889426 9. 800059 9. 900736 10. 16767 10. 10188 10. 16012  
11719105\_ 8. 391474 8. 265793 8. 275813 8. 2705 8. 2173 8. 254727  
11719106\_ 8. 143783 8. 133646 8. 140224 8. 031598 8. 033396 8. 00984  
11719107\_ 6. 397605 6. 399656 6. 507645 6. 500561 6. 50193 6. 577285  
11719108\_ 6. 533318 6. 500866 6. 486203 6. 23889 6. 17065 6. 219207  
11719109\_ 8. 421216 8. 382684 8. 39444 8. 05579 8. 018122 7. 986965  
11719110\_ 8. 109734 8. 019739 8. 050985 7. 995888 8. 152612 8. 093544  
11719111\_ 7. 849101 7. 780225 7. 774262 7. 791048 7. 764841 7. 809867  
11719112\_ 9. 306688 9. 365001 9. 30144 9. 48315 9. 433169 9. 399873  
11719113\_ 9. 032556 9. 084795 9. 077496 9. 112966 9. 057978 9. 08924  
11719114\_ 9. 110754 9. 045852 9. 062851 8. 912128 8. 886544 8. 875922  
11719115\_ 8. 98588 8. 974449 8. 978696 8. 976789 8. 994437 8. 955848  
11719116\_ 9. 048019 9. 094944 9. 131892 9. 207186 9. 146098 9. 215547  
11719117\_ 9. 478193 9. 504851 9. 467174 9. 563951 9. 580877 9. 546892  
11719118\_ 7. 558412 7. 452654 7. 567341 7. 044455 7. 0982 7. 194578  
11719119\_ 8. 064859 7. 999542 8. 029379 7. 991245 8. 027878 7. 970697  
11719120\_ 9. 044416 8. 898849 9. 016208 8. 721471 8. 646096 8. 747057  
11719121\_ 4. 438465 4. 401196 4. 255025 4. 084485 4. 155021 4. 258497  
11719122\_ 9. 162819 9. 123467 9. 225061 8. 585909 8. 619808 8. 619662  
11719123\_ 7. 329037 7. 293088 7. 473255 8. 13457 8. 081228 8. 180946  
11719124\_ 4. 358228 4. 471034 4. 403969 4. 715941 4. 613356 4. 79251  
11719125\_ 6. 762283 6. 700371 6. 743584 6. 742623 6. 796855 6. 885584  
11719126\_ 7. 299879 7. 154768 7. 082484 6. 91499 6. 966793 6. 974704  
11719127\_ 6. 946337 6. 916549 6. 894247 6. 398027 6. 479264 6. 49691

11719128\_ 7. 531631 7. 437617 7. 434587 7. 638206 7. 748159 7. 635999  
11719129\_ 7. 078357 7. 044434 7. 036717 7. 174876 7. 240418 7. 185275  
11719130\_ 6. 531479 6. 484506 6. 526095 6. 609721 6. 584888 6. 639315  
11719131\_ 7. 167186 7. 162689 7. 143871 7. 306822 7. 26879 7. 244767  
11719132\_ 9. 62247 9. 61562 9. 649988 9. 511232 9. 562971 9. 442259  
11719133\_ 5. 277771 5. 309674 5. 166766 5. 404689 5. 385804 5. 41838  
11719134\_ 7. 948215 8. 029445 8. 094645 8. 271966 8. 324185 8. 323383  
11719135\_ 4. 26259 4. 271387 4. 213226 4. 23284 4. 347179 4. 15673  
11719136\_ 7. 648197 7. 607023 7. 78284 8. 41205 8. 476718 8. 438137  
11719137\_ 6. 087459 6. 05471 6. 123981 6. 963733 6. 936087 6. 991336  
11719138\_ 9. 195563 9. 162282 9. 180196 9. 073415 9. 062947 9. 076357  
11719139\_ 4. 021588 4. 021588 3. 961906 4. 048133 4. 061021 4. 055284  
11719140\_ 7. 153238 7. 108073 7. 251758 6. 505629 6. 495036 6. 589889  
11719141\_ 6. 716465 6. 57196 6. 779349 6. 666973 6. 666623 6. 849271  
11719142\_ 5. 685321 5. 564477 5. 690373 5. 831338 5. 77545 5. 777912  
11719143\_ 6. 012493 6. 138749 6. 114294 6. 263567 6. 303478 6. 213564  
11719144\_ 5. 431509 5. 769101 5. 521274 5. 761586 5. 870242 5. 628645  
11719145\_ 7. 363732 7. 337303 7. 354973 7. 580629 7. 568879 7. 652215  
11719146\_ 7. 600089 7. 606968 7. 585272 7. 917354 8. 001102 7. 928103  
11719147\_ 5. 38125 5. 215062 5. 241907 5. 522386 5. 637288 5. 711157  
11719148\_ 6. 592384 6. 437856 6. 408607 6. 777708 6. 739328 6. 6434  
11719149\_ 7. 933237 7. 877666 7. 929539 8. 138673 8. 138673 8. 186913  
11719150\_ 6. 799505 6. 685277 6. 894958 6. 898793 6. 95414 7. 06424  
11719151\_ 4. 415744 3. 979632 4. 440488 4. 634634 4. 459939 4. 440406  
11719152\_ 9. 299208 9. 194745 9. 297861 8. 910024 8. 932484 9. 037909  
11719153\_ 4. 884428 5. 149545 4. 989119 5. 156303 5. 241016 5. 137516  
11719154\_ 7. 577961 7. 515741 7. 584031 6. 864731 6. 769923 6. 823834  
11719155\_ 8. 099435 8. 109247 8. 110075 7. 394705 7. 276058 7. 338829  
11719156\_ 9. 065905 9. 064826 9. 106332 8. 746335 8. 76898 8. 82333  
11719157\_ 6. 204902 6. 034808 6. 188845 6. 553057 6. 554017 6. 518846  
11719158\_ 6. 069949 6. 048061 6. 029354 4. 900175 5. 154376 5. 086622  
11719159\_ 5. 489984 5. 98478 5. 388813 5. 388813 5. 183024 5. 402684  
11719160\_ 9. 323763 9. 27531 9. 376 9. 036702 9. 026207 9. 047467  
11719161\_ 6. 800131 6. 813356 6. 712244 6. 937748 6. 934086 6. 95941  
11719162\_ 7. 296541 7. 180816 7. 310307 8. 607661 8. 591872 8. 650435  
11719163\_ 5. 544167 5. 586323 5. 773907 5. 817497 5. 740374 5. 717379  
11719164\_ 5. 166421 4. 990646 5. 17691 5. 553579 5. 664496 5. 618445  
11719165\_ 6. 983803 6. 948935 7. 072805 6. 855443 6. 909816 6. 955333  
11719166\_ 6. 441548 6. 324632 6. 453005 6. 353432 6. 314584 6. 330929  
11719167\_ 8. 970572 8. 990563 9. 052814 9. 032032 8. 980131 9. 020791  
11719168\_ 7. 896096 7. 863798 7. 894294 7. 367849 7. 365447 7. 455647  
11719169\_ 9. 615191 9. 556481 9. 598352 9. 281972 9. 239774 9. 204261  
11719170\_ 8. 411977 8. 35715 8. 371287 8. 199586 8. 25418 8. 209284  
11719171\_ 4. 760486 4. 748323 4. 617233 4. 808138 4. 765315 4. 77098  
11719172\_ 4. 804113 5. 03337 4. 843246 5. 03463 4. 987767 4. 834271  
11719173\_ 10. 51461 10. 48367 10. 53656 10. 83204 10. 84854 10. 75827  
11719174\_ 8. 479914 8. 440018 8. 516828 7. 553362 7. 533587 7. 474274  
11719175\_ 4. 815683 4. 827651 4. 825993 4. 874234 4. 862267 4. 897303  
11719176\_ 5. 36906 5. 38036 5. 365737 5. 438596 5. 3944 5. 513376  
11719177\_ 7. 435035 7. 393045 7. 425104 7. 456656 7. 493521 7. 338054  
11719178\_ 6. 206103 6. 179206 6. 261515 6. 3278 6. 384918 6. 291448

11719179\_ 6.001443 6.042872 5.943656 6.183032 6.199606 6.132039  
11719180\_ 10.95807 10.92609 10.95951 10.962 10.96416 10.98004  
11719181\_ 5.920616 5.963048 5.967419 5.908299 6.051574 6.068992  
11719182\_ 8.460103 8.438287 8.563759 8.47523 8.488337 8.521349  
11719183\_ 7.3832 7.407247 7.406345 7.668823 7.603208 7.64861  
11719184\_ 9.329992 9.313897 9.31737 8.844416 8.869871 8.891722  
11719185\_ 7.134375 7.133613 7.244721 7.181761 7.223617 7.071379  
11719186\_ 7.382652 7.342961 7.301985 7.376893 7.395834 7.412261  
11719187\_ 7.125721 7.276565 7.151881 7.232165 7.193908 7.280841  
11719188\_ 9.088831 8.947659 9.063351 8.718012 8.680635 8.722458  
11719189\_ 9.730579 9.707147 9.69492 9.880295 9.825233 9.836304  
11719190\_ 8.830897 8.852488 8.76061 8.936378 8.803577 8.743773  
11719191\_ 8.226388 8.151483 8.202299 8.043456 8.056666 8.037901  
11719192\_ 4.705486 4.685607 4.453549 4.980983 4.937422 4.806131  
11719193\_ 6.897353 6.882371 6.911786 6.629647 6.667031 6.669409  
11719194\_ 7.484997 7.417811 7.52548 7.543315 7.514346 7.567496  
11719195\_ 8.062667 8.023435 8.03786 7.751044 7.888652 7.827986  
11719196\_ 9.164424 9.093786 9.120612 9.126947 9.136016 9.158548  
11719197\_ 3.886259 3.818401 3.792967 3.811999 3.969526 3.879309  
11719198\_ 2.232298 2.386814 2.356957 2.470042 2.334763 2.385718  
11719199\_ 4.584933 4.525807 4.48374 4.62566 4.748814 4.763543  
11719200\_ 7.537735 7.432889 7.493328 7.652176 7.619186 7.606152  
11719201\_ 6.971486 6.962727 6.978823 7.122422 7.052899 7.149266  
11719202\_ 5.784304 5.717599 5.906116 5.745678 5.841037 5.799398  
11719203\_ 8.4065 8.423868 8.398759 8.583433 8.602658 8.548448  
11719204\_ 8.018045 7.975833 7.967685 7.776077 7.811337 7.725271  
11719205\_ 7.098647 7.16791 7.179715 6.899412 7.018213 6.912891  
11719206\_ 8.071198 8.02501 8.082025 7.804993 7.727528 7.716231  
11719207\_ 10.13774 10.14168 10.10054 10.3991 10.29059 10.25753  
11719208\_ 8.362654 8.272887 8.347955 8.374005 8.30763 8.300711  
11719209\_ 8.078755 8.004908 8.100798 7.97075 8.02177 8.041721  
11719210\_ 6.912806 6.892885 6.919562 6.913561 6.917303 6.918496  
11719211\_ 6.661301 6.794147 6.647618 6.570138 6.413602 6.47071  
11719212\_ 7.263541 7.324886 7.321883 7.150032 7.094349 7.187461  
11719213\_ 10.20228 10.07777 10.18295 9.995337 9.970813 9.957987  
11719214\_ 5.101928 5.04242 5.147705 4.566696 4.779427 4.595911  
11719215\_ 5.397086 4.947108 5.476761 5.293999 5.338302 5.399232  
11719216\_ 6.991638 6.89141 6.994099 6.74027 6.800836 6.853767  
11719217\_ 5.407853 5.480966 5.401977 5.425451 5.457286 5.370339  
11719218\_ 6.33956 6.218219 6.393089 6.176959 6.239246 6.337416  
11719219\_ 6.960417 6.818658 6.891913 6.851607 6.945376 6.873626  
11719220\_ 7.126154 7.098812 7.066458 7.119983 7.158529 7.103121  
11719221\_ 6.120095 6.239088 6.15034 6.072967 6.142407 6.010411  
11719222\_ 2.493143 2.699017 2.511433 2.530554 2.635871 2.411621  
11719223\_ 5.795109 6.033594 6.020564 5.926755 5.948404 5.994704  
11719224\_ 7.1782 7.033814 7.128246 8.108692 8.096301 8.104218  
11719225\_ 5.746331 5.698225 5.658242 5.828637 6.059172 6.053429  
11719226\_ 9.005611 8.945919 9.027469 8.914714 8.857935 8.807433  
11719227\_ 9.624474 9.589478 9.656046 9.366186 9.464916 9.498543  
11719228\_ 5.49909 5.691436 5.512078 5.77433 5.703021 5.602067  
11719229\_ 9.338306 9.277427 9.357702 9.293538 9.296308 9.255872



11719230\_ 6. 257261 6. 206103 6. 270159 6. 108026 6. 113665 6. 121872  
11719231\_ 6. 306521 6. 433176 6. 275383 6. 429934 6. 487853 6. 490242  
11719232\_ 5. 94825 5. 896154 5. 941617 6. 072474 6. 11102 6. 140588  
11719233\_ 7. 018142 6. 908047 7. 07314 7. 176963 7. 226664 7. 316654  
11719234\_ 4. 663089 4. 847121 4. 828779 4. 878834 5. 140549 4. 912358  
11719235\_ 7. 84076 7. 942077 7. 827476 7. 868316 7. 914216 7. 89074  
11719236\_ 7. 55988 7. 528188 7. 542543 7. 873491 7. 920819 7. 918037  
11719237\_ 5. 602243 5. 181969 5. 542961 5. 471544 5. 697892 5. 584264  
11719238\_ 7. 619246 7. 598212 7. 583672 7. 057929 6. 972643 6. 996775  
11719239\_ 7. 111953 7. 049649 7. 107717 7. 091171 6. 951671 6. 97913  
11719240\_ 7. 861352 7. 787316 7. 830828 7. 627127 7. 653407 7. 689963  
11719241\_ 6. 777477 6. 787837 6. 678884 7. 01224 6. 99052 6. 880335  
11719242\_ 6. 026752 5. 915321 5. 916096 7. 607238 7. 599412 7. 621489  
11719243\_ 7. 553475 7. 508875 7. 576544 7. 127477 7. 19339 7. 220575  
11719244\_ 7. 485245 7. 364599 7. 419048 7. 459839 7. 451428 7. 551452  
11719245\_ 4. 965894 4. 82313 4. 573607 4. 878857 4. 963098 4. 946368  
11719246\_ 8. 0939 8. 032478 8. 071598 7. 982034 8. 084162 8. 043456  
11719247\_ 9. 486112 9. 416397 9. 465677 9. 313839 9. 349195 9. 323104  
11719248\_ 7. 498019 7. 426968 7. 393138 7. 241232 7. 207001 7. 317814  
11719249\_ 5. 340778 5. 343722 5. 251225 4. 593036 4. 920614 4. 994281  
11719250\_ 6. 860584 6. 822242 6. 868063 6. 916625 6. 910833 6. 838074  
11719251\_ 6. 148264 6. 257736 6. 219072 6. 302573 6. 282224 6. 222702  
11719252\_ 4. 783877 4. 894569 4. 794151 4. 860248 4. 984669 5. 003817  
11719253\_ 7. 469918 7. 324997 7. 489062 7. 438254 7. 438241 7. 553896  
11719254\_ 3. 885908 3. 931567 4. 077916 3. 771618 3. 310948 3. 78115  
11719255\_ 6. 558171 6. 497107 6. 589889 6. 493588 6. 522072 6. 554331  
11719256\_ 6. 826726 6. 608327 6. 765911 6. 053685 6. 088166 6. 231926  
11719257\_ 8. 749412 8. 662995 8. 713696 8. 74415 8. 701047 8. 763389  
11719258\_ 8. 036575 7. 873551 7. 985442 7. 465328 7. 429354 7. 467235  
11719259\_ 5. 11527 5. 195905 4. 991547 4. 992243 5. 184986 5. 151303  
11719260\_ 10. 31326 10. 25911 10. 27118 10. 41092 10. 44418 10. 38745  
11719261\_ 8. 785752 8. 741045 8. 742552 8. 938979 8. 896705 8. 974646  
11719262\_ 8. 100867 8. 058496 8. 127151 8. 111571 8. 138673 8. 142646  
11719263\_ 6. 811259 6. 70602 6. 770839 6. 734086 6. 808107 6. 766609  
11719264\_ 6. 994345 7. 075274 7. 015901 7. 214044 7. 141423 7. 173611  
11719265\_ 5. 819078 5. 954939 5. 860165 6. 138281 6. 021735 6. 130289  
11719266\_ 4. 026092 3. 753462 4. 226974 3. 862718 3. 941979 3. 879309  
11719267\_ 9. 941264 9. 941739 9. 919497 9. 601644 9. 588394 9. 57679  
11719268\_ 5. 156303 5. 119358 5. 297498 4. 928336 4. 935669 4. 609968  
11719269\_ 9. 363157 9. 271376 9. 360658 9. 007683 9. 063382 9. 014896  
11719270\_ 9. 682084 9. 645137 9. 700353 9. 463258 9. 494846 9. 47471  
11719271\_ 8. 652079 8. 550741 8. 57894 8. 819752 8. 852829 8. 819916  
11719272\_ 8. 297485 8. 200407 8. 264757 9. 674472 9. 639915 9. 656804  
11719273\_ 8. 569584 8. 576151 8. 662903 10. 06798 10. 03217 10. 04407  
11719274\_ 7. 156049 7. 00037 7. 067358 7. 562834 7. 587265 7. 505138  
11719275\_ 10. 67136 10. 68077 10. 6647 10. 86217 10. 83984 10. 79893  
11719276\_ 5. 344813 5. 418429 5. 518169 5. 801905 5. 736831 5. 879165  
11719277\_ 9. 949909 9. 919432 9. 969091 9. 884667 9. 906838 9. 874188  
11719278\_ 7. 611488 7. 704927 7. 694452 7. 666485 7. 66062 7. 692698  
11719279\_ 7. 146968 7. 191283 7. 244026 7. 197694 7. 166645 7. 214517  
11719280\_ 10. 22879 10. 23944 10. 25716 10. 19521 10. 22655 10. 28445

11719281\_ 10.14603 10.0928 10.13035 10.39036 10.44043 10.36051  
11719282\_ 9.635885 9.651418 9.69503 10.03385 10.00567 9.957944  
11719283\_ 6.884619 6.744256 6.727092 7.217198 7.176773 7.080228  
11719284\_ 7.103406 7.030663 7.081964 7.592179 7.587172 7.716896  
11719285\_ 8.23828 8.118025 8.348881 8.484022 8.422267 8.524661  
11719286\_ 8.654618 8.560734 8.629825 8.882024 8.849129 8.873053  
11719287\_ 6.622944 6.464951 6.395045 6.812213 6.75033 6.830936  
11719288\_ 6.342727 6.19869 6.260434 6.48589 6.523259 6.589668  
11719289\_ 6.800168 6.849603 6.826361 6.752593 6.90181 6.93039  
11719290\_ 7.470427 7.477425 7.436063 7.707345 7.776157 7.731997  
11719291\_ 9.395555 9.308088 9.375408 9.025607 9.061395 9.092848  
11719292\_ 5.173668 5.189628 5.098169 7.143816 7.136086 7.143816  
11719293\_ 5.187854 5.037468 4.871993 6.198199 5.977827 5.925911  
11719294\_ 8.709864 8.715491 8.755844 8.762354 8.77522 8.768286  
11719295\_ 8.285879 8.105009 8.160364 8.035136 7.984865 8.087208  
11719296\_ 7.084301 7.055228 7.160556 7.145769 7.220732 7.158077  
11719297\_ 7.364821 7.408586 7.392275 7.610917 7.597695 7.648621  
11719298\_ 7.499358 7.429669 7.4858 7.72227 7.683861 7.758  
11719299\_ 7.271984 7.237727 7.171989 7.517098 7.506218 7.593129  
11719300\_ 5.047574 5.120312 4.909385 5.377777 5.353687 5.569622  
11719301\_ 9.542137 9.534583 9.570745 9.425216 9.321156 9.289616  
11719302\_ 9.01786 8.992942 9.025742 9.073573 9.033183 9.02161  
11719303\_ 9.155877 9.117258 9.179611 9.109085 9.120373 9.094097  
11719304\_ 7.710981 7.635398 7.745442 7.475728 7.565114 7.524375  
11719305\_ 7.216046 7.087285 7.150697 7.560151 7.558697 7.541703  
11719306\_ 7.481087 7.381325 7.442902 7.495311 7.538176 7.534863  
11719307\_ 5.168707 5.045042 5.102959 5.478697 5.407154 5.674697  
11719308\_ 4.708979 4.663359 4.867678 4.960429 5.144432 4.939729  
11719309\_ 6.075314 6.100903 6.134122 6.213826 6.290378 6.325716  
11719310\_ 6.033864 5.971791 6.045666 5.878889 5.717865 5.840894  
11719311\_ 5.518208 5.577519 5.463054 5.585091 5.577508 5.577519  
11719312\_ 6.759765 6.778029 6.795226 6.798641 6.816945 6.805142  
11719313\_ 7.596691 7.501064 7.570575 7.815491 7.796162 7.713765  
11719314\_ 5.62705 5.586117 5.64301 5.432225 5.508799 5.405074  
11719315\_ 7.486605 7.498667 7.488635 7.115411 7.010725 6.979774  
11719316\_ 9.028208 8.966393 9.001196 8.50657 8.569035 8.477866  
11719317\_ 7.590771 7.630563 7.536182 7.300361 7.218871 7.105161  
11719318\_ 9.628993 9.603455 9.57921 9.085793 9.123331 9.061284  
11719319\_ 9.202898 9.20839 9.205897 8.679108 8.776965 8.680635  
11719320\_ 9.409951 9.449357 9.473793 8.953422 8.948817 8.933184  
11719321\_ 3.793725 4.100906 3.870908 3.732324 3.697918 4.035161  
11719322\_ 5.26379 5.062441 5.107586 5.149439 5.142125 5.256616  
11719323\_ 5.588747 5.603625 5.653184 5.186968 5.262069 5.137715  
11719324\_ 8.504887 8.487022 8.577361 8.159005 8.193894 8.145743  
11719325\_ 9.982986 9.898846 9.932998 10.11044 10.11498 10.11001  
11719326\_ 8.329064 8.436123 8.39272 8.292429 8.282293 8.228047  
11719327\_ 9.344109 9.297519 9.317903 9.29383 9.336593 9.288542  
11719328\_ 8.468649 8.486856 8.468192 8.641429 8.671202 8.595875  
11719329\_ 8.306619 8.30948 8.38318 8.512741 8.553985 8.504879  
11719330\_ 6.661554 6.521873 6.590934 6.578013 6.6616 6.641191  
11719331\_ 9.818971 9.732017 9.75086 9.319784 9.256081 9.25659

11719332\_ 5. 368961 5. 138277 5. 375052 5. 242263 5. 403457 5. 379302  
11719333\_ 4. 829095 4. 829593 5. 082891 4. 67089 4. 634011 4. 709605  
11719334\_ 6. 046951 5. 995611 6. 069567 6. 486573 6. 373004 6. 352371  
11719335\_ 7. 855076 7. 832777 7. 867724 7. 678052 7. 687628 7. 701873  
11719336\_ 6. 367509 6. 462574 6. 457263 6. 45597 6. 547412 6. 67471  
11719337\_ 7. 079232 7. 031612 6. 978876 6. 621947 6. 712449 6. 607844  
11719338\_ 6. 878633 6. 836399 6. 933517 6. 241706 6. 223641 6. 3467  
11719339\_ 6. 010277 5. 673405 5. 823022 6. 395462 6. 367981 6. 403637  
11719340\_ 6. 799924 6. 724223 6. 718053 6. 857014 6. 916742 6. 8921  
11719341\_ 7. 298754 7. 230373 7. 286951 7. 257341 7. 238987 7. 172656  
11719342\_ 3. 398236 3. 192159 3. 262835 2. 967983 2. 912551 3. 076882  
11719343\_ 7. 660599 7. 599839 7. 654706 6. 965727 6. 856814 6. 97913  
11719344\_ 9. 033867 8. 958055 8. 998576 8. 115821 8. 183368 8. 164044  
11719345\_ 7. 796449 7. 680692 7. 710038 7. 465312 7. 549806 7. 527395  
11719346\_ 6. 273912 6. 086469 6. 173537 6. 639696 6. 624868 6. 740106  
11719347\_ 6. 839507 6. 926002 6. 859466 7. 451938 7. 474342 7. 504643  
11719348\_ 5. 321454 5. 261327 5. 324805 5. 53836 5. 583376 5. 528624  
11719349\_ 7. 876872 7. 775797 7. 836019 8. 043734 8. 121316 8. 033967  
11719350\_ 6. 805778 6. 799331 6. 750047 7. 099734 6. 987662 6. 792183  
11719351\_ 8. 720983 8. 63919 8. 74632 8. 632982 8. 703281 8. 705032  
11719352\_ 6. 181306 6. 340332 6. 249312 6. 333812 6. 35796 6. 282224  
11719353\_ 8. 407766 8. 270491 8. 332308 8. 449396 8. 376788 8. 461627  
11719354\_ 7. 780763 7. 634216 7. 63666 7. 551571 7. 601284 7. 596239  
11719355\_ 6. 794742 6. 857156 6. 809911 6. 567247 6. 763786 6. 650327  
11719356\_ 5. 584813 5. 606323 5. 569047 5. 522623 5. 778401 5. 669458  
11719357\_ 6. 417646 6. 256375 6. 115374 6. 361967 6. 347268 6. 408062  
11719358\_ 2. 633657 2. 577594 2. 671186 2. 512144 2. 650212 2. 660869  
11719359\_ 4. 959798 5. 200656 4. 883113 5. 940064 5. 98948 6. 014357  
11719360\_ 6. 66057 6. 448951 6. 602764 6. 488604 6. 349047 6. 410385  
11719361\_ 5. 809115 5. 581787 5. 538001 5. 340611 5. 11273 5. 492845  
11719362\_ 6. 630229 6. 631808 6. 74056 7. 170826 7. 171231 7. 204265  
11719363\_ 7. 951686 7. 868028 7. 98976 8. 431131 8. 357775 8. 440055  
11719364\_ 9. 157975 9. 032473 9. 147467 9. 349406 9. 282762 9. 280554  
11719365\_ 5. 308614 5. 210298 5. 206246 5. 846555 5. 916136 5. 918385  
11719366\_ 9. 15232 9. 172065 9. 123087 9. 223871 9. 213015 9. 210023  
11719367\_ 6. 714212 6. 751236 6. 736696 7. 054942 7. 077957 7. 111953  
11719368\_ 7. 490341 7. 527046 7. 594262 9. 069685 8. 943664 8. 949564  
11719369\_ 4. 586507 4. 876053 4. 622662 4. 863033 4. 993909 4. 920369  
11719370\_ 7. 600906 7. 53394 7. 572618 7. 277216 7. 327709 7. 342771  
11719371\_ 8. 094885 8. 028176 8. 11728 8. 188961 8. 227191 8. 209871  
11719372\_ 11. 39012 11. 31139 11. 38171 11. 5845 11. 52624 11. 60581  
11719373\_ 8. 619071 8. 577585 8. 665318 9. 414742 9. 45271 9. 476713  
11719374\_ 6. 637144 6. 627473 6. 729521 7. 10398 7. 152897 7. 132995  
11719375\_ 4. 374948 4. 676962 4. 319256 4. 5223 4. 509326 4. 565518  
11719376\_ 9. 10817 9. 138061 9. 065563 9. 004839 9. 039318 9. 019051  
11719377\_ 10. 85893 10. 8783 10. 87123 10. 83541 10. 85392 10. 77164  
11719378\_ 8. 599371 8. 492058 8. 558152 8. 347077 8. 36428 8. 375115  
11719379\_ 6. 859991 6. 70039 6. 790821 7. 23118 7. 177012 7. 085641  
11719380\_ 10. 02472 10. 02388 9. 983018 9. 942394 9. 901611 9. 908868  
11719381\_ 9. 52002 9. 514254 9. 568115 9. 299796 9. 334635 9. 35788  
11719382\_ 8. 731702 8. 688827 8. 765619 9. 328235 9. 389441 9. 374689

11719383\_ 8. 942989 8. 869667 8. 938523 9. 53006 9. 588393 9. 541671  
11719384\_ 4. 802917 4. 915171 4. 99005 4. 880951 4. 93837 4. 819028  
11719385\_ 4. 072097 3. 92478 4. 199317 3. 974825 3. 824459 4. 068197  
11719386\_ 5. 419041 5. 331304 5. 502752 5. 125661 5. 233942 5. 218073  
11719387\_ 7. 734827 7. 695213 7. 738414 7. 64467 7. 656609 7. 60039  
11719388\_ 7. 289973 7. 272276 7. 28836 7. 046953 7. 168586 7. 205294  
11719389\_ 4. 802747 5. 045287 4. 994197 4. 925024 4. 935274 5. 004447  
11719390\_ 7. 457366 7. 446286 7. 329171 7. 254881 7. 313035 7. 349987  
11719391\_ 9. 014329 8. 952684 9. 0061 9. 379149 9. 372875 9. 372898  
11719392\_ 8. 806128 8. 780202 8. 813929 8. 828121 8. 739151 8. 731699  
11719393\_ 6. 638389 6. 504011 6. 589889 6. 778724 6. 750799 6. 844222  
11719394\_ 6. 425789 6. 511386 6. 559304 6. 368612 6. 227277 6. 296088  
11719395\_ 8. 699655 8. 633579 8. 711042 8. 8466 8. 835696 8. 906079  
11719396\_ 7. 976758 7. 904134 7. 886565 8. 12857 8. 09223 8. 099946  
11719397\_ 8. 094491 8. 059857 8. 029959 7. 943194 7. 926761 7. 979015  
11719398\_ 9. 098327 9. 008882 9. 0785 8. 874791 8. 907683 8. 880441  
11719399\_ 6. 265763 6. 225513 6. 33679 6. 400937 6. 318792 6. 417769  
11719400\_ 6. 470981 6. 549476 6. 503996 6. 279029 6. 327591 6. 345817  
11719401\_ 9. 590091 9. 502733 9. 587255 9. 264487 9. 25523 9. 211763  
11719402\_ 8. 847912 8. 711356 8. 771006 9. 016151 9. 010237 8. 939542  
11719403\_ 7. 967068 7. 990401 7. 98209 7. 991853 7. 993898 7. 995107  
11719404\_ 6. 810802 6. 799167 6. 81781 6. 440436 6. 551077 6. 489492  
11719405\_ 6. 028333 6. 150322 6. 214522 5. 996126 6. 07305 6. 035203  
11719406\_ 7. 704181 7. 672494 7. 785635 7. 374843 7. 312641 7. 331312  
11719407\_ 9. 563342 9. 46181 9. 5253 9. 040276 9. 075243 9. 050195  
11719408\_ 9. 687844 9. 61833 9. 689163 9. 102783 9. 124382 9. 178917  
11719409\_ 9. 385771 9. 395445 9. 38779 9. 159323 9. 054148 9. 085871  
11719410\_ 10. 48787 10. 48281 10. 47668 10. 14783 10. 19637 10. 15856  
11719411\_ 8. 170353 8. 1 8. 159908 7. 868277 7. 937853 7. 973883  
11719412\_ 4. 699136 4. 713206 4. 643717 4. 703555 4. 696628 4. 763543  
11719413\_ 5. 040706 5. 00572 4. 966464 5. 066373 5. 031216 5. 047158  
11719414\_ 6. 694259 6. 663171 6. 70959 7. 050571 6. 940589 6. 942819  
11719415\_ 8. 677183 8. 604927 8. 688145 8. 455307 8. 410977 8. 454622  
11719416\_ 7. 726247 7. 782128 7. 808834 8. 693924 8. 694292 8. 583444  
11719417\_ 7. 708475 7. 66917 7. 673145 7. 282764 7. 117461 7. 101045  
11719418\_ 8. 412455 8. 342899 8. 366266 7. 91343 7. 819405 7. 878856  
11719419\_ 7. 557974 7. 44129 7. 56014 7. 956294 7. 903852 7. 977972  
11719420\_ 5. 986733 5. 916473 5. 864317 5. 772968 5. 787044 5. 749197  
11719421\_ 7. 1782 7. 106593 7. 043899 6. 905416 6. 97913 6. 843545  
11719422\_ 8. 683108 8. 677408 8. 627153 8. 438551 8. 456522 8. 454784  
11719423\_ 6. 426412 6. 392765 6. 478352 6. 472417 6. 389345 6. 415873  
11719424\_ 6. 7637 6. 686571 6. 666466 7. 049794 7. 014532 7. 027083  
11719425\_ 6. 59854 6. 583647 6. 531028 6. 892956 6. 817463 6. 854315  
11719426\_ 9. 071748 9. 081728 9. 129157 9. 148762 9. 156533 9. 165436  
11719427\_ 7. 178649 7. 166193 7. 394455 7. 221341 7. 220278 7. 16879  
11719428\_ 6. 433427 6. 237655 6. 379328 6. 225486 6. 309829 6. 339507  
11719429\_ 5. 871718 5. 766622 5. 871758 5. 452646 5. 460848 5. 543757  
11719430\_ 6. 597093 6. 496066 6. 528618 6. 166753 6. 189336 6. 170183  
11719431\_ 5. 988406 5. 894697 5. 870242 5. 866693 5. 871294 6. 001591  
11719432\_ 6. 647907 6. 626853 6. 619489 6. 862059 6. 922187 6. 834052  
11719433\_ 7. 025374 6. 979075 7. 018407 7. 10567 7. 046518 7. 227119

11719434\_ 9. 175523 9. 156101 9. 204151 9. 459709 9. 526336 9. 500301  
11719435\_ 6. 152458 6. 087969 6. 193567 6. 254427 6. 224094 6. 212882  
11719436\_ 7. 475403 7. 426223 7. 4167 7. 076762 7. 173021 7. 258788  
11719437\_ 5. 334834 5. 277098 5. 211702 5. 214846 5. 10818 5. 240801  
11719438\_ 7. 954112 7. 839705 7. 890189 8. 30015 8. 392076 8. 306062  
11719439\_ 6. 017066 6. 154537 6. 061234 6. 358612 6. 299289 6. 423827  
11719440\_ 7. 075116 6. 991234 7. 183924 7. 417887 7. 359032 7. 384496  
11719441\_ 4. 63031 4. 902515 4. 923939 4. 86458 4. 923143 4. 820756  
11719442\_ 3. 96212 3. 909593 3. 967843 4. 060167 4. 041705 4. 059614  
11719443\_ 2. 038343 2. 423267 2. 473979 2. 001661 1. 995297 1. 995297  
11719444\_ 3. 963453 3. 704045 4. 070833 3. 598538 3. 528237 3. 752433  
11719445\_ 7. 539572 7. 53736 7. 534189 7. 337534 7. 438289 7. 484409  
11719446\_ 4. 584933 4. 771495 4. 824195 4. 790537 4. 712737 4. 766559  
11719447\_ 5. 641655 5. 614563 5. 814264 5. 723241 5. 799227 5. 676992  
11719448\_ 9. 718783 9. 622674 9. 702752 9. 218339 9. 220741 9. 315652  
11719449\_ 3. 855614 3. 708254 3. 890845 3. 947528 3. 855614 4. 074379  
11719450\_ 9. 89458 9. 805321 9. 856643 9. 557454 9. 6203 9. 533126  
11719451\_ 9. 811229 9. 706487 9. 794554 9. 580877 9. 509174 9. 529591  
11719452\_ 9. 397226 9. 334138 9. 361022 9. 292065 9. 309465 9. 275086  
11719453\_ 7. 152572 7. 071336 7. 242324 7. 014936 6. 979776 6. 996047  
11719454\_ 5. 564193 5. 703261 5. 584813 5. 464093 5. 545283 5. 554436  
11719455\_ 5. 614563 5. 512589 5. 515248 5. 514088 5. 436979 5. 482582  
11719456\_ 5. 164095 4. 992629 5. 03091 5. 229766 5. 147686 5. 168562  
11719457\_ 8. 748448 8. 765805 8. 768253 8. 317945 8. 319419 8. 325688  
11719458\_ 7. 900069 7. 906861 7. 940481 7. 914854 7. 793185 7. 824214  
11719459\_ 9. 375073 9. 366604 9. 418545 9. 079307 9. 062554 9. 070658  
11719460\_ 8. 413843 8. 361251 8. 433912 7. 841649 7. 8024 7. 986187  
11719461\_ 8. 907592 8. 91437 8. 970767 8. 561524 8. 508544 8. 486332  
11719462\_ 12. 46522 12. 43837 12. 42167 12. 57843 12. 59105 12. 52801  
11719463\_ 6. 272274 6. 277126 6. 194452 6. 633543 6. 555693 6. 525654  
11719464\_ 12. 27638 12. 31015 12. 26452 12. 28258 12. 25337 12. 22411  
11719465\_ 4. 992942 4. 931735 4. 931735 4. 96169 5. 014865 4. 877117  
11719466\_ 5. 041683 5. 064574 5. 005494 5. 061105 5. 036573 5. 002415  
11719467\_ 8. 877439 8. 782484 8. 924724 9. 174663 9. 177179 9. 148604  
11719468\_ 8. 217429 8. 149159 8. 147247 8. 459447 8. 48648 8. 445535  
11719469\_ 8. 789704 8. 70324 8. 733609 9. 058816 9. 071637 9. 053422  
11719470\_ 7. 983792 7. 919827 8. 013448 8. 248402 8. 272019 8. 260029  
11719471\_ 8. 34064 8. 295013 8. 350177 8. 74027 8. 710033 8. 741472  
11719472\_ 8. 592173 8. 459904 8. 520926 8. 940801 8. 899992 8. 916477  
11719473\_ 8. 718962 8. 62551 8. 651032 8. 591206 8. 631969 8. 663499  
11719474\_ 8. 580367 8. 520374 8. 572199 9. 223616 9. 210144 9. 15103  
11719475\_ 4. 977054 4. 951135 4. 950335 4. 793993 4. 865892 4. 946548  
11719476\_ 9. 203124 9. 162282 9. 122932 8. 975746 8. 928507 8. 957421  
11719477\_ 8. 552455 8. 556013 8. 58013 8. 638253 8. 695244 8. 651656  
11719478\_ 9. 014809 8. 981675 8. 998874 9. 190399 9. 158385 9. 087572  
11719479\_ 5. 159223 5. 011324 5. 16176 5. 171503 5. 134345 5. 154349  
11719480\_ 3. 554483 3. 530434 3. 510139 3. 503743 3. 449942 3. 53475  
11719481\_ 6. 206741 6. 044875 6. 141613 6. 363614 6. 387621 6. 429851  
11719482\_ 9. 889381 9. 894076 9. 90991 9. 937366 9. 919992 9. 920505  
11719483\_ 6. 251906 6. 300881 6. 348537 6. 271833 6. 320183 6. 311951  
11719484\_ 7. 458612 7. 411673 7. 458612 7. 645022 7. 505522 7. 594719

11719485\_ 7. 269747 7. 164857 7. 28608 7. 429738 7. 353949 7. 417811  
11719486\_ 9. 876765 9. 820807 9. 841589 9. 498742 9. 494846 9. 532043  
11719487\_ 7. 430638 7. 349357 7. 563405 6. 37183 6. 469011 6. 301583  
11719488\_ 3. 41774 3. 492637 3. 230404 3. 621892 3. 450269 3. 333108  
11719489\_ 3. 244822 3. 141297 3. 295903 3. 261186 3. 199483 3. 189394  
11719490\_ 9. 537272 9. 529712 9. 604787 9. 27392 9. 342718 9. 323906  
11719491\_ 6. 936557 6. 898793 6. 997934 7. 146306 7. 17458 7. 228594  
11719492\_ 7. 69207 7. 607155 7. 635954 7. 856672 7. 936756 7. 874579  
11719493\_ 8. 561074 8. 557125 8. 503829 8. 440168 8. 402934 8. 377409  
11719494\_ 6. 631711 6. 53748 6. 605705 6. 208282 6. 232614 6. 212602  
11719495\_ 9. 70113 9. 737207 9. 686165 9. 772636 9. 762865 9. 814527  
11719496\_ 2. 614092 2. 800416 2. 671919 2. 950192 2. 926264 2. 788424  
11719497\_ 6. 188155 6. 431763 6. 207381 6. 256741 6. 383618 6. 300643  
11719498\_ 8. 875787 8. 750172 8. 812675 8. 318047 8. 35428 8. 254033  
11719499\_ 5. 333723 5. 124906 5. 150357 5. 26034 5. 351118 5. 337254  
11719500\_ 9. 984087 10. 07744 9. 909368 9. 993355 9. 848927 9. 834889  
11719501\_ 8. 18574 8. 167986 8. 251158 8. 217708 8. 186459 8. 234287  
11719502\_ 9. 132045 9. 062033 9. 106093 8. 91437 8. 965771 8. 949139  
11719503\_ 9. 407377 9. 467544 9. 444994 9. 250656 9. 255815 9. 185201  
11719504\_ 7. 03266 7. 040651 7. 013189 7. 064141 7. 111737 7. 044495  
11719505\_ 8. 245041 8. 2497 8. 345013 8. 268183 8. 256852 8. 168229  
11719506\_ 9. 828675 9. 80036 9. 832656 9. 674003 9. 659383 9. 654826  
11719507\_ 5. 862597 5. 718293 6. 044285 6. 370526 6. 338278 6. 372053  
11719508\_ 6. 440165 6. 334115 6. 429541 6. 912377 6. 844586 6. 971583  
11719509\_ 6. 919494 6. 756426 6. 907554 7. 340973 7. 355695 7. 339492  
11719510\_ 6. 432087 6. 365861 6. 486148 6. 85918 6. 678743 6. 774711  
11719511\_ 7. 499886 7. 507019 7. 631167 8. 326643 8. 307113 8. 351881  
11719512\_ 7. 185379 7. 090958 7. 204711 7. 521345 7. 499153 7. 545781  
11719513\_ 8. 26861 8. 187327 8. 341091 8. 40937 8. 529504 8. 481201  
11719514\_ 8. 533142 8. 525674 8. 561071 8. 560682 8. 591815 8. 602209  
11719515\_ 8. 462775 8. 401079 8. 403379 8. 199874 8. 23889 8. 321912  
11719516\_ 8. 225334 8. 148147 8. 159286 7. 805032 7. 786294 7. 813285  
11719517\_ 5. 810167 5. 742006 5. 768731 5. 467217 5. 426098 5. 52764  
11719518\_ 3. 355472 3. 26162 3. 311951 3. 126355 3. 143938 3. 256744  
11719519\_ 2. 966307 2. 966928 3. 138626 3. 03647 3. 092377 2. 774677  
11719520\_ 4. 390718 4. 422106 4. 189452 4. 03569 4. 154076 4. 218138  
11719521\_ 5. 07788 5. 309674 5. 084177 4. 885795 4. 865725 4. 999648  
11719522\_ 4. 954928 5. 008297 4. 923561 4. 992243 5. 050204 4. 795699  
11719523\_ 8. 392725 8. 285574 8. 399567 8. 395674 8. 425952 8. 405019  
11719524\_ 5. 982199 5. 861261 5. 83846 5. 921644 5. 960315 5. 922714  
11719525\_ 8. 272309 8. 248085 8. 241314 7. 206747 7. 170824 7. 186218  
11719526\_ 7. 251041 7. 311464 7. 185927 7. 389759 7. 37929 7. 406704  
11719527\_ 3. 050519 3. 147033 3. 000463 3. 081109 3. 081109 3. 087673  
11719528\_ 7. 381856 7. 319148 7. 447973 7. 053088 7. 047018 7. 1111  
11719529\_ 6. 332269 6. 435397 6. 385358 6. 437414 6. 451701 6. 524606  
11719530\_ 6. 070832 6. 153611 6. 116206 6. 22852 6. 288176 6. 299552  
11719531\_ 8. 344274 8. 356352 8. 376827 6. 567247 6. 794656 6. 772652  
11719532\_ 6. 814247 6. 852002 6. 884962 6. 882207 6. 851792 6. 924245  
11719533\_ 7. 677192 7. 551916 7. 694077 7. 507511 7. 468075 7. 489982  
11719534\_ 8. 504343 8. 418211 8. 493234 8. 338899 8. 335797 8. 329251  
11719535\_ 6. 578035 6. 472039 6. 355202 6. 642921 6. 64851 6. 688191

11719536\_ 5. 714306 5. 716233 5. 901639 5. 60058 5. 787782 5. 799769  
11719537\_ 4. 425382 4. 53746 4. 435796 4. 524193 4. 633256 4. 636271  
11719538\_ 2. 449301 2. 408413 2. 552858 2. 541878 2. 63677 2. 552858  
11719539\_ 7. 462172 7. 47929 7. 456009 7. 720368 7. 74143 7. 787658  
11719540\_ 5. 980194 5. 969733 6. 010118 5. 821215 5. 869487 5. 83511  
11719541\_ 8. 155479 8. 263676 8. 278011 8. 071283 8. 014422 8. 075826  
11719542\_ 8. 433912 8. 347753 8. 38859 8. 202839 8. 173065 8. 143816  
11719543\_ 3. 963975 4. 150517 3. 763621 4. 289094 4. 432554 4. 04501  
11719544\_ 6. 316347 6. 300643 6. 287176 6. 343037 6. 476011 6. 461561  
11719545\_ 5. 930957 5. 910539 5. 977549 6. 042614 6. 207176 6. 156443  
11719546\_ 6. 82541 6. 835745 6. 840629 6. 341891 6. 348114 6. 397452  
11719547\_ 5. 309876 5. 193859 5. 335643 4. 811568 4. 742011 4. 868094  
11719548\_ 7. 182008 7. 047872 7. 157346 6. 691187 6. 740349 6. 626577  
11719549\_ 3. 776761 3. 909593 3. 67299 3. 794458 3. 64415 3. 646393  
11719550\_ 4. 12332 3. 909593 3. 756622 3. 695747 3. 582089 3. 695389  
11719551\_ 5. 377502 5. 242271 5. 361439 5. 07885 5. 188251 5. 20417  
11719552\_ 5. 141825 5. 017251 5. 262956 4. 679747 4. 691149 4. 770198  
11719553\_ 8. 082769 8. 174519 8. 090526 7. 964499 7. 999296 8. 028811  
11719554\_ 6. 617088 6. 73109 6. 706553 6. 228723 6. 191048 6. 235386  
11719555\_ 5. 775742 5. 733763 5. 770016 5. 981972 5. 86022 5. 807362  
11719556\_ 6. 61729 6. 579822 6. 428975 6. 658323 6. 711956 6. 751524  
11719557\_ 6. 735416 6. 777219 6. 879003 6. 728534 6. 78287 6. 82351  
11719558\_ 7. 19891 7. 091695 7. 145608 7. 098857 7. 098857 7. 05455  
11719559\_ 6. 508821 6. 700998 6. 456638 6. 663807 6. 809959 6. 604265  
11719560\_ 6. 900497 6. 772149 6. 954405 7. 047715 7. 03186 7. 085641  
11719561\_ 7. 217262 7. 076962 7. 184855 7. 216647 7. 241594 7. 224086  
11719562\_ 6. 982417 6. 895848 7. 007439 6. 927061 6. 781547 6. 892065  
11719563\_ 5. 76859 5. 69501 5. 828369 5. 685028 5. 844559 5. 918347  
11719564\_ 10. 70428 10. 65433 10. 70816 10. 70994 10. 68708 10. 71224  
11719565\_ 7. 843287 7. 781224 7. 866465 7. 808174 7. 779103 7. 73286  
11719566\_ 10. 43983 10. 36173 10. 41227 10. 49505 10. 54395 10. 49536  
11719567\_ 7. 52381 7. 537616 7. 544833 7. 502788 7. 486785 7. 568686  
11719568\_ 8. 388673 8. 403192 8. 454165 8. 640613 8. 704463 8. 685432  
11719569\_ 10. 16121 10. 13499 10. 21209 10. 39692 10. 44179 10. 42147  
11719570\_ 6. 429478 6. 394028 6. 489523 6. 24786 6. 233521 6. 319927  
11719571\_ 8. 486012 8. 431646 8. 428594 7. 326081 7. 181599 7. 367735  
11719572\_ 7. 142525 7. 154867 7. 185281 7. 45117 7. 434587 7. 549425  
11719573\_ 8. 363685 8. 347431 8. 30511 8. 953233 8. 874817 8. 86665  
11719574\_ 7. 937839 7. 955799 7. 993544 7. 736513 7. 795916 7. 747357  
11719575\_ 8. 744356 8. 727965 8. 690975 8. 599776 8. 565404 8. 562563  
11719576\_ 4. 595148 4. 627425 4. 549534 4. 575032 4. 532752 4. 448831  
11719577\_ 7. 598813 7. 566723 7. 450724 7. 569876 7. 65664 7. 647274  
11719578\_ 5. 86907 5. 918165 5. 797402 5. 936698 5. 839855 5. 995989  
11719579\_ 8. 502863 8. 51141 8. 528119 8. 561587 8. 617562 8. 54576  
11719580\_ 9. 987921 10. 02873 10. 05337 10. 22523 10. 23155 10. 22887  
11719581\_ 5. 987306 5. 89443 5. 89443 6. 097927 6. 104931 6. 047107  
11719582\_ 3. 198407 3. 261419 3. 219983 3. 101435 3. 282995 3. 298778  
11719583\_ 5. 487537 5. 640908 5. 699611 6. 3084 6. 201476 6. 073142  
11719584\_ 5. 654674 5. 345598 5. 545619 6. 523484 6. 33419 6. 424498  
11719585\_ 5. 401202 5. 354442 5. 265458 6. 169131 6. 175619 6. 292623  
11719586\_ 6. 433862 6. 525072 6. 525072 6. 557477 6. 510423 6. 55872

11719587\_ 9. 394095 9. 465327 9. 418118 9. 826924 9. 811854 9. 780474  
11719588\_ 4. 9226 5. 17995 5. 091075 5. 17633 5. 148552 5. 138905  
11719589\_ 7. 334703 7. 4117 7. 392181 7. 172204 7. 120636 7. 189848  
11719590\_ 9. 951971 9. 930597 9. 998612 9. 748367 9. 785617 9. 727244  
11719591\_ 8. 846175 8. 849706 8. 897742 8. 771319 8. 720823 8. 775389  
11719592\_ 6. 67074 6. 704762 6. 720937 6. 472453 6. 462693 6. 544244  
11719593\_ 6. 592992 6. 520387 6. 752593 7. 042516 7. 021108 7. 058348  
11719594\_ 7. 494889 7. 459391 7. 559658 7. 86908 7. 935425 7. 897094  
11719595\_ 5. 727241 5. 830216 5. 673504 5. 728863 5. 716704 5. 640062  
11719596\_ 8. 988673 8. 886189 8. 976273 8. 689103 8. 722884 8. 75573  
11719597\_ 7. 85346 7. 751176 7. 845909 7. 698707 7. 645988 7. 666369  
11719598\_ 7. 556912 7. 426223 7. 470379 8. 318203 8. 208617 8. 238135  
11719599\_ 6. 121793 6. 101232 6. 03089 6. 206804 6. 111101 6. 101255  
11719600\_ 6. 1625 6. 06671 6. 131255 6. 244313 6. 227802 6. 244313  
11719601\_ 6. 110165 6. 264493 5. 985964 5. 722966 5. 949776 5. 900218  
11719602\_ 5. 614563 5. 580513 5. 643713 5. 405239 5. 426098 5. 408987  
11719603\_ 6. 920629 6. 727853 6. 810237 7. 272117 7. 303672 7. 30283  
11719604\_ 6. 854981 6. 800041 6. 80101 7. 330326 7. 285032 7. 323031  
11719605\_ 7. 832615 7. 900537 7. 902416 7. 741217 7. 85343 7. 725208  
11719606\_ 7. 714402 7. 700101 7. 740119 7. 50075 7. 519987 7. 47195  
11719607\_ 8. 009697 7. 926402 8. 004745 7. 659347 7. 735504 7. 703088  
11719608\_ 7. 995257 8. 006656 7. 898994 8. 058288 7. 960217 7. 848537  
11719609\_ 9. 019577 8. 913503 9. 058396 8. 747617 8. 722915 8. 751621  
11719610\_ 9. 299578 9. 326458 9. 332924 8. 985379 9. 014936 9. 031597  
11719611\_ 7. 313987 7. 223189 7. 36365 7. 077621 7. 007064 7. 101486  
11719612\_ 7. 534357 7. 50047 7. 604815 7. 317602 7. 293968 7. 299162  
11719613\_ 9. 544129 9. 559842 9. 511235 9. 122524 9. 087658 9. 018515  
11719614\_ 7. 446201 7. 373144 7. 511643 8. 551793 8. 568347 8. 508249  
11719615\_ 8. 897775 8. 803529 8. 794429 9. 934494 9. 84213 9. 883261  
11719616\_ 7. 683506 7. 569801 7. 643051 7. 236262 7. 236298 7. 145587  
11719617\_ 7. 434587 7. 352391 7. 446296 7. 602927 7. 65419 7. 651953  
11719618\_ 7. 941142 7. 86735 7. 924794 8. 302185 8. 300711 8. 385841  
11719619\_ 5. 616201 5. 324389 5. 674694 6. 047725 5. 957997 6. 016031  
11719620\_ 6. 376496 6. 389224 6. 402613 6. 42291 6. 382833 6. 369444  
11719621\_ 6. 248717 6. 161386 6. 242845 6. 098483 6. 207919 6. 048474  
11719622\_ 5. 817221 5. 721532 5. 762643 5. 934154 5. 821884 6. 108561  
11719623\_ 4. 748795 4. 643717 4. 729503 4. 776504 4. 773973 4. 772751  
11719624\_ 7. 564425 7. 667243 7. 618451 7. 385441 7. 392009 7. 458484  
11719625\_ 9. 502832 9. 397307 9. 457301 9. 146545 9. 216214 9. 167064  
11719626\_ 4. 997356 5. 088549 5. 025723 4. 914651 4. 752963 4. 866013  
11719627\_ 5. 009549 4. 857204 5. 022303 4. 786176 4. 62878 4. 901485  
11719628\_ 3. 743648 3. 857306 3. 871284 3. 947456 3. 937385 3. 953273  
11719629\_ 6. 27355 6. 16992 6. 322523 6. 27083 6. 249967 6. 396542  
11719630\_ 10. 05794 10. 07315 10. 08034 9. 960503 9. 948293 9. 954628  
11719631\_ 7. 266738 7. 146765 7. 099495 6. 869102 6. 75121 6. 846889  
11719632\_ 6. 935141 6. 82995 6. 941848 6. 742151 6. 653214 6. 713446  
11719633\_ 7. 111599 7. 009074 7. 194641 6. 496797 6. 469803 6. 378225  
11719634\_ 8. 096091 7. 970253 8. 064823 6. 391544 6. 515098 6. 421549  
11719635\_ 7. 862204 7. 788724 7. 88724 7. 647976 7. 674729 7. 737149  
11719636\_ 9. 196672 9. 106432 9. 128377 9. 087892 8. 979253 9. 049529  
11719637\_ 6. 690937 6. 888793 6. 837555 7. 40057 7. 344183 7. 26686



11719638\_ 4. 367438 4. 40461 4. 472352 4. 213226 4. 003311 4. 018524  
11719639\_ 5. 105515 5. 189628 5. 092163 5. 102325 5. 087713 4. 963144  
11719640\_ 7. 959973 7. 90929 8. 0548 7. 874386 7. 882556 7. 884293  
11719641\_ 6. 553443 6. 332686 6. 447239 5. 961538 5. 869059 5. 870338  
11719642\_ 6. 925822 6. 983243 7. 116576 5. 833941 5. 736339 5. 811188  
11719643\_ 6. 529216 6. 464893 6. 624371 5. 306756 5. 265212 5. 371063  
11719644\_ 7. 301129 7. 199962 7. 240582 7. 630563 7. 625509 7. 593665  
11719645\_ 4. 863023 5. 072442 4. 946684 5. 2012 5. 141947 5. 200731  
11719646\_ 9. 268658 9. 217958 9. 243833 9. 229363 9. 196828 9. 228946  
11719647\_ 7. 085223 6. 961704 7. 144612 7. 32557 7. 385066 7. 330453  
11719648\_ 7. 390717 7. 23412 7. 341095 7. 801037 7. 645436 7. 714183  
11719649\_ 7. 903765 7. 737656 7. 905321 7. 377249 7. 37071 7. 467261  
11719650\_ 8. 200783 8. 125365 8. 172979 7. 97997 7. 944544 8. 041341  
11719651\_ 3. 348059 3. 521646 3. 272401 3. 041472 3. 146514 3. 185183  
11719652\_ 2. 524926 2. 47102 2. 525284 2. 605516 2. 544406 2. 568046  
11719653\_ 7. 042988 6. 959278 6. 972009 7. 118889 7. 17799 7. 192633  
11719654\_ 5. 894697 5. 860076 5. 914408 6. 300643 6. 230875 6. 101761  
11719655\_ 6. 229062 6. 197472 6. 362745 6. 399794 6. 399804 6. 448619  
11719656\_ 4. 16452 4. 163483 4. 023418 4. 039475 4. 256896 4. 200678  
11719657\_ 5. 572866 5. 674996 5. 589853 5. 343131 5. 409157 5. 343583  
11719658\_ 3. 999334 3. 878729 3. 851413 4. 052746 3. 943195 4. 074199  
11719659\_ 5. 766239 5. 842945 5. 760887 5. 904375 6. 007667 5. 828562  
11719660\_ 3. 121419 3. 031906 3. 121419 3. 238759 3. 121419 2. 922146  
11719661\_ 7. 277149 7. 12694 7. 198455 6. 728704 6. 619895 6. 746866  
11719662\_ 7. 979424 7. 849172 7. 954181 7. 432088 7. 348966 7. 369907  
11719663\_ 9. 715953 9. 724037 9. 70202 9. 612671 9. 542384 9. 612161  
11719664\_ 7. 973543 7. 958304 8. 114832 7. 895275 7. 803377 7. 895825  
11719665\_ 9. 362298 9. 277773 9. 319174 8. 944118 8. 90995 8. 855372  
11719666\_ 10. 58671 10. 64286 10. 61189 10. 95616 10. 9863 10. 89849  
11719667\_ 11. 6643 11. 68869 11. 64743 11. 90224 11. 87263 11. 88762  
11719668\_ 6. 300643 6. 223607 6. 184566 6. 244666 6. 138633 6. 034113  
11719669\_ 7. 230373 7. 153485 7. 321883 7. 125437 7. 154768 7. 167447  
11719670\_ 4. 085456 4. 341908 4. 073795 4. 260911 4. 239445 4. 227858  
11719671\_ 3. 109175 2. 998483 2. 929779 2. 817231 3. 033452 3. 063222  
11719672\_ 6. 517609 6. 521286 6. 201485 6. 324816 6. 475481 6. 457476  
11719673\_ 4. 875173 4. 923466 4. 875366 4. 92549 5. 101096 4. 92549  
11719674\_ 2. 265535 2. 131233 2. 265535 2. 280776 2. 301625 2. 231191  
11719675\_ 4. 184314 4. 211906 4. 052219 4. 131267 4. 0271 4. 087597  
11719676\_ 6. 845428 6. 655758 6. 840078 6. 653512 6. 64395 6. 759448  
11719677\_ 7. 542631 7. 531996 7. 538953 7. 72983 7. 657976 7. 816269  
11719678\_ 7. 722947 7. 57723 7. 735118 7. 721323 7. 776995 7. 728639  
11719679\_ 6. 351889 6. 351889 6. 307394 6. 567247 6. 431763 6. 601313  
11719680\_ 9. 098896 9. 016478 9. 011823 9. 698377 9. 673006 9. 649543  
11719681\_ 7. 053711 6. 980956 7. 026169 6. 869499 6. 869499 6. 832381  
11719682\_ 11. 08488 11. 09694 11. 09405 11. 04877 11. 06626 10. 99395  
11719683\_ 7. 03437 7. 006659 7. 002369 7. 301532 7. 416559 7. 29994  
11719684\_ 3. 0583 3. 077422 2. 88707 3. 184776 2. 98801 3. 16662  
11719685\_ 3. 662714 3. 558531 3. 513371 3. 749616 3. 687957 3. 783851  
11719686\_ 7. 088529 7. 164543 7. 251079 7. 049065 6. 97661 6. 953763  
11719687\_ 7. 75254 7. 636589 7. 767571 7. 37789 7. 367735 7. 464845  
11719688\_ 7. 141733 7. 120691 7. 227845 7. 316168 7. 394174 7. 378114

11719689\_ 7. 211029 7. 096586 7. 172152 7. 236405 7. 221091 7. 201258  
11719690\_ 8. 099997 8. 104754 7. 986118 8. 760426 8. 70221 8. 562814  
11719691\_ 8. 258888 8. 251551 8. 148451 8. 910951 8. 776141 8. 719843  
11719692\_ 5. 168182 5. 043399 5. 158017 4. 830628 4. 558737 4. 709692  
11719693\_ 7. 943903 7. 836019 7. 905719 7. 996094 7. 927871 7. 923944  
11719694\_ 7. 894958 7. 939589 7. 880341 7. 982943 7. 875766 7. 870284  
11719695\_ 8. 48849 8. 416689 8. 37181 8. 437699 8. 465155 8. 352389  
11719696\_ 8. 297254 8. 29097 8. 271013 8. 319435 8. 344206 8. 231644  
11719697\_ 7. 393732 7. 215221 7. 314675 8. 863646 8. 940389 8. 907783  
11719698\_ 8. 169871 8. 06571 8. 102692 9. 709976 9. 726494 9. 696598  
11719699\_ 6. 078875 5. 997722 6. 103752 7. 086756 7. 040582 7. 062278  
11719700\_ 6. 491992 6. 471123 6. 544899 7. 022187 7. 010994 7. 130426  
11719701\_ 7. 889234 7. 84426 7. 847623 8. 361789 8. 346165 8. 467753  
11719702\_ 8. 261288 8. 239725 8. 324648 8. 381199 8. 400858 8. 43397  
11719703\_ 8. 101405 8. 051579 8. 104193 8. 138051 8. 216722 8. 183644  
11719704\_ 6. 69541 6. 689369 6. 64667 6. 852459 6. 855599 6. 810022  
11719705\_ 8. 071764 8. 009015 8. 132465 8. 246936 8. 280422 8. 229549  
11719706\_ 8. 813763 8. 778815 8. 878547 8. 759161 8. 826048 8. 740239  
11719707\_ 6. 257046 6. 178084 6. 287715 6. 685903 6. 621199 6. 718334  
11719708\_ 7. 044113 6. 876112 7. 092011 6. 828673 6. 910833 6. 887669  
11719709\_ 7. 437404 7. 409349 7. 446949 7. 177407 7. 32591 7. 193066  
11719710\_ 8. 232659 8. 206552 8. 313335 8. 056518 8. 144102 8. 169909  
11719711\_ 6. 096166 6. 206103 6. 300597 5. 749518 5. 878551 5. 863356  
11719712\_ 8. 536327 8. 481816 8. 547224 8. 2731 8. 287523 8. 388277  
11719713\_ 7. 784569 7. 707047 7. 766006 7. 457221 7. 374996 7. 409768  
11719714\_ 7. 660182 7. 62471 7. 624722 7. 212651 7. 299162 7. 343922  
11719715\_ 10. 38982 10. 37876 10. 41656 10. 31476 10. 30327 10. 26121  
11719716\_ 4. 126661 3. 924636 4. 176031 4. 53036 4. 356903 4. 450017  
11719717\_ 11. 22836 11. 23824 11. 27522 11. 37278 11. 36376 11. 34068  
11719718\_ 3. 929309 4. 044229 4. 160721 4. 07274 3. 948299 4. 086653  
11719719\_ 6. 000648 6. 1182 6. 069567 6. 292868 6. 21183 6. 203124  
11719720\_ 9. 793637 9. 754788 9. 837164 10. 02854 10. 0717 10. 04879  
11719721\_ 9. 519011 9. 41822 9. 507309 9. 652856 9. 711683 9. 688657  
11719722\_ 6. 925162 6. 73123 6. 884429 6. 836048 6. 857038 6. 743158  
11719723\_ 6. 527674 6. 429114 6. 493931 6. 17867 6. 200721 6. 179378  
11719724\_ 6. 263567 6. 018113 6. 318829 5. 777934 5. 702302 5. 691166  
11719725\_ 9. 636075 9. 594814 9. 634505 9. 723547 9. 757382 9. 696722  
11719726\_ 9. 207985 9. 172397 9. 169945 9. 058945 9. 099318 9. 141334  
11719727\_ 6. 308972 6. 276864 6. 325853 6. 380355 6. 387974 6. 442573  
11719728\_ 5. 908738 6. 004362 5. 870242 5. 975348 6. 147186 6. 405621  
11719729\_ 3. 827963 4. 063953 4. 130847 4. 125933 3. 894903 3. 999727  
11719730\_ 6. 251029 6. 047997 6. 284182 6. 196115 6. 210404 6. 297538  
11719731\_ 7. 646051 7. 687632 7. 789935 7. 31683 7. 290161 7. 329625  
11719732\_ 8. 958104 8. 861055 8. 928672 8. 310904 8. 281187 8. 290855  
11719733\_ 8. 766021 8. 620413 8. 735083 8. 840762 8. 88449 8. 812696  
11719734\_ 8. 299566 8. 339791 8. 295962 8. 204812 8. 25965 8. 234659  
11719735\_ 9. 944918 9. 879174 9. 898233 9. 812762 9. 820922 9. 821531  
11719736\_ 7. 522216 7. 460503 7. 609349 7. 600673 7. 480685 7. 582525  
11719737\_ 6. 747402 6. 699517 6. 837642 6. 660519 6. 656673 6. 633363  
11719738\_ 8. 540432 8. 551682 8. 565829 7. 328497 7. 265532 7. 293859  
11719739\_ 10. 08161 9. 990716 10. 03283 8. 832556 8. 783476 8. 801033

11719740\_ 5. 841327 5. 687603 5. 890367 3. 732756 4. 178775 3. 785753  
11719741\_ 6. 742568 6. 612181 6. 785734 5. 700302 5. 708945 5. 792158  
11719742\_ 9. 435651 9. 414448 9. 390257 9. 167903 9. 086115 9. 066048  
11719743\_ 5. 267705 5. 2666 5. 310506 5. 161005 5. 429836 5. 312401  
11719744\_ 4. 856711 4. 884142 4. 887343 4. 841747 4. 93837 4. 884142  
11719745\_ 5. 968975 6. 065802 5. 92528 5. 895135 5. 955388 5. 886087  
11719746\_ 7. 382311 7. 230373 7. 384418 6. 804732 6. 700371 6. 756972  
11719747\_ 8. 752474 8. 695791 8. 877147 9. 270367 9. 296658 9. 296774  
11719748\_ 8. 822654 8. 806265 8. 860629 8. 539749 8. 560595 8. 564131  
11719749\_ 10. 61535 10. 60386 10. 61555 10. 80973 10. 78004 10. 82019  
11719750\_ 8. 07189 8. 08606 8. 178225 8. 287379 8. 285849 8. 300711  
11719751\_ 5. 92735 5. 8574 5. 900471 6. 107515 6. 14543 6. 141243  
11719752\_ 6. 831572 6. 7277 6. 690199 7. 209876 7. 374996 7. 281172  
11719753\_ 5. 539399 5. 460271 5. 391461 5. 232643 5. 239672 5. 273345  
11719754\_ 4. 287841 3. 860903 4. 088128 4. 226637 4. 130568 3. 825353  
11719755\_ 9. 680601 9. 680937 9. 661227 9. 887636 9. 896171 9. 782444  
11719756\_ 9. 028998 8. 987192 8. 986913 9. 19207 9. 157814 9. 173986  
11719757\_ 6. 61974 6. 736856 6. 539428 6. 635763 6. 61974 6. 722131  
11719758\_ 8. 440236 8. 396832 8. 509555 8. 286911 8. 216858 8. 240845  
11719759\_ 11. 6637 11. 63084 11. 66263 11. 71074 11. 72696 11. 68916  
11719760\_ 5. 214709 5. 002621 5. 196457 5. 295307 5. 336348 5. 378522  
11719761\_ 5. 212991 5. 053628 5. 106258 5. 598055 5. 575831 5. 452283  
11719762\_ 7. 634777 7. 549035 7. 655439 7. 923665 8. 008769 7. 962752  
11719763\_ 8. 740913 8. 664897 8. 757279 8. 260504 8. 211864 8. 219488  
11719764\_ 6. 851126 6. 929296 6. 874408 6. 851295 6. 812996 6. 899705  
11719765\_ 6. 118838 6. 253337 6. 146386 6. 173161 6. 167015 6. 178979  
11719766\_ 3. 743624 4. 09529 3. 934162 3. 824527 3. 96784 3. 95605  
11719767\_ 4. 821627 5. 066608 4. 678374 5. 108602 4. 935932 5. 040413  
11719768\_ 5. 644999 5. 441151 5. 691581 6. 041928 6. 060139 6. 07989  
11719769\_ 7. 154096 7. 085517 7. 092611 6. 587409 6. 468151 6. 595519  
11719770\_ 7. 007439 6. 898854 6. 936769 7. 020202 7. 054248 7. 042517  
11719771\_ 4. 965573 4. 990349 5. 015977 5. 261573 5. 417369 5. 427296  
11719772\_ 7. 746099 7. 718884 7. 620471 8. 183649 7. 968717 7. 928736  
11719773\_ 9. 684173 9. 597337 9. 679357 9. 832914 9. 810355 9. 872513  
11719774\_ 7. 579907 7. 532045 7. 64382 6. 860713 6. 882851 6. 780228  
11719775\_ 8. 06424 8. 027535 8. 193979 7. 230373 7. 37181 7. 394539  
11719776\_ 6. 840494 6. 879916 6. 850651 6. 549137 6. 642241 6. 421898  
11719777\_ 5. 319886 5. 370118 5. 395654 5. 429002 5. 466139 5. 535959  
11719778\_ 6. 656162 6. 623208 6. 596083 6. 621446 6. 635556 6. 603908  
11719779\_ 9. 509515 9. 481688 9. 522914 8. 940584 8. 905795 8. 931338  
11719780\_ 4. 43497 4. 509939 4. 336503 4. 502345 4. 573688 4. 517532  
11719781\_ 6. 003018 6. 023499 5. 879632 6. 103569 6. 058124 5. 982173  
11719782\_ 12. 92479 12. 94547 12. 91413 13. 13924 13. 13063 13. 13396  
11719783\_ 12. 86924 12. 84359 12. 8417 12. 95533 12. 97992 12. 97576  
11719784\_ 8. 824943 8. 729338 8. 767754 8. 710553 8. 680596 8. 688339  
11719785\_ 6. 38662 6. 509561 6. 475287 6. 741434 6. 696751 6. 685285  
11719786\_ 7. 505116 7. 46774 7. 584845 7. 505116 7. 465831 7. 577778  
11719787\_ 8. 63668 8. 553873 8. 647441 8. 910437 8. 930025 8. 917938  
11719788\_ 9. 866388 9. 786921 9. 819019 9. 578769 9. 52013 9. 571251  
11719789\_ 9. 539176 9. 463153 9. 499626 9. 241132 9. 19909 9. 215211  
11719790\_ 6. 496368 6. 317769 6. 303728 6. 476847 6. 456943 6. 544244

11719791\_ 10. 52431 10. 47448 10. 53219 9. 765626 9. 757705 9. 739872  
11719792\_ 8. 69133 8. 713131 8. 706977 7. 837375 7. 924013 7. 889077  
11719793\_ 7. 924803 8. 009625 7. 818084 8. 016665 8. 084295 8. 04419  
11719794\_ 7. 367724 7. 315474 7. 309945 7. 619033 7. 712681 7. 748159  
11719795\_ 6. 002712 5. 919713 6. 076939 6. 414326 6. 442612 6. 451129  
11719796\_ 6. 607448 6. 462688 6. 559836 7. 003559 7. 001821 7. 000858  
11719797\_ 6. 858285 6. 837965 6. 942812 6. 815823 6. 844553 6. 857644  
11719798\_ 8. 270447 8. 183097 8. 335347 8. 329392 8. 322078 8. 333629  
11719799\_ 8. 654618 8. 556665 8. 643543 8. 658104 8. 630239 8. 661309  
11719800\_ 8. 693775 8. 736451 8. 701 9. 329725 9. 275185 9. 200485  
11719801\_ 8. 322916 8. 194454 8. 26983 8. 519629 8. 521162 8. 456104  
11719802\_ 8. 259061 8. 249367 8. 268558 7. 856474 7. 824141 7. 899361  
11719803\_ 8. 335439 8. 204079 8. 2527 8. 500858 8. 532336 8. 541922  
11719804\_ 2. 867463 3. 026845 3. 176853 2. 670339 2. 670339 2. 546077  
11719805\_ 5. 014073 5. 065372 5. 114984 4. 824195 5. 035505 5. 124156  
11719806\_ 2. 047763 2. 245543 2. 223371 2. 006922 1. 90266 2. 112855  
11719807\_ 8. 160071 8. 09118 8. 196648 7. 948338 7. 897815 7. 937969  
11719808\_ 6. 412058 6. 377847 6. 541665 6. 416971 6. 366235 6. 219011  
11719809\_ 6. 748816 6. 710892 6. 70959 6. 627148 6. 634698 6. 564147  
11719810\_ 9. 556686 9. 532412 9. 549495 9. 485911 9. 488834 9. 490438  
11719811\_ 8. 440725 8. 294334 8. 461421 8. 693643 8. 68552 8. 672573  
11719812\_ 5. 956607 5. 967992 5. 990191 5. 614275 5. 749963 5. 788422  
11719813\_ 8. 955635 8. 825456 8. 862784 8. 31739 8. 332213 8. 318144  
11719814\_ 3. 830941 4. 244728 4. 053686 4. 43489 4. 493841 4. 524945  
11719815\_ 7. 778536 7. 812979 7. 686743 7. 815563 7. 796149 7. 804583  
11719816\_ 7. 367937 7. 27368 7. 295938 7. 202263 7. 306776 7. 248251  
11719817\_ 6. 247485 6. 146568 6. 239181 6. 208607 6. 205477 6. 149691  
11719818\_ 4. 022039 4. 006877 4. 026092 4. 017577 4. 094191 4. 200678  
11719819\_ 8. 890272 8. 851618 8. 854075 8. 822464 8. 727511 8. 711193  
11719820\_ 7. 940935 7. 914005 7. 861551 7. 632257 7. 625076 7. 717857  
11719821\_ 6. 599923 6. 546844 6. 586939 6. 282224 6. 367584 6. 39335  
11719822\_ 6. 559113 6. 45254 6. 548831 6. 243776 6. 191884 6. 324104  
11719823\_ 6. 12579 6. 194982 6. 115374 6. 223857 6. 19926 6. 379099  
11719824\_ 7. 309416 7. 27575 7. 292751 7. 209944 7. 271222 7. 250554  
11719825\_ 5. 394789 5. 518169 5. 501719 5. 498405 5. 396681 5. 536376  
11719826\_ 6. 180367 6. 003612 6. 116401 6. 158195 6. 182418 6. 087117  
11719827\_ 8. 639021 8. 572165 8. 619499 8. 259059 8. 147222 8. 181263  
11719828\_ 8. 481504 8. 437628 8. 426464 8. 078023 7. 922003 8. 05827  
11719829\_ 6. 781625 6. 843331 6. 902634 7. 045271 6. 99539 7. 023519  
11719830\_ 10. 01399 9. 951474 10. 00758 9. 73887 9. 778042 9. 709523  
11719831\_ 7. 643989 7. 680217 7. 812587 7. 903514 7. 955817 7. 899818  
11719832\_ 7. 98056 7. 94612 7. 978727 7. 850127 7. 826405 7. 837629  
11719833\_ 1. 911482 1. 920364 1. 738361 2. 034315 1. 998765 2. 07348  
11719834\_ 4. 12383 4. 174374 4. 061761 4. 090887 4. 090887 4. 047417  
11719835\_ 7. 73277 7. 694638 7. 780515 7. 253482 7. 301484 7. 257853  
11719836\_ 8. 214892 8. 1491 8. 232945 7. 726368 7. 737004 7. 717433  
11719837\_ 8. 152227 8. 094452 8. 139307 7. 645353 7. 654211 7. 688798  
11719838\_ 8. 91413 8. 828121 8. 83573 8. 40177 8. 406215 8. 381521  
11719839\_ 8. 290764 8. 178225 8. 270384 7. 727688 7. 734251 7. 717363  
11719840\_ 9. 078675 8. 997203 8. 984765 8. 549746 8. 604903 8. 559476  
11719841\_ 8. 308437 8. 316752 8. 335368 8. 038151 8. 173236 8. 033396

11719842\_ 9. 049192 8. 965818 9. 03537 8. 487081 8. 594227 8. 553854  
11719843\_ 8. 638687 8. 594724 8. 635942 8. 825251 8. 744305 8. 73167  
11719844\_ 8. 179332 8. 18237 8. 177212 8. 36737 8. 361166 8. 454107  
11719845\_ 7. 068811 7. 074535 7. 181845 6. 908484 6. 939856 6. 940799  
11719846\_ 8. 765715 8. 690142 8. 717023 8. 470737 8. 546776 8. 378468  
11719847\_ 6. 609939 6. 60765 6. 603462 6. 475851 6. 428705 6. 45944  
11719848\_ 6. 630179 6. 62805 6. 54521 6. 504823 6. 43153 6. 445883  
11719849\_ 10. 1201 10. 05889 10. 12406 10. 72006 10. 75292 10. 73216  
11719850\_ 2. 138927 2. 222074 2. 034526 2. 339661 2. 161771 2. 283976  
11719851\_ 9. 084492 8. 950273 9. 040733 8. 698129 8. 670048 8. 693722  
11719852\_ 7. 287897 7. 234987 7. 358974 7. 268816 7. 270708 7. 270735  
11719853\_ 9. 244766 9. 193205 9. 170139 9. 417219 9. 376106 9. 337782  
11719854\_ 8. 809182 8. 749383 8. 853772 8. 890617 8. 868161 8. 854993  
11719855\_ 5. 098021 5. 299037 5. 07376 5. 268605 5. 263583 5. 324795  
11719856\_ 5. 242528 5. 266412 5. 21723 5. 333367 5. 168031 5. 289382  
11719857\_ 7. 726856 7. 685483 7. 793832 7. 816929 7. 852216 7. 891976  
11719858\_ 9. 686224 9. 629921 9. 699475 9. 727326 9. 689605 9. 704545  
11719859\_ 7. 760348 7. 701361 7. 729319 7. 976676 8. 041004 8. 046777  
11719860\_ 8. 022796 8. 0898 8. 065107 8. 245354 8. 265951 8. 283349  
11719861\_ 6. 405885 6. 320014 6. 374921 6. 521957 6. 521803 6. 554365  
11719862\_ 5. 341994 5. 260962 5. 203279 5. 441187 5. 341299 5. 285955  
11719863\_ 7. 228165 7. 111953 7. 223491 8. 053096 8. 06037 8. 079175  
11719864\_ 8. 416855 8. 286768 8. 398722 8. 307756 8. 29323 8. 335368  
11719865\_ 6. 70713 6. 645257 6. 707866 6. 811006 7. 03871 6. 810435  
11719866\_ 5. 895518 5. 937232 5. 834029 5. 986127 5. 895518 5. 834301  
11719867\_ 4. 135171 4. 354498 4. 305717 4. 253857 4. 371059 4. 29828  
11719868\_ 5. 114608 5. 142571 5. 212751 5. 143464 4. 984669 5. 228627  
11719869\_ 1. 898324 1. 713514 1. 932633 1. 954891 1. 917262 2. 034934  
11719870\_ 2. 703479 2. 718322 2. 62439 2. 70712 2. 820156 2. 720609  
11719871\_ 3. 172395 3. 307682 3. 174995 3. 171044 3. 345059 3. 29762  
11719872\_ 8. 518241 8. 442987 8. 4674 8. 123233 8. 085906 8. 156675  
11719873\_ 7. 587659 7. 531794 7. 460306 7. 177824 7. 201044 7. 11445  
11719874\_ 6. 439257 6. 498244 6. 222756 6. 47794 6. 468239 6. 578723  
11719875\_ 9. 577497 9. 45908 9. 566774 9. 679471 9. 7316 9. 659555  
11719876\_ 3. 206462 3. 372209 3. 291003 3. 342265 3. 398236 3. 397007  
11719877\_ 8. 899342 8. 850397 8. 917854 9. 048843 9. 192793 9. 142659  
11719878\_ 8. 255956 8. 22036 8. 187937 8. 19761 8. 224118 8. 228384  
11719879\_ 4. 256067 4. 053682 4. 455378 3. 610991 3. 841194 3. 696299  
11719880\_ 7. 42504 7. 303237 7. 475158 6. 349037 6. 191028 6. 355988  
11719881\_ 8. 886857 8. 980165 8. 976044 7. 835716 7. 729464 7. 690531  
11719882\_ 7. 233174 7. 186447 7. 273049 6. 736515 6. 742488 6. 686988  
11719883\_ 4. 415436 4. 394316 4. 52373 4. 135961 4. 3438 4. 435825  
11719884\_ 5. 304348 5. 427265 5. 267041 5. 275621 5. 286626 5. 211483  
11719885\_ 6. 483294 6. 510758 6. 698642 6. 135775 6. 020875 6. 246692  
11719886\_ 7. 743679 7. 674892 7. 715356 7. 800226 7. 73988 7. 782446  
11719887\_ 6. 444193 6. 331569 6. 475319 6. 472288 6. 470515 6. 479569  
11719888\_ 6. 660519 6. 531304 6. 637989 6. 412167 6. 366235 6. 483577  
11719889\_ 4. 914426 5. 141076 4. 978266 5. 272585 5. 269187 5. 360838  
11719890\_ 7. 921495 8. 014608 8. 020641 7. 948338 7. 929387 7. 890797  
11719891\_ 8. 617164 8. 514189 8. 57941 8. 963924 8. 912605 8. 94075  
11719892\_ 5. 652541 5. 672285 5. 66982 6. 028087 5. 880514 6. 025978

11719893\_ 6. 05423 6. 209241 6. 133636 6. 20281 6. 246566 6. 212602  
11719894\_ 8. 807123 8. 833193 8. 884347 8. 681301 8. 631615 8. 658733  
11719895\_ 8. 412184 8. 401473 8. 419553 8. 219196 8. 22041 8. 2093  
11719896\_ 8. 128398 8. 095878 8. 15181 7. 558135 7. 560307 7. 497147  
11719897\_ 7. 320636 7. 343832 7. 317936 7. 847141 7. 599372 7. 59476  
11719898\_ 7. 678871 7. 618584 7. 615688 6. 770563 6. 773937 6. 711667  
11719899\_ 5. 355377 5. 355377 5. 364979 6. 163633 6. 035394 6. 100164  
11719900\_ 5. 977166 5. 857409 6. 060827 5. 946689 5. 944211 5. 857409  
11719901\_ 8. 479889 8. 499296 8. 566265 8. 529995 8. 514657 8. 529044  
11719902\_ 7. 995232 7. 960861 8. 034932 7. 65702 7. 635163 7. 725935  
11719903\_ 6. 935461 6. 875912 6. 826009 6. 404187 6. 480143 6. 498618  
11719904\_ 8. 915017 8. 831291 8. 913091 8. 738075 8. 70681 8. 791082  
11719905\_ 6. 225513 6. 318949 6. 195746 6. 300866 6. 429586 6. 289121  
11719906\_ 3. 905942 3. 656024 3. 825646 3. 690658 3. 782082 3. 836421  
11719907\_ 6. 313674 6. 305546 6. 313674 6. 283329 6. 439854 6. 438963  
11719908\_ 7. 2471 7. 046144 7. 21894 7. 015817 7. 125793 7. 055258  
11719909\_ 7. 775571 7. 693039 7. 666226 7. 599158 7. 639515 7. 60606  
11719910\_ 8. 561621 8. 579664 8. 692397 8. 518666 8. 574048 8. 561621  
11719911\_ 5. 517492 5. 568024 5. 475514 5. 710178 5. 6191 5. 767901  
11719912\_ 6. 282224 6. 058786 6. 251412 6. 279045 6. 26982 6. 368605  
11719913\_ 8. 442595 8. 315454 8. 28615 8. 152885 8. 278448 8. 164044  
11719914\_ 5. 159911 5. 339844 5. 197728 5. 088503 5. 198713 5. 422975  
11719915\_ 5. 828405 5. 932036 5. 847021 5. 857267 5. 892093 5. 663592  
11719916\_ 6. 24686 6. 232712 6. 220971 6. 101185 6. 045568 6. 128654  
11719917\_ 9. 563293 9. 67325 9. 641951 9. 351668 9. 370553 9. 346243  
11719918\_ 8. 94549 8. 902611 8. 9252 8. 578412 8. 580125 8. 575285  
11719919\_ 7. 295824 7. 231418 7. 375532 7. 074703 7. 097951 7. 064251  
11719920\_ 8. 207297 8. 07648 8. 084027 7. 802179 7. 860513 7. 895202  
11719921\_ 6. 983874 6. 782719 6. 983387 7. 167353 7. 240006 7. 238357  
11719922\_ 5. 291824 5. 350909 5. 3094 5. 569694 5. 500332 5. 63282  
11719923\_ 4. 831465 4. 646115 4. 772991 5. 188383 4. 98229 5. 095284  
11719924\_ 6. 895374 6. 754737 6. 862059 7. 598795 7. 482354 7. 606448  
11719925\_ 9. 12905 9. 20022 9. 229812 9. 164219 9. 164173 9. 134721  
11719926\_ 5. 858496 5. 797156 5. 899883 7. 055713 6. 962262 6. 988628  
11719927\_ 8. 663253 8. 556868 8. 624289 8. 689107 8. 642194 8. 680035  
11719928\_ 8. 34417 8. 297877 8. 336527 7. 530969 7. 533909 7. 595385  
11719929\_ 8. 123768 8. 138673 8. 226104 7. 78262 7. 723702 7. 84713  
11719930\_ 8. 903856 8. 86535 8. 881614 8. 723504 8. 815718 8. 784865  
11719931\_ 8. 702901 8. 699266 8. 712633 8. 564606 8. 69531 8. 611686  
11719932\_ 7. 606115 7. 602879 7. 55522 7. 408941 7. 361459 7. 373592  
11719933\_ 10. 94501 10. 89281 10. 96871 11. 23419 11. 24198 11. 25923  
11719934\_ 5. 288759 4. 983881 5. 545603 6. 832935 6. 870432 6. 914453  
11719935\_ 8. 215849 8. 209473 8. 192221 8. 094369 8. 148019 8. 159432  
11719936\_ 7. 963021 7. 868277 7. 901387 7. 694613 7. 814709 7. 674414  
11719937\_ 8. 49396 8. 497899 8. 555848 8. 56786 8. 433505 8. 538152  
11719938\_ 7. 89738 7. 849543 7. 919056 7. 669964 7. 720773 7. 634667  
11719939\_ 9. 345204 9. 3314 9. 317017 9. 596124 9. 620065 9. 541732  
11719940\_ 7. 319633 7. 277112 7. 356458 6. 946909 6. 933467 6. 856359  
11719941\_ 8. 244681 8. 139916 8. 236489 7. 881126 7. 801732 7. 883499  
11719942\_ 6. 991847 7. 162133 6. 947131 6. 995386 7. 035269 7. 092705  
11719943\_ 4. 62842 4. 476899 4. 426891 4. 661566 4. 640469 4. 65213

11719944\_ 6. 709916 6. 873283 6. 862059 7. 329268 7. 459391 7. 319312  
11719945\_ 7. 457533 7. 469719 7. 40219 7. 878971 7. 772557 8. 106304  
11719946\_ 6. 742363 6. 546076 6. 733079 6. 779439 6. 847583 6. 737329  
11719947\_ 5. 836602 5. 723148 5. 894504 5. 754172 5. 768053 5. 824302  
11719948\_ 6. 871931 6. 82502 6. 921824 6. 938978 6. 935142 6. 956558  
11719949\_ 9. 237886 9. 214685 9. 207553 9. 313505 9. 303938 9. 271482  
11719950\_ 4. 987622 4. 904629 5. 038227 4. 834669 4. 87212 4. 789962  
11719951\_ 7. 143526 6. 984071 7. 099734 6. 986563 6. 934615 6. 869902  
11719952\_ 6. 037966 6. 1725 6. 168078 5. 74691 5. 914146 5. 877306  
11719953\_ 7. 382677 7. 238078 7. 292342 7. 249461 7. 212651 7. 255004  
11719954\_ 6. 292441 6. 289587 6. 228317 6. 301007 6. 319245 6. 257359  
11719955\_ 7. 420383 7. 294803 7. 369751 7. 071993 7. 17818 7. 28696  
11719956\_ 7. 451594 7. 503933 7. 541154 7. 357926 7. 373041 7. 357926  
11719957\_ 10. 73626 10. 68228 10. 73004 10. 46412 10. 53716 10. 44279  
11719958\_ 5. 905621 5. 987224 6. 005349 6. 211801 6. 23453 6. 258123  
11719959\_ 5. 523518 5. 623932 5. 572981 6. 440955 6. 347624 6. 347572  
11719960\_ 9. 428018 9. 344346 9. 446384 9. 905085 9. 869329 9. 921859  
11719961\_ 8. 538078 8. 570592 8. 57164 9. 063373 9. 155193 9. 082152  
11719962\_ 6. 479897 6. 460977 6. 413296 6. 445987 6. 49733 6. 442739  
11719963\_ 8. 669783 8. 554534 8. 68736 8. 534803 8. 588071 8. 654612  
11719964\_ 8. 232727 8. 239529 8. 238274 7. 926504 7. 928894 7. 911125  
11719965\_ 9. 059087 9. 04599 9. 05414 9. 233608 9. 359141 9. 219526  
11719966\_ 10. 27665 10. 23361 10. 24165 10. 41408 10. 47326 10. 43659  
11719967\_ 7. 782125 7. 804508 7. 722204 7. 831673 7. 914996 7. 827323  
11719968\_ 6. 006358 5. 791655 5. 837244 6. 123343 6. 272881 6. 121768  
11719969\_ 8. 044941 7. 929802 8. 032949 7. 708389 7. 711461 7. 7355  
11719970\_ 5. 442406 5. 326156 5. 557571 6. 603739 6. 597374 6. 663701  
11719971\_ 7. 53489 7. 406609 7. 610453 8. 276466 8. 405913 8. 280261  
11719972\_ 8. 137154 7. 984253 8. 107383 8. 105583 8. 088812 8. 143611  
11719973\_ 7. 937342 7. 947557 8. 115451 7. 834241 7. 833618 7. 915255  
11719974\_ 5. 521469 5. 456591 5. 410782 5. 599979 5. 489115 5. 425345  
11719975\_ 5. 221624 5. 191519 5. 299946 4. 782221 4. 63778 4. 814719  
11719976\_ 8. 817265 8. 781343 8. 804854 8. 497499 8. 473008 8. 606421  
11719977\_ 4. 699926 4. 672545 4. 70978 4. 710414 4. 744758 4. 700243  
11719978\_ 6. 511698 6. 674491 6. 555313 6. 536243 6. 752593 6. 61658  
11719979\_ 8. 292334 8. 258798 8. 319139 8. 394271 8. 369939 8. 404163  
11719980\_ 10. 4592 10. 41473 10. 46014 9. 996533 9. 987471 9. 989627  
11719981\_ 6. 480599 6. 354838 6. 515819 6. 189726 6. 120697 6. 17981  
11719982\_ 6. 545063 6. 606325 6. 571273 6. 810038 6. 896657 6. 957183  
11719983\_ 8. 236247 8. 075258 8. 252033 8. 6493 8. 550564 8. 631266  
11719984\_ 5. 547617 5. 448296 5. 13498 5. 392143 5. 442837 5. 283076  
11719985\_ 8. 818133 8. 803684 8. 807339 8. 199707 8. 19309 8. 1813  
11719986\_ 6. 725283 6. 75638 6. 799543 6. 958833 6. 97913 6. 958146  
11719987\_ 6. 881741 6. 7006 6. 784769 6. 998064 6. 956062 6. 969293  
11719988\_ 8. 231525 8. 161657 8. 192568 8. 099574 8. 11279 8. 130323  
11719989\_ 7. 94146 7. 822621 7. 868347 7. 924523 7. 97343 7. 993992  
11719990\_ 7. 218955 7. 14117 7. 13023 7. 078521 7. 223767 7. 111889  
11719991\_ 7. 709503 7. 637737 7. 642673 7. 608808 7. 683711 7. 615792  
11719992\_ 7. 206235 7. 333003 7. 353821 6. 769795 6. 637566 6. 692014  
11719993\_ 7. 761404 7. 801352 7. 859853 7. 32409 7. 37599 7. 232088  
11719994\_ 6. 665058 6. 564709 6. 657369 5. 950238 5. 867198 5. 984645

11719995\_ 8. 523467 8. 387777 8. 51737 8. 316391 8. 345808 8. 345808  
11719996\_ 8. 456956 8. 417128 8. 531025 8. 425392 8. 448992 8. 475945  
11719997\_ 8. 841102 8. 910883 8. 917171 9. 124539 9. 185896 9. 158059  
11719998\_ 7. 823931 7. 818597 7. 856983 7. 680457 7. 699654 7. 704904  
11719999\_ 6. 087538 6. 012457 6. 011768 6. 046042 6. 008791 6. 050528  
11720000\_ 7. 10063 6. 945554 7. 060466 7. 604825 7. 610833 7. 605797  
11720001\_ 7. 258625 7. 288342 7. 269249 7. 204449 7. 14431 7. 298188  
11720002\_ 6. 847488 6. 948613 6. 948613 6. 930588 6. 888285 6. 973652  
11720003\_ 4. 195817 4. 290885 4. 098844 4. 271109 4. 280404 4. 247797  
11720004\_ 6. 096181 6. 076709 5. 982798 6. 072939 6. 086768 6. 054108  
11720005\_ 5. 222103 5. 104383 5. 087702 4. 798327 4. 747635 4. 891235  
11720006\_ 6. 444919 6. 641531 6. 555343 6. 651944 6. 658147 6. 571241  
11720007\_ 3. 494369 3. 665667 3. 635679 3. 54116 3. 556861 3. 597812  
11720008\_ 3. 605647 3. 789559 3. 676691 3. 988066 3. 705625 3. 712449  
11720009\_ 6. 731986 6. 730697 6. 716932 6. 722682 6. 679894 6. 797546  
11720010\_ 7. 525617 7. 589926 7. 586327 7. 528846 7. 382465 7. 463102  
11720011\_ 6. 360394 6. 316571 6. 416174 6. 040786 6. 142856 6. 245208  
11720012\_ 6. 891799 6. 727853 6. 79718 6. 524712 6. 599839 6. 705166  
11720013\_ 6. 020727 5. 909135 5. 988335 6. 003552 5. 986997 6. 00489  
11720014\_ 7. 442599 7. 41913 7. 402284 7. 458688 7. 405121 7. 358974  
11720015\_ 4. 308597 4. 345124 4. 309891 4. 552143 4. 329414 4. 463981  
11720016\_ 3. 225606 3. 250291 3. 135335 3. 163202 3. 229056 3. 253974  
11720017\_ 5. 357265 5. 387536 5. 384878 5. 642881 5. 323758 5. 44123  
11720018\_ 6. 25214 6. 363798 6. 311085 6. 577414 6. 562775 6. 609965  
11720019\_ 6. 331347 6. 280849 6. 181192 6. 315202 6. 432068 6. 365955  
11720020\_ 5. 96777 6. 119335 6. 044285 6. 131662 6. 124903 6. 073142  
11720021\_ 5. 434067 5. 46419 5. 308456 5. 500902 5. 412957 5. 660471  
11720022\_ 4. 087149 3. 952323 3. 885425 3. 997491 4. 032618 3. 905093  
11720023\_ 5. 530772 5. 189628 5. 354183 5. 197754 5. 218129 5. 205914  
11720024\_ 5. 442778 5. 19494 5. 284029 5. 148049 5. 341701 5. 200691  
11720025\_ 6. 502421 6. 361393 6. 395679 6. 393355 6. 34864 6. 363717  
11720026\_ 11. 37531 11. 35745 11. 3508 11. 28417 11. 30757 11. 29388  
11720027\_ 11. 33641 11. 29415 11. 33116 11. 27273 11. 29648 11. 31931  
11720028\_ 8. 41149 8. 30553 8. 460455 8. 973692 8. 902919 8. 990287  
11720029\_ 9. 43776 9. 38693 9. 490787 10. 05641 10. 03907 9. 998217  
11720030\_ 8. 006891 7. 964528 8. 017248 7. 451889 7. 511706 7. 442902  
11720031\_ 3. 411628 3. 687066 3. 499866 3. 917641 3. 723344 4. 071872  
11720032\_ 4. 494899 4. 247387 4. 238203 4. 373591 4. 673831 4. 601074  
11720033\_ 2. 84762 3. 021389 2. 858492 3. 036921 2. 902139 3. 013  
11720034\_ 5. 729655 5. 838756 5. 860789 5. 741556 5. 648656 5. 681788  
11720035\_ 9. 090657 8. 984879 9. 02174 9. 005611 9. 019472 8. 993296  
11720036\_ 5. 981995 5. 983935 6. 124408 5. 780425 5. 950545 5. 922714  
11720037\_ 8. 026238 8. 027673 8. 000911 8. 091391 8. 144729 8. 185571  
11720038\_ 7. 29838 7. 167543 7. 291509 7. 341662 7. 367702 7. 383661  
11720039\_ 8. 957354 8. 90398 8. 901995 8. 64211 8. 589888 8. 589888  
11720040\_ 8. 871377 8. 862477 8. 902256 8. 709078 8. 728816 8. 633161  
11720041\_ 9. 251582 9. 207146 9. 186678 8. 859619 8. 839444 8. 897833  
11720042\_ 8. 182611 8. 102696 8. 200775 8. 596608 8. 726041 8. 702599  
11720043\_ 8. 115513 8. 075261 8. 085268 8. 054351 8. 097547 8. 093611  
11720044\_ 7. 970603 7. 904764 7. 95623 8. 003917 7. 927784 7. 971848  
11720045\_ 8. 149895 8. 085325 8. 116807 7. 731014 7. 768946 7. 727754



11720046\_ 7. 961941 8. 06221 7. 981511 7. 995091 7. 949363 7. 924404  
11720047\_ 4. 360041 4. 329334 4. 282867 4. 394637 4. 502732 4. 498786  
11720048\_ 2. 162497 2. 285493 2. 739802 2. 467378 2. 579872 2. 374203  
11720049\_ 8. 861778 8. 74709 8. 767718 9. 011282 9. 102775 9. 030756  
11720050\_ 6. 871384 6. 994375 6. 739151 6. 962756 7. 001821 6. 967737  
11720051\_ 8. 496647 8. 428105 8. 544783 7. 927931 7. 891581 7. 961055  
11720052\_ 9. 976557 9. 93903 9. 972255 10. 57125 10. 5812 10. 61535  
11720053\_ 9. 383211 9. 347838 9. 363951 10. 00161 9. 995032 10. 0059  
11720054\_ 10. 28172 10. 30391 10. 26723 9. 870589 9. 911556 9. 776213  
11720055\_ 9. 230458 9. 252006 9. 250517 9. 383735 9. 404234 9. 388868  
11720056\_ 7. 80504 7. 725192 7. 851123 7. 955086 7. 997158 8. 002496  
11720057\_ 8. 484339 8. 524963 8. 601669 8. 604792 8. 6179 8. 597078  
11720058\_ 6. 892902 6. 952474 6. 97845 6. 778699 6. 79291 6. 833805  
11720059\_ 4. 830352 4. 875308 4. 741834 5. 015557 4. 934646 4. 898972  
11720060\_ 5. 360087 5. 468454 5. 402891 5. 455563 5. 428631 5. 289844  
11720061\_ 7. 916845 7. 916207 7. 945198 8. 048914 8. 016781 8. 032473  
11720062\_ 10. 44238 10. 33297 10. 4376 10. 66411 10. 71918 10. 6552  
11720063\_ 4. 815683 5. 029529 4. 857295 5. 220892 5. 309245 5. 114684  
11720064\_ 5. 547592 5. 567637 5. 477212 5. 870242 5. 881087 5. 784601  
11720065\_ 7. 528745 7. 435429 7. 558703 7. 286852 7. 359489 7. 299735  
11720066\_ 7. 580761 7. 554787 7. 567284 7. 163411 7. 153454 7. 142002  
11720067\_ 4. 984315 4. 997545 5. 063169 5. 048497 5. 013455 5. 07406  
11720068\_ 5. 667931 5. 502091 5. 518169 5. 466858 5. 417526 5. 272866  
11720069\_ 9. 574925 9. 6884 9. 583204 9. 487088 9. 392076 9. 432864  
11720070\_ 10. 72029 10. 71585 10. 70025 10. 59935 10. 58712 10. 6127  
11720071\_ 7. 534218 7. 62144 7. 570794 7. 574591 7. 585952 7. 523908  
11720072\_ 4. 514547 4. 520359 4. 423817 4. 267275 4. 510026 4. 50146  
11720073\_ 9. 529182 9. 404136 9. 483438 9. 375218 9. 445066 9. 399828  
11720074\_ 9. 65491 9. 588393 9. 643241 9. 555322 9. 600039 9. 559528  
11720075\_ 7. 855877 7. 795663 7. 837951 6. 889017 6. 824334 6. 849306  
11720076\_ 6. 180429 6. 247161 6. 250342 6. 235573 6. 281563 6. 245314  
11720077\_ 9. 463404 9. 35111 9. 456491 9. 234279 9. 233003 9. 233828  
11720078\_ 4. 320869 4. 436223 4. 327019 4. 376095 4. 50802 4. 542114  
11720079\_ 3. 292043 3. 2442 3. 1201 3. 271878 3. 358244 3. 355985  
11720080\_ 2. 235709 2. 25483 2. 256131 2. 187746 2. 166552 2. 278299  
11720081\_ 5. 182558 5. 100657 5. 122133 5. 545459 5. 530266 5. 54743  
11720082\_ 8. 361291 8. 307997 8. 350181 9. 117385 9. 139965 9. 135667  
11720083\_ 7. 976878 7. 934177 8. 062349 8. 329545 8. 32357 8. 393727  
11720084\_ 8. 092569 8. 0459 8. 199177 8. 443183 8. 458967 8. 552009  
11720085\_ 3. 663531 4. 117175 4. 051273 4. 772366 4. 692269 4. 643717  
11720086\_ 8. 141614 8. 046563 8. 090809 8. 300951 8. 321777 8. 335931  
11720087\_ 8. 179055 8. 075197 8. 191135 8. 154921 8. 168061 8. 128436  
11720088\_ 8. 336958 8. 428261 8. 451089 8. 476826 8. 506163 8. 398682  
11720089\_ 5. 755778 5. 727222 5. 817424 6. 192899 6. 105058 6. 30351  
11720090\_ 6. 971486 6. 877573 6. 747728 7. 417811 7. 470353 7. 350159  
11720091\_ 9. 704273 9. 580331 9. 664477 9. 617822 9. 606525 9. 6162  
11720092\_ 7. 89841 7. 879163 7. 824646 7. 997809 8. 073869 8. 038535  
11720093\_ 8. 038524 8. 044963 8. 057471 8. 03047 8. 069797 8. 074143  
11720094\_ 7. 900237 7. 818554 7. 859862 7. 528859 7. 457113 7. 5232  
11720095\_ 8. 638349 8. 632371 8. 661985 8. 66295 8. 599038 8. 765264  
11720096\_ 6. 59078 6. 635912 6. 66396 6. 331743 6. 357654 6. 414267

11720097\_ 5.926672 5.806183 5.99869 5.954081 5.880487 5.986884  
11720098\_ 7.424471 7.383711 7.366329 7.670985 7.603589 7.752102  
11720099\_ 6.35331 6.286231 6.400817 6.643036 6.599032 6.632752  
11720100\_ 7.863703 7.756946 7.879825 7.608146 7.632652 7.643901  
11720101\_ 10.40992 10.34414 10.43574 10.33483 10.30974 10.34772  
11720102\_ 8.84497 8.740733 8.766507 8.589331 8.586554 8.646421  
11720103\_ 7.761569 7.711631 7.761942 8.164023 8.162878 8.191938  
11720104\_ 8.375171 8.282611 8.331062 8.316636 8.338763 8.196597  
11720105\_ 10.14548 10.05892 10.12984 9.830206 9.876564 9.858288  
11720106\_ 10.46746 10.49012 10.47825 10.35402 10.3339 10.30746  
11720107\_ 9.368576 9.309837 9.339188 8.798377 8.85424 8.899255  
11720108\_ 8.53498 8.434312 8.536112 8.55723 8.596747 8.589704  
11720109\_ 6.505543 6.578906 6.601583 7.136879 7.249605 7.037694  
11720110\_ 7.391156 7.238667 7.409349 7.357886 7.386992 7.405728  
11720111\_ 8.14267 8.003674 8.108318 8.294904 8.248098 8.297201  
11720112\_ 8.775759 8.719428 8.735535 8.947441 8.99683 8.98527  
11720113\_ 10.0143 9.960776 10.00019 9.99075 9.984919 10.03361  
11720114\_ 7.122072 7.091175 7.017015 7.276333 7.399192 7.400849  
11720115\_ 7.121299 7.112878 7.153079 7.767001 7.732649 7.664116  
11720116\_ 6.047118 6.099712 6.058574 6.409492 6.20578 6.272847  
11720117\_ 7.282921 7.135218 7.274738 7.471005 7.424986 7.483849  
11720118\_ 6.698699 6.550412 6.722123 6.808913 6.833873 6.741935  
11720119\_ 6.000517 6.002085 5.922714 6.013065 6.005309 6.107806  
11720120\_ 6.128092 5.96222 6.165718 6.203858 6.215804 6.291023  
11720121\_ 5.06458 5.100434 4.886404 5.158512 5.128749 5.151618  
11720122\_ 7.474514 7.57447 7.429752 7.68458 7.681017 7.640167  
11720123\_ 6.616128 6.699771 6.557691 6.896702 6.826776 6.881811  
11720124\_ 7.588975 7.599399 7.633346 8.067365 8.096948 8.16528  
11720125\_ 3.62254 3.625824 3.766732 3.945593 3.697406 3.925411  
11720126\_ 7.478351 7.557959 7.55857 7.471134 7.427188 7.498443  
11720127\_ 6.453195 6.145906 6.093399 5.79255 5.739176 5.781787  
11720128\_ 8.094885 8.187398 8.151428 8.134846 8.198358 8.195447  
11720129\_ 6.50219 6.527099 6.481677 6.703659 6.792515 6.863471  
11720130\_ 6.741889 6.736799 6.709266 6.954598 6.922518 6.959072  
11720131\_ 5.592665 5.454963 5.50091 6.040112 5.944715 6.217308  
11720132\_ 6.337783 6.02549 6.365403 6.65401 6.731108 6.733577  
11720133\_ 5.656174 5.602094 5.699538 5.284647 5.400067 5.289796  
11720134\_ 7.772557 7.710403 7.865461 7.478194 7.335558 7.493278  
11720135\_ 6.522355 6.455428 6.512572 5.973495 6.042275 6.126343  
11720136\_ 9.119441 9.132223 9.122754 8.982729 8.905768 8.911163  
11720137\_ 8.123776 8.110387 8.107907 8.21238 8.267516 8.207982  
11720138\_ 7.6059 7.53756 7.627838 7.756816 7.810389 7.744707  
11720139\_ 5.841739 5.841177 5.815427 5.723241 5.686361 5.758795  
11720140\_ 6.414953 6.344461 6.515821 6.886652 6.997431 6.800823  
11720141\_ 8.531295 8.441585 8.576364 8.980491 8.964808 8.976838  
11720142\_ 3.329773 3.340259 3.365755 3.328647 3.641247 3.426127  
11720143\_ 7.820219 7.868277 7.980646 8.299356 8.259108 8.314372  
11720144\_ 5.597751 5.52568 5.637022 5.645409 5.63355 5.685934  
11720145\_ 6.089546 6.085218 6.184339 6.471387 6.501129 6.543893  
11720146\_ 7.149188 7.04158 7.133187 6.848203 6.856016 7.058568  
11720147\_ 6.198031 6.142636 6.188945 6.186696 6.124437 6.18983

11720148\_ 7. 606227 7. 543416 7. 544594 7. 04692 7. 025793 7. 000566  
11720149\_ 4. 997517 5. 090604 4. 846116 4. 970864 4. 890539 5. 024066  
11720150\_ 2. 720021 2. 551603 2. 874619 2. 9904 2. 957964 2. 742507  
11720151\_ 5. 57353 5. 609406 5. 216986 5. 630556 5. 527785 5. 487211  
11720152\_ 8. 356797 8. 419723 8. 455713 8. 539439 8. 568697 8. 514531  
11720153\_ 7. 662766 7. 604825 7. 633831 6. 889794 6. 946361 6. 769732  
11720154\_ 7. 303529 7. 16402 7. 365109 6. 52202 6. 547534 6. 45065  
11720155\_ 9. 938471 9. 883459 9. 974425 9. 272436 9. 264184 9. 227758  
11720156\_ 5. 958705 5. 895699 5. 926132 6. 179142 6. 00265 6. 003004  
11720157\_ 8. 596143 8. 519393 8. 570593 7. 639003 7. 590243 7. 647545  
11720158\_ 6. 505359 6. 392355 6. 468786 6. 256119 6. 276598 6. 200464  
11720159\_ 6. 550382 6. 472438 6. 537475 6. 408009 6. 479286 6. 493415  
11720160\_ 5. 270266 5. 376729 5. 27788 5. 43011 5. 310051 5. 394484  
11720161\_ 3. 249984 3. 503743 3. 321385 3. 402457 3. 224413 3. 046858  
11720162\_ 4. 936383 4. 98016 4. 672119 5. 238434 5. 075693 4. 816632  
11720163\_ 8. 686822 8. 631084 8. 715834 7. 995115 7. 996418 8. 000463  
11720164\_ 6. 519091 6. 538822 6. 444829 6. 494443 6. 597333 6. 559393  
11720165\_ 7. 089177 7. 134375 7. 062469 7. 670028 7. 688506 7. 793397  
11720166\_ 5. 865861 5. 875476 5. 877441 5. 870242 5. 927019 5. 930011  
11720167\_ 2. 87416 2. 83198 3. 150034 3. 249714 3. 131936 3. 180062  
11720168\_ 4. 565267 4. 635799 4. 591945 4. 632537 4. 601525 4. 652391  
11720169\_ 6. 804699 6. 685406 6. 677911 6. 88037 7. 03674 6. 964521  
11720170\_ 8. 896363 8. 914555 8. 929806 9. 114163 9. 204027 9. 163519  
11720171\_ 9. 55367 9. 499294 9. 573528 9. 736808 9. 819302 9. 774995  
11720172\_ 9. 358659 9. 350192 9. 402833 9. 240779 9. 307993 9. 285661  
11720173\_ 8. 259869 8. 215723 8. 257398 8. 158818 8. 231077 8. 204808  
11720174\_ 7. 821905 7. 772544 7. 836939 7. 816493 7. 866979 7. 934167  
11720175\_ 7. 731783 7. 650244 7. 669033 7. 647764 7. 715572 7. 663745  
11720176\_ 7. 238795 7. 344469 7. 300688 7. 340915 7. 335667 7. 382352  
11720177\_ 7. 169001 7. 124047 7. 111547 7. 116268 7. 240471 7. 145569  
11720178\_ 6. 685558 6. 72741 6. 659953 6. 688897 6. 717859 6. 774194  
11720179\_ 7. 275535 7. 205925 7. 25286 7. 284556 7. 339628 7. 391258  
11720180\_ 6. 946361 6. 951961 7. 001462 7. 123917 7. 169612 7. 217933  
11720181\_ 9. 084779 8. 997208 9. 017061 8. 882539 8. 845088 8. 919903  
11720182\_ 7. 973853 7. 881374 7. 904721 8. 419856 8. 389401 8. 455907  
11720183\_ 11. 99399 12. 00716 11. 97224 11. 79973 11. 7811 11. 70898  
11720184\_ 12. 25435 12. 24406 12. 24794 11. 95984 11. 99731 11. 95985  
11720185\_ 9. 388076 9. 433554 9. 357545 10. 17985 10. 14045 10. 08511  
11720186\_ 9. 034327 9. 058036 9. 05785 9. 998975 9. 923939 9. 896708  
11720187\_ 5. 192835 5. 171667 5. 198482 5. 264579 5. 394457 5. 488532  
11720188\_ 9. 801022 9. 76237 9. 788125 9. 989214 9. 985318 9. 947195  
11720189\_ 6. 353969 6. 309179 6. 332316 6. 274594 6. 348541 6. 34267  
11720190\_ 6. 597943 6. 714177 6. 574834 7. 265178 7. 350159 7. 321412  
11720191\_ 4. 815683 4. 986074 4. 832095 4. 646558 4. 849431 4. 887566  
11720192\_ 7. 625569 7. 558383 7. 582732 7. 570591 7. 608077 7. 554442  
11720193\_ 8. 690649 8. 654767 8. 667288 8. 678802 8. 666281 8. 640759  
11720194\_ 5. 206249 5. 385998 5. 24531 5. 288601 5. 602819 5. 338987  
11720195\_ 7. 821363 7. 786515 7. 961646 8. 092839 8. 138486 8. 184257  
11720196\_ 5. 984661 5. 997155 6. 141071 6. 14374 6. 096364 6. 072992  
11720197\_ 6. 714657 6. 528382 6. 637882 6. 534923 6. 502516 6. 463296  
11720198\_ 10. 18501 10. 18792 10. 12314 9. 664307 9. 608337 9. 552922

11720199\_ 7. 611021 7. 500601 7. 518326 7. 734944 7. 716239 7. 647573  
11720200\_ 9. 928529 9. 832868 9. 868189 9. 815536 9. 889049 9. 864225  
11720201\_ 6. 975069 6. 869996 6. 886649 7. 249461 7. 181501 7. 115782  
11720202\_ 4. 38391 4. 35265 4. 221214 4. 382298 4. 494033 4. 403203  
11720203\_ 8. 528061 8. 438847 8. 508772 9. 129464 9. 158423 9. 146114  
11720204\_ 6. 133532 5. 980904 6. 103833 6. 495054 6. 428658 6. 498368  
11720205\_ 7. 846998 7. 726365 7. 753199 7. 179541 7. 263358 7. 259037  
11720206\_ 8. 66114 8. 665318 8. 678026 8. 082613 7. 973907 8. 013338  
11720207\_ 6. 816745 6. 818525 6. 897768 6. 868312 6. 862059 7. 00259  
11720208\_ 6. 23445 6. 159905 6. 343005 6. 228818 6. 282224 6. 140465  
11720209\_ 7. 313857 7. 299094 7. 38838 7. 372778 7. 388684 7. 32653  
11720210\_ 5. 618656 5. 672285 5. 614605 5. 891406 5. 758374 5. 793507  
11720211\_ 7. 934622 7. 732177 7. 870461 8. 143783 8. 162227 8. 176955  
11720212\_ 5. 835592 5. 947063 5. 74985 5. 954244 5. 869867 5. 894533  
11720213\_ 7. 687632 7. 664026 7. 571782 7. 701561 7. 719502 7. 720484  
11720214\_ 7. 777787 7. 665301 7. 738533 7. 957251 7. 955137 7. 926972  
11720215\_ 7. 846296 7. 863072 7. 849635 7. 952008 8. 07461 8. 027878  
11720216\_ 7. 821211 7. 78787 7. 831732 7. 967302 8. 005511 7. 978136  
11720217\_ 6. 092141 6. 073407 5. 93413 6. 119678 6. 059534 6. 00772  
11720218\_ 6. 499449 6. 330789 6. 449766 7. 409629 7. 477523 7. 473441  
11720219\_ 6. 2645 6. 186428 6. 269635 6. 765812 6. 934615 6. 765911  
11720220\_ 6. 094413 5. 908635 6. 021066 5. 748684 5. 629494 5. 745469  
11720221\_ 9. 359004 9. 312736 9. 384964 8. 80285 8. 789813 8. 763924  
11720222\_ 8. 810625 8. 686522 8. 84421 8. 213546 8. 175147 8. 111355  
11720223\_ 7. 741021 7. 730816 7. 78125 7. 598461 7. 589273 7. 604716  
11720224\_ 6. 500841 6. 606886 6. 654058 6. 932109 6. 919968 6. 959296  
11720225\_ 7. 80432 7. 772882 7. 849257 7. 753523 7. 722161 7. 683706  
11720226\_ 8. 141523 8. 104574 8. 186522 7. 999885 7. 998395 8. 023009  
11720227\_ 8. 764701 8. 781315 8. 790021 8. 948854 8. 94538 8. 892449  
11720228\_ 7. 203144 7. 031554 7. 065297 7. 0509 7. 053996 7. 06092  
11720229\_ 6. 626925 6. 57099 6. 584876 6. 058786 6. 070923 6. 297419  
11720230\_ 9. 200478 9. 146887 9. 122536 8. 368485 8. 503382 8. 456466  
11720231\_ 9. 09054 8. 99052 9. 108028 8. 037291 8. 02776 8. 098883  
11720232\_ 9. 113255 9. 062634 9. 113769 8. 972153 9. 008082 8. 974847  
11720233\_ 5. 550924 5. 668668 5. 573963 5. 70841 5. 774126 5. 742088  
11720234\_ 5. 578897 5. 661944 5. 575588 5. 744727 5. 799458 5. 742364  
11720235\_ 5. 556923 5. 419248 5. 514872 5. 748533 5. 789534 5. 724078  
11720236\_ 7. 821211 7. 770128 7. 762626 8. 110071 8. 151494 8. 131322  
11720237\_ 7. 446694 7. 430419 7. 434033 7. 760924 7. 793902 7. 7933  
11720238\_ 6. 605599 6. 489518 6. 594492 6. 792183 6. 696559 6. 812042  
11720239\_ 8. 341982 8. 330895 8. 354088 8. 437071 8. 424917 8. 406434  
11720240\_ 4. 956224 4. 784173 4. 906848 5. 114996 5. 026128 5. 068748  
11720241\_ 7. 796131 7. 705632 7. 928749 8. 384356 8. 425238 8. 356844  
11720242\_ 6. 24286 6. 299978 6. 083372 6. 253935 6. 252661 6. 36362  
11720243\_ 6. 067912 6. 226277 6. 159771 6. 02172 6. 158267 6. 245595  
11720244\_ 5. 564461 5. 735761 5. 728004 5. 828837 5. 880679 5. 895155  
11720245\_ 6. 946361 7. 097444 6. 97107 7. 167591 7. 178347 7. 183172  
11720246\_ 6. 966533 6. 887127 6. 994297 7. 174876 7. 20252 7. 294323  
11720247\_ 8. 221317 8. 195947 8. 186554 8. 950309 8. 984294 8. 956454  
11720248\_ 7. 355586 7. 548385 7. 408916 7. 456773 7. 486481 7. 577216  
11720249\_ 7. 324516 7. 298108 7. 362259 7. 370798 7. 41503 7. 363837

11720250\_ 9. 499624 9. 449809 9. 498631 9. 438044 9. 396732 9. 397075  
11720251\_ 2. 397503 2. 331798 2. 235709 2. 254426 2. 241678 2. 494072  
11720252\_ 7. 448288 7. 361975 7. 430978 6. 58964 6. 682329 6. 78184  
11720253\_ 9. 273784 9. 317166 9. 225861 9. 405131 9. 342446 9. 286171  
11720254\_ 6. 347024 6. 040911 6. 278072 6. 776257 6. 858412 6. 884733  
11720255\_ 3. 209468 3. 359491 3. 175234 3. 138717 3. 434108 3. 273903  
11720256\_ 4. 018852 3. 997131 4. 018852 3. 668786 4. 071897 4. 083502  
11720257\_ 7. 080684 7. 045124 7. 031268 6. 94441 6. 945477 6. 992785  
11720258\_ 7. 395041 7. 230093 7. 353642 6. 687999 6. 667598 6. 671568  
11720259\_ 8. 062516 8. 002885 8. 033834 8. 449178 8. 432422 8. 499826  
11720260\_ 9. 390498 9. 349925 9. 398413 9. 21276 9. 245389 9. 226102  
11720261\_ 7. 716086 7. 738447 7. 749174 7. 25266 7. 206996 7. 223238  
11720262\_ 8. 358527 8. 284273 8. 292242 7. 78787 7. 950823 7. 848212  
11720263\_ 7. 851218 7. 732895 7. 861195 7. 382114 7. 523979 7. 391324  
11720264\_ 8. 25111 8. 205913 8. 27236 7. 633734 7. 660887 7. 589  
11720265\_ 5. 140588 5. 131153 5. 060114 5. 125851 5. 229798 5. 130985  
11720266\_ 6. 772207 6. 648994 6. 704869 6. 74635 6. 857513 6. 883739  
11720267\_ 5. 509916 5. 667947 5. 53143 5. 758512 5. 677421 5. 691228  
11720268\_ 7. 82663 7. 771236 7. 816952 7. 317368 7. 289973 7. 31013  
11720269\_ 9. 584805 9. 563964 9. 528651 9. 217462 9. 159033 9. 165099  
11720270\_ 8. 174434 8. 101481 8. 119141 8. 068007 8. 03822 8. 082097  
11720271\_ 6. 074326 6. 244363 6. 048387 6. 085052 6. 149455 6. 118838  
11720272\_ 5. 059487 5. 189628 4. 978987 5. 378433 5. 427044 5. 319588  
11720273\_ 6. 910833 6. 998066 6. 939281 7. 151194 7. 141458 7. 093964  
11720274\_ 6. 997048 6. 827649 7. 039023 7. 021563 6. 899936 7. 004787  
11720275\_ 6. 616344 6. 655758 6. 598438 6. 570672 6. 563772 6. 506318  
11720276\_ 7. 343205 7. 36259 7. 264167 7. 689007 7. 676451 7. 623641  
11720277\_ 6. 7659 6. 644609 6. 618774 7. 502461 7. 527999 7. 425969  
11720278\_ 5. 363959 5. 291109 5. 265554 5. 26034 5. 416414 5. 330968  
11720279\_ 5. 502397 5. 518369 5. 395846 5. 502648 5. 591907 5. 474174  
11720280\_ 6. 253647 6. 033313 6. 206526 6. 495731 6. 450072 6. 485642  
11720281\_ 5. 993198 5. 785138 5. 954992 6. 297178 6. 307816 6. 313755  
11720282\_ 5. 045134 4. 98122 5. 073036 5. 351598 5. 297498 5. 260201  
11720283\_ 7. 006141 6. 990182 6. 970036 6. 893218 6. 900906 6. 889962  
11720284\_ 4. 787239 4. 787239 4. 739245 4. 871826 4. 787239 4. 79911  
11720285\_ 5. 235825 5. 326185 5. 325151 5. 156303 5. 150281 5. 201887  
11720286\_ 7. 116663 7. 169777 7. 111885 7. 195012 7. 260162 7. 234988  
11720287\_ 6. 559282 6. 502875 6. 583271 6. 397946 6. 582092 6. 528702  
11720288\_ 7. 551128 7. 660209 7. 645059 7. 525149 7. 537124 7. 469145  
11720289\_ 9. 768621 9. 715051 9. 758408 9. 629209 9. 629427 9. 632956  
11720290\_ 6. 704411 6. 811382 6. 774803 6. 437382 6. 44265 6. 507464  
11720291\_ 5. 032158 4. 976536 5. 11282 5. 141562 5. 199505 5. 217994  
11720292\_ 6. 842035 6. 610558 7. 166527 6. 193491 5. 662262 6. 320254  
11720293\_ 8. 274629 8. 256832 8. 330363 6. 414953 6. 426893 6. 527884  
11720294\_ 8. 611039 8. 579504 8. 565219 8. 696756 8. 809353 8. 659475  
11720295\_ 4. 530413 4. 214986 4. 281712 4. 425688 4. 300078 4. 108975  
11720296\_ 5. 763355 5. 658091 5. 808264 5. 836269 5. 802529 5. 882374  
11720297\_ 5. 139115 5. 164037 5. 218079 5. 820052 5. 768053 5. 77317  
11720298\_ 6. 057948 6. 011116 6. 295595 5. 6882 5. 523406 5. 788389  
11720299\_ 9. 494735 9. 471668 9. 527223 9. 814813 9. 850946 9. 863641  
11720300\_ 5. 089046 5. 133114 5. 116007 5. 193679 5. 221463 5. 213841

11720301\_ 5. 180929 5. 319958 5. 378394 5. 439326 5. 429116 5. 376148  
11720302\_ 5. 096387 5. 202183 5. 00991 5. 239814 5. 280454 5. 214002  
11720303\_ 10. 40011 10. 35683 10. 38103 10. 55202 10. 54484 10. 53983  
11720304\_ 9. 738928 9. 718812 9. 764646 10. 20427 10. 24614 10. 20286  
11720305\_ 7. 702151 7. 5269 7. 680618 7. 873628 7. 923894 7. 823336  
11720306\_ 8. 938097 8. 932906 8. 987724 9. 082887 9. 089851 9. 118232  
11720307\_ 9. 091388 9. 023545 8. 952479 9. 341199 9. 258757 9. 255976  
11720308\_ 9. 347979 9. 307013 9. 325363 9. 446964 9. 465896 9. 481365  
11720309\_ 11. 45849 11. 40798 11. 43077 11. 39374 11. 35481 11. 39694  
11720310\_ 8. 82431 8. 76136 8. 813313 9. 032186 9. 000502 8. 988822  
11720311\_ 10. 8793 10. 83044 10. 87151 10. 87863 10. 86626 10. 83264  
11720312\_ 9. 193115 9. 173924 9. 192698 9. 54505 9. 56633 9. 573801  
11720313\_ 9. 824281 9. 818984 9. 882671 9. 877475 9. 907271 9. 815799  
11720314\_ 10. 47033 10. 47607 10. 5027 10. 32474 10. 32802 10. 37937  
11720315\_ 9. 947081 9. 942253 10. 01443 9. 922707 9. 925638 9. 889262  
11720316\_ 8. 362653 8. 292493 8. 370506 8. 462985 8. 562135 8. 52856  
11720317\_ 10. 10903 10. 05032 10. 0642 10. 41733 10. 32884 10. 40782  
11720318\_ 7. 268806 7. 266011 7. 325321 7. 174876 7. 21395 7. 126206  
11720319\_ 8. 596815 8. 532661 8. 635018 9. 132024 9. 122421 9. 092637  
11720320\_ 9. 064015 9. 03295 9. 079787 9. 449205 9. 499504 9. 535454  
11720321\_ 6. 146037 6. 154878 6. 184359 6. 394614 6. 441734 6. 341077  
11720322\_ 9. 535059 9. 485148 9. 545869 9. 431139 9. 38729 9. 390979  
11720323\_ 9. 172832 9. 122003 9. 200602 9. 161242 9. 175329 9. 186919  
11720324\_ 10. 37296 10. 29739 10. 28999 10. 51684 10. 54623 10. 53432  
11720325\_ 5. 940898 6. 155286 6. 018412 6. 08944 6. 106645 6. 144936  
11720326\_ 2. 648213 2. 841109 2. 777679 2. 512144 2. 404475 2. 509638  
11720327\_ 9. 102254 8. 90831 9. 126551 9. 85712 9. 852522 9. 857196  
11720328\_ 10. 55043 10. 48448 10. 50457 10. 77149 10. 7676 10. 65973  
11720329\_ 8. 625083 8. 483647 8. 57785 8. 58181 8. 613266 8. 604074  
11720330\_ 10. 69575 10. 65781 10. 67107 10. 7281 10. 70928 10. 70904  
11720331\_ 8. 990145 8. 947005 9. 014019 8. 179071 8. 26836 8. 243104  
11720332\_ 7. 524509 7. 368242 7. 593972 7. 781327 7. 733682 7. 759064  
11720333\_ 8. 752205 8. 716443 8. 762144 8. 980792 8. 971246 8. 993884  
11720334\_ 7. 003112 6. 940349 7. 046136 7. 169091 7. 188567 7. 244592  
11720335\_ 8. 547953 8. 345039 8. 422259 8. 712646 8. 699227 8. 633291  
11720336\_ 8. 118168 8. 011199 8. 073314 8. 224439 8. 324775 8. 246535  
11720337\_ 10. 71222 10. 68708 10. 73556 10. 59008 10. 63646 10. 5924  
11720338\_ 5. 512912 5. 353883 5. 253929 5. 481693 5. 442379 5. 473681  
11720339\_ 4. 157324 4. 020633 4. 029836 4. 340106 4. 303224 4. 286654  
11720340\_ 7. 778584 7. 707653 7. 66691 7. 241647 7. 313325 7. 250844  
11720341\_ 5. 371472 5. 47013 5. 569625 5. 727698 5. 606088 5. 731202  
11720342\_ 11. 15524 11. 09766 11. 13265 11. 1021 11. 11851 11. 06819  
11720343\_ 4. 64846 4. 672916 4. 763731 4. 807496 4. 800411 4. 75133  
11720344\_ 4. 243932 4. 391599 4. 204368 4. 312508 4. 404853 4. 344434  
11720345\_ 9. 226828 9. 149179 9. 222503 9. 069481 9. 060388 9. 083455  
11720346\_ 8. 19777 8. 19316 8. 192895 8. 202361 8. 192661 8. 200573  
11720347\_ 7. 97343 8. 006949 8. 069928 7. 950842 7. 998743 8. 016756  
11720348\_ 9. 363954 9. 295452 9. 340548 9. 310342 9. 361577 9. 43456  
11720349\_ 5. 77032 5. 41587 5. 481678 4. 350589 4. 221131 4. 670409  
11720350\_ 9. 255279 9. 212157 9. 290871 9. 231621 9. 289974 9. 230929  
11720351\_ 8. 48065 8. 318416 8. 337709 8. 592887 8. 61051 8. 617068

11720352\_ 8. 331097 8. 34054 8. 283827 8. 482826 8. 495553 8. 46319  
11720353\_ 9. 170707 9. 22318 9. 236419 9. 330296 9. 342816 9. 399819  
11720354\_ 6. 866078 6. 892207 6. 828844 6. 894191 6. 987864 6. 831788  
11720355\_ 7. 667552 7. 508223 7. 636995 7. 939676 7. 955209 7. 990549  
11720356\_ 5. 997969 6. 026213 5. 965857 5. 753655 5. 934765 5. 720426  
11720357\_ 7. 519913 7. 417811 7. 451284 7. 495815 7. 461017 7. 410344  
11720358\_ 7. 948338 7. 907194 7. 876816 7. 723216 7. 73817 7. 794043  
11720359\_ 5. 181261 4. 985027 5. 213561 5. 766276 5. 768053 5. 833416  
11720360\_ 8. 456297 8. 438097 8. 395984 8. 269103 8. 269103 8. 224128  
11720361\_ 7. 867447 7. 735776 7. 811066 6. 844422 6. 833695 6. 881544  
11720362\_ 8. 697505 8. 55462 8. 704463 8. 731302 8. 763139 8. 738379  
11720363\_ 8. 625297 8. 636785 8. 693347 8. 596319 8. 604025 8. 557201  
11720364\_ 4. 757189 4. 809663 4. 709082 4. 741578 4. 750763 4. 766134  
11720365\_ 5. 864052 5. 86331 5. 827065 5. 956171 5. 925373 5. 937874  
11720366\_ 7. 997978 7. 982396 7. 996842 7. 885758 7. 898286 7. 900315  
11720367\_ 10. 06102 9. 968127 10. 04617 8. 844986 8. 885536 8. 831762  
11720368\_ 8. 483883 8. 436661 8. 479097 7. 739881 7. 593201 7. 505345  
11720369\_ 8. 760345 8. 64759 8. 638664 8. 574318 8. 565347 8. 569321  
11720370\_ 9. 685506 9. 565593 9. 657155 9. 334759 9. 322616 9. 350995  
11720371\_ 6. 75814 6. 722545 6. 680001 6. 632898 6. 637348 6. 680001  
11720372\_ 5. 357777 5. 419635 5. 559899 5. 220659 5. 054242 5. 143931  
11720373\_ 6. 596178 6. 521047 6. 438815 6. 441663 6. 351732 6. 332059  
11720374\_ 7. 092687 6. 990847 7. 020775 6. 657294 6. 755413 6. 772112  
11720375\_ 8. 17038 8. 167625 8. 225041 8. 047576 7. 909218 7. 949591  
11720376\_ 6. 338988 6. 350624 6. 220984 6. 347305 6. 509559 6. 441398  
11720377\_ 6. 296256 6. 165218 6. 176624 6. 358811 6. 3131 6. 44628  
11720378\_ 7. 742669 7. 704465 7. 72538 7. 639003 7. 637004 7. 61842  
11720379\_ 7. 664919 7. 579196 7. 618347 7. 529667 7. 531634 7. 543379  
11720380\_ 9. 262331 9. 225277 9. 146407 9. 9994 9. 999963 10. 00468  
11720381\_ 9. 167901 9. 140346 9. 186012 8. 950186 8. 991798 8. 945485  
11720382\_ 8. 443383 8. 39093 8. 498802 7. 538764 7. 609153 7. 545711  
11720383\_ 8. 167874 8. 060002 8. 116398 7. 723716 7. 673005 7. 665366  
11720384\_ 8. 737545 8. 615464 8. 664184 8. 062375 8. 03792 8. 100578  
11720385\_ 6. 338699 6. 159771 6. 141788 6. 338622 6. 33875 6. 318339  
11720386\_ 5. 36314 5. 322754 5. 593157 5. 505082 5. 4978 5. 481813  
11720387\_ 9. 145955 9. 060801 9. 100605 9. 091481 9. 135717 9. 060255  
11720388\_ 4. 519843 4. 469927 4. 417228 4. 465359 4. 489078 4. 616815  
11720389\_ 4. 269346 4. 442479 4. 395364 4. 631424 4. 668154 4. 66114  
11720390\_ 6. 701219 6. 544096 6. 643477 6. 815994 6. 813717 6. 871434  
11720391\_ 9. 117812 9. 00333 9. 092744 8. 776159 8. 841103 8. 785709  
11720392\_ 4. 600346 4. 418406 4. 413611 4. 432675 4. 634596 4. 432675  
11720393\_ 4. 662746 4. 473533 4. 659577 4. 317703 4. 557074 4. 666158  
11720394\_ 3. 270542 3. 57689 3. 349439 3. 551079 3. 387842 3. 539783  
11720395\_ 8. 294198 8. 262973 8. 257444 8. 336843 8. 25292 8. 240867  
11720396\_ 8. 294227 8. 268102 8. 221605 8. 326579 8. 289108 8. 238353  
11720397\_ 7. 566167 7. 501167 7. 495605 7. 578293 7. 6347 7. 52564  
11720398\_ 9. 181675 9. 134335 9. 229966 9. 567698 9. 605323 9. 626277  
11720399\_ 7. 420356 7. 450203 7. 230373 7. 567008 7. 592353 7. 590379  
11720400\_ 5. 138568 4. 842872 5. 297498 5. 954081 6. 021954 6. 152555  
11720401\_ 6. 867109 6. 770791 6. 83286 7. 051505 7. 222056 7. 044392  
11720402\_ 6. 88388 6. 874408 6. 96235 6. 986766 7. 001124 6. 972692

11720403\_ 8. 154477 8. 048914 8. 180432 8. 049074 8. 140247 8. 078413  
11720404\_ 8. 615704 8. 632371 8. 576605 8. 853507 8. 843382 8. 85896  
11720405\_ 7. 045375 7. 044812 7. 084672 7. 033254 7. 042563 7. 059057  
11720406\_ 7. 055228 7. 009306 7. 036727 6. 839141 6. 933578 6. 853119  
11720407\_ 7. 910863 7. 873737 7. 948032 7. 581959 7. 607105 7. 600114  
11720408\_ 5. 181107 5. 290596 5. 17639 5. 203125 5. 296365 5. 328133  
11720409\_ 6. 855939 6. 794351 6. 894852 6. 238205 6. 147422 6. 043382  
11720410\_ 6. 876172 6. 870601 7. 010573 6. 192459 6. 127827 6. 293901  
11720411\_ 6. 182248 6. 051629 6. 230932 5. 302653 4. 944156 5. 065037  
11720412\_ 8. 460196 8. 381481 8. 470123 8. 365431 8. 370331 8. 32363  
11720413\_ 7. 203111 7. 178549 7. 190494 7. 366623 7. 442788 7. 387167  
11720414\_ 6. 398997 6. 420441 6. 5986 6. 952362 6. 998687 7. 058567  
11720415\_ 7. 896403 7. 782453 7. 834944 7. 61711 7. 663735 7. 64914  
11720416\_ 7. 694613 7. 632064 7. 666485 7. 576132 7. 558739 7. 617801  
11720417\_ 4. 357029 4. 614818 4. 430055 4. 841169 4. 453011 4. 437243  
11720418\_ 9. 323995 9. 267193 9. 352797 9. 356808 9. 362146 9. 373217  
11720419\_ 8. 390337 8. 400333 8. 470519 8. 54808 8. 57552 8. 651843  
11720420\_ 5. 955392 5. 797083 5. 878995 5. 665521 5. 666467 5. 73719  
11720421\_ 8. 609231 8. 536441 8. 672072 7. 079842 7. 129343 7. 176588  
11720422\_ 9. 855356 9. 863455 9. 816308 9. 798817 9. 770341 9. 674696  
11720423\_ 6. 601052 6. 583274 6. 517698 5. 67411 5. 361298 5. 571857  
11720424\_ 6. 836656 6. 668983 6. 689965 6. 621806 6. 712643 6. 728001  
11720425\_ 4. 072818 3. 650452 3. 830549 3. 830549 3. 503743 3. 671362  
11720426\_ 6. 589133 6. 556003 6. 460736 6. 401237 6. 312793 6. 39109  
11720427\_ 6. 726744 6. 705049 6. 703226 7. 296767 7. 286885 7. 303318  
11720428\_ 7. 495646 7. 388078 7. 501082 7. 203101 7. 250969 7. 19478  
11720429\_ 7. 955686 7. 91161 7. 909803 7. 750018 7. 732787 7. 741724  
11720430\_ 7. 392275 7. 52847 7. 449698 7. 347991 7. 21432 7. 284151  
11720431\_ 3. 571903 3. 304967 3. 398236 3. 028515 2. 84656 3. 063748  
11720432\_ 7. 110209 7. 220941 7. 099449 7. 093496 7. 073839 7. 21364  
11720433\_ 7. 54118 7. 547916 7. 575339 6. 651608 6. 630453 6. 756387  
11720434\_ 7. 464351 7. 451021 7. 470871 7. 183722 7. 151405 7. 188192  
11720435\_ 7. 272757 7. 233306 7. 26311 6. 975313 6. 965141 7. 059456  
11720436\_ 5. 01147 5. 241733 5. 01147 4. 997996 5. 254941 5. 2666  
11720437\_ 8. 552637 8. 417128 8. 513682 8. 231671 8. 151159 8. 211864  
11720438\_ 5. 676101 5. 773546 5. 763634 5. 793341 5. 850629 5. 773546  
11720439\_ 5. 958694 5. 886723 5. 944903 5. 622417 5. 660201 5. 771652  
11720440\_ 4. 695587 4. 64252 4. 532266 4. 606827 4. 600288 4. 709344  
11720441\_ 4. 305577 4. 211548 4. 384553 4. 48641 4. 56419 4. 488078  
11720442\_ 6. 898793 7. 075227 6. 846533 7. 123983 7. 213524 7. 270587  
11720443\_ 9. 198675 9. 162273 9. 181502 8. 747277 8. 743232 8. 739382  
11720444\_ 9. 13945 9. 088194 9. 15247 8. 950592 9. 017422 9. 031971  
11720445\_ 7. 204199 7. 41867 7. 282987 7. 184357 7. 157013 7. 170415  
11720446\_ 7. 00845 7. 049078 6. 963042 7. 308728 7. 099947 7. 201258  
11720447\_ 4. 870604 4. 787688 4. 966216 4. 590356 4. 54717 4. 670778  
11720448\_ 3. 871188 3. 997131 3. 887777 3. 872406 3. 915533 3. 787819  
11720449\_ 7. 679316 7. 754237 7. 768775 7. 749286 7. 824882 7. 678346  
11720450\_ 4. 881092 4. 720908 4. 762288 4. 824195 4. 762288 4. 612691  
11720451\_ 3. 662832 3. 607982 3. 711337 3. 850246 3. 711337 3. 781769  
11720452\_ 6. 225513 6. 282224 6. 001875 6. 087474 6. 122294 6. 175536  
11720453\_ 8. 251181 8. 267271 8. 269981 8. 269067 8. 248636 8. 23669



11720454\_ 9.98778 9.965267 9.979318 9.85647 9.822153 9.781757  
11720455\_ 10.52534 10.50959 10.5504 10.47262 10.45464 10.4737  
11720456\_ 7.176105 7.2219 7.178695 7.60645 7.52816 7.510657  
11720457\_ 5.704835 5.380649 5.39192 6.085226 5.995029 6.118838  
11720458\_ 11.06478 11.02224 11.05185 11.0347 11.03462 11.04739  
11720459\_ 10.46412 10.51397 10.54538 10.67522 10.68021 10.64087  
11720460\_ 7.7997 7.756069 7.818706 7.957827 7.887664 7.952877  
11720461\_ 7.01795 6.960766 7.036158 7.052785 7.045734 7.073016  
11720462\_ 1.862996 1.932724 1.833178 2.006801 2.006801 2.176603  
11720463\_ 1.951549 1.898146 1.941896 2.045481 2.045481 2.034666  
11720464\_ 5.584813 5.457693 5.686079 5.624627 5.782364 5.803735  
11720465\_ 9.002636 8.946693 8.978696 9.037322 9.067587 9.074384  
11720466\_ 10.57497 10.56547 10.55442 10.61069 10.57632 10.59315  
11720467\_ 9.329785 9.21621 9.267489 9.517551 9.501282 9.55691  
11720468\_ 9.113387 9.032401 9.103524 9.311233 9.342227 9.337207  
11720469\_ 3.865426 3.606313 3.644288 3.843717 3.879309 3.715222  
11720470\_ 7.737558 7.605578 7.641132 7.702793 7.75353 7.732941  
11720471\_ 6.7637 6.826157 6.895317 6.701371 6.745141 6.712342  
11720472\_ 5.090808 5.11527 5.087041 5.198308 5.056176 5.075635  
11720473\_ 5.115024 5.129837 5.142788 5.053755 5.254993 5.081668  
11720474\_ 10.96207 10.93749 10.9211 10.99465 10.92916 10.92332  
11720475\_ 10.92393 10.89529 10.8931 10.93457 10.85125 10.87768  
11720476\_ 3.814826 3.717901 3.804984 3.575027 4.004756 4.004756  
11720477\_ 4.349275 4.416847 4.332225 4.537375 4.265055 4.431245  
11720478\_ 7.299162 7.224492 7.257385 7.282732 7.273075 7.174876  
11720479\_ 7.203309 7.25839 7.084145 7.417811 7.284354 7.33354  
11720480\_ 8.981229 8.895303 9.006841 9.103502 9.106216 9.121057  
11720481\_ 8.951608 8.962912 8.976347 9.069172 9.00589 8.973275  
11720482\_ 7.042083 7.021395 7.142802 6.917027 6.902715 6.902905  
11720483\_ 7.117225 7.020462 7.101239 6.86704 6.915104 6.906318  
11720484\_ 9.900837 9.819273 9.858052 10.06832 10.06361 10.04341  
11720485\_ 7.176183 7.110912 7.175658 7.696114 7.653334 7.815901  
11720486\_ 6.729247 6.720129 6.699904 7.040736 7.077787 7.115129  
11720487\_ 7.238952 7.254981 7.316482 7.355922 7.296824 7.366958  
11720488\_ 5.508347 5.430738 5.495874 5.946235 5.627487 5.622289  
11720489\_ 3.476716 3.374926 3.515582 3.573688 3.534703 3.462252  
11720490\_ 3.487663 3.428221 3.470456 3.459152 3.460145 3.428221  
11720491\_ 2.761613 2.53177 2.508262 2.658797 2.53825 2.605235  
11720492\_ 8.640093 8.514409 8.551111 8.940447 8.967496 8.985274  
11720493\_ 7.997856 7.926086 8.042066 7.645995 7.720446 7.621664  
11720494\_ 10.22502 10.28619 10.20782 9.869329 9.833397 9.739405  
11720495\_ 10.10029 10.03324 10.03097 10.04126 9.998964 10.00567  
11720496\_ 3.711297 4.181499 3.868214 4.027006 3.99103 3.84359  
11720497\_ 8.389004 8.449128 8.389265 8.544672 8.480277 8.421343  
11720498\_ 8.161841 8.099502 8.094354 8.828276 8.90243 8.949535  
11720499\_ 10.13746 10.08588 10.19167 10.37951 10.33823 10.36933  
11720500\_ 6.388955 6.332037 6.366873 6.382671 6.338856 6.311665  
11720501\_ 8.708427 8.633069 8.731727 8.481063 8.532713 8.628951  
11720502\_ 7.364436 7.331035 7.330656 7.519846 7.4089 7.487445  
11720503\_ 6.979763 7.072679 7.095695 7.240907 7.271924 7.313045  
11720504\_ 5.724992 5.77954 5.730269 6.163965 6.120669 6.19864

11720505\_ 6. 824288 6. 860073 6. 930154 6. 527933 6. 424163 6. 528702  
11720506\_ 7. 172976 7. 123835 7. 118731 7. 017085 7. 102052 7. 07826  
11720507\_ 2. 730705 2. 36728 2. 777326 2. 683395 2. 387636 2. 592516  
11720508\_ 4. 227477 4. 424085 4. 335573 3. 687337 3. 670911 3. 705625  
11720509\_ 7. 285909 7. 172323 7. 328099 6. 749814 6. 827218 6. 768233  
11720510\_ 7. 880783 7. 886188 7. 748168 7. 995641 7. 917894 7. 928441  
11720511\_ 7. 189627 7. 081069 7. 223155 7. 583435 7. 544654 7. 708592  
11720512\_ 7. 555802 7. 616491 7. 533163 8. 182954 8. 182323 8. 248692  
11720513\_ 6. 94773 6. 962755 7. 023335 6. 94441 6. 956528 6. 965946  
11720514\_ 6. 078737 6. 099476 6. 069567 5. 994343 5. 920485 5. 992354  
11720515\_ 2. 761498 2. 470635 2. 690289 2. 608856 2. 718322 2. 494072  
11720516\_ 7. 362702 7. 334601 7. 357052 7. 553519 7. 566016 7. 537133  
11720517\_ 6. 088062 6. 146755 6. 064404 6. 300592 6. 257874 6. 245199  
11720518\_ 8. 433652 8. 389131 8. 4115 8. 13498 8. 109034 8. 154265  
11720519\_ 5. 558146 5. 479088 5. 614752 5. 203511 5. 018552 4. 956388  
11720520\_ 5. 983284 5. 791798 5. 859653 5. 438378 5. 600586 5. 520286  
11720521\_ 5. 799206 5. 858809 5. 760362 5. 827571 5. 898435 5. 825975  
11720522\_ 8. 155881 8. 135984 8. 170467 8. 254911 8. 22879 8. 290884  
11720523\_ 7. 415182 7. 380586 7. 355752 7. 529039 7. 648522 7. 505114  
11720524\_ 5. 718988 5. 674725 5. 661959 5. 678647 5. 667249 5. 851813  
11720525\_ 5. 5725 5. 678041 5. 572672 5. 634461 5. 684775 5. 830441  
11720526\_ 9. 147599 9. 03596 9. 166657 9. 521656 9. 523074 9. 494681  
11720527\_ 5. 356301 5. 395573 5. 735636 5. 089092 5. 089092 4. 933431  
11720528\_ 6. 951374 6. 939518 7. 079742 5. 614563 6. 014517 6. 091436  
11720529\_ 5. 78262 5. 566011 5. 459791 4. 737313 4. 985867 5. 166072  
11720530\_ 6. 69413 6. 607643 6. 746524 5. 90046 5. 754995 6. 067245  
11720531\_ 6. 637423 6. 489785 6. 550814 6. 670848 6. 713722 6. 7471  
11720532\_ 6. 953925 6. 856537 6. 945126 7. 050425 7. 034574 7. 053575  
11720533\_ 4. 629594 4. 893345 4. 739216 5. 26034 4. 899239 4. 95414  
11720534\_ 8. 170202 8. 143442 8. 216103 8. 114206 8. 141714 8. 204553  
11720535\_ 7. 413012 7. 435991 7. 533766 8. 01636 8. 0078 7. 969993  
11720536\_ 6. 96842 7. 031531 6. 794686 7. 07331 7. 037762 7. 085641  
11720537\_ 5. 558183 5. 584813 5. 69617 6. 189726 6. 147589 6. 156265  
11720538\_ 5. 199021 5. 177276 5. 129372 5. 078087 5. 173419 5. 173757  
11720539\_ 4. 915788 4. 9226 4. 929489 5. 058429 4. 74574 4. 984669  
11720540\_ 5. 909439 5. 885103 5. 951282 6. 04271 6. 002143 6. 00939  
11720541\_ 7. 177093 7. 164758 7. 182821 6. 527305 6. 472855 6. 64694  
11720542\_ 6. 910833 6. 816211 6. 851131 6. 594872 6. 464493 6. 636704  
11720543\_ 8. 61301 8. 598902 8. 630605 8. 748821 8. 737498 8. 711937  
11720544\_ 7. 854291 7. 771186 7. 858147 8. 064267 8. 158305 8. 138395  
11720545\_ 5. 91702 5. 930644 5. 929269 5. 936614 5. 967792 6. 028539  
11720546\_ 4. 190962 4. 136907 4. 296469 4. 265104 4. 350524 4. 302873  
11720547\_ 8. 072329 8. 01809 8. 086229 7. 908863 7. 868103 7. 908339  
11720548\_ 6. 669381 6. 745314 6. 733989 6. 945597 6. 967636 7. 072169  
11720549\_ 6. 631774 6. 621165 6. 672044 6. 326534 6. 31097 6. 321578  
11720550\_ 8. 900764 8. 903712 8. 825571 9. 670694 9. 655903 9. 591309  
11720551\_ 7. 953197 7. 920552 7. 994555 7. 791041 7. 850454 7. 814425  
11720552\_ 5. 469144 5. 269436 5. 41211 5. 547932 5. 453793 5. 469144  
11720553\_ 6. 217794 6. 326694 6. 191381 6. 353991 6. 383618 6. 544244  
11720554\_ 7. 912405 7. 859506 7. 932349 7. 692404 7. 730484 7. 760752  
11720555\_ 8. 133545 8. 111155 8. 041576 8. 466631 8. 367233 8. 32625

11720556\_ 9. 368263 9. 336495 9. 349507 9. 565609 9. 556138 9. 520274  
11720557\_ 8. 615661 8. 540432 8. 564376 8. 408143 8. 426032 8. 409151  
11720558\_ 4. 859174 4. 650484 4. 799085 4. 213226 4. 085443 4. 232829  
11720559\_ 2. 117259 2. 132553 2. 101456 2. 361778 2. 117947 2. 204597  
11720560\_ 5. 880036 5. 938482 5. 959962 5. 99882 5. 957954 5. 96938  
11720561\_ 7. 43722 7. 377617 7. 397718 7. 923181 7. 975841 8. 027903  
11720562\_ 6. 065925 6. 14435 6. 184793 5. 611445 5. 675164 5. 826228  
11720563\_ 5. 102407 5. 080522 5. 293733 4. 5038 4. 71983 4. 746398  
11720564\_ 5. 492478 5. 57001 5. 476444 5. 456124 5. 588395 5. 443998  
11720565\_ 5. 013936 4. 821268 5. 041727 4. 688805 4. 644488 4. 773753  
11720566\_ 9. 853263 9. 884978 9. 857885 9. 923545 9. 906511 9. 871248  
11720567\_ 4. 583586 4. 500319 4. 419054 4. 614741 4. 493218 4. 456812  
11720568\_ 6. 168392 6. 092408 5. 997384 6. 167087 6. 120124 6. 101705  
11720569\_ 5. 285218 5. 301853 5. 272701 5. 485634 5. 397861 5. 497567  
11720570\_ 6. 785331 6. 795149 6. 852945 7. 759387 7. 778769 7. 74458  
11720571\_ 5. 813003 5. 815789 5. 845057 6. 02719 6. 00364 5. 94785  
11720572\_ 6. 076817 5. 943804 6. 14315 6. 129859 6. 136154 6. 132611  
11720573\_ 1. 792685 1. 625666 2. 082196 1. 804393 1. 804393 1. 796334  
11720574\_ 2. 532855 2. 367898 2. 675548 2. 512144 2. 47102 2. 734737  
11720575\_ 8. 64746 8. 646016 8. 593779 8. 795098 8. 806533 8. 760216  
11720576\_ 7. 916845 7. 858236 7. 90716 7. 846952 7. 881187 7. 823618  
11720577\_ 8. 156344 8. 149316 8. 117961 8. 034119 8. 061852 8. 115133  
11720578\_ 4. 513241 4. 33881 4. 213226 4. 415785 4. 326551 4. 454259  
11720579\_ 4. 004505 4. 138347 3. 986648 4. 164098 3. 993563 4. 021205  
11720580\_ 9. 275626 9. 411411 9. 285373 9. 311071 9. 276245 9. 236437  
11720581\_ 9. 731613 9. 654583 9. 619194 9. 580591 9. 484609 9. 496785  
11720582\_ 8. 155393 8. 083881 8. 184229 8. 007225 8. 017866 7. 985467  
11720583\_ 8. 543851 8. 615363 8. 585248 8. 321251 8. 363387 8. 374389  
11720584\_ 9. 001914 8. 884172 8. 960634 8. 84965 8. 857582 8. 887099  
11720585\_ 7. 03133 7. 063648 7. 141251 6. 862059 6. 88431 6. 891578  
11720586\_ 6. 709655 6. 661798 6. 67954 6. 942834 6. 848194 6. 950588  
11720587\_ 7. 509574 7. 431962 7. 510042 7. 315713 7. 185674 7. 238771  
11720588\_ 5. 229183 5. 320677 5. 272142 5. 476596 5. 434897 5. 451479  
11720589\_ 9. 080804 8. 993396 9. 006905 8. 895995 8. 895528 8. 93023  
11720590\_ 6. 787269 6. 960833 6. 843618 7. 155543 7. 055542 7. 133973  
11720591\_ 7. 195197 7. 075813 7. 215347 6. 846324 6. 954551 6. 971161  
11720592\_ 4. 954099 4. 897176 4. 926899 5. 297498 5. 22755 5. 168511  
11720593\_ 5. 790019 5. 785464 5. 89056 5. 75649 5. 888712 5. 944438  
11720594\_ 6. 478192 6. 515621 6. 462391 6. 927062 6. 829157 6. 829157  
11720595\_ 9. 433669 9. 361289 9. 402216 8. 970732 8. 982965 8. 970143  
11720596\_ 7. 009341 6. 898954 7. 007226 7. 079211 7. 019573 7. 038102  
11720597\_ 7. 43956 7. 359962 7. 413074 7. 169814 7. 254983 7. 26757  
11720598\_ 9. 759396 9. 666028 9. 721902 9. 735738 9. 707103 9. 634303  
11720599\_ 7. 017967 6. 842583 7. 061801 7. 729025 7. 666971 7. 670856  
11720600\_ 9. 484813 9. 399248 9. 490028 9. 359452 9. 407027 9. 369102  
11720601\_ 7. 017304 6. 951561 7. 114913 6. 50277 6. 477627 6. 437624  
11720602\_ 7. 935991 7. 873413 7. 922171 7. 281645 7. 32769 7. 339534  
11720603\_ 8. 179739 8. 13842 8. 21799 7. 804828 7. 938868 7. 921242  
11720604\_ 9. 989586 9. 947652 10. 00139 9. 6503 9. 672955 9. 657831  
11720605\_ 9. 291165 9. 238254 9. 254789 9. 604373 9. 643136 9. 591648  
11720606\_ 2. 114596 2. 365925 2. 346804 2. 142978 2. 277647 2. 127724

11720607\_ 3. 771781 3. 636985 3. 574338 3. 692314 3. 716646 3. 756105  
11720608\_ 8. 796681 8. 741815 8. 859123 8. 583313 8. 571734 8. 514736  
11720609\_ 8. 610033 8. 598187 8. 640884 8. 735849 8. 791397 8. 7944  
11720610\_ 10. 75509 10. 65207 10. 75402 10. 85798 10. 85345 10. 82936  
11720611\_ 2. 446971 2. 361778 2. 235709 2. 446971 2. 108753 2. 303924  
11720612\_ 2. 445848 2. 637148 2. 251335 2. 447826 2. 506757 2. 517723  
11720613\_ 8. 02541 8. 140304 8. 194978 7. 973165 7. 976338 7. 975235  
11720614\_ 10. 53218 10. 44348 10. 46613 10. 76146 10. 70614 10. 69951  
11720615\_ 8. 851026 8. 857885 8. 886795 8. 3808 8. 432231 8. 489427  
11720616\_ 8. 102159 8. 044399 8. 198385 8. 514237 8. 463707 8. 552692  
11720617\_ 6. 212943 6. 117601 6. 085117 5. 920413 5. 906086 5. 922714  
11720618\_ 6. 711826 6. 808017 6. 907951 6. 442974 6. 555734 6. 44195  
11720619\_ 6. 72952 6. 649871 6. 633941 7. 164857 7. 137372 7. 102995  
11720620\_ 8. 279867 8. 180219 8. 360459 8. 755173 8. 71735 8. 672732  
11720621\_ 10. 45109 10. 3444 10. 44245 10. 62977 10. 63118 10. 63836  
11720622\_ 7. 473137 7. 459391 7. 353624 7. 899613 7. 86209 7. 928995  
11720623\_ 6. 984245 6. 801991 6. 906766 6. 7796 6. 747827 6. 840205  
11720624\_ 8. 094932 8. 101351 8. 091468 8. 072432 8. 031115 8. 048914  
11720625\_ 9. 545711 9. 601339 9. 590266 9. 621543 9. 570921 9. 557622  
11720626\_ 7. 369978 7. 237076 7. 398039 8. 436574 8. 427162 8. 422282  
11720627\_ 7. 958063 7. 97863 7. 99402 7. 647599 7. 686156 7. 628909  
11720628\_ 9. 934979 9. 845545 9. 86415 9. 477025 9. 525511 9. 490507  
11720629\_ 8. 334909 8. 31711 8. 282484 8. 326506 8. 361999 8. 364967  
11720630\_ 8. 867275 8. 761517 8. 813615 9. 326652 9. 379849 9. 354554  
11720631\_ 10. 31399 10. 34095 10. 18468 10. 57546 10. 50713 10. 42191  
11720632\_ 10. 31429 10. 2947 10. 28751 10. 49202 10. 50713 10. 40985  
11720633\_ 5. 326825 5. 328364 5. 410424 5. 477191 5. 38962 5. 420616  
11720634\_ 7. 279411 7. 320726 7. 279579 7. 29951 7. 256936 7. 313416  
11720635\_ 8. 637574 8. 529364 8. 622605 8. 888137 8. 958976 8. 914519  
11720636\_ 8. 143392 8. 09976 8. 05374 8. 287687 8. 281554 8. 358996  
11720637\_ 5. 338819 5. 023669 5. 104672 4. 889232 4. 883933 4. 858246  
11720638\_ 9. 357216 9. 317245 9. 401839 9. 043014 9. 056332 9. 031351  
11720639\_ 9. 325863 9. 288771 9. 338903 9. 219249 9. 241186 9. 168351  
11720640\_ 8. 886575 8. 787096 8. 837288 8. 709361 8. 738981 8. 740389  
11720641\_ 8. 208422 8. 151886 8. 208594 7. 919827 7. 979159 7. 948695  
11720642\_ 8. 300883 8. 263437 8. 253659 7. 952915 8. 002401 7. 984951  
11720643\_ 7. 315872 7. 322725 7. 29362 7. 321175 7. 362061 7. 223901  
11720644\_ 3. 198082 3. 266262 3. 254402 3. 279698 3. 239677 3. 296029  
11720645\_ 6. 950869 7. 067086 7. 021725 7. 089177 7. 115425 7. 08353  
11720646\_ 8. 325979 8. 231997 8. 317896 7. 753311 7. 713011 7. 640138  
11720647\_ 7. 932005 7. 903784 8. 070418 8. 66072 8. 699013 8. 775743  
11720648\_ 9. 412882 9. 407734 9. 425393 9. 100211 9. 053342 9. 10947  
11720649\_ 6. 638269 6. 499157 6. 725812 6. 303958 6. 420059 6. 473981  
11720650\_ 8. 812715 8. 847162 8. 850411 8. 912697 8. 938294 8. 929335  
11720651\_ 8. 523542 8. 49009 8. 582631 8. 597948 8. 703333 8. 635398  
11720652\_ 8. 571127 8. 524888 8. 564131 8. 467369 8. 497827 8. 423199  
11720653\_ 7. 92804 7. 859202 7. 901258 8. 263859 8. 277943 8. 272023  
11720654\_ 8. 094422 8. 000433 8. 048072 8. 123133 8. 114786 8. 058314  
11720655\_ 8. 512599 8. 508186 8. 579212 8. 553895 8. 510825 8. 545951  
11720656\_ 8. 544109 8. 426126 8. 490598 8. 789936 8. 799814 8. 857298  
11720657\_ 5. 006175 4. 976495 5. 006184 5. 061566 5. 048516 5. 147847

11720658\_ 6. 536494 6. 497688 6. 654635 6. 401912 6. 340048 6. 162691  
11720659\_ 6. 544684 6. 544248 6. 638574 7. 192747 7. 245886 7. 248622  
11720660\_ 7. 727807 7. 684253 7. 621343 8. 153627 8. 255308 8. 160617  
11720661\_ 6. 077235 6. 158496 6. 006091 5. 986887 6. 2483 6. 147004  
11720662\_ 8. 529975 8. 446891 8. 531828 8. 595234 8. 641971 8. 601749  
11720663\_ 7. 527689 7. 471715 7. 568957 7. 83625 7. 796267 7. 830521  
11720664\_ 7. 893786 7. 786866 7. 867855 8. 073222 8. 127993 8. 108891  
11720665\_ 10. 35646 10. 27884 10. 33898 10. 64937 10. 64739 10. 7011  
11720666\_ 8. 569276 8. 532102 8. 542018 8. 734236 8. 770346 8. 712462  
11720667\_ 4. 499731 4. 225718 4. 158266 3. 977594 4. 044014 4. 099821  
11720668\_ 6. 50944 6. 546999 6. 654141 5. 937059 5. 898692 5. 845593  
11720669\_ 8. 206345 8. 119208 8. 194704 7. 69478 7. 586595 7. 594125  
11720670\_ 8. 088933 8. 024771 8. 121528 8. 116611 8. 153217 8. 054713  
11720671\_ 8. 131242 8. 11024 8. 136017 8. 291118 8. 250662 8. 221563  
11720672\_ 6. 027164 5. 934605 6. 065533 7. 077164 7. 046136 7. 047023  
11720673\_ 8. 65666 8. 608548 8. 652805 8. 44326 8. 417832 8. 498013  
11720674\_ 4. 356019 4. 440024 4. 327218 4. 8599 4. 790925 4. 790925  
11720675\_ 7. 162727 7. 132287 7. 259134 7. 299162 7. 431076 7. 436348  
11720676\_ 7. 361415 7. 350688 7. 354936 7. 344252 7. 426223 7. 50994  
11720677\_ 7. 165506 7. 2975 6. 994068 7. 146306 7. 065657 7. 107531  
11720678\_ 5. 918294 5. 833805 5. 763634 6. 146994 5. 879824 5. 954466  
11720679\_ 8. 799318 8. 725075 8. 724024 9. 352128 9. 361258 9. 368977  
11720680\_ 8. 412922 8. 433685 8. 506692 7. 847809 7. 878496 7. 916518  
11720681\_ 2. 939075 3. 148344 3. 224138 3. 745558 3. 882079 4. 194908  
11720682\_ 8. 059621 7. 932678 8. 046082 8. 004634 7. 982549 7. 888068  
11720683\_ 6. 98337 6. 931529 7. 067944 7. 363065 7. 33934 7. 409944  
11720684\_ 8. 293634 8. 187327 8. 251749 8. 15363 8. 163039 8. 175271  
11720685\_ 4. 229569 4. 505332 4. 365856 4. 790764 4. 772929 4. 592805  
11720686\_ 6. 282224 6. 334534 6. 339301 6. 507716 6. 568074 6. 597983  
11720687\_ 6. 86273 6. 931644 6. 898779 6. 75825 6. 771309 6. 789562  
11720688\_ 6. 042582 6. 024895 6. 084263 5. 950037 5. 940388 5. 939153  
11720689\_ 8. 376382 8. 31485 8. 32099 8. 212193 8. 391397 8. 289592  
11720690\_ 8. 016566 8. 030218 8. 125922 8. 038374 8. 165403 8. 159978  
11720691\_ 6. 265025 6. 232291 6. 270281 6. 257443 6. 390007 6. 253474  
11720692\_ 3. 755523 3. 809937 3. 651465 3. 599699 3. 660064 3. 675435  
11720693\_ 4. 521705 4. 485875 4. 604919 4. 382731 4. 39195 4. 415744  
11720694\_ 6. 456157 6. 388375 6. 440256 6. 839141 6. 937058 6. 967702  
11720695\_ 5. 916038 5. 910078 5. 820052 6. 024435 6. 023183 6. 015199  
11720696\_ 6. 56554 6. 499257 6. 498118 6. 608479 6. 65814 6. 623153  
11720697\_ 7. 579698 7. 629394 7. 661631 7. 782521 7. 793495 7. 765944  
11720698\_ 8. 882834 8. 800999 8. 868004 8. 589624 8. 638162 8. 632367  
11720699\_ 5. 413214 5. 24299 5. 489441 4. 746078 4. 498776 4. 627218  
11720700\_ 2. 044933 1. 878063 2. 297356 2. 069084 2. 024697 2. 095256  
11720701\_ 2. 224908 2. 25483 1. 995297 2. 35605 2. 292596 2. 25483  
11720702\_ 6. 263567 6. 236747 6. 318829 6. 389601 6. 392785 6. 467626  
11720703\_ 4. 977054 5. 106362 4. 879753 5. 073571 5. 029526 5. 035476  
11720704\_ 8. 515169 8. 463815 8. 537082 7. 876015 7. 923239 7. 903546  
11720705\_ 8. 864971 8. 775927 8. 774227 8. 834742 8. 842855 8. 775561  
11720706\_ 6. 170797 6. 170797 6. 202693 6. 138317 6. 091447 6. 263896  
11720707\_ 10. 1592 10. 12281 10. 13188 10. 04658 10. 07376 10. 02759  
11720708\_ 7. 665301 7. 484633 7. 62024 8. 017013 7. 980383 7. 998592

11720709\_ 5.62441 5.637631 5.698813 5.431471 5.493155 5.567969  
11720710\_ 7.698438 7.607577 7.764761 7.470149 7.351504 7.450824  
11720711\_ 6.627145 6.547789 6.622887 6.495344 6.520221 6.589889  
11720712\_ 3.654265 3.687943 3.597731 3.677852 3.607283 3.541048  
11720713\_ 4.943627 4.749227 4.386603 4.622936 4.814463 4.648626  
11720714\_ 6.3197 6.130273 6.40699 7.472605 7.542839 7.477618  
11720715\_ 6.116468 6.108961 6.202022 6.359267 6.308633 6.359945  
11720716\_ 7.354244 7.193356 7.341629 7.17504 7.167439 7.198868  
11720717\_ 8.759427 8.697198 8.740026 8.491686 8.497041 8.492778  
11720718\_ 6.028906 6.124191 6.00115 6.203868 6.110166 6.085197  
11720719\_ 5.149606 5.023847 5.17904 4.96416 5.2222 5.255113  
11720720\_ 6.130332 6.102708 6.002278 6.342534 6.507025 6.312978  
11720721\_ 8.358027 8.213154 8.244605 7.599395 7.529004 7.639371  
11720722\_ 7.983924 7.9908 7.988167 7.927119 7.880138 7.913541  
11720723\_ 7.851158 7.871619 7.939224 7.654081 7.721691 7.608224  
11720724\_ 8.5419 8.572974 8.621078 8.550512 8.573506 8.560769  
11720725\_ 5.945194 5.945763 6.0331 6.165991 6.034301 5.918822  
11720726\_ 7.340555 7.247639 7.395526 7.119857 7.126861 7.0443  
11720727\_ 9.158572 9.070108 9.090423 8.773328 8.72938 8.715859  
11720728\_ 8.032695 7.959234 8.076912 7.41716 7.409228 7.409228  
11720729\_ 6.525163 6.567305 6.525527 6.771329 6.659599 6.680275  
11720730\_ 6.37361 6.340151 6.207407 6.410864 6.33178 6.384251  
11720731\_ 7.213423 7.158897 7.243353 6.946079 7.007177 7.017294  
11720732\_ 5.759562 5.655205 5.809878 5.622709 5.514299 5.572411  
11720733\_ 5.314025 5.361256 5.377061 5.512364 5.498474 5.610645  
11720734\_ 7.11406 7.091037 7.099734 7.071137 7.11458 7.218421  
11720735\_ 6.620283 6.685157 6.576483 6.404765 6.491074 6.398938  
11720736\_ 6.119519 6.006754 6.167218 6.54192 6.642575 6.676464  
11720737\_ 7.101863 7.006174 7.111926 6.946143 6.970178 6.947675  
11720738\_ 5.096488 5.228627 5.256712 5.170188 5.183941 5.246846  
11720739\_ 7.400837 7.384656 7.446949 7.120021 7.09798 7.054105  
11720740\_ 7.98198 7.854837 8.00022 7.546856 7.575115 7.64917  
11720741\_ 5.963242 5.847742 6.115374 5.589883 5.478106 5.648514  
11720742\_ 7.421197 7.317717 7.549958 6.793665 6.805664 6.879328  
11720743\_ 7.335892 7.169824 7.178778 6.943539 6.998566 6.97913  
11720744\_ 6.024433 6.011116 5.990963 5.352587 5.459497 5.444856  
11720745\_ 5.876163 6.03794 6.088695 6.185079 6.139024 6.080183  
11720746\_ 7.739974 7.704338 7.742942 7.713054 7.787677 7.818427  
11720747\_ 7.739495 7.780382 7.770425 7.492115 7.43452 7.405295  
11720748\_ 7.090962 6.97259 7.026468 6.979988 7.165797 7.116765  
11720749\_ 5.590576 5.566644 5.647963 5.290387 5.287761 5.253545  
11720750\_ 5.176534 5.32324 5.297498 5.151163 5.327502 5.261406  
11720751\_ 7.992403 7.84312 7.921773 7.620677 7.597317 7.573698  
11720752\_ 8.288837 8.212675 8.281407 8.363338 8.398574 8.435865  
11720753\_ 5.67352 5.575462 5.569034 5.433225 5.282443 5.293024  
11720754\_ 12.27178 12.29409 12.23458 12.34524 12.26336 12.21346  
11720755\_ 8.970787 8.909992 8.952033 8.452243 8.373495 8.362907  
11720756\_ 8.901774 8.800678 8.880764 8.27342 8.228256 8.355831  
11720757\_ 9.602958 9.524779 9.518684 9.337699 9.328021 9.357908  
11720758\_ 8.867422 8.82303 8.824363 8.635734 8.643847 8.605532  
11720759\_ 8.10279 7.991779 8.163205 7.8306 7.811375 7.677842

11720760\_ 7. 623302 7. 573609 7. 692863 7. 335346 7. 265043 7. 318304  
11720761\_ 7. 283854 7. 158315 7. 196008 7. 117824 7. 071869 7. 153771  
11720762\_ 7. 690313 7. 603953 7. 623581 7. 496666 7. 494007 7. 461179  
11720763\_ 5. 681531 5. 664035 5. 579724 5. 51108 5. 540548 5. 509537  
11720764\_ 8. 790057 8. 800801 8. 781152 8. 739073 8. 826434 8. 674761  
11720765\_ 9. 503705 9. 553518 9. 565646 9. 432199 9. 502266 9. 423952  
11720766\_ 9. 167127 9. 190037 9. 181903 9. 369405 9. 396306 9. 355371  
11720767\_ 10. 19963 10. 2305 10. 17088 10. 50116 10. 42749 10. 3611  
11720768\_ 6. 467524 6. 316311 6. 380699 7. 698005 7. 637252 7. 701561  
11720769\_ 7. 929167 7. 797333 7. 948448 7. 791963 7. 823582 7. 892845  
11720770\_ 8. 86771 8. 814772 8. 868869 8. 209564 8. 273757 8. 226727  
11720771\_ 9. 145196 9. 10663 9. 146354 8. 469359 8. 634547 8. 548205  
11720772\_ 10. 3959 10. 32286 10. 40076 9. 91226 9. 976796 9. 972154  
11720773\_ 6. 329247 6. 030809 6. 318735 6. 397198 6. 517045 6. 436198  
11720774\_ 8. 538718 8. 474502 8. 556875 8. 92754 8. 924601 8. 881816  
11720775\_ 7. 596842 7. 58797 7. 629764 7. 476188 7. 569182 7. 464112  
11720776\_ 4. 074269 4. 086817 3. 652831 4. 074269 4. 086817 4. 086817  
11720777\_ 6. 473248 6. 442388 6. 39366 6. 550712 6. 538764 6. 491564  
11720778\_ 4. 338601 4. 40461 4. 237705 4. 541589 4. 40461 4. 595954  
11720779\_ 4. 729372 4. 693559 4. 586312 4. 774268 4. 758056 4. 684339  
11720780\_ 8. 191656 8. 070473 8. 212618 6. 611148 6. 778175 6. 665144  
11720781\_ 8. 161479 8. 148204 8. 093017 8. 670072 8. 676173 8. 68182  
11720782\_ 7. 592688 7. 555079 7. 634723 8. 23866 8. 22762 8. 295292  
11720783\_ 8. 979594 8. 90059 8. 949444 9. 231656 9. 275581 9. 237876  
11720784\_ 9. 431911 9. 378845 9. 367136 9. 776149 9. 793291 9. 789786  
11720785\_ 6. 907216 6. 924974 6. 927538 6. 765911 6. 907658 6. 765911  
11720786\_ 7. 159466 7. 139935 7. 194536 7. 56872 7. 535586 7. 453944  
11720787\_ 9. 374878 9. 292684 9. 358385 9. 506282 9. 504501 9. 505304  
11720788\_ 8. 351103 8. 239279 8. 333473 8. 32017 8. 261459 8. 31628  
11720789\_ 8. 682782 8. 659593 8. 673647 8. 623021 8. 628178 8. 585848  
11720790\_ 9. 037464 9. 127837 9. 073454 9. 065178 9. 063382 9. 015934  
11720791\_ 10. 19247 10. 15597 10. 18742 9. 820183 9. 850729 9. 827828  
11720792\_ 7. 494933 7. 525609 7. 505543 7. 271878 7. 345864 7. 321597  
11720793\_ 7. 285723 7. 219243 7. 306786 7. 051919 7. 24256 7. 103848  
11720794\_ 9. 514323 9. 419933 9. 500832 9. 378995 9. 460843 9. 432169  
11720795\_ 7. 426572 7. 436648 7. 311325 8. 817919 8. 711288 8. 678577  
11720796\_ 7. 65611 7. 601629 7. 553895 8. 999322 8. 908393 8. 913045  
11720797\_ 8. 621159 8. 556708 8. 609772 8. 298873 8. 323161 8. 322657  
11720798\_ 8. 877163 8. 743135 8. 813171 7. 860428 7. 70267 7. 789431  
11720799\_ 9. 181466 9. 145148 9. 174564 8. 137257 8. 125218 8. 145592  
11720800\_ 7. 447402 7. 40698 7. 314584 6. 302474 6. 234164 6. 196734  
11720801\_ 8. 054351 7. 926761 8. 001367 8. 31739 8. 342573 8. 341688  
11720802\_ 8. 80027 8. 820286 8. 803868 9. 182917 9. 227871 9. 195391  
11720803\_ 3. 774654 3. 838098 3. 729382 3. 831707 3. 753039 3. 827419  
11720804\_ 8. 799201 8. 781108 8. 820149 9. 241312 9. 255599 9. 165341  
11720805\_ 6. 643569 6. 710736 6. 677907 7. 052091 7. 079699 7. 259475  
11720806\_ 7. 215342 7. 215889 7. 138046 7. 3334 7. 417811 7. 380312  
11720807\_ 2. 125047 2. 01954 2. 125047 2. 026854 1. 955645 2. 01954  
11720808\_ 8. 049821 8. 037977 8. 0711 8. 067058 8. 078672 8. 058553  
11720809\_ 9. 867271 9. 794949 9. 87625 10. 06007 10. 10742 10. 04576  
11720810\_ 7. 622263 7. 588744 7. 644965 8. 02029 8. 057394 7. 91094

11720811\_ 5. 317455 5. 399638 5. 190327 5. 37669 5. 369533 5. 483443  
11720812\_ 8. 291609 8. 224507 8. 267545 8. 153949 8. 158747 8. 118481  
11720813\_ 7. 434587 7. 404507 7. 495264 7. 59757 7. 610102 7. 589752  
11720814\_ 8. 137351 8. 105489 8. 158164 8. 223568 8. 211059 8. 189027  
11720815\_ 5. 162151 5. 113996 5. 059581 5. 158262 5. 107736 5. 076023  
11720816\_ 5. 318047 5. 267176 5. 318047 5. 352596 5. 333278 5. 224255  
11720817\_ 4. 32446 3. 843369 3. 985083 4. 02675 4. 054288 4. 054288  
11720818\_ 2. 546439 2. 455844 2. 433349 2. 344557 2. 285003 2. 384435  
11720819\_ 2. 103037 2. 031113 2. 235709 2. 402622 2. 298716 2. 265988  
11720820\_ 3. 39358 3. 429438 3. 549877 3. 309084 3. 474214 3. 414134  
11720821\_ 9. 221984 9. 12175 9. 204151 9. 199631 9. 18445 9. 191102  
11720822\_ 7. 847581 7. 784005 7. 847556 7. 908263 7. 994607 8. 015673  
11720823\_ 6. 294249 6. 226028 6. 410844 5. 138602 5. 134827 5. 072705  
11720824\_ 5. 994861 6. 077327 6. 155333 5. 902231 5. 84669 5. 876141  
11720825\_ 7. 182603 7. 152279 7. 175519 5. 444085 5. 483178 5. 509759  
11720826\_ 4. 890352 4. 666578 4. 709463 4. 590171 4. 347179 4. 626078  
11720827\_ 8. 876823 8. 779541 8. 844015 9. 535498 9. 544403 9. 610075  
11720828\_ 7. 347981 7. 41824 7. 403069 7. 668651 7. 554976 7. 539699  
11720829\_ 8. 083033 8. 022325 8. 034037 8. 011199 8. 014393 8. 089581  
11720830\_ 4. 648029 4. 606314 4. 467906 5. 075726 5. 014511 5. 037168  
11720831\_ 4. 490312 4. 681686 4. 486549 4. 678492 4. 600189 4. 75261  
11720832\_ 6. 599854 6. 46688 6. 578899 6. 952186 7. 011172 6. 98411  
11720833\_ 8. 102831 8. 212675 8. 0658 8. 710754 8. 594547 8. 607159  
11720834\_ 9. 406941 9. 427602 9. 395166 9. 479883 9. 440589 9. 403836  
11720835\_ 6. 324003 6. 097927 6. 307575 7. 265936 7. 24918 7. 261827  
11720836\_ 8. 790794 8. 763714 8. 829006 8. 160361 8. 168496 8. 183197  
11720837\_ 6. 5084 6. 495987 6. 494334 6. 475647 6. 40304 6. 375022  
11720838\_ 8. 086881 8. 017145 8. 122082 8. 297617 8. 254441 8. 265191  
11720839\_ 8. 969473 8. 921328 8. 928275 8. 548161 8. 547154 8. 577426  
11720840\_ 6. 724551 6. 637289 6. 609393 6. 193309 6. 300643 6. 224917  
11720841\_ 10. 22443 10. 20942 10. 22339 9. 806493 9. 808741 9. 835576  
11720842\_ 6. 935564 7. 087615 6. 857761 7. 159152 7. 154875 7. 087615  
11720843\_ 7. 289566 7. 325538 7. 34504 7. 444103 7. 418263 7. 424766  
11720844\_ 8. 847132 8. 778278 8. 846496 8. 2845 8. 265007 8. 292366  
11720845\_ 4. 514848 4. 686682 4. 603157 4. 408124 4. 459939 4. 48275  
11720846\_ 5. 745287 5. 894251 5. 720652 6. 019519 5. 926308 5. 981998  
11720847\_ 9. 144655 9. 094413 9. 133865 9. 55426 9. 418418 9. 481801  
11720848\_ 6. 7637 6. 743873 6. 92099 7. 025626 6. 890913 6. 956076  
11720849\_ 6. 958861 6. 896488 6. 869465 6. 884387 6. 869662 6. 902295  
11720850\_ 6. 779107 6. 607436 6. 75666 6. 614663 6. 671126 6. 639953  
11720851\_ 5. 188616 5. 081835 5. 291495 5. 35289 5. 21323 5. 356313  
11720852\_ 4. 83891 4. 919399 4. 936646 5. 059764 4. 757161 4. 655818  
11720853\_ 3. 302224 3. 088337 3. 138626 3. 316097 3. 178275 3. 444114  
11720854\_ 5. 236958 5. 392458 5. 257962 5. 349717 5. 260641 5. 239709  
11720855\_ 4. 65391 4. 535683 4. 772366 4. 429958 4. 471892 4. 451001  
11720856\_ 6. 072145 5. 762959 5. 906606 5. 922167 5. 90522 5. 975318  
11720857\_ 4. 416473 4. 488838 4. 628405 4. 688532 4. 665924 4. 52373  
11720858\_ 5. 156303 5. 056843 4. 986668 5. 210791 5. 134611 5. 079671  
11720859\_ 6. 112975 5. 918795 6. 021398 7. 194546 7. 083205 7. 033634  
11720860\_ 6. 159232 6. 015492 6. 094413 6. 318245 6. 312793 6. 283631  
11720861\_ 5. 672714 5. 588166 5. 625321 5. 734374 5. 721158 5. 772309



11720862\_ 2. 29036 1. 946404 2. 235709 2. 502026 2. 070805 2. 085138  
11720863\_ 4. 469703 4. 335594 4. 419921 4. 569855 4. 594142 4. 639002  
11720864\_ 10. 03741 10. 06465 10. 06449 9. 801947 9. 613495 9. 672587  
11720865\_ 6. 37234 6. 250567 6. 223994 6. 136526 5. 840963 6. 004021  
11720866\_ 8. 328037 8. 259057 8. 284763 7. 917222 7. 873815 7. 945705  
11720867\_ 7. 920189 7. 787526 7. 776402 6. 660519 6. 742393 6. 808221  
11720868\_ 6. 267588 6. 179377 6. 302486 5. 934641 5. 960963 5. 995973  
11720869\_ 7. 325379 7. 316809 7. 197919 7. 383825 7. 312032 7. 428537  
11720870\_ 4. 522199 4. 699329 4. 749371 5. 082198 4. 81836 4. 887862  
11720871\_ 7. 146273 7. 219037 7. 193066 7. 11455 7. 098776 7. 115276  
11720872\_ 8. 103863 7. 991494 7. 995535 7. 987427 7. 988391 7. 947358  
11720873\_ 6. 966693 7. 071435 6. 892728 6. 882753 6. 892218 6. 900877  
11720874\_ 5. 348505 5. 196864 5. 236291 5. 426529 5. 317538 5. 360077  
11720875\_ 5. 803326 5. 686747 5. 744427 5. 655097 5. 538876 5. 629198  
11720876\_ 6. 264663 6. 424335 6. 365153 6. 172483 6. 313514 6. 313471  
11720877\_ 4. 942913 4. 946002 4. 877477 4. 988588 5. 049635 5. 071051  
11720878\_ 7. 030103 7. 003666 7. 050228 6. 957973 7. 04434 6. 992445  
11720879\_ 6. 629958 6. 489167 6. 67941 6. 801882 6. 787978 6. 828602  
11720880\_ 9. 939263 9. 891848 9. 930698 9. 617206 9. 639328 9. 621569  
11720881\_ 6. 01587 5. 833377 5. 976483 6. 098157 5. 99011 6. 008904  
11720882\_ 5. 652922 5. 545302 5. 876081 6. 084907 6. 011187 6. 077665  
11720883\_ 7. 502964 7. 551856 7. 580393 7. 595849 7. 587868 7. 625803  
11720884\_ 8. 893476 8. 841912 8. 884499 9. 164411 9. 197825 9. 148301  
11720885\_ 5. 504956 5. 554436 5. 46569 5. 832502 5. 576648 5. 528624  
11720886\_ 5. 737399 5. 759581 5. 580077 6. 25944 6. 359091 6. 083509  
11720887\_ 7. 044518 7. 144608 6. 955868 6. 909217 6. 852088 7. 02331  
11720888\_ 8. 605217 8. 617732 8. 632479 8. 665028 8. 537013 8. 579321  
11720889\_ 6. 392572 6. 330546 6. 440348 6. 315555 6. 391807 6. 422733  
11720890\_ 6. 753865 6. 684319 6. 692783 6. 223471 6. 227586 6. 354529  
11720891\_ 5. 751353 5. 729063 5. 614563 5. 66585 5. 566323 5. 673097  
11720892\_ 5. 117099 5. 266578 5. 246991 6. 107688 6. 275847 6. 125819  
11720893\_ 7. 296794 7. 283479 7. 321124 8. 623033 8. 644911 8. 617695  
11720894\_ 6. 295508 6. 237163 6. 358417 6. 097927 6. 128602 6. 112304  
11720895\_ 8. 664961 8. 673817 8. 704941 8. 429264 8. 370276 8. 412042  
11720896\_ 7. 163191 7. 36675 7. 245261 7. 305473 7. 354569 7. 258764  
11720897\_ 4. 977054 4. 785603 4. 643717 4. 737707 4. 93837 4. 947961  
11720898\_ 6. 981336 7. 078318 6. 973375 6. 791338 6. 742709 6. 878456  
11720899\_ 4. 26401 4. 314854 4. 009495 4. 479763 4. 361225 4. 365299  
11720900\_ 4. 346488 4. 364369 4. 269989 4. 281299 4. 376457 4. 470714  
11720901\_ 4. 758243 4. 638874 4. 80092 4. 881725 4. 990668 5. 100271  
11720902\_ 4. 835898 5. 112016 5. 072347 5. 097661 5. 278247 5. 125182  
11720903\_ 4. 48307 4. 515346 4. 626581 4. 450673 4. 630418 4. 612176  
11720904\_ 9. 938221 9. 872699 9. 886578 10. 22681 10. 23501 10. 2674  
11720905\_ 7. 754955 7. 690531 7. 732849 7. 546526 7. 502238 7. 497173  
11720906\_ 6. 986385 6. 912136 6. 946771 6. 983174 7. 015477 6. 899234  
11720907\_ 5. 799813 5. 705477 5. 826426 5. 778708 5. 766574 5. 857716  
11720908\_ 5. 755685 5. 640529 5. 788688 5. 501934 5. 501814 5. 619334  
11720909\_ 5. 18828 5. 011769 5. 095194 5. 306922 5. 480212 5. 229147  
11720910\_ 3. 923315 4. 046956 3. 70976 3. 572643 3. 498922 3. 61305  
11720911\_ 2. 47102 2. 242986 2. 244056 2. 417374 2. 396511 2. 599492  
11720912\_ 4. 859601 4. 892915 4. 779255 4. 801051 4. 882389 4. 89665

11720913\_ 7. 718465 7. 724793 7. 740951 7. 722161 7. 756506 7. 762834  
11720914\_ 6. 447634 6. 424881 6. 47712 6. 583567 6. 604289 6. 700371  
11720915\_ 11. 78336 11. 78202 11. 76416 11. 78377 11. 79969 11. 78698  
11720916\_ 12. 99926 12. 9622 12. 9739 13. 00325 13. 00585 13. 04032  
11720917\_ 4. 109315 3. 685882 3. 967675 3. 982305 3. 971556 3. 899759  
11720918\_ 12. 00588 12. 00148 11. 9926 12. 00908 11. 99638 11. 94224  
11720919\_ 11. 37981 11. 419 11. 39839 11. 41985 11. 42681 11. 41037  
11720920\_ 12. 22534 12. 20551 12. 18658 12. 20924 12. 17495 12. 16425  
11720921\_ 8. 521401 8. 478982 8. 534019 8. 377122 8. 337655 8. 412343  
11720922\_ 3. 629883 3. 609444 3. 903875 4. 088439 4. 368741 4. 347179  
11720923\_ 5. 056984 5. 07981 5. 047061 5. 177659 5. 188868 5. 205862  
11720924\_ 8. 028426 7. 99162 8. 038346 8. 031941 8. 09976 8. 162583  
11720925\_ 7. 533362 7. 496556 7. 48692 7. 552748 7. 641564 7. 66553  
11720926\_ 8. 923298 8. 766474 8. 836245 10. 69654 10. 68737 10. 6708  
11720927\_ 10. 62143 10. 57138 10. 5915 10. 50394 10. 53482 10. 52582  
11720928\_ 9. 733315 9. 62874 9. 728111 9. 673124 9. 703907 9. 662956  
11720929\_ 6. 407639 6. 23057 6. 355873 6. 976026 7. 019573 6. 990886  
11720930\_ 6. 274132 6. 282224 6. 308373 6. 803514 6. 786975 6. 767606  
11720931\_ 6. 964119 6. 954323 7. 008888 7. 586801 7. 56436 7. 714183  
11720932\_ 7. 262367 7. 24034 7. 308942 7. 892766 7. 942702 7. 952227  
11720933\_ 6. 77881 6. 633573 6. 739151 6. 296363 6. 448378 6. 347529  
11720934\_ 7. 548844 7. 412575 7. 305305 7. 173415 7. 189792 7. 135007  
11720935\_ 10. 79945 10. 71775 10. 76053 11. 06465 11. 07393 11. 08497  
11720936\_ 6. 273929 6. 225823 6. 282441 6. 183835 6. 158489 6. 176765  
11720937\_ 8. 621735 8. 600093 8. 594358 8. 44271 8. 465891 8. 410172  
11720938\_ 9. 232289 9. 271775 9. 171581 9. 599969 9. 617387 9. 600109  
11720939\_ 8. 483206 8. 444452 8. 451711 8. 564804 8. 665281 8. 610489  
11720940\_ 6. 405947 6. 465353 6. 456957 6. 6151 6. 702029 6. 609736  
11720941\_ 6. 469105 6. 459237 6. 529262 6. 834939 6. 832102 6. 779676  
11720942\_ 5. 75708 5. 908017 5. 957154 6. 230082 6. 27012 6. 223082  
11720943\_ 6. 955744 6. 870944 7. 029878 7. 224753 7. 113219 7. 194397  
11720944\_ 5. 876768 5. 985643 5. 929137 6. 075512 6. 074234 6. 037454  
11720945\_ 10. 28203 10. 29189 10. 30401 10. 35501 10. 32413 10. 29168  
11720946\_ 5. 189719 5. 149545 5. 216646 5. 321749 5. 408603 5. 431655  
11720947\_ 2. 913721 3. 180062 3. 268363 3. 280069 3. 367357 3. 290188  
11720948\_ 4. 577136 4. 309563 4. 601208 4. 703898 4. 458605 4. 569602  
11720949\_ 4. 538261 4. 530851 4. 299765 4. 334256 4. 372641 4. 320821  
11720950\_ 10. 44534 10. 43769 10. 40126 10. 59242 10. 56168 10. 54697  
11720951\_ 7. 246045 7. 210391 7. 283614 7. 526951 7. 483118 7. 540835  
11720952\_ 7. 615246 7. 657253 7. 637849 7. 214701 7. 151672 7. 27048  
11720953\_ 8. 512051 8. 469227 8. 57833 8. 575329 8. 659566 8. 565412  
11720954\_ 12. 60768 12. 64676 12. 64461 12. 56833 12. 56685 12. 52649  
11720955\_ 7. 246569 7. 313162 7. 464746 7. 138996 7. 133778 7. 089777  
11720956\_ 6. 26841 6. 18716 6. 276961 5. 809548 5. 730936 5. 557315  
11720957\_ 7. 671306 7. 732341 7. 639655 7. 111353 7. 359594 7. 310151  
11720958\_ 9. 245541 9. 107883 9. 273395 8. 705861 8. 857228 8. 80053  
11720959\_ 8. 543969 8. 457514 8. 518893 8. 50621 8. 413607 8. 483712  
11720960\_ 7. 323586 7. 240679 7. 383668 7. 048679 7. 130634 6. 999427  
11720961\_ 8. 869899 8. 80497 8. 918393 8. 670639 8. 621587 8. 662727  
11720962\_ 5. 633098 5. 617238 5. 555606 5. 639085 5. 575165 5. 658019  
11720963\_ 6. 991488 6. 864846 6. 959005 7. 249738 7. 198895 7. 276216

11720964\_ 8. 304724 8. 202371 8. 185467 8. 544301 8. 44154 8. 443436  
11720965\_ 7. 800397 7. 798263 7. 784605 8. 127853 8. 146433 8. 082311  
11720966\_ 7. 797968 7. 801095 7. 747041 8. 120476 8. 146269 8. 112043  
11720967\_ 7. 935858 7. 935771 7. 974783 8. 193461 8. 056527 8. 134391  
11720968\_ 8. 990055 8. 973275 8. 958951 9. 082509 9. 07295 9. 079949  
11720969\_ 9. 171767 9. 16111 9. 159783 9. 268335 9. 32371 9. 301168  
11720970\_ 10. 28412 10. 25324 10. 3154 10. 8516 10. 91397 10. 88318  
11720971\_ 9. 402603 9. 354924 9. 346645 9. 941491 9. 94463 9. 921954  
11720972\_ 9. 223852 9. 11209 9. 164894 9. 682437 9. 724375 9. 672798  
11720973\_ 6. 439935 6. 546818 6. 596265 6. 506067 6. 643784 6. 59968  
11720974\_ 6. 652857 6. 550138 6. 757078 6. 812533 6. 725582 6. 700826  
11720975\_ 7. 467565 7. 420013 7. 46665 7. 818891 7. 887238 7. 872993  
11720976\_ 7. 073265 7. 056969 7. 079161 7. 551479 7. 528007 7. 573673  
11720977\_ 7. 89131 7. 69763 7. 878172 7. 378177 7. 41621 7. 371405  
11720978\_ 7. 466592 7. 370875 7. 480166 7. 038374 7. 12773 7. 115968  
11720979\_ 7. 774328 7. 699424 7. 673567 7. 656076 7. 696936 7. 61863  
11720980\_ 4. 063534 4. 116003 3. 822934 4. 316322 4. 16943 3. 899686  
11720981\_ 8. 163371 8. 334413 8. 26416 8. 26536 8. 197844 8. 113257  
11720982\_ 3. 008735 3. 07585 3. 123981 3. 198741 3. 002316 3. 126027  
11720983\_ 10. 43878 10. 38854 10. 3875 10. 60555 10. 5749 10. 52356  
11720984\_ 6. 132422 6. 299758 6. 130273 6. 290083 6. 233937 6. 289104  
11720985\_ 9. 691434 9. 607868 9. 610595 9. 179602 9. 248503 9. 221654  
11720986\_ 10. 13028 10. 12207 10. 19946 9. 50852 9. 416317 9. 491043  
11720987\_ 7. 323085 7. 298729 7. 421174 7. 188779 7. 274963 7. 202272  
11720988\_ 5. 11527 5. 186794 5. 245983 4. 764583 5. 059812 5. 167119  
11720989\_ 4. 062338 4. 043203 3. 897449 4. 124428 4. 011583 4. 203102  
11720990\_ 8. 078487 7. 975086 8. 040138 7. 9861 7. 963012 8. 019429  
11720991\_ 5. 548523 5. 612959 5. 643713 5. 741464 5. 766758 5. 849541  
11720992\_ 6. 816972 6. 615223 6. 773018 6. 824204 6. 928017 6. 96125  
11720993\_ 7. 132611 7. 097752 7. 143359 7. 738963 7. 589343 7. 651762  
11720994\_ 5. 254114 5. 178043 5. 22566 5. 147166 5. 195199 5. 151782  
11720995\_ 3. 868463 3. 994532 3. 610016 3. 979823 3. 845327 3. 822458  
11720996\_ 4. 010611 4. 280058 4. 001659 4. 227643 4. 195098 4. 197829  
11720997\_ 3. 399672 3. 397413 3. 335988 3. 480161 3. 585297 3. 546881  
11720998\_ 3. 296432 3. 387308 3. 233902 3. 399573 3. 232494 3. 463511  
11720999\_ 5. 241962 5. 11218 5. 183207 5. 142003 5. 239189 5. 207442  
11721000\_ 6. 094413 6. 077525 6. 170671 6. 34864 6. 369858 6. 424655  
11721001\_ 7. 066036 7. 08775 7. 131046 7. 606289 7. 514289 7. 563731  
11721002\_ 7. 787044 7. 859452 7. 832785 8. 169461 8. 130689 8. 158897  
11721003\_ 8. 417906 8. 434545 8. 462018 8. 360459 8. 354487 8. 337635  
11721004\_ 9. 543241 9. 624118 9. 597252 9. 548191 9. 486193 9. 487976  
11721005\_ 8. 974078 8. 916703 8. 918855 9. 022493 9. 016595 9. 043023  
11721006\_ 8. 727966 8. 695791 8. 824848 8. 889764 8. 881934 8. 907907  
11721007\_ 8. 584226 8. 506302 8. 596312 8. 541277 8. 526181 8. 545276  
11721008\_ 8. 765005 8. 739578 8. 753521 8. 762747 8. 893792 8. 844427  
11721009\_ 9. 452407 9. 395008 9. 448351 9. 433227 9. 392109 9. 363959  
11721010\_ 6. 922773 6. 847882 7. 063749 6. 676688 6. 749779 6. 702313  
11721011\_ 5. 175324 4. 95251 5. 097145 5. 163789 5. 131326 5. 103172  
11721012\_ 4. 784366 4. 774301 4. 654734 4. 87876 4. 931515 4. 881401  
11721013\_ 6. 631711 6. 623682 6. 685441 6. 485505 6. 42916 6. 394699  
11721014\_ 7. 204134 7. 103782 7. 043111 6. 920679 6. 962777 6. 983937

11721015\_ 7. 317761 7. 232084 7. 316069 7. 050297 7. 02487 7. 062667  
11721016\_ 7. 916845 7. 932678 7. 919013 8. 034723 8. 118795 8. 118795  
11721017\_ 6. 967352 7. 131295 6. 910833 7. 342037 7. 284548 7. 276579  
11721018\_ 7. 26753 7. 330626 7. 36759 7. 440457 7. 529698 7. 477415  
11721019\_ 5. 251587 5. 463325 5. 511381 5. 09237 5. 219063 5. 299245  
11721020\_ 4. 953095 4. 920425 5. 098965 4. 794112 5. 026565 5. 026211  
11721021\_ 7. 599637 7. 552011 7. 596644 7. 104233 7. 088311 7. 140747  
11721022\_ 7. 05837 7. 036978 7. 042517 7. 121445 7. 125793 7. 184636  
11721023\_ 5. 090868 5. 049243 5. 122191 5. 114949 5. 24423 5. 233221  
11721024\_ 6. 618088 6. 556393 6. 67825 6. 548946 6. 66993 6. 658419  
11721025\_ 6. 404815 6. 516875 6. 426029 6. 554512 6. 540913 6. 751319  
11721026\_ 6. 65731 6. 720519 6. 60946 7. 247454 7. 189509 7. 114126  
11721027\_ 7. 317368 7. 362543 7. 320031 7. 351631 7. 502833 7. 345053  
11721028\_ 7. 438047 7. 416368 7. 482678 7. 411352 7. 443063 7. 433355  
11721029\_ 3. 482462 3. 545009 3. 348807 3. 488109 3. 43647 3. 431858  
11721030\_ 2. 60374 2. 523842 2. 64569 2. 472544 2. 695096 2. 675437  
11721031\_ 5. 574053 5. 643713 5. 360916 5. 297498 5. 347774 5. 347774  
11721032\_ 5. 133861 5. 323008 5. 2222 5. 292332 5. 377324 5. 376632  
11721033\_ 4. 769855 4. 900038 4. 709463 4. 911858 4. 890539 4. 763543  
11721034\_ 5. 445876 5. 242731 5. 373734 5. 162049 5. 243163 5. 318552  
11721035\_ 5. 186744 5. 271246 5. 10765 5. 217054 4. 945858 5. 029529  
11721036\_ 6. 402266 6. 395092 6. 484026 6. 533358 6. 584888 6. 539218  
11721037\_ 5. 311536 5. 301944 5. 087466 5. 363138 5. 33909 5. 378395  
11721038\_ 5. 627896 5. 689102 5. 676992 5. 702587 5. 759113 5. 661175  
11721039\_ 8. 325433 8. 333076 8. 341124 8. 11805 8. 128398 8. 135632  
11721040\_ 7. 679566 7. 588785 7. 596445 7. 363336 7. 186064 7. 310805  
11721041\_ 7. 868629 8. 176128 8. 079439 7. 953006 7. 969916 7. 880554  
11721042\_ 8. 561789 8. 64028 8. 572041 8. 547635 8. 553427 8. 565586  
11721043\_ 8. 18342 8. 13988 8. 226078 8. 000901 7. 973056 7. 993774  
11721044\_ 7. 039332 7. 083467 7. 198169 6. 975816 7. 062557 7. 024431  
11721045\_ 8. 613073 8. 543483 8. 599119 8. 566171 8. 441979 8. 517425  
11721046\_ 7. 116538 7. 045346 7. 110214 7. 141772 7. 114135 7. 13087  
11721047\_ 3. 485648 3. 170981 3. 211721 3. 547865 3. 410366 3. 384473  
11721048\_ 7. 709971 7. 62212 7. 710678 7. 739184 7. 744982 7. 717284  
11721049\_ 4. 832694 5. 235656 4. 873252 5. 063842 5. 142657 5. 143632  
11721050\_ 5. 219569 5. 188653 5. 203379 5. 154809 5. 166535 5. 185726  
11721051\_ 9. 118328 9. 07799 9. 069475 8. 9402 8. 887694 8. 897283  
11721052\_ 6. 292684 6. 314154 6. 295041 6. 577153 6. 584888 6. 586636  
11721053\_ 8. 331366 8. 259698 8. 256469 8. 556593 8. 602967 8. 585595  
11721054\_ 7. 278026 7. 268524 7. 341512 7. 468222 7. 395786 7. 531009  
11721055\_ 5. 337938 5. 391416 5. 533993 5. 384893 5. 320335 5. 259479  
11721056\_ 6. 623761 6. 543678 6. 511517 6. 523174 6. 500448 6. 60835  
11721057\_ 7. 572691 7. 702368 7. 543567 7. 588109 7. 60622 7. 664378  
11721058\_ 7. 930436 7. 895306 7. 858257 7. 921911 7. 957185 7. 978596  
11721059\_ 7. 35834 7. 290992 7. 458326 7. 402919 7. 37711 7. 483457  
11721060\_ 7. 280725 7. 198308 7. 200765 7. 066559 6. 935933 6. 961756  
11721061\_ 4. 673771 4. 886931 4. 757604 4. 97748 4. 69895 4. 83667  
11721062\_ 9. 025375 8. 956358 8. 936343 9. 140154 9. 122631 9. 106768  
11721063\_ 7. 58569 7. 550373 7. 687386 6. 815891 6. 97913 6. 826082  
11721064\_ 7. 462196 7. 43784 7. 586103 7. 738566 7. 649796 7. 677338  
11721065\_ 6. 345291 6. 186638 6. 25735 7. 272296 7. 367109 7. 455232

11721066\_ 6. 283704 6. 159771 6. 113273 6. 735326 6. 873257 6. 937332  
11721067\_ 9. 315738 9. 256377 9. 268011 9. 184337 9. 179619 9. 133972  
11721068\_ 6. 214558 6. 129388 6. 06539 5. 99948 6. 01079 6. 066638  
11721069\_ 8. 947717 8. 8982 8. 96582 8. 75003 8. 778056 8. 800884  
11721070\_ 8. 667432 8. 607053 8. 691717 8. 55208 8. 608684 8. 581166  
11721071\_ 9. 577149 9. 430776 9. 523695 9. 434926 9. 449544 9. 480421  
11721072\_ 8. 070252 8. 089415 8. 134107 8. 382698 8. 415894 8. 427097  
11721073\_ 6. 668253 6. 464805 6. 716143 6. 811452 6. 770419 6. 808415  
11721074\_ 7. 715356 7. 597395 7. 681699 8. 118749 8. 162698 8. 122728  
11721075\_ 10. 29803 10. 33955 10. 37283 10. 47873 10. 41556 10. 41891  
11721076\_ 7. 341309 7. 297635 7. 344036 7. 632237 7. 652235 7. 654922  
11721077\_ 10. 66319 10. 56999 10. 59664 10. 93802 10. 92518 10. 95931  
11721078\_ 9. 27998 9. 241284 9. 299033 9. 20801 9. 169348 9. 166871  
11721079\_ 9. 464629 9. 437135 9. 471645 9. 418191 9. 395682 9. 383443  
11721080\_ 8. 292193 8. 121333 8. 189054 7. 9751 7. 965453 8. 098873  
11721081\_ 7. 991925 7. 943138 8. 028584 7. 627318 7. 645739 7. 683404  
11721082\_ 2. 460145 2. 479267 2. 235709 2. 352398 2. 427439 2. 319692  
11721083\_ 2. 694222 2. 880316 2. 504579 2. 678851 2. 594981 2. 880316  
11721084\_ 7. 757715 7. 643501 7. 652671 7. 306967 7. 380346 7. 403375  
11721085\_ 8. 884021 8. 902732 8. 942819 8. 416634 8. 379856 8. 426314  
11721086\_ 2. 325345 2. 526079 2. 272142 2. 644407 2. 329326 2. 432147  
11721087\_ 2. 784642 2. 722685 2. 913002 3. 141148 2. 785495 3. 063097  
11721088\_ 7. 282618 7. 237633 7. 335258 7. 482104 7. 446714 7. 473642  
11721089\_ 7. 364056 7. 291546 7. 354606 7. 345126 7. 406785 7. 417811  
11721090\_ 12. 09376 12. 16977 12. 09514 11. 80922 11. 73047 11. 69719  
11721091\_ 9. 09758 9. 059494 9. 108947 8. 1708 8. 136366 8. 09557  
11721092\_ 11. 97759 12. 02195 12. 02962 11. 21068 11. 25557 11. 23155  
11721093\_ 11. 55722 11. 50203 11. 50299 10. 57427 10. 56472 10. 53191  
11721094\_ 4. 415744 4. 40461 4. 516885 4. 824195 4. 8919 5. 011709  
11721095\_ 4. 902383 4. 912871 5. 063151 5. 277346 5. 351944 5. 434989  
11721096\_ 9. 255485 9. 056198 9. 25387 9. 507261 9. 474575 9. 559126  
11721097\_ 6. 175875 6. 035815 6. 171268 7. 230373 7. 226308 7. 316219  
11721098\_ 8. 618958 8. 616004 8. 606591 9. 036548 9. 018797 9. 042751  
11721099\_ 6. 698773 6. 620988 6. 715655 5. 355495 5. 516336 5. 250279  
11721100\_ 5. 660789 5. 694433 5. 475388 5. 819641 5. 753034 5. 787576  
11721101\_ 6. 20631 6. 172961 6. 117545 6. 173161 6. 225583 6. 259705  
11721102\_ 6. 270003 6. 252914 6. 20337 6. 198743 6. 217804 6. 105464  
11721103\_ 5. 858024 5. 935873 5. 94759 6. 264682 6. 163195 6. 247833  
11721104\_ 7. 621452 7. 52834 7. 510893 8. 221676 8. 268203 8. 294315  
11721105\_ 6. 610499 6. 602761 6. 711648 6. 741397 6. 602761 6. 649941  
11721106\_ 6. 468467 6. 381089 6. 491453 6. 386025 6. 30453 6. 377494  
11721107\_ 7. 293542 7. 211161 7. 316141 7. 277548 7. 360673 7. 324886  
11721108\_ 8. 070528 7. 991494 8. 08611 7. 813899 7. 753413 7. 765749  
11721109\_ 3. 965571 3. 802642 3. 538515 4. 209952 3. 915693 4. 35883  
11721110\_ 4. 108592 4. 106852 4. 320679 4. 362914 4. 24916 4. 451909  
11721111\_ 7. 526536 7. 48288 7. 612191 7. 800765 7. 802836 7. 781732  
11721112\_ 8. 489416 8. 34704 8. 464185 8. 867778 8. 80648 8. 821804  
11721113\_ 9. 649109 9. 55682 9. 61786 9. 881453 9. 953095 9. 940022  
11721114\_ 8. 631765 8. 571837 8. 643664 9. 202047 9. 22461 9. 206188  
11721115\_ 8. 51778 8. 492646 8. 537745 8. 290882 8. 270458 8. 278016  
11721116\_ 9. 11073 9. 101146 9. 083165 9. 275936 9. 208697 9. 253674

11721117\_ 9. 304389 9. 238952 9. 300227 9. 047647 9. 053809 9. 030776  
11721118\_ 6. 118838 5. 851602 5. 873836 5. 828513 5. 866916 5. 913731  
11721119\_ 9. 059989 8. 9964 9. 111287 8. 681221 8. 72801 8. 655642  
11721120\_ 9. 25415 9. 210883 9. 252939 9. 231022 9. 227269 9. 19148  
11721121\_ 7. 151851 6. 991736 7. 179187 7. 17298 7. 185162 7. 178422  
11721122\_ 7. 122626 7. 03276 7. 153882 7. 149329 7. 197197 7. 202889  
11721123\_ 7. 197987 7. 277629 7. 159326 7. 159326 7. 223889 7. 286797  
11721124\_ 6. 056337 6. 166658 6. 104487 6. 213318 6. 140871 6. 162677  
11721125\_ 9. 645049 9. 552339 9. 625423 9. 38806 9. 364447 9. 424856  
11721126\_ 3. 361088 3. 479785 3. 234927 3. 306729 3. 555906 3. 340477  
11721127\_ 2. 324186 2. 25483 2. 159307 2. 25483 2. 255868 2. 421781  
11721128\_ 9. 598242 9. 50593 9. 555141 9. 154543 9. 231209 9. 15616  
11721129\_ 5. 036476 4. 746569 4. 984669 4. 961273 5. 080568 5. 036476  
11721130\_ 6. 334976 6. 440964 6. 444705 6. 484166 6. 567139 6. 624503  
11721131\_ 6. 191831 6. 309524 6. 254088 6. 340764 6. 435699 6. 508631  
11721132\_ 8. 990925 8. 923511 8. 990336 9. 091179 9. 126013 9. 13029  
11721133\_ 7. 350243 7. 382221 7. 450648 7. 543576 7. 554807 7. 607851  
11721134\_ 8. 028932 7. 942972 8. 059212 8. 037977 8. 078604 8. 098883  
11721135\_ 7. 325921 7. 233357 7. 215876 6. 862059 6. 948906 6. 794258  
11721136\_ 9. 699342 9. 662975 9. 686745 9. 725732 9. 716539 9. 765438  
11721137\_ 7. 257667 7. 315859 7. 245448 9. 082668 9. 044381 9. 130987  
11721138\_ 7. 529956 7. 443613 7. 416717 9. 502655 9. 460422 9. 497852  
11721139\_ 8. 114511 8. 000851 8. 141313 8. 29223 8. 273735 8. 315642  
11721140\_ 5. 853533 5. 79158 5. 851709 5. 507637 5. 36323 5. 410922  
11721141\_ 6. 225513 6. 181625 6. 115374 5. 799257 5. 736831 5. 783492  
11721142\_ 7. 899124 7. 840019 7. 91363 8. 866996 8. 851703 8. 850943  
11721143\_ 9. 078536 8. 993961 9. 027659 9. 831511 9. 837451 9. 806681  
11721144\_ 6. 859243 6. 761988 6. 869306 7. 604825 7. 559506 7. 481087  
11721145\_ 8. 192118 8. 127394 8. 228983 8. 883089 8. 926168 8. 952049  
11721146\_ 7. 297822 7. 191317 7. 305833 7. 683762 7. 680445 7. 78923  
11721147\_ 6. 884411 6. 89658 6. 792183 6. 737363 6. 756003 6. 7888  
11721148\_ 4. 69812 4. 941845 4. 901145 4. 825689 4. 877014 4. 891926  
11721149\_ 8. 06125 8. 10414 8. 128252 7. 689097 7. 792087 7. 668031  
11721150\_ 7. 14478 7. 265541 7. 056074 7. 302301 7. 34781 7. 327746  
11721151\_ 7. 853151 7. 892018 7. 947276 8. 194573 8. 183197 8. 361092  
11721152\_ 8. 22717 8. 102439 8. 23164 8. 159005 8. 158617 8. 130122  
11721153\_ 7. 205552 7. 270193 7. 26574 7. 118463 7. 082315 7. 092705  
11721154\_ 7. 82327 7. 916711 7. 709971 8. 242356 8. 071856 8. 018092  
11721155\_ 8. 064837 7. 979493 7. 980875 7. 619946 7. 550931 7. 604893  
11721156\_ 7. 836346 7. 722272 7. 800448 7. 190482 7. 140136 7. 215465  
11721157\_ 7. 992807 7. 88589 7. 973312 8. 285964 8. 278524 8. 276028  
11721158\_ 8. 848558 8. 785164 8. 84026 8. 520435 8. 553886 8. 609477  
11721159\_ 8. 202903 8. 179127 8. 272613 7. 911122 7. 919411 7. 936586  
11721160\_ 8. 718071 8. 703145 8. 767761 8. 614528 8. 649741 8. 663449  
11721161\_ 6. 661973 6. 565485 6. 663073 6. 517094 6. 53912 6. 564246  
11721162\_ 6. 455694 6. 375668 6. 216962 6. 197349 6. 235109 6. 206049  
11721163\_ 7. 740459 7. 638947 7. 640879 7. 560932 7. 598264 7. 630508  
11721164\_ 5. 536571 5. 582265 5. 499837 5. 657171 5. 590834 5. 622112  
11721165\_ 7. 432649 7. 358705 7. 491113 7. 337052 7. 323845 7. 397358  
11721166\_ 5. 156303 5. 146152 5. 235639 5. 116401 5. 149545 5. 064891  
11721167\_ 6. 214253 6. 020159 5. 970825 6. 067911 6. 196824 6. 171707

11721168\_ 5.696724 5.72785 5.782772 5.687465 5.693493 5.618068  
11721169\_ 5.051237 5.067822 4.929364 4.899475 5.003484 4.988801  
11721170\_ 6.377732 6.247081 6.21527 6.12766 6.231263 6.019945  
11721171\_ 8.306443 8.238049 8.359066 7.770322 7.770347 7.752835  
11721172\_ 9.066711 9.03556 9.094359 8.542467 8.496917 8.559552  
11721173\_ 6.278514 6.234219 6.300643 5.954113 5.820052 5.904188  
11721174\_ 8.053359 8.072329 8.115451 8.077816 8.095312 8.141825  
11721175\_ 2.753772 2.711029 2.803317 2.77755 2.665267 2.950016  
11721176\_ 7.046954 7.01286 7.027988 7.361439 7.338424 7.349598  
11721177\_ 5.965753 6.044846 5.996126 6.209356 5.995724 6.091866  
11721178\_ 5.803354 5.841324 5.763634 6.054437 6.026226 5.992795  
11721179\_ 7.793178 7.712701 7.790243 7.770016 7.748129 7.799566  
11721180\_ 7.985132 7.952959 7.995268 7.754569 7.772122 7.688938  
11721181\_ 5.406138 5.347538 5.39304 5.510927 5.507142 5.564841  
11721182\_ 3.212935 3.376081 3.155701 3.23339 3.242665 3.336597  
11721183\_ 2.43152 2.625541 2.347267 2.473487 2.585264 2.551529  
11721184\_ 6.277217 6.34885 6.157125 6.540863 6.349504 6.49023  
11721185\_ 6.205863 6.1982 6.11386 6.300678 6.330828 6.164465  
11721186\_ 7.410211 7.462746 7.379954 7.59556 7.554996 7.568717  
11721187\_ 7.270603 7.226436 7.343859 7.174876 7.104983 7.162915  
11721188\_ 4.436894 5.009162 5.016314 5.830707 5.776512 5.864723  
11721189\_ 6.484514 6.541819 6.541665 6.695955 6.800237 6.84124  
11721190\_ 9.243813 9.235673 9.280753 8.942037 8.965068 8.986154  
11721191\_ 7.642368 7.574932 7.688518 7.537993 7.609902 7.546305  
11721192\_ 4.582581 4.596882 4.503612 4.525929 4.556535 4.556535  
11721193\_ 5.285218 5.289341 5.359806 5.380649 5.508394 5.289341  
11721194\_ 6.05553 5.958989 5.967903 6.139537 6.205434 6.354529  
11721195\_ 8.901216 8.789084 8.930105 9.756091 9.697828 9.668751  
11721196\_ 7.04414 6.753623 6.869237 6.448326 6.338929 6.474528  
11721197\_ 6.006743 6.202998 6.015861 6.223757 6.177942 6.138582  
11721198\_ 5.374309 5.432351 5.353488 5.419595 5.509782 5.491514  
11721199\_ 7.658207 7.622827 7.754929 7.45391 7.429124 7.386992  
11721200\_ 5.06681 5.063171 5.174254 5.18195 5.218087 5.122053  
11721201\_ 5.438349 5.369751 5.24157 5.535898 5.509984 5.483463  
11721202\_ 5.046694 5.249648 4.927942 5.016447 5.02909 4.988107  
11721203\_ 5.018116 5.009971 5.177516 5.040118 5.110453 5.083093  
11721204\_ 7.037344 6.99773 7.120163 6.48684 6.56893 6.638507  
11721205\_ 6.757263 6.690668 6.654207 6.094825 6.202681 6.140023  
11721206\_ 7.788204 7.810589 7.856014 7.34023 7.37227 7.388949  
11721207\_ 9.18734 9.034223 9.121952 8.166563 8.284386 8.272066  
11721208\_ 5.952292 5.866126 5.970247 6.594872 6.614497 6.583326  
11721209\_ 6.926471 6.951212 6.969297 7.595065 7.660314 7.614584  
11721210\_ 9.487062 9.388678 9.469399 9.47246 9.430155 9.355816  
11721211\_ 7.326385 7.275309 7.276032 7.291509 7.400837 7.335977  
11721212\_ 4.240979 4.114803 4.234714 4.620526 4.620526 4.633197  
11721213\_ 5.999888 5.76218 5.945209 6.318829 6.312793 6.417769  
11721214\_ 8.108515 8.115001 8.120175 8.340951 8.303776 8.258437  
11721215\_ 4.679025 4.709463 4.439302 5.843746 5.736831 5.817576  
11721216\_ 5.11527 5.087319 5.203649 6.083089 5.889728 6.155594  
11721217\_ 6.945479 6.78521 6.971486 7.735223 7.709511 7.758468  
11721218\_ 7.230373 7.148834 7.210346 6.494443 6.362653 6.486152

11721219\_ 5.961144 5.928511 6.13883 5.614563 5.70762 5.727041  
11721220\_ 7.218601 7.315859 7.371256 7.249461 7.130916 7.277536  
11721221\_ 6.79055 6.794351 6.885496 6.709643 6.658672 6.696726  
11721222\_ 6.826261 6.853289 6.85148 6.751171 6.663649 6.662185  
11721223\_ 8.305769 8.262116 8.27582 8.138038 8.199357 8.217175  
11721224\_ 2.515128 3.012539 2.659938 2.749585 3.033952 3.248986  
11721225\_ 4.34785 4.176294 4.504392 4.352206 4.540617 4.415744  
11721226\_ 5.885335 5.689618 5.865362 5.585077 5.245156 5.617271  
11721227\_ 7.097804 6.921877 7.128586 6.678867 6.666344 6.670521  
11721228\_ 7.74793 7.74053 7.744062 7.658485 7.645716 7.585195  
11721229\_ 5.845365 5.702158 5.763634 5.840549 5.829912 5.759267  
11721230\_ 4.534875 4.489574 4.532441 4.398643 4.391396 4.301179  
11721231\_ 6.610553 6.504419 6.485559 5.756342 5.798167 5.787195  
11721232\_ 8.058994 7.933875 7.975116 7.254855 7.262586 7.224248  
11721233\_ 3.073155 3.033 3.138626 2.991414 3.003585 3.176296  
11721234\_ 5.87097 5.841177 5.773589 5.710909 5.719344 5.762922  
11721235\_ 4.744177 4.702875 4.674934 4.804503 4.796116 4.815683  
11721236\_ 6.430498 6.362784 6.380371 6.16474 6.061248 6.2959  
11721237\_ 7.716009 7.577694 7.679618 7.419749 7.377085 7.51074  
11721238\_ 8.153949 8.004827 8.071897 8.393727 8.343232 8.365572  
11721239\_ 8.364745 8.316251 8.298457 8.612034 8.560267 8.554195  
11721240\_ 7.455407 7.42554 7.254194 7.512089 7.494704 7.526907  
11721241\_ 3.112232 3.215514 2.991817 3.15759 3.124635 3.181431  
11721242\_ 9.68823 9.668872 9.760864 10.34614 10.3617 10.32631  
11721243\_ 8.010202 8.017622 8.032785 8.412282 8.418411 8.396014  
11721244\_ 5.353833 5.216807 5.353833 5.735627 5.671908 5.670338  
11721245\_ 8.578605 8.472554 8.581866 8.948269 8.951241 8.950821  
11721246\_ 8.670879 8.684147 8.591192 9.029774 9.003283 8.998576  
11721247\_ 5.813875 6.034631 5.741713 5.908773 5.852297 5.970573  
11721248\_ 7.844346 7.818575 7.822424 8.377618 8.367397 8.431159  
11721249\_ 6.740599 6.683659 6.688225 6.805607 6.743288 6.864235  
11721250\_ 7.33238 7.286897 7.392871 8.001581 8.066832 7.992193  
11721251\_ 9.090084 9.056675 9.091858 9.150497 9.135886 9.130987  
11721252\_ 4.805256 4.910763 4.83165 4.846178 4.992479 4.903986  
11721253\_ 5.963192 5.888007 5.736831 6.030279 5.964277 5.859972  
11721254\_ 5.174857 5.115769 5.166421 5.352308 5.148088 5.367172  
11721255\_ 10.70951 10.68235 10.70865 10.04781 10.03754 10.05589  
11721256\_ 10.05588 10.04409 10.05544 9.240306 9.280876 9.164634  
11721257\_ 8.899051 8.823831 8.879822 8.261793 8.234761 8.278871  
11721258\_ 5.905385 5.906468 5.778569 5.978424 5.928234 5.93184  
11721259\_ 7.925144 7.85083 7.862556 7.664788 7.653435 7.638603  
11721260\_ 7.066036 6.989995 7.012507 6.779107 6.720793 6.701787  
11721261\_ 6.790409 6.734191 6.759388 6.772312 6.722225 6.893253  
11721262\_ 8.754096 8.716469 8.646397 8.731085 8.706642 8.594511  
11721263\_ 2.660702 2.984318 2.966471 2.48369 2.465476 2.414403  
11721264\_ 5.349312 5.263545 5.438359 4.793886 4.86317 4.815683  
11721265\_ 6.893531 6.868362 7.014879 7.03309 7.203877 7.124765  
11721266\_ 5.000135 5.25986 4.939785 5.142676 5.186272 5.174205  
11721267\_ 2.933878 2.85634 2.753199 2.646422 2.767816 2.891351  
11721268\_ 2.900464 2.960509 2.796461 2.861626 2.787711 2.861979  
11721269\_ 1.930897 1.924144 2.05803 1.989732 1.872505 1.825172



11721270\_ 2. 224066 2. 269377 2. 337795 2. 333848 2. 166552 2. 258692  
11721271\_ 8. 39801 8. 242595 8. 393999 8. 494502 8. 568322 8. 544189  
11721272\_ 10. 33067 10. 27124 10. 37395 10. 61364 10. 65755 10. 65378  
11721273\_ 4. 677992 4. 707274 4. 52373 5. 141908 5. 034498 5. 2666  
11721274\_ 7. 563029 7. 443094 7. 517742 7. 431981 7. 501465 7. 527917  
11721275\_ 7. 946155 7. 918463 7. 95769 8. 155567 8. 107105 8. 17841  
11721276\_ 8. 159311 8. 07542 8. 08272 8. 346993 8. 371433 8. 341552  
11721277\_ 7. 433423 7. 496582 7. 339271 7. 714324 7. 764165 7. 703688  
11721278\_ 7. 618752 7. 723343 7. 823336 8. 333306 8. 40467 8. 395658  
11721279\_ 6. 472772 6. 433665 6. 61905 7. 011942 6. 979138 7. 001965  
11721280\_ 3. 840853 3. 787551 4. 209739 3. 978051 3. 912813 4. 054288  
11721281\_ 5. 678198 5. 894697 5. 79643 5. 93062 5. 981176 5. 949973  
11721282\_ 9. 894929 9. 86521 9. 951495 10. 19608 10. 25365 10. 1878  
11721283\_ 7. 799789 7. 730153 7. 780506 7. 244063 7. 183272 7. 287946  
11721284\_ 8. 252672 8. 178225 8. 267544 7. 852234 7. 962094 7. 793836  
11721285\_ 9. 225661 9. 13177 9. 143959 8. 890634 8. 904144 8. 955509  
11721286\_ 8. 834938 8. 746967 8. 853469 8. 391344 8. 455307 8. 463614  
11721287\_ 5. 587936 5. 337186 5. 400254 5. 143676 5. 120997 5. 250601  
11721288\_ 7. 337549 7. 342771 7. 409185 6. 762245 6. 800836 6. 86616  
11721289\_ 2. 698299 2. 950556 2. 819907 3. 157744 3. 101013 2. 934745  
11721290\_ 7. 758132 7. 637156 7. 790934 5. 257827 5. 408044 5. 40544  
11721291\_ 9. 996193 10. 0313 9. 962367 7. 724131 7. 689792 7. 717273  
11721292\_ 8. 404364 8. 374076 8. 310273 8. 139004 8. 118116 8. 148875  
11721293\_ 8. 054081 8. 054351 8. 128467 7. 853813 7. 754903 7. 793544  
11721294\_ 7. 69484 7. 532709 7. 69999 8. 252921 8. 220234 8. 27168  
11721295\_ 7. 961516 7. 877199 7. 873855 7. 997679 8. 046409 7. 973578  
11721296\_ 10. 62482 10. 63882 10. 6121 10. 56691 10. 59893 10. 5302  
11721297\_ 8. 474068 8. 463718 8. 4402 8. 692604 8. 676814 8. 622723  
11721298\_ 10. 96631 10. 87856 10. 88991 11. 04126 11. 03037 11. 03193  
11721299\_ 10. 39065 10. 31549 10. 40524 10. 41171 10. 4831 10. 47803  
11721300\_ 11. 85529 11. 79927 11. 84486 11. 74102 11. 75744 11. 76533  
11721301\_ 9. 246473 9. 180737 9. 221017 9. 182232 9. 142786 9. 200788  
11721302\_ 9. 078467 8. 987724 9. 07428 8. 753757 8. 75737 8. 779209  
11721303\_ 3. 795044 3. 865819 3. 850246 3. 969832 3. 876946 3. 865819  
11721304\_ 6. 924666 6. 887208 6. 988357 6. 665582 6. 718977 6. 742144  
11721305\_ 11. 04322 11. 04258 11. 05934 10. 51455 10. 52382 10. 51774  
11721306\_ 10. 8168 10. 76873 10. 83066 10. 59456 10. 60588 10. 61263  
11721307\_ 9. 396159 9. 392033 9. 465298 8. 745428 8. 79887 8. 810006  
11721308\_ 9. 476754 9. 395297 9. 443279 9. 246481 9. 250128 9. 238611  
11721309\_ 8. 697405 8. 680563 8. 726857 8. 664469 8. 711363 8. 66744  
11721310\_ 8. 817008 8. 910411 8. 94067 8. 885731 8. 869547 8. 83733  
11721311\_ 9. 914691 9. 882982 9. 957614 9. 865206 9. 826473 9. 784908  
11721312\_ 10. 4552 10. 41031 10. 44786 10. 4416 10. 4851 10. 43537  
11721313\_ 9. 276184 9. 219809 9. 330568 8. 684731 8. 738638 8. 801024  
11721314\_ 7. 140246 7. 062026 7. 124951 8. 74889 8. 697571 8. 691452  
11721315\_ 9. 965777 9. 938263 9. 952321 9. 636011 9. 617196 9. 62809  
11721316\_ 5. 029529 5. 112789 4. 88241 4. 852186 4. 984669 4. 906658  
11721317\_ 4. 927051 4. 978699 4. 927051 4. 863211 4. 851069 4. 875641  
11721318\_ 5. 4543 5. 364623 5. 514153 5. 2222 5. 281877 5. 305567  
11721319\_ 7. 50458 7. 460809 7. 571768 7. 266255 7. 337655 7. 337001  
11721320\_ 5. 339529 5. 205224 5. 312125 5. 094938 5. 233046 5. 042255

11721321\_ 5. 371751 5. 24366 5. 374866 5. 152284 5. 094853 5. 066184  
11721322\_ 6. 7086 6. 706642 6. 704738 6. 726099 6. 742959 6. 825959  
11721323\_ 7. 557943 7. 530682 7. 513661 7. 823431 7. 7847 7. 795574  
11721324\_ 6. 78979 6. 764057 6. 822286 6. 913337 6. 907743 6. 786526  
11721325\_ 5. 985486 5. 716071 5. 736429 6. 644723 6. 543195 6. 638316  
11721326\_ 8. 747885 8. 704641 8. 775955 9. 052086 9. 015362 9. 009712  
11721327\_ 5. 174209 5. 370597 5. 446672 5. 229194 5. 255066 5. 275802  
11721328\_ 6. 988611 6. 857703 6. 82721 6. 910674 7. 007896 7. 091455  
11721329\_ 7. 587428 7. 459391 7. 627561 7. 353947 7. 316665 7. 491129  
11721330\_ 7. 154768 6. 999499 7. 238238 7. 001449 7. 024962 7. 030982  
11721331\_ 7. 612719 7. 537783 7. 617044 7. 435473 7. 401464 7. 472319  
11721332\_ 9. 37115 9. 337904 9. 368679 9. 012834 9. 053277 9. 0325  
11721333\_ 9. 643246 9. 575419 9. 567472 9. 438979 9. 441959 9. 407636  
11721334\_ 9. 804813 9. 856297 9. 839865 9. 839865 9. 728552 9. 804616  
11721335\_ 9. 974893 9. 920679 9. 975264 9. 845768 9. 770823 9. 861334  
11721336\_ 7. 951653 7. 854264 7. 99106 7. 769858 7. 81342 7. 917273  
11721337\_ 10. 43112 10. 38783 10. 39414 9. 72977 9. 747204 9. 761607  
11721338\_ 7. 871607 7. 704769 7. 830313 7. 854633 7. 806204 7. 776415  
11721339\_ 7. 247895 7. 233693 7. 172676 6. 783278 6. 750339 6. 741901  
11721340\_ 5. 970033 5. 912593 6. 137287 5. 738602 5. 639305 5. 667294  
11721341\_ 5. 940841 5. 841177 6. 049198 5. 554436 5. 377893 5. 443295  
11721342\_ 7. 187426 7. 095171 7. 10188 6. 675385 6. 655007 6. 763833  
11721343\_ 6. 674007 6. 471978 6. 478352 6. 147552 6. 282224 6. 252294  
11721344\_ 5. 544167 5. 722004 5. 544945 5. 778979 5. 670449 5. 528624  
11721345\_ 5. 548995 5. 31601 5. 333723 5. 328996 5. 26348 5. 011108  
11721346\_ 5. 078765 5. 032453 4. 971581 5. 158672 4. 996058 5. 123343  
11721347\_ 2. 235709 2. 413373 2. 209225 2. 438734 2. 207323 2. 382269  
11721348\_ 6. 494657 6. 423361 6. 353844 6. 654548 6. 726985 6. 688636  
11721349\_ 4. 626857 4. 643717 4. 651159 4. 690985 4. 781393 4. 60852  
11721350\_ 10. 67464 10. 61582 10. 69677 10. 83305 10. 85497 10. 8672  
11721351\_ 8. 141968 8. 093884 8. 204226 7. 879315 7. 825323 7. 893882  
11721352\_ 8. 540432 8. 471486 8. 508435 8. 136433 8. 130481 8. 221467  
11721353\_ 2. 595071 2. 463113 2. 600719 2. 602545 2. 704241 2. 616642  
11721354\_ 3. 140027 2. 946672 3. 297233 3. 101013 3. 211324 3. 059207  
11721355\_ 6. 802737 6. 739454 6. 848694 6. 553976 6. 556566 6. 556873  
11721356\_ 7. 855817 7. 911163 7. 925459 7. 828384 7. 811972 7. 81152  
11721357\_ 8. 027196 8. 030229 8. 022054 8. 255792 8. 290653 8. 222504  
11721358\_ 5. 022022 5. 345598 5. 257306 5. 347595 5. 123895 5. 127529  
11721359\_ 4. 003134 4. 358568 4. 179959 4. 259131 4. 521248 4. 33818  
11721360\_ 6. 787263 6. 873277 6. 874408 7. 117753 7. 182484 7. 090281  
11721361\_ 7. 059448 7. 040726 7. 059755 7. 322796 7. 297593 7. 362451  
11721362\_ 8. 026957 7. 998092 7. 99126 7. 324747 7. 15118 7. 234229  
11721363\_ 9. 018218 8. 954897 9. 015139 9. 081486 9. 044928 9. 058632  
11721364\_ 8. 563249 8. 582726 8. 541481 8. 797866 8. 721038 8. 633646  
11721365\_ 8. 406538 8. 405823 8. 425785 7. 121809 7. 090129 7. 175463  
11721366\_ 8. 024091 7. 983931 8. 023198 7. 89064 7. 920648 7. 918543  
11721367\_ 6. 159418 6. 056498 6. 18839 6. 57073 6. 65814 6. 626158  
11721368\_ 6. 963225 7. 058843 6. 971934 7. 015052 7. 154221 7. 109696  
11721369\_ 5. 89366 5. 818051 5. 791412 5. 796633 5. 838785 5. 811651  
11721370\_ 6. 895941 7. 07941 6. 962183 6. 999788 7. 030071 7. 004789  
11721371\_ 5. 845365 5. 963475 5. 841846 5. 932162 5. 873059 5. 913599

11721372\_ 5. 689648 5. 669357 5. 688267 5. 884368 5. 775497 5. 792731  
11721373\_ 4. 855278 4. 88884 4. 984669 5. 246068 5. 171902 5. 076975  
11721374\_ 5. 789947 5. 732095 5. 794286 6. 004404 5. 923644 5. 725593  
11721375\_ 4. 700243 4. 566028 4. 70352 4. 665908 4. 742458 4. 80104  
11721376\_ 5. 121166 5. 003614 5. 162584 5. 537844 5. 659351 5. 502136  
11721377\_ 5. 009531 4. 815036 5. 088766 5. 443024 5. 658069 5. 502342  
11721378\_ 3. 69177 3. 777196 3. 678111 3. 606313 3. 581462 3. 786777  
11721379\_ 5. 765364 5. 878232 5. 827916 5. 768615 5. 894697 5. 848878  
11721380\_ 6. 934615 6. 986298 6. 932787 6. 916261 6. 917963 6. 838684  
11721381\_ 6. 551328 6. 636222 6. 48359 6. 311371 6. 236922 6. 375324  
11721382\_ 5. 084774 5. 128681 5. 009416 5. 208727 5. 196263 5. 284366  
11721383\_ 6. 660519 6. 521938 6. 428975 6. 985616 6. 920768 7. 025744  
11721384\_ 6. 576854 6. 478969 6. 483844 5. 693619 5. 694539 5. 751426  
11721385\_ 7. 769914 7. 769914 7. 841473 7. 689996 7. 72358 7. 711109  
11721386\_ 6. 403508 6. 329005 6. 417171 6. 111555 6. 276476 6. 296376  
11721387\_ 7. 303732 7. 303755 7. 332222 6. 778652 6. 788095 6. 855088  
11721388\_ 7. 431873 7. 354752 7. 546468 6. 940947 7. 084986 7. 093258  
11721389\_ 4. 600831 4. 48713 4. 540558 4. 434755 4. 612667 4. 453973  
11721390\_ 5. 913365 5. 95728 5. 987784 6. 012479 6. 144856 6. 076046  
11721391\_ 6. 324481 6. 446045 6. 23137 6. 482707 6. 396564 6. 253218  
11721392\_ 8. 810063 8. 804834 8. 829284 8. 925082 8. 949284 8. 949284  
11721393\_ 5. 110974 5. 144344 5. 116599 4. 748602 4. 861899 4. 921964  
11721394\_ 7. 569758 7. 543579 7. 548952 7. 528202 7. 650858 7. 581744  
11721395\_ 6. 26836 6. 254407 6. 358662 6. 527622 6. 539512 6. 659919  
11721396\_ 6. 649907 6. 687684 6. 541665 6. 721117 6. 813717 6. 809082  
11721397\_ 6. 695377 6. 647224 6. 805759 6. 577068 6. 61609 6. 635274  
11721398\_ 6. 229265 6. 248772 6. 38841 6. 083893 6. 124743 6. 212602  
11721399\_ 6. 965146 6. 867674 6. 850235 6. 506577 6. 539128 6. 655939  
11721400\_ 9. 853181 9. 804648 9. 860586 9. 937945 9. 985468 9. 961198  
11721401\_ 5. 518506 5. 36202 5. 230743 5. 321749 5. 227701 5. 196201  
11721402\_ 7. 426223 7. 298793 7. 291384 7. 151481 7. 188464 7. 208392  
11721403\_ 7. 943912 7. 985723 7. 985437 7. 7593 7. 789391 7. 777794  
11721404\_ 7. 246473 7. 143108 7. 312094 6. 784476 6. 605081 6. 844013  
11721405\_ 6. 644319 6. 582706 6. 616882 6. 619142 6. 565531 6. 525526  
11721406\_ 5. 300864 5. 300864 5. 269771 5. 320076 5. 272561 5. 217531  
11721407\_ 6. 296802 6. 416499 6. 309147 6. 415746 6. 45098 6. 45087  
11721408\_ 3. 553442 3. 273966 3. 415455 3. 845471 3. 545689 3. 789707  
11721409\_ 5. 999082 6. 099956 6. 039036 6. 200708 6. 096232 6. 151884  
11721410\_ 5. 682196 5. 778841 5. 733804 6. 022816 5. 878248 5. 902959  
11721411\_ 3. 623593 3. 763633 3. 805981 3. 727799 3. 877556 3. 828721  
11721412\_ 5. 362376 5. 423417 5. 333696 5. 29767 5. 394366 5. 269788  
11721413\_ 7. 785724 7. 709886 7. 68399 7. 509076 7. 442902 7. 350159  
11721414\_ 6. 387198 6. 439421 6. 46208 6. 154283 6. 358606 6. 349543  
11721415\_ 5. 554424 5. 705161 5. 344688 5. 554436 5. 55807 5. 531414  
11721416\_ 6. 545634 6. 619831 6. 622217 6. 658963 6. 581027 6. 65186  
11721417\_ 4. 945459 5. 073036 5. 136289 5. 26034 5. 414416 5. 144261  
11721418\_ 6. 421627 6. 18323 6. 354529 6. 3411 6. 330828 6. 400466  
11721419\_ 4. 173833 3. 894142 4. 071793 4. 866633 4. 636292 4. 590654  
11721420\_ 5. 956198 6. 018833 6. 060308 6. 133421 6. 128075 6. 231375  
11721421\_ 8. 28371 8. 176379 8. 185967 8. 241647 8. 245605 8. 302648  
11721422\_ 5. 926414 6. 057143 6. 076946 6. 027598 5. 719225 5. 837908

11721423\_ 10. 32161 10. 22195 10. 28072 10. 00536 10. 08147 10. 09938  
11721424\_ 5. 353759 5. 294008 5. 083426 5. 2222 5. 26034 5. 187236  
11721425\_ 6. 264402 6. 463477 6. 372053 6. 431763 6. 394052 6. 389366  
11721426\_ 5. 684729 5. 521212 5. 64209 5. 362763 5. 372575 5. 497384  
11721427\_ 6. 158038 6. 32313 6. 343968 6. 347197 6. 412347 6. 325311  
11721428\_ 8. 237089 8. 268522 8. 29235 7. 03302 6. 959712 7. 045911  
11721429\_ 6. 565668 6. 341707 6. 411258 5. 894764 5. 977655 5. 992249  
11721430\_ 6. 786253 6. 7322 6. 7322 6. 61871 6. 510356 6. 591194  
11721431\_ 4. 867878 4. 9694 4. 849896 4. 849264 4. 893974 4. 767425  
11721432\_ 8. 049821 7. 943792 8. 036197 7. 887525 7. 922287 7. 865519  
11721433\_ 7. 554551 7. 499448 7. 519597 7. 545587 7. 503116 7. 625774  
11721434\_ 7. 468091 7. 446562 7. 596659 7. 434191 7. 407739 7. 377241  
11721435\_ 6. 910375 6. 783187 6. 503746 6. 361326 6. 009826 6. 076244  
11721436\_ 5. 854566 5. 872739 5. 985887 5. 605352 5. 672171 5. 632628  
11721437\_ 6. 25442 6. 328743 6. 274443 5. 697422 5. 921032 5. 910381  
11721438\_ 3. 517004 3. 398236 3. 517004 3. 850246 3. 60845 3. 620802  
11721439\_ 8. 111144 7. 995421 8. 06985 8. 164302 8. 220041 8. 240647  
11721440\_ 8. 390799 8. 374409 8. 349313 8. 601423 8. 547403 8. 602009  
11721441\_ 6. 364294 6. 189564 6. 408332 5. 870242 5. 910993 5. 876191  
11721442\_ 7. 237418 7. 297635 7. 299393 7. 358617 7. 374996 7. 394719  
11721443\_ 8. 952455 8. 907142 8. 987442 9. 199574 9. 224332 9. 155229  
11721444\_ 7. 765241 7. 726455 7. 773346 7. 677088 7. 704861 7. 785281  
11721445\_ 9. 09048 8. 987799 9. 06021 9. 218794 9. 167415 9. 22391  
11721446\_ 8. 595402 8. 47012 8. 536294 7. 843672 7. 828737 7. 820523  
11721447\_ 9. 071817 9. 055963 9. 100491 8. 503675 8. 45227 8. 51765  
11721448\_ 9. 568765 9. 486585 9. 567197 10. 32312 10. 34815 10. 35136  
11721449\_ 8. 393727 8. 395022 8. 481235 8. 336974 8. 356678 8. 274549  
11721450\_ 9. 403886 9. 382379 9. 398118 9. 163632 9. 162392 9. 197092  
11721451\_ 10. 22191 10. 1296 10. 16683 10. 05361 10. 01238 9. 970282  
11721452\_ 9. 011679 8. 984206 8. 97944 9. 108333 9. 101083 9. 02131  
11721453\_ 8. 191868 8. 121886 8. 181098 8. 040742 7. 998978 7. 973951  
11721454\_ 4. 936213 5. 026765 4. 857783 4. 276891 4. 046309 4. 130413  
11721455\_ 5. 885214 5. 66487 5. 571479 5. 111462 5. 159314 5. 093275  
11721456\_ 5. 808072 5. 438805 5. 636999 5. 190529 5. 203469 5. 213098  
11721457\_ 5. 156124 4. 9694 4. 809424 4. 928664 5. 029529 5. 029529  
11721458\_ 6. 996345 6. 964046 7. 061695 7. 181653 7. 179177 7. 227567  
11721459\_ 6. 96105 7. 020462 6. 923471 6. 78652 6. 799292 6. 765911  
11721460\_ 6. 413851 6. 406243 6. 548764 5. 665836 5. 859824 5. 867295  
11721461\_ 9. 976235 9. 965942 9. 938157 9. 769267 9. 754717 9. 679126  
11721462\_ 6. 371345 6. 218153 6. 340917 6. 785416 6. 86721 6. 854748  
11721463\_ 5. 42914 5. 387368 5. 432989 5. 557425 5. 644521 5. 67573  
11721464\_ 6. 111016 6. 061358 6. 115796 6. 223834 6. 312793 6. 311826  
11721465\_ 8. 29199 8. 360708 8. 305917 8. 592438 8. 616531 8. 614625  
11721466\_ 11. 69355 11. 67423 11. 69398 11. 70596 11. 65888 11. 67121  
11721467\_ 7. 116171 6. 898793 7. 099576 7. 317368 7. 379585 7. 383759  
11721468\_ 4. 986093 4. 814949 4. 82663 4. 927034 4. 864673 4. 718006  
11721469\_ 4. 218115 4. 25838 4. 162055 4. 347179 4. 251332 4. 415744  
11721470\_ 10. 01809 10. 08636 10. 02034 10. 05775 10. 02926 9. 973622  
11721471\_ 9. 855913 9. 821342 9. 862203 9. 70593 9. 781619 9. 698294  
11721472\_ 9. 753966 9. 671547 9. 740746 9. 385717 9. 355024 9. 409078  
11721473\_ 8. 806739 8. 745208 8. 772857 7. 859649 7. 849635 7. 930299

11721474\_ 3. 398236 3. 723624 3. 290188 3. 443428 3. 613968 3. 601269  
11721475\_ 2. 507528 2. 703595 2. 663825 2. 51365 2. 591348 2. 607582  
11721476\_ 7. 463247 7. 374059 7. 4878 7. 906861 7. 893553 7. 851833  
11721477\_ 8. 23271 8. 228323 8. 239203 8. 988438 8. 986438 8. 986867  
11721478\_ 6. 796482 6. 581236 6. 707764 6. 494443 6. 711885 6. 589889  
11721479\_ 7. 147133 7. 092704 7. 102949 7. 504568 7. 399604 7. 441389  
11721480\_ 8. 608295 8. 514802 8. 607501 8. 837619 8. 837021 8. 854483  
11721481\_ 6. 176882 6. 175475 6. 175475 6. 189124 6. 153641 6. 107104  
11721482\_ 7. 2001 7. 217041 7. 230656 7. 245311 7. 198516 7. 174876  
11721483\_ 6. 616771 6. 584387 6. 486995 7. 497369 7. 63457 7. 448451  
11721484\_ 5. 892209 5. 955248 5. 903854 5. 804309 5. 894697 5. 849825  
11721485\_ 5. 875645 5. 873053 5. 941574 6. 106756 6. 073982 6. 071038  
11721486\_ 8. 536552 8. 433871 8. 533296 8. 687306 8. 692679 8. 691359  
11721487\_ 6. 058515 6. 162945 6. 123692 6. 217505 6. 277513 6. 179477  
11721488\_ 8. 112759 7. 968158 8. 159042 7. 688561 7. 582664 7. 617722  
11721489\_ 6. 925964 6. 897184 6. 862059 6. 998064 7. 115425 6. 874661  
11721490\_ 7. 260481 7. 248424 7. 218786 7. 264634 7. 295009 7. 302592  
11721491\_ 4. 513241 4. 62198 4. 502611 4. 511174 4. 52373 4. 415744  
11721492\_ 3. 408722 3. 413873 3. 395011 3. 302374 3. 300419 2. 955677  
11721493\_ 9. 411147 9. 316266 9. 331454 8. 431793 8. 362872 8. 302329  
11721494\_ 3. 656384 3. 811196 3. 668936 3. 986531 3. 937788 4. 022823  
11721495\_ 6. 773625 6. 631329 6. 687437 7. 131275 7. 233443 7. 190857  
11721496\_ 4. 323522 3. 9989 4. 248616 4. 386156 4. 520438 4. 488652  
11721497\_ 4. 984724 5. 060564 5. 26477 5. 340067 5. 609647 5. 510978  
11721498\_ 6. 810026 6. 752673 6. 807291 6. 396957 6. 332575 6. 446201  
11721499\_ 9. 540842 9. 516355 9. 591336 9. 331268 9. 367047 9. 341136  
11721500\_ 7. 021081 6. 965905 6. 800502 6. 895126 6. 748926 6. 700712  
11721501\_ 7. 17563 7. 172604 7. 173329 6. 927164 6. 99191 6. 939849  
11721502\_ 8. 053632 7. 988577 8. 050834 8. 11545 8. 154294 8. 239001  
11721503\_ 4. 513241 4. 518298 4. 160391 4. 584933 4. 544031 4. 620177  
11721504\_ 9. 008882 8. 953154 8. 983233 9. 34238 9. 359373 9. 302837  
11721505\_ 7. 490742 7. 498355 7. 410893 7. 579337 7. 589209 7. 646023  
11721506\_ 7. 220733 7. 156666 7. 290959 6. 76509 6. 889406 6. 864125  
11721507\_ 7. 761758 7. 726361 7. 748103 7. 53912 7. 459391 7. 526267  
11721508\_ 5. 701966 5. 704919 5. 811279 5. 983625 5. 75125 5. 924955  
11721509\_ 8. 197764 8. 166593 8. 167718 8. 592131 8. 601932 8. 643538  
11721510\_ 7. 515908 7. 387063 7. 531219 7. 898066 7. 840919 7. 888975  
11721511\_ 4. 869002 4. 623596 4. 960445 5. 919588 5. 922229 5. 970515  
11721512\_ 8. 473518 8. 465546 8. 47268 8. 956364 8. 851876 8. 827142  
11721513\_ 9. 247555 9. 181638 9. 204865 8. 772492 8. 765161 8. 76753  
11721514\_ 8. 969221 8. 940603 8. 99195 8. 912081 8. 953195 8. 885344  
11721515\_ 8. 717837 8. 68018 8. 70206 8. 923262 8. 884664 8. 882908  
11721516\_ 5. 842414 5. 841177 5. 871564 7. 01733 6. 946361 6. 955704  
11721517\_ 7. 02409 6. 983057 6. 888052 8. 061841 8. 066959 8. 086017  
11721518\_ 5. 517531 5. 397706 5. 67267 5. 172571 5. 277719 5. 005317  
11721519\_ 6. 602974 6. 344753 6. 546423 5. 997466 6. 032633 6. 155583  
11721520\_ 7. 74746 7. 629791 7. 676278 7. 696033 7. 769815 7. 695066  
11721521\_ 5. 796978 5. 529329 5. 933701 5. 205134 5. 33847 5. 131704  
11721522\_ 8. 667117 8. 677115 8. 645814 8. 86387 8. 908851 8. 924303  
11721523\_ 10. 5148 10. 46484 10. 49285 10. 37815 10. 32361 10. 33799  
11721524\_ 6. 850647 6. 880997 6. 820805 7. 052826 7. 022412 7. 225694

11721525\_ 5. 680086 5. 619959 5. 757357 5. 650336 5. 584813 5. 50807  
11721526\_ 7. 735076 7. 620094 7. 60764 8. 059768 8. 0566 8. 050754  
11721527\_ 7. 585992 7. 513565 7. 602273 7. 560333 7. 572204 7. 664116  
11721528\_ 6. 327385 6. 186828 6. 407732 6. 032776 6. 061658 5. 995422  
11721529\_ 7. 661488 7. 6563 7. 680618 7. 643057 7. 522216 7. 507724  
11721530\_ 7. 756067 7. 724452 7. 887977 7. 380757 7. 300291 7. 385975  
11721531\_ 6. 183269 6. 310195 6. 088202 6. 276365 6. 263709 6. 312046  
11721532\_ 7. 799789 7. 868457 7. 859746 7. 854895 7. 810075 7. 74923  
11721533\_ 9. 045182 9. 026312 9. 005141 8. 883806 8. 901896 8. 815367  
11721534\_ 8. 085844 8. 064068 8. 044752 7. 818044 7. 801221 7. 793129  
11721535\_ 4. 582089 4. 712014 4. 495844 4. 649587 4. 611175 4. 581586  
11721536\_ 9. 750949 9. 668891 9. 764766 9. 517371 9. 436114 9. 477704  
11721537\_ 6. 103987 5. 90529 5. 880171 6. 133896 6. 186211 6. 102284  
11721538\_ 7. 423328 7. 315859 7. 441907 7. 950083 7. 949311 7. 917342  
11721539\_ 6. 537789 6. 571294 6. 640156 6. 553756 6. 554405 6. 638965  
11721540\_ 3. 887373 4. 174945 3. 907856 4. 067703 3. 968408 3. 906818  
11721541\_ 7. 126572 7. 203478 7. 181021 6. 83822 6. 94401 6. 887292  
11721542\_ 7. 213006 7. 05634 7. 169825 7. 207833 7. 179714 7. 214923  
11721543\_ 6. 904113 6. 952013 7. 067931 6. 585052 6. 529906 6. 57782  
11721544\_ 7. 610322 7. 503941 7. 592128 7. 625251 7. 559928 7. 624733  
11721545\_ 8. 912386 8. 855372 8. 916983 8. 886103 8. 872464 8. 911635  
11721546\_ 7. 899425 7. 79323 7. 864509 7. 970846 8. 000911 7. 954569  
11721547\_ 8. 631541 8. 545981 8. 605552 8. 609661 8. 585189 8. 651883  
11721548\_ 3. 099796 3. 04813 3. 172218 3. 053573 3. 054292 3. 034272  
11721549\_ 7. 533515 7. 522352 7. 453874 7. 159371 7. 153599 7. 065965  
11721550\_ 9. 419601 9. 305184 9. 35968 8. 915161 8. 936692 8. 936603  
11721551\_ 6. 376177 6. 300197 6. 345829 6. 983558 6. 922104 6. 971591  
11721552\_ 5. 386952 5. 42911 5. 404655 5. 280233 5. 28902 5. 333026  
11721553\_ 6. 806203 6. 78488 6. 747346 6. 682837 6. 796312 6. 717996  
11721554\_ 7. 794553 7. 808042 7. 838731 8. 079346 8. 161226 8. 071191  
11721555\_ 7. 089177 7. 055937 7. 100063 7. 293071 7. 210039 7. 254194  
11721556\_ 5. 830836 5. 807956 5. 626881 5. 866787 5. 853067 5. 811607  
11721557\_ 2. 469654 2. 759333 2. 501413 2. 595724 2. 726947 2. 705958  
11721558\_ 6. 608684 6. 690932 6. 725582 6. 703465 6. 702668 6. 710617  
11721559\_ 7. 863528 8. 044367 7. 985215 8. 232809 8. 041935 8. 061597  
11721560\_ 6. 837236 6. 850259 6. 909396 6. 582391 6. 518596 6. 587074  
11721561\_ 7. 210309 7. 100986 7. 146648 7. 086756 7. 126539 7. 139056  
11721562\_ 9. 67422 9. 66313 9. 683401 9. 638426 9. 644084 9. 630758  
11721563\_ 7. 943209 7. 991494 7. 974659 8. 50513 8. 545308 8. 451111  
11721564\_ 4. 115146 4. 133998 4. 287593 3. 850246 3. 83992 3. 921126  
11721565\_ 10. 00959 10. 08988 10. 05889 9. 918607 9. 832404 9. 759507  
11721566\_ 3. 503743 3. 803528 3. 80495 4. 000275 3. 996967 4. 259217  
11721567\_ 7. 119631 7. 345263 7. 293462 7. 808731 7. 829691 7. 857391  
11721568\_ 8. 285076 8. 256753 8. 254914 8. 16241 8. 236363 8. 162253  
11721569\_ 4. 462253 4. 797556 4. 392915 4. 915117 4. 633219 4. 696681  
11721570\_ 6. 656308 6. 580062 6. 598304 6. 546821 6. 536479 6. 648903  
11721571\_ 5. 901784 5. 978011 6. 034551 5. 995179 5. 886581 6. 033047  
11721572\_ 5. 715243 5. 621607 5. 598856 5. 637195 5. 75401 5. 573321  
11721573\_ 4. 978796 5. 052175 4. 881837 4. 99398 4. 99398 4. 979734  
11721574\_ 7. 407286 7. 351631 7. 483298 7. 396446 7. 443611 7. 451846  
11721575\_ 8. 637383 8. 600514 8. 639625 8. 619321 8. 620202 8. 622949

11721576\_ 8. 999009 8. 964606 8. 957088 9. 018186 9. 015396 9. 006803  
11721577\_ 4. 685229 4. 858395 4. 685427 4. 646002 4. 752974 4. 672077  
11721578\_ 6. 259405 6. 345942 6. 300337 6. 280981 6. 31417 6. 298117  
11721579\_ 3. 289099 3. 115615 3. 155285 2. 933647 2. 75603 2. 952875  
11721580\_ 4. 56937 4. 583354 4. 384132 4. 384132 4. 397404 4. 287478  
11721581\_ 6. 364338 6. 321838 6. 297831 6. 591783 6. 535204 6. 528702  
11721582\_ 2. 281712 2. 211037 2. 174694 2. 002461 2. 137992 2. 316421  
11721583\_ 5. 03291 4. 934867 4. 880171 4. 952013 5. 123372 5. 01433  
11721584\_ 6. 474952 6. 665441 6. 477465 6. 255358 6. 256212 6. 274353  
11721585\_ 6. 436166 6. 320625 6. 560915 5. 983601 5. 970858 6. 222546  
11721586\_ 5. 088621 5. 149001 5. 279032 5. 734023 5. 843202 5. 86888  
11721587\_ 5. 44842 5. 308863 5. 295397 4. 929714 4. 825976 4. 787797  
11721588\_ 6. 352263 6. 206103 6. 372964 5. 448666 5. 523406 5. 412061  
11721589\_ 5. 553041 5. 516647 5. 223302 4. 996739 5. 071222 5. 105455  
11721590\_ 8. 064887 8. 044359 8. 021158 7. 986873 8. 017963 7. 988936  
11721591\_ 5. 474467 5. 50034 5. 369509 5. 881208 6. 12202 6. 003579  
11721592\_ 5. 622072 5. 660399 5. 596385 5. 565305 5. 552918 5. 622072  
11721593\_ 5. 375774 5. 537945 5. 653746 6. 803944 6. 794294 6. 834844  
11721594\_ 6. 398575 6. 522749 6. 436032 6. 116681 6. 398575 6. 361556  
11721595\_ 5. 35586 5. 305183 5. 342055 5. 29093 5. 591412 5. 476891  
11721596\_ 7. 703364 7. 685395 7. 666485 7. 670772 7. 664733 7. 706455  
11721597\_ 3. 883663 3. 947119 3. 780843 3. 925044 3. 82621 3. 97017  
11721598\_ 4. 120822 4. 075933 4. 076158 3. 890038 3. 992342 4. 033519  
11721599\_ 3. 072025 3. 269586 3. 097015 3. 065941 3. 21312 2. 98887  
11721600\_ 6. 330037 6. 186428 6. 23038 6. 215237 6. 206131 6. 17182  
11721601\_ 8. 653002 8. 582116 8. 632685 7. 95007 7. 858578 7. 91946  
11721602\_ 2. 826216 2. 590733 2. 898383 2. 704391 2. 791105 2. 826216  
11721603\_ 3. 615801 3. 701809 3. 751215 3. 680012 3. 701809 3. 725024  
11721604\_ 2. 705213 2. 519102 2. 606061 2. 606061 2. 606061 2. 69694  
11721605\_ 6. 023598 6. 150797 5. 992995 5. 947739 6. 001367 5. 981888  
11721606\_ 8. 592599 8. 577967 8. 665512 8. 962274 8. 925208 8. 859188  
11721607\_ 6. 467819 6. 486237 6. 519366 5. 804215 5. 932399 6. 155106  
11721608\_ 9. 22365 9. 170563 9. 180941 8. 522782 8. 458684 8. 533275  
11721609\_ 9. 909657 9. 838526 9. 937366 9. 365201 9. 34444 9. 38423  
11721610\_ 7. 293011 7. 075971 7. 224723 6. 42217 6. 460424 6. 433509  
11721611\_ 6. 929191 6. 827831 6. 87937 7. 05884 6. 959092 6. 994566  
11721612\_ 6. 870998 6. 805582 6. 945054 7. 230845 7. 195498 7. 169768  
11721613\_ 2. 646333 2. 696709 2. 745689 2. 83835 2. 82722 2. 813284  
11721614\_ 2. 262452 2. 281573 2. 309259 2. 32838 2. 246325 2. 494072  
11721615\_ 5. 610069 5. 745494 5. 642198 6. 305353 6. 247625 6. 466656  
11721616\_ 6. 931778 6. 957251 6. 966724 7. 034951 7. 005843 7. 026752  
11721617\_ 6. 146806 6. 162047 5. 970961 6. 2883 6. 221672 6. 229545  
11721618\_ 4. 484534 4. 501078 4. 445256 4. 527708 4. 571332 4. 472969  
11721619\_ 2. 988093 2. 835746 2. 799066 2. 655355 2. 958641 2. 88619  
11721620\_ 6. 659916 6. 726675 6. 724388 6. 72371 6. 738507 6. 791652  
11721621\_ 6. 425615 6. 339761 6. 461671 6. 318939 6. 367799 6. 385374  
11721622\_ 8. 09778 7. 957681 8. 137205 7. 744726 7. 666485 7. 790407  
11721623\_ 2. 988093 2. 718322 2. 780954 3. 025388 3. 024692 2. 699598  
11721624\_ 9. 969419 9. 974 9. 98333 9. 852393 9. 74132 9. 835699  
11721625\_ 5. 505086 5. 43746 5. 492924 6. 0156 5. 964832 6. 117388  
11721626\_ 6. 257546 6. 118838 6. 209912 6. 384283 6. 464805 6. 548437

11721627\_ 6. 704491 6. 758891 6. 754933 6. 396152 6. 620735 6. 502769  
11721628\_ 6. 373288 6. 478745 6. 363341 6. 559564 6. 579152 6. 650679  
11721629\_ 5. 047348 5. 215589 5. 047348 5. 081075 5. 165479 5. 198146  
11721630\_ 3. 377607 3. 366897 3. 213827 3. 213827 3. 280635 3. 523478  
11721631\_ 8. 15499 8. 042097 8. 161539 8. 399984 8. 388982 8. 488577  
11721632\_ 8. 289974 8. 19948 8. 249567 8. 692844 8. 68111 8. 669769  
11721633\_ 8. 795128 8. 669526 8. 74148 9. 030097 9. 053484 9. 064717  
11721634\_ 6. 788486 6. 674561 6. 684938 6. 92349 7. 00933 6. 978148  
11721635\_ 7. 926063 7. 867602 8. 016036 7. 905925 7. 878017 7. 91505  
11721636\_ 8. 28615 8. 265491 8. 372843 8. 26465 8. 315139 8. 311982  
11721637\_ 8. 399373 8. 371829 8. 352239 8. 339828 8. 336689 8. 400555  
11721638\_ 5. 121492 5. 172529 4. 982725 5. 176304 5. 119776 5. 11568  
11721639\_ 7. 101961 7. 155052 7. 211491 7. 111164 7. 197952 7. 154412  
11721640\_ 7. 99304 7. 912337 7. 890274 7. 984865 7. 986131 7. 932642  
11721641\_ 6. 968009 6. 882946 6. 94882 6. 314355 6. 118565 6. 267045  
11721642\_ 6. 737758 6. 727929 6. 879581 6. 05381 6. 153886 5. 946303  
11721643\_ 7. 332202 7. 196884 7. 390299 8. 124672 8. 095105 8. 128494  
11721644\_ 6. 004187 6. 026644 6. 007514 6. 813274 6. 804147 6. 749296  
11721645\_ 7. 65712 7. 626819 7. 61445 8. 505439 8. 482449 8. 389431  
11721646\_ 9. 282521 9. 260342 9. 270852 9. 428221 9. 391734 9. 359233  
11721647\_ 5. 866514 5. 806385 5. 856665 7. 098494 7. 026624 7. 115827  
11721648\_ 10. 36569 10. 29606 10. 33367 9. 824659 9. 865355 9. 843409  
11721649\_ 9. 86392 9. 832495 9. 891157 9. 356661 9. 412026 9. 36682  
11721650\_ 4. 781925 5. 085708 4. 853313 4. 926913 4. 877095 4. 730594  
11721651\_ 4. 582768 4. 542326 4. 413688 4. 477276 4. 447162 4. 415744  
11721652\_ 5. 891348 6. 006332 5. 860206 6. 039476 5. 892267 5. 842817  
11721653\_ 4. 865637 4. 892779 4. 602427 4. 877157 4. 865433 4. 892819  
11721654\_ 5. 067522 4. 989606 5. 22352 4. 874234 4. 847365 4. 805158  
11721655\_ 8. 956702 8. 821264 8. 918882 9. 05885 9. 02969 9. 027422  
11721656\_ 7. 509822 7. 490488 7. 505953 8. 102654 8. 089216 8. 119428  
11721657\_ 4. 722933 4. 42112 4. 724379 4. 799315 4. 967246 4. 90309  
11721658\_ 3. 836874 3. 801287 3. 998721 4. 440566 4. 485684 4. 331437  
11721659\_ 6. 361274 6. 386281 6. 333016 6. 318829 6. 396807 6. 407616  
11721660\_ 8. 278337 8. 339117 8. 247925 8. 46455 8. 424608 8. 483579  
11721661\_ 4. 522147 4. 334988 4. 518464 4. 734212 4. 619475 4. 513433  
11721662\_ 5. 930998 5. 852495 5. 683089 5. 941487 5. 913647 5. 91357  
11721663\_ 5. 290843 5. 114009 5. 374866 5. 745821 5. 798531 6. 003218  
11721664\_ 6. 956665 6. 935618 6. 884034 7. 21109 7. 174522 7. 181725  
11721665\_ 7. 765002 7. 845384 7. 941997 7. 860515 7. 91566 7. 864678  
11721666\_ 7. 594497 7. 415796 7. 540893 8. 282839 8. 20763 8. 178644  
11721667\_ 6. 646187 6. 501462 6. 504474 7. 254215 7. 370293 7. 398155  
11721668\_ 5. 64294 5. 798549 5. 827557 6. 587589 6. 745551 6. 719496  
11721669\_ 7. 779139 7. 709431 7. 836019 7. 650897 7. 686807 7. 794787  
11721670\_ 5. 583102 5. 630036 5. 670972 5. 666865 5. 678094 5. 727568  
11721671\_ 6. 097785 5. 92839 6. 085178 6. 153631 6. 263567 6. 096034  
11721672\_ 8. 770166 8. 690214 8. 771503 9. 192031 9. 219695 9. 241883  
11721673\_ 9. 625116 9. 560177 9. 659071 9. 544563 9. 575149 9. 584889  
11721674\_ 9. 080804 9. 106617 9. 098583 9. 277781 9. 203744 9. 191534  
11721675\_ 9. 681673 9. 618286 9. 679342 9. 619032 9. 63798 9. 648891  
11721676\_ 8. 918996 8. 750839 8. 846468 8. 803318 8. 828358 8. 88956  
11721677\_ 6. 467524 6. 402201 6. 533617 6. 875625 6. 837039 6. 828247



11721678\_ 9. 067092 8. 9148 9. 003545 8. 985754 9. 024388 9. 034484  
11721679\_ 9. 328588 9. 319223 9. 236263 9. 434483 9. 36964 9. 330684  
11721680\_ 8. 603767 8. 5538 8. 654618 8. 500596 8. 461895 8. 491994  
11721681\_ 7. 115881 6. 996643 7. 047434 7. 67084 7. 714553 7. 622669  
11721682\_ 7. 458059 7. 503369 7. 444358 8. 115431 8. 112072 8. 170089  
11721683\_ 8. 149911 8. 089602 8. 119726 8. 020449 7. 97159 7. 999466  
11721684\_ 8. 885228 8. 8597 8. 933543 8. 969119 8. 995369 9. 01528  
11721685\_ 5. 062489 5. 186438 5. 370421 5. 200947 5. 150539 5. 240223  
11721686\_ 4. 478184 4. 247513 4. 288095 4. 275543 4. 295137 4. 122446  
11721687\_ 2. 542366 2. 282025 2. 419592 2. 474695 2. 424373 2. 327299  
11721688\_ 4. 135112 4. 174945 4. 229906 3. 756925 3. 757428 3. 837228  
11721689\_ 5. 771947 5. 609734 5. 895713 5. 880703 5. 870242 5. 849541  
11721690\_ 6. 289992 6. 159771 6. 318829 6. 393114 6. 415015 6. 302184  
11721691\_ 5. 86143 5. 769429 5. 903421 5. 903421 5. 853231 5. 838237  
11721692\_ 8. 374202 8. 32557 8. 403935 8. 233868 8. 170491 8. 165762  
11721693\_ 9. 702206 9. 70476 9. 736562 9. 481018 9. 487587 9. 441306  
11721694\_ 5. 546512 5. 61278 5. 608512 5. 746828 5. 624435 5. 622301  
11721695\_ 6. 263567 6. 13945 6. 13113 6. 064723 6. 082461 5. 995792  
11721696\_ 9. 831544 9. 813896 9. 790229 10. 03185 10. 01777 10. 02925  
11721697\_ 6. 393347 6. 336496 6. 30287 6. 22792 6. 259882 6. 285673  
11721698\_ 6. 777846 6. 762343 6. 852162 6. 604796 6. 701945 6. 606283  
11721699\_ 7. 112704 7. 090397 7. 134085 7. 485679 7. 572644 7. 522624  
11721700\_ 2. 259939 2. 131936 2. 15733 2. 070845 2. 065679 2. 108565  
11721701\_ 6. 410653 6. 487259 6. 487259 6. 42049 6. 560057 6. 493289  
11721702\_ 9. 721533 9. 648648 9. 71771 9. 816672 9. 784325 9. 803585  
11721703\_ 7. 853963 7. 850003 7. 840941 7. 914586 7. 931992 7. 977671  
11721704\_ 4. 484653 4. 721551 4. 433133 4. 465232 4. 676832 4. 563197  
11721705\_ 7. 259115 7. 389716 7. 19196 6. 765767 6. 890854 6. 829687  
11721706\_ 6. 572575 6. 474899 6. 398947 6. 984795 6. 863215 6. 960307  
11721707\_ 4. 550255 4. 870761 4. 684751 5. 062043 4. 823953 4. 775416  
11721708\_ 5. 353398 5. 37038 5. 235551 5. 578094 5. 452743 5. 550912  
11721709\_ 5. 916363 5. 683616 5. 779255 5. 823776 5. 921681 5. 981907  
11721710\_ 6. 417274 6. 564709 6. 535642 6. 143897 6. 103366 6. 205452  
11721711\_ 6. 341286 6. 150334 6. 33679 6. 373172 6. 489879 6. 476303  
11721712\_ 6. 850323 6. 822242 6. 877658 7. 00045 6. 998389 6. 917012  
11721713\_ 7. 249337 7. 213065 7. 28227 7. 174366 7. 244629 7. 19613  
11721714\_ 9. 165634 9. 090592 9. 128411 9. 133558 9. 087568 9. 002039  
11721715\_ 4. 811316 4. 828648 4. 827069 5. 021775 5. 055886 4. 978658  
11721716\_ 6. 536494 6. 538579 6. 571151 6. 326685 6. 344488 6. 168877  
11721717\_ 9. 106468 9. 039583 9. 063379 8. 922053 8. 861998 8. 951926  
11721718\_ 7. 39757 7. 386978 7. 495618 7. 123087 7. 147527 7. 266785  
11721719\_ 5. 784447 5. 823003 5. 710509 5. 930408 6. 092438 6. 097153  
11721720\_ 5. 616934 5. 34846 5. 376373 5. 554436 5. 523406 5. 615843  
11721721\_ 6. 598213 6. 547415 6. 48052 7. 064578 7. 066659 7. 055731  
11721722\_ 6. 462113 6. 397028 6. 400198 6. 702681 6. 796756 6. 767798  
11721723\_ 3. 713388 3. 754323 3. 80214 3. 503743 3. 574912 3. 86821  
11721724\_ 8. 297695 8. 272661 8. 201365 8. 456024 8. 442214 8. 451173  
11721725\_ 6. 812693 6. 765911 6. 815248 6. 837307 6. 831722 6. 935683  
11721726\_ 7. 109464 7. 007824 7. 22895 6. 665952 6. 777802 6. 678875  
11721727\_ 8. 726326 8. 678272 8. 654721 9. 029269 9. 045086 9. 036408  
11721728\_ 4. 638201 4. 628794 4. 667984 4. 835407 4. 745867 4. 725758

11721729\_ 6. 193934 6. 247572 6. 299907 6. 333812 6. 24824 6. 332495  
11721730\_ 7. 055482 7. 077735 7. 181426 7. 79919 7. 730401 7. 834878  
11721731\_ 7. 462685 7. 473596 7. 475181 6. 82806 6. 822612 6. 718588  
11721732\_ 8. 405173 8. 483796 8. 421852 8. 13381 8. 083896 8. 028507  
11721733\_ 4. 928592 4. 646538 4. 817496 5. 626109 5. 50912 5. 646722  
11721734\_ 4. 854752 4. 644959 4. 826343 5. 601026 5. 465876 5. 456707  
11721735\_ 6. 634823 6. 451575 6. 658544 7. 351866 7. 462109 7. 462637  
11721736\_ 7. 373547 7. 222631 7. 447919 8. 623863 8. 61268 8. 533343  
11721737\_ 7. 532307 7. 336318 7. 468754 8. 164154 8. 202875 8. 259293  
11721738\_ 8. 685779 8. 51335 8. 673309 7. 477375 7. 499733 7. 428462  
11721739\_ 5. 494814 5. 460374 5. 411057 5. 192907 5. 183905 5. 060649  
11721740\_ 6. 351638 6. 228808 6. 225333 6. 66632 6. 720506 6. 727978  
11721741\_ 5. 006387 5. 316292 5. 272937 5. 472326 5. 382708 5. 325174  
11721742\_ 6. 003638 6. 092053 6. 028834 5. 835503 5. 878496 5. 882968  
11721743\_ 6. 792498 6. 832493 6. 777437 6. 702692 6. 78026 6. 751928  
11721744\_ 4. 737481 5. 077546 4. 925472 5. 09178 5. 153258 5. 113522  
11721745\_ 6. 420172 6. 423877 6. 439112 6. 394254 6. 491582 6. 449644  
11721746\_ 4. 087828 4. 369655 3. 967215 4. 313339 4. 241323 4. 173445  
11721747\_ 6. 457098 6. 330935 6. 384274 6. 311718 6. 373027 6. 258542  
11721748\_ 5. 584813 5. 584813 5. 484294 5. 584813 5. 585494 5. 60661  
11721749\_ 6. 401037 6. 484358 6. 513718 6. 515469 6. 749749 6. 684699  
11721750\_ 5. 811926 5. 897513 5. 917413 5. 894697 5. 890175 6. 007095  
11721751\_ 6. 723848 6. 611484 6. 724613 6. 875377 6. 89607 6. 916304  
11721752\_ 7. 39242 7. 395575 7. 418653 7. 522694 7. 518048 7. 58863  
11721753\_ 8. 405525 8. 381679 8. 412643 7. 854559 7. 978175 7. 892266  
11721754\_ 8. 898926 8. 786253 8. 858773 8. 359101 8. 47496 8. 365572  
11721755\_ 8. 602675 8. 642027 8. 665211 8. 303279 8. 193525 8. 173236  
11721756\_ 6. 304174 6. 221932 6. 115374 6. 49419 6. 550923 6. 593171  
11721757\_ 7. 066036 6. 975313 7. 068115 6. 507716 6. 69259 6. 680946  
11721758\_ 8. 018128 7. 958071 7. 968859 7. 549617 7. 573609 7. 642618  
11721759\_ 5. 547253 5. 380649 5. 574152 5. 899362 5. 826928 5. 855945  
11721760\_ 7. 069659 7. 052651 7. 188028 7. 260922 7. 296279 7. 370918  
11721761\_ 5. 903547 5. 976629 5. 982797 5. 902686 5. 996938 5. 939949  
11721762\_ 3. 959597 3. 824107 3. 607816 3. 852802 3. 774298 3. 797604  
11721763\_ 5. 510139 5. 37601 5. 212819 5. 488117 5. 506104 5. 352673  
11721764\_ 4. 537575 4. 411644 4. 528026 4. 665693 4. 669231 4. 583223  
11721765\_ 2. 122062 2. 14298 1. 938713 2. 269279 2. 157938 2. 458855  
11721766\_ 2. 885938 2. 86683 3. 074522 2. 751985 3. 006154 2. 954503  
11721767\_ 8. 11216 8. 058378 8. 135933 8. 502269 8. 462823 8. 494946  
11721768\_ 6. 574204 6. 699817 6. 589013 6. 577663 6. 621626 6. 63577  
11721769\_ 10. 77091 10. 73847 10. 71295 10. 22474 10. 18917 10. 16093  
11721770\_ 4. 655727 4. 595298 4. 670428 4. 657778 4. 632144 4. 729731  
11721771\_ 5. 512805 5. 505807 5. 527239 5. 393921 5. 646766 5. 564589  
11721772\_ 7. 306203 7. 208059 7. 193066 6. 86562 6. 938471 6. 956076  
11721773\_ 3. 218945 3. 417631 3. 194074 3. 461341 3. 478479 3. 283748  
11721774\_ 9. 049957 9. 024985 9. 024985 8. 551994 8. 453409 8. 362232  
11721775\_ 10. 44684 10. 46159 10. 42159 9. 936316 9. 873693 9. 862849  
11721776\_ 4. 913669 4. 930718 4. 87685 4. 91322 4. 883579 4. 913669  
11721777\_ 8. 05073 8. 015777 8. 042338 7. 723723 7. 695735 7. 719662  
11721778\_ 8. 221119 8. 13249 8. 061888 7. 735946 7. 739509 7. 672634  
11721779\_ 8. 590674 8. 566735 8. 57959 8. 491026 8. 443328 8. 492977

11721780\_ 5.497297 5.387307 5.643713 5.497297 5.589992 5.626415  
11721781\_ 10.05808 9.983076 10.04987 9.858986 9.891523 9.917116  
11721782\_ 7.560232 7.613885 7.605715 7.49678 7.463227 7.486018  
11721783\_ 6.635548 6.596218 6.629995 6.870842 6.783143 6.790561  
11721784\_ 5.908706 6.095318 5.961954 5.875599 5.941992 5.97358  
11721785\_ 3.639188 3.671467 3.511276 3.658469 3.661083 3.610346  
11721786\_ 6.151946 6.263567 6.169659 5.976766 6.248848 6.178349  
11721787\_ 4.707248 5.059915 4.951505 4.982288 4.886409 4.982288  
11721788\_ 6.605835 6.545365 6.65063 6.594471 6.594549 6.723725  
11721789\_ 5.544158 5.444196 5.716879 5.252204 5.188414 5.399907  
11721790\_ 4.729991 4.929067 4.904689 5.112092 4.931873 5.013025  
11721791\_ 4.200678 4.251928 4.009267 3.798743 4.09136 4.017374  
11721792\_ 7.797616 7.678013 7.726593 7.882874 7.787408 7.810609  
11721793\_ 6.06084 6.337063 6.044383 6.318829 6.440131 6.282224  
11721794\_ 3.660922 3.579034 3.513696 3.728448 3.843186 3.684727  
11721795\_ 6.016765 6.027644 5.973344 6.226466 6.263567 6.256292  
11721796\_ 9.580591 9.50179 9.547305 9.434339 9.458319 9.446564  
11721797\_ 8.292099 8.160687 8.304399 8.842699 8.806158 8.862914  
11721798\_ 7.342626 7.205726 7.323823 7.707325 7.704574 7.707163  
11721799\_ 9.022354 9.012734 8.939067 9.969299 9.979933 9.867832  
11721800\_ 8.105009 8.011526 8.119758 9.003611 9.033467 8.973444  
11721801\_ 8.046033 7.998092 8.065079 7.974597 8.045421 7.931278  
11721802\_ 9.41821 9.376103 9.421417 9.404646 9.318411 9.379007  
11721803\_ 7.410374 7.309815 7.373527 8.681798 8.693745 8.652898  
11721804\_ 9.70563 9.69529 9.740286 10.15603 10.14306 10.08672  
11721805\_ 7.780089 7.902153 7.902972 7.432951 7.576181 7.485194  
11721806\_ 8.050465 8.01418 8.058867 7.841369 7.914443 7.797896  
11721807\_ 7.05457 6.954537 7.066036 7.168921 7.115425 7.219653  
11721808\_ 8.695232 8.63321 8.74408 8.420588 8.482797 8.48255  
11721809\_ 9.302416 9.23098 9.261285 9.124628 9.088791 9.086565  
11721810\_ 6.280486 6.377847 6.318829 6.399747 6.385042 6.426464  
11721811\_ 7.928736 7.906861 7.887983 8.051261 8.159005 8.060141  
11721812\_ 5.58955 5.631194 5.613425 5.673015 5.612637 5.638302  
11721813\_ 6.654993 6.701471 6.581242 6.712526 6.731 6.710536  
11721814\_ 6.321942 6.546818 6.381042 6.505931 6.563219 6.454557  
11721815\_ 5.920212 5.859006 5.944564 5.08315 5.348766 5.2666  
11721816\_ 5.56466 5.496818 5.36706 4.643717 4.458196 4.57824  
11721817\_ 7.388287 7.465728 7.454852 7.583838 7.590182 7.564747  
11721818\_ 5.508224 5.668324 5.643713 5.977166 5.980978 5.952977  
11721819\_ 5.171316 5.26303 5.133548 5.346974 5.382849 5.32682  
11721820\_ 8.974098 8.929476 9.041338 8.611074 8.621632 8.619694  
11721821\_ 9.489542 9.444691 9.452721 9.196225 9.192211 9.195646  
11721822\_ 7.099066 7.024977 7.072048 7.446998 7.504748 7.49661  
11721823\_ 10.23432 10.16683 10.24781 10.01318 10.05111 10.00497  
11721824\_ 8.767064 8.724885 8.764559 8.640829 8.658701 8.556286  
11721825\_ 9.323009 9.261519 9.337239 9.102224 9.169495 9.114163  
11721826\_ 7.97343 7.87312 8.026011 7.741893 7.799857 7.733013  
11721827\_ 7.51856 7.506647 7.586928 7.75075 7.76924 7.719858  
11721828\_ 7.961984 7.986483 7.990534 8.316063 8.339828 8.35839  
11721829\_ 9.135072 9.058435 9.115289 9.00572 9.020763 8.965292  
11721830\_ 7.197987 7.098061 7.165661 6.974613 6.95149 6.92709

11721831\_ 5. 183942 4. 93805 5. 10653 5. 051355 4. 963687 5. 027916  
11721832\_ 6. 628887 6. 594967 6. 604788 6. 535163 6. 530414 6. 544244  
11721833\_ 5. 184488 4. 929089 5. 168821 4. 734322 4. 79992 4. 818135  
11721834\_ 7. 359826 7. 37244 7. 306451 7. 247719 7. 276206 7. 31527  
11721835\_ 10. 67404 10. 68055 10. 6814 10. 72209 10. 70191 10. 67511  
11721836\_ 9. 923765 9. 859468 9. 85314 9. 975991 9. 889217 9. 888989  
11721837\_ 5. 975366 5. 993525 5. 892388 5. 420356 5. 467757 5. 461798  
11721838\_ 7. 070384 7. 129408 7. 031531 6. 808427 6. 767867 6. 800282  
11721839\_ 7. 535647 7. 551016 7. 583142 7. 273772 7. 174876 7. 330415  
11721840\_ 5. 614563 5. 789947 5. 651213 5. 015529 4. 78462 4. 908185  
11721841\_ 6. 239812 6. 250793 6. 286892 6. 067437 6. 120192 6. 072655  
11721842\_ 6. 202468 6. 099704 6. 243456 5. 220777 5. 306304 5. 272144  
11721843\_ 8. 558227 8. 542116 8. 602433 8. 428224 8. 445684 8. 455041  
11721844\_ 2. 510045 2. 283123 2. 179286 2. 282427 2. 457905 2. 466857  
11721845\_ 2. 363772 2. 551166 2. 535243 2. 512144 2. 307982 2. 338064  
11721846\_ 3. 38798 3. 183817 3. 44688 3. 252278 3. 182494 3. 520909  
11721847\_ 7. 772655 7. 638764 7. 768067 8. 01733 8. 067705 8. 12036  
11721848\_ 8. 357492 8. 39717 8. 292193 8. 430348 8. 51714 8. 536231  
11721849\_ 8. 317682 8. 313766 8. 246517 8. 438229 8. 505892 8. 536552  
11721850\_ 8. 141857 8. 161323 8. 163951 7. 941812 7. 924976 7. 871191  
11721851\_ 7. 760395 7. 665301 7. 680763 7. 385284 7. 374888 7. 354113  
11721852\_ 4. 576594 4. 753283 4. 628449 4. 914651 4. 900122 4. 90988  
11721853\_ 4. 575006 4. 762497 4. 564427 4. 914651 4. 940956 4. 87056  
11721854\_ 7. 138468 7. 033665 7. 058258 7. 954248 8. 044178 8. 003043  
11721855\_ 6. 882309 6. 751188 6. 818696 7. 269381 7. 170545 7. 234166  
11721856\_ 6. 881429 6. 744561 6. 792183 7. 49093 7. 332762 7. 420416  
11721857\_ 6. 282224 6. 177979 6. 117441 6. 448961 6. 362019 6. 308101  
11721858\_ 6. 463124 6. 297785 6. 323058 6. 52745 6. 481046 6. 261116  
11721859\_ 8. 30553 8. 300711 8. 283062 8. 394811 8. 494932 8. 516331  
11721860\_ 8. 295363 8. 235687 8. 288685 8. 043456 7. 898116 7. 934644  
11721861\_ 6. 71875 6. 535106 6. 571722 6. 988193 6. 93112 6. 939203  
11721862\_ 8. 243237 8. 151908 8. 180085 7. 940882 7. 895569 7. 902486  
11721863\_ 7. 149344 7. 133911 7. 056105 6. 803459 6. 783447 6. 604154  
11721864\_ 7. 841725 7. 81961 7. 870568 7. 303248 7. 251041 7. 184237  
11721865\_ 5. 83562 5. 773558 5. 903752 5. 890595 5. 773558 5. 957336  
11721866\_ 7. 420382 7. 396425 7. 418649 7. 261379 7. 278082 7. 144608  
11721867\_ 6. 482646 6. 356094 6. 316885 6. 310896 6. 187814 6. 236109  
11721868\_ 9. 209992 9. 134363 9. 20896 9. 24761 9. 20979 9. 18186  
11721869\_ 6. 655557 6. 553902 6. 697179 7. 04246 6. 925571 7. 001038  
11721870\_ 7. 008972 7. 023068 7. 067323 7. 289037 7. 323777 7. 310202  
11721871\_ 6. 402908 6. 310844 6. 46208 6. 583349 6. 629057 6. 649026  
11721872\_ 6. 604759 6. 599148 6. 655175 6. 623408 6. 594461 6. 469638  
11721873\_ 7. 229528 7. 19471 7. 183419 6. 591195 6. 616927 6. 500128  
11721874\_ 8. 882155 8. 838416 8. 88778 8. 141884 8. 072329 8. 091478  
11721875\_ 7. 543351 7. 442902 7. 536532 7. 563154 7. 480259 7. 54588  
11721876\_ 9. 354837 9. 270865 9. 323995 9. 484568 9. 463066 9. 495117  
11721877\_ 6. 52333 6. 512417 6. 396979 6. 491101 6. 541442 6. 646651  
11721878\_ 5. 818063 5. 950423 5. 81013 5. 765697 5. 866832 5. 936335  
11721879\_ 8. 259944 8. 073724 8. 180893 7. 686588 7. 709738 7. 59501  
11721880\_ 9. 502055 9. 432923 9. 456486 9. 038192 8. 943433 8. 957063  
11721881\_ 7. 767452 7. 763373 7. 794699 8. 305542 8. 311635 8. 267825

11721882\_ 7. 847746 7. 850945 7. 842015 8. 555278 8. 461219 8. 474755  
11721883\_ 6. 884619 6. 773862 6. 779107 7. 356561 7. 323149 7. 407513  
11721884\_ 7. 307466 7. 260626 7. 392067 7. 634439 7. 687632 7. 68296  
11721885\_ 7. 528058 7. 271884 7. 385609 7. 565817 7. 478287 7. 581102  
11721886\_ 8. 667611 8. 68845 8. 695912 8. 855147 8. 853928 8. 670293  
11721887\_ 4. 188031 4. 075225 3. 939983 4. 21538 4. 382259 4. 130256  
11721888\_ 6. 7625 6. 742648 6. 816405 6. 874048 6. 875792 6. 937462  
11721889\_ 4. 39434 4. 490322 4. 350442 4. 50294 4. 398915 4. 547616  
11721890\_ 8. 115532 8. 222865 8. 128424 8. 226288 8. 228953 8. 245805  
11721891\_ 6. 683965 6. 757345 6. 694959 6. 879237 6. 902323 7. 018452  
11721892\_ 7. 900392 7. 793089 7. 789736 7. 760876 7. 673233 7. 748678  
11721893\_ 7. 047153 6. 936474 6. 963399 7. 299807 7. 377811 7. 326018  
11721894\_ 6. 305782 6. 350244 6. 403292 6. 691978 6. 661546 6. 65306  
11721895\_ 6. 672489 6. 737975 6. 792982 7. 205558 7. 091056 7. 169864  
11721896\_ 5. 318957 5. 366068 5. 419244 5. 390349 5. 536705 5. 46862  
11721897\_ 6. 385824 6. 304092 6. 576628 6. 140378 6. 120707 6. 27147  
11721898\_ 5. 383934 5. 65302 5. 518169 5. 657285 5. 688913 5. 502342  
11721899\_ 9. 228599 9. 147192 9. 230342 9. 229362 9. 264635 9. 315066  
11721900\_ 4. 922913 4. 772942 4. 650664 4. 710158 4. 722965 4. 686784  
11721901\_ 7. 698066 7. 558383 7. 724137 8. 158048 8. 153949 8. 209973  
11721902\_ 4. 597169 4. 250934 4. 669034 4. 305707 4. 428855 4. 470714  
11721903\_ 6. 153869 6. 175805 6. 180144 6. 197245 6. 132895 6. 237155  
11721904\_ 7. 563736 7. 459391 7. 498807 7. 04609 7. 126788 7. 049129  
11721905\_ 8. 936313 8. 954511 8. 967835 9. 196908 9. 254338 9. 134319  
11721906\_ 11. 41036 11. 44292 11. 46495 11. 61523 11. 6072 11. 57055  
11721907\_ 8. 343256 8. 301965 8. 440229 8. 047203 8. 002127 7. 965115  
11721908\_ 7. 037314 6. 957125 7. 156092 6. 65374 6. 770694 6. 811403  
11721909\_ 6. 168672 6. 229698 6. 181468 6. 110578 6. 18465 6. 127712  
11721910\_ 7. 612606 7. 55144 7. 651624 7. 48546 7. 599616 7. 552733  
11721911\_ 4. 629088 4. 65545 4. 587935 4. 706388 4. 741682 4. 654172  
11721912\_ 7. 049817 7. 067785 7. 052739 7. 509535 7. 367009 7. 454986  
11721913\_ 7. 164857 7. 193341 7. 253765 7. 621969 7. 570672 7. 547552  
11721914\_ 8. 19073 8. 063499 8. 106426 7. 549033 7. 585435 7. 535828  
11721915\_ 8. 815604 8. 837892 8. 826749 8. 847458 8. 812161 8. 831333  
11721916\_ 6. 871372 6. 655758 6. 818225 7. 042039 7. 09798 7. 101486  
11721917\_ 7. 399034 7. 238969 7. 424429 7. 447947 7. 438169 7. 503342  
11721918\_ 8. 240104 8. 201469 8. 290486 8. 692608 8. 68548 8. 639315  
11721919\_ 8. 677115 8. 60916 8. 527187 8. 241167 8. 256379 8. 28481  
11721920\_ 5. 544167 5. 397088 5. 657546 4. 982429 5. 048225 5. 221746  
11721921\_ 7. 750562 7. 728092 7. 732111 7. 841514 7. 757304 7. 801911  
11721922\_ 3. 722261 3. 781811 3. 609628 3. 925181 3. 863456 3. 805683  
11721923\_ 2. 109787 2. 49357 2. 593062 2. 425342 2. 352649 2. 397739  
11721924\_ 4. 27426 4. 44822 4. 370337 4. 618771 4. 414309 4. 390957  
11721925\_ 5. 918081 5. 883514 5. 971374 6. 391196 6. 4347 6. 359829  
11721926\_ 5. 614563 5. 544557 5. 559051 5. 834832 5. 895355 5. 910841  
11721927\_ 4. 275543 4. 379133 4. 253063 4. 191656 4. 327019 4. 401789  
11721928\_ 6. 097348 6. 165866 6. 156225 6. 205878 6. 331326 6. 177085  
11721929\_ 5. 979726 5. 950282 5. 794286 6. 00804 6. 046893 5. 98718  
11721930\_ 6. 140542 6. 193193 6. 041317 6. 4084 6. 239822 6. 154069  
11721931\_ 5. 666938 5. 834589 5. 715615 5. 82388 5. 839452 5. 975425  
11721932\_ 8. 744648 8. 824733 8. 647273 8. 951869 8. 893792 8. 905215

11721933\_ 5. 498237 5. 573679 5. 75876 5. 530457 5. 545424 5. 676857  
11721934\_ 6. 515411 6. 494947 6. 541665 6. 116558 6. 044285 6. 20542  
11721935\_ 5. 728116 5. 771016 5. 743711 5. 228138 5. 232204 5. 355212  
11721936\_ 2. 777132 2. 522534 2. 750383 2. 964047 3. 009917 2. 972972  
11721937\_ 3. 546823 3. 431954 3. 480726 3. 531536 3. 566557 3. 577132  
11721938\_ 8. 456803 8. 475038 8. 465453 8. 16164 8. 109369 8. 154971  
11721939\_ 5. 770809 5. 894065 5. 844492 5. 880553 5. 957618 5. 844492  
11721940\_ 4. 392903 4. 691877 4. 642078 4. 5233 4. 627169 4. 671309  
11721941\_ 2. 316748 2. 400041 2. 388658 2. 231465 2. 203847 2. 325019  
11721942\_ 6. 436838 6. 626233 6. 628967 6. 320361 6. 407322 6. 366065  
11721943\_ 6. 239629 6. 331571 6. 309857 6. 27841 6. 345529 6. 301311  
11721944\_ 7. 260623 7. 28446 7. 322463 7. 072554 7. 07099 7. 204355  
11721945\_ 4. 400422 4. 535724 4. 495728 4. 573892 4. 602838 4. 487624  
11721946\_ 3. 047116 2. 871949 2. 704151 2. 718322 2. 718322 2. 718322  
11721947\_ 3. 018074 3. 473763 2. 995053 3. 29956 3. 237663 3. 23476  
11721948\_ 8. 656587 8. 569121 8. 569546 8. 076333 8. 139366 8. 127011  
11721949\_ 8. 199648 8. 108879 8. 112008 8. 202099 8. 143783 8. 14264  
11721950\_ 6. 941429 6. 941429 6. 898956 7. 153171 7. 144608 7. 185132  
11721951\_ 3. 343949 3. 45059 3. 556039 3. 75172 3. 70009 3. 495247  
11721952\_ 4. 643717 4. 595078 4. 532631 4. 58267 4. 626355 4. 675381  
11721953\_ 7. 06148 6. 973782 7. 048193 7. 326164 7. 409349 7. 409349  
11721954\_ 7. 381447 7. 323752 7. 442247 7. 219458 7. 316859 7. 336574  
11721955\_ 7. 023797 6. 926912 6. 969221 6. 719857 6. 720332 6. 697431  
11721956\_ 7. 571771 7. 469974 7. 494952 7. 473009 7. 331436 7. 365024  
11721957\_ 6. 727026 6. 683919 6. 677599 6. 697765 6. 631431 6. 822441  
11721958\_ 5. 222046 5. 354923 5. 294362 5. 391832 5. 447162 5. 475572  
11721959\_ 5. 189977 5. 1596 5. 194987 5. 253519 5. 031261 5. 217781  
11721960\_ 7. 975628 7. 947754 7. 980638 7. 739184 7. 711065 7. 733948  
11721961\_ 9. 049035 8. 999235 9. 08745 8. 616531 8. 560087 8. 645631  
11721962\_ 3. 784577 4. 010237 3. 816263 3. 718486 3. 842041 3. 708277  
11721963\_ 4. 362397 4. 544563 4. 381816 4. 347179 4. 347301 4. 122687  
11721964\_ 8. 058998 7. 968698 8. 060048 7. 767698 7. 66443 7. 697248  
11721965\_ 5. 065594 5. 055038 4. 973299 5. 178511 5. 469203 5. 029529  
11721966\_ 6. 050697 6. 052422 6. 203992 5. 199823 5. 249212 5. 254266  
11721967\_ 5. 014051 5. 123921 4. 957064 5. 2222 5. 222127 5. 145926  
11721968\_ 4. 735302 4. 56998 4. 584391 4. 803212 4. 941736 4. 677437  
11721969\_ 9. 30567 9. 224912 9. 261608 9. 015476 8. 900148 8. 901858  
11721970\_ 6. 049695 5. 952823 6. 106111 5. 980179 5. 937355 6. 071348  
11721971\_ 5. 833634 5. 839155 5. 789233 5. 701797 5. 767372 5. 728581  
11721972\_ 7. 326434 7. 243497 7. 264871 7. 212598 7. 177788 7. 278947  
11721973\_ 6. 269954 6. 253696 6. 477406 6. 20533 6. 029773 6. 200557  
11721974\_ 7. 423809 7. 389575 7. 321883 7. 458056 7. 400525 7. 454192  
11721975\_ 5. 867819 5. 958705 5. 983457 5. 879019 5. 761135 5. 894702  
11721976\_ 5. 887435 5. 936692 5. 805138 5. 95781 5. 872327 5. 917025  
11721977\_ 5. 129098 5. 08228 5. 229415 5. 691873 5. 694957 5. 849541  
11721978\_ 5. 096221 5. 282629 5. 193496 5. 573486 5. 471226 5. 539687  
11721979\_ 5. 551615 5. 60245 5. 366352 5. 414869 5. 426098 5. 475572  
11721980\_ 5. 831628 5. 770715 5. 972318 5. 820052 5. 773547 5. 824302  
11721981\_ 6. 339504 6. 673325 6. 291133 6. 503357 6. 469357 6. 643041  
11721982\_ 5. 523785 5. 407146 5. 4689 5. 429417 5. 446628 5. 277395  
11721983\_ 6. 505536 6. 321312 6. 343954 5. 807863 5. 937435 5. 771347

11721984\_ 2. 884931 2. 88758 2. 793419 3. 067159 2. 991861 2. 989212  
11721985\_ 7. 557556 7. 489932 7. 267303 7. 089177 7. 09283 6. 92751  
11721986\_ 4. 846561 4. 737394 4. 687355 4. 879526 4. 660181 4. 827509  
11721987\_ 5. 460913 5. 353776 5. 248269 5. 144172 5. 294261 5. 23501  
11721988\_ 4. 949378 4. 834378 5. 029529 4. 820963 4. 868394 4. 777989  
11721989\_ 6. 337074 6. 217191 6. 289747 6. 727006 6. 840031 6. 847993  
11721990\_ 4. 119366 4. 083273 3. 933643 4. 050603 4. 000168 4. 075106  
11721991\_ 7. 008867 7. 122793 7. 098235 6. 813401 6. 737237 6. 77952  
11721992\_ 4. 200678 4. 065222 4. 177863 4. 178666 4. 065222 3. 864385  
11721993\_ 9. 272064 9. 264893 9. 291217 9. 270236 9. 285139 9. 29231  
11721994\_ 9. 013767 8. 939314 9. 034202 8. 840503 8. 925399 8. 89945  
11721995\_ 4. 772779 5. 021493 4. 775301 4. 952283 4. 754566 4. 860765  
11721996\_ 7. 240224 7. 222325 7. 389941 6. 744961 6. 770933 6. 792376  
11721997\_ 8. 3403 8. 31935 8. 2871 8. 039674 8. 082616 8. 019338  
11721998\_ 5. 993418 5. 900831 6. 002638 5. 163176 5. 032156 5. 299834  
11721999\_ 10. 9947 11. 02594 10. 99908 11. 13255 11. 08691 11. 07296  
11722000\_ 7. 850435 7. 737561 7. 892934 8. 298361 8. 278866 8. 18619  
11722001\_ 10. 8281 10. 83326 10. 80845 10. 90589 10. 91857 10. 88776  
11722002\_ 5. 68992 5. 51642 5. 519044 6. 34864 6. 352333 6. 422339  
11722003\_ 4. 9226 4. 719972 4. 907176 5. 036097 4. 944623 5. 027849  
11722004\_ 11. 11116 11. 13543 11. 10586 11. 15368 11. 16877 11. 12192  
11722005\_ 9. 639633 9. 557166 9. 599697 10. 161 10. 15201 10. 18446  
11722006\_ 5. 339766 5. 257578 5. 228056 5. 396603 5. 334413 5. 341898  
11722007\_ 10. 38516 10. 33619 10. 39864 10. 16887 10. 18562 10. 18987  
11722008\_ 10. 93106 10. 9455 10. 95558 10. 94788 10. 88559 10. 87459  
11722009\_ 10. 44705 10. 42948 10. 43368 10. 41471 10. 50042 10. 4372  
11722010\_ 8. 952936 9. 066256 9. 046873 8. 902723 8. 915127 8. 869163  
11722011\_ 1. 995297 2. 114789 2. 148895 2. 276851 2. 02651 2. 114789  
11722012\_ 2. 692498 2. 778086 2. 60528 2. 664114 2. 622581 2. 71487  
11722013\_ 5. 798952 5. 725457 5. 736831 5. 863551 5. 728665 5. 869211  
11722014\_ 9. 926756 9. 870133 9. 906922 9. 981402 9. 978837 9. 978539  
11722015\_ 3. 847153 3. 997131 3. 733473 3. 435362 3. 364759 3. 391305  
11722016\_ 4. 129253 4. 08452 4. 089874 4. 167165 4. 143107 4. 062268  
11722017\_ 4. 032286 3. 631266 3. 915878 3. 995023 3. 897868 4. 054288  
11722018\_ 10. 87692 10. 84594 10. 86843 11. 03401 11. 05982 11. 0017  
11722019\_ 7. 146736 7. 037591 7. 174026 7. 694025 7. 713006 7. 653762  
11722020\_ 6. 240709 6. 376891 6. 30279 6. 618381 6. 541679 6. 464805  
11722021\_ 8. 049821 7. 978429 8. 113365 8. 185218 8. 227191 8. 175002  
11722022\_ 7. 34744 7. 293739 7. 305183 6. 735136 6. 615173 6. 655291  
11722023\_ 7. 955955 7. 899652 7. 92914 7. 837158 7. 88209 7. 827554  
11722024\_ 7. 261964 7. 231269 7. 36862 6. 996454 7. 011172 7. 035059  
11722025\_ 7. 282972 7. 249378 7. 376155 6. 992435 7. 011172 7. 051995  
11722026\_ 7. 398086 7. 281729 7. 375015 7. 7593 7. 842155 7. 828602  
11722027\_ 8. 199648 8. 048996 8. 154295 8. 456333 8. 456333 8. 510358  
11722028\_ 9. 173902 9. 114135 9. 134688 8. 85169 8. 805209 8. 813729  
11722029\_ 8. 557846 8. 544732 8. 593409 8. 295838 8. 262844 8. 221348  
11722030\_ 7. 709315 7. 603421 7. 702467 7. 494545 7. 454989 7. 504038  
11722031\_ 9. 99083 10. 0084 9. 881638 9. 765968 9. 681078 9. 624878  
11722032\_ 5. 497327 5. 423148 5. 457431 5. 160117 5. 104089 5. 208521  
11722033\_ 7. 158257 6. 872583 6. 958178 6. 640914 6. 769015 6. 779107  
11722034\_ 6. 794675 6. 77783 6. 607253 6. 323325 6. 502769 6. 289685

11722035\_ 5. 84645 5. 922345 5. 828819 5. 857844 5. 744332 5. 903262  
11722036\_ 7. 910406 7. 967905 7. 943386 8. 64963 8. 562075 8. 690312  
11722037\_ 4. 182788 4. 081542 4. 241498 4. 166652 4. 27943 4. 19886  
11722038\_ 6. 149071 6. 234099 6. 204508 6. 173161 6. 292715 6. 300643  
11722039\_ 5. 750494 5. 866126 5. 900785 5. 986102 5. 92677 5. 942463  
11722040\_ 9. 348071 9. 275649 9. 353161 9. 291144 9. 294769 9. 35996  
11722041\_ 6. 543033 6. 607264 6. 702943 6. 52322 6. 577756 6. 68046  
11722042\_ 6. 83817 6. 814755 6. 77967 6. 772174 6. 739151 6. 885199  
11722043\_ 7. 223188 7. 163278 7. 226551 7. 175474 7. 26676 7. 173261  
11722044\_ 9. 493111 9. 387711 9. 489133 9. 605499 9. 617867 9. 652776  
11722045\_ 4. 511866 4. 653763 4. 421051 4. 668387 4. 646286 4. 602285  
11722046\_ 7. 425853 7. 406663 7. 460979 7. 275581 7. 241361 7. 149981  
11722047\_ 6. 523191 6. 425716 6. 665958 5. 970998 6. 038041 6. 09739  
11722048\_ 7. 205922 7. 145753 7. 294944 6. 780383 6. 80166 6. 758439  
11722049\_ 10. 61374 10. 5538 10. 60863 10. 16597 10. 21715 10. 19795  
11722050\_ 6. 734854 6. 730448 6. 74889 6. 765911 6. 904116 6. 862639  
11722051\_ 5. 39448 5. 452789 5. 145699 5. 482132 5. 554531 5. 491233  
11722052\_ 4. 385041 4. 225547 4. 152117 4. 166199 4. 284263 4. 133515  
11722053\_ 7. 825595 7. 777386 7. 852885 8. 005811 8. 038892 8. 122814  
11722054\_ 2. 917613 2. 926716 2. 815195 2. 786048 2. 786252 2. 850329  
11722055\_ 7. 854352 7. 842319 7. 873628 7. 805562 7. 806249 7. 761861  
11722056\_ 7. 563504 7. 65852 7. 529166 7. 136898 7. 230373 7. 268193  
11722057\_ 8. 986444 8. 967609 9. 045673 9. 040276 9. 115838 9. 073124  
11722058\_ 8. 179055 8. 133545 8. 157129 8. 265718 8. 201077 8. 210481  
11722059\_ 5. 752937 5. 631623 5. 696117 5. 783005 5. 826512 5. 715629  
11722060\_ 7. 117382 7. 029511 6. 996737 7. 086797 7. 156966 7. 083275  
11722061\_ 4. 936323 4. 828918 4. 749031 5. 01504 4. 915249 5. 010948  
11722062\_ 8. 576213 8. 586455 8. 604636 7. 613888 7. 691189 7. 586013  
11722063\_ 5. 819928 5. 89885 6. 021857 5. 147325 5. 031836 5. 052292  
11722064\_ 5. 409222 5. 456273 5. 318766 5. 655056 5. 426098 5. 396265  
11722065\_ 6. 599839 6. 528016 6. 631362 6. 490949 6. 520775 6. 5648  
11722066\_ 7. 059846 7. 068252 7. 116826 6. 91154 6. 929905 7. 028653  
11722067\_ 8. 538683 8. 470176 8. 485451 8. 523737 8. 463783 8. 531653  
11722068\_ 5. 691862 6. 018151 6. 024399 5. 9022 5. 976798 6. 059486  
11722069\_ 6. 65599 6. 492953 6. 625462 7. 492996 7. 504228 7. 580184  
11722070\_ 9. 43555 9. 430188 9. 444137 9. 606695 9. 578372 9. 515024  
11722071\_ 4. 28176 4. 424802 4. 501435 4. 344284 4. 469159 4. 303992  
11722072\_ 8. 565117 8. 491833 8. 516337 8. 422873 8. 450539 8. 42513  
11722073\_ 3. 655778 3. 611361 3. 56856 3. 693275 3. 931427 3. 738849  
11722074\_ 3. 797663 3. 673372 3. 583769 3. 797663 3. 873754 3. 376225  
11722075\_ 5. 311454 5. 23766 5. 093767 5. 229223 5. 257253 5. 313779  
11722076\_ 7. 619107 7. 654622 7. 614619 8. 026575 7. 869218 7. 811955  
11722077\_ 3. 405015 3. 404417 3. 511895 3. 564732 3. 499093 3. 606313  
11722078\_ 4. 0594 4. 393505 4. 09778 4. 223684 3. 953476 4. 198288  
11722079\_ 8. 634451 8. 567939 8. 625593 8. 284656 8. 310459 8. 297496  
11722080\_ 7. 269381 7. 191619 7. 264402 7. 171096 7. 243038 7. 219313  
11722081\_ 6. 619904 6. 572273 6. 505537 6. 298308 6. 346972 6. 268392  
11722082\_ 2. 974487 2. 833868 2. 977812 2. 83198 2. 705153 2. 860785  
11722083\_ 4. 515837 4. 459939 4. 509972 4. 534641 4. 240591 4. 437667  
11722084\_ 7. 521112 7. 664144 7. 574149 7. 777729 7. 885898 7. 865489  
11722085\_ 8. 723852 8. 617226 8. 719982 8. 417496 8. 397297 8. 438078



11722086\_ 4. 203044 4. 201705 3. 89209 4. 016301 4. 104571 4. 065415  
11722087\_ 8. 252046 8. 31368 8. 318897 8. 143015 8. 105366 8. 100453  
11722088\_ 5. 049734 4. 815683 5. 073036 5. 095438 5. 183024 5. 475572  
11722089\_ 8. 725504 8. 666669 8. 718793 8. 715554 8. 731569 8. 717313  
11722090\_ 6. 0074 5. 971853 6. 053745 6. 326825 6. 263567 6. 159771  
11722091\_ 4. 801503 4. 899348 4. 906507 5. 00505 4. 839254 4. 839254  
11722092\_ 4. 651639 4. 763866 4. 723518 4. 633781 4. 703745 4. 743667  
11722093\_ 8. 574693 8. 442399 8. 599388 7. 942702 8. 039193 8. 050914  
11722094\_ 8. 815414 8. 844686 8. 877986 8. 359182 8. 423736 8. 367144  
11722095\_ 6. 265319 6. 127177 6. 17981 6. 727853 6. 747958 6. 778955  
11722096\_ 6. 994653 6. 881398 6. 934615 7. 176804 7. 057576 7. 054195  
11722097\_ 7. 701561 7. 606655 7. 632723 7. 318505 7. 302567 7. 408503  
11722098\_ 7. 368592 7. 31529 7. 296292 6. 534832 6. 5748 6. 565764  
11722099\_ 7. 857829 7. 746804 7. 806814 7. 736521 7. 657581 7. 646302  
11722100\_ 8. 838495 8. 801839 8. 882178 8. 649287 8. 59361 8. 624782  
11722101\_ 5. 405204 5. 585781 5. 531559 5. 396087 5. 509566 5. 518674  
11722102\_ 6. 601437 6. 573629 6. 665265 6. 77715 6. 664693 6. 779107  
11722103\_ 4. 352733 4. 272157 4. 370337 4. 162687 3. 99328 3. 972216  
11722104\_ 7. 392477 7. 335068 7. 48364 7. 164126 7. 215623 7. 136245  
11722105\_ 7. 982279 7. 890751 7. 962504 8. 082802 8. 02464 8. 122543  
11722106\_ 7. 119189 6. 935084 7. 11299 6. 45695 6. 475135 6. 453146  
11722107\_ 5. 386889 5. 573062 5. 643713 6. 157073 6. 104782 6. 251647  
11722108\_ 6. 646999 6. 572081 6. 630264 6. 839403 6. 891303 6. 934615  
11722109\_ 4. 613004 4. 768352 4. 460071 5. 195192 5. 19884 5. 011821  
11722110\_ 5. 027925 5. 140071 4. 905503 5. 428057 5. 506442 5. 374866  
11722111\_ 5. 887154 6. 037091 5. 784528 5. 595326 5. 78743 5. 838133  
11722112\_ 4. 791036 5. 03377 4. 938259 5. 07325 5. 111029 5. 070037  
11722113\_ 7. 665102 7. 665142 7. 682281 7. 945458 7. 872564 7. 931528  
11722114\_ 7. 144297 7. 047935 7. 113599 7. 253425 7. 272393 7. 224891  
11722115\_ 8. 000515 7. 972553 8. 055725 8. 138673 8. 106582 8. 122064  
11722116\_ 6. 090147 6. 058786 6. 101527 5. 995333 5. 970127 6. 033109  
11722117\_ 3. 923691 3. 678966 3. 86236 4. 189172 4. 155954 3. 987666  
11722118\_ 4. 300522 4. 332433 4. 466093 4. 533552 4. 596645 4. 49402  
11722119\_ 6. 037767 6. 13945 5. 997558 6. 646957 6. 737558 6. 561348  
11722120\_ 7. 591494 7. 473706 7. 61232 8. 153384 8. 171172 8. 202099  
11722121\_ 4. 149465 4. 356159 4. 037191 4. 452994 4. 87249 4. 394332  
11722122\_ 8. 15176 8. 123832 8. 040785 8. 006514 8. 080516 8. 158042  
11722123\_ 7. 06426 7. 074274 7. 190891 6. 913429 7. 059991 7. 038457  
11722124\_ 7. 248538 7. 163335 7. 306609 7. 500994 7. 472424 7. 452036  
11722125\_ 7. 758356 7. 798187 7. 801437 7. 201544 7. 199648 7. 28747  
11722126\_ 7. 706578 7. 605685 7. 675731 7. 167608 7. 212717 7. 201258  
11722127\_ 5. 327546 5. 375623 5. 324033 5. 440604 5. 339961 5. 337945  
11722128\_ 8. 174995 8. 02065 8. 105517 8. 186376 8. 254218 8. 33583  
11722129\_ 5. 31372 5. 356036 5. 257014 5. 309147 5. 281168 5. 281769  
11722130\_ 7. 837073 7. 846227 7. 838885 7. 756543 7. 811308 7. 704321  
11722131\_ 7. 219099 7. 350558 7. 223864 7. 35927 7. 334929 7. 379671  
11722132\_ 5. 508275 5. 664387 5. 374866 5. 587091 5. 600817 5. 700312  
11722133\_ 5. 909813 5. 856869 6. 044285 6. 069489 6. 054883 5. 992354  
11722134\_ 7. 756352 7. 698224 7. 762626 7. 717365 7. 78828 7. 810388  
11722135\_ 5. 120768 5. 235373 5. 110844 5. 304011 5. 192669 5. 055415  
11722136\_ 2. 028005 2. 13657 2. 237308 2. 25483 2. 344409 2. 123154

11722137\_ 3. 925181 4. 114816 4. 135496 4. 213226 4. 28607 4. 214774  
11722138\_ 3. 705625 3. 848932 3. 641805 3. 714953 3. 758054 3. 730325  
11722139\_ 2. 465548 2. 333875 2. 131387 2. 17541 2. 352921 2. 245973  
11722140\_ 2. 306732 2. 492899 2. 610457 2. 263674 2. 150015 2. 605657  
11722141\_ 7. 953219 7. 845279 7. 80869 7. 294013 7. 279177 7. 294013  
11722142\_ 6. 634888 6. 644459 6. 572696 6. 987435 7. 000757 7. 078989  
11722143\_ 6. 884619 6. 874408 6. 90005 6. 33277 6. 369589 6. 388175  
11722144\_ 6. 653523 6. 511104 6. 601353 6. 554512 6. 453652 6. 439358  
11722145\_ 6. 520868 6. 321838 6. 541665 6. 136919 6. 099433 6. 300643  
11722146\_ 2. 988093 3. 061205 2. 852741 3. 020392 3. 14083 3. 135384  
11722147\_ 5. 247739 5. 295804 5. 312502 5. 516278 5. 415732 5. 526057  
11722148\_ 7. 848785 7. 936514 7. 954167 7. 836035 7. 771109 7. 72902  
11722149\_ 6. 192918 6. 20644 6. 023048 5. 849262 5. 729753 5. 541648  
11722150\_ 5. 581195 5. 508398 5. 643263 5. 312403 5. 255927 5. 362855  
11722151\_ 6. 337264 6. 257858 6. 318538 6. 159771 6. 035287 6. 249423  
11722152\_ 6. 664399 6. 493167 6. 729409 6. 55324 6. 565759 6. 534257  
11722153\_ 5. 751422 5. 894697 5. 851398 5. 835659 5. 842855 5. 81673  
11722154\_ 4. 401846 4. 350656 4. 546841 4. 213816 4. 343425 4. 486413  
11722155\_ 3. 415525 3. 271431 3. 540249 2. 563955 2. 633403 2. 733362  
11722156\_ 7. 727967 7. 672332 7. 672723 7. 522974 7. 534709 7. 528093  
11722157\_ 7. 060114 6. 998064 7. 060114 7. 055744 7. 058053 7. 093248  
11722158\_ 4. 763543 4. 599202 4. 783527 4. 855363 4. 909596 4. 872818  
11722159\_ 5. 451755 5. 540644 5. 480966 5. 350875 5. 395836 5. 404006  
11722160\_ 6. 549594 6. 499354 6. 543572 6. 89603 6. 798442 6. 866285  
11722161\_ 8. 201712 8. 184981 8. 147024 8. 194442 8. 197582 8. 17907  
11722162\_ 9. 564141 9. 516882 9. 548491 9. 220318 9. 150708 9. 184863  
11722163\_ 9. 58276 9. 524269 9. 581975 9. 102838 9. 122508 9. 166103  
11722164\_ 6. 041037 5. 855558 5. 963316 5. 031307 5. 17803 5. 29074  
11722165\_ 6. 164069 6. 190512 6. 159818 6. 125711 6. 234301 6. 172001  
11722166\_ 5. 443427 5. 213838 5. 510916 4. 64899 4. 508495 4. 548032  
11722167\_ 11. 17489 11. 17522 11. 1615 11. 16693 11. 14479 11. 1171  
11722168\_ 11. 02761 11. 03086 11. 02769 11. 39182 11. 43222 11. 33657  
11722169\_ 11. 04511 11. 01012 11. 03507 11. 38804 11. 38997 11. 35448  
11722170\_ 6. 87871 6. 915436 6. 985533 6. 926498 7. 011075 7. 009306  
11722171\_ 5. 03694 5. 047351 4. 929938 5. 290552 5. 239284 5. 195722  
11722172\_ 7. 895425 7. 957012 7. 912458 7. 677454 7. 717726 7. 732451  
11722173\_ 6. 996236 6. 826522 7. 039829 6. 96367 7. 060482 7. 01846  
11722174\_ 7. 497147 7. 517481 7. 489289 7. 34928 7. 397972 7. 405893  
11722175\_ 6. 836098 6. 837894 6. 851754 7. 298311 7. 439693 7. 378482  
11722176\_ 9. 829067 9. 720928 9. 783661 10. 04619 10. 00212 10. 0273  
11722177\_ 8. 383771 8. 277433 8. 28615 8. 090546 8. 179818 8. 143737  
11722178\_ 8. 131123 8. 25815 8. 114792 8. 30475 8. 204419 8. 192564  
11722179\_ 8. 92474 8. 942011 9. 001538 8. 53886 8. 492977 8. 510109  
11722180\_ 9. 25842 9. 296451 9. 339097 8. 833191 8. 846897 8. 831291  
11722181\_ 9. 670971 9. 660141 9. 765292 9. 490325 9. 402833 9. 454525  
11722182\_ 6. 311352 6. 496314 6. 401084 7. 305371 7. 239118 7. 297902  
11722183\_ 6. 290248 6. 241899 6. 419807 7. 107758 7. 082537 7. 205212  
11722184\_ 9. 09054 9. 119238 9. 110472 9. 544575 9. 493907 9. 385991  
11722185\_ 5. 441535 5. 356415 5. 605615 6. 040637 5. 932263 5. 927478  
11722186\_ 7. 475272 7. 485511 7. 504702 7. 625539 7. 722204 7. 665726  
11722187\_ 5. 162658 5. 272676 5. 260687 5. 271671 5. 26034 5. 302406

11722188\_ 6. 776415 6. 822242 6. 847517 8. 377436 8. 369121 8. 267793  
11722189\_ 7. 052386 6. 923199 6. 983596 8. 087547 8. 057411 7. 995603  
11722190\_ 8. 577088 8. 439538 8. 57552 9. 63619 9. 594521 9. 569153  
11722191\_ 9. 186509 9. 146768 9. 240741 8. 95143 8. 924199 8. 942922  
11722192\_ 9. 155035 9. 075628 9. 097418 9. 282691 9. 365268 9. 287444  
11722193\_ 10. 04936 10. 04884 10. 07904 10. 18842 10. 19055 10. 19873  
11722194\_ 10. 27058 10. 26047 10. 28227 10. 28873 10. 30482 10. 2824  
11722195\_ 9. 39183 9. 36539 9. 422164 9. 247232 9. 29339 9. 273013  
11722196\_ 8. 815559 8. 745073 8. 803458 8. 602346 8. 615191 8. 546355  
11722197\_ 7. 116166 7. 042818 7. 206168 7. 464845 7. 530023 7. 564747  
11722198\_ 4. 120817 4. 159658 4. 223449 4. 242046 4. 395992 4. 370268  
11722199\_ 5. 500977 5. 518169 5. 680073 4. 880057 4. 886677 4. 866013  
11722200\_ 4. 009861 4. 141772 4. 19566 4. 107467 4. 31725 4. 330156  
11722201\_ 11. 23729 11. 18 11. 22683 11. 18499 11. 20724 11. 17034  
11722202\_ 9. 232186 9. 21933 9. 246641 9. 14804 9. 09054 9. 121628  
11722203\_ 8. 121144 8. 206371 8. 147133 8. 177078 8. 044629 8. 036438  
11722204\_ 9. 929626 9. 892535 9. 95453 9. 656115 9. 679516 9. 703447  
11722205\_ 7. 260481 7. 205725 7. 160801 7. 360536 7. 330858 7. 423277  
11722206\_ 6. 658712 6. 589104 6. 541665 6. 7414 6. 685324 6. 816316  
11722207\_ 10. 51032 10. 45015 10. 50429 10. 505 10. 45442 10. 46087  
11722208\_ 5. 145115 5. 136432 5. 029529 5. 353876 5. 24338 5. 254252  
11722209\_ 5. 565269 5. 663339 5. 719758 5. 339313 5. 415822 5. 402048  
11722210\_ 4. 424277 4. 214462 4. 161022 4. 155114 4. 037021 4. 122263  
11722211\_ 6. 307242 6. 174047 6. 151541 6. 756773 6. 787182 6. 885234  
11722212\_ 7. 781185 7. 789552 7. 658176 7. 968638 7. 974896 7. 952562  
11722213\_ 8. 652448 8. 597882 8. 641104 8. 800764 8. 826316 8. 823723  
11722214\_ 6. 646187 6. 686847 6. 680959 6. 792943 6. 760574 6. 922773  
11722215\_ 8. 362973 8. 343486 8. 399093 8. 615296 8. 642941 8. 657598  
11722216\_ 7. 837825 7. 798828 7. 806301 7. 722322 7. 746642 7. 714953  
11722217\_ 8. 017818 8. 051239 8. 084165 8. 02166 8. 020971 8. 023661  
11722218\_ 7. 925916 7. 881303 7. 94314 7. 782648 7. 682867 7. 700109  
11722219\_ 6. 800809 6. 905037 6. 918212 6. 61184 6. 569419 6. 637763  
11722220\_ 7. 601822 7. 582329 7. 615353 7. 485621 7. 482432 7. 434879  
11722221\_ 4. 560232 4. 669078 4. 383787 4. 668368 4. 744045 4. 553862  
11722222\_ 8. 033785 7. 853789 8. 018209 8. 348948 8. 332963 8. 280892  
11722223\_ 3. 108131 3. 036087 2. 964777 3. 284661 3. 095011 2. 953426  
11722224\_ 5. 825098 5. 944313 5. 803612 5. 929681 5. 844586 5. 92997  
11722225\_ 5. 05369 5. 161069 5. 300286 5. 153449 5. 141444 5. 130587  
11722226\_ 7. 605653 7. 620255 7. 625993 8. 444061 8. 327156 8. 188152  
11722227\_ 7. 730153 7. 709909 7. 752089 7. 70601 7. 843366 7. 795828  
11722228\_ 7. 396659 7. 330246 7. 202891 7. 442902 7. 391802 7. 488743  
11722229\_ 8. 623376 8. 649661 8. 634173 9. 050854 9. 008072 8. 971681  
11722230\_ 10. 68514 10. 69131 10. 69092 9. 815403 9. 783374 9. 843384  
11722231\_ 11. 00396 10. 96977 10. 95486 10. 2802 10. 22876 10. 18965  
11722232\_ 2. 718322 2. 810777 2. 841452 2. 9519 2. 838478 2. 801448  
11722233\_ 7. 292682 7. 327107 7. 269719 7. 249461 7. 334993 7. 183417  
11722234\_ 5. 456068 5. 365197 5. 366523 5. 651715 5. 526004 5. 455439  
11722235\_ 5. 052567 4. 99731 4. 88241 4. 878968 5. 176472 5. 029971  
11722236\_ 5. 812442 5. 638447 5. 572927 5. 494845 5. 632351 5. 2666  
11722237\_ 8. 12716 8. 121 8. 13782 7. 819083 7. 684407 7. 800261  
11722238\_ 8. 78025 8. 717123 8. 756507 8. 991617 9. 025018 8. 9526

11722239\_ 6. 993277 7. 027411 6. 993577 6. 727928 6. 750212 6. 782563  
11722240\_ 8. 630724 8. 544626 8. 584105 7. 846674 7. 863659 7. 757653  
11722241\_ 8. 474267 8. 394325 8. 458083 7. 711386 7. 755409 7. 68464  
11722242\_ 7. 524562 7. 563651 7. 484831 6. 667778 6. 678241 6. 676851  
11722243\_ 6. 186174 6. 339761 6. 126401 6. 358589 6. 334055 6. 397478  
11722244\_ 7. 149989 6. 994144 7. 138425 5. 706147 5. 708759 5. 783821  
11722245\_ 6. 819949 6. 880347 6. 965071 6. 839141 6. 856897 6. 846474  
11722246\_ 7. 214812 7. 21572 7. 254194 7. 215925 7. 25761 7. 229541  
11722247\_ 5. 711499 5. 815789 5. 740649 5. 76922 5. 880579 5. 873786  
11722248\_ 5. 996841 5. 982485 5. 973344 5. 980203 6. 004805 5. 973092  
11722249\_ 4. 650517 4. 527851 4. 649947 4. 405716 4. 285606 4. 210545  
11722250\_ 5. 943919 5. 980204 5. 975548 5. 956668 5. 918745 5. 888649  
11722251\_ 7. 610765 7. 596761 7. 588945 8. 302386 8. 235776 8. 224101  
11722252\_ 8. 834455 8. 788222 8. 850461 9. 383509 9. 349107 9. 32967  
11722253\_ 8. 101472 8. 089981 8. 1351 8. 573097 8. 619261 8. 586925  
11722254\_ 8. 068374 8. 058159 8. 145807 8. 413812 8. 417657 8. 383218  
11722255\_ 5. 633991 5. 643938 5. 619302 5. 670944 5. 635699 5. 77685  
11722256\_ 7. 611091 7. 641646 7. 708475 7. 652443 7. 757209 7. 645736  
11722257\_ 6. 309255 6. 263567 6. 139103 6. 3831 6. 399585 6. 387546  
11722258\_ 5. 909474 5. 923694 5. 893946 5. 922463 5. 875211 5. 806981  
11722259\_ 7. 425613 7. 417811 7. 401737 7. 546394 7. 499294 7. 348498  
11722260\_ 7. 016743 6. 975338 7. 005397 6. 244666 6. 379549 6. 369255  
11722261\_ 6. 625142 6. 622864 6. 741324 6. 040637 6. 182409 6. 060258  
11722262\_ 9. 677162 9. 689751 9. 679471 9. 399445 9. 329932 9. 317778  
11722263\_ 7. 739743 7. 719938 7. 666789 7. 553821 7. 498457 7. 619924  
11722264\_ 8. 315266 8. 227517 8. 314956 8. 229938 8. 204663 8. 272853  
11722265\_ 7. 628404 7. 512268 7. 599082 7. 389382 7. 505315 7. 406533  
11722266\_ 4. 234086 4. 390544 4. 178951 4. 535271 4. 477031 4. 568113  
11722267\_ 6. 831233 6. 749956 6. 849079 6. 823841 6. 902295 6. 81533  
11722268\_ 7. 314125 7. 216872 7. 252614 7. 098061 7. 004823 7. 099478  
11722269\_ 3. 536362 3. 802321 3. 612081 3. 666029 3. 429915 3. 526893  
11722270\_ 4. 400258 4. 681584 4. 537723 4. 5915 4. 671421 4. 605688  
11722271\_ 6. 922773 6. 898634 7. 1466 6. 82118 6. 680871 6. 828602  
11722272\_ 7. 657054 7. 697149 7. 707898 7. 571916 7. 533648 7. 521541  
11722273\_ 8. 733678 8. 624599 8. 672445 8. 426016 8. 430401 8. 409401  
11722274\_ 6. 025952 5. 796442 6. 007557 6. 113468 6. 048168 5. 999157  
11722275\_ 6. 388234 6. 228655 6. 412133 6. 694932 6. 672806 6. 784498  
11722276\_ 6. 0504 6. 100455 5. 904684 6. 471059 6. 381529 6. 339325  
11722277\_ 7. 125835 7. 004272 7. 085658 7. 358545 7. 333856 7. 272972  
11722278\_ 7. 164274 7. 243193 7. 158298 7. 08821 7. 185852 7. 183801  
11722279\_ 6. 756565 6. 648613 6. 728498 5. 979708 6. 004687 5. 943785  
11722280\_ 8. 022363 8. 076503 8. 082395 8. 245806 8. 192836 8. 202969  
11722281\_ 5. 856446 5. 874714 5. 89445 5. 102696 5. 194313 5. 454275  
11722282\_ 6. 636889 6. 613096 6. 676685 6. 788088 6. 635807 6. 767766  
11722283\_ 6. 334623 6. 336218 6. 262678 6. 472148 6. 486827 6. 463974  
11722284\_ 8. 61796 8. 518107 8. 547872 7. 980388 8. 016572 7. 969648  
11722285\_ 7. 086373 7. 178258 7. 138987 6. 464276 6. 378453 6. 427094  
11722286\_ 7. 999128 7. 932678 7. 940954 7. 779971 7. 734676 7. 718537  
11722287\_ 8. 102143 8. 075697 8. 102581 7. 859751 7. 806217 7. 833671  
11722288\_ 7. 294029 7. 256953 7. 336044 7. 152914 7. 076779 7. 23745  
11722289\_ 6. 336506 6. 306112 6. 30967 6. 22892 6. 123573 6. 30316

11722290\_ 6. 822506 6. 73273 6. 81731 6. 689823 6. 616313 6. 617088  
11722291\_ 7. 144608 6. 99128 7. 09934 6. 973232 6. 928741 6. 904269  
11722292\_ 5. 793273 5. 845247 5. 74969 5. 864965 5. 868634 6. 018304  
11722293\_ 7. 102051 7. 164949 7. 097442 7. 206121 7. 202802 7. 226043  
11722294\_ 5. 415539 5. 462728 5. 315137 5. 523998 5. 528365 5. 519254  
11722295\_ 5. 980217 6. 023614 5. 982276 6. 303227 6. 24432 6. 185921  
11722296\_ 6. 468112 6. 574923 6. 640329 6. 503265 6. 624324 6. 54586  
11722297\_ 7. 878595 7. 903818 7. 912503 7. 763549 7. 799737 7. 795517  
11722298\_ 7. 736193 7. 65321 7. 727171 7. 339942 7. 362141 7. 435159  
11722299\_ 8. 998634 8. 95543 9. 008542 8. 796621 8. 820329 8. 872916  
11722300\_ 10. 64535 10. 58913 10. 61671 10. 00157 9. 952924 10. 00468  
11722301\_ 4. 126046 4. 182679 4. 272694 4. 206948 4. 0188 3. 990186  
11722302\_ 6. 212972 6. 162538 6. 070734 6. 734928 6. 59245 6. 382716  
11722303\_ 8. 530884 8. 495835 8. 467707 8. 64894 8. 57496 8. 614435  
11722304\_ 8. 550565 8. 470506 8. 533299 8. 607133 8. 556549 8. 565774  
11722305\_ 9. 384914 9. 30722 9. 376101 8. 68636 8. 67747 8. 7099  
11722306\_ 5. 381948 5. 346989 5. 409892 5. 28313 5. 366763 5. 337769  
11722307\_ 7. 395911 7. 34082 7. 416038 7. 172582 7. 221165 7. 289973  
11722308\_ 3. 860753 3. 944379 3. 946687 3. 98792 3. 984033 3. 929085  
11722309\_ 6. 569716 6. 556581 6. 58063 6. 492209 6. 542728 6. 561788  
11722310\_ 5. 23659 5. 350151 5. 143202 5. 475768 5. 308522 5. 374609  
11722311\_ 7. 461069 7. 436006 7. 509824 7. 422943 7. 344465 7. 343319  
11722312\_ 3. 523539 3. 542401 3. 54571 3. 506984 3. 436055 3. 674083  
11722313\_ 7. 241302 7. 164593 7. 213012 7. 067829 7. 005851 7. 043526  
11722314\_ 8. 715333 8. 572331 8. 679916 8. 304898 8. 268514 8. 314372  
11722315\_ 6. 09674 6. 137475 5. 891596 5. 926982 6. 264827 6. 013901  
11722316\_ 6. 747286 6. 781017 6. 781268 6. 83794 6. 795626 6. 903784  
11722317\_ 6. 592226 6. 501085 6. 579265 6. 364529 6. 16656 6. 262336  
11722318\_ 7. 504945 7. 469914 7. 473672 7. 580571 7. 635574 7. 621047  
11722319\_ 5. 634003 5. 750795 5. 654327 5. 820052 5. 794286 5. 881127  
11722320\_ 4. 938516 4. 812699 4. 814104 4. 812322 4. 790946 4. 763543  
11722321\_ 9. 516178 9. 470134 9. 50626 8. 979863 8. 973906 8. 891971  
11722322\_ 4. 475007 4. 541314 4. 633523 4. 459939 4. 643717 4. 457689  
11722323\_ 4. 65881 4. 776275 4. 731644 4. 650743 4. 812064 4. 677494  
11722324\_ 7. 665301 7. 596002 7. 657089 7. 143394 7. 076348 6. 999944  
11722325\_ 6. 507303 6. 514267 6. 429794 6. 97589 6. 97893 6. 925776  
11722326\_ 7. 658599 7. 573774 7. 468407 6. 718279 6. 84082 6. 874606  
11722327\_ 4. 473954 4. 534941 4. 53338 4. 45804 4. 465871 4. 426432  
11722328\_ 5. 820052 5. 957954 5. 906134 5. 916714 5. 931829 5. 943131  
11722329\_ 4. 924056 5. 157452 5. 06451 5. 162523 5. 214997 5. 157659  
11722330\_ 7. 67778 7. 646802 7. 524628 7. 681608 7. 649879 7. 702872  
11722331\_ 7. 93814 8. 050583 7. 99098 7. 692859 7. 64552 7. 678909  
11722332\_ 7. 566555 7. 588251 7. 578933 7. 32736 7. 342771 7. 361285  
11722333\_ 5. 579777 5. 596246 5. 60387 5. 77523 5. 696844 5. 642188  
11722334\_ 3. 579183 3. 52803 3. 47435 3. 569153 3. 645605 3. 667712  
11722335\_ 4. 575234 4. 580905 4. 655788 4. 761295 4. 655788 4. 655788  
11722336\_ 6. 488188 6. 273206 6. 343972 6. 332232 6. 35173 6. 29288  
11722337\_ 6. 340432 6. 412133 6. 435486 6. 448378 6. 514714 6. 558579  
11722338\_ 7. 214154 7. 029342 7. 230373 6. 841774 6. 853861 6. 910833  
11722339\_ 6. 970757 6. 958616 7. 007364 6. 521908 6. 587552 6. 606896  
11722340\_ 5. 657575 5. 77783 5. 599726 5. 632464 5. 610311 5. 630041

11722341\_ 6. 811478 6. 838528 6. 898964 7. 083969 7. 155781 7. 21391  
11722342\_ 2. 51244 2. 529862 2. 528948 2. 473728 2. 459815 2. 56766  
11722343\_ 7. 219801 7. 175947 7. 363141 7. 119316 7. 035432 7. 143006  
11722344\_ 6. 571122 6. 495728 6. 495331 6. 62332 6. 659482 6. 624793  
11722345\_ 7. 611363 7. 688681 7. 676133 7. 607412 7. 608789 7. 58802  
11722346\_ 6. 978547 6. 988021 6. 898125 6. 85304 6. 851544 6. 909111  
11722347\_ 4. 594032 4. 493715 4. 596187 4. 389121 4. 459939 4. 660232  
11722348\_ 3. 122119 3. 175272 3. 16609 3. 418944 3. 292419 3. 411684  
11722349\_ 7. 020462 7. 120202 7. 047746 6. 956076 7. 111681 6. 982642  
11722350\_ 3. 023876 3. 030915 3. 222576 2. 985018 3. 035143 3. 036551  
11722351\_ 6. 656933 6. 713517 6. 72018 6. 722692 6. 627113 6. 70573  
11722352\_ 8. 376466 8. 347429 8. 351559 7. 896822 7. 918922 7. 967678  
11722353\_ 2. 188476 2. 314545 2. 599175 1. 995297 2. 423787 2. 103698  
11722354\_ 9. 402438 9. 386831 9. 419791 9. 256957 9. 231692 9. 199602  
11722355\_ 6. 821538 6. 703962 6. 719786 6. 454067 6. 504403 6. 461437  
11722356\_ 8. 049843 7. 931698 8. 123786 7. 339712 7. 230831 7. 474037  
11722357\_ 8. 515421 8. 451108 8. 574744 8. 363187 8. 377116 8. 372054  
11722358\_ 8. 591835 8. 434551 8. 612254 8. 272571 8. 299174 8. 26707  
11722359\_ 8. 851686 8. 769506 8. 859438 8. 509757 8. 562602 8. 561011  
11722360\_ 6. 927384 6. 799943 6. 950295 6. 879891 6. 871664 6. 971123  
11722361\_ 6. 264841 6. 449338 6. 411188 6. 416747 6. 400561 6. 401643  
11722362\_ 5. 863972 5. 900967 5. 863972 5. 827819 5. 846099 5. 900544  
11722363\_ 6. 701927 6. 754821 6. 752593 6. 478438 6. 526095 6. 417264  
11722364\_ 6. 481438 6. 317563 6. 428975 6. 246363 6. 397489 6. 453097  
11722365\_ 8. 90689 8. 807144 8. 840005 8. 679551 8. 674013 8. 716659  
11722366\_ 7. 557305 7. 549425 7. 492138 7. 988236 8. 027878 7. 973866  
11722367\_ 8. 571734 8. 58116 8. 475941 9. 325586 9. 261461 9. 209741  
11722368\_ 5. 007003 4. 584933 4. 975924 3. 723069 3. 755838 3. 606313  
11722369\_ 6. 337037 6. 22595 6. 35794 5. 465332 5. 30791 5. 347483  
11722370\_ 7. 038409 6. 704493 6. 895977 5. 321749 5. 348642 5. 049984  
11722371\_ 6. 467524 6. 315999 6. 587944 4. 993867 5. 080037 4. 987506  
11722372\_ 6. 985752 6. 795925 6. 995282 7. 105666 7. 217471 7. 072604  
11722373\_ 6. 646187 6. 659715 6. 596427 6. 523484 6. 527199 6. 619956  
11722374\_ 7. 444966 7. 371793 7. 398968 7. 312014 7. 239347 7. 353199  
11722375\_ 8. 367825 8. 34027 8. 408662 8. 193601 8. 169786 8. 183197  
11722376\_ 4. 251884 4. 230038 4. 206769 4. 538248 4. 766549 4. 584933  
11722377\_ 8. 806802 8. 80312 8. 82497 8. 90737 8. 90085 8. 958055  
11722378\_ 8. 325515 8. 379129 8. 31278 8. 339814 8. 374713 8. 346609  
11722379\_ 10. 25563 10. 24088 10. 21229 9. 738647 9. 760712 9. 772025  
11722380\_ 8. 362653 8. 317306 8. 4007 8. 345878 8. 38938 8. 377189  
11722381\_ 7. 130563 7. 121891 7. 152792 6. 728743 6. 754463 6. 834526  
11722382\_ 7. 790638 7. 721936 7. 728815 7. 499228 7. 489139 7. 41657  
11722383\_ 6. 169849 6. 065991 6. 034658 6. 265751 6. 245998 6. 114329  
11722384\_ 7. 366518 7. 261205 7. 331964 7. 663866 7. 708477 7. 590741  
11722385\_ 7. 16242 7. 257549 7. 110214 7. 844414 7. 868805 8. 053981  
11722386\_ 5. 504623 5. 517611 5. 648185 5. 427263 5. 635339 5. 662305  
11722387\_ 8. 239683 8. 074095 8. 123597 7. 86209 7. 907628 7. 931048  
11722388\_ 7. 262324 7. 193446 7. 272972 7. 283721 7. 301219 7. 321079  
11722389\_ 7. 000985 7. 088452 7. 08741 7. 391576 7. 358974 7. 336963  
11722390\_ 7. 658176 7. 534048 7. 511935 7. 474062 7. 511742 7. 572465  
11722391\_ 4. 322676 4. 42351 4. 165051 4. 768156 4. 446793 4. 64114

11722392\_ 10.18832 10.07986 10.14747 10.0875 10.05919 10.08068  
11722393\_ 9.894305 9.849523 9.863404 9.795261 9.838671 9.783675  
11722394\_ 6.075211 6.048863 6.021131 6.281054 6.184366 6.133381  
11722395\_ 7.181577 7.186901 7.169495 7.209278 7.266714 7.168784  
11722396\_ 8.009943 7.883052 8.000911 8.148917 8.117799 8.096646  
11722397\_ 6.773702 6.604329 6.810659 6.977334 6.989574 7.018033  
11722398\_ 7.555689 7.516974 7.528741 7.879169 7.79417 7.79417  
11722399\_ 6.290395 6.130214 6.211514 5.812312 5.686361 5.680355  
11722400\_ 6.971486 7.018515 6.904005 7.051448 7.115072 7.031531  
11722401\_ 4.026092 3.997131 3.980323 4.067703 4.073686 3.987737  
11722402\_ 7.15664 7.162878 7.167733 7.355324 7.41387 7.435282  
11722403\_ 6.720597 6.599873 6.668045 6.767854 6.754283 6.727853  
11722404\_ 7.932799 7.906861 7.904759 8.011199 7.99485 7.982635  
11722405\_ 6.352275 6.311765 6.367351 6.278977 6.414457 6.332513  
11722406\_ 7.231188 7.195335 7.224063 7.169435 7.240384 7.317045  
11722407\_ 7.114579 7.073512 7.148208 7.254236 7.18188 7.150013  
11722408\_ 7.562715 7.627209 7.582925 6.975127 7.025222 7.062258  
11722409\_ 7.252632 7.221112 7.358079 6.791329 6.738242 6.788352  
11722410\_ 8.508617 8.445452 8.497922 8.087964 8.073818 8.171856  
11722411\_ 6.829298 6.758515 6.771929 6.67471 6.722565 6.727149  
11722412\_ 7.457931 7.335425 7.544282 7.474505 7.489139 7.496658  
11722413\_ 8.740174 8.671583 8.709256 9.015606 9.03491 9.005982  
11722414\_ 5.947665 5.617821 5.831504 5.608134 5.610654 5.568495  
11722415\_ 6.859172 6.932323 6.759152 6.914659 6.861856 6.857897  
11722416\_ 3.032918 3.312193 3.12443 3.02024 3.070318 3.603457  
11722417\_ 6.276897 6.133858 6.31191 5.660867 5.759574 5.860457  
11722418\_ 10.20079 10.15143 10.17716 9.957415 9.913209 9.857185  
11722419\_ 9.01658 9.024797 8.996224 8.764773 8.812136 8.751675  
11722420\_ 6.580189 6.530717 6.653273 6.792183 6.807453 6.752593  
11722421\_ 8.044921 7.933434 8.077343 8.05011 8.048887 8.058553  
11722422\_ 8.34291 8.269893 8.304764 9.398206 9.395738 9.376764  
11722423\_ 8.035517 7.883856 7.946094 8.02234 7.949311 8.007467  
11722424\_ 10.29533 10.27704 10.26559 9.368076 9.357336 9.344932  
11722425\_ 7.263604 7.400837 7.403876 7.784987 7.702533 7.701166  
11722426\_ 3.461811 3.290188 3.164105 3.081869 3.068197 3.349336  
11722427\_ 2.017323 2.402898 2.310266 2.17248 1.928524 2.276856  
11722428\_ 5.67751 5.748804 5.706289 5.688411 5.658069 5.774965  
11722429\_ 3.62504 3.51826 3.480874 3.417916 3.754147 3.331966  
11722430\_ 4.208141 4.334211 4.208141 4.169026 4.29141 4.241497  
11722431\_ 9.094344 9.095623 9.070525 8.722099 8.740556 8.761279  
11722432\_ 5.815007 5.858596 5.771954 5.364646 5.249215 5.214371  
11722433\_ 7.505754 7.370918 7.392806 7.423481 7.535074 7.432091  
11722434\_ 8.360122 8.334286 8.3349 9.009253 9.076554 9.027614  
11722435\_ 6.781285 6.774444 6.90278 6.567247 6.537699 6.530193  
11722436\_ 7.570855 7.472768 7.556065 7.085051 7.126103 7.117896  
11722437\_ 6.69402 6.520045 6.734754 6.321598 6.383618 6.282224  
11722438\_ 7.157802 7.164223 7.167804 7.095118 7.214534 7.169869  
11722439\_ 7.154027 7.099734 7.128434 7.167267 7.239949 7.191585  
11722440\_ 6.485632 6.556014 6.593617 7.000236 7.073549 7.181091  
11722441\_ 5.835007 5.919424 5.792741 6.010663 6.039746 6.083221  
11722442\_ 8.142792 8.126138 8.036146 8.955151 8.816227 8.762935

11722443\_ 8. 635935 8. 60303 8. 64382 8. 619095 8. 620346 8. 644624  
11722444\_ 8. 475747 8. 394331 8. 460869 8. 6415 8. 648639 8. 622963  
11722445\_ 10. 23177 10. 15114 10. 18764 9. 951823 10. 00674 9. 960211  
11722446\_ 6. 424138 6. 452804 6. 379138 6. 292967 6. 349281 6. 276408  
11722447\_ 7. 082907 7. 04434 7. 091824 7. 046506 7. 083126 7. 066074  
11722448\_ 5. 164178 5. 18417 5. 261498 5. 475111 5. 446939 5. 355878  
11722449\_ 6. 27689 6. 321838 6. 250997 6. 261004 6. 294434 6. 2913  
11722450\_ 6. 917125 6. 835875 6. 961294 6. 752593 6. 829595 6. 922773  
11722451\_ 8. 10482 8. 036848 8. 172152 8. 097512 8. 125167 8. 127445  
11722452\_ 9. 106756 9. 114163 9. 158928 9. 767886 9. 725059 9. 742862  
11722453\_ 5. 643713 5. 614563 5. 847064 6. 357229 6. 465766 6. 469286  
11722454\_ 8. 864687 8. 913891 8. 933534 9. 791658 9. 732995 9. 72091  
11722455\_ 8. 874973 8. 844379 8. 791839 8. 122208 8. 050427 8. 100632  
11722456\_ 5. 762236 5. 743857 5. 643713 5. 627127 5. 677164 5. 716396  
11722457\_ 7. 470081 7. 380587 7. 392631 7. 392631 7. 382772 7. 439383  
11722458\_ 8. 445684 8. 385122 8. 516518 8. 327919 8. 376004 8. 374236  
11722459\_ 3. 958304 3. 961281 3. 632247 4. 189159 4. 136109 4. 020788  
11722460\_ 5. 191939 5. 472985 5. 305625 5. 342359 5. 211495 5. 37065  
11722461\_ 6. 838497 6. 89184 6. 953789 6. 389526 6. 419895 6. 505318  
11722462\_ 7. 332129 7. 251558 7. 285418 7. 208326 7. 176362 7. 184297  
11722463\_ 6. 686057 6. 517352 6. 65098 6. 274926 6. 308459 6. 362573  
11722464\_ 7. 885425 7. 772431 7. 826502 7. 679445 7. 667263 7. 605972  
11722465\_ 8. 537183 8. 540432 8. 48849 8. 432521 8. 405885 8. 433912  
11722466\_ 2. 647217 2. 605516 2. 523611 2. 718322 2. 787093 2. 77361  
11722467\_ 3. 611221 3. 544923 3. 745967 3. 81681 3. 660381 3. 760893  
11722468\_ 5. 302554 5. 414869 5. 092656 5. 445192 5. 471755 5. 339673  
11722469\_ 2. 693083 2. 446596 2. 693083 2. 877624 2. 624706 2. 693083  
11722470\_ 2. 976961 3. 183093 2. 976961 3. 119863 2. 989925 3. 061205  
11722471\_ 2. 717126 2. 783596 3. 193467 2. 938973 3. 101013 3. 140855  
11722472\_ 3. 568621 3. 377294 3. 85842 3. 698279 3. 879309 3. 799269  
11722473\_ 4. 605196 4. 808735 4. 586215 4. 897416 4. 707192 4. 60335  
11722474\_ 6. 641921 6. 700371 6. 619536 6. 972088 6. 907749 6. 872839  
11722475\_ 5. 691332 5. 804618 5. 49232 5. 399017 5. 408179 5. 376466  
11722476\_ 9. 002469 9. 078582 9. 00053 9. 323511 9. 20292 9. 170833  
11722477\_ 8. 009334 7. 971866 7. 978397 8. 02234 7. 956904 8. 004717  
11722478\_ 6. 133304 5. 963481 6. 08858 5. 738919 5. 840666 5. 901288  
11722479\_ 7. 373547 7. 368836 7. 544282 7. 573553 7. 580351 7. 519842  
11722480\_ 6. 607013 6. 803912 6. 501822 6. 747513 6. 791858 6. 791736  
11722481\_ 8. 206241 8. 180527 8. 237359 8. 196205 8. 23359 8. 239654  
11722482\_ 6. 824292 6. 754821 6. 83721 6. 700693 6. 748288 6. 768648  
11722483\_ 5. 989555 6. 058941 5. 895219 6. 102714 6. 014029 6. 059263  
11722484\_ 6. 677762 6. 515868 6. 709203 6. 846715 6. 92126 6. 983213  
11722485\_ 7. 701582 7. 708475 7. 831532 8. 09976 8. 042117 8. 07657  
11722486\_ 6. 661498 6. 700043 6. 552329 7. 019458 7. 075689 7. 014628  
11722487\_ 5. 329925 5. 384259 5. 294359 5. 590114 5. 612192 5. 603989  
11722488\_ 6. 866483 6. 691853 6. 896325 7. 061389 7. 117877 7. 227018  
11722489\_ 6. 167415 6. 243976 6. 282224 6. 48931 6. 528204 6. 561918  
11722490\_ 7. 253742 7. 288969 7. 358974 7. 554551 7. 596153 7. 601824  
11722491\_ 7. 543663 7. 54081 7. 462121 7. 54081 7. 538752 7. 572268  
11722492\_ 7. 335346 7. 28482 7. 360006 7. 495815 7. 458844 7. 563797  
11722493\_ 4. 804243 4. 739605 4. 653 4. 907552 4. 947588 4. 849381



11722494\_ 6. 634813 6. 703251 6. 685428 6. 98042 7. 102641 7. 100252  
11722495\_ 7. 548557 7. 544667 7. 597289 7. 539129 7. 53669 7. 555592  
11722496\_ 5. 667658 5. 625994 5. 733555 5. 777502 5. 686361 5. 731864  
11722497\_ 7. 00928 6. 950255 7. 073634 6. 941066 7. 00928 6. 996569  
11722498\_ 6. 793491 6. 687693 6. 716693 6. 847137 6. 790012 6. 812608  
11722499\_ 7. 324248 7. 381707 7. 263139 6. 915422 6. 806312 6. 956076  
11722500\_ 6. 412768 6. 343071 6. 36686 5. 91432 5. 887974 5. 951274  
11722501\_ 5. 470893 5. 480966 5. 491697 5. 534027 5. 567306 5. 442967  
11722502\_ 4. 634395 4. 941336 4. 93609 4. 76676 4. 823612 4. 920372  
11722503\_ 9. 2018 9. 294328 9. 175588 9. 263649 9. 215925 9. 177644  
11722504\_ 3. 449077 3. 492653 3. 335269 3. 436467 3. 589957 3. 550332  
11722505\_ 3. 496437 3. 456753 3. 145932 3. 42152 3. 301721 3. 456753  
11722506\_ 6. 854368 6. 892718 6. 696781 7. 101751 7. 091779 6. 998307  
11722507\_ 3. 481533 3. 416723 3. 505734 3. 610182 3. 521657 3. 653499  
11722508\_ 3. 681133 3. 765293 3. 625408 3. 711657 3. 672509 3. 67347  
11722509\_ 4. 643717 4. 646535 4. 749876 4. 693687 4. 634499 4. 700243  
11722510\_ 8. 104566 8. 032811 8. 074993 7. 964042 7. 888622 7. 937157  
11722511\_ 5. 556719 5. 556719 5. 556719 5. 577386 5. 459746 5. 556719  
11722512\_ 6. 94423 6. 848922 6. 910833 7. 113946 7. 014893 7. 109768  
11722513\_ 6. 922773 7. 117766 6. 943939 7. 125793 6. 934615 7. 024988  
11722514\_ 5. 436474 5. 342148 5. 449023 5. 508302 5. 373097 5. 440829  
11722515\_ 5. 290574 5. 423861 5. 342419 5. 428503 5. 62747 5. 579429  
11722516\_ 6. 411332 6. 390113 6. 373893 6. 733197 6. 69645 6. 710608  
11722517\_ 8. 018764 7. 91818 8. 000911 7. 687349 7. 718667 7. 714191  
11722518\_ 7. 088646 6. 87806 7. 047245 6. 17764 6. 241925 6. 271405  
11722519\_ 5. 535243 5. 58088 5. 56326 5. 641758 5. 672434 5. 668144  
11722520\_ 6. 079539 6. 225513 6. 248728 6. 228723 6. 34864 6. 134509  
11722521\_ 5. 48819 5. 503879 5. 470266 5. 534807 5. 564788 5. 557323  
11722522\_ 6. 210278 6. 011206 6. 189924 4. 973858 5. 056014 5. 181122  
11722523\_ 6. 284373 6. 216643 6. 264583 6. 464805 6. 378634 6. 410783  
11722524\_ 5. 757011 5. 746613 5. 700293 6. 058523 6. 000233 5. 931795  
11722525\_ 8. 072316 8. 077343 8. 059008 7. 720627 7. 686808 7. 77669  
11722526\_ 4. 819452 4. 801855 4. 63859 4. 468907 4. 513386 4. 62373  
11722527\_ 6. 000557 6. 083022 6. 194976 5. 822118 5. 575094 5. 627496  
11722528\_ 3. 567762 3. 180062 3. 291973 2. 908869 3. 018111 2. 931525  
11722529\_ 6. 154703 6. 158883 6. 136035 5. 453324 5. 610849 5. 455122  
11722530\_ 9. 257293 9. 322483 9. 330179 9. 080537 9. 015984 9. 056053  
11722531\_ 8. 018185 7. 962572 7. 948675 7. 413487 7. 441921 7. 38438  
11722532\_ 9. 102395 9. 133829 9. 04896 8. 684731 8. 674395 8. 581182  
11722533\_ 8. 663257 8. 54899 8. 587446 8. 081769 8. 055139 8. 08301  
11722534\_ 4. 401448 4. 401448 4. 361497 4. 65874 4. 564684 4. 564684  
11722535\_ 7. 698517 7. 623891 7. 629959 7. 382034 7. 455664 7. 387245  
11722536\_ 6. 377847 6. 229371 6. 426686 6. 085481 6. 262458 6. 29534  
11722537\_ 7. 376513 7. 359032 7. 376513 7. 069778 7. 120214 7. 190873  
11722538\_ 6. 76071 6. 686412 6. 783492 7. 131899 7. 066718 7. 085947  
11722539\_ 7. 204675 7. 305317 7. 148845 7. 038504 7. 059983 7. 044277  
11722540\_ 8. 572162 8. 471776 8. 553946 8. 422722 8. 365153 8. 386084  
11722541\_ 4. 737692 4. 459939 4. 643717 4. 478484 4. 677891 4. 681861  
11722542\_ 6. 047713 5. 839588 6. 034933 5. 134018 5. 010934 5. 246681  
11722543\_ 7. 278677 7. 191648 7. 08741 7. 390083 7. 446142 7. 440765  
11722544\_ 2. 371976 2. 38832 2. 177956 2. 207997 2. 242052 2. 180231

11722545\_ 3. 758444 3. 579201 3. 776759 3. 668666 3. 965234 3. 890221  
11722546\_ 7. 087487 7. 206244 7. 262798 7. 425692 7. 44547 7. 452253  
11722547\_ 5. 217306 5. 531915 5. 497249 5. 01147 4. 622961 4. 84973  
11722548\_ 6. 566323 6. 512534 6. 589889 6. 132012 6. 142856 6. 077768  
11722549\_ 7. 270075 7. 281717 7. 280802 7. 280802 7. 338025 7. 219527  
11722550\_ 6. 101193 6. 116534 6. 136454 6. 450272 6. 380454 6. 421883  
11722551\_ 6. 652918 6. 594429 6. 626365 7. 027322 6. 976734 7. 090915  
11722552\_ 6. 90602 6. 59594 6. 834015 7. 412908 7. 256067 7. 305283  
11722553\_ 8. 346605 8. 330754 8. 314372 8. 386836 8. 339184 8. 241534  
11722554\_ 8. 908353 8. 834975 8. 903599 8. 84652 8. 814418 8. 823059  
11722555\_ 7. 910263 7. 890405 7. 926952 8. 616788 8. 628178 8. 614123  
11722556\_ 2. 226268 2. 389161 2. 192112 2. 198938 2. 556918 2. 392962  
11722557\_ 4. 045293 4. 086218 3. 996114 4. 163641 4. 179353 3. 854079  
11722558\_ 6. 754385 6. 511887 6. 727868 6. 791866 6. 899713 6. 950989  
11722559\_ 2. 465459 2. 416973 2. 507852 2. 441124 2. 275132 2. 368487  
11722560\_ 9. 38693 9. 319825 9. 355705 9. 571797 9. 685906 9. 53041  
11722561\_ 10. 66952 10. 63102 10. 64581 10. 90889 10. 95723 10. 89439  
11722562\_ 9. 976273 9. 946412 9. 956008 10. 26783 10. 26539 10. 2453  
11722563\_ 8. 155939 8. 156515 8. 055812 8. 581703 8. 473215 8. 326846  
11722564\_ 7. 248956 7. 273446 7. 371297 7. 348538 7. 267264 7. 360952  
11722565\_ 9. 043454 9. 087468 9. 040775 9. 511445 9. 444314 9. 431857  
11722566\_ 7. 444284 7. 417811 7. 504799 7. 017109 6. 902884 6. 979335  
11722567\_ 4. 95047 5. 012105 4. 997818 5. 115459 4. 997818 5. 004143  
11722568\_ 5. 770326 5. 827315 5. 765249 5. 649166 5. 490631 5. 521156  
11722569\_ 6. 363909 6. 239143 6. 393824 6. 071767 5. 980978 6. 118671  
11722570\_ 9. 170236 9. 114284 9. 065211 8. 666445 8. 580788 8. 479458  
11722571\_ 8. 406243 8. 373412 8. 405829 8. 990963 8. 937311 8. 968679  
11722572\_ 8. 577319 8. 508047 8. 548406 9. 175483 9. 143867 9. 205435  
11722573\_ 5. 468836 5. 383926 5. 448296 5. 024332 4. 886472 5. 08829  
11722574\_ 7. 673286 7. 594748 7. 649147 7. 859993 7. 861467 7. 87928  
11722575\_ 7. 537219 7. 525612 7. 523845 6. 951997 6. 999146 7. 024667  
11722576\_ 7. 107981 7. 055854 7. 109259 6. 888006 6. 91949 6. 879841  
11722577\_ 8. 693222 8. 680365 8. 66282 8. 457536 8. 500048 8. 417606  
11722578\_ 8. 428139 8. 307143 8. 44006 8. 138584 8. 115207 8. 132485  
11722579\_ 8. 047701 7. 972676 7. 972698 7. 948286 7. 90073 7. 848862  
11722580\_ 9. 187947 9. 11805 9. 164653 9. 100982 9. 062133 9. 146085  
11722581\_ 8. 391161 8. 279832 8. 286207 7. 984872 7. 952261 8. 085392  
11722582\_ 7. 54779 7. 56188 7. 520397 7. 376439 7. 443116 7. 513035  
11722583\_ 7. 3461 7. 21265 7. 372899 7. 399869 7. 312786 7. 30642  
11722584\_ 9. 091669 9. 010268 9. 07208 8. 496064 8. 56432 8. 590495  
11722585\_ 7. 979159 7. 943994 7. 994299 8. 280056 8. 257656 8. 229555  
11722586\_ 10. 01229 9. 982274 10. 01652 10. 27409 10. 29113 10. 27329  
11722587\_ 9. 619367 9. 569126 9. 555419 9. 540579 9. 596501 9. 53706  
11722588\_ 8. 712886 8. 662663 8. 684503 8. 509437 8. 456019 8. 404191  
11722589\_ 8. 5403 8. 435542 8. 494201 8. 263904 8. 238169 8. 270267  
11722590\_ 4. 286345 4. 296854 4. 56247 4. 460438 4. 452041 4. 394331  
11722591\_ 8. 639055 8. 595444 8. 624659 8. 378658 8. 425545 8. 38213  
11722592\_ 5. 091897 4. 869897 4. 972274 5. 397001 5. 277697 5. 4019  
11722593\_ 7. 154768 7. 186847 7. 211344 7. 270056 7. 30279 7. 24998  
11722594\_ 6. 245833 6. 132238 6. 295584 6. 453382 6. 340453 6. 411039  
11722595\_ 8. 239459 8. 146897 8. 215509 7. 983239 7. 979232 7. 990499

11722596\_ 6. 86653 6. 851053 6. 786465 6. 919183 6. 809649 6. 726524  
11722597\_ 3. 891275 3. 822903 4. 025113 4. 453303 4. 488972 4. 219737  
11722598\_ 2. 095256 2. 131936 1. 912415 2. 152126 2. 195037 2. 099841  
11722599\_ 6. 602015 6. 345534 6. 484373 6. 690308 6. 80301 6. 805353  
11722600\_ 6. 39221 6. 272385 6. 340942 6. 69689 6. 871946 6. 743938  
11722601\_ 8. 572957 8. 55151 8. 535801 9. 321564 9. 312466 9. 34312  
11722602\_ 7. 462121 7. 650776 7. 519597 7. 376455 7. 408606 7. 456087  
11722603\_ 2. 825373 2. 505583 2. 521912 2. 655232 2. 887242 2. 731441  
11722604\_ 2. 292721 2. 444306 2. 077184 2. 224069 2. 293744 2. 502481  
11722605\_ 8. 953905 8. 861912 8. 8992 7. 891447 7. 793122 7. 855758  
11722606\_ 8. 531138 8. 501697 8. 504443 7. 637309 7. 581163 7. 657859  
11722607\_ 5. 739936 5. 471434 5. 619387 5. 50524 5. 468593 5. 518091  
11722608\_ 5. 804646 5. 884868 5. 602182 5. 795904 5. 808425 5. 848344  
11722609\_ 9. 018205 8. 965601 9. 023761 8. 5465 8. 578674 8. 598001  
11722610\_ 7. 308645 7. 327586 7. 244781 6. 696096 6. 74073 6. 727887  
11722611\_ 5. 811823 6. 04858 5. 875271 6. 382973 6. 30138 6. 235484  
11722612\_ 6. 23127 6. 136563 6. 139174 6. 182628 6. 222296 6. 25566  
11722613\_ 7. 909678 7. 856095 7. 873556 7. 918559 7. 902753 8. 011308  
11722614\_ 6. 093354 5. 842722 5. 886387 5. 773829 5. 753626 5. 674313  
11722615\_ 2. 920632 3. 025385 3. 025679 3. 025972 3. 090741 3. 156386  
11722616\_ 8. 687685 8. 724709 8. 715533 8. 356903 8. 3002 8. 338498  
11722617\_ 6. 346207 6. 381839 6. 424839 6. 38521 6. 377798 6. 453829  
11722618\_ 4. 921383 4. 956165 4. 772366 5. 170531 5. 172567 4. 987756  
11722619\_ 3. 751928 3. 564566 3. 705803 3. 771689 3. 683841 3. 751649  
11722620\_ 2. 445242 2. 079728 2. 159772 2. 205757 2. 144193 2. 316905  
11722621\_ 2. 83319 2. 770938 2. 784112 2. 751246 3. 034529 2. 88354  
11722622\_ 6. 805142 6. 833496 6. 884453 6. 828602 6. 799794 6. 749894  
11722623\_ 7. 622276 7. 613424 7. 489246 7. 370929 7. 374996 7. 329579  
11722624\_ 6. 549961 6. 448874 6. 796809 6. 836055 6. 732622 6. 726497  
11722625\_ 6. 477967 6. 466889 6. 480435 6. 625972 6. 733402 6. 739638  
11722626\_ 8. 501817 8. 579926 8. 573282 8. 261518 8. 125196 8. 10967  
11722627\_ 7. 903518 7. 806944 7. 881339 7. 175579 7. 108889 7. 212366  
11722628\_ 8. 831781 8. 784737 8. 838347 8. 313616 8. 314851 8. 398035  
11722629\_ 8. 681029 8. 58166 8. 629816 8. 640192 8. 673409 8. 639165  
11722630\_ 7. 230373 7. 384474 7. 294962 7. 472989 7. 315859 7. 314987  
11722631\_ 7. 066042 7. 060159 7. 076053 7. 121305 7. 041237 7. 078489  
11722632\_ 7. 223781 7. 285445 7. 335121 7. 274526 7. 329746 7. 358719  
11722633\_ 4. 685423 4. 633032 4. 609156 4. 69834 4. 590631 4. 696641  
11722634\_ 5. 939296 5. 875962 5. 997616 6. 08133 6. 159771 6. 266698  
11722635\_ 5. 523796 5. 151802 5. 137785 5. 328442 5. 362391 5. 554436  
11722636\_ 4. 580615 4. 552248 4. 860489 4. 990657 4. 977242 4. 996843  
11722637\_ 8. 119451 8. 068084 8. 133414 8. 573384 8. 583731 8. 586038  
11722638\_ 10. 62223 10. 6492 10. 63237 10. 38774 10. 32814 10. 35656  
11722639\_ 6. 737442 6. 60622 6. 573629 6. 559818 6. 635501 6. 713879  
11722640\_ 4. 734099 4. 705526 4. 613294 4. 659693 4. 804422 4. 78788  
11722641\_ 6. 428869 6. 344005 6. 407445 6. 609444 6. 712563 6. 691561  
11722642\_ 7. 332731 7. 361954 7. 342884 7. 415899 7. 388044 7. 433838  
11722643\_ 6. 244666 6. 256205 6. 39748 6. 271404 6. 207613 6. 24433  
11722644\_ 8. 059075 8. 136837 8. 094124 7. 502308 7. 369339 7. 350302  
11722645\_ 9. 232824 9. 19311 9. 223365 8. 60916 8. 563666 8. 61261  
11722646\_ 2. 2359 2. 331065 2. 070322 2. 243428 2. 2359 2. 380576

11722647\_ 3. 568742 3. 486801 3. 351913 3. 559989 3. 303318 3. 448478  
11722648\_ 4. 108592 4. 158351 4. 004261 4. 207621 4. 240554 4. 027754  
11722649\_ 5. 96618 6. 065306 6. 022385 6. 210036 6. 223569 6. 185323  
11722650\_ 5. 72419 5. 748761 5. 763634 5. 96653 5. 834383 5. 984355  
11722651\_ 7. 289973 7. 107276 7. 304912 7. 089177 7. 068915 7. 155615  
11722652\_ 4. 41318 4. 467769 4. 294696 4. 20001 4. 41527 4. 471686  
11722653\_ 8. 008776 8. 003526 8. 065834 8. 013955 8. 04802 7. 968033  
11722654\_ 4. 637437 4. 893874 4. 88241 5. 168438 5. 005611 5. 070388  
11722655\_ 10. 30689 10. 24905 10. 26798 10. 19861 10. 19464 10. 16911  
11722656\_ 7. 062044 6. 972696 6. 994297 6. 942107 6. 924433 6. 988628  
11722657\_ 8. 707965 8. 657249 8. 655061 8. 568387 8. 507665 8. 544567  
11722658\_ 5. 967332 5. 92978 6. 125459 6. 121157 6. 043758 6. 095005  
11722659\_ 4. 75723 4. 968289 4. 88241 4. 736759 4. 686395 4. 990945  
11722660\_ 7. 668651 7. 771086 7. 702194 7. 631747 7. 5797 7. 57865  
11722661\_ 5. 367432 5. 537965 5. 456022 5. 240713 5. 293932 5. 08995  
11722662\_ 5. 889823 5. 605721 5. 738858 5. 591857 5. 635099 5. 646082  
11722663\_ 4. 957141 4. 557481 5. 121926 4. 500711 4. 575933 4. 678502  
11722664\_ 5. 396882 5. 300593 5. 302194 5. 63221 5. 432049 5. 410588  
11722665\_ 3. 908113 3. 942864 3. 860891 4. 21141 4. 293136 4. 117478  
11722666\_ 4. 424815 4. 334372 4. 186785 4. 132862 4. 190808 4. 247913  
11722667\_ 4. 436184 4. 554708 4. 44453 4. 627362 4. 659127 4. 61326  
11722668\_ 6. 404869 6. 399529 6. 318829 6. 532238 6. 420308 6. 463816  
11722669\_ 5. 897303 5. 758692 5. 822395 5. 883712 5. 975666 6. 031271  
11722670\_ 7. 031531 6. 923003 7. 063271 7. 018292 7. 090506 7. 121088  
11722671\_ 8. 708001 8. 642482 8. 685249 8. 592764 8. 522337 8. 604545  
11722672\_ 9. 063241 9. 088735 9. 007746 8. 968345 8. 926775 8. 94695  
11722673\_ 4. 326749 4. 189658 4. 226645 4. 424738 4. 319898 4. 222081  
11722674\_ 6. 502421 6. 659007 6. 694829 6. 709056 6. 762682 6. 622829  
11722675\_ 4. 554881 4. 656637 4. 587004 4. 736782 4. 680936 4. 640118  
11722676\_ 8. 027551 8. 082133 8. 055244 8. 060964 8. 081368 8. 094738  
11722677\_ 4. 757787 4. 643717 4. 789633 4. 757783 4. 879625 4. 901362  
11722678\_ 6. 291881 6. 390977 6. 33679 6. 727853 6. 67486 6. 61131  
11722679\_ 7. 970507 8. 031241 8. 009039 7. 720731 7. 708487 7. 645318  
11722680\_ 5. 828241 5. 869146 5. 802566 5. 842741 5. 857725 5. 94847  
11722681\_ 3. 778468 3. 923811 3. 823755 4. 117874 3. 991715 3. 907735  
11722682\_ 6. 732575 6. 742146 6. 803837 7. 470181 7. 603667 7. 666537  
11722683\_ 7. 917803 7. 895709 7. 845087 7. 598241 7. 609174 7. 600281  
11722684\_ 7. 160064 7. 046543 7. 145033 7. 836153 7. 767861 7. 74521  
11722685\_ 6. 67471 6. 622519 6. 75844 6. 965727 6. 827133 6. 769702  
11722686\_ 6. 24453 6. 118258 6. 065068 4. 837324 5. 11527 5. 015958  
11722687\_ 5. 707536 5. 584813 5. 712331 5. 524286 5. 402148 5. 502342  
11722688\_ 5. 466916 5. 282198 5. 191842 4. 1793 4. 444451 4. 337521  
11722689\_ 7. 571233 7. 472387 7. 617731 7. 844451 7. 801478 7. 817607  
11722690\_ 5. 026977 4. 903509 4. 881392 5. 679964 5. 685343 5. 736008  
11722691\_ 8. 276227 8. 151104 8. 274713 7. 898037 8. 03419 7. 985229  
11722692\_ 8. 96733 8. 893637 8. 939075 9. 666717 9. 750445 9. 710231  
11722693\_ 7. 985787 7. 861457 7. 927406 8. 191613 8. 137475 8. 11978  
11722694\_ 8. 110722 8. 022857 8. 097209 7. 553998 7. 583967 7. 562204  
11722695\_ 8. 034136 7. 95946 8. 02234 7. 834862 7. 841112 7. 839627  
11722696\_ 4. 630738 4. 693667 4. 634585 4. 878041 4. 927277 5. 042798  
11722697\_ 6. 073142 6. 190367 6. 175122 6. 344117 6. 444818 6. 517941

11722698\_ 9. 995055 9. 956117 10. 00859 9. 953727 9. 967284 9. 95058  
11722699\_ 6. 844702 6. 724486 7. 027999 6. 546109 6. 520376 6. 689237  
11722700\_ 7. 594493 7. 460961 7. 620233 7. 04996 7. 01298 7. 117947  
11722701\_ 7. 00779 7. 103834 7. 150975 6. 808082 6. 758816 6. 681177  
11722702\_ 8. 321028 8. 271348 8. 217764 8. 45628 8. 413715 8. 400165  
11722703\_ 8. 764398 8. 758706 8. 759696 8. 925778 8. 819445 8. 802665  
11722704\_ 4. 928641 4. 810463 5. 034146 5. 073386 5. 11527 5. 180071  
11722705\_ 7. 076762 7. 016644 7. 110703 6. 859976 6. 933059 6. 868438  
11722706\_ 5. 037421 5. 182641 5. 0505 5. 106634 5. 023331 5. 2222  
11722707\_ 4. 381382 4. 154651 4. 264284 4. 438823 4. 433438 4. 218553  
11722708\_ 7. 335093 7. 420619 7. 383661 6. 69794 6. 779107 6. 736532  
11722709\_ 8. 441056 8. 420773 8. 435548 8. 157727 8. 226058 8. 245841  
11722710\_ 6. 67433 6. 491568 6. 630524 7. 359148 7. 342085 7. 313804  
11722711\_ 6. 81453 6. 775812 6. 774642 7. 095036 7. 080686 7. 02516  
11722712\_ 7. 461874 7. 437878 7. 453685 7. 77846 7. 746419 7. 694587  
11722713\_ 7. 974452 7. 948024 7. 921309 7. 4784 7. 442902 7. 424466  
11722714\_ 5. 412099 5. 436305 5. 313034 5. 327399 5. 431797 5. 552847  
11722715\_ 7. 543998 7. 559163 7. 550875 7. 818777 7. 70002 7. 704365  
11722716\_ 6. 41138 6. 324209 6. 489486 6. 564906 6. 478957 6. 50492  
11722717\_ 7. 005234 6. 849603 6. 994936 6. 630905 6. 898793 6. 819308  
11722718\_ 5. 943424 5. 927948 5. 950197 5. 677914 5. 948409 5. 956793  
11722719\_ 6. 617088 6. 705713 6. 619536 6. 654929 6. 615278 6. 522684  
11722720\_ 7. 145413 7. 195839 7. 161478 6. 948759 6. 937926 7. 057762  
11722721\_ 7. 152393 7. 048365 7. 263594 6. 974924 6. 999579 7. 041184  
11722722\_ 4. 722746 4. 396063 4. 540338 4. 670111 4. 627404 4. 540616  
11722723\_ 5. 596152 5. 61018 5. 596006 5. 89654 5. 793417 5. 696417  
11722724\_ 5. 798731 5. 820412 5. 751694 5. 799846 5. 803193 5. 833796  
11722725\_ 4. 774169 4. 712371 4. 764058 5. 009114 5. 168791 5. 02264  
11722726\_ 8. 532706 8. 468325 8. 530188 8. 614502 8. 595975 8. 638663  
11722727\_ 3. 934695 4. 148588 3. 924255 3. 731583 4. 090887 4. 010009  
11722728\_ 7. 989021 7. 948971 8. 014145 5. 11527 5. 205465 5. 214193  
11722729\_ 9. 107348 9. 062398 9. 079057 9. 251079 9. 266529 9. 266626  
11722730\_ 6. 762381 6. 686431 6. 606091 7. 196656 7. 16807 7. 180637  
11722731\_ 6. 677817 6. 639763 6. 634973 6. 998035 6. 962938 6. 918197  
11722732\_ 6. 77748 6. 72102 6. 747885 6. 765962 6. 765962 6. 839832  
11722733\_ 7. 893498 7. 855445 7. 860182 8. 105639 8. 095625 8. 221995  
11722734\_ 6. 618696 6. 431763 6. 56567 6. 862881 6. 839334 6. 880276  
11722735\_ 7. 644146 7. 669761 7. 688171 8. 138673 8. 124096 8. 073221  
11722736\_ 7. 262864 7. 183406 7. 153079 7. 865413 7. 806559 7. 741433  
11722737\_ 7. 579907 7. 533589 7. 506698 8. 1974 8. 109369 8. 177374  
11722738\_ 5. 69479 5. 746057 6. 035122 5. 480966 5. 632069 5. 755459  
11722739\_ 6. 88012 6. 893758 6. 946092 7. 081642 7. 031821 7. 128467  
11722740\_ 4. 772186 4. 581715 4. 889365 4. 658803 4. 581715 4. 739734  
11722741\_ 6. 863863 6. 791956 6. 777591 6. 86143 6. 923476 6. 867389  
11722742\_ 3. 960304 3. 885687 4. 037862 3. 972068 4. 091175 3. 954157  
11722743\_ 5. 018382 5. 023875 5. 11058 5. 286494 5. 115896 5. 229287  
11722744\_ 3. 609382 3. 686912 3. 62094 4. 136221 3. 735245 4. 034468  
11722745\_ 6. 597877 6. 653793 6. 677362 6. 594606 6. 685706 6. 667435  
11722746\_ 6. 599839 6. 618847 6. 717078 6. 601881 6. 668784 6. 657216  
11722747\_ 5. 851373 5. 759247 5. 765837 6. 563819 6. 446632 6. 461762  
11722748\_ 7. 399709 7. 265251 7. 336999 7. 485669 7. 45399 7. 47701

11722749\_ 7. 641414 7. 529269 7. 656317 7. 754791 7. 79376 7. 7933  
11722750\_ 7. 666675 7. 635555 7. 657442 7. 566836 7. 60916 7. 49081  
11722751\_ 9. 396723 9. 245541 9. 386231 8. 967429 8. 97119 9. 029781  
11722752\_ 8. 359357 8. 291449 8. 33753 8. 041876 8. 026241 7. 981916  
11722753\_ 6. 03747 6. 173253 6. 04952 6. 109921 6. 11189 6. 086678  
11722754\_ 6. 915432 6. 839367 6. 818407 6. 443595 6. 512542 6. 547141  
11722755\_ 5. 09459 5. 120789 4. 976379 4. 613453 4. 798511 4. 669872  
11722756\_ 5. 858497 6. 148026 5. 938452 6. 145109 6. 194358 6. 202542  
11722757\_ 3. 895732 3. 863062 3. 284424 3. 756925 3. 666645 3. 712084  
11722758\_ 4. 814218 4. 802183 4. 617293 4. 90196 4. 836077 4. 852628  
11722759\_ 7. 797735 7. 758062 7. 779531 7. 41997 7. 458907 7. 516287  
11722760\_ 8. 541648 8. 509072 8. 595125 8. 246936 8. 300226 8. 275271  
11722761\_ 7. 194209 7. 056971 7. 14849 7. 313857 7. 313857 7. 381781  
11722762\_ 2. 732015 2. 894404 3. 025972 3. 342234 2. 898921 3. 178508  
11722763\_ 5. 580622 5. 537492 5. 4864 5. 555327 5. 592756 5. 605517  
11722764\_ 6. 444802 6. 526381 6. 524724 6. 786939 6. 725975 6. 702972  
11722765\_ 6. 688785 6. 658029 6. 648228 6. 747041 6. 711885 6. 67471  
11722766\_ 7. 583832 7. 407735 7. 59565 7. 282207 7. 30453 7. 323459  
11722767\_ 9. 86392 9. 868161 9. 829604 9. 799217 9. 708501 9. 722483  
11722768\_ 5. 4623 5. 496571 5. 467026 5. 734995 5. 686361 5. 870242  
11722769\_ 6. 065215 6. 154113 6. 063542 6. 135818 6. 012185 5. 98314  
11722770\_ 4. 427043 4. 528694 4. 346999 4. 288499 4. 5818 4. 470714  
11722771\_ 2. 571892 2. 476701 2. 426471 2. 559819 2. 573332 2. 636315  
11722772\_ 7. 620487 7. 541444 7. 597395 7. 34365 7. 327353 7. 337834  
11722773\_ 6. 506855 6. 462411 6. 538294 6. 364632 6. 247798 6. 315189  
11722774\_ 4. 653607 4. 679277 4. 584933 4. 440481 4. 531017 4. 643717  
11722775\_ 6. 988146 7. 071472 7. 111552 6. 924008 6. 94171 6. 930617  
11722776\_ 6. 282224 6. 319005 6. 389366 6. 608929 6. 634184 6. 679564  
11722777\_ 5. 220561 5. 204079 5. 510725 5. 15736 5. 287933 5. 305371  
11722778\_ 6. 321838 6. 329033 6. 336425 6. 328427 6. 311271 6. 300643  
11722779\_ 5. 843755 5. 854249 5. 753964 5. 96695 5. 994554 5. 815519  
11722780\_ 4. 630688 4. 72677 4. 618495 4. 574987 4. 675086 4. 569352  
11722781\_ 6. 568049 6. 668454 6. 602435 6. 899336 6. 911495 6. 864532  
11722782\_ 5. 354815 5. 338723 5. 262444 5. 930894 5. 912196 6. 024755  
11722783\_ 3. 207131 3. 470206 3. 290188 3. 174064 3. 101013 3. 180062  
11722784\_ 7. 257368 7. 243457 7. 33848 7. 174876 7. 248714 7. 241767  
11722785\_ 7. 737323 7. 616727 7. 655284 7. 623346 7. 685391 7. 635939  
11722786\_ 8. 598378 8. 474859 8. 596734 9. 34143 9. 359373 9. 385133  
11722787\_ 10. 31764 10. 25769 10. 32149 10. 51773 10. 58199 10. 55593  
11722788\_ 8. 642635 8. 68765 8. 639088 8. 449493 8. 485091 8. 468828  
11722789\_ 8. 061446 8. 095589 8. 129316 7. 695142 7. 669377 7. 62514  
11722790\_ 10. 17384 10. 1378 10. 15618 9. 816211 9. 760709 9. 784778  
11722791\_ 4. 530874 4. 759546 4. 66537 4. 139738 4. 139738 4. 055151  
11722792\_ 2. 656374 2. 83198 2. 874619 2. 948313 3. 119828 2. 884082  
11722793\_ 8. 983119 8. 927565 9. 025717 9. 128181 9. 147616 9. 162827  
11722794\_ 8. 639226 8. 580387 8. 585604 8. 619238 8. 651846 8. 679303  
11722795\_ 8. 065946 8. 018626 8. 079807 7. 723294 7. 754994 7. 756388  
11722796\_ 9. 441302 9. 362532 9. 437218 8. 511439 8. 470359 8. 513175  
11722797\_ 8. 556177 8. 557813 8. 577771 8. 236242 8. 197544 8. 236207  
11722798\_ 9. 844814 9. 860985 9. 887365 9. 659509 9. 652505 9. 577517  
11722799\_ 8. 642198 8. 49713 8. 631765 8. 065171 8. 123837 8. 069307

11722800\_ 8. 725395 8. 703247 8. 701 8. 337377 8. 151823 8. 285224  
11722801\_ 9. 035828 8. 982687 9. 017177 8. 57949 8. 52574 8. 535922  
11722802\_ 6. 571692 6. 596245 6. 52011 7. 230608 7. 199979 7. 202271  
11722803\_ 7. 716588 7. 77069 7. 741719 6. 968187 6. 903516 6. 884417  
11722804\_ 8. 85972 8. 871075 8. 813949 8. 255875 8. 216314 8. 229089  
11722805\_ 7. 268264 7. 306656 7. 175212 7. 239712 7. 248072 7. 295629  
11722806\_ 6. 779107 6. 81778 6. 873548 7. 291509 7. 299092 7. 335674  
11722807\_ 9. 401812 9. 335629 9. 421926 9. 785078 9. 851979 9. 795287  
11722808\_ 7. 926482 7. 834368 7. 869716 8. 032452 8. 093611 8. 064319  
11722809\_ 6. 060593 6. 10757 6. 199575 5. 643713 5. 804875 5. 859  
11722810\_ 8. 482524 8. 45736 8. 475356 8. 715714 8. 738638 8. 799997  
11722811\_ 10. 24645 10. 23628 10. 23978 10. 07592 10. 13872 10. 07347  
11722812\_ 9. 549137 9. 543998 9. 601544 9. 640861 9. 684691 9. 687966  
11722813\_ 11. 05367 11. 04224 11. 07278 10. 91564 10. 91831 10. 86466  
11722814\_ 8. 766867 8. 718442 8. 769159 8. 358371 8. 376382 8. 322154  
11722815\_ 6. 931507 6. 873416 6. 799267 6. 846278 6. 674153 6. 857282  
11722816\_ 6. 134503 6. 173605 6. 228793 5. 996126 5. 985837 6. 047788  
11722817\_ 6. 682741 6. 629001 6. 626697 6. 318829 6. 40253 6. 162593  
11722818\_ 9. 137732 9. 114539 9. 10524 9. 615021 9. 715953 9. 533149  
11722819\_ 5. 74662 5. 820691 5. 698427 5. 619032 5. 649989 5. 741147  
11722820\_ 4. 635404 4. 549329 4. 59698 4. 757545 4. 616002 4. 659296  
11722821\_ 2. 347012 2. 4287 2. 301604 2. 184962 2. 435268 2. 131945  
11722822\_ 3. 502773 3. 741224 3. 66945 3. 718587 3. 589069 3. 642979  
11722823\_ 7. 031754 7. 057601 7. 136618 7. 357451 7. 333851 7. 392275  
11722824\_ 2. 458518 2. 657347 2. 376544 2. 528106 2. 450708 2. 605516  
11722825\_ 5. 938717 5. 790268 5. 879876 6. 209035 6. 306902 6. 32821  
11722826\_ 9. 052641 9. 065869 9. 038485 9. 695907 9. 6911 9. 612078  
11722827\_ 4. 815683 4. 71299 4. 994634 4. 610297 4. 473754 4. 35957  
11722828\_ 6. 880404 6. 783956 6. 85927 6. 689815 6. 783956 6. 652091  
11722829\_ 9. 283924 9. 246409 9. 280835 9. 023742 8. 97742 9. 053891  
11722830\_ 7. 973431 7. 955812 8. 027996 7. 613916 7. 570363 7. 626265  
11722831\_ 7. 29826 7. 324072 7. 293603 8. 261932 8. 161397 8. 176372  
11722832\_ 7. 394483 7. 308148 7. 309649 8. 10687 7. 99525 8. 054351  
11722833\_ 6. 916115 6. 976603 6. 973857 7. 001031 6. 998038 7. 066335  
11722834\_ 7. 675789 7. 651196 7. 700386 7. 717268 7. 737171 7. 772557  
11722835\_ 7. 187062 7. 230559 7. 236376 7. 37789 7. 397395 7. 407093  
11722836\_ 9. 29513 9. 323167 9. 325584 9. 173007 9. 12702 9. 058323  
11722837\_ 9. 355213 9. 295292 9. 370331 9. 122416 9. 181276 9. 126045  
11722838\_ 4. 554693 4. 612774 4. 185212 4. 63988 4. 535305 4. 364387  
11722839\_ 9. 376303 9. 401343 9. 378366 9. 581028 9. 58916 9. 540832  
11722840\_ 9. 890306 9. 815426 9. 850811 9. 981747 9. 995377 10. 00572  
11722841\_ 10. 08933 10. 04425 10. 07114 10. 0169 9. 999642 10. 02034  
11722842\_ 10. 75756 10. 74761 10. 74762 10. 91979 10. 92241 10. 87278  
11722843\_ 6. 232644 6. 213731 6. 188766 7. 255975 7. 330965 7. 431952  
11722844\_ 9. 970021 10. 01384 9. 99045 10. 13272 10. 14184 10. 08035  
11722845\_ 9. 678869 9. 641441 9. 704898 9. 65888 9. 641242 9. 657607  
11722846\_ 7. 473607 7. 530085 7. 572132 8. 029016 7. 990331 8. 009765  
11722847\_ 8. 905272 8. 844565 8. 931043 8. 80021 8. 780346 8. 8026  
11722848\_ 5. 926672 6. 065118 6. 049097 5. 95394 5. 965564 5. 951154  
11722849\_ 9. 166546 9. 11562 9. 19966 9. 060604 9. 033409 9. 052256  
11722850\_ 8. 738696 8. 836227 8. 768172 6. 608369 6. 59444 6. 500473

11722851\_ 7. 609801 7. 605633 7. 608184 5. 516363 5. 646329 5. 494227  
11722852\_ 7. 952123 8. 040923 8. 02258 6. 097462 5. 995148 5. 980127  
11722853\_ 7. 541333 7. 417811 7. 583047 7. 299162 7. 299162 7. 467036  
11722854\_ 5. 636179 5. 541009 5. 535291 5. 534046 5. 537777 5. 485304  
11722855\_ 5. 227559 5. 089032 5. 083052 5. 097544 5. 044344 5. 073036  
11722856\_ 5. 295201 5. 285668 5. 324951 5. 334183 5. 179399 5. 124044  
11722857\_ 7. 61132 7. 560839 7. 618497 7. 797222 7. 804443 7. 908923  
11722858\_ 7. 782511 7. 730684 7. 746066 8. 074316 8. 06503 8. 096544  
11722859\_ 6. 898922 7. 030022 6. 940544 7. 111165 7. 141621 7. 145814  
11722860\_ 7. 16711 7. 098792 7. 141189 7. 146306 7. 141189 7. 023759  
11722861\_ 8. 247389 8. 312827 8. 247904 8. 286002 8. 302743 8. 250859  
11722862\_ 7. 486865 7. 47678 7. 498915 7. 565803 7. 507172 7. 457331  
11722863\_ 1. 995297 1. 902269 2. 043313 2. 091871 2. 070667 1. 822838  
11722864\_ 8. 511406 8. 442836 8. 498329 8. 521891 8. 484289 8. 603608  
11722865\_ 8. 955791 8. 863965 8. 888468 8. 763851 8. 73443 8. 759623  
11722866\_ 5. 424925 5. 584813 5. 554436 5. 321613 5. 523406 5. 44719  
11722867\_ 5. 079805 5. 0252 4. 946651 5. 058936 5. 274586 5. 079246  
11722868\_ 5. 266036 5. 306376 5. 259472 6. 060186 6. 126733 6. 097493  
11722869\_ 8. 656297 8. 591597 8. 639021 8. 64747 8. 673586 8. 683442  
11722870\_ 5. 816841 5. 813536 5. 769442 6. 238578 6. 119543 6. 231532  
11722871\_ 8. 659954 8. 527225 8. 64485 8. 313669 8. 330391 8. 33939  
11722872\_ 8. 883075 8. 724128 8. 901482 9. 782439 9. 817922 9. 761407  
11722873\_ 7. 320803 7. 279502 7. 35177 7. 425189 7. 389573 7. 494178  
11722874\_ 7. 321604 7. 260795 7. 26861 7. 138701 7. 18631 7. 174745  
11722875\_ 5. 416129 5. 727085 5. 76016 5. 073149 4. 791526 5. 245073  
11722876\_ 6. 135889 6. 142613 6. 157794 6. 217035 6. 214151 6. 20112  
11722877\_ 7. 928271 7. 836724 7. 929418 7. 989152 8. 026939 8. 054369  
11722878\_ 7. 478459 7. 623975 7. 576132 7. 58084 7. 688827 7. 652691  
11722879\_ 4. 594825 4. 539627 4. 646094 4. 115273 4. 069286 4. 001727  
11722880\_ 8. 76019 8. 695094 8. 783528 9. 509195 9. 548794 9. 487522  
11722881\_ 5. 844397 6. 002267 6. 076266 5. 428375 5. 508099 5. 473825  
11722882\_ 7. 671969 7. 665675 7. 590285 6. 950925 7. 012238 6. 891579  
11722883\_ 6. 682587 6. 804939 6. 682978 5. 891986 5. 907241 5. 898949  
11722884\_ 6. 944384 6. 871552 6. 835004 6. 189246 6. 066553 6. 189945  
11722885\_ 6. 398536 6. 523574 6. 536591 6. 779107 6. 88303 6. 932459  
11722886\_ 6. 397946 6. 561716 6. 578757 6. 414953 6. 146146 6. 184164  
11722887\_ 8. 003591 8. 02234 8. 02234 7. 639003 7. 570037 7. 675189  
11722888\_ 8. 245905 8. 188026 8. 28197 8. 484943 8. 438078 8. 495511  
11722889\_ 3. 82318 3. 894924 3. 842284 3. 798777 3. 867751 3. 66998  
11722890\_ 5. 169984 5. 23192 5. 068838 5. 40845 5. 189072 5. 176998  
11722891\_ 5. 588671 5. 699729 5. 385637 5. 782691 5. 764562 5. 623801  
11722892\_ 5. 436662 5. 419691 5. 49252 5. 515712 5. 730447 5. 499636  
11722893\_ 8. 090847 8. 133545 8. 093043 8. 101911 7. 990549 8. 118169  
11722894\_ 8. 920147 8. 866866 8. 818566 9. 21415 9. 11132 9. 180311  
11722895\_ 6. 653296 6. 637952 6. 737106 6. 350632 6. 287253 6. 331975  
11722896\_ 6. 796493 6. 595455 6. 820115 6. 368689 6. 261082 6. 385594  
11722897\_ 6. 148104 6. 07918 6. 210532 6. 087976 5. 966943 6. 114525  
11722898\_ 7. 266514 7. 235113 7. 25625 7. 315424 7. 214371 7. 198599  
11722899\_ 7. 318834 7. 251087 7. 321883 7. 318395 7. 395877 7. 37015  
11722900\_ 8. 45313 8. 432401 8. 518272 7. 642752 7. 614151 7. 745713  
11722901\_ 5. 429833 5. 59488 5. 49656 5. 504799 5. 622362 5. 512527



11722902\_ 8.466775 8.3798 8.438078 7.814424 7.812815 7.874439  
11722903\_ 5.333723 5.448296 5.122191 5.389917 5.399137 5.409222  
11722904\_ 8.997086 8.858187 8.917665 8.00781 7.98899 8.140469  
11722905\_ 6.252994 6.228406 6.420016 5.857823 5.889109 5.821838  
11722906\_ 8.106915 7.983056 7.994696 7.691521 7.725777 7.649603  
11722907\_ 7.060325 7.088235 7.109506 7.092482 6.997339 7.043271  
11722908\_ 5.737707 5.716405 5.761232 5.705732 5.771305 5.636002  
11722909\_ 5.480245 5.26161 5.564243 5.614563 5.563466 5.584652  
11722910\_ 4.709203 4.60576 4.813452 4.651012 4.736754 4.742629  
11722911\_ 7.211029 7.090328 7.254546 7.550798 7.653407 7.56555  
11722912\_ 8.139081 8.073793 8.117713 8.531202 8.556487 8.500918  
11722913\_ 6.982937 6.915701 6.922773 7.74283 7.860661 7.815418  
11722914\_ 7.779174 7.715356 7.841536 7.55696 7.55696 7.549425  
11722915\_ 7.34088 7.359495 7.323968 7.222123 7.077823 7.137602  
11722916\_ 8.503414 8.54462 8.456919 8.411612 8.265704 8.303577  
11722917\_ 10.06465 10.02076 10.0894 9.930141 9.926804 9.980053  
11722918\_ 5.578814 5.687873 5.811258 6.407028 6.495573 6.522703  
11722919\_ 5.666955 5.538171 5.745148 5.804736 5.869048 5.83402  
11722920\_ 7.994356 8.02678 8.058867 8.203751 8.190576 8.275059  
11722921\_ 7.62161 7.658454 7.694613 7.717159 7.833938 7.750387  
11722922\_ 6.906957 6.708308 6.886458 7.964838 7.911756 7.955958  
11722923\_ 8.074298 7.998236 8.070909 8.32616 8.357499 8.407477  
11722924\_ 1.897897 2.059388 1.946582 2.346929 2.166552 1.98215  
11722925\_ 2.235709 2.495662 2.125855 2.441101 2.166552 2.356756  
11722926\_ 3.735071 3.51256 3.699735 3.839302 3.847094 3.80833  
11722927\_ 7.535 7.489803 7.528821 7.750503 7.764883 7.761078  
11722928\_ 6.856218 6.816104 6.950191 6.748934 6.725582 6.678735  
11722929\_ 6.910833 6.983485 7.045766 6.755667 6.749974 6.836466  
11722930\_ 7.798016 7.804773 7.842254 8.78171 8.743666 8.756315  
11722931\_ 8.89303 8.753042 8.818566 9.339596 9.351918 9.308055  
11722932\_ 6.987205 6.862631 6.965942 6.966317 6.977409 7.031797  
11722933\_ 6.853868 6.87887 6.809151 6.298867 6.087357 6.15598  
11722934\_ 9.944139 9.953207 9.97011 10.02251 9.978797 9.942543  
11722935\_ 7.689897 7.688218 7.582872 7.995268 7.786782 7.774834  
11722936\_ 7.404137 7.30418 7.341052 6.45882 6.247861 6.30396  
11722937\_ 7.571022 7.523766 7.572949 6.729269 6.794173 6.734946  
11722938\_ 6.724336 6.612181 6.827385 7.386473 7.346763 7.280725  
11722939\_ 4.161613 4.371112 4.436858 4.576311 4.52373 4.653986  
11722940\_ 7.568494 7.511622 7.590547 7.394739 7.429695 7.48394  
11722941\_ 4.39033 4.562821 4.52373 4.663768 4.725526 4.639962  
11722942\_ 4.86719 5.015778 5.006251 4.918213 5.011331 4.803125  
11722943\_ 5.6297 5.737331 5.743009 5.581615 5.618108 5.471962  
11722944\_ 7.487131 7.302015 7.416018 7.563287 7.539353 7.547714  
11722945\_ 5.142064 5.159005 5.240066 5.189722 5.360368 5.099942  
11722946\_ 4.024964 4.024964 4.109489 3.74307 3.969526 3.994462  
11722947\_ 4.237859 4.322132 4.147503 4.081526 4.08363 4.206568  
11722948\_ 5.515043 5.26839 5.26034 5.498723 5.498644 5.464586  
11722949\_ 6.778201 6.741408 6.753512 6.344902 6.341298 6.385048  
11722950\_ 5.303577 5.321054 5.536528 5.343497 5.375229 5.266519  
11722951\_ 4.499249 4.891466 4.408993 4.952112 4.776639 4.7053  
11722952\_ 7.017815 6.91308 7.007123 7.219155 7.169833 7.137596

11722953\_ 5. 609336 5. 531633 5. 574541 5. 197202 5. 267798 5. 323872  
11722954\_ 6. 206103 6. 27706 6. 237576 5. 986504 5. 988506 6. 027656  
11722955\_ 3. 723905 3. 657211 3. 796767 3. 745104 3. 896396 3. 568654  
11722956\_ 5. 828124 5. 941163 5. 777626 5. 866353 5. 917193 5. 963827  
11722957\_ 7. 433598 7. 340405 7. 311141 7. 1551 7. 207787 7. 19012  
11722958\_ 3. 921966 4. 033624 3. 871165 3. 835055 3. 956411 4. 034276  
11722959\_ 5. 793571 5. 825764 5. 66835 5. 924195 5. 896837 5. 843657  
11722960\_ 6. 805142 6. 583262 6. 665265 6. 514618 6. 581356 6. 502014  
11722961\_ 6. 309745 6. 32232 6. 212329 6. 322347 6. 283898 6. 231926  
11722962\_ 7. 153288 7. 077341 7. 212188 6. 983344 7. 000006 6. 999944  
11722963\_ 7. 424323 7. 363293 7. 349985 7. 112215 7. 092558 7. 170478  
11722964\_ 8. 840846 8. 750576 8. 814644 7. 959212 7. 965326 7. 916064  
11722965\_ 7. 849399 7. 751057 7. 805107 7. 788706 7. 769625 7. 779209  
11722966\_ 7. 023668 6. 933639 7. 023668 6. 932648 7. 018689 6. 926249  
11722967\_ 7. 579907 7. 668238 7. 588643 7. 790131 7. 923337 7. 878151  
11722968\_ 6. 130923 5. 939757 5. 973344 6. 068887 6. 122208 6. 164855  
11722969\_ 7. 071544 7. 115777 7. 118507 7. 249635 7. 190328 7. 298505  
11722970\_ 5. 86697 5. 748321 5. 735536 4. 297145 4. 326345 4. 381084  
11722971\_ 6. 918137 6. 926305 6. 996386 5. 592796 5. 553823 5. 676992  
11722972\_ 5. 652989 5. 590679 5. 797773 5. 736411 5. 817586 5. 677627  
11722973\_ 7. 61401 7. 709223 7. 703772 8. 041439 7. 96569 7. 961139  
11722974\_ 7. 182925 7. 174659 7. 269148 7. 286324 7. 294637 7. 262815  
11722975\_ 2. 991557 2. 909135 2. 935154 3. 242177 3. 04796 2. 991557  
11722976\_ 4. 391357 4. 312634 4. 266914 4. 424976 4. 276159 4. 345662  
11722977\_ 6. 165187 6. 056105 6. 094413 6. 124929 6. 071374 6. 212602  
11722978\_ 7. 042988 7. 113936 7. 113936 7. 122755 7. 165075 7. 15596  
11722979\_ 5. 809226 5. 704919 5. 790511 5. 813655 5. 82856 5. 801426  
11722980\_ 5. 726494 5. 492255 5. 671206 5. 826403 5. 694366 5. 990142  
11722981\_ 5. 607034 5. 398235 5. 448296 5. 621719 5. 317912 5. 720531  
11722982\_ 6. 95857 6. 698427 6. 893567 6. 42521 6. 657196 6. 671459  
11722983\_ 2. 095256 2. 240147 2. 309721 2. 450855 2. 356536 2. 184082  
11722984\_ 2. 574908 2. 779355 2. 805073 2. 650412 2. 928046 2. 667911  
11722985\_ 7. 066036 7. 230135 7. 150194 7. 113962 7. 078189 7. 185531  
11722986\_ 6. 470999 6. 360536 6. 419967 6. 117517 6. 340364 6. 321461  
11722987\_ 5. 69004 5. 656604 5. 618613 5. 718173 5. 664354 5. 676992  
11722988\_ 7. 203907 7. 081549 7. 189203 6. 813503 6. 762884 6. 730184  
11722989\_ 8. 563841 8. 476563 8. 50502 8. 282222 8. 200672 8. 108385  
11722990\_ 8. 442787 8. 339765 8. 343579 8. 111835 8. 055241 8. 105629  
11722991\_ 5. 834551 5. 763634 5. 861212 5. 296735 5. 460121 5. 375719  
11722992\_ 4. 603695 4. 535144 4. 652982 4. 089035 4. 065824 4. 222015  
11722993\_ 8. 903784 8. 867856 8. 911074 8. 639617 8. 665717 8. 630187  
11722994\_ 5. 451466 5. 652743 5. 439253 5. 801694 5. 682794 5. 716895  
11722995\_ 2. 105294 1. 931866 2. 096301 2. 042063 2. 000906 1. 990451  
11722996\_ 9. 173122 9. 1046 9. 157755 9. 317147 9. 247271 9. 24082  
11722997\_ 8. 98558 8. 946549 9. 033281 9. 057948 9. 112401 9. 071002  
11722998\_ 5. 772511 5. 707202 5. 690011 6. 255399 6. 19036 6. 414763  
11722999\_ 9. 876032 9. 920453 9. 917671 11. 09679 11. 06426 11. 05305  
11723000\_ 3. 142756 3. 254193 3. 067167 3. 395938 3. 245326 3. 30193  
11723001\_ 11. 04831 11. 00329 11. 08148 11. 2809 11. 30989 11. 32796  
11723002\_ 10. 81308 10. 78504 10. 82641 11. 18498 11. 24029 11. 05613  
11723003\_ 6. 248842 6. 493029 6. 378327 6. 430944 6. 397946 6. 372053

11723004\_ 5. 756906 5. 79747 5. 794286 6. 058818 5. 846838 5. 888456  
11723005\_ 7. 563476 7. 660551 7. 673568 7. 377729 7. 382863 7. 299622  
11723006\_ 11. 53282 11. 54443 11. 52597 11. 40386 11. 40247 11. 37121  
11723007\_ 5. 190341 5. 195628 5. 24401 5. 115173 5. 141541 5. 107587  
11723008\_ 7. 580809 7. 615857 7. 537586 7. 45074 7. 358974 7. 299162  
11723009\_ 3. 728229 3. 489922 4. 106068 3. 78566 3. 879309 3. 656594  
11723010\_ 9. 054484 8. 930598 9. 017906 9. 67248 9. 718897 9. 690783  
11723011\_ 9. 422704 9. 348762 9. 389075 9. 396115 9. 355708 9. 362873  
11723012\_ 10. 40241 10. 34021 10. 35425 10. 23464 10. 21775 10. 24082  
11723013\_ 8. 353125 8. 486324 8. 330307 8. 499589 8. 413607 8. 372403  
11723014\_ 9. 474188 9. 393667 9. 498874 9. 140796 9. 199727 9. 191503  
11723015\_ 9. 586862 9. 515314 9. 580877 9. 349352 9. 339736 9. 286129  
11723016\_ 8. 804845 8. 748803 8. 796147 8. 563427 8. 554128 8. 411905  
11723017\_ 8. 505409 8. 490844 8. 416425 8. 34991 8. 445302 8. 272569  
11723018\_ 7. 877427 7. 812842 7. 906556 7. 984865 7. 978472 7. 973446  
11723019\_ 8. 330103 8. 421735 8. 416129 7. 965132 7. 810926 7. 85543  
11723020\_ 3. 339847 3. 438099 3. 230605 3. 576935 3. 230605 3. 317967  
11723021\_ 7. 346226 7. 196512 7. 183172 7. 082567 7. 136103 7. 210984  
11723022\_ 3. 876367 4. 104833 3. 9786 4. 205472 4. 238413 4. 333523  
11723023\_ 6. 427692 6. 525098 6. 395436 6. 598193 6. 620733 6. 643652  
11723024\_ 8. 048298 8. 05118 8. 09115 7. 850399 7. 886682 7. 889524  
11723025\_ 4. 501241 4. 468848 4. 722134 4. 7572 4. 575221 4. 466583  
11723026\_ 7. 340583 7. 33181 7. 38256 7. 549442 7. 411973 7. 450447  
11723027\_ 4. 295358 4. 079335 4. 273327 4. 340076 4. 449328 4. 189858  
11723028\_ 5. 348523 5. 523058 5. 583968 5. 835358 5. 907809 5. 963137  
11723029\_ 5. 493838 5. 663827 5. 467777 5. 696869 5. 799635 5. 732315  
11723030\_ 6. 597119 6. 637785 6. 59465 6. 456338 6. 487898 6. 679668  
11723031\_ 5. 202164 5. 530533 5. 432976 5. 497522 5. 509459 5. 414003  
11723032\_ 10. 10915 10. 0277 10. 09165 10. 32483 10. 41943 10. 37449  
11723033\_ 5. 820938 5. 793721 5. 680989 6. 015627 5. 978623 6. 04448  
11723034\_ 5. 845777 5. 60639 5. 862144 5. 48516 5. 58423 5. 534646  
11723035\_ 11. 13026 11. 09623 11. 03468 10. 92034 10. 85305 10. 91425  
11723036\_ 8. 230984 8. 149165 8. 170097 8. 103453 8. 049982 8. 134027  
11723037\_ 8. 40228 8. 315271 8. 373298 8. 384348 8. 432822 8. 426139  
11723038\_ 6. 203698 6. 132959 6. 163779 6. 686053 6. 625424 6. 677563  
11723039\_ 9. 326119 9. 325847 9. 354606 9. 562269 9. 599399 9. 477456  
11723040\_ 2. 3269 2. 58498 2. 310991 2. 763383 2. 742957 2. 72656  
11723041\_ 2. 361778 2. 605516 2. 601591 2. 310038 2. 293941 2. 870291  
11723042\_ 6. 169393 5. 914041 6. 037328 6. 647978 6. 61994 6. 743515  
11723043\_ 9. 094943 8. 980292 9. 034445 8. 818407 8. 798919 8. 770744  
11723044\_ 7. 142614 7. 068102 7. 064373 6. 918232 6. 906479 7. 083659  
11723045\_ 8. 9624 8. 911377 8. 953922 9. 199836 9. 273995 9. 172353  
11723046\_ 10. 27863 10. 22692 10. 27191 10. 42904 10. 45021 10. 4642  
11723047\_ 3. 580438 3. 8098 3. 768509 3. 862492 3. 587692 3. 696142  
11723048\_ 3. 503743 3. 333484 3. 295128 3. 362777 3. 297279 3. 305346  
11723049\_ 4. 559483 4. 304554 4. 528786 4. 763595 4. 680264 4. 648728  
11723050\_ 5. 449343 5. 538342 5. 48646 5. 630661 5. 66068 5. 632514  
11723051\_ 5. 149901 4. 763717 4. 785938 4. 87885 4. 849431 4. 866013  
11723052\_ 6. 164813 6. 199503 6. 164813 6. 188767 6. 133437 6. 164813  
11723053\_ 7. 444765 7. 482037 7. 339564 7. 489282 7. 502539 7. 505252  
11723054\_ 5. 792289 5. 873507 5. 72474 5. 780293 5. 880935 5. 86793

11723055\_ 5. 512912 5. 437202 5. 375999 5. 709652 5. 670211 5. 528624  
11723056\_ 9. 700574 9. 694918 9. 660671 9. 598878 9. 58453 9. 558161  
11723057\_ 10. 1941 10. 18683 10. 15141 10. 09186 10. 08104 10. 00316  
11723058\_ 8. 22084 8. 189021 8. 224658 8. 156999 8. 127402 8. 145647  
11723059\_ 6. 738949 6. 890595 6. 824267 6. 854272 6. 76561 6. 899706  
11723060\_ 6. 475018 6. 412133 6. 506824 6. 741085 6. 610375 6. 653509  
11723061\_ 7. 38076 7. 286897 7. 369088 7. 450661 7. 570152 7. 545661  
11723062\_ 8. 211227 8. 181409 8. 263343 9. 147636 9. 175329 9. 17371  
11723063\_ 6. 739852 6. 562395 6. 725786 6. 896541 6. 928077 6. 916991  
11723064\_ 8. 445684 8. 337091 8. 448437 8. 506219 8. 52876 8. 478421  
11723065\_ 7. 626141 7. 612097 7. 55549 7. 528918 7. 652713 7. 572158  
11723066\_ 7. 355742 7. 237128 7. 353086 7. 226075 7. 180536 7. 195255  
11723067\_ 5. 527147 5. 362337 5. 475458 5. 26034 5. 408479 5. 438122  
11723068\_ 3. 801738 3. 46551 3. 403153 3. 31178 3. 327878 3. 342685  
11723069\_ 4. 205103 4. 192586 4. 033632 4. 03735 4. 372702 4. 036096  
11723070\_ 4. 977216 5. 029529 5. 101528 5. 016517 5. 016517 5. 153001  
11723071\_ 8. 173236 8. 213287 8. 164684 8. 239992 8. 280069 8. 246517  
11723072\_ 5. 845365 5. 883111 5. 740125 5. 320379 5. 397861 5. 371066  
11723073\_ 8. 439454 8. 499162 8. 42527 8. 281141 8. 228444 8. 170608  
11723074\_ 9. 009596 9. 084199 8. 995412 8. 825052 8. 781028 8. 757047  
11723075\_ 7. 321794 7. 257341 7. 364178 7. 193108 7. 186179 7. 237129  
11723076\_ 7. 230902 7. 12748 7. 19747 7. 147729 7. 098298 7. 161323  
11723077\_ 8. 672185 8. 620066 8. 680993 8. 35211 8. 260286 8. 225488  
11723078\_ 9. 039848 8. 985308 9. 037942 8. 667357 8. 600553 8. 629895  
11723079\_ 5. 442778 5. 447652 5. 469485 5. 630608 5. 584813 5. 433062  
11723080\_ 9. 005491 8. 96279 9. 015703 8. 78642 8. 768291 8. 78469  
11723081\_ 8. 777932 8. 722055 8. 830552 8. 798351 8. 869845 8. 88355  
11723082\_ 4. 061588 4. 009251 4. 02911 3. 989978 4. 002824 3. 954157  
11723083\_ 6. 534613 6. 563308 6. 529352 6. 788467 6. 773542 6. 686431  
11723084\_ 6. 6985 6. 606614 6. 555105 6. 404528 6. 344493 6. 372779  
11723085\_ 3. 390117 3. 502307 3. 571401 3. 408379 3. 418054 3. 384329  
11723086\_ 5. 514616 5. 632917 5. 453237 5. 489554 5. 581278 5. 609861  
11723087\_ 6. 163159 6. 124154 6. 031049 6. 133408 6. 194306 6. 206294  
11723088\_ 7. 162061 7. 199118 7. 244683 7. 1664 7. 326503 7. 294828  
11723089\_ 8. 219814 8. 316755 8. 290921 7. 861086 7. 897815 7. 838608  
11723090\_ 7. 678633 7. 54971 7. 595003 7. 311179 7. 255562 7. 246149  
11723091\_ 7. 083412 7. 133372 7. 020566 6. 616338 6. 678288 6. 582552  
11723092\_ 6. 436305 6. 300643 6. 380367 5. 763808 5. 788383 5. 868873  
11723093\_ 4. 734922 4. 813033 4. 850384 4. 842745 4. 888096 4. 756557  
11723094\_ 6. 007165 5. 900336 5. 892623 6. 033719 5. 817841 6. 023603  
11723095\_ 8. 429735 8. 340625 8. 383843 7. 084625 7. 164144 7. 153129  
11723096\_ 5. 156303 5. 279262 5. 235197 5. 448296 5. 36323 5. 405062  
11723097\_ 2. 790645 3. 0828 3. 031515 2. 98023 3. 031515 3. 263264  
11723098\_ 3. 198542 3. 147157 3. 058279 3. 20406 3. 158017 3. 037482  
11723099\_ 2. 227568 2. 40682 2. 039053 2. 325714 2. 166552 2. 227568  
11723100\_ 2. 960115 3. 222524 2. 951502 3. 075868 3. 133326 3. 110852  
11723101\_ 7. 054339 6. 86175 7. 008269 6. 781152 6. 864884 6. 893198  
11723102\_ 4. 977281 4. 993897 4. 97355 5. 23343 5. 227704 5. 224749  
11723103\_ 6. 357109 6. 268994 6. 233153 6. 478745 6. 477263 6. 458759  
11723104\_ 9. 02411 8. 996433 8. 987712 9. 173271 9. 116497 9. 135855  
11723105\_ 4. 784133 4. 737867 4. 807291 5. 575204 5. 575886 5. 776627

11723106\_ 3. 117791 3. 409042 3. 283566 3. 196399 3. 125872 2. 993475  
11723107\_ 7. 955856 7. 85524 7. 980243 8. 047591 8. 109369 8. 124096  
11723108\_ 9. 353729 9. 322055 9. 362375 9. 254994 9. 284426 9. 271821  
11723109\_ 8. 908804 8. 97808 8. 959988 8. 950298 8. 917854 8. 874358  
11723110\_ 9. 444142 9. 381605 9. 387604 9. 271439 9. 231808 9. 238042  
11723111\_ 7. 909924 7. 73482 7. 875691 7. 799164 7. 706572 7. 74686  
11723112\_ 8. 409617 8. 42588 8. 406888 7. 730376 7. 713349 7. 713078  
11723113\_ 6. 13945 6. 149061 6. 049448 5. 794286 6. 000116 5. 870242  
11723114\_ 6. 82257 6. 794842 6. 840999 6. 583653 6. 515754 6. 565878  
11723115\_ 8. 510158 8. 459258 8. 443327 8. 476512 8. 432564 8. 454876  
11723116\_ 8. 248046 8. 212675 8. 269152 7. 799537 7. 779432 7. 731271  
11723117\_ 7. 42287 7. 342771 7. 426677 7. 645022 7. 676611 7. 605797  
11723118\_ 7. 185268 7. 293713 7. 257251 6. 979492 7. 005042 7. 040345  
11723119\_ 6. 772253 6. 794351 6. 753361 6. 467849 6. 577157 6. 522438  
11723120\_ 5. 898582 5. 703085 5. 722959 5. 727292 5. 706041 5. 697916  
11723121\_ 7. 951508 7. 870154 8. 002958 7. 497394 7. 535797 7. 496112  
11723122\_ 6. 820406 6. 710493 6. 765911 6. 380375 6. 442517 6. 280149  
11723123\_ 6. 688764 6. 706244 6. 847517 7. 404747 7. 589916 7. 537937  
11723124\_ 7. 101861 7. 218688 7. 176364 6. 67906 6. 498338 6. 61068  
11723125\_ 7. 711266 7. 64382 7. 676691 7. 344252 7. 182417 7. 183172  
11723126\_ 4. 960898 5. 187716 5. 085425 5. 123759 5. 096065 5. 067111  
11723127\_ 5. 223713 5. 523449 5. 319847 5. 483177 5. 431797 5. 4154  
11723128\_ 6. 13945 6. 227974 6. 095966 5. 889431 5. 972932 5. 929945  
11723129\_ 7. 653989 7. 654172 7. 614088 7. 364513 7. 421827 7. 362996  
11723130\_ 8. 947272 8. 913112 8. 976653 8. 834595 8. 856901 8. 872873  
11723131\_ 7. 885902 7. 886171 7. 881619 7. 862935 7. 879695 7. 905724  
11723132\_ 6. 599839 6. 519639 6. 292828 6. 474821 6. 474821 6. 451129  
11723133\_ 3. 821146 4. 091481 4. 003732 4. 109493 4. 06088 3. 976292  
11723134\_ 5. 812772 5. 946499 5. 723091 5. 903788 5. 876187 5. 830375  
11723135\_ 7. 92019 7. 942828 7. 874004 8. 09443 8. 120201 8. 124118  
11723136\_ 7. 10048 7. 182945 7. 1796 7. 33295 7. 287284 7. 348117  
11723137\_ 7. 341436 7. 369487 7. 298077 7. 270557 7. 28095 7. 282053  
11723138\_ 8. 334236 8. 27935 8. 365685 8. 025047 7. 983499 8. 031007  
11723139\_ 7. 188798 7. 229044 7. 297826 7. 302235 7. 372344 7. 456992  
11723140\_ 9. 434458 9. 34443 9. 415835 9. 101029 9. 130374 9. 09483  
11723141\_ 8. 003479 7. 977761 7. 982188 7. 657005 7. 609328 7. 647631  
11723142\_ 5. 225873 5. 414917 5. 288536 5. 281749 5. 310875 5. 250457  
11723143\_ 4. 872752 4. 960267 4. 91953 4. 832131 4. 855739 4. 923366  
11723144\_ 5. 033357 5. 138982 4. 991697 5. 051282 5. 085699 5. 051282  
11723145\_ 6. 109918 5. 882538 6. 028396 5. 630826 5. 438468 5. 630826  
11723146\_ 4. 594234 4. 372264 4. 335189 4. 325026 4. 389341 4. 432161  
11723147\_ 6. 990238 7. 036095 6. 989837 6. 487701 6. 461268 6. 516522  
11723148\_ 7. 012797 6. 809436 6. 803825 6. 618716 6. 683469 6. 589889  
11723149\_ 7. 309023 7. 274752 7. 345718 7. 212754 7. 185994 7. 089738  
11723150\_ 2. 826784 2. 879043 2. 863391 2. 92555 2. 912551 2. 9017  
11723151\_ 7. 452816 7. 279959 7. 452381 6. 79775 6. 919149 6. 761078  
11723152\_ 7. 563476 7. 452656 7. 489442 7. 370906 7. 415629 7. 449019  
11723153\_ 7. 222601 7. 15127 7. 326473 7. 325474 7. 443369 7. 370752  
11723154\_ 4. 205225 4. 137115 4. 118641 3. 902221 3. 833478 3. 80076  
11723155\_ 4. 091474 4. 215628 4. 170731 3. 889946 4. 050744 4. 13141  
11723156\_ 4. 66253 4. 587121 4. 360164 4. 751085 4. 36724 4. 708298

11723157\_ 4. 735522 5. 034732 4. 990637 5. 02356 5. 002441 5. 060436  
11723158\_ 5. 434768 5. 607512 5. 226457 5. 407904 5. 440734 5. 37985  
11723159\_ 6. 234381 6. 103127 6. 093216 6. 407046 6. 391266 6. 386905  
11723160\_ 4. 041783 3. 712389 3. 822574 3. 109299 3. 408882 3. 055818  
11723161\_ 8. 520579 8. 513693 8. 479151 8. 109757 8. 168565 8. 069805  
11723162\_ 5. 714481 5. 763634 5. 795628 5. 3515 5. 112955 5. 222011  
11723163\_ 2. 586142 2. 672944 2. 760752 2. 777694 2. 767272 2. 857725  
11723164\_ 3. 455157 3. 147034 3. 138626 3. 450461 3. 218534 3. 38638  
11723165\_ 3. 891337 3. 869623 3. 909293 3. 928642 4. 1266 3. 888834  
11723166\_ 5. 483748 5. 373015 5. 619751 5. 15624 5. 394429 5. 317921  
11723167\_ 5. 775121 5. 975863 5. 740749 5. 854656 5. 682544 5. 82954  
11723168\_ 7. 057539 7. 164857 7. 088823 7. 191075 7. 223786 7. 017131  
11723169\_ 8. 592254 8. 545341 8. 586908 8. 662399 8. 658092 8. 6824  
11723170\_ 6. 206103 6. 101901 6. 389366 5. 368159 5. 34135 5. 532134  
11723171\_ 4. 409319 4. 366586 4. 27096 4. 082513 3. 984619 4. 080055  
11723172\_ 3. 03859 3. 153248 2. 831697 2. 512144 2. 896879 2. 609686  
11723173\_ 6. 220986 6. 059755 6. 360003 5. 443407 5. 572088 5. 490326  
11723174\_ 3. 177058 3. 246035 3. 041909 3. 117472 3. 095484 3. 04157  
11723175\_ 4. 130083 4. 220307 3. 994441 4. 106649 4. 257341 4. 220481  
11723176\_ 2. 373461 2. 290131 2. 18699 2. 153872 2. 290131 2. 434386  
11723177\_ 7. 039608 6. 932067 7. 128432 6. 080939 6. 140264 6. 117092  
11723178\_ 8. 154326 8. 122051 8. 064018 8. 211053 8. 196372 8. 255572  
11723179\_ 7. 367837 7. 290034 7. 263614 6. 667646 6. 584888 6. 678427  
11723180\_ 8. 682401 8. 672586 8. 717177 8. 119371 8. 136862 8. 184588  
11723181\_ 4. 923905 4. 870859 4. 829802 5. 114991 4. 891503 5. 145961  
11723182\_ 5. 251812 5. 020362 5. 216991 5. 100775 4. 99635 5. 039924  
11723183\_ 5. 758808 5. 627504 5. 790161 5. 637332 5. 686166 5. 807686  
11723184\_ 6. 219681 6. 014663 6. 117267 6. 03541 6. 166665 6. 188199  
11723185\_ 7. 720791 7. 705474 7. 613936 7. 859571 7. 781393 7. 755732  
11723186\_ 5. 370086 5. 412784 5. 493773 4. 730434 4. 740191 4. 808582  
11723187\_ 4. 364514 4. 359734 4. 628905 3. 862406 4. 01685 4. 045775  
11723188\_ 6. 116619 6. 084932 6. 116619 6. 311844 6. 200722 6. 341271  
11723189\_ 3. 558304 3. 571285 3. 293648 3. 487668 3. 477906 3. 293648  
11723190\_ 5. 209259 5. 319462 5. 275358 5. 448296 5. 475382 5. 421273  
11723191\_ 8. 120022 8. 080021 8. 212372 8. 499305 8. 549461 8. 55422  
11723192\_ 9. 025126 8. 977617 8. 978006 9. 826085 9. 880051 9. 845635  
11723193\_ 3. 826645 3. 973155 3. 777871 3. 699326 3. 832013 3. 732981  
11723194\_ 9. 466982 9. 461572 9. 484991 9. 432302 9. 447611 9. 47639  
11723195\_ 8. 873815 8. 891065 8. 959434 8. 825545 8. 802182 8. 885721  
11723196\_ 6. 872507 6. 694099 6. 808828 6. 824019 6. 78688 6. 801455  
11723197\_ 7. 619572 7. 483358 7. 583092 8. 665318 8. 469389 8. 409882  
11723198\_ 9. 448996 9. 424487 9. 464429 10. 73449 10. 72475 10. 62403  
11723199\_ 7. 155193 7. 183776 7. 30154 9. 723558 9. 658133 9. 6211  
11723200\_ 7. 382572 7. 394482 7. 363022 8. 559634 8. 509555 8. 507182  
11723201\_ 6. 407076 6. 144312 6. 300643 7. 074736 7. 133973 7. 135866  
11723202\_ 4. 375456 4. 40461 4. 48166 4. 641235 4. 319562 4. 516441  
11723203\_ 9. 376221 9. 364615 9. 385034 9. 245044 9. 216798 9. 1679  
11723204\_ 10. 10361 10. 06599 10. 08918 10. 13858 10. 15649 10. 13086  
11723205\_ 8. 609677 8. 530141 8. 559645 8. 473351 8. 57552 8. 506707  
11723206\_ 5. 273626 5. 275825 4. 85316 5. 224948 5. 172976 5. 224948  
11723207\_ 9. 500884 9. 454717 9. 516871 9. 67678 9. 676115 9. 691073

11723208\_ 7. 718258 7. 610247 7. 714602 7. 670522 7. 618924 7. 723622  
11723209\_ 6. 819491 6. 810106 6. 914227 7. 490677 7. 494955 7. 535793  
11723210\_ 6. 812524 6. 986734 6. 873767 6. 909833 6. 862059 7. 003258  
11723211\_ 3. 300462 3. 250886 3. 185152 3. 201798 3. 21279 3. 164301  
11723212\_ 5. 463198 5. 507817 5. 366144 5. 437548 5. 358723 5. 432022  
11723213\_ 6. 550765 6. 49892 6. 67663 6. 064736 6. 192973 6. 108053  
11723214\_ 4. 408141 4. 570979 4. 345824 4. 585729 4. 572338 4. 680086  
11723215\_ 5. 842708 5. 740517 5. 770717 5. 831041 5. 924695 5. 958523  
11723216\_ 5. 738701 5. 957389 6. 021658 5. 947705 6. 10638 5. 953774  
11723217\_ 7. 978818 7. 924847 8. 000911 8. 27605 8. 327156 8. 31351  
11723218\_ 9. 535882 9. 470249 9. 477572 9. 424716 9. 453347 9. 385754  
11723219\_ 2. 953527 3. 144431 3. 066192 3. 398236 3. 231076 3. 120639  
11723220\_ 2. 14896 2. 051988 2. 171223 2. 121796 2. 25483 1. 994087  
11723221\_ 8. 246728 8. 18237 8. 208617 8. 06119 8. 070252 8. 057298  
11723222\_ 2. 480447 2. 973258 2. 803758 2. 741642 2. 731834 2. 8142  
11723223\_ 4. 347179 4. 105595 4. 120928 4. 300788 4. 313434 4. 238569  
11723224\_ 7. 596153 7. 614872 7. 567284 7. 624651 7. 587206 7. 506616  
11723225\_ 1. 898324 2. 131936 2. 413284 2. 216353 2. 076866 1. 885961  
11723226\_ 5. 484558 5. 567954 5. 570473 5. 967922 5. 985471 5. 921126  
11723227\_ 9. 155572 9. 060979 9. 161842 8. 843169 8. 828634 8. 839374  
11723228\_ 6. 655736 6. 633448 6. 583167 6. 604938 6. 59013 6. 665429  
11723229\_ 9. 509722 9. 445896 9. 487468 9. 25168 9. 239223 9. 178015  
11723230\_ 5. 873886 5. 824043 5. 876708 6. 289917 6. 058922 6. 070056  
11723231\_ 8. 231197 8. 235787 8. 222317 8. 113716 8. 080336 7. 984528  
11723232\_ 9. 840668 9. 801502 9. 843467 9. 465916 9. 486825 9. 494055  
11723233\_ 8. 502851 8. 509125 8. 529739 8. 441835 8. 427154 8. 363611  
11723234\_ 4. 786457 4. 711402 4. 959375 4. 464848 4. 330385 4. 374371  
11723235\_ 5. 280952 5. 181436 5. 296723 4. 633803 4. 652693 4. 906658  
11723236\_ 2. 722752 2. 623141 2. 636278 2. 512144 2. 800764 2. 736799  
11723237\_ 7. 330555 7. 342014 7. 381125 7. 336834 7. 448317 7. 392275  
11723238\_ 5. 289938 5. 319967 5. 237332 5. 587582 5. 48634 5. 589814  
11723239\_ 5. 303019 5. 48184 5. 395372 6. 126456 5. 894697 6. 113719  
11723240\_ 9. 168056 9. 108066 9. 12497 9. 081029 9. 060992 9. 098816  
11723241\_ 10. 99373 10. 92611 10. 9997 10. 49759 10. 50041 10. 47013  
11723242\_ 8. 642387 8. 523799 8. 720878 8. 03891 8. 026826 8. 017662  
11723243\_ 11. 27742 11. 30271 11. 30558 10. 88849 10. 8809 10. 82747  
11723244\_ 10. 96008 10. 93179 10. 97297 10. 36666 10. 40453 10. 39116  
11723245\_ 7. 187872 7. 107382 7. 32502 8. 583969 8. 550414 8. 59248  
11723246\_ 8. 532661 8. 504856 8. 491905 9. 904189 9. 894305 9. 892085  
11723247\_ 7. 111635 7. 112664 7. 237923 8. 586227 8. 65128 8. 584317  
11723248\_ 8. 861588 8. 779691 8. 797495 8. 956753 8. 923808 8. 93877  
11723249\_ 5. 601531 5. 632182 5. 466585 5. 712207 5. 687435 5. 605362  
11723250\_ 4. 67856 4. 776163 4. 712373 4. 980718 4. 906787 4. 837367  
11723251\_ 10. 26436 10. 18755 10. 25098 10. 02144 10. 03976 10. 02071  
11723252\_ 4. 638936 4. 459939 4. 643717 4. 532416 4. 638007 4. 486246  
11723253\_ 9. 093724 9. 11256 9. 141828 8. 930372 8. 976102 8. 869186  
11723254\_ 8. 779737 8. 795256 8. 736564 9. 245022 9. 217849 9. 071104  
11723255\_ 9. 117466 9. 096205 9. 159205 9. 512823 9. 58137 9. 387805  
11723256\_ 7. 417811 7. 636589 7. 470279 8. 02234 7. 960938 8. 04298  
11723257\_ 5. 92009 6. 212526 5. 957347 6. 706582 6. 614212 6. 633769  
11723258\_ 8. 666492 8. 736388 8. 641184 9. 071741 9. 070236 8. 967678

11723259\_ 8. 133545 7. 982541 8. 099171 7. 289053 7. 157193 7. 328871  
11723260\_ 7. 98689 7. 995432 7. 959007 8. 153537 8. 115954 8. 078668  
11723261\_ 8. 677629 8. 6488 8. 586072 8. 473701 8. 486628 8. 451495  
11723262\_ 5. 200655 5. 305349 5. 278332 5. 416694 5. 530302 5. 563521  
11723263\_ 7. 297294 7. 147058 7. 275917 7. 290905 7. 2962 7. 34437  
11723264\_ 3. 97295 3. 849623 3. 750381 3. 997131 3. 897181 3. 705625  
11723265\_ 6. 398971 6. 376285 6. 267716 6. 702465 6. 770965 6. 732216  
11723266\_ 5. 202302 5. 317158 5. 393179 5. 655064 5. 515621 5. 576692  
11723267\_ 8. 211206 8. 115976 8. 263477 7. 605939 7. 570151 7. 58069  
11723268\_ 8. 795645 8. 765962 8. 73932 8. 908378 8. 887713 8. 909559  
11723269\_ 8. 613368 8. 46469 8. 636762 8. 670767 8. 71823 8. 690487  
11723270\_ 9. 103761 8. 994882 9. 044916 9. 197461 9. 181942 9. 183412  
11723271\_ 8. 071944 7. 983292 8. 112365 8. 023575 8. 113958 8. 141205  
11723272\_ 6. 44893 6. 407208 6. 342287 6. 688764 6. 739151 6. 763929  
11723273\_ 7. 26865 7. 234257 7. 323702 6. 886652 6. 783386 6. 869717  
11723274\_ 7. 756429 7. 636312 7. 648719 7. 53912 7. 492242 7. 562331  
11723275\_ 4. 926247 4. 926247 5. 027338 4. 663518 4. 93837 4. 752267  
11723276\_ 7. 449583 7. 257341 7. 361565 7. 200082 7. 165255 7. 214562  
11723277\_ 6. 369267 6. 342251 6. 400971 6. 055455 6. 12022 6. 060474  
11723278\_ 6. 251395 6. 257751 6. 308795 6. 39693 6. 282168 6. 422685  
11723279\_ 6. 551705 6. 565018 6. 575913 6. 149902 5. 958541 6. 150455  
11723280\_ 5. 561187 5. 337013 5. 505999 5. 971376 5. 922247 6. 016428  
11723281\_ 8. 300711 8. 259954 8. 335368 7. 403907 7. 474568 7. 466994  
11723282\_ 6. 377847 6. 348398 6. 357827 5. 52691 5. 520307 5. 481713  
11723283\_ 5. 685468 5. 732315 5. 782374 5. 533327 5. 558652 5. 512264  
11723284\_ 6. 263567 6. 118838 6. 308362 6. 312968 6. 45372 6. 407397  
11723285\_ 3. 190863 3. 39062 3. 480822 3. 080314 3. 037766 2. 962361  
11723286\_ 9. 454632 9. 446384 9. 4501 9. 38834 9. 445512 9. 403001  
11723287\_ 6. 913112 7. 076035 6. 965577 7. 132722 7. 184826 7. 063823  
11723288\_ 5. 381806 5. 291869 5. 090597 5. 53892 5. 510221 5. 605466  
11723289\_ 6. 165396 6. 165119 6. 295065 6. 569885 6. 641329 6. 626128  
11723290\_ 7. 360671 7. 22793 7. 341536 7. 516205 7. 538219 7. 663678  
11723291\_ 11. 38987 11. 3889 11. 40047 11. 48838 11. 48723 11. 4869  
11723292\_ 8. 717856 8. 628202 8. 662678 8. 54403 8. 558275 8. 592182  
11723293\_ 4. 285636 4. 203904 4. 007872 4. 30658 4. 137975 4. 264573  
11723294\_ 7. 935445 8. 075424 8. 083007 8. 180243 8. 086709 8. 029237  
11723295\_ 7. 770294 7. 706622 7. 78001 7. 5412 7. 617123 7. 541703  
11723296\_ 6. 336447 6. 291393 6. 238038 6. 280187 6. 304625 6. 322354  
11723297\_ 9. 081181 9. 081692 9. 065178 8. 748527 8. 724311 8. 65155  
11723298\_ 9. 402176 9. 301533 9. 341693 8. 972798 8. 936608 8. 990409  
11723299\_ 8. 213573 8. 179337 8. 178225 7. 75822 7. 726686 7. 677097  
11723300\_ 6. 71869 6. 718633 6. 693103 6. 693141 6. 691728 6. 69316  
11723301\_ 8. 517551 8. 465452 8. 479752 8. 441459 8. 295973 8. 465859  
11723302\_ 4. 438797 4. 562159 4. 441925 4. 666762 4. 52373 4. 408443  
11723303\_ 5. 551417 5. 528036 5. 414869 5. 640773 5. 57817 5. 518817  
11723304\_ 8. 486892 8. 405971 8. 496273 9. 026049 9. 116232 9. 069163  
11723305\_ 8. 077429 7. 994501 8. 024613 8. 224576 8. 264518 8. 282742  
11723306\_ 7. 208092 7. 24788 7. 146347 7. 392275 7. 465501 7. 459436  
11723307\_ 6. 900223 6. 862059 6. 779107 6. 753221 6. 84233 6. 816242  
11723308\_ 8. 144985 8. 128398 8. 108554 8. 217866 8. 229643 8. 208939  
11723309\_ 4. 831205 4. 926597 4. 742971 4. 989318 4. 973783 5. 016102



11723310\_ 3. 004834 3. 033213 2. 90767 3. 145201 3. 078163 3. 114577  
11723311\_ 7. 571055 7. 497932 7. 477649 7. 852849 7. 83815 7. 80313  
11723312\_ 7. 867858 7. 876588 7. 882909 8. 353202 8. 27581 8. 261222  
11723313\_ 7. 388659 7. 345137 7. 409285 7. 505378 7. 617758 7. 588097  
11723314\_ 8. 359251 8. 274192 8. 318897 8. 627077 8. 610633 8. 657598  
11723315\_ 6. 272783 6. 567029 6. 425963 6. 318829 6. 421463 6. 535709  
11723316\_ 4. 399654 4. 268306 4. 252445 4. 186637 4. 347179 4. 200678  
11723317\_ 2. 576711 2. 514658 2. 418314 2. 538889 2. 490381 2. 772165  
11723318\_ 5. 244543 5. 175855 5. 081571 5. 193728 5. 134672 5. 40985  
11723319\_ 7. 277655 7. 460542 7. 565582 7. 049794 6. 925981 7. 059611  
11723320\_ 5. 707736 5. 774476 5. 69963 5. 891014 5. 831002 5. 824302  
11723321\_ 7. 961794 7. 848592 7. 92983 7. 484298 7. 476349 7. 541703  
11723322\_ 7. 935627 7. 955479 7. 94972 8. 192268 8. 294995 8. 259351  
11723323\_ 5. 564159 5. 535255 5. 431464 5. 668353 5. 627202 5. 644725  
11723324\_ 7. 828035 7. 745339 7. 871282 7. 678838 7. 709466 7. 853425  
11723325\_ 5. 796695 6. 083714 5. 973695 5. 975783 6. 075809 6. 101454  
11723326\_ 5. 605822 5. 511936 5. 355125 5. 636854 5. 517075 5. 663538  
11723327\_ 5. 153101 5. 147274 5. 192205 5. 338296 5. 226705 5. 297603  
11723328\_ 6. 492909 6. 502736 6. 372053 6. 716465 6. 57464 6. 645876  
11723329\_ 10. 18042 10. 16486 10. 21144 9. 914973 10. 00052 9. 958583  
11723330\_ 7. 237047 7. 154768 7. 267673 7. 227859 7. 319284 7. 373685  
11723331\_ 5. 879933 6. 02809 5. 882476 6. 028505 6. 133702 6. 043004  
11723332\_ 4. 242617 4. 061319 3. 850246 3. 956614 4. 122446 4. 052095  
11723333\_ 3. 705625 3. 45725 3. 740892 3. 870249 3. 927201 3. 861188  
11723334\_ 5. 929223 6. 048496 5. 851039 5. 922707 6. 04595 6. 121569  
11723335\_ 6. 357933 6. 475292 6. 432865 6. 608186 6. 598304 6. 65828  
11723336\_ 5. 098399 4. 977028 5. 083116 5. 015762 5. 012493 5. 028321  
11723337\_ 7. 673294 7. 621796 7. 734552 6. 851446 6. 944959 6. 888349  
11723338\_ 8. 858038 8. 830083 8. 793755 8. 064267 7. 946338 8. 001849  
11723339\_ 4. 767795 4. 689578 4. 570864 4. 736759 4. 80672 4. 643717  
11723340\_ 5. 688451 5. 643713 5. 593201 5. 957784 6. 021998 5. 969512  
11723341\_ 8. 288208 8. 39733 8. 369112 8. 14897 8. 162334 8. 240141  
11723342\_ 7. 267844 7. 196443 7. 222171 7. 479255 7. 592151 7. 538432  
11723343\_ 6. 646187 6. 396076 6. 54158 6. 128125 6. 022412 6. 200331  
11723344\_ 7. 182655 7. 132396 7. 10696 6. 867626 6. 748968 6. 855266  
11723345\_ 7. 986483 8. 023022 7. 997899 8. 010174 8. 059905 8. 080996  
11723346\_ 6. 307445 6. 286249 6. 267831 6. 316896 6. 392807 6. 294525  
11723347\_ 9. 27465 9. 288855 9. 277663 9. 362374 9. 37397 9. 389654  
11723348\_ 9. 240787 9. 231569 9. 238615 9. 147851 9. 160279 9. 198842  
11723349\_ 8. 339328 8. 312134 8. 348657 8. 345301 8. 2709 8. 307562  
11723350\_ 3. 920051 3. 847547 3. 850246 3. 837582 3. 877441 3. 889187  
11723351\_ 4. 595052 4. 650127 4. 549088 4. 552802 4. 758515 4. 724768  
11723352\_ 2. 68488 2. 68488 2. 750208 2. 527275 2. 661689 2. 611905  
11723353\_ 6. 664152 6. 536007 6. 637284 6. 225845 6. 270811 6. 08441  
11723354\_ 8. 811472 8. 771805 8. 832048 8. 124716 8. 163431 8. 217407  
11723355\_ 8. 196178 8. 122445 8. 197764 7. 744428 7. 690985 7. 800919  
11723356\_ 7. 712289 7. 633375 7. 677242 7. 269414 7. 242612 7. 272641  
11723357\_ 8. 603141 8. 497923 8. 585931 8. 375692 8. 319375 8. 377189  
11723358\_ 7. 562626 7. 589926 7. 583346 8. 005597 8. 016781 7. 974264  
11723359\_ 6. 255955 6. 235044 6. 261783 6. 223616 6. 176476 6. 255645  
11723360\_ 7. 39243 7. 3619 7. 365507 7. 396942 7. 420406 7. 383661

11723361\_ 7. 728779 7. 666967 7. 694986 7. 685597 7. 694986 7. 721959  
11723362\_ 7. 513936 7. 537736 7. 551988 7. 471679 7. 417076 7. 427088  
11723363\_ 1. 981726 2. 006756 1. 983026 1. 847791 2. 12273 2. 076908  
11723364\_ 3. 234241 3. 332152 3. 456084 3. 601136 3. 366768 3. 220327  
11723365\_ 8. 300711 8. 219082 8. 278199 9. 185558 9. 258947 9. 197755  
11723366\_ 3. 339949 3. 444317 3. 521674 3. 54129 3. 493413 3. 540319  
11723367\_ 7. 006959 7. 045027 7. 138764 7. 018608 7. 02062 7. 083193  
11723368\_ 6. 696116 6. 468174 6. 525291 6. 608021 6. 460812 6. 593483  
11723369\_ 5. 273217 5. 233654 4. 969634 5. 388823 5. 267343 5. 147829  
11723370\_ 6. 885762 7. 030163 6. 849791 6. 949676 7. 027608 6. 985743  
11723371\_ 4. 164195 4. 330205 4. 066075 4. 41372 4. 347179 4. 472827  
11723372\_ 6. 563461 6. 402709 6. 506358 6. 450095 6. 437395 6. 429253  
11723373\_ 4. 053025 4. 335594 4. 302727 4. 455147 4. 275543 4. 338994  
11723374\_ 7. 743966 7. 664347 7. 744297 7. 623917 7. 56569 7. 599876  
11723375\_ 7. 435252 7. 41791 7. 436084 7. 423629 7. 444165 7. 27403  
11723376\_ 3. 446707 3. 209817 3. 287237 3. 249625 3. 249625 3. 09454  
11723377\_ 4. 631875 4. 386204 4. 135496 4. 28566 4. 359452 4. 571888  
11723378\_ 7. 646371 7. 531341 7. 55385 7. 498991 7. 620822 7. 596201  
11723379\_ 6. 704988 6. 755361 6. 703398 6. 722906 6. 752593 6. 779346  
11723380\_ 8. 039628 8. 099806 8. 073182 8. 227625 8. 166272 8. 252323  
11723381\_ 7. 315176 7. 182797 7. 244087 6. 48349 6. 48951 6. 564599  
11723382\_ 7. 118531 7. 052275 7. 124988 7. 297048 7. 462745 7. 312252  
11723383\_ 7. 826698 7. 695 7. 769286 8. 00183 8. 009385 7. 990687  
11723384\_ 2. 302243 2. 291536 2. 399216 2. 329817 2. 406683 2. 530208  
11723385\_ 2. 290477 2. 485279 2. 490971 2. 605516 2. 62851 2. 371578  
11723386\_ 9. 513576 9. 458006 9. 51657 9. 51568 9. 508281 9. 522034  
11723387\_ 8. 371368 8. 30669 8. 388249 8. 341511 8. 244074 8. 341867  
11723388\_ 4. 752686 4. 579089 4. 609492 4. 73708 4. 700243 4. 939965  
11723389\_ 5. 310099 5. 345598 5. 254527 5. 573149 5. 453793 5. 419962  
11723390\_ 6. 530177 6. 341498 6. 480412 6. 978019 6. 948669 7. 087357  
11723391\_ 5. 789327 5. 73624 5. 827862 6. 127255 6. 100177 6. 188421  
11723392\_ 4. 386279 4. 589509 4. 189922 4. 608237 4. 334918 4. 413918  
11723393\_ 5. 378255 5. 27025 5. 242285 5. 290795 5. 290224 5. 305986  
11723394\_ 6. 336792 5. 886841 6. 028314 7. 146107 7. 197486 7. 176237  
11723395\_ 4. 606673 4. 671804 4. 890466 4. 760062 4. 757176 4. 830627  
11723396\_ 7. 363475 7. 462228 7. 319192 7. 392355 7. 447671 7. 405878  
11723397\_ 4. 476058 4. 431509 4. 539887 4. 581874 4. 565402 4. 473725  
11723398\_ 8. 309908 8. 334904 8. 315138 8. 328399 8. 342218 8. 397788  
11723399\_ 7. 633737 7. 51029 7. 596262 6. 92083 6. 946266 6. 930301  
11723400\_ 9. 812607 9. 8512 9. 791552 9. 709873 9. 674152 9. 674478  
11723401\_ 9. 867345 9. 894855 9. 888578 9. 700919 9. 70473 9. 717176  
11723402\_ 9. 050594 8. 993097 8. 958591 8. 807333 8. 879525 8. 805653  
11723403\_ 3. 570036 3. 599007 4. 287593 3. 101013 3. 125562 3. 155195  
11723404\_ 3. 040377 3. 477191 3. 586015 3. 172266 3. 166444 3. 127807  
11723405\_ 6. 1453 6. 255762 6. 070586 6. 473477 6. 460812 6. 595975  
11723406\_ 6. 338096 6. 369374 6. 309018 6. 584501 6. 626703 6. 592347  
11723407\_ 4. 17351 4. 067703 4. 162024 4. 272402 4. 188169 4. 317538  
11723408\_ 7. 115433 7. 045587 7. 101278 7. 125292 7. 111126 7. 082618  
11723409\_ 8. 374456 8. 316233 8. 356178 8. 278813 8. 311721 8. 307812  
11723410\_ 7. 537261 7. 596455 7. 605021 7. 435176 7. 505598 7. 526395  
11723411\_ 7. 462691 7. 421949 7. 465227 7. 835756 7. 746959 7. 819161

11723412\_ 8. 444486 8. 456836 8. 485628 8. 697702 8. 738813 8. 732095  
11723413\_ 4. 537183 4. 747206 4. 864608 4. 731379 4. 818519 4. 823759  
11723414\_ 6. 872357 6. 700371 6. 850061 6. 012038 6. 046319 6. 185431  
11723415\_ 8. 439415 8. 365428 8. 296129 7. 961094 7. 864143 7. 892766  
11723416\_ 6. 833947 6. 750239 6. 845831 6. 13945 6. 027997 6. 141336  
11723417\_ 12. 16144 12. 14793 12. 13376 12. 26275 12. 24577 12. 20157  
11723418\_ 6. 787793 6. 763399 6. 780961 7. 004389 7. 072248 7. 139288  
11723419\_ 9. 679178 9. 649488 9. 679648 9. 65512 9. 668361 9. 598088  
11723420\_ 8. 901799 8. 869734 8. 940406 8. 698775 8. 633486 8. 608146  
11723421\_ 9. 666283 9. 682679 9. 660982 9. 429852 9. 363625 9. 336867  
11723422\_ 8. 246321 8. 262079 8. 213601 8. 012303 7. 956463 8. 068357  
11723423\_ 7. 059695 6. 99004 6. 927631 7. 029692 7. 03084 7. 02704  
11723424\_ 6. 880424 6. 920682 6. 869208 6. 788543 6. 728503 6. 679297  
11723425\_ 6. 520026 6. 468409 6. 526095 6. 233455 6. 154197 6. 349031  
11723426\_ 8. 923411 8. 881953 8. 921711 9. 120845 9. 128434 9. 081319  
11723427\_ 8. 236788 8. 198087 8. 249835 8. 198479 8. 21221 8. 220708  
11723428\_ 13. 16737 13. 15458 13. 16524 13. 08846 13. 11822 13. 10353  
11723429\_ 7. 430162 7. 369327 7. 422418 7. 387514 7. 346559 7. 332047  
11723430\_ 8. 982295 8. 902525 8. 953371 8. 637822 8. 721383 8. 68826  
11723431\_ 9. 500743 9. 459852 9. 486483 9. 094186 9. 105361 9. 117985  
11723432\_ 10. 40242 10. 35545 10. 37826 9. 982049 10. 01708 10. 04474  
11723433\_ 5. 161364 5. 118748 5. 221954 5. 578193 5. 511948 5. 615969  
11723434\_ 6. 374902 6. 296283 6. 17981 6. 397946 6. 320389 6. 441708  
11723435\_ 7. 779356 7. 670986 7. 741798 8. 439661 8. 445684 8. 45736  
11723436\_ 6. 416354 6. 366941 6. 459289 6. 554286 6. 604328 6. 555092  
11723437\_ 7. 632869 7. 604078 7. 580147 7. 633661 7. 705445 7. 749448  
11723438\_ 10. 64734 10. 58139 10. 62847 10. 3882 10. 36137 10. 38926  
11723439\_ 6. 683126 6. 622717 6. 731737 6. 028014 6. 089976 6. 140763  
11723440\_ 6. 668414 6. 628437 6. 596554 5. 734162 5. 979675 5. 946303  
11723441\_ 6. 517709 6. 584123 6. 62149 5. 410558 5. 469744 5. 544154  
11723442\_ 6. 632895 6. 399814 6. 574558 5. 712948 5. 76539 5. 817862  
11723443\_ 6. 29816 6. 133712 6. 154993 5. 414869 5. 444466 5. 324648  
11723444\_ 3. 70491 3. 602759 3. 346136 3. 412214 3. 407687 3. 400182  
11723445\_ 5. 119454 5. 155564 5. 198302 4. 984625 5. 097379 5. 029529  
11723446\_ 7. 909121 7. 859629 7. 79113 7. 579787 7. 564529 7. 616863  
11723447\_ 5. 796372 5. 835896 5. 835896 5. 941524 5. 820052 5. 861933  
11723448\_ 5. 751173 5. 838536 6. 003752 5. 946921 5. 820052 5. 838536  
11723449\_ 8. 453497 8. 349812 8. 473198 8. 190297 8. 241548 8. 19736  
11723450\_ 5. 239416 5. 344376 5. 254557 5. 61433 5. 545187 5. 563791  
11723451\_ 8. 665727 8. 562155 8. 620202 9. 233139 9. 246681 9. 211076  
11723452\_ 6. 774279 6. 650833 6. 734107 6. 626672 6. 709463 6. 713458  
11723453\_ 8. 08434 8. 021718 8. 041304 7. 706605 7. 730656 7. 758076  
11723454\_ 7. 973915 7. 95804 7. 954699 7. 544903 7. 60156 7. 57865  
11723455\_ 5. 736831 5. 732315 5. 649512 5. 729886 5. 741081 5. 753214  
11723456\_ 6. 116868 6. 287265 6. 034897 6. 310428 6. 177061 6. 129329  
11723457\_ 7. 103082 7. 077196 7. 028851 6. 860169 6. 821998 6. 923491  
11723458\_ 5. 015724 4. 995144 5. 273952 4. 649886 4. 696287 4. 61335  
11723459\_ 6. 392871 6. 5483 6. 478352 6. 351251 6. 362573 6. 369394  
11723460\_ 7. 449444 7. 509076 7. 459031 7. 632841 7. 585006 7. 644525  
11723461\_ 7. 404949 7. 371858 7. 472072 7. 511457 7. 62581 7. 594732  
11723462\_ 5. 522712 5. 337937 5. 541045 5. 298441 5. 489223 5. 369438

11723463\_ 6.094413 6.276689 6.211344 6.333812 6.565493 6.537674  
11723464\_ 4.398308 4.451583 4.34356 4.470534 4.373775 4.490126  
11723465\_ 4.127652 4.212749 3.990837 4.260371 4.347343 3.954157  
11723466\_ 7.918326 7.935209 7.917362 8.195173 8.215982 8.163611  
11723467\_ 10.39539 10.37229 10.43057 10.31518 10.3029 10.33306  
11723468\_ 7.305969 7.138237 7.357609 7.284056 7.248768 7.36164  
11723469\_ 9.689999 9.639626 9.662934 9.585962 9.539329 9.61253  
11723470\_ 8.084761 8.082324 8.145925 7.541542 7.581163 7.583322  
11723471\_ 8.102131 8.07101 8.098745 8.126511 8.13274 8.164044  
11723472\_ 5.188659 5.156545 5.221839 4.854766 4.808153 4.720844  
11723473\_ 9.146344 9.144956 9.169467 9.120175 9.113729 9.1086  
11723474\_ 6.300613 6.033389 6.247718 6.34864 6.346945 6.351658  
11723475\_ 6.779966 6.828669 6.925433 7.150005 7.131394 7.126295  
11723476\_ 3.941952 3.992131 3.938118 3.874961 3.932372 3.870563  
11723477\_ 6.9439 6.900191 6.951886 6.554916 6.682717 6.589889  
11723478\_ 9.806542 9.782444 9.806478 9.902254 9.914019 9.822819  
11723479\_ 6.089194 6.118838 5.999071 6.020013 6.124988 6.084231  
11723480\_ 9.150345 9.117982 9.181559 9.093596 9.108511 9.105661  
11723481\_ 8.221432 8.08552 8.168256 7.934541 7.891279 7.891072  
11723482\_ 8.425368 8.382943 8.476932 8.171753 8.19405 8.172622  
11723483\_ 7.252623 7.190594 7.183327 7.498917 7.524261 7.514764  
11723484\_ 8.813002 8.776203 8.821645 8.80835 8.843781 8.869093  
11723485\_ 10.59139 10.48649 10.54093 10.67161 10.66882 10.68394  
11723486\_ 6.705968 6.531304 6.584072 6.921103 6.798449 6.798449  
11723487\_ 11.1741 11.1806 11.17413 11.09623 11.07228 10.96981  
11723488\_ 4.07917 3.908768 4.026092 4.390458 4.275543 4.3979  
11723489\_ 5.095826 5.050112 5.152554 5.297243 4.979711 5.143893  
11723490\_ 8.986187 8.907877 8.950152 8.922817 8.884092 8.901858  
11723491\_ 5.300258 5.06611 5.388071 5.247578 5.340368 5.397623  
11723492\_ 5.612206 5.604586 5.584813 5.68299 5.614746 5.607126  
11723493\_ 5.548899 5.500238 5.528887 5.518408 5.525511 5.616602  
11723494\_ 4.815683 4.916226 4.765188 5.172507 5.106386 5.264983  
11723495\_ 5.304533 5.363461 5.293278 5.304323 5.378305 5.456615  
11723496\_ 5.445599 5.461521 5.572108 5.441635 5.376881 5.218173  
11723497\_ 6.793085 6.822735 6.856571 6.642422 6.738289 6.689729  
11723498\_ 6.518014 6.338846 6.509563 6.459276 6.545449 6.504309  
11723499\_ 3.606313 3.772552 3.590639 3.850246 3.909398 3.65242  
11723500\_ 7.144608 7.051946 7.152312 7.078754 7.08466 7.152312  
11723501\_ 2.499382 2.768818 2.401571 2.585417 2.542204 2.635003  
11723502\_ 3.102322 3.078273 3.066097 3.028939 2.993106 3.076005  
11723503\_ 2.235709 2.16126 2.53983 2.355489 2.361778 2.335346  
11723504\_ 7.880573 7.816828 7.899236 8.122768 8.170412 8.208167  
11723505\_ 6.56978 6.589101 6.606706 6.560158 6.614637 6.630021  
11723506\_ 7.147151 7.191486 7.219239 6.821857 6.901797 6.8518  
11723507\_ 8.347979 8.194731 8.322692 7.96578 7.89213 7.863015  
11723508\_ 7.251041 7.029877 7.109489 6.526584 6.556224 6.846107  
11723509\_ 9.145414 9.071424 9.152695 8.574123 8.545066 8.625114  
11723510\_ 7.223802 7.235967 7.127586 7.186537 7.228712 7.213979  
11723511\_ 4.565851 4.540024 4.52373 4.503368 4.602013 4.580495  
11723512\_ 7.115262 7.057387 7.045996 6.696093 6.882514 6.937775  
11723513\_ 8.389535 8.421768 8.401197 8.31708 8.242447 8.286141

11723514\_ 7. 495289 7. 376987 7. 340603 7. 436083 7. 308136 7. 337929  
11723515\_ 5. 339668 5. 496268 5. 547712 5. 523959 5. 54126 5. 619022  
11723516\_ 5. 073036 4. 923188 5. 024512 5. 005273 4. 923188 4. 958006  
11723517\_ 6. 082093 6. 167713 6. 193477 5. 924125 5. 799131 6. 003174  
11723518\_ 6. 606172 6. 571803 6. 542901 6. 256666 6. 378804 6. 17374  
11723519\_ 4. 859798 4. 725349 4. 810586 4. 692987 4. 680439 4. 545141  
11723520\_ 3. 536118 3. 526219 3. 625408 3. 702449 3. 702449 3. 701804  
11723521\_ 6. 054233 6. 123915 5. 950987 6. 576015 6. 496839 6. 645129  
11723522\_ 2. 038442 2. 131936 2. 00984 2. 047976 2. 018682 1. 825579  
11723523\_ 2. 553917 2. 711236 2. 605516 2. 556575 2. 605516 2. 605516  
11723524\_ 2. 819714 2. 922766 2. 913167 2. 739962 2. 945783 2. 956705  
11723525\_ 8. 531328 8. 502208 8. 56813 8. 402853 8. 397297 8. 39118  
11723526\_ 5. 544167 5. 578337 5. 498606 5. 696345 5. 624718 5. 676992  
11723527\_ 7. 65371 7. 614593 7. 69776 7. 318877 7. 310211 7. 295499  
11723528\_ 7. 448355 7. 341919 7. 373597 7. 206494 7. 186509 7. 218374  
11723529\_ 7. 147795 7. 239949 7. 314763 7. 436073 7. 434587 7. 434587  
11723530\_ 9. 138151 9. 041697 9. 148657 8. 798778 8. 827892 8. 773634  
11723531\_ 7. 968373 7. 940692 8. 034279 7. 834552 7. 847471 7. 941247  
11723532\_ 6. 377847 6. 328498 6. 300643 6. 198804 6. 170139 6. 278294  
11723533\_ 6. 256521 6. 09781 6. 193582 5. 988522 6. 065982 6. 02013  
11723534\_ 7. 341902 7. 418354 7. 423969 7. 399891 7. 446383 7. 467208  
11723535\_ 5. 189535 4. 93288 5. 127055 5. 329313 5. 356486 5. 446692  
11723536\_ 5. 181872 5. 017047 5. 033052 5. 074924 5. 061248 5. 366836  
11723537\_ 5. 234302 4. 938067 4. 721381 5. 044478 5. 123742 5. 073665  
11723538\_ 8. 571847 8. 548179 8. 557429 8. 648846 8. 754871 8. 677702  
11723539\_ 7. 341005 7. 212824 7. 30075 7. 256378 7. 228724 7. 22575  
11723540\_ 4. 633908 4. 450019 4. 379597 4. 63262 4. 668246 4. 564716  
11723541\_ 6. 023816 6. 011116 5. 892716 6. 146943 6. 177177 6. 11184  
11723542\_ 6. 558792 6. 514899 6. 526939 6. 545085 6. 71145 6. 706893  
11723543\_ 3. 045602 2. 935098 2. 977643 2. 84492 2. 658419 2. 700964  
11723544\_ 4. 847498 5. 036172 5. 036172 4. 818019 4. 597207 4. 611986  
11723545\_ 6. 117292 6. 188344 6. 225562 6. 184591 6. 100854 6. 107322  
11723546\_ 6. 222443 6. 306089 6. 379422 6. 214696 6. 104578 6. 173122  
11723547\_ 6. 389968 6. 333205 6. 343906 6. 275379 6. 21482 6. 251467  
11723548\_ 7. 70368 7. 716967 7. 770891 7. 543556 7. 554583 7. 598398  
11723549\_ 8. 59917 8. 508633 8. 553138 8. 546329 8. 500602 8. 50152  
11723550\_ 6. 015868 5. 980338 6. 093018 5. 984527 5. 918745 5. 98367  
11723551\_ 4. 808429 4. 815653 4. 709782 4. 889352 4. 841441 4. 787619  
11723552\_ 3. 099523 3. 529737 3. 694567 3. 509121 3. 51128 3. 503743  
11723553\_ 4. 133911 4. 472292 4. 119399 4. 306093 4. 166228 4. 300326  
11723554\_ 5. 351533 5. 485509 5. 720887 5. 520967 5. 50419 5. 643454  
11723555\_ 7. 12407 7. 046309 6. 971486 8. 215542 8. 169065 8. 002768  
11723556\_ 6. 805142 6. 830143 6. 684726 7. 988464 7. 912217 7. 798241  
11723557\_ 6. 743001 6. 448242 6. 567574 7. 336715 7. 384483 7. 373139  
11723558\_ 11. 12079 11. 10492 11. 1326 11. 04306 11. 08045 11. 07626  
11723559\_ 4. 604399 4. 229488 4. 730988 5. 512164 5. 461052 5. 486271  
11723560\_ 5. 643413 5. 74326 5. 674447 6. 164709 6. 236616 6. 247976  
11723561\_ 5. 018537 5. 00639 5. 18521 5. 811414 6. 001182 6. 02153  
11723562\_ 6. 355985 6. 279864 6. 441633 6. 409519 6. 251801 6. 385148  
11723563\_ 7. 358785 7. 309363 7. 414721 7. 351376 7. 426417 7. 472479  
11723564\_ 8. 892455 8. 894686 8. 824943 8. 938071 8. 970492 8. 978309

11723565\_ 8. 135131 8. 114264 7. 997526 8. 934299 8. 906654 8. 826201  
11723566\_ 7. 17143 7. 019951 7. 051133 6. 827551 6. 827551 6. 800971  
11723567\_ 8. 327224 8. 235542 8. 339424 8. 068175 7. 937884 8. 107278  
11723568\_ 5. 659519 5. 549533 5. 54671 5. 602481 5. 529017 5. 648908  
11723569\_ 8. 066867 8. 013223 8. 140763 7. 752765 7. 662026 7. 690193  
11723570\_ 1. 858783 2. 212015 2. 253009 2. 159964 1. 968425 2. 18238  
11723571\_ 7. 537827 7. 482432 7. 683464 7. 185319 7. 134285 7. 194829  
11723572\_ 4. 682812 4. 815683 4. 897332 4. 393098 4. 431722 4. 184504  
11723573\_ 5. 222899 5. 175726 5. 090513 4. 758599 4. 890539 5. 099836  
11723574\_ 5. 196989 5. 234514 5. 319704 4. 966645 4. 834489 4. 922971  
11723575\_ 7. 088531 6. 893019 7. 0757 7. 301595 7. 235718 7. 367654  
11723576\_ 5. 978153 5. 891578 5. 821481 5. 497735 5. 445261 5. 500912  
11723577\_ 5. 230704 4. 80946 4. 988579 4. 644496 4. 471371 4. 982876  
11723578\_ 6. 643773 6. 670797 6. 678812 5. 614455 5. 847757 5. 675661  
11723579\_ 4. 513241 4. 556083 4. 746221 4. 3521 4. 449135 4. 470714  
11723580\_ 8. 987895 8. 927997 9. 030146 8. 497463 8. 52196 8. 564913  
11723581\_ 7. 687632 7. 666568 7. 73854 7. 397546 7. 393484 7. 296303  
11723582\_ 6. 149362 6. 218729 6. 159771 6. 302948 6. 300643 6. 249759  
11723583\_ 7. 330406 7. 298032 7. 367169 7. 747754 7. 757705 7. 818711  
11723584\_ 7. 197987 7. 242525 7. 231337 7. 578136 7. 618047 7. 598022  
11723585\_ 5. 87216 5. 895597 6. 08091 5. 683463 5. 804327 5. 874148  
11723586\_ 4. 093686 3. 932897 3. 791765 4. 207344 4. 292956 4. 321293  
11723587\_ 8. 631943 8. 557603 8. 611819 8. 161449 8. 176158 8. 194909  
11723588\_ 6. 448728 6. 500442 6. 478025 6. 192876 6. 181519 6. 155358  
11723589\_ 7. 235559 7. 190568 7. 275471 6. 68849 6. 672355 6. 710413  
11723590\_ 8. 319038 8. 173236 8. 281521 7. 991571 8. 005167 8. 047105  
11723591\_ 6. 390998 6. 36665 6. 443899 6. 228723 6. 288842 6. 229135  
11723592\_ 5. 676992 5. 5733 5. 820052 6. 23711 6. 119129 6. 193267  
11723593\_ 5. 750081 5. 676872 5. 741661 5. 821608 5. 844553 5. 795165  
11723594\_ 6. 708685 6. 664687 6. 662691 6. 934262 6. 949919 6. 847714  
11723595\_ 4. 598369 4. 702619 4. 626061 4. 761566 4. 779129 4. 822279  
11723596\_ 4. 71933 4. 796951 4. 769603 5. 164054 5. 14362 5. 171367  
11723597\_ 9. 179667 9. 099935 9. 113357 9. 745796 9. 64958 9. 640434  
11723598\_ 7. 935436 7. 889044 7. 995479 8. 261036 8. 280665 8. 299366  
11723599\_ 8. 354572 8. 321375 8. 322815 7. 38517 7. 338291 7. 487186  
11723600\_ 3. 791483 3. 640335 4. 074959 3. 101013 3. 060766 2. 950523  
11723601\_ 7. 358667 7. 425872 7. 506734 7. 552192 7. 505352 7. 553585  
11723602\_ 6. 065245 6. 142893 6. 117772 6. 760552 6. 708353 6. 717402  
11723603\_ 5. 790102 5. 77598 5. 821344 5. 661756 5. 607717 5. 563892  
11723604\_ 7. 205274 7. 194708 7. 16318 7. 100084 7. 248715 7. 230373  
11723605\_ 6. 250664 6. 260069 6. 334694 6. 281671 6. 380056 6. 366479  
11723606\_ 8. 632456 8. 599085 8. 647015 8. 314309 8. 183465 8. 216722  
11723607\_ 5. 641142 5. 560481 5. 634041 6. 147425 6. 010617 5. 997486  
11723608\_ 7. 411912 7. 38333 7. 377057 7. 414844 7. 376955 7. 450715  
11723609\_ 3. 185212 3. 321551 3. 035943 3. 26174 3. 245469 3. 202412  
11723610\_ 4. 277392 4. 574613 4. 370337 4. 40461 4. 570706 4. 488281  
11723611\_ 3. 6804 3. 651156 3. 693903 3. 698763 3. 705625 3. 678531  
11723612\_ 4. 832862 4. 922595 5. 109968 5. 377937 5. 189858 5. 276641  
11723613\_ 3. 870806 3. 879141 3. 898051 3. 76134 4. 012324 4. 011907  
11723614\_ 5. 043721 4. 996659 4. 951542 4. 298286 4. 255482 4. 396258  
11723615\_ 4. 855426 4. 691239 4. 4466 4. 335176 4. 292368 4. 11456

11723616\_ 8. 548161 8. 560588 8. 583237 8. 707817 8. 750042 8. 738642  
11723617\_ 3. 426401 3. 202453 3. 088086 3. 357199 3. 488122 3. 426401  
11723618\_ 3. 375323 3. 380685 3. 138626 3. 459936 3. 349291 3. 46571  
11723619\_ 4. 889937 5. 085732 4. 944259 4. 944927 4. 889937 4. 761431  
11723620\_ 5. 746187 5. 8026 5. 800682 6. 263655 6. 503929 6. 365172  
11723621\_ 7. 632959 7. 671296 7. 608267 7. 166323 7. 299995 7. 302465  
11723622\_ 5. 855864 5. 875454 5. 82865 5. 875533 5. 917049 5. 869885  
11723623\_ 6. 768441 6. 660088 6. 626398 6. 507901 6. 397946 6. 415447  
11723624\_ 5. 104618 5. 142018 5. 11051 5. 305217 5. 242724 5. 073036  
11723625\_ 2. 627416 2. 864058 2. 913328 3. 02013 2. 899647 3. 162083  
11723626\_ 5. 954081 5. 988659 5. 934068 6. 036603 6. 097921 6. 013975  
11723627\_ 4. 870045 4. 762803 4. 88241 5. 073036 4. 900309 4. 842121  
11723628\_ 3. 00712 3. 079444 3. 009806 3. 257512 2. 996917 3. 189072  
11723629\_ 7. 96244 7. 950309 8. 094201 8. 300238 8. 305279 8. 243005  
11723630\_ 7. 383096 7. 392245 7. 317774 7. 248638 7. 136086 7. 254029  
11723631\_ 8. 749427 8. 665409 8. 803523 8. 320738 8. 287403 8. 34125  
11723632\_ 7. 624735 7. 579742 7. 684137 7. 745363 7. 706562 7. 833853  
11723633\_ 9. 710183 9. 685846 9. 732966 9. 963246 9. 956228 9. 953895  
11723634\_ 4. 971918 4. 976715 5. 029529 5. 152922 5. 075012 5. 073036  
11723635\_ 5. 614991 5. 554653 5. 980465 3. 919115 4. 497536 4. 428665  
11723636\_ 6. 054591 6. 067616 6. 080172 6. 242626 6. 140753 6. 249353  
11723637\_ 9. 571666 9. 549728 9. 47096 9. 684913 9. 581111 9. 546825  
11723638\_ 7. 479222 7. 415518 7. 503602 7. 234943 7. 400877 7. 418948  
11723639\_ 8. 073199 8. 072329 8. 031633 7. 983497 8. 027633 8. 021516  
11723640\_ 10. 2298 10. 39647 10. 34219 10. 2866 10. 2323 10. 16376  
11723641\_ 8. 17603 8. 068914 8. 154033 7. 18039 7. 268511 7. 141192  
11723642\_ 5. 388246 5. 228627 5. 153213 5. 289238 5. 184632 5. 242293  
11723643\_ 9. 079442 9. 021683 9. 106987 8. 9744 8. 992142 8. 995203  
11723644\_ 3. 024424 3. 170986 3. 22366 3. 057037 3. 199009 3. 121445  
11723645\_ 3. 279524 3. 385722 3. 076842 3. 456337 3. 279524 3. 232087  
11723646\_ 9. 586707 9. 538132 9. 545038 9. 354916 9. 32071 9. 352055  
11723647\_ 10. 22083 10. 18469 10. 26866 9. 883014 9. 81501 9. 872209  
11723648\_ 8. 008939 7. 971143 8. 041617 8. 112373 8. 218489 8. 169325  
11723649\_ 8. 173245 8. 072722 8. 08611 7. 964957 7. 940563 7. 861539  
11723650\_ 8. 957329 8. 866164 8. 892035 8. 91876 8. 949443 8. 949978  
11723651\_ 6. 962516 6. 836 6. 939529 6. 641325 6. 644892 6. 762383  
11723652\_ 6. 94414 7. 017648 6. 951269 7. 249349 7. 15126 7. 203616  
11723653\_ 7. 190228 7. 048372 7. 193351 7. 177006 7. 161742 7. 280144  
11723654\_ 3. 502187 3. 389381 3. 389381 3. 423073 3. 403205 3. 492615  
11723655\_ 9. 928155 9. 883303 9. 921338 9. 933072 9. 857132 9. 872785  
11723656\_ 8. 945421 8. 838256 8. 960169 8. 693377 8. 656603 8. 664504  
11723657\_ 7. 318581 7. 33366 7. 212651 7. 084716 7. 098699 7. 063896  
11723658\_ 5. 838078 5. 762845 5. 886256 5. 576469 5. 445449 5. 692745  
11723659\_ 7. 277402 7. 240781 7. 309588 6. 879065 6. 946976 6. 81555  
11723660\_ 7. 407295 7. 408525 7. 424752 7. 014076 7. 08962 6. 919871  
11723661\_ 6. 906503 6. 826258 6. 836538 6. 736039 6. 796068 6. 883762  
11723662\_ 6. 777187 6. 782465 6. 538964 6. 994007 7. 021538 6. 864125  
11723663\_ 11. 08481 11. 09424 11. 07815 11. 1429 11. 15221 11. 12066  
11723664\_ 6. 793827 6. 705399 6. 715669 6. 940605 7. 093201 7. 046195  
11723665\_ 8. 591396 8. 430432 8. 561953 8. 446019 8. 448954 8. 510126  
11723666\_ 8. 026957 7. 886682 7. 97376 7. 051848 7. 008076 7. 045865

11723667\_ 8. 856225 8. 830452 8. 906459 8. 049331 8. 011199 8. 156775  
11723668\_ 9. 948237 9. 945552 9. 951554 9. 271817 9. 264794 9. 250069  
11723669\_ 10. 32023 10. 35307 10. 28788 10. 01469 9. 911872 9. 834522  
11723670\_ 8. 475713 8. 450107 8. 486393 8. 354894 8. 335368 8. 286912  
11723671\_ 9. 286546 9. 287566 9. 270135 9. 053498 9. 09013 9. 116257  
11723672\_ 7. 661128 7. 537276 7. 632313 7. 242337 7. 121906 7. 105322  
11723673\_ 3. 927681 4. 241554 4. 442387 4. 266795 4. 158578 3. 972945  
11723674\_ 5. 37913 5. 2266 5. 37913 5. 318399 5. 154625 5. 228627  
11723675\_ 2. 900046 3. 474761 3. 329882 3. 142449 2. 904695 3. 240459  
11723676\_ 3. 462154 3. 351268 3. 352037 3. 273928 3. 529949 3. 316103  
11723677\_ 8. 874991 8. 804355 8. 804912 9. 365363 9. 391979 9. 383162  
11723678\_ 8. 260206 8. 394453 8. 33195 9. 102838 9. 025126 8. 967006  
11723679\_ 2. 164498 2. 180421 2. 235709 1. 73267 2. 051749 1. 931853  
11723680\_ 8. 165278 8. 19245 8. 216177 7. 456475 7. 522114 7. 561259  
11723681\_ 8. 072692 8. 066123 8. 077991 7. 920896 7. 938191 7. 929124  
11723682\_ 10. 49581 10. 40214 10. 50096 10. 45297 10. 51046 10. 46917  
11723683\_ 6. 579392 6. 646823 6. 637017 6. 956076 6. 887803 6. 944023  
11723684\_ 6. 817136 6. 761732 6. 776559 6. 82471 6. 894014 6. 810545  
11723685\_ 6. 329703 6. 319806 6. 42296 6. 163794 6. 184186 6. 317805  
11723686\_ 7. 605387 7. 513621 7. 641814 7. 115936 7. 049761 7. 089894  
11723687\_ 7. 245762 7. 216186 7. 32311 6. 929021 6. 919001 6. 85642  
11723688\_ 8. 028578 7. 893054 8. 006437 7. 498928 7. 559658 7. 550237  
11723689\_ 7. 808472 7. 628624 7. 770504 7. 351011 7. 406998 7. 392275  
11723690\_ 8. 647092 8. 718926 8. 676527 8. 376466 8. 339828 8. 345712  
11723691\_ 6. 660397 6. 448378 6. 636057 7. 102831 7. 135779 7. 154768  
11723692\_ 7. 391328 7. 207074 7. 244468 7. 503234 7. 518651 7. 520042  
11723693\_ 9. 829919 9. 825746 9. 871206 9. 749898 9. 727932 9. 763215  
11723694\_ 6. 073142 6. 067033 6. 022077 6. 018553 6. 068946 6. 03588  
11723695\_ 7. 948338 7. 91286 7. 884386 7. 842629 7. 839425 7. 877828  
11723696\_ 3. 346821 3. 267283 3. 495037 3. 301389 3. 257888 3. 365472  
11723697\_ 7. 005476 6. 929939 7. 017829 6. 565823 6. 56779 6. 641204  
11723698\_ 6. 105803 6. 27508 6. 126822 6. 40509 6. 509631 6. 587431  
11723699\_ 7. 805334 7. 659703 7. 722938 8. 203393 8. 17908 8. 165604  
11723700\_ 5. 808006 5. 781618 5. 868541 5. 742537 5. 688063 5. 793203  
11723701\_ 6. 81416 6. 650432 6. 730297 5. 480966 5. 523406 5. 742604  
11723702\_ 4. 64847 4. 623049 4. 773775 4. 003246 4. 05414 4. 122446  
11723703\_ 6. 284897 6. 452343 6. 287411 5. 667237 5. 542887 5. 770958  
11723704\_ 3. 633601 3. 453345 3. 737089 3. 244985 3. 253968 3. 334488  
11723705\_ 4. 491856 4. 530903 4. 444719 4. 369197 4. 196172 4. 176089  
11723706\_ 7. 607668 7. 60658 7. 658314 6. 910956 6. 932539 6. 968971  
11723707\_ 8. 604266 8. 510773 8. 523466 8. 389431 8. 39589 8. 318144  
11723708\_ 7. 09529 7. 177004 7. 077693 7. 125168 7. 074719 7. 085641  
11723709\_ 9. 56869 9. 514452 9. 540118 8. 592438 8. 552976 8. 485907  
11723710\_ 9. 079319 9. 039707 9. 052102 8. 811344 8. 832525 8. 842487  
11723711\_ 4. 218218 4. 28778 4. 079615 3. 985561 3. 838922 3. 807925  
11723712\_ 7. 933285 7. 808396 7. 959007 8. 111477 8. 008783 8. 048561  
11723713\_ 6. 188898 6. 244666 6. 229507 6. 758038 6. 85744 6. 911755  
11723714\_ 5. 003831 5. 189628 4. 988622 5. 160968 5. 116474 5. 159653  
11723715\_ 2. 784391 3. 061205 3. 025972 3. 133498 3. 004853 2. 715447  
11723716\_ 7. 877073 7. 838158 7. 892766 7. 58325 7. 657513 7. 729709  
11723717\_ 8. 029767 7. 968709 8. 019637 7. 95767 7. 999104 7. 949957



11723718\_ 9. 629209 9. 537856 9. 600119 9. 44019 9. 508993 9. 408096  
11723719\_ 8. 590241 8. 488536 8. 587537 8. 365525 8. 421435 8. 406086  
11723720\_ 5. 673847 5. 815789 5. 801967 6. 410848 6. 323531 6. 318025  
11723721\_ 8. 753058 8. 668937 8. 694862 8. 333496 8. 408027 8. 435383  
11723722\_ 8. 684988 8. 665318 8. 72341 8. 688247 8. 670558 8. 666185  
11723723\_ 8. 063163 7. 98393 8. 00792 7. 523645 7. 515037 7. 562731  
11723724\_ 8. 987899 8. 963363 9. 054548 8. 350677 8. 324453 8. 279974  
11723725\_ 8. 931393 8. 850184 8. 935114 8. 075033 8. 051522 8. 062392  
11723726\_ 9. 803778 9. 755447 9. 754486 9. 912352 9. 802716 9. 865044  
11723727\_ 4. 824832 4. 768629 5. 022407 4. 824195 5. 05859 4. 892448  
11723728\_ 2. 997216 3. 141218 3. 021393 3. 072179 3. 1374 3. 205558  
11723729\_ 4. 178492 4. 070444 3. 840278 4. 11566 4. 161948 4. 601083  
11723730\_ 6. 267706 6. 313409 6. 260434 6. 48052 6. 471869 6. 52053  
11723731\_ 8. 728363 8. 583076 8. 706483 8. 584622 8. 621955 8. 640166  
11723732\_ 8. 415273 8. 288499 8. 314413 8. 393258 8. 282016 8. 220571  
11723733\_ 7. 145431 7. 166464 7. 138815 6. 681408 6. 677451 6. 752593  
11723734\_ 7. 79019 7. 91466 7. 771224 7. 788062 7. 774441 7. 664984  
11723735\_ 7. 814029 7. 836431 7. 811436 7. 975642 8. 00155 7. 877762  
11723736\_ 7. 195331 7. 26918 7. 28326 7. 118622 7. 175724 7. 066584  
11723737\_ 6. 829401 6. 849603 6. 759037 6. 857634 6. 94645 6. 964964  
11723738\_ 8. 178098 8. 034212 8. 130497 7. 866885 7. 824454 7. 833007  
11723739\_ 8. 353611 8. 306766 8. 369225 8. 521247 8. 513021 8. 514625  
11723740\_ 8. 973368 8. 929687 8. 938767 9. 018721 8. 939593 9. 011636  
11723741\_ 5. 47834 5. 490041 5. 431141 5. 560559 5. 448466 5. 448466  
11723742\_ 5. 001068 5. 167159 5. 028886 5. 184171 5. 126836 5. 328586  
11723743\_ 5. 296992 5. 429903 5. 282685 5. 411246 5. 512334 5. 453228  
11723744\_ 4. 020994 3. 977702 3. 956193 4. 007807 3. 956193 4. 070432  
11723745\_ 5. 600356 5. 400462 5. 328642 5. 544936 5. 528129 5. 507713  
11723746\_ 4. 784672 4. 905232 4. 764926 4. 933836 4. 891599 4. 906658  
11723747\_ 7. 708349 7. 618623 7. 550176 8. 285819 8. 24344 8. 387269  
11723748\_ 4. 999435 5. 026244 4. 668045 5. 428249 5. 454324 5. 326642  
11723749\_ 3. 712286 3. 593549 3. 538835 3. 743915 3. 555613 3. 71568  
11723750\_ 7. 333865 7. 17362 7. 325505 6. 945215 6. 921488 7. 029907  
11723751\_ 4. 979669 4. 784965 4. 867945 5. 043993 5. 010416 5. 13452  
11723752\_ 8. 868011 8. 830381 8. 873223 10. 16435 10. 1823 10. 10117  
11723753\_ 8. 54036 8. 51662 8. 546862 8. 396273 8. 355583 8. 389563  
11723754\_ 3. 303103 3. 442562 3. 517554 3. 391686 3. 484523 3. 437044  
11723755\_ 3. 266588 3. 56526 3. 463517 3. 313532 3. 404411 3. 442698  
11723756\_ 9. 184096 9. 166679 9. 198445 9. 130936 9. 181811 9. 160279  
11723757\_ 10. 02598 9. 967988 10. 0391 10. 04676 10. 04227 9. 893865  
11723758\_ 8. 6021 8. 642802 8. 642974 8. 540432 8. 532111 8. 548319  
11723759\_ 7. 937281 7. 774516 7. 94293 7. 667668 7. 650449 7. 648672  
11723760\_ 8. 262308 8. 13849 8. 213687 8. 032854 8. 110814 8. 012119  
11723761\_ 6. 145387 6. 236548 6. 303587 6. 34864 6. 345084 6. 383216  
11723762\_ 6. 584888 6. 608662 6. 348725 6. 867672 6. 790012 6. 93329  
11723763\_ 7. 97343 7. 979159 7. 959007 7. 576132 7. 555089 7. 673287  
11723764\_ 7. 506903 7. 431595 7. 565374 7. 260387 7. 260364 7. 380595  
11723765\_ 4. 584933 4. 763543 4. 52373 4. 837953 4. 643717 4. 65065  
11723766\_ 7. 299162 7. 277336 7. 302499 7. 139803 7. 140858 7. 198478  
11723767\_ 6. 478741 6. 554256 6. 343366 6. 497398 6. 504231 6. 587227  
11723768\_ 7. 995098 7. 921973 7. 977179 7. 981442 7. 997492 7. 971167

11723769\_ 8. 071629 8. 112653 8. 088087 8. 449192 8. 38169 8. 319761  
11723770\_ 8. 35816 8. 35559 8. 397226 8. 435451 8. 410841 8. 478052  
11723771\_ 7. 132051 7. 078542 7. 174888 7. 582778 7. 537405 7. 552479  
11723772\_ 5. 91291 5. 973955 6. 220774 5. 879302 5. 865761 5. 751307  
11723773\_ 7. 472989 7. 605017 7. 497157 7. 514688 7. 403084 7. 487737  
11723774\_ 7. 448935 7. 515232 7. 458147 7. 524979 7. 379481 7. 436566  
11723775\_ 7. 451601 7. 45896 7. 453237 7. 435698 7. 525502 7. 534004  
11723776\_ 6. 346382 6. 343813 6. 271845 6. 60628 6. 664456 6. 739095  
11723777\_ 7. 476233 7. 332826 7. 468297 7. 971428 7. 982043 8. 003167  
11723778\_ 4. 382699 4. 138773 4. 153484 4. 165157 4. 288018 4. 170417  
11723779\_ 3. 975155 4. 378053 4. 32921 3. 966798 4. 011143 4. 118394  
11723780\_ 7. 135896 7. 062924 7. 046687 7. 084251 7. 15468 7. 261483  
11723781\_ 7. 562201 7. 498249 7. 462137 7. 205902 7. 06876 7. 049973  
11723782\_ 6. 266565 6. 054708 6. 157845 7. 333106 7. 246145 7. 439182  
11723783\_ 8. 297797 8. 258182 8. 345013 7. 798908 7. 854767 7. 812309  
11723784\_ 6. 345286 6. 316319 6. 431176 6. 440594 6. 51777 6. 310627  
11723785\_ 7. 619775 7. 652688 7. 656997 7. 802202 7. 750301 7. 723841  
11723786\_ 7. 129224 7. 102767 7. 098853 6. 858044 6. 938888 6. 833021  
11723787\_ 5. 495436 5. 370297 5. 374866 5. 073036 5. 043685 5. 228627  
11723788\_ 5. 712297 5. 675413 5. 721372 5. 584813 5. 629029 5. 487764  
11723789\_ 6. 524463 6. 550157 6. 495289 6. 16014 6. 205254 6. 159771  
11723790\_ 4. 540638 4. 63312 4. 307575 4. 442212 4. 547454 4. 536031  
11723791\_ 4. 66611 4. 861456 4. 615546 4. 954062 4. 949503 4. 920773  
11723792\_ 8. 031227 7. 901259 7. 956929 7. 737016 7. 780234 7. 722204  
11723793\_ 8. 693739 8. 679993 8. 694923 8. 480719 8. 532212 8. 523227  
11723794\_ 6. 619247 6. 736437 6. 680326 6. 863476 6. 777612 6. 762395  
11723795\_ 5. 672743 5. 608146 5. 850475 6. 131804 6. 064053 6. 169868  
11723796\_ 6. 811083 6. 558405 6. 654932 6. 417549 6. 551062 6. 546835  
11723797\_ 7. 402384 7. 384612 7. 452873 7. 858039 7. 832071 7. 818685  
11723798\_ 8. 329142 8. 278371 8. 344766 8. 858196 8. 845826 8. 857398  
11723799\_ 8. 62852 8. 552375 8. 672408 9. 220818 9. 173836 9. 135697  
11723800\_ 7. 125801 7. 138476 7. 110311 7. 14348 7. 136275 7. 102197  
11723801\_ 7. 564271 7. 562873 7. 650368 7. 767758 7. 742528 7. 783571  
11723802\_ 4. 879629 5. 029332 4. 923137 5. 029332 5. 078654 5. 156885  
11723803\_ 2. 631247 2. 770966 2. 845093 2. 695403 2. 697767 2. 682474  
11723804\_ 9. 708299 9. 651545 9. 628966 9. 764662 9. 771529 9. 798347  
11723805\_ 7. 498262 7. 449138 7. 467107 7. 94719 7. 960281 7. 991664  
11723806\_ 5. 823243 5. 765597 5. 84428 5. 531296 5. 420497 5. 587833  
11723807\_ 7. 751994 7. 630514 7. 644305 7. 321717 7. 398845 7. 375148  
11723808\_ 7. 722204 7. 644917 7. 69561 7. 303689 7. 36336 7. 37502  
11723809\_ 7. 356041 7. 433885 7. 470279 7. 127478 6. 990598 7. 121189  
11723810\_ 6. 864811 6. 858082 6. 896451 6. 712601 6. 655318 6. 799746  
11723811\_ 6. 621846 6. 732189 6. 653857 6. 436257 6. 487205 6. 538567  
11723812\_ 6. 660722 6. 431763 6. 619536 6. 018553 6. 32709 5. 949721  
11723813\_ 8. 614275 8. 72035 8. 735371 8. 788452 8. 734936 8. 830002  
11723814\_ 8. 490204 8. 429093 8. 494383 8. 653344 8. 671649 8. 659535  
11723815\_ 6. 898793 6. 879 6. 891349 6. 699641 6. 753731 6. 831197  
11723816\_ 4. 531173 4. 42135 4. 453063 4. 604923 4. 642173 4. 630707  
11723817\_ 4. 73158 4. 532958 4. 709463 4. 944667 4. 793814 4. 816972  
11723818\_ 5. 870242 6. 011929 5. 789294 5. 816344 5. 896409 5. 784631  
11723819\_ 5. 980411 5. 821102 6. 105572 5. 34794 5. 611243 5. 644633

11723820\_ 3. 069363 3. 190049 3. 290188 3. 095841 3. 07207 3. 419725  
11723821\_ 10. 76435 10. 73384 10. 73782 9. 872847 9. 840203 9. 852377  
11723822\_ 5. 571819 5. 7917 5. 763634 5. 551295 5. 656983 5. 543527  
11723823\_ 4. 914557 4. 529301 4. 833635 4. 648675 4. 812019 4. 760051  
11723824\_ 5. 926672 5. 789947 5. 782196 5. 857634 5. 724767 5. 849541  
11723825\_ 6. 568203 6. 46054 6. 430288 6. 429911 6. 421267 6. 422302  
11723826\_ 3. 899454 3. 853151 3. 882446 3. 938177 3. 871058 4. 018031  
11723827\_ 6. 828962 6. 758426 6. 774171 6. 684512 6. 736076 6. 755417  
11723828\_ 5. 54757 5. 580895 5. 633593 5. 798896 5. 926028 5. 866839  
11723829\_ 6. 445826 6. 235054 6. 418754 7. 471475 7. 450154 7. 433766  
11723830\_ 4. 584933 4. 477413 4. 694838 5. 572308 5. 668408 5. 624733  
11723831\_ 7. 464031 7. 383029 7. 497311 7. 492603 7. 420072 7. 503427  
11723832\_ 6. 205376 6. 185073 6. 25317 5. 757691 5. 711424 5. 599211  
11723833\_ 5. 586393 5. 808959 5. 643713 5. 437568 5. 426098 5. 171097  
11723834\_ 4. 710666 4. 793689 4. 978952 4. 92872 4. 940812 5. 007271  
11723835\_ 7. 946734 7. 861103 7. 941997 7. 345732 7. 396236 7. 392275  
11723836\_ 5. 805009 5. 933557 5. 794286 5. 97861 5. 918745 5. 910039  
11723837\_ 6. 305976 6. 594872 6. 384076 6. 643785 6. 567722 6. 564439  
11723838\_ 6. 433663 6. 425189 6. 281779 5. 51372 5. 36323 5. 517624  
11723839\_ 7. 818775 7. 906081 7. 946968 7. 776372 7. 836339 7. 891928  
11723840\_ 7. 587428 7. 506456 7. 481706 8. 432521 8. 296129 8. 350542  
11723841\_ 5. 962478 6. 124176 5. 797173 6. 688454 6. 749487 6. 575341  
11723842\_ 8. 090311 8. 06071 8. 148451 7. 676095 7. 673241 7. 587428  
11723843\_ 2. 313709 2. 504835 2. 378766 2. 541313 2. 337318 2. 486284  
11723844\_ 9. 540582 9. 555696 9. 491869 9. 431051 9. 434322 9. 39517  
11723845\_ 2. 968265 2. 971389 3. 036323 2. 940647 3. 208326 2. 824071  
11723846\_ 4. 65583 4. 709463 4. 584933 4. 386059 4. 459939 4. 760542  
11723847\_ 7. 867248 7. 8429 7. 919164 7. 846959 7. 871985 7. 909801  
11723848\_ 6. 414953 6. 307703 6. 171815 6. 324369 6. 367112 6. 392529  
11723849\_ 3. 875984 3. 75817 4. 052132 3. 813025 4. 012838 3. 916296  
11723850\_ 4. 841942 4. 738014 4. 810493 4. 902728 4. 70897 4. 850662  
11723851\_ 5. 707082 5. 510597 5. 623448 5. 547626 5. 614234 5. 525866  
11723852\_ 2. 871094 3. 061205 2. 874619 2. 934228 2. 978155 3. 180062  
11723853\_ 3. 87759 3. 979334 3. 808264 3. 928681 4. 069783 3. 931972  
11723854\_ 7. 375453 7. 34631 7. 315403 7. 108474 7. 054895 7. 109581  
11723855\_ 7. 225372 7. 147988 7. 256702 7. 302274 7. 334111 7. 339537  
11723856\_ 5. 247739 5. 073346 5. 208386 5. 457227 5. 584813 5. 467595  
11723857\_ 3. 950796 4. 067703 4. 295844 4. 606747 4. 171663 4. 347179  
11723858\_ 5. 658793 5. 872504 5. 689407 6. 441548 6. 285847 6. 230147  
11723859\_ 9. 508155 9. 43137 9. 534687 9. 530879 9. 563115 9. 594055  
11723860\_ 6. 951838 6. 930739 6. 960731 6. 727853 6. 778336 6. 779107  
11723861\_ 4. 295292 4. 304853 4. 143035 4. 437388 4. 203681 4. 162147  
11723862\_ 1. 885797 1. 951441 2. 099541 2. 002207 2. 194924 1. 933928  
11723863\_ 5. 307097 4. 900897 5. 005349 4. 800016 4. 774332 4. 839862  
11723864\_ 6. 6653 6. 486331 6. 578255 6. 539082 6. 57045 6. 572309  
11723865\_ 4. 512348 4. 512348 4. 314356 4. 800046 4. 502877 4. 764883  
11723866\_ 2. 069092 1. 82179 1. 820211 1. 836988 1. 674124 1. 743056  
11723867\_ 5. 463383 5. 578823 5. 535506 4. 752165 5. 195487 5. 113801  
11723868\_ 7. 911199 7. 842319 7. 855529 7. 162528 7. 174877 7. 127043  
11723869\_ 6. 642467 6. 607793 6. 672937 7. 119731 7. 151752 7. 138961  
11723870\_ 5. 332341 5. 390191 5. 31491 5. 594265 5. 482869 5. 526299

11723871\_ 5. 094362 5. 345598 5. 18214 4. 690985 4. 71732 4. 630656  
11723872\_ 6. 616985 6. 510341 6. 450763 6. 308483 6. 373173 6. 286268  
11723873\_ 6. 548906 6. 648659 6. 548906 6. 771786 6. 708481 6. 671751  
11723874\_ 6. 345665 6. 422789 6. 428975 6. 383618 6. 418723 6. 439039  
11723875\_ 5. 185815 5. 055608 5. 150441 5. 148939 5. 176586 5. 182889  
11723876\_ 5. 068949 4. 974108 5. 113834 5. 114734 5. 146832 4. 975041  
11723877\_ 5. 193734 5. 313598 4. 930507 5. 394579 5. 236108 5. 338462  
11723878\_ 4. 715387 4. 600177 4. 839439 4. 762592 4. 749137 4. 984669  
11723879\_ 5. 080764 4. 920539 5. 171523 5. 485448 5. 229918 5. 297498  
11723880\_ 6. 180077 6. 39531 6. 182222 6. 564915 6. 536235 6. 64781  
11723881\_ 5. 704919 5. 507415 5. 642619 5. 336019 5. 544472 5. 608013  
11723882\_ 4. 624982 4. 820303 4. 486277 4. 672663 4. 700243 4. 700243  
11723883\_ 6. 34782 6. 19363 6. 443718 5. 622395 5. 729057 5. 680502  
11723884\_ 7. 664444 7. 657819 7. 722204 7. 009306 7. 065198 7. 141758  
11723885\_ 5. 977583 6. 052821 5. 977154 6. 431328 6. 479776 6. 387385  
11723886\_ 5. 197318 5. 201657 5. 008268 5. 239548 5. 09898 5. 307583  
11723887\_ 6. 580264 6. 626853 6. 739509 6. 514334 6. 543867 6. 451129  
11723888\_ 7. 326385 7. 374608 7. 393315 7. 027427 7. 060539 7. 150848  
11723889\_ 6. 810924 6. 564709 6. 668677 6. 247329 6. 254453 6. 211406  
11723890\_ 6. 915512 6. 897146 6. 785398 6. 792914 6. 818609 6. 895338  
11723891\_ 5. 39622 5. 380649 5. 185172 5. 925772 5. 783789 5. 593909  
11723892\_ 4. 305005 4. 267656 4. 273643 4. 233369 4. 376898 4. 510278  
11723893\_ 8. 384916 8. 474078 8. 25042 8. 457715 8. 287887 8. 116868  
11723894\_ 6. 311859 6. 357668 6. 452799 6. 588185 6. 374111 6. 418808  
11723895\_ 6. 48664 6. 546818 6. 628753 6. 318829 6. 253744 6. 336676  
11723896\_ 6. 591861 6. 517932 6. 526095 6. 804127 6. 710352 6. 682519  
11723897\_ 5. 87664 5. 988233 5. 75572 6. 049816 6. 03226 6. 003427  
11723898\_ 7. 420587 7. 507271 7. 440534 7. 609721 7. 639003 7. 642756  
11723899\_ 5. 789834 5. 977159 5. 494486 5. 910055 5. 737521 5. 962606  
11723900\_ 7. 372618 7. 330644 7. 478392 7. 505422 7. 540754 7. 57823  
11723901\_ 2. 763653 3. 202608 2. 914837 2. 610559 2. 621977 2. 672272  
11723902\_ 4. 94619 4. 815683 5. 179141 4. 734009 4. 742687 4. 86497  
11723903\_ 4. 486832 4. 56829 4. 544761 4. 209627 4. 306982 4. 410182  
11723904\_ 3. 679872 3. 610627 3. 499711 3. 366889 3. 502713 3. 398236  
11723905\_ 5. 907283 5. 957954 5. 976082 5. 432984 5. 613963 5. 374866  
11723906\_ 7. 03682 6. 952039 7. 077939 6. 451606 6. 262494 6. 497107  
11723907\_ 6. 160379 6. 268161 6. 235769 6. 537653 6. 536402 6. 507414  
11723908\_ 4. 694482 4. 613647 4. 676076 4. 07973 4. 284452 4. 330055  
11723909\_ 8. 227843 8. 158719 8. 183267 8. 547162 8. 609663 8. 575314  
11723910\_ 5. 540878 5. 678887 5. 568696 5. 823562 5. 787717 5. 625363  
11723911\_ 3. 872834 3. 733439 3. 619114 3. 482597 3. 61308 3. 54719  
11723912\_ 3. 631342 3. 570817 3. 779992 3. 631342 3. 65655 3. 60108  
11723913\_ 7. 975586 7. 912129 8. 025211 8. 234514 8. 213681 8. 237152  
11723914\_ 7. 440875 7. 374289 7. 437033 7. 608241 7. 569539 7. 569883  
11723915\_ 4. 955208 4. 72333 4. 772366 4. 782114 4. 919404 4. 94649  
11723916\_ 6. 957093 7. 106772 6. 999171 7. 575933 7. 576788 7. 586504  
11723917\_ 11. 07192 11. 0187 11. 04475 11. 02287 11. 05539 11. 05094  
11723918\_ 10. 52335 10. 50395 10. 50882 10. 50256 10. 51437 10. 53145  
11723919\_ 8. 454076 8. 343019 8. 417475 8. 615525 8. 623989 8. 546393  
11723920\_ 4. 687291 4. 537226 4. 486779 4. 5566 4. 52373 4. 644401  
11723921\_ 3. 35664 3. 082999 3. 20902 2. 98828 3. 07 3. 043617

11723922\_ 7. 367116 7. 313336 7. 466843 7. 197067 7. 353795 7. 246163  
11723923\_ 7. 720861 7. 757545 7. 684144 7. 433305 7. 589551 7. 596638  
11723924\_ 8. 425565 8. 276331 8. 431192 8. 431902 8. 528429 8. 423865  
11723925\_ 4. 830851 4. 863196 4. 782122 4. 980255 4. 925988 5. 078913  
11723926\_ 3. 50012 3. 444317 3. 192045 3. 704334 3. 848061 3. 875072  
11723927\_ 4. 726263 4. 763543 4. 81946 5. 040086 5. 076474 5. 093021  
11723928\_ 5. 120797 4. 943551 4. 972905 6. 008565 6. 032367 6. 028205  
11723929\_ 4. 756162 5. 071925 4. 870297 5. 13014 5. 089016 5. 337984  
11723930\_ 6. 492119 6. 313481 6. 485083 6. 409654 6. 485138 6. 39508  
11723931\_ 11. 77418 11. 72651 11. 77064 11. 74725 11. 77128 11. 73677  
11723932\_ 4. 901105 5. 105366 4. 894128 5. 18899 5. 088472 5. 00461  
11723933\_ 5. 11527 5. 189628 5. 17639 5. 172244 5. 085711 5. 092404  
11723934\_ 5. 249753 5. 241773 5. 166439 5. 109418 5. 333723 5. 244219  
11723935\_ 5. 759547 5. 872415 5. 715633 5. 746038 5. 934556 5. 797936  
11723936\_ 6. 62377 6. 552826 6. 646834 6. 776072 6. 7905 6. 794958  
11723937\_ 9. 695639 9. 573352 9. 617484 9. 298265 9. 343357 9. 281174  
11723938\_ 8. 184102 8. 230613 8. 19309 8. 262916 8. 188511 8. 221628  
11723939\_ 10. 03769 10. 06504 10. 03856 10. 69868 10. 73186 10. 664  
11723940\_ 3. 589528 3. 82882 3. 624449 3. 756365 3. 601208 3. 669974  
11723941\_ 8. 620795 8. 57486 8. 492785 8. 459046 8. 538648 8. 578039  
11723942\_ 8. 025723 7. 967907 7. 974863 7. 814205 7. 860073 7. 917752  
11723943\_ 8. 211021 8. 145974 8. 143606 8. 179075 8. 143559 8. 043245  
11723944\_ 9. 782383 9. 83489 9. 799615 9. 665506 9. 674166 9. 586537  
11723945\_ 10. 67655 10. 60507 10. 61201 10. 3812 10. 42012 10. 34343  
11723946\_ 5. 657515 5. 621214 5. 602337 5. 199199 5. 369352 5. 235874  
11723947\_ 5. 468386 5. 424817 5. 470834 4. 57098 4. 460946 4. 250317  
11723948\_ 4. 851738 4. 9226 5. 223199 4. 855511 4. 742474 4. 890744  
11723949\_ 1. 891228 2. 002944 1. 995297 1. 905927 1. 93452 1. 956587  
11723950\_ 8. 878138 8. 818029 8. 815367 9. 551996 9. 47754 9. 477583  
11723951\_ 7. 743124 7. 741316 7. 706801 7. 180249 7. 31014 7. 373327  
11723952\_ 5. 168338 5. 252671 5. 039571 5. 327615 5. 227434 5. 343204  
11723953\_ 9. 411176 9. 369356 9. 36704 9. 25701 9. 294093 9. 296759  
11723954\_ 10. 13234 10. 09112 10. 04759 10. 14999 10. 12261 10. 16104  
11723955\_ 9. 399131 9. 339257 9. 383289 9. 210907 9. 230917 9. 211065  
11723956\_ 8. 627395 8. 622302 8. 662756 8. 514695 8. 536399 8. 550225  
11723957\_ 5. 671422 5. 553018 5. 820699 6. 572371 6. 662942 6. 604788  
11723958\_ 10. 29007 10. 26915 10. 29919 10. 64318 10. 58604 10. 57074  
11723959\_ 6. 061066 6. 13215 6. 209024 6. 242023 6. 122294 6. 127813  
11723960\_ 8. 614591 8. 507175 8. 605461 8. 332415 8. 406301 8. 311881  
11723961\_ 6. 090664 6. 074934 6. 154499 5. 977166 6. 117333 5. 910409  
11723962\_ 8. 695171 8. 633515 8. 690195 9. 007337 8. 977798 8. 940749  
11723963\_ 8. 113876 8. 072329 8. 158164 8. 128016 8. 083919 8. 151129  
11723964\_ 8. 414586 8. 408395 8. 43951 8. 401367 8. 460631 8. 529913  
11723965\_ 6. 644381 6. 408527 6. 618383 6. 709612 6. 675069 6. 65054  
11723966\_ 4. 445953 4. 463876 4. 198898 4. 635919 4. 545476 4. 652817  
11723967\_ 5. 540424 5. 732315 5. 688783 5. 671225 5. 619292 5. 708516  
11723968\_ 6. 861351 6. 959211 6. 829627 6. 854604 6. 800836 6. 84929  
11723969\_ 8. 793792 8. 81002 8. 777683 8. 769163 8. 822692 8. 717278  
11723970\_ 8. 11698 8. 072073 8. 135985 7. 778141 7. 953664 7. 858831  
11723971\_ 7. 644228 7. 532437 7. 686316 8. 215794 8. 291981 8. 300711  
11723972\_ 6. 229136 6. 194412 6. 251 7. 108858 7. 256439 7. 236819

11723973\_ 7. 894967 7. 768004 7. 914738 8. 011738 7. 999188 8. 017245  
11723974\_ 4. 441834 4. 62288 4. 36638 4. 327491 4. 345587 4. 279795  
11723975\_ 5. 654453 5. 575759 5. 566524 5. 46825 5. 447981 5. 565405  
11723976\_ 5. 833826 5. 817364 5. 78028 5. 969766 5. 956423 5. 828057  
11723977\_ 5. 863122 6. 009381 6. 230131 6. 809059 6. 537335 6. 580961  
11723978\_ 6. 609782 6. 641378 6. 677479 6. 990926 7. 093639 7. 01706  
11723979\_ 7. 08881 7. 04434 7. 118148 7. 257341 7. 30237 7. 219895  
11723980\_ 6. 688259 6. 748056 6. 641618 6. 875977 6. 785532 6. 858383  
11723981\_ 6. 198569 6. 050801 5. 980611 5. 408045 5. 492221 5. 471757  
11723982\_ 5. 442778 5. 433294 5. 237723 5. 29242 5. 235979 5. 349476  
11723983\_ 5. 160888 5. 089973 5. 2222 5. 26034 5. 256368 5. 367938  
11723984\_ 8. 050883 8. 042408 8. 08611 7. 963529 7. 980759 7. 944311  
11723985\_ 7. 855934 7. 845187 7. 948338 7. 750412 7. 72902 7. 757701  
11723986\_ 8. 868701 8. 826467 8. 851334 8. 641894 8. 686483 8. 632371  
11723987\_ 9. 146344 9. 079989 9. 166262 8. 925842 8. 93538 8. 885314  
11723988\_ 5. 102143 4. 954474 5. 383289 5. 720911 5. 600924 5. 6685  
11723989\_ 6. 817986 6. 77085 6. 834935 6. 554512 6. 65814 6. 392029  
11723990\_ 3. 524497 3. 398236 3. 627336 3. 691011 3. 663613 3. 545941  
11723991\_ 7. 699797 7. 619347 7. 599596 7. 970151 8. 007193 8. 087902  
11723992\_ 6. 795256 6. 754805 6. 780721 7. 29357 7. 171989 7. 192723  
11723993\_ 7. 384102 7. 366511 7. 422089 7. 425755 7. 487215 7. 580527  
11723994\_ 8. 054351 8. 001566 8. 055649 8. 159012 8. 223104 8. 161098  
11723995\_ 5. 466292 5. 440909 5. 680759 5. 882598 5. 839476 5. 783425  
11723996\_ 6. 944582 6. 859452 6. 915046 6. 978764 6. 947964 7. 005588  
11723997\_ 7. 637464 7. 637245 7. 565526 7. 230426 7. 222413 7. 246346  
11723998\_ 5. 822605 5. 543748 5. 763462 6. 852555 6. 745535 6. 931446  
11723999\_ 5. 209259 5. 201775 5. 15005 5. 228928 5. 221993 5. 236155  
11724000\_ 8. 853477 8. 788974 8. 817733 8. 608804 8. 60071 8. 619223  
11724001\_ 6. 334648 6. 370364 6. 291748 6. 453127 6. 414177 6. 65528  
11724002\_ 3. 617677 3. 664968 3. 547313 3. 728409 3. 782624 3. 664968  
11724003\_ 3. 398359 3. 534823 3. 336042 3. 328645 3. 434876 3. 177104  
11724004\_ 2. 309885 2. 049387 2. 180572 2. 088775 2. 344328 2. 005806  
11724005\_ 2. 583088 2. 73117 2. 604932 2. 513 2. 615668 2. 536061  
11724006\_ 4. 326277 4. 509644 4. 227247 4. 300689 4. 362671 4. 331177  
11724007\_ 1. 97418 2. 016414 1. 894517 2. 005856 2. 166552 1. 995297  
11724008\_ 5. 189698 5. 394781 5. 290359 5. 402676 5. 387663 5. 53859  
11724009\_ 6. 014393 6. 069802 6. 102821 6. 156117 6. 227578 6. 180435  
11724010\_ 5. 763634 5. 777786 5. 727053 5. 990097 5. 956378 5. 994475  
11724011\_ 7. 545192 7. 555474 7. 516169 8. 31155 8. 162281 8. 194198  
11724012\_ 6. 930959 7. 030872 6. 90301 7. 297599 7. 370706 7. 44013  
11724013\_ 8. 283903 8. 265176 8. 251366 8. 265087 8. 165116 8. 222966  
11724014\_ 8. 330574 8. 211722 8. 32375 8. 432203 8. 375329 8. 440504  
11724015\_ 5. 870242 5. 957954 5. 886481 6. 042811 5. 982941 6. 0758  
11724016\_ 8. 473214 8. 426486 8. 440636 8. 545775 8. 520919 8. 520531  
11724017\_ 4. 574636 4. 512636 4. 51289 3. 867699 3. 606313 3. 874267  
11724018\_ 5. 673177 5. 591638 5. 555038 5. 955841 5. 757619 5. 813857  
11724019\_ 6. 222818 6. 266882 6. 216471 6. 311179 6. 414927 6. 305391  
11724020\_ 2. 864461 2. 689502 2. 590813 2. 83198 2. 863441 2. 677237  
11724021\_ 7. 583514 7. 514104 7. 532407 6. 257434 6. 225381 6. 417769  
11724022\_ 6. 619756 6. 557536 6. 680585 6. 858266 6. 921752 6. 881297  
11724023\_ 5. 695513 5. 479265 5. 695131 5. 913267 5. 950188 5. 954173

11724024\_ 7. 193211 7. 260892 7. 196037 7. 398177 7. 349201 7. 441398  
11724025\_ 7. 600691 7. 467508 7. 513062 7. 282569 7. 328003 7. 238362  
11724026\_ 5. 878217 5. 929776 6. 018553 6. 896373 6. 709578 6. 8056  
11724027\_ 7. 477866 7. 517559 7. 452414 7. 556611 7. 647655 7. 629181  
11724028\_ 7. 274216 7. 198721 7. 249518 6. 688764 6. 565393 6. 658161  
11724029\_ 6. 54886 6. 546927 6. 48468 6. 571108 6. 522611 6. 577862  
11724030\_ 5. 99911 5. 968688 5. 986135 5. 899597 5. 947855 5. 982373  
11724031\_ 4. 880901 4. 887359 4. 778784 4. 911991 4. 799877 4. 869545  
11724032\_ 7. 610232 7. 474342 7. 663999 8. 658194 8. 585913 8. 647783  
11724033\_ 8. 209578 8. 096583 8. 052571 7. 765944 7. 837696 7. 692954  
11724034\_ 6. 579945 6. 453294 6. 48754 5. 942074 5. 887205 6. 118838  
11724035\_ 6. 356326 6. 348498 6. 18194 6. 416549 6. 263567 6. 22883  
11724036\_ 4. 318975 4. 533965 4. 438222 3. 639061 3. 719695 3. 667139  
11724037\_ 5. 78659 5. 641466 5. 721784 4. 436839 4. 259837 4. 431446  
11724038\_ 4. 981911 5. 101216 5. 154195 4. 312681 4. 377347 4. 236375  
11724039\_ 4. 259523 4. 473497 4. 808478 5. 196236 5. 151399 5. 347133  
11724040\_ 4. 032765 3. 943808 4. 101593 4. 091549 4. 209497 4. 260139  
11724041\_ 7. 078616 6. 972769 7. 161061 7. 198141 7. 125418 7. 149342  
11724042\_ 6. 198756 6. 273834 6. 252639 6. 335273 6. 451097 6. 308221  
11724043\_ 5. 436828 5. 409294 5. 376786 5. 448296 5. 297498 5. 321518  
11724044\_ 4. 67659 4. 67659 4. 67659 4. 720098 4. 594746 4. 67659  
11724045\_ 5. 90307 5. 921864 5. 891619 5. 978779 6. 017293 5. 938898  
11724046\_ 8. 207639 8. 156465 8. 250353 8. 186502 8. 138828 8. 188152  
11724047\_ 5. 676992 5. 601908 5. 633257 5. 689731 5. 714958 5. 755454  
11724048\_ 6. 900233 6. 833398 6. 826144 6. 796867 6. 847879 6. 83809  
11724049\_ 7. 959656 7. 943462 8. 058361 8. 258364 8. 236568 8. 201604  
11724050\_ 4. 236281 4. 123475 4. 257066 4. 449645 4. 313592 4. 206452  
11724051\_ 6. 874711 6. 914211 6. 957917 6. 926562 6. 924385 6. 92174  
11724052\_ 7. 03991 7. 089177 7. 085652 7. 113168 7. 17448 7. 280725  
11724053\_ 6. 996501 6. 995907 7. 064488 7. 273339 7. 308511 7. 277715  
11724054\_ 5. 112233 5. 092707 5. 236459 5. 753359 5. 728856 5. 615041  
11724055\_ 6. 837373 6. 797806 6. 947404 7. 450366 7. 384988 7. 3461  
11724056\_ 7. 438206 7. 29975 7. 486919 7. 431957 7. 448105 7. 511713  
11724057\_ 7. 748765 7. 674747 7. 657481 7. 126997 7. 154768 7. 10576  
11724058\_ 7. 067577 7. 035939 7. 048877 7. 207719 7. 274802 7. 248288  
11724059\_ 6. 711049 6. 67895 6. 531748 6. 339814 6. 307991 6. 31306  
11724060\_ 3. 822746 3. 668824 3. 740892 4. 15369 3. 867208 4. 039792  
11724061\_ 7. 799789 7. 78033 7. 853791 7. 948338 7. 981917 7. 954986  
11724062\_ 8. 344668 8. 286519 8. 389348 8. 474364 8. 520956 8. 437511  
11724063\_ 3. 484067 3. 5932 3. 40587 3. 40587 3. 527322 3. 538298  
11724064\_ 7. 660998 7. 557346 7. 627447 7. 890489 7. 969165 7. 935569  
11724065\_ 2. 498638 2. 84316 2. 72347 2. 876858 2. 692658 2. 692658  
11724066\_ 9. 740491 9. 69117 9. 742864 9. 871063 9. 903483 9. 858177  
11724067\_ 5. 709262 5. 664648 5. 534195 5. 8894 5. 853002 5. 840826  
11724068\_ 5. 999888 5. 932574 6. 163712 5. 999049 5. 880082 6. 105812  
11724069\_ 4. 275543 4. 569531 4. 481803 4. 431569 4. 52373 4. 25155  
11724070\_ 6. 867491 6. 943215 7. 08741 6. 943215 7. 02157 6. 827801  
11724071\_ 6. 89537 6. 779764 6. 861402 7. 104253 7. 171391 7. 15518  
11724072\_ 6. 051554 6. 011565 5. 995075 5. 706712 5. 842321 5. 875729  
11724073\_ 5. 584813 5. 546401 5. 444493 6. 242222 6. 160842 6. 222829  
11724074\_ 7. 937274 7. 999302 8. 001621 8. 016096 8. 103421 8. 020702

11724075\_ 2. 921213 2. 805903 2. 848887 2. 835573 2. 981759 2. 864401  
11724076\_ 1. 755128 1. 809713 2. 014986 1. 73029 2. 03623 1. 744247  
11724077\_ 2. 870457 3. 120759 2. 874619 2. 753125 3. 10269 2. 993449  
11724078\_ 4. 121323 3. 866293 3. 952713 4. 252399 4. 135176 4. 233104  
11724079\_ 6. 678637 6. 693452 6. 712605 7. 246311 7. 1545 7. 222394  
11724080\_ 3. 882895 3. 834323 3. 834323 3. 715203 3. 698084 3. 698084  
11724081\_ 6. 161048 6. 221832 6. 260434 6. 18052 6. 25456 6. 212601  
11724082\_ 6. 444944 6. 464805 6. 480993 6. 415112 6. 493015 6. 41034  
11724083\_ 7. 966717 7. 953995 8. 00101 7. 942226 7. 962196 7. 922255  
11724084\_ 4. 164754 4. 259301 4. 099564 4. 37912 4. 40686 4. 46591  
11724085\_ 4. 216923 4. 325362 4. 260029 4. 361947 4. 216415 4. 350201  
11724086\_ 6. 153568 6. 121739 6. 170286 6. 286606 6. 246051 6. 319886  
11724087\_ 6. 12646 6. 071776 6. 056118 6. 052427 6. 02738 6. 218517  
11724088\_ 6. 55126 6. 536249 6. 492476 5. 904674 6. 082942 6. 064845  
11724089\_ 7. 345243 7. 337026 7. 375721 7. 200785 7. 124885 7. 121141  
11724090\_ 2. 095256 2. 385887 2. 025808 2. 009722 2. 096755 2. 096278  
11724091\_ 5. 916768 5. 934326 5. 792616 6. 037097 5. 980978 6. 090452  
11724092\_ 5. 286369 5. 302758 5. 302758 5. 396248 5. 448905 5. 367712  
11724093\_ 8. 945476 8. 840043 8. 952054 9. 096532 9. 121952 9. 145139  
11724094\_ 6. 351067 6. 273215 6. 33679 5. 769266 5. 741175 5. 748349  
11724095\_ 8. 006853 7. 984969 8. 040584 7. 236063 7. 298604 7. 275472  
11724096\_ 7. 042023 7. 002386 7. 048035 6. 507915 6. 533882 6. 597695  
11724097\_ 6. 605618 6. 524116 6. 574834 6. 089138 6. 104931 6. 210551  
11724098\_ 6. 811012 6. 729853 6. 821099 6. 42308 6. 402841 6. 428319  
11724099\_ 4. 17411 4. 202208 4. 169651 4. 48355 4. 459939 4. 346903  
11724100\_ 5. 612112 5. 554436 5. 617267 6. 153324 6. 34206 6. 318829  
11724101\_ 5. 531691 5. 569347 5. 321311 5. 700302 5. 922064 5. 713451  
11724102\_ 6. 218438 6. 316461 6. 342457 6. 414997 6. 419567 6. 419614  
11724103\_ 3. 624195 3. 623431 3. 800746 3. 854882 3. 649388 3. 728437  
11724104\_ 6. 264578 6. 033313 6. 159771 6. 261627 6. 173349 6. 302056  
11724105\_ 6. 357516 6. 404111 6. 461489 6. 548331 6. 528904 6. 553583  
11724106\_ 5. 583128 5. 614563 5. 604968 5. 643224 5. 638895 5. 673483  
11724107\_ 6. 599839 6. 520656 6. 643109 6. 20625 6. 061815 6. 137735  
11724108\_ 8. 012133 7. 928251 8. 019053 8. 333737 8. 256316 8. 174625  
11724109\_ 5. 144642 5. 069751 5. 087614 5. 297239 5. 46545 5. 374475  
11724110\_ 6. 969135 7. 053068 7. 065512 7. 111619 7. 104983 7. 103398  
11724111\_ 7. 071615 7. 134747 7. 101985 7. 148645 7. 194058 7. 212277  
11724112\_ 5. 512779 5. 533622 5. 639668 5. 749072 5. 890077 5. 864156  
11724113\_ 6. 561816 6. 467398 6. 504553 6. 806539 6. 802652 6. 794165  
11724114\_ 6. 50396 6. 532437 6. 466052 6. 378454 6. 380852 6. 514728  
11724115\_ 6. 036269 6. 175359 6. 044285 6. 318787 6. 249358 6. 287959  
11724116\_ 7. 91192 7. 833651 7. 820566 8. 078695 8. 084775 8. 064585  
11724117\_ 5. 285218 5. 31669 5. 443537 5. 109867 5. 194022 5. 047259  
11724118\_ 5. 780246 6. 070465 6. 06431 5. 325905 5. 509359 5. 52856  
11724119\_ 5. 432387 5. 380435 5. 398032 5. 371713 5. 382618 5. 350166  
11724120\_ 5. 330557 5. 251717 5. 330557 5. 064412 5. 157848 5. 148778  
11724121\_ 3. 842318 3. 975808 3. 921455 4. 065099 4. 010514 3. 863266  
11724122\_ 9. 600213 9. 54209 9. 640809 8. 854204 8. 89783 8. 872044  
11724123\_ 6. 165474 6. 40031 6. 370815 6. 510716 6. 442613 6. 580553  
11724124\_ 8. 065608 8. 088647 8. 113668 7. 903365 7. 920819 7. 978967  
11724125\_ 3. 890311 4. 003061 3. 78633 4. 060892 3. 966052 3. 913363



11724126\_ 6. 405738 6. 349224 6. 353535 6. 240618 6. 148318 6. 22211  
11724127\_ 4. 856043 4. 812973 4. 716511 4. 582794 4. 61623 4. 734435  
11724128\_ 3. 794067 3. 81804 3. 605516 3. 542044 3. 636058 3. 630646  
11724129\_ 4. 373684 4. 24869 4. 007542 4. 13593 4. 225223 4. 143206  
11724130\_ 4. 415744 4. 467717 4. 56082 4. 432484 4. 551336 4. 276262  
11724131\_ 3. 719124 3. 723624 3. 590116 3. 74898 3. 503743 3. 664083  
11724132\_ 5. 361618 5. 038334 4. 86389 4. 535349 4. 647355 4. 36332  
11724133\_ 6. 844299 6. 716816 6. 96066 7. 254618 7. 212474 7. 237345  
11724134\_ 7. 831449 7. 82927 7. 916549 7. 238331 7. 164857 7. 230514  
11724135\_ 3. 706101 3. 740672 3. 600169 3. 740672 3. 706101 3. 705625  
11724136\_ 8. 288063 8. 250012 8. 333545 8. 44649 8. 437818 8. 469076  
11724137\_ 6. 453156 6. 424444 6. 45434 6. 636703 6. 616331 6. 521221  
11724138\_ 5. 11527 5. 037061 5. 101407 5. 310739 5. 185704 5. 360812  
11724139\_ 10. 17051 10. 11535 10. 13997 10. 54494 10. 44375 10. 43671  
11724140\_ 9. 818107 9. 723583 9. 844037 9. 991072 10. 03257 10. 02774  
11724141\_ 6. 704988 6. 641378 6. 665265 6. 329211 6. 207794 6. 38358  
11724142\_ 8. 026978 8. 005017 7. 948934 7. 744627 7. 731948 7. 558734  
11724143\_ 8. 492537 8. 39083 8. 447063 7. 986749 8. 115886 8. 010608  
11724144\_ 5. 956628 5. 820948 5. 806188 5. 507637 5. 356483 5. 371556  
11724145\_ 5. 538515 5. 664994 5. 446244 5. 546831 5. 439154 5. 480599  
11724146\_ 7. 016555 6. 941901 7. 001836 7. 160451 7. 082363 7. 092705  
11724147\_ 7. 692715 7. 606467 7. 783101 7. 748639 7. 805055 7. 762288  
11724148\_ 4. 239281 4. 219649 4. 214552 4. 451015 4. 372057 4. 35318  
11724149\_ 3. 491059 3. 592127 3. 571446 3. 997131 3. 582408 3. 521681  
11724150\_ 8. 059768 7. 842282 7. 975021 8. 474832 8. 428458 8. 445684  
11724151\_ 5. 86047 5. 789947 5. 676992 5. 853103 5. 915737 5. 915936  
11724152\_ 5. 757309 5. 79945 5. 857524 5. 944443 5. 886407 5. 772046  
11724153\_ 3. 705625 3. 705625 3. 662911 3. 709861 3. 705625 3. 705625  
11724154\_ 2. 452677 2. 323979 2. 260196 2. 408728 2. 358745 2. 30976  
11724155\_ 2. 574931 2. 442936 2. 591587 2. 637165 2. 825627 2. 591587  
11724156\_ 1. 94529 2. 042263 1. 898324 1. 851358 1. 898324 1. 762255  
11724157\_ 2. 095256 2. 095808 2. 049203 1. 864392 2. 049203 1. 995297  
11724158\_ 6. 624638 6. 44406 6. 620087 6. 392052 6. 507088 6. 575777  
11724159\_ 7. 345731 7. 325705 7. 370481 7. 184063 7. 204522 7. 199185  
11724160\_ 7. 575952 7. 664392 7. 721331 7. 021503 7. 051414 6. 992583  
11724161\_ 6. 750127 6. 543397 6. 765241 6. 034868 6. 087357 6. 26396  
11724162\_ 7. 819185 7. 738934 7. 779022 6. 422785 6. 490438 6. 528702  
11724163\_ 4. 068377 4. 173698 4. 15035 4. 22808 4. 264487 4. 1373  
11724164\_ 4. 845602 4. 619144 4. 461665 4. 959177 4. 744459 4. 95006  
11724165\_ 3. 428917 3. 373622 3. 310392 3. 643593 3. 466737 3. 373213  
11724166\_ 7. 072954 7. 198141 7. 08741 7. 20025 7. 206127 7. 214421  
11724167\_ 5. 870242 5. 752091 5. 806438 5. 663349 5. 554436 5. 704919  
11724168\_ 5. 068343 5. 312669 5. 139578 4. 969953 5. 162841 5. 057745  
11724169\_ 6. 537711 6. 445532 6. 545327 5. 996126 6. 001309 6. 081778  
11724170\_ 6. 594129 6. 472598 6. 577577 5. 922865 5. 794044 5. 95452  
11724171\_ 7. 042517 6. 947464 7. 025626 6. 469597 6. 493004 6. 386635  
11724172\_ 7. 698358 7. 686677 7. 696532 7. 180229 7. 103527 7. 167315  
11724173\_ 7. 158525 7. 128415 7. 065875 6. 611026 6. 58203 6. 716084  
11724174\_ 6. 961214 7. 072981 7. 031531 7. 059186 7. 099058 7. 072981  
11724175\_ 4. 944074 4. 869505 4. 820361 4. 856084 5. 059748 4. 950024  
11724176\_ 7. 124123 7. 13442 7. 064991 7. 218203 7. 33626 7. 417811

11724177\_ 5. 557533 5. 380649 5. 301029 5. 590107 5. 578466 5. 64325  
11724178\_ 5. 787714 5. 528705 5. 676992 6. 031846 5. 887467 5. 860996  
11724179\_ 5. 081419 5. 14761 5. 097571 5. 153163 5. 161469 5. 105281  
11724180\_ 6. 245303 6. 282224 6. 310234 6. 058786 6. 150145 6. 22139  
11724181\_ 6. 317658 6. 4196 6. 283393 6. 380569 6. 378115 6. 320021  
11724182\_ 3. 261278 3. 259313 3. 047113 3. 243895 3. 21279 3. 290188  
11724183\_ 5. 66864 5. 649505 5. 556592 5. 734169 5. 643103 5. 455894  
11724184\_ 3. 055438 2. 944077 2. 898114 2. 969853 2. 948345 3. 048797  
11724185\_ 8. 675139 8. 557446 8. 64061 8. 925495 8. 968987 8. 920875  
11724186\_ 8. 815367 8. 647441 8. 632347 9. 04672 9. 022354 9. 037991  
11724187\_ 7. 042548 7. 042382 7. 158489 7. 419077 7. 374378 7. 416947  
11724188\_ 7. 387296 7. 326081 7. 188271 7. 271106 7. 302158 7. 281611  
11724189\_ 6. 817986 6. 845563 6. 639682 6. 640181 6. 714827 6. 815148  
11724190\_ 11. 83535 11. 84501 11. 8896 12. 23031 12. 2023 12. 17814  
11724191\_ 9. 575807 9. 563554 9. 62893 9. 293384 9. 300607 9. 280116  
11724192\_ 7. 773414 7. 795576 7. 765352 7. 780206 7. 765944 7. 772424  
11724193\_ 6. 202125 6. 303932 6. 312897 6. 468509 6. 346962 6. 355408  
11724194\_ 11. 73409 11. 72748 11. 73129 11. 57892 11. 59555 11. 61083  
11724195\_ 5. 492801 5. 124353 5. 440159 5. 31669 5. 354703 5. 452319  
11724196\_ 6. 488932 6. 656657 6. 620597 6. 276792 6. 398193 6. 357295  
11724197\_ 6. 650237 6. 396012 6. 499898 5. 635612 5. 772361 5. 618144  
11724198\_ 5. 702513 5. 523081 5. 700698 5. 163466 5. 05569 5. 292276  
11724199\_ 7. 214666 7. 195443 7. 260845 7. 444685 7. 430347 7. 417312  
11724200\_ 4. 130317 3. 85659 3. 711166 3. 894184 3. 910159 3. 959529  
11724201\_ 4. 961045 4. 863238 4. 848552 5. 045301 5. 227642 5. 120208  
11724202\_ 8. 228729 8. 24105 8. 290231 8. 805176 8. 858643 8. 829881  
11724203\_ 7. 111538 6. 91283 7. 049812 7. 992855 8. 106557 8. 108215  
11724204\_ 7. 168899 7. 202259 7. 139016 8. 158772 8. 329749 8. 142919  
11724205\_ 10. 59603 10. 5885 10. 58792 10. 59178 10. 59314 10. 58986  
11724206\_ 7. 071644 7. 03961 7. 120618 7. 199228 7. 156301 7. 146015  
11724207\_ 6. 893145 6. 903152 6. 88035 6. 910949 7. 000717 6. 954993  
11724208\_ 9. 136568 9. 116804 9. 133799 8. 807254 8. 815572 8. 7396  
11724209\_ 6. 61888 6. 612181 6. 412133 7. 174876 7. 090287 7. 15902  
11724210\_ 8. 48157 8. 443337 8. 495828 8. 115476 8. 053612 8. 164044  
11724211\_ 8. 991349 8. 936132 8. 993787 8. 986655 9. 015978 9. 027955  
11724212\_ 7. 072699 7. 11174 7. 145438 7. 5123 7. 475581 7. 376728  
11724213\_ 7. 326438 7. 295783 7. 429901 7. 819083 7. 805603 7. 765944  
11724214\_ 7. 317302 7. 148205 7. 366555 7. 411246 7. 401347 7. 480022  
11724215\_ 5. 170621 5. 032986 5. 194493 5. 705379 5. 655398 5. 791901  
11724216\_ 8. 782785 8. 689761 8. 76048 8. 332172 8. 363608 8. 336475  
11724217\_ 6. 081144 6. 156534 6. 070417 5. 249047 5. 226678 5. 110732  
11724218\_ 7. 59506 7. 50047 7. 543406 6. 300295 6. 282059 6. 391002  
11724219\_ 2. 278363 2. 251309 2. 43612 2. 327794 2. 321465 2. 336513  
11724220\_ 2. 783732 3. 075356 2. 874619 2. 394421 2. 47102 2. 685374  
11724221\_ 5. 310837 5. 280533 5. 26949 4. 643717 4. 800872 4. 867602  
11724222\_ 9. 897761 9. 844857 9. 889162 9. 680602 9. 657495 9. 702102  
11724223\_ 7. 706179 7. 707995 7. 762579 7. 569528 7. 466674 7. 465911  
11724224\_ 8. 542305 8. 603954 8. 524491 8. 679893 8. 686377 8. 714842  
11724225\_ 8. 950435 8. 992569 8. 997141 9. 320579 9. 27196 9. 250309  
11724226\_ 9. 598271 9. 500868 9. 557936 9. 550489 9. 526263 9. 541106  
11724227\_ 8. 113315 8. 086206 8. 005489 7. 888966 7. 756004 7. 824218

11724228\_ 9. 383361 9. 297533 9. 371946 8. 736369 8. 681843 8. 747951  
11724229\_ 9. 557784 9. 468774 9. 574198 8. 750412 8. 777149 8. 731752  
11724230\_ 9. 143772 9. 046097 9. 079276 8. 113867 8. 054539 8. 216288  
11724231\_ 10. 89229 10. 8009 10. 88929 10. 8996 10. 89481 10. 85276  
11724232\_ 2. 133702 2. 183508 2. 232047 2. 040503 2. 082171 2. 11287  
11724233\_ 6. 360198 6. 459311 6. 183527 6. 450566 6. 51251 6. 434545  
11724234\_ 4. 411333 4. 40461 4. 385263 4. 737734 4. 798511 4. 82008  
11724235\_ 6. 24782 6. 172953 6. 136219 6. 15762 6. 087877 6. 111767  
11724236\_ 8. 462537 8. 304262 8. 473031 7. 930708 7. 92228 7. 992223  
11724237\_ 5. 769643 5. 696308 5. 807728 5. 406906 5. 499382 5. 562682  
11724238\_ 8. 466347 8. 405988 8. 436891 7. 954881 8. 000045 7. 916922  
11724239\_ 6. 558555 6. 531715 6. 5435 6. 62239 6. 737006 6. 7385  
11724240\_ 2. 96285 2. 779136 2. 748739 2. 804381 2. 851392 2. 902177  
11724241\_ 5. 687254 5. 704227 5. 662318 5. 468613 5. 441986 5. 562259  
11724242\_ 5. 763973 5. 780257 5. 855086 5. 751033 5. 630625 5. 762118  
11724243\_ 5. 676992 5. 629273 5. 744406 5. 688933 5. 768053 5. 798406  
11724244\_ 5. 440422 5. 276586 5. 400077 5. 473045 5. 54235 5. 512883  
11724245\_ 5. 845365 5. 753553 5. 924989 6. 410469 6. 497107 6. 434545  
11724246\_ 4. 221748 4. 272865 4. 225205 4. 992489 4. 984025 4. 984268  
11724247\_ 6. 269775 6. 440209 6. 428725 6. 892049 6. 716231 6. 85304  
11724248\_ 6. 515583 6. 572735 6. 597881 7. 109033 7. 147005 7. 183172  
11724249\_ 6. 496261 6. 492309 6. 484462 6. 638135 6. 560436 6. 717059  
11724250\_ 4. 560351 4. 57225 4. 59991 4. 417293 4. 543554 4. 518095  
11724251\_ 5. 204961 5. 190614 5. 333723 5. 110555 5. 149545 5. 259485  
11724252\_ 6. 869063 6. 937281 6. 96173 7. 405353 7. 194674 7. 296566  
11724253\_ 3. 459448 3. 818401 3. 502964 3. 691188 3. 604722 3. 600322  
11724254\_ 2. 990186 3. 173455 3. 018054 3. 418752 3. 096608 3. 187226  
11724255\_ 5. 004008 5. 088104 5. 098557 5. 097675 5. 245353 5. 025951  
11724256\_ 3. 973437 4. 125476 4. 265069 4. 221442 4. 2637 4. 214072  
11724257\_ 5. 643713 5. 704919 5. 582759 5. 918904 5. 859878 5. 908745  
11724258\_ 6. 30552 6. 07713 6. 154431 6. 798951 6. 643784 6. 808623  
11724259\_ 7. 610178 7. 526722 7. 634038 7. 62299 7. 656673 7. 65297  
11724260\_ 7. 781665 7. 634659 7. 819849 7. 124738 7. 240617 7. 319505  
11724261\_ 5. 825043 5. 804175 5. 855549 5. 349106 5. 497625 5. 543039  
11724262\_ 7. 841609 7. 880573 7. 9506 7. 514182 7. 435431 7. 580234  
11724263\_ 7. 464744 7. 363512 7. 346262 7. 393323 7. 445975 7. 433553  
11724264\_ 7. 954158 7. 894963 7. 967869 7. 762556 7. 776495 7. 837499  
11724265\_ 5. 411951 5. 587398 5. 361849 5. 418864 5. 391259 5. 409222  
11724266\_ 6. 036588 6. 000817 6. 011851 6. 120828 6. 135728 6. 161021  
11724267\_ 4. 619829 4. 68781 4. 547537 4. 836172 4. 692739 4. 73292  
11724268\_ 5. 01218 4. 788314 4. 968889 5. 348307 5. 240705 5. 312958  
11724269\_ 5. 709218 5. 627235 5. 65734 5. 710643 5. 662677 5. 582013  
11724270\_ 5. 293563 5. 346866 5. 291729 5. 529892 5. 403961 5. 461346  
11724271\_ 3. 533616 3. 450747 3. 427012 3. 336685 3. 364419 3. 335643  
11724272\_ 3. 599441 3. 762519 3. 622983 3. 611695 3. 821786 3. 707236  
11724273\_ 7. 017954 6. 921539 6. 851849 5. 926164 5. 87049 5. 900165  
11724274\_ 8. 964839 8. 923779 9. 032195 8. 082321 8. 136285 8. 108168  
11724275\_ 7. 164292 7. 030282 7. 102021 7. 276386 7. 326733 7. 163167  
11724276\_ 6. 385765 6. 347439 6. 22142 6. 464562 6. 417626 6. 445398  
11724277\_ 6. 300643 6. 383589 6. 449356 6. 634134 6. 570241 6. 561859  
11724278\_ 7. 181356 7. 311013 7. 290768 7. 322167 7. 340662 7. 301922

11724279\_ 6. 169022 6. 169022 6. 177846 6. 178096 6. 150453 6. 274384  
11724280\_ 7. 338277 7. 239949 7. 299328 7. 089177 7. 065753 7. 096737  
11724281\_ 9. 801495 9. 81658 9. 751789 9. 744523 9. 749984 9. 670741  
11724282\_ 2. 47102 2. 408553 2. 47102 2. 508404 2. 537461 2. 554301  
11724283\_ 4. 027182 3. 997131 4. 278484 3. 631218 3. 714619 3. 879309  
11724284\_ 7. 468129 7. 477023 7. 479032 7. 502043 7. 51188 7. 489346  
11724285\_ 7. 286827 7. 225195 7. 28869 7. 679445 7. 718971 7. 741598  
11724286\_ 6. 199303 6. 138564 6. 162674 6. 21327 6. 121392 6. 111566  
11724287\_ 6. 597403 6. 593162 6. 520844 6. 644129 6. 541665 6. 582663  
11724288\_ 7. 407678 7. 315676 7. 444487 7. 064085 7. 153723 7. 154768  
11724289\_ 9. 019577 9. 000219 9. 047675 9. 481335 9. 523512 9. 528119  
11724290\_ 5. 492977 5. 444611 5. 394572 4. 800572 5. 301146 5. 073036  
11724291\_ 8. 816517 8. 825745 8. 812609 8. 391472 8. 406179 8. 373747  
11724292\_ 9. 50514 9. 497241 9. 501352 9. 073025 9. 074986 9. 028107  
11724293\_ 7. 122552 7. 145937 7. 153079 6. 696907 6. 790012 6. 794999  
11724294\_ 6. 619896 6. 677054 6. 588943 6. 727853 6. 722513 6. 677656  
11724295\_ 4. 700243 4. 76557 4. 618591 4. 914651 4. 811545 4. 777154  
11724296\_ 4. 372821 4. 251007 4. 131182 4. 867119 4. 923848 4. 755321  
11724297\_ 4. 700243 4. 643217 4. 557315 4. 89707 4. 828028 5. 11527  
11724298\_ 7. 770128 7. 705372 7. 824938 7. 423866 7. 442621 7. 453273  
11724299\_ 8. 239083 8. 146439 8. 238187 7. 810698 7. 832346 7. 821825  
11724300\_ 10. 28166 10. 22684 10. 25255 10. 04998 10. 02861 10. 01971  
11724301\_ 8. 364692 8. 39825 8. 412902 8. 064267 8. 039032 7. 961339  
11724302\_ 7. 667226 7. 710715 7. 766965 7. 26575 7. 471273 7. 202102  
11724303\_ 8. 115533 8. 01924 8. 09158 7. 978616 8. 068414 7. 965451  
11724304\_ 6. 363028 6. 446785 6. 386872 6. 5466 6. 422472 6. 421511  
11724305\_ 5. 511117 5. 541217 5. 413577 5. 510512 5. 5408 5. 523295  
11724306\_ 7. 578723 7. 378489 7. 527411 6. 637712 6. 675814 6. 805142  
11724307\_ 8. 014073 7. 998168 8. 029515 7. 652905 7. 710853 7. 704341  
11724308\_ 7. 429442 7. 456159 7. 47142 8. 082841 8. 056394 8. 062556  
11724309\_ 4. 831368 5. 073036 4. 945132 4. 91525 5. 022714 5. 010314  
11724310\_ 6. 254239 6. 197648 6. 33679 6. 103503 6. 210549 6. 159771  
11724311\_ 6. 114633 6. 011116 6. 104498 6. 26375 6. 241571 6. 32359  
11724312\_ 7. 31331 7. 202534 7. 262495 7. 364067 7. 392275 7. 280725  
11724313\_ 6. 798252 6. 745978 6. 695176 7. 030523 7. 107524 7. 238357  
11724314\_ 8. 496575 8. 389579 8. 46828 8. 188052 8. 131304 8. 188557  
11724315\_ 5. 891324 5. 785104 5. 945593 5. 506184 5. 512691 5. 59014  
11724316\_ 7. 687578 7. 679944 7. 749277 7. 758045 7. 795346 7. 692616  
11724317\_ 5. 101074 5. 195169 5. 040431 5. 028952 5. 073764 5. 048738  
11724318\_ 8. 037703 8. 095925 8. 127742 7. 667106 7. 607206 7. 66007  
11724319\_ 6. 420662 6. 453986 6. 423367 6. 354249 6. 447383 6. 444678  
11724320\_ 6. 883639 6. 91283 6. 830699 6. 616232 6. 684569 6. 724539  
11724321\_ 7. 425474 7. 371403 7. 419713 7. 073445 7. 071314 7. 139152  
11724322\_ 4. 874234 5. 284965 4. 993744 5. 140235 5. 205427 5. 137182  
11724323\_ 7. 40164 7. 339711 7. 417594 7. 416594 7. 297557 7. 411636  
11724324\_ 5. 862413 5. 669479 5. 734708 5. 426362 5. 327889 5. 313738  
11724325\_ 6. 462865 6. 210334 6. 313107 5. 934157 6. 008242 6. 142428  
11724326\_ 5. 575799 5. 657219 5. 553372 5. 519498 5. 598189 5. 600718  
11724327\_ 8. 425545 8. 318048 8. 343308 8. 303523 8. 31196 8. 291873  
11724328\_ 10. 37198 10. 37618 10. 39041 10. 95705 11. 03468 10. 95636  
11724329\_ 4. 766295 4. 760333 4. 807378 4. 753049 5. 009876 4. 898515

11724330\_ 7. 213547 7. 192278 7. 117929 7. 205624 7. 333856 7. 330467  
11724331\_ 5. 800088 5. 772439 5. 649055 5. 794286 5. 878698 5. 784146  
11724332\_ 6. 511984 6. 497839 6. 58828 6. 812358 6. 826022 6. 704264  
11724333\_ 6. 663052 6. 659237 6. 73679 6. 577129 6. 486827 6. 513764  
11724334\_ 8. 790961 8. 810866 8. 801065 8. 470064 8. 425546 8. 432818  
11724335\_ 9. 150707 9. 117292 9. 145727 8. 760523 8. 749985 8. 745597  
11724336\_ 3. 208808 3. 318468 3. 341473 3. 44047 3. 657597 3. 555028  
11724337\_ 7. 098933 7. 015817 7. 037779 6. 62853 6. 690602 6. 617914  
11724338\_ 4. 775187 5. 061295 4. 826043 4. 953485 4. 881849 4. 867063  
11724339\_ 6. 632803 6. 56361 6. 481058 6. 64612 6. 739232 6. 756306  
11724340\_ 4. 982852 4. 973509 4. 876279 5. 152899 4. 992632 5. 050095  
11724341\_ 4. 664001 4. 733018 4. 887205 4. 839656 5. 049142 4. 792949  
11724342\_ 5. 915465 5. 983509 5. 853065 6. 068919 6. 048055 6. 188937  
11724343\_ 7. 691271 7. 663099 7. 65107 7. 182033 7. 12383 7. 081372  
11724344\_ 5. 954081 6. 118838 5. 887338 5. 156189 5. 183024 5. 105816  
11724345\_ 6. 983963 6. 927829 6. 940665 6. 096105 6. 139611 6. 161964  
11724346\_ 6. 780571 6. 580672 6. 630948 5. 772028 5. 761221 5. 759485  
11724347\_ 5. 139324 5. 171947 5. 22463 4. 874665 4. 787664 4. 963871  
11724348\_ 5. 701992 5. 741932 5. 705812 5. 817606 5. 840021 5. 694427  
11724349\_ 4. 679748 4. 571071 4. 787734 5. 220089 5. 271884 5. 130017  
11724350\_ 6. 073142 6. 118838 5. 977088 6. 694271 6. 683978 6. 712953  
11724351\_ 7. 157393 7. 135692 7. 108724 7. 801743 7. 786399 7. 812995  
11724352\_ 8. 53808 8. 461956 8. 525493 8. 575844 8. 632928 8. 500316  
11724353\_ 4. 425054 4. 316319 4. 485976 4. 356256 4. 516162 4. 429169  
11724354\_ 5. 379878 5. 303983 5. 363944 5. 379017 5. 442857 5. 397306  
11724355\_ 10. 43554 10. 40596 10. 41133 10. 21081 10. 25397 10. 26397  
11724356\_ 6. 934615 6. 915949 6. 876469 6. 964622 6. 98131 6. 934011  
11724357\_ 8. 914074 8. 924457 8. 900253 8. 020821 7. 992039 7. 965354  
11724358\_ 6. 288854 6. 290618 6. 211565 7. 273153 7. 100507 7. 053419  
11724359\_ 6. 606594 6. 59621 6. 497305 6. 275886 6. 416314 6. 24745  
11724360\_ 7. 382731 7. 344508 7. 354016 7. 28086 7. 342832 7. 449795  
11724361\_ 8. 009019 8. 04455 8. 090686 7. 947164 7. 926552 7. 99363  
11724362\_ 6. 665776 6. 444823 6. 665776 5. 963384 5. 72468 6. 019068  
11724363\_ 5. 04479 4. 821793 4. 867632 4. 913249 4. 997891 5. 066225  
11724364\_ 6. 395126 6. 365406 6. 326013 6. 36057 6. 309689 6. 36057  
11724365\_ 5. 987732 5. 969706 5. 937955 5. 942776 6. 047866 5. 995197  
11724366\_ 3. 764445 3. 927779 3. 818537 4. 675244 4. 587608 4. 746947  
11724367\_ 3. 649115 3. 555723 3. 66267 3. 496256 3. 740533 3. 555723  
11724368\_ 3. 640887 3. 774069 3. 696864 3. 894578 3. 592521 3. 76366  
11724369\_ 5. 032594 5. 189733 4. 919874 5. 089037 5. 073036 4. 943777  
11724370\_ 4. 251314 4. 2109 4. 182768 4. 396927 4. 380154 4. 33925  
11724371\_ 4. 674859 4. 539645 4. 606355 4. 681615 4. 783103 4. 713541  
11724372\_ 3. 191035 3. 411418 3. 315869 3. 187193 3. 081512 3. 202564  
11724373\_ 9. 485147 9. 496809 9. 554749 9. 517147 9. 556471 9. 538179  
11724374\_ 5. 193991 5. 311716 5. 097845 5. 36625 5. 064261 5. 093836  
11724375\_ 6. 231157 6. 08913 6. 396905 5. 81911 5. 695158 5. 838775  
11724376\_ 5. 459773 5. 543154 5. 627358 5. 271464 5. 292159 5. 242353  
11724377\_ 4. 590035 4. 142478 4. 299172 4. 724801 4. 67155 4. 39554  
11724378\_ 7. 118159 6. 972985 7. 212289 6. 567247 6. 579201 6. 589889  
11724379\_ 5. 97304 5. 986181 5. 975307 6. 200701 6. 308357 6. 332292  
11724380\_ 7. 207557 7. 212178 7. 252171 7. 597294 7. 607285 7. 631276

11724381\_ 4. 762156 4. 655547 4. 669375 4. 180657 4. 046619 4. 217656  
11724382\_ 2. 405221 2. 083288 2. 007452 2. 31118 2. 354529 2. 17722  
11724383\_ 2. 15385 2. 34319 2. 157521 2. 020668 2. 168532 2. 173444  
11724384\_ 8. 414179 8. 329227 8. 387064 8. 247238 8. 220475 8. 173518  
11724385\_ 8. 358758 8. 291369 8. 339607 8. 750421 8. 734488 8. 798848  
11724386\_ 6. 186115 6. 103661 6. 141479 6. 340259 6. 260549 6. 186141  
11724387\_ 9. 43592 9. 438745 9. 503016 9. 207391 9. 253873 9. 257012  
11724388\_ 8. 274948 8. 285548 8. 307513 7. 491548 7. 282995 7. 352922  
11724389\_ 8. 101518 8. 032125 8. 040719 7. 837559 7. 852081 7. 840222  
11724390\_ 8. 955635 8. 925561 9. 030076 8. 766186 8. 783044 8. 773737  
11724391\_ 5. 69279 5. 719592 5. 719592 5. 696463 5. 713272 5. 69949  
11724392\_ 7. 053377 7. 000314 7. 000314 6. 710692 6. 756843 6. 813494  
11724393\_ 6. 051554 6. 029564 6. 005015 6. 098855 6. 042076 6. 033313  
11724394\_ 4. 019814 4. 119159 4. 046155 4. 098994 4. 179596 4. 162981  
11724395\_ 6. 607867 6. 511097 6. 548342 6. 688764 6. 65814 6. 611535  
11724396\_ 7. 408821 7. 302445 7. 380187 7. 490643 7. 503982 7. 379589  
11724397\_ 8. 599894 8. 560478 8. 596002 8. 017296 7. 990549 7. 939882  
11724398\_ 5. 587579 5. 564324 5. 446954 5. 626963 5. 593821 5. 63597  
11724399\_ 6. 245677 6. 255344 6. 132342 5. 524739 5. 585389 5. 628015  
11724400\_ 7. 487372 7. 482432 7. 517027 7. 725616 7. 760632 7. 695323  
11724401\_ 3. 637765 3. 700013 3. 623017 3. 734719 3. 644171 3. 74891  
11724402\_ 3. 115443 3. 180508 3. 162838 3. 422722 3. 065866 3. 0603  
11724403\_ 4. 541121 4. 541121 4. 437753 4. 56589 4. 431879 4. 622236  
11724404\_ 9. 523296 9. 497677 9. 529422 9. 449498 9. 414358 9. 458872  
11724405\_ 4. 299957 4. 337044 4. 224902 4. 36379 4. 40461 4. 157999  
11724406\_ 5. 394352 5. 403635 5. 389203 5. 492712 5. 375785 5. 40758  
11724407\_ 7. 772829 7. 707182 7. 747631 7. 804707 7. 765281 7. 76844  
11724408\_ 6. 944883 7. 015203 6. 947012 7. 080525 6. 980066 7. 06424  
11724409\_ 6. 622803 6. 557332 6. 523954 6. 605605 6. 554352 6. 589889  
11724410\_ 5. 856691 5. 841177 5. 899713 6. 034674 6. 059492 6. 08495  
11724411\_ 6. 491922 6. 558229 6. 500207 6. 485151 6. 512126 6. 491922  
11724412\_ 5. 495062 5. 649881 5. 27173 5. 551476 5. 398638 5. 596277  
11724413\_ 6. 409721 6. 345561 6. 320223 6. 542119 6. 417102 6. 557068  
11724414\_ 2. 469146 2. 605516 2. 226124 2. 442313 2. 473527 2. 469146  
11724415\_ 5. 494473 5. 332091 5. 387054 5. 44843 5. 44843 5. 483498  
11724416\_ 6. 298771 6. 181658 6. 331865 6. 327524 6. 241365 6. 223538  
11724417\_ 7. 673815 7. 769605 7. 717623 7. 451251 7. 492994 7. 398074  
11724418\_ 8. 04811 7. 95123 8. 009614 8. 316724 8. 272837 8. 268416  
11724419\_ 3. 493031 3. 503743 3. 398236 3. 564726 3. 360498 3. 426904  
11724420\_ 4. 16437 4. 195791 4. 174639 4. 894384 4. 967766 4. 832806  
11724421\_ 6. 977163 6. 956428 6. 876654 7. 147497 7. 074247 7. 103303  
11724422\_ 4. 763543 4. 9694 4. 762977 4. 920843 5. 179352 4. 79501  
11724423\_ 5. 442778 5. 573346 5. 63455 5. 444011 5. 504135 5. 527337  
11724424\_ 5. 635321 5. 603375 5. 516744 5. 382749 5. 608748 5. 531631  
11724425\_ 9. 595365 9. 545253 9. 571675 9. 200243 9. 186185 9. 161908  
11724426\_ 9. 072389 9. 117608 9. 021892 9. 18989 9. 185502 9. 153035  
11724427\_ 6. 167007 6. 076709 6. 173927 6. 28017 6. 388034 6. 280237  
11724428\_ 9. 081893 9. 180627 9. 017737 8. 846718 8. 840356 8. 846881  
11724429\_ 8. 124529 7. 949384 7. 965976 7. 372327 7. 299162 7. 373909  
11724430\_ 6. 619387 6. 482858 6. 593623 6. 549899 6. 548358 6. 65177  
11724431\_ 6. 65168 6. 757334 6. 720063 5. 808192 5. 58925 5. 576741

11724432\_ 6. 62067 6. 533493 6. 513033 6. 942587 6. 876468 6. 78942  
11724433\_ 5. 623374 5. 53975 5. 573163 5. 637954 5. 723194 5. 52384  
11724434\_ 3. 003134 2. 940568 3. 122152 2. 621392 2. 677936 2. 578623  
11724435\_ 5. 620986 5. 554436 5. 586075 5. 131393 5. 289248 5. 138564  
11724436\_ 6. 986075 7. 000463 6. 992881 7. 344752 7. 151702 7. 337012  
11724437\_ 6. 906022 6. 7983 6. 780585 6. 769362 6. 813136 6. 78985  
11724438\_ 7. 012416 7. 029372 6. 910833 6. 805032 6. 750162 6. 792488  
11724439\_ 5. 607606 5. 517781 5. 518169 5. 745821 5. 685353 5. 839506  
11724440\_ 6. 220265 6. 312964 6. 182427 6. 124157 6. 10265 6. 154872  
11724441\_ 2. 850317 2. 746968 2. 605516 2. 643567 2. 756373 2. 78035  
11724442\_ 4. 426184 4. 40848 4. 322031 4. 755878 4. 733382 4. 759395  
11724443\_ 5. 969558 6. 011383 5. 696602 5. 93062 6. 137856 5. 923726  
11724444\_ 8. 014865 8. 052027 8. 104193 8. 464806 8. 396493 8. 423913  
11724445\_ 3. 755224 3. 678921 3. 759732 3. 850246 3. 824891 3. 814034  
11724446\_ 7. 405816 7. 400837 7. 382899 7. 009389 7. 120577 7. 11851  
11724447\_ 4. 316829 4. 65983 4. 755344 4. 88153 5. 023753 4. 913953  
11724448\_ 8. 589227 8. 472845 8. 541962 8. 02429 7. 976018 8. 023507  
11724449\_ 4. 044623 3. 833945 4. 076469 4. 14194 4. 249988 4. 031814  
11724450\_ 4. 71972 4. 763543 4. 722983 4. 722983 4. 741787 4. 658684  
11724451\_ 5. 122223 5. 240908 5. 178016 5. 366156 5. 325801 5. 228627  
11724452\_ 7. 708325 7. 677794 7. 695036 7. 610016 7. 546775 7. 610894  
11724453\_ 2. 834847 3. 098667 3. 009802 2. 842393 3. 179401 3. 053775  
11724454\_ 7. 133726 7. 088152 7. 176283 6. 589454 6. 596989 6. 62631  
11724455\_ 4. 699527 4. 73146 4. 594601 4. 749929 4. 676379 4. 9552  
11724456\_ 7. 082248 7. 101956 7. 128679 7. 080952 7. 081008 7. 005197  
11724457\_ 4. 764062 4. 696606 4. 626105 4. 936761 4. 693853 4. 906658  
11724458\_ 4. 700224 4. 700224 4. 709463 4. 700224 4. 654384 4. 767203  
11724459\_ 8. 760611 8. 712227 8. 768575 8. 735707 8. 749063 8. 746497  
11724460\_ 8. 560991 8. 520926 8. 511733 8. 631539 8. 628245 8. 592112  
11724461\_ 5. 779911 5. 941577 6. 034217 7. 98909 8. 022449 7. 911067  
11724462\_ 6. 464647 6. 457752 6. 221056 8. 163416 8. 081611 8. 074717  
11724463\_ 8. 214858 8. 10357 8. 243366 8. 27012 8. 339583 8. 242075  
11724464\_ 10. 17938 10. 17785 10. 20123 10. 55211 10. 50445 10. 45193  
11724465\_ 9. 188893 9. 163368 9. 160699 9. 443681 9. 404701 9. 435335  
11724466\_ 9. 547723 9. 519879 9. 552162 9. 776458 9. 805239 9. 777283  
11724467\_ 3. 529793 3. 273928 3. 210471 3. 507386 3. 503743 3. 439143  
11724468\_ 8. 699614 8. 613274 8. 659216 9. 295375 9. 349651 9. 328842  
11724469\_ 9. 258925 9. 26642 9. 24037 9. 219836 9. 274172 9. 19179  
11724470\_ 8. 269533 8. 344699 8. 279578 8. 634861 8. 501302 8. 479959  
11724471\_ 9. 248454 9. 157411 9. 256944 9. 375678 9. 360617 9. 35511  
11724472\_ 5. 963117 5. 896412 5. 986189 5. 809519 5. 870798 5. 794606  
11724473\_ 4. 245137 4. 067703 4. 013556 4. 270619 4. 222707 4. 225131  
11724474\_ 7. 637974 7. 399565 7. 488477 7. 359572 7. 462716 7. 427825  
11724475\_ 4. 9226 4. 885259 4. 867813 4. 100241 4. 584933 4. 342084  
11724476\_ 6. 608802 6. 344183 6. 554628 6. 162358 6. 106041 6. 209076  
11724477\_ 8. 716894 8. 597019 8. 654624 8. 776267 8. 786694 8. 759872  
11724478\_ 9. 711656 9. 666211 9. 712999 9. 754534 9. 820916 9. 768724  
11724479\_ 8. 661854 8. 663617 8. 652397 8. 794815 8. 78025 8. 768347  
11724480\_ 6. 583309 6. 736091 6. 74472 6. 797421 6. 797056 6. 775653  
11724481\_ 8. 65095 8. 565663 8. 639055 8. 582128 8. 605389 8. 616068  
11724482\_ 8. 084412 8. 08852 8. 098367 7. 686232 7. 625058 7. 634785

11724483\_ 9. 897936 9. 81152 9. 858177 9. 429048 9. 390052 9. 396731  
11724484\_ 7. 526776 7. 467298 7. 528741 7. 341299 7. 458776 7. 424176  
11724485\_ 8. 243711 8. 207144 8. 23396 8. 091776 8. 119589 8. 107959  
11724486\_ 8. 218417 8. 152342 8. 167021 8. 488239 8. 43284 8. 511074  
11724487\_ 8. 301101 8. 231885 8. 236381 8. 569019 8. 512384 8. 580969  
11724488\_ 5. 285218 5. 351939 5. 401071 4. 836911 4. 836911 4. 749486  
11724489\_ 3. 210664 3. 459814 3. 695614 3. 058744 2. 829845 2. 927074  
11724490\_ 5. 16668 5. 20524 4. 930138 4. 577642 4. 590235 4. 563656  
11724491\_ 9. 407989 9. 36246 9. 392183 9. 562869 9. 493472 9. 523552  
11724492\_ 6. 910833 7. 066036 6. 976167 7. 355292 7. 489139 7. 383661  
11724493\_ 9. 449492 9. 471969 9. 410586 9. 534356 9. 516443 9. 516151  
11724494\_ 8. 967839 8. 94935 8. 974111 8. 994458 8. 998843 9. 053097  
11724495\_ 9. 075902 8. 971017 9. 006397 8. 983044 9. 074555 8. 989638  
11724496\_ 8. 343094 8. 180163 8. 352858 8. 307486 8. 370471 8. 351213  
11724497\_ 7. 302549 7. 297635 7. 269614 7. 415842 7. 408094 7. 489139  
11724498\_ 4. 736023 4. 763543 4. 824195 4. 677761 4. 719087 4. 782266  
11724499\_ 5. 928048 5. 952304 5. 918587 5. 885144 5. 943822 5. 897671  
11724500\_ 6. 491756 6. 564709 6. 501608 6. 537103 6. 522747 6. 496275  
11724501\_ 2. 679484 2. 498167 2. 464617 2. 430023 2. 446116 2. 661548  
11724502\_ 4. 637709 4. 5756 4. 55457 4. 643717 4. 732641 4. 584933  
11724503\_ 2. 172788 2. 361778 2. 463651 2. 361483 2. 321793 2. 499275  
11724504\_ 5. 029529 5. 051282 5. 031103 5. 102351 5. 062159 5. 213998  
11724505\_ 7. 712742 7. 601106 7. 680766 8. 057768 8. 099583 8. 118165  
11724506\_ 6. 693683 6. 649252 6. 653841 7. 121875 7. 236626 7. 06236  
11724507\_ 8. 437662 8. 408547 8. 514384 8. 359893 8. 267917 8. 328642  
11724508\_ 3. 123997 3. 099904 2. 957127 3. 251489 3. 097762 3. 143365  
11724509\_ 10. 31824 10. 26331 10. 28789 9. 724836 9. 66214 9. 699796  
11724510\_ 9. 60917 9. 599244 9. 540637 8. 928257 8. 929716 8. 854384  
11724511\_ 5. 32043 5. 382619 5. 412276 5. 328572 5. 36323 5. 444128  
11724512\_ 4. 40461 4. 399922 4. 254137 4. 40461 4. 40461 4. 430843  
11724513\_ 3. 608915 3. 554294 3. 404155 3. 499673 3. 554294 3. 69006  
11724514\_ 4. 23742 4. 063559 4. 370337 4. 690985 4. 804837 4. 94619  
11724515\_ 6. 358554 6. 225415 6. 361034 7. 297934 7. 387068 7. 345402  
11724516\_ 6. 769057 6. 685101 6. 783237 7. 72009 7. 646202 7. 695815  
11724517\_ 8. 348706 8. 330895 8. 318143 8. 265193 8. 214474 8. 248176  
11724518\_ 7. 294458 7. 337134 7. 219004 7. 203565 7. 159765 7. 23818  
11724519\_ 7. 326299 7. 179937 7. 230373 6. 769861 6. 732373 6. 765797  
11724520\_ 6. 498564 6. 522742 6. 523213 6. 365163 6. 415458 6. 40574  
11724521\_ 6. 631611 6. 645647 6. 788862 6. 601688 6. 66514 6. 701521  
11724522\_ 6. 982937 6. 893203 6. 926768 6. 799272 6. 786143 6. 79887  
11724523\_ 6. 63074 6. 490171 6. 65818 6. 748685 6. 798196 6. 708938  
11724524\_ 7. 168488 7. 261197 7. 296633 7. 417473 7. 502533 7. 481332  
11724525\_ 8. 366295 8. 32289 8. 345675 8. 318365 8. 229033 8. 247031  
11724526\_ 6. 652204 6. 481931 6. 524372 6. 464188 6. 317103 6. 386232  
11724527\_ 6. 607411 6. 495865 6. 441059 6. 383172 6. 307286 6. 329834  
11724528\_ 5. 461228 5. 293062 5. 10195 5. 270984 5. 154393 5. 15793  
11724529\_ 2. 853906 2. 787735 2. 403797 2. 596468 2. 680787 2. 971907  
11724530\_ 3. 19761 3. 180062 3. 38873 3. 333175 3. 477041 3. 384401  
11724531\_ 7. 090857 7. 070779 7. 001418 7. 163573 7. 167109 7. 14757  
11724532\_ 7. 422539 7. 21882 7. 295552 8. 170186 8. 141281 8. 095372  
11724533\_ 4. 881899 5. 025838 4. 915089 5. 066961 5. 160334 5. 071946



11724534\_ 3. 428564 3. 266455 3. 23805 3. 309713 3. 2691 3. 588476  
11724535\_ 8. 207449 8. 180671 8. 150971 8. 013465 7. 934373 7. 989869  
11724536\_ 7. 910863 7. 739184 7. 816332 7. 621597 7. 544596 7. 56126  
11724537\_ 5. 448295 5. 559128 5. 441933 5. 745821 5. 600062 5. 718948  
11724538\_ 5. 400174 5. 497659 5. 2145 5. 555469 5. 56243 5. 603638  
11724539\_ 3. 708206 3. 953348 3. 986541 3. 830895 3. 878339 3. 746945  
11724540\_ 3. 087416 3. 107101 2. 987343 3. 177019 3. 073761 2. 749283  
11724541\_ 4. 850582 4. 887702 5. 088504 5. 135004 5. 10707 4. 990356  
11724542\_ 3. 47167 3. 453757 3. 680318 3. 874213 3. 746897 3. 7247  
11724543\_ 3. 405816 3. 324078 3. 426428 3. 410473 3. 38646 3. 402579  
11724544\_ 7. 181511 7. 199139 7. 199254 7. 19628 7. 160096 7. 21442  
11724545\_ 7. 379175 7. 315899 7. 409439 6. 49491 6. 443133 6. 394353  
11724546\_ 5. 519359 5. 763634 5. 586887 4. 892492 5. 002176 5. 196201  
11724547\_ 5. 480966 5. 518169 5. 559475 5. 551102 5. 353727 5. 470519  
11724548\_ 6. 43438 6. 408986 6. 432454 6. 298579 6. 271117 6. 258547  
11724549\_ 8. 645702 8. 643838 8. 632864 8. 354817 8. 368914 8. 392027  
11724550\_ 7. 206456 7. 078977 7. 202476 7. 217074 7. 206456 7. 227967  
11724551\_ 6. 792183 6. 780617 6. 816118 6. 804177 6. 864111 6. 797965  
11724552\_ 10. 43876 10. 41583 10. 4476 10. 68729 10. 66046 10. 72036  
11724553\_ 5. 998094 6. 23313 6. 091983 5. 448296 5. 190745 5. 4769  
11724554\_ 7. 361654 7. 467854 7. 383661 7. 375656 7. 306776 7. 365962  
11724555\_ 2. 334125 2. 354185 2. 361778 1. 930099 2. 25483 2. 113044  
11724556\_ 3. 327902 3. 358453 3. 460784 3. 310341 3. 503743 3. 336832  
11724557\_ 2. 244218 2. 129189 2. 155958 2. 213776 2. 109723 2. 365232  
11724558\_ 4. 686767 4. 804938 4. 961079 5. 009333 4. 89818 5. 069985  
11724559\_ 3. 565581 3. 680738 3. 545339 3. 544475 3. 523791 3. 549751  
11724560\_ 6. 982385 7. 011752 6. 861162 7. 078424 7. 142721 7. 100461  
11724561\_ 6. 743889 6. 740406 6. 529043 6. 746304 6. 846002 6. 908255  
11724562\_ 6. 749461 6. 673168 6. 75654 7. 324059 7. 455794 7. 305125  
11724563\_ 6. 772237 6. 651084 6. 736345 6. 602286 6. 62769 6. 645358  
11724564\_ 9. 626399 9. 627298 9. 637823 9. 761319 9. 834419 9. 756154  
11724565\_ 6. 187868 6. 173039 6. 071421 6. 232609 6. 19025 6. 132062  
11724566\_ 4. 729774 4. 760337 4. 755358 4. 618769 4. 74574 4. 798294  
11724567\_ 7. 621752 7. 571846 7. 620285 7. 881507 7. 828948 7. 85523  
11724568\_ 8. 003044 7. 876977 7. 973225 8. 098155 8. 114755 8. 101862  
11724569\_ 6. 829222 6. 817813 6. 896411 7. 039483 7. 040801 7. 090161  
11724570\_ 8. 337698 8. 263984 8. 41268 7. 653106 7. 724557 7. 705278  
11724571\_ 7. 01879 7. 009927 7. 063697 6. 891424 6. 793535 6. 762584  
11724572\_ 7. 828997 7. 672359 7. 795196 7. 652212 7. 562285 7. 539046  
11724573\_ 5. 893929 5. 710079 6. 013725 6. 445513 6. 511286 6. 599635  
11724574\_ 7. 086886 7. 11518 7. 032214 7. 135508 7. 132577 7. 191771  
11724575\_ 6. 425933 6. 49371 6. 573176 6. 540506 6. 599839 6. 534692  
11724576\_ 4. 700243 4. 684258 4. 704858 4. 795919 4. 764697 4. 807153  
11724577\_ 6. 173435 6. 143045 5. 986718 6. 058187 5. 957246 6. 116252  
11724578\_ 6. 483047 6. 516022 6. 593662 6. 565304 6. 600227 6. 589054  
11724579\_ 9. 753903 9. 765053 9. 764667 9. 70036 9. 735381 9. 718462  
11724580\_ 7. 223005 7. 048594 7. 018608 7. 057747 6. 987187 7. 043158  
11724581\_ 6. 100519 5. 920756 6. 067607 5. 688328 5. 854214 5. 896636  
11724582\_ 6. 5716 6. 36619 6. 494426 6. 800436 6. 710931 6. 752796  
11724583\_ 6. 514779 6. 649683 6. 599417 6. 673268 6. 608795 6. 633507  
11724584\_ 5. 992912 6. 00639 6. 109099 5. 769298 5. 869751 6. 017367

11724585\_ 6. 514006 6. 661249 6. 703135 5. 966317 6. 044285 6. 230295  
11724586\_ 6. 509065 6. 497107 6. 678419 5. 924368 6. 046578 6. 17341  
11724587\_ 6. 663077 6. 572594 6. 702576 5. 900291 6. 059892 5. 88411  
11724588\_ 5. 206697 5. 269669 5. 210657 5. 202236 5. 218988 5. 103516  
11724589\_ 2. 849349 2. 616601 2. 77512 2. 468147 2. 531382 2. 616601  
11724590\_ 3. 594003 3. 687439 3. 720072 3. 398236 3. 483208 3. 483208  
11724591\_ 3. 89866 4. 0697 4. 021243 3. 802233 3. 956894 4. 030293  
11724592\_ 5. 773439 5. 772841 5. 711626 5. 808244 5. 863631 5. 811058  
11724593\_ 8. 744817 8. 729696 8. 707941 9. 317005 9. 320581 9. 369232  
11724594\_ 5. 051744 5. 074994 5. 241658 4. 995072 5. 124445 5. 196201  
11724595\_ 8. 889716 8. 958808 8. 906296 8. 625013 8. 47434 8. 526329  
11724596\_ 7. 886773 7. 879024 7. 768017 7. 5887 7. 462252 7. 49181  
11724597\_ 5. 657136 5. 657136 5. 506756 5. 711715 5. 665538 5. 798849  
11724598\_ 6. 320496 6. 301355 6. 264765 6. 282997 6. 365462 6. 318829  
11724599\_ 7. 842377 7. 773748 7. 82186 7. 83855 7. 769201 7. 810753  
11724600\_ 8. 576464 8. 465022 8. 532661 8. 117322 8. 128398 8. 183707  
11724601\_ 7. 772698 7. 702545 7. 729449 7. 396591 7. 470898 7. 459538  
11724602\_ 6. 793238 6. 768224 6. 83949 6. 321644 6. 298671 6. 394504  
11724603\_ 5. 980033 6. 12452 5. 992161 6. 062257 5. 976957 5. 985217  
11724604\_ 6. 515844 6. 464805 6. 483939 6. 91961 6. 922773 7. 021439  
11724605\_ 8. 306039 8. 239069 8. 337919 8. 864687 8. 782002 8. 849851  
11724606\_ 7. 042667 6. 922679 7. 07785 7. 393648 7. 410541 7. 42518  
11724607\_ 7. 131873 7. 128856 7. 270335 7. 296711 7. 331462 7. 369078  
11724608\_ 6. 38749 6. 395092 6. 232017 6. 481993 6. 549112 6. 581623  
11724609\_ 6. 630536 6. 693793 6. 555606 6. 777273 6. 788266 6. 905212  
11724610\_ 9. 30542 9. 242719 9. 273318 8. 55145 8. 565867 8. 578472  
11724611\_ 8. 258669 8. 142827 8. 131219 8. 099454 8. 029422 8. 035635  
11724612\_ 8. 943293 8. 963185 9. 007585 8. 105009 8. 173586 8. 143673  
11724613\_ 7. 551705 7. 541047 7. 463043 7. 118889 7. 104452 7. 036901  
11724614\_ 6. 669716 6. 815447 6. 749498 6. 996162 6. 946361 6. 864125  
11724615\_ 5. 071428 5. 130915 5. 221341 5. 231901 5. 183024 5. 197492  
11724616\_ 4. 978905 4. 876639 4. 854471 5. 070631 4. 998068 5. 105864  
11724617\_ 4. 287324 4. 170446 4. 244653 4. 287324 4. 472015 4. 381333  
11724618\_ 5. 339084 5. 435769 5. 491984 5. 645368 5. 474574 5. 480361  
11724619\_ 3. 802621 3. 606313 3. 589704 3. 825669 4. 078577 3. 821799  
11724620\_ 3. 531742 3. 528687 3. 616849 3. 575259 3. 534797 3. 540906  
11724621\_ 2. 599756 2. 736317 2. 845559 2. 747898 2. 645329 2. 745626  
11724622\_ 5. 129844 5. 228627 5. 15967 5. 286268 5. 327737 5. 335606  
11724623\_ 5. 482366 5. 535007 5. 301353 5. 691714 5. 520224 5. 549556  
11724624\_ 4. 142434 3. 826408 3. 850122 4. 078538 4. 121194 4. 082587  
11724625\_ 4. 026092 4. 315698 4. 079707 4. 066606 4. 037397 4. 037397  
11724626\_ 7. 552926 7. 480788 7. 528705 7. 292161 7. 305478 7. 288042  
11724627\_ 5. 042862 5. 133099 5. 182634 5. 199302 5. 349897 5. 269326  
11724628\_ 5. 835266 5. 954466 5. 872906 5. 900006 6. 035686 6. 074239  
11724629\_ 9. 126832 9. 081874 9. 079107 9. 062976 9. 099409 9. 078185  
11724630\_ 3. 600628 3. 84315 3. 871707 3. 690658 3. 679363 3. 786777  
11724631\_ 3. 859925 3. 791176 3. 80034 3. 918559 3. 719941 4. 004201  
11724632\_ 4. 803283 4. 709463 4. 721679 4. 800696 4. 796789 4. 96703  
11724633\_ 7. 886682 7. 782653 7. 859495 7. 370573 7. 345433 7. 496107  
11724634\_ 8. 664826 8. 744398 8. 73344 8. 901376 8. 818077 8. 869541  
11724635\_ 9. 461076 9. 398617 9. 383513 8. 298739 8. 194981 8. 230714

11724636\_ 5. 997388 5. 979064 5. 987756 5. 867742 5. 976287 5. 92945  
11724637\_ 6. 300643 6. 244826 6. 053089 6. 265148 6. 281361 6. 240994  
11724638\_ 6. 858578 6. 896348 6. 896876 6. 612193 6. 558981 6. 469721  
11724639\_ 5. 97542 5. 869583 6. 145779 5. 763101 5. 614898 5. 887296  
11724640\_ 4. 636544 4. 602645 4. 304938 4. 584933 4. 52373 4. 561424  
11724641\_ 4. 393349 4. 389673 4. 346166 4. 667438 4. 538944 4. 544203  
11724642\_ 4. 768699 5. 085315 4. 983763 4. 546325 4. 819321 4. 660063  
11724643\_ 5. 544167 5. 614563 5. 603824 6. 459431 6. 335479 6. 481046  
11724644\_ 6. 288626 6. 225513 6. 237126 5. 501267 5. 380062 5. 732315  
11724645\_ 4. 777145 5. 010542 5. 023308 5. 880021 5. 906163 5. 916956  
11724646\_ 7. 76078 7. 659029 7. 731686 7. 737518 7. 72137 7. 731301  
11724647\_ 7. 127134 7. 160461 7. 228828 7. 01433 6. 929633 7. 056458  
11724648\_ 5. 926672 5. 637743 5. 69669 5. 794286 5. 849307 5. 734751  
11724649\_ 6. 228801 6. 121948 6. 229349 6. 346817 6. 509196 6. 481046  
11724650\_ 7. 63458 7. 467414 7. 634487 7. 828868 7. 81096 7. 851893  
11724651\_ 6. 837007 6. 746636 6. 89281 6. 420813 6. 373314 6. 461467  
11724652\_ 6. 966783 6. 926605 7. 009905 6. 580562 6. 567371 6. 519138  
11724653\_ 5. 512912 5. 078705 5. 455664 5. 643713 5. 588378 5. 692461  
11724654\_ 5. 401826 5. 525853 5. 18034 5. 544899 5. 58309 5. 522654  
11724655\_ 6. 375163 6. 412133 6. 436407 6. 362737 6. 291823 6. 42252  
11724656\_ 4. 999034 5. 101603 4. 897171 5. 091192 5. 122207 5. 251624  
11724657\_ 4. 182382 4. 19943 4. 146923 4. 286043 4. 294092 4. 260374  
11724658\_ 5. 20559 5. 063382 5. 098015 5. 177401 5. 160448 5. 063352  
11724659\_ 3. 844518 3. 848454 3. 744416 3. 934627 3. 83917 3. 848454  
11724660\_ 4. 140581 4. 281499 4. 226636 4. 275265 4. 238342 4. 175992  
11724661\_ 6. 010083 6. 026296 5. 996126 5. 963515 5. 896825 6. 012281  
11724662\_ 5. 449846 5. 614563 5. 389386 5. 623167 5. 621327 5. 619463  
11724663\_ 5. 96717 5. 994167 6. 029088 6. 134889 6. 117093 6. 186423  
11724664\_ 7. 189162 7. 258181 7. 070563 7. 097092 7. 118144 7. 193066  
11724665\_ 6. 035553 6. 160205 6. 122898 6. 272623 6. 157919 6. 218994  
11724666\_ 8. 609708 8. 560314 8. 591085 8. 5855 8. 645289 8. 56742  
11724667\_ 5. 281783 5. 225827 5. 2739 5. 189615 5. 238634 5. 389511  
11724668\_ 4. 301851 4. 362608 4. 128997 4. 310557 4. 199657 4. 376596  
11724669\_ 9. 76788 9. 664735 9. 69485 9. 789916 9. 853403 9. 790171  
11724670\_ 4. 375133 4. 536966 4. 400327 4. 461307 4. 530637 4. 468674  
11724671\_ 3. 503743 3. 261444 3. 437876 3. 398236 3. 606313 3. 605703  
11724672\_ 6. 147496 6. 006525 6. 136035 6. 301904 6. 257814 6. 338817  
11724673\_ 6. 506199 6. 312545 6. 451099 6. 058786 6. 068284 6. 246633  
11724674\_ 5. 995371 5. 763634 5. 806529 5. 933063 5. 926545 5. 906095  
11724675\_ 5. 472306 5. 255525 5. 407487 5. 263956 5. 427758 5. 524781  
11724676\_ 6. 817986 6. 720661 6. 898793 6. 560874 6. 606699 6. 735437  
11724677\_ 8. 064951 8. 038785 8. 100106 8. 158263 8. 222031 8. 137978  
11724678\_ 5. 49614 5. 563402 5. 421875 5. 540684 5. 495174 5. 58145  
11724679\_ 7. 532227 7. 464662 7. 492675 6. 970913 6. 947684 6. 95424  
11724680\_ 8. 148987 8. 175609 8. 1761 7. 715818 7. 804161 7. 67427  
11724681\_ 6. 956804 6. 807065 6. 932685 6. 539082 6. 60926 6. 520218  
11724682\_ 9. 721398 9. 689431 9. 729285 8. 492965 8. 44751 8. 442497  
11724683\_ 5. 642435 5. 732315 5. 681635 5. 699786 5. 885746 5. 805183  
11724684\_ 6. 818349 6. 89842 6. 709286 6. 97045 7. 018994 7. 019002  
11724685\_ 6. 402873 6. 381296 6. 455446 6. 470537 6. 207721 6. 438471  
11724686\_ 7. 107688 7. 094081 7. 072457 6. 628049 6. 530845 6. 544244

11724687\_ 4. 332298 4. 390406 4. 509152 4. 072913 4. 386097 4. 375138  
11724688\_ 7. 383636 7. 388264 7. 47094 7. 417988 7. 419378 7. 451571  
11724689\_ 8. 79651 8. 79008 8. 761284 8. 572843 8. 618795 8. 540651  
11724690\_ 2. 833742 2. 727913 2. 721027 2. 623296 2. 542896 2. 81738  
11724691\_ 4. 057973 4. 252372 4. 257001 4. 307276 4. 27888 4. 185916  
11724692\_ 6. 668527 6. 751269 6. 57332 6. 719105 6. 781017 6. 739183  
11724693\_ 6. 587504 6. 566081 6. 47997 6. 459286 6. 546801 6. 543296  
11724694\_ 6. 673482 6. 821532 6. 700613 6. 836226 6. 967649 6. 73509  
11724695\_ 8. 720654 8. 678786 8. 747353 7. 934809 7. 95116 7. 976707  
11724696\_ 4. 561235 4. 60804 4. 223555 4. 483341 4. 577333 4. 5559  
11724697\_ 5. 93313 5. 990356 5. 730639 5. 966651 6. 145072 5. 88129  
11724698\_ 4. 773139 4. 908459 4. 893538 4. 799261 4. 806067 4. 82527  
11724699\_ 6. 463425 6. 543948 6. 425604 6. 710348 6. 599313 6. 579785  
11724700\_ 5. 630426 5. 841177 5. 573263 5. 56895 5. 584813 5. 608496  
11724701\_ 3. 176652 3. 140528 2. 761462 3. 175869 3. 196034 3. 443336  
11724702\_ 2. 366843 2. 296918 2. 424085 2. 201984 2. 41157 2. 369378  
11724703\_ 2. 572832 2. 591264 2. 509733 2. 753471 2. 798956 2. 669804  
11724704\_ 2. 605516 2. 716963 2. 936585 2. 716963 2. 326497 2. 654413  
11724705\_ 3. 804724 3. 606313 3. 526811 3. 792389 3. 874824 3. 963102  
11724706\_ 3. 483426 3. 690074 3. 483426 3. 607003 3. 458229 3. 459267  
11724707\_ 3. 565279 3. 503743 3. 437127 3. 503743 3. 53793 3. 441858  
11724708\_ 6. 664003 6. 562981 6. 526295 6. 586163 6. 605448 6. 660193  
11724709\_ 8. 11024 8. 025042 8. 111979 8. 180474 8. 17683 8. 126108  
11724710\_ 6. 241607 6. 183329 6. 41719 6. 367719 6. 545996 6. 386855  
11724711\_ 6. 692625 6. 502628 6. 670678 6. 468206 6. 450944 6. 509485  
11724712\_ 4. 694094 4. 976581 4. 734741 4. 974003 5. 050061 4. 99422  
11724713\_ 5. 812655 5. 824955 5. 950197 5. 771318 5. 73554 5. 896458  
11724714\_ 8. 592061 8. 540491 8. 635881 8. 561831 8. 462217 8. 532498  
11724715\_ 7. 53129 7. 573226 7. 549073 7. 590736 7. 531311 7. 606453  
11724716\_ 7. 590925 7. 584758 7. 705555 7. 486786 7. 487903 7. 51378  
11724717\_ 7. 803886 7. 757075 7. 804727 7. 881874 7. 929798 7. 89261  
11724718\_ 6. 617195 6. 608207 6. 67941 6. 702681 6. 72309 6. 714177  
11724719\_ 7. 278288 7. 320981 7. 313792 7. 202891 7. 212271 7. 286089  
11724720\_ 3. 372405 3. 448363 3. 690655 3. 85828 3. 976049 3. 860055  
11724721\_ 2. 784792 3. 028262 3. 075499 3. 058915 3. 171576 3. 242349  
11724722\_ 7. 127091 7. 134753 7. 174857 7. 354912 7. 464514 7. 343777  
11724723\_ 5. 643713 5. 351977 5. 584813 5. 975393 5. 901283 5. 993708  
11724724\_ 10. 30774 10. 25428 10. 35348 10. 19083 10. 24058 10. 19428  
11724725\_ 8. 391006 8. 372887 8. 47435 8. 247113 8. 369939 8. 261288  
11724726\_ 9. 165841 9. 063317 9. 146413 9. 136558 9. 118111 9. 141318  
11724727\_ 4. 69823 4. 572573 4. 595342 5. 657715 5. 636023 5. 57386  
11724728\_ 4. 943506 4. 975648 5. 000811 5. 247814 5. 176776 5. 15533  
11724729\_ 4. 575273 4. 643717 4. 579235 4. 584278 4. 601778 4. 575273  
11724730\_ 7. 458129 7. 495068 7. 544069 7. 574464 7. 549064 7. 504673  
11724731\_ 8. 723162 8. 693804 8. 780411 8. 798037 8. 847873 8. 807377  
11724732\_ 11. 01227 10. 97363 10. 99762 11. 52886 11. 50895 11. 56686  
11724733\_ 5. 366506 5. 506142 5. 377923 5. 541116 5. 544716 5. 544438  
11724734\_ 5. 592703 5. 789947 5. 534508 5. 654937 5. 455434 5. 5303  
11724735\_ 3. 357698 3. 609177 3. 738027 3. 573295 3. 573295 3. 464871  
11724736\_ 2. 193383 2. 193383 2. 095256 2. 216862 2. 16875 2. 25483  
11724737\_ 4. 200678 4. 109835 4. 135496 4. 213472 4. 198684 4. 151791

11724738\_ 2. 627808 2. 740755 2. 547031 2. 451259 2. 722945 2. 642375  
11724739\_ 4. 962437 5. 061368 4. 96975 5. 06771 5. 132633 5. 070565  
11724740\_ 11. 61278 11. 56794 11. 62516 12. 0232 12. 03353 12. 01357  
11724741\_ 6. 236051 6. 18479 6. 17981 7. 099148 7. 130116 7. 092151  
11724742\_ 8. 118993 8. 016988 7. 987285 7. 705331 7. 761348 7. 752543  
11724743\_ 5. 253366 5. 481336 5. 453315 5. 247981 5. 293388 5. 292383  
11724744\_ 5. 14604 5. 264356 5. 250147 4. 24437 4. 40461 4. 213036  
11724745\_ 4. 978102 5. 102793 5. 16344 4. 989984 5. 085394 5. 200266  
11724746\_ 8. 967425 8. 824536 8. 909273 8. 616531 8. 642161 8. 583979  
11724747\_ 8. 511518 8. 48812 8. 571306 8. 263337 8. 211264 8. 146103  
11724748\_ 9. 333907 9. 307136 9. 295375 9. 182798 9. 137803 9. 137558  
11724749\_ 5. 421603 5. 355561 5. 273824 5. 522772 5. 572039 5. 586167  
11724750\_ 7. 392669 7. 429082 7. 422803 7. 453593 7. 418781 7. 423447  
11724751\_ 7. 59031 7. 525081 7. 603412 7. 442916 7. 369681 7. 46549  
11724752\_ 7. 348747 7. 322749 7. 33434 6. 712642 6. 631902 6. 610816  
11724753\_ 7. 347842 7. 256565 7. 383661 7. 307154 7. 280584 7. 277177  
11724754\_ 7. 375279 7. 359307 7. 392275 6. 956762 7. 234568 7. 134375  
11724755\_ 5. 609587 5. 599754 5. 538733 5. 602844 5. 327774 5. 512056  
11724756\_ 9. 16206 9. 121005 9. 170066 8. 960953 8. 983263 8. 987222  
11724757\_ 8. 365388 8. 381062 8. 37013 8. 174342 8. 173236 8. 085223  
11724758\_ 9. 032806 9. 05231 9. 03569 8. 87022 8. 917615 8. 868367  
11724759\_ 9. 191525 9. 150616 9. 184863 9. 043014 9. 037295 9. 098296  
11724760\_ 11. 26268 11. 21899 11. 24109 11. 27502 11. 29019 11. 29139  
11724761\_ 9. 77936 9. 740595 9. 776828 9. 925621 9. 93845 9. 91817  
11724762\_ 6. 052433 6. 026203 6. 005977 6. 098422 6. 00364 6. 214172  
11724763\_ 7. 111448 7. 174614 7. 0866 7. 174614 7. 16439 7. 266147  
11724764\_ 8. 786911 8. 652169 8. 735984 8. 65234 8. 687149 8. 620733  
11724765\_ 8. 864968 8. 811837 8. 883387 8. 693094 8. 684817 8. 694546  
11724766\_ 5. 224434 5. 098116 5. 134623 5. 594817 5. 464147 5. 593853  
11724767\_ 7. 237822 7. 281196 7. 340341 7. 428136 7. 465916 7. 426232  
11724768\_ 5. 89295 5. 868614 5. 883012 5. 623852 5. 66143 5. 673066  
11724769\_ 7. 282742 7. 176075 7. 189995 6. 937696 6. 893543 6. 946361  
11724770\_ 7. 13488 7. 111448 7. 1157 7. 149778 7. 074403 7. 16447  
11724771\_ 6. 661073 6. 666771 6. 575069 6. 56522 6. 436491 6. 551088  
11724772\_ 8. 044763 8. 198968 7. 936609 8. 071015 8. 086189 8. 039468  
11724773\_ 4. 9849 5. 210799 4. 974803 5. 204456 5. 17343 4. 992763  
11724774\_ 5. 822287 5. 841177 5. 886602 5. 977166 6. 053291 5. 946303  
11724775\_ 5. 170276 5. 210092 5. 261826 5. 261826 5. 162325 5. 283525  
11724776\_ 6. 167519 6. 058786 6. 309568 5. 697757 5. 638895 5. 694165  
11724777\_ 4. 878523 4. 963394 4. 657064 4. 723237 4. 663769 4. 670257  
11724778\_ 4. 916164 5. 056063 5. 030683 4. 884364 4. 89267 4. 864422  
11724779\_ 4. 869296 4. 874234 4. 887391 4. 583782 4. 585087 4. 64974  
11724780\_ 8. 822041 8. 781034 8. 819068 8. 762272 8. 822041 8. 740248  
11724781\_ 5. 275717 5. 294117 5. 323168 5. 039216 4. 87373 4. 881835  
11724782\_ 8. 387723 8. 412015 8. 462498 8. 038189 7. 997647 7. 99621  
11724783\_ 9. 521107 9. 49538 9. 514694 9. 561431 9. 587956 9. 622317  
11724784\_ 8. 361217 8. 353795 8. 288628 8. 389752 8. 33872 8. 355601  
11724785\_ 9. 546885 9. 525927 9. 532794 9. 561885 9. 536267 9. 533679  
11724786\_ 8. 631765 8. 615398 8. 701072 8. 460907 8. 453371 8. 471448  
11724787\_ 8. 13756 8. 228884 8. 288683 8. 213778 8. 044367 8. 084776  
11724788\_ 7. 180926 7. 197032 7. 27453 6. 31103 6. 211834 6. 425307

11724789\_ 8. 085669 7. 947607 7. 968407 7. 68055 7. 767032 7. 761789  
11724790\_ 4. 520047 4. 504176 4. 543204 4. 736362 4. 655918 4. 684119  
11724791\_ 4. 659903 4. 459355 4. 574321 4. 643717 4. 852586 4. 820394  
11724792\_ 5. 836429 5. 645913 5. 819729 5. 752145 5. 761322 5. 824596  
11724793\_ 8. 720109 8. 632717 8. 700409 8. 52455 8. 5258 8. 557305  
11724794\_ 6. 34515 6. 309306 6. 367636 6. 338707 6. 394001 6. 362089  
11724795\_ 3. 566705 3. 868799 3. 763863 3. 929981 3. 841978 3. 799574  
11724796\_ 4. 467236 4. 416303 4. 298054 4. 412885 4. 460861 4. 523984  
11724797\_ 7. 941508 7. 777945 7. 999209 8. 339593 8. 397731 8. 285832  
11724798\_ 8. 389129 8. 328195 8. 419326 8. 813525 8. 850522 8. 747057  
11724799\_ 4. 399448 4. 507853 4. 287593 4. 456904 4. 36198 4. 330268  
11724800\_ 5. 961626 5. 995151 5. 95705 5. 996126 5. 98681 6. 127516  
11724801\_ 7. 18824 7. 205114 7. 166609 7. 010934 6. 953553 6. 799511  
11724802\_ 8. 542114 8. 475823 8. 558934 8. 278426 8. 264994 8. 226388  
11724803\_ 6. 78927 6. 732387 6. 832196 6. 683923 6. 722425 6. 714177  
11724804\_ 2. 781462 2. 928375 2. 753019 2. 877198 2. 835541 2. 778711  
11724805\_ 4. 568084 4. 602112 4. 429765 4. 660567 4. 743045 4. 759789  
11724806\_ 6. 173087 6. 315433 6. 359571 6. 135608 6. 291446 6. 022149  
11724807\_ 9. 12679 9. 155437 9. 107699 9. 313859 9. 227466 9. 280808  
11724808\_ 6. 211195 6. 177695 6. 045569 6. 039101 5. 879489 5. 956542  
11724809\_ 7. 437135 7. 390358 7. 415233 7. 522189 7. 519368 7. 663429  
11724810\_ 8. 705784 8. 545338 8. 656023 8. 72546 8. 790061 8. 758035  
11724811\_ 5. 468111 5. 452513 5. 503298 5. 572478 5. 348636 5. 576077  
11724812\_ 8. 097672 8. 114859 8. 170058 7. 589893 7. 632911 7. 653457  
11724813\_ 6. 245383 6. 384958 6. 195399 6. 216734 6. 267879 6. 352739  
11724814\_ 8. 429341 8. 430891 8. 447121 8. 110871 8. 130281 8. 064742  
11724815\_ 8. 708454 8. 607692 8. 682977 8. 278426 8. 188815 8. 239756  
11724816\_ 9. 523725 9. 488681 9. 541124 9. 322541 9. 327338 9. 298888  
11724817\_ 9. 733825 9. 651504 9. 76628 9. 500796 9. 527222 9. 53388  
11724818\_ 6. 639278 6. 454823 6. 426493 7. 226844 7. 245305 7. 241519  
11724819\_ 9. 018555 9. 017978 9. 028876 8. 84212 8. 800357 8. 7944  
11724820\_ 7. 676949 7. 569204 7. 670841 6. 994876 7. 012872 7. 106193  
11724821\_ 9. 03295 8. 951831 9. 028383 8. 7594 8. 789165 8. 714091  
11724822\_ 6. 929939 7. 009763 6. 990863 7. 181028 7. 223388 7. 186247  
11724823\_ 7. 600612 7. 581163 7. 524158 7. 612047 7. 562539 7. 555628  
11724824\_ 9. 660423 9. 615224 9. 628616 9. 392773 9. 438876 9. 407498  
11724825\_ 7. 339917 7. 256917 7. 320979 7. 135244 7. 29019 7. 21188  
11724826\_ 5. 56444 5. 688429 5. 709555 5. 601912 5. 763627 5. 771811  
11724827\_ 7. 529003 7. 456288 7. 400837 7. 350461 7. 400837 7. 393393  
11724828\_ 5. 435103 5. 532682 5. 801907 5. 515869 5. 442988 5. 386802  
11724829\_ 4. 637761 4. 874234 4. 667183 4. 778956 4. 863543 4. 778956  
11724830\_ 2. 013715 2. 135025 1. 79111 2. 100052 1. 962313 2. 070241  
11724831\_ 3. 047196 3. 28593 3. 269331 3. 105773 3. 363923 3. 178574  
11724832\_ 4. 688274 4. 755188 4. 59046 4. 67626 4. 692006 4. 663437  
11724833\_ 5. 576303 5. 578373 5. 492328 5. 509921 5. 395854 5. 396657  
11724834\_ 3. 499803 3. 564651 3. 59504 3. 588305 3. 534367 3. 601075  
11724835\_ 4. 977054 5. 072804 5. 011598 5. 140595 5. 040544 4. 994407  
11724836\_ 7. 426067 7. 347116 7. 448766 6. 138458 6. 299891 6. 318677  
11724837\_ 7. 492811 7. 333718 7. 429694 6. 489572 6. 464805 6. 713347  
11724838\_ 6. 653427 6. 818604 6. 735652 5. 894697 6. 042505 6. 073142  
11724839\_ 6. 013436 6. 160765 6. 178603 6. 368523 6. 220061 6. 263567

11724840\_ 6. 984125 6. 838861 6. 97532 6. 688022 6. 614618 6. 722015  
11724841\_ 7. 976436 7. 871477 7. 952989 7. 825457 7. 769165 7. 765944  
11724842\_ 5. 575304 5. 11527 5. 56865 4. 565719 4. 538823 4. 420084  
11724843\_ 5. 922767 6. 118838 5. 778095 5. 929854 5. 888886 5. 963735  
11724844\_ 8. 898215 8. 808659 8. 850667 8. 774462 8. 845466 8. 799371  
11724845\_ 6. 460247 6. 566129 6. 616559 6. 816893 6. 837981 7. 003543  
11724846\_ 6. 49865 6. 731021 6. 571953 6. 826664 6. 81128 6. 772453  
11724847\_ 2. 605516 3. 133144 2. 865935 2. 986533 2. 838797 2. 823297  
11724848\_ 7. 326385 7. 19775 7. 314921 6. 986777 7. 029521 7. 099985  
11724849\_ 5. 973914 5. 842426 6. 018553 5. 725673 6. 014158 5. 856429  
11724850\_ 3. 916144 3. 938264 3. 780367 3. 76386 3. 887819 3. 709301  
11724851\_ 7. 193095 7. 099734 7. 202315 5. 883352 6. 051728 6. 094413  
11724852\_ 7. 462121 7. 52966 7. 409349 7. 595257 7. 537793 7. 580501  
11724853\_ 4. 977776 5. 026912 4. 94117 5. 146644 5. 183024 5. 289488  
11724854\_ 3. 891153 3. 68455 3. 860252 4. 144334 3. 991315 4. 092075  
11724855\_ 4. 911289 4. 88723 4. 770457 4. 806989 4. 806989 4. 812614  
11724856\_ 6. 43652 6. 439606 6. 17868 6. 496259 6. 460845 6. 472145  
11724857\_ 8. 094491 8. 02234 8. 133093 7. 978388 7. 909863 7. 97343  
11724858\_ 5. 078435 5. 018083 4. 993986 5. 211995 5. 114328 5. 057823  
11724859\_ 6. 364397 6. 414482 6. 412212 6. 831359 6. 912382 6. 731597  
11724860\_ 5. 657871 5. 353469 5. 531511 6. 253401 6. 097037 6. 183411  
11724861\_ 5. 043986 5. 114022 4. 907603 5. 057968 5. 00865 5. 15134  
11724862\_ 6. 795208 6. 728699 6. 842914 6. 886802 6. 885004 6. 984231  
11724863\_ 7. 812882 7. 808417 7. 817129 7. 7237 7. 796088 7. 791435  
11724864\_ 5. 236614 4. 839542 4. 936594 5. 273544 5. 075253 5. 23131  
11724865\_ 2. 282459 2. 47102 2. 235709 2. 643419 2. 546211 2. 146874  
11724866\_ 5. 085356 5. 102951 5. 076134 5. 157075 5. 145214 5. 134828  
11724867\_ 7. 335346 7. 346349 7. 381001 7. 378 7. 407123 7. 489139  
11724868\_ 8. 247459 8. 282279 8. 28575 8. 482116 8. 449816 8. 391996  
11724869\_ 8. 276427 8. 347613 8. 314372 8. 495996 8. 430432 8. 420964  
11724870\_ 6. 230922 6. 275883 6. 242581 6. 079223 6. 179718 6. 210177  
11724871\_ 4. 338296 4. 320088 4. 224103 4. 421223 4. 339955 4. 417842  
11724872\_ 4. 7721 4. 757309 4. 593491 4. 699542 4. 772334 4. 834592  
11724873\_ 7. 553601 7. 458228 7. 568637 7. 946822 7. 983042 7. 91863  
11724874\_ 6. 416053 6. 379646 6. 371168 6. 477539 6. 526095 6. 51127  
11724875\_ 2. 981761 2. 95869 2. 822515 2. 718322 2. 763823 2. 798898  
11724876\_ 8. 825196 8. 841741 8. 777209 8. 604351 8. 587573 8. 565566  
11724877\_ 6. 50473 6. 396314 6. 416215 6. 435008 6. 362102 6. 217415  
11724878\_ 3. 175247 2. 895771 3. 01195 2. 983566 2. 797594 3. 103611  
11724879\_ 3. 472326 3. 603303 3. 572285 3. 613684 3. 655613 3. 644825  
11724880\_ 5. 73338 5. 675409 5. 902283 5. 859796 5. 803944 5. 867244  
11724881\_ 10. 35043 10. 41091 10. 32234 10. 23121 10. 20296 10. 18534  
11724882\_ 8. 905438 8. 862268 8. 960604 8. 159414 8. 100779 8. 191099  
11724883\_ 5. 848032 5. 825897 5. 870242 6. 430269 6. 397946 6. 247833  
11724884\_ 6. 13945 6. 08936 5. 997532 6. 609721 6. 602396 6. 567363  
11724885\_ 4. 149488 4. 383312 4. 157309 4. 40461 4. 355569 4. 268248  
11724886\_ 2. 98403 3. 023104 2. 736636 3. 034244 2. 956928 3. 061205  
11724887\_ 5. 978048 6. 109206 5. 978244 5. 979137 6. 06122 6. 090211  
11724888\_ 8. 095738 8. 084856 8. 05362 7. 658672 7. 821414 7. 787081  
11724889\_ 5. 939706 5. 94726 6. 015108 6. 253976 6. 152706 6. 24302  
11724890\_ 5. 831469 5. 642998 5. 841243 6. 033912 5. 939992 6. 030306

11724891\_ 8. 25166 8. 170118 8. 233651 8. 191356 8. 314917 8. 330306  
11724892\_ 4. 223786 4. 192572 4. 221112 4. 194637 4. 197311 4. 253778  
11724893\_ 7. 055617 7. 020462 7. 093685 7. 300169 7. 300951 7. 334824  
11724894\_ 3. 503469 3. 731124 3. 503469 3. 540219 3. 734632 3. 618779  
11724895\_ 7. 894399 7. 781556 7. 718077 8. 179669 8. 162669 8. 159966  
11724896\_ 6. 486679 6. 499802 6. 487261 6. 62185 6. 548567 6. 59839  
11724897\_ 6. 073142 6. 074172 6. 176156 6. 481046 6. 371375 6. 345462  
11724898\_ 6. 239386 6. 238667 6. 24148 6. 247454 6. 39378 6. 202541  
11724899\_ 5. 906102 6. 005911 6. 01025 6. 015813 5. 896317 5. 905387  
11724900\_ 4. 679286 4. 79935 4. 774439 4. 719379 4. 791712 4. 650517  
11724901\_ 10. 10248 10. 09635 10. 14147 9. 437605 9. 411827 9. 415359  
11724902\_ 9. 045652 8. 895487 8. 90229 6. 650358 6. 900845 6. 898163  
11724903\_ 7. 011505 7. 001979 7. 181833 5. 776753 5. 861012 5. 828483  
11724904\_ 4. 416494 4. 373206 4. 435397 4. 488444 4. 524667 4. 508292  
11724905\_ 8. 656872 8. 603881 8. 589544 8. 101757 8. 101215 8. 05474  
11724906\_ 8. 128881 8. 06735 8. 064267 8. 103196 8. 059421 8. 082908  
11724907\_ 7. 976398 7. 918214 7. 961849 7. 765075 7. 737841 7. 684699  
11724908\_ 3. 534548 3. 434589 3. 456687 3. 497498 3. 548266 3. 463419  
11724909\_ 4. 096436 4. 010899 3. 800219 4. 135455 3. 962977 4. 062792  
11724910\_ 5. 738042 5. 891573 5. 834354 5. 823715 5. 957954 5. 807428  
11724911\_ 3. 398236 3. 398236 3. 290188 3. 430214 3. 417019 3. 66432  
11724912\_ 4. 335245 4. 343301 4. 343301 4. 806755 4. 440274 4. 666984  
11724913\_ 9. 324847 9. 350192 9. 367703 9. 160813 9. 218349 9. 136131  
11724914\_ 3. 643331 3. 820717 3. 732006 4. 110523 4. 029244 3. 935312  
11724915\_ 8. 025425 7. 961762 7. 992956 7. 327405 7. 335628 7. 488473  
11724916\_ 7. 599269 7. 437386 7. 595537 7. 675159 7. 667368 7. 764914  
11724917\_ 7. 928736 7. 946164 7. 854598 7. 655076 7. 632362 7. 674183  
11724918\_ 6. 061905 6. 056478 6. 069519 5. 669784 5. 609647 5. 513248  
11724919\_ 6. 091066 6. 1962 6. 180753 6. 34409 6. 513371 6. 539628  
11724920\_ 5. 542368 5. 50543 5. 669951 5. 648467 5. 573232 5. 564567  
11724921\_ 7. 532525 7. 573158 7. 571457 7. 170448 7. 125793 7. 103261  
11724922\_ 6. 487218 6. 507174 6. 561174 6. 00416 5. 919069 5. 880533  
11724923\_ 7. 409552 7. 34861 7. 433703 7. 440238 7. 445481 7. 536981  
11724924\_ 6. 357707 6. 260994 6. 47532 6. 103319 6. 06993 5. 976667  
11724925\_ 7. 106628 7. 019163 7. 102653 6. 874408 6. 749654 6. 786328  
11724926\_ 9. 115365 9. 088357 9. 12694 8. 843306 8. 785127 8. 801328  
11724927\_ 5. 980833 5. 846419 5. 913215 5. 894697 5. 845365 5. 81629  
11724928\_ 6. 545564 6. 485027 6. 470763 6. 45461 6. 560246 6. 577496  
11724929\_ 6. 159088 6. 064595 6. 075756 6. 240934 6. 185528 6. 105206  
11724930\_ 5. 869513 5. 888625 5. 851437 5. 924564 5. 907181 6. 026491  
11724931\_ 2. 928782 3. 046186 2. 77004 2. 985186 3. 000114 3. 050164  
11724932\_ 7. 034195 6. 917546 6. 958012 6. 851956 6. 80711 6. 84124  
11724933\_ 8. 581271 8. 459411 8. 537864 8. 482614 8. 523134 8. 534666  
11724934\_ 7. 339964 7. 423143 7. 344195 7. 417811 7. 544624 7. 485404  
11724935\_ 7. 700815 7. 702407 7. 793226 7. 760939 7. 823888 7. 840966  
11724936\_ 7. 492413 7. 417811 7. 44627 7. 415198 7. 526026 7. 489139  
11724937\_ 6. 084245 6. 129516 6. 070833 6. 161479 6. 109172 6. 088627  
11724938\_ 4. 373074 4. 492536 4. 25586 4. 404832 4. 271663 4. 446609  
11724939\_ 4. 032332 4. 322595 4. 157722 4. 157722 4. 054937 4. 260731  
11724940\_ 3. 895947 3. 954766 4. 053079 4. 135496 4. 098336 4. 298748  
11724941\_ 7. 216669 7. 164876 7. 184292 6. 751034 6. 810844 6. 800957



11724942\_ 5. 114116 5. 268172 5. 073903 5. 041893 5. 12995 4. 98249  
11724943\_ 5. 540102 5. 726344 5. 588172 5. 648023 5. 692951 5. 736909  
11724944\_ 4. 60646 4. 61349 4. 760877 4. 49933 4. 458207 4. 473452  
11724945\_ 7. 899025 7. 947908 7. 97401 7. 493631 7. 42526 7. 334928  
11724946\_ 4. 029444 4. 225518 4. 108825 4. 029444 4. 029831 4. 098397  
11724947\_ 5. 548193 5. 493465 5. 518169 5. 617171 5. 59896 5. 528624  
11724948\_ 8. 601042 8. 509975 8. 557612 7. 889773 7. 887352 7. 840212  
11724949\_ 7. 748122 7. 701561 7. 755967 6. 804914 6. 867981 6. 829848  
11724950\_ 5. 676992 5. 791655 5. 829721 5. 471612 5. 422762 5. 328611  
11724951\_ 6. 628521 6. 579869 6. 58139 5. 20874 5. 308851 5. 22922  
11724952\_ 3. 703319 3. 623915 3. 770154 3. 01038 3. 039005 2. 945929  
11724953\_ 6. 42299 6. 317716 6. 559245 7. 346266 7. 416142 7. 417513  
11724954\_ 2. 235709 2. 131176 2. 369155 2. 199657 2. 13585 2. 213287  
11724955\_ 4. 886164 4. 834947 4. 930507 4. 977225 5. 095183 5. 012958  
11724956\_ 7. 609908 7. 546104 7. 577615 7. 523639 7. 478989 7. 541703  
11724957\_ 4. 501286 4. 368817 4. 668416 4. 213226 4. 40461 4. 411217  
11724958\_ 5. 093153 4. 994317 4. 932466 5. 435364 5. 500023 5. 475103  
11724959\_ 7. 839513 7. 834118 7. 919127 7. 899451 7. 849477 7. 93249  
11724960\_ 6. 114438 6. 066475 6. 136035 6. 091711 6. 168381 6. 157816  
11724961\_ 6. 554512 6. 64841 6. 57666 6. 526605 6. 555026 6. 604788  
11724962\_ 3. 771445 3. 907972 3. 721386 3. 849816 3. 867759 3. 875842  
11724963\_ 7. 789662 7. 753741 7. 818999 8. 742715 8. 749635 8. 785668  
11724964\_ 5. 59803 5. 779104 5. 700418 5. 773105 5. 742246 5. 713711  
11724965\_ 5. 361022 5. 408385 5. 305652 5. 192925 5. 36529 5. 311107  
11724966\_ 6. 377665 6. 484878 6. 372053 6. 351885 6. 244281 6. 247848  
11724967\_ 6. 561271 6. 332746 6. 609664 6. 102636 6. 134682 6. 164282  
11724968\_ 7. 587511 7. 519843 7. 621739 7. 456932 7. 312883 7. 466224  
11724969\_ 6. 914967 6. 902476 6. 878051 6. 898351 6. 84962 7. 021601  
11724970\_ 5. 342398 5. 081877 5. 414869 4. 391594 4. 391594 4. 52373  
11724971\_ 5. 48157 5. 413591 5. 567247 5. 305697 5. 217653 5. 289258  
11724972\_ 6. 059233 6. 106854 6. 111584 6. 259843 6. 302361 6. 426365  
11724973\_ 2. 31698 2. 133202 2. 095256 1. 963571 2. 079884 1. 795709  
11724974\_ 3. 352307 3. 232106 3. 128249 3. 070524 3. 070524 2. 875417  
11724975\_ 4. 407446 4. 567861 4. 459939 4. 701143 4. 673368 4. 776316  
11724976\_ 7. 842319 7. 836291 7. 813937 7. 673815 7. 631855 7. 696807  
11724977\_ 6. 543752 6. 473514 6. 410543 6. 379256 6. 434084 6. 508084  
11724978\_ 5. 630538 5. 764378 5. 682685 5. 620589 5. 661368 5. 702512  
11724979\_ 3. 367452 3. 462838 3. 475457 3. 718579 3. 650191 3. 795777  
11724980\_ 7. 413861 7. 346315 7. 413861 7. 477694 7. 314748 7. 316217  
11724981\_ 4. 585608 4. 751723 4. 504423 4. 465503 4. 590935 4. 463061  
11724982\_ 4. 353497 4. 558703 4. 465506 4. 408255 4. 052434 4. 326376  
11724983\_ 3. 619389 3. 339023 3. 41832 3. 271349 2. 927292 3. 081926  
11724984\_ 2. 329965 2. 690471 2. 444597 2. 316022 2. 224774 2. 388161  
11724985\_ 4. 686978 4. 835831 4. 794188 4. 890197 4. 8325 4. 957002  
11724986\_ 5. 610581 5. 569409 5. 635029 5. 304228 5. 080593 5. 299578  
11724987\_ 3. 727335 3. 858139 3. 995305 3. 981034 3. 745978 3. 931631  
11724988\_ 6. 037446 5. 997464 5. 973009 5. 517637 5. 626173 5. 584401  
11724989\_ 5. 423934 5. 381018 5. 702339 4. 999648 5. 13836 5. 13836  
11724990\_ 6. 578841 6. 482034 6. 614377 5. 761795 5. 929823 5. 846813  
11724991\_ 5. 812702 5. 886506 5. 923223 6. 007254 6. 061484 6. 062095  
11724992\_ 8. 093321 8. 11024 8. 158164 8. 920169 8. 922524 8. 895901

11724993\_ 5. 613658 5. 877948 5. 808848 6. 348062 6. 24562 6. 396659  
11724994\_ 5. 870242 5. 755982 5. 532822 6. 025723 6. 088646 6. 118838  
11724995\_ 4. 474085 4. 182135 4. 384039 4. 608285 4. 519598 4. 562273  
11724996\_ 4. 885321 5. 029248 4. 981102 5. 107409 5. 024941 4. 924644  
11724997\_ 3. 461409 3. 458273 3. 422461 3. 441569 3. 398222 3. 522839  
11724998\_ 4. 312799 4. 463033 4. 45684 4. 40461 4. 503704 4. 252724  
11724999\_ 7. 39169 7. 373292 7. 392813 7. 244659 7. 395741 7. 492742  
11725000\_ 5. 20007 5. 012973 5. 171504 5. 286628 5. 146372 5. 245363  
11725001\_ 7. 13797 7. 096395 7. 218397 7. 700836 7. 665358 7. 87524  
11725002\_ 7. 268185 7. 194708 7. 374996 7. 833333 7. 787699 7. 937067  
11725003\_ 8. 322056 8. 203315 8. 285473 7. 602398 7. 637718 7. 646951  
11725004\_ 7. 364821 7. 366207 7. 337784 7. 089177 7. 193119 7. 144608  
11725005\_ 7. 273746 7. 323597 7. 476749 6. 853727 7. 000857 6. 879183  
11725006\_ 4. 338722 4. 272797 4. 392334 4. 508216 4. 464106 4. 604973  
11725007\_ 6. 817416 6. 960085 6. 847517 7. 081395 7. 066606 7. 053988  
11725008\_ 5. 091372 5. 075683 5. 200318 5. 241094 5. 257629 5. 389976  
11725009\_ 4. 445516 4. 352653 4. 166523 4. 245705 4. 283301 4. 359173  
11725010\_ 4. 853036 4. 964027 4. 680026 5. 11527 5. 027621 4. 984813  
11725011\_ 7. 614897 7. 56644 7. 582135 7. 654609 7. 673568 7. 63403  
11725012\_ 6. 024913 6. 12047 6. 050883 6. 290852 6. 008981 6. 126549  
11725013\_ 7. 605507 7. 558561 7. 539157 7. 754889 7. 720141 7. 810553  
11725014\_ 7. 223926 7. 06289 7. 047004 6. 685719 6. 705212 6. 685719  
11725015\_ 7. 507976 7. 346177 7. 369766 6. 966014 6. 994455 6. 949715  
11725016\_ 7. 334481 7. 286685 7. 380487 7. 701553 7. 625354 7. 609913  
11725017\_ 4. 852831 5. 146842 5. 124537 5. 146842 5. 168696 5. 115023  
11725018\_ 4. 403937 4. 401362 4. 537366 4. 79113 4. 643755 4. 651239  
11725019\_ 5. 012959 5. 143759 5. 131172 5. 086882 4. 978843 5. 078283  
11725020\_ 2. 477457 2. 408207 2. 342962 2. 275099 2. 270768 2. 534172  
11725021\_ 3. 97383 4. 189724 4. 06267 3. 992457 4. 18178 4. 110328  
11725022\_ 4. 224851 4. 311421 4. 190734 4. 277763 4. 423188 4. 342753  
11725023\_ 3. 251945 3. 669871 3. 162778 3. 452079 3. 158416 3. 393617  
11725024\_ 6. 173918 6. 188104 6. 359154 6. 370549 6. 418366 6. 428068  
11725025\_ 8. 827313 8. 777935 8. 77051 8. 665817 8. 756399 8. 789325  
11725026\_ 7. 39647 7. 442766 7. 462919 7. 358609 7. 38332 7. 397488  
11725027\_ 9. 343545 9. 278825 9. 381518 9. 226531 9. 220972 9. 228005  
11725028\_ 9. 274418 9. 250273 9. 252811 9. 683619 9. 640513 9. 611014  
11725029\_ 9. 805781 9. 725643 9. 801858 9. 598517 9. 617206 9. 539459  
11725030\_ 9. 733755 9. 702618 9. 781718 9. 479209 9. 47545 9. 482798  
11725031\_ 8. 824624 8. 786739 8. 875477 8. 630512 8. 655507 8. 642907  
11725032\_ 7. 041299 6. 96365 7. 081149 6. 940888 6. 980419 6. 888541  
11725033\_ 7. 329745 7. 417811 7. 21498 7. 35235 7. 34562 7. 368338  
11725034\_ 4. 079871 4. 048032 3. 981158 4. 225585 4. 145973 4. 140477  
11725035\_ 8. 125427 8. 188425 8. 191129 8. 094676 8. 052108 7. 918889  
11725036\_ 8. 65256 8. 623931 8. 678836 8. 577686 8. 655377 8. 629914  
11725037\_ 8. 345395 8. 323864 8. 363117 8. 247121 8. 191576 8. 222852  
11725038\_ 8. 938007 8. 923857 8. 952481 9. 23891 9. 248912 9. 267534  
11725039\_ 8. 129249 8. 079122 8. 221279 7. 74873 7. 748159 7. 741129  
11725040\_ 5. 763634 5. 71377 5. 960972 5. 958138 5. 966894 5. 939029  
11725041\_ 8. 147236 8. 045616 8. 022262 7. 693035 7. 682461 7. 765062  
11725042\_ 11. 48381 11. 51216 11. 49531 11. 62083 11. 6393 11. 5514  
11725043\_ 8. 996547 9. 036141 8. 978496 9. 070502 8. 9552 9. 025059

11725044\_ 11. 24052 11. 22131 11. 27503 11. 17155 11. 15886 11. 19506  
11725045\_ 9. 69567 9. 595961 9. 658684 9. 680999 9. 653827 9. 706568  
11725046\_ 9. 664353 9. 589665 9. 600267 9. 892219 9. 784517 9. 806273  
11725047\_ 10. 05685 10. 01467 10. 03685 10. 19501 10. 17152 10. 20229  
11725048\_ 6. 14283 6. 368828 6. 121178 6. 244522 6. 198472 6. 255984  
11725049\_ 9. 27019 9. 233374 9. 290901 9. 469571 9. 512259 9. 535289  
11725050\_ 6. 8986 6. 985766 6. 865622 7. 033429 7. 140348 7. 15219  
11725051\_ 5. 84536 5. 952459 5. 960846 6. 044785 6. 044785 6. 033313  
11725052\_ 8. 276248 8. 217261 8. 300711 8. 22077 8. 230954 8. 18323  
11725053\_ 7. 214139 7. 186322 7. 234203 7. 217431 7. 20954 7. 058759  
11725054\_ 6. 976822 6. 941985 6. 938988 5. 50828 5. 448383 5. 416671  
11725055\_ 4. 47033 4. 40461 4. 52373 4. 297492 4. 275543 4. 481864  
11725056\_ 6. 059566 6. 118838 6. 15464 5. 643504 5. 654104 5. 540906  
11725057\_ 7. 392964 7. 318934 7. 45117 6. 7414 6. 795133 6. 795133  
11725058\_ 5. 994553 5. 793444 5. 908695 5. 351307 5. 250011 5. 440812  
11725059\_ 6. 171237 6. 251452 6. 213124 6. 239003 6. 258794 6. 334407  
11725060\_ 9. 092477 9. 035702 9. 103043 9. 01554 8. 984619 9. 04027  
11725061\_ 8. 481157 8. 367714 8. 482295 8. 431225 8. 436156 8. 441391  
11725062\_ 5. 745571 5. 946139 5. 535205 6. 050279 6. 095864 6. 226571  
11725063\_ 8. 540274 8. 58852 8. 649101 8. 553595 8. 482384 8. 480224  
11725064\_ 6. 563069 6. 362088 6. 473657 7. 397345 7. 351462 7. 267138  
11725065\_ 8. 681909 8. 61938 8. 684017 9. 16477 9. 18367 9. 23226  
11725066\_ 4. 522436 4. 724806 4. 512155 4. 553279 4. 540226 4. 424916  
11725067\_ 4. 078338 4. 063019 4. 00971 3. 945475 4. 194796 4. 122877  
11725068\_ 6. 458888 6. 555324 6. 468137 6. 646554 6. 518321 6. 544272  
11725069\_ 8. 116588 8. 049265 8. 132339 8. 176843 8. 173631 8. 267181  
11725070\_ 5. 789537 5. 780238 5. 822066 6. 041442 5. 908307 5. 894697  
11725071\_ 7. 988139 7. 953449 8. 01175 8. 167521 8. 104136 8. 194846  
11725072\_ 5. 115622 5. 189628 5. 309186 5. 460279 5. 554436 5. 414031  
11725073\_ 7. 595083 7. 595083 7. 71414 7. 759294 7. 716229 7. 813744  
11725074\_ 8. 836596 8. 822487 8. 869385 8. 256836 8. 283191 8. 244066  
11725075\_ 8. 393727 8. 424132 8. 433583 8. 447507 8. 397572 8. 418079  
11725076\_ 4. 643717 4. 217382 4. 223277 4. 249208 4. 113811 4. 072907  
11725077\_ 8. 107211 8. 048914 8. 057413 7. 146306 7. 168628 7. 140417  
11725078\_ 7. 407133 7. 29104 7. 37731 6. 803684 6. 711708 6. 6234  
11725079\_ 9. 573906 9. 552083 9. 492511 8. 961608 9. 012607 9. 002637  
11725080\_ 7. 778544 7. 683811 7. 820173 7. 2678 7. 171347 7. 22473  
11725081\_ 7. 604815 7. 600803 7. 474477 7. 14653 7. 030048 7. 027406  
11725082\_ 7. 737309 7. 668816 7. 809406 6. 89263 6. 924636 6. 82153  
11725083\_ 6. 468967 6. 730817 6. 475095 7. 082823 7. 050343 7. 072162  
11725084\_ 9. 939253 9. 872154 9. 914223 10. 00695 10. 03599 10. 01315  
11725085\_ 7. 71663 7. 655371 7. 784032 7. 66801 7. 6537 7. 754561  
11725086\_ 6. 892652 6. 869021 6. 870265 6. 989951 7. 014054 7. 025773  
11725087\_ 5. 589897 5. 560227 5. 750147 5. 809101 5. 856037 5. 86835  
11725088\_ 2. 354236 2. 113194 2. 35239 2. 201042 2. 25483 2. 095256  
11725089\_ 7. 551067 7. 490154 7. 519597 7. 326385 7. 156884 7. 165099  
11725090\_ 6. 919645 6. 923607 7. 040228 6. 5137 6. 529773 6. 643637  
11725091\_ 8. 636447 8. 570505 8. 571734 8. 48782 8. 55615 8. 532347  
11725092\_ 9. 726711 9. 699876 9. 765261 9. 712111 9. 708502 9. 722842  
11725093\_ 8. 934076 8. 97471 8. 914869 8. 782549 8. 805079 8. 826103  
11725094\_ 6. 403335 6. 301781 6. 496553 6. 928841 6. 927867 6. 972668

11725095\_ 6. 322872 6. 171019 6. 38127 6. 850646 6. 81008 6. 910833  
11725096\_ 4. 552576 4. 869169 4. 75091 5. 487635 5. 616296 5. 589227  
11725097\_ 5. 878952 5. 584813 5. 506028 6. 811425 6. 824689 6. 898793  
11725098\_ 5. 101713 4. 75685 5. 075498 5. 800319 5. 781564 5. 927216  
11725099\_ 9. 388399 9. 370329 9. 387695 9. 307569 9. 285383 9. 261081  
11725100\_ 7. 055228 7. 156915 7. 099609 7. 101367 7. 024062 6. 866655  
11725101\_ 9. 08004 9. 089592 9. 113077 8. 948441 8. 982032 8. 959247  
11725102\_ 5. 00532 4. 765461 4. 67785 4. 487046 4. 39972 4. 643717  
11725103\_ 6. 536494 6. 475008 6. 260434 6. 268225 6. 189257 6. 301709  
11725104\_ 6. 630812 6. 558314 6. 569452 6. 281242 6. 235756 6. 285721  
11725105\_ 4. 275339 4. 041322 4. 030318 4. 232227 4. 094022 4. 106216  
11725106\_ 9. 981127 9. 975464 10. 00431 9. 890396 9. 848661 9. 875814  
11725107\_ 6. 923056 6. 838045 6. 922773 6. 883279 6. 862849 6. 948738  
11725108\_ 8. 105009 8. 068795 8. 141955 8. 213756 8. 225294 8. 317128  
11725109\_ 6. 819483 6. 680515 6. 695739 6. 726303 6. 89458 6. 805694  
11725110\_ 7. 852314 7. 797843 7. 846869 8. 230346 8. 21683 8. 221856  
11725111\_ 5. 845587 5. 884032 5. 845365 6. 071999 5. 983687 6. 083125  
11725112\_ 6. 058794 5. 916314 6. 040165 6. 132658 6. 041622 6. 011116  
11725113\_ 7. 556761 7. 729983 7. 614107 7. 684708 7. 745571 7. 693267  
11725114\_ 7. 958954 7. 871801 7. 941289 7. 780655 7. 891091 7. 840686  
11725115\_ 9. 834946 9. 78018 9. 852015 9. 689491 9. 706956 9. 642194  
11725116\_ 7. 434307 7. 361784 7. 361871 7. 094684 7. 281283 7. 237305  
11725117\_ 7. 543199 7. 566016 7. 523014 7. 328391 7. 257606 7. 298542  
11725118\_ 6. 075725 5. 894697 6. 043554 6. 043332 6. 132444 6. 220457  
11725119\_ 3. 925181 4. 007013 4. 1032 4. 221593 3. 879309 4. 122446  
11725120\_ 8. 448223 8. 360237 8. 411599 8. 159819 8. 056029 8. 101625  
11725121\_ 6. 897066 6. 753967 6. 75223 6. 506193 6. 466216 6. 440187  
11725122\_ 7. 354676 7. 352584 7. 375363 7. 123836 7. 048214 7. 025522  
11725123\_ 8. 000069 7. 985785 8. 012131 7. 801918 7. 833246 7. 767083  
11725124\_ 4. 560089 4. 590363 4. 532642 4. 581858 4. 585589 4. 568515  
11725125\_ 3. 101928 3. 104239 2. 967432 3. 22024 2. 856843 2. 990484  
11725126\_ 9. 243997 9. 216063 9. 272669 10. 09567 10. 13314 10. 15319  
11725127\_ 7. 524346 7. 465041 7. 471036 7. 210289 7. 133014 7. 130538  
11725128\_ 6. 523013 6. 600212 6. 467419 7. 279437 7. 245288 7. 300972  
11725129\_ 5. 72945 5. 676072 5. 609345 5. 782502 5. 752665 5. 62669  
11725130\_ 7. 456812 7. 358604 7. 43223 7. 435149 7. 41037 7. 519719  
11725131\_ 8. 015246 7. 955334 7. 951829 7. 975731 7. 926921 7. 969483  
11725132\_ 8. 361423 8. 421343 8. 445093 8. 439761 8. 409816 8. 433912  
11725133\_ 8. 547071 8. 479547 8. 533588 8. 679767 8. 65724 8. 694262  
11725134\_ 8. 659013 8. 648552 8. 738507 8. 296036 8. 309344 8. 284998  
11725135\_ 8. 253641 8. 1424 8. 276877 8. 214081 8. 18761 8. 211864  
11725136\_ 4. 86254 5. 073036 4. 930507 5. 06575 4. 951731 4. 927679  
11725137\_ 7. 41066 7. 433397 7. 391159 7. 604326 7. 618349 7. 635387  
11725138\_ 4. 457612 4. 606086 4. 457612 4. 688318 4. 633349 4. 611653  
11725139\_ 6. 631711 6. 472668 6. 645536 7. 066626 7. 069087 6. 98639  
11725140\_ 6. 986034 6. 874408 7. 018608 7. 360438 7. 270633 7. 254194  
11725141\_ 9. 183958 9. 353397 9. 310669 9. 627349 9. 510436 9. 429518  
11725142\_ 7. 522451 7. 402707 7. 548788 7. 994207 8. 06054 8. 092113  
11725143\_ 4. 874234 4. 893277 4. 817251 4. 745775 4. 878646 4. 84674  
11725144\_ 5. 733727 5. 554436 5. 692114 5. 668761 5. 744322 5. 733727  
11725145\_ 6. 583339 6. 419959 6. 588068 6. 691857 6. 807257 6. 736153

11725146\_ 7. 35302 7. 416758 7. 447041 7. 542671 7. 444151 7. 603109  
11725147\_ 6. 851593 6. 862453 6. 867158 6. 886652 6. 871069 6. 940195  
11725148\_ 5. 573601 5. 491913 5. 636033 6. 716465 6. 684624 6. 728496  
11725149\_ 8. 221531 8. 123725 8. 211864 8. 864466 8. 743075 8. 720169  
11725150\_ 6. 175632 6. 140506 6. 049617 6. 100769 6. 217989 6. 197931  
11725151\_ 6. 436445 6. 482312 6. 424496 6. 582231 6. 484703 6. 389366  
11725152\_ 7. 289626 7. 230142 7. 308657 7. 083016 7. 140781 7. 124898  
11725153\_ 7. 876818 7. 735886 7. 771098 7. 456656 7. 489139 7. 587599  
11725154\_ 3. 04818 3. 012752 2. 915266 2. 973599 2. 735821 2. 788788  
11725155\_ 9. 041216 9. 043384 9. 025201 7. 907913 7. 94371 7. 959531  
11725156\_ 8. 269953 8. 17013 8. 204188 8. 02124 8. 111823 8. 024173  
11725157\_ 7. 593357 7. 523246 7. 522427 7. 570029 7. 599574 7. 567576  
11725158\_ 6. 307125 6. 225337 6. 299422 6. 622493 6. 659054 6. 634207  
11725159\_ 7. 501977 7. 419513 7. 475216 7. 199936 7. 321134 7. 149198  
11725160\_ 5. 544167 5. 365556 5. 518169 6. 110464 5. 902495 6. 025862  
11725161\_ 7. 087676 7. 053463 7. 081937 7. 61272 7. 625672 7. 677097  
11725162\_ 4. 396343 4. 347225 4. 383884 4. 44347 4. 513178 4. 471639  
11725163\_ 3. 274183 3. 280882 3. 327408 3. 047271 3. 3229 2. 873842  
11725164\_ 2. 757648 2. 725977 3. 016155 2. 718143 2. 819909 2. 662945  
11725165\_ 4. 932024 4. 749199 4. 852202 4. 962385 5. 131453 5. 023836  
11725166\_ 7. 779537 7. 794154 7. 80227 7. 614241 7. 609369 7. 579778  
11725167\_ 2. 623171 2. 373097 2. 408369 2. 593365 2. 546786 2. 460214  
11725168\_ 4. 460815 4. 495622 4. 46166 4. 509262 4. 451831 4. 52373  
11725169\_ 3. 778809 3. 717485 3. 886857 3. 736599 3. 854198 3. 821896  
11725170\_ 4. 097023 4. 260661 3. 984772 4. 276249 4. 221492 4. 276111  
11725171\_ 6. 997178 7. 113307 6. 920355 7. 141454 7. 156698 7. 237035  
11725172\_ 6. 55639 6. 704126 6. 632575 6. 637948 6. 64009 6. 681567  
11725173\_ 4. 073054 4. 264755 4. 021118 4. 211212 4. 301032 4. 185009  
11725174\_ 4. 938832 4. 989475 4. 767366 4. 91745 4. 984669 4. 815683  
11725175\_ 3. 492215 3. 776879 3. 591642 3. 893003 3. 687606 3. 768515  
11725176\_ 3. 875961 3. 930254 4. 287593 4. 040612 4. 029932 4. 315216  
11725177\_ 4. 357959 4. 577632 4. 492959 4. 47979 4. 40461 4. 52373  
11725178\_ 5. 560942 5. 383778 5. 421899 5. 49694 5. 426098 5. 412821  
11725179\_ 5. 186329 5. 348102 5. 23654 5. 284306 5. 27587 5. 291326  
11725180\_ 6. 467524 6. 225513 6. 463237 5. 894921 5. 89485 5. 866951  
11725181\_ 6. 226593 6. 15191 6. 074382 6. 166466 6. 166466 6. 202972  
11725182\_ 7. 05328 7. 021819 6. 959543 6. 318567 6. 338471 6. 451129  
11725183\_ 6. 612274 6. 616646 6. 570573 6. 826706 6. 765911 6. 783834  
11725184\_ 5. 335989 5. 13699 5. 143748 5. 136337 5. 081633 5. 115427  
11725185\_ 6. 946361 7. 071435 7. 067422 7. 35657 7. 242312 7. 372922  
11725186\_ 7. 078486 7. 036388 7. 158503 7. 375137 7. 264365 7. 34559  
11725187\_ 6. 553183 6. 669834 6. 608591 6. 163559 6. 26127 6. 317519  
11725188\_ 6. 580555 6. 595154 6. 588902 5. 6717 5. 543169 5. 695065  
11725189\_ 5. 800406 5. 812476 5. 722936 4. 886476 4. 711749 4. 795597  
11725190\_ 7. 673208 7. 525755 7. 575452 7. 068332 7. 044156 7. 171733  
11725191\_ 7. 90837 7. 791604 7. 824318 7. 298074 7. 33104 7. 404436  
11725192\_ 7. 349558 7. 293187 7. 307251 7. 645325 7. 713917 7. 680472  
11725193\_ 7. 610988 7. 536575 7. 637482 8. 143783 8. 098193 8. 18013  
11725194\_ 5. 796324 5. 842943 5. 643515 5. 771869 5. 81455 5. 794442  
11725195\_ 4. 225686 4. 30749 4. 199745 4. 024438 3. 801444 3. 98694  
11725196\_ 5. 47984 5. 577722 5. 741066 5. 367498 5. 449463 5. 304249

11725197\_ 6. 577211 6. 512939 6. 557068 6. 058343 6. 241491 6. 240948  
11725198\_ 7. 645905 7. 423076 7. 489144 6. 091808 6. 155457 6. 156351  
11725199\_ 3. 886176 4. 168034 4. 055116 3. 985722 3. 801444 4. 054288  
11725200\_ 3. 794577 3. 943477 4. 022385 4. 101612 4. 160387 3. 99793  
11725201\_ 4. 491929 4. 75538 4. 368127 3. 974814 4. 215941 4. 380887  
11725202\_ 8. 419861 8. 421343 8. 385841 7. 99432 7. 972838 8. 055477  
11725203\_ 7. 536214 7. 498298 7. 589926 7. 515057 7. 473814 7. 487582  
11725204\_ 5. 325628 5. 662126 5. 436062 5. 469471 5. 458862 5. 498429  
11725205\_ 4. 72225 4. 793848 4. 643717 4. 816289 4. 854618 4. 818939  
11725206\_ 4. 52361 4. 498508 4. 136632 4. 58598 4. 600056 4. 594293  
11725207\_ 6. 465905 6. 374304 6. 479709 6. 410041 6. 320705 6. 302016  
11725208\_ 7. 52644 7. 443401 7. 559734 7. 666485 7. 640576 7. 626008  
11725209\_ 8. 199648 8. 093595 8. 209812 8. 224848 8. 250158 8. 272259  
11725210\_ 7. 305281 7. 287741 7. 29776 6. 859073 6. 914978 6. 920473  
11725211\_ 7. 309503 7. 209248 7. 27746 8. 220019 8. 253045 8. 226514  
11725212\_ 5. 757816 5. 724906 5. 721909 6. 107913 6. 136997 6. 183792  
11725213\_ 6. 645666 6. 683751 6. 698606 6. 957102 7. 118841 7. 070844  
11725214\_ 5. 646844 5. 732315 5. 646844 5. 840875 5. 739171 5. 762727  
11725215\_ 3. 725969 3. 942204 3. 917816 3. 85364 3. 891003 3. 829852  
11725216\_ 5. 475383 5. 576791 5. 502741 5. 639702 5. 651952 5. 650528  
11725217\_ 4. 813771 4. 874234 5. 026897 4. 75138 4. 810172 4. 734122  
11725218\_ 3. 832362 3. 997131 4. 031009 3. 790247 3. 801444 3. 969236  
11725219\_ 9. 184899 9. 161619 9. 168549 8. 835126 8. 860782 8. 848575  
11725220\_ 8. 07542 7. 968642 8. 021122 7. 48159 7. 523509 7. 514291  
11725221\_ 6. 660519 6. 598952 6. 621502 6. 356791 6. 347279 6. 267956  
11725222\_ 6. 748126 6. 658392 6. 71452 6. 329742 6. 330828 6. 384814  
11725223\_ 7. 472989 7. 377469 7. 464813 7. 631747 7. 554649 7. 530594  
11725224\_ 7. 381999 7. 26674 7. 412081 6. 849732 6. 762459 6. 818326  
11725225\_ 4. 777324 4. 876238 4. 876238 5. 027413 4. 913137 4. 856949  
11725226\_ 4. 197272 3. 754967 3. 865281 4. 170198 4. 119616 3. 924643  
11725227\_ 4. 533722 4. 429383 4. 458786 4. 407814 4. 550272 4. 612024  
11725228\_ 4. 291421 4. 278124 4. 218741 4. 477767 4. 600258 4. 558867  
11725229\_ 7. 170738 7. 089701 7. 142907 7. 060162 7. 089701 7. 25402  
11725230\_ 6. 817986 6. 752078 6. 779107 6. 873971 6. 862861 6. 820872  
11725231\_ 7. 573008 7. 571127 7. 641636 7. 549178 7. 581163 7. 645387  
11725232\_ 7. 395416 7. 316019 7. 326112 7. 839551 7. 799631 7. 803025  
11725233\_ 6. 444239 6. 440275 6. 372053 6. 479589 6. 495445 6. 397153  
11725234\_ 4. 940297 4. 815947 4. 923919 4. 979117 5. 186947 4. 97269  
11725235\_ 5. 460994 5. 309674 5. 423988 5. 383822 5. 307868 5. 340911  
11725236\_ 6. 922203 6. 880549 6. 870539 6. 684742 6. 684742 6. 564654  
11725237\_ 7. 759133 7. 756394 7. 887575 8. 148342 8. 162699 8. 22149  
11725238\_ 5. 567324 5. 456031 5. 44885 5. 565773 5. 359303 5. 648514  
11725239\_ 2. 850317 3. 000549 2. 798966 2. 826304 2. 865312 2. 924046  
11725240\_ 5. 002488 4. 886729 4. 715968 4. 490685 4. 537111 4. 541262  
11725241\_ 5. 605002 5. 60789 5. 397219 5. 55979 5. 622039 5. 616804  
11725242\_ 4. 27854 4. 415179 4. 321608 4. 675626 4. 37577 4. 333314  
11725243\_ 7. 701579 7. 638043 7. 748138 7. 855034 7. 898509 7. 863699  
11725244\_ 5. 887763 5. 736214 5. 873091 5. 418782 5. 239208 5. 420431  
11725245\_ 7. 12407 6. 930915 7. 142907 6. 727518 6. 739151 6. 45683  
11725246\_ 6. 980917 6. 832795 7. 178281 6. 550092 6. 473499 6. 618783  
11725247\_ 5. 704919 5. 985306 5. 848756 6. 130107 6. 057828 5. 984953

11725248\_ 4. 847497 4. 590673 4. 421274 4. 431916 4. 678745 4. 680299  
11725249\_ 2. 212714 2. 026023 2. 129542 1. 920855 2. 001495 2. 02335  
11725250\_ 6. 179916 6. 017752 6. 018553 6. 076442 6. 151642 6. 110821  
11725251\_ 5. 894697 5. 80529 5. 954351 5. 868565 5. 845365 5. 898537  
11725252\_ 6. 685264 6. 720823 6. 66761 6. 865558 7. 016042 7. 067672  
11725253\_ 5. 135813 4. 83221 4. 800693 5. 01551 4. 905853 5. 001215  
11725254\_ 4. 586294 4. 69658 4. 788064 4. 496071 4. 463788 4. 587744  
11725255\_ 5. 999907 5. 896004 6. 055963 5. 444194 5. 41645 5. 388996  
11725256\_ 5. 081904 4. 925201 4. 992454 4. 991705 5. 119429 5. 018676  
11725257\_ 2. 528851 2. 568346 2. 460297 2. 568346 2. 486706 2. 639728  
11725258\_ 2. 998381 2. 933188 3. 038193 2. 906599 3. 016035 2. 834177  
11725259\_ 7. 645535 7. 647048 7. 562346 7. 041641 7. 007822 6. 910049  
11725260\_ 3. 501614 3. 468694 3. 430521 3. 691526 3. 777623 3. 703496  
11725261\_ 3. 606928 3. 589814 3. 570897 3. 739293 3. 648638 3. 720321  
11725262\_ 7. 01109 7. 120276 7. 081701 6. 626326 6. 665736 6. 710337  
11725263\_ 4. 112626 4. 392181 4. 352269 4. 473515 4. 405426 4. 370366  
11725264\_ 2. 711214 2. 735789 2. 769916 2. 893899 2. 479053 2. 711214  
11725265\_ 2. 578738 2. 453915 2. 090348 2. 388556 2. 578738 2. 485529  
11725266\_ 1. 62874 1. 711908 1. 715992 1. 804393 1. 958088 1. 898324  
11725267\_ 3. 474165 3. 812208 3. 453176 3. 25079 3. 288718 3. 222976  
11725268\_ 4. 848837 4. 874234 4. 984669 3. 957442 4. 321072 4. 321072  
11725269\_ 4. 229751 4. 277106 4. 302644 4. 338756 4. 307866 4. 297421  
11725270\_ 4. 547807 4. 844817 4. 788896 4. 558076 4. 516135 4. 523143  
11725271\_ 7. 753393 7. 761589 7. 785947 7. 63087 7. 572417 7. 599876  
11725272\_ 3. 698407 3. 818401 3. 414109 3. 727429 3. 727429 3. 682865  
11725273\_ 6. 106912 6. 147272 6. 109771 5. 919073 6. 005822 6. 033446  
11725274\_ 7. 112674 6. 83721 6. 961316 6. 717077 6. 700371 6. 779107  
11725275\_ 2. 904757 2. 813737 2. 904757 2. 968894 3. 112834 2. 913695  
11725276\_ 6. 882728 6. 928361 6. 915686 7. 188001 7. 246651 7. 205038  
11725277\_ 6. 165285 6. 120896 6. 181102 6. 181677 6. 236581 6. 345188  
11725278\_ 6. 288766 6. 394122 6. 389366 6. 383618 6. 388144 6. 394619  
11725279\_ 5. 999888 6. 035256 5. 924774 5. 93062 5. 960099 5. 724251  
11725280\_ 2. 502694 2. 601579 2. 568394 2. 620098 2. 724474 2. 745949  
11725281\_ 4. 999009 4. 998931 4. 586525 4. 933143 4. 960726 5. 026515  
11725282\_ 7. 816478 7. 867467 7. 878342 7. 562592 7. 725434 7. 657469  
11725283\_ 7. 212588 7. 207667 7. 22808 6. 999855 7. 04434 7. 02344  
11725284\_ 4. 501693 4. 620287 4. 4363 4. 253965 4. 32922 4. 347179  
11725285\_ 5. 801067 5. 86536 5. 887334 5. 921928 5. 899357 5. 89113  
11725286\_ 6. 815326 6. 717524 6. 873478 7. 023495 7. 036576 7. 06424  
11725287\_ 6. 946387 6. 910256 6. 870685 6. 704831 6. 688412 6. 919595  
11725288\_ 4. 415744 4. 608138 4. 373001 4. 726894 4. 700243 4. 754563  
11725289\_ 4. 431217 4. 460731 4. 317076 4. 616503 4. 679937 4. 60697  
11725290\_ 4. 414875 4. 634496 4. 683809 4. 545545 4. 55516 4. 621409  
11725291\_ 4. 872421 4. 834975 4. 865474 4. 966239 4. 959934 5. 087706  
11725292\_ 4. 521779 4. 451557 4. 727389 5. 132572 4. 917273 4. 765688  
11725293\_ 2. 133436 1. 902163 1. 954695 2. 035694 2. 163567 2. 352601  
11725294\_ 2. 361778 2. 534709 2. 319485 2. 307488 2. 404072 2. 40598  
11725295\_ 1. 819232 1. 805919 1. 997219 1. 898324 1. 976099 1. 813635  
11725296\_ 5. 149629 5. 129307 5. 056363 4. 932788 5. 094789 4. 94619  
11725297\_ 8. 019884 7. 987762 8. 022122 7. 867654 7. 871398 7. 893296  
11725298\_ 6. 872357 6. 951911 6. 935129 7. 509964 7. 59345 7. 579239

11725299\_ 4. 842708 5. 368424 4. 889008 4. 945277 5. 029529 4. 903278  
11725300\_ 2. 519132 2. 573196 2. 693976 2. 402214 2. 64371 2. 665791  
11725301\_ 8. 330926 8. 245137 8. 327156 7. 96976 7. 909863 7. 960269  
11725302\_ 8. 321154 8. 291779 8. 247346 7. 858626 7. 859717 7. 895697  
11725303\_ 9. 973973 10. 03275 9. 998663 10. 2909 10. 32493 10. 2116  
11725304\_ 10. 86299 10. 84687 10. 7994 10. 98546 10. 99476 10. 9137  
11725305\_ 9. 002801 9. 015166 8. 993021 9. 111351 9. 098458 8. 975694  
11725306\_ 10. 26239 10. 24389 10. 32188 10. 20484 10. 21507 10. 16874  
11725307\_ 9. 994727 9. 916863 9. 921018 9. 848447 9. 930022 9. 815817  
11725308\_ 10. 09082 10. 06102 10. 04591 9. 964273 9. 988632 9. 920501  
11725309\_ 3. 605046 3. 618766 3. 552819 3. 511084 3. 625918 3. 613684  
11725310\_ 2. 871453 3. 061205 3. 019766 3. 004359 2. 899008 3. 093074  
11725311\_ 10. 36869 10. 3091 10. 32581 10. 29977 10. 31264 10. 30024  
11725312\_ 9. 458095 9. 43819 9. 493428 9. 424856 9. 406751 9. 369472  
11725313\_ 8. 83614 8. 957681 8. 754585 9. 176822 9. 111186 9. 084881  
11725314\_ 8. 416282 8. 498907 8. 385754 8. 95146 8. 89993 8. 831933  
11725315\_ 11. 12139 11. 06806 11. 11607 11. 00646 11. 04959 11. 0004  
11725316\_ 3. 606313 3. 499811 3. 616609 3. 617819 3. 501777 3. 610245  
11725317\_ 10. 64896 10. 64229 10. 63148 10. 44385 10. 39341 10. 45268  
11725318\_ 5. 190081 5. 171834 5. 223709 5. 190081 5. 178817 5. 15957  
11725319\_ 8. 215041 8. 25934 8. 298285 8. 27484 8. 299463 8. 282527  
11725320\_ 9. 376868 9. 358996 9. 402262 8. 802647 8. 825078 8. 880791  
11725321\_ 8. 362378 8. 367608 8. 420746 7. 798195 7. 882803 7. 865536  
11725322\_ 6. 91239 6. 950255 6. 994845 6. 745756 6. 917178 6. 828602  
11725323\_ 7. 60697 7. 54034 7. 520451 7. 324676 7. 43784 7. 305647  
11725324\_ 7. 884329 7. 879185 7. 860429 7. 824524 7. 762124 7. 743111  
11725325\_ 6. 273898 6. 395386 6. 336113 6. 186077 6. 24946 6. 210388  
11725326\_ 6. 901784 6. 930737 7. 001847 7. 591063 7. 67916 7. 656984  
11725327\_ 7. 804365 7. 699336 7. 745514 7. 853991 7. 857653 7. 909098  
11725328\_ 5. 683463 5. 775714 5. 776943 5. 817579 5. 74257 5. 644576  
11725329\_ 10. 25722 10. 23879 10. 25985 10. 02614 10. 03461 10. 00652  
11725330\_ 6. 073142 5. 899882 6. 215497 6. 58265 6. 570505 6. 605883  
11725331\_ 7. 344084 7. 340717 7. 401966 7. 325012 7. 293025 7. 24415  
11725332\_ 8. 535332 8. 511038 8. 510046 8. 310127 8. 251869 8. 251505  
11725333\_ 9. 087635 9. 078608 9. 086829 9. 426637 9. 426684 9. 388906  
11725334\_ 8. 735222 8. 695483 8. 825347 9. 844667 9. 770616 9. 711014  
11725335\_ 7. 991794 7. 966153 7. 986979 9. 091036 9. 059938 9. 083315  
11725336\_ 5. 860225 5. 85175 5. 891863 5. 380649 5. 332075 5. 340369  
11725337\_ 8. 327443 8. 305997 8. 325738 8. 252205 8. 258308 8. 30587  
11725338\_ 8. 216065 8. 20126 8. 216003 8. 160149 8. 181658 8. 182024  
11725339\_ 6. 809491 6. 890913 6. 714217 6. 970642 6. 905141 6. 928363  
11725340\_ 9. 293132 9. 247143 9. 297824 9. 285761 9. 32418 9. 255215  
11725341\_ 8. 799159 8. 789281 8. 734469 8. 475713 8. 434607 8. 412697  
11725342\_ 7. 575021 7. 465849 7. 553894 7. 160918 7. 09889 7. 066208  
11725343\_ 5. 640777 5. 345598 5. 482002 5. 872651 6. 001561 6. 197545  
11725344\_ 6. 018969 6. 042412 6. 018553 6. 244666 6. 18164 6. 308229  
11725345\_ 7. 54506 7. 579618 7. 607166 7. 592726 7. 675649 7. 565664  
11725346\_ 11. 76675 11. 71477 11. 75571 11. 50971 11. 56598 11. 53683  
11725347\_ 9. 467443 9. 402816 9. 479783 9. 655236 9. 70788 9. 659727  
11725348\_ 9. 473965 9. 415652 9. 437779 9. 618016 9. 702775 9. 65689  
11725349\_ 10. 42548 10. 3827 10. 38041 10. 71878 10. 67595 10. 64903



11725350\_ 5. 948824 5. 798093 5. 845365 6. 155687 6. 127628 6. 131804  
11725351\_ 5. 180377 4. 842781 5. 003625 5. 225375 5. 233846 5. 295417  
11725352\_ 8. 155109 8. 27228 8. 311233 8. 261904 8. 296129 8. 271501  
11725353\_ 6. 249467 6. 131257 6. 260434 6. 263567 6. 174763 6. 193016  
11725354\_ 5. 505248 5. 616689 5. 71948 5. 175678 5. 24679 5. 168158  
11725355\_ 5. 532431 5. 614333 5. 59636 5. 445363 5. 535768 5. 419635  
11725356\_ 2. 441068 2. 47102 2. 372628 2. 512144 2. 628365 2. 73086  
11725357\_ 2. 098743 2. 199787 2. 339139 2. 195716 2. 209568 2. 295674  
11725358\_ 4. 15172 4. 218178 4. 218178 4. 247199 4. 30263 4. 218178  
11725359\_ 5. 105165 5. 380591 5. 27136 5. 458908 5. 290862 5. 384437  
11725360\_ 8. 670146 8. 725216 8. 654618 8. 685048 8. 664783 8. 685459  
11725361\_ 7. 581087 7. 491816 7. 602263 7. 300093 7. 286182 7. 266582  
11725362\_ 8. 328108 8. 250998 8. 262899 8. 204612 8. 088039 8. 089796  
11725363\_ 6. 245395 6. 186834 6. 288288 6. 842908 6. 730725 6. 709021  
11725364\_ 7. 676306 7. 633426 7. 673484 8. 349982 8. 396607 8. 399645  
11725365\_ 7. 091533 6. 891531 7. 095472 6. 824417 6. 866213 6. 919546  
11725366\_ 7. 03044 7. 052852 7. 000804 7. 115378 7. 103348 7. 142654  
11725367\_ 6. 397946 6. 500714 6. 408476 6. 745984 6. 699692 6. 760597  
11725368\_ 6. 591286 6. 757207 6. 487104 6. 7414 6. 627392 6. 640593  
11725369\_ 2. 2036 2. 090932 2. 079333 2. 194568 2. 182474 2. 3322  
11725370\_ 7. 330067 7. 223876 7. 167199 7. 257254 7. 348388 7. 301475  
11725371\_ 8. 670855 8. 624622 8. 643667 8. 898265 8. 837087 8. 818715  
11725372\_ 8. 385114 8. 3295 8. 431153 8. 600627 8. 542114 8. 562548  
11725373\_ 6. 00827 6. 090697 6. 027595 6. 145555 6. 265834 6. 247985  
11725374\_ 7. 826922 7. 718252 7. 762975 7. 111402 7. 222452 7. 223766  
11725375\_ 8. 817277 8. 800696 8. 835636 7. 948338 7. 911718 7. 959415  
11725376\_ 10. 00837 9. 964695 9. 997812 9. 211759 9. 133807 9. 198896  
11725377\_ 7. 747621 7. 733179 7. 82643 7. 817678 7. 833797 7. 820334  
11725378\_ 10. 74791 10. 72253 10. 73548 10. 5915 10. 59308 10. 59064  
11725379\_ 8. 506453 8. 490933 8. 485385 7. 892766 7. 959068 7. 944516  
11725380\_ 7. 474508 7. 357955 7. 507654 6. 894766 6. 952054 6. 948125  
11725381\_ 5. 986345 6. 058786 5. 950197 6. 008995 6. 084713 6. 108592  
11725382\_ 5. 375452 5. 340116 5. 332418 5. 291613 5. 215658 5. 256731  
11725383\_ 7. 027638 7. 078542 7. 022594 6. 890456 6. 990875 6. 94653  
11725384\_ 4. 338147 4. 46091 4. 334049 4. 427442 4. 338147 4. 170778  
11725385\_ 10. 40631 10. 35469 10. 33807 9. 095723 9. 126992 9. 053912  
11725386\_ 6. 982937 6. 988031 6. 990771 6. 851345 6. 898633 6. 805142  
11725387\_ 7. 205609 7. 24286 7. 208279 7. 206138 7. 184099 7. 134375  
11725388\_ 6. 120775 6. 077131 6. 069549 6. 216955 6. 040331 6. 033313  
11725389\_ 3. 799867 3. 834657 3. 838804 3. 915227 4. 112323 3. 953133  
11725390\_ 5. 365367 5. 4534 5. 132536 5. 27251 5. 273849 5. 333708  
11725391\_ 3. 588873 3. 636429 3. 685845 3. 685845 3. 727308 3. 644952  
11725392\_ 9. 079937 9. 013088 9. 067869 8. 594024 8. 608677 8. 659286  
11725393\_ 8. 658176 8. 599971 8. 60296 8. 296126 8. 300647 8. 244737  
11725394\_ 5. 564431 5. 531098 5. 511866 5. 523854 5. 604773 5. 573684  
11725395\_ 8. 352986 8. 280596 8. 35804 8. 310089 8. 337644 8. 346263  
11725396\_ 8. 961201 8. 908292 8. 938435 8. 846136 8. 807726 8. 811956  
11725397\_ 8. 386471 8. 321957 8. 384723 8. 289486 8. 225095 8. 322839  
11725398\_ 4. 222679 4. 043152 4. 156936 4. 301657 4. 555713 4. 448294  
11725399\_ 7. 631244 7. 590714 7. 513395 8. 834674 8. 784633 8. 787544  
11725400\_ 5. 656298 5. 834225 5. 815631 5. 777527 5. 905818 5. 979409

11725401\_ 6. 825395 6. 723412 6. 763207 6. 986428 7. 022094 7. 081694  
11725402\_ 6. 959944 6. 934931 7. 043362 7. 154704 7. 129335 7. 177537  
11725403\_ 9. 206536 9. 131391 9. 139846 8. 539854 8. 520353 8. 450093  
11725404\_ 10. 28195 10. 28478 10. 3013 10. 20183 10. 25769 10. 21018  
11725405\_ 8. 081447 7. 935857 8. 000911 8. 019808 8. 05537 8. 048914  
11725406\_ 5. 11527 5. 309674 5. 2222 5. 220119 5. 389599 5. 41169  
11725407\_ 2. 853251 2. 851374 2. 664388 2. 83198 2. 796372 2. 776003  
11725408\_ 7. 572894 7. 560756 7. 605211 7. 402981 7. 508479 7. 444716  
11725409\_ 6. 908031 7. 004336 7. 051694 7. 557444 7. 527806 7. 566856  
11725410\_ 5. 572861 5. 611986 5. 710024 6. 508761 6. 439494 6. 48533  
11725411\_ 7. 180012 7. 082982 7. 212193 6. 9635 6. 857316 6. 916967  
11725412\_ 7. 212988 7. 192957 7. 249644 7. 652484 7. 687466 7. 72564  
11725413\_ 7. 326385 7. 339039 7. 374996 7. 953133 8. 010906 7. 980203  
11725414\_ 8. 762932 8. 765691 8. 791234 8. 777742 8. 779047 8. 686983  
11725415\_ 8. 391106 8. 357205 8. 406848 8. 415034 8. 340731 8. 323901  
11725416\_ 5. 962521 6. 003002 5. 934161 5. 959495 6. 034927 5. 974901  
11725417\_ 6. 898862 6. 975313 6. 84761 6. 949667 6. 820739 6. 816962  
11725418\_ 8. 780249 8. 73895 8. 804513 7. 652212 7. 676786 7. 721753  
11725419\_ 8. 376709 8. 390027 8. 399997 7. 610489 7. 571974 7. 594938  
11725420\_ 9. 284238 9. 222547 9. 318088 9. 376822 9. 419247 9. 364489  
11725421\_ 7. 107201 7. 132098 7. 061317 7. 014704 7. 048082 7. 036588  
11725422\_ 6. 962289 6. 919859 6. 921556 6. 880623 6. 862059 6. 9214  
11725423\_ 4. 654143 4. 403159 4. 403159 4. 871907 4. 678191 4. 754885  
11725424\_ 3. 638692 3. 547093 3. 517237 4. 059335 4. 001311 4. 011485  
11725425\_ 5. 161949 5. 189628 5. 103119 5. 358793 5. 201679 5. 381352  
11725426\_ 3. 930647 3. 951017 3. 903844 3. 997131 3. 995332 4. 019171  
11725427\_ 3. 97942 4. 132901 3. 880629 4. 075269 4. 010062 3. 961083  
11725428\_ 4. 906883 4. 924708 4. 475657 4. 166745 4. 380912 4. 264324  
11725429\_ 3. 971428 3. 862729 3. 681543 4. 413733 4. 229211 4. 417376  
11725430\_ 2. 482084 2. 399468 2. 179181 2. 385111 2. 496628 2. 305656  
11725431\_ 7. 335398 7. 270904 7. 345767 7. 23587 7. 089643 7. 216458  
11725432\_ 6. 04635 6. 095839 6. 132498 5. 949901 6. 067879 6. 096484  
11725433\_ 5. 155163 5. 003733 5. 055997 5. 054444 5. 249436 5. 170163  
11725434\_ 6. 950132 6. 874353 6. 9014 6. 894881 6. 879953 6. 864125  
11725435\_ 5. 236755 5. 281643 5. 313016 5. 294186 5. 322848 5. 143404  
11725436\_ 3. 698274 3. 7442 3. 706492 3. 715919 3. 678974 3. 778348  
11725437\_ 6. 043941 5. 957954 5. 982177 6. 058786 6. 168604 6. 020336  
11725438\_ 4. 669548 4. 574498 4. 64361 4. 756631 4. 926572 4. 623845  
11725439\_ 4. 515061 4. 643717 4. 509562 4. 581303 4. 781291 4. 612032  
11725440\_ 6. 087738 6. 293737 6. 154499 6. 028325 6. 109959 6. 112461  
11725441\_ 7. 337935 7. 269072 7. 279432 8. 024785 8. 095446 8. 082374  
11725442\_ 6. 945814 6. 980461 6. 93595 7. 63631 7. 630042 7. 624182  
11725443\_ 2. 103391 2. 056249 1. 880079 2. 330517 1. 92146 2. 056249  
11725444\_ 4. 26529 4. 174945 4. 177241 4. 079712 4. 299097 4. 283382  
11725445\_ 7. 656826 7. 741275 7. 646939 7. 53912 7. 427872 7. 576205  
11725446\_ 5. 720906 5. 730592 5. 750188 5. 797115 5. 728392 5. 731395  
11725447\_ 5. 304905 5. 332126 5. 332651 5. 359459 5. 36624 5. 369838  
11725448\_ 7. 195733 7. 269854 7. 350421 6. 862059 6. 843175 6. 84898  
11725449\_ 8. 100915 8. 007574 8. 058103 7. 421118 7. 414628 7. 427462  
11725450\_ 5. 280989 5. 443971 5. 398473 5. 436145 5. 454433 5. 442778  
11725451\_ 3. 069847 3. 308182 3. 225005 3. 070552 3. 029294 3. 048955

11725452\_ 8. 732864 8. 680897 8. 80375 8. 818566 8. 876683 8. 85201  
11725453\_ 4. 346044 4. 436995 4. 329268 4. 261306 4. 406928 4. 403278  
11725454\_ 7. 509695 7. 486668 7. 40313 7. 358081 7. 258753 7. 238357  
11725455\_ 4. 138586 4. 13434 4. 063651 4. 067703 4. 40461 4. 027392  
11725456\_ 7. 727693 7. 596549 7. 671394 7. 679445 7. 661993 7. 638574  
11725457\_ 6. 727833 6. 641378 6. 694313 6. 661643 6. 579903 6. 721134  
11725458\_ 3. 707727 3. 818401 3. 740982 3. 721886 3. 887643 3. 941876  
11725459\_ 2. 343495 2. 424584 2. 570667 2. 695519 2. 500292 2. 51612  
11725460\_ 4. 578134 4. 631199 4. 399201 4. 596563 4. 565488 4. 772858  
11725461\_ 8. 920215 8. 950546 8. 953392 8. 579238 8. 600374 8. 631717  
11725462\_ 8. 309833 8. 326407 8. 377332 8. 812859 8. 757489 8. 824943  
11725463\_ 8. 416067 8. 41037 8. 497596 8. 916451 8. 848221 8. 896338  
11725464\_ 7. 83395 7. 78716 7. 785492 7. 944049 7. 940066 7. 947164  
11725465\_ 6. 822 6. 760275 6. 975355 6. 921468 6. 805667 7. 010854  
11725466\_ 6. 91866 6. 780536 6. 7958 7. 05884 7. 010684 7. 003871  
11725467\_ 4. 794664 4. 886535 4. 69992 4. 893291 4. 761472 4. 768713  
11725468\_ 4. 132541 4. 314772 4. 213972 4. 316697 4. 267429 4. 159443  
11725469\_ 2. 300343 2. 320066 2. 28158 2. 239483 2. 084649 2. 092898  
11725470\_ 6. 941196 6. 971886 6. 968944 6. 939194 6. 924959 6. 976723  
11725471\_ 8. 436033 8. 418627 8. 422486 7. 89686 7. 864447 7. 845459  
11725472\_ 5. 59022 5. 530673 5. 455785 5. 948701 5. 998178 6. 084853  
11725473\_ 6. 246303 6. 183675 6. 141933 6. 65564 6. 48925 6. 588252  
11725474\_ 5. 766151 5. 644125 5. 829045 5. 64742 5. 543886 5. 548015  
11725475\_ 6. 690592 6. 718781 6. 641668 6. 478333 6. 412072 6. 359192  
11725476\_ 5. 225943 5. 200807 5. 129334 4. 998465 5. 127604 5. 129334  
11725477\_ 4. 962065 4. 950931 4. 974262 4. 984391 4. 938734 4. 906658  
11725478\_ 5. 825178 5. 910532 5. 906257 5. 890366 5. 914734 5. 893708  
11725479\_ 4. 695943 4. 704216 4. 569873 4. 759473 4. 723274 4. 72192  
11725480\_ 6. 817986 6. 73386 6. 845681 7. 000616 7. 022313 6. 981077  
11725481\_ 4. 924443 4. 918563 4. 949459 5. 02761 4. 849431 5. 077364  
11725482\_ 5. 520269 5. 59001 5. 489804 5. 700302 5. 485803 5. 589814  
11725483\_ 5. 999677 5. 822029 6. 049982 5. 482048 5. 604154 5. 561856  
11725484\_ 6. 824973 6. 807083 6. 826782 7. 069584 7. 046725 7. 066106  
11725485\_ 4. 295784 4. 037836 4. 419736 4. 267501 4. 267501 4. 566725  
11725486\_ 7. 19695 7. 176807 7. 222344 7. 668976 7. 713631 7. 631066  
11725487\_ 6. 23181 6. 350579 6. 281284 6. 182461 6. 159224 6. 268407  
11725488\_ 7. 39204 7. 396316 7. 495815 7. 257659 7. 278416 7. 249043  
11725489\_ 6. 68474 6. 662792 6. 738729 6. 404063 6. 47 6. 523698  
11725490\_ 4. 626816 4. 491406 4. 522233 4. 769749 4. 587716 4. 644068  
11725491\_ 5. 775657 5. 823511 5. 629639 5. 731405 5. 731405 5. 700547  
11725492\_ 9. 391042 9. 248706 9. 327843 8. 85168 8. 88055 8. 916077  
11725493\_ 3. 70282 3. 569098 3. 746714 3. 7846 3. 728856 3. 716269  
11725494\_ 3. 872878 3. 993833 3. 884591 3. 910755 3. 872878 3. 629066  
11725495\_ 5. 985853 6. 179056 6. 190884 5. 723244 5. 809591 5. 752866  
11725496\_ 8. 923153 8. 862094 8. 908541 8. 919842 8. 899175 8. 898838  
11725497\_ 5. 408044 5. 636964 5. 52464 5. 604228 5. 601846 5. 892184  
11725498\_ 5. 937846 5. 785952 5. 891574 5. 814818 5. 930561 5. 822857  
11725499\_ 5. 630993 5. 552691 5. 725518 5. 366958 5. 317467 5. 2666  
11725500\_ 5. 745857 5. 643395 5. 622876 5. 171373 5. 244857 5. 179768  
11725501\_ 6. 599839 6. 482308 6. 480485 6. 275846 6. 34088 6. 405617  
11725502\_ 5. 915465 5. 983509 5. 853065 6. 068919 6. 048055 6. 188937

11725503\_ 9.136737 9.047101 9.062482 8.85997 8.964715 8.866748  
11725504\_ 7.626889 7.526103 7.620908 7.652146 7.656797 7.667417  
11725505\_ 6.889684 6.77348 6.934615 7.118889 7.079192 7.020995  
11725506\_ 7.066036 6.911239 7.008564 6.986734 7.054169 7.016713  
11725507\_ 6.769187 6.903015 6.829221 6.887377 6.839342 6.940822  
11725508\_ 7.393012 7.458921 7.585205 6.476894 6.47143 6.56858  
11725509\_ 7.121996 7.083467 7.172664 6.828602 6.779107 6.707757  
11725510\_ 6.92952 6.932346 6.957287 6.803693 6.870272 6.826925  
11725511\_ 3.256208 3.398236 3.355775 3.325492 3.25002 3.344446  
11725512\_ 4.281758 4.141639 4.239295 3.603847 3.723127 3.707758  
11725513\_ 4.250062 4.335594 4.584933 4.262341 4.268942 4.331854  
11725514\_ 7.299435 7.184636 7.235725 6.52788 6.461718 6.635352  
11725515\_ 4.003059 4.042133 4.496472 4.430726 4.512418 4.488534  
11725516\_ 3.312813 3.184729 3.436402 3.453048 3.280751 3.656812  
11725517\_ 4.132345 4.348523 4.179639 4.738028 4.403266 4.421891  
11725518\_ 6.97427 6.911165 7.01167 6.606733 6.725582 6.700592  
11725519\_ 7.447113 7.468183 7.464624 7.316562 7.374251 7.319665  
11725520\_ 6.37199 6.241232 6.273739 6.08962 6.179807 6.094413  
11725521\_ 6.206103 6.089936 6.151963 6.645562 6.61567 6.646187  
11725522\_ 7.31278 7.352144 7.374996 7.381813 7.506433 7.400837  
11725523\_ 7.50946 7.418344 7.485504 7.244263 7.22631 7.161796  
11725524\_ 9.127859 9.184442 9.137023 9.054096 9.027555 8.936132  
11725525\_ 7.523557 7.377097 7.478387 7.143137 7.155195 7.125087  
11725526\_ 4.815683 4.929023 4.934888 5.135734 4.727813 4.698695  
11725527\_ 4.928685 4.927952 4.853307 5.02938 5.097796 5.037489  
11725528\_ 4.843944 4.935082 4.616998 4.347179 4.126501 4.20555  
11725529\_ 5.086927 5.067107 5.02646 5.176827 5.319531 5.160039  
11725530\_ 2.154186 1.898324 2.235709 2.098273 1.881528 1.979252  
11725531\_ 3.648558 3.736107 3.603151 3.46175 3.532001 3.440835  
11725532\_ 3.682332 3.427423 3.566371 3.427423 3.603703 3.44192  
11725533\_ 6.433085 6.453702 6.473663 6.738536 6.711786 6.71127  
11725534\_ 6.214316 6.135926 6.077556 6.25584 6.261034 6.265669  
11725535\_ 6.638444 6.596476 6.71115 6.757063 6.881394 6.898793  
11725536\_ 6.740777 6.763005 6.71567 6.542081 6.605672 6.567077  
11725537\_ 4.271258 4.279638 4.279638 4.309692 4.288018 4.414134  
11725538\_ 7.515837 7.58632 7.681583 6.704084 6.866691 6.923436  
11725539\_ 4.728399 4.585777 4.748845 4.767473 4.900151 4.700529  
11725540\_ 5.920698 5.981726 6.157846 6.300643 6.383372 6.320558  
11725541\_ 5.437504 5.449933 5.328314 5.573409 5.603518 5.829202  
11725542\_ 5.186835 5.443795 5.307609 5.55587 5.398192 5.467915  
11725543\_ 4.904167 4.924581 4.904464 4.925925 4.96811 4.882998  
11725544\_ 5.676992 5.73418 5.518169 5.621549 5.733279 5.732315  
11725545\_ 3.996261 3.824033 3.913557 3.932907 3.855508 3.807542  
11725546\_ 5.335264 5.275091 5.210791 5.422174 5.483591 5.450421  
11725547\_ 3.856838 3.990019 3.969002 4.154545 3.897414 4.203089  
11725548\_ 7.910863 7.747041 7.948765 8.04679 8.065248 8.092112  
11725549\_ 4.769643 4.647153 4.686366 4.568375 4.876151 4.575306  
11725550\_ 4.749472 4.739326 4.774068 4.91255 4.938454 5.167275  
11725551\_ 6.232869 6.118838 6.2052 6.280993 6.443745 6.323495  
11725552\_ 1.993829 2.052604 2.015375 2.052604 1.995297 2.09613  
11725553\_ 1.898324 1.820906 1.780703 1.898324 1.898324 1.972427

11725554\_ 5. 548617 5. 465414 5. 762699 5. 347282 5. 344277 5. 261883  
11725555\_ 4. 54341 4. 610148 4. 608816 4. 40461 4. 446107 4. 255142  
11725556\_ 6. 877343 7. 045127 6. 935727 7. 009121 7. 030182 6. 983354  
11725557\_ 5. 766979 5. 841177 5. 776362 5. 857892 5. 906288 5. 992354  
11725558\_ 5. 856275 5. 894697 5. 845365 5. 90402 5. 894697 5. 92083  
11725559\_ 7. 65251 7. 518028 7. 504867 6. 607059 6. 543184 6. 686985  
11725560\_ 5. 721141 5. 568384 5. 660082 5. 42251 5. 297498 5. 552061  
11725561\_ 6. 568074 6. 54233 6. 598099 6. 625157 6. 689813 6. 75365  
11725562\_ 4. 868598 4. 987164 4. 772243 4. 868598 4. 886371 4. 868598  
11725563\_ 5. 554254 5. 348447 5. 554436 5. 407788 5. 538052 5. 70021  
11725564\_ 5. 458483 5. 526029 5. 603553 6. 274225 6. 217234 6. 182461  
11725565\_ 5. 875385 5. 709129 5. 800478 6. 420778 6. 440633 6. 572496  
11725566\_ 6. 688329 6. 727853 6. 837323 7. 174876 7. 319629 7. 210795  
11725567\_ 4. 322913 4. 199299 4. 199299 4. 52373 4. 322913 4. 293248  
11725568\_ 3. 711729 3. 612417 3. 631512 3. 83998 4. 031917 3. 953639  
11725569\_ 8. 554704 8. 533866 8. 511602 7. 99026 7. 930525 7. 953673  
11725570\_ 6. 079452 6. 009553 6. 087475 6. 149704 6. 154921 6. 200877  
11725571\_ 5. 870242 5. 792547 5. 786681 5. 803016 5. 853283 5. 9078  
11725572\_ 5. 606626 5. 515176 5. 56944 5. 763909 5. 827417 5. 775684  
11725573\_ 2. 974944 2. 987589 2. 887875 3. 07323 3. 097577 3. 158449  
11725574\_ 8. 549679 8. 603415 8. 518952 8. 158841 8. 172419 8. 114912  
11725575\_ 4. 753195 4. 648135 4. 554021 4. 557256 4. 574096 4. 502072  
11725576\_ 5. 478751 5. 425411 5. 509115 4. 880667 4. 697031 4. 631954  
11725577\_ 6. 215249 5. 994796 6. 079114 6. 04069 6. 114663 6. 059347  
11725578\_ 5. 742038 5. 819798 5. 735963 5. 977166 5. 960155 6. 141773  
11725579\_ 6. 729963 6. 475306 6. 691573 7. 156454 7. 180483 7. 162289  
11725580\_ 6. 21201 6. 445169 6. 314394 6. 375615 6. 43956 6. 405278  
11725581\_ 5. 409222 5. 396824 5. 312662 5. 499449 5. 399229 5. 416449  
11725582\_ 4. 86271 4. 803941 4. 752345 4. 951241 4. 907055 4. 944602  
11725583\_ 6. 332796 6. 321483 6. 315486 6. 040336 6. 024944 5. 962061  
11725584\_ 6. 056223 5. 953264 6. 00112 5. 842668 6. 008682 5. 984185  
11725585\_ 7. 5783 7. 516974 7. 475464 5. 967803 5. 853853 5. 94119  
11725586\_ 4. 156139 4. 03517 4. 170098 4. 211337 4. 217783 4. 307966  
11725587\_ 5. 704919 5. 883832 5. 666967 6. 165592 6. 113607 6. 092163  
11725588\_ 3. 398236 3. 499401 3. 535467 3. 503743 3. 503743 3. 559371  
11725589\_ 8. 58278 8. 524026 8. 575592 8. 534464 8. 658151 8. 678428  
11725590\_ 6. 169387 6. 188786 6. 086961 6. 112674 6. 069686 6. 16528  
11725591\_ 5. 328189 5. 270078 5. 415168 5. 399142 5. 263475 5. 375313  
11725592\_ 6. 624528 6. 620204 6. 743766 6. 561162 6. 56978 6. 656588  
11725593\_ 7. 522216 7. 562171 7. 569639 7. 473908 7. 583867 7. 612419  
11725594\_ 6. 831122 6. 800927 6. 902646 6. 729842 6. 946361 6. 79768  
11725595\_ 6. 054405 6. 157399 6. 170113 6. 052774 6. 027911 6. 056128  
11725596\_ 5. 496545 5. 517747 5. 677471 5. 469264 5. 496389 5. 588479  
11725597\_ 2. 991127 3. 014086 2. 991127 2. 974226 2. 877208 2. 975461  
11725598\_ 3. 089872 3. 380483 3. 122489 3. 110438 3. 372291 3. 185484  
11725599\_ 4. 244905 4. 342591 4. 233141 4. 195706 4. 3444 4. 193897  
11725600\_ 5. 404448 5. 454717 5. 295158 5. 454717 5. 475532 5. 496803  
11725601\_ 3. 521655 3. 158783 3. 535107 3. 606313 3. 613001 3. 902395  
11725602\_ 7. 755036 7. 658176 7. 653327 7. 509076 7. 470989 7. 588712  
11725603\_ 4. 262835 4. 194722 4. 518403 4. 460245 4. 501422 4. 700243  
11725604\_ 4. 956695 5. 019239 5. 202632 5. 110215 5. 277521 5. 152449

11725605\_ 3. 801871 4. 014267 4. 021547 4. 129748 3. 870214 4. 013462  
11725606\_ 5. 708692 5. 804717 6. 049089 5. 259254 5. 264352 5. 413812  
11725607\_ 4. 722966 4. 819538 4. 553015 4. 661123 4. 776799 4. 465769  
11725608\_ 5. 846498 6. 048149 5. 80696 5. 924602 6. 046739 6. 049343  
11725609\_ 4. 004045 4. 028306 3. 85537 3. 986387 4. 01744 4. 043123  
11725610\_ 4. 039993 4. 317553 4. 11404 4. 004961 4. 017068 3. 896192  
11725611\_ 6. 438223 6. 250204 6. 412133 6. 762774 6. 563595 6. 67471  
11725612\_ 11. 40384 11. 38276 11. 43784 11. 48717 11. 48039 11. 45576  
11725613\_ 8. 132888 8. 046364 8. 118858 8. 061526 8. 061569 8. 060619  
11725614\_ 7. 472867 7. 493662 7. 524962 7. 987025 8. 031735 7. 966012  
11725615\_ 8. 851153 8. 745397 8. 816196 8. 650958 8. 666183 8. 635098  
11725616\_ 7. 788378 7. 969231 7. 92384 8. 82319 8. 815399 8. 779703  
11725617\_ 11. 57699 11. 61664 11. 59525 11. 69066 11. 62317 11. 62881  
11725618\_ 2. 988093 3. 036451 3. 01863 2. 629428 2. 808844 2. 326181  
11725619\_ 5. 210658 4. 800347 4. 645123 3. 952294 3. 765503 3. 722219  
11725620\_ 10. 60852 10. 59333 10. 61794 10. 57481 10. 56227 10. 54038  
11725621\_ 6. 866008 6. 904396 6. 728608 6. 92369 6. 908213 6. 861766  
11725622\_ 7. 494512 7. 580855 7. 553173 7. 461127 7. 410286 7. 483414  
11725623\_ 6. 898793 6. 733604 6. 886378 7. 085357 7. 04501 7. 020718  
11725624\_ 3. 403262 3. 250775 3. 451062 3. 133463 2. 833735 3. 027925  
11725625\_ 4. 693849 4. 663757 4. 640959 4. 135496 3. 969526 4. 191959  
11725626\_ 5. 444187 5. 562778 5. 373157 5. 217523 5. 301508 5. 11154  
11725627\_ 8. 679883 8. 671124 8. 724497 8. 967212 9. 003116 8. 93582  
11725628\_ 5. 926672 5. 962512 5. 677417 6. 040637 6. 135076 5. 931917  
11725629\_ 9. 46409 9. 520796 9. 531439 9. 830777 9. 898171 9. 829233  
11725630\_ 9. 12404 9. 022491 9. 150808 9. 014275 9. 078124 9. 079027  
11725631\_ 5. 176021 5. 117237 5. 17639 5. 117237 5. 182428 5. 166799  
11725632\_ 4. 880196 4. 714099 5. 032214 5. 020686 5. 042711 5. 126703  
11725633\_ 6. 093045 5. 984914 6. 121575 5. 987332 5. 986995 5. 833334  
11725634\_ 6. 760476 6. 802441 6. 797466 6. 523081 6. 576971 6. 512378  
11725635\_ 8. 10063 8. 123923 8. 20523 8. 107425 8. 163487 8. 081683  
11725636\_ 10. 51914 10. 5129 10. 5041 10. 07664 10. 10721 10. 13078  
11725637\_ 8. 543094 8. 509157 8. 517825 8. 366977 8. 352001 8. 349048  
11725638\_ 10. 05559 10. 01584 10. 04952 9. 776543 9. 711641 9. 799986  
11725639\_ 5. 97962 6. 052772 5. 872559 6. 280035 6. 238883 6. 241227  
11725640\_ 8. 457365 8. 446455 8. 477063 9. 034703 9. 016153 9. 044378  
11725641\_ 7. 315226 7. 358173 7. 338975 7. 103109 7. 2677 7. 129864  
11725642\_ 8. 309782 8. 205099 8. 340777 8. 328788 8. 323408 8. 280424  
11725643\_ 9. 125338 9. 086154 9. 163625 9. 263439 9. 277964 9. 261445  
11725644\_ 7. 141518 6. 904093 7. 108066 6. 569551 6. 571707 6. 605947  
11725645\_ 8. 200335 8. 155997 8. 213688 8. 262167 8. 32064 8. 268195  
11725646\_ 4. 815464 4. 799965 4. 709463 4. 875645 4. 798511 4. 807243  
11725647\_ 8. 04959 8. 120938 8. 052541 7. 985293 8. 041611 8. 081812  
11725648\_ 5. 402173 5. 554436 5. 546546 5. 633487 5. 65818 5. 635713  
11725649\_ 5. 29173 5. 371419 5. 548553 5. 022657 4. 98555 5. 061586  
11725650\_ 4. 996745 4. 900865 4. 860554 4. 794101 4. 483696 4. 572859  
11725651\_ 7. 656069 7. 600541 7. 685539 7. 235287 7. 183168 7. 148682  
11725652\_ 3. 143941 3. 082098 3. 189315 2. 867573 2. 67978 2. 950893  
11725653\_ 2. 84005 2. 728589 3. 034043 2. 215542 2. 302209 2. 33777  
11725654\_ 4. 205611 4. 271498 4. 21356 4. 423698 4. 364957 4. 340107  
11725655\_ 8. 927809 8. 835365 8. 86342 8. 953679 8. 964273 8. 957944

11725656\_ 4. 200781 4. 270964 4. 213861 4. 6555 4. 484581 4. 928894  
11725657\_ 7. 408734 7. 38169 7. 411978 6. 994815 7. 053552 6. 988628  
11725658\_ 8. 765292 8. 748185 8. 733746 9. 102931 9. 087892 9. 010895  
11725659\_ 8. 251538 8. 187614 8. 280837 8. 507802 8. 501224 8. 482449  
11725660\_ 10. 03502 9. 976461 9. 987408 9. 483928 9. 521005 9. 521487  
11725661\_ 4. 215672 4. 247049 4. 208514 4. 000194 3. 999466 4. 131558  
11725662\_ 3. 356382 3. 529502 3. 595266 3. 47745 3. 365666 3. 543464  
11725663\_ 6. 001147 5. 792407 5. 579709 5. 677675 5. 638895 5. 797458  
11725664\_ 3. 94163 4. 101205 4. 091983 3. 821187 3. 759781 3. 828219  
11725665\_ 7. 714115 7. 728387 7. 69986 7. 87817 7. 865942 7. 916845  
11725666\_ 6. 507843 6. 630077 6. 559581 6. 31558 6. 032465 6. 355064  
11725667\_ 6. 258822 6. 130561 6. 094465 6. 626769 6. 580176 6. 641219  
11725668\_ 6. 412643 6. 286627 6. 464826 6. 873911 6. 879268 6. 858075  
11725669\_ 6. 373618 6. 266217 6. 374087 6. 158814 5. 942807 6. 108758  
11725670\_ 8. 498103 8. 444409 8. 468621 8. 673797 8. 735467 8. 658576  
11725671\_ 6. 519936 6. 53932 6. 505223 6. 488149 6. 473437 6. 497107  
11725672\_ 8. 673304 8. 6749 8. 68158 8. 693381 8. 69006 8. 646669  
11725673\_ 6. 353243 6. 242869 6. 414948 6. 139846 6. 172353 6. 155206  
11725674\_ 5. 544167 5. 55522 5. 597288 5. 528624 5. 556141 5. 513128  
11725675\_ 4. 289 4. 160258 4. 117825 4. 067703 4. 066186 4. 10977  
11725676\_ 3. 873192 3. 61373 4. 245672 3. 336707 3. 580931 3. 705625  
11725677\_ 8. 223123 8. 07467 8. 250001 7. 748284 7. 782097 7. 819451  
11725678\_ 8. 861588 8. 830959 8. 865718 9. 313563 9. 358529 9. 395166  
11725679\_ 9. 50861 9. 503719 9. 506865 9. 786472 9. 769912 9. 820898  
11725680\_ 9. 411541 9. 354973 9. 395166 9. 754854 9. 72266 9. 645592  
11725681\_ 7. 947756 7. 903093 7. 836019 7. 207655 7. 112029 7. 031531  
11725682\_ 7. 880573 7. 747302 7. 838643 7. 178025 7. 160751 7. 102103  
11725683\_ 7. 444284 7. 442902 7. 473293 6. 97607 6. 903823 6. 970271  
11725684\_ 4. 643717 4. 512894 4. 364851 4. 347179 4. 386698 4. 4154  
11725685\_ 3. 910866 3. 577704 3. 872175 3. 33895 3. 130836 3. 053021  
11725686\_ 5. 138777 5. 193417 4. 958397 4. 788272 5. 017983 4. 790737  
11725687\_ 6. 786772 6. 676745 6. 807291 6. 903383 6. 936636 6. 922773  
11725688\_ 6. 921771 7. 066036 7. 046669 7. 2646 7. 189025 7. 183243  
11725689\_ 6. 113976 5. 88231 5. 920417 5. 998342 5. 906676 5. 929751  
11725690\_ 8. 452865 8. 360873 8. 48849 8. 10695 8. 033709 8. 140937  
11725691\_ 4. 027354 3. 751691 3. 751054 3. 821176 4. 094379 3. 763248  
11725692\_ 5. 226793 5. 536982 5. 327298 5. 388331 5. 49842 5. 576549  
11725693\_ 6. 712958 6. 667954 6. 752532 6. 796603 6. 744134 6. 922562  
11725694\_ 4. 257841 4. 061284 4. 135496 3. 814571 3. 876888 3. 918912  
11725695\_ 2. 633204 2. 718322 2. 565011 2. 605516 2. 690635 2. 702497  
11725696\_ 6. 971486 6. 931021 7. 029282 6. 957026 6. 94355 6. 988826  
11725697\_ 7. 238451 7. 217413 7. 252671 7. 014303 6. 944303 7. 053884  
11725698\_ 7. 498372 7. 419262 7. 566345 6. 583564 6. 497107 6. 463181  
11725699\_ 8. 96926 9. 01257 9. 042851 8. 975566 8. 882153 8. 931112  
11725700\_ 7. 674821 7. 690933 7. 745069 7. 590645 7. 623757 7. 590313  
11725701\_ 3. 589943 3. 589943 3. 304173 3. 593509 3. 503743 3. 490692  
11725702\_ 4. 775753 4. 9694 4. 709463 4. 93091 4. 983304 4. 984669  
11725703\_ 4. 632814 4. 723966 4. 581847 4. 772366 4. 822448 4. 447906  
11725704\_ 7. 857368 7. 920658 7. 938953 8. 000654 8. 049821 8. 059037  
11725705\_ 9. 244004 9. 15051 9. 215376 9. 433 9. 444314 9. 496844  
11725706\_ 8. 326083 8. 158181 8. 317441 8. 78967 8. 75034 8. 771986

11725707\_ 7. 29842 7. 338276 7. 27139 7. 01655 6. 96625 7. 020464  
11725708\_ 3. 818401 3. 715138 3. 522607 4. 071419 4. 293324 4. 185276  
11725709\_ 5. 60172 5. 352182 5. 780175 6. 136554 6. 186744 6. 316309  
11725710\_ 7. 280725 7. 186749 7. 289829 7. 739224 7. 717135 7. 713556  
11725711\_ 6. 788285 6. 767209 6. 834935 7. 274529 7. 290242 7. 285855  
11725712\_ 9. 069067 8. 985158 9. 063611 9. 561597 9. 59105 9. 575594  
11725713\_ 2. 616315 2. 479659 2. 616315 2. 713288 2. 606573 2. 855105  
11725714\_ 10. 13153 10. 0403 10. 12404 10. 49677 10. 48606 10. 55099  
11725715\_ 10. 15649 10. 13589 10. 16728 10. 44583 10. 45526 10. 4364  
11725716\_ 6. 821692 6. 624842 6. 744798 6. 95532 6. 914288 6. 910327  
11725717\_ 3. 727776 3. 730856 3. 625408 3. 503743 3. 511366 3. 843843  
11725718\_ 8. 324582 8. 311273 8. 317809 8. 477104 8. 483786 8. 33034  
11725719\_ 6. 129179 6. 219854 6. 020665 6. 176834 6. 065461 6. 101597  
11725720\_ 8. 579567 8. 62708 8. 636321 8. 70667 8. 649866 8. 688003  
11725721\_ 5. 448915 5. 570885 5. 370705 5. 656363 5. 698004 5. 575671  
11725722\_ 6. 428341 6. 377847 6. 428975 7. 500017 7. 497783 7. 421819  
11725723\_ 8. 161564 8. 057965 8. 073357 7. 84445 7. 845226 7. 872778  
11725724\_ 5. 463891 5. 516568 5. 643713 5. 468196 5. 697028 5. 568288  
11725725\_ 7. 511093 7. 531712 7. 544779 7. 56134 7. 45733 7. 52777  
11725726\_ 7. 23865 7. 279101 7. 269409 7. 378419 7. 506433 7. 407763  
11725727\_ 7. 125169 7. 087611 7. 174114 7. 237391 7. 362801 7. 264131  
11725728\_ 5. 60411 5. 594128 5. 549091 5. 20481 5. 536746 5. 186993  
11725729\_ 7. 95289 7. 953496 7. 955711 7. 695099 7. 631385 7. 644988  
11725730\_ 8. 069553 8. 071606 8. 106755 7. 742753 7. 869431 7. 816952  
11725731\_ 8. 483935 8. 48408 8. 592745 8. 146073 8. 213464 8. 226431  
11725732\_ 9. 707948 9. 709969 9. 618264 9. 591693 9. 576682 9. 551866  
11725733\_ 6. 940854 6. 85758 6. 913628 7. 557717 7. 601594 7. 711273  
11725734\_ 6. 753434 6. 512119 6. 733835 6. 805764 6. 757825 6. 765911  
11725735\_ 5. 154708 5. 047401 5. 163906 5. 434655 5. 265282 5. 460233  
11725736\_ 5. 645807 5. 499283 5. 630088 4. 946936 5. 186612 5. 140329  
11725737\_ 6. 847822 6. 720397 6. 833779 6. 357643 6. 382805 6. 303934  
11725738\_ 4. 473977 4. 462148 4. 446125 4. 596606 4. 646819 4. 679667  
11725739\_ 3. 788503 3. 837069 3. 674623 3. 982859 4. 003025 4. 013109  
11725740\_ 5. 992278 5. 831542 5. 77525 6. 282224 6. 295487 6. 265227  
11725741\_ 5. 36906 5. 206501 5. 214155 5. 406827 5. 26034 5. 328222  
11725742\_ 6. 460613 6. 348438 6. 448746 6. 458856 6. 425674 6. 560142  
11725743\_ 3. 61789 3. 508179 3. 639083 3. 534915 3. 610699 3. 789259  
11725744\_ 4. 857878 4. 664265 4. 881035 4. 832658 4. 88103 4. 976231  
11725745\_ 4. 5415 4. 335594 4. 455759 4. 159879 4. 339937 4. 275543  
11725746\_ 8. 207102 8. 177492 8. 27756 8. 204414 8. 116177 8. 230847  
11725747\_ 7. 08096 7. 007305 7. 103915 7. 177375 7. 125081 7. 170686  
11725748\_ 6. 916188 7. 036949 6. 994297 7. 535423 7. 554779 7. 467724  
11725749\_ 7. 874439 7. 782947 7. 784154 8. 475713 8. 456671 8. 466032  
11725750\_ 7. 111953 6. 97981 7. 00157 7. 382922 7. 473091 7. 370134  
11725751\_ 8. 254315 8. 209536 8. 215421 7. 153428 7. 2655 7. 237291  
11725752\_ 8. 422058 8. 393258 8. 420792 7. 293246 7. 263636 7. 310164  
11725753\_ 2. 397372 2. 447257 2. 667679 2. 365361 2. 376816 2. 567721  
11725754\_ 1. 745862 1. 808447 2. 086747 2. 083939 2. 083939 1. 999473  
11725755\_ 6. 021844 5. 799521 5. 810918 5. 390614 5. 152172 5. 451168  
11725756\_ 9. 952207 9. 875757 9. 913923 10. 00985 10. 05467 10. 05378  
11725757\_ 6. 626026 6. 515683 6. 522881 6. 349859 6. 191052 6. 462695



11725758\_ 8. 077679 7. 999688 8. 102162 7. 724261 7. 72526 7. 820844  
11725759\_ 7. 853739 7. 694613 7. 755967 7. 46393 7. 454572 7. 418981  
11725760\_ 7. 328714 7. 239712 7. 361548 7. 466985 7. 437773 7. 466138  
11725761\_ 7. 275918 7. 277659 7. 345092 7. 360438 7. 431054 7. 409349  
11725762\_ 5. 614563 5. 732315 5. 667891 6. 097431 5. 973546 5. 969512  
11725763\_ 6. 359228 6. 558662 6. 482787 6. 607541 6. 613141 6. 574643  
11725764\_ 1. 898324 1. 898324 1. 898324 1. 898324 1. 898324 1. 835135  
11725765\_ 3. 712766 3. 70328 3. 834629 2. 978186 2. 780684 2. 71197  
11725766\_ 3. 65418 3. 359836 3. 362574 2. 816197 2. 882209 3. 011888  
11725767\_ 6. 835907 6. 844199 6. 844199 6. 844199 6. 852491 6. 844199  
11725768\_ 5. 34825 5. 11527 5. 2222 5. 249988 5. 162964 5. 345077  
11725769\_ 6. 706281 6. 725839 6. 602741 6. 693053 6. 494445 6. 444012  
11725770\_ 6. 891346 6. 888217 6. 869381 6. 880922 6. 703319 6. 695167  
11725771\_ 7. 561532 7. 499288 7. 567619 7. 120111 7. 138768 7. 200646  
11725772\_ 6. 65576 6. 796252 6. 733035 6. 471773 6. 598626 6. 445131  
11725773\_ 6. 597241 6. 626853 6. 62207 6. 766529 6. 696247 6. 798473  
11725774\_ 5. 736831 5. 871802 5. 765534 5. 757073 5. 779923 5. 858972  
11725775\_ 5. 672425 5. 545153 5. 598723 5. 894697 5. 878881 5. 804025  
11725776\_ 5. 434548 5. 480966 5. 448942 5. 11527 5. 201913 5. 359956  
11725777\_ 4. 793355 4. 790501 4. 736104 4. 892271 4. 905982 4. 779511  
11725778\_ 6. 17981 6. 179951 6. 254738 6. 203228 6. 364277 6. 231926  
11725779\_ 3. 950771 4. 183751 3. 65736 4. 100916 3. 95803 3. 979747  
11725780\_ 2. 438327 2. 25483 2. 349581 2. 219267 2. 438327 2. 351486  
11725781\_ 7. 786782 7. 715494 7. 86222 7. 184826 7. 134576 7. 100978  
11725782\_ 6. 310518 6. 500808 6. 56703 6. 584446 6. 592763 6. 503005  
11725783\_ 7. 089735 6. 984886 7. 007439 7. 082158 6. 973759 6. 964844  
11725784\_ 8. 044028 8. 035441 8. 022754 8. 015682 8. 022754 8. 047207  
11725785\_ 5. 043563 4. 903087 5. 029529 5. 351316 5. 559549 5. 620339  
11725786\_ 7. 348864 7. 348779 7. 216065 7. 383754 7. 451771 7. 317382  
11725787\_ 7. 145962 7. 227683 7. 182592 7. 323397 7. 21491 7. 196284  
11725788\_ 9. 505384 9. 443171 9. 527943 10. 18448 10. 18911 10. 10167  
11725789\_ 8. 470636 8. 392614 8. 449516 8. 171292 8. 200644 8. 207617  
11725790\_ 8. 618827 8. 59996 8. 612863 8. 520859 8. 470134 8. 487558  
11725791\_ 4. 023697 3. 97398 4. 170559 5. 070176 4. 928725 5. 073036  
11725792\_ 5. 029529 4. 79135 4. 772366 5. 643713 5. 654151 5. 811186  
11725793\_ 6. 281163 6. 047197 6. 159074 5. 124352 4. 985828 4. 948761  
11725794\_ 4. 986284 5. 007216 4. 950821 4. 750852 4. 779992 4. 843031  
11725795\_ 8. 009334 8. 062215 7. 975752 8. 041141 8. 07099 7. 979086  
11725796\_ 7. 624483 7. 627651 7. 608102 7. 669285 7. 648866 7. 648866  
11725797\_ 7. 307762 7. 221788 7. 202837 6. 946305 6. 772771 6. 804944  
11725798\_ 7. 687632 7. 601818 7. 738108 7. 135308 7. 080832 7. 141787  
11725799\_ 4. 809302 4. 740745 4. 782674 4. 908845 4. 963462 4. 928095  
11725800\_ 5. 76187 5. 690615 5. 744769 5. 507295 5. 477091 5. 418208  
11725801\_ 7. 43573 7. 479175 7. 348589 7. 239949 7. 273762 7. 25661  
11725802\_ 6. 772564 6. 726249 6. 934615 6. 437833 6. 492133 6. 372398  
11725803\_ 6. 497504 6. 298348 6. 490882 5. 524105 5. 443705 5. 507274  
11725804\_ 7. 103456 6. 957437 7. 084296 6. 510211 6. 33658 6. 530941  
11725805\_ 6. 098368 5. 894487 5. 950197 5. 52707 5. 453793 5. 455375  
11725806\_ 4. 305011 4. 493207 4. 619311 4. 751875 4. 655373 4. 795574  
11725807\_ 3. 714715 3. 933428 3. 850246 4. 001312 3. 874675 3. 954157  
11725808\_ 5. 338274 5. 2666 5. 3078 5. 333132 5. 350286 5. 511272

11725809\_ 6. 433732 6. 457196 6. 353581 6. 066107 6. 226436 6. 18116  
11725810\_ 4. 780052 4. 805572 4. 584965 4. 751331 4. 909547 4. 776828  
11725811\_ 4. 78427 4. 776507 4. 600989 5. 044884 4. 95683 4. 896766  
11725812\_ 9. 206829 9. 18956 9. 203245 9. 017438 9. 020367 8. 935192  
11725813\_ 6. 011469 6. 126303 6. 066395 6. 621979 6. 763569 6. 646179  
11725814\_ 4. 492081 4. 568827 4. 330399 4. 520533 4. 405042 4. 552438  
11725815\_ 2. 867875 2. 83198 2. 895172 2. 912551 3. 066134 2. 80706  
11725816\_ 5. 994642 6. 039417 6. 057554 6. 606136 6. 670325 6. 584358  
11725817\_ 4. 760356 4. 721278 4. 511143 4. 764775 4. 757415 4. 996344  
11725818\_ 6. 516734 6. 539311 6. 601492 6. 439451 6. 405593 6. 489211  
11725819\_ 6. 993994 6. 915622 6. 970903 6. 677671 6. 74498 6. 646187  
11725820\_ 7. 878119 7. 879779 7. 84441 7. 788765 7. 740102 7. 770937  
11725821\_ 7. 417431 7. 472585 7. 397663 7. 402878 7. 526155 7. 478413  
11725822\_ 7. 018387 6. 9522 6. 994297 7. 426232 7. 404389 7. 383661  
11725823\_ 5. 516841 5. 44657 5. 308585 5. 479622 5. 60302 5. 578415  
11725824\_ 5. 170205 5. 19966 5. 297498 5. 279922 5. 323272 5. 296234  
11725825\_ 5. 926672 5. 949742 5. 739931 6. 23217 6. 20319 6. 214433  
11725826\_ 3. 891136 4. 003885 3. 867247 3. 988365 3. 885288 3. 998645  
11725827\_ 6. 774839 6. 623426 6. 854748 6. 584427 6. 622861 6. 707042  
11725828\_ 6. 667946 6. 563696 6. 705531 6. 373203 6. 312793 6. 311232  
11725829\_ 4. 875031 5. 076429 4. 969308 4. 95771 4. 954333 5. 143508  
11725830\_ 4. 308739 4. 353986 4. 498186 3. 600217 3. 747413 3. 258647  
11725831\_ 5. 211667 5. 120251 5. 234555 5. 364194 5. 457566 5. 455601  
11725832\_ 5. 190227 5. 134522 5. 019678 5. 264167 5. 370109 5. 366872  
11725833\_ 7. 811716 7. 754714 7. 81503 7. 613026 7. 655684 7. 725784  
11725834\_ 5. 209259 5. 196988 5. 120017 5. 250904 5. 333723 5. 394432  
11725835\_ 6. 331952 6. 148256 6. 161408 5. 811693 5. 837572 5. 779516  
11725836\_ 8. 527148 8. 38491 8. 522323 7. 997537 7. 919031 7. 954972  
11725837\_ 6. 846994 6. 818482 6. 919593 7. 5307 7. 5138 7. 461877  
11725838\_ 3. 268517 3. 180062 3. 193572 3. 398236 3. 442033 3. 268517  
11725839\_ 3. 662369 3. 872625 3. 665344 3. 820501 3. 568372 3. 665344  
11725840\_ 6. 401383 6. 491673 6. 570838 6. 744266 6. 823346 6. 736909  
11725841\_ 6. 379558 6. 288241 6. 480066 5. 768053 5. 768053 5. 713907  
11725842\_ 6. 588075 6. 477391 6. 636791 7. 314787 7. 306277 7. 349098  
11725843\_ 3. 512777 3. 827862 3. 503717 3. 77024 3. 835829 3. 782814  
11725844\_ 6. 40395 6. 343118 6. 392198 6. 825617 6. 895728 6. 735114  
11725845\_ 7. 780036 7. 690573 7. 699973 7. 542615 7. 490799 7. 501238  
11725846\_ 8. 08832 8. 08601 8. 075898 7. 924783 7. 864297 7. 877202  
11725847\_ 6. 972101 6. 760674 6. 93966 7. 551462 7. 396336 7. 404907  
11725848\_ 6. 129216 6. 179089 6. 069567 6. 518094 6. 56978 6. 636627  
11725849\_ 7. 291296 7. 326959 7. 346608 6. 831826 6. 898793 6. 911765  
11725850\_ 7. 514311 7. 532013 7. 570863 7. 455985 7. 402929 7. 489436  
11725851\_ 6. 526744 6. 425163 6. 481478 6. 411518 6. 147426 6. 250473  
11725852\_ 4. 977455 5. 048392 4. 922859 5. 11087 5. 018549 5. 132424  
11725853\_ 6. 764369 6. 706282 6. 727042 6. 965107 6. 843465 6. 898729  
11725854\_ 6. 086265 6. 096385 6. 083319 5. 91258 5. 801756 5. 910237  
11725855\_ 12. 13474 12. 10895 12. 12749 12. 07958 12. 06542 12. 04112  
11725856\_ 6. 113159 6. 234094 6. 045036 6. 071147 5. 993142 5. 978732  
11725857\_ 6. 502421 6. 54349 6. 423711 6. 554324 6. 425166 6. 561465  
11725858\_ 5. 433654 5. 376429 5. 262409 5. 234182 5. 364212 5. 507006  
11725859\_ 4. 694594 4. 723683 4. 638214 4. 917009 4. 684789 4. 75163

11725860\_ 4. 678989 4. 758976 4. 758976 4. 637697 4. 819935 4. 406701  
11725861\_ 8. 172936 8. 160203 8. 245311 7. 958063 7. 880573 7. 988535  
11725862\_ 8. 088326 8. 040463 8. 101448 7. 020038 7. 055228 7. 228663  
11725863\_ 8. 295363 8. 241399 8. 327156 7. 462298 7. 48243 7. 541703  
11725864\_ 6. 051561 5. 92041 5. 950493 5. 594801 5. 582743 5. 641527  
11725865\_ 7. 299346 7. 24846 7. 31409 7. 416144 7. 351268 7. 42418  
11725866\_ 5. 400501 5. 674031 5. 652905 5. 763473 5. 738835 5. 703096  
11725867\_ 6. 835963 6. 809843 6. 75533 7. 133259 7. 13691 7. 114265  
11725868\_ 6. 239743 6. 367757 6. 308877 6. 414953 6. 446513 6. 413682  
11725869\_ 7. 408987 7. 336804 7. 3072 7. 704579 7. 6781 7. 618217  
11725870\_ 7. 353564 7. 217051 7. 283732 6. 867062 6. 883291 6. 935103  
11725871\_ 6. 778429 6. 687797 6. 643268 6. 690151 6. 512 6. 698867  
11725872\_ 6. 50178 6. 6796 6. 650676 6. 595176 6. 694432 6. 567117  
11725873\_ 4. 375352 4. 263651 4. 213226 4. 263651 4. 240168 4. 263651  
11725874\_ 3. 558329 3. 557355 3. 318263 3. 372545 3. 514064 3. 427479  
11725875\_ 4. 397346 4. 397346 4. 269195 4. 663186 4. 397346 4. 397346  
11725876\_ 6. 583882 6. 725988 6. 454737 6. 75766 6. 752593 6. 727501  
11725877\_ 5. 01262 4. 859704 4. 766952 5. 323846 5. 321316 5. 373877  
11725878\_ 3. 772583 3. 855109 3. 680037 3. 766365 3. 955962 3. 954157  
11725879\_ 6. 499327 6. 337916 6. 627335 5. 9265 6. 068482 6. 048513  
11725880\_ 6. 613027 6. 619368 6. 619536 6. 703698 6. 725204 6. 748255  
11725881\_ 5. 844908 5. 84369 5. 827328 5. 759791 5. 718101 5. 735243  
11725882\_ 5. 559228 5. 53013 5. 674881 6. 158708 6. 15349 6. 143378  
11725883\_ 4. 234389 4. 407019 4. 287593 4. 459939 4. 443471 4. 350664  
11725884\_ 7. 780353 7. 698673 7. 680618 7. 384673 7. 391461 7. 288491  
11725885\_ 6. 321078 6. 313013 6. 439238 5. 748202 5. 71813 5. 816495  
11725886\_ 6. 282926 6. 192618 6. 199575 6. 050574 6. 010763 5. 971831  
11725887\_ 6. 17981 6. 282224 6. 186823 6. 246955 6. 327011 6. 220439  
11725888\_ 4. 790218 4. 915281 4. 824195 4. 841299 4. 725056 4. 710306  
11725889\_ 3. 810245 3. 797479 3. 747777 3. 856263 3. 995079 3. 62829  
11725890\_ 3. 131856 3. 324754 3. 532956 4. 357477 4. 506741 4. 440269  
11725891\_ 8. 518662 8. 470467 8. 527326 8. 686379 8. 723594 8. 676671  
11725892\_ 4. 696434 4. 802674 4. 770459 4. 425193 4. 4553 4. 161546  
11725893\_ 2. 850317 2. 691481 2. 935415 2. 770459 2. 762673 3. 026886  
11725894\_ 3. 250319 3. 454568 3. 220957 3. 605918 3. 251768 3. 33292  
11725895\_ 7. 450108 7. 604377 7. 467288 7. 526484 7. 610718 7. 60247  
11725896\_ 7. 369263 7. 381216 7. 460101 7. 451275 7. 366167 7. 39914  
11725897\_ 6. 023607 5. 998997 6. 052397 5. 958413 5. 989191 6. 011302  
11725898\_ 3. 89401 3. 928483 3. 642105 3. 998611 3. 799189 4. 105227  
11725899\_ 8. 415721 8. 392823 8. 388749 8. 747748 8. 724497 8. 625593  
11725900\_ 7. 986404 7. 861056 7. 896229 8. 062502 8. 051134 8. 173236  
11725901\_ 5. 940284 5. 990438 5. 892033 5. 956919 6. 028457 5. 814896  
11725902\_ 7. 317368 7. 267841 7. 300405 6. 850482 6. 852818 6. 771002  
11725903\_ 3. 777348 3. 822183 4. 079905 3. 610862 3. 819582 3. 741302  
11725904\_ 4. 598085 4. 47175 4. 605324 4. 694927 4. 740887 4. 55033  
11725905\_ 3. 13885 2. 919242 2. 852539 3. 149085 3. 328653 3. 097763  
11725906\_ 3. 964495 3. 98113 3. 920345 3. 942262 3. 973597 4. 070515  
11725907\_ 6. 876387 6. 984362 6. 870419 6. 900373 6. 898793 6. 864125  
11725908\_ 5. 806846 5. 880255 5. 807845 5. 905872 5. 882886 5. 761796  
11725909\_ 5. 509466 5. 477997 5. 348745 5. 143174 5. 241458 5. 195907  
11725910\_ 2. 870458 3. 297412 3. 398236 2. 835672 2. 751473 2. 737851

11725911\_ 4. 341477 4. 036011 3. 992504 4. 213226 4. 328944 4. 13239  
11725912\_ 4. 344203 4. 173912 4. 086068 4. 099716 4. 366582 3. 951555  
11725913\_ 3. 804688 3. 827593 3. 594286 3. 89862 3. 862513 4. 080397  
11725914\_ 3. 540832 3. 355567 3. 594685 3. 657002 3. 649844 3. 70225  
11725915\_ 4. 513241 4. 509632 4. 457411 4. 94138 4. 590056 4. 901498  
11725916\_ 6. 677436 6. 745626 6. 888716 6. 727063 6. 527572 6. 643744  
11725917\_ 6. 776055 6. 635598 6. 756356 6. 475933 6. 61315 6. 511309  
11725918\_ 7. 773933 7. 766426 7. 631741 7. 782726 7. 849286 7. 732599  
11725919\_ 6. 90033 7. 06725 6. 903386 7. 024501 7. 030788 7. 009794  
11725920\_ 7. 141459 7. 079764 7. 185517 7. 411792 7. 400837 7. 383661  
11725921\_ 4. 656483 4. 653345 4. 739224 4. 468265 4. 740984 4. 677095  
11725922\_ 2. 372624 2. 399486 2. 566644 2. 450724 2. 361778 2. 555077  
11725923\_ 8. 619232 8. 587727 8. 655973 8. 228795 8. 206223 8. 164044  
11725924\_ 5. 272456 5. 37118 5. 171268 5. 510407 5. 598125 5. 433249  
11725925\_ 6. 239531 6. 316792 6. 262261 6. 244571 6. 215674 6. 259639  
11725926\_ 9. 065627 9. 087897 8. 953845 9. 175459 9. 089311 9. 021405  
11725927\_ 10. 24387 10. 20209 10. 22121 10. 33225 10. 35505 10. 32117  
11725928\_ 8. 808529 8. 74905 8. 849677 8. 590624 8. 487626 8. 518949  
11725929\_ 8. 572178 8. 464972 8. 575189 8. 166277 8. 115451 8. 114223  
11725930\_ 10. 5967 10. 60007 10. 58166 10. 69747 10. 71433 10. 60935  
11725931\_ 7. 222185 7. 14626 7. 182685 7. 562959 7. 605708 7. 502743  
11725932\_ 11. 07018 11. 0653 11. 03416 11. 2776 11. 29128 11. 2861  
11725933\_ 10. 41781 10. 37032 10. 39996 10. 48564 10. 49324 10. 43878  
11725934\_ 10. 85064 10. 78106 10. 83852 10. 89899 10. 90974 10. 85283  
11725935\_ 5. 616317 5. 432539 5. 548577 5. 670284 5. 627254 5. 780913  
11725936\_ 5. 045365 5. 080283 4. 950057 5. 121318 5. 139697 5. 074042  
11725937\_ 10. 45819 10. 40755 10. 47376 9. 735427 9. 8029 9. 790603  
11725938\_ 5. 356882 5. 524727 5. 371509 5. 50631 5. 580542 5. 473839  
11725939\_ 1. 912825 1. 750683 1. 68105 1. 706376 1. 759291 1. 750683  
11725940\_ 2. 934603 3. 095321 3. 007029 3. 013253 3. 148175 3. 222417  
11725941\_ 4. 782789 4. 917436 4. 887378 4. 920682 4. 90526 4. 880826  
11725942\_ 5. 119122 5. 026898 5. 047718 5. 146516 5. 08423 5. 181202  
11725943\_ 4. 344643 4. 459939 4. 362035 4. 49392 4. 399988 4. 507315  
11725944\_ 10. 20941 10. 14091 10. 21111 10. 36975 10. 41058 10. 3627  
11725945\_ 6. 933679 6. 989358 7. 082788 6. 532926 6. 550672 6. 52991  
11725946\_ 5. 262819 5. 384345 5. 098961 5. 499731 5. 409465 5. 483657  
11725947\_ 5. 343477 5. 401826 5. 315622 5. 786042 5. 878879 5. 945832  
11725948\_ 8. 687368 8. 691145 8. 737512 8. 482604 8. 453833 8. 441817  
11725949\_ 8. 713089 8. 598696 8. 784653 8. 489779 8. 442346 8. 413607  
11725950\_ 9. 853453 9. 800353 9. 839523 9. 146822 9. 096439 9. 114163  
11725951\_ 8. 962992 9. 003751 8. 986998 8. 2067 8. 223037 8. 183126  
11725952\_ 6. 466386 6. 566254 6. 565151 6. 710252 6. 83642 6. 815553  
11725953\_ 8. 461551 8. 338352 8. 376717 8. 139167 8. 209597 8. 221623  
11725954\_ 9. 435335 9. 369459 9. 414734 9. 287539 9. 28801 9. 319993  
11725955\_ 4. 694485 4. 575565 4. 670551 4. 650092 4. 762662 4. 597838  
11725956\_ 10. 14678 10. 13915 10. 11693 10. 13159 10. 17597 10. 15636  
11725957\_ 10. 4007 10. 34806 10. 39744 10. 3175 10. 34248 10. 36864  
11725958\_ 5. 900643 6. 248422 6. 107084 6. 366066 6. 309309 6. 41776  
11725959\_ 8. 059069 7. 999318 7. 84654 8. 231986 8. 168336 8. 08301  
11725960\_ 8. 396875 8. 410647 8. 369212 8. 51292 8. 537567 8. 51724  
11725961\_ 3. 209715 3. 253222 3. 359658 3. 336489 3. 295456 3. 336489

11725962\_ 5. 614563 5. 706884 5. 709521 5. 771076 5. 617979 5. 706884  
11725963\_ 9. 05782 8. 996224 9. 027432 9. 163155 9. 221118 9. 149782  
11725964\_ 9. 179006 9. 128988 9. 169688 8. 515303 8. 462823 8. 454723  
11725965\_ 6. 8463 6. 787596 6. 778735 6. 62508 6. 66715 6. 612215  
11725966\_ 4. 567398 4. 815683 4. 813645 4. 879694 4. 753971 4. 815683  
11725967\_ 6. 776927 6. 791566 6. 900369 6. 512513 6. 605626 6. 567469  
11725968\_ 9. 018685 9. 021158 9. 042036 8. 937037 8. 899687 8. 915255  
11725969\_ 9. 061132 8. 97679 9. 007355 8. 926918 8. 874513 8. 878122  
11725970\_ 10. 52339 10. 51663 10. 50207 10. 62567 10. 63447 10. 55636  
11725971\_ 7. 187127 6. 950255 7. 220746 7. 542881 7. 65488 7. 523755  
11725972\_ 8. 513359 8. 442513 8. 487268 8. 621012 8. 599792 8. 692602  
11725973\_ 7. 231622 7. 055228 7. 142907 7. 530006 7. 549183 7. 553977  
11725974\_ 7. 134375 7. 081204 7. 141241 7. 342659 7. 366116 7. 333645  
11725975\_ 8. 702789 8. 58662 8. 651034 9. 04102 9. 059917 9. 116257  
11725976\_ 6. 583987 6. 631394 6. 521151 6. 66135 6. 701187 6. 651433  
11725977\_ 6. 825283 6. 789658 6. 825278 7. 252358 7. 131478 7. 134375  
11725978\_ 9. 031264 8. 99303 9. 05405 8. 905372 8. 975371 8. 958406  
11725979\_ 4. 789345 4. 365553 4. 478201 4. 356479 4. 100281 4. 437618  
11725980\_ 4. 584071 4. 331066 4. 52373 4. 573686 4. 627578 4. 628638  
11725981\_ 4. 026092 4. 066407 4. 121698 4. 137262 4. 373441 4. 394425  
11725982\_ 3. 671879 3. 872155 3. 585772 3. 899147 3. 762551 3. 537039  
11725983\_ 6. 741935 6. 583838 6. 704667 6. 318378 6. 425795 6. 17981  
11725984\_ 9. 099576 9. 031762 9. 070778 8. 334311 8. 387996 8. 355893  
11725985\_ 11. 08405 11. 12301 11. 12231 11. 26547 11. 25717 11. 22212  
11725986\_ 10. 65035 10. 61758 10. 65608 10. 51337 10. 5485 10. 50481  
11725987\_ 6. 199916 6. 348301 6. 219049 6. 370773 6. 449637 6. 409393  
11725988\_ 7. 015201 7. 096796 6. 953475 7. 047115 7. 057266 7. 09831  
11725989\_ 6. 926632 7. 020419 6. 923503 7. 077365 7. 063612 7. 081406  
11725990\_ 8. 517513 8. 45573 8. 466181 8. 360734 8. 335405 8. 342581  
11725991\_ 9. 169156 9. 103552 9. 153733 9. 151931 9. 184221 9. 198077  
11725992\_ 7. 227019 7. 154768 7. 230128 7. 001364 6. 847741 6. 875638  
11725993\_ 5. 133885 5. 11318 5. 072615 5. 297498 5. 159325 5. 299994  
11725994\_ 5. 912619 6. 09213 5. 862383 6. 318396 6. 141949 6. 403637  
11725995\_ 6. 856525 6. 732054 6. 729805 6. 731908 6. 828417 6. 839723  
11725996\_ 2. 594671 2. 569681 2. 460774 2. 687075 2. 628461 2. 66964  
11725997\_ 2. 191942 2. 089372 2. 027867 2. 092171 2. 105369 2. 291255  
11725998\_ 8. 736551 8. 699686 8. 67185 7. 399224 7. 311524 7. 42389  
11725999\_ 9. 245151 9. 19069 9. 192732 7. 850536 7. 772948 7. 772948  
11726000\_ 2. 670468 2. 43797 2. 14753 2. 320875 2. 295316 2. 373525  
11726001\_ 8. 998259 9. 104579 9. 02334 8. 824943 8. 754871 8. 670726  
11726002\_ 5. 808933 5. 872987 5. 702223 5. 224624 5. 191124 5. 18738  
11726003\_ 7. 109659 6. 940712 7. 026538 6. 475112 6. 586288 6. 580636  
11726004\_ 3. 117311 3. 01774 3. 063851 3. 242487 3. 026432 3. 111672  
11726005\_ 6. 485056 6. 293119 6. 556785 5. 666954 5. 656705 5. 619463  
11726006\_ 8. 318111 8. 251645 8. 282935 7. 456656 7. 382891 7. 43686  
11726007\_ 4. 839456 4. 874822 4. 838142 4. 873509 4. 803224 4. 85753  
11726008\_ 3. 906873 3. 804304 3. 804304 3. 624718 3. 705625 3. 779154  
11726009\_ 8. 130918 8. 030948 8. 164837 8. 043456 8. 11227 8. 081707  
11726010\_ 7. 537827 7. 479989 7. 539871 7. 925288 7. 909863 7. 859112  
11726011\_ 7. 040536 7. 035763 6. 935012 6. 946669 6. 868128 7. 020462  
11726012\_ 7. 216822 7. 107356 7. 211001 6. 068884 6. 116168 6. 233726

11726013\_ 9. 208853 9. 180094 9. 19436 8. 164868 8. 136339 8. 148886  
11726014\_ 6. 525967 6. 491488 6. 587145 6. 300643 6. 298819 6. 272333  
11726015\_ 8. 073089 8. 057065 8. 128585 8. 048914 8. 075156 8. 099656  
11726016\_ 3. 318049 3. 135145 3. 322823 3. 388073 3. 237715 3. 259287  
11726017\_ 7. 515803 7. 510928 7. 491895 7. 284195 7. 327664 7. 353843  
11726018\_ 7. 740753 7. 747041 7. 687376 7. 670365 7. 611425 7. 628444  
11726019\_ 3. 506402 3. 398236 3. 625408 3. 669565 3. 671472 3. 771754  
11726020\_ 3. 212812 3. 346192 3. 375585 3. 472074 3. 45695 3. 400934  
11726021\_ 5. 820052 5. 981454 6. 088402 6. 054771 6. 089435 6. 112696  
11726022\_ 8. 444763 8. 35386 8. 412349 8. 077404 8. 094455 8. 160671  
11726023\_ 6. 235365 6. 225513 6. 240755 5. 507637 5. 794286 5. 449861  
11726024\_ 4. 955972 4. 818542 5. 026096 3. 856307 3. 807821 4. 138135  
11726025\_ 6. 318865 6. 17476 6. 310954 6. 227732 6. 166977 6. 320586  
11726026\_ 7. 839583 7. 613676 7. 772011 7. 642727 7. 646582 7. 658522  
11726027\_ 7. 823085 7. 780837 7. 834972 7. 825368 7. 732343 7. 804645  
11726028\_ 6. 830716 6. 945446 6. 786529 7. 222675 7. 208927 7. 140413  
11726029\_ 3. 961474 3. 892907 3. 80435 4. 193202 4. 061483 3. 962331  
11726030\_ 4. 80681 4. 819779 4. 792655 4. 823655 4. 855169 4. 79896  
11726031\_ 9. 67927 9. 598037 9. 702774 9. 359011 9. 312892 9. 377116  
11726032\_ 6. 628159 6. 628221 6. 724564 6. 397244 6. 54284 6. 467076  
11726033\_ 6. 297323 6. 207943 6. 25787 6. 086799 6. 280038 6. 164621  
11726034\_ 4. 158561 4. 189969 3. 947786 4. 408144 4. 325202 4. 278677  
11726035\_ 3. 597181 3. 741778 3. 772553 3. 906148 3. 734114 3. 606313  
11726036\_ 5. 267745 5. 366924 5. 448296 5. 316486 5. 246616 5. 2666  
11726037\_ 8. 260468 8. 222368 8. 282219 7. 64458 7. 64108 7. 701318  
11726038\_ 8. 772608 8. 722396 8. 778879 8. 12896 8. 153517 8. 096181  
11726039\_ 8. 648848 8. 597667 8. 602948 7. 962322 7. 983273 7. 952227  
11726040\_ 5. 259366 5. 029529 5. 067313 4. 40461 4. 582382 4. 46493  
11726041\_ 7. 022467 6. 898793 6. 969957 6. 468657 6. 344566 6. 59833  
11726042\_ 6. 2633 6. 189373 6. 41075 5. 444471 5. 483395 5. 549773  
11726043\_ 8. 869996 8. 776672 8. 836293 8. 77255 8. 773628 8. 79347  
11726044\_ 6. 041926 6. 196908 5. 999155 6. 144978 6. 16931 6. 16994  
11726045\_ 5. 496226 5. 443671 5. 435436 5. 594241 5. 510314 5. 571522  
11726046\_ 4. 842225 4. 814273 4. 594047 4. 993563 4. 989676 4. 895751  
11726047\_ 5. 640244 5. 508502 5. 643713 5. 495164 5. 436971 5. 382655  
11726048\_ 6. 126438 6. 267213 6. 118137 6. 141032 6. 141032 6. 045424  
11726049\_ 4. 556251 4. 551828 4. 655062 4. 134306 4. 145178 3. 953828  
11726050\_ 8. 984309 8. 860079 8. 901367 9. 083607 9. 147616 9. 150294  
11726051\_ 2. 68534 2. 7336 2. 811409 2. 656202 2. 69012 2. 645484  
11726052\_ 9. 776766 9. 780936 9. 791384 9. 515033 9. 46764 9. 475538  
11726053\_ 8. 663196 8. 673124 8. 65401 8. 696351 8. 651262 8. 725065  
11726054\_ 2. 851388 3. 182231 2. 850329 2. 910911 2. 927562 2. 751336  
11726055\_ 5. 073036 4. 947939 4. 949111 5. 164257 5. 395914 5. 097837  
11726056\_ 9. 030021 8. 987257 8. 995818 8. 958576 8. 977517 8. 987257  
11726057\_ 5. 689026 5. 722736 5. 625825 5. 847099 5. 7688 5. 943472  
11726058\_ 6. 424597 6. 501357 6. 511608 6. 123894 5. 935517 5. 939497  
11726059\_ 7. 040514 7. 004667 7. 199527 6. 574107 6. 692099 6. 637933  
11726060\_ 2. 821682 2. 801361 2. 771673 2. 944135 2. 727893 2. 634151  
11726061\_ 4. 077035 4. 574924 4. 217475 4. 463056 4. 347179 4. 470714  
11726062\_ 4. 165167 4. 160979 3. 996794 4. 203887 4. 323442 4. 159692  
11726063\_ 3. 539988 3. 198608 3. 401877 3. 350516 3. 531763 3. 444448

11726064\_ 8. 062975 8. 028116 8. 074242 7. 930228 8. 005708 8. 03618  
11726065\_ 7. 755593 7. 734482 7. 746623 8. 081475 8. 024981 8. 027523  
11726066\_ 7. 962873 7. 859756 7. 932446 8. 221262 8. 198775 8. 135847  
11726067\_ 6. 231113 6. 295518 6. 251344 6. 022658 6. 183283 5. 934703  
11726068\_ 5. 679218 5. 518209 5. 890298 5. 487017 5. 593034 5. 156082  
11726069\_ 6. 660856 6. 655758 6. 617862 6. 717452 6. 788331 6. 792183  
11726070\_ 5. 681112 5. 616512 5. 690616 5. 694131 5. 697988 5. 741591  
11726071\_ 7. 532223 7. 421482 7. 48404 7. 86209 7. 801033 7. 78113  
11726072\_ 8. 276101 8. 090194 8. 208921 8. 506751 8. 477034 8. 361191  
11726073\_ 3. 677805 3. 697764 3. 555126 3. 798863 3. 797099 3. 671605  
11726074\_ 6. 224556 6. 20587 6. 20587 6. 287652 6. 28098 6. 350881  
11726075\_ 8. 470409 8. 472042 8. 465814 8. 32774 8. 307654 8. 332554  
11726076\_ 8. 983929 8. 985658 9. 059396 8. 897314 8. 908878 8. 956781  
11726077\_ 8. 68145 8. 65564 8. 753797 8. 891981 8. 872583 8. 833928  
11726078\_ 2. 936781 3. 159543 3. 304399 3. 201495 3. 164261 3. 252539  
11726079\_ 2. 552639 2. 760258 2. 683759 2. 762337 2. 769661 2. 785032  
11726080\_ 3. 489578 3. 401783 3. 490901 3. 59282 3. 528306 3. 402993  
11726081\_ 4. 063771 4. 018001 4. 105116 3. 646122 3. 603777 3. 580143  
11726082\_ 6. 978978 6. 958879 7. 079705 6. 362129 6. 306594 6. 357882  
11726083\_ 6. 638692 6. 689232 6. 756355 6. 929424 6. 837495 6. 868221  
11726084\_ 6. 792961 6. 700371 6. 890037 7. 060644 7. 125793 7. 102756  
11726085\_ 5. 647597 5. 662251 5. 718077 5. 954081 5. 935999 5. 903092  
11726086\_ 7. 658176 7. 598384 7. 602472 7. 802784 7. 650549 7. 715356  
11726087\_ 5. 311749 5. 130488 5. 128881 4. 736759 4. 647601 4. 700538  
11726088\_ 4. 190275 4. 158622 4. 059221 4. 131756 4. 122207 4. 158622  
11726089\_ 7. 579491 7. 599022 7. 547385 7. 299162 7. 348393 7. 341155  
11726090\_ 6. 792272 6. 726632 6. 684874 6. 756914 6. 843114 6. 845651  
11726091\_ 7. 006378 7. 060868 7. 011949 6. 873154 6. 837185 6. 922672  
11726092\_ 5. 942283 6. 081479 5. 820052 6. 105292 5. 957763 5. 969124  
11726093\_ 5. 502541 5. 59182 5. 449568 5. 583848 5. 645755 5. 623925  
11726094\_ 5. 86179 5. 841177 5. 752548 5. 760441 5. 794286 5. 832504  
11726095\_ 7. 591971 7. 43987 7. 502449 7. 55228 7. 562019 7. 583794  
11726096\_ 7. 424409 7. 327415 7. 415063 7. 392108 7. 409694 7. 526695  
11726097\_ 6. 864942 6. 792424 6. 858649 5. 86421 5. 932397 5. 830239  
11726098\_ 6. 816294 6. 950255 7. 024197 6. 952241 6. 836756 6. 805142  
11726099\_ 5. 315594 5. 289393 5. 316813 5. 39748 5. 465263 5. 465263  
11726100\_ 7. 308294 7. 385307 7. 334696 7. 400837 7. 371916 7. 358148  
11726101\_ 5. 997452 6. 05218 5. 885529 5. 938514 6. 000972 6. 048916  
11726102\_ 7. 579907 7. 656483 7. 539726 8. 073798 8. 094273 8. 016165  
11726103\_ 7. 590512 7. 482432 7. 544282 7. 516974 7. 550685 7. 678881  
11726104\_ 6. 465136 6. 412751 6. 421481 7. 192714 7. 032619 7. 04833  
11726105\_ 7. 884303 7. 884962 7. 928488 8. 543476 8. 525986 8. 530984  
11726106\_ 6. 427102 6. 376555 6. 445622 6. 472912 6. 468557 6. 557211  
11726107\_ 5. 580824 5. 625227 5. 494281 5. 584084 5. 53686 5. 604548  
11726108\_ 4. 810993 4. 963534 5. 025603 4. 775424 4. 877093 4. 916291  
11726109\_ 4. 447133 4. 709463 4. 687108 4. 362445 4. 514445 4. 548845  
11726110\_ 5. 826 6. 002748 5. 794286 5. 910773 5. 958886 5. 909081  
11726111\_ 4. 816583 4. 845104 4. 88241 4. 845104 4. 878052 4. 841373  
11726112\_ 5. 504053 5. 309674 5. 518169 5. 321749 5. 236475 5. 297498  
11726113\_ 8. 120665 8. 02234 8. 154871 7. 862336 7. 740861 7. 830069  
11726114\_ 5. 814344 5. 711102 5. 695809 5. 663236 5. 627791 5. 599522

11726115\_ 8. 998981 8. 972008 8. 863002 9. 199385 9. 152395 9. 149599  
11726116\_ 8. 984954 8. 940766 9. 045632 9. 152756 9. 184591 9. 210666  
11726117\_ 9. 023409 8. 977362 8. 981727 9. 109631 9. 066477 9. 061794  
11726118\_ 6. 528565 6. 539397 6. 578635 6. 712409 6. 808005 6. 706474  
11726119\_ 6. 956785 6. 858339 6. 997157 6. 412151 6. 22565 6. 277215  
11726120\_ 5. 720936 5. 487257 5. 48117 4. 996334 4. 873746 5. 009083  
11726121\_ 5. 113657 5. 128728 4. 930507 5. 06508 5. 102928 5. 15159  
11726122\_ 5. 281033 5. 311433 5. 256271 5. 388668 5. 460014 5. 377167  
11726123\_ 5. 344009 5. 409181 5. 336459 5. 280568 5. 344009 5. 370564  
11726124\_ 6. 626837 6. 64342 6. 705901 5. 501361 5. 702606 5. 798544  
11726125\_ 8. 193004 8. 149297 8. 174847 7. 929574 7. 861422 7. 926042  
11726126\_ 7. 746289 7. 801703 7. 727272 6. 980333 7. 081863 6. 935888  
11726127\_ 7. 440434 7. 541605 7. 659376 6. 615517 6. 602597 6. 578539  
11726128\_ 2. 332515 2. 52716 2. 279905 2. 690963 2. 617398 2. 527098  
11726129\_ 3. 795311 4. 034826 4. 141525 4. 057117 4. 122446 4. 132678  
11726130\_ 6. 377847 6. 414642 6. 280867 5. 788616 5. 711856 5. 667156  
11726131\_ 5. 281154 5. 283911 5. 326556 4. 439595 4. 350285 4. 421862  
11726132\_ 3. 925181 3. 989376 3. 82244 3. 872406 3. 987064 3. 879309  
11726133\_ 5. 225811 5. 302445 5. 15244 5. 214461 5. 286393 5. 213117  
11726134\_ 5. 980171 5. 995994 5. 825544 5. 847077 5. 925954 5. 754755  
11726135\_ 5. 76861 5. 765285 5. 785107 5. 954487 5. 843944 5. 943895  
11726136\_ 5. 005726 4. 907696 4. 948604 4. 710849 4. 772779 4. 79287  
11726137\_ 4. 710253 4. 736154 4. 652335 4. 816334 4. 765577 4. 763543  
11726138\_ 5. 562584 5. 547591 5. 734445 5. 48086 5. 38823 5. 547591  
11726139\_ 6. 959944 6. 966852 6. 899285 6. 895938 6. 813717 7. 006644  
11726140\_ 7. 311454 7. 291889 7. 211738 7. 488534 7. 535627 7. 5097  
11726141\_ 9. 192283 9. 184199 9. 138259 8. 545751 8. 492231 8. 521719  
11726142\_ 7. 962552 7. 903832 7. 876599 7. 248542 7. 233102 7. 154593  
11726143\_ 1. 857309 2. 131936 1. 910805 1. 999881 2. 098249 2. 002207  
11726144\_ 6. 389152 6. 478274 6. 495542 6. 564262 6. 497172 6. 544244  
11726145\_ 4. 843313 4. 806817 4. 806817 4. 586966 4. 866323 4. 82709  
11726146\_ 5. 615492 5. 682351 5. 606173 5. 734517 5. 800155 5. 709017  
11726147\_ 5. 36906 5. 149545 5. 251508 5. 632456 5. 820052 5. 715518  
11726148\_ 7. 056936 6. 966473 7. 036398 7. 229445 7. 253169 7. 338793  
11726149\_ 7. 568497 7. 500412 7. 595197 7. 912205 7. 943992 7. 933931  
11726150\_ 7. 988655 7. 89398 7. 884568 8. 403019 8. 388156 8. 336889  
11726151\_ 8. 249309 8. 098541 8. 173633 8. 518072 8. 531664 8. 540432  
11726152\_ 6. 975935 6. 950255 7. 119204 6. 84077 6. 862059 7. 031673  
11726153\_ 2. 43179 2. 565419 2. 312494 2. 258325 2. 284836 2. 471487  
11726154\_ 3. 290083 3. 311434 3. 415202 3. 42844 3. 50256 3. 444325  
11726155\_ 3. 10519 3. 130223 3. 115199 3. 10519 3. 02828 3. 10519  
11726156\_ 7. 70832 7. 671033 7. 730153 8. 11149 8. 089102 8. 152743  
11726157\_ 5. 433511 5. 345598 5. 550835 5. 451672 5. 367789 5. 502342  
11726158\_ 7. 517105 7. 464738 7. 445162 7. 908181 7. 799269 7. 761279  
11726159\_ 5. 990858 5. 949379 6. 100184 5. 44745 5. 680759 5. 502342  
11726160\_ 2. 78502 2. 566117 2. 605717 2. 711883 2. 718322 2. 67196  
11726161\_ 5. 189627 5. 218723 5. 090571 5. 256838 5. 160873 5. 226046  
11726162\_ 5. 090626 5. 191437 5. 018421 5. 147527 5. 027968 5. 078843  
11726163\_ 4. 495137 4. 40461 4. 452457 4. 635146 4. 445537 4. 526468  
11726164\_ 3. 212165 3. 14375 3. 219606 2. 904373 2. 937712 3. 104671  
11726165\_ 7. 144754 7. 106988 7. 286673 6. 665488 6. 733169 6. 801829



11726166\_ 8. 853363 8. 683472 8. 772375 8. 519847 8. 507515 8. 506802  
11726167\_ 2. 820133 2. 559386 2. 77168 2. 347864 2. 779373 2. 726201  
11726168\_ 2. 528472 2. 431595 2. 624292 2. 527343 2. 718322 2. 336438  
11726169\_ 4. 874054 4. 909485 4. 720335 4. 8306 4. 979869 4. 966178  
11726170\_ 5. 579243 5. 548837 5. 440746 5. 685385 5. 592764 5. 654773  
11726171\_ 3. 948243 3. 822818 3. 971698 4. 142274 4. 131273 3. 776578  
11726172\_ 4. 899121 5. 011189 4. 892232 5. 170828 5. 051807 4. 906107  
11726173\_ 7. 234419 7. 372334 7. 300688 7. 457354 7. 433403 7. 392752  
11726174\_ 5. 492945 5. 495487 5. 569466 5. 32233 5. 237676 5. 323865  
11726175\_ 2. 718322 2. 740651 2. 672682 2. 83198 3. 216619 3. 061205  
11726176\_ 8. 889494 8. 881546 8. 813091 8. 947107 8. 945742 8. 918352  
11726177\_ 4. 472271 4. 3961 4. 394708 4. 402205 4. 258038 4. 336779  
11726178\_ 5. 702193 5. 700572 5. 894697 6. 290734 6. 300496 6. 368288  
11726179\_ 5. 309578 5. 050268 5. 107312 5. 419131 5. 421058 5. 396697  
11726180\_ 4. 9226 5. 16035 4. 821221 5. 03524 5. 094597 5. 193289  
11726181\_ 7. 459185 7. 365521 7. 521463 7. 542266 7. 570391 7. 581057  
11726182\_ 4. 806853 5. 01266 4. 845035 4. 833546 4. 885416 4. 841832  
11726183\_ 4. 694653 4. 905029 4. 653939 4. 89283 4. 665537 4. 659889  
11726184\_ 4. 001405 4. 123405 4. 180681 4. 106517 4. 255224 4. 190711  
11726185\_ 6. 7121 6. 589114 6. 697184 6. 941783 6. 963298 6. 877664  
11726186\_ 7. 585946 7. 565893 7. 545031 7. 777094 7. 726118 7. 810081  
11726187\_ 6. 735749 6. 810137 6. 71382 6. 819989 6. 843087 6. 892146  
11726188\_ 3. 721477 3. 802357 3. 850246 4. 40461 4. 716287 4. 511827  
11726189\_ 9. 787379 9. 729655 9. 731576 9. 930653 9. 984891 9. 941364  
11726190\_ 8. 11024 8. 059208 8. 05094 7. 77312 7. 675091 7. 699258  
11726191\_ 8. 825297 8. 784971 8. 830149 7. 929002 7. 897815 7. 931334  
11726192\_ 9. 483893 9. 463654 9. 414377 9. 852587 9. 876049 9. 841281  
11726193\_ 8. 401198 8. 413936 8. 45291 7. 591268 7. 552532 7. 566351  
11726194\_ 6. 745124 6. 726376 6. 719955 6. 816445 6. 761447 6. 80962  
11726195\_ 6. 895943 6. 848498 6. 847622 7. 01274 7. 038732 7. 063374  
11726196\_ 4. 763543 5. 007275 4. 853185 5. 029529 4. 966682 5. 044544  
11726197\_ 4. 454226 4. 562026 4. 456685 4. 597764 4. 555166 4. 555166  
11726198\_ 3. 976587 4. 230413 3. 967026 3. 978997 4. 109866 3. 901281  
11726199\_ 7. 928213 7. 868277 7. 89296 7. 887225 7. 85327 7. 850383  
11726200\_ 4. 895545 5. 029529 4. 781761 5. 057583 4. 904159 5. 069385  
11726201\_ 4. 552685 4. 643717 4. 355139 5. 126734 5. 095712 5. 127307  
11726202\_ 3. 249924 3. 170815 3. 371152 3. 353168 3. 316119 3. 284502  
11726203\_ 2. 077662 2. 302313 2. 306901 2. 079884 2. 25483 2. 219684  
11726204\_ 7. 058876 7. 120756 7. 131473 7. 033678 7. 002001 6. 978678  
11726205\_ 6. 326607 6. 126918 6. 258754 5. 687447 5. 67634 5. 905574  
11726206\_ 6. 71875 6. 566599 6. 563802 6. 364329 6. 448378 6. 408642  
11726207\_ 4. 849399 5. 112161 5. 009172 5. 076536 5. 116288 4. 842064  
11726208\_ 5. 332831 5. 48703 5. 357557 4. 988467 5. 236932 5. 107152  
11726209\_ 3. 691104 4. 022409 3. 869418 3. 772446 3. 954005 3. 648803  
11726210\_ 6. 249776 6. 386333 6. 249776 6. 216924 6. 160903 6. 182805  
11726211\_ 5. 546107 5. 601367 5. 523677 5. 532702 5. 501247 5. 563771  
11726212\_ 2. 878177 2. 851865 2. 576224 2. 782586 2. 718753 2. 721866  
11726213\_ 5. 285218 5. 142521 5. 147357 4. 991906 4. 994133 5. 072955  
11726214\_ 4. 97632 4. 927219 4. 772366 5. 274323 5. 274323 5. 346827  
11726215\_ 6. 172449 6. 020619 6. 072384 5. 978596 5. 909725 6. 048791  
11726216\_ 8. 506933 8. 36157 8. 441361 8. 445591 8. 429835 8. 436381

11726217\_ 7. 434587 7. 324886 7. 402007 5. 825629 5. 910058 5. 943117  
11726218\_ 7. 798347 7. 684375 7. 739306 5. 469484 5. 593284 5. 626951  
11726219\_ 6. 332801 6. 306303 6. 356325 6. 358525 6. 431936 6. 342819  
11726220\_ 5. 336076 5. 145793 5. 096522 5. 029529 4. 982555 5. 191448  
11726221\_ 4. 483485 4. 58716 4. 284644 4. 547055 4. 528835 4. 488887  
11726222\_ 4. 434357 4. 172936 4. 382723 4. 301788 4. 442309 4. 445225  
11726223\_ 4. 270767 4. 345145 4. 051905 4. 064859 4. 278268 4. 191225  
11726224\_ 8. 781342 8. 718446 8. 810047 9. 129655 9. 192202 9. 125292  
11726225\_ 4. 542463 4. 740918 4. 411145 4. 429229 4. 521936 4. 523499  
11726226\_ 4. 47146 4. 411749 4. 345391 4. 481837 4. 364513 4. 612548  
11726227\_ 4. 006317 4. 000825 3. 80416 4. 140813 4. 058953 3. 785495  
11726228\_ 9. 024357 9. 042701 9. 018002 9. 31456 9. 374531 9. 346687  
11726229\_ 4. 515298 4. 493764 4. 552558 4. 52373 4. 661799 4. 782208  
11726230\_ 6. 177998 6. 302891 6. 179956 6. 267733 6. 208799 6. 263567  
11726231\_ 6. 143807 6. 143807 5. 870242 6. 300643 6. 236663 6. 112847  
11726232\_ 7. 141939 7. 16992 7. 107564 7. 121041 7. 121041 7. 054024  
11726233\_ 4. 039487 4. 067703 4. 298213 4. 23938 4. 160139 4. 082023  
11726234\_ 7. 437458 7. 269757 7. 358974 7. 032866 7. 145589 7. 049144  
11726235\_ 2. 898383 3. 150692 3. 206033 3. 05372 2. 958114 3. 141344  
11726236\_ 4. 661349 4. 751247 4. 689145 4. 807494 4. 772583 4. 772583  
11726237\_ 4. 323217 4. 380648 4. 379657 4. 474447 4. 652091 4. 529706  
11726238\_ 6. 180615 6. 420894 6. 230068 6. 295662 6. 330844 6. 294055  
11726239\_ 7. 137809 7. 129774 7. 247489 7. 183075 7. 089528 7. 224476  
11726240\_ 5. 478405 5. 445625 5. 54994 5. 318749 5. 422021 5. 415376  
11726241\_ 2. 841972 2. 681642 2. 758916 2. 755254 2. 854187 2. 752891  
11726242\_ 4. 957738 4. 819792 4. 583655 4. 643717 4. 643717 4. 857392  
11726243\_ 4. 745314 4. 668598 4. 778978 4. 619254 4. 643717 4. 515785  
11726244\_ 5. 219639 4. 821698 5. 032089 4. 086572 4. 009642 4. 388403  
11726245\_ 12. 50949 12. 50335 12. 53485 12. 67259 12. 62344 12. 66443  
11726246\_ 12. 61317 12. 61783 12. 62658 12. 76473 12. 72532 12. 74182  
11726247\_ 5. 850483 5. 828397 5. 837559 6. 605455 6. 62635 6. 682702  
11726248\_ 6. 941433 7. 023113 7. 024808 7. 783687 7. 700419 7. 68078  
11726249\_ 8. 645553 8. 567586 8. 651144 9. 259372 9. 345195 9. 236355  
11726250\_ 5. 46258 5. 681663 5. 589926 5. 68578 5. 784033 5. 670448  
11726251\_ 5. 854318 5. 741247 5. 628923 4. 828467 5. 037944 5. 06877  
11726252\_ 6. 406393 5. 992384 6. 110133 4. 690985 4. 798511 4. 8531  
11726253\_ 7. 32246 7. 442285 7. 382274 7. 471144 7. 580157 7. 545557  
11726254\_ 10. 30172 10. 2687 10. 28849 10. 248 10. 28692 10. 29714  
11726255\_ 10. 05861 9. 965963 10. 06307 10. 03399 10. 0815 10. 06532  
11726256\_ 4. 505646 4. 339249 4. 52373 4. 740051 4. 586737 4. 763543  
11726257\_ 5. 144737 5. 181399 5. 463871 5. 754661 5. 724351 5. 639648  
11726258\_ 4. 931265 5. 046415 4. 964773 5. 328697 5. 407243 5. 255698  
11726259\_ 7. 042756 6. 966563 7. 043021 7. 545079 7. 54044 7. 565977  
11726260\_ 6. 746535 6. 693278 6. 761224 6. 787496 6. 805599 6. 819234  
11726261\_ 7. 214954 7. 076264 7. 142907 7. 165972 7. 121815 7. 211029  
11726262\_ 8. 228555 8. 14507 8. 220432 8. 366257 8. 420227 8. 430925  
11726263\_ 8. 353125 8. 245933 8. 258124 8. 294558 8. 328196 8. 320233  
11726264\_ 6. 166724 5. 973155 5. 985886 5. 729631 5. 848459 5. 859213  
11726265\_ 7. 683014 7. 664831 7. 590878 8. 247113 8. 150146 8. 139936  
11726266\_ 9. 459193 9. 396172 9. 437487 9. 414612 9. 424389 9. 417334  
11726267\_ 7. 020462 7. 007441 7. 069538 6. 422081 6. 584888 6. 557068

11726268\_ 7. 631174 7. 597395 7. 589926 7. 339534 7. 233289 7. 285626  
11726269\_ 8. 831062 8. 739201 8. 810451 8. 551521 8. 605721 8. 608667  
11726270\_ 8. 594021 8. 567422 8. 510276 8. 043456 8. 049474 8. 075135  
11726271\_ 9. 530722 9. 510804 9. 516117 9. 523188 9. 542197 9. 515033  
11726272\_ 10. 06972 10. 03529 10. 06277 10. 02404 10. 05585 10. 05866  
11726273\_ 2. 005124 1. 902614 1. 897076 1. 869315 1. 999586 2. 004501  
11726274\_ 2. 953094 2. 815635 2. 820274 3. 07303 3. 006943 2. 987667  
11726275\_ 9. 121766 9. 085344 9. 133341 8. 924949 8. 947296 8. 965405  
11726276\_ 5. 614563 5. 575501 5. 498252 5. 813783 6. 131838 5. 969512  
11726277\_ 5. 587 5. 500485 5. 562031 5. 652925 5. 553388 5. 392842  
11726278\_ 5. 226316 5. 039184 5. 237835 5. 227326 5. 197109 5. 196179  
11726279\_ 11. 69144 11. 65412 11. 70584 11. 83192 11. 88423 11. 86828  
11726280\_ 6. 424233 6. 395092 6. 426563 6. 570489 6. 712305 6. 622564  
11726281\_ 7. 039747 6. 993227 6. 935951 7. 174126 7. 194036 7. 295538  
11726282\_ 4. 049617 4. 067002 4. 030322 4. 881079 4. 890539 5. 072721  
11726283\_ 1. 969363 1. 965262 2. 11031 1. 828416 1. 969363 2. 159312  
11726284\_ 6. 940509 6. 93424 6. 900982 6. 941483 6. 967295 6. 989297  
11726285\_ 7. 360017 7. 265646 7. 217732 7. 255518 7. 371365 7. 33569  
11726286\_ 9. 425215 9. 320414 9. 437356 9. 65731 9. 635804 9. 714726  
11726287\_ 8. 784673 8. 761787 8. 804241 9. 094369 9. 076294 9. 057861  
11726288\_ 7. 854626 7. 812785 7. 778044 6. 779107 6. 611391 6. 660991  
11726289\_ 8. 094491 7. 990243 8. 100824 6. 89315 6. 851751 6. 856409  
11726290\_ 7. 298711 7. 307898 7. 374996 7. 055594 7. 003426 7. 109065  
11726291\_ 6. 93907 6. 799866 6. 875314 5. 653794 5. 432881 5. 686164  
11726292\_ 7. 197987 7. 18217 7. 180347 6. 79781 6. 769542 6. 768353  
11726293\_ 7. 162061 7. 030066 7. 152277 6. 850646 6. 782764 6. 804883  
11726294\_ 4. 3492 4. 699339 4. 39866 4. 844284 4. 742889 4. 919912  
11726295\_ 6. 898793 6. 798889 6. 803245 6. 688764 6. 674002 6. 689543  
11726296\_ 6. 233455 6. 315841 6. 163307 6. 244012 6. 379625 6. 285185  
11726297\_ 5. 181197 5. 448421 5. 332238 5. 533126 5. 451013 5. 268279  
11726298\_ 8. 137215 8. 057712 8. 060207 7. 825457 7. 86209 7. 767634  
11726299\_ 8. 605189 8. 620202 8. 658675 8. 283065 8. 356995 8. 356797  
11726300\_ 6. 44326 6. 433649 6. 489566 6. 720411 6. 622078 6. 743421  
11726301\_ 7. 197502 7. 078542 7. 13189 6. 907764 6. 850669 6. 910162  
11726302\_ 7. 948338 7. 889313 7. 966606 8. 767285 8. 783528 8. 73817  
11726303\_ 3. 206641 3. 183678 3. 17292 3. 280993 3. 17292 3. 197155  
11726304\_ 2. 970943 3. 062229 3. 129244 2. 786132 3. 003958 2. 950093  
11726305\_ 8. 009569 7. 95712 8. 061209 7. 707365 7. 771045 7. 725776  
11726306\_ 5. 46544 5. 536827 5. 325956 5. 776712 5. 622692 5. 725988  
11726307\_ 7. 335283 7. 347858 7. 343853 7. 088679 7. 0117 7. 02737  
11726308\_ 8. 180838 8. 248695 8. 214686 7. 987809 7. 916702 7. 942989  
11726309\_ 4. 859551 4. 525728 4. 731304 4. 406598 4. 417958 4. 538924  
11726310\_ 5. 980747 5. 776533 5. 803575 5. 768053 5. 750683 5. 738639  
11726311\_ 3. 02894 3. 06714 2. 930123 3. 109025 3. 151982 3. 572517  
11726312\_ 5. 926672 5. 747216 5. 82767 5. 715751 5. 782772 5. 730678  
11726313\_ 6. 565184 6. 198808 6. 487209 6. 397031 6. 516536 6. 510003  
11726314\_ 6. 764423 6. 722207 6. 843131 6. 916849 6. 964944 6. 86158  
11726315\_ 7. 177118 6. 963994 7. 094199 6. 850738 6. 878197 6. 892288  
11726316\_ 2. 258943 2. 361778 2. 634064 2. 266063 2. 053708 2. 17469  
11726317\_ 5. 678126 5. 987612 5. 919167 5. 879573 5. 760259 5. 878083  
11726318\_ 12. 76581 12. 72694 12. 76003 12. 72477 12. 74191 12. 72238

11726319\_ 8. 421384 8. 420292 8. 456191 8. 010107 7. 979159 7. 987414  
11726320\_ 7. 071714 6. 994578 7. 0433 6. 909029 6. 806149 6. 923701  
11726321\_ 8. 682345 8. 74124 8. 672697 8. 566906 8. 491096 8. 408225  
11726322\_ 6. 059603 6. 014331 6. 152258 6. 236096 6. 269513 6. 325865  
11726323\_ 7. 645532 7. 60746 7. 672562 7. 635864 7. 625672 7. 664049  
11726324\_ 9. 252342 9. 192073 9. 268522 9. 263649 9. 307846 9. 317769  
11726325\_ 10. 25424 10. 24365 10. 28858 10. 14476 10. 11088 10. 15418  
11726326\_ 8. 322816 8. 27095 8. 274533 7. 839503 7. 926761 7. 925791  
11726327\_ 7. 9571 7. 85395 7. 946615 7. 588677 7. 623356 7. 648387  
11726328\_ 6. 452815 6. 261268 6. 160999 5. 473293 5. 394387 5. 558677  
11726329\_ 5. 653731 5. 688984 5. 829255 5. 019441 4. 858401 5. 139348  
11726330\_ 3. 46027 3. 744764 3. 56688 3. 57792 3. 398236 3. 486073  
11726331\_ 9. 85369 9. 905105 9. 859285 9. 776092 9. 709978 9. 748464  
11726332\_ 3. 895319 3. 716126 3. 801199 4. 031084 4. 194962 4. 106208  
11726333\_ 7. 623696 7. 511661 7. 614354 7. 915895 7. 856454 7. 94052  
11726334\_ 7. 632005 7. 574748 7. 650828 8. 040107 8. 069419 8. 115046  
11726335\_ 8. 470141 8. 362751 8. 461807 9. 09922 9. 112932 9. 115643  
11726336\_ 4. 694093 4. 624299 4. 824195 5. 284683 5. 2222 5. 465148  
11726337\_ 2. 563613 2. 384886 2. 568158 2. 499413 2. 336235 2. 449747  
11726338\_ 4. 556836 4. 239345 4. 407615 4. 388175 4. 667225 4. 62533  
11726339\_ 11. 10074 11. 07421 11. 08998 11. 02534 11. 05582 11. 03103  
11726340\_ 6. 325898 6. 300364 6. 373227 6. 279313 6. 428851 6. 398856  
11726341\_ 4. 120134 4. 116627 4. 293681 4. 251461 4. 145031 4. 233007  
11726342\_ 8. 313431 8. 338096 8. 324916 7. 963966 7. 908865 7. 87413  
11726343\_ 8. 096213 8. 120648 8. 207728 7. 814255 7. 905765 7. 783312  
11726344\_ 5. 607887 5. 763634 5. 769774 5. 781535 5. 772541 5. 77685  
11726345\_ 5. 285902 5. 468715 5. 381003 5. 498679 5. 554592 5. 42094  
11726346\_ 6. 18022 6. 206446 6. 227919 6. 125854 6. 16087 6. 197883  
11726347\_ 5. 184328 4. 953811 5. 182546 4. 959571 4. 889936 5. 010336  
11726348\_ 6. 443791 6. 333028 6. 475676 6. 523265 6. 50653 6. 523265  
11726349\_ 4. 901877 4. 848065 4. 779614 4. 993171 4. 984669 4. 973244  
11726350\_ 6. 324009 6. 197983 6. 138232 6. 383618 6. 541674 6. 352101  
11726351\_ 6. 909964 6. 749655 6. 860952 6. 916017 6. 933847 6. 950955  
11726352\_ 5. 304186 5. 297321 5. 20665 5. 097223 5. 198443 5. 094239  
11726353\_ 5. 622261 5. 669264 5. 573232 5. 504984 5. 627314 5. 608036  
11726354\_ 3. 737666 3. 737666 3. 763014 3. 906171 4. 075844 3. 934649  
11726355\_ 5. 190584 4. 9694 5. 026079 5. 064375 5. 261985 5. 345878  
11726356\_ 2. 899697 3. 11951 2. 794122 3. 568202 3. 315925 3. 575458  
11726357\_ 8. 471419 8. 424924 8. 457635 8. 310394 8. 319175 8. 362841  
11726358\_ 7. 314085 7. 211973 7. 304274 7. 092246 7. 22728 7. 114254  
11726359\_ 8. 475661 8. 451837 8. 460019 8. 299007 8. 294588 8. 274578  
11726360\_ 4. 202276 4. 3928 4. 156802 4. 048062 4. 183843 4. 008608  
11726361\_ 7. 291549 7. 342691 7. 456162 7. 444337 7. 459501 7. 396084  
11726362\_ 5. 612155 5. 704233 5. 644307 6. 314404 6. 296718 6. 412158  
11726363\_ 3. 771045 3. 592673 3. 449958 3. 567845 3. 667158 3. 699409  
11726364\_ 7. 798554 7. 715356 7. 780533 7. 291509 7. 293094 7. 284553  
11726365\_ 8. 603398 8. 530568 8. 546191 8. 559509 8. 536552 8. 558856  
11726366\_ 7. 091867 7. 152428 7. 100393 7. 055267 6. 985523 7. 030077  
11726367\_ 6. 501787 6. 509334 6. 570668 6. 474823 6. 604157 6. 547736  
11726368\_ 6. 539589 6. 515621 6. 557068 6. 375717 6. 379056 6. 443004  
11726369\_ 8. 774736 8. 739201 8. 801634 8. 231767 8. 272995 8. 281814

11726370\_ 5. 93817 5. 697161 5. 719283 5. 347265 5. 419684 5. 530281  
11726371\_ 8. 432071 8. 275342 8. 366483 8. 658194 8. 65342 8. 622471  
11726372\_ 5. 939065 5. 911546 5. 976141 6. 010718 5. 950774 5. 946303  
11726373\_ 6. 846311 6. 798556 6. 975382 7. 257805 7. 252953 7. 229755  
11726374\_ 1. 804115 1. 79411 1. 804392 1. 908559 1. 985952 1. 898324  
11726375\_ 2. 259265 2. 179858 2. 459999 2. 361417 2. 41382 2. 275188  
11726376\_ 7. 886682 7. 860828 7. 909818 8. 096472 8. 069364 8. 101975  
11726377\_ 6. 17981 6. 231391 6. 202241 6. 51529 6. 584888 6. 512105  
11726378\_ 7. 098844 7. 022874 7. 050692 7. 576764 7. 617535 7. 714422  
11726379\_ 7. 1782 7. 066036 7. 110244 7. 680311 7. 660961 7. 740061  
11726380\_ 5. 919399 5. 732315 5. 828566 6. 159771 6. 34864 6. 423211  
11726381\_ 6. 444325 6. 500261 6. 572429 6. 483775 6. 267801 6. 425873  
11726382\_ 5. 407913 5. 380251 5. 342731 5. 554414 5. 515895 5. 602316  
11726383\_ 2. 186832 2. 064456 2. 011392 2. 140726 2. 192952 2. 213383  
11726384\_ 3. 078622 3. 021001 3. 098039 3. 253196 3. 304391 3. 252186  
11726385\_ 7. 657799 7. 715356 7. 622621 8. 273772 8. 178994 8. 128398  
11726386\_ 7. 410467 7. 271892 7. 455626 6. 736508 6. 78563 6. 861504  
11726387\_ 7. 765021 7. 811019 7. 867981 7. 16292 7. 172268 7. 238357  
11726388\_ 5. 317448 5. 513249 5. 124998 5. 333891 5. 390918 5. 295847  
11726389\_ 4. 254322 4. 547796 4. 472009 4. 267385 4. 233202 4. 115716  
11726390\_ 7. 800736 7. 779267 7. 751495 7. 828728 7. 81054 7. 86893  
11726391\_ 6. 557938 6. 557069 6. 566985 6. 562636 6. 557068 6. 671208  
11726392\_ 6. 006475 5. 889857 5. 973344 5. 055953 4. 834605 4. 968301  
11726393\_ 6. 748766 6. 661981 6. 68649 6. 691688 6. 747408 6. 710826  
11726394\_ 6. 490706 6. 377847 6. 663295 5. 783415 5. 845365 5. 969512  
11726395\_ 6. 225513 6. 321838 6. 310441 5. 193262 5. 149545 5. 417696  
11726396\_ 2. 541753 2. 669027 2. 810856 2. 703943 2. 94383 2. 647292  
11726397\_ 4. 275543 4. 201443 4. 135346 4. 217181 4. 332633 4. 196049  
11726398\_ 4. 027977 4. 031229 4. 022947 4. 020261 4. 094238 4. 071738  
11726399\_ 5. 074175 5. 099198 5. 018672 5. 117716 5. 175705 5. 196201  
11726400\_ 6. 927792 6. 862575 6. 854832 6. 746653 6. 703934 6. 649388  
11726401\_ 4. 748121 4. 767831 4. 964355 4. 381027 4. 405547 4. 557578  
11726402\_ 6. 921156 6. 762604 6. 854851 6. 031835 6. 29864 6. 159771  
11726403\_ 5. 332553 5. 269619 5. 218873 5. 490019 5. 446924 5. 473484  
11726404\_ 7. 519688 7. 509636 7. 455326 7. 491635 7. 510129 7. 481452  
11726405\_ 4. 560116 4. 584839 4. 713952 4. 673694 4. 553656 4. 707734  
11726406\_ 3. 606313 3. 529556 3. 774784 3. 595583 3. 628227 3. 699028  
11726407\_ 6. 938567 6. 804559 6. 870519 6. 575258 6. 54733 6. 580386  
11726408\_ 5. 434493 5. 201772 5. 341674 5. 322097 5. 344403 5. 310656  
11726409\_ 7. 318642 7. 328609 7. 456799 7. 211966 7. 136556 7. 219556  
11726410\_ 6. 739998 6. 661768 6. 773818 6. 844125 6. 701708 6. 782005  
11726411\_ 6. 632039 6. 656289 6. 629707 6. 661998 6. 677 6. 732568  
11726412\_ 5. 681594 5. 754856 5. 703654 5. 681594 5. 644366 5. 683711  
11726413\_ 6. 366501 6. 23142 6. 200934 6. 009381 6. 065266 6. 121933  
11726414\_ 4. 331742 4. 268881 4. 316823 4. 363061 4. 523868 4. 506473  
11726415\_ 4. 936451 4. 987328 5. 431615 4. 459939 4. 52373 4. 813337  
11726416\_ 6. 926882 6. 957881 6. 997793 7. 302142 7. 247097 7. 254828  
11726417\_ 7. 296866 7. 269322 7. 304481 7. 515129 7. 427419 7. 522777  
11726418\_ 8. 737929 8. 718882 8. 752272 8. 691726 8. 60136 8. 729339  
11726419\_ 4. 40798 4. 446466 4. 289094 4. 448947 4. 689493 4. 381212  
11726420\_ 2. 644477 2. 683571 2. 361778 2. 960249 3. 094401 2. 746077

11726421\_ 4. 373787 4. 212411 4. 313001 4. 266283 4. 293452 4. 342924  
11726422\_ 6. 293095 6. 297866 6. 24449 6. 42974 6. 39692 6. 496908  
11726423\_ 4. 108592 4. 242383 3. 979822 4. 153234 4. 303133 4. 403667  
11726424\_ 2. 235709 2. 478811 2. 541883 2. 541167 2. 494667 2. 381838  
11726425\_ 4. 108365 3. 870289 3. 980046 4. 050049 3. 918926 3. 796868  
11726426\_ 8. 526964 8. 431242 8. 572836 8. 157078 8. 142092 8. 175787  
11726427\_ 4. 619834 4. 635901 4. 881179 4. 592097 4. 517266 4. 729595  
11726428\_ 9. 329785 9. 305377 9. 335884 9. 002689 8. 968147 8. 912433  
11726429\_ 3. 62365 3. 668228 3. 627296 3. 72431 3. 712189 3. 718672  
11726430\_ 4. 993393 4. 953919 5. 033812 4. 889717 4. 918527 4. 859519  
11726431\_ 7. 89383 7. 900837 7. 938046 7. 547192 7. 517153 7. 597339  
11726432\_ 6. 290588 6. 374979 6. 198184 6. 591987 6. 583527 6. 571954  
11726433\_ 8. 945426 8. 917854 9. 010625 8. 170444 8. 160326 8. 123949  
11726434\_ 2. 405502 2. 302595 2. 532437 2. 553814 2. 573439 2. 428554  
11726435\_ 6. 28062 6. 281942 6. 242469 6. 177603 6. 332397 6. 26238  
11726436\_ 6. 602418 6. 328105 6. 493745 6. 604798 6. 703979 6. 681649  
11726437\_ 6. 514435 6. 559367 6. 548089 6. 891538 6. 954203 6. 964703  
11726438\_ 8. 008972 7. 848512 8. 003092 7. 732267 7. 736526 7. 696312  
11726439\_ 6. 843053 6. 862059 6. 881284 6. 857228 6. 83379 6. 792183  
11726440\_ 6. 498043 6. 412133 6. 449551 6. 34395 6. 444412 6. 375876  
11726441\_ 6. 876027 7. 009624 6. 841293 7. 636489 7. 581163 7. 694613  
11726442\_ 7. 645237 7. 659233 7. 470582 7. 659233 7. 628557 7. 704801  
11726443\_ 8. 522663 8. 412528 8. 480534 8. 606958 8. 601794 8. 626215  
11726444\_ 6. 238826 6. 116221 6. 180475 6. 04327 5. 992304 5. 965311  
11726445\_ 3. 647787 3. 859875 3. 713767 3. 641417 3. 461133 3. 577389  
11726446\_ 5. 355354 5. 293011 5. 246937 5. 448134 5. 398366 5. 555  
11726447\_ 5. 78464 5. 911163 5. 950884 5. 97785 5. 889764 5. 966875  
11726448\_ 5. 793332 5. 707547 5. 700737 5. 561301 5. 435172 5. 628802  
11726449\_ 7. 339667 7. 258506 7. 347452 7. 21979 7. 230373 7. 164857  
11726450\_ 5. 727853 5. 723141 5. 595977 5. 68414 5. 834565 5. 782368  
11726451\_ 5. 544167 5. 522859 5. 683169 5. 63134 5. 84188 5. 751842  
11726452\_ 4. 387269 4. 511761 4. 677434 4. 664167 4. 461245 4. 540333  
11726453\_ 6. 961618 6. 974506 6. 957211 7. 124899 7. 100149 7. 045698  
11726454\_ 6. 043953 5. 894415 6. 170935 5. 647354 5. 482433 5. 495528  
11726455\_ 6. 642573 6. 441084 6. 417348 5. 195963 5. 429009 5. 526696  
11726456\_ 2. 24689 2. 002089 2. 158793 2. 039848 2. 039848 2. 131589  
11726457\_ 6. 872197 6. 742381 6. 957219 6. 263245 6. 342644 6. 256707  
11726458\_ 8. 455403 8. 401327 8. 404351 7. 874235 7. 874889 7. 840097  
11726459\_ 6. 71875 6. 521637 6. 568047 6. 820242 6. 993477 7. 01767  
11726460\_ 4. 365624 4. 386464 4. 53751 4. 627966 4. 581595 4. 521663  
11726461\_ 7. 610787 7. 590502 7. 622813 7. 912996 7. 932883 7. 926118  
11726462\_ 8. 083983 8. 098787 8. 068268 7. 662309 7. 641113 7. 703805  
11726463\_ 6. 369119 6. 310912 6. 238049 6. 414384 6. 255582 6. 155222  
11726464\_ 6. 833405 6. 837039 6. 91037 7. 189025 7. 230373 7. 152127  
11726465\_ 4. 119013 4. 18472 4. 406356 4. 40461 4. 31233 4. 540308  
11726466\_ 6. 837273 7. 126498 6. 909872 6. 849375 6. 944047 6. 870605  
11726467\_ 6. 236739 6. 284897 6. 2459 6. 212433 6. 416971 6. 186918  
11726468\_ 7. 035828 7. 122329 7. 074883 7. 096707 7. 139374 7. 208251  
11726469\_ 7. 222377 6. 952897 7. 134442 7. 718607 7. 765895 7. 813615  
11726470\_ 7. 756511 7. 695982 7. 726631 7. 740721 7. 71979 7. 756371  
11726471\_ 4. 692479 4. 749769 4. 784539 4. 7179 4. 499741 4. 75137

11726472\_ 7. 41264 7. 441457 7. 493743 7. 608221 7. 54002 7. 593576  
11726473\_ 5. 448423 5. 481366 5. 280736 5. 420803 5. 324047 5. 371292  
11726474\_ 6. 519777 6. 624005 6. 713478 6. 642765 6. 715735 6. 692162  
11726475\_ 6. 412099 6. 466068 6. 358378 6. 541338 6. 537258 6. 457759  
11726476\_ 3. 249924 3. 149532 3. 095937 3. 374463 3. 21279 3. 376604  
11726477\_ 4. 347179 4. 36696 4. 370337 4. 274486 4. 336696 4. 333305  
11726478\_ 3. 706928 3. 443492 3. 542574 3. 555702 3. 661666 3. 61501  
11726479\_ 8. 212257 8. 11102 8. 232797 8. 321201 8. 289611 8. 348856  
11726480\_ 6. 155664 6. 150228 6. 11852 6. 156712 6. 197225 6. 106645  
11726481\_ 4. 61992 5. 10582 4. 820654 4. 777549 4. 846634 4. 822209  
11726482\_ 5. 580566 5. 725028 5. 710966 5. 689855 5. 680683 5. 710966  
11726483\_ 6. 959143 6. 856234 7. 040154 6. 844828 6. 837098 6. 82047  
11726484\_ 5. 537922 5. 596268 5. 537922 5. 584588 5. 616237 5. 631254  
11726485\_ 4. 192931 4. 120725 3. 569865 4. 432276 4. 570035 4. 377631  
11726486\_ 4. 992691 4. 997566 5. 025337 5. 02044 5. 02044 5. 035681  
11726487\_ 3. 816463 3. 997131 3. 885154 4. 043771 4. 035668 4. 21955  
11726488\_ 7. 44678 7. 296719 7. 427696 7. 134982 7. 183853 7. 11998  
11726489\_ 5. 442778 5. 612441 5. 431872 5. 721052 5. 509768 5. 592112  
11726490\_ 3. 065488 3. 471888 2. 975219 3. 230639 3. 500139 3. 387537  
11726491\_ 4. 371429 4. 605649 4. 36694 4. 640886 4. 682242 4. 559594  
11726492\_ 4. 513241 4. 483792 4. 521108 4. 525289 4. 52373 4. 503245  
11726493\_ 5. 453695 5. 492383 5. 275554 5. 529816 5. 547249 5. 565092  
11726494\_ 5. 378822 5. 362663 5. 347536 5. 752595 5. 735434 5. 784725  
11726495\_ 5. 215807 5. 231444 5. 007198 5. 307183 5. 193158 5. 303007  
11726496\_ 5. 580634 5. 72363 5. 68028 5. 101097 4. 929685 4. 792271  
11726497\_ 5. 71282 5. 804013 5. 603391 5. 282346 5. 514903 5. 228627  
11726498\_ 7. 819237 7. 771705 7. 86653 7. 131127 7. 163075 7. 148991  
11726499\_ 3. 220645 3. 405224 3. 365063 3. 47146 3. 345069 3. 365063  
11726500\_ 2. 632909 2. 612415 2. 616747 2. 605516 2. 438583 2. 706021  
11726501\_ 7. 819046 7. 857987 7. 79473 7. 904746 7. 896928 7. 93577  
11726502\_ 5. 576994 5. 660258 5. 709521 5. 541189 5. 611435 5. 409222  
11726503\_ 6. 309011 6. 318231 6. 215554 6. 178499 6. 273665 6. 432536  
11726504\_ 7. 546856 7. 384628 7. 574976 6. 507686 6. 550561 6. 562805  
11726505\_ 3. 249924 2. 979626 2. 736636 3. 125442 3. 108011 2. 904361  
11726506\_ 1. 96469 2. 305105 2. 105679 2. 331559 2. 120344 2. 212481  
11726507\_ 3. 976467 4. 072815 3. 999442 4. 072815 4. 155834 4. 347179  
11726508\_ 2. 073527 1. 940495 2. 160442 2. 116984 2. 196048 2. 095256  
11726509\_ 3. 726273 3. 867661 3. 774959 3. 685181 3. 746389 3. 767687  
11726510\_ 3. 762806 3. 763047 3. 763047 4. 064724 3. 912345 3. 784859  
11726511\_ 6. 821192 6. 714177 6. 817156 7. 021379 7. 009516 6. 957295  
11726512\_ 7. 465044 7. 452336 7. 547164 7. 685743 7. 691138 7. 732518  
11726513\_ 7. 482416 7. 448316 7. 513858 7. 391303 7. 347522 7. 356401  
11726514\_ 5. 006611 5. 035076 5. 237039 4. 24869 4. 200678 4. 321082  
11726515\_ 7. 601947 7. 622963 7. 680894 6. 566555 6. 611411 6. 643434  
11726516\_ 6. 897128 6. 837129 6. 97159 5. 876258 5. 795826 5. 808079  
11726517\_ 8. 831281 8. 854264 8. 861263 8. 893856 8. 877129 8. 904503  
11726518\_ 6. 244666 6. 293007 6. 252031 6. 300702 6. 194568 6. 212499  
11726519\_ 2. 361778 2. 189545 2. 095256 2. 074667 2. 184408 2. 184408  
11726520\_ 3. 499309 3. 499309 3. 522101 3. 558611 3. 584366 3. 499309  
11726521\_ 4. 509355 4. 752403 4. 856296 4. 479232 4. 769381 4. 52286  
11726522\_ 5. 798066 5. 812662 5. 795704 6. 036741 6. 142856 6. 129437

11726523\_ 7. 810404 7. 814818 7. 847698 8. 126673 8. 111162 8. 043081  
11726524\_ 7. 341038 7. 138933 7. 368572 7. 851497 7. 891317 7. 882928  
11726525\_ 5. 763634 5. 938195 5. 856226 5. 924254 6. 081921 5. 992354  
11726526\_ 5. 162618 5. 073036 5. 184708 5. 261442 5. 11527 5. 03416  
11726527\_ 4. 04519 4. 052781 3. 955808 4. 410688 4. 140514 4. 504452  
11726528\_ 6. 084498 6. 076709 6. 070349 6. 309611 6. 300251 6. 300643  
11726529\_ 7. 516782 7. 434318 7. 552867 7. 373864 7. 270615 7. 364083  
11726530\_ 7. 092509 7. 118811 7. 115082 7. 041551 6. 927004 6. 784154  
11726531\_ 7. 434587 7. 557659 7. 523851 7. 383753 7. 426221 7. 149545  
11726532\_ 5. 215821 5. 433304 5. 318017 5. 303716 5. 386563 5. 324038  
11726533\_ 4. 755849 4. 733468 4. 717951 3. 667273 3. 582576 3. 579536  
11726534\_ 4. 65555 4. 718833 4. 747794 4. 72854 4. 791502 4. 664401  
11726535\_ 2. 546368 2. 829146 2. 864829 2. 615306 2. 759618 2. 752341  
11726536\_ 8. 029777 7. 906271 8. 029792 6. 868776 6. 824898 6. 804929  
11726537\_ 6. 226307 6. 20791 6. 216063 6. 580941 6. 497107 6. 483538  
11726538\_ 7. 258399 7. 181072 7. 243127 7. 52726 7. 639203 7. 608472  
11726539\_ 9. 957189 9. 921338 9. 913578 9. 728276 9. 682772 9. 639633  
11726540\_ 8. 595937 8. 599772 8. 658194 8. 266625 8. 245038 8. 221563  
11726541\_ 9. 061547 9. 068609 9. 143064 8. 734693 8. 721292 8. 786107  
11726542\_ 5. 351167 5. 536915 5. 224573 5. 450135 5. 299232 5. 480573  
11726543\_ 3. 507021 3. 723624 3. 77777 3. 915919 4. 054288 3. 77085  
11726544\_ 8. 158375 8. 110811 8. 167815 8. 051686 8. 192691 8. 092771  
11726545\_ 4. 380151 4. 471681 4. 518567 4. 481962 4. 383944 4. 463305  
11726546\_ 3. 416108 3. 43181 3. 371503 3. 543163 3. 612365 3. 447997  
11726547\_ 2. 992857 2. 734232 2. 874619 3. 006628 2. 86607 2. 941137  
11726548\_ 4. 702705 4. 902473 4. 746291 4. 746209 4. 693249 4. 865412  
11726549\_ 6. 315451 6. 416294 6. 375145 6. 486731 6. 487733 6. 399893  
11726550\_ 4. 643717 4. 54759 4. 483799 4. 538685 4. 40461 4. 636004  
11726551\_ 7. 095787 6. 93553 7. 10794 7. 285159 7. 294338 7. 283784  
11726552\_ 6. 366572 6. 272976 6. 354346 6. 701577 6. 74187 6. 669293  
11726553\_ 3. 89608 3. 836727 3. 87583 3. 956829 4. 049231 4. 023831  
11726554\_ 2. 708638 2. 797116 2. 675769 2. 689007 2. 689866 2. 728006  
11726555\_ 6. 073142 5. 945583 6. 137122 6. 301988 6. 312793 6. 255002  
11726556\_ 3. 249924 3. 399622 3. 438475 3. 19213 3. 096707 3. 290188  
11726557\_ 5. 927461 6. 00391 5. 973344 5. 958468 5. 868284 5. 870242  
11726558\_ 9. 115615 9. 116182 9. 115919 9. 368132 9. 398943 9. 350192  
11726559\_ 4. 071017 3. 789233 3. 939983 3. 770541 3. 83813 3. 684862  
11726560\_ 10. 89828 10. 89361 10. 88882 10. 90574 10. 8963 10. 85266  
11726561\_ 7. 59319 7. 54815 7. 611388 7. 664122 7. 605464 7. 629723  
11726562\_ 6. 490243 6. 430149 6. 504485 6. 516016 6. 496355 6. 667231  
11726563\_ 9. 76685 9. 686762 9. 721865 9. 664257 9. 719507 9. 688369  
11726564\_ 3. 586004 3. 533863 3. 552062 3. 532485 3. 488087 3. 571377  
11726565\_ 4. 095275 4. 136886 4. 179134 4. 066314 4. 114282 3. 978851  
11726566\_ 8. 980768 8. 952385 8. 953622 9. 095439 9. 166062 9. 143768  
11726567\_ 9. 299242 9. 285743 9. 297956 9. 458476 9. 548769 9. 528119  
11726568\_ 9. 067269 9. 021429 9. 052872 9. 290492 9. 304587 9. 258287  
11726569\_ 3. 144363 3. 254304 3. 085204 2. 948476 3. 193832 2. 972751  
11726570\_ 2. 295645 2. 47102 2. 309478 2. 368312 1. 978254 2. 694403  
11726571\_ 4. 680698 4. 88562 4. 995114 4. 719024 4. 338273 4. 665569  
11726572\_ 8. 050869 7. 931912 7. 912945 7. 759352 7. 825307 7. 784451  
11726573\_ 5. 813027 5. 724295 5. 678601 5. 726089 5. 805094 5. 731138



11726574\_ 5. 065308 5. 014879 4. 946429 5. 209769 4. 980703 5. 128608  
11726575\_ 5. 177979 5. 094863 5. 223636 5. 251943 5. 273589 5. 207372  
11726576\_ 5. 455838 5. 266608 5. 340057 5. 445334 5. 433974 5. 598612  
11726577\_ 5. 480966 5. 610499 5. 463268 5. 549092 5. 505276 5. 589814  
11726578\_ 7. 829575 7. 876079 7. 834149 7. 930708 7. 943462 7. 928736  
11726579\_ 9. 888901 9. 772842 9. 899576 9. 672241 9. 702325 9. 67903  
11726580\_ 9. 161863 9. 142094 9. 191481 8. 949577 8. 955764 8. 990351  
11726581\_ 3. 224594 3. 368681 3. 099934 3. 302489 3. 278957 3. 290188  
11726582\_ 5. 243971 5. 228882 5. 308952 5. 380649 5. 500356 5. 59001  
11726583\_ 8. 760374 8. 76224 8. 739979 10. 42646 10. 44251 10. 38359  
11726584\_ 9. 490051 9. 406082 9. 409878 9. 906703 9. 931013 9. 943728  
11726585\_ 3. 039669 2. 951742 3. 129039 3. 088994 3. 133513 3. 108176  
11726586\_ 4. 749323 4. 946787 4. 772366 4. 994808 4. 700243 5. 00788  
11726587\_ 7. 225969 7. 208753 7. 405301 7. 918786 7. 984417 7. 928758  
11726588\_ 8. 314372 8. 388045 8. 305781 8. 2712 8. 296111 8. 385841  
11726589\_ 8. 540309 8. 526819 8. 536808 8. 50647 8. 510258 8. 557311  
11726590\_ 7. 674357 7. 540295 7. 597668 6. 813005 6. 89908 6. 890826  
11726591\_ 6. 898793 6. 794351 6. 854969 6. 160482 6. 062573 6. 226531  
11726592\_ 6. 536704 6. 464805 6. 638491 6. 191136 6. 055324 6. 085077  
11726593\_ 6. 557318 6. 376273 6. 597763 6. 060083 6. 182885 6. 208996  
11726594\_ 8. 456753 8. 379366 8. 413718 8. 382971 8. 369939 8. 339828  
11726595\_ 9. 68709 9. 612747 9. 673725 10. 10969 10. 17029 10. 13166  
11726596\_ 9. 929251 9. 866145 9. 927122 10. 32795 10. 40965 10. 36868  
11726597\_ 5. 774605 5. 954757 5. 883286 7. 640773 7. 745307 7. 67687  
11726598\_ 2. 235709 2. 318029 1. 995297 2. 430427 2. 197372 2. 411279  
11726599\_ 4. 733335 4. 947392 4. 897415 5. 040475 4. 980554 4. 983069  
11726600\_ 10. 25281 10. 15675 10. 18623 9. 93118 9. 870102 9. 918359  
11726601\_ 9. 373314 9. 314897 9. 341563 8. 807232 8. 904563 8. 920426  
11726602\_ 9. 31294 9. 25001 9. 291159 9. 846805 9. 868043 9. 824642  
11726603\_ 8. 232754 8. 197192 8. 202916 8. 803675 8. 770422 8. 803124  
11726604\_ 6. 917346 6. 787826 6. 772373 6. 648586 6. 698181 6. 692684  
11726605\_ 9. 444625 9. 384973 9. 454289 8. 869602 8. 903811 8. 911308  
11726606\_ 7. 422267 7. 348157 7. 42737 6. 853664 6. 791983 6. 900134  
11726607\_ 8. 377292 8. 278878 8. 391261 7. 705158 7. 708176 7. 666529  
11726608\_ 8. 488212 8. 410304 8. 419944 7. 778978 7. 741992 7. 770079  
11726609\_ 6. 612771 6. 679966 6. 587234 6. 247427 6. 128847 5. 993627  
11726610\_ 8. 208222 8. 124376 8. 160711 7. 413089 7. 427894 7. 388163  
11726611\_ 7. 414912 7. 411869 7. 315568 6. 572489 6. 396556 6. 55766  
11726612\_ 5. 029529 4. 997987 4. 912499 5. 133331 5. 038595 5. 050916  
11726613\_ 5. 407214 5. 379983 5. 15786 5. 524466 5. 36038 5. 375069  
11726614\_ 9. 849475 9. 790734 9. 85623 9. 597677 9. 622151 9. 596617  
11726615\_ 9. 246043 9. 222293 9. 245186 8. 798029 8. 867229 8. 823069  
11726616\_ 3. 398236 3. 484872 3. 398236 3. 539423 3. 499669 3. 59052  
11726617\_ 9. 271259 9. 242522 9. 223588 10. 01721 10. 03185 10. 0026  
11726618\_ 7. 219269 7. 23975 7. 211284 8. 012857 7. 994656 7. 877804  
11726619\_ 6. 721616 6. 711622 6. 715888 7. 524278 7. 518791 7. 503977  
11726620\_ 5. 351522 5. 433102 5. 521181 5. 439601 5. 490949 5. 364103  
11726621\_ 10. 45268 10. 37865 10. 4404 10. 58867 10. 61466 10. 5873  
11726622\_ 6. 951698 6. 961492 6. 840775 7. 125793 7. 1196 7. 121135  
11726623\_ 8. 700847 8. 66729 8. 715387 8. 474269 8. 361254 8. 451207  
11726624\_ 7. 245937 7. 161725 7. 17642 7. 3851 7. 398599 7. 395878

11726625\_ 7. 397191 7. 264873 7. 459925 7. 63471 7. 600955 7. 64786  
11726626\_ 4. 700243 4. 555704 4. 672554 5. 077914 5. 172039 5. 191551  
11726627\_ 6. 42933 6. 581506 6. 464338 6. 786921 6. 699926 6. 709487  
11726628\_ 4. 834237 4. 955284 4. 81196 4. 68884 4. 652321 4. 725285  
11726629\_ 7. 187999 7. 031868 7. 090076 6. 957902 7. 002348 6. 995816  
11726630\_ 7. 947695 7. 848845 7. 908999 8. 029587 8. 09713 8. 080779  
11726631\_ 6. 377847 6. 304505 6. 275987 6. 143063 6. 320698 6. 311004  
11726632\_ 8. 917855 8. 925168 8. 928152 8. 788422 8. 806802 8. 820277  
11726633\_ 9. 241013 9. 133254 9. 212365 8. 960742 9. 061228 8. 96804  
11726634\_ 7. 534125 7. 485364 7. 617556 8. 140223 8. 097672 8. 197001  
11726635\_ 7. 605321 7. 546158 7. 535191 7. 97959 8. 004603 8. 012781  
11726636\_ 7. 368389 7. 294923 7. 347528 7. 823183 7. 820797 7. 834338  
11726637\_ 7. 552111 7. 576196 7. 537385 7. 624768 7. 662506 7. 666263  
11726638\_ 7. 711661 7. 688407 7. 571695 7. 644069 7. 630315 7. 608178  
11726639\_ 5. 11527 5. 149545 5. 307799 5. 824496 5. 738812 5. 831202  
11726640\_ 5. 153002 4. 995847 5. 265719 5. 85684 5. 901622 5. 96599  
11726641\_ 8. 312958 8. 289621 8. 374938 8. 662479 8. 711324 8. 726088  
11726642\_ 5. 64929 5. 419933 5. 601067 5. 49835 5. 511541 5. 528624  
11726643\_ 8. 035221 8. 035303 8. 003164 8. 025297 8. 003758 8. 038429  
11726644\_ 6. 151611 6. 05512 6. 037884 6. 28542 6. 175964 6. 241713  
11726645\_ 5. 82934 5. 884059 5. 689731 6. 000619 6. 029295 6. 007946  
11726646\_ 4. 396199 4. 359095 4. 370337 4. 52373 4. 594983 4. 573164  
11726647\_ 5. 25477 5. 277546 5. 239776 5. 447426 5. 493677 5. 370821  
11726648\_ 8. 096362 8. 037977 8. 019672 7. 485627 7. 482468 7. 475275  
11726649\_ 5. 574667 5. 670159 5. 540461 5. 683109 5. 615619 5. 611365  
11726650\_ 8. 017882 8. 237348 7. 928201 7. 974386 7. 990265 8. 190162  
11726651\_ 5. 489395 5. 662903 5. 489578 5. 662903 5. 615464 5. 57798  
11726652\_ 6. 784595 6. 714177 6. 849298 6. 898236 6. 860004 6. 922773  
11726653\_ 4. 69247 4. 571136 4. 43232 4. 736759 4. 817957 4. 815683  
11726654\_ 6. 45025 6. 511456 6. 515043 6. 399628 6. 464805 6. 540303  
11726655\_ 7. 02807 6. 950255 6. 964247 6. 752593 6. 72769 6. 726164  
11726656\_ 8. 296842 8. 363742 8. 397246 8. 020585 7. 937024 7. 955558  
11726657\_ 5. 482273 5. 567301 5. 614563 5. 589093 5. 609803 5. 652411  
11726658\_ 4. 94555 5. 012834 4. 861353 5. 074908 4. 917592 4. 989509  
11726659\_ 6. 744958 6. 610873 6. 718874 7. 058885 7. 047561 7. 07304  
11726660\_ 8. 000645 8. 034859 7. 892766 8. 579297 8. 451115 8. 423646  
11726661\_ 8. 220911 8. 312075 8. 208992 8. 62806 8. 660305 8. 642859  
11726662\_ 9. 123418 9. 126274 9. 159158 9. 412559 9. 408555 9. 417192  
11726663\_ 7. 544704 7. 606401 7. 560862 7. 560932 7. 643867 7. 708423  
11726664\_ 5. 966663 6. 237456 5. 973853 5. 986097 5. 890523 5. 84648  
11726665\_ 5. 440236 5. 464253 5. 541171 5. 073036 5. 32605 5. 218981  
11726666\_ 6. 339256 6. 20263 6. 219072 6. 039683 5. 974524 6. 118838  
11726667\_ 6. 691503 6. 655867 6. 747851 6. 065675 6. 036706 6. 018695  
11726668\_ 6. 689032 6. 615464 6. 684676 5. 820043 5. 868772 5. 77685  
11726669\_ 7. 614629 7. 639667 7. 667395 7. 950416 7. 745951 7. 753084  
11726670\_ 6. 07224 5. 930075 6. 01037 6. 721733 6. 660866 6. 84207  
11726671\_ 6. 665647 6. 657132 6. 764272 7. 446487 7. 399857 7. 471591  
11726672\_ 6. 747988 6. 665708 6. 748498 6. 554512 6. 543879 6. 544244  
11726673\_ 2. 880479 2. 983472 2. 696731 3. 036992 2. 80966 2. 93417  
11726674\_ 2. 514086 2. 496444 2. 381451 2. 605516 2. 47102 2. 665506  
11726675\_ 3. 832779 3. 9003 3. 9143 4. 032527 4. 067832 4. 05512

11726676\_ 3. 312946 3. 471852 3. 226956 3. 293245 3. 245895 3. 268947  
11726677\_ 8. 338215 8. 217816 8. 40646 8. 293224 8. 315208 8. 300983  
11726678\_ 7. 166751 7. 197865 7. 192457 6. 783398 6. 779655 6. 769207  
11726679\_ 6. 751311 6. 771219 6. 782216 6. 626431 6. 60802 6. 585139  
11726680\_ 10. 34407 10. 40843 10. 34382 10. 63542 10. 5931 10. 47201  
11726681\_ 10. 52926 10. 53871 10. 49858 10. 76226 10. 71653 10. 58665  
11726682\_ 5. 073036 4. 980525 5. 168381 4. 850064 4. 776017 5. 012433  
11726683\_ 6. 792183 6. 700371 6. 771001 6. 854598 6. 886094 6. 830108  
11726684\_ 6. 153872 6. 033355 6. 152123 6. 024893 6. 044244 6. 045427  
11726685\_ 4. 655898 4. 84026 4. 689817 4. 692995 4. 788798 4. 702191  
11726686\_ 7. 626889 7. 688476 7. 603459 7. 686717 7. 718459 7. 659495  
11726687\_ 4. 381741 4. 174945 4. 537501 4. 459138 4. 431062 4. 521201  
11726688\_ 5. 964007 6. 097112 5. 93849 6. 072329 6. 000444 5. 948222  
11726689\_ 7. 842525 7. 747041 7. 713562 7. 362381 7. 330536 7. 38032  
11726690\_ 7. 899012 7. 85723 7. 935723 7. 481904 7. 55395 7. 509168  
11726691\_ 7. 745248 7. 666444 7. 697098 7. 154726 7. 136086 7. 298759  
11726692\_ 7. 187891 7. 208328 7. 147799 7. 079672 6. 927322 7. 002952  
11726693\_ 7. 481119 7. 594565 7. 577146 7. 373855 7. 41602 7. 398796  
11726694\_ 8. 011622 8. 00453 8. 06835 8. 253307 8. 231388 8. 244561  
11726695\_ 6. 831883 6. 763168 6. 796496 6. 994442 7. 166951 7. 144608  
11726696\_ 4. 970967 4. 860348 4. 934397 4. 667689 4. 721974 4. 775157  
11726697\_ 6. 096931 6. 10509 6. 087349 5. 845989 5. 811116 5. 854031  
11726698\_ 6. 372472 6. 184757 6. 383728 5. 991494 6. 113283 5. 991494  
11726699\_ 5. 108058 5. 117511 4. 930507 5. 178371 4. 976637 5. 046959  
11726700\_ 7. 800398 7. 758308 7. 741513 7. 095665 7. 037218 7. 009306  
11726701\_ 7. 04307 7. 031423 7. 029789 6. 271865 6. 35389 6. 301126  
11726702\_ 7. 874439 7. 976238 7. 854035 7. 464845 7. 370842 7. 314221  
11726703\_ 7. 992661 7. 878194 7. 969734 7. 344164 7. 332656 7. 358974  
11726704\_ 8. 869099 8. 970383 8. 911188 8. 395243 8. 446709 8. 501284  
11726705\_ 8. 776946 8. 671008 8. 741851 8. 26918 8. 31446 8. 330469  
11726706\_ 6. 026286 6. 004191 5. 929639 5. 820052 5. 861181 5. 836134  
11726707\_ 5. 977843 5. 918501 5. 933893 5. 926809 5. 872799 5. 847753  
11726708\_ 7. 173758 6. 998064 7. 087946 7. 505545 7. 492296 7. 444379  
11726709\_ 6. 237454 6. 45911 6. 282224 6. 528661 6. 52496 6. 570894  
11726710\_ 7. 592229 7. 719889 7. 658478 7. 784878 7. 804991 7. 723001  
11726711\_ 8. 982616 8. 951758 9. 00152 9. 16302 9. 141625 9. 171164  
11726712\_ 7. 650209 7. 549425 7. 724542 7. 480812 7. 515858 7. 51546  
11726713\_ 6. 117903 5. 97269 5. 999493 5. 734758 5. 56157 5. 708559  
11726714\_ 7. 741261 7. 631721 7. 66907 7. 863472 7. 807862 7. 884967  
11726715\_ 6. 956575 7. 000201 6. 934608 7. 334819 7. 141379 7. 190135  
11726716\_ 7. 412594 7. 351631 7. 42043 7. 779981 7. 575294 7. 586748  
11726717\_ 6. 557288 6. 645229 6. 595432 6. 374755 6. 444541 6. 399895  
11726718\_ 6. 880055 6. 833405 6. 936618 6. 90117 7. 062035 7. 080046  
11726719\_ 5. 202564 5. 19307 5. 082097 5. 127178 5. 091702 5. 110751  
11726720\_ 9. 294801 9. 292807 9. 317024 9. 376139 9. 390665 9. 393019  
11726721\_ 8. 862178 8. 834926 8. 929641 8. 954221 8. 995642 9. 041678  
11726722\_ 5. 897394 5. 793937 5. 763983 5. 83497 5. 73236 5. 85727  
11726723\_ 8. 116852 7. 919134 8. 019012 7. 623804 7. 732417 7. 65814  
11726724\_ 6. 78736 6. 514133 6. 701618 7. 222226 7. 260036 7. 307009  
11726725\_ 8. 017319 7. 951187 7. 886959 7. 090684 6. 986493 6. 86919  
11726726\_ 8. 005835 7. 926905 7. 996781 7. 036247 7. 0105 7. 022336

11726727\_ 7. 944116 7. 954002 8. 015109 6. 765605 6. 674509 6. 68928  
11726728\_ 3. 808725 3. 911451 3. 910691 3. 765041 3. 81276 3. 9282  
11726729\_ 6. 424041 6. 495389 6. 490218 6. 475655 6. 518023 6. 573257  
11726730\_ 7. 305657 7. 334909 7. 308324 7. 31237 7. 307206 7. 263614  
11726731\_ 7. 861595 7. 836019 7. 730153 7. 694468 7. 631747 7. 661583  
11726732\_ 7. 739293 7. 746432 7. 887514 7. 924783 7. 905143 7. 916845  
11726733\_ 7. 811554 7. 792761 7. 834733 7. 964112 7. 931241 7. 991579  
11726734\_ 7. 253959 7. 2527 7. 354357 7. 358022 7. 434587 7. 373328  
11726735\_ 8. 105001 8. 074461 8. 15211 7. 826737 7. 806833 7. 833371  
11726736\_ 5. 92889 5. 867346 5. 823043 6. 065828 6. 055886 5. 972706  
11726737\_ 6. 35759 6. 258521 6. 198961 6. 503758 6. 48338 6. 341376  
11726738\_ 6. 720141 6. 71036 6. 762297 6. 730305 6. 764301 6. 742095  
11726739\_ 7. 363136 7. 330146 7. 423379 7. 388533 7. 504984 7. 417634  
11726740\_ 7. 32326 7. 269634 7. 396393 8. 031649 8. 081642 8. 059579  
11726741\_ 7. 532122 7. 411084 7. 533678 7. 519545 7. 416644 7. 533684  
11726742\_ 5. 614563 5. 460756 5. 684201 5. 672285 5. 625302 5. 661003  
11726743\_ 7. 861062 8. 012567 7. 980068 6. 814891 6. 737603 6. 948446  
11726744\_ 6. 430295 6. 477874 6. 418217 6. 141748 6. 131099 6. 212602  
11726745\_ 4. 999562 4. 96943 5. 027865 5. 227678 5. 124219 5. 234291  
11726746\_ 5. 654723 5. 448296 5. 533756 5. 723241 5. 609647 5. 676992  
11726747\_ 5. 890024 5. 872491 5. 742089 6. 122862 6. 141905 6. 197676  
11726748\_ 6. 006838 6. 092672 6. 044442 6. 199585 6. 169043 6. 068477  
11726749\_ 8. 504229 8. 411946 8. 483205 8. 096015 8. 085588 8. 148147  
11726750\_ 7. 554551 7. 444087 7. 520196 7. 34247 7. 313552 7. 351308  
11726751\_ 5. 56124 5. 536073 5. 644911 5. 558901 5. 719708 5. 611688  
11726752\_ 7. 035659 6. 867173 6. 912397 7. 064365 6. 922773 7. 042517  
11726753\_ 5. 492092 5. 734452 5. 628945 5. 695901 5. 670108 5. 685003  
11726754\_ 4. 982782 4. 913607 4. 988199 4. 953208 4. 869544 5. 001691  
11726755\_ 8. 073624 8. 037977 8. 09185 8. 119376 8. 038617 8. 081573  
11726756\_ 6. 56835 6. 549432 6. 417104 6. 603915 6. 52168 6. 52434  
11726757\_ 7. 974086 7. 878986 7. 992259 8. 1834 8. 160483 8. 193014  
11726758\_ 6. 365915 6. 480596 6. 46208 6. 683378 6. 696768 6. 651345  
11726759\_ 7. 884504 7. 849468 7. 86433 8. 679703 8. 538337 8. 529102  
11726760\_ 8. 918707 8. 816637 8. 761709 8. 601124 8. 544665 8. 715517  
11726761\_ 7. 028346 7. 105083 7. 196942 6. 973708 6. 996931 7. 054136  
11726762\_ 3. 153685 3. 534249 3. 290188 3. 529769 3. 140866 3. 476753  
11726763\_ 4. 171389 4. 234052 4. 331932 4. 415307 4. 492476 4. 348285  
11726764\_ 5. 849508 6. 118838 5. 86225 6. 021571 6. 056292 6. 073142  
11726765\_ 3. 571502 3. 480169 3. 41528 3. 826034 3. 425112 3. 365536  
11726766\_ 8. 783457 8. 664689 8. 738976 9. 145452 9. 145844 9. 176987  
11726767\_ 5. 285218 5. 309674 5. 113702 5. 451699 5. 440673 5. 339673  
11726768\_ 3. 892398 4. 012944 3. 993693 3. 298309 3. 360296 3. 427914  
11726769\_ 2. 7295 2. 711315 2. 603139 2. 614343 2. 696209 2. 826472  
11726770\_ 2. 899142 2. 853792 2. 85713 2. 912551 2. 802979 2. 850454  
11726771\_ 5. 500954 5. 523111 5. 461517 5. 530302 5. 513792 5. 582025  
11726772\_ 9. 467595 9. 416083 9. 454784 9. 450061 9. 35136 9. 361769  
11726773\_ 8. 445707 8. 267544 8. 398722 8. 464317 8. 464862 8. 447376  
11726774\_ 4. 240379 4. 240823 4. 017762 4. 112582 4. 348308 4. 122446  
11726775\_ 7. 260481 7. 174989 7. 140472 7. 038238 7. 076762 6. 992787  
11726776\_ 6. 728739 6. 765911 6. 497255 6. 926601 6. 900066 6. 97913  
11726777\_ 5. 453679 5. 485225 5. 540643 5. 338801 5. 489564 5. 502342

11726778\_ 4. 317974 4. 409085 4. 287593 4. 47858 4. 304407 4. 274168  
11726779\_ 7. 352857 7. 283396 7. 300335 7. 265694 7. 247909 7. 265694  
11726780\_ 7. 037846 6. 93787 7. 042899 6. 760584 6. 798781 6. 75029  
11726781\_ 6. 528795 6. 583886 6. 583886 6. 839069 6. 839069 6. 840378  
11726782\_ 6. 552158 6. 432714 6. 592213 6. 305458 6. 120082 6. 375754  
11726783\_ 4. 065738 4. 25394 4. 101836 3. 830267 3. 879309 4. 025986  
11726784\_ 2. 718322 2. 605516 2. 810317 2. 605516 2. 748641 2. 469561  
11726785\_ 2. 083766 1. 945955 1. 912295 2. 005291 2. 190568 2. 024583  
11726786\_ 5. 073036 5. 009534 5. 096096 5. 131528 5. 082617 5. 066264  
11726787\_ 4. 746241 4. 54931 4. 768354 4. 683099 4. 798511 4. 805151  
11726788\_ 8. 763635 8. 724092 8. 715811 8. 432596 8. 460307 8. 374019  
11726789\_ 5. 192817 5. 271352 5. 307437 5. 313893 5. 211301 5. 211301  
11726790\_ 4. 200678 4. 321948 4. 22008 4. 513902 4. 29629 4. 401891  
11726791\_ 3. 304181 3. 136668 3. 080067 3. 449874 3. 101013 3. 401895  
11726792\_ 6. 412075 6. 339306 6. 263416 6. 422665 6. 466289 6. 400827  
11726793\_ 5. 924485 5. 903729 5. 922714 5. 967993 5. 888766 5. 951  
11726794\_ 6. 304331 6. 355145 6. 278779 6. 38291 6. 320093 6. 311165  
11726795\_ 5. 585171 5. 725182 5. 715028 5. 645043 5. 628502 5. 645733  
11726796\_ 5. 604159 5. 562511 5. 668392 4. 840985 4. 908535 4. 941659  
11726797\_ 6. 889204 6. 964835 6. 862891 6. 327411 6. 392685 6. 339437  
11726798\_ 6. 445843 6. 202786 6. 240152 5. 530669 5. 494055 5. 777026  
11726799\_ 5. 522221 5. 542981 5. 354805 5. 512671 5. 563384 5. 575886  
11726800\_ 5. 531256 5. 54218 5. 595114 5. 282699 5. 365629 5. 442778  
11726801\_ 6. 074341 5. 966165 6. 159771 5. 27972 5. 266099 5. 422674  
11726802\_ 4. 908432 4. 961596 4. 90926 4. 808943 4. 593276 4. 675155  
11726803\_ 6. 17981 6. 099015 6. 237222 6. 327049 6. 275578 6. 206474  
11726804\_ 5. 996677 5. 981727 5. 958339 6. 042251 6. 037288 6. 294037  
11726805\_ 6. 428351 6. 592536 6. 596636 6. 792419 6. 830401 6. 778871  
11726806\_ 8. 084856 8. 015966 8. 050652 8. 461885 8. 534434 8. 454012  
11726807\_ 6. 565924 6. 588909 6. 589889 6. 815853 6. 826485 6. 777589  
11726808\_ 5. 598454 5. 520818 5. 6155 5. 654481 5. 747277 5. 798613  
11726809\_ 6. 176374 6. 263567 6. 159771 6. 030829 6. 159771 6. 059008  
11726810\_ 5. 382169 5. 401243 5. 045983 5. 505511 5. 318138 5. 392275  
11726811\_ 4. 506075 4. 785514 4. 852578 4. 650385 4. 566675 4. 633492  
11726812\_ 3. 842255 4. 153376 3. 835213 4. 002468 4. 013334 4. 054288  
11726813\_ 5. 816855 5. 866126 5. 837371 6. 031442 6. 002634 5. 946303  
11726814\_ 2. 922642 3. 237651 2. 927581 3. 278241 3. 245824 3. 262808  
11726815\_ 5. 541314 5. 454387 5. 257874 5. 926062 5. 821448 6. 009871  
11726816\_ 5. 122759 5. 281957 4. 907926 5. 200019 5. 26094 5. 253724  
11726817\_ 6. 576461 6. 713647 6. 602534 6. 655485 6. 685282 6. 777694  
11726818\_ 7. 144608 7. 215889 7. 007074 7. 236954 7. 131904 7. 246101  
11726819\_ 6. 467524 6. 639253 6. 500168 7. 110214 7. 180469 7. 170687  
11726820\_ 5. 30427 5. 327486 5. 397258 5. 150731 5. 397861 5. 158406  
11726821\_ 5. 208905 5. 598341 5. 339018 5. 637078 5. 474673 5. 680377  
11726822\_ 4. 746432 4. 811683 4. 709463 4. 842916 4. 860427 4. 862408  
11726823\_ 4. 853835 4. 933984 4. 873472 5. 011702 4. 932896 4. 84926  
11726824\_ 5. 263179 5. 198882 5. 402507 5. 502215 5. 523406 5. 554436  
11726825\_ 5. 417155 5. 474586 5. 286502 5. 417155 5. 426098 5. 459073  
11726826\_ 6. 182295 6. 097927 6. 069567 6. 19295 6. 18596 6. 190303  
11726827\_ 2. 188571 2. 25483 2. 092049 2. 300213 2. 498395 2. 54163  
11726828\_ 5. 604511 5. 643794 5. 676992 5. 814913 5. 955025 5. 839544

11726829\_ 7. 08397 7. 258035 7. 075932 7. 369796 7. 207501 7. 278257  
11726830\_ 6. 90899 6. 785489 6. 874757 6. 688764 6. 649944 6. 784688  
11726831\_ 6. 163714 5. 957127 6. 178101 6. 018553 5. 882632 5. 900304  
11726832\_ 4. 529238 4. 716266 4. 727062 4. 63009 4. 678576 4. 678576  
11726833\_ 7. 308781 7. 458381 7. 409349 7. 548757 7. 586977 7. 571083  
11726834\_ 8. 46908 8. 416613 8. 443247 8. 064836 7. 980183 8. 078569  
11726835\_ 5. 592777 5. 415088 5. 33505 5. 861454 5. 698485 5. 614929  
11726836\_ 5. 52799 5. 209804 5. 262742 5. 438354 5. 255822 5. 31178  
11726837\_ 5. 333723 5. 025066 5. 26034 5. 432182 5. 658069 5. 631499  
11726838\_ 5. 374383 5. 253321 5. 450951 5. 598045 5. 551022 5. 646336  
11726839\_ 9. 631991 9. 668437 9. 672774 9. 676665 9. 672774 9. 638061  
11726840\_ 9. 014857 8. 923813 8. 968393 8. 005027 7. 927363 8. 020023  
11726841\_ 4. 711016 4. 844648 4. 746056 4. 752445 4. 731326 4. 787678  
11726842\_ 7. 909873 7. 92659 7. 870062 7. 852588 7. 852538 7. 85795  
11726843\_ 5. 49611 5. 378244 5. 482091 5. 297187 5. 515011 5. 284758  
11726844\_ 2. 994446 2. 789121 2. 895641 2. 990985 2. 908983 3. 105875  
11726845\_ 3. 508332 3. 628034 3. 572322 3. 729203 3. 49885 3. 595076  
11726846\_ 3. 284508 3. 410577 3. 343253 3. 321453 3. 369562 3. 343253  
11726847\_ 3. 546733 3. 720931 3. 436495 3. 583364 3. 655975 3. 570561  
11726848\_ 5. 870242 5. 868023 5. 801007 5. 996126 5. 894697 5. 849541  
11726849\_ 3. 850265 3. 865562 3. 734955 3. 733734 3. 620139 3. 579922  
11726850\_ 6. 14079 6. 194319 6. 179746 6. 139731 6. 281755 6. 14079  
11726851\_ 6. 413473 6. 373732 6. 326964 6. 567916 6. 506592 6. 445977  
11726852\_ 5. 109773 5. 310707 5. 122191 5. 145531 5. 30589 5. 2666  
11726853\_ 7. 133013 6. 994846 7. 09183 6. 450378 6. 428736 6. 312596  
11726854\_ 3. 198527 3. 383222 3. 158571 3. 198527 3. 462228 3. 214993  
11726855\_ 3. 398236 3. 609944 3. 091691 3. 332002 3. 398988 3. 35918  
11726856\_ 3. 459058 3. 191011 3. 268431 2. 847599 3. 177675 3. 207457  
11726857\_ 4. 047279 4. 050382 4. 22643 3. 919537 4. 108187 4. 114773  
11726858\_ 7. 403765 7. 360838 7. 430295 7. 765101 7. 741958 7. 756985  
11726859\_ 3. 370145 3. 456798 3. 354672 3. 532403 3. 453694 3. 413836  
11726860\_ 6. 117641 6. 115187 6. 243575 6. 336977 6. 32771 6. 481046  
11726861\_ 7. 700832 7. 699381 7. 749964 7. 853258 7. 837653 7. 90862  
11726862\_ 7. 739882 7. 790663 7. 56741 7. 952131 7. 91538 7. 901756  
11726863\_ 4. 528627 4. 557667 4. 592409 4. 555922 4. 580196 4. 605976  
11726864\_ 5. 178863 5. 166111 5. 290123 5. 230441 5. 252613 5. 341796  
11726865\_ 6. 737783 6. 796682 6. 604788 6. 740534 6. 826485 6. 802465  
11726866\_ 6. 874628 6. 975313 6. 802717 6. 929582 6. 884618 7. 044057  
11726867\_ 6. 087966 5. 978571 6. 088606 5. 920797 5. 999577 6. 048709  
11726868\_ 7. 210561 7. 112969 7. 130948 7. 07976 7. 110993 7. 105146  
11726869\_ 6. 695097 6. 69894 6. 693187 6. 457302 6. 483603 6. 479138  
11726870\_ 5. 38396 5. 409597 5. 480883 4. 646409 4. 641456 4. 515144  
11726871\_ 5. 710107 5. 689329 5. 722571 5. 626668 5. 584399 5. 5812  
11726872\_ 6. 094413 6. 093266 5. 983056 5. 999797 6. 090091 6. 115958  
11726873\_ 6. 24218 6. 345648 6. 201121 6. 240349 6. 340446 6. 39042  
11726874\_ 4. 150417 4. 247967 4. 20048 4. 247967 4. 302109 4. 247967  
11726875\_ 5. 249478 5. 028712 5. 035032 5. 248272 5. 303388 5. 285865  
11726876\_ 6. 861931 6. 819607 6. 88091 7. 173049 7. 249461 7. 212948  
11726877\_ 5. 313217 5. 135503 5. 319061 5. 505979 5. 351858 5. 336592  
11726878\_ 6. 487292 6. 469681 6. 589247 6. 831485 6. 733568 6. 794479  
11726879\_ 5. 252729 5. 35278 5. 224224 5. 47982 5. 356472 5. 493383

11726880\_ 5. 112083 5. 422076 5. 204976 3. 972839 3. 981554 4. 025954  
11726881\_ 7. 509322 7. 394493 7. 483569 7. 137835 7. 076762 7. 171717  
11726882\_ 6. 633907 6. 579869 6. 738588 5. 435204 5. 257447 5. 429686  
11726883\_ 8. 020135 7. 895201 8. 00858 6. 849144 6. 879818 6. 90829  
11726884\_ 5. 029529 5. 072022 4. 985589 5. 11739 5. 168414 5. 167738  
11726885\_ 6. 663751 6. 568345 6. 629419 7. 118889 7. 227015 7. 178725  
11726886\_ 4. 675965 4. 729335 4. 774923 4. 778509 4. 895022 4. 862238  
11726887\_ 5. 5981 5. 798028 5. 551702 5. 713024 5. 743848 5. 642437  
11726888\_ 5. 042799 4. 903213 4. 88241 5. 1573 5. 237075 5. 221982  
11726889\_ 4. 175903 4. 320357 4. 268638 4. 300135 4. 3364 4. 293678  
11726890\_ 7. 842088 7. 856054 7. 790877 8. 016001 8. 0136 8. 009969  
11726891\_ 1. 960314 1. 933257 1. 975896 2. 029378 2. 088497 2. 047206  
11726892\_ 4. 009014 4. 00785 4. 091697 4. 037239 3. 983475 3. 900792  
11726893\_ 7. 806973 7. 784774 7. 784483 7. 709533 7. 746541 7. 716079  
11726894\_ 3. 30394 3. 290188 3. 247794 3. 290188 3. 290188 3. 290188  
11726895\_ 3. 041759 3. 290367 3. 279807 3. 33305 3. 383483 3. 3054  
11726896\_ 1. 995297 1. 843211 1. 946984 1. 865854 1. 9565 1. 807439  
11726897\_ 3. 935247 4. 06721 4. 071984 4. 19155 4. 491512 4. 347179  
11726898\_ 4. 619557 4. 815683 4. 730265 4. 874234 4. 857679 4. 960369  
11726899\_ 6. 724426 6. 838456 6. 750556 6. 975328 6. 881724 6. 891233  
11726900\_ 5. 682025 5. 693029 5. 622858 5. 681984 5. 633862 5. 626997  
11726901\_ 5. 132907 5. 153128 5. 19995 5. 153128 5. 19847 5. 056489  
11726902\_ 6. 324569 6. 460727 6. 400591 6. 172586 6. 349315 6. 267478  
11726903\_ 4. 569059 4. 815683 4. 871154 4. 859984 4. 849431 4. 770377  
11726904\_ 6. 849396 6. 924592 6. 960246 6. 842657 6. 811315 6. 740831  
11726905\_ 2. 026878 2. 107092 2. 120809 1. 994745 1. 967282 2. 092487  
11726906\_ 7. 960664 7. 922595 7. 935781 8. 019755 8. 106198 8. 006228  
11726907\_ 6. 668456 6. 801437 6. 722016 6. 791608 6. 711604 6. 727896  
11726908\_ 4. 75911 4. 863352 4. 728856 4. 776668 4. 825237 4. 758712  
11726909\_ 4. 019996 3. 791092 3. 732044 3. 961317 4. 064089 3. 954157  
11726910\_ 9. 855165 9. 792596 9. 856747 9. 760293 9. 753836 9. 737836  
11726911\_ 5. 437501 5. 672285 5. 594869 5. 186301 5. 186776 5. 300758  
11726912\_ 3. 613675 3. 708335 3. 336071 3. 338522 3. 705625 3. 327374  
11726913\_ 4. 125862 4. 492687 4. 350679 4. 578425 4. 517593 4. 433044  
11726914\_ 5. 762646 5. 748878 5. 804278 5. 645905 5. 701691 5. 725513  
11726915\_ 4. 203673 4. 185104 4. 211287 4. 207695 4. 158141 4. 220947  
11726916\_ 4. 788693 4. 786733 4. 769915 5. 014195 4. 700243 4. 698837  
11726917\_ 6. 110437 6. 090712 5. 951851 6. 16004 6. 125495 6. 05664  
11726918\_ 2. 465651 2. 392031 2. 257536 2. 108947 2. 166552 2. 480397  
11726919\_ 3. 88368 3. 870003 3. 699207 3. 832296 3. 902801 3. 954157  
11726920\_ 4. 434811 4. 66537 4. 417684 4. 81465 4. 716152 4. 742253  
11726921\_ 7. 35499 7. 560937 7. 300688 7. 325719 7. 365794 7. 314603  
11726922\_ 2. 604764 2. 624462 2. 452846 2. 619424 2. 464736 2. 607228  
11726923\_ 7. 783699 7. 796603 7. 87357 7. 653914 7. 788041 7. 734279  
11726924\_ 7. 43547 7. 33645 7. 434212 7. 141851 7. 116509 7. 16386  
11726925\_ 9. 790676 9. 794037 9. 770536 9. 933182 9. 964811 9. 873836  
11726926\_ 3. 088838 3. 094486 2. 998765 3. 420133 3. 3337 3. 088838  
11726927\_ 8. 138673 8. 079219 8. 131822 7. 005921 7. 076349 7. 158709  
11726928\_ 5. 818623 5. 981701 5. 763743 5. 792879 5. 968474 5. 711125  
11726929\_ 5. 019327 5. 150523 5. 042479 4. 997369 5. 023232 5. 02997  
11726930\_ 3. 750567 3. 715526 3. 696096 3. 749751 3. 596138 3. 689619

11726931\_ 3. 655637 3. 804711 3. 898138 3. 850246 3. 605166 3. 503743  
11726932\_ 5. 164918 4. 849099 5. 253543 5. 109332 5. 193957 4. 904824  
11726933\_ 3. 728216 3. 709599 3. 779935 3. 990105 4. 173553 3. 88022  
11726934\_ 7. 336753 7. 356931 7. 386679 7. 760417 7. 766663 7. 695527  
11726935\_ 6. 14011 6. 119572 6. 069567 6. 118838 6. 081478 6. 024215  
11726936\_ 8. 056962 8. 143783 8. 138115 8. 181274 8. 208617 8. 301233  
11726937\_ 2. 912441 2. 710855 2. 935598 2. 723612 2. 697118 2. 785832  
11726938\_ 10. 35291 10. 26347 10. 31614 10. 094 10. 10846 10. 10501  
11726939\_ 3. 610369 3. 539958 3. 468648 3. 39418 3. 589095 3. 631379  
11726940\_ 3. 796604 3. 641412 4. 015436 3. 923481 3. 924596 4. 001156  
11726941\_ 6. 623223 6. 655169 6. 728385 6. 491111 6. 558795 6. 610953  
11726942\_ 3. 619021 3. 500957 3. 584508 3. 609006 3. 453145 3. 399465  
11726943\_ 3. 637105 3. 185193 3. 465492 3. 341952 3. 168601 3. 32632  
11726944\_ 4. 235999 3. 669743 3. 976388 3. 798786 3. 652983 3. 527496  
11726945\_ 6. 211477 6. 16485 6. 129619 6. 487595 6. 395492 6. 572827  
11726946\_ 5. 964573 5. 816599 5. 833228 5. 750355 5. 8391 5. 763457  
11726947\_ 3. 705625 3. 682528 3. 439584 3. 694919 3. 608765 3. 694919  
11726948\_ 3. 409562 3. 488689 3. 447441 3. 623185 3. 522482 3. 500986  
11726949\_ 9. 474625 9. 406905 9. 426393 9. 144607 9. 211357 9. 107567  
11726950\_ 3. 248762 2. 973129 3. 025972 3. 101013 3. 279679 3. 290188  
11726951\_ 4. 071443 3. 909593 4. 071443 4. 184619 4. 347179 4. 184363  
11726952\_ 5. 584813 5. 737851 5. 638005 5. 664449 5. 798402 5. 77685  
11726953\_ 5. 438089 5. 450809 5. 281672 5. 478453 5. 446883 5. 442338  
11726954\_ 5. 150224 5. 253717 5. 162773 5. 522872 5. 208467 5. 154007  
11726955\_ 6. 939654 6. 934452 6. 848714 6. 957487 7. 011172 6. 961848  
11726956\_ 3. 646049 3. 951616 3. 687573 3. 613072 3. 71269 3. 838055  
11726957\_ 9. 266613 9. 383362 9. 273395 9. 28992 9. 241124 9. 218349  
11726958\_ 5. 73576 5. 661401 5. 736831 5. 89989 5. 885409 6. 070625  
11726959\_ 4. 404991 4. 429447 4. 3287 4. 674209 4. 384236 4. 562845  
11726960\_ 2. 76105 2. 332653 2. 596244 2. 482186 2. 551728 2. 700383  
11726961\_ 6. 524639 6. 398633 6. 518081 5. 634381 5. 74573 5. 806699  
11726962\_ 7. 652687 7. 562975 7. 520729 7. 275185 7. 257722 7. 231184  
11726963\_ 7. 534517 7. 572866 7. 600024 7. 257504 7. 258376 7. 298575  
11726964\_ 3. 809329 3. 718384 3. 637388 3. 720013 3. 687103 3. 712357  
11726965\_ 3. 868401 3. 965726 3. 52408 4. 1651 4. 087719 4. 180341  
11726966\_ 4. 082084 4. 082084 4. 0233 4. 088732 3. 844243 4. 135106  
11726967\_ 5. 113616 5. 206872 5. 085487 5. 419725 5. 27186 5. 309449  
11726968\_ 7. 489548 7. 536682 7. 519733 7. 612065 7. 702179 7. 616237  
11726969\_ 6. 322714 6. 44045 6. 018553 6. 548293 6. 604876 6. 420857  
11726970\_ 4. 275543 4. 299614 4. 135496 4. 233872 4. 356325 4. 236409  
11726971\_ 8. 002998 7. 91286 7. 964816 7. 708146 7. 707122 7. 741433  
11726972\_ 6. 929468 6. 989721 6. 982164 7. 043009 6. 961381 7. 070365  
11726973\_ 4. 590651 4. 518467 4. 573461 4. 494939 4. 471411 4. 518467  
11726974\_ 8. 34844 8. 222129 8. 310206 8. 4 8. 361067 8. 374327  
11726975\_ 8. 680635 8. 620971 8. 708509 8. 791548 8. 789759 8. 831712  
11726976\_ 3. 259648 3. 345976 3. 538649 3. 706936 3. 879309 3. 820884  
11726977\_ 9. 817971 9. 804152 9. 838014 10. 10375 10. 0226 10. 01374  
11726978\_ 8. 037759 7. 942789 8. 032526 7. 749389 7. 866679 7. 834966  
11726979\_ 5. 572357 5. 705152 5. 891373 6. 026759 5. 951973 6. 062046  
11726980\_ 6. 645438 6. 49948 6. 591884 6. 427635 6. 492465 6. 522225  
11726981\_ 3. 31846 3. 088617 3. 138626 3. 211512 3. 057791 3. 094343



11726982\_ 2. 605516 1. 995297 2. 25142 1. 975699 2. 273666 2. 514883  
11726983\_ 9. 536752 9. 618656 9. 486391 9. 39276 9. 361035 9. 324672  
11726984\_ 8. 389081 8. 441482 8. 462296 8. 28246 8. 296113 8. 220214  
11726985\_ 9. 022538 8. 984879 9. 104186 8. 752629 8. 718533 8. 738436  
11726986\_ 5. 18003 5. 137865 5. 144643 5. 192495 5. 144998 5. 175126  
11726987\_ 5. 01189 5. 059738 4. 85924 4. 892325 5. 087046 4. 984669  
11726988\_ 9. 769578 9. 746336 9. 790283 10. 03556 10. 08785 10. 02693  
11726989\_ 8. 46799 8. 401846 8. 492196 8. 692307 8. 673423 8. 672834  
11726990\_ 5. 952534 5. 851936 6. 049301 5. 744695 5. 856647 5. 799437  
11726991\_ 7. 726944 7. 575411 7. 694613 7. 972199 7. 959067 7. 942688  
11726992\_ 4. 617668 4. 648633 4. 631711 4. 584933 4. 700243 4. 621905  
11726993\_ 5. 866472 5. 86961 5. 680762 5. 966847 5. 89058 5. 8954  
11726994\_ 6. 554343 6. 564568 6. 494443 6. 49711 6. 596881 6. 528702  
11726995\_ 5. 933815 5. 887539 5. 922714 6. 163833 6. 174693 6. 174635  
11726996\_ 6. 796585 6. 670312 6. 91609 7. 050818 7. 051919 7. 046729  
11726997\_ 9. 59203 9. 497289 9. 579163 9. 684817 9. 731612 9. 73133  
11726998\_ 4. 915644 5. 017098 4. 897082 5. 098613 4. 997161 5. 113487  
11726999\_ 9. 154878 9. 166993 9. 159398 9. 848522 9. 709014 9. 619486  
11727000\_ 8. 621474 8. 58872 8. 603359 9. 015275 8. 924587 8. 980909  
11727001\_ 7. 176336 7. 297168 7. 268879 7. 48043 7. 426223 7. 452372  
11727002\_ 8. 0092 7. 917281 8. 046586 8. 356163 8. 445017 8. 359714  
11727003\_ 8. 076656 7. 906861 7. 99461 8. 393727 8. 419824 8. 384839  
11727004\_ 10. 56542 10. 60548 10. 58407 10. 57007 10. 60852 10. 57644  
11727005\_ 6. 554503 6. 508663 6. 65098 6. 182442 6. 183123 6. 135928  
11727006\_ 2. 473159 2. 594713 2. 46253 2. 504764 2. 549853 2. 403662  
11727007\_ 7. 934129 7. 869641 7. 959007 7. 690304 7. 614685 7. 719889  
11727008\_ 6. 446275 6. 22626 6. 208038 6. 014784 6. 018542 6. 082239  
11727009\_ 4. 30225 4. 245168 4. 292517 4. 561293 4. 551743 4. 62763  
11727010\_ 4. 383256 4. 414293 4. 255002 4. 571012 4. 248658 4. 357857  
11727011\_ 2. 084796 2. 25483 2. 111247 2. 150454 2. 22747 2. 175521  
11727012\_ 2. 488977 2. 572411 2. 385043 2. 614363 2. 567719 2. 438938  
11727013\_ 3. 155563 3. 081515 2. 886354 3. 120341 2. 976374 2. 970277  
11727014\_ 3. 380793 3. 646271 3. 727808 3. 750428 3. 613611 3. 652478  
11727015\_ 5. 247739 4. 64604 5. 128407 3. 815607 3. 786437 3. 880789  
11727016\_ 4. 624439 4. 536488 4. 568982 3. 911856 3. 901377 4. 199836  
11727017\_ 5. 011947 5. 149545 5. 11074 4. 681363 4. 747453 4. 758539  
11727018\_ 4. 635806 4. 296556 4. 55879 4. 308485 4. 35695 4. 200204  
11727019\_ 6. 84989 6. 681253 6. 747951 7. 043789 7. 07275 7. 121568  
11727020\_ 7. 731233 7. 718332 7. 697686 8. 049429 8. 032338 8. 114225  
11727021\_ 8. 161206 8. 209619 8. 179036 7. 9021 7. 895411 7. 828852  
11727022\_ 6. 06916 5. 910091 6. 076004 5. 119723 4. 922258 5. 04403  
11727023\_ 9. 454632 9. 468818 9. 485944 8. 005597 7. 957078 8. 027098  
11727024\_ 7. 701246 7. 618187 7. 678371 7. 663992 7. 654035 7. 643319  
11727025\_ 8. 246055 8. 261888 8. 275387 8. 172328 8. 287202 8. 222345  
11727026\_ 9. 48078 9. 474117 9. 499888 9. 557454 9. 58464 9. 541272  
11727027\_ 6. 663167 6. 508566 6. 541296 6. 346265 6. 404667 6. 437285  
11727028\_ 4. 430836 4. 200485 4. 301825 4. 434399 4. 363562 4. 401  
11727029\_ 5. 725976 5. 737005 5. 698042 5. 836668 5. 869861 5. 849541  
11727030\_ 6. 238284 6. 273605 6. 139825 6. 333812 6. 271791 6. 278715  
11727031\_ 8. 258907 8. 288122 8. 284445 8. 210367 8. 223263 8. 176783  
11727032\_ 2. 28968 2. 235438 2. 490452 2. 422244 2. 323736 2. 412104

11727033\_ 8. 300831 8. 159629 8. 293671 8. 64804 8. 635819 8. 619779  
11727034\_ 8. 471822 8. 404771 8. 442923 8. 786156 8. 808688 8. 81548  
11727035\_ 9. 791426 9. 74748 9. 754853 9. 769754 9. 794356 9. 781171  
11727036\_ 6. 445389 6. 536154 6. 491597 6. 370744 6. 394392 6. 381072  
11727037\_ 7. 072462 7. 099304 7. 071043 7. 592429 7. 514346 7. 571083  
11727038\_ 7. 588101 7. 589926 7. 596557 7. 832593 7. 825457 7. 851718  
11727039\_ 6. 082506 5. 8563 6. 195203 6. 245349 6. 348196 6. 433505  
11727040\_ 6. 230473 6. 005093 6. 182865 6. 610923 6. 746372 6. 707539  
11727041\_ 7. 567025 7. 512885 7. 574368 7. 446103 7. 481495 7. 427733  
11727042\_ 7. 937288 7. 932842 8. 000911 7. 919422 7. 892237 7. 888638  
11727043\_ 7. 641414 7. 517425 7. 574358 7. 485135 7. 486058 7. 420451  
11727044\_ 8. 410583 8. 312249 8. 478202 8. 083896 7. 993468 8. 111981  
11727045\_ 5. 195993 5. 188244 5. 122191 5. 120638 5. 169424 5. 176785  
11727046\_ 5. 962704 5. 790482 5. 670656 6. 012583 5. 984978 6. 233657  
11727047\_ 8. 062962 8. 026431 8. 095813 8. 292381 8. 28808 8. 355877  
11727048\_ 7. 596496 7. 473258 7. 482448 7. 272673 7. 348338 7. 359018  
11727049\_ 9. 737843 9. 680836 9. 714316 9. 549695 9. 539984 9. 548287  
11727050\_ 7. 505036 7. 44075 7. 54358 7. 156454 7. 174876 7. 096015  
11727051\_ 5. 36762 5. 398451 5. 237182 5. 277175 5. 594666 5. 399821  
11727052\_ 5. 805383 5. 6938 5. 892202 5. 976466 5. 92434 6. 004664  
11727053\_ 6. 453781 6. 556708 6. 457193 6. 682549 6. 521198 6. 489051  
11727054\_ 5. 496631 5. 45467 5. 405166 5. 524039 5. 505121 5. 554626  
11727055\_ 6. 08083 5. 968532 5. 894932 5. 766282 5. 822808 5. 781986  
11727056\_ 4. 108592 3. 856016 3. 880785 3. 355834 3. 111901 3. 116377  
11727057\_ 7. 272481 7. 295564 7. 319567 6. 960725 6. 816725 6. 896176  
11727058\_ 5. 020709 5. 029442 4. 864086 5. 532011 5. 275304 5. 493188  
11727059\_ 5. 20205 5. 269059 5. 076891 5. 665312 5. 532982 5. 734395  
11727060\_ 9. 235056 9. 230226 9. 188239 9. 747726 9. 769869 9. 638251  
11727061\_ 9. 294801 9. 23667 9. 284234 9. 270327 9. 24198 9. 266502  
11727062\_ 5. 392011 5. 467834 5. 322093 5. 473919 5. 380406 5. 370507  
11727063\_ 9. 274469 9. 251483 9. 30529 9. 342348 9. 445831 9. 367533  
11727064\_ 8. 889446 8. 85093 8. 92666 8. 705092 8. 732217 8. 685175  
11727065\_ 9. 598962 9. 492009 9. 541273 9. 24052 9. 26915 9. 309795  
11727066\_ 8. 680528 8. 564542 8. 665926 8. 448883 8. 523786 8. 427069  
11727067\_ 3. 538543 3. 654591 3. 363436 3. 672141 3. 797485 3. 398669  
11727068\_ 5. 397162 5. 580247 5. 658591 5. 532497 5. 551612 5. 57936  
11727069\_ 4. 580179 4. 620152 4. 739019 4. 628975 4. 584933 4. 700243  
11727070\_ 8. 216536 8. 1753 8. 175642 8. 180487 8. 122242 8. 149227  
11727071\_ 4. 24726 4. 24726 4. 406503 4. 341192 4. 487093 4. 351805  
11727072\_ 2. 37028 2. 5238 2. 619688 2. 371779 2. 280062 2. 467252  
11727073\_ 4. 844288 4. 906678 4. 7713 4. 965578 4. 942825 4. 9189  
11727074\_ 2. 574679 2. 469401 2. 595649 2. 669985 2. 806308 2. 4857  
11727075\_ 5. 079919 5. 027478 5. 054824 5. 085201 5. 205989 5. 085201  
11727076\_ 4. 598421 4. 763543 4. 692946 4. 736759 4. 767974 4. 892185  
11727077\_ 8. 008552 7. 883803 7. 95491 7. 820883 7. 835438 7. 757804  
11727078\_ 8. 141813 8. 090391 8. 106755 7. 897243 8. 016781 8. 010975  
11727079\_ 8. 443921 8. 342622 8. 453702 8. 037977 8. 068899 8. 118978  
11727080\_ 6. 477055 6. 457543 6. 393821 6. 377407 6. 418096 6. 344314  
11727081\_ 8. 434853 8. 219641 8. 336464 8. 634078 8. 65257 8. 740746  
11727082\_ 6. 155628 6. 072717 6. 180505 6. 220227 6. 104549 6. 177902  
11727083\_ 9. 206057 9. 179986 9. 213497 9. 202325 9. 246106 9. 232672

11727084\_ 2. 228547 2. 25483 2. 236509 2. 325077 2. 240489 2. 200189  
11727085\_ 2. 637692 2. 605516 2. 677518 2. 761067 2. 820705 2. 83198  
11727086\_ 5. 273059 5. 527736 5. 341947 5. 380649 5. 397861 5. 496109  
11727087\_ 9. 447967 9. 375917 9. 383378 9. 449316 9. 527521 9. 429388  
11727088\_ 4. 089022 4. 344469 4. 430008 4. 121965 3. 835232 3. 803947  
11727089\_ 4. 283273 4. 459939 4. 705059 4. 264337 4. 098145 4. 206915  
11727090\_ 6. 159771 6. 010244 6. 161004 5. 628214 5. 548767 5. 522446  
11727091\_ 7. 680393 7. 64286 7. 722245 7. 872993 7. 866012 7. 860517  
11727092\_ 4. 140098 4. 561387 4. 278327 3. 723418 3. 842875 3. 695255  
11727093\_ 10. 38101 10. 36085 10. 35295 10. 41503 10. 37604 10. 33687  
11727094\_ 7. 046489 6. 905401 7. 059222 7. 563216 7. 493235 7. 508479  
11727095\_ 7. 137671 7. 028264 7. 161009 7. 118408 7. 247321 7. 288589  
11727096\_ 8. 135172 8. 065159 8. 109015 8. 191794 8. 224489 8. 197161  
11727097\_ 9. 325294 9. 321749 9. 331803 9. 155338 9. 085023 9. 094874  
11727098\_ 7. 234068 7. 172865 7. 284057 7. 306392 7. 289973 7. 329192  
11727099\_ 5. 541061 5. 667594 5. 551628 5. 468031 5. 609647 5. 589814  
11727100\_ 5. 497014 5. 610515 5. 577676 5. 686466 5. 704431 5. 766716  
11727101\_ 7. 66356 7. 668652 7. 680618 7. 436849 7. 405364 7. 434587  
11727102\_ 7. 470339 7. 512189 7. 527935 6. 75409 6. 681021 6. 757735  
11727103\_ 9. 52995 9. 449672 9. 519216 9. 080523 9. 09054 9. 080251  
11727104\_ 5. 086053 5. 172298 4. 994575 5. 005539 5. 01517 5. 048976  
11727105\_ 3. 437869 3. 696748 3. 546514 3. 546514 3. 515992 3. 468147  
11727106\_ 8. 377652 8. 241156 8. 307146 8. 289444 8. 412026 8. 370249  
11727107\_ 9. 679849 9. 594371 9. 647219 9. 736498 9. 761666 9. 723191  
11727108\_ 9. 337465 9. 22454 9. 330873 9. 435704 9. 425806 9. 475354  
11727109\_ 4. 200921 3. 777852 4. 164725 3. 942603 4. 10927 4. 239592  
11727110\_ 4. 787035 4. 88825 4. 859486 4. 880334 4. 922866 4. 886347  
11727111\_ 4. 863056 4. 763071 4. 803651 6. 535396 6. 500991 6. 554301  
11727112\_ 4. 589211 4. 720331 4. 578283 4. 694259 4. 770958 4. 648642  
11727113\_ 5. 357724 5. 113493 5. 145339 4. 584933 4. 347179 4. 249775  
11727114\_ 6. 971134 7. 053186 7. 007439 6. 688764 6. 755942 6. 744424  
11727115\_ 7. 484842 7. 400837 7. 450625 7. 110214 7. 212662 7. 124622  
11727116\_ 2. 910951 2. 913517 2. 885745 2. 93091 2. 949535 2. 963542  
11727117\_ 5. 722393 5. 900208 5. 817351 5. 554436 5. 397861 5. 619463  
11727118\_ 4. 338639 4. 386403 4. 367123 4. 315967 4. 344913 4. 34085  
11727119\_ 3. 084467 3. 343853 2. 836309 3. 234611 3. 101013 3. 055212  
11727120\_ 9. 512352 9. 481465 9. 489253 9. 171301 9. 106332 9. 056624  
11727121\_ 9. 04517 8. 980088 9. 041392 8. 621989 8. 610677 8. 591022  
11727122\_ 2. 189396 2. 189396 2. 249114 2. 168108 2. 361778 2. 1823  
11727123\_ 2. 259848 2. 246763 2. 269608 2. 356473 2. 110124 2. 269608  
11727124\_ 2. 800565 2. 574308 2. 808221 2. 752103 2. 854322 2. 79387  
11727125\_ 9. 234905 9. 213497 9. 274875 8. 86515 8. 857691 8. 811248  
11727126\_ 5. 385035 5. 556361 5. 450938 5. 760439 5. 707637 5. 536189  
11727127\_ 3. 712879 4. 093034 3. 813824 3. 595767 3. 474154 3. 85526  
11727128\_ 4. 763543 4. 704079 4. 456128 4. 563831 4. 585633 4. 475317  
11727129\_ 4. 7546 4. 820683 4. 763757 4. 824195 4. 807233 4. 969997  
11727130\_ 7. 458226 7. 444898 7. 396399 6. 938409 6. 849603 6. 925572  
11727131\_ 6. 380442 6. 275791 6. 300643 8. 181264 8. 159079 8. 205261  
11727132\_ 8. 725371 8. 762265 8. 815551 8. 297309 8. 21296 8. 186619  
11727133\_ 7. 662955 7. 569675 7. 598403 7. 592892 7. 626885 7. 660858  
11727134\_ 6. 050612 5. 92103 6. 110737 5. 637825 5. 629774 5. 665917

11727135\_ 6. 030461 5. 965056 6. 005149 5. 671638 5. 661608 5. 699655  
11727136\_ 6. 863207 6. 847293 6. 878038 7. 271567 7. 181767 7. 143811  
11727137\_ 4. 717273 4. 746474 4. 648246 4. 815501 4. 531496 4. 824759  
11727138\_ 3. 606313 3. 649318 3. 744833 3. 673602 3. 677813 3. 673602  
11727139\_ 4. 172441 3. 994496 4. 125617 4. 007726 3. 982042 4. 023937  
11727140\_ 4. 173534 4. 250934 4. 370337 4. 364117 4. 48322 4. 337427  
11727141\_ 4. 41011 4. 275974 4. 322446 4. 053491 4. 281177 4. 219206  
11727142\_ 4. 193198 4. 240124 4. 234341 4. 192111 4. 269175 4. 203483  
11727143\_ 3. 933229 3. 855742 4. 304716 4. 033248 3. 855742 3. 822717  
11727144\_ 6. 1544 6. 194873 6. 163178 6. 361282 6. 308813 6. 372053  
11727145\_ 6. 342727 6. 306247 6. 277616 6. 643557 6. 768091 6. 814914  
11727146\_ 5. 614563 5. 553518 5. 481003 5. 976782 6. 068687 6. 17981  
11727147\_ 7. 045088 7. 009306 7. 031531 6. 160355 6. 263567 6. 073142  
11727148\_ 7. 570622 7. 446588 7. 61229 6. 677339 6. 844593 6. 967649  
11727149\_ 5. 789947 5. 713376 5. 349385 5. 614563 5. 840119 5. 732374  
11727150\_ 5. 831108 5. 8846 5. 798859 4. 558862 4. 801117 4. 970008  
11727151\_ 7. 889905 7. 925121 7. 754387 7. 249461 7. 370332 7. 33934  
11727152\_ 7. 373547 7. 297635 7. 31137 5. 910773 5. 939852 5. 944028  
11727153\_ 7. 554551 7. 509137 7. 59997 6. 69157 6. 739151 6. 800418  
11727154\_ 6. 24326 6. 380067 6. 221539 5. 754905 5. 494409 5. 815227  
11727155\_ 7. 106162 7. 112987 7. 065277 6. 66406 6. 670484 6. 672567  
11727156\_ 8. 527387 8. 449128 8. 475137 8. 121008 8. 138673 8. 166988  
11727157\_ 7. 967425 7. 898159 7. 926096 7. 7573 7. 70295 7. 813599  
11727158\_ 7. 531338 7. 638884 7. 561086 7. 368794 7. 362937 7. 251872  
11727159\_ 7. 510536 7. 423459 7. 426223 7. 253709 7. 396094 7. 320003  
11727160\_ 9. 123664 9. 016367 9. 103712 9. 266356 9. 197531 9. 239949  
11727161\_ 9. 138262 9. 0068 9. 061545 9. 156184 9. 104522 9. 102037  
11727162\_ 9. 148988 9. 101855 9. 078719 9. 165546 9. 193942 9. 17425  
11727163\_ 7. 3323 7. 454401 7. 666485 6. 402758 6. 386733 6. 481046  
11727164\_ 5. 919021 5. 94336 5. 945076 5. 891958 5. 789911 5. 937799  
11727165\_ 7. 155654 7. 029501 7. 122089 7. 01009 6. 976497 6. 989682  
11727166\_ 4. 61352 4. 737943 4. 876044 4. 601653 4. 640186 4. 8737  
11727167\_ 5. 160178 4. 949961 5. 26034 5. 094867 5. 208682 5. 214409  
11727168\_ 4. 639116 4. 405654 4. 355335 4. 553607 4. 597241 4. 462638  
11727169\_ 6. 395994 6. 510016 6. 414652 6. 466122 6. 597116 6. 553465  
11727170\_ 7. 94317 7. 933057 8. 026268 7. 964535 7. 871988 7. 991764  
11727171\_ 7. 334213 7. 258629 7. 374235 6. 947585 6. 954662 6. 974337  
11727172\_ 6. 377847 6. 233356 6. 340307 6. 441819 6. 497107 6. 51075  
11727173\_ 7. 021307 6. 98052 7. 142345 6. 453615 6. 541665 6. 574348  
11727174\_ 8. 342008 8. 229213 8. 338321 7. 819185 7. 753539 7. 791917  
11727175\_ 2. 605516 2. 47102 2. 47102 2. 519871 2. 61341 2. 519577  
11727176\_ 5. 283672 5. 303608 5. 376031 5. 314497 5. 426098 5. 408966  
11727177\_ 4. 104739 4. 150223 4. 06162 4. 118209 3. 98185 4. 092559  
11727178\_ 6. 893222 6. 880315 6. 935293 6. 437483 6. 508782 6. 422153  
11727179\_ 6. 113222 6. 125816 6. 015309 5. 774753 5. 762212 5. 899218  
11727180\_ 7. 777239 7. 739184 7. 826278 7. 352668 7. 313725 7. 294145  
11727181\_ 7. 506174 7. 523329 7. 515633 5. 857338 5. 870937 5. 922087  
11727182\_ 5. 876701 5. 888033 6. 026159 5. 658949 5. 580162 5. 671674  
11727183\_ 5. 285218 5. 345598 5. 268184 5. 074659 5. 2084 4. 794788  
11727184\_ 6. 302413 6. 253372 6. 228723 5. 872121 6. 118706 5. 992354  
11727185\_ 5. 665394 5. 717229 5. 394488 5. 842223 5. 523406 5. 674008

11727186\_ 9. 110339 9. 087752 9. 103418 8. 847954 8. 835599 8. 858973  
11727187\_ 6. 145065 6. 070162 6. 297515 5. 799555 5. 997647 5. 998579  
11727188\_ 8. 121942 8. 113792 8. 168101 7. 661537 7. 64997 7. 681327  
11727189\_ 7. 239639 7. 095538 7. 246102 7. 622937 7. 567757 7. 519597  
11727190\_ 6. 414953 6. 364934 6. 384643 6. 160507 6. 317635 6. 225983  
11727191\_ 6. 194315 5. 965017 6. 20077 5. 369497 5. 444356 5. 671901  
11727192\_ 2. 660015 2. 66299 2. 489247 2. 532273 2. 609648 2. 634675  
11727193\_ 4. 696415 4. 90982 4. 861583 4. 917221 4. 952053 4. 88684  
11727194\_ 7. 301309 7. 330018 7. 361964 6. 779107 6. 894417 6. 864773  
11727195\_ 7. 066036 7. 099531 7. 328081 6. 813082 6. 757663 6. 75266  
11727196\_ 5. 726017 5. 79399 5. 815586 5. 35934 5. 376149 5. 425433  
11727197\_ 7. 519794 7. 503526 7. 442902 6. 84269 6. 787208 6. 876094  
11727198\_ 7. 872931 7. 747797 7. 874181 7. 355115 7. 23801 7. 405809  
11727199\_ 7. 472808 7. 349963 7. 42987 6. 6625 6. 684229 6. 822186  
11727200\_ 10. 17336 10. 1659 10. 14686 10. 06747 10. 0018 10. 02476  
11727201\_ 4. 361001 4. 514863 4. 512504 4. 261688 4. 26062 4. 348987  
11727202\_ 4. 853331 4. 810517 4. 782448 4. 748358 4. 742903 4. 59096  
11727203\_ 6. 078057 5. 994547 6. 008253 5. 884016 5. 921268 5. 769206  
11727204\_ 7. 684187 7. 683517 7. 643553 7. 670448 7. 713317 7. 798507  
11727205\_ 6. 290381 6. 287566 6. 619536 6. 198202 6. 27664 6. 345704  
11727206\_ 5. 424328 5. 349491 5. 349491 5. 415588 5. 348206 5. 569461  
11727207\_ 5. 832556 5. 727047 5. 832556 5. 429439 5. 08775 5. 244743  
11727208\_ 6. 596093 6. 504017 6. 417746 5. 869928 5. 72986 5. 890155  
11727209\_ 9. 414558 9. 335378 9. 378861 9. 464111 9. 430558 9. 387214  
11727210\_ 4. 394421 4. 504213 4. 230795 4. 343595 4. 452131 4. 377531  
11727211\_ 7. 190317 7. 088393 7. 156165 7. 4878 7. 514346 7. 555912  
11727212\_ 4. 602021 4. 960259 4. 637343 5. 001383 5. 079293 4. 992368  
11727213\_ 6. 401176 6. 431763 6. 450835 6. 660497 6. 646825 6. 67886  
11727214\_ 8. 476299 8. 433131 8. 505562 8. 256215 8. 246592 8. 152126  
11727215\_ 7. 376829 7. 267109 7. 475533 6. 961089 7. 01363 6. 988406  
11727216\_ 6. 147734 6. 278078 6. 17981 6. 41944 6. 481046 6. 481032  
11727217\_ 3. 749803 3. 822667 3. 747377 3. 67642 3. 68725 3. 609112  
11727218\_ 5. 175137 5. 210164 5. 331666 5. 403991 5. 34466 5. 339673  
11727219\_ 7. 799789 7. 834717 7. 8329 6. 944182 6. 956076 6. 877763  
11727220\_ 5. 726881 5. 763634 5. 670582 5. 851937 5. 833286 5. 830427  
11727221\_ 3. 144033 3. 159566 3. 309526 3. 839263 3. 553938 3. 602104  
11727222\_ 6. 811979 6. 927735 6. 912991 6. 877736 6. 923758 7. 015523  
11727223\_ 6. 21253 6. 33338 6. 371704 5. 918328 5. 675308 5. 895146  
11727224\_ 6. 383348 6. 594872 6. 389366 6. 524636 6. 515782 6. 464673  
11727225\_ 6. 012513 6. 175622 6. 059102 6. 201626 6. 18255 6. 241303  
11727226\_ 3. 325094 3. 188941 3. 219576 3. 55068 3. 370501 3. 345678  
11727227\_ 3. 510915 3. 516628 3. 379989 3. 189085 3. 413942 3. 755308  
11727228\_ 6. 105709 6. 169522 5. 80564 6. 118838 6. 122294 6. 178932  
11727229\_ 5. 239302 5. 303246 5. 365314 5. 20847 5. 312538 5. 144728  
11727230\_ 6. 971486 7. 129201 7. 004501 7. 082076 7. 053082 7. 063791  
11727231\_ 4. 515596 4. 42248 4. 52373 4. 041251 4. 301181 4. 275543  
11727232\_ 3. 27279 3. 455641 3. 51601 3. 387211 3. 275902 3. 381359  
11727233\_ 5. 846871 5. 897485 5. 769675 5. 672285 5. 510183 5. 75978  
11727234\_ 6. 889846 6. 849603 7. 007989 6. 149074 6. 219677 6. 231247  
11727235\_ 5. 846964 5. 98533 5. 940817 5. 968017 6. 091044 5. 952201  
11727236\_ 7. 337825 7. 218689 7. 308939 6. 179296 6. 288657 6. 34953

11727237\_ 4. 539425 4. 364423 4. 245358 3. 700252 4. 02231 3. 774993  
11727238\_ 4. 584933 4. 666192 4. 717212 4. 745501 4. 643874 4. 763543  
11727239\_ 4. 451435 4. 626075 4. 794789 4. 694657 4. 727002 4. 650494  
11727240\_ 4. 751658 4. 9694 4. 740955 4. 670194 4. 435227 4. 624919  
11727241\_ 5. 018391 4. 978026 4. 803794 4. 914651 5. 026571 5. 082455  
11727242\_ 6. 073903 6. 268114 6. 122428 6. 327308 6. 25959 6. 151843  
11727243\_ 5. 436271 5. 441097 5. 233108 5. 563751 5. 492641 5. 372431  
11727244\_ 7. 223427 7. 180602 7. 13061 6. 563208 6. 711885 6. 836007  
11727245\_ 5. 46964 5. 448296 5. 503847 5. 491566 5. 580225 5. 557663  
11727246\_ 6. 98039 6. 815924 6. 894657 6. 511144 6. 464375 6. 495507  
11727247\_ 6. 419554 6. 138411 6. 293902 6. 000723 5. 928147 5. 94292  
11727248\_ 3. 423275 3. 160735 3. 404213 3. 479654 3. 586677 3. 974728  
11727249\_ 3. 818401 4. 058812 4. 001664 3. 940487 4. 122446 4. 074268  
11727250\_ 5. 883378 5. 800665 5. 867249 5. 93062 6. 0301 6. 084024  
11727251\_ 6. 066995 6. 186428 6. 059314 6. 300589 6. 225469 6. 17981  
11727252\_ 2. 434377 2. 604269 2. 384991 2. 524369 2. 427396 2. 391409  
11727253\_ 3. 5223 3. 524488 3. 495786 3. 535377 3. 457722 3. 606313  
11727254\_ 6. 209692 6. 25133 6. 211331 6. 448378 6. 286432 6. 390846  
11727255\_ 5. 11527 4. 991559 4. 944535 5. 056201 5. 057425 4. 960516  
11727256\_ 7. 727373 7. 748475 7. 795133 6. 886652 6. 993897 6. 917901  
11727257\_ 5. 259968 5. 345598 5. 25032 5. 35646 5. 36323 5. 26172  
11727258\_ 5. 646133 5. 884486 5. 848741 5. 768053 5. 894697 5. 727751  
11727259\_ 5. 534002 5. 618368 5. 541996 5. 691021 5. 433707 5. 559817  
11727260\_ 5. 02838 5. 2313 5. 046005 5. 284059 5. 031699 5. 005176  
11727261\_ 6. 026748 6. 034861 5. 829043 5. 822067 5. 898251 5. 855049  
11727262\_ 6. 035545 5. 877902 6. 053914 5. 316899 5. 315292 5. 375346  
11727263\_ 5. 771983 5. 650963 5. 985013 5. 103446 5. 123612 5. 2666  
11727264\_ 5. 742928 5. 930138 5. 880114 6. 03579 6. 006009 6. 073142  
11727265\_ 7. 077282 6. 979857 7. 1109 6. 962839 6. 935019 7. 043429  
11727266\_ 3. 112587 3. 100661 3. 000102 3. 041713 3. 022352 3. 036792  
11727267\_ 5. 951248 5. 890335 6. 055997 6. 111569 6. 111856 6. 121271  
11727268\_ 5. 474519 5. 382972 5. 456799 5. 659792 5. 845365 5. 855391  
11727269\_ 8. 453434 8. 387554 8. 385841 8. 108455 8. 101693 8. 08063  
11727270\_ 2. 247739 2. 26056 2. 302957 2. 4206 2. 574331 2. 38681  
11727271\_ 2. 171176 2. 273235 2. 235709 2. 144624 2. 280346 2. 174142  
11727272\_ 2. 906144 2. 882072 2. 920026 2. 653091 3. 047999 2. 88402  
11727273\_ 7. 455057 7. 449518 7. 556668 7. 608006 7. 621918 7. 578756  
11727274\_ 6. 779107 6. 684125 6. 722368 6. 71956 6. 672355 6. 692905  
11727275\_ 7. 148451 7. 294667 7. 337828 7. 816387 7. 730012 7. 767814  
11727276\_ 6. 55352 6. 35182 6. 434451 6. 003878 6. 001805 6. 099888  
11727277\_ 6. 253221 6. 324749 6. 267639 6. 027137 6. 14959 6. 030396  
11727278\_ 5. 860104 5. 887513 5. 88627 6. 188848 6. 128441 6. 208495  
11727279\_ 9. 561965 9. 474346 9. 525583 9. 224023 9. 141432 9. 100929  
11727280\_ 4. 172172 4. 20856 4. 135496 4. 087628 4. 024084 4. 246413  
11727281\_ 6. 481616 6. 644832 6. 473566 6. 548618 6. 531655 6. 498024  
11727282\_ 6. 387086 6. 427188 6. 444217 6. 37599 6. 472262 6. 482971  
11727283\_ 5. 686491 5. 819549 5. 552894 5. 573704 5. 553275 5. 557344  
11727284\_ 3. 084539 3. 30641 2. 989138 3. 208955 3. 218132 3. 233996  
11727285\_ 3. 307075 3. 214628 2. 935368 3. 151905 3. 105386 3. 06745  
11727286\_ 3. 530822 3. 609771 3. 730798 3. 504662 3. 313452 3. 349578  
11727287\_ 7. 702501 7. 701574 7. 738375 8. 214298 8. 106175 8. 173236

11727288\_ 5. 589153 5. 736613 5. 598711 5. 723241 5. 713216 5. 701959  
11727289\_ 4. 811929 4. 885951 4. 795475 4. 832555 4. 807976 5. 138592  
11727290\_ 5. 809505 5. 841177 5. 67093 5. 485962 5. 761301 5. 589763  
11727291\_ 6. 985956 6. 963548 6. 900433 6. 929845 6. 917661 6. 97363  
11727292\_ 3. 476647 3. 295151 3. 522442 3. 497099 3. 638539 3. 257019  
11727293\_ 4. 62025 4. 947483 4. 479311 6. 114174 6. 014418 6. 137622  
11727294\_ 6. 396567 6. 175809 6. 283742 6. 669533 6. 652796 6. 656016  
11727295\_ 7. 231113 7. 123942 7. 37229 7. 037 7. 118485 7. 037559  
11727296\_ 4. 700243 4. 561011 4. 663769 4. 623827 4. 460076 4. 427115  
11727297\_ 4. 347179 4. 335594 4. 322155 4. 461117 4. 312345 4. 577069  
11727298\_ 6. 567383 6. 496855 6. 438085 6. 226353 6. 356939 6. 387883  
11727299\_ 4. 673039 4. 453503 4. 56174 4. 427408 4. 471259 4. 317605  
11727300\_ 6. 56978 6. 602529 6. 488205 6. 42293 6. 491917 6. 536429  
11727301\_ 6. 983021 6. 958609 7. 061988 7. 3851 7. 380774 7. 448857  
11727302\_ 4. 219648 3. 801827 4. 054883 3. 238991 3. 336056 3. 593541  
11727303\_ 8. 796062 8. 753866 8. 797645 8. 643296 8. 638713 8. 632371  
11727304\_ 4. 654396 4. 602076 4. 437468 4. 546099 4. 2868 4. 470714  
11727305\_ 7. 064221 7. 11803 7. 116216 6. 752593 6. 829499 6. 787675  
11727306\_ 7. 052658 7. 115255 7. 002212 6. 88356 6. 771302 6. 856534  
11727307\_ 6. 550191 6. 392634 6. 569366 6. 268642 6. 189021 6. 374691  
11727308\_ 4. 641394 4. 735682 4. 628921 4. 615302 4. 75134 4. 727814  
11727309\_ 4. 85812 4. 905055 4. 869842 4. 838958 4. 918751 4. 860135  
11727310\_ 6. 954984 7. 059109 6. 941428 7. 123723 7. 112127 7. 075008  
11727311\_ 6. 20762 6. 064634 6. 278258 5. 990943 6. 102715 6. 309849  
11727312\_ 2. 644095 2. 287451 2. 41696 2. 547123 2. 652328 2. 434153  
11727313\_ 4. 415744 4. 601406 4. 4959 4. 688786 4. 706847 4. 612295  
11727314\_ 8. 685925 8. 588695 8. 696792 7. 809282 7. 826206 7. 853988  
11727315\_ 5. 47625 5. 571441 5. 613734 5. 638813 5. 617172 5. 548295  
11727316\_ 5. 569584 5. 528551 5. 499639 5. 556633 5. 555151 5. 570776  
11727317\_ 4. 558366 4. 618417 4. 222805 4. 613619 4. 648786 4. 741872  
11727318\_ 3. 944393 4. 298014 3. 966318 4. 416698 4. 394328 4. 410692  
11727319\_ 3. 334983 3. 334289 3. 402975 3. 386282 3. 225047 3. 581591  
11727320\_ 5. 802139 5. 866126 6. 080802 5. 85774 5. 907782 5. 959688  
11727321\_ 5. 362987 5. 248549 5. 168273 5. 315193 5. 26837 5. 197336  
11727322\_ 4. 322821 4. 311752 4. 441688 4. 304135 4. 543337 4. 437066  
11727323\_ 5. 958369 5. 963668 5. 824332 6. 072285 5. 991833 5. 97239  
11727324\_ 6. 221728 6. 246279 6. 272048 6. 199735 6. 204721 6. 18017  
11727325\_ 5. 00705 5. 013644 4. 914501 5. 023371 5. 052918 4. 977775  
11727326\_ 4. 850366 5. 025669 4. 826056 4. 960891 4. 943653 5. 025669  
11727327\_ 4. 288542 4. 338798 4. 365194 4. 363407 4. 363407 4. 346325  
11727328\_ 3. 463631 3. 490433 3. 481945 3. 626177 3. 389889 3. 398236  
11727329\_ 5. 270517 5. 343871 5. 286284 5. 362148 5. 392721 5. 352671  
11727330\_ 5. 998673 6. 137017 5. 970301 5. 926444 5. 889766 5. 982436  
11727331\_ 5. 931453 5. 611296 5. 834312 6. 447925 6. 323797 6. 434882  
11727332\_ 4. 420962 4. 164196 4. 174534 4. 552219 4. 663973 4. 425861  
11727333\_ 4. 930856 4. 940018 4. 964937 5. 19929 5. 177046 5. 161862  
11727334\_ 5. 932535 5. 925777 5. 829608 5. 985735 6. 033506 5. 901724  
11727335\_ 4. 394225 4. 040401 4. 375203 4. 375203 4. 326905 4. 497082  
11727336\_ 5. 798585 5. 891598 5. 741364 5. 745821 5. 662951 5. 594993  
11727337\_ 5. 516509 5. 465221 5. 48026 5. 652738 5. 640807 5. 72831  
11727338\_ 4. 18156 4. 368724 4. 490695 4. 252278 4. 30994 4. 197296

11727339\_ 6. 01677 6. 060398 6. 076815 6. 504672 6. 280138 6. 37914  
11727340\_ 7. 225981 7. 086275 7. 181495 7. 033337 7. 117572 7. 184157  
11727341\_ 5. 923891 6. 036052 5. 764141 6. 076709 6. 132944 6. 122127  
11727342\_ 7. 136277 7. 227602 7. 069898 7. 067996 7. 116512 7. 093528  
11727343\_ 6. 8717 6. 783645 6. 792558 6. 743806 6. 856349 6. 87701  
11727344\_ 2. 975631 3. 631726 3. 129927 3. 081224 3. 088398 3. 223562  
11727345\_ 4. 294698 4. 348248 4. 177264 4. 724106 4. 592398 4. 602696  
11727346\_ 5. 285218 5. 162788 5. 147495 5. 249221 5. 173064 5. 105697  
11727347\_ 5. 218436 5. 236435 5. 253702 5. 304861 5. 314254 5. 299588  
11727348\_ 7. 313531 7. 385939 7. 397815 7. 659226 7. 722204 7. 668164  
11727349\_ 5. 304548 5. 313295 5. 283993 5. 328833 5. 369686 5. 461687  
11727350\_ 6. 934412 7. 028344 7. 193066 6. 670909 6. 486723 6. 740392  
11727351\_ 5. 473849 5. 569882 5. 428797 5. 479801 5. 565846 5. 476945  
11727352\_ 7. 121677 7. 08521 7. 001541 7. 091972 6. 969481 6. 922773  
11727353\_ 7. 507978 7. 421962 7. 509524 7. 981143 8. 059478 8. 072713  
11727354\_ 4. 487709 4. 555445 4. 509979 4. 602112 4. 62476 4. 737532  
11727355\_ 2. 594881 2. 563351 2. 328938 2. 422566 2. 695876 2. 695876  
11727356\_ 3. 781886 3. 823164 3. 55253 3. 787092 3. 901852 3. 781886  
11727357\_ 4. 815683 4. 863059 4. 64897 4. 833726 4. 74574 4. 790141  
11727358\_ 3. 783485 3. 882455 3. 741196 4. 055179 3. 90826 3. 965486  
11727359\_ 4. 566896 4. 820708 4. 591426 4. 843752 4. 83652 4. 866013  
11727360\_ 5. 480908 5. 608071 5. 41233 5. 58118 5. 697144 5. 617664  
11727361\_ 6. 56468 6. 49667 6. 415524 6. 01632 6. 051711 5. 950451  
11727362\_ 10. 86364 10. 85563 10. 85428 10. 88859 10. 8755 10. 83752  
11727363\_ 9. 483297 9. 354046 9. 501095 9. 481038 9. 46302 9. 488842  
11727364\_ 9. 400854 9. 343127 9. 432137 9. 343127 9. 436979 9. 351598  
11727365\_ 6. 797452 6. 794351 6. 803359 6. 969465 6. 868536 6. 880455  
11727366\_ 6. 750007 6. 847861 6. 820609 6. 989814 6. 877486 6. 919429  
11727367\_ 6. 397541 6. 321838 6. 301006 6. 427329 6. 360548 6. 394909  
11727368\_ 7. 24235 7. 291486 7. 238969 7. 326437 7. 357502 7. 241147  
11727369\_ 7. 451236 7. 496092 7. 436483 7. 456792 7. 527024 7. 502544  
11727370\_ 6. 244666 6. 199068 6. 123651 6. 548527 6. 436003 6. 449093  
11727371\_ 2. 94135 2. 945929 3. 066649 2. 933161 3. 008452 2. 94135  
11727372\_ 10. 23841 10. 14122 10. 16552 10. 16648 10. 16328 10. 16137  
11727373\_ 9. 371063 9. 35663 9. 386236 9. 322337 9. 362066 9. 300124  
11727374\_ 7. 880288 7. 883715 7. 927203 8. 016505 8. 040868 8. 102976  
11727375\_ 7. 67995 7. 621476 7. 749972 7. 808261 7. 813725 7. 845459  
11727376\_ 8. 372787 8. 348705 8. 402191 8. 57013 8. 527443 8. 471656  
11727377\_ 8. 78899 8. 640555 8. 817894 8. 72684 8. 757695 8. 796138  
11727378\_ 7. 476622 7. 481175 7. 434587 7. 650979 7. 653407 7. 682092  
11727379\_ 4. 621714 4. 648021 5. 079337 4. 953968 4. 966955 4. 922384  
11727380\_ 6. 585467 6. 540725 6. 51171 7. 034751 7. 033368 7. 020462  
11727381\_ 8. 97204 8. 889704 8. 994612 8. 993917 8. 97007 8. 968755  
11727382\_ 9. 796336 9. 715481 9. 761545 9. 731395 9. 757601 9. 784405  
11727383\_ 7. 580945 7. 568148 7. 547517 7. 529599 7. 624665 7. 559674  
11727384\_ 5. 864429 5. 835415 5. 870242 5. 899737 5. 912928 5. 887682  
11727385\_ 8. 237445 8. 164004 8. 182432 7. 959086 8. 027092 7. 958601  
11727386\_ 4. 176943 4. 191613 4. 173273 4. 355673 4. 320108 4. 302541  
11727387\_ 2. 852865 2. 83198 3. 0958 3. 389749 3. 296534 3. 253684  
11727388\_ 2. 692676 2. 815083 2. 84279 3. 221511 3. 113735 3. 069055  
11727389\_ 6. 683844 6. 534231 6. 683476 6. 073759 5. 995961 6. 030819



11727390\_ 3. 527348 3. 233763 3. 095773 3. 529838 3. 341376 3. 632292  
11727391\_ 2. 954885 2. 803414 2. 657178 2. 746888 2. 746888 2. 918691  
11727392\_ 8. 434615 8. 336959 8. 444516 8. 233074 8. 322076 8. 29169  
11727393\_ 8. 218042 8. 248695 8. 22685 8. 050691 8. 055261 8. 041138  
11727394\_ 6. 315438 6. 108429 6. 296588 6. 621979 6. 798516 6. 67914  
11727395\_ 6. 850777 6. 808537 6. 723349 6. 342556 6. 397982 6. 423832  
11727396\_ 10. 0355 9. 942562 9. 963129 9. 891822 9. 891216 9. 835999  
11727397\_ 10. 3547 10. 34813 10. 31388 10. 29593 10. 3599 10. 3194  
11727398\_ 5. 093717 5. 275363 5. 082532 5. 156303 5. 076265 5. 156303  
11727399\_ 4. 50832 4. 643717 4. 533497 4. 518981 4. 519796 4. 709338  
11727400\_ 5. 285895 5. 063021 4. 979192 5. 132642 5. 160268 5. 060898  
11727401\_ 3. 783159 3. 753362 3. 613448 3. 747401 3. 606259 3. 503743  
11727402\_ 9. 728068 9. 699275 9. 71549 9. 568013 9. 556603 9. 584802  
11727403\_ 4. 347837 4. 333642 4. 278972 4. 555195 4. 532873 4. 710091  
11727404\_ 4. 597573 4. 602748 4. 484711 4. 755559 4. 621247 4. 518414  
11727405\_ 1. 917312 1. 898324 1. 980002 1. 954871 2. 062369 1. 833059  
11727406\_ 4. 321005 4. 295007 3. 812212 3. 201993 3. 268641 3. 268641  
11727407\_ 7. 778596 7. 730896 7. 775807 7. 286685 7. 382491 7. 478633  
11727408\_ 6. 969136 7. 053372 7. 035229 7. 160484 7. 163598 7. 204707  
11727409\_ 7. 444284 7. 425083 7. 350159 7. 225137 7. 259898 7. 232983  
11727410\_ 9. 970865 9. 908135 9. 897605 9. 890634 9. 840526 9. 755538  
11727411\_ 7. 813668 7. 748967 7. 797828 8. 055127 8. 071372 8. 120779  
11727412\_ 6. 805365 6. 716814 6. 718427 6. 295031 6. 230607 6. 297458  
11727413\_ 4. 884593 5. 073036 5. 015676 4. 981601 4. 890539 4. 955042  
11727414\_ 7. 367372 7. 501014 7. 249681 6. 772261 6. 80429 6. 765911  
11727415\_ 5. 627666 5. 789823 5. 545789 5. 28607 5. 480939 5. 39088  
11727416\_ 7. 092102 6. 877706 6. 991945 6. 835407 6. 934628 6. 886133  
11727417\_ 7. 730101 7. 708688 7. 713697 7. 873511 7. 886636 7. 818341  
11727418\_ 7. 758134 7. 662454 7. 645821 7. 81268 7. 91585 7. 856056  
11727419\_ 11. 29078 11. 28084 11. 28402 11. 24998 11. 2392 11. 14441  
11727420\_ 6. 970176 6. 892566 6. 871464 7. 013055 6. 970211 7. 01474  
11727421\_ 10. 76966 10. 74935 10. 69113 10. 85082 10. 89781 10. 81519  
11727422\_ 10. 89275 10. 8246 10. 89631 10. 91085 10. 90645 10. 90139  
11727423\_ 10. 42249 10. 37906 10. 44612 10. 37247 10. 40596 10. 3547  
11727424\_ 10. 66175 10. 69828 10. 66101 10. 70563 10. 66924 10. 62255  
11727425\_ 11. 28629 11. 23248 11. 2471 11. 50844 11. 52406 11. 53787  
11727426\_ 7. 502912 7. 408774 7. 341208 7. 974386 7. 906754 7. 957153  
11727427\_ 3. 155234 3. 054346 3. 138626 2. 912551 3. 257907 2. 976681  
11727428\_ 2. 663952 2. 557171 2. 40565 2. 567973 2. 697541 2. 474041  
11727429\_ 6. 243692 6. 080175 6. 353177 6. 498208 6. 545168 6. 731627  
11727430\_ 3. 599182 3. 496599 3. 625408 3. 775733 3. 879309 3. 879309  
11727431\_ 6. 581971 6. 561506 6. 671159 6. 594872 6. 614637 6. 613468  
11727432\_ 9. 934936 9. 878499 9. 885438 10. 03394 10. 06042 10. 05677  
11727433\_ 10. 77934 10. 8045 10. 74241 11. 09727 10. 97634 10. 98514  
11727434\_ 4. 440475 4. 729849 4. 357634 4. 548538 4. 700243 4. 520863  
11727435\_ 5. 65579 5. 612808 5. 644781 5. 700302 5. 672666 5. 719156  
11727436\_ 5. 073036 5. 065692 4. 893615 5. 220408 5. 074663 5. 104678  
11727437\_ 7. 169199 7. 086291 7. 120322 6. 82739 6. 843254 6. 879459  
11727438\_ 8. 031467 8. 021002 8. 004335 8. 41329 8. 411075 8. 438515  
11727439\_ 7. 29065 7. 25933 7. 273984 6. 844654 6. 861452 6. 828602  
11727440\_ 8. 54909 8. 474388 8. 604222 7. 430743 7. 446984 7. 457077

11727441\_ 7. 736932 7. 593861 7. 882705 6. 815853 6. 784884 6. 758994  
11727442\_ 5. 394055 5. 577785 5. 402943 5. 540789 5. 48634 5. 595363  
11727443\_ 4. 576001 4. 775971 4. 592149 4. 736759 4. 755936 4. 8268  
11727444\_ 5. 606179 5. 570162 5. 697641 5. 458119 5. 398103 5. 613058  
11727445\_ 3. 284374 3. 43426 3. 713768 2. 823447 2. 823447 2. 93532  
11727446\_ 3. 829324 3. 512174 3. 389806 3. 58711 3. 582655 3. 547302  
11727447\_ 6. 996182 6. 880342 7. 018608 5. 617043 5. 732394 5. 737595  
11727448\_ 6. 947098 6. 753897 6. 908425 5. 561972 5. 539266 5. 637328  
11727449\_ 4. 694989 4. 999693 4. 584304 4. 445346 4. 910739 4. 717546  
11727450\_ 6. 899674 6. 919786 6. 871397 6. 646572 6. 700105 6. 77236  
11727451\_ 5. 473833 5. 481519 5. 336647 5. 414471 5. 219276 5. 185732  
11727452\_ 7. 392275 7. 390843 7. 416954 7. 179195 7. 230574 7. 188389  
11727453\_ 8. 653001 8. 584317 8. 58376 9. 248434 9. 234003 9. 22182  
11727454\_ 3. 847563 3. 854158 3. 76947 3. 815403 3. 815008 3. 822582  
11727455\_ 3. 842445 3. 846841 3. 763435 3. 815403 3. 846912 3. 822582  
11727456\_ 8. 31965 8. 308209 8. 323837 7. 99576 8. 034942 8. 040236  
11727457\_ 7. 26005 7. 216946 7. 178368 7. 040191 7. 08741 7. 040191  
11727458\_ 7. 677906 7. 640479 7. 774337 8. 028561 7. 968804 7. 961087  
11727459\_ 6. 617088 6. 531304 6. 677653 6. 566811 6. 577779 6. 660673  
11727460\_ 6. 881626 6. 801737 6. 743289 6. 966194 7. 021537 7. 097504  
11727461\_ 6. 866136 6. 809436 6. 746189 6. 999954 7. 011227 7. 100404  
11727462\_ 5. 301975 5. 092902 5. 384109 5. 250444 5. 073893 5. 376841  
11727463\_ 6. 880466 6. 890869 6. 84458 6. 968406 6. 945295 6. 977096  
11727464\_ 5. 434336 5. 446262 5. 320379 5. 342512 5. 249616 5. 397747  
11727465\_ 5. 66097 5. 732328 5. 753439 5. 753446 5. 798295 5. 912684  
11727466\_ 7. 332369 7. 271175 7. 352248 7. 024914 7. 083236 6. 951355  
11727467\_ 7. 138868 6. 917353 7. 026043 7. 169761 7. 155405 7. 084497  
11727468\_ 11. 37191 11. 3898 11. 37576 11. 81685 11. 77294 11. 72898  
11727469\_ 11. 17162 11. 18949 11. 18908 11. 54666 11. 50057 11. 46909  
11727470\_ 8. 071286 8. 011199 8. 188659 7. 642316 7. 673568 7. 691532  
11727471\_ 2. 80864 2. 923932 2. 879315 2. 83198 2. 886336 2. 945353  
11727472\_ 3. 925678 3. 742066 3. 863785 3. 999115 3. 925678 3. 766814  
11727473\_ 3. 492692 3. 606313 3. 482598 3. 758677 3. 578579 3. 748987  
11727474\_ 6. 956364 6. 899838 6. 87877 6. 583012 6. 753798 6. 788512  
11727475\_ 6. 749686 6. 693849 6. 893331 6. 622157 6. 530041 6. 63459  
11727476\_ 7. 528078 7. 565792 7. 587713 7. 532422 7. 518512 7. 565089  
11727477\_ 7. 949796 7. 873434 7. 924963 8. 106664 7. 972121 7. 981941  
11727478\_ 8. 61308 8. 525198 8. 491581 8. 675247 8. 677115 8. 632816  
11727479\_ 8. 454622 8. 395737 8. 442923 8. 284178 8. 282293 8. 300124  
11727480\_ 5. 695023 5. 789525 5. 714748 5. 993407 6. 015418 5. 932732  
11727481\_ 3. 597755 3. 153152 3. 322947 3. 247707 3. 557357 3. 241587  
11727482\_ 9. 124656 9. 08547 9. 098696 9. 170747 9. 169129 9. 20568  
11727483\_ 9. 598006 9. 592257 9. 613248 9. 682546 9. 741552 9. 672086  
11727484\_ 7. 971546 7. 893799 7. 898369 8. 396169 8. 40221 8. 369205  
11727485\_ 4. 65532 4. 639722 4. 623953 5. 292086 5. 067475 5. 223033  
11727486\_ 6. 726576 6. 693731 6. 697228 7. 085676 7. 102165 7. 181655  
11727487\_ 8. 250638 8. 138673 8. 168312 8. 918596 8. 899655 8. 865074  
11727488\_ 8. 057782 8. 138117 8. 089122 8. 825201 8. 637835 8. 611639  
11727489\_ 9. 438182 9. 452308 9. 418888 10. 07676 10. 06116 10. 00554  
11727490\_ 8. 040616 7. 933004 7. 965756 8. 683788 8. 590657 8. 565982  
11727491\_ 4. 976186 5. 032191 5. 034854 4. 901476 4. 849431 4. 674692

11727492\_ 7. 415171 7. 472704 7. 219621 7. 387553 7. 324487 7. 423666  
11727493\_ 5. 980837 6. 018466 5. 830097 5. 956303 5. 908115 6. 007427  
11727494\_ 6. 830434 6. 716111 6. 793826 7. 170617 7. 14997 7. 087642  
11727495\_ 8. 773048 8. 766054 8. 811454 8. 357664 8. 400845 8. 392183  
11727496\_ 12. 495 12. 461 12. 46135 12. 20479 12. 20861 12. 18767  
11727497\_ 7. 316463 7. 344839 7. 405904 7. 05325 6. 979369 7. 06266  
11727498\_ 6. 116699 6. 007485 6. 029699 6. 01788 6. 143015 6. 13264  
11727499\_ 7. 743679 7. 678949 7. 710914 7. 208016 7. 166987 7. 230373  
11727500\_ 4. 499388 4. 587506 4. 687341 4. 578043 4. 700243 4. 592521  
11727501\_ 4. 584933 4. 471772 4. 606673 4. 875519 4. 664341 4. 736527  
11727502\_ 5. 084866 5. 134632 5. 122757 5. 403597 5. 081054 5. 264606  
11727503\_ 3. 621076 3. 892685 3. 909244 3. 756925 3. 801444 3. 71494  
11727504\_ 2. 037879 2. 398186 2. 224761 2. 320839 2. 335214 2. 283554  
11727505\_ 7. 752626 7. 640491 7. 701561 7. 930942 7. 966421 7. 908868  
11727506\_ 9. 307205 9. 297576 9. 291945 8. 970755 8. 925464 8. 906945  
11727507\_ 6. 356801 6. 373484 6. 2514 6. 271059 6. 159771 6. 016355  
11727508\_ 8. 347681 8. 257743 8. 318662 8. 096875 8. 141399 8. 053743  
11727509\_ 5. 786493 5. 841177 5. 971336 5. 775359 5. 715908 5. 599131  
11727510\_ 5. 905213 5. 669604 5. 87841 6. 032215 5. 967557 5. 965834  
11727511\_ 6. 173486 5. 91313 6. 159973 6. 423017 6. 257952 6. 197208  
11727512\_ 6. 300722 6. 177486 6. 39529 6. 135852 6. 147776 6. 176006  
11727513\_ 4. 655856 4. 818897 4. 817085 4. 908868 4. 614226 4. 909675  
11727514\_ 2. 712314 2. 630927 2. 669134 2. 575242 2. 431603 2. 590613  
11727515\_ 4. 990001 5. 156877 5. 156877 5. 11527 5. 452657 5. 188414  
11727516\_ 6. 360394 6. 076709 6. 314217 6. 817324 6. 915478 6. 792183  
11727517\_ 5. 544167 5. 63791 5. 709521 5. 493397 5. 490937 5. 587784  
11727518\_ 5. 256156 5. 292575 5. 151253 5. 158696 5. 295213 5. 172654  
11727519\_ 3. 220917 3. 490355 3. 349791 3. 652388 3. 677185 3. 673265  
11727520\_ 6. 895719 6. 798746 6. 855883 6. 98823 6. 959931 7. 070201  
11727521\_ 7. 98972 7. 950333 8. 014492 7. 495901 7. 510343 7. 584046  
11727522\_ 8. 415292 8. 370928 8. 378982 6. 432602 6. 302907 6. 38444  
11727523\_ 9. 723221 9. 640695 9. 682592 7. 679025 7. 659366 7. 759362  
11727524\_ 4. 791903 4. 899239 4. 824195 4. 860686 4. 947908 4. 702235  
11727525\_ 8. 830195 8. 810223 8. 813712 8. 577669 8. 521517 8. 589277  
11727526\_ 2. 361778 2. 363241 2. 211366 2. 320417 2. 327346 2. 395422  
11727527\_ 4. 197183 4. 080695 4. 149883 4. 143495 4. 253096 4. 463279  
11727528\_ 6. 177413 6. 204513 6. 284337 5. 698027 5. 748129 5. 786908  
11727529\_ 6. 957168 6. 790513 6. 895501 6. 291274 6. 393065 6. 408845  
11727530\_ 8. 295454 8. 26853 8. 311643 7. 950401 7. 977858 7. 94639  
11727531\_ 6. 828574 6. 84284 6. 892301 6. 905491 6. 903135 6. 932878  
11727532\_ 9. 762744 9. 665886 9. 693607 9. 524858 9. 516743 9. 548748  
11727533\_ 9. 688242 9. 645767 9. 741178 9. 513057 9. 489688 9. 51306  
11727534\_ 5. 779549 5. 770755 5. 973677 5. 836232 5. 716245 5. 76489  
11727535\_ 5. 499201 5. 536891 5. 43801 6. 172026 6. 273102 6. 060881  
11727536\_ 6. 679901 6. 714542 6. 711115 7. 442902 7. 475834 7. 571083  
11727537\_ 4. 342612 4. 343243 4. 304707 4. 232451 4. 424963 4. 291061  
11727538\_ 2. 866981 3. 042485 2. 822713 3. 005392 3. 075448 3. 156434  
11727539\_ 10. 79792 10. 74849 10. 7795 10. 39977 10. 39636 10. 42978  
11727540\_ 8. 228825 8. 156088 8. 173344 7. 872345 7. 815973 7. 876976  
11727541\_ 8. 774172 8. 787024 8. 74484 8. 744127 8. 686204 8. 678947  
11727542\_ 7. 521297 7. 409349 7. 55954 7. 453935 7. 526132 7. 41494

11727543\_ 8. 373764 8. 267772 8. 31955 8. 973725 8. 886842 8. 980266  
11727544\_ 8. 672926 8. 577858 8. 70151 8. 660793 8. 635067 8. 689749  
11727545\_ 8. 681567 8. 718373 8. 579297 7. 911192 7. 888327 7. 815658  
11727546\_ 6. 501314 6. 594588 6. 522981 6. 26237 6. 323239 6. 382162  
11727547\_ 9. 131441 9. 086559 9. 012031 9. 292603 9. 188934 9. 234484  
11727548\_ 3. 394631 3. 432291 3. 398236 3. 669941 3. 257937 3. 565326  
11727549\_ 2. 845078 2. 959795 2. 730318 2. 997392 2. 909247 3. 061205  
11727550\_ 3. 843417 3. 832695 4. 230753 3. 589822 3. 514923 3. 722116  
11727551\_ 3. 944832 4. 149093 3. 939983 4. 071431 4. 157401 4. 110489  
11727552\_ 8. 547056 8. 465822 8. 509263 8. 808716 8. 829239 8. 680511  
11727553\_ 3. 215755 3. 174722 3. 179253 3. 025972 3. 088981 3. 060386  
11727554\_ 2. 802867 2. 97666 2. 415619 2. 646755 2. 668079 2. 576073  
11727555\_ 7. 812947 7. 729257 7. 743679 7. 838307 7. 819796 7. 812428  
11727556\_ 5. 935512 5. 761487 5. 803428 5. 414869 5. 584813 5. 530723  
11727557\_ 5. 494715 5. 470573 5. 503094 5. 70893 5. 745086 5. 834677  
11727558\_ 6. 107228 5. 873399 5. 97686 5. 828997 5. 917599 5. 974795  
11727559\_ 5. 449398 5. 343748 5. 545933 5. 377907 5. 396468 5. 594785  
11727560\_ 4. 0617 3. 845585 3. 850246 3. 87467 3. 896261 3. 954157  
11727561\_ 4. 3296 4. 335594 4. 158864 4. 108631 4. 269673 4. 533721  
11727562\_ 6. 281693 6. 222175 6. 260434 6. 29923 6. 245476 6. 283922  
11727563\_ 8. 73324 8. 650173 8. 744256 8. 939565 8. 873068 8. 950476  
11727564\_ 4. 063132 4. 061715 4. 004567 4. 147719 4. 054288 4. 127543  
11727565\_ 4. 908358 4. 552475 4. 830244 4. 289301 4. 588939 4. 588939  
11727566\_ 6. 237139 6. 304496 6. 23831 6. 076185 6. 183123 6. 199167  
11727567\_ 6. 971486 6. 909477 6. 997578 6. 945284 7. 014664 6. 97097  
11727568\_ 6. 18976 6. 097927 6. 195056 6. 137876 6. 044285 5. 966905  
11727569\_ 4. 659213 4. 659213 4. 533144 4. 671558 4. 531773 4. 566744  
11727570\_ 4. 806353 4. 639312 4. 435152 4. 728144 4. 615448 4. 706961  
11727571\_ 6. 553374 6. 720251 6. 677767 6. 760505 6. 732286 6. 753645  
11727572\_ 2. 244166 2. 275781 2. 272469 2. 186759 2. 415876 2. 372754  
11727573\_ 3. 378914 3. 498289 3. 629409 3. 496975 3. 605464 3. 510396  
11727574\_ 4. 614701 4. 627511 4. 542916 4. 690459 4. 493923 4. 6816  
11727575\_ 6. 25915 6. 341999 6. 200677 6. 630191 6. 715056 6. 538625  
11727576\_ 6. 448378 6. 530481 6. 450817 6. 820852 6. 84945 6. 731765  
11727577\_ 4. 856986 4. 856986 4. 817717 5. 521452 5. 34095 5. 348449  
11727578\_ 5. 332009 5. 363788 5. 296798 5. 668902 5. 74526 5. 566195  
11727579\_ 9. 809165 9. 759162 9. 795757 10. 26222 10. 17924 10. 21397  
11727580\_ 8. 280748 8. 293004 8. 372843 8. 690696 8. 706092 8. 747558  
11727581\_ 4. 502254 4. 505033 4. 476506 4. 512864 4. 536253 4. 556729  
11727582\_ 4. 78719 4. 683554 4. 745091 4. 625489 4. 754231 4. 735951  
11727583\_ 8. 015363 8. 037154 8. 078167 7. 709618 7. 647145 7. 773714  
11727584\_ 4. 556476 4. 666142 4. 48937 4. 647697 4. 903515 4. 803778  
11727585\_ 4. 815683 4. 841284 4. 96004 4. 642384 4. 861049 4. 52373  
11727586\_ 4. 513241 4. 556556 4. 475701 5. 707903 5. 694586 5. 691596  
11727587\_ 7. 094199 7. 118333 7. 171067 7. 42172 7. 520888 7. 544784  
11727588\_ 6. 252236 6. 259302 6. 277549 6. 425147 6. 413162 6. 44356  
11727589\_ 4. 713582 4. 927278 5. 029529 4. 484781 4. 666931 4. 474267  
11727590\_ 5. 862236 5. 975215 5. 850161 5. 993259 5. 97008 5. 900217  
11727591\_ 6. 726595 6. 716455 6. 754581 7. 040081 7. 037973 7. 113873  
11727592\_ 5. 068011 5. 334574 5. 00996 5. 141736 5. 025254 5. 097036  
11727593\_ 6. 307905 6. 181721 6. 316376 6. 027356 5. 997958 6. 172604

11727594\_ 7. 542082 7. 443784 7. 484647 7. 366641 7. 443784 7. 438721  
11727595\_ 8. 083021 8. 0751 8. 039204 7. 992822 8. 015318 7. 990748  
11727596\_ 6. 548579 6. 502829 6. 406434 6. 583792 6. 597786 6. 612363  
11727597\_ 5. 39112 5. 448296 5. 361224 5. 425213 5. 584813 5. 544377  
11727598\_ 6. 218656 6. 065405 6. 038094 6. 352702 6. 228333 6. 324183  
11727599\_ 5. 836475 5. 75652 5. 953689 5. 798395 5. 773591 5. 904498  
11727600\_ 5. 802872 5. 822616 5. 895639 5. 944509 5. 880945 5. 889028  
11727601\_ 4. 481488 4. 321308 4. 15138 4. 3952 4. 527742 4. 502138  
11727602\_ 5. 079302 4. 986927 5. 125201 5. 253023 5. 152772 5. 228627  
11727603\_ 5. 447366 5. 554599 5. 584813 5. 334718 5. 276452 5. 389837  
11727604\_ 5. 161132 5. 029529 5. 014667 5. 190173 5. 39216 5. 222743  
11727605\_ 5. 388758 5. 441864 5. 23961 5. 281805 5. 273463 5. 318362  
11727606\_ 5. 402429 5. 618301 5. 481825 5. 430546 5. 600764 5. 577892  
11727607\_ 7. 039697 7. 028279 7. 015146 7. 388401 7. 431287 7. 388111  
11727608\_ 7. 165054 7. 17076 7. 188737 7. 410477 7. 407458 7. 378163  
11727609\_ 3. 539085 3. 44664 3. 20746 3. 181443 3. 517609 3. 387621  
11727610\_ 6. 732657 6. 762395 6. 681126 6. 922895 6. 841752 6. 955028  
11727611\_ 3. 411885 3. 459363 3. 369573 3. 369536 3. 369573 3. 253685  
11727612\_ 4. 949326 5. 034242 5. 074718 5. 191498 5. 024214 5. 088345  
11727613\_ 5. 743325 5. 793646 5. 719941 5. 698069 5. 673583 5. 721809  
11727614\_ 7. 273447 7. 376867 7. 30491 7. 381882 7. 438862 7. 438532  
11727615\_ 7. 12407 7. 074538 7. 18519 7. 232457 7. 289973 7. 285703  
11727616\_ 6. 272903 6. 324669 6. 060954 6. 517467 6. 338778 6. 379633  
11727617\_ 5. 761116 5. 934788 5. 763634 6. 018553 6. 002049 5. 912408  
11727618\_ 5. 102739 5. 132165 5. 263285 5. 35974 5. 286429 5. 382394  
11727619\_ 5. 489329 5. 525033 5. 279154 5. 564194 5. 506329 5. 540217  
11727620\_ 3. 099216 3. 013981 3. 34325 2. 459515 2. 807262 2. 853038  
11727621\_ 4. 388695 4. 278995 4. 683366 4. 014182 4. 032754 4. 06082  
11727622\_ 6. 278672 6. 063584 6. 211832 5. 910773 5. 872093 5. 870242  
11727623\_ 4. 469331 4. 584933 4. 798218 4. 311176 4. 30856 4. 311176  
11727624\_ 7. 270279 7. 181004 7. 230141 7. 183559 7. 245876 7. 294437  
11727625\_ 7. 568666 7. 526047 7. 563839 7. 52479 7. 50786 7. 595498  
11727626\_ 7. 905448 7. 715356 7. 847568 7. 846453 7. 78625 7. 824331  
11727627\_ 7. 413806 7. 344604 7. 400837 6. 9855 6. 967734 7. 05231  
11727628\_ 6. 676226 6. 686723 6. 762385 6. 097918 6. 1465 6. 039134  
11727629\_ 6. 324086 6. 168648 6. 306322 6. 410666 6. 511005 6. 492506  
11727630\_ 6. 13259 6. 094767 6. 173994 6. 200515 6. 263567 6. 359175  
11727631\_ 7. 741704 7. 644532 7. 741268 7. 690352 7. 697736 7. 609585  
11727632\_ 5. 475798 5. 585772 5. 480966 5. 582763 5. 653901 5. 689644  
11727633\_ 4. 543799 4. 623861 4. 504407 4. 476976 4. 597834 4. 702501  
11727634\_ 8. 597821 8. 536356 8. 57552 8. 459905 8. 491597 8. 40699  
11727635\_ 3. 762956 3. 856888 3. 513407 3. 849532 3. 768514 3. 784348  
11727636\_ 3. 409805 3. 353993 3. 503737 3. 482306 3. 404437 3. 521492  
11727637\_ 8. 233105 8. 228762 8. 310707 8. 113704 8. 029934 8. 089452  
11727638\_ 7. 907124 7. 84195 8. 010678 7. 914854 8. 002341 7. 897949  
11727639\_ 7. 29259 7. 188523 7. 230698 7. 371073 7. 313665 7. 336288  
11727640\_ 7. 141022 6. 949248 7. 00358 6. 834437 6. 790012 6. 877032  
11727641\_ 6. 545083 6. 684497 6. 56996 6. 544004 6. 439479 6. 386173  
11727642\_ 4. 76755 5. 11527 4. 915176 5. 514914 5. 559136 5. 619463  
11727643\_ 5. 488897 5. 395297 5. 567373 6. 034695 5. 968417 6. 141889  
11727644\_ 5. 02448 4. 96828 5. 079447 4. 895577 4. 817079 5. 009332

11727645\_ 6. 999289 7. 1044 7. 117986 7. 055478 7. 04434 7. 061927  
11727646\_ 6. 608393 6. 542607 6. 676704 6. 228723 6. 129872 6. 192194  
11727647\_ 7. 652535 7. 642223 7. 614016 7. 390555 7. 286655 7. 270568  
11727648\_ 5. 329921 5. 304535 5. 252172 5. 61066 5. 608263 5. 601334  
11727649\_ 11. 33628 11. 30829 11. 34085 11. 33292 11. 35981 11. 2974  
11727650\_ 5. 172035 5. 339502 5. 2222 5. 280979 5. 243833 5. 339673  
11727651\_ 3. 691435 3. 65069 3. 439785 3. 70767 3. 52404 3. 716897  
11727652\_ 5. 460039 5. 594535 5. 394761 5. 569166 5. 542836 5. 449057  
11727653\_ 3. 761289 3. 639707 3. 456706 3. 85196 3. 779324 3. 829314  
11727654\_ 3. 103679 2. 907465 2. 928976 3. 098226 3. 010326 3. 083293  
11727655\_ 6. 08963 5. 962409 6. 202127 5. 988292 5. 896316 6. 177868  
11727656\_ 6. 642959 6. 568477 6. 614397 6. 565118 6. 53974 6. 497955  
11727657\_ 6. 196154 6. 0372 6. 235602 5. 965666 5. 891021 6. 01923  
11727658\_ 3. 508082 3. 570513 3. 468436 3. 369383 3. 33404 3. 424548  
11727659\_ 4. 57346 4. 670847 4. 396632 4. 613126 4. 521187 4. 628765  
11727660\_ 3. 610437 3. 617009 3. 686725 3. 534582 3. 64645 3. 733973  
11727661\_ 5. 032813 4. 96938 4. 939012 4. 964105 5. 059636 5. 032516  
11727662\_ 4. 203973 4. 321284 4. 273547 4. 227287 4. 275749 4. 240509  
11727663\_ 2. 808624 2. 919479 2. 990791 3. 053198 3. 007327 2. 974394  
11727664\_ 3. 742123 3. 918557 3. 582072 4. 039382 3. 953821 3. 639665  
11727665\_ 5. 410572 5. 481148 5. 263893 5. 566329 5. 426098 5. 50022  
11727666\_ 7. 551219 7. 454662 7. 5093 8. 150254 8. 171623 8. 147781  
11727667\_ 3. 885567 3. 958821 3. 95004 3. 929964 3. 827296 3. 83937  
11727668\_ 7. 973537 7. 83265 8. 001775 8. 034136 8. 002994 8. 082026  
11727669\_ 6. 876901 6. 918292 7. 005901 6. 921662 6. 891808 7. 017788  
11727670\_ 6. 642478 6. 549836 6. 65907 6. 579903 6. 628884 6. 626511  
11727671\_ 4. 893768 4. 924377 4. 997032 5. 168735 5. 192094 5. 115001  
11727672\_ 5. 204258 5. 11527 4. 906074 5. 175163 5. 13257 5. 23218  
11727673\_ 5. 745604 5. 831754 5. 644119 5. 841182 5. 828243 5. 783255  
11727674\_ 5. 956421 5. 927783 5. 996126 6. 264714 6. 208102 6. 318829  
11727675\_ 9. 011772 8. 989149 9. 017811 9. 560805 9. 562668 9. 582514  
11727676\_ 8. 497288 8. 541361 8. 479151 8. 523706 8. 598431 8. 659992  
11727677\_ 7. 191981 7. 145528 7. 222344 7. 107067 7. 136086 7. 201258  
11727678\_ 6. 888006 6. 799804 6. 887618 6. 885804 6. 936747 6. 911957  
11727679\_ 6. 837403 6. 654615 6. 873527 6. 633582 6. 757987 6. 804093  
11727680\_ 10. 66399 10. 59052 10. 65457 10. 38971 10. 42277 10. 40346  
11727681\_ 6. 906368 6. 876785 6. 910204 7. 051297 7. 011172 7. 113097  
11727682\_ 6. 631711 6. 731683 6. 63933 6. 935695 6. 88447 7. 015497  
11727683\_ 4. 270348 4. 478108 4. 191128 4. 251643 4. 251643 4. 405034  
11727684\_ 4. 549087 4. 369494 4. 171342 4. 271515 4. 271515 4. 516967  
11727685\_ 5. 95613 5. 949271 5. 846598 6. 107471 6. 064869 5. 969808  
11727686\_ 6. 169036 6. 3025 6. 359399 7. 010586 6. 956076 7. 053419  
11727687\_ 5. 652935 5. 991726 5. 868129 6. 724971 6. 622708 6. 623818  
11727688\_ 5. 626023 5. 461409 5. 689968 6. 13945 6. 164276 6. 248314  
11727689\_ 6. 652748 6. 626853 6. 730596 6. 634134 6. 652748 6. 727853  
11727690\_ 6. 832842 6. 892064 7. 05227 6. 663831 6. 783949 6. 749321  
11727691\_ 5. 912578 5. 977008 5. 820052 5. 986473 5. 889771 6. 005781  
11727692\_ 4. 862111 4. 551101 4. 593979 4. 646472 4. 746596 4. 814692  
11727693\_ 3. 775494 4. 174945 3. 755877 3. 906243 3. 999615 4. 197162  
11727694\_ 5. 328142 5. 384078 5. 408777 5. 348071 5. 344957 5. 387192  
11727695\_ 4. 186832 4. 180555 4. 135496 4. 258201 4. 147383 4. 186334

11727696\_ 7. 816671 7. 927823 7. 880573 8. 02998 7. 979159 7. 990321  
11727697\_ 2. 68509 2. 670663 2. 430966 2. 595046 2. 605516 2. 494072  
11727698\_ 4. 589265 4. 643717 4. 650672 4. 642419 4. 624966 4. 582615  
11727699\_ 5. 493313 5. 447811 5. 484784 5. 731565 5. 80716 5. 737731  
11727700\_ 7. 663898 7. 673421 7. 730896 7. 499403 7. 476229 7. 44657  
11727701\_ 5. 64398 5. 595304 5. 370256 5. 414869 5. 523406 5. 530358  
11727702\_ 5. 073036 5. 095484 5. 057624 5. 134499 5. 154597 5. 151784  
11727703\_ 4. 223169 4. 157152 4. 063306 4. 190202 4. 244958 4. 109027  
11727704\_ 4. 884574 4. 654802 4. 654961 4. 248914 4. 317041 4. 236174  
11727705\_ 4. 20274 4. 240393 4. 223055 4. 327037 4. 44336 4. 480206  
11727706\_ 6. 114551 6. 145107 5. 940461 6. 118838 6. 128192 6. 11945  
11727707\_ 8. 088591 8. 073093 8. 207683 7. 849883 7. 750378 7. 962551  
11727708\_ 3. 593612 3. 57128 3. 57128 3. 624941 3. 513232 3. 490373  
11727709\_ 6. 612298 6. 494636 6. 730363 6. 181949 6. 260407 6. 178459  
11727710\_ 2. 441991 2. 362625 2. 604669 2. 43392 2. 54658 2. 441991  
11727711\_ 4. 434458 4. 345372 4. 245644 4. 514758 4. 347179 4. 506414  
11727712\_ 2. 139059 2. 237431 2. 223312 2. 238939 2. 211544 2. 338665  
11727713\_ 6. 433302 6. 293543 6. 485532 5. 687657 5. 764876 5. 948275  
11727714\_ 6. 599802 6. 838684 6. 72315 6. 60728 6. 561544 6. 416777  
11727715\_ 6. 878531 6. 937503 7. 031788 7. 111797 7. 127162 7. 170148  
11727716\_ 5. 996162 6. 073222 5. 973344 6. 276278 6. 146756 6. 115188  
11727717\_ 4. 134629 4. 108454 4. 39725 4. 812574 4. 643717 4. 583874  
11727718\_ 4. 608064 4. 605051 4. 487453 4. 625072 4. 539832 4. 69994  
11727719\_ 8. 421031 8. 353417 8. 366574 8. 231469 8. 234892 8. 219911  
11727720\_ 7. 786782 7. 670141 7. 806944 7. 66769 7. 722204 7. 628479  
11727721\_ 5. 789947 5. 613851 5. 655399 6. 057995 6. 044433 6. 13945  
11727722\_ 3. 082923 3. 094835 3. 094835 3. 135551 3. 142678 3. 104412  
11727723\_ 5. 142819 5. 142819 4. 998523 4. 872484 5. 0015 5. 097237  
11727724\_ 6. 045707 6. 050856 6. 069288 6. 031351 6. 0305 6. 054804  
11727725\_ 5. 948891 5. 877026 5. 76377 5. 851795 5. 911844 5. 93164  
11727726\_ 6. 685539 6. 612181 6. 725582 6. 670943 6. 733226 6. 660519  
11727727\_ 6. 555214 6. 522378 6. 541665 6. 648586 6. 670515 6. 55509  
11727728\_ 7. 593965 7. 474788 7. 556148 7. 603515 7. 610875 7. 606443  
11727729\_ 7. 15272 7. 09205 7. 193066 6. 56973 6. 695181 6. 658932  
11727730\_ 3. 914076 3. 860251 3. 895583 3. 920429 3. 82722 3. 875819  
11727731\_ 2. 788546 2. 619064 2. 571993 2. 632945 2. 725733 2. 674762  
11727732\_ 4. 989709 5. 202395 4. 945686 5. 11527 5. 154033 5. 156303  
11727733\_ 3. 724676 3. 820432 3. 400481 3. 469747 3. 467742 3. 40329  
11727734\_ 2. 674902 2. 814231 2. 762912 2. 884745 2. 744199 2. 81586  
11727735\_ 7. 126083 7. 178631 7. 039897 7. 20807 7. 264932 7. 225073  
11727736\_ 5. 142062 4. 934434 5. 086864 6. 555899 6. 429256 6. 504764  
11727737\_ 4. 56043 4. 653255 4. 877622 5. 977166 5. 774134 5. 956713  
11727738\_ 2. 713689 2. 604448 2. 778169 2. 877191 2. 79157 2. 945929  
11727739\_ 5. 728085 6. 018569 5. 689035 5. 801473 5. 810692 5. 942493  
11727740\_ 3. 628336 3. 669112 3. 535489 3. 68867 3. 76971 4. 021599  
11727741\_ 4. 815683 5. 003864 4. 813991 5. 137461 5. 159463 5. 108087  
11727742\_ 3. 261623 3. 336641 3. 398236 3. 299534 3. 21279 3. 357486  
11727743\_ 6. 266584 6. 330435 6. 108985 6. 468388 6. 481046 6. 401601  
11727744\_ 5. 69466 5. 791998 5. 551385 5. 794739 5. 778116 5. 854523  
11727745\_ 3. 466538 3. 685724 3. 549086 3. 289078 3. 380337 3. 547895  
11727746\_ 4. 906466 4. 950662 4. 878764 4. 995959 4. 919681 5. 125249

11727747\_ 3. 796849 3. 730488 3. 687403 3. 765352 3. 823977 3. 990414  
11727748\_ 5. 529486 5. 663216 5. 554538 5. 762611 5. 742272 5. 758274  
11727749\_ 3. 159223 3. 278649 3. 292835 2. 877474 2. 999117 2. 948576  
11727750\_ 3. 488239 3. 985353 3. 594379 3. 383397 3. 485844 3. 619255  
11727751\_ 4. 240813 4. 151028 4. 515612 4. 192061 4. 506799 4. 401954  
11727752\_ 5. 441614 5. 255265 5. 197054 5. 284744 5. 208252 5. 285326  
11727753\_ 6. 660902 6. 644208 6. 481319 6. 628326 6. 684364 6. 656949  
11727754\_ 6. 611437 6. 476031 6. 559838 6. 458053 6. 370418 6. 402408  
11727755\_ 5. 680803 5. 567607 5. 729143 5. 574058 5. 723243 5. 700039  
11727756\_ 4. 309088 4. 282768 4. 073777 4. 213226 4. 246843 4. 275543  
11727757\_ 5. 870242 5. 992897 5. 795469 5. 93062 5. 964318 5. 974834  
11727758\_ 4. 168087 4. 320957 4. 206155 4. 15233 4. 076898 4. 172851  
11727759\_ 2. 17431 2. 382928 2. 58996 2. 577737 2. 376192 2. 464224  
11727760\_ 2. 590982 2. 458026 2. 871488 2. 590284 2. 605516 2. 414792  
11727761\_ 6. 172298 5. 750361 5. 932569 6. 490895 6. 418898 6. 403834  
11727762\_ 4. 768148 4. 828705 4. 661346 4. 677269 4. 787378 4. 768148  
11727763\_ 4. 326076 4. 336231 4. 357157 4. 533256 4. 719753 4. 656791  
11727764\_ 5. 181704 5. 240348 5. 304935 5. 265219 5. 15208 5. 226092  
11727765\_ 5. 896066 5. 842937 5. 952818 6. 457842 6. 464805 6. 434545  
11727766\_ 5. 760577 5. 875147 5. 88952 6. 263211 6. 145198 6. 255093  
11727767\_ 5. 580258 5. 728913 5. 38328 5. 948043 5. 925545 6. 044633  
11727768\_ 7. 374924 7. 382957 7. 383756 7. 856548 7. 904478 7. 883735  
11727769\_ 7. 658311 7. 666319 7. 842123 8. 241774 8. 257342 8. 250979  
11727770\_ 6. 171304 5. 980613 6. 145876 6. 231681 6. 189382 6. 208837  
11727771\_ 4. 382538 4. 493145 4. 29739 4. 19968 4. 384665 4. 271094  
11727772\_ 5. 456294 5. 380649 5. 256584 5. 482978 5. 316093 5. 442778  
11727773\_ 8. 457376 8. 413761 8. 497785 8. 449603 8. 500622 8. 445985  
11727774\_ 8. 239678 8. 165761 8. 207092 7. 779856 7. 808234 7. 802864  
11727775\_ 10. 3043 10. 23648 10. 27141 10. 12497 10. 09715 10. 15979  
11727776\_ 7. 863969 7. 747572 7. 900404 7. 830393 7. 864403 7. 898  
11727777\_ 7. 320591 7. 31443 7. 320591 7. 274526 7. 333856 7. 383779  
11727778\_ 9. 546885 9. 595594 9. 547218 9. 409104 9. 339485 9. 360406  
11727779\_ 6. 139287 6. 102211 5. 8679 5. 845472 6. 006244 6. 012062  
11727780\_ 5. 526884 5. 70267 5. 577458 5. 454337 5. 394058 5. 485059  
11727781\_ 3. 926627 3. 755618 3. 850246 3. 809078 3. 901128 3. 750179  
11727782\_ 6. 916615 6. 817661 6. 804591 7. 175261 7. 052628 7. 1941  
11727783\_ 8. 769012 8. 743135 8. 812504 9. 130987 9. 116259 9. 087554  
11727784\_ 8. 344345 8. 358263 8. 356736 8. 795694 8. 754251 8. 788289  
11727785\_ 9. 485916 9. 600636 9. 416457 9. 957234 9. 818186 9. 742335  
11727786\_ 11. 13221 11. 10324 11. 09231 11. 26134 11. 24186 11. 21877  
11727787\_ 5. 490137 5. 522468 5. 343941 5. 800388 5. 686361 5. 813071  
11727788\_ 9. 991431 9. 936429 9. 988965 10. 0378 10. 00636 10. 01071  
11727789\_ 8. 691351 8. 66176 8. 731567 9. 242108 9. 193689 9. 208629  
11727790\_ 8. 543412 8. 550229 8. 505117 8. 083896 8. 01181 8. 037563  
11727791\_ 7. 571401 7. 581001 7. 523264 7. 520369 7. 558454 7. 619754  
11727792\_ 7. 613206 7. 589969 7. 654569 7. 842915 7. 781113 7. 862082  
11727793\_ 7. 643533 7. 631069 7. 650389 7. 861485 7. 800581 7. 841717  
11727794\_ 11. 72716 11. 76155 11. 73498 11. 70358 11. 69807 11. 6959  
11727795\_ 11. 70091 11. 6834 11. 66701 11. 69166 11. 65537 11. 64112  
11727796\_ 8. 768117 8. 624778 8. 675464 8. 139018 8. 091581 8. 048163  
11727797\_ 6. 381393 6. 17261 6. 362314 6. 75317 6. 7673 6. 772288



11727798\_ 5. 958736 6. 116369 5. 996628 5. 912341 5. 890709 6. 13945  
11727799\_ 5. 35631 5. 294504 5. 243463 5. 186225 5. 440231 5. 310204  
11727800\_ 8. 806165 8. 733274 8. 799812 9. 044037 9. 054775 9. 084785  
11727801\_ 6. 536494 6. 471579 6. 525104 6. 292969 6. 490641 6. 476213  
11727802\_ 8. 656286 8. 649175 8. 627573 8. 63813 8. 553603 8. 624995  
11727803\_ 7. 671564 7. 570634 7. 58829 7. 341214 7. 331828 7. 400837  
11727804\_ 11. 52772 11. 43993 11. 52481 11. 67023 11. 66539 11. 71548  
11727805\_ 7. 214852 7. 20255 7. 220369 7. 855876 7. 81268 7. 871453  
11727806\_ 8. 56523 8. 40081 8. 572218 8. 812845 8. 79569 8. 829693  
11727807\_ 4. 994959 4. 945729 4. 984669 5. 044049 5. 079983 5. 156303  
11727808\_ 8. 08832 8. 096584 8. 108675 8. 146986 8. 18044 8. 162564  
11727809\_ 4. 879704 4. 965768 4. 920065 5. 030831 5. 010185 5. 195426  
11727810\_ 9. 097048 9. 059259 9. 03652 8. 647395 8. 736066 8. 668562  
11727811\_ 10. 03202 9. 975182 9. 994613 10. 14722 10. 12214 10. 10065  
11727812\_ 10. 71233 10. 68175 10. 68605 10. 78074 10. 79448 10. 77204  
11727813\_ 7. 351741 7. 252911 7. 157656 7. 780324 7. 766604 7. 823336  
11727814\_ 8. 119339 8. 05443 8. 02807 7. 873116 7. 950026 7. 882872  
11727815\_ 8. 287338 8. 171915 8. 274181 7. 534 7. 544772 7. 533274  
11727816\_ 8. 011028 7. 964993 8. 015776 7. 990767 8. 025284 7. 949762  
11727817\_ 8. 883853 8. 838843 8. 896317 7. 986796 8. 057404 8. 024968  
11727818\_ 9. 570163 9. 571771 9. 578992 9. 794949 9. 719782 9. 728872  
11727819\_ 7. 142399 6. 999189 7. 130342 7. 451664 7. 413492 7. 39103  
11727820\_ 9. 175329 9. 112253 9. 24044 9. 30896 9. 334635 9. 348036  
11727821\_ 3. 639639 3. 770199 3. 4848 3. 682969 3. 606313 3. 493181  
11727822\_ 6. 343365 6. 240315 6. 324641 6. 303218 6. 237798 6. 234129  
11727823\_ 6. 7637 6. 632079 6. 726169 6. 585691 6. 500955 6. 648726  
11727824\_ 7. 152734 7. 071197 7. 024755 7. 093409 6. 977216 7. 02371  
11727825\_ 6. 413197 6. 491365 6. 49832 6. 507716 6. 643784 6. 497107  
11727826\_ 8. 99399 8. 907701 9. 017235 8. 510113 8. 541806 8. 532891  
11727827\_ 6. 346167 6. 419107 6. 303524 6. 650469 6. 499869 6. 372108  
11727828\_ 5. 247739 5. 415302 5. 611412 5. 459503 5. 451039 5. 535322  
11727829\_ 6. 614546 6. 524119 6. 687121 6. 7414 6. 72698 6. 813975  
11727830\_ 7. 159416 7. 055228 7. 176903 7. 269682 7. 155797 7. 209584  
11727831\_ 4. 927512 5. 073036 4. 868142 5. 358374 5. 497322 5. 192711  
11727832\_ 9. 090079 9. 062033 9. 130694 9. 192692 9. 132203 9. 191759  
11727833\_ 9. 266765 9. 234886 9. 258737 8. 841313 8. 885143 8. 825386  
11727834\_ 8. 205366 8. 258498 8. 264798 8. 023767 7. 982762 7. 894215  
11727835\_ 6. 438152 6. 348474 6. 436413 6. 686637 6. 843624 6. 68581  
11727836\_ 5. 155777 5. 147616 4. 938324 5. 271411 5. 453793 5. 135472  
11727837\_ 8. 482368 8. 53346 8. 490908 8. 858736 8. 845785 8. 774156  
11727838\_ 7. 394607 7. 373311 7. 445551 7. 398424 7. 416226 7. 401239  
11727839\_ 6. 300833 6. 118011 6. 290269 6. 885403 6. 793268 6. 845612  
11727840\_ 3. 331221 3. 256301 3. 537079 3. 282014 3. 41626 3. 18871  
11727841\_ 8. 131945 8. 096755 8. 134866 7. 946305 8. 020503 7. 966671  
11727842\_ 6. 175314 6. 225513 6. 145286 6. 284955 6. 263259 6. 397843  
11727843\_ 5. 36906 5. 334246 5. 219834 5. 403117 5. 439342 5. 402849  
11727844\_ 8. 486622 8. 532661 8. 524536 8. 513708 8. 459584 8. 495208  
11727845\_ 9. 12637 9. 074211 9. 118605 9. 13467 9. 153337 9. 149246  
11727846\_ 6. 817112 6. 765911 6. 734226 6. 525513 6. 398722 6. 364346  
11727847\_ 5. 809363 5. 739507 5. 829507 6. 294596 6. 213519 6. 313706  
11727848\_ 7. 800239 7. 664881 7. 741141 8. 264012 8. 254218 8. 250305

11727849\_ 9. 577526 9. 51604 9. 645289 9. 38422 9. 434815 9. 461689  
11727850\_ 8. 771417 8. 70709 8. 768425 8. 740104 8. 634615 8. 591666  
11727851\_ 7. 666293 7. 665221 7. 72665 7. 556098 7. 618257 7. 625653  
11727852\_ 7. 714168 7. 684573 7. 796841 7. 618999 7. 655804 7. 664968  
11727853\_ 7. 759139 7. 777704 7. 7618 7. 857086 7. 822548 7. 913522  
11727854\_ 8. 944241 8. 849477 8. 974371 9. 02329 8. 963121 9. 053912  
11727855\_ 7. 755787 7. 677191 7. 784602 7. 736554 7. 7933 7. 759111  
11727856\_ 8. 601642 8. 510488 8. 498071 8. 67821 8. 666781 8. 656242  
11727857\_ 7. 322742 7. 320008 7. 272972 7. 327421 7. 344143 7. 341775  
11727858\_ 7. 269313 7. 068738 7. 272972 7. 499399 7. 400837 7. 481087  
11727859\_ 5. 699914 5. 822406 5. 634541 5. 743916 5. 714682 5. 694433  
11727860\_ 7. 85609 7. 860696 7. 866168 7. 870774 7. 855876 7. 871888  
11727861\_ 5. 614563 5. 619909 5. 514118 5. 367953 5. 260976 5. 272111  
11727862\_ 3. 622483 3. 663855 3. 737312 3. 732552 3. 768951 3. 766285  
11727863\_ 3. 85474 3. 708399 3. 850246 3. 756925 3. 665537 3. 548675  
11727864\_ 5. 073036 4. 708267 5. 261269 5. 11527 5. 10105 5. 093293  
11727865\_ 4. 195378 4. 277622 4. 520505 4. 374595 4. 374595 4. 212341  
11727866\_ 5. 002344 4. 831516 4. 88241 4. 719874 4. 703554 4. 785742  
11727867\_ 5. 187191 5. 116427 5. 074028 5. 132184 5. 224316 5. 047828  
11727868\_ 6. 362436 6. 316018 6. 372437 6. 421266 6. 320437 6. 394456  
11727869\_ 8. 008362 7. 961274 8. 024194 7. 565666 7. 566016 7. 512215  
11727870\_ 3. 406416 3. 347755 3. 451528 3. 300909 3. 47457 3. 281085  
11727871\_ 5. 660393 5. 578012 5. 702542 4. 884714 4. 940524 5. 114491  
11727872\_ 5. 202446 5. 135291 5. 344779 5. 830067 5. 884946 5. 803398  
11727873\_ 6. 027774 5. 95173 5. 973344 6. 554512 6. 527339 6. 63223  
11727874\_ 6. 357794 6. 347626 6. 389366 6. 295486 6. 336362 6. 300643  
11727875\_ 3. 818401 3. 853777 3. 696445 3. 647599 3. 591059 3. 854201  
11727876\_ 3. 181227 3. 170667 3. 181227 3. 215663 3. 2323 3. 107243  
11727877\_ 7. 634461 7. 580008 7. 723738 7. 436503 7. 444145 7. 345076  
11727878\_ 7. 39893 7. 422968 7. 368788 8. 032883 8. 188152 8. 06798  
11727879\_ 8. 111105 8. 007503 8. 091354 9. 020503 9. 067741 9. 012632  
11727880\_ 7. 230373 7. 291564 7. 245107 8. 182193 8. 17484 8. 178009  
11727881\_ 6. 464016 6. 359905 6. 408052 5. 977166 5. 934556 6. 005756  
11727882\_ 5. 060094 4. 802922 5. 190758 4. 732498 4. 763448 5. 090412  
11727883\_ 7. 096833 7. 197276 7. 093866 7. 053991 7. 1472 7. 122236  
11727884\_ 2. 375845 2. 165484 2. 385256 2. 461748 2. 55043 2. 375845  
11727885\_ 3. 382152 3. 58612 3. 372658 3. 373663 3. 56533 3. 490708  
11727886\_ 4. 784243 4. 891456 4. 775969 4. 72709 4. 964129 5. 020146  
11727887\_ 5. 68711 5. 755644 5. 740922 5. 585916 5. 66037 5. 599217  
11727888\_ 5. 546724 5. 670257 5. 486479 5. 774521 5. 519831 5. 571477  
11727889\_ 6. 204206 6. 13945 6. 105792 5. 951165 6. 006886 5. 935257  
11727890\_ 7. 986404 7. 863615 7. 848867 8. 297077 8. 268999 8. 319825  
11727891\_ 5. 799247 5. 88178 5. 78939 6. 146631 6. 104719 6. 133273  
11727892\_ 4. 037428 3. 909593 4. 030979 4. 017062 4. 052441 4. 228057  
11727893\_ 5. 517593 5. 236012 5. 335829 5. 939046 5. 896816 5. 925753  
11727894\_ 5. 890185 5. 88247 5. 819823 5. 867852 5. 884859 5. 944815  
11727895\_ 7. 942114 7. 961626 8. 006946 7. 760824 7. 833903 7. 839024  
11727896\_ 5. 47202 5. 446905 5. 604378 5. 593496 5. 563153 5. 749953  
11727897\_ 9. 600569 9. 525659 9. 576815 9. 814841 9. 901493 9. 841688  
11727898\_ 5. 763603 5. 56298 5. 533524 5. 796764 6. 038179 5. 868014  
11727899\_ 6. 136238 6. 199982 6. 113625 6. 460268 6. 450384 6. 497107

11727900\_ 3. 319613 3. 031776 3. 298183 3. 286585 3. 182902 3. 065504  
11727901\_ 7. 204076 7. 271993 7. 24839 7. 10839 7. 081916 7. 140606  
11727902\_ 8. 058619 7. 991494 7. 953574 7. 79975 7. 849608 8. 017969  
11727903\_ 6. 044806 5. 98478 5. 97466 5. 705557 5. 584037 5. 70265  
11727904\_ 5. 07474 4. 760438 5. 00058 4. 378193 4. 349695 4. 505451  
11727905\_ 6. 781822 6. 825871 6. 795723 6. 682 6. 72553 6. 80988  
11727906\_ 3. 367671 2. 93737 3. 617057 3. 098504 2. 881018 2. 942631  
11727907\_ 6. 225513 6. 115424 6. 225858 6. 154278 6. 250695 6. 240046  
11727908\_ 5. 214256 5. 213129 5. 390505 5. 268876 5. 297498 5. 232301  
11727909\_ 4. 311701 4. 195638 4. 01186 4. 182259 4. 164918 4. 130744  
11727910\_ 5. 017785 5. 07785 5. 002544 5. 237791 5. 165171 5. 126798  
11727911\_ 5. 610389 5. 681625 5. 577351 5. 836674 5. 681625 5. 697069  
11727912\_ 7. 196592 7. 249458 7. 324917 7. 344252 7. 288439 7. 361499  
11727913\_ 6. 587407 6. 597887 6. 596649 6. 618023 6. 614637 6. 65344  
11727914\_ 5. 653279 5. 646066 5. 652616 5. 638294 5. 635496 5. 63352  
11727915\_ 2. 906769 3. 196402 3. 342238 3. 624294 3. 327605 3. 39655  
11727916\_ 7. 949589 7. 963559 7. 834862 8. 771635 8. 79875 8. 716018  
11727917\_ 5. 825572 5. 963744 5. 936924 5. 910773 5. 755325 5. 898099  
11727918\_ 3. 944911 3. 945952 3. 944911 3. 623171 3. 879309 3. 716543  
11727919\_ 4. 004046 4. 106715 3. 909632 4. 095031 3. 901591 4. 053699  
11727920\_ 8. 561912 8. 544304 8. 694204 8. 324846 8. 40408 8. 360158  
11727921\_ 5. 125875 5. 000082 5. 058219 5. 035659 5. 006224 5. 115359  
11727922\_ 8. 041261 7. 991723 8. 088112 8. 30806 8. 288512 8. 401095  
11727923\_ 9. 56294 9. 539261 9. 592746 9. 748845 9. 700384 9. 698117  
11727924\_ 8. 216722 8. 07966 8. 127539 8. 823922 8. 793654 8. 83218  
11727925\_ 4. 388027 4. 615774 4. 318288 4. 543709 4. 533877 4. 470714  
11727926\_ 6. 242059 5. 952932 5. 906774 6. 371159 6. 243025 6. 229444  
11727927\_ 4. 36693 4. 143163 4. 303412 3. 290188 3. 70698 3. 776716  
11727928\_ 4. 70471 4. 624013 4. 510638 4. 459939 4. 589658 4. 643717  
11727929\_ 6. 143563 6. 331672 5. 996444 5. 698968 5. 355426 5. 611575  
11727930\_ 6. 455295 6. 616089 6. 564047 6. 331814 6. 323058 6. 292472  
11727931\_ 2. 142868 2. 153064 2. 148775 2. 153234 2. 145423 2. 071571  
11727932\_ 6. 125394 5. 986216 5. 940998 5. 516866 5. 594176 5. 374866  
11727933\_ 6. 012389 6. 188597 6. 03074 6. 04214 5. 825437 6. 027762  
11727934\_ 7. 621681 7. 473486 7. 624128 7. 626572 7. 659366 7. 680843  
11727935\_ 5. 049737 5. 045531 5. 054747 5. 041325 5. 027902 4. 94619  
11727936\_ 8. 196077 8. 249836 8. 146687 8. 41716 8. 447449 8. 408314  
11727937\_ 9. 496857 9. 5921 9. 454671 8. 924028 8. 950502 8. 86323  
11727938\_ 7. 693614 7. 664346 7. 792248 7. 517765 7. 537352 7. 464845  
11727939\_ 6. 134699 6. 084574 6. 153118 6. 363825 6. 444131 6. 573141  
11727940\_ 6. 023235 6. 118307 5. 964218 6. 190868 6. 154123 6. 195088  
11727941\_ 7. 9515 8. 034383 7. 924783 8. 425545 8. 482452 8. 411804  
11727942\_ 2. 922036 2. 95547 2. 906828 2. 855929 2. 851067 2. 813533  
11727943\_ 3. 286409 3. 26243 3. 163266 3. 220501 3. 180043 3. 254907  
11727944\_ 5. 363567 5. 375855 5. 298305 5. 528624 5. 449407 5. 374866  
11727945\_ 6. 651608 6. 686431 6. 612584 6. 716035 6. 6993 6. 674458  
11727946\_ 6. 797962 6. 638778 6. 48656 7. 376717 7. 267176 7. 181832  
11727947\_ 4. 463746 4. 53848 4. 218275 4. 355697 4. 28957 4. 200678  
11727948\_ 7. 901919 7. 925303 7. 870411 8. 228827 8. 196464 8. 186219  
11727949\_ 8. 635398 8. 556395 8. 58854 8. 540843 8. 554182 8. 558604  
11727950\_ 8. 971231 8. 896039 8. 951332 8. 85925 8. 885553 8. 908037

11727951\_ 6. 516652 6. 461526 6. 357205 6. 338029 6. 270602 6. 336023  
11727952\_ 6. 345986 6. 491316 6. 394776 6. 465176 6. 491316 6. 502606  
11727953\_ 3. 948812 3. 981801 4. 192248 4. 263726 4. 064727 4. 058144  
11727954\_ 5. 477319 5. 461562 5. 53812 5. 452441 5. 375352 5. 444734  
11727955\_ 6. 312635 6. 346375 6. 23831 6. 350181 6. 42455 6. 289953  
11727956\_ 5. 355973 5. 497475 5. 231804 5. 577566 5. 453793 5. 633938  
11727957\_ 5. 428207 5. 400786 5. 369671 5. 40461 5. 357315 5. 391907  
11727958\_ 6. 872176 6. 785187 6. 636153 7. 063599 7. 090494 6. 970708  
11727959\_ 8. 326471 8. 425545 8. 421343 8. 618442 8. 591045 8. 544301  
11727960\_ 7. 777988 7. 644559 7. 798851 7. 969867 7. 939055 7. 924123  
11727961\_ 7. 042035 7. 103488 7. 018608 7. 034331 7. 034331 6. 953184  
11727962\_ 4. 85347 4. 923258 4. 944259 5. 007345 5. 034391 4. 966233  
11727963\_ 3. 962199 3. 849945 3. 658788 3. 367278 3. 504948 3. 46502  
11727964\_ 6. 204828 6. 206103 5. 946062 6. 089262 6. 025952 6. 119822  
11727965\_ 4. 956642 5. 027395 4. 859862 5. 11527 5. 2183 5. 157569  
11727966\_ 2. 605516 2. 664608 2. 462076 2. 361778 2. 649423 2. 479797  
11727967\_ 5. 020848 5. 15723 5. 029529 5. 11527 5. 122922 5. 117821  
11727968\_ 7. 665301 7. 521652 7. 71659 7. 941951 7. 913569 7. 892766  
11727969\_ 7. 013386 6. 803998 6. 950962 6. 188174 6. 219558 6. 264434  
11727970\_ 5. 466092 5. 357357 5. 541623 4. 685998 4. 700243 4. 77543  
11727971\_ 6. 7637 6. 765911 6. 835442 6. 670849 6. 725582 6. 740206  
11727972\_ 7. 11226 7. 135205 7. 197219 7. 212651 7. 201267 7. 168476  
11727973\_ 7. 470712 7. 445685 7. 472839 7. 386909 7. 434587 7. 43044  
11727974\_ 6. 291246 6. 33286 6. 223734 6. 357981 6. 348547 6. 332243  
11727975\_ 4. 420782 4. 369894 4. 241337 4. 339479 4. 233972 4. 216827  
11727976\_ 4. 69876 4. 742263 4. 808945 4. 954419 4. 787937 4. 850347  
11727977\_ 5. 985275 6. 062004 5. 947911 5. 679166 5. 788344 5. 869965  
11727978\_ 7. 301345 7. 266763 7. 277763 7. 096564 7. 06373 7. 155615  
11727979\_ 6. 402917 6. 396564 6. 537201 6. 346401 6. 313611 6. 229055  
11727980\_ 5. 887546 5. 858111 5. 8221 6. 056185 6. 188927 6. 138806  
11727981\_ 5. 033602 4. 895899 4. 959266 5. 134795 5. 220642 5. 335397  
11727982\_ 4. 560024 4. 411537 4. 313214 4. 501913 4. 7726 4. 609783  
11727983\_ 4. 765031 4. 760155 4. 61188 4. 878803 4. 86206 4. 862902  
11727984\_ 7. 871493 7. 881689 7. 984637 7. 612397 7. 556511 7. 627453  
11727985\_ 6. 97881 7. 00398 6. 947517 6. 669758 6. 635363 6. 676604  
11727986\_ 4. 520519 4. 580392 4. 604044 4. 994846 4. 948489 5. 142368  
11727987\_ 6. 356131 6. 392065 6. 456914 6. 472732 6. 503378 6. 523515  
11727988\_ 7. 496853 7. 445455 7. 631341 7. 023915 7. 020462 7. 020462  
11727989\_ 3. 576123 3. 626775 3. 513806 3. 606313 3. 451586 3. 592042  
11727990\_ 5. 816013 5. 888128 5. 983015 5. 745821 5. 791228 5. 801329  
11727991\_ 5. 704919 5. 732315 5. 722084 5. 382869 5. 448051 5. 494912  
11727992\_ 5. 314208 5. 301013 5. 712296 3. 924556 4. 192544 4. 008093  
11727993\_ 1. 922568 1. 922568 2. 247036 1. 849838 1. 946811 1. 705289  
11727994\_ 4. 023616 4. 048489 3. 797796 3. 257941 3. 133896 3. 474115  
11727995\_ 4. 784675 4. 986825 4. 918658 4. 888554 4. 986877 4. 924925  
11727996\_ 7. 15235 7. 089177 7. 255514 6. 936986 6. 74008 6. 771682  
11727997\_ 7. 697604 7. 549425 7. 659322 7. 397642 7. 299162 7. 464845  
11727998\_ 5. 164814 5. 009028 5. 17639 5. 54258 5. 662568 5. 625749  
11727999\_ 5. 820179 5. 971135 5. 951453 6. 444431 6. 33898 6. 521561  
11728000\_ 6. 762215 6. 658015 6. 764419 6. 981383 7. 037158 6. 960454  
11728001\_ 6. 04583 6. 113963 5. 940257 6. 2831 6. 140343 6. 113963

11728002\_ 3. 947527 3. 960517 3. 662022 4. 027139 3. 79579 3. 773668  
11728003\_ 8. 988134 8. 942011 8. 9681 8. 776327 8. 788283 8. 749853  
11728004\_ 7. 811203 7. 842781 7. 816816 7. 724959 7. 707752 7. 692834  
11728005\_ 3. 839715 3. 909593 3. 781564 3. 830456 3. 858009 3. 705625  
11728006\_ 3. 819519 3. 807206 3. 68993 3. 830835 3. 978879 3. 890503  
11728007\_ 5. 421249 5. 540758 5. 458234 5. 522072 5. 566282 5. 436847  
11728008\_ 3. 671671 3. 89345 3. 687283 3. 996376 3. 937959 4. 032969  
11728009\_ 4. 402385 4. 338596 4. 292289 4. 516429 4. 381107 4. 551822  
11728010\_ 6. 67471 6. 531645 6. 658807 6. 460005 6. 614758 6. 52775  
11728011\_ 4. 656319 4. 257448 4. 403655 4. 403655 4. 348507 4. 449352  
11728012\_ 6. 466002 6. 315338 6. 544138 6. 351871 6. 284542 6. 255729  
11728013\_ 7. 867248 7. 703704 7. 717699 7. 503843 7. 487109 7. 560213  
11728014\_ 7. 294737 7. 184175 7. 333094 6. 867103 6. 787538 6. 82747  
11728015\_ 5. 056042 4. 962566 4. 88241 5. 029529 5. 26034 5. 03472  
11728016\_ 6. 143176 6. 299624 6. 263086 6. 23858 6. 414273 6. 38478  
11728017\_ 5. 600994 5. 540873 5. 526429 5. 763225 5. 776761 5. 880068  
11728018\_ 6. 282346 6. 373032 6. 315299 6. 084955 6. 071513 5. 999107  
11728019\_ 3. 634821 3. 731794 3. 624372 3. 696301 3. 75868 3. 436411  
11728020\_ 4. 271342 4. 261232 4. 189393 4. 228481 4. 275543 4. 244648  
11728021\_ 7. 880649 7. 78478 7. 828766 8. 100356 8. 148332 8. 109494  
11728022\_ 6. 339449 6. 281584 6. 316821 6. 850646 6. 875335 6. 914776  
11728023\_ 4. 275543 4. 350771 4. 297856 4. 275543 4. 275543 4. 201067  
11728024\_ 6. 046607 6. 15915 6. 109036 6. 095732 6. 105884 6. 078599  
11728025\_ 4. 335811 4. 473745 4. 52098 4. 680357 4. 951415 4. 721735  
11728026\_ 2. 625149 2. 444155 2. 235709 2. 513241 2. 49922 2. 494072  
11728027\_ 6. 782014 6. 770625 6. 826034 6. 939086 6. 82876 6. 847843  
11728028\_ 5. 604736 5. 672285 5. 745901 5. 029953 5. 249488 5. 303679  
11728029\_ 5. 894989 5. 891829 5. 857821 5. 603977 5. 518356 5. 467131  
11728030\_ 3. 759828 4. 067703 3. 939983 3. 398236 3. 527331 3. 300401  
11728031\_ 1. 84354 1. 946811 1. 852879 2. 066224 2. 175373 2. 003115  
11728032\_ 4. 632309 4. 45299 4. 217938 4. 429637 4. 574482 4. 483375  
11728033\_ 8. 030385 7. 956434 8. 050971 7. 869172 7. 899649 7. 900989  
11728034\_ 6. 837536 6. 718473 6. 805128 7. 120145 7. 13537 7. 211944  
11728035\_ 3. 700192 3. 801273 3. 503743 3. 997131 3. 76586 3. 787316  
11728036\_ 6. 338896 6. 457727 6. 402373 6. 582072 6. 520285 6. 481046  
11728037\_ 5. 820556 5. 880627 5. 72744 6. 123916 5. 990624 5. 989781  
11728038\_ 2. 689191 2. 361778 2. 74202 2. 569458 2. 632778 2. 569458  
11728039\_ 4. 227061 4. 111904 4. 213189 4. 213189 4. 034717 4. 186206  
11728040\_ 10. 59148 10. 55002 10. 57829 10. 59204 10. 59863 10. 57761  
11728041\_ 2. 146043 2. 361778 2. 426017 2. 310928 2. 166552 2. 284646  
11728042\_ 5. 295188 5. 484414 5. 414869 5. 464242 5. 422007 5. 45618  
11728043\_ 4. 843437 4. 732721 4. 790594 4. 896013 5. 093046 4. 990747  
11728044\_ 7. 288521 7. 334315 7. 3037 7. 303722 7. 288511 7. 314862  
11728045\_ 6. 382789 6. 467284 6. 338021 6. 69401 6. 679319 6. 652881  
11728046\_ 3. 81702 4. 017754 3. 952319 3. 976001 4. 028333 3. 911861  
11728047\_ 6. 769381 6. 637043 6. 629631 6. 325541 6. 389049 6. 519741  
11728048\_ 4. 207227 4. 461831 4. 197395 4. 325191 4. 232208 4. 389663  
11728049\_ 7. 195214 7. 169239 7. 214939 6. 969357 6. 915655 6. 971998  
11728050\_ 5. 709093 5. 598072 5. 634157 4. 734384 4. 717236 4. 728011  
11728051\_ 6. 359422 6. 519697 6. 515079 5. 882784 5. 685964 5. 788079  
11728052\_ 7. 589774 7. 536604 7. 578481 6. 759919 6. 743569 6. 713193

11728053\_ 7. 040828 6. 980558 7. 037 6. 582683 6. 629437 6. 540202  
11728054\_ 7. 185685 7. 082516 7. 267602 7. 201142 7. 288169 7. 238679  
11728055\_ 5. 270449 5. 132004 5. 368294 5. 254872 5. 058276 5. 227281  
11728056\_ 4. 373591 4. 599589 4. 327456 4. 026358 4. 33735 4. 423918  
11728057\_ 4. 501643 4. 451863 4. 387962 4. 369551 4. 549875 4. 580021  
11728058\_ 6. 961903 6. 764297 6. 717965 6. 648185 6. 725983 6. 677032  
11728059\_ 7. 240148 7. 308796 7. 358974 7. 186846 7. 159021 7. 137204  
11728060\_ 4. 768294 4. 839612 5. 029252 4. 427901 4. 627846 4. 435174  
11728061\_ 7. 661001 7. 580776 7. 737749 6. 817695 6. 878118 6. 817232  
11728062\_ 8. 767222 8. 85057 8. 868037 8. 877845 8. 892254 8. 941192  
11728063\_ 7. 856608 7. 861794 7. 937415 7. 953948 7. 930953 7. 974096  
11728064\_ 6. 434332 6. 41292 6. 208662 6. 416388 6. 423391 6. 437298  
11728065\_ 6. 179143 6. 213383 6. 159771 6. 442375 6. 444539 6. 52999  
11728066\_ 3. 888726 4. 298246 3. 740892 4. 027303 3. 969526 4. 022557  
11728067\_ 6. 766063 6. 893951 6. 850854 6. 775493 6. 795214 6. 779107  
11728068\_ 5. 979412 5. 957362 5. 822804 5. 958843 5. 966073 5. 96475  
11728069\_ 4. 93428 4. 9226 4. 984669 4. 949686 4. 923644 4. 943236  
11728070\_ 6. 007749 6. 050823 5. 844592 6. 029132 6. 042216 6. 066196  
11728071\_ 6. 934615 7. 08876 7. 078477 7. 830748 7. 65242 7. 764486  
11728072\_ 2. 912163 3. 04936 3. 106183 3. 10954 3. 246034 3. 015304  
11728073\_ 7. 125952 7. 154768 7. 07667 6. 92079 6. 923598 6. 987209  
11728074\_ 4. 12868 4. 125277 4. 164403 3. 862314 3. 868315 3. 931749  
11728075\_ 5. 705587 5. 896954 5. 824046 5. 823146 5. 816476 5. 803244  
11728076\_ 7. 587055 7. 514362 7. 508163 6. 582142 6. 631711 6. 649607  
11728077\_ 5. 569872 5. 643713 5. 489238 5. 672285 5. 518864 5. 794603  
11728078\_ 5. 494522 5. 554444 5. 672387 5. 449975 5. 426098 5. 369136  
11728079\_ 6. 254193 6. 230145 6. 195252 6. 180811 6. 163281 6. 116672  
11728080\_ 4. 661609 4. 687902 4. 88241 4. 688086 4. 760452 4. 599954  
11728081\_ 6. 369312 6. 314504 6. 327355 6. 713248 6. 788673 6. 756491  
11728082\_ 6. 967544 6. 977807 6. 939256 7. 07478 7. 058215 7. 177451  
11728083\_ 5. 547978 5. 57382 5. 45617 5. 548374 5. 523175 5. 462949  
11728084\_ 2. 815744 2. 913881 2. 874619 2. 572007 2. 644184 2. 392608  
11728085\_ 3. 991145 3. 863714 3. 995113 3. 866175 4. 077292 3. 895154  
11728086\_ 5. 88368 5. 713717 5. 781245 5. 467028 5. 237244 5. 436646  
11728087\_ 4. 829177 4. 87305 4. 648776 4. 634109 4. 657829 4. 609622  
11728088\_ 2. 888285 2. 871068 2. 913707 2. 524254 2. 292315 2. 424794  
11728089\_ 4. 108592 4. 170503 4. 137564 3. 925181 4. 025164 4. 124339  
11728090\_ 4. 05866 3. 941798 3. 611971 4. 05532 3. 910699 3. 943151  
11728091\_ 6. 053237 6. 030339 6. 093187 6. 157326 6. 113843 6. 272099  
11728092\_ 3. 824567 3. 790254 3. 902919 3. 992825 3. 878522 3. 986644  
11728093\_ 8. 204547 8. 276161 8. 262207 7. 959588 7. 906711 7. 844668  
11728094\_ 8. 727612 8. 758745 8. 811122 8. 220937 8. 163548 8. 30381  
11728095\_ 3. 041246 2. 96252 3. 060342 3. 249784 2. 994627 3. 321923  
11728096\_ 5. 721708 5. 513196 5. 653523 5. 685921 5. 69179 5. 791837  
11728097\_ 4. 108592 4. 251811 4. 240609 4. 52373 4. 221513 4. 382909  
11728098\_ 6. 635101 6. 764431 6. 885044 6. 731699 6. 743947 6. 835891  
11728099\_ 6. 032195 5. 905637 5. 758839 6. 078324 5. 978854 5. 982673  
11728100\_ 5. 619895 5. 618065 5. 720801 5. 792168 5. 834255 5. 808847  
11728101\_ 7. 828168 7. 853389 7. 833677 7. 253923 7. 35915 7. 266271  
11728102\_ 5. 742496 5. 711975 5. 715977 5. 608107 5. 597917 5. 599169  
11728103\_ 7. 452099 7. 297635 7. 344285 6. 520116 6. 567272 6. 604788

11728104\_ 2. 915484 3. 106721 2. 980508 2. 915484 2. 84887 3. 220951  
11728105\_ 2. 978137 2. 783453 2. 885738 2. 627705 2. 647789 2. 619216  
11728106\_ 4. 244874 4. 535721 3. 964534 4. 188675 4. 426479 4. 143485  
11728107\_ 6. 135486 6. 204237 6. 114164 6. 142033 6. 241059 6. 222066  
11728108\_ 5. 488655 5. 526 5. 360441 5. 482493 5. 442173 5. 589814  
11728109\_ 3. 122119 2. 948921 3. 027079 3. 133473 3. 049933 3. 140812  
11728110\_ 5. 747208 5. 922731 5. 905127 4. 832007 4. 765289 4. 903643  
11728111\_ 6. 183532 6. 161896 6. 229614 5. 833828 5. 890234 5. 892572  
11728112\_ 6. 718451 6. 705262 6. 672046 6. 846067 6. 739151 6. 692309  
11728113\_ 3. 12423 2. 945504 2. 985303 2. 751469 2. 945504 2. 985303  
11728114\_ 5. 258777 5. 30536 5. 282915 5. 224566 5. 315438 5. 302925  
11728115\_ 7. 494781 7. 48789 7. 427104 7. 471301 7. 350386 7. 468761  
11728116\_ 5. 354756 5. 622838 5. 485232 5. 480356 5. 60037 5. 55938  
11728117\_ 5. 073036 4. 991206 5. 0444 4. 868838 4. 994068 4. 815683  
11728118\_ 5. 792513 5. 800213 5. 66976 5. 678981 5. 817623 5. 769803  
11728119\_ 5. 643713 5. 644738 5. 614665 5. 648484 5. 633011 5. 676976  
11728120\_ 3. 920297 4. 09146 4. 030011 3. 954822 4. 158051 4. 122446  
11728121\_ 3. 628288 3. 469781 3. 537933 3. 381636 3. 671468 3. 552813  
11728122\_ 3. 357636 3. 275082 3. 252936 3. 374802 3. 349118 3. 324346  
11728123\_ 6. 859686 6. 888325 6. 880541 6. 778389 6. 849603 6. 824141  
11728124\_ 5. 639614 5. 797319 5. 692709 5. 745821 5. 794421 5. 754755  
11728125\_ 4. 781786 4. 670315 4. 662021 5. 04415 5. 040138 4. 891483  
11728126\_ 3. 139487 3. 089883 3. 097253 3. 042171 3. 207241 3. 156119  
11728127\_ 3. 498145 3. 200583 3. 276137 3. 247742 3. 14736 3. 254629  
11728128\_ 6. 792539 6. 731035 6. 752593 7. 490945 7. 510642 7. 511713  
11728129\_ 7. 403978 7. 348907 7. 47434 8. 313437 8. 397297 8. 365492  
11728130\_ 8. 722639 8. 632615 8. 679834 8. 967212 8. 99984 8. 97543  
11728131\_ 8. 251149 8. 180941 8. 169665 7. 776949 7. 799583 7. 74736  
11728132\_ 7. 952442 7. 925167 7. 925575 7. 678076 7. 558508 7. 603235  
11728133\_ 5. 060293 5. 143005 5. 207167 5. 236228 5. 022348 5. 228803  
11728134\_ 6. 646187 6. 759517 6. 667559 6. 674974 6. 704878 6. 765911  
11728135\_ 6. 806242 6. 832686 6. 832747 6. 825885 6. 918003 6. 876456  
11728136\_ 3. 169731 3. 045385 2. 952186 3. 112773 3. 21279 3. 062783  
11728137\_ 3. 222328 3. 062452 3. 290188 3. 21279 3. 243271 3. 426867  
11728138\_ 2. 814162 2. 707942 2. 999929 2. 770845 3. 004721 2. 83198  
11728139\_ 5. 11527 5. 172642 5. 14692 5. 26034 5. 24981 5. 373942  
11728140\_ 6. 816045 6. 936579 6. 886652 6. 945656 6. 949583 6. 958732  
11728141\_ 10. 5094 10. 5375 10. 48962 10. 69326 10. 69861 10. 6831  
11728142\_ 4. 614514 4. 643717 4. 645204 4. 611924 4. 454551 4. 56191  
11728143\_ 5. 024075 5. 188424 4. 982024 5. 04714 5. 04714 5. 10467  
11728144\_ 5. 771381 5. 883002 5. 643713 5. 729347 5. 742195 5. 658706  
11728145\_ 4. 883515 4. 797881 4. 906888 4. 992243 5. 000989 4. 90113  
11728146\_ 5. 035911 4. 842603 4. 902794 4. 954018 4. 929637 4. 885147  
11728147\_ 4. 862043 4. 796247 4. 725526 4. 710896 4. 665557 4. 778565  
11728148\_ 3. 568653 3. 315503 3. 507707 3. 489214 3. 582356 3. 680311  
11728149\_ 3. 495235 3. 559013 3. 465081 3. 576798 3. 542859 3. 624765  
11728150\_ 4. 657128 4. 583724 4. 38689 4. 535519 4. 570313 4. 731729  
11728151\_ 4. 125912 3. 962814 3. 928599 3. 99025 4. 069762 4. 053394  
11728152\_ 7. 876619 7. 648083 7. 87845 6. 648586 6. 652206 6. 792932  
11728153\_ 6. 582466 6. 464758 6. 589889 5. 320189 5. 26023 5. 532601  
11728154\_ 3. 691461 3. 62533 3. 586396 3. 629325 3. 440934 3. 553294

11728155\_ 4. 43346 4. 529643 4. 229463 4. 69921 4. 324509 4. 536029  
11728156\_ 6. 399459 6. 48468 6. 381908 5. 569774 5. 540136 5. 526461  
11728157\_ 4. 783742 4. 949661 4. 547548 4. 87619 4. 91863 4. 933189  
11728158\_ 4. 638869 4. 853581 4. 709463 4. 826486 4. 86885 4. 815683  
11728159\_ 5. 139622 5. 125335 5. 135054 4. 566059 4. 632849 4. 495215  
11728160\_ 3. 690548 3. 829564 3. 615588 3. 715615 3. 607833 3. 802652  
11728161\_ 5. 247739 5. 414869 5. 380571 5. 315219 5. 395385 5. 268913  
11728162\_ 4. 825356 4. 874141 4. 576416 4. 72211 4. 849431 4. 598281  
11728163\_ 6. 420928 6. 481046 6. 561232 6. 639761 6. 66149 6. 633643  
11728164\_ 5. 024222 4. 905022 4. 730573 5. 266777 5. 281118 5. 144328  
11728165\_ 4. 055415 3. 861837 4. 179368 3. 997131 4. 195937 3. 948751  
11728166\_ 8. 749831 8. 710797 8. 701131 8. 758075 8. 703652 8. 764064  
11728167\_ 5. 072909 5. 039098 5. 173501 4. 533623 4. 475164 4. 560323  
11728168\_ 4. 424204 4. 403624 4. 19968 4. 553648 4. 510913 4. 501999  
11728169\_ 2. 814011 2. 961513 2. 791053 2. 777564 2. 805862 2. 90582  
11728170\_ 4. 636474 4. 643717 4. 60311 4. 582569 4. 57056 4. 704681  
11728171\_ 7. 239949 7. 055228 7. 272972 7. 20143 7. 289976 7. 30345  
11728172\_ 5. 614563 5. 569204 5. 769644 5. 455979 5. 480686 5. 403885  
11728173\_ 7. 044046 7. 166209 7. 106339 7. 092598 7. 121443 7. 128272  
11728174\_ 6. 676414 6. 68384 6. 680693 6. 582953 6. 730722 6. 646187  
11728175\_ 6. 036 6. 138103 6. 014205 6. 152143 6. 106652 6. 09481  
11728176\_ 3. 456289 3. 686617 3. 560343 3. 638516 3. 698951 3. 607619  
11728177\_ 6. 474933 6. 24585 6. 286879 5. 916631 5. 845365 5. 969512  
11728178\_ 5. 540933 5. 530972 5. 476983 5. 433312 5. 457287 5. 469911  
11728179\_ 5. 772502 5. 709155 5. 357065 5. 865158 5. 673189 5. 724558  
11728180\_ 6. 385347 6. 182456 6. 235257 5. 94818 5. 90134 5. 903566  
11728181\_ 3. 705625 3. 797104 3. 755667 3. 482388 3. 026461 3. 335364  
11728182\_ 6. 151542 6. 18219 6. 170878 5. 659104 5. 990562 5. 853316  
11728183\_ 4. 006841 4. 104704 3. 92362 3. 983702 4. 085082 4. 062969  
11728184\_ 3. 929022 4. 256204 4. 135496 3. 956075 3. 910735 4. 21396  
11728185\_ 5. 628651 5. 560156 5. 860546 5. 413938 5. 426098 5. 554436  
11728186\_ 2. 58309 2. 692332 2. 738133 2. 899925 2. 665055 2. 460551  
11728187\_ 5. 198372 5. 186958 5. 156053 5. 122812 5. 369409 5. 183443  
11728188\_ 4. 895516 4. 947665 4. 883402 4. 794506 5. 055859 5. 023731  
11728189\_ 4. 533985 4. 472469 4. 418827 4. 46417 4. 432658 4. 605634  
11728190\_ 2. 102905 1. 92467 1. 902297 2. 037591 2. 037591 1. 994241  
11728191\_ 3. 801444 3. 962017 3. 774101 3. 997641 3. 950544 3. 868574  
11728192\_ 4. 450135 4. 40461 4. 357285 4. 659532 4. 543792 4. 509301  
11728193\_ 11. 12766 11. 0748 11. 09726 11. 1965 11. 20438 11. 1901  
11728194\_ 8. 291056 8. 200948 8. 31412 8. 271835 8. 341331 8. 228961  
11728195\_ 3. 857311 4. 040142 3. 915534 4. 014571 4. 308269 4. 122239  
11728196\_ 3. 831943 4. 159819 3. 875354 4. 013332 3. 963374 4. 042507  
11728197\_ 1. 956333 2. 196822 2. 05362 2. 079825 1. 922829 2. 047308  
11728198\_ 5. 648541 5. 576271 5. 578023 5. 416172 5. 367773 5. 418024  
11728199\_ 6. 879827 7. 010986 6. 934615 6. 975313 6. 968863 7. 102499  
11728200\_ 4. 021783 4. 043369 3. 913989 3. 884645 3. 810966 3. 778238  
11728201\_ 4. 351805 4. 301773 4. 409701 4. 29169 4. 275543 4. 30632  
11728202\_ 8. 637002 8. 706191 8. 634833 8. 60386 8. 556385 8. 541252  
11728203\_ 9. 647033 9. 586078 9. 636228 10. 25354 10. 28969 10. 20934  
11728204\_ 10. 93985 10. 87528 10. 94195 11. 00451 10. 96983 11. 0206  
11728205\_ 10. 69103 10. 68161 10. 69636 10. 80524 10. 75466 10. 71125



11728206\_ 9. 579068 9. 588374 9. 629144 9. 64715 9. 678591 9. 628238  
11728207\_ 9. 125831 9. 050653 9. 102826 8. 768983 8. 784353 8. 808521  
11728208\_ 7. 954075 7. 821664 7. 950841 8. 248043 8. 263563 8. 2149  
11728209\_ 3. 676762 3. 58283 3. 582139 3. 677452 3. 625839 3. 641667  
11728210\_ 3. 857872 3. 652806 3. 61746 3. 777151 3. 75167 3. 665206  
11728211\_ 6. 480353 6. 485921 6. 347015 6. 632444 6. 667481 6. 430147  
11728212\_ 6. 17981 5. 935065 5. 996126 6. 312184 6. 117939 6. 247833  
11728213\_ 7. 826311 7. 780022 7. 926489 7. 618086 7. 679035 7. 7162  
11728214\_ 6. 336797 6. 183567 6. 347925 6. 088257 6. 106021 6. 205172  
11728215\_ 6. 105653 5. 927364 5. 994738 5. 798712 5. 934341 5. 861622  
11728216\_ 7. 420446 7. 346946 7. 430235 7. 560648 7. 572584 7. 516638  
11728217\_ 5. 387988 5. 475973 5. 439727 5. 894697 5. 794286 5. 768021  
11728218\_ 7. 604762 7. 63604 7. 567562 7. 638426 7. 675629 7. 552437  
11728219\_ 9. 82646 9. 735694 9. 811233 9. 841141 9. 89698 9. 864327  
11728220\_ 3. 765006 3. 418426 3. 395199 3. 503743 3. 543696 3. 544305  
11728221\_ 5. 298218 5. 491372 5. 366346 5. 566992 5. 450296 5. 589941  
11728222\_ 8. 738307 8. 654885 8. 717995 8. 854609 8. 787989 8. 840033  
11728223\_ 6. 401319 6. 265374 6. 296603 6. 796474 6. 756993 6. 749878  
11728224\_ 8. 406616 8. 266683 8. 372843 8. 294297 8. 262865 8. 350102  
11728225\_ 7. 000423 6. 88028 6. 967479 6. 995914 7. 064528 6. 99588  
11728226\_ 6. 673946 6. 588607 6. 691341 6. 963025 6. 994917 6. 941637  
11728227\_ 9. 062034 8. 967736 9. 051658 8. 638596 8. 708886 8. 650647  
11728228\_ 3. 049631 3. 163536 3. 07292 2. 978725 3. 200464 3. 093143  
11728229\_ 3. 374904 3. 398236 3. 496569 3. 503743 3. 54766 3. 345605  
11728230\_ 8. 1007 8. 087469 7. 982653 7. 936627 7. 855376 7. 851718  
11728231\_ 2. 988093 3. 363417 3. 28929 3. 405026 3. 188471 3. 136232  
11728232\_ 6. 554325 6. 500245 6. 519917 5. 621964 5. 130374 5. 511481  
11728233\_ 5. 676992 5. 858268 5. 680589 5. 363523 5. 333723 5. 475247  
11728234\_ 5. 97426 5. 963216 6. 260434 4. 854343 5. 073036 5. 094903  
11728235\_ 6. 189964 6. 246194 6. 060957 6. 431401 6. 440472 6. 508317  
11728236\_ 4. 340659 4. 267272 3. 984915 4. 26037 4. 470188 4. 183336  
11728237\_ 9. 055559 9. 05997 9. 095384 8. 724376 8. 77578 8. 709484  
11728238\_ 6. 657137 6. 579869 6. 516319 6. 455273 6. 464805 6. 490729  
11728239\_ 5. 869716 5. 764293 5. 797699 5. 835902 5. 863431 5. 749633  
11728240\_ 5. 729352 5. 919721 6. 115374 5. 802399 5. 906126 5. 908452  
11728241\_ 7. 941508 7. 950361 7. 979166 7. 984865 7. 960593 7. 96908  
11728242\_ 9. 257818 9. 241728 9. 304619 9. 109117 9. 12171 9. 075893  
11728243\_ 3. 431004 3. 446298 3. 582029 3. 606313 3. 625024 3. 534145  
11728244\_ 2. 498686 2. 164457 2. 348735 2. 360481 2. 076178 2. 257856  
11728245\_ 4. 19077 4. 192983 4. 083728 4. 115198 4. 201784 4. 200678  
11728246\_ 5. 611027 5. 474477 5. 658209 5. 977508 5. 819184 6. 078218  
11728247\_ 7. 073297 7. 052267 7. 093493 7. 141776 7. 069509 7. 158202  
11728248\_ 8. 571641 8. 54388 8. 568716 8. 847655 8. 778353 8. 862196  
11728249\_ 4. 725905 4. 607321 4. 824195 5. 395372 5. 275747 5. 228627  
11728250\_ 3. 021749 3. 250171 3. 03326 3. 181849 3. 063425 3. 123424  
11728251\_ 3. 875945 4. 250934 4. 108896 4. 282809 4. 300248 4. 363983  
11728252\_ 6. 81163 6. 729943 6. 703697 6. 606694 6. 686148 6. 709344  
11728253\_ 7. 950386 7. 886152 7. 936679 7. 687558 7. 739531 7. 723752  
11728254\_ 8. 189127 8. 191852 8. 293191 7. 784863 7. 879019 7. 903723  
11728255\_ 11. 5363 11. 46818 11. 53532 11. 20656 11. 19994 11. 1923  
11728256\_ 10. 52833 10. 43402 10. 52405 10. 18052 10. 20311 10. 21652

11728257\_ 6. 571736 6. 466986 6. 610484 7. 311173 7. 251106 7. 357067  
11728258\_ 6. 970839 6. 923029 6. 929713 6. 849152 6. 826126 6. 851915  
11728259\_ 7. 844126 7. 803438 7. 849057 7. 530011 7. 584373 7. 528986  
11728260\_ 4. 483274 4. 525508 4. 43502 4. 568167 4. 499892 4. 605033  
11728261\_ 8. 350867 8. 30721 8. 299536 8. 15978 8. 2073 8. 229036  
11728262\_ 8. 08832 8. 084326 8. 195969 7. 800846 7. 813564 7. 808522  
11728263\_ 7. 317649 7. 277371 7. 333358 6. 751571 6. 779107 6. 970047  
11728264\_ 8. 231948 8. 229306 8. 264339 8. 039385 7. 984615 8. 050624  
11728265\_ 2. 09772 1. 869447 2. 205134 2. 194147 2. 194692 2. 245013  
11728266\_ 1. 738663 1. 835018 1. 751064 1. 729511 1. 841804 1. 795412  
11728267\_ 3. 791013 3. 798919 3. 639344 3. 994943 3. 774056 3. 798919  
11728268\_ 5. 026294 5. 148631 5. 05696 5. 232445 5. 188839 5. 284558  
11728269\_ 2. 85811 2. 761956 2. 860941 2. 85811 2. 764178 2. 978445  
11728270\_ 8. 441811 8. 369108 8. 349445 8. 476585 8. 439355 8. 349802  
11728271\_ 8. 428515 8. 4285 8. 417128 8. 516617 8. 426463 8. 357513  
11728272\_ 8. 528072 8. 504428 8. 456441 8. 483796 8. 467585 8. 405654  
11728273\_ 7. 151061 7. 19001 7. 223228 6. 987514 7. 065055 7. 053574  
11728274\_ 10. 72675 10. 66828 10. 71802 10. 25424 10. 2492 10. 27517  
11728275\_ 6. 53072 6. 552592 6. 501567 6. 595579 6. 511636 6. 567446  
11728276\_ 7. 317899 7. 296308 7. 289121 7. 481662 7. 449494 7. 388409  
11728277\_ 7. 761776 7. 730361 7. 727412 7. 775791 7. 714783 7. 762244  
11728278\_ 5. 736831 5. 548245 5. 732266 6. 281084 6. 210868 6. 213319  
11728279\_ 6. 801602 6. 686431 6. 821912 7. 108315 7. 005145 7. 162499  
11728280\_ 5. 977166 5. 940389 5. 993863 6. 182832 6. 10796 6. 052007  
11728281\_ 5. 889171 5. 931627 5. 901429 6. 472244 6. 468619 6. 464805  
11728282\_ 7. 396942 7. 262706 7. 415497 6. 642875 6. 899277 6. 705566  
11728283\_ 5. 781858 5. 703982 5. 74537 5. 087479 5. 061161 4. 980004  
11728284\_ 5. 718322 5. 693977 5. 776974 5. 202179 5. 055655 5. 144279  
11728285\_ 6. 342727 6. 377847 6. 389366 7. 494218 7. 412148 7. 480267  
11728286\_ 6. 702188 6. 694929 6. 633304 6. 889165 6. 889539 7. 019942  
11728287\_ 6. 140998 6. 147933 6. 159911 6. 134099 6. 122294 6. 156981  
11728288\_ 6. 618724 6. 40081 6. 367946 5. 751323 5. 707781 5. 676992  
11728289\_ 6. 057092 6. 060587 6. 038605 5. 870242 5. 90846 5. 97474  
11728290\_ 2. 852019 2. 914906 2. 893429 3. 113895 3. 046802 3. 022396  
11728291\_ 3. 746201 3. 783412 3. 795356 3. 746201 3. 704143 3. 786777  
11728292\_ 3. 069773 2. 872419 3. 04324 2. 98245 2. 998942 3. 074136  
11728293\_ 2. 30064 2. 30064 2. 30064 2. 338267 2. 30064 2. 34454  
11728294\_ 6. 08603 5. 901465 6. 199575 8. 773672 8. 845039 8. 798458  
11728295\_ 8. 070852 8. 094724 8. 05998 7. 962326 7. 997182 7. 979622  
11728296\_ 7. 852095 7. 803946 7. 909578 6. 743899 6. 768669 6. 808259  
11728297\_ 7. 724627 7. 639699 7. 760141 7. 565502 7. 525675 7. 582677  
11728298\_ 7. 946115 7. 93613 7. 995429 8. 051466 8. 089203 8. 094451  
11728299\_ 7. 424775 7. 546889 7. 441545 7. 614506 7. 566057 7. 545308  
11728300\_ 6. 79097 6. 797178 6. 8056 7. 577417 7. 588677 7. 523901  
11728301\_ 6. 710063 6. 613236 6. 609346 7. 243006 7. 253016 7. 320512  
11728302\_ 8. 990933 8. 917854 9. 006542 8. 812853 8. 787994 8. 767856  
11728303\_ 8. 184573 8. 064176 8. 156754 7. 557177 7. 566016 7. 547956  
11728304\_ 5. 044759 5. 236006 5. 079341 5. 174534 5. 132616 5. 252967  
11728305\_ 8. 623863 8. 795927 8. 648207 8. 994602 8. 774384 8. 603704  
11728306\_ 9. 75877 9. 75977 9. 755436 9. 850033 9. 755436 9. 775626  
11728307\_ 9. 675632 9. 606234 9. 620082 9. 530614 9. 58276 9. 530071

11728308\_ 4. 352066 4. 239871 4. 287593 4. 30761 4. 249577 4. 226583  
11728309\_ 4. 900619 4. 979604 5. 029551 5. 124702 5. 137251 5. 096173  
11728310\_ 8. 188217 8. 178069 8. 131278 7. 903409 7. 843073 7. 765125  
11728311\_ 9. 718215 9. 691998 9. 737036 9. 448537 9. 525442 9. 45295  
11728312\_ 5. 912776 5. 966079 5. 935722 6. 378784 6. 460854 6. 228665  
11728313\_ 5. 358732 5. 182112 5. 108682 6. 034459 5. 957954 6. 13945  
11728314\_ 7. 121998 7. 250219 7. 275983 7. 453768 7. 374996 7. 380455  
11728315\_ 7. 405787 7. 250958 7. 403569 7. 832366 7. 83619 7. 857723  
11728316\_ 5. 91037 5. 913869 6. 380298 4. 952044 4. 937183 5. 204746  
11728317\_ 7. 140253 7. 131359 7. 136087 7. 10964 6. 912928 7. 056915  
11728318\_ 5. 932838 6. 111305 5. 910301 5. 967042 5. 73058 5. 932838  
11728319\_ 6. 016322 6. 277203 6. 073093 6. 061695 6. 124856 6. 153662  
11728320\_ 10. 26849 10. 18564 10. 22528 10. 19119 10. 24466 10. 20465  
11728321\_ 5. 584813 5. 448296 5. 414869 6. 058786 5. 961389 6. 073142  
11728322\_ 6. 432639 6. 322535 6. 361908 7. 049132 7. 134251 7. 088011  
11728323\_ 2. 900903 2. 945929 2. 975507 2. 877006 2. 856094 2. 83198  
11728324\_ 2. 746551 2. 746551 2. 816373 2. 703613 2. 696676 2. 703613  
11728325\_ 3. 834012 3. 738059 3. 834012 3. 514348 3. 951626 3. 723916  
11728326\_ 5. 626731 5. 637636 5. 697636 5. 270383 5. 282402 5. 348393  
11728327\_ 2. 962612 3. 089346 2. 839442 2. 617992 2. 990191 3. 131165  
11728328\_ 3. 341154 3. 605146 3. 551914 3. 566399 3. 46976 3. 536056  
11728329\_ 5. 72606 5. 737437 5. 640318 5. 742944 5. 810904 5. 811623  
11728330\_ 7. 678311 7. 730153 7. 678311 7. 7145 7. 64929 7. 706061  
11728331\_ 7. 098903 6. 907201 7. 03787 7. 231689 7. 25093 7. 277732  
11728332\_ 7. 052435 7. 179221 7. 169029 7. 164857 7. 262325 7. 268774  
11728333\_ 6. 451424 6. 439987 6. 478352 6. 30434 6. 383525 6. 339775  
11728334\_ 6. 985423 6. 893273 7. 12705 6. 470394 6. 563011 6. 536617  
11728335\_ 5. 038788 5. 052892 5. 118237 4. 954549 5. 07933 5. 054711  
11728336\_ 5. 799665 5. 923258 5. 826524 6. 06223 5. 802749 5. 786933  
11728337\_ 4. 539755 4. 802239 4. 68239 4. 88804 4. 900735 4. 785474  
11728338\_ 7. 174341 7. 191936 7. 258862 7. 348494 7. 258843 7. 295736  
11728339\_ 6. 166444 6. 118838 6. 093329 5. 956918 6. 070097 6. 145596  
11728340\_ 6. 355524 6. 308707 6. 43988 6. 727005 6. 694941 6. 765724  
11728341\_ 4. 203346 4. 260657 4. 180466 4. 146998 4. 297827 4. 027971  
11728342\_ 3. 297358 3. 658318 3. 562974 2. 81922 2. 901342 2. 605516  
11728343\_ 2. 011051 1. 898324 1. 877122 1. 946811 1. 971054 1. 971054  
11728344\_ 4. 763543 5. 10737 4. 944436 5. 091379 5. 084954 5. 119952  
11728345\_ 8. 468349 8. 3864 8. 416621 8. 423623 8. 40937 8. 381521  
11728346\_ 2. 827005 2. 886378 2. 864884 2. 751463 3. 094765 2. 838229  
11728347\_ 5. 410676 5. 427456 5. 299933 5. 519015 5. 593696 5. 640884  
11728348\_ 8. 231197 8. 172026 8. 284739 8. 798186 8. 796037 8. 716553  
11728349\_ 7. 647621 7. 597395 7. 556908 7. 341116 7. 383035 7. 336848  
11728350\_ 8. 027577 7. 998616 8. 05569 7. 833697 7. 80761 7. 815081  
11728351\_ 7. 558275 7. 568694 7. 593613 7. 666697 7. 613217 7. 608662  
11728352\_ 7. 013044 6. 9699 7. 074835 7. 009034 6. 996309 7. 010688  
11728353\_ 5. 887981 5. 727595 5. 839442 6. 020017 5. 887686 5. 904187  
11728354\_ 7. 230997 7. 078542 7. 275835 7. 302955 7. 328517 7. 367735  
11728355\_ 7. 683386 7. 700401 7. 719535 7. 562812 7. 632741 7. 598046  
11728356\_ 6. 830716 6. 77077 6. 838811 6. 636926 6. 583082 6. 702734  
11728357\_ 7. 083261 7. 005805 7. 105767 6. 721927 6. 683082 6. 66034  
11728358\_ 8. 09976 8. 139877 8. 140402 7. 083497 7. 112405 7. 115537

11728359\_ 2. 416399 2. 361778 2. 342968 2. 450356 2. 307158 2. 303713  
11728360\_ 7. 332633 7. 214725 7. 287852 6. 842839 6. 80173 6. 838969  
11728361\_ 7. 031531 7. 088771 7. 110218 7. 079388 7. 093002 7. 077345  
11728362\_ 7. 250921 7. 304836 7. 21228 5. 99404 5. 909154 5. 922696  
11728363\_ 2. 361778 2. 453367 2. 361778 2. 31174 2. 339709 2. 361778  
11728364\_ 3. 554317 3. 735767 3. 235321 3. 598827 3. 616253 3. 763226  
11728365\_ 6. 836129 6. 852338 6. 948232 6. 287431 6. 11849 6. 317598  
11728366\_ 2. 715989 2. 83198 2. 847918 2. 81128 2. 909811 2. 933992  
11728367\_ 7. 582964 7. 524829 7. 578981 7. 45117 7. 513493 7. 517248  
11728368\_ 8. 851994 8. 753298 8. 79856 8. 441641 8. 454303 8. 439652  
11728369\_ 7. 819983 7. 728141 7. 703416 7. 274526 7. 098484 7. 136581  
11728370\_ 7. 044889 7. 060961 7. 012947 6. 815709 6. 821438 6. 770405  
11728371\_ 6. 032842 5. 899862 6. 038098 5. 501354 5. 549458 5. 469934  
11728372\_ 5. 668223 5. 590053 5. 662358 5. 178071 5. 04615 5. 132131  
11728373\_ 3. 557428 3. 31578 3. 685411 3. 494507 3. 362202 3. 879309  
11728374\_ 10. 82178 10. 82344 10. 82443 10. 54565 10. 54077 10. 51752  
11728375\_ 10. 46069 10. 4564 10. 46403 10. 09352 10. 12605 10. 1308  
11728376\_ 5. 697651 5. 612354 5. 679952 7. 524219 7. 52999 7. 533478  
11728377\_ 5. 555109 5. 656586 5. 580171 7. 653502 7. 653407 7. 759224  
11728378\_ 9. 296453 9. 223614 9. 283684 9. 599773 9. 647634 9. 58271  
11728379\_ 5. 216285 5. 465364 5. 281744 6. 263567 6. 021471 5. 965592  
11728380\_ 11. 58592 11. 60324 11. 58253 11. 69769 11. 59171 11. 58563  
11728381\_ 6. 369947 6. 392506 6. 368761 6. 279692 6. 458702 6. 432419  
11728382\_ 2. 67329 2. 579371 2. 646639 2. 458821 2. 69137 2. 592816  
11728383\_ 8. 86719 8. 717252 8. 890816 8. 343534 8. 297385 8. 286098  
11728384\_ 8. 026627 7. 963165 8. 024642 7. 53912 7. 536532 7. 571126  
11728385\_ 6. 128099 6. 285174 6. 233288 6. 880282 6. 852767 6. 845734  
11728386\_ 6. 631003 6. 849716 6. 545886 7. 254644 7. 28212 7. 256368  
11728387\_ 3. 670543 3. 769788 3. 584482 3. 725741 3. 549907 3. 683313  
11728388\_ 7. 487771 7. 346398 7. 486829 5. 409409 5. 410305 5. 268411  
11728389\_ 5. 675144 5. 475538 5. 844333 4. 174029 3. 51423 3. 864916  
11728390\_ 7. 832024 7. 703059 7. 820219 5. 691446 5. 594775 5. 894503  
11728391\_ 8. 205349 8. 202916 8. 136773 7. 889329 8. 003025 7. 962122  
11728392\_ 7. 409349 7. 256554 7. 34149 7. 042474 7. 060642 7. 042517  
11728393\_ 6. 46355 6. 38541 6. 424861 6. 764975 6. 799117 6. 805142  
11728394\_ 3. 877275 3. 855015 4. 082186 3. 627786 3. 525217 3. 630607  
11728395\_ 7. 704859 7. 697905 7. 707998 7. 550189 7. 447404 7. 469207  
11728396\_ 8. 686487 8. 669673 8. 678116 8. 448811 8. 425519 8. 40228  
11728397\_ 1. 930882 2. 047668 2. 056976 2. 218568 1. 992948 2. 095256  
11728398\_ 4. 753063 4. 773887 4. 79691 4. 799652 4. 87746 4. 873935  
11728399\_ 7. 276069 7. 222197 7. 304206 7. 295041 7. 284167 7. 285471  
11728400\_ 6. 869439 6. 804256 6. 873664 7. 217873 7. 070766 7. 042314  
11728401\_ 7. 19894 7. 15981 7. 237058 6. 828602 6. 841764 6. 812099  
11728402\_ 6. 549947 6. 50524 6. 574834 6. 149329 6. 26134 6. 240887  
11728403\_ 7. 741526 7. 656069 7. 704443 7. 897594 7. 879797 7. 909345  
11728404\_ 8. 048676 8. 009435 8. 02234 8. 417128 8. 250275 8. 318855  
11728405\_ 5. 132034 5. 258746 5. 197212 5. 281759 5. 158283 5. 133158  
11728406\_ 5. 866821 5. 960799 5. 852896 5. 992259 5. 909418 5. 926001  
11728407\_ 6. 538086 6. 491525 6. 4673 6. 507315 6. 536117 6. 53925  
11728408\_ 6. 354686 6. 339761 6. 296742 6. 306393 6. 360869 6. 378313  
11728409\_ 5. 080137 5. 141598 5. 177109 5. 243422 5. 254438 5. 132136

11728410\_ 7. 725851 7. 677095 7. 72135 7. 932293 8. 030975 7. 999772  
11728411\_ 4. 315654 4. 428459 4. 369395 4. 601944 4. 353597 4. 193695  
11728412\_ 5. 897916 6. 043234 5. 83027 5. 901839 5. 968302 6. 004777  
11728413\_ 6. 67471 6. 610269 6. 738308 6. 608268 6. 530887 6. 711548  
11728414\_ 5. 331222 5. 47478 5. 500446 5. 584813 5. 565523 5. 484157  
11728415\_ 7. 558467 7. 494303 7. 56278 7. 66161 7. 689068 7. 588018  
11728416\_ 4. 515676 4. 533974 4. 335283 4. 519095 4. 519798 4. 492582  
11728417\_ 5. 249976 5. 171667 5. 31719 4. 939276 4. 938251 4. 983273  
11728418\_ 3. 786881 3. 723624 3. 685625 3. 883853 3. 791661 3. 791661  
11728419\_ 6. 180546 5. 856087 6. 046835 6. 159771 6. 182405 6. 186712  
11728420\_ 5. 484114 5. 253597 5. 211973 5. 386825 5. 297498 5. 309934  
11728421\_ 6. 041584 5. 945263 6. 088069 6. 217451 6. 206938 6. 178015  
11728422\_ 7. 13256 7. 223787 7. 176466 7. 121426 7. 339376 7. 273579  
11728423\_ 3. 148036 3. 08963 3. 338674 3. 266322 3. 241702 3. 243319  
11728424\_ 4. 465849 4. 838619 4. 638374 4. 531426 4. 632881 4. 4478  
11728425\_ 10. 27187 10. 16038 10. 18496 10. 39737 10. 36201 10. 398  
11728426\_ 7. 806249 7. 676845 7. 824876 7. 888735 7. 847485 7. 880573  
11728427\_ 8. 296425 8. 201807 8. 301345 7. 756217 7. 604513 7. 674507  
11728428\_ 6. 526115 6. 472562 6. 451693 6. 339594 6. 329474 6. 391307  
11728429\_ 9. 549876 9. 547478 9. 554866 9. 213225 9. 250238 9. 254005  
11728430\_ 4. 930676 5. 088116 5. 04772 5. 164517 5. 250837 5. 119697  
11728431\_ 5. 059698 5. 08975 5. 056323 5. 122419 5. 062363 5. 289968  
11728432\_ 3. 458772 3. 606313 3. 706317 3. 281065 3. 092228 3. 155326  
11728433\_ 4. 286527 3. 992575 4. 204612 3. 649671 3. 64966 3. 563074  
11728434\_ 4. 946768 5. 444853 5. 203788 5. 473515 5. 50348 5. 434767  
11728435\_ 7. 690664 7. 62604 7. 688832 7. 743099 7. 784012 7. 834517  
11728436\_ 4. 947587 4. 846989 4. 843795 4. 769983 4. 660017 4. 890089  
11728437\_ 2. 776406 3. 15103 3. 042929 3. 072609 3. 042929 3. 107842  
11728438\_ 5. 247168 5. 404463 5. 352698 5. 19174 4. 974953 5. 020208  
11728439\_ 4. 66474 4. 728605 4. 756059 4. 873907 4. 811241 4. 831991  
11728440\_ 4. 776439 4. 706037 4. 768669 4. 843709 4. 776439 4. 803781  
11728441\_ 4. 313306 4. 396785 4. 348573 4. 364606 4. 447659 4. 409356  
11728442\_ 4. 194011 4. 355532 4. 287593 4. 573142 4. 355979 4. 417985  
11728443\_ 6. 668665 6. 621464 6. 775054 6. 307138 6. 288725 6. 385967  
11728444\_ 7. 594074 7. 380294 7. 488458 7. 766189 7. 782052 7. 817708  
11728445\_ 6. 17933 6. 16532 6. 251065 6. 487879 6. 548497 6. 531269  
11728446\_ 4. 909871 4. 934571 4. 904083 4. 967803 4. 873871 4. 967277  
11728447\_ 8. 074339 7. 99529 8. 043796 8. 074892 8. 095226 8. 08832  
11728448\_ 5. 398842 5. 408392 5. 51221 5. 584813 5. 66273 5. 616547  
11728449\_ 2. 605516 2. 605516 2. 620824 2. 605516 2. 414612 2. 750194  
11728450\_ 3. 118458 3. 181465 2. 990561 3. 015984 3. 099351 3. 204317  
11728451\_ 6. 774981 6. 668785 6. 799471 6. 890255 6. 947842 6. 903919  
11728452\_ 5. 60328 5. 589731 5. 60328 5. 649466 5. 60328 5. 576054  
11728453\_ 6. 603376 6. 532462 6. 542332 6. 455768 6. 386609 6. 412907  
11728454\_ 6. 805585 6. 7992 6. 813159 6. 749284 6. 554409 6. 612922  
11728455\_ 3. 353069 3. 260801 3. 068824 3. 290188 3. 136872 3. 508002  
11728456\_ 5. 195885 5. 214746 5. 481787 5. 226996 5. 228434 5. 245644  
11728457\_ 6. 910545 7. 020462 6. 946678 6. 893197 6. 899764 6. 920979  
11728458\_ 5. 944431 6. 41521 6. 318829 6. 397946 6. 33825 6. 459734  
11728459\_ 4. 134524 4. 034566 4. 213226 3. 882977 3. 843661 3. 844429  
11728460\_ 7. 415133 7. 41746 7. 533404 7. 216849 7. 150208 7. 237739

11728461\_ 7. 799789 7. 732702 7. 705868 8. 034698 7. 975623 7. 98872  
11728462\_ 7. 513266 7. 365378 7. 5199 7. 76485 7. 790132 7. 770512  
11728463\_ 8. 388952 8. 235438 8. 41614 7. 018608 7. 022313 7. 109842  
11728464\_ 7. 360569 7. 292124 7. 322868 6. 08965 6. 08123 6. 102209  
11728465\_ 8. 893399 8. 816125 8. 775388 8. 663585 8. 591223 8. 530845  
11728466\_ 4. 391218 4. 010192 4. 408198 4. 165393 4. 110256 4. 194241  
11728467\_ 4. 597259 4. 621885 4. 414197 4. 499772 4. 555101 4. 398589  
11728468\_ 5. 870892 5. 965257 5. 79276 5. 871426 5. 913541 5. 980783  
11728469\_ 6. 644327 6. 531277 6. 569925 6. 180633 6. 266172 6. 16658  
11728470\_ 4. 170013 4. 181969 4. 205426 3. 921478 3. 88177 4. 09192  
11728471\_ 2. 507741 2. 543824 2. 575898 2. 851474 2. 701969 2. 808614  
11728472\_ 2. 492537 2. 380508 2. 572749 2. 286768 2. 468777 2. 375307  
11728473\_ 2. 921555 3. 17184 2. 887872 3. 126337 3. 248287 3. 285499  
11728474\_ 6. 630832 6. 646754 6. 796326 6. 02623 6. 158651 6. 028339  
11728475\_ 3. 817786 3. 841386 3. 368349 3. 580031 3. 692732 3. 939891  
11728476\_ 4. 108592 3. 818401 3. 649353 3. 21279 3. 264396 3. 519607  
11728477\_ 4. 656363 4. 923319 4. 563881 4. 34861 4. 371549 4. 436672  
11728478\_ 7. 272007 7. 18587 7. 16318 6. 159771 6. 025952 6. 233557  
11728479\_ 7. 218896 7. 200652 7. 255218 6. 087575 6. 044336 6. 037874  
11728480\_ 2. 227273 1. 882399 2. 06075 1. 912516 2. 227273 1. 925287  
11728481\_ 6. 175197 6. 200733 6. 293714 5. 91159 5. 899179 5. 926692  
11728482\_ 7. 536104 7. 548891 7. 544683 7. 206894 7. 148405 7. 179585  
11728483\_ 6. 023961 5. 946397 6. 095768 5. 495749 5. 560177 5. 495749  
11728484\_ 3. 756524 3. 659552 3. 659552 3. 56562 3. 8069 3. 569438  
11728485\_ 6. 321838 6. 412133 6. 424213 6. 739725 6. 614714 6. 585436  
11728486\_ 4. 682119 4. 9226 4. 778555 4. 584933 4. 770975 4. 590033  
11728487\_ 2. 036081 1. 943462 2. 161306 1. 96271 1. 905619 2. 1519  
11728488\_ 5. 023246 5. 083786 5. 073036 4. 347179 4. 23194 4. 357692  
11728489\_ 3. 270056 3. 218771 3. 330089 3. 270056 3. 321341 3. 250045  
11728490\_ 10. 72019 10. 65133 10. 72095 10. 75436 10. 78632 10. 74187  
11728491\_ 3. 246932 3. 326039 3. 053543 3. 013826 3. 26814 3. 135135  
11728492\_ 2. 193922 2. 23877 2. 393834 2. 413478 2. 393834 2. 404111  
11728493\_ 5. 201679 5. 127529 5. 081682 4. 715713 4. 555185 4. 739414  
11728494\_ 6. 911288 6. 822226 6. 926951 6. 375328 6. 222296 6. 320779  
11728495\_ 5. 08893 5. 086816 4. 965824 5. 335542 5. 197244 4. 943848  
11728496\_ 4. 175599 3. 854112 3. 922181 4. 067703 4. 056386 4. 054288  
11728497\_ 8. 525153 8. 473072 8. 584412 8. 092661 8. 140015 8. 087114  
11728498\_ 8. 624015 8. 59353 8. 634173 8. 351252 8. 199126 8. 321941  
11728499\_ 8. 620392 8. 657664 8. 643657 8. 324267 8. 190003 8. 261748  
11728500\_ 3. 793351 4. 028662 3. 918203 3. 899136 3. 888612 3. 911664  
11728501\_ 5. 451097 5. 484065 5. 448296 5. 436242 5. 429109 5. 47959  
11728502\_ 3. 213769 3. 417819 3. 418422 3. 496556 3. 552825 3. 323926  
11728503\_ 4. 70615 4. 85252 4. 84229 4. 839751 4. 843399 4. 98136  
11728504\_ 5. 170402 5. 088958 5. 153608 4. 938528 4. 976718 5. 132465  
11728505\_ 5. 911375 5. 848707 5. 966283 5. 989562 5. 985631 5. 902496  
11728506\_ 3. 660598 3. 422004 3. 466838 3. 515493 3. 651847 3. 523075  
11728507\_ 5. 698055 5. 835178 5. 962031 5. 160989 5. 297498 5. 071984  
11728508\_ 7. 479716 7. 334601 7. 527525 7. 834766 7. 943462 7. 946113  
11728509\_ 4. 369847 4. 174945 4. 390808 4. 040298 3. 910096 3. 923948  
11728510\_ 5. 686639 5. 542544 5. 676891 5. 003017 4. 943634 4. 870514  
11728511\_ 7. 425113 7. 353056 7. 48109 7. 472989 7. 372682 7. 414904

11728512\_ 6. 930283 6. 903877 7. 007439 6. 601881 6. 65814 6. 738296  
11728513\_ 8. 097831 8. 042968 8. 11256 7. 833083 7. 800145 7. 906718  
11728514\_ 3. 925181 4. 337933 4. 179484 3. 951537 3. 86246 4. 275543  
11728515\_ 4. 115532 4. 198314 3. 956709 4. 286298 4. 048188 4. 009213  
11728516\_ 5. 675574 5. 739798 5. 700798 5. 662574 5. 739897 5. 704919  
11728517\_ 8. 163831 8. 023745 8. 157155 8. 315305 8. 410385 8. 302308  
11728518\_ 2. 718322 2. 709404 2. 671773 2. 915883 2. 659037 2. 79262  
11728519\_ 6. 455552 6. 424876 6. 494226 5. 147735 5. 655529 5. 28606  
11728520\_ 3. 971872 4. 067577 4. 129833 3. 958336 3. 958336 3. 896528  
11728521\_ 7. 679544 7. 623995 7. 658176 7. 856892 7. 838413 7. 8152  
11728522\_ 3. 799981 3. 807595 3. 759697 3. 925181 3. 82091 3. 835196  
11728523\_ 4. 598867 4. 273584 4. 499015 4. 409739 4. 398293 4. 474127  
11728524\_ 5. 736831 5. 804002 5. 605465 5. 984326 5. 886015 5. 861104  
11728525\_ 4. 381677 4. 230256 4. 703642 4. 124749 4. 055245 4. 123012  
11728526\_ 4. 794417 4. 79467 4. 736011 4. 80352 4. 707378 4. 94619  
11728527\_ 4. 088542 4. 09344 4. 092488 4. 140145 4. 16629 4. 238936  
11728528\_ 5. 717046 5. 792598 5. 69781 6. 005454 6. 107357 6. 027716  
11728529\_ 5. 346248 5. 305574 5. 296568 5. 247418 5. 526978 5. 320816  
11728530\_ 2. 524722 2. 334617 2. 242826 2. 593003 2. 43892 2. 421436  
11728531\_ 5. 815125 5. 89853 5. 795343 5. 745153 5. 797897 6. 080346  
11728532\_ 4. 139956 4. 166841 4. 02607 4. 321998 4. 39501 4. 359345  
11728533\_ 9. 138559 9. 076466 9. 099897 9. 214209 9. 198401 9. 143733  
11728534\_ 7. 888787 7. 868277 7. 936609 7. 902968 7. 98968 8. 011732  
11728535\_ 6. 704833 6. 62818 6. 636711 6. 493616 6. 496394 6. 648572  
11728536\_ 5. 381905 5. 720248 5. 561785 5. 139941 5. 176828 5. 245161  
11728537\_ 6. 599839 6. 597782 6. 62015 6. 546598 6. 616732 6. 557068  
11728538\_ 5. 486841 5. 486841 5. 612364 4. 964062 4. 798511 4. 878216  
11728539\_ 4. 513555 4. 570912 4. 465523 4. 571804 4. 637745 4. 663489  
11728540\_ 5. 619179 5. 697751 5. 507461 5. 620972 5. 650723 5. 609862  
11728541\_ 4. 851779 4. 895526 4. 873366 4. 807624 4. 897192 4. 733592  
11728542\_ 2. 988093 2. 969989 2. 994037 3. 010004 2. 925246 3. 112432  
11728543\_ 3. 001116 3. 061084 3. 061084 3. 119788 3. 236427 3. 24509  
11728544\_ 4. 811698 4. 968759 5. 024638 4. 932331 4. 893304 5. 012432  
11728545\_ 5. 474877 5. 69403 5. 607616 5. 419875 5. 345939 5. 538439  
11728546\_ 5. 567977 5. 305858 5. 376179 5. 550446 5. 529249 5. 489814  
11728547\_ 4. 449754 4. 496553 4. 271532 4. 40461 4. 523381 4. 628038  
11728548\_ 7. 903005 8. 011862 7. 951894 8. 030386 8. 057337 8. 075618  
11728549\_ 4. 320135 4. 319028 4. 109848 4. 221078 4. 235906 4. 20682  
11728550\_ 6. 118303 6. 081962 6. 010974 6. 041796 5. 964635 6. 01567  
11728551\_ 6. 300643 6. 412003 6. 273053 6. 318829 6. 285501 6. 239341  
11728552\_ 2. 971067 3. 192722 3. 038632 3. 227283 3. 080309 3. 094477  
11728553\_ 5. 077804 5. 109906 5. 083963 5. 165268 5. 062844 5. 204918  
11728554\_ 5. 829361 5. 599169 5. 537638 6. 232956 6. 282572 6. 406755  
11728555\_ 5. 502897 5. 552864 5. 643713 6. 177825 6. 198885 6. 116948  
11728556\_ 4. 139267 4. 158463 4. 026092 4. 477532 4. 284986 4. 200678  
11728557\_ 6. 051554 6. 074762 6. 117621 6. 216912 6. 030072 6. 033313  
11728558\_ 5. 893632 5. 862683 5. 903786 5. 578359 5. 50007 5. 652737  
11728559\_ 5. 95085 6. 092448 5. 839378 5. 979943 5. 938456 5. 991524  
11728560\_ 4. 38325 4. 222312 4. 302972 4. 375801 4. 033635 4. 281702  
11728561\_ 4. 442603 4. 28374 4. 01165 4. 28374 4. 280813 4. 245936  
11728562\_ 4. 341792 4. 430049 4. 229108 4. 499897 4. 646174 4. 253527

11728563\_ 8. 561357 8. 498441 8. 626958 8. 402403 8. 475083 8. 449032  
11728564\_ 4. 546247 4. 387151 4. 444881 4. 706347 4. 687662 4. 9314  
11728565\_ 7. 670308 7. 685866 7. 635955 7. 294155 7. 288212 7. 298049  
11728566\_ 6. 229241 6. 052234 6. 231847 6. 523484 6. 668857 6. 589051  
11728567\_ 5. 010945 5. 115324 5. 126746 5. 287857 5. 200598 5. 116823  
11728568\_ 5. 707797 5. 619705 5. 574386 5. 971433 5. 941425 5. 977004  
11728569\_ 6. 662083 6. 625412 6. 739636 7. 834208 7. 738628 7. 800521  
11728570\_ 6. 941754 6. 838739 6. 989956 7. 148179 7. 11135 7. 179132  
11728571\_ 4. 478757 4. 545922 4. 499769 4. 009132 4. 2101 3. 857035  
11728572\_ 10. 95373 10. 94561 10. 95013 10. 84182 10. 77014 10. 77998  
11728573\_ 10. 93065 10. 89907 10. 87799 10. 72366 10. 69788 10. 62844  
11728574\_ 5. 945224 6. 060105 5. 944667 6. 105553 6. 077571 5. 984671  
11728575\_ 2. 979255 3. 033811 2. 874619 3. 094464 3. 028105 2. 882282  
11728576\_ 6. 831898 6. 890653 6. 958036 6. 756182 6. 75422 6. 805758  
11728577\_ 6. 236235 6. 300643 6. 318829 6. 404982 6. 44895 6. 43871  
11728578\_ 5. 911867 5. 905401 5. 926677 5. 858616 5. 878227 5. 864011  
11728579\_ 3. 776171 3. 428871 3. 750518 3. 889949 3. 641505 3. 57112  
11728580\_ 5. 097888 5. 11527 4. 919615 5. 321749 5. 33916 5. 323495  
11728581\_ 4. 95339 5. 073036 4. 889629 5. 11527 4. 759636 5. 021591  
11728582\_ 5. 614563 5. 948 5. 723802 5. 834673 5. 902119 5. 824302  
11728583\_ 5. 378556 5. 448296 5. 307563 5. 418167 5. 490296 5. 458053  
11728584\_ 1. 861848 1. 866991 1. 771239 2. 177242 1. 969714 1. 92356  
11728585\_ 4. 769731 4. 643717 4. 769731 4. 432347 4. 817121 4. 445084  
11728586\_ 2. 988093 3. 180062 3. 0166 3. 070415 3. 056999 2. 990553  
11728587\_ 7. 261576 7. 308941 7. 278782 6. 315429 6. 126783 6. 255195  
11728588\_ 6. 075771 6. 183529 6. 232418 6. 107616 6. 005831 6. 136679  
11728589\_ 6. 242651 6. 280482 6. 23831 6. 155784 6. 133595 6. 17981  
11728590\_ 6. 454457 6. 482519 6. 43499 6. 513021 6. 507186 6. 477427  
11728591\_ 4. 13113 4. 197002 4. 056187 4. 077934 4. 072021 4. 070156  
11728592\_ 3. 319634 3. 229643 3. 319634 3. 2336 3. 606313 3. 389351  
11728593\_ 3. 000783 2. 977816 2. 874619 3. 21279 3. 046406 3. 000473  
11728594\_ 5. 536964 5. 639856 5. 527907 5. 635946 5. 639856 5. 590852  
11728595\_ 4. 897437 5. 060515 4. 877858 4. 986417 4. 99799 4. 840846  
11728596\_ 2. 47102 2. 605516 2. 498319 2. 605516 2. 682541 2. 566074  
11728597\_ 6. 79486 6. 722304 6. 75473 5. 837411 6. 018628 5. 883638  
11728598\_ 4. 6943 4. 711104 4. 852151 4. 869656 4. 922432 4. 831622  
11728599\_ 4. 915682 4. 741142 4. 971955 4. 963256 4. 925452 4. 925452  
11728600\_ 6. 732383 6. 639685 6. 752593 6. 13195 5. 975408 6. 018356  
11728601\_ 3. 898256 3. 909593 3. 694233 3. 850246 3. 87992 3. 836455  
11728602\_ 5. 556721 5. 684622 5. 543086 5. 776244 5. 803382 5. 836795  
11728603\_ 4. 32604 4. 327714 4. 370337 4. 278728 4. 247726 4. 257315  
11728604\_ 4. 584933 4. 874234 4. 750891 4. 914651 5. 034755 5. 228627  
11728605\_ 3. 13287 3. 235668 3. 109151 3. 255153 3. 275318 3. 255541  
11728606\_ 5. 653874 5. 711136 5. 497581 5. 636982 5. 715437 5. 662891  
11728607\_ 4. 815683 4. 954803 4. 842948 4. 87291 4. 777909 4. 906658  
11728608\_ 6. 365663 6. 366415 6. 45225 6. 034277 5. 894697 5. 904499  
11728609\_ 5. 789947 5. 81547 5. 829695 5. 44846 5. 293176 5. 463086  
11728610\_ 6. 310303 6. 430408 6. 541545 5. 881793 5. 819919 5. 824302  
11728611\_ 6. 206046 6. 305823 6. 318772 6. 383618 6. 396871 6. 489206  
11728612\_ 6. 366363 6. 161621 6. 283786 5. 672285 5. 651515 5. 754755  
11728613\_ 4. 484792 4. 568095 4. 316936 4. 465195 4. 680661 4. 529567



11728614\_ 5. 248917 5. 376586 5. 473243 5. 869064 5. 941577 5. 78423  
11728615\_ 5. 782623 5. 89292 5. 826501 6. 211133 6. 169296 6. 184775  
11728616\_ 4. 850639 4. 84754 4. 738087 4. 620605 4. 761823 4. 635366  
11728617\_ 7. 126221 7. 217536 7. 291509 6. 822134 6. 907546 6. 878943  
11728618\_ 5. 869556 5. 847178 5. 640662 5. 789551 5. 924439 5. 842734  
11728619\_ 4. 223764 4. 220181 4. 179482 4. 193789 4. 182787 4. 333286  
11728620\_ 5. 737952 5. 775415 5. 776468 5. 792804 5. 783872 5. 790092  
11728621\_ 4. 499431 4. 441062 4. 466439 4. 335358 4. 409298 4. 500897  
11728622\_ 7. 019009 7. 054145 6. 993199 7. 011315 7. 016449 7. 05854  
11728623\_ 4. 162063 4. 118613 3. 92165 4. 181184 4. 009449 4. 180912  
11728624\_ 4. 200678 4. 234001 4. 168222 4. 194459 4. 222047 4. 415744  
11728625\_ 6. 110708 6. 076288 6. 069567 6. 050935 6. 122294 6. 09097  
11728626\_ 6. 934615 6. 964977 6. 946249 7. 169069 7. 104983 7. 169069  
11728627\_ 4. 641989 4. 701078 4. 849169 4. 58629 4. 44221 4. 495206  
11728628\_ 3. 214915 3. 606313 3. 297942 3. 41565 3. 430338 3. 512622  
11728629\_ 5. 164703 5. 154966 5. 059358 5. 067492 5. 057755 5. 098004  
11728630\_ 4. 767301 4. 581141 4. 725978 4. 696302 4. 700243 4. 748385  
11728631\_ 5. 833653 5. 518225 5. 698673 5. 359008 5. 334087 5. 265312  
11728632\_ 3. 647852 3. 821851 3. 644622 3. 431662 3. 172129 3. 415284  
11728633\_ 3. 960528 3. 891406 4. 241174 3. 395162 3. 620749 3. 522481  
11728634\_ 5. 15035 5. 138722 5. 157036 4. 661626 4. 654052 4. 812614  
11728635\_ 7. 554405 7. 502416 7. 626653 7. 146772 7. 197301 7. 234034  
11728636\_ 3. 118312 2. 832795 2. 820605 2. 915325 2. 927987 2. 816543  
11728637\_ 11. 73001 11. 73012 11. 73276 11. 81458 11. 83476 11. 82054  
11728638\_ 6. 27407 6. 329719 6. 354529 6. 366235 6. 414953 6. 523486  
11728639\_ 3. 030881 3. 080815 3. 206359 3. 060708 3. 155305 3. 223993  
11728640\_ 11. 22281 11. 13805 11. 14453 11. 25389 11. 30525 11. 22129  
11728641\_ 3. 107941 3. 080924 3. 107042 3. 293957 3. 209611 3. 188736  
11728642\_ 4. 777704 4. 952235 4. 952125 4. 917531 4. 846618 4. 806839  
11728643\_ 10. 62345 10. 6047 10. 62344 10. 46092 10. 42801 10. 41256  
11728644\_ 3. 818401 4. 171189 4. 090591 4. 048114 4. 22265 4. 101232  
11728645\_ 10. 56045 10. 66711 10. 58282 10. 8125 10. 68818 10. 65528  
11728646\_ 10. 50148 10. 51822 10. 50665 10. 77172 10. 75618 10. 70661  
11728647\_ 8. 013079 7. 806129 7. 882893 8. 85397 8. 915878 8. 913081  
11728648\_ 10. 76997 10. 69667 10. 739 10. 97398 11. 04473 10. 95783  
11728649\_ 10. 05665 10. 01944 10. 05594 10. 36843 10. 4007 10. 37705  
11728650\_ 7. 429295 7. 53967 7. 374593 7. 776268 7. 769276 7. 805295  
11728651\_ 10. 34238 10. 24262 10. 32076 9. 991505 9. 967004 9. 981205  
11728652\_ 9. 450246 9. 456344 9. 452574 9. 309149 9. 268234 9. 242559  
11728653\_ 6. 727759 6. 515621 6. 754277 6. 492696 6. 686431 6. 527887  
11728654\_ 6. 639524 6. 515621 6. 778021 6. 46322 6. 686431 6. 633454  
11728655\_ 4. 829755 4. 867079 4. 744434 4. 880561 4. 799477 4. 858474  
11728656\_ 6. 13945 6. 142559 6. 318829 6. 124811 6. 212076 6. 17981  
11728657\_ 3. 52411 3. 569911 3. 658201 3. 688746 3. 569911 3. 685313  
11728658\_ 12. 91028 12. 88823 12. 89383 12. 85172 12. 90163 12. 89459  
11728659\_ 8. 863872 8. 838663 8. 934391 9. 159018 9. 150485 9. 23286  
11728660\_ 6. 041505 5. 871615 6. 129259 6. 90902 6. 789033 6. 961622  
11728661\_ 10. 33544 10. 27201 10. 36801 10. 03195 10. 09006 10. 10997  
11728662\_ 10. 68619 10. 69237 10. 6182 10. 57482 10. 5243 10. 49312  
11728663\_ 3. 429586 3. 592878 3. 503743 3. 603588 3. 503743 3. 454326  
11728664\_ 3. 775969 3. 908239 3. 457281 3. 93163 3. 988165 3. 803355

11728665\_ 11. 30885 11. 2631 11. 29284 11. 38303 11. 4483 11. 39211  
11728666\_ 11. 80811 11. 80936 11. 75391 11. 96421 11. 94946 11. 94373  
11728667\_ 11. 03256 10. 98073 11. 02685 11. 12121 11. 1986 11. 12164  
11728668\_ 7. 37981 7. 313549 7. 38637 7. 156454 7. 195911 7. 169325  
11728669\_ 8. 9744 8. 940764 8. 881897 8. 869836 8. 813684 8. 786673  
11728670\_ 6. 843643 6. 805086 6. 842378 6. 547215 6. 526095 6. 615502  
11728671\_ 7. 153765 7. 288412 7. 148722 7. 066734 7. 002313 6. 977592  
11728672\_ 8. 051536 8. 005184 8. 085084 7. 704716 7. 768662 7. 748159  
11728673\_ 7. 688157 7. 689267 7. 639093 8. 261371 8. 308519 8. 227803  
11728674\_ 11. 03415 11. 00594 11. 00721 11. 02542 11. 00468 11. 01962  
11728675\_ 7. 285177 7. 32752 7. 318147 7. 417885 7. 374243 7. 301864  
11728676\_ 6. 955488 7. 013974 6. 933376 7. 679651 7. 616944 7. 622163  
11728677\_ 7. 643023 7. 607111 7. 652164 7. 548943 7. 619502 7. 603347  
11728678\_ 10. 13954 10. 1012 10. 07664 10. 52053 10. 55202 10. 455  
11728679\_ 3. 861015 3. 813364 3. 913768 3. 966522 3. 913768 3. 955083  
11728680\_ 8. 399322 8. 392358 8. 356674 8. 480196 8. 372769 8. 537381  
11728681\_ 8. 452676 8. 48618 8. 494621 8. 68101 8. 509574 8. 472314  
11728682\_ 8. 970851 8. 882429 8. 975907 8. 910356 8. 921719 8. 986077  
11728683\_ 9. 203555 9. 206763 9. 178558 9. 176652 9. 095373 9. 116764  
11728684\_ 7. 296205 7. 186369 7. 112666 7. 315384 7. 226335 7. 334714  
11728685\_ 6. 31993 6. 410431 6. 281119 6. 396286 6. 342357 6. 389265  
11728686\_ 8. 783021 8. 783491 8. 854118 8. 501975 8. 430293 8. 507343  
11728687\_ 9. 189956 9. 129578 9. 159127 8. 745987 8. 739776 8. 81786  
11728688\_ 8. 334623 8. 320402 8. 376827 8. 255006 8. 22313 8. 23605  
11728689\_ 6. 322086 6. 237393 6. 358536 6. 378806 6. 36391 6. 437016  
11728690\_ 7. 536319 7. 382221 7. 530095 7. 138988 7. 249126 7. 267267  
11728691\_ 8. 252196 8. 167456 8. 214158 8. 763749 8. 796736 8. 719169  
11728692\_ 7. 184451 7. 123851 7. 217802 6. 618306 6. 732886 6. 624746  
11728693\_ 6. 521571 6. 229837 6. 284236 5. 775908 5. 692941 5. 819978  
11728694\_ 5. 745425 5. 763114 5. 766222 5. 103504 5. 0096 5. 026059  
11728695\_ 6. 971486 6. 935012 6. 935028 7. 067936 7. 13277 7. 080943  
11728696\_ 5. 452559 5. 410868 5. 461169 7. 309977 7. 318586 7. 33318  
11728697\_ 6. 865214 6. 951166 6. 951725 6. 634134 6. 400728 6. 42744  
11728698\_ 7. 916868 7. 880206 7. 776486 7. 400837 7. 328651 7. 324886  
11728699\_ 6. 971262 6. 806273 6. 800936 6. 63541 6. 751171 6. 762917  
11728700\_ 7. 227683 7. 207632 7. 192623 6. 887089 6. 995769 6. 882695  
11728701\_ 8. 518955 8. 50424 8. 572446 8. 302824 8. 338187 8. 314997  
11728702\_ 8. 223809 8. 118485 8. 152474 7. 93279 7. 976998 7. 930199  
11728703\_ 5. 233616 5. 150133 5. 18737 5. 534792 5. 412405 5. 4978  
11728704\_ 6. 139168 5. 894697 5. 95083 6. 275784 6. 215327 6. 170148  
11728705\_ 6. 007454 5. 957084 6. 11799 6. 921784 6. 86768 6. 927458  
11728706\_ 6. 314759 6. 357682 6. 327692 6. 172635 6. 293647 6. 273823  
11728707\_ 6. 895023 6. 859668 6. 80946 6. 929575 6. 940322 6. 932821  
11728708\_ 8. 788497 8. 725065 8. 770121 8. 575128 8. 575117 8. 518234  
11728709\_ 7. 736932 7. 6964 7. 722408 7. 629041 7. 617096 7. 537242  
11728710\_ 7. 211029 7. 223588 7. 286513 7. 107655 7. 100027 7. 106182  
11728711\_ 8. 362653 8. 257176 8. 363433 8. 07291 8. 146448 8. 157911  
11728712\_ 8. 356797 8. 330895 8. 369543 8. 651963 8. 561687 8. 651111  
11728713\_ 8. 156213 8. 10649 8. 143368 7. 863791 7. 814627 7. 904411  
11728714\_ 7. 43319 7. 428283 7. 412445 8. 313156 8. 326002 8. 378763  
11728715\_ 2. 040789 2. 187975 2. 055417 2. 121821 2. 055417 2. 116496

11728716\_ 2. 148521 2. 463284 2. 34707 2. 411734 2. 338295 2. 384435  
11728717\_ 2. 635956 2. 358351 2. 233271 2. 308304 2. 294799 2. 235854  
11728718\_ 5. 210974 5. 091902 5. 182781 5. 262499 5. 368684 5. 339374  
11728719\_ 4. 942338 4. 720869 4. 790786 4. 854769 4. 900217 5. 002788  
11728720\_ 5. 430413 5. 445706 5. 316238 5. 559976 5. 454908 5. 50269  
11728721\_ 5. 416238 5. 371687 5. 25412 5. 465169 5. 428652 5. 474256  
11728722\_ 8. 945882 8. 980645 8. 905372 9. 043763 8. 90595 8. 907285  
11728723\_ 9. 619377 9. 633804 9. 628186 9. 584998 9. 575327 9. 561638  
11728724\_ 7. 329185 7. 36932 7. 280544 7. 652927 7. 69601 7. 701561  
11728725\_ 8. 245331 8. 187327 8. 201799 8. 527665 8. 480855 8. 537906  
11728726\_ 3. 367471 3. 405503 3. 351541 3. 347305 3. 325787 3. 400271  
11728727\_ 4. 415744 4. 503204 4. 503204 4. 643657 4. 781555 4. 589621  
11728728\_ 8. 173477 7. 979097 8. 103746 6. 820706 6. 528486 6. 838865  
11728729\_ 7. 40978 7. 270663 7. 361564 8. 322626 8. 256304 8. 260969  
11728730\_ 7. 787516 7. 76555 7. 842319 8. 615125 8. 60916 8. 554227  
11728731\_ 7. 633224 7. 397179 7. 572917 8. 548343 8. 471716 8. 38679  
11728732\_ 9. 503207 9. 439054 9. 539214 9. 711514 9. 748097 9. 753362  
11728733\_ 10. 36944 10. 42919 10. 38395 10. 11196 10. 09527 10. 09915  
11728734\_ 9. 291159 9. 198926 9. 233608 8. 901933 8. 981657 8. 947682  
11728735\_ 8. 909657 8. 839066 8. 907794 8. 485264 8. 448662 8. 455532  
11728736\_ 5. 01819 5. 331612 4. 983407 5. 252993 5. 225474 5. 321233  
11728737\_ 4. 20271 4. 053347 4. 069665 4. 288021 4. 174363 4. 174187  
11728738\_ 8. 186357 8. 158783 8. 175733 7. 785004 7. 751056 7. 763963  
11728739\_ 6. 96004 6. 936579 6. 940417 6. 543172 6. 65814 6. 580453  
11728740\_ 6. 731901 6. 796381 6. 724217 6. 702681 6. 646339 6. 74248  
11728741\_ 8. 262405 8. 108796 8. 173201 8. 347051 8. 377489 8. 378014  
11728742\_ 7. 300934 7. 292748 7. 3431 7. 08875 7. 222809 7. 167907  
11728743\_ 5. 371585 5. 2666 5. 152716 5. 448296 5. 449591 5. 313025  
11728744\_ 6. 061923 6. 130722 6. 175982 7. 238114 7. 136536 7. 070242  
11728745\_ 5. 669421 5. 635949 5. 904825 7. 168057 7. 047717 7. 16273  
11728746\_ 2. 841879 2. 843141 2. 912966 2. 835969 2. 87358 2. 827172  
11728747\_ 9. 042955 9. 148713 9. 002577 9. 378332 9. 282816 9. 337652  
11728748\_ 8. 086143 8. 100201 8. 102503 8. 421896 8. 401533 8. 379566  
11728749\_ 5. 243072 5. 067534 5. 181494 5. 765622 5. 740895 5. 648514  
11728750\_ 6. 9701 6. 849603 7. 038361 6. 557718 6. 633501 6. 547394  
11728751\_ 7. 665924 7. 603654 7. 722326 7. 05775 6. 969032 7. 050486  
11728752\_ 6. 760459 6. 766514 6. 716007 6. 988571 7. 153254 7. 008693  
11728753\_ 2. 047308 2. 063025 2. 221854 2. 00188 2. 260899 2. 18238  
11728754\_ 4. 977054 4. 987704 4. 921078 5. 348797 5. 294925 5. 309619  
11728755\_ 5. 360773 5. 402312 5. 494733 5. 094746 5. 213903 5. 189856  
11728756\_ 5. 942062 6. 168386 6. 300643 5. 701693 5. 755229 5. 613701  
11728757\_ 6. 231927 6. 177114 6. 171628 5. 532014 5. 566598 5. 608832  
11728758\_ 9. 398436 9. 359922 9. 357213 8. 855062 8. 873831 8. 806802  
11728759\_ 7. 037451 6. 961621 7. 056595 6. 964645 6. 926625 7. 134042  
11728760\_ 10. 40767 10. 38582 10. 40584 10. 61007 10. 56951 10. 51454  
11728761\_ 8. 824943 8. 901314 8. 849321 8. 962108 8. 883801 8. 922445  
11728762\_ 7. 466725 7. 4536 7. 564677 6. 675801 6. 768299 6. 712328  
11728763\_ 6. 222869 5. 920337 6. 259945 6. 480576 6. 478889 6. 53515  
11728764\_ 5. 700206 6. 046631 6. 066704 5. 098906 5. 085192 5. 600894  
11728765\_ 6. 070316 6. 173181 5. 998206 5. 954081 5. 987409 5. 734537  
11728766\_ 8. 407147 8. 508844 8. 445423 8. 017594 7. 993902 7. 968048

11728767\_ 8. 5303 8. 408439 8. 56192 8. 086221 8. 041357 8. 017719  
11728768\_ 9. 675433 9. 596142 9. 627505 9. 292578 9. 184542 9. 137264  
11728769\_ 6. 573067 6. 482147 6. 605671 6. 160124 6. 119511 6. 268618  
11728770\_ 1. 881616 2. 039548 1. 741842 1. 881616 1. 889725 1. 914287  
11728771\_ 2. 466499 2. 555651 2. 506763 2. 388195 2. 526867 2. 372207  
11728772\_ 8. 456925 8. 443546 8. 398549 8. 454995 8. 500954 8. 370943  
11728773\_ 8. 11805 8. 056647 8. 112862 8. 18573 8. 203886 8. 211864  
11728774\_ 3. 800559 3. 77079 3. 448241 3. 650783 3. 744578 3. 646124  
11728775\_ 4. 388291 4. 505546 4. 292826 4. 435897 4. 366987 4. 421175  
11728776\_ 7. 089675 7. 065386 7. 10055 7. 359239 7. 308362 7. 340081  
11728777\_ 7. 497147 7. 596104 7. 374996 7. 483945 7. 708598 7. 534901  
11728778\_ 5. 701561 5. 462261 5. 735804 5. 488747 5. 595128 5. 389415  
11728779\_ 4. 693703 4. 876248 4. 777522 4. 886876 4. 93837 4. 854374  
11728780\_ 3. 769623 3. 80467 3. 704923 3. 882489 3. 890011 3. 693418  
11728781\_ 5. 100548 5. 139858 5. 102448 5. 358687 5. 05704 5. 251215  
11728782\_ 3. 986152 4. 042525 4. 112204 4. 275543 3. 977708 4. 112204  
11728783\_ 7. 022795 6. 886652 6. 926343 6. 213861 6. 22013 6. 311024  
11728784\_ 7. 349552 7. 257341 7. 225101 6. 883407 6. 959172 6. 836344  
11728785\_ 5. 64803 5. 672285 5. 642827 5. 709543 5. 738523 5. 62898  
11728786\_ 6. 535192 6. 485265 6. 576732 6. 586626 6. 583226 6. 563186  
11728787\_ 4. 243142 3. 997478 4. 262146 3. 202173 3. 574289 3. 407483  
11728788\_ 4. 660713 4. 557032 4. 589159 4. 724325 4. 697444 4. 790042  
11728789\_ 4. 772735 4. 459939 4. 756913 4. 727952 4. 583659 4. 786652  
11728790\_ 6. 253292 6. 397039 6. 525474 6. 669231 6. 739322 6. 761818  
11728791\_ 4. 925754 4. 914511 4. 801719 4. 97669 4. 939231 4. 981289  
11728792\_ 7. 146971 7. 103138 7. 059697 7. 983244 8. 016657 8. 02292  
11728793\_ 7. 398751 7. 414494 7. 429194 7. 716378 7. 748093 7. 732136  
11728794\_ 7. 650603 7. 696326 7. 5966 7. 99604 7. 988946 8. 06765  
11728795\_ 9. 03928 9. 103311 9. 115517 9. 412985 9. 44565 9. 339912  
11728796\_ 9. 557773 9. 461486 9. 468856 9. 752452 9. 747206 9. 734701  
11728797\_ 9. 413821 9. 364763 9. 333944 9. 453551 9. 422755 9. 39698  
11728798\_ 9. 265287 9. 169077 9. 218677 9. 227414 9. 234309 9. 180124  
11728799\_ 9. 19889 9. 188176 9. 233001 8. 163775 8. 063446 8. 104286  
11728800\_ 6. 658555 6. 806041 6. 82217 6. 395072 6. 466221 6. 474197  
11728801\_ 3. 637923 3. 786791 3. 647877 3. 936607 3. 898556 3. 648655  
11728802\_ 9. 09054 9. 022723 9. 093386 8. 579297 8. 512008 8. 579807  
11728803\_ 3. 062473 3. 145662 3. 24132 3. 101013 3. 115377 3. 212289  
11728804\_ 4. 891875 4. 780824 4. 894322 4. 421089 4. 392707 4. 636665  
11728805\_ 8. 324409 8. 178225 8. 332567 7. 645608 7. 7933 7. 682321  
11728806\_ 7. 505553 7. 48301 7. 470163 7. 018185 6. 902028 7. 085747  
11728807\_ 6. 416331 6. 666226 6. 567411 6. 745925 6. 666119 6. 725271  
11728808\_ 8. 411453 8. 370523 8. 367783 8. 489258 8. 445922 8. 406018  
11728809\_ 7. 327224 7. 176551 7. 27116 6. 591641 6. 757461 6. 739111  
11728810\_ 4. 610793 4. 601199 4. 595967 4. 828381 4. 960537 4. 984669  
11728811\_ 7. 292442 7. 184849 7. 235633 7. 019437 6. 97913 7. 060538  
11728812\_ 5. 890203 5. 950968 5. 777145 5. 815961 5. 950968 6. 123483  
11728813\_ 5. 209428 5. 189628 5. 159244 5. 248321 5. 197887 5. 115938  
11728814\_ 8. 077065 8. 044367 8. 039755 7. 833544 7. 829723 7. 928736  
11728815\_ 6. 653436 6. 621117 6. 714526 6. 771222 6. 863512 6. 806723  
11728816\_ 6. 507504 6. 497107 6. 374918 6. 559958 6. 739151 6. 66639  
11728817\_ 5. 801258 5. 859155 5. 807241 6. 12554 6. 087357 6. 140329

11728818\_ 5. 360398 5. 144979 5. 410659 5. 452277 5. 54734 5. 409222  
11728819\_ 7. 537827 7. 596092 7. 52188 7. 841566 7. 750995 7. 826601  
11728820\_ 7. 389247 7. 447798 7. 371624 7. 554551 7. 456019 7. 529499  
11728821\_ 2. 363509 2. 267618 2. 361778 2. 42698 2. 270922 2. 402114  
11728822\_ 3. 524321 3. 648275 3. 546268 3. 632998 3. 672255 3. 850968  
11728823\_ 11. 69625 11. 69198 11. 69397 11. 62435 11. 63394 11. 59091  
11728824\_ 12. 14779 12. 11187 12. 1331 11. 98373 12. 01482 12. 03485  
11728825\_ 8. 540432 8. 515197 8. 360459 8. 546965 8. 503713 8. 405071  
11728826\_ 9. 144221 9. 134232 9. 138719 9. 132224 9. 083524 9. 053499  
11728827\_ 5. 870921 5. 895305 5. 900227 5. 869075 5. 801055 5. 846466  
11728828\_ 4. 874234 4. 70714 4. 709463 4. 736524 4. 685294 4. 484782  
11728829\_ 4. 100343 3. 873262 4. 01784 3. 947822 3. 754866 3. 990488  
11728830\_ 4. 256966 4. 370222 4. 497107 4. 275543 4. 275543 4. 200678  
11728831\_ 7. 006251 7. 134375 7. 110455 7. 119483 7. 104579 7. 156067  
11728832\_ 4. 226705 4. 132652 3. 872184 4. 264546 4. 326298 4. 226705  
11728833\_ 5. 247243 5. 155834 5. 122191 5. 373348 5. 149545 5. 022955  
11728834\_ 7. 888783 7. 748262 7. 79871 7. 353804 7. 324886 7. 410661  
11728835\_ 7. 309921 7. 24484 7. 392282 7. 044024 7. 097187 7. 114213  
11728836\_ 4. 810113 4. 765677 4. 652265 4. 874234 4. 897393 4. 898487  
11728837\_ 3. 86086 4. 001326 3. 855889 4. 011113 4. 034054 4. 001326  
11728838\_ 3. 705393 3. 813239 3. 63163 3. 264178 3. 213482 3. 199594  
11728839\_ 5. 08735 5. 047027 5. 138853 5. 128473 5. 149545 5. 156303  
11728840\_ 3. 107773 3. 282474 3. 271549 3. 106011 2. 993493 2. 994567  
11728841\_ 6. 86352 6. 808954 6. 87192 6. 66914 6. 682083 6. 623796  
11728842\_ 6. 386156 6. 469848 6. 469848 6. 999784 6. 810008 6. 910833  
11728843\_ 7. 892422 7. 820034 7. 902604 7. 732416 7. 73348 7. 694613  
11728844\_ 5. 799159 5. 750971 5. 698512 5. 888838 5. 839286 5. 914824  
11728845\_ 5. 19641 5. 300118 4. 927552 4. 958711 4. 883846 4. 816108  
11728846\_ 5. 42955 5. 537744 5. 304522 5. 557606 5. 561046 5. 513373  
11728847\_ 5. 845365 5. 732315 5. 922714 5. 814018 5. 898027 5. 88471  
11728848\_ 5. 555559 5. 779198 5. 671204 5. 872161 5. 783425 5. 959522  
11728849\_ 5. 205714 5. 157348 5. 054513 4. 918164 5. 030753 5. 167212  
11728850\_ 3. 249924 3. 18275 3. 308613 3. 099039 3. 077014 3. 156021  
11728851\_ 4. 275543 4. 149344 4. 459939 4. 354787 3. 919519 4. 31833  
11728852\_ 5. 742171 5. 647601 5. 853421 6. 586284 6. 502241 6. 627296  
11728853\_ 5. 22138 5. 232989 5. 248765 5. 358282 5. 213331 5. 29688  
11728854\_ 2. 608524 2. 975005 2. 703447 2. 989365 2. 784167 2. 622455  
11728855\_ 3. 791398 3. 947991 3. 68479 3. 916442 3. 830888 3. 888239  
11728856\_ 3. 836052 3. 880649 3. 825611 3. 827201 3. 915815 3. 916027  
11728857\_ 5. 251511 5. 484893 5. 388629 5. 183407 4. 974881 5. 084589  
11728858\_ 5. 872585 5. 747968 5. 57876 5. 431899 5. 36323 5. 339673  
11728859\_ 6. 397946 6. 360394 6. 398376 6. 366235 6. 408935 6. 430396  
11728860\_ 5. 635639 5. 596498 5. 448925 5. 737945 5. 693939 5. 475572  
11728861\_ 4. 972446 4. 962878 4. 918366 3. 935441 3. 807725 3. 931397  
11728862\_ 6. 074244 5. 943514 6. 094413 5. 879724 5. 818015 5. 818015  
11728863\_ 8. 716928 8. 662186 8. 701 9. 726777 9. 67387 9. 713345  
11728864\_ 6. 358903 6. 407339 6. 42698 7. 220733 7. 181593 7. 266244  
11728865\_ 8. 063755 7. 977571 8. 050942 8. 395132 8. 398147 8. 376523  
11728866\_ 5. 022647 5. 007079 4. 925675 5. 193178 5. 117454 5. 316805  
11728867\_ 5. 29897 5. 350295 5. 276365 6. 089968 5. 965714 5. 889756  
11728868\_ 5. 496879 5. 434139 5. 367168 5. 24292 5. 439808 5. 380883

11728869\_ 4. 22789 3. 991706 4. 025371 3. 809947 4. 03063 3. 97226  
11728870\_ 5. 820052 5. 944653 5. 818484 5. 678035 5. 638895 5. 682766  
11728871\_ 4. 966158 4. 78238 4. 88241 4. 947881 4. 939067 4. 934465  
11728872\_ 4. 668472 4. 375662 4. 611946 3. 757183 3. 806073 3. 701361  
11728873\_ 6. 133515 6. 048016 5. 944132 5. 443921 5. 206045 5. 461628  
11728874\_ 6. 811729 6. 751135 6. 724758 6. 922764 6. 925608 6. 903243  
11728875\_ 6. 053216 6. 20338 6. 24997 6. 44149 6. 392654 6. 379869  
11728876\_ 5. 382944 5. 26573 5. 315101 4. 792067 4. 958962 5. 041897  
11728877\_ 7. 301934 7. 147569 7. 247153 6. 971856 6. 934497 7. 078759  
11728878\_ 7. 603449 7. 65541 7. 567284 7. 867205 7. 726488 7. 595286  
11728879\_ 7. 179235 7. 120251 7. 229862 7. 072766 7. 040181 6. 892462  
11728880\_ 7. 164857 7. 190236 7. 26962 6. 98151 6. 906246 6. 988628  
11728881\_ 7. 453916 7. 474988 7. 481123 7. 426479 7. 461836 7. 577568  
11728882\_ 3. 070973 3. 408704 3. 094046 2. 92702 3. 007549 3. 05828  
11728883\_ 2. 969953 2. 90854 2. 898763 3. 006338 3. 015488 2. 943414  
11728884\_ 4. 151537 3. 970888 4. 038063 4. 461598 4. 519969 4. 453632  
11728885\_ 5. 422761 5. 266086 5. 408313 5. 862695 5. 813713 5. 711003  
11728886\_ 7. 381133 7. 413694 7. 508766 7. 472989 7. 36121 7. 3649  
11728887\_ 7. 682568 7. 723095 7. 919873 7. 691289 7. 643717 7. 699195  
11728888\_ 4. 081293 4. 098377 4. 182123 4. 05347 4. 213768 3. 907857  
11728889\_ 7. 07758 7. 091439 7. 15545 6. 983591 7. 042826 6. 845957  
11728890\_ 3. 847815 4. 030927 3. 97013 4. 003557 4. 037447 4. 245918  
11728891\_ 4. 763543 4. 815683 4. 812548 4. 946678 4. 73515 4. 795263  
11728892\_ 3. 574365 3. 692966 3. 361979 3. 755925 3. 660052 3. 827841  
11728893\_ 5. 763634 5. 841177 5. 638695 5. 756007 5. 864448 5. 833692  
11728894\_ 6. 073581 6. 065541 6. 114781 6. 074809 6. 152794 6. 110631  
11728895\_ 5. 446147 5. 361924 5. 485221 5. 448296 5. 523406 5. 561161  
11728896\_ 7. 625735 7. 478867 7. 602469 7. 745921 7. 763998 7. 78772  
11728897\_ 5. 67312 5. 70204 5. 586236 5. 783053 5. 882172 5. 896678  
11728898\_ 6. 092144 6. 01873 6. 031474 6. 097932 6. 245958 6. 152917  
11728899\_ 5. 589786 5. 60959 5. 48572 5. 644131 5. 519843 5. 581535  
11728900\_ 4. 581872 4. 806871 4. 479833 4. 913255 4. 680314 4. 742058  
11728901\_ 5. 688927 5. 898845 5. 86694 5. 81946 5. 812609 5. 758426  
11728902\_ 4. 989934 5. 105237 4. 954419 5. 005616 4. 985355 5. 024349  
11728903\_ 6. 553946 6. 689215 6. 477958 6. 544345 6. 489191 6. 57997  
11728904\_ 6. 62994 6. 586717 6. 740858 6. 378641 6. 303629 6. 362965  
11728905\_ 5. 824766 6. 040967 5. 942914 5. 748047 5. 64494 5. 677545  
11728906\_ 7. 335346 7. 114405 7. 304457 7. 182551 7. 192456 7. 220733  
11728907\_ 5. 113461 5. 133709 5. 029738 5. 706106 5. 560116 5. 755958  
11728908\_ 5. 246694 5. 26451 5. 288559 5. 48346 5. 553681 5. 535157  
11728909\_ 7. 039693 7. 066628 7. 097587 7. 250023 7. 272898 7. 369116  
11728910\_ 4. 827385 4. 708765 4. 869715 4. 340799 4. 28367 4. 260229  
11728911\_ 4. 430688 4. 470555 4. 473781 4. 713024 4. 691446 4. 668829  
11728912\_ 3. 943249 3. 887074 3. 805646 3. 981128 4. 06324 4. 011297  
11728913\_ 4. 867404 4. 926591 4. 822245 4. 927922 4. 963223 4. 92997  
11728914\_ 6. 708256 6. 527985 6. 622804 6. 504698 6. 500375 6. 525411  
11728915\_ 7. 039121 6. 809436 6. 916474 7. 412838 7. 438326 7. 383661  
11728916\_ 6. 018918 6. 023816 6. 138928 6. 038054 6. 164424 6. 102618  
11728917\_ 5. 205066 5. 343749 5. 122191 5. 43406 5. 361037 5. 419489  
11728918\_ 6. 895689 6. 78548 6. 868886 6. 828333 6. 802319 6. 898793  
11728919\_ 4. 529282 4. 412544 4. 459681 4. 421056 4. 488619 4. 284687

11728920\_ 3. 23509 3. 382167 3. 362208 3. 42329 3. 382167 3. 504926  
11728921\_ 2. 473207 2. 434634 2. 61366 2. 080519 2. 102817 2. 373248  
11728922\_ 4. 185477 4. 22032 3. 954006 4. 270551 4. 315191 4. 202664  
11728923\_ 3. 67355 3. 552953 3. 702719 3. 780331 3. 751163 3. 895109  
11728924\_ 5. 071309 5. 02667 5. 087729 5. 165695 5. 079225 5. 123449  
11728925\_ 4. 64891 4. 459939 4. 533171 4. 655863 4. 608904 4. 984669  
11728926\_ 3. 979058 3. 769167 3. 55762 3. 685344 3. 552977 3. 766833  
11728927\_ 2. 113954 2. 21508 2. 030001 2. 207768 2. 217095 2. 183865  
11728928\_ 6. 807217 6. 941146 6. 877499 6. 938682 6. 955502 7. 016381  
11728929\_ 6. 888973 6. 992151 6. 868724 6. 956895 7. 018531 7. 048887  
11728930\_ 2. 430901 2. 656432 2. 679187 2. 834344 2. 745166 2. 653737  
11728931\_ 6. 452697 6. 633863 6. 526095 6. 635197 6. 728316 6. 826764  
11728932\_ 6. 332487 6. 454753 6. 480335 6. 50734 6. 687042 6. 622619  
11728933\_ 3. 578169 3. 364899 3. 456506 3. 334431 3. 450506 3. 659539  
11728934\_ 4. 64693 4. 748754 4. 479633 4. 73725 4. 84944 4. 733478  
11728935\_ 8. 144319 8. 212774 8. 23318 8. 829786 8. 786253 8. 936132  
11728936\_ 6. 317407 6. 291336 6. 291336 7. 366263 7. 46096 7. 491283  
11728937\_ 2. 45691 2. 578119 2. 630317 2. 507532 2. 404242 2. 526015  
11728938\_ 5. 784409 5. 936645 5. 688014 5. 870147 5. 845294 5. 832163  
11728939\_ 5. 323034 5. 256089 5. 17931 5. 336384 5. 378497 5. 388856  
11728940\_ 5. 186041 5. 257222 4. 976237 5. 230639 5. 403622 5. 233617  
11728941\_ 8. 778034 8. 709895 8. 683604 8. 719602 8. 754968 8. 766887  
11728942\_ 3. 982486 4. 00015 3. 88355 4. 235439 4. 070937 3. 875805  
11728943\_ 5. 117149 5. 178062 5. 143591 5. 145759 5. 066222 5. 035483  
11728944\_ 5. 421269 5. 337233 5. 518169 4. 954447 4. 983564 5. 048525  
11728945\_ 5. 527394 5. 414869 5. 30078 5. 409065 5. 418171 5. 252024  
11728946\_ 5. 568711 5. 540943 5. 69206 5. 790282 5. 785696 5. 806731  
11728947\_ 6. 21036 6. 192015 6. 10762 6. 073844 6. 21036 6. 122992  
11728948\_ 3. 110959 3. 126525 3. 013105 2. 8222 3. 001996 3. 372431  
11728949\_ 5. 953438 5. 845053 5. 897367 5. 917955 6. 037941 6. 030918  
11728950\_ 5. 221533 5. 288841 5. 190296 5. 364285 5. 406857 5. 536567  
11728951\_ 5. 138954 4. 931202 4. 948243 4. 874234 4. 958687 5. 073036  
11728952\_ 6. 456293 6. 372788 6. 463036 6. 326995 6. 209624 6. 258519  
11728953\_ 4. 890198 4. 930158 4. 815594 4. 856718 4. 74574 4. 843057  
11728954\_ 6. 867657 6. 655758 6. 577594 5. 828473 5. 853258 5. 824302  
11728955\_ 4. 956171 4. 685557 5. 270592 4. 360685 4. 484573 4. 329123  
11728956\_ 7. 482528 7. 338912 7. 410645 6. 532801 6. 426878 6. 701805  
11728957\_ 4. 836489 4. 763543 4. 90993 5. 75064 5. 894697 5. 635099  
11728958\_ 5. 570483 5. 377818 5. 656038 6. 507716 6. 389519 6. 472643  
11728959\_ 7. 019831 6. 941524 6. 983864 6. 755642 6. 915671 6. 867219  
11728960\_ 7. 535937 7. 521748 7. 548785 7. 251971 7. 219966 7. 236581  
11728961\_ 5. 873456 5. 840133 5. 893385 5. 696666 5. 800057 5. 725976  
11728962\_ 5. 655554 5. 660349 5. 59289 5. 584813 5. 709521 5. 644482  
11728963\_ 6. 913425 6. 955098 6. 817554 6. 928574 6. 978906 6. 867381  
11728964\_ 6. 697723 6. 747006 6. 837656 6. 306597 6. 324873 6. 213037  
11728965\_ 6. 285716 6. 310047 6. 306913 5. 768053 5. 774818 5. 837174  
11728966\_ 6. 893955 6. 674704 6. 838825 6. 035147 6. 122401 6. 26828  
11728967\_ 5. 580223 5. 380649 5. 400009 4. 752711 4. 68487 4. 937891  
11728968\_ 9. 755053 9. 797919 9. 79418 9. 798166 9. 718643 9. 654017  
11728969\_ 10. 51635 10. 47404 10. 49357 10. 33662 10. 36226 10. 27791  
11728970\_ 3. 413873 3. 320273 3. 215786 3. 045603 3. 183503 3. 139169

11728971\_ 3. 794121 3. 4627 3. 57814 3. 817283 3. 799495 3. 818653  
11728972\_ 6. 727294 6. 732941 6. 759474 6. 662227 6. 703798 6. 752348  
11728973\_ 4. 835515 4. 702632 4. 621535 5. 135172 4. 806554 4. 91936  
11728974\_ 7. 039322 7. 063287 7. 075361 7. 448244 7. 407287 7. 320233  
11728975\_ 5. 812678 5. 926161 5. 757503 5. 842958 5. 842958 5. 838338  
11728976\_ 5. 128061 5. 029529 5. 448296 4. 874252 5. 114463 5. 00523  
11728977\_ 4. 160926 4. 074699 4. 164369 4. 280955 4. 452049 4. 306612  
11728978\_ 8. 286366 8. 26286 8. 198001 7. 674594 7. 585259 7. 710804  
11728979\_ 5. 055873 4. 91014 4. 986667 5. 018108 5. 209502 5. 080488  
11728980\_ 3. 504583 3. 470845 3. 441184 3. 590832 3. 429605 3. 836766  
11728981\_ 2. 348025 2. 734861 2. 628059 2. 763801 2. 546186 2. 626298  
11728982\_ 5. 812957 5. 614563 5. 834509 5. 30776 5. 291913 5. 312204  
11728983\_ 4. 710788 4. 731342 4. 641831 4. 773347 4. 672354 4. 689699  
11728984\_ 8. 929555 8. 874689 8. 929826 8. 910994 8. 843015 8. 893848  
11728985\_ 9. 142657 9. 091619 9. 079303 9. 123259 9. 103275 9. 16673  
11728986\_ 8. 753189 8. 645382 8. 768536 8. 700218 8. 682471 8. 694747  
11728987\_ 6. 270783 6. 09495 6. 237132 6. 208178 6. 159024 6. 211424  
11728988\_ 4. 68728 4. 584047 4. 877693 4. 961038 5. 048749 4. 99885  
11728989\_ 7. 263461 7. 346579 7. 337351 7. 304757 7. 28918 7. 319305  
11728990\_ 6. 67303 6. 680895 6. 418221 6. 649122 6. 634267 6. 590884  
11728991\_ 4. 876166 4. 483141 4. 63522 4. 536449 4. 489385 4. 649814  
11728992\_ 5. 401972 5. 309115 5. 186111 5. 295046 5. 306866 5. 294251  
11728993\_ 4. 489285 4. 545816 4. 463749 4. 663218 4. 569952 4. 594982  
11728994\_ 7. 749163 7. 659314 7. 717163 7. 83231 7. 818968 7. 798862  
11728995\_ 3. 249924 3. 068187 2. 796483 2. 947761 3. 00552 3. 279355  
11728996\_ 6. 22347 6. 284263 6. 123551 6. 204872 6. 224056 6. 216445  
11728997\_ 6. 647935 6. 595712 6. 67941 7. 291509 7. 154785 7. 375125  
11728998\_ 6. 583461 6. 671249 6. 796205 6. 574056 6. 592304 6. 686431  
11728999\_ 4. 234403 3. 993442 3. 974793 4. 016783 4. 016783 3. 793774  
11729000\_ 4. 394848 4. 414708 4. 287593 4. 690985 4. 502556 4. 502556  
11729001\_ 3. 36817 3. 727451 3. 276127 3. 719503 3. 469566 3. 339991  
11729002\_ 7. 040115 6. 921702 7. 030269 6. 874408 6. 911316 6. 964323  
11729003\_ 4. 209817 3. 884126 3. 965017 4. 398868 4. 305044 4. 275538  
11729004\_ 4. 6649 4. 552885 4. 718131 4. 753966 4. 657981 4. 767037  
11729005\_ 6. 684228 6. 705485 6. 632897 6. 559463 6. 816626 6. 698523  
11729006\_ 3. 248178 3. 386683 3. 248178 3. 142946 3. 505628 3. 449693  
11729007\_ 5. 385954 5. 226516 5. 2222 5. 455062 5. 497624 5. 408417  
11729008\_ 4. 251307 4. 250934 4. 414369 4. 273186 4. 343812 4. 530601  
11729009\_ 5. 052806 4. 8429 4. 838358 4. 930747 5. 108596 5. 212531  
11729010\_ 5. 216222 5. 157322 5. 149655 5. 322723 5. 230579 5. 189674  
11729011\_ 4. 810398 4. 782106 4. 875722 4. 801007 4. 719898 4. 78209  
11729012\_ 5. 926174 5. 787052 5. 787172 5. 794746 5. 914366 5. 921212  
11729013\_ 5. 480966 5. 553037 5. 435285 5. 443988 5. 210491 5. 243516  
11729014\_ 3. 733721 3. 885332 3. 732889 3. 877846 3. 899979 3. 881577  
11729015\_ 2. 109997 1. 995297 1. 931589 2. 013024 1. 810607 2. 036931  
11729016\_ 4. 402688 4. 386613 4. 322471 4. 584933 4. 307665 4. 210692  
11729017\_ 5. 481383 5. 752624 5. 495635 5. 635046 5. 598662 5. 409821  
11729018\_ 5. 340601 5. 424501 5. 41224 5. 547557 5. 491166 5. 51946  
11729019\_ 3. 226564 3. 453028 3. 42035 3. 391757 3. 432727 3. 452758  
11729020\_ 7. 631919 7. 583677 7. 70626 6. 815853 6. 672355 6. 83586  
11729021\_ 3. 117852 3. 123944 3. 317344 3. 034374 3. 088682 3. 04826



11729022\_ 4. 296025 4. 304419 4. 274421 4. 421681 4. 310668 4. 319688  
11729023\_ 3. 516655 3. 647223 3. 544533 3. 750187 3. 822839 3. 71133  
11729024\_ 4. 219441 4. 343626 4. 269409 4. 643717 4. 185903 4. 558141  
11729025\_ 5. 71939 5. 754232 5. 529852 5. 796052 5. 609028 5. 703993  
11729026\_ 6. 367543 6. 476145 6. 280729 5. 730067 5. 638115 5. 846451  
11729027\_ 4. 618073 4. 529076 4. 523974 5. 2222 5. 314822 5. 077006  
11729028\_ 2. 739852 2. 398781 2. 382341 2. 508411 2. 328838 2. 494072  
11729029\_ 5. 113732 5. 230323 5. 283627 5. 11527 5. 155966 5. 330524  
11729030\_ 4. 766874 5. 005545 4. 886565 4. 992243 5. 073945 4. 786606  
11729031\_ 4. 557939 4. 630215 4. 577282 4. 896623 4. 752857 4. 623167  
11729032\_ 4. 007238 4. 246059 4. 0411 4. 144955 4. 209713 4. 411164  
11729033\_ 9. 318655 9. 241373 9. 242794 9. 15032 9. 140254 9. 100869  
11729034\_ 7. 382077 7. 44595 7. 485183 7. 280996 7. 281145 7. 352082  
11729035\_ 9. 381124 9. 295249 9. 390517 9. 270021 9. 213497 9. 179136  
11729036\_ 5. 75741 5. 763634 5. 591594 5. 60143 5. 714401 5. 775701  
11729037\_ 5. 61254 5. 821404 5. 830644 5. 535004 5. 490144 5. 414465  
11729038\_ 2. 539247 2. 692618 2. 408569 2. 395275 2. 523564 2. 415591  
11729039\_ 3. 623616 3. 620026 3. 720557 3. 741646 3. 746588 3. 548817  
11729040\_ 5. 723283 5. 675621 5. 629651 5. 577196 5. 463606 5. 475572  
11729041\_ 3. 414999 3. 307602 3. 339849 3. 493993 3. 486329 3. 430922  
11729042\_ 4. 877417 5. 105024 4. 820451 5. 162312 5. 071646 4. 97607  
11729043\_ 4. 776564 4. 909116 4. 849182 4. 874234 4. 957448 4. 837593  
11729044\_ 4. 4973 4. 264485 4. 169817 4. 213226 4. 237546 4. 347179  
11729045\_ 4. 606064 4. 925771 4. 541346 4. 802454 4. 802454 4. 830055  
11729046\_ 3. 675402 3. 737719 3. 670083 3. 638061 3. 56251 3. 605852  
11729047\_ 4. 992936 4. 642422 5. 007567 4. 643717 4. 536748 4. 618822  
11729048\_ 5. 35312 5. 350489 5. 190282 5. 311196 5. 320025 5. 285997  
11729049\_ 3. 426905 3. 290188 3. 408552 3. 398236 3. 22877 3. 31547  
11729050\_ 2. 798271 2. 80915 2. 663776 2. 825799 2. 891337 2. 724503  
11729051\_ 8. 592729 8. 52876 8. 59821 8. 807889 8. 824943 8. 745693  
11729052\_ 6. 978796 6. 873886 7. 142352 6. 819801 6. 711885 6. 777523  
11729053\_ 7. 782172 7. 821055 7. 825759 7. 837106 7. 9131 7. 837106  
11729054\_ 6. 637139 6. 695082 6. 64811 6. 745686 6. 733733 6. 69357  
11729055\_ 3. 332286 3. 653557 3. 402363 3. 572498 3. 485489 3. 485489  
11729056\_ 4. 251421 4. 169076 4. 076836 4. 379989 4. 261749 4. 046103  
11729057\_ 3. 122119 3. 061205 3. 23069 3. 232682 3. 21118 3. 363467  
11729058\_ 5. 090184 4. 953412 4. 830792 4. 906491 4. 859537 4. 933767  
11729059\_ 6. 153709 6. 027477 6. 081171 6. 663874 6. 523598 6. 564487  
11729060\_ 5. 352735 5. 304377 5. 246115 5. 246115 5. 086823 5. 202913  
11729061\_ 3. 676857 3. 691938 3. 932381 3. 722351 3. 705625 3. 710188  
11729062\_ 7. 345731 7. 226661 7. 352521 6. 525819 6. 570269 6. 604788  
11729063\_ 8. 580654 8. 534439 8. 553743 7. 807677 7. 860675 7. 976845  
11729064\_ 5. 049309 5. 091532 5. 218369 4. 9256 5. 019255 5. 054854  
11729065\_ 4. 519942 4. 550308 4. 603135 4. 457625 4. 418689 4. 550631  
11729066\_ 6. 734196 6. 587092 6. 755122 6. 466697 6. 443231 6. 544838  
11729067\_ 5. 115071 5. 029651 4. 785093 5. 046592 5. 015113 5. 015113  
11729068\_ 2. 309886 2. 319853 2. 193815 2. 224631 2. 128968 2. 112288  
11729069\_ 4. 921344 4. 746727 4. 643717 4. 673721 4. 584933 4. 528914  
11729070\_ 6. 969648 6. 886652 7. 042563 6. 781458 6. 86315 6. 758363  
11729071\_ 4. 545262 4. 709463 4. 724263 4. 458467 4. 56635 4. 599728  
11729072\_ 7. 345731 7. 305401 7. 367317 7. 679445 7. 699337 7. 64677

11729073\_ 4. 643717 4. 783068 4. 772366 4. 649141 4. 586053 4. 535595  
11729074\_ 4. 688196 4. 704905 4. 806048 5. 070264 4. 963428 5. 00599  
11729075\_ 6. 680932 6. 613444 6. 496852 6. 581746 6. 649183 6. 67471  
11729076\_ 5. 819504 5. 776494 5. 705341 5. 820074 5. 853386 5. 64067  
11729077\_ 2. 604352 2. 623474 2. 730421 2. 453063 2. 364784 2. 36394  
11729078\_ 2. 49282 2. 477484 2. 283059 2. 25483 2. 376991 2. 298985  
11729079\_ 2. 409219 2. 450172 2. 476966 2. 270249 2. 945669 2. 611462  
11729080\_ 3. 072798 3. 123054 3. 101063 3. 101063 3. 15544 3. 072798  
11729081\_ 4. 866067 4. 666373 5. 2222 4. 781652 4. 72272 4. 731696  
11729082\_ 4. 65227 4. 683566 4. 213226 4. 623344 4. 742327 4. 710872  
11729083\_ 6. 277682 6. 445652 6. 224873 6. 542681 6. 543975 6. 473559  
11729084\_ 2. 318988 2. 525371 2. 33407 2. 571867 2. 398513 2. 486361  
11729085\_ 1. 803121 1. 810343 1. 890895 1. 970146 1. 994025 1. 813221  
11729086\_ 5. 911073 5. 866126 5. 784606 6. 103483 5. 991007 5. 99608  
11729087\_ 6. 946361 7. 003765 6. 977187 6. 994888 7. 001821 6. 986064  
11729088\_ 4. 291393 4. 461071 4. 626564 3. 800074 3. 49304 3. 769197  
11729089\_ 4. 779119 4. 97938 4. 872578 4. 937378 5. 007616 5. 124529  
11729090\_ 5. 160135 5. 370988 5. 23184 5. 23184 5. 233648 5. 107888  
11729091\_ 5. 949607 6. 011116 5. 861082 5. 904666 5. 857576 5. 896888  
11729092\_ 5. 232074 5. 34406 5. 280966 5. 280205 5. 407012 5. 286937  
11729093\_ 5. 223428 5. 242549 5. 183045 5. 381744 5. 422106 5. 23893  
11729094\_ 5. 791563 5. 798294 5. 853631 5. 412168 5. 451545 5. 297498  
11729095\_ 4. 167824 4. 100557 4. 114522 4. 233904 4. 114522 4. 181788  
11729096\_ 7. 514338 7. 558743 7. 547833 7. 576006 7. 526243 7. 560301  
11729097\_ 5. 89209 5. 867804 5. 876853 5. 886019 5. 902854 5. 854383  
11729098\_ 5. 897536 5. 882493 5. 850629 5. 372002 5. 546313 5. 474695  
11729099\_ 7. 964801 7. 916193 8. 158155 7. 582418 7. 628916 7. 546055  
11729100\_ 2. 986389 2. 767017 2. 820497 2. 816887 2. 905085 2. 895809  
11729101\_ 6. 459544 6. 465175 6. 55177 6. 610715 6. 759827 6. 783818  
11729102\_ 9. 053648 9. 065847 9. 052353 9. 133262 9. 208206 9. 091398  
11729103\_ 11. 0878 11. 13369 11. 15307 10. 89614 10. 87681 10. 83703  
11729104\_ 6. 225513 6. 014125 6. 106994 6. 578419 6. 510356 6. 527359  
11729105\_ 3. 127447 3. 015123 2. 982601 3. 015123 3. 065066 2. 885667  
11729106\_ 4. 584933 4. 490546 4. 653188 4. 643717 4. 584933 4. 683143  
11729107\_ 3. 170524 3. 16214 2. 879661 2. 959245 2. 887951 3. 037562  
11729108\_ 4. 803121 4. 696932 4. 706659 4. 686112 4. 685576 4. 643717  
11729109\_ 2. 580989 2. 714841 2. 573686 2. 667875 2. 481102 2. 515291  
11729110\_ 2. 211501 2. 121515 1. 956213 2. 26039 2. 121515 2. 121515  
11729111\_ 2. 040509 2. 157818 2. 085829 1. 91408 2. 287711 2. 057003  
11729112\_ 5. 463856 5. 632351 5. 514753 5. 52118 5. 577599 5. 65336  
11729113\_ 10. 23856 10. 224 10. 19245 10. 36161 10. 34558 10. 27253  
11729114\_ 10. 69043 10. 69001 10. 72592 10. 72467 10. 75861 10. 72475  
11729115\_ 5. 437859 5. 514881 5. 374439 5. 474932 5. 453408 5. 533706  
11729116\_ 5. 736831 5. 702808 5. 595537 5. 847359 5. 879047 5. 775414  
11729117\_ 4. 677213 4. 584933 4. 548478 4. 574176 4. 402928 4. 512204  
11729118\_ 6. 855525 6. 768217 6. 853287 6. 55865 6. 683262 6. 640804  
11729119\_ 8. 603432 8. 613569 8. 565094 8. 728802 8. 711676 8. 731472  
11729120\_ 8. 295805 8. 188834 8. 24559 8. 357762 8. 272568 8. 377189  
11729121\_ 9. 899069 9. 887441 9. 906424 9. 949333 9. 92227 9. 888559  
11729122\_ 9. 922555 9. 874971 9. 898214 9. 947849 9. 935599 9. 896033  
11729123\_ 9. 729338 9. 814024 9. 797839 9. 917032 9. 912492 9. 79691

11729124\_ 10. 22769 10. 15914 10. 20343 10. 18158 10. 20329 10. 17803  
11729125\_ 3. 038914 3. 225734 3. 291087 3. 269431 3. 107138 3. 145695  
11729126\_ 11. 48984 11. 4861 11. 48484 11. 39685 11. 43245 11. 38831  
11729127\_ 12. 39078 12. 36169 12. 36532 12. 27947 12. 29753 12. 30116  
11729128\_ 10. 83033 10. 77256 10. 80762 9. 112661 9. 083719 9. 125791  
11729129\_ 8. 983239 8. 958949 9. 03758 7. 11932 7. 077753 7. 126134  
11729130\_ 6. 301603 6. 319447 6. 403766 6. 431763 6. 341454 6. 514299  
11729131\_ 9. 093292 8. 996224 9. 158236 9. 248658 9. 334837 9. 312836  
11729132\_ 7. 05288 7. 00573 7. 08741 8. 300711 8. 179388 8. 218177  
11729133\_ 6. 555307 6. 562471 6. 516917 6. 760922 6. 661664 6. 770505  
11729134\_ 10. 79 10. 69941 10. 77072 10. 70528 10. 70597 10. 73102  
11729135\_ 8. 238733 8. 150345 8. 173375 8. 081056 8. 26062 8. 175273  
11729136\_ 4. 024686 3. 851152 3. 65165 4. 390458 4. 147813 4. 527036  
11729137\_ 5. 410583 5. 309193 5. 408733 5. 287067 5. 255419 5. 13836  
11729138\_ 5. 873891 5. 699742 5. 601301 5. 346236 5. 366205 5. 328003  
11729139\_ 5. 646297 5. 704241 5. 58036 5. 129695 5. 480402 5. 312215  
11729140\_ 6. 089221 6. 161704 5. 998539 5. 25971 5. 603503 5. 55704  
11729141\_ 6. 025952 5. 816449 6. 00964 6. 123612 6. 078336 6. 33679  
11729142\_ 6. 931701 6. 884606 6. 898207 6. 82832 6. 862059 6. 828602  
11729143\_ 8. 542802 8. 451179 8. 55932 8. 409082 8. 368065 8. 389008  
11729144\_ 8. 184851 8. 146896 8. 269645 8. 054707 8. 128256 8. 081503  
11729145\_ 9. 885866 9. 917919 9. 833146 10. 3699 10. 28832 10. 25465  
11729146\_ 7. 212473 7. 092738 7. 126311 7. 826402 7. 761364 7. 77294  
11729147\_ 5. 357853 5. 47535 5. 442047 5. 52396 5. 4333 5. 435883  
11729148\_ 8. 494722 8. 489695 8. 467412 8. 413675 8. 396981 8. 377189  
11729149\_ 10. 52331 10. 50409 10. 50765 10. 57585 10. 5835 10. 61363  
11729150\_ 5. 073036 4. 999958 4. 970831 5. 447472 5. 297498 5. 465396  
11729151\_ 7. 375768 7. 305758 7. 34875 7. 796531 7. 754603 7. 849497  
11729152\_ 10. 6473 10. 6527 10. 61762 10. 67676 10. 62614 10. 57982  
11729153\_ 7. 303122 7. 216117 7. 165715 7. 311752 7. 409349 7. 410171  
11729154\_ 6. 438446 6. 322329 6. 436097 6. 37114 6. 445129 6. 572584  
11729155\_ 2. 835262 2. 85805 2. 625736 2. 82125 2. 950395 2. 818945  
11729156\_ 9. 104342 9. 062403 9. 087313 8. 767064 8. 731528 8. 718329  
11729157\_ 4. 517888 4. 553685 4. 468976 4. 583246 4. 543581 4. 573558  
11729158\_ 10. 07512 9. 964573 10. 09218 10. 57628 10. 58329 10. 63014  
11729159\_ 6. 893045 6. 920793 6. 766673 6. 956076 6. 832159 6. 971645  
11729160\_ 6. 827877 6. 874408 6. 726755 6. 956617 6. 909954 7. 07518  
11729161\_ 9. 788943 9. 80842 9. 815773 9. 860992 9. 870798 9. 834161  
11729162\_ 9. 374396 9. 409607 9. 416048 9. 392203 9. 449453 9. 325828  
11729163\_ 8. 615658 8. 521036 8. 658395 8. 70391 8. 789226 8. 753495  
11729164\_ 7. 472989 7. 356604 7. 499642 7. 552753 7. 599975 7. 688798  
11729165\_ 7. 061728 7. 027267 7. 138772 7. 291088 7. 217173 7. 243294  
11729166\_ 9. 218327 9. 125666 9. 147894 8. 951029 8. 975658 8. 90849  
11729167\_ 8. 621698 8. 582427 8. 617304 8. 55909 8. 490146 8. 480015  
11729168\_ 9. 536769 9. 553635 9. 616337 9. 424324 9. 459433 9. 474973  
11729169\_ 7. 867815 7. 860991 7. 919283 7. 047918 7. 108917 7. 02939  
11729170\_ 8. 652506 8. 647633 8. 619009 7. 834559 7. 822118 7. 84  
11729171\_ 8. 787525 8. 736292 8. 768515 8. 346669 8. 291146 8. 366829  
11729172\_ 10. 10372 10. 0719 10. 09736 9. 94033 9. 941654 9. 96788  
11729173\_ 8. 147852 8. 186128 8. 172158 8. 581032 8. 537361 8. 580557  
11729174\_ 7. 852707 7. 822933 7. 838748 7. 955363 7. 88134 7. 951929

11729175\_ 3. 723707 3. 964069 3. 716767 3. 909854 3. 879309 3. 991426  
11729176\_ 2. 352743 2. 19376 2. 259603 2. 361778 2. 132478 2. 002058  
11729177\_ 7. 828768 7. 810933 7. 933604 7. 679445 7. 748159 7. 712873  
11729178\_ 6. 343479 6. 466417 6. 47394 6. 327662 6. 282224 6. 427049  
11729179\_ 6. 486209 6. 275913 6. 566618 6. 035981 6. 048886 6. 247112  
11729180\_ 7. 539733 7. 499583 7. 571594 7. 277896 7. 191629 7. 284825  
11729181\_ 4. 977054 5. 058323 5. 073036 4. 968813 4. 8818 5. 01277  
11729182\_ 6. 125449 6. 239687 6. 198745 5. 739866 5. 65792 5. 733888  
11729183\_ 8. 316814 8. 289202 8. 319941 8. 231703 8. 221563 8. 169679  
11729184\_ 6. 377847 6. 303372 6. 288487 6. 554512 6. 498937 6. 549863  
11729185\_ 9. 430719 9. 37913 9. 375382 8. 889721 8. 846647 8. 869321  
11729186\_ 8. 167018 8. 011441 8. 036212 7. 564051 7. 642748 7. 673736  
11729187\_ 8. 199064 8. 048133 8. 027908 7. 61611 7. 651317 7. 665432  
11729188\_ 7. 598024 7. 581904 7. 612591 7. 228722 7. 233659 7. 129692  
11729189\_ 7. 452367 7. 398371 7. 454908 7. 16988 7. 162715 7. 114069  
11729190\_ 7. 403044 7. 324498 7. 372497 7. 058076 7. 05305 6. 999944  
11729191\_ 8. 142564 8. 160294 8. 201594 7. 742658 7. 737806 7. 871638  
11729192\_ 4. 584933 4. 463187 4. 638489 4. 061378 4. 108147 4. 054288  
11729193\_ 7. 57435 7. 52437 7. 567111 7. 034193 7. 074699 7. 23509  
11729194\_ 7. 968977 7. 918284 7. 976272 7. 239672 7. 292034 7. 27536  
11729195\_ 8. 69947 8. 609462 8. 629716 8. 741141 8. 731302 8. 761467  
11729196\_ 9. 992459 9. 964237 9. 978042 10. 14082 10. 10503 10. 04354  
11729197\_ 8. 662598 8. 559152 8. 65633 8. 25407 8. 329196 8. 312618  
11729198\_ 5. 153378 4. 986086 4. 846548 4. 843046 4. 76294 4. 928914  
11729199\_ 7. 664532 7. 589926 7. 716964 6. 908874 7. 022313 6. 829318  
11729200\_ 5. 721125 5. 657072 5. 667131 5. 13268 5. 236626 5. 238186  
11729201\_ 8. 65987 8. 681289 8. 726332 7. 842037 7. 723279 7. 827334  
11729202\_ 5. 664265 5. 60455 5. 478318 5. 614563 5. 658069 5. 604125  
11729203\_ 6. 457685 6. 567432 6. 570786 6. 71801 6. 712041 6. 688877  
11729204\_ 2. 940889 3. 126366 2. 874619 3. 002715 3. 101013 3. 017574  
11729205\_ 3. 434715 3. 858375 3. 792617 3. 902897 3. 932187 3. 885746  
11729206\_ 9. 166262 9. 132145 9. 175835 9. 139685 9. 136364 9. 028573  
11729207\_ 5. 678443 5. 748533 5. 908656 5. 573902 5. 486283 5. 53269  
11729208\_ 7. 251041 7. 160132 7. 294188 7. 104168 7. 1097 7. 162199  
11729209\_ 4. 167431 4. 308975 4. 070562 4. 371027 4. 491203 4. 274359  
11729210\_ 7. 001652 6. 925216 6. 929246 7. 672341 7. 696943 7. 7338  
11729211\_ 6. 732383 6. 660908 6. 683856 6. 779107 6. 860208 6. 923437  
11729212\_ 8. 010843 7. 967248 8. 019931 7. 939678 7. 967255 7. 933329  
11729213\_ 6. 140171 6. 164523 6. 102109 6. 293287 6. 392774 6. 491067  
11729214\_ 2. 431784 2. 414407 2. 508339 2. 467479 2. 559667 2. 281595  
11729215\_ 5. 972084 5. 995962 6. 031863 6. 579367 6. 620543 6. 53905  
11729216\_ 6. 067889 5. 931647 6. 136035 6. 72217 6. 607732 6. 783337  
11729217\_ 2. 798622 2. 786017 2. 924166 3. 005424 3. 033318 2. 933118  
11729218\_ 7. 065105 7. 03431 7. 098698 6. 986734 6. 899319 6. 90845  
11729219\_ 7. 701212 7. 619572 7. 591374 7. 257883 7. 220807 7. 250626  
11729220\_ 5. 77927 5. 704919 5. 700556 5. 768053 5. 699288 5. 677111  
11729221\_ 3. 64383 3. 54244 3. 54244 3. 54244 3. 54244 3. 66639  
11729222\_ 6. 986063 6. 907218 6. 982937 6. 511225 6. 557068 6. 592469  
11729223\_ 6. 134438 6. 03151 6. 209514 5. 239257 5. 276052 5. 208233  
11729224\_ 8. 378369 8. 302574 8. 391951 8. 41459 8. 411181 8. 417709  
11729225\_ 7. 352662 7. 194792 7. 357526 7. 264816 7. 199936 7. 274291

11729226\_ 4. 989844 4. 994386 4. 862263 5. 017961 4. 946876 4. 890252  
11729227\_ 7. 394031 7. 327416 7. 352994 6. 954257 6. 86121 6. 979295  
11729228\_ 4. 797218 4. 542515 4. 643717 4. 278196 4. 357244 4. 163015  
11729229\_ 6. 984296 6. 826558 7. 027047 6. 310058 6. 279556 6. 298586  
11729230\_ 2. 855917 2. 832409 2. 808158 2. 722903 2. 742533 2. 862319  
11729231\_ 6. 842729 6. 872701 6. 878478 6. 452247 6. 448994 6. 396509  
11729232\_ 7. 788209 7. 722329 7. 762587 7. 158532 7. 173747 7. 194667  
11729233\_ 7. 728828 7. 683621 7. 749508 7. 454773 7. 484195 7. 392868  
11729234\_ 4. 768117 4. 874234 4. 859164 4. 820228 4. 695525 4. 831416  
11729235\_ 8. 212226 8. 183428 8. 124838 7. 924912 7. 877002 7. 902865  
11729236\_ 9. 856166 9. 762793 9. 838691 10. 05492 10. 06173 10. 06632  
11729237\_ 9. 502537 9. 411617 9. 431609 9. 070108 9. 150158 9. 093313  
11729238\_ 7. 898823 7. 919827 7. 792859 8. 570105 8. 53126 8. 422109  
11729239\_ 8. 035444 7. 999614 7. 962228 8. 650581 8. 674148 8. 570944  
11729240\_ 7. 534141 7. 53394 7. 553679 7. 569552 7. 579168 7. 575172  
11729241\_ 8. 441554 8. 393086 8. 395573 8. 319515 8. 248454 8. 351004  
11729242\_ 2. 543478 2. 684547 2. 547908 2. 557411 2. 606925 2. 65028  
11729243\_ 4. 233843 4. 411175 4. 227999 4. 297172 4. 294343 4. 002399  
11729244\_ 9. 239292 9. 21365 9. 192281 9. 164115 9. 121952 9. 130092  
11729245\_ 6. 225513 6. 150477 6. 3358 6. 160865 6. 241491 6. 318547  
11729246\_ 6. 48642 6. 497107 6. 625361 6. 459094 6. 408658 6. 504759  
11729247\_ 3. 048329 3. 048329 3. 211451 3. 295631 3. 489859 3. 389997  
11729248\_ 5. 704919 5. 539475 5. 835037 5. 552945 5. 59087 5. 437297  
11729249\_ 6. 024039 6. 011082 6. 084428 6. 019218 6. 019172 6. 032536  
11729250\_ 5. 071905 5. 02407 5. 09167 3. 366125 3. 487045 3. 219781  
11729251\_ 2. 336493 2. 452735 2. 644221 2. 491376 2. 420807 2. 535326  
11729252\_ 5. 624848 5. 664002 5. 58077 5. 096406 5. 336836 5. 236022  
11729253\_ 5. 728464 5. 732315 5. 503378 5. 535491 5. 377679 5. 479869  
11729254\_ 3. 540105 3. 503743 3. 432467 3. 588708 3. 606313 3. 566963  
11729255\_ 9. 297992 9. 313624 9. 281635 9. 258043 9. 236002 9. 206188  
11729256\_ 7. 823961 7. 730779 7. 853191 7. 825457 7. 836729 7. 916845  
11729257\_ 5. 397272 5. 228627 5. 373868 5. 528624 5. 42783 5. 516398  
11729258\_ 6. 086346 5. 939976 6. 060263 6. 492281 6. 504187 6. 55168  
11729259\_ 8. 104186 8. 049898 7. 995685 7. 70953 7. 767729 7. 697801  
11729260\_ 8. 082824 8. 008788 8. 120321 7. 816239 7. 894465 7. 890183  
11729261\_ 9. 189712 9. 180752 9. 131189 8. 67906 8. 600513 8. 687153  
11729262\_ 3. 430944 3. 324308 3. 501251 3. 364116 3. 43546 3. 374405  
11729263\_ 2. 666801 2. 684693 2. 475401 2. 55948 2. 52455 2. 756411  
11729264\_ 7. 516123 7. 429123 7. 499364 7. 282092 7. 239762 7. 183182  
11729265\_ 4. 923752 5. 047728 4. 87658 4. 962826 4. 840432 4. 889397  
11729266\_ 5. 253932 5. 329405 5. 097493 5. 284421 5. 368116 5. 219577  
11729267\_ 7. 877691 7. 675522 7. 764758 6. 699067 6. 8221 6. 811332  
11729268\_ 3. 503743 3. 503743 3. 398236 3. 495694 3. 511792 3. 503743  
11729269\_ 6. 366567 6. 453116 6. 286719 6. 440715 6. 367646 6. 397319  
11729270\_ 6. 372681 6. 389636 6. 271833 6. 235213 6. 352759 6. 400492  
11729271\_ 8. 135001 8. 128733 8. 089772 7. 61633 7. 593084 7. 558286  
11729272\_ 6. 347441 6. 404702 6. 371191 6. 504079 6. 538122 6. 591495  
11729273\_ 5. 272351 5. 316594 5. 23788 5. 230961 5. 189008 5. 159469  
11729274\_ 3. 397447 3. 470479 3. 397447 3. 290188 3. 001532 3. 29915  
11729275\_ 7. 63486 7. 551646 7. 684958 7. 185569 7. 212651 7. 358974  
11729276\_ 7. 967743 7. 991494 8. 00237 7. 89831 7. 86209 7. 854589

11729277\_ 7. 101815 7. 014487 7. 018268 6. 937354 6. 890343 6. 991791  
11729278\_ 7. 534257 7. 505 7. 510098 7. 324121 7. 279177 7. 216923  
11729279\_ 6. 505182 6. 403308 6. 417406 6. 260786 6. 253983 6. 352276  
11729280\_ 6. 805142 6. 765888 6. 826678 6. 682746 6. 765888 6. 761138  
11729281\_ 7. 516171 7. 484543 7. 496292 7. 480805 7. 50628 7. 619086  
11729282\_ 4. 761783 4. 929765 4. 751525 5. 092826 4. 859615 5. 042428  
11729283\_ 5. 926672 6. 136345 5. 843706 6. 058786 6. 074256 6. 016828  
11729284\_ 5. 765678 5. 692394 5. 69142 5. 738783 5. 739837 5. 731847  
11729285\_ 9. 10194 9. 107412 9. 125696 8. 941557 8. 915213 8. 89696  
11729286\_ 6. 829064 6. 737518 6. 896174 6. 528566 6. 67268 6. 563288  
11729287\_ 6. 14266 6. 170117 6. 224327 5. 950175 5. 915816 5. 928364  
11729288\_ 6. 167178 6. 158568 6. 080766 6. 142051 6. 157746 6. 084018  
11729289\_ 5. 675335 5. 734119 5. 761796 5. 140525 5. 104173 5. 427225  
11729290\_ 6. 118838 6. 187775 6. 33679 6. 664906 6. 777365 6. 851921  
11729291\_ 7. 582347 7. 447687 7. 546829 7. 514581 7. 54447 7. 588518  
11729292\_ 5. 814176 5. 932898 5. 93516 6. 08078 6. 129924 6. 021243  
11729293\_ 7. 16535 7. 193327 7. 127531 7. 169394 7. 225673 7. 222385  
11729294\_ 5. 233421 4. 975532 5. 056083 5. 048875 4. 830414 5. 228347  
11729295\_ 7. 185601 7. 049482 7. 120618 7. 009306 6. 980194 7. 115773  
11729296\_ 4. 353513 4. 395806 4. 364002 4. 244882 4. 348915 4. 506112  
11729297\_ 3. 386364 3. 494879 3. 746325 3. 401149 3. 522934 3. 401149  
11729298\_ 9. 640835 9. 568091 9. 586518 9. 825391 9. 820983 9. 849259  
11729299\_ 7. 416109 7. 405919 7. 489251 7. 17439 7. 274767 7. 174906  
11729300\_ 4. 261859 4. 184354 4. 169484 3. 968821 4. 201589 3. 999543  
11729301\_ 4. 233104 4. 037572 4. 044553 4. 06055 3. 992078 3. 983348  
11729302\_ 4. 53517 4. 591801 4. 268537 4. 741541 4. 53517 4. 708139  
11729303\_ 6. 830716 6. 978784 6. 910536 6. 642937 6. 812644 6. 793112  
11729304\_ 9. 247284 9. 200284 9. 247284 9. 14391 9. 143495 9. 11424  
11729305\_ 9. 033029 9. 019544 9. 067197 8. 621527 8. 614719 8. 63691  
11729306\_ 9. 927147 9. 894434 9. 845463 9. 727621 9. 679198 9. 610048  
11729307\_ 6. 536494 6. 697491 6. 56114 6. 757037 6. 733235 6. 687612  
11729308\_ 6. 118838 6. 105624 6. 130562 6. 683168 6. 47452 6. 422829  
11729309\_ 6. 821592 6. 769416 6. 84772 7. 085963 7. 12621 7. 211049  
11729310\_ 7. 591185 7. 515004 7. 598206 7. 967731 7. 919688 7. 966775  
11729311\_ 3. 021611 2. 906049 2. 829998 2. 908686 2. 879075 2. 710673  
11729312\_ 5. 632908 5. 426026 5. 554436 5. 442565 5. 297498 5. 411683  
11729313\_ 6. 280652 6. 253492 6. 190226 6. 410422 6. 401083 6. 322054  
11729314\_ 5. 876597 6. 259136 6. 057784 6. 60241 6. 509715 6. 519276  
11729315\_ 4. 918165 4. 923861 4. 892818 4. 772885 4. 834467 4. 834457  
11729316\_ 7. 14422 7. 13204 7. 261514 7. 724233 7. 768676 7. 784571  
11729317\_ 8. 966529 8. 873673 9. 052102 8. 700664 8. 741389 8. 766512  
11729318\_ 3. 702959 3. 351271 3. 397557 3. 707814 3. 65329 3. 878629  
11729319\_ 10. 05166 9. 95844 10. 01434 8. 948798 8. 92543 8. 943818  
11729320\_ 9. 076759 9. 057927 9. 05787 8. 056873 8. 046748 8. 071763  
11729321\_ 5. 019017 4. 966451 5. 029529 5. 054298 4. 910297 4. 957322  
11729322\_ 4. 343449 4. 398365 4. 300667 4. 568013 4. 466184 4. 436378  
11729323\_ 4. 149443 4. 285194 4. 298325 4. 52373 4. 298325 4. 122446  
11729324\_ 2. 416738 2. 14927 2. 362826 1. 970748 2. 284581 2. 257319  
11729325\_ 3. 95885 4. 044923 4. 052782 4. 213226 4. 052782 4. 052782  
11729326\_ 7. 344629 7. 219361 7. 273436 6. 892342 6. 935043 6. 945908  
11729327\_ 7. 312911 7. 207998 7. 368619 7. 295111 7. 285154 7. 298719

11729328\_ 7. 942181 7. 925858 7. 945669 8. 101449 8. 106745 8. 097943  
11729329\_ 7. 571083 7. 649674 7. 444213 7. 606815 7. 573609 7. 634297  
11729330\_ 3. 8924 3. 8924 4. 082053 4. 076761 4. 134872 4. 044034  
11729331\_ 3. 412761 3. 314476 3. 424899 3. 756925 3. 498254 3. 523195  
11729332\_ 5. 058407 5. 15434 5. 321299 4. 651348 4. 960138 4. 843341  
11729333\_ 5. 412472 5. 672285 5. 534137 5. 353996 5. 484397 5. 504149  
11729334\_ 6. 8463 6. 787596 6. 778735 6. 62508 6. 66715 6. 612215  
11729335\_ 3. 914567 3. 973767 3. 664763 3. 89524 3. 819913 3. 869272  
11729336\_ 6. 140432 6. 243227 6. 22668 6. 203769 6. 130148 6. 203769  
11729337\_ 6. 450688 6. 425295 6. 435629 6. 507716 6. 362246 6. 384442  
11729338\_ 2. 574483 2. 733567 2. 679455 2. 726051 2. 754206 2. 81634  
11729339\_ 7. 500493 7. 646522 7. 536773 7. 610327 7. 630296 7. 574634  
11729340\_ 5. 01254 5. 123661 4. 876685 5. 26034 5. 1329 5. 029529  
11729341\_ 4. 075128 4. 030595 4. 044708 4. 03867 4. 171864 4. 144452  
11729342\_ 7. 14097 7. 372354 7. 285776 7. 265178 7. 2267 7. 311809  
11729343\_ 6. 639555 6. 366929 6. 298615 6. 363869 6. 391792 6. 351851  
11729344\_ 3. 004612 3. 291663 3. 239923 3. 487225 3. 283423 3. 453904  
11729345\_ 8. 92128 8. 949479 8. 813889 8. 88958 8. 870573 8. 918938  
11729346\_ 7. 234387 7. 183723 7. 254313 7. 113181 7. 151809 7. 119213  
11729347\_ 6. 845428 6. 847039 6. 90124 6. 790387 6. 823641 6. 911921  
11729348\_ 4. 347993 4. 285934 4. 62859 4. 669934 4. 652925 4. 850568  
11729349\_ 5. 557073 5. 673746 5. 73774 5. 369565 5. 311901 5. 351857  
11729350\_ 6. 326055 6. 176809 6. 256879 5. 745821 5. 584813 5. 794391  
11729351\_ 4. 316553 4. 335594 4. 370337 3. 690658 3. 780814 3. 786777  
11729352\_ 4. 772851 4. 934907 4. 831469 5. 018347 5. 097845 5. 134622  
11729353\_ 6. 914463 6. 970135 6. 874408 6. 278326 6. 044285 6. 151295  
11729354\_ 8. 303161 8. 296372 8. 311892 7. 734767 7. 690587 7. 831857  
11729355\_ 8. 389618 8. 348842 8. 384814 7. 873048 7. 812582 7. 836035  
11729356\_ 7. 749672 7. 814928 7. 673435 8. 027769 7. 853675 7. 950682  
11729357\_ 7. 931048 8. 094051 8. 057853 8. 178225 8. 168286 8. 186241  
11729358\_ 5. 275576 5. 367394 5. 362345 5. 272121 5. 305845 5. 261103  
11729359\_ 4. 192068 4. 306405 4. 126836 4. 084197 4. 063648 4. 192068  
11729360\_ 2. 195928 2. 218481 2. 039526 2. 105446 2. 154977 2. 297889  
11729361\_ 2. 277668 2. 342852 2. 338154 2. 370073 2. 185262 2. 277668  
11729362\_ 2. 850317 2. 772518 2. 660425 2. 755332 2. 945443 2. 925407  
11729363\_ 2. 605516 2. 666388 2. 613959 2. 55944 2. 605516 2. 597403  
11729364\_ 5. 548355 5. 472157 5. 51893 5. 25775 5. 115613 5. 367865  
11729365\_ 5. 680068 5. 711294 5. 837933 5. 654584 5. 452394 5. 575868  
11729366\_ 6. 080403 6. 033313 6. 211188 5. 533078 5. 619568 5. 68633  
11729367\_ 3. 925181 3. 818401 3. 576167 3. 646934 3. 636212 3. 604811  
11729368\_ 6. 690506 6. 695127 6. 736263 6. 5721 6. 505367 6. 634397  
11729369\_ 4. 903631 4. 697843 4. 670736 4. 471263 4. 682086 4. 650633  
11729370\_ 4. 513241 4. 26253 4. 370337 4. 298217 4. 499916 4. 399736  
11729371\_ 4. 868935 5. 201702 5. 04249 5. 158695 5. 191413 5. 092312  
11729372\_ 5. 498819 5. 642969 5. 657983 5. 711368 5. 552318 5. 565243  
11729373\_ 4. 936199 4. 971488 4. 647499 4. 992311 4. 918989 5. 002357  
11729374\_ 5. 53049 5. 422546 5. 530698 5. 149071 5. 067431 5. 030355  
11729375\_ 2. 979444 2. 756401 3. 270307 2. 841861 2. 975391 2. 979444  
11729376\_ 3. 152654 2. 95425 3. 345647 3. 231975 3. 330275 3. 326337  
11729377\_ 8. 336277 8. 315669 8. 38471 8. 513993 8. 550805 8. 516364  
11729378\_ 3. 282315 3. 207526 3. 200807 3. 244148 3. 119678 3. 133096

11729379\_ 6. 211167 6. 124349 6. 174979 6. 157865 6. 157865 6. 228115  
11729380\_ 5. 492399 5. 361442 5. 499478 5. 451811 5. 420877 5. 467896  
11729381\_ 2. 835256 2. 945422 3. 079013 3. 266407 3. 173422 3. 074943  
11729382\_ 6. 811705 6. 619287 6. 812004 6. 621979 6. 522584 6. 612657  
11729383\_ 4. 990705 4. 935473 4. 930507 4. 963407 4. 96176 5. 079422  
11729384\_ 6. 094413 6. 047812 6. 082032 6. 972327 6. 874408 6. 796058  
11729385\_ 4. 840154 5. 043036 4. 783099 5. 395385 5. 403887 5. 332669  
11729386\_ 6. 966039 7. 009306 7. 021409 7. 118889 7. 132898 7. 249008  
11729387\_ 6. 746606 6. 920686 6. 807291 7. 169967 7. 097571 7. 201513  
11729388\_ 3. 384337 3. 454454 3. 32202 3. 402402 3. 353846 3. 535739  
11729389\_ 7. 440726 7. 468406 7. 383989 7. 485809 7. 566489 7. 511952  
11729390\_ 7. 490435 7. 370403 7. 41068 6. 965727 6. 874408 6. 957184  
11729391\_ 7. 539845 7. 544632 7. 583672 7. 151724 7. 141061 7. 218148  
11729392\_ 5. 180309 5. 283413 4. 952888 5. 316829 5. 215911 5. 166994  
11729393\_ 6. 855249 6. 900008 6. 84242 6. 874229 6. 89162 6. 910833  
11729394\_ 4. 727183 4. 779915 4. 804778 4. 679485 4. 554774 4. 631775  
11729395\_ 6. 16168 6. 037162 6. 347647 5. 838203 5. 98882 5. 913458  
11729396\_ 7. 042552 7. 008269 7. 008614 6. 886601 6. 922374 6. 951279  
11729397\_ 6. 240992 6. 315543 6. 345933 5. 943769 6. 111575 6. 182066  
11729398\_ 6. 851522 6. 831992 6. 8776 6. 982123 6. 972404 7. 011995  
11729399\_ 5. 894697 5. 620736 5. 66324 4. 863657 5. 057959 4. 992784  
11729400\_ 3. 93297 3. 902862 3. 70982 4. 00284 4. 031562 4. 223404  
11729401\_ 3. 249924 3. 377627 3. 361704 3. 269177 3. 558503 3. 423838  
11729402\_ 4. 912683 4. 808239 4. 804824 4. 73676 4. 849431 4. 866013  
11729403\_ 7. 45287 7. 552752 7. 430732 7. 505413 7. 575138 7. 546231  
11729404\_ 7. 256094 7. 238993 7. 13805 7. 314141 7. 422243 7. 324744  
11729405\_ 7. 204566 7. 241635 7. 075921 7. 291002 7. 376627 7. 232326  
11729406\_ 7. 971364 7. 854837 7. 948338 7. 759034 7. 722204 7. 722295  
11729407\_ 4. 736372 4. 837631 4. 67005 4. 846873 4. 780717 4. 815683  
11729408\_ 5. 029529 5. 046217 4. 984669 5. 106244 5. 088038 5. 328005  
11729409\_ 6. 936596 6. 862059 6. 913343 6. 734794 6. 660023 6. 853767  
11729410\_ 5. 112438 5. 076649 5. 120052 4. 422036 4. 649623 4. 769437  
11729411\_ 3. 551122 3. 461542 3. 767722 3. 712057 3. 722376 3. 760882  
11729412\_ 7. 916845 7. 77968 7. 829325 7. 862585 8. 005286 7. 97343  
11729413\_ 9. 603655 9. 560317 9. 563874 9. 993735 10. 00282 9. 928112  
11729414\_ 9. 524832 9. 456023 9. 495249 9. 782701 9. 809795 9. 902153  
11729415\_ 7. 77761 7. 64382 7. 663227 7. 542099 7. 551736 7. 554315  
11729416\_ 6. 320238 6. 361759 6. 401285 6. 515289 6. 448401 6. 407361  
11729417\_ 2. 804305 3. 055405 3. 234827 3. 03631 3. 076536 2. 97699  
11729418\_ 3. 475682 3. 475682 3. 526128 3. 402917 3. 476729 3. 518076  
11729419\_ 5. 022856 5. 324886 4. 773721 5. 268697 5. 347615 5. 31861  
11729420\_ 6. 004332 5. 805753 6. 042118 5. 578971 5. 61312 5. 532618  
11729421\_ 6. 44987 6. 261152 6. 412133 6. 029364 5. 918676 5. 989314  
11729422\_ 9. 018581 9. 011089 9. 058535 9. 115523 9. 063382 9. 096702  
11729423\_ 5. 094991 5. 121306 4. 942304 5. 093035 4. 978367 5. 037019  
11729424\_ 3. 973611 3. 954658 4. 085367 3. 994488 3. 95623 4. 131209  
11729425\_ 3. 371468 3. 428868 3. 458842 3. 421719 3. 421719 3. 468685  
11729426\_ 4. 85417 5. 172377 4. 822249 4. 936083 4. 984951 5. 073036  
11729427\_ 4. 014128 3. 984513 3. 952572 4. 248015 4. 257897 4. 200678  
11729428\_ 4. 663032 4. 956451 4. 667766 4. 538029 4. 647661 4. 797233  
11729429\_ 1. 926593 2. 097788 2. 161452 2. 181598 1. 957413 2. 122595



11729430\_ 4. 109659 3. 850638 4. 213226 3. 760357 3. 748428 3. 919552  
11729431\_ 5. 32267 5. 382655 5. 620146 5. 836801 5. 768761 5. 883287  
11729432\_ 5. 825875 5. 941435 5. 867402 5. 979416 5. 825678 5. 97625  
11729433\_ 5. 473262 5. 686569 5. 619129 5. 685997 5. 636016 5. 96777  
11729434\_ 5. 61929 5. 411451 5. 373925 5. 379787 5. 601401 5. 492115  
11729435\_ 5. 120656 4. 803113 4. 949839 5. 178085 5. 145408 5. 202133  
11729436\_ 3. 008652 2. 976166 3. 008652 2. 73596 2. 902295 3. 149526  
11729437\_ 3. 593313 3. 662986 3. 790326 3. 515364 3. 740817 3. 730894  
11729438\_ 7. 001901 6. 849603 6. 966825 6. 904517 6. 955779 6. 967649  
11729439\_ 3. 390259 3. 441319 3. 403619 3. 246975 3. 322543 3. 350033  
11729440\_ 3. 566319 3. 800136 3. 750097 4. 060996 3. 906648 4. 082205  
11729441\_ 4. 306644 3. 87879 4. 206814 4. 93806 4. 770793 5. 022345  
11729442\_ 7. 083434 7. 089477 7. 12723 6. 692644 6. 792145 6. 871864  
11729443\_ 7. 137209 7. 183166 7. 247154 7. 328581 7. 295927 7. 324886  
11729444\_ 4. 817654 4. 992995 4. 679511 4. 945895 5. 064955 5. 121259  
11729445\_ 3. 647099 3. 604864 3. 296634 3. 509202 3. 301126 3. 731116  
11729446\_ 3. 249924 3. 234708 3. 425612 3. 290188 3. 272497 3. 290188  
11729447\_ 4. 79134 4. 791501 4. 684155 4. 852281 4. 840672 4. 772757  
11729448\_ 6. 569754 6. 677137 6. 664054 6. 977001 6. 873692 6. 943276  
11729449\_ 7. 99082 7. 987853 8. 048291 8. 131109 8. 127586 8. 238187  
11729450\_ 10. 29635 10. 22148 10. 28595 9. 394162 9. 375246 9. 409237  
11729451\_ 9. 92504 9. 827335 9. 907885 8. 744256 8. 799246 8. 789467  
11729452\_ 4. 747846 4. 910217 4. 856349 4. 847878 4. 850678 4. 794168  
11729453\_ 5. 206168 5. 34869 5. 374229 5. 323151 5. 347657 5. 488041  
11729454\_ 3. 291415 3. 600805 3. 740892 3. 795096 3. 793983 3. 432919  
11729455\_ 3. 584345 3. 644084 3. 540942 3. 710414 3. 671707 3. 636525  
11729456\_ 2. 499747 2. 166511 2. 298627 2. 361778 2. 477583 2. 296023  
11729457\_ 4. 643717 4. 750228 4. 666471 5. 072861 4. 903377 4. 937721  
11729458\_ 6. 786014 6. 633512 6. 829136 7. 734188 7. 756537 7. 873964  
11729459\_ 3. 529957 3. 622276 3. 435027 3. 577969 3. 624671 3. 721126  
11729460\_ 3. 820901 3. 909593 3. 740892 3. 82177 3. 356751 3. 554597  
11729461\_ 5. 120109 5. 118888 4. 894935 5. 109435 5. 208256 5. 090961  
11729462\_ 6. 237391 6. 213504 6. 300643 6. 338819 6. 388783 6. 397263  
11729463\_ 4. 646096 4. 685711 4. 591682 4. 769194 4. 871045 4. 628705  
11729464\_ 5. 774432 5. 858346 5. 813504 5. 796449 5. 741884 5. 73992  
11729465\_ 6. 274222 6. 173246 6. 260705 5. 403531 5. 605115 5. 698094  
11729466\_ 6. 321503 6. 405813 6. 286871 6. 226477 6. 351647 6. 30674  
11729467\_ 3. 555047 3. 607521 3. 597548 3. 528014 3. 57796 3. 439662  
11729468\_ 7. 489581 7. 567829 7. 45728 7. 569154 7. 516587 7. 633415  
11729469\_ 4. 613427 4. 683135 4. 639114 4. 764188 4. 606449 4. 667867  
11729470\_ 4. 275903 4. 371135 4. 344094 4. 304684 4. 275903 4. 384962  
11729471\_ 4. 643717 4. 621096 4. 606951 4. 736759 4. 556167 4. 742665  
11729472\_ 4. 247843 4. 522044 4. 225346 4. 596126 4. 694307 4. 798461  
11729473\_ 5. 028554 4. 993306 5. 029529 5. 297498 5. 503815 5. 435301  
11729474\_ 4. 933112 5. 059685 4. 796647 5. 427441 5. 314891 5. 601265  
11729475\_ 6. 438305 6. 509688 6. 354529 6. 631764 6. 664407 6. 512991  
11729476\_ 6. 17981 6. 076709 6. 079803 6. 39223 6. 292279 6. 193195  
11729477\_ 4. 556859 4. 577637 4. 523816 4. 606702 4. 666363 4. 616462  
11729478\_ 5. 84499 5. 882095 5. 657435 5. 927749 5. 947524 5. 882095  
11729479\_ 2. 617438 2. 707406 2. 81064 3. 014391 2. 834918 2. 83198  
11729480\_ 11. 22438 11. 14589 11. 21419 10. 98483 11. 0661 11. 06128

11729481\_ 10. 68664 10. 63182 10. 65574 10. 49445 10. 54459 10. 53448  
11729482\_ 5. 673927 5. 567894 5. 672405 5. 6775 5. 75446 5. 698419  
11729483\_ 2. 372335 2. 206338 2. 295542 2. 446003 2. 283442 2. 369216  
11729484\_ 2. 234652 2. 246607 2. 196366 2. 251565 2. 332769 2. 173194  
11729485\_ 4. 803922 4. 665944 4. 91786 4. 778531 4. 851923 4. 836714  
11729486\_ 4. 993209 5. 114281 4. 84803 5. 030297 5. 007312 5. 042101  
11729487\_ 5. 604978 5. 614563 5. 643713 5. 637108 5. 702161 5. 620814  
11729488\_ 4. 872836 4. 740281 4. 833496 4. 894699 4. 984669 4. 894699  
11729489\_ 2. 970843 2. 987718 2. 92898 3. 142875 2. 987718 3. 117252  
11729490\_ 4. 674435 4. 740084 4. 707044 4. 863379 4. 733189 4. 726653  
11729491\_ 6. 054052 6. 112999 5. 972244 6. 155914 6. 152461 6. 186222  
11729492\_ 4. 940655 5. 019614 4. 824195 5. 322391 5. 335507 5. 17725  
11729493\_ 4. 191031 4. 025852 3. 733234 4. 050659 4. 177437 3. 977398  
11729494\_ 4. 782049 5. 008994 4. 370337 4. 973456 5. 016532 4. 840019  
11729495\_ 4. 636438 4. 52373 4. 381413 5. 441198 5. 341363 5. 502342  
11729496\_ 5. 144633 5. 234841 5. 297498 5. 783961 5. 953604 5. 98792  
11729497\_ 4. 053899 3. 984381 3. 95635 3. 832041 4. 054288 3. 966382  
11729498\_ 5. 539833 5. 377513 5. 261844 5. 484501 5. 467813 5. 5103  
11729499\_ 4. 840106 4. 704117 4. 798281 4. 822113 4. 716584 4. 687242  
11729500\_ 5. 996053 6. 011116 6. 046816 6. 083421 6. 184829 6. 115115  
11729501\_ 7. 612443 7. 52632 7. 376751 6. 960849 6. 99052 6. 875228  
11729502\_ 6. 779572 6. 781294 6. 85524 6. 263567 6. 275091 6. 377709  
11729503\_ 5. 046366 5. 179873 5. 126394 5. 013422 4. 949274 4. 903296  
11729504\_ 5. 614294 5. 58641 5. 309758 5. 477049 5. 435726 5. 409365  
11729505\_ 7. 299162 7. 285687 7. 317731 7. 512845 7. 574274 7. 513216  
11729506\_ 6. 769235 6. 895758 6. 874408 6. 844472 6. 909213 6. 844331  
11729507\_ 4. 887173 5. 027597 4. 91915 4. 207258 4. 442579 4. 180073  
11729508\_ 4. 517389 4. 521264 4. 370337 4. 772366 4. 505198 4. 525139  
11729509\_ 5. 156303 5. 284073 5. 116567 5. 34986 5. 256614 5. 354162  
11729510\_ 4. 936704 4. 779069 4. 772809 4. 641062 4. 921323 4. 85042  
11729511\_ 6. 447743 6. 242403 6. 28715 6. 291424 6. 153955 6. 335267  
11729512\_ 5. 073857 5. 139027 5. 009573 5. 230009 5. 232511 5. 1853  
11729513\_ 6. 712351 6. 772685 6. 672381 6. 775523 6. 775523 6. 80335  
11729514\_ 6. 154656 6. 244666 6. 154656 6. 054983 6. 106406 6. 259991  
11729515\_ 4. 495294 4. 471347 4. 478546 4. 719551 4. 785393 4. 574085  
11729516\_ 8. 642783 8. 565293 8. 620517 8. 312366 8. 269763 8. 265982  
11729517\_ 8. 111595 8. 067529 8. 108685 7. 426223 7. 462494 7. 491111  
11729518\_ 2. 617827 2. 954327 2. 919771 2. 682623 2. 577116 2. 718734  
11729519\_ 6. 581254 6. 50336 6. 65345 6. 542161 6. 598851 6. 643071  
11729520\_ 4. 269981 4. 52373 4. 48108 4. 372887 4. 355399 4. 512047  
11729521\_ 5. 381424 5. 505954 5. 52294 5. 466667 5. 430677 5. 449313  
11729522\_ 6. 66227 6. 730135 6. 82635 6. 684311 6. 719957 6. 648096  
11729523\_ 4. 019764 4. 116031 4. 024034 3. 985716 3. 763263 4. 008373  
11729524\_ 3. 687898 3. 78616 3. 857277 3. 926117 3. 841906 3. 990291  
11729525\_ 8. 806923 8. 797901 8. 807339 9. 28227 9. 328876 9. 310602  
11729526\_ 6. 828021 6. 594705 6. 553708 6. 683007 6. 595623 6. 650547  
11729527\_ 6. 15095 6. 254797 6. 195518 6. 586272 6. 421444 6. 444238  
11729528\_ 6. 304177 6. 211998 6. 225706 6. 005307 6. 181621 5. 96546  
11729529\_ 6. 799593 6. 635243 6. 611345 6. 515108 6. 659222 6. 65744  
11729530\_ 5. 503349 5. 696596 5. 613181 5. 519981 5. 618007 5. 622805  
11729531\_ 6. 877037 6. 810611 6. 886652 7. 274526 7. 242573 7. 377495

11729532\_ 4. 977054 5. 107136 5. 124905 5. 2222 5. 10999 5. 253069  
11729533\_ 5. 512912 5. 612588 5. 51684 5. 528624 5. 546117 5. 43186  
11729534\_ 9. 771756 9. 714525 9. 785691 9. 404588 9. 451436 9. 44845  
11729535\_ 3. 925181 4. 18689 3. 4965 4. 007879 4. 028045 3. 917357  
11729536\_ 4. 75961 4. 827225 4. 909678 4. 706309 4. 80581 4. 760446  
11729537\_ 5. 809463 5. 833919 5. 709274 5. 928995 5. 826278 5. 862009  
11729538\_ 4. 331765 4. 416209 4. 19629 4. 458049 4. 347179 4. 347179  
11729539\_ 6. 377847 6. 236027 6. 368619 6. 616206 6. 502829 6. 590914  
11729540\_ 5. 693163 5. 704919 5. 577996 5. 845365 5. 743538 5. 741896  
11729541\_ 6. 928038 6. 956342 7. 060109 7. 15681 7. 143473 7. 041829  
11729542\_ 7. 623711 7. 474179 7. 576351 7. 704858 7. 779835 7. 838045  
11729543\_ 2. 816136 2. 860854 3. 077881 3. 010462 3. 013802 3. 123288  
11729544\_ 4. 793775 4. 902337 4. 951045 5. 013362 5. 029529 5. 074652  
11729545\_ 5. 947086 5. 967846 5. 958788 5. 355484 5. 397861 5. 514483  
11729546\_ 7. 027765 6. 975313 7. 00622 6. 988211 7. 061682 7. 027943  
11729547\_ 6. 559576 6. 502038 6. 569004 6. 567247 6. 571147 6. 652474  
11729548\_ 5. 756988 5. 845777 5. 80946 5. 739637 5. 867748 5. 76494  
11729549\_ 6. 624784 6. 529956 6. 732114 5. 845834 5. 787203 5. 739618  
11729550\_ 7. 677625 7. 517858 7. 572642 7. 066564 7. 049689 7. 168922  
11729551\_ 7. 509446 7. 463495 7. 518148 7. 60285 7. 536532 7. 605852  
11729552\_ 5. 865745 5. 820155 5. 765608 5. 811633 5. 779311 5. 798613  
11729553\_ 6. 876219 6. 895577 6. 926974 6. 980779 6. 952217 7. 059696  
11729554\_ 6. 179536 6. 263567 6. 08339 6. 321642 6. 270207 6. 11378  
11729555\_ 2. 00132 2. 151835 2. 037183 2. 192224 2. 045115 2. 041709  
11729556\_ 3. 487186 3. 264835 3. 313547 3. 228292 3. 389719 3. 105989  
11729557\_ 2. 409362 2. 54064 2. 530407 2. 572641 2. 51091 2. 563297  
11729558\_ 5. 206615 5. 400163 5. 246827 5. 313547 5. 434421 5. 42334  
11729559\_ 5. 309614 5. 394171 5. 340059 5. 375825 5. 358406 5. 411064  
11729560\_ 5. 933185 5. 983232 5. 800798 6. 027897 5. 962583 6. 070264  
11729561\_ 8. 488192 8. 362591 8. 436575 8. 310123 8. 309833 8. 297985  
11729562\_ 3. 920971 3. 832994 3. 730399 3. 89791 4. 0228 3. 958322  
11729563\_ 4. 055605 4. 307384 3. 961117 4. 225437 4. 226577 4. 035012  
11729564\_ 8. 18836 8. 208652 8. 230872 7. 873146 7. 881501 7. 970416  
11729565\_ 6. 789015 6. 783098 6. 876836 6. 902231 6. 999833 6. 864896  
11729566\_ 6. 612838 6. 639806 6. 57707 6. 372185 6. 495271 6. 431223  
11729567\_ 2. 630452 2. 982652 3. 25342 3. 424073 2. 914815 3. 159754  
11729568\_ 4. 335802 4. 894078 4. 320118 4. 358223 4. 703143 4. 504788  
11729569\_ 2. 226568 2. 10746 2. 207892 1. 98283 2. 014696 2. 013528  
11729570\_ 4. 53963 4. 6422 4. 473168 4. 631789 4. 701803 4. 854722  
11729571\_ 5. 285218 5. 380241 5. 29809 5. 557617 5. 307117 5. 431093  
11729572\_ 7. 419163 7. 375338 7. 434804 7. 392699 7. 312661 7. 347082  
11729573\_ 5. 22326 5. 079708 5. 132814 5. 261404 5. 214954 5. 194457  
11729574\_ 9. 455374 9. 394221 9. 398432 8. 893526 8. 911908 8. 877941  
11729575\_ 9. 393447 9. 391452 9. 361202 9. 202305 9. 245131 9. 221433  
11729576\_ 8. 100796 8. 010444 8. 058867 7. 812189 7. 626408 7. 791867  
11729577\_ 6. 13945 6. 145328 6. 094413 6. 180453 6. 231041 6. 126244  
11729578\_ 3. 030295 3. 195423 3. 056814 3. 025972 3. 133303 3. 085163  
11729579\_ 10. 68767 10. 67633 10. 72854 10. 55181 10. 55882 10. 58961  
11729580\_ 8. 421684 8. 356794 8. 442226 8. 227343 8. 228815 8. 246826  
11729581\_ 6. 726029 6. 714177 6. 76949 7. 067829 7. 182371 7. 06146  
11729582\_ 2. 154853 2. 169082 2. 238653 2. 150145 2. 07851 2. 154853

11729583\_ 5. 666723 5. 735217 5. 642105 5. 738603 5. 729663 5. 939997  
11729584\_ 9. 38923 9. 277566 9. 344536 9. 82001 9. 841838 9. 794316  
11729585\_ 9. 502994 9. 493281 9. 484126 9. 977664 9. 970345 9. 945351  
11729586\_ 2. 558066 2. 643934 2. 542534 2. 601369 2. 553055 2. 549232  
11729587\_ 3. 801422 3. 760598 3. 892299 3. 93331 3. 879309 3. 886714  
11729588\_ 5. 001199 5. 171986 5. 302856 5. 232739 5. 341594 5. 290367  
11729589\_ 3. 024056 3. 123099 2. 87994 3. 123099 2. 720961 3. 024056  
11729590\_ 4. 666352 4. 598388 4. 487018 4. 637071 4. 766107 4. 705435  
11729591\_ 4. 945269 4. 943932 4. 96591 5. 044682 5. 028584 5. 015362  
11729592\_ 4. 151843 4. 294862 4. 287593 4. 449049 4. 559596 4. 503816  
11729593\_ 8. 330806 8. 313839 8. 336395 8. 635582 8. 594436 8. 656927  
11729594\_ 9. 486845 9. 455145 9. 494698 9. 500996 9. 553197 9. 555452  
11729595\_ 8. 74094 8. 720617 8. 735875 8. 759978 8. 795166 8. 714296  
11729596\_ 6. 695192 6. 644439 6. 772906 6. 882315 6. 843907 6. 945846  
11729597\_ 6. 770363 6. 640773 6. 752994 6. 848163 6. 866202 6. 865137  
11729598\_ 5. 522129 5. 330711 5. 433081 5. 584434 5. 686361 5. 798613  
11729599\_ 3. 49597 3. 402972 3. 286973 3. 841443 3. 655604 3. 719012  
11729600\_ 6. 381475 6. 235323 6. 451871 6. 381475 6. 381475 6. 368221  
11729601\_ 9. 552527 9. 55426 9. 54206 9. 383361 9. 399594 9. 381893  
11729602\_ 10. 13723 10. 06694 10. 08505 10. 24404 10. 25522 10. 18128  
11729603\_ 10. 73165 10. 67319 10. 72708 11. 29589 11. 32853 11. 33668  
11729604\_ 4. 144856 4. 287378 4. 135496 4. 213226 3. 994911 4. 310748  
11729605\_ 4. 38885 4. 460665 4. 266679 4. 186368 4. 273005 4. 1758  
11729606\_ 9. 405006 9. 323307 9. 39177 9. 273007 9. 308378 9. 313161  
11729607\_ 6. 615359 6. 45099 6. 241766 6. 453432 6. 384415 6. 300643  
11729608\_ 6. 565904 6. 515241 6. 60993 5. 954081 6. 005657 6. 030721  
11729609\_ 6. 519746 6. 507361 6. 600414 5. 973202 5. 966572 6. 039078  
11729610\_ 6. 164978 6. 224254 6. 005387 6. 695792 6. 625851 6. 679333  
11729611\_ 9. 124554 9. 066928 9. 134512 9. 172748 9. 27872 9. 166005  
11729612\_ 5. 857715 5. 610982 5. 599805 5. 540648 5. 626164 5. 684477  
11729613\_ 12. 17591 12. 18242 12. 17539 12. 5742 12. 54876 12. 52094  
11729614\_ 12. 10677 12. 07078 12. 103 12. 47734 12. 4902 12. 51055  
11729615\_ 7. 047238 7. 032402 7. 099734 6. 909833 6. 949246 6. 927369  
11729616\_ 6. 748126 6. 822242 6. 862391 6. 706017 6. 704636 6. 632127  
11729617\_ 8. 240343 8. 256224 8. 257364 7. 866648 7. 862132 7. 7933  
11729618\_ 9. 192743 9. 128163 9. 198337 8. 759258 8. 795106 8. 811312  
11729619\_ 5. 671662 5. 686732 5. 643547 5. 571294 5. 481798 5. 699538  
11729620\_ 4. 379161 4. 473818 4. 287593 4. 590557 4. 429633 4. 414966  
11729621\_ 5. 459941 5. 292627 5. 531841 5. 501464 5. 448178 5. 623034  
11729622\_ 5. 521707 5. 457826 5. 711603 5. 297068 5. 149545 5. 409222  
11729623\_ 7. 683189 7. 6751 7. 77542 8. 508809 8. 614371 8. 545042  
11729624\_ 7. 35824 7. 213758 7. 349099 7. 387866 7. 35673 7. 427934  
11729625\_ 8. 489135 8. 394814 8. 450905 8. 394814 8. 368738 8. 391064  
11729626\_ 9. 263488 9. 233248 9. 300647 8. 839022 8. 933145 8. 881609  
11729627\_ 9. 393516 9. 334671 9. 407408 9. 286147 9. 29011 9. 27639  
11729628\_ 8. 097821 8. 062341 8. 059599 8. 089877 8. 082805 8. 143605  
11729629\_ 7. 864259 7. 845981 7. 843074 7. 69711 7. 692161 7. 715775  
11729630\_ 7. 698723 7. 6727 7. 773395 7. 605377 7. 663651 7. 607187  
11729631\_ 5. 826579 5. 828204 5. 853012 6. 104091 6. 161379 6. 072705  
11729632\_ 11. 525 11. 50334 11. 4998 11. 0673 11. 10653 10. 9772  
11729633\_ 11. 59305 11. 56153 11. 58014 11. 13441 11. 17196 11. 13021

11729634\_ 6. 00284 6. 083187 5. 804234 5. 932255 6. 052441 6. 005354  
11729635\_ 4. 031828 4. 251709 3. 740077 3. 972253 3. 944323 4. 179203  
11729636\_ 4. 34498 4. 418092 4. 277939 4. 347179 4. 339392 4. 206318  
11729637\_ 4. 425973 4. 618759 4. 487966 4. 490258 4. 644042 4. 665415  
11729638\_ 5. 387255 5. 463777 5. 451075 5. 897392 5. 998767 5. 89277  
11729639\_ 5. 870242 5. 749887 5. 795596 5. 701062 5. 886326 6. 053076  
11729640\_ 7. 128755 7. 031999 7. 262811 7. 124194 7. 1084 7. 112759  
11729641\_ 7. 634214 7. 462007 7. 597395 9. 244946 9. 236002 9. 232223  
11729642\_ 5. 387732 5. 542498 5. 598047 6. 416519 6. 487304 6. 278234  
11729643\_ 8. 03781 7. 947362 7. 874167 9. 77402 9. 715752 9. 72423  
11729644\_ 8. 038301 7. 916115 7. 911627 8. 435828 8. 380068 8. 37842  
11729645\_ 7. 143907 7. 001677 7. 175106 7. 44003 7. 418875 7. 438863  
11729646\_ 4. 145232 4. 33111 3. 897977 4. 244038 4. 348415 4. 330984  
11729647\_ 5. 464087 5. 472581 5. 470551 5. 200891 5. 197638 5. 071066  
11729648\_ 6. 253926 6. 191442 6. 26779 6. 573005 6. 586378 6. 722458  
11729649\_ 5. 33225 5. 461879 5. 305396 5. 584609 5. 555165 5. 392764  
11729650\_ 9. 885225 9. 903517 9. 91128 9. 89582 9. 865238 9. 851179  
11729651\_ 4. 753769 4. 801077 4. 899034 4. 957014 4. 937487 4. 735758  
11729652\_ 4. 238717 4. 499075 4. 550353 4. 550353 4. 546287 4. 620603  
11729653\_ 6. 401487 6. 346018 6. 342062 6. 855005 6. 880395 6. 880395  
11729654\_ 6. 292968 6. 067031 6. 354529 6. 539041 6. 541484 6. 512991  
11729655\_ 5. 72915 5. 676527 5. 887816 6. 570683 6. 554931 6. 59457  
11729656\_ 7. 629527 7. 558995 7. 621091 7. 247299 7. 271305 7. 324935  
11729657\_ 7. 890945 7. 763627 7. 773111 7. 852297 7. 839874 7. 825336  
11729658\_ 6. 746247 6. 907441 6. 922773 6. 710068 6. 705962 6. 765911  
11729659\_ 7. 740291 7. 668426 7. 760693 8. 120508 8. 072637 8. 097128  
11729660\_ 5. 598934 5. 70863 5. 486161 5. 712555 5. 704729 5. 560555  
11729661\_ 9. 025459 8. 935322 8. 987724 9. 056927 9. 052396 9. 068479  
11729662\_ 8. 695839 8. 651231 8. 705986 8. 723124 8. 73456 8. 754264  
11729663\_ 8. 166613 8. 040244 8. 16312 8. 215104 8. 173363 8. 221327  
11729664\_ 4. 118335 4. 449719 4. 380079 5. 243216 5. 270083 5. 398161  
11729665\_ 6. 972905 6. 803299 6. 975785 6. 224184 6. 301218 6. 449867  
11729666\_ 7. 016871 7. 016377 7. 120636 7. 319137 7. 318431 7. 315198  
11729667\_ 7. 703234 7. 760052 7. 701024 7. 787343 7. 760052 7. 821904  
11729668\_ 8. 544301 8. 524723 8. 626877 8. 371111 8. 374536 8. 35659  
11729669\_ 11. 08857 11. 01115 11. 05566 11. 21035 11. 25772 11. 18734  
11729670\_ 5. 148938 5. 199118 5. 273159 5. 371352 5. 495048 5. 618592  
11729671\_ 9. 731473 9. 693188 9. 734554 9. 41308 9. 39338 9. 369377  
11729672\_ 9. 124212 9. 08839 9. 161541 8. 737527 8. 793792 8. 743993  
11729673\_ 6. 481937 6. 594872 6. 70741 6. 555762 6. 599839 6. 624091  
11729674\_ 7. 444085 7. 367072 7. 425591 7. 051433 7. 125793 7. 12407  
11729675\_ 7. 199994 7. 194708 7. 284337 6. 825492 6. 9373 6. 951625  
11729676\_ 8. 527134 8. 477327 8. 480955 8. 099058 8. 084288 8. 083428  
11729677\_ 4. 42501 4. 394735 4. 351618 4. 305722 4. 490948 4. 294637  
11729678\_ 5. 675218 5. 75544 5. 815807 5. 522794 5. 39965 5. 37193  
11729679\_ 5. 357073 5. 282808 5. 296488 4. 763957 4. 738731 4. 663402  
11729680\_ 4. 055658 4. 28323 4. 462175 4. 470858 4. 556231 4. 522904  
11729681\_ 6. 855792 6. 810994 6. 758875 7. 030705 6. 905595 6. 925617  
11729682\_ 7. 8235 7. 725826 7. 731708 7. 931045 8. 023523 7. 969737  
11729683\_ 6. 360394 6. 178446 6. 35108 6. 416934 6. 560928 6. 529358  
11729684\_ 6. 984526 6. 910858 6. 893715 7. 351104 7. 415046 7. 374019

11729685\_ 4. 069327 4. 252865 4. 274337 4. 637317 4. 466275 4. 442256  
11729686\_ 4. 410198 4. 465644 4. 475925 4. 830202 4. 687143 4. 761413  
11729687\_ 7. 461849 7. 415052 7. 508698 7. 837458 7. 806805 7. 700123  
11729688\_ 6. 998279 7. 037792 7. 045425 7. 648968 7. 579717 7. 541444  
11729689\_ 5. 500564 5. 505908 5. 457412 6. 049505 6. 030655 6. 044816  
11729690\_ 4. 954887 4. 91546 4. 695213 4. 914651 4. 93837 4. 909812  
11729691\_ 6. 857161 6. 541966 6. 665265 6. 48504 6. 414953 6. 602044  
11729692\_ 4. 891757 4. 962243 4. 966845 4. 992243 4. 994155 4. 991859  
11729693\_ 2. 051386 2. 07003 2. 238095 2. 237866 2. 19083 2. 143934  
11729694\_ 2. 403971 2. 345486 2. 226432 2. 417337 2. 26263 2. 376919  
11729695\_ 6. 920318 6. 975313 6. 928119 6. 959006 7. 017246 7. 134103  
11729696\_ 9. 387043 9. 317612 9. 389325 8. 782849 8. 645799 8. 713483  
11729697\_ 7. 786877 7. 636589 7. 758239 7. 358415 7. 176218 7. 180539  
11729698\_ 8. 54918 8. 407717 8. 483801 8. 978315 8. 939885 8. 965735  
11729699\_ 8. 313664 8. 316063 8. 333493 8. 587319 8. 629246 8. 665066  
11729700\_ 5. 82303 5. 630866 5. 709521 5. 728595 5. 878263 5. 835067  
11729701\_ 5. 865512 5. 784087 5. 849895 5. 947885 5. 971621 5. 917224  
11729702\_ 8. 622525 8. 560203 8. 608092 8. 694898 8. 680032 8. 692778  
11729703\_ 7. 150646 7. 001095 7. 239833 7. 278064 7. 319619 7. 288584  
11729704\_ 7. 542168 7. 496212 7. 522594 6. 641118 6. 70241 6. 670245  
11729705\_ 7. 092645 7. 007146 7. 221514 6. 12904 6. 15331 6. 263567  
11729706\_ 7. 573967 7. 413663 7. 667948 6. 883283 6. 732944 6. 918341  
11729707\_ 7. 766272 7. 830397 7. 74828 7. 650034 7. 681616 7. 713267  
11729708\_ 5. 182421 4. 987145 4. 876561 5. 06941 5. 068955 5. 175281  
11729709\_ 2. 60307 3. 125816 2. 648494 2. 931306 2. 671213 2. 718322  
11729710\_ 7. 313595 7. 272112 7. 434587 6. 688574 6. 755281 6. 85297  
11729711\_ 8. 162318 8. 048914 8. 071334 7. 436279 7. 390549 7. 426223  
11729712\_ 4. 688525 4. 776139 4. 446997 4. 563097 4. 855866 4. 778356  
11729713\_ 4. 842628 4. 860531 5. 003615 4. 736759 5. 018804 4. 882075  
11729714\_ 2. 398468 2. 774134 2. 618543 2. 707869 2. 848906 2. 784818  
11729715\_ 8. 908731 8. 972979 9. 031772 9. 338078 9. 356125 9. 334505  
11729716\_ 8. 687119 8. 70752 8. 689505 9. 162798 9. 134817 9. 130987  
11729717\_ 6. 977191 7. 05071 7. 085452 8. 009014 7. 92282 8. 012614  
11729718\_ 7. 025687 6. 825812 7. 015056 8. 067546 7. 900967 7. 87119  
11729719\_ 7. 442514 7. 286897 7. 4878 7. 792255 7. 749168 7. 769683  
11729720\_ 5. 430496 5. 477885 5. 511089 5. 569159 5. 382262 5. 340218  
11729721\_ 4. 646348 4. 538579 4. 573321 4. 478527 4. 729649 4. 4281  
11729722\_ 6. 980878 6. 898793 6. 982937 6. 645839 6. 648708 6. 672889  
11729723\_ 5. 398458 5. 212253 5. 17639 5. 49139 5. 596771 5. 430186  
11729724\_ 8. 172508 8. 112783 8. 167779 8. 198738 8. 199337 8. 221563  
11729725\_ 6. 056647 5. 979891 5. 97436 5. 953007 5. 915515 5. 998608  
11729726\_ 2. 941457 2. 964704 3. 065091 2. 923237 2. 896743 3. 02591  
11729727\_ 2. 470578 2. 718322 2. 780254 2. 828217 2. 570781 2. 592032  
11729728\_ 6. 992636 6. 873057 6. 861819 7. 184826 7. 140967 7. 09115  
11729729\_ 6. 554605 6. 588342 6. 529682 6. 79936 6. 82682 6. 809968  
11729730\_ 2. 605516 2. 678397 2. 499067 2. 614549 2. 596483 2. 605516  
11729731\_ 4. 018555 3. 8402 3. 833502 4. 21018 4. 258399 4. 197195  
11729732\_ 4. 681966 4. 676651 4. 706402 4. 701087 4. 657447 4. 725605  
11729733\_ 8. 575844 8. 525898 8. 554559 8. 439788 8. 47614 8. 432759  
11729734\_ 2. 20177 2. 485366 2. 149964 2. 291157 2. 622883 2. 384435  
11729735\_ 6. 925006 6. 746202 6. 839121 6. 554512 6. 579908 6. 581679

11729736\_ 5. 892952 5. 876062 5. 824739 5. 240836 5. 290061 5. 248299  
11729737\_ 7. 937614 7. 848592 7. 875848 8. 554181 8. 479274 8. 567303  
11729738\_ 5. 36906 5. 23826 5. 335863 5. 894697 5. 896242 6. 002288  
11729739\_ 3. 095492 3. 397438 3. 352647 3. 176218 3. 134397 2. 88347  
11729740\_ 4. 81195 4. 993779 4. 763244 5. 029876 4. 94445 4. 881004  
11729741\_ 6. 40559 6. 400449 6. 519535 7. 190444 7. 105416 7. 185017  
11729742\_ 6. 918759 6. 924168 6. 810694 6. 975898 6. 964594 6. 993917  
11729743\_ 3. 419445 3. 488976 3. 429025 3. 406432 3. 61993 3. 321845  
11729744\_ 4. 882024 4. 953778 4. 83834 4. 931938 4. 92077 4. 878499  
11729745\_ 7. 396939 7. 342771 7. 400837 7. 337041 7. 375078 7. 459528  
11729746\_ 6. 074168 5. 94057 6. 218737 6. 240374 6. 307135 6. 292164  
11729747\_ 5. 661797 5. 768599 5. 673256 5. 768599 5. 848353 5. 768599  
11729748\_ 4. 516161 4. 643717 4. 562461 4. 678404 4. 824984 4. 678404  
11729749\_ 2. 9935 2. 742228 2. 874619 2. 860572 2. 837675 2. 994266  
11729750\_ 6. 513516 6. 419615 6. 488066 5. 852921 5. 918745 5. 889576  
11729751\_ 6. 756491 6. 76225 6. 786751 6. 018553 6. 173323 6. 267112  
11729752\_ 7. 351977 7. 315213 7. 369168 7. 419086 7. 485935 7. 441521  
11729753\_ 2. 450609 2. 672624 2. 552315 2. 615163 2. 541713 2. 741808  
11729754\_ 3. 224296 3. 180062 3. 206037 3. 374662 3. 306585 3. 301004  
11729755\_ 2. 819818 2. 922545 2. 59423 2. 999123 3. 11345 2. 986179  
11729756\_ 4. 466331 4. 28623 4. 340787 4. 390171 4. 33617 4. 36566  
11729757\_ 4. 444849 4. 678287 4. 578966 4. 770123 4. 643785 4. 625685  
11729758\_ 3. 925181 3. 706482 3. 809179 3. 732085 3. 819718 3. 895962  
11729759\_ 2. 47102 2. 519296 2. 789782 2. 56275 2. 59711 2. 597464  
11729760\_ 4. 415108 4. 470193 4. 368725 4. 807224 4. 644942 4. 56138  
11729761\_ 4. 764222 4. 987614 4. 961288 5. 10994 5. 008023 5. 011705  
11729762\_ 5. 757805 5. 765942 5. 888541 5. 7921 5. 825542 5. 789678  
11729763\_ 9. 790386 9. 779262 9. 790193 9. 701925 9. 702058 9. 708394  
11729764\_ 8. 745361 8. 55078 8. 708715 8. 474772 8. 565513 8. 563145  
11729765\_ 5. 878495 5. 875203 5. 839903 6. 269313 6. 266543 6. 256268  
11729766\_ 6. 487408 6. 31181 6. 501159 6. 721735 6. 618977 6. 711601  
11729767\_ 4. 521616 4. 557262 4. 497754 4. 489849 4. 472253 4. 547118  
11729768\_ 6. 995064 7. 026994 6. 991918 7. 244879 7. 272002 7. 264573  
11729769\_ 4. 135844 4. 193788 4. 118272 4. 207109 4. 275543 4. 122522  
11729770\_ 5. 02607 5. 055471 5. 05711 5. 055471 5. 05711 5. 044545  
11729771\_ 5. 490908 5. 555874 5. 526155 5. 603885 5. 589564 5. 62445  
11729772\_ 3. 091918 3. 069771 3. 057531 3. 395702 3. 21279 3. 180062  
11729773\_ 4. 531764 4. 37061 4. 255293 4. 275543 4. 270818 4. 415744  
11729774\_ 2. 468903 2. 361778 2. 44135 2. 361778 2. 289109 2. 340696  
11729775\_ 6. 465002 6. 463062 6. 479967 6. 282146 6. 196208 6. 239817  
11729776\_ 5. 044116 4. 997367 4. 900439 4. 916218 4. 93837 4. 94619  
11729777\_ 7. 395162 7. 445437 7. 441852 7. 166996 7. 347045 7. 236733  
11729778\_ 3. 053595 3. 076201 3. 070136 3. 101013 3. 220411 3. 226246  
11729779\_ 4. 447613 4. 249459 3. 98092 4. 426865 4. 353681 4. 470714  
11729780\_ 7. 417811 7. 409528 7. 365759 7. 398726 7. 463896 7. 52408  
11729781\_ 6. 004053 5. 883053 5. 903803 6. 024501 5. 950309 5. 968124  
11729782\_ 2. 405564 2. 83198 2. 404947 2. 33574 2. 400031 2. 251153  
11729783\_ 3. 642473 3. 757343 3. 729121 3. 702491 3. 766296 3. 792273  
11729784\_ 3. 378683 3. 452468 3. 396982 3. 560664 3. 490512 3. 448016  
11729785\_ 5. 232734 5. 035803 4. 993161 5. 211599 5. 11345 5. 156303  
11729786\_ 5. 104772 5. 11527 4. 940072 5. 181991 5. 092867 5. 116601

11729787\_ 5. 812446 5. 704919 5. 806599 5. 920614 5. 886464 5. 964409  
11729788\_ 5. 254122 5. 41444 5. 27735 5. 320325 5. 457926 5. 39826  
11729789\_ 5. 904521 5. 898276 5. 79653 5. 921446 6. 015181 5. 905614  
11729790\_ 5. 523003 5. 303576 5. 414865 5. 036475 4. 981654 5. 15418  
11729791\_ 2. 425411 2. 542599 2. 353774 2. 479202 2. 519447 2. 554493  
11729792\_ 6. 859454 6. 764661 6. 968827 6. 199722 6. 082217 6. 179602  
11729793\_ 7. 429083 7. 365434 7. 421703 6. 911009 6. 855615 6. 994448  
11729794\_ 7. 475544 7. 477207 7. 514321 7. 177985 7. 207773 7. 210236  
11729795\_ 7. 423851 7. 307199 7. 4878 7. 439833 7. 392939 7. 370068  
11729796\_ 6. 134568 6. 174832 6. 235201 6. 152469 6. 145494 6. 12642  
11729797\_ 6. 204147 6. 180182 6. 107637 6. 259638 6. 178492 6. 184442  
11729798\_ 6. 386744 6. 416613 6. 468124 6. 516971 6. 339523 6. 506787  
11729799\_ 2. 84071 2. 827867 2. 882753 2. 66236 2. 588054 2. 503679  
11729800\_ 4. 256417 4. 249837 4. 174422 4. 501966 4. 322865 4. 52658  
11729801\_ 8. 30924 8. 155111 8. 34822 7. 928268 7. 817485 8. 018682  
11729802\_ 7. 567706 7. 526184 7. 48349 7. 369102 7. 383661 7. 392539  
11729803\_ 4. 196225 4. 076129 3. 926335 3. 768516 3. 926335 3. 6068  
11729804\_ 6. 48642 6. 67622 6. 57266 6. 618803 6. 468987 6. 642418  
11729805\_ 7. 449309 7. 382565 7. 466172 7. 056954 7. 083727 7. 031531  
11729806\_ 5. 814291 5. 630627 5. 65755 5. 292737 5. 360326 5. 379354  
11729807\_ 11. 4856 11. 42795 11. 44922 11. 52344 11. 5256 11. 49419  
11729808\_ 7. 476133 7. 459811 7. 528741 7. 322755 7. 396381 7. 425044  
11729809\_ 7. 244472 7. 243492 7. 311653 7. 112035 7. 219967 7. 136502  
11729810\_ 4. 038625 4. 107226 3. 924623 4. 079517 4. 10054 4. 232012  
11729811\_ 3. 095857 2. 949885 3. 142339 3. 177335 3. 206711 3. 176349  
11729812\_ 6. 410482 6. 194359 6. 558134 6. 760486 6. 632862 6. 661628  
11729813\_ 6. 46221 6. 405685 6. 417334 6. 494443 6. 652506 6. 660519  
11729814\_ 6. 377847 6. 375996 6. 372053 6. 383618 6. 464805 6. 560046  
11729815\_ 7. 5554 7. 482432 7. 591412 7. 60546 7. 652416 7. 747189  
11729816\_ 8. 050246 8. 117035 8. 167142 8. 131287 8. 057651 8. 134401  
11729817\_ 4. 811172 4. 837832 4. 824195 4. 965357 5. 02431 4. 863565  
11729818\_ 2. 94457 2. 913656 2. 765961 2. 988665 2. 836262 2. 763427  
11729819\_ 6. 222807 6. 329575 6. 212112 6. 360928 6. 327594 6. 340526  
11729820\_ 5. 109684 5. 072957 5. 067664 5. 490573 5. 51091 5. 406956  
11729821\_ 7. 01099 6. 998064 6. 984189 6. 965858 7. 024061 7. 013552  
11729822\_ 6. 456257 6. 271697 6. 499268 6. 210924 6. 343245 6. 251865  
11729823\_ 7. 474864 7. 411231 7. 372501 7. 253577 7. 264037 7. 302535  
11729824\_ 3. 925181 3. 66299 3. 781512 3. 606313 3. 705849 3. 841726  
11729825\_ 5. 584813 5. 751023 5. 623197 5. 535633 5. 569311 5. 664117  
11729826\_ 4. 301471 4. 211667 4. 300897 4. 271008 4. 181777 4. 206149  
11729827\_ 3. 705625 3. 528681 3. 554668 3. 596279 3. 234201 3. 537559  
11729828\_ 4. 350647 4. 398701 4. 313584 4. 422597 4. 308349 4. 378909  
11729829\_ 3. 187527 3. 252007 3. 360603 3. 355943 3. 46175 3. 330113  
11729830\_ 7. 135299 7. 087206 7. 068879 7. 420015 7. 518382 7. 439177  
11729831\_ 2. 532787 2. 423323 2. 601673 2. 69075 2. 601673 2. 613202  
11729832\_ 2. 448319 2. 488914 2. 555247 2. 499951 2. 483985 2. 13358  
11729833\_ 5. 445381 5. 269485 5. 256164 5. 518225 5. 381892 5. 567279  
11729834\_ 5. 881983 5. 672285 5. 847006 5. 952564 5. 98941 6. 016948  
11729835\_ 3. 182343 2. 851169 3. 177404 2. 610751 2. 993934 3. 016591  
11729836\_ 5. 702939 5. 614694 5. 454432 5. 542438 5. 646638 5. 693266  
11729837\_ 5. 597317 5. 600832 5. 699313 4. 866932 4. 900765 4. 92774



11729838\_ 6. 889437 6. 824891 6. 880901 6. 31311 6. 184438 6. 252777  
11729839\_ 2. 713219 2. 515753 2. 897495 2. 331244 2. 515753 2. 527642  
11729840\_ 7. 354593 7. 179401 7. 326901 6. 423413 6. 395359 6. 478127  
11729841\_ 5. 074198 5. 138984 5. 029076 5. 279397 5. 322609 5. 160904  
11729842\_ 4. 06837 4. 337085 4. 206021 4. 214055 4. 187637 4. 073517  
11729843\_ 3. 537849 3. 531302 3. 42385 3. 15526 3. 048992 3. 234055  
11729844\_ 2. 017362 1. 907353 1. 976924 1. 920389 1. 968875 2. 017362  
11729845\_ 5. 421861 5. 679303 5. 453919 5. 503008 5. 466327 5. 526922  
11729846\_ 7. 465974 7. 541119 7. 492393 7. 174876 7. 104983 7. 186097  
11729847\_ 3. 009521 2. 959076 3. 140642 3. 111099 3. 121962 3. 114658  
11729848\_ 6. 029252 6. 111366 6. 052894 6. 135474 6. 110881 6. 198441  
11729849\_ 6. 316226 6. 240464 6. 240958 6. 02663 6. 204207 6. 240866  
11729850\_ 7. 917118 7. 843948 7. 978205 7. 666485 7. 683327 7. 692404  
11729851\_ 5. 442778 5. 592282 5. 433317 5. 546597 5. 48634 5. 343857  
11729852\_ 5. 134558 5. 151081 5. 070376 4. 459939 4. 40461 4. 374734  
11729853\_ 6. 286614 6. 487612 6. 266646 6. 365981 6. 383226 6. 444429  
11729854\_ 7. 536305 7. 687062 7. 552634 7. 191238 7. 148178 7. 226258  
11729855\_ 5. 866534 5. 668248 5. 70722 5. 747521 6. 007938 5. 79925  
11729856\_ 5. 962259 6. 070498 6. 111869 6. 165343 6. 11587 6. 267715  
11729857\_ 5. 388784 5. 368391 5. 232844 5. 809779 5. 815179 5. 972995  
11729858\_ 5. 082429 5. 029529 4. 967838 5. 594913 5. 597636 5. 549032  
11729859\_ 5. 649498 5. 584813 5. 5641 5. 944027 5. 870242 5. 889551  
11729860\_ 4. 815683 4. 727854 4. 684012 4. 992243 5. 090013 5. 039464  
11729861\_ 6. 541385 6. 452924 6. 477612 6. 808661 6. 843316 6. 92985  
11729862\_ 4. 50905 4. 584933 4. 384342 4. 386429 4. 559213 4. 509753  
11729863\_ 10. 56151 10. 57181 10. 53056 10. 58652 10. 60007 10. 63645  
11729864\_ 3. 859201 3. 876966 3. 809547 4. 152068 4. 097788 4. 1015  
11729865\_ 6. 239268 6. 285607 6. 235443 6. 225882 6. 082384 6. 173949  
11729866\_ 3. 606313 3. 545221 3. 478642 3. 766227 3. 705625 3. 693943  
11729867\_ 5. 920316 6. 008913 5. 982385 6. 102402 6. 045315 6. 051575  
11729868\_ 2. 920045 3. 068358 2. 988849 3. 101013 3. 073695 3. 10848  
11729869\_ 6. 753287 6. 701468 6. 698069 6. 884763 7. 05451 6. 842568  
11729870\_ 7. 394206 7. 381352 7. 347639 7. 560557 7. 694453 7. 517616  
11729871\_ 3. 165331 3. 465877 3. 385697 3. 647446 3. 619357 3. 371225  
11729872\_ 4. 623504 4. 666187 4. 497566 4. 859734 4. 788692 4. 8498  
11729873\_ 6. 475435 6. 553305 6. 514412 6. 606276 6. 730107 6. 588765  
11729874\_ 4. 467253 4. 745503 4. 659311 4. 818158 4. 618844 4. 573498  
11729875\_ 3. 381741 3. 21373 3. 01473 2. 623835 2. 588667 2. 656344  
11729876\_ 4. 874234 4. 584933 4. 807368 4. 566059 4. 426936 4. 458775  
11729877\_ 5. 685282 5. 646582 5. 500348 5. 848832 5. 778246 5. 794385  
11729878\_ 6. 953528 6. 815511 6. 874408 6. 825716 6. 946361 6. 877322  
11729879\_ 3. 045498 3. 407576 2. 826656 2. 925023 2. 843616 3. 361571  
11729880\_ 3. 479828 3. 841906 3. 409353 3. 315426 3. 176892 3. 563443  
11729881\_ 4. 763543 4. 929532 4. 973912 5. 014955 4. 889983 4. 900426  
11729882\_ 4. 638578 4. 82059 4. 675944 4. 660086 4. 786493 4. 752816  
11729883\_ 4. 772454 4. 847483 4. 919285 4. 832596 4. 877295 4. 865974  
11729884\_ 5. 36906 5. 089904 5. 421491 5. 528624 5. 441121 5. 535948  
11729885\_ 5. 494473 5. 305448 5. 45966 5. 952033 6. 010015 6. 110885  
11729886\_ 6. 991123 6. 731164 6. 929841 7. 315401 7. 288755 7. 233207  
11729887\_ 7. 866282 7. 818523 7. 892278 7. 963077 7. 961822 7. 983624  
11729888\_ 4. 198097 4. 099248 4. 213978 4. 001635 3. 739144 4. 099248

11729889\_ 4. 376065 4. 56536 4. 37378 4. 562524 4. 584628 4. 450753  
11729890\_ 3. 25734 3. 276461 3. 258939 3. 270881 3. 274862 3. 199879  
11729891\_ 2. 235709 2. 327685 2. 068888 2. 282724 2. 282724 2. 385219  
11729892\_ 5. 974612 5. 863725 5. 990759 5. 524817 5. 589439 5. 525719  
11729893\_ 5. 935571 5. 837288 5. 929656 5. 552018 5. 569433 5. 660116  
11729894\_ 9. 151903 9. 216842 9. 281604 9. 502471 9. 455816 9. 511313  
11729895\_ 9. 24659 9. 291277 9. 350528 9. 552251 9. 555893 9. 595256  
11729896\_ 4. 672039 4. 902275 4. 666523 4. 809837 5. 00394 4. 887226  
11729897\_ 2. 599933 2. 688718 2. 637412 2. 481587 2. 50296 2. 586864  
11729898\_ 5. 52323 5. 331904 5. 398571 6. 325117 6. 28482 6. 47147  
11729899\_ 3. 145944 3. 38693 3. 283789 3. 433896 3. 530868 3. 346359  
11729900\_ 6. 310418 6. 360394 6. 320789 6. 253361 6. 330179 6. 4331  
11729901\_ 5. 584535 5. 715636 5. 659059 5. 652328 5. 698073 5. 652328  
11729902\_ 6. 371418 6. 371418 6. 432538 6. 280781 6. 49323 6. 402473  
11729903\_ 5. 93915 5. 97246 5. 949694 6. 118838 6. 109264 5. 970636  
11729904\_ 5. 300387 5. 484114 5. 388491 5. 518991 5. 573747 5. 543836  
11729905\_ 5. 328727 5. 28037 5. 423252 5. 717025 5. 777217 5. 512552  
11729906\_ 5. 727254 5. 440418 5. 621894 5. 890072 5. 804818 5. 940032  
11729907\_ 7. 488967 7. 481923 7. 568537 7. 475828 7. 374391 7. 452943  
11729908\_ 4. 071622 3. 909593 3. 671528 3. 917968 3. 969526 3. 966115  
11729909\_ 4. 57432 4. 722855 4. 446875 4. 484674 4. 496024 4. 644679  
11729910\_ 7. 252452 7. 176894 7. 198575 7. 609916 7. 725856 7. 704767  
11729911\_ 5. 868931 6. 018801 6. 060983 5. 97305 6. 019505 5. 924427  
11729912\_ 5. 757466 5. 833068 5. 919339 5. 876166 5. 985077 5. 992354  
11729913\_ 6. 601116 6. 495308 6. 566787 6. 52812 6. 682539 6. 65343  
11729914\_ 8. 097959 7. 954882 8. 144581 6. 953055 6. 904144 7. 09205  
11729915\_ 7. 156356 7. 08788 7. 19794 6. 309555 6. 142158 6. 267274  
11729916\_ 7. 807504 7. 85262 7. 765023 6. 822914 6. 68243 6. 773648  
11729917\_ 2. 696001 2. 845105 2. 612964 2. 718322 2. 620458 2. 430854  
11729918\_ 2. 749189 3. 09161 2. 997679 3. 153259 3. 004853 2. 93359  
11729919\_ 4. 860624 4. 95475 4. 665898 4. 86971 4. 946994 4. 88076  
11729920\_ 4. 585312 4. 33313 4. 651723 4. 342708 4. 399864 4. 310947  
11729921\_ 7. 227108 7. 29959 6. 981807 7. 308 7. 313092 7. 316619  
11729922\_ 4. 967245 5. 347955 5. 194263 5. 572349 5. 323913 5. 432969  
11729923\_ 8. 313977 8. 314735 8. 262457 8. 153836 8. 221989 8. 205354  
11729924\_ 7. 178317 7. 083891 7. 192865 7. 252561 7. 241765 7. 318654  
11729925\_ 4. 902169 4. 974145 4. 726553 4. 726961 4. 770914 4. 857472  
11729926\_ 6. 135107 5. 998285 6. 115374 6. 00563 6. 057927 5. 934518  
11729927\_ 4. 667939 4. 57991 4. 799799 4. 481617 4. 481617 4. 335116  
11729928\_ 3. 027767 3. 118625 3. 044964 3. 200391 3. 207554 3. 112103  
11729929\_ 5. 39481 5. 495291 5. 402425 5. 367469 5. 380505 5. 457874  
11729930\_ 6. 516297 6. 57629 6. 359662 6. 463947 6. 44714 6. 654775  
11729931\_ 6. 263567 6. 219421 6. 367847 6. 276912 6. 366235 6. 401073  
11729932\_ 2. 620453 2. 487453 2. 442858 2. 487453 2. 363641 2. 581574  
11729933\_ 2. 552963 2. 539754 2. 542174 2. 661415 2. 590737 2. 766914  
11729934\_ 5. 98823 6. 058786 5. 931348 6. 10854 6. 134731 6. 08911  
11729935\_ 5. 987431 5. 987431 5. 995337 6. 332061 6. 293889 6. 299108  
11729936\_ 7. 370313 7. 40987 7. 354388 7. 439508 7. 515194 7. 444531  
11729937\_ 4. 513241 4. 535764 4. 535764 4. 067703 4. 193022 4. 093552  
11729938\_ 4. 710686 4. 686587 4. 709463 4. 785551 4. 867528 4. 745398  
11729939\_ 6. 258356 6. 35117 6. 251867 6. 489427 6. 442235 6. 494244

11729940\_ 5. 168198 5. 005077 5. 287509 4. 704706 4. 824347 4. 835134  
11729941\_ 3. 775663 3. 941618 3. 949924 4. 049666 3. 890973 4. 211525  
11729942\_ 5. 867569 5. 842008 5. 903128 5. 755491 5. 717693 5. 949488  
11729943\_ 4. 711482 4. 955271 5. 019475 4. 816232 4. 782326 4. 896306  
11729944\_ 6. 04895 6. 044634 6. 130463 6. 119763 6. 124617 6. 057161  
11729945\_ 3. 779358 3. 974144 3. 814407 3. 798399 3. 808091 3. 838142  
11729946\_ 5. 43041 5. 552382 5. 379548 5. 533694 5. 626993 5. 500241  
11729947\_ 5. 204901 5. 161597 5. 059621 5. 775846 5. 724916 5. 825143  
11729948\_ 2. 937217 3. 056643 3. 058401 3. 138789 3. 00033 3. 043869  
11729949\_ 2. 183226 2. 679702 2. 427244 2. 544186 2. 441098 2. 445019  
11729950\_ 4. 070458 4. 363962 4. 357351 4. 087127 4. 137498 4. 340525  
11729951\_ 5. 087102 5. 196094 5. 242425 4. 986153 5. 017301 5. 069078  
11729952\_ 4. 972875 5. 018564 4. 957645 5. 121452 4. 870362 5. 024764  
11729953\_ 3. 962671 3. 858384 3. 895556 4. 166169 3. 999226 4. 020198  
11729954\_ 3. 90732 3. 793866 3. 756891 3. 688778 3. 734974 3. 750346  
11729955\_ 3. 614099 3. 472249 3. 442484 3. 505122 3. 429491 3. 543914  
11729956\_ 4. 006265 4. 081316 3. 967148 4. 073936 4. 141534 4. 113301  
11729957\_ 2. 313002 2. 265957 2. 361778 2. 361778 2. 397004 2. 387909  
11729958\_ 4. 997549 5. 124979 5. 025958 5. 055158 5. 031003 4. 866013  
11729959\_ 6. 431262 6. 383209 6. 287987 6. 445503 6. 457429 6. 713105  
11729960\_ 5. 159595 5. 270503 5. 219836 5. 394081 5. 198057 5. 380172  
11729961\_ 3. 899892 4. 174945 3. 937512 4. 058324 4. 052882 3. 97949  
11729962\_ 3. 720784 3. 831261 3. 813133 3. 990518 3. 801444 3. 939616  
11729963\_ 4. 80517 4. 425901 4. 497961 3. 786257 3. 88557 3. 960704  
11729964\_ 8. 074051 7. 997725 7. 888331 7. 906657 7. 971658 8. 014845  
11729965\_ 4. 010446 4. 209263 3. 713483 4. 010446 3. 977919 4. 010446  
11729966\_ 7. 11446 7. 025831 7. 142907 6. 942774 7. 138661 7. 042517  
11729967\_ 5. 624174 5. 400188 5. 610031 5. 550762 5. 260807 5. 466445  
11729968\_ 4. 886535 4. 978529 5. 122191 5. 047543 4. 967807 5. 143095  
11729969\_ 6. 141881 6. 293115 6. 266937 6. 444086 6. 401415 6. 485693  
11729970\_ 4. 815683 4. 827841 4. 86872 4. 668063 4. 848819 4. 667569  
11729971\_ 6. 685662 6. 579869 6. 575265 6. 448378 6. 510356 6. 327027  
11729972\_ 2. 768417 2. 953913 2. 920996 2. 578341 2. 669944 2. 845928  
11729973\_ 5. 578355 5. 74318 5. 688541 5. 713295 5. 794286 5. 681636  
11729974\_ 5. 389488 5. 447047 5. 484321 5. 266814 5. 48982 5. 548733  
11729975\_ 4. 597675 4. 689464 4. 537901 4. 612065 4. 68976 4. 784147  
11729976\_ 3. 305513 3. 548484 3. 114003 3. 401416 3. 3649 3. 32817  
11729977\_ 3. 705625 3. 503743 3. 422534 3. 567858 3. 569082 3. 377704  
11729978\_ 2. 786882 2. 686565 2. 66552 2. 783689 2. 783689 2. 861016  
11729979\_ 10. 34205 10. 37202 10. 3554 10. 30833 10. 26369 10. 15404  
11729980\_ 1. 957732 1. 854593 1. 772969 2. 074637 2. 093247 1. 898324  
11729981\_ 4. 89606 4. 976776 4. 966498 5. 26034 5. 06964 5. 048421  
11729982\_ 5. 301506 5. 408644 5. 361429 5. 066732 4. 89184 5. 010246  
11729983\_ 4. 535992 4. 347523 4. 582741 3. 923205 4. 009817 4. 095184  
11729984\_ 4. 941726 4. 919124 5. 056859 4. 543426 4. 543426 4. 415744  
11729985\_ 5. 379861 5. 297959 5. 489978 5. 089812 5. 006811 5. 11964  
11729986\_ 2. 259939 2. 36105 2. 287689 2. 453418 2. 629901 2. 270171  
11729987\_ 2. 476451 2. 465836 2. 62412 2. 25483 2. 25483 2. 18238  
11729988\_ 2. 618361 2. 273148 2. 314758 2. 609189 2. 759736 2. 401357  
11729989\_ 7. 134375 7. 139682 7. 245715 7. 490951 7. 52605 7. 488182  
11729990\_ 6. 215697 6. 227546 6. 344935 6. 605803 6. 54426 6. 564312

11729991\_ 5. 13435 5. 162436 5. 162436 5. 284007 5. 291552 5. 354578  
11729992\_ 5. 732254 5. 555741 5. 601857 5. 723241 5. 763515 5. 847694  
11729993\_ 4. 867554 4. 973238 5. 016718 5. 238093 5. 303275 5. 317431  
11729994\_ 5. 59108 5. 650525 5. 480966 5. 945351 5. 961157 5. 965953  
11729995\_ 2. 31831 2. 207864 2. 253174 2. 387126 2. 31549 2. 264981  
11729996\_ 8. 424998 8. 394787 8. 422319 7. 376152 7. 381711 7. 373954  
11729997\_ 5. 448769 5. 614637 5. 780828 5. 59435 5. 614637 5. 614637  
11729998\_ 7. 230373 7. 127906 7. 192195 6. 938638 6. 88759 6. 954325  
11729999\_ 4. 958274 4. 948067 4. 977569 4. 819 4. 893073 4. 960231  
11730000\_ 3. 911814 3. 83277 3. 87915 3. 984355 3. 84912 3. 870549  
11730001\_ 5. 251122 5. 475964 5. 292386 5. 422567 5. 584813 5. 471467  
11730002\_ 4. 722042 4. 769807 4. 706094 4. 824195 4. 876836 4. 870256  
11730003\_ 3. 987316 4. 250934 4. 095583 4. 228912 4. 214102 4. 452655  
11730004\_ 3. 925181 4. 054357 3. 995757 3. 997363 4. 165594 4. 045298  
11730005\_ 7. 210445 7. 291971 7. 330872 7. 369936 7. 464311 7. 393782  
11730006\_ 3. 620759 3. 772942 3. 603503 3. 700858 3. 828506 3. 786777  
11730007\_ 6. 056743 6. 064945 6. 009316 6. 176161 6. 193106 6. 165137  
11730008\_ 6. 367 6. 518103 6. 382523 6. 464805 6. 45236 6. 485606  
11730009\_ 4. 882639 5. 024556 4. 911761 4. 888224 4. 821804 4. 949849  
11730010\_ 3. 190271 3. 305109 3. 289186 3. 317387 3. 342045 3. 117715  
11730011\_ 4. 685555 4. 628529 4. 772366 3. 398236 3. 655874 3. 461646  
11730012\_ 6. 307152 6. 356875 6. 275503 4. 851874 4. 820974 4. 792986  
11730013\_ 7. 984865 8. 048596 8. 039141 7. 948338 7. 904298 7. 981129  
11730014\_ 3. 565291 3. 635279 3. 579148 3. 614731 3. 612981 3. 508707  
11730015\_ 5. 171408 5. 184334 4. 955873 5. 288456 5. 17429 5. 075128  
11730016\_ 4. 50536 4. 239512 4. 291603 4. 485623 4. 579555 4. 664984  
11730017\_ 4. 428233 4. 550352 4. 473902 4. 580509 4. 694178 4. 581556  
11730018\_ 5. 621106 5. 646161 5. 527897 5. 61677 5. 628175 5. 72938  
11730019\_ 6. 897734 6. 897734 6. 873561 6. 98681 6. 943729 6. 968698  
11730020\_ 4. 757626 4. 812425 4. 559785 4. 890209 4. 878877 4. 686276  
11730021\_ 2. 405026 2. 3048 2. 438418 2. 379174 2. 422086 2. 398415  
11730022\_ 8. 16163 8. 110135 8. 191324 7. 622455 7. 691866 7. 681528  
11730023\_ 9. 149311 9. 038114 9. 062332 8. 303467 8. 387596 8. 338697  
11730024\_ 3. 23754 3. 532716 3. 214733 3. 209922 3. 291969 3. 419106  
11730025\_ 5. 423494 5. 356756 5. 347334 5. 287196 5. 554436 5. 567444  
11730026\_ 9. 246886 9. 17479 9. 213377 9. 087887 9. 201623 9. 125547  
11730027\_ 5. 74472 5. 809146 5. 736831 5. 836431 5. 681036 5. 78426  
11730028\_ 6. 442084 6. 670988 6. 539929 6. 690349 6. 711885 6. 646187  
11730029\_ 9. 045399 8. 95844 8. 998263 8. 664643 8. 660999 8. 684144  
11730030\_ 7. 530902 7. 649343 7. 551346 7. 338025 7. 358974 7. 315565  
11730031\_ 6. 176083 6. 28544 6. 18468 6. 211541 6. 182158 6. 179742  
11730032\_ 2. 19352 2. 034413 2. 342783 1. 919568 1. 946045 2. 148791  
11730033\_ 5. 924157 5. 844788 5. 950197 5. 658222 5. 794675 5. 778047  
11730034\_ 3. 811545 4. 081682 3. 87239 4. 139719 4. 132631 3. 954157  
11730035\_ 5. 774765 5. 789377 5. 547214 5. 749272 5. 658069 5. 732084  
11730036\_ 4. 077192 4. 189852 4. 097931 4. 129096 4. 206272 4. 198616  
11730037\_ 5. 480914 5. 489322 5. 360341 5. 519277 5. 541785 5. 617684  
11730038\_ 2. 479147 2. 460161 2. 480679 2. 453734 2. 4224 2. 498134  
11730039\_ 4. 779057 4. 782159 4. 74422 4. 810168 4. 771574 4. 820132  
11730040\_ 4. 786661 4. 711274 4. 583553 4. 686933 4. 435228 4. 641357  
11730041\_ 4. 763543 5. 029529 4. 903637 5. 039429 4. 93686 5. 106888

11730042\_ 4. 363298 4. 411398 4. 414835 4. 363298 4. 535738 4. 401088  
11730043\_ 2. 718322 2. 723264 2. 712353 2. 794946 2. 846159 2. 83198  
11730044\_ 4. 204798 3. 90577 3. 996649 3. 894558 4. 082278 3. 986346  
11730045\_ 8. 083116 8. 067272 8. 101378 8. 347836 8. 341675 8. 370735  
11730046\_ 2. 84809 2. 944192 3. 077507 2. 857037 3. 101013 3. 014522  
11730047\_ 4. 320559 4. 251029 4. 465954 4. 41026 4. 372276 4. 494242  
11730048\_ 7. 708475 7. 564875 7. 623457 7. 968638 7. 942335 7. 979066  
11730049\_ 7. 061655 7. 078542 7. 054171 6. 097927 6. 068302 6. 214725  
11730050\_ 4. 9226 5. 14106 5. 029529 4. 852189 4. 664183 4. 438273  
11730051\_ 5. 539758 5. 720073 5. 763634 5. 134564 5. 220703 5. 270674  
11730052\_ 6. 835343 6. 7984 6. 831893 5. 891753 5. 948351 5. 978992  
11730053\_ 5. 789505 5. 704919 5. 390429 5. 339192 5. 183024 5. 290671  
11730054\_ 7. 515488 7. 492618 7. 40746 6. 884892 6. 686793 6. 860303  
11730055\_ 5. 544167 5. 554655 5. 558994 5. 700302 5. 754969 5. 764784  
11730056\_ 6. 506515 6. 451697 6. 56185 6. 586083 6. 510356 6. 49631  
11730057\_ 3. 270056 3. 277651 3. 391257 3. 311195 3. 29268 3. 267768  
11730058\_ 3. 067272 3. 146276 2. 981399 3. 067272 3. 193343 2. 794782  
11730059\_ 3. 276018 3. 764797 3. 16952 3. 276322 3. 370254 3. 244397  
11730060\_ 5. 348652 5. 376292 5. 235106 5. 647052 5. 376873 5. 33613  
11730061\_ 4. 790496 4. 82142 4. 849396 4. 859796 4. 848222 4. 792064  
11730062\_ 3. 127311 3. 151882 3. 579161 3. 158705 3. 389266 3. 259003  
11730063\_ 5. 751339 5. 802521 5. 876869 5. 776216 5. 853852 5. 866788  
11730064\_ 3. 337977 3. 318303 3. 183284 2. 997737 2. 906578 3. 122631  
11730065\_ 4. 590563 4. 515357 4. 623112 4. 625904 4. 728158 4. 773211  
11730066\_ 4. 375353 4. 539717 4. 833443 4. 473781 4. 345412 4. 388257  
11730067\_ 5. 55406 5. 524825 5. 583385 5. 505654 5. 516127 5. 528624  
11730068\_ 2. 762098 2. 710813 2. 798163 2. 865482 2. 874025 2. 720268  
11730069\_ 8. 323596 8. 296129 8. 379393 8. 135377 8. 090647 8. 093611  
11730070\_ 2. 710848 3. 061205 2. 814198 2. 715187 2. 702292 2. 817756  
11730071\_ 2. 680539 2. 588699 2. 588699 2. 588699 2. 568829 2. 63915  
11730072\_ 6. 889151 6. 92951 6. 873077 6. 764094 6. 758764 6. 81154  
11730073\_ 7. 542441 7. 454191 7. 496383 7. 386843 7. 230373 7. 426223  
11730074\_ 5. 606751 5. 31349 5. 574865 4. 465341 4. 335206 4. 656208  
11730075\_ 4. 275543 3. 922399 4. 165101 3. 730432 3. 864927 3. 786777  
11730076\_ 6. 892371 6. 924753 6. 825138 6. 997236 7. 012217 6. 975295  
11730077\_ 6. 552518 6. 729347 6. 681202 6. 581495 6. 751462 6. 65528  
11730078\_ 5. 650893 5. 657064 5. 578119 5. 706355 5. 813431 5. 690971  
11730079\_ 5. 185175 5. 515434 5. 316342 5. 516082 5. 440319 5. 488725  
11730080\_ 6. 298227 6. 164816 6. 387005 6. 606611 6. 557482 6. 663112  
11730081\_ 8. 027479 8. 030148 7. 971158 7. 74275 7. 708213 7. 733709  
11730082\_ 5. 653058 5. 551817 5. 507494 5. 71919 5. 688972 5. 644915  
11730083\_ 4. 359375 4. 479201 4. 075786 4. 560718 4. 565088 4. 440176  
11730084\_ 7. 32396 7. 367629 7. 110878 6. 967286 7. 065172 7. 146999  
11730085\_ 5. 736831 5. 737323 5. 663991 5. 768053 5. 76579 5. 776098  
11730086\_ 5. 720662 5. 660943 5. 637801 5. 639863 5. 760759 5. 598409  
11730087\_ 6. 256154 6. 34459 6. 286306 6. 221315 6. 296212 6. 257734  
11730088\_ 6. 354977 6. 464805 6. 219072 6. 277541 6. 343626 6. 329166  
11730089\_ 4. 921378 5. 029529 4. 848477 4. 893842 4. 93837 4. 818233  
11730090\_ 6. 139102 6. 13392 6. 067428 6. 127989 6. 114061 6. 109388  
11730091\_ 4. 12685 4. 066238 3. 881495 3. 982756 3. 838954 4. 069423  
11730092\_ 4. 347236 4. 624969 4. 231524 4. 576431 4. 523426 4. 434492

11730093\_ 6. 350455 6. 542332 6. 3791 6. 566015 6. 3791 6. 510235  
11730094\_ 5. 915962 5. 944548 5. 845365 5. 905239 5. 765946 5. 918451  
11730095\_ 5. 226322 5. 116933 5. 029529 5. 159118 5. 297498 5. 176128  
11730096\_ 3. 038225 3. 045859 2. 879753 2. 83198 2. 872265 2. 948401  
11730097\_ 4. 317383 4. 422366 4. 426625 4. 441578 4. 142445 4. 42189  
11730098\_ 5. 408067 5. 518169 5. 228776 5. 482104 5. 397861 5. 418268  
11730099\_ 5. 323331 5. 402289 5. 409266 5. 583468 5. 700341 5. 595936  
11730100\_ 5. 944946 5. 997765 5. 945034 6. 029734 6. 234329 6. 092921  
11730101\_ 3. 475895 3. 495324 3. 690765 3. 641638 3. 753084 3. 605889  
11730102\_ 3. 152809 3. 328192 3. 042247 3. 092681 2. 992038 2. 734596  
11730103\_ 2. 230572 2. 255987 2. 235709 2. 255987 1. 947611 1. 864638  
11730104\_ 5. 258489 5. 309674 5. 381978 5. 317867 5. 354558 5. 11527  
11730105\_ 5. 242687 5. 339234 5. 261344 5. 297949 5. 397861 5. 199364  
11730106\_ 8. 051551 7. 89505 7. 997927 7. 70626 7. 66956 7. 71228  
11730107\_ 5. 19421 5. 253315 5. 122191 5. 029529 4. 970011 5. 073036  
11730108\_ 2. 763681 2. 76847 2. 690628 2. 677591 2. 862402 2. 76847  
11730109\_ 4. 232882 4. 329413 4. 440292 4. 20776 4. 257719 4. 256653  
11730110\_ 5. 954081 6. 015661 6. 132896 5. 630148 5. 44967 5. 374866  
11730111\_ 7. 999605 7. 97065 7. 874439 8. 469172 8. 363335 8. 317232  
11730112\_ 7. 692558 7. 680697 7. 668896 8. 333371 8. 36455 8. 349198  
11730113\_ 6. 347917 6. 165849 6. 255976 6. 410079 6. 488687 6. 459575  
11730114\_ 4. 414887 4. 6248 4. 446596 4. 471591 4. 654559 4. 483459  
11730115\_ 2. 992541 2. 914204 3. 099343 3. 264238 3. 099901 3. 080105  
11730116\_ 3. 387786 3. 406226 3. 604794 3. 290188 3. 402468 3. 36183  
11730117\_ 2. 350049 2. 497382 2. 443981 2. 512144 2. 600708 2. 384435  
11730118\_ 7. 806249 7. 800946 7. 851917 7. 536311 7. 526967 7. 581459  
11730119\_ 5. 21473 5. 245085 5. 187957 5. 413276 5. 570864 5. 396033  
11730120\_ 6. 207286 6. 265788 6. 08552 6. 061085 6. 088276 6. 059964  
11730121\_ 3. 772385 3. 915013 4. 233995 3. 663143 3. 696815 3. 53724  
11730122\_ 4. 900617 4. 643717 4. 636093 4. 72471 4. 907543 4. 754417  
11730123\_ 5. 191279 5. 172588 5. 18997 5. 217229 5. 192588 5. 191279  
11730124\_ 5. 952908 5. 98089 5. 941441 5. 887138 5. 972068 5. 96035  
11730125\_ 6. 435814 6. 634367 6. 524085 6. 648586 6. 582869 6. 677128  
11730126\_ 6. 057056 6. 108517 6. 100971 6. 622641 6. 457425 6. 451129  
11730127\_ 2. 410614 2. 73167 2. 511789 2. 611349 2. 532245 2. 572027  
11730128\_ 6. 764966 6. 777708 6. 718757 6. 759235 6. 737955 6. 664183  
11730129\_ 7. 058907 7. 190744 7. 041925 7. 087136 7. 115927 7. 085641  
11730130\_ 5. 900929 5. 90372 5. 984779 5. 698028 5. 612214 5. 706681  
11730131\_ 2. 805857 2. 658936 2. 760976 2. 712485 2. 820433 2. 760976  
11730132\_ 4. 674872 4. 815683 4. 82949 4. 914651 5. 149456 5. 00267  
11730133\_ 6. 976729 6. 992968 6. 880859 7. 34756 7. 142084 7. 070095  
11730134\_ 5. 993663 5. 953395 5. 996126 5. 696969 5. 792671 5. 754907  
11730135\_ 6. 683014 6. 679544 6. 599812 6. 782694 6. 740842 6. 838848  
11730136\_ 7. 159861 7. 254294 7. 072952 7. 190696 7. 19386 7. 149712  
11730137\_ 4. 761398 4. 52373 4. 61762 4. 946656 4. 720347 4. 697352  
11730138\_ 4. 542275 4. 609887 4. 651746 4. 695253 4. 861164 4. 759257  
11730139\_ 8. 814172 8. 748624 8. 774439 8. 561341 8. 598746 8. 621183  
11730140\_ 3. 049974 2. 991586 3. 208843 3. 404081 3. 090898 3. 373451  
11730141\_ 6. 828966 6. 820192 6. 784579 6. 766827 6. 612961 6. 749623  
11730142\_ 2. 051055 2. 155322 2. 13647 2. 11851 2. 14832 1. 954083  
11730143\_ 2. 375603 2. 586829 2. 257279 2. 550639 2. 612978 2. 320306

11730144\_ 6. 633564 6. 750902 6. 715009 6. 915954 6. 90372 6. 839269  
11730145\_ 5. 696042 5. 838284 5. 792198 5. 659515 5. 623956 5. 624895  
11730146\_ 6. 486115 6. 464805 6. 532633 6. 121615 6. 051335 6. 116135  
11730147\_ 4. 963837 4. 902924 4. 817801 4. 976391 5. 144762 5. 040725  
11730148\_ 4. 495837 4. 637219 4. 4476 4. 927042 4. 76857 4. 687663  
11730149\_ 5. 209259 5. 149545 4. 975546 5. 189628 5. 265888 5. 195602  
11730150\_ 5. 670326 5. 710099 5. 621963 5. 712421 5. 743952 5. 922714  
11730151\_ 3. 030646 3. 060627 3. 199695 3. 206301 3. 360529 3. 347742  
11730152\_ 3. 292832 3. 374865 3. 138626 3. 436618 3. 374865 3. 324536  
11730153\_ 8. 044759 8. 164841 7. 960723 8. 103935 8. 2163 8. 191824  
11730154\_ 3. 740214 3. 662819 3. 625408 3. 573947 3. 680087 3. 787273  
11730155\_ 4. 837956 4. 880793 4. 893248 4. 941261 4. 883639 4. 883639  
11730156\_ 5. 846965 5. 790324 5. 926434 5. 945952 5. 846965 5. 858594  
11730157\_ 4. 751384 4. 763543 4. 686997 4. 828537 4. 849431 4. 905634  
11730158\_ 4. 146057 4. 065932 4. 122357 4. 269055 4. 080832 4. 300871  
11730159\_ 5. 335863 5. 531618 5. 184481 5. 480004 5. 576215 5. 370763  
11730160\_ 3. 943294 3. 627389 3. 928194 3. 645031 4. 114655 3. 983558  
11730161\_ 4. 414238 4. 435449 4. 459939 4. 533863 4. 447514 4. 533863  
11730162\_ 8. 868866 8. 774081 8. 826992 8. 689191 8. 69542 8. 729347  
11730163\_ 8. 770865 8. 714088 8. 770307 8. 667583 8. 7294 8. 696708  
11730164\_ 7. 011446 6. 970233 6. 995052 6. 619724 6. 64633 6. 670249  
11730165\_ 4. 55971 4. 672252 4. 382951 4. 642977 4. 784172 4. 642977  
11730166\_ 3. 695138 3. 845819 3. 756806 4. 005368 3. 847025 3. 951326  
11730167\_ 4. 727162 5. 112503 4. 586588 4. 986232 4. 927361 4. 902394  
11730168\_ 9. 226392 9. 259618 9. 221356 9. 160076 9. 118295 9. 133421  
11730169\_ 10. 00753 10. 00753 10. 07757 9. 534778 9. 52087 9. 517062  
11730170\_ 5. 512395 5. 529848 5. 469099 5. 672595 5. 680459 5. 51055  
11730171\_ 6. 693329 6. 631045 6. 733975 5. 962762 6. 087532 6. 082662  
11730172\_ 4. 220732 4. 388802 4. 315452 4. 482707 4. 315452 4. 290991  
11730173\_ 9. 892535 9. 842109 9. 874773 9. 752372 9. 663189 9. 63812  
11730174\_ 3. 892745 3. 655877 3. 674191 3. 769535 3. 595876 3. 74393  
11730175\_ 5. 311931 5. 408341 5. 346806 5. 625783 5. 5135 5. 577383  
11730176\_ 5. 735405 5. 793662 5. 749389 5. 987544 6. 004692 5. 928973  
11730177\_ 7. 260281 7. 237128 7. 273353 7. 280422 7. 236088 7. 259228  
11730178\_ 8. 611797 8. 53939 8. 636179 8. 373153 8. 47747 8. 448454  
11730179\_ 5. 758621 5. 61375 5. 675354 5. 706869 5. 675354 5. 675354  
11730180\_ 7. 557618 7. 554354 7. 565588 7. 850607 7. 852993 7. 68465  
11730181\_ 7. 812549 7. 801904 7. 859819 7. 693915 7. 79109 7. 701668  
11730182\_ 4. 80039 5. 03329 4. 889522 4. 85486 4. 890539 4. 848959  
11730183\_ 4. 565741 4. 665681 4. 673243 4. 450862 4. 200678 4. 43283  
11730184\_ 4. 600877 4. 874234 4. 491635 4. 510416 4. 600877 4. 624865  
11730185\_ 4. 739583 4. 813365 4. 641457 4. 874234 4. 784045 4. 664114  
11730186\_ 9. 318465 9. 240428 9. 324793 9. 438764 9. 527265 9. 497683  
11730187\_ 8. 990452 8. 878384 8. 959358 9. 157809 9. 159049 9. 134126  
11730188\_ 8. 939443 8. 860146 8. 878547 8. 828601 8. 827654 8. 806802  
11730189\_ 9. 590266 9. 566872 9. 564162 9. 489986 9. 538463 9. 464355  
11730190\_ 5. 491689 5. 460295 5. 293328 5. 504291 5. 582188 5. 455192  
11730191\_ 6. 265214 6. 281153 6. 09065 6. 277667 6. 407248 6. 309207  
11730192\_ 6. 780346 6. 828151 6. 792183 6. 992658 7. 011172 6. 971778  
11730193\_ 5. 479909 5. 490778 5. 550358 5. 0581 5. 182685 5. 297958  
11730194\_ 5. 645407 5. 6997 5. 636951 5. 655826 5. 596719 5. 624207

11730195\_ 3. 434139 3. 511949 3. 511696 3. 504278 3. 072732 3. 282724  
11730196\_ 8. 197296 8. 219216 8. 22391 8. 382354 8. 436765 8. 428328  
11730197\_ 5. 742618 5. 704919 5. 794286 5. 997941 5. 977686 5. 990863  
11730198\_ 10. 34829 10. 29211 10. 32622 10. 54022 10. 59368 10. 56771  
11730199\_ 8. 195156 8. 173236 8. 186172 8. 464185 8. 512472 8. 460665  
11730200\_ 6. 010842 5. 849676 5. 972122 5. 76178 5. 875296 5. 70156  
11730201\_ 3. 186748 3. 374698 3. 327974 3. 037031 3. 129342 3. 037031  
11730202\_ 7. 206494 7. 120179 7. 235732 6. 943406 7. 060096 6. 934615  
11730203\_ 6. 875834 6. 767473 6. 86909 6. 607614 6. 550608 6. 606537  
11730204\_ 10. 89013 10. 83498 10. 84699 10. 71449 10. 81121 10. 73485  
11730205\_ 9. 15787 9. 05616 9. 149483 9. 039286 9. 018151 9. 031953  
11730206\_ 6. 013786 5. 936397 6. 06294 6. 24392 6. 232714 6. 191267  
11730207\_ 4. 896281 4. 966737 4. 745681 4. 210451 4. 139251 4. 338895  
11730208\_ 6. 563388 6. 555977 6. 527867 6. 69907 6. 555392 6. 595097  
11730209\_ 6. 357224 6. 548765 6. 355612 6. 460603 6. 413797 6. 408144  
11730210\_ 5. 557065 5. 548787 5. 510782 5. 714514 5. 601049 5. 53932  
11730211\_ 7. 079934 7. 030327 7. 122971 7. 275914 7. 314687 7. 282645  
11730212\_ 9. 438533 9. 312688 9. 399806 9. 247719 9. 274901 9. 249325  
11730213\_ 9. 770105 9. 696959 9. 762988 9. 571154 9. 63523 9. 58613  
11730214\_ 3. 40523 3. 707469 3. 398236 3. 663004 3. 651894 3. 524236  
11730215\_ 9. 239791 9. 179661 9. 245337 9. 352425 9. 338341 9. 31945  
11730216\_ 9. 288554 9. 258327 9. 261057 9. 424609 9. 433607 9. 391473  
11730217\_ 7. 470454 7. 366232 7. 426223 6. 993751 7. 131675 7. 181511  
11730218\_ 8. 81002 8. 744643 8. 737512 8. 403026 8. 50901 8. 48782  
11730219\_ 5. 62604 5. 565068 5. 692601 5. 927497 5. 910904 6. 053019  
11730220\_ 9. 623896 9. 639633 9. 559686 9. 203548 9. 159901 9. 104149  
11730221\_ 5. 631623 5. 672285 5. 502345 5. 822645 5. 762903 5. 623492  
11730222\_ 6. 93322 6. 869572 6. 807474 7. 194708 7. 164857 7. 118065  
11730223\_ 6. 979879 6. 889438 6. 772878 7. 026043 6. 969455 6. 951922  
11730224\_ 7. 41023 7. 417676 7. 436752 7. 400837 7. 391683 7. 389738  
11730225\_ 7. 790181 7. 818586 7. 839714 7. 88169 7. 921099 7. 889307  
11730226\_ 7. 07223 7. 00144 7. 216045 6. 908163 7. 00144 6. 900352  
11730227\_ 4. 80357 4. 815065 4. 736213 4. 848366 4. 871147 4. 866228  
11730228\_ 5. 340112 5. 265434 5. 367986 5. 450036 5. 433227 5. 392517  
11730229\_ 7. 828893 7. 708748 7. 774763 7. 511695 7. 517863 7. 560245  
11730230\_ 9. 561698 9. 630872 9. 609785 9. 517675 9. 54461 9. 513401  
11730231\_ 10. 48201 10. 49202 10. 46181 10. 3041 10. 27099 10. 27984  
11730232\_ 7. 549638 7. 482432 7. 544368 6. 986734 6. 9985 7. 050792  
11730233\_ 3. 099255 3. 142892 3. 102294 3. 231562 3. 129858 3. 102294  
11730234\_ 2. 606281 2. 763933 2. 698943 2. 413248 2. 590634 2. 552723  
11730235\_ 9. 220456 9. 212503 9. 273075 9. 161329 9. 163955 9. 196172  
11730236\_ 9. 629043 9. 577445 9. 633442 9. 612169 9. 659853 9. 607696  
11730237\_ 8. 836901 8. 766867 8. 806839 9. 017631 9. 014776 9. 084531  
11730238\_ 8. 989421 8. 933424 8. 948239 8. 96401 8. 978929 9. 039275  
11730239\_ 5. 073512 4. 742287 5. 017132 4. 938234 4. 848909 4. 817767  
11730240\_ 4. 693989 4. 667079 4. 584933 4. 413014 4. 442125 4. 580711  
11730241\_ 3. 808562 3. 831261 3. 858343 3. 945512 3. 858978 4. 104057  
11730242\_ 8. 628922 8. 508175 8. 628086 8. 726143 8. 803577 8. 777481  
11730243\_ 4. 255916 4. 242585 4. 22857 4. 459939 4. 264119 4. 200678  
11730244\_ 3. 889693 3. 864468 3. 779745 3. 827236 4. 153594 3. 889693  
11730245\_ 3. 954507 4. 059628 3. 812782 3. 959667 3. 932256 4. 01245



11730246\_ 2. 896713 2. 973742 2. 997869 3. 294568 2. 948507 3. 026496  
11730247\_ 4. 800256 4. 693153 4. 43516 4. 800277 4. 76824 4. 93128  
11730248\_ 5. 350832 5. 365735 5. 266038 5. 3515 5. 360368 5. 339673  
11730249\_ 8. 190723 8. 200153 8. 212027 8. 109598 8. 142359 8. 10564  
11730250\_ 6. 187105 6. 178469 6. 282224 5. 822724 5. 955158 5. 894886  
11730251\_ 6. 142908 6. 142607 6. 255263 5. 913994 5. 830875 5. 961504  
11730252\_ 8. 363008 8. 357942 8. 358549 8. 215625 8. 194952 8. 155767  
11730253\_ 7. 991197 8. 00473 8. 11763 8. 151485 8. 103321 8. 111833  
11730254\_ 7. 820746 7. 729281 7. 709785 7. 476533 7. 412709 7. 474279  
11730255\_ 3. 402224 3. 324881 3. 102209 3. 326478 3. 318621 3. 34861  
11730256\_ 4. 079459 4. 09025 4. 118427 4. 115375 4. 280762 4. 132601  
11730257\_ 2. 965755 3. 075981 3. 035798 3. 153104 3. 061022 3. 093787  
11730258\_ 6. 883315 6. 885509 6. 798759 6. 937217 7. 023592 6. 918584  
11730259\_ 4. 087795 3. 765077 3. 932582 3. 932582 3. 861787 3. 942738  
11730260\_ 7. 089979 6. 949538 6. 972148 6. 954663 7. 01051 7. 003363  
11730261\_ 7. 702301 7. 735687 7. 792267 8. 004829 7. 967381 7. 980082  
11730262\_ 7. 73402 7. 629745 7. 610566 7. 914854 7. 897815 8. 022209  
11730263\_ 2. 835813 3. 290188 2. 935127 2. 95343 2. 916824 2. 935127  
11730264\_ 8. 956297 8. 868001 8. 948839 9. 61807 9. 653338 9. 682275  
11730265\_ 5. 559153 5. 50719 5. 422072 5. 290186 5. 365687 5. 355541  
11730266\_ 4. 252283 4. 302579 4. 257212 4. 341229 4. 445722 4. 421776  
11730267\_ 7. 347728 7. 315859 7. 345952 7. 306582 7. 283731 7. 289973  
11730268\_ 5. 165246 4. 891049 5. 127151 4. 835051 4. 890464 4. 897715  
11730269\_ 7. 992371 7. 939148 7. 916347 7. 548938 7. 535184 7. 614941  
11730270\_ 8. 030654 8. 042219 8. 011947 7. 751917 7. 77365 7. 827423  
11730271\_ 9. 496803 9. 461163 9. 456334 9. 31005 9. 305113 9. 355809  
11730272\_ 8. 732074 8. 717946 8. 710302 8. 529787 8. 452535 8. 448528  
11730273\_ 3. 792449 3. 848087 3. 612701 3. 731149 3. 892704 3. 758415  
11730274\_ 3. 892623 4. 170821 3. 717539 4. 042072 3. 740988 3. 89764  
11730275\_ 2. 291556 2. 186605 2. 209308 2. 108852 1. 970379 2. 140778  
11730276\_ 2. 183383 2. 296189 2. 41723 2. 275025 2. 309869 2. 19912  
11730277\_ 4. 551204 4. 376664 4. 682324 4. 333471 4. 551204 4. 354203  
11730278\_ 8. 901613 8. 867579 8. 901743 8. 397351 8. 438701 8. 420973  
11730279\_ 5. 362631 5. 435672 5. 115707 5. 487835 5. 56437 5. 286891  
11730280\_ 5. 670391 5. 497884 5. 452142 5. 193918 5. 452142 5. 392236  
11730281\_ 7. 755565 7. 716983 7. 728094 7. 622141 7. 734676 7. 753243  
11730282\_ 7. 391222 7. 412367 7. 475549 7. 428655 7. 472386 7. 456136  
11730283\_ 4. 462345 4. 370467 4. 28922 4. 22431 4. 318283 4. 097486  
11730284\_ 4. 584933 4. 495398 4. 287593 4. 35114 4. 455114 4. 222418  
11730285\_ 7. 12407 7. 012763 7. 109376 6. 79194 6. 765216 6. 876456  
11730286\_ 7. 059646 7. 015649 7. 070215 7. 042594 6. 975535 7. 066494  
11730287\_ 7. 683176 7. 66238 7. 70462 7. 996136 7. 872743 7. 882154  
11730288\_ 4. 202443 4. 240483 4. 351514 5. 699687 5. 60151 5. 385605  
11730289\_ 6. 900021 6. 880593 6. 960965 7. 315636 7. 34667 7. 33312  
11730290\_ 7. 211398 7. 107735 7. 280722 7. 786378 7. 783852 7. 799433  
11730291\_ 6. 792183 6. 757132 6. 826567 6. 866519 6. 829359 6. 801745  
11730292\_ 6. 782143 6. 975313 6. 984801 7. 218243 7. 204522 7. 176801  
11730293\_ 7. 773831 7. 651016 7. 750413 8. 065815 8. 104136 8. 054351  
11730294\_ 6. 983118 6. 889711 6. 984119 7. 393283 7. 374146 7. 317845  
11730295\_ 7. 781264 7. 803029 7. 888864 7. 7572 7. 673505 7. 77026  
11730296\_ 5. 45242 5. 38327 5. 405294 4. 054546 4. 274394 4. 208338

11730297\_ 7. 345731 7. 282277 7. 373205 7. 344394 7. 339916 7. 254194  
11730298\_ 5. 327489 5. 205066 5. 156612 5. 43177 5. 426182 5. 430151  
11730299\_ 4. 762202 4. 51423 4. 491066 3. 549767 3. 58398 3. 58398  
11730300\_ 5. 146982 5. 029529 5. 13021 4. 067703 3. 845083 3. 768526  
11730301\_ 5. 792052 5. 810838 5. 794286 6. 301375 6. 486314 6. 29057  
11730302\_ 3. 916383 3. 959269 4. 02609 3. 797315 3. 994575 4. 020402  
11730303\_ 6. 413543 6. 495862 6. 466848 6. 73236 6. 64625 6. 649402  
11730304\_ 7. 185161 7. 303839 7. 149112 7. 546856 7. 459391 7. 524557  
11730305\_ 6. 281983 6. 355109 6. 320715 6. 493768 6. 395327 6. 458381  
11730306\_ 8. 521335 8. 433134 8. 594989 8. 326204 8. 352816 8. 385156  
11730307\_ 2. 712331 3. 048577 2. 829331 3. 101013 3. 300594 3. 029366  
11730308\_ 4. 346254 4. 341234 4. 28335 4. 402177 4. 340228 4. 341234  
11730309\_ 2. 264008 2. 279149 2. 264008 2. 140215 2. 042628 2. 379108  
11730310\_ 5. 455122 5. 414869 5. 243784 5. 302634 5. 427949 5. 54188  
11730311\_ 4. 186992 3. 997131 4. 003323 4. 146675 4. 3677 4. 196951  
11730312\_ 7. 478048 7. 42947 7. 413639 7. 067481 7. 084507 7. 074712  
11730313\_ 5. 167686 5. 141004 5. 345261 5. 193831 5. 203526 5. 2666  
11730314\_ 6. 383702 6. 299957 6. 418491 6. 443897 6. 467904 6. 482787  
11730315\_ 4. 026092 4. 069109 3. 831335 3. 773634 3. 96654 3. 742589  
11730316\_ 3. 035743 3. 051666 2. 874619 3. 007359 3. 21279 3. 212311  
11730317\_ 2. 604972 2. 627422 2. 357671 2. 492167 2. 718322 2. 623218  
11730318\_ 3. 543566 3. 658791 3. 642849 3. 67523 3. 756496 3. 627429  
11730319\_ 7. 506955 7. 462719 7. 408824 6. 790017 6. 765424 6. 867229  
11730320\_ 4. 419121 4. 340614 4. 198319 4. 327182 4. 293648 4. 352943  
11730321\_ 4. 466441 4. 681761 4. 426903 4. 677863 4. 724981 4. 6484  
11730322\_ 3. 18432 3. 071514 3. 171351 3. 154496 3. 136772 3. 063341  
11730323\_ 7. 61182 7. 603264 7. 56501 7. 269228 7. 491239 7. 386806  
11730324\_ 6. 258038 6. 215803 6. 266405 6. 288058 6. 215803 6. 226822  
11730325\_ 7. 302251 7. 237606 7. 200425 7. 567334 7. 618361 7. 638809  
11730326\_ 6. 112514 6. 262763 6. 050739 6. 244666 6. 260329 6. 231926  
11730327\_ 8. 803522 8. 779986 8. 855372 9. 101723 9. 058494 9. 043358  
11730328\_ 8. 741355 8. 782166 8. 791275 9. 189545 8. 970092 9. 039327  
11730329\_ 4. 578121 4. 623249 4. 709463 4. 786197 4. 644692 4. 736504  
11730330\_ 4. 36177 4. 312369 4. 208704 4. 441019 4. 419632 4. 297959  
11730331\_ 7. 250646 7. 146528 7. 1393 7. 685004 7. 724654 7. 757398  
11730332\_ 3. 489812 3. 729087 3. 442538 3. 370704 3. 534937 3. 578694  
11730333\_ 4. 255693 4. 335594 4. 349394 4. 347179 4. 448931 4. 344283  
11730334\_ 6. 380424 6. 484608 6. 413388 6. 231185 6. 420454 6. 410398  
11730335\_ 6. 419267 6. 385284 6. 511347 6. 471464 6. 507978 6. 392044  
11730336\_ 3. 527969 3. 86183 3. 616559 3. 898788 3. 652214 3. 687869  
11730337\_ 6. 115899 6. 148482 6. 146921 6. 155281 6. 035079 6. 201586  
11730338\_ 7. 409965 7. 243032 7. 34234 7. 017374 7. 012314 7. 055411  
11730339\_ 6. 507294 6. 641378 6. 550867 6. 416152 6. 462427 6. 451129  
11730340\_ 5. 873622 5. 78901 5. 961837 5. 492118 5. 651559 5. 643035  
11730341\_ 5. 696006 5. 988291 5. 90811 6. 014161 6. 010231 5. 915945  
11730342\_ 4. 765542 5. 000853 4. 752633 4. 845179 4. 773941 4. 743655  
11730343\_ 5. 132995 5. 293648 5. 149452 5. 251922 5. 155763 5. 225052  
11730344\_ 3. 238396 3. 458441 3. 347029 3. 129648 3. 473707 3. 582328  
11730345\_ 5. 441127 5. 268227 5. 592822 4. 911542 4. 854692 4. 763543  
11730346\_ 8. 75133 8. 670966 8. 720574 8. 584893 8. 589391 8. 659786  
11730347\_ 4. 108592 4. 112042 3. 919295 4. 284412 4. 054288 4. 097955

11730348\_ 6. 509505 6. 60001 6. 448003 6. 621824 6. 580306 6. 623451  
11730349\_ 6. 340974 6. 202451 6. 296301 6. 288537 6. 285362 6. 277597  
11730350\_ 7. 886618 7. 832861 7. 91752 7. 381748 7. 525326 7. 54934  
11730351\_ 7. 237293 7. 403486 7. 30571 7. 387343 7. 41401 7. 397473  
11730352\_ 3. 762881 3. 884094 3. 745034 4. 06712 4. 145175 3. 835994  
11730353\_ 4. 65853 4. 459962 4. 625317 4. 505568 4. 580148 4. 749115  
11730354\_ 5. 715451 5. 764618 5. 684283 6. 003639 5. 887766 5. 795648  
11730355\_ 6. 409937 6. 390977 6. 483628 6. 683275 6. 752569 6. 696255  
11730356\_ 5. 546702 5. 518169 5. 456652 5. 580952 5. 472603 5. 323817  
11730357\_ 4. 358942 4. 21313 4. 440302 4. 067703 4. 203232 4. 211816  
11730358\_ 4. 925234 5. 268935 5. 09978 5. 446304 5. 189052 5. 28901  
11730359\_ 7. 50511 7. 213824 7. 31678 6. 839983 6. 790012 6. 99605  
11730360\_ 7. 317822 7. 286673 7. 266815 7. 145554 7. 094233 7. 129214  
11730361\_ 6. 542242 6. 494628 6. 519676 6. 044782 6. 037173 6. 02692  
11730362\_ 4. 156052 4. 070124 4. 044754 4. 044632 4. 264397 4. 085539  
11730363\_ 7. 422426 7. 12407 7. 272806 6. 34864 6. 030934 6. 329337  
11730364\_ 6. 240456 6. 104467 6. 221763 5. 092183 5. 263224 5. 20948  
11730365\_ 3. 23647 3. 180062 3. 138626 3. 306643 3. 139039 3. 19913  
11730366\_ 5. 985688 5. 866305 5. 947374 5. 647144 5. 470803 5. 662047  
11730367\_ 5. 825803 5. 77865 5. 741247 5. 377346 5. 475046 5. 534375  
11730368\_ 7. 402617 7. 321643 7. 348573 6. 662196 6. 574279 6. 680003  
11730369\_ 4. 720423 4. 59104 4. 611595 4. 551577 4. 744505 4. 937547  
11730370\_ 4. 102927 3. 970994 4. 124908 4. 05489 4. 077308 4. 060693  
11730371\_ 2. 255652 2. 042097 2. 235709 2. 413588 2. 199827 2. 517181  
11730372\_ 3. 111243 3. 312363 3. 070437 3. 02731 3. 046364 3. 056912  
11730373\_ 4. 861044 4. 914054 4. 752595 4. 952088 4. 844409 4. 872044  
11730374\_ 2. 862468 2. 988537 2. 862468 2. 640752 2. 415474 2. 705475  
11730375\_ 3. 852276 3. 980895 3. 823232 4. 051513 3. 70637 3. 879309  
11730376\_ 7. 763239 7. 693813 7. 742701 7. 715356 7. 711242 7. 700348  
11730377\_ 7. 89467 7. 822325 7. 930708 7. 890841 7. 868277 7. 87221  
11730378\_ 5. 992951 5. 762844 5. 647564 5. 106135 5. 162811 4. 88675  
11730379\_ 7. 209229 7. 21652 7. 257075 7. 073998 7. 102582 7. 122092  
11730380\_ 5. 858347 5. 797166 5. 79776 5. 723241 5. 736191 5. 77685  
11730381\_ 5. 734614 5. 660997 5. 638781 5. 513787 5. 49211 5. 577577  
11730382\_ 7. 08032 6. 991307 6. 952865 6. 332165 6. 37825 6. 31663  
11730383\_ 8. 02978 7. 9454 8. 017729 7. 573669 7. 600068 7. 624583  
11730384\_ 2. 381034 2. 332548 2. 496677 2. 284061 2. 339889 2. 304634  
11730385\_ 2. 886557 2. 89753 2. 821375 2. 661839 2. 92744 2. 932836  
11730386\_ 3. 472851 3. 83474 3. 63266 3. 850246 3. 565959 3. 742129  
11730387\_ 3. 645684 3. 634569 3. 817299 3. 640916 3. 801444 3. 510653  
11730388\_ 4. 150608 4. 252158 4. 287593 4. 40461 4. 276677 4. 214413  
11730389\_ 4. 820967 4. 931877 4. 590099 4. 685213 4. 876117 4. 876117  
11730390\_ 10. 12342 10. 15021 10. 15506 9. 784954 9. 73899 9. 766561  
11730391\_ 8. 829057 8. 757096 8. 766497 8. 538526 8. 509279 8. 588673  
11730392\_ 6. 155009 6. 124975 6. 163596 6. 115013 6. 159771 6. 118838  
11730393\_ 3. 555688 3. 494774 3. 308188 3. 626185 3. 640705 3. 548174  
11730394\_ 6. 015141 5. 855998 5. 912787 4. 914651 4. 890539 5. 158836  
11730395\_ 6. 91054 6. 717676 6. 956975 6. 276128 6. 080756 6. 19385  
11730396\_ 4. 140321 4. 01161 4. 282328 4. 34428 4. 091424 4. 268937  
11730397\_ 4. 362955 4. 555611 4. 285782 4. 606888 4. 451177 4. 379253  
11730398\_ 10. 53662 10. 44434 10. 50685 10. 54526 10. 56898 10. 51051

11730399\_ 6. 932149 6. 989705 7. 016627 6. 37266 6. 44857 6. 419481  
11730400\_ 3. 570063 3. 997131 3. 404721 3. 782636 3. 921188 3. 522353  
11730401\_ 5. 009603 4. 956857 4. 914958 4. 255054 4. 163114 4. 75415  
11730402\_ 6. 787562 6. 853988 6. 850961 6. 808465 6. 765136 6. 746368  
11730403\_ 7. 837282 7. 751308 7. 811089 8. 411025 8. 357076 8. 403303  
11730404\_ 6. 016079 6. 058786 6. 044285 6. 456896 6. 383618 6. 374203  
11730405\_ 4. 621862 4. 744454 4. 699378 4. 946039 4. 821645 4. 948829  
11730406\_ 2. 116416 2. 234239 2. 385022 2. 220727 2. 10479 2. 355913  
11730407\_ 3. 346332 3. 285337 3. 452494 3. 432173 3. 559412 3. 52542  
11730408\_ 8. 557492 8. 491755 8. 503887 8. 441469 8. 479086 8. 384102  
11730409\_ 8. 269673 8. 166797 8. 262071 7. 612217 7. 650712 7. 655239  
11730410\_ 6. 002012 6. 093403 5. 894312 6. 211338 6. 161236 6. 205915  
11730411\_ 7. 192227 6. 898671 7. 037067 7. 406316 7. 453045 7. 366964  
11730412\_ 5. 766356 5. 957954 5. 845714 5. 92036 5. 851197 5. 935341  
11730413\_ 3. 524237 3. 829861 3. 697266 3. 962624 3. 879309 3. 613672  
11730414\_ 2. 260024 2. 024427 2. 020141 2. 214161 2. 105061 1. 935888  
11730415\_ 4. 347179 4. 341387 4. 214037 4. 406029 4. 336377 4. 275543  
11730416\_ 6. 064819 6. 174491 6. 156342 6. 112299 6. 167359 6. 248453  
11730417\_ 5. 028866 5. 116337 4. 990876 5. 030133 5. 113144 5. 105683  
11730418\_ 4. 16335 4. 053258 4. 038989 4. 166922 4. 122446 4. 307177  
11730419\_ 4. 210641 4. 447997 4. 231513 4. 477164 4. 309754 4. 306232  
11730420\_ 6. 522181 6. 612181 6. 441357 6. 495425 6. 560805 6. 573948  
11730421\_ 6. 593007 6. 634781 6. 605804 6. 61216 6. 672355 6. 590606  
11730422\_ 7. 563962 7. 517908 7. 741546 7. 27673 7. 302952 7. 341395  
11730423\_ 6. 495537 6. 551077 6. 46203 6. 752593 6. 659926 6. 586704  
11730424\_ 5. 692137 5. 708421 5. 643713 5. 766224 5. 716558 5. 65962  
11730425\_ 5. 590096 5. 571806 5. 459639 5. 480966 5. 457184 5. 491668  
11730426\_ 5. 577004 5. 69663 5. 66554 5. 606173 5. 779206 5. 695372  
11730427\_ 6. 178635 6. 271208 6. 368231 6. 514101 6. 450262 6. 461336  
11730428\_ 9. 060521 9. 08024 9. 151593 9. 321513 9. 227872 9. 246551  
11730429\_ 4. 581403 4. 583368 4. 618275 4. 575897 4. 593149 4. 711028  
11730430\_ 3. 992593 4. 064285 3. 838261 3. 9608 3. 927938 4. 244398  
11730431\_ 7. 109357 7. 066396 7. 063633 7. 202891 7. 232017 7. 222309  
11730432\_ 8. 183797 8. 124083 8. 234112 8. 166994 8. 198317 8. 211512  
11730433\_ 5. 576321 5. 259517 5. 453765 5. 577032 5. 755299 5. 577032  
11730434\_ 4. 29146 4. 485111 4. 251845 4. 5916 4. 539401 4. 548812  
11730435\_ 5. 116086 5. 24256 5. 139552 5. 414869 5. 314617 5. 315898  
11730436\_ 9. 711593 9. 684947 9. 643246 9. 121868 9. 07949 9. 028223  
11730437\_ 8. 39801 8. 309883 8. 376188 8. 463091 8. 445684 8. 484194  
11730438\_ 5. 584813 5. 67797 5. 503807 5. 672285 5. 62471 5. 676992  
11730439\_ 8. 550798 8. 533976 8. 658004 8. 236137 8. 277827 8. 224287  
11730440\_ 5. 161205 4. 786561 5. 030061 4. 406239 4. 423194 4. 355152  
11730441\_ 4. 322114 4. 368913 4. 490411 4. 477913 4. 733237 4. 560618  
11730442\_ 4. 08234 4. 181575 4. 172086 4. 366437 4. 446868 4. 453545  
11730443\_ 5. 506055 5. 552942 5. 525295 5. 542474 5. 45407 5. 456301  
11730444\_ 6. 396378 6. 339761 6. 428044 6. 058637 5. 984529 5. 881954  
11730445\_ 5. 549638 5. 516209 5. 464899 5. 298291 5. 2222 5. 338053  
11730446\_ 4. 369301 4. 297377 4. 365038 4. 30164 4. 471574 4. 235147  
11730447\_ 2. 059661 2. 153868 1. 931383 1. 973364 2. 219335 2. 132411  
11730448\_ 4. 930008 4. 685983 4. 971866 5. 058822 5. 103167 5. 158131  
11730449\_ 4. 252217 4. 43419 4. 176873 4. 237251 4. 367322 4. 386712

11730450\_ 4. 938735 4. 925755 4. 844984 4. 946086 4. 958498 5. 004568  
11730451\_ 6. 01082 6. 02106 6. 031609 6. 179015 6. 269383 6. 212058  
11730452\_ 5. 36698 4. 981187 4. 931129 5. 731623 5. 590142 5. 569222  
11730453\_ 5. 088194 5. 176464 4. 967172 5. 143086 5. 198182 5. 036683  
11730454\_ 4. 783235 4. 331798 4. 311033 4. 760488 4. 677221 4. 574521  
11730455\_ 7. 120614 7. 232355 7. 124906 6. 881896 6. 686773 6. 792183  
11730456\_ 4. 908833 4. 735199 4. 649488 4. 796976 4. 733547 4. 654908  
11730457\_ 7. 224644 7. 194708 7. 298913 7. 234847 7. 300744 7. 238357  
11730458\_ 6. 805035 6. 71881 6. 826088 6. 667525 6. 812692 6. 752593  
11730459\_ 1. 948438 2. 170275 2. 187807 2. 207482 2. 187807 2. 308517  
11730460\_ 4. 713933 4. 833581 4. 95008 4. 984392 4. 970998 4. 929  
11730461\_ 2. 347748 2. 523046 2. 322717 2. 260296 2. 431551 2. 471443  
11730462\_ 2. 650339 2. 713646 2. 479375 2. 83198 2. 745898 2. 530479  
11730463\_ 3. 482245 3. 597447 3. 511325 3. 504075 3. 806194 3. 657655  
11730464\_ 5. 475665 5. 639999 5. 55696 5. 643854 5. 52741 5. 651557  
11730465\_ 6. 45893 6. 495781 6. 485469 5. 755206 5. 694563 5. 968569  
11730466\_ 3. 987387 4. 228688 3. 877168 4. 145781 3. 92802 3. 954157  
11730467\_ 4. 850936 4. 506544 4. 700413 4. 661628 4. 713855 4. 867645  
11730468\_ 5. 291677 5. 345598 5. 330533 5. 476751 5. 369572 5. 317956  
11730469\_ 6. 492159 6. 442329 6. 422276 6. 262959 6. 172761 6. 242606  
11730470\_ 5. 050222 5. 068121 5. 166678 5. 203489 5. 059251 5. 088334  
11730471\_ 2. 441648 2. 620178 2. 425404 2. 596719 2. 569644 2. 612798  
11730472\_ 5. 183446 5. 290374 5. 190078 5. 189628 5. 354668 5. 297498  
11730473\_ 2. 293272 2. 289799 2. 293272 1. 977955 2. 433017 2. 040441  
11730474\_ 3. 63313 3. 398236 3. 28558 3. 35364 3. 398236 3. 521686  
11730475\_ 4. 894918 4. 309044 4. 108951 4. 524601 4. 203172 4. 535882  
11730476\_ 2. 962824 3. 131353 2. 996857 2. 521133 2. 605721 2. 708216  
11730477\_ 5. 175524 5. 327911 5. 470764 5. 488508 5. 531968 5. 671261  
11730478\_ 7. 513271 7. 386306 7. 453032 7. 901157 7. 983751 7. 961836  
11730479\_ 5. 640568 5. 684113 5. 640568 5. 554436 5. 640568 5. 676992  
11730480\_ 4. 347179 4. 377004 4. 184698 4. 327988 4. 234824 4. 289817  
11730481\_ 2. 410861 2. 364871 2. 316929 2. 182085 2. 316929 2. 18238  
11730482\_ 5. 208943 5. 257333 5. 027649 5. 360952 5. 183341 5. 128845  
11730483\_ 5. 349369 5. 326821 5. 297498 5. 584813 5. 411409 5. 462724  
11730484\_ 3. 313494 2. 983801 3. 320168 3. 148621 3. 202239 3. 092885  
11730485\_ 6. 708746 6. 837039 6. 765911 6. 615192 6. 660832 6. 544797  
11730486\_ 3. 762342 4. 085772 3. 888246 4. 110257 4. 114167 3. 93055  
11730487\_ 3. 973827 4. 077205 3. 883593 4. 33473 4. 123014 4. 431597  
11730488\_ 3. 925181 3. 64552 3. 880909 3. 934822 4. 067544 3. 971119  
11730489\_ 4. 091671 3. 816201 3. 893751 4. 181258 4. 140501 3. 972305  
11730490\_ 5. 971454 6. 076709 6. 040785 6. 096989 6. 164806 6. 094309  
11730491\_ 7. 762439 7. 703042 7. 723778 7. 793529 7. 864345 7. 866704  
11730492\_ 4. 999248 5. 288017 5. 123778 5. 406557 5. 323169 5. 316807  
11730493\_ 2. 098628 2. 25483 2. 088511 2. 085139 2. 083727 2. 130997  
11730494\_ 2. 234824 2. 073166 2. 076321 1. 991087 1. 996971 1. 981237  
11730495\_ 6. 571626 6. 684924 6. 552411 6. 677582 6. 607363 6. 67471  
11730496\_ 9. 258252 9. 208249 9. 159119 9. 15768 9. 147951 9. 126035  
11730497\_ 6. 274952 6. 314041 6. 46208 5. 955973 6. 089563 5. 978574  
11730498\_ 8. 503744 8. 491833 8. 540432 8. 726767 8. 741322 8. 772523  
11730499\_ 4. 59262 4. 652282 4. 354187 4. 742184 5. 146159 4. 942502  
11730500\_ 6. 690834 6. 556217 6. 705481 6. 088028 6. 100488 6. 042935

11730501\_ 4. 497457 4. 522961 4. 40815 4. 171666 3. 954329 4. 313165  
11730502\_ 4. 283248 4. 005065 4. 372474 4. 190765 4. 380603 4. 537288  
11730503\_ 5. 369432 5. 325732 5. 305189 5. 314327 5. 369893 5. 37713  
11730504\_ 5. 181707 5. 27147 5. 118741 5. 297541 5. 310991 5. 258788  
11730505\_ 6. 397226 6. 357794 6. 327973 6. 450993 6. 508483 6. 474358  
11730506\_ 4. 037358 4. 037172 4. 287593 4. 347179 4. 235084 4. 13411  
11730507\_ 4. 96951 5. 215324 4. 869405 4. 873695 4. 875107 5. 132045  
11730508\_ 4. 705019 4. 938794 5. 038222 5. 041025 4. 541268 4. 857997  
11730509\_ 6. 899315 6. 72266 6. 796663 6. 353997 6. 394503 6. 33679  
11730510\_ 5. 173865 4. 685659 5. 018228 5. 502957 5. 379354 5. 353788  
11730511\_ 4. 365127 4. 38022 4. 502206 4. 416754 4. 507132 4. 631673  
11730512\_ 4. 019807 3. 951766 3. 951721 4. 187877 4. 116225 3. 989706  
11730513\_ 5. 954895 5. 65216 5. 731568 5. 605735 5. 513181 5. 474837  
11730514\_ 4. 026092 4. 055679 4. 01623 4. 011637 4. 043404 4. 038195  
11730515\_ 5. 902309 5. 958636 5. 923795 6. 593927 6. 487783 6. 523992  
11730516\_ 2. 235709 1. 960383 2. 162409 2. 211348 2. 079884 2. 069109  
11730517\_ 6. 191757 6. 16577 6. 096325 6. 078297 6. 136198 6. 204597  
11730518\_ 5. 661848 5. 737546 5. 850336 5. 822976 5. 894697 5. 798864  
11730519\_ 3. 385287 3. 290188 3. 336133 3. 503743 3. 34866 3. 400254  
11730520\_ 2. 543 2. 123848 2. 408091 2. 125473 2. 216352 2. 337403  
11730521\_ 3. 444153 3. 534235 3. 469743 3. 570674 3. 457868 3. 582769  
11730522\_ 3. 746448 3. 866284 3. 646489 3. 738117 3. 574934 3. 463939  
11730523\_ 3. 581227 3. 606173 3. 651905 3. 776641 3. 822363 3. 876683  
11730524\_ 6. 629049 6. 598742 6. 616089 6. 333812 6. 183123 6. 31734  
11730525\_ 5. 53827 5. 526184 5. 533281 5. 71432 5. 722601 5. 663561  
11730526\_ 4. 229617 4. 174945 4. 139206 4. 241044 4. 189745 4. 165859  
11730527\_ 5. 712586 5. 732315 5. 692052 5. 579398 5. 593875 5. 531289  
11730528\_ 4. 118973 3. 99747 4. 117457 4. 23687 4. 082789 4. 030116  
11730529\_ 5. 736831 5. 611128 5. 934589 5. 720882 5. 784181 5. 754755  
11730530\_ 5. 771246 5. 810712 5. 789096 5. 60289 5. 705596 5. 705596  
11730531\_ 5. 636034 5. 700185 5. 495773 5. 590302 5. 599846 5. 564518  
11730532\_ 3. 306579 3. 529128 3. 347729 3. 541518 3. 250153 3. 492412  
11730533\_ 7. 022288 6. 91969 6. 978847 6. 684796 6. 812064 6. 747126  
11730534\_ 6. 7647 6. 727853 6. 729001 6. 609721 6. 584888 6. 590332  
11730535\_ 5. 006175 5. 001153 5. 17639 5. 0467 5. 10151 5. 073036  
11730536\_ 3. 878893 3. 853021 3. 877635 4. 047013 4. 104898 3. 87526  
11730537\_ 4. 366979 4. 679122 4. 646698 4. 759734 4. 718705 4. 487804  
11730538\_ 4. 794358 4. 839279 4. 794358 4. 762411 4. 863341 4. 992298  
11730539\_ 4. 853311 4. 967409 4. 853311 4. 753854 4. 909461 4. 948794  
11730540\_ 7. 891877 7. 864665 7. 871887 7. 829066 7. 774004 7. 642607  
11730541\_ 8. 603608 8. 598109 8. 594492 8. 544301 8. 471394 8. 4863  
11730542\_ 7. 044717 7. 079361 7. 120838 6. 944511 7. 011172 7. 085641  
11730543\_ 5. 480966 5. 518169 5. 354299 5. 422898 5. 589282 5. 442778  
11730544\_ 4. 947644 4. 99257 4. 777821 4. 99771 4. 986703 5. 034898  
11730545\_ 6. 314336 6. 152784 6. 242212 6. 679883 6. 609052 6. 619219  
11730546\_ 7. 160319 7. 106518 7. 128777 7. 495164 7. 554836 7. 529563  
11730547\_ 7. 470609 7. 349111 7. 421495 7. 682013 7. 621707 7. 563535  
11730548\_ 6. 493847 6. 350845 6. 568586 6. 63391 6. 622748 6. 566186  
11730549\_ 5. 299087 5. 067014 5. 299087 3. 980462 4. 188538 4. 43337  
11730550\_ 4. 370715 4. 422151 4. 439296 4. 363426 4. 493833 4. 326804  
11730551\_ 4. 854817 4. 825876 4. 913023 4. 135496 4. 347179 4. 41591

11730552\_ 4. 396928 4. 489344 4. 283248 4. 23889 4. 328642 4. 343877  
11730553\_ 5. 849138 5. 888506 5. 884401 5. 666568 5. 715452 5. 67157  
11730554\_ 6. 263567 6. 337476 6. 218686 6. 244624 6. 262926 6. 30255  
11730555\_ 4. 786431 4. 762572 4. 924174 4. 635517 4. 475024 4. 576211  
11730556\_ 6. 115261 6. 055132 6. 271748 6. 062668 6. 050934 6. 019467  
11730557\_ 2. 733712 2. 836781 2. 852711 2. 561848 2. 689808 2. 785369  
11730558\_ 4. 850014 4. 755237 4. 829272 4. 616622 4. 770402 4. 660287  
11730559\_ 3. 71123 3. 71123 3. 751829 3. 668224 3. 774363 3. 636774  
11730560\_ 4. 702098 4. 623559 4. 597193 4. 75295 4. 652956 4. 75295  
11730561\_ 6. 371865 6. 541101 6. 386826 6. 418729 6. 406606 6. 372293  
11730562\_ 2. 052828 2. 393241 2. 141133 2. 002582 2. 137433 2. 141133  
11730563\_ 6. 737655 6. 655758 6. 70959 7. 257248 7. 316078 7. 352462  
11730564\_ 3. 70324 3. 653511 3. 601372 3. 772228 3. 868788 3. 716869  
11730565\_ 5. 052708 5. 073036 5. 14537 5. 165854 5. 2222 5. 228627  
11730566\_ 4. 205027 4. 271182 4. 321654 4. 104096 4. 226603 4. 419573  
11730567\_ 4. 278473 4. 437404 4. 097525 4. 322649 4. 465385 4. 280042  
11730568\_ 4. 026092 4. 232773 4. 101265 4. 080665 4. 039541 4. 043113  
11730569\_ 3. 28925 3. 135515 3. 13431 3. 393844 3. 607388 3. 225363  
11730570\_ 5. 937402 5. 930811 6. 102185 6. 323291 6. 350538 6. 281497  
11730571\_ 5. 064578 5. 11527 5. 080493 5. 029529 5. 057334 5. 235028  
11730572\_ 6. 706891 6. 705167 6. 619536 6. 998064 6. 863766 7. 003765  
11730573\_ 5. 109677 5. 183147 5. 374866 5. 156303 5. 093313 5. 11527  
11730574\_ 5. 350331 5. 350331 5. 449126 5. 247515 5. 312683 5. 251676  
11730575\_ 6. 588642 6. 795357 6. 725582 6. 037522 6. 074011 6. 100057  
11730576\_ 4. 295671 4. 46374 4. 503894 4. 990683 4. 974996 4. 932225  
11730577\_ 6. 779107 6. 726548 6. 813759 6. 867851 6. 798388 6. 84124  
11730578\_ 5. 781824 6. 022838 5. 810604 5. 93195 6. 021705 6. 000713  
11730579\_ 3. 301797 3. 15804 3. 418012 2. 766542 2. 806727 2. 838544  
11730580\_ 5. 4966 5. 391037 5. 659295 4. 823979 5. 004302 4. 891096  
11730581\_ 5. 259848 5. 258153 5. 295125 5. 020458 5. 224775 5. 274485  
11730582\_ 5. 312515 5. 034854 5. 381626 5. 68812 5. 559912 5. 750745  
11730583\_ 6. 331646 6. 38497 6. 349746 6. 341435 6. 40765 6. 392351  
11730584\_ 5. 107519 5. 146608 5. 085732 5. 340323 5. 266309 5. 194956  
11730585\_ 5. 214161 5. 144256 4. 953466 5. 384463 5. 338073 5. 250084  
11730586\_ 4. 445611 4. 895967 4. 735739 4. 640745 4. 821177 4. 726876  
11730587\_ 4. 730125 4. 570235 4. 53203 4. 664667 4. 701694 4. 724351  
11730588\_ 3. 389798 3. 209357 3. 425547 3. 425547 3. 406674 3. 55784  
11730589\_ 5. 409222 5. 541054 5. 518169 5. 403735 5. 450567 5. 404504  
11730590\_ 6. 260988 6. 129517 6. 191315 5. 917402 5. 940936 6. 050519  
11730591\_ 2. 325279 2. 25483 2. 508545 2. 41283 2. 110773 2. 231347  
11730592\_ 2. 266437 2. 054419 2. 365886 2. 084547 2. 151391 2. 151391  
11730593\_ 2. 367425 2. 489168 2. 491377 2. 118842 2. 147013 2. 319725  
11730594\_ 7. 012382 7. 013067 7. 094161 7. 256892 7. 305017 7. 267931  
11730595\_ 6. 235474 6. 282224 6. 362859 6. 159771 6. 107437 6. 107437  
11730596\_ 3. 840503 3. 898338 3. 850246 3. 781879 3. 791904 3. 816603  
11730597\_ 3. 555028 3. 555028 3. 503743 3. 606313 3. 618104 3. 529386  
11730598\_ 5. 325346 5. 318925 5. 249832 5. 285831 5. 209539 5. 343764  
11730599\_ 4. 481527 4. 404674 4. 466191 4. 576024 4. 522152 4. 561451  
11730600\_ 5. 572563 5. 496731 5. 223916 5. 460053 5. 447569 5. 524746  
11730601\_ 8. 054016 8. 107335 8. 086078 8. 137497 8. 131414 8. 150663  
11730602\_ 4. 770871 4. 463582 4. 804955 4. 368199 4. 355433 4. 548792

11730603\_ 2. 727209 2. 550261 2. 640758 2. 503257 2. 766448 2. 586975  
11730604\_ 4. 275543 4. 264588 4. 135496 4. 071362 4. 162019 4. 046553  
11730605\_ 2. 427464 2. 380377 2. 285914 2. 639313 2. 198202 2. 569457  
11730606\_ 4. 951739 5. 121552 4. 976037 5. 019658 5. 021571 4. 874904  
11730607\_ 2. 774044 2. 718322 2. 599297 2. 718322 2. 769118 2. 6626  
11730608\_ 3. 089258 2. 93115 3. 138626 2. 819486 2. 834177 2. 727096  
11730609\_ 2. 819505 2. 818627 2. 679052 2. 663966 2. 74229 2. 90646  
11730610\_ 5. 308015 5. 317018 5. 2222 5. 284416 5. 403607 5. 309988  
11730611\_ 6. 22519 6. 234037 6. 339156 6. 376941 6. 311059 6. 338417  
11730612\_ 6. 67471 6. 629259 6. 739727 6. 898904 6. 987163 6. 967819  
11730613\_ 6. 571385 6. 58948 6. 506175 6. 783526 6. 884098 6. 792418  
11730614\_ 6. 97186 6. 927103 7. 131021 7. 306593 7. 29999 7. 257232  
11730615\_ 3. 226178 3. 107767 3. 624654 3. 027376 3. 21127 3. 287623  
11730616\_ 5. 676992 5. 729535 5. 480966 5. 495085 5. 554436 5. 427236  
11730617\_ 3. 337664 3. 503743 3. 356301 3. 632736 3. 503743 3. 814005  
11730618\_ 3. 756238 3. 718509 3. 671013 3. 843215 3. 776459 3. 954157  
11730619\_ 2. 276779 2. 464344 2. 534681 2. 464344 2. 519086 2. 65971  
11730620\_ 3. 742545 3. 718846 3. 480298 3. 545133 3. 637319 3. 540384  
11730621\_ 7. 657668 7. 576452 7. 669563 7. 621395 7. 706994 7. 61142  
11730622\_ 5. 310807 5. 110859 5. 222545 5. 186812 5. 106424 5. 113641  
11730623\_ 4. 95974 4. 810665 4. 984669 4. 95974 4. 971967 4. 947512  
11730624\_ 2. 302451 2. 471607 2. 587239 2. 270281 2. 456118 2. 459971  
11730625\_ 4. 109726 4. 135757 4. 151791 4. 209982 4. 200678 4. 111015  
11730626\_ 2. 47102 2. 435205 2. 672354 2. 668432 2. 605516 2. 650962  
11730627\_ 2. 719724 2. 567441 2. 658951 2. 781198 2. 894262 2. 718322  
11730628\_ 5. 614563 5. 732315 5. 797784 5. 825423 5. 845589 5. 798613  
11730629\_ 6. 135611 6. 262891 6. 053717 6. 184603 6. 131377 6. 177676  
11730630\_ 3. 78286 3. 723624 3. 740892 3. 832447 3. 879309 4. 000882  
11730631\_ 4. 401025 4. 569173 4. 521742 4. 53365 4. 511222 4. 386972  
11730632\_ 6. 094496 6. 011201 6. 00206 6. 057221 6. 041892 6. 026529  
11730633\_ 4. 185974 4. 119522 4. 156181 4. 185974 4. 215767 4. 234399  
11730634\_ 3. 372144 3. 391265 3. 618915 3. 494215 3. 29969 3. 52087  
11730635\_ 4. 720777 4. 484607 4. 640913 3. 982997 4. 191709 4. 26382  
11730636\_ 4. 842078 4. 459939 4. 329436 4. 645441 4. 617796 4. 533337  
11730637\_ 4. 278189 4. 124543 4. 213226 4. 451133 4. 246023 4. 339395  
11730638\_ 4. 614536 4. 52373 4. 393359 4. 565413 4. 780883 4. 658213  
11730639\_ 4. 399132 4. 480863 4. 362828 4. 52373 4. 589357 4. 52373  
11730640\_ 2. 100925 2. 045276 1. 989627 2. 045276 2. 170073 2. 034707  
11730641\_ 3. 122119 3. 137837 3. 175405 3. 226913 3. 296605 3. 178981  
11730642\_ 3. 078205 3. 039977 2. 98179 3. 28928 2. 925224 3. 154142  
11730643\_ 4. 708973 5. 071058 4. 905673 5. 189628 5. 175168 5. 058147  
11730644\_ 4. 76733 4. 84135 4. 975929 4. 847875 4. 84135 4. 762769  
11730645\_ 5. 401097 5. 456168 5. 449469 5. 525365 5. 477605 5. 58612  
11730646\_ 4. 171452 4. 141914 4. 055273 4. 231145 4. 212959 4. 194108  
11730647\_ 4. 026332 3. 874204 4. 061568 4. 083301 4. 114508 4. 166918  
11730648\_ 5. 905515 5. 990462 6. 023563 6. 059157 6. 168187 6. 158938  
11730649\_ 3. 275466 3. 448079 3. 50924 3. 025972 3. 264914 3. 290188  
11730650\_ 5. 358766 5. 300319 5. 597459 4. 990592 4. 815898 4. 944158  
11730651\_ 5. 406034 5. 294421 5. 20634 5. 585758 5. 585758 5. 611789  
11730652\_ 3. 594155 3. 613277 3. 492471 3. 438331 3. 61081 3. 608119  
11730653\_ 4. 720308 4. 595875 4. 459939 4. 569129 4. 40461 4. 636325



11730654\_ 5. 763634 5. 918745 5. 771297 5. 790998 5. 684362 5. 722394  
11730655\_ 7. 291242 7. 297635 7. 304056 6. 966831 7. 077111 7. 07584  
11730656\_ 2. 456629 2. 584812 2. 533478 2. 442599 2. 45506 2. 411823  
11730657\_ 6. 937184 6. 932131 6. 95742 6. 669686 6. 749263 6. 697072  
11730658\_ 4. 329713 4. 717803 4. 638087 4. 695236 4. 849431 4. 763729  
11730659\_ 8. 586981 8. 543796 8. 627615 8. 653574 8. 702956 8. 647922  
11730660\_ 4. 799967 4. 642572 4. 56472 4. 642572 4. 752519 4. 643717  
11730661\_ 4. 363779 4. 57919 4. 45694 4. 380996 4. 564037 4. 436014  
11730662\_ 4. 999456 5. 088271 4. 951177 4. 871713 4. 892738 4. 900965  
11730663\_ 5. 27376 5. 192953 5. 302235 5. 217978 5. 203859 5. 101093  
11730664\_ 2. 287738 2. 659143 2. 622227 2. 308304 2. 434519 2. 452934  
11730665\_ 4. 383204 4. 316116 4. 399677 4. 29583 4. 23497 4. 257642  
11730666\_ 5. 862692 5. 907988 5. 724899 5. 911774 5. 972237 5. 846548  
11730667\_ 4. 116424 4. 109209 4. 096059 4. 069901 4. 108398 4. 092001  
11730668\_ 4. 517649 4. 609521 4. 509981 4. 504758 4. 560346 4. 46071  
11730669\_ 3. 174296 2. 973691 2. 976449 2. 865082 2. 776537 3. 013633  
11730670\_ 4. 44304 4. 338637 4. 271773 3. 919063 4. 103721 4. 000502  
11730671\_ 5. 879374 5. 79662 5. 820052 5. 695596 5. 776733 5. 788636  
11730672\_ 3. 321562 3. 631049 3. 214912 3. 506931 3. 393434 3. 428177  
11730673\_ 2. 66756 2. 590481 2. 556184 2. 512144 2. 579842 2. 57733  
11730674\_ 3. 497135 3. 690304 3. 398236 3. 603401 3. 733871 3. 510635  
11730675\_ 5. 480966 5. 641267 5. 477412 5. 602248 5. 625989 5. 645976  
11730676\_ 5. 315638 5. 512349 5. 468115 5. 448296 5. 48634 5. 425934  
11730677\_ 5. 328029 5. 382589 5. 491609 5. 606598 5. 606598 5. 676992  
11730678\_ 4. 176016 4. 240061 4. 235686 4. 14762 4. 1986 3. 976523  
11730679\_ 7. 035617 7. 111953 7. 024309 6. 808631 6. 725582 6. 772844  
11730680\_ 5. 956328 6. 023625 5. 843796 6. 2592 5. 936425 6. 063175  
11730681\_ 5. 220258 5. 152949 5. 095349 5. 076679 5. 17255 5. 175398  
11730682\_ 7. 144977 7. 184826 7. 14979 7. 143383 7. 20248 7. 127218  
11730683\_ 2. 47102 2. 393602 2. 551257 2. 441214 2. 718322 2. 686393  
11730684\_ 7. 704781 7. 652054 7. 639047 7. 358465 7. 313357 7. 243194  
11730685\_ 4. 782062 4. 691598 4. 929535 4. 20308 4. 092286 4. 199488  
11730686\_ 6. 772397 6. 783601 6. 863081 7. 032725 7. 016434 7. 016833  
11730687\_ 5. 649367 5. 598812 5. 545062 5. 700302 5. 686361 5. 727206  
11730688\_ 4. 694804 4. 914505 4. 703528 4. 862958 4. 739461 4. 96695  
11730689\_ 5. 752224 5. 807818 5. 736275 5. 758486 5. 807572 5. 835835  
11730690\_ 8. 599894 8. 556763 8. 625479 8. 698952 8. 716872 8. 68242  
11730691\_ 7. 328386 7. 265426 7. 342379 6. 696432 6. 578444 6. 612394  
11730692\_ 5. 774136 5. 76921 5. 681236 5. 710852 5. 874028 5. 829849  
11730693\_ 3. 371175 3. 565278 3. 121177 3. 369659 3. 276622 3. 429563  
11730694\_ 2. 19015 2. 154188 2. 20415 2. 396713 2. 242035 2. 120016  
11730695\_ 5. 695029 5. 795697 5. 679758 5. 973836 5. 887943 5. 754889  
11730696\_ 5. 260416 5. 42751 5. 297902 5. 565505 5. 683356 5. 635836  
11730697\_ 3. 796496 3. 650385 3. 808075 3. 895708 3. 753582 3. 653683  
11730698\_ 4. 357054 4. 518956 4. 290833 4. 537268 4. 357161 4. 491725  
11730699\_ 4. 58147 4. 641167 4. 459939 4. 430764 4. 597546 4. 595324  
11730700\_ 8. 214514 8. 000535 8. 124592 8. 048594 8. 066204 8. 069181  
11730701\_ 6. 507384 6. 764115 6. 617925 6. 612574 6. 586822 6. 517934  
11730702\_ 6. 180303 5. 981565 5. 906844 6. 109138 6. 025544 6. 167052  
11730703\_ 5. 434184 5. 399547 5. 389181 5. 45026 5. 454965 5. 409729  
11730704\_ 4. 317252 4. 508526 4. 076883 4. 40461 4. 519612 4. 413234

11730705\_ 5. 267847 5. 149545 4. 920724 5. 300239 5. 410574 5. 272802  
11730706\_ 5. 51363 5. 446904 5. 146513 5. 424977 5. 333723 5. 229781  
11730707\_ 7. 004806 6. 899389 7. 161103 6. 281781 6. 541315 6. 365444  
11730708\_ 1. 813649 1. 909336 2. 177045 2. 23368 2. 289372 2. 159687  
11730709\_ 2. 78066 2. 89691 2. 864486 2. 614487 2. 736716 2. 505969  
11730710\_ 6. 357138 6. 544696 6. 349817 6. 518681 6. 546303 6. 534878  
11730711\_ 3. 715436 3. 685071 3. 508218 3. 894076 3. 635631 3. 670401  
11730712\_ 6. 789339 6. 731683 6. 721503 6. 956076 6. 992279 6. 963369  
11730713\_ 6. 074132 6. 202983 6. 148641 6. 235934 6. 209292 6. 143881  
11730714\_ 10. 99175 11. 03851 11. 0116 11. 27571 11. 37361 11. 19379  
11730715\_ 9. 070638 9. 04456 9. 054365 8. 976546 9. 057744 8. 939075  
11730716\_ 10. 4687 10. 47417 10. 49124 10. 36912 10. 35204 10. 34448  
11730717\_ 10. 49824 10. 47904 10. 50748 10. 46407 10. 42193 10. 38161  
11730718\_ 4. 528671 4. 632564 4. 584562 4. 789368 4. 558557 4. 756644  
11730719\_ 8. 655125 8. 600855 8. 652085 8. 412566 8. 308149 8. 351714  
11730720\_ 6. 164295 6. 430194 6. 159999 6. 110311 6. 213446 6. 251183  
11730721\_ 4. 125437 4. 14336 4. 051445 4. 083203 4. 199886 4. 261913  
11730722\_ 4. 788887 4. 849407 4. 752008 4. 559693 4. 738417 4. 760676  
11730723\_ 5. 813738 5. 944215 5. 854685 5. 794286 5. 885431 5. 834284  
11730724\_ 10. 83654 10. 84176 10. 74307 11. 12162 11. 13845 11. 05135  
11730725\_ 6. 106225 6. 127791 6. 27205 5. 892527 5. 950817 5. 852713  
11730726\_ 3. 84604 4. 16951 3. 918515 3. 962122 3. 860722 4. 204664  
11730727\_ 3. 66271 3. 592883 3. 747191 3. 809137 3. 658377 3. 888776  
11730728\_ 8. 830518 8. 828144 8. 794244 8. 770147 8. 784868 8. 779772  
11730729\_ 7. 810264 7. 692515 7. 84679 7. 217959 7. 315859 7. 299498  
11730730\_ 8. 85196 8. 820646 8. 840329 9. 065141 9. 058738 8. 983169  
11730731\_ 7. 472722 7. 411136 7. 471978 6. 240019 6. 340629 6. 211136  
11730732\_ 6. 310007 6. 309264 6. 254444 6. 618772 6. 659312 6. 66995  
11730733\_ 6. 459608 6. 451058 6. 396132 6. 767414 6. 726289 6. 787253  
11730734\_ 5. 103142 5. 143122 5. 380266 5. 537907 5. 59167 5. 561721  
11730735\_ 8. 650564 8. 64046 8. 615227 9. 439985 9. 416342 9. 400156  
11730736\_ 5. 705493 5. 781202 5. 762409 6. 027138 5. 894697 5. 993117  
11730737\_ 8. 214202 8. 157202 8. 149069 8. 367097 8. 406164 8. 33899  
11730738\_ 6. 706412 6. 315789 6. 692041 7. 296752 7. 270929 7. 441834  
11730739\_ 8. 837594 8. 772429 8. 800131 8. 465527 8. 490229 8. 481212  
11730740\_ 7. 135461 7. 020578 7. 132351 6. 723415 6. 844493 6. 83101  
11730741\_ 9. 155334 9. 173769 9. 146563 8. 60515 8. 610655 8. 593477  
11730742\_ 9. 145058 9. 05066 9. 129097 8. 562648 8. 573592 8. 506037  
11730743\_ 7. 203055 7. 096459 7. 213285 6. 816004 6. 757267 6. 812462  
11730744\_ 7. 545984 7. 500648 7. 563821 7. 227493 7. 122074 7. 12007  
11730745\_ 8. 74741 8. 674185 8. 751444 8. 298981 8. 243062 8. 29693  
11730746\_ 10. 58511 10. 58181 10. 65151 10. 59217 10. 58275 10. 53487  
11730747\_ 10. 00842 9. 968707 9. 975349 9. 91136 9. 967266 9. 857999  
11730748\_ 10. 24746 10. 20045 10. 24746 10. 15199 10. 14568 10. 13021  
11730749\_ 8. 360475 8. 26994 8. 366607 8. 046123 8. 009237 8. 094965  
11730750\_ 6. 955796 6. 907015 6. 895563 6. 724865 6. 707866 6. 777436  
11730751\_ 7. 691405 7. 562313 7. 726321 7. 484148 7. 407037 7. 42862  
11730752\_ 9. 961923 9. 895965 9. 955764 9. 571659 9. 591215 9. 565856  
11730753\_ 5. 401752 5. 048231 5. 399446 5. 528096 5. 397861 5. 56377  
11730754\_ 8. 737426 8. 661771 8. 738527 8. 298263 8. 269846 8. 295481  
11730755\_ 8. 956604 8. 937056 8. 940825 8. 888943 8. 918519 8. 876735

11730756\_ 8. 8708 8. 862622 8. 862105 8. 75688 8. 763797 8. 726462  
11730757\_ 7. 618589 7. 609321 7. 675558 7. 283596 7. 35489 7. 245121  
11730758\_ 6. 811342 6. 590335 6. 792183 5. 701906 5. 744574 5. 607335  
11730759\_ 7. 912707 7. 884854 7. 840341 7. 786 7. 75498 7. 784818  
11730760\_ 8. 284293 8. 325874 8. 355255 8. 238047 8. 251626 8. 188511  
11730761\_ 9. 288855 9. 267909 9. 333522 9. 235076 9. 25446 9. 184863  
11730762\_ 6. 389269 6. 283019 6. 320876 6. 173161 6. 21537 6. 300184  
11730763\_ 7. 183237 7. 029773 7. 073404 6. 90801 6. 966104 7. 031531  
11730764\_ 5. 188299 5. 327519 5. 101055 5. 100737 5. 212431 5. 16287  
11730765\_ 3. 202231 3. 408698 3. 368273 3. 56685 3. 288508 3. 367345  
11730766\_ 4. 31743 4. 250934 4. 213226 4. 168519 4. 347179 4. 23767  
11730767\_ 7. 826603 7. 860298 7. 890293 7. 510307 7. 571293 7. 578928  
11730768\_ 6. 383574 6. 395092 6. 197254 6. 271221 6. 333098 6. 318829  
11730769\_ 3. 047337 3. 112055 3. 007802 2. 977115 3. 104768 3. 201285  
11730770\_ 7. 405327 7. 27294 7. 341068 7. 30904 7. 416681 7. 296214  
11730771\_ 6. 8391 6. 653526 6. 832929 6. 716465 6. 658468 6. 647055  
11730772\_ 5. 694526 5. 839091 5. 717002 5. 49583 5. 580544 5. 558308  
11730773\_ 6. 478835 6. 485024 6. 477442 6. 143982 6. 233417 6. 383204  
11730774\_ 7. 61577 7. 579872 7. 568662 8. 679654 8. 67846 8. 708513  
11730775\_ 7. 911921 7. 814818 7. 87673 7. 715356 7. 687632 7. 719546  
11730776\_ 6. 212414 6. 142409 6. 26578 6. 230689 6. 368939 6. 394239  
11730777\_ 6. 045555 6. 011899 6. 157315 6. 017195 5. 85848 6. 158266  
11730778\_ 7. 463181 7. 40294 7. 445322 7. 744697 7. 661991 7. 739355  
11730779\_ 3. 757175 3. 877732 3. 647276 3. 961177 3. 740463 4. 024272  
11730780\_ 3. 818401 3. 83371 3. 781464 4. 082621 3. 887035 3. 954157  
11730781\_ 9. 419402 9. 347802 9. 418851 9. 552538 9. 565136 9. 521596  
11730782\_ 6. 424902 6. 321801 6. 451548 6. 321801 6. 28614 6. 302178  
11730783\_ 5. 890294 5. 927977 5. 950197 5. 796412 5. 870242 5. 930145  
11730784\_ 9. 048323 8. 985871 9. 046076 9. 009345 8. 964265 8. 995611  
11730785\_ 5. 012909 5. 24157 5. 122361 4. 917167 4. 998409 5. 075473  
11730786\_ 8. 111079 8. 003759 8. 12992 7. 652399 7. 649342 7. 589359  
11730787\_ 7. 391987 7. 361298 7. 315295 6. 979021 7. 104983 7. 012473  
11730788\_ 9. 777016 9. 680196 9. 765784 9. 94861 9. 955681 9. 977018  
11730789\_ 4. 439553 4. 421754 4. 590425 4. 590425 4. 413318 4. 497221  
11730790\_ 12. 37243 12. 39968 12. 38732 12. 73351 12. 72307 12. 70476  
11730791\_ 8. 480883 8. 559901 8. 493328 8. 686401 8. 614718 8. 662901  
11730792\_ 6. 862616 6. 868249 6. 902296 6. 915735 6. 819607 6. 7527  
11730793\_ 3. 473971 3. 686148 3. 795843 3. 766119 3. 733993 3. 608089  
11730794\_ 8. 487718 8. 46931 8. 543938 8. 772706 8. 798718 8. 824715  
11730795\_ 7. 177677 7. 155487 7. 277275 7. 247668 7. 322264 7. 317226  
11730796\_ 8. 772657 8. 763749 8. 862293 8. 92455 8. 838693 8. 869321  
11730797\_ 7. 048267 6. 906447 7. 018595 7. 164857 7. 124396 7. 10601  
11730798\_ 8. 25074 8. 212675 8. 243157 8. 291182 8. 22652 8. 253034  
11730799\_ 7. 123902 7. 213399 7. 221197 7. 194121 7. 201475 7. 238339  
11730800\_ 5. 484185 5. 591863 5. 519962 5. 611958 5. 605387 5. 655463  
11730801\_ 2. 861011 2. 662757 2. 694602 2. 756041 2. 645801 2. 718322  
11730802\_ 6. 371723 6. 401115 6. 388608 6. 430507 6. 401115 6. 497107  
11730803\_ 7. 798351 7. 752375 7. 748296 7. 638614 7. 550212 7. 63265  
11730804\_ 8. 52876 8. 509527 8. 52876 8. 189305 8. 075567 8. 08832  
11730805\_ 6. 700182 6. 657948 6. 744579 6. 57203 6. 662197 6. 589889  
11730806\_ 7. 154768 7. 134375 7. 115197 7. 164712 7. 195532 7. 24788

11730807\_ 7. 063241 6. 953315 6. 886419 7. 09569 7. 070674 6. 976246  
11730808\_ 7. 416554 7. 334512 7. 411728 7. 613325 7. 559658 7. 609945  
11730809\_ 3. 536029 3. 637769 3. 44734 3. 722943 3. 64078 3. 560146  
11730810\_ 2. 659736 2. 722453 2. 740031 2. 718322 2. 804345 2. 597698  
11730811\_ 2. 51908 2. 7183 2. 892201 2. 51294 2. 685812 2. 651373  
11730812\_ 2. 455627 2. 42749 2. 604791 2. 686912 2. 568581 2. 586444  
11730813\_ 3. 078691 3. 003423 2. 985217 2. 969167 3. 068193 2. 948142  
11730814\_ 5. 47846 5. 431861 5. 47846 5. 321109 5. 570471 5. 508537  
11730815\_ 4. 738676 4. 52373 4. 566911 4. 685634 4. 984669 4. 779269  
11730816\_ 9. 618171 9. 576061 9. 598004 9. 625196 9. 547658 9. 588695  
11730817\_ 7. 826927 7. 804686 7. 778609 7. 81722 7. 811276 7. 835194  
11730818\_ 7. 483867 7. 400837 7. 521859 7. 163719 7. 246591 7. 168944  
11730819\_ 11. 1559 11. 10721 11. 14108 11. 14309 11. 1719 11. 15162  
11730820\_ 4. 823288 4. 677394 4. 857325 4. 823288 4. 666249 5. 073036  
11730821\_ 8. 220322 8. 201435 8. 302185 9. 018229 9. 036059 9. 00289  
11730822\_ 4. 02733 4. 303731 3. 943365 4. 061511 4. 027952 4. 100403  
11730823\_ 5. 420162 5. 523187 5. 565016 5. 831902 5. 888163 5. 838664  
11730824\_ 7. 703645 7. 567904 7. 717322 7. 487119 7. 474342 7. 539464  
11730825\_ 5. 628214 5. 372535 5. 331594 5. 198383 5. 250047 5. 234068  
11730826\_ 6. 144225 6. 24962 6. 075801 6. 03949 5. 996443 6. 057677  
11730827\_ 7. 164857 7. 174876 7. 175303 6. 947698 6. 973262 6. 917006  
11730828\_ 8. 538475 8. 547114 8. 527127 8. 313616 8. 36412 8. 351232  
11730829\_ 6. 653954 6. 673679 6. 724944 6. 812406 6. 820138 6. 843618  
11730830\_ 6. 860896 6. 849603 6. 841632 6. 986734 6. 943114 7. 020681  
11730831\_ 5. 45226 5. 524717 5. 536376 6. 17363 6. 059993 6. 110684  
11730832\_ 7. 473633 7. 427971 7. 525225 7. 332527 7. 418945 7. 433103  
11730833\_ 4. 724927 5. 033218 5. 003595 4. 9594 4. 95998 4. 855454  
11730834\_ 6. 831831 6. 614345 6. 725582 6. 621979 6. 599297 6. 555105  
11730835\_ 9. 086863 9. 006676 9. 081357 8. 858484 8. 929737 8. 901544  
11730836\_ 9. 340982 9. 231209 9. 314124 9. 52688 9. 559206 9. 579074  
11730837\_ 8. 088447 8. 049164 8. 087674 7. 669333 7. 602787 7. 533016  
11730838\_ 6. 138754 6. 003427 6. 025015 6. 173161 6. 119607 5. 953453  
11730839\_ 6. 89919 6. 833659 6. 926688 6. 897837 6. 805681 6. 923913  
11730840\_ 8. 329361 8. 282444 8. 394526 8. 874261 8. 935231 8. 832583  
11730841\_ 9. 483877 9. 392614 9. 515033 9. 912452 9. 956369 9. 901362  
11730842\_ 6. 961366 6. 886134 6. 926725 6. 937205 6. 967649 6. 995455  
11730843\_ 6. 065441 6. 118557 6. 005602 6. 289368 6. 229769 6. 262437  
11730844\_ 6. 094413 6. 12252 6. 153709 5. 984945 6. 106416 6. 002695  
11730845\_ 4. 129804 3. 757587 3. 972791 3. 524186 3. 630671 3. 541306  
11730846\_ 6. 028013 6. 040239 6. 133896 5. 751754 5. 791235 5. 810583  
11730847\_ 2. 383957 2. 317721 2. 361778 2. 47196 2. 471454 2. 494072  
11730848\_ 8. 387907 8. 26511 8. 3204 7. 638441 7. 65608 7. 732194  
11730849\_ 6. 340998 6. 245843 6. 304982 6. 002216 5. 854669 5. 983868  
11730850\_ 4. 368324 4. 532531 4. 518442 4. 514152 4. 418042 4. 637655  
11730851\_ 7. 401234 7. 478944 7. 312093 7. 50203 7. 544931 7. 513731  
11730852\_ 5. 073952 5. 171458 5. 047698 5. 519424 5. 460003 5. 544288  
11730853\_ 8. 768719 8. 719297 8. 675174 8. 886084 8. 812607 8. 791362  
11730854\_ 7. 009274 7. 045345 6. 988833 7. 249461 7. 205082 7. 209782  
11730855\_ 7. 172441 7. 132974 7. 356799 7. 255065 7. 349877 7. 199568  
11730856\_ 9. 508815 9. 431487 9. 474 9. 64141 9. 592156 9. 644571  
11730857\_ 6. 7637 6. 702243 6. 751376 6. 69817 6. 778492 6. 817986

11730858\_ 7. 087303 7. 093174 7. 131811 6. 990991 6. 936066 6. 947483  
11730859\_ 3. 925181 4. 008775 4. 13722 4. 181009 4. 054288 4. 101653  
11730860\_ 6. 614897 6. 748617 6. 504317 6. 539838 6. 671312 6. 610057  
11730861\_ 6. 189965 6. 296664 6. 154453 6. 213794 6. 182384 6. 230207  
11730862\_ 6. 377633 6. 244528 6. 276622 6. 309542 6. 084399 6. 251291  
11730863\_ 7. 429159 7. 24311 7. 342754 6. 695144 6. 693007 6. 83559  
11730864\_ 8. 749294 8. 716616 8. 821758 8. 298016 8. 365572 8. 314372  
11730865\_ 7. 845259 7. 850592 7. 848928 7. 380096 7. 404479 7. 394769  
11730866\_ 5. 617124 5. 486365 5. 363204 5. 429387 5. 388916 5. 614578  
11730867\_ 3. 398236 3. 500747 3. 377854 3. 638913 3. 626695 3. 557826  
11730868\_ 9. 009962 8. 897653 8. 957562 9. 275725 9. 298117 9. 30414  
11730869\_ 5. 324344 5. 400104 5. 192028 5. 401005 5. 361528 5. 405794  
11730870\_ 7. 157433 7. 096809 7. 145443 7. 116809 7. 167476 7. 174532  
11730871\_ 4. 765478 4. 715297 4. 612156 4. 979797 4. 99708 4. 889168  
11730872\_ 5. 60166 5. 500143 5. 623202 5. 778219 5. 697986 5. 765513  
11730873\_ 7. 069338 7. 148905 6. 94676 7. 31616 7. 3666 7. 349497  
11730874\_ 4. 677195 4. 675229 4. 66056 4. 858099 4. 748398 4. 728918  
11730875\_ 6. 924142 6. 770337 6. 998135 8. 172358 8. 282051 8. 201017  
11730876\_ 7. 217336 7. 225355 7. 202891 8. 027878 8. 038014 8. 103745  
11730877\_ 6. 724517 6. 780676 6. 79541 7. 058916 7. 076912 7. 067839  
11730878\_ 2. 181091 2. 248864 2. 108666 2. 317552 2. 130121 2. 181091  
11730879\_ 4. 590817 4. 436834 4. 27565 4. 459939 4. 492904 4. 470714  
11730880\_ 2. 697272 2. 689114 2. 693149 2. 668888 2. 522635 2. 825879  
11730881\_ 4. 165356 4. 279276 4. 277048 4. 353057 4. 270081 4. 278162  
11730882\_ 3. 142731 3. 405134 2. 951837 3. 401764 3. 197874 3. 14711  
11730883\_ 1. 898324 1. 768478 1. 995297 1. 806569 1. 804393 1. 883967  
11730884\_ 7. 467942 7. 467565 7. 540762 7. 509076 7. 514411 7. 522341  
11730885\_ 7. 167538 7. 188872 7. 138607 7. 004021 7. 041691 6. 97758  
11730886\_ 5. 643713 5. 618783 5. 621661 5. 235937 5. 257508 5. 231334  
11730887\_ 4. 960317 5. 132757 5. 021066 5. 11527 5. 071909 5. 141037  
11730888\_ 7. 314564 7. 344306 7. 1118 7. 504656 7. 494895 7. 387982  
11730889\_ 7. 679075 7. 636589 7. 764207 7. 733724 7. 766399 7. 78417  
11730890\_ 8. 292071 8. 202916 8. 300711 8. 421635 8. 376489 8. 536927  
11730891\_ 6. 52821 6. 461931 6. 495715 6. 673283 6. 744561 6. 777927  
11730892\_ 4. 742556 4. 85709 4. 807818 5. 023421 4. 886282 4. 811394  
11730893\_ 8. 791425 8. 686076 8. 736993 8. 464145 8. 431022 8. 489252  
11730894\_ 8. 71676 8. 619588 8. 662488 8. 62234 8. 539806 8. 621941  
11730895\_ 4. 467509 4. 515707 4. 592956 4. 871875 4. 752389 5. 051095  
11730896\_ 5. 246762 5. 448296 5. 356733 6. 441384 6. 629015 6. 631544  
11730897\_ 9. 514829 9. 448794 9. 458077 8. 990563 8. 964808 8. 986897  
11730898\_ 8. 633178 8. 503143 8. 569094 8. 382071 8. 456002 8. 377189  
11730899\_ 8. 709633 8. 74434 8. 713196 9. 024544 8. 951802 8. 954778  
11730900\_ 8. 269387 8. 208049 8. 193733 8. 298042 8. 27449 8. 307113  
11730901\_ 5. 506408 5. 612651 5. 507144 6. 027313 6. 065278 6. 033313  
11730902\_ 4. 332359 4. 322977 4. 214281 4. 312194 4. 594731 4. 408209  
11730903\_ 6. 110603 6. 042674 6. 213846 6. 377467 6. 351127 6. 403232  
11730904\_ 4. 250391 4. 459939 4. 28827 4. 359535 4. 475087 4. 397584  
11730905\_ 8. 525439 8. 471206 8. 514685 8. 483709 8. 469245 8. 504827  
11730906\_ 6. 082389 6. 006758 6. 088747 6. 428195 6. 437306 6. 508692  
11730907\_ 5. 510803 5. 543727 5. 467563 5. 613603 5. 567608 5. 48968  
11730908\_ 4. 85633 4. 776376 4. 784891 4. 953968 4. 748655 4. 960154

11730909\_ 3. 503743 3. 504303 3. 622151 3. 690658 3. 828548 3. 590045  
11730910\_ 4. 299056 4. 299056 4. 342852 4. 020253 4. 395818 4. 411862  
11730911\_ 4. 571111 4. 539257 4. 371343 4. 852891 4. 542598 4. 630675  
11730912\_ 11. 7012 11. 68635 11. 72024 11. 66652 11. 69329 11. 68233  
11730913\_ 8. 181196 8. 142509 8. 109895 8. 215842 8. 193759 8. 125773  
11730914\_ 9. 324938 9. 323694 9. 437773 9. 065332 9. 112972 9. 112447  
11730915\_ 8. 218239 8. 169861 8. 272172 8. 005597 7. 979159 7. 893058  
11730916\_ 7. 815973 7. 792523 7. 816952 7. 721065 7. 719605 7. 769088  
11730917\_ 7. 042863 6. 851359 6. 915001 7. 124291 7. 062422 7. 071493  
11730918\_ 5. 717045 5. 717273 5. 755981 5. 776511 5. 837086 5. 98973  
11730919\_ 4. 453633 4. 348504 4. 337257 4. 297346 4. 528947 4. 428654  
11730920\_ 4. 643717 4. 60477 4. 61219 4. 521229 4. 576069 4. 480972  
11730921\_ 6. 286563 6. 310776 6. 097345 6. 340062 6. 375323 6. 508734  
11730922\_ 5. 55416 5. 616437 5. 557314 5. 68822 5. 752782 5. 632172  
11730923\_ 7. 922062 7. 783438 7. 893664 8. 371304 8. 383983 8. 398091  
11730924\_ 3. 103014 3. 08914 2. 781921 3. 08914 3. 08914 3. 197082  
11730925\_ 2. 456745 2. 518467 2. 395875 2. 563856 2. 239086 2. 632461  
11730926\_ 3. 397033 3. 466631 3. 911712 3. 6713 3. 573383 3. 403418  
11730927\_ 3. 300262 3. 498346 3. 425474 3. 246238 3. 525113 3. 294354  
11730928\_ 6. 380832 6. 377847 6. 451396 6. 752593 6. 852661 6. 894589  
11730929\_ 6. 061409 6. 022249 6. 082264 6. 258273 6. 271489 6. 365132  
11730930\_ 6. 768617 6. 705521 6. 771305 6. 748801 6. 856019 6. 910084  
11730931\_ 4. 986069 5. 03812 5. 104216 4. 613865 4. 68552 4. 779554  
11730932\_ 6. 794979 6. 714177 6. 732529 6. 345003 6. 282224 6. 409286  
11730933\_ 7. 614037 7. 606895 7. 576132 7. 948338 7. 937744 7. 943548  
11730934\_ 5. 142856 5. 009049 4. 952879 4. 988447 5. 118637 5. 114603  
11730935\_ 3. 507487 3. 350698 3. 163331 3. 775105 3. 879309 3. 843153  
11730936\_ 5. 704183 5. 521785 5. 584694 6. 010931 6. 051366 5. 944266  
11730937\_ 6. 899772 6. 852504 6. 768811 7. 12179 7. 182285 7. 257094  
11730938\_ 7. 773081 7. 721139 7. 75571 8. 040642 8. 052886 8. 154919  
11730939\_ 4. 200678 4. 233916 4. 267691 4. 248541 4. 319804 4. 395167  
11730940\_ 7. 211408 7. 198281 7. 218392 6. 961748 7. 003712 7. 020462  
11730941\_ 3. 881327 4. 272145 3. 980211 4. 504004 4. 424155 4. 352419  
11730942\_ 4. 513241 4. 475849 4. 411777 4. 684618 4. 697036 4. 747693  
11730943\_ 4. 974214 5. 125912 5. 027696 5. 054674 5. 240181 5. 107722  
11730944\_ 4. 156143 4. 118034 4. 156143 4. 153447 4. 145546 4. 436755  
11730945\_ 6. 314364 6. 382634 6. 358559 6. 430273 6. 376417 6. 536273  
11730946\_ 5. 032831 5. 021594 5. 077026 5. 297498 5. 091684 5. 317961  
11730947\_ 4. 025682 4. 018477 3. 739565 3. 94907 4. 020178 3. 883347  
11730948\_ 6. 27474 6. 084356 6. 102393 5. 7474 5. 843687 5. 78202  
11730949\_ 8. 793764 8. 780988 8. 773514 8. 656884 8. 700727 8. 671702  
11730950\_ 5. 342183 5. 320425 5. 16567 5. 504655 5. 365873 5. 382449  
11730951\_ 5. 420027 5. 314482 5. 297108 5. 44886 5. 35248 5. 404785  
11730952\_ 6. 579752 6. 436491 6. 55732 6. 698537 6. 831775 6. 878301  
11730953\_ 5. 799577 5. 88564 5. 905332 5. 912359 6. 032553 5. 872225  
11730954\_ 5. 275305 5. 368345 5. 211592 5. 262236 5. 293256 5. 347957  
11730955\_ 4. 929382 5. 174134 4. 907758 5. 233148 5. 240788 5. 086239  
11730956\_ 4. 417714 4. 459939 4. 203568 4. 370407 4. 275543 4. 532257  
11730957\_ 7. 479604 7. 540053 7. 392317 7. 550367 7. 482432 7. 479604  
11730958\_ 7. 502857 7. 513867 7. 428674 7. 723187 7. 755852 7. 671184  
11730959\_ 6. 295423 6. 189403 6. 334204 6. 00268 6. 152268 6. 050211

11730960\_ 6. 153991 6. 116853 6. 172203 5. 828007 5. 845577 5. 917357  
11730961\_ 7. 309045 7. 174783 7. 304856 5. 654996 5. 74137 5. 918176  
11730962\_ 8. 291108 8. 175816 8. 257634 8. 293919 8. 258251 8. 268217  
11730963\_ 4. 9226 4. 815683 4. 900952 4. 753684 4. 980111 4. 626674  
11730964\_ 8. 306352 8. 163394 8. 254999 8. 415717 8. 433533 8. 364013  
11730965\_ 4. 54131 4. 558932 4. 555441 4. 52373 4. 584933 4. 637318  
11730966\_ 5. 546518 5. 541837 5. 443949 5. 640973 5. 541297 5. 475572  
11730967\_ 3. 88029 4. 054565 3. 717597 4. 087293 4. 181088 4. 100519  
11730968\_ 6. 682191 6. 532312 6. 64353 6. 817062 6. 85204 6. 887714  
11730969\_ 4. 443372 4. 709463 4. 703323 3. 756925 3. 868392 3. 738009  
11730970\_ 6. 571635 6. 464805 6. 687762 5. 185999 5. 554436 5. 59117  
11730971\_ 6. 658709 6. 589625 6. 567748 6. 690434 6. 788016 6. 825691  
11730972\_ 7. 316555 7. 184826 7. 239291 7. 427208 7. 336932 7. 388239  
11730973\_ 4. 747126 4. 753963 4. 612906 4. 750933 4. 79461 4. 892226  
11730974\_ 6. 145341 6. 377847 6. 277791 6. 260264 6. 218664 6. 378381  
11730975\_ 7. 589523 7. 636538 7. 61734 7. 615013 7. 638982 7. 676211  
11730976\_ 3. 34327 3. 239697 3. 238308 3. 219994 3. 21279 3. 140069  
11730977\_ 4. 853603 5. 033164 4. 984669 4. 928787 4. 984669 5. 023463  
11730978\_ 4. 023109 4. 417849 4. 093377 4. 074629 4. 093377 4. 061664  
11730979\_ 2. 887718 2. 852123 2. 852123 2. 500526 2. 893932 2. 90976  
11730980\_ 2. 154121 2. 250353 2. 066903 2. 050784 1. 968569 2. 17632  
11730981\_ 6. 183952 6. 137425 6. 298848 6. 290023 6. 290871 6. 194811  
11730982\_ 7. 500967 7. 354573 7. 470321 7. 063278 7. 139138 7. 134016  
11730983\_ 5. 827187 5. 695568 5. 655499 5. 604105 5. 647058 5. 607495  
11730984\_ 5. 605624 5. 727728 5. 638507 5. 629132 5. 583191 5. 513521  
11730985\_ 2. 664493 2. 619861 2. 860274 2. 804434 2. 734652 2. 789787  
11730986\_ 4. 697246 4. 697042 4. 684679 4. 69919 4. 749861 4. 619938  
11730987\_ 2. 028205 2. 160352 2. 004739 2. 097244 2. 074889 2. 283012  
11730988\_ 5. 209259 5. 228627 5. 081525 5. 379407 5. 475531 5. 167433  
11730989\_ 5. 999888 5. 873083 6. 241816 5. 448296 5. 433996 5. 46679  
11730990\_ 6. 118838 6. 104145 6. 069567 5. 7691 5. 711645 5. 640602  
11730991\_ 8. 155361 8. 085901 8. 15332 7. 895579 7. 926963 7. 890204  
11730992\_ 8. 696355 8. 710295 8. 758539 8. 511585 8. 479713 8. 484901  
11730993\_ 9. 10683 9. 012694 9. 050476 9. 262781 9. 170407 9. 211915  
11730994\_ 4. 460744 4. 588702 4. 47009 4. 394661 4. 245629 4. 449066  
11730995\_ 4. 080774 4. 16011 4. 065758 4. 21527 4. 127086 4. 133832  
11730996\_ 4. 636808 4. 93424 4. 667236 4. 903372 4. 851774 4. 920434  
11730997\_ 4. 237908 4. 213267 4. 278459 4. 360537 4. 255859 4. 26474  
11730998\_ 8. 439607 8. 441956 8. 443231 7. 643362 7. 688749 7. 677269  
11730999\_ 7. 743679 7. 670092 7. 792212 6. 81846 6. 768872 6. 827108  
11731000\_ 5. 315934 5. 33924 5. 310507 5. 161629 5. 063435 5. 295045  
11731001\_ 7. 122723 7. 135544 7. 267428 7. 003212 7. 071313 7. 149619  
11731002\_ 4. 108592 4. 163423 4. 08642 4. 062657 4. 192076 4. 112736  
11731003\_ 7. 881292 7. 830377 7. 873551 8. 130049 8. 207245 8. 104136  
11731004\_ 6. 597277 6. 701073 6. 693704 7. 135486 6. 891447 6. 972365  
11731005\_ 6. 991053 6. 83854 7. 024581 7. 813221 7. 690365 7. 741433  
11731006\_ 5. 805754 5. 966664 5. 922714 7. 138069 6. 904035 6. 69088  
11731007\_ 7. 632959 7. 440593 7. 533021 8. 138465 8. 152503 8. 043456  
11731008\_ 6. 635936 6. 528163 6. 683362 6. 182229 6. 226077 6. 250815  
11731009\_ 6. 949166 7. 062339 6. 913834 6. 978496 6. 944852 7. 099837  
11731010\_ 5. 968546 6. 143791 6. 053634 6. 058021 5. 981748 6. 180957

11731011\_ 3. 26679 3. 566107 3. 402887 3. 693694 3. 366582 3. 550607  
11731012\_ 3. 662954 3. 892986 3. 903366 3. 829114 3. 301305 3. 729392  
11731013\_ 4. 080571 3. 97316 3. 782974 3. 97316 4. 082401 3. 878689  
11731014\_ 5. 0749 4. 899466 4. 93184 4. 735814 4. 785085 4. 87914  
11731015\_ 3. 966419 3. 955285 3. 738064 3. 971203 3. 843296 3. 841048  
11731016\_ 5. 049101 4. 850083 4. 944415 4. 900633 4. 975388 5. 036737  
11731017\_ 5. 605697 5. 731978 5. 693797 5. 827065 5. 768053 5. 798613  
11731018\_ 4. 295159 4. 905033 4. 499183 4. 499183 4. 556321 4. 601752  
11731019\_ 4. 156174 4. 276762 4. 121444 4. 326205 4. 466133 4. 361185  
11731020\_ 4. 484808 4. 36823 4. 349109 4. 389356 4. 184106 4. 328149  
11731021\_ 5. 700018 5. 759971 5. 677046 5. 74686 5. 784126 5. 755052  
11731022\_ 6. 199131 6. 179291 6. 18014 6. 034374 5. 944631 6. 044447  
11731023\_ 8. 229062 8. 154936 8. 315186 7. 977833 7. 919499 7. 991827  
11731024\_ 8. 925663 8. 879216 8. 936013 8. 652978 8. 655493 8. 644731  
11731025\_ 4. 128308 4. 32996 3. 939983 4. 240261 4. 269589 4. 183004  
11731026\_ 4. 610236 4. 434323 4. 276762 4. 309254 4. 192481 4. 210781  
11731027\_ 8. 185709 8. 127507 8. 16042 7. 997254 8. 014735 8. 037299  
11731028\_ 4. 74439 5. 298046 4. 839429 5. 102479 5. 018283 4. 972363  
11731029\_ 5. 325431 5. 414869 5. 053653 5. 345986 5. 303536 5. 303012  
11731030\_ 5. 36906 5. 452432 5. 414227 5. 333361 5. 526801 5. 558337  
11731031\_ 7. 788708 7. 751961 7. 729658 7. 333219 7. 324886 7. 330169  
11731032\_ 8. 044367 8. 031269 8. 0771 8. 067856 8. 12994 8. 098973  
11731033\_ 5. 825994 5. 952153 5. 911152 5. 875471 5. 902462 5. 919114  
11731034\_ 6. 588431 6. 531677 6. 593069 6. 318772 6. 364517 6. 350817  
11731035\_ 2. 714307 2. 758204 2. 617316 2. 724118 2. 591543 2. 758204  
11731036\_ 6. 217799 6. 321214 6. 225706 6. 118838 6. 279867 6. 262635  
11731037\_ 6. 196398 6. 419838 6. 258844 6. 383755 6. 489409 6. 541531  
11731038\_ 5. 962436 6. 072863 5. 95829 6. 04777 6. 100217 6. 035839  
11731039\_ 6. 371092 6. 242117 6. 229093 6. 213547 6. 23993 6. 196257  
11731040\_ 3. 652175 3. 735453 3. 624801 3. 632153 3. 721154 3. 796418  
11731041\_ 7. 244794 7. 360079 7. 12274 7. 294514 7. 305572 7. 279381  
11731042\_ 5. 134862 5. 375915 5. 064052 5. 430902 5. 284156 5. 36308  
11731043\_ 6. 878123 6. 847659 6. 958012 6. 481046 6. 363907 6. 442053  
11731044\_ 5. 97065 5. 944098 6. 087944 5. 683151 5. 760562 5. 613515  
11731045\_ 7. 661111 7. 629243 7. 599563 7. 38774 7. 417034 7. 503786  
11731046\_ 3. 606538 3. 744766 3. 667562 3. 761362 3. 725465 3. 706164  
11731047\_ 3. 986154 4. 046884 4. 133342 4. 060474 4. 046884 4. 047084  
11731048\_ 4. 601868 4. 70905 4. 698841 4. 825331 4. 733178 4. 88051  
11731049\_ 5. 156303 4. 957981 5. 19513 5. 11527 5. 26034 5. 31269  
11731050\_ 6. 174268 6. 283117 6. 152006 6. 361853 6. 269177 6. 326118  
11731051\_ 3. 610389 3. 513427 3. 666662 3. 638525 3. 614676 3. 697309  
11731052\_ 5. 816502 5. 75207 5. 775141 5. 462225 5. 560963 5. 518157  
11731053\_ 5. 737935 5. 557246 5. 612387 4. 792265 4. 780313 4. 820175  
11731054\_ 7. 213829 7. 218076 7. 303477 6. 689842 6. 668479 6. 80171  
11731055\_ 7. 443896 7. 461293 7. 500757 7. 171732 6. 917863 7. 049534  
11731056\_ 5. 767215 5. 754151 5. 8555 5. 652283 5. 58016 5. 795539  
11731057\_ 6. 021466 6. 001216 5. 841049 5. 932654 6. 0083 6. 025648  
11731058\_ 4. 936961 5. 039889 4. 908311 5. 007795 5. 042264 4. 983859  
11731059\_ 6. 720731 6. 799484 6. 752641 6. 798061 6. 759934 6. 673623  
11731060\_ 7. 400837 7. 191624 7. 337509 7. 351144 7. 355271 7. 254172  
11731061\_ 6. 317235 6. 352443 6. 116975 6. 481046 6. 257856 6. 353834



11731062\_ 4. 636555 4. 584933 4. 672247 4. 902704 4. 984669 5. 021714  
11731063\_ 5. 166078 5. 151753 4. 948129 5. 261007 5. 350976 5. 527423  
11731064\_ 7. 123139 7. 128264 7. 161598 7. 177556 7. 09842 7. 174876  
11731065\_ 4. 616074 4. 623658 4. 531161 4. 610982 4. 618105 4. 772754  
11731066\_ 3. 373873 3. 258055 3. 339329 3. 281209 3. 339329 3. 390349  
11731067\_ 4. 724374 4. 763543 4. 870172 4. 681867 4. 775455 4. 763543  
11731068\_ 7. 942236 7. 872736 7. 930537 8. 331462 8. 282293 8. 342552  
11731069\_ 8. 591416 8. 58652 8. 603011 8. 407902 8. 460602 8. 392975  
11731070\_ 8. 597026 8. 55293 8. 602905 8. 415106 8. 454828 8. 39404  
11731071\_ 5. 556926 5. 697701 5. 606238 5. 628695 5. 554436 5. 712198  
11731072\_ 6. 812801 6. 792189 6. 876406 6. 743147 6. 764189 6. 730459  
11731073\_ 6. 872624 7. 031692 6. 87491 6. 800934 6. 819645 6. 730224  
11731074\_ 8. 080513 8. 025317 8. 092721 7. 577309 7. 572744 7. 569888  
11731075\_ 6. 054806 5. 989441 5. 86872 5. 918892 6. 089034 6. 040183  
11731076\_ 6. 994843 6. 881591 7. 015406 6. 151865 6. 134696 6. 259147  
11731077\_ 7. 239949 7. 121277 7. 189921 6. 507716 6. 431763 6. 446655  
11731078\_ 6. 550848 6. 582127 6. 5509 6. 470379 6. 462999 6. 459599  
11731079\_ 2. 825611 2. 931642 2. 825611 2. 934428 2. 966261 3. 051386  
11731080\_ 4. 171029 4. 281022 4. 239586 4. 29788 4. 242665 4. 101841  
11731081\_ 3. 393129 3. 589444 3. 542192 3. 721251 3. 719844 3. 641251  
11731082\_ 5. 065481 4. 812084 5. 033128 4. 140402 4. 389724 4. 066043  
11731083\_ 4. 816972 4. 929822 4. 837778 4. 784113 4. 792893 4. 766677  
11731084\_ 5. 108507 5. 180745 5. 156525 5. 138712 5. 037247 5. 222728  
11731085\_ 5. 090202 5. 125523 5. 022409 5. 114073 5. 099573 5. 337511  
11731086\_ 2. 476129 2. 361778 3. 082409 2. 301939 2. 289956 2. 18238  
11731087\_ 7. 363175 7. 335658 7. 372489 7. 709395 7. 742264 7. 705373  
11731088\_ 6. 602094 6. 728946 6. 549235 6. 75231 6. 760918 6. 734457  
11731089\_ 9. 165957 9. 058111 9. 118638 9. 387842 9. 506699 9. 489676  
11731090\_ 6. 392275 6. 093937 6. 278743 6. 208206 6. 150754 6. 152925  
11731091\_ 6. 545317 6. 537224 6. 44027 6. 366235 6. 423724 6. 336494  
11731092\_ 6. 533169 6. 458613 6. 359636 6. 120637 6. 290194 6. 322214  
11731093\_ 6. 2079 6. 229626 6. 195708 6. 01992 6. 065982 5. 992354  
11731094\_ 6. 200234 6. 188181 6. 456211 6. 13295 6. 071851 5. 981842  
11731095\_ 6. 693475 6. 773273 6. 67941 7. 013924 6. 968945 6. 962343  
11731096\_ 4. 522386 4. 676871 4. 53597 4. 635192 4. 837678 4. 721026  
11731097\_ 5. 485604 5. 501992 5. 460291 5. 594723 5. 534936 5. 502342  
11731098\_ 3. 698726 3. 851226 3. 73017 3. 961352 3. 984514 4. 0694  
11731099\_ 8. 483534 8. 398948 8. 472844 8. 656994 8. 646007 8. 656994  
11731100\_ 5. 837318 5. 81451 5. 738913 6. 212216 6. 170555 6. 110919  
11731101\_ 6. 859991 6. 922309 6. 847517 7. 289347 7. 332514 7. 314151  
11731102\_ 5. 091319 4. 971183 4. 712925 5. 151716 5. 098933 5. 102063  
11731103\_ 6. 467524 6. 437568 6. 422024 6. 489392 6. 393782 6. 361059  
11731104\_ 4. 360107 4. 397679 4. 291539 4. 409439 4. 354033 4. 445637  
11731105\_ 5. 313279 5. 150156 5. 185234 5. 311838 5. 394633 5. 225406  
11731106\_ 4. 85072 4. 876888 4. 733457 4. 865052 4. 859526 4. 868892  
11731107\_ 8. 049182 8. 0184 8. 020488 8. 129874 8. 147413 8. 097577  
11731108\_ 9. 013417 9. 023743 8. 985797 9. 176246 9. 171312 9. 179467  
11731109\_ 7. 957806 7. 87095 7. 947821 7. 503083 7. 463054 7. 492966  
11731110\_ 9. 085099 8. 978146 9. 095718 8. 530171 8. 492137 8. 422712  
11731111\_ 1. 995297 2. 177784 2. 012366 2. 09061 1. 89589 1. 925148  
11731112\_ 5. 352441 5. 303309 5. 200266 5. 506073 5. 330072 5. 308199

11731113\_ 8. 224181 8. 202566 8. 258326 8. 737208 8. 848362 8. 756724  
11731114\_ 3. 207276 3. 098517 3. 030502 3. 279755 3. 246867 3. 207276  
11731115\_ 4. 931722 5. 278376 4. 975547 5. 158426 5. 26587 5. 294835  
11731116\_ 3. 53329 3. 302243 3. 744758 3. 869121 3. 905215 4. 021553  
11731117\_ 6. 617088 6. 556809 6. 541665 6. 567247 6. 701504 6. 721575  
11731118\_ 6. 181782 5. 901637 6. 044285 6. 318829 6. 414953 6. 462114  
11731119\_ 8. 351449 8. 253933 8. 267544 8. 345668 8. 357672 8. 366638  
11731120\_ 3. 683251 3. 762576 3. 458001 3. 717043 3. 330112 3. 705625  
11731121\_ 3. 623988 3. 450503 3. 809365 4. 673309 4. 536282 4. 429597  
11731122\_ 3. 945178 3. 668418 3. 910323 4. 403082 4. 308249 4. 469542  
11731123\_ 5. 232479 4. 993669 5. 042732 4. 68851 4. 378835 4. 386449  
11731124\_ 4. 818227 4. 867956 4. 756285 4. 675442 5. 015895 4. 998302  
11731125\_ 5. 261622 5. 242738 5. 200394 5. 23192 5. 265515 5. 242212  
11731126\_ 7. 878997 7. 774754 7. 906876 7. 897209 7. 891383 7. 928736  
11731127\_ 3. 375736 3. 398236 3. 740892 3. 30485 3. 399808 3. 388174  
11731128\_ 5. 624339 5. 727065 5. 845365 5. 748291 5. 778648 5. 849541  
11731129\_ 8. 393727 8. 38988 8. 413593 8. 452358 8. 428608 8. 454622  
11731130\_ 5. 453956 5. 601455 5. 603926 5. 349893 5. 550895 5. 402159  
11731131\_ 4. 142988 4. 177609 4. 261071 4. 486793 4. 559476 4. 406834  
11731132\_ 6. 648515 6. 67955 6. 600584 6. 885101 6. 930827 6. 79843  
11731133\_ 6. 304011 6. 307217 6. 272713 6. 329977 6. 245459 6. 329656  
11731134\_ 6. 117258 6. 124623 6. 251921 5. 977705 6. 159771 6. 158453  
11731135\_ 4. 517578 4. 526948 4. 735953 4. 315243 4. 390804 4. 404541  
11731136\_ 4. 584576 4. 676338 4. 624678 4. 385985 4. 200678 4. 292376  
11731137\_ 4. 9226 5. 149545 5. 150766 3. 850246 3. 543056 4. 054288  
11731138\_ 5. 168663 5. 168663 5. 12998 5. 10703 5. 075939 5. 085087  
11731139\_ 8. 269362 8. 186401 8. 215495 7. 990846 7. 926592 8. 0188  
11731140\_ 5. 547632 5. 727446 5. 595869 5. 440044 5. 582544 5. 412619  
11731141\_ 3. 551902 3. 361485 3. 270185 3. 339588 3. 487487 3. 449848  
11731142\_ 2. 070082 2. 355846 1. 995297 2. 079884 2. 234761 2. 039284  
11731143\_ 4. 14105 4. 303137 4. 284016 4. 125678 4. 122542 4. 030139  
11731144\_ 5. 346952 5. 350991 5. 224922 5. 441128 5. 344288 5. 480472  
11731145\_ 7. 408588 7. 246565 7. 289717 6. 485602 6. 631711 6. 503788  
11731146\_ 6. 646093 6. 478365 6. 605349 6. 071769 6. 183841 5. 911707  
11731147\_ 3. 971084 4. 262973 4. 005025 4. 347179 4. 127014 3. 989203  
11731148\_ 2. 718322 2. 272952 2. 51669 2. 450855 2. 405621 2. 476082  
11731149\_ 7. 708475 7. 590649 7. 680745 7. 326385 7. 361872 7. 349057  
11731150\_ 6. 102168 6. 125601 5. 982073 6. 073909 5. 936569 6. 000324  
11731151\_ 8. 160302 8. 091247 8. 140416 7. 770673 7. 869704 7. 787017  
11731152\_ 8. 981077 8. 911377 8. 973272 8. 754261 8. 583934 8. 779209  
11731153\_ 6. 347306 6. 303682 6. 330396 6. 136503 6. 046578 5. 940893  
11731154\_ 7. 580203 7. 500959 7. 551871 7. 286176 7. 259596 7. 179556  
11731155\_ 4. 201511 4. 335691 4. 283941 4. 430367 4. 531615 4. 440798  
11731156\_ 3. 957911 4. 190075 3. 900378 4. 167239 4. 151085 4. 146104  
11731157\_ 6. 232592 6. 172425 6. 15752 5. 850931 5. 768053 5. 911279  
11731158\_ 6. 980398 6. 962193 6. 891632 6. 898793 6. 967649 6. 925262  
11731159\_ 6. 676496 6. 5416 6. 59182 6. 288473 6. 365777 6. 372263  
11731160\_ 5. 760039 5. 605591 5. 674711 5. 820052 5. 707751 5. 705734  
11731161\_ 4. 676153 4. 802919 4. 643717 4. 953968 4. 916039 4. 772771  
11731162\_ 4. 520007 4. 5662 4. 620918 4. 531408 4. 503152 4. 531408  
11731163\_ 5. 497394 5. 570882 5. 584813 5. 479057 5. 50305 5. 444036

11731164\_ 6. 148023 6. 142634 6. 262453 5. 834678 5. 733841 5. 862217  
11731165\_ 5. 498915 5. 536233 5. 175735 5. 528624 5. 588891 5. 528624  
11731166\_ 9. 178237 9. 078219 9. 113308 8. 964163 8. 983517 8. 947971  
11731167\_ 5. 6009 5. 69926 5. 478349 5. 657394 5. 577346 5. 631729  
11731168\_ 4. 485165 4. 604867 4. 247693 4. 625768 4. 599022 4. 431864  
11731169\_ 4. 940459 5. 099517 5. 050341 5. 163147 5. 236666 5. 17353  
11731170\_ 5. 217047 5. 256141 5. 305876 5. 452878 5. 56212 5. 578292  
11731171\_ 4. 095938 4. 124972 4. 032434 4. 100636 3. 987162 4. 234091  
11731172\_ 4. 415744 4. 43111 4. 373391 4. 40461 4. 438573 4. 380854  
11731173\_ 2. 009187 1. 937078 1. 866629 1. 937078 1. 961443 1. 922511  
11731174\_ 4. 998664 5. 073036 5. 073036 5. 061862 5. 088666 5. 081901  
11731175\_ 4. 497012 4. 388994 4. 568531 4. 594182 4. 756958 4. 584933  
11731176\_ 4. 975949 4. 976035 4. 881256 4. 968758 4. 976035 5. 106264  
11731177\_ 4. 965671 5. 135826 5. 059241 5. 247833 5. 094352 5. 154584  
11731178\_ 5. 093967 5. 144892 5. 192349 5. 00082 5. 000035 4. 825744  
11731179\_ 7. 109766 7. 222473 7. 109055 7. 221424 7. 305883 7. 247174  
11731180\_ 4. 183287 4. 344579 4. 088385 4. 347179 4. 280259 4. 29028  
11731181\_ 4. 521167 4. 467853 4. 658237 4. 554373 4. 548423 4. 444469  
11731182\_ 5. 649833 5. 577788 5. 465004 5. 77307 5. 76455 5. 655539  
11731183\_ 6. 851755 6. 809436 6. 828794 6. 162045 6. 208242 6. 135151  
11731184\_ 5. 978825 6. 028256 5. 889275 6. 05721 6. 070806 6. 110597  
11731185\_ 4. 17577 4. 325807 4. 199294 4. 107385 4. 107385 3. 777722  
11731186\_ 4. 229738 4. 220201 4. 304988 3. 857987 3. 944942 4. 192743  
11731187\_ 6. 183476 6. 118244 6. 035269 5. 811424 5. 659978 5. 904149  
11731188\_ 3. 606313 3. 550398 3. 503743 3. 586143 3. 598602 3. 442062  
11731189\_ 3. 66992 3. 580839 3. 723969 3. 606313 3. 840372 3. 836593  
11731190\_ 2. 292921 2. 098922 2. 09599 2. 304161 2. 18677 2. 239819  
11731191\_ 2. 663505 2. 538313 2. 584169 2. 893015 2. 751625 2. 737858  
11731192\_ 2. 310864 2. 370533 2. 361778 2. 450855 2. 394539 2. 501769  
11731193\_ 2. 157885 2. 138937 2. 075903 2. 232869 2. 201972 2. 094877  
11731194\_ 5. 072399 4. 899571 5. 120576 4. 035965 4. 141672 4. 258475  
11731195\_ 7. 526409 7. 495068 7. 530827 7. 117665 6. 951494 7. 133868  
11731196\_ 5. 162639 5. 15512 5. 090458 4. 991728 5. 145101 5. 11778  
11731197\_ 2. 862846 3. 036451 2. 876876 3. 050279 2. 737852 2. 694469  
11731198\_ 1. 912886 1. 912886 1. 864399 1. 795889 1. 947882 1. 961372  
11731199\_ 3. 522689 3. 48186 3. 378206 3. 406876 3. 424429 3. 188802  
11731200\_ 5. 049575 5. 057669 4. 994118 5. 087904 5. 029529 5. 164876  
11731201\_ 5. 101065 5. 11527 5. 170417 4. 573218 4. 650097 4. 571516  
11731202\_ 4. 169667 4. 021755 4. 139379 3. 904344 3. 822657 3. 866164  
11731203\_ 7. 869134 7. 79628 7. 947366 7. 02864 7. 124686 7. 168758  
11731204\_ 6. 795891 6. 754749 6. 864756 6. 271118 6. 318985 6. 494726  
11731205\_ 5. 557041 5. 554436 5. 60331 5. 373951 5. 557041 5. 475572  
11731206\_ 4. 942924 4. 837418 4. 782541 4. 932906 4. 945918 4. 813543  
11731207\_ 4. 601472 4. 554879 5. 10051 4. 420832 4. 689733 4. 483897  
11731208\_ 6. 308124 6. 384208 6. 428975 6. 316946 6. 184553 6. 298803  
11731209\_ 6. 443114 6. 474827 6. 225963 6. 431763 6. 361807 6. 381361  
11731210\_ 5. 666116 5. 792425 5. 774264 5. 689009 5. 701662 5. 608029  
11731211\_ 2. 836114 2. 806177 2. 823757 2. 824695 2. 820066 2. 794759  
11731212\_ 4. 631831 4. 547837 4. 659645 4. 961474 4. 722925 4. 669529  
11731213\_ 4. 360882 4. 475224 4. 385952 4. 355251 4. 398996 4. 385952  
11731214\_ 6. 435068 6. 408469 6. 384168 6. 217671 6. 303476 6. 22683

11731215\_ 5. 907216 5. 771208 5. 904522 6. 056924 5. 984877 6. 092665  
11731216\_ 5. 162992 5. 32182 5. 134316 5. 306862 5. 522707 5. 443491  
11731217\_ 4. 033706 4. 285316 4. 049882 4. 071877 4. 200483 4. 049882  
11731218\_ 5. 707013 5. 799014 5. 684342 5. 745821 5. 714817 5. 767649  
11731219\_ 2. 530572 2. 414211 2. 302391 2. 449277 2. 410947 2. 311282  
11731220\_ 2. 107789 1. 776505 2. 058288 1. 885323 1. 913495 2. 177085  
11731221\_ 5. 849706 5. 672107 5. 76495 4. 558965 4. 286236 4. 496993  
11731222\_ 6. 694509 6. 512232 6. 720478 7. 33038 7. 293959 7. 380922  
11731223\_ 5. 022873 4. 888377 4. 956678 5. 399667 5. 42747 5. 334309  
11731224\_ 4. 320413 4. 250934 4. 422024 4. 690985 4. 994503 4. 935579  
11731225\_ 5. 645739 5. 68292 5. 690821 5. 646575 5. 736041 5. 431893  
11731226\_ 3. 266095 2. 941921 3. 158456 3. 298464 3. 238675 3. 36145  
11731227\_ 4. 091284 4. 234524 4. 229936 4. 528921 4. 210663 4. 270966  
11731228\_ 6. 719763 6. 821221 6. 78633 6. 964959 6. 968377 7. 030028  
11731229\_ 7. 598135 7. 57765 7. 625726 7. 614237 7. 591822 7. 683906  
11731230\_ 8. 562985 8. 507775 8. 59695 8. 606078 8. 708289 8. 621155  
11731231\_ 4. 803832 4. 796708 4. 746213 4. 857092 4. 778533 4. 768639  
11731232\_ 5. 768492 5. 833481 5. 662447 5. 72415 5. 554654 5. 871385  
11731233\_ 4. 210478 4. 107591 4. 11736 4. 089353 4. 325815 4. 21274  
11731234\_ 5. 097859 4. 854124 4. 93049 5. 118513 4. 991413 5. 030078  
11731235\_ 4. 625012 4. 684059 4. 630829 4. 629305 4. 698481 4. 59738  
11731236\_ 5. 809048 5. 728775 5. 710954 5. 746595 5. 712961 5. 80387  
11731237\_ 6. 647304 6. 564709 6. 374176 7. 504686 7. 33636 7. 503786  
11731238\_ 2. 371932 2. 622904 2. 403799 2. 351634 2. 304833 2. 597885  
11731239\_ 2. 323147 2. 318438 2. 334925 2. 272461 2. 461919 2. 440635  
11731240\_ 4. 336472 4. 434377 4. 353052 4. 532701 4. 379007 4. 459577  
11731241\_ 4. 901001 4. 97397 4. 930507 5. 167366 4. 993376 4. 853838  
11731242\_ 2. 179597 1. 958579 2. 209051 2. 098992 2. 179597 1. 943836  
11731243\_ 1. 998518 1. 828587 2. 058564 1. 793354 2. 085735 1. 891715  
11731244\_ 2. 067142 2. 061061 1. 955644 1. 90752 2. 087377 1. 980557  
11731245\_ 3. 927167 3. 792671 3. 464297 3. 850301 4. 028624 4. 064757  
11731246\_ 9. 756596 9. 732649 9. 756556 9. 223949 9. 322135 9. 271414  
11731247\_ 9. 05726 8. 959526 9. 073597 8. 776261 8. 764281 8. 822926  
11731248\_ 6. 267042 6. 255574 6. 459139 6. 468575 6. 510338 6. 38567  
11731249\_ 4. 980584 5. 262777 5. 210848 5. 603248 5. 573702 5. 446253  
11731250\_ 5. 606996 5. 609615 5. 566962 5. 750214 5. 709521 5. 729603  
11731251\_ 4. 86341 5. 114759 4. 930507 5. 019725 5. 073036 5. 156303  
11731252\_ 6. 387852 6. 334047 6. 345434 6. 582572 6. 474637 6. 531641  
11731253\_ 9. 349948 9. 321721 9. 373471 9. 466731 9. 519216 9. 424324  
11731254\_ 8. 163144 8. 169041 8. 309429 8. 413805 8. 491833 8. 450343  
11731255\_ 4. 264343 3. 923188 3. 968285 4. 006379 4. 054288 3. 939959  
11731256\_ 4. 342356 4. 442737 4. 274604 4. 534215 4. 459939 4. 275543  
11731257\_ 3. 338104 3. 591627 3. 458612 3. 2563 3. 020669 3. 374014  
11731258\_ 5. 199876 5. 151781 5. 220197 4. 775519 4. 911325 4. 959297  
11731259\_ 6. 321838 6. 448378 6. 285653 6. 481046 6. 478324 6. 487078  
11731260\_ 5. 548214 5. 483598 5. 520291 5. 786147 5. 696592 5. 719007  
11731261\_ 4. 786131 4. 655333 4. 568847 4. 663596 4. 721423 4. 718447  
11731262\_ 3. 536558 3. 038133 3. 553066 3. 704628 3. 943336 3. 785455  
11731263\_ 6. 57864 6. 376038 6. 486764 6. 474889 6. 530945 6. 698417  
11731264\_ 3. 215705 3. 33972 3. 360975 3. 379527 3. 252582 3. 324431  
11731265\_ 5. 20728 5. 263181 5. 164965 5. 205242 5. 185244 5. 432849

11731266\_ 3. 900635 3. 900635 3. 837388 3. 900635 3. 908684 3. 97512  
11731267\_ 2. 812276 2. 745733 3. 184482 2. 849117 2. 827998 2. 658762  
11731268\_ 7. 732115 7. 528387 7. 674258 6. 700114 6. 76857 6. 749733  
11731269\_ 5. 416686 5. 618599 5. 167235 5. 460011 5. 574813 5. 554933  
11731270\_ 4. 108592 4. 250116 4. 071207 4. 200181 4. 259316 4. 233805  
11731271\_ 2. 375444 2. 480344 2. 576178 2. 576178 2. 480344 2. 715517  
11731272\_ 5. 644847 5. 709067 5. 592129 5. 817841 5. 67707 5. 827263  
11731273\_ 4. 350329 4. 67816 4. 2593 4. 676404 4. 574215 4. 511137  
11731274\_ 4. 01433 4. 101109 3. 865033 4. 319117 4. 280085 4. 145125  
11731275\_ 3. 424412 3. 433161 3. 255125 3. 610634 3. 361078 3. 546524  
11731276\_ 4. 227084 4. 393479 4. 181441 4. 409312 4. 202575 4. 57615  
11731277\_ 3. 870362 3. 972638 3. 948927 3. 855368 4. 030315 3. 989684  
11731278\_ 6. 159771 6. 236192 6. 146496 6. 117101 6. 215915 6. 191369  
11731279\_ 4. 430913 4. 584933 4. 594923 4. 500794 4. 615307 4. 584933  
11731280\_ 5. 394067 5. 565873 5. 673921 5. 707635 5. 708695 5. 513563  
11731281\_ 5. 995334 5. 869776 5. 866366 5. 995334 5. 987296 6. 159304  
11731282\_ 5. 636567 5. 631168 5. 610474 5. 878393 5. 815965 5. 739708  
11731283\_ 5. 064526 5. 106499 5. 064526 5. 136928 5. 13135 5. 119043  
11731284\_ 2. 742873 2. 845472 2. 649626 2. 725456 2. 79372 2. 83198  
11731285\_ 5. 816245 5. 793726 5. 786662 5. 922358 5. 768053 5. 79182  
11731286\_ 6. 646187 6. 700371 6. 641142 6. 690478 6. 748948 6. 607982  
11731287\_ 3. 198894 3. 312251 3. 05313 3. 474123 3. 370149 3. 483124  
11731288\_ 7. 203157 7. 173699 7. 173211 6. 998064 6. 867753 6. 845151  
11731289\_ 5. 34172 5. 471938 5. 493436 5. 359336 5. 444845 5. 39457  
11731290\_ 2. 642398 2. 625948 2. 830094 2. 611175 2. 718322 2. 749113  
11731291\_ 7. 977683 7. 807115 7. 944304 7. 688804 7. 671312 7. 794094  
11731292\_ 2. 975702 3. 084944 2. 968132 3. 101013 3. 004853 3. 107025  
11731293\_ 5. 442751 5. 372889 5. 331453 5. 198284 5. 255572 5. 378345  
11731294\_ 5. 47325 5. 595308 5. 456715 5. 517445 5. 584813 5. 442778  
11731295\_ 2. 7959 2. 424014 2. 54481 2. 422983 2. 424014 2. 404911  
11731296\_ 5. 115423 5. 310915 5. 074337 4. 768282 4. 624859 4. 540134  
11731297\_ 10. 0649 10. 03299 10. 04738 10. 20419 10. 21927 10. 1569  
11731298\_ 4. 035069 4. 041342 3. 999691 4. 015864 4. 014958 3. 954157  
11731299\_ 7. 621864 7. 637918 7. 554567 7. 612217 7. 613734 7. 571083  
11731300\_ 6. 908242 6. 972971 6. 852544 6. 909152 6. 922607 6. 720441  
11731301\_ 5. 403173 5. 137714 5. 227387 5. 223068 5. 318037 5. 162761  
11731302\_ 5. 990218 6. 015003 5. 986642 6. 134457 6. 182391 6. 282224  
11731303\_ 8. 050927 7. 995396 8. 121508 7. 308294 7. 289973 7. 311457  
11731304\_ 6. 003583 5. 933276 6. 083712 5. 98404 6. 040205 5. 927506  
11731305\_ 3. 093418 2. 978851 3. 045217 3. 078047 2. 959221 2. 892265  
11731306\_ 7. 882669 7. 842648 7. 910016 7. 131025 7. 095362 7. 108446  
11731307\_ 6. 544719 6. 727853 6. 574263 6. 588981 6. 609966 6. 589889  
11731308\_ 2. 718322 2. 654266 2. 438385 2. 180427 2. 267094 2. 304393  
11731309\_ 4. 275543 4. 264997 4. 488638 4. 690291 4. 59893 4. 739622  
11731310\_ 5. 048004 5. 2666 5. 030661 5. 137464 5. 09229 5. 029529  
11731311\_ 4. 617365 4. 659449 4. 719985 4. 593248 4. 716508 4. 635219  
11731312\_ 4. 732687 4. 441638 4. 365686 4. 328934 4. 33469 4. 540993  
11731313\_ 5. 924079 5. 869275 5. 967789 6. 024558 5. 969914 6. 038959  
11731314\_ 6. 567443 6. 515621 6. 58256 6. 462198 6. 532107 6. 506267  
11731315\_ 3. 970282 4. 042338 4. 1473 4. 102091 4. 200678 4. 31378  
11731316\_ 5. 382637 5. 533815 5. 448921 5. 662081 5. 622136 5. 551622

11731317\_ 4. 124129 4. 04829 4. 236021 4. 277128 4. 307317 4. 198994  
11731318\_ 6. 881628 6. 805521 6. 971486 7. 651933 7. 72902 7. 756654  
11731319\_ 6. 768956 6. 743615 6. 824579 7. 377371 7. 41267 7. 353698  
11731320\_ 3. 751375 4. 004333 3. 671746 3. 816686 3. 835912 4. 029277  
11731321\_ 6. 818525 6. 641378 6. 654085 8. 125049 8. 126221 8. 203992  
11731322\_ 5. 170776 5. 302268 5. 213293 5. 184467 5. 397861 5. 297383  
11731323\_ 2. 070185 2. 187845 2. 259024 1. 982951 2. 06104 2. 167762  
11731324\_ 5. 387335 5. 54243 5. 501088 5. 762623 5. 584813 5. 589814  
11731325\_ 3. 708457 4. 013339 3. 65668 3. 866494 3. 996088 3. 876427  
11731326\_ 6. 438613 6. 484834 6. 304997 6. 397946 6. 419895 6. 460352  
11731327\_ 5. 085461 5. 149545 5. 051828 5. 324498 5. 149545 5. 254749  
11731328\_ 4. 627536 4. 401559 4. 438852 4. 522029 4. 326005 4. 51473  
11731329\_ 6. 988007 7. 020747 6. 980204 7. 009306 7. 032735 7. 041476  
11731330\_ 3. 520726 3. 547657 3. 372274 3. 606313 3. 400626 3. 180062  
11731331\_ 2. 439049 2. 61153 2. 565167 2. 985623 2. 816739 2. 897404  
11731332\_ 4. 092541 4. 190543 4. 22535 4. 185378 4. 31163 4. 155812  
11731333\_ 4. 549917 4. 413523 4. 51965 4. 631274 4. 566363 4. 584503  
11731334\_ 4. 318135 4. 30675 4. 496885 4. 328911 4. 362991 4. 551973  
11731335\_ 2. 71576 2. 784308 2. 784308 2. 673489 2. 80911 2. 902843  
11731336\_ 5. 888249 5. 83377 6. 114601 5. 285927 5. 141215 5. 071329  
11731337\_ 5. 936235 5. 912536 5. 973344 5. 460015 5. 371292 5. 345293  
11731338\_ 7. 712883 7. 675377 7. 677476 7. 135796 7. 266988 7. 176657  
11731339\_ 5. 059748 5. 150563 5. 188845 5. 401016 5. 214101 5. 270637  
11731340\_ 2. 749292 2. 819556 2. 712842 2. 753429 2. 626396 2. 649333  
11731341\_ 3. 599101 3. 793907 3. 670913 3. 595176 3. 536417 3. 872708  
11731342\_ 6. 611151 6. 808327 6. 555703 6. 646932 6. 60336 6. 62321  
11731343\_ 4. 968569 5. 015386 4. 890378 4. 931731 4. 906638 4. 968569  
11731344\_ 4. 538899 4. 613025 4. 520015 4. 578881 4. 516713 4. 647955  
11731345\_ 6. 130132 6. 107535 6. 069567 6. 13903 6. 188791 6. 094413  
11731346\_ 9. 255782 9. 21682 9. 324373 9. 096108 9. 093287 9. 11645  
11731347\_ 6. 03918 6. 084452 5. 84054 6. 074972 6. 042924 6. 048645  
11731348\_ 4. 293368 4. 417094 4. 459939 4. 201852 4. 297968 4. 334567  
11731349\_ 5. 056617 4. 994047 5. 207264 4. 994047 4. 882288 4. 815027  
11731350\_ 5. 259408 5. 191038 5. 075119 5. 181593 5. 26034 5. 167911  
11731351\_ 6. 295973 6. 269438 6. 288883 5. 268723 5. 29042 5. 368214  
11731352\_ 4. 611158 4. 511199 4. 459939 4. 66104 4. 585695 4. 698282  
11731353\_ 6. 404186 6. 570421 6. 457095 6. 719633 6. 577269 6. 670013  
11731354\_ 5. 192728 5. 314056 5. 073639 5. 318451 5. 300553 5. 25812  
11731355\_ 5. 571432 5. 518105 5. 571432 5. 709194 5. 56696 5. 671449  
11731356\_ 4. 497258 4. 593564 4. 469209 4. 442114 4. 517653 4. 465168  
11731357\_ 4. 44933 4. 430994 4. 291834 4. 426353 4. 527237 4. 557112  
11731358\_ 5. 064994 4. 774802 4. 652 5. 204744 5. 11527 5. 1786  
11731359\_ 2. 695163 2. 681288 2. 766464 2. 609763 2. 770417 2. 495988  
11731360\_ 4. 780515 4. 798557 4. 589379 4. 691238 4. 933219 4. 725143  
11731361\_ 4. 430722 4. 62874 4. 489515 4. 62874 4. 675692 4. 594071  
11731362\_ 5. 016886 4. 780728 4. 969283 4. 421661 4. 497222 4. 491222  
11731363\_ 3. 810825 3. 797777 3. 666432 3. 848399 4. 005957 4. 064098  
11731364\_ 5. 447534 5. 518169 5. 26034 5. 669859 5. 575197 5. 595532  
11731365\_ 6. 182501 6. 401485 6. 321813 6. 294724 6. 248946 6. 358265  
11731366\_ 4. 608701 4. 703503 4. 65825 4. 87476 4. 833101 4. 733565  
11731367\_ 5. 191146 5. 105882 5. 184151 5. 266104 5. 305332 5. 366302

11731368\_ 6. 189564 6. 251418 6. 260434 5. 486459 5. 416931 5. 442264  
11731369\_ 6. 206103 6. 339064 6. 242107 5. 328449 5. 325054 5. 297077  
11731370\_ 2. 781655 2. 835579 2. 944821 2. 898124 2. 94123 3. 035508  
11731371\_ 4. 112473 4. 163703 4. 014466 4. 045767 4. 050114 4. 116704  
11731372\_ 5. 655813 5. 704355 5. 557558 5. 776042 5. 83858 5. 840613  
11731373\_ 5. 184582 5. 395435 5. 327642 5. 457464 5. 297498 5. 28263  
11731374\_ 2. 576198 2. 562011 2. 652017 2. 496265 2. 636646 2. 652017  
11731375\_ 5. 031554 5. 045627 4. 934592 5. 187697 5. 037404 5. 031554  
11731376\_ 3. 738659 3. 870042 3. 691828 3. 691828 3. 766868 3. 67694  
11731377\_ 4. 873582 4. 659232 4. 771154 4. 622939 4. 683327 4. 619177  
11731378\_ 7. 843052 7. 724269 7. 741714 7. 841198 7. 919788 7. 851025  
11731379\_ 7. 786782 7. 71512 7. 825227 7. 816525 7. 842243 7. 821706  
11731380\_ 5. 11527 5. 083095 5. 114309 5. 11527 4. 967277 5. 07624  
11731381\_ 6. 389066 6. 430605 6. 464838 6. 123039 6. 133712 6. 18052  
11731382\_ 4. 761188 4. 892745 5. 142537 4. 275543 4. 298701 4. 378513  
11731383\_ 4. 918851 5. 143146 5. 160647 5. 383941 5. 084362 5. 053699  
11731384\_ 5. 090504 5. 056827 5. 035076 5. 167623 5. 152111 5. 090871  
11731385\_ 6. 132224 6. 192276 6. 219072 6. 131063 6. 142856 6. 145696  
11731386\_ 3. 449519 3. 561551 3. 486805 3. 456428 3. 42438 3. 458402  
11731387\_ 4. 013379 3. 980837 3. 957951 4. 027785 4. 232181 4. 121157  
11731388\_ 7. 990429 8. 14554 7. 955356 7. 982521 7. 992617 8. 033904  
11731389\_ 3. 387056 3. 40244 3. 009153 3. 397204 3. 397686 3. 290188  
11731390\_ 3. 143298 3. 05668 2. 940088 3. 081109 3. 101214 3. 081109  
11731391\_ 4. 064189 4. 206294 4. 108866 4. 141953 4. 149075 4. 061035  
11731392\_ 3. 267921 3. 479684 3. 499393 3. 422025 3. 422025 3. 428901  
11731393\_ 3. 229617 3. 256504 3. 290737 3. 303274 3. 343475 3. 163025  
11731394\_ 13. 04253 13. 03018 13. 02537 13. 12632 13. 11799 13. 11575  
11731395\_ 9. 806043 9. 807066 9. 823753 9. 911432 9. 87129 9. 839276  
11731396\_ 11. 83261 11. 81802 11. 79952 11. 83426 11. 81495 11. 82716  
11731397\_ 9. 425386 9. 451547 9. 484668 9. 319558 9. 320053 9. 444939  
11731398\_ 3. 85936 3. 985369 3. 72499 3. 997131 4. 06323 3. 996458  
11731399\_ 2. 376919 2. 470851 2. 470851 2. 509129 2. 496123 2. 385775  
11731400\_ 10. 95288 10. 91049 10. 94911 10. 67936 10. 62529 10. 64434  
11731401\_ 8. 153292 8. 100147 8. 121508 8. 210152 8. 148875 8. 258465  
11731402\_ 3. 576256 3. 484271 2. 964783 3. 881263 3. 878712 4. 005003  
11731403\_ 8. 851127 8. 83721 8. 834842 9. 351631 9. 335072 9. 319937  
11731404\_ 2. 218592 2. 220208 2. 266141 2. 485477 2. 483799 2. 583788  
11731405\_ 5. 237891 4. 9226 5. 211201 5. 267996 5. 296943 5. 530798  
11731406\_ 7. 907629 7. 985285 7. 880826 7. 819819 7. 789458 7. 823336  
11731407\_ 7. 872924 7. 905758 7. 993072 7. 101018 7. 141631 7. 164727  
11731408\_ 6. 707018 6. 628303 6. 666514 6. 716465 6. 762908 6. 777384  
11731409\_ 5. 954607 6. 095445 5. 87798 6. 104663 6. 076469 6. 221042  
11731410\_ 4. 611288 4. 611092 4. 640053 4. 611092 4. 612729 4. 68248  
11731411\_ 9. 015498 9. 123738 8. 898622 9. 094944 9. 18279 9. 152917  
11731412\_ 7. 144381 7. 285027 7. 090608 7. 201864 7. 268673 7. 288004  
11731413\_ 3. 981803 4. 168965 4. 032327 4. 275543 4. 275543 4. 189306  
11731414\_ 3. 587794 3. 676276 3. 535261 3. 650717 3. 836192 3. 658289  
11731415\_ 10. 34071 10. 31819 10. 33354 10. 2312 10. 25288 10. 2221  
11731416\_ 5. 999888 5. 81365 5. 955259 6. 076709 6. 00364 6. 171913  
11731417\_ 8. 717828 8. 679287 8. 765026 8. 91437 8. 910427 8. 901616  
11731418\_ 7. 448145 7. 323859 7. 387321 7. 974703 8. 044367 8. 001849

11731419\_ 7. 21153 7. 291159 7. 268964 7. 258561 7. 176986 7. 162118  
11731420\_ 8. 358572 8. 335003 8. 34584 8. 128398 8. 084825 8. 15142  
11731421\_ 8. 374591 8. 337954 8. 410201 8. 208237 8. 279125 8. 134114  
11731422\_ 2. 057697 1. 900909 1. 886226 2. 073621 2. 148814 2. 18238  
11731423\_ 3. 030848 2. 664367 2. 779121 2. 67387 2. 608861 2. 672173  
11731424\_ 2. 974975 2. 809908 2. 702531 2. 748749 2. 702531 2. 545346  
11731425\_ 3. 481525 3. 505107 3. 398305 3. 387598 3. 424716 3. 430214  
11731426\_ 4. 706189 4. 627889 4. 547611 4. 606511 4. 683438 4. 650941  
11731427\_ 2. 496561 2. 400405 2. 219778 2. 429358 2. 444565 2. 368034  
11731428\_ 3. 589393 3. 589641 3. 590714 3. 490677 3. 606313 3. 503743  
11731429\_ 2. 902688 2. 921809 2. 969207 2. 932467 2. 874383 2. 967311  
11731430\_ 7. 658176 7. 71743 7. 715356 7. 652026 7. 724011 7. 613644  
11731431\_ 2. 871575 2. 718322 2. 980979 2. 605516 2. 823854 2. 647948  
11731432\_ 6. 979348 6. 89694 7. 056707 6. 644574 6. 628168 6. 706655  
11731433\_ 3. 400992 3. 188452 3. 206972 3. 209808 3. 309229 3. 309121  
11731434\_ 10. 91152 10. 89988 10. 91376 10. 7498 10. 75363 10. 72085  
11731435\_ 6. 944608 6. 920973 6. 897285 6. 437832 6. 366235 6. 494469  
11731436\_ 9. 593406 9. 541411 9. 555699 9. 278037 9. 341599 9. 382104  
11731437\_ 8. 874197 8. 848624 8. 878009 8. 648605 8. 60876 8. 68264  
11731438\_ 8. 579929 8. 519442 8. 603131 8. 232513 8. 281892 8. 253018  
11731439\_ 4. 64864 4. 658793 4. 772366 4. 646514 4. 596571 4. 815869  
11731440\_ 8. 756635 8. 747811 8. 783228 8. 400078 8. 392124 8. 4181  
11731441\_ 2. 68248 2. 698869 2. 82456 2. 850746 2. 664966 2. 785621  
11731442\_ 4. 258234 4. 275098 4. 055637 4. 57533 4. 530869 4. 671079  
11731443\_ 8. 174675 8. 101624 8. 111131 7. 408948 7. 544791 7. 503786  
11731444\_ 9. 063868 9. 067775 9. 041218 9. 038499 9. 021401 9. 040546  
11731445\_ 7. 905494 7. 818921 7. 900505 5. 641944 5. 700975 5. 917692  
11731446\_ 5. 795248 5. 637422 5. 741337 5. 858697 5. 828282 6. 00524  
11731447\_ 8. 353125 8. 289389 8. 419668 8. 225985 8. 223268 8. 271558  
11731448\_ 4. 60135 4. 213397 4. 287593 4. 330274 4. 337024 4. 558051  
11731449\_ 7. 751909 7. 647912 7. 785024 7. 594632 7. 521823 7. 578521  
11731450\_ 9. 100109 9. 07239 9. 090254 8. 760614 8. 709807 8. 633734  
11731451\_ 5. 025874 5. 145084 5. 157303 5. 127469 5. 105393 5. 124259  
11731452\_ 6. 163453 6. 301942 6. 360576 6. 173161 6. 268382 6. 247833  
11731453\_ 6. 321838 6. 388933 6. 39203 6. 295093 6. 448378 6. 36462  
11731454\_ 10. 18278 10. 1378 10. 22122 9. 855629 9. 880465 9. 885659  
11731455\_ 5. 917117 5. 789947 5. 989719 5. 65814 5. 706681 5. 793242  
11731456\_ 7. 562065 7. 511215 7. 554749 7. 438446 7. 466666 7. 508239  
11731457\_ 8. 650146 8. 665357 8. 708766 8. 415877 8. 39275 8. 398616  
11731458\_ 4. 447382 4. 626063 4. 535726 4. 798775 4. 658742 4. 574184  
11731459\_ 2. 776726 2. 681757 2. 528603 2. 817939 2. 685075 2. 853172  
11731460\_ 5. 561948 5. 554436 5. 562473 5. 477926 5. 483828 5. 445178  
11731461\_ 3. 249924 3. 070385 3. 125759 2. 908628 2. 912551 2. 956839  
11731462\_ 2. 513992 2. 185455 2. 477697 2. 185935 2. 266088 2. 072649  
11731463\_ 3. 243679 3. 246737 3. 353514 3. 240395 3. 207371 3. 094252  
11731464\_ 5. 252196 5. 158437 5. 188826 5. 236654 5. 29443 5. 303131  
11731465\_ 7. 151258 7. 059443 7. 097587 7. 945995 7. 836452 7. 916357  
11731466\_ 10. 89817 10. 84681 10. 89194 10. 97612 11. 00866 10. 96387  
11731467\_ 4. 579621 4. 356776 4. 589629 4. 243996 4. 286833 4. 241336  
11731468\_ 5. 512358 5. 211307 5. 329656 5. 095223 5. 11527 5. 129664  
11731469\_ 5. 170039 5. 227304 5. 433333 5. 876233 5. 787111 5. 772437



11731470\_ 4. 958496 5. 062051 5. 050675 5. 154304 5. 004173 5. 388075  
11731471\_ 4. 987473 4. 811073 5. 053193 5. 139835 5. 085862 5. 11527  
11731472\_ 9. 232126 9. 175911 9. 218349 9. 112427 9. 132798 9. 097301  
11731473\_ 4. 637226 4. 466124 4. 310756 4. 627045 4. 799902 4. 457856  
11731474\_ 2. 006283 2. 042876 1. 976401 1. 851318 1. 972058 1. 872745  
11731475\_ 3. 127383 3. 20745 3. 438199 3. 374866 3. 256111 3. 394533  
11731476\_ 2. 560632 2. 651707 2. 525314 2. 699752 2. 537878 2. 807763  
11731477\_ 8. 670653 8. 646298 8. 691135 8. 712189 8. 755479 8. 697795  
11731478\_ 7. 073047 6. 977884 7. 090532 7. 226728 7. 288869 7. 309539  
11731479\_ 8. 133545 8. 152267 8. 109462 8. 299678 8. 284756 8. 191673  
11731480\_ 10. 5267 10. 69173 10. 5533 11. 08751 10. 94393 10. 92259  
11731481\_ 8. 198782 8. 198998 8. 226072 8. 376466 8. 44465 8. 467853  
11731482\_ 10. 92962 10. 86297 10. 90716 10. 88487 10. 93648 10. 88865  
11731483\_ 8. 249473 8. 26016 8. 333999 8. 186029 8. 195815 8. 198874  
11731484\_ 6. 627262 6. 537955 6. 593713 6. 806613 6. 733218 6. 840927  
11731485\_ 6. 068955 6. 154592 6. 109396 6. 179139 6. 217529 6. 228722  
11731486\_ 7. 346683 7. 307745 7. 398175 7. 514878 7. 554725 7. 611527  
11731487\_ 7. 70405 7. 813809 7. 800135 7. 910571 7. 921812 7. 940487  
11731488\_ 7. 295029 7. 355103 7. 339305 7. 341919 7. 346573 7. 336686  
11731489\_ 9. 118483 9. 042102 9. 09844 9. 219112 9. 239463 9. 230282  
11731490\_ 7. 93163 7. 873068 7. 84424 8. 023779 8. 026245 8. 070292  
11731491\_ 9. 5427 9. 547 9. 534396 9. 70137 9. 648474 9. 724653  
11731492\_ 8. 446473 8. 387746 8. 446753 8. 153694 8. 135479 8. 124575  
11731493\_ 5. 472568 5. 37625 5. 394423 5. 533024 5. 500159 5. 493311  
11731494\_ 9. 328649 9. 308308 9. 340205 8. 565531 8. 65382 8. 595578  
11731495\_ 7. 472989 7. 463014 7. 529536 7. 107037 7. 128921 7. 183172  
11731496\_ 8. 003351 7. 92604 7. 985523 6. 418144 6. 46973 6. 548194  
11731497\_ 7. 308294 7. 230373 7. 365518 6. 498499 6. 541294 6. 530013  
11731498\_ 6. 90215 6. 854571 6. 865334 6. 155765 6. 175288 6. 265365  
11731499\_ 5. 139085 5. 1737 5. 235055 5. 448296 5. 456931 5. 409222  
11731500\_ 4. 584563 4. 381594 4. 69855 4. 605463 4. 753662 4. 700243  
11731501\_ 8. 440866 8. 358065 8. 391885 8. 124344 8. 139878 8. 10407  
11731502\_ 8. 093329 8. 04629 8. 049035 7. 871065 7. 869785 7. 822281  
11731503\_ 10. 40794 10. 37999 10. 42532 9. 580476 9. 538917 9. 497821  
11731504\_ 5. 716702 5. 941209 5. 741826 5. 82454 5. 842918 5. 781397  
11731505\_ 5. 990189 6. 01655 5. 962145 6. 117631 6. 090841 6. 021413  
11731506\_ 7. 935367 7. 865828 7. 917112 8. 210802 8. 197744 8. 219439  
11731507\_ 5. 260684 5. 209042 5. 254989 5. 176076 5. 091731 5. 381517  
11731508\_ 4. 693132 4. 643719 4. 844484 4. 622398 4. 650451 4. 797953  
11731509\_ 7. 462121 7. 388711 7. 400837 7. 106762 7. 061976 7. 07498  
11731510\_ 6. 190795 6. 133889 6. 096349 5. 821258 5. 895491 5. 858799  
11731511\_ 4. 742967 4. 658631 4. 717933 5. 10932 5. 300824 5. 247106  
11731512\_ 7. 765944 7. 613117 7. 779941 7. 597395 7. 642279 7. 634605  
11731513\_ 8. 040475 7. 992677 8. 025649 8. 008768 7. 992677 8. 049858  
11731514\_ 4. 584933 4. 366306 4. 5637 5. 103843 4. 900066 5. 067408  
11731515\_ 6. 56434 6. 511711 6. 456631 6. 032834 6. 137738 5. 995695  
11731516\_ 7. 521308 7. 465851 7. 604058 7. 093549 7. 084754 7. 079555  
11731517\_ 7. 145792 7. 155727 7. 110214 6. 7056 6. 708134 6. 651881  
11731518\_ 8. 45564 8. 428727 8. 45117 8. 403234 8. 43489 8. 400934  
11731519\_ 7. 364083 7. 27021 7. 328539 6. 71304 6. 699341 6. 853784  
11731520\_ 6. 532053 6. 527698 6. 571473 6. 508073 6. 464805 6. 557068

11731521\_ 6. 058654 5. 98478 6. 168678 6. 506567 6. 451716 6. 417584  
11731522\_ 4. 64591 4. 768852 4. 578405 4. 50377 4. 610888 4. 613638  
11731523\_ 7. 477764 7. 38629 7. 481036 7. 341485 7. 409202 7. 425283  
11731524\_ 5. 628869 5. 662345 5. 512539 5. 602629 5. 688575 5. 459289  
11731525\_ 8. 326137 8. 272644 8. 287996 8. 933037 8. 951172 8. 905007  
11731526\_ 8. 838743 8. 788974 8. 831911 9. 290931 9. 386076 9. 343841  
11731527\_ 3. 503743 3. 375143 3. 604986 3. 606313 3. 449969 3. 606313  
11731528\_ 5. 068417 5. 143838 5. 264879 5. 083898 5. 265682 5. 191768  
11731529\_ 3. 278402 3. 358479 3. 380825 3. 419614 3. 3568 3. 435653  
11731530\_ 3. 574443 3. 680873 3. 683685 3. 658452 3. 929944 3. 645181  
11731531\_ 4. 978433 4. 916425 4. 98423 5. 068584 5. 139437 5. 164927  
11731532\_ 5. 64751 5. 316116 5. 555331 5. 93062 5. 820052 5. 902747  
11731533\_ 7. 392275 7. 25452 7. 353371 7. 071764 7. 176599 7. 145397  
11731534\_ 5. 983732 5. 907516 5. 965088 5. 975753 5. 989094 6. 031324  
11731535\_ 5. 677612 5. 891332 5. 976324 5. 845365 5. 872675 6. 026877  
11731536\_ 4. 815683 4. 839297 4. 719198 4. 601542 4. 652771 4. 380009  
11731537\_ 4. 838317 4. 974656 5. 043927 4. 079151 4. 071281 4. 366386  
11731538\_ 8. 059768 7. 940161 8. 063107 7. 28646 7. 306776 7. 357342  
11731539\_ 7. 020261 6. 913576 6. 998305 7. 064126 7. 017718 7. 085836  
11731540\_ 3. 011507 2. 945929 3. 12091 3. 038857 3. 281235 3. 027793  
11731541\_ 4. 065165 4. 39464 4. 287593 4. 930032 4. 777608 4. 978058  
11731542\_ 4. 378513 4. 234676 4. 459939 4. 606028 4. 640244 4. 668564  
11731543\_ 4. 160911 4. 115557 3. 977807 4. 243509 4. 200134 4. 37396  
11731544\_ 6. 840029 6. 879749 6. 918955 6. 620843 6. 630781 6. 693154  
11731545\_ 6. 07973 6. 110829 6. 210461 6. 130486 6. 062773 5. 969512  
11731546\_ 4. 977931 4. 851246 4. 955239 4. 839274 4. 911209 4. 742557  
11731547\_ 4. 301222 4. 001795 4. 247381 3. 700491 3. 665454 4. 078128  
11731548\_ 6. 156106 5. 947612 5. 973344 5. 315278 5. 328635 5. 335062  
11731549\_ 5. 650459 5. 785566 5. 798225 5. 021617 5. 149545 5. 022971  
11731550\_ 4. 720512 4. 790042 4. 917741 4. 417778 4. 54794 4. 443851  
11731551\_ 6. 46019 6. 352902 6. 377968 6. 441758 6. 431976 6. 528702  
11731552\_ 7. 765794 7. 848387 7. 78822 7. 895727 7. 963715 7. 893682  
11731553\_ 3. 325485 3. 4605 3. 430279 3. 514354 3. 43984 3. 484544  
11731554\_ 2. 856784 2. 7073 2. 634996 2. 912551 2. 661557 2. 711354  
11731555\_ 4. 491178 4. 720758 4. 529374 4. 719753 4. 663327 4. 663327  
11731556\_ 6. 657192 6. 826037 6. 541665 6. 748253 6. 739151 6. 714938  
11731557\_ 3. 494183 3. 63536 3. 448774 3. 562977 3. 514714 3. 55517  
11731558\_ 4. 8664 5. 060084 4. 818408 5. 017031 5. 048282 5. 043518  
11731559\_ 2. 794212 2. 851419 2. 785425 2. 733405 2. 873548 2. 832191  
11731560\_ 7. 672148 7. 592925 7. 657828 7. 171088 7. 212651 7. 344275  
11731561\_ 6. 704382 6. 619448 6. 586253 6. 17576 6. 233561 6. 277702  
11731562\_ 4. 656227 4. 460363 4. 67374 4. 834312 4. 776226 4. 623389  
11731563\_ 8. 961039 8. 805337 8. 961737 8. 929358 8. 963867 8. 912394  
11731564\_ 7. 345218 7. 444799 7. 478392 6. 7414 6. 954367 6. 828823  
11731565\_ 8. 347912 8. 2631 8. 299649 7. 953462 7. 756399 7. 858489  
11731566\_ 9. 212413 9. 173807 9. 258824 8. 4505 8. 45972 8. 405351  
11731567\_ 9. 831845 9. 819733 9. 784317 9. 104214 9. 091381 9. 029475  
11731568\_ 7. 7933 7. 793127 7. 781873 7. 460479 7. 400837 7. 479245  
11731569\_ 9. 411106 9. 395507 9. 383025 8. 680429 8. 591038 8. 671972  
11731570\_ 6. 691505 6. 72014 6. 725751 6. 663827 6. 747206 6. 717538  
11731571\_ 6. 508516 6. 460358 6. 412392 6. 472961 6. 496596 6. 514474

11731572\_ 6. 884619 6. 725457 6. 899661 6. 621066 6. 701496 6. 640505  
11731573\_ 7. 341102 7. 248174 7. 447327 7. 110622 7. 096976 7. 069543  
11731574\_ 7. 979852 7. 877743 7. 934828 7. 771274 7. 782153 7. 744253  
11731575\_ 5. 379389 5. 082558 5. 348174 4. 915898 4. 911606 5. 304972  
11731576\_ 7. 12378 7. 147636 7. 172784 6. 998064 6. 973327 7. 064164  
11731577\_ 4. 641977 4. 562775 4. 509657 4. 472607 4. 397742 4. 544243  
11731578\_ 5. 699686 5. 973622 5. 921385 6. 141216 6. 245602 6. 13945  
11731579\_ 6. 32204 6. 470606 6. 413002 6. 356404 6. 282224 6. 362978  
11731580\_ 7. 072041 7. 008511 7. 082403 6. 898793 6. 718579 6. 666186  
11731581\_ 7. 688917 7. 774754 7. 768696 7. 508793 7. 482432 7. 437696  
11731582\_ 6. 751424 6. 538503 6. 764729 6. 47877 6. 555815 6. 533454  
11731583\_ 5. 218008 5. 345598 5. 388671 4. 906371 4. 943328 5. 018687  
11731584\_ 6. 906119 6. 857854 6. 887422 6. 792183 6. 811992 6. 846919  
11731585\_ 8. 181157 8. 106644 8. 11167 8. 372118 8. 425161 8. 377826  
11731586\_ 4. 951831 4. 756925 4. 792551 4. 690985 4. 764121 4. 811947  
11731587\_ 4. 281067 4. 254342 4. 374288 4. 417088 4. 152802 4. 361667  
11731588\_ 1. 99869 1. 909904 2. 069607 2. 094715 1. 909904 2. 18238  
11731589\_ 6. 37305 6. 378306 6. 445267 6. 753191 6. 763768 6. 80644  
11731590\_ 4. 304295 4. 225592 4. 257438 4. 304295 4. 496577 4. 31367  
11731591\_ 7. 761779 7. 74282 7. 764986 7. 807973 7. 820822 7. 850173  
11731592\_ 7. 742684 7. 682608 7. 725082 7. 631841 7. 637 7. 748395  
11731593\_ 7. 289229 7. 172939 7. 356278 6. 914338 6. 86347 6. 983152  
11731594\_ 5. 385641 5. 298785 5. 375243 5. 858454 5. 971929 5. 93062  
11731595\_ 5. 756269 5. 704919 5. 689974 6. 209356 6. 308926 6. 309094  
11731596\_ 7. 071779 6. 97527 7. 08741 7. 266197 7. 403718 7. 334089  
11731597\_ 5. 695519 6. 114269 5. 903663 6. 127579 6. 061399 6. 175368  
11731598\_ 2. 718322 2. 853362 2. 773966 2. 549473 2. 526896 2. 63878  
11731599\_ 7. 984832 8. 02231 8. 004255 6. 504181 6. 687917 6. 707339  
11731600\_ 5. 045237 5. 037253 4. 967027 4. 346154 4. 584933 4. 69684  
11731601\_ 2. 487402 2. 5062 2. 591313 2. 492509 2. 25483 2. 52241  
11731602\_ 6. 553003 6. 419695 6. 58679 6. 799112 6. 945089 6. 907078  
11731603\_ 4. 929234 4. 880501 4. 69833 5. 431651 5. 479071 5. 458328  
11731604\_ 3. 722393 3. 442962 3. 59975 3. 571367 3. 631235 3. 519751  
11731605\_ 9. 750293 9. 760158 9. 710664 9. 996036 10. 0007 9. 929911  
11731606\_ 3. 199697 3. 341672 3. 025506 3. 094981 3. 219975 3. 063197  
11731607\_ 3. 221362 3. 266563 3. 025972 3. 326547 3. 30155 3. 334155  
11731608\_ 5. 933038 5. 97281 5. 896453 6. 076654 6. 073409 6. 112956  
11731609\_ 7. 086077 7. 02854 7. 031106 7. 264539 7. 215404 7. 100108  
11731610\_ 6. 667832 6. 488464 6. 626016 6. 78856 6. 787848 6. 764915  
11731611\_ 10. 00416 9. 995868 9. 957085 9. 759857 9. 724507 9. 676275  
11731612\_ 10. 41286 10. 37442 10. 46574 10. 10896 10. 0836 10. 15924  
11731613\_ 5. 614563 5. 724557 5. 415055 6. 125722 6. 03268 6. 094413  
11731614\_ 10. 52978 10. 50517 10. 49043 10. 39257 10. 38909 10. 3748  
11731615\_ 5. 275669 5. 496942 5. 165095 5. 112888 5. 190815 5. 073036  
11731616\_ 5. 590086 5. 484617 5. 162492 5. 432074 5. 38779 5. 409222  
11731617\_ 3. 045909 3. 207809 2. 980405 3. 093211 3. 173845 3. 122246  
11731618\_ 7. 735799 7. 692544 7. 678279 7. 685586 7. 662039 7. 701446  
11731619\_ 8. 128398 8. 096529 8. 110007 8. 123233 8. 090788 8. 128678  
11731620\_ 4. 833587 5. 265257 5. 081774 5. 49928 5. 471806 5. 426946  
11731621\_ 6. 749712 6. 710731 6. 741169 5. 197193 5. 331801 5. 067179  
11731622\_ 8. 485025 8. 378012 8. 424394 7. 137668 7. 293686 7. 246809

11731623\_ 6. 646187 6. 6239 6. 709051 6. 730254 6. 836647 6. 756156  
11731624\_ 7. 263341 7. 18838 7. 272972 6. 826811 6. 901212 6. 823846  
11731625\_ 6. 366411 6. 309306 6. 314952 5. 755169 5. 873716 5. 789119  
11731626\_ 5. 913243 5. 876068 6. 076088 5. 697693 5. 570593 5. 712552  
11731627\_ 7. 018127 6. 85973 7. 070933 6. 434799 6. 525582 6. 377863  
11731628\_ 5. 78482 5. 853772 5. 736831 5. 968954 5. 911456 5. 834788  
11731629\_ 8. 389063 8. 323619 8. 415657 8. 09976 8. 142965 8. 093181  
11731630\_ 2. 93465 2. 856466 2. 852469 2. 959271 3. 053203 2. 786282  
11731631\_ 2. 394448 2. 178258 2. 202737 2. 703429 2. 390131 2. 508114  
11731632\_ 9. 783576 9. 708499 9. 75333 9. 592136 9. 632875 9. 538179  
11731633\_ 4. 518825 4. 648588 4. 244049 4. 544066 4. 307701 4. 318242  
11731634\_ 3. 67668 3. 921425 3. 771248 3. 930373 3. 825164 3. 717344  
11731635\_ 6. 688354 6. 722692 6. 654602 6. 467298 6. 371631 6. 533804  
11731636\_ 3. 305972 3. 191263 3. 406537 3. 625337 3. 496017 3. 599055  
11731637\_ 4. 415744 4. 412928 4. 101855 4. 736671 4. 40461 4. 367714  
11731638\_ 5. 021721 5. 079821 5. 060855 4. 825046 4. 933959 5. 099353  
11731639\_ 5. 701157 5. 350876 5. 687434 5. 016989 4. 991038 5. 285314  
11731640\_ 6. 910833 6. 849603 6. 914338 7. 219014 7. 204522 7. 235888  
11731641\_ 5. 732372 5. 554308 5. 632692 6. 216311 6. 131612 6. 115125  
11731642\_ 5. 76832 5. 789947 5. 709521 5. 56326 5. 749174 5. 75314  
11731643\_ 5. 882017 5. 748913 6. 022371 6. 556545 6. 420907 6. 490793  
11731644\_ 6. 844321 6. 857908 6. 904321 6. 621979 6. 567621 6. 766089  
11731645\_ 8. 73151 8. 588829 8. 677729 8. 846204 8. 876234 8. 927217  
11731646\_ 4. 522992 4. 827173 4. 560861 4. 59353 4. 697377 4. 556199  
11731647\_ 5. 323313 5. 516166 5. 32437 5. 491619 5. 360598 5. 173283  
11731648\_ 7. 92722 7. 842319 7. 836019 7. 0529 7. 144608 7. 141006  
11731649\_ 7. 908782 7. 944364 7. 877004 7. 277678 7. 405176 7. 272627  
11731650\_ 7. 265654 7. 265517 7. 455108 6. 580536 6. 655451 6. 767734  
11731651\_ 7. 996444 8. 037662 8. 018013 8. 05701 8. 04871 8. 084525  
11731652\_ 10. 49027 10. 48354 10. 51958 11. 07067 11. 0887 11. 03799  
11731653\_ 4. 544863 4. 602719 4. 528015 4. 549972 4. 456565 4. 473404  
11731654\_ 5. 286175 5. 311125 5. 332802 4. 978943 4. 839302 4. 844826  
11731655\_ 5. 067035 5. 220173 5. 237302 5. 267419 5. 075956 5. 183074  
11731656\_ 5. 652872 5. 843591 5. 802592 5. 809631 5. 926725 5. 903237  
11731657\_ 5. 566353 5. 550609 5. 540814 5. 576081 5. 48634 5. 626597  
11731658\_ 5. 842143 6. 104283 5. 917533 6. 31935 6. 335482 6. 270414  
11731659\_ 3. 331619 3. 597605 3. 695832 3. 597605 3. 716921 3. 398236  
11731660\_ 3. 489262 3. 762363 3. 547944 3. 655921 3. 588985 3. 898376  
11731661\_ 7. 02664 7. 089177 7. 193699 7. 217489 7. 329294 7. 2255  
11731662\_ 6. 088776 6. 157662 6. 281125 5. 908665 5. 727634 5. 801586  
11731663\_ 5. 910174 5. 609761 5. 901619 5. 620217 5. 577932 5. 801957  
11731664\_ 6. 451489 6. 54543 6. 592461 6. 386151 6. 46692 6. 455632  
11731665\_ 6. 055342 6. 094679 5. 893446 5. 924275 6. 025745 6. 10034  
11731666\_ 4. 797318 4. 771878 4. 935142 4. 826431 4. 644188 4. 584933  
11731667\_ 6. 6532 6. 809436 6. 615659 6. 549769 6. 490062 6. 446993  
11731668\_ 6. 562679 6. 662222 6. 455755 6. 814752 6. 664661 6. 604236  
11731669\_ 3. 405389 3. 397325 3. 311717 3. 21041 3. 225699 3. 189249  
11731670\_ 7. 595903 7. 585736 7. 600624 7. 575476 7. 518315 7. 561138  
11731671\_ 9. 077248 9. 036824 9. 101012 9. 343545 9. 275356 9. 287569  
11731672\_ 4. 961621 4. 572568 4. 733315 4. 772366 4. 822917 4. 815683  
11731673\_ 6. 633768 6. 448378 6. 545453 6. 715714 6. 741313 6. 763872

11731674\_ 4. 687652 4. 831197 4. 706414 4. 693735 4. 833782 4. 921543  
11731675\_ 3. 158137 3. 002727 3. 102686 3. 104836 3. 173982 3. 241642  
11731676\_ 4. 28904 4. 067703 4. 260195 4. 26558 4. 204865 4. 27097  
11731677\_ 3. 042889 3. 269855 3. 251724 3. 054793 3. 22289 3. 280088  
11731678\_ 6. 687233 6. 714177 6. 516968 6. 886652 6. 960613 7. 009306  
11731679\_ 5. 785724 5. 823268 5. 841997 6. 388912 6. 535094 6. 622547  
11731680\_ 5. 288351 5. 269812 5. 369334 5. 02376 5. 080007 5. 029529  
11731681\_ 4. 506402 4. 519395 4. 486308 4. 600327 4. 643833 4. 665692  
11731682\_ 9. 66488 9. 692279 9. 7284 9. 746506 9. 716341 9. 703609  
11731683\_ 8. 370063 8. 300321 8. 353995 8. 400858 8. 457648 8. 489101  
11731684\_ 8. 953484 8. 940005 8. 927022 8. 640723 8. 668142 8. 722923  
11731685\_ 8. 016341 7. 842383 7. 957549 7. 590334 7. 612217 7. 65934  
11731686\_ 8. 977322 8. 924543 8. 944652 8. 641508 8. 634606 8. 764013  
11731687\_ 2. 47102 2. 217039 2. 361778 2. 354008 2. 29761 2. 233081  
11731688\_ 4. 016929 3. 918968 3. 638128 3. 606313 3. 506301 3. 559814  
11731689\_ 6. 830716 6. 748852 6. 662443 7. 124763 6. 951979 6. 872626  
11731690\_ 2. 121834 2. 289097 2. 252417 2. 299222 2. 346531 2. 253365  
11731691\_ 4. 568454 4. 264851 4. 35051 4. 264851 4. 316259 4. 249434  
11731692\_ 3. 506714 3. 338792 3. 339075 3. 279876 3. 424946 3. 39207  
11731693\_ 4. 66777 4. 709463 4. 807329 4. 805042 4. 860488 4. 763543  
11731694\_ 4. 092407 3. 89448 3. 840217 4. 200941 4. 006989 3. 981096  
11731695\_ 4. 991298 4. 831089 5. 029891 5. 121951 5. 135302 4. 941523  
11731696\_ 2. 897829 2. 83198 2. 718444 2. 621672 2. 752431 2. 84331  
11731697\_ 5. 588094 5. 608854 5. 597256 6. 057825 6. 041138 6. 057825  
11731698\_ 6. 523414 6. 358002 6. 411226 6. 77888 6. 779643 6. 79157  
11731699\_ 5. 989089 5. 936829 5. 896674 5. 966934 5. 958937 5. 958937  
11731700\_ 5. 575976 5. 722402 5. 636242 5. 799371 5. 712151 5. 826813  
11731701\_ 4. 700243 4. 690218 4. 403469 4. 52373 4. 479425 4. 656424  
11731702\_ 3. 722879 3. 637241 3. 618119 3. 563243 3. 666386 3. 521009  
11731703\_ 5. 825285 5. 718357 5. 954335 5. 903256 5. 763984 5. 825285  
11731704\_ 3. 172801 3. 203697 3. 302477 3. 435525 3. 290022 3. 206329  
11731705\_ 7. 529303 7. 58241 7. 489262 7. 521943 7. 600214 7. 549581  
11731706\_ 5. 163822 5. 043996 5. 179261 5. 089445 5. 145138 5. 198135  
11731707\_ 4. 805179 4. 840691 4. 727206 4. 901577 4. 872787 4. 842144  
11731708\_ 3. 910619 3. 629252 3. 617756 3. 925181 4. 044478 3. 881972  
11731709\_ 7. 432668 7. 443324 7. 397501 7. 239803 7. 269645 7. 232049  
11731710\_ 6. 40268 6. 463299 6. 463299 6. 219415 6. 087078 6. 19536  
11731711\_ 3. 076288 3. 291192 3. 232585 3. 50324 3. 046908 3. 060201  
11731712\_ 3. 065022 2. 952146 3. 069131 2. 96805 3. 059094 2. 952146  
11731713\_ 4. 966864 4. 841587 5. 168542 5. 017744 4. 821899 4. 996878  
11731714\_ 3. 005034 3. 164026 3. 080168 3. 277007 3. 095072 3. 183075  
11731715\_ 4. 751003 4. 641331 4. 479156 4. 874234 4. 926832 4. 785187  
11731716\_ 2. 983291 2. 46957 2. 639718 2. 676558 2. 576518 2. 397119  
11731717\_ 4. 819114 4. 654904 4. 642268 4. 695739 4. 643717 4. 803637  
11731718\_ 3. 923011 3. 739856 3. 735843 3. 791638 3. 816064 3. 945668  
11731719\_ 4. 485724 4. 551121 4. 414254 4. 672639 4. 288566 4. 569101  
11731720\_ 5. 157337 5. 18749 5. 245791 5. 209566 5. 268478 5. 315337  
11731721\_ 5. 735295 5. 59234 5. 53202 5. 572575 5. 694102 5. 661374  
11731722\_ 7. 471604 7. 436169 7. 541862 6. 838326 6. 908244 6. 954563  
11731723\_ 6. 153819 5. 981629 6. 039149 5. 691183 5. 994289 5. 875633  
11731724\_ 5. 58786 5. 480966 5. 433772 5. 430909 5. 522821 5. 335595

11731725\_ 6. 551305 6. 539045 6. 490307 6. 383618 6. 546368 6. 469102  
11731726\_ 3. 068674 3. 001014 2. 98572 2. 975222 2. 916149 3. 094223  
11731727\_ 2. 296092 2. 083608 2. 12216 2. 093776 2. 117715 2. 20642  
11731728\_ 4. 305237 4. 489418 4. 146493 4. 555933 4. 374881 4. 389929  
11731729\_ 2. 251402 2. 343037 2. 225891 2. 508839 2. 26135 2. 357204  
11731730\_ 6. 758097 6. 808912 6. 630657 6. 277183 6. 526344 6. 450901  
11731731\_ 4. 419003 4. 713227 4. 48342 4. 488227 4. 471261 4. 499343  
11731732\_ 3. 428617 3. 490019 3. 3589 3. 586552 3. 587327 3. 403579  
11731733\_ 3. 240255 3. 38373 3. 308557 3. 276167 3. 332103 3. 449576  
11731734\_ 4. 68547 4. 81195 4. 699265 4. 951456 4. 890539 4. 906658  
11731735\_ 10. 04033 10. 01226 10. 02911 9. 902035 9. 990876 9. 962653  
11731736\_ 5. 078641 5. 22432 5. 297498 5. 323187 5. 364314 5. 452441  
11731737\_ 5. 533803 5. 442558 5. 540781 5. 262221 5. 131619 5. 194272  
11731738\_ 5. 956479 5. 951225 6. 018553 5. 414869 5. 278411 5. 380133  
11731739\_ 5. 627355 5. 622959 5. 794944 5. 552133 5. 683088 5. 573818  
11731740\_ 5. 079494 5. 036023 4. 984669 4. 990013 5. 149545 5. 002059  
11731741\_ 7. 365592 7. 327859 7. 357524 6. 829092 6. 747022 6. 852422  
11731742\_ 5. 672154 5. 509596 5. 806529 5. 481104 5. 337087 5. 621975  
11731743\_ 6. 645953 6. 448378 6. 509766 6. 517076 6. 448378 6. 496276  
11731744\_ 4. 726063 4. 584933 4. 861271 5. 022117 4. 77086 4. 906658  
11731745\_ 7. 248229 7. 405512 7. 182792 7. 403252 7. 351948 7. 296547  
11731746\_ 4. 907933 4. 912271 4. 962618 4. 435454 4. 52373 4. 710523  
11731747\_ 5. 123603 5. 073036 4. 993577 5. 102464 5. 183024 5. 174026  
11731748\_ 5. 398028 5. 487245 5. 409736 5. 52696 5. 486969 5. 517715  
11731749\_ 5. 840903 5. 849539 5. 846759 5. 838372 5. 91101 5. 820131  
11731750\_ 6. 051554 6. 058786 6. 030329 6. 989204 7. 175765 7. 07498  
11731751\_ 7. 00591 6. 955604 6. 953607 6. 296469 6. 247265 6. 290607  
11731752\_ 4. 761318 4. 555244 4. 812108 4. 475831 4. 408254 4. 388081  
11731753\_ 4. 722343 4. 630856 4. 824195 4. 479299 4. 499066 4. 630856  
11731754\_ 5. 097653 5. 34812 5. 261761 5. 609925 5. 250425 5. 303579  
11731755\_ 8. 479845 8. 442608 8. 578984 7. 686479 7. 69985 7. 774862  
11731756\_ 4. 549657 4. 795892 4. 461714 4. 719616 4. 676479 4. 763543  
11731757\_ 5. 887425 5. 769659 5. 824112 5. 857042 5. 857812 5. 737796  
11731758\_ 6. 059397 5. 956753 6. 110489 6. 056759 6. 093372 6. 080985  
11731759\_ 6. 82944 6. 777744 6. 804052 6. 436977 6. 501824 6. 445488  
11731760\_ 6. 343741 6. 328633 6. 456529 6. 07382 5. 898289 5. 913385  
11731761\_ 6. 466114 6. 462064 6. 571774 5. 958904 6. 131392 6. 035138  
11731762\_ 5. 174582 5. 059479 5. 049059 5. 24756 5. 313819 5. 393775  
11731763\_ 5. 653428 5. 656448 5. 700017 5. 788912 5. 899887 5. 844342  
11731764\_ 4. 47576 4. 763543 4. 459939 4. 708914 4. 651131 4. 601038  
11731765\_ 4. 61538 4. 278349 4. 584933 4. 507436 4. 602963 4. 595032  
11731766\_ 6. 253935 6. 370071 6. 170002 6. 374155 6. 371626 6. 341842  
11731767\_ 5. 656723 5. 536894 5. 414869 5. 331946 5. 406204 5. 368093  
11731768\_ 6. 563043 6. 510914 6. 600145 6. 609333 6. 618369 6. 614866  
11731769\_ 7. 122631 7. 112396 7. 218056 7. 105939 7. 116993 7. 118137  
11731770\_ 7. 799789 7. 834717 7. 8329 6. 944182 6. 956076 6. 877763  
11731771\_ 3. 986251 3. 879005 3. 70208 3. 534332 3. 451863 3. 561626  
11731772\_ 4. 24632 4. 24632 4. 236158 4. 428597 4. 515477 4. 527399  
11731773\_ 5. 565948 5. 634286 5. 643713 5. 672285 5. 808143 5. 703999  
11731774\_ 5. 935711 5. 759619 5. 773309 5. 471291 5. 439881 5. 360528  
11731775\_ 8. 435137 8. 425545 8. 464566 7. 864602 7. 838648 7. 840348

11731776\_ 5. 125224 5. 256156 5. 083212 5. 275598 5. 363608 5. 432824  
11731777\_ 6. 828331 6. 815032 6. 702949 7. 052804 6. 990075 7. 069428  
11731778\_ 5. 23511 5. 206646 5. 167409 5. 269277 5. 370101 5. 268466  
11731779\_ 2. 743939 2. 592695 2. 649842 2. 651246 2. 673996 2. 760841  
11731780\_ 6. 784809 6. 879181 6. 747808 6. 792183 6. 721273 6. 765911  
11731781\_ 6. 759378 6. 874408 6. 744721 6. 786658 6. 703108 6. 792056  
11731782\_ 11. 83911 11. 84503 11. 87322 11. 83189 11. 82125 11. 77049  
11731783\_ 6. 164817 6. 282224 6. 139038 6. 277132 6. 2531 6. 300574  
11731784\_ 2. 860733 2. 938451 2. 727347 3. 049408 2. 824793 2. 938451  
11731785\_ 3. 268262 3. 415505 3. 259743 3. 539019 3. 360637 3. 488975  
11731786\_ 6. 703943 6. 684623 6. 610587 6. 493677 6. 51113 6. 584622  
11731787\_ 6. 56978 6. 664761 6. 57494 6. 64796 6. 633329 6. 521694  
11731788\_ 6. 572889 6. 612622 6. 610298 6. 55522 6. 514752 6. 640485  
11731789\_ 5. 861516 5. 681933 5. 643155 5. 730762 5. 724158 5. 775153  
11731790\_ 5. 66187 5. 698213 5. 602065 5. 794286 5. 648789 5. 708219  
11731791\_ 2. 683303 2. 461748 2. 447992 2. 44829 2. 221825 2. 44829  
11731792\_ 2. 539569 2. 276272 2. 454993 2. 506115 2. 298204 2. 384435  
11731793\_ 4. 820025 4. 982271 4. 766997 4. 771381 4. 823621 4. 837667  
11731794\_ 5. 763806 5. 878815 5. 812887 5. 843506 5. 946942 5. 925213  
11731795\_ 6. 432849 6. 506013 6. 507893 6. 147737 6. 152785 6. 245393  
11731796\_ 1. 90498 2. 023519 2. 001953 1. 762025 1. 846612 1. 977209  
11731797\_ 2. 078356 2. 311967 1. 905623 1. 804393 1. 946058 2. 083036  
11731798\_ 3. 636198 3. 600862 3. 525106 3. 726064 3. 527483 3. 666388  
11731799\_ 6. 722898 6. 744997 6. 736281 6. 639973 6. 847721 6. 776431  
11731800\_ 6. 160911 6. 049192 6. 180912 5. 962184 5. 957906 6. 086184  
11731801\_ 5. 133345 5. 187338 5. 174697 4. 751699 4. 72663 5. 208199  
11731802\_ 4. 423137 4. 510366 4. 537961 4. 522912 4. 37587 4. 642032  
11731803\_ 4. 793599 4. 907857 4. 724058 5. 068172 4. 942825 4. 902289  
11731804\_ 6. 599493 6. 530044 6. 633003 5. 894792 6. 112024 6. 094231  
11731805\_ 5. 090118 5. 090118 5. 151238 4. 501029 4. 693819 4. 775307  
11731806\_ 7. 173454 7. 012727 7. 13666 6. 061252 6. 050674 6. 088234  
11731807\_ 7. 790157 7. 690578 7. 780849 7. 591885 7. 636159 7. 637045  
11731808\_ 4. 369313 4. 584933 4. 544249 4. 643124 4. 554199 4. 52373  
11731809\_ 1. 971968 1. 989104 1. 954831 1. 989104 1. 988359 2. 083613  
11731810\_ 1. 898324 2. 012831 1. 950945 2. 177339 2. 063686 2. 136918  
11731811\_ 2. 780319 2. 956183 2. 736636 2. 718322 2. 777262 2. 777262  
11731812\_ 2. 943475 2. 927557 2. 756453 3. 28329 2. 798956 2. 927557  
11731813\_ 5. 954846 6. 147153 5. 916613 6. 118838 6. 081643 6. 149078  
11731814\_ 2. 179994 2. 190552 2. 108198 2. 373945 2. 289982 2. 343047  
11731815\_ 5. 480966 5. 575679 5. 735941 5. 500611 5. 523406 5. 35004  
11731816\_ 4. 933462 5. 199371 5. 01647 5. 131915 4. 994753 4. 976759  
11731817\_ 6. 890147 6. 7998 6. 9333 6. 832813 6. 832813 6. 837708  
11731818\_ 6. 360394 6. 380276 6. 475995 6. 442411 6. 429501 6. 512665  
11731819\_ 2. 795243 2. 487598 2. 755214 2. 464374 2. 686057 2. 701885  
11731820\_ 5. 319708 5. 161108 5. 264062 5. 29142 5. 265844 5. 236386  
11731821\_ 5. 414845 5. 55714 5. 587635 5. 546838 5. 631105 5. 516111  
11731822\_ 2. 617654 2. 655131 2. 721858 2. 77281 2. 793979 2. 705461  
11731823\_ 4. 54391 4. 50355 4. 507807 4. 52373 4. 436876 4. 52373  
11731824\_ 3. 336424 3. 503743 3. 471553 3. 580764 3. 503743 3. 606313  
11731825\_ 3. 281955 3. 44021 3. 390878 3. 21279 3. 393478 3. 281955  
11731826\_ 6. 086085 6. 012403 6. 055474 5. 235023 5. 029529 5. 360283

11731827\_ 5. 319604 5. 160893 5. 214717 4. 9626 4. 979 5. 07907  
11731828\_ 3. 215473 3. 758413 4. 015235 3. 943224 4. 077338 4. 002185  
11731829\_ 3. 503743 3. 93931 4. 212418 4. 121767 4. 315057 4. 203613  
11731830\_ 5. 098469 5. 035535 5. 068782 5. 098469 5. 079873 5. 104015  
11731831\_ 5. 194414 5. 196481 5. 204656 5. 314489 5. 194414 5. 190173  
11731832\_ 4. 763543 4. 938383 4. 997665 4. 29465 4. 353006 4. 25248  
11731833\_ 9. 56414 9. 497301 9. 576483 9. 396951 9. 321624 9. 380362  
11731834\_ 10. 32373 10. 2899 10. 30184 9. 355379 9. 376062 9. 425181  
11731835\_ 2. 979612 3. 020618 3. 001497 3. 014293 3. 028074 2. 948167  
11731836\_ 9. 031113 9. 0021 9. 020933 8. 90423 8. 952084 8. 889562  
11731837\_ 8. 330376 8. 308132 8. 337514 8. 215323 8. 270176 8. 252911  
11731838\_ 5. 859737 5. 886606 5. 760351 5. 079448 4. 938817 4. 945977  
11731839\_ 6. 921 6. 866671 6. 994297 7. 218775 7. 333856 7. 350159  
11731840\_ 5. 840326 5. 801381 5. 903508 5. 770129 5. 83022 5. 870242  
11731841\_ 8. 310818 8. 218168 8. 255749 8. 994399 9. 010571 8. 990731  
11731842\_ 6. 753264 6. 626853 6. 743691 7. 418305 7. 382668 7. 438315  
11731843\_ 6. 288094 6. 234258 6. 372053 5. 737897 5. 895844 5. 628183  
11731844\_ 5. 85877 5. 918745 5. 894697 5. 842627 5. 966773 5. 95783  
11731845\_ 5. 82443 5. 768012 5. 850343 6. 715488 6. 639429 6. 792183  
11731846\_ 3. 504806 3. 262025 3. 645259 3. 558357 3. 79471 3. 521558  
11731847\_ 6. 278215 6. 063135 6. 219072 6. 076709 6. 129334 6. 241258  
11731848\_ 5. 181001 5. 17613 5. 286117 3. 706662 3. 87234 3. 737634  
11731849\_ 6. 039812 6. 069475 6. 143269 5. 948901 5. 935698 5. 953507  
11731850\_ 5. 11527 4. 937452 4. 709947 4. 786107 4. 757462 4. 489654  
11731851\_ 7. 464353 7. 522404 7. 400017 7. 534654 7. 476898 7. 491128  
11731852\_ 3. 515527 3. 536068 3. 209768 3. 398236 3. 464166 3. 606313  
11731853\_ 8. 968172 8. 963862 8. 959666 9. 301031 9. 289213 9. 380081  
11731854\_ 5. 132024 5. 184095 5. 112786 5. 428454 5. 245384 5. 319026  
11731855\_ 3. 28307 3. 218734 3. 370288 3. 341905 3. 244081 3. 244081  
11731856\_ 5. 11527 5. 087035 5. 025627 5. 029529 5. 148303 5. 160914  
11731857\_ 3. 808571 3. 8466 3. 878455 3. 807481 3. 724616 3. 832407  
11731858\_ 2. 82908 2. 839134 2. 90802 2. 828926 2. 978606 2. 963575  
11731859\_ 6. 775724 6. 7333 6. 792183 6. 887381 6. 905976 6. 98392  
11731860\_ 5. 9497 5. 932868 5. 976193 6. 050246 6. 09525 6. 050246  
11731861\_ 4. 694746 4. 538411 4. 538411 4. 678302 4. 635383 4. 576021  
11731862\_ 8. 992738 9. 01992 8. 926279 8. 536762 8. 397295 8. 468099  
11731863\_ 4. 929566 4. 951873 4. 779742 4. 868107 5. 032273 4. 971273  
11731864\_ 5. 48813 5. 559874 5. 531335 5. 750143 5. 93895 5. 855758  
11731865\_ 2. 526625 2. 475403 2. 63822 2. 586981 2. 47102 2. 530493  
11731866\_ 5. 442778 5. 407806 5. 414356 5. 432979 5. 524211 5. 461915  
11731867\_ 6. 249103 6. 23162 6. 341997 6. 312716 6. 330451 6. 304723  
11731868\_ 8. 485929 8. 506721 8. 570353 8. 485192 8. 387386 8. 449816  
11731869\_ 4. 647198 4. 647198 4. 554956 4. 623756 4. 722059 4. 709046  
11731870\_ 6. 723499 6. 784256 6. 528474 6. 675522 6. 698654 6. 829341  
11731871\_ 3. 326953 3. 152041 3. 032538 3. 242478 3. 257795 3. 114007  
11731872\_ 4. 276018 4. 247731 4. 102649 4. 368801 4. 287373 4. 264021  
11731873\_ 5. 137563 5. 328467 5. 214346 5. 14116 5. 231495 5. 518108  
11731874\_ 5. 798444 5. 715207 5. 783998 5. 973542 5. 826647 5. 981707  
11731875\_ 5. 687162 5. 763951 5. 654536 5. 53527 5. 757584 5. 799313  
11731876\_ 5. 690082 5. 456835 5. 515342 4. 68626 4. 828254 4. 877968  
11731877\_ 4. 381658 4. 361796 4. 320528 4. 446338 4. 405586 4. 368721



11731878\_ 4. 980553 4. 981077 4. 776773 5. 002553 5. 030805 5. 089289  
11731879\_ 5. 029529 5. 067072 4. 961877 4. 803562 4. 875198 4. 643717  
11731880\_ 5. 029529 5. 091681 5. 208908 4. 681621 4. 508394 4. 795273  
11731881\_ 7. 200604 7. 219088 7. 162496 7. 007383 6. 931037 7. 048766  
11731882\_ 3. 503743 3. 544359 3. 428577 3. 160523 3. 177877 3. 299928  
11731883\_ 4. 584933 4. 490391 4. 459939 4. 530751 4. 779369 4. 976795  
11731884\_ 6. 131272 5. 975692 5. 923196 6. 020083 6. 047121 6. 108066  
11731885\_ 5. 476465 5. 53518 5. 271353 5. 671384 5. 397861 5. 554436  
11731886\_ 3. 401725 3. 559072 3. 472082 3. 941172 3. 463959 3. 426435  
11731887\_ 7. 752664 7. 743828 7. 81967 8. 373505 8. 386895 8. 354841  
11731888\_ 7. 401612 7. 306009 7. 322592 7. 86209 7. 879888 7. 847671  
11731889\_ 7. 959333 7. 820173 7. 874642 6. 78195 6. 829947 6. 792318  
11731890\_ 6. 046393 6. 113677 5. 945585 6. 252197 6. 130616 6. 15282  
11731891\_ 6. 56978 6. 431763 6. 639371 5. 68109 5. 722495 5. 834906  
11731892\_ 3. 293623 3. 351348 3. 277683 3. 259678 3. 356798 3. 254228  
11731893\_ 5. 028943 5. 281886 5. 122191 5. 098636 5. 19887 5. 235435  
11731894\_ 5. 328669 5. 423834 5. 368427 5. 328669 5. 396913 5. 426614  
11731895\_ 5. 157561 5. 2666 5. 297498 5. 189628 5. 252086 5. 204142  
11731896\_ 6. 325401 6. 275115 6. 094413 4. 772366 5. 48634 4. 984669  
11731897\_ 4. 703589 4. 442095 4. 560685 3. 403138 3. 398236 3. 552926  
11731898\_ 5. 676352 5. 560006 5. 660423 5. 713287 5. 808975 5. 580279  
11731899\_ 8. 910118 8. 925071 8. 964722 8. 904209 8. 97359 8. 948966  
11731900\_ 8. 544661 8. 436749 8. 557209 8. 386721 8. 358574 8. 445644  
11731901\_ 2. 970236 3. 443805 3. 025972 3. 160673 3. 004853 2. 902488  
11731902\_ 1. 971023 1. 996394 1. 943764 1. 865635 1. 861429 1. 871065  
11731903\_ 4. 510578 4. 643717 4. 536915 4. 861911 4. 782465 4. 727367  
11731904\_ 2. 039111 2. 22826 2. 270024 2. 332093 2. 108487 2. 230016  
11731905\_ 4. 287731 4. 255469 4. 071961 4. 268099 4. 261495 4. 328691  
11731906\_ 5. 643713 5. 700403 5. 404661 5. 750651 5. 68565 5. 754755  
11731907\_ 5. 227183 4. 645925 5. 139508 5. 900811 5. 738646 5. 665131  
11731908\_ 4. 688728 4. 958079 4. 787487 4. 923967 4. 940364 4. 924878  
11731909\_ 5. 968842 5. 946076 5. 718715 5. 775623 5. 816022 5. 795823  
11731910\_ 4. 063508 4. 178263 4. 170853 4. 259284 4. 368525 4. 293639  
11731911\_ 5. 559783 5. 673195 5. 619486 5. 678571 5. 887703 5. 64291  
11731912\_ 5. 559814 5. 493007 5. 426552 5. 559814 5. 539737 5. 670249  
11731913\_ 2. 064287 2. 302185 2. 195139 2. 079475 2. 25483 2. 107921  
11731914\_ 4. 458822 4. 65414 4. 410251 4. 522627 4. 421856 4. 446082  
11731915\_ 5. 938056 5. 893981 5. 944024 5. 379105 5. 419148 5. 340388  
11731916\_ 3. 968547 4. 31585 3. 946804 4. 210298 4. 283558 4. 196973  
11731917\_ 3. 639182 3. 674856 3. 540754 3. 675249 3. 658481 3. 765735  
11731918\_ 7. 065039 6. 948082 6. 996851 7. 971164 7. 973109 8. 006309  
11731919\_ 6. 053394 6. 023645 6. 015522 7. 30057 7. 332804 7. 328306  
11731920\_ 4. 538692 4. 394161 4. 218591 4. 545745 4. 459939 4. 557826  
11731921\_ 2. 799574 2. 782892 2. 613249 2. 653574 2. 921041 2. 691526  
11731922\_ 3. 266011 3. 212592 3. 138626 3. 060943 3. 398236 3. 315179  
11731923\_ 5. 341445 5. 073036 5. 257144 5. 010234 4. 563398 4. 962739  
11731924\_ 4. 881276 4. 797372 4. 918328 5. 073036 5. 035547 5. 072147  
11731925\_ 5. 160792 5. 156701 5. 094256 5. 330406 5. 277808 5. 033215  
11731926\_ 4. 754578 4. 824901 4. 921206 4. 914651 4. 853739 4. 959575  
11731927\_ 4. 462384 4. 477503 4. 391092 4. 588538 4. 62784 4. 612839  
11731928\_ 4. 350848 4. 447246 4. 179151 4. 153717 4. 253875 4. 373582

11731929\_ 2. 853264 2. 853264 2. 718769 2. 796169 2. 96607 2. 853264  
11731930\_ 3. 195749 3. 290188 3. 290188 3. 375827 3. 478565 3. 459336  
11731931\_ 5. 305107 5. 2666 5. 14223 5. 318815 5. 273627 5. 339673  
11731932\_ 6. 735337 6. 674068 6. 685825 6. 625836 6. 593891 6. 52547  
11731933\_ 2. 847817 2. 881606 2. 735225 2. 944789 3. 032931 2. 911  
11731934\_ 6. 260054 6. 355485 6. 159771 6. 34864 6. 245876 6. 248755  
11731935\_ 3. 355974 3. 707209 3. 637743 3. 599858 3. 328949 3. 543693  
11731936\_ 4. 0223 4. 111088 4. 048605 4. 194213 3. 995602 4. 035555  
11731937\_ 2. 714778 2. 479121 2. 692676 2. 587169 2. 361778 2. 411157  
11731938\_ 6. 276062 6. 350419 6. 282982 6. 454837 6. 399798 6. 356993  
11731939\_ 4. 183745 4. 077559 4. 211377 4. 003188 3. 924979 3. 648969  
11731940\_ 4. 55141 4. 69958 4. 731888 4. 55324 4. 610758 4. 415744  
11731941\_ 5. 659009 5. 859251 5. 760815 5. 929757 6. 104931 5. 943757  
11731942\_ 6. 900075 6. 844653 6. 667544 5. 382235 5. 595813 5. 619422  
11731943\_ 8. 654729 8. 625413 8. 619733 8. 491386 8. 44324 8. 535813  
11731944\_ 2. 19284 2. 361778 2. 116054 2. 167224 2. 38628 2. 218763  
11731945\_ 5. 319453 5. 481114 5. 438031 5. 460134 5. 445449 5. 391279  
11731946\_ 6. 221977 6. 150653 6. 002967 6. 064682 6. 012895 6. 165815  
11731947\_ 3. 84864 3. 921687 3. 954147 4. 437274 4. 337512 4. 285707  
11731948\_ 2. 758547 2. 770876 2. 704786 2. 567285 2. 867788 3. 035242  
11731949\_ 2. 268004 2. 22571 2. 539813 2. 310297 2. 241015 2. 268004  
11731950\_ 3. 526119 3. 695776 3. 680901 3. 290188 3. 533057 3. 700676  
11731951\_ 5. 490943 5. 195473 5. 147372 5. 33084 5. 48634 5. 15397  
11731952\_ 6. 659221 6. 794351 6. 674605 6. 70343 6. 776918 6. 657082  
11731953\_ 4. 518194 4. 470196 4. 532264 4. 599523 4. 73062 4. 815022  
11731954\_ 7. 099734 7. 165565 7. 210272 7. 306755 7. 269859 7. 230373  
11731955\_ 7. 993249 8. 0551 7. 886948 7. 909895 7. 921022 8. 004488  
11731956\_ 4. 988759 4. 763543 4. 79045 4. 903503 4. 820827 4. 748347  
11731957\_ 5. 465857 5. 518416 5. 577515 5. 469028 5. 661974 5. 58452  
11731958\_ 2. 922499 3. 107372 2. 851256 3. 296127 3. 142003 3. 053331  
11731959\_ 2. 394406 2. 316288 2. 268336 2. 301451 2. 315646 2. 345733  
11731960\_ 4. 368602 4. 368602 4. 338626 4. 375894 4. 375894 4. 491462  
11731961\_ 7. 672945 7. 856791 7. 678152 7. 689546 7. 778928 7. 726309  
11731962\_ 6. 610409 6. 464964 6. 510356 6. 293675 6. 147922 6. 237439  
11731963\_ 6. 451883 6. 383742 6. 385697 6. 255982 6. 280083 6. 291274  
11731964\_ 5. 285765 5. 120994 5. 024466 5. 285765 5. 338034 5. 159868  
11731965\_ 5. 434976 5. 519264 5. 508592 5. 516998 5. 616536 5. 528358  
11731966\_ 5. 440426 5. 444909 5. 45963 5. 4892 5. 635813 5. 541422  
11731967\_ 6. 481719 6. 579579 6. 529702 6. 532476 6. 570543 6. 538142  
11731968\_ 6. 365863 6. 559152 6. 395063 6. 395063 6. 302996 6. 417769  
11731969\_ 4. 408377 4. 335594 4. 459939 4. 213226 4. 347909 4. 460667  
11731970\_ 3. 232051 3. 309341 3. 309341 3. 443837 3. 263433 3. 275655  
11731971\_ 2. 456642 2. 367725 2. 05764 2. 510508 2. 45394 2. 634983  
11731972\_ 3. 219434 3. 226039 3. 291465 3. 13445 3. 038664 3. 197153  
11731973\_ 4. 718348 4. 942896 4. 728342 4. 602634 4. 837335 4. 707011  
11731974\_ 3. 731389 4. 021754 3. 97311 3. 818617 3. 808605 3. 846745  
11731975\_ 5. 629608 5. 721645 5. 643713 5. 794286 5. 591355 5. 738328  
11731976\_ 2. 605516 2. 454512 2. 521233 2. 526714 2. 714046 2. 718322  
11731977\_ 4. 105291 3. 933057 4. 183276 4. 352963 4. 166195 4. 254042  
11731978\_ 8. 147729 8. 134303 8. 164134 7. 781327 7. 83818 7. 778923  
11731979\_ 4. 381956 4. 576149 4. 267732 4. 475348 4. 866484 4. 676579

11731980\_ 4. 761398 4. 946234 4. 952369 5. 081939 4. 891973 4. 923513  
11731981\_ 5. 708299 5. 672285 5. 612371 5. 531007 5. 558448 5. 589814  
11731982\_ 4. 404924 4. 635389 4. 52373 4. 690985 4. 537713 4. 622601  
11731983\_ 5. 534942 5. 189628 5. 456732 4. 805136 4. 7102 4. 712015  
11731984\_ 5. 180559 5. 041768 4. 939782 4. 577378 4. 55243 4. 455216  
11731985\_ 4. 902177 4. 963173 4. 824195 4. 959902 4. 976339 5. 00432  
11731986\_ 2. 371924 2. 341254 2. 31492 1. 950769 2. 230108 2. 126967  
11731987\_ 9. 313034 9. 147192 9. 266375 9. 826011 9. 835018 9. 85594  
11731988\_ 5. 586122 5. 738039 5. 732828 5. 73415 5. 843959 5. 69415  
11731989\_ 3. 175808 3. 029972 3. 173422 2. 9939 2. 84796 2. 979817  
11731990\_ 2. 673167 2. 740441 2. 736636 2. 64698 2. 566219 2. 543795  
11731991\_ 7. 155099 7. 049576 7. 141426 7. 732102 7. 792745 7. 892766  
11731992\_ 7. 33332 7. 409753 7. 303619 7. 964793 8. 146829 8. 124429  
11731993\_ 3. 455017 3. 499001 3. 694392 3. 671235 3. 746906 3. 761515  
11731994\_ 7. 890183 7. 921624 7. 995881 7. 622697 7. 670905 7. 691265  
11731995\_ 6. 589885 6. 527145 6. 564046 6. 318385 6. 272683 6. 319541  
11731996\_ 7. 722055 7. 743169 7. 747174 7. 565607 7. 505701 7. 577648  
11731997\_ 7. 827576 7. 842319 7. 792585 7. 833779 7. 816264 7. 822768  
11731998\_ 4. 569627 4. 400754 4. 535272 4. 584933 4. 473094 4. 521255  
11731999\_ 2. 127292 2. 127292 2. 134482 2. 052323 2. 027333 2. 150344  
11732000\_ 3. 225895 3. 028894 2. 758947 3. 131152 2. 822099 2. 932361  
11732001\_ 2. 828136 2. 466452 2. 451158 2. 280871 2. 451158 2. 444615  
11732002\_ 3. 364631 3. 430416 3. 283894 3. 531435 3. 421196 3. 519796  
11732003\_ 4. 623776 4. 676956 4. 569334 4. 602894 4. 571366 4. 711386  
11732004\_ 7. 157545 6. 93357 7. 003253 6. 805012 6. 800836 6. 769893  
11732005\_ 5. 185445 5. 049773 5. 180536 5. 180536 5. 236107 5. 155629  
11732006\_ 6. 69781 6. 498802 6. 716537 6. 607606 6. 557068 6. 572309  
11732007\_ 5. 964281 6. 121888 6. 043543 6. 053789 6. 062418 6. 138226  
11732008\_ 5. 227297 5. 151301 5. 021813 5. 221973 5. 194159 5. 094229  
11732009\_ 4. 994154 5. 013082 5. 02335 5. 045975 5. 168508 5. 118207  
11732010\_ 4. 435831 4. 219441 4. 459939 4. 40461 4. 494223 4. 434301  
11732011\_ 2. 645293 2. 55328 2. 490923 2. 489468 2. 489468 2. 677557  
11732012\_ 3. 500216 3. 275531 3. 316142 3. 316142 3. 316142 3. 507047  
11732013\_ 7. 50408 7. 426223 7. 53853 6. 702681 6. 787243 6. 7414  
11732014\_ 4. 892099 5. 114808 4. 894864 4. 66328 4. 695168 4. 864647  
11732015\_ 2. 658738 2. 638464 2. 758327 2. 57393 2. 533533 2. 638464  
11732016\_ 3. 557368 3. 837917 3. 652295 3. 284121 3. 652295 3. 652295  
11732017\_ 3. 943499 3. 969341 3. 774409 3. 962589 4. 091564 4. 088928  
11732018\_ 2. 215859 2. 126552 1. 935648 1. 964579 2. 033753 1. 947769  
11732019\_ 5. 409222 5. 492705 5. 436384 5. 533789 5. 442083 5. 442083  
11732020\_ 6. 075602 6. 196732 6. 115802 6. 162728 6. 177074 6. 231193  
11732021\_ 6. 955254 6. 818064 6. 911092 6. 957893 6. 97745 6. 92598  
11732022\_ 4. 605621 4. 401328 4. 694891 4. 419846 4. 52373 4. 326614  
11732023\_ 5. 209259 4. 89215 5. 089563 4. 969915 5. 174037 4. 99467  
11732024\_ 7. 295762 7. 277629 7. 389516 7. 19035 7. 241382 7. 244967  
11732025\_ 1. 723726 1. 90648 2. 171466 1. 725571 1. 889555 1. 973748  
11732026\_ 8. 044021 8. 084552 8. 030106 8. 09976 8. 11978 8. 186162  
11732027\_ 3. 729599 3. 937791 3. 809118 3. 767075 3. 832609 3. 844909  
11732028\_ 5. 046847 4. 851007 4. 789804 4. 926859 5. 062739 4. 905824  
11732029\_ 6. 438543 6. 425657 6. 27285 6. 376283 6. 38951 6. 3932  
11732030\_ 5. 327962 5. 457025 5. 297498 5. 445551 5. 414801 5. 47492

11732031\_ 5. 251085 5. 332521 5. 152799 5. 38775 5. 375492 5. 414556  
11732032\_ 4. 81807 4. 894703 4. 760095 5. 131989 5. 0165 4. 907259  
11732033\_ 4. 997818 4. 997818 5. 05597 4. 961253 4. 997818 4. 927144  
11732034\_ 4. 642969 4. 777886 4. 412408 4. 635927 4. 545304 4. 763543  
11732035\_ 4. 254914 4. 419873 4. 357217 4. 579619 4. 321826 4. 424321  
11732036\_ 3. 009214 3. 123517 3. 012794 2. 911045 3. 108853 2. 960002  
11732037\_ 9. 597969 9. 541496 9. 573485 9. 243867 9. 26448 9. 248418  
11732038\_ 5. 209259 4. 805915 5. 219553 5. 261046 5. 26034 5. 303554  
11732039\_ 2. 913516 2. 418588 2. 691246 2. 578082 2. 358011 2. 251892  
11732040\_ 4. 953405 5. 109135 4. 984669 5. 380649 5. 152642 5. 335336  
11732041\_ 4. 399363 4. 372631 4. 157424 4. 399791 4. 447647 4. 439726  
11732042\_ 4. 708187 4. 778876 4. 759321 4. 8685 4. 808015 4. 70435  
11732043\_ 6. 014181 6. 06176 5. 954249 5. 989444 5. 995197 6. 094801  
11732044\_ 4. 79809 4. 980405 4. 734236 5. 145822 5. 197427 5. 021893  
11732045\_ 2. 235709 1. 898812 2. 077539 2. 216807 2. 079884 2. 171471  
11732046\_ 5. 147295 5. 167436 5. 195401 5. 189628 5. 220552 5. 24293  
11732047\_ 6. 543666 6. 470973 6. 359192 6. 532148 6. 486311 6. 479098  
11732048\_ 6. 710695 6. 767438 6. 656755 6. 692918 6. 688598 6. 706908  
11732049\_ 4. 268818 4. 580711 4. 540248 4. 66392 4. 520283 4. 785596  
11732050\_ 4. 000405 4. 053543 3. 959507 4. 143638 4. 075542 4. 200678  
11732051\_ 3. 893824 3. 95154 3. 836518 4. 218812 3. 92758 3. 912909  
11732052\_ 5. 496261 5. 620443 5. 385317 5. 721022 5. 568556 5. 637135  
11732053\_ 4. 883961 5. 065268 4. 955259 4. 843002 5. 065268 5. 065268  
11732054\_ 5. 587047 5. 784508 5. 455174 5. 724048 5. 608366 5. 732315  
11732055\_ 3. 039718 3. 05757 2. 901337 3. 21279 3. 184362 2. 933955  
11732056\_ 5. 513142 5. 644216 5. 709521 5. 914076 5. 915579 5. 942093  
11732057\_ 5. 839171 5. 763634 5. 848348 6. 036877 6. 125756 6. 046685  
11732058\_ 6. 985163 6. 910771 6. 903419 7. 468807 7. 438185 7. 464354  
11732059\_ 5. 283417 5. 189628 5. 251325 5. 3515 5. 383555 5. 145818  
11732060\_ 6. 845428 6. 870827 6. 846751 6. 218367 6. 241491 6. 279286  
11732061\_ 4. 415086 4. 157061 4. 351885 3. 86776 3. 969526 4. 384372  
11732062\_ 4. 496381 4. 078079 4. 256926 4. 048243 4. 302886 4. 409085  
11732063\_ 5. 043061 5. 090709 4. 844931 5. 03608 4. 934534 4. 990924  
11732064\_ 6. 033329 6. 194268 6. 119256 6. 180016 6. 147377 6. 186059  
11732065\_ 3. 034458 3. 159358 3. 225747 3. 165092 3. 284212 3. 371754  
11732066\_ 5. 560193 5. 66349 5. 475257 5. 591941 5. 576595 5. 578399  
11732067\_ 4. 763543 4. 591629 4. 497149 4. 824195 4. 818315 4. 859275  
11732068\_ 5. 252373 5. 145425 5. 17639 5. 217585 5. 268081 5. 170996  
11732069\_ 3. 356711 3. 49335 3. 356711 3. 572884 3. 404666 3. 427718  
11732070\_ 2. 500766 2. 694786 2. 723426 2. 723426 2. 718322 2. 635772  
11732071\_ 5. 056812 5. 169924 5. 125953 5. 279371 5. 233033 5. 253624  
11732072\_ 6. 546296 6. 644355 6. 602319 6. 63336 6. 719316 6. 541058  
11732073\_ 7. 298755 7. 313 7. 270022 7. 288407 7. 30831 7. 195486  
11732074\_ 4. 946279 4. 972228 4. 728379 4. 874234 4. 716066 4. 92527  
11732075\_ 2. 054551 1. 829782 2. 141063 1. 958187 1. 963672 2. 141063  
11732076\_ 2. 676827 2. 754485 2. 772799 2. 603556 2. 740847 2. 660649  
11732077\_ 5. 510699 5. 63311 5. 446177 5. 751735 5. 724212 5. 751735  
11732078\_ 8. 371493 8. 355431 8. 365047 7. 717638 7. 690869 7. 622389  
11732079\_ 4. 312279 4. 400345 4. 376812 4. 603066 4. 503693 4. 543743  
11732080\_ 5. 748525 5. 550196 5. 810832 5. 26034 5. 475584 5. 446567  
11732081\_ 1. 986055 1. 898324 1. 892123 2. 000908 1. 843644 1. 928457

11732082\_ 5. 632904 5. 77063 5. 712564 5. 881063 5. 828861 5. 877355  
11732083\_ 3. 735059 3. 806813 3. 830817 4. 00837 3. 803986 3. 929079  
11732084\_ 1. 90215 1. 843679 1. 995297 1. 905976 1. 918887 1. 802835  
11732085\_ 3. 503743 3. 290188 3. 589224 3. 528856 3. 521484 3. 606313  
11732086\_ 6. 998573 6. 923884 6. 988502 7. 024127 7. 002341 6. 948819  
11732087\_ 6. 536494 6. 430975 6. 318829 6. 373357 6. 47205 6. 512496  
11732088\_ 5. 02566 4. 939919 4. 7928 5. 204987 5. 058935 4. 974175  
11732089\_ 3. 726402 4. 073402 3. 965857 3. 835335 4. 127593 3. 986314  
11732090\_ 4. 903469 4. 9226 4. 483408 5. 029538 4. 916665 4. 916265  
11732091\_ 7. 957516 7. 917342 7. 931565 8. 36245 8. 424727 8. 377163  
11732092\_ 4. 995052 5. 014487 4. 983678 5. 029529 4. 984669 5. 024337  
11732093\_ 5. 433855 5. 509962 5. 448296 5. 380649 5. 320178 5. 377484  
11732094\_ 5. 652985 5. 694695 5. 614563 5. 65646 5. 525682 5. 559778  
11732095\_ 7. 944387 7. 799641 7. 876545 7. 3851 7. 444946 7. 363113  
11732096\_ 2. 21142 2. 447055 2. 41942 2. 50958 2. 479647 2. 305142  
11732097\_ 5. 705822 5. 890818 5. 912548 5. 09842 5. 45555 5. 297498  
11732098\_ 8. 339005 8. 26272 8. 336471 8. 386044 8. 401357 8. 39801  
11732099\_ 5. 438071 5. 642694 5. 446586 5. 511004 5. 506055 5. 663893  
11732100\_ 6. 203104 6. 08834 6. 314467 6. 285541 6. 337615 6. 286869  
11732101\_ 4. 169299 3. 856572 4. 077459 4. 030604 4. 044194 4. 017671  
11732102\_ 4. 614325 4. 324382 4. 655582 4. 511688 4. 501162 4. 541703  
11732103\_ 4. 35909 4. 29874 4. 355268 3. 679422 3. 712484 3. 843247  
11732104\_ 8. 690952 8. 627869 8. 671685 8. 802912 8. 847373 8. 767433  
11732105\_ 8. 744005 8. 667712 8. 697991 8. 794547 8. 875301 8. 859053  
11732106\_ 2. 042774 2. 122965 2. 107671 2. 080053 2. 076363 2. 139746  
11732107\_ 4. 180898 4. 148773 3. 897686 3. 925181 3. 705625 4. 0382  
11732108\_ 8. 433912 8. 585361 8. 525673 8. 475365 8. 588071 8. 540211  
11732109\_ 3. 352589 3. 466887 3. 256815 3. 360211 3. 274647 3. 274687  
11732110\_ 5. 773869 5. 917641 5. 913679 5. 794286 5. 864477 5. 917509  
11732111\_ 10. 06185 9. 970578 9. 974958 10. 59209 10. 64544 10. 65445  
11732112\_ 4. 078537 4. 188614 4. 029039 4. 384639 4. 299522 4. 367322  
11732113\_ 4. 494467 4. 400545 4. 276254 4. 36105 4. 518296 4. 425074  
11732114\_ 4. 203997 4. 315984 4. 068113 4. 128458 4. 312226 4. 196716  
11732115\_ 4. 689858 4. 601903 4. 433875 4. 787789 4. 651498 4. 629473  
11732116\_ 4. 962826 4. 870651 4. 921836 4. 994928 5. 007488 4. 999075  
11732117\_ 8. 059155 8. 026957 8. 079941 8. 053877 8. 050906 8. 036061  
11732118\_ 8. 347377 8. 287071 8. 333133 8. 274651 8. 245482 8. 283977  
11732119\_ 9. 571218 9. 539628 9. 620097 9. 453634 9. 472061 9. 522159  
11732120\_ 8. 40228 8. 346753 8. 445135 8. 535571 8. 506156 8. 53925  
11732121\_ 10. 42942 10. 40623 10. 46369 10. 35937 10. 37393 10. 35429  
11732122\_ 4. 913509 4. 921181 4. 878325 5. 096912 5. 03018 4. 947794  
11732123\_ 7. 567259 7. 487474 7. 504172 7. 531343 7. 581163 7. 651246  
11732124\_ 8. 033847 8. 050788 8. 023937 8. 034146 7. 976898 8. 029506  
11732125\_ 6. 826743 6. 737924 6. 792183 6. 913024 6. 771349 6. 726953  
11732126\_ 12. 5358 12. 51068 12. 53576 12. 64738 12. 6575 12. 64558  
11732127\_ 12. 06791 12. 11119 12. 08223 12. 17658 12. 17485 12. 13461  
11732128\_ 12. 00002 12. 04916 12. 0552 12. 24122 12. 15836 12. 14074  
11732129\_ 3. 497121 3. 410512 3. 295583 3. 455399 3. 311344 3. 410512  
11732130\_ 2. 675729 2. 707819 2. 586523 2. 884229 3. 090481 3. 183011  
11732131\_ 7. 455763 7. 342771 7. 425445 8. 232163 8. 192184 8. 256144  
11732132\_ 7. 495001 7. 370813 7. 341388 7. 16202 7. 134849 7. 184977

11732133\_ 8. 032478 7. 943462 8. 050463 7. 164857 7. 142432 7. 289973  
11732134\_ 8. 446964 8. 38623 8. 394332 8. 413943 8. 428439 8. 314837  
11732135\_ 7. 04903 6. 899471 6. 99795 7. 194708 7. 233999 7. 211029  
11732136\_ 8. 579926 8. 506229 8. 631685 8. 502269 8. 55864 8. 536552  
11732137\_ 9. 171523 9. 139613 9. 182044 9. 277295 9. 286394 9. 286931  
11732138\_ 6. 48642 6. 588144 6. 443053 6. 514036 6. 541665 6. 609751  
11732139\_ 8. 28615 8. 19445 8. 337023 8. 352005 8. 44154 8. 378893  
11732140\_ 5. 496075 5. 323009 5. 446955 5. 938936 5. 925693 6. 191478  
11732141\_ 9. 383168 9. 321932 9. 34006 9. 395405 9. 437816 9. 391733  
11732142\_ 10. 23159 10. 1548 10. 195 10. 0257 10. 00915 10. 00052  
11732143\_ 7. 433177 7. 333484 7. 336015 7. 423747 7. 40984 7. 382589  
11732144\_ 7. 981652 8. 15146 8. 122508 8. 379038 8. 310674 8. 277633  
11732145\_ 10. 46423 10. 41664 10. 47892 10. 42651 10. 48896 10. 42999  
11732146\_ 9. 725887 9. 741194 9. 745512 9. 744142 9. 785396 9. 708597  
11732147\_ 7. 875222 7. 836982 7. 834554 8. 156763 8. 205048 8. 098316  
11732148\_ 9. 286581 9. 213497 9. 288746 9. 525345 9. 508997 9. 526875  
11732149\_ 7. 369728 7. 414892 7. 325207 7. 514123 7. 619974 7. 493873  
11732150\_ 7. 271417 7. 314444 7. 257882 7. 49596 7. 496937 7. 45601  
11732151\_ 4. 540476 4. 607862 4. 707641 4. 784213 4. 890539 4. 939233  
11732152\_ 6. 379761 6. 377847 6. 561997 6. 335317 6. 227517 6. 372053  
11732153\_ 7. 998583 8. 027085 8. 059078 7. 831905 7. 781696 7. 792267  
11732154\_ 7. 782417 7. 71725 7. 754629 8. 059768 7. 895425 7. 892766  
11732155\_ 9. 230033 9. 205278 9. 24814 8. 640588 8. 692725 8. 630135  
11732156\_ 7. 098876 7. 05051 7. 16318 6. 75915 6. 781468 6. 768049  
11732157\_ 6. 18664 6. 249527 6. 162619 6. 015066 5. 64292 5. 811208  
11732158\_ 4. 652524 4. 61596 4. 539718 4. 557061 4. 571333 4. 594464  
11732159\_ 9. 080532 9. 005106 9. 131084 8. 87057 8. 873677 8. 900157  
11732160\_ 7. 066608 7. 007346 7. 005618 6. 640896 6. 700336 6. 677833  
11732161\_ 9. 749793 9. 684209 9. 716803 9. 763914 9. 747994 9. 752923  
11732162\_ 4. 788812 4. 653226 4. 903656 4. 815793 4. 844934 4. 92017  
11732163\_ 5. 425316 5. 470877 5. 593195 5. 643713 5. 532564 5. 633616  
11732164\_ 5. 288801 5. 162026 5. 051351 5. 261145 5. 2222 5. 261145  
11732165\_ 5. 256874 5. 343205 5. 187614 5. 304205 5. 254599 5. 564677  
11732166\_ 5. 236949 5. 383622 5. 322858 5. 686571 5. 493915 5. 568872  
11732167\_ 2. 963205 2. 764198 2. 644761 3. 003305 2. 937439 2. 925438  
11732168\_ 3. 019219 2. 97181 2. 937837 3. 056539 3. 019219 3. 159774  
11732169\_ 6. 145431 6. 134012 6. 117429 6. 196767 6. 158205 6. 014538  
11732170\_ 9. 304099 9. 314339 9. 365228 9. 20304 9. 271451 9. 160832  
11732171\_ 5. 370024 5. 261393 5. 518488 6. 337649 6. 208872 6. 332355  
11732172\_ 8. 614695 8. 508394 8. 61092 8. 607966 8. 651774 8. 649407  
11732173\_ 6. 828588 6. 886382 6. 908551 6. 773951 6. 914151 6. 859046  
11732174\_ 6. 217372 6. 212438 6. 25549 6. 509763 6. 461608 6. 524643  
11732175\_ 6. 414953 6. 258404 6. 366721 6. 393227 6. 263567 6. 422566  
11732176\_ 8. 583439 8. 512752 8. 562625 8. 580019 8. 552689 8. 587689  
11732177\_ 2. 718943 2. 639105 2. 28359 2. 694897 2. 641882 2. 717456  
11732178\_ 2. 702525 2. 811852 3. 013092 3. 067141 2. 798956 2. 905044  
11732179\_ 6. 603051 6. 617859 6. 531118 6. 488538 6. 663017 6. 596697  
11732180\_ 5. 435545 5. 481463 5. 112189 5. 703777 5. 498508 5. 528624  
11732181\_ 4. 854504 4. 936829 4. 966934 4. 961318 4. 935633 4. 968162  
11732182\_ 6. 870636 6. 955925 6. 826448 6. 841161 6. 866002 6. 851779  
11732183\_ 6. 767425 6. 838129 6. 817983 6. 773311 6. 769614 6. 685188

11732184\_ 6. 664535 6. 72243 6. 624648 6. 488816 6. 477072 6. 438725  
11732185\_ 8. 069337 7. 951061 7. 867866 7. 732208 7. 653615 7. 76041  
11732186\_ 2. 625516 2. 654922 2. 640581 2. 63594 2. 63594 2. 685857  
11732187\_ 6. 743021 6. 669127 6. 779107 6. 792183 6. 783572 6. 770779  
11732188\_ 8. 370801 8. 334031 8. 381404 8. 328483 8. 378509 8. 39616  
11732189\_ 8. 196706 8. 203349 8. 215857 8. 169822 8. 176209 8. 230706  
11732190\_ 4. 134866 4. 241199 4. 234243 4. 285478 4. 484077 4. 268194  
11732191\_ 5. 841097 5. 839179 5. 796228 8. 233063 8. 127304 8. 145058  
11732192\_ 6. 072604 5. 880761 6. 086791 7. 996564 7. 927213 7. 861649  
11732193\_ 5. 209259 4. 915927 5. 129038 5. 913551 5. 71797 5. 991003  
11732194\_ 10. 09034 10. 06833 10. 06234 9. 90301 9. 859673 9. 87291  
11732195\_ 9. 388138 9. 407591 9. 412299 9. 235053 9. 236039 9. 212738  
11732196\_ 7. 744073 7. 739184 7. 695439 7. 351631 7. 340773 7. 248357  
11732197\_ 5. 848219 5. 784891 5. 802083 5. 685149 5. 711181 5. 789414  
11732198\_ 5. 509171 5. 451987 5. 415521 5. 579861 5. 6517 5. 522194  
11732199\_ 7. 41554 7. 315859 7. 281629 7. 328092 7. 325521 7. 371984  
11732200\_ 7. 205554 7. 238398 7. 30985 7. 351614 7. 357048 7. 345364  
11732201\_ 7. 287256 7. 232599 7. 229811 7. 216433 7. 326932 7. 24918  
11732202\_ 7. 536278 7. 48803 7. 567284 7. 60778 7. 615 7. 620817  
11732203\_ 6. 32968 6. 360394 6. 366065 6. 009113 5. 871436 5. 883411  
11732204\_ 10. 0832 10. 07082 9. 967336 10. 68326 10. 57454 10. 56555  
11732205\_ 10. 09994 10. 10857 10. 04661 10. 63721 10. 58753 10. 55418  
11732206\_ 5. 851864 5. 84894 5. 950098 6. 61977 6. 701498 6. 646247  
11732207\_ 2. 68161 2. 790852 2. 618304 2. 55489 2. 68161 2. 868692  
11732208\_ 6. 219219 6. 092309 6. 16904 6. 317885 6. 083877 6. 359667  
11732209\_ 7. 724671 7. 622976 7. 589926 7. 251803 7. 223927 7. 328661  
11732210\_ 8. 346759 8. 255202 8. 321456 8. 031693 7. 994364 7. 970608  
11732211\_ 6. 285947 6. 281761 6. 457674 6. 345909 6. 190966 6. 227298  
11732212\_ 8. 470078 8. 332221 8. 452443 8. 256084 8. 245421 8. 301859  
11732213\_ 7. 632275 7. 704175 7. 672667 7. 508298 7. 62583 7. 566906  
11732214\_ 8. 163237 8. 125142 8. 11941 8. 117574 8. 038892 8. 05831  
11732215\_ 8. 049915 8. 013623 8. 006277 8. 392542 8. 403503 8. 305285  
11732216\_ 8. 415721 8. 419415 8. 460094 8. 796509 8. 917083 8. 843108  
11732217\_ 8. 071766 7. 987647 8. 087458 7. 980868 8. 018029 8. 034034  
11732218\_ 8. 168229 8. 140436 8. 198311 8. 110877 8. 05025 8. 100384  
11732219\_ 7. 939199 7. 955213 7. 909951 7. 919827 7. 878058 7. 839696  
11732220\_ 8. 837294 8. 679291 8. 788404 9. 300247 9. 322542 9. 281871  
11732221\_ 4. 841804 4. 75993 4. 614361 4. 585242 4. 762938 4. 751051  
11732222\_ 9. 930353 9. 903991 9. 932065 9. 499309 9. 487852 9. 439467  
11732223\_ 7. 601005 7. 619572 7. 592815 7. 728934 7. 774004 7. 803844  
11732224\_ 7. 442063 7. 400837 7. 430462 7. 63718 7. 623623 7. 690844  
11732225\_ 9. 153097 9. 140009 9. 153021 9. 191966 9. 189812 9. 193158  
11732226\_ 9. 894904 9. 866952 9. 878037 9. 836117 9. 804585 9. 845948  
11732227\_ 6. 135694 5. 994206 6. 057109 6. 41623 6. 329471 6. 421363  
11732228\_ 7. 400837 7. 365844 7. 414793 7. 547481 7. 498455 7. 499612  
11732229\_ 1. 804393 1. 869153 1. 842385 1. 868575 1. 897751 2. 095256  
11732230\_ 3. 104301 3. 012151 2. 865564 3. 263811 3. 247716 3. 206862  
11732231\_ 4. 931071 4. 994206 4. 984669 4. 765115 4. 84527 4. 885221  
11732232\_ 8. 612774 8. 58097 8. 624473 8. 428204 8. 444174 8. 434124  
11732233\_ 4. 428764 5. 03653 4. 904432 4. 771221 4. 804885 5. 042212  
11732234\_ 3. 984584 3. 795866 4. 033306 3. 937728 3. 835673 3. 88253

11732235\_ 3. 627914 3. 773582 3. 696038 3. 733939 3. 818409 3. 773217  
11732236\_ 2. 457675 2. 522205 2. 436961 2. 430057 2. 426899 2. 528126  
11732237\_ 2. 912117 2. 951026 2. 913323 2. 829662 2. 912551 3. 061205  
11732238\_ 6. 886227 6. 870841 6. 798038 6. 936131 6. 945196 6. 867651  
11732239\_ 6. 151831 6. 157289 6. 025071 6. 311405 6. 325481 6. 388212  
11732240\_ 9. 025126 8. 996629 9. 054725 8. 108406 8. 070579 8. 122609  
11732241\_ 7. 612072 7. 549425 7. 503786 6. 765911 6. 79551 6. 70934  
11732242\_ 6. 094723 6. 121016 6. 154691 6. 589623 6. 519036 6. 617088  
11732243\_ 4. 516643 4. 674004 4. 364502 4. 661804 4. 584933 4. 543425  
11732244\_ 5. 156303 5. 104534 4. 990822 5. 228301 5. 1741 5. 141657  
11732245\_ 5. 887756 5. 823474 5. 763634 5. 837988 5. 798073 5. 80657  
11732246\_ 7. 739629 7. 71339 7. 838188 8. 519039 8. 548161 8. 522338  
11732247\_ 7. 928736 7. 794384 7. 889722 8. 603448 8. 542723 8. 506682  
11732248\_ 6. 293615 6. 229669 6. 387224 6. 315159 6. 284122 6. 380008  
11732249\_ 7. 152308 7. 071057 7. 185863 6. 621969 6. 625529 6. 650002  
11732250\_ 7. 494226 7. 479586 7. 513745 7. 039252 7. 133247 7. 002055  
11732251\_ 7. 564632 7. 590642 7. 582979 7. 258008 7. 11634 7. 264976  
11732252\_ 6. 907146 6. 799413 6. 858929 6. 503403 6. 419932 6. 373812  
11732253\_ 6. 79755 6. 717837 6. 898765 6. 566534 6. 655751 6. 71574  
11732254\_ 7. 397833 7. 383667 7. 409349 7. 33616 7. 333567 7. 326029  
11732255\_ 7. 910299 7. 898503 7. 893741 7. 730885 7. 694613 7. 741433  
11732256\_ 6. 637257 6. 610613 6. 586747 6. 491519 6. 359792 6. 366077  
11732257\_ 4. 362425 4. 21864 4. 370337 4. 456187 4. 536821 4. 347179  
11732258\_ 7. 173904 7. 138391 7. 234759 6. 546699 6. 467397 6. 541867  
11732259\_ 6. 179867 6. 076231 6. 137084 6. 094903 6. 080742 6. 078369  
11732260\_ 8. 360715 8. 430432 8. 351672 8. 404008 8. 286204 8. 39801  
11732261\_ 7. 205332 7. 21807 7. 325867 6. 494064 6. 458938 6. 681032  
11732262\_ 5. 291986 5. 327788 5. 265489 5. 330795 5. 533155 5. 34157  
11732263\_ 6. 923906 6. 992622 6. 952285 6. 938967 6. 97913 7. 03845  
11732264\_ 5. 32053 5. 444274 5. 338236 5. 434746 5. 49989 5. 426968  
11732265\_ 2. 08161 2. 079718 2. 383735 2. 427868 2. 174487 2. 194085  
11732266\_ 2. 120183 2. 152513 2. 404613 2. 475493 2. 325386 2. 15328  
11732267\_ 9. 879914 9. 836418 9. 892765 9. 857031 9. 855476 9. 903484  
11732268\_ 4. 20929 4. 335594 4. 14839 4. 52373 4. 600404 4. 379232  
11732269\_ 7. 119295 6. 963802 7. 203787 6. 988524 7. 045255 7. 014808  
11732270\_ 7. 715664 7. 797982 7. 755819 7. 726313 7. 766492 7. 746276  
11732271\_ 2. 267947 2. 36646 2. 3522 2. 05089 2. 226995 2. 181649  
11732272\_ 2. 005048 2. 111102 2. 106882 1. 924343 2. 106882 2. 285649  
11732273\_ 7. 830591 7. 77025 7. 823336 7. 613902 7. 66157 7. 736609  
11732274\_ 7. 020033 6. 973631 6. 982937 6. 580937 6. 497107 6. 619302  
11732275\_ 7. 444284 7. 258864 7. 584693 6. 811758 6. 782227 6. 847934  
11732276\_ 7. 992774 7. 909009 8. 026825 7. 334582 7. 183866 7. 325627  
11732277\_ 6. 656357 6. 585635 6. 571173 6. 327456 6. 235739 6. 315911  
11732278\_ 7. 685058 7. 510403 7. 687632 7. 382423 7. 324886 7. 24788  
11732279\_ 4. 090189 3. 830049 3. 856894 3. 605881 3. 934364 3. 75354  
11732280\_ 6. 073142 6. 028159 6. 136035 5. 715127 5. 871584 5. 864047  
11732281\_ 4. 978467 5. 251001 5. 207458 4. 774191 4. 823202 4. 744971  
11732282\_ 7. 83715 7. 873577 7. 877829 8. 107312 8. 027149 8. 000821  
11732283\_ 8. 769555 8. 740771 8. 815367 8. 779721 8. 811076 8. 783666  
11732284\_ 4. 166253 4. 506964 4. 217413 4. 661746 4. 377675 4. 355826  
11732285\_ 4. 659074 4. 514665 4. 328078 4. 836695 4. 955889 5. 269873



11732286\_ 6. 217134 6. 023443 6. 300005 6. 523602 6. 332233 6. 418031  
11732287\_ 7. 607813 7. 576551 7. 623264 7. 732416 7. 715273 7. 688798  
11732288\_ 5. 51164 5. 368702 5. 557921 5. 565892 5. 44834 5. 409876  
11732289\_ 5. 109599 5. 20316 5. 124306 5. 242968 5. 306395 5. 202771  
11732290\_ 5. 918321 5. 880989 5. 791965 5. 992277 5. 946517 5. 977634  
11732291\_ 5. 205682 5. 231245 5. 336503 5. 387635 5. 453256 5. 214728  
11732292\_ 7. 462121 7. 175068 7. 356118 7. 411436 7. 399477 7. 453731  
11732293\_ 9. 203744 9. 208629 9. 163348 8. 801515 8. 756646 8. 70961  
11732294\_ 7. 041686 6. 950286 6. 883912 6. 373019 6. 402682 6. 379288  
11732295\_ 7. 09595 6. 964904 6. 992346 7. 156454 7. 043549 7. 25961  
11732296\_ 5. 214358 5. 066158 4. 765855 5. 058862 5. 175335 4. 983872  
11732297\_ 6. 504973 6. 476279 6. 475472 6. 630081 6. 531983 6. 519305  
11732298\_ 6. 507704 6. 444125 6. 541665 6. 376449 6. 398721 6. 376449  
11732299\_ 5. 799822 5. 706868 5. 688524 5. 711876 5. 895385 5. 77647  
11732300\_ 5. 489959 5. 460998 5. 614563 5. 59604 5. 603102 5. 718585  
11732301\_ 5. 304981 5. 170066 5. 249795 5. 340758 5. 163933 5. 26024  
11732302\_ 6. 539024 6. 498515 6. 645569 7. 131415 7. 022715 7. 156781  
11732303\_ 6. 236771 6. 26195 6. 207661 6. 651594 6. 593636 6. 639848  
11732304\_ 7. 434016 7. 424644 7. 425119 7. 712794 7. 659366 7. 679868  
11732305\_ 6. 591894 6. 518788 6. 700428 6. 779107 6. 806432 6. 778148  
11732306\_ 7. 561218 7. 503804 7. 544282 8. 064267 7. 955232 7. 913718  
11732307\_ 4. 441177 4. 634519 4. 194435 4. 909461 4. 759513 4. 747204  
11732308\_ 6. 46039 6. 343819 6. 48689 6. 464805 6. 420562 6. 371133  
11732309\_ 6. 961496 7. 043939 7. 066036 7. 057867 7. 059304 7. 087591  
11732310\_ 6. 716323 6. 681059 6. 65098 6. 759277 6. 786662 6. 798097  
11732311\_ 8. 879825 8. 752765 8. 770372 7. 927041 7. 881677 7. 934644  
11732312\_ 8. 235827 8. 18804 8. 205952 7. 352285 7. 345953 7. 314386  
11732313\_ 7. 481946 7. 547536 7. 526002 6. 699949 6. 718851 6. 672811  
11732314\_ 5. 452673 5. 219187 5. 389288 4. 988888 4. 920216 4. 999571  
11732315\_ 3. 28062 3. 340199 3. 472286 3. 471524 3. 537669 3. 472246  
11732316\_ 4. 004135 4. 067703 4. 102828 3. 850246 3. 902685 4. 148263  
11732317\_ 5. 499368 5. 67286 5. 518169 5. 601173 5. 554436 5. 598958  
11732318\_ 7. 161164 7. 124918 7. 207228 6. 689577 6. 90288 6. 763137  
11732319\_ 4. 843103 4. 863117 4. 546705 4. 90321 4. 791683 4. 698818  
11732320\_ 7. 843069 7. 776884 7. 850074 7. 113694 7. 050128 7. 061077  
11732321\_ 9. 0186 8. 996176 8. 978533 9. 013584 9. 029279 9. 104299  
11732322\_ 8. 172622 8. 071728 8. 111271 7. 964266 8. 006179 8. 030369  
11732323\_ 5. 072421 5. 162055 5. 287644 5. 155181 5. 087734 5. 009664  
11732324\_ 4. 422481 4. 258202 3. 931924 4. 148368 4. 304196 4. 149362  
11732325\_ 2. 894343 2. 906733 2. 832842 3. 007149 2. 957889 2. 759988  
11732326\_ 5. 893533 5. 709755 5. 69502 5. 463607 5. 460303 5. 626073  
11732327\_ 8. 640244 8. 637678 8. 601274 8. 460094 8. 427928 8. 437404  
11732328\_ 8. 563592 8. 495732 8. 550631 8. 347016 8. 349603 8. 327269  
11732329\_ 7. 362816 7. 303412 7. 320865 7. 413263 7. 466845 7. 386357  
11732330\_ 9. 116349 9. 070997 9. 156241 9. 316055 9. 321425 9. 363377  
11732331\_ 8. 817734 8. 678246 8. 875983 8. 254225 8. 179144 8. 310769  
11732332\_ 4. 372925 4. 372925 4. 272133 4. 364031 4. 364031 4. 522752  
11732333\_ 4. 815683 4. 894646 4. 832519 4. 80518 4. 821577 4. 741739  
11732334\_ 9. 452965 9. 357358 9. 446672 9. 145919 9. 195687 9. 148851  
11732335\_ 6. 980414 6. 921128 7. 056913 6. 881616 6. 875483 6. 921128  
11732336\_ 6. 431763 6. 220924 6. 318829 6. 313292 6. 440706 6. 564354

11732337\_ 2. 938686 3. 086656 2. 920946 3. 183742 3. 160719 3. 014878  
11732338\_ 7. 327479 7. 232104 7. 312974 7. 64511 7. 783872 7. 696813  
11732339\_ 3. 671494 3. 671494 3. 894912 3. 564546 3. 315726 3. 75889  
11732340\_ 2. 103115 2. 263113 2. 216732 1. 970647 2. 032438 2. 032438  
11732341\_ 3. 503743 3. 775079 3. 822831 3. 67251 3. 840759 3. 493338  
11732342\_ 5. 870242 5. 760635 5. 800741 5. 535528 5. 523247 5. 231816  
11732343\_ 6. 202389 6. 370911 6. 34713 6. 481046 6. 477859 6. 479006  
11732344\_ 5. 12191 4. 964653 5. 073545 5. 27308 5. 335293 5. 219375  
11732345\_ 5. 921461 5. 749717 5. 845513 6. 065707 6. 120357 6. 095846  
11732346\_ 6. 500106 6. 526808 6. 526095 6. 595356 6. 561625 6. 572309  
11732347\_ 4. 448706 4. 682539 4. 709463 4. 87769 4. 849431 4. 812258  
11732348\_ 7. 418545 7. 389871 7. 369242 8. 032622 8. 041527 8. 020094  
11732349\_ 3. 057384 2. 990878 2. 919911 3. 101013 3. 079486 2. 945929  
11732350\_ 5. 063443 4. 763543 4. 950231 4. 950231 4. 782546 4. 958312  
11732351\_ 4. 664309 4. 706515 4. 743775 4. 699942 4. 77425 4. 629493  
11732352\_ 8. 044367 8. 086026 8. 116543 8. 142538 8. 238918 8. 156804  
11732353\_ 9. 137623 9. 074916 9. 159533 8. 792232 8. 837989 8. 855372  
11732354\_ 2. 384793 2. 819363 2. 472011 2. 441284 2. 480801 2. 494072  
11732355\_ 3. 508148 3. 716054 3. 51532 3. 617938 3. 490749 3. 5138  
11732356\_ 5. 449624 5. 348379 5. 300426 5. 358398 5. 437582 5. 470479  
11732357\_ 8. 253534 8. 231363 8. 207188 8. 101342 8. 080791 8. 028322  
11732358\_ 8. 59179 8. 604047 8. 608337 8. 527223 8. 553021 8. 565774  
11732359\_ 7. 158756 7. 190062 7. 195698 7. 194708 7. 157133 7. 177711  
11732360\_ 6. 955597 6. 939277 6. 914936 7. 005179 6. 973586 6. 895938  
11732361\_ 6. 693986 6. 221262 6. 305668 7. 20971 7. 169426 7. 145376  
11732362\_ 7. 348359 7. 298197 7. 406596 6. 744377 6. 654639 6. 686626  
11732363\_ 4. 684696 4. 43655 4. 709463 4. 689316 4. 40461 4. 409385  
11732364\_ 5. 479602 5. 564208 5. 535848 5. 358515 5. 359327 5. 382995  
11732365\_ 9. 325294 9. 211065 9. 239871 9. 144018 9. 141056 9. 221116  
11732366\_ 5. 308827 5. 177803 5. 333097 5. 067526 4. 821884 4. 934756  
11732367\_ 3. 794299 3. 678075 3. 679822 3. 1523 3. 31334 3. 216368  
11732368\_ 3. 185592 3. 070127 3. 240299 3. 309389 3. 224928 3. 240299  
11732369\_ 4. 143105 4. 017681 3. 818864 3. 901284 3. 644215 3. 93026  
11732370\_ 7. 27187 7. 182876 7. 202678 7. 951114 7. 919095 7. 909588  
11732371\_ 2. 776897 2. 792191 2. 701557 2. 822665 2. 895964 2. 859374  
11732372\_ 2. 492485 2. 574692 2. 554883 2. 612973 3. 061403 2. 599647  
11732373\_ 9. 238393 9. 19167 9. 228738 9. 591774 9. 59176 9. 613143  
11732374\_ 5. 442778 5. 337263 5. 323508 5. 417317 5. 419386 5. 465394  
11732375\_ 8. 709067 8. 670444 8. 7224 8. 623863 8. 631685 8. 625267  
11732376\_ 7. 002969 6. 809436 7. 120618 6. 163506 6. 11574 6. 238561  
11732377\_ 7. 070078 7. 023185 7. 126494 6. 578529 6. 468 6. 605437  
11732378\_ 1. 966595 2. 020378 1. 999393 1. 844659 1. 840026 2. 16733  
11732379\_ 8. 056905 8. 053144 8. 079948 7. 980089 8. 006801 8. 083228  
11732380\_ 5. 207271 5. 269614 5. 156536 5. 223072 5. 251905 5. 238981  
11732381\_ 7. 154768 7. 177741 7. 167532 6. 814569 6. 946411 6. 869824  
11732382\_ 7. 427844 7. 278744 7. 366279 7. 034845 6. 874408 7. 037221  
11732383\_ 4. 789682 4. 804975 4. 894134 4. 992022 4. 903746 4. 814037  
11732384\_ 5. 988065 5. 990677 6. 021569 6. 03076 5. 980978 6. 141834  
11732385\_ 7. 301317 7. 303076 7. 173558 7. 080321 7. 125738 7. 23718  
11732386\_ 4. 110118 4. 080782 4. 100915 4. 496366 4. 439086 4. 39448  
11732387\_ 6. 888009 6. 813342 6. 820686 6. 578662 6. 645018 6. 66391

11732388\_ 6. 393253 6. 463463 6. 502769 6. 325713 6. 339471 6. 31363  
11732389\_ 8. 643989 8. 565538 8. 60651 8. 210735 8. 180161 8. 18511  
11732390\_ 4. 12661 4. 055516 4. 205352 4. 1978 4. 139112 4. 152854  
11732391\_ 7. 165122 6. 973703 7. 122747 7. 4878 7. 517673 7. 581645  
11732392\_ 11. 93398 11. 86936 11. 8956 12. 0532 12. 11669 12. 06026  
11732393\_ 8. 886541 8. 879947 8. 864854 8. 259239 8. 240648 8. 213016  
11732394\_ 6. 263567 6. 275116 6. 224585 5. 942409 5. 921174 6. 017521  
11732395\_ 7. 69104 7. 663744 7. 752402 7. 179738 7. 225005 7. 221598  
11732396\_ 8. 133545 8. 062803 8. 160679 7. 749268 7. 712003 7. 722945  
11732397\_ 7. 698877 7. 571495 7. 673112 7. 919463 7. 86209 7. 923994  
11732398\_ 8. 842513 8. 873345 8. 841934 8. 783426 8. 797116 8. 832  
11732399\_ 6. 757307 6. 838461 6. 722713 6. 838461 6. 925531 6. 954183  
11732400\_ 6. 060951 5. 986327 6. 050184 6. 516899 6. 387534 6. 457299  
11732401\_ 5. 807498 5. 846984 5. 870877 5. 87883 5. 907893 5. 972289  
11732402\_ 8. 635337 8. 570791 8. 623421 8. 718658 8. 759622 8. 717426  
11732403\_ 5. 701509 5. 69468 5. 698714 5. 022017 4. 789311 4. 820805  
11732404\_ 8. 672244 8. 509962 8. 554536 8. 386991 8. 414388 8. 353793  
11732405\_ 7. 681267 7. 512673 7. 51295 7. 506098 7. 52361 7. 515205  
11732406\_ 3. 511772 3. 67471 3. 703855 3. 982923 3. 882699 3. 801578  
11732407\_ 4. 647957 4. 605793 4. 58834 4. 563294 4. 685296 4. 652121  
11732408\_ 6. 063141 5. 918745 6. 032406 4. 92272 4. 931388 4. 893369  
11732409\_ 10. 46285 10. 53527 10. 46438 10. 44277 10. 29439 10. 20191  
11732410\_ 7. 569952 7. 685395 7. 592598 7. 646242 7. 601988 7. 611299  
11732411\_ 4. 604281 4. 666488 4. 503137 4. 776577 4. 65903 4. 641584  
11732412\_ 6. 088728 6. 067316 5. 820052 6. 097927 6. 104931 6. 08196  
11732413\_ 1. 826443 1. 938742 1. 82429 2. 192138 2. 123553 2. 25483  
11732414\_ 4. 731991 5. 182621 5. 165408 5. 407683 5. 269255 5. 341444  
11732415\_ 8. 093361 8. 054351 8. 089471 7. 819804 7. 819754 7. 920475  
11732416\_ 5. 270081 5. 166433 5. 083052 5. 071212 5. 082415 5. 038115  
11732417\_ 2. 640565 2. 540115 2. 860274 2. 817406 2. 846795 2. 619861  
11732418\_ 4. 16642 3. 986397 3. 850246 3. 975683 3. 862282 4. 049364  
11732419\_ 7. 758821 7. 753741 7. 845853 6. 593053 6. 631723 6. 714179  
11732420\_ 5. 360916 5. 386162 5. 430938 5. 554436 5. 454662 5. 63926  
11732421\_ 8. 015852 7. 900477 7. 893112 7. 207171 7. 212154 7. 16317  
11732422\_ 5. 155171 5. 161273 5. 341862 4. 709559 4. 671854 4. 719489  
11732423\_ 5. 643713 5. 726503 5. 890841 5. 107174 5. 149502 5. 25289  
11732424\_ 4. 987653 5. 016496 4. 831821 5. 090235 5. 283137 4. 946106  
11732425\_ 3. 564255 3. 503743 3. 421123 3. 327506 3. 502452 3. 430002  
11732426\_ 2. 271027 2. 361778 2. 416399 2. 307158 2. 361778 2. 457113  
11732427\_ 6. 263567 6. 389403 6. 230012 6. 235624 6. 330644 6. 305643  
11732428\_ 5. 167709 5. 205067 5. 2222 5. 124773 5. 169937 5. 14022  
11732429\_ 3. 381378 3. 196981 3. 290188 3. 345922 3. 349998 3. 398236  
11732430\_ 3. 819107 3. 372489 3. 86886 4. 135496 4. 226693 4. 001513  
11732431\_ 4. 277458 4. 350264 4. 136446 4. 533668 4. 448743 4. 420501  
11732432\_ 4. 474823 4. 40461 4. 515845 4. 459939 4. 252254 4. 467356  
11732433\_ 4. 666369 4. 666802 4. 763559 4. 804895 4. 966477 4. 839954  
11732434\_ 4. 598292 4. 580882 4. 824195 4. 459939 4. 546931 4. 579956  
11732435\_ 4. 445985 4. 474781 4. 326905 4. 507652 4. 541715 4. 529796  
11732436\_ 5. 312028 5. 341463 5. 177042 5. 371912 5. 468743 5. 369604  
11732437\_ 4. 337928 4. 2121 4. 089388 4. 164812 4. 1581 4. 193875  
11732438\_ 4. 159318 4. 375447 4. 272078 4. 459939 4. 208106 4. 270477

11732439\_ 5. 293449 5. 339316 5. 220979 5. 513791 5. 461111 5. 390139  
11732440\_ 8. 231382 8. 140057 8. 16688 8. 124197 8. 135062 8. 157137  
11732441\_ 7. 930024 7. 803969 7. 8872 7. 753953 7. 780078 7. 771314  
11732442\_ 7. 562077 7. 56045 7. 563633 7. 558465 7. 598993 7. 54991  
11732443\_ 4. 501095 4. 612579 4. 411001 5. 086366 4. 811647 5. 030941  
11732444\_ 3. 153247 3. 144927 3. 218152 3. 025972 3. 21279 3. 178207  
11732445\_ 5. 638101 5. 608351 5. 746033 5. 467151 5. 523406 5. 619463  
11732446\_ 5. 820052 5. 841177 5. 861049 5. 803076 5. 933952 5. 78288  
11732447\_ 6. 841219 6. 76554 6. 689083 6. 56156 6. 598294 6. 563015  
11732448\_ 7. 523206 7. 453925 7. 536532 7. 003468 6. 938534 7. 002668  
11732449\_ 10. 42514 10. 41544 10. 43911 10. 48665 10. 4755 10. 46226  
11732450\_ 11. 39005 11. 32806 11. 37625 11. 12158 11. 12423 11. 12684  
11732451\_ 6. 897351 6. 844327 6. 760947 6. 908855 6. 922773 7. 001344  
11732452\_ 2. 213068 2. 352893 2. 11311 2. 016137 2. 217452 2. 032641  
11732453\_ 3. 164641 3. 325724 2. 991957 3. 025972 3. 142273 3. 146952  
11732454\_ 3. 352758 3. 559461 3. 365106 3. 569019 3. 464652 3. 677896  
11732455\_ 3. 818256 3. 664654 3. 818924 3. 710912 3. 729147 3. 697259  
11732456\_ 4. 579906 4. 364679 4. 604111 3. 724626 3. 815498 3. 789121  
11732457\_ 6. 516689 6. 303291 6. 404545 6. 399885 6. 320082 6. 403637  
11732458\_ 6. 191366 6. 285298 6. 23831 6. 26212 6. 224812 6. 269521  
11732459\_ 4. 340905 4. 387831 4. 422051 4. 561618 4. 67751 4. 558854  
11732460\_ 3. 992153 3. 780065 4. 138951 3. 784018 3. 609072 3. 780065  
11732461\_ 3. 862548 3. 813085 3. 775378 4. 397316 4. 224231 4. 085881  
11732462\_ 6. 21251 6. 087913 6. 0568 5. 57159 5. 98402 5. 931684  
11732463\_ 7. 317368 7. 233429 7. 320338 7. 644841 7. 634737 7. 553442  
11732464\_ 3. 705625 3. 727933 3. 435625 3. 660831 3. 778003 3. 794981  
11732465\_ 2. 972435 2. 768839 2. 956988 2. 443452 2. 455833 2. 662345  
11732466\_ 3. 380054 3. 455146 3. 658932 2. 671967 2. 885865 2. 523706  
11732467\_ 5. 812483 5. 554436 5. 845365 4. 946945 4. 834139 4. 748052  
11732468\_ 4. 833223 4. 874234 4. 860181 5. 001511 5. 110627 4. 958654  
11732469\_ 5. 065828 5. 316767 4. 959645 5. 195657 5. 15227 5. 076641  
11732470\_ 3. 863686 3. 807322 3. 818741 3. 850343 3. 912829 3. 785255  
11732471\_ 2. 883906 2. 803903 2. 505728 2. 619092 2. 565381 2. 751911  
11732472\_ 6. 397421 6. 564856 6. 187445 6. 525616 6. 537817 6. 533416  
11732473\_ 5. 73567 5. 938482 5. 766338 5. 870242 5. 831072 5. 888193  
11732474\_ 4. 156912 4. 122769 4. 061168 4. 295375 4. 300938 4. 210831  
11732475\_ 5. 977262 6. 090093 5. 78203 6. 130382 6. 024347 6. 06031  
11732476\_ 3. 122119 3. 297563 3. 054589 3. 21279 3. 015668 3. 235831  
11732477\_ 6. 711377 6. 604808 6. 55551 6. 605145 6. 59077 6. 6607  
11732478\_ 4. 605316 4. 316372 4. 473435 4. 247739 4. 294614 4. 208275  
11732479\_ 3. 914102 3. 885679 3. 740439 3. 940617 3. 778015 4. 01937  
11732480\_ 4. 043385 4. 080228 3. 625408 3. 206772 3. 306585 2. 998696  
11732481\_ 5. 042329 5. 087368 5. 035541 4. 691824 4. 834952 4. 719945  
11732482\_ 7. 348512 7. 351527 7. 544282 6. 834839 6. 765911 6. 891925  
11732483\_ 7. 27573 7. 234532 7. 263018 7. 173033 7. 074971 7. 189191  
11732484\_ 4. 900736 4. 98639 4. 845218 4. 942381 4. 979307 4. 877333  
11732485\_ 2. 988093 2. 936199 3. 000663 3. 08525 3. 004853 2. 905697  
11732486\_ 5. 103921 5. 215956 5. 01989 5. 149749 5. 2222 5. 196201  
11732487\_ 5. 601241 5. 584813 5. 565874 5. 779523 5. 658069 5. 676992  
11732488\_ 3. 135235 3. 018712 2. 943219 3. 153208 3. 215614 3. 168977  
11732489\_ 8. 159005 8. 125485 8. 198011 7. 686401 7. 548644 7. 684333

11732490\_ 6.091558 6.038366 6.006871 5.463387 5.512253 5.69201  
11732491\_ 7.27048 7.286039 7.31822 6.769892 6.72899 6.966995  
11732492\_ 5.947525 5.882908 6.019425 6.420454 6.556906 6.365525  
11732493\_ 6.554512 6.569818 6.607336 5.89217 5.849796 5.8915  
11732494\_ 6.697123 6.432036 6.503419 6.892666 6.914662 7.044992  
11732495\_ 5.986508 5.973711 6.157889 6.572408 6.50971 6.474355  
11732496\_ 5.285982 5.127159 5.072878 4.899394 4.859172 4.714872  
11732497\_ 4.407058 4.305209 4.192403 4.347179 4.305209 4.275543  
11732498\_ 3.960839 4.116443 3.89735 4.040919 3.841574 3.806185  
11732499\_ 6.842846 6.857907 6.74638 6.836725 6.84813 6.845694  
11732500\_ 2.298744 2.338194 2.054658 2.532309 2.492227 2.44747  
11732501\_ 5.485315 5.551057 5.564009 5.501066 5.457547 5.491885  
11732502\_ 3.638596 3.801423 3.850304 3.982983 3.996713 3.874284  
11732503\_ 2.74931 2.567373 2.679181 2.994043 2.929927 2.888351  
11732504\_ 5.15779 5.283518 5.122227 5.27402 5.261122 5.323358  
11732505\_ 4.943894 4.978851 5.062489 5.205415 5.317423 5.219154  
11732506\_ 5.933898 5.918745 5.983126 6.030053 6.044285 6.024  
11732507\_ 4.34902 4.448563 4.160246 4.398359 3.980957 4.28969  
11732508\_ 4.956799 5.049315 4.733898 4.987844 4.987844 4.938927  
11732509\_ 4.700243 4.643717 4.637479 4.67198 4.67198 4.6954  
11732510\_ 2.467839 2.592009 2.605516 2.605516 2.481008 2.603441  
11732511\_ 3.872857 3.969588 3.709148 4.07679 4.058637 3.963049  
11732512\_ 5.908056 6.008818 5.894697 6.072892 6.006082 5.992354  
11732513\_ 2.739751 2.521287 2.793946 2.781713 2.81825 2.696871  
11732514\_ 6.602599 6.339761 6.58185 6.160999 6.170092 6.193539  
11732515\_ 5.069724 4.467986 4.723207 4.903652 4.895962 4.885586  
11732516\_ 4.201114 4.149863 4.008121 4.20444 4.184157 4.249833  
11732517\_ 7.111953 7.061992 7.049667 7.246665 7.250765 7.174876  
11732518\_ 5.022628 4.958562 4.880128 4.776184 4.831799 4.891823  
11732519\_ 2.850317 2.990842 2.578367 2.674231 2.88098 2.83198  
11732520\_ 9.501279 9.455247 9.458977 9.229131 9.194303 9.222909  
11732521\_ 2.618194 2.751761 2.772503 2.712126 2.786377 2.809099  
11732522\_ 4.215637 4.503917 4.323256 4.377216 4.525898 4.386233  
11732523\_ 1.790854 1.687863 1.755131 1.794584 1.703705 1.642728  
11732524\_ 6.185557 6.270836 6.213232 5.812783 5.826997 5.728445  
11732525\_ 5.704919 5.414869 5.608093 5.188535 5.16455 5.076303  
11732526\_ 6.352075 6.056939 6.116397 5.388011 5.441775 5.518946  
11732527\_ 2.33092 2.404033 2.3688 2.434902 2.33793 2.374757  
11732528\_ 2.249196 2.397303 2.356445 2.42754 2.654563 2.25483  
11732529\_ 3.873193 4.234186 4.164249 4.221504 3.985694 4.086828  
11732530\_ 3.818401 4.1683 3.97202 3.965984 4.07677 4.079023  
11732531\_ 2.65025 2.85875 3.105553 2.983211 3.016895 3.011335  
11732532\_ 7.231706 7.2037 7.254734 7.194708 7.212651 7.221751  
11732533\_ 4.551263 4.428551 4.431867 5.626189 5.562269 5.6567  
11732534\_ 6.860065 6.865461 6.83718 6.104849 6.033827 6.128669  
11732535\_ 5.523467 5.566794 5.45388 5.889448 5.808624 5.869448  
11732536\_ 5.840602 6.008155 5.853028 5.557717 5.285965 5.727738  
11732537\_ 3.458537 3.843672 3.773615 3.879122 3.504247 3.9288  
11732538\_ 4.175011 4.196393 4.09593 4.077962 4.313074 4.227422  
11732539\_ 5.15481 5.190081 4.989416 5.136505 5.147372 5.119617  
11732540\_ 4.913626 4.89448 4.891724 5.055822 4.986705 5.073036

11732541\_ 3. 541078 3. 469579 3. 494556 3. 676116 3. 683134 3. 563721  
11732542\_ 5. 937784 5. 704919 5. 855991 6. 609382 6. 643784 6. 440238  
11732543\_ 5. 676992 5. 583199 5. 430737 5. 727982 5. 638895 5. 637188  
11732544\_ 3. 257761 3. 14692 3. 185689 3. 082587 2. 824675 3. 263899  
11732545\_ 10. 2879 10. 21434 10. 2072 9. 930319 9. 936058 9. 922825  
11732546\_ 4. 40876 4. 419589 4. 208026 4. 376272 4. 483834 4. 583375  
11732547\_ 2. 823783 2. 749496 2. 829023 2. 575893 2. 722054 2. 709416  
11732548\_ 4. 289609 4. 346271 4. 247316 4. 490369 4. 265224 4. 473113  
11732549\_ 5. 055247 4. 996825 4. 840358 5. 082731 5. 144063 5. 138322  
11732550\_ 2. 099332 2. 211231 1. 984767 2. 162133 2. 284433 2. 25483  
11732551\_ 4. 611999 4. 681772 4. 456862 4. 641929 4. 514322 4. 449418  
11732552\_ 3. 586737 3. 617102 3. 505198 3. 634162 3. 751381 3. 578194  
11732553\_ 4. 97349 4. 978994 4. 682784 5. 039961 4. 847427 4. 972101  
11732554\_ 7. 388251 7. 493713 7. 617591 8. 030167 7. 960938 7. 959598  
11732555\_ 4. 157149 4. 451657 4. 24292 4. 307027 4. 16292 4. 331908  
11732556\_ 3. 398236 3. 360144 3. 516441 3. 555671 3. 28389 3. 463514  
11732557\_ 3. 491668 3. 723624 3. 625408 3. 669629 3. 503743 3. 61868  
11732558\_ 6. 510246 6. 516888 6. 408913 6. 550188 6. 55315 6. 569352  
11732559\_ 7. 763719 7. 747264 7. 79767 7. 78016 7. 832639 7. 796995  
11732560\_ 8. 911876 8. 830355 8. 896787 8. 87678 8. 875478 8. 892248  
11732561\_ 4. 514143 4. 672009 4. 413725 4. 129763 4. 41937 4. 374214  
11732562\_ 5. 800308 5. 811794 6. 047913 5. 724352 5. 653652 5. 76622  
11732563\_ 5. 743491 5. 636157 5. 81616 5. 469749 5. 503768 5. 56822  
11732564\_ 4. 583789 4. 382909 4. 587797 4. 844408 4. 754107 4. 740746  
11732565\_ 2. 799657 3. 010929 2. 996588 2. 95358 3. 135964 2. 996588  
11732566\_ 2. 760028 2. 495733 2. 736636 2. 51629 2. 315493 2. 481121  
11732567\_ 4. 108592 4. 481663 4. 146929 4. 08356 4. 151677 4. 200678  
11732568\_ 4. 275543 4. 240493 4. 165973 4. 26964 4. 200678 4. 407555  
11732569\_ 2. 393308 2. 391568 2. 459712 2. 391568 2. 310203 2. 384653  
11732570\_ 5. 096245 5. 284789 4. 960537 4. 275865 4. 375548 4. 275865  
11732571\_ 4. 45781 4. 822694 4. 617966 4. 024606 4. 127498 3. 879309  
11732572\_ 4. 797466 4. 968721 4. 879045 4. 278211 4. 33799 4. 278211  
11732573\_ 5. 0649 5. 01904 4. 938643 4. 831587 5. 0649 5. 081678  
11732574\_ 4. 415744 4. 40461 4. 328878 4. 352523 4. 399098 4. 43111  
11732575\_ 3. 992093 3. 997131 4. 026092 3. 923621 4. 053047 3. 931642  
11732576\_ 4. 048595 4. 178875 4. 048595 4. 089718 4. 020419 4. 169074  
11732577\_ 2. 431406 2. 632081 2. 712125 2. 729113 2. 713221 2. 925679  
11732578\_ 6. 095609 6. 095731 5. 972464 6. 184849 6. 184849 6. 152256  
11732579\_ 4. 538782 4. 463235 4. 596511 3. 946968 4. 099337 4. 242447  
11732580\_ 6. 037405 5. 967466 5. 989145 5. 624263 5. 565909 5. 473651  
11732581\_ 4. 523293 4. 52373 4. 546118 4. 07954 4. 240717 4. 136739  
11732582\_ 7. 817711 7. 76041 7. 835647 8. 083896 8. 204537 8. 066026  
11732583\_ 7. 543889 7. 527913 7. 545492 7. 840896 7. 950173 7. 834107  
11732584\_ 6. 590312 6. 845399 6. 866631 6. 555664 6. 534674 6. 489772  
11732585\_ 5. 874554 5. 999999 6. 109163 5. 335495 5. 396598 5. 598983  
11732586\_ 5. 125828 5. 276271 5. 168135 5. 356043 5. 207747 5. 198574  
11732587\_ 3. 714689 3. 757592 3. 680665 3. 7563 3. 783234 3. 680665  
11732588\_ 2. 847099 2. 707755 2. 706646 2. 574285 2. 956561 2. 724265  
11732589\_ 6. 655264 6. 648155 6. 606765 6. 614058 6. 573602 6. 580871  
11732590\_ 6. 261229 6. 300643 6. 523918 5. 977166 6. 03162 6. 033313  
11732591\_ 5. 11467 5. 035563 5. 102025 5. 092969 4. 966059 4. 946854

11732592\_ 4. 26337 4. 227213 4. 038799 4. 444066 4. 240681 4. 335083  
11732593\_ 2. 278843 2. 298197 2. 455367 2. 318845 2. 395169 2. 396905  
11732594\_ 2. 450243 2. 567185 2. 505141 2. 560537 2. 43557 2. 527092  
11732595\_ 2. 043737 2. 21995 2. 138332 2. 209474 2. 070869 2. 325415  
11732596\_ 3. 407337 3. 515283 3. 330372 3. 4547 3. 478602 3. 491687  
11732597\_ 4. 810538 4. 767429 4. 695974 4. 860297 4. 971081 4. 736329  
11732598\_ 5. 132917 5. 036816 5. 007667 4. 98679 4. 98679 4. 95453  
11732599\_ 6. 984057 7. 030475 6. 975283 7. 086891 7. 087376 7. 031384  
11732600\_ 5. 679825 5. 480966 5. 490729 5. 721261 5. 70758 5. 648514  
11732601\_ 6. 45048 6. 353536 6. 551954 6. 44784 6. 34047 6. 376204  
11732602\_ 7. 876226 7. 818602 7. 847982 7. 945024 7. 879881 7. 952725  
11732603\_ 4. 635094 4. 557191 4. 819935 4. 913528 5. 03755 4. 852534  
11732604\_ 4. 954087 4. 988037 4. 847163 5. 287631 5. 289713 5. 190148  
11732605\_ 3. 996924 3. 966957 3. 996924 4. 010376 4. 02689 3. 996924  
11732606\_ 2. 51101 2. 808907 2. 887006 2. 803109 2. 76975 2. 736689  
11732607\_ 4. 759281 4. 59592 4. 581419 4. 794126 4. 500528 4. 632884  
11732608\_ 6. 15808 6. 211196 6. 149337 6. 223145 6. 128865 6. 289257  
11732609\_ 6. 332368 6. 242955 6. 383226 6. 436779 6. 41341 6. 435916  
11732610\_ 2. 742573 2. 720714 2. 720714 2. 611472 2. 520989 2. 750902  
11732611\_ 3. 302816 3. 085235 3. 476212 2. 797516 3. 160049 2. 999242  
11732612\_ 5. 476003 5. 692797 5. 472761 5. 731885 5. 753117 5. 673101  
11732613\_ 5. 870242 6. 097927 5. 712204 6. 14941 6. 110562 6. 036981  
11732614\_ 4. 489954 4. 655092 4. 540079 4. 436235 4. 508889 4. 515568  
11732615\_ 4. 169688 4. 281844 4. 183075 4. 342872 4. 414667 4. 200678  
11732616\_ 5. 562418 5. 335043 5. 396264 5. 693978 5. 742122 5. 671108  
11732617\_ 5. 696417 5. 643713 5. 493204 5. 589726 5. 688012 5. 532964  
11732618\_ 5. 632946 5. 57432 5. 749988 5. 754515 5. 715775 5. 717284  
11732619\_ 6. 544029 6. 719254 6. 575589 6. 676648 6. 716083 6. 839125  
11732620\_ 7. 556066 7. 667515 7. 52347 7. 507856 7. 509734 7. 54298  
11732621\_ 6. 340223 6. 491586 6. 347516 6. 356954 6. 356954 6. 330519  
11732622\_ 7. 281494 7. 358678 7. 253657 7. 336808 7. 312494 7. 322621  
11732623\_ 2. 060975 1. 982183 2. 077607 1. 856416 2. 162194 2. 171986  
11732624\_ 4. 70073 4. 743964 4. 643717 4. 508051 4. 583464 4. 723362  
11732625\_ 5. 014252 4. 9694 5. 26034 4. 827219 4. 877604 4. 750758  
11732626\_ 5. 097968 4. 813227 4. 852048 5. 078267 5. 297498 5. 137099  
11732627\_ 5. 978002 6. 044054 6. 025038 6. 109065 6. 064839 6. 22919  
11732628\_ 6. 678505 6. 746229 6. 902511 6. 491507 6. 438966 6. 57065  
11732629\_ 4. 562708 4. 462498 4. 820061 4. 213226 4. 437694 4. 276131  
11732630\_ 5. 39094 5. 584813 5. 591874 4. 992243 5. 107648 5. 113587  
11732631\_ 5. 130567 5. 190885 5. 307361 5. 40737 5. 32386 5. 389269  
11732632\_ 3. 705625 3. 85702 3. 875334 3. 925181 3. 864765 3. 823395  
11732633\_ 3. 331737 3. 561828 3. 858816 3. 760861 3. 756374 3. 649445  
11732634\_ 2. 24277 2. 121815 2. 299891 2. 147887 2. 190649 2. 207269  
11732635\_ 3. 785742 3. 826006 3. 884072 3. 680161 3. 868211 3. 752951  
11732636\_ 5. 096521 5. 209327 5. 049325 5. 191134 5. 149545 5. 156303  
11732637\_ 3. 936447 3. 974635 4. 027926 3. 861742 3. 956114 3. 984108  
11732638\_ 6. 490984 6. 474979 6. 555082 6. 595932 6. 65437 6. 611208  
11732639\_ 2. 564912 2. 769414 2. 551008 2. 661081 2. 672441 2. 741463  
11732640\_ 8. 843515 8. 743974 8. 839753 8. 716521 8. 717359 8. 70423  
11732641\_ 7. 111439 7. 088971 7. 223068 7. 313863 7. 312171 7. 350312  
11732642\_ 4. 835091 5. 08762 4. 932063 4. 921076 5. 141943 5. 032022

11732643\_ 3. 537327 3. 700138 3. 697413 3. 72175 3. 750752 3. 705291  
11732644\_ 5. 277204 5. 187219 4. 999137 5. 013931 5. 099744 5. 080273  
11732645\_ 4. 344222 4. 321908 4. 287593 4. 600263 4. 415624 4. 538291  
11732646\_ 2. 999978 2. 820096 2. 451226 2. 897168 2. 701941 2. 828507  
11732647\_ 2. 455287 2. 492296 2. 258356 2. 256606 2. 230046 2. 269016  
11732648\_ 4. 191234 3. 975322 4. 304968 4. 240805 4. 044733 4. 077796  
11732649\_ 4. 101946 4. 016783 4. 011596 4. 137121 4. 03086 4. 147251  
11732650\_ 6. 994188 7. 099734 7. 173945 7. 07993 7. 029419 7. 037711  
11732651\_ 6. 244666 6. 106415 6. 117722 4. 944356 4. 87249 4. 948236  
11732652\_ 6. 404593 6. 410467 6. 449506 5. 271676 5. 377724 5. 18089  
11732653\_ 5. 333723 5. 396104 5. 32256 5. 413673 5. 481999 5. 421886  
11732654\_ 4. 415744 4. 052076 4. 266823 4. 446432 4. 319093 4. 325435  
11732655\_ 5. 633824 5. 643149 5. 614563 5. 812125 5. 648007 5. 616687  
11732656\_ 5. 628298 5. 520681 5. 541232 5. 609772 5. 429193 5. 590788  
11732657\_ 4. 620966 4. 851319 4. 383633 4. 572025 4. 475081 4. 702236  
11732658\_ 3. 009688 3. 077296 2. 870202 2. 996271 2. 996835 3. 107762  
11732659\_ 3. 265965 3. 359897 2. 943533 3. 254501 3. 340081 3. 442308  
11732660\_ 2. 296617 2. 452791 2. 282373 2. 296617 2. 402252 2. 274871  
11732661\_ 8. 462639 8. 392959 8. 494916 9. 146072 9. 104176 9. 038068  
11732662\_ 3. 606313 3. 414142 3. 398236 3. 496006 3. 306585 3. 487838  
11732663\_ 5. 198191 5. 109815 5. 008164 4. 663203 4. 6663 4. 675095  
11732664\_ 5. 338747 5. 418827 5. 209629 5. 269064 5. 290005 5. 376398  
11732665\_ 6. 374479 6. 244666 6. 172596 5. 718609 5. 634777 5. 798613  
11732666\_ 10. 28485 10. 26922 10. 353 10. 42873 10. 44025 10. 42342  
11732667\_ 2. 988093 2. 755763 3. 082089 2. 718322 2. 840848 2. 923062  
11732668\_ 6. 168184 6. 221987 6. 325605 6. 383618 6. 398328 6. 378242  
11732669\_ 5. 167035 5. 126694 5. 26034 5. 182224 5. 410689 5. 281976  
11732670\_ 5. 889742 5. 94131 5. 988877 5. 643713 5. 709521 5. 728947  
11732671\_ 5. 980025 6. 167225 6. 14538 5. 866032 6. 022723 6. 049575  
11732672\_ 6. 242476 6. 175705 6. 402162 5. 943087 6. 051305 6. 123124  
11732673\_ 4. 990309 5. 145417 5. 16637 5. 106974 5. 1433 5. 148902  
11732674\_ 7. 585768 7. 507147 7. 689377 7. 774268 7. 766695 7. 790575  
11732675\_ 2. 235709 2. 481211 2. 542555 2. 711412 2. 794249 2. 494072  
11732676\_ 4. 572163 4. 524156 4. 518461 4. 608597 4. 559124 4. 496823  
11732677\_ 2. 677456 2. 929479 2. 85941 2. 907662 2. 727016 3. 023295  
11732678\_ 4. 083497 4. 142049 4. 129231 4. 329876 3. 894568 4. 214004  
11732679\_ 2. 698127 2. 521534 2. 610753 2. 488559 2. 533118 2. 592266  
11732680\_ 2. 818852 2. 590053 2. 803324 2. 710221 2. 718322 2. 83198  
11732681\_ 4. 678694 4. 590331 4. 485825 4. 584933 4. 662707 4. 700243  
11732682\_ 4. 847965 4. 678132 4. 773992 4. 636555 4. 541247 4. 674469  
11732683\_ 4. 632496 4. 590332 4. 480853 4. 394543 4. 552989 4. 3584  
11732684\_ 4. 735908 5. 15532 5. 324464 4. 880963 4. 496873 4. 592407  
11732685\_ 5. 434932 5. 235023 5. 300769 5. 221837 5. 213906 5. 186618  
11732686\_ 4. 475468 4. 40461 4. 518995 4. 643717 4. 518995 4. 5033  
11732687\_ 7. 166422 7. 18001 7. 230777 7. 220186 7. 073536 7. 036126  
11732688\_ 8. 330396 8. 25115 8. 345759 8. 202861 8. 177482 8. 200457  
11732689\_ 8. 077679 7. 978305 8. 055168 7. 77704 7. 701553 7. 760632  
11732690\_ 8. 223909 8. 194191 8. 251169 7. 681776 7. 523058 7. 579203  
11732691\_ 4. 331594 4. 469735 4. 457904 4. 230971 4. 335954 4. 548114  
11732692\_ 3. 098116 3. 204064 3. 382995 3. 188201 3. 175627 2. 96712  
11732693\_ 2. 921272 2. 933127 2. 960287 3. 051758 3. 099942 3. 112176



11732694\_ 2. 902164 2. 903156 2. 974421 2. 830598 3. 010381 2. 854931  
11732695\_ 4. 735888 4. 980231 4. 798399 4. 948153 5. 042629 5. 029331  
11732696\_ 5. 075975 5. 087785 5. 074908 4. 953968 5. 10987 5. 045731  
11732697\_ 2. 622278 2. 46254 2. 605516 2. 462059 2. 380197 2. 216682  
11732698\_ 4. 550604 4. 671666 4. 716211 4. 822105 4. 649169 4. 551417  
11732699\_ 2. 313195 2. 545367 2. 288388 2. 431709 2. 257914 2. 436641  
11732700\_ 2. 293756 2. 293756 2. 217914 2. 052715 2. 14599 2. 538826  
11732701\_ 8. 739542 8. 778372 8. 810501 8. 296309 8. 278467 8. 143959  
11732702\_ 4. 311731 4. 555247 4. 441816 4. 500756 4. 578991 4. 628763  
11732703\_ 4. 106816 4. 064375 3. 980293 4. 075415 4. 179441 4. 064375  
11732704\_ 7. 500967 7. 446011 7. 54604 7. 709156 7. 83913 7. 775737  
11732705\_ 7. 535501 7. 645747 7. 546925 7. 78787 7. 829242 7. 835086  
11732706\_ 5. 696004 5. 78171 5. 777832 5. 959119 6. 02149 5. 998438  
11732707\_ 6. 257885 6. 298766 6. 327533 6. 560025 6. 608184 6. 585989  
11732708\_ 6. 922773 6. 687575 6. 526467 6. 263567 6. 435268 6. 4088  
11732709\_ 5. 753987 5. 882229 5. 614563 5. 959412 5. 857708 5. 812926  
11732710\_ 2. 519667 2. 423796 2. 431178 2. 44084 2. 34135 2. 418278  
11732711\_ 5. 675808 5. 836032 5. 70675 5. 891081 5. 747139 5. 80258  
11732712\_ 8. 709445 8. 681752 8. 650017 9. 484477 9. 558411 9. 44788  
11732713\_ 5. 480966 5. 519064 5. 708257 6. 406885 6. 358671 6. 346903  
11732714\_ 2. 929169 3. 176597 2. 929169 3. 09768 3. 026142 2. 887956  
11732715\_ 5. 615962 5. 596947 5. 579273 5. 599515 5. 637886 5. 655731  
11732716\_ 6. 863949 6. 831559 6. 721845 6. 796642 6. 969985 6. 924308  
11732717\_ 5. 404844 5. 364006 5. 285487 5. 467503 5. 48634 5. 478314  
11732718\_ 3. 925181 4. 06427 3. 976796 3. 950555 3. 934168 4. 053646  
11732719\_ 2. 745558 2. 532859 2. 605516 2. 367813 2. 278879 2. 266336  
11732720\_ 4. 243716 4. 147478 3. 837909 4. 100587 4. 064299 4. 064299  
11732721\_ 6. 688513 6. 727853 6. 575499 6. 609977 6. 664624 6. 604788  
11732722\_ 5. 492171 5. 448296 5. 414869 5. 43014 5. 520993 5. 45979  
11732723\_ 6. 802072 6. 786696 6. 760344 6. 791797 6. 841102 6. 648263  
11732724\_ 2. 686383 2. 721939 2. 818911 2. 777349 2. 682334 2. 695283  
11732725\_ 3. 77618 3. 645715 3. 761277 3. 920852 3. 849261 3. 848401  
11732726\_ 6. 042277 6. 079019 6. 03987 6. 27849 6. 197222 6. 223901  
11732727\_ 4. 957123 4. 989788 5. 030849 5. 068534 5. 136815 5. 100983  
11732728\_ 6. 52893 6. 477826 6. 555255 6. 878618 6. 845101 7. 062614  
11732729\_ 7. 962773 7. 751722 7. 783797 7. 220836 7. 30046 7. 225819  
11732730\_ 7. 095788 6. 951422 7. 1899 6. 7057 6. 705187 6. 779107  
11732731\_ 4. 777735 4. 777735 4. 794421 4. 808635 4. 759077 4. 755573  
11732732\_ 4. 454411 4. 512365 4. 433447 4. 576759 4. 650755 4. 640681  
11732733\_ 3. 801659 3. 718983 3. 747449 3. 815729 3. 721889 3. 693689  
11732734\_ 5. 115956 5. 181977 5. 133805 5. 153808 5. 240172 5. 102905  
11732735\_ 3. 713667 3. 367616 3. 759236 4. 046316 4. 247174 4. 191399  
11732736\_ 4. 880332 5. 128519 5. 042778 5. 132461 5. 309424 5. 24998  
11732737\_ 3. 69607 3. 694986 3. 63649 4. 150778 3. 918308 3. 832879  
11732738\_ 4. 671193 4. 792979 4. 905551 4. 726866 4. 694802 4. 767662  
11732739\_ 6. 158036 6. 06011 6. 06427 6. 067495 5. 89032 5. 867267  
11732740\_ 5. 189628 5. 189628 5. 073036 5. 189628 5. 189628 5. 18008  
11732741\_ 5. 566643 5. 524712 5. 348388 5. 579793 5. 591853 5. 680416  
11732742\_ 4. 01262 4. 333488 4. 271745 4. 386453 4. 266243 4. 275139  
11732743\_ 5. 775199 5. 949094 5. 937003 5. 93062 5. 969716 5. 82404  
11732744\_ 4. 180507 4. 080167 4. 381823 4. 148537 4. 200678 4. 200678

11732745\_ 3. 150974 3. 113267 3. 220215 3. 209287 3. 285469 3. 212717  
11732746\_ 4. 068468 4. 159443 4. 205258 4. 32081 4. 217028 4. 296075  
11732747\_ 2. 615988 2. 459325 2. 476988 2. 498269 2. 58222 2. 400921  
11732748\_ 5. 020098 5. 125337 5. 037981 5. 163715 5. 181637 5. 020037  
11732749\_ 6. 094413 6. 153101 5. 998166 6. 185226 6. 181043 6. 269981  
11732750\_ 4. 979764 4. 853862 4. 813953 4. 915539 4. 986148 4. 98718  
11732751\_ 7. 470665 7. 24788 7. 316907 7. 19691 7. 155066 7. 103315  
11732752\_ 4. 148113 4. 195813 4. 248072 4. 30327 4. 211582 4. 391821  
11732753\_ 5. 181346 5. 094889 5. 219808 4. 984835 5. 021455 5. 018068  
11732754\_ 3. 433003 3. 462848 3. 376153 3. 335652 3. 431015 3. 578051  
11732755\_ 4. 345923 4. 212547 4. 21799 4. 135496 4. 455928 4. 426347  
11732756\_ 7. 876199 7. 78787 7. 972312 6. 629543 6. 647196 6. 779107  
11732757\_ 6. 208237 6. 288067 6. 052324 6. 55564 6. 507099 6. 452878  
11732758\_ 2. 988093 3. 16718 3. 222737 3. 157712 3. 157712 3. 108396  
11732759\_ 3. 503743 3. 503743 3. 23722 3. 73272 3. 402871 3. 572732  
11732760\_ 3. 958244 3. 791035 3. 749812 3. 843744 3. 801444 3. 786773  
11732761\_ 2. 903647 2. 662848 2. 697396 2. 541571 2. 751842 2. 846122  
11732762\_ 3. 967931 4. 011768 3. 45942 3. 997131 3. 801444 4. 091096  
11732763\_ 3. 866447 3. 974456 3. 837473 3. 86165 4. 054288 3. 872627  
11732764\_ 5. 205915 5. 16586 5. 187905 5. 233541 5. 289939 5. 265857  
11732765\_ 6. 089001 5. 914313 6. 104753 5. 996126 5. 91796 6. 031795  
11732766\_ 3. 963332 3. 856384 4. 054835 3. 952321 3. 760022 3. 800775  
11732767\_ 5. 209259 5. 383356 5. 188764 5. 285737 5. 311492 5. 339673  
11732768\_ 3. 784079 3. 741915 4. 026092 4. 085968 3. 705625 3. 825819  
11732769\_ 5. 389908 5. 28115 5. 317946 5. 385454 5. 455187 5. 475572  
11732770\_ 5. 396666 5. 489988 5. 352439 5. 187672 5. 265384 5. 001483  
11732771\_ 6. 554716 6. 514924 6. 481497 6. 547191 6. 401176 6. 487194  
11732772\_ 5. 318768 5. 346468 5. 243486 5. 360503 5. 304234 5. 39322  
11732773\_ 6. 800616 6. 8387 6. 757776 6. 706427 6. 631792 6. 684954  
11732774\_ 5. 830957 5. 957954 5. 759791 4. 758882 4. 849431 4. 983837  
11732775\_ 5. 073036 4. 649658 5. 080774 5. 024241 4. 984669 4. 998429  
11732776\_ 3. 955193 4. 041835 4. 336806 4. 169206 4. 022704 4. 055051  
11732777\_ 5. 959164 5. 858474 5. 858474 5. 87205 5. 856918 5. 774454  
11732778\_ 5. 189489 5. 209348 5. 063666 5. 247968 5. 192953 5. 159105  
11732779\_ 7. 953009 7. 900837 7. 708038 8. 017242 8. 02234 7. 989138  
11732780\_ 1. 899704 2. 229244 2. 485757 2. 23298 2. 128234 2. 277973  
11732781\_ 2. 095256 2. 227687 2. 049191 2. 216434 2. 130714 2. 218239  
11732782\_ 4. 613245 4. 726051 4. 61065 4. 678033 4. 676993 4. 652467  
11732783\_ 4. 874709 4. 813503 4. 800769 4. 957229 5. 029529 4. 968404  
11732784\_ 3. 249924 3. 391107 3. 296909 3. 406695 3. 583937 3. 255815  
11732785\_ 7. 902089 7. 924828 7. 853048 8. 081037 8. 13535 8. 091093  
11732786\_ 5. 674956 5. 694192 5. 480708 5. 643455 5. 545128 5. 588092  
11732787\_ 3. 90383 3. 901126 3. 891393 3. 938359 3. 938359 3. 985325  
11732788\_ 6. 676868 6. 775515 6. 634134 6. 929717 6. 83549 6. 869926  
11732789\_ 6. 723039 6. 714177 6. 67941 6. 705451 6. 763149 6. 78835  
11732790\_ 2. 621602 2. 516057 2. 72447 2. 438993 2. 718322 2. 818117  
11732791\_ 6. 125856 6. 20823 6. 236634 6. 266848 6. 148612 6. 290727  
11732792\_ 3. 080325 3. 180062 3. 025972 3. 06481 3. 004853 3. 228014  
11732793\_ 7. 095616 7. 116072 7. 16334 7. 472989 7. 409349 7. 499657  
11732794\_ 6. 112424 6. 036641 6. 010925 5. 906888 6. 13027 6. 048226  
11732795\_ 5. 127963 5. 212789 5. 133016 5. 145496 5. 05529 5. 15918

11732796\_ 2. 00633 2. 082252 1. 922077 2. 045934 1. 936759 2. 0016  
11732797\_ 5. 241443 5. 197545 5. 142777 5. 256276 5. 073418 5. 340756  
11732798\_ 6. 138441 5. 905296 6. 150594 5. 956667 5. 990879 6. 13943  
11732799\_ 4. 080326 4. 427792 4. 300071 3. 69105 3. 343833 3. 852488  
11732800\_ 4. 445765 4. 441625 4. 44729 4. 643717 4. 241999 4. 52373  
11732801\_ 4. 410218 4. 599513 4. 601581 4. 644659 4. 52397 4. 629477  
11732802\_ 2. 509312 2. 562319 2. 562319 2. 598388 2. 470683 2. 645892  
11732803\_ 5. 542957 5. 567657 5. 517161 5. 728087 5. 749217 5. 63421  
11732804\_ 4. 900068 4. 986745 4. 910609 5. 029529 4. 896519 4. 912672  
11732805\_ 5. 535312 5. 492967 5. 466521 5. 439309 5. 585699 5. 520189  
11732806\_ 4. 320406 4. 148172 4. 238258 4. 019709 4. 245978 4. 13681  
11732807\_ 2. 129869 2. 129869 2. 361778 2. 099666 2. 129869 2. 223801  
11732808\_ 2. 598214 2. 597091 2. 718756 2. 685045 2. 597091 2. 4898  
11732809\_ 3. 493459 3. 46054 3. 297845 3. 574665 3. 598966 3. 767929  
11732810\_ 5. 924764 5. 894697 5. 84357 6. 022167 6. 015107 5. 943429  
11732811\_ 7. 049367 7. 018895 7. 102453 6. 309819 6. 422346 6. 278106  
11732812\_ 5. 702267 5. 858939 5. 652996 5. 87383 5. 846997 5. 750403  
11732813\_ 4. 847618 4. 85418 4. 669097 4. 835459 4. 728641 4. 798983  
11732814\_ 4. 752717 4. 714455 4. 657807 4. 643717 4. 670233 4. 854556  
11732815\_ 4. 524007 4. 656973 4. 482082 4. 681055 4. 733067 4. 63485  
11732816\_ 3. 819223 3. 829961 3. 659142 3. 902682 3. 874958 3. 853136  
11732817\_ 3. 517059 3. 433648 3. 503743 3. 627102 3. 345425 3. 625291  
11732818\_ 7. 132899 7. 098465 7. 13722 6. 91264 6. 95076 6. 94607  
11732819\_ 4. 087045 3. 919089 3. 946495 3. 866159 4. 181226 3. 786777  
11732820\_ 4. 200678 4. 201446 4. 159906 4. 459939 4. 27158 4. 275543  
11732821\_ 8. 839469 8. 744101 8. 888859 8. 089306 8. 027878 8. 068418  
11732822\_ 7. 081212 7. 013774 7. 099734 6. 486976 6. 34864 6. 382249  
11732823\_ 7. 154667 7. 025332 7. 093369 6. 156733 6. 237363 6. 306193  
11732824\_ 6. 79196 6. 670355 6. 870026 6. 000746 5. 976241 5. 998827  
11732825\_ 4. 321007 3. 955598 4. 213226 4. 254307 4. 268915 4. 259964  
11732826\_ 2. 364283 2. 268368 2. 263138 2. 454043 2. 456044 2. 20213  
11732827\_ 3. 249924 3. 232009 3. 100719 3. 352848 3. 196905 3. 29765  
11732828\_ 5. 267768 5. 500511 5. 386785 5. 328434 5. 339998 5. 377156  
11732829\_ 4. 269631 4. 074432 4. 001441 4. 338926 4. 429206 4. 200678  
11732830\_ 5. 363269 5. 078256 5. 236981 5. 094097 5. 029529 5. 125914  
11732831\_ 7. 7593 7. 814818 7. 86209 7. 536954 7. 54276 7. 458189  
11732832\_ 6. 170048 6. 071487 6. 23268 6. 280677 6. 310892 6. 329886  
11732833\_ 5. 870242 5. 866126 5. 950197 4. 509022 4. 474063 4. 415744  
11732834\_ 4. 353537 4. 308794 4. 376183 4. 182275 4. 253216 4. 347179  
11732835\_ 4. 60144 4. 851954 4. 579547 5. 010765 5. 036765 4. 816538  
11732836\_ 4. 86095 4. 855377 4. 652343 4. 800047 4. 800047 4. 806474  
11732837\_ 4. 744901 4. 935304 4. 837493 4. 953813 4. 889703 4. 903681  
11732838\_ 5. 084529 5. 252146 5. 185349 5. 362663 5. 415466 5. 241055  
11732839\_ 3. 824139 3. 982008 3. 72924 3. 982008 3. 847513 3. 976538  
11732840\_ 3. 237413 3. 006686 3. 185425 3. 418285 3. 555785 3. 428824  
11732841\_ 3. 999283 4. 174945 4. 227405 3. 424715 3. 399064 3. 621646  
11732842\_ 5. 763634 5. 939802 5. 672077 6. 131121 6. 035293 5. 988202  
11732843\_ 2. 877337 2. 718322 2. 715111 2. 817975 2. 798956 2. 452824  
11732844\_ 5. 068551 4. 84 4. 979507 4. 885946 4. 849431 4. 89233  
11732845\_ 4. 80253 4. 788875 4. 716399 4. 824195 4. 798511 4. 852029  
11732846\_ 3. 503743 3. 475799 3. 698029 3. 775947 3. 374231 3. 555949

11732847\_ 4. 791496 5. 040775 4. 898765 4. 983353 4. 950692 5. 022647  
11732848\_ 4. 609594 4. 650289 4. 643717 4. 494285 4. 655092 4. 622266  
11732849\_ 3. 597635 3. 528938 3. 565597 3. 567278 3. 539815 3. 553547  
11732850\_ 4. 072413 4. 036399 4. 004415 4. 056459 4. 029713 4. 049772  
11732851\_ 4. 026092 4. 286076 4. 135496 4. 170896 4. 241102 4. 128677  
11732852\_ 4. 26603 4. 250934 4. 130879 4. 131918 4. 371129 4. 461995  
11732853\_ 1. 975643 2. 164936 2. 018571 2. 135218 2. 018571 1. 948122  
11732854\_ 2. 173883 2. 524656 2. 166255 2. 074218 2. 017094 2. 093096  
11732855\_ 4. 062615 4. 039358 4. 116606 4. 305204 4. 197111 4. 032354  
11732856\_ 4. 496043 4. 457585 4. 420288 4. 564533 4. 56344 4. 392574  
11732857\_ 7. 780661 7. 783566 7. 761556 7. 104506 7. 151304 7. 1988  
11732858\_ 5. 821565 5. 778431 5. 967908 6. 268253 6. 191791 6. 273547  
11732859\_ 5. 008869 4. 746805 5. 055369 4. 379047 4. 518798 4. 314866  
11732860\_ 4. 084745 4. 528465 4. 371091 4. 241299 4. 087261 4. 489525  
11732861\_ 6. 090235 6. 223173 6. 23831 6. 235844 6. 323771 6. 219766  
11732862\_ 7. 94069 7. 902137 7. 991182 7. 962072 7. 935464 7. 822843  
11732863\_ 5. 285218 5. 616967 5. 297498 5. 638583 5. 642148 5. 525434  
11732864\_ 6. 137406 6. 132604 6. 00975 6. 147777 6. 277227 6. 151953  
11732865\_ 3. 521884 3. 333344 3. 259389 3. 326525 3. 428884 3. 433796  
11732866\_ 3. 073385 2. 876454 2. 686582 2. 914492 3. 030885 3. 025118  
11732867\_ 6. 658922 6. 7326 6. 697898 6. 771096 6. 863539 6. 833997  
11732868\_ 4. 238553 4. 480489 4. 439708 4. 573593 4. 576257 4. 789876  
11732869\_ 4. 914636 5. 258219 5. 223946 5. 226117 5. 33905 5. 252276  
11732870\_ 3. 398236 3. 377076 3. 524007 2. 361778 2. 672289 2. 42836  
11732871\_ 4. 700243 4. 858033 4. 643717 4. 63527 4. 62606 4. 643717  
11732872\_ 4. 029866 4. 250934 4. 213226 4. 199407 4. 40461 4. 356682  
11732873\_ 5. 666554 5. 47038 5. 607771 5. 561337 5. 69806 5. 626255  
11732874\_ 5. 343728 5. 315402 5. 127446 5. 032623 5. 366002 5. 366002  
11732875\_ 8. 517245 8. 508992 8. 496652 8. 343682 8. 379307 8. 432637  
11732876\_ 3. 979191 3. 812714 3. 841611 3. 279328 3. 407823 3. 639087  
11732877\_ 2. 531856 2. 665731 2. 929522 2. 54778 2. 420076 2. 495223  
11732878\_ 5. 484701 5. 583891 5. 493616 5. 446865 5. 387728 5. 489836  
11732879\_ 5. 311097 5. 291017 5. 256975 5. 208104 5. 256975 5. 296651  
11732880\_ 5. 821691 5. 986644 5. 875074 5. 954081 6. 101959 6. 056681  
11732881\_ 4. 036232 4. 216809 3. 710471 4. 205899 4. 205899 4. 179649  
11732882\_ 4. 752744 4. 927725 4. 5353 4. 87086 4. 942496 4. 931053  
11732883\_ 5. 247739 5. 3344 5. 219142 5. 445238 5. 476415 5. 332008  
11732884\_ 5. 915553 6. 320922 6. 14274 6. 302999 6. 33198 6. 327378  
11732885\_ 3. 705718 3. 694543 3. 307668 3. 690379 3. 803784 3. 732196  
11732886\_ 4. 347179 4. 409553 4. 243809 4. 462924 4. 447412 4. 522735  
11732887\_ 4. 347179 4. 405986 4. 162693 4. 462924 4. 443845 4. 522735  
11732888\_ 5. 040376 5. 106939 5. 153692 5. 039029 5. 107816 5. 195849  
11732889\_ 4. 97255 5. 149545 5. 160602 5. 173306 5. 084319 5. 029529  
11732890\_ 2. 832323 2. 641419 2. 61527 2. 809515 2. 798956 2. 743134  
11732891\_ 4. 746748 4. 752144 4. 746296 4. 9131 4. 757963 4. 752144  
11732892\_ 4. 257471 4. 29992 4. 328027 4. 296444 4. 266896 4. 279972  
11732893\_ 3. 957865 4. 103042 4. 103042 3. 984769 4. 048462 3. 877208  
11732894\_ 4. 311576 4. 174945 4. 493306 4. 326853 4. 424165 4. 390955  
11732895\_ 2. 427171 2. 24236 2. 361778 2. 413175 2. 496806 2. 367303  
11732896\_ 7. 413548 7. 365839 7. 335416 7. 491971 7. 477974 7. 426585  
11732897\_ 5. 297894 5. 356258 5. 276808 5. 345634 5. 297894 5. 475432

11732898\_ 2. 095256 2. 252348 2. 391959 2. 210156 2. 294744 2. 022348  
11732899\_ 8. 498829 8. 488793 8. 528882 8. 137256 8. 190322 8. 122149  
11732900\_ 3. 556521 3. 734427 3. 407808 3. 672951 3. 66106 3. 638987  
11732901\_ 8. 071714 8. 097809 8. 055423 8. 767422 8. 652174 8. 657932  
11732902\_ 8. 282123 8. 206703 8. 186065 8. 824712 8. 754871 8. 734478  
11732903\_ 5. 524696 5. 228627 5. 495513 5. 528624 5. 530112 5. 52816  
11732904\_ 3. 218177 3. 252105 3. 313998 3. 471997 3. 240576 3. 385307  
11732905\_ 6. 593036 6. 547323 6. 428975 6. 588819 6. 519735 6. 523276  
11732906\_ 7. 077856 6. 798595 7. 105552 6. 517642 6. 337985 6. 516299  
11732907\_ 3. 192991 3. 163841 3. 131979 3. 398236 3. 323139 3. 303927  
11732908\_ 4. 200678 4. 277148 4. 236047 4. 231477 4. 220676 4. 165838  
11732909\_ 4. 21911 3. 971374 4. 261062 4. 16278 4. 303356 4. 147481  
11732910\_ 3. 032391 3. 019125 3. 290188 3. 063759 3. 331991 3. 133074  
11732911\_ 4. 977834 5. 11527 4. 775952 4. 95249 4. 863243 5. 139573  
11732912\_ 6. 361996 6. 357846 6. 07879 6. 462727 6. 377836 6. 377836  
11732913\_ 4. 707594 4. 817765 4. 981482 4. 845999 4. 973139 5. 03986  
11732914\_ 2. 911561 2. 945929 2. 85826 2. 614104 2. 716679 2. 925255  
11732915\_ 4. 978059 4. 710467 4. 99422 5. 058079 4. 900124 5. 006871  
11732916\_ 4. 500741 4. 496552 4. 336526 4. 496552 4. 295567 4. 230029  
11732917\_ 5. 293313 5. 149545 5. 096292 5. 348369 5. 238676 5. 248943  
11732918\_ 4. 026092 3. 997131 3. 881251 4. 015721 4. 00267 4. 011596  
11732919\_ 2. 278423 2. 435777 1. 878536 2. 437998 2. 178465 2. 271358  
11732920\_ 3. 811146 3. 70091 3. 787663 3. 787663 3. 819039 3. 764991  
11732921\_ 4. 119313 4. 15659 4. 039302 4. 15313 3. 988678 4. 232685  
11732922\_ 6. 570229 6. 345052 6. 503001 6. 179302 6. 128223 6. 340379  
11732923\_ 3. 919222 3. 901519 3. 927089 4. 213226 4. 110352 4. 043555  
11732924\_ 3. 877353 3. 877353 3. 569329 3. 897529 3. 735611 3. 637262  
11732925\_ 4. 749337 4. 538189 4. 635161 4. 043777 4. 314362 4. 237561  
11732926\_ 2. 84664 2. 849391 2. 800673 2. 802058 2. 711179 2. 756065  
11732927\_ 5. 272363 5. 227772 5. 224533 4. 09509 4. 062109 4. 127016  
11732928\_ 4. 099633 4. 510046 4. 232793 4. 342756 4. 204336 4. 154361  
11732929\_ 3. 409932 2. 945929 3. 146713 2. 887841 3. 073454 2. 919412  
11732930\_ 7. 017252 7. 138006 6. 982937 7. 184826 7. 103172 7. 196174  
11732931\_ 4. 206638 4. 207875 4. 4849 4. 502129 4. 489295 4. 643717  
11732932\_ 2. 101791 2. 195802 2. 213395 2. 122516 2. 074052 2. 101791  
11732933\_ 5. 262347 5. 200135 5. 09825 4. 938264 4. 915947 4. 932482  
11732934\_ 4. 29375 4. 386019 4. 290676 4. 492894 4. 416947 4. 421014  
11732935\_ 6. 453108 6. 380524 6. 552952 6. 583427 6. 537232 6. 529676  
11732936\_ 7. 306283 7. 322616 7. 301641 7. 847418 7. 880646 7. 877124  
11732937\_ 6. 270656 6. 227841 6. 3318 5. 99267 6. 208275 6. 134751  
11732938\_ 5. 235955 5. 244825 5. 337137 5. 299502 5. 312798 5. 28455  
11732939\_ 5. 579366 5. 705685 5. 578141 5. 578141 5. 661835 5. 645037  
11732940\_ 7. 064048 6. 986105 7. 117554 7. 088729 7. 032925 7. 061098  
11732941\_ 7. 538733 7. 57952 7. 527718 7. 536385 7. 540456 7. 617625  
11732942\_ 8. 821758 8. 653398 8. 807025 8. 954117 8. 966241 8. 959289  
11732943\_ 4. 812004 4. 727815 4. 544891 4. 870131 4. 821747 4. 725349  
11732944\_ 7. 136765 7. 25857 7. 270352 7. 179857 7. 204522 7. 211365  
11732945\_ 6. 2266 6. 263567 6. 246722 6. 239142 6. 222296 6. 321423  
11732946\_ 4. 645779 4. 407741 4. 24066 4. 287444 4. 331122 4. 413137  
11732947\_ 6. 577728 6. 558474 6. 563135 6. 315004 6. 14342 6. 307401  
11732948\_ 2. 093505 2. 217343 2. 376408 1. 973678 2. 067011 2. 278328

11732949\_ 4. 523909 4. 250934 4. 258836 4. 336517 4. 501977 4. 334953  
11732950\_ 6. 202846 6. 042394 6. 149533 5. 761907 5. 926363 5. 94772  
11732951\_ 6. 43872 6. 50623 6. 540578 6. 715622 6. 603953 6. 610047  
11732952\_ 7. 019688 6. 96751 6. 922773 7. 057386 6. 928995 7. 066936  
11732953\_ 3. 676637 3. 745094 3. 779015 3. 82776 3. 779015 3. 764063  
11732954\_ 4. 920185 4. 819007 4. 725162 4. 932858 4. 819007 4. 883355  
11732955\_ 6. 972675 6. 9511 6. 860016 6. 846619 6. 765911 6. 870727  
11732956\_ 3. 937324 3. 856478 3. 791091 3. 945207 3. 953247 4. 011116  
11732957\_ 7. 296025 7. 290561 7. 306884 7. 585298 7. 499389 7. 571828  
11732958\_ 6. 292126 6. 225513 6. 318829 6. 383618 6. 40533 6. 394386  
11732959\_ 5. 766307 5. 830386 5. 704101 5. 926951 5. 916605 5. 884892  
11732960\_ 8. 66588 8. 680353 8. 742391 9. 123172 9. 192836 9. 154319  
11732961\_ 3. 886365 3. 950879 3. 827528 4. 014788 3. 967276 3. 975507  
11732962\_ 3. 515817 3. 330077 3. 567731 3. 55906 3. 411434 3. 463348  
11732963\_ 2. 726321 2. 735843 2. 939567 2. 887353 2. 645031 2. 774036  
11732964\_ 2. 152348 2. 152348 2. 152348 2. 193746 2. 152348 2. 065763  
11732965\_ 4. 66096 4. 62504 4. 72814 4. 436583 4. 35081 4. 453175  
11732966\_ 10. 15304 10. 11248 10. 17449 10. 21182 10. 20808 10. 20957  
11732967\_ 7. 32538 7. 26674 7. 210448 7. 282721 7. 289973 7. 254194  
11732968\_ 2. 850317 3. 044414 3. 094511 3. 044414 3. 044414 2. 92767  
11732969\_ 2. 397167 2. 491099 2. 481329 2. 442339 2. 442339 2. 345393  
11732970\_ 5. 077065 5. 181282 5. 095541 5. 184349 5. 194733 5. 122564  
11732971\_ 3. 71595 3. 71595 3. 826345 3. 741396 3. 715162 3. 844294  
11732972\_ 3. 819492 3. 997131 3. 858025 3. 850246 3. 969526 3. 953552  
11732973\_ 5. 229928 5. 480966 5. 448296 5. 520797 5. 546812 5. 415397  
11732974\_ 5. 647985 5. 732302 5. 554593 5. 690341 5. 752054 5. 709727  
11732975\_ 3. 621794 3. 754057 3. 748933 3. 8226 3. 923217 3. 640885  
11732976\_ 8. 508038 8. 332663 8. 348516 7. 80628 7. 755517 7. 704368  
11732977\_ 5. 648334 5. 672285 5. 62792 5. 2222 5. 131084 5. 196201  
11732978\_ 2. 522805 2. 863218 2. 549669 2. 961675 2. 82984 3. 032156  
11732979\_ 3. 783914 3. 797268 3. 452052 4. 11566 4. 02547 4. 127931  
11732980\_ 3. 789294 3. 723624 3. 569097 3. 701692 4. 017267 3. 975863  
11732981\_ 4. 719487 4. 813464 4. 719487 4. 580708 4. 779708 4. 593796  
11732982\_ 2. 867486 2. 980246 2. 949338 2. 980246 3. 080798 3. 061205  
11732983\_ 6. 520868 6. 364534 6. 444618 6. 85845 6. 807201 6. 876456  
11732984\_ 2. 137532 2. 196433 2. 191473 2. 22086 2. 293672 2. 323355  
11732985\_ 5. 725563 5. 805535 5. 588669 5. 770229 5. 772157 5. 811072  
11732986\_ 3. 089799 2. 951463 2. 897323 2. 878474 3. 031819 3. 124487  
11732987\_ 3. 075347 3. 180062 3. 009086 3. 21279 3. 278468 3. 301916  
11732988\_ 4. 425501 4. 434851 4. 429698 4. 365116 4. 536371 4. 454477  
11732989\_ 4. 553748 4. 680657 4. 496879 4. 690985 4. 798511 4. 700243  
11732990\_ 4. 96674 4. 952871 4. 878173 4. 979104 5. 127933 5. 092941  
11732991\_ 2. 589542 2. 56709 2. 589542 2. 46013 2. 946048 2. 793554  
11732992\_ 4. 939839 4. 942649 4. 87741 4. 835701 4. 839017 4. 944164  
11732993\_ 5. 510767 5. 40526 5. 514194 4. 526466 4. 546632 4. 474724  
11732994\_ 5. 363856 5. 422408 5. 430583 5. 154456 5. 116316 4. 91786  
11732995\_ 4. 112354 4. 138668 4. 251316 3. 694636 3. 609871 3. 74977  
11732996\_ 9. 031833 8. 853769 9. 02306 9. 854671 9. 853879 9. 886143  
11732997\_ 8. 030104 7. 999875 8. 034843 9. 555578 9. 493113 9. 494453  
11732998\_ 4. 275543 4. 338403 4. 136942 5. 173299 5. 122187 5. 339673  
11732999\_ 6. 931987 6. 770294 7. 014086 6. 344531 6. 452087 6. 426444

11733000\_ 7. 562398 7. 578824 7. 624375 7. 091185 7. 104983 7. 147333  
11733001\_ 6. 225513 6. 232204 6. 264566 6. 04879 6. 087357 5. 973707  
11733002\_ 7. 326145 7. 267186 7. 421499 7. 059526 7. 149806 7. 050864  
11733003\_ 5. 000666 5. 21469 5. 3116 5. 222257 5. 339188 5. 21469  
11733004\_ 3. 636523 3. 48244 3. 458228 3. 476491 3. 348782 3. 148523  
11733005\_ 3. 427184 3. 625333 3. 598195 3. 497284 3. 466216 3. 428602  
11733006\_ 5. 391753 5. 492998 5. 424006 5. 404487 5. 339843 5. 526864  
11733007\_ 9. 072843 9. 056991 9. 00241 8. 652897 8. 7371 8. 621095  
11733008\_ 6. 263567 6. 227864 6. 360725 6. 087692 6. 051392 6. 071963  
11733009\_ 10. 2072 10. 22298 10. 19235 10. 06862 10. 04793 10. 04393  
11733010\_ 8. 471821 8. 375888 8. 501075 8. 734323 8. 73873 8. 721927  
11733011\_ 5. 504269 5. 614563 5. 587396 5. 449435 5. 556166 5. 611103  
11733012\_ 4. 610737 4. 628177 4. 508464 4. 939237 4. 875489 4. 748493  
11733013\_ 5. 962696 5. 857167 6. 065248 6. 267704 6. 282224 6. 372053  
11733014\_ 7. 710543 7. 663234 7. 763885 7. 570995 7. 562727 7. 559758  
11733015\_ 8. 103148 8. 169184 8. 208292 8. 174718 8. 244089 8. 298538  
11733016\_ 3. 619541 3. 746844 3. 664752 3. 797045 3. 789918 3. 746844  
11733017\_ 6. 19219 6. 230853 6. 059448 5. 870224 5. 910245 5. 90331  
11733018\_ 6. 725684 6. 751864 6. 63712 6. 559944 6. 541665 6. 608  
11733019\_ 7. 150942 7. 258492 7. 260983 7. 258858 7. 310852 7. 271941  
11733020\_ 12. 51583 12. 49667 12. 52397 12. 70641 12. 71541 12. 68791  
11733021\_ 12. 31793 12. 32245 12. 33224 12. 50704 12. 45826 12. 5103  
11733022\_ 3. 239474 3. 121623 3. 239474 3. 334017 3. 138931 3. 69057  
11733023\_ 9. 664735 9. 635622 9. 651491 9. 591432 9. 65698 9. 623832  
11733024\_ 9. 043251 9. 016805 9. 090942 8. 984326 9. 030291 9. 03521  
11733025\_ 3. 745613 3. 571343 4. 026092 3. 150945 3. 136292 3. 186399  
11733026\_ 3. 00082 3. 071957 3. 088207 2. 974985 2. 617462 2. 866301  
11733027\_ 4. 229247 4. 161495 4. 218706 4. 074586 3. 925828 3. 880188  
11733028\_ 7. 677731 7. 623356 7. 687746 8. 373184 8. 472334 8. 274485  
11733029\_ 8. 297509 8. 178225 8. 304588 9. 157755 9. 133986 9. 130293  
11733030\_ 8. 479431 8. 417782 8. 414763 9. 842545 9. 842571 9. 751711  
11733031\_ 7. 326385 7. 265469 7. 405187 7. 937571 7. 950116 7. 926186  
11733032\_ 8. 231197 8. 09153 8. 164263 7. 645022 7. 644896 7. 639155  
11733033\_ 9. 777501 9. 690781 9. 719356 9. 68586 9. 751301 9. 684903  
11733034\_ 9. 513386 9. 467208 9. 536454 9. 593924 9. 518364 9. 580877  
11733035\_ 5. 759678 5. 687245 5. 904493 6. 331625 6. 159771 6. 23856  
11733036\_ 10. 30487 10. 2497 10. 18866 10. 06466 10. 0526 9. 997747  
11733037\_ 9. 406549 9. 363512 9. 368362 8. 801263 8. 768868 8. 689755  
11733038\_ 9. 490757 9. 497992 9. 555394 8. 990779 8. 980846 8. 956338  
11733039\_ 3. 643153 3. 643153 3. 671113 4. 009635 3. 550622 3. 752701  
11733040\_ 8. 198568 8. 178093 8. 221336 7. 98482 7. 915351 7. 980271  
11733041\_ 8. 542422 8. 487441 8. 593061 8. 727543 8. 724779 8. 697202  
11733042\_ 4. 956476 4. 936335 5. 122191 5. 480966 5. 401209 5. 634679  
11733043\_ 4. 573853 4. 422393 4. 515679 4. 602824 4. 726607 4. 645058  
11733044\_ 6. 108622 6. 04299 6. 073964 6. 442076 6. 582931 6. 481046  
11733045\_ 5. 072907 5. 05569 5. 146186 5. 257247 5. 423033 5. 582507  
11733046\_ 9. 025126 9. 008648 9. 049453 9. 006035 8. 910652 9. 015986  
11733047\_ 6. 974508 6. 811752 6. 995983 7. 103572 7. 106404 7. 151637  
11733048\_ 7. 790849 7. 73808 7. 854156 7. 580916 7. 631019 7. 623758  
11733049\_ 9. 332022 9. 265846 9. 332022 9. 506827 9. 537586 9. 463831  
11733050\_ 8. 239224 8. 173159 8. 208617 8. 08332 8. 149418 8. 128398

11733051\_ 9. 064587 8. 974136 9. 006162 9. 17204 9. 154461 9. 146603  
11733052\_ 4. 3329 4. 33143 4. 455341 4. 837401 4. 833095 4. 718888  
11733053\_ 7. 958329 7. 914484 7. 87526 7. 843911 7. 878081 7. 875744  
11733054\_ 6. 53298 6. 51638 6. 448321 6. 747958 6. 711885 6. 657084  
11733055\_ 8. 020025 7. 944539 8. 054575 8. 185438 8. 104136 8. 16929  
11733056\_ 7. 854907 7. 924935 7. 843994 7. 19082 7. 065909 7. 076325  
11733057\_ 8. 493789 8. 474292 8. 486126 8. 863411 8. 833928 8. 902024  
11733058\_ 7. 962549 7. 8297 7. 92936 7. 095429 7. 100738 7. 201897  
11733059\_ 7. 315264 7. 217496 7. 339814 6. 492298 6. 690608 6. 554726  
11733060\_ 7. 410137 7. 530104 7. 497951 6. 362368 6. 481525 6. 404589  
11733061\_ 8. 156742 8. 170892 8. 143041 7. 250147 7. 317001 7. 287546  
11733062\_ 3. 847389 3. 693354 3. 503508 3. 823218 3. 877132 3. 786079  
11733063\_ 3. 303164 2. 926637 3. 272179 2. 980417 2. 999123 3. 101619  
11733064\_ 7. 901782 7. 778454 7. 894901 7. 595775 7. 546821 7. 55659  
11733065\_ 8. 364049 8. 396419 8. 368252 8. 110464 8. 074185 8. 101101  
11733066\_ 5. 426963 5. 447095 5. 414869 5. 602136 5. 642871 5. 714183  
11733067\_ 7. 608514 7. 687059 7. 627 7. 834891 7. 785044 7. 846103  
11733068\_ 10. 29523 10. 25611 10. 241 9. 165644 9. 011304 9. 018172  
11733069\_ 6. 900993 6. 936579 6. 945676 6. 880613 6. 943555 6. 922773  
11733070\_ 6. 183763 6. 33888 6. 210346 6. 128965 6. 145361 6. 219924  
11733071\_ 10. 48269 10. 43201 10. 4873 10. 15673 10. 23884 10. 14571  
11733072\_ 6. 910266 6. 909223 6. 904469 6. 931421 6. 997615 6. 8997  
11733073\_ 10. 00046 9. 922942 9. 998403 9. 782444 9. 759805 9. 811156  
11733074\_ 9. 180799 9. 127762 9. 205172 8. 773529 8. 745675 8. 756579  
11733075\_ 8. 206941 8. 128649 8. 255703 7. 646878 7. 600211 7. 582261  
11733076\_ 8. 196404 8. 146876 8. 198245 7. 584793 7. 589675 7. 571725  
11733077\_ 8. 557118 8. 533088 8. 58866 7. 955595 7. 931197 7. 932445  
11733078\_ 8. 798281 8. 711445 8. 779208 8. 29574 8. 180522 8. 20564  
11733079\_ 7. 724083 7. 665231 7. 732989 8. 135839 8. 134934 8. 168163  
11733080\_ 2. 531953 2. 630964 2. 824921 3. 657228 3. 8628 3. 694597  
11733081\_ 5. 820052 5. 894697 5. 795202 5. 8504 5. 791656 5. 785899  
11733082\_ 5. 369512 5. 410069 5. 508359 5. 266409 5. 382475 5. 414777  
11733083\_ 7. 932349 7. 808699 7. 79113 7. 725616 7. 687329 7. 665193  
11733084\_ 7. 038199 6. 983336 7. 044839 6. 846686 6. 712647 6. 911138  
11733085\_ 6. 407477 6. 466686 6. 521214 6. 246027 6. 154799 6. 265302  
11733086\_ 5. 450652 5. 468379 5. 547437 5. 52407 5. 601262 5. 507611  
11733087\_ 7. 749722 7. 70823 7. 731406 7. 702987 7. 729296 7. 730015  
11733088\_ 7. 704961 7. 70169 7. 687462 7. 444975 7. 440267 7. 434587  
11733089\_ 8. 280019 8. 387201 8. 342291 8. 125354 8. 120561 8. 080783  
11733090\_ 4. 90461 4. 831749 5. 071801 4. 891216 4. 940797 5. 141622  
11733091\_ 4. 334985 4. 327004 4. 3387 4. 175744 4. 209268 3. 926099  
11733092\_ 7. 29965 7. 206538 7. 296312 7. 795589 7. 855872 7. 964098  
11733093\_ 7. 983505 7. 932395 8. 004845 8. 679507 8. 641721 8. 589356  
11733094\_ 7. 437522 7. 488344 7. 479388 7. 937723 7. 89453 8. 072976  
11733095\_ 10. 65457 10. 67486 10. 66722 10. 77988 10. 81697 10. 74905  
11733096\_ 8. 634731 8. 544301 8. 591192 8. 914731 9. 025665 8. 952044  
11733097\_ 12. 0829 12. 01234 12. 09023 12. 2324 12. 24264 12. 25023  
11733098\_ 5. 942752 5. 889121 5. 884016 5. 902842 5. 871702 5. 86194  
11733099\_ 5. 505983 5. 495309 5. 479292 5. 52308 5. 538877 5. 515267  
11733100\_ 6. 362058 6. 413262 6. 356025 6. 069836 6. 170565 6. 185041  
11733101\_ 6. 57965 6. 590899 6. 553192 6. 380761 6. 200579 6. 372053



11733102\_ 7. 34096 7. 288717 7. 275392 7. 946295 7. 860385 7. 988808  
11733103\_ 6. 870819 6. 947222 6. 947224 7. 445893 7. 510914 7. 408448  
11733104\_ 6. 767558 6. 617582 6. 69566 7. 257132 7. 188272 7. 258095  
11733105\_ 8. 485584 8. 515715 8. 628071 8. 130662 8. 105122 8. 179865  
11733106\_ 8. 969517 8. 869321 8. 990563 8. 477933 8. 457824 8. 504256  
11733107\_ 7. 37006 7. 30453 7. 301288 6. 759322 6. 783421 6. 790329  
11733108\_ 8. 568076 8. 429557 8. 490458 8. 103013 8. 077679 8. 134608  
11733109\_ 7. 432213 7. 306776 7. 417811 7. 223884 7. 144103 7. 053419  
11733110\_ 7. 731156 7. 620066 7. 587733 7. 408137 7. 330065 7. 400837  
11733111\_ 6. 321812 6. 225513 6. 428975 5. 86972 6. 00658 5. 958581  
11733112\_ 3. 846011 3. 818401 3. 730673 3. 730397 3. 861517 3. 925849  
11733113\_ 8. 209445 8. 106805 8. 139614 8. 04593 8. 05344 8. 073549  
11733114\_ 9. 281511 9. 258781 9. 287508 9. 222671 9. 229306 9. 219501  
11733115\_ 2. 426762 2. 519392 2. 361778 2. 176509 2. 25483 2. 235857  
11733116\_ 6. 676076 6. 671056 6. 718782 6. 788445 6. 679485 6. 794791  
11733117\_ 6. 528076 6. 537084 6. 573718 6. 996548 6. 884242 6. 96161  
11733118\_ 6. 527884 6. 606766 6. 686442 6. 324149 6. 397531 6. 434545  
11733119\_ 8. 441788 8. 341114 8. 507282 8. 190209 8. 196165 8. 148625  
11733120\_ 7. 635555 7. 497942 7. 523441 7. 337092 7. 231231 7. 3048  
11733121\_ 1. 888638 2. 10754 1. 809833 1. 742676 1. 737909 1. 971794  
11733122\_ 1. 947529 1. 568233 1. 855477 1. 827093 1. 804646 1. 8714  
11733123\_ 5. 946142 6. 088462 5. 933792 6. 079285 5. 961554 6. 033207  
11733124\_ 7. 717556 7. 640653 7. 743679 7. 77622 7. 769509 7. 778084  
11733125\_ 7. 049388 6. 968761 6. 996098 7. 012588 7. 034846 7. 009729  
11733126\_ 7. 8434 7. 78787 7. 879683 8. 843417 8. 817428 8. 854531  
11733127\_ 5. 894697 6. 011116 6. 105939 5. 953921 5. 953921 5. 800413  
11733128\_ 7. 462089 7. 328811 7. 415504 7. 504472 7. 437238 7. 470978  
11733129\_ 6. 379767 6. 162912 6. 355568 5. 907914 5. 847435 5. 781219  
11733130\_ 6. 520112 6. 40556 6. 541141 5. 950433 6. 021426 5. 956897  
11733131\_ 10. 28369 10. 32693 10. 23013 10. 37336 10. 31521 10. 24177  
11733132\_ 5. 079705 5. 115477 4. 947746 5. 053449 4. 858949 5. 006392  
11733133\_ 5. 296613 5. 416922 5. 374674 5. 290692 5. 365156 5. 329348  
11733134\_ 9. 650994 9. 626756 9. 65497 9. 62229 9. 625558 9. 636474  
11733135\_ 7. 389029 7. 386928 7. 373696 7. 465066 7. 243328 7. 288772  
11733136\_ 6. 48642 6. 362547 6. 431591 5. 885531 6. 00905 6. 033313  
11733137\_ 2. 44219 2. 331029 2. 391409 2. 493194 2. 424961 2. 41053  
11733138\_ 7. 743679 7. 545191 7. 649633 6. 713131 6. 731817 6. 784917  
11733139\_ 6. 06122 6. 00632 5. 962034 5. 631454 5. 7514 5. 801635  
11733140\_ 8. 980719 8. 885944 8. 9772 8. 670138 8. 695138 8. 579588  
11733141\_ 4. 123074 4. 270193 4. 004105 4. 372732 4. 187092 4. 341774  
11733142\_ 5. 181179 5. 061109 5. 212348 5. 184004 5. 2222 5. 042689  
11733143\_ 8. 171149 8. 135261 8. 267635 8. 021666 8. 030335 8. 038264  
11733144\_ 9. 873693 9. 854895 9. 865228 9. 726566 9. 695652 9. 711943  
11733145\_ 3. 754555 3. 456101 3. 648798 4. 532273 4. 247378 4. 326932  
11733146\_ 4. 599626 4. 426986 4. 533692 4. 911481 4. 832484 4. 876361  
11733147\_ 5. 127921 4. 978956 5. 076245 5. 547758 5. 538251 5. 590224  
11733148\_ 9. 427755 9. 371789 9. 460177 8. 996224 9. 030813 9. 032433  
11733149\_ 6. 526463 6. 526067 6. 667577 5. 910773 5. 980978 5. 831793  
11733150\_ 7. 476645 7. 499344 7. 554609 7. 534395 7. 586848 7. 511713  
11733151\_ 6. 732383 6. 531304 6. 684669 6. 572786 6. 56461 6. 589889  
11733152\_ 4. 097778 4. 006672 3. 84453 4. 10937 4. 133168 4. 132807

11733153\_ 8. 415772 8. 312312 8. 42192 8. 715485 8. 701 8. 716135  
11733154\_ 6. 989842 6. 992851 7. 043964 7. 300755 7. 292041 7. 328959  
11733155\_ 3. 185036 3. 306441 3. 346053 3. 31608 3. 399169 3. 325718  
11733156\_ 9. 077673 9. 121071 9. 022342 8. 749853 8. 679595 8. 625965  
11733157\_ 6. 672267 6. 641378 6. 628444 7. 357432 7. 372956 7. 387032  
11733158\_ 5. 350754 5. 41832 5. 343479 5. 445845 5. 438106 5. 515445  
11733159\_ 3. 071061 3. 188898 3. 295263 3. 095938 3. 457931 3. 07524  
11733160\_ 3. 337346 3. 363874 3. 425095 3. 435752 3. 503743 3. 587082  
11733161\_ 4. 102509 3. 88637 4. 015467 4. 612578 4. 459272 4. 57659  
11733162\_ 5. 493457 5. 547235 5. 55279 5. 646586 5. 610962 5. 633008  
11733163\_ 4. 28533 4. 252069 4. 28533 4. 299145 4. 28533 4. 206401  
11733164\_ 2. 85114 2. 884947 3. 016726 2. 313081 2. 350098 2. 402685  
11733165\_ 7. 788755 7. 680673 7. 772347 7. 951868 7. 951068 8. 056383  
11733166\_ 3. 803592 3. 773841 3. 812876 3. 874716 3. 722177 3. 628065  
11733167\_ 4. 578297 4. 459939 4. 513681 4. 56324 4. 539586 4. 575024  
11733168\_ 6. 17981 6. 393269 6. 141532 6. 297583 6. 282224 6. 378057  
11733169\_ 6. 001888 5. 774499 5. 872322 6. 054042 6. 00364 6. 033787  
11733170\_ 9. 021891 8. 979173 9. 038628 8. 947379 8. 933118 8. 94664  
11733171\_ 6. 973545 6. 836621 7. 052734 6. 874408 6. 788578 6. 867721  
11733172\_ 6. 418414 6. 471631 6. 560439 7. 181847 7. 194241 7. 193854  
11733173\_ 5. 239148 5. 122181 5. 205009 5. 220745 5. 417508 5. 434188  
11733174\_ 7. 632626 7. 500422 7. 522953 7. 519297 7. 506123 7. 489139  
11733175\_ 5. 329674 5. 253432 5. 384803 5. 056575 5. 136166 4. 971211  
11733176\_ 5. 513291 5. 584269 5. 683022 5. 70294 5. 69915 5. 619463  
11733177\_ 4. 200678 3. 738712 3. 995999 4. 366669 4. 459939 4. 268493  
11733178\_ 2. 858118 2. 83198 2. 874619 3. 047138 2. 990127 2. 878409  
11733179\_ 3. 936667 4. 180528 4. 213226 4. 2076 4. 430946 4. 521577  
11733180\_ 7. 571285 7. 604687 7. 601067 7. 765944 7. 741433 7. 697263  
11733181\_ 4. 789991 4. 700589 4. 915297 5. 661877 5. 617843 5. 562499  
11733182\_ 5. 763634 5. 684695 5. 761309 5. 508543 5. 426098 5. 568145  
11733183\_ 5. 278031 5. 201486 5. 2222 5. 124424 5. 153557 4. 978123  
11733184\_ 5. 523577 5. 228627 5. 541764 4. 470618 4. 746929 4. 694191  
11733185\_ 6. 917769 6. 835384 6. 834935 6. 727114 6. 524284 6. 587165  
11733186\_ 6. 905922 6. 708611 6. 721754 6. 361232 6. 307336 6. 250596  
11733187\_ 8. 619589 8. 555484 8. 513607 7. 297592 7. 184095 7. 233429  
11733188\_ 7. 053919 6. 978347 6. 988659 8. 126235 8. 244307 8. 097183  
11733189\_ 5. 524571 5. 672285 5. 774279 6. 132953 6. 442523 6. 254048  
11733190\_ 7. 388677 7. 323196 7. 255113 7. 442902 7. 358974 7. 380765  
11733191\_ 5. 691799 5. 896828 5. 644084 5. 973656 5. 892925 5. 857817  
11733192\_ 3. 017082 3. 175697 3. 417846 3. 110195 3. 289293 3. 175697  
11733193\_ 2. 361778 2. 287016 2. 283281 2. 243141 2. 311091 2. 094901  
11733194\_ 4. 556531 4. 605622 4. 606965 4. 557458 4. 480085 4. 820399  
11733195\_ 6. 088598 6. 080671 6. 103394 6. 131867 6. 251933 6. 193016  
11733196\_ 7. 485613 7. 463653 7. 414185 6. 899021 6. 794186 6. 787808  
11733197\_ 6. 729722 6. 74977 6. 886652 6. 446045 6. 426674 6. 354529  
11733198\_ 10. 20443 10. 12949 10. 14941 10. 44507 10. 48786 10. 38442  
11733199\_ 8. 267506 8. 174554 8. 188633 8. 305811 8. 237865 8. 268605  
11733200\_ 8. 447314 8. 430432 8. 48849 8. 828738 8. 840238 8. 845997  
11733201\_ 5. 763634 5. 614563 5. 776244 5. 560577 5. 67945 5. 798613  
11733202\_ 4. 511581 4. 546253 4. 510497 4. 473695 4. 491835 4. 511581  
11733203\_ 5. 926996 5. 936063 5. 935088 5. 661766 5. 667242 5. 714997

11733204\_ 6. 762143 6. 633859 6. 637314 6. 388473 6. 428565 6. 440574  
11733205\_ 7. 002026 7. 020462 7. 028944 7. 149877 7. 083773 7. 125874  
11733206\_ 5. 795135 5. 978935 5. 919263 5. 801048 5. 780462 5. 689092  
11733207\_ 6. 372052 6. 316634 6. 377216 6. 004301 6. 014931 6. 105497  
11733208\_ 6. 881387 6. 877808 6. 900377 6. 755815 6. 719424 6. 804262  
11733209\_ 6. 471251 6. 429121 6. 43197 6. 398855 6. 404562 6. 386917  
11733210\_ 7. 197987 7. 215889 7. 193066 7. 118889 7. 040542 6. 876456  
11733211\_ 8. 103363 8. 021266 8. 056094 7. 86209 7. 917486 7. 839984  
11733212\_ 6. 715439 6. 786453 6. 656128 7. 099734 6. 964454 6. 946361  
11733213\_ 6. 578014 6. 641714 6. 489158 6. 450783 6. 34678 6. 291967  
11733214\_ 6. 875865 6. 714177 6. 800847 6. 537321 6. 526095 6. 550477  
11733215\_ 4. 304976 4. 279365 4. 400917 4. 446851 4. 364591 4. 375161  
11733216\_ 6. 636539 6. 482061 6. 476586 6. 394337 6. 504336 6. 428238  
11733217\_ 7. 356041 7. 272172 7. 313105 7. 066193 7. 098225 7. 085641  
11733218\_ 7. 017473 6. 948868 6. 958012 7. 424929 7. 357372 7. 409349  
11733219\_ 7. 813749 7. 749458 7. 778354 8. 201867 8. 074029 8. 038159  
11733220\_ 9. 528646 9. 526405 9. 568006 9. 915815 9. 918574 9. 907069  
11733221\_ 7. 457338 7. 428428 7. 382916 7. 70404 7. 710308 7. 651888  
11733222\_ 5. 928035 6. 046517 5. 915915 6. 118565 6. 080792 6. 162005  
11733223\_ 6. 384458 6. 319767 6. 433439 6. 221934 6. 368961 6. 197831  
11733224\_ 5. 363237 5. 359099 5. 420692 5. 245371 5. 335927 5. 419525  
11733225\_ 5. 910564 5. 968173 5. 924968 6. 081229 6. 095638 6. 212602  
11733226\_ 5. 880222 5. 977792 5. 830531 5. 914588 5. 925329 5. 935987  
11733227\_ 7. 899885 7. 897708 7. 863289 7. 971985 7. 958999 8. 054351  
11733228\_ 5. 189505 5. 282316 5. 246821 5. 318951 5. 302875 5. 36703  
11733229\_ 2. 645601 2. 709935 2. 489477 2. 361778 2. 099716 2. 379078  
11733230\_ 3. 425092 3. 554229 3. 367643 3. 09854 3. 281686 3. 066087  
11733231\_ 4. 41582 4. 152229 4. 282213 4. 485018 4. 487926 4. 48852  
11733232\_ 4. 805973 4. 778824 4. 784514 4. 954409 4. 956316 5. 017417  
11733233\_ 7. 240233 7. 366473 7. 233257 7. 249057 7. 247618 7. 310154  
11733234\_ 5. 758762 5. 702868 5. 661637 5. 844516 5. 609448 5. 682886  
11733235\_ 4. 670331 4. 583665 4. 79591 4. 651185 4. 670501 4. 792954  
11733236\_ 7. 128131 7. 119426 7. 215511 7. 1051 7. 076908 7. 090909  
11733237\_ 4. 340292 4. 171645 4. 340909 4. 673145 4. 4012 4. 540706  
11733238\_ 5. 895058 5. 880322 5. 919847 5. 886209 5. 807808 5. 85866  
11733239\_ 6. 249767 6. 190135 6. 257332 6. 232891 6. 22056 6. 193016  
11733240\_ 5. 277334 5. 245208 5. 270453 4. 952721 4. 92317 5. 188601  
11733241\_ 6. 662266 6. 770306 6. 472329 6. 694111 6. 74571 6. 700899  
11733242\_ 5. 312244 5. 380649 5. 253943 5. 395626 5. 289506 5. 305957  
11733243\_ 2. 06228 2. 14816 1. 901259 1. 964538 2. 094685 2. 029875  
11733244\_ 4. 763021 4. 709854 4. 871915 4. 915422 4. 881811 4. 798471  
11733245\_ 5. 569252 5. 504349 5. 557746 5. 629454 5. 621122 5. 712877  
11733246\_ 5. 209259 5. 380649 5. 406254 5. 513048 5. 45366 5. 552229  
11733247\_ 9. 602825 9. 535642 9. 579119 9. 804057 9. 814632 9. 828063  
11733248\_ 8. 303941 8. 308925 8. 319141 8. 22242 8. 198011 8. 20699  
11733249\_ 5. 740779 5. 763634 5. 725711 5. 688153 5. 586344 5. 655283  
11733250\_ 5. 796007 5. 771398 5. 65596 5. 822538 5. 609647 5. 506348  
11733251\_ 3. 349252 3. 37542 3. 24473 3. 338043 3. 317702 3. 31978  
11733252\_ 6. 923296 6. 886652 6. 829914 7. 05996 6. 946361 6. 886619  
11733253\_ 4. 874234 5. 264077 5. 036118 5. 072648 5. 011346 5. 196201  
11733254\_ 6. 833477 6. 833477 6. 924203 7. 212651 7. 227099 7. 228086

11733255\_ 6. 4143 6. 44825 6. 213734 5. 954081 5. 99157 5. 992354  
11733256\_ 3. 864886 3. 773558 4. 043732 3. 945713 3. 987812 3. 834372  
11733257\_ 8. 441339 8. 474475 8. 365479 8. 360524 8. 413607 8. 274803  
11733258\_ 7. 158687 7. 137113 7. 246376 6. 693024 6. 710577 6. 553778  
11733259\_ 7. 038907 6. 992875 6. 964491 6. 516968 6. 469318 6. 547325  
11733260\_ 6. 729596 6. 6912 6. 676809 6. 792068 6. 786018 6. 731085  
11733261\_ 2. 584426 2. 611749 2. 853628 2. 773385 2. 942718 2. 841968  
11733262\_ 2. 638148 2. 778288 2. 612012 2. 667964 2. 661919 2. 628156  
11733263\_ 7. 637239 7. 625344 7. 699383 7. 721053 7. 786775 7. 710874  
11733264\_ 6. 94575 7. 019649 6. 995224 6. 845543 6. 864759 6. 893165  
11733265\_ 4. 135542 4. 250934 4. 026092 3. 982174 4. 137707 4. 31478  
11733266\_ 5. 147684 5. 237222 5. 119565 5. 21002 5. 004468 5. 202028  
11733267\_ 4. 113777 3. 986014 4. 172348 4. 226122 4. 211016 4. 199939  
11733268\_ 4. 250334 4. 310391 4. 307789 4. 184768 4. 298501 4. 268258  
11733269\_ 5. 739599 5. 781041 5. 836329 5. 684643 5. 772837 5. 760986  
11733270\_ 4. 629413 4. 543888 4. 395639 4. 5067 4. 566044 4. 585814  
11733271\_ 6. 690548 6. 900136 6. 78125 6. 739636 6. 715766 6. 786852  
11733272\_ 6. 968436 7. 151511 6. 963417 7. 055112 7. 022313 7. 061982  
11733273\_ 5. 954081 5. 880864 5. 926418 6. 102239 6. 014195 6. 060078  
11733274\_ 5. 808159 5. 609768 5. 834962 4. 892161 4. 86984 4. 820355  
11733275\_ 6. 736995 6. 763566 6. 903978 6. 524323 6. 56978 6. 528702  
11733276\_ 2. 602286 2. 733566 2. 688594 2. 914601 2. 77222 2. 623805  
11733277\_ 1. 898324 1. 876468 1. 898324 1. 901941 2. 001466 1. 929991  
11733278\_ 2. 359202 2. 450843 2. 404665 2. 535601 2. 383102 2. 428653  
11733279\_ 4. 836722 4. 823784 4. 987934 4. 56417 4. 873951 4. 826552  
11733280\_ 5. 298336 5. 189628 5. 25584 5. 315276 5. 327638 5. 260739  
11733281\_ 5. 467041 5. 546249 5. 338479 5. 608225 5. 658645 5. 55418  
11733282\_ 5. 848077 5. 712131 5. 757652 5. 528624 5. 459263 5. 55855  
11733283\_ 6. 864754 6. 603556 6. 758445 6. 486569 6. 366235 6. 471449  
11733284\_ 3. 633485 3. 786415 3. 784142 3. 728613 3. 680054 3. 812348  
11733285\_ 5. 14918 5. 224377 5. 150831 5. 260649 5. 171382 5. 198405  
11733286\_ 6. 433191 6. 5294 6. 496218 6. 618032 6. 48633 6. 66019  
11733287\_ 7. 489237 7. 421534 7. 589699 7. 213218 7. 207269 7. 178713  
11733288\_ 4. 986316 5. 099077 4. 946401 5. 127254 5. 096869 5. 062988  
11733289\_ 5. 874246 6. 000756 5. 895049 6. 016228 5. 980978 5. 950367  
11733290\_ 2. 434956 2. 419481 2. 513044 2. 624716 2. 359414 2. 505182  
11733291\_ 2. 9476 2. 9476 2. 911155 3. 023424 3. 107789 3. 138504  
11733292\_ 7. 243561 7. 23126 7. 213022 6. 778848 6. 748551 6. 680365  
11733293\_ 7. 29505 7. 115606 7. 119492 6. 551942 6. 537581 6. 715772  
11733294\_ 6. 740539 6. 578208 6. 676417 5. 965981 6. 024869 6. 113813  
11733295\_ 7. 464461 7. 398664 7. 360086 7. 7179 7. 606132 7. 700346  
11733296\_ 7. 138714 7. 221469 7. 044204 7. 002065 7. 06866 7. 055469  
11733297\_ 3. 25846 3. 610285 3. 154596 3. 314096 3. 046127 3. 157498  
11733298\_ 7. 096805 6. 986403 6. 985991 6. 970004 6. 861476 6. 873223  
11733299\_ 3. 818401 4. 031417 3. 829864 3. 542887 3. 875964 3. 799507  
11733300\_ 4. 816004 4. 807871 4. 740934 4. 900355 4. 937853 4. 758209  
11733301\_ 2. 605516 2. 625405 2. 625405 2. 377847 2. 605516 2. 540594  
11733302\_ 6. 244666 6. 278018 6. 232367 5. 501218 5. 338056 5. 442778  
11733303\_ 4. 438022 4. 389308 4. 504749 3. 436923 3. 75407 3. 503743  
11733304\_ 7. 510802 7. 488604 7. 462446 7. 623072 7. 576005 7. 66949  
11733305\_ 4. 581485 4. 205837 4. 233853 4. 091066 4. 237052 4. 275543

11733306\_ 3. 95099 3. 723624 4. 035294 3. 841302 3. 912914 3. 963682  
11733307\_ 4. 244706 4. 238308 4. 213226 4. 288279 4. 244706 4. 276362  
11733308\_ 6. 557895 6. 567164 6. 592903 6. 767222 6. 778127 6. 836809  
11733309\_ 5. 519204 5. 411119 5. 40931 5. 637408 5. 765239 5. 664184  
11733310\_ 4. 039231 4. 170954 4. 177226 4. 706356 4. 374377 4. 507267  
11733311\_ 5. 254257 5. 438374 5. 286139 5. 728576 5. 763198 5. 650587  
11733312\_ 7. 33164 7. 261231 7. 26818 6. 59563 6. 600546 6. 796827  
11733313\_ 8. 24166 8. 147757 8. 112755 7. 618881 7. 519187 7. 52476  
11733314\_ 4. 79299 5. 019992 4. 772366 5. 054186 4. 858959 4. 806149  
11733315\_ 6. 266124 6. 395092 6. 284561 6. 459616 6. 290171 6. 305937  
11733316\_ 5. 868591 5. 965662 5. 778937 5. 873164 5. 934637 5. 770425  
11733317\_ 10. 0161 9. 986984 9. 990333 9. 975348 10. 02298 9. 946405  
11733318\_ 3. 985369 4. 037854 4. 097275 4. 04479 4. 139715 3. 974343  
11733319\_ 3. 496821 3. 803188 3. 863303 3. 66883 3. 383495 3. 579735  
11733320\_ 8. 643728 8. 532094 8. 654579 8. 434429 8. 415487 8. 40122  
11733321\_ 6. 44476 6. 455059 6. 398843 6. 4586 6. 473721 6. 532014  
11733322\_ 2. 137129 1. 879182 2. 002931 1. 896717 1. 721147 2. 002931  
11733323\_ 3. 234749 2. 59641 3. 012307 2. 83198 2. 672777 2. 945929  
11733324\_ 2. 913639 2. 844743 3. 037415 2. 651727 3. 010895 2. 958801  
11733325\_ 5. 156303 5. 316058 5. 17639 5. 084411 5. 051422 5. 233861  
11733326\_ 6. 705653 6. 886298 6. 739151 6. 9648 6. 864098 6. 907236  
11733327\_ 3. 671843 3. 548452 3. 307058 3. 745154 3. 696352 3. 865407  
11733328\_ 4. 69638 4. 443004 4. 653382 5. 029529 4. 983467 5. 102338  
11733329\_ 4. 569394 4. 38249 4. 831698 5. 387463 5. 432532 5. 347516  
11733330\_ 3. 870998 3. 674067 3. 833183 3. 758488 3. 858165 3. 863383  
11733331\_ 2. 210572 2. 285691 2. 214395 2. 150454 2. 225866 2. 382788  
11733332\_ 5. 257501 5. 345661 5. 110373 5. 169385 5. 333785 5. 251229  
11733333\_ 4. 873651 4. 815683 4. 635436 4. 944116 4. 823627 4. 812918  
11733334\_ 4. 528078 4. 649113 4. 541573 4. 482504 4. 572787 4. 625625  
11733335\_ 5. 347594 5. 472124 5. 533803 5. 254812 5. 26034 5. 310871  
11733336\_ 4. 132299 4. 17641 4. 428468 3. 380935 3. 72987 3. 822197  
11733337\_ 4. 200678 4. 276728 4. 233486 3. 981148 4. 168152 4. 14889  
11733338\_ 6. 524706 6. 672355 6. 69622 6. 892414 6. 677734 6. 726958  
11733339\_ 5. 572668 5. 513884 5. 699167 5. 494579 5. 490461 5. 593733  
11733340\_ 7. 943494 7. 742532 7. 956256 8. 237974 8. 248681 8. 286284  
11733341\_ 4. 509721 4. 439515 4. 367159 4. 468832 4. 560995 4. 558312  
11733342\_ 5. 102809 5. 125459 5. 194456 5. 194456 5. 136103 5. 266413  
11733343\_ 10. 78641 10. 68966 10. 71342 10. 60624 10. 5632 10. 54157  
11733344\_ 2. 248101 2. 402451 1. 9192 1. 912299 2. 046868 2. 103203  
11733345\_ 3. 976921 3. 865464 3. 864875 3. 969311 3. 962642 3. 969966  
11733346\_ 6. 045269 5. 972295 5. 825554 5. 858396 5. 905444 5. 824795  
11733347\_ 9. 81066 9. 728817 9. 758808 9. 985628 10. 03102 9. 989782  
11733348\_ 6. 690894 6. 619033 6. 725998 6. 615781 6. 623336 6. 626041  
11733349\_ 4. 584933 4. 212956 4. 589257 4. 067703 4. 212956 4. 287946  
11733350\_ 4. 85763 4. 757032 5. 150669 4. 868346 4. 747939 4. 774317  
11733351\_ 5. 874455 5. 705437 5. 710428 5. 685115 5. 650107 5. 529183  
11733352\_ 8. 381297 8. 291279 8. 35593 7. 865363 7. 861539 7. 866635  
11733353\_ 2. 562081 2. 34081 2. 430609 2. 487767 2. 417197 2. 519536  
11733354\_ 5. 465953 5. 249069 5. 425013 4. 966503 5. 048326 4. 966227  
11733355\_ 2. 452211 2. 605516 2. 694018 2. 387373 2. 47102 2. 773888  
11733356\_ 4. 28336 4. 534081 4. 354532 4. 274066 4. 345277 4. 237703

11733357\_ 5. 280477 5. 268146 5. 17639 5. 393301 5. 395969 5. 500784  
11733358\_ 2. 988093 3. 214258 3. 284435 3. 205184 3. 213911 3. 362996  
11733359\_ 5. 869565 5. 692395 5. 904679 5. 012353 5. 169281 4. 922947  
11733360\_ 5. 814317 5. 627078 5. 765555 5. 005839 4. 822959 4. 914534  
11733361\_ 3. 503743 3. 446216 3. 625408 3. 432246 3. 446216 3. 278627  
11733362\_ 2. 661522 2. 648326 2. 874619 2. 803205 2. 624147 2. 698978  
11733363\_ 5. 716995 5. 845793 5. 79729 5. 478066 5. 590871 5. 631967  
11733364\_ 5. 146829 5. 211373 5. 08782 5. 11527 5. 04127 5. 188272  
11733365\_ 3. 260223 3. 342426 3. 187137 3. 455232 3. 578821 3. 328883  
11733366\_ 2. 39655 2. 668765 2. 361778 2. 718322 2. 683746 2. 687617  
11733367\_ 8. 175561 8. 059768 8. 173236 8. 511523 8. 512648 8. 552009  
11733368\_ 4. 438573 4. 766476 4. 663176 4. 710788 5. 147976 4. 802347  
11733369\_ 4. 43882 4. 50837 4. 698231 4. 860339 5. 138017 4. 866498  
11733370\_ 9. 018389 8. 975341 9. 02605 8. 801949 8. 884838 8. 821126  
11733371\_ 3. 818255 3. 180062 3. 274111 3. 465016 3. 363443 3. 252653  
11733372\_ 6. 536494 6. 534328 6. 66344 6. 142138 6. 082703 6. 201304  
11733373\_ 5. 808898 5. 658548 5. 645341 5. 56723 5. 589921 5. 643089  
11733374\_ 6. 901411 6. 958509 6. 917707 6. 354056 6. 225595 6. 205784  
11733375\_ 7. 166262 7. 019603 7. 149146 6. 58903 6. 692325 6. 740082  
11733376\_ 7. 590438 7. 497848 7. 607638 8. 246169 8. 226661 8. 252196  
11733377\_ 3. 915454 4. 151747 4. 135496 4. 05833 3. 837533 4. 034953  
11733378\_ 3. 122119 2. 630104 2. 975856 2. 524597 2. 524597 2. 721426  
11733379\_ 5. 029529 4. 884953 5. 073036 4. 456535 4. 200678 4. 446769  
11733380\_ 2. 359218 2. 386728 2. 359218 2. 388635 2. 243654 2. 329801  
11733381\_ 6. 370458 6. 30475 6. 317115 5. 935883 5. 950791 5. 909858  
11733382\_ 5. 675749 5. 584813 5. 773795 5. 366923 5. 440056 5. 397095  
11733383\_ 8. 831352 8. 751738 8. 78025 9. 237555 9. 29274 9. 30691  
11733384\_ 4. 059109 3. 9244 3. 909467 4. 07205 4. 102907 4. 140777  
11733385\_ 3. 548287 3. 665882 3. 972527 4. 524559 4. 528397 4. 620679  
11733386\_ 4. 663431 4. 576987 4. 590077 4. 761905 4. 9709 5. 006379  
11733387\_ 5. 436182 5. 66284 5. 3379 5. 40702 5. 325481 5. 3379  
11733388\_ 5. 1419 5. 151198 5. 17639 4. 771686 4. 701709 4. 946583  
11733389\_ 4. 120562 4. 357973 3. 987405 4. 372692 4. 280454 4. 465901  
11733390\_ 3. 379552 3. 539127 3. 312335 3. 353872 3. 543736 3. 538683  
11733391\_ 2. 853545 2. 716238 2. 74907 2. 518448 2. 775386 2. 696522  
11733392\_ 4. 643717 4. 651091 4. 459939 4. 645986 4. 552838 4. 765054  
11733393\_ 5. 231273 5. 225088 5. 193989 5. 028055 4. 887433 5. 150628  
11733394\_ 2. 943416 2. 875147 2. 85386 3. 020093 2. 959339 2. 953674  
11733395\_ 8. 277571 8. 294321 8. 419377 8. 238911 8. 212193 8. 261302  
11733396\_ 2. 783774 2. 704378 2. 578285 2. 43691 2. 425231 2. 518158  
11733397\_ 4. 422825 4. 473752 4. 335607 4. 387543 4. 476272 4. 510468  
11733398\_ 2. 457783 2. 436872 2. 474548 2. 450855 2. 433596 2. 454073  
11733399\_ 2. 988431 3. 273218 2. 969966 3. 194239 3. 075472 3. 027814  
11733400\_ 6. 441687 6. 330401 6. 517021 5. 414869 5. 579546 5. 77685  
11733401\_ 7. 20919 7. 311278 7. 113213 7. 582953 7. 498526 7. 58117  
11733402\_ 2. 556476 2. 642301 2. 798915 2. 642301 2. 54879 2. 439282  
11733403\_ 3. 71312 3. 82823 3. 899105 3. 339047 2. 897299 3. 03551  
11733404\_ 5. 285218 5. 28514 4. 998567 5. 2222 5. 297263 5. 246269  
11733405\_ 5. 411774 5. 316361 5. 314633 5. 662351 5. 681381 5. 523003  
11733406\_ 6. 680744 6. 722299 6. 711467 6. 748383 6. 723727 6. 71527  
11733407\_ 6. 588209 6. 842769 6. 746142 6. 772645 6. 725306 6. 827098

11733408\_ 3. 982451 4. 020895 3. 995052 3. 726955 3. 815477 3. 764241  
11733409\_ 7. 361773 7. 478423 7. 325703 7. 59757 7. 603589 7. 60723  
11733410\_ 6. 456845 6. 334392 6. 464089 6. 623364 6. 601253 6. 568747  
11733411\_ 5. 255459 5. 208618 5. 101662 5. 312979 5. 303829 5. 254023  
11733412\_ 4. 32656 4. 148761 4. 36521 4. 365846 4. 305173 4. 377986  
11733413\_ 6. 992823 7. 037316 7. 021645 6. 851299 6. 870048 6. 945905  
11733414\_ 4. 408114 4. 448377 4. 709463 4. 623411 4. 567497 4. 470714  
11733415\_ 10. 62838 10. 68881 10. 72394 10. 56067 10. 5932 10. 49661  
11733416\_ 6. 538968 6. 538968 6. 482637 6. 48518 6. 557068 6. 591692  
11733417\_ 6. 551375 6. 592446 6. 564139 6. 478718 6. 557068 6. 58586  
11733418\_ 3. 383452 3. 378102 3. 372235 3. 506251 3. 490254 3. 52208  
11733419\_ 4. 388643 4. 644014 4. 420083 4. 527596 4. 478264 4. 509286  
11733420\_ 3. 985546 3. 790046 3. 742512 3. 997131 4. 071433 3. 896476  
11733421\_ 5. 02364 4. 817707 4. 782615 4. 697359 4. 649041 4. 542203  
11733422\_ 7. 278635 7. 136788 7. 153079 6. 751023 6. 705991 6. 779107  
11733423\_ 4. 428291 4. 546808 4. 503672 4. 512056 4. 487465 4. 580799  
11733424\_ 2. 267946 2. 466165 2. 338802 2. 260826 2. 354096 2. 352199  
11733425\_ 5. 676992 5. 739879 5. 641041 5. 723241 5. 688176 5. 78941  
11733426\_ 3. 891803 3. 825673 3. 822511 3. 714641 3. 694766 3. 554542  
11733427\_ 6. 185764 6. 240496 6. 229272 6. 357618 6. 229525 6. 229272  
11733428\_ 7. 147351 6. 998271 7. 058482 6. 770202 6. 736032 6. 831196  
11733429\_ 4. 212802 4. 260252 4. 17182 4. 176903 4. 157354 4. 166737  
11733430\_ 7. 363535 7. 316134 7. 343163 7. 192495 7. 163203 7. 136427  
11733431\_ 2. 504447 2. 777648 2. 790748 2. 614511 2. 810783 2. 772304  
11733432\_ 2. 658276 2. 800539 2. 607547 2. 846898 2. 878989 2. 853177  
11733433\_ 2. 959192 2. 978334 2. 978334 3. 178607 3. 196841 2. 898279  
11733434\_ 2. 260682 2. 231894 2. 095256 2. 079884 2. 095256 2. 095054  
11733435\_ 3. 223714 3. 303025 3. 113125 3. 1683 3. 126741 3. 246182  
11733436\_ 5. 190262 5. 17109 5. 073036 5. 049123 5. 071787 5. 056964  
11733437\_ 4. 903906 4. 8599 4. 878593 4. 782764 4. 899772 4. 881456  
11733438\_ 5. 864447 6. 112414 6. 010575 6. 101778 6. 104931 6. 234585  
11733439\_ 2. 174674 2. 077903 2. 084825 2. 064659 2. 148401 2. 326653  
11733440\_ 7. 273565 7. 383954 7. 369219 7. 332061 7. 374996 7. 261138  
11733441\_ 3. 576852 3. 181809 3. 158701 3. 33644 3. 33644 3. 225379  
11733442\_ 3. 448041 3. 776137 3. 651192 2. 975013 3. 141062 2. 993716  
11733443\_ 5. 994923 6. 097927 5. 958085 6. 1873 6. 122294 6. 110751  
11733444\_ 5. 437452 5. 472582 5. 435574 5. 36334 5. 499712 5. 491812  
11733445\_ 6. 484394 6. 555981 6. 29036 7. 256866 7. 22153 7. 118115  
11733446\_ 5. 860442 5. 93979 6. 032152 6. 624535 6. 608906 6. 766045  
11733447\_ 3. 397299 3. 595997 3. 411024 3. 5067 3. 453492 3. 330823  
11733448\_ 3. 126716 3. 02764 3. 175593 3. 232355 3. 052019 3. 161542  
11733449\_ 2. 732053 2. 889341 2. 73866 2. 81694 2. 908658 2. 95966  
11733450\_ 7. 018772 6. 879445 7. 142907 7. 274136 7. 160144 7. 179352  
11733451\_ 6. 946361 6. 86909 6. 964795 7. 36919 7. 323777 7. 344723  
11733452\_ 8. 28615 8. 446969 8. 299174 8. 338399 8. 254058 8. 398789  
11733453\_ 4. 813609 5. 004167 4. 966565 4. 784242 4. 988713 5. 278622  
11733454\_ 6. 20762 6. 064634 6. 278258 5. 990943 6. 102715 6. 309849  
11733455\_ 4. 695917 4. 818572 4. 974305 5. 151693 5. 118857 5. 121632  
11733456\_ 6. 286828 6. 227496 6. 175947 7. 631747 7. 589434 7. 59395  
11733457\_ 6. 025952 6. 066501 5. 950197 5. 803813 5. 911589 5. 81759  
11733458\_ 7. 659424 7. 572955 7. 583972 7. 556389 7. 578205 7. 572677

11733459\_ 6. 137717 6. 210902 6. 084067 6. 24763 6. 254576 6. 229225  
11733460\_ 5. 83862 5. 823825 5. 832357 5. 947664 5. 941555 5. 943644  
11733461\_ 5. 670539 5. 576862 5. 608376 5. 836395 5. 683195 5. 751774  
11733462\_ 4. 348952 4. 232453 4. 063751 4. 486632 4. 368244 4. 287674  
11733463\_ 3. 776601 3. 4617 3. 933966 3. 706462 3. 879309 3. 693366  
11733464\_ 6. 935654 6. 91283 6. 946353 6. 230391 6. 349576 6. 282224  
11733465\_ 6. 718538 6. 809436 6. 668847 6. 479542 6. 476966 6. 528702  
11733466\_ 5. 248232 5. 076266 5. 425825 5. 136513 4. 833423 5. 108366  
11733467\_ 2. 443035 2. 444887 2. 392177 2. 311079 2. 577508 2. 55032  
11733468\_ 2. 228817 2. 190955 2. 361778 2. 21325 2. 190955 2. 328775  
11733469\_ 5. 689558 5. 662197 5. 741907 5. 600994 5. 575038 5. 418855  
11733470\_ 5. 704919 5. 680655 5. 61656 5. 90814 5. 870978 5. 945091  
11733471\_ 4. 80566 4. 92634 4. 779235 4. 959673 4. 939649 5. 13856  
11733472\_ 4. 912725 5. 107948 4. 986425 4. 914651 4. 951808 4. 978881  
11733473\_ 4. 933955 5. 042118 5. 000297 4. 97058 5. 000297 5. 029529  
11733474\_ 2. 486863 2. 203262 2. 002551 2. 264634 2. 303037 2. 239841  
11733475\_ 3. 295243 3. 295243 3. 234238 3. 365473 3. 498597 3. 318254  
11733476\_ 4. 193994 4. 273573 4. 156582 4. 305888 4. 283241 4. 269786  
11733477\_ 4. 209205 4. 203628 4. 057389 4. 294385 4. 225493 4. 129022  
11733478\_ 3. 356984 3. 44496 3. 435026 3. 535745 3. 607541 3. 469772  
11733479\_ 8. 412387 8. 381365 8. 366455 8. 138497 8. 104744 8. 108217  
11733480\_ 8. 72365 8. 635807 8. 66195 8. 429308 8. 405272 8. 449877  
11733481\_ 5. 048057 5. 10224 5. 142542 5. 311946 5. 223029 5. 13215  
11733482\_ 8. 119262 8. 084046 8. 08719 7. 752012 7. 770474 7. 69232  
11733483\_ 4. 33028 4. 482837 4. 526777 4. 453246 4. 482837 4. 59037  
11733484\_ 5. 378938 5. 390948 5. 42704 5. 030897 4. 984669 5. 209188  
11733485\_ 6. 042629 6. 13855 6. 108255 6. 158909 6. 260869 6. 127605  
11733486\_ 4. 74097 4. 856081 4. 663412 4. 564457 4. 690671 4. 916784  
11733487\_ 3. 298393 3. 527248 3. 545797 3. 527248 3. 479953 3. 716769  
11733488\_ 3. 748925 3. 650372 3. 70946 3. 863401 3. 692743 3. 736594  
11733489\_ 4. 987221 4. 997015 5. 005032 5. 009903 4. 97748 4. 882087  
11733490\_ 2. 777299 2. 940377 2. 882582 2. 783643 2. 752421 2. 697771  
11733491\_ 5. 704096 5. 503317 5. 835083 4. 704874 4. 827201 4. 975892  
11733492\_ 5. 854636 5. 80199 5. 960305 5. 139971 4. 977329 5. 169355  
11733493\_ 6. 943033 7. 009306 6. 995741 7. 104327 7. 033765 7. 031531  
11733494\_ 6. 605915 6. 53239 6. 486217 5. 804908 5. 855664 5. 691051  
11733495\_ 10. 67561 10. 68474 10. 68719 10. 49647 10. 48205 10. 44948  
11733496\_ 10. 80321 10. 78502 10. 79691 10. 58022 10. 5564 10. 57633  
11733497\_ 4. 565245 4. 670689 4. 49094 4. 628057 4. 482616 4. 571571  
11733498\_ 2. 439801 2. 559517 2. 491009 2. 48148 2. 479784 2. 525291  
11733499\_ 2. 359398 2. 25483 2. 361778 2. 597233 2. 523398 2. 360985  
11733500\_ 5. 645161 5. 635028 5. 736831 5. 427919 5. 426098 5. 475572  
11733501\_ 3. 718579 3. 64085 3. 785897 3. 721195 3. 705625 3. 802499  
11733502\_ 2. 086967 2. 493967 2. 308713 2. 234434 2. 47102 2. 208506  
11733503\_ 6. 296804 6. 357523 6. 324436 6. 451074 6. 507612 6. 424388  
11733504\_ 4. 768361 4. 747124 4. 598674 4. 834662 4. 807057 4. 578635  
11733505\_ 2. 571471 2. 462449 2. 651653 2. 641175 2. 477539 2. 575289  
11733506\_ 2. 352483 2. 616209 2. 271668 2. 628418 2. 407712 2. 514317  
11733507\_ 5. 775333 5. 905668 5. 794286 5. 845365 5. 918745 5. 849541  
11733508\_ 2. 71911 2. 552925 2. 801562 2. 572835 2. 534299 2. 623743  
11733509\_ 5. 247739 5. 30374 5. 179544 4. 950179 5. 013483 4. 94619



11733510\_ 4. 911492 4. 763543 4. 643717 4. 753105 4. 765644 4. 753105  
11733511\_ 8. 632456 8. 585911 8. 589005 8. 477757 8. 447325 8. 431338  
11733512\_ 8. 920928 8. 861393 8. 928857 8. 690017 8. 736459 8. 688602  
11733513\_ 7. 46644 7. 390843 7. 427438 7. 527488 7. 58059 7. 570859  
11733514\_ 3. 801476 3. 673512 3. 74189 3. 814979 3. 84557 3. 918489  
11733515\_ 5. 566821 5. 540507 5. 480298 5. 589379 5. 573312 5. 642585  
11733516\_ 2. 084439 1. 864662 2. 03614 2. 091163 1. 898324 2. 158539  
11733517\_ 4. 359846 4. 284514 4. 449154 4. 570997 4. 370255 4. 502145  
11733518\_ 3. 384446 3. 640495 3. 415822 3. 564348 3. 45743 3. 66748  
11733519\_ 4. 103605 4. 174044 4. 164725 4. 139362 4. 189784 4. 111552  
11733520\_ 6. 282224 6. 159624 6. 299071 6. 609721 6. 711885 6. 674482  
11733521\_ 6. 20845 6. 18581 6. 075955 6. 178364 6. 309726 6. 298687  
11733522\_ 5. 907837 5. 869751 5. 929935 5. 825175 5. 896225 5. 824302  
11733523\_ 3. 56802 3. 474988 3. 487306 3. 423371 3. 386709 3. 547718  
11733524\_ 2. 734522 2. 734522 2. 867031 2. 791295 2. 515098 2. 726578  
11733525\_ 4. 503107 4. 723819 4. 383407 4. 643717 4. 611092 4. 593231  
11733526\_ 2. 249055 2. 646895 2. 349013 2. 134321 2. 315881 2. 231293  
11733527\_ 3. 466111 3. 583204 3. 456335 3. 397076 3. 526852 3. 828024  
11733528\_ 5. 101236 5. 18881 5. 062794 5. 234507 5. 382957 5. 213888  
11733529\_ 3. 03369 2. 93094 3. 020415 3. 164463 3. 103546 3. 160298  
11733530\_ 6. 386664 6. 327216 6. 354529 6. 594872 6. 557536 6. 663739  
11733531\_ 6. 423879 6. 276193 6. 333008 6. 253621 6. 336322 6. 316801  
11733532\_ 5. 231353 5. 149545 5. 17639 5. 139119 5. 11527 5. 262406  
11733533\_ 3. 653254 4. 073958 4. 287593 4. 112962 4. 168828 4. 257949  
11733534\_ 4. 596203 4. 63566 4. 699557 4. 674651 4. 63055 4. 422632  
11733535\_ 4. 897188 5. 004255 4. 700741 4. 897188 4. 933501 4. 91892  
11733536\_ 3. 540752 3. 29345 3. 360656 3. 62019 3. 540286 3. 688941  
11733537\_ 3. 831434 4. 030305 3. 600566 3. 802698 3. 78382 3. 9063  
11733538\_ 4. 254105 4. 273264 4. 361033 4. 52904 4. 189254 4. 286156  
11733539\_ 6. 241431 6. 011116 6. 169159 6. 033816 5. 86715 5. 929965  
11733540\_ 4. 340432 4. 393548 4. 36567 4. 394633 4. 397887 4. 475191  
11733541\_ 4. 729008 4. 743441 4. 718387 4. 69184 4. 734712 4. 888678  
11733542\_ 4. 094965 3. 961783 4. 120684 4. 044311 3. 917009 4. 106484  
11733543\_ 3. 136518 3. 234949 3. 398236 3. 306109 3. 251535 3. 306109  
11733544\_ 5. 820052 5. 914928 5. 676992 6. 065528 6. 00507 6. 00067  
11733545\_ 2. 464123 2. 636016 2. 365824 2. 674938 2. 730555 2. 612849  
11733546\_ 2. 497843 2. 38282 2. 542508 2. 206081 2. 139951 2. 324762  
11733547\_ 5. 138135 5. 390404 5. 218727 5. 291976 5. 294355 5. 258399  
11733548\_ 4. 553006 4. 563022 4. 664059 4. 457291 4. 439597 4. 585776  
11733549\_ 4. 585495 4. 381949 4. 287861 4. 023243 4. 012581 4. 079037  
11733550\_ 4. 856916 4. 756958 4. 772366 4. 843472 4. 981139 4. 856916  
11733551\_ 3. 473607 3. 061205 3. 569852 3. 929195 3. 622771 3. 940476  
11733552\_ 5. 467044 5. 278268 5. 344902 5. 211692 5. 344301 5. 145234  
11733553\_ 4. 640008 4. 502896 4. 669209 4. 38713 4. 138224 4. 252145  
11733554\_ 5. 498801 5. 750827 5. 56146 5. 677382 5. 640305 5. 736121  
11733555\_ 4. 454028 4. 518052 4. 460295 4. 459939 4. 258801 4. 501977  
11733556\_ 2. 689022 2. 393389 2. 38861 2. 479746 2. 112477 2. 482108  
11733557\_ 3. 520256 3. 458106 3. 498114 3. 58249 3. 285691 3. 50192  
11733558\_ 4. 804666 4. 86345 4. 716035 5. 149882 5. 054881 4. 86345  
11733559\_ 6. 3262 6. 531304 6. 472183 6. 646786 6. 534128 6. 578486  
11733560\_ 6. 416406 6. 361741 6. 412133 5. 926169 6. 043928 6. 080257

11733561\_ 4. 778615 4. 502966 4. 60088 4. 431305 4. 522011 4. 533647  
11733562\_ 6. 960949 6. 914172 6. 96785 6. 102364 5. 97442 6. 09885  
11733563\_ 6. 629629 6. 604966 6. 585113 6. 365122 6. 381628 6. 450055  
11733564\_ 6. 166411 6. 118838 6. 140069 6. 118041 6. 100293 6. 206461  
11733565\_ 5. 500255 5. 331532 5. 516011 5. 549002 5. 410772 5. 454182  
11733566\_ 4. 123672 4. 464084 4. 820298 4. 366557 4. 175152 4. 218023  
11733567\_ 3. 346618 3. 182936 3. 346618 3. 105643 3. 075988 3. 309601  
11733568\_ 7. 338876 7. 438305 7. 420871 6. 921546 6. 872561 6. 874853  
11733569\_ 4. 877892 4. 236349 4. 77035 4. 998676 4. 890828 4. 799011  
11733570\_ 4. 756819 4. 582117 4. 792464 4. 701439 4. 72816 4. 643717  
11733571\_ 5. 209259 5. 346284 5. 333337 5. 330884 5. 237156 5. 309604  
11733572\_ 2. 447353 2. 165713 2. 383034 2. 266472 2. 258216 2. 357351  
11733573\_ 4. 780012 4. 892818 4. 893768 5. 189628 5. 008736 5. 120425  
11733574\_ 6. 806023 6. 752095 6. 818609 6. 924621 6. 876355 7. 053419  
11733575\_ 3. 931308 4. 031512 3. 880412 4. 057346 4. 035461 3. 669559  
11733576\_ 9. 351783 9. 226581 9. 317131 9. 515965 9. 597798 9. 45717  
11733577\_ 5. 983256 6. 063324 6. 012824 6. 173161 6. 100676 6. 092277  
11733578\_ 5. 867602 5. 978132 5. 807249 5. 897669 5. 861751 5. 773357  
11733579\_ 7. 532715 7. 394934 7. 52248 7. 393544 7. 430522 7. 426223  
11733580\_ 7. 003109 7. 080855 7. 011463 7. 041792 6. 962831 7. 097664  
11733581\_ 4. 994153 5. 048105 4. 796127 4. 99755 4. 984669 4. 808974  
11733582\_ 7. 613117 7. 651886 7. 671439 7. 614574 7. 575801 7. 659801  
11733583\_ 5. 041734 5. 360788 5. 0183 4. 992243 4. 92417 5. 073036  
11733584\_ 6. 813145 6. 685137 6. 89485 7. 009306 7. 003998 7. 142748  
11733585\_ 4. 887453 4. 956514 5. 054645 5. 181467 5. 094601 5. 033784  
11733586\_ 6. 387797 6. 377272 6. 260434 6. 396759 6. 444801 6. 411571  
11733587\_ 2. 501115 2. 59513 2. 731393 2. 501115 2. 420184 2. 598665  
11733588\_ 4. 112516 3. 983993 4. 135496 3. 950121 4. 077925 4. 107027  
11733589\_ 6. 033864 6. 078122 5. 930379 6. 097878 6. 162139 6. 060946  
11733590\_ 3. 29078 3. 356835 3. 312931 3. 51731 3. 426196 3. 207839  
11733591\_ 4. 20077 4. 174945 4. 211312 3. 982941 4. 216729 4. 180173  
11733592\_ 4. 635118 4. 854999 4. 596209 4. 546545 4. 53217 4. 657093  
11733593\_ 3. 515676 3. 405356 3. 487962 3. 398236 3. 398236 3. 511166  
11733594\_ 5. 76252 5. 554436 5. 624633 5. 723241 5. 708554 5. 882853  
11733595\_ 6. 90896 7. 03496 6. 860538 7. 040313 7. 015397 6. 953542  
11733596\_ 2. 311652 2. 396257 2. 329053 2. 423372 2. 395909 2. 40024  
11733597\_ 4. 867287 4. 849801 4. 81119 4. 857439 5. 031144 5. 013569  
11733598\_ 3. 574336 4. 004587 3. 608031 3. 774846 3. 529678 3. 91542  
11733599\_ 7. 497147 7. 354448 7. 429768 7. 164481 7. 200388 7. 291285  
11733600\_ 3. 73268 3. 860375 3. 79854 4. 033939 4. 111897 3. 928214  
11733601\_ 3. 521597 3. 395855 3. 529212 3. 866292 3. 733424 3. 784993  
11733602\_ 5. 235305 5. 379465 5. 22842 5. 408986 5. 355919 5. 373989  
11733603\_ 3. 712782 3. 925701 3. 955638 4. 044595 4. 030079 4. 035718  
11733604\_ 4. 896374 4. 94663 4. 897502 5. 198994 4. 993914 5. 041602  
11733605\_ 3. 062334 3. 260834 3. 137075 3. 061422 3. 26912 2. 972194  
11733606\_ 5. 356538 5. 554768 5. 671612 5. 558882 5. 614121 5. 584295  
11733607\_ 1. 923278 1. 927086 2. 088645 2. 024058 2. 014769 2. 201852  
11733608\_ 2. 05821 2. 248083 2. 033893 2. 344353 2. 230911 2. 127825  
11733609\_ 4. 763543 4. 729942 4. 679351 4. 744403 4. 843071 4. 819662  
11733610\_ 5. 764759 5. 886492 5. 614486 5. 796619 6. 007569 5. 894697  
11733611\_ 3. 087741 3. 265865 2. 981889 2. 939799 3. 168917 2. 880965

11733612\_ 3. 828199 3. 905649 3. 857425 3. 616516 3. 550269 3. 828199  
11733613\_ 5. 9651 5. 771212 5. 824095 6. 503305 6. 432895 6. 635747  
11733614\_ 4. 415094 4. 21685 4. 135496 4. 143997 4. 425781 4. 200678  
11733615\_ 5. 004477 5. 006127 4. 833007 4. 936788 4. 811308 5. 073036  
11733616\_ 5. 568713 5. 408472 5. 538136 4. 886273 4. 803107 4. 817987  
11733617\_ 3. 575433 3. 892271 3. 698323 3. 606313 3. 503743 3. 590275  
11733618\_ 2. 226212 2. 131936 2. 153146 2. 216953 2. 169686 2. 233802  
11733619\_ 4. 193057 4. 392238 4. 147486 4. 392238 4. 340967 4. 548905  
11733620\_ 3. 36506 3. 405679 2. 984363 3. 395251 3. 547563 3. 389262  
11733621\_ 5. 412859 5. 377012 5. 316162 5. 450658 5. 386722 5. 419391  
11733622\_ 3. 856014 3. 961189 3. 855049 3. 794538 4. 038087 3. 769859  
11733623\_ 4. 290662 4. 253843 4. 153663 4. 541959 4. 347179 4. 347179  
11733624\_ 3. 653657 3. 469617 3. 413178 3. 547537 3. 705625 3. 44631  
11733625\_ 3. 249924 3. 555418 3. 48757 3. 304512 3. 346333 3. 243073  
11733626\_ 4. 509478 4. 664851 4. 732723 4. 82659 4. 74136 4. 858415  
11733627\_ 5. 143381 5. 089249 5. 186359 5. 061071 5. 157195 5. 050683  
11733628\_ 3. 554182 3. 557989 3. 561796 3. 557989 3. 412907 3. 682993  
11733629\_ 7. 217793 7. 179325 7. 236885 7. 219771 7. 232051 7. 285008  
11733630\_ 4. 229682 4. 33258 4. 072808 4. 173494 4. 459939 4. 122446  
11733631\_ 5. 265909 5. 378669 5. 131287 5. 435952 5. 537588 5. 511325  
11733632\_ 1. 88158 1. 90441 1. 864865 2. 102253 1. 995297 2. 141113  
11733633\_ 3. 889267 3. 900793 3. 644602 3. 958264 3. 814463 3. 795577  
11733634\_ 5. 896826 5. 886758 5. 873455 6. 127791 6. 023823 6. 078299  
11733635\_ 4. 312579 4. 348543 4. 161393 4. 615728 4. 481062 4. 479643  
11733636\_ 3. 213216 3. 213609 3. 038594 3. 015991 3. 152406 3. 058548  
11733637\_ 3. 897352 4. 003402 3. 962279 3. 96563 3. 976185 3. 994693  
11733638\_ 6. 082002 6. 033313 6. 224967 5. 898362 5. 74876 5. 957101  
11733639\_ 6. 122194 6. 060437 6. 262242 6. 057642 6. 001612 6. 081049  
11733640\_ 1. 802835 2. 060185 2. 060185 2. 060185 2. 272347 2. 060185  
11733641\_ 4. 218052 4. 163692 4. 134913 4. 194518 4. 339541 4. 220078  
11733642\_ 8. 708354 8. 733856 8. 66885 8. 280364 8. 319544 8. 382704  
11733643\_ 7. 74782 7. 811999 7. 892617 7. 446491 7. 494912 7. 451242  
11733644\_ 8. 494928 8. 477292 8. 496859 8. 113467 8. 149584 8. 144169  
11733645\_ 4. 199548 3. 929721 4. 287593 3. 601609 3. 365761 3. 414583  
11733646\_ 8. 748488 8. 60239 8. 794749 8. 314797 8. 314797 8. 348726  
11733647\_ 4. 655538 4. 874234 4. 541066 4. 584933 4. 636023 4. 465628  
11733648\_ 6. 670844 6. 753517 6. 603533 6. 756597 6. 772236 6. 671851  
11733649\_ 2. 526377 2. 434577 2. 664419 2. 266182 2. 651876 2. 526377  
11733650\_ 4. 693813 4. 698132 4. 536717 4. 920343 4. 698948 4. 770362  
11733651\_ 4. 089408 3. 930123 4. 057251 4. 031867 4. 26703 4. 128406  
11733652\_ 4. 660678 4. 763543 4. 370337 4. 933351 4. 867816 4. 756372  
11733653\_ 4. 637171 4. 763543 4. 634765 4. 531664 4. 484005 4. 531664  
11733654\_ 5. 490119 5. 540862 5. 490669 5. 516709 5. 4877 5. 58175  
11733655\_ 6. 385878 6. 462146 6. 29876 6. 361555 6. 364263 6. 393493  
11733656\_ 7. 816101 7. 898973 7. 849017 7. 509101 7. 49738 7. 426595  
11733657\_ 6. 554578 6. 73188 6. 694172 6. 815853 6. 715383 6. 763947  
11733658\_ 5. 0738 5. 232565 4. 901532 5. 264246 5. 247208 5. 212952  
11733659\_ 5. 280414 5. 049705 5. 145195 5. 156539 5. 1579 5. 148761  
11733660\_ 4. 009709 3. 946255 3. 7943 3. 768495 3. 906818 3. 719424  
11733661\_ 4. 558191 4. 617407 4. 47455 4. 615786 4. 605007 4. 647861  
11733662\_ 4. 079653 4. 185382 4. 092079 4. 284022 4. 527628 4. 392071

11733663\_ 7. 645919 7. 518734 7. 645919 8. 02234 8. 048536 8. 014562  
11733664\_ 7. 102613 7. 076803 7. 146518 7. 657181 7. 558425 7. 618809  
11733665\_ 5. 95225 5. 907965 5. 894697 5. 848372 6. 113571 5. 999739  
11733666\_ 4. 874234 4. 860758 4. 897 4. 824195 4. 675417 4. 774795  
11733667\_ 4. 64746 4. 859942 4. 696852 4. 772366 4. 805141 5. 02699  
11733668\_ 3. 249924 3. 391027 3. 50958 3. 305242 3. 212732 3. 399852  
11733669\_ 6. 470942 6. 48373 6. 545006 6. 514629 6. 553363 6. 588693  
11733670\_ 5. 029529 4. 993667 4. 801163 4. 992243 4. 93809 4. 921118  
11733671\_ 6. 618555 6. 552661 6. 510658 7. 818911 7. 80647 7. 827976  
11733672\_ 4. 552298 4. 731103 4. 56401 4. 690985 4. 626877 4. 526747  
11733673\_ 5. 340113 5. 243843 5. 17639 5. 318678 5. 239025 5. 331888  
11733674\_ 2. 648074 2. 485722 2. 541054 2. 779958 2. 718322 2. 733815  
11733675\_ 2. 202976 2. 295111 2. 111812 2. 671346 2. 486016 2. 295111  
11733676\_ 5. 507541 5. 342068 5. 361326 5. 471656 5. 48634 5. 441465  
11733677\_ 4. 474047 4. 482675 4. 301348 4. 459939 4. 40461 4. 694252  
11733678\_ 6. 090535 6. 058794 5. 823342 6. 137345 6. 068369 5. 98158  
11733679\_ 6. 493641 6. 418119 6. 366093 6. 528066 6. 686431 6. 559615  
11733680\_ 2. 718322 3. 116878 2. 931145 2. 883136 2. 987111 3. 007383  
11733681\_ 4. 742284 4. 791326 4. 767423 4. 859865 4. 791326 4. 837896  
11733682\_ 4. 68859 4. 651895 4. 354191 4. 736759 4. 712227 4. 675532  
11733683\_ 5. 450007 5. 478187 5. 395721 5. 584939 5. 796353 5. 554436  
11733684\_ 4. 119431 4. 230949 4. 086376 4. 108462 4. 109829 4. 108625  
11733685\_ 2. 961138 2. 888954 2. 888954 2. 888954 2. 888954 2. 888954  
11733686\_ 6. 347647 6. 33281 6. 2994 6. 388123 6. 282224 6. 33679  
11733687\_ 7. 694613 7. 6335 7. 677098 7. 591992 7. 647115 7. 60606  
11733688\_ 3. 62363 3. 286599 3. 517537 3. 621134 3. 625585 3. 831706  
11733689\_ 4. 132809 4. 064743 4. 452747 4. 282918 4. 352398 4. 325737  
11733690\_ 10. 75363 10. 69854 10. 69309 10. 70841 10. 72092 10. 66462  
11733691\_ 3. 533004 3. 339084 3. 452787 3. 323966 3. 433692 3. 235943  
11733692\_ 4. 932877 5. 001107 4. 810915 4. 920269 4. 643717 4. 984669  
11733693\_ 3. 724231 3. 71734 3. 503743 3. 521311 3. 630627 3. 626817  
11733694\_ 6. 198985 6. 208204 6. 095209 6. 282026 6. 259331 6. 318626  
11733695\_ 9. 654874 9. 642842 9. 611072 10. 27652 10. 25961 10. 30012  
11733696\_ 10. 97827 10. 90805 10. 93179 11. 45819 11. 46947 11. 50372  
11733697\_ 9. 661175 9. 549195 9. 66199 9. 837323 9. 846921 9. 860045  
11733698\_ 8. 812723 8. 751412 8. 809943 8. 950816 8. 952853 8. 916989  
11733699\_ 7. 343431 7. 373148 7. 329222 7. 317174 7. 233487 7. 291894  
11733700\_ 3. 29528 3. 424149 3. 320798 3. 317025 3. 242921 3. 362234  
11733701\_ 9. 088299 9. 01249 9. 023459 9. 401159 9. 423578 9. 470581  
11733702\_ 10. 12017 10. 1145 10. 12875 10. 66643 10. 68138 10. 65707  
11733703\_ 4. 546756 4. 697288 5. 029529 4. 202087 4. 347179 4. 638188  
11733704\_ 3. 799132 3. 975683 3. 879106 3. 720965 3. 856563 3. 659505  
11733705\_ 2. 61916 2. 560577 2. 36577 2. 730887 2. 438028 2. 379671  
11733706\_ 4. 539133 4. 519161 4. 400056 4. 354173 4. 231828 4. 367662  
11733707\_ 3. 606638 3. 61696 3. 830763 3. 299249 3. 25344 3. 075458  
11733708\_ 2. 064806 2. 229829 1. 968971 1. 873323 2. 039039 1. 974607  
11733709\_ 10. 33091 10. 25408 10. 28195 10. 17441 10. 2118 10. 19475  
11733710\_ 4. 920535 4. 960785 5. 099142 4. 988713 5. 029529 5. 060595  
11733711\_ 3. 149231 3. 54005 3. 555011 3. 173608 3. 364513 3. 364513  
11733712\_ 5. 988839 6. 102497 5. 85146 6. 218671 6. 112155 5. 922714  
11733713\_ 3. 122119 3. 281445 3. 398236 3. 310475 3. 750665 3. 390506

11733714\_ 6. 733425 6. 600591 6. 729578 6. 31887 6. 185925 6. 235004  
11733715\_ 6. 217837 6. 146307 6. 242451 6. 215161 6. 264982 6. 270658  
11733716\_ 6. 817986 6. 783119 6. 811541 6. 714809 6. 810933 6. 768033  
11733717\_ 5. 699128 5. 730581 5. 612338 5. 479706 5. 609647 5. 68552  
11733718\_ 4. 850242 4. 823674 4. 874697 4. 901265 4. 748052 4. 974684  
11733719\_ 4. 426303 4. 516963 4. 4566 4. 452579 4. 486995 4. 456097  
11733720\_ 3. 837641 3. 656989 3. 740157 3. 915075 3. 86961 3. 820185  
11733721\_ 6. 885516 6. 678183 6. 791927 6. 389489 6. 333998 6. 382772  
11733722\_ 6. 502421 6. 44481 6. 544048 6. 429461 6. 455697 6. 375374  
11733723\_ 2. 540355 2. 700363 2. 580363 2. 408963 2. 487703 2. 588834  
11733724\_ 5. 085866 5. 158406 4. 981575 5. 184954 5. 162279 5. 089356  
11733725\_ 5. 977166 5. 968087 5. 910707 5. 950599 5. 841566 5. 970191  
11733726\_ 7. 401559 7. 382221 7. 408898 7. 366359 7. 383661 7. 348077  
11733727\_ 3. 606313 3. 560388 3. 758728 3. 101013 3. 242473 3. 402344  
11733728\_ 7. 990555 7. 907883 7. 906428 7. 940292 8. 066692 7. 940946  
11733729\_ 6. 910833 6. 91283 6. 929367 6. 936937 6. 924429 7. 017349  
11733730\_ 9. 408158 9. 354973 9. 461562 9. 116165 9. 177822 9. 16607  
11733731\_ 8. 173236 8. 19424 8. 200628 8. 326407 8. 29516 8. 233956  
11733732\_ 6. 546568 6. 589534 6. 691582 6. 516291 6. 485364 6. 387351  
11733733\_ 7. 314102 7. 264702 7. 275457 7. 434856 7. 396166 7. 37163  
11733734\_ 6. 720589 6. 45538 6. 716339 7. 02879 7. 079249 7. 079042  
11733735\_ 6. 708702 6. 606454 6. 894347 7. 126192 7. 077801 7. 075563  
11733736\_ 5. 555677 5. 368882 5. 334075 5. 28991 5. 210339 5. 344481  
11733737\_ 4. 738723 4. 944692 4. 822027 4. 793633 4. 802335 4. 647929  
11733738\_ 5. 628759 5. 634406 5. 736831 5. 541285 5. 596179 5. 668646  
11733739\_ 7. 579907 7. 636589 7. 673568 7. 54196 7. 612461 7. 574651  
11733740\_ 4. 735161 4. 951327 4. 765788 4. 937 5. 219554 4. 857395  
11733741\_ 7. 087168 7. 134375 7. 08741 7. 410349 7. 363468 7. 310851  
11733742\_ 8. 433548 8. 3873 8. 532755 8. 884664 8. 935052 8. 881659  
11733743\_ 6. 930181 6. 97049 6. 958012 6. 971404 7. 035036 7. 115673  
11733744\_ 5. 250458 5. 322428 5. 196962 5. 250478 5. 369583 5. 176144  
11733745\_ 4. 191109 4. 273029 4. 389101 4. 102672 4. 102672 4. 230055  
11733746\_ 5. 709791 5. 758999 5. 789661 5. 49212 5. 505653 5. 496744  
11733747\_ 2. 580785 2. 714061 2. 735382 2. 565477 2. 657309 2. 472498  
11733748\_ 4. 985969 5. 133363 5. 122035 4. 958866 4. 864206 5. 015991  
11733749\_ 2. 552008 2. 428819 2. 331847 2. 488808 2. 7953 2. 522707  
11733750\_ 5. 503469 5. 428108 5. 611784 4. 790904 4. 783961 4. 952161  
11733751\_ 6. 326268 6. 296442 6. 378611 5. 516275 5. 590417 5. 684957  
11733752\_ 5. 744472 5. 814309 5. 618408 5. 788652 5. 877794 5. 775662  
11733753\_ 3. 382233 3. 487449 3. 459345 3. 457798 3. 416525 3. 337196  
11733754\_ 6. 779107 6. 754491 6. 839422 6. 685729 6. 634355 6. 675442  
11733755\_ 5. 432525 5. 524263 5. 471888 5. 652966 5. 592082 5. 525528  
11733756\_ 4. 5116 4. 175801 4. 370848 4. 744266 4. 432026 4. 432026  
11733757\_ 2. 974887 3. 061205 3. 138626 3. 018805 3. 297975 3. 068819  
11733758\_ 6. 913267 6. 982851 6. 898793 7. 050765 7. 07014 6. 946687  
11733759\_ 1. 91922 1. 995297 1. 995297 1. 987248 2. 003346 2. 091625  
11733760\_ 5. 370576 5. 334767 5. 333723 5. 406286 5. 335239 5. 399018  
11733761\_ 5. 514938 5. 543835 5. 444969 5. 50315 5. 58663 5. 627431  
11733762\_ 5. 497261 5. 63832 5. 484637 5. 391103 5. 263896 5. 316595  
11733763\_ 5. 377122 5. 247001 5. 309896 5. 238299 5. 258983 5. 197266  
11733764\_ 4. 087417 4. 141246 4. 120593 4. 067703 4. 200678 4. 187433

11733765\_ 6. 924225 6. 7414 6. 921953 5. 653884 5. 382112 5. 592024  
11733766\_ 5. 978514 6. 054721 5. 973344 6. 120811 6. 250324 6. 122819  
11733767\_ 2. 341847 2. 131936 2. 215777 2. 067072 2. 337245 2. 380931  
11733768\_ 2. 763282 2. 779537 2. 62198 2. 683078 2. 711249 2. 78082  
11733769\_ 4. 23319 4. 40461 4. 287593 4. 494818 4. 332503 4. 308351  
11733770\_ 2. 569587 2. 54745 2. 393074 3. 010904 2. 569587 2. 503753  
11733771\_ 2. 889914 2. 979463 2. 668329 2. 768042 2. 991937 2. 80153  
11733772\_ 3. 714698 3. 911627 3. 740892 3. 886695 3. 879309 3. 802787  
11733773\_ 3. 646841 3. 632611 3. 530184 3. 704813 3. 688113 3. 674592  
11733774\_ 5. 869665 5. 925187 5. 8439 6. 156062 6. 241491 6. 159771  
11733775\_ 4. 260758 4. 270692 4. 114063 4. 086915 4. 224272 4. 200678  
11733776\_ 6. 467524 6. 355673 6. 565634 6. 949583 7. 007547 7. 050148  
11733777\_ 5. 782278 5. 681002 5. 778721 5. 865793 5. 884404 5. 952895  
11733778\_ 6. 389106 6. 517581 6. 430631 6. 451699 6. 473129 6. 469033  
11733779\_ 7. 292374 7. 292024 7. 330474 7. 962437 7. 992044 7. 986811  
11733780\_ 7. 471711 7. 458856 7. 44989 7. 216045 7. 129496 7. 193559  
11733781\_ 5. 526101 5. 439239 5. 577166 5. 379209 5. 291737 5. 339673  
11733782\_ 6. 244377 6. 283967 6. 235402 5. 85622 5. 71364 5. 631654  
11733783\_ 9. 3524 9. 299802 9. 376871 9. 318532 9. 345068 9. 341216  
11733784\_ 6. 934946 6. 97264 7. 005456 6. 701919 6. 431505 6. 583606  
11733785\_ 4. 608637 4. 6759 4. 571583 4. 772366 4. 68687 4. 766779  
11733786\_ 6. 295823 6. 175842 6. 309273 6. 191842 6. 127113 6. 297628  
11733787\_ 6. 696556 6. 546818 6. 635914 6. 502778 6. 517763 6. 617088  
11733788\_ 6. 987707 6. 98878 6. 956452 6. 86359 6. 849575 6. 883911  
11733789\_ 7. 765944 7. 751721 7. 769643 7. 436577 7. 393379 7. 489139  
11733790\_ 6. 956111 6. 761841 6. 862135 6. 681178 6. 641454 6. 787091  
11733791\_ 4. 099772 4. 292878 4. 187007 4. 340548 4. 296386 4. 234665  
11733792\_ 7. 529182 7. 408162 7. 469367 7. 202716 7. 160799 7. 243394  
11733793\_ 5. 994013 6. 011116 6. 068016 6. 046218 6. 103705 6. 183144  
11733794\_ 6. 899947 6. 846646 6. 893126 6. 822589 6. 865268 6. 805199  
11733795\_ 7. 683459 7. 482965 7. 553505 7. 631747 7. 61532 7. 568038  
11733796\_ 9. 727381 9. 639118 9. 690332 10. 3059 10. 33357 10. 28686  
11733797\_ 8. 419394 8. 361847 8. 436973 8. 981417 9. 065439 9. 014007  
11733798\_ 6. 416187 6. 493795 6. 600576 7. 090769 7. 069838 7. 127188  
11733799\_ 7. 708475 7. 671908 7. 639412 6. 788991 6. 821487 6. 748014  
11733800\_ 6. 222907 6. 225513 6. 278787 5. 668271 5. 769819 5. 844458  
11733801\_ 5. 407645 5. 518169 5. 409069 5. 438191 5. 304204 5. 339673  
11733802\_ 8. 784917 8. 732346 8. 706298 8. 260421 8. 270608 8. 398394  
11733803\_ 8. 236612 8. 198684 8. 285843 7. 775162 7. 81127 7. 817117  
11733804\_ 5. 235556 5. 425658 5. 168944 5. 479672 5. 223572 5. 304271  
11733805\_ 6. 899209 6. 983039 6. 906228 6. 88687 7. 048887 7. 041246  
11733806\_ 6. 893948 6. 819026 6. 792605 7. 041625 7. 098916 7. 053419  
11733807\_ 11. 78693 11. 76434 11. 78634 11. 67363 11. 66585 11. 6556  
11733808\_ 2. 569003 2. 63531 2. 578775 2. 545092 2. 599297 2. 778085  
11733809\_ 4. 849053 4. 874808 4. 962545 5. 331265 5. 326595 5. 527755  
11733810\_ 8. 876435 8. 87345 8. 951782 8. 529406 8. 525501 8. 570469  
11733811\_ 6. 392297 6. 333827 6. 327968 7. 229217 7. 219181 7. 285151  
11733812\_ 8. 010164 8. 052672 8. 005496 7. 809889 7. 890427 7. 829856  
11733813\_ 4. 549334 4. 710511 4. 7037 4. 659692 4. 708705 4. 763604  
11733814\_ 6. 992469 7. 159885 7. 032557 7. 05884 7. 017359 7. 150998  
11733815\_ 5. 947677 5. 819245 5. 962182 5. 97704 5. 929221 6. 010059

11733816\_ 11.12226 11.15901 11.16019 11.81001 11.82648 11.78588  
11733817\_ 7.530042 7.664864 7.677532 7.597395 7.600243 7.679579  
11733818\_ 6.34538 6.269365 6.283889 6.213398 6.07079 6.266067  
11733819\_ 3.050538 3.124299 3.190992 3.191946 2.941275 3.13218  
11733820\_ 5.571352 5.575471 5.490189 5.537452 5.444209 5.37371  
11733821\_ 5.084525 4.954198 4.864041 5.047898 5.206095 4.965611  
11733822\_ 7.759946 7.753214 7.764165 8.161008 8.179852 8.188536  
11733823\_ 6.502054 6.530812 6.644513 7.203767 7.262109 7.255781  
11733824\_ 4.288866 4.516163 4.478975 4.754787 4.534427 4.856152  
11733825\_ 8.703729 8.681411 8.640925 8.753328 8.753966 8.752352  
11733826\_ 2.447415 2.582957 2.588169 2.620339 2.462097 2.588169  
11733827\_ 8.659058 8.660662 8.680679 8.974906 9.020202 8.992222  
11733828\_ 7.901981 7.868912 7.967294 8.247113 8.305817 8.273118  
11733829\_ 4.413087 4.633292 4.368827 4.711584 4.453783 4.281565  
11733830\_ 5.764438 5.666083 5.741498 5.342884 5.412839 5.377011  
11733831\_ 6.201896 6.167478 6.154766 5.852283 5.750535 5.873195  
11733832\_ 2.581206 2.605336 2.409216 2.385455 2.409216 2.046668  
11733833\_ 4.388888 4.335594 4.354255 4.398845 4.46425 4.415793  
11733834\_ 8.61285 8.551882 8.602866 8.41028 8.383683 8.394158  
11733835\_ 9.445741 9.408876 9.459202 9.798422 9.84509 9.797653  
11733836\_ 3.411248 3.502441 3.483707 3.314964 3.298261 3.504139  
11733837\_ 9.42909 9.363358 9.428812 9.212925 9.237173 9.217873  
11733838\_ 9.098781 9.095428 9.086591 8.776244 8.848575 8.816677  
11733839\_ 7.105285 7.1481 7.112002 6.297296 6.465436 6.352038  
11733840\_ 6.373628 6.490906 6.483838 5.794198 5.996738 5.892086  
11733841\_ 5.841492 5.851567 5.976601 5.210645 5.113768 4.864218  
11733842\_ 9.737728 9.618612 9.759439 10.15489 10.18179 10.19423  
11733843\_ 2.718322 2.877198 2.751129 2.83198 2.903592 2.846381  
11733844\_ 7.167524 7.166157 7.252152 6.923627 6.905954 6.984651  
11733845\_ 6.0561 6.087202 6.097726 6.26073 6.30719 6.266098  
11733846\_ 6.533757 6.674695 6.527287 6.889506 6.831167 6.982596  
11733847\_ 8.009861 8.013806 7.983653 7.685369 7.705868 7.750983  
11733848\_ 5.573364 5.311616 5.40802 5.470422 5.306823 5.311616  
11733849\_ 10.20318 10.18992 10.19639 10.19718 10.18458 10.15671  
11733850\_ 11.20925 11.20392 11.25466 11.16814 11.14144 11.17503  
11733851\_ 4.09008 3.9733 4.101007 4.314736 4.160582 4.163151  
11733852\_ 3.17115 3.224768 3.393021 3.069213 3.088596 3.00398  
11733853\_ 7.434646 7.293468 7.460405 7.460405 7.450213 7.536331  
11733854\_ 8.342731 8.5271 8.468264 7.957573 7.810985 7.805351  
11733855\_ 6.741653 7.013387 6.74047 7.029692 6.949109 6.858015  
11733856\_ 9.432216 9.410317 9.468832 9.266567 9.231881 9.190623  
11733857\_ 8.828133 8.720192 8.733638 8.02059 8.004661 7.982402  
11733858\_ 8.081674 8.004661 8.017587 7.907198 7.85691 7.939934  
11733859\_ 5.209259 5.165899 5.122191 5.524869 5.556953 5.634672  
11733860\_ 6.503067 6.498287 6.46208 6.505605 6.494776 6.559181  
11733861\_ 7.24023 7.167513 7.274626 7.386076 7.441002 7.347477  
11733862\_ 5.58047 5.597565 5.608537 5.541417 5.46393 5.472368  
11733863\_ 8.092102 8.043502 8.00781 7.94348 7.910644 7.820415  
11733864\_ 9.108664 9.082052 9.102274 9.569269 9.611888 9.612277  
11733865\_ 5.921275 6.049832 5.917631 6.027508 6.018286 6.125869  
11733866\_ 8.489953 8.394877 8.45302 8.374697 8.367574 8.37092

11733867\_ 5.412281 5.463299 5.436296 5.524225 5.439384 5.53265  
11733868\_ 2.817002 2.671997 2.59287 3.06074 3.001234 3.037947  
11733869\_ 5.943911 5.964223 5.895861 6.391854 6.374259 6.490424  
11733870\_ 6.292045 6.056998 6.081636 6.522266 6.496144 6.653471  
11733871\_ 10.17781 10.12474 10.12026 10.52076 10.43337 10.44933  
11733872\_ 9.852823 9.808566 9.806722 10.18536 10.14839 10.12156  
11733873\_ 10.36933 10.29467 10.40503 10.98351 11.01161 11.04812  
11733874\_ 9.742164 9.638074 9.736592 10.21207 10.23393 10.19617  
11733875\_ 10.48322 10.47841 10.36191 11.1249 11.05114 10.99841  
11733876\_ 10.16591 10.22725 10.1195 10.86349 10.8091 10.74654  
11733877\_ 8.914814 9.010106 8.915902 8.078287 8.047969 8.016655  
11733878\_ 5.034633 4.874234 4.930937 5.073036 5.019305 4.852926  
11733879\_ 8.042124 8.003398 8.087944 8.261323 8.23553 8.194718  
11733880\_ 6.864566 6.906528 6.779263 7.018595 6.990749 6.962173  
11733881\_ 8.10021 8.029506 8.039763 8.016757 8.024013 8.031318  
11733882\_ 7.573026 7.589545 7.574985 7.75267 7.738418 7.698545  
11733883\_ 7.796204 7.78787 7.838879 8.034995 7.949028 8.015287  
11733884\_ 9.235761 9.191508 9.252549 9.705963 9.707926 9.670426  
11733885\_ 5.413802 5.41582 5.324701 5.605171 5.445714 5.541437  
11733886\_ 8.94706 8.923663 8.994018 8.920861 8.926775 8.908197  
11733887\_ 5.054163 5.090886 5.119275 4.861723 4.924011 4.946114  
11733888\_ 6.506626 6.39042 6.422629 6.301072 6.305315 6.257149  
11733889\_ 2.642938 2.692739 2.65795 2.501834 2.748628 2.586885  
11733890\_ 3.914352 3.962424 3.871983 3.997131 3.907928 4.042833  
11733891\_ 7.099062 6.965746 7.136547 6.740505 6.734294 6.769829  
11733892\_ 6.620485 6.606042 6.63466 6.34864 6.350503 6.396386  
11733893\_ 7.055228 7.12039 7.202891 6.902795 6.874408 6.857601  
11733894\_ 6.659865 6.649922 6.639456 6.5866 6.748152 6.617088  
11733895\_ 6.051554 5.974771 6.132722 5.814836 5.835818 5.849541  
11733896\_ 6.356726 6.44315 6.391069 6.413446 6.430575 6.51608  
11733897\_ 8.317766 8.415239 8.380163 7.767883 7.764873 7.715802  
11733898\_ 8.738075 8.658781 8.764483 7.978829 7.945761 8.031383  
11733899\_ 10.00126 9.976107 9.978157 9.811586 9.832253 9.744482  
11733900\_ 9.449477 9.436791 9.462749 9.516547 9.561049 9.569733  
11733901\_ 11.83306 11.77324 11.85438 11.82477 11.84073 11.84756  
11733902\_ 3.099709 3.058038 3.212104 3.121758 3.121758 3.03284  
11733903\_ 4.166535 4.409816 4.146419 3.994709 4.143977 4.058089  
11733904\_ 6.279215 6.161792 6.293216 6.973996 6.907815 6.891717  
11733905\_ 8.465219 8.358263 8.391346 8.18394 8.071663 7.989438  
11733906\_ 7.694169 7.544419 7.685466 7.064824 7.046105 7.105928  
11733907\_ 5.10793 5.11527 5.073036 4.8246 5.045965 4.984669  
11733908\_ 7.356041 7.47159 7.366279 7.464845 7.434587 7.490406  
11733909\_ 3.922762 4.018309 3.761604 3.954792 3.850838 3.932393  
11733910\_ 7.029572 6.948222 7.024327 6.908096 6.867579 6.996699  
11733911\_ 7.062593 6.983604 7.069946 6.690756 6.525912 6.639207  
11733912\_ 5.809974 5.98478 5.966953 6.045117 6.025952 6.088892  
11733913\_ 5.714349 5.65132 5.817233 5.81023 5.800754 5.788613  
11733914\_ 7.2608 7.134375 7.212681 7.218313 7.205466 7.207886  
11733915\_ 4.40673 4.396548 4.741485 4.115777 3.940859 4.061493  
11733916\_ 5.478377 5.633398 5.496564 5.6347 5.484295 5.532263  
11733917\_ 5.950174 6.109749 6.044285 6.119671 6.14573 6.037298



11733918\_ 10.09883 10.20594 10.07077 10.46844 10.36029 10.37568  
11733919\_ 9.213314 9.20476 9.144286 8.727231 8.760495 8.730883  
11733920\_ 7.23793 7.227848 7.145527 6.823752 6.927186 6.942071  
11733921\_ 1.888192 1.703381 1.804393 1.888192 1.981644 1.976024  
11733922\_ 4.509083 4.610221 4.495655 4.505844 4.498296 4.545654  
11733923\_ 6.468094 6.23407 6.445622 5.701986 5.667785 5.784032  
11733924\_ 8.815662 8.708367 8.82582 8.588149 8.535308 8.603476  
11733925\_ 8.641095 8.62206 8.568083 8.445233 8.442477 8.4314  
11733926\_ 6.009647 5.859667 5.997186 5.998037 6.088517 6.007641  
11733927\_ 5.694865 5.592405 5.603228 5.723241 5.795315 5.793019  
11733928\_ 5.670767 5.544202 5.571552 5.158805 5.442479 5.442479  
11733929\_ 7.517827 7.395627 7.484656 6.946458 6.956383 6.91596  
11733930\_ 5.591996 5.571766 5.674882 5.923434 6.044285 6.068338  
11733931\_ 7.554551 7.482432 7.600321 8.221054 8.317457 8.213702  
11733932\_ 7.848483 7.701561 7.813258 8.563441 8.40512 8.501969  
11733933\_ 5.703493 5.64487 5.862589 6.911746 6.882057 6.88992  
11733934\_ 5.66486 5.659118 5.500497 5.579495 5.594217 5.52467  
11733935\_ 8.246321 8.133545 8.30827 8.323287 8.420323 8.459339  
11733936\_ 5.818457 5.881734 5.765675 6.036593 6.065982 6.018659  
11733937\_ 9.552339 9.522322 9.516476 9.652766 9.600325 9.57545  
11733938\_ 10.4544 10.40189 10.45874 10.44982 10.41398 10.44655  
11733939\_ 2.823661 2.930287 2.914371 2.916339 2.841432 2.899845  
11733940\_ 7.154768 7.134375 7.147719 7.105981 7.171981 7.049674  
11733941\_ 4.776974 4.415026 4.480141 3.848624 3.995814 3.903329  
11733942\_ 6.927918 6.982905 7.014176 6.379935 6.312121 6.394319  
11733943\_ 2.664953 2.551175 2.689529 2.718322 2.622189 2.63756  
11733944\_ 4.823954 4.9226 5.196789 4.953968 4.891726 5.029678  
11733945\_ 4.317403 4.294165 4.050427 4.478484 4.473227 4.667765  
11733946\_ 10.17786 10.14011 10.14783 9.760712 9.758739 9.786622  
11733947\_ 2.813528 2.889218 2.779346 2.980478 2.589602 2.818259  
11733948\_ 7.085069 6.886947 6.885522 6.786277 6.833411 6.85449  
11733949\_ 6.530108 6.620403 6.7302 6.355852 6.245131 6.498724  
11733950\_ 2.145258 2.060665 2.170023 2.054379 2.153283 2.046354  
11733951\_ 5.047794 5.099175 5.072704 5.085564 5.035303 5.060654  
11733952\_ 2.313437 2.281585 2.322594 2.296231 2.312329 2.245352  
11733953\_ 2.718322 2.681106 2.741246 2.718322 2.720779 2.649482  
11733954\_ 4.781548 4.617046 4.892066 4.135646 4.200678 4.09595  
11733955\_ 7.658969 7.581413 7.589404 6.743791 6.663493 6.693008  
11733956\_ 5.693316 5.755505 5.564142 5.623463 5.741244 5.730477  
11733957\_ 5.451785 5.656855 5.409702 5.718307 5.50118 5.590236  
11733958\_ 5.036969 5.056668 4.951227 5.179903 5.195708 5.177158  
11733959\_ 5.677875 5.591333 5.697625 5.727159 5.713335 5.82249  
11733960\_ 4.413908 4.633374 4.43939 4.602199 4.508636 4.360637  
11733961\_ 7.635782 7.723903 7.454696 7.665137 7.671811 7.621021  
11733962\_ 5.637166 5.598867 5.501322 5.785146 5.740346 5.731599  
11733963\_ 4.644625 4.924475 4.613924 4.791186 4.77079 4.791676  
11733964\_ 2.779292 2.68536 2.499754 2.594481 2.68536 2.791085  
11733965\_ 2.850317 2.952631 2.631908 2.912551 3.046996 2.806136  
11733966\_ 2.425973 2.547858 2.53271 2.456393 2.470956 2.560362  
11733967\_ 3.730078 3.756873 3.786751 3.756873 3.864743 3.527682  
11733968\_ 3.191049 3.204599 3.292999 3.308031 3.218955 3.275306

11733969\_ 7. 786782 7. 775145 7. 767294 8. 2332 8. 202916 8. 28403  
11733970\_ 6. 953485 6. 799951 6. 821594 6. 40776 6. 413599 6. 48871  
11733971\_ 7. 621936 7. 610779 7. 727292 7. 183719 7. 117204 7. 203728  
11733972\_ 2. 827273 2. 757756 2. 817081 2. 886275 2. 720729 2. 867724  
11733973\_ 6. 013925 6. 12545 6. 12545 5. 902523 5. 995002 5. 935671  
11733974\_ 6. 291286 6. 235683 6. 36537 6. 283845 6. 366142 6. 300865  
11733975\_ 7. 363583 7. 270282 7. 26976 7. 347498 7. 325148 7. 335104  
11733976\_ 5. 219319 5. 440352 5. 385576 5. 767418 5. 839173 5. 816651  
11733977\_ 4. 822183 4. 755641 4. 804872 5. 054087 5. 062437 5. 131749  
11733978\_ 3. 531395 3. 748043 3. 469125 3. 49517 3. 786134 3. 834382  
11733979\_ 3. 529622 3. 506905 3. 385099 3. 596178 3. 60315 3. 60315  
11733980\_ 3. 444687 3. 398236 3. 351786 3. 480034 3. 434162 3. 598553  
11733981\_ 7. 190812 7. 018689 7. 171136 7. 174077 7. 327062 7. 140674  
11733982\_ 5. 851492 5. 785363 5. 973076 5. 634442 5. 744545 5. 748058  
11733983\_ 2. 737928 2. 891537 2. 982892 2. 913111 2. 889 2. 978875  
11733984\_ 2. 267768 2. 361778 2. 267768 2. 309167 2. 254032 2. 254032  
11733985\_ 3. 570008 3. 638856 3. 720541 3. 682928 3. 590886 3. 537182  
11733986\_ 6. 733702 6. 789416 6. 683566 7. 035639 6. 974866 6. 917448  
11733987\_ 8. 521182 8. 411359 8. 458691 8. 806802 8. 856854 8. 853585  
11733988\_ 6. 740235 6. 850865 6. 914814 6. 720717 6. 747304 6. 688095  
11733989\_ 5. 775096 5. 727229 5. 811893 5. 964562 6. 018729 5. 847191  
11733990\_ 7. 708344 7. 672684 7. 711067 8. 063518 8. 035886 8. 051197  
11733991\_ 7. 107169 7. 008908 7. 158296 6. 978738 7. 046709 6. 968752  
11733992\_ 6. 320087 6. 295635 6. 318984 6. 383618 6. 427696 6. 428773  
11733993\_ 4. 313381 4. 659654 4. 253542 4. 695388 4. 557528 4. 546012  
11733994\_ 3. 316598 3. 503743 3. 199566 3. 287637 3. 269039 3. 344794  
11733995\_ 7. 12407 7. 031531 7. 060388 7. 392252 7. 324886 7. 370578  
11733996\_ 7. 126856 7. 096191 7. 072024 6. 987704 6. 969392 7. 177536  
11733997\_ 6. 66109 6. 597232 6. 642447 5. 297498 5. 333177 5. 419648  
11733998\_ 4. 066492 4. 091809 4. 084807 3. 799025 4. 083476 3. 865024  
11733999\_ 4. 108592 4. 232062 4. 238439 4. 290846 4. 130798 4. 327094  
11734000\_ 7. 844773 7. 80239 7. 843671 7. 590539 7. 551537 7. 575566  
11734001\_ 2. 90204 2. 842054 2. 637795 2. 681681 2. 681681 3. 142249  
11734002\_ 7. 041696 6. 901833 6. 953036 6. 228723 6. 071612 6. 281743  
11734003\_ 2. 115839 2. 502196 2. 301462 2. 527152 2. 320988 2. 587809  
11734004\_ 9. 119382 9. 070108 9. 10564 8. 579062 8. 590558 8. 635398  
11734005\_ 5. 330476 5. 130782 5. 074245 5. 268349 5. 27971 5. 125135  
11734006\_ 8. 678193 8. 615572 8. 732161 10. 00439 9. 980989 9. 940306  
11734007\_ 6. 068282 5. 998485 6. 192065 6. 263567 6. 183123 6. 249433  
11734008\_ 6. 106062 5. 995249 6. 011295 6. 148224 6. 162448 6. 176732  
11734009\_ 5. 977166 6. 082412 5. 985993 6. 184984 6. 129927 6. 138447  
11734010\_ 5. 633121 5. 694657 5. 633121 6. 263518 6. 256411 6. 282166  
11734011\_ 8. 131849 8. 065873 8. 130427 7. 90571 7. 917118 7. 989766  
11734012\_ 2. 993681 3. 056036 3. 185886 3. 088913 3. 102851 3. 180062  
11734013\_ 5. 997966 6. 118838 6. 056455 6. 114611 6. 041542 6. 076064  
11734014\_ 8. 554084 8. 539233 8. 557836 8. 281611 8. 245943 8. 226858  
11734015\_ 5. 971767 5. 91398 5. 971767 6. 817179 6. 733111 6. 696167  
11734016\_ 9. 008086 9. 01168 9. 071155 9. 056738 9. 01444 9. 039753  
11734017\_ 10. 10982 10. 05693 10. 07519 10. 51591 10. 48617 10. 47067  
11734018\_ 6. 075543 6. 143372 6. 03657 6. 296871 6. 269863 6. 126312  
11734019\_ 4. 542537 4. 560269 4. 548394 4. 619718 4. 494884 4. 566126

11734020\_ 2. 660596 2. 703889 2. 60682 2. 816361 2. 773991 2. 763166  
11734021\_ 4. 486346 4. 583072 4. 558038 4. 66409 4. 558038 4. 670687  
11734022\_ 4. 462672 4. 617561 4. 422696 4. 3985 4. 459939 4. 519579  
11734023\_ 7. 457239 7. 2784 7. 392275 7. 414671 7. 279962 7. 308294  
11734024\_ 7. 48215 7. 333141 7. 369984 7. 489466 7. 412832 7. 418107  
11734025\_ 7. 020462 6. 924753 7. 036352 6. 556035 6. 572523 6. 516616  
11734026\_ 8. 227082 8. 371958 8. 02234 8. 74201 8. 648639 8. 457395  
11734027\_ 8. 112683 8. 00891 8. 045442 8. 027428 7. 872271 8. 070242  
11734028\_ 7. 280725 7. 373568 7. 257378 7. 951296 7. 95165 7. 942317  
11734029\_ 6. 502421 6. 353668 6. 521262 5. 939087 6. 00364 5. 825215  
11734030\_ 7. 052875 6. 85897 6. 971486 6. 383618 6. 393894 6. 434545  
11734031\_ 4. 344862 4. 570284 4. 655816 4. 476912 4. 68309 4. 303154  
11734032\_ 2. 045249 1. 917522 2. 178204 1. 982287 1. 804393 2. 07926  
11734033\_ 7. 269312 7. 277321 7. 350159 7. 44335 7. 448853 7. 436024  
11734034\_ 4. 122147 4. 042795 4. 098124 4. 284808 4. 255298 4. 072386  
11734035\_ 2. 013253 2. 131936 2. 038797 2. 079884 2. 389688 1. 914893  
11734036\_ 6. 066599 6. 282224 6. 078403 6. 188733 6. 236408 6. 122317  
11734037\_ 6. 069333 5. 896191 6. 3022 5. 947709 5. 963478 5. 930251  
11734038\_ 8. 42597 8. 37777 8. 464185 8. 501358 8. 472125 8. 474934  
11734039\_ 5. 593838 5. 760026 5. 717281 5. 414869 5. 461102 5. 397947  
11734040\_ 7. 38288 7. 400406 7. 355866 7. 444403 7. 428362 7. 400406  
11734041\_ 7. 03974 6. 876549 7. 043818 7. 032265 7. 007869 7. 073924  
11734042\_ 4. 464444 4. 545175 4. 476992 4. 515469 4. 52373 4. 539309  
11734043\_ 3. 503743 3. 718361 3. 79137 3. 687199 3. 809583 3. 752891  
11734044\_ 3. 754799 3. 104558 3. 621788 2. 669284 2. 575936 2. 990123  
11734045\_ 5. 013891 5. 029529 5. 106553 4. 459939 4. 700243 4. 594194  
11734046\_ 5. 799897 5. 918745 5. 763634 5. 897934 5. 89789 5. 657717  
11734047\_ 3. 184622 2. 943919 3. 081619 3. 241444 3. 065978 2. 980963  
11734048\_ 9. 378563 9. 356409 9. 398793 9. 403849 9. 418643 9. 43051  
11734049\_ 8. 07655 7. 976851 8. 094781 8. 501469 8. 508421 8. 572267  
11734050\_ 4. 543133 4. 638298 4. 514125 4. 617266 4. 945019 4. 535237  
11734051\_ 1. 869281 2. 123232 2. 053452 1. 787494 1. 898324 2. 004057  
11734052\_ 5. 95144 5. 66509 5. 804084 5. 695443 5. 66509 5. 709099  
11734053\_ 3. 86495 3. 533263 3. 732571 3. 576804 3. 55847 3. 621111  
11734054\_ 5. 37579 5. 706432 5. 496455 5. 479665 5. 36323 5. 399957  
11734055\_ 4. 518485 4. 434365 4. 512133 4. 63212 4. 498155 4. 66431  
11734056\_ 5. 28059 5. 239103 5. 125988 5. 476187 5. 505896 5. 585229  
11734057\_ 6. 338176 6. 309464 6. 331615 6. 656366 6. 617932 6. 502567  
11734058\_ 3. 082946 3. 098869 3. 120095 3. 33001 3. 189748 3. 360831  
11734059\_ 7. 280725 7. 066716 7. 259647 7. 01654 7. 091357 7. 07498  
11734060\_ 2. 939469 2. 933735 3. 03936 2. 933735 2. 84005 3. 030202  
11734061\_ 6. 641863 6. 547689 6. 577266 6. 378923 6. 42328 6. 429113  
11734062\_ 2. 721654 2. 755795 2. 514826 2. 519548 2. 639572 2. 462967  
11734063\_ 2. 306989 2. 329396 2. 136054 2. 026115 2. 126671 2. 307527  
11734064\_ 4. 108592 4. 182931 4. 401032 3. 876636 4. 054288 4. 047923  
11734065\_ 4. 70273 4. 552797 4. 398707 4. 508125 4. 377588 4. 519351  
11734066\_ 5. 709666 5. 614563 5. 683387 5. 501242 5. 469253 5. 502342  
11734067\_ 5. 336695 5. 181638 5. 287003 5. 416245 5. 499938 5. 619463  
11734068\_ 10. 51519 10. 48549 10. 49537 10. 1269 10. 10634 10. 04924  
11734069\_ 8. 691998 8. 643994 8. 683352 8. 345992 8. 406395 8. 454573  
11734070\_ 8. 279594 8. 190515 8. 322657 8. 455158 8. 418631 8. 399429

11734071\_ 5. 143048 5. 308451 5. 147804 5. 331272 5. 396334 5. 299606  
11734072\_ 2. 988093 2. 83198 2. 898149 2. 894538 2. 917054 3. 178593  
11734073\_ 4. 035418 3. 88751 4. 124296 3. 989618 3. 930158 4. 030361  
11734074\_ 3. 592498 3. 608422 3. 830349 3. 608422 3. 545641 3. 492965  
11734075\_ 5. 681672 5. 709175 5. 672123 5. 731368 5. 595486 5. 63859  
11734076\_ 5. 362025 5. 467023 5. 333723 5. 434336 5. 48634 5. 439102  
11734077\_ 6. 786609 6. 901632 6. 900672 6. 483286 6. 336561 6. 467844  
11734078\_ 4. 988196 4. 941491 5. 11804 4. 916764 4. 940483 4. 885856  
11734079\_ 7. 502977 7. 40549 7. 526605 7. 378683 7. 372153 7. 395553  
11734080\_ 2. 3608 2. 481244 2. 467602 2. 507878 2. 268165 2. 3942  
11734081\_ 3. 576684 3. 631028 3. 551882 3. 567238 3. 633345 3. 508802  
11734082\_ 8. 868334 8. 875734 8. 85265 8. 855372 8. 858484 8. 821049  
11734083\_ 3. 468023 3. 404198 3. 289159 3. 585909 3. 55122 3. 443397  
11734084\_ 5. 033253 5. 204479 5. 035321 5. 204479 5. 170652 5. 16189  
11734085\_ 3. 806979 3. 949066 3. 829895 3. 881606 3. 788052 3. 80302  
11734086\_ 7. 729013 7. 648538 7. 729971 7. 412872 7. 453951 7. 429113  
11734087\_ 8. 756955 8. 687521 8. 765032 8. 514792 8. 485896 8. 460494  
11734088\_ 2. 804172 2. 810809 2. 738167 2. 885306 2. 804195 2. 897247  
11734089\_ 2. 747074 2. 681914 2. 702236 2. 702236 2. 724655 2. 61634  
11734090\_ 3. 866369 3. 671524 3. 886227 3. 503743 3. 77238 3. 762177  
11734091\_ 5. 213232 5. 286383 5. 2222 5. 348195 5. 297498 5. 2727  
11734092\_ 1. 927237 1. 9089 2. 107609 1. 801561 1. 798044 2. 022849  
11734093\_ 2. 72382 2. 763836 2. 750372 2. 924554 2. 830622 2. 986709  
11734094\_ 4. 623471 4. 362068 4. 415394 4. 611085 4. 621601 4. 663813  
11734095\_ 4. 593592 4. 551427 4. 552501 4. 434855 4. 404454 4. 439717  
11734096\_ 4. 842882 4. 85094 4. 825275 4. 899533 5. 101025 4. 916285  
11734097\_ 5. 096763 5. 253073 5. 154381 5. 133663 5. 141062 5. 157808  
11734098\_ 3. 931156 3. 519504 3. 474645 3. 370432 3. 192994 3. 486293  
11734099\_ 2. 864397 2. 758483 2. 810973 2. 607235 2. 473588 2. 757644  
11734100\_ 2. 784308 2. 897966 2. 736636 2. 784308 2. 784308 2. 83198  
11734101\_ 5. 470082 5. 620997 5. 448296 5. 665477 5. 680604 5. 588443  
11734102\_ 5. 512912 5. 575728 5. 541707 5. 593277 5. 749784 5. 57094  
11734103\_ 6. 349295 6. 232386 6. 215807 5. 925268 5. 889421 5. 922714  
11734104\_ 5. 704919 5. 592499 5. 397006 5. 77304 5. 732273 5. 62425  
11734105\_ 5. 255285 5. 317526 4. 987867 5. 350694 5. 106761 5. 452457  
11734106\_ 7. 631704 7. 713534 7. 715319 7. 969002 7. 954735 7. 906298  
11734107\_ 5. 333723 5. 189628 4. 999983 5. 194467 5. 304455 5. 281641  
11734108\_ 6. 428303 6. 383652 6. 467025 6. 188053 6. 116424 6. 11382  
11734109\_ 6. 821085 6. 773001 6. 721249 6. 502741 6. 676273 6. 461319  
11734110\_ 4. 810624 4. 712962 4. 709463 4. 790447 4. 932478 4. 815683  
11734111\_ 3. 497868 3. 297048 3. 503743 3. 472504 3. 485917 3. 387917  
11734112\_ 4. 099087 4. 068345 3. 585719 4. 012595 4. 032397 3. 987643  
11734113\_ 2. 269318 2. 362514 2. 677239 2. 079884 2. 199136 2. 177703  
11734114\_ 2. 988093 3. 017088 2. 871884 2. 85819 2. 929964 2. 979214  
11734115\_ 3. 90781 4. 039953 3. 90781 4. 058176 4. 012555 4. 03938  
11734116\_ 6. 001735 6. 011116 5. 824402 6. 110345 6. 105167 5. 992354  
11734117\_ 6. 109709 5. 884784 6. 059545 5. 938301 5. 868198 5. 969057  
11734118\_ 6. 066812 5. 916603 6. 087947 6. 206054 6. 095984 6. 092964  
11734119\_ 6. 350601 6. 372688 6. 334438 6. 391017 6. 330828 6. 43955  
11734120\_ 6. 335418 6. 360394 6. 327725 6. 454678 6. 385313 6. 446715  
11734121\_ 5. 409222 5. 505575 5. 415372 5. 073036 5. 306167 4. 985388

11734122\_ 5. 418087 5. 520939 5. 444746 5. 790133 5. 870242 5. 838161  
11734123\_ 3. 957745 4. 055943 3. 821412 3. 956815 3. 936371 3. 994132  
11734124\_ 4. 962194 5. 172437 5. 042653 5. 145654 5. 117694 5. 131696  
11734125\_ 5. 7286 5. 684752 5. 615881 5. 810546 5. 80946 5. 757724  
11734126\_ 4. 970833 4. 975009 5. 073036 5. 041918 5. 158774 5. 237676  
11734127\_ 5. 282792 5. 392774 5. 219967 5. 506201 5. 520943 5. 481084  
11734128\_ 3. 747093 3. 8645 3. 747093 3. 846582 4. 037487 3. 8645  
11734129\_ 3. 409158 3. 21509 3. 071773 3. 105848 3. 173624 3. 226124  
11734130\_ 3. 58067 3. 555812 3. 503743 3. 756925 3. 507711 3. 58067  
11734131\_ 4. 837357 4. 98191 4. 760272 5. 002943 4. 943384 4. 935579  
11734132\_ 3. 931409 3. 879297 3. 618262 4. 101317 3. 943948 3. 920391  
11734133\_ 6. 839816 6. 946557 6. 899691 6. 92126 6. 914439 7. 019204  
11734134\_ 5. 235281 5. 077324 5. 470592 5. 050715 4. 833989 4. 994869  
11734135\_ 7. 401198 7. 401198 7. 261302 6. 703956 6. 709573 6. 853686  
11734136\_ 6. 252066 6. 325054 6. 398674 7. 123732 7. 139913 7. 146064  
11734137\_ 6. 421689 6. 321838 6. 417684 6. 94441 6. 91299 7. 044349  
11734138\_ 4. 490565 4. 451651 4. 472856 4. 562466 4. 545898 4. 578526  
11734139\_ 5. 073304 5. 272919 5. 005945 5. 330658 5. 370203 5. 156625  
11734140\_ 4. 147809 4. 098502 4. 287593 4. 229288 4. 18755 4. 118316  
11734141\_ 6. 985262 6. 913808 6. 986932 7. 105159 6. 992722 6. 988684  
11734142\_ 6. 74398 6. 684157 6. 812479 6. 561716 6. 621365 6. 600911  
11734143\_ 4. 293325 4. 122867 4. 041868 4. 151361 4. 343843 4. 223826  
11734144\_ 6. 742412 6. 784485 6. 800336 6. 664394 6. 748888 6. 817061  
11734145\_ 5. 336355 5. 410075 5. 569129 5. 392427 5. 272184 5. 100598  
11734146\_ 2. 367354 2. 231073 2. 0305 2. 346272 2. 105058 2. 286866  
11734147\_ 4. 734166 4. 931399 4. 714547 4. 889046 4. 964678 4. 878133  
11734148\_ 4. 490934 4. 536038 4. 695082 4. 717767 4. 817153 4. 847372  
11734149\_ 6. 175859 6. 260379 6. 136035 6. 150976 6. 323636 6. 443124  
11734150\_ 3. 597648 3. 60768 3. 541294 3. 641075 3. 453733 3. 530525  
11734151\_ 3. 107511 3. 029277 2. 791386 2. 81902 2. 879009 2. 988589  
11734152\_ 2. 072031 1. 927842 1. 935546 2. 006447 2. 177702 2. 072031  
11734153\_ 4. 060679 3. 787661 3. 660085 4. 215281 4. 105536 4. 49299  
11734154\_ 3. 419686 3. 489171 3. 506438 3. 465805 3. 306585 3. 321546  
11734155\_ 2. 70128 2. 861733 2. 679944 2. 603248 2. 510285 2. 869833  
11734156\_ 4. 510661 4. 593587 4. 638951 4. 681747 4. 564012 4. 700243  
11734157\_ 6. 669057 6. 611178 6. 645239 6. 786045 6. 838647 6. 850902  
11734158\_ 5. 544167 5. 61207 5. 708458 5. 63874 5. 439392 5. 736615  
11734159\_ 6. 552425 6. 4848 6. 699166 6. 333282 6. 389835 6. 442445  
11734160\_ 3. 82941 3. 802463 3. 745314 3. 757137 3. 82941 3. 929271  
11734161\_ 2. 670148 3. 133602 2. 639524 2. 996068 2. 840154 2. 397616  
11734162\_ 2. 721396 2. 919493 2. 664465 2. 467655 2. 56696 2. 524522  
11734163\_ 3. 686273 3. 45643 3. 41975 3. 491654 3. 491046 3. 606313  
11734164\_ 6. 064944 5. 868481 6. 014781 5. 609761 5. 603871 5. 763963  
11734165\_ 5. 464087 5. 477005 5. 399475 5. 391657 5. 399475 5. 264859  
11734166\_ 7. 151787 7. 036915 7. 18481 7. 102608 7. 036959 7. 160889  
11734167\_ 1. 869658 1. 889139 2. 067017 1. 811741 1. 975637 1. 824053  
11734168\_ 2. 63372 2. 442816 2. 472578 2. 472578 2. 63372 2. 507812  
11734169\_ 5. 880895 5. 85084 5. 573506 5. 939164 5. 891399 5. 957555  
11734170\_ 4. 817808 4. 807629 4. 918063 4. 75759 4. 825422 4. 66521  
11734171\_ 4. 915295 4. 806169 4. 903735 4. 89071 4. 969142 4. 921411  
11734172\_ 4. 848744 4. 91655 4. 716308 4. 965135 4. 976051 5. 066986

11734173\_ 4. 258959 4. 328063 4. 336965 4. 398946 4. 418075 4. 456282  
11734174\_ 3. 392414 3. 68392 3. 543258 3. 666127 3. 796549 3. 664968  
11734175\_ 3. 961344 4. 098746 3. 772913 3. 940465 4. 039968 3. 861256  
11734176\_ 4. 345041 4. 610297 4. 492883 4. 681309 4. 489063 4. 399145  
11734177\_ 4. 967613 4. 812928 4. 761543 4. 670664 4. 902745 4. 855475  
11734178\_ 5. 186307 5. 309674 5. 205914 5. 189628 5. 20644 5. 266735  
11734179\_ 2. 546568 2. 370054 2. 581504 2. 25483 2. 02469 2. 280431  
11734180\_ 2. 260677 2. 125255 2. 231588 2. 299548 2. 443577 2. 351719  
11734181\_ 5. 961049 5. 706318 5. 651488 4. 824195 4. 786451 4. 934186  
11734182\_ 7. 913429 7. 971499 7. 783359 8. 084235 8. 064574 7. 974485  
11734183\_ 3. 770064 3. 90948 3. 545895 3. 864123 3. 786953 4. 023202  
11734184\_ 3. 616761 3. 626052 3. 580917 3. 626052 3. 690159 3. 784273  
11734185\_ 3. 922866 4. 009328 4. 032463 4. 090985 4. 070562 4. 054288  
11734186\_ 4. 133067 4. 424347 4. 131793 4. 494027 4. 514087 4. 515385  
11734187\_ 3. 761734 3. 723624 3. 64559 3. 835744 3. 879309 3. 709659  
11734188\_ 2. 182863 2. 167358 2. 240852 2. 214155 2. 256146 2. 344729  
11734189\_ 3. 181164 3. 183241 3. 199551 3. 046471 3. 172119 3. 054771  
11734190\_ 3. 378706 3. 620869 3. 493437 3. 689329 3. 606313 3. 622825  
11734191\_ 4. 92693 4. 872981 4. 93898 4. 786883 5. 075348 4. 963904  
11734192\_ 4. 502284 4. 46877 4. 272646 4. 698573 4. 502284 4. 750816  
11734193\_ 5. 785504 5. 791617 5. 761452 5. 791617 5. 866896 5. 976157  
11734194\_ 3. 456568 3. 399934 3. 265438 3. 701804 3. 469042 3. 28849  
11734195\_ 4. 085692 4. 280375 4. 214553 4. 340611 4. 217665 4. 171599  
11734196\_ 7. 50511 7. 459171 7. 498278 7. 830748 7. 922424 7. 861682  
11734197\_ 2. 241647 1. 96824 2. 001235 2. 359161 2. 17249 2. 101193  
11734198\_ 5. 447684 5. 454466 5. 371816 5. 472469 5. 554436 5. 4591  
11734199\_ 6. 039308 5. 859168 5. 811815 5. 286683 5. 267976 5. 09991  
11734200\_ 7. 092213 7. 066573 7. 037969 6. 089509 6. 139409 6. 273749  
11734201\_ 5. 58215 5. 322801 5. 588529 5. 490801 5. 397861 5. 46273  
11734202\_ 2. 395377 2. 275765 2. 097671 2. 263368 2. 123218 2. 502229  
11734203\_ 5. 333723 5. 164529 5. 347563 4. 774408 4. 833128 4. 824696  
11734204\_ 6. 431763 6. 531304 6. 368232 6. 476539 6. 389592 6. 421408  
11734205\_ 3. 939493 3. 995997 3. 914732 3. 856614 4. 001561 4. 087477  
11734206\_ 5. 141664 5. 039684 5. 241282 4. 74155 4. 57668 4. 745083  
11734207\_ 6. 451356 6. 387614 6. 547487 5. 930797 5. 952533 5. 890309  
11734208\_ 5. 349101 5. 416704 5. 351566 5. 211976 5. 241582 5. 375363  
11734209\_ 5. 486716 5. 43969 5. 395775 5. 156303 4. 907774 5. 116923  
11734210\_ 3. 795433 3. 803411 3. 818637 3. 835374 3. 948215 3. 842741  
11734211\_ 2. 727301 2. 686541 2. 593571 2. 904715 2. 764826 2. 827259  
11734212\_ 9. 552339 9. 547423 9. 53986 9. 539149 9. 601549 9. 533953  
11734213\_ 8. 561529 8. 491149 8. 57518 8. 981235 9. 022309 8. 964809  
11734214\_ 3. 054534 2. 807735 2. 754519 2. 882249 2. 828572 2. 882249  
11734215\_ 2. 8291 2. 610953 2. 762891 2. 932595 2. 847478 2. 793986  
11734216\_ 3. 752603 3. 720856 3. 675586 3. 716373 3. 440971 3. 649423  
11734217\_ 6. 17981 6. 011116 6. 173064 6. 026786 5. 996513 6. 101152  
11734218\_ 5. 785266 5. 624571 5. 701578 5. 729315 5. 880086 5. 779412  
11734219\_ 2. 718322 2. 945929 2. 68068 2. 901659 2. 829581 3. 056673  
11734220\_ 1. 952132 2. 07453 2. 144073 2. 096646 2. 102254 1. 988871  
11734221\_ 4. 363486 4. 36001 4. 280035 4. 609313 4. 775395 4. 706349  
11734222\_ 5. 029529 4. 800006 4. 807913 4. 528825 4. 584933 4. 401136  
11734223\_ 4. 826814 5. 016369 5. 211069 4. 926825 5. 133108 5. 243578

11734224\_ 2. 993251 3. 055358 2. 98811 3. 09889 3. 015538 3. 290188  
11734225\_ 6. 414953 6. 281854 6. 450081 6. 520546 6. 481417 6. 46255  
11734226\_ 8. 843595 8. 724917 8. 734768 7. 531463 7. 500621 7. 582766  
11734227\_ 5. 841799 5. 701367 5. 683718 5. 731249 5. 811874 5. 678992  
11734228\_ 4. 69774 4. 520003 4. 52373 4. 671587 4. 798311 4. 398207  
11734229\_ 4. 068978 3. 889681 4. 360702 3. 756925 3. 799207 3. 705625  
11734230\_ 5. 637854 5. 714669 5. 712201 5. 760851 5. 691415 5. 668295  
11734231\_ 6. 414953 6. 348245 6. 389366 6. 366235 6. 413838 6. 331838  
11734232\_ 5. 04042 5. 019283 5. 082581 5. 002829 5. 135254 5. 282336  
11734233\_ 5. 596501 5. 635717 5. 56229 5. 537601 5. 52223 5. 567832  
11734234\_ 4. 383361 4. 383361 4. 460567 4. 256192 4. 379562 4. 189341  
11734235\_ 4. 578891 4. 643717 4. 502521 4. 58647 4. 808636 4. 410965  
11734236\_ 6. 125281 6. 216049 6. 051515 6. 18177 6. 206103 6. 231926  
11734237\_ 7. 637192 7. 509076 7. 598642 7. 636206 7. 679562 7. 634472  
11734238\_ 4. 563881 4. 644427 4. 554185 4. 573361 4. 52373 4. 497205  
11734239\_ 4. 495192 4. 338933 4. 261728 4. 441759 4. 392848 4. 369925  
11734240\_ 3. 687115 3. 723795 3. 663204 3. 714625 3. 751167 3. 705625  
11734241\_ 5. 821991 5. 733631 5. 616065 5. 852117 5. 920824 5. 948938  
11734242\_ 5. 678112 5. 803528 5. 664412 5. 861633 5. 861186 5. 925414  
11734243\_ 5. 922828 6. 104274 6. 052366 5. 395883 5. 592917 5. 484869  
11734244\_ 3. 984507 4. 208355 4. 139762 4. 182444 4. 121763 4. 097123  
11734245\_ 5. 419007 5. 554436 5. 574819 6. 108571 5. 88079 5. 969512  
11734246\_ 5. 32209 5. 474635 5. 109665 5. 448551 5. 469825 5. 38925  
11734247\_ 5. 490939 5. 918745 5. 70745 5. 93062 5. 950187 5. 886249  
11734248\_ 2. 614198 2. 614198 2. 660503 2. 83198 2. 798956 2. 695736  
11734249\_ 2. 818395 2. 76138 3. 085061 3. 168089 3. 093706 2. 990403  
11734250\_ 3. 204052 3. 252498 3. 479729 3. 53745 3. 479362 3. 432306  
11734251\_ 3. 851546 3. 961775 3. 850246 3. 581706 3. 814802 3. 929788  
11734252\_ 5. 890046 5. 888526 5. 805698 5. 687907 5. 676493 5. 753121  
11734253\_ 3. 768486 3. 725562 3. 82982 3. 879039 4. 039672 4. 134577  
11734254\_ 5. 034041 5. 022906 5. 048729 5. 129103 5. 091902 4. 969003  
11734255\_ 3. 606313 3. 43881 3. 448968 3. 527659 3. 403797 3. 529689  
11734256\_ 5. 285218 5. 4474 5. 214766 5. 427527 5. 350787 5. 343688  
11734257\_ 4. 468021 4. 473231 4. 302931 4. 545376 4. 52373 4. 468021  
11734258\_ 5. 576777 5. 735117 5. 668332 5. 909565 5. 924396 5. 739007  
11734259\_ 4. 815807 4. 902462 5. 008081 4. 787455 4. 747933 4. 710711  
11734260\_ 5. 008733 5. 054873 4. 914802 5. 119227 5. 050072 4. 978436  
11734261\_ 3. 284829 3. 362533 3. 22369 3. 371045 3. 247093 3. 191397  
11734262\_ 5. 250469 5. 305932 5. 197559 5. 211972 5. 182025 5. 100624  
11734263\_ 6. 25994 6. 292935 6. 342602 5. 91992 5. 957954 5. 835002  
11734264\_ 2. 530234 2. 332742 2. 157473 2. 596748 2. 398182 2. 414804  
11734265\_ 3. 925181 3. 92937 3. 737986 3. 756925 3. 513855 3. 902245  
11734266\_ 5. 11527 5. 073477 4. 965386 5. 159339 5. 05728 5. 154637  
11734267\_ 6. 56682 6. 500185 6. 65118 6. 318829 6. 350728 6. 388854  
11734268\_ 4. 981563 4. 880851 5. 046036 4. 914651 5. 029529 4. 918588  
11734269\_ 5. 08401 5. 17305 5. 042504 5. 070712 5. 060117 5. 121086  
11734270\_ 2. 298744 2. 337861 2. 285705 2. 346994 2. 291848 2. 372029  
11734271\_ 3. 309572 3. 611385 3. 503743 3. 506552 3. 871809 3. 595443  
11734272\_ 3. 386163 3. 53988 3. 411064 3. 59023 3. 685672 3. 425816  
11734273\_ 2. 788443 2. 926809 3. 093624 2. 867548 2. 631329 2. 732789  
11734274\_ 5. 284858 5. 643964 5. 468714 5. 349892 5. 456939 5. 351508

11734275\_ 4. 871626 4. 937422 4. 538626 5. 083485 4. 773166 5. 073036  
11734276\_ 5. 624003 5. 909712 5. 793072 5. 769849 5. 946427 5. 888611  
11734277\_ 6. 962842 6. 963603 7. 041047 6. 958328 6. 997138 7. 008438  
11734278\_ 4. 449813 4. 438418 4. 487743 4. 436922 4. 458753 4. 30008  
11734279\_ 3. 847798 3. 720619 3. 939983 3. 847798 3. 905453 3. 808467  
11734280\_ 3. 905074 3. 915537 3. 983475 4. 108736 3. 868254 3. 821605  
11734281\_ 7. 302327 7. 1913 7. 209678 6. 805567 6. 70274 6. 84023  
11734282\_ 5. 058351 5. 118942 4. 994706 5. 212163 5. 191749 5. 418762  
11734283\_ 4. 523263 4. 516505 4. 58916 4. 599189 4. 323916 4. 502742  
11734284\_ 8. 946104 8. 941663 8. 941187 8. 869577 8. 916826 8. 887299  
11734285\_ 8. 843707 8. 834596 8. 848763 8. 7999 8. 869996 8. 773691  
11734286\_ 2. 427798 2. 32018 2. 47102 2. 455134 2. 255527 2. 372411  
11734287\_ 4. 659289 4. 850106 4. 669117 4. 861051 4. 71582 4. 753192  
11734288\_ 5. 717637 5. 729397 5. 709967 5. 676797 5. 630924 5. 732315  
11734289\_ 3. 27592 3. 498651 3. 227609 3. 423025 3. 364125 3. 462318  
11734290\_ 2. 685861 2. 706994 3. 262912 2. 821398 2. 991988 3. 023611  
11734291\_ 5. 029529 5. 244892 5. 193386 5. 064869 5. 092742 5. 14192  
11734292\_ 2. 465157 2. 369433 2. 190676 2. 338733 2. 299118 2. 371225  
11734293\_ 7. 283106 7. 376023 7. 280595 7. 250577 7. 169369 7. 285742  
11734294\_ 4. 763543 4. 662482 4. 677269 4. 74446 4. 759696 4. 700243  
11734295\_ 7. 451525 7. 382326 7. 482732 7. 766072 7. 849318 7. 842699  
11734296\_ 4. 543121 4. 415557 4. 287593 4. 275543 4. 209287 4. 407617  
11734297\_ 5. 233687 5. 34606 5. 354475 5. 34606 5. 34606 5. 127303  
11734298\_ 7. 627516 7. 747041 7. 576132 7. 692447 7. 714188 7. 718975  
11734299\_ 6. 457197 6. 234193 6. 450278 5. 414869 5. 41193 5. 370866  
11734300\_ 5. 053894 5. 212979 5. 363284 4. 427942 4. 523047 4. 438852  
11734301\_ 4. 631357 4. 744499 4. 370343 4. 666643 4. 283428 4. 420721  
11734302\_ 3. 773829 3. 596054 3. 407347 3. 413103 3. 379575 3. 511869  
11734303\_ 6. 403897 6. 403897 6. 283001 6. 425698 6. 396779 6. 507528  
11734304\_ 4. 461366 4. 584933 4. 687035 4. 457078 4. 647859 4. 621138  
11734305\_ 7. 199889 7. 154768 7. 256956 6. 55767 6. 466302 6. 572309  
11734306\_ 2. 320565 2. 034236 2. 171855 2. 309728 2. 113586 2. 225141  
11734307\_ 5. 312655 5. 381321 5. 330074 5. 388909 5. 331708 5. 444997  
11734308\_ 4. 719016 4. 616457 4. 756895 4. 577739 4. 668719 4. 710485  
11734309\_ 2. 423425 2. 352156 2. 449076 2. 512144 2. 604981 2. 763807  
11734310\_ 5. 949257 5. 848334 5. 708542 5. 932419 5. 870242 5. 919267  
11734311\_ 4. 338412 4. 411863 4. 302082 4. 278917 4. 258323 4. 323778  
11734312\_ 6. 031004 6. 285841 6. 028039 6. 174974 6. 226583 6. 248709  
11734313\_ 3. 939204 4. 103765 3. 994157 4. 193518 3. 979257 4. 278982  
11734314\_ 2. 219431 2. 219431 2. 296947 2. 219431 2. 219431 2. 296303  
11734315\_ 2. 087538 2. 131462 2. 087538 2. 087538 1. 969948 2. 120112  
11734316\_ 4. 20302 4. 067703 4. 226682 3. 969838 3. 879309 3. 969838  
11734317\_ 6. 433238 6. 497107 6. 444598 6. 594872 6. 527028 6. 655283  
11734318\_ 2. 298744 2. 308304 2. 361778 2. 317865 2. 25483 2. 4428  
11734319\_ 2. 835348 2. 919137 2. 686277 2. 890326 2. 930758 2. 962539  
11734320\_ 3. 100165 3. 22087 3. 068314 3. 310111 3. 273114 3. 329821  
11734321\_ 2. 603594 2. 740232 2. 703552 2. 450855 2. 786038 2. 87652  
11734322\_ 2. 21846 2. 155502 2. 14136 2. 04626 2. 100408 2. 157547  
11734323\_ 5. 34146 5. 343903 5. 281333 5. 45531 5. 421471 5. 375411  
11734324\_ 5. 683563 5. 419829 5. 577521 5. 839434 5. 670273 5. 8335  
11734325\_ 2. 418728 2. 421659 2. 477122 2. 53612 2. 516996 2. 515591



11734326\_ 6. 136673 6. 012083 6. 190104 6. 283917 6. 165728 6. 276605  
11734327\_ 4. 053476 4. 02153 4. 026092 4. 091456 4. 054576 4. 00475  
11734328\_ 2. 84982 2. 691548 2. 789836 2. 461491 2. 521674 2. 783923  
11734329\_ 3. 548163 3. 471251 3. 493578 3. 606998 3. 97465 3. 755307  
11734330\_ 2. 351028 2. 562516 2. 294201 2. 322408 2. 552366 2. 453873  
11734331\_ 5. 104701 5. 135652 5. 040308 5. 252981 5. 093905 5. 073837  
11734332\_ 4. 199087 4. 292289 4. 257056 4. 302934 4. 355325 4. 211829  
11734333\_ 3. 245547 3. 290188 3. 290188 3. 385705 3. 488275 3. 50391  
11734334\_ 4. 665105 4. 729911 4. 613978 4. 7012 4. 710699 4. 795931  
11734335\_ 7. 392275 7. 38438 7. 370527 7. 531343 7. 618974 7. 481361  
11734336\_ 8. 106583 8. 014261 8. 115959 8. 25284 8. 236009 8. 200284  
11734337\_ 3. 649084 3. 621811 3. 540578 3. 463204 3. 4704 3. 430906  
11734338\_ 3. 306094 3. 201941 3. 163489 3. 263979 3. 287808 3. 323064  
11734339\_ 3. 44111 3. 469507 3. 41878 3. 563439 3. 73543 3. 925993  
11734340\_ 3. 818401 3. 659138 3. 46239 3. 647014 3. 831372 3. 727987  
11734341\_ 2. 234769 2. 194219 2. 070639 1. 921541 2. 264282 2. 230214  
11734342\_ 6. 847418 6. 847418 6. 861278 6. 912766 6. 969876 6. 987861  
11734343\_ 5. 376708 5. 275723 5. 030385 5. 465957 5. 382785 5. 396747  
11734344\_ 5. 600807 5. 644099 5. 624342 5. 701739 5. 685271 5. 6772  
11734345\_ 3. 627567 3. 442346 3. 669517 3. 429924 3. 555932 3. 555932  
11734346\_ 3. 758645 3. 837061 3. 875969 3. 851409 3. 986314 3. 83472  
11734347\_ 2. 976673 2. 89116 2. 900198 3. 383995 3. 093638 3. 446875  
11734348\_ 2. 971965 3. 153745 3. 135286 3. 261355 3. 203168 3. 229161  
11734349\_ 8. 093906 8. 106842 8. 110975 8. 045608 8. 080014 8. 155394  
11734350\_ 6. 16715 6. 197381 6. 196907 6. 083079 6. 236495 6. 147676  
11734351\_ 3. 210013 3. 613283 3. 417716 3. 503743 3. 398236 3. 620275  
11734352\_ 2. 581701 2. 314812 2. 604667 2. 249661 2. 079884 2. 408744  
11734353\_ 2. 561291 2. 744479 2. 736636 2. 742851 2. 569533 2. 5386  
11734354\_ 5. 14613 5. 232667 4. 984669 5. 060874 5. 149545 5. 073036  
11734355\_ 5. 409222 5. 380649 5. 446068 5. 380649 5. 570226 5. 403357  
11734356\_ 4. 196044 4. 186595 4. 053856 4. 224616 4. 251678 4. 301871  
11734357\_ 3. 836476 3. 861809 3. 760151 3. 809758 4. 032078 3. 811265  
11734358\_ 5. 54947 5. 403688 5. 563778 5. 067954 5. 121757 5. 205994  
11734359\_ 6. 806796 6. 7414 6. 819752 6. 151733 6. 134421 6. 17981  
11734360\_ 4. 506986 4. 578101 4. 426196 4. 418744 4. 484674 4. 509596  
11734361\_ 6. 047299 5. 857749 6. 006458 5. 650515 5. 611664 5. 548255  
11734362\_ 8. 735432 8. 702193 8. 685237 8. 24493 8. 171543 8. 103388  
11734363\_ 2. 399094 2. 179781 2. 101097 2. 117311 2. 229617 2. 308115  
11734364\_ 3. 637478 3. 503743 3. 500899 3. 233682 3. 187333 3. 271917  
11734365\_ 8. 287716 8. 310233 8. 236256 8. 264842 8. 19504 8. 358936  
11734366\_ 6. 319816 6. 387073 6. 360201 6. 571319 6. 319554 6. 440519  
11734367\_ 5. 767997 5. 705417 5. 763634 6. 223801 6. 057517 6. 183642  
11734368\_ 4. 198309 4. 353456 4. 139008 4. 274707 4. 247219 4. 329726  
11734369\_ 5. 37171 5. 338563 5. 113823 5. 394936 5. 280971 5. 394936  
11734370\_ 5. 093668 5. 159133 5. 1819 5. 163848 5. 283841 5. 204952  
11734371\_ 6. 563288 6. 360913 6. 490096 6. 10138 6. 030402 6. 097238  
11734372\_ 5. 529255 5. 565111 5. 484007 5. 559066 5. 52199 5. 554436  
11734373\_ 8. 188105 8. 204964 8. 164858 7. 922844 7. 887405 7. 96679  
11734374\_ 2. 66739 2. 262624 2. 486613 2. 671177 2. 5651 2. 705465  
11734375\_ 4. 166412 4. 407891 4. 355086 4. 383848 4. 262907 4. 192065  
11734376\_ 2. 429769 2. 61562 2. 443114 2. 718491 2. 49431 2. 515969

11734377\_ 4. 758343 4. 806708 4. 520986 4. 747295 4. 849431 4. 700243  
11734378\_ 6. 066594 6. 206103 6. 074944 6. 075106 6. 20187 6. 120296  
11734379\_ 4. 768537 4. 905238 4. 917128 5. 110484 5. 083978 4. 946001  
11734380\_ 2. 969292 3. 044336 2. 853473 3. 101013 3. 004853 3. 159426  
11734381\_ 3. 722395 3. 665804 3. 625408 3. 659377 3. 294151 3. 552447  
11734382\_ 6. 158778 6. 225099 6. 183265 6. 370193 6. 287604 6. 128723  
11734383\_ 5. 091 5. 045601 5. 132622 5. 116011 5. 111003 5. 131382  
11734384\_ 3. 134671 3. 314876 3. 063465 3. 350009 3. 391342 3. 373267  
11734385\_ 3. 687274 3. 763317 3. 611755 3. 990244 3. 776642 4. 021566  
11734386\_ 7. 016529 6. 871097 6. 971622 6. 877382 6. 987521 6. 848334  
11734387\_ 5. 568804 5. 578965 5. 270977 5. 35128 5. 426098 5. 450772  
11734388\_ 2. 552677 2. 446383 2. 235709 2. 333577 2. 581055 2. 331596  
11734389\_ 3. 709148 3. 962752 3. 337646 4. 250255 4. 072073 3. 923663  
11734390\_ 5. 186817 5. 192192 5. 045738 5. 430948 5. 079416 5. 139193  
11734391\_ 5. 249764 5. 288806 4. 919135 5. 308357 5. 345433 5. 257393  
11734392\_ 3. 312057 3. 082661 3. 15843 3. 082661 2. 948165 2. 963207  
11734393\_ 5. 544167 5. 541661 5. 663896 5. 768053 5. 859648 5. 83932  
11734394\_ 5. 7013 5. 894609 6. 004022 5. 234071 4. 917263 5. 225853  
11734395\_ 5. 009161 5. 04248 5. 054138 3. 410917 3. 592707 3. 515646  
11734396\_ 4. 9226 4. 809959 4. 88808 5. 013288 4. 916907 4. 960098  
11734397\_ 7. 942742 7. 80083 7. 852823 7. 131832 7. 224252 7. 160003  
11734398\_ 2. 844782 2. 934746 2. 918822 3. 197054 2. 864287 3. 016748  
11734399\_ 6. 198905 5. 932678 5. 966897 5. 389888 5. 416081 5. 458686  
11734400\_ 4. 545694 4. 688756 4. 610522 4. 603158 4. 594463 4. 684318  
11734401\_ 2. 593999 2. 710785 2. 408398 2. 488661 2. 574714 2. 613812  
11734402\_ 3. 310913 3. 355504 3. 365378 3. 289759 3. 326207 3. 519468  
11734403\_ 5. 558946 5. 480966 5. 453755 5. 233671 5. 294388 5. 4293  
11734404\_ 6. 829882 6. 730204 6. 843571 6. 698258 6. 764078 6. 787203  
11734405\_ 5. 135556 5. 244269 5. 0672 5. 137321 5. 304541 5. 243022  
11734406\_ 2. 039129 2. 345012 1. 867658 2. 228426 2. 118548 2. 336836  
11734407\_ 5. 836791 5. 821955 5. 984747 6. 018553 5. 968372 5. 965398  
11734408\_ 2. 384471 2. 250709 2. 281645 2. 17887 2. 377484 2. 455747  
11734409\_ 3. 722 3. 871971 3. 732416 3. 572412 3. 700466 3. 591599  
11734410\_ 4. 691323 4. 884538 4. 559359 4. 747247 4. 52373 4. 708864  
11734411\_ 8. 170405 8. 0865 8. 114173 8. 020696 8. 089181 8. 077228  
11734412\_ 4. 833507 4. 695317 4. 503928 4. 485466 4. 443801 4. 362832  
11734413\_ 7. 483322 7. 425213 7. 424279 6. 921129 6. 869556 6. 900824  
11734414\_ 5. 339844 5. 436817 5. 243645 5. 346069 5. 457846 5. 39803  
11734415\_ 3. 513507 3. 383779 3. 380075 3. 496403 3. 471654 3. 433985  
11734416\_ 4. 35926 4. 412287 4. 397359 4. 73202 4. 596065 4. 700243  
11734417\_ 4. 421794 4. 581893 4. 414771 4. 466436 4. 506215 4. 466436  
11734418\_ 2. 177475 2. 280616 2. 177475 2. 279074 2. 25483 2. 106844  
11734419\_ 2. 49774 2. 812407 2. 550214 2. 635956 2. 578796 2. 635956  
11734420\_ 2. 557599 2. 605516 2. 591899 2. 801748 2. 47102 2. 912007  
11734421\_ 5. 217752 5. 37567 5. 333723 5. 3515 5. 297498 5. 350197  
11734422\_ 3. 928746 3. 930279 3. 706894 3. 997131 3. 978306 4. 054288  
11734423\_ 4. 250728 4. 117754 4. 076142 4. 266737 4. 097898 4. 435285  
11734424\_ 4. 214048 4. 258243 4. 088591 4. 432277 4. 532186 4. 379615  
11734425\_ 5. 941608 5. 95547 5. 686261 6. 001654 5. 924794 5. 808375  
11734426\_ 6. 417534 6. 507415 6. 300643 6. 554455 6. 469614 6. 418742  
11734427\_ 4. 535826 4. 695288 4. 592147 4. 771499 4. 786167 4. 71228

11734428\_ 8. 0399 7. 94314 7. 952148 8. 056003 8. 074982 8. 042238  
11734429\_ 5. 209465 5. 100107 4. 940381 5. 269959 5. 118586 5. 303396  
11734430\_ 2. 470836 2. 511015 2. 47102 2. 595602 2. 718322 2. 676587  
11734431\_ 3. 281385 3. 593923 3. 629467 3. 312029 3. 498683 3. 498683  
11734432\_ 2. 447206 2. 790743 2. 421636 2. 434592 2. 408305 2. 350233  
11734433\_ 4. 300902 4. 340962 4. 300639 4. 456444 4. 312946 4. 266753  
11734434\_ 6. 557179 6. 467168 6. 601575 6. 589167 6. 597303 6. 592346  
11734435\_ 5. 386705 5. 397353 5. 420627 5. 608914 5. 544297 5. 421545  
11734436\_ 7. 233179 7. 277752 7. 180325 7. 163094 7. 097537 7. 220284  
11734437\_ 7. 038995 6. 917155 6. 985657 6. 991401 7. 005045 7. 004139  
11734438\_ 3. 261093 3. 261093 3. 17941 3. 322815 3. 226689 3. 26613  
11734439\_ 5. 605642 5. 682145 5. 670061 5. 635111 5. 637681 5. 745262  
11734440\_ 5. 621556 5. 694211 5. 535236 5. 745916 5. 697196 5. 570573  
11734441\_ 5. 450358 5. 542609 5. 365109 5. 707193 5. 587261 5. 710595  
11734442\_ 5. 117945 5. 149545 4. 993737 5. 254326 5. 198578 5. 133917  
11734443\_ 2. 628621 2. 374008 2. 354452 2. 354452 2. 566197 2. 494072  
11734444\_ 5. 669078 5. 761412 5. 668325 5. 838729 5. 90648 5. 763478  
11734445\_ 4. 773775 4. 788771 4. 923203 5. 086215 5. 046645 5. 172591  
11734446\_ 5. 033028 5. 135024 5. 030956 5. 033028 5. 114041 4. 962479  
11734447\_ 5. 013491 5. 155715 5. 097932 5. 047502 5. 111637 5. 005735  
11734448\_ 5. 775362 5. 893594 5. 648574 5. 794286 5. 800309 5. 798613  
11734449\_ 3. 391347 3. 581405 3. 503743 3. 503743 3. 606313 3. 581405  
11734450\_ 4. 552006 4. 49584 4. 364116 4. 695093 4. 585334 4. 601198  
11734451\_ 4. 436584 4. 406777 4. 434146 4. 495349 4. 3721 4. 253116  
11734452\_ 3. 67724 3. 356088 3. 527223 3. 642722 3. 59339 3. 58954  
11734453\_ 4. 928962 5. 008896 4. 882006 5. 090296 4. 938531 5. 053972  
11734454\_ 6. 054193 6. 04711 6. 086662 5. 880548 5. 820052 5. 84717  
11734455\_ 5. 798012 5. 815789 5. 746134 5. 651794 5. 702728 5. 754755  
11734456\_ 2. 755158 3. 105909 2. 729614 2. 906256 2. 976915 3. 021566  
11734457\_ 4. 719859 4. 449795 4. 769522 4. 66861 4. 457095 4. 616619  
11734458\_ 8. 107582 7. 99208 8. 052648 6. 178796 6. 364216 6. 41637  
11734459\_ 3. 988005 4. 024993 3. 811701 3. 896288 3. 882548 3. 998784  
11734460\_ 2. 078449 2. 08641 2. 08641 2. 185251 2. 08641 2. 18165  
11734461\_ 2. 50273 2. 430173 2. 430173 2. 372734 2. 397822 2. 316248  
11734462\_ 4. 808915 4. 793163 4. 858932 4. 949409 4. 903597 4. 825586  
11734463\_ 5. 616678 5. 68448 5. 529053 5. 607876 5. 918745 5. 577532  
11734464\_ 4. 981477 5. 047864 4. 980875 5. 108395 5. 077295 4. 944601  
11734465\_ 5. 024118 5. 420171 5. 2222 6. 478278 6. 282224 6. 258723  
11734466\_ 3. 175131 3. 331395 3. 18717 3. 19047 3. 103788 3. 135657  
11734467\_ 6. 390772 6. 494429 6. 34564 6. 540181 6. 563445 6. 592942  
11734468\_ 3. 295499 3. 310893 3. 290188 3. 864257 3. 705625 3. 65123  
11734469\_ 5. 05284 5. 081894 5. 206071 5. 092763 5. 259756 5. 117218  
11734470\_ 4. 440412 4. 338367 4. 33458 3. 92529 3. 987246 3. 987386  
11734471\_ 4. 850687 4. 980294 4. 864708 4. 82058 4. 863782 5. 043318  
11734472\_ 2. 832292 2. 47102 2. 592889 2. 324964 2. 617192 2. 498955  
11734473\_ 6. 577521 6. 759183 6. 622936 6. 78275 6. 803895 6. 84124  
11734474\_ 1. 861594 1. 970294 1. 998335 1. 970294 1. 970294 1. 88875  
11734475\_ 2. 294719 2. 38573 2. 415435 2. 606339 2. 361778 2. 472384  
11734476\_ 2. 148193 2. 240009 2. 061745 2. 041245 2. 096325 2. 144207  
11734477\_ 2. 183199 2. 191699 2. 277687 2. 19673 2. 345392 2. 308265  
11734478\_ 4. 584933 4. 691892 4. 511253 4. 690985 4. 842798 4. 689046

11734479\_ 2. 867505 2. 862989 2. 763555 2. 887443 2. 970419 2. 682195  
11734480\_ 2. 606197 2. 543459 2. 644888 2. 670711 2. 606197 2. 606197  
11734481\_ 2. 988093 3. 204169 3. 132859 2. 746752 2. 854362 3. 09022  
11734482\_ 5. 865766 5. 835926 5. 820052 5. 941429 5. 898762 5. 899627  
11734483\_ 6. 330397 6. 405277 6. 38865 6. 563513 6. 55837 6. 566729  
11734484\_ 2. 400532 2. 590207 2. 484784 2. 579223 2. 569044 2. 590207  
11734485\_ 4. 587381 4. 635776 4. 657899 4. 61328 4. 702999 4. 582177  
11734486\_ 4. 691364 4. 779151 4. 693863 4. 83155 4. 447294 4. 729096  
11734487\_ 4. 145112 4. 264937 4. 099024 4. 387183 4. 199363 4. 234129  
11734488\_ 5. 8003 5. 771727 5. 771572 5. 503234 5. 728391 5. 565352  
11734489\_ 7. 453916 7. 306776 7. 408251 7. 633209 7. 661566 7. 648621  
11734490\_ 6. 157442 6. 236837 6. 010464 6. 296748 6. 195603 6. 381049  
11734491\_ 6. 151275 6. 111071 6. 069544 6. 200607 6. 26987 6. 350017  
11734492\_ 3. 559214 3. 877148 3. 815974 3. 820353 3. 714301 3. 892911  
11734493\_ 5. 644572 5. 727029 5. 634058 5. 803983 5. 870242 5. 824302  
11734494\_ 5. 778606 5. 763634 5. 806417 5. 820052 5. 80508 5. 752519  
11734495\_ 6. 809506 6. 840139 6. 928369 6. 675255 6. 568901 6. 710632  
11734496\_ 3. 608534 3. 686785 3. 590736 3. 81661 3. 719358 3. 708159  
11734497\_ 4. 769912 4. 729296 4. 788227 4. 772366 4. 873414 4. 769912  
11734498\_ 2. 945902 3. 084476 3. 19676 2. 954483 3. 017652 3. 016933  
11734499\_ 6. 042896 5. 943446 5. 858817 5. 960836 5. 947794 6. 012336  
11734500\_ 5. 563189 5. 542341 5. 664597 5. 614575 5. 683337 5. 751219  
11734501\_ 8. 161508 8. 080775 8. 218528 8. 182502 8. 269181 8. 314372  
11734502\_ 8. 195032 8. 141616 8. 163292 7. 995268 7. 963699 7. 943207  
11734503\_ 5. 02232 4. 957685 4. 866249 5. 155149 4. 954138 5. 069086  
11734504\_ 4. 787488 4. 786417 4. 594408 4. 289447 4. 47283 4. 613373  
11734505\_ 6. 380216 6. 591168 6. 551331 6. 594345 6. 582361 6. 561949  
11734506\_ 5. 676992 5. 7224 5. 833523 5. 93062 5. 929887 5. 992346  
11734507\_ 6. 131145 6. 129119 6. 002616 5. 906769 6. 145496 6. 092753  
11734508\_ 6. 679957 6. 633455 6. 694677 6. 753046 6. 687494 6. 687564  
11734509\_ 2. 630553 2. 536097 2. 556817 2. 150454 2. 079884 2. 022066  
11734510\_ 5. 258036 5. 497728 5. 219205 5. 408322 5. 226398 5. 368661  
11734511\_ 5. 636625 5. 578563 5. 425279 5. 456195 5. 440944 5. 534472  
11734512\_ 4. 820494 4. 94623 5. 024652 5. 145971 5. 018112 5. 059297  
11734513\_ 2. 764038 3. 05511 2. 929157 2. 903868 2. 73796 2. 878657  
11734514\_ 3. 862484 4. 230183 4. 180677 4. 361155 4. 221483 4. 321158  
11734515\_ 4. 120121 3. 848268 3. 949927 4. 191791 4. 143913 4. 052186  
11734516\_ 4. 91502 5. 163006 5. 033673 5. 005426 5. 101487 5. 087889  
11734517\_ 5. 968528 5. 977084 5. 903691 5. 909375 5. 983203 6. 101544  
11734518\_ 7. 534274 7. 429747 7. 478832 7. 29128 7. 445516 7. 453336  
11734519\_ 8. 025978 7. 9222 7. 975315 7. 814679 7. 871786 7. 914116  
11734520\_ 3. 605753 3. 607026 3. 652257 3. 947804 3. 857805 3. 853786  
11734521\_ 6. 039784 6. 123738 6. 219072 6. 330478 6. 281676 6. 43439  
11734522\_ 6. 123412 6. 283547 6. 222653 6. 292646 6. 327498 6. 283247  
11734523\_ 8. 516719 8. 542648 8. 518164 8. 665179 8. 59424 8. 493949  
11734524\_ 4. 720132 4. 720665 4. 74679 4. 736759 5. 034254 4. 718877  
11734525\_ 2. 466471 2. 483198 2. 592765 2. 4576 2. 648031 2. 355233  
11734526\_ 5. 428595 5. 380649 5. 246937 5. 309115 5. 303213 5. 227841  
11734527\_ 4. 408156 4. 676859 4. 495072 4. 823766 4. 789665 5. 017272  
11734528\_ 6. 492644 6. 481046 6. 336673 6. 557197 6. 49463 6. 454875  
11734529\_ 3. 529348 3. 547497 3. 395651 3. 613557 3. 705625 3. 541106

11734530\_ 6. 1169 6. 136869 6. 101765 5. 791184 5. 717953 5. 668911  
11734531\_ 3. 675703 3. 6309 3. 78101 4. 071813 3. 744557 3. 735547  
11734532\_ 5. 905378 5. 984292 5. 940975 6. 019556 5. 97204 6. 040136  
11734533\_ 5. 759492 5. 538003 5. 650777 5. 625512 5. 590442 5. 709969  
11734534\_ 5. 01385 4. 752243 4. 837191 4. 865352 5. 059226 4. 973956  
11734535\_ 3. 081169 3. 038294 3. 029083 2. 925056 2. 927065 2. 998292  
11734536\_ 4. 741038 5. 065421 4. 841888 4. 83181 4. 978404 4. 930934  
11734537\_ 7. 280725 7. 286837 7. 272006 7. 335346 7. 336072 7. 400759  
11734538\_ 4. 680124 4. 529393 4. 421358 4. 725127 4. 448296 4. 427785  
11734539\_ 4. 563605 4. 784772 4. 468096 4. 854525 4. 766969 4. 756188  
11734540\_ 2. 947445 3. 168147 3. 117823 3. 127343 2. 941683 3. 054489  
11734541\_ 4. 293923 4. 416977 4. 267984 4. 207859 4. 301688 4. 209157  
11734542\_ 2. 671465 2. 51498 2. 605516 2. 605516 2. 70576 2. 781472  
11734543\_ 4. 815683 4. 798067 4. 643717 4. 899011 4. 939296 4. 866013  
11734544\_ 6. 928392 6. 929666 6. 922773 6. 932648 6. 989992 6. 937597  
11734545\_ 6. 298497 6. 252999 6. 33679 6. 409631 6. 431763 6. 396234  
11734546\_ 10. 50924 10. 50089 10. 45894 10. 11988 10. 07806 10. 03374  
11734547\_ 4. 58532 4. 670959 4. 692547 4. 643717 4. 810016 4. 671261  
11734548\_ 8. 046217 7. 978452 8. 058867 6. 664866 6. 787932 6. 657362  
11734549\_ 7. 731486 7. 683948 7. 728277 6. 128463 6. 138409 6. 104331  
11734550\_ 8. 613616 8. 498796 8. 564022 7. 165627 7. 232538 7. 286703  
11734551\_ 6. 366713 6. 546915 6. 345808 6. 428947 6. 408968 6. 481223  
11734552\_ 6. 20111 6. 100344 6. 016459 6. 165338 6. 17064 6. 243301  
11734553\_ 2. 400576 2. 315649 2. 058018 2. 295125 2. 399501 2. 349401  
11734554\_ 8. 03837 7. 991494 8. 038914 7. 914151 7. 997812 7. 987616  
11734555\_ 8. 565305 8. 478965 8. 558212 8. 357557 8. 411492 8. 406948  
11734556\_ 9. 535749 9. 484784 9. 541905 9. 351607 9. 437163 9. 358196  
11734557\_ 5. 035684 5. 196412 5. 040353 4. 787929 4. 892808 4. 877034  
11734558\_ 4. 865413 4. 875982 4. 907644 4. 72289 4. 904876 4. 825949  
11734559\_ 6. 607453 6. 339761 6. 516711 6. 483282 6. 544843 6. 572309  
11734560\_ 3. 970028 3. 854823 3. 717163 3. 923516 3. 967629 3. 981102  
11734561\_ 4. 705123 4. 787636 4. 545626 4. 933502 4. 884095 4. 879641  
11734562\_ 4. 499842 4. 734718 4. 656214 4. 746276 4. 682847 4. 625316  
11734563\_ 4. 245921 4. 220902 4. 144053 4. 220902 4. 275543 4. 18737  
11734564\_ 4. 01749 4. 153628 4. 117036 4. 001085 3. 880106 3. 948895  
11734565\_ 4. 023262 3. 777694 3. 956139 4. 057315 4. 052387 4. 024051  
11734566\_ 6. 658831 6. 655009 6. 636746 6. 496333 6. 585297 6. 548428  
11734567\_ 4. 274541 4. 38448 4. 452451 4. 581167 4. 480647 4. 525969  
11734568\_ 7. 412759 7. 427775 7. 413498 7. 590157 7. 569118 7. 511687  
11734569\_ 7. 929632 7. 986565 7. 953848 7. 760182 7. 823131 7. 754125  
11734570\_ 8. 57224 8. 496122 8. 562585 8. 312871 8. 386836 8. 29537  
11734571\_ 7. 939365 7. 974931 7. 939175 7. 769641 7. 808529 7. 817722  
11734572\_ 5. 531545 5. 202086 5. 446955 6. 121346 6. 067792 6. 075724  
11734573\_ 4. 49382 4. 455909 4. 353141 4. 540538 4. 599393 4. 584933  
11734574\_ 4. 013805 3. 857039 3. 821158 4. 135496 4. 108384 4. 015838  
11734575\_ 6. 997487 6. 97902 7. 040648 7. 110146 7. 141027 7. 071288  
11734576\_ 6. 202823 6. 235491 6. 22512 6. 389887 6. 344017 6. 32172  
11734577\_ 4. 98995 5. 214373 5. 174934 5. 273409 5. 247515 5. 324341  
11734578\_ 5. 216188 4. 83899 5. 051519 4. 335068 4. 540907 4. 52373  
11734579\_ 4. 131248 3. 901405 4. 200011 3. 889229 3. 960904 3. 996133  
11734580\_ 4. 068054 4. 067703 3. 740716 4. 15298 4. 093107 4. 302533

11734581\_ 4. 741485 4. 945812 4. 687795 4. 911622 4. 849663 5. 019939  
11734582\_ 3. 882218 4. 115683 4. 07778 4. 010176 4. 04082 4. 115683  
11734583\_ 5. 900401 5. 886042 5. 910762 5. 845365 5. 825271 5. 878962  
11734584\_ 4. 751588 4. 877228 4. 8525 4. 837097 4. 754561 4. 860794  
11734585\_ 1. 935947 2. 411335 1. 968493 1. 877614 1. 838639 1. 850027  
11734586\_ 8. 678492 8. 640227 8. 701389 7. 854204 7. 945679 7. 938681  
11734587\_ 8. 60363 8. 577842 8. 639608 7. 781327 7. 83543 7. 858972  
11734588\_ 3. 288294 3. 043493 3. 165572 3. 103474 3. 191056 3. 12596  
11734589\_ 5. 188923 5. 186204 4. 947032 5. 203289 5. 09489 5. 061957  
11734590\_ 3. 850261 3. 885381 3. 816268 4. 021344 3. 999245 4. 232067  
11734591\_ 3. 931473 4. 321153 4. 026092 3. 850246 3. 865582 3. 820231  
11734592\_ 2. 246895 2. 160586 2. 44237 2. 36989 2. 386286 2. 583445  
11734593\_ 2. 596487 2. 601903 2. 606048 2. 615608 2. 615608 2. 475526  
11734594\_ 6. 224716 6. 043609 6. 21517 5. 967415 5. 957643 5. 973554  
11734595\_ 3. 867262 4. 322951 4. 183957 4. 08764 4. 224461 3. 983948  
11734596\_ 5. 2838 5. 371975 5. 231864 5. 297498 5. 361811 5. 297498  
11734597\_ 5. 080578 4. 969791 4. 869496 4. 817424 4. 968089 4. 779029  
11734598\_ 5. 771536 5. 617444 5. 789887 5. 786245 5. 843408 5. 801617  
11734599\_ 2. 695673 2. 344988 2. 210832 2. 344988 2. 278116 2. 333569  
11734600\_ 7. 325778 7. 352143 7. 331304 7. 978333 7. 964011 7. 868421  
11734601\_ 4. 019535 3. 997131 3. 771283 3. 830117 3. 879309 3. 797292  
11734602\_ 4. 564148 4. 335594 4. 024471 4. 129367 4. 280059 4. 122446  
11734603\_ 6. 533148 6. 65214 6. 448004 6. 494197 6. 483947 6. 5193  
11734604\_ 5. 299488 5. 175987 5. 060862 5. 393098 5. 160498 5. 151698  
11734605\_ 2. 57957 2. 684035 2. 307668 2. 577087 2. 585941 2. 625919  
11734606\_ 6. 305269 6. 451423 6. 196465 6. 424698 6. 409221 6. 458076  
11734607\_ 7. 982192 7. 91087 7. 935616 7. 803134 7. 757472 7. 76579  
11734608\_ 8. 002878 7. 893437 7. 938281 7. 854918 7. 797413 7. 836688  
11734609\_ 6. 123548 6. 174371 6. 122081 6. 22335 6. 234784 6. 139076  
11734610\_ 6. 575887 6. 613493 6. 504946 6. 721057 6. 646405 6. 643854  
11734611\_ 5. 422799 5. 459967 5. 405834 5. 440881 5. 38885 5. 529458  
11734612\_ 6. 026026 6. 092908 6. 02245 6. 16642 6. 175791 6. 178066  
11734613\_ 6. 026026 6. 098514 6. 02245 6. 181606 6. 150036 6. 178066  
11734614\_ 4. 677557 4. 589962 4. 56057 4. 755676 4. 798511 4. 766475  
11734615\_ 5. 809651 5. 756357 5. 878802 5. 903992 5. 750867 5. 636648  
11734616\_ 3. 813209 3. 802074 3. 739143 3. 982398 4. 078241 3. 799968  
11734617\_ 5. 74114 5. 706971 5. 732869 5. 676694 5. 764142 5. 645724  
11734618\_ 4. 735714 4. 811121 4. 76358 4. 772366 4. 640794 4. 674482  
11734619\_ 4. 112254 4. 050672 4. 057706 4. 367026 4. 05795 4. 115002  
11734620\_ 5. 028631 4. 984266 5. 001713 4. 944629 4. 679556 4. 560757  
11734621\_ 5. 233173 5. 062176 5. 254873 4. 824195 4. 962985 4. 815683  
11734622\_ 2. 402431 2. 194914 2. 017491 2. 236739 2. 022091 1. 93655  
11734623\_ 4. 47995 4. 622468 4. 481189 4. 476232 4. 25584 4. 457001  
11734624\_ 4. 680628 4. 58339 4. 314322 4. 832693 4. 67387 4. 655238  
11734625\_ 3. 708681 3. 321657 3. 804198 4. 482565 4. 383176 4. 533254  
11734626\_ 4. 31175 4. 292805 4. 307866 4. 423266 4. 340266 4. 566519  
11734627\_ 3. 709023 3. 699476 3. 905416 3. 786947 3. 768237 3. 763177  
11734628\_ 4. 431352 4. 33429 4. 126214 4. 271956 4. 24533 4. 354837  
11734629\_ 5. 724792 5. 756923 5. 678252 5. 793361 5. 821602 5. 868173  
11734630\_ 3. 940108 3. 78494 3. 806306 3. 946353 3. 986955 3. 986822  
11734631\_ 8. 438078 8. 392679 8. 464185 7. 686466 7. 685129 7. 690347

11734632\_ 3. 940151 3. 794401 3. 794401 3. 795504 3. 419626 3. 78668  
11734633\_ 4. 786114 4. 889436 4. 888024 4. 889436 4. 806415 4. 923269  
11734634\_ 5. 454802 5. 51787 5. 46972 5. 524255 5. 486083 5. 377671  
11734635\_ 6. 402064 6. 350056 6. 338725 6. 368485 6. 396892 6. 499623  
11734636\_ 7. 435532 7. 519216 7. 315189 7. 343059 7. 385191 7. 471839  
11734637\_ 5. 403546 5. 190699 5. 432758 5. 486656 5. 495875 5. 502342  
11734638\_ 4. 964641 4. 90621 4. 985659 5. 040706 5. 057759 5. 026292  
11734639\_ 5. 901406 6. 200682 6. 1601 6. 219014 6. 178642 6. 223107  
11734640\_ 7. 813095 8. 054424 7. 978326 8. 029993 7. 960938 7. 977286  
11734641\_ 5. 171866 5. 26234 5. 321685 5. 148781 5. 048281 5. 017491  
11734642\_ 5. 962699 5. 887339 6. 062529 5. 250134 5. 243192 5. 411391  
11734643\_ 5. 387695 5. 405618 5. 42497 5. 435618 5. 566738 5. 455223  
11734644\_ 7. 076762 6. 896314 7. 094584 7. 090309 7. 09798 7. 201258  
11734645\_ 5. 66173 5. 827323 5. 623616 5. 627775 5. 590948 5. 509927  
11734646\_ 4. 9226 5. 016 4. 968408 5. 013445 5. 016852 5. 146329  
11734647\_ 3. 831098 3. 901069 3. 952763 3. 919898 3. 874869 3. 989973  
11734648\_ 5. 417532 5. 529617 5. 641498 5. 531949 5. 632489 5. 655011  
11734649\_ 2. 840648 3. 411631 3. 007038 3. 156901 3. 368124 3. 23595  
11734650\_ 3. 699351 3. 77112 3. 716629 3. 770695 3. 793557 3. 917508  
11734651\_ 6. 395306 6. 390255 6. 253091 6. 280789 6. 449547 6. 335095  
11734652\_ 11. 97588 11. 92205 11. 92659 11. 95954 11. 95511 11. 97252  
11734653\_ 10. 73942 10. 70406 10. 7187 10. 75075 10. 77651 10. 73981  
11734654\_ 4. 049908 4. 066481 4. 211916 4. 055433 4. 094103 3. 971368  
11734655\_ 4. 40753 4. 451312 4. 548285 4. 40461 4. 600094 4. 429352  
11734656\_ 3. 806843 3. 837054 3. 785782 3. 865132 3. 685824 3. 707289  
11734657\_ 7. 818448 7. 72592 7. 849635 6. 295916 6. 37304 6. 447009  
11734658\_ 7. 710571 7. 899621 7. 874439 7. 428817 7. 320139 7. 528759  
11734659\_ 7. 520755 7. 417811 7. 576176 6. 227139 6. 190481 6. 262715  
11734660\_ 5. 029529 5. 051025 4. 888226 5. 0412 5. 15122 5. 196201  
11734661\_ 6. 799594 6. 893336 6. 90696 6. 920464 6. 90185 6. 921135  
11734662\_ 11. 49312 11. 42832 11. 47055 11. 54944 11. 54571 11. 53232  
11734663\_ 5. 075655 4. 951038 4. 880082 5. 133266 5. 1129 5. 084423  
11734664\_ 5. 916982 6. 009267 5. 958991 6. 07413 6. 043619 5. 966259  
11734665\_ 3. 192972 2. 996041 2. 812427 2. 979974 3. 213962 3. 036954  
11734666\_ 10. 79079 10. 77685 10. 85142 10. 92244 10. 93583 10. 96244  
11734667\_ 8. 662971 8. 515764 8. 625915 8. 387535 8. 45176 8. 338018  
11734668\_ 7. 283332 7. 192187 7. 379074 7. 22911 7. 338783 7. 314935  
11734669\_ 8. 355809 8. 234154 8. 271986 7. 907498 7. 874465 7. 953063  
11734670\_ 5. 37844 5. 495707 5. 464946 5. 745821 5. 713718 5. 952862  
11734671\_ 8. 411793 8. 350393 8. 382752 8. 384595 8. 377062 8. 398773  
11734672\_ 5. 920979 5. 97841 5. 922714 6. 024772 5. 976054 6. 076002  
11734673\_ 5. 725049 5. 732422 5. 677622 5. 715786 5. 738472 5. 652248  
11734674\_ 7. 762754 7. 792434 7. 769001 7. 421371 7. 399701 7. 444425  
11734675\_ 5. 79684 5. 691574 5. 480103 5. 625444 5. 583425 5. 68418  
11734676\_ 4. 013137 3. 713511 3. 742537 3. 518574 3. 379205 3. 305019  
11734677\_ 3. 976466 4. 075339 3. 645135 3. 555028 3. 804265 3. 488838  
11734678\_ 6. 296751 6. 399407 6. 308554 6. 229722 6. 085739 6. 166248  
11734679\_ 3. 495315 3. 216432 3. 373261 3. 590174 3. 553279 3. 445449  
11734680\_ 6. 39077 6. 711863 6. 731712 6. 955601 6. 901182 6. 95839  
11734681\_ 5. 787726 5. 70777 5. 76927 6. 986734 6. 927431 6. 956093  
11734682\_ 11. 78385 11. 75133 11. 76073 11. 8338 11. 84087 11. 81851

11734683\_ 4. 712471 4. 604839 4. 432671 4. 712424 4. 823243 4. 750008  
11734684\_ 9. 339007 9. 237386 9. 298395 9. 805928 9. 745341 9. 793999  
11734685\_ 5. 406935 5. 496374 5. 499393 5. 528624 5. 455922 5. 488444  
11734686\_ 8. 251064 8. 199235 8. 248877 8. 224782 8. 270607 8. 181444  
11734687\_ 9. 297662 9. 30098 9. 319428 8. 926796 8. 980784 8. 933886  
11734688\_ 4. 339202 4. 428092 4. 233463 4. 449787 4. 52373 4. 526285  
11734689\_ 3. 099065 3. 053299 3. 441981 3. 049026 3. 220233 3. 166957  
11734690\_ 4. 113444 4. 106221 4. 01206 4. 130769 4. 111783 3. 963979  
11734691\_ 7. 349075 7. 260418 7. 354856 6. 869678 6. 968927 6. 876456  
11734692\_ 5. 421438 5. 54134 5. 591571 5. 158028 5. 143287 5. 150384  
11734693\_ 4. 354522 4. 522207 4. 459939 4. 391747 4. 580991 4. 407988  
11734694\_ 4. 173608 4. 082227 4. 047225 4. 049156 3. 818636 3. 964411  
11734695\_ 9. 85059 9. 780393 9. 804585 9. 732191 9. 792548 9. 785452  
11734696\_ 8. 33462 8. 254218 8. 331313 8. 02912 7. 962244 8. 082917  
11734697\_ 6. 023935 5. 888939 5. 84256 5. 800954 5. 72459 5. 676652  
11734698\_ 6. 106523 6. 039748 6. 170342 5. 535935 5. 577816 5. 690068  
11734699\_ 8. 615481 8. 581806 8. 618579 8. 39801 8. 453154 8. 42345  
11734700\_ 8. 707104 8. 695975 8. 642044 8. 707104 8. 817102 8. 716464  
11734701\_ 7. 169076 7. 06043 7. 090273 7. 223783 7. 117713 7. 195069  
11734702\_ 6. 580328 6. 957107 6. 67747 6. 857525 6. 920564 6. 943859  
11734703\_ 6. 926285 6. 941444 6. 903085 6. 871558 7. 019983 6. 978936  
11734704\_ 8. 154854 8. 151042 8. 179175 8. 007535 8. 066386 8. 013784  
11734705\_ 4. 347179 4. 221397 4. 367318 4. 509086 4. 430726 4. 356602  
11734706\_ 9. 550347 9. 501652 9. 515033 9. 085339 9. 052213 8. 986186  
11734707\_ 9. 633993 9. 638046 9. 627685 9. 489788 9. 437581 9. 451893  
11734708\_ 6. 085384 6. 041701 6. 07209 6. 760302 6. 549359 6. 702882  
11734709\_ 2. 508216 2. 640673 2. 909899 2. 813085 2. 549794 2. 549794  
11734710\_ 3. 76739 3. 989204 3. 814726 3. 836372 3. 863744 3. 814726  
11734711\_ 5. 828621 5. 837495 5. 83324 5. 869037 5. 90285 5. 939483  
11734712\_ 6. 835958 6. 702742 6. 704517 6. 241082 6. 122294 6. 29866  
11734713\_ 8. 100296 8. 061122 8. 06799 8. 32444 8. 215436 8. 214655  
11734714\_ 4. 433573 4. 250934 4. 326644 4. 373837 4. 435589 4. 346617  
11734715\_ 8. 382177 8. 268653 8. 298033 8. 459424 8. 425574 8. 437511  
11734716\_ 7. 042517 6. 958744 7. 016192 7. 047759 6. 997987 7. 122299  
11734717\_ 7. 614112 7. 549425 7. 574947 7. 372735 7. 350659 7. 372637  
11734718\_ 6. 402228 6. 233096 6. 101386 7. 708246 7. 700918 7. 732423  
11734719\_ 8. 69394 8. 684783 8. 707529 8. 701579 8. 663672 8. 704746  
11734720\_ 9. 104613 9. 042791 9. 138009 9. 193483 9. 273848 9. 229408  
11734721\_ 2. 494378 2. 60844 2. 499158 2. 801352 2. 494782 2. 513499  
11734722\_ 4. 131243 4. 082305 3. 890303 4. 030148 3. 922281 3. 786777  
11734723\_ 3. 752896 3. 743014 3. 740892 3. 330471 3. 503743 3. 116645  
11734724\_ 4. 211473 4. 074877 4. 271809 4. 127113 4. 266891 4. 334953  
11734725\_ 9. 974106 9. 886741 9. 951932 9. 720654 9. 724348 9. 705634  
11734726\_ 6. 04005 5. 901036 5. 993218 5. 990875 6. 064348 6. 101663  
11734727\_ 4. 650297 4. 637108 4. 311652 4. 689698 4. 74574 4. 750321  
11734728\_ 8. 894148 8. 872403 8. 893286 9. 364853 9. 340952 9. 352529  
11734729\_ 2. 314025 2. 274087 2. 184893 2. 041465 2. 200816 1. 929118  
11734730\_ 7. 12407 7. 076133 7. 097207 7. 08968 7. 117173 7. 2408  
11734731\_ 7. 454945 7. 324886 7. 36233 7. 453287 7. 492568 7. 506836  
11734732\_ 4. 309416 4. 312112 4. 204063 4. 459939 4. 214952 4. 214952  
11734733\_ 5. 147347 5. 076746 5. 028766 5. 074673 5. 09612 5. 062044



11734734\_ 7. 835688 7. 904016 7. 883994 8. 545354 8. 488154 8. 479543  
11734735\_ 5. 739402 5. 603959 5. 808853 7. 551858 7. 543447 7. 534872  
11734736\_ 8. 056597 7. 998092 7. 984099 7. 861604 7. 72902 7. 772557  
11734737\_ 7. 489232 7. 515141 7. 469328 7. 629883 7. 504428 7. 484155  
11734738\_ 4. 186563 3. 852525 4. 026092 3. 925181 4. 063302 4. 045193  
11734739\_ 4. 0374 4. 157344 4. 046593 3. 982398 4. 230839 4. 114688  
11734740\_ 4. 382842 4. 404476 4. 582032 4. 495762 4. 42133 4. 454354  
11734741\_ 5. 028487 4. 84186 5. 025526 4. 678648 4. 858102 4. 702924  
11734742\_ 6. 706987 6. 609684 6. 709881 6. 510767 6. 564212 6. 464805  
11734743\_ 7. 687355 7. 608578 7. 637796 7. 004447 6. 984683 6. 97913  
11734744\_ 8. 809154 8. 726321 8. 771285 8. 603993 8. 676666 8. 705605  
11734745\_ 5. 614257 5. 652512 5. 586419 5. 785191 5. 785487 5. 640538  
11734746\_ 6. 95651 6. 854069 7. 020545 7. 093954 6. 975468 6. 959226  
11734747\_ 5. 587369 5. 619826 5. 653114 5. 681393 5. 68633 5. 573345  
11734748\_ 5. 216601 5. 233018 5. 114775 5. 40063 5. 391796 5. 37638  
11734749\_ 6. 039818 6. 063177 5. 960394 6. 159698 6. 19062 6. 250706  
11734750\_ 6. 045796 5. 87654 5. 663219 5. 986109 5. 983713 5. 975301  
11734751\_ 10. 09386 10. 02197 10. 06046 9. 893242 9. 897271 9. 88164  
11734752\_ 7. 356754 7. 360998 7. 422227 6. 8146 6. 65982 6. 825205  
11734753\_ 7. 009977 6. 821564 7. 060083 6. 826566 6. 803739 6. 825645  
11734754\_ 6. 122884 5. 966027 6. 207365 5. 948518 6. 115615 6. 060324  
11734755\_ 8. 107876 7. 986885 8. 09258 7. 954326 7. 932678 7. 978814  
11734756\_ 4. 910523 4. 897177 4. 94068 4. 889313 4. 781742 4. 782115  
11734757\_ 8. 19712 8. 222368 8. 200099 7. 880573 7. 874871 7. 846106  
11734758\_ 8. 193566 8. 096527 8. 177839 7. 823736 7. 870142 7. 856897  
11734759\_ 8. 031296 8. 048661 7. 941997 8. 125009 8. 169065 8. 16581  
11734760\_ 5. 904047 5. 760736 5. 855694 5. 886024 5. 883003 6. 121953  
11734761\_ 5. 769689 5. 684241 5. 816815 5. 728799 5. 765024 5. 84456  
11734762\_ 5. 969674 5. 965289 5. 849483 6. 030326 5. 996845 6. 133617  
11734763\_ 7. 186757 7. 1585 7. 193316 7. 379192 7. 440635 7. 445429  
11734764\_ 4. 138972 4. 191424 4. 174705 4. 230433 4. 193136 4. 122446  
11734765\_ 6. 317233 6. 397506 6. 229836 6. 491339 6. 457685 6. 514776  
11734766\_ 9. 022621 9. 013161 9. 028771 9. 124539 9. 057018 9. 006001  
11734767\_ 7. 487462 7. 53518 7. 519366 7. 48467 7. 486293 7. 497123  
11734768\_ 8. 283281 8. 245066 8. 31585 8. 53912 8. 467585 8. 497089  
11734769\_ 7. 827583 7. 707596 7. 772119 7. 78125 7. 843366 7. 722711  
11734770\_ 1. 8283 1. 85552 2. 21084 2. 119278 1. 93747 2. 170804  
11734771\_ 7. 507125 7. 490558 7. 414578 7. 436444 7. 391583 7. 41019  
11734772\_ 7. 784732 7. 787206 7. 821179 7. 290847 7. 282398 7. 247936  
11734773\_ 4. 047315 4. 150025 4. 125987 4. 213226 4. 147863 4. 101941  
11734774\_ 2. 045125 1. 939591 2. 029712 1. 957788 2. 072985 2. 071884  
11734775\_ 4. 423926 4. 588111 4. 415568 4. 275543 4. 683795 4. 772074  
11734776\_ 7. 870418 7. 817927 7. 948338 7. 502436 7. 573609 7. 510779  
11734777\_ 4. 486347 4. 669582 4. 701764 4. 904247 4. 795216 4. 814327  
11734778\_ 6. 815258 6. 804701 6. 837705 7. 099734 7. 055228 7. 163608  
11734779\_ 3. 260367 3. 406032 3. 253598 3. 387401 3. 482828 3. 435386  
11734780\_ 8. 099242 8. 037977 8. 128645 7. 894581 7. 867673 7. 850045  
11734781\_ 5. 297111 5. 46354 5. 617214 5. 848783 5. 88882 5. 804914  
11734782\_ 4. 508322 4. 473415 4. 646921 4. 73184 4. 736524 4. 76269  
11734783\_ 2. 688387 2. 23743 2. 476169 2. 287836 2. 395161 2. 292591  
11734784\_ 2. 71923 2. 908763 2. 736636 2. 725428 2. 733912 2. 644652

11734785\_ 3. 126019 3. 180062 3. 127388 2. 970571 3. 213004 3. 398236  
11734786\_ 2. 540819 2. 346908 2. 330984 2. 384994 2. 300407 2. 295173  
11734787\_ 2. 235709 2. 13312 2. 169872 2. 139682 2. 231984 2. 183565  
11734788\_ 2. 577524 2. 694184 2. 602281 2. 333178 2. 44661 2. 429126  
11734789\_ 6. 053058 6. 029291 6. 025738 6. 276687 6. 278693 6. 300414  
11734790\_ 6. 644833 6. 588415 6. 526782 6. 755401 6. 56941 6. 596078  
11734791\_ 6. 688764 6. 513168 6. 699376 6. 691789 6. 810973 6. 733261  
11734792\_ 7. 449304 7. 284398 7. 31667 7. 306308 7. 279728 7. 241052  
11734793\_ 11. 32622 11. 39406 11. 33424 10. 77902 10. 74295 10. 66284  
11734794\_ 8. 92579 8. 913643 8. 92469 8. 917365 8. 900518 8. 921592  
11734795\_ 4. 879541 4. 754224 4. 934702 4. 745336 4. 992301 4. 906658  
11734796\_ 4. 837489 4. 877346 4. 849578 4. 55594 4. 718458 4. 162918  
11734797\_ 4. 778338 4. 932934 4. 88241 4. 445227 4. 607204 4. 427652  
11734798\_ 10. 39367 10. 37045 10. 33331 10. 23532 10. 2304 10. 23333  
11734799\_ 8. 131117 8. 031293 8. 116398 7. 27849 7. 358968 7. 339624  
11734800\_ 2. 792946 2. 746083 2. 858731 2. 842885 2. 912551 2. 767032  
11734801\_ 6. 932209 6. 797175 6. 834935 6. 797303 6. 813717 6. 817986  
11734802\_ 3. 528422 3. 547543 3. 398236 3. 055993 2. 995637 3. 263312  
11734803\_ 5. 244008 5. 522176 5. 303137 5. 362256 5. 356769 5. 412978  
11734804\_ 7. 556121 7. 362237 7. 482622 8. 290061 8. 188879 8. 175683  
11734805\_ 7. 597043 7. 579952 7. 611331 7. 593533 7. 568287 7. 648621  
11734806\_ 7. 055594 7. 036338 7. 089934 7. 262235 7. 302917 7. 308843  
11734807\_ 2. 235709 2. 597224 2. 713642 2. 466465 2. 471307 2. 249916  
11734808\_ 3. 777936 3. 44082 3. 798696 3. 464391 3. 376167 3. 57244  
11734809\_ 2. 41802 2. 541942 2. 470357 2. 472628 2. 479124 2. 453669  
11734810\_ 3. 183021 3. 457633 3. 381742 3. 267463 3. 21279 3. 398236  
11734811\_ 5. 75951 5. 771209 5. 730631 5. 14954 5. 077012 5. 029529  
11734812\_ 4. 799436 4. 950954 4. 807611 4. 844939 4. 90987 5. 005373  
11734813\_ 4. 597611 4. 584933 4. 594511 4. 643717 4. 668452 4. 677077  
11734814\_ 2. 017643 2. 208028 1. 993729 2. 25483 2. 365993 2. 171348  
11734815\_ 4. 35228 4. 470149 4. 15585 4. 040175 3. 964979 3. 867335  
11734816\_ 5. 168531 5. 240322 4. 959724 5. 392345 5. 1779 5. 126965  
11734817\_ 6. 719195 6. 614255 6. 722994 6. 078665 6. 002792 6. 110985  
11734818\_ 8. 239982 8. 371774 8. 173236 8. 368485 8. 351691 8. 339828  
11734819\_ 6. 669223 6. 691848 6. 749235 6. 629991 6. 636834 6. 495963  
11734820\_ 5. 924807 6. 054824 5. 882013 5. 482207 5. 694057 5. 700317  
11734821\_ 7. 773642 7. 736633 7. 721337 7. 018608 6. 993471 7. 030848  
11734822\_ 4. 708717 4. 611503 4. 39391 4. 864112 4. 708475 4. 756189  
11734823\_ 7. 741005 7. 795729 7. 892617 6. 965727 7. 115425 7. 119195  
11734824\_ 5. 614355 5. 71423 5. 684122 6. 731607 6. 633014 6. 844156  
11734825\_ 9. 60917 9. 636249 9. 559116 9. 273074 9. 261727 9. 185803  
11734826\_ 10. 30316 10. 3176 10. 2806 10. 07601 9. 969671 9. 930292  
11734827\_ 8. 292337 8. 189254 8. 300711 8. 312308 8. 272995 8. 301237  
11734828\_ 9. 275375 9. 1976 9. 295375 8. 683851 8. 754871 8. 740091  
11734829\_ 2. 752786 2. 84347 2. 928848 2. 718322 2. 613654 2. 86322  
11734830\_ 7. 960345 7. 846483 7. 925031 8. 041182 8. 062643 8. 082212  
11734831\_ 4. 763543 4. 700542 4. 834427 4. 76853 4. 824887 4. 817681  
11734832\_ 2. 854897 3. 066631 2. 821611 3. 112307 3. 004853 3. 020091  
11734833\_ 8. 401479 8. 39649 8. 431929 8. 369629 8. 345188 8. 384537  
11734834\_ 7. 551975 7. 515755 7. 578204 7. 453655 7. 426223 7. 488433  
11734835\_ 8. 2965 8. 26804 8. 294792 8. 191587 8. 132854 8. 139047

11734836\_ 5.76175 5.730745 5.526239 5.615515 5.66566 5.676846  
11734837\_ 5.792177 5.894363 5.795299 5.93062 5.863635 5.843019  
11734838\_ 7.874395 7.848592 7.911861 7.942485 7.98612 8.019349  
11734839\_ 8.362241 8.324461 8.418012 8.225463 8.24094 8.238041  
11734840\_ 8.424656 8.371746 8.442416 8.192268 8.183366 8.241431  
11734841\_ 7.330998 7.310478 7.368349 7.792815 7.77351 7.842075  
11734842\_ 7.976037 7.836113 8.078905 7.781959 7.722204 7.841008  
11734843\_ 7.764429 7.678439 7.927113 7.630774 7.506639 7.550602  
11734844\_ 8.49337 8.44207 8.469968 8.358036 8.364075 8.319954  
11734845\_ 7.051597 7.085587 7.051189 7.252331 7.053713 7.156283  
11734846\_ 7.319166 7.315869 7.338321 7.412269 7.309253 7.466694  
11734847\_ 5.674721 5.568471 5.593474 5.299026 5.2222 5.480394  
11734848\_ 8.975957 8.952164 8.954457 8.447965 8.373107 8.424653  
11734849\_ 7.011007 6.991312 6.934189 7.208204 7.096424 7.002897  
11734850\_ 6.055723 6.09289 6.096789 5.979702 6.108803 6.069566  
11734851\_ 5.315808 5.494597 5.396102 5.652221 5.388311 5.293601  
11734852\_ 3.722743 3.748585 4.063982 3.381091 3.249035 3.161423  
11734853\_ 2.989137 2.945929 3.089095 2.854955 2.798956 3.180062  
11734854\_ 3.393497 3.606313 3.613193 3.503743 3.593071 3.655309  
11734855\_ 2.605516 2.516719 2.472319 2.605516 2.575582 2.276813  
11734856\_ 5.621003 5.501009 5.739184 5.42984 5.261414 5.513245  
11734857\_ 6.847904 6.66196 6.820084 6.879359 6.922591 7.007698  
11734858\_ 6.448378 6.441783 6.439119 5.700302 5.681507 5.665835  
11734859\_ 7.104135 7.025606 7.203323 7.251652 7.197916 7.236517  
11734860\_ 6.599839 6.686034 6.641585 6.188765 6.254231 6.328092  
11734861\_ 3.165904 3.618411 3.462442 3.21279 3.19745 3.225727  
11734862\_ 7.175888 6.993216 7.059809 6.98154 7.012032 7.004363  
11734863\_ 10.25474 10.15621 10.18243 10.09015 10.09175 10.0542  
11734864\_ 10.02186 9.949444 10.00743 9.861079 9.87278 9.826478  
11734865\_ 7.923732 7.730153 7.814331 8.222136 8.211864 8.207726  
11734866\_ 4.867281 4.886649 4.672568 5.294259 5.184114 4.851177  
11734867\_ 3.818401 4.21429 4.135496 4.109166 4.21429 4.301152  
11734868\_ 3.631854 3.924229 4.026092 3.733325 3.914611 3.861595  
11734869\_ 6.182069 6.229508 6.253929 6.17978 6.407322 6.322574  
11734870\_ 8.072234 8.066873 8.06775 8.192034 8.173167 8.194456  
11734871\_ 10.41395 10.38667 10.46922 10.13572 10.13314 10.12221  
11734872\_ 9.659703 9.646354 9.69551 9.377377 9.430569 9.396797  
11734873\_ 5.502504 5.448025 5.480966 5.297498 5.271353 5.362569  
11734874\_ 6.527635 6.434495 6.491983 6.786612 6.829657 6.779107  
11734875\_ 7.212817 7.112481 7.156963 7.069262 6.964553 7.034477  
11734876\_ 3.909905 3.909593 3.948292 3.822135 4.160891 3.929978  
11734877\_ 3.639589 3.7543 3.569197 3.625204 3.55409 3.690216  
11734878\_ 2.857076 2.97262 3.115279 3.016161 3.076945 2.969997  
11734879\_ 4.889326 5.070219 4.981373 5.135494 5.079944 4.959922  
11734880\_ 2.993215 2.806053 2.809366 2.860829 3.083819 2.926277  
11734881\_ 8.356554 8.309056 8.342734 8.048876 8.174645 8.089005  
11734882\_ 8.473595 8.430432 8.467114 8.420409 8.386143 8.458396  
11734883\_ 7.024966 6.950255 7.044731 6.755929 6.755317 6.774793  
11734884\_ 3.695901 3.476084 3.600277 3.562237 3.548122 3.606544  
11734885\_ 4.066837 4.40461 4.086271 4.116884 4.200678 4.286292  
11734886\_ 6.271665 6.304083 6.178438 6.329791 6.361747 6.244734

11734887\_ 5. 479492 5. 660509 5. 523684 5. 666407 5. 681374 5. 619463  
11734888\_ 5. 265945 5. 070753 4. 921768 5. 013526 5. 084141 5. 136046  
11734889\_ 5. 237082 5. 345598 5. 094107 5. 232734 5. 200143 5. 029211  
11734890\_ 8. 142202 8. 146578 8. 205748 6. 936269 7. 125339 7. 186577  
11734891\_ 3. 634804 3. 454824 3. 801805 3. 802873 3. 762654 3. 806493  
11734892\_ 3. 469054 3. 343498 3. 290188 3. 614268 3. 644645 3. 569913  
11734893\_ 8. 093448 8. 007625 8. 09185 8. 327588 8. 338493 8. 256031  
11734894\_ 6. 481727 6. 416742 6. 477223 6. 621511 6. 652618 6. 630507  
11734895\_ 3. 648188 3. 595764 3. 398236 3. 734885 3. 696363 3. 681596  
11734896\_ 6. 145038 6. 314246 6. 277974 6. 355837 6. 362361 6. 319529  
11734897\_ 3. 383307 3. 508172 3. 498359 3. 333225 3. 492118 3. 391382  
11734898\_ 5. 863229 5. 847631 5. 88394 6. 328535 6. 503758 6. 596505  
11734899\_ 4. 373473 4. 435632 4. 309169 4. 560607 4. 367392 4. 445244  
11734900\_ 7. 096836 7. 048947 7. 092075 7. 258138 7. 354515 7. 326881  
11734901\_ 6. 115479 6. 196092 6. 063066 5. 993045 6. 025952 6. 05125  
11734902\_ 5. 700565 5. 80187 5. 736831 5. 701561 5. 737745 5. 868635  
11734903\_ 8. 039523 8. 091012 8. 06307 7. 930708 7. 920819 7. 960094  
11734904\_ 7. 287758 7. 356368 7. 239719 6. 944958 6. 889498 6. 993703  
11734905\_ 4. 576453 4. 753416 4. 551186 4. 772366 4. 648919 4. 643717  
11734906\_ 5. 653949 5. 547726 5. 614563 5. 583047 5. 507942 5. 638988  
11734907\_ 5. 795157 5. 712196 5. 771592 5. 186214 5. 226956 5. 002205  
11734908\_ 5. 070023 4. 849078 4. 919326 4. 976355 5. 11527 5. 184432  
11734909\_ 8. 186513 8. 180473 8. 212931 8. 105017 8. 074384 8. 130046  
11734910\_ 8. 106165 8. 104876 8. 162483 8. 148586 8. 061523 8. 178245  
11734911\_ 5. 923732 5. 868736 5. 995445 6. 303289 6. 227947 6. 33679  
11734912\_ 8. 175525 8. 066062 7. 983096 7. 428863 7. 42644 7. 442902  
11734913\_ 5. 564904 5. 419218 5. 327926 4. 689943 4. 886409 4. 829695  
11734914\_ 5. 691871 5. 8007 5. 866286 5. 871895 5. 819561 5. 827037  
11734915\_ 4. 759141 4. 40461 4. 790802 5. 236776 5. 111782 5. 140854  
11734916\_ 5. 268441 5. 326202 5. 256158 5. 511713 5. 319319 5. 364445  
11734917\_ 6. 567754 6. 782894 6. 85525 7. 026714 7. 034921 7. 144541  
11734918\_ 9. 407048 9. 35657 9. 367452 9. 369372 9. 374683 9. 383285  
11734919\_ 10. 16503 10. 18397 10. 24407 10. 40339 10. 36796 10. 37963  
11734920\_ 6. 952887 6. 913703 6. 922773 6. 811401 6. 932493 6. 858026  
11734921\_ 5. 600959 5. 134827 5. 378565 5. 368079 5. 245216 5. 323836  
11734922\_ 6. 988478 6. 942551 7. 007439 6. 746672 6. 686431 6. 702751  
11734923\_ 6. 613998 6. 745905 6. 589836 6. 724051 6. 917379 6. 831433  
11734924\_ 4. 995334 5. 214007 5. 004809 5. 288744 5. 266928 5. 22095  
11734925\_ 4. 182299 4. 325341 4. 213036 4. 213226 4. 317928 4. 457795  
11734926\_ 5. 597325 5. 554436 5. 297498 5. 591692 5. 574598 5. 696351  
11734927\_ 6. 121302 6. 003918 6. 069567 6. 312607 6. 147001 6. 269454  
11734928\_ 7. 492462 7. 415448 7. 470712 7. 667047 7. 533074 7. 590774  
11734929\_ 1. 968164 1. 968164 2. 036323 1. 968164 1. 968164 1. 968164  
11734930\_ 2. 280357 2. 361778 2. 083426 2. 186105 2. 101559 2. 402782  
11734931\_ 3. 384015 3. 534501 3. 43364 3. 588349 3. 534501 3. 664105  
11734932\_ 2. 095256 2. 361778 2. 156692 2. 215526 2. 073645 2. 233125  
11734933\_ 10. 01926 9. 954042 9. 948524 10. 17054 10. 28289 10. 10963  
11734934\_ 6. 248217 6. 444273 6. 081596 6. 366235 6. 472374 6. 401883  
11734935\_ 6. 51228 6. 498457 6. 6126 6. 551683 6. 480915 6. 431059  
11734936\_ 8. 041601 7. 998092 8. 120024 8. 168794 8. 158898 8. 167336  
11734937\_ 9. 098192 9. 214647 9. 245541 9. 354606 9. 225409 9. 124108

11734938\_ 3. 316646 3. 490363 3. 545732 3. 575296 3. 508119 3. 684152  
11734939\_ 3. 633121 3. 546567 3. 786729 3. 492919 3. 461889 3. 467107  
11734940\_ 4. 676813 4. 730738 4. 709872 4. 644867 4. 748714 4. 983519  
11734941\_ 6. 202403 6. 235919 6. 212701 5. 853731 6. 012554 5. 925895  
11734942\_ 7. 400846 7. 24989 7. 21323 7. 16679 7. 20727 7. 045614  
11734943\_ 3. 018078 2. 861877 2. 966903 3. 060835 3. 157808 3. 060835  
11734944\_ 5. 097646 5. 17458 4. 961933 5. 247683 5. 127084 5. 100989  
11734945\_ 3. 062814 3. 290188 3. 246359 3. 447739 3. 213954 3. 514149  
11734946\_ 7. 009195 7. 009156 6. 943042 7. 004037 7. 023284 6. 989759  
11734947\_ 2. 485768 2. 459031 2. 219245 2. 553078 2. 426401 2. 359086  
11734948\_ 3. 068507 2. 945929 2. 988289 3. 066701 2. 866624 3. 064542  
11734949\_ 3. 457351 3. 361232 3. 40551 3. 254564 3. 459529 3. 356927  
11734950\_ 4. 917192 4. 974962 5. 104962 5. 191794 5. 008892 5. 138819  
11734951\_ 3. 354406 3. 252432 3. 383552 3. 230645 3. 541149 3. 427446  
11734952\_ 4. 539303 4. 751841 4. 560129 4. 499125 4. 537802 4. 527613  
11734953\_ 2. 742947 2. 300409 2. 617052 2. 382388 2. 386263 2. 567199  
11734954\_ 3. 39899 3. 437659 3. 400619 3. 302877 3. 503761 3. 551317  
11734955\_ 7. 10911 7. 009306 7. 03761 6. 836681 6. 725582 6. 725085  
11734956\_ 3. 221424 3. 73793 3. 37697 3. 615162 3. 422158 3. 402281  
11734957\_ 8. 574692 8. 530395 8. 590024 7. 953197 7. 98321 8. 082032  
11734958\_ 8. 263979 8. 258293 8. 142029 7. 927254 7. 83656 7. 691924  
11734959\_ 8. 344082 8. 339939 8. 405274 8. 563603 8. 454664 8. 548288  
11734960\_ 7. 554568 7. 532098 7. 650545 7. 343141 7. 316108 7. 263331  
11734961\_ 5. 778473 5. 700114 5. 707433 5. 582903 5. 649343 5. 61821  
11734962\_ 5. 126571 5. 226426 5. 072045 5. 329259 5. 349909 5. 311187  
11734963\_ 6. 42516 6. 361695 6. 423812 6. 34864 6. 408441 6. 434878  
11734964\_ 6. 415081 6. 391031 6. 32004 6. 494783 6. 332192 6. 330311  
11734965\_ 7. 653618 7. 549425 7. 687632 7. 923436 7. 799561 7. 937193  
11734966\_ 5. 304469 5. 24101 5. 208846 5. 319209 5. 24081 5. 367557  
11734967\_ 2. 718322 2. 718322 2. 605516 2. 587302 2. 718322 2. 826544  
11734968\_ 4. 411391 4. 537148 4. 471052 4. 474297 4. 454043 4. 462256  
11734969\_ 7. 224983 7. 126633 7. 193622 7. 378848 7. 403775 7. 426513  
11734970\_ 10. 12012 10. 11191 10. 03985 9. 815374 9. 82065 9. 776684  
11734971\_ 7. 379828 7. 284485 7. 350883 7. 708817 7. 627398 7. 66885  
11734972\_ 7. 208021 7. 164857 7. 175704 7. 603278 7. 59117 7. 497147  
11734973\_ 5. 477425 5. 414764 5. 338849 5. 257064 5. 200011 5. 378083  
11734974\_ 3. 46578 3. 118512 3. 394432 3. 210284 3. 576614 3. 162714  
11734975\_ 8. 763196 8. 668867 8. 724591 8. 40636 8. 411879 8. 385152  
11734976\_ 3. 822637 3. 714408 3. 840318 3. 690658 3. 56554 3. 641161  
11734977\_ 5. 829223 5. 579614 5. 894697 5. 879761 5. 81972 5. 829462  
11734978\_ 4. 92964 4. 981814 4. 897133 5. 07188 5. 039475 4. 906658  
11734979\_ 3. 240671 3. 266964 3. 321657 3. 207514 3. 217928 3. 003246  
11734980\_ 7. 353451 7. 285519 7. 375193 7. 459752 7. 532762 7. 472796  
11734981\_ 7. 978873 7. 949798 8. 046483 8. 198055 8. 309833 8. 170511  
11734982\_ 4. 298278 4. 423976 4. 262821 4. 23312 4. 145273 4. 167129  
11734983\_ 2. 830635 2. 897151 2. 995509 2. 842914 2. 908647 3. 020046  
11734984\_ 5. 437221 5. 388442 5. 184648 5. 202927 5. 474773 5. 442778  
11734985\_ 5. 445711 5. 590226 5. 38108 5. 499177 5. 343226 5. 50814  
11734986\_ 2. 775839 2. 954054 2. 817215 2. 678866 2. 912551 2. 892894  
11734987\_ 5. 232514 5. 335078 5. 108924 4. 990149 5. 148389 4. 986053  
11734988\_ 7. 402098 7. 30618 7. 350159 7. 112129 7. 032317 7. 08197

11734989\_ 6. 025952 6. 139087 6. 084857 5. 669292 5. 588662 5. 695588  
11734990\_ 5. 071317 5. 123882 4. 787193 4. 972821 4. 971358 5. 143788  
11734991\_ 6. 218952 6. 13475 6. 320318 6. 238387 6. 360163 6. 174913  
11734992\_ 6. 685762 6. 589133 6. 604523 6. 558238 6. 459207 6. 362172  
11734993\_ 8. 47976 8. 49749 8. 557608 8. 283065 8. 301985 8. 387243  
11734994\_ 8. 090144 8. 069724 8. 105236 8. 059485 8. 038892 8. 087967  
11734995\_ 8. 758902 8. 778592 8. 81573 8. 574657 8. 60916 8. 650252  
11734996\_ 6. 554512 6. 535168 6. 541665 6. 413237 6. 457493 6. 51885  
11734997\_ 5. 982262 6. 083697 5. 997056 5. 210731 5. 380856 5. 304733  
11734998\_ 4. 643717 4. 9694 4. 82015 4. 643717 4. 626149 4. 911997  
11734999\_ 8. 654259 8. 635163 8. 654618 8. 760036 8. 727269 8. 759872  
11735000\_ 5. 789947 5. 910959 5. 839843 5. 920178 5. 876383 5. 952015  
11735001\_ 5. 252647 4. 908193 5. 021921 4. 56351 4. 567129 4. 397801  
11735002\_ 3. 339809 3. 290188 3. 138626 3. 356288 3. 140062 2. 83198  
11735003\_ 6. 753633 6. 753324 6. 827327 5. 946371 5. 823918 5. 96479  
11735004\_ 4. 966093 5. 002937 4. 93124 5. 40886 5. 264244 5. 229033  
11735005\_ 3. 153928 3. 059996 2. 908434 3. 115734 3. 091622 3. 067096  
11735006\_ 3. 160609 3. 074687 3. 027907 3. 121204 3. 004784 3. 072567  
11735007\_ 5. 213592 5. 408536 5. 179237 5. 348859 5. 327776 5. 448059  
11735008\_ 5. 655573 5. 554436 5. 669903 5. 480966 5. 554436 5. 528624  
11735009\_ 3. 341613 3. 411007 3. 241963 3. 343232 3. 263497 3. 386408  
11735010\_ 5. 045084 5. 035704 5. 17958 5. 288505 5. 254341 5. 044394  
11735011\_ 5. 235677 5. 378826 5. 335833 5. 300035 5. 352552 5. 286523  
11735012\_ 8. 206498 8. 074117 8. 135382 8. 016881 8. 04676 8. 070821  
11735013\_ 9. 389488 9. 473084 9. 418613 9. 326476 9. 343175 9. 441166  
11735014\_ 7. 25826 7. 312537 7. 223296 7. 305063 7. 260635 7. 303712  
11735015\_ 6. 712906 6. 75943 6. 736534 6. 768446 6. 794635 6. 81731  
11735016\_ 8. 426465 8. 376119 8. 449999 7. 231826 7. 222884 7. 243399  
11735017\_ 6. 096852 6. 010662 6. 24205 6. 078403 6. 096424 6. 055372  
11735018\_ 5. 559886 5. 565392 5. 489178 5. 521681 5. 665181 5. 500686  
11735019\_ 6. 561997 6. 4833 6. 536941 5. 910552 6. 087751 5. 99623  
11735020\_ 3. 730825 3. 984678 3. 740892 3. 925181 3. 868513 3. 747699  
11735021\_ 8. 273452 8. 282751 8. 360267 8. 335368 8. 366138 8. 340927  
11735022\_ 5. 784653 5. 63372 5. 794286 5. 398891 5. 166057 5. 374866  
11735023\_ 7. 330417 7. 480918 7. 347075 7. 450902 7. 471036 7. 478232  
11735024\_ 4. 98179 5. 072982 4. 953193 5. 022085 5. 002312 5. 132914  
11735025\_ 4. 993057 5. 015067 4. 947503 4. 899978 4. 984669 4. 967542  
11735026\_ 5. 897246 5. 935085 5. 929676 5. 953849 6. 025928 5. 994882  
11735027\_ 5. 935167 5. 924033 5. 8427 6. 026408 6. 087948 5. 970781  
11735028\_ 4. 703501 4. 564939 4. 540214 4. 687243 4. 612622 4. 703212  
11735029\_ 5. 644612 5. 662719 5. 596974 5. 5788 5. 628137 5. 531988  
11735030\_ 6. 19262 6. 132864 6. 373121 5. 830295 5. 989563 5. 894697  
11735031\_ 5. 274729 5. 177536 5. 233764 5. 383182 5. 250228 5. 463933  
11735032\_ 4. 543742 4. 9226 4. 968461 5. 029529 5. 053681 5. 100161  
11735033\_ 10. 17824 10. 14362 10. 21719 10. 18988 10. 24816 10. 18201  
11735034\_ 2. 598783 2. 257345 2. 436071 2. 382593 2. 413194 2. 310142  
11735035\_ 3. 756039 3. 885646 3. 786203 3. 693021 3. 955238 3. 842478  
11735036\_ 5. 594709 5. 962468 5. 682525 5. 567009 5. 505764 5. 561695  
11735037\_ 6. 114144 6. 263567 6. 232435 6. 12868 6. 003142 6. 033313  
11735038\_ 6. 451377 6. 329778 6. 37226 6. 19971 6. 196287 6. 101793  
11735039\_ 7. 074738 7. 036219 7. 074638 6. 775603 6. 59519 6. 628737

11735040\_ 5.192037 5.113842 5.139431 5.137826 4.97208 5.230977  
11735041\_ 4.906443 5.094704 5.073036 5.377778 5.395437 5.306618  
11735042\_ 9.544955 9.508775 9.506794 8.898639 8.889016 8.866952  
11735043\_ 5.098589 5.160301 5.148731 5.106691 5.125465 5.079487  
11735044\_ 7.617062 7.552942 7.616757 7.330358 7.270043 7.208143  
11735045\_ 4.119339 4.02846 3.959817 3.942161 4.122446 4.00117  
11735046\_ 1.996052 1.924128 1.995656 2.079884 2.172577 2.192588  
11735047\_ 4.865118 4.980307 4.988214 4.891873 4.893654 5.07637  
11735048\_ 2.088949 2.138426 2.083727 2.061574 2.171332 2.105881  
11735049\_ 3.89138 4.385021 4.282137 4.482876 4.32629 4.388626  
11735050\_ 4.407782 4.54219 4.370337 4.353125 4.447458 4.449067  
11735051\_ 5.11527 4.957619 5.063817 4.974046 4.940537 4.974694  
11735052\_ 5.088623 4.894346 4.899935 4.770125 4.926419 4.80023  
11735053\_ 1.986834 1.943547 1.902806 2.054533 1.836136 1.910768  
11735054\_ 5.768258 5.720884 5.586525 5.508759 5.837576 5.714898  
11735055\_ 4.196388 4.177283 4.582838 4.40361 4.543654 4.497222  
11735056\_ 1.790138 1.695554 1.618667 1.598992 1.555056 1.792845  
11735057\_ 5.152429 4.782686 5.190616 5.010838 5.007148 4.856987  
11735058\_ 7.847075 7.841179 7.927041 8.333442 8.417605 8.455026  
11735059\_ 4.643209 4.561248 4.549072 5.036385 4.849431 4.652966  
11735060\_ 9.641323 9.61552 9.651379 9.329927 9.305719 9.258372  
11735061\_ 6.617756 6.54866 6.439015 6.593252 6.536234 6.559569  
11735062\_ 7.049309 6.947888 7.08741 6.328885 6.223476 6.380052  
11735063\_ 5.277544 5.336318 5.340888 4.706821 4.705835 4.806414  
11735064\_ 4.954999 4.903413 4.809719 5.118331 4.970769 5.03762  
11735065\_ 5.269861 5.452442 5.4578 5.109035 5.304829 5.246121  
11735066\_ 6.392314 6.530537 6.531619 5.768053 5.894697 6.033313  
11735067\_ 6.634915 6.695329 6.607434 6.778677 6.813154 6.822353  
11735068\_ 4.81227 4.957745 4.785727 4.907557 4.890539 4.868126  
11735069\_ 4.817934 4.672351 4.889923 4.672351 4.89622 4.845412  
11735070\_ 4.108592 4.158131 4.087195 4.3316 4.157411 4.124353  
11735071\_ 2.853852 3.136569 3.230501 3.243248 3.185793 3.252669  
11735072\_ 4.718527 4.584933 4.88241 4.874234 4.806403 4.918518  
11735073\_ 3.020679 3.237922 3.025972 2.852618 2.798956 2.623855  
11735074\_ 4.804296 4.879191 4.865252 4.745261 4.790912 4.700243  
11735075\_ 5.686329 5.819605 5.735431 5.706672 5.737135 5.77685  
11735076\_ 6.127209 6.12028 6.1134 6.278006 6.284582 6.184028  
11735077\_ 2.261607 2.252619 2.332126 2.581577 2.554824 2.384913  
11735078\_ 3.06012 3.061205 2.874619 3.093147 2.963395 2.920144  
11735079\_ 4.621359 4.677459 4.459939 4.643717 4.677459 4.490064  
11735080\_ 7.029545 6.957648 6.926305 6.902683 6.9617 6.952119  
11735081\_ 5.074529 5.19025 4.988177 5.318627 5.199436 5.188034  
11735082\_ 3.004218 3.056212 3.385619 3.21279 2.715839 3.104177  
11735083\_ 6.604304 6.606471 6.634134 7.050082 6.886652 7.021194  
11735084\_ 6.692931 6.512168 6.456418 7.115785 7.070856 7.052718  
11735085\_ 4.195517 3.723624 4.283948 4.603064 4.503158 4.704587  
11735086\_ 5.489952 5.751993 5.599079 5.489952 5.413346 5.247035  
11735087\_ 2.268169 2.217283 2.361778 2.204172 2.177681 2.309975  
11735088\_ 2.532075 2.534203 2.540587 2.606932 2.544271 2.465729  
11735089\_ 6.641615 6.475928 6.620104 6.481046 6.435729 6.453679  
11735090\_ 4.336372 4.072486 4.480993 3.606313 3.740238 3.544102

11735091\_ 2.74993 2.610451 2.7245 2.605516 2.548339 2.718322  
11735092\_ 2.675217 2.865354 2.675217 2.597886 2.605516 2.718322  
11735093\_ 6.685115 6.780499 6.64425 6.642388 6.660376 6.603903  
11735094\_ 4.572324 4.544927 4.427891 4.852219 4.872 4.680516  
11735095\_ 2.825614 2.853734 2.835752 2.83198 2.799349 2.655394  
11735096\_ 8.634578 8.620832 8.677877 8.438472 8.498422 8.470277  
11735097\_ 9.677201 9.588393 9.666654 9.442773 9.4872 9.474578  
11735098\_ 5.840369 5.790558 6.011729 5.493229 5.609468 5.683267  
11735099\_ 3.385475 3.181395 3.368612 3.148761 3.28766 3.188113  
11735100\_ 2.169469 1.832808 1.884268 1.993622 2.202439 1.949152  
11735101\_ 2.227621 2.253573 2.096856 2.316697 2.242321 2.25483  
11735102\_ 2.872924 3.22943 2.896209 3.201789 2.969048 3.066389  
11735103\_ 7.228354 7.109359 7.201294 7.721386 7.655003 7.749595  
11735104\_ 9.480854 9.417067 9.469604 9.525535 9.625753 9.499397  
11735105\_ 3.296419 3.106048 3.118636 3.116639 3.338594 3.326251  
11735106\_ 4.831117 5.013608 4.770008 4.889095 4.967729 4.934258  
11735107\_ 6.930204 6.886652 6.880872 7.05406 7.157397 7.154768  
11735108\_ 9.422206 9.344107 9.414127 9.339733 9.370545 9.318145  
11735109\_ 8.125082 8.151246 8.126866 8.092776 8.091908 8.059584  
11735110\_ 6.014215 5.929673 6.024994 5.794286 5.887234 5.883114  
11735111\_ 5.512912 5.612594 5.462374 5.496527 5.584813 5.621948  
11735112\_ 2.246999 2.42886 2.208768 2.123543 2.215484 2.029611  
11735113\_ 4.336609 4.527589 4.062535 4.459939 4.288492 4.322968  
11735114\_ 4.147977 4.261515 4.36373 4.347179 4.498888 4.319968  
11735115\_ 7.200945 7.269402 7.342171 6.896462 6.960978 6.989408  
11735116\_ 8.42293 8.437142 8.419048 8.430023 8.427692 8.452677  
11735117\_ 4.700178 4.584933 4.873918 5.031841 4.950874 5.228627  
11735118\_ 5.76444 5.831855 5.875294 5.797032 5.592299 5.687786  
11735119\_ 7.522405 7.497523 7.546879 7.659849 7.678769 7.737373  
11735120\_ 5.549043 5.319936 5.520966 5.666358 5.724943 5.751252  
11735121\_ 6.704988 6.670796 6.702224 6.894812 6.832783 6.884484  
11735122\_ 6.504941 6.531304 6.398332 6.73836 6.70979 6.623747  
11735123\_ 8.300157 8.25231 8.315848 8.142882 8.148252 8.177473  
11735124\_ 4.573655 4.742536 4.763635 4.652112 4.634972 4.748163  
11735125\_ 5.019149 5.130017 4.984669 5.076371 5.097749 5.074357  
11735126\_ 2.213864 2.183822 2.197357 2.311119 2.259677 2.207082  
11735127\_ 5.925381 6.140387 5.933968 6.133077 6.076905 5.883723  
11735128\_ 8.579874 8.608761 8.632196 7.74611 7.646888 7.621872  
11735129\_ 5.388155 5.332507 5.349953 6.100861 6.175048 6.093424  
11735130\_ 5.946948 6.033416 5.872972 5.952752 5.911618 5.988379  
11735131\_ 5.703509 5.724993 5.678581 5.588471 5.504064 5.390335  
11735132\_ 8.419939 8.356324 8.311386 8.100034 8.061569 8.056451  
11735133\_ 3.491577 4.080996 3.613309 3.764871 3.781268 3.838211  
11735134\_ 3.394193 3.11163 3.070774 3.252493 3.250357 3.112939  
11735135\_ 3.780215 3.744355 3.678486 3.90445 3.931088 3.89984  
11735136\_ 3.469716 3.254308 3.372214 3.261726 3.148632 3.354266  
11735137\_ 8.850923 8.746498 8.824458 8.597814 8.552286 8.610455  
11735138\_ 2.245961 2.353983 2.12458 2.131125 2.299261 2.172738  
11735139\_ 8.148995 7.984413 8.01355 7.579485 7.61619 7.642447  
11735140\_ 7.551185 7.611976 7.606051 7.214565 7.066036 7.120866  
11735141\_ 2.84906 2.825223 2.666963 2.792553 2.84906 2.787035



11735142\_ 2. 840968 3. 040487 3. 025972 3. 035196 2. 912551 2. 817721  
11735143\_ 4. 519962 4. 710434 4. 584933 4. 590614 4. 584933 4. 539031  
11735144\_ 6. 692029 6. 54571 6. 589733 6. 49902 6. 539562 6. 631313  
11735145\_ 2. 718322 2. 974946 2. 823859 2. 912551 3. 025681 2. 806834  
11735146\_ 7. 97752 7. 882177 8. 020087 8. 807553 8. 778964 8. 892948  
11735147\_ 5. 134462 5. 20836 4. 954813 4. 957949 5. 132427 5. 019152  
11735148\_ 7. 773392 7. 777434 7. 761941 7. 756182 7. 701288 7. 708579  
11735149\_ 5. 787275 5. 725924 5. 762037 5. 778246 5. 849881 5. 788059  
11735150\_ 6. 195474 6. 150953 6. 17981 6. 229318 6. 403673 6. 202899  
11735151\_ 5. 174265 4. 977896 5. 2222 5. 189628 5. 2222 5. 273577  
11735152\_ 6. 473574 6. 237729 6. 575249 6. 804009 6. 708278 6. 751274  
11735153\_ 2. 126024 2. 078928 2. 046313 2. 149388 2. 14586 2. 108196  
11735154\_ 2. 826193 2. 690464 2. 941905 2. 86257 2. 757036 2. 556981  
11735155\_ 6. 962467 6. 894737 7. 118754 6. 498182 6. 540474 6. 631306  
11735156\_ 6. 688764 6. 722189 6. 735649 6. 196829 6. 13831 6. 321173  
11735157\_ 2. 798015 3. 085275 2. 899371 2. 965444 3. 078116 2. 959658  
11735158\_ 4. 008169 3. 888344 3. 861038 4. 011612 4. 067976 3. 97208  
11735159\_ 2. 605516 2. 507132 2. 524335 2. 450855 2. 39271 2. 658831  
11735160\_ 5. 496881 5. 422715 5. 395689 5. 586248 5. 661698 5. 429606  
11735161\_ 6. 067361 6. 180704 6. 097386 6. 215046 6. 151688 6. 074811  
11735162\_ 5. 245347 5. 270782 5. 361249 5. 304834 5. 47072 5. 439822  
11735163\_ 5. 968468 5. 907095 5. 825435 6. 103166 5. 959434 5. 999536  
11735164\_ 4. 773723 4. 709463 4. 776138 4. 739188 4. 807407 4. 916185  
11735165\_ 6. 007552 6. 191512 6. 215186 6. 123706 6. 257766 6. 193016  
11735166\_ 5. 480966 5. 690924 5. 654259 5. 595949 5. 593056 5. 571043  
11735167\_ 8. 291987 8. 347101 8. 242119 8. 53002 8. 61939 8. 48313  
11735168\_ 6. 281732 6. 321838 6. 264556 6. 528243 6. 481046 6. 561267  
11735169\_ 1. 995297 1. 781915 1. 922568 1. 852539 1. 922568 1. 958753  
11735170\_ 4. 700243 4. 827964 4. 600276 4. 844289 5. 07031 4. 963192  
11735171\_ 4. 475972 4. 691962 4. 533853 4. 581379 4. 51944 4. 634749  
11735172\_ 3. 235799 2. 901761 3. 073815 2. 972736 2. 982936 3. 073815  
11735173\_ 9. 766262 9. 755741 9. 783809 10. 00014 10. 02507 10. 0913  
11735174\_ 7. 739505 7. 630766 7. 674742 6. 438366 6. 50364 6. 483319  
11735175\_ 6. 190151 6. 207554 6. 082971 6. 31441 6. 286643 6. 391851  
11735176\_ 4. 180341 4. 252283 4. 323116 4. 271495 4. 275543 4. 217043  
11735177\_ 3. 646628 3. 638808 3. 56703 3. 701827 3. 683397 3. 733753  
11735178\_ 6. 416451 6. 348754 6. 428975 6. 833945 6. 898793 6. 883892  
11735179\_ 1. 971054 1. 906695 1. 819479 1. 995297 1. 995297 1. 894242  
11735180\_ 5. 11527 5. 205973 5. 195553 5. 311726 5. 281381 5. 374866  
11735181\_ 8. 209262 8. 19391 8. 211583 8. 28692 8. 293402 8. 28917  
11735182\_ 6. 732383 6. 770685 6. 764617 6. 824213 6. 825633 6. 792183  
11735183\_ 4. 977054 5. 149499 4. 813542 5. 073036 5. 104187 5. 282032  
11735184\_ 9. 450217 9. 419117 9. 437409 9. 160279 9. 11832 9. 160279  
11735185\_ 3. 045312 2. 972875 3. 108155 3. 203357 3. 029941 3. 220961  
11735186\_ 2. 089752 1. 662067 1. 864919 1. 710826 1. 846878 1. 762  
11735187\_ 3. 753792 3. 495067 3. 426377 3. 798886 3. 754313 3. 606127  
11735188\_ 5. 156303 5. 142918 5. 180121 5. 28253 5. 148292 5. 366871  
11735189\_ 10. 94896 10. 98149 11. 0024 11. 10787 11. 01285 11. 04005  
11735190\_ 4. 264125 4. 329958 4. 232985 4. 648875 4. 601175 4. 411166  
11735191\_ 4. 716652 4. 729674 4. 610748 4. 703163 4. 731334 4. 805951  
11735192\_ 4. 076935 3. 539219 3. 672348 3. 37948 3. 56104 3. 513409

11735193\_ 4. 481434 4. 641379 4. 501148 4. 4446 4. 351906 4. 451764  
11735194\_ 6. 857173 6. 850498 6. 796023 7. 127388 7. 262771 7. 197911  
11735195\_ 4. 761151 5. 020143 4. 775389 4. 658667 4. 746958 4. 763543  
11735196\_ 5. 988207 5. 894697 5. 973344 5. 845365 5. 980978 5. 954198  
11735197\_ 5. 093602 5. 012272 4. 89688 4. 995559 4. 971186 5. 053305  
11735198\_ 5. 262695 5. 101848 5. 282453 5. 774803 5. 76947 5. 831153  
11735199\_ 3. 506382 3. 434458 3. 222829 3. 522306 3. 585824 3. 522306  
11735200\_ 6. 953156 6. 87131 6. 950078 6. 326933 6. 430954 6. 566366  
11735201\_ 5. 642905 5. 745397 5. 475585 5. 407068 5. 230272 5. 332461  
11735202\_ 6. 833673 6. 814849 6. 878459 6. 496668 6. 572145 6. 596865  
11735203\_ 4. 358544 4. 172425 4. 138049 3. 388083 3. 473413 3. 785716  
11735204\_ 5. 544167 5. 218543 5. 245128 5. 32257 5. 435727 5. 299174  
11735205\_ 5. 537058 5. 460937 5. 508782 5. 489524 5. 35379 5. 371701  
11735206\_ 2. 880589 2. 940466 2. 803828 2. 775429 2. 786912 2. 854185  
11735207\_ 5. 003711 4. 870769 4. 836425 5. 036855 4. 892951 4. 952464  
11735208\_ 2. 230975 2. 217663 2. 200877 2. 206472 2. 206472 2. 195282  
11735209\_ 2. 864398 2. 926929 2. 905102 3. 118032 3. 01469 2. 926211  
11735210\_ 4. 59024 4. 641831 4. 788662 4. 612337 4. 740192 4. 607556  
11735211\_ 4. 878982 5. 11527 5. 119605 5. 11527 5. 169266 4. 972102  
11735212\_ 3. 137513 2. 895399 2. 856506 2. 83198 2. 761292 2. 848585  
11735213\_ 4. 876625 4. 941984 4. 910236 5. 037884 4. 727659 4. 926159  
11735214\_ 3. 222637 3. 27429 3. 30777 3. 364406 3. 290687 3. 207069  
11735215\_ 3. 317388 3. 558628 3. 483647 3. 606313 3. 409974 3. 472289  
11735216\_ 6. 225513 6. 195517 6. 213222 6. 42655 6. 385221 6. 387286  
11735217\_ 7. 426804 7. 350412 7. 352623 7. 199174 7. 164857 7. 111769  
11735218\_ 2. 620073 2. 425062 2. 66838 2. 623419 2. 691785 2. 475596  
11735219\_ 2. 082201 2. 200782 1. 924922 2. 060864 2. 210147 2. 07995  
11735220\_ 5. 874428 5. 665758 5. 756329 6. 108619 5. 971211 6. 14186  
11735221\_ 3. 659769 3. 663748 3. 347488 3. 288018 3. 54339 3. 458803  
11735222\_ 2. 13161 2. 001491 2. 236707 2. 021632 2. 274638 2. 107644  
11735223\_ 5. 644777 5. 634757 5. 600206 5. 854032 5. 630488 5. 754296  
11735224\_ 5. 826771 5. 72432 5. 798259 5. 767987 5. 621534 5. 68773  
11735225\_ 8. 089502 8. 112854 8. 038892 8. 301559 8. 304568 8. 254375  
11735226\_ 4. 210742 4. 530233 4. 153623 4. 3424 4. 386483 4. 204228  
11735227\_ 4. 316518 4. 387883 4. 243899 4. 216782 4. 256395 4. 370223  
11735228\_ 4. 185545 4. 065342 4. 135496 4. 347179 4. 200678 4. 194947  
11735229\_ 5. 580683 5. 536602 5. 646784 5. 655722 5. 649473 5. 607512  
11735230\_ 5. 212945 5. 495636 5. 247203 5. 248965 5. 277081 5. 212428  
11735231\_ 5. 425064 5. 266936 5. 233157 5. 583416 5. 499462 5. 576426  
11735232\_ 4. 662923 4. 722001 4. 77733 4. 769704 4. 841121 4. 723831  
11735233\_ 4. 584933 4. 584933 4. 507236 4. 63312 4. 508268 4. 64811  
11735234\_ 5. 087909 4. 999818 4. 884947 4. 981329 5. 140484 5. 021673  
11735235\_ 7. 887029 7. 836406 7. 832886 7. 957462 7. 932678 7. 937184  
11735236\_ 8. 127256 8. 077999 8. 091364 8. 229756 8. 140755 8. 195203  
11735237\_ 3. 182411 3. 111774 3. 316803 3. 316803 3. 35076 3. 621196  
11735238\_ 7. 280725 7. 174876 7. 318171 6. 634134 6. 703929 6. 67471  
11735239\_ 4. 617947 4. 784019 4. 88241 4. 730003 4. 770701 4. 860758  
11735240\_ 4. 824079 4. 893233 4. 719884 4. 960293 4. 677043 4. 954575  
11735241\_ 6. 842885 6. 811552 7. 117321 6. 20892 6. 271103 6. 360967  
11735242\_ 7. 289973 7. 18794 7. 276704 6. 583845 6. 53041 6. 682415  
11735243\_ 5. 763634 5. 547624 5. 808772 5. 178676 5. 084747 4. 982658

11735244\_ 4. 884621 4. 86638 4. 898574 4. 829193 4. 816019 4. 856525  
11735245\_ 4. 763543 4. 768642 4. 715281 4. 914651 4. 642133 4. 820742  
11735246\_ 3. 279764 3. 292383 3. 086772 3. 483062 3. 447561 3. 252677  
11735247\_ 3. 514032 3. 623202 3. 692773 3. 879078 4. 050912 3. 886793  
11735248\_ 3. 970154 3. 905831 4. 002721 4. 201144 4. 26307 4. 221028  
11735249\_ 7. 389495 7. 413893 7. 47685 7. 043833 7. 02548 7. 091446  
11735250\_ 4. 591099 4. 713092 4. 76544 4. 664529 4. 662999 4. 940026  
11735251\_ 3. 398236 3. 298368 3. 290188 3. 526918 3. 077054 3. 430872  
11735252\_ 3. 350888 3. 459834 3. 44458 3. 468219 3. 459262 3. 481266  
11735253\_ 6. 59012 6. 626853 6. 385838 6. 577296 6. 660339 6. 575775  
11735254\_ 6. 357611 6. 400987 6. 2225 6. 320817 6. 413577 6. 358975  
11735255\_ 5. 367532 5. 612763 5. 361864 5. 65303 5. 598136 5. 502342  
11735256\_ 5. 047952 5. 117961 5. 029529 5. 205499 5. 283263 5. 195548  
11735257\_ 6. 055828 6. 033313 6. 03729 6. 00944 6. 020491 6. 039029  
11735258\_ 6. 581489 6. 493564 6. 682781 6. 531338 6. 563071 6. 599412  
11735259\_ 3. 705625 3. 290188 3. 735539 3. 746487 3. 82051 3. 857628  
11735260\_ 5. 751057 5. 911533 5. 875371 6. 17919 6. 081232 6. 106016  
11735261\_ 4. 013088 3. 937646 4. 162888 3. 391736 3. 268861 3. 393619  
11735262\_ 4. 44577 4. 535277 4. 160789 4. 548743 4. 601501 4. 63459  
11735263\_ 5. 390089 4. 997773 5. 298238 3. 712141 3. 035374 3. 041957  
11735264\_ 4. 809516 4. 938573 4. 713911 4. 953968 5. 018797 4. 824569  
11735265\_ 3. 470526 3. 526633 3. 602187 3. 411855 3. 728256 3. 703147  
11735266\_ 7. 312161 7. 283957 7. 080716 7. 284846 7. 204522 7. 296126  
11735267\_ 6. 244666 6. 431763 6. 231422 6. 380245 6. 463386 6. 415553  
11735268\_ 6. 497339 6. 418883 6. 532798 5. 421579 5. 60551 5. 474073  
11735269\_ 5. 406866 5. 230676 5. 470015 4. 280044 4. 65162 4. 65162  
11735270\_ 4. 158345 4. 177911 4. 322698 4. 330272 4. 358401 4. 511911  
11735271\_ 3. 996442 4. 222771 4. 055743 4. 019573 3. 897383 4. 072397  
11735272\_ 4. 724578 4. 86557 4. 746332 4. 852877 4. 751133 4. 746332  
11735273\_ 6. 725742 6. 654146 6. 639174 6. 399674 6. 353779 6. 437634  
11735274\_ 5. 967462 5. 938482 5. 845805 5. 768053 5. 721853 5. 770114  
11735275\_ 3. 103183 2. 94658 3. 502361 2. 844686 2. 94658 3. 017478  
11735276\_ 3. 140443 2. 779789 2. 933806 2. 768179 2. 954996 2. 836834  
11735277\_ 9. 96376 9. 930976 9. 94945 9. 842289 9. 860549 9. 837969  
11735278\_ 1. 982795 1. 787156 1. 858495 1. 910826 1. 972216 1. 910826  
11735279\_ 3. 448535 3. 347937 3. 480168 3. 448535 3. 448535 3. 705625  
11735280\_ 3. 819016 3. 909593 3. 987085 3. 824051 4. 009701 4. 058557  
11735281\_ 7. 099734 6. 996406 7. 038798 6. 498247 6. 523081 6. 544244  
11735282\_ 4. 484125 4. 379243 4. 347608 4. 808562 4. 874662 4. 850796  
11735283\_ 7. 436557 7. 325842 7. 423199 7. 215023 7. 338071 7. 282271  
11735284\_ 7. 998854 8. 000361 7. 969342 7. 830607 7. 846885 7. 771161  
11735285\_ 5. 522783 5. 535689 5. 522507 5. 473862 5. 412293 5. 430416  
11735286\_ 6. 253842 6. 308178 6. 18643 6. 380156 6. 311674 6. 315786  
11735287\_ 3. 967705 4. 032726 4. 083685 3. 974443 4. 097871 3. 867155  
11735288\_ 4. 961049 4. 848736 4. 61146 4. 651015 4. 83686 4. 7504  
11735289\_ 5. 319444 5. 277103 5. 329508 5. 321749 5. 253789 5. 37625  
11735290\_ 7. 761046 7. 670985 7. 75301 7. 771457 7. 861218 7. 772557  
11735291\_ 3. 430858 3. 322809 3. 419659 3. 433544 3. 320123 3. 476951  
11735292\_ 5. 303117 5. 3583 5. 028652 5. 242481 5. 099454 5. 264299  
11735293\_ 4. 036238 4. 428525 4. 187663 4. 281595 4. 281595 4. 254534  
11735294\_ 4. 347179 4. 189506 4. 213226 3. 907996 4. 032449 4. 210894

11735295\_ 5. 091107 4. 595562 4. 838263 4. 146125 4. 164072 4. 248833  
11735296\_ 3. 751919 3. 447924 3. 738921 3. 469227 3. 435658 3. 644989  
11735297\_ 3. 875209 3. 613806 3. 503743 3. 603279 3. 623735 3. 668752  
11735298\_ 3. 14289 3. 011352 3. 099446 3. 17976 3. 004853 2. 99983  
11735299\_ 4. 451482 4. 497343 4. 392164 4. 459939 4. 534577 4. 52373  
11735300\_ 6. 522326 6. 461354 6. 512854 7. 145336 7. 217966 7. 337063  
11735301\_ 4. 843473 4. 917837 4. 873003 4. 885038 4. 877528 4. 756241  
11735302\_ 5. 015445 5. 016537 5. 062528 5. 237864 5. 125779 5. 165097  
11735303\_ 4. 174258 4. 09535 4. 181565 4. 244959 4. 290807 4. 413556  
11735304\_ 4. 61463 4. 921868 4. 738583 4. 943916 5. 095051 4. 854095  
11735305\_ 6. 55235 6. 499761 6. 494443 6. 34864 6. 441513 6. 430208  
11735306\_ 3. 351055 3. 503743 3. 442908 3. 194776 3. 30525 3. 320191  
11735307\_ 4. 404148 4. 423662 4. 584933 4. 431203 4. 396919 4. 386082  
11735308\_ 5. 49837 5. 394178 5. 525242 5. 399859 5. 443383 5. 369698  
11735309\_ 3. 869224 3. 840651 3. 793724 3. 894092 3. 816716 3. 86875  
11735310\_ 8. 941671 8. 931564 8. 926429 8. 884156 8. 893606 8. 83429  
11735311\_ 4. 087323 4. 345578 4. 24362 4. 349069 4. 083328 4. 28734  
11735312\_ 4. 954628 5. 078872 5. 130456 5. 029529 5. 05592 5. 127601  
11735313\_ 3. 249924 3. 38711 3. 209033 3. 266549 3. 0838 3. 398236  
11735314\_ 3. 031353 2. 973934 2. 81665 2. 974341 2. 973934 3. 06652  
11735315\_ 5. 367036 5. 24172 5. 25422 4. 684609 4. 867471 4. 789239  
11735316\_ 5. 894697 5. 815789 5. 847833 6. 057235 6. 051356 6. 074297  
11735317\_ 2. 47102 2. 525548 2. 289025 2. 437944 2. 47523 2. 494072  
11735318\_ 2. 785004 3. 087099 2. 918638 3. 228064 2. 998322 2. 919312  
11735319\_ 7. 019317 6. 956964 6. 94029 6. 416946 6. 520705 6. 503283  
11735320\_ 7. 736693 7. 613617 7. 737149 7. 058554 7. 191924 7. 196998  
11735321\_ 7. 404798 7. 516435 7. 491125 7. 469473 7. 60907 7. 468319  
11735322\_ 6. 063019 6. 351991 6. 145629 6. 415242 6. 229995 6. 299039  
11735323\_ 8. 669203 8. 546385 8. 527209 7. 424885 7. 538089 7. 541448  
11735324\_ 8. 654637 8. 599159 8. 648956 9. 15724 9. 202058 9. 201811  
11735325\_ 3. 572184 3. 473478 3. 359046 3. 503743 3. 584273 3. 401332  
11735326\_ 4. 692972 4. 972461 4. 70948 4. 854953 4. 884025 4. 632059  
11735327\_ 5. 645006 5. 789947 5. 645006 5. 746644 5. 69836 5. 806588  
11735328\_ 4. 049279 4. 085893 4. 089187 4. 212449 4. 287046 4. 003079  
11735329\_ 7. 485372 7. 335474 7. 444045 7. 901953 7. 944634 7. 980424  
11735330\_ 6. 493116 6. 531936 6. 478352 6. 587462 6. 593703 6. 636651  
11735331\_ 4. 763543 4. 569953 4. 772366 4. 584933 4. 657574 4. 676132  
11735332\_ 5. 455015 5. 328666 5. 322765 5. 532463 5. 367468 5. 43364  
11735333\_ 4. 135935 4. 392359 4. 193968 4. 36905 4. 278556 4. 290128  
11735334\_ 5. 277308 5. 171029 5. 195783 5. 312959 5. 308153 5. 292117  
11735335\_ 3. 216571 3. 035062 3. 466379 3. 619013 3. 108883 3. 593487  
11735336\_ 2. 608125 2. 811948 2. 736636 2. 675458 2. 542141 2. 466095  
11735337\_ 4. 026092 4. 023084 3. 850246 4. 340422 4. 200678 3. 880337  
11735338\_ 5. 485151 5. 711126 5. 448296 5. 606152 5. 558179 5. 676992  
11735339\_ 6. 926544 6. 946629 6. 94766 6. 967045 6. 969193 6. 93779  
11735340\_ 7. 125351 7. 108052 7. 094635 6. 862059 6. 786605 6. 819629  
11735341\_ 9. 280023 9. 265606 9. 279232 8. 847558 8. 874636 8. 846304  
11735342\_ 7. 466071 7. 509352 7. 362016 7. 526723 7. 611349 7. 576415  
11735343\_ 3. 202946 3. 571415 3. 418022 3. 356769 3. 59657 3. 467685  
11735344\_ 5. 119814 5. 412002 5. 333723 5. 310343 5. 272422 5. 2666  
11735345\_ 6. 146437 6. 235946 6. 177879 6. 342888 6. 391717 6. 468068

11735346\_ 4. 848206 5. 037636 4. 984669 5. 2222 5. 030213 5. 037636  
11735347\_ 6. 27592 6. 154401 6. 110664 6. 050876 6. 080127 6. 045666  
11735348\_ 5. 649128 5. 518169 5. 62696 5. 448296 5. 485781 5. 465947  
11735349\_ 3. 545655 3. 40891 3. 343547 3. 718614 3. 962476 3. 835161  
11735350\_ 4. 858722 4. 941755 4. 878106 4. 999799 5. 032634 5. 078722  
11735351\_ 5. 47855 5. 580747 5. 530489 5. 495035 5. 586394 5. 708935  
11735352\_ 6. 968323 6. 97426 6. 797675 6. 866262 6. 907365 6. 828153  
11735353\_ 4. 714603 4. 500606 4. 635185 4. 773699 4. 700712 4. 599919  
11735354\_ 6. 270422 6. 225513 6. 182023 6. 111199 6. 12744 6. 151666  
11735355\_ 5. 457841 5. 562354 5. 463333 5. 580864 5. 37738 5. 599196  
11735356\_ 4. 336612 4. 429498 4. 244198 4. 210124 4. 255453 4. 354781  
11735357\_ 2. 908177 2. 95054 3. 00776 3. 058542 2. 932097 3. 04047  
11735358\_ 5. 263666 5. 570652 5. 282671 5. 560576 5. 60639 5. 702389  
11735359\_ 9. 264081 9. 15748 9. 307156 8. 830882 8. 852747 8. 782573  
11735360\_ 3. 602416 3. 598519 3. 617166 3. 614106 3. 658451 3. 602416  
11735361\_ 4. 256608 4. 347801 3. 967141 4. 354232 4. 332275 4. 26849  
11735362\_ 7. 98978 7. 934409 8. 08471 7. 983421 8. 02234 8. 083064  
11735363\_ 3. 129461 3. 535467 3. 300932 3. 570459 3. 529816 3. 503743  
11735364\_ 3. 713763 3. 710635 3. 722182 4. 040182 4. 045377 3. 760074  
11735365\_ 5. 425428 5. 52141 5. 500352 5. 462187 5. 589772 5. 704308  
11735366\_ 2. 740189 3. 503743 3. 379099 3. 434838 3. 306725 3. 061205  
11735367\_ 4. 697805 4. 643717 4. 599534 4. 687901 4. 595003 4. 643717  
11735368\_ 5. 789947 5. 668795 5. 811908 5. 537661 5. 357116 5. 609989  
11735369\_ 4. 929425 5. 082048 4. 95545 4. 792834 4. 612585 4. 732858  
11735370\_ 6. 038113 5. 971092 5. 905528 6. 053414 6. 010635 5. 97324  
11735371\_ 4. 381549 4. 46454 4. 423876 4. 331214 4. 275543 4. 468673  
11735372\_ 5. 480966 5. 489734 5. 276632 5. 544997 5. 643114 5. 448317  
11735373\_ 6. 1609 6. 101563 6. 304304 5. 622134 5. 573155 5. 762596  
11735374\_ 5. 427457 5. 576528 5. 312902 5. 462967 5. 426098 5. 502342  
11735375\_ 5. 765642 5. 739813 5. 749263 5. 68161 5. 721247 5. 709834  
11735376\_ 1. 78426 1. 824525 1. 613454 1. 81458 1. 787117 1. 828069  
11735377\_ 3. 368704 3. 433237 3. 290188 3. 606313 3. 444501 3. 604538  
11735378\_ 2. 67074 2. 723348 2. 976912 2. 95119 2. 970649 2. 584359  
11735379\_ 3. 784441 3. 688578 3. 620634 3. 608595 3. 61586 3. 643762  
11735380\_ 4. 282593 4. 37923 4. 317904 4. 315734 4. 262701 4. 315734  
11735381\_ 4. 821874 4. 904583 4. 967415 5. 198142 5. 040819 4. 984297  
11735382\_ 3. 293828 3. 342827 3. 293828 3. 277998 3. 334027 3. 238191  
11735383\_ 2. 330762 2. 25483 2. 330762 2. 25881 2. 47102 2. 574895  
11735384\_ 6. 137442 5. 977718 5. 990199 6. 119571 6. 206103 6. 218927  
11735385\_ 4. 297842 4. 235382 4. 393451 3. 567464 3. 812686 3. 556441  
11735386\_ 5. 175125 5. 286615 5. 125766 5. 256533 5. 255037 5. 336485  
11735387\_ 4. 86723 4. 892074 4. 703083 4. 175089 4. 385814 4. 617171  
11735388\_ 3. 925181 3. 870347 3. 725707 3. 827298 3. 768961 3. 920818  
11735389\_ 2. 070266 2. 142601 2. 070266 2. 264495 1. 995297 2. 045276  
11735390\_ 7. 394192 7. 407219 7. 448326 7. 772275 7. 831 7. 736222  
11735391\_ 6. 433227 6. 57796 6. 538312 6. 567036 6. 574988 6. 60131  
11735392\_ 5. 352084 5. 438664 5. 477034 5. 523268 5. 2872 5. 465381  
11735393\_ 5. 518425 5. 378533 5. 298627 5. 406337 5. 368356 5. 298627  
11735394\_ 5. 856865 5. 98478 5. 935705 5. 71846 5. 682873 5. 595844  
11735395\_ 3. 38997 3. 422361 3. 192342 3. 429169 3. 357961 3. 371633  
11735396\_ 6. 065045 6. 188244 6. 166819 6. 189726 6. 175402 6. 194053

11735397\_ 3. 867951 3. 606313 3. 625408 3. 973408 3. 892618 3. 956408  
11735398\_ 4. 617532 4. 560616 4. 755508 4. 668414 4. 673874 4. 657477  
11735399\_ 5. 965551 5. 830455 5. 988573 5. 443959 5. 30321 5. 475572  
11735400\_ 4. 980982 4. 988908 5. 059654 4. 843507 4. 784976 4. 859842  
11735401\_ 4. 609787 4. 481622 4. 527249 4. 625499 4. 574192 4. 495772  
11735402\_ 4. 853435 4. 882818 4. 464787 4. 92018 4. 803221 4. 628549  
11735403\_ 6. 361258 6. 140553 6. 276174 5. 436049 5. 627355 5. 696575  
11735404\_ 2. 208491 2. 364846 2. 208491 2. 090204 2. 253982 2. 190501  
11735405\_ 4. 095716 4. 186909 4. 116778 4. 379592 4. 345412 4. 076384  
11735406\_ 6. 679828 6. 881674 6. 711537 6. 911694 6. 898793 6. 916863  
11735407\_ 6. 332617 6. 282224 6. 298541 6. 346754 6. 414579 6. 378006  
11735408\_ 2. 375552 2. 139623 2. 484794 2. 409499 2. 408525 2. 363777  
11735409\_ 3. 779505 3. 958248 3. 824793 3. 798847 3. 847832 3. 824679  
11735410\_ 3. 421109 3. 339565 3. 442429 3. 369291 3. 340621 3. 506705  
11735411\_ 6. 210137 6. 069641 5. 989939 6. 209356 6. 336502 6. 165173  
11735412\_ 6. 247177 6. 241733 6. 54358 6. 252622 6. 187766 6. 214851  
11735413\_ 7. 266 7. 331953 7. 394755 7. 14773 7. 206249 7. 166099  
11735414\_ 7. 871022 7. 765944 7. 795286 7. 731342 7. 680618 7. 749462  
11735415\_ 8. 212698 8. 06282 8. 202516 8. 533789 8. 54947 8. 587066  
11735416\_ 6. 519902 6. 413121 6. 469926 6. 494443 6. 510356 6. 541879  
11735417\_ 4. 471278 4. 529022 4. 412138 4. 747396 4. 49384 4. 511563  
11735418\_ 5. 59345 5. 644835 5. 496431 5. 584989 5. 503056 5. 528624  
11735419\_ 4. 971062 5. 25259 4. 898788 5. 011594 5. 205822 5. 056812  
11735420\_ 5. 448167 5. 520068 5. 345133 5. 434471 5. 534834 5. 414298  
11735421\_ 4. 787774 4. 95051 4. 753477 4. 972585 4. 900047 4. 958752  
11735422\_ 4. 254855 4. 32877 4. 203732 4. 408061 4. 367867 4. 582089  
11735423\_ 4. 295344 4. 257882 4. 046892 4. 263757 4. 054288 4. 246632  
11735424\_ 5. 114659 5. 153844 5. 071909 5. 063744 5. 066762 5. 106851  
11735425\_ 5. 007826 5. 053365 4. 984669 4. 874234 5. 063655 4. 986318  
11735426\_ 2. 64081 2. 629406 2. 543 2. 739532 2. 595067 2. 581888  
11735427\_ 3. 719343 3. 494681 3. 581072 3. 781807 3. 553281 3. 798426  
11735428\_ 7. 722188 7. 763695 7. 726238 7. 681189 7. 739586 7. 696385  
11735429\_ 8. 216668 8. 237153 8. 177556 8. 385559 8. 362329 8. 341497  
11735430\_ 6. 627247 6. 475023 6. 358873 6. 48936 6. 433154 6. 486093  
11735431\_ 6. 959638 6. 94443 6. 983728 6. 929655 6. 979452 6. 97669  
11735432\_ 2. 410551 2. 336543 2. 408921 2. 25483 2. 502853 2. 538425  
11735433\_ 6. 013229 6. 206103 5. 953762 6. 119133 6. 217679 6. 088186  
11735434\_ 6. 949355 6. 954573 7. 063282 6. 532713 6. 615532 6. 734346  
11735435\_ 5. 53562 5. 604957 5. 483847 5. 326542 5. 335019 5. 446267  
11735436\_ 4. 059548 3. 997131 3. 822715 4. 043591 4. 043936 4. 061764  
11735437\_ 4. 038947 4. 20464 4. 017011 3. 850246 3. 945634 4. 054288  
11735438\_ 5. 158495 5. 175929 5. 117849 5. 247594 5. 242843 5. 272104  
11735439\_ 6. 4924 6. 521942 6. 393071 6. 535448 6. 603048 6. 603048  
11735440\_ 2. 763086 2. 655038 2. 716835 2. 886743 2. 763086 3. 036947  
11735441\_ 4. 742239 4. 720134 4. 719918 4. 763282 4. 766441 4. 800284  
11735442\_ 3. 204537 3. 27478 3. 152246 2. 789771 2. 799872 3. 223556  
11735443\_ 4. 539051 4. 190068 4. 453269 4. 239057 4. 229043 4. 077505  
11735444\_ 4. 017852 4. 06789 4. 058996 4. 035776 3. 820533 4. 247179  
11735445\_ 4. 715581 4. 718181 4. 532893 4. 678465 4. 863906 4. 579285  
11735446\_ 5. 865474 6. 291797 6. 120796 6. 480622 6. 25103 6. 219473  
11735447\_ 3. 326571 3. 433298 3. 619359 3. 413133 3. 356445 3. 523028

11735448\_ 5. 596695 5. 60859 5. 610545 5. 584813 5. 630745 5. 522301  
11735449\_ 5. 676992 5. 637328 5. 562093 6. 097927 6. 078484 6. 240847  
11735450\_ 6. 116145 6. 033974 6. 107274 5. 899714 5. 910245 5. 822508  
11735451\_ 3. 515494 3. 470962 3. 440312 3. 259989 3. 619738 3. 319633  
11735452\_ 4. 384495 4. 415859 4. 387652 4. 442141 4. 463564 4. 562834  
11735453\_ 2. 701285 2. 79703 2. 850662 2. 763652 2. 723282 2. 972554  
11735454\_ 6. 971486 6. 991587 6. 987506 6. 94441 6. 906253 6. 905909  
11735455\_ 4. 542247 4. 496602 4. 792772 4. 214819 4. 372299 4. 476122  
11735456\_ 3. 708025 3. 909593 3. 606061 3. 717099 3. 710747 3. 80908  
11735457\_ 6. 953024 6. 896626 6. 938647 6. 904295 6. 867353 6. 971734  
11735458\_ 2. 943898 2. 963019 2. 792097 3. 066568 2. 977143 3. 024107  
11735459\_ 3. 728279 3. 715413 3. 668242 3. 728279 3. 741146 3. 760056  
11735460\_ 3. 24413 3. 121839 3. 000837 3. 226355 3. 042577 3. 256335  
11735461\_ 2. 360678 2. 242812 2. 433337 2. 339405 2. 47102 2. 427029  
11735462\_ 2. 556272 2. 533208 2. 659592 2. 544714 2. 615159 2. 631166  
11735463\_ 2. 859689 2. 888971 2. 753284 3. 245515 2. 944885 2. 953928  
11735464\_ 7. 13683 7. 080083 7. 146804 6. 727038 6. 671892 6. 655147  
11735465\_ 3. 624594 3. 817947 3. 659699 3. 813972 3. 811906 3. 798819  
11735466\_ 4. 702919 4. 709463 4. 709404 4. 63226 4. 515023 4. 503842  
11735467\_ 5. 029529 5. 140456 4. 994273 5. 146869 5. 308013 5. 095569  
11735468\_ 4. 543027 4. 585828 4. 574919 4. 694606 4. 63784 4. 830044  
11735469\_ 4. 415744 4. 467105 4. 49057 4. 569442 4. 617508 4. 478662  
11735470\_ 4. 723469 4. 82222 4. 586909 4. 81323 4. 830304 4. 729249  
11735471\_ 3. 429872 3. 582148 3. 467419 3. 43511 3. 609426 3. 321474  
11735472\_ 2. 662229 2. 787401 2. 761315 2. 671613 2. 588346 2. 333836  
11735473\_ 3. 559458 3. 406367 3. 453863 3. 653 3. 556803 3. 390153  
11735474\_ 2. 465349 2. 450954 2. 366327 2. 369191 2. 332892 2. 342478  
11735475\_ 5. 049596 5. 168185 4. 896775 5. 119174 5. 153146 5. 049217  
11735476\_ 4. 127164 4. 03042 4. 348869 3. 817774 3. 705625 3. 723236  
11735477\_ 4. 674714 4. 879269 4. 684821 4. 974309 4. 809815 4. 988425  
11735478\_ 5. 432366 5. 309674 5. 584813 5. 704443 5. 7616 5. 750638  
11735479\_ 4. 9226 4. 9226 4. 955396 5. 316492 5. 045659 5. 120957  
11735480\_ 5. 71077 5. 770323 5. 763634 5. 643533 5. 514769 5. 663794  
11735481\_ 2. 907446 3. 214859 2. 930218 3. 077215 2. 988936 2. 975069  
11735482\_ 6. 151846 6. 053972 6. 121619 4. 995315 5. 453793 5. 373566  
11735483\_ 3. 028851 2. 91739 3. 036806 2. 956023 3. 120937 2. 874416  
11735484\_ 5. 188204 5. 186783 5. 071344 5. 013502 4. 93463 5. 039406  
11735485\_ 3. 837102 3. 701902 3. 728279 3. 773771 3. 683116 3. 897303  
11735486\_ 6. 719748 6. 687026 6. 67941 6. 173161 6. 155807 6. 247833  
11735487\_ 8. 188217 8. 108097 8. 199653 7. 78459 7. 802374 7. 847745  
11735488\_ 3. 059184 2. 934674 2. 974106 2. 937576 2. 87617 3. 059184  
11735489\_ 4. 562939 4. 52703 4. 284293 4. 521972 4. 525479 4. 317647  
11735490\_ 4. 765201 4. 855167 4. 702828 4. 824195 4. 840066 4. 815683  
11735491\_ 7. 321833 7. 164726 7. 264484 7. 171054 7. 233694 7. 238493  
11735492\_ 2. 08757 2. 240878 2. 086846 2. 402108 2. 086846 2. 086846  
11735493\_ 3. 988375 3. 909593 3. 943642 3. 894443 4. 046783 3. 873299  
11735494\_ 6. 225513 6. 106587 6. 153948 6. 512778 6. 448378 6. 481046  
11735495\_ 5. 06114 4. 815058 4. 914021 4. 1016 4. 08855 4. 241647  
11735496\_ 5. 506078 5. 364014 5. 031884 5. 117834 5. 169071 5. 132199  
11735497\_ 2. 61214 2. 65925 2. 5463 2. 808111 2. 639388 2. 702421  
11735498\_ 3. 029899 2. 816387 2. 979711 2. 743829 2. 61323 3. 032664

11735499\_ 2. 013233 2. 096564 2. 071579 2. 156429 2. 13118 2. 079342  
11735500\_ 3. 249924 2. 966181 2. 840112 2. 871087 2. 966181 3. 194439  
11735501\_ 3. 869398 4. 128932 4. 033282 4. 005691 4. 102947 4. 041603  
11735502\_ 5. 75377 5. 797146 5. 942669 5. 609734 5. 440243 5. 473231  
11735503\_ 5. 243645 5. 404107 5. 174917 5. 323313 5. 315739 5. 501522  
11735504\_ 2. 829223 2. 919966 2. 887456 2. 754607 2. 698867 2. 823924  
11735505\_ 3. 1693 3. 070819 3. 112882 3. 101013 3. 312998 3. 024357  
11735506\_ 2. 409522 2. 231992 2. 50948 2. 544745 2. 431086 2. 457557  
11735507\_ 2. 584563 2. 687704 2. 526805 2. 622894 2. 636134 2. 872515  
11735508\_ 3. 456175 3. 69144 3. 850246 3. 398236 3. 60795 3. 65792  
11735509\_ 5. 836001 5. 96066 5. 985476 5. 97324 6. 045569 5. 940086  
11735510\_ 4. 18013 4. 081809 4. 099717 4. 129347 4. 215486 4. 181768  
11735511\_ 7. 128814 7. 079768 7. 05403 6. 811139 6. 868508 6. 91161  
11735512\_ 6. 849196 6. 849196 6. 768774 6. 385829 6. 397946 6. 285052  
11735513\_ 5. 190392 5. 284104 5. 325568 5. 129296 5. 421618 5. 338886  
11735514\_ 5. 354277 5. 30796 5. 16345 5. 192059 5. 333492 5. 21144  
11735515\_ 4. 238104 4. 335594 3. 9064 4. 445584 4. 504193 4. 272031  
11735516\_ 2. 752784 2. 734448 2. 494634 2. 742079 2. 509928 2. 782758  
11735517\_ 3. 022646 3. 503743 3. 22357 3. 11653 3. 125787 3. 180062  
11735518\_ 6. 402995 6. 445767 6. 388121 6. 658881 6. 618156 6. 611043  
11735519\_ 3. 300676 3. 664501 3. 503743 3. 756925 3. 69513 3. 670159  
11735520\_ 4. 946891 4. 863264 4. 866674 4. 776932 4. 745009 4. 745415  
11735521\_ 9. 917116 9. 903126 9. 909616 9. 941325 9. 921825 9. 99688  
11735522\_ 4. 419993 4. 280256 4. 275813 4. 405396 4. 465171 4. 505645  
11735523\_ 4. 678758 4. 573408 4. 674178 4. 076301 4. 438492 4. 438492  
11735524\_ 5. 63741 5. 664105 5. 659065 5. 788614 5. 927511 5. 823111  
11735525\_ 4. 567583 4. 639254 4. 639254 4. 484585 4. 536074 4. 557323  
11735526\_ 2. 646875 2. 557971 2. 864617 2. 646951 2. 646491 2. 873339  
11735527\_ 7. 590378 7. 630792 7. 672147 7. 426223 7. 554097 7. 526143  
11735528\_ 5. 596657 5. 548146 5. 451189 5. 345917 5. 451189 5. 553278  
11735529\_ 5. 585933 5. 694162 5. 666808 5. 726148 5. 86986 5. 651056  
11735530\_ 2. 586475 2. 753572 2. 583801 2. 710848 2. 500734 2. 490364  
11735531\_ 6. 659653 6. 809436 6. 861775 6. 82411 6. 862059 6. 888512  
11735532\_ 5. 244537 5. 458191 5. 162413 5. 158474 5. 428676 5. 229782  
11735533\_ 7. 523839 7. 629486 7. 55199 7. 63714 7. 624345 7. 708434  
11735534\_ 6. 502224 6. 59652 6. 501082 6. 547188 6. 533742 6. 560085  
11735535\_ 2. 58945 2. 643095 2. 462615 2. 640324 2. 516936 2. 689079  
11735536\_ 3. 551131 3. 771012 3. 186014 3. 823083 3. 675377 3. 565769  
11735537\_ 5. 954081 5. 8605 5. 92136 5. 90256 5. 918745 5. 852539  
11735538\_ 7. 218537 7. 147057 7. 204318 6. 849487 6. 849855 6. 985306  
11735539\_ 6. 02001 5. 943532 6. 021009 5. 961651 5. 990266 5. 978672  
11735540\_ 3. 938333 4. 038645 3. 844612 4. 181989 4. 126935 3. 928865  
11735541\_ 2. 274444 2. 197236 2. 075532 2. 201836 1. 933645 2. 169463  
11735542\_ 6. 56978 6. 431763 6. 412133 5. 560172 5. 783705 5. 753407  
11735543\_ 5. 052881 5. 030048 5. 066195 5. 156303 4. 93837 5. 048234  
11735544\_ 3. 585361 3. 797473 3. 503743 3. 799471 3. 77536 3. 797473  
11735545\_ 5. 298024 5. 369431 5. 374866 5. 410555 5. 384305 5. 403118  
11735546\_ 2. 970933 3. 00705 2. 906178 2. 835108 3. 04312 3. 00705  
11735547\_ 3. 993122 3. 960452 3. 969549 4. 059193 3. 845878 4. 014498  
11735548\_ 3. 809433 3. 91308 3. 793096 4. 064104 3. 886487 3. 870341  
11735549\_ 4. 703585 4. 763543 4. 539278 4. 700324 4. 858879 4. 833239



11735550\_ 5. 767876 5. 878438 5. 736831 6. 007432 5. 760317 5. 870242  
11735551\_ 4. 86499 5. 061113 4. 790962 5. 061113 5. 057681 5. 128437  
11735552\_ 3. 110773 3. 421191 3. 336937 3. 378532 3. 311949 3. 433854  
11735553\_ 6. 455038 6. 347934 6. 428975 6. 339924 6. 498598 6. 47882  
11735554\_ 2. 762926 2. 403748 2. 537026 2. 430173 2. 413661 2. 387162  
11735555\_ 4. 644128 4. 731022 4. 656631 4. 667275 4. 760647 4. 736191  
11735556\_ 5. 555924 5. 701681 5. 579349 5. 577371 5. 600863 5. 478678  
11735557\_ 6. 046953 6. 21116 5. 996126 6. 13945 6. 104871 6. 084524  
11735558\_ 5. 434799 5. 43585 5. 333982 5. 614228 5. 573103 5. 49214  
11735559\_ 3. 31642 3. 079783 2. 985851 3. 079783 3. 132536 3. 027029  
11735560\_ 3. 925181 3. 601509 3. 740892 3. 775964 3. 836667 3. 832064  
11735561\_ 2. 319741 2. 454237 2. 210499 2. 680701 2. 386989 2. 386989  
11735562\_ 5. 58323 5. 75439 5. 622651 5. 528624 5. 576182 5. 494597  
11735563\_ 4. 843313 4. 639953 4. 347653 4. 634446 4. 622625 4. 622625  
11735564\_ 5. 724895 5. 689206 5. 641223 5. 712847 5. 688476 5. 689449  
11735565\_ 3. 267494 3. 500391 3. 12704 3. 166745 3. 345071 3. 297187  
11735566\_ 4. 733566 4. 890204 4. 82376 4. 802343 4. 83945 4. 729744  
11735567\_ 4. 390514 4. 584933 4. 4685 4. 669671 4. 648371 4. 618453  
11735568\_ 5. 33406 5. 387228 5. 167464 5. 297159 5. 307825 5. 346269  
11735569\_ 6. 187738 6. 375775 6. 143058 6. 43362 6. 493921 6. 508513  
11735570\_ 7. 683951 7. 604825 7. 692204 7. 736983 7. 753741 7. 796426  
11735571\_ 6. 939386 6. 886652 6. 971583 6. 961137 6. 988163 6. 980311  
11735572\_ 7. 335346 7. 303391 7. 26341 7. 203847 7. 298175 7. 207954  
11735573\_ 5. 146869 4. 828688 5. 095027 4. 953794 5. 011922 4. 953047  
11735574\_ 1. 909707 1. 9092 1. 820615 1. 804393 1. 823581 1. 909707  
11735575\_ 6. 361505 6. 404313 6. 250224 6. 253456 6. 243856 6. 33258  
11735576\_ 6. 704988 6. 626853 6. 494443 5. 93062 5. 838061 5. 77591  
11735577\_ 6. 204134 6. 092172 6. 10367 6. 211759 6. 237623 6. 116031  
11735578\_ 5. 704919 5. 6471 5. 632555 5. 509625 5. 518606 5. 502342  
11735579\_ 2. 641196 2. 608975 2. 333616 2. 610051 2. 574053 2. 521437  
11735580\_ 5. 205629 5. 358148 5. 35056 5. 272989 5. 396202 5. 359568  
11735581\_ 3. 48421 3. 503743 3. 306254 2. 931396 2. 912551 3. 028148  
11735582\_ 5. 817454 5. 799806 5. 698209 5. 971772 5. 869043 5. 964956  
11735583\_ 5. 111344 5. 33207 5. 184568 5. 830858 5. 704686 5. 554436  
11735584\_ 7. 103485 7. 065587 7. 184548 7. 83096 7. 852732 7. 94193  
11735585\_ 2. 667368 2. 803905 2. 667368 2. 56042 2. 685874 2. 590055  
11735586\_ 2. 828698 2. 965234 2. 559858 2. 72175 2. 828698 2. 945929  
11735587\_ 5. 676069 5. 812729 5. 720919 5. 459879 5. 367737 5. 306947  
11735588\_ 3. 200934 3. 098713 3. 44419 3. 292093 3. 21279 3. 21534  
11735589\_ 2. 47102 2. 62378 2. 439495 2. 571729 2. 354838 2. 612828  
11735590\_ 6. 119732 6. 200211 6. 08876 6. 187775 6. 243806 6. 077889  
11735591\_ 2. 896236 2. 558851 2. 489715 2. 733453 2. 585831 2. 601202  
11735592\_ 4. 394979 4. 364364 4. 354719 4. 628264 4. 525514 4. 618626  
11735593\_ 4. 895473 5. 034983 5. 088849 5. 105032 4. 880913 4. 95491  
11735594\_ 4. 018962 4. 098748 4. 243051 4. 411594 4. 218773 4. 228891  
11735595\_ 4. 088261 3. 997554 3. 916321 3. 981923 4. 021524 4. 073747  
11735596\_ 2. 582676 2. 605516 2. 346927 2. 512144 2. 52611 2. 592429  
11735597\_ 5. 661664 5. 614563 5. 724561 5. 91579 5. 839671 5. 837548  
11735598\_ 6. 313265 6. 359598 6. 357536 6. 344375 6. 299417 6. 457863  
11735599\_ 5. 391679 5. 501985 5. 287832 5. 391679 5. 381262 5. 390555  
11735600\_ 3. 82378 3. 473144 3. 415782 3. 819206 3. 807695 3. 467964

11735601\_ 5. 106909 5. 385546 5. 0689 5. 104303 4. 878248 5. 181775  
11735602\_ 2. 716057 3. 190965 3. 093164 2. 907099 3. 011376 2. 915558  
11735603\_ 5. 303487 5. 228627 5. 216578 5. 401828 5. 386462 5. 286014  
11735604\_ 7. 125015 7. 219008 7. 131297 7. 095728 7. 107533 7. 079992  
11735605\_ 3. 728541 3. 687225 3. 643599 3. 842382 3. 838445 3. 792325  
11735606\_ 8. 119316 8. 064436 8. 167716 7. 933706 7. 951246 7. 857029  
11735607\_ 4. 63001 4. 489186 4. 59165 4. 528142 4. 489186 4. 519318  
11735608\_ 4. 989972 4. 896793 4. 974917 4. 840252 4. 79294 4. 908513  
11735609\_ 2. 285169 2. 3389 2. 4821 2. 326516 2. 25483 2. 437295  
11735610\_ 6. 545868 6. 488171 6. 543192 6. 273772 6. 288207 6. 329749  
11735611\_ 5. 073036 5. 011868 5. 076359 5. 073036 5. 073036 5. 102656  
11735612\_ 2. 200316 2. 195686 2. 102495 2. 23843 2. 28492 2. 192292  
11735613\_ 7. 552714 7. 639423 7. 479585 7. 612217 7. 639003 7. 59597  
11735614\_ 5. 870242 5. 633911 5. 614563 4. 772366 4. 626022 4. 801379  
11735615\_ 6. 696772 6. 79609 6. 644868 6. 78759 6. 764105 6. 94437  
11735616\_ 6. 69423 6. 802166 6. 645841 6. 775618 6. 748227 6. 942393  
11735617\_ 6. 768272 6. 68785 6. 766532 6. 801564 6. 760223 6. 782767  
11735618\_ 6. 54685 6. 567234 6. 677883 6. 121523 6. 210573 6. 165952  
11735619\_ 3. 949584 4. 1155 3. 950605 3. 828044 3. 866476 3. 827641  
11735620\_ 2. 08269 1. 995582 2. 234321 1. 898324 2. 040933 1. 898324  
11735621\_ 2. 334748 2. 301048 2. 397442 2. 479348 2. 337315 2. 311877  
11735622\_ 5. 890437 5. 938482 5. 852469 5. 901425 5. 934556 5. 841  
11735623\_ 7. 378439 7. 22301 7. 335131 7. 286333 7. 232648 7. 304801  
11735624\_ 7. 783868 7. 729018 7. 737553 7. 572748 7. 651783 7. 687128  
11735625\_ 3. 159198 3. 140671 3. 222371 3. 165884 3. 341426 3. 272555  
11735626\_ 2. 875859 3. 062365 2. 831451 3. 025972 3. 09942 2. 967184  
11735627\_ 6. 129244 6. 173742 6. 159771 5. 971556 6. 090642 6. 087528  
11735628\_ 6. 474658 6. 655765 6. 492496 6. 56467 6. 552426 6. 496004  
11735629\_ 5. 226259 5. 134539 5. 025636 5. 252941 5. 322963 5. 136801  
11735630\_ 9. 461447 9. 455355 9. 478398 9. 21117 9. 243905 9. 148357  
11735631\_ 4. 972453 5. 034212 5. 168755 5. 030358 5. 16857 5. 011299  
11735632\_ 4. 062174 4. 111653 4. 275141 4. 358955 4. 359881 4. 322401  
11735633\_ 5. 232085 4. 923284 4. 911509 4. 584933 4. 595988 4. 633869  
11735634\_ 2. 067689 2. 297077 2. 190275 2. 14225 2. 142037 2. 271855  
11735635\_ 5. 048658 5. 062835 4. 930507 4. 987182 5. 042719 5. 068748  
11735636\_ 6. 373363 6. 204536 6. 127548 5. 544721 5. 617589 5. 585255  
11735637\_ 4. 964474 5. 276389 5. 147144 5. 282294 5. 228962 5. 2666  
11735638\_ 6. 635408 6. 696093 6. 521435 6. 6464 6. 718271 6. 683353  
11735639\_ 6. 616003 6. 700649 6. 533431 6. 698058 6. 739922 6. 699221  
11735640\_ 7. 808098 7. 758165 7. 83055 7. 675786 7. 560672 7. 59628  
11735641\_ 2. 995655 3. 060999 3. 134716 3. 051966 3. 127006 3. 175702  
11735642\_ 5. 996795 5. 969561 5. 998682 6. 178572 6. 250493 6. 129112  
11735643\_ 2. 880667 2. 971332 2. 971332 2. 930159 3. 039401 3. 146883  
11735644\_ 9. 569974 9. 572794 9. 542055 9. 619783 9. 58276 9. 526005  
11735645\_ 6. 17028 6. 371014 6. 083062 6. 467987 6. 250126 6. 386177  
11735646\_ 4. 868777 4. 812576 4. 765282 4. 884355 4. 870789 4. 786559  
11735647\_ 5. 917412 5. 895014 5. 82044 5. 955852 5. 812891 5. 790942  
11735648\_ 5. 226504 5. 229351 5. 226504 5. 226504 5. 218856 5. 350917  
11735649\_ 4. 041671 4. 301383 3. 893816 4. 279157 4. 292932 4. 133568  
11735650\_ 5. 721333 5. 673188 5. 681897 5. 630061 5. 650711 5. 744841  
11735651\_ 2. 706269 3. 091194 2. 956658 2. 919046 3. 041428 2. 900289

11735652\_ 8. 080482 8. 182419 8. 174995 8. 280706 8. 130304 8. 234654  
11735653\_ 6. 036641 6. 097927 6. 363595 6. 487489 6. 628969 6. 590648  
11735654\_ 5. 734567 5. 741853 5. 627167 5. 725791 5. 734567 5. 729709  
11735655\_ 2. 264153 2. 304372 2. 189333 2. 242442 2. 387536 2. 278448  
11735656\_ 3. 919011 3. 919011 3. 969136 4. 143263 3. 983059 3. 97025  
11735657\_ 5. 435586 5. 488788 5. 329622 5. 603003 5. 472866 5. 47005  
11735658\_ 5. 259506 5. 1405 5. 145576 5. 192722 5. 338506 5. 528141  
11735659\_ 1. 959239 2. 129318 2. 458023 2. 241833 2. 314129 2. 247191  
11735660\_ 4. 236862 4. 273482 4. 210611 4. 362174 4. 375114 4. 391137  
11735661\_ 5. 736831 5. 848422 5. 831741 5. 916633 5. 934556 5. 969512  
11735662\_ 4. 460858 4. 663927 4. 646071 4. 641364 4. 7461 4. 691716  
11735663\_ 1. 937405 1. 969506 2. 22378 2. 03882 1. 969506 1. 937405  
11735664\_ 3. 68821 3. 797623 3. 817395 3. 756925 3. 692059 3. 68821  
11735665\_ 3. 742012 3. 961893 3. 632129 3. 755167 3. 882051 3. 830667  
11735666\_ 3. 998962 4. 413428 3. 898914 4. 085411 4. 409854 4. 310333  
11735667\_ 3. 467917 3. 301247 3. 521137 3. 532198 3. 311007 3. 405114  
11735668\_ 8. 983929 9. 071709 9. 012842 9. 051156 9. 132445 9. 109526  
11735669\_ 4. 200678 4. 250934 4. 035736 4. 237445 4. 486878 4. 404212  
11735670\_ 5. 180296 5. 195243 5. 231389 5. 24324 5. 240277 5. 249129  
11735671\_ 5. 349285 5. 380649 5. 122191 5. 307263 5. 371548 5. 417471  
11735672\_ 4. 890401 4. 806354 5. 021521 5. 156303 5. 071748 4. 846583  
11735673\_ 2. 112793 2. 026648 2. 208189 2. 299306 2. 260572 2. 095256  
11735674\_ 2. 264026 2. 820555 2. 516783 2. 431165 2. 38528 2. 36358  
11735675\_ 3. 503743 3. 503743 3. 549646 3. 492518 3. 503743 3. 503743  
11735676\_ 6. 359428 6. 366059 6. 361562 6. 10126 6. 264446 6. 192546  
11735677\_ 3. 5386 3. 536123 3. 520313 3. 710468 3. 265941 3. 402368  
11735678\_ 5. 820052 5. 784655 5. 840126 5. 448894 5. 410589 5. 537504  
11735679\_ 7. 520331 7. 410956 7. 534679 7. 174511 7. 28348 7. 226711  
11735680\_ 3. 662903 3. 909593 3. 663523 3. 955945 3. 770889 3. 716538  
11735681\_ 10. 23179 10. 32251 10. 23627 10. 08095 10. 02612 9. 964387  
11735682\_ 4. 281764 4. 448151 4. 335757 4. 474625 4. 629193 4. 399547  
11735683\_ 4. 846966 5. 061354 4. 560306 4. 852807 4. 906797 4. 949914  
11735684\_ 5. 931487 5. 978545 5. 889665 6. 018719 6. 06999 5. 994247  
11735685\_ 6. 206355 6. 35596 6. 262774 6. 308043 6. 337419 6. 342026  
11735686\_ 2. 070413 1. 884415 1. 775245 1. 928874 2. 02542 1. 959102  
11735687\_ 5. 152515 5. 060481 4. 877013 5. 234247 5. 23619 5. 202442  
11735688\_ 8. 847722 8. 875614 8. 785603 8. 919054 8. 91728 8. 915631  
11735689\_ 8. 368832 8. 24315 8. 40622 8. 260504 8. 3067 8. 30482  
11735690\_ 7. 423614 7. 414354 7. 411732 7. 49891 7. 492216 7. 505329  
11735691\_ 8. 044367 7. 95804 7. 965756 7. 771457 7. 907371 7. 961006  
11735692\_ 8. 509946 8. 498345 8. 521504 8. 33235 8. 353579 8. 251231  
11735693\_ 2. 840148 2. 853634 2. 822713 3. 010214 2. 853634 2. 810311  
11735694\_ 6. 943871 6. 97058 7. 007269 5. 96525 6. 059817 6. 141344  
11735695\_ 8. 674648 8. 614643 8. 68219 8. 833672 8. 837689 8. 873346  
11735696\_ 8. 037686 7. 977307 7. 985606 7. 755229 7. 723623 7. 780095  
11735697\_ 7. 880006 7. 872318 7. 901093 7. 774062 7. 676855 7. 727168  
11735698\_ 7. 743391 7. 64546 7. 846019 7. 533485 7. 532431 7. 56309  
11735699\_ 7. 089177 7. 064763 7. 061289 7. 056407 7. 077436 7. 082318  
11735700\_ 5. 007398 5. 225261 4. 988475 5. 189628 5. 293799 5. 228526  
11735701\_ 6. 572108 6. 591007 6. 615906 6. 761546 6. 851539 6. 8347  
11735702\_ 9. 191957 9. 220524 9. 258678 9. 210592 9. 285776 9. 227888

11735703\_ 5. 602538 5. 654023 5. 556286 5. 794286 5. 669092 5. 759149  
11735704\_ 5. 432894 5. 4561 5. 330798 5. 534503 5. 443604 5. 47557  
11735705\_ 9. 16528 9. 087432 9. 184511 9. 310662 9. 274378 9. 351546  
11735706\_ 9. 138094 9. 075074 9. 073373 9. 221332 9. 243519 9. 233348  
11735707\_ 9. 062547 9. 005603 8. 953007 8. 997146 8. 993396 9. 011679  
11735708\_ 6. 896079 6. 996862 6. 844802 6. 808203 6. 875073 6. 941668  
11735709\_ 5. 075851 4. 878003 5. 01474 5. 07019 5. 212159 5. 092382  
11735710\_ 2. 235709 2. 232985 2. 367481 2. 361778 2. 215358 2. 218191  
11735711\_ 8. 40901 8. 352709 8. 381132 8. 398872 8. 40901 8. 421441  
11735712\_ 7. 874283 7. 877598 7. 941997 7. 877598 7. 955137 8. 013383  
11735713\_ 8. 730392 8. 713083 8. 689031 8. 688816 8. 66251 8. 701579  
11735714\_ 8. 326281 8. 194434 8. 306481 8. 2986 8. 331641 8. 365572  
11735715\_ 7. 931483 8. 033275 7. 938252 8. 027236 8. 028186 7. 966063  
11735716\_ 8. 981894 9. 033862 9. 067649 9. 010418 9. 089664 9. 032711  
11735717\_ 7. 885761 7. 736427 7. 900378 7. 138877 7. 14495 7. 131777  
11735718\_ 5. 333723 5. 364513 5. 483128 6. 018553 6. 042549 6. 113125  
11735719\_ 3. 25428 3. 494527 3. 45387 3. 404716 3. 315801 3. 187312  
11735720\_ 6. 850099 6. 80725 6. 814574 6. 669993 6. 596745 6. 651911  
11735721\_ 4. 380662 4. 281116 4. 265218 4. 517347 4. 555489 4. 549273  
11735722\_ 6. 641577 6. 614952 6. 53076 6. 329463 6. 347293 6. 39422  
11735723\_ 7. 066854 7. 041489 7. 077868 7. 029728 7. 024833 6. 866265  
11735724\_ 6. 827098 6. 831333 6. 85226 7. 012507 6. 778089 6. 719513  
11735725\_ 7. 209014 7. 24788 7. 231 7. 151401 7. 135761 7. 026937  
11735726\_ 4. 428152 4. 629787 4. 445263 4. 51376 4. 471029 4. 563951  
11735727\_ 2. 243523 2. 017874 2. 123115 2. 117682 2. 046592 2. 193861  
11735728\_ 6. 194541 6. 27824 6. 2069 6. 300643 6. 443877 6. 418954  
11735729\_ 6. 186518 5. 947262 6. 103435 5. 886552 5. 76356 5. 949156  
11735730\_ 9. 902004 9. 846042 9. 908763 9. 685074 9. 64668 9. 706654  
11735731\_ 9. 351952 9. 298446 9. 369223 9. 047565 9. 087091 9. 074665  
11735732\_ 6. 573478 6. 523622 6. 695739 6. 209866 6. 148489 6. 339986  
11735733\_ 7. 490093 7. 463187 7. 439773 7. 109364 7. 162581 7. 180695  
11735734\_ 6. 3786 6. 55398 6. 391854 6. 436282 6. 256459 6. 34631  
11735735\_ 6. 048673 6. 18406 6. 117314 6. 162718 5. 815436 6. 034731  
11735736\_ 5. 143485 5. 242302 5. 121121 5. 237969 5. 245276 5. 259317  
11735737\_ 6. 588336 6. 518254 6. 665131 6. 932617 6. 910889 6. 910499  
11735738\_ 7. 854287 7. 899809 7. 854351 8. 040132 8. 028719 8. 081541  
11735739\_ 4. 700243 4. 660379 4. 709463 4. 633556 4. 625191 4. 710641  
11735740\_ 6. 41737 6. 464931 6. 501356 6. 385015 6. 36963 6. 423782  
11735741\_ 8. 840071 8. 808573 8. 817899 8. 476433 8. 487116 8. 447273  
11735742\_ 3. 868762 4. 160329 4. 164298 4. 264064 4. 275298 4. 119544  
11735743\_ 4. 396736 3. 616251 3. 824746 3. 306968 3. 306585 3. 17259  
11735744\_ 9. 307015 9. 223225 9. 305032 9. 274405 9. 354491 9. 261841  
11735745\_ 2. 603288 2. 762863 2. 535814 2. 548643 2. 361778 2. 340978  
11735746\_ 3. 136357 3. 280747 3. 036398 3. 154421 3. 085947 3. 035236  
11735747\_ 5. 149494 5. 324807 5. 015857 5. 231808 5. 19095 5. 282266  
11735748\_ 8. 70473 8. 687159 8. 741154 8. 054351 7. 998555 8. 109948  
11735749\_ 5. 285343 5. 146222 5. 170948 5. 03168 5. 11527 5. 11457  
11735750\_ 5. 101324 4. 752354 5. 086295 5. 012695 4. 952317 4. 849899  
11735751\_ 9. 572329 9. 612331 9. 562187 9. 54715 9. 567107 9. 588393  
11735752\_ 7. 845153 7. 76041 7. 841323 7. 920444 7. 900329 7. 98088  
11735753\_ 5. 69462 5. 676405 5. 780178 5. 750315 5. 838913 5. 650447

11735754\_ 6. 914482 6. 850872 6. 875711 6. 962087 7. 020437 7. 095445  
11735755\_ 2. 669789 2. 683773 2. 610341 2. 715669 2. 801511 2. 637786  
11735756\_ 2. 361778 2. 333375 2. 422946 2. 329014 2. 043047 2. 604023  
11735757\_ 6. 744766 6. 924916 6. 756117 7. 109071 7. 115425 6. 95764  
11735758\_ 6. 342859 6. 484808 6. 450357 5. 92008 5. 909386 5. 894697  
11735759\_ 9. 17889 9. 213497 9. 164648 9. 276875 9. 320061 9. 239715  
11735760\_ 4. 730755 4. 630755 4. 709746 4. 577625 4. 510097 4. 351161  
11735761\_ 8. 209993 8. 110246 8. 218826 7. 816408 7. 741249 7. 851718  
11735762\_ 6. 387371 6. 456505 6. 359911 6. 430692 6. 511754 6. 521909  
11735763\_ 4. 953272 5. 03581 4. 999302 4. 984954 5. 031831 5. 03581  
11735764\_ 2. 819842 2. 718322 2. 577042 2. 915273 2. 815918 2. 839685  
11735765\_ 6. 617088 6. 596258 6. 702981 5. 441369 5. 445451 5. 416214  
11735766\_ 5. 845365 5. 882594 5. 872449 5. 949694 5. 95752 5. 850794  
11735767\_ 2. 176527 2. 10311 2. 364463 2. 173559 2. 173559 2. 17059  
11735768\_ 2. 239068 2. 196819 2. 200429 2. 290751 2. 25483 2. 201529  
11735769\_ 3. 357231 3. 141922 3. 333074 3. 290188 3. 21279 3. 207593  
11735770\_ 2. 040094 1. 956305 1. 715504 1. 904908 1. 771494 1. 995297  
11735771\_ 2. 204711 2. 045462 2. 008259 1. 914867 1. 883513 1. 987924  
11735772\_ 5. 17521 4. 827761 4. 924013 5. 495383 5. 453793 5. 374866  
11735773\_ 4. 530139 4. 690508 4. 486822 4. 824195 4. 957982 4. 906658  
11735774\_ 7. 092704 7. 117883 7. 101061 7. 604825 7. 506658 7. 43571  
11735775\_ 7. 706627 7. 861414 7. 535958 7. 679445 7. 605846 7. 47113  
11735776\_ 7. 06816 6. 960336 7. 085615 6. 922567 6. 859164 6. 855028  
11735777\_ 4. 779842 5. 213005 5. 147179 5. 311037 5. 313603 5. 397467  
11735778\_ 6. 433595 6. 244666 6. 23831 6. 812511 6. 826485 6. 776674  
11735779\_ 4. 724018 4. 80329 4. 552984 4. 87216 4. 786065 4. 74557  
11735780\_ 5. 436761 5. 353094 5. 146119 5. 34471 5. 261466 5. 284123  
11735781\_ 3. 6289 3. 890684 3. 810992 3. 683663 3. 803528 3. 763991  
11735782\_ 6. 540142 6. 478298 6. 638977 6. 312102 6. 402853 6. 429933  
11735783\_ 5. 557053 5. 57225 5. 464543 5. 698231 5. 645364 5. 546212  
11735784\_ 2. 009106 1. 974504 2. 108058 1. 983763 1. 983763 1. 923247  
11735785\_ 3. 974017 4. 085783 3. 865902 4. 154495 4. 040127 3. 968471  
11735786\_ 4. 211847 4. 316141 4. 210429 4. 459939 4. 395039 4. 534998  
11735787\_ 5. 461986 5. 584813 5. 542414 5. 684486 5. 584813 5. 596836  
11735788\_ 6. 505386 6. 520579 6. 46583 6. 837553 6. 820855 6. 782283  
11735789\_ 7. 48948 7. 351729 7. 538224 8. 047824 8. 194362 8. 016103  
11735790\_ 5. 731214 5. 842502 5. 879738 5. 914955 5. 932952 5. 79208  
11735791\_ 5. 078943 5. 205765 5. 137785 5. 156303 5. 166139 5. 237072  
11735792\_ 8. 974608 9. 025704 9. 069288 9. 054353 9. 105692 9. 062906  
11735793\_ 5. 623932 5. 697311 5. 568938 5. 766844 5. 658676 5. 637343  
11735794\_ 5. 379 5. 473486 5. 228733 5. 615044 5. 614048 5. 43372  
11735795\_ 6. 51118 6. 612181 6. 492533 6. 734234 6. 698987 6. 683757  
11735796\_ 2. 388166 2. 47102 2. 202237 2. 301665 2. 643283 2. 281182  
11735797\_ 4. 948625 4. 752531 4. 816824 4. 902664 4. 938711 4. 604441  
11735798\_ 2. 515697 2. 493181 2. 393579 2. 592161 2. 549877 2. 665068  
11735799\_ 6. 146293 6. 248488 6. 022138 6. 126537 6. 223668 6. 212602  
11735800\_ 3. 818401 3. 911697 4. 010825 3. 997131 4. 174533 4. 071126  
11735801\_ 2. 085269 2. 131936 2. 275047 2. 231338 2. 079884 1. 992139  
11735802\_ 4. 925951 5. 068713 4. 743757 4. 881379 4. 894091 4. 925686  
11735803\_ 6. 00661 5. 792553 5. 849624 6. 273777 6. 432334 6. 26162  
11735804\_ 5. 911872 5. 885944 5. 921091 6. 502269 6. 457663 6. 384931

11735805\_ 5. 616003 5. 586856 5. 39588 5. 624119 5. 578713 5. 634499  
11735806\_ 8. 409634 8. 35007 8. 39444 8. 924615 8. 886923 8. 907866  
11735807\_ 4. 872437 4. 835803 4. 675687 4. 816233 4. 728303 4. 541167  
11735808\_ 5. 250196 4. 814055 5. 047343 4. 939707 4. 955158 4. 962881  
11735809\_ 3. 953801 4. 011232 4. 034888 3. 925181 3. 969526 4. 177317  
11735810\_ 4. 975992 5. 219861 4. 824195 5. 117158 5. 056561 5. 023226  
11735811\_ 3. 982955 3. 963117 4. 167346 3. 99764 4. 009373 3. 892313  
11735812\_ 3. 799352 3. 723624 3. 874257 3. 896213 3. 969526 3. 797127  
11735813\_ 6. 421823 6. 157297 6. 409399 5. 815335 5. 751454 5. 798613  
11735814\_ 1. 995297 1. 912925 2. 0138 2. 085559 1. 997712 2. 053945  
11735815\_ 4. 502544 4. 484228 4. 355461 4. 390608 4. 444805 4. 5158  
11735816\_ 7. 814123 7. 836187 7. 764608 7. 888125 7. 963597 7. 880573  
11735817\_ 4. 132144 4. 211084 4. 16427 4. 294352 4. 169885 4. 047432  
11735818\_ 7. 756148 7. 717785 7. 755967 7. 619572 7. 645419 7. 595385  
11735819\_ 3. 388974 3. 664079 3. 598737 3. 738475 3. 798033 3. 74714  
11735820\_ 4. 242118 4. 174945 4. 102715 4. 52373 4. 507321 4. 483905  
11735821\_ 6. 702318 6. 714177 6. 596899 6. 765911 6. 90183 6. 708069  
11735822\_ 3. 051149 3. 133324 3. 183749 3. 16262 3. 148555 3. 058108  
11735823\_ 5. 521311 5. 528757 5. 515888 5. 34485 5. 397861 5. 489688  
11735824\_ 4. 046563 4. 226488 4. 279056 4. 155916 4. 153172 4. 229232  
11735825\_ 4. 88154 4. 952462 5. 04691 5. 112594 5. 110062 5. 009926  
11735826\_ 7. 325315 7. 282997 7. 088479 7. 279098 7. 299162 7. 394815  
11735827\_ 4. 066781 4. 016582 4. 199888 3. 917994 4. 074542 4. 155823  
11735828\_ 3. 130985 3. 26895 3. 198413 3. 320425 3. 161576 3. 293869  
11735829\_ 4. 897985 4. 834927 4. 864404 4. 87688 4. 766702 4. 828123  
11735830\_ 4. 686112 4. 584933 4. 459939 4. 64695 4. 661917 4. 643717  
11735831\_ 3. 958291 4. 16918 4. 133947 4. 164776 4. 237292 4. 354363  
11735832\_ 8. 242631 8. 173485 8. 311662 9. 09212 9. 094894 9. 082922  
11735833\_ 10. 36274 10. 27985 10. 3261 10. 79641 10. 82827 10. 83594  
11735834\_ 2. 39525 2. 223077 2. 431092 2. 450449 2. 379879 2. 510686  
11735835\_ 8. 848844 8. 792693 8. 764061 8. 74031 8. 74879 8. 684147  
11735836\_ 7. 571083 7. 537102 7. 578279 7. 509076 7. 467622 7. 491437  
11735837\_ 2. 235709 2. 423389 2. 082868 2. 380575 2. 379434 2. 298114  
11735838\_ 4. 95852 5. 308246 5. 093871 5. 202258 5. 201797 5. 228627  
11735839\_ 2. 83198 2. 82659 2. 83737 2. 83198 2. 823118 2. 83198  
11735840\_ 3. 336013 3. 374614 3. 366677 3. 505365 3. 319645 3. 331483  
11735841\_ 5. 935304 6. 282224 6. 156712 6. 325444 6. 241491 6. 273463  
11735842\_ 5. 060097 5. 18883 4. 86117 5. 193178 5. 191004 5. 248771  
11735843\_ 4. 511338 4. 684269 4. 442606 4. 749925 4. 664746 4. 693171  
11735844\_ 3. 586751 3. 412725 3. 290188 3. 112829 3. 101013 3. 180062  
11735845\_ 4. 117855 4. 333003 4. 206952 4. 090956 4. 119855 4. 206952  
11735846\_ 4. 200678 4. 168196 4. 166496 4. 36109 4. 413833 4. 188446  
11735847\_ 4. 543543 4. 584933 4. 406028 4. 459939 4. 583131 4. 690044  
11735848\_ 4. 394392 4. 540625 4. 260134 4. 635935 4. 309541 4. 394392  
11735849\_ 4. 672769 4. 622974 4. 480536 4. 301361 4. 459939 4. 38884  
11735850\_ 5. 770912 5. 606013 5. 623669 4. 980931 4. 733776 4. 910327  
11735851\_ 2. 18885 2. 125857 2. 095187 2. 295921 2. 11111 1. 967504  
11735852\_ 5. 862828 5. 918716 5. 755502 5. 986842 5. 979919 6. 083954  
11735853\_ 2. 198441 2. 135449 2. 068319 2. 282236 2. 110608 1. 97683  
11735854\_ 3. 418826 3. 382756 3. 675367 3. 855205 3. 863828 3. 652822  
11735855\_ 2. 429176 2. 351316 2. 143603 2. 256225 2. 353988 2. 260056

11735856\_ 2. 445066 2. 654957 2. 172991 2. 488178 2. 516363 2. 45751  
11735857\_ 4. 41937 4. 271652 4. 450766 4. 127086 4. 241367 4. 11882  
11735858\_ 3. 85214 3. 956153 3. 971948 4. 067314 3. 95235 3. 946136  
11735859\_ 2. 603666 2. 603666 2. 391197 2. 470584 2. 678277 2. 688904  
11735860\_ 5. 080916 5. 341614 5. 220986 5. 081524 5. 26034 5. 156303  
11735861\_ 2. 110899 2. 175577 2. 165545 2. 448236 2. 25483 2. 25483  
11735862\_ 4. 237987 4. 278004 4. 135496 4. 275543 4. 37397 4. 155795  
11735863\_ 5. 587056 5. 715836 5. 575395 5. 787919 5. 758485 5. 77685  
11735864\_ 3. 407405 3. 398236 3. 304845 3. 304845 3. 338106 3. 41975  
11735865\_ 5. 43867 5. 415876 5. 371793 5. 369007 5. 448475 5. 422635  
11735866\_ 4. 623107 4. 709463 4. 651691 4. 782682 4. 908216 4. 864809  
11735867\_ 5. 320966 5. 323205 5. 237327 5. 060896 5. 2222 5. 191385  
11735868\_ 6. 047254 6. 036971 6. 043148 6. 136107 6. 037848 5. 948325  
11735869\_ 4. 811251 4. 740103 4. 899718 4. 783634 4. 869676 4. 982238  
11735870\_ 3. 305508 3. 395649 3. 354495 3. 451653 3. 549246 3. 652132  
11735871\_ 3. 525179 3. 503743 3. 384379 3. 432329 3. 516916 3. 58856  
11735872\_ 3. 340888 3. 263041 3. 276122 3. 207209 3. 161336 3. 121147  
11735873\_ 5. 756397 5. 848057 5. 794286 6. 186476 6. 087357 6. 095002  
11735874\_ 6. 039129 5. 97959 5. 765636 5. 745821 5. 858333 6. 110579  
11735875\_ 4. 254449 4. 300121 4. 300156 4. 464007 4. 42446 4. 669963  
11735876\_ 4. 003216 4. 250495 4. 142454 4. 162397 4. 2544 4. 20343  
11735877\_ 6. 312339 6. 353999 6. 317138 6. 318876 6. 288578 6. 2875  
11735878\_ 5. 802057 6. 010399 5. 768734 5. 836006 5. 791146 5. 862666  
11735879\_ 3. 180296 3. 277759 3. 290188 3. 263187 3. 339871 3. 290188  
11735880\_ 7. 77682 7. 688806 7. 825387 7. 830748 7. 901597 7. 845459  
11735881\_ 7. 70323 7. 73111 7. 704791 7. 785617 7. 843038 7. 848779  
11735882\_ 4. 960264 4. 984356 4. 746011 4. 935394 4. 867765 5. 052413  
11735883\_ 5. 016046 5. 087652 5. 003806 5. 416723 5. 193111 5. 112761  
11735884\_ 5. 035814 4. 991649 5. 073036 4. 974842 5. 063917 4. 948607  
11735885\_ 3. 818117 3. 825764 3. 625408 3. 869304 3. 879309 3. 701043  
11735886\_ 4. 352451 4. 52373 4. 137827 3. 925181 4. 101557 4. 039256  
11735887\_ 5. 759746 5. 591648 5. 525556 5. 744558 5. 638622 5. 651877  
11735888\_ 6. 728947 6. 80816 6. 789739 6. 746117 6. 74052 6. 861138  
11735889\_ 4. 101918 4. 198231 4. 498193 4. 412907 4. 419738 4. 221539  
11735890\_ 6. 054614 5. 980222 6. 099645 6. 099645 6. 159771 6. 15059  
11735891\_ 5. 29001 5. 302651 5. 053876 5. 480966 5. 542166 5. 421389  
11735892\_ 4. 826539 5. 073841 4. 83143 5. 04868 5. 26807 5. 005932  
11735893\_ 6. 13331 6. 044622 6. 122748 6. 401166 6. 244444 6. 268782  
11735894\_ 4. 794158 4. 955402 4. 782988 4. 971302 5. 144672 4. 999389  
11735895\_ 3. 529562 3. 520516 3. 445722 3. 692386 3. 896034 3. 692386  
11735896\_ 3. 893302 3. 788129 3. 788494 4. 068766 3. 971734 4. 060787  
11735897\_ 3. 442969 3. 564014 3. 496538 3. 463029 3. 496538 3. 498442  
11735898\_ 6. 330427 6. 327911 6. 216331 6. 188324 6. 202406 6. 252827  
11735899\_ 2. 732843 2. 762759 2. 361778 2. 7932 2. 714642 2. 714464  
11735900\_ 2. 738833 2. 623098 2. 599566 2. 781126 2. 846212 2. 605516  
11735901\_ 2. 567916 2. 586559 2. 593407 2. 377011 2. 634433 2. 567916  
11735902\_ 7. 006992 6. 772471 6. 958493 5. 768053 5. 710947 5. 741085  
11735903\_ 4. 350754 4. 446366 4. 446728 4. 276818 4. 242995 4. 120567  
11735904\_ 6. 502421 6. 397036 6. 55253 5. 643713 5. 781171 5. 654251  
11735905\_ 2. 24053 2. 168396 2. 142125 2. 23258 2. 307212 2. 236555  
11735906\_ 5. 147538 5. 252989 5. 147538 5. 250107 5. 233679 5. 261917

11735907\_ 4. 989735 4. 958664 4. 736188 4. 847252 4. 943087 4. 842956  
11735908\_ 4. 318559 4. 368683 4. 095963 4. 095963 4. 259057 4. 069531  
11735909\_ 3. 732039 3. 711023 3. 61233 3. 501237 3. 82123 3. 76179  
11735910\_ 5. 714641 5. 865215 5. 515188 5. 751079 5. 870242 5. 843608  
11735911\_ 6. 28253 6. 35958 6. 427227 5. 571951 5. 502661 5. 794614  
11735912\_ 4. 96059 5. 035662 4. 923295 5. 1577 5. 027848 4. 999501  
11735913\_ 5. 707967 5. 72443 5. 681139 5. 764243 5. 954684 5. 920952  
11735914\_ 7. 001942 7. 160788 7. 065335 7. 194108 7. 155929 7. 102236  
11735915\_ 4. 386809 4. 372513 4. 310865 4. 322351 4. 49128 4. 535535  
11735916\_ 3. 024629 2. 945929 2. 874619 2. 916213 2. 916213 2. 731402  
11735917\_ 4. 094001 3. 717104 3. 740892 3. 814889 3. 901915 3. 993407  
11735918\_ 6. 705016 6. 683995 6. 846422 6. 793454 6. 855425 6. 898793  
11735919\_ 5. 252763 5. 302095 5. 244174 5. 253567 5. 417459 5. 256214  
11735920\_ 7. 606708 7. 687424 7. 557648 7. 699019 7. 696076 7. 646746  
11735921\_ 3. 55562 3. 636248 3. 778866 3. 749906 3. 588032 3. 654273  
11735922\_ 6. 530176 6. 583555 6. 541844 6. 57272 6. 613104 6. 594016  
11735923\_ 6. 564895 6. 645702 6. 609062 6. 670232 6. 688814 6. 811149  
11735924\_ 7. 566574 7. 74117 7. 377003 7. 660682 7. 48719 7. 520812  
11735925\_ 7. 853464 8. 079895 7. 904656 7. 988896 7. 894663 7. 983413  
11735926\_ 2. 258874 2. 33217 2. 138136 2. 51772 2. 425272 2. 270661  
11735927\_ 3. 170832 3. 297594 3. 141975 3. 016739 3. 007933 3. 023761  
11735928\_ 4. 570328 4. 856464 4. 700021 4. 614766 4. 694232 4. 646692  
11735929\_ 3. 606313 3. 588661 3. 398236 3. 577595 3. 557181 3. 478855  
11735930\_ 4. 695615 4. 778924 4. 746222 4. 889636 4. 758285 4. 766879  
11735931\_ 2. 835127 2. 665184 2. 914818 3. 013522 3. 00875 3. 00875  
11735932\_ 1. 960903 1. 796067 1. 940295 2. 186875 1. 954977 2. 066271  
11735933\_ 6. 553617 6. 6351 6. 584177 6. 672945 6. 67966 6. 748788  
11735934\_ 4. 982294 5. 207506 5. 073036 5. 199672 5. 136204 5. 305133  
11735935\_ 3. 637867 3. 950015 3. 714795 3. 856083 3. 720756 3. 950015  
11735936\_ 2. 307942 2. 410512 2. 307942 2. 148848 2. 007512 1. 969572  
11735937\_ 2. 47102 2. 617933 2. 491864 2. 579961 2. 587429 2. 494072  
11735938\_ 5. 152828 5. 316528 5. 189637 5. 156303 5. 217857 5. 193595  
11735939\_ 2. 339056 2. 276286 2. 339056 2. 44846 2. 224944 2. 276286  
11735940\_ 2. 605516 2. 680848 2. 719584 2. 797132 2. 708055 2. 806708  
11735941\_ 5. 77715 5. 841886 5. 866458 5. 951885 5. 930857 5. 902319  
11735942\_ 3. 680048 3. 612049 3. 625408 3. 624737 3. 919766 3. 79277  
11735943\_ 2. 501825 2. 358653 2. 62373 2. 461532 2. 486355 2. 561187  
11735944\_ 5. 705907 5. 631586 5. 651194 5. 535377 5. 214226 5. 395837  
11735945\_ 2. 110391 2. 149244 2. 025705 2. 040074 2. 149244 2. 092054  
11735946\_ 3. 809844 3. 94735 3. 956212 3. 690658 3. 82112 3. 796447  
11735947\_ 2. 808156 2. 643384 2. 797876 2. 463593 2. 32293 2. 637721  
11735948\_ 7. 579907 7. 581167 7. 563322 7. 360393 7. 234443 7. 417534  
11735949\_ 4. 838373 5. 373131 4. 794476 5. 27212 5. 212976 5. 274179  
11735950\_ 2. 997449 3. 21151 3. 350429 3. 311598 3. 181845 3. 066004  
11735951\_ 6. 72783 6. 854799 6. 690813 6. 889286 7. 023454 6. 898723  
11735952\_ 4. 865526 5. 096202 4. 968481 4. 949871 5. 013076 4. 815276  
11735953\_ 3. 037946 3. 197732 3. 025972 3. 241864 2. 981542 3. 180062  
11735954\_ 6. 555633 6. 688456 6. 445622 6. 693046 6. 642965 6. 677949  
11735955\_ 3. 432737 3. 481526 3. 443226 3. 485972 3. 420634 3. 402867  
11735956\_ 5. 154269 5. 128672 5. 3043 5. 20581 5. 3043 4. 930708  
11735957\_ 5. 044063 4. 780163 4. 813981 4. 953968 4. 825635 4. 979446



11735958\_ 6. 069669 6. 021514 5. 850956 6. 091975 6. 157157 6. 109576  
11735959\_ 4. 004942 3. 877249 3. 789464 3. 925181 4. 099968 3. 954157  
11735960\_ 5. 033328 5. 108951 4. 977716 5. 069527 4. 964547 5. 012033  
11735961\_ 5. 073171 5. 116117 5. 042161 5. 129793 5. 167851 5. 211029  
11735962\_ 2. 94913 3. 046024 3. 237608 3. 14048 3. 14048 2. 988907  
11735963\_ 4. 398649 4. 46488 4. 307733 4. 310974 4. 334393 4. 314396  
11735964\_ 5. 674632 5. 777017 5. 768861 5. 72548 5. 775263 5. 925164  
11735965\_ 4. 694227 4. 694227 4. 701403 4. 849773 4. 884435 4. 738045  
11735966\_ 6. 226248 6. 244666 6. 193134 6. 130019 6. 276007 6. 280058  
11735967\_ 3. 679824 3. 818401 3. 681643 4. 035302 3. 948962 3. 619509  
11735968\_ 6. 157919 6. 440942 5. 983426 6. 467006 6. 425793 6. 445532  
11735969\_ 4. 736263 4. 899942 4. 800741 4. 946802 4. 926346 4. 822849  
11735970\_ 6. 761196 6. 829469 6. 775539 6. 648586 6. 779107 6. 793373  
11735971\_ 2. 892321 2. 940204 2. 997071 2. 862806 2. 998168 2. 9576  
11735972\_ 3. 676607 3. 525841 3. 398236 3. 525841 3. 538673 3. 448634  
11735973\_ 3. 88753 3. 680377 3. 979235 4. 008157 4. 007177 4. 122274  
11735974\_ 6. 044468 6. 221183 6. 196379 6. 265 6. 289265 6. 188902  
11735975\_ 4. 644708 4. 832102 4. 709463 4. 824195 4. 760601 4. 705994  
11735976\_ 4. 999331 5. 309674 5. 09719 4. 9648 4. 885761 5. 039595  
11735977\_ 5. 21183 5. 248711 5. 060308 5. 316464 5. 576152 5. 30645  
11735978\_ 4. 714358 4. 73945 4. 712364 4. 809131 4. 762119 4. 686258  
11735979\_ 4. 61431 4. 541062 4. 698675 4. 69656 4. 689455 4. 596503  
11735980\_ 4. 787582 4. 697456 4. 584933 4. 55001 4. 935475 4. 690609  
11735981\_ 6. 056005 6. 088199 6. 136035 6. 12241 6. 152977 6. 062277  
11735982\_ 2. 181732 2. 204703 2. 041523 2. 232907 2. 189389 2. 174075  
11735983\_ 4. 348775 4. 320866 4. 257711 4. 391242 4. 390007 4. 336556  
11735984\_ 3. 932283 4. 081352 3. 883417 4. 16633 4. 049737 4. 034865  
11735985\_ 4. 396671 4. 327282 4. 382345 4. 561508 4. 539639 4. 382345  
11735986\_ 4. 270388 4. 056877 4. 026092 4. 245518 4. 175378 4. 040781  
11735987\_ 5. 209024 5. 395193 5. 20678 5. 209824 5. 511389 5. 308983  
11735988\_ 4. 598959 4. 737014 4. 399583 4. 653498 4. 678114 4. 823362  
11735989\_ 5. 665607 5. 826619 5. 578613 5. 559963 5. 788868 5. 774436  
11735990\_ 3. 101022 3. 219042 2. 922281 3. 011265 3. 101013 3. 059291  
11735991\_ 7. 343532 7. 343532 7. 315926 8. 195415 8. 142194 8. 005159  
11735992\_ 10. 43462 10. 35571 10. 40603 10. 38059 10. 43297 10. 37758  
11735993\_ 2. 764949 2. 742943 2. 690657 2. 548705 2. 836245 2. 79271  
11735994\_ 9. 506339 9. 496844 9. 461965 9. 45326 9. 419131 9. 428139  
11735995\_ 6. 732031 6. 616038 6. 774294 7. 137619 7. 16179 7. 115037  
11735996\_ 6. 916714 6. 800483 6. 923219 7. 004614 7. 079994 7. 069344  
11735997\_ 4. 150199 4. 10068 4. 151168 4. 167324 4. 154073 4. 184048  
11735998\_ 6. 787231 6. 891189 6. 769399 6. 89806 6. 88289 6. 898793  
11735999\_ 7. 619572 7. 524829 7. 740923 6. 78532 6. 865839 6. 785241  
11736000\_ 7. 547714 7. 531382 7. 680829 6. 924051 6. 980292 6. 958398  
11736001\_ 5. 925786 5. 682186 5. 796183 4. 962808 5. 00178 5. 02351  
11736002\_ 5. 646183 5. 61541 5. 771707 5. 131008 5. 16332 5. 392564  
11736003\_ 10. 02917 10. 04039 10. 06952 9. 984174 9. 9894 9. 917116  
11736004\_ 4. 233311 3. 707748 3. 821952 4. 095543 4. 085377 4. 176474  
11736005\_ 4. 605494 4. 589377 4. 560457 4. 585203 4. 347179 4. 39215  
11736006\_ 8. 817248 8. 743801 8. 787886 8. 818519 8. 845997 8. 85324  
11736007\_ 4. 017231 3. 879659 4. 178676 4. 481855 4. 189856 4. 305296  
11736008\_ 9. 842343 9. 804537 9. 84826 9. 823359 9. 838334 9. 810831

11736009\_ 9. 766852 9. 741268 9. 722722 9. 41202 9. 427125 9. 371991  
11736010\_ 8. 808873 8. 807617 8. 843528 8. 084094 8. 062787 8. 082272  
11736011\_ 7. 478431 7. 462218 7. 544282 7. 359288 7. 342372 7. 390315  
11736012\_ 6. 356874 6. 300163 6. 43237 6. 303081 6. 317538 6. 191341  
11736013\_ 6. 382815 6. 138727 6. 416516 8. 536771 8. 596025 8. 574279  
11736014\_ 6. 440756 6. 528725 6. 690097 8. 557316 8. 370264 8. 401407  
11736015\_ 9. 667713 9. 695908 9. 707219 9. 727747 9. 771481 9. 719356  
11736016\_ 9. 23481 9. 184452 9. 282289 8. 936362 8. 924597 8. 938142  
11736017\_ 10. 2433 10. 23995 10. 28162 10. 34789 10. 34695 10. 37988  
11736018\_ 7. 078058 7. 096093 7. 125666 6. 983164 6. 901552 7. 069366  
11736019\_ 8. 770372 8. 699752 8. 789848 8. 527665 8. 511074 8. 540432  
11736020\_ 7. 906325 7. 858247 7. 930673 7. 36288 7. 34814 7. 305023  
11736021\_ 6. 964332 7. 015979 7. 116559 8. 054351 8. 115955 8. 067856  
11736022\_ 3. 503743 3. 398236 3. 038283 3. 966463 3. 877469 3. 88483  
11736023\_ 9. 193271 9. 018272 9. 051068 8. 78691 8. 815367 8. 763196  
11736024\_ 4. 764419 4. 57597 4. 96064 4. 473276 4. 540482 4. 540482  
11736025\_ 8. 049821 7. 967598 7. 979422 7. 212651 7. 136086 7. 257074  
11736026\_ 8. 485062 8. 35386 8. 458965 7. 869414 7. 91806 7. 837627  
11736027\_ 8. 924321 8. 879035 8. 895272 8. 165492 8. 249471 8. 129423  
11736028\_ 8. 8628 8. 822885 8. 867238 8. 163205 8. 253894 8. 183197  
11736029\_ 9. 738765 9. 743574 9. 763873 9. 639569 9. 615716 9. 630738  
11736030\_ 5. 844563 5. 798206 5. 949036 5. 75036 5. 830885 5. 771758  
11736031\_ 6. 261478 6. 218217 6. 228104 6. 23743 6. 222604 6. 216896  
11736032\_ 4. 335956 4. 516367 4. 459939 4. 584933 4. 472582 4. 457369  
11736033\_ 5. 863605 5. 888925 5. 762753 6. 002062 5. 944254 5. 930422  
11736034\_ 7. 903834 7. 895903 7. 959887 8. 016623 7. 929642 8. 047792  
11736035\_ 8. 388331 8. 339245 8. 399642 8. 613294 8. 678035 8. 677007  
11736036\_ 7. 923757 7. 93466 8. 009516 8. 217175 8. 286215 8. 258987  
11736037\_ 6. 789496 6. 711675 6. 732277 6. 932663 7. 091108 6. 961246  
11736038\_ 4. 933786 4. 826838 4. 68676 5. 234288 5. 17104 5. 275871  
11736039\_ 5. 497213 5. 412901 5. 448036 5. 554136 5. 591095 5. 442778  
11736040\_ 4. 524675 4. 243465 4. 461117 4. 459939 4. 500874 4. 40923  
11736041\_ 6. 171867 6. 320877 6. 096932 6. 346745 6. 313053 6. 369132  
11736042\_ 7. 146675 7. 149187 7. 053419 7. 024409 7. 066425 7. 081648  
11736043\_ 5. 333723 5. 508989 5. 41215 5. 37693 5. 453793 5. 285845  
11736044\_ 8. 293619 8. 218715 8. 279397 8. 737017 8. 720656 8. 694255  
11736045\_ 6. 662045 6. 564709 6. 618346 6. 882635 6. 86576 6. 897107  
11736046\_ 4. 319424 4. 150583 4. 370337 4. 118362 4. 218978 4. 319424  
11736047\_ 7. 288642 7. 266061 7. 301903 6. 539033 6. 632102 6. 480021  
11736048\_ 5. 999888 5. 991725 5. 982228 5. 768393 5. 686361 5. 683787  
11736049\_ 6. 565641 6. 453392 6. 605521 6. 704511 6. 621239 6. 615492  
11736050\_ 7. 119781 7. 03626 7. 019274 7. 017996 7. 021378 7. 049614  
11736051\_ 2. 234238 2. 261127 2. 241748 2. 25483 2. 342163 2. 428335  
11736052\_ 7. 115386 7. 163499 7. 202891 7. 764812 7. 680618 7. 688798  
11736053\_ 7. 208021 7. 289599 7. 347168 7. 876591 7. 831822 7. 833075  
11736054\_ 8. 636288 8. 608326 8. 639666 7. 987362 8. 02897 7. 977541  
11736055\_ 7. 44137 7. 359808 7. 423368 7. 27517 7. 349043 7. 267082  
11736056\_ 8. 487473 8. 321742 8. 390152 8. 205028 8. 19547 8. 081718  
11736057\_ 8. 179883 8. 174356 8. 269895 8. 045868 7. 970383 7. 988867  
11736058\_ 6. 71875 6. 822148 6. 897152 6. 748577 6. 637331 6. 468476  
11736059\_ 10. 80794 10. 79405 10. 75695 10. 77705 10. 72089 10. 71134

11736060\_ 9. 055988 8. 95777 9. 018048 8. 673394 8. 667387 8. 596124  
11736061\_ 2. 972038 3. 234839 3. 16722 3. 600535 3. 573362 3. 916391  
11736062\_ 9. 069184 9. 131889 9. 025767 9. 124444 9. 014936 8. 993149  
11736063\_ 10. 90163 10. 86592 10. 89263 10. 86885 10. 84865 10. 82399  
11736064\_ 5. 088788 5. 226221 5. 049985 5. 236252 5. 326103 5. 310197  
11736065\_ 3. 148992 3. 351985 3. 173449 3. 410359 3. 362882 3. 353497  
11736066\_ 4. 600805 4. 504028 4. 619676 4. 319909 4. 535859 4. 546373  
11736067\_ 9. 658727 9. 583425 9. 641119 9. 669762 9. 65312 9. 648352  
11736068\_ 7. 868167 7. 776497 7. 853259 8. 122891 8. 093791 8. 136556  
11736069\_ 3. 838547 3. 739234 3. 850246 3. 596951 3. 982645 3. 954157  
11736070\_ 8. 297071 8. 239403 8. 35702 8. 305279 8. 403695 8. 438078  
11736071\_ 8. 430951 8. 386515 8. 475369 8. 526184 8. 553194 8. 600031  
11736072\_ 8. 788749 8. 753271 8. 773184 8. 704523 8. 817877 8. 818424  
11736073\_ 6. 227371 6. 157376 6. 333842 6. 422991 6. 407826 6. 402756  
11736074\_ 8. 673764 8. 639516 8. 696446 8. 633368 8. 627703 8. 643381  
11736075\_ 9. 392053 9. 343545 9. 410441 9. 367798 9. 378503 9. 336621  
11736076\_ 9. 157755 9. 136731 9. 12829 9. 30567 9. 330519 9. 317394  
11736077\_ 5. 614563 5. 465561 5. 594208 5. 708702 5. 725269 5. 905341  
11736078\_ 6. 569839 6. 741168 6. 635074 6. 66381 6. 744996 6. 741168  
11736079\_ 6. 13945 6. 147507 5. 98635 5. 994929 6. 119019 6. 15644  
11736080\_ 9. 395404 9. 30488 9. 3648 9. 546181 9. 576421 9. 478857  
11736081\_ 3. 469405 3. 469405 3. 909505 3. 629262 3. 670482 3. 515043  
11736082\_ 6. 869984 6. 779736 6. 997415 7. 39774 7. 412258 7. 461388  
11736083\_ 6. 660096 6. 594872 6. 695739 7. 218847 7. 174876 7. 239217  
11736084\_ 7. 965799 7. 928408 7. 946124 7. 894484 7. 973489 7. 916845  
11736085\_ 8. 865416 8. 750544 8. 862165 8. 695488 8. 724658 8. 702861  
11736086\_ 2. 235709 2. 131936 2. 41589 2. 167133 2. 3248 2. 200511  
11736087\_ 6. 787321 6. 830484 6. 779646 6. 830671 6. 903071 6. 868242  
11736088\_ 7. 295188 7. 326999 7. 440871 7. 340505 7. 279857 7. 295188  
11736089\_ 7. 599856 7. 61602 7. 567819 7. 462555 7. 501945 7. 493311  
11736090\_ 6. 176149 6. 137705 6. 191349 6. 227995 6. 14493 6. 14388  
11736091\_ 5. 330035 4. 962962 5. 069458 5. 09208 5. 194777 5. 12958  
11736092\_ 3. 00594 3. 038675 3. 017527 3. 042553 3. 024611 3. 061205  
11736093\_ 7. 550361 7. 441832 7. 534887 7. 975611 8. 002745 8. 098534  
11736094\_ 10. 61551 10. 65128 10. 59685 10. 59038 10. 56521 10. 48763  
11736095\_ 7. 356041 7. 220438 7. 236382 7. 207779 7. 170362 7. 154943  
11736096\_ 6. 348119 6. 244073 6. 210251 6. 371772 6. 454951 6. 361265  
11736097\_ 7. 815674 7. 811403 7. 930989 7. 771457 7. 811312 7. 808343  
11736098\_ 6. 3749 6. 225513 6. 148977 6. 004623 6. 002663 5. 968207  
11736099\_ 8. 533271 8. 499207 8. 582444 8. 569431 8. 60916 8. 570054  
11736100\_ 7. 715356 7. 739805 7. 822423 7. 696083 7. 7046 7. 612452  
11736101\_ 5. 837532 5. 676161 5. 722463 5. 660688 5. 552055 5. 568804  
11736102\_ 5. 401992 5. 345598 5. 285063 5. 322883 5. 341646 5. 506642  
11736103\_ 7. 489139 7. 387005 7. 453988 7. 509076 7. 497108 7. 534746  
11736104\_ 4. 308271 3. 914371 4. 02391 4. 145361 4. 122446 4. 180357  
11736105\_ 1. 622824 1. 901097 1. 83544 1. 566509 1. 72117 1. 64142  
11736106\_ 1. 896942 1. 977203 2. 11943 1. 876777 2. 026224 2. 016202  
11736107\_ 5. 650919 5. 546538 5. 74103 5. 15457 5. 010112 5. 238866  
11736108\_ 5. 790527 5. 775696 5. 702283 5. 94192 5. 792277 5. 75247  
11736109\_ 6. 432206 6. 571232 6. 618892 6. 347629 6. 333494 6. 387169  
11736110\_ 5. 773066 5. 729883 5. 800864 5. 552359 5. 576268 5. 619012

11736111\_ 7. 486098 7. 544101 7. 570639 7. 474765 7. 394108 7. 472989  
11736112\_ 8. 431136 8. 319112 8. 332919 8. 378866 8. 336373 8. 385772  
11736113\_ 8. 473843 8. 458933 8. 532714 8. 44417 8. 432275 8. 460894  
11736114\_ 6. 260015 6. 299272 6. 30889 6. 233872 6. 248504 6. 126495  
11736115\_ 4. 586294 4. 627423 4. 554516 4. 440991 4. 652642 4. 56011  
11736116\_ 8. 061181 8. 105038 7. 985733 7. 932604 7. 893198 7. 892766  
11736117\_ 10. 54645 10. 48482 10. 52169 10. 25258 10. 25832 10. 2756  
11736118\_ 6. 52907 6. 388375 6. 509891 6. 670083 6. 641928 6. 723156  
11736119\_ 9. 551964 9. 580563 9. 606236 9. 539325 9. 412912 9. 506259  
11736120\_ 10. 25157 10. 25587 10. 19684 9. 946138 9. 90883 9. 843128  
11736121\_ 9. 623275 9. 560499 9. 630865 9. 460787 9. 363438 9. 429017  
11736122\_ 7. 573767 7. 600001 7. 579151 7. 509109 7. 523757 7. 552824  
11736123\_ 6. 62393 6. 80454 6. 533517 6. 85489 6. 769286 6. 772916  
11736124\_ 6. 538989 6. 675828 6. 539595 6. 898016 6. 78076 6. 748541  
11736125\_ 5. 073036 5. 089809 5. 073036 5. 272655 5. 204983 5. 192327  
11736126\_ 4. 660426 4. 815683 4. 872955 4. 977904 4. 910232 4. 894899  
11736127\_ 1. 995297 2. 044244 2. 235709 2. 091337 1. 983844 1. 930507  
11736128\_ 6. 704207 6. 892477 6. 633872 6. 746576 6. 752593 6. 823898  
11736129\_ 7. 453841 7. 298143 7. 326246 7. 729217 7. 727135 7. 689107  
11736130\_ 7. 965588 7. 821211 7. 842844 8. 264419 8. 248838 8. 228171  
11736131\_ 10. 11484 10. 13434 10. 11513 9. 478857 9. 476467 9. 466956  
11736132\_ 10. 70763 10. 67091 10. 7339 10. 67984 10. 71178 10. 67095  
11736133\_ 7. 050623 7. 033535 7. 113803 7. 665192 7. 59564 7. 629043  
11736134\_ 5. 078928 5. 003641 5. 130304 5. 141172 5. 059196 5. 207188  
11736135\_ 4. 178471 4. 209493 4. 384081 4. 40264 4. 40461 4. 511323  
11736136\_ 6. 502421 6. 580422 6. 426216 6. 515238 6. 560996 6. 67471  
11736137\_ 1. 855749 1. 978217 1. 911222 2. 00887 2. 14914 1. 969338  
11736138\_ 1. 61825 1. 743398 1. 987419 1. 979244 1. 769543 2. 055625  
11736139\_ 5. 063207 5. 141237 4. 977673 5. 168991 5. 122688 5. 106088  
11736140\_ 4. 239213 4. 38771 4. 239213 4. 21629 4. 162418 4. 501957  
11736141\_ 7. 313281 7. 276891 7. 366823 7. 61945 7. 608365 7. 678185  
11736142\_ 4. 758293 4. 479237 4. 613816 4. 4724 4. 368136 4. 40116  
11736143\_ 4. 207722 4. 116843 4. 109685 4. 301654 4. 194272 4. 362204  
11736144\_ 5. 644345 5. 42852 5. 498771 5. 584813 5. 686361 5. 902295  
11736145\_ 7. 40738 7. 408383 7. 457847 7. 285806 7. 339013 7. 359461  
11736146\_ 8. 467866 8. 344622 8. 378246 8. 14986 8. 188396 8. 19237  
11736147\_ 8. 336079 8. 354919 8. 252642 8. 217422 8. 155914 8. 151661  
11736148\_ 6. 525517 6. 555154 6. 601769 6. 20437 6. 058253 6. 181759  
11736149\_ 6. 32896 6. 386095 6. 312492 6. 074233 6. 062992 6. 165488  
11736150\_ 5. 570433 5. 592151 5. 654467 5. 507319 5. 330859 5. 688132  
11736151\_ 7. 813749 7. 708475 7. 781146 7. 695265 7. 72902 7. 68296  
11736152\_ 5. 530879 5. 486628 5. 653421 5. 259318 5. 374424 5. 403744  
11736153\_ 5. 701697 5. 710763 5. 688747 5. 686154 5. 611323 5. 683562  
11736154\_ 8. 849825 8. 831291 8. 82118 8. 442252 8. 474491 8. 532661  
11736155\_ 6. 332294 6. 201169 6. 279064 6. 129407 6. 109749 6. 239734  
11736156\_ 5. 005285 4. 977376 5. 049786 4. 635543 4. 615566 4. 86539  
11736157\_ 5. 515197 5. 623183 5. 799899 6. 076709 6. 087357 6. 161127  
11736158\_ 2. 605516 2. 687424 2. 361778 2. 663904 2. 575625 2. 369206  
11736159\_ 6. 536494 6. 543295 6. 506218 6. 490403 6. 516652 6. 417769  
11736160\_ 1. 930416 1. 829081 1. 835928 1. 971681 1. 923013 1. 857699  
11736161\_ 2. 235709 2. 25483 2. 211514 2. 32122 2. 176019 2. 448677

11736162\_ 2.487096 2.611974 2.450074 2.52552 2.605542 2.605948  
11736163\_ 2.239304 1.880708 2.032229 1.826761 1.945647 2.04242  
11736164\_ 4.252009 4.35557 4.259623 4.29328 4.525532 4.486545  
11736165\_ 3.774409 3.914008 3.982101 3.90027 3.818164 4.070291  
11736166\_ 9.950055 9.95224 9.932106 9.916376 9.945193 9.915079  
11736167\_ 7.902269 7.9045 7.941997 8.02234 8.065802 8.062319  
11736168\_ 5.07565 4.874234 5.182916 5.082958 5.330016 5.156303  
11736169\_ 8.640599 8.543301 8.653599 8.148408 8.193187 8.177343  
11736170\_ 9.195987 9.14 9.132364 8.638973 8.664885 8.611773  
11736171\_ 8.065165 8.004661 7.997703 8.322275 8.327979 8.277168  
11736172\_ 5.751135 5.77226 5.579444 5.485903 5.624401 5.671184  
11736173\_ 7.093325 6.924753 7.212047 7.357722 7.386306 7.432363  
11736174\_ 4.584933 4.643717 4.963372 4.882565 4.902418 4.777058  
11736175\_ 5.908447 5.80821 5.836542 6.042031 5.962803 5.908447  
11736176\_ 7.174494 7.215046 7.151397 6.997968 6.937248 6.883321  
11736177\_ 9.035116 8.997408 9.064162 8.861715 8.880272 8.819188  
11736178\_ 8.090218 7.990112 8.10758 7.646281 7.624297 7.675626  
11736179\_ 6.940318 6.939464 6.898793 6.821713 6.876332 6.867754  
11736180\_ 7.591215 7.462217 7.621093 7.526081 7.497555 7.528268  
11736181\_ 5.160549 5.218493 5.213346 5.109309 5.185881 5.218493  
11736182\_ 6.894368 6.891391 6.878153 6.817033 6.886285 6.866809  
11736183\_ 5.911621 5.904403 5.798896 5.85619 5.844315 5.798545  
11736184\_ 3.116102 3.141164 3.160308 3.21279 3.30158 3.180062  
11736185\_ 5.881552 5.885313 5.837042 5.806457 5.886155 5.802926  
11736186\_ 5.790066 5.787675 5.845365 5.64971 5.78632 5.676992  
11736187\_ 5.492878 5.480175 5.413531 5.465511 5.500493 5.449798  
11736188\_ 7.197239 7.284438 7.228037 7.164836 7.09391 7.181078  
11736189\_ 5.835993 5.860743 5.801851 5.700302 5.836124 5.828116  
11736190\_ 2.219199 2.211398 2.015061 2.161946 2.290495 2.118973  
11736191\_ 3.045202 3.22606 3.206938 3.221916 3.16583 3.249515  
11736192\_ 9.726609 9.800817 9.832619 9.293958 9.301229 9.268835  
11736193\_ 9.636991 9.554113 9.578325 8.726312 8.62143 8.719794  
11736194\_ 7.924061 7.888983 7.968103 6.616607 6.618133 6.747574  
11736195\_ 6.739897 6.671993 6.659367 7.256494 7.085324 7.114503  
11736196\_ 4.514006 4.436388 4.310952 4.524717 4.408783 4.561702  
11736197\_ 4.98873 5.173475 5.072818 5.134382 5.186085 5.272785  
11736198\_ 4.098905 4.405188 3.93556 4.275543 4.1431 4.233266  
11736199\_ 3.818401 4.01996 3.641456 3.962982 3.962982 3.860903  
11736200\_ 7.386492 7.576755 7.488602 7.449584 7.442876 7.447555  
11736201\_ 6.173288 6.401565 6.348737 6.420765 6.316076 6.399518  
11736202\_ 4.693643 4.73694 4.776788 4.746118 4.584933 4.763543  
11736203\_ 6.847505 6.952797 6.757155 6.96482 6.894953 6.889957  
11736204\_ 8.74335 8.729626 8.803359 8.758106 8.793173 8.813601  
11736205\_ 8.944722 9.019856 8.906551 8.95059 8.963419 8.997836  
11736206\_ 3.93758 3.947914 3.899463 3.827926 3.932811 3.932811  
11736207\_ 4.815683 4.744453 4.76172 4.345859 4.524572 4.575084  
11736208\_ 6.199796 6.239156 6.308539 6.286499 6.226714 6.275995  
11736209\_ 8.969464 8.953382 8.96577 8.655587 8.765823 8.701578  
11736210\_ 10.40169 10.3519 10.34868 10.32053 10.34541 10.33072  
11736211\_ 6.20075 6.13404 6.219072 6.263567 6.284032 6.280537  
11736212\_ 6.226888 6.15133 6.197047 6.324973 6.289566 6.282224

11736213\_ 7. 134375 7. 105617 7. 235131 7. 08044 7. 104983 6. 954328  
11736214\_ 6. 934615 7. 025013 6. 961339 6. 965553 6. 9448 6. 981503  
11736215\_ 6. 780752 6. 7414 6. 852856 6. 621979 6. 65814 6. 604733  
11736216\_ 7. 210866 7. 147204 7. 261205 7. 178444 7. 202969 7. 204005  
11736217\_ 2. 297369 2. 187979 2. 302563 2. 361778 2. 308632 2. 095256  
11736218\_ 4. 584279 4. 545872 4. 163174 4. 610225 4. 529646 4. 497285  
11736219\_ 4. 188328 3. 989952 4. 124886 4. 071765 4. 137953 4. 211802  
11736220\_ 6. 670363 6. 577655 6. 665265 6. 776542 6. 830392 6. 818107  
11736221\_ 5. 36906 5. 395038 5. 311817 5. 414869 5. 596673 5. 502342  
11736222\_ 6. 463939 6. 448378 6. 558699 6. 742167 6. 711885 6. 754362  
11736223\_ 7. 161844 7. 042386 7. 182498 6. 910609 6. 92965 6. 838859  
11736224\_ 7. 292715 7. 361381 7. 361381 6. 981844 7. 000824 6. 97875  
11736225\_ 8. 882945 8. 862622 8. 869092 8. 657787 8. 61875 8. 581644  
11736226\_ 7. 438395 7. 280619 7. 302976 6. 883035 6. 942276 6. 967649  
11736227\_ 7. 952981 7. 894272 7. 86209 7. 556755 7. 373286 7. 454564  
11736228\_ 8. 032478 7. 98228 8. 094626 8. 356063 8. 397228 8. 370902  
11736229\_ 11. 15087 11. 05512 11. 08259 10. 38255 10. 41623 10. 35851  
11736230\_ 7. 272767 7. 146833 7. 042517 6. 69726 6. 865012 6. 67471  
11736231\_ 5. 285218 5. 361268 5. 3518 5. 298025 5. 379681 5. 294436  
11736232\_ 8. 257234 8. 21697 8. 173355 8. 157005 8. 110657 8. 206523  
11736233\_ 5. 618957 5. 710748 5. 830876 5. 900031 5. 921379 5. 845868  
11736234\_ 7. 117834 6. 960633 7. 042517 7. 190082 7. 15556 7. 090932  
11736235\_ 6. 500771 6. 481046 6. 51582 6. 526938 6. 395915 6. 503298  
11736236\_ 6. 367051 6. 345657 6. 478352 5. 863687 5. 672345 5. 772487  
11736237\_ 2. 412911 2. 179542 2. 095256 2. 223083 2. 117278 2. 164248  
11736238\_ 6. 198878 6. 144267 6. 146066 5. 531642 5. 253334 5. 415179  
11736239\_ 6. 78348 6. 703047 6. 849139 6. 216313 6. 052151 6. 144387  
11736240\_ 6. 678761 6. 716225 6. 695739 8. 338677 8. 282293 8. 261474  
11736241\_ 9. 652566 9. 54668 9. 68619 9. 60876 9. 631538 9. 660455  
11736242\_ 6. 642885 6. 567234 6. 648288 6. 714445 6. 643784 6. 694513  
11736243\_ 8. 816611 8. 764456 8. 807554 8. 679869 8. 685409 8. 675853  
11736244\_ 8. 09061 8. 060448 8. 066811 6. 883038 6. 910674 7. 044686  
11736245\_ 7. 370461 7. 335129 7. 329288 7. 092452 7. 174876 7. 183172  
11736246\_ 7. 826138 7. 93216 7. 861825 7. 662275 7. 620904 7. 538732  
11736247\_ 9. 956252 9. 995272 10. 01352 9. 764415 9. 749657 9. 742221  
11736248\_ 2. 456615 2. 612593 2. 442816 2. 600979 2. 514154 2. 766146  
11736249\_ 5. 352543 5. 311655 5. 52523 7. 536921 7. 427357 7. 48129  
11736250\_ 9. 662602 9. 6377 9. 652595 10. 20301 10. 19454 10. 1554  
11736251\_ 3. 364041 3. 412069 3. 398236 3. 378803 3. 096017 3. 308993  
11736252\_ 6. 323587 6. 481046 6. 224049 6. 551245 6. 481046 6. 521952  
11736253\_ 9. 040885 9. 051827 8. 989182 9. 061923 8. 980125 9. 005889  
11736254\_ 9. 524671 9. 475294 9. 558962 9. 403976 9. 447785 9. 422715  
11736255\_ 7. 666285 7. 533864 7. 690221 7. 76122 7. 691097 7. 829691  
11736256\_ 5. 811064 5. 854101 5. 704982 5. 862915 5. 937776 5. 767994  
11736257\_ 8. 080615 7. 938246 8. 093663 6. 978143 7. 091076 6. 977864  
11736258\_ 6. 553063 6. 55414 6. 720486 6. 004447 5. 999169 5. 742595  
11736259\_ 3. 609852 3. 88597 3. 761088 3. 867446 3. 924877 3. 379346  
11736260\_ 2. 56766 2. 47102 2. 584507 2. 502575 2. 641496 2. 599915  
11736261\_ 5. 734897 5. 826194 5. 730742 5. 78379 5. 73085 5. 714858  
11736262\_ 2. 834444 3. 000785 3. 025972 3. 835241 3. 57714 3. 949728  
11736263\_ 5. 199388 5. 200157 5. 17639 5. 199388 5. 24078 5. 219151

11736264\_ 3. 128934 3. 269971 3. 089159 3. 45564 3. 499813 3. 207083  
11736265\_ 6. 481345 6. 454908 6. 264281 6. 460818 6. 431994 6. 4114  
11736266\_ 7. 572833 7. 690855 7. 605551 7. 780196 7. 738748 7. 749713  
11736267\_ 9. 044892 9. 001907 9. 032463 8. 731887 8. 680777 8. 69859  
11736268\_ 4. 362934 4. 672784 4. 713583 4. 873628 4. 902241 5. 045802  
11736269\_ 8. 25668 8. 245772 8. 262412 8. 253296 8. 249485 8. 255797  
11736270\_ 7. 271417 7. 258364 7. 358974 7. 1436 7. 211327 7. 221858  
11736271\_ 8. 612767 8. 522786 8. 605223 8. 529214 8. 518289 8. 533584  
11736272\_ 5. 507298 5. 704919 5. 710947 5. 672327 5. 646054 5. 65925  
11736273\_ 2. 361778 2. 428102 2. 474077 2. 361778 2. 586431 2. 497673  
11736274\_ 3. 249924 3. 590687 3. 457403 3. 503743 3. 366891 3. 443157  
11736275\_ 4. 790281 4. 924544 4. 902646 4. 659324 4. 59386 4. 381505  
11736276\_ 5. 736831 5. 845424 5. 742059 6. 01338 6. 086506 6. 056896  
11736277\_ 6. 596953 6. 47766 6. 549785 5. 716324 5. 614579 5. 763455  
11736278\_ 6. 86514 6. 765911 6. 853218 6. 002863 6. 023534 6. 00347  
11736279\_ 5. 679166 5. 742326 5. 746776 4. 425834 4. 310736 4. 3836  
11736280\_ 3. 576212 3. 676521 3. 469992 3. 634763 3. 682055 3. 627444  
11736281\_ 1. 846444 1. 899572 1. 907464 1. 785734 1. 942951 1. 826104  
11736282\_ 7. 163044 7. 176797 7. 17786 6. 702612 6. 794493 6. 832603  
11736283\_ 5. 580844 5. 608359 5. 52418 5. 435341 5. 445864 5. 323092  
11736284\_ 3. 487619 3. 527883 3. 367867 3. 21279 3. 586488 3. 527883  
11736285\_ 7. 813342 7. 753507 7. 666041 7. 678988 7. 72194 7. 694316  
11736286\_ 5. 259513 5. 360803 5. 096089 5. 507637 5. 466199 5. 549042  
11736287\_ 6. 745992 6. 698809 6. 856586 6. 78256 6. 757143 6. 820069  
11736288\_ 5. 209259 5. 058173 5. 290776 5. 11527 5. 156109 5. 111976  
11736289\_ 8. 135452 8. 13296 8. 084682 6. 999363 7. 070038 7. 03884  
11736290\_ 6. 134064 5. 790762 5. 909073 5. 699745 5. 674829 5. 732413  
11736291\_ 5. 848758 6. 005251 5. 736831 5. 750238 5. 590582 5. 754755  
11736292\_ 4. 852159 4. 704355 4. 707942 4. 353905 4. 348766 4. 275543  
11736293\_ 9. 40163 9. 343122 9. 425573 9. 50149 9. 471481 9. 49448  
11736294\_ 3. 537893 3. 589205 3. 398236 3. 586971 3. 413262 3. 750935  
11736295\_ 4. 382485 4. 159018 4. 299901 4. 509703 4. 473156 4. 845254  
11736296\_ 2. 309186 2. 115841 2. 115503 2. 115503 2. 090528 1. 951214  
11736297\_ 4. 897281 5. 029529 4. 927818 5. 055707 4. 923191 5. 032033  
11736298\_ 5. 835295 5. 980408 5. 950197 5. 978947 5. 990974 6. 011116  
11736299\_ 4. 846352 4. 899003 4. 867676 4. 790278 4. 873569 4. 899003  
11736300\_ 4. 391287 4. 602962 4. 736625 4. 73156 4. 610556 4. 628359  
11736301\_ 4. 50585 4. 488376 4. 510297 4. 352203 4. 50585 4. 393567  
11736302\_ 3. 83399 3. 976025 3. 99314 4. 236877 4. 290003 4. 145966  
11736303\_ 5. 205333 5. 116689 5. 2397 5. 133947 5. 073036 5. 157357  
11736304\_ 6. 337287 6. 282134 6. 356417 5. 800441 5. 918118 5. 893437  
11736305\_ 7. 097675 7. 050177 7. 053419 6. 660464 6. 636677 6. 673632  
11736306\_ 2. 8095 2. 943918 2. 659122 2. 878113 3. 015628 2. 83198  
11736307\_ 10. 63915 10. 66856 10. 65543 10. 28841 10. 31817 10. 22069  
11736308\_ 9. 619747 9. 529251 9. 604844 9. 215399 9. 238282 9. 261147  
11736309\_ 9. 977925 10. 0372 9. 843126 9. 726672 9. 691245 9. 545133  
11736310\_ 10. 7196 10. 71805 10. 71345 10. 26731 10. 28572 10. 27852  
11736311\_ 3. 53573 3. 748962 3. 703182 3. 724915 3. 821546 3. 879309  
11736312\_ 3. 366416 3. 42779 3. 035802 3. 425396 3. 424583 3. 137444  
11736313\_ 3. 783405 3. 644168 3. 441024 3. 659333 3. 611458 3. 726176  
11736314\_ 3. 881019 3. 930513 3. 871496 3. 911489 3. 945927 3. 875736

11736315\_ 6. 781096 6. 822242 6. 641936 7. 270862 7. 372603 7. 188137  
11736316\_ 8. 384374 8. 529835 8. 436212 8. 727904 8. 619211 8. 626299  
11736317\_ 6. 147546 6. 170189 6. 17981 6. 118838 6. 167737 6. 094413  
11736318\_ 7. 260481 7. 158431 7. 172574 6. 802581 6. 570232 6. 663985  
11736319\_ 6. 616861 6. 494168 6. 557476 6. 453475 6. 471021 6. 454245  
11736320\_ 5. 305017 5. 380649 5. 381172 5. 270559 5. 419723 5. 2666  
11736321\_ 6. 257374 6. 268964 6. 25139 6. 137481 6. 135573 6. 225578  
11736322\_ 5. 803059 5. 814587 5. 702163 5. 870768 5. 870242 5. 848772  
11736323\_ 5. 305114 5. 386409 5. 293834 5. 588427 5. 408572 5. 446814  
11736324\_ 8. 073665 8. 09997 8. 06484 7. 960489 7. 981674 7. 877726  
11736325\_ 3. 630534 3. 413447 3. 428423 3. 69294 3. 617509 3. 630666  
11736326\_ 6. 599662 6. 583207 6. 72193 6. 874545 6. 932013 6. 817986  
11736327\_ 7. 409287 7. 499566 7. 502099 6. 9303 6. 973114 6. 884533  
11736328\_ 7. 060862 7. 050336 7. 142773 6. 226969 6. 334316 6. 300706  
11736329\_ 9. 150314 9. 045291 9. 096218 8. 691633 8. 704463 8. 726745  
11736330\_ 5. 604363 5. 564748 5. 546775 5. 492643 5. 488627 5. 526688  
11736331\_ 5. 220197 5. 104432 5. 272532 5. 12015 5. 217387 5. 11784  
11736332\_ 5. 867885 5. 836923 5. 950197 6. 046326 6. 114453 6. 103703  
11736333\_ 6. 020367 6. 061328 6. 053647 6. 417292 6. 481586 6. 428787  
11736334\_ 5. 47699 5. 307047 5. 354693 5. 34781 5. 393109 5. 540691  
11736335\_ 8. 885667 8. 839644 8. 881787 8. 536245 8. 510625 8. 533158  
11736336\_ 6. 557424 6. 463734 6. 605639 6. 268749 6. 403438 6. 3453  
11736337\_ 8. 173236 8. 122194 8. 133445 8. 392305 8. 399503 8. 454622  
11736338\_ 6. 783381 6. 685168 6. 721852 6. 282224 6. 279574 6. 234564  
11736339\_ 3. 920099 3. 764359 3. 947906 3. 362325 3. 520844 3. 454122  
11736340\_ 4. 375753 4. 490905 4. 620986 4. 314737 4. 342182 4. 52373  
11736341\_ 5. 18308 5. 211287 5. 197947 5. 359911 5. 324364 5. 2793  
11736342\_ 6. 773231 6. 839113 6. 732677 6. 040069 6. 200842 6. 209363  
11736343\_ 5. 384145 5. 306716 5. 291671 5. 300456 5. 429837 5. 406075  
11736344\_ 5. 879993 5. 903137 6. 012237 5. 93062 5. 910705 5. 894697  
11736345\_ 7. 190765 7. 213346 7. 254194 7. 216197 7. 218139 7. 242814  
11736346\_ 4. 824795 4. 939636 4. 832409 5. 223945 5. 203389 5. 11187  
11736347\_ 5. 203173 5. 21628 5. 09679 5. 321878 5. 463377 5. 583807  
11736348\_ 5. 384669 5. 178706 5. 667346 5. 584813 5. 504775 5. 598299  
11736349\_ 2. 212034 2. 269931 2. 344467 2. 115349 2. 041584 2. 305937  
11736350\_ 3. 851877 3. 832378 3. 832378 3. 922273 3. 832378 3. 820422  
11736351\_ 4. 022197 4. 074625 4. 006642 4. 067239 4. 12422 4. 044341  
11736352\_ 4. 237527 4. 163572 4. 214446 4. 110882 4. 086962 4. 350655  
11736353\_ 4. 196866 4. 517293 4. 396556 4. 337988 4. 132965 4. 458759  
11736354\_ 6. 1887 6. 359681 6. 330957 6. 540813 6. 622567 6. 514914  
11736355\_ 6. 314458 6. 434563 6. 420222 6. 283304 6. 425499 6. 205217  
11736356\_ 7. 677921 7. 539902 7. 795278 7. 34675 7. 265605 7. 373769  
11736357\_ 5. 054478 4. 941428 5. 014288 5. 261819 5. 368884 5. 433785  
11736358\_ 2. 141128 2. 017663 2. 095256 2. 244033 2. 25483 2. 158292  
11736359\_ 2. 559764 2. 702752 2. 66078 2. 787986 2. 785423 2. 672639  
11736360\_ 3. 178195 3. 14541 3. 138626 3. 085975 3. 087316 3. 129672  
11736361\_ 2. 292767 1. 871816 1. 911667 2. 076577 2. 043071 2. 004127  
11736362\_ 3. 164532 3. 180062 2. 929389 3. 105941 3. 291244 3. 180062  
11736363\_ 3. 471099 3. 35569 3. 25528 3. 403718 3. 340497 3. 104057  
11736364\_ 6. 618798 6. 60637 6. 687533 7. 130485 7. 006026 7. 024057  
11736365\_ 7. 5347 7. 398727 7. 43982 7. 693803 7. 76757 7. 765234



11736366\_ 5. 669723 5. 895348 5. 664265 6. 480101 6. 531894 6. 515944  
11736367\_ 6. 648613 6. 701785 6. 628837 7. 620363 7. 564345 7. 658319  
11736368\_ 6. 167219 6. 201588 6. 256686 6. 594872 6. 790982 6. 757692  
11736369\_ 6. 487899 6. 458424 6. 407473 6. 621979 6. 595487 6. 688563  
11736370\_ 2. 539683 2. 58847 2. 872516 2. 598952 2. 652926 2. 605516  
11736371\_ 3. 54703 3. 377657 3. 363039 3. 74549 3. 521746 3. 512153  
11736372\_ 5. 14121 5. 214569 5. 168496 5. 271066 5. 153179 5. 285572  
11736373\_ 2. 718322 2. 874157 2. 576931 3. 119526 2. 960045 2. 908944  
11736374\_ 3. 752421 3. 711532 3. 711171 3. 64096 3. 712012 3. 885756  
11736375\_ 3. 879179 3. 672733 4. 061034 3. 920071 4. 115271 3. 652583  
11736376\_ 5. 746335 5. 881194 5. 667764 5. 978721 5. 821607 5. 991873  
11736377\_ 8. 552817 8. 516455 8. 646923 8. 579297 8. 721107 8. 615016  
11736378\_ 8. 806802 8. 758052 8. 871909 8. 836195 8. 787167 8. 875252  
11736379\_ 7. 298876 7. 128319 7. 27514 7. 009347 7. 098529 7. 062539  
11736380\_ 5. 018844 4. 792028 5. 018844 5. 00816 4. 970537 5. 122612  
11736381\_ 3. 67975 3. 845714 3. 873927 3. 523925 3. 873927 3. 828476  
11736382\_ 9. 324554 9. 194045 9. 349866 8. 160258 8. 179257 8. 161642  
11736383\_ 7. 292455 7. 198832 7. 099734 7. 572536 7. 514346 7. 450642  
11736384\_ 7. 256082 7. 210325 7. 120665 7. 693195 7. 462099 7. 414883  
11736385\_ 4. 385029 4. 749295 4. 370777 5. 321749 5. 417721 5. 442778  
11736386\_ 3. 356883 3. 384723 3. 290188 3. 458268 3. 376005 3. 34661  
11736387\_ 4. 421606 4. 055436 4. 466875 5. 269789 5. 129891 5. 358021  
11736388\_ 5. 640825 5. 591546 5. 748334 5. 709472 5. 734785 5. 571087  
11736389\_ 4. 738883 4. 674054 4. 701942 4. 717595 4. 791982 4. 574508  
11736390\_ 3. 935529 3. 909593 3. 939983 3. 917192 3. 916096 4. 013564  
11736391\_ 4. 8389 4. 834903 4. 865449 4. 961385 4. 46517 4. 708775  
11736392\_ 6. 669606 6. 721011 6. 607441 6. 718859 6. 790012 6. 72204  
11736393\_ 3. 754529 3. 835108 3. 641374 3. 682558 3. 77613 3. 851429  
11736394\_ 7. 499208 7. 423699 7. 635371 6. 497715 6. 59688 6. 589889  
11736395\_ 5. 990824 5. 890158 5. 892158 6. 097927 6. 104931 6. 057159  
11736396\_ 7. 461975 7. 334322 7. 419934 7. 561651 7. 534821 7. 613189  
11736397\_ 5. 470997 5. 587234 5. 451012 5. 765699 5. 724426 5. 89015  
11736398\_ 5. 498321 5. 627995 5. 539759 5. 751919 5. 64247 5. 865674  
11736399\_ 4. 341168 4. 445113 4. 4229 4. 618777 4. 485457 4. 421143  
11736400\_ 6. 245135 6. 324768 6. 133411 6. 052998 6. 2197 6. 094914  
11736401\_ 6. 209149 6. 335923 6. 398783 6. 23926 6. 326683 6. 31701  
11736402\_ 5. 343415 5. 456513 5. 390276 5. 372214 5. 305933 5. 39282  
11736403\_ 5. 219106 5. 190533 5. 479429 5. 137386 5. 028852 5. 058477  
11736404\_ 5. 747649 5. 738984 5. 920435 8. 240424 8. 233143 8. 25004  
11736405\_ 9. 494846 9. 472982 9. 477689 9. 948745 9. 975363 9. 833146  
11736406\_ 5. 484659 5. 513366 5. 49323 5. 490484 5. 509124 5. 453315  
11736407\_ 6. 397946 6. 246784 6. 281807 6. 323861 6. 331101 6. 282224  
11736408\_ 2. 894109 2. 967118 3. 074587 2. 865789 2. 796986 2. 586197  
11736409\_ 9. 580298 9. 561617 9. 590217 9. 568446 9. 607549 9. 628238  
11736410\_ 6. 456762 6. 54014 6. 5434 6. 536255 6. 638474 6. 44897  
11736411\_ 6. 876192 6. 774755 6. 77601 6. 839727 6. 943347 6. 906657  
11736412\_ 4. 643101 4. 974065 4. 801988 4. 939948 4. 816403 4. 956888  
11736413\_ 6. 229429 6. 055499 6. 123208 4. 988416 5. 020058 5. 271821  
11736414\_ 6. 193161 5. 838925 5. 983806 6. 175854 6. 120827 6. 27416  
11736415\_ 6. 152238 6. 174098 6. 107143 6. 123401 6. 199769 6. 384804  
11736416\_ 7. 260556 7. 283348 7. 342717 7. 274091 7. 267332 7. 200961

11736417\_ 7. 969578 7. 943396 7. 96341 7. 809076 7. 821325 7. 708747  
11736418\_ 8. 027615 7. 879782 7. 998229 7. 548265 7. 514008 7. 523072  
11736419\_ 7. 729583 7. 729583 7. 81477 6. 984951 6. 996718 7. 089499  
11736420\_ 7. 253759 7. 324109 7. 276333 7. 150592 7. 253612 7. 180951  
11736421\_ 7. 313274 7. 320302 7. 312283 7. 180889 7. 262723 7. 195872  
11736422\_ 3. 007034 3. 028985 3. 039557 2. 9758 3. 177075 2. 910128  
11736423\_ 4. 039633 4. 067703 3. 80618 3. 852881 3. 879965 3. 869198  
11736424\_ 6. 070078 6. 159765 6. 031181 6. 368034 6. 41874 6. 427472  
11736425\_ 6. 770634 6. 572288 6. 634356 6. 61344 6. 574173 6. 580125  
11736426\_ 10. 3301 10. 28095 10. 33792 9. 52375 9. 456073 9. 534458  
11736427\_ 7. 923207 7. 909004 7. 886936 7. 021446 6. 88623 6. 982327  
11736428\_ 5. 272648 5. 117403 5. 285548 5. 507637 5. 523406 5. 502342  
11736429\_ 5. 870242 5. 848743 5. 822471 6. 898065 6. 86887 6. 890558  
11736430\_ 8. 023356 8. 117431 8. 080278 7. 890633 7. 912974 7. 877759  
11736431\_ 8. 075699 7. 990425 8. 060507 7. 918165 7. 935186 7. 894817  
11736432\_ 8. 506453 8. 567889 8. 570888 8. 427166 8. 436859 8. 356131  
11736433\_ 6. 619747 6. 734285 6. 660792 6. 69759 6. 765711 6. 706689  
11736434\_ 4. 352139 4. 285016 4. 198256 4. 427569 4. 218269 4. 214618  
11736435\_ 2. 69788 2. 878196 2. 991849 2. 471297 2. 600713 2. 792367  
11736436\_ 6. 924618 6. 937785 6. 807291 6. 660519 6. 672355 6. 575184  
11736437\_ 8. 939565 8. 990563 8. 9356 8. 554849 8. 569582 8. 519203  
11736438\_ 8. 711754 8. 668931 8. 708652 8. 322708 8. 365549 8. 35735  
11736439\_ 6. 74289 6. 572448 6. 565199 6. 675876 6. 80251 6. 81663  
11736440\_ 6. 549524 6. 445037 6. 467518 6. 657817 6. 709391 6. 728927  
11736441\_ 5. 54296 5. 68117 5. 611626 5. 814151 5. 790005 5. 755446  
11736442\_ 2. 475175 2. 366406 2. 256919 2. 38113 2. 079884 2. 170776  
11736443\_ 3. 209013 3. 101383 2. 74232 3. 062629 2. 917678 2. 83309  
11736444\_ 8. 072329 8. 001108 8. 025983 7. 459177 7. 457216 7. 519742  
11736445\_ 6. 215541 6. 263313 6. 2884 5. 970554 6. 094967 5. 891387  
11736446\_ 7. 346291 7. 197535 7. 332435 7. 592454 7. 565175 7. 556078  
11736447\_ 7. 823416 7. 720061 7. 821906 8. 59445 8. 568167 8. 591486  
11736448\_ 6. 496705 6. 468134 6. 49142 6. 637285 6. 529136 6. 579215  
11736449\_ 2. 235709 2. 244192 2. 390732 2. 522702 2. 372337 2. 174543  
11736450\_ 3. 371279 3. 397305 3. 371279 3. 345254 3. 350992 3. 371279  
11736451\_ 5. 310982 5. 040471 5. 038693 4. 787845 4. 984669 4. 850323  
11736452\_ 7. 892896 7. 896116 7. 89664 7. 486091 7. 351316 7. 479182  
11736453\_ 4. 710495 4. 651276 4. 669949 4. 572043 4. 621603 4. 610722  
11736454\_ 3. 060095 2. 966262 2. 87233 2. 87233 2. 795832 3. 163193  
11736455\_ 2. 613682 2. 753906 2. 71364 2. 768838 2. 729457 2. 838102  
11736456\_ 4. 980846 4. 988914 4. 937602 5. 122871 4. 980846 5. 204582  
11736457\_ 5. 084874 5. 232789 5. 084874 4. 968723 5. 234149 5. 030161  
11736458\_ 4. 992812 5. 235682 5. 052756 4. 996643 5. 232726 5. 052756  
11736459\_ 2. 909064 2. 909064 2. 909064 2. 96376 3. 070708 2. 958979  
11736460\_ 4. 249185 4. 345187 4. 577965 4. 277531 4. 189465 4. 319734  
11736461\_ 5. 618767 5. 435814 5. 55693 5. 196001 5. 269609 5. 372514  
11736462\_ 6. 236112 6. 458726 6. 288356 6. 446598 6. 419444 6. 267901  
11736463\_ 5. 403966 5. 639206 5. 528323 5. 584813 5. 574881 5. 580004  
11736464\_ 7. 554303 7. 485748 7. 551648 6. 705967 6. 597179 6. 83432  
11736465\_ 7. 25622 7. 082338 7. 298394 6. 366235 6. 429235 6. 497357  
11736466\_ 8. 398 8. 460373 8. 518685 8. 450084 8. 484851 8. 461459  
11736467\_ 4. 421897 4. 515966 4. 138544 4. 386697 4. 432281 4. 310453

11736468\_ 6. 757901 6. 615801 6. 604788 7. 103061 7. 116109 7. 060805  
11736469\_ 5. 999744 5. 841177 6. 027148 5. 220851 5. 352523 5. 42376  
11736470\_ 7. 584514 7. 536774 7. 571872 7. 85942 7. 940166 7. 933452  
11736471\_ 4. 883513 4. 870558 4. 792033 5. 121248 4. 93837 5. 01402  
11736472\_ 7. 422611 7. 466486 7. 374996 7. 394226 7. 501771 7. 481087  
11736473\_ 4. 45538 4. 591774 4. 444156 4. 431404 4. 381787 4. 504859  
11736474\_ 4. 398638 4. 800644 4. 709459 4. 68052 4. 500529 4. 764066  
11736475\_ 3. 63736 4. 093205 3. 801548 3. 847809 3. 774851 3. 961495  
11736476\_ 6. 313854 6. 373356 6. 350153 6. 423742 6. 401153 6. 450523  
11736477\_ 8. 199648 8. 160896 8. 290764 7. 232471 7. 128132 7. 204396  
11736478\_ 7. 50511 7. 524418 7. 489176 6. 580972 6. 4518 6. 589889  
11736479\_ 8. 587201 8. 52876 8. 545213 9. 192452 9. 164463 9. 0985  
11736480\_ 4. 430232 4. 429408 4. 379481 4. 603043 4. 696334 4. 535346  
11736481\_ 4. 892613 4. 880238 4. 827735 4. 901147 4. 909143 5. 034201  
11736482\_ 5. 848541 5. 633981 5. 72465 5. 808763 5. 787302 5. 766259  
11736483\_ 6. 477948 6. 58525 6. 490823 6. 446328 6. 57153 6. 501538  
11736484\_ 5. 701612 5. 723428 5. 639295 6. 058728 6. 14489 6. 189612  
11736485\_ 2. 605516 2. 579016 2. 509628 2. 605516 2. 551573 2. 773011  
11736486\_ 3. 987053 4. 180101 3. 892149 4. 171752 4. 107104 4. 018455  
11736487\_ 4. 669396 4. 883526 4. 682792 4. 883526 4. 921772 4. 85656  
11736488\_ 6. 732383 6. 795994 6. 592616 6. 616048 6. 862884 6. 768447  
11736489\_ 6. 899003 6. 934197 6. 874408 6. 539082 6. 55619 6. 512773  
11736490\_ 3. 922485 3. 947437 4. 02166 3. 925181 4. 045758 3. 947437  
11736491\_ 7. 356041 7. 244922 7. 445919 7. 047382 7. 112325 7. 210605  
11736492\_ 4. 025138 3. 808743 3. 720141 4. 377071 4. 360822 4. 370994  
11736493\_ 5. 904496 5. 7855 5. 777987 6. 252596 6. 321029 6. 248496  
11736494\_ 7. 653408 7. 62684 7. 709717 7. 575531 7. 581951 7. 679839  
11736495\_ 7. 250839 7. 024443 7. 162678 6. 93873 6. 952401 6. 96658  
11736496\_ 7. 410517 7. 369753 7. 438417 7. 202891 7. 204624 7. 341828  
11736497\_ 7. 524786 7. 476657 7. 468516 7. 423603 7. 467486 7. 483984  
11736498\_ 7. 935627 7. 975821 7. 978909 7. 830104 7. 722204 7. 823696  
11736499\_ 5. 073036 5. 128521 5. 168879 5. 290567 5. 11267 5. 287649  
11736500\_ 6. 242596 6. 406815 6. 270931 6. 491196 6. 57932 6. 28948  
11736501\_ 7. 984833 7. 984833 8. 031102 8. 547776 8. 452756 8. 581981  
11736502\_ 5. 050595 5. 021165 5. 029529 5. 081252 5. 146681 5. 133971  
11736503\_ 6. 119934 6. 121646 6. 02511 6. 060607 6. 057274 6. 154642  
11736504\_ 6. 858159 6. 9865 6. 949639 7. 329705 7. 361816 7. 368852  
11736505\_ 2. 284454 2. 257442 2. 176406 2. 068512 2. 250167 2. 24888  
11736506\_ 1. 902824 1. 92066 1. 645886 1. 805448 2. 045511 1. 817519  
11736507\_ 9. 820802 9. 777441 9. 819995 9. 645642 9. 599414 9. 550739  
11736508\_ 3. 575615 3. 723624 3. 740892 3. 799133 3. 480945 3. 706091  
11736509\_ 5. 59165 5. 753933 5. 759927 5. 039275 5. 183024 5. 228627  
11736510\_ 5. 286148 5. 393334 5. 427828 5. 519703 5. 459979 5. 428843  
11736511\_ 5. 188053 4. 861594 5. 050587 4. 651453 4. 862778 4. 764073  
11736512\_ 5. 070306 4. 966756 5. 119146 4. 602334 4. 514487 4. 763744  
11736513\_ 7. 095408 7. 008557 7. 183172 6. 553324 6. 414953 6. 586569  
11736514\_ 3. 436116 3. 190833 3. 116608 3. 224791 3. 29398 3. 175392  
11736515\_ 4. 658113 4. 670213 4. 617059 4. 871878 4. 773076 4. 748837  
11736516\_ 5. 156303 4. 881738 4. 843575 4. 731256 4. 602917 4. 975904  
11736517\_ 6. 454448 6. 400571 6. 463494 6. 800209 6. 859208 6. 81  
11736518\_ 6. 572698 6. 411576 6. 595484 6. 864381 6. 946959 6. 994726

11736519\_ 8. 514311 8. 497451 8. 536844 8. 008706 7. 979715 8. 005972  
11736520\_ 3. 554193 3. 439304 3. 498127 3. 823136 3. 616081 3. 551997  
11736521\_ 4. 389629 4. 532631 4. 495429 4. 068565 3. 890948 4. 170766  
11736522\_ 7. 521079 7. 637758 7. 736837 7. 879238 7. 920555 7. 916518  
11736523\_ 7. 586227 7. 497292 7. 597521 7. 960381 7. 926762 7. 949194  
11736524\_ 5. 003361 5. 216664 5. 058958 5. 154484 5. 339967 5. 064465  
11736525\_ 2. 9188 2. 919812 2. 938148 2. 944346 2. 779865 2. 98231  
11736526\_ 5. 295143 5. 270365 5. 394646 4. 81515 4. 621477 4. 668134  
11736527\_ 7. 6067 7. 600605 7. 589758 8. 219581 8. 222304 8. 28495  
11736528\_ 5. 785565 5. 785151 5. 794406 6. 618966 6. 814372 6. 797306  
11736529\_ 2. 984752 2. 83198 2. 72789 2. 824862 2. 718322 2. 519943  
11736530\_ 4. 229432 4. 424381 4. 295996 4. 557329 4. 347179 4. 23722  
11736531\_ 4. 87067 4. 853414 4. 725256 5. 111378 4. 992944 4. 920861  
11736532\_ 5. 85264 5. 789228 5. 858517 5. 772209 5. 862371 5. 866342  
11736533\_ 6. 499904 6. 282412 6. 343927 6. 440377 6. 352358 6. 509505  
11736534\_ 5. 855964 5. 906211 5. 834846 5. 771129 5. 85054 5. 798613  
11736535\_ 2. 980696 2. 842938 2. 736136 2. 681908 3. 099904 2. 483305  
11736536\_ 5. 60067 5. 666857 5. 570301 5. 563715 5. 56057 5. 552888  
11736537\_ 5. 304357 5. 179303 5. 106532 5. 507637 5. 490342 5. 478794  
11736538\_ 2. 913034 3. 423295 3. 413734 3. 400651 3. 797504 3. 527516  
11736539\_ 7. 173316 7. 068818 7. 171105 6. 871774 6. 786484 6. 847037  
11736540\_ 7. 464769 7. 471675 7. 569144 7. 187474 7. 1863 7. 221083  
11736541\_ 3. 037084 2. 991496 2. 776442 2. 776442 2. 873356 2. 703197  
11736542\_ 5. 1568 5. 252856 5. 157692 5. 20512 5. 095483 5. 253153  
11736543\_ 5. 902232 6. 038799 6. 038799 6. 319518 6. 307274 6. 447756  
11736544\_ 3. 783856 3. 779288 3. 740892 3. 766786 3. 858196 3. 870698  
11736545\_ 2. 988093 3. 020251 2. 848587 2. 912551 3. 143453 3. 104975  
11736546\_ 2. 933062 2. 780966 2. 758773 3. 103017 3. 117528 3. 147911  
11736547\_ 8. 069536 8. 178815 8. 100062 8. 407422 8. 553405 8. 477612  
11736548\_ 5. 898277 5. 700256 5. 998421 6. 42732 6. 445408 6. 554725  
11736549\_ 7. 12407 7. 224016 7. 374996 7. 121119 7. 055228 7. 154768  
11736550\_ 6. 745858 6. 818415 6. 838382 6. 741005 6. 72914 6. 68034  
11736551\_ 5. 412075 5. 103316 5. 177027 4. 749531 4. 748967 4. 760847  
11736552\_ 7. 426935 7. 300469 7. 321501 6. 962918 6. 767954 6. 774496  
11736553\_ 5. 045187 5. 19471 5. 002041 5. 305969 5. 299525 5. 266356  
11736554\_ 6. 24798 6. 133115 6. 231775 5. 981921 5. 968184 5. 999882  
11736555\_ 9. 199 9. 089588 9. 210445 7. 601159 7. 675514 7. 755225  
11736556\_ 9. 060376 8. 994258 8. 914427 8. 042964 8. 027552 8. 109579  
11736557\_ 6. 792183 6. 663064 6. 67941 6. 839141 6. 857028 6. 898793  
11736558\_ 6. 859991 6. 849603 6. 816315 6. 840375 6. 893279 6. 881018  
11736559\_ 2. 397192 2. 713246 2. 429362 2. 149912 2. 096191 2. 206288  
11736560\_ 5. 02713 5. 048435 4. 976683 4. 934044 5. 211175 5. 232097  
11736561\_ 2. 47102 2. 587971 2. 47102 2. 335766 2. 44859 2. 49345  
11736562\_ 6. 614396 6. 515559 6. 627153 6. 369416 6. 376295 6. 436079  
11736563\_ 4. 006 3. 997131 3. 887227 4. 067703 4. 456868 4. 028568  
11736564\_ 5. 762789 5. 45974 5. 528362 4. 904291 4. 998114 5. 16374  
11736565\_ 7. 390283 7. 229704 7. 379641 6. 656159 6. 647203 6. 698153  
11736566\_ 3. 853067 3. 669552 3. 809463 4. 157768 4. 189017 4. 200678  
11736567\_ 6. 308806 6. 269191 6. 266459 6. 318829 6. 438482 6. 524112  
11736568\_ 6. 088542 5. 922839 6. 099369 6. 34887 6. 325608 6. 374825  
11736569\_ 3. 387671 3. 387671 3. 234691 3. 153637 3. 064561 3. 455539

11736570\_ 9. 468156 9. 449316 9. 513078 9. 621576 9. 664791 9. 625612  
11736571\_ 5. 255615 5. 245744 5. 276736 5. 331994 5. 346537 5. 339157  
11736572\_ 2. 964813 2. 945929 3. 061853 3. 025324 3. 158252 3. 061205  
11736573\_ 7. 774439 7. 713357 7. 769268 7. 546114 7. 654775 7. 647265  
11736574\_ 4. 389785 4. 322675 4. 232421 4. 239664 4. 252123 4. 320688  
11736575\_ 2. 876143 2. 707416 2. 797833 3. 068376 3. 005808 3. 154377  
11736576\_ 5. 199467 5. 196846 5. 284176 5. 248552 5. 328862 5. 284699  
11736577\_ 6. 108768 5. 911077 6. 069567 6. 339012 6. 210789 6. 33679  
11736578\_ 6. 690368 6. 73222 6. 756038 6. 580805 6. 602088 6. 491014  
11736579\_ 4. 587911 4. 865787 4. 743319 4. 896498 4. 926463 4. 685286  
11736580\_ 3. 93475 3. 676357 4. 044113 4. 022036 3. 941024 4. 180938  
11736581\_ 4. 020176 3. 984423 4. 173933 4. 24014 4. 131001 4. 265497  
11736582\_ 6. 97262 6. 865192 6. 915608 6. 226396 6. 238736 6. 31053  
11736583\_ 6. 655065 6. 575165 6. 749214 6. 20989 6. 122294 6. 266696  
11736584\_ 5. 507556 5. 38308 5. 520917 5. 553365 5. 541494 5. 508522  
11736585\_ 4. 379549 4. 448442 4. 527387 4. 47125 4. 61593 4. 717074  
11736586\_ 1. 921293 2. 156022 2. 085573 1. 994694 2. 03451 2. 128442  
11736587\_ 6. 694847 6. 694533 6. 653191 6. 602399 6. 635979 6. 646414  
11736588\_ 4. 208876 4. 225509 3. 950079 4. 268416 4. 257114 4. 172611  
11736589\_ 6. 129336 6. 051836 6. 205383 6. 850646 6. 85482 6. 886954  
11736590\_ 5. 423952 5. 543253 5. 542544 5. 677741 5. 697035 5. 72967  
11736591\_ 8. 204048 8. 10062 8. 132395 8. 145384 8. 153929 8. 106436  
11736592\_ 1. 920644 2. 103157 1. 881698 2. 121675 2. 057612 2. 085758  
11736593\_ 2. 854897 2. 840361 2. 673795 2. 958038 2. 914704 2. 824487  
11736594\_ 6. 78511 6. 777813 7. 022782 6. 52467 6. 534845 6. 53416  
11736595\_ 3. 044419 3. 069504 3. 060912 3. 044553 3. 037755 3. 02653  
11736596\_ 6. 98796 6. 917936 7. 05654 8. 039741 7. 990912 8. 000079  
11736597\_ 5. 704826 5. 789311 5. 833676 6. 750656 6. 802918 6. 748713  
11736598\_ 6. 073142 6. 134756 6. 066647 6. 119697 6. 087357 6. 265171  
11736599\_ 5. 599289 5. 620711 5. 668796 5. 941728 5. 941744 5. 949095  
11736600\_ 4. 705901 4. 709463 4. 677974 4. 87166 5. 003452 5. 073036  
11736601\_ 4. 290393 4. 067703 4. 208276 4. 738134 4. 786399 4. 453063  
11736602\_ 4. 760719 4. 709463 4. 985341 5. 367635 5. 283047 5. 480365  
11736603\_ 7. 222073 7. 27514 7. 191202 8. 055507 8. 020481 8. 021381  
11736604\_ 9. 35366 9. 314515 9. 384484 9. 330803 9. 348652 9. 36765  
11736605\_ 8. 597254 8. 507473 8. 473948 8. 648846 8. 65032 8. 662141  
11736606\_ 7. 043658 6. 936092 7. 014379 6. 71567 6. 687354 6. 78188  
11736607\_ 4. 370484 4. 510279 4. 61265 4. 229052 4. 093484 4. 181765  
11736608\_ 4. 990373 4. 932194 4. 52373 4. 956185 4. 949696 5. 029374  
11736609\_ 7. 830334 7. 875481 7. 754453 7. 744694 7. 766439 7. 743061  
11736610\_ 6. 174535 6. 294074 6. 315306 5. 838338 5. 709188 5. 818837  
11736611\_ 6. 696043 6. 734916 6. 683112 6. 179971 6. 10329 5. 938686  
11736612\_ 6. 859285 6. 873808 6. 942917 6. 279946 6. 259154 6. 387732  
11736613\_ 7. 161735 7. 068929 7. 020082 6. 270594 6. 486261 6. 221649  
11736614\_ 6. 633288 6. 834059 6. 774453 6. 79183 6. 857405 6. 855991  
11736615\_ 4. 963154 4. 937747 4. 858768 4. 797101 4. 884809 4. 923991  
11736616\_ 2. 676418 2. 654672 2. 412721 2. 757799 2. 777098 2. 491607  
11736617\_ 4. 415744 3. 890562 4. 141929 4. 380767 4. 099927 4. 251819  
11736618\_ 8. 119853 8. 048914 8. 115984 8. 12583 8. 095189 8. 05824  
11736619\_ 5. 340846 5. 316561 5. 253543 5. 326405 5. 375457 5. 43398  
11736620\_ 1. 736233 1. 736233 1. 949858 1. 796171 1. 611416 1. 637814

11736621\_ 4. 634216 4. 793096 4. 6716 4. 797877 4. 872334 4. 529947  
11736622\_ 5. 881378 5. 789383 5. 827799 5. 872579 5. 909266 5. 990215  
11736623\_ 6. 887742 6. 761457 6. 855072 6. 596666 6. 632167 6. 68949  
11736624\_ 5. 237842 5. 431406 5. 28673 5. 3515 5. 426098 5. 464049  
11736625\_ 3. 653179 3. 75755 3. 600548 3. 690658 3. 800446 3. 705625  
11736626\_ 3. 413033 3. 153701 3. 265396 2. 981787 3. 195025 3. 079346  
11736627\_ 4. 511231 4. 587506 4. 653834 4. 645727 4. 55459 4. 437644  
11736628\_ 4. 314091 4. 476427 4. 403222 4. 506716 4. 506716 4. 558141  
11736629\_ 5. 544167 5. 564875 5. 447919 5. 544891 5. 538862 5. 585731  
11736630\_ 5. 783809 5. 921807 5. 692599 5. 743985 5. 764831 5. 663178  
11736631\_ 7. 122327 7. 201162 7. 09328 7. 13904 7. 167668 7. 1258  
11736632\_ 5. 145958 5. 02038 4. 811078 4. 951543 4. 896633 4. 843617  
11736633\_ 7. 316437 7. 243279 7. 263216 7. 27633 7. 309881 7. 264652  
11736634\_ 4. 219856 4. 352121 4. 213226 4. 370443 3. 768288 4. 297171  
11736635\_ 8. 722416 8. 671102 8. 752097 8. 712012 8. 683411 8. 734238  
11736636\_ 5. 400413 5. 400001 5. 389785 5. 479179 5. 472049 5. 292203  
11736637\_ 6. 584888 6. 471147 6. 567423 5. 958751 5. 834112 5. 865747  
11736638\_ 5. 063156 4. 887933 4. 88241 4. 865706 4. 878384 5. 100422  
11736639\_ 5. 75993 5. 641966 5. 661649 5. 349159 5. 417897 5. 297498  
11736640\_ 5. 247739 5. 147252 4. 943158 5. 167996 5. 104646 5. 292261  
11736641\_ 5. 452111 5. 185904 5. 215581 5. 185943 5. 13995 5. 303035  
11736642\_ 6. 841094 6. 818301 6. 86774 6. 842285 6. 832212 6. 934184  
11736643\_ 5. 668569 5. 575486 5. 405806 5. 466318 5. 491134 5. 552015  
11736644\_ 2. 898319 3. 006217 3. 239906 3. 15465 3. 21279 3. 061205  
11736645\_ 7. 009571 7. 020101 7. 183172 6. 620035 6. 564141 6. 567443  
11736646\_ 6. 023517 6. 047081 5. 9202 5. 92552 5. 968654 5. 975992  
11736647\_ 9. 123038 9. 128927 9. 088564 8. 564776 8. 630314 8. 642957  
11736648\_ 2. 212172 2. 144904 2. 233159 2. 117684 2. 123917 2. 253892  
11736649\_ 2. 207575 2. 223498 2. 135897 2. 079884 2. 25483 2. 200479  
11736650\_ 5. 571055 5. 700548 5. 567097 5. 889049 5. 641381 5. 695937  
11736651\_ 3. 764633 4. 087498 3. 804101 3. 986355 3. 913343 4. 063637  
11736652\_ 3. 26665 3. 478721 3. 312841 3. 151178 3. 279502 3. 207145  
11736653\_ 4. 74218 4. 9226 4. 723168 5. 073036 4. 919237 4. 930141  
11736654\_ 5. 285218 5. 400431 5. 283075 5. 321749 5. 418712 5. 238856  
11736655\_ 8. 026957 7. 953274 8. 009087 8. 357032 8. 321994 8. 344274  
11736656\_ 6. 826946 6. 673028 6. 957314 6. 262821 6. 1721 6. 311251  
11736657\_ 7. 024525 7. 054828 7. 01811 7. 077682 7. 155004 7. 030043  
11736658\_ 5. 241133 5. 130248 5. 478534 4. 705173 4. 953799 4. 960936  
11736659\_ 5. 976698 6. 042793 5. 877803 5. 557391 5. 551354 5. 519252  
11736660\_ 4. 639461 4. 545104 4. 714851 4. 367176 4. 530405 4. 225724  
11736661\_ 2. 913265 3. 018695 3. 467186 2. 703126 2. 609165 2. 973137  
11736662\_ 5. 485428 5. 598234 5. 469436 5. 155381 4. 878669 5. 205147  
11736663\_ 5. 733732 5. 602772 5. 736831 5. 125629 4. 984669 4. 953972  
11736664\_ 6. 067772 6. 043181 6. 214352 6. 416747 6. 351004 6. 403739  
11736665\_ 4. 18697 4. 22317 4. 289896 4. 051204 4. 46027 4. 392155  
11736666\_ 6. 683073 6. 709731 6. 722877 6. 76983 6. 834927 6. 956076  
11736667\_ 3. 206017 3. 356912 3. 344747 3. 485381 3. 606251 3. 590484  
11736668\_ 5. 072744 5. 150002 4. 959542 5. 307033 5. 201426 5. 158366  
11736669\_ 5. 736831 5. 773463 5. 88764 5. 807497 5. 762498 5. 718494  
11736670\_ 9. 467595 9. 43747 9. 520538 9. 97369 10. 01815 9. 986546  
11736671\_ 4. 700243 4. 63819 4. 632924 4. 733578 4. 757347 4. 727357

11736672\_ 3. 249924 2. 945929 3. 29682 3. 136044 3. 277075 3. 29682  
11736673\_ 6. 543878 6. 533484 6. 574231 6. 363436 6. 338285 6. 430763  
11736674\_ 4. 784334 4. 9135 4. 707001 4. 784334 4. 733374 4. 829734  
11736675\_ 11. 78326 11. 72318 11. 77257 11. 91754 11. 94492 11. 94571  
11736676\_ 2. 47102 2. 260544 2. 266492 2. 374299 2. 47102 2. 406047  
11736677\_ 2. 404227 2. 639538 2. 168814 2. 498575 2. 498575 2. 372242  
11736678\_ 7. 941684 7. 883097 7. 954368 7. 612835 7. 666485 7. 415422  
11736679\_ 5. 011083 4. 920795 4. 772366 4. 807203 4. 882289 4. 977102  
11736680\_ 4. 771672 4. 759531 4. 401299 4. 938078 4. 823657 4. 885062  
11736681\_ 5. 566137 5. 767657 5. 52607 5. 5183 5. 471119 5. 588387  
11736682\_ 5. 513817 5. 544781 5. 72635 5. 759817 5. 833534 5. 945954  
11736683\_ 9. 498308 9. 550646 9. 58276 9. 470733 9. 490249 9. 447656  
11736684\_ 3. 527109 3. 778622 3. 658173 3. 755675 3. 389304 3. 496266  
11736685\_ 4. 359361 4. 523798 4. 471793 4. 356516 4. 371931 4. 295422  
11736686\_ 2. 00406 1. 919832 2. 083868 1. 921777 1. 869599 1. 921777  
11736687\_ 2. 967181 3. 097145 3. 390501 3. 148741 3. 009687 2. 782371  
11736688\_ 3. 123375 3. 01617 3. 41142 3. 209469 3. 256481 3. 015477  
11736689\_ 4. 088044 4. 217423 4. 215208 4. 21474 4. 025565 4. 128623  
11736690\_ 2. 44114 2. 363682 2. 44114 2. 325209 2. 410648 2. 312117  
11736691\_ 3. 449599 3. 477366 3. 488682 3. 29192 3. 21279 3. 344092  
11736692\_ 4. 668194 4. 716592 4. 504275 4. 680742 4. 764971 4. 730613  
11736693\_ 7. 579907 7. 50688 7. 456775 6. 981155 6. 964849 7. 219429  
11736694\_ 7. 217615 7. 179479 7. 237183 7. 177345 7. 137398 7. 103766  
11736695\_ 5. 36906 5. 317679 5. 405514 5. 221217 5. 499314 5. 442778  
11736696\_ 2. 355048 2. 366359 2. 457238 2. 650988 2. 421 2. 501549  
11736697\_ 7. 299162 7. 502036 7. 320782 7. 405547 7. 405547 7. 50347  
11736698\_ 4. 513241 4. 63612 4. 370337 4. 723658 4. 754775 4. 701759  
11736699\_ 5. 113254 4. 835209 4. 824195 5. 350675 5. 435691 5. 475572  
11736700\_ 2. 182392 2. 024954 1. 954758 1. 929806 1. 763897 1. 969223  
11736701\_ 5. 098246 5. 006696 5. 191897 4. 969645 5. 112606 5. 225235  
11736702\_ 5. 285218 5. 473511 5. 374211 5. 452008 5. 527964 5. 326665  
11736703\_ 5. 580464 5. 636954 5. 628322 5. 723429 5. 732062 5. 707284  
11736704\_ 4. 32147 4. 361643 4. 213226 4. 547454 4. 409746 4. 412087  
11736705\_ 9. 123284 9. 103656 9. 197798 8. 559913 8. 60265 8. 587545  
11736706\_ 7. 886085 7. 728016 7. 864346 7. 139357 7. 128356 7. 225269  
11736707\_ 3. 503743 3. 503743 3. 507462 3. 419528 3. 383984 3. 503743  
11736708\_ 3. 871172 3. 841239 4. 202273 3. 771578 3. 795673 3. 623065  
11736709\_ 6. 171019 5. 93311 6. 04953 6. 246407 6. 316462 6. 38056  
11736710\_ 7. 910863 7. 835952 7. 881731 7. 377122 7. 447329 7. 417811  
11736711\_ 5. 051211 5. 262975 5. 203204 5. 182541 5. 334981 5. 22801  
11736712\_ 4. 745875 4. 936169 4. 910628 5. 03217 5. 093537 5. 020777  
11736713\_ 2. 085497 2. 204803 2. 198178 2. 107299 2. 156581 2. 16298  
11736714\_ 3. 490749 3. 497819 3. 398236 3. 290188 3. 256935 3. 446644  
11736715\_ 3. 549816 3. 621508 3. 55117 3. 668172 3. 710745 3. 565239  
11736716\_ 2. 098913 2. 155971 2. 098913 2. 019332 2. 16547 1. 983911  
11736717\_ 3. 216597 3. 210023 3. 144493 3. 132453 3. 13067 3. 097472  
11736718\_ 6. 235612 6. 175274 6. 499388 6. 116805 6. 000056 6. 165726  
11736719\_ 4. 363902 4. 386016 4. 471356 4. 692046 4. 532116 4. 444641  
11736720\_ 4. 297313 4. 132352 4. 341957 4. 448273 4. 357697 4. 387365  
11736721\_ 7. 272393 7. 274858 7. 39783 7. 154037 7. 30447 7. 335632  
11736722\_ 3. 162526 3. 123487 3. 084874 3. 223804 3. 110529 2. 995108

11736723\_ 6. 132352 6. 174204 6. 24538 6. 352031 6. 365743 6. 260858  
11736724\_ 6. 212487 6. 235189 6. 136035 6. 300643 6. 394658 6. 214528  
11736725\_ 4. 775785 4. 802948 4. 974743 4. 957149 4. 784541 4. 996539  
11736726\_ 5. 398052 5. 352223 5. 435207 5. 758521 5. 699766 5. 674439  
11736727\_ 5. 616189 5. 526494 5. 502497 5. 817863 5. 94578 5. 814391  
11736728\_ 4. 763578 4. 796903 4. 767459 4. 839048 4. 767459 4. 803052  
11736729\_ 6. 523048 6. 316331 6. 507938 4. 633213 4. 648445 4. 663773  
11736730\_ 6. 753615 6. 559642 6. 930836 5. 375446 5. 099617 5. 225791  
11736731\_ 4. 588185 4. 520643 4. 083907 3. 187327 3. 56874 3. 535255  
11736732\_ 6. 52427 6. 341882 6. 407291 5. 969466 5. 980978 6. 188016  
11736733\_ 5. 969722 5. 939035 6. 055419 5. 602729 5. 678768 5. 771893  
11736734\_ 5. 789947 5. 713794 6. 093815 5. 552492 5. 2222 5. 521837  
11736735\_ 6. 878776 6. 696827 6. 898793 6. 583835 6. 57858 6. 686431  
11736736\_ 6. 995504 6. 936579 6. 973649 6. 507716 6. 464805 6. 494214  
11736737\_ 6. 010417 5. 946899 5. 979292 5. 320648 5. 209909 5. 269858  
11736738\_ 2. 556249 2. 484325 2. 520287 2. 502306 2. 621677 2. 520287  
11736739\_ 2. 988093 2. 786402 2. 736636 2. 995407 2. 798956 2. 736146  
11736740\_ 6. 50141 6. 3669 6. 437048 5. 815401 5. 964829 5. 903758  
11736741\_ 7. 236569 7. 212398 7. 264868 7. 795238 7. 752984 7. 832713  
11736742\_ 5. 48122 5. 520137 5. 392162 5. 521951 5. 548096 5. 54522  
11736743\_ 1. 67472 1. 616134 1. 69759 1. 585823 1. 782949 1. 65784  
11736744\_ 1. 932191 2. 115472 1. 967457 1. 737319 2. 009965 1. 890464  
11736745\_ 8. 408204 8. 31467 8. 466608 7. 583088 7. 528979 7. 553617  
11736746\_ 4. 751885 4. 596089 4. 657641 4. 912408 4. 816295 4. 628233  
11736747\_ 2. 748712 2. 672303 2. 682796 2. 979756 2. 737721 3. 077282  
11736748\_ 2. 542774 2. 663581 2. 343748 2. 854486 2. 484855 2. 638385  
11736749\_ 4. 929325 4. 87982 4. 987868 4. 992243 4. 917483 4. 763543  
11736750\_ 3. 827748 3. 873075 4. 026092 3. 742007 4. 075708 3. 981719  
11736751\_ 3. 359141 3. 267 3. 225671 3. 339014 3. 406854 3. 307293  
11736752\_ 3. 160613 3. 158708 3. 072522 3. 21279 3. 069456 2. 945929  
11736753\_ 2. 127026 2. 524485 2. 54733 2. 417537 2. 17325 2. 577059  
11736754\_ 5. 954081 5. 9647 6. 077635 5. 93062 5. 88545 5. 954162  
11736755\_ 5. 527472 5. 332752 5. 410149 5. 42927 5. 295615 5. 311282  
11736756\_ 5. 052796 5. 138721 5. 029529 5. 098211 5. 113179 5. 195419  
11736757\_ 4. 425185 4. 510469 4. 409096 4. 530875 4. 543591 4. 439383  
11736758\_ 8. 520171 8. 448366 8. 535984 9. 000226 9. 055269 9. 021892  
11736759\_ 8. 468472 8. 372151 8. 440443 8. 957586 8. 941941 8. 970092  
11736760\_ 6. 619089 6. 551967 6. 544564 6. 48033 6. 446997 6. 385588  
11736761\_ 4. 047652 3. 869906 4. 174987 3. 142823 3. 15356 3. 192796  
11736762\_ 4. 811283 4. 790081 4. 68 4. 448678 4. 579936 4. 503337  
11736763\_ 3. 960305 3. 708764 3. 741344 3. 750589 3. 927883 3. 733256  
11736764\_ 5. 761571 5. 869015 5. 93856 5. 497308 5. 630341 5. 757884  
11736765\_ 4. 959449 4. 915909 4. 973284 4. 471449 4. 765233 4. 661323  
11736766\_ 5. 486792 5. 098475 5. 297872 4. 979606 4. 790428 4. 76524  
11736767\_ 5. 247739 5. 279849 5. 143501 5. 230709 5. 337634 5. 37222  
11736768\_ 5. 099772 4. 795806 4. 965089 4. 978844 4. 895687 4. 869603  
11736769\_ 5. 566516 5. 376976 5. 450633 5. 558957 5. 662935 5. 545278  
11736770\_ 4. 354879 4. 253743 4. 025755 4. 236297 4. 449682 4. 319355  
11736771\_ 8. 040991 7. 907158 7. 999234 7. 426687 7. 515168 7. 528651  
11736772\_ 10. 59975 10. 56624 10. 58011 10. 64892 10. 705 10. 66624  
11736773\_ 4. 018449 4. 018449 3. 865224 3. 87424 3. 905674 3. 913527



11736774\_ 3. 739019 3. 463562 3. 363984 3. 840512 3. 771087 3. 787243  
11736775\_ 2. 615291 2. 83198 2. 877892 2. 708075 2. 87933 2. 6839  
11736776\_ 3. 74348 3. 82304 3. 83413 3. 896969 3. 954871 4. 041228  
11736777\_ 4. 07499 4. 07499 4. 132906 4. 079657 3. 983352 4. 200678  
11736778\_ 4. 367097 4. 422518 4. 699833 4. 583867 4. 615377 4. 587331  
11736779\_ 5. 617182 5. 606129 5. 583366 5. 433404 5. 516082 5. 558398  
11736780\_ 5. 56773 5. 500956 5. 769725 5. 239416 5. 492295 5. 506078  
11736781\_ 5. 902324 5. 792663 5. 7906 5. 753442 5. 713507 5. 800029  
11736782\_ 4. 579277 4. 456374 4. 656366 4. 482305 4. 472604 4. 388373  
11736783\_ 4. 552417 4. 547901 4. 571817 3. 867885 3. 786966 4. 0465  
11736784\_ 6. 25761 6. 472183 6. 354529 6. 396762 6. 23696 6. 334676  
11736785\_ 5. 674042 5. 560639 5. 676992 5. 924895 5. 736831 5. 789482  
11736786\_ 3. 935628 3. 970158 3. 70998 3. 758153 3. 931234 3. 598837  
11736787\_ 2. 262716 2. 362262 2. 424028 2. 489992 2. 496562 2. 45011  
11736788\_ 4. 196787 4. 333425 4. 177865 4. 210418 4. 314917 4. 266108  
11736789\_ 4. 50402 4. 525843 4. 397692 4. 624086 4. 606541 4. 479954  
11736790\_ 3. 667927 3. 667927 3. 614771 3. 832858 3. 808805 3. 703611  
11736791\_ 5. 763634 5. 654046 5. 688495 5. 710847 5. 761877 5. 78816  
11736792\_ 5. 772323 5. 815514 5. 759014 6. 077538 6. 101062 6. 109331  
11736793\_ 5. 19419 5. 448296 5. 461073 5. 855677 5. 775392 5. 816255  
11736794\_ 3. 269119 3. 255476 3. 407351 3. 412206 3. 283801 3. 434202  
11736795\_ 7. 06414 7. 134375 7. 042517 7. 174876 7. 23106 7. 200318  
11736796\_ 4. 384491 4. 550419 4. 435576 4. 305567 4. 507178 4. 400525  
11736797\_ 5. 501946 5. 44751 5. 518169 5. 650272 5. 885096 5. 754755  
11736798\_ 5. 386105 5. 199186 5. 284608 5. 251555 5. 43949 5. 370371  
11736799\_ 3. 72005 3. 886611 4. 047092 3. 871456 3. 831968 3. 695784  
11736800\_ 3. 706359 3. 368929 3. 394046 3. 75794 3. 610439 3. 71601  
11736801\_ 7. 086228 7. 034462 7. 120335 6. 87267 6. 95097 6. 888945  
11736802\_ 5. 499688 5. 448296 5. 518169 5. 60504 5. 438886 5. 582735  
11736803\_ 2. 81557 3. 011513 2. 74499 2. 912464 2. 912464 3. 013501  
11736804\_ 6. 773268 6. 777524 6. 857402 6. 680768 6. 702879 6. 580832  
11736805\_ 6. 865125 6. 774333 6. 894285 6. 653701 6. 745094 6. 536812  
11736806\_ 2. 031367 2. 218761 2. 051938 2. 252672 2. 277779 2. 246859  
11736807\_ 2. 552475 2. 395686 2. 567164 2. 565185 2. 648971 2. 740172  
11736808\_ 5. 660072 5. 616895 5. 661268 5. 47353 5. 449633 5. 594457  
11736809\_ 5. 905115 6. 076709 5. 912543 6. 099977 6. 104245 5. 992354  
11736810\_ 6. 920812 6. 951283 6. 838461 6. 158194 6. 324532 6. 241461  
11736811\_ 3. 829095 3. 853201 3. 810457 3. 625549 3. 544841 3. 728852  
11736812\_ 4. 613132 4. 669201 4. 337456 4. 431272 4. 40461 4. 419936  
11736813\_ 5. 208457 4. 870506 5. 156022 3. 8906 4. 003206 3. 618282  
11736814\_ 2. 433815 2. 518559 2. 396539 2. 546621 2. 627254 2. 499681  
11736815\_ 2. 424195 2. 496496 2. 608228 2. 424195 2. 359857 2. 424195  
11736816\_ 6. 445965 6. 359536 6. 508364 6. 320338 6. 274221 6. 351252  
11736817\_ 5. 512912 5. 611734 5. 589347 5. 678255 5. 671928 5. 674887  
11736818\_ 1. 898324 1. 775138 1. 992982 2. 010814 1. 898324 2. 065784  
11736819\_ 4. 253307 4. 510474 4. 425607 4. 561898 4. 631336 4. 52335  
11736820\_ 4. 266293 4. 562513 4. 467169 4. 454465 4. 488049 4. 442661  
11736821\_ 4. 806017 4. 630865 4. 78004 5. 096165 5. 055129 5. 172627  
11736822\_ 6. 159401 6. 041151 6. 024105 6. 281449 6. 203066 6. 222412  
11736823\_ 4. 029265 4. 189371 4. 052328 4. 290414 4. 176993 4. 304696  
11736824\_ 7. 315318 7. 353441 7. 35339 7. 403405 7. 437053 7. 466517

11736825\_ 5. 262262 5. 246263 5. 335593 5. 265296 5. 26034 5. 297498  
11736826\_ 4. 063745 4. 083454 4. 055321 4. 256879 4. 162312 4. 063511  
11736827\_ 4. 324944 4. 218015 4. 22234 4. 32848 4. 336152 4. 189762  
11736828\_ 6. 755438 6. 660202 6. 723705 6. 58379 6. 525434 6. 589889  
11736829\_ 8. 957713 8. 907914 9. 01792 8. 727935 8. 791428 8. 761777  
11736830\_ 8. 737266 8. 672193 8. 702012 8. 4926 8. 503696 8. 441799  
11736831\_ 6. 274448 6. 267574 6. 395821 6. 534425 6. 569973 6. 592629  
11736832\_ 5. 460061 5. 510016 5. 337608 5. 550438 5. 585744 5. 499138  
11736833\_ 6. 277069 6. 31172 6. 22745 6. 314389 6. 512138 6. 024375  
11736834\_ 7. 145621 7. 085413 7. 256317 7. 717194 7. 701262 7. 746602  
11736835\_ 5. 750414 5. 789947 5. 736831 5. 858805 5. 959716 5. 743317  
11736836\_ 6. 526333 6. 415812 6. 552186 6. 550203 6. 571209 6. 638446  
11736837\_ 5. 674795 5. 755066 5. 705246 5. 668276 5. 71348 5. 694184  
11736838\_ 4. 967734 5. 11527 5. 153956 5. 156303 4. 906216 5. 111648  
11736839\_ 4. 656199 4. 508677 4. 446274 4. 515083 4. 539903 4. 441429  
11736840\_ 2. 695336 2. 721549 2. 587053 2. 555369 2. 609441 2. 576713  
11736841\_ 3. 008585 3. 021109 3. 139706 2. 912551 3. 036378 3. 008585  
11736842\_ 3. 503743 3. 527139 3. 527139 3. 726533 3. 711584 3. 93203  
11736843\_ 2. 077815 2. 32541 2. 45002 2. 378297 2. 240437 2. 270575  
11736844\_ 5. 194562 4. 968969 5. 186684 5. 303722 5. 105608 5. 162835  
11736845\_ 2. 822359 2. 812277 3. 034657 2. 802194 2. 850728 2. 730845  
11736846\_ 7. 908863 8. 004661 8. 012245 7. 894327 7. 835635 7. 840222  
11736847\_ 3. 623648 3. 627016 3. 642418 3. 797748 3. 714371 3. 765889  
11736848\_ 6. 385117 6. 419725 6. 51216 6. 503184 6. 555797 6. 454704  
11736849\_ 5. 226854 5. 357918 5. 554436 4. 953968 4. 949015 5. 010515  
11736850\_ 5. 969566 5. 804133 5. 871841 5. 058794 5. 095952 5. 138127  
11736851\_ 4. 636486 4. 626233 4. 65625 5. 065069 4. 723587 4. 66587  
11736852\_ 3. 26506 3. 116527 3. 250603 3. 275098 3. 356424 3. 250603  
11736853\_ 2. 403678 2. 406475 2. 300405 2. 38572 2. 195688 2. 382595  
11736854\_ 3. 318655 3. 453264 3. 277316 3. 477441 3. 310396 3. 392854  
11736855\_ 5. 44846 5. 672285 5. 656152 5. 697763 5. 721437 5. 699744  
11736856\_ 5. 107979 5. 109907 5. 202171 5. 156303 5. 187308 5. 2666  
11736857\_ 4. 760386 4. 846733 4. 675399 4. 784151 4. 912255 4. 851632  
11736858\_ 3. 898141 4. 051288 4. 069663 4. 157032 4. 147533 4. 291959  
11736859\_ 8. 545652 8. 48188 8. 525625 8. 678528 8. 652139 8. 711048  
11736860\_ 4. 644814 4. 625104 4. 784038 4. 275543 4. 134072 4. 398145  
11736861\_ 3. 516521 3. 744156 3. 486396 3. 626844 3. 706374 3. 680557  
11736862\_ 3. 384078 3. 555217 3. 381017 3. 294997 3. 453839 3. 577873  
11736863\_ 9. 216923 9. 122165 9. 137554 9. 052102 9. 090592 9. 122165  
11736864\_ 4. 643717 4. 549931 4. 52373 4. 660148 4. 754678 4. 702696  
11736865\_ 6. 944974 6. 911276 6. 947778 6. 855377 6. 798632 6. 811111  
11736866\_ 6. 805142 6. 634872 6. 685668 6. 574596 6. 495142 6. 394774  
11736867\_ 7. 348881 7. 196592 7. 326606 7. 04808 6. 975563 6. 946532  
11736868\_ 7. 395408 7. 371417 7. 470279 7. 136086 7. 164857 7. 183606  
11736869\_ 8. 735037 8. 66893 8. 69753 8. 859172 8. 902215 8. 875809  
11736870\_ 5. 414087 5. 434593 5. 256973 5. 222118 5. 25237 5. 085991  
11736871\_ 2. 787096 2. 886737 3. 025972 3. 023644 3. 124629 2. 965819  
11736872\_ 4. 446346 4. 510346 4. 318148 4. 584933 4. 518998 4. 447702  
11736873\_ 5. 285218 5. 229953 5. 260651 5. 106195 5. 207583 5. 239169  
11736874\_ 5. 444394 5. 569137 5. 645387 5. 284381 5. 379339 5. 444394  
11736875\_ 5. 270012 5. 273885 5. 230916 5. 162207 5. 136747 5. 286207

11736876\_ 3. 904721 4. 078745 3. 819272 3. 862973 3. 935661 3. 997935  
11736877\_ 5. 420919 5. 538166 5. 294563 5. 212089 5. 20338 5. 297498  
11736878\_ 3. 815717 3. 785408 3. 854558 3. 75203 3. 989166 3. 819693  
11736879\_ 4. 484684 4. 721292 4. 287593 4. 526305 4. 324534 4. 362129  
11736880\_ 4. 687146 4. 592973 4. 561598 4. 825118 4. 68173 4. 779876  
11736881\_ 4. 677378 4. 72612 4. 71978 4. 833224 4. 75539 4. 907175  
11736882\_ 2. 073493 2. 037373 2. 263137 2. 215639 2. 215639 2. 176634  
11736883\_ 2. 627918 2. 758753 2. 851689 2. 953999 2. 625613 2. 887452  
11736884\_ 5. 730829 5. 66834 5. 875313 5. 279933 5. 399519 5. 435029  
11736885\_ 2. 620816 2. 711935 2. 742312 2. 881242 2. 903414 2. 755401  
11736886\_ 4. 050794 4. 063792 4. 140169 4. 09077 4. 200678 4. 162211  
11736887\_ 5. 750011 5. 761288 5. 617759 5. 79985 5. 860446 5. 619463  
11736888\_ 2. 964033 2. 946891 2. 931588 2. 938941 2. 921799 2. 954244  
11736889\_ 7. 357507 7. 395164 7. 39201 6. 279615 6. 390037 6. 391644  
11736890\_ 4. 070333 3. 950643 3. 893913 3. 759211 3. 77938 4. 009669  
11736891\_ 5. 086397 5. 395288 5. 30496 5. 287995 5. 285586 5. 156303  
11736892\_ 4. 632471 4. 707776 4. 709463 4. 643717 4. 720709 4. 415744  
11736893\_ 4. 008027 4. 141845 4. 113878 4. 159412 4. 188788 4. 426905  
11736894\_ 8. 365826 8. 337938 8. 385862 8. 365826 8. 274669 8. 3268  
11736895\_ 8. 379377 8. 296186 8. 354046 8. 296454 8. 269103 8. 246823  
11736896\_ 4. 564819 4. 712834 4. 507646 4. 40233 4. 364745 4. 57542  
11736897\_ 3. 833055 4. 089711 4. 154602 3. 83264 3. 30831 3. 501198  
11736898\_ 6. 007918 6. 008441 6. 09405 5. 78159 5. 940962 5. 822616  
11736899\_ 6. 134649 6. 065258 6. 004864 6. 048406 6. 146082 6. 037865  
11736900\_ 6. 116554 6. 171342 6. 203703 6. 057778 6. 090851 6. 207447  
11736901\_ 5. 015428 5. 125486 5. 098474 5. 07344 4. 890539 5. 017438  
11736902\_ 4. 989116 4. 89203 4. 701164 4. 84571 4. 888732 4. 875486  
11736903\_ 3. 212962 3. 398236 3. 276964 3. 578275 3. 396625 3. 548637  
11736904\_ 5. 348631 5. 526551 5. 414869 5. 447911 5. 426098 5. 409262  
11736905\_ 4. 494236 4. 536927 4. 483819 4. 627302 4. 566306 4. 470714  
11736906\_ 2. 594984 2. 749888 2. 840767 2. 840767 2. 860707 2. 865056  
11736907\_ 4. 573572 4. 381643 4. 584933 4. 132108 4. 110076 4. 122446  
11736908\_ 6. 089757 6. 040936 6. 236327 6. 078602 6. 003734 6. 079745  
11736909\_ 2. 944692 2. 793132 2. 785268 2. 962546 3. 053495 2. 882577  
11736910\_ 6. 0396 6. 050225 5. 728577 5. 968107 5. 884896 5. 884896  
11736911\_ 4. 75399 4. 84849 4. 739248 4. 693729 4. 703826 4. 774395  
11736912\_ 4. 700243 4. 637625 4. 606484 4. 582612 4. 574655 4. 584933  
11736913\_ 5. 118775 5. 189628 5. 226721 5. 183637 5. 252272 5. 134164  
11736914\_ 5. 068182 5. 309803 4. 93685 5. 066735 5. 213763 5. 07751  
11736915\_ 6. 58441 6. 317293 6. 739151 7. 164857 7. 194539 7. 216319  
11736916\_ 7. 364821 7. 390843 7. 353896 7. 41509 7. 451429 7. 464748  
11736917\_ 5. 540194 5. 691105 5. 480573 5. 703028 5. 611869 5. 695474  
11736918\_ 3. 249683 3. 198119 3. 004036 3. 125183 3. 198119 3. 295968  
11736919\_ 6. 13674 5. 993929 6. 08655 6. 40898 6. 325644 6. 29509  
11736920\_ 5. 554706 5. 441284 5. 614563 5. 422665 5. 386158 5. 599005  
11736921\_ 5. 406118 5. 277422 5. 347295 5. 242485 5. 23708 5. 335194  
11736922\_ 2. 762429 2. 843865 2. 712707 2. 727846 2. 718322 2. 720091  
11736923\_ 3. 736917 3. 974639 3. 748967 3. 68062 3. 661005 3. 907084  
11736924\_ 5. 349805 5. 573721 5. 614563 5. 371455 5. 336078 5. 265948  
11736925\_ 9. 607028 9. 635992 9. 664961 9. 40616 9. 352983 9. 324929  
11736926\_ 5. 195167 5. 094541 5. 073036 5. 188714 5. 182112 5. 321005

11736927\_ 5. 536095 5. 513735 5. 482818 5. 352627 5. 382079 5. 057653  
11736928\_ 7. 157545 7. 123876 7. 138216 6. 843735 6. 673497 6. 789271  
11736929\_ 3. 184623 3. 121913 3. 091196 3. 255511 3. 085307 2. 99555  
11736930\_ 3. 808638 3. 867349 3. 939983 4. 027223 4. 054288 3. 917186  
11736931\_ 8. 914528 8. 837453 8. 819831 9. 238447 9. 257248 9. 252279  
11736932\_ 6. 876882 6. 831969 6. 87844 6. 343742 6. 288479 6. 220946  
11736933\_ 5. 336412 5. 189628 5. 302684 5. 432114 5. 420725 5. 587125  
11736934\_ 2. 850317 3. 269052 3. 091491 2. 987158 3. 21279 3. 002529  
11736935\_ 2. 997394 3. 164044 3. 187049 2. 997394 3. 069556 3. 069556  
11736936\_ 4. 147901 4. 223852 4. 106835 4. 094785 4. 290687 4. 103327  
11736937\_ 8. 339311 8. 312578 8. 372327 8. 310589 8. 323408 8. 321126  
11736938\_ 7. 407585 7. 346593 7. 407585 6. 898793 7. 020582 7. 003198  
11736939\_ 5. 209259 5. 024337 5. 032789 5. 04169 5. 029529 4. 969723  
11736940\_ 5. 819089 5. 869345 5. 805707 5. 745312 5. 860657 5. 882676  
11736941\_ 5. 159251 5. 250462 5. 180539 5. 156303 5. 106953 5. 14797  
11736942\_ 5. 942179 6. 098244 5. 975876 6. 110007 6. 012856 6. 011116  
11736943\_ 6. 275947 6. 440549 6. 23831 6. 511009 6. 386196 6. 432593  
11736944\_ 2. 773653 2. 60783 2. 471192 2. 809434 2. 775151 2. 549901  
11736945\_ 5. 294248 5. 248011 5. 26034 5. 286195 5. 249841 5. 396342  
11736946\_ 9. 108427 9. 111011 9. 096792 9. 368718 9. 370359 9. 390528  
11736947\_ 6. 254621 6. 172908 6. 199874 6. 057698 6. 058634 6. 028062  
11736948\_ 3. 579875 3. 501466 3. 460903 3. 489992 3. 363686 3. 451232  
11736949\_ 5. 100548 5. 253755 5. 034528 5. 171008 5. 244151 5. 210845  
11736950\_ 2. 493278 2. 25483 2. 617034 2. 387577 2. 479494 2. 493278  
11736951\_ 4. 986497 4. 979089 4. 896984 4. 937469 5. 130185 5. 040952  
11736952\_ 5. 431151 5. 40289 5. 344106 5. 386598 5. 330666 5. 475572  
11736953\_ 5. 956246 5. 504809 5. 882999 5. 123428 5. 2222 5. 238823  
11736954\_ 2. 91361 2. 858986 3. 171293 3. 001666 3. 001666 3. 017686  
11736955\_ 3. 065207 3. 31632 3. 184297 3. 435541 3. 081967 3. 01423  
11736956\_ 5. 490166 5. 395803 5. 344462 5. 601814 5. 468311 5. 614688  
11736957\_ 5. 325687 5. 596002 5. 217717 5. 357733 5. 490621 5. 660205  
11736958\_ 3. 385907 3. 385622 3. 238124 3. 230961 3. 227241 3. 051308  
11736959\_ 3. 761669 3. 465305 3. 838301 3. 848338 3. 761669 3. 598755  
11736960\_ 4. 343663 4. 353283 4. 219473 4. 340506 4. 344261 4. 425526  
11736961\_ 4. 47201 4. 505334 4. 437897 4. 360349 4. 420627 4. 451551  
11736962\_ 8. 525323 8. 479375 8. 602545 8. 360125 8. 334158 8. 3169  
11736963\_ 5. 645243 5. 732315 5. 76763 5. 118792 5. 247232 5. 11527  
11736964\_ 4. 907974 4. 957301 4. 95909 5. 139769 5. 160972 5. 082488  
11736965\_ 3. 695804 4. 111205 4. 202059 4. 363278 4. 363278 3. 934163  
11736966\_ 4. 254923 3. 997131 4. 135496 4. 108148 4. 49963 4. 0965  
11736967\_ 2. 783539 2. 83198 2. 927974 2. 824217 2. 781901 2. 728069  
11736968\_ 2. 961388 2. 87069 3. 138626 2. 83198 2. 818638 2. 737138  
11736969\_ 3. 797478 4. 103301 4. 003656 4. 253566 4. 011171 4. 006168  
11736970\_ 3. 862922 3. 520143 3. 748163 3. 846433 3. 842225 3. 762789  
11736971\_ 4. 336613 4. 268115 4. 458195 4. 067703 3. 894614 4. 171056  
11736972\_ 6. 485727 6. 428155 6. 322509 6. 461238 6. 487287 6. 557068  
11736973\_ 3. 649862 3. 523235 3. 555708 3. 718378 3. 508023 3. 760867  
11736974\_ 6. 190888 6. 134864 6. 108771 6. 143487 6. 089614 6. 04674  
11736975\_ 6. 022503 6. 189985 6. 05762 6. 172869 6. 07351 6. 191064  
11736976\_ 5. 98977 5. 73295 5. 97245 5. 312383 5. 262339 5. 164601  
11736977\_ 6. 4552 6. 410452 6. 516489 6. 157098 6. 086088 6. 259692

11736978\_ 5. 643713 5. 734031 5. 609347 5. 723714 5. 799115 5. 604129  
11736979\_ 5. 006157 4. 847068 4. 774819 4. 632488 4. 662274 4. 650276  
11736980\_ 2. 01381 2. 12635 2. 17078 2. 098179 2. 164985 2. 084059  
11736981\_ 4. 518347 4. 251124 4. 237357 4. 430061 4. 371776 4. 211579  
11736982\_ 4. 666072 4. 763187 4. 476329 4. 70082 4. 607778 4. 693052  
11736983\_ 3. 918238 3. 818401 3. 792168 3. 925181 3. 828388 3. 781952  
11736984\_ 4. 434879 4. 283144 4. 330223 4. 302616 4. 52516 4. 353905  
11736985\_ 6. 830903 6. 898793 6. 952898 7. 071051 7. 033337 7. 111953  
11736986\_ 5. 999888 5. 918745 6. 017055 5. 865293 6. 005881 5. 843659  
11736987\_ 5. 819388 5. 780223 5. 95681 5. 584389 5. 665655 5. 677618  
11736988\_ 4. 118314 4. 204265 4. 302475 4. 229287 4. 309218 4. 255519  
11736989\_ 6. 693182 6. 756742 6. 683689 6. 955966 6. 953488 6. 976632  
11736990\_ 2. 396575 2. 477721 2. 323192 2. 3055 2. 361778 2. 25483  
11736991\_ 3. 816022 3. 661408 3. 740856 3. 650097 3. 703698 3. 540245  
11736992\_ 2. 564342 2. 548251 2. 428578 2. 494323 2. 610138 2. 524883  
11736993\_ 2. 176397 2. 258667 2. 000551 2. 162338 1. 951749 1. 953953  
11736994\_ 2. 361778 2. 309167 2. 47102 2. 560014 2. 481879 2. 585658  
11736995\_ 7. 364821 7. 255226 7. 397591 7. 652212 7. 676447 7. 706932  
11736996\_ 8. 295982 8. 383387 8. 359072 8. 51884 8. 571343 8. 595569  
11736997\_ 6. 028881 6. 030769 6. 109431 6. 259398 6. 243642 6. 160976  
11736998\_ 6. 631711 6. 700371 6. 787586 5. 624313 5. 736201 5. 797655  
11736999\_ 6. 393548 6. 263567 6. 46208 5. 854667 5. 822178 5. 998338  
11737000\_ 6. 21906 6. 277438 6. 223805 5. 87398 5. 690842 5. 869694  
11737001\_ 5. 615115 5. 52321 5. 617332 5. 523829 5. 569182 5. 569762  
11737002\_ 4. 700243 4. 772346 4. 706183 4. 599235 4. 889608 4. 731244  
11737003\_ 3. 568598 3. 643115 3. 822395 3. 540689 3. 830379 3. 786777  
11737004\_ 3. 483796 3. 425081 3. 421625 3. 661322 3. 445887 3. 612929  
11737005\_ 3. 292699 3. 180062 3. 311013 2. 714629 2. 714629 2. 903804  
11737006\_ 4. 059271 4. 058727 3. 922202 4. 135668 4. 214758 3. 972924  
11737007\_ 4. 184005 4. 257683 4. 11489 4. 097842 4. 135276 4. 188309  
11737008\_ 7. 942168 7. 865943 7. 924783 7. 616003 7. 721667 7. 661156  
11737009\_ 3. 038733 3. 02734 2. 874619 3. 21279 3. 03825 2. 924031  
11737010\_ 2. 16611 2. 378672 2. 36466 2. 137727 2. 272912 2. 36466  
11737011\_ 3. 076282 2. 619307 2. 950296 2. 991027 2. 765577 2. 950581  
11737012\_ 5. 467918 5. 448296 5. 322971 5. 073397 5. 11527 5. 298222  
11737013\_ 1. 713498 1. 912344 2. 084938 2. 054125 2. 070525 1. 991006  
11737014\_ 6. 631711 6. 664828 6. 691359 6. 333812 6. 382327 6. 372053  
11737015\_ 3. 929175 4. 398077 4. 455902 4. 64533 4. 661435 4. 337754  
11737016\_ 5. 186353 5. 338601 5. 333723 5. 110669 5. 028487 5. 156303  
11737017\_ 5. 27616 4. 897306 4. 861864 4. 957947 4. 776996 5. 102943  
11737018\_ 5. 070221 5. 117805 4. 980834 5. 106403 5. 126032 5. 238322  
11737019\_ 5. 787939 5. 799759 5. 588982 5. 872706 5. 857954 5. 956755  
11737020\_ 6. 28315 6. 132425 6. 043839 6. 327563 6. 339028 6. 442326  
11737021\_ 4. 232603 4. 552648 4. 381279 4. 569301 4. 556586 4. 503942  
11737022\_ 3. 834927 3. 834927 3. 871386 4. 07886 4. 106426 4. 150955  
11737023\_ 3. 709553 3. 714295 3. 676995 3. 655806 3. 599484 3. 779228  
11737024\_ 1. 984174 2. 363193 1. 99149 2. 118706 2. 043968 2. 174193  
11737025\_ 5. 314823 5. 352442 5. 219646 5. 297247 5. 216089 5. 223589  
11737026\_ 4. 711812 4. 920019 4. 870709 4. 992243 5. 012393 4. 866013  
11737027\_ 4. 281833 4. 187753 4. 310001 4. 273065 4. 280355 4. 214026  
11737028\_ 5. 854218 5. 920907 5. 79973 6. 25627 6. 189218 6. 488686

11737029\_ 3. 687651 3. 344907 3. 319882 3. 319477 3. 484412 3. 507276  
11737030\_ 4. 814111 4. 761508 4. 694124 4. 421598 4. 627785 4. 39432  
11737031\_ 3. 568118 3. 386093 3. 488586 3. 441019 3. 368711 3. 309622  
11737032\_ 2. 598934 2. 551549 2. 486523 2. 749392 2. 605516 2. 602408  
11737033\_ 7. 454142 7. 389677 7. 526554 7. 423465 7. 432767 7. 474354  
11737034\_ 8. 286597 8. 237579 8. 288423 8. 359231 8. 380501 8. 295651  
11737035\_ 3. 139287 3. 275662 3. 12015 3. 083334 3. 159608 3. 118675  
11737036\_ 3. 927177 3. 739577 3. 513632 3. 915501 3. 840505 3. 767777  
11737037\_ 6. 835205 6. 823325 6. 70554 6. 734986 6. 702132 6. 751516  
11737038\_ 5. 563895 5. 483229 5. 512147 5. 57749 5. 647306 5. 463696  
11737039\_ 6. 179628 6. 02521 5. 877205 5. 566378 5. 364561 5. 551629  
11737040\_ 10. 48824 10. 44164 10. 42418 10. 00507 9. 979507 9. 951531  
11737041\_ 9. 693694 9. 672764 9. 710778 8. 963856 9. 025349 8. 977381  
11737042\_ 8. 471486 8. 347039 8. 351002 7. 821769 7. 782272 7. 749301  
11737043\_ 9. 338276 9. 306315 9. 339044 8. 661194 8. 724059 8. 684146  
11737044\_ 3. 731615 3. 734145 3. 646906 3. 622374 3. 718202 3. 637172  
11737045\_ 6. 206103 6. 321647 6. 219072 6. 189726 6. 294114 6. 212602  
11737046\_ 3. 134443 2. 618333 2. 605516 2. 81086 3. 167366 2. 958689  
11737047\_ 3. 814162 4. 045467 3. 79529 4. 309058 4. 164235 4. 135346  
11737048\_ 5. 196015 5. 067188 5. 061404 5. 380216 5. 271351 5. 233574  
11737049\_ 4. 723011 4. 891202 4. 984669 5. 162889 4. 999652 5. 057246  
11737050\_ 7. 504844 7. 444312 7. 195139 6. 76824 6. 679645 6. 678293  
11737051\_ 5. 84105 6. 058786 6. 198851 5. 337926 5. 352721 5. 080281  
11737052\_ 4. 36575 4. 557471 4. 481026 4. 656757 4. 451202 4. 607801  
11737053\_ 11. 09213 11. 15506 11. 03864 11. 33684 11. 30606 11. 23297  
11737054\_ 5. 820052 5. 823937 5. 947044 6. 0386 6. 109312 5. 922008  
11737055\_ 3. 731123 3. 55299 3. 461915 3. 21279 2. 718322 2. 416797  
11737056\_ 7. 223165 7. 174876 7. 154455 7. 035722 7. 071503 6. 984419  
11737057\_ 2. 484626 2. 55037 2. 250935 2. 453595 2. 521551 2. 443541  
11737058\_ 8. 907518 8. 864644 8. 967567 8. 543096 8. 600712 8. 677483  
11737059\_ 5. 356336 5. 133459 5. 029956 5. 233251 5. 351042 5. 35958  
11737060\_ 5. 140079 5. 073036 5. 214353 5. 040766 5. 102718 4. 898029  
11737061\_ 5. 409222 5. 540956 5. 582767 5. 315715 5. 364144 5. 423585  
11737062\_ 4. 661214 4. 526913 4. 663362 4. 706717 4. 798511 4. 815414  
11737063\_ 3. 005868 3. 111398 2. 959208 3. 016424 3. 157825 3. 078041  
11737064\_ 4. 867374 4. 63494 4. 792116 4. 851497 4. 816696 4. 850541  
11737065\_ 5. 625628 5. 554436 5. 504169 5. 582311 5. 797391 5. 594327  
11737066\_ 2. 334441 2. 133328 1. 996689 2. 107395 2. 364895 2. 400712  
11737067\_ 6. 216722 6. 170336 6. 080896 6. 188617 6. 162539 6. 218633  
11737068\_ 4. 94689 4. 833429 4. 772366 5. 056973 5. 11527 4. 984689  
11737069\_ 4. 412655 4. 455895 4. 476217 4. 397098 4. 480886 4. 519457  
11737070\_ 4. 456893 4. 598928 4. 459939 4. 513079 4. 500455 4. 412366  
11737071\_ 2. 255247 2. 22872 2. 241088 2. 297723 2. 347653 2. 162842  
11737072\_ 3. 343381 3. 290188 3. 123531 3. 290188 3. 076508 3. 398236  
11737073\_ 10. 46839 10. 41464 10. 45571 10. 29918 10. 3547 10. 31533  
11737074\_ 10. 39599 10. 34846 10. 40156 10. 25429 10. 31329 10. 27973  
11737075\_ 7. 525767 7. 370784 7. 423179 7. 338831 7. 32749 7. 335842  
11737076\_ 8. 219252 8. 245054 8. 289773 8. 629261 8. 645611 8. 559489  
11737077\_ 8. 564517 8. 531802 8. 603676 8. 883804 8. 949326 8. 871673  
11737078\_ 2. 718023 2. 790604 2. 494072 2. 323911 2. 157978 2. 502652  
11737079\_ 7. 55776 7. 509133 7. 49623 7. 831089 7. 862699 7. 918675

11737080\_ 2. 446629 2. 606204 2. 387951 2. 582709 2. 473241 2. 520666  
11737081\_ 3. 509577 3. 723624 3. 675637 3. 338253 3. 822458 3. 608195  
11737082\_ 3. 609527 3. 398236 3. 290188 3. 715922 3. 540052 3. 690679  
11737083\_ 6. 169643 6. 13744 6. 140139 5. 898413 6. 135844 6. 073639  
11737084\_ 6. 494708 6. 443202 6. 521626 6. 357415 6. 381926 6. 373101  
11737085\_ 7. 504499 7. 464758 7. 414964 7. 373 7. 34939 7. 492104  
11737086\_ 3. 249924 3. 574599 3. 278573 3. 480335 3. 566525 3. 398236  
11737087\_ 2. 703073 2. 765338 2. 827603 2. 649453 2. 846314 2. 835787  
11737088\_ 2. 587114 2. 644545 2. 548904 2. 407058 2. 612543 2. 427732  
11737089\_ 2. 455048 2. 345176 2. 734005 2. 604709 2. 361778 2. 624989  
11737090\_ 4. 309162 4. 523113 4. 52093 4. 644314 4. 667231 4. 62266  
11737091\_ 2. 896491 2. 722901 2. 736636 2. 722901 2. 599257 2. 695391  
11737092\_ 5. 40664 5. 414869 5. 49404 5. 493634 5. 402222 5. 357152  
11737093\_ 4. 142175 4. 252015 3. 769911 3. 899608 4. 025608 4. 091463  
11737094\_ 4. 056048 3. 983651 4. 05227 4. 477039 4. 279161 3. 957028  
11737095\_ 8. 527536 8. 506309 8. 474927 8. 191878 8. 182395 8. 118881  
11737096\_ 4. 415744 4. 566817 4. 339391 4. 41814 4. 367272 4. 428131  
11737097\_ 3. 630805 3. 298531 3. 625408 3. 398236 3. 265507 3. 398236  
11737098\_ 7. 501854 7. 332335 7. 426223 7. 911957 7. 851358 7. 923216  
11737099\_ 2. 47102 2. 49799 2. 416022 2. 477505 2. 49799 2. 494072  
11737100\_ 1. 7306 1. 996184 1. 898324 2. 084711 1. 876342 2. 149001  
11737101\_ 4. 379014 4. 013318 4. 487203 4. 100846 4. 189979 4. 402606  
11737102\_ 3. 244562 3. 208309 3. 295826 3. 455926 3. 533043 3. 162137  
11737103\_ 8. 24016 8. 119136 8. 208583 7. 930449 7. 865505 7. 87382  
11737104\_ 5. 567933 5. 520051 5. 499329 5. 503403 5. 360169 5. 500163  
11737105\_ 5. 954081 5. 978875 5. 946511 5. 892868 5. 794248 5. 780028  
11737106\_ 4. 977054 5. 059686 5. 09142 5. 058018 5. 090692 5. 047062  
11737107\_ 5. 282206 5. 477407 5. 657806 5. 590622 5. 36323 5. 502342  
11737108\_ 2. 98595 2. 98595 2. 98595 3. 027074 2. 891815 2. 945929  
11737109\_ 5. 249842 5. 434419 5. 269811 5. 341486 5. 261624 5. 303923  
11737110\_ 4. 871678 4. 99875 4. 774785 4. 879087 4. 912027 4. 813484  
11737111\_ 6. 704032 6. 6882 6. 668035 6. 508487 6. 525939 6. 573565  
11737112\_ 2. 272049 2. 284991 2. 325439 2. 378829 2. 325439 2. 318988  
11737113\_ 8. 945917 8. 923808 8. 96116 8. 611472 8. 669586 8. 58619  
11737114\_ 2. 618156 2. 548585 2. 612142 2. 245159 2. 492951 2. 533903  
11737115\_ 3. 441367 3. 530036 3. 625315 3. 650862 3. 398236 3. 61033  
11737116\_ 1. 792543 1. 952118 1. 86863 1. 847741 1. 845478 1. 885099  
11737117\_ 2. 530599 2. 453213 2. 434641 2. 347706 2. 437076 2. 521765  
11737118\_ 4. 736711 4. 682772 4. 714355 4. 757413 4. 804881 4. 693203  
11737119\_ 3. 476442 3. 723624 3. 563581 3. 443349 3. 306585 3. 493999  
11737120\_ 3. 293079 3. 396338 3. 520249 3. 567578 3. 502506 3. 615165  
11737121\_ 5. 308894 5. 216576 5. 3411 5. 161277 5. 308894 5. 366357  
11737122\_ 4. 68705 4. 804221 4. 579292 4. 18143 4. 459234 4. 615115  
11737123\_ 3. 838802 3. 774186 3. 969602 3. 969602 3. 848672 4. 079422  
11737124\_ 3. 019518 2. 778953 2. 664989 2. 955449 3. 03049 3. 131402  
11737125\_ 2. 721579 2. 857337 2. 856075 2. 729223 3. 001357 2. 849921  
11737126\_ 5. 442778 5. 55802 5. 40403 5. 636891 5. 543805 5. 554436  
11737127\_ 7. 188065 7. 073854 7. 202891 6. 531803 6. 56978 6. 604788  
11737128\_ 4. 282497 4. 650039 3. 96729 4. 464638 4. 366836 4. 401692  
11737129\_ 4. 773138 4. 941853 4. 904785 4. 797299 4. 913649 4. 891735  
11737130\_ 5. 522096 5. 556625 5. 415757 5. 870242 5. 820052 5. 665536

11737131\_ 6. 687535 6. 607891 6. 817488 6. 371087 6. 414953 6. 555797  
11737132\_ 4. 27437 4. 331346 4. 41259 4. 40461 4. 365093 4. 317069  
11737133\_ 3. 594309 3. 691462 3. 740892 3. 693508 3. 795182 3. 535178  
11737134\_ 4. 22192 4. 244865 4. 135496 4. 437724 4. 332217 4. 489991  
11737135\_ 10. 1133 10. 01523 10. 07649 9. 911891 9. 903002 9. 956978  
11737136\_ 6. 447372 6. 502007 6. 451211 6. 125259 6. 426756 6. 263567  
11737137\_ 3. 330023 3. 405164 3. 233876 3. 25497 3. 420694 3. 394764  
11737138\_ 9. 117069 9. 159538 9. 138358 8. 823978 8. 864229 8. 851834  
11737139\_ 4. 513241 4. 151995 4. 237776 4. 140531 4. 133939 4. 122446  
11737140\_ 3. 640437 3. 658405 3. 492299 3. 640743 3. 503743 3. 697777  
11737141\_ 5. 391626 5. 622702 5. 57906 5. 650521 5. 639754 5. 670278  
11737142\_ 5. 999888 5. 825432 5. 906944 5. 697753 5. 860677 5. 894343  
11737143\_ 9. 057582 9. 00631 9. 123334 9. 333519 9. 293305 9. 318789  
11737144\_ 5. 513856 5. 497195 5. 362699 5. 525862 5. 458746 5. 477659  
11737145\_ 5. 692245 5. 732315 5. 845365 5. 631039 5. 591712 5. 583387  
11737146\_ 4. 415223 4. 296932 4. 301115 3. 937365 4. 2731 4. 231451  
11737147\_ 2. 47102 2. 456582 2. 361778 2. 29206 2. 088466 1. 989059  
11737148\_ 3. 577693 3. 510919 3. 452 3. 606313 3. 411277 3. 182897  
11737149\_ 7. 957673 7. 8857 7. 934314 7. 024006 7. 025172 6. 911396  
11737150\_ 3. 033022 2. 998979 3. 166529 3. 292598 3. 152474 3. 125753  
11737151\_ 3. 503743 3. 338965 3. 537602 3. 611954 3. 56972 3. 705625  
11737152\_ 3. 419157 3. 352915 3. 337958 3. 488324 3. 534474 3. 453976  
11737153\_ 5. 427078 5. 412322 5. 413516 5. 48946 5. 427078 5. 387391  
11737154\_ 2. 726424 2. 673402 2. 750337 3. 002466 2. 616352 3. 029509  
11737155\_ 5. 542663 5. 602388 5. 584813 5. 446144 5. 438773 5. 520525  
11737156\_ 5. 150344 5. 187462 5. 255851 5. 491094 5. 447908 5. 612721  
11737157\_ 6. 000022 6. 086092 6. 051302 6. 622272 6. 55848 6. 576599  
11737158\_ 3. 156404 3. 105199 2. 776158 3. 210706 3. 163131 3. 156404  
11737159\_ 4. 148158 4. 270407 4. 238129 4. 40461 4. 377097 4. 276907  
11737160\_ 5. 120755 5. 293921 5. 23805 5. 215405 5. 175557 5. 307322  
11737161\_ 5. 976378 5. 855993 5. 894646 5. 160541 4. 984669 4. 913206  
11737162\_ 3. 920691 3. 980699 3. 850246 3. 807618 3. 786872 3. 978078  
11737163\_ 7. 084014 7. 04434 6. 958992 6. 792183 6. 894455 6. 804795  
11737164\_ 2. 873846 2. 757359 2. 984743 3. 182666 3. 093985 3. 171639  
11737165\_ 5. 687356 5. 794375 5. 588604 5. 741579 5. 764834 5. 78252  
11737166\_ 1. 712082 1. 742529 1. 816134 1. 983875 1. 811629 1. 898324  
11737167\_ 2. 287722 2. 389404 2. 107522 2. 334057 2. 475412 2. 446863  
11737168\_ 8. 562531 8. 546234 8. 524849 8. 189378 8. 098774 8. 070866  
11737169\_ 7. 408212 7. 345469 7. 428176 6. 802637 6. 887874 6. 914246  
11737170\_ 6. 483582 6. 558761 6. 430417 6. 545902 6. 431763 6. 487258  
11737171\_ 5. 139147 5. 259619 5. 120821 5. 25829 5. 183024 5. 297498  
11737172\_ 4. 957802 5. 137393 4. 899077 5. 180934 5. 242595 5. 162276  
11737173\_ 5. 044968 4. 965363 4. 965303 4. 986318 5. 029529 5. 071503  
11737174\_ 8. 564131 8. 468941 8. 510791 8. 996224 8. 97484 9. 013232  
11737175\_ 4. 332037 4. 459939 4. 442327 4. 606162 4. 53573 4. 628616  
11737176\_ 4. 410605 4. 199192 4. 290026 4. 412242 4. 415775 4. 365745  
11737177\_ 3. 312801 3. 478774 3. 406738 3. 42236 3. 407432 3. 433254  
11737178\_ 3. 691542 3. 42836 3. 509232 3. 512948 3. 691542 3. 63048  
11737179\_ 3. 71568 3. 841588 3. 83247 3. 848091 3. 835344 3. 987614  
11737180\_ 4. 297055 4. 312735 4. 370337 4. 347179 4. 338092 4. 459923  
11737181\_ 8. 333388 8. 303961 8. 262553 8. 033185 8. 10249 8. 005549



11737182\_ 4. 880787 4. 880787 4. 764542 4. 896343 4. 83153 5. 06048  
11737183\_ 6. 796381 6. 834291 6. 765911 6. 898793 6. 837288 6. 856263  
11737184\_ 2. 515 2. 471068 2. 841213 2. 31144 2. 283548 2. 508371  
11737185\_ 4. 209635 4. 303567 4. 138032 4. 167715 4. 398093 4. 450366  
11737186\_ 5. 103499 5. 143712 4. 976243 5. 106115 5. 272287 5. 214342  
11737187\_ 3. 059999 3. 156859 2. 931466 2. 988615 2. 812616 3. 120992  
11737188\_ 2. 070268 2. 131936 2. 230748 2. 129102 2. 066385 2. 173409  
11737189\_ 4. 6893 4. 643717 4. 575778 4. 992398 4. 849431 4. 948042  
11737190\_ 4. 012766 4. 050898 4. 039469 4. 165466 4. 077609 4. 1232  
11737191\_ 3. 240004 3. 140454 3. 004396 3. 49237 3. 330675 3. 472921  
11737192\_ 3. 191922 3. 458444 3. 596464 3. 537524 3. 439347 3. 710856  
11737193\_ 5. 037692 5. 179044 5. 007896 5. 163053 5. 084953 5. 265418  
11737194\_ 3. 975037 4. 052913 3. 786438 3. 640833 3. 916672 3. 81507  
11737195\_ 4. 9226 4. 763543 4. 772825 4. 521931 4. 561877 4. 650156  
11737196\_ 2. 059546 2. 1794 2. 239381 2. 305787 2. 095175 2. 18238  
11737197\_ 7. 863922 7. 670736 7. 812443 8. 386019 8. 380068 8. 442607  
11737198\_ 3. 564854 3. 627607 3. 368494 3. 707341 3. 667781 3. 65381  
11737199\_ 2. 419047 2. 535388 2. 54597 2. 49264 2. 600607 2. 670496  
11737200\_ 6. 640082 6. 658789 6. 729442 6. 928264 6. 865627 6. 969342  
11737201\_ 5. 416074 5. 518169 5. 442241 5. 497373 5. 613215 5. 590184  
11737202\_ 2. 935874 2. 844995 2. 697381 2. 844995 2. 672283 3. 1049  
11737203\_ 4. 58603 4. 709463 4. 635903 4. 786948 4. 622198 4. 625328  
11737204\_ 4. 569428 5. 006216 4. 80911 4. 797649 4. 597103 4. 819519  
11737205\_ 5. 716355 5. 719654 5. 643713 5. 809887 5. 85038 5. 848887  
11737206\_ 5. 11359 5. 121032 5. 267384 5. 16869 5. 2222 5. 296069  
11737207\_ 3. 861574 3. 84387 3. 717834 3. 758564 3. 767642 3. 99594  
11737208\_ 1. 786131 2. 125415 1. 970808 2. 0437 2. 034536 2. 034536  
11737209\_ 6. 774256 6. 6738 6. 833469 7. 19774 7. 166128 7. 211309  
11737210\_ 11. 15449 11. 17744 11. 16344 11. 60305 11. 58262 11. 53384  
11737211\_ 10. 83576 10. 85876 10. 85655 11. 31201 11. 27431 11. 18672  
11737212\_ 4. 482986 4. 322169 4. 190559 4. 186872 4. 252469 4. 204347  
11737213\_ 3. 740512 3. 987078 3. 442663 3. 792372 3. 461446 3. 563672  
11737214\_ 3. 189315 3. 038125 3. 232787 3. 161622 3. 16363 3. 386231  
11737215\_ 4. 557239 4. 631355 4. 439229 4. 674748 4. 534696 4. 525032  
11737216\_ 2. 841338 2. 763653 2. 726842 3. 062215 2. 854532 2. 93695  
11737217\_ 7. 014456 6. 985725 6. 941674 6. 768247 6. 764115 6. 768247  
11737218\_ 4. 716871 4. 990568 4. 794965 4. 904265 4. 726881 4. 918236  
11737219\_ 7. 679644 7. 659207 7. 746986 8. 124962 8. 07406 8. 240436  
11737220\_ 3. 673795 3. 242479 3. 273047 3. 21279 3. 207737 3. 290188  
11737221\_ 8. 094376 7. 949132 8. 169572 7. 479519 7. 53545 7. 44485  
11737222\_ 5. 461468 5. 466699 5. 352056 5. 437618 5. 539656 5. 636997  
11737223\_ 5. 626197 5. 521105 5. 541203 5. 606562 5. 602415 5. 471255  
11737224\_ 4. 194877 4. 200891 4. 199372 4. 018894 4. 036161 3. 943975  
11737225\_ 4. 51185 4. 503802 4. 520363 4. 388364 4. 673607 4. 452235  
11737226\_ 4. 860436 5. 079561 4. 770681 4. 916313 4. 984776 4. 870064  
11737227\_ 4. 622351 4. 632806 4. 651263 4. 875837 4. 646149 4. 680175  
11737228\_ 6. 729368 6. 705036 6. 820115 6. 448378 6. 587516 6. 412103  
11737229\_ 4. 27402 4. 405427 4. 207337 4. 389383 4. 417195 4. 509063  
11737230\_ 4. 934431 5. 273725 5. 09157 5. 11527 5. 029529 5. 09164  
11737231\_ 4. 405435 4. 368386 4. 202545 4. 368386 4. 188288 4. 403665  
11737232\_ 5. 455512 5. 393662 5. 38588 5. 455512 5. 525848 5. 432581

11737233\_ 3. 872448 3. 69 3. 772939 3. 823129 3. 846909 3. 867125  
11737234\_ 7. 678385 7. 656947 7. 534918 7. 901166 7. 665796 7. 637083  
11737235\_ 4. 759954 4. 65109 4. 722151 4. 778479 4. 726652 4. 732912  
11737236\_ 3. 525519 3. 70277 3. 551208 3. 673649 3. 649857 3. 704924  
11737237\_ 3. 176934 3. 290188 3. 345698 3. 742466 3. 969526 3. 954157  
11737238\_ 6. 802202 6. 844502 6. 74584 6. 823937 6. 850772 6. 914794  
11737239\_ 3. 923991 3. 588344 3. 842956 4. 02751 3. 850216 4. 078552  
11737240\_ 3. 694229 3. 694229 3. 694229 4. 175263 4. 003373 3. 69924  
11737241\_ 3. 817774 3. 826892 3. 721236 3. 756925 3. 71765 3. 910167  
11737242\_ 4. 274748 4. 077332 4. 040634 4. 285172 4. 217089 4. 132075  
11737243\_ 4. 031571 4. 388077 4. 081989 4. 341522 4. 288421 4. 059675  
11737244\_ 3. 925181 3. 909593 3. 955116 3. 9125 3. 9571 3. 720312  
11737245\_ 7. 146366 7. 124194 7. 188497 7. 082425 7. 086106 7. 074391  
11737246\_ 5. 692703 5. 692848 5. 840454 5. 174791 5. 243938 5. 340697  
11737247\_ 5. 263911 5. 230732 5. 158462 4. 981244 4. 988949 4. 977895  
11737248\_ 5. 636107 5. 764607 5. 783913 5. 722664 5. 689605 5. 676992  
11737249\_ 4. 491287 4. 531365 4. 52373 4. 439449 4. 48789 4. 470714  
11737250\_ 7. 850765 7. 671625 7. 829744 7. 191439 7. 16254 7. 201956  
11737251\_ 3. 272489 3. 337015 3. 280175 3. 408967 3. 245857 3. 18161  
11737252\_ 5. 585643 5. 732315 5. 612547 5. 706012 5. 771909 5. 762433  
11737253\_ 6. 487361 6. 638488 6. 548776 6. 614136 6. 680032 6. 654189  
11737254\_ 2. 312791 2. 38154 2. 084777 2. 169365 2. 058488 2. 120082  
11737255\_ 5. 210376 5. 123055 5. 01585 5. 008494 5. 156641 5. 179742  
11737256\_ 4. 815683 4. 646954 4. 741626 4. 278172 4. 137494 4. 493238  
11737257\_ 3. 120014 3. 164724 3. 004714 2. 989294 3. 058231 2. 973245  
11737258\_ 4. 209357 4. 341626 4. 123173 4. 191012 4. 390991 4. 196513  
11737259\_ 4. 33351 4. 459939 4. 161646 4. 204595 4. 244057 4. 07221  
11737260\_ 3. 827055 4. 205471 3. 838989 4. 06809 3. 838989 3. 837878  
11737261\_ 4. 489617 4. 715662 4. 606349 4. 750323 4. 664074 4. 823744  
11737262\_ 3. 6158 3. 904078 3. 587678 3. 714889 3. 807795 3. 823797  
11737263\_ 5. 425687 5. 6488 5. 285005 5. 677329 5. 50271 5. 692767  
11737264\_ 3. 285023 3. 291659 3. 138626 3. 183179 3. 249689 3. 178392  
11737265\_ 3. 35015 3. 423601 3. 186712 3. 164703 3. 261928 3. 37098  
11737266\_ 3. 691649 4. 197139 3. 785729 3. 676487 3. 674477 3. 862358  
11737267\_ 2. 862127 3. 186774 3. 087882 3. 025972 3. 053158 2. 96144  
11737268\_ 4. 020717 3. 9281 4. 058596 4. 010211 4. 291674 4. 025452  
11737269\_ 4. 055409 4. 048725 4. 065299 4. 068418 3. 939289 4. 116353  
11737270\_ 5. 223678 5. 329935 5. 243375 5. 443107 5. 284424 5. 452442  
11737271\_ 6. 047782 6. 083697 6. 237372 6. 196891 6. 18505 6. 184961  
11737272\_ 5. 95633 5. 789947 6. 005484 5. 297498 5. 426098 5. 354008  
11737273\_ 3. 312853 3. 37402 3. 705687 3. 439422 3. 43838 3. 567907  
11737274\_ 3. 350131 3. 470782 3. 509887 3. 38039 3. 228104 3. 437457  
11737275\_ 4. 671439 4. 793439 4. 971738 4. 816653 4. 714224 4. 881679  
11737276\_ 6. 528485 6. 453428 6. 455771 6. 127189 6. 306332 6. 205898  
11737277\_ 5. 234879 5. 230483 5. 173565 5. 2222 5. 180227 4. 905725  
11737278\_ 1. 924719 1. 963345 2. 264411 2. 18981 2. 202643 2. 101208  
11737279\_ 3. 88166 3. 90409 3. 782303 3. 725273 3. 85923 3. 85923  
11737280\_ 3. 040804 3. 08382 3. 050652 3. 048108 3. 016433 3. 195159  
11737281\_ 3. 864611 3. 909593 4. 081819 3. 401307 3. 749408 3. 705625  
11737282\_ 3. 802263 3. 702532 4. 026092 3. 083126 3. 479857 3. 498564  
11737283\_ 3. 964352 4. 025388 3. 866854 3. 982507 4. 047799 3. 941049

11737284\_ 2. 579488 2. 480726 2. 738924 2. 622498 2. 723816 2. 789316  
11737285\_ 3. 789695 3. 675665 3. 789695 3. 874282 3. 871351 3. 673892  
11737286\_ 2. 491054 2. 65099 2. 661556 2. 586567 2. 672848 2. 608426  
11737287\_ 2. 235709 2. 121903 2. 224128 2. 351192 2. 39013 2. 393453  
11737288\_ 6. 033721 5. 977002 6. 111861 5. 980809 5. 964232 5. 922714  
11737289\_ 5. 677869 5. 684217 5. 706627 5. 823696 5. 855736 5. 852454  
11737290\_ 2. 664256 2. 720521 2. 714526 2. 766036 2. 908708 2. 960795  
11737291\_ 3. 92551 4. 016976 4. 059614 4. 135496 4. 189849 4. 26788  
11737292\_ 4. 367638 4. 682751 4. 565734 4. 736759 4. 643717 4. 630608  
11737293\_ 4. 255884 4. 422778 4. 304865 4. 48116 4. 52373 4. 354386  
11737294\_ 2. 457297 2. 760006 2. 605516 2. 909809 2. 909809 2. 867103  
11737295\_ 5. 227344 5. 240495 5. 238155 5. 35425 5. 53864 5. 409222  
11737296\_ 6. 931942 6. 72752 6. 875021 7. 126901 6. 965707 7. 096405  
11737297\_ 4. 225805 4. 183604 4. 190126 4. 166854 4. 141246 4. 275543  
11737298\_ 3. 142051 3. 3192 3. 417421 3. 22647 3. 240517 3. 371118  
11737299\_ 6. 769951 6. 791012 6. 723169 6. 765854 6. 694408 6. 746022  
11737300\_ 4. 16873 4. 366158 4. 224379 4. 40461 4. 208989 4. 028277  
11737301\_ 7. 95511 7. 892438 7. 915614 8. 110271 8. 160366 8. 123167  
11737302\_ 4. 806622 4. 643717 4. 800847 4. 918388 4. 882882 4. 938465  
11737303\_ 7. 703793 7. 592857 7. 698297 7. 401149 7. 536532 7. 622638  
11737304\_ 3. 513678 3. 713689 3. 438827 3. 698438 3. 492063 3. 747687  
11737305\_ 4. 455891 4. 628746 4. 33104 4. 445803 4. 437842 4. 437842  
11737306\_ 3. 473436 3. 685524 3. 363769 3. 575397 3. 498265 3. 516392  
11737307\_ 3. 410093 3. 499607 3. 325171 3. 525905 3. 698045 3. 591557  
11737308\_ 6. 397946 6. 431763 6. 349008 6. 349044 6. 427861 6. 324175  
11737309\_ 9. 438267 9. 444626 9. 464632 9. 451999 9. 457212 9. 362298  
11737310\_ 4. 483845 4. 327118 4. 312956 4. 618094 4. 486326 4. 34158  
11737311\_ 4. 095274 4. 274078 4. 071752 4. 058486 3. 96941 4. 184449  
11737312\_ 4. 172963 4. 395625 4. 221503 4. 490617 4. 531422 4. 501751  
11737313\_ 2. 155037 2. 370308 2. 254995 2. 315811 2. 273335 2. 273335  
11737314\_ 4. 700243 4. 595714 4. 855029 4. 830914 4. 762367 4. 779392  
11737315\_ 3. 991563 3. 867207 4. 102909 4. 144027 4. 02503 4. 222951  
11737316\_ 6. 59957 6. 799702 6. 64319 6. 706653 6. 840606 6. 820591  
11737317\_ 4. 337202 4. 456047 4. 456047 4. 275543 4. 421789 4. 437161  
11737318\_ 4. 459743 4. 135122 4. 164684 3. 721004 3. 861051 3. 687891  
11737319\_ 4. 830321 4. 750521 4. 830321 4. 881011 4. 798769 4. 883129  
11737320\_ 6. 926143 7. 05402 6. 899364 6. 871804 6. 929028 7. 010716  
11737321\_ 7. 503856 7. 350241 7. 493248 7. 027928 7. 11514 7. 0873  
11737322\_ 6. 440517 6. 459934 6. 659043 6. 473331 6. 397127 6. 560859  
11737323\_ 2. 794337 3. 026443 2. 991268 2. 983582 2. 837398 3. 02904  
11737324\_ 3. 333539 3. 55796 3. 515098 3. 515098 3. 515098 3. 558379  
11737325\_ 4. 815683 5. 029529 5. 018812 4. 995446 4. 966499 4. 941702  
11737326\_ 7. 005809 7. 141217 6. 849873 7. 33947 7. 351871 7. 393501  
11737327\_ 3. 099161 3. 234744 3. 371819 3. 233967 3. 307023 3. 117433  
11737328\_ 5. 696238 5. 763634 5. 676668 5. 723241 5. 67107 5. 795216  
11737329\_ 4. 180654 4. 393719 4. 14412 3. 806736 3. 738389 4. 032119  
11737330\_ 3. 74851 3. 57247 3. 799642 3. 651894 3. 668061 3. 714211  
11737331\_ 7. 777163 7. 737082 7. 855156 7. 501102 7. 551302 7. 529415  
11737332\_ 4. 264586 4. 411146 4. 413136 3. 923544 4. 029234 4. 322779  
11737333\_ 3. 945118 3. 575561 3. 76783 3. 850246 3. 839104 3. 836321  
11737334\_ 7. 878876 7. 888253 7. 822222 7. 657237 7. 633584 7. 588052

11737335\_ 6. 536494 6. 641378 6. 67716 5. 644788 5. 589913 5. 594049  
11737336\_ 7. 647623 7. 687433 7. 83628 6. 532534 6. 645205 6. 705799  
11737337\_ 6. 158543 5. 990091 5. 965104 5. 730822 5. 70971 5. 782937  
11737338\_ 5. 548883 5. 40915 5. 217412 4. 889876 4. 870394 4. 890528  
11737339\_ 5. 099764 5. 194506 5. 072454 5. 321749 5. 301415 5. 332445  
11737340\_ 5. 17076 5. 256294 5. 143284 5. 356313 5. 292232 5. 205477  
11737341\_ 6. 857799 7. 055228 7. 004078 6. 934638 7. 038393 6. 953806  
11737342\_ 7. 583315 7. 676993 7. 600994 7. 440225 7. 609458 7. 543054  
11737343\_ 4. 708931 4. 339189 4. 584933 4. 624124 4. 469653 4. 518424  
11737344\_ 2. 782133 2. 690285 2. 726976 2. 784774 2. 688614 2. 691254  
11737345\_ 4. 736947 4. 941947 4. 489537 4. 803791 4. 772335 4. 780895  
11737346\_ 4. 026092 4. 067703 4. 175853 4. 084199 3. 991457 4. 009334  
11737347\_ 7. 324922 7. 313788 7. 220585 7. 465905 7. 369118 7. 367057  
11737348\_ 7. 605335 7. 612816 7. 505876 7. 560712 7. 614809 7. 614809  
11737349\_ 2. 481321 2. 718322 2. 658063 2. 834812 2. 478306 2. 392432  
11737350\_ 8. 190344 8. 040419 8. 158164 8. 037242 8. 077295 8. 113275  
11737351\_ 4. 982658 5. 145253 5. 03805 5. 093927 4. 922429 4. 947695  
11737352\_ 7. 797059 7. 927 7. 740997 7. 857591 7. 959925 7. 866192  
11737353\_ 4. 740283 4. 597337 4. 740283 4. 474667 4. 778413 4. 674985  
11737354\_ 4. 985563 4. 643717 4. 830034 4. 817493 4. 849431 4. 910765  
11737355\_ 5. 812159 5. 973823 5. 808275 6. 03056 5. 850915 5. 996962  
11737356\_ 4. 128124 3. 997131 3. 834157 3. 993918 4. 039543 4. 09004  
11737357\_ 3. 35057 3. 377185 3. 391393 3. 398823 3. 733729 3. 41357  
11737358\_ 5. 238559 5. 361883 5. 377878 5. 281894 5. 29848 5. 412243  
11737359\_ 5. 162497 5. 380649 5. 398532 5. 468826 5. 398256 5. 452694  
11737360\_ 6. 744359 6. 902207 6. 611963 6. 637743 6. 773369 6. 775982  
11737361\_ 5. 202862 5. 157335 5. 332802 5. 213136 5. 052319 5. 109978  
11737362\_ 2. 896602 2. 800552 2. 9441 2. 72791 2. 800552 2. 945929  
11737363\_ 5. 467245 5. 44249 5. 670041 5. 681453 5. 718229 5. 432984  
11737364\_ 4. 051892 4. 123815 3. 884163 4. 238066 4. 264375 4. 106417  
11737365\_ 6. 56955 6. 484868 6. 67941 6. 297294 6. 31325 6. 13945  
11737366\_ 2. 108261 2. 636627 2. 272738 2. 331572 2. 166552 2. 384435  
11737367\_ 2. 363936 2. 487239 2. 409375 2. 363936 2. 354137 2. 318496  
11737368\_ 5. 553955 5. 616808 5. 687109 5. 672285 5. 663968 5. 583803  
11737369\_ 6. 60628 6. 642483 6. 63186 7. 064638 7. 173028 7. 063569  
11737370\_ 2. 308304 2. 361778 2. 308304 2. 309736 2. 356621 2. 25348  
11737371\_ 5. 655139 5. 81451 5. 660474 6. 220486 6. 123334 6. 283959  
11737372\_ 5. 265776 5. 175721 5. 159729 5. 064124 5. 11527 5. 196201  
11737373\_ 3. 943916 3. 925283 3. 988596 4. 031062 3. 988596 4. 030582  
11737374\_ 3. 794396 3. 923484 3. 798429 3. 942905 3. 757442 3. 826199  
11737375\_ 6. 800922 6. 809436 6. 860109 6. 963663 6. 88799 6. 914355  
11737376\_ 5. 262098 5. 414869 5. 329901 5. 435408 5. 426098 5. 554436  
11737377\_ 4. 216279 4. 021538 4. 005098 4. 306352 4. 320178 4. 291971  
11737378\_ 10. 48422 10. 60917 10. 47964 10. 50227 10. 51742 10. 57841  
11737379\_ 4. 125156 4. 47932 4. 344093 4. 547112 4. 534564 4. 462143  
11737380\_ 5. 379245 5. 395001 5. 396146 5. 718746 5. 539491 5. 451854  
11737381\_ 5. 859873 5. 996598 5. 786197 5. 910773 5. 824632 5. 849541  
11737382\_ 6. 500928 6. 613516 6. 557068 6. 554039 6. 532368 6. 62474  
11737383\_ 4. 090723 4. 047013 3. 936244 4. 090723 4. 126184 4. 140707  
11737384\_ 3. 522605 3. 600624 3. 349642 3. 123274 3. 013416 3. 331328  
11737385\_ 5. 287021 5. 382186 5. 122249 5. 248857 5. 315103 5. 350058

11737386\_ 4. 761523 4. 782771 4. 686459 4. 692245 4. 655857 4. 815683  
11737387\_ 7. 489139 7. 400837 7. 59521 7. 810276 7. 58388 7. 693164  
11737388\_ 6. 263567 6. 206103 6. 280902 6. 137251 6. 227201 6. 214008  
11737389\_ 5. 785195 5. 808754 5. 718024 5. 909225 5. 824947 5. 838238  
11737390\_ 4. 829177 4. 817995 4. 834115 4. 91562 5. 106681 5. 111195  
11737391\_ 3. 112925 3. 061205 2. 92633 3. 401059 3. 190191 3. 271765  
11737392\_ 5. 339817 5. 482159 5. 448296 5. 355145 5. 397861 5. 344757  
11737393\_ 4. 958 4. 867216 5. 128427 4. 852604 4. 833791 4. 755627  
11737394\_ 3. 93766 3. 486669 3. 596795 3. 453485 3. 661339 3. 36447  
11737395\_ 4. 711693 4. 711 4. 712384 4. 965717 4. 866896 4. 875666  
11737396\_ 9. 659781 9. 621305 9. 630827 9. 309338 9. 367992 9. 303964  
11737397\_ 5. 749335 5. 69385 5. 483715 5. 863787 5. 684811 5. 744411  
11737398\_ 5. 584813 5. 535177 5. 448296 5. 506072 5. 562967 5. 571263  
11737399\_ 2. 315312 2. 555085 2. 442262 2. 287574 2. 404269 2. 351383  
11737400\_ 3. 77679 3. 879702 3. 705584 3. 845427 3. 823031 3. 802556  
11737401\_ 4. 541017 4. 776576 4. 714345 4. 679018 4. 767402 4. 737065  
11737402\_ 5. 014251 4. 997725 4. 931343 5. 144018 5. 176932 5. 064171  
11737403\_ 6. 871358 6. 886386 6. 898793 7. 019907 7. 027718 7. 031546  
11737404\_ 4. 721513 4. 753784 4. 582151 4. 503554 4. 577686 4. 660414  
11737405\_ 2. 23116 2. 1301 2. 23116 2. 03165 2. 140281 2. 026641  
11737406\_ 4. 20286 4. 250048 4. 030167 4. 261182 4. 156182 4. 138553  
11737407\_ 8. 526019 8. 505173 8. 6274 8. 473162 8. 51324 8. 504404  
11737408\_ 5. 585077 5. 488316 5. 686105 5. 626744 5. 725911 5. 673367  
11737409\_ 9. 012987 8. 996595 8. 952159 9. 064373 9. 044381 8. 973471  
11737410\_ 3. 689535 3. 775276 3. 5635 3. 750478 3. 800562 3. 81829  
11737411\_ 4. 075816 3. 875313 3. 755393 4. 019816 4. 159478 4. 075816  
11737412\_ 2. 50458 2. 562524 2. 67265 2. 605516 2. 68181 2. 366242  
11737413\_ 3. 291816 3. 476212 3. 097259 3. 524523 3. 432358 3. 401778  
11737414\_ 4. 649734 4. 737583 4. 788299 4. 736039 4. 789926 4. 832534  
11737415\_ 4. 515853 4. 617622 4. 58136 4. 638508 4. 693019 4. 796289  
11737416\_ 7. 227746 7. 014098 7. 072813 6. 490942 6. 508949 6. 578816  
11737417\_ 4. 771048 4. 776515 4. 863455 4. 369036 4. 726785 4. 61251  
11737418\_ 6. 660519 6. 63804 6. 744483 6. 364037 6. 4045 6. 480247  
11737419\_ 5. 542973 5. 713144 5. 521844 5. 650493 5. 660604 5. 521844  
11737420\_ 1. 991238 1. 733591 1. 762458 1. 777132 1. 648727 1. 875264  
11737421\_ 4. 8172 4. 636221 4. 495776 4. 736759 4. 69156 4. 899034  
11737422\_ 5. 824842 5. 912317 5. 901773 6. 045232 6. 087357 6. 089855  
11737423\_ 5. 939871 5. 978304 6. 055194 6. 058786 6. 25952 6. 118838  
11737424\_ 3. 818401 3. 867196 3. 698254 3. 939711 3. 783271 3. 823248  
11737425\_ 4. 516346 4. 694537 4. 51197 4. 710124 4. 7974 4. 76521  
11737426\_ 6. 027696 6. 117219 6. 08663 6. 216547 6. 045727 6. 087034  
11737427\_ 2. 313472 2. 402748 2. 497362 2. 523237 2. 666841 2. 505571  
11737428\_ 4. 800765 4. 683462 4. 861022 4. 231978 4. 289334 4. 289334  
11737429\_ 4. 810665 4. 866946 4. 871785 4. 214723 4. 339112 4. 422799  
11737430\_ 5. 510981 5. 062159 5. 122191 5. 157292 5. 221311 5. 196201  
11737431\_ 3. 924802 4. 094975 3. 947477 3. 803213 3. 985474 3. 863889  
11737432\_ 5. 845682 6. 033313 5. 709521 5. 742671 5. 753269 5. 86644  
11737433\_ 2. 833398 2. 723373 2. 704406 3. 173122 3. 004853 2. 947056  
11737434\_ 2. 811641 3. 041921 2. 683198 2. 911162 2. 827002 2. 94388  
11737435\_ 4. 384011 4. 494849 4. 209124 4. 435429 4. 589981 4. 50683  
11737436\_ 4. 445593 4. 362309 4. 439688 4. 441043 4. 369356 4. 223704

11737437\_ 5. 32209 5. 428645 5. 497515 5. 507637 5. 709355 5. 636436  
11737438\_ 6. 435685 6. 598431 6. 339291 6. 558086 6. 500098 6. 606452  
11737439\_ 4. 853395 4. 964066 4. 835146 4. 964066 5. 009731 5. 021703  
11737440\_ 5. 180689 5. 207189 5. 135281 5. 12677 5. 132602 5. 205842  
11737441\_ 6. 38064 6. 351431 6. 397681 5. 414869 5. 526168 5. 434502  
11737442\_ 6. 340912 6. 379743 6. 391192 5. 219778 5. 427421 5. 408203  
11737443\_ 3. 940249 3. 829236 4. 007627 3. 859257 3. 931963 4. 089274  
11737444\_ 4. 145625 4. 13618 4. 171602 4. 352779 4. 046647 4. 32021  
11737445\_ 5. 09257 4. 954441 5. 045453 4. 693258 4. 698124 5. 025366  
11737446\_ 2. 463945 2. 753829 2. 605516 2. 527899 2. 163644 2. 260106  
11737447\_ 6. 08359 6. 055002 6. 029617 5. 999169 5. 986353 6. 114401  
11737448\_ 7. 136326 7. 040644 7. 084456 7. 013919 6. 978422 6. 913691  
11737449\_ 2. 336489 2. 040572 1. 973653 1. 996326 2. 122523 2. 256203  
11737450\_ 2. 450149 2. 075217 2. 122248 2. 108759 2. 115943 2. 385264  
11737451\_ 4. 700243 4. 535539 4. 586296 4. 496559 4. 571095 4. 415744  
11737452\_ 5. 324361 5. 340928 5. 214859 5. 293645 5. 322199 5. 234488  
11737453\_ 3. 503003 3. 68203 3. 331305 3. 463095 3. 557177 3. 525614  
11737454\_ 4. 210354 4. 078469 4. 310802 3. 628699 3. 683409 3. 81128  
11737455\_ 3. 746824 3. 967442 3. 700919 3. 717863 3. 772215 3. 700919  
11737456\_ 4. 820219 4. 723246 4. 820219 4. 842674 5. 073036 4. 912692  
11737457\_ 1. 833697 1. 639086 1. 65571 1. 685355 1. 475126 1. 578735  
11737458\_ 3. 683249 3. 601658 3. 761066 3. 692537 3. 543282 3. 825213  
11737459\_ 2. 471784 2. 540686 2. 335755 2. 613023 2. 566212 2. 618994  
11737460\_ 4. 445576 4. 801172 4. 644732 4. 791637 4. 726936 4. 823563  
11737461\_ 5. 068194 5. 11527 4. 88132 5. 272241 5. 279916 5. 089007  
11737462\_ 4. 183865 4. 317707 4. 09787 4. 200395 4. 377571 4. 429273  
11737463\_ 6. 116445 6. 2056 6. 178703 6. 228723 6. 145548 6. 118838  
11737464\_ 5. 047004 5. 178346 5. 307306 5. 05173 5. 192423 5. 308237  
11737465\_ 6. 273106 6. 282224 6. 167309 6. 206544 6. 174739 6. 211672  
11737466\_ 6. 353988 6. 345261 6. 468964 6. 48185 6. 553337 6. 526755  
11737467\_ 4. 990936 5. 263624 5. 129673 5. 156676 5. 293039 5. 234628  
11737468\_ 4. 011789 4. 047474 3. 788034 3. 815633 4. 08574 3. 929626  
11737469\_ 4. 885932 5. 073036 4. 824195 4. 95048 5. 158488 5. 299562  
11737470\_ 6. 698281 6. 758558 6. 734021 6. 747845 6. 760912 6. 834784  
11737471\_ 6. 986765 7. 206802 6. 959527 6. 943089 7. 041317 6. 987845  
11737472\_ 5. 723921 5. 817007 5. 725055 5. 701557 5. 762556 5. 834531  
11737473\_ 7. 345191 7. 376281 7. 410327 7. 25453 7. 255629 7. 338293  
11737474\_ 5. 166784 5. 127938 5. 26034 5. 247931 5. 260616 5. 11527  
11737475\_ 2. 627409 2. 532774 2. 717585 2. 710827 2. 453928 2. 516835  
11737476\_ 7. 708555 7. 794384 7. 587865 7. 773414 7. 688978 7. 723219  
11737477\_ 5. 344279 5. 390111 5. 347189 5. 711236 5. 580634 5. 491405  
11737478\_ 2. 458311 2. 510927 2. 47102 2. 408515 2. 570633 2. 462034  
11737479\_ 9. 016047 8. 948558 8. 991367 8. 456222 8. 493256 8. 39611  
11737480\_ 9. 588838 9. 529435 9. 497267 9. 075457 9. 031472 9. 025148  
11737481\_ 2. 073276 1. 888466 1. 896798 1. 799075 1. 800618 2. 072776  
11737482\_ 2. 246599 2. 126041 2. 045865 1. 931029 2. 217689 2. 126041  
11737483\_ 4. 694319 4. 854139 4. 829578 5. 06542 4. 955803 5. 050511  
11737484\_ 4. 729059 4. 688026 4. 735891 4. 687328 4. 75578 4. 645792  
11737485\_ 3. 096111 2. 869289 2. 969515 2. 991051 3. 00645 2. 950419  
11737486\_ 6. 808643 6. 737364 6. 811503 6. 961572 6. 928888 6. 937605  
11737487\_ 7. 295382 7. 264307 7. 15933 7. 279453 7. 237274 7. 24483

11737488\_ 9. 269785 9. 312993 9. 35858 9. 246276 9. 267945 9. 236137  
11737489\_ 4. 275543 4. 247618 4. 36055 4. 221968 4. 275543 4. 241987  
11737490\_ 4. 118744 3. 957975 3. 909454 4. 016527 4. 041379 3. 899583  
11737491\_ 4. 673046 4. 786122 4. 699992 4. 969941 4. 798203 4. 79435  
11737492\_ 3. 312795 3. 525329 3. 350639 3. 328537 3. 211262 3. 490706  
11737493\_ 2. 716752 2. 682731 2. 616793 2. 744417 2. 745865 2. 737443  
11737494\_ 2. 555262 2. 526675 2. 416399 2. 431419 2. 555262 2. 620607  
11737495\_ 1. 695595 1. 823686 1. 805375 1. 991794 1. 675102 1. 787006  
11737496\_ 2. 209001 2. 193413 2. 075185 1. 890132 2. 022758 2. 234074  
11737497\_ 6. 052577 6. 17847 6. 02917 6. 213933 6. 206692 6. 135074  
11737498\_ 5. 600236 5. 661401 5. 617814 5. 894697 5. 820052 5. 799924  
11737499\_ 5. 285218 5. 444803 5. 407523 5. 517031 5. 475372 5. 481479  
11737500\_ 2. 606355 2. 44417 2. 596033 2. 628981 2. 725953 2. 866065  
11737501\_ 2. 553013 2. 495225 2. 637266 2. 696101 2. 653154 2. 553013  
11737502\_ 4. 01948 4. 065239 4. 38892 4. 354533 4. 15615 4. 217534  
11737503\_ 5. 029529 5. 087664 5. 119715 5. 124269 5. 053947 5. 078335  
11737504\_ 5. 406146 5. 433952 5. 400568 5. 406146 5. 446756 5. 337055  
11737505\_ 2. 206283 2. 465816 1. 991814 2. 110834 2. 09136 2. 201713  
11737506\_ 7. 291421 7. 283705 7. 310499 6. 431763 6. 626212 6. 727853  
11737507\_ 7. 295411 7. 39095 7. 291795 7. 250917 7. 388012 7. 323801  
11737508\_ 3. 81939 3. 98265 3. 905255 3. 838511 3. 834375 3. 605287  
11737509\_ 3. 463812 3. 488314 3. 47302 3. 606313 3. 543208 3. 560137  
11737510\_ 5. 310456 5. 231461 4. 92313 4. 760535 4. 93493 5. 077864  
11737511\_ 5. 789641 5. 747513 5. 580063 5. 311417 5. 320636 5. 375722  
11737512\_ 2. 906531 3. 002137 2. 74371 2. 876788 2. 803181 2. 871382  
11737513\_ 4. 021155 4. 126908 4. 063011 4. 02504 4. 021155 3. 917239  
11737514\_ 3. 311559 3. 290188 3. 290188 3. 303874 3. 211601 3. 466755  
11737515\_ 5. 209259 5. 173768 5. 157053 5. 283122 4. 977653 5. 083402  
11737516\_ 4. 763599 4. 837652 4. 870573 4. 837652 4. 782323 4. 789914  
11737517\_ 5. 393225 5. 448296 5. 34124 5. 372904 5. 370568 5. 383601  
11737518\_ 6. 683125 6. 76535 6. 774143 6. 227238 6. 33932 6. 348783  
11737519\_ 2. 381437 2. 20755 2. 298429 2. 149635 2. 262671 2. 441397  
11737520\_ 2. 718863 3. 085479 2. 736636 2. 989818 2. 989818 2. 998893  
11737521\_ 4. 680327 4. 930965 4. 678795 4. 803379 5. 196597 4. 937377  
11737522\_ 3. 169764 3. 307226 3. 056958 3. 014456 2. 921414 3. 26091  
11737523\_ 4. 648874 4. 626007 4. 338343 4. 546052 4. 612289 4. 554332  
11737524\_ 4. 206437 4. 049298 4. 176608 4. 012269 4. 03328 4. 219083  
11737525\_ 1. 874151 2. 074091 2. 058168 1. 842675 2. 074885 1. 899016  
11737526\_ 2. 875023 3. 055734 3. 046494 2. 928234 3. 101678 2. 92925  
11737527\_ 9. 131104 9. 016816 9. 124262 8. 603331 8. 635638 8. 58499  
11737528\_ 5. 623813 5. 378372 5. 600842 5. 542688 5. 406393 5. 555611  
11737529\_ 2. 628408 2. 38467 2. 466082 2. 277722 2. 361588 2. 463558  
11737530\_ 2. 634166 2. 858153 3. 097596 3. 115322 3. 107786 2. 913216  
11737531\_ 6. 393866 6. 447492 6. 408392 6. 770367 6. 542979 6. 630688  
11737532\_ 2. 946051 2. 734553 2. 665904 2. 946051 2. 62631 2. 698408  
11737533\_ 6. 472738 6. 382418 6. 422601 6. 81201 6. 824174 6. 854699  
11737534\_ 5. 281195 5. 396544 5. 231425 5. 34121 5. 501367 5. 462018  
11737535\_ 3. 138859 3. 476972 3. 290188 3. 345421 3. 185929 3. 151584  
11737536\_ 3. 108076 2. 978313 3. 137009 2. 845644 2. 911606 2. 943017  
11737537\_ 3. 181529 3. 146743 3. 263565 3. 146743 3. 111958 3. 012194  
11737538\_ 1. 977078 2. 085064 2. 25805 2. 213968 2. 178996 2. 327403

11737539\_ 5. 235944 5. 16413 5. 260451 5. 292438 5. 3716 5. 334062  
11737540\_ 3. 703086 3. 619682 3. 76187 3. 746374 3. 606313 3. 965358  
11737541\_ 6. 058202 6. 16849 6. 081354 6. 32523 6. 305588 6. 200708  
11737542\_ 4. 106891 4. 092104 4. 26344 4. 147944 4. 009013 3. 944298  
11737543\_ 2. 235709 2. 318401 2. 389196 2. 450855 2. 424032 2. 532033  
11737544\_ 3. 196263 2. 951611 3. 058577 3. 230923 3. 039474 3. 431438  
11737545\_ 5. 958402 5. 779579 5. 835875 4. 81707 4. 700243 4. 950992  
11737546\_ 4. 01862 4. 22416 4. 078185 4. 123995 4. 22345 4. 04184  
11737547\_ 2. 636737 2. 852045 2. 715436 2. 870563 2. 869316 2. 875011  
11737548\_ 4. 994298 4. 934666 4. 88241 5. 051705 4. 960662 4. 957128  
11737549\_ 5. 841657 5. 818903 5. 684469 5. 803591 5. 709271 5. 913409  
11737550\_ 3. 423707 3. 323869 3. 417907 3. 485914 3. 455609 3. 080523  
11737551\_ 4. 092189 4. 147587 4. 013091 4. 055054 4. 235919 3. 90347  
11737552\_ 3. 645521 3. 723624 3. 863573 3. 756925 3. 731875 3. 623035  
11737553\_ 3. 207132 3. 37308 3. 323746 3. 481672 3. 371659 3. 517688  
11737554\_ 5. 917162 5. 971702 5. 752309 6. 037997 5. 982807 6. 037806  
11737555\_ 6. 786859 6. 764087 6. 847013 6. 560506 6. 578737 6. 560857  
11737556\_ 4. 224484 4. 36765 3. 973027 4. 243893 4. 372657 4. 459438  
11737557\_ 4. 422802 4. 66193 4. 515479 4. 668298 4. 656653 4. 636043  
11737558\_ 6. 83223 6. 850039 6. 860086 6. 863435 6. 900537 6. 902256  
11737559\_ 7. 611122 7. 539798 7. 658789 7. 013657 7. 091731 6. 981944  
11737560\_ 2. 400651 2. 736245 2. 770304 2. 640683 2. 628497 2. 455625  
11737561\_ 3. 672559 4. 142761 3. 867981 3. 691931 3. 867981 3. 890637  
11737562\_ 5. 42157 5. 409399 5. 578495 5. 258624 5. 239132 5. 227386  
11737563\_ 5. 086356 5. 132081 4. 958458 4. 99676 4. 975505 5. 081317  
11737564\_ 6. 72667 6. 641616 6. 755211 6. 596038 6. 529343 6. 517893  
11737565\_ 8. 358387 8. 219968 8. 364806 8. 524431 8. 546566 8. 584567  
11737566\_ 3. 375268 3. 360836 3. 343513 3. 220831 3. 502725 3. 316472  
11737567\_ 4. 898548 5. 120805 4. 902686 5. 013121 5. 117369 5. 035041  
11737568\_ 4. 121996 4. 141117 4. 065888 4. 20164 4. 143603 4. 143603  
11737569\_ 6. 02158 6. 073449 5. 900566 6. 082126 6. 034546 6. 143256  
11737570\_ 4. 874234 4. 835272 4. 949043 4. 940778 4. 758213 4. 815683  
11737571\_ 5. 736831 5. 961715 5. 756933 6. 073468 5. 892152 5. 969512  
11737572\_ 3. 387932 3. 13713 3. 203642 3. 40382 3. 625233 3. 638795  
11737573\_ 2. 412583 2. 664864 2. 639228 2. 753941 2. 481062 2. 560064  
11737574\_ 3. 40578 3. 570152 3. 503743 3. 606313 3. 387526 3. 587976  
11737575\_ 3. 736127 4. 001196 4. 107498 3. 949905 4. 137167 3. 859026  
11737576\_ 4. 284367 4. 231065 4. 266873 4. 248559 4. 38841 4. 222298  
11737577\_ 3. 938221 4. 108698 3. 965139 3. 126827 2. 854169 2. 863684  
11737578\_ 3. 167732 3. 39418 2. 715066 2. 582697 2. 477336 2. 695219  
11737579\_ 3. 716211 3. 893397 3. 917172 3. 533773 3. 728321 3. 766939  
11737580\_ 4. 134312 4. 149551 3. 988964 3. 709109 3. 793045 4. 07581  
11737581\_ 3. 720687 3. 69063 3. 649127 3. 734127 3. 830687 3. 744508  
11737582\_ 2. 410613 2. 438719 2. 39183 2. 294088 2. 32189 2. 322245  
11737583\_ 3. 406117 3. 438774 3. 492027 3. 24787 3. 390288 3. 390288  
11737584\_ 5. 929733 5. 944437 6. 045251 6. 123679 5. 980978 6. 098314  
11737585\_ 2. 519845 2. 47102 2. 500624 2. 512144 2. 527204 2. 463319  
11737586\_ 4. 212674 4. 480068 4. 374494 4. 643717 4. 517116 4. 533279  
11737587\_ 5. 266905 5. 380754 5. 311986 5. 555506 5. 427062 5. 190447  
11737588\_ 5. 689601 5. 760062 5. 560963 5. 9828 5. 791775 5. 876684  
11737589\_ 4. 546255 4. 504091 4. 522778 4. 347179 4. 491748 4. 204808



11737590\_ 5. 133878 5. 345598 5. 532164 4. 887184 4. 991028 4. 998542  
11737591\_ 7. 206573 7. 144608 7. 17317 6. 307363 6. 285211 6. 258658  
11737592\_ 3. 305899 3. 460072 3. 570329 3. 605497 3. 53864 4. 029543  
11737593\_ 5. 48936 5. 661145 5. 672956 5. 26701 5. 308675 5. 383429  
11737594\_ 2. 641522 2. 856707 2. 722668 2. 862235 2. 96628 2. 605516  
11737595\_ 3. 609985 3. 624565 3. 603537 3. 564242 3. 719853 3. 749513  
11737596\_ 2. 00506 1. 890648 1. 795963 1. 69899 1. 840971 1. 831463  
11737597\_ 4. 243934 3. 994573 4. 11287 4. 080871 4. 347179 4. 054288  
11737598\_ 6. 584888 6. 625934 6. 445249 6. 535058 6. 557274 6. 553609  
11737599\_ 5. 22945 5. 201183 5. 2222 5. 347677 5. 397861 5. 258939  
11737600\_ 5. 242511 5. 314525 5. 259019 5. 320942 5. 187881 5. 16637  
11737601\_ 2. 070698 2. 051912 2. 058771 1. 942956 1. 912047 1. 934734  
11737602\_ 5. 285218 5. 305749 5. 125812 4. 799065 4. 915401 4. 95541  
11737603\_ 2. 784306 2. 659489 2. 581788 2. 755173 2. 620235 2. 765635  
11737604\_ 9. 368859 9. 2693 9. 36866 9. 490172 9. 379007 9. 3471  
11737605\_ 2. 684993 2. 853069 2. 605516 2. 967191 2. 898007 2. 928731  
11737606\_ 6. 615589 6. 726433 6. 702398 6. 653768 6. 503594 6. 367786  
11737607\_ 5. 335725 5. 314479 5. 381534 5. 424998 5. 365061 5. 341531  
11737608\_ 4. 628853 4. 642476 4. 619604 4. 503734 4. 697894 4. 610811  
11737609\_ 5. 268101 5. 314175 5. 088186 5. 17129 5. 197129 5. 029529  
11737610\_ 5. 67157 5. 772856 5. 59952 5. 663424 5. 690802 5. 506752  
11737611\_ 7. 80671 7. 595972 7. 74982 6. 957216 6. 896312 6. 987474  
11737612\_ 7. 099734 6. 925189 7. 093507 6. 535452 6. 473532 6. 524781  
11737613\_ 3. 726484 3. 606846 3. 63395 3. 668434 3. 532469 3. 776206  
11737614\_ 3. 3275 3. 098465 3. 121512 3. 121512 3. 230754 3. 042387  
11737615\_ 4. 815683 4. 898469 4. 793987 4. 971939 4. 956964 4. 94619  
11737616\_ 2. 69897 2. 799194 2. 678799 2. 671027 2. 605516 2. 756913  
11737617\_ 4. 223605 4. 415546 3. 993068 4. 24625 4. 232758 4. 162691  
11737618\_ 2. 988093 3. 107242 3. 076238 3. 283238 3. 235238 3. 287706  
11737619\_ 5. 129928 5. 289877 5. 16885 5. 333417 5. 381579 5. 314734  
11737620\_ 6. 904056 6. 659296 6. 751363 5. 335272 5. 481886 5. 379883  
11737621\_ 5. 424184 5. 366538 5. 369732 5. 54024 5. 389816 5. 422767  
11737622\_ 7. 083638 6. 759871 6. 76224 6. 755526 6. 704309 6. 761853  
11737623\_ 7. 729437 7. 649907 7. 730067 7. 369912 7. 440214 7. 475925  
11737624\_ 4. 82761 5. 055217 4. 812319 4. 976767 5. 109659 4. 941601  
11737625\_ 6. 502416 6. 718938 6. 491753 6. 689059 6. 694229 6. 658682  
11737626\_ 6. 461002 6. 461002 6. 474704 6. 432542 6. 361264 6. 338914  
11737627\_ 2. 592053 2. 386754 2. 277828 2. 509649 2. 412322 2. 412322  
11737628\_ 5. 5488 5. 536811 5. 379392 5. 305062 5. 306569 5. 205052  
11737629\_ 4. 25096 4. 182007 4. 303434 3. 719311 3. 869633 3. 780683  
11737630\_ 3. 764726 3. 940738 3. 843765 3. 952159 3. 707321 3. 879309  
11737631\_ 2. 300296 1. 898324 2. 507826 2. 057122 1. 898324 2. 153121  
11737632\_ 2. 481354 2. 562865 2. 357761 2. 538948 2. 540149 2. 362163  
11737633\_ 4. 756183 4. 632319 4. 673692 4. 699372 4. 622403 4. 746267  
11737634\_ 2. 675552 2. 504474 2. 515318 2. 626929 2. 446161 2. 665202  
11737635\_ 9. 388122 9. 374025 9. 412206 9. 373579 9. 438911 9. 377134  
11737636\_ 3. 967757 4. 019305 3. 787408 4. 105337 3. 979496 3. 875831  
11737637\_ 4. 886866 4. 896085 4. 986529 4. 957413 4. 812792 4. 644063  
11737638\_ 5. 145945 5. 228627 5. 153468 5. 176698 5. 335034 5. 295882  
11737639\_ 3. 679327 3. 78682 3. 746612 3. 96985 3. 817614 3. 78682  
11737640\_ 3. 652456 3. 844425 3. 816684 3. 565483 3. 580878 3. 66099

11737641\_ 3. 74691 3. 683659 3. 644766 3. 710242 3. 705625 3. 596696  
11737642\_ 4. 461606 4. 432218 4. 395538 4. 452473 4. 577612 4. 477514  
11737643\_ 4. 067666 4. 225738 4. 171652 4. 253661 4. 216171 4. 239564  
11737644\_ 4. 203954 4. 341845 4. 332612 4. 405312 4. 519766 4. 254222  
11737645\_ 4. 161021 4. 250058 4. 049119 4. 254953 4. 144742 4. 291243  
11737646\_ 3. 761692 3. 77087 3. 468665 4. 018115 3. 836522 3. 77087  
11737647\_ 5. 194347 5. 194347 5. 372673 5. 915317 5. 888144 5. 953124  
11737648\_ 3. 049785 2. 555167 3. 079403 3. 021189 2. 752562 3. 155292  
11737649\_ 4. 763293 4. 872647 4. 819777 4. 736075 4. 497124 4. 526934  
11737650\_ 5. 718873 5. 651279 5. 973344 5. 778564 5. 693944 5. 705687  
11737651\_ 5. 228792 5. 187713 5. 13486 5. 179317 5. 22025 5. 042532  
11737652\_ 3. 542869 3. 180508 3. 156192 2. 791076 2. 985281 3. 132406  
11737653\_ 3. 013202 2. 912885 3. 040475 2. 859697 3. 274386 2. 943502  
11737654\_ 5. 732525 5. 513195 5. 485842 5. 602976 5. 525638 5. 523378  
11737655\_ 4. 804666 4. 86345 4. 716035 5. 149882 5. 054881 4. 86345  
11737656\_ 5. 747157 5. 818122 5. 850044 5. 938966 6. 044285 5. 792088  
11737657\_ 3. 399622 3. 256883 3. 460958 3. 228917 3. 348198 3. 416763  
11737658\_ 6. 233287 6. 153346 6. 224996 5. 865823 5. 881733 5. 729085  
11737659\_ 3. 669313 3. 907755 3. 813032 3. 829049 3. 830394 3. 687854  
11737660\_ 8. 800749 8. 830908 8. 829538 8. 85083 8. 879992 8. 773123  
11737661\_ 7. 916746 7. 878062 7. 893363 7. 953866 7. 958114 7. 8927  
11737662\_ 4. 200678 4. 250934 4. 213868 4. 459939 4. 347179 4. 503953  
11737663\_ 4. 112343 4. 115826 4. 287593 4. 112343 3. 94386 3. 962083  
11737664\_ 5. 769114 5. 771195 5. 727934 5. 806683 5. 7522 5. 764623  
11737665\_ 3. 989484 4. 245891 4. 085003 4. 062888 4. 247699 4. 153767  
11737666\_ 4. 172549 3. 961753 4. 008837 3. 961178 4. 113889 3. 786777  
11737667\_ 4. 401979 4. 457857 4. 457857 4. 610055 4. 545118 4. 502304  
11737668\_ 5. 617408 5. 633694 5. 510644 5. 712377 5. 717376 5. 732315  
11737669\_ 4. 367694 4. 375894 4. 404139 4. 369341 4. 40357 4. 339221  
11737670\_ 5. 923269 5. 918745 5. 879712 6. 058786 5. 917193 5. 904943  
11737671\_ 2. 150529 2. 12684 2. 157991 2. 021304 2. 032786 2. 263852  
11737672\_ 6. 405597 6. 327232 6. 466775 6. 45905 6. 371005 6. 425102  
11737673\_ 3. 38935 3. 356325 3. 456283 3. 519984 3. 320577 3. 45537  
11737674\_ 2. 144444 2. 186927 1. 95354 2. 464083 2. 097602 1. 906698  
11737675\_ 4. 594066 4. 803338 4. 738126 4. 555042 4. 641594 4. 513146  
11737676\_ 4. 834583 4. 594376 4. 514952 4. 85658 4. 661372 4. 762514  
11737677\_ 4. 106979 4. 379534 4. 026847 4. 324937 4. 197213 4. 138948  
11737678\_ 4. 363242 4. 52373 4. 357986 4. 52373 4. 60785 4. 553633  
11737679\_ 6. 176275 6. 562693 6. 330583 6. 521905 6. 535916 6. 515994  
11737680\_ 3. 006451 3. 232247 2. 922198 3. 113312 3. 153616 3. 121765  
11737681\_ 5. 276284 5. 161371 5. 122191 4. 992243 5. 077282 5. 048804  
11737682\_ 5. 047969 5. 064099 5. 029529 5. 136374 5. 031519 5. 062159  
11737683\_ 3. 663808 3. 819386 3. 614194 3. 720443 3. 942081 3. 585253  
11737684\_ 4. 584933 4. 709463 4. 329793 4. 753039 4. 788126 4. 700243  
11737685\_ 5. 369084 5. 412918 5. 200044 5. 317298 5. 463966 5. 387076  
11737686\_ 2. 132287 2. 065718 2. 251194 2. 228269 2. 228269 2. 156919  
11737687\_ 5. 162559 5. 253326 5. 327963 5. 289593 5. 159929 5. 422782  
11737688\_ 5. 386806 5. 291223 5. 256628 5. 277126 5. 338446 5. 409222  
11737689\_ 4. 321127 4. 305385 4. 227175 4. 347179 4. 104674 4. 200678  
11737690\_ 7. 502576 7. 465585 7. 469513 7. 641285 7. 710143 7. 760031  
11737691\_ 2. 834203 2. 491435 2. 491678 2. 439384 2. 427831 2. 443407

11737692\_ 7. 833346 7. 771599 7. 882058 7. 813281 7. 932678 7. 990549  
11737693\_ 4. 234588 4. 229874 4. 287593 4. 474904 4. 275543 4. 342962  
11737694\_ 3. 018233 3. 087074 2. 980934 2. 99456 2. 974713 2. 735276  
11737695\_ 4. 997338 5. 045598 4. 846499 5. 151181 5. 162019 5. 156643  
11737696\_ 4. 633732 4. 29517 4. 353979 4. 554112 4. 37574 4. 42977  
11737697\_ 2. 422109 2. 132806 2. 408146 2. 357711 2. 310939 2. 477079  
11737698\_ 4. 9226 5. 020517 5. 026051 5. 021592 5. 084954 5. 018383  
11737699\_ 5. 972238 5. 927289 5. 685934 6. 071684 6. 024049 5. 836133  
11737700\_ 7. 209805 7. 095512 7. 217351 6. 727338 6. 856405 6. 881228  
11737701\_ 6. 036423 6. 183167 6. 122282 6. 156395 6. 377396 6. 28324  
11737702\_ 2. 310288 2. 130616 2. 392725 2. 363207 2. 197498 2. 46018  
11737703\_ 6. 078894 5. 940445 6. 010703 6. 236695 6. 296952 6. 296018  
11737704\_ 5. 633367 5. 866907 5. 800083 5. 952235 6. 05504 5. 982543  
11737705\_ 4. 823443 4. 882261 4. 620775 4. 745623 4. 745623 4. 584933  
11737706\_ 6. 345468 6. 392308 6. 230622 6. 481131 6. 481046 6. 4813  
11737707\_ 5. 199504 5. 345598 5. 132124 5. 284091 5. 242659 5. 134611  
11737708\_ 7. 803717 7. 610929 7. 702168 7. 59644 7. 573609 7. 615846  
11737709\_ 7. 685747 7. 485235 7. 633057 7. 505701 7. 504144 7. 606959  
11737710\_ 3. 675947 3. 697513 3. 655086 3. 725922 3. 692897 3. 83511  
11737711\_ 6. 258915 6. 250568 6. 162419 6. 259741 6. 387132 6. 285486  
11737712\_ 4. 491495 4. 323534 4. 439413 4. 489453 4. 553588 4. 497527  
11737713\_ 4. 680516 4. 709463 4. 622088 4. 643717 4. 688825 4. 788223  
11737714\_ 2. 567336 2. 49033 2. 635636 2. 438396 2. 593176 2. 384435  
11737715\_ 6. 263567 6. 396067 6. 172516 6. 204683 6. 421965 6. 391962  
11737716\_ 3. 925218 3. 953389 3. 733629 3. 866119 3. 898645 4. 134925  
11737717\_ 3. 154148 3. 090524 2. 872855 3. 27355 3. 205154 3. 078631  
11737718\_ 8. 285838 8. 186676 8. 212546 9. 201188 9. 194008 9. 191834  
11737719\_ 8. 825543 8. 858484 8. 771262 8. 945429 8. 972989 9. 020192  
11737720\_ 2. 040763 2. 003521 1. 90258 1. 992 2. 090953 1. 956388  
11737721\_ 6. 425199 6. 434301 6. 445599 6. 554512 6. 581912 6. 534376  
11737722\_ 7. 044994 6. 887086 7. 000591 6. 78496 6. 785121 6. 771876  
11737723\_ 7. 907766 7. 842585 7. 90893 7. 726901 7. 794159 7. 802791  
11737724\_ 4. 720011 4. 62778 4. 356319 4. 650773 4. 753218 4. 499533  
11737725\_ 2. 236095 2. 007367 2. 350094 2. 14453 2. 168249 2. 073428  
11737726\_ 3. 77582 3. 931368 3. 91803 3. 921638 3. 906083 4. 042533  
11737727\_ 4. 542459 4. 577173 4. 678202 4. 543223 4. 287879 4. 582723  
11737728\_ 4. 963459 4. 893441 5. 125811 4. 910833 4. 791759 4. 853339  
11737729\_ 2. 352772 2. 684877 2. 661256 2. 631296 2. 79164 2. 779951  
11737730\_ 2. 459641 2. 56386 2. 488532 2. 507653 2. 435372 2. 536543  
11737731\_ 3. 030965 3. 076521 2. 874619 2. 718322 3. 229147 2. 95993  
11737732\_ 5. 578017 5. 730913 5. 584813 5. 461539 5. 609647 5. 671949  
11737733\_ 2. 522579 2. 471482 2. 642561 2. 367211 2. 338093 2. 176128  
11737734\_ 3. 024044 3. 156448 2. 887821 2. 922837 2. 861924 2. 922837  
11737735\_ 3. 583178 3. 624633 3. 6104 3. 624633 3. 625644 3. 524191  
11737736\_ 2. 763587 2. 948157 3. 003999 3. 15447 2. 948157 2. 854225  
11737737\_ 2. 948536 2. 815821 2. 854186 2. 79797 2. 801605 2. 855252  
11737738\_ 3. 057232 3. 212833 3. 456571 3. 271492 3. 376264 3. 156221  
11737739\_ 6. 777878 6. 770578 6. 730298 6. 777878 6. 832832 6. 867335  
11737740\_ 5. 066732 5. 134481 5. 034935 5. 152447 5. 268036 5. 195168  
11737741\_ 7. 678288 7. 678437 7. 699073 7. 661744 7. 721794 7. 685227  
11737742\_ 7. 00556 7. 031976 7. 073446 6. 918079 6. 864604 7. 007581

11737743\_ 5. 226545 5. 206156 5. 193282 5. 300016 5. 355227 5. 578968  
11737744\_ 4. 922076 5. 098179 4. 721478 5. 004911 4. 963787 5. 002569  
11737745\_ 5. 343335 5. 380431 5. 347937 5. 361656 5. 311442 5. 321119  
11737746\_ 7. 72251 7. 79441 7. 707441 7. 668646 7. 637363 7. 655449  
11737747\_ 8. 78405 8. 792232 8. 75828 9. 368102 9. 267949 9. 225597  
11737748\_ 7. 757086 7. 732409 7. 802669 7. 626586 7. 605546 7. 593782  
11737749\_ 8. 003724 7. 90914 8. 064921 7. 998643 8. 033237 8. 07333  
11737750\_ 9. 063472 9. 036537 9. 124948 9. 201295 9. 242695 9. 189352  
11737751\_ 7. 811312 7. 942445 7. 707498 8. 055935 8. 113623 8. 097171  
11737752\_ 4. 668673 4. 49981 4. 444399 4. 439555 4. 614793 4. 35643  
11737753\_ 8. 468892 8. 454912 8. 511934 8. 770372 8. 708371 8. 728426  
11737754\_ 8. 1988 8. 166585 8. 179903 8. 021565 8. 115075 8. 110319  
11737755\_ 8. 654618 8. 611111 8. 668055 8. 485948 8. 483564 8. 48782  
11737756\_ 6. 926879 6. 947287 6. 96911 6. 843491 6. 824748 6. 883286  
11737757\_ 8. 676533 8. 694067 8. 694876 8. 364113 8. 351275 8. 32342  
11737758\_ 9. 058459 9. 005801 9. 048927 8. 659032 8. 7208 8. 641332  
11737759\_ 7. 553082 7. 500118 7. 535119 7. 58692 7. 611513 7. 619061  
11737760\_ 10. 50883 10. 44456 10. 48647 9. 984803 9. 939376 10. 01069  
11737761\_ 8. 844448 8. 807344 8. 78269 9. 069168 9. 079083 9. 017378  
11737762\_ 9. 070839 9. 032678 9. 054365 9. 297669 9. 259195 9. 217498  
11737763\_ 5. 061189 5. 080663 5. 072857 4. 953968 5. 032889 5. 014069  
11737764\_ 7. 268632 7. 369917 7. 284514 7. 441103 7. 412607 7. 465504  
11737765\_ 8. 795565 8. 793071 8. 746308 8. 212962 8. 208196 8. 183757  
11737766\_ 5. 820052 5. 84228 5. 710336 5. 884974 5. 953256 5. 946303  
11737767\_ 2. 423206 2. 310187 2. 444928 2. 702108 2. 536012 2. 433353  
11737768\_ 7. 77217 7. 688838 7. 715356 7. 791689 7. 796577 7. 748639  
11737769\_ 9. 305925 9. 221104 9. 329482 8. 880835 8. 942619 8. 922101  
11737770\_ 4. 963485 5. 068701 4. 772366 5. 283742 4. 887216 5. 137877  
11737771\_ 7. 660453 7. 781327 7. 749638 7. 523523 7. 597499 7. 5102  
11737772\_ 6. 107568 6. 058786 6. 028712 5. 694968 5. 670788 5. 827737  
11737773\_ 7. 997654 8. 093624 8. 101978 7. 877522 7. 912933 7. 884918  
11737774\_ 8. 00003 7. 861056 8. 058352 7. 762119 7. 806466 7. 844438  
11737775\_ 8. 698686 8. 660605 8. 762687 8. 47987 8. 475523 8. 477027  
11737776\_ 8. 438268 8. 362919 8. 392173 8. 020696 8. 014943 8. 021209  
11737777\_ 4. 085619 4. 259141 4. 113162 4. 228706 4. 365723 4. 199889  
11737778\_ 4. 330429 4. 669294 4. 569602 4. 565043 4. 577731 4. 586395  
11737779\_ 3. 962017 3. 802793 4. 093734 3. 262014 2. 974713 3. 30472  
11737780\_ 3. 082311 3. 329892 3. 30948 3. 214686 3. 102388 3. 156333  
11737781\_ 2. 096637 2. 131936 2. 025989 1. 966235 2. 08978 2. 033963  
11737782\_ 7. 426223 7. 329069 7. 500335 7. 142975 7. 154768 7. 236614  
11737783\_ 7. 492565 7. 331299 7. 399009 7. 241366 7. 299162 7. 310692  
11737784\_ 7. 808359 7. 924316 7. 796243 7. 977159 7. 930431 7. 930852  
11737785\_ 5. 265343 5. 470791 5. 423108 5. 423577 5. 554436 5. 584242  
11737786\_ 7. 002641 7. 106508 6. 998242 7. 294967 7. 167017 7. 258176  
11737787\_ 5. 594327 5. 653008 5. 583655 5. 815312 5. 71294 5. 697388  
11737788\_ 7. 146594 7. 236389 7. 165799 7. 398075 7. 32204 7. 280151  
11737789\_ 5. 583343 5. 658133 5. 544923 5. 580213 5. 632292 5. 649433  
11737790\_ 9. 907984 9. 86245 9. 877238 9. 507993 9. 491208 9. 507349  
11737791\_ 4. 874234 4. 781661 4. 697531 4. 590952 4. 638772 4. 804542  
11737792\_ 9. 358812 9. 384331 9. 281132 9. 553209 9. 479203 9. 529309  
11737793\_ 7. 46046 7. 47379 7. 575022 8. 059768 8. 064121 8. 028579

11737794\_ 7. 232047 7. 172353 7. 328693 6. 677858 6. 672355 6. 556462  
11737795\_ 6. 792708 6. 750431 6. 87709 7. 434587 7. 38983 7. 487403  
11737796\_ 7. 287453 7. 311827 7. 242757 7. 961701 7. 829176 7. 651467  
11737797\_ 6. 765942 6. 673213 6. 695739 6. 781008 6. 92159 6. 784729  
11737798\_ 8. 623912 8. 542213 8. 629871 8. 534904 8. 511638 8. 553775  
11737799\_ 8. 092645 8. 038835 8. 133599 8. 166939 8. 163381 8. 19477  
11737800\_ 7. 475677 7. 573609 7. 581655 7. 631747 7. 701175 7. 585769  
11737801\_ 5. 168136 5. 140677 5. 499343 5. 306298 5. 314581 5. 302462  
11737802\_ 6. 833438 6. 74604 6. 918334 6. 941323 6. 964042 6. 966792  
11737803\_ 7. 065237 7. 156357 7. 153121 7. 289805 7. 248978 7. 2666  
11737804\_ 3. 318018 3. 39772 3. 332778 3. 576782 3. 526714 3. 351388  
11737805\_ 2. 531043 2. 605516 2. 466999 2. 611834 2. 614471 2. 705766  
11737806\_ 4. 632287 4. 491312 4. 606749 4. 643717 4. 606749 4. 584933  
11737807\_ 7. 60178 7. 552825 7. 610845 6. 529364 6. 527529 6. 529364  
11737808\_ 6. 850335 6. 924753 6. 898591 6. 80299 6. 809602 6. 767039  
11737809\_ 3. 826578 3. 91808 3. 936394 4. 001799 3. 873828 4. 050395  
11737810\_ 5. 098514 5. 081039 5. 238343 5. 156303 5. 170533 5. 229021  
11737811\_ 7. 177192 7. 187111 7. 142824 7. 214814 7. 243848 7. 201258  
11737812\_ 7. 37801 7. 307131 7. 421089 7. 713948 7. 65377 7. 628548  
11737813\_ 8. 184919 8. 202916 8. 222368 8. 493703 8. 313864 8. 358058  
11737814\_ 9. 152938 9. 155227 9. 160779 9. 08923 9. 066421 9. 006078  
11737815\_ 4. 752265 4. 732499 4. 747179 4. 983008 4. 978461 4. 881132  
11737816\_ 6. 052846 6. 043752 6. 142494 6. 085987 6. 084568 6. 108243  
11737817\_ 4. 456385 4. 684009 4. 345945 4. 602325 4. 555521 4. 555521  
11737818\_ 6. 284537 6. 112468 6. 152449 6. 1573 6. 208164 6. 139701  
11737819\_ 4. 14941 3. 818401 3. 845476 4. 110384 4. 003463 3. 951222  
11737820\_ 4. 733989 4. 53412 4. 659351 5. 26034 5. 11527 5. 029529  
11737821\_ 5. 470508 5. 299173 5. 297498 6. 027517 6. 20156 5. 94657  
11737822\_ 5. 082665 5. 04058 4. 965247 5. 124271 5. 046176 5. 120821  
11737823\_ 5. 768119 5. 595124 5. 811841 6. 177376 6. 148029 6. 194423  
11737824\_ 9. 901655 9. 916447 9. 912383 10. 12842 10. 06581 10. 06705  
11737825\_ 9. 69551 9. 648175 9. 706047 9. 739208 9. 824312 9. 751524  
11737826\_ 1. 956966 1. 965207 1. 942682 1. 905333 1. 963164 2. 064222  
11737827\_ 2. 605516 2. 830977 2. 6085 2. 450855 2. 47102 2. 384435  
11737828\_ 4. 427049 4. 24849 4. 438267 3. 956278 3. 85125 3. 954157  
11737829\_ 5. 816938 5. 454557 5. 823981 5. 123026 4. 955792 5. 263248  
11737830\_ 2. 256418 2. 35733 2. 533469 2. 400781 2. 466652 2. 35733  
11737831\_ 6. 903655 6. 87764 6. 906692 6. 886556 6. 870359 6. 805345  
11737832\_ 2. 598898 2. 34319 2. 599297 2. 664705 2. 624174 2. 83577  
11737833\_ 2. 97965 2. 679344 3. 099647 2. 567107 2. 610019 2. 937384  
11737834\_ 4. 434906 4. 293962 4. 542662 4. 599741 4. 440372 4. 310782  
11737835\_ 5. 250561 5. 366979 5. 09509 5. 309944 5. 320617 5. 530472  
11737836\_ 6. 67668 6. 663368 6. 675027 6. 673897 6. 686592 6. 687722  
11737837\_ 8. 015826 8. 058465 8. 046426 8. 089388 8. 065763 8. 068711  
11737838\_ 7. 817475 7. 854837 7. 934104 7. 889214 7. 953964 7. 900793  
11737839\_ 8. 032478 7. 903799 8. 046939 8. 425545 8. 400858 8. 454622  
11737840\_ 4. 99028 5. 168194 4. 984669 5. 395775 5. 095282 5. 171634  
11737841\_ 7. 269673 7. 176652 7. 199031 7. 33425 7. 479821 7. 442342  
11737842\_ 4. 450615 4. 474427 4. 458165 4. 619399 4. 516207 4. 482251  
11737843\_ 7. 157316 7. 021389 7. 20338 6. 953603 6. 956123 6. 92063  
11737844\_ 7. 177753 7. 370093 7. 227929 7. 442937 7. 323166 7. 44405

11737845\_ 7. 023434 7. 067781 7. 119341 7. 249461 7. 194054 7. 220733  
11737846\_ 7. 632664 7. 635678 7. 601141 7. 649295 7. 67568 7. 681933  
11737847\_ 6. 31546 6. 167724 6. 3593 5. 867608 5. 832272 5. 640984  
11737848\_ 5. 735957 5. 802541 5. 973344 5. 507637 5. 55218 5. 513928  
11737849\_ 5. 589968 5. 518874 5. 59609 5. 584813 5. 585052 5. 718744  
11737850\_ 7. 091297 7. 095418 7. 126983 6. 897913 6. 917838 6. 938955  
11737851\_ 9. 405013 9. 32707 9. 409239 9. 295756 9. 293314 9. 299632  
11737852\_ 10. 15761 10. 07337 10. 15413 9. 917861 9. 932464 9. 979817  
11737853\_ 4. 852249 4. 667061 4. 521795 4. 49184 4. 382624 4. 465947  
11737854\_ 4. 203375 4. 191168 4. 243991 4. 417071 4. 4312 4. 501751  
11737855\_ 4. 860845 4. 920201 4. 613316 4. 708208 4. 622466 4. 974202  
11737856\_ 5. 226651 5. 085171 5. 066475 5. 136358 5. 124081 5. 07635  
11737857\_ 6. 284541 6. 463362 6. 191223 6. 471278 6. 481046 6. 334557  
11737858\_ 5. 765321 5. 77281 5. 847302 5. 64005 5. 61124 5. 807598  
11737859\_ 7. 044578 6. 910768 7. 04823 6. 925069 7. 090174 7. 043215  
11737860\_ 7. 030967 7. 005451 7. 086476 7. 179164 7. 121718 7. 111629  
11737861\_ 6. 505698 6. 437809 6. 321319 6. 703133 6. 808047 6. 68416  
11737862\_ 6. 101499 5. 875167 5. 902515 6. 150901 6. 283866 6. 290913  
11737863\_ 7. 898823 7. 781717 7. 966866 7. 962968 7. 978715 8. 038892  
11737864\_ 5. 83242 5. 815181 5. 899588 6. 065293 6. 205193 6. 180667  
11737865\_ 5. 073347 5. 203659 4. 930507 5. 310589 5. 439541 5. 263182  
11737866\_ 3. 212683 3. 135394 3. 003788 3. 416847 3. 096538 3. 190871  
11737867\_ 2. 157548 2. 291248 2. 157548 2. 30592 2. 297684 2. 132296  
11737868\_ 6. 147894 6. 383586 6. 258388 6. 350193 6. 418404 6. 302427  
11737869\_ 4. 275543 4. 216649 4. 234963 4. 225345 4. 200678 4. 280059  
11737870\_ 6. 116282 6. 124081 6. 182821 6. 149571 6. 375187 6. 234515  
11737871\_ 4. 764308 4. 995788 4. 918318 4. 743545 4. 873904 4. 804605  
11737872\_ 8. 728767 8. 691096 8. 759845 8. 530263 8. 487436 8. 446954  
11737873\_ 4. 228138 4. 283666 4. 039036 4. 410759 4. 345005 4. 420618  
11737874\_ 6. 150176 6. 09491 5. 817333 5. 50291 5. 591617 5. 692107  
11737875\_ 2. 99721 2. 59401 2. 944696 2. 912551 2. 887968 2. 741009  
11737876\_ 5. 408556 5. 398413 5. 464498 5. 855562 5. 709521 5. 746916  
11737877\_ 4. 268243 3. 998676 4. 007401 4. 193364 4. 247482 4. 062966  
11737878\_ 8. 075686 8. 015034 8. 046701 8. 40512 8. 436046 8. 41248  
11737879\_ 9. 490287 9. 386296 9. 407178 9. 721216 9. 674179 9. 696994  
11737880\_ 7. 781435 7. 763709 7. 749277 7. 17185 7. 136383 7. 173921  
11737881\_ 5. 283895 5. 309674 5. 277964 5. 511857 5. 482182 5. 42288  
11737882\_ 5. 867674 5. 826502 5. 931606 6. 430988 6. 412375 6. 671281  
11737883\_ 8. 392526 8. 353015 8. 409219 8. 609901 8. 629315 8. 601188  
11737884\_ 6. 116825 6. 191611 6. 063175 6. 340426 6. 255531 6. 214598  
11737885\_ 3. 743112 3. 665932 3. 725886 3. 881509 3. 817977 3. 893497  
11737886\_ 4. 40697 4. 315642 4. 340304 4. 437277 4. 347179 4. 284441  
11737887\_ 4. 5847 4. 459939 4. 274803 4. 586583 4. 644133 4. 516014  
11737888\_ 2. 979922 3. 020186 2. 890879 3. 018717 3. 061975 3. 19224  
11737889\_ 4. 796004 5. 044848 4. 727189 4. 902299 5. 104781 5. 026371  
11737890\_ 5. 508591 5. 338693 5. 547284 5. 320917 5. 355923 5. 326576  
11737891\_ 3. 789979 3. 832949 3. 769232 3. 911388 3. 879309 3. 896572  
11737892\_ 4. 573268 4. 459939 4. 287593 4. 444332 4. 546902 4. 490799  
11737893\_ 3. 717133 3. 646689 3. 640442 3. 648421 3. 526229 3. 732489  
11737894\_ 5. 280761 5. 17023 5. 420591 4. 975753 5. 047837 4. 943613  
11737895\_ 3. 53049 3. 626565 3. 647713 3. 629184 3. 443737 3. 503713

11737896\_ 5. 404844 5. 360244 5. 565093 5. 140854 4. 998133 5. 050653  
11737897\_ 8. 963558 8. 883129 8. 896018 8. 670016 8. 651015 8. 625523  
11737898\_ 4. 869149 4. 838772 4. 84009 4. 758054 4. 904082 4. 886616  
11737899\_ 6. 318041 6. 374206 6. 309379 6. 447365 6. 474255 6. 573857  
11737900\_ 5. 599778 5. 594573 5. 553333 5. 758292 5. 718209 5. 729069  
11737901\_ 9. 141811 9. 077531 9. 091439 9. 3684 9. 271117 9. 263842  
11737902\_ 9. 257164 9. 213391 9. 174497 9. 454803 9. 432817 9. 463051  
11737903\_ 5. 126193 5. 189125 4. 773453 5. 188541 5. 177204 5. 297498  
11737904\_ 8. 835035 8. 87076 8. 737913 8. 905295 8. 827077 8. 703208  
11737905\_ 6. 752388 6. 770248 6. 786832 6. 557321 6. 600743 6. 518834  
11737906\_ 7. 717508 7. 718305 7. 771484 7. 666972 7. 69558 7. 675893  
11737907\_ 10. 36903 10. 34608 10. 31344 10. 40549 10. 46226 10. 42574  
11737908\_ 4. 353989 4. 032135 4. 354155 4. 268906 4. 313721 4. 287  
11737909\_ 3. 249718 3. 440632 3. 348744 2. 956345 3. 529242 3. 476182  
11737910\_ 5. 589496 5. 643713 5. 672544 5. 767539 5. 7451 5. 752832  
11737911\_ 4. 340073 4. 250934 4. 389624 4. 584933 4. 375923 4. 584933  
11737912\_ 8. 567001 8. 570894 8. 550006 8. 782982 8. 580831 8. 716849  
11737913\_ 11. 09471 11. 03823 11. 08901 11. 27476 11. 2856 11. 23938  
11737914\_ 5. 36906 5. 554436 5. 4327 5. 575738 5. 501421 5. 463767  
11737915\_ 5. 073036 4. 95066 4. 925466 4. 952239 4. 93837 5. 08594  
11737916\_ 5. 209259 5. 309674 5. 468812 5. 089144 5. 075861 5. 156303  
11737917\_ 4. 998066 5. 029529 5. 029529 4. 860763 5. 063803 5. 078243  
11737918\_ 4. 699069 4. 643717 4. 794766 4. 827718 4. 870401 4. 906658  
11737919\_ 3. 22645 3. 329592 3. 30437 3. 329592 3. 472434 3. 329592  
11737920\_ 3. 033966 3. 019911 3. 159475 3. 155178 3. 214283 3. 056623  
11737921\_ 3. 20719 3. 208613 3. 356712 3. 202355 3. 145646 3. 184057  
11737922\_ 7. 202003 7. 203656 7. 299215 6. 852861 6. 897843 6. 877861  
11737923\_ 6. 534922 6. 659352 6. 752276 6. 688764 6. 67096 6. 543006  
11737924\_ 4. 624781 4. 60387 4. 47895 4. 831953 4. 793043 4. 698959  
11737925\_ 5. 869829 5. 889406 5. 783899 5. 937447 5. 773223 5. 948031  
11737926\_ 4. 702918 4. 751881 4. 773988 4. 63065 4. 684843 4. 836828  
11737927\_ 3. 7854 3. 539076 3. 64285 3. 563086 3. 538974 3. 41489  
11737928\_ 5. 478025 5. 365113 5. 387903 5. 552065 5. 504022 5. 518835  
11737929\_ 2. 866853 3. 013588 2. 834979 2. 969025 2. 798115 2. 945929  
11737930\_ 4. 46417 4. 443383 4. 509528 4. 418811 4. 479164 4. 46417  
11737931\_ 4. 275543 4. 318586 4. 316111 4. 378206 4. 336841 4. 303061  
11737932\_ 4. 153747 4. 19499 4. 140911 4. 229323 4. 294797 4. 262131  
11737933\_ 4. 385615 4. 437771 4. 358813 4. 459939 4. 349074 4. 393279  
11737934\_ 6. 091331 5. 929998 6. 013862 6. 020496 5. 962223 5. 873834  
11737935\_ 5. 567231 5. 701354 5. 685431 5. 749663 5. 841598 5. 76556  
11737936\_ 2. 361778 2. 234995 2. 424709 2. 056438 2. 36894 2. 230689  
11737937\_ 2. 025189 1. 973565 2. 176984 1. 828815 2. 086371 1. 995297  
11737938\_ 6. 346852 6. 396339 6. 425488 6. 438573 6. 441185 6. 550106  
11737939\_ 6. 836836 6. 805481 6. 779107 6. 909935 6. 923377 6. 817986  
11737940\_ 6. 830716 6. 895836 6. 934656 6. 986734 7. 074178 7. 060269  
11737941\_ 5. 507762 5. 414804 5. 466238 5. 845365 5. 569888 5. 68293  
11737942\_ 7. 861082 7. 779948 7. 725535 7. 71376 7. 803192 7. 749724  
11737943\_ 8. 011954 7. 927404 8. 081464 7. 522306 7. 628617 7. 609186  
11737944\_ 7. 787986 7. 693942 7. 846028 7. 225691 7. 242062 7. 169959  
11737945\_ 5. 519907 5. 659084 5. 470323 5. 659084 5. 710174 5. 648202  
11737946\_ 4. 559402 4. 508296 4. 410859 4. 486952 4. 545349 4. 431936

11737947\_ 5. 419806 5. 249858 5. 432086 4. 940675 5. 044279 5. 119256  
11737948\_ 3. 207881 3. 127296 3. 016707 3. 266798 3. 183822 3. 213988  
11737949\_ 5. 52606 5. 447594 5. 452458 5. 458074 5. 485817 5. 498377  
11737950\_ 3. 318562 3. 414711 3. 525773 3. 334091 3. 301052 3. 605583  
11737951\_ 5. 445363 5. 229259 5. 357234 5. 462398 5. 357234 5. 51972  
11737952\_ 6. 859991 6. 842672 6. 858797 6. 609721 6. 559165 6. 604683  
11737953\_ 4. 771635 4. 772749 4. 709463 4. 977987 4. 788067 4. 899582  
11737954\_ 7. 624574 7. 608373 7. 597379 7. 785813 7. 796295 7. 774512  
11737955\_ 8. 470412 8. 462317 8. 499354 8. 326407 8. 290512 8. 325546  
11737956\_ 7. 727886 7. 620567 7. 669009 7. 606383 7. 58532 7. 65392  
11737957\_ 6. 712135 6. 794382 6. 669274 6. 791398 6. 803595 6. 682527  
11737958\_ 11. 76342 11. 7747 11. 7108 11. 88239 11. 92178 11. 88239  
11737959\_ 3. 62886 3. 678622 3. 467394 3. 661055 3. 870464 3. 508027  
11737960\_ 7. 691468 7. 565781 7. 653662 7. 569928 7. 535333 7. 575861  
11737961\_ 8. 062558 8. 013636 7. 979074 7. 602543 7. 484662 7. 600452  
11737962\_ 3. 68849 3. 914954 3. 746534 3. 69227 3. 670692 3. 670692  
11737963\_ 6. 324659 6. 244364 6. 32051 6. 366499 6. 434093 6. 472725  
11737964\_ 5. 929328 5. 854879 5. 961803 5. 93062 5. 914262 5. 804008  
11737965\_ 2. 548077 2. 808406 2. 402348 2. 270806 2. 645339 2. 548077  
11737966\_ 6. 842477 6. 718912 6. 847079 5. 585785 5. 976794 5. 944265  
11737967\_ 7. 659907 7. 703488 7. 619024 6. 34864 6. 561874 6. 549184  
11737968\_ 4. 58867 4. 675963 4. 416429 4. 724229 4. 656936 4. 598011  
11737969\_ 5. 710865 5. 710865 5. 752251 5. 57921 5. 700132 5. 714713  
11737970\_ 5. 710865 5. 710865 5. 746597 5. 560848 5. 700132 5. 714713  
11737971\_ 3. 082708 3. 053175 2. 860484 2. 923541 2. 942599 2. 96659  
11737972\_ 4. 002999 4. 002999 4. 242236 3. 421329 3. 421329 3. 513418  
11737973\_ 4. 587115 4. 568736 4. 634276 4. 260627 4. 33317 4. 485669  
11737974\_ 6. 827886 6. 891974 6. 592284 6. 828427 6. 873682 6. 862378  
11737975\_ 5. 692755 5. 689582 5. 691254 5. 728282 5. 761312 5. 719488  
11737976\_ 3. 118486 3. 074169 3. 045501 3. 190461 3. 242935 3. 188804  
11737977\_ 8. 286444 8. 243549 8. 272794 8. 21811 8. 23331 8. 230674  
11737978\_ 5. 140638 5. 099776 5. 09705 4. 850337 4. 954971 5. 066904  
11737979\_ 5. 696406 5. 617176 5. 736834 5. 26034 5. 182996 5. 215616  
11737980\_ 6. 335854 6. 337494 6. 168073 6. 313123 6. 362442 6. 305431  
11737981\_ 6. 617489 6. 758173 6. 71908 6. 891779 6. 863318 6. 805142  
11737982\_ 8. 18914 8. 154121 8. 196233 8. 002984 8. 049163 8. 114876  
11737983\_ 5. 505999 5. 563358 5. 61169 5. 741056 5. 756714 5. 771142  
11737984\_ 3. 692847 3. 862919 3. 483265 3. 755199 3. 620703 3. 468271  
11737985\_ 2. 983391 2. 880432 2. 597146 2. 528622 2. 68868 2. 887855  
11737986\_ 7. 930376 7. 939713 7. 949242 8. 309131 8. 273827 8. 266737  
11737987\_ 2. 638653 2. 70479 2. 488052 2. 619048 2. 587733 2. 574188  
11737988\_ 1. 966736 1. 788089 1. 682672 1. 841868 2. 030431 1. 93961  
11737989\_ 2. 019287 1. 874334 1. 741014 1. 837556 1. 874334 1. 874334  
11737990\_ 7. 244904 7. 236775 7. 256265 6. 916232 6. 920108 6. 998515  
11737991\_ 7. 628698 7. 57156 7. 635882 7. 3851 7. 325085 7. 311145  
11737992\_ 5. 93717 5. 664811 5. 759769 4. 576246 4. 608816 4. 665713  
11737993\_ 8. 494171 8. 511687 8. 540261 8. 283804 8. 311132 8. 282167  
11737994\_ 4. 000941 4. 067703 4. 046315 4. 067703 4. 112222 4. 069367  
11737995\_ 6. 112432 6. 097927 6. 053287 6. 23773 6. 181034 6. 199467  
11737996\_ 2. 463721 2. 489149 2. 48644 2. 39827 2. 361778 2. 403688  
11737997\_ 3. 573843 3. 807871 3. 721508 3. 636252 3. 930131 3. 91902



11737998\_ 6.003119 5.98478 5.99941 6.122275 6.045583 6.118838  
11737999\_ 2.23597 2.3345 2.23597 2.391126 2.137854 2.359109  
11738000\_ 4.185851 4.325251 4.107607 4.472724 4.648516 4.367218  
11738001\_ 4.922785 5.046074 4.951606 5.123572 4.990161 5.035524  
11738002\_ 7.609822 7.587796 7.434587 7.526587 7.640819 7.664116  
11738003\_ 5.703783 5.697225 5.795278 5.79782 5.735969 5.752703  
11738004\_ 5.544167 5.646911 5.709521 5.688668 5.709102 5.635846  
11738005\_ 6.809444 6.955107 6.860439 6.896177 6.921739 7.051811  
11738006\_ 7.200176 7.25622 7.134444 7.171279 7.196842 7.220733  
11738007\_ 2.368114 2.219464 2.227661 2.331325 2.289791 2.500844  
11738008\_ 9.987321 10.0208 9.99594 9.788987 9.793412 9.715801  
11738009\_ 4.21276 4.346543 4.205639 4.427168 4.370247 4.36297  
11738010\_ 2.473415 2.454451 2.278693 2.273721 2.382257 2.631444  
11738011\_ 5.496175 5.554436 5.517633 5.513526 5.532661 5.554119  
11738012\_ 5.544167 5.408541 5.576285 5.665894 5.721594 5.631497  
11738013\_ 4.367171 4.195898 4.314163 4.168512 4.143705 4.286777  
11738014\_ 6.286477 6.300643 6.171224 6.412824 6.366235 6.362754  
11738015\_ 7.357079 7.390843 7.364394 7.539568 7.659366 7.666859  
11738016\_ 2.806527 2.850723 2.854251 3.036701 2.817576 2.741491  
11738017\_ 5.877402 5.918745 5.973982 6.040637 5.973982 6.020694  
11738018\_ 8.879689 8.812566 8.911876 8.767064 8.761535 8.775249  
11738019\_ 4.898649 4.774597 4.774597 4.967268 4.994991 4.93371  
11738020\_ 5.156303 5.19354 4.697235 5.189628 5.2222 5.152977  
11738021\_ 5.447044 5.524588 5.448296 5.11527 4.875571 5.045513  
11738022\_ 2.055272 2.135204 2.095919 1.818605 2.075204 1.98489  
11738023\_ 2.582668 2.722933 2.638259 2.609897 2.379768 2.773093  
11738024\_ 5.026511 5.228627 5.347794 5.144177 5.067991 5.144177  
11738025\_ 5.482292 5.617413 5.617413 5.561435 5.523406 5.635599  
11738026\_ 4.967391 4.984174 5.073531 4.169922 4.063871 4.248235  
11738027\_ 5.32517 5.433551 5.491336 4.62024 4.690096 4.810056  
11738028\_ 6.014264 6.001481 6.087852 5.829956 5.890289 6.012041  
11738029\_ 6.165111 6.339639 6.268039 6.318994 6.248587 6.356406  
11738030\_ 5.365819 5.413888 5.291148 5.49724 5.335028 5.49519  
11738031\_ 3.832351 4.040513 3.936815 4.056389 3.951848 4.098409  
11738032\_ 4.711928 4.936175 4.835807 5.046717 5.025876 4.994887  
11738033\_ 5.684536 5.712856 5.584813 5.861298 5.785861 5.808071  
11738034\_ 5.36906 5.117963 5.303201 5.543606 5.422848 5.475572  
11738035\_ 7.210184 7.120381 7.143782 7.25182 7.226249 7.297374  
11738036\_ 9.192281 9.087814 9.174022 9.365798 9.353626 9.428179  
11738037\_ 2.155282 2.10532 2.177244 2.193167 2.193167 2.044359  
11738038\_ 5.59865 5.755055 5.616531 5.94166 5.757466 5.653691  
11738039\_ 5.235247 5.215452 5.235195 5.126955 5.175458 5.249067  
11738040\_ 4.275543 4.17647 4.484505 4.153325 4.172815 4.05685  
11738041\_ 3.477037 3.275972 3.41419 3.619559 3.691284 3.633494  
11738042\_ 4.516434 4.888608 4.687914 4.78938 4.803594 4.847489  
11738043\_ 5.196283 5.204684 4.996791 5.318585 5.454246 5.318585  
11738044\_ 3.624533 3.58647 3.675245 3.609161 3.779909 3.624533  
11738045\_ 5.870242 5.946114 5.900552 5.768833 5.854462 5.971972  
11738046\_ 5.001781 5.001043 5.062546 4.768403 5.11527 5.029529  
11738047\_ 3.253277 3.262756 3.296655 3.448482 3.190646 3.363358  
11738048\_ 3.78571 3.929798 3.667606 3.847944 3.801444 4.109089

11738049\_ 4. 103208 4. 201898 4. 189693 4. 275543 4. 428842 4. 365533  
11738050\_ 4. 177536 4. 204035 4. 347744 4. 361137 4. 24508 4. 443088  
11738051\_ 2. 375275 2. 238272 2. 27031 2. 42004 2. 402043 2. 324468  
11738052\_ 6. 61854 6. 682714 6. 566205 5. 835986 5. 926636 5. 882604  
11738053\_ 9. 063146 9. 035208 9. 096688 8. 772495 8. 797124 8. 827074  
11738054\_ 4. 738433 4. 679169 4. 622326 4. 606946 4. 884334 4. 661916  
11738055\_ 2. 454607 2. 718322 2. 176334 2. 051165 2. 492982 2. 384435  
11738056\_ 6. 970248 6. 956355 6. 906072 6. 822022 6. 867777 6. 871108  
11738057\_ 7. 631591 7. 683611 7. 69569 7. 448593 7. 489139 7. 530396  
11738058\_ 4. 552011 4. 470428 4. 559397 4. 158723 4. 008111 3. 997116  
11738059\_ 3. 559083 3. 052799 3. 390184 3. 140441 3. 101013 2. 8938  
11738060\_ 6. 121217 6. 296486 6. 459851 4. 828907 4. 798511 4. 99404  
11738061\_ 5. 823955 5. 862126 5. 878025 5. 600075 5. 688894 5. 831914  
11738062\_ 4. 628393 4. 889893 4. 793454 4. 693137 5. 01806 4. 81483  
11738063\_ 3. 358555 3. 704739 3. 290188 3. 500795 3. 398236 3. 377923  
11738064\_ 4. 008739 3. 723624 3. 722038 3. 649783 3. 603395 3. 713311  
11738065\_ 6. 081097 6. 266089 6. 301477 6. 281548 6. 339594 6. 433565  
11738066\_ 4. 744153 4. 88326 4. 796587 4. 820629 4. 862599 4. 776014  
11738067\_ 2. 763854 2. 718322 2. 515494 2. 735777 2. 591211 2. 607039  
11738068\_ 4. 34617 3. 926006 3. 874229 3. 931378 3. 888798 3. 888404  
11738069\_ 5. 484258 5. 597544 5. 296718 5. 623647 5. 704217 5. 587476  
11738070\_ 4. 924926 4. 898612 5. 005221 4. 968174 5. 029529 4. 899537  
11738071\_ 3. 077991 3. 105211 3. 256732 3. 292231 3. 101327 3. 412247  
11738072\_ 6. 435621 6. 397498 6. 42972 6. 303104 6. 370227 6. 364936  
11738073\_ 6. 220369 6. 085158 6. 133915 6. 404648 6. 439656 6. 493271  
11738074\_ 5. 603244 5. 488815 5. 556697 5. 580158 5. 595629 5. 615481  
11738075\_ 6. 572033 6. 488026 6. 409005 6. 691107 6. 57346 6. 557068  
11738076\_ 4. 100498 4. 078076 4. 301449 4. 422779 4. 347179 4. 424147  
11738077\_ 4. 533774 4. 282999 4. 402 4. 014343 4. 111137 3. 898304  
11738078\_ 5. 527821 5. 537902 5. 644217 5. 630821 5. 693143 5. 659186  
11738079\_ 5. 174674 5. 132509 5. 099702 5. 159091 5. 099702 5. 366643  
11738080\_ 2. 533122 2. 685806 2. 459341 2. 520602 2. 597302 2. 490372  
11738081\_ 6. 334945 6. 327531 6. 245103 5. 616773 5. 802387 5. 775293  
11738082\_ 8. 014926 7. 858657 8. 02728 7. 213197 7. 233236 7. 294423  
11738083\_ 8. 61285 8. 633749 8. 499422 8. 221733 8. 079006 8. 07136  
11738084\_ 2. 190478 2. 348843 2. 37597 2. 354682 2. 361778 2. 4016  
11738085\_ 5. 763407 5. 953131 5. 826063 5. 954081 5. 924978 5. 846183  
11738086\_ 2. 338295 2. 539029 2. 368435 2. 445097 2. 427599 2. 445097  
11738087\_ 6. 104297 6. 273712 6. 10501 6. 248504 6. 248959 6. 180852  
11738088\_ 6. 938638 7. 04708 6. 914792 6. 822939 6. 812275 6. 920596  
11738089\_ 4. 513241 4. 585796 4. 502846 4. 584933 4. 470776 4. 52373  
11738090\_ 2. 165482 2. 21892 2. 206905 2. 188202 2. 111972 2. 165482  
11738091\_ 6. 45621 6. 421218 6. 524291 6. 450832 6. 403777 6. 389671  
11738092\_ 6. 5757 6. 491224 6. 574592 5. 817866 5. 961986 5. 921577  
11738093\_ 3. 871663 3. 767054 3. 670081 3. 601892 3. 718568 3. 718568  
11738094\_ 3. 358204 3. 490902 3. 242735 3. 416613 3. 288208 3. 192166  
11738095\_ 5. 826667 5. 741135 5. 652842 5. 838042 5. 87884 5. 824302  
11738096\_ 6. 304449 6. 430963 6. 346201 6. 467647 6. 480613 6. 431376  
11738097\_ 7. 247466 7. 305895 6. 990557 7. 369868 7. 375231 7. 198068  
11738098\_ 3. 686622 3. 754824 3. 425741 3. 8439 3. 686622 3. 647876  
11738099\_ 4. 516394 4. 691219 4. 505588 4. 643237 4. 644198 4. 793862

11738100\_ 5. 742054 5. 807795 5. 763634 6. 035157 5. 956811 5. 992354  
11738101\_ 2. 963603 2. 946708 2. 768171 2. 912551 2. 912763 2. 833902  
11738102\_ 2. 582512 2. 404235 2. 442657 2. 399623 2. 404235 2. 604064  
11738103\_ 2. 836856 2. 735079 2. 765454 2. 852006 2. 93021 3. 071103  
11738104\_ 4. 302933 4. 387088 4. 413082 4. 400973 4. 173287 4. 326497  
11738105\_ 6. 33631 6. 521167 6. 296723 6. 579869 6. 450545 6. 439572  
11738106\_ 4. 605115 4. 586256 4. 297726 4. 587352 4. 62541 4. 479058  
11738107\_ 3. 08125 3. 061205 2. 930087 2. 919947 2. 836056 2. 958065  
11738108\_ 5. 557462 5. 690096 5. 631831 5. 567554 5. 660031 5. 667064  
11738109\_ 4. 592456 4. 427645 3. 998358 4. 106336 4. 230999 4. 09371  
11738110\_ 5. 716075 5. 794838 5. 568149 5. 256715 5. 517999 5. 431574  
11738111\_ 2. 037304 2. 155366 2. 394588 2. 123201 2. 117938 2. 139442  
11738112\_ 2. 532089 2. 566751 2. 566751 2. 475872 2. 475872 2. 459442  
11738113\_ 2. 850317 3. 180062 3. 051844 3. 158384 3. 21279 3. 173755  
11738114\_ 3. 287167 3. 399962 3. 393969 3. 309964 3. 361861 3. 379134  
11738115\_ 5. 156753 4. 9226 5. 153744 4. 68028 4. 571746 4. 58967  
11738116\_ 5. 047872 5. 2666 5. 068786 5. 26034 5. 189008 5. 342901  
11738117\_ 4. 608972 4. 874234 4. 567281 4. 655884 4. 739771 4. 52622  
11738118\_ 6. 423653 6. 366942 6. 353748 6. 201706 6. 169751 6. 312082  
11738119\_ 3. 91737 4. 011302 4. 123686 4. 044712 4. 108275 3. 955011  
11738120\_ 4. 436887 4. 39618 4. 599106 4. 508228 4. 585199 4. 486723  
11738121\_ 6. 922773 6. 822242 6. 862059 6. 041307 6. 183123 6. 221885  
11738122\_ 4. 241472 4. 335594 4. 615175 4. 227925 4. 032247 4. 192218  
11738123\_ 4. 656013 4. 786178 4. 581043 4. 635299 4. 569891 4. 716879  
11738124\_ 4. 646526 4. 64942 4. 41826 4. 433922 4. 494242 4. 293005  
11738125\_ 9. 039873 9. 026605 8. 990563 8. 561587 8. 609629 8. 510152  
11738126\_ 5. 068627 4. 986819 5. 162559 5. 085067 5. 281625 5. 216044  
11738127\_ 3. 277807 3. 292914 3. 513083 3. 330601 3. 521139 3. 44014  
11738128\_ 5. 009934 5. 075531 5. 185279 5. 212472 5. 293557 5. 350568  
11738129\_ 5. 119049 5. 0587 5. 136789 5. 07282 5. 201894 5. 144946  
11738130\_ 5. 355705 5. 468294 5. 434128 5. 507637 5. 540737 5. 372788  
11738131\_ 3. 381289 3. 370208 3. 452689 3. 363729 3. 37481 3. 320187  
11738132\_ 3. 169729 3. 227914 3. 31779 3. 189091 3. 217831 3. 189091  
11738133\_ 3. 980493 4. 014441 3. 79443 3. 98583 3. 920028 3. 978684  
11738134\_ 2. 027629 1. 589365 1. 852956 1. 852956 1. 852956 1. 749815  
11738135\_ 4. 466619 4. 579425 4. 887075 4. 773653 4. 849431 4. 620743  
11738136\_ 2. 011144 2. 145374 2. 101762 2. 079884 2. 140397 1. 930291  
11738137\_ 4. 574661 4. 44299 4. 52373 4. 596099 4. 574661 4. 171333  
11738138\_ 8. 334623 8. 283687 8. 362724 8. 48782 8. 514953 8. 45848  
11738139\_ 5. 466704 5. 475728 5. 455586 5. 465465 5. 480899 5. 447768  
11738140\_ 2. 600859 2. 734162 2. 801593 2. 762887 2. 674609 2. 706182  
11738141\_ 6. 361681 6. 235854 6. 37613 5. 940473 5. 853847 6. 011713  
11738142\_ 7. 182097 7. 092665 7. 17146 7. 134616 7. 119357 7. 141998  
11738143\_ 7. 774395 7. 593645 7. 776594 7. 598491 7. 6506 7. 681181  
11738144\_ 5. 42587 5. 383741 5. 257228 6. 10509 5. 975932 5. 985323  
11738145\_ 5. 132234 5. 29601 5. 170268 5. 183571 5. 250796 5. 18055  
11738146\_ 4. 179955 4. 214652 4. 257903 4. 456743 4. 40461 4. 508422  
11738147\_ 6. 767534 6. 710956 6. 757296 6. 299663 6. 313038 6. 255604  
11738148\_ 2. 47102 2. 479075 2. 906775 2. 487041 2. 584014 2. 305524  
11738149\_ 2. 13743 2. 030539 1. 917279 1. 950186 1. 896248 2. 095256  
11738150\_ 4. 9226 4. 584933 4. 711143 4. 346887 4. 139013 4. 470714

11738151\_ 2. 579672 2. 5974 2. 597023 2. 42059 2. 500428 2. 673902  
11738152\_ 4. 982337 5. 073036 5. 26034 4. 678734 4. 710848 4. 750425  
11738153\_ 5. 093684 4. 710065 5. 133534 4. 275543 4. 611014 4. 287971  
11738154\_ 5. 609415 5. 578265 5. 603184 5. 537478 5. 583284 5. 633278  
11738155\_ 7. 88442 7. 800114 7. 898823 7. 326385 7. 260481 7. 425337  
11738156\_ 6. 60191 6. 495776 6. 60825 5. 894759 5. 948871 5. 968168  
11738157\_ 5. 589679 5. 704956 5. 469645 5. 590805 5. 708488 5. 525297  
11738158\_ 4. 378291 4. 619947 4. 224094 4. 582263 4. 34822 4. 536076  
11738159\_ 4. 250069 4. 17267 4. 160529 4. 225231 4. 247538 4. 440326  
11738160\_ 6. 263345 6. 228806 6. 17981 6. 334465 6. 178715 6. 340238  
11738161\_ 3. 912476 4. 05769 4. 020399 4. 046387 4. 146468 4. 112491  
11738162\_ 5. 462892 5. 417087 5. 421201 5. 498019 5. 646377 5. 444757  
11738163\_ 4. 584933 4. 905435 4. 696034 4. 643717 4. 643717 4. 659157  
11738164\_ 4. 727744 4. 745218 4. 629712 4. 842667 4. 804652 4. 748129  
11738165\_ 4. 962684 4. 66339 4. 730608 4. 854774 4. 767023 4. 807086  
11738166\_ 3. 855862 3. 774358 3. 631536 3. 689873 3. 673652 3. 632784  
11738167\_ 3. 649716 3. 92386 3. 807458 3. 873182 3. 833703 4. 045079  
11738168\_ 6. 538381 6. 545428 6. 4412 6. 712394 6. 519275 6. 5008  
11738169\_ 2. 242802 2. 416395 2. 095256 1. 972511 2. 028873 1. 972511  
11738170\_ 5. 168728 5. 22676 5. 266839 5. 088078 4. 818581 5. 13992  
11738171\_ 4. 07457 3. 820359 3. 779543 4. 002688 4. 015491 3. 916694  
11738172\_ 5. 932423 5. 840986 5. 905541 5. 922196 5. 94501 6. 025367  
11738173\_ 6. 510161 6. 380474 6. 403382 6. 33353 6. 506247 6. 425088  
11738174\_ 4. 789577 4. 623141 4. 731011 4. 282997 4. 349701 4. 453952  
11738175\_ 5. 231618 5. 258825 5. 10438 5. 231343 5. 126432 5. 334088  
11738176\_ 5. 683292 5. 660539 5. 554436 5. 794286 5. 74555 5. 785987  
11738177\_ 4. 971835 5. 025777 5. 085765 5. 263437 5. 517396 5. 2444  
11738178\_ 4. 91056 4. 91056 4. 771611 4. 797755 4. 694213 4. 804194  
11738179\_ 4. 048938 4. 020993 4. 085862 4. 019971 4. 06362 4. 190014  
11738180\_ 4. 891198 5. 029529 4. 824195 4. 772366 4. 702221 4. 658804  
11738181\_ 6. 032273 6. 097128 5. 974295 5. 406899 5. 319975 5. 326851  
11738182\_ 5. 009947 4. 903767 4. 838248 4. 869615 4. 808208 4. 94778  
11738183\_ 6. 002176 6. 080338 5. 950197 6. 012098 6. 104931 6. 08433  
11738184\_ 5. 830705 5. 659534 5. 839837 5. 887105 5. 923161 5. 870055  
11738185\_ 5. 239889 5. 181729 5. 057042 5. 162377 5. 283312 5. 202678  
11738186\_ 3. 948408 3. 782674 3. 902815 3. 944562 4. 028884 4. 237325  
11738187\_ 6. 101511 6. 120872 6. 076633 6. 076822 6. 073441 6. 159771  
11738188\_ 5. 900418 6. 090964 6. 018553 5. 94231 6. 222296 6. 01948  
11738189\_ 6. 163391 6. 118838 5. 910255 6. 152257 6. 159771 6. 186265  
11738190\_ 5. 547892 5. 380649 5. 32901 5. 454171 5. 333723 5. 412858  
11738191\_ 7. 369313 7. 417025 7. 455835 7. 756695 7. 615847 7. 661313  
11738192\_ 3. 1906 3. 11009 3. 1906 3. 298434 3. 310391 3. 277724  
11738193\_ 6. 253472 6. 395285 6. 006778 6. 289281 6. 242564 6. 316591  
11738194\_ 4. 111733 4. 174945 4. 210593 4. 135496 4. 001542 4. 279581  
11738195\_ 5. 306082 5. 477247 5. 325178 5. 189428 5. 53901 5. 339673  
11738196\_ 4. 278469 4. 323823 4. 273928 4. 433207 4. 515671 4. 266392  
11738197\_ 4. 367315 4. 397065 4. 409486 4. 555296 4. 397431 4. 347179  
11738198\_ 3. 584113 3. 483792 3. 391632 3. 483792 3. 406926 3. 705625  
11738199\_ 4. 275543 4. 397231 4. 006212 4. 52373 4. 379321 4. 395448  
11738200\_ 6. 902738 6. 738309 6. 770996 7. 227719 7. 16758 7. 247152  
11738201\_ 3. 319804 3. 327512 3. 427747 3. 319804 3. 470771 3. 172158

11738202\_ 9. 154053 9. 11702 9. 185688 9. 035647 9. 033413 9. 013779  
11738203\_ 9. 173651 9. 155227 9. 185924 9. 930484 9. 915374 9. 936  
11738204\_ 3. 465858 3. 537421 3. 557487 3. 816555 3. 868435 3. 766169  
11738205\_ 2. 96244 3. 079324 2. 949652 2. 989241 3. 013289 3. 052722  
11738206\_ 4. 667277 4. 839354 4. 726944 4. 356767 4. 522436 4. 522436  
11738207\_ 7. 107303 7. 123941 7. 175547 7. 180334 7. 132982 7. 121695  
11738208\_ 5. 00784 4. 864959 4. 893695 5. 003897 5. 015533 4. 892453  
11738209\_ 5. 029283 5. 142043 5. 132936 5. 073036 5. 173392 4. 993977  
11738210\_ 5. 235068 5. 395513 5. 290036 5. 029529 5. 300379 5. 102684  
11738211\_ 2. 318677 2. 389126 2. 486098 2. 25483 2. 570686 2. 475176  
11738212\_ 4. 113634 4. 158908 4. 057387 4. 10251 4. 015161 4. 300988  
11738213\_ 2. 347382 2. 387287 2. 444628 2. 182779 2. 390619 2. 476327  
11738214\_ 7. 619572 7. 636164 7. 629357 7. 984865 7. 966838 7. 92966  
11738215\_ 2. 558864 2. 672159 2. 681194 2. 647976 2. 663124 2. 58091  
11738216\_ 4. 68273 4. 874699 4. 703933 4. 391545 4. 465448 4. 412959  
11738217\_ 3. 891619 3. 997131 3. 740892 3. 850246 3. 728869 3. 641857  
11738218\_ 5. 209259 5. 413857 5. 268035 5. 417567 5. 283524 5. 291168  
11738219\_ 4. 159225 4. 126227 4. 033155 4. 250177 4. 214879 4. 181881  
11738220\_ 6. 955435 7. 125119 7. 185058 6. 907203 7. 037831 7. 02473  
11738221\_ 3. 653911 3. 719657 3. 733701 3. 584034 3. 746146 3. 827097  
11738222\_ 3. 611919 3. 917116 3. 763621 3. 696266 3. 662542 3. 632854  
11738223\_ 4. 509632 4. 511219 4. 573203 4. 529989 4. 537828 4. 464175  
11738224\_ 3. 122119 3. 546945 3. 472921 3. 472921 3. 487006 3. 33682  
11738225\_ 4. 804103 4. 759628 4. 494955 4. 70726 4. 773574 4. 763543  
11738226\_ 4. 374404 4. 55334 4. 372076 4. 628706 4. 57014 4. 584933  
11738227\_ 3. 108737 3. 248152 3. 218958 3. 322375 3. 500922 3. 369847  
11738228\_ 6. 172213 6. 24097 6. 155345 6. 135162 6. 184815 6. 211551  
11738229\_ 2. 361778 2. 583339 2. 215601 2. 454335 2. 439835 2. 470851  
11738230\_ 6. 159771 6. 206748 6. 159771 6. 069213 5. 948047 6. 046776  
11738231\_ 5. 584813 5. 613311 5. 453736 5. 614894 5. 660445 5. 49917  
11738232\_ 5. 035997 4. 916591 5. 001096 5. 659259 5. 421809 5. 476004  
11738233\_ 3. 818401 4. 173298 3. 996464 4. 259249 4. 072035 3. 996464  
11738234\_ 4. 449459 4. 312403 4. 419956 4. 274305 4. 166962 4. 622995  
11738235\_ 3. 019413 3. 206807 3. 122701 3. 389513 3. 298361 3. 075812  
11738236\_ 3. 705625 3. 606313 3. 407305 3. 694102 3. 661168 3. 694102  
11738237\_ 3. 539195 3. 352872 3. 416332 3. 529138 3. 376564 3. 471685  
11738238\_ 3. 87323 3. 490628 3. 404654 3. 384851 3. 101013 3. 172032  
11738239\_ 3. 818401 3. 602321 3. 858676 3. 789236 3. 457036 3. 625371  
11738240\_ 2. 019393 2. 090104 2. 106611 2. 223892 2. 196287 1. 917834  
11738241\_ 2. 569805 2. 718322 2. 657023 2. 620122 2. 606706 2. 494072  
11738242\_ 3. 92608 3. 990322 4. 018636 4. 005608 4. 240321 4. 063148  
11738243\_ 6. 358898 6. 434489 6. 30514 6. 414879 6. 366359 6. 367674  
11738244\_ 2. 430427 2. 486576 2. 486576 2. 46786 2. 677481 2. 486576  
11738245\_ 2. 435264 2. 524284 2. 89301 2. 671408 2. 5506 2. 509365  
11738246\_ 3. 922644 3. 858656 3. 87617 4. 123471 3. 981551 3. 999057  
11738247\_ 7. 641775 7. 817675 7. 90072 8. 070993 8. 047636 8. 016026  
11738248\_ 7. 03014 6. 931318 6. 996231 6. 964779 7. 012075 6. 989353  
11738249\_ 5. 89966 5. 509167 5. 841797 5. 794096 5. 741386 5. 69801  
11738250\_ 8. 000387 7. 975447 8. 000911 8. 529196 8. 502313 8. 526709  
11738251\_ 8. 37927 8. 393727 8. 435511 8. 58243 8. 497782 8. 607442  
11738252\_ 5. 056734 5. 083531 5. 060661 5. 238645 5. 291944 5. 176635

11738253\_ 5. 126825 4. 90612 5. 062285 4. 78123 4. 901219 4. 884343  
11738254\_ 3. 554483 3. 545493 3. 041195 3. 816427 3. 702795 3. 604729  
11738255\_ 2. 478133 2. 83198 3. 036437 2. 172588 2. 25483 2. 154683  
11738256\_ 5. 955155 5. 841177 5. 941019 6. 312742 6. 414953 6. 347044  
11738257\_ 5. 914877 5. 749321 5. 958451 6. 145112 6. 272167 6. 3028  
11738258\_ 8. 235802 8. 384108 8. 212306 8. 509091 8. 308649 8. 397082  
11738259\_ 5. 942303 6. 036235 5. 984375 5. 984375 6. 050753 5. 851424  
11738260\_ 3. 593709 3. 170694 3. 212478 3. 366718 3. 302756 3. 417322  
11738261\_ 4. 86124 4. 736692 4. 777973 4. 689063 4. 794932 4. 739904  
11738262\_ 3. 065652 2. 623301 2. 853143 2. 774789 3. 01608 2. 800454  
11738263\_ 4. 347179 4. 356273 4. 216526 4. 364785 4. 554251 4. 611748  
11738264\_ 4. 647038 4. 640164 4. 67962 4. 478615 4. 348767 4. 534263  
11738265\_ 4. 949292 4. 913187 4. 791426 4. 914651 5. 010763 5. 020149  
11738266\_ 3. 289237 3. 329224 3. 314002 3. 360517 3. 383978 3. 36235  
11738267\_ 3. 969248 4. 081841 3. 868698 4. 121879 4. 06318 3. 976573  
11738268\_ 3. 104173 3. 726944 3. 551238 3. 734166 3. 819465 3. 789073  
11738269\_ 3. 587164 3. 719549 3. 450857 3. 697717 3. 74133 3. 707582  
11738270\_ 4. 406235 4. 367274 4. 35505 4. 555697 4. 587299 4. 530859  
11738271\_ 2. 454488 2. 444545 2. 510299 2. 375251 2. 492667 2. 406124  
11738272\_ 7. 973243 7. 968638 7. 933639 8. 114611 8. 143855 8. 148262  
11738273\_ 5. 467526 5. 601058 5. 368504 5. 403672 5. 376367 5. 265301  
11738274\_ 6. 890709 7. 050326 6. 934615 6. 984658 6. 943533 7. 023222  
11738275\_ 3. 015258 3. 022825 2. 880811 3. 256839 3. 156736 3. 022825  
11738276\_ 3. 4513 3. 547282 3. 347857 3. 557996 3. 614711 3. 521035  
11738277\_ 3. 227841 3. 407851 3. 006789 3. 21279 3. 03435 2. 864336  
11738278\_ 3. 457175 3. 551699 3. 569669 3. 151101 3. 40678 3. 429248  
11738279\_ 4. 847375 4. 848201 4. 912458 4. 791041 4. 918699 4. 904017  
11738280\_ 4. 79465 4. 815775 4. 756934 5. 029529 4. 893343 4. 855612  
11738281\_ 3. 138013 3. 085725 3. 041403 3. 069737 3. 122641 3. 040984  
11738282\_ 8. 37737 8. 283867 8. 310984 8. 37464 8. 363794 8. 445843  
11738283\_ 3. 955651 4. 012992 4. 015896 4. 220593 4. 114163 4. 03517  
11738284\_ 3. 292962 3. 338674 3. 199843 3. 204918 3. 242492 3. 281009  
11738285\_ 4. 684797 4. 607154 4. 642562 4. 686572 4. 663679 4. 668386  
11738286\_ 3. 489791 3. 410313 3. 519987 3. 692275 3. 738947 3. 388866  
11738287\_ 2. 668122 2. 63338 2. 874619 2. 719045 2. 798956 2. 848714  
11738288\_ 3. 909609 3. 800808 3. 80965 3. 606313 3. 879309 3. 805093  
11738289\_ 7. 898649 7. 978092 7. 883931 7. 961759 8. 002769 7. 994735  
11738290\_ 6. 866167 6. 887945 6. 770388 6. 871799 6. 95767 6. 956076  
11738291\_ 6. 227752 6. 165623 6. 174289 6. 239757 6. 188168 6. 22636  
11738292\_ 6. 158248 5. 984694 6. 146144 6. 029706 6. 004494 6. 13945  
11738293\_ 3. 646574 3. 566051 3. 524198 3. 87026 3. 651792 3. 614511  
11738294\_ 4. 394049 4. 604006 4. 42094 4. 432279 4. 372138 4. 520925  
11738295\_ 4. 184925 4. 552259 4. 342395 4. 40461 4. 516045 4. 584933  
11738296\_ 3. 055153 3. 255123 3. 1229 3. 41374 3. 246199 3. 146653  
11738297\_ 5. 978899 5. 906169 5. 870242 6. 183712 6. 168064 6. 191428  
11738298\_ 4. 453136 4. 566281 4. 348429 4. 466834 4. 442337 4. 4246  
11738299\_ 4. 651383 4. 699707 4. 605581 4. 217704 4. 247587 4. 460286  
11738300\_ 6. 190089 6. 40843 6. 401657 6. 432421 6. 401657 6. 394824  
11738301\_ 7. 35371 7. 57644 7. 429929 7. 465991 7. 556124 7. 508592  
11738302\_ 5. 294573 5. 342637 5. 31579 5. 245772 5. 116395 5. 094664  
11738303\_ 5. 933111 5. 960377 5. 854813 5. 90849 6. 016497 5. 982252

11738304\_ 4. 619542 4. 431836 4. 554912 4. 543187 4. 664854 4. 531125  
11738305\_ 5. 180537 5. 148021 5. 178411 5. 414869 5. 379579 5. 285672  
11738306\_ 6. 989653 7. 025293 7. 004743 7. 01666 6. 956389 7. 0902  
11738307\_ 5. 246025 5. 451148 5. 36485 5. 348499 5. 332448 5. 420135  
11738308\_ 4. 549407 4. 704774 4. 6173 4. 549093 4. 720377 4. 563996  
11738309\_ 2. 850726 2. 841467 3. 016305 2. 855356 3. 035427 3. 052287  
11738310\_ 4. 920845 4. 811603 5. 05481 4. 854134 4. 817085 4. 873471  
11738311\_ 5. 812949 6. 040136 5. 786408 5. 755052 5. 823839 5. 811108  
11738312\_ 4. 350444 4. 4649 4. 473205 4. 420634 4. 58903 4. 470782  
11738313\_ 3. 904428 3. 818401 3. 514883 3. 82023 3. 825762 3. 693403  
11738314\_ 2. 471384 2. 346708 2. 361778 2. 361778 2. 541701 2. 473852  
11738315\_ 5. 682556 5. 732315 5. 523904 5. 719483 5. 610949 5. 526133  
11738316\_ 5. 675454 5. 822595 5. 784104 5. 856815 5. 767755 5. 842634  
11738317\_ 3. 08674 3. 288499 3. 267378 3. 222954 3. 195453 3. 165937  
11738318\_ 2. 504697 2. 630312 2. 609264 2. 506223 2. 775388 2. 450914  
11738319\_ 5. 4061 5. 380649 5. 423988 5. 456228 5. 350518 5. 475572  
11738320\_ 5. 229435 5. 141405 5. 298845 5. 07841 5. 36606 5. 042862  
11738321\_ 2. 654907 2. 727056 2. 509836 2. 715846 2. 632083 2. 708593  
11738322\_ 4. 810301 4. 87648 4. 913216 4. 824195 4. 939036 4. 980362  
11738323\_ 5. 137193 5. 215899 5. 002728 5. 151513 5. 062763 4. 940481  
11738324\_ 2. 744683 2. 964678 2. 760536 2. 786864 3. 02436 2. 963926  
11738325\_ 4. 9226 4. 941868 4. 913964 5. 173572 5. 140357 5. 041827  
11738326\_ 2. 196184 2. 289163 2. 468573 2. 586655 2. 562665 2. 341727  
11738327\_ 6. 397911 6. 298833 6. 448865 5. 185606 5. 00785 5. 222963  
11738328\_ 5. 153295 5. 389552 5. 350314 5. 244692 5. 267367 5. 302828  
11738329\_ 5. 59815 5. 519919 5. 567205 5. 661322 5. 694364 5. 60312  
11738330\_ 4. 996354 5. 154447 5. 090657 5. 340697 5. 130223 5. 094211  
11738331\_ 4. 894689 4. 854865 4. 982264 4. 988047 4. 977772 5. 107134  
11738332\_ 3. 386546 3. 238275 3. 520656 3. 231563 3. 287233 3. 242453  
11738333\_ 2. 781788 2. 83198 2. 945867 2. 860818 2. 836014 2. 945929  
11738334\_ 2. 874935 2. 795427 3. 012085 2. 720322 2. 97678 2. 97678  
11738335\_ 7. 409354 7. 434403 7. 266913 7. 534558 7. 501251 7. 460164  
11738336\_ 4. 169865 4. 22883 4. 279768 4. 252701 4. 305242 4. 202907  
11738337\_ 5. 161253 5. 222699 5. 249868 5. 252754 5. 297984 5. 213643  
11738338\_ 3. 466797 3. 395573 3. 290188 3. 395573 3. 503743 3. 323122  
11738339\_ 2. 210801 2. 0467 1. 990002 2. 442897 2. 077373 2. 016103  
11738340\_ 2. 998677 3. 161436 3. 091556 3. 154562 3. 110677 3. 251534  
11738341\_ 3. 721557 3. 918731 3. 638246 3. 891066 4. 068428 3. 759463  
11738342\_ 3. 289537 3. 348585 3. 201511 3. 357986 3. 376541 3. 429381  
11738343\_ 2. 896069 3. 232526 3. 243178 3. 146279 3. 052347 3. 109871  
11738344\_ 3. 942211 4. 226947 4. 038161 4. 136671 3. 949359 3. 985592  
11738345\_ 4. 268383 4. 295727 4. 205865 4. 357765 4. 453167 4. 347179  
11738346\_ 2. 06888 2. 137659 2. 095256 2. 169504 2. 328413 2. 178738  
11738347\_ 7. 603589 7. 745812 7. 567724 7. 695995 7. 708475 7. 721833  
11738348\_ 4. 81839 5. 02408 4. 860625 5. 078156 4. 700243 5. 035086  
11738349\_ 8. 639735 8. 536648 8. 615696 8. 673553 8. 716354 8. 66577  
11738350\_ 6. 082138 6. 227312 6. 047593 6. 185125 6. 160688 6. 147191  
11738351\_ 5. 952165 6. 059123 5. 878764 6. 027927 6. 007539 5. 968007  
11738352\_ 5. 27555 5. 14592 5. 273487 5. 341517 5. 295216 5. 29167  
11738353\_ 6. 359323 6. 565246 6. 38718 6. 470186 6. 348209 6. 444762  
11738354\_ 3. 138822 3. 224476 3. 174352 3. 168604 3. 161157 2. 97745

11738355\_ 4. 164785 4. 174945 4. 117754 3. 884305 4. 215953 3. 961545  
11738356\_ 3. 398236 3. 186471 3. 336822 3. 374754 3. 567835 3. 067719  
11738357\_ 4. 933544 4. 964444 4. 647348 4. 915636 5. 011576 5. 073036  
11738358\_ 2. 329149 2. 446522 2. 41643 2. 458107 2. 395311 2. 605516  
11738359\_ 4. 899561 4. 82608 5. 032141 4. 96625 5. 042908 5. 018457  
11738360\_ 2. 20314 2. 128242 2. 087196 2. 171403 2. 112261 2. 143998  
11738361\_ 6. 392376 6. 476427 6. 545171 6. 37118 6. 508561 6. 476151  
11738362\_ 2. 068337 1. 898324 1. 922284 2. 08426 1. 996413 2. 136687  
11738363\_ 1. 901863 1. 915473 1. 86568 2. 098509 1. 976314 2. 181244  
11738364\_ 5. 265351 5. 266327 5. 136274 5. 36756 5. 428128 5. 305258  
11738365\_ 3. 604684 3. 495442 3. 604684 3. 372334 3. 349522 3. 341634  
11738366\_ 6. 836912 6. 998064 6. 891099 7. 076657 7. 078644 6. 988628  
11738367\_ 3. 586182 3. 648908 3. 484105 3. 58617 3. 611894 3. 789139  
11738368\_ 5. 768357 5. 63585 5. 6853 5. 841408 5. 920646 5. 989502  
11738369\_ 2. 662645 2. 598855 2. 502365 2. 51048 2. 677896 2. 565733  
11738370\_ 1. 805919 1. 730014 1. 797957 1. 932382 1. 817861 1. 805919  
11738371\_ 2. 322427 2. 361778 2. 52985 2. 325799 2. 416188 2. 428295  
11738372\_ 2. 249892 2. 050214 2. 249506 2. 240975 2. 294855 2. 437906  
11738373\_ 5. 244964 5. 088016 5. 122719 5. 053771 5. 18666 5. 150445  
11738374\_ 4. 837246 4. 954203 4. 772366 4. 767172 4. 713549 4. 804689  
11738375\_ 4. 133439 4. 335594 3. 834072 4. 049218 3. 963803 4. 079244  
11738376\_ 4. 547468 4. 708451 4. 558498 4. 556292 4. 484169 4. 599609  
11738377\_ 2. 316284 2. 143377 2. 219311 2. 000732 2. 148862 2. 148862  
11738378\_ 2. 117889 2. 316317 2. 249122 1. 959811 2. 227131 2. 15519  
11738379\_ 3. 462963 3. 142868 3. 290188 3. 371025 3. 450548 3. 398236  
11738380\_ 4. 879938 4. 962903 4. 828884 5. 041556 5. 195513 5. 026032  
11738381\_ 2. 312986 2. 540202 2. 362796 2. 518578 2. 550694 2. 612297  
11738382\_ 3. 503743 3. 358941 3. 33738 3. 441703 3. 627744 3. 398236  
11738383\_ 2. 388591 2. 400375 2. 369201 2. 723766 2. 631914 2. 450819  
11738384\_ 5. 129926 5. 226384 5. 102786 5. 343143 5. 30361 5. 233017  
11738385\_ 3. 234244 3. 180403 3. 178838 3. 27076 3. 174143 3. 092505  
11738386\_ 4. 790004 4. 62682 4. 659464 4. 736759 4. 722616 4. 768602  
11738387\_ 5. 769911 5. 773745 5. 590756 5. 672285 5. 688057 5. 693807  
11738388\_ 4. 048183 4. 232832 4. 124617 3. 977869 3. 996401 4. 169279  
11738389\_ 5. 600791 5. 612706 5. 581578 5. 746982 5. 753143 5. 828441  
11738390\_ 3. 724428 3. 717768 3. 760074 3. 744394 3. 74176 3. 983961  
11738391\_ 4. 173464 4. 212538 4. 20042 4. 350786 4. 202558 4. 479104  
11738392\_ 4. 303825 4. 49599 4. 370337 4. 621818 4. 40461 4. 281665  
11738393\_ 2. 707419 3. 092938 2. 744174 2. 80696 2. 766899 3. 16312  
11738394\_ 7. 60371 7. 520089 7. 603829 7. 619572 7. 694613 7. 647337  
11738395\_ 3. 599736 3. 481852 3. 462731 3. 402899 3. 393574 3. 503743  
11738396\_ 2. 928614 3. 497453 3. 246469 3. 354836 3. 162178 3. 359109  
11738397\_ 4. 460874 4. 749167 4. 564721 4. 767777 4. 601935 4. 657651  
11738398\_ 5. 263526 4. 879525 4. 802016 5. 274351 5. 401617 5. 61308  
11738399\_ 4. 963656 4. 99649 4. 809118 5. 075394 4. 949171 4. 979429  
11738400\_ 4. 918602 4. 892457 4. 88241 4. 968146 5. 216654 5. 052421  
11738401\_ 2. 589978 2. 735868 2. 637559 2. 718322 2. 724075 2. 730393  
11738402\_ 5. 69152 5. 420272 5. 493516 5. 18786 5. 183024 5. 33119  
11738403\_ 3. 735644 3. 746133 3. 757129 3. 881464 3. 673062 3. 673062  
11738404\_ 5. 808405 5. 913881 5. 893111 5. 910773 5. 875855 5. 782868  
11738405\_ 4. 844294 4. 763543 4. 765761 4. 765761 4. 826965 4. 866013



11738406\_ 5. 073772 5. 215633 5. 037501 5. 156303 5. 206131 5. 228627  
11738407\_ 5. 055332 4. 846506 5. 056135 5. 01186 5. 002373 5. 06231  
11738408\_ 2. 571493 2. 684448 2. 948531 3. 007651 2. 923967 2. 905617  
11738409\_ 6. 113861 6. 294382 6. 211688 6. 370844 6. 241491 6. 222244  
11738410\_ 6. 119798 6. 249104 6. 145308 6. 282871 6. 324455 6. 294554  
11738411\_ 2. 304818 2. 259723 2. 095256 2. 361778 2. 416432 2. 253281  
11738412\_ 3. 295183 3. 280075 3. 42439 3. 558862 3. 26024 3. 357497  
11738413\_ 4. 903779 4. 788567 4. 957204 4. 690737 4. 80162 4. 939798  
11738414\_ 5. 584813 5. 605811 5. 736831 5. 652229 5. 6788 5. 666855  
11738415\_ 4. 513877 4. 34004 4. 13923 4. 390194 4. 402273 4. 470714  
11738416\_ 2. 940941 2. 840982 2. 943573 2. 988554 2. 798956 2. 945929  
11738417\_ 4. 830575 5. 105928 4. 849828 4. 807726 5. 069708 5. 013944  
11738418\_ 2. 642593 2. 699442 2. 843327 2. 831834 2. 72101 2. 856941  
11738419\_ 3. 362535 3. 35767 3. 322995 3. 180514 3. 213635 3. 292138  
11738420\_ 4. 591699 4. 74869 4. 564244 4. 61311 4. 695736 4. 767433  
11738421\_ 3. 260251 3. 315886 3. 2977 3. 458437 3. 262412 3. 315886  
11738422\_ 2. 10492 1. 990144 2. 178477 2. 110567 2. 166552 2. 148054  
11738423\_ 3. 967003 3. 86769 3. 986646 4. 018302 3. 762239 3. 956949  
11738424\_ 5. 371342 5. 526361 5. 24752 5. 662641 5. 467652 5. 442778  
11738425\_ 5. 894307 5. 735966 5. 807614 5. 856645 5. 796888 5. 86959  
11738426\_ 6. 760416 6. 706352 6. 760416 6. 017737 5. 983719 5. 977389  
11738427\_ 3. 036702 3. 097171 3. 063389 3. 195995 3. 055823 3. 188434  
11738428\_ 2. 306501 2. 23693 2. 122811 2. 193846 2. 351994 2. 306501  
11738429\_ 2. 041594 2. 14969 2. 4881 1. 955655 1. 937838 2. 136082  
11738430\_ 2. 821897 2. 94355 2. 743452 2. 852825 2. 790221 2. 821897  
11738431\_ 2. 778397 2. 767587 2. 820469 2. 807394 2. 820469 2. 659937  
11738432\_ 4. 890066 4. 953432 4. 985025 4. 889579 4. 953155 4. 947771  
11738433\_ 5. 378476 5. 571615 5. 735864 5. 45215 5. 469123 5. 533628  
11738434\_ 2. 383969 2. 452356 2. 624382 2. 450855 2. 361778 2. 33945  
11738435\_ 10. 14665 10. 10226 10. 14212 10. 12137 10. 23093 10. 16974  
11738436\_ 3. 473004 3. 506694 3. 613457 3. 507884 3. 661488 3. 621451  
11738437\_ 2. 249136 2. 298412 2. 174213 2. 251864 2. 288 2. 20144  
11738438\_ 4. 90073 4. 922681 4. 952377 4. 840356 5. 002753 5. 078909  
11738439\_ 2. 916988 2. 960829 3. 099129 3. 009957 3. 108181 2. 914318  
11738440\_ 5. 619823 5. 610929 5. 607133 5. 879633 5. 789053 5. 795607  
11738441\_ 4. 928499 5. 039953 4. 927959 4. 984433 5. 097618 4. 903224  
11738442\_ 4. 053018 4. 026705 3. 6911 3. 940363 3. 969526 3. 954157  
11738443\_ 4. 524443 4. 607602 4. 47886 4. 727673 4. 76234 4. 812343  
11738444\_ 3. 694114 3. 843331 3. 663951 3. 905791 3. 7776 4. 135016  
11738445\_ 4. 811112 4. 561694 4. 571032 4. 668642 4. 571032 4. 636037  
11738446\_ 6. 934615 6. 909931 7. 031979 6. 38595 6. 410999 6. 501716  
11738447\_ 9. 626725 9. 527076 9. 603434 9. 045291 9. 0491 9. 045553  
11738448\_ 4. 473684 4. 677652 4. 356927 4. 736759 4. 40461 4. 59771  
11738449\_ 5. 534977 5. 770185 5. 554436 5. 584791 5. 623779 5. 662766  
11738450\_ 2. 740335 2. 782311 2. 845342 2. 871388 2. 891848 2. 968308  
11738451\_ 3. 456645 3. 495008 3. 277027 3. 617925 3. 621531 3. 396844  
11738452\_ 5. 640417 5. 878597 5. 703584 5. 690119 5. 731325 5. 716215  
11738453\_ 3. 858487 3. 480029 3. 593203 2. 86601 2. 986269 2. 912896  
11738454\_ 5. 125683 5. 097394 4. 982066 4. 775049 4. 991239 4. 832791  
11738455\_ 3. 030643 3. 189306 3. 081705 3. 301576 3. 132666 3. 425093  
11738456\_ 3. 880816 3. 586222 3. 350062 3. 472832 3. 518172 3. 350062

11738457\_ 4. 965429 4. 965429 4. 965429 5. 015482 4. 953939 4. 965429  
11738458\_ 2. 528309 2. 490307 2. 372864 2. 438256 2. 479666 2. 403546  
11738459\_ 2. 24674 1. 925707 2. 062425 1. 995297 2. 079884 2. 062425  
11738460\_ 6. 129253 6. 097223 5. 900896 6. 263567 6. 209548 6. 351936  
11738461\_ 6. 721776 6. 730223 6. 56271 6. 863172 6. 821591 6. 835118  
11738462\_ 3. 393114 3. 556546 3. 350059 3. 623422 3. 414461 3. 091522  
11738463\_ 6. 023718 6. 07861 6. 18079 6. 174398 6. 202053 6. 160722  
11738464\_ 2. 765871 2. 758022 2. 838903 2. 937625 2. 932822 2. 945929  
11738465\_ 3. 507779 3. 445682 3. 449076 3. 452903 3. 400363 3. 309512  
11738466\_ 4. 919794 5. 091557 4. 850838 5. 132103 4. 984669 4. 993958  
11738467\_ 3. 840093 3. 768638 3. 611219 3. 778657 3. 902943 3. 635312  
11738468\_ 5. 554307 5. 626248 5. 28642 5. 644056 5. 618022 5. 58251  
11738469\_ 2. 484294 2. 598978 2. 344955 2. 503164 2. 519896 2. 784947  
11738470\_ 5. 662586 5. 730315 5. 636758 5. 660462 5. 766876 5. 668342  
11738471\_ 3. 318523 3. 140284 3. 221142 3. 361436 3. 38863 3. 290188  
11738472\_ 3. 110174 3. 101831 3. 281644 3. 187344 3. 206447 3. 189679  
11738473\_ 2. 218014 2. 309518 2. 218014 2. 307091 2. 280075 2. 215586  
11738474\_ 8. 917622 8. 85972 8. 846673 8. 602031 8. 541263 8. 630068  
11738475\_ 3. 453756 3. 327421 3. 299657 3. 220353 3. 405164 3. 297751  
11738476\_ 3. 969657 4. 205033 4. 01648 4. 222839 4. 122742 4. 119621  
11738477\_ 5. 899589 5. 974917 5. 930068 5. 922859 5. 969303 6. 010285  
11738478\_ 4. 6031 4. 763543 4. 562162 4. 651081 4. 670696 4. 610461  
11738479\_ 3. 774143 3. 606313 3. 605808 3. 529747 3. 879309 4. 054288  
11738480\_ 4. 082681 4. 212755 4. 242369 4. 242369 4. 376322 4. 267724  
11738481\_ 2. 870328 2. 961601 2. 795794 2. 70861 3. 056938 3. 151467  
11738482\_ 5. 42013 5. 59778 5. 404815 5. 445111 5. 459925 5. 65016  
11738483\_ 5. 789096 5. 876581 5. 832788 5. 849579 5. 892995 5. 841129  
11738484\_ 7. 164199 7. 257803 7. 173211 7. 222158 7. 170389 7. 203386  
11738485\_ 3. 627578 3. 832527 3. 916558 3. 921604 3. 965317 3. 879309  
11738486\_ 5. 894697 5. 961799 5. 992636 6. 037033 6. 066858 5. 978134  
11738487\_ 4. 721245 4. 664458 4. 489309 4. 897869 4. 904974 4. 66814  
11738488\_ 5. 366987 5. 443182 5. 248095 5. 506861 5. 472214 5. 323504  
11738489\_ 2. 928278 3. 100137 2. 970891 2. 926617 2. 916251 3. 10044  
11738490\_ 4. 664775 4. 712343 4. 605469 4. 807227 4. 66322 4. 722718  
11738491\_ 2. 411795 2. 491582 2. 585514 2. 57137 2. 552057 2. 356625  
11738492\_ 2. 778377 2. 732192 2. 527544 2. 705736 2. 798956 2. 527544  
11738493\_ 3. 705625 3. 73005 3. 759179 3. 542768 3. 503743 3. 600983  
11738494\_ 3. 27419 3. 295924 3. 537507 3. 281561 3. 362131 3. 387848  
11738495\_ 3. 022139 3. 228133 3. 095464 3. 108308 3. 153947 3. 013968  
11738496\_ 4. 763543 4. 874234 4. 840298 4. 899638 4. 760886 4. 822089  
11738497\_ 3. 260895 2. 98216 3. 137229 3. 173064 3. 011689 3. 061205  
11738498\_ 2. 486848 2. 442499 2. 361599 2. 443772 2. 387684 2. 548681  
11738499\_ 3. 957167 3. 909593 3. 939983 3. 792166 3. 97733 4. 033968  
11738500\_ 5. 930614 5. 823969 5. 666004 5. 825938 5. 815168 5. 932018  
11738501\_ 5. 13703 5. 2666 4. 976879 5. 328168 5. 316888 5. 328084  
11738502\_ 3. 697907 3. 385798 3. 383344 3. 223756 3. 383215 3. 156204  
11738503\_ 5. 559665 5. 380649 5. 614563 5. 672536 5. 706089 5. 646848  
11738504\_ 4. 774251 5. 189628 4. 735792 4. 852072 4. 93837 4. 869745  
11738505\_ 2. 530764 2. 523031 2. 222256 2. 530764 2. 582335 2. 559765  
11738506\_ 6. 97649 7. 13015 6. 926546 7. 069517 7. 060447 7. 033559  
11738507\_ 4. 197677 4. 230877 3. 948227 3. 955988 4. 418977 4. 249365

11738508\_ 2. 437463 2. 437463 2. 437463 2. 420242 2. 425934 2. 617683  
11738509\_ 5. 318886 5. 313651 5. 374955 5. 378844 5. 503768 5. 357686  
11738510\_ 5. 06072 5. 140903 4. 98466 5. 211293 5. 109654 5. 048451  
11738511\_ 6. 600666 6. 67449 6. 567687 6. 64362 6. 67449 6. 583611  
11738512\_ 2. 957262 3. 082916 3. 074667 3. 017325 2. 953685 3. 074596  
11738513\_ 2. 361778 2. 403092 2. 47102 2. 403092 2. 19097 2. 345661  
11738514\_ 4. 637084 4. 617572 4. 663136 4. 649654 4. 649654 4. 668826  
11738515\_ 4. 350374 4. 240527 4. 406044 4. 289162 4. 059382 4. 126124  
11738516\_ 8. 514618 8. 534553 8. 60916 7. 819083 7. 810343 7. 786  
11738517\_ 3. 982181 4. 057066 3. 925882 4. 010448 4. 141706 4. 02645  
11738518\_ 3. 453167 3. 49954 3. 503743 3. 433409 3. 51247 3. 601067  
11738519\_ 8. 458728 8. 532812 8. 45496 8. 52282 8. 50886 8. 624167  
11738520\_ 4. 164159 4. 283393 4. 389972 4. 259175 4. 148897 4. 175336  
11738521\_ 4. 01833 3. 948468 3. 644662 3. 926054 3. 982456 4. 037672  
11738522\_ 4. 077815 4. 13716 3. 893422 4. 065234 3. 765635 4. 212414  
11738523\_ 5. 333723 5. 394252 5. 019531 5. 179936 5. 273162 5. 362541  
11738524\_ 6. 07232 6. 085626 5. 904148 5. 806588 5. 848651 5. 976956  
11738525\_ 3. 260135 3. 274358 3. 302107 3. 317266 3. 170623 3. 22146  
11738526\_ 9. 609734 9. 54817 9. 621737 9. 369309 9. 366288 9. 250682  
11738527\_ 6. 018861 6. 052453 5. 887845 6. 022253 6. 127175 6. 088647  
11738528\_ 3. 862102 3. 810108 3. 879051 3. 925181 4. 099345 3. 785516  
11738529\_ 4. 475928 4. 55617 4. 643717 4. 633582 4. 635376 4. 743523  
11738530\_ 2. 604052 2. 417597 2. 42692 2. 359982 2. 359982 2. 332041  
11738531\_ 3. 767826 3. 934771 3. 89437 3. 876656 3. 98758 3. 953154  
11738532\_ 4. 37639 4. 456108 4. 353759 4. 487006 4. 53757 4. 487006  
11738533\_ 4. 069752 4. 174945 4. 287593 4. 230103 4. 261776 4. 275562  
11738534\_ 5. 890629 5. 882181 5. 71043 5. 927486 5. 87359 5. 882408  
11738535\_ 4. 678211 4. 722406 4. 688067 4. 833478 4. 841646 4. 678211  
11738536\_ 4. 273957 4. 433532 4. 03333 4. 214494 4. 501186 4. 435671  
11738537\_ 4. 748242 4. 972133 4. 74088 4. 769388 4. 868966 4. 769388  
11738538\_ 4. 505023 4. 586607 4. 323899 4. 395781 4. 447425 4. 298129  
11738539\_ 4. 108592 3. 956881 3. 952959 3. 73035 3. 767577 4. 040235  
11738540\_ 4. 978254 4. 790548 4. 868356 4. 980791 4. 823005 4. 831811  
11738541\_ 3. 923536 4. 057887 4. 025325 4. 177874 4. 057887 4. 108449  
11738542\_ 8. 11024 8. 116054 8. 121173 7. 062996 7. 092639 7. 154768  
11738543\_ 3. 576624 3. 522631 3. 384492 3. 495847 3. 5576 3. 48445  
11738544\_ 4. 951315 5. 046174 5. 0373 4. 950387 4. 964344 5. 024271  
11738545\_ 1. 964617 1. 983927 2. 01158 2. 045412 1. 898324 1. 964617  
11738546\_ 2. 556189 2. 667742 2. 497956 2. 561471 2. 444686 2. 3623  
11738547\_ 5. 90881 6. 069883 5. 889382 5. 98127 6. 029597 5. 915475  
11738548\_ 8. 017438 8. 082136 7. 968212 8. 041409 8. 074295 8. 098883  
11738549\_ 3. 801006 3. 811896 3. 769603 3. 824315 3. 85419 3. 811896  
11738550\_ 3. 514696 3. 546392 3. 527356 3. 842533 3. 632673 3. 386923  
11738551\_ 7. 442733 7. 346353 7. 457858 7. 155522 7. 04434 7. 179232  
11738552\_ 8. 462596 8. 384475 8. 465372 8. 287679 8. 247913 8. 220274  
11738553\_ 4. 853246 4. 9226 4. 956993 4. 941401 4. 911881 4. 928206  
11738554\_ 4. 721648 4. 48271 4. 692717 4. 616548 4. 710545 4. 507802  
11738555\_ 5. 130696 5. 153283 5. 130696 5. 302071 5. 246291 5. 200838  
11738556\_ 2. 637479 2. 5907 2. 5284 2. 750049 2. 643197 2. 898207  
11738557\_ 4. 888245 4. 778175 4. 87612 4. 986045 4. 920874 4. 900369  
11738558\_ 6. 354784 6. 434452 6. 39005 6. 416197 6. 316281 6. 403637

11738559\_ 3. 249924 3. 224545 3. 290188 3. 291826 3. 248286 3. 336058  
11738560\_ 6. 250487 6. 404993 6. 102801 6. 333014 6. 361327 6. 404993  
11738561\_ 4. 652188 4. 86394 4. 673689 4. 94014 4. 84096 4. 969997  
11738562\_ 4. 34628 4. 409138 4. 34628 4. 661487 4. 522352 4. 424199  
11738563\_ 4. 982037 4. 729429 4. 761214 5. 008434 4. 975886 4. 684753  
11738564\_ 4. 933554 5. 00607 4. 999983 5. 029529 4. 977499 4. 983586  
11738565\_ 3. 692798 3. 803392 3. 836711 3. 901862 3. 807991 3. 892885  
11738566\_ 5. 25028 5. 326175 5. 247457 5. 3515 5. 368845 5. 261916  
11738567\_ 5. 743533 5. 799897 5. 764549 5. 709766 5. 776399 5. 789994  
11738568\_ 5. 165478 5. 218311 5. 099834 5. 281253 5. 251528 5. 255834  
11738569\_ 5. 795251 5. 855442 5. 742238 5. 774256 5. 843868 5. 798613  
11738570\_ 3. 271891 3. 53237 3. 175606 3. 388688 3. 279474 3. 182443  
11738571\_ 3. 406857 3. 507708 3. 398842 3. 462055 3. 384072 3. 622011  
11738572\_ 4. 700243 4. 703848 4. 87969 4. 824195 4. 77225 4. 768595  
11738573\_ 4. 607397 4. 63624 4. 392027 4. 408633 4. 237089 4. 378369  
11738574\_ 5. 339302 5. 368454 5. 254347 5. 582087 5. 526447 5. 441772  
11738575\_ 3. 955546 3. 659761 3. 986857 4. 045296 3. 736366 3. 932758  
11738576\_ 3. 495353 3. 641928 3. 224098 3. 7966 3. 340902 3. 524842  
11738577\_ 3. 735641 3. 555028 3. 413789 3. 555028 3. 672341 3. 442813  
11738578\_ 2. 718322 2. 83198 2. 736636 2. 827172 2. 824238 2. 688347  
11738579\_ 4. 581195 4. 567886 4. 495054 4. 595436 4. 567886 4. 554577  
11738580\_ 4. 978671 5. 072333 4. 929031 4. 997328 5. 022406 4. 849177  
11738581\_ 5. 381439 5. 456253 5. 398532 5. 493292 5. 458798 5. 509568  
11738582\_ 3. 353475 3. 313736 3. 35799 3. 258475 3. 240629 3. 503743  
11738583\_ 4. 800023 4. 823099 4. 672782 4. 638562 4. 643717 4. 708588  
11738584\_ 7. 846368 7. 837811 7. 593134 7. 94964 7. 926761 7. 836249  
11738585\_ 4. 513805 4. 870348 4. 69479 4. 730498 4. 823492 4. 917216  
11738586\_ 3. 273847 3. 180062 3. 358261 3. 249051 3. 299733 3. 229886  
11738587\_ 4. 241998 4. 591349 4. 333485 4. 445228 4. 310018 4. 460922  
11738588\_ 6. 742351 6. 861455 6. 553542 6. 765911 6. 798256 6. 939813  
11738589\_ 3. 595694 3. 915374 3. 541637 3. 956654 3. 822289 3. 92819  
11738590\_ 4. 74125 4. 872344 4. 641182 4. 772366 4. 746579 4. 728655  
11738591\_ 4. 308769 4. 319012 4. 138008 4. 347179 4. 456235 4. 445389  
11738592\_ 6. 417791 6. 356681 6. 478352 6. 792183 6. 782711 6. 825152  
11738593\_ 5. 185466 5. 257473 5. 106884 5. 321749 5. 296202 5. 28236  
11738594\_ 4. 623435 4. 181682 4. 410225 4. 504594 4. 426218 4. 366309  
11738595\_ 5. 117384 5. 088914 4. 93555 5. 185675 5. 214432 5. 11324  
11738596\_ 6. 020923 5. 948998 5. 923736 6. 058539 6. 079076 5. 964333  
11738597\_ 5. 152451 5. 060272 5. 078152 5. 495574 5. 415751 5. 500375  
11738598\_ 4. 082294 4. 335198 4. 009302 4. 055748 4. 122446 4. 184634  
11738599\_ 3. 938967 3. 795947 3. 700323 3. 904906 3. 89995 3. 990408  
11738600\_ 5. 800724 6. 076709 5. 894697 6. 066443 6. 074628 6. 10796  
11738601\_ 2. 115153 2. 264374 2. 36549 2. 134113 2. 324212 2. 435352  
11738602\_ 2. 728085 2. 652933 2. 687287 2. 639611 2. 737521 2. 754656  
11738603\_ 5. 75684 5. 864974 5. 652834 5. 853831 5. 840915 5. 878385  
11738604\_ 4. 314227 4. 284713 4. 285657 4. 185817 4. 35869 4. 109297  
11738605\_ 5. 226695 5. 181148 5. 233222 5. 208374 5. 181747 5. 188104  
11738606\_ 2. 31405 2. 407982 2. 552057 2. 52951 2. 676209 2. 412888  
11738607\_ 4. 567916 4. 841558 4. 751955 4. 81289 4. 938724 4. 919503  
11738608\_ 2. 196079 2. 113351 1. 835078 1. 917182 1. 849761 1. 933253  
11738609\_ 2. 654534 2. 557561 2. 537832 2. 755346 2. 638744 2. 623375

11738610\_ 4. 526769 4. 38439 4. 240129 4. 3619 4. 484168 4. 348318  
11738611\_ 4. 763543 4. 607513 4. 792427 4. 581103 4. 708274 4. 710872  
11738612\_ 3. 278103 3. 375231 3. 243157 2. 998366 3. 272329 3. 098645  
11738613\_ 2. 931721 3. 094308 3. 018939 3. 094308 3. 265025 3. 061205  
11738614\_ 3. 324396 3. 24985 3. 308775 3. 339218 3. 21279 3. 268811  
11738615\_ 6. 211965 6. 282921 6. 152685 6. 406503 6. 252687 6. 289708  
11738616\_ 3. 40078 3. 421266 3. 161548 3. 18459 3. 373756 3. 314659  
11738617\_ 3. 996141 4. 05191 3. 980805 4. 016686 4. 067833 4. 072964  
11738618\_ 5. 44448 5. 614563 5. 328307 5. 52307 5. 405756 5. 523739  
11738619\_ 4. 231914 4. 281673 4. 238035 4. 505419 4. 34472 4. 231914  
11738620\_ 2. 427755 2. 230824 2. 252067 2. 374279 2. 499051 2. 228234  
11738621\_ 4. 347179 4. 378654 4. 3881 4. 582662 4. 643717 4. 608165  
11738622\_ 3. 923855 3. 796145 3. 923855 4. 113251 3. 816907 3. 969625  
11738623\_ 8. 150221 8. 013774 7. 990086 7. 755242 7. 787633 7. 801938  
11738624\_ 6. 74372 6. 690385 6. 678113 6. 370671 6. 454741 6. 442536  
11738625\_ 3. 764647 3. 781551 3. 552398 3. 887959 3. 893364 3. 900122  
11738626\_ 3. 076478 3. 061205 3. 088758 3. 112243 3. 124982 2. 963178  
11738627\_ 4. 065035 4. 019886 4. 064363 4. 064363 4. 012495 4. 127934  
11738628\_ 8. 049731 8. 035055 7. 966924 8. 023436 7. 935708 8. 026214  
11738629\_ 7. 175488 7. 167869 7. 177188 8. 496492 8. 522094 8. 522666  
11738630\_ 5. 631259 5. 684196 5. 579691 5. 845538 5. 808792 5. 824287  
11738631\_ 5. 333723 5. 353317 5. 385065 5. 528624 5. 597671 5. 51864  
11738632\_ 5. 894697 5. 996206 5. 927272 6. 006867 6. 159771 6. 011116  
11738633\_ 4. 737441 4. 737934 4. 794385 4. 858586 4. 756908 4. 697792  
11738634\_ 4. 775706 4. 728594 4. 709463 4. 874234 4. 822747 4. 771491  
11738635\_ 4. 412471 4. 517622 4. 479337 4. 656298 4. 517622 4. 517622  
11738636\_ 4. 869472 5. 014708 4. 922345 5. 029778 5. 075009 4. 965952  
11738637\_ 9. 350916 9. 272034 9. 367099 9. 824951 9. 822211 9. 817802  
11738638\_ 5. 628435 5. 626373 5. 494461 5. 626373 5. 792168 5. 695195  
11738639\_ 4. 19171 4. 384968 4. 213226 4. 182583 4. 200678 4. 421482  
11738640\_ 6. 102367 6. 160764 6. 176105 6. 286431 6. 145583 6. 201155  
11738641\_ 4. 886971 4. 983943 4. 845318 4. 929264 4. 889249 4. 865427  
11738642\_ 3. 870106 3. 708041 3. 711934 3. 477985 3. 398236 3. 474785  
11738643\_ 3. 553225 3. 578483 3. 462577 3. 553225 3. 501357 3. 619304  
11738644\_ 8. 278194 8. 106113 8. 195578 7. 553864 7. 609733 7. 609733  
11738645\_ 6. 322381 6. 535183 6. 352577 6. 479095 6. 540458 6. 434093  
11738646\_ 3. 640204 3. 627478 3. 742302 3. 699039 3. 480969 3. 778192  
11738647\_ 3. 813882 3. 829123 3. 832173 3. 799632 3. 991293 3. 899289  
11738648\_ 6. 866686 6. 924753 6. 841038 6. 900229 7. 064338 6. 951281  
11738649\_ 4. 049318 4. 600733 4. 199115 4. 636222 4. 55943 4. 322423  
11738650\_ 3. 204376 3. 370596 3. 159622 3. 168136 3. 350827 3. 274032  
11738651\_ 5. 639569 5. 706015 5. 451885 5. 685894 5. 73591 5. 75809  
11738652\_ 3. 002745 3. 061205 3. 277445 2. 905773 2. 880812 2. 852257  
11738653\_ 4. 366335 4. 305276 4. 097459 4. 122678 4. 191036 4. 268747  
11738654\_ 3. 322234 3. 565336 3. 551136 3. 565336 3. 521907 3. 487976  
11738655\_ 3. 827431 3. 666486 3. 686639 3. 84172 3. 970532 3. 810822  
11738656\_ 4. 348868 4. 377495 4. 005231 4. 397169 4. 285252 4. 175632  
11738657\_ 2. 851283 2. 826744 2. 976599 3. 043898 2. 929313 3. 102107  
11738658\_ 2. 944927 2. 89213 2. 814549 2. 91371 2. 917691 2. 874531  
11738659\_ 4. 385569 4. 546543 4. 460699 4. 325248 4. 561287 4. 411076  
11738660\_ 5. 896961 6. 041079 5. 793001 6. 015578 6. 035999 6. 039929

11738661\_ 7. 817402 7. 896585 7. 695058 7. 677684 7. 779274 7. 73056  
11738662\_ 3. 818401 4. 067703 4. 003743 4. 011645 4. 16196 4. 200678  
11738663\_ 3. 818401 4. 055188 4. 005969 4. 09347 4. 155786 4. 200678  
11738664\_ 4. 516675 4. 30359 4. 351679 4. 710367 4. 607804 4. 457186  
11738665\_ 3. 648968 3. 551685 3. 315141 3. 737565 3. 580257 3. 625645  
11738666\_ 5. 245031 5. 380649 5. 145243 5. 196666 5. 2222 5. 190651  
11738667\_ 5. 967535 6. 076709 6. 143677 6. 263567 6. 056901 6. 164807  
11738668\_ 3. 577067 3. 418801 3. 593041 3. 436244 3. 543676 3. 452407  
11738669\_ 5. 779713 5. 788681 5. 636279 5. 682836 5. 877251 5. 798834  
11738670\_ 3. 701883 3. 948871 3. 784081 3. 831873 3. 921351 3. 831873  
11738671\_ 3. 185402 3. 099877 3. 060724 3. 078501 3. 226335 3. 202574  
11738672\_ 5. 754952 5. 769493 5. 727534 5. 750591 5. 69847 5. 825617  
11738673\_ 5. 965425 5. 937965 5. 729742 6. 007203 6. 058706 5. 862728  
11738674\_ 6. 519664 6. 456639 6. 361434 6. 561424 6. 565331 6. 445213  
11738675\_ 4. 595523 4. 5651 4. 709455 4. 838921 4. 643717 4. 763543  
11738676\_ 4. 098245 4. 335594 4. 133682 4. 250953 4. 282793 4. 178997  
11738677\_ 2. 796063 3. 000213 2. 840638 2. 895837 2. 938909 2. 972287  
11738678\_ 2. 534997 2. 47102 2. 413765 2. 579581 2. 605646 2. 611507  
11738679\_ 6. 368311 6. 562253 6. 306077 6. 526104 6. 528875 6. 423891  
11738680\_ 4. 829551 4. 883124 4. 801978 4. 845966 4. 927283 4. 996879  
11738681\_ 3. 657435 3. 647095 3. 65157 3. 68066 3. 652033 3. 669094  
11738682\_ 4. 307172 4. 225348 4. 301307 4. 330397 4. 261332 4. 325755  
11738683\_ 10. 18174 10. 13908 10. 19413 10. 16217 10. 18662 10. 19216  
11738684\_ 9. 969185 9. 904531 9. 985167 9. 959443 9. 97897 9. 991023  
11738685\_ 3. 040201 3. 238935 3. 135446 3. 099036 3. 069782 3. 180062  
11738686\_ 5. 09783 5. 245954 5. 214469 5. 35348 5. 370662 5. 475572  
11738687\_ 2. 646147 2. 833541 2. 736636 2. 586834 2. 777668 2. 646147  
11738688\_ 1. 991512 2. 12385 1. 979283 1. 966729 2. 176163 2. 08706  
11738689\_ 2. 701531 2. 83198 2. 49196 2. 605516 2. 867525 2. 757192  
11738690\_ 5. 216149 5. 21653 5. 216149 5. 310081 5. 206204 5. 255558  
11738691\_ 4. 833018 5. 08219 4. 860227 5. 026411 4. 986811 5. 045289  
11738692\_ 2. 215977 2. 47677 2. 591742 2. 375552 2. 466417 2. 666303  
11738693\_ 3. 838296 3. 755878 3. 673128 3. 711571 3. 66803 3. 635988  
11738694\_ 4. 133188 4. 271484 4. 065755 4. 2838 4. 185825 4. 403891  
11738695\_ 5. 119724 5. 113849 5. 197724 5. 412869 5. 307665 5. 203762  
11738696\_ 4. 513241 4. 440125 4. 586271 4. 436905 4. 593 4. 415744  
11738697\_ 5. 380938 5. 493894 5. 391659 5. 477242 5. 413467 5. 535489  
11738698\_ 3. 00776 3. 023683 3. 060871 2. 999045 3. 187159 3. 125863  
11738699\_ 4. 919249 4. 872688 4. 93591 4. 93549 4. 963444 5. 038251  
11738700\_ 4. 263982 4. 585957 4. 377567 4. 567141 4. 473848 4. 447626  
11738701\_ 4. 687099 4. 577414 4. 287593 4. 619433 4. 714312 4. 471175  
11738702\_ 4. 520053 4. 240578 4. 370337 4. 498781 4. 40461 4. 431614  
11738703\_ 8. 28615 8. 300218 8. 311069 8. 929703 8. 844443 8. 881665  
11738704\_ 6. 094413 6. 256942 6. 034966 6. 539082 6. 11437 6. 385801  
11738705\_ 4. 463952 4. 685214 4. 370337 4. 668329 4. 698979 4. 713189  
11738706\_ 4. 677336 4. 700442 4. 528476 4. 65717 4. 643616 4. 592374  
11738707\_ 1. 832163 2. 013988 2. 032665 2. 131762 2. 098576 2. 20706  
11738708\_ 4. 100974 4. 227626 4. 096424 4. 271467 4. 287898 4. 620041  
11738709\_ 4. 177151 4. 062333 4. 054396 4. 184411 4. 182406 4. 15065  
11738710\_ 3. 56405 3. 763648 3. 503743 3. 690658 3. 526361 3. 777824  
11738711\_ 4. 752994 4. 68651 4. 827251 4. 860315 4. 643783 4. 796502

11738712\_ 3. 080451 3. 068352 2. 801829 3. 053667 3. 177593 3. 181366  
11738713\_ 3. 268225 3. 191505 2. 970527 3. 0851 3. 295142 3. 261258  
11738714\_ 5. 410475 5. 380649 5. 357805 5. 286552 5. 417684 5. 412982  
11738715\_ 3. 981167 3. 997825 3. 802581 4. 15724 4. 312884 4. 342648  
11738716\_ 2. 630328 2. 629991 2. 659348 2. 703474 2. 745124 2. 659348  
11738717\_ 3. 292968 3. 108361 2. 953033 3. 397634 3. 350251 3. 422312  
11738718\_ 1. 796027 1. 723962 1. 68158 1. 817622 1. 877963 1. 711774  
11738719\_ 2. 054512 1. 830594 1. 83393 2. 040367 1. 943394 2. 109666  
11738720\_ 6. 792935 6. 985878 6. 793647 7. 053509 7. 042876 6. 990464  
11738721\_ 5. 274879 4. 9226 4. 924856 4. 914651 5. 219309 5. 144441  
11738722\_ 5. 03882 5. 106032 5. 034437 5. 081447 5. 074905 5. 017935  
11738723\_ 6. 056102 6. 159771 5. 996126 6. 146746 6. 130366 6. 164406  
11738724\_ 5. 138314 5. 27375 5. 157133 5. 258506 5. 310026 5. 333166  
11738725\_ 3. 249924 3. 334538 3. 225886 3. 025972 3. 328145 3. 2961  
11738726\_ 6. 994995 7. 03249 6. 782872 7. 004104 7. 066639 7. 079405  
11738727\_ 5. 209745 5. 189628 5. 263887 5. 480966 5. 115709 5. 197559  
11738728\_ 4. 07944 4. 120789 4. 023816 4. 145335 4. 220042 4. 122446  
11738729\_ 3. 258528 3. 298309 3. 176164 3. 290188 3. 327184 3. 095169  
11738730\_ 4. 15519 4. 260696 4. 120037 4. 377777 4. 321919 4. 054288  
11738731\_ 4. 275764 4. 722119 4. 474437 4. 351311 4. 769818 4. 312534  
11738732\_ 4. 559155 4. 816582 4. 628771 5. 007819 4. 798511 4. 836073  
11738733\_ 4. 09044 4. 253212 4. 084496 4. 245734 4. 22029 4. 251249  
11738734\_ 4. 636951 4. 775961 4. 605905 4. 874998 4. 690702 4. 805229  
11738735\_ 3. 970949 3. 674107 3. 609072 3. 93146 3. 763602 3. 804614  
11738736\_ 5. 227957 5. 229261 5. 122191 5. 229261 5. 333723 5. 115151  
11738737\_ 4. 494756 4. 568226 4. 465603 4. 736759 4. 605595 4. 662304  
11738738\_ 3. 988923 3. 898711 3. 874651 4. 029874 3. 979563 3. 822545  
11738739\_ 4. 256572 4. 476039 4. 383788 4. 484206 4. 484206 4. 500235  
11738740\_ 7. 970126 8. 159316 7. 923796 8. 301873 8. 252412 8. 340985  
11738741\_ 5. 325352 5. 257356 5. 238065 5. 431557 5. 430547 5. 339936  
11738742\_ 4. 687388 4. 810142 4. 533572 4. 775322 4. 708014 4. 476255  
11738743\_ 3. 524672 3. 407801 3. 304167 3. 564936 3. 482556 3. 322981  
11738744\_ 5. 773146 5. 774231 5. 794286 5. 72902 5. 829649 5. 83274  
11738745\_ 5. 525221 5. 616458 5. 503476 5. 723241 5. 555255 5. 554436  
11738746\_ 6. 588136 6. 635755 6. 619536 6. 753043 6. 768484 6. 69032  
11738747\_ 3. 60731 3. 552977 3. 564576 3. 564576 3. 684232 3. 55476  
11738748\_ 4. 329946 4. 430388 4. 130231 4. 130647 4. 230691 4. 207867  
11738749\_ 4. 525889 4. 760509 4. 531047 4. 569632 4. 574054 4. 611854  
11738750\_ 2. 20589 2. 054369 2. 157872 2. 141047 2. 088869 2. 15844  
11738751\_ 2. 238985 2. 396648 2. 423134 2. 326189 2. 523106 2. 423134  
11738752\_ 5. 47469 5. 643713 5. 374866 5. 541972 5. 584813 5. 503475  
11738753\_ 5. 679268 5. 74751 5. 691932 5. 794286 5. 69415 5. 800253  
11738754\_ 5. 669797 5. 821514 5. 685442 5. 885203 5. 898004 5. 857862  
11738755\_ 5. 619145 5. 636598 5. 54423 5. 713614 5. 610655 5. 59944  
11738756\_ 4. 090755 4. 116649 3. 868419 4. 118272 4. 269937 4. 197168  
11738757\_ 3. 519104 3. 454888 3. 257234 3. 528737 3. 539475 3. 483698  
11738758\_ 4. 108592 4. 087606 3. 92392 4. 014786 4. 09071 4. 125063  
11738759\_ 4. 316558 4. 404284 4. 143381 4. 499887 4. 247194 4. 24648  
11738760\_ 5. 676409 5. 732315 5. 551742 5. 660277 5. 783196 5. 689626  
11738761\_ 5. 17288 5. 228627 4. 957023 5. 073932 5. 115155 5. 215738  
11738762\_ 5. 731497 5. 672285 5. 618871 5. 878206 5. 814528 5. 769652

11738763\_ 3. 834641 4. 416173 3. 904039 4. 082038 4. 124633 3. 784486  
11738764\_ 3. 417047 3. 429766 3. 533539 3. 632468 3. 649366 3. 552661  
11738765\_ 3. 838314 3. 681382 3. 972245 3. 807787 3. 703133 3. 96733  
11738766\_ 5. 156748 5. 229811 5. 108204 5. 3041 5. 114128 5. 132839  
11738767\_ 4. 981741 4. 984095 4. 77614 5. 063997 5. 094931 4. 968346  
11738768\_ 2. 770342 3. 058534 2. 954594 2. 845352 3. 029604 2. 930503  
11738769\_ 3. 443279 3. 280927 3. 620012 3. 593645 3. 359396 3. 643063  
11738770\_ 4. 61976 4. 717504 4. 553929 4. 622774 4. 673097 4. 70266  
11738771\_ 4. 447483 4. 415311 4. 219484 4. 335535 4. 32306 4. 46714  
11738772\_ 2. 380879 2. 310861 2. 477851 2. 450855 2. 196068 2. 57781  
11738773\_ 2. 663057 2. 776716 2. 590247 2. 874219 2. 688583 2. 890664  
11738774\_ 1. 978651 2. 284199 1. 950573 1. 984922 1. 984922 2. 104336  
11738775\_ 3. 123754 3. 084899 3. 09638 3. 162609 3. 247562 3. 290188  
11738776\_ 5. 797348 5. 996764 5. 751299 5. 977166 5. 969961 6. 022376  
11738777\_ 3. 31033 3. 476204 3. 068783 3. 35135 3. 19297 3. 315457  
11738778\_ 7. 340601 7. 400837 7. 303993 7. 32076 7. 250157 7. 164857  
11738779\_ 2. 157676 2. 157676 2. 245461 1. 976358 2. 072825 2. 054134  
11738780\_ 2. 360367 2. 420539 2. 47102 2. 604537 2. 511418 2. 559091  
11738781\_ 6. 78607 6. 940547 6. 794582 6. 880509 6. 890174 6. 815076  
11738782\_ 5. 496297 5. 548826 5. 52541 5. 548826 5. 608197 5. 564863  
11738783\_ 4. 030384 4. 019501 4. 030384 4. 40461 4. 190756 4. 171739  
11738784\_ 5. 071154 5. 301427 5. 197866 5. 347991 5. 340292 5. 397601  
11738785\_ 6. 335863 6. 323427 6. 285164 6. 332345 6. 27954 6. 318037  
11738786\_ 5. 751842 5. 805146 5. 763634 5. 784675 5. 686361 5. 718243  
11738787\_ 5. 885748 5. 935484 5. 920294 5. 98105 5. 906509 5. 932483  
11738788\_ 3. 614524 3. 690264 3. 656837 3. 614524 3. 770581 3. 515452  
11738789\_ 4. 538699 4. 658238 4. 78128 4. 757777 4. 928285 4. 844831  
11738790\_ 3. 209786 3. 030805 3. 446331 3. 21279 3. 46932 3. 398236  
11738791\_ 2. 361778 2. 237879 2. 267226 2. 267226 2. 267226 2. 226014  
11738792\_ 2. 663212 2. 393742 2. 376362 2. 606502 2. 389161 2. 402569  
11738793\_ 3. 043947 3. 160498 3. 096546 3. 177394 3. 245041 3. 260284  
11738794\_ 5. 536707 5. 625916 5. 395095 5. 670154 5. 633766 5. 727057  
11738795\_ 3. 012113 3. 203177 3. 222143 3. 292941 3. 265263 3. 32448  
11738796\_ 2. 47102 2. 462044 2. 425969 2. 462044 2. 298795 2. 437708  
11738797\_ 1. 957856 2. 199522 2. 133023 2. 036051 2. 140985 1. 898324  
11738798\_ 1. 919357 1. 95237 2. 108772 2. 008814 2. 299167 2. 084663  
11738799\_ 5. 914659 5. 81475 5. 877179 5. 844 5. 919727 5. 894697  
11738800\_ 7. 12407 7. 156521 7. 183172 5. 621829 5. 640737 5. 658885  
11738801\_ 3. 283321 3. 527336 3. 535243 3. 377102 3. 551594 3. 269474  
11738802\_ 1. 652101 2. 131936 2. 201959 2. 011055 1. 755242 1. 817035  
11738803\_ 3. 661003 3. 61543 3. 525057 3. 816987 3. 937023 3. 68893  
11738804\_ 5. 288508 5. 294155 5. 269232 5. 362403 5. 393054 5. 261899  
11738805\_ 3. 491576 3. 549111 3. 259387 3. 542235 3. 647674 3. 458232  
11738806\_ 6. 204182 6. 21424 6. 134555 6. 255364 6. 258345 6. 176182  
11738807\_ 8. 634597 8. 68728 8. 722572 8. 858132 8. 834534 8. 896551  
11738808\_ 8. 703322 8. 68765 8. 703322 7. 89654 7. 913872 7. 922803  
11738809\_ 8. 310387 8. 2395 8. 331604 8. 014896 8. 003798 7. 996091  
11738810\_ 1. 982685 2. 200164 2. 325244 2. 25483 2. 079884 2. 350829  
11738811\_ 5. 746702 5. 753747 5. 772363 5. 622397 5. 635925 5. 628066  
11738812\_ 5. 211248 5. 039342 5. 053043 5. 182072 5. 170092 4. 984669  
11738813\_ 5. 566629 5. 402348 5. 539382 5. 292629 5. 346195 5. 239082



11738814\_ 4. 833298 4. 934449 5. 064539 4. 934449 5. 06613 5. 073036  
11738815\_ 4. 266488 4. 313049 4. 307204 4. 355002 4. 350987 4. 489437  
11738816\_ 4. 184368 4. 28112 4. 04283 4. 135262 4. 369107 4. 467402  
11738817\_ 4. 14461 4. 067703 4. 095667 4. 048094 4. 201462 3. 992527  
11738818\_ 4. 064625 4. 160237 4. 086692 4. 019726 4. 111496 4. 184408  
11738819\_ 5. 234326 5. 108663 4. 923511 4. 913844 5. 094766 5. 029529  
11738820\_ 4. 791103 5. 005694 4. 822813 4. 883244 4. 790945 4. 940838  
11738821\_ 4. 268729 4. 269944 4. 275621 4. 37819 4. 347179 4. 445971  
11738822\_ 4. 468826 4. 056965 3. 922415 4. 223903 4. 133443 4. 166498  
11738823\_ 1. 77082 1. 556377 1. 686754 1. 693265 2. 05606 1. 880774  
11738824\_ 4. 924255 4. 862126 4. 761508 4. 960633 4. 799907 4. 866164  
11738825\_ 5. 849472 6. 028871 5. 999641 5. 970643 6. 105168 6. 027364  
11738826\_ 6. 321838 6. 369053 6. 321051 6. 296358 6. 364047 6. 338  
11738827\_ 2. 001245 1. 643722 2. 095256 1. 907313 1. 813189 2. 031072  
11738828\_ 6. 625588 6. 626897 6. 516519 6. 688869 6. 50355 6. 57967  
11738829\_ 8. 079096 8. 062501 8. 025227 7. 965988 7. 966576 7. 991594  
11738830\_ 4. 163655 4. 353562 4. 508437 4. 40461 4. 516888 4. 52373  
11738831\_ 2. 755781 2. 593667 2. 797907 2. 439735 2. 659208 2. 774902  
11738832\_ 3. 189043 3. 15778 3. 167554 3. 179606 3. 216314 3. 202344  
11738833\_ 5. 551513 5. 584813 5. 540731 5. 240266 5. 379547 5. 443153  
11738834\_ 4. 350428 4. 423001 4. 39465 4. 397461 4. 214172 4. 436468  
11738835\_ 4. 765422 4. 926859 4. 719719 5. 03934 4. 963137 4. 94619  
11738836\_ 2. 831983 2. 926 2. 94983 3. 025972 2. 760059 3. 012444  
11738837\_ 7. 203262 7. 149648 7. 153563 7. 118204 7. 11085 7. 104011  
11738838\_ 3. 34469 3. 437946 3. 46409 3. 510676 3. 437946 3. 43789  
11738839\_ 5. 443369 5. 449857 5. 392198 5. 532576 5. 610419 5. 582078  
11738840\_ 2. 312216 2. 289552 2. 233911 2. 389572 2. 308304 2. 292562  
11738841\_ 3. 945506 3. 965101 3. 955525 4. 040327 4. 040656 4. 252593  
11738842\_ 5. 739881 5. 796852 5. 643713 5. 800887 5. 759517 5. 84284  
11738843\_ 2. 040604 2. 078332 1. 97519 2. 006824 2. 134536 2. 040604  
11738844\_ 7. 211873 7. 222422 7. 195579 6. 36823 6. 456142 6. 604788  
11738845\_ 6. 728872 6. 598006 6. 6798 5. 955151 5. 954563 5. 969396  
11738846\_ 8. 48544 8. 315785 8. 403507 8. 034017 8. 045315 8. 05342  
11738847\_ 8. 806971 8. 77479 8. 933274 8. 535918 8. 52876 8. 530954  
11738848\_ 2. 367913 2. 464886 2. 362998 2. 367913 2. 297464 2. 367913  
11738849\_ 2. 164302 2. 183157 2. 167863 2. 552788 2. 412905 2. 175723  
11738850\_ 4. 598213 4. 848085 4. 500524 4. 703544 4. 487948 4. 606878  
11738851\_ 7. 437602 7. 332723 7. 415039 7. 357734 7. 352972 7. 322363  
11738852\_ 5. 332877 5. 259199 5. 200405 5. 138303 5. 196227 5. 3165  
11738853\_ 5. 627252 5. 66458 5. 644591 5. 634933 5. 657794 5. 679727  
11738854\_ 4. 473322 4. 559974 4. 601971 4. 663345 4. 599912 4. 571108  
11738855\_ 5. 74416 5. 724392 5. 858697 5. 730671 5. 674919 5. 724392  
11738856\_ 2. 08542 2. 08542 2. 147564 2. 282736 2. 306429 2. 147564  
11738857\_ 3. 519069 3. 433284 3. 3583 3. 539831 3. 593611 3. 76606  
11738858\_ 3. 705625 3. 689033 3. 775504 3. 925181 3. 735536 3. 822007  
11738859\_ 7. 187689 7. 226785 7. 218342 7. 197852 7. 194496 7. 167177  
11738860\_ 2. 278998 2. 36219 2. 193549 2. 488018 2. 181062 2. 274482  
11738861\_ 2. 47102 2. 180887 2. 164776 2. 26256 2. 234477 2. 275429  
11738862\_ 4. 808963 4. 98844 5. 093475 4. 870824 4. 846114 4. 848865  
11738863\_ 7. 571277 7. 581163 7. 623862 7. 794384 7. 810183 7. 847125  
11738864\_ 2. 89609 2. 926405 3. 093021 3. 334174 3. 014615 2. 943319

11738865\_ 5. 26393 5. 36758 5. 297498 5. 519981 5. 356032 5. 339673  
11738866\_ 4. 771461 4. 852759 4. 902502 5. 156303 5. 123403 4. 884885  
11738867\_ 3. 345077 3. 087907 3. 205393 3. 111461 3. 154172 3. 1563  
11738868\_ 4. 633252 4. 648779 4. 734976 4. 721579 4. 937971 4. 759251  
11738869\_ 4. 262117 4. 470392 4. 329819 4. 33704 4. 317848 4. 439609  
11738870\_ 2. 789321 2. 617346 2. 64542 2. 584239 2. 730794 2. 451937  
11738871\_ 7. 92115 7. 839595 7. 915753 7. 476218 7. 426934 7. 486512  
11738872\_ 8. 315427 8. 24266 8. 207293 7. 86636 7. 923396 7. 857533  
11738873\_ 3. 426003 3. 493038 3. 605756 3. 372035 3. 408942 3. 402467  
11738874\_ 5. 209001 4. 979186 4. 69222 4. 902813 5. 132033 4. 934222  
11738875\_ 2. 143319 2. 161102 2. 065154 2. 022768 2. 080448 2. 152372  
11738876\_ 8. 536386 8. 474915 8. 513577 8. 751071 8. 793316 8. 76502  
11738877\_ 4. 513762 4. 562349 4. 310177 4. 645714 4. 635442 4. 322114  
11738878\_ 3. 978961 3. 716654 4. 098046 3. 754516 4. 153853 3. 666398  
11738879\_ 6. 78513 6. 83617 6. 718799 6. 84383 6. 813052 6. 84693  
11738880\_ 2. 395442 2. 507295 2. 450848 2. 39773 2. 555923 2. 342582  
11738881\_ 3. 454228 3. 743972 3. 459465 3. 494644 3. 760369 3. 514989  
11738882\_ 4. 586548 4. 259539 4. 422865 4. 430723 4. 483511 4. 446094  
11738883\_ 5. 029529 5. 159778 5. 075693 5. 152682 5. 26034 5. 135515  
11738884\_ 3. 392941 3. 108146 3. 57572 3. 166478 2. 986434 2. 743327  
11738885\_ 2. 868314 2. 879325 2. 866445 2. 838101 2. 864576 2. 97045  
11738886\_ 2. 875569 2. 916835 2. 836793 2. 882962 2. 856708 2. 720328  
11738887\_ 7. 759027 7. 72436 7. 81161 7. 493997 7. 525294 7. 442602  
11738888\_ 7. 559092 7. 489335 7. 654745 7. 463928 7. 488363 7. 467131  
11738889\_ 5. 234776 5. 09311 5. 157024 4. 942359 5. 108005 5. 311285  
11738890\_ 4. 127677 4. 0647 4. 127677 4. 275543 4. 309295 4. 283268  
11738891\_ 5. 561661 5. 490722 5. 56506 5. 556876 5. 610159 5. 697145  
11738892\_ 9. 945907 9. 855259 9. 902177 8. 401654 8. 448036 8. 399964  
11738893\_ 8. 725453 8. 682921 8. 725453 7. 862215 7. 842972 7. 846841  
11738894\_ 4. 217359 4. 299618 4. 373656 4. 285574 4. 330745 4. 291397  
11738895\_ 2. 855241 3. 061177 3. 110186 3. 097516 3. 028977 3. 161136  
11738896\_ 3. 520993 3. 751627 3. 715911 3. 731944 3. 879309 3. 810318  
11738897\_ 5. 896692 5. 781235 5. 950197 6. 107954 6. 252021 6. 233003  
11738898\_ 3. 297459 3. 059016 3. 070562 3. 221452 3. 267248 3. 244254  
11738899\_ 4. 971614 4. 9226 4. 82481 5. 046259 5. 015702 4. 978923  
11738900\_ 12. 53896 12. 50912 12. 53922 12. 50767 12. 53117 12. 51851  
11738901\_ 3. 271186 3. 573539 3. 338142 3. 33002 3. 456937 3. 439381  
11738902\_ 3. 875858 3. 909593 4. 03355 4. 032531 4. 096321 4. 141599  
11738903\_ 3. 685075 3. 608374 3. 650723 3. 677733 3. 85689 4. 014351  
11738904\_ 3. 790018 3. 825654 3. 89682 3. 768309 3. 627235 3. 848706  
11738905\_ 4. 122431 4. 188737 4. 117613 4. 213226 4. 32227 4. 206874  
11738906\_ 8. 783446 8. 690252 8. 822114 8. 98243 9. 057897 9. 014177  
11738907\_ 5. 392233 5. 331819 5. 302952 5. 511066 5. 519776 5. 445472  
11738908\_ 2. 603233 2. 61903 2. 637434 2. 619259 2. 842826 2. 718322  
11738909\_ 3. 59952 3. 926305 3. 635924 3. 997131 3. 86918 3. 845958  
11738910\_ 5. 626296 5. 631943 5. 425529 5. 637152 5. 518396 5. 770291  
11738911\_ 2. 431107 2. 371203 2. 36422 2. 143434 2. 176915 2. 268062  
11738912\_ 2. 094017 2. 151189 2. 015154 2. 066892 2. 029836 2. 075398  
11738913\_ 2. 220643 2. 231347 2. 325279 2. 382966 2. 25483 2. 295037  
11738914\_ 2. 75213 2. 801099 2. 631366 2. 919081 2. 813472 2. 806894  
11738915\_ 2. 399106 2. 337523 2. 422603 2. 398179 2. 31404 2. 265073

11738916\_ 4. 288708 4. 291965 4. 447981 4. 40461 4. 433409 4. 166548  
11738917\_ 4. 617461 4. 662478 4. 776734 4. 819187 4. 756991 4. 488093  
11738918\_ 5. 999888 6. 037853 6. 085289 6. 152385 6. 104931 6. 147247  
11738919\_ 3. 658745 3. 471981 3. 754219 3. 439098 3. 439098 3. 780009  
11738920\_ 5. 079499 5. 395247 5. 498907 5. 162395 5. 313174 5. 260159  
11738921\_ 2. 781028 3. 044871 2. 942321 3. 32139 2. 977325 2. 969357  
11738922\_ 3. 843528 4. 082643 3. 839463 3. 700204 3. 910405 3. 621252  
11738923\_ 3. 337577 2. 83198 3. 025972 2. 991395 2. 991362 3. 053712  
11738924\_ 5. 111122 5. 181529 5. 073425 5. 038819 5. 208164 5. 167357  
11738925\_ 7. 216217 7. 289032 7. 129586 7. 487537 7. 342771 7. 263614  
11738926\_ 4. 806805 4. 798111 4. 723426 5. 081501 4. 94982 4. 814639  
11738927\_ 2. 747216 2. 528952 2. 516699 2. 563966 2. 610555 2. 63925  
11738928\_ 3. 296727 3. 340234 3. 296727 3. 296727 3. 398236 3. 180062  
11738929\_ 3. 16895 3. 474106 3. 290188 3. 384096 3. 398236 3. 530147  
11738930\_ 2. 981686 2. 950243 3. 02499 3. 11723 2. 831014 2. 894524  
11738931\_ 2. 487126 2. 678608 2. 874619 2. 779249 2. 661919 2. 494072  
11738932\_ 2. 993298 3. 287934 3. 557037 3. 322583 3. 40074 3. 366091  
11738933\_ 5. 219177 5. 100205 5. 106371 5. 295855 5. 219177 5. 382558  
11738934\_ 4. 669123 4. 968654 4. 954873 5. 224075 5. 148461 5. 152648  
11738935\_ 4. 888356 4. 960863 5. 189431 3. 032951 3. 317551 3. 18704  
11738936\_ 4. 644323 4. 107384 4. 502801 3. 389282 3. 226877 2. 800454  
11738937\_ 6. 573586 6. 494736 6. 493369 6. 762396 6. 822671 6. 707111  
11738938\_ 4. 094621 4. 082934 3. 900174 4. 067703 3. 979714 3. 99687  
11738939\_ 2. 330505 2. 349771 2. 133593 2. 137203 2. 239626 2. 271494  
11738940\_ 3. 829587 3. 77235 3. 749601 3. 841991 3. 823125 3. 765096  
11738941\_ 4. 621477 4. 539085 4. 479351 4. 583234 4. 511144 4. 571705  
11738942\_ 4. 591803 4. 808461 4. 359552 4. 885383 4. 723929 4. 568844  
11738943\_ 1. 895786 2. 050044 2. 235709 2. 233365 2. 468416 2. 384435  
11738944\_ 4. 637645 4. 465793 4. 304026 4. 297783 4. 400998 4. 330256  
11738945\_ 4. 435953 4. 344552 4. 307818 4. 634501 4. 438814 4. 51922  
11738946\_ 5. 073036 5. 389525 5. 047051 4. 998389 5. 175412 5. 11527  
11738947\_ 2. 875052 2. 758639 2. 6969 2. 820879 2. 751669 2. 783646  
11738948\_ 3. 866968 3. 207163 3. 381196 3. 732666 3. 74613 3. 648794  
11738949\_ 4. 742213 4. 723609 4. 812105 4. 76262 4. 722859 4. 759053  
11738950\_ 2. 15195 2. 109785 1. 912754 2. 079884 1. 932727 2. 113488  
11738951\_ 4. 79993 4. 905825 4. 772366 4. 586345 4. 353047 4. 595741  
11738952\_ 3. 618945 3. 58595 3. 742074 3. 54401 3. 494299 3. 58595  
11738953\_ 5. 59427 5. 633925 5. 621889 5. 556779 5. 625022 5. 590418  
11738954\_ 3. 699043 4. 071248 3. 874935 3. 52844 3. 968479 3. 966123  
11738955\_ 2. 383983 2. 566427 2. 353462 2. 538255 2. 493194 2. 643516  
11738956\_ 1. 92037 1. 995297 1. 995297 1. 995297 2. 028077 1. 995297  
11738957\_ 5. 278792 5. 409541 5. 374514 5. 39401 5. 344196 5. 325311  
11738958\_ 3. 727913 3. 97937 3. 742383 3. 874776 3. 894341 3. 978688  
11738959\_ 1. 833796 1. 933342 1. 995297 1. 929941 1. 720729 1. 845354  
11738960\_ 3. 918451 4. 067703 3. 832639 3. 970826 3. 983213 4. 042461  
11738961\_ 2. 145012 1. 805927 2. 074218 2. 074218 1. 883313 1. 977245  
11738962\_ 2. 669023 2. 508028 2. 549036 2. 642524 2. 474855 2. 725148  
11738963\_ 7. 033467 7. 020462 6. 971486 7. 156628 7. 117785 7. 085641  
11738964\_ 5. 5054 5. 446232 5. 243407 5. 482087 5. 531893 5. 538376  
11738965\_ 2. 850317 2. 767522 2. 792439 2. 851273 2. 767522 2. 878026  
11738966\_ 4. 331759 4. 381179 4. 310186 4. 3464 4. 274433 4. 258888

11738967\_ 3. 208248 3. 10211 2. 995886 3. 356773 3. 232983 3. 166084  
11738968\_ 3. 270582 3. 094461 3. 138626 3. 398236 3. 483122 3. 143807  
11738969\_ 3. 002119 2. 925419 2. 929758 3. 168889 3. 345558 2. 979077  
11738970\_ 2. 330523 2. 367203 2. 330524 2. 568963 2. 496272 2. 475966  
11738971\_ 2. 900844 2. 9448 2. 900844 3. 139283 3. 029334 3. 046286  
11738972\_ 3. 777014 3. 909593 3. 657106 3. 792937 3. 805879 3. 772034  
11738973\_ 6. 565027 6. 674692 6. 435775 6. 658997 6. 644988 6. 66807  
11738974\_ 5. 100757 5. 122777 5. 051508 5. 182328 5. 097774 5. 101501  
11738975\_ 4. 126213 4. 088313 4. 126213 4. 269872 4. 138048 4. 425078  
11738976\_ 1. 89724 2. 084719 2. 118418 2. 197335 2. 156921 2. 166593  
11738977\_ 6. 537658 6. 468868 6. 437814 6. 525951 6. 65784 6. 472207  
11738978\_ 6. 340692 6. 431763 6. 323848 6. 359244 6. 406314 6. 368698  
11738979\_ 6. 212809 6. 144575 5. 997478 6. 138806 6. 098973 6. 19366  
11738980\_ 4. 60068 4. 999088 4. 707134 4. 849569 4. 827122 5. 005235  
11738981\_ 4. 215838 4. 294926 4. 280244 4. 185756 4. 14268 4. 364497  
11738982\_ 4. 488349 4. 576952 4. 581467 4. 582532 4. 521125 4. 491612  
11738983\_ 7. 977765 7. 892766 7. 909345 7. 867451 7. 884314 7. 848565  
11738984\_ 9. 330447 9. 323332 9. 310506 9. 20357 9. 211065 9. 173153  
11738985\_ 6. 726652 6. 798274 6. 831439 6. 858316 6. 93752 6. 913823  
11738986\_ 6. 353598 6. 227098 6. 372252 6. 194326 6. 265951 6. 27977  
11738987\_ 5. 685989 5. 594984 5. 721273 5. 673859 5. 585056 5. 647656  
11738988\_ 7. 207989 7. 219314 7. 307582 7. 509076 7. 568749 7. 518086  
11738989\_ 8. 153949 8. 156795 8. 21338 8. 195909 8. 263322 8. 260373  
11738990\_ 7. 618586 7. 629156 7. 6006 7. 775221 7. 763637 7. 838831  
11738991\_ 5. 480966 5. 558892 5. 393193 5. 544225 5. 658069 5. 616919  
11738992\_ 5. 561092 5. 841177 5. 580827 5. 83489 5. 894697 5. 890444  
11738993\_ 2. 683896 2. 742373 2. 605516 2. 668525 2. 798956 2. 68538  
11738994\_ 5. 679543 5. 773742 5. 673837 5. 805522 5. 87917 5. 754755  
11738995\_ 6. 966289 6. 96429 6. 966289 6. 950638 6. 983832 7. 013143  
11738996\_ 9. 471424 9. 433475 9. 406253 9. 344433 9. 359569 9. 339679  
11738997\_ 10. 25187 10. 16872 10. 21391 10. 05647 10. 04505 10. 06618  
11738998\_ 6. 636001 6. 513971 6. 460865 6. 56939 6. 4972 6. 355744  
11738999\_ 8. 767992 8. 683745 8. 729806 8. 753397 8. 763302 8. 746614  
11739000\_ 11. 12992 11. 09437 11. 10434 11. 2957 11. 28051 11. 32214  
11739001\_ 6. 959413 6. 907829 6. 965127 6. 787476 6. 851484 6. 900759  
11739002\_ 10. 50902 10. 47731 10. 46316 10. 93768 10. 95991 10. 89451  
11739003\_ 7. 297072 7. 229456 7. 261581 7. 734589 7. 800579 7. 75129  
11739004\_ 7. 941508 7. 774754 7. 875437 8. 430752 8. 476045 8. 4755  
11739005\_ 10. 80595 10. 8717 10. 81455 11. 47262 11. 33391 11. 33948  
11739006\_ 11. 2124 11. 21406 11. 21421 11. 71539 11. 67156 11. 68449  
11739007\_ 9. 547192 9. 549184 9. 531498 10. 2128 10. 12262 10. 13439  
11739008\_ 10. 16463 10. 07927 10. 09614 10. 60484 10. 64282 10. 63846  
11739009\_ 9. 922184 9. 900924 9. 955354 9. 771744 9. 817973 9. 823057  
11739010\_ 6. 245117 6. 303224 6. 321246 6. 346669 6. 582012 6. 351758  
11739011\_ 10. 06222 10. 05641 10. 0219 10. 33474 10. 33945 10. 32443  
11739012\_ 7. 933376 7. 925127 7. 90329 8. 08606 8. 178282 8. 125137  
11739013\_ 8. 473269 8. 353998 8. 42189 8. 637885 8. 61973 8. 667175  
11739014\_ 8. 392821 8. 321954 8. 384017 8. 406639 8. 405893 8. 413799  
11739015\_ 3. 077693 2. 939483 2. 874619 3. 255062 3. 31628 3. 16113  
11739016\_ 2. 25005 2. 26152 2. 235709 2. 313491 2. 138567 2. 25005  
11739017\_ 10. 09479 10. 04738 10. 13183 10. 10098 10. 16186 10. 11441

11739018\_ 6. 754679 6. 688721 6. 665927 6. 618393 6. 510356 6. 669498  
11739019\_ 8. 957814 8. 907757 8. 920358 9. 052128 9. 108276 9. 07529  
11739020\_ 6. 679923 6. 802384 6. 742633 6. 742633 6. 675372 6. 742633  
11739021\_ 6. 426379 6. 480164 6. 447022 6. 423798 6. 481171 6. 404774  
11739022\_ 5. 919698 5. 789947 5. 81493 5. 831248 5. 982582 5. 837479  
11739023\_ 9. 41393 9. 356866 9. 418033 9. 3726 9. 387031 9. 379981  
11739024\_ 9. 122091 9. 034548 9. 119486 9. 12497 9. 19478 9. 132452  
11739025\_ 7. 90363 7. 85718 7. 860027 8. 669864 8. 615785 8. 653158  
11739026\_ 9. 640033 9. 644348 9. 598324 10. 41461 10. 40432 10. 36693  
11739027\_ 4. 072834 3. 903864 4. 086359 4. 307103 4. 24372 4. 140788  
11739028\_ 11. 92348 11. 85635 11. 88357 11. 66578 11. 67863 11. 68093  
11739029\_ 11. 65557 11. 6035 11. 64405 11. 42055 11. 41293 11. 4123  
11739030\_ 10. 71195 10. 63646 10. 67303 10. 47063 10. 49221 10. 43839  
11739031\_ 10. 52244 10. 5509 10. 51286 10. 61369 10. 59625 10. 52494  
11739032\_ 11. 14755 11. 14664 11. 13339 11. 18348 11. 18042 11. 16333  
11739033\_ 10. 05856 9. 976141 10. 03428 10. 1612 10. 14233 10. 22283  
11739034\_ 10. 30612 10. 3352 10. 32676 10. 5244 10. 4312 10. 44836  
11739035\_ 9. 57211 9. 52019 9. 560178 9. 745082 9. 712417 9. 652898  
11739036\_ 8. 493508 8. 45987 8. 480055 8. 638546 8. 688399 8. 610135  
11739037\_ 8. 192154 8. 161284 8. 262952 8. 477917 8. 322692 8. 383336  
11739038\_ 2. 620271 2. 649839 2. 832032 2. 800139 2. 636195 2. 677115  
11739039\_ 3. 350366 3. 531219 3. 290188 3. 616941 3. 627464 3. 586253  
11739040\_ 8. 820839 8. 79894 8. 820459 8. 432643 8. 36507 8. 393223  
11739041\_ 8. 710689 8. 668965 8. 748944 8. 350749 8. 365572 8. 341595  
11739042\_ 4. 905892 4. 877016 4. 733986 4. 646499 4. 589133 4. 779872  
11739043\_ 5. 134283 5. 036979 5. 115102 4. 772366 4. 946308 5. 000729  
11739044\_ 3. 598491 3. 560609 3. 661575 3. 544957 3. 358316 3. 497309  
11739045\_ 5. 590656 5. 587387 5. 47758 5. 592355 5. 529005 5. 428714  
11739046\_ 4. 349414 4. 349414 4. 218475 4. 349644 4. 358865 4. 396023  
11739047\_ 4. 175479 4. 274235 4. 392412 4. 266159 4. 275543 4. 347179  
11739048\_ 3. 221164 2. 906088 2. 847304 2. 695532 2. 852703 2. 873722  
11739049\_ 3. 755126 3. 623611 3. 885275 3. 745366 3. 443039 3. 720791  
11739050\_ 4. 403099 4. 535022 4. 4179 3. 686039 3. 800917 3. 981661  
11739051\_ 4. 771791 4. 884651 4. 742525 4. 886925 4. 74574 4. 941036  
11739052\_ 5. 596423 5. 624209 5. 657379 5. 543713 5. 649766 5. 619463  
11739053\_ 3. 583224 3. 392319 3. 398236 3. 581007 3. 489849 3. 705625  
11739054\_ 4. 529711 4. 477896 4. 592917 4. 869168 4. 833904 4. 830758  
11739055\_ 6. 06608 6. 213166 5. 989115 6. 218105 6. 204407 6. 200372  
11739056\_ 3. 48366 3. 472564 3. 536799 3. 497463 3. 312151 3. 419351  
11739057\_ 9. 867291 9. 817181 9. 81556 9. 718771 9. 678591 9. 666203  
11739058\_ 6. 357349 6. 539999 6. 391011 6. 431359 6. 359536 6. 397509  
11739059\_ 10. 23041 10. 19387 10. 24714 10. 19398 10. 14086 10. 1649  
11739060\_ 7. 382221 7. 287833 7. 449852 7. 4878 7. 494038 7. 556458  
11739061\_ 9. 535867 9. 590266 9. 53396 9. 845893 9. 847278 9. 759082  
11739062\_ 9. 909319 9. 895312 9. 893814 10. 05114 9. 944591 9. 960103  
11739063\_ 9. 492904 9. 481762 9. 530078 9. 629615 9. 6587 9. 727265  
11739064\_ 10. 50612 10. 49517 10. 53571 10. 48784 10. 49948 10. 48868  
11739065\_ 8. 916246 8. 890375 8. 905398 8. 700613 8. 761951 8. 679081  
11739066\_ 7. 7073 7. 536313 7. 56959 8. 321033 8. 315058 8. 301509  
11739067\_ 4. 874234 4. 949023 4. 965137 5. 134161 4. 95249 5. 035337  
11739068\_ 8. 614458 8. 606749 8. 60265 8. 724463 8. 681513 8. 626043

11739069\_ 10.12138 10.09393 10.10629 9.988485 10.01808 10.04733  
11739070\_ 5.415237 5.465406 5.307337 5.556615 5.63764 5.520744  
11739071\_ 6.63246 6.466557 6.680597 6.383179 6.384792 6.365976  
11739072\_ 7.921679 7.818982 7.874439 7.679347 7.759563 7.832503  
11739073\_ 6.922773 7.136224 7.165974 7.778495 7.81268 7.700509  
11739074\_ 8.344493 8.34656 8.402233 8.851043 8.855469 8.87689  
11739075\_ 6.223908 6.159771 6.267652 6.257958 6.354713 6.360857  
11739076\_ 6.065582 5.890164 6.263868 6.39814 6.258405 6.280027  
11739077\_ 9.156214 9.171164 9.18783 9.2613 9.228652 9.276585  
11739078\_ 9.184274 9.191588 9.228406 9.183623 9.156885 9.182494  
11739079\_ 7.20808 7.176244 7.267304 7.777277 7.831451 7.809559  
11739080\_ 8.312172 8.425759 8.389595 7.56846 7.493974 7.42324  
11739081\_ 8.536896 8.503788 8.56936 7.605372 7.65911 7.613446  
11739082\_ 7.526393 7.47698 7.516587 7.913119 7.925345 7.872576  
11739083\_ 5.923615 5.799001 5.965817 6.061656 6.080811 6.193016  
11739084\_ 2.095256 2.073257 2.012437 2.079884 2.157712 2.18238  
11739085\_ 9.145532 9.083006 9.14173 8.494328 8.605461 8.552009  
11739086\_ 6.225327 6.276696 6.278674 6.309437 6.212465 6.284856  
11739087\_ 9.091725 9.012145 9.101087 8.888004 8.84466 8.890518  
11739088\_ 8.586001 8.50039 8.579468 8.389408 8.32064 8.350825  
11739089\_ 5.614563 5.523446 5.480734 5.723241 5.654524 5.720235  
11739090\_ 9.19173 9.12897 9.163996 9.119487 9.16259 9.12897  
11739091\_ 10.64101 10.6901 10.69588 10.60789 10.5996 10.55262  
11739092\_ 9.323332 9.261615 9.317356 9.263673 9.12866 9.171804  
11739093\_ 9.299943 9.226321 9.291361 9.477791 9.450363 9.401136  
11739094\_ 4.28126 4.373982 4.416893 4.422153 4.519477 4.460538  
11739095\_ 6.997088 6.90814 7.049445 7.127714 7.15421 7.095527  
11739096\_ 8.317331 8.28942 8.261325 8.453305 8.508683 8.489821  
11739097\_ 6.719464 6.719464 6.636733 6.831733 6.882741 6.85596  
11739098\_ 4.235048 4.497401 4.385772 4.456395 4.446975 4.415744  
11739099\_ 6.689357 6.807558 6.691922 6.739522 6.87253 6.958036  
11739100\_ 8.639546 8.628731 8.719126 8.433949 8.456776 8.48782  
11739101\_ 9.306973 9.297874 9.2785 9.177012 9.126948 9.056206  
11739102\_ 5.922159 5.911185 6.01121 5.911243 5.905659 5.798613  
11739103\_ 8.076734 7.98032 7.99975 7.868155 7.795201 7.851643  
11739104\_ 8.83473 8.796431 8.803361 8.65396 8.605461 8.654618  
11739105\_ 8.269662 8.31059 8.28615 8.452564 8.494502 8.399839  
11739106\_ 8.753507 8.837095 8.76969 8.55133 8.53006 8.512933  
11739107\_ 8.129624 8.146548 8.138909 7.87492 7.811004 7.829269  
11739108\_ 5.958874 5.956774 5.926784 6.067523 6.264862 6.164352  
11739109\_ 5.54808 5.695166 5.539135 5.61065 5.620014 5.61065  
11739110\_ 6.064942 6.101749 6.064887 6.20559 6.031305 6.245155  
11739111\_ 4.614457 4.779636 4.446435 4.843387 4.842469 4.763543  
11739112\_ 9.06856 9.016883 9.015401 9.034066 9.064785 9.048181  
11739113\_ 9.019512 8.893702 8.966022 9.288997 9.325657 9.297617  
11739114\_ 5.160378 5.196769 4.881817 5.015414 4.998311 4.988337  
11739115\_ 5.234999 5.247367 5.208332 5.13939 5.136209 5.053425  
11739116\_ 7.874515 7.841603 7.924099 7.422344 7.214261 7.250705  
11739117\_ 7.095742 6.799047 7.021243 5.954081 5.940991 5.981512  
11739118\_ 6.905762 6.887881 6.921051 7.078262 7.08741 6.955653  
11739119\_ 6.735761 6.691705 6.890611 6.839141 6.922773 6.886652

11739120\_ 8. 800345 8. 721082 8. 771836 8. 920005 8. 880488 8. 899201  
11739121\_ 6. 612265 6. 565751 6. 607945 6. 765181 6. 838527 6. 825159  
11739122\_ 2. 671947 2. 81288 2. 79185 2. 412828 2. 597916 2. 402176  
11739123\_ 8. 806408 8. 691981 8. 751032 8. 724745 8. 775686 8. 773178  
11739124\_ 7. 351489 7. 209565 7. 240913 7. 368084 7. 259244 7. 280307  
11739125\_ 9. 544955 9. 449436 9. 47863 9. 190466 9. 125831 9. 157755  
11739126\_ 7. 09059 7. 229904 7. 072985 7. 042354 7. 050589 7. 107387  
11739127\_ 5. 852193 5. 866126 5. 702307 6. 018553 5. 736831 5. 922714  
11739128\_ 5. 67612 5. 750863 5. 751446 5. 714059 5. 771027 5. 785023  
11739129\_ 3. 122119 3. 06224 2. 965103 3. 055748 3. 096583 3. 054643  
11739130\_ 5. 177019 5. 024482 5. 222216 5. 326425 5. 29236 5. 534732  
11739131\_ 6. 214023 5. 948949 6. 19473 6. 064761 6. 194702 6. 056148  
11739132\_ 8. 884924 8. 788974 8. 899032 8. 910014 8. 949326 8. 939186  
11739133\_ 3. 786705 3. 722764 3. 88227 4. 082005 3. 754644 4. 007604  
11739134\_ 10. 35334 10. 2807 10. 30676 9. 829961 9. 799204 9. 729846  
11739135\_ 9. 937126 9. 965777 9. 875567 9. 487608 9. 466743 9. 38907  
11739136\_ 4. 028711 4. 151573 4. 143258 4. 125928 4. 025156 4. 233232  
11739137\_ 7. 568632 7. 516974 7. 694353 8. 694014 8. 579329 8. 647378  
11739138\_ 7. 021109 6. 998064 6. 901506 7. 291554 7. 394692 7. 342771  
11739139\_ 5. 909381 5. 78026 5. 917452 6. 715606 6. 709027 6. 672191  
11739140\_ 2. 344303 2. 347643 2. 528121 2. 284372 2. 550745 2. 436248  
11739141\_ 5. 101964 5. 183975 4. 997388 5. 299929 4. 921725 5. 104901  
11739142\_ 9. 58276 9. 596076 9. 607664 9. 793121 9. 760712 9. 703309  
11739143\_ 6. 686759 6. 712878 6. 773611 6. 450711 6. 486538 6. 510598  
11739144\_ 8. 323147 8. 258319 8. 366072 8. 160397 8. 178527 8. 243423  
11739145\_ 6. 711468 6. 723737 6. 846892 6. 503983 6. 579831 6. 536375  
11739146\_ 7. 347489 7. 272047 7. 311046 7. 87369 7. 88748 7. 949523  
11739147\_ 8. 499624 8. 412902 8. 608324 8. 693177 8. 783622 8. 780761  
11739148\_ 4. 496783 4. 697194 4. 560963 4. 58217 4. 576932 4. 556814  
11739149\_ 6. 326331 6. 134778 6. 269538 5. 936715 6. 044588 5. 937232  
11739150\_ 5. 948076 6. 011304 6. 085553 5. 900588 6. 019708 5. 984902  
11739151\_ 6. 806035 6. 835961 6. 801776 6. 956454 6. 976095 6. 957592  
11739152\_ 8. 144651 8. 132128 8. 258802 8. 294377 8. 315213 8. 288817  
11739153\_ 8. 297252 8. 195009 8. 281521 8. 1636 8. 114533 8. 155229  
11739154\_ 5. 568983 5. 477655 5. 503252 5. 768053 5. 686361 5. 554436  
11739155\_ 8. 267278 8. 218961 8. 247447 8. 372006 8. 341196 8. 364412  
11739156\_ 8. 823582 8. 8163 8. 818059 8. 562173 8. 555089 8. 494278  
11739157\_ 9. 243335 9. 18465 9. 278892 8. 942638 8. 947051 8. 936253  
11739158\_ 6. 74739 6. 613934 6. 695739 6. 727649 6. 686431 6. 686431  
11739159\_ 7. 537143 7. 589003 7. 679808 7. 612358 7. 594683 7. 624628  
11739160\_ 5. 553345 5. 68718 5. 50405 5. 590981 5. 743878 5. 695984  
11739161\_ 6. 880987 6. 797799 6. 822819 6. 860854 6. 915408 6. 924453  
11739162\_ 3. 622524 3. 4082 3. 481202 3. 422691 3. 436341 3. 655687  
11739163\_ 2. 006182 1. 995297 1. 995297 2. 027952 1. 995297 1. 995297  
11739164\_ 7. 080935 7. 067667 7. 117759 7. 265601 7. 323413 7. 330217  
11739165\_ 6. 177485 6. 141074 6. 053422 6. 250175 6. 357329 6. 333077  
11739166\_ 8. 16399 8. 160217 8. 185027 7. 375535 7. 32298 7. 280725  
11739167\_ 4. 89334 5. 069983 4. 996223 4. 965436 5. 211112 5. 039837  
11739168\_ 3. 057094 3. 074657 2. 800126 3. 015272 3. 109273 3. 065005  
11739169\_ 7. 202867 7. 178753 7. 312784 7. 156712 7. 317182 7. 238357  
11739170\_ 6. 838412 6. 886643 6. 831667 6. 924362 6. 917009 6. 900782

11739171\_ 6.406552 6.34149 6.26063 6.885981 6.722686 6.841427  
11739172\_ 7.252402 7.197297 7.212651 7.467354 7.485332 7.552244  
11739173\_ 7.967487 7.90707 7.959274 7.489445 7.570469 7.501352  
11739174\_ 8.530049 8.470254 8.495691 8.079645 8.055451 8.14324  
11739175\_ 11.02584 10.98033 11.01437 11.18699 11.23553 11.13876  
11739176\_ 7.352736 7.246888 7.27353 6.92251 6.963337 6.933886  
11739177\_ 6.519543 6.575087 6.591467 5.97661 6.025652 6.048287  
11739178\_ 5.801778 5.789947 5.577287 5.672924 5.720347 5.540727  
11739179\_ 6.006032 5.946189 5.811228 6.007393 5.995445 5.872987  
11739180\_ 5.926048 5.933797 5.892661 5.977193 6.01103 5.911565  
11739181\_ 7.092393 7.100757 7.064685 7.078122 7.08905 7.087979  
11739182\_ 8.84332 8.837081 8.890563 8.352603 8.364721 8.425341  
11739183\_ 6.64513 6.543082 6.551671 5.999736 6.173477 6.17981  
11739184\_ 8.693151 8.653226 8.686091 8.634949 8.689251 8.693752  
11739185\_ 8.527609 8.516856 8.524347 8.509409 8.586422 8.531691  
11739186\_ 4.375801 4.405571 4.352647 4.342288 4.284338 4.415744  
11739187\_ 6.680899 6.555176 6.584502 6.475647 6.339869 6.379012  
11739188\_ 8.3858 8.321319 8.300159 8.462597 8.511074 8.500875  
11739189\_ 8.445324 8.422766 8.489817 7.892913 7.954114 7.91442  
11739190\_ 7.715356 7.742084 7.759217 7.209106 7.273213 7.187929  
11739191\_ 7.156259 7.05918 7.090418 6.670641 6.670519 6.611507  
11739192\_ 4.584933 4.542515 4.675048 4.636112 4.553449 4.542515  
11739193\_ 8.402443 8.386874 8.40066 8.037498 8.084117 8.027427  
11739194\_ 9.06177 9.137708 9.139676 8.781028 8.797068 8.713099  
11739195\_ 5.772898 5.670281 5.693241 5.715875 5.760456 5.853772  
11739196\_ 7.596144 7.612033 7.698631 8.475037 8.388693 8.460516  
11739197\_ 6.971154 6.903103 6.956317 6.860791 6.730915 6.809598  
11739198\_ 5.981426 5.827087 5.937521 5.590273 5.698593 5.665861  
11739199\_ 9.614619 9.544412 9.597733 9.756334 9.826011 9.7679  
11739200\_ 10.16117 10.1475 10.14509 10.29071 10.32734 10.3371  
11739201\_ 10.99659 10.9635 11.01825 11.17236 11.16868 11.12714  
11739202\_ 5.066151 5.344027 5.209195 5.340731 5.329988 5.168813  
11739203\_ 6.899818 6.907378 6.832384 6.904305 7.042958 6.946855  
11739204\_ 8.757162 8.696754 8.808511 8.627516 8.564572 8.627168  
11739205\_ 5.873288 5.815789 5.800649 5.5 5.48634 5.502342  
11739206\_ 8.681179 8.701198 8.726536 8.544301 8.554174 8.569011  
11739207\_ 5.893349 5.909932 5.796945 6.084918 6.015893 5.861413  
11739208\_ 5.457509 5.518169 5.559205 5.500483 5.523406 5.589814  
11739209\_ 8.265986 8.183721 8.274232 7.631025 7.610095 7.642618  
11739210\_ 1.906861 2.140472 2.103792 2.15899 2.179039 2.445945  
11739211\_ 10.1239 10.14706 10.14629 10.46762 10.35833 10.26155  
11739212\_ 9.023608 8.947886 9.083843 8.532824 8.515835 8.546747  
11739213\_ 7.757937 7.722457 7.784169 7.555259 7.547824 7.607536  
11739214\_ 6.015128 5.863551 5.959292 6.051075 6.186106 6.17345  
11739215\_ 5.317154 5.435076 5.280547 5.569574 5.533338 5.462985  
11739216\_ 5.041437 5.15772 5.329406 4.223301 4.201758 4.080107  
11739217\_ 6.270598 6.046312 6.145807 5.552924 5.579039 5.702282  
11739218\_ 7.915632 7.754335 7.919906 8.45133 8.517918 8.466555  
11739219\_ 7.618775 7.576483 7.475721 8.321483 8.208689 8.247218  
11739220\_ 5.957091 6.156939 6.049191 6.387729 6.218693 6.425155  
11739221\_ 6.345175 6.403917 6.296705 6.682644 6.655246 6.494282



11739222\_ 6. 667603 6. 32429 6. 497316 5. 643713 5. 748706 5. 704919  
11739223\_ 6. 58139 6. 390424 6. 769099 5. 907669 5. 92461 5. 942364  
11739224\_ 6. 366813 6. 466292 6. 541665 5. 652317 5. 708822 5. 773464  
11739225\_ 7. 266224 7. 22414 7. 183931 7. 317368 7. 330508 7. 297187  
11739226\_ 8. 945917 8. 900761 8. 877757 8. 295271 8. 219042 8. 251819  
11739227\_ 7. 326385 7. 267995 7. 247704 7. 74282 7. 747227 7. 765735  
11739228\_ 8. 325314 8. 311851 8. 332269 8. 799609 8. 759011 8. 749165  
11739229\_ 7. 572359 7. 517022 7. 622154 7. 756556 7. 701685 7. 780234  
11739230\_ 7. 756266 7. 662307 7. 783199 7. 432924 7. 467753 7. 487733  
11739231\_ 8. 099282 8. 062277 8. 099443 8. 339828 8. 290155 8. 262148  
11739232\_ 5. 271567 5. 451585 5. 005325 5. 360989 5. 233093 5. 213016  
11739233\_ 8. 631219 8. 515229 8. 60719 8. 375468 8. 401062 8. 352997  
11739234\_ 8. 31293 8. 32484 8. 292986 8. 057305 8. 028391 8. 117899  
11739235\_ 7. 317368 7. 297635 7. 245682 6. 673918 6. 682435 6. 814707  
11739236\_ 8. 451843 8. 498021 8. 505829 8. 260947 8. 241424 8. 155317  
11739237\_ 9. 416531 9. 477035 9. 404901 9. 12205 9. 097853 9. 119205  
11739238\_ 8. 445067 8. 342868 8. 385615 8. 478902 8. 4472 8. 451328  
11739239\_ 8. 054788 7. 971988 7. 938134 7. 556285 7. 536532 7. 572202  
11739240\_ 7. 992733 7. 87446 7. 930708 7. 592813 7. 633116 7. 63417  
11739241\_ 7. 472989 7. 415804 7. 477338 7. 109777 7. 073616 7. 15442  
11739242\_ 8. 775668 8. 733966 8. 852546 8. 431118 8. 349868 8. 420918  
11739243\_ 8. 316751 8. 337289 8. 358938 7. 849401 7. 838786 7. 885942  
11739244\_ 7. 812684 7. 777589 7. 75849 7. 45504 7. 442433 7. 568932  
11739245\_ 6. 712111 6. 594011 6. 654725 6. 741258 6. 789139 6. 684164  
11739246\_ 6. 6184 6. 714177 6. 665774 6. 525645 6. 3656 6. 597699  
11739247\_ 8. 325544 8. 404263 8. 304603 8. 211053 8. 143783 7. 998169  
11739248\_ 5. 103159 5. 11527 5. 049275 5. 061863 5. 11527 5. 009577  
11739249\_ 2. 609166 2. 708405 2. 660404 2. 814519 2. 835355 2. 843525  
11739250\_ 6. 886111 6. 814067 6. 820132 7. 389461 7. 36883 7. 380638  
11739251\_ 10. 2551 10. 18946 10. 24892 10. 29557 10. 29322 10. 2597  
11739252\_ 4. 393362 4. 302785 4. 397641 4. 426813 4. 442645 4. 379367  
11739253\_ 8. 106861 8. 090421 8. 149747 8. 047084 8. 076485 8. 113608  
11739254\_ 8. 332503 8. 308509 8. 32879 8. 190752 8. 171186 8. 186877  
11739255\_ 9. 560483 9. 543666 9. 488834 9. 721023 9. 510235 9. 472322  
11739256\_ 7. 078356 7. 085603 7. 188241 6. 805205 6. 81128 6. 80328  
11739257\_ 7. 027233 7. 030358 7. 029251 6. 99311 6. 975224 6. 935679  
11739258\_ 3. 597927 3. 52469 3. 4425 3. 604218 3. 648842 3. 355712  
11739259\_ 6. 695751 6. 691094 6. 651372 6. 70374 6. 676879 6. 688077  
11739260\_ 9. 252432 9. 186417 9. 268889 9. 149833 9. 074965 9. 13453  
11739261\_ 7. 981557 8. 003138 8. 059416 9. 02125 8. 888492 8. 922371  
11739262\_ 8. 715346 8. 627254 8. 738574 8. 313221 8. 370771 8. 30975  
11739263\_ 6. 01487 5. 933719 6. 066155 5. 563926 5. 436666 5. 321916  
11739264\_ 6. 950075 6. 857514 6. 929544 6. 449994 6. 575406 6. 528855  
11739265\_ 7. 432733 7. 467407 7. 366997 7. 451805 7. 452576 7. 445442  
11739266\_ 5. 039918 5. 209143 4. 980052 5. 315267 5. 139983 5. 13553  
11739267\_ 4. 221833 4. 356749 4. 51014 4. 156952 4. 40461 4. 421864  
11739268\_ 8. 850403 8. 788954 8. 917854 8. 540441 8. 536454 8. 604952  
11739269\_ 7. 563476 7. 411022 7. 509402 7. 154662 7. 034144 7. 172977  
11739270\_ 6. 75338 6. 810537 6. 834496 7. 20404 7. 222164 7. 257139  
11739271\_ 9. 176057 8. 998286 9. 099607 9. 51226 9. 454972 9. 525421  
11739272\_ 8. 527873 8. 43962 8. 416905 8. 86909 8. 88004 8. 904369

11739273\_ 6. 89749 6. 849603 6. 779025 6. 714534 6. 651176 6. 778276  
11739274\_ 6. 835194 6. 7414 6. 898793 6. 438794 6. 39013 6. 462761  
11739275\_ 7. 881135 7. 926761 7. 936581 7. 968638 8. 007848 7. 996679  
11739276\_ 5. 293574 5. 426503 5. 271472 5. 3515 5. 34757 5. 203178  
11739277\_ 7. 249462 7. 183583 7. 195049 7. 183069 7. 114614 7. 27447  
11739278\_ 9. 578771 9. 546537 9. 58513 9. 543362 9. 586518 9. 496844  
11739279\_ 4. 066482 4. 049778 4. 001238 4. 015057 4. 024732 4. 040103  
11739280\_ 5. 50247 5. 643713 5. 484352 5. 548926 5. 538632 5. 495418  
11739281\_ 7. 700803 7. 566498 7. 689772 7. 048035 7. 106749 7. 131437  
11739282\_ 7. 980745 8. 012017 7. 986925 7. 592982 7. 474342 7. 42007  
11739283\_ 6. 796597 6. 757568 6. 795064 6. 234404 6. 22513 6. 159765  
11739284\_ 7. 240038 7. 131103 7. 19459 6. 61958 6. 801566 6. 669856  
11739285\_ 8. 463329 8. 391707 8. 34057 9. 150265 9. 117474 9. 116182  
11739286\_ 8. 209194 8. 188946 8. 209222 7. 708254 7. 725893 7. 741433  
11739287\_ 7. 632959 7. 566077 7. 692504 7. 548943 7. 513399 7. 507038  
11739288\_ 6. 165529 5. 984445 6. 164183 5. 597385 5. 778627 5. 693952  
11739289\_ 7. 480218 7. 457396 7. 484548 7. 327368 7. 317579 7. 378249  
11739290\_ 9. 542417 9. 533152 9. 519469 9. 464536 9. 431124 9. 4355  
11739291\_ 4. 658534 4. 934152 4. 833403 4. 820679 4. 495187 4. 691525  
11739292\_ 3. 923965 4. 061381 3. 838289 4. 149868 4. 044002 4. 055456  
11739293\_ 5. 709048 5. 7815 5. 866213 6. 149305 6. 111078 6. 08079  
11739294\_ 6. 796838 6. 809408 6. 806831 6. 710716 6. 780282 6. 724903  
11739295\_ 4. 72519 4. 667004 4. 643717 4. 830697 4. 655128 4. 872674  
11739296\_ 5. 713646 5. 682028 5. 583016 5. 827136 5. 961578 5. 797172  
11739297\_ 8. 525123 8. 441082 8. 490237 8. 171586 8. 290059 8. 221143  
11739298\_ 8. 013191 7. 984761 8. 073251 8. 109369 8. 05075 8. 058152  
11739299\_ 5. 315583 5. 550484 5. 400572 5. 410346 5. 465506 5. 324425  
11739300\_ 9. 214606 9. 161565 9. 191027 9. 072967 9. 123593 9. 007214  
11739301\_ 6. 620216 6. 732504 6. 705022 6. 991691 6. 928354 7. 002357  
11739302\_ 9. 047747 9. 035879 9. 045777 9. 092418 9. 109464 9. 082438  
11739303\_ 8. 799986 8. 763034 8. 831024 8. 363842 8. 327845 8. 305279  
11739304\_ 7. 557946 7. 455854 7. 489667 6. 920663 6. 878538 6. 896064  
11739305\_ 8. 193827 8. 085767 8. 159521 8. 688499 8. 662018 8. 743671  
11739306\_ 6. 585203 6. 595527 6. 525812 6. 665896 6. 414944 6. 545816  
11739307\_ 9. 088038 9. 065616 9. 106332 9. 110661 9. 061274 9. 060239  
11739308\_ 8. 821863 8. 788165 8. 806638 8. 640174 8. 669025 8. 632962  
11739309\_ 7. 436232 7. 489761 7. 441505 7. 620463 7. 559658 7. 50415  
11739310\_ 7. 937425 7. 701331 7. 768962 7. 530732 7. 461229 7. 58115  
11739311\_ 6. 133417 5. 996992 6. 272345 5. 414869 5. 322332 5. 392788  
11739312\_ 7. 429671 7. 424323 7. 460369 7. 404767 7. 28346 7. 28346  
11739313\_ 9. 523696 9. 483802 9. 475712 9. 580736 9. 542596 9. 51686  
11739314\_ 9. 502057 9. 476123 9. 548368 9. 639647 9. 667274 9. 597324  
11739315\_ 6. 681557 6. 802536 6. 634134 6. 596302 6. 524128 6. 494259  
11739316\_ 4. 694541 4. 658495 4. 643717 4. 53342 4. 456583 4. 470714  
11739317\_ 7. 669905 7. 607419 7. 719474 6. 84 6. 960271 6. 854384  
11739318\_ 5. 59487 5. 559397 5. 703847 5. 446125 5. 471701 5. 670439  
11739319\_ 4. 825375 4. 6538 4. 935046 4. 841935 4. 810687 4. 93568  
11739320\_ 9. 146365 9. 057387 9. 104287 8. 992248 8. 961725 8. 896434  
11739321\_ 6. 458337 6. 501647 6. 476054 6. 547211 6. 580709 6. 427436  
11739322\_ 6. 958964 6. 769549 6. 986408 6. 906918 6. 891351 6. 934615  
11739323\_ 6. 779107 7. 001038 7. 031531 6. 808631 6. 649856 6. 699374

11739324\_ 5. 340151 5. 485239 5. 386793 4. 420196 4. 375336 4. 525772  
11739325\_ 6. 649065 6. 612181 6. 67941 6. 290671 6. 397718 6. 381115  
11739326\_ 5. 35471 5. 456048 5. 637377 5. 134084 5. 39715 5. 490351  
11739327\_ 10. 18061 10. 15161 10. 13541 10. 11193 10. 12599 10. 0757  
11739328\_ 7. 689993 7. 809557 7. 801463 8. 9141 8. 931859 8. 966041  
11739329\_ 7. 880573 7. 858417 7. 903727 7. 984865 7. 956643 8. 030886  
11739330\_ 10. 07396 10. 00607 10. 06541 10. 00593 9. 962799 9. 931618  
11739331\_ 7. 174604 7. 028584 7. 030211 6. 956076 6. 988146 7. 052155  
11739332\_ 4. 98053 5. 219875 4. 691229 5. 244832 4. 980797 5. 130553  
11739333\_ 2. 235709 2. 129117 2. 277039 2. 209266 2. 130178 2. 209044  
11739334\_ 2. 361778 2. 435682 2. 361778 2. 335366 2. 262863 2. 262863  
11739335\_ 8. 759832 8. 73083 8. 735616 7. 886598 7. 905918 7. 892766  
11739336\_ 9. 023772 9. 0483 9. 008353 8. 330895 8. 275321 8. 25237  
11739337\_ 8. 543519 8. 503394 8. 453247 8. 247763 8. 197608 8. 168441  
11739338\_ 3. 047174 3. 015992 3. 047174 2. 993452 2. 888185 2. 934617  
11739339\_ 3. 769313 3. 442595 3. 519674 3. 190042 3. 413091 3. 002998  
11739340\_ 3. 526463 3. 568392 3. 526463 3. 517959 3. 464811 3. 526463  
11739341\_ 8. 47976 8. 463709 8. 515996 8. 666265 8. 735807 8. 683972  
11739342\_ 5. 689696 5. 875169 5. 689696 5. 712063 5. 934556 5. 862082  
11739343\_ 5. 171742 5. 245409 5. 113627 5. 32117 5. 291468 5. 446561  
11739344\_ 3. 817749 3. 828492 3. 872 3. 839235 3. 828492 3. 796262  
11739345\_ 4. 982336 4. 736372 4. 952561 4. 914651 4. 98014 4. 978248  
11739346\_ 8. 362483 8. 361055 8. 405802 8. 030061 8. 161847 8. 027318  
11739347\_ 4. 926052 4. 913948 5. 253033 4. 736759 4. 890539 4. 877268  
11739348\_ 7. 491533 7. 509669 7. 619908 7. 311063 7. 311824 7. 263129  
11739349\_ 8. 086422 8. 103081 8. 061374 7. 678865 7. 691924 7. 743752  
11739350\_ 3. 818401 3. 571198 3. 308026 2. 970642 3. 139659 2. 970642  
11739351\_ 7. 832723 7. 86936 7. 832781 7. 783594 7. 746847 7. 756947  
11739352\_ 6. 179374 6. 343506 6. 147299 5. 684506 5. 557292 5. 792376  
11739353\_ 5. 227202 5. 199083 4. 871458 5. 285754 5. 134974 5. 175062  
11739354\_ 5. 261633 5. 302949 5. 310137 5. 379491 5. 324686 5. 253806  
11739355\_ 5. 847573 5. 676671 5. 516809 5. 917184 5. 770259 5. 938773  
11739356\_ 5. 044495 5. 087195 4. 811411 5. 005169 5. 123757 5. 044495  
11739357\_ 1. 84217 1. 87885 1. 793262 1. 783438 1. 927758 2. 066333  
11739358\_ 3. 442399 3. 390989 3. 390989 3. 423739 3. 53307 3. 503743  
11739359\_ 7. 197987 7. 125666 7. 132947 6. 850646 6. 953094 6. 916342  
11739360\_ 7. 510908 7. 412861 7. 474481 6. 865084 6. 754989 6. 780053  
11739361\_ 7. 745176 7. 742184 7. 738012 7. 177052 7. 096698 7. 220733  
11739362\_ 5. 565832 5. 362319 5. 325183 5. 422448 5. 450344 5. 377398  
11739363\_ 6. 941158 6. 796239 6. 89905 6. 714816 6. 758035 6. 690309  
11739364\_ 8. 504822 8. 461239 8. 456714 8. 661782 8. 623863 8. 590067  
11739365\_ 9. 022844 9. 021067 9. 053232 9. 162191 9. 170705 9. 184931  
11739366\_ 7. 570572 7. 567827 7. 551914 8. 422604 8. 358219 8. 400494  
11739367\_ 5. 901752 5. 874007 5. 894536 6. 942576 6. 885618 6. 891522  
11739368\_ 4. 037678 3. 935109 4. 026092 4. 135496 4. 136991 4. 242273  
11739369\_ 9. 098896 9. 058063 9. 021715 8. 166023 8. 187785 8. 20934  
11739370\_ 8. 568571 8. 443011 8. 530768 7. 603745 7. 612571 7. 63879  
11739371\_ 8. 35784 8. 376821 8. 363462 8. 688511 8. 761535 8. 693458  
11739372\_ 8. 181949 8. 183388 8. 222184 7. 819026 7. 949243 7. 952746  
11739373\_ 5. 629203 5. 740021 5. 680597 5. 769766 5. 658363 5. 862916  
11739374\_ 4. 441526 4. 552965 4. 554013 4. 554332 4. 554332 4. 615196

11739375\_ 3. 535417 3. 408264 3. 513831 3. 696479 3. 714429 3. 688188  
11739376\_ 8. 467585 8. 431187 8. 493526 8. 16029 8. 2161 8. 202099  
11739377\_ 7. 874377 7. 746117 7. 842319 7. 546856 7. 555368 7. 523397  
11739378\_ 9. 428743 9. 326254 9. 396145 9. 275341 9. 21864 9. 266517  
11739379\_ 4. 806414 4. 660074 4. 537706 3. 722716 3. 837562 3. 886961  
11739380\_ 5. 06471 4. 916942 4. 984669 4. 584933 4. 475426 4. 475426  
11739381\_ 4. 708544 4. 360503 4. 506026 4. 757389 4. 68942 4. 68942  
11739382\_ 2. 947 2. 708093 2. 605516 2. 702226 2. 717036 2. 539604  
11739383\_ 7. 761909 7. 697015 7. 68864 8. 362913 8. 313371 8. 265949  
11739384\_ 8. 738807 8. 646222 8. 74067 7. 972147 8. 046488 7. 889254  
11739385\_ 8. 771496 8. 750171 8. 718985 8. 184847 8. 215067 8. 167523  
11739386\_ 7. 624435 7. 597331 7. 644064 7. 671045 7. 649998 7. 742794  
11739387\_ 9. 524048 9. 480741 9. 564358 9. 284756 9. 204445 9. 237741  
11739388\_ 6. 629122 6. 64194 6. 635476 6. 646084 6. 667152 6. 759555  
11739389\_ 4. 273928 4. 172332 4. 380993 4. 228563 4. 401116 4. 325535  
11739390\_ 5. 334554 5. 156324 5. 168182 5. 189628 5. 037162 4. 958236  
11739391\_ 7. 718328 7. 696231 7. 744885 7. 215128 7. 205039 7. 299506  
11739392\_ 8. 670654 8. 660519 8. 594644 9. 145507 9. 114649 9. 004095  
11739393\_ 5. 954785 6. 01924 6. 03034 6. 121683 6. 011636 6. 142934  
11739394\_ 6. 55787 6. 506734 6. 469868 6. 3727 6. 422743 6. 431333  
11739395\_ 6. 109271 6. 020908 6. 091962 5. 781949 5. 775384 5. 706702  
11739396\_ 6. 662317 6. 774417 6. 835891 7. 138848 7. 141079 7. 191096  
11739397\_ 4. 604547 4. 71899 4. 537263 4. 713177 4. 546852 4. 665974  
11739398\_ 8. 032195 7. 969234 8. 034269 7. 849665 7. 781198 7. 826653  
11739399\_ 8. 834632 8. 8025 8. 78025 8. 744501 8. 80635 8. 77667  
11739400\_ 9. 237356 9. 177422 9. 227342 9. 43872 9. 43238 9. 501755  
11739401\_ 9. 46662 9. 417378 9. 428591 9. 473488 9. 491718 9. 442758  
11739402\_ 7. 450136 7. 434742 7. 415716 6. 731083 6. 78347 6. 855184  
11739403\_ 8. 874746 8. 821601 8. 828559 8. 228436 8. 163822 8. 194289  
11739404\_ 5. 240743 5. 211171 5. 434183 5. 224841 5. 165097 5. 359188  
11739405\_ 7. 996062 7. 996062 7. 929718 8. 122132 8. 101868 8. 108431  
11739406\_ 7. 040984 6. 998064 7. 031531 7. 174639 7. 144608 7. 120844  
11739407\_ 8. 20322 8. 024097 8. 121082 7. 543564 7. 522167 7. 549086  
11739408\_ 8. 065165 7. 933048 7. 930708 7. 239949 7. 177529 7. 252009  
11739409\_ 7. 903272 7. 821211 7. 932254 7. 414257 7. 350159 7. 393115  
11739410\_ 8. 189278 8. 129924 8. 132458 7. 711995 7. 643364 7. 663095  
11739411\_ 7. 909125 7. 823885 7. 922993 7. 414132 7. 34615 7. 427295  
11739412\_ 8. 581513 8. 491405 8. 607229 8. 630297 8. 574072 8. 651356  
11739413\_ 8. 036696 8. 000935 7. 978609 8. 280838 8. 224044 8. 269074  
11739414\_ 7. 908771 7. 822413 7. 871287 7. 463446 7. 442507 7. 496918  
11739415\_ 6. 791752 6. 751743 6. 942733 6. 481046 6. 564018 6. 539703  
11739416\_ 7. 684764 7. 569819 7. 563117 7. 483719 7. 479401 7. 459656  
11739417\_ 4. 763543 4. 9694 4. 852505 4. 767158 4. 692293 4. 51779  
11739418\_ 4. 967144 4. 938734 5. 218422 4. 34678 4. 402969 4. 179435  
11739419\_ 5. 115092 4. 957995 5. 026397 4. 675711 4. 957995 4. 805316  
11739420\_ 2. 71724 2. 711904 2. 698046 2. 599919 2. 806845 2. 805836  
11739421\_ 7. 316063 7. 131318 7. 187936 7. 629847 7. 799928 7. 679179  
11739422\_ 6. 67763 6. 727672 6. 52296 6. 852896 6. 709491 6. 71471  
11739423\_ 7. 172282 7. 067113 7. 218921 7. 563413 7. 533006 7. 579675  
11739424\_ 4. 766965 4. 857626 4. 910339 5. 2784 5. 2585 5. 363425  
11739425\_ 5. 061143 5. 048363 4. 941849 5. 088767 5. 159193 5. 179784

11739426\_ 8. 199997 8. 16212 8. 199997 8. 74698 8. 777536 8. 764746  
11739427\_ 7. 435452 7. 37261 7. 418406 8. 012399 8. 005597 8. 0544  
11739428\_ 6. 521189 6. 412547 6. 487791 6. 515143 6. 503395 6. 434545  
11739429\_ 7. 261979 7. 25268 7. 289571 7. 29399 7. 398112 7. 382812  
11739430\_ 7. 901606 7. 854217 7. 868168 8. 169128 8. 130515 8. 005071  
11739431\_ 4. 782687 4. 673961 4. 785494 5. 043595 5. 028284 5. 046841  
11739432\_ 6. 360394 6. 38182 6. 285161 7. 009306 6. 927313 6. 835038  
11739433\_ 7. 731718 7. 595211 7. 690224 8. 276851 8. 183197 8. 226388  
11739434\_ 7. 965388 7. 74292 7. 882312 7. 409765 7. 361602 7. 449564  
11739435\_ 5. 536564 5. 480966 5. 361562 4. 486764 4. 459939 4. 488541  
11739436\_ 6. 72097 6. 725565 6. 841526 7. 064246 7. 011172 6. 999944  
11739437\_ 9. 128411 9. 078582 9. 13279 8. 864249 8. 861303 8. 963665  
11739438\_ 5. 361773 5. 023281 5. 20485 5. 232912 5. 065721 5. 115026  
11739439\_ 4. 255499 4. 273367 4. 149374 4. 347179 4. 339998 4. 214869  
11739440\_ 4. 547261 4. 606038 4. 480528 4. 784581 4. 791032 4. 641785  
11739441\_ 2. 607322 2. 716492 2. 767634 2. 704875 2. 605516 2. 528886  
11739442\_ 5. 834917 5. 971866 5. 884965 5. 844178 5. 855215 5. 945216  
11739443\_ 5. 313066 5. 221236 5. 446477 5. 140918 5. 095816 5. 090283  
11739444\_ 6. 042952 6. 098483 6. 04267 6. 090139 6. 085825 6. 130334  
11739445\_ 6. 911427 6. 767143 6. 778857 6. 759143 6. 763217 6. 96811  
11739446\_ 9. 313021 9. 252106 9. 318486 9. 571812 9. 578508 9. 600883  
11739447\_ 3. 903895 3. 909593 3. 769399 4. 286792 3. 903895 3. 765206  
11739448\_ 7. 692134 7. 61987 7. 743194 7. 316328 7. 323494 7. 35808  
11739449\_ 7. 095662 6. 988065 7. 112767 6. 79338 6. 998872 6. 951492  
11739450\_ 8. 821503 8. 823728 8. 87641 8. 70466 8. 663318 8. 663563  
11739451\_ 8. 054351 7. 994079 8. 074817 7. 58971 7. 595435 7. 646458  
11739452\_ 9. 172832 9. 095864 9. 164866 9. 002913 9. 056474 9. 015445  
11739453\_ 8. 198965 8. 146785 8. 100905 8. 061163 8. 085177 8. 113922  
11739454\_ 2. 907027 2. 839817 2. 720171 2. 778955 2. 861588 2. 906503  
11739455\_ 7. 086326 7. 000436 6. 999547 6. 529707 6. 564316 6. 591426  
11739456\_ 6. 664497 6. 676104 6. 6576 6. 258307 6. 222296 6. 276376  
11739457\_ 6. 011913 5. 91865 6. 006469 5. 926892 5. 848707 6. 003377  
11739458\_ 6. 869001 6. 840934 6. 93833 6. 937798 6. 926421 6. 85098  
11739459\_ 8. 309651 8. 366982 8. 428656 8. 193891 8. 175264 8. 143858  
11739460\_ 6. 929675 6. 914041 6. 947924 6. 945466 6. 885799 6. 961843  
11739461\_ 6. 963832 6. 795146 6. 886652 6. 765911 6. 811412 6. 714739  
11739462\_ 5. 200742 4. 869815 5. 125209 4. 506463 4. 485658 4. 46425  
11739463\_ 7. 370669 7. 22631 7. 441696 7. 065487 7. 096309 7. 074869  
11739464\_ 3. 010235 2. 846696 2. 822565 2. 85861 3. 019408 2. 991899  
11739465\_ 6. 227204 6. 277364 6. 364881 6. 412148 6. 372493 6. 47474  
11739466\_ 8. 427778 8. 405316 8. 410601 8. 455307 8. 427778 8. 441057  
11739467\_ 8. 457035 8. 411904 8. 413285 7. 898286 7. 902665 7. 931382  
11739468\_ 6. 599839 6. 493432 6. 62811 6. 17708 6. 225317 6. 171563  
11739469\_ 7. 922599 7. 930892 7. 946261 6. 919434 7. 043504 6. 986607  
11739470\_ 7. 474199 7. 385029 7. 481188 6. 442684 6. 436293 6. 51198  
11739471\_ 5. 756375 5. 732315 5. 685823 5. 419352 5. 504449 5. 446261  
11739472\_ 6. 069058 6. 164432 6. 040144 5. 589705 5. 62585 5. 782425  
11739473\_ 5. 123603 5. 239947 4. 957085 5. 038633 4. 97265 5. 051841  
11739474\_ 7. 015549 6. 993247 7. 035521 6. 719668 6. 657754 6. 566861  
11739475\_ 7. 587428 7. 513953 7. 442742 7. 438678 7. 472298 7. 550739  
11739476\_ 6. 466178 6. 495385 6. 469792 6. 163771 6. 347929 6. 194558

11739477\_ 7. 550735 7. 577524 7. 575168 7. 309386 7. 329942 7. 323727  
11739478\_ 7. 57335 7. 666721 7. 676804 7. 40476 7. 372404 7. 372372  
11739479\_ 4. 802671 4. 559348 4. 709463 4. 759926 4. 961034 4. 993096  
11739480\_ 5. 279813 5. 350591 5. 131843 5. 296589 5. 47411 5. 372351  
11739481\_ 11. 55526 11. 56088 11. 52159 11. 87198 11. 85565 11. 83859  
11739482\_ 5. 196665 5. 306518 5. 2222 5. 006919 5. 165739 5. 067224  
11739483\_ 7. 119529 7. 14419 7. 129661 7. 597395 7. 586443 7. 541703  
11739484\_ 6. 56978 6. 489266 6. 594614 6. 255088 6. 300643 6. 353007  
11739485\_ 9. 000036 8. 999277 8. 985202 9. 005245 8. 977531 8. 949326  
11739486\_ 9. 026691 9. 100079 9. 089358 9. 392455 9. 199633 9. 168434  
11739487\_ 9. 716002 9. 702453 9. 690132 9. 829633 9. 800448 9. 79869  
11739488\_ 4. 219055 4. 233817 4. 238345 4. 329342 4. 422305 4. 361268  
11739489\_ 7. 645901 7. 524236 7. 651425 7. 383362 7. 345762 7. 395265  
11739490\_ 4. 495445 4. 643717 4. 580519 4. 347179 4. 520264 4. 584933  
11739491\_ 3. 359471 3. 312739 3. 369647 3. 457613 3. 037157 3. 265539  
11739492\_ 3. 442402 3. 327091 3. 265456 3. 34543 3. 301483 3. 548784  
11739493\_ 2. 650697 3. 026788 2. 800324 3. 041027 3. 127799 2. 859467  
11739494\_ 3. 986297 4. 114154 4. 166775 4. 184744 4. 087372 4. 11622  
11739495\_ 4. 612183 4. 474337 4. 493266 4. 470092 4. 347179 4. 477465  
11739496\_ 5. 133694 5. 263943 5. 10744 5. 280195 5. 323294 5. 207415  
11739497\_ 4. 71949 4. 686804 4. 749932 4. 626753 4. 696149 4. 767218  
11739498\_ 5. 46259 5. 518556 5. 399572 5. 605739 5. 462346 5. 475572  
11739499\_ 4. 690622 4. 699031 4. 707129 4. 758571 4. 844151 4. 750682  
11739500\_ 7. 065861 7. 000353 6. 991679 7. 309729 7. 266758 7. 292262  
11739501\_ 5. 963471 6. 017422 5. 930781 6. 09968 6. 189903 6. 093439  
11739502\_ 4. 217376 4. 341906 4. 358878 4. 347179 4. 459939 4. 358878  
11739503\_ 5. 343223 5. 149545 4. 924373 4. 753024 4. 661723 4. 843136  
11739504\_ 4. 368718 4. 624308 4. 610061 4. 388648 4. 354433 4. 579166  
11739505\_ 8. 487266 8. 433873 8. 48759 8. 459132 8. 445194 8. 447065  
11739506\_ 3. 531621 3. 589565 3. 483804 3. 667784 3. 412057 3. 565446  
11739507\_ 7. 308327 7. 344214 7. 306297 6. 986734 7. 001821 7. 028417  
11739508\_ 8. 060192 8. 016627 8. 070595 7. 804264 7. 79668 7. 812669  
11739509\_ 5. 831303 6. 084516 5. 86721 5. 857675 5. 753455 5. 640747  
11739510\_ 4. 361714 4. 505901 4. 220511 4. 370762 4. 130576 4. 307294  
11739511\_ 6. 222893 6. 321014 6. 222893 6. 259765 6. 415796 6. 28037  
11739512\_ 9. 460859 9. 371599 9. 476154 9. 70561 9. 714398 9. 664497  
11739513\_ 2. 751234 2. 770779 2. 986969 2. 972631 3. 130013 3. 028717  
11739514\_ 3. 771373 3. 539585 3. 757716 3. 747192 3. 705625 3. 704263  
11739515\_ 4. 222773 4. 272863 4. 407474 4. 215142 4. 203934 4. 18864  
11739516\_ 4. 115035 4. 115035 4. 033971 4. 211127 4. 018943 4. 127617  
11739517\_ 8. 315524 8. 242935 8. 333987 8. 448142 8. 499814 8. 511074  
11739518\_ 9. 112398 8. 995413 9. 062482 8. 952532 8. 965254 9. 067159  
11739519\_ 5. 156303 5. 228627 5. 205551 5. 191975 5. 120812 5. 231757  
11739520\_ 8. 470073 8. 39059 8. 484364 8. 642866 8. 716042 8. 615336  
11739521\_ 7. 772557 7. 823921 7. 764173 7. 679754 7. 695764 7. 760015  
11739522\_ 6. 306083 6. 225513 6. 300643 6. 619388 6. 704613 6. 681377  
11739523\_ 5. 918537 5. 837475 5. 944403 5. 75251 5. 772931 5. 899543  
11739524\_ 8. 119262 8. 061345 8. 158164 9. 231763 9. 256794 9. 285224  
11739525\_ 3. 45644 3. 517682 3. 531311 3. 315121 3. 29696 3. 147796  
11739526\_ 7. 986455 7. 944299 7. 968485 7. 326107 7. 337564 7. 34931  
11739527\_ 8. 053866 7. 990427 8. 013281 7. 784748 7. 826742 7. 807691

11739528\_ 6. 013219 6. 001554 6. 103539 5. 901696 5. 885507 6. 018128  
11739529\_ 6. 284422 6. 16558 6. 309176 6. 068764 6. 002638 6. 232991  
11739530\_ 6. 39677 6. 26045 6. 415131 5. 805141 5. 882723 5. 855856  
11739531\_ 6. 387774 6. 339761 6. 389366 5. 845365 5. 856422 6. 000733  
11739532\_ 3. 415458 3. 398236 3. 415458 3. 206285 3. 284962 3. 386169  
11739533\_ 9. 737038 9. 686808 9. 775476 9. 787051 9. 792823 9. 759384  
11739534\_ 9. 624755 9. 576906 9. 651121 8. 056522 8. 227191 8. 128506  
11739535\_ 10. 01466 9. 953542 9. 980991 8. 57412 8. 57552 8. 521581  
11739536\_ 9. 574124 9. 526066 9. 615816 8. 010882 8. 109508 8. 028062  
11739537\_ 6. 265139 6. 380511 6. 338407 6. 038894 6. 230225 6. 247642  
11739538\_ 5. 479222 5. 384774 5. 355813 5. 525598 5. 602634 5. 618754  
11739539\_ 6. 557032 6. 546818 6. 604122 6. 570831 6. 575482 6. 646855  
11739540\_ 5. 309463 5. 307999 5. 146159 5. 302259 5. 26034 5. 212375  
11739541\_ 6. 113413 6. 15619 6. 222077 6. 005872 5. 882261 6. 033352  
11739542\_ 6. 118838 6. 159771 6. 119273 6. 065013 6. 159336 6. 183698  
11739543\_ 6. 246289 6. 426851 6. 36748 6. 330693 6. 291145 6. 134268  
11739544\_ 8. 117097 8. 146625 8. 164701 7. 715356 7. 749273 7. 817493  
11739545\_ 7. 8706 7. 761575 7. 798165 8. 642454 8. 587293 8. 590596  
11739546\_ 6. 43283 6. 368025 6. 428179 7. 224484 7. 175351 7. 060138  
11739547\_ 8. 07562 8. 028061 8. 082123 8. 400791 8. 388451 8. 37536  
11739548\_ 6. 388279 6. 394502 6. 372053 6. 792183 6. 783057 6. 696609  
11739549\_ 6. 510515 6. 45454 6. 506594 6. 051046 5. 966268 5. 854923  
11739550\_ 9. 347979 9. 282298 9. 337262 8. 776965 8. 776017 8. 770086  
11739551\_ 6. 552941 6. 606549 6. 603088 6. 48021 6. 590198 6. 513012  
11739552\_ 6. 296875 6. 172782 6. 051868 4. 914641 5. 196564 4. 971166  
11739553\_ 7. 629244 7. 547048 7. 698407 7. 372046 7. 448976 7. 352831  
11739554\_ 7. 020462 6. 829959 6. 841618 7. 4878 7. 51881 7. 48363  
11739555\_ 5. 635039 5. 711714 5. 579776 5. 653114 5. 713509 5. 690638  
11739556\_ 8. 582037 8. 415431 8. 478993 8. 090467 8. 060512 8. 093757  
11739557\_ 8. 464438 8. 358109 8. 47322 8. 127848 8. 138686 8. 164411  
11739558\_ 7. 600701 7. 512483 7. 575389 7. 844467 7. 923266 7. 993631  
11739559\_ 7. 537827 7. 414025 7. 482323 7. 687087 7. 68206 7. 74335  
11739560\_ 8. 617997 8. 503143 8. 601752 7. 728355 7. 748159 7. 796677  
11739561\_ 7. 791446 7. 768533 7. 771457 7. 034187 7. 000216 7. 081489  
11739562\_ 7. 115713 7. 115713 7. 099561 6. 59564 6. 501276 6. 554218  
11739563\_ 5. 118508 5. 110342 4. 860884 5. 217008 5. 149545 5. 034701  
11739564\_ 5. 639964 5. 392608 5. 743573 5. 808484 5. 711444 5. 755404  
11739565\_ 5. 794854 5. 782047 5. 588944 5. 820052 5. 818078 5. 935162  
11739566\_ 4. 785111 4. 568192 4. 628728 4. 837225 5. 017718 4. 830372  
11739567\_ 6. 989576 6. 871931 6. 958012 7. 368602 7. 324886 7. 373042  
11739568\_ 7. 307622 7. 215316 7. 213161 7. 274918 7. 273929 7. 225932  
11739569\_ 10. 06284 10. 0396 10. 07847 9. 759619 9. 781113 9. 830853  
11739570\_ 8. 663009 8. 598732 8. 742042 8. 40512 8. 392122 8. 425576  
11739571\_ 7. 817609 7. 792636 7. 817641 7. 347872 7. 371085 7. 461591  
11739572\_ 7. 54034 7. 565176 7. 619938 7. 516974 7. 510748 7. 520782  
11739573\_ 9. 088427 8. 903141 9. 009348 8. 930831 9. 041699 9. 062033  
11739574\_ 8. 947603 8. 826583 8. 878547 8. 861588 8. 87516 8. 930448  
11739575\_ 6. 137399 5. 918745 6. 122849 5. 888117 6. 028056 5. 854293  
11739576\_ 9. 238886 9. 131291 9. 158762 8. 532746 8. 461526 8. 554382  
11739577\_ 5. 671693 5. 961489 5. 751756 6. 052608 6. 030167 5. 994786  
11739578\_ 4. 527661 4. 74424 4. 643717 4. 874234 4. 74424 4. 810373

11739579\_ 5. 597483 5. 464853 5. 635655 5. 386132 5. 437627 5. 407249  
11739580\_ 4. 690667 4. 822881 4. 692816 4. 72811 4. 598149 4. 359818  
11739581\_ 8. 714827 8. 651253 8. 753428 8. 594884 8. 660484 8. 60916  
11739582\_ 6. 3458 6. 46008 6. 371987 6. 450121 6. 322812 6. 56569  
11739583\_ 8. 356633 8. 318754 8. 322254 8. 297197 8. 311078 8. 313932  
11739584\_ 9. 121122 9. 128411 9. 150158 9. 177002 9. 140461 9. 14507  
11739585\_ 7. 195907 7. 174715 7. 237725 7. 209828 7. 210046 7. 061636  
11739586\_ 8. 090545 8. 044541 8. 139234 7. 88081 7. 97343 7. 845459  
11739587\_ 4. 511714 4. 487593 4. 610298 4. 39235 4. 420326 4. 415744  
11739588\_ 5. 701868 5. 744763 5. 739959 5. 554436 5. 634138 5. 617981  
11739589\_ 2. 946308 2. 966851 2. 86609 3. 038414 3. 000587 3. 02746  
11739590\_ 3. 836373 3. 581611 3. 808279 3. 947824 3. 873575 4. 029521  
11739591\_ 8. 295363 8. 177171 8. 161189 8. 468264 8. 433394 8. 433912  
11739592\_ 5. 781244 5. 866126 5. 889254 6. 010085 6. 122294 6. 244258  
11739593\_ 5. 780039 5. 710049 5. 702385 5. 646676 5. 686361 5. 713866  
11739594\_ 5. 305067 4. 919776 5. 265114 6. 134913 6. 087471 6. 113926  
11739595\_ 6. 591098 6. 559353 6. 547428 7. 019829 6. 862888 6. 87539  
11739596\_ 10. 09421 10. 05761 10. 07429 9. 955324 10. 02159 9. 973102  
11739597\_ 4. 30187 4. 281474 4. 135496 4. 425681 4. 347179 4. 401299  
11739598\_ 5. 4016 5. 373868 5. 358547 5. 382008 5. 219513 5. 366687  
11739599\_ 7. 131324 7. 089177 7. 317271 6. 653899 6. 609742 6. 752593  
11739600\_ 8. 272647 8. 281247 8. 309833 8. 345246 8. 383078 8. 318144  
11739601\_ 5. 272721 5. 144474 5. 337736 5. 554436 5. 452101 5. 560233  
11739602\_ 7. 789061 7. 82174 7. 878883 8. 170685 8. 136871 8. 171215  
11739603\_ 7. 537827 7. 548866 7. 593563 8. 041931 8. 098567 8. 073222  
11739604\_ 5. 626402 5. 672285 5. 665788 5. 929088 5. 846113 5. 890893  
11739605\_ 6. 440711 6. 440711 6. 309384 6. 932621 6. 814146 6. 817259  
11739606\_ 8. 082121 7. 930589 7. 968285 8. 448995 8. 364226 8. 41342  
11739607\_ 6. 556658 6. 580246 6. 504527 6. 593272 6. 639754 6. 648401  
11739608\_ 5. 57073 5. 549115 5. 578753 5. 486896 5. 417183 5. 457164  
11739609\_ 6. 584888 6. 65057 6. 67839 6. 688764 6. 614712 6. 630168  
11739610\_ 6. 321838 6. 198083 6. 280807 6. 532743 6. 599839 6. 553214  
11739611\_ 4. 415744 4. 335594 4. 492246 4. 719138 4. 74904 4. 638889  
11739612\_ 5. 546721 5. 477932 5. 541629 5. 641199 5. 458087 5. 497083  
11739613\_ 5. 612159 5. 643713 5. 709521 5. 883981 5. 845365 5. 907113  
11739614\_ 6. 212872 6. 123458 6. 218962 6. 230812 6. 171026 6. 27381  
11739615\_ 8. 075873 8. 069115 8. 021651 8. 152656 8. 083879 8. 06204  
11739616\_ 7. 960246 7. 946625 7. 905295 7. 992541 7. 933307 7. 970595  
11739617\_ 10. 98902 11. 02824 11. 00429 10. 97946 10. 9454 10. 87933  
11739618\_ 4. 904522 4. 697623 4. 992877 5. 396913 5. 554436 5. 508799  
11739619\_ 6. 104706 6. 058786 6. 178267 5. 690878 5. 794286 5. 892873  
11739620\_ 4. 240118 4. 490781 4. 172227 4. 520305 4. 466939 4. 339848  
11739621\_ 4. 487653 4. 616857 4. 352687 4. 539346 4. 403708 4. 470714  
11739622\_ 3. 398236 3. 184659 3. 293589 3. 227519 3. 397585 3. 184074  
11739623\_ 4. 483589 4. 378806 4. 317285 4. 492407 4. 479176 4. 248329  
11739624\_ 7. 563476 7. 541703 7. 62932 7. 795789 7. 738497 7. 820985  
11739625\_ 4. 298243 3. 940217 4. 135496 4. 135496 4. 144385 3. 954157  
11739626\_ 4. 463353 4. 469058 4. 596398 4. 500731 4. 593868 4. 57324  
11739627\_ 8. 446045 8. 363038 8. 441098 8. 139359 8. 096321 8. 0976  
11739628\_ 6. 744286 6. 793153 6. 694982 6. 828602 6. 886652 6. 831882  
11739629\_ 9. 372367 9. 269283 9. 357906 9. 335286 9. 416763 9. 407919



11739630\_ 2. 567049 2. 592147 2. 588262 2. 645926 2. 671024 2. 71175  
11739631\_ 4. 653863 4. 576236 4. 773335 4. 273314 4. 36606 4. 415744  
11739632\_ 7. 103242 7. 164857 6. 987402 6. 331552 6. 54755 6. 263567  
11739633\_ 8. 409781 8. 316001 8. 361576 8. 280524 8. 237066 8. 290644  
11739634\_ 8. 471424 8. 399038 8. 421888 8. 532329 8. 467496 8. 558962  
11739635\_ 7. 392275 7. 368978 7. 452712 6. 600685 6. 464805 6. 619441  
11739636\_ 7. 01462 7. 050459 6. 806621 7. 207087 7. 087582 7. 117879  
11739637\_ 6. 357588 6. 198927 6. 27242 6. 258803 6. 251871 6. 118838  
11739638\_ 8. 08702 8. 023067 8. 189781 8. 09141 8. 077679 8. 140989  
11739639\_ 7. 333347 7. 217166 7. 235098 7. 400837 7. 374854 7. 485282  
11739640\_ 7. 060591 7. 083257 7. 081274 7. 010968 6. 997077 7. 045626  
11739641\_ 8. 861588 8. 778434 8. 849954 9. 206119 9. 254386 9. 26209  
11739642\_ 6. 88886 6. 806893 6. 948453 6. 291779 6. 179854 6. 332556  
11739643\_ 8. 264865 8. 137781 8. 186703 8. 249676 8. 27936 8. 246591  
11739644\_ 7. 830568 7. 763683 7. 849635 7. 794756 7. 806249 7. 748159  
11739645\_ 8. 215138 8. 191313 8. 234211 8. 264624 8. 204715 8. 256224  
11739646\_ 7. 228847 7. 047869 7. 168777 7. 153278 7. 199363 7. 150889  
11739647\_ 6. 938536 6. 92973 7. 029945 7. 008804 7. 02022 7. 053397  
11739648\_ 6. 637183 6. 634067 6. 758083 6. 632392 6. 614193 6. 604788  
11739649\_ 5. 05864 5. 104111 4. 772366 5. 090448 5. 206953 5. 071791  
11739650\_ 5. 682886 5. 760029 5. 514733 5. 833424 5. 830171 5. 640721  
11739651\_ 5. 940666 5. 835595 5. 80666 5. 796027 5. 794286 5. 678286  
11739652\_ 7. 91983 7. 796539 7. 869993 7. 799789 7. 76603 7. 723128  
11739653\_ 6. 017429 6. 056678 6. 010772 6. 533262 6. 396583 6. 462097  
11739654\_ 7. 258052 7. 116736 7. 235576 6. 551551 6. 634985 6. 755778  
11739655\_ 6. 677644 6. 483505 6. 726051 5. 779412 5. 923591 5. 894223  
11739656\_ 4. 391743 4. 456539 4. 330747 4. 40665 4. 309841 4. 52373  
11739657\_ 5. 5588 5. 530194 5. 666785 5. 448592 5. 590127 5. 577583  
11739658\_ 8. 169659 8. 260305 8. 132683 8. 248525 8. 238726 8. 22339  
11739659\_ 7. 966641 7. 872849 7. 918319 8. 20348 8. 186216 8. 222062  
11739660\_ 8. 706093 8. 773544 8. 680325 8. 691726 8. 663004 8. 674911  
11739661\_ 7. 67981 7. 646235 7. 684199 7. 633571 7. 677861 7. 635954  
11739662\_ 7. 63554 7. 67336 7. 649605 7. 633152 7. 640294 7. 636732  
11739663\_ 5. 574394 5. 584813 5. 449362 5. 672034 5. 709521 5. 68434  
11739664\_ 4. 293258 4. 442984 4. 224866 4. 259754 4. 383526 4. 212191  
11739665\_ 4. 123784 4. 128415 4. 108814 4. 32869 4. 364302 4. 233642  
11739666\_ 6. 567923 6. 528838 6. 552481 6. 874765 6. 840283 6. 943576  
11739667\_ 6. 193099 6. 130436 6. 128349 6. 092591 6. 05729 6. 132436  
11739668\_ 5. 926117 5. 861264 5. 801031 5. 647197 5. 762147 5. 665218  
11739669\_ 7. 440747 7. 397643 7. 477007 7. 559609 7. 600904 7. 639046  
11739670\_ 4. 256296 4. 296068 4. 14527 4. 215426 4. 309364 4. 470714  
11739671\_ 4. 653869 4. 829228 4. 534895 4. 814267 4. 814267 4. 808549  
11739672\_ 6. 225513 6. 355474 6. 440699 5. 645982 5. 48634 5. 717083  
11739673\_ 5. 784505 5. 708967 5. 688358 5. 380984 5. 427129 5. 502008  
11739674\_ 7. 066036 6. 998479 7. 169041 6. 605298 6. 6242 6. 703888  
11739675\_ 1. 909708 1. 898324 2. 013227 1. 925343 1. 863193 2. 013227  
11739676\_ 1. 88008 2. 016719 2. 078123 1. 822637 1. 964668 1. 893497  
11739677\_ 3. 060399 2. 96594 2. 97639 3. 025972 2. 934163 2. 945929  
11739678\_ 3. 450304 3. 450304 3. 369697 3. 477219 3. 489767 3. 411199  
11739679\_ 3. 730094 4. 067367 3. 725867 4. 068458 3. 961178 3. 710861  
11739680\_ 8. 291281 8. 154793 8. 246664 7. 807521 7. 804819 7. 850334

11739681\_ 9. 877109 9. 873103 9. 850132 9. 785856 9. 655224 9. 618287  
11739682\_ 6. 001748 6. 048823 6. 018553 6. 062206 6. 044285 6. 081538  
11739683\_ 5. 870596 6. 010192 5. 952629 5. 975524 5. 938596 6. 069181  
11739684\_ 4. 502546 4. 539813 4. 458669 4. 624401 4. 663353 4. 601263  
11739685\_ 4. 57363 4. 648568 4. 584625 4. 19713 3. 860986 4. 498259  
11739686\_ 4. 7457 4. 865526 4. 693529 4. 702589 4. 693529 4. 689174  
11739687\_ 6. 373689 6. 277053 6. 260434 6. 531452 6. 507627 6. 580835  
11739688\_ 5. 491802 5. 565918 5. 540307 5. 460141 5. 516486 5. 371754  
11739689\_ 5. 321589 5. 321589 5. 329119 5. 488755 5. 70933 5. 480176  
11739690\_ 4. 413699 4. 452786 4. 257512 4. 631706 4. 594377 4. 57549  
11739691\_ 5. 014141 4. 669126 5. 06719 5. 047466 5. 038719 5. 160837  
11739692\_ 5. 183966 5. 288714 5. 324723 5. 509899 5. 373641 5. 244429  
11739693\_ 2. 211892 2. 331027 2. 399038 2. 297615 2. 25483 2. 279543  
11739694\_ 3. 107498 2. 831385 3. 080724 2. 98751 2. 908152 2. 92311  
11739695\_ 3. 876101 3. 435605 3. 66324 3. 384618 3. 384618 3. 39999  
11739696\_ 5. 367593 5. 355316 5. 629077 4. 624959 4. 620091 4. 56188  
11739697\_ 4. 350956 4. 627073 4. 427835 4. 209982 4. 31693 4. 141769  
11739698\_ 5. 197391 5. 024154 5. 018517 5. 024154 5. 021742 5. 156303  
11739699\_ 5. 670227 5. 579989 5. 709798 5. 399576 5. 530025 5. 590709  
11739700\_ 4. 705097 4. 819596 4. 692197 4. 528757 4. 355969 4. 504507  
11739701\_ 7. 268222 7. 212281 7. 190561 7. 247944 7. 302296 7. 406909  
11739702\_ 8. 324158 8. 248504 8. 298044 8. 058408 8. 096891 8. 12497  
11739703\_ 3. 05778 3. 377778 3. 227018 3. 264182 3. 255193 3. 218204  
11739704\_ 4. 72388 4. 737197 4. 763959 4. 772366 4. 820853 4. 734112  
11739705\_ 5. 784006 5. 731069 5. 819215 5. 880305 5. 802846 5. 812174  
11739706\_ 6. 536494 6. 60725 6. 431375 6. 609539 6. 614637 6. 60725  
11739707\_ 7. 934414 7. 861674 7. 978362 8. 141699 8. 15611 8. 16337  
11739708\_ 2. 998206 2. 949194 2. 825751 3. 150317 3. 107448 2. 9785  
11739709\_ 6. 205708 6. 226833 6. 236089 5. 799582 5. 683154 5. 932815  
11739710\_ 6. 720313 6. 69898 6. 778832 6. 31666 6. 276466 6. 377911  
11739711\_ 7. 239945 7. 206152 7. 324738 6. 522846 6. 522744 6. 664936  
11739712\_ 7. 02342 7. 052254 6. 953412 6. 68037 6. 599844 6. 572386  
11739713\_ 5. 025315 5. 162222 5. 19354 4. 774893 4. 998199 4. 794798  
11739714\_ 4. 924225 4. 953646 5. 06542 4. 823308 4. 898349 4. 815683  
11739715\_ 5. 045899 5. 131963 5. 068057 4. 735884 4. 93837 4. 97646  
11739716\_ 6. 636244 6. 515621 6. 701462 6. 314787 6. 392458 6. 417769  
11739717\_ 6. 244324 6. 387804 6. 294181 6. 315902 6. 263567 6. 319115  
11739718\_ 7. 107441 7. 105589 7. 102735 7. 115239 7. 145983 7. 062348  
11739719\_ 7. 121011 7. 120049 7. 105981 7. 131854 7. 146767 7. 123896  
11739720\_ 3. 213566 3. 495885 2. 932935 3. 434511 3. 405348 3. 210234  
11739721\_ 3. 682756 3. 523813 3. 464868 3. 716813 3. 718591 3. 785325  
11739722\_ 4. 085221 4. 088057 3. 903775 4. 249582 4. 120153 3. 924152  
11739723\_ 3. 438037 3. 675791 3. 331521 3. 756925 3. 612346 3. 606313  
11739724\_ 3. 046674 3. 510127 3. 243605 3. 331174 3. 455632 3. 566326  
11739725\_ 1. 889979 2. 080884 2. 269102 1. 948401 1. 881192 2. 509579  
11739726\_ 11. 72965 11. 71773 11. 74766 11. 55901 11. 53364 11. 53501  
11739727\_ 12. 11494 12. 13906 12. 07183 11. 97285 11. 93183 11. 9602  
11739728\_ 8. 368482 8. 401679 8. 447451 8. 61842 8. 640054 8. 588156  
11739729\_ 8. 880424 8. 817091 8. 826993 9. 213497 9. 070252 9. 095172  
11739730\_ 8. 190535 8. 13192 8. 176637 7. 54288 7. 569797 7. 634077  
11739731\_ 8. 590474 8. 536552 8. 536552 8. 084373 8. 078428 8. 187035

11739732\_ 6. 898793 6. 765563 6. 96345 6. 554512 6. 383618 6. 573704  
11739733\_ 8. 853767 8. 691503 8. 798918 7. 645022 7. 701569 7. 666867  
11739734\_ 8. 222224 8. 077679 8. 202916 6. 898776 6. 927054 6. 914004  
11739735\_ 3. 346417 3. 365241 3. 186634 3. 453477 3. 175364 3. 366563  
11739736\_ 4. 310534 4. 189347 4. 190708 4. 319358 4. 45282 4. 354107  
11739737\_ 5. 862979 5. 872511 6. 036167 5. 863668 5. 845365 5. 867155  
11739738\_ 7. 118096 7. 016646 7. 140471 7. 136823 7. 13082 7. 111389  
11739739\_ 4. 501447 4. 313773 4. 371079 4. 317856 4. 452101 4. 499705  
11739740\_ 4. 854087 4. 843838 4. 558353 4. 677156 4. 775411 4. 861956  
11739741\_ 5. 101805 5. 214448 5. 225382 5. 176227 5. 222684 5. 190084  
11739742\_ 4. 530785 4. 62811 4. 771069 4. 757329 4. 741961 4. 758521  
11739743\_ 5. 014233 4. 9226 4. 772366 5. 2222 5. 308886 5. 398984  
11739744\_ 6. 966452 7. 01056 6. 982299 7. 289517 7. 347425 7. 248632  
11739745\_ 5. 060972 5. 096248 4. 971097 4. 863589 4. 873528 4. 87896  
11739746\_ 8. 767064 8. 635224 8. 769373 8. 300827 8. 350358 8. 279974  
11739747\_ 6. 542772 6. 475238 6. 700246 6. 473861 6. 475238 6. 526928  
11739748\_ 6. 808413 6. 666839 6. 736328 6. 868286 6. 851588 6. 790316  
11739749\_ 3. 598139 3. 574392 3. 441596 3. 573644 3. 53696 3. 290188  
11739750\_ 3. 931826 3. 880721 3. 868846 3. 899701 3. 896855 3. 955919  
11739751\_ 5. 57022 5. 687525 5. 709521 5. 480966 5. 680869 5. 474057  
11739752\_ 7. 16763 7. 029522 7. 269184 6. 734118 6. 800836 6. 786169  
11739753\_ 6. 153643 6. 269687 6. 083018 6. 219644 6. 20257 6. 187047  
11739754\_ 6. 159771 6. 228123 6. 135528 6. 350934 6. 330457 6. 372053  
11739755\_ 6. 985305 6. 909908 6. 933817 6. 691206 6. 721906 6. 602483  
11739756\_ 6. 673292 6. 51335 6. 409608 6. 309798 6. 305274 6. 356027  
11739757\_ 7. 045568 6. 945098 6. 958012 7. 216476 7. 204522 7. 291423  
11739758\_ 6. 246734 6. 244666 6. 166697 6. 383618 6. 34864 6. 407059  
11739759\_ 4. 407033 4. 293556 4. 77913 4. 005724 3. 99647 4. 232188  
11739760\_ 5. 283224 5. 39054 5. 310248 5. 321827 5. 327468 5. 473537  
11739761\_ 2. 816368 2. 9103 2. 794165 2. 808418 2. 819343 2. 886845  
11739762\_ 4. 125495 4. 081641 4. 304235 4. 265006 4. 111101 4. 265006  
11739763\_ 6. 401442 6. 325791 6. 494443 7. 031239 7. 056694 7. 001028  
11739764\_ 5. 496093 5. 494619 5. 553548 5. 425159 5. 669586 5. 676847  
11739765\_ 3. 088551 3. 133535 3. 219543 3. 083926 3. 23879 3. 024074  
11739766\_ 6. 071498 5. 964248 6. 022894 6. 042225 6. 108878 6. 140367  
11739767\_ 4. 680066 4. 821202 4. 703022 4. 484897 4. 456097 4. 680066  
11739768\_ 5. 302649 5. 372533 5. 354633 5. 04306 5. 086567 5. 161511  
11739769\_ 3. 839419 4. 061619 4. 231639 3. 245054 3. 535179 3. 360889  
11739770\_ 4. 513241 4. 352138 4. 524977 4. 639683 4. 64358 4. 833663  
11739771\_ 6. 740264 6. 680141 6. 726033 6. 322288 6. 457675 6. 422999  
11739772\_ 7. 649819 7. 603504 7. 694405 7. 408574 7. 400837 7. 457563  
11739773\_ 5. 32596 5. 18738 5. 156649 5. 27493 5. 281612 5. 275975  
11739774\_ 5. 512912 5. 487864 5. 515797 5. 604393 5. 48634 5. 438689  
11739775\_ 4. 026967 3. 985139 3. 944472 3. 726088 3. 326547 3. 920071  
11739776\_ 6. 538718 6. 641378 6. 456188 6. 464805 6. 500622 6. 455703  
11739777\_ 4. 542389 4. 543206 4. 559285 4. 467815 4. 577057 4. 454265  
11739778\_ 7. 66897 7. 56174 7. 676896 7. 704384 7. 715356 7. 74542  
11739779\_ 3. 297083 3. 700662 3. 528585 3. 66762 3. 509754 3. 705625  
11739780\_ 6. 910833 7. 013331 7. 02995 6. 839173 6. 843884 6. 906194  
11739781\_ 6. 637766 6. 47639 6. 505471 7. 106274 7. 222344 7. 208158  
11739782\_ 8. 305729 8. 263683 8. 321867 8. 358221 8. 280974 8. 347624

11739783\_ 6. 044683 6. 102403 6. 051323 6. 542805 6. 48457 6. 520966  
11739784\_ 6. 592615 6. 629273 6. 468215 6. 567247 6. 490856 6. 568169  
11739785\_ 4. 540638 4. 63312 4. 307575 4. 442212 4. 547454 4. 536031  
11739786\_ 7. 906465 7. 985742 7. 8548 7. 932299 7. 944273 7. 990549  
11739787\_ 3. 94608 3. 733074 3. 887134 3. 299638 3. 207219 3. 244569  
11739788\_ 6. 925094 6. 92866 7. 053419 7. 061308 7. 067829 7. 07498  
11739789\_ 6. 936973 6. 848357 6. 981368 6. 843082 6. 786813 6. 828602  
11739790\_ 7. 810493 7. 775306 7. 736932 7. 346062 7. 401802 7. 392267  
11739791\_ 7. 223852 7. 175841 7. 227096 6. 898793 6. 837039 6. 820042  
11739792\_ 6. 894507 6. 799906 6. 86477 6. 700893 6. 649392 6. 732398  
11739793\_ 8. 022439 8. 109995 8. 111185 7. 670259 7. 635727 7. 668287  
11739794\_ 3. 606313 3. 651308 3. 616208 3. 570773 3. 705625 3. 744359  
11739795\_ 6. 277092 6. 382076 6. 277729 6. 463993 6. 37451 6. 300643  
11739796\_ 6. 479751 6. 502319 6. 46208 6. 533373 6. 614637 6. 585247  
11739797\_ 4. 146353 4. 138637 4. 096361 4. 070654 4. 160353 4. 148023  
11739798\_ 8. 189009 8. 005895 8. 192735 9. 754216 9. 817879 9. 754684  
11739799\_ 4. 891187 4. 766528 4. 812211 5. 345872 5. 26034 5. 377937  
11739800\_ 7. 816166 7. 748928 7. 794376 7. 449748 7. 445934 7. 529508  
11739801\_ 7. 899272 7. 876529 7. 820182 7. 631747 7. 597452 7. 501944  
11739802\_ 6. 95631 6. 877045 6. 971486 6. 397946 6. 332173 6. 448705  
11739803\_ 5. 259776 5. 261094 5. 322297 5. 463271 5. 281711 5. 262458  
11739804\_ 5. 548984 5. 477246 5. 634921 5. 577341 5. 576559 5. 684762  
11739805\_ 8. 978531 8. 940149 9. 011016 8. 461935 8. 461867 8. 507818  
11739806\_ 7. 226525 7. 309932 7. 504084 6. 263567 6. 208534 6. 35835  
11739807\_ 5. 47307 5. 348988 5. 398518 5. 858869 5. 954071 6. 073367  
11739808\_ 4. 807856 4. 538705 4. 837748 5. 297498 5. 312516 5. 430606  
11739809\_ 5. 387383 5. 244366 5. 572695 3. 646669 4. 011905 4. 057138  
11739810\_ 6. 367876 6. 41542 6. 404453 6. 349144 6. 327052 6. 349456  
11739811\_ 6. 394968 6. 301241 6. 274827 6. 344778 6. 579008 6. 437553  
11739812\_ 8. 848163 8. 776649 8. 821758 8. 942663 8. 998383 8. 940294  
11739813\_ 6. 121077 6. 182829 6. 254061 6. 482145 6. 426322 6. 515584  
11739814\_ 5. 489769 5. 510792 5. 483793 5. 81582 5. 820052 5. 754755  
11739815\_ 6. 244068 6. 364023 6. 132829 6. 00814 6. 128199 6. 08715  
11739816\_ 4. 415744 4. 184831 4. 00083 4. 145082 4. 108609 4. 054288  
11739817\_ 2. 994696 2. 778506 2. 73928 2. 83198 2. 929775 2. 83198  
11739818\_ 2. 89386 2. 854039 2. 833363 3. 033511 3. 057381 2. 869782  
11739819\_ 2. 988093 3. 1181 2. 972467 3. 132042 3. 020029 3. 024649  
11739820\_ 3. 205165 3. 272385 3. 025972 3. 825077 3. 560717 3. 939025  
11739821\_ 4. 271832 4. 294444 4. 139116 4. 861947 4. 580647 4. 663989  
11739822\_ 6. 814286 6. 709745 6. 779189 6. 405393 6. 543961 6. 675939  
11739823\_ 7. 941376 7. 905137 7. 911234 7. 802705 7. 777264 7. 774354  
11739824\_ 4. 586172 4. 623024 4. 671997 5. 028289 5. 064904 4. 980906  
11739825\_ 7. 427261 7. 362477 7. 367809 7. 568257 7. 557771 7. 5448  
11739826\_ 7. 6942 7. 708479 7. 677188 7. 859806 7. 90314 7. 93364  
11739827\_ 4. 696005 4. 846928 4. 615756 4. 839842 4. 757843 4. 771411  
11739828\_ 3. 202802 3. 017915 3. 264106 3. 452253 3. 555706 3. 377387  
11739829\_ 4. 882254 4. 759504 5. 037331 4. 792546 4. 779309 4. 888437  
11739830\_ 2. 434016 2. 327068 2. 307946 2. 314602 2. 401269 2. 260939  
11739831\_ 10. 14423 10. 06946 10. 11887 9. 830403 9. 798339 9. 857393  
11739832\_ 5. 350005 5. 241643 5. 317509 5. 195721 5. 138182 5. 375795  
11739833\_ 7. 439304 7. 512374 7. 377901 7. 378787 7. 514346 7. 225861

11739834\_ 8. 793858 8. 749853 8. 81375 8. 851486 8. 912233 8. 907351  
11739835\_ 5. 497177 5. 625399 5. 838596 5. 829242 5. 774449 5. 804126  
11739836\_ 4. 452969 4. 29679 4. 049183 4. 216579 4. 368851 4. 29679  
11739837\_ 9. 005056 8. 996931 9. 022161 8. 615408 8. 61236 8. 60299  
11739838\_ 4. 802888 4. 816525 4. 704107 4. 721648 4. 945233 4. 968322  
11739839\_ 2. 333262 2. 249976 2. 333262 2. 786125 2. 349185 2. 605516  
11739840\_ 6. 180219 5. 98478 6. 094488 6. 803088 6. 682073 6. 824464  
11739841\_ 4. 336873 4. 445174 4. 408115 4. 533236 4. 669594 4. 779364  
11739842\_ 5. 11527 5. 055912 5. 28944 5. 193595 5. 109584 5. 216726  
11739843\_ 4. 638294 4. 815275 4. 853586 4. 684516 4. 815275 4. 815683  
11739844\_ 2. 124215 1. 976676 2. 139464 1. 944392 2. 140138 2. 158585  
11739845\_ 6. 337984 6. 324657 6. 467516 6. 180201 6. 181978 6. 245004  
11739846\_ 5. 11527 4. 97661 5. 247139 5. 043659 5. 189318 5. 223251  
11739847\_ 5. 950434 5. 866126 5. 963703 6. 033338 6. 065982 5. 996507  
11739848\_ 5. 123762 5. 158503 5. 012463 5. 058734 5. 05556 5. 242737  
11739849\_ 6. 817986 6. 895187 6. 812962 6. 862059 6. 898793 6. 799277  
11739850\_ 4. 367279 4. 120966 4. 161764 4. 321956 4. 222685 4. 415744  
11739851\_ 3. 611231 3. 843578 3. 420784 3. 816921 3. 76832 3. 503743  
11739852\_ 4. 23353 4. 290793 4. 207246 4. 362116 4. 292717 4. 255574  
11739853\_ 6. 685707 6. 632187 6. 745192 5. 901222 5. 839055 5. 838109  
11739854\_ 9. 503153 9. 45908 9. 412068 9. 099794 8. 973831 8. 991078  
11739855\_ 3. 162677 2. 978768 3. 299483 3. 196943 3. 197646 3. 383737  
11739856\_ 6. 50983 6. 598799 6. 63201 6. 269108 6. 146561 6. 039652  
11739857\_ 6. 828461 6. 817492 6. 941845 5. 962849 5. 917359 6. 060087  
11739858\_ 6. 2915 6. 203343 6. 076114 6. 444603 6. 178725 6. 257908  
11739859\_ 4. 551641 4. 624891 4. 534846 4. 874693 4. 734533 4. 624891  
11739860\_ 10. 11271 10. 12398 10. 04016 10. 1913 10. 16863 10. 09754  
11739861\_ 11. 23934 11. 2644 11. 23847 11. 31951 11. 27126 11. 27628  
11739862\_ 4. 909219 5. 149545 5. 223858 4. 772366 4. 945969 4. 63011  
11739863\_ 8. 239589 8. 239868 8. 235699 8. 903002 8. 800771 8. 791452  
11739864\_ 7. 608958 7. 715705 7. 768039 8. 206176 8. 164044 8. 261096  
11739865\_ 4. 307877 4. 333862 4. 280893 4. 209744 4. 184797 4. 2497  
11739866\_ 5. 898734 5. 932295 5. 952236 5. 723241 5. 765223 5. 740004  
11739867\_ 6. 542336 6. 63627 6. 685572 6. 295667 6. 140081 6. 322442  
11739868\_ 7. 718365 7. 547119 7. 628726 7. 302815 7. 093371 7. 236283  
11739869\_ 4. 885767 5. 060229 4. 916769 5. 109014 4. 904136 5. 109014  
11739870\_ 6. 079881 6. 13945 6. 260434 6. 239764 6. 253893 5. 962437  
11739871\_ 5. 682728 5. 763634 5. 579451 5. 545665 5. 599732 5. 555882  
11739872\_ 6. 697906 6. 689392 6. 844446 6. 501192 6. 534227 6. 429922  
11739873\_ 5. 141576 5. 215934 5. 207702 5. 323804 5. 28013 5. 319422  
11739874\_ 6. 259395 6. 320176 6. 191462 6. 353679 6. 204913 6. 167247  
11739875\_ 8. 51482 8. 484541 8. 505758 8. 63959 8. 658487 8. 611715  
11739876\_ 9. 242688 9. 132122 9. 153496 9. 342251 9. 416071 9. 38209  
11739877\_ 8. 235147 8. 189758 8. 207191 8. 356822 8. 417832 8. 369939  
11739878\_ 6. 287009 6. 111294 6. 111294 5. 578451 5. 538591 5. 630187  
11739879\_ 6. 21008 6. 282224 6. 389366 5. 364163 5. 36323 5. 674889  
11739880\_ 8. 074947 7. 989344 8. 059795 7. 759211 7. 827046 7. 752211  
11739881\_ 6. 701484 6. 641352 6. 701484 6. 55388 6. 617811 6. 646059  
11739882\_ 7. 858412 7. 761963 7. 87173 7. 560965 7. 514346 7. 557106  
11739883\_ 4. 991228 4. 855555 4. 820302 4. 584933 4. 76191 4. 6078  
11739884\_ 8. 074575 8. 164233 8. 17613 7. 958013 7. 911661 7. 877565

11739885\_ 7. 827868 7. 806679 7. 624202 7. 666485 7. 612217 7. 507171  
11739886\_ 2. 714071 2. 62955 2. 775761 2. 838718 2. 931406 2. 705776  
11739887\_ 2. 459619 2. 4624 2. 291413 2. 441282 2. 4624 2. 555231  
11739888\_ 5. 429204 5. 401627 5. 393441 4. 464162 4. 479683 4. 711454  
11739889\_ 4. 9226 4. 829264 5. 037759 4. 823807 5. 073337 5. 031646  
11739890\_ 5. 394076 5. 392534 5. 339437 5. 414886 5. 426098 5. 34555  
11739891\_ 4. 890842 4. 791063 4. 584933 4. 736759 4. 690395 4. 773178  
11739892\_ 6. 229677 6. 37635 6. 33967 6. 192387 6. 232845 6. 276665  
11739893\_ 3. 570705 3. 507593 3. 311094 3. 675581 3. 273482 3. 376793  
11739894\_ 4. 71628 4. 675179 4. 890031 4. 397684 4. 571822 4. 675179  
11739895\_ 9. 904129 9. 841259 9. 920268 10. 17659 10. 14623 10. 18722  
11739896\_ 6. 838815 6. 814594 6. 934615 6. 752392 6. 645077 6. 746373  
11739897\_ 3. 536497 3. 279743 3. 625408 3. 263701 3. 047477 3. 172795  
11739898\_ 5. 544167 5. 367985 5. 513386 5. 321749 5. 101444 5. 325713  
11739899\_ 4. 590588 4. 354919 4. 690139 3. 988683 4. 186029 3. 896711  
11739900\_ 4. 512958 4. 473963 4. 609779 4. 37909 4. 455048 4. 415363  
11739901\_ 6. 51924 6. 460418 6. 557753 6. 421373 6. 494167 6. 418562  
11739902\_ 5. 874906 5. 844349 5. 958696 5. 733622 5. 910697 6. 052545  
11739903\_ 8. 193485 8. 123233 8. 219796 8. 004278 7. 992365 8. 000542  
11739904\_ 3. 575153 3. 462347 3. 289659 3. 409968 3. 398236 3. 326817  
11739905\_ 6. 274168 6. 300643 6. 216575 6. 058434 5. 852644 5. 984584  
11739906\_ 2. 699471 2. 468444 2. 615393 2. 553359 2. 475443 2. 575401  
11739907\_ 5. 901387 5. 956134 5. 763141 5. 975519 5. 792114 5. 824213  
11739908\_ 6. 352532 6. 271054 6. 357325 6. 273592 6. 445316 6. 328974  
11739909\_ 3. 618852 3. 490959 3. 518893 3. 60154 3. 672418 3. 577621  
11739910\_ 7. 658176 7. 583479 7. 66152 7. 433115 7. 38241 7. 402683  
11739911\_ 6. 574913 6. 412133 6. 62703 6. 371017 6. 382452 6. 307938  
11739912\_ 8. 911152 8. 889235 8. 884493 9. 052612 9. 058157 9. 101525  
11739913\_ 7. 649295 7. 491875 7. 581389 7. 49307 7. 550011 7. 572418  
11739914\_ 6. 33338 6. 239391 6. 346321 6. 470764 6. 604943 6. 545541  
11739915\_ 2. 264356 2. 006311 2. 028203 1. 946849 1. 995297 1. 90317  
11739916\_ 3. 503063 3. 789899 3. 50608 3. 589473 3. 7405 3. 786738  
11739917\_ 8. 995148 8. 95035 9. 029273 8. 678816 8. 706013 8. 716209  
11739918\_ 5. 251288 5. 448296 5. 584813 4. 93242 4. 644642 4. 708433  
11739919\_ 8. 533559 8. 461459 8. 532093 7. 751042 7. 755228 7. 765944  
11739920\_ 8. 797165 8. 716541 8. 815367 8. 031757 8. 093611 8. 11978  
11739921\_ 4. 619203 4. 815683 4. 44007 4. 793029 4. 552104 4. 652062  
11739922\_ 8. 259291 8. 244731 8. 317359 7. 920441 7. 956938 7. 897229  
11739923\_ 7. 878621 7. 916706 7. 904856 7. 523523 7. 534547 7. 490091  
11739924\_ 6. 467524 6. 41841 6. 302637 6. 36423 6. 314812 6. 266708  
11739925\_ 6. 8932 6. 728247 6. 857253 6. 400945 6. 512635 6. 434545  
11739926\_ 7. 265371 7. 270624 7. 432635 6. 808254 6. 893861 6. 872729  
11739927\_ 5. 548375 5. 446306 5. 559894 5. 979156 6. 021314 6. 246296  
11739928\_ 4. 745065 4. 874234 4. 662785 4. 721429 4. 718379 4. 796244  
11739929\_ 2. 785926 2. 945929 2. 845161 3. 068232 3. 224578 3. 061205  
11739930\_ 8. 243749 8. 211875 8. 299432 8. 526522 8. 519402 8. 476279  
11739931\_ 8. 204547 8. 272878 8. 193614 8. 637245 8. 536274 8. 552009  
11739932\_ 5. 332407 5. 020282 5. 365746 5. 991655 5. 99532 6. 062006  
11739933\_ 5. 679389 5. 400946 5. 704061 6. 409237 6. 510356 6. 529019  
11739934\_ 4. 188417 4. 180366 4. 188417 4. 240495 4. 00969 4. 347179  
11739935\_ 6. 986138 7. 01851 7. 079502 6. 890396 6. 986138 7. 043127

11739936\_ 8. 110621 8. 101242 8. 064267 8. 279962 8. 212457 8. 296129  
11739937\_ 7. 562507 7. 607894 7. 576132 7. 286154 7. 303408 7. 26556  
11739938\_ 5. 205884 5. 389751 5. 155167 5. 350069 5. 280509 5. 073036  
11739939\_ 6. 739224 6. 662649 6. 707082 6. 187189 6. 147402 6. 146868  
11739940\_ 6. 44986 6. 568865 6. 519306 6. 639396 6. 700774 6. 570194  
11739941\_ 7. 796268 7. 800075 7. 725657 7. 997721 7. 918886 7. 851718  
11739942\_ 6. 143923 6. 271011 6. 163105 6. 561178 6. 505226 6. 551138  
11739943\_ 6. 577168 6. 570803 6. 608038 6. 121538 6. 121538 6. 162065  
11739944\_ 11. 11384 11. 08975 11. 04808 10. 83312 10. 78831 10. 75123  
11739945\_ 4. 818827 4. 848638 4. 574026 4. 5783 4. 771179 4. 843028  
11739946\_ 5. 358167 5. 566034 5. 517701 5. 587213 5. 582573 5. 630395  
11739947\_ 3. 228879 3. 18202 3. 059654 3. 200038 3. 257106 3. 177989  
11739948\_ 4. 481069 4. 516982 4. 410039 4. 538382 4. 73863 4. 562622  
11739949\_ 4. 021151 3. 921193 4. 156459 4. 114605 3. 830302 4. 145054  
11739950\_ 6. 101584 6. 073511 6. 119756 6. 14141 6. 135635 6. 219382  
11739951\_ 5. 174998 5. 031941 5. 190379 5. 232644 5. 263745 5. 276627  
11739952\_ 5. 123765 5. 19421 5. 189001 5. 334941 5. 374791 5. 214136  
11739953\_ 5. 204228 5. 010934 5. 216296 4. 458587 4. 336988 4. 389033  
11739954\_ 2. 179002 2. 457414 2. 363482 2. 334159 2. 363482 2. 26955  
11739955\_ 5. 45725 5. 475216 5. 384191 5. 51549 5. 58565 5. 550298  
11739956\_ 7. 781182 7. 701561 7. 74477 7. 636309 7. 625672 7. 581908  
11739957\_ 6. 918465 6. 883171 6. 963982 6. 351433 6. 32382 6. 353691  
11739958\_ 8. 908699 8. 898952 8. 945258 8. 453915 8. 494991 8. 433267  
11739959\_ 5. 219871 5. 42643 5. 114238 5. 308973 5. 19012 5. 174548  
11739960\_ 8. 170121 8. 015347 8. 145683 7. 437625 7. 471797 7. 424613  
11739961\_ 6. 577549 6. 426104 6. 498759 6. 414163 6. 361307 6. 475136  
11739962\_ 3. 918616 4. 009809 4. 211603 4. 135496 4. 380166 4. 122446  
11739963\_ 4. 943803 4. 972934 4. 959746 4. 984927 4. 92551 5. 093839  
11739964\_ 5. 610941 5. 475368 5. 507493 5. 702946 5. 686361 5. 736603  
11739965\_ 5. 260952 5. 199203 5. 324848 4. 319713 3. 995297 4. 353887  
11739966\_ 5. 92078 5. 938482 5. 959155 6. 009346 5. 958546 6. 068099  
11739967\_ 5. 258822 4. 874234 5. 154124 5. 568419 5. 554436 5. 471519  
11739968\_ 5. 885111 5. 774563 5. 8411 6. 097927 6. 025952 5. 984435  
11739969\_ 7. 779732 7. 658758 7. 863124 7. 795522 7. 782778 7. 745233  
11739970\_ 6. 051554 6. 209545 6. 265559 6. 179116 6. 116964 6. 127627  
11739971\_ 5. 341156 5. 113485 5. 25542 5. 050129 4. 891929 5. 040413  
11739972\_ 7. 237311 7. 30061 7. 459502 6. 609721 6. 529402 6. 731159  
11739973\_ 8. 161528 8. 194145 8. 209853 6. 943243 6. 923348 6. 879849  
11739974\_ 4. 336775 4. 309706 4. 082787 3. 847964 3. 614586 3. 800921  
11739975\_ 6. 220907 6. 186428 6. 220907 5. 321749 5. 469811 5. 557521  
11739976\_ 6. 391245 6. 407949 6. 415291 6. 280551 6. 279059 6. 21407  
11739977\_ 9. 039983 8. 952588 8. 914379 8. 495375 8. 507078 8. 437239  
11739978\_ 8. 813348 8. 74251 8. 840578 8. 065373 8. 027813 8. 135128  
11739979\_ 8. 713569 8. 658889 8. 740197 8. 25504 8. 295278 8. 221563  
11739980\_ 3. 945141 4. 050361 4. 197689 3. 684082 3. 500546 3. 679155  
11739981\_ 4. 65412 4. 594736 4. 741301 4. 148933 4. 295652 4. 156266  
11739982\_ 7. 309403 7. 357631 7. 263614 7. 353337 7. 405043 7. 322708  
11739983\_ 6. 583802 6. 514758 6. 351808 6. 338868 6. 270799 6. 368967  
11739984\_ 3. 884802 4. 250934 4. 132889 3. 925181 4. 018213 3. 93338  
11739985\_ 6. 068897 5. 938482 6. 044812 5. 768533 5. 718683 5. 847299  
11739986\_ 7. 214389 7. 017641 7. 21401 6. 935996 6. 867606 7. 008373

11739987\_ 5. 852648 5. 958233 6. 124354 5. 351292 5. 437065 5. 228627  
11739988\_ 6. 260688 6. 060593 6. 221679 6. 137272 6. 081962 6. 005502  
11739989\_ 7. 774672 7. 731071 7. 790617 7. 189386 7. 182609 7. 110807  
11739990\_ 7. 243049 7. 309361 7. 202891 7. 973522 7. 695241 7. 668294  
11739991\_ 10. 50703 10. 44175 10. 4886 10. 56752 10. 53343 10. 59543  
11739992\_ 2. 765467 2. 783466 2. 767717 2. 985023 2. 47102 2. 877081  
11739993\_ 4. 709456 4. 961869 4. 824195 4. 945089 4. 872212 4. 984669  
11739994\_ 4. 100436 4. 172386 3. 991529 3. 832308 4. 04574 3. 962032  
11739995\_ 5. 750693 5. 738539 5. 726318 5. 83581 5. 795696 5. 847344  
11739996\_ 9. 800728 9. 799503 9. 880498 9. 583643 9. 561527 9. 619485  
11739997\_ 9. 476736 9. 411147 9. 454312 9. 441205 9. 381658 9. 420651  
11739998\_ 9. 193389 9. 177375 9. 253397 9. 129122 9. 094275 9. 109382  
11739999\_ 5. 337892 5. 41225 5. 737584 4. 606009 4. 922865 4. 56442  
11740000\_ 7. 231513 7. 088244 7. 098494 6. 13945 6. 114345 6. 257787  
11740001\_ 9. 682344 9. 668614 9. 692094 9. 6995 9. 716261 9. 647584  
11740002\_ 6. 963286 6. 81884 7. 022436 7. 301916 7. 32958 7. 441488  
11740003\_ 4. 896109 4. 592113 4. 772366 4. 858974 4. 996577 4. 906658  
11740004\_ 6. 44007 6. 403804 6. 401141 6. 807724 6. 736097 6. 782236  
11740005\_ 4. 843166 4. 935416 5. 079541 4. 496247 4. 234187 4. 064863  
11740006\_ 6. 943706 6. 702809 6. 925025 5. 993234 6. 021252 6. 168619  
11740007\_ 5. 06274 5. 144406 5. 178413 5. 905482 5. 821889 5. 755386  
11740008\_ 4. 812467 4. 853215 4. 772366 5. 189628 5. 423696 5. 280971  
11740009\_ 3. 952146 3. 900538 3. 926098 3. 938662 3. 982572 4. 054148  
11740010\_ 2. 726589 2. 763269 2. 836177 2. 747293 2. 65368 2. 578824  
11740011\_ 5. 151139 5. 303808 5. 373547 5. 221101 4. 944095 5. 199385  
11740012\_ 4. 634374 4. 0286 4. 265504 5. 280641 5. 426098 5. 126332  
11740013\_ 7. 177141 6. 853286 7. 071202 7. 869457 7. 923585 7. 832669  
11740014\_ 4. 120861 4. 120861 4. 008055 4. 074058 4. 275543 3. 941462  
11740015\_ 5. 24712 5. 267658 5. 218407 5. 250672 5. 282614 5. 321606  
11740016\_ 5. 23156 5. 15491 5. 036826 5. 286758 5. 183024 5. 23156  
11740017\_ 4. 853277 4. 764254 4. 832083 4. 804324 4. 959261 4. 922957  
11740018\_ 6. 39475 6. 488788 6. 675655 6. 318829 6. 320344 6. 503287  
11740019\_ 3. 587944 3. 769051 3. 736764 3. 807896 3. 92703 3. 902315  
11740020\_ 4. 700893 4. 59683 4. 470879 4. 784385 4. 639689 4. 676198  
11740021\_ 5. 60493 5. 601066 5. 676499 5. 807245 5. 727589 5. 763032  
11740022\_ 4. 501984 4. 431326 4. 477915 5. 017418 4. 788118 4. 756231  
11740023\_ 5. 370225 5. 512326 5. 601519 5. 606706 5. 509879 5. 444272  
11740024\_ 7. 998978 7. 985886 8. 036658 7. 673746 7. 785293 7. 761174  
11740025\_ 4. 338375 4. 279306 4. 3132 4. 162991 4. 51091 4. 225281  
11740026\_ 4. 812015 4. 820708 4. 715201 4. 901493 4. 954226 4. 718447  
11740027\_ 2. 492473 2. 490691 2. 379667 2. 381449 2. 480729 2. 463381  
11740028\_ 8. 003194 7. 943462 7. 95681 7. 874799 7. 832082 7. 862907  
11740029\_ 6. 466647 6. 474931 6. 410029 6. 361252 6. 177345 6. 400249  
11740030\_ 8. 225727 8. 13649 8. 189456 8. 125267 8. 043558 8. 016605  
11740031\_ 7. 424592 7. 355613 7. 349168 7. 230373 7. 254638 7. 299162  
11740032\_ 9. 531435 9. 485893 9. 546885 9. 017833 9. 050447 9. 061292  
11740033\_ 9. 810478 9. 72582 9. 770188 9. 780637 9. 819781 9. 776998  
11740034\_ 5. 883984 5. 757175 5. 568431 5. 91173 5. 928427 5. 894697  
11740035\_ 5. 856663 5. 630902 5. 692069 5. 513886 5. 556947 5. 630902  
11740036\_ 4. 843787 4. 903311 5. 160904 5. 418643 5. 238997 5. 265418  
11740037\_ 4. 994283 4. 794966 5. 089672 4. 888821 5. 01482 4. 841499



11740038\_ 8. 403911 8. 371431 8. 451742 8. 260034 8. 239076 8. 22446  
11740039\_ 7. 798176 7. 732456 7. 784337 7. 964715 8. 028802 7. 963796  
11740040\_ 9. 745143 9. 678352 9. 715649 9. 709891 9. 74787 9. 742175  
11740041\_ 5. 270395 5. 539063 5. 426927 5. 725953 5. 878914 5. 760621  
11740042\_ 3. 509587 3. 649475 3. 542184 3. 20672 3. 657138 3. 474216  
11740043\_ 7. 46897 7. 25258 7. 351261 7. 490219 7. 535063 7. 577533  
11740044\_ 7. 738907 7. 689578 7. 844238 7. 93499 7. 864023 8. 015259  
11740045\_ 6. 297933 6. 292385 6. 396918 5. 715178 5. 80472 5. 93686  
11740046\_ 8. 135163 8. 095944 8. 128995 8. 123233 8. 167405 8. 131293  
11740047\_ 7. 994568 7. 92845 7. 954159 8. 101723 8. 108877 8. 066041  
11740048\_ 5. 926672 5. 944348 5. 956869 5. 161265 5. 133401 5. 258921  
11740049\_ 6. 06222 5. 855596 6. 037215 5. 102553 5. 043779 5. 239232  
11740050\_ 3. 993074 4. 096802 4. 006982 3. 917514 3. 618728 3. 937136  
11740051\_ 2. 988093 2. 705427 2. 745739 2. 451572 2. 802853 2. 408354  
11740052\_ 5. 511133 5. 671765 5. 475885 6. 148595 6. 149798 6. 131623  
11740053\_ 4. 202474 4. 118892 4. 192712 4. 208565 4. 117619 4. 37553  
11740054\_ 7. 922772 7. 94625 7. 960392 8. 812751 8. 933977 8. 830222  
11740055\_ 5. 680271 5. 776115 5. 497842 5. 618567 5. 655704 5. 593686  
11740056\_ 6. 168302 6. 185467 6. 20317 6. 063086 6. 138757 5. 990952  
11740057\_ 2. 364492 2. 47102 2. 155597 2. 495387 2. 530601 2. 255109  
11740058\_ 2. 73596 2. 805185 2. 805185 2. 829435 2. 805185 2. 837815  
11740059\_ 5. 506917 5. 671251 5. 554436 5. 538874 5. 604219 5. 537096  
11740060\_ 3. 014718 2. 961593 3. 012613 2. 999347 2. 988951 3. 052472  
11740061\_ 7. 783385 7. 751516 7. 758996 7. 597087 7. 718841 7. 652861  
11740062\_ 8. 904683 8. 863887 8. 955076 9. 147609 9. 173006 9. 10062  
11740063\_ 7. 848996 7. 798603 7. 827833 7. 719705 7. 681263 7. 796471  
11740064\_ 6. 324983 6. 130742 6. 237669 6. 289831 6. 300643 6. 4073  
11740065\_ 5. 870242 5. 865158 5. 864724 5. 743689 5. 837921 5. 800923  
11740066\_ 6. 540105 6. 500671 6. 50263 5. 370568 5. 39075 5. 619251  
11740067\_ 7. 007439 6. 944604 6. 876156 6. 393261 6. 373477 6. 372053  
11740068\_ 3. 009704 3. 340979 3. 1442 3. 127394 3. 052624 3. 024825  
11740069\_ 2. 42731 2. 400406 2. 432119 2. 524283 2. 29818 2. 16629  
11740070\_ 2. 798976 2. 722141 2. 879657 2. 819734 2. 8149 2. 738018  
11740071\_ 8. 756318 8. 702863 8. 7549 8. 627573 8. 690245 8. 671831  
11740072\_ 8. 290382 8. 309225 8. 291522 8. 36622 8. 22567 8. 266598  
11740073\_ 8. 774941 8. 671291 8. 799795 8. 693253 8. 647389 8. 735586  
11740074\_ 5. 073036 5. 151927 4. 988679 4. 903682 4. 849431 4. 781656  
11740075\_ 2. 259823 2. 007015 2. 296805 2. 102517 2. 488211 2. 206494  
11740076\_ 4. 200678 4. 132023 3. 939983 4. 088729 4. 145965 4. 023435  
11740077\_ 3. 979013 3. 917832 4. 193884 3. 905201 4. 044028 4. 297472  
11740078\_ 5. 954081 5. 846252 6. 051925 5. 633325 5. 650641 5. 808448  
11740079\_ 6. 397946 6. 614461 6. 501372 6. 673774 6. 755123 6. 722329  
11740080\_ 2. 413623 2. 394019 2. 163837 2. 394019 2. 316621 2. 315853  
11740081\_ 5. 99525 5. 945537 6. 098148 6. 326663 6. 281099 6. 374754  
11740082\_ 9. 562167 9. 434773 9. 56434 9. 670066 9. 671237 9. 62731  
11740083\_ 4. 211497 3. 830192 4. 100867 5. 028729 5. 193635 5. 180745  
11740084\_ 5. 569166 5. 748494 5. 717722 5. 828352 5. 734227 5. 81426  
11740085\_ 9. 63146 9. 597093 9. 60938 9. 563938 9. 6381 9. 624924  
11740086\_ 9. 628133 9. 585566 9. 627265 9. 619033 9. 598758 9. 591825  
11740087\_ 9. 204803 9. 094975 9. 197204 9. 265994 9. 30491 9. 252898  
11740088\_ 4. 76927 4. 872139 4. 744755 4. 525517 4. 74574 4. 866013

11740089\_ 6. 151582 6. 13945 6. 078353 6. 192614 6. 176192 6. 151582  
11740090\_ 5. 758725 5. 576146 5. 794191 5. 887764 5. 884339 5. 938792  
11740091\_ 3. 167111 3. 124877 2. 967823 3. 081369 3. 0651 2. 958907  
11740092\_ 6. 604827 6. 590646 6. 680809 6. 533538 6. 475262 6. 594994  
11740093\_ 6. 049781 6. 324111 6. 181329 6. 392423 6. 343517 6. 309898  
11740094\_ 4. 6428 4. 730756 4. 699462 4. 728565 4. 684169 4. 726601  
11740095\_ 2. 682009 2. 569203 2. 686813 2. 548421 2. 520843 2. 667908  
11740096\_ 6. 065364 6. 057913 6. 130595 5. 666659 5. 746415 5. 84608  
11740097\_ 7. 816851 7. 703464 7. 751238 6. 930155 6. 990797 7. 014383  
11740098\_ 3. 922399 3. 736639 3. 875139 3. 606313 3. 661359 3. 65933  
11740099\_ 5. 252837 5. 239641 5. 297498 5. 066788 5. 149205 4. 904938  
11740100\_ 5. 700557 5. 629629 5. 619785 5. 451019 5. 484823 5. 346497  
11740101\_ 4. 733363 4. 62839 4. 495455 4. 589387 4. 679956 4. 674238  
11740102\_ 2. 866873 2. 791045 2. 531434 2. 573934 2. 933172 2. 933172  
11740103\_ 8. 463341 8. 425808 8. 372027 8. 247033 8. 277554 8. 314645  
11740104\_ 4. 838432 5. 160509 4. 746077 4. 99196 4. 949064 4. 943008  
11740105\_ 5. 623641 5. 583644 5. 608858 6. 414953 6. 516829 6. 63177  
11740106\_ 3. 400368 3. 486978 3. 579069 3. 591377 3. 414637 3. 692683  
11740107\_ 7. 656991 7. 643914 7. 659285 7. 713059 7. 629408 7. 717707  
11740108\_ 6. 275519 6. 198899 6. 058712 6. 351275 6. 488486 6. 32799  
11740109\_ 7. 603554 7. 553705 7. 646153 7. 271974 7. 2648 7. 313001  
11740110\_ 5. 347404 5. 422502 5. 417221 5. 490903 5. 337346 5. 433446  
11740111\_ 7. 98465 7. 891403 7. 984865 8. 605252 8. 632486 8. 621042  
11740112\_ 5. 21992 4. 967933 5. 146094 4. 631822 4. 595594 4. 637883  
11740113\_ 4. 020428 3. 986001 3. 946552 3. 941043 4. 011734 3. 856456  
11740114\_ 3. 860478 3. 907366 3. 877409 3. 262379 3. 341928 3. 684712  
11740115\_ 4. 400595 4. 630996 4. 472578 4. 39787 4. 4662 4. 362452  
11740116\_ 5. 517902 5. 241227 5. 29834 5. 326751 5. 471481 5. 40093  
11740117\_ 8. 116982 8. 116488 8. 174235 7. 924782 7. 86937 7. 916336  
11740118\_ 8. 309509 8. 291054 8. 242356 8. 928081 8. 800345 8. 895935  
11740119\_ 7. 872888 7. 793875 7. 836163 8. 370678 8. 349296 8. 37161  
11740120\_ 6. 159771 6. 225513 6. 35431 7. 087171 7. 03236 7. 155416  
11740121\_ 5. 961146 5. 986727 6. 024478 5. 632504 5. 598223 5. 482958  
11740122\_ 6. 865389 6. 904819 6. 820115 6. 173161 6. 104637 6. 282224  
11740123\_ 6. 591336 6. 545155 6. 392286 5. 754514 5. 868593 5. 863577  
11740124\_ 3. 903083 4. 18917 4. 026885 4. 347179 4. 389498 4. 528166  
11740125\_ 4. 680301 4. 790221 4. 709463 4. 964548 5. 020064 5. 173422  
11740126\_ 6. 867436 6. 936061 6. 924856 5. 527414 5. 578047 5. 731524  
11740127\_ 3. 2246 3. 612309 3. 449262 2. 811411 3. 058126 2. 803582  
11740128\_ 7. 545744 7. 521399 7. 606384 6. 956535 6. 985404 6. 876322  
11740129\_ 4. 409404 4. 42063 4. 12041 4. 493175 4. 323799 4. 397652  
11740130\_ 5. 844614 5. 767969 5. 807828 5. 995558 5. 91435 5. 921328  
11740131\_ 6. 331821 6. 373356 6. 447966 6. 393288 6. 467886 6. 524881  
11740132\_ 7. 351443 7. 382221 7. 476703 6. 902585 6. 816056 6. 876456  
11740133\_ 8. 201356 8. 157423 8. 133716 7. 610336 7. 642161 7. 556802  
11740134\_ 9. 571508 9. 543407 9. 546975 9. 294371 9. 364212 9. 272004  
11740135\_ 6. 792271 6. 765911 6. 929815 6. 481046 6. 481046 6. 504764  
11740136\_ 5. 203289 5. 17106 4. 961037 5. 105739 4. 93837 4. 949435  
11740137\_ 2. 096452 2. 260624 2. 354556 2. 125438 2. 287356 2. 012222  
11740138\_ 2. 661919 2. 664278 2. 751662 2. 446652 2. 537255 2. 440028  
11740139\_ 5. 202182 5. 359077 5. 26034 5. 525125 5. 371181 5. 475572

11740140\_ 6. 434157 6. 338007 6. 568818 5. 158724 4. 959803 5. 11527  
11740141\_ 6. 159771 6. 139519 6. 210878 6. 108453 6. 142856 6. 152692  
11740142\_ 4. 469092 4. 610259 4. 213226 4. 556653 4. 700243 4. 685246  
11740143\_ 5. 40777 5. 306801 5. 544639 5. 550736 5. 434523 5. 633783  
11740144\_ 7. 111817 6. 998064 7. 007439 6. 909833 6. 907553 6. 908103  
11740145\_ 8. 850559 8. 777935 8. 840082 8. 651851 8. 72768 8. 623613  
11740146\_ 5. 936665 5. 98478 6. 231986 6. 101022 6. 106234 6. 280781  
11740147\_ 4. 874234 4. 759038 4. 836998 4. 843578 4. 80021 4. 761124  
11740148\_ 7. 128385 6. 775039 6. 891991 5. 949261 5. 961259 5. 969351  
11740149\_ 4. 327369 4. 181489 4. 284615 4. 419324 4. 341425 4. 316416  
11740150\_ 4. 445191 4. 497665 4. 318725 4. 665226 4. 488836 4. 533141  
11740151\_ 3. 171473 3. 713804 3. 186884 3. 240487 3. 240487 3. 302159  
11740152\_ 5. 022853 5. 379971 5. 306152 5. 210664 5. 184284 5. 337607  
11740153\_ 6. 312989 5. 998224 6. 117791 6. 027069 6. 042276 6. 00279  
11740154\_ 8. 719566 8. 719168 8. 75108 8. 461896 8. 502364 8. 494565  
11740155\_ 4. 258068 4. 094924 4. 217359 4. 191201 4. 248353 4. 086434  
11740156\_ 5. 433872 5. 195689 5. 280212 4. 776231 4. 907928 4. 925791  
11740157\_ 4. 343154 4. 286736 4. 376877 4. 030739 4. 122446 4. 142772  
11740158\_ 6. 488279 6. 386401 6. 40375 6. 495511 6. 630489 6. 605489  
11740159\_ 2. 573999 2. 685618 2. 700068 2. 690522 2. 611221 2. 642251  
11740160\_ 6. 717371 6. 624789 6. 66002 6. 679724 6. 587762 6. 74942  
11740161\_ 4. 248027 4. 356838 4. 189988 4. 617834 4. 562629 4. 496833  
11740162\_ 6. 322196 6. 311716 6. 282224 6. 523484 6. 605974 6. 617088  
11740163\_ 4. 180688 4. 250985 4. 271261 4. 365631 4. 148233 4. 195153  
11740164\_ 5. 640205 5. 639651 5. 584813 5. 548172 5. 560693 5. 593038  
11740165\_ 3. 925181 3. 998711 3. 844103 3. 997465 3. 998711 3. 974389  
11740166\_ 6. 466512 6. 377847 6. 580968 6. 890112 6. 834975 6. 875053  
11740167\_ 3. 957782 4. 053394 4. 026092 3. 824133 4. 029316 3. 996588  
11740168\_ 5. 28514 5. 256256 5. 425889 5. 428159 5. 453793 5. 409222  
11740169\_ 5. 524362 5. 454207 5. 460081 5. 545181 5. 477035 5. 492863  
11740170\_ 5. 999888 5. 667517 5. 972389 4. 64263 4. 707518 4. 765014  
11740171\_ 7. 56103 7. 575139 7. 578133 7. 914814 7. 846308 7. 822681  
11740172\_ 8. 901839 8. 847272 8. 948357 7. 747246 7. 781627 7. 90165  
11740173\_ 8. 415123 8. 459546 8. 452006 7. 535719 7. 501514 7. 52542  
11740174\_ 2. 038409 2. 22079 2. 329272 2. 033261 1. 859683 2. 229314  
11740175\_ 6. 206103 6. 071867 6. 248258 5. 630757 5. 675894 5. 643592  
11740176\_ 6. 68154 6. 705803 6. 716277 6. 465474 6. 3963 6. 517655  
11740177\_ 4. 205251 3. 984415 4. 172581 4. 135496 4. 102485 4. 192254  
11740178\_ 5. 10974 5. 10977 4. 98416 5. 398073 5. 420334 5. 465911  
11740179\_ 5. 400187 5. 238071 5. 376447 5. 09313 5. 073036 5. 043011  
11740180\_ 5. 622597 5. 653296 5. 597943 5. 673898 5. 736831 5. 737807  
11740181\_ 9. 998579 9. 986766 10. 01851 9. 706127 9. 745404 9. 640342  
11740182\_ 6. 471916 6. 423892 6. 281592 6. 015941 6. 156121 6. 095502  
11740183\_ 4. 00509 4. 082906 4. 166362 3. 9925 3. 82506 3. 954157  
11740184\_ 6. 712361 6. 809383 6. 713775 6. 992279 6. 869075 6. 861162  
11740185\_ 5. 760847 5. 849848 6. 056838 5. 80743 5. 97975 6. 020383  
11740186\_ 6. 547514 6. 636836 6. 622913 6. 303296 6. 285385 6. 24707  
11740187\_ 3. 180186 3. 180632 2. 893617 3. 025972 3. 194287 3. 194287  
11740188\_ 1. 786746 1. 781991 1. 883719 2. 021965 1. 781991 1. 766697  
11740189\_ 8. 873061 8. 849799 8. 873534 8. 9028 8. 950406 8. 917639  
11740190\_ 7. 409349 7. 299695 7. 504457 6. 393443 6. 417208 6. 466539

11740191\_ 6. 240513 6. 450382 6. 405391 6. 260207 6. 382418 6. 375085  
11740192\_ 7. 438802 7. 469763 7. 474457 8. 073222 8. 008454 8. 052925  
11740193\_ 8. 501832 8. 392536 8. 440154 8. 667717 8. 64044 8. 622081  
11740194\_ 9. 906519 9. 842573 9. 83424 9. 925895 9. 928554 9. 84673  
11740195\_ 7. 346936 7. 361935 7. 339928 6. 8913 6. 982797 6. 931551  
11740196\_ 7. 283525 7. 276587 7. 334266 6. 88422 6. 976207 6. 993757  
11740197\_ 2. 995965 2. 794661 3. 154271 3. 629896 3. 347474 3. 833515  
11740198\_ 4. 646822 4. 943047 4. 873641 4. 889674 4. 874407 4. 822475  
11740199\_ 5. 688264 5. 874777 5. 620069 5. 844349 5. 821979 5. 828827  
11740200\_ 7. 540242 7. 676457 7. 70849 7. 307928 7. 420702 7. 500141  
11740201\_ 5. 42572 5. 492292 5. 380459 5. 319256 5. 318718 5. 296085  
11740202\_ 7. 062816 7. 057523 7. 010588 6. 96667 7. 075487 7. 084479  
11740203\_ 8. 040744 8. 011528 7. 974991 7. 767837 7. 759281 7. 593665  
11740204\_ 5. 962848 5. 934192 5. 844533 5. 938679 5. 908496 5. 869157  
11740205\_ 5. 302242 5. 449538 5. 205872 5. 516926 5. 320149 5. 507  
11740206\_ 3. 158576 2. 706893 3. 188345 3. 367811 3. 465599 3. 526891  
11740207\_ 4. 463874 4. 74961 4. 589943 4. 874604 4. 74961 4. 719375  
11740208\_ 3. 646486 3. 645818 3. 302418 4. 025401 4. 275543 4. 210848  
11740209\_ 3. 039901 3. 254471 3. 161566 2. 902199 2. 926795 3. 006576  
11740210\_ 3. 764419 3. 37008 3. 280794 3. 296827 3. 15389 3. 270398  
11740211\_ 9. 301737 9. 188083 9. 243427 9. 08208 9. 118974 9. 093594  
11740212\_ 2. 388126 2. 416656 2. 276745 2. 177197 2. 331989 2. 263831  
11740213\_ 9. 553689 9. 534064 9. 589498 9. 56147 9. 536502 9. 504685  
11740214\_ 7. 835582 7. 812149 7. 87671 8. 159005 8. 209076 8. 115121  
11740215\_ 3. 860202 4. 025689 4. 013447 3. 987646 3. 996734 4. 005486  
11740216\_ 3. 990575 3. 888678 3. 82933 3. 325738 3. 323948 3. 582785  
11740217\_ 2. 116563 2. 420424 2. 374129 2. 186813 2. 361778 2. 095256  
11740218\_ 4. 586558 4. 456439 4. 387485 4. 494947 4. 685311 4. 660555  
11740219\_ 6. 210276 5. 989658 6. 157426 5. 894697 5. 63358 5. 79925  
11740220\_ 5. 152729 5. 055756 5. 060079 5. 131412 4. 972959 5. 281895  
11740221\_ 3. 262087 3. 469504 3. 290188 3. 655011 3. 580579 3. 786777  
11740222\_ 5. 255562 5. 254186 5. 265603 5. 304149 5. 352308 5. 341336  
11740223\_ 6. 740724 6. 709406 6. 573089 6. 739792 6. 788918 6. 700779  
11740224\_ 5. 343144 5. 279943 5. 247419 5. 353369 5. 622441 5. 37232  
11740225\_ 5. 944774 6. 147292 5. 946024 6. 126061 6. 174221 6. 099447  
11740226\_ 2. 568214 2. 722036 2. 641114 2. 744527 2. 707892 2. 742694  
11740227\_ 2. 746345 2. 617886 2. 499043 2. 488131 2. 573507 2. 831749  
11740228\_ 4. 330563 4. 409909 4. 287593 4. 377994 4. 552198 4. 347179  
11740229\_ 5. 561693 5. 655773 5. 438741 5. 482668 5. 406628 5. 632761  
11740230\_ 5. 449924 5. 274396 5. 472582 5. 081477 5. 185267 5. 101769  
11740231\_ 8. 340179 8. 25512 8. 274369 8. 224235 8. 224938 8. 236602  
11740232\_ 6. 996182 6. 953406 7. 042569 7. 194368 7. 153123 7. 271874  
11740233\_ 6. 932599 6. 8888 7. 003468 6. 89388 6. 910517 6. 920256  
11740234\_ 5. 901772 5. 72039 5. 803328 5. 810957 5. 812654 5. 946303  
11740235\_ 5. 102032 5. 345598 5. 524604 4. 584933 4. 890539 5. 006695  
11740236\_ 4. 749857 4. 643717 4. 799093 5. 025558 5. 009609 4. 850215  
11740237\_ 8. 052248 8. 011199 8. 079293 8. 429108 8. 446983 8. 444613  
11740238\_ 9. 411147 9. 385709 9. 390999 8. 421885 8. 342653 8. 316148  
11740239\_ 4. 524604 4. 310572 4. 356024 4. 584079 4. 638437 4. 546017  
11740240\_ 6. 091382 6. 192874 6. 108436 6. 336195 6. 268689 6. 30413  
11740241\_ 5. 727591 5. 854483 5. 78209 6. 095832 6. 097242 6. 134616

11740242\_ 2. 995137 3. 168702 3. 207158 2. 815712 3. 003017 2. 839417  
11740243\_ 3. 049616 3. 049616 3. 164379 3. 081461 3. 0735 2. 810146  
11740244\_ 6. 369796 6. 464805 6. 315993 6. 34864 6. 447724 6. 434471  
11740245\_ 3. 750778 3. 847767 4. 366458 3. 258456 3. 078798 3. 317121  
11740246\_ 4. 652834 4. 896791 4. 634639 4. 763833 4. 729315 4. 675847  
11740247\_ 6. 332174 6. 331412 6. 336201 6. 395906 6. 38405 6. 349198  
11740248\_ 7. 556269 7. 5413 7. 608334 7. 046767 6. 871115 6. 904636  
11740249\_ 3. 017881 2. 836919 2. 855862 3. 20796 2. 927507 3. 080252  
11740250\_ 9. 918512 9. 969473 9. 896142 10. 07859 9. 954916 9. 949964  
11740251\_ 8. 68064 8. 669443 8. 73467 8. 603989 8. 645909 8. 529257  
11740252\_ 8. 23694 8. 114666 8. 189529 8. 234552 8. 254218 8. 27527  
11740253\_ 7. 288775 7. 285735 7. 322744 7. 921656 7. 910706 7. 860183  
11740254\_ 3. 598533 3. 719255 3. 38072 3. 587356 3. 746846 3. 799324  
11740255\_ 3. 259745 3. 370783 3. 289287 3. 267312 3. 388415 3. 550609  
11740256\_ 7. 551987 7. 560201 7. 694613 7. 865277 7. 881406 7. 887533  
11740257\_ 6. 539705 6. 436889 6. 533283 5. 912474 5. 6925 5. 86646  
11740258\_ 5. 880649 5. 967915 5. 896169 5. 892623 5. 687186 5. 762395  
11740259\_ 5. 934846 5. 964472 5. 958557 6. 197494 6. 142425 6. 156625  
11740260\_ 6. 82599 6. 78947 6. 888821 7. 101295 7. 115474 7. 079035  
11740261\_ 5. 789947 5. 808496 5. 77812 5. 150902 4. 698372 4. 98189  
11740262\_ 6. 277066 6. 459546 6. 329717 6. 382396 6. 350177 6. 178751  
11740263\_ 4. 235945 4. 089991 4. 175307 4. 15477 4. 094587 4. 156341  
11740264\_ 5. 512912 5. 540015 5. 389396 5. 556651 5. 609647 5. 704919  
11740265\_ 6. 738061 6. 822242 6. 961658 6. 794362 6. 800887 6. 829553  
11740266\_ 5. 486389 5. 609422 5. 431491 6. 127832 6. 158281 5. 985684  
11740267\_ 4. 904244 4. 940461 4. 823518 5. 050404 5. 049627 5. 096885  
11740268\_ 4. 859137 4. 832684 4. 721244 4. 870856 4. 799753 4. 831844  
11740269\_ 5. 968521 6. 142365 6. 136073 6. 16343 6. 161079 6. 08365  
11740270\_ 5. 55388 5. 701678 5. 665822 5. 614967 5. 6407 5. 590625  
11740271\_ 4. 24162 4. 250934 4. 240295 4. 333974 4. 275543 4. 346425  
11740272\_ 2. 560978 2. 776785 2. 560978 2. 395901 2. 806578 2. 59454  
11740273\_ 4. 601542 4. 706223 4. 672238 4. 668808 4. 650694 4. 710626  
11740274\_ 5. 007363 5. 048974 5. 008947 5. 221976 5. 140241 5. 276051  
11740275\_ 6. 105885 6. 209026 6. 063466 6. 172154 6. 144511 6. 197918  
11740276\_ 4. 801216 4. 806038 4. 704244 4. 772488 4. 820084 4. 828729  
11740277\_ 3. 398472 3. 628517 3. 429301 3. 524022 3. 530291 3. 202526  
11740278\_ 9. 471258 9. 445429 9. 480405 9. 219871 9. 211818 9. 231452  
11740279\_ 4. 862737 4. 948241 4. 802051 5. 044296 4. 928811 5. 029551  
11740280\_ 4. 436937 4. 331775 4. 171165 3. 939763 4. 050301 4. 054288  
11740281\_ 3. 595192 3. 516178 3. 8085 3. 994385 4. 119379 4. 133069  
11740282\_ 7. 076762 7. 00627 7. 093703 6. 941793 6. 994129 6. 932697  
11740283\_ 5. 959506 6. 015053 5. 869086 5. 8826 6. 031713 5. 974694  
11740284\_ 2. 177565 2. 345002 2. 413698 2. 220332 2. 306152 2. 44197  
11740285\_ 2. 749263 2. 559976 2. 495922 2. 511017 2. 511017 2. 53162  
11740286\_ 5. 453792 5. 473477 5. 510055 5. 434019 5. 426098 5. 568012  
11740287\_ 6. 582481 6. 418616 6. 524825 7. 257912 7. 282117 7. 296163  
11740288\_ 4. 170862 4. 287399 4. 165031 4. 324883 4. 305358 4. 258256  
11740289\_ 4. 041465 4. 451426 4. 428169 4. 3861 4. 464254 4. 461288  
11740290\_ 9. 884464 9. 830071 9. 856738 9. 649053 9. 663732 9. 689288  
11740291\_ 4. 628931 4. 52292 4. 625696 4. 570367 4. 52373 4. 643609  
11740292\_ 6. 973965 7. 079056 6. 981826 7. 049158 7. 091796 7. 013267

11740293\_ 2. 240947 2. 108776 2. 270096 2. 231671 2. 215663 1. 991858  
11740294\_ 3. 121257 2. 977885 3. 077393 3. 291972 2. 930559 3. 058213  
11740295\_ 5. 926672 5. 87597 5. 911294 5. 825799 5. 904624 5. 848435  
11740296\_ 3. 868463 3. 869246 3. 775571 3. 912786 3. 773212 3. 853857  
11740297\_ 4. 480647 4. 724821 4. 265604 4. 643717 4. 529898 4. 583178  
11740298\_ 8. 571045 8. 477123 8. 523052 8. 46202 8. 450931 8. 473464  
11740299\_ 3. 870681 3. 889075 4. 098824 3. 889075 3. 533297 4. 054288  
11740300\_ 5. 65385 5. 552512 5. 531561 5. 571564 5. 519925 5. 713877  
11740301\_ 2. 23815 2. 609676 2. 478562 2. 175892 2. 469533 2. 141177  
11740302\_ 6. 231218 6. 34957 6. 326797 6. 369503 6. 353905 6. 281548  
11740303\_ 7. 965866 7. 913959 7. 952651 8. 698609 8. 641742 8. 650125  
11740304\_ 4. 523587 4. 413941 4. 417619 4. 643717 4. 617488 4. 45116  
11740305\_ 2. 92022 2. 92022 2. 930002 2. 932527 2. 826288 2. 92022  
11740306\_ 2. 890663 3. 032549 2. 894477 2. 955384 2. 931857 2. 956041  
11740307\_ 2. 697754 2. 697754 2. 824724 2. 25483 2. 718322 2. 630732  
11740308\_ 5. 224605 5. 252719 5. 241893 5. 011671 5. 007903 4. 965087  
11740309\_ 4. 375823 4. 357796 4. 56379 3. 844221 4. 032409 3. 844221  
11740310\_ 4. 726229 4. 460823 4. 524681 3. 807646 4. 028418 4. 075929  
11740311\_ 3. 122119 3. 335756 3. 482521 3. 454473 3. 138596 3. 213418  
11740312\_ 2. 425216 2. 286659 2. 386618 2. 336939 2. 235011 2. 392567  
11740313\_ 2. 274509 2. 455924 2. 427499 2. 423673 2. 553569 2. 295884  
11740314\_ 4. 973183 4. 709463 5. 006466 4. 896073 5. 031258 4. 852289  
11740315\_ 5. 594021 5. 635799 5. 723494 5. 666622 5. 81416 5. 662209  
11740316\_ 5. 949224 6. 009087 5. 901123 5. 826303 5. 866824 5. 833761  
11740317\_ 4. 773143 4. 723059 4. 745638 4. 780232 4. 6049 4. 829362  
11740318\_ 3. 139665 3. 039707 2. 9066 3. 039707 3. 00536 3. 220032  
11740319\_ 4. 128705 4. 08678 3. 931473 4. 0581 3. 992346 4. 021008  
11740320\_ 2. 968303 3. 027672 3. 011197 3. 105129 3. 039994 3. 158573  
11740321\_ 4. 350934 4. 459939 4. 352129 4. 423936 4. 458569 4. 270455  
11740322\_ 5. 376526 5. 575397 5. 334607 5. 429068 5. 446107 5. 44475  
11740323\_ 3. 419291 3. 359387 3. 482963 3. 433573 3. 420559 3. 398236  
11740324\_ 4. 357992 4. 342941 4. 390758 4. 689074 4. 575336 4. 602474  
11740325\_ 3. 22657 3. 339142 3. 124001 3. 337846 3. 193898 2. 917797  
11740326\_ 7. 272951 7. 139776 7. 30587 7. 184055 7. 222344 7. 167439  
11740327\_ 6. 454207 6. 372639 6. 344187 6. 375909 6. 363257 6. 553925  
11740328\_ 2. 952084 2. 842842 2. 569322 2. 763342 2. 806114 2. 832157  
11740329\_ 3. 198181 3. 06049 3. 029207 3. 146661 3. 080915 3. 178587  
11740330\_ 6. 487819 6. 613378 6. 527436 6. 643091 6. 642895 6. 699077  
11740331\_ 5. 250588 5. 217478 5. 147347 5. 29993 5. 294161 5. 250588  
11740332\_ 9. 654184 9. 614818 9. 673275 9. 459379 9. 492845 9. 451035  
11740333\_ 5. 399891 5. 533302 5. 346518 5. 486085 5. 357747 5. 452365  
11740334\_ 4. 623173 4. 551249 4. 690822 4. 575689 4. 609614 4. 677772  
11740335\_ 5. 820252 6. 119093 5. 894697 6. 121555 6. 047541 6. 128336  
11740336\_ 6. 446284 6. 272387 6. 428975 6. 548021 6. 467081 6. 515304  
11740337\_ 5. 197959 5. 210465 5. 157346 4. 579375 4. 801875 4. 57904  
11740338\_ 5. 53718 5. 455702 5. 603359 5. 990727 5. 978646 6. 188118  
11740339\_ 5. 514649 5. 692197 5. 584598 5. 682585 5. 506702 5. 653706  
11740340\_ 4. 986421 4. 978597 4. 930507 4. 947768 4. 741298 4. 897144  
11740341\_ 2. 120809 2. 374685 2. 180944 2. 303656 2. 115881 2. 25483  
11740342\_ 4. 277594 4. 118568 4. 109018 4. 275543 4. 054288 4. 08649  
11740343\_ 3. 995789 4. 465198 4. 331914 4. 455463 4. 225033 4. 34635

11740344\_ 3. 194788 3. 032503 3. 051206 3. 365696 3. 296857 3. 292028  
11740345\_ 3. 943931 4. 055906 3. 925712 4. 095577 4. 151892 4. 06704  
11740346\_ 7. 186963 7. 261276 7. 321335 7. 02063 7. 03053 7. 060415  
11740347\_ 7. 289973 7. 18299 7. 146746 6. 867837 6. 905234 6. 999944  
11740348\_ 3. 235558 3. 475761 3. 285258 3. 227818 3. 376938 3. 321191  
11740349\_ 5. 329125 5. 245786 5. 200083 5. 180044 5. 362433 5. 246709  
11740350\_ 3. 801799 3. 813295 3. 685547 3. 810855 3. 802999 3. 647458  
11740351\_ 7. 165471 7. 174773 7. 174174 7. 174773 7. 154164 7. 222249  
11740352\_ 4. 910402 4. 914385 4. 879623 4. 87746 4. 908315 4. 960263  
11740353\_ 5. 274793 5. 469215 5. 352253 5. 612346 5. 453793 5. 714665  
11740354\_ 8. 211559 8. 115451 8. 216022 9. 345764 9. 347241 9. 314759  
11740355\_ 3. 208729 3. 111756 3. 025972 3. 193697 3. 163074 3. 385324  
11740356\_ 3. 249924 3. 566953 3. 398236 3. 526679 3. 319648 3. 477037  
11740357\_ 4. 425025 4. 208218 4. 313436 4. 40461 4. 388081 4. 506796  
11740358\_ 3. 249587 3. 289847 3. 422584 3. 366591 3. 103001 3. 344075  
11740359\_ 3. 968528 3. 99706 3. 740892 3. 786267 3. 962212 3. 948018  
11740360\_ 5. 108031 5. 008107 5. 101325 4. 768145 4. 887525 4. 906658  
11740361\_ 7. 107975 6. 973953 7. 071278 7. 216128 7. 160709 7. 190047  
11740362\_ 6. 973547 6. 860038 6. 973477 6. 837091 6. 876361 6. 936421  
11740363\_ 6. 729785 6. 692958 6. 738361 6. 54417 6. 505053 6. 499272  
11740364\_ 7. 099734 7. 115395 7. 119412 6. 841347 6. 810021 6. 898793  
11740365\_ 3. 637394 3. 81039 3. 69823 3. 769948 3. 796476 3. 813905  
11740366\_ 7. 440867 7. 418157 7. 435039 7. 956381 8. 000071 7. 960293  
11740367\_ 6. 829479 6. 890519 6. 882155 6. 592018 6. 564409 6. 564409  
11740368\_ 6. 506645 6. 451151 6. 565667 6. 150576 6. 143388 6. 275235  
11740369\_ 8. 584515 8. 541216 8. 576749 8. 062113 8. 000601 8. 027925  
11740370\_ 3. 617122 3. 407045 3. 398236 3. 386895 3. 259923 3. 398236  
11740371\_ 8. 869082 8. 91437 8. 788915 8. 66049 8. 682017 8. 609108  
11740372\_ 5. 352204 5. 454334 5. 300961 5. 405209 5. 356422 5. 374866  
11740373\_ 3. 894355 3. 794616 3. 68181 3. 749795 3. 749289 3. 673274  
11740374\_ 4. 672972 4. 740832 4. 583428 4. 672042 4. 59721 4. 64576  
11740375\_ 8. 934505 8. 880733 8. 917441 8. 658194 8. 669184 8. 706074  
11740376\_ 4. 200678 4. 449671 4. 341575 4. 383186 4. 2673 4. 355147  
11740377\_ 6. 493651 6. 504909 6. 692425 7. 00205 7. 055694 6. 993794  
11740378\_ 8. 317901 8. 287568 8. 399244 7. 721827 7. 716632 7. 624266  
11740379\_ 9. 519311 9. 465896 9. 494568 9. 422322 9. 362274 9. 399219  
11740380\_ 7. 887737 7. 924363 7. 953113 7. 750673 7. 711249 7. 746317  
11740381\_ 3. 647016 3. 657099 3. 447954 3. 641975 3. 641975 3. 641975  
11740382\_ 5. 056877 4. 854799 5. 017485 5. 468619 5. 427495 5. 401932  
11740383\_ 5. 926672 6. 105123 5. 819635 6. 173124 6. 330828 6. 08862  
11740384\_ 5. 306822 5. 227675 5. 1302 5. 221461 5. 059293 5. 059099  
11740385\_ 4. 276072 4. 43097 4. 387682 4. 616244 4. 681771 4. 539018  
11740386\_ 4. 283397 4. 410349 4. 199036 4. 534093 4. 358484 4. 648278  
11740387\_ 6. 536494 6. 406027 6. 432224 6. 539082 6. 531276 6. 585038  
11740388\_ 4. 407766 4. 205883 4. 329392 4. 414706 4. 520775 4. 43263  
11740389\_ 5. 010888 5. 173777 4. 874336 5. 234109 5. 068991 5. 104181  
11740390\_ 6. 325414 6. 287548 6. 324207 6. 990582 6. 967649 7. 031875  
11740391\_ 5. 963184 5. 810601 5. 858273 6. 017318 5. 98642 6. 034291  
11740392\_ 4. 237 4. 57435 4. 287593 4. 347179 4. 275543 4. 347179  
11740393\_ 4. 853737 4. 841084 4. 986349 4. 52175 4. 414263 4. 497417  
11740394\_ 4. 137142 4. 308141 4. 188987 4. 222793 4. 264027 4. 305718

11740395\_ 3. 914854 3. 945197 3. 788473 4. 09254 4. 057885 4. 052736  
11740396\_ 4. 405429 4. 515444 4. 371319 4. 570551 4. 643717 4. 520045  
11740397\_ 6. 100225 6. 19396 6. 040639 6. 209356 6. 227326 6. 051554  
11740398\_ 2. 987534 3. 17249 2. 85883 3. 081778 3. 004853 2. 771914  
11740399\_ 2. 885222 2. 901884 3. 014528 3. 069989 3. 085956 2. 973964  
11740400\_ 2. 867542 3. 018872 2. 871028 2. 949444 2. 91291 2. 840716  
11740401\_ 7. 722204 7. 667676 7. 650846 7. 825845 7. 670023 7. 622831  
11740402\_ 2. 892414 2. 6734 2. 980896 2. 869646 3. 021783 2. 86605  
11740403\_ 2. 16836 2. 031157 2. 031157 1. 819832 2. 099202 1. 924209  
11740404\_ 7. 339761 7. 198016 7. 222409 6. 821608 6. 854319 6. 853025  
11740405\_ 4. 76045 4. 703539 4. 722192 4. 621277 4. 650069 4. 584933  
11740406\_ 5. 64761 5. 68595 5. 763194 5. 064414 5. 010991 5. 032078  
11740407\_ 3. 725327 3. 752071 3. 712671 3. 843995 3. 744449 3. 638369  
11740408\_ 6. 10091 6. 24928 6. 1997 6. 123936 6. 141503 6. 195438  
11740409\_ 3. 006022 3. 290188 3. 228679 3. 144577 3. 004853 3. 121731  
11740410\_ 8. 558456 8. 451223 8. 503434 8. 280344 8. 212631 8. 142832  
11740411\_ 7. 405278 7. 347561 7. 430516 7. 48775 7. 501794 7. 524941  
11740412\_ 7. 366651 7. 284088 7. 397004 7. 477323 7. 495355 7. 465078  
11740413\_ 4. 395259 4. 690295 4. 572078 4. 654117 4. 625414 4. 629381  
11740414\_ 6. 608623 6. 484198 6. 696651 6. 744636 6. 684527 6. 687081  
11740415\_ 4. 557695 4. 686921 4. 604575 4. 804133 4. 797702 4. 838097  
11740416\_ 5. 472352 5. 27333 5. 276702 5. 845584 5. 89828 6. 037648  
11740417\_ 2. 253931 2. 221261 2. 216835 2. 124111 2. 312762 2. 119321  
11740418\_ 3. 389437 3. 20227 3. 074779 3. 025972 3. 08373 3. 249878  
11740419\_ 7. 068286 6. 895063 6. 919311 6. 686605 6. 733514 6. 789151  
11740420\_ 7. 412266 7. 46373 7. 474998 6. 864178 6. 737151 6. 771301  
11740421\_ 6. 498677 6. 341029 6. 453164 6. 062978 6. 068166 6. 241825  
11740422\_ 6. 221845 6. 055518 6. 174312 5. 863647 5. 865084 5. 809689  
11740423\_ 9. 581198 9. 514498 9. 540837 9. 68515 9. 709139 9. 660562  
11740424\_ 4. 468552 4. 584933 4. 459939 4. 592189 4. 698313 4. 504874  
11740425\_ 3. 797597 4. 067703 4. 294331 3. 95338 3. 879309 3. 780377  
11740426\_ 5. 459298 5. 612757 5. 342309 5. 53591 5. 508039 5. 505955  
11740427\_ 4. 991272 4. 979079 4. 844722 5. 003464 4. 999807 4. 991272  
11740428\_ 5. 581108 5. 526208 5. 374217 5. 589595 5. 579471 5. 589297  
11740429\_ 7. 250245 7. 220334 7. 235277 7. 559788 7. 533982 7. 54037  
11740430\_ 5. 220235 5. 143669 5. 345309 7. 122165 7. 034623 7. 173266  
11740431\_ 4. 029439 3. 969894 4. 227053 4. 158029 4. 306828 4. 208738  
11740432\_ 4. 526129 4. 494162 4. 500468 4. 533303 4. 700243 4. 457614  
11740433\_ 4. 252964 4. 343397 4. 351662 4. 319892 4. 264078 4. 304785  
11740434\_ 8. 244806 8. 040573 8. 16529 7. 880573 7. 822985 7. 922803  
11740435\_ 2. 900007 2. 675065 2. 996608 2. 691931 2. 601713 2. 658265  
11740436\_ 4. 156779 4. 114013 3. 870275 4. 067703 4. 067346 3. 705625  
11740437\_ 3. 972515 4. 111132 4. 159373 3. 903823 3. 660482 3. 909043  
11740438\_ 4. 040085 4. 700308 4. 491493 4. 932003 4. 683816 4. 629183  
11740439\_ 6. 43707 6. 546141 6. 382036 6. 691651 6. 643306 6. 678626  
11740440\_ 4. 529725 4. 735385 4. 643717 4. 693395 4. 878961 4. 878628  
11740441\_ 3. 673525 3. 67704 3. 646095 3. 861336 3. 934326 3. 861336  
11740442\_ 7. 973225 7. 95804 7. 981098 8. 269271 8. 277455 8. 31974  
11740443\_ 3. 728123 3. 802877 3. 40449 3. 511146 3. 534304 3. 789415  
11740444\_ 7. 309183 7. 36804 7. 214036 7. 034405 6. 968425 6. 960398  
11740445\_ 7. 12407 6. 998046 7. 076762 6. 559907 6. 599001 6. 706505



11740446\_ 4. 75067 4. 70811 4. 547639 4. 665414 4. 660368 4. 661012  
11740447\_ 6. 353837 6. 281347 6. 050508 6. 115193 6. 133612 6. 211447  
11740448\_ 2. 435698 2. 307137 2. 358505 2. 1867 2. 392879 2. 384435  
11740449\_ 4. 534163 4. 094296 4. 778096 3. 16903 3. 182681 3. 484853  
11740450\_ 6. 114901 6. 20021 6. 20721 6. 237891 6. 053852 6. 180245  
11740451\_ 2. 944339 3. 088474 3. 029126 3. 114545 3. 004171 2. 991208  
11740452\_ 2. 453409 2. 500891 2. 495957 2. 454844 2. 364253 2. 442628  
11740453\_ 3. 424298 3. 080072 3. 158551 3. 160115 3. 101013 3. 221867  
11740454\_ 2. 240436 2. 426 2. 327833 2. 426 2. 421765 2. 301642  
11740455\_ 4. 815683 4. 924147 4. 755027 4. 872392 4. 959059 4. 887763  
11740456\_ 2. 828669 2. 831646 2. 928339 2. 882141 2. 882141 2. 939694  
11740457\_ 3. 174055 3. 433589 3. 096766 3. 247501 3. 245832 3. 286558  
11740458\_ 6. 830133 6. 898793 6. 971583 6. 902601 6. 874408 6. 895522  
11740459\_ 5. 549043 5. 560271 5. 528264 5. 567708 5. 736831 5. 683036  
11740460\_ 3. 501336 3. 341125 3. 444972 3. 617832 3. 428973 3. 480635  
11740461\_ 8. 191811 8. 081472 8. 095655 7. 979717 7. 741645 7. 819534  
11740462\_ 7. 532105 7. 408016 7. 528958 7. 809833 7. 757592 7. 70762  
11740463\_ 4. 108592 4. 206952 4. 097283 4. 210089 4. 210089 4. 230133  
11740464\_ 5. 511879 5. 581145 5. 54153 5. 528624 5. 708558 5. 620832  
11740465\_ 4. 226947 4. 21719 4. 155283 4. 180746 4. 175585 4. 175228  
11740466\_ 5. 856216 5. 825539 5. 820339 5. 745821 5. 72232 5. 816538  
11740467\_ 4. 802372 4. 626764 4. 59134 4. 997427 4. 865769 4. 987698  
11740468\_ 4. 966502 4. 874234 4. 98195 5. 081423 4. 826326 5. 112586  
11740469\_ 3. 928024 3. 554111 3. 692713 3. 690658 3. 755994 3. 656681  
11740470\_ 8. 535838 8. 594749 8. 474916 8. 410425 8. 408561 8. 401989  
11740471\_ 8. 11805 8. 138673 8. 122732 8. 026948 8. 077679 8. 003275  
11740472\_ 7. 161364 6. 947446 7. 063054 6. 629226 6. 705876 6. 738074  
11740473\_ 6. 454626 6. 413996 6. 354529 6. 173161 6. 161634 6. 17981  
11740474\_ 3. 589868 3. 650567 3. 913049 3. 650567 3. 589868 3. 6708  
11740475\_ 5. 711259 5. 634185 5. 796161 5. 26034 5. 246241 5. 339673  
11740476\_ 3. 413562 3. 35071 3. 272295 3. 503903 3. 44471 3. 336662  
11740477\_ 4. 392924 4. 20566 4. 231529 4. 373895 4. 452961 4. 28206  
11740478\_ 4. 415744 4. 542847 4. 438855 4. 470077 4. 459939 4. 500637  
11740479\_ 4. 84998 4. 98374 4. 811963 4. 938905 4. 91581 4. 884104  
11740480\_ 4. 487989 4. 659955 4. 514865 4. 758922 4. 738918 4. 481696  
11740481\_ 4. 055429 4. 120015 4. 257651 4. 741761 4. 860371 4. 707088  
11740482\_ 5. 869039 5. 850414 5. 784915 5. 807697 5. 573034 5. 7857  
11740483\_ 5. 406901 5. 181581 4. 967646 5. 649824 5. 519116 5. 374866  
11740484\_ 3. 353247 3. 568528 3. 386379 3. 710382 3. 684086 3. 739445  
11740485\_ 8. 028097 7. 906861 7. 955386 8. 568571 8. 592595 8. 498466  
11740486\_ 7. 962677 7. 900758 7. 973705 8. 056285 8. 023288 8. 018919  
11740487\_ 5. 693797 5. 785878 5. 687717 5. 943271 5. 971895 5. 920577  
11740488\_ 3. 932291 4. 017331 3. 933846 3. 898068 3. 938508 3. 873514  
11740489\_ 5. 331347 5. 11527 5. 285691 4. 498401 4. 581283 4. 451343  
11740490\_ 4. 757462 5. 016406 4. 969467 5. 016406 4. 757462 5. 054608  
11740491\_ 5. 629447 5. 569719 5. 646825 5. 624879 5. 636994 5. 617752  
11740492\_ 7. 237814 7. 190252 7. 230373 6. 999856 7. 090214 7. 077502  
11740493\_ 4. 914703 4. 950035 5. 165407 4. 853801 4. 890779 4. 844832  
11740494\_ 4. 418207 4. 458172 4. 334395 4. 430838 4. 576073 4. 409883  
11740495\_ 5. 966078 5. 957954 5. 875104 5. 93062 5. 98355 5. 852916  
11740496\_ 7. 212592 7. 239949 7. 300688 7. 267641 7. 258345 7. 298394

11740497\_ 3. 904542 3. 768804 3. 693352 4. 049175 3. 969526 4. 100274  
11740498\_ 4. 19179 3. 89472 4. 156753 4. 135496 4. 13119 4. 12504  
11740499\_ 8. 893611 8. 79562 8. 85296 8. 387019 8. 369036 8. 400577  
11740500\_ 5. 80604 5. 920439 5. 876436 5. 802971 5. 92231 5. 851497  
11740501\_ 6. 91796 7. 038979 6. 783741 6. 899276 6. 903755 6. 960982  
11740502\_ 3. 597547 3. 146066 3. 168202 3. 306683 3. 118784 3. 490065  
11740503\_ 7. 782215 7. 871683 7. 899854 7. 930282 7. 95325 7. 845459  
11740504\_ 5. 019102 4. 839865 5. 139465 4. 937783 4. 8854 4. 948699  
11740505\_ 5. 898272 5. 857523 5. 894697 5. 861073 6. 044285 5. 898272  
11740506\_ 4. 356246 4. 404374 4. 231862 4. 47339 4. 812789 4. 462713  
11740507\_ 3. 356669 3. 148161 3. 734923 3. 14753 3. 073768 3. 182577  
11740508\_ 5. 371769 5. 441449 5. 507189 5. 36778 5. 475341 5. 483541  
11740509\_ 5. 571417 5. 11527 5. 471613 5. 022802 5. 052028 5. 162974  
11740510\_ 2. 835913 2. 921254 2. 623548 3. 14197 3. 02038 2. 941252  
11740511\_ 3. 340875 3. 310903 3. 426471 3. 00349 3. 267395 3. 097586  
11740512\_ 4. 914034 4. 815991 5. 073036 4. 584933 4. 822751 4. 714329  
11740513\_ 6. 360394 6. 253244 6. 272151 5. 794286 5. 892912 6. 038393  
11740514\_ 5. 14433 4. 998552 5. 138601 4. 79023 4. 70789 4. 889741  
11740515\_ 5. 198285 5. 310191 5. 244094 5. 2222 5. 26034 5. 233098  
11740516\_ 6. 405699 6. 490525 6. 552279 6. 552279 6. 513364 6. 585263  
11740517\_ 4. 922055 4. 713979 5. 16754 5. 288436 5. 375722 5. 576394  
11740518\_ 8. 355163 8. 299597 8. 334539 7. 924818 7. 889761 7. 87052  
11740519\_ 3. 879473 3. 979007 3. 850081 3. 850081 3. 879473 3. 876106  
11740520\_ 4. 364672 4. 216775 4. 024411 4. 344903 4. 384663 4. 304838  
11740521\_ 5. 334335 5. 316094 5. 312449 5. 30554 5. 41534 5. 409222  
11740522\_ 3. 142278 3. 067235 2. 972412 3. 162113 3. 292234 3. 328503  
11740523\_ 7. 361927 7. 434424 7. 304123 7. 441606 7. 403324 7. 373882  
11740524\_ 7. 359707 7. 335326 7. 311325 7. 36725 7. 29508 7. 375835  
11740525\_ 4. 333422 4. 459939 4. 433381 4. 417145 4. 418875 4. 433381  
11740526\_ 8. 800669 8. 719522 8. 80403 8. 509872 8. 621067 8. 599896  
11740527\_ 3. 414057 3. 427881 3. 282387 3. 464725 3. 453687 3. 508277  
11740528\_ 5. 847351 5. 614563 5. 584813 5. 027134 5. 032434 5. 071441  
11740529\_ 6. 197406 6. 239214 6. 222552 6. 865675 6. 860782 6. 967273  
11740530\_ 2. 275291 2. 320612 2. 388515 2. 197094 2. 281567 2. 360079  
11740531\_ 3. 729267 3. 941525 3. 839337 3. 997131 3. 997495 4. 054288  
11740532\_ 3. 40158 3. 060016 3. 250415 3. 368338 3. 256312 3. 274003  
11740533\_ 3. 440418 3. 669638 3. 518075 3. 757307 3. 870054 3. 883193  
11740534\_ 4. 277636 4. 123423 4. 16483 4. 841105 4. 679123 4. 716446  
11740535\_ 2. 362434 2. 135431 2. 408089 2. 314157 2. 406779 2. 384435  
11740536\_ 6. 835101 6. 890576 6. 717446 6. 967722 6. 922354 6. 927519  
11740537\_ 5. 000409 5. 123264 4. 998068 5. 095368 5. 094341 5. 104723  
11740538\_ 5. 307805 5. 414869 5. 358933 5. 440283 5. 514271 5. 400751  
11740539\_ 4. 014076 3. 857868 3. 73447 3. 748117 3. 942152 3. 761245  
11740540\_ 9. 867088 9. 798576 9. 825905 9. 137707 9. 103524 9. 093847  
11740541\_ 3. 876672 4. 175728 4. 165972 4. 217288 4. 010147 4. 122446  
11740542\_ 2. 663066 2. 653752 2. 47102 2. 76741 2. 78956 2. 76656  
11740543\_ 4. 991715 5. 162775 5. 086266 4. 979994 4. 962508 5. 048413  
11740544\_ 6. 838361 6. 995296 6. 836421 7. 026986 7. 069499 6. 961979  
11740545\_ 4. 914269 4. 668421 4. 760006 4. 67667 4. 722198 4. 528382  
11740546\_ 3. 36894 3. 48598 3. 578506 2. 905448 3. 097556 3. 398236  
11740547\_ 4. 805651 4. 667356 4. 792064 4. 850596 4. 868851 4. 925866

11740548\_ 9. 994211 10. 09036 9. 943362 10. 33632 10. 32143 10. 23311  
11740549\_ 4. 181324 4. 27078 4. 062555 4. 276245 4. 390706 4. 213204  
11740550\_ 5. 431317 5. 504333 5. 621739 5. 435514 5. 428214 5. 562955  
11740551\_ 7. 204741 7. 329159 7. 164094 7. 156454 7. 195067 7. 170333  
11740552\_ 4. 703189 4. 751893 4. 522379 4. 862257 4. 801083 4. 840491  
11740553\_ 8. 061651 7. 91414 7. 981905 7. 700557 7. 770174 7. 721069  
11740554\_ 6. 514435 6. 736939 6. 70837 6. 73071 6. 776516 6. 818619  
11740555\_ 3. 892424 3. 865901 4. 012222 3. 952556 4. 086653 4. 029955  
11740556\_ 4. 200678 4. 250934 4. 177181 4. 213226 4. 302175 4. 255066  
11740557\_ 4. 14499 4. 209423 3. 980793 4. 294154 4. 194141 4. 203255  
11740558\_ 2. 912922 3. 251268 3. 254155 3. 933414 3. 816927 3. 933515  
11740559\_ 7. 650496 7. 547455 7. 597443 7. 290774 7. 367906 7. 229122  
11740560\_ 8. 062158 7. 995428 8. 114626 7. 762132 7. 75826 7. 811656  
11740561\_ 2. 080701 1. 97827 2. 010925 2. 015443 1. 918023 1. 997371  
11740562\_ 2. 649027 2. 533165 2. 620737 2. 961037 2. 864064 2. 825406  
11740563\_ 3. 681607 4. 005158 4. 112106 4. 026301 4. 044084 3. 947111  
11740564\_ 5. 546819 5. 323781 5. 501321 5. 602791 5. 517306 5. 63034  
11740565\_ 2. 605516 2. 361778 2. 436642 2. 510071 2. 548115 2. 470997  
11740566\_ 3. 347935 3. 548119 3. 153854 3. 209656 3. 169208 3. 364626  
11740567\_ 5. 574904 5. 497536 5. 751326 5. 652592 5. 585658 5. 633225  
11740568\_ 2. 235709 2. 337727 2. 008384 2. 165437 2. 069277 2. 292439  
11740569\_ 2. 960724 2. 564949 2. 351394 2. 432764 2. 402345 2. 541641  
11740570\_ 2. 87422 2. 806061 2. 87422 2. 83198 2. 862691 3. 049957  
11740571\_ 2. 501693 2. 377785 2. 313723 2. 475914 2. 583344 2. 405922  
11740572\_ 3. 951648 3. 884588 3. 855882 3. 942389 3. 904837 3. 836338  
11740573\_ 3. 9864 3. 820415 3. 776348 3. 546116 3. 876759 3. 696753  
11740574\_ 3. 925181 3. 919492 3. 846876 3. 89903 3. 898032 3. 862061  
11740575\_ 5. 021254 5. 111339 5. 094451 4. 95045 5. 021254 4. 943119  
11740576\_ 5. 972729 5. 763634 5. 771024 5. 720524 5. 658069 5. 657054  
11740577\_ 4. 490578 4. 922415 4. 459939 4. 894449 4. 790177 4. 592715  
11740578\_ 5. 038466 5. 124501 5. 09442 5. 029529 4. 749932 5. 210862  
11740579\_ 4. 421818 4. 530989 4. 23567 4. 590015 4. 633782 4. 5635  
11740580\_ 4. 991725 5. 108144 5. 208441 4. 91708 5. 128529 4. 931905  
11740581\_ 6. 830716 6. 800038 6. 881749 6. 684381 6. 598356 6. 626662  
11740582\_ 7. 452162 7. 454243 7. 503786 7. 308838 7. 302623 7. 322823  
11740583\_ 4. 818123 4. 7114 4. 845979 4. 690202 4. 634526 4. 706457  
11740584\_ 7. 493068 7. 440311 7. 490414 7. 481087 7. 490441 7. 567022  
11740585\_ 4. 185888 3. 930935 4. 269109 3. 781336 3. 845216 3. 715657  
11740586\_ 3. 524761 3. 555347 3. 524761 3. 11908 3. 187376 3. 188865  
11740587\_ 10. 09403 10. 08824 10. 13184 9. 663519 9. 693429 9. 711381  
11740588\_ 3. 296251 2. 981697 2. 926444 3. 060744 3. 132862 3. 217143  
11740589\_ 9. 524637 9. 486169 9. 517484 9. 54817 9. 508495 9. 492396  
11740590\_ 6. 5753 6. 703136 6. 725283 6. 578678 6. 543288 6. 611086  
11740591\_ 5. 515024 5. 53967 5. 49478 5. 600974 5. 613293 5. 59685  
11740592\_ 4. 804246 4. 744966 4. 869496 4. 807231 4. 923269 4. 804246  
11740593\_ 4. 762456 4. 763543 4. 678172 4. 803304 4. 761883 4. 763543  
11740594\_ 4. 680642 4. 717322 4. 923304 4. 422109 4. 665271 4. 562201  
11740595\_ 2. 96897 3. 30642 3. 135983 3. 222151 2. 89558 2. 989512  
11740596\_ 4. 933522 4. 747224 4. 793475 4. 795343 4. 780425 4. 62465  
11740597\_ 4. 628236 4. 742278 4. 849206 4. 784102 4. 9131 4. 890847  
11740598\_ 5. 248954 5. 245187 5. 235371 5. 331437 5. 343698 5. 235035

11740599\_ 4. 108592 4. 150987 3. 974324 4. 260245 4. 049513 4. 276301  
11740600\_ 4. 609291 4. 885278 4. 46359 4. 504067 4. 487637 4. 608443  
11740601\_ 5. 073739 5. 055557 5. 112417 5. 10651 5. 072182 5. 196201  
11740602\_ 5. 604244 5. 614563 5. 760654 5. 467624 5. 624805 5. 576695  
11740603\_ 6. 145887 6. 105103 6. 005758 5. 931539 5. 976765 5. 817267  
11740604\_ 10. 94703 10. 92365 10. 93489 10. 82803 10. 79097 10. 81752  
11740605\_ 5. 247739 5. 292904 5. 211194 5. 34333 5. 291737 5. 295326  
11740606\_ 4. 150075 3. 955211 3. 992625 4. 246624 4. 360298 4. 3708  
11740607\_ 2. 225434 2. 251345 2. 282285 2. 323927 2. 265285 2. 25483  
11740608\_ 3. 685772 3. 899584 3. 764452 3. 945034 3. 722636 3. 609876  
11740609\_ 1. 871104 2. 066336 2. 071838 1. 889352 1. 88761 1. 992867  
11740610\_ 8. 344238 8. 347945 8. 37282 8. 026847 7. 98123 8. 040669  
11740611\_ 8. 126665 8. 133736 8. 19309 7. 868277 7. 762042 7. 864452  
11740612\_ 4. 914217 4. 9307 4. 869236 5. 029529 4. 928821 4. 992906  
11740613\_ 7. 005526 7. 050677 7. 039118 6. 732194 6. 639578 6. 579263  
11740614\_ 8. 693529 8. 654935 8. 685587 7. 946641 7. 993424 7. 905223  
11740615\_ 8. 327587 8. 277718 8. 304758 8. 399028 8. 301359 8. 334559  
11740616\_ 5. 029529 5. 165574 4. 843278 5. 11111 5. 24143 5. 144515  
11740617\_ 5. 189266 5. 290691 5. 095087 5. 189266 5. 197599 5. 266951  
11740618\_ 3. 844746 3. 586204 3. 90627 3. 557079 3. 529086 3. 470238  
11740619\_ 5. 387145 5. 6879 5. 549368 5. 58493 5. 485887 5. 598786  
11740620\_ 4. 137419 3. 958699 3. 712013 3. 901127 3. 963444 3. 925331  
11740621\_ 8. 359296 8. 279291 8. 415233 8. 355622 8. 422391 8. 372852  
11740622\_ 4. 193858 4. 186342 4. 158897 4. 213011 4. 232627 4. 210951  
11740623\_ 4. 126163 4. 339646 4. 267657 3. 972814 4. 216552 4. 216552  
11740624\_ 5. 56881 5. 508979 5. 410944 5. 798927 5. 76147 5. 854549  
11740625\_ 5. 957528 5. 977814 5. 829731 5. 943337 5. 940958 5. 983188  
11740626\_ 5. 736616 5. 567383 5. 619366 5. 547258 5. 544804 5. 632743  
11740627\_ 4. 567525 4. 628871 4. 603745 4. 787212 4. 874914 4. 836432  
11740628\_ 4. 943907 5. 015857 4. 708535 4. 939982 4. 929398 5. 142411  
11740629\_ 5. 704919 5. 580197 5. 789035 5. 841403 5. 791213 5. 849541  
11740630\_ 5. 646066 5. 518169 5. 538924 4. 754738 4. 984669 5. 160706  
11740631\_ 4. 471122 4. 460416 4. 563167 4. 408364 4. 349234 4. 485602  
11740632\_ 6. 073142 5. 908164 5. 938541 6. 142268 6. 088853 6. 045323  
11740633\_ 4. 692264 4. 667655 4. 855394 4. 643717 4. 722535 4. 58626  
11740634\_ 4. 174591 4. 040187 3. 930922 4. 213702 4. 132933 4. 026354  
11740635\_ 4. 44371 4. 183627 4. 233856 4. 510522 4. 486793 4. 47686  
11740636\_ 5. 092414 5. 018012 5. 014812 4. 957676 5. 031234 5. 10045  
11740637\_ 6. 955711 6. 841215 7. 012559 6. 415369 6. 517085 6. 540217  
11740638\_ 5. 03466 5. 042083 5. 122191 4. 953968 4. 976972 4. 938575  
11740639\_ 5. 736831 5. 961683 5. 996126 6. 04407 6. 11124 6. 063706  
11740640\_ 1. 698884 1. 784497 1. 78537 1. 757277 1. 831916 1. 704046  
11740641\_ 4. 606518 4. 47115 4. 649875 4. 649875 4. 48503 4. 733142  
11740642\_ 2. 062906 2. 031708 2. 052973 1. 761211 1. 80375 1. 994654  
11740643\_ 2. 447159 2. 476783 2. 476783 2. 356072 2. 596346 2. 494072  
11740644\_ 4. 186555 4. 418707 4. 0821 4. 249692 4. 21136 4. 15273  
11740645\_ 4. 469465 4. 577378 4. 534753 4. 720844 4. 650063 4. 681912  
11740646\_ 3. 058961 2. 924412 2. 898957 3. 055617 2. 912551 2. 879562  
11740647\_ 6. 08749 6. 319854 6. 199695 6. 38183 6. 319316 6. 292807  
11740648\_ 4. 972909 4. 783693 4. 709463 5. 216842 5. 210633 5. 148393  
11740649\_ 5. 645387 5. 440715 5. 560703 5. 401178 5. 506574 5. 528624

11740650\_ 7. 506518 7. 378454 7. 365442 7. 324269 7. 337297 7. 383818  
11740651\_ 5. 565914 5. 518328 5. 519093 5. 528624 5. 456525 5. 665773  
11740652\_ 10. 04939 10. 08022 10. 03925 9. 587989 9. 59824 9. 555665  
11740653\_ 5. 261864 5. 247927 5. 16227 5. 295062 5. 11527 5. 246879  
11740654\_ 4. 944561 5. 130986 4. 929232 5. 050068 5. 073036 4. 944561  
11740655\_ 5. 063668 4. 816366 4. 930507 4. 992243 4. 858317 5. 057553  
11740656\_ 10. 63811 10. 59261 10. 58511 9. 765283 9. 756086 9. 78966  
11740657\_ 6. 336699 6. 460239 6. 624182 6. 179843 6. 114061 6. 370999  
11740658\_ 6. 556468 6. 260085 6. 433949 5. 958432 6. 138345 5. 951133  
11740659\_ 4. 815683 5. 036083 4. 78352 4. 84906 5. 03191 4. 945179  
11740660\_ 6. 557293 6. 646188 6. 556946 6. 688591 6. 746367 6. 723123  
11740661\_ 4. 375505 4. 551114 4. 31238 4. 3415 4. 493072 4. 250185  
11740662\_ 2. 586324 2. 766701 2. 510789 2. 844612 2. 718322 2. 859836  
11740663\_ 7. 92115 7. 875853 7. 834646 6. 740608 6. 580311 6. 745993  
11740664\_ 3. 472316 3. 533273 3. 408815 3. 51384 3. 700928 3. 384804  
11740665\_ 3. 230848 3. 208892 3. 27616 3. 277775 3. 278376 3. 301096  
11740666\_ 2. 56806 2. 769095 2. 563791 2. 764525 2. 57819 2. 707031  
11740667\_ 5. 704919 5. 828451 5. 711118 5. 757448 5. 80937 5. 819595  
11740668\_ 2. 095256 2. 279701 1. 936052 2. 185769 2. 270955 2. 18238  
11740669\_ 2. 857357 2. 76844 3. 064316 3. 08533 3. 148903 3. 164275  
11740670\_ 8. 148875 8. 189173 8. 159059 8. 043665 7. 932926 8. 050866  
11740671\_ 8. 190753 8. 115451 8. 208617 8. 016781 8. 052164 8. 073527  
11740672\_ 7. 227842 7. 173441 7. 151887 7. 073962 7. 083017 7. 065203  
11740673\_ 3. 109743 3. 184227 3. 290188 3. 290333 3. 20846 3. 109743  
11740674\_ 9. 458204 9. 380508 9. 44395 9. 154557 9. 154124 9. 179426  
11740675\_ 3. 243922 3. 098781 3. 567743 3. 381292 3. 406126 3. 252929  
11740676\_ 8. 453071 8. 469054 8. 535725 8. 206176 8. 191673 8. 219279  
11740677\_ 11. 08325 11. 07373 11. 09891 11. 06832 11. 0742 11. 07077  
11740678\_ 5. 540611 5. 431801 5. 302321 5. 468313 5. 567881 5. 456486  
11740679\_ 6. 017684 6. 325326 6. 17981 6. 085786 6. 160385 6. 152323  
11740680\_ 3. 223344 3. 156872 3. 128015 3. 719664 3. 981352 3. 807668  
11740681\_ 8. 504819 8. 511733 8. 552009 7. 898282 7. 949761 7. 976874  
11740682\_ 5. 777557 5. 899549 5. 554537 5. 926129 5. 827117 5. 844468  
11740683\_ 4. 067102 4. 08278 3. 925884 4. 241143 4. 406994 4. 278895  
11740684\_ 4. 695226 4. 789157 4. 612441 4. 822397 4. 745084 4. 88416  
11740685\_ 7. 22382 7. 167114 7. 211109 6. 104758 5. 957954 5. 892554  
11740686\_ 6. 122719 6. 153919 6. 208985 5. 08379 5. 242176 5. 270876  
11740687\_ 2. 827333 2. 961829 2. 827333 2. 6767 3. 017209 2. 843654  
11740688\_ 6. 263551 6. 117595 6. 282501 5. 744695 5. 498186 5. 628955  
11740689\_ 6. 526361 6. 429042 6. 530769 6. 196225 6. 137471 6. 176271  
11740690\_ 3. 103716 2. 964163 2. 919419 3. 087646 3. 136148 2. 794326  
11740691\_ 5. 286886 5. 336719 5. 171787 5. 413355 5. 361005 5. 339673  
11740692\_ 7. 133474 7. 072024 7. 14143 6. 931681 6. 840606 6. 909533  
11740693\_ 6. 171109 6. 190651 5. 956542 6. 408251 6. 293186 6. 255979  
11740694\_ 2. 068026 2. 042317 1. 898324 2. 152614 1. 967699 1. 971906  
11740695\_ 3. 394997 3. 466908 3. 468319 3. 374153 3. 39727 3. 442878  
11740696\_ 3. 545016 3. 515102 3. 293497 3. 599488 3. 362794 3. 392741  
11740697\_ 4. 016209 4. 05228 3. 889052 4. 128589 4. 079299 3. 972169  
11740698\_ 5. 269451 5. 189628 5. 339932 4. 40461 4. 455071 4. 236781  
11740699\_ 5. 388935 5. 492726 5. 564769 5. 604142 5. 6046 5. 627085  
11740700\_ 7. 099734 6. 99154 7. 043462 7. 122526 7. 125793 7. 143834

11740701\_ 6. 266226 6. 393551 6. 151027 6. 23561 6. 357977 6. 178643  
11740702\_ 3. 527918 3. 592347 3. 510203 3. 997131 3. 879309 4. 030668  
11740703\_ 5. 170141 5. 208833 5. 073905 5. 093395 5. 224088 5. 156303  
11740704\_ 6. 613591 6. 500176 6. 629664 6. 123308 6. 193158 6. 134038  
11740705\_ 3. 330996 3. 260843 3. 250528 3. 489774 3. 468682 3. 373748  
11740706\_ 7. 314125 7. 216872 7. 252614 7. 098061 7. 004823 7. 099478  
11740707\_ 9. 554411 9. 557622 9. 519578 9. 367214 9. 382182 9. 37899  
11740708\_ 6. 325415 6. 563901 6. 468471 6. 551616 6. 463572 6. 480646  
11740709\_ 5. 802425 5. 880104 5. 765025 5. 83424 5. 918975 5. 894697  
11740710\_ 5. 209259 5. 262936 5. 264194 5. 375406 5. 295996 5. 316446  
11740711\_ 3. 130441 3. 149563 3. 469063 3. 16643 3. 189703 2. 899844  
11740712\_ 2. 521948 2. 393089 2. 421989 2. 52702 2. 381614 2. 605941  
11740713\_ 3. 237469 3. 51635 3. 267821 3. 46195 3. 575209 3. 319916  
11740714\_ 8. 546107 8. 534164 8. 592081 8. 995831 8. 999412 9. 010367  
11740715\_ 4. 623362 4. 705935 4. 495211 4. 679969 4. 688763 4. 64597  
11740716\_ 2. 755543 2. 794105 2. 653619 3. 001094 2. 588929 2. 676777  
11740717\_ 4. 195502 4. 111178 4. 026092 4. 234073 4. 026362 4. 172863  
11740718\_ 3. 00566 2. 593014 2. 874619 2. 716699 2. 760859 2. 83445  
11740719\_ 7. 249865 7. 264591 7. 143079 7. 794384 7. 765944 7. 765944  
11740720\_ 2. 432783 2. 590844 2. 487703 2. 780438 2. 692041 2. 38482  
11740721\_ 4. 816522 4. 492065 4. 629246 4. 643717 4. 654585 4. 632256  
11740722\_ 5. 442778 5. 422229 5. 451069 5. 50073 5. 496972 5. 558628  
11740723\_ 5. 985001 5. 921422 5. 785854 5. 985213 5. 845365 6. 068888  
11740724\_ 5. 215531 5. 101261 5. 224304 5. 143668 5. 149545 5. 101261  
11740725\_ 3. 715204 3. 894179 3. 981411 3. 789468 3. 916498 4. 00861  
11740726\_ 3. 240712 3. 174666 3. 069241 3. 083787 3. 083787 3. 121593  
11740727\_ 4. 134191 4. 067703 4. 134191 4. 125173 4. 134191 4. 203252  
11740728\_ 5. 717458 5. 863852 5. 924403 5. 90989 5. 979777 5. 987855  
11740729\_ 5. 42232 5. 49837 5. 256881 5. 297364 5. 391562 5. 265997  
11740730\_ 6. 867447 6. 858897 6. 819925 7. 098004 7. 133088 7. 102921  
11740731\_ 6. 590107 6. 450752 6. 619536 6. 792426 6. 891343 6. 80627  
11740732\_ 7. 033352 6. 937728 6. 956043 6. 77217 6. 892621 6. 930919  
11740733\_ 2. 165725 2. 286947 2. 47102 2. 441216 2. 353904 2. 384435  
11740734\_ 2. 893936 2. 818908 3. 127059 2. 766215 2. 808247 2. 948619  
11740735\_ 5. 275279 5. 190004 5. 160281 5. 025365 5. 089537 4. 971239  
11740736\_ 5. 531819 5. 348114 5. 337926 4. 767366 4. 975599 5. 139033  
11740737\_ 6. 341429 6. 369871 6. 136035 6. 466016 6. 464805 6. 446844  
11740738\_ 5. 830251 5. 98478 5. 767771 5. 838095 5. 879747 5. 895252  
11740739\_ 3. 260115 3. 188811 3. 23145 3. 290441 3. 495774 3. 260115  
11740740\_ 4. 019808 3. 954158 3. 998719 4. 067121 4. 014091 3. 934578  
11740741\_ 3. 397835 3. 288214 3. 140852 3. 154098 3. 373417 3. 304589  
11740742\_ 4. 106386 3. 979745 3. 933022 4. 007591 3. 936636 3. 873321  
11740743\_ 10. 14521 10. 13015 10. 13494 9. 850236 9. 929308 9. 826015  
11740744\_ 10. 96803 10. 91368 10. 98481 10. 65435 10. 71094 10. 64937  
11740745\_ 4. 950909 4. 757507 5. 006809 5. 355768 5. 547366 5. 552889  
11740746\_ 6. 570274 6. 627053 6. 660873 7. 268651 7. 156733 7. 16219  
11740747\_ 6. 75149 6. 62661 6. 691152 6. 174601 6. 244019 6. 342776  
11740748\_ 8. 900433 8. 869028 8. 915679 8. 712328 8. 606792 8. 651291  
11740749\_ 7. 320179 7. 252688 7. 336902 7. 452654 7. 556187 7. 491398  
11740750\_ 3. 334014 3. 238424 3. 170987 3. 421361 3. 382519 3. 484226  
11740751\_ 6. 572251 6. 573673 6. 589889 6. 568432 6. 66304 6. 667367

11740752\_ 5. 394576 5. 514593 5. 21864 5. 413371 5. 41208 5. 492758  
11740753\_ 2. 933101 2. 858527 2. 977897 2. 886203 3. 091121 2. 935879  
11740754\_ 6. 566817 6. 722623 6. 627344 6. 779107 6. 759937 6. 795562  
11740755\_ 4. 769572 4. 750019 4. 446676 4. 791505 4. 795637 4. 860413  
11740756\_ 3. 152506 3. 304974 3. 275351 3. 304974 3. 279947 3. 200993  
11740757\_ 3. 545045 3. 556742 3. 61326 3. 658996 3. 652789 3. 554476  
11740758\_ 3. 253086 2. 864919 3. 153127 3. 139507 3. 131239 3. 237469  
11740759\_ 5. 749242 5. 659232 5. 59634 5. 826666 5. 917615 5. 820808  
11740760\_ 3. 362439 3. 362439 3. 044058 3. 455762 3. 37782 3. 474793  
11740761\_ 3. 380347 3. 290188 3. 42038 3. 357011 3. 503743 3. 411255  
11740762\_ 5. 198752 5. 283711 5. 192211 5. 097557 5. 071228 5. 203415  
11740763\_ 2. 416222 2. 191439 2. 306405 2. 177365 2. 166072 2. 289446  
11740764\_ 4. 635312 4. 734587 4. 57193 4. 826966 4. 924444 4. 826966  
11740765\_ 2. 988093 2. 91202 3. 256524 3. 088233 3. 21279 2. 717406  
11740766\_ 3. 61846 3. 66682 3. 617121 3. 575941 3. 662101 3. 612595  
11740767\_ 5. 732616 5. 676173 5. 661986 5. 56654 5. 717828 5. 800824  
11740768\_ 2. 129176 2. 197052 2. 093144 2. 139451 2. 212834 2. 1771  
11740769\_ 4. 006142 4. 186667 4. 010161 3. 99492 3. 931468 3. 81336  
11740770\_ 2. 438884 2. 25483 2. 185029 2. 241246 2. 272943 2. 385749  
11740771\_ 3. 232714 3. 252607 3. 232714 3. 24175 3. 161486 3. 223678  
11740772\_ 4. 440751 4. 839956 4. 90846 4. 779828 4. 771138 4. 90846  
11740773\_ 5. 323524 5. 227954 5. 353209 5. 542612 5. 377439 5. 702863  
11740774\_ 2. 013507 2. 017643 2. 017643 1. 898324 2. 079884 1. 938538  
11740775\_ 4. 613953 4. 666871 4. 614843 4. 614843 4. 84585 4. 671542  
11740776\_ 5. 694516 5. 605148 5. 626442 5. 740176 5. 77699 5. 788471  
11740777\_ 4. 8874 4. 945343 4. 828257 4. 833842 4. 770134 4. 884715  
11740778\_ 2. 47102 2. 356309 2. 374265 2. 450855 2. 372969 2. 468197  
11740779\_ 4. 941867 4. 994301 5. 024961 5. 057788 5. 167174 5. 176935  
11740780\_ 5. 213605 5. 260532 5. 122636 5. 44282 5. 494527 5. 40567  
11740781\_ 8. 49302 8. 437967 8. 418037 8. 835596 8. 739681 8. 619655  
11740782\_ 6. 267987 6. 13945 6. 287914 5. 598756 5. 534117 5. 565305  
11740783\_ 4. 887863 5. 049705 4. 928559 4. 937515 4. 900803 4. 925262  
11740784\_ 3. 071569 3. 066493 3. 056639 3. 134603 3. 071422 2. 84104  
11740785\_ 7. 294051 7. 089177 7. 153079 7. 451809 7. 26774 7. 42698  
11740786\_ 5. 800532 6. 04127 6. 012622 6. 099197 6. 065982 6. 131052  
11740787\_ 9. 023353 9. 012363 9. 00581 8. 869523 8. 911034 8. 982907  
11740788\_ 6. 250184 6. 135056 6. 23831 5. 845365 5. 669734 5. 883595  
11740789\_ 7. 125897 7. 023047 7. 08741 6. 609721 6. 642034 6. 68969  
11740790\_ 5. 702344 5. 687845 5. 732388 5. 10073 4. 991762 5. 055035  
11740791\_ 6. 553585 6. 414001 6. 613249 5. 594991 5. 513624 5. 665948  
11740792\_ 6. 225513 6. 224432 6. 223635 6. 319451 6. 24534 6. 352618  
11740793\_ 2. 944809 3. 306479 3. 183846 3. 137692 3. 137692 3. 131204  
11740794\_ 5. 061872 4. 967883 4. 793545 5. 258321 5. 087832 5. 008916  
11740795\_ 5. 316891 5. 268107 5. 212155 5. 355697 5. 26034 5. 446113  
11740796\_ 4. 818039 4. 923834 4. 939543 5. 181249 5. 033216 5. 152643  
11740797\_ 8. 186469 8. 213009 8. 325626 8. 022354 8. 031307 8. 040315  
11740798\_ 4. 493309 4. 845036 4. 697804 4. 599548 4. 614435 4. 674506  
11740799\_ 4. 597053 4. 357287 4. 487881 3. 904001 4. 014205 4. 242551  
11740800\_ 1. 996813 1. 995297 1. 894425 1. 917014 1. 995297 2. 015934  
11740801\_ 6. 480473 6. 45984 6. 458761 6. 50039 6. 415638 6. 531853  
11740802\_ 5. 450701 5. 396425 5. 376569 5. 219199 5. 217443 5. 411891

11740803\_ 2. 605447 2. 798524 2. 701932 2. 852221 2. 795564 2. 704592  
11740804\_ 3. 475825 3. 596514 3. 456455 3. 539654 3. 559024 3. 553605  
11740805\_ 8. 505858 8. 428812 8. 428812 8. 375672 8. 318562 8. 227112  
11740806\_ 6. 568448 6. 56476 6. 619724 6. 024014 5. 936087 5. 961689  
11740807\_ 2. 095256 1. 977993 2. 052962 2. 037591 2. 070266 1. 995297  
11740808\_ 8. 566469 8. 642969 8. 519517 8. 691964 8. 722296 8. 668366  
11740809\_ 5. 075485 5. 125264 5. 14286 5. 13259 5. 220953 5. 130074  
11740810\_ 4. 814096 4. 74955 4. 733788 4. 879902 4. 814096 4. 823417  
11740811\_ 6. 37094 6. 54819 6. 36392 6. 498325 6. 531421 6. 60555  
11740812\_ 6. 409823 6. 468184 6. 308613 6. 439682 6. 428209 6. 488626  
11740813\_ 4. 182134 4. 021804 3. 826387 4. 107488 4. 168345 3. 931894  
11740814\_ 7. 586659 7. 489832 7. 56888 7. 221508 7. 218956 7. 240139  
11740815\_ 2. 727297 2. 718322 2. 736636 2. 72281 2. 57613 2. 610882  
11740816\_ 3. 894653 4. 106577 3. 986281 3. 950516 4. 153213 3. 995496  
11740817\_ 4. 075338 4. 095823 4. 213226 3. 925181 3. 898945 3. 907027  
11740818\_ 3. 925181 3. 771623 3. 744445 3. 756925 3. 916791 3. 830927  
11740819\_ 2. 61989 2. 718322 3. 141253 3. 175944 3. 010133 3. 010133  
11740820\_ 4. 108592 4. 113234 3. 884391 4. 181968 4. 054288 3. 954157  
11740821\_ 2. 95607 2. 936519 2. 778819 2. 928656 2. 885621 2. 979553  
11740822\_ 4. 854859 5. 087433 5. 264646 5. 10431 5. 119347 4. 967169  
11740823\_ 4. 067748 4. 217698 4. 273127 4. 15987 4. 121897 4. 233452  
11740824\_ 2. 011848 2. 162325 2. 023159 1. 755518 1. 937851 1. 849239  
11740825\_ 6. 375603 6. 334722 6. 411017 6. 383618 6. 470961 6. 217838  
11740826\_ 4. 751347 4. 9226 4. 844713 4. 844295 4. 759949 4. 802481  
11740827\_ 4. 046533 3. 928241 3. 824844 3. 942686 4. 100615 3. 962448  
11740828\_ 3. 705625 3. 879384 3. 636682 3. 810469 3. 88639 3. 766333  
11740829\_ 4. 740818 4. 480741 4. 674662 4. 324838 4. 507986 4. 316015  
11740830\_ 3. 384409 3. 380195 3. 650413 3. 3702 3. 334495 3. 28445  
11740831\_ 3. 291281 3. 19322 3. 088166 3. 404222 3. 261347 3. 180062  
11740832\_ 2. 369842 2. 430731 2. 430731 2. 445072 2. 106252 2. 625381  
11740833\_ 1. 909382 1. 804393 1. 802031 1. 905173 1. 688091 1. 728053  
11740834\_ 2. 587226 2. 737802 2. 537068 2. 778025 2. 730985 2. 811317  
11740835\_ 4. 365526 4. 18249 4. 44504 4. 627086 4. 523555 4. 579536  
11740836\_ 1. 8982 1. 98429 1. 712058 1. 768232 1. 681354 1. 879598  
11740837\_ 3. 818401 4. 122509 4. 202553 3. 891107 4. 092989 3. 782097  
11740838\_ 3. 772786 3. 724944 3. 791101 3. 867985 3. 854076 4. 070783  
11740839\_ 4. 502634 4. 776882 4. 482248 4. 643295 4. 691822 4. 602592  
11740840\_ 9. 388197 9. 267581 9. 338444 9. 063026 9. 086324 9. 080245  
11740841\_ 4. 856535 4. 84625 4. 950376 4. 695767 4. 576674 4. 622628  
11740842\_ 3. 176795 3. 113432 3. 237961 3. 093295 3. 121292 3. 268241  
11740843\_ 4. 397101 4. 484573 4. 389317 4. 417176 4. 367862 4. 477393  
11740844\_ 2. 90911 2. 904812 2. 76831 2. 806541 2. 914228 2. 801423  
11740845\_ 3. 542478 3. 598931 3. 083642 3. 565224 3. 503743 3. 503743  
11740846\_ 3. 16275 3. 234042 3. 060718 3. 185374 3. 135559 3. 130823  
11740847\_ 4. 802912 4. 752701 5. 080692 4. 936221 5. 174171 5. 09956  
11740848\_ 2. 17874 2. 293833 2. 110067 2. 17874 2. 449378 2. 180476  
11740849\_ 7. 238282 7. 278196 7. 205305 7. 261108 7. 304148 7. 323651  
11740850\_ 7. 366734 7. 431965 7. 390555 7. 370867 7. 345614 7. 386422  
11740851\_ 8. 231955 8. 229191 8. 212218 8. 18277 8. 237575 8. 208043  
11740852\_ 3. 865802 4. 131982 4. 131982 4. 115258 4. 200678 4. 290204  
11740853\_ 4. 305029 4. 365074 4. 276933 4. 381584 4. 305565 4. 209998



11740854\_ 2. 363651 2. 458972 2. 458972 2. 565304 2. 284026 2. 458972  
11740855\_ 7. 413029 7. 429344 7. 417811 7. 290016 7. 264677 7. 269472  
11740856\_ 2. 045276 1. 900309 2. 058097 1. 776203 2. 125601 1. 829527  
11740857\_ 7. 886682 7. 872378 7. 908869 7. 270545 7. 167481 7. 270545  
11740858\_ 5. 581339 5. 609161 5. 447159 5. 732762 5. 538281 5. 682585  
11740859\_ 2. 177167 2. 341974 2. 27033 2. 285935 2. 242395 2. 27505  
11740860\_ 8. 064455 8. 062326 8. 07308 8. 033156 8. 104136 8. 050537  
11740861\_ 9. 31962 9. 225999 9. 260771 9. 160279 9. 192512 9. 138484  
11740862\_ 3. 392658 3. 514521 3. 460783 3. 34103 3. 595285 3. 290402  
11740863\_ 2. 815588 3. 059327 2. 63528 3. 012271 3. 032499 3. 018005  
11740864\_ 5. 586867 5. 84038 5. 829824 5. 60539 5. 565761 5. 421255  
11740865\_ 3. 503743 3. 499848 3. 687983 3. 669855 3. 742489 3. 763787  
11740866\_ 7. 985126 8. 002785 7. 910267 8. 079238 8. 14005 8. 115927  
11740867\_ 5. 985352 5. 667942 6. 131677 5. 612907 5. 52431 5. 542647  
11740868\_ 4. 775246 4. 883232 4. 930507 5. 015432 4. 783709 5. 062321  
11740869\_ 5. 614563 5. 393259 5. 532845 5. 573066 5. 554436 5. 407045  
11740870\_ 5. 916553 5. 998582 5. 94101 5. 830865 5. 782205 5. 764709  
11740871\_ 1. 828378 1. 805659 1. 897058 1. 818861 1. 805659 1. 896538  
11740872\_ 3. 457969 3. 49849 3. 495481 3. 45167 3. 505925 3. 321114  
11740873\_ 3. 124795 3. 147405 3. 071263 3. 056249 3. 055334 3. 099756  
11740874\_ 5. 700503 5. 789947 5. 820052 5. 890376 5. 920711 5. 922714  
11740875\_ 3. 573188 3. 724613 3. 51532 3. 610664 3. 593456 3. 599221  
11740876\_ 4. 792418 4. 967544 4. 820659 5. 263659 5. 081782 4. 746867  
11740877\_ 6. 006419 6. 076709 6. 012367 5. 984204 6. 021042 6. 020699  
11740878\_ 6. 858652 6. 894815 6. 874408 6. 71477 6. 700371 6. 850155  
11740879\_ 12. 34863 12. 35594 12. 33127 12. 12681 12. 11778 12. 09657  
11740880\_ 12. 34069 12. 36547 12. 36357 12. 13476 12. 1484 12. 12135  
11740881\_ 5. 330306 5. 398276 5. 130274 4. 281101 4. 263903 4. 19724  
11740882\_ 5. 163291 5. 165256 5. 122191 5. 222797 5. 271134 5. 189399  
11740883\_ 7. 30567 7. 226547 7. 315999 7. 230559 7. 143488 7. 105367  
11740884\_ 1. 804393 2. 149911 2. 045912 1. 824274 2. 042963 2. 307399  
11740885\_ 8. 87203 8. 845526 8. 931683 8. 039316 8. 081587 8. 045007  
11740886\_ 9. 892767 9. 841323 9. 909128 9. 81803 9. 856755 9. 843223  
11740887\_ 7. 036226 7. 074968 7. 052689 7. 604825 7. 575406 7. 459166  
11740888\_ 2. 461839 2. 522565 2. 426988 2. 37096 2. 405811 2. 278291  
11740889\_ 4. 919544 4. 973442 4. 793298 4. 943829 5. 055227 4. 906872  
11740890\_ 2. 470433 2. 39914 2. 182727 2. 470433 2. 39914 2. 418086  
11740891\_ 5. 089516 5. 104926 5. 094154 5. 061882 5. 149545 5. 025395  
11740892\_ 6. 240927 6. 421553 6. 399318 6. 216234 6. 302786 6. 345963  
11740893\_ 5. 650118 5. 649796 5. 783773 5. 784917 5. 981908 5. 88475  
11740894\_ 3. 606313 3. 713297 3. 628173 3. 683371 3. 678631 3. 654997  
11740895\_ 8. 185798 8. 045238 8. 209131 7. 752626 7. 712404 7. 704148  
11740896\_ 7. 6384 7. 470579 7. 475379 6. 998865 6. 926711 6. 970956  
11740897\_ 6. 10073 6. 132026 5. 943045 5. 996126 6. 059664 6. 139042  
11740898\_ 4. 754525 4. 916654 4. 927765 4. 999633 4. 908475 4. 982131  
11740899\_ 5. 413184 5. 367094 5. 364931 5. 662111 5. 715843 5. 709842  
11740900\_ 2. 491996 2. 528676 2. 547756 2. 460302 2. 476624 2. 394816  
11740901\_ 2. 404853 2. 718322 2. 545955 2. 543609 2. 554743 2. 356215  
11740902\_ 4. 198062 4. 005917 4. 144124 4. 070319 4. 34276 4. 266119  
11740903\_ 3. 401926 3. 493126 3. 403526 3. 853008 3. 822465 3. 904714  
11740904\_ 3. 637844 3. 953237 3. 768086 3. 870057 3. 855042 3. 927105

11740905\_ 4. 170246 4. 27935 4. 270494 4. 149444 4. 19791 4. 304342  
11740906\_ 3. 106124 3. 174142 3. 144508 3. 052908 3. 067194 2. 667491  
11740907\_ 5. 74577 5. 873254 5. 870242 5. 723241 5. 894934 5. 788004  
11740908\_ 5. 922266 5. 97052 5. 98861 6. 060534 6. 036251 5. 992354  
11740909\_ 5. 871633 5. 852513 5. 905006 5. 808704 5. 846926 5. 891995  
11740910\_ 5. 510325 5. 465549 5. 466779 5. 413498 5. 410213 5. 457983  
11740911\_ 3. 804794 3. 634866 3. 92299 3. 602666 3. 511827 3. 700308  
11740912\_ 3. 407294 3. 435605 3. 598198 3. 598198 3. 502923 3. 509854  
11740913\_ 5. 913947 6. 02347 5. 920961 6. 003823 5. 959791 5. 987715  
11740914\_ 5. 109413 5. 268225 5. 178536 5. 146925 5. 196646 5. 079117  
11740915\_ 4. 799424 4. 686846 4. 599014 5. 001077 4. 914803 4. 809211  
11740916\_ 5. 029529 4. 9694 5. 000417 4. 949742 4. 974576 4. 973217  
11740917\_ 5. 288013 5. 447918 5. 447918 4. 615508 4. 907138 5. 009215  
11740918\_ 4. 079148 3. 78901 3. 545764 3. 91002 3. 733981 3. 744756  
11740919\_ 4. 63817 4. 740104 4. 459939 4. 923885 4. 890539 4. 827915  
11740920\_ 3. 590573 3. 503743 3. 224577 3. 503743 3. 503743 3. 462608  
11740921\_ 2. 538912 2. 466421 2. 47102 2. 545768 2. 509754 2. 635715  
11740922\_ 6. 663357 6. 572831 6. 622492 6. 492559 6. 59136 6. 481217  
11740923\_ 11. 96299 11. 90001 11. 94441 11. 9514 11. 97923 11. 93958  
11740924\_ 11. 89347 11. 83407 11. 89393 11. 87338 11. 88393 11. 86451  
11740925\_ 4. 009074 4. 202448 4. 370337 4. 113064 4. 038199 4. 122446  
11740926\_ 4. 403774 4. 275559 4. 441502 4. 213226 4. 347179 4. 256917  
11740927\_ 3. 995983 4. 335594 4. 275512 4. 40461 4. 457975 4. 314323  
11740928\_ 2. 620426 2. 596302 2. 968936 2. 769014 2. 596302 2. 911123  
11740929\_ 8. 059058 7. 953305 8. 109556 7. 23614 7. 273732 7. 382097  
11740930\_ 5. 396519 5. 379721 5. 483118 4. 734098 4. 890539 4. 984669  
11740931\_ 7. 492524 7. 490068 7. 384247 7. 47884 7. 496378 7. 567621  
11740932\_ 6. 449307 6. 533082 6. 375764 6. 432414 6. 468868 6. 435349  
11740933\_ 5. 218059 5. 235335 5. 236839 5. 276893 5. 397652 5. 456057  
11740934\_ 8. 207638 8. 100397 8. 12382 9. 007967 8. 980482 8. 948694  
11740935\_ 9. 338036 9. 355573 9. 333911 9. 223222 9. 240684 9. 2275  
11740936\_ 5. 128621 5. 187466 5. 169953 5. 110204 5. 205578 5. 11527  
11740937\_ 4. 595607 4. 210881 4. 698503 5. 011107 5. 170937 4. 967058  
11740938\_ 8. 255864 8. 267544 8. 290287 7. 632935 7. 657196 7. 70048  
11740939\_ 6. 622722 6. 573855 6. 622551 7. 075038 6. 929815 7. 042126  
11740940\_ 4. 670859 4. 595254 4. 551007 4. 546462 4. 790242 4. 766841  
11740941\_ 4. 493936 4. 712307 4. 458888 4. 55633 4. 644768 4. 612285  
11740942\_ 3. 586658 3. 72343 3. 60419 3. 69346 3. 690405 3. 712119  
11740943\_ 4. 560495 4. 924768 4. 770678 4. 983759 4. 920359 4. 983759  
11740944\_ 4. 407544 4. 383977 4. 287593 4. 518473 4. 518473 4. 594474  
11740945\_ 6. 468815 6. 466675 6. 459876 6. 514236 6. 485124 6. 481046  
11740946\_ 2. 22125 2. 131936 2. 523309 2. 437102 2. 415983 2. 357059  
11740947\_ 2. 418881 2. 332761 2. 351857 2. 334624 2. 332761 2. 349995  
11740948\_ 4. 53531 4. 428907 4. 559003 4. 52014 4. 53646 4. 686431  
11740949\_ 5. 010308 5. 047592 5. 105857 5. 104302 4. 984669 5. 071499  
11740950\_ 4. 088106 4. 373334 4. 014872 4. 193415 4. 214175 4. 177974  
11740951\_ 4. 707433 4. 756822 4. 646227 4. 690665 4. 820692 4. 718344  
11740952\_ 3. 782622 3. 687512 3. 916495 3. 840312 3. 742228 3. 911402  
11740953\_ 4. 515438 4. 446272 4. 452869 4. 517161 4. 462467 4. 511662  
11740954\_ 6. 365941 6. 471747 6. 280262 6. 354822 6. 348512 6. 416518  
11740955\_ 4. 075206 4. 243275 4. 188532 4. 168027 4. 50025 4. 360266

11740956\_ 5. 010899 5. 189628 4. 982653 5. 273949 5. 26034 5. 261943  
11740957\_ 7. 850188 7. 807048 7. 846084 7. 687743 7. 680676 7. 643251  
11740958\_ 7. 125082 7. 225509 7. 170186 7. 262474 7. 231525 7. 177361  
11740959\_ 6. 024522 5. 778972 5. 698629 5. 546751 5. 571421 5. 539206  
11740960\_ 3. 946145 3. 536077 4. 003938 3. 850246 3. 524707 3. 705625  
11740961\_ 6. 72561 6. 571984 6. 693505 6. 443096 6. 474736 6. 448423  
11740962\_ 7. 878158 7. 828634 7. 898823 7. 534474 7. 544234 7. 5454  
11740963\_ 7. 406409 7. 379694 7. 439382 7. 199975 7. 283159 7. 275758  
11740964\_ 5. 70089 5. 612163 5. 441057 5. 507637 5. 54614 5. 657987  
11740965\_ 4. 465294 4. 360315 4. 489596 4. 542296 4. 50295 4. 543902  
11740966\_ 4. 607933 4. 495676 4. 695717 4. 752411 4. 646916 4. 716845  
11740967\_ 4. 867655 4. 760524 4. 694778 4. 823518 4. 953183 4. 917074  
11740968\_ 5. 219204 5. 024902 5. 261344 5. 315868 5. 412093 5. 332697  
11740969\_ 1. 976828 1. 902173 2. 003151 2. 06851 2. 01727 2. 088549  
11740970\_ 3. 300594 3. 300594 3. 514994 3. 305337 3. 427612 3. 548034  
11740971\_ 6. 417386 6. 399337 6. 360209 6. 308087 6. 279028 6. 359479  
11740972\_ 6. 115564 5. 998103 6. 217193 6. 37204 6. 348122 6. 343879  
11740973\_ 8. 046533 8. 015521 7. 982603 8. 298019 8. 293875 8. 338671  
11740974\_ 9. 394002 9. 309614 9. 390517 9. 186812 9. 200625 9. 202726  
11740975\_ 4. 183335 4. 301569 4. 230259 4. 524789 4. 376775 4. 423363  
11740976\_ 6. 751341 6. 738901 6. 727444 6. 913034 7. 037264 7. 041745  
11740977\_ 8. 11805 8. 205056 8. 188152 8. 155318 8. 173329 8. 178399  
11740978\_ 5. 441425 5. 472112 5. 266881 5. 60929 5. 531531 5. 614201  
11740979\_ 4. 110666 4. 237926 4. 13757 4. 211067 4. 054025 4. 202679  
11740980\_ 9. 929979 10. 08225 10. 03864 9. 732682 9. 674461 9. 524124  
11740981\_ 5. 75454 5. 672127 5. 614563 6. 050706 6. 137572 5. 921977  
11740982\_ 5. 447051 5. 345598 5. 333723 5. 410317 5. 343027 5. 345137  
11740983\_ 5. 082802 5. 074438 5. 067719 5. 297226 5. 264964 5. 140746  
11740984\_ 9. 702622 9. 669642 9. 690187 9. 458402 9. 507531 9. 481106  
11740985\_ 9. 185205 9. 147815 9. 179067 9. 060152 9. 070948 9. 096283  
11740986\_ 7. 920955 7. 858948 7. 889379 8. 472964 8. 42512 8. 39753  
11740987\_ 7. 063928 7. 097962 7. 062856 6. 536573 6. 484092 6. 464805  
11740988\_ 6. 772375 6. 725914 6. 601814 6. 631188 6. 835155 6. 727313  
11740989\_ 3. 40888 3. 494866 3. 342366 3. 650737 3. 700579 3. 515392  
11740990\_ 4. 094905 4. 29417 4. 047784 4. 426743 4. 206188 4. 386676  
11740991\_ 8. 739271 8. 630954 8. 703745 8. 436691 8. 498497 8. 4639  
11740992\_ 7. 438277 7. 435138 7. 380688 7. 603513 7. 638724 7. 557106  
11740993\_ 8. 421108 8. 486892 8. 468405 8. 457382 8. 384313 8. 396168  
11740994\_ 2. 244889 2. 204892 2. 275516 2. 165082 2. 234748 2. 19494  
11740995\_ 3. 230913 3. 026669 2. 914407 2. 965298 3. 227482 3. 170262  
11740996\_ 2. 340206 2. 44793 2. 377117 2. 340206 2. 411412 2. 232157  
11740997\_ 6. 343682 6. 5205 6. 417422 6. 453109 6. 444781 6. 462967  
11740998\_ 7. 837675 7. 758384 7. 811999 7. 121637 7. 060844 7. 180131  
11740999\_ 4. 428917 4. 346528 4. 528201 4. 156201 4. 077234 4. 005598  
11741000\_ 5. 686437 5. 671873 5. 820557 5. 725841 5. 558586 5. 564131  
11741001\_ 4. 25087 4. 343123 4. 309535 4. 299616 4. 427012 4. 473652  
11741002\_ 7. 009735 6. 905231 7. 038059 6. 752038 6. 907442 6. 802151  
11741003\_ 6. 061909 6. 08363 5. 961262 5. 82601 5. 853833 5. 77685  
11741004\_ 4. 85578 4. 937445 4. 968323 4. 976433 4. 728595 4. 890549  
11741005\_ 5. 470201 5. 483992 5. 676992 5. 737717 5. 690385 5. 766684  
11741006\_ 6. 006189 5. 985579 5. 870169 6. 059613 6. 104931 5. 971236

11741007\_ 6. 794585 6. 748674 6. 68236 6. 870441 6. 829876 6. 910833  
11741008\_ 4. 002073 4. 037539 3. 859295 3. 940565 4. 088461 4. 01093  
11741009\_ 4. 197344 4. 248709 4. 130113 4. 251259 4. 275543 4. 316699  
11741010\_ 9. 233608 9. 157997 9. 243183 9. 250944 9. 206761 9. 236398  
11741011\_ 6. 814697 6. 832496 6. 891245 7. 577531 7. 568937 7. 626889  
11741012\_ 7. 337947 7. 252971 7. 296871 7. 286172 7. 115425 7. 244178  
11741013\_ 2. 187752 2. 230896 2. 045733 2. 230896 2. 165217 2. 095256  
11741014\_ 6. 755949 6. 763281 6. 697771 6. 775099 6. 887262 6. 814896  
11741015\_ 7. 603 7. 534676 7. 602184 8. 832032 8. 850525 8. 836516  
11741016\_ 8. 262944 8. 228987 8. 345013 8. 037775 7. 944983 7. 932682  
11741017\_ 7. 411278 7. 344921 7. 517807 7. 12194 7. 145703 7. 155274  
11741018\_ 7. 468009 7. 459978 7. 53334 7. 636498 7. 602023 7. 596445  
11741019\_ 5. 188496 5. 411434 5. 19725 5. 464264 5. 381916 5. 13197  
11741020\_ 4. 315011 4. 299995 4. 08215 4. 085484 4. 227061 4. 299039  
11741021\_ 5. 066511 5. 154125 5. 010483 5. 221486 5. 230467 5. 154125  
11741022\_ 8. 66503 8. 469495 8. 588952 8. 475603 8. 494445 8. 425885  
11741023\_ 6. 534265 6. 505026 6. 575313 7. 670476 7. 701589 7. 629776  
11741024\_ 6. 18491 6. 087202 6. 197328 6. 002194 6. 018649 6. 014038  
11741025\_ 6. 324818 6. 075033 6. 131671 6. 094434 6. 098318 6. 099142  
11741026\_ 6. 16072 6. 293467 6. 060708 5. 97317 6. 041974 6. 058419  
11741027\_ 7. 775132 7. 71322 7. 81737 7. 635997 7. 686729 7. 717281  
11741028\_ 4. 393977 4. 249832 4. 379792 4. 401416 4. 382078 4. 421346  
11741029\_ 8. 276991 8. 244209 8. 314318 8. 178684 8. 095854 8. 123114  
11741030\_ 7. 144608 7. 133868 7. 252762 7. 029692 6. 946692 7. 01369  
11741031\_ 10. 0797 9. 981469 10. 06419 10. 17239 10. 19787 10. 18808  
11741032\_ 8. 550542 8. 459249 8. 515431 8. 996224 9. 022382 9. 017958  
11741033\_ 4. 200678 4. 174736 4. 148761 4. 178852 4. 251452 4. 195559  
11741034\_ 5. 142818 5. 311162 5. 186427 5. 232063 5. 127384 5. 253252  
11741035\_ 7. 618285 7. 514257 7. 594349 7. 575848 7. 633002 7. 606054  
11741036\_ 6. 604437 6. 548785 6. 627483 6. 595839 6. 667694 6. 705158  
11741037\_ 8. 853112 8. 851079 8. 930567 8. 40512 8. 43883 8. 401932  
11741038\_ 8. 638303 8. 50443 8. 592285 8. 170349 8. 121703 8. 171702  
11741039\_ 10. 65943 10. 63878 10. 62193 10. 21957 10. 35114 10. 24703  
11741040\_ 10. 86123 10. 81537 10. 83758 10. 52534 10. 56957 10. 51468  
11741041\_ 6. 520868 6. 582262 6. 668377 6. 648586 6. 648409 6. 778099  
11741042\_ 7. 075668 7. 154768 7. 068327 7. 018608 6. 944549 6. 976199  
11741043\_ 3. 544746 3. 443536 3. 507181 3. 730115 3. 879309 3. 786777  
11741044\_ 7. 973941 7. 854994 7. 974125 7. 605194 7. 699412 7. 657308  
11741045\_ 6. 171373 6. 216706 6. 249917 6. 317614 6. 37563 6. 20103  
11741046\_ 8. 083788 8. 058422 8. 188677 7. 990038 8. 027878 7. 959331  
11741047\_ 2. 906506 3. 138086 2. 996594 3. 041114 2. 978248 3. 093566  
11741048\_ 3. 239293 3. 105734 3. 125613 3. 134306 3. 37647 3. 16694  
11741049\_ 3. 228608 3. 153273 3. 261125 2. 973123 3. 220508 3. 230247  
11741050\_ 7. 150235 7. 055228 7. 177037 7. 582418 7. 726197 7. 708475  
11741051\_ 7. 356041 7. 157636 7. 229376 7. 988918 7. 86209 8. 027141  
11741052\_ 4. 870112 4. 870112 4. 88241 4. 870112 4. 775215 4. 866013  
11741053\_ 5. 192499 4. 888615 5. 114276 5. 548606 5. 60932 5. 41473  
11741054\_ 4. 608118 4. 615455 4. 669931 5. 12857 5. 118 5. 067021  
11741055\_ 6. 855955 6. 914855 7. 007973 6. 52085 6. 448378 6. 557068  
11741056\_ 8. 349965 8. 231358 8. 334708 8. 9697 8. 928144 9. 014605  
11741057\_ 4. 55289 4. 746895 4. 546797 4. 830738 4. 867472 4. 914379

11741058\_ 2. 059055 2. 069199 2. 099195 2. 074978 2. 145474 2. 077868  
11741059\_ 6. 601344 6. 434892 6. 501504 5. 970767 5. 932916 6. 090796  
11741060\_ 5. 52241 5. 563828 5. 511386 5. 490506 5. 360192 5. 448551  
11741061\_ 6. 54352 6. 630791 6. 640597 6. 564391 6. 586232 6. 700037  
11741062\_ 6. 965601 6. 763658 6. 842121 6. 750047 6. 761883 6. 851206  
11741063\_ 8. 015852 7. 94892 8. 043252 7. 949427 7. 932678 8. 002689  
11741064\_ 7. 462121 7. 591295 7. 371801 7. 845876 7. 902733 7. 898823  
11741065\_ 6. 259472 6. 3052 6. 422789 6. 646189 6. 696059 6. 58629  
11741066\_ 7. 538474 7. 600414 7. 565744 7. 433521 7. 535275 7. 515118  
11741067\_ 9. 759531 9. 6688 9. 704375 9. 569368 9. 676759 9. 63655  
11741068\_ 3. 578683 3. 757292 3. 625408 3. 198796 3. 236514 3. 180062  
11741069\_ 6. 398542 6. 36099 6. 410036 6. 418575 6. 376333 6. 381058  
11741070\_ 10. 13698 10. 11519 10. 07124 10. 05915 9. 965964 10. 01099  
11741071\_ 2. 212694 2. 193986 2. 748096 2. 03329 2. 223183 2. 213958  
11741072\_ 3. 302946 3. 351221 3. 334447 3. 402848 3. 36583 3. 461484  
11741073\_ 5. 879477 5. 866126 5. 775897 5. 747482 5. 609647 5. 704919  
11741074\_ 7. 163866 7. 168977 7. 260012 7. 048448 7. 101878 7. 198947  
11741075\_ 7. 982107 7. 829184 7. 884333 8. 367788 8. 281286 8. 37443  
11741076\_ 2. 235709 2. 237176 2. 166207 1. 83764 1. 730907 1. 726006  
11741077\_ 8. 599894 8. 597914 8. 61285 8. 658087 8. 652181 8. 631135  
11741078\_ 5. 090803 5. 12063 5. 129188 5. 088828 5. 397757 5. 203774  
11741079\_ 8. 017442 8. 038864 8. 039665 7. 798193 7. 853405 7. 845459  
11741080\_ 5. 719383 5. 754597 5. 682508 5. 805878 5. 700392 5. 832441  
11741081\_ 3. 598285 3. 606313 3. 516802 3. 629651 3. 610326 3. 660054  
11741082\_ 3. 971408 3. 7931 3. 726343 3. 836195 3. 917701 4. 013889  
11741083\_ 11. 44035 11. 45488 11. 46449 11. 45373 11. 39767 11. 39453  
11741084\_ 3. 438577 3. 550166 3. 382049 3. 493776 3. 509874 3. 35352  
11741085\_ 8. 471828 8. 344274 8. 385841 8. 303249 8. 316492 8. 384459  
11741086\_ 9. 552837 9. 458782 9. 517235 9. 801274 9. 731007 9. 816357  
11741087\_ 7. 211336 7. 24091 7. 229463 7. 365028 7. 267353 7. 326483  
11741088\_ 4. 024802 3. 890392 4. 023219 4. 036776 4. 046372 3. 955383  
11741089\_ 4. 605548 4. 723838 4. 668694 5. 008955 4. 849431 4. 704072  
11741090\_ 2. 617448 2. 590927 2. 364463 2. 397176 2. 359609 2. 367295  
11741091\_ 6. 686734 6. 639166 6. 597351 6. 205178 6. 126063 6. 133409  
11741092\_ 7. 667377 7. 580265 7. 62695 8. 196016 8. 202467 8. 204145  
11741093\_ 5. 988815 5. 877168 5. 963031 6. 017674 5. 991047 6. 065557  
11741094\_ 3. 121059 3. 328826 3. 024066 3. 200694 3. 216051 3. 0123  
11741095\_ 5. 71295 5. 787409 5. 767555 6. 246536 6. 354969 6. 300862  
11741096\_ 5. 084532 4. 948155 5. 163923 5. 469646 5. 62868 5. 509923  
11741097\_ 5. 949002 5. 92868 6. 018553 6. 118838 5. 739634 5. 759704  
11741098\_ 3. 782178 3. 540833 3. 794623 3. 479627 3. 534876 3. 564423  
11741099\_ 7. 21021 6. 999333 7. 244896 7. 37789 7. 459192 7. 381779  
11741100\_ 4. 60523 4. 411482 4. 868798 4. 610877 4. 678238 4. 446478  
11741101\_ 8. 000071 7. 884916 7. 944993 7. 52246 7. 476725 7. 476937  
11741102\_ 3. 933384 3. 826455 4. 170532 3. 933384 3. 815209 3. 921668  
11741103\_ 10. 5874 10. 55161 10. 59976 10. 50412 10. 5117 10. 51481  
11741104\_ 6. 239524 6. 26594 6. 33567 6. 085382 5. 984909 6. 038553  
11741105\_ 8. 77663 8. 760426 8. 753772 7. 687574 7. 730711 7. 685201  
11741106\_ 8. 89603 8. 794315 8. 873378 7. 730981 7. 808283 7. 832209  
11741107\_ 9. 79165 9. 735349 9. 739631 10. 0201 9. 988139 9. 948481  
11741108\_ 5. 244134 5. 252388 5. 249379 5. 344884 5. 295638 5. 44146

11741109\_ 6. 145831 6. 264986 6. 219072 5. 968963 6. 128659 6. 02378  
11741110\_ 6. 388967 6. 270318 6. 429316 6. 222705 6. 222296 6. 096495  
11741111\_ 7. 007439 7. 017133 7. 031774 7. 012505 7. 029047 7. 024615  
11741112\_ 6. 116747 6. 163622 6. 25086 6. 085114 6. 13156 6. 235023  
11741113\_ 7. 367696 7. 334221 7. 408676 7. 577368 7. 618152 7. 638162  
11741114\_ 6. 501726 6. 497474 6. 501726 6. 496816 6. 52527 6. 488013  
11741115\_ 2. 674301 2. 574343 2. 451872 2. 384167 2. 124633 2. 384167  
11741116\_ 7. 736932 7. 701561 7. 776646 5. 528222 5. 531871 5. 775755  
11741117\_ 6. 155037 6. 234064 6. 170047 6. 206853 6. 303554 6. 226462  
11741118\_ 3. 661087 3. 413785 3. 709549 3. 503743 3. 694711 3. 705625  
11741119\_ 5. 789179 5. 81624 5. 894697 5. 388603 5. 674435 5. 475572  
11741120\_ 4. 711859 4. 807202 4. 637328 4. 914651 4. 890539 4. 858443  
11741121\_ 7. 816107 7. 740629 7. 815823 7. 490462 7. 460035 7. 529818  
11741122\_ 8. 78082 8. 713651 8. 7532 7. 742743 7. 913713 7. 903605  
11741123\_ 6. 064906 6. 012446 5. 850155 5. 850155 5. 885716 5. 680505  
11741124\_ 9. 064063 9. 071079 9. 102036 8. 674474 8. 698757 8. 598385  
11741125\_ 3. 804323 3. 82459 3. 529823 3. 817311 3. 901899 3. 733865  
11741126\_ 7. 359535 7. 366967 7. 418913 7. 983954 7. 837799 7. 91233  
11741127\_ 11. 22966 11. 13736 11. 17969 11. 54413 11. 55946 11. 5919  
11741128\_ 7. 752979 7. 821211 7. 777488 7. 764939 7. 789832 7. 74525  
11741129\_ 11. 57929 11. 60438 11. 60871 11. 34209 11. 37333 11. 36487  
11741130\_ 7. 718116 7. 727993 7. 770752 7. 825496 7. 748159 7. 829358  
11741131\_ 9. 666956 9. 572477 9. 64305 9. 725177 9. 733833 9. 758982  
11741132\_ 2. 614554 3. 010739 2. 775113 2. 775113 2. 887609 2. 670744  
11741133\_ 7. 371895 7. 286897 7. 346696 7. 575859 7. 578568 7. 533231  
11741134\_ 6. 124391 6. 086807 6. 167527 5. 811493 5. 816103 5. 836981  
11741135\_ 7. 997879 7. 892031 8. 034215 7. 620581 7. 607113 7. 576955  
11741136\_ 2. 917688 2. 909605 2. 902905 2. 755412 2. 700305 2. 682084  
11741137\_ 7. 255045 7. 162847 7. 288675 6. 67672 6. 868388 6. 81431  
11741138\_ 7. 130832 7. 134375 7. 084156 7. 342253 7. 359132 7. 328393  
11741139\_ 2. 96206 3. 036486 2. 883462 3. 101013 3. 249943 3. 070544  
11741140\_ 10. 0437 9. 966979 10. 0076 9. 193215 9. 215719 9. 154671  
11741141\_ 7. 853265 7. 956599 7. 912 7. 308037 7. 198289 7. 147926  
11741142\_ 6. 936882 6. 915373 6. 936068 6. 769372 6. 739526 6. 73196  
11741143\_ 5. 609181 5. 478277 5. 584479 5. 228298 5. 208778 4. 99941  
11741144\_ 10. 48741 10. 50274 10. 53924 10. 4061 10. 47346 10. 42709  
11741145\_ 1. 942173 1. 786979 1. 825616 1. 922831 1. 974139 1. 848241  
11741146\_ 6. 982937 7. 099734 7. 053419 6. 932648 6. 885938 6. 910606  
11741147\_ 10. 47455 10. 47289 10. 44927 10. 23047 10. 26678 10. 19741  
11741148\_ 9. 569306 9. 551631 9. 604203 9. 482812 9. 493634 9. 519016  
11741149\_ 10. 62445 10. 60051 10. 60552 10. 2989 10. 38198 10. 34626  
11741150\_ 5. 791316 5. 697788 5. 707882 5. 442629 5. 359699 5. 341663  
11741151\_ 3. 837298 3. 907477 3. 643342 3. 83629 3. 588988 3. 707749  
11741152\_ 5. 004348 4. 858046 5. 082323 5. 416365 5. 447167 5. 282055  
11741153\_ 2. 977439 3. 262389 2. 990591 3. 022576 2. 973968 3. 180062  
11741154\_ 8. 805689 8. 831291 8. 839739 8. 465335 8. 361464 8. 465234  
11741155\_ 7. 832564 7. 782065 7. 813093 7. 419133 7. 45117 7. 445583  
11741156\_ 6. 048942 6. 125996 6. 083759 6. 115633 6. 149216 6. 157759  
11741157\_ 2. 222006 2. 474316 2. 117389 2. 150454 2. 166552 2. 372909  
11741158\_ 3. 658999 3. 7441 3. 85302 3. 7441 3. 705625 3. 7441  
11741159\_ 6. 65148 6. 527069 6. 720366 7. 799156 7. 791902 7. 834966

11741160\_ 5. 945188 5. 827525 5. 764476 5. 572713 5. 646556 5. 774383  
11741161\_ 5. 726575 5. 693091 5. 670891 5. 717701 5. 644079 5. 720323  
11741162\_ 7. 024952 6. 988778 6. 99814 6. 761326 6. 767023 6. 876001  
11741163\_ 4. 212634 4. 335594 4. 250555 4. 081905 4. 502579 4. 054288  
11741164\_ 4. 574143 4. 462615 4. 501719 4. 556275 4. 6173 4. 514503  
11741165\_ 7. 721134 7. 715803 7. 775669 7. 522116 7. 498128 7. 625704  
11741166\_ 2. 476992 2. 525065 2. 500343 2. 542889 2. 393725 2. 476992  
11741167\_ 5. 646653 5. 643713 5. 740823 5. 580174 5. 404594 5. 413662  
11741168\_ 6. 374439 6. 284306 6. 572409 5. 716224 5. 734511 5. 70831  
11741169\_ 6. 201342 6. 322099 6. 116567 6. 360119 6. 25164 6. 511631  
11741170\_ 4. 965452 5. 071294 4. 980837 5. 278738 5. 23305 5. 054488  
11741171\_ 3. 904543 3. 863693 3. 904543 3. 905988 4. 20225 3. 798448  
11741172\_ 3. 414558 3. 553959 3. 704833 3. 306449 3. 709656 3. 553959  
11741173\_ 4. 241721 4. 302865 3. 97448 4. 39527 4. 428596 4. 141713  
11741174\_ 5. 614563 5. 732315 5. 622391 5. 569045 5. 584813 5. 475572  
11741175\_ 4. 897123 5. 108587 4. 957776 4. 879377 5. 110136 4. 962087  
11741176\_ 4. 044435 4. 047995 3. 985052 4. 058069 4. 183385 4. 232291  
11741177\_ 2. 887379 2. 83198 2. 610978 2. 947956 2. 630099 2. 540564  
11741178\_ 3. 679618 3. 654628 3. 478156 3. 751601 3. 654628 3. 738718  
11741179\_ 5. 483399 5. 497394 5. 578174 5. 544051 5. 499437 5. 519418  
11741180\_ 6. 36377 6. 281606 6. 412727 6. 284434 6. 411395 6. 390898  
11741181\_ 2. 909955 2. 856598 3. 164803 3. 063994 2. 785216 3. 073924  
11741182\_ 5. 81125 5. 843176 5. 942201 6. 033071 6. 044285 6. 049344  
11741183\_ 4. 299477 4. 250934 4. 308831 4. 643717 4. 238817 4. 387455  
11741184\_ 4. 108592 4. 124429 4. 24595 3. 895264 4. 057573 4. 017512  
11741185\_ 6. 048277 6. 195476 6. 17981 6. 165571 6. 146194 5. 971301  
11741186\_ 6. 883822 6. 79613 6. 940573 5. 795385 6. 024428 6. 021115  
11741187\_ 6. 731801 6. 929197 6. 659364 6. 892136 6. 889362 6. 873942  
11741188\_ 7. 067331 6. 957003 6. 982937 6. 452658 6. 461096 6. 534889  
11741189\_ 8. 139361 8. 10137 8. 058883 7. 694037 7. 60084 7. 709551  
11741190\_ 3. 234157 3. 411389 2. 99211 3. 210769 3. 10264 3. 162521  
11741191\_ 9. 095383 9. 077403 9. 165675 10. 31479 10. 35399 10. 30622  
11741192\_ 6. 136186 6. 13945 6. 262019 5. 523131 5. 595978 5. 774704  
11741193\_ 6. 513288 6. 433038 6. 387213 6. 376453 6. 533188 6. 528959  
11741194\_ 6. 48642 6. 305057 6. 408032 6. 482717 6. 505179 6. 593261  
11741195\_ 3. 725621 3. 933644 3. 855518 3. 766744 3. 675581 3. 706612  
11741196\_ 6. 005536 5. 95071 5. 770367 5. 870699 5. 816399 5. 856696  
11741197\_ 5. 353506 4. 991486 5. 245275 5. 66259 5. 434341 5. 736879  
11741198\_ 5. 329424 5. 26347 5. 2222 4. 52373 4. 574114 4. 537418  
11741199\_ 3. 598957 3. 292112 3. 684653 3. 981305 3. 837674 3. 820995  
11741200\_ 6. 525936 6. 541981 6. 640701 6. 251087 6. 269327 6. 368978  
11741201\_ 8. 670399 8. 655523 8. 661247 8. 499336 8. 52087 8. 615484  
11741202\_ 3. 064299 2. 691778 2. 7251 2. 754908 2. 639727 2. 605516  
11741203\_ 5. 885657 5. 852765 5. 81382 5. 90369 5. 87613 5. 842961  
11741204\_ 5. 758911 5. 568606 5. 836806 5. 788552 5. 788092 5. 841765  
11741205\_ 3. 040685 3. 316349 3. 040685 3. 013067 2. 942611 3. 022919  
11741206\_ 6. 96652 6. 990739 6. 885154 6. 994032 7. 098286 7. 076055  
11741207\_ 10. 95916 10. 93224 10. 91728 10. 74981 10. 71195 10. 70382  
11741208\_ 8. 059768 8. 133545 8. 095815 8. 684731 8. 737539 8. 693129  
11741209\_ 6. 057961 5. 964846 5. 758381 7. 06615 7. 139544 7. 115997  
11741210\_ 12. 64695 12. 61925 12. 6383 12. 68153 12. 64075 12. 65351

11741211\_ 12. 57994 12. 55049 12. 57612 12. 60608 12. 5652 12. 57905  
11741212\_ 8. 350719 8. 29865 8. 336689 8. 286125 8. 23963 8. 258245  
11741213\_ 8. 313665 8. 257909 8. 322657 8. 651034 8. 724034 8. 664326  
11741214\_ 9. 339681 9. 268119 9. 338842 9. 600251 9. 64685 9. 614403  
11741215\_ 4. 187983 4. 154795 4. 396554 4. 288853 4. 235997 4. 195374  
11741216\_ 10. 35137 10. 36243 10. 3375 10. 20385 10. 12396 10. 12027  
11741217\_ 4. 200678 4. 067703 3. 658757 4. 2794 3. 988981 4. 079903  
11741218\_ 6. 694102 6. 91635 6. 873517 6. 761675 7. 036338 6. 900609  
11741219\_ 6. 498572 6. 622504 6. 613517 6. 88867 6. 864863 6. 813143  
11741220\_ 2. 24893 2. 051824 2. 354701 2. 14195 2. 14195 2. 18238  
11741221\_ 5. 569569 5. 636857 5. 668555 5. 721203 5. 758376 5. 671608  
11741222\_ 4. 303723 4. 276515 4. 213226 3. 391758 3. 305711 3. 305711  
11741223\_ 5. 758757 5. 4626 5. 763634 4. 138016 4. 200678 4. 422164  
11741224\_ 9. 30992 9. 256196 9. 264705 9. 31627 9. 43566 9. 37104  
11741225\_ 6. 793867 6. 817708 6. 888903 7. 413891 7. 54819 7. 566116  
11741226\_ 6. 975049 6. 871763 7. 06532 7. 732349 7. 686628 7. 837044  
11741227\_ 6. 88776 6. 924753 6. 922773 7. 374405 7. 23388 7. 350159  
11741228\_ 8. 733579 8. 71337 8. 760426 8. 496695 8. 497605 8. 532661  
11741229\_ 7. 587428 7. 577447 7. 564711 7. 67239 7. 510715 7. 66233  
11741230\_ 2. 991341 3. 251807 3. 089807 3. 167227 2. 791988 3. 071493  
11741231\_ 9. 487758 9. 427641 9. 430981 9. 558115 9. 547123 9. 617159  
11741232\_ 7. 143039 7. 121012 7. 143006 7. 30573 7. 224544 7. 194047  
11741233\_ 3. 010407 2. 963556 3. 010407 3. 084713 3. 181748 2. 938165  
11741234\_ 3. 580903 3. 652853 3. 602148 3. 817294 3. 765426 3. 731035  
11741235\_ 8. 494517 8. 494583 8. 522905 8. 432667 8. 337668 8. 393334  
11741236\_ 5. 127094 5. 345598 5. 168245 5. 437757 5. 340653 5. 372503  
11741237\_ 2. 359663 2. 515171 2. 411223 2. 787829 2. 519238 2. 675883  
11741238\_ 10. 62035 10. 59995 10. 62612 10. 55441 10. 51098 10. 54024  
11741239\_ 10. 7628 10. 69464 10. 74118 10. 59363 10. 62738 10. 62505  
11741240\_ 4. 891647 4. 971995 4. 917132 5. 014275 4. 984669 5. 067066  
11741241\_ 6. 241166 6. 244997 6. 318514 6. 331668 6. 343042 6. 221641  
11741242\_ 3. 152763 2. 955832 3. 172055 2. 624572 2. 696332 2. 504237  
11741243\_ 4. 983749 4. 985292 4. 910686 5. 005475 5. 284343 4. 949912  
11741244\_ 5. 650128 5. 653569 5. 650128 5. 650128 5. 650128 5. 650128  
11741245\_ 7. 730153 7. 752125 7. 808843 7. 576946 7. 631747 7. 665409  
11741246\_ 4. 173797 4. 100433 4. 026092 4. 187031 4. 263367 4. 25046  
11741247\_ 5. 176274 5. 355747 5. 295399 5. 063755 5. 297241 5. 196201  
11741248\_ 6. 964861 6. 976881 6. 958199 6. 933327 6. 970874 6. 989097  
11741249\_ 6. 718728 6. 8683 6. 815934 6. 940534 6. 925011 6. 89211  
11741250\_ 6. 0371 6. 076939 5. 883167 6. 017954 6. 095424 6. 004121  
11741251\_ 3. 133792 3. 445601 3. 329454 3. 474507 3. 398236 3. 290188  
11741252\_ 6. 393528 6. 428432 6. 436188 7. 329316 7. 365658 7. 400307  
11741253\_ 3. 375961 3. 270004 3. 143336 3. 31202 3. 39259 3. 399608  
11741254\_ 5. 156929 5. 402427 5. 255778 5. 326311 5. 260288 5. 34625  
11741255\_ 7. 137221 7. 033584 7. 076762 6. 977649 6. 910927 7. 134375  
11741256\_ 5. 731936 5. 672285 5. 521399 5. 521399 5. 432605 5. 548019  
11741257\_ 6. 629495 6. 445403 6. 577793 6. 493089 6. 391725 6. 40743  
11741258\_ 6. 193884 6. 263475 5. 996677 6. 205815 6. 290343 6. 171692  
11741259\_ 4. 82372 4. 9226 5. 034092 4. 747014 4. 836322 4. 94619  
11741260\_ 3. 606313 3. 758566 3. 507866 3. 909496 3. 746436 3. 64158  
11741261\_ 6. 647168 6. 672355 6. 641848 6. 622976 6. 686724 6. 694826



11741262\_ 7. 152476 7. 132091 7. 212651 7. 063476 7. 22897 7. 121495  
11741263\_ 3. 650011 3. 32037 3. 435327 3. 55205 3. 669411 3. 757051  
11741264\_ 3. 590229 3. 552787 3. 714761 3. 620829 3. 613362 3. 836361  
11741265\_ 2. 656592 2. 774103 2. 671076 2. 689681 2. 573746 2. 699117  
11741266\_ 3. 927743 4. 119698 3. 992668 4. 070264 3. 999694 4. 191266  
11741267\_ 3. 68791 4. 089011 3. 860176 3. 939831 3. 872293 3. 852213  
11741268\_ 3. 178924 2. 936482 2. 869227 2. 808513 2. 88284 2. 713042  
11741269\_ 6. 152284 6. 096233 6. 153059 6. 557403 6. 623261 6. 597834  
11741270\_ 6. 244666 6. 360394 6. 149829 6. 378998 6. 330199 6. 388836  
11741271\_ 7. 303824 7. 248158 7. 313884 7. 46258 7. 433614 7. 463084  
11741272\_ 5. 839092 5. 689828 5. 654802 5. 312612 5. 443459 5. 485634  
11741273\_ 5. 127789 5. 145961 5. 172195 5. 080371 5. 172195 5. 288318  
11741274\_ 5. 76126 5. 893739 5. 630873 5. 855402 5. 864794 5. 765165  
11741275\_ 4. 989125 4. 921921 4. 840398 4. 963295 5. 079434 5. 077004  
11741276\_ 5. 011027 5. 120803 5. 32624 5. 396299 5. 511003 5. 478032  
11741277\_ 6. 223457 6. 243953 6. 179576 6. 450255 6. 451308 6. 435739  
11741278\_ 5. 721234 5. 488403 5. 721234 5. 488403 5. 551478 5. 628595  
11741279\_ 2. 34692 2. 407874 2. 181663 2. 460578 2. 18141 2. 34692  
11741280\_ 2. 855586 2. 800248 2. 791593 2. 809362 2. 83351 2. 689967  
11741281\_ 5. 908331 6. 009465 5. 901892 5. 966243 5. 9333 5. 989505  
11741282\_ 5. 419788 5. 553607 5. 70636 5. 722774 5. 706628 5. 65031  
11741283\_ 5. 564111 5. 523913 5. 231235 6. 662511 6. 431763 6. 497107  
11741284\_ 8. 005882 7. 940275 8. 010443 8. 73429 8. 826264 8. 735595  
11741285\_ 5. 322731 5. 502819 5. 128104 5. 205584 5. 403596 5. 306643  
11741286\_ 2. 644442 2. 629759 2. 581273 2. 618431 2. 678245 2. 633884  
11741287\_ 5. 43959 5. 441567 5. 454851 5. 388512 5. 385579 5. 392838  
11741288\_ 7. 843787 7. 949686 7. 794284 7. 891822 7. 922802 8. 011335  
11741289\_ 6. 440518 6. 447595 6. 329496 6. 540011 6. 642939 6. 528146  
11741290\_ 4. 037546 3. 914883 3. 857397 4. 131364 4. 270931 3. 927651  
11741291\_ 2. 850317 2. 674717 2. 881052 2. 857583 2. 946967 3. 006238  
11741292\_ 6. 261268 6. 16574 6. 359245 5. 42354 5. 275886 5. 404506  
11741293\_ 6. 644682 6. 669138 6. 806736 6. 547172 6. 638368 6. 819264  
11741294\_ 5. 797459 5. 889778 5. 97628 5. 402274 5. 697218 5. 479247  
11741295\_ 6. 063581 6. 041403 5. 987877 5. 752867 5. 794286 5. 850997  
11741296\_ 8. 060242 8. 011199 7. 966816 8. 67731 8. 688116 8. 691333  
11741297\_ 8. 265455 8. 24315 8. 305279 8. 889223 8. 893792 8. 901165  
11741298\_ 3. 828673 3. 816164 3. 778634 3. 778634 3. 816164 3. 757344  
11741299\_ 5. 756844 5. 749044 5. 709521 5. 702592 5. 880048 5. 713379  
11741300\_ 8. 505393 8. 446516 8. 530187 8. 177698 8. 193062 8. 170749  
11741301\_ 7. 507804 7. 516828 7. 542255 7. 129301 7. 216256 7. 230373  
11741302\_ 8. 128763 8. 070757 8. 190581 7. 85148 7. 86301 7. 779009  
11741303\_ 4. 513241 4. 709463 4. 620316 4. 319606 4. 479276 4. 488988  
11741304\_ 5. 652537 5. 454857 5. 64152 5. 200126 5. 198281 5. 331554  
11741305\_ 4. 656351 4. 632928 4. 596248 4. 715015 4. 462318 4. 448044  
11741306\_ 7. 282178 7. 227838 7. 376964 6. 468434 6. 481046 6. 382738  
11741307\_ 4. 118744 4. 231014 4. 131157 4. 417904 4. 432039 4. 294112  
11741308\_ 6. 448378 6. 246032 6. 494443 6. 551695 6. 51153 6. 646165  
11741309\_ 7. 145475 7. 161337 7. 250076 7. 67239 7. 706689 7. 749664  
11741310\_ 5. 046534 4. 725448 4. 849603 4. 664792 4. 664792 4. 799698  
11741311\_ 7. 558012 7. 402186 7. 549379 6. 991486 6. 946036 6. 994208  
11741312\_ 5. 475499 5. 407951 5. 363551 5. 438848 5. 396948 5. 424001

11741313\_ 7. 578514 7. 581163 7. 620646 7. 257341 7. 252798 7. 27452  
11741314\_ 5. 174714 5. 36874 5. 162288 5. 306469 5. 24265 5. 517723  
11741315\_ 6. 120013 5. 921271 6. 005137 4. 59172 4. 621067 4. 761224  
11741316\_ 9. 962052 9. 881813 9. 900732 10. 18067 10. 14174 10. 14882  
11741317\_ 6. 099676 6. 011116 5. 985928 4. 865945 4. 876769 4. 920276  
11741318\_ 5. 528671 5. 518003 5. 493373 5. 528671 5. 58997 5. 528671  
11741319\_ 8. 271458 8. 196617 8. 238477 8. 269963 8. 196637 8. 367986  
11741320\_ 9. 201826 9. 191589 9. 234723 9. 199463 9. 225468 9. 219319  
11741321\_ 3. 965473 3. 900619 3. 610467 3. 995596 4. 129144 4. 014896  
11741322\_ 5. 151696 5. 278337 5. 065095 5. 227219 5. 242274 5. 215249  
11741323\_ 7. 033018 6. 870303 6. 948668 7. 067928 6. 968856 7. 038296  
11741324\_ 4. 908131 5. 052544 5. 139472 4. 469504 4. 521809 4. 539764  
11741325\_ 5. 089266 5. 283558 5. 17639 4. 918843 4. 902624 4. 863394  
11741326\_ 8. 072329 8. 021038 8. 104836 8. 323348 8. 257761 8. 36437  
11741327\_ 2. 969556 2. 962992 2. 966896 2. 716278 2. 70373 2. 914465  
11741328\_ 2. 045673 1. 918667 1. 833917 2. 119167 2. 045673 1. 945003  
11741329\_ 3. 793356 3. 606994 3. 594221 3. 85587 3. 716083 3. 509968  
11741330\_ 10. 41107 10. 3118 10. 43578 10. 54643 10. 60493 10. 57691  
11741331\_ 9. 571552 9. 507437 9. 626202 9. 78726 9. 792299 9. 783332  
11741332\_ 7. 146489 7. 230319 7. 081598 7. 12629 7. 231129 7. 220733  
11741333\_ 5. 92085 6. 018296 5. 883489 5. 98954 6. 053284 6. 035481  
11741334\_ 4. 9226 5. 176259 5. 184098 5. 31859 5. 12751 5. 124102  
11741335\_ 4. 090772 4. 067703 4. 026092 4. 135496 4. 138696 3. 98118  
11741336\_ 5. 341856 5. 416955 5. 356352 5. 407286 5. 380739 5. 360647  
11741337\_ 4. 270336 4. 466056 4. 314136 4. 33278 4. 347179 4. 488721  
11741338\_ 3. 279929 3. 202971 3. 279929 3. 09184 3. 289489 3. 40741  
11741339\_ 5. 145275 4. 922569 4. 96288 4. 598072 4. 741986 4. 78331  
11741340\_ 3. 600297 3. 561371 3. 839334 3. 912995 3. 825536 3. 900046  
11741341\_ 5. 454005 5. 387849 5. 390631 5. 227976 5. 197962 5. 063123  
11741342\_ 5. 983297 6. 00219 6. 034296 6. 049772 6. 045274 6. 057885  
11741343\_ 3. 740701 3. 516748 3. 617793 3. 690658 3. 863592 3. 705625  
11741344\_ 6. 431763 6. 633915 6. 524526 6. 397946 6. 592093 6. 535104  
11741345\_ 2. 214937 2. 214937 2. 214937 2. 079884 2. 208462 2. 307928  
11741346\_ 4. 815683 4. 6979 4. 750457 4. 861482 4. 805809 4. 878708  
11741347\_ 6. 002943 6. 15508 6. 073841 6. 056675 6. 170262 6. 114984  
11741348\_ 8. 185307 8. 238273 8. 088006 7. 950433 8. 022939 8. 028389  
11741349\_ 2. 28964 2. 284366 2. 185517 1. 953677 2. 124932 2. 195307  
11741350\_ 10. 63577 10. 59614 10. 63722 10. 52273 10. 56629 10. 5275  
11741351\_ 6. 018203 5. 891381 6. 041981 6. 040637 5. 970145 6. 06765  
11741352\_ 6. 291518 6. 250703 6. 223475 6. 075525 6. 121645 6. 09001  
11741353\_ 6. 917943 6. 849312 6. 848518 6. 414953 6. 557068 6. 495681  
11741354\_ 9. 732857 9. 697115 9. 736675 9. 14338 9. 183521 9. 157979  
11741355\_ 5. 033353 5. 09188 5. 120269 5. 135387 4. 93837 4. 960343  
11741356\_ 8. 179055 8. 167505 8. 253729 7. 055793 7. 155448 7. 179629  
11741357\_ 9. 837655 9. 897529 9. 838795 8. 94631 8. 97294 8. 928138  
11741358\_ 7. 409349 7. 304557 7. 461048 7. 064008 7. 11362 7. 179022  
11741359\_ 4. 588083 4. 613043 4. 77599 4. 347506 4. 453103 4. 682474  
11741360\_ 4. 802926 5. 042688 5. 03643 4. 730077 4. 935767 4. 670694  
11741361\_ 6. 755373 6. 573363 6. 710095 6. 618152 6. 540877 6. 582356  
11741362\_ 6. 047192 5. 894697 6. 047899 5. 26034 5. 24164 5. 409222  
11741363\_ 6. 624075 6. 642642 6. 730746 6. 500587 6. 565438 6. 527915

11741364\_ 3. 749078 3. 818401 3. 62573 3. 756925 3. 987694 3. 749078  
11741365\_ 8. 128398 8. 134112 8. 174826 8. 038671 8. 024825 8. 08301  
11741366\_ 7. 492511 7. 658176 7. 45863 7. 707325 7. 680415 7. 606285  
11741367\_ 9. 816438 9. 889532 9. 834498 9. 470121 9. 444985 9. 461845  
11741368\_ 7. 398217 7. 38783 7. 518319 8. 102091 8. 017402 8. 027506  
11741369\_ 2. 442511 2. 359712 2. 416973 2. 422056 2. 422056 2. 25483  
11741370\_ 9. 457179 9. 366396 9. 427399 9. 346496 9. 35032 9. 368754  
11741371\_ 2. 555841 2. 718322 2. 505003 2. 794791 2. 735669 2. 687843  
11741372\_ 4. 618528 4. 620574 4. 63823 4. 250458 4. 583536 4. 456943  
11741373\_ 6. 787522 6. 662874 6. 932079 5. 806245 6. 063982 5. 85444  
11741374\_ 6. 31836 6. 082998 6. 288049 5. 878566 5. 924311 5. 917149  
11741375\_ 6. 291513 6. 232812 6. 225055 6. 032361 6. 034865 6. 045947  
11741376\_ 8. 213558 8. 181288 8. 241039 8. 577189 8. 589731 8. 562406  
11741377\_ 7. 014471 6. 762057 7. 06056 6. 414076 6. 550464 6. 338949  
11741378\_ 3. 874276 3. 723624 3. 566213 3. 669248 3. 819569 3. 801686  
11741379\_ 2. 71247 2. 753563 2. 731585 2. 918402 2. 634634 2. 879421  
11741380\_ 4. 849349 4. 787223 4. 921916 4. 672656 4. 612884 4. 762764  
11741381\_ 7. 044967 6. 976311 7. 103623 6. 80299 6. 773146 6. 68833  
11741382\_ 2. 422069 2. 161006 2. 170856 2. 546347 2. 439073 2. 315121  
11741383\_ 5. 808864 5. 856469 5. 843303 5. 869539 5. 889318 5. 910596  
11741384\_ 5. 403468 5. 52549 5. 47261 5. 492063 5. 508035 5. 590232  
11741385\_ 8. 203925 8. 161741 8. 134883 8. 204298 8. 230091 8. 234394  
11741386\_ 6. 081305 6. 125512 6. 23894 6. 541568 6. 62523 6. 505491  
11741387\_ 5. 480966 5. 620138 5. 67539 5. 454319 5. 634643 5. 426991  
11741388\_ 7. 092476 7. 058372 6. 983568 6. 845808 6. 90147 7. 0163  
11741389\_ 8. 534457 8. 45736 8. 519669 8. 532561 8. 648076 8. 550591  
11741390\_ 7. 993935 7. 971883 8. 039462 8. 03447 8. 143304 8. 053286  
11741391\_ 6. 888305 6. 8703 6. 873385 6. 918355 6. 941466 6. 923313  
11741392\_ 4. 671952 4. 894365 4. 871663 4. 756177 4. 621473 4. 898482  
11741393\_ 7. 050074 7. 184867 7. 165296 6. 613989 6. 614238 6. 643585  
11741394\_ 6. 574659 6. 571104 6. 300643 6. 063232 6. 026267 5. 933562  
11741395\_ 6. 748126 6. 672355 6. 643295 6. 702681 6. 76019 6. 690809  
11741396\_ 7. 528479 7. 489409 7. 56893 6. 164943 6. 263697 6. 385339  
11741397\_ 4. 660258 4. 588736 4. 702745 5. 032989 4. 660874 4. 746476  
11741398\_ 4. 447828 4. 52373 4. 552578 4. 347179 4. 292384 4. 294301  
11741399\_ 3. 124973 3. 161653 2. 83411 3. 180171 3. 190215 3. 073143  
11741400\_ 9. 167327 9. 165115 9. 186762 9. 479069 9. 508693 9. 518401  
11741401\_ 7. 952384 7. 956179 7. 904275 7. 865882 7. 980712 7. 910863  
11741402\_ 7. 667579 7. 558084 7. 643745 7. 562351 7. 737436 7. 641995  
11741403\_ 1. 873197 2. 25483 2. 26155 2. 585276 2. 176761 2. 223559  
11741404\_ 5. 864139 5. 805902 5. 871142 5. 985709 5. 848454 5. 979926  
11741405\_ 6. 310848 6. 201562 6. 293686 5. 875187 5. 822333 5. 894697  
11741406\_ 4. 625433 4. 52843 4. 651804 4. 643827 4. 584933 4. 668864  
11741407\_ 4. 611748 4. 659875 4. 579913 4. 586023 4. 451943 4. 478338  
11741408\_ 2. 949997 2. 910706 2. 844646 2. 995578 2. 999752 2. 801169  
11741409\_ 8. 013491 7. 937464 8. 028503 6. 623075 6. 620077 6. 626114  
11741410\_ 6. 576922 6. 635684 6. 526095 6. 583596 6. 542204 6. 771448  
11741411\_ 6. 352092 6. 298049 6. 283816 5. 977804 6. 155593 6. 076411  
11741412\_ 2. 841785 2. 713962 2. 993937 2. 817131 2. 88899 2. 556008  
11741413\_ 4. 681935 4. 512535 4. 472849 4. 538733 4. 123118 4. 609229  
11741414\_ 6. 843068 6. 897191 6. 842447 7. 089177 7. 177485 7. 159226

11741415\_ 4. 485445 4. 295271 4. 370284 4. 361606 4. 596296 4. 524254  
11741416\_ 10. 20177 10. 12852 10. 1839 10. 07503 10. 08279 10. 10263  
11741417\_ 9. 522844 9. 41956 9. 514093 9. 363368 9. 407406 9. 419364  
11741418\_ 3. 606313 3. 892506 3. 626761 3. 899422 3. 861475 3. 892506  
11741419\_ 6. 765379 6. 8613 6. 792183 6. 88982 6. 898793 6. 968764  
11741420\_ 4. 821636 4. 874234 4. 801249 4. 778463 4. 725723 4. 838921  
11741421\_ 5. 820052 5. 828476 5. 859183 5. 840087 5. 924857 5. 922714  
11741422\_ 6. 756895 6. 772594 6. 695739 6. 886104 6. 795828 6. 863603  
11741423\_ 7. 394798 7. 285634 7. 335685 6. 91058 6. 829734 6. 962713  
11741424\_ 5. 402436 5. 507303 5. 221746 5. 309623 5. 297498 5. 438298  
11741425\_ 2. 096589 2. 21637 2. 08034 1. 972632 1. 9803 1. 901069  
11741426\_ 3. 693059 3. 806014 3. 725588 4. 067006 3. 830477 3. 795508  
11741427\_ 7. 457835 7. 426223 7. 508489 7. 601816 7. 533415 7. 55878  
11741428\_ 6. 206103 6. 097927 6. 069567 6. 166585 6. 103294 6. 055221  
11741429\_ 5. 315558 5. 47215 5. 321226 5. 316192 5. 343176 5. 419098  
11741430\_ 5. 1642 5. 179776 5. 30436 5. 211862 5. 356211 5. 358925  
11741431\_ 4. 558093 4. 38707 4. 715894 4. 623647 4. 471344 4. 534289  
11741432\_ 5. 527793 5. 47736 5. 422469 5. 640739 5. 454624 5. 528122  
11741433\_ 10. 92244 10. 92278 10. 97888 10. 69296 10. 69853 10. 75263  
11741434\_ 8. 505981 8. 445316 8. 455083 8. 712187 8. 66585 8. 617468  
11741435\_ 10. 03004 9. 9995 10. 05481 10. 1904 10. 18946 10. 15901  
11741436\_ 9. 234939 9. 187994 9. 187371 8. 919842 8. 914869 8. 889754  
11741437\_ 8. 450836 8. 454361 8. 41578 8. 178995 8. 212271 8. 188032  
11741438\_ 4. 552262 4. 549401 4. 776595 4. 836832 4. 935874 4. 838928  
11741439\_ 3. 29584 3. 241214 3. 314808 3. 426969 3. 25974 3. 372277  
11741440\_ 5. 636695 5. 61671 5. 859981 5. 450767 5. 541914 5. 620039  
11741441\_ 7. 350849 7. 184826 7. 350159 7. 131917 7. 118643 7. 121503  
11741442\_ 10. 85171 10. 77941 10. 79903 10. 89993 10. 94087 10. 87667  
11741443\_ 10. 3416 10. 29621 10. 3179 10. 44634 10. 52621 10. 43507  
11741444\_ 3. 482234 3. 537946 3. 584688 3. 57894 3. 756599 3. 589781  
11741445\_ 6. 706988 6. 596361 6. 564887 7. 142048 7. 166894 7. 248619  
11741446\_ 7. 33013 7. 517474 7. 478536 7. 658962 7. 665476 7. 686296  
11741447\_ 3. 829702 3. 5059 3. 57614 4. 047693 3. 727133 3. 974819  
11741448\_ 4. 336189 4. 26825 4. 141938 4. 549708 4. 377492 4. 280356  
11741449\_ 10. 06339 10. 00075 10. 05078 9. 968078 10. 004 9. 993514  
11741450\_ 5. 457126 5. 460949 5. 463243 5. 263916 5. 323572 5. 356295  
11741451\_ 5. 277892 5. 122075 5. 26034 5. 448296 5. 43456 5. 650605  
11741452\_ 10. 0845 10. 07056 10. 11909 10. 17513 10. 18996 10. 21872  
11741453\_ 5. 333723 5. 47044 5. 407355 5. 451623 5. 52166 5. 330574  
11741454\_ 2. 665465 2. 63259 2. 345399 2. 620516 2. 63259 2. 605925  
11741455\_ 3. 606313 3. 606313 3. 549482 3. 448076 3. 646454 3. 59903  
11741456\_ 4. 592899 4. 629767 4. 558558 4. 757673 4. 747079 4. 729725  
11741457\_ 4. 799392 4. 907287 4. 715824 4. 987198 4. 799392 4. 802237  
11741458\_ 5. 141607 5. 421613 4. 988177 4. 331614 4. 12079 4. 220749  
11741459\_ 7. 736932 7. 824795 7. 650007 7. 874439 7. 866135 7. 752527  
11741460\_ 5. 778917 5. 798039 5. 687477 5. 755139 5. 869912 5. 721838  
11741461\_ 5. 280543 5. 314102 5. 103216 5. 429345 5. 426098 5. 374866  
11741462\_ 7. 567947 7. 486256 7. 505447 7. 808104 7. 838155 7. 753741  
11741463\_ 6. 757796 6. 757991 6. 739348 6. 380547 6. 567454 6. 483379  
11741464\_ 4. 977054 5. 11527 5. 012062 5. 178873 5. 106116 5. 192379  
11741465\_ 4. 619713 4. 654461 4. 596468 4. 658094 4. 624487 4. 611487

11741466\_ 5. 186499 5. 425484 5. 068622 5. 227588 5. 137815 5. 257324  
11741467\_ 5. 651061 5. 815223 5. 725165 5. 761393 5. 765371 5. 805382  
11741468\_ 5. 027474 4. 879125 5. 179515 5. 19854 5. 097314 5. 177327  
11741469\_ 6. 38725 6. 482806 6. 386145 6. 532184 6. 575222 6. 566935  
11741470\_ 7. 768774 7. 733671 7. 863088 8. 353367 8. 335326 8. 322458  
11741471\_ 4. 106264 3. 892368 4. 094003 3. 967184 4. 042294 4. 083272  
11741472\_ 7. 042517 7. 029286 7. 029286 7. 022585 7. 09 7. 093123  
11741473\_ 5. 019908 4. 850819 4. 772366 4. 831646 4. 849431 4. 937361  
11741474\_ 4. 407233 4. 394599 4. 145536 4. 562542 4. 598491 4. 658661  
11741475\_ 5. 714442 5. 591989 5. 672866 5. 604418 5. 672866 5. 64482  
11741476\_ 8. 297143 8. 263159 8. 327156 7. 981134 7. 995 7. 99499  
11741477\_ 4. 636475 4. 60227 4. 734288 4. 624453 4. 753053 4. 657013  
11741478\_ 5. 09988 5. 346999 5. 365496 4. 992901 4. 990638 5. 013294  
11741479\_ 9. 373579 9. 23646 9. 318708 10. 2021 10. 22454 10. 2233  
11741480\_ 5. 869806 5. 798801 5. 88427 5. 916511 5. 822178 5. 982785  
11741481\_ 3. 50089 3. 556468 3. 497684 3. 562087 3. 562087 3. 728434  
11741482\_ 5. 276391 5. 316731 5. 122735 5. 327148 5. 363038 5. 250315  
11741483\_ 2. 850317 2. 929443 2. 736636 2. 745004 2. 844179 2. 740067  
11741484\_ 7. 369166 7. 423008 7. 460567 6. 982592 6. 99052 7. 002644  
11741485\_ 3. 509605 3. 502566 3. 396966 3. 586679 3. 516643 3. 449099  
11741486\_ 3. 383086 3. 350227 3. 138626 3. 317563 3. 350227 3. 383185  
11741487\_ 2. 188392 2. 328127 2. 060156 2. 102265 2. 188392 2. 251061  
11741488\_ 5. 689453 5. 615714 5. 709521 5. 898462 5. 881722 5. 983772  
11741489\_ 4. 815683 4. 808799 4. 829244 5. 000417 5. 225187 5. 023293  
11741490\_ 5. 247107 5. 08969 5. 248513 4. 997127 5. 20044 5. 293  
11741491\_ 4. 371787 4. 521256 4. 290049 4. 563735 4. 381065 4. 536804  
11741492\_ 5. 442778 5. 224117 5. 212698 6. 12714 6. 12714 6. 162292  
11741493\_ 6. 18327 6. 265099 6. 094413 6. 263567 6. 284899 6. 434545  
11741494\_ 7. 859278 7. 838314 7. 901801 7. 744885 7. 733958 7. 627388  
11741495\_ 3. 660127 3. 683343 3. 647549 3. 699655 3. 784047 3. 780441  
11741496\_ 5. 229351 5. 393699 5. 345599 5. 431682 5. 371686 5. 355475  
11741497\_ 4. 077353 4. 432639 3. 969185 4. 198005 3. 99515 4. 213033  
11741498\_ 5. 997016 5. 948651 5. 989799 5. 654112 5. 786128 5. 870366  
11741499\_ 2. 399067 2. 312718 2. 430485 2. 512725 2. 218758 2. 324978  
11741500\_ 7. 370207 7. 230862 7. 407171 7. 050749 7. 146733 7. 136884  
11741501\_ 8. 599212 8. 512539 8. 567926 8. 089409 8. 018995 8. 094584  
11741502\_ 4. 823913 4. 905996 4. 788938 4. 959981 5. 046133 4. 976563  
11741503\_ 4. 223248 4. 21421 3. 922479 4. 33582 4. 480155 4. 328425  
11741504\_ 6. 765788 6. 666957 6. 765568 6. 594425 6. 643784 6. 578866  
11741505\_ 7. 814538 7. 701401 7. 736932 7. 82699 7. 759854 7. 66885  
11741506\_ 7. 552491 7. 553282 7. 606445 7. 521002 7. 522006 7. 511987  
11741507\_ 6. 346611 6. 172644 6. 330306 6. 118838 6. 425783 6. 290123  
11741508\_ 6. 430669 6. 266611 6. 467486 6. 4302 6. 367487 6. 436855  
11741509\_ 7. 736556 7. 631753 7. 683354 7. 777258 7. 749035 7. 800439  
11741510\_ 8. 629297 8. 59093 8. 652856 8. 638531 8. 669284 8. 692262  
11741511\_ 1. 804965 1. 910599 1. 773846 1. 962996 1. 964751 2. 060868  
11741512\_ 5. 466092 5. 554436 5. 386958 5. 505956 5. 501652 5. 569434  
11741513\_ 4. 722809 4. 82663 4. 827702 4. 934085 4. 829293 4. 923626  
11741514\_ 2. 703096 2. 772532 2. 694136 2. 542116 2. 789291 2. 871608  
11741515\_ 4. 612585 4. 491099 4. 672207 4. 554889 4. 556059 4. 695685  
11741516\_ 3. 470638 3. 592507 3. 226661 3. 721156 3. 472519 3. 714376

11741517\_ 4. 817591 4. 876543 4. 696721 4. 874234 4. 797881 4. 900377  
11741518\_ 2. 789502 2. 807052 2. 616637 2. 710765 2. 978481 2. 724891  
11741519\_ 4. 112157 3. 985285 3. 988018 4. 050393 4. 027022 4. 167127  
11741520\_ 4. 333828 4. 339359 4. 339359 4. 029969 4. 189549 4. 209551  
11741521\_ 3. 473474 3. 593233 3. 486815 3. 520545 3. 344586 3. 807898  
11741522\_ 4. 831147 4. 912767 4. 779621 4. 947657 4. 898266 4. 815683  
11741523\_ 5. 834072 5. 798352 5. 791957 5. 914322 5. 954761 5. 847845  
11741524\_ 7. 522745 7. 749547 7. 701561 7. 546856 7. 599245 7. 664359  
11741525\_ 5. 39721 5. 531784 5. 369322 5. 78255 5. 532733 5. 663356  
11741526\_ 11. 45115 11. 4564 11. 46059 11. 51339 11. 51678 11. 55445  
11741527\_ 2. 779851 3. 082191 2. 85126 2. 567778 2. 611421 3. 082191  
11741528\_ 9. 857119 9. 849013 9. 900182 9. 983157 9. 956065 9. 967419  
11741529\_ 3. 764659 3. 706668 3. 571897 3. 831431 3. 706668 3. 669686  
11741530\_ 4. 763543 4. 682976 4. 75013 4. 738923 4. 75013 4. 7785  
11741531\_ 4. 129626 4. 50821 4. 16503 4. 280542 4. 371609 4. 374322  
11741532\_ 3. 484031 2. 938331 3. 180046 3. 078079 3. 110565 3. 284257  
11741533\_ 5. 086869 5. 142036 4. 964741 4. 914651 4. 943733 4. 972684  
11741534\_ 5. 866818 6. 024426 5. 882195 5. 979737 5. 893553 5. 953505  
11741535\_ 10. 29451 10. 22214 10. 27334 9. 04095 9. 079345 9. 045397  
11741536\_ 10. 34618 10. 32165 10. 34738 9. 232978 9. 206188 9. 260183  
11741537\_ 4. 528366 4. 459939 4. 669561 4. 632403 4. 626407 4. 444723  
11741538\_ 4. 149653 4. 219596 3. 975291 4. 282615 4. 131964 4. 218523  
11741539\_ 5. 886758 5. 902781 5. 811156 6. 108128 5. 937424 5. 882302  
11741540\_ 6. 564381 6. 474093 6. 631294 6. 471396 6. 583722 6. 512991  
11741541\_ 6. 365534 6. 21291 6. 340657 6. 21679 6. 384214 6. 371613  
11741542\_ 3. 84581 3. 723624 3. 802936 3. 89108 3. 900046 3. 848713  
11741543\_ 2. 910786 2. 985552 3. 085829 2. 970216 3. 034751 3. 177177  
11741544\_ 3. 778875 3. 778693 3. 944247 4. 054925 3. 996969 4. 063074  
11741545\_ 7. 488816 7. 491411 7. 557058 7. 388264 7. 307952 7. 382926  
11741546\_ 8. 241492 8. 137705 8. 184059 8. 265346 8. 236788 8. 180389  
11741547\_ 8. 226648 8. 138912 8. 171204 7. 25103 7. 285681 7. 282965  
11741548\_ 7. 555765 7. 509708 7. 600507 7. 33557 7. 315044 7. 297653  
11741549\_ 5. 366385 5. 555529 5. 393289 5. 467144 5. 36323 5. 409222  
11741550\_ 6. 467524 6. 474844 6. 502066 6. 42084 6. 509717 6. 512991  
11741551\_ 5. 320082 5. 407342 5. 315279 5. 473604 5. 671923 5. 510622  
11741552\_ 5. 019148 5. 08292 5. 073036 5. 019148 5. 011994 4. 955708  
11741553\_ 8. 441813 8. 403947 8. 425034 6. 695546 6. 700371 6. 829812  
11741554\_ 7. 311667 7. 165854 7. 31792 6. 5489 6. 638037 6. 680622  
11741555\_ 8. 73941 8. 704465 8. 757933 9. 062482 9. 055199 9. 14804  
11741556\_ 7. 579586 7. 522198 7. 59266 7. 077885 7. 007572 6. 98455  
11741557\_ 5. 024984 5. 24584 5. 059254 5. 241084 5. 180108 5. 192786  
11741558\_ 6. 907301 6. 822242 7. 032607 7. 027402 7. 103056 7. 049354  
11741559\_ 4. 142983 4. 186319 4. 229312 4. 127535 4. 152314 3. 90864  
11741560\_ 5. 839158 5. 777861 5. 922448 5. 580116 5. 632052 5. 752756  
11741561\_ 2. 860279 3. 054688 3. 121292 2. 860279 2. 656253 2. 860279  
11741562\_ 5. 134104 5. 247297 5. 240597 5. 206904 5. 27795 5. 250405  
11741563\_ 7. 360425 7. 402569 7. 429802 7. 442902 7. 374996 7. 481087  
11741564\_ 5. 809381 5. 952236 5. 757562 6. 352845 6. 282224 6. 418302  
11741565\_ 3. 192364 3. 351736 3. 34534 3. 265726 3. 177878 3. 265726  
11741566\_ 5. 436066 5. 555987 5. 333723 5. 723241 5. 688109 5. 547663  
11741567\_ 5. 129562 5. 087624 5. 078779 5. 159777 5. 06355 5. 110281

11741568\_ 7. 2716 7. 284824 7. 241013 7. 451564 7. 449558 7. 40195  
11741569\_ 4. 923633 4. 920192 4. 852962 4. 889603 5. 006458 5. 076858  
11741570\_ 7. 90664 7. 950713 8. 000911 7. 749174 7. 659366 7. 633427  
11741571\_ 5. 11006 5. 11006 5. 183134 4. 643925 4. 618622 4. 600675  
11741572\_ 5. 653246 5. 567504 5. 480602 4. 700629 4. 761863 5. 094509  
11741573\_ 7. 472625 7. 53935 7. 511934 7. 590707 7. 540897 7. 530982  
11741574\_ 5. 970997 5. 938482 5. 996126 5. 994127 5. 912115 5. 974829  
11741575\_ 7. 269801 7. 129005 7. 099734 7. 913871 7. 860016 7. 834966  
11741576\_ 7. 63018 7. 572925 7. 694614 7. 522673 7. 506716 7. 485029  
11741577\_ 5. 319406 4. 937167 5. 05888 5. 080582 5. 049552 5. 082956  
11741578\_ 5. 303682 5. 58186 5. 288902 5. 455414 5. 36323 5. 527767  
11741579\_ 4. 153167 4. 239518 4. 122168 4. 379631 4. 343155 4. 565594  
11741580\_ 5. 807325 5. 748117 5. 978929 5. 817941 5. 675932 5. 703516  
11741581\_ 8. 94736 9. 082784 9. 002499 8. 875998 8. 816092 8. 702201  
11741582\_ 10. 74181 10. 70928 10. 73111 10. 41493 10. 47254 10. 39356  
11741583\_ 4. 722302 4. 619093 4. 382404 4. 796991 4. 752067 4. 580538  
11741584\_ 4. 089077 3. 95978 4. 044946 3. 786333 3. 8219 4. 016658  
11741585\_ 3. 017647 3. 036916 2. 965606 3. 329324 3. 101013 3. 080235  
11741586\_ 6. 244666 6. 385308 6. 371772 6. 34765 6. 332146 6. 410794  
11741587\_ 6. 475451 6. 529109 6. 556845 6. 641523 6. 671011 6. 700168  
11741588\_ 6. 073142 6. 222898 6. 110981 6. 158363 6. 215702 6. 124198  
11741589\_ 11. 34068 11. 34163 11. 36477 11. 23406 11. 29592 11. 25015  
11741590\_ 3. 807296 3. 891997 3. 75533 3. 856764 3. 875786 3. 941464  
11741591\_ 5. 625103 5. 605577 5. 642252 5. 274417 5. 381365 5. 416444  
11741592\_ 8. 448864 8. 300711 8. 360122 8. 236495 8. 173236 8. 259097  
11741593\_ 7. 480314 7. 636589 7. 283383 7. 698947 7. 556555 7. 567438  
11741594\_ 6. 35258 6. 488043 6. 376331 6. 29281 6. 414628 6. 35258  
11741595\_ 4. 216835 4. 116876 4. 065236 4. 22037 4. 288131 4. 160149  
11741596\_ 3. 142499 3. 144536 3. 071694 3. 238312 3. 197939 3. 165594  
11741597\_ 4. 026092 3. 909593 3. 827409 3. 848318 3. 997692 4. 020744  
11741598\_ 3. 106588 3. 136889 3. 087313 3. 238537 3. 198165 3. 119715  
11741599\_ 4. 822099 4. 904188 4. 772366 4. 799395 4. 865574 4. 806812  
11741600\_ 3. 037293 3. 016665 3. 220106 3. 258037 3. 175039 3. 23022  
11741601\_ 5. 251864 5. 023998 5. 019429 5. 247436 5. 151354 5. 09794  
11741602\_ 3. 353057 3. 558164 3. 288656 3. 346068 3. 459911 3. 501783  
11741603\_ 7. 499204 7. 553835 7. 422284 7. 513168 7. 451954 7. 57865  
11741604\_ 6. 456718 6. 53277 6. 43815 6. 562733 6. 431763 6. 561276  
11741605\_ 9. 069213 9. 151726 9. 142041 8. 887713 8. 993396 8. 908092  
11741606\_ 6. 479375 6. 504512 6. 554459 6. 522231 6. 441019 6. 509251  
11741607\_ 8. 32588 8. 217614 8. 315282 7. 664297 7. 772557 7. 630856  
11741608\_ 8. 34254 8. 225074 8. 30392 7. 698797 7. 76699 7. 67268  
11741609\_ 4. 584933 4. 639272 4. 735999 4. 847476 4. 778647 4. 91277  
11741610\_ 2. 625758 2. 566683 2. 463542 2. 677995 2. 478836 2. 525973  
11741611\_ 5. 179978 5. 292933 5. 488064 4. 989761 5. 057422 5. 0928  
11741612\_ 5. 139758 5. 117875 5. 020647 5. 233584 5. 110762 5. 144949  
11741613\_ 4. 52753 4. 555016 4. 571729 4. 698323 4. 674216 4. 606955  
11741614\_ 6. 906209 6. 939761 6. 885866 6. 779162 6. 907843 6. 885715  
11741615\_ 7. 594749 7. 566709 7. 409573 7. 492333 7. 545771 7. 530498  
11741616\_ 5. 364343 5. 478002 5. 331272 5. 387333 5. 314926 5. 364343  
11741617\_ 2. 911752 2. 864416 3. 014894 2. 850753 2. 773537 2. 764035  
11741618\_ 3. 453727 3. 384779 3. 375602 3. 275537 3. 237089 3. 632081

11741619\_ 2. 936183 2. 884365 2. 936183 2. 93125 2. 951865 2. 988001  
11741620\_ 6. 603941 6. 653792 6. 597179 6. 726703 6. 699343 6. 781058  
11741621\_ 4. 105301 4. 32396 4. 172199 4. 364426 4. 206224 4. 23953  
11741622\_ 5. 647468 5. 689874 5. 633097 5. 702711 5. 695576 5. 710137  
11741623\_ 2. 081968 2. 191029 2. 219599 2. 073001 2. 041522 2. 228324  
11741624\_ 3. 845957 3. 926965 3. 661883 3. 89964 3. 830586 3. 832507  
11741625\_ 5. 703975 5. 675652 5. 531517 5. 859009 5. 894747 5. 854941  
11741626\_ 6. 995116 7. 038618 7. 163917 6. 996086 6. 98985 6. 93424  
11741627\_ 5. 565319 5. 413267 5. 213169 4. 840331 4. 575332 4. 583018  
11741628\_ 6. 300643 6. 253986 6. 314724 5. 378482 5. 278674 5. 433071  
11741629\_ 7. 442051 7. 274267 7. 425664 7. 116515 7. 175515 7. 189248  
11741630\_ 6. 165963 5. 98478 6. 136035 6. 166139 6. 212621 6. 211369  
11741631\_ 5. 944657 5. 825055 5. 891152 6. 416171 6. 360071 6. 462261  
11741632\_ 5. 664386 5. 776393 5. 643713 5. 964759 5. 869048 5. 754755  
11741633\_ 4. 96239 4. 9552 4. 889746 4. 926817 4. 724057 4. 992315  
11741634\_ 5. 411012 5. 390382 5. 448296 5. 382378 5. 350084 5. 440079  
11741635\_ 3. 287507 3. 450283 3. 290188 3. 536821 3. 53813 3. 606313  
11741636\_ 5. 333723 5. 314441 5. 466201 4. 730681 5. 055506 4. 984669  
11741637\_ 5. 999355 6. 094121 6. 075547 6. 031257 6. 11923 6. 11757  
11741638\_ 6. 805247 6. 803325 6. 874408 6. 512548 6. 481046 6. 529879  
11741639\_ 4. 52373 4. 587567 4. 52373 4. 504763 4. 52373 4. 502829  
11741640\_ 7. 531471 7. 636301 7. 490372 7. 622858 7. 503479 7. 390682  
11741641\_ 6. 310154 6. 498542 6. 647444 6. 126278 6. 143557 6. 248679  
11741642\_ 5. 976821 5. 94884 6. 046633 5. 208769 5. 239803 5. 156303  
11741643\_ 6. 576419 6. 442066 6. 551003 5. 724445 5. 774607 5. 88604  
11741644\_ 5. 866439 5. 863865 5. 866439 5. 752313 5. 773024 5. 648514  
11741645\_ 4. 977054 5. 073036 4. 811026 4. 894653 4. 851129 4. 850861  
11741646\_ 4. 944024 5. 025297 4. 986983 5. 05308 4. 976168 4. 959804  
11741647\_ 2. 455504 2. 552477 2. 572767 2. 518446 2. 553709 2. 698719  
11741648\_ 10. 67527 10. 65 10. 69013 10. 42815 10. 38362 10. 408  
11741649\_ 6. 951281 6. 957798 6. 820109 6. 54888 6. 710919 6. 590476  
11741650\_ 7. 548333 7. 559386 7. 597395 7. 370444 7. 385972 7. 333856  
11741651\_ 7. 10482 7. 056126 7. 140412 7. 481563 7. 433441 7. 548999  
11741652\_ 4. 643717 4. 647071 4. 602867 4. 666013 4. 62916 4. 723779  
11741653\_ 4. 292334 4. 20627 4. 040165 4. 52202 4. 64223 4. 330388  
11741654\_ 3. 267624 3. 528506 3. 504772 3. 151655 3. 503743 3. 581179  
11741655\_ 7. 685658 7. 652952 7. 670392 7. 248759 7. 237719 7. 370068  
11741656\_ 2. 371281 2. 412477 2. 47102 2. 46471 2. 480808 2. 518615  
11741657\_ 6. 448835 6. 431487 6. 429969 6. 337161 6. 463712 6. 466739  
11741658\_ 8. 241562 8. 170876 8. 292647 7. 985516 8. 005341 7. 951877  
11741659\_ 2. 803407 2. 664889 2. 717297 2. 912551 2. 719772 2. 962305  
11741660\_ 5. 105511 4. 876668 4. 88241 4. 890369 4. 974957 4. 898521  
11741661\_ 7. 898663 7. 743592 7. 875194 7. 188299 7. 253218 7. 250134  
11741662\_ 6. 618801 6. 671216 6. 657714 6. 80427 6. 812247 6. 740443  
11741663\_ 7. 579953 7. 50624 7. 582136 7. 797434 7. 76334 7. 735804  
11741664\_ 2. 038556 2. 141195 2. 305079 2. 26409 2. 2821 2. 387759  
11741665\_ 2. 605516 2. 484951 2. 840654 2. 628188 2. 718322 2. 677138  
11741666\_ 5. 254328 5. 322319 5. 242305 5. 248317 5. 266352 5. 254328  
11741667\_ 2. 683164 2. 722853 2. 732058 2. 746605 2. 767752 2. 718322  
11741668\_ 11. 29265 11. 29041 11. 27983 11. 23475 11. 21319 11. 22997  
11741669\_ 4. 22579 4. 322806 4. 283977 4. 577831 4. 270844 4. 320858



11741670\_ 4. 553227 4. 514621 4. 857818 4. 824195 4. 74574 4. 665244  
11741671\_ 6. 209278 6. 238579 6. 204924 6. 219089 6. 265939 6. 341744  
11741672\_ 6. 31778 6. 385179 6. 200632 6. 304758 6. 374687 6. 37297  
11741673\_ 9. 886857 9. 913141 9. 939649 9. 399445 9. 490507 9. 454178  
11741674\_ 4. 91044 4. 934896 4. 954399 5. 108928 5. 023083 5. 03475  
11741675\_ 2. 112682 2. 073191 2. 190583 2. 035046 2. 043112 2. 303724  
11741676\_ 5. 202936 5. 412528 5. 13832 5. 024121 4. 940442 5. 143863  
11741677\_ 5. 325342 5. 306999 5. 41057 5. 370193 5. 376651 5. 359261  
11741678\_ 8. 287673 8. 310978 8. 329613 7. 993974 8. 030273 8. 083855  
11741679\_ 8. 733544 8. 738789 8. 704924 8. 549402 8. 549402 8. 456885  
11741680\_ 12. 34647 12. 36099 12. 33167 12. 1152 12. 11688 12. 08045  
11741681\_ 10. 14036 10. 15429 10. 14142 10. 21224 10. 18963 10. 09835  
11741682\_ 4. 415744 4. 473001 4. 480536 4. 52373 4. 476951 4. 376028  
11741683\_ 6. 251621 6. 209448 6. 351105 6. 224003 6. 204652 6. 231926  
11741684\_ 7. 665301 7. 727989 7. 859802 7. 838049 7. 838049 7. 862485  
11741685\_ 4. 150077 4. 151333 4. 026092 4. 348753 4. 318329 4. 180651  
11741686\_ 5. 094079 4. 938807 5. 037869 4. 922796 5. 039282 5. 015628  
11741687\_ 3. 219704 3. 119238 3. 086352 3. 025972 3. 139869 3. 07507  
11741688\_ 5. 235043 5. 004107 5. 323654 4. 796533 4. 882275 4. 751673  
11741689\_ 7. 063295 7. 004129 7. 033708 6. 996902 6. 971435 6. 906391  
11741690\_ 8. 167029 8. 091233 8. 151718 8. 05698 8. 044766 8. 00582  
11741691\_ 6. 94291 6. 904254 7. 049311 6. 449045 6. 433135 6. 557505  
11741692\_ 4. 300717 4. 25427 4. 306715 4. 170921 4. 343397 4. 19232  
11741693\_ 2. 203293 2. 288079 2. 163724 2. 10632 2. 21069 2. 163724  
11741694\_ 6. 704988 6. 823397 6. 742885 6. 852968 6. 809768 6. 922773  
11741695\_ 6. 469653 6. 501688 6. 412581 6. 431763 6. 353482 6. 33679  
11741696\_ 8. 425545 8. 32427 8. 525461 8. 067896 8. 159005 8. 133937  
11741697\_ 9. 364468 9. 338223 9. 378136 9. 273007 9. 323136 9. 270498  
11741698\_ 4. 861781 4. 877018 4. 805708 4. 914651 4. 84364 4. 815683  
11741699\_ 3. 644269 3. 606313 3. 665097 3. 454978 3. 752341 3. 606313  
11741700\_ 5. 352624 5. 123601 5. 254665 5. 186163 5. 232962 5. 142619  
11741701\_ 3. 731759 3. 752861 4. 038649 3. 793993 3. 815778 3. 786777  
11741702\_ 5. 92387 6. 053866 5. 956919 6. 031318 6. 025952 6. 006528  
11741703\_ 4. 564097 4. 643717 4. 516784 4. 715842 4. 662984 4. 548893  
11741704\_ 2. 605516 2. 683786 2. 459308 2. 474754 2. 46419 2. 379602  
11741705\_ 4. 643717 4. 600173 4. 589338 4. 459939 4. 570958 4. 485954  
11741706\_ 7. 059661 6. 994726 6. 998285 6. 263963 6. 20714 6. 27114  
11741707\_ 5. 760739 5. 61834 5. 620785 5. 88828 5. 767492 5. 691486  
11741708\_ 3. 606313 3. 799235 3. 274126 3. 606313 3. 606313 3. 606313  
11741709\_ 6. 866064 6. 938793 6. 888394 7. 000252 7. 055747 6. 963739  
11741710\_ 6. 672103 6. 571322 6. 717861 6. 140095 6. 324962 6. 101071  
11741711\_ 3. 268093 3. 531429 3. 22105 3. 376078 3. 312288 3. 411954  
11741712\_ 5. 645704 5. 395642 5. 551366 5. 403072 5. 546406 5. 519779  
11741713\_ 5. 201787 5. 252569 5. 226664 5. 391641 5. 303755 5. 346005  
11741714\_ 2. 311457 1. 992589 1. 978444 2. 003593 2. 241305 2. 265585  
11741715\_ 6. 252145 6. 259524 6. 325125 6. 231635 6. 178113 6. 171688  
11741716\_ 5. 106836 5. 013969 4. 818915 4. 996046 4. 981895 5. 043697  
11741717\_ 4. 812208 4. 896598 4. 858326 4. 801989 4. 880504 4. 688522  
11741718\_ 2. 131042 1. 911889 1. 995367 2. 360666 2. 084601 2. 443128  
11741719\_ 10. 07245 10. 05308 10. 0691 10. 05316 10. 08471 10. 06204  
11741720\_ 10. 85494 10. 75668 10. 86222 10. 90673 10. 87316 10. 90337

11741721\_ 7. 541899 7. 445909 7. 533296 7. 483495 7. 51476 7. 648702  
11741722\_ 2. 441828 2. 253262 2. 202899 2. 182734 2. 439023 2. 259624  
11741723\_ 4. 454414 4. 471091 4. 543205 4. 584933 4. 595904 4. 415744  
11741724\_ 4. 927047 4. 806002 4. 772366 4. 788642 4. 91599 4. 841667  
11741725\_ 8. 543406 8. 535674 8. 528102 8. 423196 8. 462204 8. 46102  
11741726\_ 5. 945514 5. 783828 5. 833823 5. 682545 5. 811145 5. 725838  
11741727\_ 6. 830716 6. 817023 6. 825968 7. 519293 7. 478011 7. 458024  
11741728\_ 6. 82807 6. 686431 6. 667779 6. 612788 6. 681808 6. 700371  
11741729\_ 5. 731144 5. 933752 5. 640231 5. 993031 5. 978227 5. 798613  
11741730\_ 4. 118099 4. 227541 4. 238545 4. 379125 4. 267348 4. 315364  
11741731\_ 8. 18492 8. 119016 8. 196764 7. 800322 7. 835221 7. 83016  
11741732\_ 9. 844168 9. 765683 9. 819758 10. 62582 10. 55576 10. 51241  
11741733\_ 4. 48222 4. 546041 4. 486693 4. 567705 4. 443963 4. 550194  
11741734\_ 5. 199428 5. 469754 5. 184923 5. 318868 5. 2222 5. 388965  
11741735\_ 7. 342752 7. 229159 7. 306998 7. 256977 7. 350159 7. 28027  
11741736\_ 5. 00495 4. 880417 5. 087355 5. 276294 5. 010529 5. 080246  
11741737\_ 3. 925181 3. 906718 3. 660363 3. 913459 3. 889173 4. 037827  
11741738\_ 3. 304962 3. 574118 3. 649616 3. 435478 3. 391938 3. 312585  
11741739\_ 2. 628755 2. 644348 2. 638005 2. 685473 2. 597677 2. 74057  
11741740\_ 4. 713374 4. 754612 4. 630935 5. 023013 4. 787281 4. 774659  
11741741\_ 4. 415744 4. 23771 4. 460297 4. 372206 4. 29363 4. 1935  
11741742\_ 4. 347179 4. 455516 4. 338129 4. 605882 4. 457409 4. 43232  
11741743\_ 2. 298396 2. 702268 2. 665588 2. 813138 2. 756973 2. 886578  
11741744\_ 3. 918095 4. 229603 4. 107303 4. 275543 3. 969526 4. 156681  
11741745\_ 6. 434983 6. 389456 6. 46641 6. 031179 6. 086289 5. 921423  
11741746\_ 4. 742849 4. 776781 4. 822206 5. 005903 4. 819817 4. 729885  
11741747\_ 3. 633737 3. 929434 3. 788521 3. 672811 3. 844415 3. 700087  
11741748\_ 5. 469514 5. 57565 5. 464588 5. 613931 5. 705103 5. 691338  
11741749\_ 3. 320738 3. 290714 3. 218873 3. 171856 3. 172779 3. 217573  
11741750\_ 8. 804548 8. 763749 8. 752558 8. 524028 8. 571395 8. 511101  
11741751\_ 2. 138952 1. 955623 2. 224595 2. 298527 2. 222758 2. 313146  
11741752\_ 2. 794448 2. 804567 2. 597517 2. 623361 2. 866304 2. 538461  
11741753\_ 8. 250358 8. 231434 8. 213801 8. 240257 8. 21562 8. 197133  
11741754\_ 6. 286648 6. 25325 6. 223741 6. 272906 6. 245709 6. 184663  
11741755\_ 4. 702006 4. 62671 4. 824195 4. 577308 4. 496499 4. 476308  
11741756\_ 3. 716103 3. 708819 3. 609797 3. 167512 2. 764111 3. 026293  
11741757\_ 4. 763543 5. 08295 4. 821947 4. 907074 4. 977487 4. 992342  
11741758\_ 6. 311093 6. 245651 6. 273284 6. 36265 6. 406461 6. 456728  
11741759\_ 3. 022048 3. 031683 2. 980368 3. 195729 3. 124561 3. 124561  
11741760\_ 5. 071837 5. 093033 5. 067712 5. 130029 5. 120223 5. 156118  
11741761\_ 3. 519499 3. 752078 3. 679821 3. 858858 3. 873411 4. 179854  
11741762\_ 6. 097674 6. 100145 6. 165891 6. 507716 6. 338834 6. 441323  
11741763\_ 4. 653953 5. 103998 4. 824436 4. 592747 4. 734467 4. 626026  
11741764\_ 8. 223528 8. 191209 8. 247259 8. 264115 8. 245639 8. 213404  
11741765\_ 3. 612213 3. 685272 3. 638664 4. 137153 4. 048076 4. 12781  
11741766\_ 8. 395853 8. 402015 8. 403701 8. 548806 8. 512669 8. 55431  
11741767\_ 3. 089782 3. 166291 3. 152397 3. 126705 3. 02044 3. 133732  
11741768\_ 2. 218883 2. 548628 2. 52738 2. 786913 2. 436949 2. 70446  
11741769\_ 6. 330468 6. 249699 6. 17981 6. 340833 6. 395279 6. 548964  
11741770\_ 3. 161436 2. 958167 3. 112334 3. 119157 3. 005562 3. 180062  
11741771\_ 8. 698468 8. 59115 8. 658783 8. 707354 8. 733902 8. 688998

11741772\_ 8. 670858 8. 643404 8. 608859 8. 724997 8. 770763 8. 779039  
11741773\_ 7. 460691 7. 409349 7. 44256 7. 622384 7. 742577 7. 587715  
11741774\_ 3. 88394 4. 033574 3. 964981 4. 045159 4. 069513 4. 065125  
11741775\_ 6. 586286 6. 390415 6. 283284 5. 735173 5. 7724 5. 810023  
11741776\_ 4. 219739 4. 225806 4. 129279 4. 284908 4. 483107 4. 264713  
11741777\_ 5. 096042 5. 241316 5. 102535 5. 335903 5. 313114 5. 409222  
11741778\_ 2. 264497 2. 000906 1. 994398 2. 040792 1. 995297 2. 259924  
11741779\_ 4. 499189 4. 379054 4. 704647 4. 454233 4. 371621 4. 302258  
11741780\_ 4. 547099 4. 733874 4. 619945 4. 89638 4. 86117 4. 7756  
11741781\_ 6. 688764 6. 736787 6. 627708 6. 752593 6. 666702 6. 660406  
11741782\_ 3. 577067 3. 580228 3. 405985 3. 651979 3. 476724 3. 69004  
11741783\_ 7. 356413 7. 372096 7. 437778 7. 59988 7. 563002 7. 591252  
11741784\_ 7. 519459 7. 592967 7. 470279 7. 749129 7. 732212 7. 792263  
11741785\_ 5. 332291 5. 414869 5. 109409 5. 531307 5. 236098 5. 375473  
11741786\_ 4. 32564 4. 624863 4. 36962 4. 552104 4. 421856 4. 557648  
11741787\_ 3. 426892 3. 400208 3. 514437 3. 502402 3. 502402 3. 502402  
11741788\_ 4. 79562 4. 874234 4. 812817 4. 645086 4. 765404 4. 826943  
11741789\_ 10. 32482 10. 33622 10. 28193 10. 71417 10. 64044 10. 60253  
11741790\_ 6. 025952 6. 040488 6. 087563 5. 95622 6. 005541 6. 079787  
11741791\_ 6. 082965 6. 111776 5. 997678 6. 328643 6. 282833 6. 293516  
11741792\_ 6. 330034 6. 374437 6. 312706 6. 498316 6. 405665 6. 412665  
11741793\_ 6. 711253 6. 614355 6. 741853 6. 909833 6. 99719 7. 106659  
11741794\_ 5. 190087 4. 873027 5. 021343 5. 106274 4. 783537 4. 895684  
11741795\_ 3. 925181 4. 250934 3. 934568 4. 289149 4. 275543 4. 049496  
11741796\_ 6. 288747 6. 306715 6. 285783 6. 32968 6. 315594 6. 339007  
11741797\_ 4. 339357 4. 342454 4. 135496 4. 342454 4. 168463 4. 230808  
11741798\_ 6. 720026 6. 800518 6. 658372 6. 540824 6. 536712 6. 667038  
11741799\_ 7. 976587 7. 996685 8. 070877 7. 907972 7. 892062 7. 938154  
11741800\_ 6. 67554 6. 603267 6. 796165 6. 733731 6. 633452 6. 699508  
11741801\_ 2. 181846 2. 316342 2. 450732 2. 339477 2. 382388 2. 201481  
11741802\_ 7. 444623 7. 378558 7. 437044 7. 039701 7. 16534 7. 174422  
11741803\_ 5. 614563 5. 293918 5. 552679 5. 554436 5. 552679 5. 623896  
11741804\_ 5. 920101 6. 06239 5. 805335 5. 762437 5. 945303 5. 765706  
11741805\_ 5. 820052 5. 753774 5. 71979 5. 911175 5. 978235 5. 881799  
11741806\_ 3. 481364 3. 836084 3. 816045 3. 672974 3. 768204 3. 668702  
11741807\_ 8. 445018 8. 373309 8. 413929 8. 359277 8. 287183 8. 373142  
11741808\_ 6. 046923 6. 095244 6. 043764 6. 121682 6. 088657 6. 096236  
11741809\_ 4. 999872 5. 001746 4. 906229 5. 078598 5. 000341 5. 057882  
11741810\_ 6. 779107 6. 765911 6. 604788 6. 507716 6. 624328 6. 678227  
11741811\_ 3. 329868 3. 383472 2. 961399 3. 417737 3. 522507 3. 559516  
11741812\_ 5. 180108 5. 255304 5. 296774 5. 359686 5. 336184 5. 386457  
11741813\_ 12. 02555 12. 02068 12. 0305 12. 02185 12. 0321 11. 98387  
11741814\_ 11. 24663 11. 29342 11. 25331 11. 31893 11. 28153 11. 22447  
11741815\_ 7. 068019 7. 055228 7. 053419 6. 530898 6. 453229 6. 481931  
11741816\_ 8. 885054 8. 816578 8. 900162 8. 40937 8. 410462 8. 403077  
11741817\_ 1. 837019 2. 037155 2. 235709 2. 171663 1. 954044 2. 18238  
11741818\_ 3. 705625 3. 812319 3. 672148 3. 925181 3. 885704 3. 518265  
11741819\_ 5. 701188 5. 922734 5. 869945 5. 793185 5. 970125 5. 970868  
11741820\_ 3. 086067 2. 945929 2. 779353 2. 912551 2. 92924 2. 921041  
11741821\_ 6. 478027 6. 314239 6. 447168 6. 166001 6. 071542 6. 130081  
11741822\_ 4. 312838 4. 168085 3. 939983 4. 167558 4. 075482 4. 133003

11741823\_ 3. 655724 3. 73355 3. 440335 3. 993463 3. 869634 3. 909083  
11741824\_ 5. 36906 5. 227094 5. 298493 5. 584813 5. 610243 5. 626543  
11741825\_ 5. 201742 5. 032628 5. 175149 5. 355627 5. 284209 5. 213031  
11741826\_ 5. 383856 5. 329199 5. 17966 5. 33074 5. 303867 5. 143346  
11741827\_ 5. 954081 6. 069259 6. 023775 6. 058835 5. 988548 5. 946303  
11741828\_ 5. 991536 5. 917314 5. 763634 6. 153085 5. 984468 5. 935822  
11741829\_ 7. 388251 7. 493713 7. 617591 8. 030167 7. 960938 7. 959598  
11741830\_ 5. 247739 5. 181899 5. 028288 5. 2222 5. 246012 5. 288039  
11741831\_ 2. 947869 2. 835063 2. 860607 3. 25552 2. 839457 2. 826903  
11741832\_ 9. 208797 9. 212638 9. 19026 9. 381483 9. 32542 9. 266268  
11741833\_ 5. 358145 5. 407605 5. 460583 5. 783674 5. 959468 5. 856232  
11741834\_ 6. 643923 6. 727853 6. 634336 6. 710856 6. 729782 6. 876422  
11741835\_ 3. 116311 3. 045188 2. 947064 3. 136067 3. 208976 3. 171031  
11741836\_ 4. 341872 4. 496818 4. 369413 4. 57366 4. 541759 4. 643717  
11741837\_ 3. 398236 3. 523557 3. 290188 3. 515356 3. 45795 3. 635047  
11741838\_ 7. 289973 7. 329156 7. 259069 7. 274392 7. 340735 7. 324886  
11741839\_ 5. 705535 5. 596263 5. 716148 5. 816593 5. 878928 5. 717837  
11741840\_ 2. 589843 2. 587242 2. 600557 2. 516391 2. 289975 2. 473507  
11741841\_ 5. 354158 5. 453864 5. 453864 5. 516996 5. 63467 5. 64811  
11741842\_ 4. 195218 4. 25527 4. 055171 4. 231239 4. 326933 4. 276743  
11741843\_ 4. 713194 4. 709463 4. 728259 4. 611064 4. 74574 4. 617242  
11741844\_ 5. 352633 5. 241172 5. 319731 5. 189783 5. 148548 5. 14373  
11741845\_ 3. 184206 2. 950666 2. 950666 3. 042416 2. 945099 2. 922382  
11741846\_ 5. 389534 5. 388767 5. 287114 5. 064324 5. 112244 5. 126907  
11741847\_ 1. 898324 1. 856996 2. 095256 1. 898324 1. 898324 1. 815636  
11741848\_ 5. 156303 5. 336936 5. 198962 5. 191664 5. 220544 5. 247913  
11741849\_ 6. 378351 6. 322235 6. 370883 6. 401536 6. 411325 6. 378351  
11741850\_ 3. 14136 3. 089968 3. 056362 3. 226743 3. 262679 3. 419633  
11741851\_ 5. 686085 5. 740818 5. 722347 5. 731375 5. 788429 5. 747525  
11741852\_ 5. 050964 5. 11527 5. 006104 5. 050964 5. 005061 5. 094472  
11741853\_ 3. 883845 3. 916335 4. 091351 3. 882957 3. 907531 3. 938661  
11741854\_ 3. 812713 3. 703845 3. 733151 3. 857521 3. 804447 3. 761044  
11741855\_ 2. 573372 2. 653494 2. 372637 2. 560122 2. 670344 2. 791566  
11741856\_ 6. 707405 6. 686928 6. 662109 5. 92772 6. 018756 6. 001432  
11741857\_ 5. 963541 5. 935978 5. 879975 5. 890685 5. 9963 5. 939561  
11741858\_ 4. 172269 4. 115678 4. 222614 4. 285718 4. 268576 4. 174242  
11741859\_ 4. 141932 4. 371095 4. 377286 4. 41805 4. 392852 4. 523557  
11741860\_ 5. 203489 5. 149545 5. 152766 5. 146912 5. 425324 5. 349003  
11741861\_ 6. 470365 6. 459085 6. 388282 6. 489703 6. 553293 6. 473191  
11741862\_ 5. 10779 5. 168877 4. 952609 4. 943181 5. 083032 5. 131153  
11741863\_ 5. 36718 5. 221717 5. 311784 5. 402417 5. 356046 5. 542551  
11741864\_ 3. 074045 3. 074045 3. 270976 3. 074045 3. 160664 3. 024231  
11741865\_ 2. 319886 2. 367104 2. 398083 2. 430895 2. 4707 2. 492571  
11741866\_ 5. 598488 5. 718128 5. 490188 5. 910773 5. 629174 5. 824302  
11741867\_ 5. 36906 5. 409812 5. 369191 5. 528624 5. 46609 5. 414599  
11741868\_ 5. 264217 5. 469424 5. 214814 5. 340685 5. 474797 5. 32813  
11741869\_ 5. 332855 5. 321706 5. 262002 5. 374085 5. 507895 5. 31699  
11741870\_ 3. 894793 3. 990476 3. 850246 4. 030892 4. 137406 3. 820122  
11741871\_ 2. 775151 2. 684272 2. 690459 2. 775151 2. 775151 2. 775151  
11741872\_ 2. 891179 2. 966305 2. 98511 3. 148615 2. 827617 3. 057584  
11741873\_ 8. 378992 8. 352995 8. 4761 8. 702964 8. 764077 8. 729506

11741874\_ 2. 718322 2. 416119 2. 84028 2. 450855 2. 577927 2. 482344  
11741875\_ 4. 757669 4. 6871 4. 673348 4. 957005 5. 068899 5. 002737  
11741876\_ 5. 289732 5. 197056 5. 223388 5. 24322 5. 370875 5. 346347  
11741877\_ 5. 751061 5. 804635 5. 723884 5. 830021 5. 6869 5. 814138  
11741878\_ 7. 170453 7. 106952 7. 227306 7. 269834 7. 388067 7. 303307  
11741879\_ 7. 798188 7. 784564 7. 768103 7. 928639 7. 894711 7. 914096  
11741880\_ 4. 010511 3. 907811 3. 894786 3. 932356 3. 899525 4. 035153  
11741881\_ 4. 898585 5. 030608 4. 861967 5. 191725 4. 960378 5. 001479  
11741882\_ 6. 383044 6. 515621 6. 412133 6. 483971 6. 512875 6. 456181  
11741883\_ 8. 251064 8. 288555 8. 30678 8. 531276 8. 463712 8. 413736  
11741884\_ 5. 522004 5. 402083 5. 462043 5. 416918 5. 607159 5. 45862  
11741885\_ 2. 988093 3. 316922 2. 981909 2. 446089 2. 621035 2. 548584  
11741886\_ 1. 897674 1. 878505 1. 772829 1. 801379 1. 878505 2. 078994  
11741887\_ 5. 442778 5. 239332 5. 375074 5. 038106 5. 185997 5. 269567  
11741888\_ 5. 134351 5. 05717 5. 05717 5. 165219 5. 269964 5. 185876  
11741889\_ 4. 265413 4. 174945 4. 220565 4. 213226 4. 10343 4. 285058  
11741890\_ 4. 632803 4. 603842 4. 674976 4. 742206 4. 679548 4. 803127  
11741891\_ 5. 738862 5. 955091 5. 848658 5. 962144 5. 895658 5. 864453  
11741892\_ 4. 687359 4. 872146 4. 762605 4. 919462 4. 980016 4. 915303  
11741893\_ 4. 923002 5. 06503 5. 143613 5. 101901 5. 109427 5. 023635  
11741894\_ 4. 887013 5. 14062 5. 11083 5. 197536 5. 149489 5. 063064  
11741895\_ 5. 717287 5. 749763 5. 765153 5. 7192 5. 773299 5. 816408  
11741896\_ 13. 06771 13. 08621 13. 08021 13. 03193 13. 03931 12. 99305  
11741897\_ 6. 947621 6. 725879 6. 767259 5. 015437 4. 981143 5. 084821  
11741898\_ 2. 320725 1. 995297 2. 026853 2. 234719 2. 241527 2. 056716  
11741899\_ 3. 958472 3. 900357 3. 752854 4. 035557 4. 009664 3. 873721  
11741900\_ 5. 97527 5. 946148 5. 836906 6. 082115 5. 923455 5. 969512  
11741901\_ 7. 198903 7. 201119 7. 183221 7. 327813 7. 263236 7. 324886  
11741902\_ 4. 977022 5. 035968 4. 97707 5. 127597 5. 051234 4. 984669  
11741903\_ 3. 844609 4. 160152 3. 966153 3. 998099 4. 050098 4. 348884  
11741904\_ 4. 928582 4. 984208 4. 799837 4. 931033 5. 048494 5. 01472  
11741905\_ 2. 721365 2. 997622 2. 665054 2. 871731 2. 96276 2. 780978  
11741906\_ 4. 287812 4. 515003 4. 447224 4. 441001 4. 459939 4. 772923  
11741907\_ 4. 35696 4. 506967 4. 264028 4. 399725 4. 459939 4. 768091  
11741908\_ 3. 273613 3. 229722 3. 208777 3. 173655 3. 270906 3. 217546  
11741909\_ 5. 894697 5. 838946 5. 90705 5. 954081 6. 06963 6. 101951  
11741910\_ 5. 236159 5. 089497 5. 121145 5. 614563 5. 51915 5. 547275  
11741911\_ 6. 041976 5. 829612 5. 69689 4. 518973 4. 533529 4. 452553  
11741912\_ 10. 62746 10. 63707 10. 61903 10. 67603 10. 69269 10. 5975  
11741913\_ 12. 42039 12. 3918 12. 40096 12. 39497 12. 39478 12. 39686  
11741914\_ 5. 985581 5. 970433 6. 094413 5. 791052 5. 768053 5. 808443  
11741915\_ 3. 979426 3. 990125 3. 909099 3. 937196 4. 014671 3. 998307  
11741916\_ 4. 486815 4. 606357 4. 510568 4. 582705 4. 486815 4. 442706  
11741917\_ 2. 076932 2. 150256 2. 076932 2. 129386 2. 192696 2. 147559  
11741918\_ 6. 104728 6. 061918 6. 044285 6. 058786 6. 037761 6. 125846  
11741919\_ 2. 402897 2. 506132 2. 362282 2. 418917 2. 461828 2. 505466  
11741920\_ 5. 336657 5. 480966 5. 379651 5. 513603 5. 431946 5. 585048  
11741921\_ 5. 999823 6. 213223 5. 967915 6. 196657 6. 179848 6. 265847  
11741922\_ 3. 691118 3. 597375 3. 398236 3. 422429 3. 262338 3. 531226  
11741923\_ 5. 556904 5. 442768 5. 308246 5. 151693 5. 265868 5. 328987  
11741924\_ 6. 56978 6. 686431 6. 751258 6. 635392 6. 41359 6. 468062

11741925\_ 1. 960779 1. 840323 1. 834489 1. 909246 1. 636587 1. 863806  
11741926\_ 6. 013159 5. 942299 5. 97 5. 9577 5. 985458 6. 061354  
11741927\_ 2. 996207 3. 172702 2. 968323 2. 986017 2. 90574 2. 997129  
11741928\_ 3. 85004 4. 151043 3. 856947 4. 079675 4. 168532 4. 151043  
11741929\_ 5. 119415 5. 388612 5. 094672 5. 434252 5. 460828 5. 374091  
11741930\_ 3. 054213 3. 326201 3. 219249 3. 132167 3. 324756 3. 325365  
11741931\_ 3. 606313 3. 770631 3. 398236 3. 578779 3. 606313 3. 587637  
11741932\_ 3. 501227 3. 664347 3. 659605 3. 919139 3. 747095 3. 572116  
11741933\_ 2. 47102 2. 599406 2. 315272 2. 555327 2. 594219 2. 546461  
11741934\_ 4. 770575 4. 874234 4. 766633 4. 917221 4. 826952 4. 899591  
11741935\_ 3. 64692 3. 909593 3. 664286 3. 690658 3. 958059 3. 756031  
11741936\_ 4. 026092 3. 900835 4. 026092 4. 070269 4. 247372 4. 124699  
11741937\_ 4. 939293 5. 01359 4. 864367 4. 819595 5. 016941 4. 899618  
11741938\_ 5. 975763 6. 103193 5. 934514 6. 009424 6. 082692 6. 009424  
11741939\_ 5. 212001 5. 19237 5. 128899 5. 078213 5. 230922 5. 258678  
11741940\_ 4. 263035 4. 405064 4. 286676 4. 43062 4. 447065 4. 272967  
11741941\_ 4. 347179 4. 184154 4. 219016 4. 39281 4. 395566 4. 333238  
11741942\_ 3. 005315 3. 374411 3. 325762 3. 431862 3. 30419 3. 167418  
11741943\_ 2. 563246 2. 605516 2. 306107 2. 511247 2. 395588 2. 493501  
11741944\_ 4. 636766 4. 818118 4. 640191 4. 818118 4. 930923 4. 749572  
11741945\_ 3. 33414 3. 290188 3. 178518 2. 890658 3. 235044 3. 068832  
11741946\_ 2. 866463 3. 041685 2. 931847 3. 281751 3. 064579 3. 041685  
11741947\_ 6. 57327 6. 494571 6. 602786 5. 815337 5. 808516 5. 699426  
11741948\_ 5. 485023 5. 500175 5. 599847 5. 055086 5. 340887 5. 354472  
11741949\_ 6. 937499 6. 992817 6. 963223 7. 338212 7. 261895 7. 201428  
11741950\_ 5. 584813 5. 789947 5. 535343 5. 829577 5. 612771 5. 819336  
11741951\_ 2. 627023 2. 581561 2. 653927 2. 610133 2. 623887 2. 639715  
11741952\_ 5. 252036 5. 309108 5. 435671 5. 417359 5. 523058 5. 613825  
11741953\_ 3. 517629 3. 723624 3. 581226 3. 690969 3. 635471 3. 380885  
11741954\_ 4. 624481 4. 663283 4. 634259 4. 575399 4. 651142 4. 66234  
11741955\_ 5. 424872 5. 34479 5. 247086 5. 509097 5. 316633 5. 339396  
11741956\_ 4. 534599 4. 57862 4. 519955 4. 754985 4. 685725 4. 449418  
11741957\_ 4. 350808 4. 489481 4. 560282 4. 343828 4. 415464 4. 237389  
11741958\_ 5. 584813 5. 518169 5. 655569 5. 428046 5. 584813 5. 431641  
11741959\_ 4. 924292 4. 823028 5. 018419 4. 405007 4. 596708 4. 621946  
11741960\_ 9. 522947 9. 474636 9. 473143 9. 039798 9. 069149 9. 08091  
11741961\_ 4. 047067 4. 268134 4. 228645 4. 321709 4. 403736 4. 383322  
11741962\_ 2. 146239 2. 146239 2. 002522 2. 096038 1. 971919 2. 096038  
11741963\_ 2. 890799 3. 138444 2. 858827 3. 049058 3. 018046 3. 061205  
11741964\_ 8. 321354 8. 263883 8. 29613 8. 36502 8. 332391 8. 346347  
11741965\_ 6. 122311 6. 042003 6. 098792 6. 084622 6. 120314 6. 063525  
11741966\_ 5. 771584 5. 699028 5. 753251 5. 995525 5. 92312 6. 019066  
11741967\_ 7. 325411 7. 212815 7. 394583 6. 969783 6. 972414 6. 899267  
11741968\_ 5. 095507 5. 062128 5. 095507 5. 122023 5. 11527 5. 073036  
11741969\_ 4. 140323 4. 435844 4. 287593 4. 471035 4. 365226 4. 390991  
11741970\_ 5. 728028 5. 684087 5. 42906 5. 880713 5. 73487 5. 74987  
11741971\_ 4. 399791 4. 646742 4. 370337 4. 626074 4. 553728 4. 72032  
11741972\_ 4. 757963 4. 642609 4. 936729 4. 793958 5. 010893 4. 757963  
11741973\_ 3. 687631 3. 785458 3. 558046 3. 871808 3. 817475 3. 786795  
11741974\_ 3. 985489 3. 891557 3. 782242 3. 988784 3. 957265 4. 04536  
11741975\_ 3. 68954 3. 688032 3. 559313 3. 77301 3. 749065 3. 800153

11741976\_ 2. 705891 2. 618957 2. 714268 2. 670357 2. 609285 2. 473856  
11741977\_ 2. 47102 2. 691688 2. 853776 2. 677703 2. 601533 2. 812889  
11741978\_ 7. 68097 7. 761698 7. 6941 7. 776778 7. 819983 7. 600912  
11741979\_ 2. 235709 1. 927877 2. 089083 2. 079884 1. 989906 2. 24944  
11741980\_ 10. 87083 10. 88488 10. 88603 10. 53825 10. 52923 10. 4912  
11741981\_ 4. 03956 4. 295673 4. 255345 4. 186731 4. 11465 4. 023102  
11741982\_ 5. 010351 4. 849467 4. 935798 5. 341735 5. 239067 5. 38862  
11741983\_ 5. 84537 5. 825458 5. 889642 6. 00804 5. 85395 5. 962843  
11741984\_ 1. 99153 2. 057511 1. 898324 1. 971054 1. 950578 1. 971054  
11741985\_ 6. 488736 6. 597098 6. 510356 6. 575829 6. 623362 6. 666745  
11741986\_ 4. 249798 4. 392952 4. 360476 4. 615746 4. 475799 4. 507769  
11741987\_ 4. 19974 4. 087964 4. 218451 4. 301809 4. 311007 4. 189069  
11741988\_ 5. 034857 4. 938482 5. 022814 4. 971201 5. 085133 5. 142842  
11741989\_ 5. 097408 5. 252542 5. 220605 5. 11527 5. 084156 5. 14378  
11741990\_ 3. 914238 3. 959032 4. 213226 3. 923182 3. 981275 4. 070684  
11741991\_ 3. 439288 3. 563931 3. 291597 3. 509752 3. 629189 3. 381653  
11741992\_ 5. 417525 5. 209123 5. 352343 5. 528624 5. 453793 5. 339673  
11741993\_ 4. 722688 4. 82861 4. 602514 4. 588 4. 895034 4. 956391  
11741994\_ 5. 622006 5. 588877 5. 57947 5. 551719 5. 804505 5. 67674  
11741995\_ 9. 083999 9. 091017 9. 133607 8. 847514 8. 870406 8. 817409  
11741996\_ 3. 958401 3. 815367 3. 974908 4. 159061 4. 180016 3. 960704  
11741997\_ 5. 029529 5. 032153 5. 042285 5. 004151 5. 026905 5. 044215  
11741998\_ 4. 471242 4. 708419 4. 425789 4. 54066 4. 696976 4. 570512  
11741999\_ 3. 473467 3. 593323 3. 722371 3. 676474 3. 735229 3. 630881  
11742000\_ 2. 259208 2. 2334 2. 25225 2. 293373 2. 25483 2. 320117  
11742001\_ 2. 509209 2. 525132 2. 594376 2. 645814 2. 512511 2. 384435  
11742002\_ 5. 050262 5. 233548 5. 13544 5. 207748 5. 303789 5. 2666  
11742003\_ 4. 526891 4. 505242 4. 32995 4. 502233 4. 409626 4. 396006  
11742004\_ 5. 404099 5. 314924 5. 26034 5. 26034 5. 412953 5. 329959  
11742005\_ 4. 68675 4. 826301 4. 76571 4. 772366 4. 74574 4. 793674  
11742006\_ 6. 98681 6. 759552 6. 741742 6. 469737 6. 555095 6. 675995  
11742007\_ 7. 275932 7. 257341 7. 101248 7. 256369 7. 176717 7. 252939  
11742008\_ 2. 5681 2. 588337 2. 314502 2. 48396 2. 143074 2. 198357  
11742009\_ 5. 820052 5. 994318 6. 126719 6. 015328 6. 053615 6. 021014  
11742010\_ 3. 506821 3. 628721 3. 290188 3. 813531 3. 705625 3. 680501  
11742011\_ 5. 290771 5. 432808 5. 520188 5. 458947 5. 440708 5. 373057  
11742012\_ 4. 33393 4. 643717 4. 414676 4. 482506 4. 35865 4. 347179  
11742013\_ 4. 965671 5. 126697 4. 917524 5. 082318 4. 931486 4. 99549  
11742014\_ 4. 162434 3. 979794 4. 232545 4. 314538 4. 459939 4. 282475  
11742015\_ 3. 000619 2. 925076 2. 917442 2. 83198 2. 941719 2. 909808  
11742016\_ 2. 988093 3. 196469 3. 436773 3. 187161 3. 398236 3. 230654  
11742017\_ 2. 361778 2. 47102 2. 730711 2. 55872 2. 380601 2. 585787  
11742018\_ 4. 020298 4. 022172 3. 928326 4. 237462 4. 237172 4. 156422  
11742019\_ 7. 189061 7. 105002 7. 062026 7. 276415 7. 306776 7. 220733  
11742020\_ 5. 147978 5. 201558 5. 095289 5. 254906 5. 309795 5. 28829  
11742021\_ 7. 561918 7. 48472 7. 604825 7. 452269 7. 51602 7. 503195  
11742022\_ 4. 227906 4. 144112 3. 850246 4. 009049 4. 319877 4. 191277  
11742023\_ 6. 12273 6. 24124 6. 070046 6. 144393 6. 130368 6. 131187  
11742024\_ 7. 383348 7. 27428 7. 364973 7. 194708 7. 269859 7. 373476  
11742025\_ 8. 148367 8. 079595 8. 17512 7. 641521 7. 640788 7. 639162  
11742026\_ 5. 393458 5. 369278 5. 457424 5. 166962 5. 263705 5. 306784

11742027\_ 3. 724844 3. 813128 3. 614207 3. 924387 4. 143792 3. 763528  
11742028\_ 4. 026092 4. 090641 4. 112755 4. 216445 4. 203815 4. 200678  
11742029\_ 8. 323428 8. 244404 8. 376827 7. 890039 7. 917418 7. 91211  
11742030\_ 5. 966663 6. 237456 5. 973853 5. 986097 5. 890523 5. 84648  
11742031\_ 4. 677514 4. 851649 4. 747688 5. 005174 5. 038471 5. 024433  
11742032\_ 3. 773275 3. 814106 3. 675371 4. 02196 3. 8088 3. 966762  
11742033\_ 4. 200678 4. 200573 4. 272497 4. 288421 4. 275543 4. 200678  
11742034\_ 2. 996566 2. 891733 2. 856153 3. 11861 3. 015687 2. 936912  
11742035\_ 3. 398236 3. 613779 3. 503743 3. 088147 3. 16584 2. 906726  
11742036\_ 6. 03418 6. 189994 6. 125318 6. 185733 6. 153573 6. 194642  
11742037\_ 5. 394294 5. 461332 5. 265378 5. 537451 5. 627647 5. 475572  
11742038\_ 3. 497204 3. 599337 3. 446117 3. 656779 3. 736633 3. 556773  
11742039\_ 5. 125611 5. 277833 5. 174434 5. 43185 5. 445926 5. 431642  
11742040\_ 8. 673754 8. 839157 8. 69405 8. 798012 8. 711915 8. 738075  
11742041\_ 7. 184026 7. 185535 7. 254924 7. 293366 7. 3344 7. 323097  
11742042\_ 6. 325943 6. 152801 6. 358701 6. 079811 6. 160444 6. 160709  
11742043\_ 10. 15383 10. 09964 10. 16804 9. 993591 10. 02951 10. 00552  
11742044\_ 2. 305417 2. 078251 2. 21659 2. 196176 2. 258319 1. 912216  
11742045\_ 4. 463462 4. 643999 4. 584651 4. 669594 4. 785013 4. 752642  
11742046\_ 8. 162433 8. 145971 8. 134853 8. 755442 8. 781602 8. 820963  
11742047\_ 2. 562659 2. 66107 2. 755002 2. 68305 2. 561258 2. 66107  
11742048\_ 2. 174048 2. 37061 2. 086424 2. 275776 2. 343769 2. 271021  
11742049\_ 7. 789275 7. 660408 7. 701561 7. 508185 7. 459391 7. 561222  
11742050\_ 8. 601287 8. 533819 8. 538802 8. 536687 8. 39493 8. 387172  
11742051\_ 4. 514102 4. 542013 4. 576678 4. 688484 4. 491325 4. 537754  
11742052\_ 6. 732908 6. 659114 6. 762495 6. 371159 6. 482046 6. 366318  
11742053\_ 8. 005145 7. 95508 8. 054632 7. 722813 7. 763924 7. 871819  
11742054\_ 4. 099329 4. 2821 4. 263312 4. 449691 4. 176397 4. 098165  
11742055\_ 5. 964326 5. 867931 5. 929909 6. 018553 5. 881049 5. 918448  
11742056\_ 3. 316882 3. 298349 3. 104785 3. 446618 3. 586185 3. 503743  
11742057\_ 4. 689634 4. 863099 4. 742982 4. 874234 4. 960402 4. 984669  
11742058\_ 5. 462524 5. 604773 5. 501786 5. 68066 5. 619554 5. 714118  
11742059\_ 10. 85314 10. 85501 10. 81196 10. 5327 10. 41341 10. 43504  
11742060\_ 9. 757616 9. 74313 9. 646759 9. 41802 9. 374264 9. 274967  
11742061\_ 6. 242675 6. 244666 6. 339457 6. 56925 6. 631711 6. 494493  
11742062\_ 9. 217185 9. 268753 9. 148456 9. 843723 9. 800161 9. 616218  
11742063\_ 5. 485119 5. 435377 5. 485119 5. 221821 5. 25585 5. 478605  
11742064\_ 2. 926664 2. 95239 3. 07457 2. 95239 2. 861511 3. 00153  
11742065\_ 5. 357186 5. 515177 5. 499507 5. 507637 5. 554436 5. 647008  
11742066\_ 5. 158142 5. 23634 5. 26745 5. 282094 5. 149545 5. 399215  
11742067\_ 2. 805218 2. 70628 2. 53926 2. 824207 2. 70628 2. 839051  
11742068\_ 3. 942733 4. 062688 3. 939983 4. 032351 4. 125859 4. 148387  
11742069\_ 6. 579319 6. 841885 6. 474117 6. 708311 6. 668206 6. 700371  
11742070\_ 3. 414907 3. 544703 3. 285093 3. 549894 3. 503743 3. 568817  
11742071\_ 4. 859913 5. 062237 4. 974165 5. 17454 5. 187849 5. 189728  
11742072\_ 7. 859049 7. 906439 7. 948338 7. 789729 7. 703351 7. 694613  
11742073\_ 5. 911918 5. 701978 5. 559291 5. 721037 5. 803999 5. 792941  
11742074\_ 6. 774878 6. 681334 6. 695739 6. 612445 6. 661979 6. 58414  
11742075\_ 4. 128984 4. 067703 4. 042266 4. 207038 4. 270347 4. 12367  
11742076\_ 3. 485093 3. 509679 3. 418661 3. 548773 3. 518115 3. 548773  
11742077\_ 3. 925181 4. 31409 4. 120526 4. 115393 4. 32927 4. 324328



11742078\_ 5. 220557 5. 164835 5. 256876 5. 31566 5. 31566 5. 324353  
11742079\_ 5. 87205 5. 719478 5. 655863 5. 910686 5. 935521 6. 080628  
11742080\_ 5. 931058 5. 814362 5. 937799 6. 018553 6. 074783 6. 051554  
11742081\_ 3. 767227 3. 997131 3. 926777 3. 833456 4. 170435 3. 879309  
11742082\_ 8. 033525 7. 978682 8. 026788 7. 650864 7. 603589 7. 592506  
11742083\_ 4. 209035 4. 318205 4. 427149 4. 408835 4. 510485 4. 490917  
11742084\_ 5. 290884 5. 043105 5. 141514 5. 2222 5. 26034 5. 333032  
11742085\_ 2. 769618 2. 844415 2. 468716 2. 642849 2. 674049 2. 769618  
11742086\_ 7. 818715 7. 649285 7. 784219 8. 193466 8. 235867 8. 223344  
11742087\_ 5. 252496 5. 238621 5. 069023 5. 253422 5. 397172 5. 31134  
11742088\_ 4. 874234 4. 929693 4. 683868 4. 629968 4. 74319 4. 732218  
11742089\_ 5. 539911 5. 584216 5. 358599 5. 545326 5. 554339 5. 568493  
11742090\_ 4. 905729 5. 047692 4. 970103 4. 953968 5. 090125 5. 016001  
11742091\_ 6. 996182 6. 886652 6. 965399 6. 63148 6. 576868 6. 664158  
11742092\_ 5. 70265 5. 730379 5. 755119 5. 721943 5. 76629 5. 745372  
11742093\_ 6. 689263 6. 733505 6. 742261 6. 678992 6. 759458 6. 757916  
11742094\_ 6. 037861 5. 900936 5. 879291 5. 883683 5. 786785 5. 908354  
11742095\_ 8. 329144 8. 337073 8. 403639 8. 192131 8. 1675 8. 222606  
11742096\_ 7. 536686 7. 523225 7. 511302 7. 384733 7. 361679 7. 317373  
11742097\_ 6. 642231 6. 789896 6. 819045 6. 620328 6. 714717 6. 732709  
11742098\_ 5. 928491 5. 770267 5. 578631 5. 672285 5. 573715 5. 788369  
11742099\_ 9. 314868 9. 322021 9. 29849 8. 61285 8. 614148 8. 52644  
11742100\_ 8. 81002 8. 900435 8. 816252 8. 143783 8. 095581 8. 168229  
11742101\_ 4. 41119 4. 468611 4. 444566 4. 723906 4. 582983 4. 524278  
11742102\_ 5. 43876 5. 478809 5. 267395 5. 448296 5. 426861 5. 479783  
11742103\_ 3. 513504 3. 293199 3. 503743 3. 790675 3. 962291 3. 705625  
11742104\_ 5. 474831 5. 467959 5. 489928 5. 471271 5. 538532 5. 531903  
11742105\_ 4. 341497 4. 586806 4. 419487 4. 593264 4. 671393 4. 563793  
11742106\_ 6. 030279 6. 08783 6. 101226 6. 130267 6. 081228 6. 203382  
11742107\_ 10. 06361 10. 09805 10. 14608 10. 03873 10. 05198 10. 02819  
11742108\_ 9. 631735 9. 624295 9. 688166 9. 583056 9. 589513 9. 560143  
11742109\_ 5. 643441 5. 879 5. 592693 5. 888401 5. 926445 5. 902225  
11742110\_ 5. 298155 5. 550545 5. 330626 5. 458347 5. 439864 5. 492637  
11742111\_ 5. 743038 5. 73139 5. 667903 5. 926168 5. 812914 5. 844097  
11742112\_ 2. 304515 2. 212241 2. 235709 2. 393591 2. 496257 2. 362104  
11742113\_ 6. 265464 6. 097542 6. 018553 5. 768053 5. 584813 5. 509613  
11742114\_ 5. 36906 5. 366046 5. 429522 5. 598658 5. 482528 5. 447099  
11742115\_ 4. 610431 4. 614325 4. 625335 4. 620298 4. 632449 4. 616141  
11742116\_ 12. 08589 12. 08975 12. 08696 12. 31312 12. 22949 12. 2379  
11742117\_ 5. 738656 5. 728969 5. 554436 5. 810104 5. 72079 5. 800486  
11742118\_ 4. 294593 4. 100193 3. 971944 4. 576315 4. 647222 4. 458605  
11742119\_ 7. 199759 7. 135672 7. 190059 7. 441829 7. 51817 7. 577289  
11742120\_ 7. 408285 7. 322219 7. 426223 7. 796509 7. 79002 7. 770129  
11742121\_ 4. 675724 4. 783227 4. 90003 4. 712385 4. 789367 4. 978743  
11742122\_ 3. 723534 3. 723624 3. 636019 3. 588124 3. 742998 3. 558651  
11742123\_ 2. 47793 2. 12989 2. 338766 2. 293174 2. 199242 2. 332824  
11742124\_ 4. 790852 4. 897769 4. 890641 4. 821928 4. 901178 5. 004697  
11742125\_ 3. 818401 3. 6223 3. 849931 3. 609979 3. 659335 3. 607006  
11742126\_ 5. 260384 5. 351654 5. 121941 5. 432405 5. 361836 5. 454295  
11742127\_ 5. 173643 5. 262442 5. 155413 5. 552549 5. 416674 5. 360726  
11742128\_ 9. 580376 9. 5393 9. 552712 9. 367615 9. 338662 9. 362298

11742129\_ 7. 643452 7. 726724 7. 612829 7. 665279 7. 53738 7. 635364  
11742130\_ 5. 617034 5. 759556 5. 613218 5. 776743 5. 648371 5. 750643  
11742131\_ 5. 325935 5. 120971 5. 220311 5. 317284 5. 247288 5. 371435  
11742132\_ 6. 942151 6. 977988 6. 880951 7. 060972 7. 054714 7. 030013  
11742133\_ 7. 1444 7. 140126 7. 099734 7. 136572 7. 139879 7. 147707  
11742134\_ 6. 643766 6. 714804 6. 599369 6. 647945 6. 667118 6. 66294  
11742135\_ 4. 028067 4. 51617 4. 297425 4. 472662 4. 584933 4. 450645  
11742136\_ 6. 611635 6. 686431 6. 624678 6. 698549 6. 661816 6. 703569  
11742137\_ 4. 471529 4. 330751 4. 184655 4. 513384 4. 45321 4. 471529  
11742138\_ 10. 43876 10. 39142 10. 40146 10. 23166 10. 25132 10. 18899  
11742139\_ 5. 066679 5. 3503 5. 069995 5. 299948 5. 285536 5. 318836  
11742140\_ 2. 162311 2. 305612 2. 242522 2. 162311 2. 068379 1. 955087  
11742141\_ 4. 485435 4. 485435 4. 318754 4. 600415 4. 545011 4. 376375  
11742142\_ 5. 145901 5. 429006 5. 333324 5. 370598 5. 183204 5. 534282  
11742143\_ 3. 186021 3. 170334 3. 062286 3. 488327 3. 961385 3. 896564  
11742144\_ 4. 346377 4. 407596 4. 153216 4. 81328 4. 657871 4. 749487  
11742145\_ 1. 864403 1. 802941 1. 777843 1. 937933 1. 770292 1. 838828  
11742146\_ 4. 588663 4. 411435 4. 318047 4. 531673 4. 516366 4. 347179  
11742147\_ 3. 789729 3. 964058 3. 456348 3. 730054 3. 785143 3. 959172  
11742148\_ 8. 817878 8. 920479 8. 837986 8. 954453 9. 040642 8. 95166  
11742149\_ 8. 110109 8. 247934 8. 046912 8. 168905 8. 30912 8. 128323  
11742150\_ 3. 25435 3. 164861 3. 140437 3. 337642 3. 198608 3. 31957  
11742151\_ 5. 215251 5. 160797 5. 151543 5. 185827 5. 340313 5. 185229  
11742152\_ 5. 298767 5. 222149 5. 315416 5. 39254 5. 38256 5. 333108  
11742153\_ 4. 513241 4. 33187 4. 305436 4. 52373 4. 647161 4. 535586  
11742154\_ 4. 282135 4. 488686 4. 421617 4. 401818 4. 448741 4. 423665  
11742155\_ 4. 643717 4. 335594 4. 148424 4. 459939 4. 438366 4. 258946  
11742156\_ 6. 247529 6. 459797 6. 342299 6. 353036 6. 353477 6. 452015  
11742157\_ 3. 832629 3. 915323 3. 954294 3. 822923 3. 998134 3. 693703  
11742158\_ 4. 30235 4. 160282 4. 135496 4. 261461 4. 52373 4. 357902  
11742159\_ 2. 779258 2. 853078 2. 864634 3. 046394 3. 052254 2. 959978  
11742160\_ 4. 679917 4. 684707 4. 758765 4. 687355 4. 928038 4. 550103  
11742161\_ 4. 546257 4. 595528 4. 61892 4. 843963 4. 570724 4. 590041  
11742162\_ 3. 851287 3. 818401 3. 88445 4. 019626 4. 041677 3. 950066  
11742163\_ 9. 101677 9. 115703 9. 201703 9. 035244 9. 054946 8. 97101  
11742164\_ 4. 142616 4. 007293 4. 121346 4. 166927 4. 206495 4. 119491  
11742165\_ 2. 47102 2. 422897 2. 381576 2. 588104 2. 508614 2. 605516  
11742166\_ 4. 632439 4. 559382 4. 563762 4. 662783 4. 885263 4. 828465  
11742167\_ 6. 053882 6. 271693 6. 011627 6. 190209 6. 142856 6. 228977  
11742168\_ 4. 872557 4. 921343 4. 945799 5. 075 5. 107869 5. 073036  
11742169\_ 4. 173774 4. 414579 4. 048968 4. 364273 4. 324664 4. 326747  
11742170\_ 5. 398931 5. 422604 5. 401101 5. 249983 5. 29364 5. 450946  
11742171\_ 5. 495992 5. 331645 5. 192836 5. 402123 5. 283722 5. 207293  
11742172\_ 4. 562555 4. 37365 4. 132064 4. 281102 4. 346284 4. 401665  
11742173\_ 6. 15903 6. 195935 6. 057208 6. 150826 6. 181228 6. 120466  
11742174\_ 5. 831042 5. 867315 5. 922174 5. 899484 5. 820052 5. 992354  
11742175\_ 7. 243868 7. 376027 7. 309692 7. 328718 7. 411569 7. 38837  
11742176\_ 4. 131764 4. 077752 4. 230046 4. 077793 4. 254855 4. 189794  
11742177\_ 5. 723766 5. 716629 5. 653358 5. 682178 5. 768053 5. 691219  
11742178\_ 6. 92026 6. 904855 6. 857795 6. 862059 7. 04434 6. 922514  
11742179\_ 1. 995297 2. 131936 1. 890199 2. 134118 2. 079884 2. 014194

11742180\_ 6. 526467 6. 612181 6. 496872 6. 603488 6. 534632 6. 48953  
11742181\_ 6. 520413 6. 612181 6. 492316 6. 59705 6. 557009 6. 610507  
11742182\_ 9. 454602 9. 410129 9. 398617 9. 326681 9. 338494 9. 273904  
11742183\_ 4. 9226 5. 130576 4. 702926 4. 884803 4. 984669 4. 885789  
11742184\_ 4. 361364 4. 183828 4. 382558 4. 382558 4. 310002 4. 456976  
11742185\_ 4. 09322 4. 10246 4. 062017 4. 332357 4. 170214 4. 348175  
11742186\_ 4. 935891 5. 045681 5. 055621 4. 157416 4. 275543 4. 22786  
11742187\_ 4. 108592 4. 067703 4. 026092 4. 067703 4. 042955 4. 085913  
11742188\_ 4. 004237 4. 067771 3. 633488 4. 03499 4. 205316 3. 804032  
11742189\_ 5. 116505 5. 002961 5. 297498 4. 72765 4. 890539 4. 826367  
11742190\_ 6. 770966 6. 922385 6. 937735 7. 374018 7. 27611 7. 416724  
11742191\_ 8. 173363 8. 123233 8. 168151 8. 500963 8. 532661 8. 57489  
11742192\_ 4. 517379 4. 428986 4. 370337 4. 33947 4. 411245 4. 567655  
11742193\_ 6. 603018 6. 588468 6. 716602 6. 118838 6. 085644 6. 009075  
11742194\_ 2. 962131 2. 872198 3. 248674 2. 872198 2. 976386 2. 873166  
11742195\_ 8. 575554 8. 486504 8. 569661 8. 150853 8. 079533 8. 143414  
11742196\_ 5. 736831 5. 626465 5. 749054 5. 592114 5. 427294 5. 676992  
11742197\_ 6. 95917 7. 001975 7. 035763 6. 614519 6. 526095 6. 594415  
11742198\_ 7. 243031 7. 215889 7. 321883 6. 898379 6. 93204 6. 878275  
11742199\_ 7. 382221 7. 390843 7. 26691 7. 481078 7. 500567 7. 418671  
11742200\_ 6. 870185 6. 984612 6. 881645 6. 541966 6. 535789 6. 596048  
11742201\_ 4. 82962 4. 919703 4. 695526 4. 964372 4. 960875 5. 102169  
11742202\_ 2. 516239 2. 395593 2. 361778 2. 624576 2. 601303 2. 747087  
11742203\_ 6. 312756 6. 336319 6. 46927 6. 593549 6. 424957 6. 459912  
11742204\_ 5. 387528 5. 216122 5. 332543 5. 583581 5. 710753 5. 238811  
11742205\_ 2. 314288 2. 123384 2. 359258 2. 251209 2. 273239 2. 251209  
11742206\_ 3. 224752 3. 203605 3. 224752 3. 043678 3. 284335 3. 176349  
11742207\_ 4. 83243 4. 741552 4. 709463 4. 793385 4. 6725 4. 914214  
11742208\_ 4. 275543 4. 26452 4. 205841 3. 938838 4. 134992 3. 896348  
11742209\_ 7. 752626 7. 685565 7. 784396 7. 381328 7. 460586 7. 51047  
11742210\_ 9. 702248 9. 659606 9. 638735 9. 337674 9. 353773 9. 266968  
11742211\_ 9. 942276 9. 886683 9. 902652 9. 582068 9. 636899 9. 571471  
11742212\_ 5. 753747 5. 752844 5. 697334 5. 712944 5. 784363 5. 848659  
11742213\_ 7. 031847 7. 189528 7. 054952 7. 03946 7. 131945 7. 112659  
11742214\_ 2. 368094 2. 376146 2. 368094 2. 450855 2. 169849 2. 285946  
11742215\_ 10. 89444 10. 8748 10. 88524 10. 58809 10. 57488 10. 56246  
11742216\_ 1. 991935 1. 996032 2. 090716 2. 011911 2. 077643 2. 031557  
11742217\_ 8. 47429 8. 528805 8. 496736 8. 583286 8. 481835 8. 461275  
11742218\_ 6. 116855 6. 178092 5. 95748 6. 10956 6. 101661 6. 158848  
11742219\_ 9. 135451 9. 068258 9. 147966 8. 67242 8. 632233 8. 614457  
11742220\_ 9. 631916 9. 575371 9. 64334 9. 23095 9. 179097 9. 193099  
11742221\_ 4. 173906 4. 279664 4. 340012 4. 089583 4. 364513 4. 362344  
11742222\_ 4. 371497 4. 669514 4. 51157 4. 657375 4. 724726 4. 653379  
11742223\_ 7. 216608 7. 20101 7. 161783 7. 208455 7. 248807 7. 185241  
11742224\_ 3. 819807 3. 922892 4. 121228 3. 833616 4. 176351 4. 047049  
11742225\_ 8. 585985 8. 654378 8. 583369 8. 329553 8. 299995 8. 357151  
11742226\_ 4. 593596 4. 646179 4. 423888 4. 710188 4. 584933 4. 702889  
11742227\_ 5. 91313 5. 918352 5. 873539 5. 293966 5. 280717 5. 292325  
11742228\_ 5. 002959 4. 984375 4. 826265 5. 070003 4. 994688 4. 931215  
11742229\_ 4. 204358 4. 363581 4. 332827 4. 116732 4. 265267 4. 31886  
11742230\_ 3. 818401 3. 753214 3. 807096 3. 891683 3. 879309 3. 976944

11742231\_ 4. 763543 4. 798893 4. 752972 5. 033862 5. 029044 4. 782366  
11742232\_ 9. 8288 9. 922825 9. 787253 9. 232404 9. 151919 9. 122025  
11742233\_ 4. 174899 4. 525356 4. 135496 4. 044432 4. 347179 4. 300484  
11742234\_ 1. 975574 1. 866429 1. 816244 1. 899085 2. 042263 1. 71169  
11742235\_ 4. 190434 4. 115859 4. 110217 4. 250197 4. 449859 4. 190434  
11742236\_ 3. 701808 3. 779448 3. 553939 3. 794264 3. 791825 3. 77662  
11742237\_ 4. 774314 4. 815683 4. 88627 4. 86075 4. 920358 4. 906658  
11742238\_ 7. 854837 7. 761808 7. 826196 8. 059768 8. 085215 8. 168229  
11742239\_ 8. 720882 8. 687346 8. 724175 9. 279361 9. 15134 9. 215213  
11742240\_ 7. 111435 7. 053803 7. 121912 6. 923161 6. 912693 6. 929607  
11742241\_ 3. 651701 3. 652675 3. 655923 3. 672853 3. 705625 3. 747674  
11742242\_ 4. 48395 4. 527875 4. 560167 4. 695094 4. 566799 4. 634229  
11742243\_ 5. 063119 5. 104543 5. 095089 4. 963968 4. 93837 5. 029529  
11742244\_ 6. 13945 6. 182772 6. 06457 6. 104748 6. 135885 6. 191294  
11742245\_ 7. 990549 8. 062608 8. 012131 8. 20427 8. 305279 8. 245081  
11742246\_ 5. 568206 5. 604649 5. 563922 5. 627202 5. 571212 5. 563922  
11742247\_ 5. 480382 5. 412384 5. 514047 5. 24834 5. 279386 5. 352324  
11742248\_ 6. 508552 6. 665937 6. 557849 6. 523663 6. 582217 6. 535909  
11742249\_ 3. 73127 3. 725187 3. 666102 3. 866359 3. 827819 3. 591119  
11742250\_ 2. 449636 2. 585779 2. 375083 2. 379123 2. 440317 2. 225495  
11742251\_ 3. 510827 3. 454651 3. 344721 3. 555246 3. 375017 3. 494914  
11742252\_ 5. 087034 5. 177116 5. 261903 5. 321833 5. 453793 5. 196201  
11742253\_ 1. 899509 1. 933491 1. 684628 1. 826207 1. 878648 1. 902293  
11742254\_ 2. 553045 2. 695162 2. 801001 2. 605516 2. 677163 2. 677163  
11742255\_ 7. 092342 7. 121462 7. 023774 6. 863012 7. 025573 6. 922482  
11742256\_ 5. 383253 5. 498368 5. 263405 5. 37698 5. 253607 5. 278062  
11742257\_ 3. 923137 3. 502425 3. 5448 3. 572196 3. 50998 3. 61443  
11742258\_ 3. 054353 2. 950579 2. 972846 3. 096812 3. 026406 3. 063644  
11742259\_ 6. 113284 6. 139434 6. 044339 6. 216579 6. 353261 6. 330491  
11742260\_ 2. 841066 2. 977704 2. 9046 2. 7691 3. 004853 3. 100599  
11742261\_ 6. 52512 6. 377847 6. 476123 6. 134686 6. 05318 6. 065969  
11742262\_ 6. 130628 6. 196215 6. 363035 6. 001819 5. 945621 5. 945621  
11742263\_ 3. 902189 3. 93767 3. 740892 3. 997131 4. 139943 3. 90099  
11742264\_ 6. 688764 6. 697609 6. 730454 6. 730337 6. 725582 6. 700371  
11742265\_ 5. 123641 5. 230801 5. 208212 5. 441791 5. 31643 5. 488346  
11742266\_ 2. 88039 3. 038145 2. 81562 2. 831248 2. 928257 2. 846619  
11742267\_ 4. 62554 4. 615403 4. 356676 4. 69867 4. 483872 4. 448539  
11742268\_ 4. 565135 4. 429019 4. 478973 4. 726624 4. 608802 4. 809026  
11742269\_ 4. 488619 4. 720315 4. 775645 4. 683815 4. 941963 4. 661764  
11742270\_ 2. 413972 2. 257028 2. 495866 2. 507903 2. 18857 2. 363631  
11742271\_ 4. 96726 5. 04691 4. 81908 5. 026322 4. 940299 4. 856588  
11742272\_ 2. 557218 2. 69956 2. 778733 2. 918856 2. 853236 2. 86437  
11742273\_ 8. 793948 8. 757299 8. 823891 8. 48302 8. 470129 8. 471348  
11742274\_ 6. 858386 6. 884836 6. 810671 6. 851311 6. 892827 6. 884061  
11742275\_ 2. 483948 2. 451586 2. 260681 2. 378167 2. 471333 2. 411001  
11742276\_ 4. 678538 4. 648968 4. 772366 4. 772366 5. 091506 4. 773243  
11742277\_ 3. 379954 3. 337742 3. 451705 3. 231072 3. 344944 3. 415572  
11742278\_ 7. 803653 7. 860323 7. 90671 7. 486339 7. 44763 7. 571083  
11742279\_ 7. 280142 7. 423914 7. 254194 7. 352266 7. 400979 7. 416623  
11742280\_ 2. 399972 2. 317762 2. 399972 2. 449212 2. 330401 2. 234359  
11742281\_ 4. 63636 4. 609593 4. 57629 4. 727229 4. 849671 4. 903742

11742282\_ 6. 50817 6. 545541 6. 586709 6. 507716 6. 714634 6. 544244  
11742283\_ 4. 275543 4. 40461 4. 298718 4. 324559 4. 469166 4. 20982  
11742284\_ 5. 497669 5. 637774 5. 568993 5. 600054 5. 546915 5. 685827  
11742285\_ 5. 969427 6. 145603 5. 94391 6. 15421 6. 157634 6. 175044  
11742286\_ 5. 050968 5. 196615 5. 064838 5. 277925 5. 1771 5. 269198  
11742287\_ 5. 746078 5. 747859 5. 870242 5. 78274 5. 789639 5. 754755  
11742288\_ 5. 906963 5. 919667 5. 803557 5. 952933 5. 948566 5. 942502  
11742289\_ 4. 206475 3. 969493 4. 08768 3. 849506 3. 914994 3. 878199  
11742290\_ 3. 026302 3. 058012 2. 902813 3. 152372 3. 155054 2. 742727  
11742291\_ 6. 650853 6. 600566 6. 717431 6. 701109 6. 663318 6. 586486  
11742292\_ 4. 937392 5. 254765 4. 999082 5. 045919 4. 982889 5. 089137  
11742293\_ 3. 241699 3. 503743 2. 902299 3. 468326 3. 303102 3. 49712  
11742294\_ 3. 053081 2. 898655 3. 046445 2. 948247 3. 105231 2. 98951  
11742295\_ 3. 249924 3. 170793 3. 296793 3. 189845 3. 349737 3. 234015  
11742296\_ 2. 340657 2. 212205 2. 508102 2. 568749 2. 401154 2. 469846  
11742297\_ 5. 539725 5. 789947 5. 559634 5. 798896 5. 707968 5. 748315  
11742298\_ 5. 706811 5. 678743 5. 732846 5. 701363 5. 71213 5. 733921  
11742299\_ 5. 583425 5. 552992 5. 61529 5. 88999 5. 916565 5. 819167  
11742300\_ 6. 975375 6. 996527 7. 055241 6. 867085 6. 847145 6. 796399  
11742301\_ 1. 880677 1. 898324 1. 992546 1. 917329 1. 898324 1. 917329  
11742302\_ 3. 883344 4. 242662 3. 913318 4. 038979 3. 996487 4. 095485  
11742303\_ 3. 106897 3. 015858 2. 865917 2. 995437 3. 276186 3. 062848  
11742304\_ 3. 120444 3. 180062 3. 030715 3. 089461 3. 218675 3. 191141  
11742305\_ 4. 535608 4. 692124 4. 633037 4. 531803 4. 673877 4. 684342  
11742306\_ 5. 073036 5. 181828 5. 154756 5. 415093 5. 287519 5. 442169  
11742307\_ 1. 991512 2. 12385 1. 979283 1. 966729 2. 176163 2. 08706  
11742308\_ 8. 704836 8. 667306 8. 738968 7. 886068 7. 884348 7. 849332  
11742309\_ 9. 295426 9. 240033 9. 255017 7. 844251 7. 884761 7. 785554  
11742310\_ 4. 212446 4. 166778 4. 191685 4. 479658 4. 223288 4. 179781  
11742311\_ 5. 820052 5. 826326 5. 709698 5. 826326 5. 870242 5. 868333  
11742312\_ 3. 135561 2. 832685 3. 148109 3. 290752 3. 394823 3. 160783  
11742313\_ 3. 395942 3. 090582 3. 139582 3. 210062 3. 274078 3. 279018  
11742314\_ 4. 923523 4. 952095 4. 644758 4. 83679 4. 986881 4. 954107  
11742315\_ 2. 619746 2. 978213 3. 144559 3. 554832 3. 559997 3. 670334  
11742316\_ 4. 131562 4. 14233 3. 939983 4. 563124 4. 351695 4. 348239  
11742317\_ 2. 808239 2. 900959 2. 73584 2. 867329 2. 765685 2. 711681  
11742318\_ 3. 398635 3. 45913 3. 410556 3. 546246 3. 603056 3. 307741  
11742319\_ 5. 266955 5. 24792 5. 022581 5. 152178 5. 187967 5. 288641  
11742320\_ 5. 17951 5. 059529 5. 068518 5. 122477 5. 15016 5. 105679  
11742321\_ 4. 08455 4. 064782 4. 074698 4. 393396 4. 190896 4. 126784  
11742322\_ 4. 80728 4. 898442 4. 70415 4. 953968 4. 808948 4. 875846  
11742323\_ 5. 630432 5. 672285 5. 996126 5. 861776 5. 743099 5. 812845  
11742324\_ 5. 809691 5. 99093 5. 922714 5. 504803 5. 472306 5. 315292  
11742325\_ 5. 862828 5. 918716 5. 755502 5. 986842 5. 979919 6. 083954  
11742326\_ 5. 812147 5. 809024 5. 736383 5. 973157 6. 093294 6. 037673  
11742327\_ 5. 690588 5. 712995 5. 583559 5. 797027 5. 836756 5. 857031  
11742328\_ 4. 025959 3. 988382 4. 177312 3. 850246 3. 913721 3. 86749  
11742329\_ 6. 206103 6. 239792 6. 158468 6. 173161 6. 159771 6. 149657  
11742330\_ 4. 68751 4. 829856 4. 713956 5. 079629 5. 073322 4. 950451  
11742331\_ 4. 139769 4. 120557 3. 943179 4. 419944 4. 075796 4. 143173  
11742332\_ 4. 711804 4. 607186 4. 607781 4. 821524 4. 715056 4. 750674

11742333\_ 5. 087821 5. 024122 5. 025679 4. 992243 5. 029529 4. 968554  
11742334\_ 4. 722349 4. 837401 4. 475655 4. 907407 4. 824115 4. 874358  
11742335\_ 4. 688676 4. 466081 4. 513302 4. 66851 4. 513791 4. 759738  
11742336\_ 3. 178553 3. 065995 3. 068456 3. 109987 3. 085585 3. 391652  
11742337\_ 5. 055291 5. 337401 4. 874633 5. 117774 5. 204102 5. 184513  
11742338\_ 2. 42225 2. 489204 2. 543832 2. 149107 2. 143462 2. 248312  
11742339\_ 4. 387859 4. 642066 4. 448881 4. 415725 4. 50345 4. 483357  
11742340\_ 5. 36906 5. 584813 5. 480966 5. 648517 5. 768053 5. 672001  
11742341\_ 3. 915944 3. 955686 3. 841728 3. 891149 3. 848738 4. 018076  
11742342\_ 4. 369387 4. 604831 4. 604831 4. 693907 4. 602539 4. 619789  
11742343\_ 3. 266846 3. 326891 3. 351744 3. 351744 3. 368617 3. 33487  
11742344\_ 4. 887704 4. 815683 4. 812132 4. 872332 5. 075495 4. 924938  
11742345\_ 5. 243485 5. 310684 5. 163274 5. 381913 5. 388785 5. 399412  
11742346\_ 3. 64748 3. 95512 3. 44903 3. 522337 3. 606313 3. 786777  
11742347\_ 4. 201423 4. 331039 4. 213576 4. 258286 4. 29451 4. 37001  
11742348\_ 4. 547366 4. 465049 4. 221781 4. 685235 4. 740806 4. 455479  
11742349\_ 4. 333773 4. 399276 4. 297289 4. 275543 4. 120728 4. 351546  
11742350\_ 5. 812094 5. 963157 5. 659103 6. 279282 6. 057107 6. 073142  
11742351\_ 4. 018912 4. 375057 4. 159784 4. 321621 4. 325895 4. 217372  
11742352\_ 3. 540167 3. 537431 3. 494145 3. 650043 3. 650043 3. 705625  
11742353\_ 5. 096197 5. 22779 4. 969404 5. 157855 5. 170886 5. 171568  
11742354\_ 4. 31603 4. 335594 4. 092841 4. 397819 4. 34727 3. 928307  
11742355\_ 4. 713261 4. 709463 4. 429546 4. 784512 4. 712876 4. 815683  
11742356\_ 4. 791341 4. 722524 4. 742473 4. 689557 4. 693299 4. 700243  
11742357\_ 5. 849045 5. 985789 5. 838054 6. 059188 5. 903646 5. 989535  
11742358\_ 3. 169364 3. 445777 2. 81268 3. 256602 3. 06814 3. 162689  
11742359\_ 3. 574989 3. 355138 3. 495505 3. 268114 3. 640378 3. 303339  
11742360\_ 5. 793249 5. 863575 5. 85977 5. 822603 5. 948818 5. 884525  
11742361\_ 4. 341173 4. 422973 4. 026092 4. 15991 4. 122446 4. 197119  
11742362\_ 3. 768644 4. 025784 4. 088568 4. 067703 4. 227601 4. 181998  
11742363\_ 4. 415744 4. 290172 4. 370337 4. 366748 4. 43717 4. 282587  
11742364\_ 4. 596711 4. 624953 4. 47459 4. 839707 4. 688796 4. 682498  
11742365\_ 4. 829769 4. 880891 4. 936786 4. 992243 5. 010042 4. 988825  
11742366\_ 4. 957923 4. 96666 4. 856997 5. 02523 4. 976811 4. 959375  
11742367\_ 6. 932154 6. 998064 6. 884325 6. 888428 6. 982857 6. 892473  
11742368\_ 5. 267421 5. 354389 5. 400148 5. 374424 5. 363072 5. 305686  
11742369\_ 3. 820006 3. 558959 3. 413303 3. 315221 3. 632669 3. 693629  
11742370\_ 4. 576725 4. 672345 4. 414136 4. 672345 4. 640157 4. 805827  
11742371\_ 5. 123178 5. 131611 5. 041816 4. 988359 5. 058442 5. 054902  
11742372\_ 5. 992167 6. 146624 5. 965919 6. 202898 6. 096189 6. 078725  
11742373\_ 3. 61283 3. 606313 3. 794306 3. 596781 3. 707788 3. 701026  
11742374\_ 4. 935354 4. 922624 4. 887559 4. 921642 4. 87632 4. 942499  
11742375\_ 3. 2472 3. 465597 3. 199389 3. 341025 3. 514579 3. 403338  
11742376\_ 2. 68584 2. 877827 2. 74423 2. 737362 2. 798956 2. 834566  
11742377\_ 4. 348345 4. 232784 4. 194047 4. 338835 4. 290419 4. 209941  
11742378\_ 4. 761511 4. 785966 4. 88241 4. 700574 4. 785512 4. 906752  
11742379\_ 5. 142844 5. 16529 5. 30697 5. 116547 5. 208548 5. 288526  
11742380\_ 4. 815683 4. 965463 4. 772364 5. 029529 5. 035439 5. 010115  
11742381\_ 8. 744156 8. 926754 8. 662148 8. 876605 8. 861232 9. 011328  
11742382\_ 2. 605516 2. 469294 2. 473446 2. 610986 2. 47102 2. 480069  
11742383\_ 3. 049887 3. 145966 2. 989411 3. 158511 3. 102458 3. 085708

11742384\_ 3. 718709 3. 750517 3. 60297 3. 812259 3. 76003 3. 743633  
11742385\_ 5. 249149 5. 331946 5. 184948 5. 230039 5. 26534 5. 273097  
11742386\_ 2. 829859 2. 773804 2. 721212 2. 46814 2. 364383 2. 310842  
11742387\_ 4. 459892 4. 243702 4. 247547 4. 292254 4. 274349 4. 315589  
11742388\_ 3. 788123 3. 743179 3. 647835 3. 797267 4. 001309 3. 795236  
11742389\_ 5. 422119 5. 554436 5. 466121 5. 523577 5. 576037 5. 585681  
11742390\_ 3. 916079 3. 977286 3. 977192 3. 925181 3. 969526 3. 882311  
11742391\_ 4. 153133 3. 993306 3. 879839 4. 234182 4. 160452 4. 309478  
11742392\_ 5. 263274 5. 298739 5. 244414 5. 298979 5. 496244 5. 244414  
11742393\_ 2. 336528 2. 496236 2. 338443 2. 441584 2. 248816 2. 384435  
11742394\_ 2. 309833 2. 48206 2. 355854 2. 469029 2. 25483 2. 368111  
11742395\_ 4. 583666 4. 751736 4. 47544 4. 830141 4. 694297 4. 757094  
11742396\_ 4. 812721 4. 844447 4. 921894 4. 88514 4. 907367 5. 039185  
11742397\_ 2. 712726 2. 72359 2. 718324 2. 726659 2. 605682 2. 681103  
11742398\_ 4. 4696 4. 019829 4. 331235 4. 423567 4. 356165 4. 473764  
11742399\_ 8. 385542 8. 319647 8. 418719 9. 064114 9. 112531 9. 118533  
11742400\_ 5. 140726 5. 049722 5. 082689 5. 021235 5. 037441 5. 181291  
11742401\_ 6. 847014 6. 834625 6. 78065 6. 431763 6. 567967 6. 54731  
11742402\_ 3. 96754 4. 081198 3. 973836 4. 071938 4. 029012 4. 121134  
11742403\_ 4. 200678 4. 173923 4. 287593 4. 377817 4. 330236 4. 181611  
11742404\_ 3. 032369 2. 823837 3. 239828 3. 092015 3. 094603 3. 023201  
11742405\_ 3. 502782 3. 300362 3. 222648 3. 205627 3. 405033 3. 317651  
11742406\_ 5. 482602 5. 155603 5. 188495 5. 417352 5. 649042 5. 380915  
11742407\_ 5. 149914 5. 083595 5. 041974 5. 131948 5. 029529 5. 083162  
11742408\_ 4. 200678 4. 179523 4. 105335 3. 990348 4. 289801 3. 91443  
11742409\_ 5. 729542 5. 788903 5. 658606 6. 015367 5. 915568 5. 759799  
11742410\_ 3. 447474 3. 509545 3. 392377 3. 554969 3. 14415 3. 064847  
11742411\_ 2. 988093 2. 795386 2. 843551 2. 739158 2. 687236 2. 677926  
11742412\_ 5. 91515 6. 118986 5. 952956 6. 021201 6. 013766 5. 971372  
11742413\_ 7. 012825 7. 009323 7. 027637 7. 03951 7. 102858 7. 090029  
11742414\_ 4. 79508 4. 589942 4. 689901 4. 712966 4. 698108 4. 802641  
11742415\_ 6. 239367 6. 431701 6. 351403 6. 660519 6. 690996 6. 676871  
11742416\_ 8. 352686 8. 306902 8. 369767 8. 2889 8. 266978 8. 267606  
11742417\_ 1. 898324 1. 996806 2. 034852 1. 995297 1. 955479 1. 804393  
11742418\_ 8. 241562 8. 22624 8. 246941 8. 213201 8. 253307 8. 244418  
11742419\_ 3. 505421 3. 734334 3. 562127 3. 374255 3. 410433 3. 460405  
11742420\_ 1. 998057 1. 913206 2. 104111 1. 625317 1. 73448 1. 913206  
11742421\_ 4. 242088 3. 739042 3. 994589 3. 852892 3. 782322 3. 838292  
11742422\_ 7. 087357 7. 020462 7. 159618 7. 258651 7. 260481 7. 277431  
11742423\_ 2. 941472 2. 873885 2. 740738 3. 503743 3. 306585 3. 398236  
11742424\_ 8. 281101 8. 314305 8. 283172 8. 031887 7. 969619 7. 926082  
11742425\_ 6. 859599 6. 993466 7. 027571 7. 494309 7. 412168 7. 454953  
11742426\_ 3. 00726 3. 12 3. 052814 3. 025972 3. 100729 3. 143017  
11742427\_ 5. 763634 5. 748544 5. 536012 5. 787685 5. 686361 5. 760557  
11742428\_ 7. 421832 7. 476311 7. 49425 7. 551526 7. 508789 7. 5707  
11742429\_ 2. 298324 2. 405329 2. 463249 2. 050706 2. 129482 2. 318744  
11742430\_ 5. 215421 5. 111647 5. 407424 4. 953968 5. 088713 5. 172786  
11742431\_ 4. 634937 4. 567816 4. 709463 4. 35944 4. 294086 4. 214941  
11742432\_ 4. 636334 4. 708078 4. 781548 3. 850246 3. 889322 3. 879309  
11742433\_ 3. 59354 3. 401446 3. 503743 3. 408179 3. 586038 3. 762589  
11742434\_ 4. 352076 4. 726652 4. 523623 4. 714266 4. 726974 4. 582339

11742435\_ 9. 718253 9. 6524 9. 689366 9. 917771 9. 929744 9. 910857  
11742436\_ 6. 12939 5. 937487 6. 109666 5. 997933 5. 957661 5. 97034  
11742437\_ 7. 007791 6. 952381 6. 996939 7. 023243 7. 04434 6. 988628  
11742438\_ 2. 964838 3. 172297 3. 061355 3. 295192 3. 206914 3. 295238  
11742439\_ 4. 944188 4. 968686 5. 104054 5. 001801 5. 168773 5. 472003  
11742440\_ 2. 862744 3. 129325 2. 894014 3. 025972 2. 912076 2. 840555  
11742441\_ 3. 818401 3. 997131 3. 8836 3. 821627 4. 032153 4. 009104  
11742442\_ 4. 331906 4. 414282 4. 414953 4. 301831 4. 354603 4. 408569  
11742443\_ 2. 622561 2. 672148 2. 53592 2. 711273 2. 701106 2. 526462  
11742444\_ 7. 995357 7. 89456 8. 008152 7. 714288 7. 678409 7. 75063  
11742445\_ 4. 074929 4. 198774 4. 000354 4. 148797 3. 952828 4. 198774  
11742446\_ 4. 336769 4. 453177 4. 370025 4. 505798 4. 307433 4. 494576  
11742447\_ 2. 665697 2. 791077 2. 665697 2. 660318 2. 826064 2. 881956  
11742448\_ 2. 171891 1. 995297 2. 227925 1. 830178 1. 848125 1. 713514  
11742449\_ 6. 826642 6. 873522 6. 841017 6. 842574 6. 892825 6. 889333  
11742450\_ 6. 578465 6. 655545 6. 670428 6. 397628 6. 541665 6. 573543  
11742451\_ 5. 193345 5. 345598 4. 900185 5. 354043 5. 363103 5. 378474  
11742452\_ 3. 804285 3. 785949 4. 017813 3. 634439 3. 927537 3. 610629  
11742453\_ 5. 830637 5. 756269 5. 795516 5. 835519 5. 757467 5. 907395  
11742454\_ 8. 498223 8. 434464 8. 544301 8. 084802 8. 143783 8. 131929  
11742455\_ 3. 664668 3. 705195 3. 526526 3. 479372 3. 399824 3. 614626  
11742456\_ 10. 33615 10. 33124 10. 36547 10. 51795 10. 53254 10. 50012  
11742457\_ 10. 8888 10. 84235 10. 89633 11. 03138 11. 02395 11. 08241  
11742458\_ 6. 080162 6. 119951 5. 948482 6. 248064 6. 06155 6. 186709  
11742459\_ 3. 75709 3. 733857 3. 551731 3. 766877 3. 922262 3. 655401  
11742460\_ 4. 835712 4. 810601 4. 584933 4. 875421 4. 800617 4. 866013  
11742461\_ 3. 122119 3. 387664 3. 375578 3. 33343 3. 274904 3. 343469  
11742462\_ 5. 610967 5. 626891 5. 59517 5. 656712 5. 60014 5. 609126  
11742463\_ 4. 139459 4. 123417 3. 978124 4. 024564 4. 112076 3. 950741  
11742464\_ 4. 243804 4. 393267 4. 213226 4. 393685 4. 275543 4. 089187  
11742465\_ 9. 156358 9. 153947 9. 09517 9. 354271 9. 26743 9. 286707  
11742466\_ 4. 762142 4. 659322 4. 472382 4. 820756 4. 643717 4. 52373  
11742467\_ 5. 495528 5. 415617 5. 34946 5. 583241 5. 441576 5. 47231  
11742468\_ 4. 380474 4. 350136 4. 400412 4. 678875 4. 515982 4. 472559  
11742469\_ 3. 128178 3. 131553 3. 19164 3. 032163 3. 123042 2. 887524  
11742470\_ 4. 122327 4. 194694 4. 052432 3. 995639 4. 066188 4. 111106  
11742471\_ 5. 378205 5. 623542 5. 26034 5. 619085 5. 446429 5. 560433  
11742472\_ 3. 026297 3. 095983 3. 044612 2. 905078 3. 095983 2. 99901  
11742473\_ 3. 473051 3. 327525 3. 417828 3. 215001 3. 501532 3. 48321  
11742474\_ 3. 48237 3. 48237 3. 275369 3. 563561 3. 413603 3. 606313  
11742475\_ 4. 523369 4. 363163 4. 500328 4. 423427 4. 431204 4. 619293  
11742476\_ 4. 700243 4. 784548 4. 545098 4. 930909 4. 849431 4. 982768  
11742477\_ 5. 227817 5. 121138 5. 473504 5. 200807 5. 215726 5. 439507  
11742478\_ 3. 406665 3. 606313 3. 625408 3. 310738 3. 21523 3. 198087  
11742479\_ 3. 118229 3. 118039 3. 170215 3. 273919 3. 134343 3. 117671  
11742480\_ 6. 431763 6. 412133 6. 335913 6. 651719 6. 657176 6. 64027  
11742481\_ 3. 59749 3. 765559 3. 760413 3. 812784 3. 467535 3. 92263  
11742482\_ 9. 651842 9. 635939 9. 714014 9. 679544 9. 729751 9. 78165  
11742483\_ 2. 905245 2. 980679 2. 882274 3. 025972 2. 912551 2. 848469  
11742484\_ 6. 300624 6. 302109 6. 120589 6. 435748 6. 321643 6. 415546  
11742485\_ 3. 925181 4. 01271 3. 868983 3. 918778 3. 982452 3. 972125



11742486\_ 2. 361778 2. 489935 2. 256324 2. 444809 2. 511782 2. 373921  
11742487\_ 6. 442658 6. 331332 6. 420971 6. 396277 6. 448378 6. 571221  
11742488\_ 4. 876235 4. 956106 4. 968116 4. 870848 4. 888556 4. 982876  
11742489\_ 5. 325887 5. 439545 5. 147887 5. 421621 5. 372238 5. 34917  
11742490\_ 5. 952577 5. 938283 5. 70218 6. 0296 5. 860859 5. 994101  
11742491\_ 4. 703782 4. 692647 4. 539131 4. 609638 4. 77509 4. 62957  
11742492\_ 4. 584933 4. 489452 4. 612888 4. 500128 4. 564805 4. 52373  
11742493\_ 5. 120917 5. 269562 5. 059214 5. 289487 5. 239505 5. 254408  
11742494\_ 3. 017302 2. 945929 3. 129953 3. 192322 3. 218036 3. 011164  
11742495\_ 2. 795938 2. 893998 2. 793844 2. 935951 3. 012325 2. 81796  
11742496\_ 5. 96165 5. 918745 5. 874664 5. 924476 5. 918745 5. 807881  
11742497\_ 7. 752626 7. 814818 7. 8009 7. 861437 7. 862958 7. 885348  
11742498\_ 3. 909064 3. 787144 4. 092735 3. 799965 3. 71842 3. 987362  
11742499\_ 4. 543613 4. 741563 4. 555592 4. 835527 4. 798642 4. 651131  
11742500\_ 4. 751817 4. 776906 4. 661768 4. 853871 4. 971895 4. 9092  
11742501\_ 4. 977054 5. 05215 4. 931389 4. 488957 4. 557814 4. 521839  
11742502\_ 5. 451492 5. 708317 5. 480966 5. 614563 5. 629037 5. 654173  
11742503\_ 2. 833163 3. 059565 2. 965688 3. 026845 2. 954881 2. 922926  
11742504\_ 8. 954152 8. 979173 9. 05175 8. 875414 8. 856012 8. 781996  
11742505\_ 5. 636796 5. 793771 5. 554436 5. 804555 5. 749715 5. 639614  
11742506\_ 7. 22124 7. 271343 7. 300688 7. 410238 7. 272046 7. 328886  
11742507\_ 5. 768777 5. 847085 5. 801294 5. 847854 5. 906139 6. 014556  
11742508\_ 5. 244718 5. 073036 5. 179537 5. 189628 5. 286355 5. 161058  
11742509\_ 4. 48242 4. 528355 4. 505356 4. 492909 4. 628053 4. 673253  
11742510\_ 5. 091626 5. 126121 4. 993961 5. 11699 5. 068842 5. 127214  
11742511\_ 4. 464365 4. 710496 4. 209416 4. 38197 4. 40461 4. 406263  
11742512\_ 5. 127058 5. 032978 5. 185843 4. 942105 5. 065807 4. 984669  
11742513\_ 4. 739187 4. 614997 4. 691194 4. 771476 4. 657034 4. 72185  
11742514\_ 3. 916654 4. 017355 3. 885386 3. 953171 3. 964601 3. 988249  
11742515\_ 4. 478609 4. 596361 4. 515616 4. 541258 4. 484586 4. 431868  
11742516\_ 6. 033492 6. 164998 6. 031496 6. 263294 6. 164998 6. 139131  
11742517\_ 2. 024233 1. 873298 2. 050299 1. 966584 2. 139543 1. 989646  
11742518\_ 4. 672771 4. 755501 4. 584933 4. 90899 4. 88561 4. 777624  
11742519\_ 3. 991587 4. 032435 3. 865941 4. 251988 4. 0339 4. 039047  
11742520\_ 3. 6724 3. 878046 3. 564917 3. 764388 3. 764388 3. 786058  
11742521\_ 4. 663784 4. 735759 4. 433643 4. 722522 4. 682118 4. 679684  
11742522\_ 2. 081486 2. 009067 2. 017872 1. 985033 2. 022334 2. 084346  
11742523\_ 4. 905135 4. 815683 4. 625192 4. 8674 5. 097078 4. 795627  
11742524\_ 4. 146303 4. 056301 4. 031119 4. 069072 4. 117189 4. 037706  
11742525\_ 5. 771548 5. 674979 5. 673043 5. 85371 5. 865657 5. 71058  
11742526\_ 4. 522557 4. 715868 4. 356475 4. 505485 4. 504256 4. 589354  
11742527\_ 4. 618975 4. 233169 4. 296626 4. 385182 4. 347179 4. 212909  
11742528\_ 3. 823096 3. 91513 3. 828202 3. 925181 4. 064339 3. 923546  
11742529\_ 4. 523797 4. 47488 4. 567267 4. 339712 4. 556479 4. 528047  
11742530\_ 5. 42013 5. 59778 5. 404815 5. 445111 5. 459925 5. 65016  
11742531\_ 3. 602579 3. 429012 3. 583414 3. 511571 3. 536807 3. 37189  
11742532\_ 4. 672514 4. 643717 4. 901687 4. 824195 4. 742569 4. 778269  
11742533\_ 4. 847209 5. 139208 4. 954117 5. 064132 5. 077879 5. 077879  
11742534\_ 6. 410624 6. 683809 6. 434909 6. 665258 6. 739481 6. 68445  
11742535\_ 6. 567441 6. 659778 6. 489063 6. 614623 6. 691768 6. 639529  
11742536\_ 6. 073142 6. 095988 6. 03299 6. 070297 6. 282782 6. 05185

11742537\_ 7. 436036 7. 408893 7. 532347 7. 37729 7. 532347 7. 4105  
11742538\_ 3. 122829 3. 353447 3. 224098 3. 421239 3. 167103 3. 37601  
11742539\_ 3. 621157 3. 526799 3. 305318 3. 661421 3. 774279 3. 614081  
11742540\_ 5. 85539 6. 174494 5. 934681 6. 158946 6. 006279 6. 10538  
11742541\_ 3. 64832 3. 634988 3. 798975 3. 457903 3. 896233 3. 645029  
11742542\_ 4. 022645 3. 835845 3. 915394 4. 02136 4. 054252 3. 929969  
11742543\_ 4. 815388 4. 77513 4. 598237 4. 975432 4. 940363 4. 898689  
11742544\_ 3. 717463 3. 539316 3. 580695 4. 046717 3. 959213 3. 794405  
11742545\_ 3. 332554 3. 67116 3. 54362 3. 801161 3. 728428 3. 638053  
11742546\_ 3. 238774 3. 59685 3. 235716 3. 517801 3. 445495 3. 362717  
11742547\_ 3. 925181 3. 707482 3. 620306 3. 871167 3. 697029 3. 823608  
11742548\_ 3. 945469 4. 017656 3. 68066 3. 897506 4. 030192 3. 90485  
11742549\_ 4. 788451 4. 768547 4. 773444 4. 808355 4. 824522 4. 788451  
11742550\_ 2. 067017 2. 083308 2. 086527 2. 13356 2. 065408 1. 987266  
11742551\_ 3. 468915 3. 339188 3. 493305 3. 3024 3. 341986 3. 364643  
11742552\_ 4. 178196 4. 178244 4. 160982 3. 970077 4. 036755 3. 888058  
11742553\_ 3. 034664 3. 056884 3. 01779 3. 227425 3. 278839 3. 123755  
11742554\_ 3. 328206 3. 447985 3. 566158 3. 369883 3. 554911 3. 598404  
11742555\_ 2. 38779 2. 427734 2. 146923 2. 296313 2. 296911 2. 437786  
11742556\_ 3. 005525 2. 970334 2. 963907 2. 973476 2. 914646 2. 893041  
11742557\_ 8. 204795 8. 270193 8. 181784 7. 874593 7. 734676 7. 744923  
11742558\_ 4. 746729 4. 857476 4. 688795 4. 88378 4. 953656 4. 730682  
11742559\_ 4. 064013 4. 136511 3. 971587 4. 2843 4. 415928 4. 231998  
11742560\_ 4. 643717 4. 734054 4. 609817 4. 782485 4. 700243 4. 754033  
11742561\_ 4. 162571 4. 530371 4. 396807 4. 369901 4. 426983 4. 47613  
11742562\_ 3. 601831 3. 54524 3. 391673 3. 764908 3. 679843 3. 568346  
11742563\_ 4. 941008 4. 855513 4. 900425 5. 076275 5. 028308 5. 053845  
11742564\_ 4. 788636 4. 947648 4. 669364 4. 563606 4. 749154 4. 711631  
11742565\_ 4. 577408 5. 071937 4. 894195 4. 943048 4. 904908 4. 94619  
11742566\_ 5. 092637 5. 14521 5. 159036 5. 285585 5. 402508 5. 204922  
11742567\_ 4. 894921 4. 904995 4. 884629 4. 938768 4. 74574 4. 949796  
11742568\_ 2. 486972 2. 486972 2. 486972 2. 470966 2. 459804 2. 502979  
11742569\_ 3. 982827 4. 283146 4. 16313 4. 236754 4. 26649 4. 248871  
11742570\_ 2. 281148 2. 361053 2. 47102 2. 416383 2. 47102 2. 621561  
11742571\_ 4. 064221 4. 446232 4. 446232 4. 164338 4. 347752 4. 267711  
11742572\_ 4. 347179 4. 499589 4. 536899 4. 59271 4. 636135 4. 660837  
11742573\_ 3. 692552 3. 782418 3. 827047 3. 939853 3. 734792 3. 664795  
11742574\_ 2. 700567 2. 757702 2. 653178 2. 745946 2. 73265 2. 718322  
11742575\_ 5. 224987 5. 608196 5. 128368 5. 318518 5. 563059 5. 616232  
11742576\_ 4. 401349 4. 09657 4. 051711 3. 943156 4. 028556 4. 182312  
11742577\_ 2. 361017 2. 381625 2. 324848 2. 466763 2. 549033 2. 645072  
11742578\_ 3. 512825 3. 399281 3. 248104 3. 303257 3. 35361 3. 369305  
11742579\_ 5. 302675 5. 331697 4. 935837 5. 23858 5. 4375 5. 405014  
11742580\_ 1. 857905 2. 099645 2. 237533 1. 982236 2. 011797 2. 173141  
11742581\_ 4. 013825 4. 02064 4. 35902 4. 039241 3. 955417 4. 227892  
11742582\_ 3. 967383 3. 968396 4. 000524 4. 06538 3. 871424 4. 068547  
11742583\_ 5. 260867 5. 188615 5. 006554 5. 358729 5. 29471 5. 170276  
11742584\_ 3. 147736 3. 405072 3. 511756 3. 21279 3. 391474 3. 339378  
11742585\_ 5. 272514 5. 226506 5. 167008 5. 375011 5. 400777 5. 170539  
11742586\_ 4. 260432 4. 116157 4. 131694 4. 213226 4. 200678 4. 165091  
11742587\_ 3. 978946 3. 723624 3. 850246 3. 766834 4. 141244 3. 766834

11742588\_ 4. 955855 5. 147861 5. 152463 5. 042631 5. 160396 5. 197697  
11742589\_ 4. 809166 4. 763543 4. 596971 4. 88345 4. 88345 4. 810999  
11742590\_ 4. 657283 4. 557514 4. 510164 4. 432628 4. 626067 4. 434627  
11742591\_ 2. 988093 3. 437563 2. 880322 3. 169193 3. 306585 2. 888284  
11742592\_ 4. 221455 4. 422648 4. 253106 4. 391342 4. 459939 4. 395069  
11742593\_ 4. 315731 4. 390084 4. 387403 4. 407689 4. 544432 4. 390084  
11742594\_ 3. 700237 3. 945038 3. 511821 3. 892748 4. 08177 3. 634018  
11742595\_ 4. 434799 4. 51257 4. 132032 4. 565879 4. 515433 4. 695217  
11742596\_ 4. 853121 4. 933672 4. 863307 5. 016792 4. 97919 5. 076573  
11742597\_ 3. 487555 3. 528921 3. 524394 3. 672272 3. 708987 3. 426823  
11742598\_ 3. 15573 3. 180062 2. 983495 3. 160425 3. 187768 3. 16811  
11742599\_ 3. 803012 3. 950579 3. 559123 3. 944047 3. 860443 3. 847075  
11742600\_ 4. 073291 4. 40461 4. 294816 4. 267091 4. 276838 4. 054288  
11742601\_ 4. 347179 4. 327403 4. 327403 4. 477761 4. 517875 4. 692273  
11742602\_ 3. 153357 3. 011271 2. 77596 3. 089301 3. 030801 3. 243962  
11742603\_ 4. 821822 4. 998883 4. 750042 5. 098202 5. 000845 5. 060409  
11742604\_ 3. 122119 3. 286383 3. 162511 3. 436748 3. 179799 3. 363214  
11742605\_ 4. 020788 4. 279166 3. 815714 4. 031211 4. 031211 4. 102745  
11742606\_ 6. 028803 6. 038561 5. 996126 6. 202794 6. 054757 6. 111731  
11742607\_ 3. 843468 3. 938003 3. 832496 4. 188159 3. 994254 4. 110105  
11742608\_ 3. 174321 3. 606313 3. 312308 3. 47708 3. 348586 3. 42341  
11742609\_ 4. 290896 4. 090187 4. 150339 4. 258037 4. 275247 4. 122446  
11742610\_ 3. 820091 3. 889698 3. 857693 4. 002504 3. 990403 3. 937715  
11742611\_ 3. 622613 3. 835391 3. 728219 3. 664428 3. 72487 3. 891875  
11742612\_ 7. 973406 8. 158912 7. 922687 8. 301723 8. 247538 8. 340985  
11742613\_ 5. 189652 5. 053979 4. 923896 5. 165156 5. 09005 5. 062348  
11742614\_ 4. 569068 4. 910624 4. 370337 4. 727731 4. 840978 4. 727731  
11742615\_ 4. 423338 4. 426905 4. 466009 4. 337866 4. 625262 4. 470714  
11742616\_ 4. 404416 4. 415744 4. 524763 4. 421408 4. 421408 4. 421408  
11742617\_ 2. 297602 2. 437328 2. 090031 2. 048331 2. 297602 2. 20424  
11742618\_ 3. 907797 4. 388314 4. 003826 4. 448182 4. 264341 4. 490784  
11742619\_ 4. 366251 4. 237503 4. 04651 4. 344216 4. 21021 4. 207806  
11742620\_ 3. 382294 3. 503743 3. 273836 3. 424613 3. 424613 3. 470513  
11742621\_ 3. 94064 3. 975999 3. 935698 3. 950531 4. 047503 3. 942195  
11742622\_ 4. 967367 5. 105626 4. 735329 5. 190886 5. 135552 5. 085524  
11742623\_ 3. 544184 3. 521181 3. 386236 3. 359361 3. 48975 3. 48975  
11742624\_ 3. 518898 3. 523012 3. 735965 3. 735965 3. 714782 3. 638992  
11742625\_ 5. 311268 5. 415136 5. 258988 5. 407772 5. 305207 5. 408681  
11742626\_ 4. 689219 4. 662106 4. 375709 4. 498533 4. 506722 4. 450011  
11742627\_ 4. 818128 4. 93276 4. 725133 5. 151767 4. 99926 4. 910589  
11742628\_ 5. 442778 5. 518169 5. 357833 5. 501026 5. 505308 5. 581351  
11742629\_ 4. 584933 4. 479481 4. 321676 4. 469983 4. 599976 4. 529925  
11742630\_ 4. 566978 4. 662856 4. 772366 4. 662856 4. 643717 4. 956847  
11742631\_ 4. 176179 4. 404814 4. 004238 4. 260766 4. 205886 4. 255108  
11742632\_ 5. 333723 5. 467586 5. 384104 5. 390783 5. 636921 5. 442778  
11742633\_ 4. 641555 4. 837777 4. 595299 4. 874234 4. 752065 4. 872204  
11742634\_ 5. 364917 5. 392632 5. 21895 5. 47486 5. 415419 5. 267704  
11742635\_ 1. 995297 2. 126229 2. 235709 2. 194127 2. 33019 2. 384435  
11742636\_ 4. 109415 4. 217525 4. 163226 4. 198126 4. 247813 4. 193235  
11742637\_ 5. 894697 5. 789947 5. 727476 5. 820052 5. 845365 5. 859011  
11742638\_ 5. 74278 5. 746874 5. 614629 6. 01802 5. 761231 5. 813784

11742639\_ 4. 643717 4. 518997 4. 476303 5. 341099 5. 329582 5. 412849  
11742640\_ 4. 651067 4. 694457 4. 796137 5. 770505 5. 650172 5. 656061  
11742641\_ 6. 034487 6. 113865 5. 896383 6. 097927 6. 047004 5. 996019  
11742642\_ 2. 632085 2. 787572 2. 663463 2. 663463 2. 60913 2. 701781  
11742643\_ 5. 967914 6. 109181 5. 954797 6. 201206 6. 319379 6. 149111  
11742644\_ 4. 248487 4. 25367 4. 115472 4. 404209 4. 332004 4. 507213  
11742645\_ 5. 073036 5. 124809 4. 995827 5. 19204 5. 124809 4. 930789  
11742646\_ 5. 291196 5. 369004 5. 138386 5. 321749 5. 432155 5. 475572  
11742647\_ 7. 793291 7. 733291 7. 749817 7. 801518 7. 716115 7. 68056  
11742648\_ 8. 310182 8. 285228 8. 255304 8. 202242 8. 208617 8. 170291  
11742649\_ 5. 480966 5. 611425 5. 315396 5. 697028 5. 584813 5. 716869  
11742650\_ 2. 718322 2. 938021 2. 956335 2. 892585 2. 866433 2. 938021  
11742651\_ 8. 939446 8. 876143 8. 955136 9. 054213 9. 101719 9. 038423  
11742652\_ 2. 08807 2. 076895 2. 293085 1. 868344 2. 183843 2. 103632  
11742653\_ 4. 513241 4. 116899 4. 370337 4. 396509 4. 433129 4. 366231  
11742654\_ 5. 43089 5. 444237 5. 312132 5. 477252 5. 414019 5. 387976  
11742655\_ 5. 333723 5. 482632 5. 462632 5. 729155 5. 612271 5. 751812  
11742656\_ 4. 475606 4. 688374 4. 483913 4. 700108 4. 781171 4. 705344  
11742657\_ 9. 705166 9. 646625 9. 788279 8. 9539 8. 776315 8. 915199  
11742658\_ 4. 980203 5. 256271 4. 934929 4. 886831 5. 093009 5. 085412  
11742659\_ 5. 708058 5. 587782 5. 560381 5. 665893 5. 667817 5. 638144  
11742660\_ 5. 55846 5. 585562 5. 616908 5. 669812 5. 697939 5. 624436  
11742661\_ 3. 977627 4. 027147 3. 974601 4. 099145 4. 188958 3. 984972  
11742662\_ 2. 310312 2. 336412 2. 2585 2. 283332 2. 339351 2. 277086  
11742663\_ 5. 69368 5. 732429 5. 67736 5. 905807 5. 881202 5. 824132  
11742664\_ 3. 49183 3. 544936 3. 49387 3. 720133 3. 607401 3. 599179  
11742665\_ 5. 512912 5. 552983 5. 480505 5. 492386 5. 637837 5. 539042  
11742666\_ 12. 97237 12. 96274 12. 93559 12. 90886 12. 90164 12. 90641  
11742667\_ 12. 53411 12. 52871 12. 54413 12. 38825 12. 4022 12. 40884  
11742668\_ 2. 652241 2. 630927 2. 673555 2. 5883 2. 579512 2. 562768  
11742669\_ 8. 766126 8. 714096 8. 754491 7. 868277 7. 928352 7. 883982  
11742670\_ 3. 503743 3. 398236 3. 398236 3. 242649 3. 390551 3. 400637  
11742671\_ 2. 853148 2. 917198 2. 66038 2. 981508 2. 951814 2. 967642  
11742672\_ 2. 84323 2. 527737 2. 629468 2. 645155 2. 695929 2. 572705  
11742673\_ 3. 033282 3. 062061 2. 999218 3. 067484 3. 138677 3. 159242  
11742674\_ 8. 486558 8. 627343 8. 522923 8. 565131 8. 625262 8. 597862  
11742675\_ 8. 477158 8. 600514 8. 508672 8. 55594 8. 574929 8. 606477  
11742676\_ 8. 494155 8. 504109 8. 468912 8. 362881 8. 378115 8. 35473  
11742677\_ 8. 908878 8. 910739 8. 908536 9. 172664 9. 156974 9. 166987  
11742678\_ 10. 75083 10. 70444 10. 76842 10. 89645 10. 88784 10. 91749  
11742679\_ 11. 79732 11. 89734 11. 80486 12. 12737 12. 06749 12. 01738  
11742680\_ 8. 039051 7. 982826 8. 028199 8. 031772 7. 979314 8. 026997  
11742681\_ 9. 437215 9. 353137 9. 496677 9. 746045 9. 800622 9. 748595  
11742682\_ 9. 440279 9. 393527 9. 47876 9. 561597 9. 516076 9. 550005  
11742683\_ 8. 342843 8. 323091 8. 388943 7. 941955 7. 988878 8. 023192  
11742684\_ 4. 276835 4. 106045 4. 276809 4. 583943 4. 693656 4. 607194  
11742685\_ 7. 407516 7. 402558 7. 407628 6. 855983 6. 938883 6. 980412  
11742686\_ 5. 992375 6. 273982 6. 043167 6. 236853 6. 365453 6. 255346  
11742687\_ 5. 582482 5. 724169 5. 618029 5. 939122 5. 808626 5. 806851  
11742688\_ 9. 192281 9. 162784 9. 317645 8. 300711 8. 322509 8. 441248  
11742689\_ 8. 972216 8. 923807 8. 996118 8. 631022 8. 634242 8. 518379

11742690\_ 10. 05473 10. 13338 10. 12763 10. 46336 10. 44509 10. 36594  
11742691\_ 10. 2897 10. 32366 10. 32136 10. 59902 10. 61552 10. 60477  
11742692\_ 9. 441896 9. 382141 9. 452116 9. 484206 9. 5773 9. 537513  
11742693\_ 7. 245573 7. 223511 7. 313749 7. 295023 7. 298476 7. 252035  
11742694\_ 10. 11893 10. 08136 10. 11474 10. 10193 10. 1296 10. 06563  
11742695\_ 7. 632243 7. 619572 7. 589926 7. 549515 7. 583332 7. 458024  
11742696\_ 9. 215249 9. 216847 9. 211928 9. 05947 9. 07114 9. 019057  
11742697\_ 4. 085459 3. 971433 3. 9529 3. 867891 3. 991528 3. 99754  
11742698\_ 8. 0616 7. 906443 7. 964038 5. 515888 5. 609873 5. 497557  
11742699\_ 6. 021459 6. 2191 6. 284683 6. 357281 6. 431281 6. 389366  
11742700\_ 4. 898046 4. 92156 4. 930507 5. 175943 5. 241553 5. 409222  
11742701\_ 4. 275543 4. 44798 4. 379203 4. 569573 4. 798511 4. 685098  
11742702\_ 8. 866664 8. 821787 8. 915224 8. 597563 8. 690224 8. 696713  
11742703\_ 10. 26825 10. 22331 10. 21778 10. 04639 10. 07556 10. 03071  
11742704\_ 6. 993254 7. 030728 7. 037803 6. 899686 6. 946361 6. 905659  
11742705\_ 9. 417775 9. 370276 9. 365839 9. 080317 9. 080043 9. 000784  
11742706\_ 10. 00538 9. 949974 10. 0173 9. 990253 10. 0331 10. 05705  
11742707\_ 5. 073036 5. 158806 5. 176208 5. 123573 5. 076611 5. 200633  
11742708\_ 4. 606297 4. 570465 4. 662879 4. 818036 4. 503123 4. 656112  
11742709\_ 5. 295807 5. 374765 5. 159584 5. 514806 5. 500306 5. 425532  
11742710\_ 6. 127448 6. 178902 6. 260434 5. 977741 5. 980978 6. 016104  
11742711\_ 2. 358528 2. 447623 2. 46533 2. 605516 2. 87251 2. 605516  
11742712\_ 3. 02106 2. 964138 3. 490253 3. 265655 3. 241545 3. 264202  
11742713\_ 8. 812862 8. 823882 8. 877555 9. 123608 9. 108315 9. 172673  
11742714\_ 4. 753924 4. 660878 4. 795311 5. 626846 5. 638817 5. 77685  
11742715\_ 6. 170837 6. 115927 6. 181621 6. 284686 6. 302496 6. 201354  
11742716\_ 8. 048864 7. 998237 8. 064267 7. 892927 7. 984773 7. 94351  
11742717\_ 8. 677249 8. 624616 8. 734781 8. 562005 8. 558598 8. 566726  
11742718\_ 9. 409369 9. 379972 9. 380564 9. 031374 8. 91779 8. 973922  
11742719\_ 9. 571276 9. 603608 9. 608101 9. 310471 9. 263843 9. 167138  
11742720\_ 8. 875854 8. 799516 8. 881454 8. 827594 8. 797643 8. 761625  
11742721\_ 8. 728736 8. 665522 8. 827999 8. 650815 8. 686483 8. 596171  
11742722\_ 9. 158991 9. 120481 9. 048434 9. 189981 9. 137654 9. 12687  
11742723\_ 7. 842319 7. 792538 7. 84058 8. 215104 8. 149989 8. 145928  
11742724\_ 6. 937707 6. 816409 6. 947631 7. 146981 7. 228488 7. 258539  
11742725\_ 7. 958187 8. 007942 7. 993988 7. 65645 7. 636851 7. 677971  
11742726\_ 8. 731437 8. 720674 8. 73821 8. 540402 8. 523102 8. 53435  
11742727\_ 7. 029042 6. 913535 7. 077216 7. 176721 7. 173666 7. 242517  
11742728\_ 10. 27231 10. 28935 10. 26359 10. 21835 10. 19201 10. 14557  
11742729\_ 6. 872087 6. 875013 6. 888145 6. 908877 6. 844284 6. 901991  
11742730\_ 8. 011018 7. 924432 8. 05162 8. 461088 8. 530977 8. 444438  
11742731\_ 8. 405924 8. 361495 8. 405924 8. 378573 8. 420604 8. 305302  
11742732\_ 11. 65827 11. 66031 11. 67052 11. 45724 11. 43336 11. 44582  
11742733\_ 11. 60566 11. 60182 11. 5871 11. 34662 11. 35484 11. 343  
11742734\_ 9. 643855 9. 60649 9. 63934 9. 427635 9. 45219 9. 404826  
11742735\_ 8. 633711 8. 610406 8. 552875 9. 455442 9. 404895 9. 357021  
11742736\_ 6. 108342 6. 072772 6. 088762 5. 84779 6. 008271 5. 942632  
11742737\_ 8. 856148 8. 802442 8. 874519 8. 384792 8. 312914 8. 346733  
11742738\_ 6. 023997 6. 008732 6. 027389 5. 98983 5. 894219 6. 019627  
11742739\_ 5. 496193 5. 52285 5. 315858 5. 49446 5. 386421 5. 502034  
11742740\_ 8. 704989 8. 695799 8. 754813 8. 709735 8. 717974 8. 740326

11742741\_ 7. 66444 7. 550521 7. 561953 7. 700534 7. 711177 7. 683995  
11742742\_ 10. 06354 10. 06319 10. 13154 9. 881931 9. 979656 9. 868717  
11742743\_ 11. 12439 11. 09283 11. 13275 10. 89549 10. 85389 10. 86579  
11742744\_ 8. 689668 8. 734132 8. 693106 9. 169201 9. 160248 9. 149678  
11742745\_ 7. 310367 7. 141566 7. 350444 7. 902166 8. 042444 8. 008486  
11742746\_ 10. 46249 10. 46484 10. 51485 10. 5707 10. 58708 10. 53906  
11742747\_ 8. 461291 8. 391791 8. 463038 8. 227345 8. 231997 8. 249838  
11742748\_ 8. 469067 8. 42126 8. 429372 8. 273701 8. 31845 8. 322936  
11742749\_ 8. 64057 8. 587106 8. 677284 8. 447381 8. 515023 8. 43463  
11742750\_ 7. 597717 7. 577364 7. 666621 8. 170603 8. 203899 8. 195281  
11742751\_ 5. 055626 4. 831102 4. 824195 4. 871879 4. 856566 4. 933671  
11742752\_ 6. 738887 6. 707393 6. 810787 6. 587972 6. 559697 6. 565647  
11742753\_ 4. 105887 3. 852015 3. 785821 3. 762475 3. 799516 3. 835033  
11742754\_ 3. 645912 3. 533836 3. 462064 3. 445358 3. 632723 3. 645912  
11742755\_ 7. 933268 7. 870153 7. 97413 7. 719831 7. 65554 7. 746548  
11742756\_ 8. 534305 8. 468524 8. 490477 8. 275559 8. 25619 8. 355856  
11742757\_ 8. 919672 8. 840151 8. 785168 8. 51666 8. 457594 8. 538968  
11742758\_ 8. 621871 8. 550308 8. 559687 7. 918116 7. 995471 7. 990656  
11742759\_ 7. 189182 7. 135596 7. 195052 6. 720131 6. 655507 6. 746691  
11742760\_ 6. 986756 6. 993759 6. 926916 6. 940652 6. 97379 6. 97302  
11742761\_ 8. 213116 8. 191254 8. 229229 8. 181543 8. 195251 8. 209504  
11742762\_ 3. 985148 3. 886666 3. 946868 4. 070053 3. 684599 3. 85965  
11742763\_ 8. 41132 8. 288168 8. 385264 7. 403639 7. 403591 7. 404206  
11742764\_ 9. 43142 9. 416388 9. 335291 9. 596292 9. 531089 9. 507356  
11742765\_ 3. 780511 3. 740391 3. 600775 3. 735132 3. 665772 3. 649512  
11742766\_ 8. 5998 8. 487822 8. 62276 8. 657885 8. 792107 8. 685325  
11742767\_ 4. 107566 4. 319779 4. 116065 4. 07803 4. 06831 4. 180678  
11742768\_ 8. 702383 8. 581003 8. 656939 8. 510772 8. 525066 8. 628143  
11742769\_ 7. 351649 7. 330215 7. 28594 7. 302778 7. 399623 7. 278911  
11742770\_ 7. 693231 7. 704964 7. 672908 7. 483929 7. 549297 7. 481844  
11742771\_ 8. 606493 8. 533385 8. 608679 8. 70182 8. 745926 8. 746441  
11742772\_ 8. 195553 8. 224797 8. 19655 8. 534313 8. 517144 8. 532661  
11742773\_ 3. 014538 2. 754504 2. 836694 2. 663625 2. 921412 2. 836694  
11742774\_ 6. 263567 6. 190682 6. 208435 6. 272771 6. 275738 6. 251643  
11742775\_ 6. 411158 6. 130496 6. 214799 6. 648115 6. 619389 6. 610345  
11742776\_ 6. 287605 6. 21351 6. 334535 6. 454546 6. 446008 6. 495579  
11742777\_ 7. 211029 7. 206733 7. 185786 7. 084592 7. 155808 7. 129958  
11742778\_ 7. 769688 7. 73987 7. 803549 7. 612128 7. 672687 7. 667874  
11742779\_ 7. 89744 7. 913616 7. 986534 7. 974852 7. 966047 7. 956399  
11742780\_ 7. 111236 7. 106974 7. 192045 7. 110267 7. 088742 7. 12024  
11742781\_ 10. 01318 9. 942032 9. 980545 9. 919849 9. 956323 9. 964473  
11742782\_ 9. 084243 9. 07171 9. 059392 9. 065325 9. 055129 9. 038457  
11742783\_ 9. 315357 9. 259378 9. 342663 9. 318616 9. 295732 9. 317778  
11742784\_ 8. 099743 7. 998092 8. 096499 7. 453956 7. 498477 7. 601532  
11742785\_ 7. 836019 7. 781545 7. 872707 7. 289234 7. 315708 7. 309104  
11742786\_ 6. 234492 6. 084447 6. 272755 5. 953592 6. 020803 5. 970445  
11742787\_ 6. 212241 6. 118838 6. 300643 6. 331011 6. 400512 6. 343261  
11742788\_ 4. 860777 4. 692879 4. 779516 4. 727901 4. 727901 4. 797221  
11742789\_ 4. 769329 4. 767335 4. 71766 4. 929292 4. 947938 4. 949108  
11742790\_ 5. 399157 5. 348575 5. 468738 5. 584813 5. 597958 5. 548281  
11742791\_ 5. 033692 4. 962166 4. 979223 5. 340183 5. 446513 5. 406798

11742792\_ 5.138392 5.01364 5.076019 5.009384 5.076019 5.109669  
11742793\_ 9.311689 9.380316 9.426855 9.409645 9.434057 9.413067  
11742794\_ 9.750786 9.625771 9.746364 9.646467 9.587887 9.617302  
11742795\_ 8.275426 8.294536 8.35187 8.123711 8.167074 8.193422  
11742796\_ 9.782444 9.793669 9.662956 10.25443 10.05187 9.917946  
11742797\_ 8.048652 7.962867 8.016923 7.736378 7.717688 7.708475  
11742798\_ 8.415721 8.333294 8.452716 8.197659 8.163296 8.17453  
11742799\_ 9.048122 8.927875 9.023621 8.832947 8.852254 8.884007  
11742800\_ 8.032478 7.950412 8.04944 8.01728 7.96729 7.950685  
11742801\_ 7.14162 7.033678 7.10109 7.052846 7.103802 7.085986  
11742802\_ 7.041057 7.006898 7.003489 7.118515 7.207207 7.159368  
11742803\_ 6.715855 6.577892 6.653876 6.772959 6.780402 6.839086  
11742804\_ 6.028839 5.9657 5.997388 6.448357 6.397946 6.572309  
11742805\_ 5.549356 5.744838 5.785431 6.080726 6.024373 6.138355  
11742806\_ 7.777276 7.601768 7.785158 8.561824 8.615987 8.62536  
11742807\_ 2.010205 2.230562 2.171854 1.99695 2.308438 2.093923  
11742808\_ 6.853133 6.791992 6.953685 6.942486 6.868804 6.827467  
11742809\_ 8.744315 8.68067 8.665666 8.308633 8.302644 8.344773  
11742810\_ 8.446952 8.362075 8.444718 8.424369 8.430437 8.447795  
11742811\_ 6.792183 6.766357 6.762932 7.144803 7.144608 7.210631  
11742812\_ 9.920116 9.846005 9.881242 9.295375 9.285776 9.266023  
11742813\_ 4.960052 4.787347 4.814039 5.208797 5.117638 5.212628  
11742814\_ 5.407829 5.594228 5.324862 5.655814 5.465249 5.753052  
11742815\_ 4.991966 4.934108 4.777224 4.948008 4.874745 5.001007  
11742816\_ 7.054327 7.04434 6.996725 6.321377 6.330098 6.399759  
11742817\_ 7.199501 7.079604 7.243534 6.671905 6.728603 6.742663  
11742818\_ 7.498049 7.394896 7.532281 7.283459 7.324799 7.34897  
11742819\_ 6.853435 6.862213 6.87943 7.018602 7.011172 6.967649  
11742820\_ 2.208738 2.26502 2.280432 2.165597 2.16645 2.25483  
11742821\_ 2.718299 2.718322 2.613771 2.682014 2.567832 2.607446  
11742822\_ 7.350145 7.26247 7.332426 7.614499 7.629253 7.665474  
11742823\_ 7.992526 8.049863 8.108728 8.558766 8.477853 8.376782  
11742824\_ 7.821662 7.681024 7.766387 7.930708 7.903042 7.894564  
11742825\_ 7.899164 7.809125 7.872005 8.113247 8.134401 8.167188  
11742826\_ 8.82681 8.858764 8.871608 8.976734 8.883976 8.924692  
11742827\_ 8.143845 8.071724 8.122305 8.19151 8.202916 8.22867  
11742828\_ 7.251041 7.285631 7.254083 7.521652 7.544334 7.550292  
11742829\_ 7.932167 7.874661 7.931264 8.056046 8.018395 8.034401  
11742830\_ 7.337367 7.307378 7.312134 7.340388 7.337367 7.335632  
11742831\_ 8.350115 8.231237 8.307306 8.351635 8.395313 8.398234  
11742832\_ 9.09674 9.02742 9.06908 9.788754 9.811087 9.81965  
11742833\_ 4.947532 4.9694 4.853229 4.974986 4.965347 4.908009  
11742834\_ 3.814714 3.647111 3.846559 4.100743 3.989433 4.3752  
11742835\_ 8.378363 8.230601 8.276545 7.956558 7.838033 7.891261  
11742836\_ 9.231703 9.217541 9.221816 9.006544 8.970679 8.950642  
11742837\_ 7.176364 7.134375 7.231936 7.270106 7.365948 7.297807  
11742838\_ 5.614563 5.480966 5.372501 5.325701 5.397861 5.502342  
11742839\_ 6.713909 6.792352 6.720394 6.752593 6.679063 6.714177  
11742840\_ 6.31095 6.251285 6.395409 6.324755 6.28171 6.377866  
11742841\_ 8.364062 8.235356 8.26657 8.426108 8.454449 8.459001  
11742842\_ 6.705279 6.667618 6.640286 6.700653 6.782344 6.747898

11742843\_ 4. 91261 4. 919655 4. 97909 5. 219021 5. 184956 5. 261323  
11742844\_ 7. 848493 7. 791541 7. 764993 8. 005838 7. 990549 8. 045646  
11742845\_ 8. 529371 8. 451434 8. 442947 8. 331303 8. 315964 8. 375774  
11742846\_ 9. 1314 9. 021066 9. 071336 8. 793998 8. 805531 8. 866465  
11742847\_ 6. 552663 6. 481046 6. 538988 6. 485058 6. 473062 6. 512991  
11742848\_ 8. 47948 8. 422996 8. 549973 7. 754632 7. 754632 7. 871235  
11742849\_ 6. 211987 6. 12909 6. 233469 6. 250365 6. 241883 6. 180153  
11742850\_ 10. 76487 10. 75234 10. 69426 10. 84127 10. 78849 10. 80982  
11742851\_ 4. 330246 4. 410295 4. 424178 4. 330246 4. 330246 4. 235068  
11742852\_ 9. 353809 9. 31288 9. 304928 9. 266198 9. 314025 9. 237991  
11742853\_ 9. 629135 9. 622672 9. 690091 9. 628204 9. 673006 9. 608559  
11742854\_ 8. 117076 8. 14815 8. 099912 8. 299428 8. 339577 8. 292441  
11742855\_ 8. 292085 8. 30049 8. 30049 7. 936843 7. 858809 8. 01069  
11742856\_ 9. 073857 8. 972534 9. 082754 8. 776965 8. 747532 8. 758483  
11742857\_ 6. 961791 6. 899296 7. 067363 6. 683521 6. 823525 6. 79502  
11742858\_ 8. 857485 8. 826107 8. 835798 9. 020833 9. 008427 9. 020651  
11742859\_ 4. 20946 4. 178937 4. 100382 4. 231895 4. 178937 4. 150894  
11742860\_ 2. 434176 2. 44947 2. 323153 2. 416258 2. 416926 2. 427271  
11742861\_ 3. 225087 3. 091258 2. 847687 3. 121424 3. 184909 3. 004003  
11742862\_ 3. 946781 3. 563117 3. 488086 3. 43405 3. 351822 3. 600354  
11742863\_ 4. 993501 4. 763543 5. 101046 5. 456583 5. 317483 5. 243085  
11742864\_ 7. 469756 7. 463691 7. 580469 6. 868115 6. 930346 6. 887401  
11742865\_ 4. 274622 4. 217204 4. 29148 4. 238397 4. 306774 4. 495335  
11742866\_ 4. 364992 4. 40461 4. 306984 4. 195048 3. 670717 4. 28592  
11742867\_ 3. 294533 3. 398377 3. 446337 3. 494622 3. 405492 3. 449509  
11742868\_ 4. 228966 4. 433269 4. 457833 4. 396097 4. 355692 4. 27746  
11742869\_ 6. 704025 6. 681133 6. 579773 6. 735791 6. 78037 6. 749763  
11742870\_ 11. 3127 11. 24356 11. 27513 11. 16901 11. 22803 11. 17216  
11742871\_ 6. 314336 6. 356733 6. 327758 6. 387785 6. 34311 6. 446663  
11742872\_ 5. 28699 5. 345598 5. 296443 5. 389793 5. 334784 5. 323391  
11742873\_ 3. 674428 3. 918287 3. 780419 3. 934177 3. 787904 3. 935081  
11742874\_ 8. 142457 8. 046324 8. 181155 8. 288198 8. 307882 8. 292691  
11742875\_ 8. 385122 8. 330616 8. 342159 8. 15104 8. 032591 7. 987009  
11742876\_ 8. 871389 8. 994492 8. 825545 8. 892874 8. 964956 8. 982455  
11742877\_ 7. 111146 7. 147458 7. 04745 7. 099734 7. 107129 7. 06424  
11742878\_ 7. 409145 7. 407648 7. 478392 7. 504275 7. 500022 7. 511713  
11742879\_ 7. 177932 7. 04434 7. 067115 6. 946453 6. 982532 6. 998353  
11742880\_ 9. 861584 9. 861312 9. 807484 9. 674854 9. 686515 9. 641288  
11742881\_ 8. 34688 8. 268869 8. 394475 8. 160196 8. 102373 8. 182896  
11742882\_ 8. 944662 8. 965085 9. 011087 8. 773476 8. 692888 8. 735751  
11742883\_ 3. 563456 3. 53299 3. 615794 3. 60784 3. 777034 3. 739617  
11742884\_ 8. 20953 8. 030795 8. 142829 7. 765892 7. 812638 7. 72377  
11742885\_ 8. 462823 8. 402624 8. 472332 8. 655445 8. 583487 8. 541253  
11742886\_ 5. 483736 5. 47253 5. 444339 5. 88422 5. 920445 5. 906392  
11742887\_ 8. 378411 8. 353206 8. 483994 8. 487028 8. 49851 8. 576493  
11742888\_ 11. 23317 11. 19486 11. 18934 11. 38679 11. 35613 11. 37449  
11742889\_ 6. 605327 6. 489048 6. 449846 6. 670544 6. 668228 6. 557068  
11742890\_ 6. 422867 6. 459981 6. 51415 7. 44755 7. 474402 7. 528818  
11742891\_ 6. 502229 6. 462941 6. 468765 6. 702679 6. 680874 6. 696481  
11742892\_ 11. 39913 11. 42729 11. 43423 11. 61714 11. 59858 11. 57644  
11742893\_ 5. 895639 5. 830954 5. 798358 6. 025473 6. 029094 5. 996013



11742894\_ 7. 483321 7. 454534 7. 480846 7. 382367 7. 434587 7. 418738  
11742895\_ 8. 290764 8. 179404 8. 220341 8. 095087 8. 159741 8. 181183  
11742896\_ 10. 51939 10. 44288 10. 53942 10. 57677 10. 55479 10. 60438  
11742897\_ 4. 031234 4. 156133 4. 135868 4. 135496 4. 247012 3. 954157  
11742898\_ 3. 487409 3. 608426 3. 72063 3. 761781 3. 796386 3. 330161  
11742899\_ 9. 602228 9. 526812 9. 664366 9. 405671 9. 389362 9. 394237  
11742900\_ 9. 078201 9. 014936 9. 057076 9. 085216 8. 983681 9. 027882  
11742901\_ 9. 197208 9. 160899 9. 225447 9. 28462 9. 214534 9. 249906  
11742902\_ 10. 65696 10. 61941 10. 66497 10. 64708 10. 59693 10. 57242  
11742903\_ 9. 385494 9. 396235 9. 404848 9. 87011 9. 779509 9. 746159  
11742904\_ 9. 265036 9. 201381 9. 159369 8. 944261 9. 006546 8. 845997  
11742905\_ 8. 523542 8. 536552 8. 66846 7. 949935 7. 951268 7. 904066  
11742906\_ 8. 576151 8. 585671 8. 56068 7. 874439 7. 916717 8. 004985  
11742907\_ 7. 084114 6. 9621 7. 011911 6. 914164 6. 88518 6. 923409  
11742908\_ 7. 60985 7. 513387 7. 644472 7. 662659 7. 664151 7. 670211  
11742909\_ 8. 598335 8. 544301 8. 508599 8. 357913 8. 318897 8. 338558  
11742910\_ 8. 869978 8. 829896 8. 890337 8. 400488 8. 44675 8. 431435  
11742911\_ 3. 52759 3. 80276 3. 644771 3. 501793 3. 575172 3. 532229  
11742912\_ 5. 081443 5. 108571 5. 122191 4. 9644 4. 830024 5. 008251  
11742913\_ 2. 65534 2. 554438 2. 513251 2. 226895 2. 417799 2. 231468  
11742914\_ 4. 363089 4. 437894 4. 236837 4. 320396 4. 470229 4. 470229  
11742915\_ 5. 438588 5. 73904 5. 735527 5. 555707 5. 503876 5. 421427  
11742916\_ 4. 575406 4. 610769 4. 575406 4. 552193 4. 49268 4. 513103  
11742917\_ 3. 50682 3. 579816 3. 472355 3. 544699 3. 508375 3. 567283  
11742918\_ 3. 956074 4. 085299 3. 893311 3. 96917 4. 016198 3. 835801  
11742919\_ 3. 991409 4. 077417 3. 885429 3. 825347 4. 028363 3. 808755  
11742920\_ 11. 32225 11. 32123 11. 29949 11. 27508 11. 20812 11. 22191  
11742921\_ 9. 889814 9. 894653 9. 855566 9. 799466 9. 859124 9. 740052  
11742922\_ 5. 721532 5. 588206 5. 650251 5. 381148 5. 44695 5. 449992  
11742923\_ 5. 011248 5. 140315 5. 197437 3. 995583 4. 386399 4. 313238  
11742924\_ 12. 26489 12. 25942 12. 24288 12. 37839 12. 35832 12. 37421  
11742925\_ 10. 26934 10. 19543 10. 28471 9. 958467 9. 948534 9. 962944  
11742926\_ 7. 16227 7. 097314 7. 22265 7. 049058 7. 102511 7. 068736  
11742927\_ 7. 818988 7. 831194 7. 873793 8. 08882 8. 04611 8. 010739  
11742928\_ 8. 766818 8. 808983 8. 818183 9. 099689 9. 082809 9. 053747  
11742929\_ 10. 20918 10. 13834 10. 14717 10. 24508 10. 31001 10. 22342  
11742930\_ 7. 879499 7. 729896 7. 784602 7. 480947 7. 436364 7. 467201  
11742931\_ 7. 580186 7. 414285 7. 533 7. 337215 7. 293599 7. 279546  
11742932\_ 6. 845195 6. 740931 6. 940204 7. 337305 7. 440685 7. 434804  
11742933\_ 9. 557773 9. 520407 9. 545505 9. 97305 9. 991025 9. 974545  
11742934\_ 6. 781386 6. 89726 6. 889221 7. 177938 7. 165039 7. 210645  
11742935\_ 4. 874234 5. 160185 4. 792584 5. 376217 5. 337655 5. 289174  
11742936\_ 7. 691553 7. 628744 7. 736416 7. 582026 7. 581163 7. 641567  
11742937\_ 7. 947072 7. 931315 7. 929161 8. 033137 8. 11978 8. 107573  
11742938\_ 5. 530795 5. 402605 5. 537101 5. 503911 5. 571453 5. 537438  
11742939\_ 8. 66694 8. 594784 8. 676685 9. 704592 9. 661128 9. 705478  
11742940\_ 9. 409281 9. 312689 9. 350735 10. 41202 10. 38547 10. 34832  
11742941\_ 9. 426414 9. 297669 9. 370081 10. 38275 10. 3544 10. 38962  
11742942\_ 9. 334386 9. 20252 9. 258979 10. 59887 10. 60447 10. 60003  
11742943\_ 5. 690116 5. 712158 5. 523109 5. 775695 5. 769645 5. 785658  
11742944\_ 5. 958968 6. 0159 5. 845365 6. 658025 6. 730916 6. 631711

11742945\_ 9. 17322 9. 130768 9. 103204 9. 152915 9. 151433 9. 03146  
11742946\_ 10. 48053 10. 48745 10. 49677 10. 29921 10. 25458 10. 24205  
11742947\_ 8. 789846 8. 789846 8. 835569 8. 765453 8. 756568 8. 73262  
11742948\_ 6. 633094 6. 685435 6. 570854 7. 67292 7. 562398 7. 529678  
11742949\_ 9. 08166 8. 914541 9. 04062 9. 085238 9. 0982 9. 120265  
11742950\_ 8. 032172 8. 050788 8. 050531 8. 561351 8. 363252 8. 378008  
11742951\_ 9. 152834 9. 073236 9. 157263 8. 974613 9. 000893 8. 909624  
11742952\_ 9. 478766 9. 399177 9. 44106 9. 114913 9. 085518 9. 146459  
11742953\_ 6. 248943 6. 097927 6. 199575 5. 895823 5. 736831 5. 899825  
11742954\_ 3. 779646 3. 912649 3. 7323 3. 897813 3. 801444 3. 85672  
11742955\_ 4. 462185 4. 513963 4. 581471 4. 777754 4. 402385 4. 649566  
11742956\_ 6. 859936 6. 858131 6. 928231 6. 851914 6. 765929 6. 867133  
11742957\_ 8. 869652 8. 777652 8. 855524 8. 749431 8. 787845 8. 750568  
11742958\_ 8. 246508 8. 217971 8. 20972 8. 16517 8. 194668 8. 137498  
11742959\_ 10. 09199 10. 06042 10. 09477 10. 01294 10. 02871 10. 0078  
11742960\_ 8. 361057 8. 250136 8. 34057 8. 63827 8. 672226 8. 626276  
11742961\_ 6. 874894 6. 820012 6. 834935 5. 920552 5. 887366 5. 896216  
11742962\_ 7. 478148 7. 376083 7. 51254 7. 232991 7. 181933 7. 31714  
11742963\_ 5. 494061 5. 377527 5. 494061 5. 506072 5. 363342 5. 270309  
11742964\_ 7. 212174 7. 179021 7. 188937 7. 129812 7. 179807 7. 186184  
11742965\_ 6. 371595 6. 238143 6. 407902 6. 136829 6. 057666 6. 267329  
11742966\_ 5. 986804 5. 911545 5. 952823 5. 788571 5. 825585 5. 899626  
11742967\_ 5. 448355 5. 543026 5. 51235 5. 153425 5. 472348 5. 561071  
11742968\_ 8. 876964 8. 79142 8. 829588 8. 626927 8. 712077 8. 559375  
11742969\_ 6. 641052 6. 672355 6. 734368 6. 790745 6. 751371 6. 936851  
11742970\_ 7. 783937 7. 72106 7. 790716 7. 837372 7. 80514 7. 847084  
11742971\_ 5. 497003 5. 412031 5. 547126 5. 552963 5. 579224 5. 608908  
11742972\_ 9. 330025 9. 395218 9. 235084 9. 19206 9. 180759 9. 101171  
11742973\_ 9. 897245 9. 809168 9. 893075 9. 762374 9. 789518 9. 72632  
11742974\_ 6. 197006 5. 959822 6. 081984 5. 869606 5. 709521 5. 888288  
11742975\_ 6. 535594 6. 374654 6. 401696 6. 128223 6. 06011 6. 236502  
11742976\_ 4. 506474 4. 641227 4. 41013 4. 440607 4. 456538 4. 510047  
11742977\_ 5. 085568 5. 015119 4. 846644 5. 03036 5. 00224 5. 015119  
11742978\_ 4. 141613 4. 118875 4. 039661 3. 934064 3. 836523 3. 586756  
11742979\_ 4. 42457 4. 452323 4. 42457 4. 441844 4. 318547 4. 538368  
11742980\_ 1. 969099 2. 314737 2. 420448 2. 123833 2. 410047 2. 182737  
11742981\_ 4. 267096 4. 40461 4. 532585 4. 577453 4. 432383 4. 369359  
11742982\_ 5. 873519 5. 846684 6. 063297 5. 438713 5. 551384 5. 471448  
11742983\_ 5. 714673 5. 732315 5. 686523 5. 766587 5. 77024 5. 809671  
11742984\_ 5. 326407 5. 278568 5. 439167 4. 58554 4. 462484 4. 629157  
11742985\_ 6. 31827 6. 439073 6. 243167 6. 461973 6. 578161 6. 458471  
11742986\_ 11. 42448 11. 39802 11. 39734 11. 29674 11. 31197 11. 27264  
11742987\_ 8. 987724 9. 023013 9. 00116 9. 049835 9. 066827 8. 958655  
11742988\_ 9. 360263 9. 281624 9. 314629 9. 120521 9. 174922 9. 154916  
11742989\_ 8. 748351 8. 910403 8. 790096 8. 81002 8. 848924 8. 75159  
11742990\_ 8. 862 8. 873432 8. 942172 8. 836949 8. 863667 8. 848922  
11742991\_ 8. 795841 8. 671888 8. 80122 9. 845563 9. 817851 9. 82744  
11742992\_ 9. 628133 9. 641441 9. 573898 10. 76278 10. 66849 10. 60083  
11742993\_ 8. 804282 8. 745639 8. 767064 9. 861079 9. 824421 9. 835881  
11742994\_ 2. 35527 2. 439621 2. 16391 2. 496008 2. 261338 2. 177038  
11742995\_ 9. 768176 9. 667416 9. 712232 9. 47471 9. 466344 9. 443757

11742996\_ 9.06698 9.195761 9.051322 9.398326 9.43566 9.451888  
11742997\_ 8.718874 8.674698 8.684842 9.276354 9.294927 9.266051  
11742998\_ 10.0873 10.06942 10.01016 10.08098 10.04522 10.03555  
11742999\_ 10.57632 10.5268 10.47424 10.5089 10.48917 10.48128  
11743000\_ 6.342727 6.186428 6.128571 6.562961 6.729257 6.768288  
11743001\_ 6.358713 6.176409 6.316593 6.70103 6.766229 6.792183  
11743002\_ 8.169708 8.105009 8.146747 7.907708 7.99854 7.924348  
11743003\_ 6.29537 6.187322 6.137228 6.198203 6.352047 6.315207  
11743004\_ 9.062858 9.013823 9.108969 9.330891 9.366524 9.312662  
11743005\_ 7.419249 7.394969 7.503786 7.152759 7.281143 7.317368  
11743006\_ 8.321374 8.500063 8.360983 8.774028 8.794519 8.619687  
11743007\_ 8.725577 8.689814 8.719314 7.873285 7.970576 7.869762  
11743008\_ 7.052881 7.01106 7.075246 7.285158 7.258764 7.325338  
11743009\_ 7.768367 7.715205 7.692984 7.931643 7.886872 7.982441  
11743010\_ 6.821666 6.822968 6.855175 6.792183 6.877126 6.951698  
11743011\_ 7.610707 7.648005 7.690084 7.386161 7.328202 7.381785  
11743012\_ 8.81965 8.732421 8.80213 8.186409 8.210797 8.258952  
11743013\_ 8.341242 8.248144 8.285206 7.882544 7.872011 7.871335  
11743014\_ 6.502421 6.431763 6.642036 6.403741 6.521716 6.572309  
11743015\_ 5.782704 5.692818 5.895291 5.554436 5.584721 5.648514  
11743016\_ 6.294022 6.314249 6.352461 6.28728 6.336226 6.265303  
11743017\_ 7.751289 7.739184 7.741844 7.772839 7.721202 7.728313  
11743018\_ 9.732753 9.769555 9.720177 9.308177 9.27392 9.200918  
11743019\_ 6.018634 6.063082 6.137381 5.494455 5.452709 5.29179  
11743020\_ 6.431763 6.561114 6.550256 6.077556 5.986593 6.011116  
11743021\_ 7.256898 7.363111 7.270379 6.697594 6.586268 6.6462  
11743022\_ 7.452596 7.386018 7.391248 7.033072 7.084058 7.096666  
11743023\_ 6.366962 6.388658 6.354529 6.523484 6.56978 6.38515  
11743024\_ 6.896001 6.84273 6.995929 6.36655 6.361575 6.377984  
11743025\_ 6.916055 6.864338 6.944674 6.198789 6.314607 6.387718  
11743026\_ 4.184118 4.156209 4.068934 3.998876 4.121904 4.121904  
11743027\_ 3.363123 3.617905 3.570609 3.286802 3.441045 3.458848  
11743028\_ 6.732716 6.719802 6.54769 6.766776 6.813717 6.705685  
11743029\_ 5.381024 5.320876 5.210088 5.31057 5.335963 5.432384  
11743030\_ 3.9562 4.004771 3.537084 3.86837 3.705625 3.954157  
11743031\_ 12.59745 12.57033 12.58004 12.40831 12.47253 12.42563  
11743032\_ 4.861619 4.852615 5.022588 4.985292 4.813668 5.062992  
11743033\_ 11.20333 11.21053 11.2383 10.99112 10.96085 10.97239  
11743034\_ 8.77418 8.682077 8.759206 8.887878 8.844058 8.981716  
11743035\_ 10.31789 10.28723 10.30035 10.10109 10.10744 10.15418  
11743036\_ 9.162396 9.181529 9.164112 9.016732 8.93051 8.912672  
11743037\_ 6.860602 6.794351 6.867241 7.110209 7.174876 7.247827  
11743038\_ 7.011515 6.917339 7.165164 7.749902 7.68588 7.565077  
11743039\_ 6.248448 6.057238 6.142395 6.388321 6.501152 6.4325  
11743040\_ 10.55321 10.55178 10.50793 10.42806 10.45296 10.47335  
11743041\_ 9.830581 9.764438 9.814173 10.05149 10.09543 9.995516  
11743042\_ 9.85096 9.770605 9.861855 10.06681 10.14942 10.06171  
11743043\_ 5.330949 5.077996 5.122191 5.258666 5.36323 5.345747  
11743044\_ 2.36446 2.661153 2.443696 2.45363 2.362925 2.340824  
11743045\_ 6.182335 6.16096 6.277628 6.596216 6.626879 6.534895  
11743046\_ 8.569482 8.475181 8.551131 9.041681 9.087225 9.096261

11743047\_ 8. 116194 7. 965608 8. 056195 8. 574041 8. 61989 8. 608164  
11743048\_ 7. 610988 7. 474342 7. 59136 7. 614795 7. 620804 7. 648621  
11743049\_ 4. 983403 5. 011085 4. 978573 5. 230791 4. 978221 5. 11527  
11743050\_ 8. 537703 8. 509184 8. 514471 8. 30351 8. 317745 8. 32225  
11743051\_ 6. 71974 6. 6377 6. 607319 7. 097326 7. 126 7. 03539  
11743052\_ 7. 143333 7. 086637 7. 071633 7. 12427 6. 97486 6. 866726  
11743053\_ 6. 232193 6. 302135 6. 297583 6. 677015 6. 630071 6. 660773  
11743054\_ 9. 843014 9. 783874 9. 788648 9. 269933 9. 288662 9. 169077  
11743055\_ 6. 237288 6. 232226 6. 286267 7. 412668 7. 455381 7. 536645  
11743056\_ 7. 848943 7. 795196 7. 863754 8. 35214 8. 385254 8. 335981  
11743057\_ 3. 869101 3. 957107 3. 63959 3. 8187 3. 869101 3. 981906  
11743058\_ 4. 223989 4. 347627 4. 133035 4. 114229 4. 012632 4. 295681  
11743059\_ 8. 724457 8. 618222 8. 69012 8. 45416 8. 419119 8. 510058  
11743060\_ 7. 849909 7. 7442 7. 708393 7. 770139 7. 766383 7. 6522  
11743061\_ 9. 222819 9. 29068 9. 263424 9. 387897 9. 416203 9. 426288  
11743062\_ 8. 327402 8. 295501 8. 34057 8. 16554 8. 177132 8. 155665  
11743063\_ 8. 782236 8. 768717 8. 851751 8. 497499 8. 606484 8. 595879  
11743064\_ 7. 911471 7. 855251 7. 893556 8. 494695 8. 50791 8. 484676  
11743065\_ 9. 023111 8. 996425 9. 043469 9. 490608 9. 423466 9. 400401  
11743066\_ 9. 462603 9. 361933 9. 418002 9. 256983 9. 315045 9. 31909  
11743067\_ 7. 154768 7. 18006 7. 072905 7. 500624 7. 524801 7. 499741  
11743068\_ 7. 95063 7. 960536 7. 911861 8. 44093 8. 483628 8. 479242  
11743069\_ 9. 622573 9. 578462 9. 632128 9. 392024 9. 431487 9. 392136  
11743070\_ 8. 08769 8. 065521 8. 051189 8. 414905 8. 381747 8. 359957  
11743071\_ 6. 798696 6. 698691 6. 795395 6. 593369 6. 70159 6. 677542  
11743072\_ 8. 193287 8. 055051 8. 114106 7. 888722 7. 874532 7. 891258  
11743073\_ 6. 403328 6. 381931 6. 396755 6. 71894 6. 696996 6. 778296  
11743074\_ 4. 347179 4. 515388 4. 496559 4. 789368 4. 774922 4. 876737  
11743075\_ 9. 222181 9. 181993 9. 288501 9. 532229 9. 561593 9. 555594  
11743076\_ 7. 808527 7. 781327 7. 803908 7. 648646 7. 699605 7. 678466  
11743077\_ 8. 953894 8. 968665 8. 904688 9. 104274 9. 073682 8. 977939  
11743078\_ 9. 426559 9. 403091 9. 438324 9. 129828 9. 166379 9. 139965  
11743079\_ 8. 638011 8. 595676 8. 633388 8. 336956 8. 317225 8. 296129  
11743080\_ 7. 041368 7. 008784 7. 106373 6. 830155 6. 803753 6. 828444  
11743081\_ 6. 843616 6. 612181 6. 784764 6. 488243 6. 508583 6. 53412  
11743082\_ 6. 511814 6. 544183 6. 509986 6. 487781 6. 391066 6. 523159  
11743083\_ 4. 26818 4. 250934 4. 294917 4. 297846 4. 18504 4. 187969  
11743084\_ 10. 32099 10. 2822 10. 30779 10. 47467 10. 46497 10. 44656  
11743085\_ 7. 571083 7. 509335 7. 612369 6. 970557 6. 944987 6. 971012  
11743086\_ 7. 583649 7. 638957 7. 567284 7. 57846 7. 551763 7. 602722  
11743087\_ 2. 706026 2. 706026 2. 696857 2. 724445 2. 405129 2. 797521  
11743088\_ 4. 299869 4. 226608 4. 035704 4. 080745 4. 275413 4. 137487  
11743089\_ 4. 646273 4. 370013 4. 588759 4. 286687 4. 276117 4. 124078  
11743090\_ 7. 716138 7. 784839 7. 76412 8. 249347 8. 134401 8. 086432  
11743091\_ 8. 037158 7. 991462 8. 086337 8. 396432 8. 39954 8. 475713  
11743092\_ 7. 295089 7. 309126 7. 262184 7. 815233 7. 716215 7. 744936  
11743093\_ 3. 493421 3. 362031 3. 443194 3. 248747 3. 316907 3. 48756  
11743094\_ 6. 314331 6. 410929 6. 206283 6. 240618 6. 403294 6. 497015  
11743095\_ 6. 17801 6. 086913 6. 180512 5. 738862 5. 646234 5. 69784  
11743096\_ 6. 968476 6. 830772 6. 913813 6. 843133 6. 814739 6. 883624  
11743097\_ 7. 535953 7. 600643 7. 48684 7. 871388 7. 937369 7. 774819

11743098\_ 5.125012 5.056287 5.38323 4.923561 4.810486 4.904958  
11743099\_ 10.56304 10.5732 10.52809 10.57382 10.55199 10.51868  
11743100\_ 6.988292 6.879133 6.916154 7.496693 7.51134 7.410735  
11743101\_ 6.239806 6.181441 6.196346 5.79335 5.967891 5.787228  
11743102\_ 8.873246 8.746471 8.810897 8.472092 8.523736 8.465227  
11743103\_ 6.421002 6.399323 6.362366 6.381397 6.32529 6.324396  
11743104\_ 6.76696 6.718331 6.727226 6.771565 6.654998 6.723967  
11743105\_ 6.206272 6.189825 6.133907 6.179304 6.19953 6.17981  
11743106\_ 9.854544 9.803599 9.84459 9.580025 9.598241 9.58468  
11743107\_ 8.386668 8.265595 8.428597 8.039101 8.113906 8.049969  
11743108\_ 5.226615 5.35443 5.382309 5.254761 5.444006 5.221605  
11743109\_ 4.784857 4.923982 4.977374 4.845015 4.980081 4.71684  
11743110\_ 9.083583 9.061958 9.079894 8.852742 8.837029 8.853416  
11743111\_ 9.108205 9.098979 9.142737 8.708112 8.771682 8.638204  
11743112\_ 11.51821 11.52581 11.5291 11.44239 11.46862 11.39328  
11743113\_ 11.64469 11.63073 11.62052 11.54076 11.56368 11.49864  
11743114\_ 10.66602 10.63632 10.69451 11.1469 11.1454 11.1513  
11743115\_ 9.786261 9.760842 9.815163 10.12446 10.15754 10.08524  
11743116\_ 11.31189 11.2804 11.27526 11.42276 11.44675 11.38768  
11743117\_ 9.90281 9.860058 9.878587 9.741362 9.741435 9.757962  
11743118\_ 10.46672 10.58984 10.48476 10.57229 10.42874 10.43045  
11743119\_ 9.891567 9.954728 9.881292 9.839425 9.795109 9.762671  
11743120\_ 12.72808 12.70747 12.70937 12.85591 12.85728 12.8616  
11743121\_ 6.87977 6.818375 6.752207 7.172142 7.038451 7.155406  
11743122\_ 6.502421 6.486859 6.434407 6.881225 6.752593 6.82389  
11743123\_ 7.317368 7.301219 7.391761 7.485233 7.592648 7.594482  
11743124\_ 8.362653 8.276877 8.325565 8.347464 8.443947 8.416179  
11743125\_ 3.615993 3.591168 3.372929 3.649364 3.564776 3.672906  
11743126\_ 10.35399 10.32324 10.34584 10.28039 10.3163 10.26426  
11743127\_ 8.436764 8.343659 8.452827 8.466261 8.542341 8.557356  
11743128\_ 7.772557 7.855829 7.746118 7.796115 7.666485 7.764468  
11743129\_ 3.722258 3.3157 3.234243 2.95877 2.908464 2.807662  
11743130\_ 6.297051 6.449698 6.275127 6.360579 6.193615 6.409761  
11743131\_ 9.011679 8.959927 9.045851 9.199103 9.288708 9.249063  
11743132\_ 4.94991 5.139448 4.945315 5.191042 5.173441 5.212031  
11743133\_ 7.782361 7.791626 7.795736 7.835265 7.855238 7.907811  
11743134\_ 7.140148 7.130933 7.060396 7.256027 7.216705 7.255002  
11743135\_ 7.914398 7.846281 7.977809 6.782028 6.802719 6.731228  
11743136\_ 7.321292 7.133578 7.228207 6.228723 6.194264 6.166245  
11743137\_ 8.246125 8.197831 8.173236 8.14681 8.171172 8.184267  
11743138\_ 6.206103 6.058786 6.161992 6.481046 6.478094 6.418352  
11743139\_ 9.306059 9.239593 9.320592 8.923389 8.944734 8.934976  
11743140\_ 5.599895 5.554436 5.723022 5.700302 5.79482 5.741043  
11743141\_ 7.383083 7.387763 7.394325 7.417006 7.327094 7.398365  
11743142\_ 5.987033 5.965058 6.084467 6.222554 6.241491 6.248985  
11743143\_ 9.002855 8.993248 8.964606 9.085033 9.032035 9.030315  
11743144\_ 8.865036 8.871368 8.855295 9.008675 8.994103 8.892456  
11743145\_ 6.38887 6.287469 6.371159 6.559502 6.57238 6.517995  
11743146\_ 9.526259 9.460897 9.506794 9.299235 9.283513 9.243484  
11743147\_ 7.82299 7.916011 7.824809 7.87421 7.873674 7.924095  
11743148\_ 8.015852 8.086844 8.079343 8.105009 8.074108 8.061047

11743149\_ 8. 586157 8. 634527 8. 652449 8. 694575 8. 686488 8. 753799  
11743150\_ 6. 948467 6. 886652 6. 897346 6. 898443 6. 918723 6. 948664  
11743151\_ 7. 275918 7. 193609 7. 240238 4. 942218 4. 937308 5. 138303  
11743152\_ 9. 525576 9. 553112 9. 565633 9. 325517 9. 316891 9. 220336  
11743153\_ 7. 662167 7. 581103 7. 665049 7. 979159 8. 005597 7. 851718  
11743154\_ 8. 2125 8. 184225 8. 21673 8. 244076 8. 193801 8. 236284  
11743155\_ 7. 946196 8. 009111 8. 042842 8. 059427 8. 194169 8. 103548  
11743156\_ 6. 371887 6. 300643 6. 338072 6. 862059 6. 872296 6. 731682  
11743157\_ 4. 644716 4. 405977 4. 690619 4. 625496 4. 742347 4. 66064  
11743158\_ 9. 55426 9. 556698 9. 575083 9. 49038 9. 448206 9. 418545  
11743159\_ 2. 046759 1. 972357 1. 92247 2. 230621 2. 035625 2. 046759  
11743160\_ 8. 738166 8. 780046 8. 77662 9. 153922 9. 146322 9. 114886  
11743161\_ 6. 882364 6. 802421 6. 786138 7. 087288 7. 145911 7. 146552  
11743162\_ 5. 676785 5. 815789 5. 784232 4. 996459 5. 347304 5. 519478  
11743163\_ 7. 65997 7. 753741 7. 684393 7. 939087 7. 867245 7. 748159  
11743164\_ 8. 069877 8. 15221 8. 09185 8. 330895 8. 249485 8. 146629  
11743165\_ 6. 71875 6. 533603 6. 634134 6. 102656 6. 140211 6. 139303  
11743166\_ 6. 606867 6. 531565 6. 677104 6. 415547 6. 545664 6. 384153  
11743167\_ 7. 178243 7. 047477 7. 138272 6. 811528 6. 726249 6. 837973  
11743168\_ 4. 689363 4. 935538 4. 953249 4. 805045 4. 908946 4. 9716  
11743169\_ 8. 758931 8. 716682 8. 809639 8. 054799 8. 0467 8. 138357  
11743170\_ 3. 045936 3. 431616 3. 465716 3. 378464 3. 439506 3. 481033  
11743171\_ 1. 87725 1. 987495 2. 069781 1. 898324 1. 999656 1. 80746  
11743172\_ 8. 726201 8. 605461 8. 6859 9. 397882 9. 417341 9. 361061  
11743173\_ 6. 899296 6. 883537 6. 904601 6. 944412 6. 98559 6. 967613  
11743174\_ 4. 544972 4. 432377 4. 734124 4. 690985 4. 590451 4. 750024  
11743175\_ 2. 72385 2. 908984 2. 440681 2. 728633 2. 555937 2. 577349  
11743176\_ 8. 145381 8. 187899 8. 069852 7. 707079 7. 774747 7. 596395  
11743177\_ 10. 45755 10. 41309 10. 45177 10. 17346 10. 19743 10. 15852  
11743178\_ 9. 633108 9. 578392 9. 622043 9. 333021 9. 350261 9. 369964  
11743179\_ 8. 748546 8. 698108 8. 821393 8. 631765 8. 659864 8. 635125  
11743180\_ 6. 575134 6. 515621 6. 590787 6. 494434 6. 485215 6. 589889  
11743181\_ 5. 991763 5. 79168 5. 903256 6. 221503 6. 339261 6. 135038  
11743182\_ 5. 785932 5. 935638 5. 995644 6. 415524 6. 302445 6. 381389  
11743183\_ 5. 694396 5. 628961 5. 709987 5. 812629 5. 871815 5. 742774  
11743184\_ 8. 491906 8. 318825 8. 469317 8. 484772 8. 58857 8. 55974  
11743185\_ 5. 077716 5. 07557 4. 986364 5. 095594 5. 203831 5. 031453  
11743186\_ 9. 631288 9. 515416 9. 605924 9. 777483 9. 746351 9. 807275  
11743187\_ 8. 293168 8. 297417 8. 266551 8. 749196 8. 603156 8. 639624  
11743188\_ 6. 226665 6. 093165 6. 364626 6. 118838 6. 184528 6. 121562  
11743189\_ 6. 872083 6. 875058 6. 896682 5. 954081 6. 024618 6. 123503  
11743190\_ 5. 787341 5. 836407 5. 870242 8. 203991 8. 072329 8. 13294  
11743191\_ 9. 38635 9. 307569 9. 403065 8. 487094 8. 420538 8. 423672  
11743192\_ 4. 93062 4. 761464 4. 923587 4. 743136 5. 018446 4. 95025  
11743193\_ 7. 307657 7. 325164 7. 395266 7. 590682 7. 506433 7. 478911  
11743194\_ 6. 348725 6. 482644 6. 366224 6. 33857 6. 323413 6. 33103  
11743195\_ 4. 789061 5. 01254 4. 944483 5. 214442 5. 156571 5. 191305  
11743196\_ 7. 542188 7. 467961 7. 566539 6. 692245 6. 765911 6. 767908  
11743197\_ 9. 185895 9. 117639 9. 231383 7. 955847 7. 939316 7. 924888  
11743198\_ 3. 998313 4. 088798 4. 213226 3. 939845 3. 999521 3. 981069  
11743199\_ 3. 713013 3. 786967 3. 863546 3. 926598 3. 905301 3. 793827

11743200\_ 3. 478495 3. 459095 3. 376082 3. 466241 3. 553572 3. 61787  
11743201\_ 5. 421766 5. 477804 5. 388131 5. 465192 5. 41678 5. 293338  
11743202\_ 4. 251893 4. 280673 4. 355888 4. 452627 4. 455435 4. 375498  
11743203\_ 3. 970692 4. 066541 3. 879147 4. 022234 3. 970692 3. 887292  
11743204\_ 6. 194165 6. 212598 6. 136035 6. 326183 6. 328458 6. 289456  
11743205\_ 5. 937795 6. 037333 6. 008215 6. 042392 5. 993302 5. 991681  
11743206\_ 4. 480752 4. 474068 4. 370337 4. 654546 4. 545521 4. 584933  
11743207\_ 3. 154196 3. 180062 3. 101311 3. 101013 3. 224727 3. 348657  
11743208\_ 4. 712116 4. 872316 4. 66318 4. 942633 4. 917818 4. 905982  
11743209\_ 4. 853959 5. 021233 4. 782499 4. 853959 5. 049804 4. 853959  
11743210\_ 4. 168218 4. 055412 4. 085028 4. 218769 4. 078929 4. 133118  
11743211\_ 3. 713739 3. 590968 3. 901395 3. 763929 3. 750233 3. 69462  
11743212\_ 5. 239824 4. 949686 5. 088897 5. 667016 5. 486961 5. 53951  
11743213\_ 1. 867955 2. 241869 2. 223528 2. 023933 2. 010004 2. 109963  
11743214\_ 2. 583405 2. 432778 2. 954973 2. 545699 2. 76372 2. 656772  
11743215\_ 5. 574469 5. 59337 5. 480966 5. 519529 5. 559574 5. 603937  
11743216\_ 2. 679586 2. 760068 2. 760068 2. 927074 2. 858799 2. 683636  
11743217\_ 5. 04787 4. 668176 4. 88241 4. 878432 4. 798511 4. 806308  
11743218\_ 5. 508823 5. 579293 5. 775894 5. 35559 5. 626062 5. 698473  
11743219\_ 5. 247704 5. 160332 4. 998209 5. 248075 5. 156547 5. 20799  
11743220\_ 4. 81602 4. 748461 4. 560638 4. 886878 4. 762904 4. 804987  
11743221\_ 4. 361786 4. 373661 4. 288403 4. 30766 4. 416901 4. 245948  
11743222\_ 4. 386581 4. 455351 4. 389204 4. 499387 4. 499642 4. 458327  
11743223\_ 4. 90188 5. 097418 5. 029529 4. 966717 4. 93837 4. 971023  
11743224\_ 3. 989288 4. 135416 3. 837694 4. 213226 4. 221787 4. 148454  
11743225\_ 5. 904287 5. 863157 5. 676992 5. 870242 6. 005168 5. 911479  
11743226\_ 3. 519116 3. 51141 3. 726417 3. 49895 3. 410173 3. 325585  
11743227\_ 5. 276827 5. 416723 5. 424479 5. 622286 5. 673029 5. 4562  
11743228\_ 4. 117746 4. 13304 4. 030642 4. 212202 4. 318166 4. 037331  
11743229\_ 5. 333723 5. 408328 5. 201846 5. 548924 5. 382922 5. 43559  
11743230\_ 5. 675252 5. 621762 5. 695266 5. 594767 5. 566471 5. 730145  
11743231\_ 7. 498068 7. 414223 7. 391581 7. 641869 7. 544282 7. 640813  
11743232\_ 5. 723801 5. 681911 5. 556746 5. 494328 5. 397769 5. 619463  
11743233\_ 5. 031227 5. 144002 5. 104369 5. 250783 5. 169378 5. 119108  
11743234\_ 5. 882124 6. 061045 5. 913544 5. 970267 6. 069286 6. 153523  
11743235\_ 4. 467692 4. 469069 4. 660307 4. 569447 4. 698734 4. 817854  
11743236\_ 2. 245594 2. 323889 2. 536457 2. 309042 2. 238473 2. 211083  
11743237\_ 3. 672972 3. 850078 3. 625408 3. 897669 4. 047977 3. 872998  
11743238\_ 5. 614563 5. 62849 5. 501385 5. 783616 5. 709521 5. 70195  
11743239\_ 4. 989433 4. 907712 5. 005941 5. 094251 4. 890539 4. 940958  
11743240\_ 4. 402096 4. 548718 4. 601362 4. 515755 4. 593832 4. 650857  
11743241\_ 6. 172279 6. 176933 6. 262432 6. 035988 6. 0274 5. 954545  
11743242\_ 4. 599864 4. 742805 4. 625644 4. 925163 4. 905549 4. 748612  
11743243\_ 2. 418503 2. 291015 2. 525305 2. 546292 2. 528364 2. 443674  
11743244\_ 4. 935488 5. 007379 4. 846536 4. 968348 5. 054726 4. 928381  
11743245\_ 4. 215746 4. 207551 4. 026092 4. 311398 4. 209099 4. 275543  
11743246\_ 1. 898617 1. 988599 2. 053353 1. 906647 1. 905023 1. 892673  
11743247\_ 1. 933914 1. 933914 2. 030886 1. 998883 1. 959708 2. 2157  
11743248\_ 5. 205157 5. 221941 5. 223471 5. 086987 5. 191024 5. 339906  
11743249\_ 5. 497403 5. 554319 5. 512531 5. 393964 5. 594074 5. 547438  
11743250\_ 8. 209799 8. 138011 8. 269658 7. 752369 7. 772483 7. 733033

11743251\_ 9. 643959 9. 559132 9. 623041 9. 186565 9. 175329 9. 178848  
11743252\_ 9. 129543 9. 061845 9. 118132 8. 767701 8. 849588 8. 802082  
11743253\_ 8. 596171 8. 572366 8. 620122 8. 109369 8. 091679 8. 104722  
11743254\_ 10. 67454 10. 64655 10. 672 10. 57172 10. 55643 10. 52807  
11743255\_ 5. 480966 5. 477496 5. 621591 5. 38502 5. 452453 5. 528624  
11743256\_ 7. 41894 7. 286399 7. 428706 7. 793968 7. 817929 7. 875395  
11743257\_ 4. 50493 4. 215048 4. 277295 4. 436006 4. 590613 4. 350307  
11743258\_ 7. 455341 7. 427903 7. 387991 7. 066438 7. 226313 7. 137843  
11743259\_ 7. 948234 7. 924474 8. 001967 8. 299357 8. 327812 8. 323771  
11743260\_ 9. 334262 9. 270122 9. 338782 9. 06286 9. 094422 9. 121952  
11743261\_ 11. 09327 11. 04265 11. 07381 10. 99224 10. 98327 11. 03246  
11743262\_ 9. 725849 9. 680113 9. 769853 9. 715191 9. 747955 9. 727653  
11743263\_ 7. 693264 7. 707561 7. 750834 7. 715356 7. 757268 7. 757273  
11743264\_ 10. 45412 10. 46276 10. 45541 10. 49029 10. 51848 10. 50743  
11743265\_ 7. 285869 7. 111953 7. 261174 7. 001744 7. 171978 7. 080706  
11743266\_ 7. 981303 7. 932347 7. 962443 7. 996008 8. 186798 8. 104081  
11743267\_ 9. 18734 9. 101087 9. 201523 9. 176375 9. 176375 9. 13261  
11743268\_ 10. 60643 10. 57105 10. 64509 10. 33898 10. 34658 10. 36743  
11743269\_ 6. 970601 6. 881873 6. 792183 7. 388429 7. 346628 7. 383661  
11743270\_ 10. 62877 10. 52796 10. 56383 9. 961085 9. 955964 10. 03184  
11743271\_ 10. 24175 10. 18292 10. 21397 9. 513963 9. 521498 9. 621454  
11743272\_ 10. 31738 10. 33248 10. 35432 9. 752396 9. 716354 9. 731262  
11743273\_ 9. 817635 9. 811259 9. 834179 9. 264634 9. 230464 9. 272618  
11743274\_ 10. 16027 10. 14077 10. 1509 9. 51835 9. 505526 9. 5551  
11743275\_ 10. 91057 10. 86403 10. 93351 10. 7299 10. 72707 10. 77158  
11743276\_ 7. 926115 7. 86804 8. 068348 7. 971281 7. 925362 7. 889325  
11743277\_ 7. 267457 7. 104941 7. 263566 6. 398325 6. 465087 6. 524252  
11743278\_ 8. 099935 8. 160113 8. 186576 8. 304769 8. 333967 8. 2806  
11743279\_ 8. 953323 8. 939075 9. 00116 9. 087323 9. 093184 9. 038576  
11743280\_ 8. 955635 8. 870609 8. 964391 8. 819437 8. 823378 8. 807664  
11743281\_ 7. 75843 7. 641324 7. 660545 7. 953197 7. 886679 7. 886679  
11743282\_ 6. 306832 6. 274018 6. 242736 5. 678976 5. 977046 5. 83909  
11743283\_ 9. 818528 9. 732994 9. 779877 10. 13049 10. 10529 10. 09856  
11743284\_ 8. 248488 8. 221276 8. 292433 7. 900082 7. 956107 7. 923212  
11743285\_ 8. 667556 8. 626394 8. 637191 8. 912983 8. 825222 8. 886539  
11743286\_ 5. 508888 5. 704919 5. 480942 5. 792905 5. 739918 5. 80026  
11743287\_ 8. 604482 8. 598796 8. 64533 8. 360953 8. 400858 8. 390765  
11743288\_ 7. 601817 7. 534744 7. 495815 7. 666485 7. 685527 7. 654352  
11743289\_ 8. 187506 8. 11024 8. 193401 8. 308311 8. 241845 8. 318158  
11743290\_ 6. 152473 6. 07899 6. 121014 7. 753422 7. 839584 7. 853568  
11743291\_ 8. 045902 8. 052406 7. 968179 8. 174691 8. 085981 8. 206491  
11743292\_ 9. 080115 9. 080115 9. 096872 8. 985212 8. 949028 8. 993942  
11743293\_ 8. 211839 8. 155053 8. 182431 8. 338831 8. 337009 8. 342595  
11743294\_ 7. 821211 7. 823088 7. 789962 7. 931266 8. 002622 7. 895053  
11743295\_ 9. 17678 9. 071909 9. 207745 10. 02554 10. 08962 9. 975763  
11743296\_ 9. 081359 8. 987302 9. 072198 9. 627526 9. 643634 9. 609955  
11743297\_ 6. 930668 6. 788975 6. 85011 6. 936492 6. 937115 6. 898936  
11743298\_ 8. 401759 8. 388055 8. 456039 7. 637885 7. 629678 7. 727031  
11743299\_ 10. 79248 10. 73744 10. 74371 10. 81527 10. 83547 10. 86416  
11743300\_ 10. 47662 10. 45888 10. 50418 10. 55077 10. 55053 10. 49134  
11743301\_ 9. 789862 9. 734983 9. 791194 9. 839177 9. 836032 9. 814174



11743302\_ 4. 054082 4. 225008 4. 068263 4. 29661 3. 996662 4. 234312  
11743303\_ 9. 058569 9. 119592 9. 097463 8. 925292 8. 848312 8. 916863  
11743304\_ 6. 15186 6. 13945 6. 267979 6. 097927 5. 980978 6. 140414  
11743305\_ 9. 122365 9. 10362 9. 125237 9. 228662 9. 207665 9. 24606  
11743306\_ 6. 055567 5. 880618 6. 072764 5. 998897 6. 020887 5. 880575  
11743307\_ 8. 893983 8. 890722 8. 854771 8. 868927 8. 855372 8. 814207  
11743308\_ 9. 280233 9. 255702 9. 281879 9. 238639 9. 254856 9. 20433  
11743309\_ 5. 54495 5. 662532 5. 788014 5. 649584 5. 600531 5. 542274  
11743310\_ 9. 002957 8. 948839 8. 946247 8. 741539 8. 755935 8. 763196  
11743311\_ 7. 739423 7. 64382 7. 755249 7. 189287 7. 119433 7. 08081  
11743312\_ 8. 270661 8. 216549 8. 279233 8. 409209 8. 376114 8. 331641  
11743313\_ 5. 733515 5. 762432 5. 562476 5. 820052 5. 914522 5. 849541  
11743314\_ 8. 535821 8. 460615 8. 51704 8. 819033 8. 857645 8. 863481  
11743315\_ 10. 23246 10. 1878 10. 16261 9. 999473 9. 98822 10. 01828  
11743316\_ 10. 58501 10. 55666 10. 53804 10. 63294 10. 56289 10. 58364  
11743317\_ 8. 677115 8. 690982 8. 737649 8. 631368 8. 677115 8. 619043  
11743318\_ 9. 120275 9. 060862 9. 156527 9. 116229 9. 087201 9. 094065  
11743319\_ 6. 642108 6. 524929 6. 557068 6. 08272 6. 222296 6. 136177  
11743320\_ 7. 93851 7. 836024 7. 911383 7. 331873 7. 559658 7. 430908  
11743321\_ 5. 472753 5. 457771 5. 565628 5. 516589 5. 445329 5. 502342  
11743322\_ 9. 16885 9. 147929 9. 20749 8. 890244 8. 872247 8. 832325  
11743323\_ 7. 625205 7. 550361 7. 636021 7. 933033 7. 985522 7. 992403  
11743324\_ 8. 353172 8. 31299 8. 370737 8. 017013 7. 87424 7. 933706  
11743325\_ 7. 887078 7. 816957 7. 905663 7. 984851 7. 931082 7. 959692  
11743326\_ 7. 391328 7. 249411 7. 308073 7. 899131 7. 987793 8. 034657  
11743327\_ 7. 286091 7. 264318 7. 272972 7. 275094 7. 409161 7. 329648  
11743328\_ 8. 511965 8. 390188 8. 469181 8. 516484 8. 524769 8. 444782  
11743329\_ 5. 763634 5. 945376 5. 918314 5. 977166 5. 998978 6. 053427  
11743330\_ 9. 46619 9. 410734 9. 45225 9. 547266 9. 600213 9. 584584  
11743331\_ 7. 34659 7. 185878 7. 360922 7. 064183 7. 150715 7. 072514  
11743332\_ 4. 817534 4. 978374 5. 068347 5. 259393 5. 110168 5. 3398  
11743333\_ 9. 354594 9. 309844 9. 400475 9. 338857 9. 399431 9. 404732  
11743334\_ 7. 444644 7. 402874 7. 498307 7. 583452 7. 650184 7. 646243  
11743335\_ 7. 132291 7. 076162 7. 178881 6. 91398 6. 966981 6. 861589  
11743336\_ 9. 016908 8. 941027 9. 015506 8. 715152 8. 774992 8. 715136  
11743337\_ 7. 110856 7. 142685 7. 169172 7. 095991 7. 149537 7. 061102  
11743338\_ 5. 36642 5. 110046 4. 863608 5. 014933 4. 909426 5. 090072  
11743339\_ 7. 477484 7. 426842 7. 572619 6. 959604 6. 94402 6. 971257  
11743340\_ 6. 108876 6. 055584 6. 115892 6. 555351 6. 56145 6. 604683  
11743341\_ 6. 584888 6. 491204 6. 506548 6. 374772 6. 330828 6. 34236  
11743342\_ 6. 465831 6. 727694 6. 618452 7. 353701 7. 201796 7. 202602  
11743343\_ 5. 409222 5. 127575 5. 377595 6. 550086 6. 616945 6. 516316  
11743344\_ 6. 051623 6. 055517 5. 965659 6. 224152 6. 147817 6. 302133  
11743345\_ 9. 876729 9. 822686 9. 890935 9. 566539 9. 538248 9. 544435  
11743346\_ 7. 215693 7. 230111 7. 194826 7. 343353 7. 314433 7. 341817  
11743347\_ 6. 330368 6. 369899 6. 403134 6. 606851 6. 56978 6. 630584  
11743348\_ 9. 945494 9. 897009 9. 924805 9. 562297 9. 583854 9. 579914  
11743349\_ 7. 62993 7. 651016 7. 654058 7. 733532 7. 818628 7. 786782  
11743350\_ 4. 700243 4. 295256 4. 695199 4. 213226 4. 02626 4. 07808  
11743351\_ 5. 153018 5. 029529 5. 279031 4. 733194 4. 643652 4. 706581  
11743352\_ 6. 902088 6. 885319 6. 825441 6. 191329 6. 1834 6. 166908

11743353\_ 9. 454632 9. 400712 9. 426641 9. 032083 9. 020612 9. 079696  
11743354\_ 9. 152274 9. 144455 9. 213827 9. 228307 9. 210119 9. 240331  
11743355\_ 6. 360126 6. 412691 6. 418775 6. 430645 6. 414802 6. 382953  
11743356\_ 7. 189515 7. 236974 7. 287638 7. 120429 7. 032401 7. 093259  
11743357\_ 7. 127862 7. 036436 7. 002919 7. 107724 7. 125793 7. 120357  
11743358\_ 7. 648268 7. 581204 7. 618972 7. 601978 7. 612474 7. 626889  
11743359\_ 6. 835089 6. 804389 6. 856787 6. 862059 6. 800745 6. 912773  
11743360\_ 6. 013145 6. 159379 5. 884024 6. 019511 6. 063193 6. 028802  
11743361\_ 9. 395044 9. 382172 9. 415668 9. 458527 9. 397856 9. 505269  
11743362\_ 9. 534293 9. 547036 9. 484229 9. 671541 9. 627525 9. 655522  
11743363\_ 9. 335989 9. 256986 9. 303907 9. 109225 9. 082008 9. 131841  
11743364\_ 9. 436564 9. 426953 9. 385852 9. 386953 9. 35204 9. 232514  
11743365\_ 6. 938038 6. 807915 6. 859796 6. 657907 6. 802308 6. 861629  
11743366\_ 4. 7944 4. 842766 5. 096555 4. 169213 4. 059792 4. 246875  
11743367\_ 7. 521226 7. 39352 7. 568523 6. 654403 6. 702923 6. 717948  
11743368\_ 7. 349628 7. 292149 7. 439498 7. 052364 6. 992196 7. 028504  
11743369\_ 7. 038739 6. 97242 7. 104043 7. 220733 7. 248835 7. 269131  
11743370\_ 8. 740415 8. 763223 8. 76605 8. 579002 8. 545309 8. 444205  
11743371\_ 7. 12729 7. 061272 7. 094556 7. 471773 7. 299722 7. 37273  
11743372\_ 11. 82307 11. 79129 11. 79477 12. 24371 12. 24574 12. 18231  
11743373\_ 9. 140027 9. 037226 9. 119361 9. 769363 9. 744847 9. 708843  
11743374\_ 7. 918694 7. 861056 7. 884728 7. 881807 7. 818914 7. 974576  
11743375\_ 8. 438344 8. 367365 8. 440041 8. 402644 8. 328817 8. 375602  
11743376\_ 7. 221972 7. 160821 7. 335992 7. 555092 7. 501864 7. 658969  
11743377\_ 7. 686602 7. 560561 7. 695475 8. 112537 8. 0836 8. 160183  
11743378\_ 5. 833004 5. 709522 5. 696781 5. 672779 5. 816874 5. 92392  
11743379\_ 7. 342676 7. 317103 7. 385162 7. 625193 7. 614617 7. 58694  
11743380\_ 10. 44937 10. 43204 10. 43559 10. 27766 10. 22746 10. 23606  
11743381\_ 6. 130399 6. 055338 6. 196492 6. 752709 6. 867465 6. 885251  
11743382\_ 9. 863162 9. 834406 9. 863404 9. 856227 9. 870614 9. 767193  
11743383\_ 4. 584933 4. 562872 4. 610496 5. 115305 4. 963298 5. 072209  
11743384\_ 6. 360394 6. 16541 6. 382037 6. 510113 6. 272571 6. 529285  
11743385\_ 9. 112874 9. 097631 9. 128077 9. 10099 9. 171702 9. 173248  
11743386\_ 9. 389431 9. 358234 9. 351747 9. 452119 9. 44736 9. 419403  
11743387\_ 7. 672066 7. 554354 7. 60738 7. 819687 7. 679013 7. 772557  
11743388\_ 6. 870119 6. 779078 6. 754809 6. 866403 6. 896778 6. 983859  
11743389\_ 8. 574556 8. 480643 8. 517925 8. 18335 8. 181792 8. 169859  
11743390\_ 9. 499718 9. 472681 9. 502241 9. 557368 9. 493924 9. 542005  
11743391\_ 9. 286546 9. 215272 9. 261007 9. 282069 9. 302367 9. 304022  
11743392\_ 9. 982336 9. 999269 9. 950944 10. 17845 10. 09614 10. 02659  
11743393\_ 10. 02741 9. 995996 9. 99396 10. 09926 10. 06319 10. 02584  
11743394\_ 7. 06555 6. 986281 7. 022198 7. 040692 6. 931092 6. 955238  
11743395\_ 9. 277815 9. 197025 9. 179168 8. 964347 8. 971645 8. 971704  
11743396\_ 10. 76736 10. 70752 10. 70522 10. 85201 10. 84157 10. 86315  
11743397\_ 10. 90441 10. 93046 10. 91145 11. 10171 11. 04421 10. 98577  
11743398\_ 9. 508495 9. 444314 9. 480717 9. 490172 9. 449944 9. 496786  
11743399\_ 7. 888047 7. 893369 7. 859127 7. 81381 7. 800262 7. 706238  
11743400\_ 8. 9422 8. 968851 8. 916248 8. 997665 8. 958866 8. 984935  
11743401\_ 9. 385115 9. 363252 9. 352687 9. 413387 9. 417113 9. 434133  
11743402\_ 8. 610965 8. 540432 8. 715674 8. 694057 8. 622374 8. 711596  
11743403\_ 8. 531801 8. 466081 8. 504646 8. 163496 8. 205871 8. 159993

11743404\_ 8. 60724 8. 680857 8. 703767 9. 042844 9. 063951 9. 039745  
11743405\_ 6. 33357 6. 165732 6. 287198 6. 746882 6. 66415 6. 746882  
11743406\_ 6. 546137 6. 412133 6. 426069 6. 907168 6. 825023 6. 905258  
11743407\_ 8. 523542 8. 495847 8. 577726 8. 41676 8. 480549 8. 373638  
11743408\_ 8. 597602 8. 5594 8. 624473 8. 47976 8. 539537 8. 43141  
11743409\_ 8. 990798 8. 96139 9. 076711 8. 91686 8. 877127 8. 962423  
11743410\_ 8. 688175 8. 603354 8. 682653 8. 510279 8. 452698 8. 404419  
11743411\_ 8. 017874 8. 03872 8. 070542 7. 985219 7. 980954 7. 980316  
11743412\_ 8. 24907 8. 097018 8. 169767 7. 35758 7. 355604 7. 375562  
11743413\_ 10. 39461 10. 39414 10. 34083 10. 32801 10. 26564 10. 25172  
11743414\_ 7. 61567 7. 604825 7. 612217 7. 286273 7. 304836 7. 358974  
11743415\_ 7. 742915 7. 670756 7. 767299 8. 016269 8. 009659 7. 977845  
11743416\_ 7. 356893 7. 475971 7. 516487 7. 912773 7. 792524 7. 816704  
11743417\_ 6. 792183 6. 714177 6. 619536 5. 47869 5. 727786 5. 772627  
11743418\_ 6. 373092 6. 466124 6. 172897 6. 328254 6. 408472 6. 407445  
11743419\_ 7. 230748 7. 176751 7. 053796 6. 736015 6. 672011 6. 777954  
11743420\_ 6. 121592 6. 276574 6. 257529 5. 67166 5. 887989 5. 846463  
11743421\_ 5. 637663 5. 531327 5. 26426 5. 724577 5. 69205 5. 746872  
11743422\_ 6. 863335 6. 716117 6. 929942 6. 773048 6. 739716 6. 728157  
11743423\_ 2. 319305 2. 548473 2. 440887 2. 429786 2. 429786 2. 414748  
11743424\_ 5. 563996 5. 756161 5. 530411 5. 672285 5. 686361 5. 749437  
11743425\_ 5. 578992 5. 841177 5. 538011 5. 674908 5. 686361 5. 762646  
11743426\_ 9. 913869 9. 92431 9. 865662 10. 03949 10. 05802 9. 988822  
11743427\_ 8. 840762 8. 787844 8. 815227 8. 853898 8. 94134 8. 863035  
11743428\_ 7. 554957 7. 470282 7. 605889 7. 753097 7. 793131 7. 669397  
11743429\_ 6. 982937 6. 72047 6. 991542 6. 543271 6. 541665 6. 553034  
11743430\_ 8. 287552 8. 27275 8. 300959 8. 398959 8. 281872 8. 336755  
11743431\_ 5. 73187 5. 948698 5. 764783 5. 95892 6. 009114 5. 95634  
11743432\_ 5. 635742 5. 75147 5. 584813 5. 984923 5. 957726 5. 917047  
11743433\_ 9. 171907 9. 165732 9. 221112 9. 210018 9. 28837 9. 238537  
11743434\_ 5. 895731 5. 731967 5. 914311 5. 468687 5. 375645 5. 375645  
11743435\_ 6. 029014 5. 851261 6. 147634 6. 105534 6. 052102 6. 13528  
11743436\_ 6. 829192 6. 849603 6. 959294 6. 709008 6. 713413 6. 765911  
11743437\_ 6. 225513 6. 255566 6. 288478 6. 252253 6. 236024 6. 264233  
11743438\_ 7. 928787 7. 974386 7. 977261 8. 206176 8. 004635 8. 00577  
11743439\_ 5. 68843 5. 808802 5. 820052 5. 725663 5. 802839 5. 77685  
11743440\_ 7. 249009 7. 202842 7. 288576 7. 34749 7. 402314 7. 396101  
11743441\_ 10. 95801 10. 91539 10. 93472 10. 74377 10. 77326 10. 75352  
11743442\_ 7. 979159 8. 030584 7. 984064 7. 799789 7. 847325 7. 827978  
11743443\_ 5. 643084 5. 635345 5. 475385 5. 465818 5. 332481 5. 231495  
11743444\_ 9. 05674 8. 969367 9. 014019 7. 96742 7. 976046 7. 902735  
11743445\_ 7. 362272 7. 118244 7. 196295 7. 03519 7. 007787 7. 030843  
11743446\_ 8. 28734 8. 300711 8. 299475 8. 002251 8. 206247 8. 064267  
11743447\_ 6. 916991 6. 922325 6. 916201 6. 949184 6. 961359 6. 934615  
11743448\_ 8. 633687 8. 55213 8. 641211 8. 619508 8. 630689 8. 610543  
11743449\_ 8. 515173 8. 415443 8. 524849 8. 702795 8. 714801 8. 713129  
11743450\_ 5. 093548 5. 233073 5. 040624 5. 024698 4. 929308 4. 905853  
11743451\_ 8. 025151 7. 955768 8. 077053 7. 656071 7. 689489 7. 683525  
11743452\_ 8. 717407 8. 691432 8. 70445 8. 816125 8. 792358 8. 891292  
11743453\_ 5. 634859 5. 489206 5. 562676 5. 755526 5. 697205 5. 686438  
11743454\_ 9. 393814 9. 402685 9. 33732 9. 464175 9. 447228 9. 333601

11743455\_ 7. 272239 7. 194394 7. 357388 7. 329155 7. 300697 7. 348628  
11743456\_ 7. 283239 7. 176387 7. 269482 7. 431134 7. 419869 7. 486548  
11743457\_ 8. 048104 7. 967742 8. 040719 8. 782982 8. 871121 8. 89933  
11743458\_ 4. 044331 4. 172031 3. 940484 4. 182396 4. 190165 4. 19967  
11743459\_ 9. 087892 9. 056786 9. 079016 9. 225475 9. 266651 9. 177774  
11743460\_ 3. 171108 2. 756537 2. 974381 2. 866744 2. 825118 2. 932254  
11743461\_ 2. 488798 2. 788593 2. 651955 2. 554982 2. 445954 2. 718612  
11743462\_ 5. 27623 5. 399445 5. 449903 5. 480966 5. 318877 5. 374866  
11743463\_ 9. 837814 9. 733248 9. 813616 9. 849863 9. 85943 9. 862888  
11743464\_ 10. 19823 10. 14973 10. 21571 10. 20581 10. 23454 10. 21977  
11743465\_ 8. 037998 7. 927828 8. 075225 8. 083896 8. 142312 8. 134401  
11743466\_ 8. 721216 8. 705362 8. 73247 8. 874498 8. 869287 8. 875981  
11743467\_ 10. 01806 9. 935445 10. 0127 10. 08727 10. 09962 10. 03895  
11743468\_ 10. 50548 10. 45937 10. 5276 10. 55161 10. 58299 10. 60943  
11743469\_ 5. 94809 5. 816164 5. 894758 5. 619325 5. 768053 5. 849207  
11743470\_ 7. 525768 7. 415489 7. 554882 6. 424266 6. 394823 6. 495735  
11743471\_ 5. 75917 5. 704919 5. 901734 5. 60711 5. 7178 5. 61465  
11743472\_ 7. 804057 7. 839584 7. 862103 7. 382283 7. 328518 7. 257968  
11743473\_ 7. 831584 7. 799703 7. 844695 7. 427543 7. 291552 7. 235444  
11743474\_ 8. 887978 8. 881417 8. 923404 8. 949493 8. 979199 8. 971679  
11743475\_ 5. 073036 5. 039461 4. 936699 5. 141931 5. 149545 5. 187077  
11743476\_ 8. 725168 8. 494418 8. 628981 8. 354635 8. 216807 8. 195911  
11743477\_ 9. 491659 9. 388364 9. 444583 9. 034003 9. 035702 8. 988648  
11743478\_ 8. 939391 8. 869476 8. 940449 8. 89172 8. 911876 8. 931302  
11743479\_ 8. 436139 8. 409384 8. 416692 8. 858484 8. 942852 8. 800682  
11743480\_ 9. 404335 9. 306017 9. 344077 9. 277184 9. 223828 9. 205569  
11743481\_ 8. 213211 8. 155596 8. 190955 7. 834448 7. 828593 7. 877998  
11743482\_ 8. 280123 8. 179225 8. 292715 7. 941293 7. 920971 7. 931946  
11743483\_ 8. 067031 7. 969657 8. 088491 8. 573234 8. 555459 8. 571954  
11743484\_ 8. 140291 8. 208263 8. 18589 7. 933808 7. 893187 7. 834011  
11743485\_ 8. 062326 7. 91666 8. 033544 7. 673253 7. 596829 7. 66148  
11743486\_ 8. 736736 8. 738466 8. 731302 8. 363592 8. 38724 8. 337751  
11743487\_ 9. 403291 9. 419502 9. 40544 9. 449531 9. 468279 9. 377247  
11743488\_ 9. 869672 9. 819905 9. 866885 9. 814543 9. 846586 9. 851573  
11743489\_ 6. 239913 6. 058786 6. 152749 6. 430248 6. 47453 6. 548949  
11743490\_ 10. 42506 10. 35552 10. 33632 9. 790217 9. 816082 9. 841688  
11743491\_ 10. 34087 10. 34794 10. 31249 10. 0195 10. 03089 9. 999901  
11743492\_ 9. 774805 9. 862716 9. 665369 9. 816926 9. 70428 9. 662956  
11743493\_ 10. 15062 10. 16585 10. 09087 10. 10372 10. 00328 9. 919588  
11743494\_ 8. 587403 8. 499162 8. 623296 8. 479421 8. 446001 8. 43335  
11743495\_ 4. 148997 4. 13159 3. 993283 4. 210753 4. 136791 4. 250314  
11743496\_ 4. 884394 4. 990566 5. 122191 5. 091467 5. 015514 5. 138068  
11743497\_ 6. 213709 6. 032133 6. 330332 5. 217136 4. 779529 5. 253431  
11743498\_ 6. 696524 6. 628591 6. 685449 5. 729309 5. 780641 5. 694012  
11743499\_ 8. 231807 8. 195535 8. 220569 8. 604297 8. 510208 8. 45909  
11743500\_ 8. 080812 8. 070707 8. 083194 8. 300508 8. 338245 8. 20699  
11743501\_ 7. 188127 7. 107228 7. 121875 6. 791535 6. 789013 6. 831098  
11743502\_ 8. 689432 8. 66006 8. 698645 9. 234933 9. 259042 9. 265622  
11743503\_ 7. 535172 7. 482432 7. 562094 8. 121079 8. 198011 8. 19222  
11743504\_ 7. 502142 7. 356752 7. 491342 8. 258743 8. 192576 8. 284033  
11743505\_ 8. 578626 8. 55211 8. 578965 8. 548318 8. 655987 8. 642017

11743506\_ 4. 200324 3. 757995 4. 026092 3. 85963 3. 918862 4. 040094  
11743507\_ 5. 501641 5. 301548 5. 621113 5. 185129 5. 342431 5. 177555  
11743508\_ 5. 502433 5. 235372 5. 41585 4. 938834 4. 996265 5. 153902  
11743509\_ 5. 968296 5. 714426 5. 842758 6. 271481 6. 268009 6. 39012  
11743510\_ 6. 883299 6. 855043 6. 886652 7. 496526 7. 358157 7. 449969  
11743511\_ 7. 472989 7. 337384 7. 508009 8. 006317 7. 905031 8. 027878  
11743512\_ 6. 049362 5. 94896 6. 003048 5. 992454 6. 02974 5. 974188  
11743513\_ 7. 566155 7. 438776 7. 461563 8. 301829 8. 351432 8. 30329  
11743514\_ 4. 886668 5. 006543 4. 880423 4. 870026 5. 006543 5. 001837  
11743515\_ 5. 85858 5. 704919 5. 733925 5. 712699 5. 706662 5. 758744  
11743516\_ 5. 177934 5. 317565 5. 306706 5. 414869 5. 398199 5. 530863  
11743517\_ 8. 165435 8. 131259 8. 153511 8. 270884 8. 244673 8. 227223  
11743518\_ 8. 072164 8. 106818 8. 125725 8. 397059 8. 2292 8. 278483  
11743519\_ 8. 142131 8. 132855 8. 16396 8. 135199 8. 140325 8. 127942  
11743520\_ 8. 113004 8. 033847 8. 154117 7. 965167 7. 938917 7. 934286  
11743521\_ 9. 609198 9. 519068 9. 587563 10. 00445 9. 948962 9. 965603  
11743522\_ 9. 543812 9. 474852 9. 541982 9. 149962 9. 129762 9. 133643  
11743523\_ 8. 875622 8. 797141 8. 83262 8. 447822 8. 436746 8. 44146  
11743524\_ 6. 2532 6. 131021 6. 283784 5. 845365 5. 872287 6. 093304  
11743525\_ 7. 086606 6. 99997 7. 066852 6. 84595 6. 92385 6. 96558  
11743526\_ 7. 360663 7. 299473 7. 315419 7. 615529 7. 675639 7. 823336  
11743527\_ 8. 015843 7. 958433 7. 965947 8. 58189 8. 608001 8. 666479  
11743528\_ 8. 333526 8. 33192 8. 350965 8. 958424 8. 945687 8. 984186  
11743529\_ 8. 750112 8. 6225 8. 737362 8. 532661 8. 412827 8. 457936  
11743530\_ 7. 811052 7. 766949 7. 826107 8. 372118 8. 350112 8. 405309  
11743531\_ 6. 113606 6. 073799 6. 136035 6. 066117 6. 034446 6. 097003  
11743532\_ 3. 586718 3. 519754 3. 603127 3. 142117 3. 17285 3. 148337  
11743533\_ 6. 561106 6. 451479 6. 582086 6. 073842 6. 246409 6. 094413  
11743534\_ 7. 414588 7. 423726 7. 398509 7. 454593 7. 46305 7. 561971  
11743535\_ 7. 868011 7. 827341 7. 870632 7. 9321 7. 94841 7. 972955  
11743536\_ 7. 664757 7. 588229 7. 496215 8. 367527 8. 330925 8. 376268  
11743537\_ 6. 822594 6. 743694 6. 830398 6. 535748 6. 465721 6. 518934  
11743538\_ 5. 435559 5. 45468 5. 435559 5. 694214 5. 696664 5. 676992  
11743539\_ 8. 241303 8. 116782 8. 268378 8. 321049 8. 291685 8. 36925  
11743540\_ 7. 343723 7. 33416 7. 324474 7. 433944 7. 398312 7. 409349  
11743541\_ 8. 492956 8. 465546 8. 509359 8. 877494 8. 839527 8. 804949  
11743542\_ 7. 221939 7. 272859 7. 15281 7. 732102 7. 654749 7. 60981  
11743543\_ 8. 206626 8. 173497 8. 205571 8. 542272 8. 516361 8. 502017  
11743544\_ 7. 245951 7. 220065 7. 230373 7. 636991 7. 756578 7. 726216  
11743545\_ 9. 523552 9. 492602 9. 554847 9. 573717 9. 582906 9. 577683  
11743546\_ 8. 458705 8. 389348 8. 405724 7. 995141 7. 966998 7. 969965  
11743547\_ 7. 384653 7. 353485 7. 412557 7. 178598 7. 253426 7. 164308  
11743548\_ 4. 615777 4. 477397 4. 413948 4. 390829 4. 267181 4. 445974  
11743549\_ 4. 651696 4. 643717 4. 433444 4. 517924 4. 622102 4. 656176  
11743550\_ 7. 284387 7. 328717 7. 450032 7. 098046 7. 239949 7. 280102  
11743551\_ 9. 135035 9. 118984 9. 095384 8. 969151 8. 956039 8. 942389  
11743552\_ 6. 526978 6. 621412 6. 764332 6. 623632 6. 587186 6. 623632  
11743553\_ 8. 08832 8. 092966 8. 066135 7. 922264 7. 804194 7. 765944  
11743554\_ 8. 221683 8. 215825 8. 200698 8. 070152 7. 994149 7. 957362  
11743555\_ 6. 627181 6. 685906 6. 576695 6. 533417 6. 547085 6. 597361  
11743556\_ 4. 186069 4. 424214 4. 502842 4. 405397 4. 256117 4. 291739

11743557\_ 4.90681 5.020468 4.659508 5.032332 5.124071 4.966731  
11743558\_ 9.044584 8.984705 9.024427 8.905372 8.89952 8.906588  
11743559\_ 2.592661 2.129207 2.24346 2.173187 2.25483 2.226179  
11743560\_ 2.662279 2.458067 2.831196 2.542654 2.459482 2.562093  
11743561\_ 2.361778 2.166793 2.166793 2.079277 2.155962 2.072861  
11743562\_ 8.153455 8.159301 8.151267 8.595461 8.532863 8.450391  
11743563\_ 6.59317 6.448378 6.557068 6.862059 6.879967 6.801028  
11743564\_ 7.607513 7.6266 7.66206 7.748889 7.755371 7.806249  
11743565\_ 6.650103 6.716092 6.7837 6.838457 6.901199 6.913671  
11743566\_ 8.908878 8.841982 8.890067 8.606745 8.617566 8.609772  
11743567\_ 9.482823 9.515033 9.485223 9.368859 9.310163 9.29983  
11743568\_ 5.95081 5.893191 6.069567 5.666577 5.708341 5.879261  
11743569\_ 6.237954 5.999416 6.216442 5.830481 5.977037 6.081344  
11743570\_ 6.20817 6.146224 6.303369 6.081999 5.898419 5.996828  
11743571\_ 8.972367 8.862147 8.958757 8.595188 8.546055 8.616269  
11743572\_ 7.758949 7.691028 7.733104 7.765944 7.780626 7.757093  
11743573\_ 6.580025 6.464676 6.607372 6.414825 6.330902 6.318701  
11743574\_ 6.62077 6.657658 6.617128 6.519875 6.46736 6.528337  
11743575\_ 4.074226 4.103188 4.036562 4.170981 4.162586 4.200678  
11743576\_ 6.816874 6.849603 6.785744 6.397946 6.389283 6.325494  
11743577\_ 6.219035 6.29259 6.192575 5.830163 5.871093 5.871093  
11743578\_ 11.00121 11.00942 11.02065 11.00039 11.05405 11.00042  
11743579\_ 9.249861 9.165455 9.271793 9.299567 9.318953 9.301838  
11743580\_ 10.14016 10.21057 10.20142 10.2685 10.30261 10.23169  
11743581\_ 10.77843 10.76813 10.78901 10.8064 10.87067 10.80175  
11743582\_ 8.215798 8.130811 8.181093 9.667683 9.66906 9.634594  
11743583\_ 8.695856 8.660633 8.608375 8.849927 8.83463 8.85923  
11743584\_ 9.777017 9.769362 9.751305 9.919141 9.868786 9.844582  
11743585\_ 10.05083 10.05098 10.02617 9.906859 9.874005 9.861622  
11743586\_ 8.821616 8.787011 8.824241 8.58557 8.622024 8.622703  
11743587\_ 8.106287 8.036211 8.066644 7.890917 7.9235 7.849196  
11743588\_ 9.138732 9.122956 9.154841 9.003556 8.998366 9.021793  
11743589\_ 5.942257 5.957954 5.933624 5.979338 5.980978 6.016107  
11743590\_ 6.134177 6.186138 6.169065 6.15871 6.142856 6.223744  
11743591\_ 7.112856 7.076642 7.100501 7.207148 7.200037 7.202639  
11743592\_ 8.221563 8.128437 8.155804 7.577149 7.638961 7.56082  
11743593\_ 8.909581 8.84756 8.891827 9.065178 9.076357 9.111191  
11743594\_ 8.034143 7.974099 8.017646 7.565241 7.603589 7.511713  
11743595\_ 4.62551 4.931536 4.558426 4.857066 4.785117 4.785117  
11743596\_ 5.393615 5.480966 5.480966 5.416587 5.347493 5.366747  
11743597\_ 8.019051 7.880233 8.009104 7.201315 7.18458 7.145584  
11743598\_ 6.990057 6.962529 6.936494 6.693117 6.809252 6.887901  
11743599\_ 5.661959 5.573414 5.560899 5.700302 5.59912 5.721499  
11743600\_ 7.240881 7.201426 7.222344 7.092642 7.176167 7.147881  
11743601\_ 7.683179 7.632471 7.708475 7.513957 7.604218 7.626167  
11743602\_ 8.932735 8.904232 8.965126 9.400749 9.463834 9.406775  
11743603\_ 9.28474 9.223303 9.253327 9.954916 9.834881 9.893415  
11743604\_ 9.544567 9.503429 9.487333 10.20464 10.16158 10.14536  
11743605\_ 9.916525 9.965321 9.861629 10.03617 9.99023 9.983937  
11743606\_ 9.420964 9.360162 9.419394 9.540291 9.572079 9.567602  
11743607\_ 7.769685 7.724811 7.74999 7.900777 7.862688 7.815062

11743608\_ 10. 27542 10. 2769 10. 18791 9. 495512 9. 505709 9. 375066  
11743609\_ 9. 287031 9. 314868 9. 251412 8. 614208 8. 568402 8. 512617  
11743610\_ 7. 867145 7. 864887 7. 779674 7. 834652 7. 892044 7. 884416  
11743611\_ 9. 485329 9. 423603 9. 507531 9. 225548 9. 200971 9. 243289  
11743612\_ 7. 066036 6. 963898 7. 120109 6. 92079 6. 955285 6. 905036  
11743613\_ 7. 571083 7. 376225 7. 416718 7. 08794 7. 125793 7. 144608  
11743614\_ 4. 664921 4. 961934 4. 772366 5. 506441 5. 380097 5. 447156  
11743615\_ 6. 826311 6. 787186 6. 89762 6. 869687 6. 88305 6. 80421  
11743616\_ 8. 188997 8. 138093 8. 21405 7. 668913 7. 693917 7. 686303  
11743617\_ 8. 632453 8. 623375 8. 684205 7. 422778 7. 498372 7. 490393  
11743618\_ 7. 769279 7. 77551 7. 775044 6. 632009 6. 592141 6. 585293  
11743619\_ 6. 79959 6. 751766 6. 770678 6. 931356 6. 912884 6. 906875  
11743620\_ 8. 704964 8. 704261 8. 700195 7. 684049 7. 667238 7. 599876  
11743621\_ 6. 768856 6. 557733 6. 635681 6. 551922 6. 623799 6. 542705  
11743622\_ 10. 66031 10. 60799 10. 60575 10. 53496 10. 51023 10. 54768  
11743623\_ 7. 90961 7. 906861 7. 924783 7. 792526 7. 84422 7. 862574  
11743624\_ 8. 341378 8. 232182 8. 373134 8. 195083 8. 243194 8. 29207  
11743625\_ 4. 649059 4. 641064 4. 736592 4. 602372 4. 738734 4. 703133  
11743626\_ 6. 897989 6. 941078 6. 939806 6. 291614 6. 193422 6. 18235  
11743627\_ 6. 295065 6. 487039 6. 443638 6. 364198 6. 292223 6. 271721  
11743628\_ 6. 498229 6. 58667 6. 440481 6. 446762 6. 325525 6. 377589  
11743629\_ 7. 289881 7. 152839 7. 26402 6. 791611 6. 744047 6. 692377  
11743630\_ 10. 24741 10. 23734 10. 2764 10. 64434 10. 65383 10. 607  
11743631\_ 6. 034299 5. 957954 5. 997853 6. 166226 6. 280663 6. 223939  
11743632\_ 4. 588927 4. 588927 4. 708847 4. 540882 4. 630424 4. 493793  
11743633\_ 8. 145831 8. 072262 8. 162789 8. 308329 8. 320894 8. 350549  
11743634\_ 6. 945415 6. 931355 7. 031022 6. 951256 7. 011767 6. 951148  
11743635\_ 5. 971763 5. 788922 5. 908023 5. 336053 5. 348925 5. 524134  
11743636\_ 4. 584933 4. 871132 4. 724368 4. 986693 4. 665713 4. 939085  
11743637\_ 5. 894439 5. 900762 5. 816316 5. 697905 5. 808097 5. 696084  
11743638\_ 6. 171447 6. 21182 6. 171447 6. 118838 6. 183123 6. 023011  
11743639\_ 4. 966402 4. 761794 4. 907795 4. 942068 5. 104125 5. 272066  
11743640\_ 9. 639419 9. 647716 9. 628534 8. 628036 8. 598131 8. 555541  
11743641\_ 5. 591859 5. 732229 5. 72445 5. 528322 5. 487589 5. 521462  
11743642\_ 7. 020638 7. 028433 7. 1311 7. 049794 6. 870194 6. 96259  
11743643\_ 6. 484311 6. 435913 6. 317123 6. 613848 6. 585254 6. 572373  
11743644\_ 6. 06603 6. 048273 6. 282224 5. 960336 5. 945671 6. 046241  
11743645\_ 7. 012463 6. 903262 6. 954782 6. 86749 6. 803629 6. 871178  
11743646\_ 2. 86195 2. 814743 3. 014684 3. 1321 2. 867123 3. 171287  
11743647\_ 9. 334512 9. 261091 9. 285629 9. 515462 9. 501386 9. 52912  
11743648\_ 8. 192436 8. 109916 8. 104711 7. 789064 7. 734262 7. 79914  
11743649\_ 9. 402734 9. 404698 9. 415454 9. 090097 9. 054408 9. 083316  
11743650\_ 10. 03246 10. 01505 9. 956112 10. 72349 10. 68598 10. 67039  
11743651\_ 9. 047485 8. 996823 9. 061256 9. 646667 9. 654886 9. 647781  
11743652\_ 8. 606862 8. 527549 8. 579043 9. 191071 9. 26654 9. 220465  
11743653\_ 9. 829765 9. 793053 9. 843102 10. 36566 10. 42159 10. 3768  
11743654\_ 3. 710383 4. 05733 3. 797019 3. 912714 3. 882706 3. 682597  
11743655\_ 2. 706683 2. 635414 2. 610537 2. 655976 2. 718322 2. 811471  
11743656\_ 2. 535854 2. 381344 2. 266197 2. 404464 2. 316583 2. 300097  
11743657\_ 2. 517745 2. 448175 2. 276362 2. 375173 2. 669269 2. 494072  
11743658\_ 5. 540537 5. 547194 5. 688091 5. 662605 5. 77859 5. 866218

11743659\_ 5. 618026 5. 666181 5. 629696 5. 363012 5. 36323 5. 374372  
11743660\_ 9. 927709 9. 88037 9. 900913 9. 65731 9. 6257 9. 649955  
11743661\_ 8. 878218 8. 931684 8. 875781 8. 910852 8. 798436 8. 725092  
11743662\_ 7. 482058 7. 596958 7. 614676 7. 579256 7. 57757 7. 495275  
11743663\_ 8. 978195 8. 938419 8. 987082 8. 981052 8. 960323 8. 946831  
11743664\_ 7. 271332 7. 215889 7. 255225 7. 124837 7. 033368 7. 065941  
11743665\_ 6. 703732 6. 585508 6. 629173 6. 629171 6. 541665 6. 474359  
11743666\_ 7. 76441 7. 806864 7. 837848 7. 657969 7. 614757 7. 604369  
11743667\_ 4. 119601 4. 304235 4. 18914 4. 703723 4. 886084 4. 65963  
11743668\_ 6. 659357 6. 753556 6. 67763 6. 884732 6. 74044 6. 780769  
11743669\_ 5. 130729 5. 081973 5. 25683 5. 026558 4. 969201 4. 931159  
11743670\_ 6. 96245 6. 856076 6. 962168 6. 688764 6. 637341 6. 687393  
11743671\_ 7. 988904 7. 797912 7. 891447 7. 44013 7. 431154 7. 425956  
11743672\_ 7. 464066 7. 333377 7. 497813 7. 004332 7. 033674 7. 033999  
11743673\_ 6. 872357 6. 786569 6. 665265 5. 996126 6. 044285 6. 150766  
11743674\_ 6. 872357 6. 789187 6. 753665 5. 95069 6. 044285 6. 13945  
11743675\_ 8. 776616 8. 702658 8. 721848 8. 476393 8. 379953 8. 446771  
11743676\_ 6. 193626 6. 214591 5. 910426 5. 751721 5. 820052 5. 686138  
11743677\_ 3. 838481 3. 834256 3. 939352 4. 138882 3. 943656 3. 969628  
11743678\_ 5. 262066 5. 273553 5. 385298 5. 180491 5. 230868 5. 255323  
11743679\_ 7. 906654 7. 838145 7. 834422 8. 46799 8. 340984 8. 377661  
11743680\_ 7. 886647 7. 774754 7. 892766 8. 37238 8. 374188 8. 36205  
11743681\_ 11. 35048 11. 29228 11. 36658 10. 98088 10. 96138 10. 96835  
11743682\_ 10. 225 10. 17432 10. 17248 9. 082957 8. 941522 8. 940288  
11743683\_ 7. 944949 7. 979196 7. 891399 8. 225433 8. 094021 8. 04809  
11743684\_ 9. 550039 9. 507736 9. 555126 9. 420652 9. 367897 9. 380983  
11743685\_ 8. 944523 8. 863329 8. 879452 8. 758837 8. 687329 8. 785991  
11743686\_ 6. 282224 6. 296189 6. 418728 6. 056241 6. 159098 6. 193291  
11743687\_ 10. 74062 10. 70453 10. 78623 11. 22318 11. 1845 11. 12356  
11743688\_ 7. 840533 7. 804485 7. 756261 7. 586675 7. 682324 7. 639343  
11743689\_ 4. 815683 4. 930149 4. 772366 4. 987438 5. 005663 4. 948103  
11743690\_ 5. 245273 5. 325785 5. 090913 5. 288377 5. 339407 5. 302511  
11743691\_ 8. 467703 8. 407956 8. 536547 8. 609186 8. 656045 8. 61285  
11743692\_ 8. 158525 8. 157011 8. 132118 8. 855472 8. 905527 8. 818171  
11743693\_ 8. 541565 8. 452612 8. 521656 9. 091328 9. 054813 9. 10618  
11743694\_ 7. 31651 7. 298023 7. 374969 7. 885833 7. 839275 7. 892549  
11743695\_ 5. 845365 5. 834921 5. 800871 6. 226437 6. 159771 6. 188266  
11743696\_ 4. 649028 4. 786449 4. 734721 4. 724053 4. 756355 4. 813404  
11743697\_ 8. 039185 8. 007447 8. 079687 8. 169405 8. 141401 8. 242312  
11743698\_ 8. 429713 8. 439118 8. 440601 7. 769397 7. 749713 7. 701561  
11743699\_ 10. 08525 10. 0391 10. 07369 9. 666173 9. 612024 9. 640944  
11743700\_ 5. 926672 5. 889039 5. 899714 5. 757919 5. 83833 5. 912576  
11743701\_ 9. 173092 9. 118771 9. 113038 8. 783429 8. 720128 8. 788511  
11743702\_ 8. 884751 8. 74741 8. 830431 8. 923968 8. 895027 8. 878662  
11743703\_ 7. 510501 7. 397069 7. 567679 7. 396031 7. 418042 7. 40268  
11743704\_ 6. 799833 6. 891056 6. 781014 6. 977003 6. 944484 6. 923448  
11743705\_ 7. 414971 7. 377975 7. 38405 7. 424066 7. 551851 7. 43054  
11743706\_ 8. 251064 8. 128398 8. 310589 8. 025462 8. 04904 8. 127118  
11743707\_ 7. 626476 7. 619572 7. 743877 7. 641039 7. 634584 7. 564435  
11743708\_ 3. 597896 3. 503743 3. 375998 3. 850025 3. 418149 3. 688186  
11743709\_ 6. 58691 6. 585232 6. 696295 7. 105307 7. 240572 7. 198546



11743710\_ 2. 602801 2. 485824 2. 542179 2. 542867 2. 711971 2. 574793  
11743711\_ 5. 078983 5. 097092 5. 141051 5. 14062 5. 240892 5. 042127  
11743712\_ 6. 721563 6. 525879 6. 820115 6. 109148 5. 977779 6. 135326  
11743713\_ 7. 765944 7. 628642 7. 75883 7. 040896 6. 983097 7. 078204  
11743714\_ 6. 684865 6. 521072 6. 642781 6. 118838 6. 078116 6. 137649  
11743715\_ 11. 18745 11. 11487 11. 1422 11. 11668 11. 10003 11. 13052  
11743716\_ 4. 951203 4. 709463 4. 643717 4. 392645 4. 148908 4. 386802  
11743717\_ 3. 744869 3. 869283 3. 993203 4. 016665 4. 008866 4. 245288  
11743718\_ 6. 326358 6. 385359 6. 299932 6. 194288 6. 183463 6. 26446  
11743719\_ 3. 239771 3. 288568 3. 146845 3. 176336 3. 307467 3. 194858  
11743720\_ 3. 943872 3. 971544 4. 084952 4. 119391 4. 279272 4. 152008  
11743721\_ 12. 16844 12. 14488 12. 18513 12. 098 12. 09948 12. 1002  
11743722\_ 10. 31965 10. 27404 10. 3713 10. 56008 10. 5504 10. 55324  
11743723\_ 6. 340918 6. 453577 6. 450444 6. 209356 6. 230081 6. 349584  
11743724\_ 8. 583412 8. 531748 8. 529089 8. 337893 8. 33407 8. 280268  
11743725\_ 9. 552671 9. 472009 9. 511025 9. 220769 9. 271451 9. 281311  
11743726\_ 12. 05756 12. 07353 12. 10579 12. 03953 12. 00713 11. 99957  
11743727\_ 8. 799475 8. 831256 8. 821758 8. 594121 8. 635862 8. 561284  
11743728\_ 9. 797407 9. 718314 9. 766626 9. 331427 9. 401332 9. 33229  
11743729\_ 7. 69747 7. 741171 7. 752907 8. 244104 8. 234472 8. 323384  
11743730\_ 2. 169774 2. 01745 1. 917274 1. 895595 1. 897116 1. 963743  
11743731\_ 2. 881807 2. 726664 3. 010053 3. 032173 3. 238351 3. 059667  
11743732\_ 9. 224322 9. 18554 9. 256983 9. 925513 9. 880108 9. 909147  
11743733\_ 9. 537 9. 481122 9. 506794 10. 17361 10. 18446 10. 17817  
11743734\_ 7. 196656 7. 139982 7. 277297 6. 873077 6. 980044 6. 881796  
11743735\_ 8. 239675 8. 2395 8. 209678 8. 267518 8. 287042 8. 352389  
11743736\_ 7. 708241 7. 748691 7. 729725 7. 748691 7. 734549 7. 75735  
11743737\_ 6. 834136 6. 819744 6. 843316 7. 308558 7. 299707 7. 377179  
11743738\_ 7. 021549 6. 986734 7. 090838 7. 164857 7. 13868 7. 168741  
11743739\_ 6. 893108 6. 809436 6. 856581 7. 081147 7. 050984 7. 157497  
11743740\_ 8. 694099 8. 691274 8. 641503 8. 761705 8. 712171 8. 656553  
11743741\_ 7. 166191 7. 082284 7. 195168 6. 794714 6. 952954 6. 92323  
11743742\_ 7. 628955 7. 608148 7. 519221 8. 066927 8. 081676 8. 05859  
11743743\_ 6. 43373 6. 469235 6. 453564 6. 759778 6. 752104 6. 625249  
11743744\_ 3. 251593 3. 502683 3. 398836 3. 12295 3. 247199 3. 089732  
11743745\_ 7. 622871 7. 554088 7. 499742 7. 298163 7. 306776 7. 299162  
11743746\_ 6. 840047 6. 745337 6. 771998 6. 685628 6. 710476 6. 704087  
11743747\_ 4. 480697 4. 457235 4. 369449 5. 019584 4. 763963 4. 983199  
11743748\_ 5. 182965 4. 949401 5. 157712 5. 032718 4. 84558 5. 019947  
11743749\_ 6. 554599 6. 404445 6. 585536 6. 454826 6. 459334 6. 515813  
11743750\_ 6. 324866 6. 327449 6. 427217 6. 497219 6. 513735 6. 56566  
11743751\_ 4. 857239 4. 556079 4. 862724 4. 105009 4. 200686 4. 275543  
11743752\_ 7. 278042 7. 164789 7. 332256 7. 227449 7. 305547 7. 203156  
11743753\_ 6. 361835 6. 222738 6. 33679 6. 633143 6. 517246 6. 544244  
11743754\_ 10. 3345 10. 30358 10. 37364 10. 07135 10. 07723 10. 09452  
11743755\_ 8. 090231 8. 019196 8. 05134 7. 822021 7. 805986 7. 722643  
11743756\_ 8. 282978 8. 181839 8. 242761 7. 909447 7. 829691 7. 933944  
11743757\_ 7. 588283 7. 603482 7. 615873 7. 277518 7. 304612 7. 356242  
11743758\_ 7. 171829 7. 215889 7. 184919 6. 99748 7. 034092 6. 98331  
11743759\_ 8. 065165 7. 950284 8. 083157 7. 446487 7. 429674 7. 593665  
11743760\_ 7. 277366 7. 14127 7. 33454 6. 48155 6. 61918 6. 68913

11743761\_ 6.406297 6.407616 6.516706 5.94098 5.912489 5.960389  
11743762\_ 7.417811 7.232195 7.319412 6.859859 6.834189 6.89056  
11743763\_ 8.745804 8.705356 8.760087 8.694086 8.682017 8.725065  
11743764\_ 7.609528 7.453092 7.629755 7.539044 7.554251 7.568936  
11743765\_ 7.858995 7.842287 7.859835 7.852377 7.892712 7.821931  
11743766\_ 9.315546 9.261701 9.279296 9.387292 9.458267 9.444744  
11743767\_ 8.020799 7.926392 8.031287 8.017377 8.05337 7.972987  
11743768\_ 6.892394 6.921585 6.832983 7.145691 7.244449 7.253534  
11743769\_ 6.352861 6.464693 6.310915 6.364027 6.341107 6.346996  
11743770\_ 6.523455 6.344439 6.455654 5.781397 5.794286 5.781397  
11743771\_ 3.778778 3.736338 3.692601 3.67725 3.860119 3.777624  
11743772\_ 4.836504 4.875007 4.922102 5.243189 5.303177 5.182698  
11743773\_ 6.012289 5.781863 6.031041 6.242155 6.364539 6.272007  
11743774\_ 7.886136 7.814818 7.888608 7.432413 7.369661 7.442902  
11743775\_ 8.771293 8.807474 8.837293 8.559001 8.534675 8.471655  
11743776\_ 7.097689 7.143403 7.132751 6.845421 6.8151 6.8796  
11743777\_ 5.739422 5.58531 5.682605 5.623022 5.68962 5.628911  
11743778\_ 8.285558 8.208885 8.286773 8.148146 8.173236 8.139848  
11743779\_ 5.634368 5.572904 5.574697 5.604873 5.695111 5.714264  
11743780\_ 4.815683 4.935268 4.910243 4.818762 4.883306 4.94619  
11743781\_ 7.725539 7.729881 7.771836 7.957964 7.905962 7.926025  
11743782\_ 6.315135 6.456001 6.332108 5.414869 5.876994 5.768065  
11743783\_ 1.976492 2.022299 1.828279 1.947045 1.829833 2.12865  
11743784\_ 3.110961 3.165125 3.171613 3.001699 3.309088 3.15171  
11743785\_ 8.263016 8.162072 8.18242 8.003592 7.943462 8.031763  
11743786\_ 6.010335 5.942815 6.080732 5.565637 5.57413 5.732768  
11743787\_ 6.660519 6.619645 6.665265 6.473725 6.355133 6.357307  
11743788\_ 9.538599 9.529111 9.467337 9.209069 9.221162 9.158088  
11743789\_ 6.310895 6.24609 6.499939 6.950605 6.890618 7.03712  
11743790\_ 5.854424 5.862195 5.949227 5.80135 5.889738 5.856317  
11743791\_ 5.845365 5.920698 5.913195 5.82003 5.793155 5.726777  
11743792\_ 5.751013 5.754598 5.770367 5.366075 5.425517 5.467364  
11743793\_ 3.394296 3.293063 3.329722 3.177625 3.29808 3.30035  
11743794\_ 5.44523 5.380649 5.716992 5.118642 5.178704 4.999569  
11743795\_ 5.951212 5.729923 5.921067 5.768607 5.870242 5.946303  
11743796\_ 7.260481 7.179064 7.219785 8.037427 8.057462 7.98702  
11743797\_ 6.009828 6.065887 6.083746 6.256933 6.374635 6.344378  
11743798\_ 3.750828 3.85797 4.005333 3.788031 3.898301 3.947759  
11743799\_ 3.829051 3.723624 3.786151 3.682964 3.660529 3.705625  
11743800\_ 6.020011 5.605058 5.894697 5.623793 5.511789 5.611676  
11743801\_ 4.675643 4.512488 4.735037 4.600704 4.658939 4.624013  
11743802\_ 8.67724 8.625133 8.64448 8.281872 8.38538 8.339239  
11743803\_ 9.37388 9.308967 9.312463 9.306474 9.320037 9.307079  
11743804\_ 9.2958 9.294709 9.288904 9.396764 9.432977 9.379234  
11743805\_ 7.356798 7.417811 7.383088 7.832529 7.605741 7.656985  
11743806\_ 9.446271 9.401928 9.409628 9.643134 9.690189 9.630319  
11743807\_ 7.057613 6.871664 6.907837 7.4878 7.520326 7.499093  
11743808\_ 6.168112 6.187747 6.069707 7.212017 7.260821 7.299011  
11743809\_ 8.918712 9.02315 9.042433 9.148965 9.129071 9.13524  
11743810\_ 8.255098 8.254218 8.225617 7.996067 7.829288 7.812324  
11743811\_ 8.284091 8.185097 8.273572 8.193606 8.155538 8.136825

11743812\_ 8. 221928 8. 257012 8. 262575 8. 122719 8. 187374 8. 167329  
11743813\_ 6. 694815 6. 698691 6. 618426 6. 500598 6. 529543 6. 350053  
11743814\_ 8. 325827 8. 182206 8. 23107 7. 876759 7. 947886 7. 896699  
11743815\_ 6. 660519 6. 800038 6. 799004 5. 315749 5. 288598 5. 419808  
11743816\_ 7. 217335 7. 211749 7. 211076 5. 573063 5. 686361 5. 657198  
11743817\_ 8. 876533 8. 884616 8. 983884 8. 650836 8. 648153 8. 728078  
11743818\_ 2. 381112 2. 509296 2. 34616 2. 528249 2. 472229 2. 3963  
11743819\_ 7. 432279 7. 50047 7. 537933 7. 486293 7. 474342 7. 507812  
11743820\_ 9. 422121 9. 402678 9. 417285 9. 29987 9. 366001 9. 301377  
11743821\_ 9. 661508 9. 620978 9. 678445 9. 54692 9. 552367 9. 604387  
11743822\_ 6. 86823 6. 754821 6. 850658 7. 707325 7. 72902 7. 72413  
11743823\_ 8. 549357 8. 498057 8. 587736 8. 66176 8. 684804 8. 654618  
11743824\_ 8. 744088 8. 715184 8. 783528 8. 885258 8. 847907 8. 878547  
11743825\_ 5. 763634 5. 593465 5. 612683 5. 574213 5. 421294 5. 554448  
11743826\_ 3. 840541 3. 893217 3. 998733 3. 774563 3. 637412 3. 870092  
11743827\_ 4. 625646 4. 627276 4. 441438 4. 657158 4. 625646 4. 632713  
11743828\_ 3. 922136 3. 838555 3. 624045 3. 836881 4. 020101 4. 038189  
11743829\_ 7. 854837 7. 876694 7. 870319 7. 745921 7. 811424 7. 848773  
11743830\_ 7. 514346 7. 534738 7. 510326 7. 306494 7. 332625 7. 278463  
11743831\_ 6. 658814 6. 672355 6. 646211 6. 648586 6. 645476 6. 72763  
11743832\_ 4. 918712 5. 228277 5. 070533 5. 360539 5. 128349 5. 063022  
11743833\_ 8. 199908 8. 160786 8. 234825 8. 112644 8. 175714 8. 111684  
11743834\_ 7. 450254 7. 500221 7. 572864 7. 308294 7. 3151 7. 317368  
11743835\_ 4. 563871 4. 57675 4. 721933 4. 47079 4. 414282 4. 473153  
11743836\_ 6. 356314 6. 47305 6. 356314 6. 178059 6. 27106 6. 308803  
11743837\_ 6. 523981 6. 386238 6. 450323 6. 165312 6. 098957 6. 283238  
11743838\_ 7. 888065 7. 910978 7. 973063 7. 764707 7. 880392 7. 831385  
11743839\_ 5. 417552 5. 198868 5. 286811 5. 103413 5. 267299 4. 92537  
11743840\_ 7. 871964 7. 911865 7. 981808 7. 510932 7. 423321 7. 441745  
11743841\_ 8. 494079 8. 438037 8. 523294 7. 331859 7. 186772 7. 365536  
11743842\_ 5. 19417 5. 145372 5. 074352 5. 109182 5. 121975 5. 119014  
11743843\_ 3. 264275 3. 200109 3. 503743 3. 562269 3. 30537 3. 265562  
11743844\_ 3. 62258 3. 571194 3. 363348 3. 429706 3. 515905 3. 568741  
11743845\_ 6. 080111 6. 039359 6. 04329 6. 101332 6. 100127 6. 141138  
11743846\_ 5. 704982 5. 597855 5. 289125 5. 449453 5. 260988 5. 353541  
11743847\_ 4. 622839 4. 781351 4. 635388 4. 489865 4. 407711 4. 544608  
11743848\_ 5. 702361 5. 544457 5. 40292 5. 686875 5. 570804 5. 618066  
11743849\_ 6. 013879 6. 146812 6. 073432 6. 309394 6. 122764 6. 259031  
11743850\_ 5. 981391 6. 015912 5. 974854 5. 765577 5. 832163 6. 013815  
11743851\_ 9. 116029 9. 051183 9. 092377 8. 820303 8. 85539 8. 780938  
11743852\_ 5. 407663 5. 228627 5. 301201 5. 584813 5. 561887 5. 464598  
11743853\_ 8. 478832 8. 320794 8. 44472 8. 491447 8. 502354 8. 547392  
11743854\_ 8. 724937 8. 664217 8. 670608 8. 939527 8. 906825 8. 893286  
11743855\_ 6. 159101 6. 033313 6. 210522 6. 197703 6. 223676 6. 243335  
11743856\_ 9. 974499 9. 922582 9. 95782 9. 713582 9. 776536 9. 781835  
11743857\_ 2. 529952 2. 375073 2. 681313 2. 3176 2. 478591 2. 609363  
11743858\_ 2. 543047 2. 543047 2. 702726 2. 632124 2. 333095 2. 452513  
11743859\_ 2. 416287 2. 442102 2. 760073 2. 662246 2. 416287 2. 636348  
11743860\_ 3. 302069 3. 224411 3. 093265 3. 30841 3. 463072 3. 161615  
11743861\_ 8. 148875 8. 187327 8. 186783 8. 318159 8. 319151 8. 317924  
11743862\_ 6. 254985 6. 362678 6. 429709 6. 385541 6. 327542 6. 292689

11743863\_ 6. 155978 6. 361319 6. 298963 6. 056068 6. 002524 5. 915273  
11743864\_ 8. 615892 8. 510263 8. 523509 7. 886519 7. 883363 7. 884615  
11743865\_ 8. 839989 8. 770923 8. 818566 8. 216805 8. 138353 8. 092074  
11743866\_ 9. 84259 9. 792132 9. 853911 9. 616066 9. 583857 9. 637816  
11743867\_ 5. 442778 5. 509702 5. 509702 5. 472416 5. 587559 5. 500254  
11743868\_ 4. 861821 4. 95338 5. 005428 4. 85765 4. 846585 4. 906658  
11743869\_ 7. 197081 7. 178455 7. 314322 7. 237729 7. 299244 7. 25951  
11743870\_ 4. 497973 4. 264541 4. 403362 4. 083969 4. 119291 4. 166389  
11743871\_ 4. 108592 3. 909593 3. 859706 3. 907225 3. 711078 4. 053727  
11743872\_ 5. 029529 5. 061122 4. 978289 5. 187541 5. 159365 4. 977321  
11743873\_ 5. 404985 5. 453838 5. 316932 5. 453898 5. 462652 5. 364625  
11743874\_ 2. 929283 2. 746208 2. 626192 2. 912551 2. 743837 2. 605516  
11743875\_ 6. 672675 6. 691039 6. 671086 6. 903101 6. 981464 6. 928252  
11743876\_ 4. 767083 4. 607463 4. 634744 4. 901056 4. 831525 4. 737541  
11743877\_ 4. 993264 4. 854128 4. 750609 4. 721062 4. 735698 4. 699843  
11743878\_ 6. 717676 6. 484521 6. 539149 6. 130258 6. 20983 6. 118838  
11743879\_ 7. 459439 7. 351631 7. 395071 7. 040692 6. 956076 6. 991382  
11743880\_ 4. 620909 4. 72857 4. 745607 4. 647383 4. 846666 4. 569056  
11743881\_ 6. 646963 6. 580478 6. 595418 6. 34864 6. 34812 6. 281266  
11743882\_ 8. 059924 7. 977829 8. 020383 7. 567687 7. 515812 7. 484274  
11743883\_ 5. 905139 5. 834722 6. 005211 6. 147758 6. 112761 6. 092157  
11743884\_ 5. 442009 5. 418868 5. 452149 5. 53744 5. 426678 5. 489606  
11743885\_ 6. 471002 6. 395647 6. 430286 6. 48745 6. 472267 6. 471002  
11743886\_ 7. 711921 7. 651016 7. 635673 8. 114116 8. 11978 8. 181633  
11743887\_ 6. 520767 6. 603414 6. 565095 6. 527037 6. 543196 6. 638802  
11743888\_ 5. 281689 5. 449312 5. 279442 5. 443052 5. 350913 5. 334592  
11743889\_ 5. 999888 5. 858621 5. 85193 5. 591887 5. 741566 5. 619463  
11743890\_ 5. 646541 5. 676356 5. 592533 5. 666339 5. 472539 5. 744205  
11743891\_ 6. 135134 6. 002775 6. 223372 5. 330484 5. 308696 5. 471211  
11743892\_ 5. 11527 4. 934295 4. 99214 4. 824195 4. 873784 4. 880482  
11743893\_ 5. 579246 5. 473837 5. 621337 5. 297498 5. 451637 5. 519139  
11743894\_ 6. 433532 6. 150237 6. 166305 5. 448296 5. 346022 5. 472346  
11743895\_ 5. 911116 5. 894697 5. 894697 5. 448296 5. 545298 5. 370701  
11743896\_ 8. 31194 8. 207511 8. 27486 7. 906233 7. 841346 7. 908252  
11743897\_ 4. 160264 4. 041242 3. 885635 4. 171356 4. 198975 4. 074846  
11743898\_ 8. 518504 8. 460911 8. 563717 8. 513062 8. 485337 8. 454317  
11743899\_ 6. 300643 6. 418307 6. 414624 6. 558364 6. 425142 6. 680221  
11743900\_ 6. 376707 6. 262693 6. 284387 5. 945543 6. 042451 6. 049456  
11743901\_ 9. 908535 9. 891717 9. 928174 10. 44633 10. 43573 10. 42643  
11743902\_ 9. 744858 9. 640507 9. 695267 9. 724861 9. 781956 9. 78578  
11743903\_ 9. 859082 9. 930797 9. 878876 9. 661175 9. 590266 9. 568404  
11743904\_ 9. 701009 9. 6257 9. 62651 9. 175486 9. 251545 9. 208631  
11743905\_ 10. 85809 10. 82824 10. 89162 10. 84642 10. 84745 10. 8308  
11743906\_ 7. 316176 7. 417171 7. 34534 7. 514744 7. 465316 7. 477145  
11743907\_ 8. 90174 8. 789043 8. 863742 9. 076225 9. 084113 9. 011876  
11743908\_ 8. 873208 8. 861783 8. 979553 8. 988472 8. 97895 8. 977741  
11743909\_ 6. 909169 6. 884589 6. 968263 7. 343296 7. 424797 7. 349067  
11743910\_ 4. 450344 4. 450344 4. 364716 4. 578993 4. 700243 4. 578469  
11743911\_ 8. 814965 8. 741944 8. 797107 8. 752393 8. 790264 8. 792255  
11743912\_ 4. 570115 4. 584933 4. 691964 4. 66858 4. 798511 4. 814003  
11743913\_ 9. 204601 9. 169669 9. 22045 9. 102113 9. 124161 9. 021892

11743914\_ 6. 731613 6. 641378 6. 752593 6. 19134 6. 261102 6. 354529  
11743915\_ 6. 599839 6. 292764 6. 459331 7. 032442 7. 057316 7. 063534  
11743916\_ 7. 649819 7. 554624 7. 780844 7. 49218 7. 49593 7. 49405  
11743917\_ 6. 283429 5. 968622 6. 219072 6. 430115 6. 448378 6. 472425  
11743918\_ 4. 567755 4. 685507 4. 616412 4. 825554 4. 721244 4. 985053  
11743919\_ 9. 17708 9. 040043 9. 102566 8. 864478 8. 86974 8. 918801  
11743920\_ 3. 663103 3. 823855 3. 763865 3. 621858 3. 830091 3. 754176  
11743921\_ 5. 100511 5. 439097 5. 036737 5. 312397 5. 332012 5. 179917  
11743922\_ 5. 074714 5. 447221 5. 134379 6. 012104 5. 809786 5. 958668  
11743923\_ 7. 511108 7. 517138 7. 53622 8. 062419 7. 981615 7. 965758  
11743924\_ 6. 072418 5. 98478 6. 151366 5. 299423 5. 410117 5. 373349  
11743925\_ 9. 818308 9. 797532 9. 822975 9. 654976 9. 627119 9. 612297  
11743926\_ 8. 210131 8. 236467 8. 193957 7. 769214 7. 694166 7. 656985  
11743927\_ 8. 50527 8. 515735 8. 603368 7. 881779 7. 892966 7. 962867  
11743928\_ 7. 886682 7. 803805 7. 830911 7. 426025 7. 408013 7. 519597  
11743929\_ 6. 55946 6. 406841 6. 557068 6. 026793 6. 065313 5. 97302  
11743930\_ 7. 672672 7. 526986 7. 766216 7. 012803 6. 99131 7. 05942  
11743931\_ 9. 897908 9. 848545 9. 900175 10. 07079 10. 13477 10. 0736  
11743932\_ 3. 756415 3. 509635 3. 651499 3. 974301 3. 952173 3. 994622  
11743933\_ 5. 409222 5. 442405 5. 325883 5. 396792 5. 322803 5. 383378  
11743934\_ 6. 133195 5. 918745 6. 061577 6. 823837 6. 905258 6. 84296  
11743935\_ 5. 850859 5. 805046 5. 909176 6. 00066 5. 960101 5. 983152  
11743936\_ 10. 24764 10. 19778 10. 26567 10. 38215 10. 32419 10. 29457  
11743937\_ 3. 850469 4. 067703 3. 794904 3. 925181 3. 954479 4. 104175  
11743938\_ 2. 519564 2. 958429 2. 361778 2. 597762 2. 605516 2. 559559  
11743939\_ 9. 186069 9. 142501 9. 152688 8. 711373 8. 72416 8. 707785  
11743940\_ 9. 143064 9. 169059 9. 120027 8. 76932 8. 736818 8. 687283  
11743941\_ 6. 592173 6. 564709 6. 734003 6. 070629 6. 165771 6. 183221  
11743942\_ 3. 365741 3. 416417 3. 850246 3. 416417 3. 159534 3. 158496  
11743943\_ 3. 49714 3. 54623 3. 486448 3. 670133 3. 500811 3. 490542  
11743944\_ 3. 807885 3. 626452 3. 793874 3. 793874 3. 831694 3. 793874  
11743945\_ 6. 524243 6. 477831 6. 557359 6. 438601 6. 432829 6. 491613  
11743946\_ 4. 465497 4. 519901 4. 725169 4. 989054 4. 957021 4. 863874  
11743947\_ 6. 196907 6. 172571 6. 199575 5. 775518 5. 937697 6. 126256  
11743948\_ 4. 212117 4. 451966 4. 279619 4. 57116 4. 490014 4. 515756  
11743949\_ 5. 316568 5. 467897 5. 355815 5. 756659 5. 51211 5. 516208  
11743950\_ 6. 192206 5. 986235 6. 094413 6. 194966 6. 241236 6. 26913  
11743951\_ 5. 540953 5. 434227 5. 687004 4. 944013 5. 070381 5. 287629  
11743952\_ 4. 474364 4. 703243 4. 458531 4. 417006 4. 413181 4. 303485  
11743953\_ 5. 044915 5. 044915 4. 930507 5. 156303 5. 169555 5. 044915  
11743954\_ 7. 699412 7. 595144 7. 686341 7. 811067 7. 849265 7. 81161  
11743955\_ 4. 097728 4. 261318 4. 032304 4. 210439 3. 993807 4. 390804  
11743956\_ 2. 946488 3. 140508 3. 23002 3. 150515 3. 175391 2. 884948  
11743957\_ 8. 675598 8. 612619 8. 706848 8. 741072 8. 7341 8. 689779  
11743958\_ 7. 564274 7. 583657 7. 630786 7. 67634 7. 66142 7. 76041  
11743959\_ 6. 752467 6. 779051 6. 961226 6. 84481 6. 920371 6. 912155  
11743960\_ 7. 190429 7. 231868 7. 190429 6. 916023 6. 98285 7. 00388  
11743961\_ 6. 539506 6. 680115 6. 498507 6. 249167 6. 222296 6. 057708  
11743962\_ 8. 355228 8. 265975 8. 42947 7. 883528 7. 979667 7. 926927  
11743963\_ 7. 484221 7. 446258 7. 374835 6. 630214 6. 741972 6. 717829  
11743964\_ 6. 273623 6. 164888 6. 216377 5. 742287 5. 710709 5. 872272

11743965\_ 6. 283938 6. 330012 6. 358583 6. 386315 6. 34971 6. 34971  
11743966\_ 6. 795189 6. 706881 6. 769533 6. 819842 6. 830549 6. 818059  
11743967\_ 6. 44118 6. 470273 6. 571423 6. 427869 6. 489639 6. 423425  
11743968\_ 9. 896679 9. 82878 9. 906129 9. 811353 9. 888008 9. 900897  
11743969\_ 9. 888448 9. 811029 9. 836453 9. 415407 9. 470988 9. 38693  
11743970\_ 10. 14636 10. 05443 10. 1695 9. 748908 9. 784414 9. 754896  
11743971\_ 6. 761231 6. 68115 6. 778228 6. 788816 6. 881565 6. 934615  
11743972\_ 9. 387346 9. 303668 9. 313687 9. 599121 9. 561597 9. 579289  
11743973\_ 8. 753743 8. 698691 8. 703301 8. 750849 8. 744758 8. 749974  
11743974\_ 8. 185907 8. 066062 8. 180567 8. 218118 8. 313067 8. 233291  
11743975\_ 7. 34044 7. 331581 7. 335998 7. 311123 7. 326204 7. 330621  
11743976\_ 11. 24372 11. 21684 11. 21188 11. 06228 10. 96053 10. 92691  
11743977\_ 11. 58531 11. 54774 11. 55085 11. 183 11. 1829 11. 20694  
11743978\_ 11. 28504 11. 27123 11. 26659 10. 92481 10. 89566 10. 92469  
11743979\_ 11. 3346 11. 24915 11. 3187 11. 30972 11. 35219 11. 3387  
11743980\_ 7. 352897 7. 422879 7. 352748 7. 684342 7. 649897 7. 600303  
11743981\_ 4. 384617 4. 459548 4. 294329 4. 406603 4. 341791 4. 515907  
11743982\_ 7. 497568 7. 501723 7. 400843 7. 466168 7. 5274 7. 563532  
11743983\_ 6. 980228 7. 01063 6. 884032 7. 035534 7. 067853 7. 081242  
11743984\_ 7. 72551 7. 641334 7. 612217 7. 931082 7. 908651 7. 817743  
11743985\_ 8. 185124 8. 11357 8. 205833 8. 229549 8. 2751 8. 259236  
11743986\_ 7. 141925 6. 979178 7. 068283 7. 259667 7. 194708 7. 183172  
11743987\_ 6. 831858 6. 862059 6. 95002 6. 852948 6. 837039 6. 842339  
11743988\_ 6. 959944 6. 898294 6. 87204 6. 900684 6. 873274 6. 87204  
11743989\_ 9. 074362 9. 025069 9. 077437 8. 989857 9. 038315 9. 024516  
11743990\_ 7. 373236 7. 276565 7. 392275 6. 918262 6. 992115 7. 033831  
11743991\_ 8. 501817 8. 337191 8. 377979 8. 696575 8. 835997 8. 711546  
11743992\_ 7. 150813 7. 151618 7. 173756 7. 129233 7. 136151 7. 12383  
11743993\_ 7. 056309 7. 060391 7. 069561 7. 100462 7. 055885 7. 150822  
11743994\_ 7. 31255 7. 22605 7. 334482 7. 164589 7. 202387 7. 2211  
11743995\_ 5. 075987 5. 061598 5. 045961 5. 019986 5. 188793 5. 19381  
11743996\_ 8. 124836 8. 001884 8. 156465 8. 409294 8. 401246 8. 445332  
11743997\_ 8. 650035 8. 529043 8. 584862 8. 92493 8. 935642 8. 977903  
11743998\_ 7. 834867 7. 785575 7. 720919 7. 884199 7. 933104 7. 838539  
11743999\_ 7. 658176 7. 664156 7. 602218 7. 674245 7. 759159 7. 716756  
11744000\_ 8. 681525 8. 742619 8. 779853 8. 286 8. 313537 8. 286391  
11744001\_ 5. 672832 5. 715282 5. 77099 5. 800139 5. 904152 5. 931152  
11744002\_ 9. 944596 9. 94102 9. 951213 10. 82706 10. 77169 10. 76711  
11744003\_ 9. 701871 9. 630453 9. 687348 10. 58872 10. 58641 10. 59851  
11744004\_ 7. 19255 7. 292277 7. 316082 7. 285788 7. 372397 7. 349387  
11744005\_ 8. 51964 8. 493908 8. 532189 8. 072384 8. 054434 8. 074586  
11744006\_ 5. 61094 5. 607385 5. 807428 5. 617193 5. 652334 5. 681823  
11744007\_ 7. 574854 7. 496139 7. 571728 7. 779063 7. 773127 7. 773883  
11744008\_ 6. 241524 6. 252506 6. 199834 6. 234169 6. 277062 6. 31468  
11744009\_ 7. 700804 7. 785482 7. 695475 7. 840661 7. 726002 7. 783089  
11744010\_ 6. 560435 6. 621553 6. 551361 6. 772045 6. 723437 6. 787503  
11744011\_ 6. 503639 6. 439169 6. 53577 6. 680206 6. 675771 6. 575593  
11744012\_ 5. 130981 5. 146225 5. 262834 5. 307806 5. 436719 5. 156303  
11744013\_ 6. 757059 6. 737721 6. 727354 7. 049794 7. 055228 7. 045023  
11744014\_ 5. 638901 5. 812446 5. 708293 5. 912096 5. 787219 5. 830636  
11744015\_ 8. 733114 8. 651414 8. 717874 8. 886379 8. 96604 8. 923126

11744016\_ 5. 600093 5. 836118 5. 554573 5. 737714 5. 610523 5. 699824  
11744017\_ 5. 03474 5. 152113 4. 939717 5. 003547 5. 094445 5. 138615  
11744018\_ 5. 086065 4. 958816 4. 81954 5. 051413 4. 846227 4. 88259  
11744019\_ 5. 105064 5. 115941 4. 956369 5. 049252 5. 26034 5. 041177  
11744020\_ 5. 769531 5. 763634 5. 814991 6. 396796 6. 377553 6. 441308  
11744021\_ 6. 151573 6. 091784 6. 126174 7. 244401 7. 179294 7. 180755  
11744022\_ 6. 812671 6. 716426 6. 827628 6. 787024 6. 691723 6. 672606  
11744023\_ 6. 614507 6. 768946 6. 52419 6. 64629 6. 673291 6. 663955  
11744024\_ 9. 832091 9. 75763 9. 844175 9. 841883 9. 835366 9. 794531  
11744025\_ 7. 913211 7. 887465 7. 941997 7. 867976 7. 953418 7. 94622  
11744026\_ 5. 595689 5. 673532 5. 644139 5. 572378 5. 508694 5. 56511  
11744027\_ 7. 953197 8. 02059 8. 020073 8. 233629 8. 178225 8. 213732  
11744028\_ 7. 97981 8. 02921 8. 118225 8. 086395 8. 038741 7. 99621  
11744029\_ 7. 79935 7. 882231 7. 804798 7. 657875 7. 689228 7. 719409  
11744030\_ 1. 951641 1. 702533 1. 711229 1. 582755 1. 736052 1. 702533  
11744031\_ 2. 570307 2. 361778 2. 482674 2. 299616 2. 410594 2. 379402  
11744032\_ 7. 164857 7. 04724 7. 300065 6. 366235 6. 344629 6. 438026  
11744033\_ 11. 80864 11. 77452 11. 77748 11. 52835 11. 52746 11. 4946  
11744034\_ 9. 286546 9. 230112 9. 275546 9. 115869 9. 142248 9. 163527  
11744035\_ 7. 559458 7. 565106 7. 536532 7. 582418 7. 496115 7. 640513  
11744036\_ 6. 475898 6. 481046 6. 535713 6. 70243 6. 714694 6. 588113  
11744037\_ 7. 691766 7. 649834 7. 677379 7. 674945 7. 737649 7. 716255  
11744038\_ 4. 540725 4. 597598 4. 650964 4. 586983 4. 571393 4. 673889  
11744039\_ 5. 020593 5. 309674 5. 187983 5. 202689 5. 2222 5. 298808  
11744040\_ 9. 552388 9. 444776 9. 553316 9. 507658 9. 550257 9. 483878  
11744041\_ 9. 971548 10. 01969 9. 986967 9. 995013 9. 995631 9. 986349  
11744042\_ 8. 405597 8. 398722 8. 389431 8. 444252 8. 482452 8. 455375  
11744043\_ 5. 279711 5. 366765 5. 297498 5. 448296 5. 433561 5. 351686  
11744044\_ 7. 144175 7. 202078 7. 058483 7. 138016 7. 196784 7. 276804  
11744045\_ 6. 493818 6. 421565 6. 472051 6. 263567 6. 352548 6. 307697  
11744046\_ 4. 286658 4. 005265 4. 285999 4. 067703 4. 162751 4. 346217  
11744047\_ 9. 154372 9. 117021 9. 125301 8. 848374 8. 878946 8. 882802  
11744048\_ 8. 037977 7. 900419 7. 978205 7. 759953 7. 76041 7. 831728  
11744049\_ 8. 111805 8. 111161 8. 066766 7. 926302 8. 007975 7. 961155  
11744050\_ 8. 374502 8. 358657 8. 415363 8. 278529 8. 267757 8. 292221  
11744051\_ 6. 329825 6. 458363 6. 44335 6. 544156 6. 470256 6. 525934  
11744052\_ 7. 568694 7. 446203 7. 516193 7. 225932 7. 165785 7. 152462  
11744053\_ 6. 426596 6. 440432 6. 520005 6. 154726 6. 291011 6. 223256  
11744054\_ 6. 907993 6. 842637 6. 86611 7. 115487 7. 125793 7. 193066  
11744055\_ 7. 804059 7. 694613 7. 814561 7. 679629 7. 676782 7. 69754  
11744056\_ 7. 291438 7. 277629 7. 265177 7. 242874 7. 269859 7. 31752  
11744057\_ 9. 020026 9. 037376 8. 946527 9. 548063 9. 510937 9. 534293  
11744058\_ 9. 001125 8. 904304 9. 00116 9. 64782 9. 64392 9. 680722  
11744059\_ 8. 348811 8. 276127 8. 349029 8. 779142 8. 771253 8. 738413  
11744060\_ 10. 35635 10. 28843 10. 32674 10. 55918 10. 58237 10. 58571  
11744061\_ 7. 131331 7. 223339 7. 182562 7. 33304 7. 328806 7. 314214  
11744062\_ 7. 18743 7. 184425 7. 225989 7. 350832 7. 326592 7. 327514  
11744063\_ 6. 307335 6. 282224 6. 252735 6. 425923 6. 370659 6. 429931  
11744064\_ 6. 218251 6. 272411 6. 084312 6. 288397 6. 246305 6. 333295  
11744065\_ 7. 196284 7. 136662 7. 183034 7. 099457 7. 104983 7. 059169  
11744066\_ 4. 940193 5. 029529 5. 2222 4. 914651 4. 872287 5. 012488

11744067\_ 8. 284855 8. 205241 8. 296977 8. 054351 8. 07676 8. 063613  
11744068\_ 5. 909466 5. 918745 5. 91934 5. 961068 6. 036022 6. 023053  
11744069\_ 7. 490064 7. 512604 7. 466327 7. 111307 7. 170982 7. 112086  
11744070\_ 8. 378076 8. 419365 8. 422614 8. 099939 8. 098359 8. 095279  
11744071\_ 7. 763264 7. 784007 7. 791736 7. 296976 7. 313218 7. 321438  
11744072\_ 2. 279341 2. 441547 2. 250719 2. 270017 2. 533071 2. 258647  
11744073\_ 7. 84116 7. 715304 7. 784844 8. 23992 8. 239063 8. 20699  
11744074\_ 5. 979691 5. 931876 5. 92575 6. 085411 6. 044285 6. 056307  
11744075\_ 4. 568688 4. 680704 4. 792162 4. 718519 4. 602713 4. 633118  
11744076\_ 3. 071563 3. 153706 3. 194141 3. 112209 3. 135056 3. 04058  
11744077\_ 7. 601875 7. 612217 7. 700941 8. 342386 8. 384051 8. 379301  
11744078\_ 8. 498187 8. 350678 8. 508878 8. 661618 8. 740859 8. 727079  
11744079\_ 6. 091317 6. 13945 5. 93924 6. 151147 6. 121975 6. 193016  
11744080\_ 4. 382283 4. 40461 4. 33472 4. 468083 4. 465785 4. 490968  
11744081\_ 7. 470897 7. 473461 7. 481528 7. 493703 7. 517585 7. 495301  
11744082\_ 8. 820025 8. 747226 8. 800243 8. 68766 8. 737906 8. 708303  
11744083\_ 7. 796446 7. 7166 7. 78944 7. 456656 7. 384243 7. 388423  
11744084\_ 8. 867857 8. 90528 8. 89638 8. 82603 8. 672711 8. 715373  
11744085\_ 7. 52505 7. 373908 7. 493427 7. 911637 7. 944236 7. 895898  
11744086\_ 3. 894363 4. 110235 4. 065733 4. 171598 4. 111267 4. 1123  
11744087\_ 7. 509153 7. 441512 7. 482725 7. 335346 7. 304018 7. 340573  
11744088\_ 7. 609497 7. 651854 7. 607478 7. 544613 7. 570951 7. 625224  
11744089\_ 5. 416086 5. 392827 5. 380279 5. 552179 5. 660501 5. 61969  
11744090\_ 7. 192389 7. 239715 7. 161144 7. 259965 7. 280646 7. 312075  
11744091\_ 8. 059768 7. 984003 8. 012131 7. 701561 7. 815255 7. 686507  
11744092\_ 7. 402319 7. 402512 7. 397455 7. 481452 7. 605739 7. 582387  
11744093\_ 6. 878873 6. 871249 6. 915972 6. 932648 6. 837434 6. 842296  
11744094\_ 6. 967455 6. 995832 7. 047795 7. 040856 7. 008098 6. 951797  
11744095\_ 7. 895128 7. 922989 7. 949614 7. 793524 7. 800406 7. 780955  
11744096\_ 9. 087273 9. 078186 9. 173337 8. 955151 8. 942316 8. 989366  
11744097\_ 7. 481087 7. 434587 7. 519212 7. 348037 7. 3124 7. 333646  
11744098\_ 11. 32901 11. 27492 11. 29637 11. 07202 11. 09642 11. 08693  
11744099\_ 3. 708958 3. 606313 3. 633534 3. 76658 3. 547536 3. 644509  
11744100\_ 6. 37426 6. 365761 6. 203944 6. 537068 6. 628993 6. 616414  
11744101\_ 7. 307105 7. 179554 7. 313159 7. 334617 7. 258036 7. 352278  
11744102\_ 6. 584191 6. 537771 6. 735809 6. 477272 6. 550507 6. 560472  
11744103\_ 6. 073142 6. 09214 6. 222375 7. 015266 7. 129921 7. 015471  
11744104\_ 2. 855581 3. 09182 2. 675447 2. 696865 2. 611844 2. 749863  
11744105\_ 5. 267684 4. 985923 5. 179316 5. 109554 5. 211124 5. 0158  
11744106\_ 5. 684863 5. 490674 5. 649585 5. 478051 5. 445778 5. 335809  
11744107\_ 4. 676512 4. 784876 4. 781276 4. 813516 4. 832491 4. 762301  
11744108\_ 10. 37877 10. 29061 10. 35204 10. 4358 10. 48325 10. 48811  
11744109\_ 10. 44092 10. 43801 10. 40905 10. 25665 10. 24558 10. 22373  
11744110\_ 7. 537827 7. 363351 7. 479513 7. 281015 7. 472691 7. 326621  
11744111\_ 7. 489139 7. 599188 7. 539498 7. 672524 7. 701561 7. 722249  
11744112\_ 7. 922803 7. 858635 7. 92345 8. 026211 8. 047506 8. 038892  
11744113\_ 8. 338588 8. 282293 8. 284358 8. 47458 8. 472879 8. 42049  
11744114\_ 6. 671964 6. 454531 6. 702833 6. 853154 6. 891528 6. 906988  
11744115\_ 8. 546394 8. 522406 8. 580122 8. 790005 8. 849987 8. 826616  
11744116\_ 8. 112653 8. 06059 8. 170011 8. 424272 8. 451 8. 381479  
11744117\_ 3. 193988 3. 282431 3. 16911 2. 894278 3. 187069 3. 104972



11744118\_ 9. 242369 9. 1672 9. 210251 9. 546965 9. 577394 9. 537421  
11744119\_ 9. 124973 8. 962374 9. 106588 9. 101044 9. 113729 9. 07173  
11744120\_ 12. 62003 12. 58079 12. 60721 12. 52507 12. 56915 12. 55125  
11744121\_ 3. 796347 3. 561857 3. 625408 3. 746357 3. 778122 3. 720201  
11744122\_ 5. 726099 5. 865047 5. 871334 6. 256775 6. 249846 6. 172354  
11744123\_ 5. 148633 5. 288545 5. 052993 5. 402112 5. 275129 5. 343287  
11744124\_ 7. 563476 7. 548098 7. 598081 7. 631981 7. 581163 7. 623427  
11744125\_ 7. 701561 7. 651016 7. 808927 7. 721797 7. 839601 7. 739751  
11744126\_ 8. 658194 8. 683272 8. 668867 8. 765976 8. 824944 8. 751099  
11744127\_ 6. 015982 6. 102935 5. 973344 5. 870242 5. 870242 6. 031032  
11744128\_ 6. 514531 6. 486963 6. 414732 6. 29385 6. 31163 6. 438109  
11744129\_ 6. 117899 6. 135757 6. 069071 6. 244217 6. 171876 6. 240282  
11744130\_ 5. 539486 5. 672698 5. 543219 5. 58005 5. 570683 5. 631951  
11744131\_ 6. 748126 6. 7414 6. 648075 6. 00017 6. 025953 6. 159771  
11744132\_ 7. 658355 7. 625395 7. 652523 7. 234311 7. 189413 7. 101579  
11744133\_ 8. 408444 8. 365243 8. 398912 8. 282587 8. 272558 8. 282295  
11744134\_ 8. 678216 8. 632492 8. 714239 8. 592438 8. 548832 8. 534008  
11744135\_ 6. 391212 6. 254369 6. 30722 6. 044963 6. 123662 6. 051236  
11744136\_ 7. 321486 7. 337776 7. 301132 7. 728965 7. 599697 7. 698716  
11744137\_ 5. 433591 5. 341809 5. 409601 5. 487332 5. 490942 5. 449933  
11744138\_ 2. 922378 2. 840729 2. 875732 2. 873057 2. 982069 3. 047698  
11744139\_ 6. 999428 7. 00339 7. 011356 6. 905098 6. 941648 7. 037341  
11744140\_ 5. 588179 5. 565096 5. 532195 5. 612754 5. 594843 5. 559083  
11744141\_ 4. 531467 4. 67871 4. 715913 4. 726368 4. 756079 4. 67312  
11744142\_ 10. 36986 10. 28218 10. 37041 10. 10845 10. 15696 10. 1271  
11744143\_ 11. 25005 11. 19019 11. 21005 11. 08157 11. 09266 11. 06042  
11744144\_ 11. 10912 11. 06411 11. 07976 10. 94865 10. 95422 10. 9138  
11744145\_ 8. 179055 8. 154249 8. 153105 8. 189661 8. 120396 8. 140996  
11744146\_ 10. 36721 10. 37395 10. 35745 9. 986411 9. 938361 9. 900684  
11744147\_ 12. 50841 12. 5055 12. 525 12. 47955 12. 48137 12. 41412  
11744148\_ 8. 124081 8. 098207 8. 169221 8. 832114 8. 872789 8. 782788  
11744149\_ 7. 466546 7. 471561 7. 462465 7. 492418 7. 486938 7. 535152  
11744150\_ 6. 575268 6. 515623 6. 512463 6. 718016 6. 675147 6. 653036  
11744151\_ 7. 412647 7. 378379 7. 356905 7. 332047 7. 367181 7. 385112  
11744152\_ 5. 734838 5. 67975 5. 706911 5. 704319 5. 742528 5. 770843  
11744153\_ 4. 450293 4. 650787 4. 348462 4. 556693 4. 715584 4. 75334  
11744154\_ 7. 36233 7. 305848 7. 413837 7. 183639 7. 256739 7. 157944  
11744155\_ 7. 796452 7. 816886 7. 823336 8. 119527 8. 113533 8. 120793  
11744156\_ 7. 619193 7. 515165 7. 599783 7. 576756 7. 592146 7. 625495  
11744157\_ 7. 003146 6. 911553 7. 01578 7. 035655 7. 03089 6. 994128  
11744158\_ 4. 275543 4. 614186 4. 310677 4. 36915 4. 35779 4. 498755  
11744159\_ 7. 745525 7. 689703 7. 749277 7. 452709 7. 536532 7. 554409  
11744160\_ 7. 241684 7. 13704 7. 263498 7. 611399 7. 660078 7. 642142  
11744161\_ 8. 489806 8. 425615 8. 518682 8. 601085 8. 567937 8. 585542  
11744162\_ 9. 754829 9. 738928 9. 786767 9. 288282 9. 277693 9. 316535  
11744163\_ 2. 968955 2. 953161 2. 792148 2. 519787 2. 20756 2. 572782  
11744164\_ 7. 681993 7. 601051 7. 73506 7. 564512 7. 631084 7. 563868  
11744165\_ 9. 480701 9. 377665 9. 428275 8. 831829 8. 88397 8. 865513  
11744166\_ 10. 06119 9. 952435 10. 03516 10. 01924 10. 03606 10. 06091  
11744167\_ 7. 763438 7. 704254 7. 761245 7. 95855 8. 034737 7. 93337  
11744168\_ 3. 840122 4. 168822 3. 840122 4. 023479 3. 966765 3. 990751

11744169\_ 7. 227083 7. 258326 7. 420015 7. 869969 7. 990549 7. 882173  
11744170\_ 8. 160654 8. 13325 8. 159035 8. 268928 8. 312223 8. 327421  
11744171\_ 7. 596505 7. 470446 7. 534646 7. 823487 7. 807921 7. 796515  
11744172\_ 7. 111953 7. 046893 7. 018608 7. 248378 7. 144608 7. 154768  
11744173\_ 7. 423984 7. 410345 7. 42214 7. 605494 7. 573609 7. 632747  
11744174\_ 7. 810987 7. 745358 7. 88608 7. 860595 7. 903611 7. 907206  
11744175\_ 8. 18243 8. 115451 8. 227191 7. 840911 7. 923421 7. 868072  
11744176\_ 8. 148219 8. 18021 8. 153105 8. 13306 8. 159005 8. 211877  
11744177\_ 5. 936043 6. 179646 5. 920001 6. 159562 5. 932344 6. 083242  
11744178\_ 8. 410062 8. 517504 8. 38408 8. 300299 8. 198091 8. 296901  
11744179\_ 6. 175442 6. 326682 6. 148189 6. 207538 6. 262616 6. 360431  
11744180\_ 7. 319239 7. 25653 7. 280886 7. 154234 7. 252874 7. 300994  
11744181\_ 7. 675818 7. 458792 7. 615654 7. 505382 7. 453305 7. 435194  
11744182\_ 6. 779107 6. 687559 6. 744586 6. 54677 6. 587556 6. 642276  
11744183\_ 6. 26576 6. 267516 6. 228047 6. 33837 6. 28982 6. 375165  
11744184\_ 7. 732889 7. 683674 7. 67371 6. 660519 6. 778788 6. 621382  
11744185\_ 7. 092363 7. 112294 7. 097313 6. 375865 6. 37542 6. 438827  
11744186\_ 7. 176854 7. 174876 7. 109089 7. 076762 7. 045912 7. 14627  
11744187\_ 5. 345261 5. 351206 5. 30482 5. 321749 5. 453793 5. 427332  
11744188\_ 6. 646187 6. 602019 6. 646104 5. 945099 5. 836116 5. 879466  
11744189\_ 4. 42587 4. 445636 4. 176419 4. 280762 4. 415352 4. 464294  
11744190\_ 5. 517919 5. 503233 5. 452839 5. 429757 5. 57482 5. 528624  
11744191\_ 5. 029529 4. 9226 4. 951186 4. 900146 4. 91132 4. 958246  
11744192\_ 5. 851398 5. 829812 5. 732831 5. 822303 5. 980978 5. 894697  
11744193\_ 10. 64939 10. 61283 10. 61849 10. 64843 10. 6711 10. 65081  
11744194\_ 5. 645916 5. 448296 5. 468879 5. 3515 5. 373727 5. 334935  
11744195\_ 6. 869498 6. 967537 6. 946361 6. 854986 6. 898781 6. 864125  
11744196\_ 4. 422758 4. 538833 4. 443489 4. 554412 4. 505808 4. 533962  
11744197\_ 11. 07547 11. 0657 11. 08055 10. 6048 10. 56403 10. 61945  
11744198\_ 12. 24028 12. 27509 12. 25316 12. 29269 12. 25505 12. 24613  
11744199\_ 5. 72777 5. 775344 5. 563488 5. 862732 5. 817043 5. 945128  
11744200\_ 10. 08905 10. 02816 10. 07749 9. 985998 9. 964308 9. 982541  
11744201\_ 9. 881572 9. 782778 9. 837863 9. 790717 9. 775551 9. 774261  
11744202\_ 9. 307209 9. 261712 9. 325831 9. 429048 9. 486941 9. 449296  
11744203\_ 7. 678058 7. 577913 7. 697813 7. 816727 7. 845548 7. 780234  
11744204\_ 8. 42505 8. 333725 8. 425529 8. 319033 8. 273485 8. 208182  
11744205\_ 7. 966618 7. 947332 8. 009204 8. 016781 8. 034539 8. 00357  
11744206\_ 2. 427068 2. 727181 2. 404975 2. 577055 2. 600838 2. 71502  
11744207\_ 9. 306779 9. 182032 9. 316291 9. 470942 9. 536757 9. 440695  
11744208\_ 10. 7228 10. 73849 10. 73933 10. 68607 10. 73133 10. 75543  
11744209\_ 9. 011979 8. 956136 9. 003738 9. 21519 9. 318313 9. 229673  
11744210\_ 10. 25072 10. 18129 10. 25498 9. 725791 9. 734769 9. 731952  
11744211\_ 9. 307948 9. 240219 9. 32374 9. 383038 9. 51306 9. 44706  
11744212\_ 11. 91127 11. 90439 11. 91064 12. 21332 12. 20971 12. 20786  
11744213\_ 8. 316892 8. 269295 8. 238585 8. 265657 8. 252315 8. 2093  
11744214\_ 6. 942294 6. 820444 6. 890171 6. 715342 6. 755413 6. 843475  
11744215\_ 8. 713486 8. 611379 8. 704331 8. 041373 7. 994124 8. 051675  
11744216\_ 7. 839071 7. 814818 7. 784582 7. 337557 7. 260481 7. 329045  
11744217\_ 6. 382814 6. 6055 6. 439495 6. 836604 6. 782248 6. 849763  
11744218\_ 5. 188891 5. 050499 5. 246346 5. 285774 5. 191234 5. 397134  
11744219\_ 4. 347179 4. 238888 4. 218906 4. 27774 4. 314288 4. 377588

11744220\_ 5. 969585 5. 948605 5. 770029 6. 005495 5. 931909 5. 928267  
11744221\_ 8. 078168 8. 066062 8. 029232 8. 096223 8. 058025 8. 070326  
11744222\_ 9. 360731 9. 252239 9. 380636 9. 627342 9. 729154 9. 623872  
11744223\_ 9. 428244 9. 368776 9. 471733 9. 685074 9. 800143 9. 737073  
11744224\_ 6. 277981 6. 211207 6. 193857 6. 525583 6. 576429 6. 419444  
11744225\_ 6. 933423 6. 7869 6. 86803 6. 550483 6. 709251 6. 672506  
11744226\_ 7. 541676 7. 597931 7. 661551 7. 638524 7. 59318 7. 574147  
11744227\_ 7. 243062 7. 287693 7. 351317 7. 401625 7. 409699 7. 384467  
11744228\_ 6. 983108 6. 975313 6. 953666 7. 1275 7. 203103 7. 118906  
11744229\_ 2. 874609 2. 679616 2. 834135 2. 739423 2. 824915 2. 637081  
11744230\_ 3. 699951 3. 606313 3. 673437 3. 602978 3. 741009 3. 705804  
11744231\_ 5. 77956 5. 821289 5. 835002 5. 882214 5. 893945 5. 884931  
11744232\_ 8. 11024 7. 951927 8. 000591 8. 628646 8. 681626 8. 630385  
11744233\_ 8. 055112 8. 12949 8. 143779 8. 060517 8. 137863 8. 09785  
11744234\_ 7. 144027 7. 181884 7. 195023 7. 01805 7. 075359 7. 095842  
11744235\_ 7. 385207 7. 4125 7. 366279 7. 212651 7. 222442 7. 333631  
11744236\_ 6. 598609 6. 392162 6. 605706 6. 231137 6. 226765 6. 278504  
11744237\_ 7. 263956 7. 213887 7. 16318 7. 52605 7. 499844 7. 432985  
11744238\_ 5. 940665 5. 944917 5. 855129 6. 016247 5. 957672 5. 9906  
11744239\_ 5. 420944 5. 438602 5. 3595 5. 229339 5. 173642 5. 006755  
11744240\_ 1. 856991 1. 732304 1. 846587 1. 751794 1. 775408 1. 769773  
11744241\_ 7. 626889 7. 570646 7. 636739 7. 63944 7. 588677 7. 623897  
11744242\_ 4. 392986 4. 284278 4. 612651 4. 082838 4. 049716 4. 347179  
11744243\_ 7. 462121 7. 359063 7. 469007 6. 87435 6. 837039 7. 005222  
11744244\_ 2. 197535 2. 147351 2. 204503 2. 249971 2. 235199 2. 329883  
11744245\_ 3. 648123 3. 723624 3. 507095 3. 707699 3. 638858 3. 893223  
11744246\_ 4. 365537 4. 341961 4. 365537 4. 218933 4. 277317 4. 284521  
11744247\_ 3. 390919 3. 587451 3. 522532 3. 57302 3. 616701 3. 512204  
11744248\_ 5. 073036 5. 318664 5. 073036 5. 029529 4. 916876 4. 94619  
11744249\_ 6. 223394 6. 15614 6. 261178 6. 227373 6. 161838 6. 323066  
11744250\_ 3. 972607 4. 014951 3. 850833 4. 054758 3. 80419 4. 053205  
11744251\_ 4. 616281 4. 690126 4. 544719 4. 970461 4. 525718 4. 749563  
11744252\_ 5. 506736 5. 348996 5. 479536 4. 848333 4. 910184 5. 204676  
11744253\_ 5. 900423 6. 09449 5. 845045 6. 055042 6. 081543 6. 033948  
11744254\_ 10. 24199 10. 18784 10. 28067 10. 11065 10. 14813 10. 12164  
11744255\_ 9. 141531 9. 102043 9. 143369 9. 251957 9. 214413 9. 185486  
11744256\_ 4. 729769 4. 679616 4. 620789 5. 029364 4. 96379 4. 792422  
11744257\_ 5. 824348 5. 903789 5. 47438 6. 320707 6. 149463 6. 151992  
11744258\_ 8. 273843 8. 180037 8. 232165 8. 616369 8. 59797 8. 592988  
11744259\_ 10. 96247 10. 90406 10. 92248 11. 25335 11. 26698 11. 26656  
11744260\_ 9. 199778 9. 2473 9. 259133 9. 171062 9. 210342 9. 141036  
11744261\_ 7. 952834 7. 944539 8. 014806 8. 591446 8. 637584 8. 578153  
11744262\_ 8. 44039 8. 44242 8. 408662 8. 542891 8. 593952 8. 47976  
11744263\_ 5. 629157 5. 71004 5. 6359 5. 348521 5. 241596 5. 331548  
11744264\_ 8. 74182 8. 662788 8. 714485 8. 338494 8. 339828 8. 352389  
11744265\_ 7. 682355 7. 496376 7. 678415 7. 220733 7. 226295 7. 177459  
11744266\_ 7. 736712 7. 785264 7. 619425 7. 781134 7. 850338 7. 836769  
11744267\_ 7. 879766 7. 852532 7. 805437 8. 187837 8. 258288 8. 184888  
11744268\_ 8. 437127 8. 434229 8. 460359 8. 315571 8. 354445 8. 367735  
11744269\_ 8. 414117 8. 348789 8. 323913 8. 32211 8. 313881 8. 23759  
11744270\_ 9. 387127 9. 294634 9. 431821 9. 640179 9. 664281 9. 566568

11744271\_ 6. 36148 6. 445339 6. 296298 6. 47527 6. 498672 6. 402742  
11744272\_ 8. 456159 8. 385122 8. 475132 9. 009483 9. 115644 9. 039638  
11744273\_ 9. 721836 9. 677124 9. 720141 10. 10685 10. 0373 10. 01517  
11744274\_ 7. 826636 7. 99835 8. 006532 8. 710743 8. 695607 8. 652491  
11744275\_ 9. 178671 9. 119702 9. 177377 9. 116047 9. 094375 9. 104691  
11744276\_ 8. 7148 8. 728471 8. 769929 8. 766405 8. 823422 8. 770649  
11744277\_ 8. 883728 8. 880286 8. 895917 8. 884664 8. 963926 8. 90996  
11744278\_ 6. 64907 6. 574386 6. 629518 6. 681719 6. 672355 6. 609275  
11744279\_ 4. 324776 4. 058927 4. 067509 3. 992785 4. 137507 4. 118653  
11744280\_ 7. 480684 7. 34833 7. 362034 7. 745362 7. 721238 7. 705025  
11744281\_ 5. 032808 5. 165769 5. 267848 5. 243567 5. 181962 5. 172131  
11744282\_ 4. 161074 4. 353043 4. 200546 4. 277649 4. 340642 4. 355423  
11744283\_ 7. 628568 7. 492191 7. 638237 7. 407185 7. 382601 7. 360784  
11744284\_ 9. 40405 9. 314413 9. 415998 9. 528181 9. 582271 9. 571427  
11744285\_ 6. 279985 6. 188528 6. 259974 7. 037731 7. 007386 6. 974466  
11744286\_ 7. 750184 7. 603536 7. 616475 8. 689849 8. 688818 8. 693416  
11744287\_ 5. 396817 5. 215643 5. 573695 6. 276589 6. 20242 6. 320019  
11744288\_ 9. 703564 9. 669475 9. 756052 9. 113081 9. 170466 9. 149565  
11744289\_ 8. 371287 8. 318185 8. 40752 8. 070414 8. 140014 8. 108952  
11744290\_ 8. 433912 8. 36351 8. 474641 8. 454953 8. 511748 8. 523034  
11744291\_ 8. 460628 8. 455176 8. 506997 8. 50297 8. 579416 8. 528788  
11744292\_ 7. 407268 7. 360867 7. 324095 7. 348244 7. 306776 7. 37757  
11744293\_ 5. 486143 5. 552169 5. 453953 5. 482006 5. 45619 5. 515059  
11744294\_ 8. 187091 8. 220419 8. 234694 8. 657114 8. 643192 8. 525903  
11744295\_ 8. 089404 8. 09976 8. 121508 8. 319341 8. 372116 8. 362364  
11744296\_ 7. 44965 7. 407927 7. 519597 7. 194708 7. 161887 7. 185656  
11744297\_ 7. 801481 7. 72667 7. 735384 8. 435494 8. 431845 8. 489973  
11744298\_ 5. 624256 5. 34442 5. 302658 5. 655842 5. 820052 5. 719318  
11744299\_ 6. 435051 5. 933038 6. 354834 5. 156303 5. 149545 5. 073036  
11744300\_ 4. 8602 4. 87059 4. 830284 4. 895558 4. 701692 4. 739692  
11744301\_ 7. 916845 7. 792179 7. 866051 8. 403907 8. 347373 8. 412241  
11744302\_ 7. 211631 7. 258581 7. 23268 7. 289986 7. 219654 7. 268353  
11744303\_ 9. 271224 9. 204471 9. 322273 9. 260273 9. 291668 9. 263266  
11744304\_ 6. 431763 6. 320816 6. 412293 6. 705601 6. 809645 6. 688959  
11744305\_ 5. 126995 5. 192916 4. 989555 5. 205914 5. 198291 5. 239024  
11744306\_ 8. 514108 8. 456815 8. 438483 9. 118814 8. 995041 9. 036055  
11744307\_ 3. 640213 3. 697765 3. 464075 3. 519951 3. 302829 3. 302829  
11744308\_ 4. 909671 4. 814895 4. 950832 4. 992826 5. 070214 5. 080172  
11744309\_ 5. 331325 5. 27999 5. 087854 5. 409703 5. 340314 5. 361851  
11744310\_ 6. 989199 6. 913851 7. 129729 6. 968361 6. 967649 6. 898793  
11744311\_ 2. 799215 2. 739005 3. 008067 2. 74818 2. 605516 2. 825528  
11744312\_ 5. 43295 5. 532677 5. 488755 5. 493066 5. 453793 5. 536944  
11744313\_ 8. 324158 8. 281966 8. 24424 8. 227218 8. 150201 8. 153147  
11744314\_ 6. 164214 5. 960103 6. 219072 6. 145502 6. 095067 6. 051554  
11744315\_ 6. 982937 6. 806201 6. 874408 6. 285555 6. 330828 6. 23683  
11744316\_ 4. 058029 4. 167878 3. 941028 4. 001659 4. 112093 4. 073952  
11744317\_ 6. 170612 6. 088749 6. 258274 6. 727853 6. 689418 6. 797073  
11744318\_ 2. 217296 2. 218368 2. 076842 2. 068161 2. 236417 1. 962654  
11744319\_ 3. 713283 3. 766094 3. 669728 3. 840901 3. 753752 3. 810946  
11744320\_ 5. 47177 5. 416081 5. 298291 5. 4389 5. 596765 5. 326524  
11744321\_ 4. 970673 5. 18704 5. 058678 5. 060642 5. 175952 5. 181843

11744322\_ 4. 647485 4. 534481 4. 635009 4. 533702 4. 697329 4. 730353  
11744323\_ 7. 695733 7. 623738 7. 731417 7. 474948 7. 486598 7. 481476  
11744324\_ 6. 091094 6. 11949 6. 127413 6. 322779 6. 279688 6. 202176  
11744325\_ 5. 134035 5. 242904 5. 234146 5. 161803 5. 316698 5. 109227  
11744326\_ 12. 81077 12. 78359 12. 81734 12. 86836 12. 92651 12. 89468  
11744327\_ 12. 70343 12. 68339 12. 69288 12. 81054 12. 79079 12. 79783  
11744328\_ 12. 84813 12. 86407 12. 85626 12. 88896 12. 89917 12. 88536  
11744329\_ 12. 91588 12. 99059 12. 94324 12. 93173 12. 93243 12. 89907  
11744330\_ 9. 20946 9. 235422 9. 248819 9. 277663 9. 323921 9. 276362  
11744331\_ 2. 8231 2. 763322 2. 692238 2. 855062 2. 931086 2. 931086  
11744332\_ 7. 29567 7. 279707 7. 266704 7. 558841 7. 596375 7. 55134  
11744333\_ 9. 391646 9. 380543 9. 392047 9. 32734 9. 381805 9. 427473  
11744334\_ 12. 56782 12. 58512 12. 59448 12. 60421 12. 62299 12. 62731  
11744335\_ 6. 72425 6. 807992 6. 850129 7. 067829 7. 078772 7. 044527  
11744336\_ 13. 40132 13. 39611 13. 40439 13. 39981 13. 40858 13. 38476  
11744337\_ 6. 073142 6. 185517 6. 111205 6. 397946 6. 379174 6. 318829  
11744338\_ 7. 678376 7. 580228 7. 659181 8. 738763 8. 736827 8. 811735  
11744339\_ 7. 509229 7. 372096 7. 560119 7. 44413 7. 558718 7. 468252  
11744340\_ 11. 12847 11. 16627 11. 1557 11. 24082 11. 16022 11. 10998  
11744341\_ 9. 361844 9. 319058 9. 38618 9. 284771 9. 223516 9. 183442  
11744342\_ 9. 398182 9. 397526 9. 433227 9. 438745 9. 445154 9. 427899  
11744343\_ 8. 007152 7. 973079 8. 009039 8. 220244 8. 189898 8. 22727  
11744344\_ 9. 473163 9. 431487 9. 42612 9. 065178 9. 141474 9. 121599  
11744345\_ 12. 42294 12. 39506 12. 4336 12. 66831 12. 68098 12. 67133  
11744346\_ 4. 966738 4. 9226 4. 969801 4. 832944 5. 033397 4. 982113  
11744347\_ 7. 335346 7. 334601 7. 33058 7. 291509 7. 263426 7. 242827  
11744348\_ 7. 069903 7. 0259 6. 97683 6. 939194 7. 000401 7. 059889  
11744349\_ 8. 489691 8. 479413 8. 529061 8. 799984 8. 723338 8. 739402  
11744350\_ 12. 35175 12. 38022 12. 3722 12. 14753 12. 13361 12. 1927  
11744351\_ 6. 394796 6. 311523 6. 374673 6. 58688 6. 617869 6. 533732  
11744352\_ 10. 2135 10. 18024 10. 21202 9. 846599 9. 860161 9. 869771  
11744353\_ 7. 833018 7. 78787 7. 936609 7. 979014 8. 034789 8. 007324  
11744354\_ 6. 459751 6. 531304 6. 373428 6. 405243 6. 429424 6. 247833  
11744355\_ 7. 055228 7. 206152 7. 074008 7. 345916 7. 265177 7. 308019  
11744356\_ 6. 562058 6. 556168 6. 519233 6. 564401 6. 296682 6. 434545  
11744357\_ 6. 898793 6. 802318 6. 806763 6. 881698 6. 781076 6. 787816  
11744358\_ 6. 960669 6. 906451 6. 924645 6. 780756 6. 800466 6. 747998  
11744359\_ 7. 317368 7. 221558 7. 286291 7. 693752 7. 563219 7. 6072  
11744360\_ 11. 1544 11. 16129 11. 09832 11. 43478 11. 30196 11. 21898  
11744361\_ 8. 383709 8. 412817 8. 482349 8. 689488 8. 699147 8. 667909  
11744362\_ 10. 20273 10. 17098 10. 21663 10. 39217 10. 36401 10. 34976  
11744363\_ 7. 209178 7. 302712 7. 29408 7. 36919 7. 279895 7. 299162  
11744364\_ 6. 56287 6. 498075 6. 498739 6. 189726 6. 282224 6. 316017  
11744365\_ 12. 09504 12. 06146 12. 10096 11. 65246 11. 6533 11. 64166  
11744366\_ 12. 27481 12. 31219 12. 27185 12. 08141 12. 01611 11. 94937  
11744367\_ 5. 647716 5. 664331 5. 820052 5. 193119 5. 333723 5. 264754  
11744368\_ 6. 708358 6. 607006 6. 716047 6. 218349 6. 320479 6. 220501  
11744369\_ 10. 57568 10. 55113 10. 51802 9. 794753 9. 760286 9. 862466  
11744370\_ 8. 136777 8. 015281 8. 112737 8. 677355 8. 695503 8. 670639  
11744371\_ 7. 681585 7. 812445 7. 651016 8. 007886 7. 890944 7. 940529  
11744372\_ 8. 154852 8. 121597 8. 146546 8. 542945 8. 486886 8. 5238

11744373\_ 9. 508997 9. 413396 9. 491362 9. 309727 9. 353503 9. 267449  
11744374\_ 9. 46121 9. 379368 9. 466576 9. 356808 9. 364383 9. 348322  
11744375\_ 8. 627067 8. 685024 8. 636467 8. 922089 8. 924028 8. 912646  
11744376\_ 8. 195082 8. 261628 8. 261127 8. 583894 8. 625072 8. 591065  
11744377\_ 9. 034548 8. 97069 8. 889644 8. 507285 8. 43737 8. 439202  
11744378\_ 6. 189329 6. 22153 6. 126584 6. 189329 6. 198533 6. 094413  
11744379\_ 2. 598308 2. 793326 2. 570801 2. 610872 2. 244946 2. 377227  
11744380\_ 3. 895405 3. 765541 4. 024095 3. 531929 3. 632959 3. 64641  
11744381\_ 6. 711031 6. 612181 6. 656783 6. 785151 6. 827647 6. 936432  
11744382\_ 8. 664108 8. 626442 8. 66777 8. 652072 8. 748989 8. 678599  
11744383\_ 9. 064777 9. 003741 9. 07056 8. 737674 8. 845402 8. 785879  
11744384\_ 11. 04365 11. 04918 11. 10948 11. 42076 11. 40883 11. 36758  
11744385\_ 9. 375956 9. 313974 9. 379496 9. 457765 9. 39121 9. 387824  
11744386\_ 9. 294443 9. 284234 9. 329461 9. 290834 9. 361569 9. 283455  
11744387\_ 5. 631117 5. 875614 5. 686504 5. 677307 5. 751187 5. 798791  
11744388\_ 5. 482587 5. 248208 5. 226898 5. 275178 5. 441332 5. 472349  
11744389\_ 8. 004577 8. 005056 8. 035589 8. 167917 8. 121184 8. 06384  
11744390\_ 9. 696444 9. 664106 9. 679159 9. 398815 9. 430627 9. 392563  
11744391\_ 6. 688596 6. 608075 6. 587515 7. 241639 7. 342771 7. 263116  
11744392\_ 9. 390159 9. 388947 9. 421194 9. 678457 9. 627637 9. 632746  
11744393\_ 9. 966779 9. 855826 9. 886304 10. 17825 10. 14737 10. 11858  
11744394\_ 6. 58554 6. 664662 6. 523674 6. 459713 6. 551869 6. 576379  
11744395\_ 9. 140149 9. 182373 9. 151104 9. 399256 9. 366736 9. 30546  
11744396\_ 6. 38502 6. 429666 6. 497868 6. 542855 6. 637552 6. 667938  
11744397\_ 5. 666453 5. 69488 5. 685689 5. 575575 5. 614714 5. 555412  
11744398\_ 6. 971486 7. 055228 7. 017714 7. 48621 7. 473087 7. 472535  
11744399\_ 10. 13618 10. 12641 10. 11481 9. 954076 9. 949037 9. 916883  
11744400\_ 8. 706282 8. 664866 8. 738143 8. 914327 8. 956395 8. 933184  
11744401\_ 9. 405942 9. 361236 9. 410327 9. 531524 9. 580133 9. 516768  
11744402\_ 8. 723588 8. 709814 8. 696663 8. 021652 8. 007772 7. 985421  
11744403\_ 7. 668019 7. 590054 7. 722204 7. 692752 7. 737854 7. 640635  
11744404\_ 7. 366043 7. 24788 7. 405096 7. 466858 7. 596153 7. 458024  
11744405\_ 6. 255932 5. 842778 6. 236042 5. 952447 6. 135986 6. 178872  
11744406\_ 6. 708195 6. 660116 6. 804374 6. 708593 6. 79095 6. 716525  
11744407\_ 8. 701578 8. 674055 8. 709164 8. 658115 8. 583493 8. 559677  
11744408\_ 8. 546067 8. 448845 8. 497299 8. 192829 8. 096941 8. 252953  
11744409\_ 8. 239457 8. 121295 8. 226228 7. 527926 7. 571724 7. 539212  
11744410\_ 3. 290248 3. 28805 3. 15013 3. 361884 3. 364082 3. 463352  
11744411\_ 10. 86572 10. 85442 10. 84583 11. 01331 10. 97215 10. 96205  
11744412\_ 7. 552999 7. 467995 7. 524647 6. 996712 7. 025217 6. 941467  
11744413\_ 8. 911897 8. 87944 8. 96577 9. 285282 9. 254989 9. 299502  
11744414\_ 7. 117553 7. 075774 7. 155498 7. 351379 7. 384804 7. 456703  
11744415\_ 6. 005519 5. 925264 6. 04129 5. 86346 6. 007581 5. 784263  
11744416\_ 4. 215935 4. 174945 4. 194145 4. 576031 4. 609633 4. 550708  
11744417\_ 9. 073768 9. 111893 9. 121757 9. 143047 9. 158091 9. 149853  
11744418\_ 6. 47888 6. 503973 6. 483934 6. 492899 6. 416124 6. 460862  
11744419\_ 7. 522216 7. 337792 7. 478287 7. 559757 7. 51147 7. 522531  
11744420\_ 5. 541963 5. 544153 5. 374866 5. 702812 5. 564533 5. 700729  
11744421\_ 7. 530042 7. 561501 7. 579398 7. 579991 7. 574449 7. 580944  
11744422\_ 7. 981866 7. 965912 7. 992289 8. 051893 8. 058923 8. 063157  
11744423\_ 11. 45204 11. 43742 11. 46517 11. 43959 11. 48985 11. 43026

11744424\_ 2. 988093 2. 712578 2. 736636 2. 819526 2. 872773 2. 677642  
11744425\_ 11. 12847 11. 18968 11. 00947 11. 77392 11. 68399 11. 63474  
11744426\_ 11. 13369 11. 12163 11. 09095 11. 68462 11. 65403 11. 61984  
11744427\_ 8. 990563 8. 969972 8. 942011 8. 78393 8. 840238 8. 740326  
11744428\_ 10. 18686 10. 15304 10. 16112 9. 962016 10. 01238 9. 968681  
11744429\_ 8. 590633 8. 620827 8. 606643 9. 05136 9. 065543 9. 064444  
11744430\_ 8. 699748 8. 663634 8. 729511 8. 916227 8. 930903 8. 905119  
11744431\_ 3. 360475 3. 360475 3. 398705 3. 595921 3. 38559 3. 525141  
11744432\_ 8. 685562 8. 647206 8. 601643 8. 617288 8. 598972 8. 594956  
11744433\_ 2. 944545 2. 927749 2. 901205 2. 788432 2. 995554 3. 011382  
11744434\_ 6. 884241 6. 820569 6. 954548 6. 669884 6. 709859 6. 700371  
11744435\_ 10. 79669 10. 81355 10. 77924 10. 44407 10. 45625 10. 43415  
11744436\_ 7. 65658 7. 579261 7. 456597 8. 058844 8. 06974 8. 146468  
11744437\_ 3. 230215 3. 263509 3. 405871 3. 482778 3. 297331 3. 482778  
11744438\_ 9. 033204 9. 050507 9. 060769 9. 08102 9. 221059 9. 09466  
11744439\_ 10. 5152 10. 49801 10. 53702 10. 55554 10. 5567 10. 55558  
11744440\_ 8. 887785 8. 858484 8. 894683 9. 135697 9. 175003 9. 13192  
11744441\_ 3. 935403 3. 916463 4. 14463 4. 271853 4. 118398 4. 165802  
11744442\_ 7. 87358 7. 747041 7. 865292 7. 564976 7. 643134 7. 60606  
11744443\_ 8. 251621 8. 12997 8. 271502 7. 986669 8. 088431 7. 985699  
11744444\_ 10. 39378 10. 35185 10. 35518 10. 69973 10. 66557 10. 59097  
11744445\_ 8. 899342 8. 890819 8. 856071 8. 756068 8. 677127 8. 746255  
11744446\_ 5. 887151 6. 166265 6. 009784 6. 192082 6. 132371 6. 33679  
11744447\_ 6. 865111 6. 923916 6. 985775 7. 062543 7. 127345 7. 254178  
11744448\_ 7. 513386 7. 497894 7. 495815 7. 451972 7. 275042 7. 412863  
11744449\_ 7. 151927 7. 098756 7. 148223 7. 27445 7. 36383 7. 308802  
11744450\_ 7. 558125 7. 62721 7. 582744 7. 78633 7. 715476 7. 74563  
11744451\_ 9. 461642 9. 412642 9. 403722 9. 286805 9. 332572 9. 312782  
11744452\_ 8. 283171 8. 224271 8. 244289 8. 200866 8. 254218 8. 208174  
11744453\_ 9. 794871 9. 723228 9. 724174 9. 723231 9. 709473 9. 715921  
11744454\_ 8. 725888 8. 672013 8. 681514 8. 092918 8. 134219 8. 134219  
11744455\_ 12. 10173 12. 04049 12. 09221 12. 13884 12. 12238 12. 12851  
11744456\_ 8. 096254 8. 041661 8. 016781 7. 771431 7. 83526 7. 823336  
11744457\_ 9. 035234 8. 928556 9. 052102 9. 090099 9. 113729 9. 145851  
11744458\_ 5. 258734 5. 430926 5. 209749 5. 399115 5. 401726 5. 488229  
11744459\_ 6. 260346 6. 321051 6. 265296 6. 178835 6. 300366 6. 377413  
11744460\_ 8. 864591 8. 810889 8. 893517 8. 766685 8. 732238 8. 787461  
11744461\_ 9. 348955 9. 359922 9. 350767 9. 341143 9. 348737 9. 331279  
11744462\_ 9. 384804 9. 324123 9. 410265 8. 842144 8. 820989 8. 896038  
11744463\_ 9. 445952 9. 437816 9. 44872 9. 542487 9. 525674 9. 480384  
11744464\_ 6. 200359 6. 216791 6. 350933 5. 787288 5. 778846 5. 671916  
11744465\_ 9. 502892 9. 469958 9. 454814 8. 658324 8. 748388 8. 731662  
11744466\_ 9. 241851 9. 154297 9. 185588 9. 880075 9. 927576 9. 869398  
11744467\_ 8. 399848 8. 402295 8. 342987 8. 758028 8. 731982 8. 635989  
11744468\_ 7. 342167 7. 230454 7. 256061 8. 161358 8. 135568 8. 118669  
11744469\_ 7. 004638 6. 968371 7. 02598 7. 263648 7. 272245 7. 370057  
11744470\_ 12. 367 12. 33333 12. 38065 12. 26119 12. 30781 12. 26609  
11744471\_ 4. 427804 4. 5393 4. 510861 4. 760312 4. 572874 4. 993607  
11744472\_ 7. 982281 7. 960243 8. 004162 7. 869487 7. 846588 7. 753854  
11744473\_ 9. 479396 9. 366508 9. 400632 9. 270267 9. 300366 9. 300133  
11744474\_ 7. 799082 7. 735935 7. 733873 8. 363886 8. 351723 8. 298077

11744475\_ 7. 862016 7. 847991 7. 894979 7. 910876 7. 874439 7. 876639  
11744476\_ 7. 07727 7. 226349 7. 133163 7. 212651 7. 223139 7. 178398  
11744477\_ 5. 431041 5. 591793 5. 612044 5. 765925 5. 50301 5. 634548  
11744478\_ 2. 369362 2. 427306 2. 258772 2. 441989 2. 335041 2. 393268  
11744479\_ 8. 764479 8. 785164 8. 813948 8. 232833 8. 239072 8. 188152  
11744480\_ 9. 042506 9. 036549 9. 059385 8. 61561 8. 525383 8. 625241  
11744481\_ 7. 292142 7. 242188 7. 2828 7. 194399 7. 246663 7. 263148  
11744482\_ 6. 281985 6. 150329 6. 180747 6. 419329 6. 44179 6. 407346  
11744483\_ 7. 903627 7. 946663 7. 979642 7. 390817 7. 424909 7. 407669  
11744484\_ 10. 96285 10. 92825 10. 93952 10. 97874 10. 98152 10. 95311  
11744485\_ 6. 822404 6. 802048 6. 765911 7. 045368 7. 184826 7. 078093  
11744486\_ 7. 006478 7. 062421 7. 036452 7. 22235 7. 241327 7. 212654  
11744487\_ 11. 35089 11. 27377 11. 2564 11. 20093 11. 16812 11. 13264  
11744488\_ 9. 25901 9. 197044 9. 239986 8. 978586 8. 976673 9. 003409  
11744489\_ 10. 61476 10. 55181 10. 59356 10. 75256 10. 7725 10. 82985  
11744490\_ 9. 237805 9. 20342 9. 237805 9. 45535 9. 475315 9. 439059  
11744491\_ 7. 947863 8. 003644 8. 005041 7. 934082 7. 876651 7. 894741  
11744492\_ 7. 955602 7. 952443 7. 890213 8. 313943 8. 202405 8. 187701  
11744493\_ 6. 334234 6. 293891 6. 33679 6. 684392 6. 537661 6. 617391  
11744494\_ 10. 72395 10. 67522 10. 70968 10. 56414 10. 55369 10. 53776  
11744495\_ 7. 953197 7. 932678 7. 91991 8. 20757 8. 237408 8. 261288  
11744496\_ 4. 343771 4. 243443 4. 061103 4. 024387 4. 03393 4. 169951  
11744497\_ 5. 704919 5. 732315 5. 862783 6. 011849 5. 903344 6. 011116  
11744498\_ 6. 192571 6. 13945 6. 028487 6. 052524 6. 00364 6. 118489  
11744499\_ 7. 892512 7. 88929 7. 915878 8. 122417 8. 148547 8. 174559  
11744500\_ 8. 120435 8. 004278 8. 147345 8. 259963 8. 31185 8. 3622  
11744501\_ 7. 249439 7. 050938 7. 153282 6. 820301 6. 782682 6. 800831  
11744502\_ 7. 992424 7. 874159 7. 911272 7. 920407 7. 934429 7. 847986  
11744503\_ 7. 361103 7. 258444 7. 307106 7. 035591 6. 985524 6. 975204  
11744504\_ 8. 994873 8. 94482 8. 966116 9. 147624 9. 226596 9. 091863  
11744505\_ 3. 911842 4. 048393 3. 952666 3. 907225 4. 241778 4. 26879  
11744506\_ 4. 560738 4. 609797 4. 408911 4. 550763 4. 501583 4. 609129  
11744507\_ 4. 584933 4. 584933 4. 533691 4. 437811 4. 578869 4. 639885  
11744508\_ 4. 841179 4. 925056 4. 858974 4. 862551 5. 031925 4. 982213  
11744509\_ 10. 05644 10. 00175 10. 04714 9. 998368 10. 0093 10. 00032  
11744510\_ 9. 099305 8. 992748 9. 06704 9. 410794 9. 423942 9. 418886  
11744511\_ 8. 426515 8. 322614 8. 405218 8. 938558 8. 950744 8. 94199  
11744512\_ 4. 9226 4. 771478 4. 556399 4. 711045 4. 679382 4. 658318  
11744513\_ 8. 379584 8. 583023 8. 354744 8. 515972 8. 523842 8. 491776  
11744514\_ 7. 432582 7. 517178 7. 544806 7. 715356 7. 704656 7. 741761  
11744515\_ 8. 231965 8. 295075 8. 289233 8. 116475 8. 134232 8. 123656  
11744516\_ 5. 071349 5. 135594 5. 127042 5. 223131 5. 183024 5. 177554  
11744517\_ 4. 669855 4. 378771 4. 491318 4. 874234 4. 733311 4. 821679  
11744518\_ 5. 096954 5. 215652 4. 929863 5. 3515 5. 424502 5. 258196  
11744519\_ 6. 704988 6. 695206 6. 753709 7. 880887 7. 839322 7. 846183  
11744520\_ 8. 061598 8. 004661 8. 076943 8. 078569 8. 109677 8. 15983  
11744521\_ 9. 314356 9. 223087 9. 297439 9. 279137 9. 292155 9. 293737  
11744522\_ 9. 573875 9. 539948 9. 601759 9. 863647 9. 885352 9. 830011  
11744523\_ 7. 286423 7. 226547 7. 389866 7. 09509 7. 126772 7. 124695  
11744524\_ 3. 845496 3. 889281 3. 697712 3. 874748 3. 933123 3. 682059  
11744525\_ 6. 41513 6. 360394 6. 300643 6. 63431 6. 586201 6. 667703



11744526\_ 6.067525 6.077397 6.199575 6.030598 6.046438 5.988789  
11744527\_ 6.551267 6.495621 6.436906 6.609836 6.532986 6.572309  
11744528\_ 8.802032 8.779222 8.831291 8.41409 8.425345 8.409773  
11744529\_ 7.572486 7.514749 7.646894 6.398342 6.429814 6.617088  
11744530\_ 4.927524 4.874226 4.960669 5.01447 4.869931 5.004427  
11744531\_ 8.287035 8.278526 8.276216 8.311718 8.3544 8.265548  
11744532\_ 8.043874 8.056963 8.078697 7.843412 7.919977 7.83442  
11744533\_ 8.088569 8.049591 8.115659 7.668452 7.632707 7.643627  
11744534\_ 9.426298 9.428447 9.458136 9.437298 9.446378 9.463514  
11744535\_ 10.76721 10.77052 10.75509 10.89755 10.88231 10.7896  
11744536\_ 10.78398 10.77198 10.78555 10.7894 10.78165 10.77765  
11744537\_ 7.903125 7.832234 7.820124 7.800682 7.814261 7.772992  
11744538\_ 7.750224 7.645688 7.691374 7.902183 7.889311 7.845459  
11744539\_ 9.247404 9.182223 9.207427 9.442331 9.445448 9.382361  
11744540\_ 9.902216 9.881606 9.918628 10.12304 10.08657 10.14653  
11744541\_ 4.91574 4.805566 4.645972 5.185289 5.149545 5.124911  
11744542\_ 7.192464 7.097888 7.136733 7.206445 7.292388 7.275779  
11744543\_ 8.361326 8.263282 8.357996 8.450283 8.478882 8.521176  
11744544\_ 9.71234 9.784899 9.763647 9.796699 9.849938 9.878875  
11744545\_ 7.291959 7.348699 7.378673 7.366874 7.431405 7.384322  
11744546\_ 5.89021 5.881374 5.907848 5.93062 5.877625 5.917642  
11744547\_ 7.249741 7.201809 7.180209 7.333978 7.349946 7.320256  
11744548\_ 13.07288 13.04384 13.05622 12.99368 13.01362 13.00228  
11744549\_ 9.891401 9.89582 9.931022 9.854081 9.747952 9.775147  
11744550\_ 9.948168 9.867661 9.919849 9.859095 9.795156 9.742147  
11744551\_ 2.712022 2.712606 2.901667 2.440728 2.677115 2.499441  
11744552\_ 8.06826 7.980276 8.020923 8.096726 8.111428 8.169525  
11744553\_ 5.095828 4.968286 4.896979 4.738667 4.922099 4.909447  
11744554\_ 4.142998 4.121006 4.213226 4.005402 4.054288 3.974137  
11744555\_ 5.60523 5.75331 5.596542 5.808182 5.633736 5.756882  
11744556\_ 5.589947 5.758349 5.69327 5.8085 5.620113 5.70687  
11744557\_ 7.150936 7.16258 7.225246 7.099734 7.084567 6.990109  
11744558\_ 4.174217 4.394481 4.163402 4.411878 4.406157 4.200007  
11744559\_ 8.565882 8.519779 8.545765 8.289811 8.286027 8.367689  
11744560\_ 9.52932 9.446522 9.502648 9.099218 9.169495 9.159487  
11744561\_ 5.647055 5.48234 5.635605 5.607059 5.664023 5.637074  
11744562\_ 7.884416 7.847701 7.895571 7.679793 7.834194 7.680223  
11744563\_ 9.07501 9.062033 8.976123 8.8325 8.745924 8.759164  
11744564\_ 8.316094 8.29496 8.379496 8.428701 8.485308 8.426959  
11744565\_ 7.345324 7.26674 7.282172 7.558894 7.522216 7.453183  
11744566\_ 9.682877 9.601822 9.662582 9.195787 9.241886 9.191257  
11744567\_ 2.410316 2.361298 2.773594 2.347545 2.355855 2.443703  
11744568\_ 4.18676 4.276336 4.14749 4.230998 4.136458 3.993967  
11744569\_ 5.252247 5.137186 5.419854 5.079806 5.08929 4.977093  
11744570\_ 7.463088 7.413236 7.428225 7.190639 7.207582 7.244002  
11744571\_ 5.999306 5.689813 5.926513 5.91725 5.953475 5.939719  
11744572\_ 9.626059 9.579594 9.57948 8.991498 8.955268 8.954849  
11744573\_ 6.449541 6.410952 6.52325 5.820932 5.866743 5.919468  
11744574\_ 7.180906 7.037642 7.206119 6.658691 6.788543 6.714177  
11744575\_ 5.161692 4.947005 5.02561 4.584933 4.658712 4.700243  
11744576\_ 5.190459 5.259471 5.277676 5.284772 5.136758 5.173357

11744577\_ 2. 747574 2. 960103 2. 82534 2. 799574 2. 675697 2. 750728  
11744578\_ 6. 965454 6. 991398 6. 933096 7. 018354 7. 026693 6. 922664  
11744579\_ 4. 305691 4. 19944 4. 213226 4. 586533 4. 40461 4. 463241  
11744580\_ 6. 611994 6. 503179 6. 604788 6. 058786 5. 829822 6. 038616  
11744581\_ 6. 845428 6. 950255 6. 847241 6. 300643 6. 366235 6. 378925  
11744582\_ 6. 460583 6. 385391 6. 366378 5. 967196 5. 684524 5. 817128  
11744583\_ 5. 614563 5. 522891 5. 620728 5. 725324 5. 725622 5. 645342  
11744584\_ 8. 433126 8. 266731 8. 403425 8. 013759 8. 06253 8. 040556  
11744585\_ 5. 990047 6. 122987 5. 892413 6. 363984 6. 492958 6. 312867  
11744586\_ 7. 654705 7. 534622 7. 689353 6. 909833 6. 837039 6. 955339  
11744587\_ 7. 394094 7. 31619 7. 468137 7. 378934 7. 457653 7. 376866  
11744588\_ 4. 485128 4. 595585 4. 616654 4. 433111 4. 583803 4. 682393  
11744589\_ 6. 505715 6. 398111 6. 482828 6. 566065 6. 681066 6. 651168  
11744590\_ 6. 516136 6. 436266 6. 657332 6. 045129 5. 937315 5. 872147  
11744591\_ 7. 67138 7. 565439 7. 622015 7. 094071 7. 130562 7. 049995  
11744592\_ 6. 103663 6. 255846 6. 22419 6. 312558 6. 245573 6. 377451  
11744593\_ 7. 379169 7. 426919 7. 375081 7. 421727 7. 486876 7. 520744  
11744594\_ 5. 153259 5. 111291 5. 073304 5. 472799 5. 438664 5. 562686  
11744595\_ 7. 349168 7. 356775 7. 230791 7. 909112 7. 889398 7. 910911  
11744596\_ 4. 518231 4. 728033 4. 584933 4. 03302 4. 205667 4. 122446  
11744597\_ 9. 284313 9. 275725 9. 319661 9. 325511 9. 396618 9. 420552  
11744598\_ 6. 490138 6. 369227 6. 514218 7. 514408 7. 596153 7. 55731  
11744599\_ 7. 837997 7. 814818 7. 890456 7. 947529 7. 95524 7. 984009  
11744600\_ 4. 390637 4. 748954 4. 303977 4. 636433 4. 703484 4. 487523  
11744601\_ 12. 55177 12. 56399 12. 52515 12. 68199 12. 66269 12. 6377  
11744602\_ 6. 554512 6. 399228 6. 460065 7. 104857 7. 093817 7. 1511  
11744603\_ 6. 834154 6. 896446 6. 881887 7. 326487 7. 333856 7. 313123  
11744604\_ 3. 625607 3. 254579 3. 322318 3. 424005 3. 380806 3. 466239  
11744605\_ 9. 189276 9. 166979 9. 14638 9. 161197 9. 164416 9. 113142  
11744606\_ 4. 545849 4. 395413 4. 076436 5. 116525 4. 847159 5. 062627  
11744607\_ 2. 034374 2. 294771 2. 361778 2. 277795 2. 135911 2. 406579  
11744608\_ 8. 162357 8. 035286 8. 135621 8. 0198 8. 058487 8. 113064  
11744609\_ 7. 094737 6. 903801 7. 003093 6. 779133 6. 68108 6. 800465  
11744610\_ 2. 262677 2. 003549 2. 262677 2. 122054 2. 155729 2. 260125  
11744611\_ 4. 483417 4. 429866 4. 508427 4. 44373 4. 630588 4. 508427  
11744612\_ 9. 939865 9. 873693 9. 976587 9. 693215 9. 64512 9. 680514  
11744613\_ 5. 098253 5. 018776 5. 17639 5. 095544 5. 336086 5. 228843  
11744614\_ 4. 741305 4. 69071 4. 758672 5. 045489 4. 814466 5. 048694  
11744615\_ 3. 387849 3. 591526 3. 443593 3. 458973 3. 472325 3. 476383  
11744616\_ 7. 309023 7. 274752 7. 345718 7. 212754 7. 185994 7. 089738  
11744617\_ 6. 817986 6. 849603 6. 920647 7. 834199 7. 735882 7. 713344  
11744618\_ 10. 45862 10. 53125 10. 55486 10. 17046 10. 16115 10. 09173  
11744619\_ 8. 526265 8. 383212 8. 494102 7. 958238 8. 005597 7. 988767  
11744620\_ 4. 546403 4. 9226 4. 66898 4. 407836 4. 446445 4. 546413  
11744621\_ 8. 693581 8. 664451 8. 687407 8. 479121 8. 553994 8. 517077  
11744622\_ 7. 734789 7. 697768 7. 812291 8. 149508 8. 216606 8. 18555  
11744623\_ 9. 192587 9. 233608 9. 224018 9. 145292 9. 139984 9. 1537  
11744624\_ 6. 576492 6. 645897 6. 548401 6. 908475 6. 770342 6. 982254  
11744625\_ 8. 291481 8. 21753 8. 296129 8. 212901 8. 181644 8. 230301  
11744626\_ 9. 069965 9. 026446 9. 092744 8. 980165 8. 982979 8. 90232  
11744627\_ 9. 242675 9. 175745 9. 252142 9. 175606 9. 14507 9. 109344

11744628\_ 8. 111551 8. 071542 8. 04315 7. 83546 7. 870422 7. 817451  
11744629\_ 6. 526894 6. 49781 6. 678146 7. 10843 7. 110609 7. 074395  
11744630\_ 7. 838533 7. 74332 7. 807965 7. 445809 7. 482432 7. 439229  
11744631\_ 4. 600203 4. 677329 4. 496162 4. 324854 4. 234056 4. 274456  
11744632\_ 8. 186555 8. 086906 8. 163004 8. 098537 8. 115471 7. 968558  
11744633\_ 6. 751421 6. 704349 6. 743584 6. 742623 6. 795371 6. 874721  
11744634\_ 10. 47203 10. 3971 10. 34356 9. 88996 9. 853521 9. 783532  
11744635\_ 8. 957292 9. 039546 8. 999174 8. 553989 8. 465024 8. 416534  
11744636\_ 4. 528992 4. 702663 4. 459939 4. 905982 4. 700243 4. 687314  
11744637\_ 5. 99223 6. 061937 6. 120456 6. 13993 6. 196433 6. 195215  
11744638\_ 6. 364021 6. 323442 6. 389049 6. 366622 6. 25368 6. 379703  
11744639\_ 4. 213002 4. 437212 4. 300573 4. 719931 4. 495198 4. 497787  
11744640\_ 4. 224265 4. 408057 4. 183216 4. 659227 4. 411267 4. 439671  
11744641\_ 9. 97614 9. 921648 9. 994835 9. 767842 9. 770557 9. 761377  
11744642\_ 6. 930308 6. 896975 7. 111077 6. 871134 6. 881967 6. 861759  
11744643\_ 4. 093238 4. 355404 4. 118756 4. 347598 4. 277416 4. 068484  
11744644\_ 5. 871443 5. 87612 5. 87612 5. 945562 5. 928206 5. 948052  
11744645\_ 5. 327136 5. 214663 5. 078295 5. 19851 5. 2782 5. 317877  
11744646\_ 6. 121128 5. 703277 5. 722512 5. 808216 5. 689566 5. 751575  
11744647\_ 5. 714838 5. 753707 5. 481012 5. 863855 5. 753707 5. 67003  
11744648\_ 7. 687541 7. 612327 7. 726633 7. 516957 7. 495945 7. 543015  
11744649\_ 4. 3 4. 461556 4. 239497 4. 758474 4. 486165 4. 482344  
11744650\_ 8. 313881 8. 235486 8. 24869 7. 926988 7. 952009 7. 996756  
11744651\_ 4. 481679 4. 424968 4. 352454 4. 650161 4. 518404 4. 650161  
11744652\_ 5. 993153 5. 866889 5. 794214 5. 769917 6. 034321 5. 971647  
11744653\_ 12. 6943 12. 65528 12. 6925 12. 66268 12. 66263 12. 69467  
11744654\_ 10. 98383 10. 98341 10. 95176 11. 12458 11. 123 11. 06823  
11744655\_ 5. 015923 5. 052514 5. 103675 5. 182873 5. 198175 5. 188333  
11744656\_ 5. 531741 5. 551485 5. 574931 5. 794286 5. 768053 5. 773221  
11744657\_ 5. 945508 6. 213462 6. 011813 6. 233988 6. 365198 6. 401568  
11744658\_ 5. 212002 5. 051222 5. 228018 5. 215993 5. 2222 5. 326401  
11744659\_ 2. 850317 2. 836564 2. 507768 2. 912551 2. 912551 2. 669724  
11744660\_ 2. 446019 2. 446019 2. 549597 2. 543632 2. 348406 2. 446019  
11744661\_ 6. 626718 6. 632424 6. 672073 7. 239949 7. 354902 7. 334744  
11744662\_ 8. 032458 7. 95791 7. 972034 8. 666245 8. 680095 8. 670682  
11744663\_ 7. 856423 7. 849198 7. 849749 7. 430914 7. 556663 7. 450723  
11744664\_ 6. 712901 6. 702355 6. 670483 5. 877738 5. 717349 5. 858587  
11744665\_ 5. 408414 5. 449938 5. 297498 5. 475787 5. 613683 5. 594855  
11744666\_ 7. 114924 7. 05564 7. 157994 6. 876362 6. 826644 6. 716751  
11744667\_ 6. 795766 6. 791922 6. 828323 6. 465103 6. 294863 6. 344837  
11744668\_ 7. 665177 7. 546074 7. 617317 7. 753936 7. 729462 7. 778742  
11744669\_ 4. 237617 4. 376894 4. 180048 4. 290843 4. 4186 4. 328547  
11744670\_ 4. 852709 4. 87768 4. 875867 5. 149247 5. 196871 5. 228627  
11744671\_ 9. 816098 9. 77306 9. 76051 9. 780656 9. 783271 9. 783964  
11744672\_ 5. 136136 5. 101825 5. 000107 5. 077352 5. 043615 5. 12144  
11744673\_ 5. 605999 5. 431856 5. 643713 4. 982766 4. 980611 4. 922263  
11744674\_ 9. 026907 9. 056012 9. 084112 8. 51379 8. 534354 8. 433613  
11744675\_ 10. 09319 10. 09169 10. 13323 9. 644708 9. 680258 9. 651121  
11744676\_ 5. 20025 5. 252919 4. 912212 5. 268748 5. 197033 5. 27538  
11744677\_ 8. 129797 8. 193734 8. 166609 8. 13904 8. 188418 8. 22962  
11744678\_ 6. 215891 6. 182058 6. 191519 6. 397138 6. 336853 6. 38384

11744679\_ 8. 991425 8. 968917 8. 974159 8. 705001 8. 623158 8. 68375  
11744680\_ 8. 178603 8. 190309 8. 213747 8. 051241 8. 128673 8. 171976  
11744681\_ 7. 399551 7. 371445 7. 358974 6. 648586 6. 639891 6. 719223  
11744682\_ 11. 94026 11. 92692 11. 96097 12. 09804 12. 12317 12. 09767  
11744683\_ 8. 060504 8. 106427 8. 063898 10. 10065 10. 094 10. 06265  
11744684\_ 8. 192037 8. 102684 8. 164301 8. 174268 8. 016781 8. 125735  
11744685\_ 6. 022713 5. 911252 5. 904358 6. 218231 6. 203443 6. 210999  
11744686\_ 7. 257674 7. 108754 7. 212651 7. 266638 7. 323519 7. 317368  
11744687\_ 7. 062821 7. 020863 7. 003211 7. 433776 7. 423757 7. 487664  
11744688\_ 8. 588625 8. 571203 8. 546526 8. 699496 8. 687622 8. 627173  
11744689\_ 6. 60355 6. 601673 6. 738391 6. 517868 6. 531203 6. 604018  
11744690\_ 8. 449628 8. 369883 8. 437206 8. 219309 8. 229644 8. 142547  
11744691\_ 9. 114656 9. 128074 9. 166569 8. 821758 8. 877744 8. 827321  
11744692\_ 9. 812871 9. 775678 9. 816061 10. 32536 10. 30777 10. 32297  
11744693\_ 8. 100359 8. 192268 8. 082123 8. 172352 8. 097523 8. 099571  
11744694\_ 10. 61204 10. 59175 10. 56346 10. 26742 10. 25749 10. 23224  
11744695\_ 9. 99327 9. 97369 9. 975321 9. 708501 9. 607445 9. 591238  
11744696\_ 9. 607157 9. 598883 9. 534961 9. 378995 9. 337289 9. 201152  
11744697\_ 9. 33968 9. 373721 9. 285645 9. 002048 8. 956662 8. 900522  
11744698\_ 7. 354264 7. 297635 7. 409817 7. 61373 7. 649761 7. 725826  
11744699\_ 7. 766605 7. 732765 7. 770135 8. 043168 8. 134464 8. 106214  
11744700\_ 7. 552006 7. 578048 7. 676349 7. 770361 7. 802073 7. 876  
11744701\_ 3. 975524 4. 174338 3. 721931 4. 069368 4. 126722 4. 031143  
11744702\_ 6. 684806 6. 572585 6. 628776 6. 472448 6. 498671 6. 467471  
11744703\_ 6. 077881 6. 076709 6. 23831 6. 060922 6. 093938 6. 046639  
11744704\_ 7. 976421 7. 974386 7. 992932 8. 356063 8. 330202 8. 270713  
11744705\_ 6. 835605 6. 934053 6. 876269 6. 822163 6. 853809 6. 889094  
11744706\_ 5. 878386 5. 804502 5. 898278 5. 861879 5. 845365 5. 946303  
11744707\_ 2. 425337 2. 090095 2. 197359 2. 240526 2. 522309 2. 362753  
11744708\_ 7. 899114 7. 90031 7. 831596 7. 510598 7. 470687 7. 331773  
11744709\_ 8. 899864 8. 818566 8. 856006 8. 688816 8. 697553 8. 653765  
11744710\_ 6. 698262 6. 659507 6. 689825 6. 714484 6. 778557 6. 774162  
11744711\_ 6. 090265 6. 157326 6. 018609 6. 16261 6. 232518 6. 218827  
11744712\_ 6. 81593 6. 803919 6. 858022 6. 75037 6. 694551 6. 738668  
11744713\_ 4. 797644 4. 913777 5. 003183 4. 958191 5. 052836 4. 942747  
11744714\_ 4. 738206 4. 884065 4. 643717 4. 787332 4. 761059 4. 795007  
11744715\_ 6. 552043 6. 609597 6. 564541 6. 867464 6. 836037 6. 815112  
11744716\_ 8. 619501 8. 661027 8. 643197 8. 742381 8. 709081 8. 672567  
11744717\_ 7. 690014 7. 697466 7. 696394 7. 547354 7. 557015 7. 496189  
11744718\_ 9. 509991 9. 494848 9. 468568 9. 369154 9. 360074 9. 318367  
11744719\_ 2. 337346 2. 451027 2. 301113 2. 421933 2. 547992 2. 357095  
11744720\_ 4. 263784 4. 166219 4. 54821 4. 087271 4. 030719 4. 166219  
11744721\_ 7. 730638 7. 787435 7. 824209 8. 703807 8. 634727 8. 565288  
11744722\_ 4. 164039 4. 412381 4. 39326 4. 218553 4. 237703 4. 164043  
11744723\_ 6. 675625 6. 595145 6. 682095 6. 92079 6. 934615 6. 95249  
11744724\_ 9. 009816 8. 970092 9. 016264 9. 128344 9. 148616 9. 11889  
11744725\_ 4. 879039 4. 92504 5. 144607 4. 801307 4. 796702 4. 801307  
11744726\_ 8. 476356 8. 489996 8. 497178 8. 45218 8. 44388 8. 406991  
11744727\_ 9. 757145 9. 821203 9. 762652 9. 702672 9. 702333 9. 792533  
11744728\_ 9. 14252 9. 127926 9. 125289 8. 591911 8. 661169 8. 59039  
11744729\_ 9. 431478 9. 407243 9. 416681 8. 875754 8. 852318 8. 813078

11744730\_ 8. 980022 8. 912723 8. 914869 9. 242078 9. 143421 9. 203742  
11744731\_ 6. 034641 6. 04907 6. 034894 6. 109243 6. 032803 6. 069682  
11744732\_ 3. 014144 2. 718322 2. 921059 2. 89702 2. 546334 2. 718322  
11744733\_ 6. 282224 6. 4279 6. 294616 6. 340338 6. 34864 6. 29192  
11744734\_ 7. 068264 7. 023321 7. 049521 6. 894117 6. 889106 6. 991839  
11744735\_ 6. 306168 6. 428797 6. 534498 4. 961838 5. 146588 5. 190475  
11744736\_ 6. 859991 7. 019523 6. 779107 6. 878457 6. 785278 6. 925754  
11744737\_ 6. 761431 6. 657145 6. 793183 7. 0221 7. 07562 6. 997013  
11744738\_ 5. 770948 5. 299432 5. 643713 7. 009306 7. 031566 7. 053419  
11744739\_ 8. 26174 8. 261725 8. 338009 7. 977832 7. 9847 7. 995666  
11744740\_ 4. 097285 4. 162502 4. 144984 4. 172139 4. 134487 4. 185024  
11744741\_ 5. 850847 5. 808952 5. 859941 6. 133532 6. 241491 6. 243005  
11744742\_ 5. 614563 5. 723217 5. 56272 5. 700302 5. 643408 5. 660934  
11744743\_ 7. 525452 7. 391878 7. 449057 7. 868277 7. 904944 7. 880281  
11744744\_ 3. 503743 3. 658092 3. 201223 3. 84844 3. 63579 3. 694555  
11744745\_ 7. 175712 7. 215889 7. 231188 7. 255669 7. 27395 7. 358974  
11744746\_ 7. 425467 7. 347163 7. 401524 7. 144465 7. 237206 7. 239992  
11744747\_ 8. 143783 8. 154392 8. 1376 8. 202239 8. 219488 8. 219894  
11744748\_ 7. 920882 8. 045241 7. 990915 8. 035844 8. 015943 8. 022077  
11744749\_ 7. 768519 7. 688209 7. 693843 7. 660486 7. 760399 7. 615813  
11744750\_ 5. 164752 5. 1412 5. 144615 5. 334339 5. 304886 5. 284557  
11744751\_ 4. 328653 4. 35272 3. 994317 4. 297898 4. 265683 4. 359257  
11744752\_ 6. 321838 6. 385907 6. 320671 6. 971403 7. 014266 7. 020462  
11744753\_ 6. 17981 6. 195852 6. 405903 6. 146624 6. 139933 6. 281376  
11744754\_ 5. 601069 5. 519519 5. 805397 5. 482598 5. 536282 5. 454286  
11744755\_ 6. 846723 6. 759619 6. 826734 6. 480525 6. 463027 6. 392956  
11744756\_ 3. 705625 3. 9044 3. 474203 3. 71729 3. 920593 3. 825542  
11744757\_ 11. 26727 11. 33416 11. 2766 11. 14039 11. 16042 11. 17828  
11744758\_ 6. 583764 6. 605252 6. 621005 6. 386535 6. 495396 6. 393258  
11744759\_ 6. 274247 6. 321863 6. 369862 6. 341843 6. 341172 6. 254239  
11744760\_ 2. 287511 2. 403619 2. 367702 2. 139403 2. 384052 2. 172202  
11744761\_ 7. 73889 7. 69827 7. 675969 7. 931964 7. 925976 7. 957208  
11744762\_ 4. 956127 4. 733374 4. 873567 4. 922705 4. 923735 4. 915003  
11744763\_ 9. 1328 9. 125415 9. 113294 10. 08189 10. 02319 10. 06931  
11744764\_ 8. 812483 8. 713378 8. 831213 8. 773829 8. 690659 8. 813365  
11744765\_ 7. 147705 7. 360462 7. 096413 7. 254044 7. 235839 7. 24497  
11744766\_ 8. 173055 8. 085557 8. 128185 8. 296134 8. 274813 8. 274364  
11744767\_ 7. 976659 7. 975603 7. 991799 8. 175843 8. 188639 8. 224604  
11744768\_ 3. 975431 4. 106088 4. 121298 4. 213831 3. 926072 4. 098967  
11744769\_ 4. 679404 4. 605393 4. 551764 4. 917305 4. 946523 4. 485096  
11744770\_ 4. 133994 4. 05757 4. 061832 4. 243846 4. 276038 4. 403416  
11744771\_ 4. 128184 4. 371921 4. 304711 4. 52373 4. 40461 4. 371921  
11744772\_ 4. 353227 4. 643717 4. 590278 4. 704736 4. 700243 4. 696413  
11744773\_ 7. 640649 7. 508222 7. 537249 7. 53912 7. 561661 7. 564486  
11744774\_ 4. 275543 3. 997131 3. 929393 3. 93597 4. 058371 3. 822463  
11744775\_ 10. 4998 10. 50256 10. 51118 10. 33405 10. 35335 10. 32639  
11744776\_ 10. 30402 10. 28797 10. 35019 9. 93281 9. 955491 9. 954279  
11744777\_ 9. 925907 9. 879362 9. 871539 10. 1918 10. 23463 10. 23552  
11744778\_ 6. 401211 6. 252306 6. 373954 5. 546145 5. 444441 5. 578585  
11744779\_ 5. 442778 5. 168182 5. 267074 5. 259605 5. 164608 5. 132049  
11744780\_ 2. 366107 2. 605516 2. 452765 2. 538826 2. 522681 2. 492773

11744781\_ 2. 819143 2. 803112 2. 819143 2. 895532 2. 819143 2. 732558  
11744782\_ 5. 409222 5. 380649 5. 480966 5. 11527 5. 055562 5. 111914  
11744783\_ 8. 202612 8. 23592 8. 344024 7. 867893 7. 863271 7. 833589  
11744784\_ 8. 533298 8. 45325 8. 492028 8. 345705 8. 408476 8. 400123  
11744785\_ 8. 768138 8. 713083 8. 773672 8. 713871 8. 712558 8. 71823  
11744786\_ 7. 964618 7. 905858 7. 98154 8. 115395 8. 094401 8. 116232  
11744787\_ 9. 429979 9. 3524 9. 431114 9. 67945 9. 703895 9. 641441  
11744788\_ 5. 527866 5. 519851 5. 708787 6. 80472 6. 768923 6. 778541  
11744789\_ 8. 939247 8. 880288 8. 878496 9. 701575 9. 691796 9. 683291  
11744790\_ 6. 421996 6. 399322 6. 708816 6. 118838 6. 024599 6. 051524  
11744791\_ 6. 639823 6. 878427 6. 673352 6. 710431 6. 743241 6. 740224  
11744792\_ 5. 423098 5. 388337 5. 391753 5. 655398 5. 685872 5. 821681  
11744793\_ 8. 547103 8. 463326 8. 501899 9. 311141 9. 238883 9. 183374  
11744794\_ 8. 735958 8. 616531 8. 769288 8. 37747 8. 397939 8. 415297  
11744795\_ 4. 610919 4. 758851 4. 634404 4. 57675 4. 651287 4. 833962  
11744796\_ 7. 648587 7. 612333 7. 636841 7. 085845 7. 068462 7. 074279  
11744797\_ 8. 620202 8. 454067 8. 501154 7. 874031 7. 917125 7. 878116  
11744798\_ 7. 482365 7. 370759 7. 473238 7. 476014 7. 446723 7. 541703  
11744799\_ 6. 21035 6. 334984 6. 369947 6. 458785 6. 445147 6. 334988  
11744800\_ 5. 782515 6. 137594 6. 143179 6. 104486 6. 05144 6. 105531  
11744801\_ 6. 633145 6. 454309 6. 61027 6. 876333 6. 898056 6. 951139  
11744802\_ 5. 003686 4. 923492 5. 243113 4. 891509 4. 985735 4. 94436  
11744803\_ 9. 360575 9. 317462 9. 352529 9. 388776 9. 374014 9. 449508  
11744804\_ 7. 640029 7. 660707 7. 705928 7. 383055 7. 302201 7. 429773  
11744805\_ 7. 693884 7. 545435 7. 637796 7. 819083 7. 831104 7. 783317  
11744806\_ 4. 517542 4. 585731 4. 565207 4. 55444 4. 735161 4. 66352  
11744807\_ 8. 118318 8. 066697 8. 040719 7. 829 7. 861001 7. 804644  
11744808\_ 4. 595264 4. 49427 4. 389371 4. 254457 4. 39537 4. 059252  
11744809\_ 4. 084288 3. 916528 3. 813805 3. 890716 3. 988428 3. 890703  
11744810\_ 5. 054847 4. 941365 5. 086435 4. 912695 4. 819457 4. 931081  
11744811\_ 4. 246151 4. 179506 4. 314747 4. 503476 4. 222465 4. 424347  
11744812\_ 7. 071897 7. 111827 7. 167172 7. 29598 7. 395086 7. 285098  
11744813\_ 4. 290096 4. 351797 4. 284075 4. 433211 4. 43224 4. 321549  
11744814\_ 7. 062963 7. 039778 6. 983137 6. 899993 6. 967032 6. 993597  
11744815\_ 6. 752709 6. 828689 6. 803096 6. 731712 6. 539926 6. 694941  
11744816\_ 5. 067442 5. 008502 5. 14031 4. 487099 4. 558342 4. 585364  
11744817\_ 3. 755812 3. 823056 3. 719567 3. 772239 3. 818119 3. 725203  
11744818\_ 8. 374459 8. 388673 8. 397719 8. 112984 8. 1363 8. 205422  
11744819\_ 8. 591815 8. 572286 8. 668534 8. 844371 8. 833742 8. 844828  
11744820\_ 6. 397946 6. 538111 6. 380638 6. 314387 6. 393599 6. 390723  
11744821\_ 4. 83759 4. 763543 4. 832358 4. 987572 4. 80304 4. 83759  
11744822\_ 11. 1047 11. 04365 11. 13005 10. 98859 10. 95784 10. 91626  
11744823\_ 8. 994724 8. 922307 9. 004608 8. 405036 8. 414559 8. 463171  
11744824\_ 7. 879754 7. 742262 7. 955371 7. 819935 7. 903205 7. 953078  
11744825\_ 10. 80352 10. 82787 10. 78148 10. 76416 10. 72478 10. 65463  
11744826\_ 9. 116764 9. 155239 9. 192014 8. 972794 8. 957078 8. 866762  
11744827\_ 8. 281268 8. 176355 8. 174962 7. 443739 7. 4 7. 269293  
11744828\_ 7. 526234 7. 488689 7. 403794 6. 567247 6. 619849 6. 481046  
11744829\_ 7. 276188 7. 239949 7. 336777 6. 998064 7. 01791 7. 053419  
11744830\_ 10. 48507 10. 41614 10. 46074 10. 39519 10. 38118 10. 33638  
11744831\_ 10. 246 10. 15065 10. 24942 10. 11062 10. 16035 10. 12196

11744832\_ 9. 396887 9. 353848 9. 393123 9. 316695 9. 335926 9. 257933  
11744833\_ 4. 257566 4. 404795 4. 195783 4. 539635 4. 453864 4. 406724  
11744834\_ 13. 08967 13. 09909 13. 07078 13. 05421 13. 04295 13. 01086  
11744835\_ 7. 806298 7. 731372 7. 772149 8. 819549 8. 783626 8. 810536  
11744836\_ 12. 60073 12. 58318 12. 59017 12. 61424 12. 66266 12. 62286  
11744837\_ 8. 111567 7. 998092 8. 19431 7. 951508 7. 946712 7. 928736  
11744838\_ 6. 260856 6. 097927 6. 257264 6. 228311 6. 106312 6. 181685  
11744839\_ 8. 936451 8. 939075 8. 989911 9. 420652 9. 36794 9. 235434  
11744840\_ 10. 13 10. 0895 10. 14602 10. 40783 10. 40143 10. 34136  
11744841\_ 7. 714296 7. 623428 7. 73958 8. 182579 8. 205223 8. 166373  
11744842\_ 2. 874031 2. 945929 2. 74328 2. 85866 3. 219003 2. 961155  
11744843\_ 4. 178345 4. 27625 4. 082223 3. 505578 3. 487955 3. 830838  
11744844\_ 5. 204386 5. 18278 5. 261008 5. 156063 5. 118458 5. 076612  
11744845\_ 3. 716605 3. 79705 3. 690986 3. 82653 4. 047492 3. 804767  
11744846\_ 5. 084063 4. 827155 4. 88241 4. 874234 4. 787077 4. 815683  
11744847\_ 3. 122119 2. 976698 2. 874619 2. 897902 3. 028661 2. 850157  
11744848\_ 6. 711978 6. 705874 6. 756968 5. 30237 5. 51174 5. 338293  
11744849\_ 7. 44866 7. 289081 7. 351818 7. 265178 7. 381602 7. 442902  
11744850\_ 6. 864503 6. 881316 6. 9294 6. 624112 6. 429605 6. 536462  
11744851\_ 7. 275635 7. 188189 7. 191161 7. 110405 7. 134628 7. 163627  
11744852\_ 4. 670879 4. 713543 4. 673147 4. 811121 4. 805338 4. 866013  
11744853\_ 6. 65895 6. 687238 6. 670727 6. 342385 6. 384492 6. 445861  
11744854\_ 6. 206103 6. 273369 6. 153105 5. 836948 5. 810037 5. 938866  
11744855\_ 5. 36906 5. 448296 5. 23956 5. 542797 5. 488662 5. 531514  
11744856\_ 5. 357448 5. 357448 5. 208816 5. 439248 5. 357448 5. 357448  
11744857\_ 4. 212503 4. 336072 4. 30535 4. 357319 4. 268335 4. 37417  
11744858\_ 5. 583003 5. 666056 5. 674729 5. 881859 5. 839221 5. 735829  
11744859\_ 6. 13945 6. 159771 6. 167567 6. 181331 6. 144968 6. 163098  
11744860\_ 5. 371468 5. 382287 5. 239515 5. 089183 5. 169896 5. 259948  
11744861\_ 7. 691729 7. 663006 7. 630383 7. 30456 7. 395611 7. 219949  
11744862\_ 8. 176481 8. 117844 8. 093216 7. 78221 7. 861869 7. 708627  
11744863\_ 9. 641091 9. 598067 9. 613614 9. 604113 9. 630818 9. 529966  
11744864\_ 3. 941937 3. 802735 3. 867715 3. 863378 3. 879775 3. 705625  
11744865\_ 2. 977298 3. 275033 3. 128575 2. 964158 3. 018822 2. 941146  
11744866\_ 4. 951162 5. 039638 4. 956213 4. 722324 4. 70483 4. 56996  
11744867\_ 6. 386635 6. 418052 6. 301819 6. 423167 6. 459335 6. 431132  
11744868\_ 8. 159286 8. 048914 8. 015898 8. 635843 8. 548565 8. 653242  
11744869\_ 6. 66513 6. 461134 6. 682569 6. 850646 6. 760841 6. 792183  
11744870\_ 4. 307684 4. 405699 4. 114692 4. 243962 4. 337757 4. 27911  
11744871\_ 8. 105803 8. 010356 8. 153303 8. 324245 8. 395222 8. 283475  
11744872\_ 8. 172191 8. 108689 8. 177649 8. 373696 8. 34466 8. 315605  
11744873\_ 5. 078856 5. 296371 5. 046229 5. 354097 5. 284195 5. 30622  
11744874\_ 6. 893666 6. 878164 6. 959407 6. 974154 7. 011172 7. 027972  
11744875\_ 3. 909051 4. 063071 4. 082867 4. 105392 4. 259413 3. 988073  
11744876\_ 7. 541469 7. 527954 7. 51619 7. 454043 7. 436218 7. 415704  
11744877\_ 5. 391387 5. 591353 5. 287394 5. 422061 5. 466676 5. 359336  
11744878\_ 5. 11527 5. 293098 5. 061899 5. 414869 5. 255729 5. 070879  
11744879\_ 11. 27807 11. 24377 11. 27738 11. 0061 11. 00342 10. 99239  
11744880\_ 3. 896964 3. 529646 3. 986856 3. 141211 3. 491643 3. 558117  
11744881\_ 5. 667282 5. 600762 5. 441501 5. 740275 5. 656174 5. 726676  
11744882\_ 6. 980737 6. 948215 6. 865565 6. 567748 6. 441186 6. 663043

11744883\_ 5. 64311 5. 74721 5. 582603 5. 723241 5. 736831 5. 595859  
11744884\_ 6. 282224 6. 138975 6. 216939 6. 085819 6. 1329 6. 100052  
11744885\_ 9. 296317 9. 241682 9. 267814 8. 868444 8. 750378 8. 757078  
11744886\_ 8. 338497 8. 277757 8. 443671 7. 833565 7. 863674 7. 858826  
11744887\_ 8. 400788 8. 30827 8. 421751 8. 78447 8. 788997 8. 799339  
11744888\_ 6. 123122 6. 01384 6. 025631 7. 09274 7. 033277 7. 143215  
11744889\_ 4. 551263 4. 428551 4. 431867 5. 626189 5. 562269 5. 6567  
11744890\_ 9. 787077 9. 715974 9. 758202 9. 782688 9. 783843 9. 827711  
11744891\_ 8. 287411 8. 198754 8. 326507 8. 631782 8. 628613 8. 728869  
11744892\_ 8. 432352 8. 454781 8. 44019 8. 340748 8. 341267 8. 335095  
11744893\_ 4. 528745 4. 758657 4. 410277 4. 705306 4. 71965 4. 305049  
11744894\_ 3. 947961 4. 001297 3. 912538 3. 953661 3. 862834 3. 786777  
11744895\_ 4. 595767 4. 52373 4. 358545 4. 410778 4. 459939 4. 677254  
11744896\_ 5. 782948 5. 772044 5. 734852 6. 624855 6. 795997 6. 649127  
11744897\_ 8. 009567 7. 921904 8. 048548 7. 534297 7. 569757 7. 603249  
11744898\_ 10. 27748 10. 26242 10. 27017 10. 09991 10. 13664 10. 10535  
11744899\_ 6. 312955 6. 448378 5. 996332 6. 397378 6. 366235 6. 459425  
11744900\_ 7. 863198 7. 918486 7. 791973 7. 987675 8. 001509 8. 020193  
11744901\_ 8. 631937 8. 645632 8. 624547 8. 863906 8. 883846 8. 856917  
11744902\_ 4. 643717 4. 613654 4. 658643 4. 786344 4. 870946 4. 911068  
11744903\_ 5. 689593 5. 715906 5. 634493 6. 317645 6. 34288 6. 236179  
11744904\_ 2. 47102 2. 651945 2. 485822 2. 563776 2. 444119 2. 585781  
11744905\_ 3. 878925 3. 841213 4. 077727 3. 935893 3. 934924 4. 0546  
11744906\_ 2. 067413 2. 250212 2. 027322 2. 161345 2. 111273 2. 19193  
11744907\_ 9. 481098 9. 488869 9. 445484 9. 530515 9. 482501 9. 485036  
11744908\_ 7. 597431 7. 565734 7. 596432 7. 639834 7. 639003 7. 65154  
11744909\_ 5. 339466 5. 164082 5. 219438 5. 469939 5. 319573 5. 372935  
11744910\_ 6. 923945 6. 811604 6. 973797 6. 802139 6. 802139 6. 827868  
11744911\_ 3. 71786 3. 909578 3. 745331 3. 836647 3. 842927 3. 826931  
11744912\_ 5. 673108 5. 709001 5. 837188 5. 551759 5. 742748 5. 537035  
11744913\_ 5. 017776 5. 300307 5. 270137 5. 306383 5. 36836 5. 355112  
11744914\_ 9. 269066 9. 272298 9. 178687 10. 26249 10. 3061 10. 22708  
11744915\_ 5. 91219 5. 978176 5. 758585 6. 058233 6. 016511 6. 124166  
11744916\_ 9. 844669 9. 830487 9. 901132 9. 39882 9. 431612 9. 424307  
11744917\_ 2. 677434 2. 867524 3. 073601 2. 758282 2. 952443 2. 771922  
11744918\_ 9. 030838 9. 044701 9. 029309 8. 487058 8. 516477 8. 522817  
11744919\_ 8. 737618 8. 62748 8. 727904 8. 94469 8. 980125 9. 040569  
11744920\_ 4. 96151 4. 874234 5. 039989 4. 914651 5. 029529 5. 084474  
11744921\_ 5. 77535 5. 905108 5. 775108 6. 029336 6. 191052 6. 104615  
11744922\_ 7. 037106 6. 929474 6. 887986 7. 069581 7. 148213 7. 057546  
11744923\_ 6. 475797 6. 602355 6. 469944 6. 539295 6. 525249 6. 524399  
11744924\_ 7. 54904 7. 5693 7. 610691 7. 027168 6. 982711 7. 055976  
11744925\_ 6. 375298 6. 261987 6. 403666 7. 086249 7. 067526 7. 144114  
11744926\_ 10. 53652 10. 53548 10. 52271 10. 29102 10. 27382 10. 25267  
11744927\_ 6. 336748 6. 263379 6. 466459 5. 849575 6. 043733 6. 091912  
11744928\_ 7. 836281 7. 797309 7. 82708 8. 002898 7. 928941 7. 900364  
11744929\_ 6. 731787 6. 7414 6. 68492 6. 553299 6. 450949 6. 573338  
11744930\_ 6. 959319 6. 808157 6. 929129 6. 933505 6. 888883 6. 928838  
11744931\_ 6. 677803 6. 591846 6. 724185 6. 491449 6. 431763 6. 417769  
11744932\_ 6. 43448 6. 401503 6. 532507 5. 731243 5. 696028 5. 732315  
11744933\_ 8. 197786 8. 121691 8. 236681 8. 099162 8. 143783 8. 08068



11744934\_ 7. 275445 7. 192657 7. 238592 6. 834269 6. 869492 6. 805142  
11744935\_ 3. 596191 3. 606313 3. 830978 3. 690658 3. 564451 3. 613423  
11744936\_ 5. 029529 5. 063175 5. 030038 4. 875436 4. 880952 4. 849437  
11744937\_ 6. 510253 6. 400475 6. 418894 6. 254746 6. 314907 6. 499634  
11744938\_ 6. 138093 6. 13945 5. 867611 6. 040637 6. 155688 6. 022141  
11744939\_ 6. 956449 6. 999127 6. 913939 7. 07672 7. 084119 7. 018241  
11744940\_ 9. 346785 9. 235227 9. 313263 9. 211008 9. 232967 9. 190986  
11744941\_ 6. 884288 7. 001651 7. 004414 6. 977657 7. 066274 7. 306558  
11744942\_ 7. 36205 7. 386376 7. 388333 7. 076762 7. 051663 6. 986151  
11744943\_ 6. 966445 7. 055568 6. 911355 6. 790525 6. 900951 6. 914062  
11744944\_ 3. 447238 3. 46811 3. 441712 3. 551911 3. 723165 3. 68518  
11744945\_ 3. 305158 3. 11954 2. 970084 3. 144944 3. 130769 3. 195448  
11744946\_ 6. 994031 6. 891834 6. 987832 8. 395927 8. 217621 8. 280383  
11744947\_ 6. 823761 6. 825965 6. 873193 6. 624771 6. 667497 6. 570847  
11744948\_ 5. 009894 4. 885152 4. 841913 5. 043104 4. 870244 5. 013879  
11744949\_ 9. 256736 9. 243061 9. 325405 9. 457149 9. 509232 9. 45063  
11744950\_ 9. 526915 9. 520613 9. 497564 9. 621421 9. 603958 9. 577493  
11744951\_ 5. 875775 5. 938755 5. 881543 5. 859832 6. 041254 5. 883753  
11744952\_ 5. 65865 5. 598899 5. 518169 5. 639232 5. 638895 5. 68689  
11744953\_ 12. 3352 12. 39176 12. 34725 12. 33798 12. 31759 12. 31147  
11744954\_ 12. 67417 12. 67481 12. 65697 12. 63032 12. 5984 12. 59778  
11744955\_ 12. 17716 12. 14899 12. 138 12. 10056 12. 09225 12. 02335  
11744956\_ 6. 494054 6. 448285 6. 541404 6. 509437 6. 516356 6. 481658  
11744957\_ 9. 365726 9. 344574 9. 349802 9. 401107 9. 440503 9. 325581  
11744958\_ 9. 819594 9. 827599 9. 767298 9. 947979 9. 954617 9. 796788  
11744959\_ 8. 228455 8. 289423 8. 269474 8. 362571 8. 235901 8. 300595  
11744960\_ 4. 474982 4. 489592 4. 382795 4. 166606 4. 344096 4. 421494  
11744961\_ 4. 221423 3. 851681 3. 955035 4. 148271 3. 928716 4. 042642  
11744962\_ 5. 402058 5. 582642 5. 346164 5. 507637 5. 527505 5. 374866  
11744963\_ 5. 535108 5. 467746 5. 668945 5. 703834 5. 76591 5. 562828  
11744964\_ 6. 122436 5. 98579 6. 15924 5. 977166 6. 065982 5. 90807  
11744965\_ 6. 233663 6. 390379 6. 159759 6. 362438 6. 239332 6. 292493  
11744966\_ 5. 357846 5. 626669 5. 600969 5. 729068 5. 626669 5. 585403  
11744967\_ 5. 797588 5. 816127 5. 875968 5. 766541 5. 895525 5. 831396  
11744968\_ 3. 661874 3. 674079 3. 76986 3. 771044 3. 649054 3. 773017  
11744969\_ 6. 154253 6. 111972 6. 245232 5. 425159 5. 516089 5. 482746  
11744970\_ 5. 509047 5. 749481 5. 44144 5. 671582 5. 715835 5. 528694  
11744971\_ 4. 200678 3. 940694 3. 852159 4. 288064 4. 102684 4. 122446  
11744972\_ 4. 219775 4. 543188 4. 361449 4. 557412 4. 496425 4. 477369  
11744973\_ 7. 801672 7. 948652 7. 908655 7. 978531 8. 055006 7. 989631  
11744974\_ 6. 778939 6. 861246 6. 931425 6. 84907 6. 825848 6. 898793  
11744975\_ 5. 159056 5. 156485 5. 110307 5. 384592 5. 392071 5. 339077  
11744976\_ 5. 642101 5. 678276 5. 494964 5. 746199 5. 746411 5. 837335  
11744977\_ 5. 60452 5. 609975 5. 539709 5. 752036 5. 688245 5. 773119  
11744978\_ 7. 906754 7. 884316 7. 830412 8. 035158 7. 966958 7. 87005  
11744979\_ 7. 173545 7. 029424 7. 197932 6. 916267 7. 062229 6. 99422  
11744980\_ 6. 704727 6. 579869 6. 601077 6. 660519 6. 627439 6. 725272  
11744981\_ 6. 522762 6. 560496 6. 39262 6. 557447 6. 597152 6. 64905  
11744982\_ 5. 690931 5. 505048 5. 389786 5. 536861 5. 529657 5. 553735  
11744983\_ 4. 834775 4. 686063 4. 757378 4. 85233 4. 924128 4. 778038  
11744984\_ 5. 178968 5. 164093 5. 120705 5. 194817 5. 333723 5. 158301

11744985\_ 8. 748202 8. 698618 8. 735088 7. 668458 7. 626329 7. 625253  
11744986\_ 5. 189703 5. 028838 5. 319779 4. 457136 4. 619008 4. 492408  
11744987\_ 8. 719308 8. 671655 8. 752127 8. 402211 8. 485934 8. 38027  
11744988\_ 5. 704912 5. 689883 5. 763634 5. 548443 5. 729724 5. 693921  
11744989\_ 9. 645049 9. 548749 9. 629527 9. 292528 9. 327167 9. 301355  
11744990\_ 5. 544245 6. 041287 5. 493166 6. 409309 6. 394161 6. 39925  
11744991\_ 5. 707084 5. 328391 5. 518169 5. 815626 5. 852212 5. 686167  
11744992\_ 7. 311228 7. 280205 7. 417 7. 338388 7. 337658 7. 44845  
11744993\_ 8. 296881 8. 385322 8. 381597 8. 132837 8. 174834 8. 133485  
11744994\_ 7. 616753 7. 612449 7. 638683 7. 252126 7. 353393 7. 313323  
11744995\_ 6. 658303 6. 783546 6. 86096 6. 42392 6. 499671 6. 464805  
11744996\_ 7. 740335 7. 574907 7. 743679 7. 339771 7. 312049 7. 263614  
11744997\_ 6. 749534 6. 676438 6. 840379 6. 348224 6. 316931 6. 335005  
11744998\_ 7. 539123 7. 409239 7. 567344 6. 882862 6. 856522 6. 901202  
11744999\_ 8. 677115 8. 664715 8. 777589 8. 213818 8. 268503 8. 257925  
11745000\_ 8. 124069 8. 091327 8. 194175 7. 610499 7. 666618 7. 679739  
11745001\_ 6. 503302 6. 539719 6. 568918 6. 825575 6. 819636 6. 860941  
11745002\_ 3. 337791 3. 337791 3. 337791 3. 465265 3. 395494 3. 344375  
11745003\_ 10. 38763 10. 35317 10. 35065 10. 46042 10. 47217 10. 48429  
11745004\_ 4. 106768 4. 213563 3. 923307 4. 062006 4. 079068 3. 992482  
11745005\_ 8. 929311 8. 84868 8. 87468 8. 724301 8. 841536 8. 778696  
11745006\_ 8. 420973 8. 42747 8. 441289 7. 407801 7. 421307 7. 390431  
11745007\_ 7. 878362 7. 8852 7. 963782 6. 671586 6. 734178 6. 735387  
11745008\_ 6. 929813 6. 915829 6. 949443 7. 013219 7. 12343 7. 134375  
11745009\_ 7. 327663 7. 30677 7. 309488 7. 49249 7. 522216 7. 49169  
11745010\_ 10. 65414 10. 57161 10. 63214 10. 24978 10. 26446 10. 27185  
11745011\_ 7. 808292 7. 91719 7. 61011 8. 345216 8. 350191 8. 289021  
11745012\_ 5. 051282 5. 10729 5. 070534 5. 11358 5. 029529 5. 156303  
11745013\_ 5. 650792 5. 551794 5. 433994 5. 699636 5. 766999 5. 63536  
11745014\_ 5. 643183 5. 557943 5. 620205 5. 747384 5. 658069 5. 760252  
11745015\_ 7. 596684 7. 527371 7. 63911 7. 147427 7. 198701 7. 127275  
11745016\_ 11. 45686 11. 40879 11. 39928 11. 33455 11. 39234 11. 33774  
11745017\_ 10. 50909 10. 45323 10. 4529 10. 44932 10. 46274 10. 4585  
11745018\_ 6. 704988 6. 763281 6. 744805 7. 164857 7. 140262 7. 176408  
11745019\_ 6. 794611 6. 9904 6. 799801 7. 371578 7. 349516 7. 421558  
11745020\_ 8. 314694 8. 212904 8. 357322 7. 561369 7. 766609 7. 590411  
11745021\_ 8. 393554 8. 358853 8. 430373 7. 755169 7. 745262 7. 739428  
11745022\_ 5. 686908 5. 770109 5. 736062 5. 959508 5. 91137 5. 964001  
11745023\_ 5. 670005 5. 610044 5. 721635 5. 607832 5. 573313 5. 475332  
11745024\_ 4. 532619 4. 448915 4. 523957 4. 584933 4. 584933 4. 601911  
11745025\_ 6. 074857 6. 089879 6. 071456 6. 050862 6. 038314 6. 13945  
11745026\_ 4. 254618 4. 274998 4. 3152 4. 452601 4. 546362 4. 528031  
11745027\_ 6. 839765 6. 727853 6. 786668 6. 850646 6. 946361 6. 864549  
11745028\_ 8. 919487 8. 860219 8. 926373 8. 766666 8. 763175 8. 818156  
11745029\_ 7. 940111 7. 759703 7. 850558 7. 627015 7. 604522 7. 527438  
11745030\_ 4. 976873 5. 305692 5. 20205 4. 707666 4. 718675 4. 751431  
11745031\_ 4. 732357 4. 49169 4. 632397 4. 784111 4. 736368 4. 969571  
11745032\_ 7. 183544 7. 22643 7. 147056 7. 230632 7. 222344 7. 241487  
11745033\_ 5. 248209 5. 254101 5. 208019 5. 202127 5. 140044 5. 235974  
11745034\_ 5. 428082 5. 492662 5. 457036 5. 622249 5. 708803 5. 81278  
11745035\_ 7. 423886 7. 35042 7. 389719 7. 126581 7. 194708 7. 190346

11745036\_ 4. 853603 4. 80816 4. 718704 4. 655181 4. 691995 4. 660608  
11745037\_ 4. 874234 4. 860841 4. 878209 4. 860841 4. 779312 4. 893053  
11745038\_ 4. 715359 4. 752548 4. 802399 4. 894739 4. 940055 4. 808095  
11745039\_ 6. 316884 6. 220977 6. 300643 6. 613325 6. 644819 6. 587118  
11745040\_ 6. 873087 6. 970219 6. 886135 6. 60953 6. 596871 6. 532956  
11745041\_ 5. 732749 5. 769811 5. 794912 5. 876059 5. 918745 5. 890105  
11745042\_ 5. 177117 5. 312326 5. 333723 5. 18286 5. 257458 5. 308053  
11745043\_ 3. 566249 3. 345689 3. 722206 3. 406351 3. 398236 3. 786777  
11745044\_ 4. 930449 4. 99816 4. 91218 5. 038757 5. 00355 5. 02168  
11745045\_ 4. 916494 4. 836793 4. 849903 4. 918527 4. 880753 4. 953757  
11745046\_ 4. 160584 4. 318468 3. 981419 4. 30541 4. 232382 4. 244207  
11745047\_ 8. 223643 8. 233824 8. 204277 8. 059134 8. 130063 8. 109259  
11745048\_ 3. 68289 3. 82487 3. 933051 3. 852079 3. 933051 3. 606313  
11745049\_ 6. 842136 6. 734971 6. 873976 7. 537983 7. 563899 7. 502218  
11745050\_ 7. 762891 7. 78787 7. 78685 7. 099734 7. 076762 7. 053826  
11745051\_ 3. 750996 3. 770989 3. 807128 3. 770989 3. 620971 3. 770989  
11745052\_ 4. 364826 4. 439767 4. 50772 4. 459939 4. 52373 4. 470714  
11745053\_ 3. 595757 3. 42912 3. 588127 3. 681806 3. 221645 3. 705879  
11745054\_ 9. 993524 9. 928026 10. 00928 9. 985407 10. 00099 10. 00892  
11745055\_ 9. 202426 9. 152695 9. 211065 9. 197333 9. 202027 9. 224023  
11745056\_ 6. 34777 6. 253701 6. 289523 6. 404702 6. 480042 6. 529215  
11745057\_ 5. 784701 5. 936361 5. 94923 5. 781007 5. 851518 5. 773229  
11745058\_ 7. 330466 7. 302215 7. 295128 7. 284518 7. 283845 7. 308036  
11745059\_ 6. 693142 6. 670826 6. 661199 6. 763267 6. 820573 6. 727513  
11745060\_ 7. 19894 7. 217881 7. 137662 7. 21891 7. 25819 7. 312572  
11745061\_ 5. 847483 5. 838391 5. 754175 5. 669324 6. 007896 5. 720422  
11745062\_ 5. 285218 5. 471834 5. 346111 5. 310504 5. 295683 5. 475572  
11745063\_ 4. 775055 4. 856764 4. 790558 4. 822467 4. 815527 4. 920788  
11745064\_ 6. 431763 6. 414951 6. 510356 6. 521861 6. 487912 6. 481046  
11745065\_ 7. 385341 7. 398723 7. 465089 7. 365686 7. 410735 7. 302408  
11745066\_ 2. 308987 2. 381298 2. 308987 2. 411712 2. 414202 2. 494072  
11745067\_ 7. 613939 7. 640034 7. 732279 8. 159005 8. 110515 8. 215664  
11745068\_ 4. 523968 4. 384446 4. 100261 4. 321632 4. 482935 4. 578799  
11745069\_ 5. 630264 5. 662485 5. 630264 6. 263518 6. 253886 6. 279641  
11745070\_ 4. 295154 4. 241853 3. 953105 4. 358013 4. 337941 4. 467875  
11745071\_ 9. 267414 9. 278493 9. 242784 9. 466916 9. 46369 9. 356613  
11745072\_ 4. 757138 4. 639135 4. 48918 4. 737335 4. 554308 4. 594771  
11745073\_ 5. 519949 5. 391615 5. 495873 5. 098908 4. 950099 4. 912924  
11745074\_ 7. 857271 7. 796888 7. 905033 8. 030887 7. 953944 8. 06446  
11745075\_ 8. 278819 8. 262854 8. 344698 8. 437127 8. 429065 8. 461226  
11745076\_ 8. 98322 8. 938175 9. 044424 8. 865936 8. 848659 8. 910901  
11745077\_ 7. 799477 7. 682526 7. 840182 7. 560277 7. 478667 7. 526587  
11745078\_ 2. 337685 2. 148801 2. 144444 2. 146781 2. 216987 2. 040752  
11745079\_ 5. 749769 5. 789947 5. 913419 5. 828243 5. 577254 5. 770138  
11745080\_ 4. 513241 4. 452455 4. 48768 4. 581104 4. 262781 4. 37984  
11745081\_ 2. 967438 3. 275226 3. 177344 3. 097418 3. 112685 3. 070577  
11745082\_ 2. 897988 3. 187482 2. 999967 3. 091049 2. 928041 2. 999967  
11745083\_ 5. 91684 5. 887986 6. 026351 6. 300268 6. 269238 6. 405504  
11745084\_ 7. 114986 7. 094887 7. 09422 6. 77502 6. 845136 6. 964395  
11745085\_ 5. 614071 5. 573741 5. 584813 5. 723241 5. 822851 5. 704919  
11745086\_ 4. 890537 4. 903708 4. 947216 4. 937804 4. 903708 4. 981215

11745087\_ 3. 95013 3. 997131 3. 825008 3. 830467 3. 799541 3. 934864  
11745088\_ 6. 204813 6. 250473 6. 223924 6. 226057 6. 251094 6. 262836  
11745089\_ 6. 387009 6. 356437 6. 551281 6. 210284 6. 383051 6. 327476  
11745090\_ 5. 021531 5. 140794 4. 967981 5. 263709 5. 273414 5. 122446  
11745091\_ 7. 185253 7. 200446 7. 229687 7. 161978 7. 213959 7. 255144  
11745092\_ 5. 247739 5. 225871 5. 311632 5. 076427 5. 25507 5. 1745  
11745093\_ 2. 214413 2. 270548 2. 367092 2. 282617 2. 372096 2. 494072  
11745094\_ 8. 073161 8. 132319 8. 135898 8. 095513 8. 152425 8. 11978  
11745095\_ 4. 390909 4. 689719 4. 484112 4. 487269 4. 535294 4. 658845  
11745096\_ 6. 020738 6. 15401 6. 003528 6. 08288 6. 106901 6. 010409  
11745097\_ 3. 959492 3. 710905 3. 420815 3. 807878 3. 850861 3. 710905  
11745098\_ 4. 922075 5. 026875 5. 005194 4. 264729 4. 196218 4. 09554  
11745099\_ 9. 235485 9. 18451 9. 244716 9. 151342 9. 20108 9. 215939  
11745100\_ 7. 510478 7. 448366 7. 444193 6. 539364 6. 504292 6. 590659  
11745101\_ 4. 271348 4. 429336 4. 292082 4. 259219 4. 331681 4. 238458  
11745102\_ 6. 216866 6. 277335 6. 328584 6. 127101 6. 169763 6. 170418  
11745103\_ 6. 143544 6. 248672 6. 377901 6. 128577 6. 214922 6. 288037  
11745104\_ 7. 902845 7. 876133 7. 918741 7. 962291 7. 951429 8. 020577  
11745105\_ 3. 073322 3. 110002 2. 91032 3. 065457 2. 994888 3. 053086  
11745106\_ 8. 711937 8. 755305 8. 708338 8. 57784 8. 620386 8. 698435  
11745107\_ 3. 082712 2. 782332 3. 019733 2. 838504 3. 022448 2. 935481  
11745108\_ 5. 679519 5. 8299 5. 853956 5. 969511 5. 949354 5. 886425  
11745109\_ 4. 565 4. 499253 4. 689367 3. 851055 3. 72716 3. 64858  
11745110\_ 5. 842392 5. 828696 5. 616744 5. 914084 5. 9199 5. 974869  
11745111\_ 4. 606635 4. 54132 4. 368376 4. 709017 4. 584933 4. 567485  
11745112\_ 6. 470917 6. 445148 6. 541665 6. 204572 6. 152032 5. 970361  
11745113\_ 7. 227596 7. 222682 7. 261532 7. 200572 7. 287953 7. 184714  
11745114\_ 5. 397199 5. 277211 5. 277211 4. 667841 4. 621969 4. 646013  
11745115\_ 3. 85867 4. 007596 3. 883993 3. 967358 4. 091169 4. 034119  
11745116\_ 7. 378583 7. 310366 7. 330872 7. 336226 7. 334104 7. 378737  
11745117\_ 7. 907018 7. 893424 7. 912302 7. 928122 7. 933196 7. 984847  
11745118\_ 3. 952855 4. 214787 3. 939983 4. 097476 4. 200678 4. 019147  
11745119\_ 7. 452944 7. 357069 7. 458928 7. 263393 7. 241999 7. 284196  
11745120\_ 2. 189023 2. 374019 2. 507545 2. 55883 2. 55883 2. 55883  
11745121\_ 3. 393136 3. 287752 3. 626836 3. 485017 3. 606313 3. 213993  
11745122\_ 5. 198222 5. 044176 5. 448268 4. 727184 4. 795546 4. 821819  
11745123\_ 6. 244666 6. 309488 6. 227611 6. 300643 6. 426028 6. 300643  
11745124\_ 6. 077245 5. 967818 6. 189377 6. 763262 6. 752535 6. 866363  
11745125\_ 7. 469903 7. 44377 7. 459706 7. 329363 7. 417811 7. 33657  
11745126\_ 6. 44053 6. 385594 6. 48627 6. 54797 6. 590287 6. 552439  
11745127\_ 7. 558025 7. 48528 7. 539842 7. 930511 7. 92859 7. 908263  
11745128\_ 4. 394472 4. 459939 4. 459939 4. 407751 4. 642432 4. 459939  
11745129\_ 6. 225513 6. 186038 6. 282224 5. 004429 5. 059193 5. 196201  
11745130\_ 7. 995129 7. 863063 8. 009501 9. 145876 9. 159894 9. 093689  
11745131\_ 3. 926114 3. 862784 3. 850639 3. 491997 3. 511955 3. 665828  
11745132\_ 4. 584933 4. 683691 4. 601956 4. 587955 4. 64271 4. 639843  
11745133\_ 4. 986371 4. 978706 4. 772366 5. 37987 5. 254346 5. 297498  
11745134\_ 6. 740482 6. 650936 6. 756753 6. 764 6. 809701 6. 764606  
11745135\_ 4. 592602 4. 678024 4. 529635 4. 685463 4. 713871 4. 810999  
11745136\_ 3. 841832 4. 014061 3. 85035 3. 456138 3. 545618 3. 714474  
11745137\_ 5. 696394 5. 720928 5. 676992 6. 118838 5. 958277 6. 144727

11745138\_ 3. 879653 3. 91167 3. 847489 3. 948302 4. 049371 3. 943963  
11745139\_ 5. 17518 5. 303898 5. 518169 5. 368834 5. 368763 5. 372355  
11745140\_ 6. 094437 6. 27336 6. 140705 6. 139553 6. 178469 6. 301442  
11745141\_ 4. 73525 4. 806026 4. 879033 4. 817192 4. 754403 4. 806026  
11745142\_ 6. 141241 6. 120743 6. 115374 6. 173161 6. 033505 6. 209539  
11745143\_ 5. 270071 5. 353456 5. 267133 5. 846727 5. 922599 5. 795359  
11745144\_ 4. 153048 4. 224653 4. 250732 4. 432292 4. 126321 4. 242216  
11745145\_ 7. 271182 7. 189686 7. 277155 7. 427884 7. 372925 7. 378945  
11745146\_ 4. 93524 4. 763036 4. 863353 4. 336355 4. 3889 4. 693451  
11745147\_ 3. 423229 3. 484064 3. 398236 3. 457273 3. 454374 3. 555523  
11745148\_ 7. 821211 7. 794319 7. 816952 7. 800724 7. 76041 7. 77226  
11745149\_ 7. 553188 7. 473512 7. 543626 7. 633808 7. 620125 7. 61308  
11745150\_ 7. 075251 7. 020593 7. 171984 6. 283108 6. 410024 6. 415025  
11745151\_ 7. 505212 7. 575863 7. 588479 7. 522154 7. 522216 7. 503786  
11745152\_ 7. 291562 7. 278609 7. 281353 7. 238581 7. 308395 7. 285518  
11745153\_ 4. 417655 4. 344739 4. 331741 4. 415792 4. 172726 4. 358679  
11745154\_ 10. 83583 10. 80535 10. 82047 11. 03699 11. 03596 11. 00509  
11745155\_ 11. 878 11. 90954 11. 86536 12. 00304 11. 94871 11. 98345  
11745156\_ 4. 575272 4. 451769 4. 418329 4. 50155 4. 398784 4. 578014  
11745157\_ 4. 602613 4. 618096 4. 723383 4. 714234 4. 659593 4. 795491  
11745158\_ 6. 664261 6. 686431 6. 62127 6. 553838 6. 671719 6. 686431  
11745159\_ 7. 471811 7. 597395 7. 695833 6. 924704 7. 07152 7. 15568  
11745160\_ 8. 323709 8. 317488 8. 352996 8. 108677 8. 24051 8. 109154  
11745161\_ 7. 417811 7. 416527 7. 387038 7. 531272 7. 517651 7. 523826  
11745162\_ 3. 571101 3. 448482 3. 448482 3. 458295 3. 163147 3. 338356  
11745163\_ 9. 633793 9. 559233 9. 6485 9. 703211 9. 781657 9. 719218  
11745164\_ 9. 610319 9. 583826 9. 583577 9. 785051 9. 769936 9. 730739  
11745165\_ 5. 020244 5. 261205 5. 184325 5. 183396 5. 05159 5. 130995  
11745166\_ 7. 402863 7. 396602 7. 332731 7. 383128 7. 380326 7. 321961  
11745167\_ 8. 110964 8. 097161 8. 121757 8. 110964 8. 109369 8. 188152  
11745168\_ 8. 863847 8. 92386 8. 840527 8. 952998 9. 006305 8. 995838  
11745169\_ 7. 664763 7. 50047 7. 559658 7. 653265 7. 622354 7. 573024  
11745170\_ 9. 1473 9. 101087 9. 078479 9. 154019 9. 137405 9. 137659  
11745171\_ 8. 678198 8. 665318 8. 694767 8. 798186 8. 818473 8. 780466  
11745172\_ 2. 998298 3. 057751 3. 103903 3. 072837 2. 932298 2. 965105  
11745173\_ 8. 440696 8. 37855 8. 430395 8. 133501 8. 086476 8. 108828  
11745174\_ 7. 974351 8. 107039 8. 042935 7. 785375 7. 807445 7. 894945  
11745175\_ 8. 416491 8. 335368 8. 370119 8. 943235 8. 957884 8. 890249  
11745176\_ 6. 91271 6. 816605 6. 982554 7. 076431 7. 128571 7. 000383  
11745177\_ 7. 297866 7. 099863 7. 24368 7. 265178 7. 26147 7. 335696  
11745178\_ 8. 945917 8. 984098 8. 990274 8. 709279 8. 638418 8. 612338  
11745179\_ 7. 118833 7. 278466 7. 303105 7. 444009 7. 395754 7. 387222  
11745180\_ 8. 265982 8. 190668 8. 285055 7. 393548 7. 512657 7. 481016  
11745181\_ 8. 177187 8. 151507 8. 196586 8. 917286 8. 887898 8. 899698  
11745182\_ 8. 156745 8. 121266 8. 248912 8. 568571 8. 539597 8. 589928  
11745183\_ 7. 958435 7. 991441 7. 998389 8. 7175 8. 657621 8. 659631  
11745184\_ 9. 321925 9. 27223 9. 348229 9. 34755 9. 416374 9. 369348  
11745185\_ 8. 277108 8. 247555 8. 25691 8. 449772 8. 374241 8. 399376  
11745186\_ 6. 450961 6. 484107 6. 523091 6. 495156 6. 538223 6. 398907  
11745187\_ 5. 496161 5. 428367 5. 508211 5. 494229 5. 510142 5. 519768  
11745188\_ 8. 756246 8. 660249 8. 72162 8. 802147 8. 839055 8. 854094

11745189\_ 4. 70302 4. 787546 4. 814373 4. 888078 4. 853998 4. 937572  
11745190\_ 11. 3782 11. 35145 11. 33098 11. 50187 11. 5592 11. 50887  
11745191\_ 9. 735239 9. 676025 9. 749998 9. 358051 9. 340461 9. 353549  
11745192\_ 2. 712751 2. 940849 2. 847246 2. 600742 2. 863044 2. 61026  
11745193\_ 5. 187624 5. 33008 5. 34621 5. 512669 5. 354414 5. 450471  
11745194\_ 6. 944004 6. 805743 6. 934615 7. 184512 7. 136086 7. 198306  
11745195\_ 6. 001853 6. 065726 6. 135459 6. 190786 6. 263567 6. 206999  
11745196\_ 8. 323372 8. 234928 8. 275083 8. 591322 8. 588625 8. 527688  
11745197\_ 10. 13099 10. 15324 10. 06837 9. 916435 9. 947579 9. 884008  
11745198\_ 7. 684974 7. 63673 7. 68153 7. 832367 7. 842263 7. 840652  
11745199\_ 7. 068508 6. 926687 7. 002015 7. 078322 7. 077608 7. 061653  
11745200\_ 5. 317371 5. 347773 5. 058472 5. 520918 5. 48634 5. 496716  
11745201\_ 7. 769889 7. 690286 7. 7384 7. 663523 7. 786782 7. 694361  
11745202\_ 6. 616925 6. 49043 6. 679707 7. 279254 7. 367662 7. 235103  
11745203\_ 6. 060734 5. 938178 6. 128026 6. 679275 6. 67443 6. 744296  
11745204\_ 4. 236981 4. 437715 4. 245293 5. 977166 5. 699123 5. 829579  
11745205\_ 8. 032787 7. 927088 7. 885289 9. 776251 9. 717983 9. 720236  
11745206\_ 6. 566404 6. 44909 6. 453293 6. 578788 6. 641479 6. 595634  
11745207\_ 7. 538241 7. 433469 7. 501143 7. 655712 7. 669848 7. 648621  
11745208\_ 6. 758083 6. 664812 6. 901635 6. 387405 6. 308495 6. 388028  
11745209\_ 6. 646187 6. 523462 6. 611079 5. 797612 5. 75544 5. 77685  
11745210\_ 7. 557638 7. 589171 7. 64382 7. 83123 7. 8868 7. 857994  
11745211\_ 6. 558695 6. 471783 6. 578535 5. 49973 5. 524793 5. 500068  
11745212\_ 7. 14574 7. 107304 7. 166249 6. 491441 6. 557068 6. 697478  
11745213\_ 7. 710068 7. 615946 7. 722586 8. 039488 8. 078017 8. 048447  
11745214\_ 7. 966974 7. 974485 7. 990772 7. 655331 7. 658237 7. 692096  
11745215\_ 6. 029804 5. 971783 6. 190147 6. 289959 6. 229887 6. 328735  
11745216\_ 7. 607237 7. 60544 7. 57666 7. 77552 7. 736041 7. 773811  
11745217\_ 4. 322215 4. 289439 4. 289439 4. 330082 4. 205351 4. 317546  
11745218\_ 6. 939997 7. 072024 6. 929236 6. 942585 6. 969381 6. 917263  
11745219\_ 7. 155799 7. 175144 7. 151149 7. 28473 7. 136441 7. 263435  
11745220\_ 8. 269445 8. 210629 8. 218818 8. 137147 8. 104136 8. 094943  
11745221\_ 9. 385596 9. 346376 9. 406874 9. 235452 9. 210252 9. 287725  
11745222\_ 7. 206628 7. 27022 7. 249408 7. 297402 7. 213677 7. 126145  
11745223\_ 5. 044069 4. 976204 4. 982157 5. 054043 5. 10073 5. 254991  
11745224\_ 6. 581884 6. 596673 6. 485019 6. 37607 6. 315669 6. 302365  
11745225\_ 9. 062652 9. 004851 9. 077762 9. 453265 9. 438489 9. 406748  
11745226\_ 3. 11837 3. 102025 3. 062931 3. 076136 3. 398236 3. 185958  
11745227\_ 3. 774741 4. 067703 3. 855706 3. 770538 4. 04603 3. 961442  
11745228\_ 5. 02423 5. 149545 5. 297498 5. 401766 5. 600518 5. 415486  
11745229\_ 5. 557664 5. 447895 5. 29744 5. 703089 5. 659075 5. 626963  
11745230\_ 7. 134375 7. 146651 7. 156806 7. 134355 7. 149512 7. 140516  
11745231\_ 7. 41462 7. 392565 7. 432012 7. 45117 7. 367041 7. 425362  
11745232\_ 6. 721787 6. 84281 6. 816771 6. 691999 6. 79819 6. 671134  
11745233\_ 6. 152619 6. 021381 6. 062904 5. 03317 5. 322967 5. 118898  
11745234\_ 2. 424843 2. 377504 2. 531645 2. 530994 2. 164632 2. 422732  
11745235\_ 5. 59769 5. 610611 5. 793912 5. 386622 5. 422798 5. 369353  
11745236\_ 7. 433599 7. 38545 7. 40919 6. 998417 7. 037542 6. 979278  
11745237\_ 6. 520868 6. 739931 6. 72845 6. 760545 6. 754389 6. 765527  
11745238\_ 7. 480063 7. 442146 7. 535308 7. 723399 7. 842362 7. 735643  
11745239\_ 6. 384657 6. 434275 6. 413801 6. 365265 6. 373714 6. 365063

11745240\_ 5. 919559 5. 825297 6. 037958 6. 001275 6. 020176 5. 940216  
11745241\_ 9. 080804 9. 10055 9. 066236 8. 594842 8. 544399 8. 484329  
11745242\_ 8. 623396 8. 476007 8. 580576 8. 992278 9. 063648 9. 039738  
11745243\_ 10. 88887 10. 8714 10. 87359 10. 61694 10. 53603 10. 4945  
11745244\_ 6. 145368 6. 215865 6. 110448 6. 2379 6. 184292 6. 159771  
11745245\_ 2. 748279 2. 605516 2. 582647 2. 419019 2. 163322 2. 25483  
11745246\_ 9. 228876 9. 177889 9. 227675 9. 063226 9. 074773 9. 082576  
11745247\_ 6. 812733 6. 776041 6. 56958 6. 839099 6. 795582 6. 773854  
11745248\_ 7. 14309 6. 975648 7. 159594 7. 531901 7. 647539 7. 694846  
11745249\_ 6. 06485 6. 076709 6. 17981 5. 372721 5. 232892 5. 491805  
11745250\_ 6. 04573 5. 98478 6. 016669 4. 428864 4. 314231 4. 377482  
11745251\_ 4. 27241 4. 433182 4. 134548 4. 317747 4. 302003 4. 274181  
11745252\_ 5. 053169 4. 800478 4. 971052 4. 832565 4. 794848 4. 730873  
11745253\_ 7. 897588 7. 884971 8. 010751 7. 86209 7. 923318 7. 874874  
11745254\_ 9. 391949 9. 342068 9. 425288 8. 883517 8. 902147 8. 891644  
11745255\_ 6. 103943 6. 09018 5. 915905 6. 279192 6. 177795 6. 271726  
11745256\_ 9. 05958 9. 121952 8. 998148 8. 093186 8. 083584 8. 143783  
11745257\_ 6. 306936 6. 244508 6. 306924 6. 30678 6. 271057 6. 299997  
11745258\_ 9. 098054 9. 082095 9. 09363 9. 313573 9. 321679 9. 234771  
11745259\_ 5. 691255 5. 703891 5. 630858 5. 917446 5. 858099 5. 994821  
11745260\_ 4. 221941 4. 221107 4. 270446 4. 123238 4. 413777 4. 164772  
11745261\_ 3. 290569 3. 589006 3. 371086 3. 463098 3. 416842 3. 371086  
11745262\_ 2. 984671 3. 21147 3. 094453 3. 135981 3. 060851 3. 070554  
11745263\_ 8. 87908 8. 849129 8. 860516 8. 691143 8. 7149 8. 690593  
11745264\_ 7. 732547 7. 63838 7. 739462 7. 723928 7. 716329 7. 789919  
11745265\_ 5. 252185 5. 286135 5. 099093 5. 301951 5. 288156 5. 28966  
11745266\_ 6. 613718 6. 383309 6. 525197 6. 46069 6. 481046 6. 480295  
11745267\_ 5. 544167 5. 55983 5. 261618 5. 444136 5. 451877 5. 380046  
11745268\_ 5. 915111 5. 894697 5. 629764 5. 731281 5. 845365 5. 898692  
11745269\_ 6. 321729 6. 255764 6. 422879 6. 236942 6. 267774 6. 219044  
11745270\_ 5. 052429 4. 726508 4. 943798 4. 756818 4. 714584 4. 837749  
11745271\_ 7. 876592 7. 838843 7. 899401 7. 347572 7. 382837 7. 305576  
11745272\_ 8. 833806 8. 773672 8. 958656 8. 633561 8. 582538 8. 614925  
11745273\_ 6. 203798 6. 295037 6. 405487 6. 282224 6. 201278 6. 202647  
11745274\_ 6. 634866 6. 461859 6. 659337 6. 120112 6. 065217 5. 961938  
11745275\_ 7. 629015 7. 580695 7. 660711 7. 567539 7. 506849 7. 587009  
11745276\_ 8. 486371 8. 35386 8. 398722 8. 338347 8. 341011 8. 325495  
11745277\_ 6. 247254 6. 312598 6. 435027 6. 005217 6. 00364 6. 204858  
11745278\_ 4. 5683 4. 368699 4. 700508 3. 743656 3. 895674 3. 701145  
11745279\_ 5. 966535 6. 011116 5. 996126 5. 386723 5. 316135 5. 627004  
11745280\_ 4. 670821 4. 668412 4. 569319 4. 604093 4. 351704 4. 473373  
11745281\_ 5. 412596 5. 137811 5. 435409 5. 398803 5. 382127 5. 467919  
11745282\_ 2. 789661 2. 760214 2. 79888 2. 886634 2. 726867 2. 695729  
11745283\_ 9. 734701 9. 710073 9. 764019 9. 327676 9. 355785 9. 317187  
11745284\_ 9. 745625 9. 691753 9. 791821 9. 285719 9. 317861 9. 313235  
11745285\_ 6. 883304 6. 797073 6. 995596 6. 517336 6. 580231 6. 520343  
11745286\_ 4. 909588 5. 064816 5. 122217 4. 824195 4. 901546 4. 929899  
11745287\_ 3. 124883 3. 427846 3. 070869 3. 273184 3. 228768 3. 307192  
11745288\_ 3. 116986 3. 278291 3. 000797 2. 718322 3. 016042 2. 822602  
11745289\_ 10. 21546 10. 24165 10. 24553 9. 382691 9. 366116 9. 393552  
11745290\_ 6. 890632 6. 871506 6. 804611 6. 527098 6. 542975 6. 604116

11745291\_ 3.492089 3.708079 2.998705 3.607341 3.567005 3.52381  
11745292\_ 4.823516 4.759011 4.636461 4.816203 4.820215 4.763543  
11745293\_ 7.677629 7.535705 7.639893 7.733005 7.802051 7.857519  
11745294\_ 5.257668 5.366866 5.358874 5.321749 5.455014 5.434314  
11745295\_ 4.2321 4.348692 4.138417 4.444433 4.429346 4.355265  
11745296\_ 5.206766 5.37743 5.289138 5.327527 5.257461 5.41974  
11745297\_ 8.229739 8.169206 8.205654 8.75986 8.738963 8.711937  
11745298\_ 6.124781 6.087697 6.047786 6.013775 6.12601 6.079511  
11745299\_ 3.878726 3.998471 3.791086 3.942224 3.900583 3.942224  
11745300\_ 8.4781 8.464397 8.523887 8.032719 7.98929 7.977203  
11745301\_ 6.800646 6.742741 6.793426 6.228723 6.109415 6.154547  
11745302\_ 7.005593 6.921121 7.089482 7.362303 7.227845 7.379329  
11745303\_ 4.115046 4.044299 4.272795 4.093699 4.305342 4.178346  
11745304\_ 5.895394 5.929931 5.614804 5.884238 5.950407 5.884238  
11745305\_ 4.770805 4.73071 4.463663 4.676862 4.833735 4.785233  
11745306\_ 7.500647 7.440135 7.462121 7.427112 7.431023 7.431023  
11745307\_ 5.206296 5.293801 5.094246 5.474461 5.398897 5.519919  
11745308\_ 4.790071 4.887478 4.847407 4.970579 5.032283 4.95814  
11745309\_ 6.52416 6.479328 6.50685 6.300249 6.162388 6.36342  
11745310\_ 2.143064 2.123199 2.53998 2.321556 2.280718 2.249628  
11745311\_ 6.775925 6.714177 6.775925 6.899781 6.946361 7.019095  
11745312\_ 7.373547 7.410768 7.433733 7.413291 7.466206 7.493632  
11745313\_ 7.466446 7.367632 7.516733 7.011531 6.995964 6.950158  
11745314\_ 4.8668 4.909721 4.871176 4.879738 4.832142 4.909721  
11745315\_ 8.985201 8.901316 8.955054 8.539642 8.630394 8.44098  
11745316\_ 4.704451 4.762722 4.853016 4.643717 4.704451 4.704451  
11745317\_ 5.223781 5.228322 4.913612 5.319179 5.188751 5.233677  
11745318\_ 5.347882 5.376764 5.098824 5.480966 5.37403 5.438896  
11745319\_ 7.053922 6.960596 7.087642 7.170692 7.131211 7.02624  
11745320\_ 5.178239 4.982211 5.021916 5.141802 5.095082 5.271868  
11745321\_ 3.419724 3.264145 3.194208 3.205468 2.903186 3.083804  
11745322\_ 9.210362 9.128678 9.161566 9.743821 9.783809 9.811774  
11745323\_ 6.340891 6.464805 6.260434 6.333812 6.457618 6.481046  
11745324\_ 4.748511 4.604982 4.767227 4.767227 4.861159 4.767227  
11745325\_ 6.269753 6.362734 6.158029 6.329516 6.2427 6.30331  
11745326\_ 8.275453 8.295094 8.331641 8.179064 8.170793 8.202934  
11745327\_ 7.443548 7.398307 7.325506 7.054455 7.037121 7.071614  
11745328\_ 8.915367 8.830053 8.949315 8.418466 8.439028 8.455577  
11745329\_ 6.427677 6.376977 6.360221 6.28958 6.461436 6.403637  
11745330\_ 9.081788 9.042396 9.060842 8.720083 8.706975 8.733247  
11745331\_ 6.17981 5.927455 6.125805 5.982933 6.030197 6.191198  
11745332\_ 3.834147 3.880808 3.50394 3.91187 3.764627 3.84505  
11745333\_ 9.108907 9.019972 9.084795 9.094591 9.111734 9.065124  
11745334\_ 5.424044 5.307141 5.414869 4.596795 4.849431 4.701172  
11745335\_ 6.137438 6.024873 6.07048 5.597482 5.768649 5.722  
11745336\_ 6.23744 5.976346 6.14804 5.682772 5.874926 5.758341  
11745337\_ 7.381624 7.376773 7.373839 7.605822 7.62679 7.610469  
11745338\_ 6.428745 6.350102 6.306661 6.545481 6.574682 6.592907  
11745339\_ 3.980546 4.01544 4.025341 4.000673 3.989464 3.961066  
11745340\_ 6.529789 6.703551 6.534975 6.653457 6.588573 6.681048  
11745341\_ 5.545108 5.727857 5.578386 5.571558 5.712881 5.61839



11745342\_ 3. 55653 3. 303291 3. 475038 3. 456054 3. 439661 3. 44839  
11745343\_ 5. 757028 5. 732472 5. 766805 5. 889313 5. 705536 5. 984008  
11745344\_ 8. 348959 8. 228625 8. 364113 8. 47976 8. 475195 8. 528213  
11745345\_ 8. 489267 8. 316431 8. 38079 8. 632007 8. 557639 8. 607968  
11745346\_ 5. 031188 5. 075983 5. 001905 5. 057103 4. 996385 4. 868958  
11745347\_ 6. 48642 6. 57628 6. 51518 6. 481046 6. 565607 6. 546743  
11745348\_ 6. 532111 6. 547068 6. 511006 6. 523218 6. 553217 6. 619236  
11745349\_ 4. 961466 4. 961466 4. 632936 4. 755288 4. 750245 4. 837307  
11745350\_ 6. 617911 6. 629056 6. 609017 6. 630513 6. 630488 6. 613241  
11745351\_ 7. 946425 7. 885626 7. 917614 7. 679818 7. 747703 7. 800496  
11745352\_ 5. 225098 5. 169997 5. 315639 5. 396823 5. 458854 5. 24815  
11745353\_ 5. 75626 5. 793779 5. 793369 5. 958531 5. 940447 5. 854985  
11745354\_ 8. 770052 8. 702459 8. 755592 8. 579684 8. 604155 8. 609045  
11745355\_ 7. 730273 7. 717391 7. 728286 7. 238407 7. 35111 7. 26758  
11745356\_ 5. 433326 5. 579612 5. 530032 5. 67166 5. 685118 5. 571501  
11745357\_ 7. 278639 7. 307284 7. 366279 7. 697331 7. 723692 7. 772557  
11745358\_ 3. 547542 3. 618254 3. 615906 3. 297534 3. 131564 3. 277141  
11745359\_ 3. 541363 3. 627915 3. 627915 3. 398985 3. 329159 3. 376952  
11745360\_ 8. 933862 8. 909813 8. 938781 8. 881718 8. 948451 8. 893286  
11745361\_ 8. 025828 7. 96261 7. 965685 9. 389664 9. 267841 9. 3029  
11745362\_ 12. 739 12. 69246 12. 70574 12. 6271 12. 67327 12. 61678  
11745363\_ 5. 3012 5. 35567 5. 106915 5. 243413 5. 248168 5. 196208  
11745364\_ 5. 285547 5. 455372 5. 297608 5. 364852 5. 368021 5. 554778  
11745365\_ 5. 124321 5. 080637 4. 866967 4. 985601 4. 993328 5. 052217  
11745366\_ 8. 019037 8. 003925 7. 987798 8. 112853 8. 039199 8. 030078  
11745367\_ 5. 073036 5. 063969 5. 166332 5. 11527 5. 347298 5. 4336  
11745368\_ 4. 643717 4. 709463 4. 577143 4. 810482 4. 743566 4. 813044  
11745369\_ 5. 905779 5. 855035 5. 861712 5. 727169 5. 860265 5. 8634  
11745370\_ 4. 173571 4. 1865 3. 752423 4. 151676 4. 302368 4. 366965  
11745371\_ 2. 14033 1. 995221 2. 232369 1. 962861 2. 036903 2. 125182  
11745372\_ 4. 103954 4. 416159 4. 134891 4. 324549 4. 275768 4. 122446  
11745373\_ 4. 098995 4. 124691 4. 213226 4. 351155 4. 219119 4. 270633  
11745374\_ 3. 184876 2. 89357 2. 91649 2. 990248 3. 181704 3. 01309  
11745375\_ 6. 604286 6. 620362 6. 769795 6. 294272 6. 250731 6. 345764  
11745376\_ 6. 433605 6. 4327 6. 396949 6. 244666 6. 387455 6. 367486  
11745377\_ 7. 627864 7. 542244 7. 628833 7. 984281 7. 950525 7. 884933  
11745378\_ 7. 945112 7. 90685 7. 939535 7. 946243 7. 965421 7. 928736  
11745379\_ 8. 79398 8. 636082 8. 744132 8. 700272 8. 756037 8. 779486  
11745380\_ 5. 260991 5. 363951 5. 466615 5. 230759 5. 14407 5. 318233  
11745381\_ 5. 130087 5. 164794 5. 027518 4. 82912 4. 887268 4. 86066  
11745382\_ 7. 485013 7. 306109 7. 411903 7. 081887 7. 150762 7. 227453  
11745383\_ 6. 976901 6. 993187 6. 955781 7. 059366 7. 08741 7. 053419  
11745384\_ 10. 37612 10. 33798 10. 41417 10. 51619 10. 56909 10. 52206  
11745385\_ 4. 033135 4. 219205 4. 114155 4. 114155 4. 174626 4. 169259  
11745386\_ 8. 084825 7. 949535 8. 011791 8. 038285 8. 042397 8. 161132  
11745387\_ 6. 458104 6. 43204 6. 288161 6. 05436 6. 122294 6. 055622  
11745388\_ 3. 112201 3. 085681 3. 481342 3. 12893 3. 376102 3. 34271  
11745389\_ 6. 087821 6. 097927 6. 183084 6. 480039 6. 441686 6. 451129  
11745390\_ 7. 321617 7. 381392 7. 367366 7. 527828 7. 425909 7. 397187  
11745391\_ 10. 93664 10. 9092 10. 89486 11. 03319 11. 00188 10. 97878  
11745392\_ 4. 960207 4. 896924 4. 781037 4. 922764 4. 794359 4. 94771

11745393\_ 5. 013258 5. 182751 5. 025806 5. 025806 5. 013258 4. 776606  
11745394\_ 4. 874234 4. 831173 4. 87476 4. 871778 4. 902154 4. 967574  
11745395\_ 3. 00222 3. 175732 3. 109022 2. 949754 3. 00966 3. 068951  
11745396\_ 4. 091363 4. 130917 4. 004389 3. 910457 3. 511262 3. 717757  
11745397\_ 7. 197987 7. 037234 7. 205482 6. 843714 6. 812021 6. 75972  
11745398\_ 6. 820884 6. 501662 6. 713539 6. 583611 6. 474488 6. 568181  
11745399\_ 4. 079994 4. 120862 3. 836531 3. 837277 4. 112175 4. 079994  
11745400\_ 5. 932382 5. 911102 5. 922714 5. 935544 5. 907939 5. 894697  
11745401\_ 6. 59657 6. 552605 6. 512304 6. 500954 6. 600848 6. 533487  
11745402\_ 4. 122286 4. 293452 4. 356643 4. 093354 3. 837167 4. 054288  
11745403\_ 4. 620534 4. 802344 4. 704915 4. 827964 4. 776211 4. 769955  
11745404\_ 6. 343407 6. 386289 6. 338669 6. 277216 6. 234835 6. 201673  
11745405\_ 6. 405816 6. 556146 6. 477585 6. 473206 6. 465236 6. 431742  
11745406\_ 7. 22678 7. 230373 7. 247101 7. 185649 7. 230924 7. 238357  
11745407\_ 6. 125731 6. 066609 6. 038116 6. 151427 6. 053042 6. 255525  
11745408\_ 7. 469994 7. 290676 7. 397685 6. 992077 7. 020679 7. 16394  
11745409\_ 4. 896373 5. 03077 4. 896373 4. 656069 4. 625118 4. 658414  
11745410\_ 5. 200854 5. 218308 5. 423784 5. 157435 4. 975295 5. 016028  
11745411\_ 7. 56113 7. 633195 7. 644863 6. 962094 6. 902913 6. 991389  
11745412\_ 5. 034834 5. 093833 4. 984669 5. 177211 5. 17842 5. 218524  
11745413\_ 3. 971588 4. 05715 4. 161912 4. 116208 4. 065356 4. 237506  
11745414\_ 7. 597135 7. 734408 7. 708096 7. 737591 7. 725862 7. 742641  
11745415\_ 8. 899008 8. 900642 8. 969157 9. 02717 9. 043136 9. 016301  
11745416\_ 8. 848275 8. 892907 8. 902055 8. 947496 8. 969124 8. 947165  
11745417\_ 4. 18925 4. 262362 4. 536857 4. 186221 4. 302169 4. 461718  
11745418\_ 6. 156882 5. 896045 6. 044345 5. 825918 5. 671257 5. 909495  
11745419\_ 5. 954081 6. 080911 5. 998125 5. 974582 6. 044285 5. 95966  
11745420\_ 3. 095654 2. 970145 2. 928709 3. 144976 2. 826584 3. 05419  
11745421\_ 6. 688764 6. 596908 6. 753783 6. 249767 6. 358948 6. 368252  
11745422\_ 3. 229721 3. 26036 3. 182801 3. 519893 3. 431614 3. 314866  
11745423\_ 5. 166629 5. 135009 5. 355686 5. 655265 5. 607768 5. 294118  
11745424\_ 8. 314372 8. 157478 8. 176141 9. 110928 9. 167406 9. 083649  
11745425\_ 5. 116467 5. 029529 5. 195519 4. 953968 4. 762157 5. 000077  
11745426\_ 5. 380572 5. 591938 5. 390704 5. 568018 5. 476367 5. 45997  
11745427\_ 6. 613383 6. 610966 6. 42107 6. 803846 6. 739847 6. 723338  
11745428\_ 4. 758676 4. 70468 4. 846159 5. 151952 5. 216309 5. 396829  
11745429\_ 8. 131343 8. 090192 8. 104027 8. 081381 8. 05456 8. 085101  
11745430\_ 4. 40971 4. 475797 4. 493023 4. 481373 4. 619496 4. 558612  
11745431\_ 8. 55121 8. 596547 8. 58785 8. 296064 8. 155715 8. 20024  
11745432\_ 6. 636668 6. 612619 6. 610699 6. 296079 6. 482306 6. 395167  
11745433\_ 9. 381897 9. 288855 9. 369223 9. 444847 9. 537751 9. 487569  
11745434\_ 2. 034462 2. 212043 2. 318991 2. 037097 1. 855537 2. 225367  
11745435\_ 8. 221456 8. 130316 8. 213792 7. 950896 7. 954718 7. 892328  
11745436\_ 7. 978971 7. 998092 7. 925786 8. 087493 8. 062655 8. 007467  
11745437\_ 2. 659198 2. 322243 2. 358545 2. 674317 2. 359471 2. 435049  
11745438\_ 8. 318242 8. 221802 8. 284913 8. 136739 8. 126791 8. 157498  
11745439\_ 7. 801675 7. 708475 7. 723226 7. 740286 7. 727916 7. 667234  
11745440\_ 9. 333685 9. 271282 9. 299645 9. 023741 8. 96489 8. 974264  
11745441\_ 7. 553666 7. 517928 7. 439118 7. 457873 7. 454781 7. 445366  
11745442\_ 9. 90303 9. 926207 9. 896716 10. 01431 9. 954813 9. 896214  
11745443\_ 6. 481189 6. 394565 6. 516946 7. 342968 7. 320409 7. 386296

11745444\_ 6. 734334 6. 649322 6. 816215 6. 435054 6. 398205 6. 426475  
11745445\_ 2. 840996 2. 837783 2. 929812 2. 830136 2. 830136 2. 782212  
11745446\_ 2. 220292 2. 303461 2. 293213 2. 199051 2. 171336 2. 075039  
11745447\_ 8. 617004 8. 662199 8. 660766 8. 761979 8. 798856 8. 684021  
11745448\_ 5. 258876 5. 278367 5. 157683 5. 484744 5. 295758 5. 278367  
11745449\_ 5. 956958 5. 895001 5. 841508 5. 630183 5. 492871 5. 517673  
11745450\_ 7. 991112 7. 898747 7. 896274 7. 631747 7. 563023 7. 529662  
11745451\_ 8. 521058 8. 500429 8. 532538 8. 171368 8. 146079 8. 185153  
11745452\_ 6. 607003 6. 640682 6. 634134 5. 894697 5. 927754 5. 977173  
11745453\_ 7. 462274 7. 426111 7. 540989 6. 892861 6. 840713 6. 890764  
11745454\_ 6. 028481 6. 025005 5. 922969 5. 873958 5. 984094 5. 957779  
11745455\_ 4. 719744 4. 862086 4. 880415 4. 87552 4. 997105 4. 938836  
11745456\_ 4. 936271 4. 935258 4. 824195 4. 939578 4. 915742 4. 934157  
11745457\_ 9. 815676 9. 838312 9. 866417 9. 972936 9. 930689 9. 885747  
11745458\_ 6. 071228 5. 918346 6. 199575 5. 794286 5. 820052 5. 837451  
11745459\_ 8. 665177 8. 62987 8. 695256 9. 133168 9. 174435 9. 135555  
11745460\_ 6. 985478 6. 925177 6. 999707 6. 76774 6. 769257 6. 789276  
11745461\_ 3. 348227 3. 47728 3. 462685 3. 584209 3. 53415 3. 584805  
11745462\_ 10. 47718 10. 45456 10. 44112 10. 40557 10. 38609 10. 42676  
11745463\_ 10. 42544 10. 4371 10. 48431 10. 3966 10. 44349 10. 41261  
11745464\_ 7. 965374 7. 920486 8. 057701 8. 768849 8. 807693 8. 724306  
11745465\_ 4. 296821 4. 222146 4. 417374 4. 0367 4. 193235 4. 356415  
11745466\_ 6. 188507 6. 02721 6. 159771 6. 003766 6. 10146 5. 896075  
11745467\_ 7. 466451 7. 436412 7. 38845 6. 936531 7. 006041 6. 929829  
11745468\_ 4. 824065 4. 926635 4. 7601 4. 722441 4. 890539 4. 94059  
11745469\_ 9. 288855 9. 212224 9. 286844 8. 525197 8. 588136 8. 528081  
11745470\_ 9. 241391 9. 227453 9. 309247 8. 593438 8. 653925 8. 540478  
11745471\_ 7. 565503 7. 541703 7. 408873 7. 199095 7. 151208 7. 250786  
11745472\_ 5. 74987 5. 789947 5. 798941 5. 706697 5. 792956 5. 77685  
11745473\_ 4. 566474 4. 496846 4. 490281 4. 099445 4. 332571 4. 279999  
11745474\_ 4. 258089 3. 909593 3. 8048 3. 98491 3. 7799 3. 879309  
11745475\_ 5. 509092 5. 579164 5. 477279 5. 627585 5. 640092 5. 585086  
11745476\_ 6. 867712 6. 792126 6. 901477 6. 751724 6. 790435 6. 77958  
11745477\_ 5. 176751 5. 147986 5. 335873 5. 376687 5. 341426 5. 260808  
11745478\_ 4. 417608 4. 451282 4. 396082 4. 459939 4. 426793 4. 454347  
11745479\_ 5. 853738 6. 060404 5. 994662 5. 93553 5. 957954 5. 988362  
11745480\_ 7. 207424 7. 279374 7. 191738 7. 228532 7. 29027 7. 248464  
11745481\_ 5. 401426 5. 599071 5. 564068 5. 614563 5. 664858 5. 76568  
11745482\_ 9. 455 9. 403497 9. 421027 9. 401751 9. 31715 9. 319783  
11745483\_ 10. 78567 10. 72269 10. 74774 10. 5519 10. 52921 10. 56672  
11745484\_ 4. 930819 5. 22023 4. 922523 5. 162138 5. 18568 5. 118707  
11745485\_ 3. 124986 3. 052711 2. 930966 3. 101013 2. 989194 3. 077099  
11745486\_ 5. 736831 5. 638477 5. 785178 5. 683125 5. 700102 5. 704919  
11745487\_ 5. 506783 5. 401272 5. 409082 5. 62839 5. 644472 5. 704047  
11745488\_ 4. 389341 4. 417638 4. 192797 4. 526322 4. 298627 4. 159952  
11745489\_ 4. 984218 4. 906796 4. 765079 5. 062052 4. 90022 5. 042394  
11745490\_ 2. 783126 2. 821262 2. 929882 2. 783897 2. 905849 3. 059455  
11745491\_ 4. 535325 4. 171958 4. 186635 4. 500018 4. 362017 4. 462002  
11745492\_ 5. 36906 5. 343173 5. 463696 5. 357148 5. 44868 5. 405497  
11745493\_ 6. 520868 6. 412133 6. 531378 6. 596249 6. 632674 6. 828602  
11745494\_ 7. 19116 7. 075102 7. 10337 7. 023448 7. 072658 7. 086162

11745495\_ 8. 547394 8. 477888 8. 556361 8. 524846 8. 520901 8. 570793  
11745496\_ 4. 53298 4. 627044 4. 772366 4. 72584 4. 510452 4. 612547  
11745497\_ 9. 039641 8. 947378 9. 01492 8. 66176 8. 664106 8. 701578  
11745498\_ 8. 226118 8. 164208 8. 225721 8. 114897 8. 1291 8. 094423  
11745499\_ 8. 038625 7. 982504 8. 097941 7. 932171 8. 030149 7. 937395  
11745500\_ 3. 871204 3. 922527 3. 995183 3. 997131 3. 894789 4. 120551  
11745501\_ 6. 094413 6. 159771 6. 06458 6. 0806 6. 18875 6. 116246  
11745502\_ 4. 509639 4. 554318 4. 436565 4. 635708 4. 51252 4. 618066  
11745503\_ 10. 1572 10. 1428 10. 15354 10. 09493 10. 12595 10. 09868  
11745504\_ 5. 497297 5. 205795 5. 374651 5. 498185 5. 467547 5. 655734  
11745505\_ 6. 218204 6. 193294 6. 292023 6. 452978 6. 415944 6. 459588  
11745506\_ 9. 144382 9. 059299 9. 134637 9. 196389 9. 18027 9. 228005  
11745507\_ 8. 501814 8. 45736 8. 46439 8. 107637 8. 142456 8. 145796  
11745508\_ 8. 781292 8. 782843 8. 855494 8. 477664 8. 579411 8. 487564  
11745509\_ 4. 679278 4. 649007 4. 697681 4. 471951 4. 436615 4. 436919  
11745510\_ 5. 950799 6. 01359 5. 827598 6. 150525 6. 044285 6. 099111  
11745511\_ 7. 867248 7. 775393 7. 76933 7. 402952 7. 44579 7. 377927  
11745512\_ 4. 559952 4. 334893 4. 281013 3. 813266 3. 993716 4. 026821  
11745513\_ 5. 321701 5. 453513 5. 400562 5. 194219 5. 253037 5. 250745  
11745514\_ 8. 113367 8. 072631 8. 149717 8. 222859 8. 263374 8. 255181  
11745515\_ 2. 616577 2. 718322 2. 617402 2. 719474 2. 547006 2. 72752  
11745516\_ 7. 18222 7. 094774 7. 290259 6. 936322 6. 959893 6. 864509  
11745517\_ 10. 66634 10. 67414 10. 67186 10. 84723 10. 83212 10. 80156  
11745518\_ 4. 889636 4. 812999 4. 889991 4. 882991 4. 761947 4. 785688  
11745519\_ 8. 297006 8. 126361 8. 272901 8. 181499 8. 109178 8. 111666  
11745520\_ 7. 893686 7. 869568 7. 86754 7. 795757 7. 780547 7. 802362  
11745521\_ 7. 280139 7. 228479 7. 199899 7. 21371 7. 108673 7. 170942  
11745522\_ 8. 228728 8. 192268 8. 247904 8. 219951 8. 078908 8. 148491  
11745523\_ 3. 628617 3. 503743 3. 618515 3. 68959 3. 705625 3. 705639  
11745524\_ 5. 954081 5. 957954 6. 04914 6. 219863 6. 150793 6. 32256  
11745525\_ 1. 919496 1. 70323 1. 836115 1. 787818 1. 790041 1. 754755  
11745526\_ 1. 868849 2. 028424 1. 907549 2. 039065 1. 869979 2. 006186  
11745527\_ 6. 685379 6. 612181 6. 720968 6. 344353 6. 365298 6. 414187  
11745528\_ 4. 685463 4. 79238 4. 854449 5. 025379 4. 744539 4. 806452  
11745529\_ 6. 472492 6. 462306 6. 476723 6. 41672 6. 462306 6. 446425  
11745530\_ 4. 659396 4. 643717 4. 701441 4. 570061 4. 667137 4. 700243  
11745531\_ 5. 382238 5. 646926 5. 783466 5. 73174 5. 564572 5. 630628  
11745532\_ 5. 675853 5. 614564 5. 709521 5. 425092 5. 256664 5. 527472  
11745533\_ 7. 737255 7. 589926 7. 578368 7. 987529 7. 941785 8. 007467  
11745534\_ 4. 186073 4. 299004 4. 315807 4. 432103 4. 331101 4. 415744  
11745535\_ 2. 488786 2. 47102 2. 436829 2. 361778 2. 317281 2. 408415  
11745536\_ 5. 707784 5. 771891 5. 763167 5. 78289 5. 725994 5. 710535  
11745537\_ 7. 555816 7. 462811 7. 501963 7. 384283 7. 429683 7. 437396  
11745538\_ 3. 205544 3. 105585 3. 050197 3. 30503 3. 050197 3. 333603  
11745539\_ 4. 487005 4. 418521 4. 007719 4. 363191 4. 403547 4. 316962  
11745540\_ 4. 526524 4. 282687 4. 452074 4. 384331 4. 436042 4. 374654  
11745541\_ 9. 847172 9. 793536 9. 851331 10. 10186 10. 17123 10. 14224  
11745542\_ 7. 136377 7. 301282 7. 135549 7. 194999 7. 220312 7. 054367  
11745543\_ 8. 558221 8. 536552 8. 581953 7. 697157 7. 639003 7. 682416  
11745544\_ 5. 847106 5. 733846 5. 697166 5. 692256 5. 715248 5. 712502  
11745545\_ 6. 222031 6. 22368 6. 076424 6. 19196 6. 21876 6. 152558

11745546\_ 4. 050343 4. 174872 4. 179202 4. 167313 3. 960835 4. 122446  
11745547\_ 4. 632479 4. 828701 4. 6324 4. 649922 4. 627536 4. 538478  
11745548\_ 5. 197246 5. 242823 5. 23751 5. 186214 5. 321837 5. 435701  
11745549\_ 6. 138175 6. 054148 6. 074645 6. 242278 6. 267726 6. 242754  
11745550\_ 6. 016382 5. 900525 5. 918327 5. 527548 5. 344254 5. 409222  
11745551\_ 10. 14792 10. 06759 10. 17041 9. 750274 9. 696396 9. 68123  
11745552\_ 7. 747701 7. 693677 7. 774623 7. 38978 7. 414535 7. 481087  
11745553\_ 7. 2546 7. 303821 7. 536532 7. 116723 7. 252835 7. 140687  
11745554\_ 6. 006799 5. 95504 5. 981495 5. 981627 6. 007406 5. 971088  
11745555\_ 8. 41777 8. 439118 8. 468253 8. 558797 8. 483531 8. 501052  
11745556\_ 7. 155251 7. 116293 7. 125556 7. 243361 7. 232653 7. 221792  
11745557\_ 3. 737994 3. 899925 3. 893334 3. 802877 3. 87918 3. 900619  
11745558\_ 4. 358362 4. 550331 4. 497211 4. 584933 4. 638711 4. 550331  
11745559\_ 2. 453159 1. 983562 2. 262255 2. 255999 2. 345402 2. 242832  
11745560\_ 5. 067782 5. 120401 4. 936062 5. 016703 5. 112042 4. 984669  
11745561\_ 5. 976821 5. 94884 6. 046633 5. 208769 5. 239803 5. 156303  
11745562\_ 5. 134677 5. 216414 5. 038553 4. 994001 5. 314175 5. 180349  
11745563\_ 5. 575749 5. 646379 5. 50012 5. 784749 5. 886423 5. 954677  
11745564\_ 6. 704988 6. 781939 6. 679897 6. 899212 6. 813717 6. 855988  
11745565\_ 3. 909367 3. 918729 3. 778158 3. 937538 4. 001061 3. 894438  
11745566\_ 8. 735118 8. 730797 8. 706457 8. 831501 8. 790061 8. 833501  
11745567\_ 7. 644984 7. 581369 7. 571064 7. 785657 7. 740787 7. 748996  
11745568\_ 5. 294338 5. 309095 5. 223153 5. 435072 5. 390543 5. 279824  
11745569\_ 8. 674624 8. 643361 8. 734314 8. 579297 8. 496353 8. 504468  
11745570\_ 3. 396883 3. 39437 3. 303879 3. 307931 3. 23814 3. 248736  
11745571\_ 7. 341715 7. 333926 7. 328427 8. 143821 8. 072745 8. 164924  
11745572\_ 7. 52079 7. 440019 7. 557364 7. 335346 7. 346908 7. 36108  
11745573\_ 5. 767027 5. 67761 5. 836149 5. 845347 5. 845839 5. 630013  
11745574\_ 5. 333723 5. 111022 5. 122191 5. 219024 5. 19422 5. 160472  
11745575\_ 6. 210836 6. 250788 6. 249631 6. 239414 6. 1721 6. 263924  
11745576\_ 5. 242742 5. 2293 5. 016367 5. 205472 5. 278521 5. 313451  
11745577\_ 3. 222722 3. 294288 3. 009032 3. 009032 3. 093619 3. 382297  
11745578\_ 6. 450182 6. 377327 6. 426223 6. 370668 6. 462817 6. 442974  
11745579\_ 5. 81525 5. 69566 5. 599994 5. 729457 5. 824495 5. 732231  
11745580\_ 6. 153571 5. 971052 6. 071399 5. 971377 6. 065264 6. 08664  
11745581\_ 2. 605516 2. 778451 2. 717599 2. 665415 2. 538873 2. 717599  
11745582\_ 2. 395993 2. 446011 2. 414308 2. 447837 2. 355132 2. 270145  
11745583\_ 3. 606313 3. 991252 3. 740892 3. 936273 3. 807868 4. 110109  
11745584\_ 5. 779866 6. 024363 6. 067818 5. 924222 5. 883007 5. 822058  
11745585\_ 3. 89921 3. 893403 3. 835101 3. 876124 3. 809775 4. 000651  
11745586\_ 8. 13477 8. 048914 8. 071344 8. 159005 8. 108653 8. 059724  
11745587\_ 5. 24155 5. 065502 5. 12757 5. 745821 5. 615372 5. 790307  
11745588\_ 3. 577363 3. 824374 3. 402089 3. 619339 3. 559955 3. 584977  
11745589\_ 3. 014532 3. 001031 3. 037146 2. 999533 3. 035648 3. 022147  
11745590\_ 6. 141069 6. 184016 6. 147532 6. 088948 6. 106651 6. 141069  
11745591\_ 5. 465864 5. 518338 5. 413269 5. 453278 5. 606091 5. 508613  
11745592\_ 6. 593571 6. 516297 6. 672089 6. 688764 6. 65814 6. 57594  
11745593\_ 7. 722204 7. 763421 7. 782628 7. 782503 7. 757309 7. 786249  
11745594\_ 5. 52916 5. 675238 5. 443431 5. 685706 5. 472594 5. 636518  
11745595\_ 7. 546042 7. 446792 7. 549211 7. 417811 7. 506107 7. 413811  
11745596\_ 3. 695901 3. 476084 3. 600277 3. 562237 3. 548122 3. 606544

11745597\_ 7. 327919 7. 193634 7. 196136 6. 493179 6. 542708 6. 448141  
11745598\_ 7. 099954 7. 01122 7. 024616 7. 308032 7. 322352 7. 32934  
11745599\_ 4. 744342 4. 771858 4. 723577 4. 707944 4. 749033 4. 700243  
11745600\_ 4. 718912 4. 72225 4. 664813 4. 857432 5. 066024 4. 689825  
11745601\_ 5. 078541 5. 134324 5. 291117 4. 898468 4. 876514 4. 952575  
11745602\_ 11. 51598 11. 49311 11. 49743 11. 42829 11. 39149 11. 41841  
11745603\_ 10. 19708 10. 1678 10. 1827 10. 00662 10. 04096 9. 95763  
11745604\_ 6. 813866 6. 549449 6. 881514 6. 244666 6. 232859 6. 208727  
11745605\_ 6. 905598 7. 200485 7. 145551 7. 171317 7. 149575 7. 182362  
11745606\_ 4. 587065 4. 763616 4. 699825 4. 882227 4. 70613 4. 811005  
11745607\_ 5. 029529 5. 222557 5. 134527 5. 130563 5. 193522 5. 266206  
11745608\_ 7. 859357 7. 905899 7. 930048 7. 778957 7. 669105 7. 694613  
11745609\_ 8. 37707 8. 412552 8. 473228 8. 183147 8. 187796 8. 168229  
11745610\_ 7. 296249 7. 29358 7. 191191 7. 050774 7. 199994 6. 991787  
11745611\_ 6. 873673 6. 898793 6. 922773 6. 67471 6. 726231 6. 698427  
11745612\_ 4. 838767 5. 254301 4. 844415 5. 014358 4. 97976 4. 949383  
11745613\_ 6. 282224 6. 117863 6. 049324 6. 052739 6. 119492 6. 213128  
11745614\_ 3. 631126 3. 554855 3. 572626 3. 652137 3. 64642 3. 718622  
11745615\_ 2. 121397 2. 136972 2. 292868 2. 459564 2. 268659 2. 308791  
11745616\_ 4. 876216 4. 990494 4. 736209 5. 189628 4. 85926 5. 036485  
11745617\_ 5. 339308 5. 309674 5. 234811 5. 442077 5. 4116 5. 500584  
11745618\_ 4. 198785 4. 396457 4. 504644 4. 474374 4. 489341 4. 515314  
11745619\_ 2. 499929 2. 536114 2. 439142 2. 47805 2. 511871 2. 463385  
11745620\_ 5. 998525 5. 98478 5. 951376 6. 004856 6. 00364 5. 917361  
11745621\_ 6. 265485 6. 284386 6. 339649 7. 165144 7. 268986 7. 101914  
11745622\_ 3. 503743 3. 504879 3. 65353 3. 706436 3. 519083 3. 70453  
11745623\_ 5. 273882 5. 346505 5. 182302 5. 313714 5. 312754 5. 299373  
11745624\_ 4. 410305 4. 549102 4. 740199 4. 183079 4. 281138 4. 009861  
11745625\_ 4. 243397 4. 136018 4. 222177 4. 277375 4. 328962 4. 370502  
11745626\_ 2. 233185 2. 423611 2. 30354 2. 653641 2. 736264 2. 517543  
11745627\_ 2. 995338 2. 991785 3. 091699 2. 971756 2. 971756 3. 180062  
11745628\_ 6. 005097 6. 296881 6. 042115 6. 08004 6. 330828 6. 193016  
11745629\_ 4. 422272 4. 52373 4. 395906 4. 600317 4. 475356 4. 477445  
11745630\_ 4. 608042 4. 759528 4. 587043 4. 739362 4. 490777 4. 614949  
11745631\_ 4. 546019 4. 411138 4. 422021 4. 375351 4. 066229 4. 513613  
11745632\_ 5. 06768 4. 858482 4. 76704 4. 523755 4. 453591 4. 643719  
11745633\_ 8. 000932 7. 771002 7. 972639 7. 517984 7. 449903 7. 588667  
11745634\_ 8. 305425 8. 212675 8. 311441 7. 793085 7. 836477 7. 929188  
11745635\_ 6. 075974 6. 206103 6. 23831 5. 109317 5. 074471 5. 276865  
11745636\_ 6. 453782 6. 430154 6. 595399 6. 099282 6. 268176 6. 227578  
11745637\_ 4. 026092 4. 112798 4. 056135 4. 151479 4. 211005 4. 172591  
11745638\_ 4. 003098 4. 066143 3. 861314 4. 129598 4. 087685 3. 915083  
11745639\_ 3. 42413 3. 254785 3. 40617 3. 337499 3. 402914 3. 585983  
11745640\_ 7. 426223 7. 437458 7. 409349 7. 497661 7. 377618 7. 340869  
11745641\_ 5. 075305 5. 34087 5. 045408 5. 23845 5. 288228 5. 223731  
11745642\_ 2. 260214 2. 507515 2. 520698 2. 680799 2. 638248 2. 549761  
11745643\_ 4. 711179 4. 744995 4. 772366 4. 973349 4. 875692 4. 707404  
11745644\_ 5. 526953 5. 728637 5. 440959 5. 62906 5. 658884 5. 693904  
11745645\_ 4. 399591 4. 476234 4. 431739 4. 513309 4. 477802 4. 53474  
11745646\_ 4. 404526 4. 253226 4. 291259 4. 218193 4. 157201 4. 230252  
11745647\_ 7. 68805 7. 772927 7. 667158 7. 712876 7. 799789 7. 809729

11745648\_ 13. 2318 13. 27999 13. 24693 13. 28095 13. 26619 13. 25471  
11745649\_ 7. 682243 7. 777243 7. 78559 7. 44868 7. 540851 7. 483846  
11745650\_ 5. 010564 4. 665242 5. 014711 5. 219384 5. 010564 4. 92393  
11745651\_ 2. 648871 2. 776706 2. 785653 2. 650239 2. 873456 2. 777637  
11745652\_ 2. 987723 3. 003852 3. 241749 2. 769136 2. 686036 2. 890751  
11745653\_ 4. 199277 4. 1452 3. 991111 3. 897213 3. 985953 4. 022339  
11745654\_ 6. 300643 6. 081807 6. 349237 5. 926916 5. 929969 5. 878738  
11745655\_ 7. 364821 7. 321179 7. 3398 7. 457861 7. 497825 7. 539821  
11745656\_ 5. 720395 5. 750146 5. 602893 5. 776794 5. 74768 5. 699858  
11745657\_ 5. 740632 5. 789947 5. 763634 5. 977166 5. 884355 5. 930704  
11745658\_ 5. 750255 5. 692088 5. 665933 5. 669113 5. 759406 5. 598406  
11745659\_ 8. 303672 8. 343396 8. 326326 8. 403532 8. 382128 8. 412797  
11745660\_ 6. 410789 6. 321838 6. 409327 6. 268311 6. 349075 6. 37096  
11745661\_ 4. 250798 3. 996264 4. 003185 4. 127977 4. 053867 4. 077195  
11745662\_ 6. 817986 6. 97431 6. 67123 6. 905286 6. 971381 6. 882912  
11745663\_ 5. 41696 5. 484155 5. 378056 5. 43404 5. 349468 5. 375707  
11745664\_ 6. 441786 6. 465651 6. 523825 6. 336235 6. 329907 6. 387415  
11745665\_ 5. 35142 5. 441152 5. 25524 5. 43803 5. 554436 5. 451684  
11745666\_ 6. 971486 6. 798633 6. 834935 7. 15264 7. 136086 7. 096474  
11745667\_ 8. 873743 8. 866109 8. 953114 8. 47894 8. 489758 8. 507698  
11745668\_ 6. 675768 6. 611057 6. 734345 6. 600958 6. 622146 6. 622172  
11745669\_ 4. 597986 4. 628193 4. 669678 4. 77573 4. 756978 4. 72504  
11745670\_ 4. 344794 4. 2731 4. 269172 4. 230193 4. 374679 4. 363518  
11745671\_ 6. 651136 6. 646485 6. 639966 5. 937326 6. 036829 6. 093561  
11745672\_ 5. 532932 5. 635688 5. 685327 5. 596259 5. 790791 5. 675183  
11745673\_ 5. 025278 4. 639838 4. 924434 5. 180113 5. 143726 5. 086721  
11745674\_ 4. 575871 4. 652899 4. 702617 4. 643717 4. 607665 4. 635826  
11745675\_ 5. 995433 5. 886617 5. 99073 6. 099449 6. 09233 6. 106082  
11745676\_ 4. 573185 4. 752006 4. 938341 4. 82568 4. 700617 4. 600847  
11745677\_ 4. 145292 4. 289937 4. 285746 4. 11578 4. 045334 4. 232586  
11745678\_ 5. 285218 5. 331687 5. 218881 5. 125509 4. 93837 5. 017958  
11745679\_ 9. 469971 9. 389444 9. 452574 9. 854277 9. 848615 9. 888883  
11745680\_ 4. 617599 4. 778351 4. 447621 4. 632549 4. 541245 4. 488088  
11745681\_ 6. 559489 6. 525396 6. 661326 6. 506139 6. 411363 6. 561173  
11745682\_ 4. 146933 4. 161586 4. 090277 4. 024689 4. 151536 3. 994699  
11745683\_ 3. 89221 3. 999355 3. 87292 3. 999355 4. 039289 4. 120222  
11745684\_ 6. 067274 5. 989902 6. 16864 6. 02743 6. 206103 6. 023235  
11745685\_ 5. 247739 4. 931208 5. 05321 5. 445815 5. 424696 5. 589814  
11745686\_ 5. 788654 5. 915762 5. 923 5. 998711 5. 968625 6. 194572  
11745687\_ 4. 602832 4. 675172 4. 51998 4. 556035 4. 611503 4. 809226  
11745688\_ 5. 212648 5. 071938 5. 212648 5. 272058 5. 182051 5. 299571  
11745689\_ 5. 704919 5. 638215 5. 621822 5. 875186 5. 808639 5. 894697  
11745690\_ 6. 76722 6. 831317 6. 763177 6. 811725 6. 896817 6. 765911  
11745691\_ 3. 691855 3. 726129 3. 644253 3. 902587 3. 703839 3. 714145  
11745692\_ 4. 736671 4. 818386 4. 709463 4. 866205 4. 74574 4. 643717  
11745693\_ 3. 503743 3. 16067 3. 29733 3. 398236 3. 563853 3. 456994  
11745694\_ 3. 976581 3. 899659 4. 084082 4. 008426 3. 959624 3. 913202  
11745695\_ 4. 843072 4. 949628 4. 940142 4. 986952 4. 94472 4. 803078  
11745696\_ 4. 122287 4. 02448 3. 850246 4. 234253 4. 206935 4. 10731  
11745697\_ 3. 557128 3. 512345 3. 448105 3. 688399 3. 512268 3. 604815  
11745698\_ 4. 916746 4. 950725 4. 670338 5. 08922 4. 943467 4. 950725

11745699\_ 1. 996121 2. 099337 2. 071827 2. 017073 2. 188328 2. 071827  
11745700\_ 5. 031355 5. 065023 5. 037827 5. 308761 5. 448461 5. 392612  
11745701\_ 6. 448378 6. 506373 6. 421482 6. 387904 6. 414177 6. 263567  
11745702\_ 5. 029876 4. 989804 5. 101012 5. 197136 5. 130522 5. 230146  
11745703\_ 6. 450336 6. 217136 6. 391605 6. 337213 6. 397946 6. 461487  
11745704\_ 2. 224067 2. 219178 2. 129021 2. 135568 2. 20113 2. 192855  
11745705\_ 4. 874234 4. 761179 4. 644746 4. 862513 4. 798511 4. 867583  
11745706\_ 8. 405781 8. 42777 8. 475442 8. 546876 8. 562825 8. 542098  
11745707\_ 3. 393423 3. 766406 3. 52619 3. 570669 3. 502521 3. 662146  
11745708\_ 3. 979193 3. 798962 4. 124263 5. 057647 4. 985659 5. 053374  
11745709\_ 5. 537371 5. 479971 5. 508759 5. 531177 5. 443579 5. 502504  
11745710\_ 5. 598812 5. 779456 5. 664558 5. 451016 5. 571972 5. 514625  
11745711\_ 3. 604448 3. 850229 3. 565672 3. 712635 3. 879309 3. 705625  
11745712\_ 2. 591274 2. 94778 2. 763879 2. 643774 2. 481078 2. 717513  
11745713\_ 6. 130067 5. 943321 6. 152493 6. 689159 6. 604378 6. 604378  
11745714\_ 5. 454546 5. 667009 5. 413749 5. 648116 5. 535461 5. 495309  
11745715\_ 11. 55218 11. 53319 11. 54623 11. 38433 11. 38109 11. 33203  
11745716\_ 11. 12135 11. 09035 11. 08745 11. 01607 11. 0195 10. 9815  
11745717\_ 10. 76976 10. 72423 10. 75229 11. 34226 11. 44091 11. 36167  
11745718\_ 9. 256424 9. 283314 9. 297167 9. 508931 9. 549299 9. 502984  
11745719\_ 6. 656181 6. 564709 6. 768901 6. 364551 6. 302638 6. 263567  
11745720\_ 11. 10701 11. 10639 11. 12403 11. 14146 11. 13984 11. 12172  
11745721\_ 5. 333723 5. 168273 5. 152452 5. 148122 5. 26034 5. 247212  
11745722\_ 5. 999888 6. 094288 6. 106345 5. 968857 5. 894697 6. 019442  
11745723\_ 9. 68463 9. 604434 9. 674183 9. 857196 9. 835241 9. 820678  
11745724\_ 6. 900287 6. 809436 6. 8415 7. 412053 7. 423054 7. 459731  
11745725\_ 7. 523631 7. 552546 7. 531502 7. 532795 7. 48248 7. 53659  
11745726\_ 7. 726297 7. 724068 7. 756222 7. 743319 7. 720181 7. 736229  
11745727\_ 9. 414527 9. 432899 9. 47079 9. 234878 9. 193298 9. 182571  
11745728\_ 8. 547776 8. 462584 8. 585248 8. 318108 8. 364203 8. 439761  
11745729\_ 7. 872869 7. 886682 7. 874439 7. 849326 7. 959036 7. 880573  
11745730\_ 8. 082588 7. 920335 8. 072635 7. 941504 7. 876869 7. 875287  
11745731\_ 7. 130893 7. 031125 7. 141541 6. 964689 6. 940783 6. 909545  
11745732\_ 6. 937747 6. 901308 7. 005177 6. 833534 6. 925666 6. 832591  
11745733\_ 6. 884655 6. 936579 6. 974407 6. 926444 6. 946361 6. 959916  
11745734\_ 5. 901739 6. 097786 5. 916864 6. 127362 5. 991602 6. 020889  
11745735\_ 9. 711302 9. 61088 9. 703129 9. 785374 9. 811234 9. 815797  
11745736\_ 7. 189843 7. 129163 7. 244819 7. 308634 7. 34081 7. 395126  
11745737\_ 10. 18121 10. 15662 10. 18174 10. 06584 10. 12296 10. 09477  
11745738\_ 7. 907794 7. 847161 7. 987268 8. 883432 8. 867044 8. 861133  
11745739\_ 7. 950697 7. 910607 8. 010467 8. 223065 8. 213118 8. 163417  
11745740\_ 7. 634049 7. 542413 7. 608426 7. 847173 7. 847782 7. 778968  
11745741\_ 8. 936142 8. 795284 8. 903917 8. 944054 8. 922437 9. 007608  
11745742\_ 5. 654314 5. 621627 5. 635769 5. 662441 5. 743098 5. 514941  
11745743\_ 3. 745585 3. 721303 3. 82023 3. 879613 3. 801873 3. 65288  
11745744\_ 7. 254195 7. 241495 7. 148808 7. 402245 7. 428656 7. 420232  
11745745\_ 5. 697728 5. 885658 5. 894697 5. 951158 6. 02784 6. 041361  
11745746\_ 8. 257182 8. 131795 8. 300711 8. 232797 8. 300431 8. 223908  
11745747\_ 9. 022501 8. 95764 8. 967679 9. 018186 9. 035544 8. 992251  
11745748\_ 5. 820052 5. 894697 5. 727165 5. 990791 5. 921943 5. 915758  
11745749\_ 10. 15808 10. 21376 10. 12757 10. 16394 10. 16897 10. 1809



11745750\_ 7. 973936 7. 959793 8. 005014 7. 87778 7. 82731 7. 855243  
11745751\_ 6. 001002 5. 957954 6. 018553 5. 740824 5. 739799 5. 824302  
11745752\_ 7. 668788 7. 563894 7. 640909 7. 640909 7. 618349 7. 678441  
11745753\_ 5. 065519 5. 161444 5. 129339 5. 148324 5. 44914 5. 154751  
11745754\_ 11. 09335 11. 06491 11. 10033 10. 67051 10. 72159 10. 64893  
11745755\_ 5. 604991 5. 568722 5. 579834 5. 747209 5. 654842 5. 568656  
11745756\_ 6. 52155 6. 538165 6. 653085 6. 397946 6. 400509 6. 545918  
11745757\_ 2. 823369 2. 936144 2. 713618 2. 649711 2. 632464 2. 67945  
11745758\_ 4. 763543 4. 861611 4. 649082 4. 734253 4. 750032 4. 649082  
11745759\_ 7. 175976 7. 206152 7. 130948 7. 271872 7. 273637 7. 236572  
11745760\_ 10. 04839 10. 06062 10. 01299 10. 08922 10. 05753 10. 05397  
11745761\_ 8. 656363 8. 619629 8. 676634 8. 843043 8. 861005 8. 797933  
11745762\_ 9. 384882 9. 328817 9. 393152 9. 515081 9. 561301 9. 56002  
11745763\_ 6. 136791 6. 094712 5. 996126 6. 117539 6. 123394 6. 15678  
11745764\_ 8. 497732 8. 509755 8. 568658 8. 430758 8. 392044 8. 356091  
11745765\_ 6. 8008 6. 58734 6. 776505 6. 453037 6. 391483 6. 403637  
11745766\_ 7. 172903 7. 128879 7. 174213 7. 550904 7. 549529 7. 564114  
11745767\_ 8. 736 8. 676357 8. 730211 8. 219951 8. 265894 8. 235209  
11745768\_ 8. 618414 8. 487317 8. 532724 8. 41938 8. 380475 8. 465546  
11745769\_ 7. 434587 7. 294787 7. 330825 6. 968201 7. 042224 6. 956076  
11745770\_ 10. 69846 10. 6121 10. 71103 11. 05718 11. 00995 11. 09605  
11745771\_ 7. 815378 7. 743707 7. 731007 8. 291776 8. 235239 8. 103311  
11745772\_ 6. 498604 6. 536791 6. 4164 6. 353323 6. 444071 6. 497262  
11745773\_ 4. 60826 4. 660949 4. 532372 4. 655249 4. 498583 4. 60644  
11745774\_ 9. 770564 9. 815691 9. 845466 10. 0189 10. 0355 9. 988285  
11745775\_ 7. 700023 7. 613747 7. 798669 8. 001849 8. 048177 7. 997949  
11745776\_ 6. 282224 6. 294857 6. 261129 6. 365421 6. 375714 6. 332539  
11745777\_ 6. 322991 6. 242623 6. 168464 6. 356022 6. 338143 6. 308777  
11745778\_ 5. 139002 5. 193752 5. 108493 5. 282089 5. 292452 5. 306191  
11745779\_ 5. 256058 5. 362154 5. 475238 5. 155813 5. 115967 5. 005271  
11745780\_ 7. 933879 7. 902432 8. 009615 7. 80067 7. 810469 7. 801758  
11745781\_ 4. 299384 4. 008127 4. 386317 2. 434957 2. 912551 2. 783023  
11745782\_ 3. 182228 3. 113062 3. 494813 2. 743301 2. 672732 2. 573413  
11745783\_ 3. 976346 3. 896196 4. 047828 4. 084331 4. 280439 4. 001442  
11745784\_ 7. 007439 7. 12708 7. 119332 7. 296068 7. 291511 7. 205651  
11745785\_ 5. 197001 5. 147265 5. 088596 5. 149997 5. 390838 5. 194913  
11745786\_ 9. 978861 9. 897334 10. 00316 9. 779639 9. 811902 9. 785348  
11745787\_ 4. 9226 4. 799646 4. 681736 4. 636076 4. 700243 4. 720253  
11745788\_ 3. 35334 3. 501058 3. 2518 3. 295158 3. 503491 3. 507221  
11745789\_ 9. 265181 9. 236124 9. 227348 8. 677702 8. 657468 8. 714803  
11745790\_ 8. 044367 7. 991494 8. 072187 7. 308294 7. 248136 7. 360283  
11745791\_ 4. 384026 4. 482706 4. 594341 4. 270618 4. 40461 4. 557025  
11745792\_ 3. 891135 3. 890815 3. 898822 3. 942434 3. 877842 3. 999505  
11745793\_ 6. 660553 6. 617826 6. 841785 6. 845246 6. 825045 6. 817986  
11745794\_ 6. 655789 6. 686431 6. 749445 6. 505163 6. 541665 6. 413524  
11745795\_ 11. 1156 11. 1244 11. 08875 10. 94826 10. 96169 10. 89809  
11745796\_ 8. 535021 8. 456673 8. 530426 8. 644801 8. 689981 8. 66505  
11745797\_ 5. 473844 5. 393993 5. 532614 5. 388875 5. 499089 5. 457447  
11745798\_ 6. 852853 7. 001951 6. 847517 6. 818164 6. 947397 6. 931626  
11745799\_ 8. 114897 8. 080294 8. 152253 8. 266935 8. 260241 8. 243598  
11745800\_ 7. 92679 7. 844568 7. 940999 7. 132468 7. 10049 7. 199908

11745801\_ 10. 41265 10. 41213 10. 40974 10. 38624 10. 37399 10. 35718  
11745802\_ 8. 290153 8. 180209 8. 183197 8. 264694 8. 187296 8. 152354  
11745803\_ 11. 13164 11. 04939 11. 11594 10. 1297 10. 10591 10. 09721  
11745804\_ 9. 262942 9. 284294 9. 210851 8. 92241 8. 889782 8. 896721  
11745805\_ 4. 494428 4. 381593 4. 219767 4. 329392 4. 215545 4. 407415  
11745806\_ 7. 340389 7. 310838 7. 320146 7. 257017 7. 291468 7. 308294  
11745807\_ 7. 320505 7. 235833 7. 273876 7. 172699 7. 254837 7. 159901  
11745808\_ 4. 045436 4. 335594 3. 873186 4. 017842 3. 933047 4. 154491  
11745809\_ 5. 903174 5. 990438 5. 845036 5. 919731 5. 935055 6. 009686  
11745810\_ 5. 471194 5. 25091 5. 279449 5. 011856 5. 192126 5. 263219  
11745811\_ 7. 914197 8. 141699 7. 948338 8. 156019 8. 106923 8. 168433  
11745812\_ 8. 803845 8. 716946 8. 785436 9. 173568 9. 212762 9. 163368  
11745813\_ 5. 024741 5. 084685 5. 140284 4. 952251 5. 046839 5. 11527  
11745814\_ 5. 635313 5. 650803 5. 581003 5. 54798 5. 667005 5. 578425  
11745815\_ 6. 789357 6. 70071 6. 804165 6. 845877 6. 851067 6. 944654  
11745816\_ 5. 7395 5. 877856 5. 655743 6. 016791 5. 861785 5. 936961  
11745817\_ 5. 042185 4. 96093 5. 148954 5. 3177 5. 218001 5. 242679  
11745818\_ 5. 853067 5. 896608 6. 034177 6. 392336 6. 254131 6. 32134  
11745819\_ 9. 336867 9. 340297 9. 349487 9. 984729 10. 00713 9. 932754  
11745820\_ 5. 368824 5. 267096 5. 26034 5. 49248 5. 453793 5. 502788  
11745821\_ 4. 080784 4. 272443 4. 096302 4. 10544 4. 326186 4. 281317  
11745822\_ 9. 481626 9. 394418 9. 444068 8. 972184 8. 93587 8. 972582  
11745823\_ 7. 472989 7. 67239 7. 43046 7. 660134 7. 625672 7. 601991  
11745824\_ 6. 984792 7. 116522 7. 0037 7. 054762 6. 974369 6. 97913  
11745825\_ 2. 71304 2. 852198 2. 94571 2. 77418 2. 740231 2. 963078  
11745826\_ 9. 879831 9. 793053 9. 895132 9. 04786 9. 041391 9. 095186  
11745827\_ 8. 678639 8. 635432 8. 689956 8. 356825 8. 368547 8. 36807  
11745828\_ 8. 624906 8. 593077 8. 651806 8. 432126 8. 474338 8. 491115  
11745829\_ 6. 96644 6. 783251 6. 941054 6. 374889 6. 469835 6. 525998  
11745830\_ 6. 946445 6. 87645 6. 934615 7. 05982 7. 066036 7. 128626  
11745831\_ 4. 058929 4. 222424 4. 152551 4. 324611 4. 354194 4. 258691  
11745832\_ 4. 728915 5. 086982 5. 030771 4. 807118 4. 831461 4. 921598  
11745833\_ 8. 594173 8. 583699 8. 540789 9. 02061 9. 024549 8. 958729  
11745834\_ 7. 608278 7. 478614 7. 41785 7. 842746 7. 798367 7. 80459  
11745835\_ 8. 41626 8. 43191 8. 464658 8. 400468 8. 38185 8. 392105  
11745836\_ 4. 826241 4. 547935 4. 716173 4. 267691 4. 41132 4. 468624  
11745837\_ 9. 157237 9. 140374 9. 160992 7. 721395 7. 721622 7. 610494  
11745838\_ 8. 040442 7. 98436 8. 000008 7. 495874 7. 455222 7. 442982  
11745839\_ 7. 978248 7. 914527 7. 993664 7. 812343 7. 805783 7. 788158  
11745840\_ 6. 985287 7. 044002 6. 954688 7. 403149 7. 43886 7. 570403  
11745841\_ 6. 473423 6. 244666 6. 501521 6. 709611 6. 703034 6. 557068  
11745842\_ 7. 629233 7. 585277 7. 634785 7. 832427 7. 785023 7. 770406  
11745843\_ 8. 52876 8. 495835 8. 439725 9. 293077 9. 340683 9. 271781  
11745844\_ 9. 076171 9. 043785 9. 105746 9. 364463 9. 345573 9. 342422  
11745845\_ 9. 546361 9. 44355 9. 46337 8. 931501 8. 923414 8. 880292  
11745846\_ 7. 632959 7. 604459 7. 529761 8. 384048 8. 282293 8. 25496  
11745847\_ 6. 956373 6. 866044 6. 975333 6. 820756 6. 873904 6. 880243  
11745848\_ 8. 184838 8. 163081 8. 188849 7. 760615 7. 904965 7. 821643  
11745849\_ 7. 64599 7. 582068 7. 583672 7. 341863 7. 266572 7. 211962  
11745850\_ 9. 002147 8. 880693 8. 996867 8. 862388 8. 839277 8. 881624  
11745851\_ 11. 59951 11. 60288 11. 57199 11. 66207 11. 63592 11. 61259

11745852\_ 8. 049869 8. 031997 8. 017521 8. 134356 8. 154497 8. 217703  
11745853\_ 6. 938746 6. 910763 6. 951531 6. 683189 6. 563096 6. 647438  
11745854\_ 10. 25413 10. 14952 10. 19871 9. 897491 9. 832751 9. 846967  
11745855\_ 8. 555322 8. 391006 8. 542198 8. 042695 8. 059298 7. 988228  
11745856\_ 8. 837042 8. 72785 8. 849641 8. 320391 8. 324868 8. 269883  
11745857\_ 6. 444844 6. 450012 6. 366902 6. 504866 6. 581076 6. 463229  
11745858\_ 7. 758023 7. 67648 7. 756386 7. 848666 7. 884015 7. 782013  
11745859\_ 7. 342044 7. 314585 7. 325043 7. 426413 7. 486658 7. 51584  
11745860\_ 7. 684514 7. 685215 7. 747686 7. 79633 7. 870129 7. 783148  
11745861\_ 8. 059768 7. 976184 7. 959007 7. 875214 7. 966717 7. 835688  
11745862\_ 8. 326857 8. 212675 8. 312385 8. 112765 8. 216722 8. 074748  
11745863\_ 5. 915445 5. 878144 5. 805514 6. 203177 6. 104649 6. 079524  
11745864\_ 5. 017433 4. 939203 4. 874283 4. 958649 4. 879806 5. 054087  
11745865\_ 10. 17232 10. 19149 10. 20109 10. 04218 10. 02282 10. 01215  
11745866\_ 5. 017874 5. 187662 5. 263368 5. 058997 4. 943924 5. 116197  
11745867\_ 5. 442778 5. 378746 5. 480174 5. 329414 5. 150037 5. 305628  
11745868\_ 9. 122651 9. 123988 9. 174444 9. 959776 9. 969172 9. 998853  
11745869\_ 8. 684731 8. 697257 8. 68484 8. 672708 8. 744235 8. 746935  
11745870\_ 9. 249005 9. 120465 9. 1933 10. 20665 10. 18595 10. 1778  
11745871\_ 8. 186891 8. 110878 8. 144854 9. 155227 9. 137362 9. 203827  
11745872\_ 6. 969534 7. 016301 7. 092252 8. 051874 7. 992462 7. 946169  
11745873\_ 7. 687953 7. 509703 7. 655023 8. 362723 8. 329493 8. 337029  
11745874\_ 6. 073399 6. 090885 5. 997262 6. 218037 6. 192816 6. 259224  
11745875\_ 8. 956771 8. 821349 8. 91718 9. 211908 9. 242198 9. 170193  
11745876\_ 9. 409477 9. 383637 9. 458211 9. 579707 9. 556318 9. 5908  
11745877\_ 8. 648666 8. 61285 8. 604116 9. 105954 9. 111672 9. 155227  
11745878\_ 9. 203912 9. 114174 9. 268655 8. 801043 8. 804242 8. 884702  
11745879\_ 8. 761423 8. 735023 8. 797543 8. 595581 8. 569171 8. 511074  
11745880\_ 4. 168849 4. 157059 4. 034572 4. 466664 4. 491143 4. 258462  
11745881\_ 6. 333882 6. 304267 6. 265779 6. 325475 6. 507546 6. 372774  
11745882\_ 7. 250838 7. 120131 7. 16318 7. 6117 7. 531919 7. 625798  
11745883\_ 6. 507847 6. 396552 6. 496201 6. 491231 6. 541665 6. 497859  
11745884\_ 8. 756053 8. 647601 8. 716138 8. 779485 8. 744413 8. 748303  
11745885\_ 6. 293345 6. 066283 6. 144359 6. 323196 6. 370492 6. 282224  
11745886\_ 6. 612621 6. 50811 6. 501931 6. 411283 6. 39113 6. 371653  
11745887\_ 5. 840017 5. 710479 5. 746926 5. 528624 5. 487664 5. 533972  
11745888\_ 6. 330044 6. 161471 6. 257866 5. 977166 5. 990696 6. 056022  
11745889\_ 6. 87948 6. 761217 6. 841207 6. 617206 6. 698566 6. 61491  
11745890\_ 8. 922794 8. 962471 8. 822839 8. 629905 8. 560461 8. 601703  
11745891\_ 5. 156453 5. 247397 4. 959613 5. 317033 5. 384405 5. 2642  
11745892\_ 10. 04196 9. 915308 9. 934661 10. 84121 10. 81301 10. 86841  
11745893\_ 9. 572375 9. 547077 9. 559997 10. 45515 10. 40939 10. 42602  
11745894\_ 5. 49434 5. 606929 5. 519217 5. 580438 5. 524592 5. 580944  
11745895\_ 6. 135579 6. 126791 6. 012787 5. 940867 5. 952588 6. 018067  
11745896\_ 7. 350219 7. 304567 7. 368535 7. 18274 7. 20937 7. 238782  
11745897\_ 5. 19861 5. 165114 5. 063849 5. 189628 5. 294043 5. 105726  
11745898\_ 6. 291364 6. 22459 6. 469286 6. 47714 6. 468437 6. 452949  
11745899\_ 7. 233538 7. 14379 7. 15288 6. 750323 6. 778873 6. 713153  
11745900\_ 9. 046209 9. 07649 9. 107062 8. 684846 8. 720386 8. 689405  
11745901\_ 6. 002299 6. 022114 5. 937065 5. 908826 5. 96228 6. 068491  
11745902\_ 9. 300008 9. 240982 9. 289724 9. 410014 9. 369621 9. 301581

11745903\_ 5. 304783 5. 511215 5. 394643 4. 941818 4. 591132 4. 802573  
11745904\_ 9. 683729 9. 602224 9. 693337 10. 02513 10. 06708 10. 06191  
11745905\_ 6. 786404 7. 078542 6. 96112 7. 238095 7. 24922 7. 248457  
11745906\_ 5. 385068 5. 48525 5. 417738 6. 491855 6. 299037 6. 355783  
11745907\_ 4. 728647 4. 494348 4. 642769 5. 19772 5. 257363 5. 350153  
11745908\_ 6. 496334 6. 308286 6. 40236 5. 814492 5. 948619 5. 779175  
11745909\_ 7. 684328 7. 666195 7. 725944 7. 784082 7. 667041 7. 732718  
11745910\_ 5. 131177 5. 228038 5. 172722 5. 041851 5. 174517 5. 194135  
11745911\_ 6. 724462 6. 556508 6. 775054 5. 878812 5. 893875 5. 984951  
11745912\_ 8. 041694 7. 991494 8. 075898 6. 89355 6. 938537 6. 972887  
11745913\_ 5. 864757 5. 76377 5. 884215 5. 405977 5. 571668 5. 388005  
11745914\_ 6. 694575 6. 781294 6. 69005 6. 533767 6. 628766 6. 434545  
11745915\_ 7. 166326 7. 167899 7. 153079 7. 067829 7. 045681 7. 098982  
11745916\_ 5. 773711 5. 57444 5. 805215 5. 412392 5. 276349 5. 462421  
11745917\_ 6. 753004 6. 907579 6. 648024 6. 847271 6. 739166 6. 776037  
11745918\_ 7. 435759 7. 381366 7. 45117 7. 099734 7. 185999 7. 104028  
11745919\_ 7. 959493 7. 960167 8. 076124 7. 665101 7. 651642 7. 726726  
11745920\_ 2. 714344 2. 517642 2. 49852 2. 333396 2. 675505 2. 445191  
11745921\_ 4. 134899 3. 909593 4. 107672 4. 010521 4. 103762 4. 063263  
11745922\_ 4. 763543 4. 643426 4. 607097 4. 568258 4. 743836 4. 721251  
11745923\_ 6. 206103 6. 196266 6. 142956 5. 981055 5. 99063 5. 996617  
11745924\_ 4. 593335 4. 643717 4. 588266 4. 506925 4. 50034 4. 650583  
11745925\_ 5. 118779 4. 923969 5. 011176 4. 777083 4. 789154 4. 837947  
11745926\_ 7. 53507 7. 52563 7. 608814 7. 693648 7. 757133 7. 68219  
11745927\_ 7. 148037 7. 245583 7. 238834 7. 24248 7. 382203 7. 368791  
11745928\_ 6. 959944 6. 99279 6. 946361 7. 31438 7. 125793 7. 164857  
11745929\_ 7. 629085 7. 507953 7. 629174 7. 900357 8. 005597 7. 998771  
11745930\_ 6. 629517 6. 609391 6. 667085 6. 683596 6. 780368 6. 720525  
11745931\_ 6. 718298 6. 832546 6. 60191 6. 883523 6. 878943 6. 889529  
11745932\_ 12. 21192 12. 20397 12. 19026 12. 25858 12. 30246 12. 24125  
11745933\_ 8. 31637 8. 330895 8. 387138 8. 123381 8. 17811 8. 130131  
11745934\_ 7. 320802 7. 252386 7. 305574 7. 149597 7. 114804 7. 102806  
11745935\_ 3. 868525 3. 852494 3. 938561 3. 938561 4. 061332 3. 909275  
11745936\_ 7. 538813 7. 510147 7. 495815 7. 361367 7. 439721 7. 39515  
11745937\_ 6. 798688 7. 035859 6. 874408 7. 115547 7. 085089 7. 064172  
11745938\_ 7. 481123 7. 333473 7. 376435 7. 202909 7. 231377 7. 313948  
11745939\_ 6. 247813 6. 03691 6. 273306 5. 405005 5. 574382 5. 578109  
11745940\_ 7. 272014 7. 272736 7. 259975 6. 751709 6. 763296 6. 833207  
11745941\_ 3. 954804 3. 954804 4. 060136 3. 816202 3. 515156 3. 780813  
11745942\_ 7. 477075 7. 435759 7. 503802 7. 314937 7. 318714 7. 289973  
11745943\_ 7. 050065 7. 148771 7. 065 7. 384374 7. 294708 7. 367152  
11745944\_ 8. 632759 8. 597223 8. 667923 8. 660713 8. 617597 8. 647078  
11745945\_ 6. 530092 6. 531171 6. 457609 6. 55211 6. 599199 6. 490129  
11745946\_ 7. 554101 7. 490334 7. 582193 7. 442902 7. 320775 7. 457113  
11745947\_ 4. 31221 4. 543163 4. 587559 4. 532923 4. 375396 4. 470714  
11745948\_ 8. 487477 8. 393727 8. 457938 8. 639476 8. 492334 8. 499826  
11745949\_ 8. 993453 8. 969709 8. 957088 9. 024761 9. 042822 9. 076357  
11745950\_ 8. 920287 8. 798361 8. 878809 9. 607594 9. 629957 9. 633181  
11745951\_ 8. 632195 8. 59306 8. 658194 8. 300711 8. 335368 8. 329424  
11745952\_ 5. 409222 5. 496815 5. 435411 5. 472876 5. 529695 5. 479466  
11745953\_ 5. 647344 5. 439587 5. 683343 5. 648471 5. 586564 5. 464044

11745954\_ 7. 35716 7. 290649 7. 321058 7. 049788 6. 90285 6. 987775  
11745955\_ 7. 900279 7. 87035 7. 885059 7. 81831 7. 880392 7. 857645  
11745956\_ 9. 937707 9. 896848 9. 970922 9. 656118 9. 678514 9. 666622  
11745957\_ 4. 740006 4. 93322 4. 818203 4. 826285 4. 725144 4. 860454  
11745958\_ 8. 577818 8. 591815 8. 566198 8. 442958 8. 466022 8. 474306  
11745959\_ 5. 213216 5. 247435 5. 218875 4. 950462 5. 200416 5. 189569  
11745960\_ 7. 310258 7. 298527 7. 358974 7. 289937 7. 304632 7. 224863  
11745961\_ 5. 62263 5. 330307 5. 603919 5. 432906 5. 407622 5. 390015  
11745962\_ 7. 964494 7. 825696 8. 029963 8. 123645 8. 187477 8. 207735  
11745963\_ 6. 108284 6. 108284 6. 096064 5. 962057 5. 842631 5. 882983  
11745964\_ 11. 82191 11. 78478 11. 80758 11. 99367 12. 01626 11. 99477  
11745965\_ 8. 755397 8. 640955 8. 682164 8. 827506 8. 79079 8. 770237  
11745966\_ 7. 030223 7. 039033 7. 052689 7. 320933 7. 46341 7. 432025  
11745967\_ 8. 495677 8. 469289 8. 442923 8. 582772 8. 505119 8. 461602  
11745968\_ 6. 203991 6. 257582 6. 069567 6. 611938 6. 667885 6. 417769  
11745969\_ 6. 239386 6. 277795 6. 230816 6. 301851 6. 434485 6. 318829  
11745970\_ 5. 646596 5. 584813 5. 584813 5. 62337 5. 712007 5. 571698  
11745971\_ 11. 37238 11. 31207 11. 3501 11. 22099 11. 25381 11. 21023  
11745972\_ 9. 607543 9. 609063 9. 662861 9. 64096 9. 64198 9. 605117  
11745973\_ 5. 999888 5. 983791 5. 911402 5. 94278 5. 908831 5. 823197  
11745974\_ 5. 173403 5. 019571 5. 448296 5. 004047 5. 073036 5. 173387  
11745975\_ 9. 817652 9. 717905 9. 769735 9. 710354 9. 74761 9. 773795  
11745976\_ 9. 517864 9. 417218 9. 519066 9. 511935 9. 560747 9. 519744  
11745977\_ 5. 247739 5. 480966 5. 295375 5. 723683 5. 8995 5. 850349  
11745978\_ 6. 217329 6. 260965 6. 282224 5. 531683 5. 472224 5. 673347  
11745979\_ 6. 848681 6. 891957 7. 013623 7. 40687 7. 453507 7. 482733  
11745980\_ 7. 988343 7. 96514 8. 027847 8. 269788 8. 231997 8. 239177  
11745981\_ 3. 881436 3. 503178 3. 675663 3. 703081 3. 636365 3. 811574  
11745982\_ 3. 332954 3. 234461 3. 203908 3. 374408 3. 191377 3. 33282  
11745983\_ 4. 786422 4. 766792 4. 681463 4. 970332 4. 73272 4. 926085  
11745984\_ 9. 864577 9. 790478 9. 781624 9. 698547 9. 736649 9. 702074  
11745985\_ 7. 364032 7. 399766 7. 367977 7. 322499 7. 319028 7. 337  
11745986\_ 5. 676992 5. 478981 5. 867024 6. 058786 5. 942272 5. 875902  
11745987\_ 2. 377111 2. 377111 2. 377111 2. 407771 2. 36558 2. 377111  
11745988\_ 7. 387774 7. 257311 7. 395209 7. 715215 7. 709835 7. 681312  
11745989\_ 7. 98115 7. 889541 7. 965756 7. 974081 7. 956194 7. 984865  
11745990\_ 7. 365021 7. 349894 7. 37093 7. 273411 7. 119386 7. 200977  
11745991\_ 7. 45902 7. 422935 7. 405256 7. 069739 7. 188622 7. 185272  
11745992\_ 8. 316728 8. 267544 8. 307658 7. 886682 7. 848436 7. 851137  
11745993\_ 3. 720048 3. 785794 3. 904636 3. 812477 3. 688432 3. 759068  
11745994\_ 3. 606409 3. 682918 3. 948242 4. 135496 3. 727108 3. 760132  
11745995\_ 5. 854772 5. 802147 5. 86781 5. 8628 5. 77914 5. 802147  
11745996\_ 7. 345078 7. 342771 7. 355934 7. 574975 7. 577833 7. 543176  
11745997\_ 7. 112605 7. 078542 7. 115974 6. 268694 6. 504601 6. 464805  
11745998\_ 7. 382221 7. 306776 7. 338677 7. 073015 7. 029781 7. 06424  
11745999\_ 5. 052988 5. 06935 4. 910459 4. 719989 4. 869153 4. 685001  
11746000\_ 6. 097922 6. 058786 6. 028373 5. 81834 5. 888369 5. 997639  
11746001\_ 4. 849113 4. 96306 4. 794358 4. 66773 4. 66773 4. 614043  
11746002\_ 9. 384143 9. 333857 9. 356808 8. 653653 8. 624983 8. 594366  
11746003\_ 8. 538881 8. 509632 8. 531015 8. 578044 8. 580378 8. 574054  
11746004\_ 4. 339527 4. 446582 4. 351578 4. 525566 4. 523924 4. 595612

11746005\_ 6. 866766 6. 744989 6. 795206 6. 285977 6. 179258 6. 237312  
11746006\_ 7. 514346 7. 482729 7. 544282 7. 741147 7. 702419 7. 748159  
11746007\_ 7. 290312 7. 312383 7. 325499 7. 217384 7. 289069 7. 297795  
11746008\_ 6. 849615 6. 825749 6. 864829 6. 024888 6. 01493 6. 152679  
11746009\_ 8. 563816 8. 510584 8. 476823 9. 269333 9. 323055 9. 289378  
11746010\_ 8. 708948 8. 66176 8. 731302 9. 358518 9. 35253 9. 367359  
11746011\_ 5. 498841 5. 585874 5. 405705 5. 466336 5. 356768 5. 343058  
11746012\_ 5. 40441 5. 399895 5. 448296 5. 497433 5. 489382 5. 466192  
11746013\_ 4. 275543 4. 282207 4. 41171 4. 366802 4. 453627 4. 584188  
11746014\_ 6. 551935 6. 790174 6. 657394 6. 660103 6. 677521 6. 727853  
11746015\_ 5. 699392 5. 756096 5. 714485 5. 90142 5. 875912 5. 827053  
11746016\_ 5. 9219 5. 789705 5. 790153 6. 039795 6. 079232 5. 94678  
11746017\_ 5. 409222 5. 549467 5. 284873 5. 218061 5. 48634 5. 357178  
11746018\_ 7. 886862 7. 854417 7. 776007 6. 779107 6. 643627 6. 687587  
11746019\_ 8. 331734 8. 196008 8. 339434 7. 347326 7. 362414 7. 37227  
11746020\_ 8. 20107 8. 187337 8. 221709 7. 250229 7. 325016 7. 374996  
11746021\_ 3. 638226 3. 707782 3. 983761 3. 749137 3. 741546 3. 713092  
11746022\_ 3. 719013 3. 724179 3. 740892 3. 854846 3. 943918 4. 090442  
11746023\_ 8. 708194 8. 635907 8. 672807 8. 666316 8. 71121 8. 681807  
11746024\_ 3. 577706 3. 421004 3. 46524 3. 162438 3. 398236 3. 290188  
11746025\_ 3. 032686 2. 863647 2. 921515 2. 437212 2. 683496 2. 643242  
11746026\_ 3. 818401 3. 909593 3. 924526 3. 899749 3. 844495 3. 864512  
11746027\_ 6. 732383 6. 725011 6. 824724 6. 629667 6. 696669 6. 644743  
11746028\_ 6. 809962 6. 793643 6. 929069 6. 699924 6. 793643 6. 779585  
11746029\_ 5. 589495 5. 658022 5. 513369 5. 532735 5. 479535 5. 567474  
11746030\_ 8. 851709 8. 860062 8. 733512 8. 851148 8. 860062 8. 860062  
11746031\_ 8. 355033 8. 230537 8. 320988 8. 8094 8. 794219 8. 672079  
11746032\_ 6. 760775 6. 670246 6. 695739 6. 173161 6. 207744 6. 229523  
11746033\_ 8. 11067 8. 160893 8. 128329 8. 078663 8. 124888 8. 14717  
11746034\_ 6. 114773 6. 053712 6. 197868 5. 886049 5. 890218 5. 872874  
11746035\_ 5. 466413 5. 412382 5. 520552 5. 51335 5. 581104 5. 471743  
11746036\_ 8. 562216 8. 521837 8. 608448 9. 028988 9. 115039 9. 027992  
11746037\_ 6. 521224 6. 53014 6. 454047 6. 298901 6. 339553 6. 457814  
11746038\_ 6. 769875 6. 837655 6. 85743 6. 638227 6. 744916 6. 727798  
11746039\_ 4. 332422 4. 13054 4. 053455 4. 140396 4. 562398 4. 234311  
11746040\_ 5. 703962 5. 672285 5. 568437 5. 490549 5. 396444 5. 262558  
11746041\_ 9. 031212 8. 937648 8. 963286 9. 580424 9. 577048 9. 575769  
11746042\_ 10. 40589 10. 50104 10. 42911 11. 08887 11. 01002 10. 97301  
11746043\_ 10. 52764 10. 41511 10. 4958 10. 63513 10. 6516 10. 59786  
11746044\_ 6. 118659 6. 059496 6. 038429 5. 893649 5. 815755 5. 801132  
11746045\_ 7. 081631 6. 911321 7. 142428 6. 966312 6. 960883 6. 976115  
11746046\_ 7. 477501 7. 390944 7. 495815 7. 568552 7. 576738 7. 60677  
11746047\_ 4. 643717 4. 718968 4. 459357 4. 664297 4. 643717 4. 763527  
11746048\_ 6. 952881 6. 816657 6. 969697 6. 855331 6. 752966 6. 897196  
11746049\_ 6. 705849 6. 81038 6. 882688 6. 932651 6. 913714 6. 976858  
11746050\_ 7. 22072 7. 26788 7. 35301 7. 417928 7. 436584 7. 494623  
11746051\_ 8. 340049 8. 360153 8. 436012 8. 364986 8. 371597 8. 338344  
11746052\_ 7. 787199 7. 687632 7. 670415 7. 553932 7. 629094 7. 57344  
11746053\_ 7. 688973 7. 592714 7. 571525 7. 194635 7. 324903 7. 303187  
11746054\_ 6. 536821 6. 511145 6. 506777 6. 442212 6. 454777 6. 515032  
11746055\_ 5. 664703 5. 323875 5. 561894 5. 206124 5. 237696 5. 347319

11746056\_ 4. 458655 4. 490383 4. 602318 4. 761635 4. 592952 4. 644281  
11746057\_ 8. 317561 8. 230288 8. 307264 7. 94609 7. 874439 7. 845459  
11746058\_ 8. 377228 8. 361196 8. 383025 8. 053627 8. 062141 8. 025743  
11746059\_ 9. 776953 9. 657905 9. 68123 9. 862184 9. 931785 9. 783429  
11746060\_ 5. 075879 5. 151235 5. 116239 5. 156303 5. 151235 5. 180939  
11746061\_ 7. 190327 7. 193725 7. 165488 7. 174876 7. 168278 7. 16488  
11746062\_ 5. 108261 5. 213629 5. 118697 5. 228823 5. 198393 5. 200271  
11746063\_ 5. 35385 5. 174699 5. 463683 5. 427287 5. 397861 5. 424609  
11746064\_ 7. 430255 7. 492127 7. 461234 7. 077077 7. 177506 7. 113249  
11746065\_ 3. 427496 3. 101386 3. 269802 3. 475136 3. 155313 3. 430276  
11746066\_ 9. 417674 9. 362404 9. 397707 9. 310825 9. 326115 9. 316532  
11746067\_ 8. 871377 8. 864437 8. 875478 8. 869836 8. 9043 8. 85315  
11746068\_ 4. 316986 4. 453731 4. 525783 4. 316986 4. 251239 4. 346783  
11746069\_ 3. 340923 3. 528393 3. 390508 3. 31396 3. 256529 3. 073742  
11746070\_ 7. 134503 7. 26674 7. 280507 7. 446164 7. 434587 7. 377795  
11746071\_ 5. 509316 5. 5978 5. 671992 5. 624941 5. 643683 5. 585689  
11746072\_ 5. 852125 5. 896067 5. 913449 5. 970256 5. 958106 5. 974993  
11746073\_ 6. 257949 6. 259877 6. 308889 6. 260306 6. 312071 6. 40072  
11746074\_ 7. 849985 7. 899258 7. 844475 7. 818614 7. 82145 7. 834581  
11746075\_ 8. 281326 8. 152453 8. 270419 8. 303178 8. 342319 8. 220612  
11746076\_ 8. 53801 8. 4975 8. 512312 8. 499356 8. 602451 8. 512998  
11746077\_ 6. 859352 6. 94427 6. 919316 7. 100447 7. 023297 6. 996794  
11746078\_ 5. 460176 5. 507295 5. 220153 5. 690613 5. 391862 5. 403585  
11746079\_ 6. 399942 6. 328513 6. 386697 5. 944805 6. 206103 6. 165906  
11746080\_ 5. 217 4. 968686 5. 029529 5. 167312 5. 236913 5. 336062  
11746081\_ 8. 177287 8. 216368 8. 34705 8. 010372 7. 987235 8. 014245  
11746082\_ 5. 417591 5. 470485 5. 3053 5. 2222 5. 272436 5. 49893  
11746083\_ 6. 649442 6. 630177 6. 542231 6. 502954 6. 609091 6. 521764  
11746084\_ 9. 675654 9. 644204 9. 71938 9. 802648 9. 753474 9. 74155  
11746085\_ 4. 840636 4. 96868 4. 765533 5. 003829 4. 946432 5. 005346  
11746086\_ 4. 756669 4. 776638 4. 681778 4. 985476 4. 910756 4. 918532  
11746087\_ 2. 246028 2. 179246 2. 405148 2. 243005 2. 52248 2. 446762  
11746088\_ 5. 881113 5. 838211 5. 876356 6. 069692 5. 862084 5. 842833  
11746089\_ 7. 477773 7. 604825 7. 532077 7. 608722 7. 615199 7. 660426  
11746090\_ 7. 97937 7. 880573 7. 976723 7. 348861 7. 416522 7. 464887  
11746091\_ 6. 467524 6. 321838 6. 28995 5. 721295 5. 76112 5. 528624  
11746092\_ 7. 170946 7. 279876 7. 28227 7. 325766 7. 352862 7. 394644  
11746093\_ 6. 230715 6. 209562 6. 10628 6. 377873 6. 295843 6. 300963  
11746094\_ 6. 710822 6. 737786 6. 77291 5. 984116 6. 008448 6. 02867  
11746095\_ 7. 2037 7. 200988 7. 075963 7. 183455 7. 187083 7. 224809  
11746096\_ 7. 006767 7. 017099 7. 027772 6. 584538 6. 764727 6. 782236  
11746097\_ 9. 654402 9. 599186 9. 639851 9. 288525 9. 300091 9. 319536  
11746098\_ 8. 873192 8. 769363 8. 87189 8. 280775 8. 403427 8. 385829  
11746099\_ 8. 212569 8. 154716 8. 250469 7. 725185 7. 72425 7. 829691  
11746100\_ 8. 508143 8. 50899 8. 546963 9. 863086 9. 865558 9. 798354  
11746101\_ 6. 028187 5. 918745 6. 021422 6. 135824 6. 16411 6. 028187  
11746102\_ 6. 597895 6. 409514 6. 415055 6. 739606 6. 826485 6. 881892  
11746103\_ 8. 40639 8. 342643 8. 460431 8. 732369 8. 761151 8. 682891  
11746104\_ 5. 825181 5. 836532 5. 780762 5. 716466 5. 808245 5. 671933  
11746105\_ 5. 890177 5. 873931 5. 945703 5. 792047 5. 729987 5. 824302  
11746106\_ 9. 279718 9. 233689 9. 272113 8. 954441 8. 917837 9. 005096

11746107\_ 8. 864661 8. 842335 8. 836624 8. 595612 8. 59555 8. 609414  
11746108\_ 4. 763543 4. 831461 5. 001779 5. 018726 5. 050742 5. 026694  
11746109\_ 6. 156378 6. 016351 6. 132755 6. 397946 6. 502627 6. 487556  
11746110\_ 6. 13267 6. 101197 6. 098371 6. 276512 6. 298046 6. 239813  
11746111\_ 9. 335499 9. 258947 9. 31416 9. 570012 9. 651466 9. 5463  
11746112\_ 6. 984019 7. 144998 7. 142145 6. 930326 6. 865049 6. 924309  
11746113\_ 7. 49835 7. 359571 7. 512537 6. 80746 6. 809925 6. 902273  
11746114\_ 7. 409349 7. 342527 7. 46574 6. 380485 6. 531998 6. 645557  
11746115\_ 7. 601461 7. 590472 7. 709324 6. 862059 6. 939177 7. 108865  
11746116\_ 6. 074068 6. 046335 6. 094413 6. 141341 6. 176911 6. 164884  
11746117\_ 5. 355716 5. 55181 5. 521057 5. 44203 5. 55734 5. 503225  
11746118\_ 6. 702733 6. 45378 6. 646057 7. 2968 7. 280217 7. 250069  
11746119\_ 9. 008648 8. 957304 8. 968262 9. 69631 9. 677644 9. 60777  
11746120\_ 5. 690783 5. 882937 5. 781069 5. 823702 5. 676307 5. 884375  
11746121\_ 5. 826012 6. 03459 5. 894697 5. 982816 5. 960693 5. 939139  
11746122\_ 7. 756516 7. 784657 7. 748152 7. 478107 7. 463894 7. 471666  
11746123\_ 8. 721317 8. 772678 8. 79524 8. 513708 8. 484647 8. 489575  
11746124\_ 5. 025396 4. 874234 4. 722075 3. 810872 3. 780139 3. 813163  
11746125\_ 7. 322426 7. 328111 7. 264641 7. 326113 7. 362224 7. 341458  
11746126\_ 8. 159331 8. 041658 8. 080625 7. 974386 8. 038342 8. 038498  
11746127\_ 7. 874383 7. 857778 7. 878746 7. 65337 7. 674667 7. 677782  
11746128\_ 8. 221512 8. 200546 8. 242356 8. 067856 8. 036778 8. 04972  
11746129\_ 5. 193286 5. 312329 5. 298061 5. 02785 5. 096592 5. 107077  
11746130\_ 11. 18034 11. 21588 11. 19552 11. 16266 11. 12476 11. 07465  
11746131\_ 2. 55883 2. 55883 2. 55883 2. 550574 2. 534062 2. 55883  
11746132\_ 4. 464498 4. 503862 4. 529883 4. 611334 4. 630039 4. 560089  
11746133\_ 7. 478884 7. 328539 7. 45826 7. 265178 7. 324886 7. 358974  
11746134\_ 11. 04661 10. 99848 11. 01599 10. 91128 10. 90688 10. 92128  
11746135\_ 10. 65782 10. 60225 10. 61478 10. 56924 10. 59426 10. 60273  
11746136\_ 9. 030662 8. 91437 8. 941431 8. 528207 8. 623863 8. 550492  
11746137\_ 8. 416307 8. 344331 8. 422699 8. 637496 8. 694622 8. 627659  
11746138\_ 8. 4162 8. 366669 8. 389431 8. 569266 8. 55961 8. 693703  
11746139\_ 5. 710831 5. 422296 5. 586522 5. 785355 5. 794052 5. 871473  
11746140\_ 6. 064944 5. 868481 6. 014781 5. 609761 5. 603871 5. 763963  
11746141\_ 5. 52605 5. 539368 5. 287021 5. 260575 5. 208785 5. 159953  
11746142\_ 4. 697421 4. 464093 4. 6893 4. 647157 4. 505164 4. 658261  
11746143\_ 4. 592623 4. 579084 4. 456712 4. 604212 4. 443662 4. 563235  
11746144\_ 4. 584716 4. 523802 4. 553697 4. 449458 4. 643507 4. 584933  
11746145\_ 5. 769542 5. 614563 5. 746008 4. 947614 4. 93837 5. 023862  
11746146\_ 3. 582741 3. 622972 3. 609752 3. 555283 3. 567833 3. 713194  
11746147\_ 10. 02893 10. 02893 10. 01426 9. 948735 9. 925246 9. 898468  
11746148\_ 4. 944992 4. 823929 4. 816478 5. 103062 5. 058847 5. 177392  
11746149\_ 5. 203529 5. 380649 5. 304569 5. 581915 5. 49299 5. 442778  
11746150\_ 7. 135011 7. 180662 7. 128431 6. 838023 6. 929091 6. 905368  
11746151\_ 6. 661199 6. 779201 6. 666395 6. 442852 6. 51605 6. 458117  
11746152\_ 2. 685356 2. 774955 2. 777684 2. 677274 2. 721241 2. 897556  
11746153\_ 3. 654495 3. 631513 3. 524258 3. 677867 3. 687063 3. 746553  
11746154\_ 4. 733845 4. 763543 4. 806434 5. 830665 5. 704917 5. 735176  
11746155\_ 7. 209551 7. 235658 7. 277957 7. 278462 7. 242615 7. 346178  
11746156\_ 6. 819337 6. 869694 6. 916441 6. 900068 6. 916441 7. 034534  
11746157\_ 7. 209728 7. 137579 7. 154989 7. 116264 7. 157831 7. 172652



11746158\_ 4.764397 4.794147 4.767722 4.794147 4.990454 4.764292  
11746159\_ 6.008893 6.102263 6.089697 5.884455 5.935418 5.894697  
11746160\_ 4.970962 5.095144 5.111988 4.234184 4.733264 4.526954  
11746161\_ 9.4914 9.431487 9.492259 9.129864 9.128214 9.185716  
11746162\_ 10.09636 10.04848 10.09646 9.924381 9.932077 9.93591  
11746163\_ 7.443216 7.558682 7.551702 7.227029 7.251372 7.31648  
11746164\_ 7.963701 7.903493 7.936017 7.763314 7.794196 7.764676  
11746165\_ 5.507884 5.469322 5.365859 5.5009 5.476307 5.493786  
11746166\_ 8.770704 8.793082 8.797776 8.934328 8.910025 8.979169  
11746167\_ 6.083507 6.115853 6.087391 5.207733 5.416484 5.325706  
11746168\_ 7.313585 7.292622 7.396508 7.234312 7.248178 7.30739  
11746169\_ 3.455576 3.548433 3.201765 3.665389 3.671328 3.517763  
11746170\_ 3.986328 4.090697 3.981527 4.180061 4.314263 4.29728  
11746171\_ 3.797381 3.831724 3.830953 3.938505 4.138153 3.952574  
11746172\_ 7.537206 7.62222 7.495815 7.560932 7.547301 7.642828  
11746173\_ 5.849366 5.591168 5.695628 5.275172 5.101652 5.302322  
11746174\_ 8.233306 8.126271 8.144588 8.628348 8.607191 8.599274  
11746175\_ 2.759756 2.814878 2.53854 2.716658 2.826221 2.70793  
11746176\_ 4.502171 4.3613 4.381339 4.278238 4.418046 4.449362  
11746177\_ 7.220971 7.312068 7.243127 7.138007 7.146317 7.111953  
11746178\_ 6.568638 6.487138 6.555341 6.094486 6.135933 6.206511  
11746179\_ 5.703255 5.731263 5.766005 5.49187 5.567724 5.635226  
11746180\_ 7.770872 7.76041 7.66472 7.714868 7.692728 7.68387  
11746181\_ 6.418236 6.258192 6.411613 6.471543 6.558582 6.552144  
11746182\_ 7.832759 7.857862 7.781119 7.899441 7.894661 7.894661  
11746183\_ 8.174472 8.151116 8.204822 7.366994 7.347867 7.40132  
11746184\_ 6.362772 6.325485 6.351696 6.552159 6.385701 6.596783  
11746185\_ 8.734902 8.66657 8.702806 8.310169 8.347552 8.331781  
11746186\_ 7.284032 7.27674 7.295333 7.46231 7.432197 7.481087  
11746187\_ 8.196549 8.240715 8.182811 8.390392 8.567125 8.443185  
11746188\_ 12.98419 12.98927 12.95989 12.93649 12.92945 12.89982  
11746189\_ 2.172615 2.097681 2.322603 2.15146 2.166552 2.265378  
11746190\_ 5.88641 5.848318 5.826375 6.067109 6.074173 5.996669  
11746191\_ 8.072114 8.099676 8.155073 8.337096 8.410289 8.394493  
11746192\_ 3.103999 3.379969 2.935391 2.352438 2.47102 2.605516  
11746193\_ 7.337093 7.257341 7.212562 7.527783 7.55199 7.467316  
11746194\_ 7.843372 7.774255 7.772325 7.95977 7.955531 8.010269  
11746195\_ 10.2184 10.24901 10.28019 9.840699 9.817724 9.815258  
11746196\_ 8.283517 8.183962 8.259077 8.28996 8.283243 8.219927  
11746197\_ 7.260057 7.295536 7.334307 7.092889 7.028184 7.045408  
11746198\_ 4.161002 3.862555 4.372368 4.921314 5.229811 5.144529  
11746199\_ 9.584444 9.552063 9.559823 9.725352 9.752099 9.741154  
11746200\_ 8.857901 8.787672 8.832419 8.737345 8.796159 8.756583  
11746201\_ 7.034905 7.036468 6.963791 6.738591 6.632655 6.691881  
11746202\_ 5.351329 5.414869 5.273754 5.131774 5.169228 5.273643  
11746203\_ 4.912949 5.183892 4.953213 5.577459 5.48634 5.475572  
11746204\_ 5.063485 5.219707 5.24793 5.424175 5.432092 5.349224  
11746205\_ 6.179711 6.119932 6.095735 5.959715 6.065982 6.07234  
11746206\_ 7.707612 7.67258 7.705387 7.475656 7.506467 7.577426  
11746207\_ 7.45307 7.479006 7.468727 6.741295 6.797834 6.727853  
11746208\_ 4.689834 4.842747 4.65177 5.002147 5.008448 4.875805

11746209\_ 6. 646703 6. 657809 6. 495401 6. 682225 6. 652202 6. 674575  
11746210\_ 7. 579907 7. 632752 7. 593065 7. 658423 7. 697407 7. 715356  
11746211\_ 5. 635913 5. 815789 5. 863568 5. 495394 5. 872036 5. 807242  
11746212\_ 6. 892532 6. 847333 6. 878141 7. 332302 7. 272129 7. 216918  
11746213\_ 7. 879442 7. 90277 7. 943782 8. 126504 8. 148499 8. 127889  
11746214\_ 7. 340461 7. 329332 7. 366828 7. 317931 7. 370404 7. 416587  
11746215\_ 7. 95217 7. 888755 7. 921727 8. 344874 8. 387996 8. 347747  
11746216\_ 7. 04438 6. 948055 6. 898071 7. 076064 7. 115916 7. 00148  
11746217\_ 6. 424955 6. 203547 6. 461188 6. 652971 6. 721775 6. 792303  
11746218\_ 6. 554512 6. 625546 6. 665265 6. 815853 6. 893773 6. 842799  
11746219\_ 6. 360821 6. 357877 6. 34721 6. 215391 6. 226325 6. 249377  
11746220\_ 5. 403774 5. 167117 5. 426686 5. 716984 5. 678539 5. 704919  
11746221\_ 6. 687896 6. 497107 6. 643969 6. 909833 7. 006695 7. 001945  
11746222\_ 6. 707029 6. 640992 6. 670964 6. 56445 6. 608284 6. 552601  
11746223\_ 7. 981328 7. 984865 7. 959007 7. 223394 7. 126267 7. 210748  
11746224\_ 5. 707829 5. 568065 5. 65005 6. 118966 6. 162544 6. 154872  
11746225\_ 7. 352567 7. 252818 7. 246812 6. 760366 6. 73736 6. 843019  
11746226\_ 5. 437925 5. 234179 5. 414472 5. 188766 5. 137799 5. 192791  
11746227\_ 7. 104767 7. 126 7. 077691 6. 778406 6. 852296 6. 859128  
11746228\_ 6. 420114 6. 418505 6. 486452 6. 45139 6. 293309 6. 310558  
11746229\_ 6. 339077 6. 351399 6. 357392 6. 745547 6. 752593 6. 876456  
11746230\_ 6. 023195 5. 850629 5. 905646 5. 766531 5. 691786 5. 828972  
11746231\_ 6. 040608 5. 930653 5. 995462 5. 821463 5. 774141 5. 823988  
11746232\_ 8. 666051 8. 658489 8. 70095 8. 201641 8. 184396 8. 202375  
11746233\_ 5. 480781 5. 467917 5. 508223 5. 581195 5. 635016 5. 600891  
11746234\_ 7. 959273 7. 90612 8. 020196 7. 416438 7. 52328 7. 463788  
11746235\_ 6. 615967 6. 564709 6. 580599 6. 319289 6. 355641 6. 370653  
11746236\_ 7. 214179 7. 204606 7. 165153 6. 899625 6. 913947 7. 012812  
11746237\_ 5. 474162 5. 746974 5. 845365 6. 005769 6. 001216 5. 736602  
11746238\_ 9. 353972 9. 335583 9. 347424 8. 987724 9. 024128 8. 9621  
11746239\_ 5. 553408 5. 518169 5. 573774 5. 57733 5. 727582 5. 715946  
11746240\_ 5. 780922 5. 745415 5. 725992 5. 464767 5. 391604 5. 480941  
11746241\_ 7. 459412 7. 318695 7. 442902 6. 92781 6. 927578 6. 877567  
11746242\_ 7. 007439 6. 998968 7. 120618 6. 507716 6. 548817 6. 573644  
11746243\_ 8. 235454 8. 205995 8. 2539 8. 144208 8. 002556 8. 058634  
11746244\_ 5. 409222 5. 149545 5. 510318 5. 381164 5. 407678 5. 365697  
11746245\_ 5. 74125 5. 684011 5. 724259 5. 753407 5. 856383 5. 768647  
11746246\_ 2. 235709 2. 353561 2. 447492 2. 535851 2. 522435 2. 494072  
11746247\_ 2. 521906 2. 605516 2. 408501 2. 771209 2. 762436 2. 745  
11746248\_ 6. 093829 5. 938482 6. 018553 5. 170825 5. 358603 5. 376405  
11746249\_ 4. 14389 4. 379818 4. 136952 4. 493613 4. 416057 4. 379818  
11746250\_ 2. 389359 2. 371022 2. 466198 2. 467718 2. 506837 2. 32302  
11746251\_ 9. 936215 9. 913088 9. 931275 9. 922825 9. 978694 9. 941564  
11746252\_ 8. 44688 8. 446733 8. 357194 8. 270356 8. 294821 8. 316426  
11746253\_ 5. 073172 5. 124092 5. 066969 5. 207668 5. 09514 5. 147984  
11746254\_ 6. 214895 6. 19046 6. 195971 6. 381093 6. 331781 6. 289366  
11746255\_ 10. 04945 10. 01695 10. 03868 9. 980942 10. 01808 9. 98418  
11746256\_ 4. 189427 4. 293105 4. 177822 4. 340039 4. 355734 4. 258112  
11746257\_ 5. 204872 5. 109001 5. 330804 5. 076108 5. 245518 5. 016654  
11746258\_ 5. 270136 5. 631342 5. 607521 5. 623908 5. 512294 5. 571606  
11746259\_ 6. 823571 6. 747083 6. 922773 6. 571134 6. 631711 6. 56532

11746260\_ 5. 940463 5. 844913 5. 916611 5. 700302 5. 609647 5. 60228  
11746261\_ 6. 162472 6. 035874 6. 199575 5. 894842 5. 897528 5. 976337  
11746262\_ 7. 591687 7. 536561 7. 639174 7. 6681 7. 637675 7. 663731  
11746263\_ 7. 013832 6. 928389 6. 925298 6. 992813 7. 039483 6. 990656  
11746264\_ 7. 937027 7. 901651 7. 924783 7. 903817 7. 882227 7. 822217  
11746265\_ 5. 563407 5. 509756 5. 568307 5. 3515 5. 36323 5. 273286  
11746266\_ 6. 13945 6. 31642 5. 931906 6. 48358 6. 448378 6. 412024  
11746267\_ 6. 578537 6. 667462 6. 508551 6. 761228 6. 885197 6. 779507  
11746268\_ 3. 205589 3. 025371 3. 163736 2. 83198 2. 898648 2. 718322  
11746269\_ 5. 429429 5. 356622 5. 236873 5. 973688 6. 078038 6. 190988  
11746270\_ 5. 9487 5. 646816 5. 905162 5. 794286 5. 767875 5. 900684  
11746271\_ 7. 948034 7. 927989 7. 964637 7. 834379 7. 768912 7. 749082  
11746272\_ 6. 001845 5. 866126 6. 001844 5. 909783 5. 889832 6. 001845  
11746273\_ 6. 859625 6. 769206 6. 872843 6. 827077 6. 78476 6. 786233  
11746274\_ 5. 403621 5. 451333 5. 513028 5. 112193 5. 444451 5. 328075  
11746275\_ 5. 215886 5. 045924 4. 997112 5. 43336 5. 440556 5. 376479  
11746276\_ 4. 747395 4. 766871 5. 025493 5. 158538 5. 199058 5. 31243  
11746277\_ 3. 687009 3. 6376 3. 78596 3. 713431 3. 72391 3. 758645  
11746278\_ 3. 714435 3. 711939 3. 507479 3. 604243 3. 89492 3. 899583  
11746279\_ 10. 30772 10. 27105 10. 3 10. 3 10. 34502 10. 33768  
11746280\_ 6. 538424 6. 666991 6. 574834 6. 490141 6. 506436 6. 572309  
11746281\_ 6. 800351 6. 732181 6. 886652 7. 029865 7. 018563 7. 060831  
11746282\_ 7. 337066 7. 282658 7. 320191 7. 430961 7. 414673 7. 367735  
11746283\_ 8. 808931 8. 752233 8. 966228 7. 591938 7. 469257 7. 447938  
11746284\_ 5. 118661 5. 228627 5. 264599 5. 297498 5. 321084 5. 237236  
11746285\_ 4. 782141 4. 772481 4. 783104 5. 029529 4. 913176 4. 942679  
11746286\_ 4. 839328 4. 862104 4. 834509 5. 041659 4. 901705 4. 865839  
11746287\_ 6. 922773 6. 848376 6. 96259 6. 991669 7. 04684 6. 96259  
11746288\_ 4. 529056 4. 493064 4. 398035 4. 303668 4. 315339 4. 226564  
11746289\_ 4. 752683 4. 625927 4. 498307 4. 580776 4. 569574 4. 580898  
11746290\_ 5. 013281 5. 215011 5. 015161 5. 226473 5. 116696 5. 205017  
11746291\_ 4. 842941 4. 424998 4. 479485 4. 61899 4. 601912 4. 521193  
11746292\_ 7. 386704 7. 188179 7. 353796 7. 742318 7. 789152 7. 739206  
11746293\_ 7. 970909 7. 828432 7. 923121 7. 402601 7. 414117 7. 481363  
11746294\_ 7. 422189 7. 348869 7. 478189 7. 166192 7. 144895 7. 260228  
11746295\_ 6. 595294 6. 477477 6. 493869 6. 411799 6. 507826 6. 464926  
11746296\_ 8. 833182 8. 76902 8. 79348 8. 797524 8. 767868 8. 752214  
11746297\_ 4. 501683 4. 394902 4. 341723 4. 304981 4. 374276 4. 578451  
11746298\_ 6. 150574 6. 140651 6. 211357 6. 076709 6. 257645 6. 318829  
11746299\_ 7. 886682 7. 794384 7. 911861 8. 117627 8. 245672 8. 16794  
11746300\_ 4. 643717 4. 640977 4. 459939 4. 428843 4. 40461 4. 440348  
11746301\_ 5. 804832 5. 952231 5. 906728 5. 778079 5. 781861 5. 838408  
11746302\_ 8. 692308 8. 604599 8. 709132 8. 264098 8. 324778 8. 272416  
11746303\_ 2. 718322 2. 605516 2. 718322 2. 718322 2. 718322 2. 718322  
11746304\_ 8. 072329 8. 032478 8. 111033 7. 966479 7. 956315 7. 956377  
11746305\_ 8. 107829 8. 071979 8. 08611 8. 062507 8. 043474 8. 027878  
11746306\_ 2. 342197 2. 717962 2. 47102 2. 47102 2. 47102 2. 861899  
11746307\_ 3. 307383 3. 406971 3. 388043 3. 435828 3. 003568 3. 306835  
11746308\_ 4. 821375 4. 928819 4. 759217 4. 95015 5. 080492 4. 859795  
11746309\_ 6. 012627 5. 851182 5. 991221 5. 940069 6. 016312 5. 981536  
11746310\_ 5. 913952 5. 766475 5. 987936 6. 32692 6. 309207 6. 407815

11746311\_ 7. 949437 7. 913736 7. 970102 8. 301401 8. 339555 8. 354871  
11746312\_ 8. 164428 8. 187327 8. 183197 8. 429735 8. 454482 8. 430758  
11746313\_ 8. 126977 7. 98184 8. 088667 7. 855246 7. 944132 7. 922803  
11746314\_ 9. 017017 9. 024212 9. 011496 9. 03358 9. 017017 8. 998309  
11746315\_ 8. 675981 8. 665672 8. 648112 8. 55393 8. 5784 8. 58862  
11746316\_ 8. 912095 8. 920558 8. 943637 9. 403136 9. 427471 9. 412091  
11746317\_ 9. 135251 9. 012163 9. 129357 9. 138778 9. 14507 9. 135282  
11746318\_ 4. 857873 4. 715154 4. 834557 4. 648676 4. 435993 4. 6937  
11746319\_ 3. 825621 3. 731689 3. 905038 3. 861099 3. 85907 3. 825621  
11746320\_ 6. 884125 6. 851771 6. 91758 7. 347508 7. 306198 7. 336995  
11746321\_ 9. 01206 8. 956389 9. 019378 9. 205523 9. 309994 9. 22214  
11746322\_ 4. 045565 4. 040277 3. 959543 4. 193666 4. 020954 4. 187464  
11746323\_ 2. 47102 2. 288387 2. 479258 2. 598161 2. 201344 2. 339607  
11746324\_ 9. 266312 9. 184743 9. 314286 8. 854908 8. 818421 8. 817762  
11746325\_ 5. 529442 5. 685827 5. 600899 5. 845404 5. 768882 5. 788841  
11746326\_ 7. 18457 7. 048625 7. 280855 6. 83439 6. 660288 6. 755421  
11746327\_ 8. 44857 8. 453405 8. 382193 8. 300451 8. 365222 8. 319167  
11746328\_ 8. 076356 7. 962867 7. 996042 7. 868238 7. 834047 7. 881197  
11746329\_ 8. 383161 8. 318277 8. 387536 8. 1888 8. 207345 8. 199859  
11746330\_ 8. 286223 8. 248695 8. 295425 8. 580336 8. 576652 8. 544651  
11746331\_ 8. 92654 8. 877462 8. 893878 8. 756334 8. 70272 8. 683216  
11746332\_ 7. 39402 7. 319674 7. 386002 7. 40666 7. 414642 7. 355778  
11746333\_ 6. 823381 6. 659801 6. 772032 6. 402497 6. 30141 6. 309121  
11746334\_ 4. 28669 4. 425317 4. 323492 4. 504104 4. 347179 4. 370205  
11746335\_ 5. 008182 4. 908585 4. 921502 5. 041106 5. 000734 5. 020311  
11746336\_ 8. 419789 8. 327444 8. 429735 8. 40512 8. 453029 8. 409304  
11746337\_ 7. 141924 7. 219972 7. 321883 6. 507716 6. 539965 6. 545081  
11746338\_ 5. 170991 5. 319844 5. 037037 5. 369725 5. 206001 5. 252803  
11746339\_ 4. 652369 4. 761831 4. 743435 4. 701741 4. 668139 4. 697653  
11746340\_ 8. 029922 8. 172224 8. 064595 7. 876501 7. 837071 7. 782394  
11746341\_ 8. 907942 8. 940096 8. 875383 9. 062482 8. 981283 8. 908114  
11746342\_ 5. 476126 5. 294029 5. 339337 5. 029029 4. 973258 4. 887882  
11746343\_ 6. 067471 5. 899197 6. 043044 6. 188514 6. 26803 6. 337764  
11746344\_ 5. 98336 5. 851097 6. 047165 6. 134952 6. 171664 6. 272031  
11746345\_ 8. 223423 8. 166909 8. 160973 8. 459537 8. 507932 8. 518885  
11746346\_ 7. 833448 7. 701457 7. 825036 7. 280652 7. 348564 7. 420097  
11746347\_ 8. 730069 8. 701146 8. 813278 8. 283715 8. 34012 8. 307652  
11746348\_ 9. 238393 9. 173248 9. 222476 9. 183648 9. 127423 9. 113579  
11746349\_ 4. 961668 4. 866579 4. 726613 4. 929632 4. 89125 4. 846357  
11746350\_ 3. 277812 3. 394261 3. 008306 3. 50296 3. 712006 3. 495076  
11746351\_ 9. 009793 8. 966283 9. 003026 8. 367949 8. 419026 8. 411474  
11746352\_ 7. 007439 6. 974267 7. 086832 6. 474593 6. 488515 6. 510365  
11746353\_ 5. 285218 5. 2956 5. 263807 5. 397019 5. 326124 5. 29433  
11746354\_ 3. 82812 3. 779559 3. 765837 3. 880391 3. 576787 3. 920737  
11746355\_ 1. 851666 2. 055822 1. 870265 2. 027651 1. 997301 1. 964753  
11746356\_ 2. 386563 2. 644482 2. 300453 2. 316939 2. 396729 2. 482917  
11746357\_ 6. 861175 6. 722425 6. 872709 6. 95593 7. 003545 7. 060267  
11746358\_ 7. 632959 7. 549327 7. 608728 7. 651519 7. 689674 7. 656991  
11746359\_ 8. 394362 8. 404633 8. 483049 8. 515089 8. 521716 8. 478986  
11746360\_ 5. 11527 5. 152117 5. 189498 5. 455786 5. 356965 5. 317788  
11746361\_ 4. 285037 4. 462208 4. 281988 4. 480942 4. 447792 4. 509918

11746362\_ 3. 573595 3. 539344 3. 462297 3. 536461 3. 646272 3. 613859  
11746363\_ 8. 316389 8. 300043 8. 318324 8. 059839 8. 089471 8. 161482  
11746364\_ 5. 264323 5. 46502 5. 202999 5. 426305 5. 35657 5. 408103  
11746365\_ 4. 583961 4. 642861 4. 84276 4. 510024 4. 316863 4. 413222  
11746366\_ 4. 959055 5. 021631 4. 988042 5. 03392 5. 026056 5. 001082  
11746367\_ 10. 36153 10. 3257 10. 28559 10. 66773 10. 68461 10. 64217  
11746368\_ 7. 251041 7. 115049 7. 254194 6. 941097 6. 870553 6. 974564  
11746369\_ 9. 371403 9. 354973 9. 355895 9. 36624 9. 43051 9. 352565  
11746370\_ 7. 547387 7. 505815 7. 556827 7. 449506 7. 454946 7. 418193  
11746371\_ 9. 263668 9. 270884 9. 273318 9. 173087 9. 077953 9. 110586  
11746372\_ 6. 287062 6. 339072 6. 289995 6. 266493 6. 156482 6. 278872  
11746373\_ 8. 542819 8. 537344 8. 598067 7. 963849 7. 924779 7. 950599  
11746374\_ 8. 600383 8. 510658 8. 542644 8. 289648 8. 271524 8. 283985  
11746375\_ 4. 643717 4. 67291 4. 523414 4. 75656 4. 647609 4. 643717  
11746376\_ 5. 333723 5. 187607 5. 258393 5. 199113 5. 2222 5. 189179  
11746377\_ 3. 606313 3. 771773 3. 660005 3. 511471 3. 520962 3. 539273  
11746378\_ 7. 329225 7. 207987 7. 243127 6. 217154 6. 188115 6. 266678  
11746379\_ 6. 136589 6. 195304 6. 174192 5. 537871 5. 546941 5. 57607  
11746380\_ 5. 482241 5. 490338 5. 44301 5. 073036 5. 48634 5. 340941  
11746381\_ 5. 74713 5. 769997 5. 967955 5. 795619 5. 700746 5. 774705  
11746382\_ 5. 99962 6. 118838 6. 053778 6. 097927 6. 104931 6. 140494  
11746383\_ 7. 2607 7. 329437 7. 422784 7. 075374 7. 124658 7. 042517  
11746384\_ 7. 973588 7. 965706 8. 041637 7. 768258 7. 63692 7. 6749  
11746385\_ 7. 031289 6. 91247 7. 027789 7. 04419 7. 098409 7. 053419  
11746386\_ 6. 056518 5. 986455 6. 009472 6. 067704 6. 0244 6. 09428  
11746387\_ 6. 2304 5. 995703 6. 260434 6. 290093 6. 328323 6. 403637  
11746388\_ 7. 474392 7. 437727 7. 541732 7. 661877 7. 592811 7. 586162  
11746389\_ 5. 134557 5. 093668 5. 049669 5. 150316 5. 162136 5. 185194  
11746390\_ 6. 329856 6. 461266 6. 372053 6. 407329 6. 459658 6. 371553  
11746391\_ 6. 954318 6. 802716 6. 840156 6. 655031 6. 614185 6. 756869  
11746392\_ 7. 033516 7. 054807 7. 136347 6. 594872 6. 661962 6. 700371  
11746393\_ 6. 110228 6. 187923 6. 159771 5. 913125 5. 920183 5. 894697  
11746394\_ 5. 201643 5. 178075 5. 208464 4. 452854 4. 233902 4. 39165  
11746395\_ 6. 104535 5. 914398 6. 038346 5. 267999 5. 126565 5. 228627  
11746396\_ 7. 328544 7. 201768 7. 24766 6. 844795 6. 852172 6. 920906  
11746397\_ 9. 179861 9. 162387 9. 19568 9. 197372 9. 192894 9. 194226  
11746398\_ 9. 201949 9. 143594 9. 217937 9. 119233 9. 149827 9. 194442  
11746399\_ 9. 122602 9. 078862 9. 148318 9. 136631 9. 144904 9. 180361  
11746400\_ 6. 567348 6. 7414 6. 474882 6. 554512 6. 538793 6. 7414  
11746401\_ 5. 662617 5. 747061 5. 677247 5. 528624 5. 556232 5. 660228  
11746402\_ 9. 490425 9. 482993 9. 58464 9. 339569 9. 216989 9. 338935  
11746403\_ 7. 280725 7. 240388 7. 301326 7. 615116 7. 578211 7. 631676  
11746404\_ 5. 417094 5. 388349 5. 563469 5. 198332 5. 32639 5. 374298  
11746405\_ 4. 826717 4. 945413 4. 833383 4. 964872 4. 778005 4. 952359  
11746406\_ 2. 518843 2. 473791 2. 240722 2. 189186 2. 214375 2. 075574  
11746407\_ 2. 485964 2. 253052 2. 559552 2. 459593 2. 516617 2. 719127  
11746408\_ 6. 846423 6. 749688 6. 6818 6. 496725 6. 531241 6. 530117  
11746409\_ 6. 021947 6. 057444 6. 019887 5. 86986 5. 751086 5. 749659  
11746410\_ 3. 482287 3. 533736 3. 400391 3. 53749 3. 542616 3. 486544  
11746411\_ 5. 156303 5. 228328 5. 121918 5. 267185 5. 167519 5. 017437  
11746412\_ 8. 670888 8. 560314 8. 692288 8. 918921 8. 970027 8. 905717

11746413\_ 6. 823778 6. 910769 6. 95033 6. 97351 6. 996899 6. 896163  
11746414\_ 6. 770224 6. 746761 6. 820292 6. 721158 6. 794747 6. 857155  
11746415\_ 3. 389859 3. 278056 3. 389859 3. 405952 3. 389859 3. 396516  
11746416\_ 7. 154591 7. 129726 7. 205677 7. 45117 7. 508643 7. 409349  
11746417\_ 6. 648523 6. 766274 6. 70959 6. 72755 6. 858301 6. 682473  
11746418\_ 6. 825081 6. 752326 6. 833451 6. 311358 6. 240301 6. 35723  
11746419\_ 8. 768336 8. 756835 8. 733815 8. 636462 8. 672911 8. 668572  
11746420\_ 4. 098425 4. 004303 4. 098425 4. 037871 4. 345419 4. 146204  
11746421\_ 8. 515813 8. 551343 8. 550262 7. 974033 8. 02528 7. 909383  
11746422\_ 5. 977166 5. 957954 6. 093521 5. 54336 5. 61778 5. 908291  
11746423\_ 8. 079334 8. 03571 8. 070167 7. 462446 7. 459992 7. 516596  
11746424\_ 2. 554691 2. 349818 2. 688158 2. 501126 2. 353291 2. 234265  
11746425\_ 4. 214972 4. 353442 4. 261762 4. 247641 4. 247575 4. 301099  
11746426\_ 4. 574257 4. 611498 4. 577224 4. 707636 4. 522126 4. 556423  
11746427\_ 6. 546404 6. 401358 6. 509746 5. 438281 5. 408502 5. 737831  
11746428\_ 7. 427546 7. 338891 7. 363833 7. 136086 7. 23952 7. 229374  
11746429\_ 4. 280019 4. 206222 4. 613005 4. 153533 4. 073549 4. 504035  
11746430\_ 7. 669246 7. 67189 7. 649887 7. 622743 7. 622752 7. 635654  
11746431\_ 6. 702702 6. 718599 6. 816104 6. 535304 6. 607538 6. 643274  
11746432\_ 6. 724735 6. 730408 6. 818704 6. 539868 6. 634303 6. 6585  
11746433\_ 5. 640451 5. 594247 5. 734075 4. 60171 4. 749277 4. 516125  
11746434\_ 7. 239949 7. 1399 7. 330872 7. 375831 7. 363758 7. 387935  
11746435\_ 6. 052203 6. 096709 6. 037116 6. 2169 6. 104709 6. 097475  
11746436\_ 7. 829004 7. 740776 7. 782968 7. 695848 7. 7933 7. 794776  
11746437\_ 5. 871904 5. 860337 5. 825097 5. 35068 5. 397861 5. 459432  
11746438\_ 9. 494318 9. 39551 9. 455458 9. 83519 9. 90205 9. 854981  
11746439\_ 9. 30429 9. 367235 9. 339585 9. 564431 9. 538964 9. 518976  
11746440\_ 9. 75877 9. 718829 9. 72502 9. 936449 10. 01167 9. 903335  
11746441\_ 4. 869182 4. 825678 4. 822897 4. 225962 4. 054288 4. 491478  
11746442\_ 8. 236896 8. 23547 8. 180312 8. 141376 8. 180785 8. 10894  
11746443\_ 8. 1928 8. 145375 8. 238711 8. 186502 8. 253477 8. 138072  
11746444\_ 5. 045601 5. 283017 4. 825245 5. 274289 5. 057031 5. 083608  
11746445\_ 2. 731274 2. 47102 2. 558156 2. 465315 2. 389248 2. 446715  
11746446\_ 6. 139898 6. 198057 6. 128719 6. 381217 6. 289609 6. 295796  
11746447\_ 6. 42356 6. 448464 6. 467867 6. 295093 6. 186259 6. 1722  
11746448\_ 6. 377928 6. 452239 6. 420935 6. 647127 6. 575193 6. 757753  
11746449\_ 6. 528295 6. 57461 6. 494443 6. 590238 6. 700371 6. 721857  
11746450\_ 6. 681391 6. 7414 6. 676251 6. 909833 6. 862036 6. 838796  
11746451\_ 7. 60434 7. 570612 7. 649603 7. 316284 7. 458287 7. 351755  
11746452\_ 5. 287297 5. 157922 5. 26034 4. 894858 4. 984669 4. 657436  
11746453\_ 5. 733848 5. 696485 5. 526559 5. 618252 5. 5952 5. 689242  
11746454\_ 8. 905285 8. 851363 8. 871303 8. 203719 8. 167114 8. 173119  
11746455\_ 2. 445684 2. 396428 2. 644505 2. 41184 2. 144628 2. 302496  
11746456\_ 2. 780436 2. 71275 2. 759464 3. 049781 2. 701278 2. 951501  
11746457\_ 5. 832881 5. 672285 5. 894697 5. 766991 5. 823435 5. 778192  
11746458\_ 5. 502962 5. 345598 5. 50775 5. 384578 5. 505618 5. 417301  
11746459\_ 6. 399012 6. 464805 6. 572476 5. 965726 5. 934526 6. 070292  
11746460\_ 1. 947773 1. 952807 1. 898024 1. 862518 1. 843566 1. 987256  
11746461\_ 8. 013307 7. 842319 7. 926547 8. 436392 8. 493233 8. 422299  
11746462\_ 8. 236788 8. 173364 8. 364113 7. 33723 7. 400487 7. 435326  
11746463\_ 7. 548872 7. 481312 7. 572996 5. 795258 6. 013701 5. 676302

11746464\_ 6. 106708 6. 045379 6. 221737 5. 78731 5. 715712 5. 780187  
11746465\_ 7. 453916 7. 482432 7. 536532 7. 539419 7. 576875 7. 619572  
11746466\_ 7. 419492 7. 460731 7. 536051 7. 597395 7. 640882 7. 709576  
11746467\_ 7. 057934 6. 951438 6. 903133 7. 415674 7. 379157 7. 299173  
11746468\_ 8. 697118 8. 665629 8. 652706 8. 978017 8. 948587 8. 861619  
11746469\_ 8. 517652 8. 498085 8. 485304 8. 71823 8. 701081 8. 660804  
11746470\_ 6. 095054 5. 999462 5. 966037 5. 864548 5. 844933 5. 887828  
11746471\_ 8. 440102 8. 433016 8. 477615 7. 930708 7. 926329 7. 940529  
11746472\_ 9. 575215 9. 447447 9. 519134 9. 310859 9. 378742 9. 304916  
11746473\_ 6. 734569 6. 791046 6. 665666 7. 661331 7. 647347 7. 579041  
11746474\_ 2. 924774 3. 145182 3. 042041 2. 76934 2. 99465 3. 10024  
11746475\_ 4. 838017 4. 791674 4. 788439 5. 195771 4. 970088 4. 890987  
11746476\_ 8. 283278 8. 217228 8. 253551 7. 866895 7. 883406 7. 882377  
11746477\_ 4. 177954 4. 245335 4. 232892 4. 393143 4. 358977 4. 216261  
11746478\_ 6. 518866 6. 425444 6. 593862 6. 712016 6. 490751 6. 529936  
11746479\_ 5. 053613 5. 144265 5. 17639 5. 20903 5. 127309 5. 112642  
11746480\_ 4. 075241 4. 381761 4. 41784 4. 261775 4. 429006 4. 345277  
11746481\_ 8. 505851 8. 438077 8. 503018 8. 314069 8. 282293 8. 316954  
11746482\_ 4. 4948 4. 167615 4. 416519 4. 481871 4. 555278 4. 422323  
11746483\_ 6. 056525 5. 984478 6. 098375 5. 672653 5. 755841 5. 708435  
11746484\_ 4. 787314 4. 653529 4. 972974 4. 440317 4. 358497 4. 318023  
11746485\_ 3. 616315 3. 707516 3. 582196 3. 488264 3. 469165 3. 514199  
11746486\_ 5. 333723 5. 38677 5. 554237 5. 550555 5. 442974 5. 374866  
11746487\_ 6. 455036 6. 705528 6. 620724 6. 731154 6. 689823 6. 653544  
11746488\_ 8. 385105 8. 318448 8. 374348 8. 261173 8. 213138 8. 272203  
11746489\_ 8. 049549 8. 004661 8. 05661 8. 245716 8. 253426 8. 216722  
11746490\_ 5. 860701 5. 908125 5. 776026 5. 915321 5. 892428 5. 861142  
11746491\_ 7. 365241 7. 299193 7. 262338 7. 390332 7. 35024 7. 34955  
11746492\_ 8. 63395 8. 526591 8. 573428 8. 726549 8. 760734 8. 762509  
11746493\_ 4. 192208 4. 113127 3. 961681 3. 998491 4. 118792 4. 054288  
11746494\_ 4. 415744 4. 528706 4. 59472 4. 513367 4. 516259 4. 484078  
11746495\_ 5. 868606 5. 903304 5. 786113 5. 810214 5. 864295 5. 917456  
11746496\_ 8. 301285 8. 26987 8. 216639 7. 585996 7. 634977 7. 645527  
11746497\_ 7. 154317 7. 003254 7. 138975 6. 609207 6. 699649 6. 739125  
11746498\_ 3. 379291 3. 625258 3. 443997 3. 731312 3. 439323 3. 686178  
11746499\_ 3. 213414 3. 007402 3. 025972 3. 146382 3. 16248 3. 21637  
11746500\_ 4. 698036 4. 705508 4. 71635 4. 764022 4. 840111 4. 811694  
11746501\_ 4. 502264 4. 487279 4. 615381 4. 619096 4. 596618 4. 517285  
11746502\_ 5. 576592 5. 614563 5. 661829 5. 511832 5. 412598 5. 523526  
11746503\_ 3. 112265 3. 277444 3. 11849 3. 138817 3. 257662 3. 078263  
11746504\_ 6. 319944 6. 232684 6. 416412 5. 996126 6. 06094 5. 859844  
11746505\_ 7. 131078 7. 060426 7. 249273 6. 829707 6. 954356 6. 983524  
11746506\_ 7. 314372 7. 306415 7. 303499 6. 862507 6. 797508 6. 818879  
11746507\_ 5. 465927 5. 365611 5. 261087 5. 348225 5. 382822 5. 41224  
11746508\_ 6. 588817 6. 836282 6. 623587 6. 85212 6. 794663 6. 78289  
11746509\_ 7. 487541 7. 286897 7. 434129 7. 05884 7. 155126 7. 119784  
11746510\_ 10. 81224 10. 80997 10. 83136 10. 70273 10. 71619 10. 69031  
11746511\_ 8. 573058 8. 541573 8. 528323 8. 71207 8. 711478 8. 73902  
11746512\_ 5. 231401 5. 082478 5. 073036 4. 541038 4. 413296 4. 47616  
11746513\_ 7. 625248 7. 620032 7. 540254 7. 814503 7. 78713 7. 814357  
11746514\_ 6. 463971 6. 579869 6. 403468 6. 621979 6. 553006 6. 593187

11746515\_ 4. 61825 4. 874234 4. 399612 4. 619866 4. 388391 4. 415744  
11746516\_ 6. 814852 6. 903517 6. 759963 6. 932805 6. 944756 6. 913861  
11746517\_ 6. 039862 5. 96467 6. 016754 5. 854805 5. 72984 5. 856282  
11746518\_ 5. 375526 5. 271784 5. 490546 5. 093159 5. 196706 5. 100348  
11746519\_ 6. 034647 5. 903549 6. 074915 6. 208011 6. 299459 6. 16569  
11746520\_ 5. 94325 5. 908281 5. 894697 5. 910773 5. 901886 5. 939645  
11746521\_ 6. 01937 5. 881276 5. 899383 5. 848476 6. 00364 5. 939645  
11746522\_ 6. 645965 6. 487562 6. 533347 6. 33239 6. 386779 6. 436969  
11746523\_ 7. 432636 7. 336005 7. 412371 7. 330217 7. 27107 7. 301694  
11746524\_ 5. 027684 5. 048138 5. 005257 5. 197356 5. 180215 5. 242329  
11746525\_ 6. 1009 6. 002433 5. 973344 5. 73213 5. 699194 5. 721126  
11746526\_ 7. 963226 7. 943856 8. 103558 7. 92634 7. 979367 7. 942695  
11746527\_ 7. 084827 7. 139261 7. 08741 7. 09015 7. 118796 7. 151144  
11746528\_ 3. 025739 2. 747011 2. 886969 2. 847931 2. 787446 2. 707065  
11746529\_ 6. 450642 6. 628626 6. 426431 6. 426431 6. 409904 6. 469747  
11746530\_ 7. 736932 7. 687632 7. 816635 7. 628963 7. 628883 7. 695665  
11746531\_ 6. 728494 6. 706083 6. 692322 6. 292132 6. 319222 6. 468693  
11746532\_ 4. 584933 4. 452969 4. 332719 4. 455302 4. 461106 4. 483507  
11746533\_ 6. 025952 6. 011116 6. 031409 5. 595264 5. 566131 5. 627767  
11746534\_ 2. 642363 2. 595193 2. 595193 2. 595193 2. 65395 2. 736282  
11746535\_ 5. 614563 5. 64078 5. 647445 5. 723241 5. 762965 5. 861085  
11746536\_ 8. 225888 8. 074365 8. 231288 8. 173236 8. 264498 8. 218958  
11746537\_ 8. 261021 8. 204493 8. 281521 8. 043456 8. 033396 8. 067856  
11746538\_ 4. 909659 5. 135863 4. 865748 5. 082483 5. 029529 5. 174388  
11746539\_ 2. 795893 2. 800488 2. 795893 2. 840067 2. 629409 2. 77684  
11746540\_ 7. 004037 6. 839345 6. 97845 7. 108602 6. 98525 7. 008817  
11746541\_ 7. 85812 7. 993464 7. 81706 7. 895171 7. 912573 7. 918901  
11746542\_ 7. 372594 7. 182402 7. 304923 7. 310365 7. 29427 7. 310967  
11746543\_ 8. 297343 8. 296129 8. 213124 8. 153806 8. 094025 8. 096351  
11746544\_ 6. 740027 6. 762572 6. 686247 6. 625149 6. 692704 6. 723162  
11746545\_ 3. 362852 3. 608231 3. 545359 3. 422959 3. 421354 3. 287669  
11746546\_ 5. 894697 5. 875526 5. 881021 6. 162786 6. 065982 6. 011116  
11746547\_ 5. 682508 5. 972778 5. 84654 5. 891577 5. 920279 5. 895066  
11746548\_ 7. 727309 7. 599257 7. 714765 7. 125401 7. 212534 7. 166788  
11746549\_ 7. 122796 7. 162666 7. 021498 6. 402412 6. 605677 6. 605486  
11746550\_ 4. 870843 4. 856467 4. 777648 4. 992243 4. 837233 4. 837233  
11746551\_ 4. 894892 4. 612395 4. 878759 4. 867587 4. 84423 4. 815291  
11746552\_ 4. 145351 4. 30301 4. 173928 4. 176468 4. 09399 4. 156555  
11746553\_ 6. 160361 5. 924779 6. 142414 5. 892068 5. 951011 5. 990884  
11746554\_ 11. 24181 11. 27398 11. 22432 10. 97913 11. 01522 10. 98118  
11746555\_ 11. 38606 11. 35478 11. 38021 11. 00557 11. 04532 11. 01925  
11746556\_ 8. 70239 8. 613564 8. 689308 8. 937242 8. 912893 8. 923255  
11746557\_ 5. 926672 5. 777083 5. 908554 5. 91205 5. 925902 5. 82877  
11746558\_ 5. 763083 5. 880549 5. 859701 5. 978648 5. 92389 5. 814559  
11746559\_ 6. 934615 6. 809649 6. 899396 6. 100314 6. 206636 6. 17981  
11746560\_ 5. 222557 5. 2666 5. 227538 5. 284593 5. 329359 5. 331984  
11746561\_ 5. 501176 5. 611088 5. 42076 5. 620248 5. 565623 5. 611088  
11746562\_ 5. 657697 5. 66385 5. 530374 5. 66385 5. 684592 5. 671226  
11746563\_ 8. 692489 8. 649564 8. 664734 8. 714363 8. 773672 8. 805113  
11746564\_ 6. 550984 6. 593477 6. 652734 6. 67004 6. 755324 6. 697484  
11746565\_ 7. 413915 7. 247663 7. 243127 6. 963739 7. 011858 7. 042517



11746566\_ 10. 11092 10. 04571 10. 09695 10. 03637 10. 02026 9. 992339  
11746567\_ 5. 428843 5. 646194 5. 330451 5. 528345 5. 48634 5. 356979  
11746568\_ 5. 684069 5. 644984 5. 691852 5. 65057 5. 632393 5. 699181  
11746569\_ 8. 084115 8. 06615 8. 08515 8. 009364 8. 058377 8. 058867  
11746570\_ 7. 842319 7. 780182 7. 851543 7. 856833 7. 842988 7. 850874  
11746571\_ 4. 257109 4. 40461 4. 343324 4. 539732 4. 4872 4. 470714  
11746572\_ 5. 408675 5. 355417 5. 530268 5. 30811 5. 216137 5. 375955  
11746573\_ 6. 551869 6. 568039 6. 635537 6. 196782 6. 137956 6. 088302  
11746574\_ 6. 233664 6. 170335 6. 074752 5. 925129 5. 98034 5. 806754  
11746575\_ 6. 946117 6. 878146 7. 056988 6. 609721 6. 706567 6. 670238  
11746576\_ 5. 168496 5. 092329 5. 046626 5. 059134 5. 077819 5. 013417  
11746577\_ 2. 987402 3. 061205 3. 241221 3. 250376 3. 004853 3. 177992  
11746578\_ 4. 914905 5. 195256 4. 696036 4. 971905 5. 081847 4. 913738  
11746579\_ 3. 87079 4. 547528 4. 334647 4. 52373 4. 37083 4. 444159  
11746580\_ 7. 990577 7. 950284 7. 981369 7. 156194 7. 122379 7. 084789  
11746581\_ 7. 079626 7. 052772 7. 092062 6. 964447 6. 988231 6. 901061  
11746582\_ 6. 051554 5. 789947 5. 950197 5. 564188 5. 73391 5. 672375  
11746583\_ 4. 503866 4. 377704 4. 556505 4. 248854 4. 197739 4. 001831  
11746584\_ 9. 335143 9. 303275 9. 351855 8. 688775 8. 702509 8. 747414  
11746585\_ 5. 410596 5. 639794 5. 569895 5. 631667 5. 737854 5. 859575  
11746586\_ 8. 210262 8. 248695 8. 243916 9. 228807 9. 329119 9. 274949  
11746587\_ 8. 265679 8. 129533 8. 246594 7. 907025 7. 952654 8. 00675  
11746588\_ 6. 947939 6. 878367 6. 994664 6. 888964 6. 919516 6. 925672  
11746589\_ 5. 903169 5. 894803 5. 858558 6. 225415 6. 03093 6. 20278  
11746590\_ 5. 207414 5. 243017 5. 066661 5. 232754 5. 217606 5. 228982  
11746591\_ 8. 397927 8. 443275 8. 45867 8. 175484 8. 218732 8. 210905  
11746592\_ 5. 338576 5. 031687 5. 383695 5. 260059 5. 374935 5. 305296  
11746593\_ 6. 033852 6. 062717 6. 063128 6. 065133 6. 000022 6. 061643  
11746594\_ 7. 110912 7. 054312 7. 08741 8. 256287 8. 265051 8. 285213  
11746595\_ 8. 419367 8. 367576 8. 360346 8. 22903 8. 264 8. 192909  
11746596\_ 8. 477989 8. 429373 8. 472422 8. 460496 8. 574308 8. 544301  
11746597\_ 3. 898941 3. 905011 3. 994045 3. 971275 4. 112562 4. 018628  
11746598\_ 6. 601927 6. 640081 6. 688591 6. 977743 6. 885506 6. 95566  
11746599\_ 4. 739833 4. 309103 4. 406496 4. 43843 4. 463022 4. 415744  
11746600\_ 5. 938479 5. 728568 5. 891712 5. 73377 5. 548806 5. 783086  
11746601\_ 7. 979159 7. 914235 7. 979292 7. 855962 7. 863211 7. 833079  
11746602\_ 4. 568902 4. 530016 4. 542655 4. 68187 4. 659 4. 612133  
11746603\_ 6. 555639 6. 643897 6. 428733 6. 68487 6. 724704 6. 691259  
11746604\_ 7. 513792 7. 44233 7. 548852 7. 901452 7. 885472 7. 86434  
11746605\_ 7. 426749 7. 400837 7. 419078 7. 527545 7. 506433 7. 518968  
11746606\_ 7. 271417 7. 175949 7. 276923 7. 412394 7. 50391 7. 410934  
11746607\_ 6. 411554 6. 340893 6. 412289 6. 328034 6. 484487 6. 381198  
11746608\_ 8. 333526 8. 33192 8. 350965 8. 958424 8. 945687 8. 984186  
11746609\_ 4. 964069 4. 818167 5. 158665 5. 241072 5. 347507 5. 193733  
11746610\_ 6. 119612 5. 986769 5. 801036 6. 381327 6. 427688 6. 296427  
11746611\_ 9. 312545 9. 293802 9. 319661 9. 264435 9. 239808 9. 25659  
11746612\_ 8. 585349 8. 515755 8. 572284 8. 219221 8. 240241 8. 223308  
11746613\_ 8. 159005 8. 134765 8. 119504 7. 948338 7. 858733 7. 890101  
11746614\_ 9. 654708 9. 653447 9. 656714 9. 564494 9. 529746 9. 520641  
11746615\_ 6. 692385 6. 593572 6. 744094 6. 342912 6. 275173 6. 330978  
11746616\_ 8. 694547 8. 580441 8. 754791 8. 128057 8. 157922 8. 221563

11746617\_ 6. 308992 6. 16464 6. 287173 6. 244666 6. 308218 6. 408855  
11746618\_ 6. 750393 6. 517045 6. 651452 7. 097292 7. 053138 7. 048719  
11746619\_ 5. 111646 5. 130767 5. 111646 5. 427099 5. 346957 5. 300078  
11746620\_ 4. 920645 5. 02214 4. 873444 5. 081829 5. 103387 5. 029529  
11746621\_ 4. 392922 4. 465445 4. 452761 4. 309608 4. 432098 4. 404577  
11746622\_ 6. 484693 6. 222451 6. 388551 6. 911984 7. 025053 7. 129849  
11746623\_ 1. 920023 1. 921928 1. 995153 2. 079884 1. 946918 2. 021887  
11746624\_ 2. 948359 2. 948359 2. 854428 2. 948359 3. 004853 2. 948359  
11746625\_ 8. 639021 8. 649153 8. 679463 8. 218214 8. 296129 8. 175122  
11746626\_ 8. 094744 8. 104812 8. 178145 8. 407548 8. 374927 8. 430859  
11746627\_ 2. 453454 2. 748698 2. 720969 2. 686968 2. 833755 2. 8839  
11746628\_ 3. 29847 3. 192299 3. 06553 3. 476534 3. 356282 3. 28886  
11746629\_ 6. 219522 6. 350988 6. 199575 6. 318829 6. 258519 6. 370045  
11746630\_ 6. 369931 6. 453223 6. 247894 6. 524619 6. 521937 6. 592358  
11746631\_ 7. 771077 7. 688611 7. 775853 7. 889532 7. 868552 7. 961497  
11746632\_ 6. 882291 6. 922231 6. 787216 7. 074836 7. 071615 7. 030036  
11746633\_ 7. 693598 7. 693975 7. 658625 8. 173236 8. 229178 8. 258213  
11746634\_ 7. 648079 7. 700206 7. 626547 8. 235145 8. 183382 8. 169538  
11746635\_ 6. 742016 6. 375524 6. 73027 6. 740065 6. 828015 6. 751731  
11746636\_ 6. 206252 6. 134557 6. 431967 6. 833174 6. 721626 6. 859135  
11746637\_ 8. 623071 8. 574285 8. 592474 8. 7006 8. 708306 8. 682911  
11746638\_ 5. 845365 5. 853336 5. 904642 6. 448378 6. 356681 6. 396942  
11746639\_ 5. 556273 5. 376543 5. 400334 5. 416102 5. 41834 5. 421826  
11746640\_ 4. 635008 4. 598653 4. 52373 4. 721548 4. 692982 4. 650971  
11746641\_ 3. 360934 3. 118558 3. 082299 3. 269117 3. 269117 3. 29127  
11746642\_ 3. 60379 3. 818401 3. 740892 3. 856496 3. 645426 3. 805197  
11746643\_ 8. 98272 8. 863727 8. 964111 8. 93715 8. 963594 8. 965367  
11746644\_ 6. 641213 6. 77671 6. 656855 6. 822149 6. 638008 6. 715639  
11746645\_ 10. 23356 10. 20015 10. 22924 10. 24606 10. 33929 10. 27632  
11746646\_ 7. 624114 7. 63388 7. 634221 7. 912207 7. 874383 7. 84244  
11746647\_ 6. 538139 6. 505717 6. 53498 5. 753415 5. 622331 5. 684408  
11746648\_ 4. 451929 4. 482792 4. 53427 4. 614459 4. 687745 4. 598725  
11746649\_ 5. 744257 5. 817295 5. 767903 5. 798113 5. 817948 5. 802635  
11746650\_ 6. 121347 5. 91393 6. 018553 6. 73797 6. 850802 6. 80392  
11746651\_ 7. 217084 7. 332807 7. 305928 7. 426223 7. 371073 7. 358765  
11746652\_ 8. 214007 8. 401179 8. 320324 8. 259078 8. 32888 8. 306837  
11746653\_ 6. 831323 6. 792907 6. 792598 6. 936314 6. 920989 6. 965639  
11746654\_ 5. 16957 4. 937612 5. 089524 4. 972443 5. 076206 4. 997712  
11746655\_ 7. 447832 7. 382316 7. 398734 7. 360438 7. 33523 7. 406496  
11746656\_ 7. 213868 7. 233748 7. 221482 7. 302793 7. 15886 7. 229254  
11746657\_ 6. 731808 6. 75568 6. 711244 6. 580235 6. 664655 6. 496459  
11746658\_ 3. 995242 4. 228534 3. 988746 3. 912409 4. 047188 4. 095201  
11746659\_ 7. 390654 7. 401262 7. 42534 7. 442837 7. 554556 7. 467505  
11746660\_ 5. 521005 5. 529039 5. 650941 5. 377103 5. 502237 5. 391872  
11746661\_ 5. 031234 5. 120661 5. 037313 4. 901339 5. 003617 5. 073036  
11746662\_ 3. 249924 3. 094202 2. 921233 3. 221274 3. 187544 3. 179596  
11746663\_ 6. 104285 5. 968504 5. 97546 6. 011018 6. 066023 6. 06206  
11746664\_ 5. 789011 5. 840531 5. 801321 5. 819512 5. 893687 5. 909171  
11746665\_ 6. 607486 6. 591432 6. 617486 6. 525636 6. 401272 6. 48903  
11746666\_ 5. 623997 5. 341274 5. 52571 6. 987676 7. 014255 6. 864395  
11746667\_ 3. 77909 3. 736394 3. 51885 3. 777936 3. 851658 3. 777936

11746668\_ 8. 72052 8. 703684 8. 744281 8. 569904 8. 593202 8. 523115  
11746669\_ 5. 560824 5. 61458 5. 772744 5. 480966 5. 462903 5. 399496  
11746670\_ 7. 472114 7. 558383 7. 579409 7. 53912 7. 514981 7. 561867  
11746671\_ 5. 543725 5. 731798 5. 4701 5. 791027 5. 487891 5. 895948  
11746672\_ 5. 590552 5. 645322 5. 631 5. 32302 5. 340708 5. 472062  
11746673\_ 2. 676623 2. 818272 2. 750344 2. 626954 2. 954896 2. 750344  
11746674\_ 6. 439652 6. 337983 6. 460278 6. 648212 6. 712915 6. 7062  
11746675\_ 6. 165255 5. 893988 6. 115374 6. 097927 6. 206103 6. 193016  
11746676\_ 4. 773425 4. 802323 4. 818242 4. 741019 4. 752234 4. 800655  
11746677\_ 6. 961209 7. 053637 6. 861065 6. 921063 6. 862059 6. 967865  
11746678\_ 2. 251191 2. 522206 2. 456242 2. 512144 2. 61356 2. 494072  
11746679\_ 7. 687632 7. 607482 7. 651924 7. 502875 7. 528915 7. 513515  
11746680\_ 3. 467506 3. 388439 3. 398236 3. 420285 3. 416614 3. 392111  
11746681\_ 4. 206882 4. 307126 4. 093498 4. 435783 4. 411532 4. 415744  
11746682\_ 6. 542486 6. 441374 6. 510356 6. 407397 6. 48627 6. 390285  
11746683\_ 2. 752585 2. 791703 3. 089143 2. 826492 2. 738644 2. 668013  
11746684\_ 6. 496119 6. 473366 6. 485821 6. 439154 6. 542787 6. 501838  
11746685\_ 5. 850761 5. 81105 5. 967715 6. 014889 6. 012766 6. 036481  
11746686\_ 4. 999506 4. 436503 4. 72825 4. 72825 4. 693856 4. 766641  
11746687\_ 6. 024764 6. 097711 6. 115079 6. 215612 6. 297296 6. 224506  
11746688\_ 5. 059218 5. 247451 4. 956917 5. 266404 5. 175955 5. 040655  
11746689\_ 6. 995421 6. 977998 7. 134872 6. 62986 6. 542872 6. 473492  
11746690\_ 7. 864624 7. 882717 7. 887088 7. 555721 7. 476898 7. 429242  
11746691\_ 7. 02452 6. 966643 6. 979835 6. 309401 6. 400371 6. 213219  
11746692\_ 7. 848695 7. 757188 7. 842319 7. 325322 7. 333347 7. 394614  
11746693\_ 5. 209259 5. 508751 5. 188923 5. 321749 5. 478467 5. 305101  
11746694\_ 5. 49332 5. 148662 5. 4349 5. 073036 5. 109756 5. 11527  
11746695\_ 7. 089177 7. 123042 7. 108544 6. 885297 6. 886652 6. 921349  
11746696\_ 2. 605516 2. 511006 2. 580577 2. 356948 2. 394106 2. 507875  
11746697\_ 10. 45982 10. 42057 10. 44575 10. 15695 10. 2168 10. 14337  
11746698\_ 12. 27618 12. 2622 12. 2755 12. 29928 12. 31093 12. 30287  
11746699\_ 5. 234454 5. 11527 5. 207046 5. 207046 5. 25426 5. 185983  
11746700\_ 1. 960377 1. 878038 1. 759643 1. 866445 1. 751232 1. 672425  
11746701\_ 4. 947247 4. 887346 4. 9725 4. 898461 4. 974022 4. 906658  
11746702\_ 3. 398236 3. 398236 3. 446598 3. 511571 3. 417081 3. 587889  
11746703\_ 5. 562081 5. 582746 5. 513965 5. 611932 5. 710726 5. 595917  
11746704\_ 7. 047573 6. 88131 7. 110214 7. 509076 7. 47678 7. 489139  
11746705\_ 6. 845787 6. 790664 6. 933027 7. 126652 7. 111988 7. 117246  
11746706\_ 8. 368202 8. 358056 8. 353141 8. 416021 8. 413239 8. 440839  
11746707\_ 2. 326842 2. 55703 2. 326842 2. 529192 2. 69817 2. 63724  
11746708\_ 5. 954081 5. 946007 5. 815219 5. 872295 5. 909151 5. 909151  
11746709\_ 5. 127809 5. 238695 5. 086283 5. 162937 5. 247004 5. 200032  
11746710\_ 4. 798787 4. 702251 4. 855763 4. 549618 4. 558956 4. 627212  
11746711\_ 8. 120436 8. 043641 8. 08202 7. 903336 7. 841759 7. 832877  
11746712\_ 6. 506936 6. 488908 6. 519739 6. 520216 6. 526095 6. 55813  
11746713\_ 7. 164857 7. 295733 7. 212425 7. 212651 7. 263405 7. 263614  
11746714\_ 8. 06378 7. 91171 8. 003521 8. 006564 8. 099832 8. 149738  
11746715\_ 5. 184974 5. 243593 5. 159035 5. 528498 5. 142583 5. 147688  
11746716\_ 5. 333601 5. 52333 5. 414869 5. 257996 5. 220515 5. 401481  
11746717\_ 7. 092924 7. 027582 7. 139217 6. 925353 6. 809494 6. 944228  
11746718\_ 5. 011614 5. 093953 4. 903634 4. 903634 5. 021744 5. 175668

11746719\_ 6. 917182 6. 966954 6. 951914 7. 031548 7. 113016 7. 058401  
11746720\_ 7. 836848 7. 902683 7. 839186 7. 543182 7. 644479 7. 462504  
11746721\_ 3. 916716 3. 785371 3. 865723 3. 80179 3. 886377 3. 705889  
11746722\_ 8. 212586 8. 154793 8. 257364 8. 536402 8. 632016 8. 579773  
11746723\_ 7. 45568 7. 458575 7. 562871 7. 049119 7. 227087 7. 273806  
11746724\_ 5. 803922 5. 652356 5. 626625 5. 573723 5. 601021 5. 564093  
11746725\_ 5. 11527 5. 113273 4. 9716 5. 066673 5. 044014 5. 082643  
11746726\_ 5. 196392 5. 119463 5. 147544 4. 989404 5. 028305 5. 029529  
11746727\_ 8. 705615 8. 628307 8. 654994 8. 402162 8. 389946 8. 40937  
11746728\_ 6. 135307 6. 135745 6. 019129 6. 068846 6. 206103 6. 121591  
11746729\_ 2. 79536 2. 794243 2. 774521 2. 573213 2. 708744 2. 785839  
11746730\_ 3. 818401 3. 789152 3. 713647 3. 782864 3. 994547 3. 786777  
11746731\_ 3. 978013 3. 968822 3. 889454 4. 011477 3. 924956 4. 005509  
11746732\_ 6. 846371 6. 877575 6. 93706 5. 952683 6. 056661 6. 008203  
11746733\_ 7. 240797 7. 194708 7. 257381 6. 175151 6. 34864 6. 420654  
11746734\_ 5. 680984 5. 752676 5. 83893 5. 569518 5. 647715 5. 540736  
11746735\_ 5. 05854 5. 146357 5. 167733 5. 215 5. 26034 5. 224259  
11746736\_ 5. 356409 5. 335034 5. 419094 5. 320139 5. 095479 5. 155647  
11746737\_ 6. 225426 6. 256267 6. 33679 6. 629954 6. 534396 6. 589889  
11746738\_ 4. 9226 4. 827403 4. 709463 4. 852012 4. 874088 4. 849246  
11746739\_ 7. 050033 7. 009306 7. 106631 7. 103556 7. 143953 7. 185535  
11746740\_ 10. 32228 10. 29613 10. 3782 10. 4108 10. 39927 10. 33204  
11746741\_ 6. 493598 6. 639172 6. 433421 6. 467084 6. 515956 6. 590943  
11746742\_ 6. 301763 6. 282115 6. 351284 6. 422934 6. 456751 6. 451129  
11746743\_ 8. 928162 8. 911377 8. 975356 9. 051523 9. 045282 9. 037991  
11746744\_ 7. 928736 7. 895301 7. 925398 6. 789726 6. 771168 6. 742371  
11746745\_ 6. 29674 6. 350068 6. 443762 6. 364484 6. 465089 6. 466117  
11746746\_ 7. 239949 7. 239949 7. 215861 6. 962619 7. 030739 6. 968903  
11746747\_ 7. 26998 7. 362522 7. 471068 7. 327441 7. 362923 7. 472989  
11746748\_ 2. 013068 1. 804393 2. 048292 1. 954742 1. 863482 2. 036551  
11746749\_ 3. 778328 3. 61954 3. 528877 3. 796373 3. 775319 3. 868879  
11746750\_ 4. 680417 4. 860167 4. 542712 4. 902245 4. 808407 4. 815683  
11746751\_ 5. 272098 5. 392909 5. 191988 4. 904795 5. 09289 5. 11462  
11746752\_ 6. 73648 6. 826676 6. 729884 6. 940308 6. 865824 6. 88255  
11746753\_ 4. 423514 4. 480398 4. 545193 4. 739479 4. 613614 4. 621253  
11746754\_ 5. 776833 5. 577706 5. 639321 5. 915378 5. 828315 5. 884942  
11746755\_ 4. 462432 4. 52373 4. 609528 4. 49638 4. 573619 4. 516564  
11746756\_ 4. 900302 4. 916818 4. 82176 5. 113942 5. 034027 4. 950395  
11746757\_ 3. 973578 4. 188514 4. 20994 4. 335982 4. 086226 4. 183941  
11746758\_ 6. 040022 6. 102235 6. 090921 6. 085801 6. 015636 6. 13308  
11746759\_ 4. 39028 4. 328333 4. 331296 4. 183635 4. 149606 4. 134312  
11746760\_ 6. 099964 5. 930074 5. 737361 6. 653479 6. 777014 6. 886652  
11746761\_ 6. 971486 6. 874119 6. 820479 6. 992128 6. 970198 7. 056475  
11746762\_ 5. 011696 4. 973028 5. 075876 4. 977606 4. 860644 4. 878639  
11746763\_ 3. 091202 3. 249156 3. 058252 3. 091202 3. 164206 3. 13749  
11746764\_ 2. 593907 2. 264868 2. 594504 2. 248891 2. 410347 2. 442328  
11746765\_ 4. 008239 3. 900974 4. 092072 3. 718743 3. 715348 3. 900974  
11746766\_ 2. 095256 2. 582597 2. 308764 2. 109177 2. 193399 2. 384435  
11746767\_ 6. 708726 6. 573879 6. 59334 6. 246503 6. 206103 6. 219021  
11746768\_ 6. 357903 6. 296765 6. 289642 6. 566462 6. 679133 6. 747344  
11746769\_ 6. 225513 6. 158396 6. 177296 6. 332452 6. 397946 6. 491648

11746770\_ 6. 101941 6. 092074 6. 018553 6. 435296 6. 351075 6. 290916  
11746771\_ 8. 095962 8. 057224 8. 072426 7. 405454 7. 456595 7. 573883  
11746772\_ 5. 425982 5. 480966 5. 348314 5. 663206 5. 736831 5. 603195  
11746773\_ 4. 247239 4. 351479 4. 30679 4. 395551 4. 360795 4. 29474  
11746774\_ 4. 540642 4. 602697 4. 620068 4. 614061 4. 93837 4. 774161  
11746775\_ 4. 575967 4. 730249 4. 98717 5. 173323 5. 136331 5. 260959  
11746776\_ 6. 928594 6. 907593 7. 004232 6. 986541 7. 041838 7. 057543  
11746777\_ 5. 026917 5. 063131 4. 889108 5. 26034 5. 152988 5. 066313  
11746778\_ 5. 588084 5. 531483 5. 507723 5. 531483 5. 59191 5. 45975  
11746779\_ 6. 876131 6. 859476 6. 964688 6. 449627 6. 526095 6. 42456  
11746780\_ 2. 345715 2. 633549 2. 473476 2. 407948 2. 171642 2. 403399  
11746781\_ 4. 815683 4. 614463 4. 584933 4. 953968 4. 797854 4. 711174  
11746782\_ 6. 109567 5. 985818 5. 979199 6. 081613 6. 062956 6. 080134  
11746783\_ 5. 913518 5. 996975 6. 035971 5. 945845 6. 083865 6. 002371  
11746784\_ 2. 097645 2. 333842 2. 107058 2. 069261 2. 079884 2. 047601  
11746785\_ 6. 881489 6. 898793 7. 066525 6. 689734 6. 753143 6. 84455  
11746786\_ 8. 318334 8. 354069 8. 360459 8. 417128 8. 435904 8. 401984  
11746787\_ 4. 79757 4. 617943 4. 584933 4. 650671 4. 447065 4. 792169  
11746788\_ 6. 815377 6. 896292 6. 830127 6. 154035 6. 062517 5. 986495  
11746789\_ 8. 999196 8. 967212 8. 975699 8. 985357 8. 921323 8. 943862  
11746790\_ 9. 451241 9. 387233 9. 43217 9. 280401 9. 319408 9. 309455  
11746791\_ 9. 632255 9. 586904 9. 648976 9. 36816 9. 390535 9. 345867  
11746792\_ 9. 454632 9. 373579 9. 404539 9. 220593 9. 150158 9. 180311  
11746793\_ 8. 207909 8. 15544 8. 205016 7. 748456 7. 768928 7. 794393  
11746794\_ 5. 609198 5. 633104 5. 660524 5. 570237 5. 565597 5. 555212  
11746795\_ 6. 709907 6. 706694 6. 611118 6. 562479 6. 406987 6. 522255  
11746796\_ 7. 827787 7. 814818 7. 836019 8. 123233 8. 072329 8. 17332  
11746797\_ 7. 199851 7. 205986 7. 262508 5. 950867 5. 804639 5. 967613  
11746798\_ 8. 015227 7. 958167 8. 025142 6. 802869 6. 699773 6. 732405  
11746799\_ 10. 00349 10. 01384 10. 01165 10. 4108 10. 4198 10. 40762  
11746800\_ 10. 56687 10. 53547 10. 50779 10. 99862 11. 03433 11. 00297  
11746801\_ 5. 547607 5. 561327 5. 602703 5. 62089 5. 738126 5. 589304  
11746802\_ 8. 724088 8. 638178 8. 689049 8. 531171 8. 586582 8. 544312  
11746803\_ 3. 313243 3. 522181 3. 239574 3. 510005 3. 425885 3. 334918  
11746804\_ 5. 431291 5. 452304 5. 480966 5. 465146 5. 554436 5. 428987  
11746805\_ 7. 006423 7. 073189 7. 065204 6. 883377 6. 956217 6. 973288  
11746806\_ 7. 97343 7. 867814 8. 000738 7. 312285 7. 2969 7. 257482  
11746807\_ 6. 565872 6. 527188 6. 609079 6. 434071 6. 486523 6. 571592  
11746808\_ 7. 7825 7. 832241 7. 796113 7. 777456 7. 777456 7. 816952  
11746809\_ 7. 778386 7. 687701 7. 797674 7. 185131 7. 190097 7. 24788  
11746810\_ 9. 132034 9. 183445 9. 141471 9. 285492 9. 172624 9. 135242  
11746811\_ 9. 21209 9. 177079 9. 247916 9. 172548 9. 192767 9. 132992  
11746812\_ 6. 159771 6. 215921 6. 150384 5. 954081 6. 102366 6. 095818  
11746813\_ 3. 319279 2. 945929 3. 041876 3. 025972 3. 19201 3. 22927  
11746814\_ 6. 041919 6. 029368 6. 155586 5. 835532 5. 887225 5. 876103  
11746815\_ 8. 670899 8. 614086 8. 691991 8. 094491 8. 153293 8. 116736  
11746816\_ 7. 634944 7. 644827 7. 724272 7. 424009 7. 394698 7. 337145  
11746817\_ 6. 610383 6. 704601 6. 512774 6. 684556 6. 803845 6. 726896  
11746818\_ 11. 13861 11. 05775 11. 1255 11. 3788 11. 40371 11. 42296  
11746819\_ 3. 249924 3. 041313 3. 102285 3. 292144 3. 106697 2. 959247  
11746820\_ 7. 957491 7. 832928 7. 901122 7. 469139 7. 506433 7. 437296

11746821\_ 2. 151533 2. 375814 2. 155947 2. 292727 2. 25557 2. 338311  
11746822\_ 4. 291756 4. 213643 4. 278367 4. 021253 4. 296096 4. 200678  
11746823\_ 7. 385795 7. 473024 7. 297198 7. 464462 7. 530197 7. 517881  
11746824\_ 5. 113975 5. 047496 4. 779806 5. 381945 5. 367982 5. 346639  
11746825\_ 5. 032281 5. 041553 4. 973196 5. 336969 5. 155591 5. 280813  
11746826\_ 7. 437305 7. 388675 7. 394404 7. 362192 7. 394836 7. 468425  
11746827\_ 6. 826041 6. 822242 6. 886564 7. 19325 7. 227423 7. 224162  
11746828\_ 10. 81184 10. 76827 10. 77992 10. 87328 10. 83582 10. 82162  
11746829\_ 6. 713736 6. 763966 6. 751881 6. 498967 6. 540186 6. 502785  
11746830\_ 2. 965632 3. 061205 3. 074873 2. 912551 3. 019031 2. 945929  
11746831\_ 6. 877006 6. 87334 6. 944895 6. 882936 6. 889396 6. 950725  
11746832\_ 4. 104382 4. 174474 4. 225495 4. 439776 4. 190228 4. 347179  
11746833\_ 3. 584069 3. 328966 3. 347107 3. 481012 3. 438208 3. 334058  
11746834\_ 7. 941211 7. 93407 8. 044583 7. 884952 7. 779868 7. 774538  
11746835\_ 3. 981271 3. 582699 3. 69402 3. 897775 3. 7954 3. 981058  
11746836\_ 5. 844702 5. 949804 6. 092594 6. 009957 6. 039467 6. 071161  
11746837\_ 8. 964808 8. 92417 8. 988991 8. 528644 8. 580411 8. 555848  
11746838\_ 7. 142998 7. 037835 7. 095417 7. 138482 7. 187766 7. 190058  
11746839\_ 7. 187064 7. 204518 7. 176985 7. 516815 7. 619924 7. 596763  
11746840\_ 6. 910382 6. 755895 6. 890101 6. 581705 6. 64602 6. 572286  
11746841\_ 8. 800345 8. 829996 8. 882707 8. 429812 8. 475281 8. 442898  
11746842\_ 8. 818294 8. 790228 8. 797123 8. 42081 8. 473007 8. 434126  
11746843\_ 7. 587428 7. 514578 7. 610084 7. 029692 7. 10098 7. 069608  
11746844\_ 7. 254082 7. 389721 7. 296273 7. 303477 7. 39242 7. 515879  
11746845\_ 4. 13989 4. 171465 4. 15217 4. 395959 4. 378077 4. 4247  
11746846\_ 6. 295693 6. 229596 6. 143842 5. 257749 5. 326344 5. 459467  
11746847\_ 5. 482479 5. 636261 5. 601568 4. 914651 4. 765402 4. 979661  
11746848\_ 7. 631571 7. 583928 7. 582657 7. 495912 7. 546617 7. 54066  
11746849\_ 3. 705625 3. 743425 3. 712492 3. 685515 3. 763604 3. 786777  
11746850\_ 5. 914911 5. 985232 5. 839024 6. 014331 6. 116973 6. 140641  
11746851\_ 8. 544593 8. 486163 8. 518376 8. 556817 8. 63415 8. 664015  
11746852\_ 4. 239764 4. 111012 4. 279391 4. 198731 4. 220852 4. 244554  
11746853\_ 7. 818744 7. 780306 7. 770359 7. 780306 7. 839975 7. 830933  
11746854\_ 5. 518189 5. 640468 5. 680935 5. 879706 5. 694052 5. 736908  
11746855\_ 9. 753487 9. 70298 9. 755413 9. 891303 9. 961394 9. 931223  
11746856\_ 6. 24443 6. 214053 6. 23887 5. 571352 5. 466815 5. 560294  
11746857\_ 7. 481636 7. 256565 7. 406227 7. 120793 7. 218003 7. 17167  
11746858\_ 6. 6627 6. 562726 6. 581318 6. 693795 6. 801665 6. 712976  
11746859\_ 2. 532218 2. 47102 2. 606821 2. 450855 2. 450226 2. 51941  
11746860\_ 4. 352449 4. 486945 4. 352449 4. 486945 4. 622528 4. 578219  
11746861\_ 2. 32243 2. 257683 2. 2342 2. 031567 2. 188965 2. 095033  
11746862\_ 7. 364136 7. 351631 7. 320903 7. 417037 7. 341306 7. 364136  
11746863\_ 7. 959937 7. 869775 7. 933404 7. 650679 7. 630933 7. 554732  
11746864\_ 6. 861988 6. 911511 6. 810606 6. 886652 6. 861988 6. 861988  
11746865\_ 8. 233428 8. 045591 8. 173916 8. 171454 8. 140504 8. 145901  
11746866\_ 9. 716719 9. 651231 9. 62129 9. 402151 9. 415157 9. 30453  
11746867\_ 6. 152964 5. 921358 6. 109019 5. 378346 5. 32461 5. 40812  
11746868\_ 7. 020022 6. 947632 7. 017802 6. 76332 6. 849603 6. 713399  
11746869\_ 5. 71676 5. 766332 5. 791204 5. 432867 5. 35638 5. 506673  
11746870\_ 4. 252019 4. 358614 4. 12585 4. 335466 4. 558395 4. 366418  
11746871\_ 6. 990914 6. 987018 6. 992566 7. 122451 7. 030669 7. 039088

11746872\_ 4. 93502 5. 006658 5. 179622 4. 79509 4. 988958 5. 028975  
11746873\_ 6. 507405 6. 471643 6. 581364 6. 038569 6. 112801 6. 016391  
11746874\_ 10. 70889 10. 62901 10. 69069 10. 68791 10. 71034 10. 70198  
11746875\_ 9. 329805 9. 346314 9. 341433 9. 434264 9. 502569 9. 380578  
11746876\_ 9. 355684 9. 43897 9. 387723 9. 245541 9. 211065 9. 109055  
11746877\_ 5. 850915 5. 881032 5. 926765 5. 92379 5. 996165 5. 954759  
11746878\_ 4. 325777 4. 319178 4. 383606 4. 213098 4. 075487 4. 196307  
11746879\_ 2. 016339 1. 97651 2. 050431 2. 102967 1. 976468 1. 891326  
11746880\_ 8. 11401 8. 085982 8. 12103 8. 296039 8. 385652 8. 291188  
11746881\_ 5. 46311 5. 46311 5. 646456 4. 886448 4. 941839 4. 578807  
11746882\_ 5. 755069 5. 784049 5. 816614 4. 892796 4. 993158 4. 902339  
11746883\_ 4. 166527 4. 433354 4. 55025 4. 264468 3. 959623 4. 195599  
11746884\_ 6. 015399 5. 925765 5. 85887 5. 384289 5. 502901 5. 47126  
11746885\_ 6. 584888 6. 521663 6. 589889 6. 392782 6. 224462 6. 367004  
11746886\_ 6. 635425 6. 579707 6. 544975 6. 152561 6. 133476 6. 138472  
11746887\_ 5. 558026 5. 803242 5. 696392 5. 939884 5. 898504 5. 92548  
11746888\_ 5. 29206 5. 140077 5. 344194 4. 936549 5. 140077 5. 174303  
11746889\_ 8. 026451 8. 128317 8. 140613 9. 551769 9. 541185 9. 466537  
11746890\_ 4. 847012 4. 856849 4. 840738 4. 809814 4. 977133 4. 762648  
11746891\_ 5. 135927 5. 161019 5. 17639 5. 260396 5. 29173 5. 063254  
11746892\_ 7. 797966 7. 785845 7. 784602 7. 886288 7. 963658 7. 955976  
11746893\_ 6. 37712 6. 582026 6. 560768 6. 606537 6. 591114 6. 612121  
11746894\_ 6. 308975 6. 305214 6. 282224 6. 461837 6. 38401 6. 423175  
11746895\_ 6. 663278 6. 681027 6. 706001 6. 543095 6. 499897 6. 536503  
11746896\_ 5. 211159 5. 128213 5. 179693 5. 300688 5. 251176 5. 227288  
11746897\_ 9. 645993 9. 518806 9. 614896 9. 439732 9. 41425 9. 358388  
11746898\_ 2. 564152 2. 452691 2. 565717 2. 479108 2. 386061 2. 601655  
11746899\_ 8. 789517 8. 824943 8. 82047 8. 5877 8. 603359 8. 590244  
11746900\_ 3. 777824 3. 774626 3. 571027 3. 882973 3. 827676 3. 751818  
11746901\_ 2. 003909 2. 25483 2. 148637 1. 789827 1. 885046 1. 922548  
11746902\_ 2. 261552 2. 618058 2. 16762 2. 357275 2. 186584 2. 358525  
11746903\_ 4. 840592 5. 084605 5. 103701 5. 110666 5. 077641 5. 217955  
11746904\_ 7. 489506 7. 393531 7. 442229 7. 35863 7. 394526 7. 368746  
11746905\_ 7. 56292 7. 499696 7. 511837 7. 50831 7. 481655 7. 456638  
11746906\_ 5. 626203 5. 457826 5. 528937 5. 272794 5. 196681 5. 394486  
11746907\_ 4. 004085 3. 780614 4. 038572 3. 852331 3. 852331 3. 607366  
11746908\_ 6. 712531 6. 677195 6. 670679 6. 597662 6. 64248 6. 762769  
11746909\_ 5. 639305 5. 659269 5. 402342 5. 617035 5. 618563 5. 696506  
11746910\_ 2. 384111 2. 566292 2. 505089 2. 608906 2. 493353 2. 254598  
11746911\_ 8. 951408 8. 886189 8. 964082 9. 044537 9. 067784 9. 066524  
11746912\_ 4. 871716 5. 2493 4. 984669 5. 112616 5. 152489 5. 130079  
11746913\_ 5. 926672 5. 856467 5. 876316 5. 541395 5. 600662 5. 65183  
11746914\_ 5. 551244 5. 434745 5. 676992 5. 141967 5. 227432 5. 17647  
11746915\_ 6. 416788 6. 453673 6. 361043 6. 224678 6. 167843 6. 210244  
11746916\_ 8. 379576 8. 346566 8. 442923 8. 343534 8. 353125 8. 27695  
11746917\_ 5. 158875 5. 166789 5. 15643 5. 122141 5. 132346 5. 197866  
11746918\_ 6. 419652 6. 294838 6. 412133 6. 262388 6. 294838 6. 321185  
11746919\_ 5. 463259 5. 396277 5. 343433 5. 434415 5. 329375 5. 474211  
11746920\_ 5. 912646 5. 633595 5. 991197 6. 286412 6. 359719 6. 436024  
11746921\_ 5. 775354 5. 612346 5. 85403 6. 017675 6. 01648 6. 044562  
11746922\_ 4. 745879 4. 705026 4. 518101 4. 633751 4. 507681 4. 637059

11746923\_ 4. 042081 4. 210928 4. 094651 4. 158448 4. 158448 4. 152996  
11746924\_ 5. 156303 5. 001026 5. 009705 5. 087902 5. 146462 5. 228627  
11746925\_ 5. 838639 6. 070111 5. 897462 6. 075299 6. 138211 6. 057225  
11746926\_ 2. 843775 2. 792356 2. 656746 2. 804101 2. 646844 2. 565892  
11746927\_ 5. 213763 5. 484457 5. 385332 5. 450073 5. 629334 5. 4943  
11746928\_ 7. 609138 7. 572448 7. 583667 6. 980963 7. 071704 7. 134375  
11746929\_ 4. 477378 4. 616397 4. 66442 4. 369949 4. 380708 4. 295428  
11746930\_ 5. 493492 5. 561153 5. 510631 5. 308093 5. 443538 5. 340394  
11746931\_ 9. 470737 9. 398311 9. 416699 8. 109901 8. 080922 8. 075606  
11746932\_ 6. 842943 6. 69679 6. 797102 6. 720714 6. 642286 6. 684052  
11746933\_ 6. 941739 6. 934103 7. 026239 6. 676415 6. 717376 6. 785348  
11746934\_ 6. 748272 6. 541835 6. 477786 6. 931537 6. 949695 6. 963155  
11746935\_ 7. 49761 7. 351818 7. 488005 7. 052477 7. 009129 7. 026698  
11746936\_ 5. 435257 5. 454298 5. 546478 5. 449279 5. 650238 5. 494524  
11746937\_ 7. 617703 7. 521643 7. 51622 7. 205958 7. 254409 7. 257799  
11746938\_ 7. 239949 7. 170059 7. 286036 6. 594872 6. 546442 6. 653273  
11746939\_ 8. 217795 8. 269259 8. 1552 8. 153228 8. 185064 8. 223524  
11746940\_ 9. 080804 9. 04956 9. 097713 9. 4246 9. 434519 9. 384686  
11746941\_ 6. 054819 6. 111808 5. 901044 6. 090891 6. 209323 6. 11933  
11746942\_ 7. 569737 7. 629739 7. 714164 8. 267183 8. 385193 8. 339018  
11746943\_ 6. 711596 6. 906895 6. 549625 6. 986734 6. 970125 6. 887506  
11746944\_ 4. 553175 4. 425336 4. 325956 4. 389114 4. 393896 4. 393896  
11746945\_ 7. 134728 7. 031531 7. 035501 7. 249461 7. 404539 7. 308368  
11746946\_ 7. 308898 7. 277323 7. 373862 7. 28006 7. 246021 7. 290569  
11746947\_ 6. 807702 6. 764887 6. 853071 7. 024846 6. 855421 6. 913648  
11746948\_ 10. 11675 10. 10949 10. 13541 10. 31286 10. 2737 10. 19657  
11746949\_ 10. 1345 10. 11482 10. 07104 10. 30713 10. 25637 10. 19664  
11746950\_ 8. 848086 8. 825341 8. 974021 8. 836164 8. 69156 8. 827072  
11746951\_ 8. 932158 8. 891274 8. 987295 9. 050637 8. 991058 9. 035801  
11746952\_ 9. 332646 9. 284234 9. 314177 9. 391492 9. 471421 9. 425329  
11746953\_ 4. 18414 4. 295683 4. 368537 4. 618105 4. 75434 4. 760767  
11746954\_ 4. 291706 4. 160587 4. 144313 4. 096983 4. 238162 4. 315665  
11746955\_ 6. 596558 6. 699132 6. 591632 6. 301778 6. 559955 6. 645145  
11746956\_ 6. 596032 6. 459853 6. 557068 5. 917724 5. 918745 5. 894697  
11746957\_ 3. 187433 2. 711099 3. 068586 2. 847071 3. 20028 3. 305279  
11746958\_ 4. 278808 4. 37355 4. 239055 4. 653001 4. 239647 4. 28068  
11746959\_ 4. 763543 4. 798332 4. 695802 4. 846187 4. 843071 4. 899097  
11746960\_ 4. 658482 4. 830414 4. 737228 4. 845482 4. 875154 4. 773792  
11746961\_ 6. 176435 6. 133533 6. 207454 6. 367569 6. 424265 6. 517117  
11746962\_ 6. 211656 6. 176374 6. 208499 6. 366557 6. 561856 6. 456072  
11746963\_ 5. 822957 5. 892073 5. 748641 6. 06793 5. 828884 5. 972251  
11746964\_ 10. 82743 10. 81068 10. 81238 10. 80013 10. 81069 10. 81456  
11746965\_ 9. 06252 8. 984453 9. 003528 8. 869662 8. 89415 8. 904344  
11746966\_ 3. 046947 2. 862181 2. 994986 2. 949309 3. 190724 3. 032903  
11746967\_ 3. 305031 3. 114127 3. 10125 3. 301984 3. 251918 3. 117173  
11746968\_ 2. 746546 2. 517486 2. 639743 2. 840478 2. 847296 2. 643724  
11746969\_ 6. 375866 6. 309208 6. 282376 5. 996525 5. 937111 6. 077239  
11746970\_ 3. 543754 3. 467837 3. 409258 3. 37439 3. 543754 3. 578081  
11746971\_ 5. 117389 5. 25668 5. 027305 5. 282712 5. 205754 5. 194384  
11746972\_ 4. 96626 4. 900109 5. 029529 4. 355801 4. 437448 4. 815683  
11746973\_ 5. 926672 5. 996177 6. 031401 6. 219696 6. 318502 6. 249648



11746974\_ 7. 268389 7. 164144 7. 279686 7. 768976 7. 784719 7. 801483  
11746975\_ 5. 425558 5. 503826 5. 476938 5. 498155 5. 603851 5. 571862  
11746976\_ 9. 026434 8. 940749 8. 979836 8. 946287 8. 918965 8. 936923  
11746977\_ 9. 01917 8. 946976 8. 963264 9. 100211 9. 073682 9. 14773  
11746978\_ 7. 031289 6. 91247 7. 027789 7. 04419 7. 098409 7. 053419  
11746979\_ 3. 925181 3. 572124 3. 647654 3. 709987 3. 466459 3. 815861  
11746980\_ 5. 335229 5. 29964 5. 068202 5. 52659 5. 499029 5. 242223  
11746981\_ 5. 230305 5. 407436 5. 161824 5. 140749 5. 178944 5. 228627  
11746982\_ 7. 273453 7. 375923 7. 273165 7. 345769 7. 296492 7. 350693  
11746983\_ 6. 153495 6. 30389 6. 216841 6. 34864 6. 363027 6. 403637  
11746984\_ 6. 954843 6. 99136 7. 007439 7. 095806 7. 114174 7. 10548  
11746985\_ 7. 813749 7. 690814 7. 893168 6. 809366 6. 686431 6. 706276  
11746986\_ 11. 6226 11. 58261 11. 60712 11. 78038 11. 77202 11. 70527  
11746987\_ 2. 114724 1. 898324 1. 951375 1. 804393 1. 917793 1. 86479  
11746988\_ 7. 708934 7. 566016 7. 556827 7. 697205 7. 544872 7. 66538  
11746989\_ 8. 483465 8. 455622 8. 540013 8. 368485 8. 348792 8. 344635  
11746990\_ 5. 371795 5. 228627 5. 380945 5. 454375 5. 445534 5. 420487  
11746991\_ 7. 644415 7. 56354 7. 735193 7. 303668 7. 36957 7. 370072  
11746992\_ 3. 241466 3. 438933 3. 371912 3. 610866 3. 627777 3. 444135  
11746993\_ 6. 802564 6. 850312 6. 725258 6. 852774 6. 862004 6. 91376  
11746994\_ 6. 849064 6. 849603 6. 73095 6. 792586 6. 764716 6. 829617  
11746995\_ 3. 732578 3. 955231 3. 670728 4. 562664 4. 503839 4. 474709  
11746996\_ 3. 804389 3. 620721 3. 911191 3. 99965 3. 820312 3. 829414  
11746997\_ 6. 309964 6. 241776 6. 344395 6. 432867 6. 417225 6. 512991  
11746998\_ 2. 796303 2. 605516 2. 605516 2. 536741 2. 605516 2. 429455  
11746999\_ 2. 677804 2. 675142 2. 616587 2. 68669 2. 806911 2. 945929  
11747000\_ 9. 735642 9. 69017 9. 763059 9. 674406 9. 703763 9. 667707  
11747001\_ 5. 894697 5. 87039 5. 856399 5. 3451 5. 391872 5. 416362  
11747002\_ 5. 090001 5. 012871 5. 012871 5. 374277 5. 285612 5. 147036  
11747003\_ 2. 050013 2. 144764 2. 143945 2. 111075 1. 969068 1. 995297  
11747004\_ 6. 154936 6. 145784 6. 130393 6. 200958 6. 245201 6. 236049  
11747005\_ 5. 917961 5. 856549 5. 844064 5. 724631 5. 518758 5. 737116  
11747006\_ 4. 821877 4. 784508 4. 591516 4. 643717 4. 694207 4. 650115  
11747007\_ 6. 206103 6. 093237 6. 146763 6. 14382 6. 153702 6. 14453  
11747008\_ 9. 734887 9. 628871 9. 713624 9. 366676 9. 349506 9. 418384  
11747009\_ 5. 563229 5. 410701 5. 451434 5. 737897 5. 87351 5. 609577  
11747010\_ 3. 765184 3. 630304 3. 452341 3. 911958 3. 981435 3. 546964  
11747011\_ 8. 306976 8. 24464 8. 290764 7. 731286 7. 71761 7. 86678  
11747012\_ 2. 255573 2. 175269 1. 977811 2. 065506 2. 136231 2. 136231  
11747013\_ 9. 174787 9. 192884 9. 236592 9. 450547 9. 524635 9. 481473  
11747014\_ 3. 810671 4. 091876 4. 07663 4. 008092 4. 033933 4. 092553  
11747015\_ 7. 800266 7. 877809 7. 775207 7. 846521 7. 851524 7. 82923  
11747016\_ 6. 38625 6. 427446 6. 235594 6. 421357 6. 355729 6. 530545  
11747017\_ 3. 944807 3. 74126 3. 823336 3. 891612 3. 915939 3. 757405  
11747018\_ 6. 243983 6. 344637 6. 328714 6. 381543 6. 256789 6. 251457  
11747019\_ 4. 887561 4. 922165 4. 836424 4. 992687 5. 26034 5. 012042  
11747020\_ 4. 945928 5. 140052 4. 974234 5. 214828 5. 119612 5. 073036  
11747021\_ 2. 468386 2. 356522 2. 437519 2. 318451 2. 464411 2. 447401  
11747022\_ 3. 690332 3. 694721 3. 659488 3. 738173 3. 734529 3. 904765  
11747023\_ 7. 74514 7. 73391 7. 737105 7. 885052 7. 898536 7. 842166  
11747024\_ 4. 044543 3. 809031 3. 872822 4. 197324 4. 103238 4. 013679

11747025\_ 7. 352699 7. 292704 7. 276076 7. 521374 7. 559586 7. 501125  
11747026\_ 5. 845365 6. 040382 5. 947792 6. 101559 6. 084125 6. 040382  
11747027\_ 6. 920509 6. 968195 6. 92272 7. 089458 7. 124592 7. 055162  
11747028\_ 5. 863636 6. 146168 6. 032936 5. 99575 6. 168809 6. 118838  
11747029\_ 5. 114681 5. 139648 5. 285171 5. 283489 5. 358994 5. 154422  
11747030\_ 5. 535838 5. 470715 5. 554436 5. 347578 5. 478327 5. 438856  
11747031\_ 5. 014849 4. 9226 4. 899088 4. 921734 4. 809468 4. 852782  
11747032\_ 7. 572431 7. 619926 7. 544282 7. 590893 7. 600502 7. 659004  
11747033\_ 2. 478042 2. 52472 2. 631668 2. 406903 2. 436442 2. 571974  
11747034\_ 6. 914794 6. 780891 6. 885345 7. 156454 7. 105807 7. 093854  
11747035\_ 5. 895498 5. 75637 5. 922714 5. 907548 5. 894697 5. 94125  
11747036\_ 2. 605516 2. 609055 2. 657145 2. 702457 2. 614352 2. 83198  
11747037\_ 5. 869151 5. 864324 5. 866927 5. 838613 5. 937179 5. 894862  
11747038\_ 3. 356975 3. 607978 3. 73976 4. 000243 3. 987193 4. 021634  
11747039\_ 7. 046086 6. 896691 7. 065198 6. 706589 6. 614637 6. 714177  
11747040\_ 4. 200043 4. 370231 4. 020011 4. 486611 4. 43505 4. 416454  
11747041\_ 11. 51129 11. 47857 11. 50788 11. 67099 11. 64521 11. 60223  
11747042\_ 2. 566665 2. 649145 2. 643815 2. 643549 2. 420145 2. 655952  
11747043\_ 4. 65418 4. 441016 4. 25027 4. 529049 4. 692655 4. 638504  
11747044\_ 7. 472989 7. 443087 7. 44824 7. 648941 7. 566016 7. 60841  
11747045\_ 5. 845365 5. 876185 5. 676992 5. 791375 5. 820467 5. 820467  
11747046\_ 9. 359255 9. 320952 9. 233068 9. 275679 9. 201349 9. 20507  
11747047\_ 6. 204422 6. 327532 6. 316872 5. 073036 5. 191247 5. 268645  
11747048\_ 6. 982937 6. 853038 7. 042517 6. 362799 6. 271697 6. 282224  
11747049\_ 5. 029529 5. 294858 5. 316158 5. 520223 5. 397526 5. 453522  
11747050\_ 7. 020666 7. 048326 6. 994016 7. 002718 7. 085444 7. 087355  
11747051\_ 7. 960207 8. 012883 8. 107963 7. 913044 7. 942555 7. 8821  
11747052\_ 5. 390662 5. 403403 5. 451635 5. 688094 5. 715795 5. 685297  
11747053\_ 2. 700378 2. 700378 2. 678498 2. 712321 2. 640717 2. 700378  
11747054\_ 3. 734267 3. 917265 3. 992762 3. 803587 3. 970154 3. 91179  
11747055\_ 6. 518284 6. 325457 6. 44999 5. 893436 5. 789246 5. 858069  
11747056\_ 6. 128943 6. 140331 6. 018648 6. 189726 6. 217568 6. 039237  
11747057\_ 5. 139424 5. 242142 4. 958123 5. 210129 5. 246658 5. 368149  
11747058\_ 6. 962186 6. 928854 6. 896715 6. 740315 6. 649712 6. 603754  
11747059\_ 5. 507575 5. 554436 5. 371809 5. 579525 5. 649252 5. 660938  
11747060\_ 3. 59983 3. 718489 3. 5567 3. 629122 3. 600335 3. 764308  
11747061\_ 8. 371352 8. 231058 8. 284928 8. 393928 8. 418789 8. 386567  
11747062\_ 5. 963391 6. 118359 6. 090501 6. 190576 6. 227754 6. 189126  
11747063\_ 5. 964777 5. 781829 6. 005771 5. 189628 4. 984669 5. 190445  
11747064\_ 9. 862493 9. 847742 9. 896018 9. 811952 9. 885052 9. 808312  
11747065\_ 8. 899318 8. 830129 8. 872375 8. 767497 8. 818347 8. 813518  
11747066\_ 10. 55442 10. 53085 10. 58433 10. 46216 10. 48006 10. 5229  
11747067\_ 11. 74854 11. 72131 11. 75517 11. 7482 11. 79138 11. 72205  
11747068\_ 12. 04251 12. 02277 12. 03207 12. 07016 12. 07946 12. 06081  
11747069\_ 5. 229374 4. 88175 5. 172679 5. 474049 5. 549729 5. 465066  
11747070\_ 7. 038731 7. 138068 7. 099734 6. 931939 6. 986531 7. 06414  
11747071\_ 1. 95938 1. 868501 2. 064428 1. 804393 1. 749098 2. 064428  
11747072\_ 10. 80281 10. 7878 10. 8032 10. 63062 10. 67227 10. 69067  
11747073\_ 7. 730153 7. 710464 7. 729909 8. 095467 8. 166476 8. 062216  
11747074\_ 8. 538776 8. 502509 8. 516102 8. 822229 8. 903365 8. 866251  
11747075\_ 8. 960699 8. 896389 8. 908231 8. 66117 8. 690758 8. 688187

11747076\_ 7. 827576 7. 763091 7. 79871 7. 983017 8. 009707 8. 002344  
11747077\_ 13. 37882 13. 37644 13. 36338 13. 34091 13. 34684 13. 3233  
11747078\_ 2. 279578 2. 271669 2. 271669 2. 718322 2. 655343 2. 409802  
11747079\_ 7. 226368 7. 396116 7. 223288 9. 138732 9. 166726 9. 30453  
11747080\_ 5. 829945 5. 773199 5. 91024 6. 400829 6. 415708 6. 444783  
11747081\_ 6. 599105 6. 506843 6. 705285 6. 948464 6. 922699 6. 887296  
11747082\_ 8. 989796 8. 980736 9. 045746 9. 495512 9. 419247 9. 423346  
11747083\_ 5. 36906 5. 274383 5. 414869 5. 300839 5. 357365 5. 454297  
11747084\_ 7. 899657 7. 829147 7. 882658 7. 839235 7. 80868 7. 840837  
11747085\_ 7. 411857 7. 489907 7. 542546 8. 133545 8. 251951 8. 206599  
11747086\_ 5. 704919 5. 627696 5. 654126 5. 648092 5. 665691 5. 636214  
11747087\_ 3. 214996 3. 59723 3. 118172 3. 382423 3. 517263 3. 510644  
11747088\_ 3. 258497 3. 180062 3. 025972 2. 761447 2. 741894 2. 968358  
11747089\_ 5. 60369 5. 69085 5. 667756 5. 820449 5. 784683 5. 772869  
11747090\_ 9. 826733 9. 780043 9. 80142 9. 619065 9. 577754 9. 490507  
11747091\_ 6. 045597 6. 03497 6. 053211 7. 004797 7. 081334 6. 996891  
11747092\_ 6. 346992 6. 435588 6. 353144 7. 308294 7. 294161 7. 301477  
11747093\_ 6. 536494 6. 419383 6. 426325 6. 318829 6. 233608 6. 198794  
11747094\_ 10. 44182 10. 36432 10. 44285 10. 29661 10. 3621 10. 2863  
11747095\_ 5. 296219 5. 535569 5. 122191 5. 46637 5. 562303 5. 402746  
11747096\_ 7. 34687 7. 311854 7. 38923 8. 048767 7. 959781 7. 943849  
11747097\_ 3. 309212 3. 26633 3. 165778 3. 52482 3. 309212 3. 358509  
11747098\_ 5. 381331 5. 298585 5. 129028 5. 237008 5. 309505 5. 204944  
11747099\_ 4. 472115 4. 560007 4. 401519 4. 382423 4. 459939 4. 629726  
11747100\_ 6. 334539 6. 35796 6. 341046 6. 34748 6. 316134 6. 347443  
11747101\_ 7. 178041 7. 042327 7. 074259 6. 310755 6. 34864 6. 541685  
11747102\_ 6. 717405 6. 800072 6. 683871 6. 850646 6. 801751 6. 653013  
11747103\_ 3. 573007 3. 669708 3. 566566 3. 683133 3. 522523 3. 509142  
11747104\_ 5. 129739 5. 404423 5. 148835 4. 931731 4. 836035 4. 804279  
11747105\_ 10. 10689 10. 08727 10. 11218 10. 01862 9. 992931 9. 975332  
11747106\_ 5. 453966 5. 371044 5. 479914 5. 413742 5. 41404 5. 465755  
11747107\_ 6. 580657 6. 502291 6. 643323 6. 53251 6. 601604 6. 47947  
11747108\_ 6. 117431 5. 967782 6. 084443 5. 900401 5. 928965 5. 960219  
11747109\_ 5. 973124 5. 960871 6. 034764 6. 024232 6. 07752 5. 974311  
11747110\_ 5. 844109 5. 80304 5. 842198 6. 123798 6. 137784 6. 267586  
11747111\_ 5. 13633 5. 337576 5. 262399 5. 26034 5. 295818 5. 229656  
11747112\_ 6. 657762 6. 567647 6. 557758 6. 361732 6. 464805 6. 481046  
11747113\_ 5. 285218 5. 389705 5. 414869 5. 35842 5. 253278 5. 479313  
11747114\_ 7. 345731 7. 270962 7. 400837 7. 872797 7. 9086 7. 968985  
11747115\_ 4. 895923 4. 683676 4. 789866 5. 038445 5. 129114 4. 927089  
11747116\_ 5. 657076 5. 524862 5. 649794 5. 365761 5. 425591 5. 227357  
11747117\_ 2. 657847 2. 509418 2. 304829 2. 501735 2. 388076 2. 39146  
11747118\_ 3. 541765 3. 551365 3. 190267 3. 587266 3. 675256 3. 563497  
11747119\_ 4. 632426 4. 721368 4. 516026 4. 568059 4. 543604 4. 519635  
11747120\_ 5. 319148 5. 309278 5. 253074 5. 319148 5. 414927 5. 409618  
11747121\_ 5. 987431 6. 023958 6. 23831 6. 036044 6. 259845 6. 051554  
11747122\_ 6. 659905 6. 517658 6. 506043 6. 370896 6. 355144 6. 512991  
11747123\_ 2. 878672 2. 799937 2. 713166 2. 83198 2. 796118 2. 740268  
11747124\_ 4. 388981 4. 3656 4. 204217 4. 472528 4. 212081 4. 430014  
11747125\_ 8. 556712 8. 529623 8. 684266 7. 673774 7. 753741 7. 664317  
11747126\_ 6. 815241 6. 643332 6. 823175 6. 807262 6. 913776 6. 959458

11747127\_ 4. 331577 4. 036183 4. 301508 3. 618391 3. 873431 3. 69048  
11747128\_ 6. 262847 6. 360394 6. 312603 6. 356176 6. 415814 6. 300094  
11747129\_ 4. 6584 4. 502165 4. 406821 4. 571574 4. 57551 4. 674267  
11747130\_ 5. 687561 5. 815789 5. 621236 5. 828211 5. 848619 5. 798613  
11747131\_ 4. 108543 3. 854753 3. 841453 3. 804167 3. 903241 3. 812519  
11747132\_ 5. 546472 5. 653389 5. 584813 5. 554787 5. 71218 5. 649108  
11747133\_ 5. 971359 5. 916906 5. 950197 6. 097242 6. 252987 6. 199256  
11747134\_ 7. 076762 7. 064918 7. 149972 6. 748141 6. 805883 6. 807485  
11747135\_ 7. 743319 7. 637436 7. 637796 7. 605333 7. 703033 7. 691238  
11747136\_ 5. 089698 5. 344356 5. 265054 5. 3515 5. 490962 5. 450072  
11747137\_ 4. 275543 3. 917211 4. 027322 3. 407279 3. 181929 3. 371407  
11747138\_ 2. 095256 2. 311468 2. 260674 2. 25483 2. 256748 2. 182106  
11747139\_ 7. 782119 7. 683514 7. 802581 7. 692495 7. 682041 7. 66885  
11747140\_ 3. 125001 3. 243033 3. 348947 3. 246331 3. 255589 3. 169004  
11747141\_ 6. 089229 6. 231277 6. 172055 6. 211112 6. 292403 6. 2856  
11747142\_ 7. 070375 7. 02563 6. 971618 6. 196592 6. 321585 6. 263567  
11747143\_ 3. 256451 3. 162519 3. 015397 3. 044387 3. 105569 3. 275008  
11747144\_ 5. 480661 5. 480966 5. 779666 5. 633329 5. 686361 5. 715483  
11747145\_ 5. 808066 5. 901183 6. 121539 5. 890525 6. 153542 6. 119359  
11747146\_ 8. 439981 8. 31059 8. 492494 8. 726038 8. 69405 8. 699471  
11747147\_ 7. 920437 7. 89837 7. 927162 7. 588323 7. 545885 7. 569923  
11747148\_ 3. 635661 3. 847749 3. 77024 3. 632921 3. 784412 4. 023048  
11747149\_ 4. 726347 4. 791229 4. 678423 5. 28877 4. 988304 5. 527615  
11747150\_ 3. 699814 3. 603551 3. 527042 3. 97105 3. 746337 3. 682633  
11747151\_ 7. 735194 7. 674087 7. 680868 7. 631382 7. 67168 7. 664116  
11747152\_ 6. 511198 6. 425692 6. 401128 6. 014571 5. 869574 5. 927288  
11747153\_ 8. 771875 8. 726095 8. 801551 8. 703885 8. 616464 8. 646168  
11747154\_ 4. 12219 4. 151165 4. 148472 4. 762291 4. 737618 4. 968469  
11747155\_ 4. 30075 4. 229532 4. 14953 4. 69321 4. 52229 4. 61867  
11747156\_ 5. 714075 5. 827573 5. 791179 6. 097796 6. 018951 6. 053505  
11747157\_ 3. 806799 3. 606313 3. 850246 3. 628749 3. 72519 3. 817068  
11747158\_ 7. 989915 8. 209681 8. 080028 8. 278426 8. 383683 8. 305719  
11747159\_ 6. 365831 6. 457855 6. 379103 6. 440479 6. 474296 6. 481973  
11747160\_ 5. 978897 6. 118838 5. 973564 6. 082496 6. 217498 6. 240392  
11747161\_ 5. 142415 5. 249907 5. 193284 5. 196645 5. 136916 5. 245834  
11747162\_ 5. 78494 5. 684475 5. 922714 5. 28128 5. 28128 5. 297498  
11747163\_ 7. 422781 7. 335481 7. 396898 6. 827504 6. 783737 6. 78186  
11747164\_ 8. 95934 8. 908816 8. 97717 8. 984553 9. 061866 9. 05175  
11747165\_ 6. 932483 6. 977454 6. 932483 7. 01171 7. 138754 7. 085713  
11747166\_ 7. 959973 7. 893824 7. 961172 7. 553982 7. 602147 7. 577486  
11747167\_ 3. 384558 3. 361728 3. 338052 3. 509828 3. 357937 3. 586012  
11747168\_ 4. 873572 4. 319984 4. 642975 4. 937843 5. 19421 5. 050829  
11747169\_ 2. 494664 2. 447945 2. 47102 2. 399766 2. 433525 2. 384435  
11747170\_ 7. 367542 7. 458272 7. 483735 7. 253288 7. 234315 7. 267275  
11747171\_ 6. 226186 6. 417505 6. 330033 6. 63271 6. 447009 6. 593307  
11747172\_ 2. 380622 2. 237991 2. 114664 2. 483771 2. 322856 2. 293404  
11747173\_ 2. 715284 2. 52515 2. 635276 2. 839194 2. 644965 2. 521263  
11747174\_ 5. 422407 5. 202565 5. 350845 4. 815642 4. 695622 4. 836869  
11747175\_ 4. 870904 4. 996664 4. 843271 4. 874234 4. 947258 4. 824964  
11747176\_ 4. 261891 4. 221201 4. 135496 4. 31709 4. 200678 4. 349016  
11747177\_ 4. 541951 4. 802723 4. 649188 4. 751461 4. 890539 4. 643717

11747178\_ 5. 558816 5. 232682 5. 558816 5. 77217 5. 645642 5. 987674  
11747179\_ 7. 52367 7. 698423 7. 55239 8. 204513 8. 067842 7. 961621  
11747180\_ 6. 552689 6. 46659 6. 46208 6. 46659 6. 490922 6. 447405  
11747181\_ 9. 250577 9. 194111 9. 216596 9. 26763 9. 335827 9. 319211  
11747182\_ 3. 245765 3. 184529 3. 052347 3. 319522 3. 366467 3. 128617  
11747183\_ 7. 825391 7. 7954 7. 947431 8. 534608 8. 591854 8. 590034  
11747184\_ 4. 242313 4. 28684 4. 368442 4. 400719 4. 441783 4. 538755  
11747185\_ 3. 984492 4. 001909 3. 94005 4. 026666 3. 930506 3. 845934  
11747186\_ 7. 817377 7. 944044 7. 82995 7. 782568 7. 814958 7. 858255  
11747187\_ 7. 289707 7. 398304 7. 30228 7. 29334 7. 262503 7. 306443  
11747188\_ 5. 549624 5. 349212 5. 26904 5. 364883 5. 510685 5. 395496  
11747189\_ 6. 410807 6. 493771 6. 221174 6. 453613 6. 442843 6. 427194  
11747190\_ 5. 675616 5. 625255 5. 564653 5. 337776 5. 356895 5. 253516  
11747191\_ 5. 262469 5. 534006 5. 414869 5. 439631 5. 548873 5. 475572  
11747192\_ 6. 308815 6. 564232 6. 488812 6. 814772 6. 64821 6. 564927  
11747193\_ 3. 604544 3. 586207 3. 526835 3. 840779 3. 720093 3. 790313  
11747194\_ 5. 646204 5. 817257 5. 878652 5. 903572 6. 059712 5. 781837  
11747195\_ 10. 27406 10. 22603 10. 24568 10. 25127 10. 30903 10. 2736  
11747196\_ 5. 430787 5. 434351 5. 263945 5. 379667 5. 336855 5. 297498  
11747197\_ 1. 970013 1. 985307 1. 933117 1. 866461 1. 718076 1. 877674  
11747198\_ 8. 015852 8. 136132 8. 040225 8. 001849 8. 017129 7. 991924  
11747199\_ 7. 020462 6. 932153 6. 970953 6. 952903 6. 975655 6. 930606  
11747200\_ 8. 808302 8. 773962 8. 858852 8. 633535 8. 614881 8. 661167  
11747201\_ 6. 545839 6. 666207 6. 604941 6. 517454 6. 545236 6. 467718  
11747202\_ 6. 900697 6. 936579 6. 982937 7. 37679 7. 294922 7. 304784  
11747203\_ 7. 358888 7. 370827 7. 438345 7. 453092 7. 528449 7. 501281  
11747204\_ 5. 442778 5. 499631 5. 394272 5. 507637 5. 453793 5. 59008  
11747205\_ 6. 123163 6. 180894 6. 054007 6. 276628 6. 159771 6. 1682  
11747206\_ 6. 258482 6. 190225 6. 257692 5. 767472 5. 788676 5. 893984  
11747207\_ 9. 712871 9. 706753 9. 732034 9. 831013 9. 812311 9. 856452  
11747208\_ 6. 912885 6. 832947 6. 81259 5. 684826 5. 680503 5. 732315  
11747209\_ 9. 353661 9. 34837 9. 33201 9. 035026 9. 029216 8. 988564  
11747210\_ 5. 845365 5. 809207 5. 855165 7. 05542 7. 014997 7. 137799  
11747211\_ 6. 104246 6. 02335 6. 054128 6. 119752 6. 032858 6. 182279  
11747212\_ 6. 379222 6. 368236 6. 391123 6. 29125 6. 210834 6. 270321  
11747213\_ 5. 546081 5. 587158 5. 999456 5. 246083 5. 298942 5. 345526  
11747214\_ 2. 856092 2. 856092 2. 856092 2. 855242 2. 856092 2. 67823  
11747215\_ 10. 63602 10. 56469 10. 62007 10. 78803 10. 81349 10. 80413  
11747216\_ 6. 158188 6. 236051 6. 044282 6. 188183 6. 216242 6. 216242  
11747217\_ 2. 092704 2. 212727 2. 46019 2. 230796 2. 22318 2. 326676  
11747218\_ 4. 874602 4. 888493 4. 776241 4. 774644 4. 871592 5. 258124  
11747219\_ 7. 587303 7. 523852 7. 612188 6. 722358 6. 879117 6. 906823  
11747220\_ 6. 297336 6. 191116 6. 191116 6. 94441 6. 78392 7. 051091  
11747221\_ 4. 815683 4. 908779 4. 825634 4. 945482 4. 894919 5. 005942  
11747222\_ 5. 815351 5. 89942 5. 918789 6. 186182 6. 350964 6. 372053  
11747223\_ 7. 678675 7. 586012 7. 658176 6. 852552 7. 085425 7. 015431  
11747224\_ 6. 17144 6. 463021 6. 473811 6. 30764 6. 210406 6. 451633  
11747225\_ 4. 815022 4. 882691 4. 702155 5. 007685 4. 769931 4. 604451  
11747226\_ 3. 503641 3. 38195 3. 487457 3. 398236 3. 450702 3. 457648  
11747227\_ 5. 08123 4. 804594 5. 077195 5. 050095 5. 050095 5. 252996  
11747228\_ 11. 0647 11. 04859 11. 10246 11. 05379 11. 04479 11. 03314

11747229\_ 4. 123554 4. 139967 4. 026092 4. 060292 4. 065709 4. 206775  
11747230\_ 7. 75514 7. 628105 7. 769947 8. 578025 8. 590405 8. 557492  
11747231\_ 6. 060287 6. 058788 6. 139298 5. 422018 5. 334062 5. 341288  
11747232\_ 7. 508437 7. 299486 7. 509102 7. 001747 6. 890194 6. 904174  
11747233\_ 5. 568186 5. 512841 5. 660586 6. 119726 6. 087357 6. 131301  
11747234\_ 3. 406982 3. 563071 3. 330595 3. 501868 3. 501868 3. 312796  
11747235\_ 5. 202114 4. 98273 4. 954158 5. 162056 4. 938371 4. 944333  
11747236\_ 8. 168649 8. 12172 8. 126638 8. 002939 8. 021826 7. 972703  
11747237\_ 2. 764554 3. 209408 2. 822399 2. 890623 2. 822399 2. 725427  
11747238\_ 7. 3825 7. 333445 7. 429682 7. 404034 7. 422186 7. 38699  
11747239\_ 8. 886427 8. 837855 8. 914869 8. 9831 9. 009908 9. 033984  
11747240\_ 7. 680811 7. 61764 7. 694408 7. 25453 7. 28912 7. 37946  
11747241\_ 6. 317985 6. 283087 6. 290697 6. 330921 6. 424756 6. 435487  
11747242\_ 6. 238169 6. 122513 6. 018553 6. 029283 6. 108706 6. 011116  
11747243\_ 5. 156303 5. 42968 5. 424077 5. 281438 5. 473735 5. 360146  
11747244\_ 5. 505886 5. 38608 5. 518169 5. 325436 5. 304862 5. 346431  
11747245\_ 8. 368319 8. 242078 8. 349335 7. 90389 7. 898889 7. 884973  
11747246\_ 4. 714431 4. 709463 4. 623356 4. 853692 4. 75961 4. 723873  
11747247\_ 9. 256 9. 330926 9. 218846 9. 247784 9. 224035 9. 103975  
11747248\_ 3. 788061 3. 43552 3. 453513 3. 001735 3. 400163 3. 255174  
11747249\_ 9. 375958 9. 34526 9. 36834 9. 371942 9. 379007 9. 370556  
11747250\_ 6. 377476 6. 342535 6. 310222 6. 026448 5. 96857 5. 993375  
11747251\_ 3. 818401 3. 847991 3. 847991 3. 847991 3. 869998 3. 879309  
11747252\_ 8. 199648 8. 188008 8. 249302 8. 052649 8. 011306 8. 08304  
11747253\_ 6. 874189 6. 857967 6. 866762 7. 712285 7. 796695 7. 752817  
11747254\_ 5. 97118 5. 96989 5. 994811 5. 857272 5. 81225 5. 858345  
11747255\_ 5. 288828 5. 443745 5. 414869 5. 201726 5. 149545 5. 152881  
11747256\_ 5. 4396 5. 132951 5. 414869 5. 150082 5. 025088 5. 073036  
11747257\_ 8. 088636 8. 042304 8. 116341 8. 009489 8. 050472 8. 068659  
11747258\_ 6. 278099 6. 274668 6. 289975 6. 29878 6. 222333 6. 21632  
11747259\_ 5. 736745 5. 979384 5. 770161 5. 802642 5. 914366 5. 970046  
11747260\_ 4. 953361 4. 954738 4. 909512 4. 928468 4. 925223 4. 918432  
11747261\_ 5. 844127 5. 761783 5. 8679 5. 886172 5. 808791 5. 760895  
11747262\_ 7. 91209 7. 965716 7. 883469 7. 367929 7. 298168 7. 251337  
11747263\_ 3. 619906 3. 578973 3. 740892 3. 850246 3. 760778 3. 835345  
11747264\_ 2. 018967 2. 125987 2. 195637 2. 505627 2. 354719 2. 378487  
11747265\_ 4. 465633 4. 576157 4. 542278 4. 740703 4. 645915 4. 989622  
11747266\_ 3. 249924 3. 013696 3. 064479 2. 918256 2. 833398 2. 889384  
11747267\_ 3. 92225 3. 819923 3. 740892 3. 915748 3. 855673 3. 752482  
11747268\_ 8. 721672 8. 695174 8. 728864 8. 649621 8. 570773 8. 485936  
11747269\_ 1. 963053 2. 072762 2. 174823 1. 980357 1. 989753 1. 90205  
11747270\_ 8. 971445 8. 928296 8. 938549 9. 109752 9. 204988 9. 152695  
11747271\_ 6. 254051 5. 979543 6. 074321 6. 248273 6. 203073 6. 133557  
11747272\_ 6. 688384 6. 576329 6. 741737 6. 987473 6. 891087 6. 930468  
11747273\_ 5. 812777 5. 815789 5. 458673 5. 835478 5. 870242 5. 81502  
11747274\_ 7. 011246 7. 042002 7. 105048 7. 183605 7. 029363 7. 184672  
11747275\_ 5. 077898 4. 9226 4. 602252 5. 00001 5. 064748 5. 136682  
11747276\_ 8. 641343 8. 555277 8. 621818 8. 68997 8. 727586 8. 776626  
11747277\_ 7. 917057 7. 788818 7. 891478 8. 309761 8. 348161 8. 316814  
11747278\_ 11. 21909 11. 21605 11. 21891 11. 23526 11. 27683 11. 235  
11747279\_ 7. 625064 7. 551617 7. 6027 8. 332735 8. 339699 8. 313741

11747280\_ 6. 989495 6. 922906 7. 003642 7. 878741 7. 941085 7. 955183  
11747281\_ 4. 026092 4. 0316 3. 934242 3. 970976 3. 90425 3. 868667  
11747282\_ 12. 59846 12. 61344 12. 5961 12. 4576 12. 44782 12. 39462  
11747283\_ 3. 892317 3. 903807 3. 919688 3. 887116 4. 060719 3. 800826  
11747284\_ 6. 05904 6. 040079 6. 020854 6. 118838 6. 065982 5. 927906  
11747285\_ 6. 999533 6. 919156 7. 007439 6. 815853 6. 781986 6. 809208  
11747286\_ 8. 7621 8. 771404 8. 807423 8. 457696 8. 376618 8. 349055  
11747287\_ 7. 811644 7. 803065 7. 813042 7. 781327 7. 862414 7. 862781  
11747288\_ 9. 643381 9. 61562 9. 630175 8. 86505 8. 900733 8. 897841  
11747289\_ 5. 539859 5. 322813 5. 355352 5. 265493 5. 140885 5. 225896  
11747290\_ 9. 145134 9. 139544 9. 10377 9. 185521 9. 122117 9. 069658  
11747291\_ 9. 21532 9. 115732 9. 177035 9. 009788 9. 013435 8. 955111  
11747292\_ 9. 742862 9. 726194 9. 656367 10. 11029 10. 06474 10. 02513  
11747293\_ 4. 724578 4. 484166 4. 641229 4. 594028 4. 700551 4. 797062  
11747294\_ 6. 520868 6. 536086 6. 604788 6. 702526 6. 785425 6. 793248  
11747295\_ 6. 188681 6. 043024 5. 827088 6. 158411 6. 015874 6. 128293  
11747296\_ 7. 305475 7. 262294 7. 286039 6. 623518 6. 707837 6. 67471  
11747297\_ 6. 158051 6. 150757 6. 105088 6. 716921 6. 830085 6. 840784  
11747298\_ 11. 24855 11. 19976 11. 24039 10. 74131 10. 77751 10. 71481  
11747299\_ 4. 767423 4. 558641 4. 626065 4. 58686 4. 69271 4. 68298  
11747300\_ 6. 366155 6. 282757 6. 363399 6. 425493 6. 466908 6. 382582  
11747301\_ 8. 530947 8. 447471 8. 638907 8. 159005 8. 143783 8. 123177  
11747302\_ 5. 082946 5. 134685 5. 162902 4. 563466 4. 589053 4. 523544  
11747303\_ 7. 001936 7. 026245 7. 116566 7. 028954 7. 128805 7. 005509  
11747304\_ 4. 876295 4. 942535 4. 65835 4. 99806 4. 876295 4. 903367  
11747305\_ 5. 080023 5. 056342 5. 047182 5. 242098 5. 306897 5. 223503  
11747306\_ 8. 230831 8. 122805 8. 157318 8. 286104 8. 304405 8. 333777  
11747307\_ 7. 326744 7. 30489 7. 417186 7. 12535 7. 100173 7. 13856  
11747308\_ 7. 127701 7. 14322 6. 934615 7. 235519 7. 093856 6. 953131  
11747309\_ 9. 410104 9. 415651 9. 44913 9. 318532 9. 23097 9. 233203  
11747310\_ 7. 487815 7. 46349 7. 572041 7. 797856 7. 797856 7. 709152  
11747311\_ 7. 508953 7. 514264 7. 458408 7. 690855 7. 732432 7. 664218  
11747312\_ 9. 463793 9. 519462 9. 504479 9. 679792 9. 705007 9. 627015  
11747313\_ 8. 596826 8. 61746 8. 624473 8. 568341 8. 581762 8. 562955  
11747314\_ 10. 19701 10. 15093 10. 21634 9. 173248 9. 17469 9. 13567  
11747315\_ 7. 296788 7. 287295 7. 290569 7. 129352 7. 124482 7. 137793  
11747316\_ 4. 91815 4. 83754 4. 827979 4. 8471 4. 802962 4. 816824  
11747317\_ 7. 282278 7. 175498 7. 235841 7. 222954 7. 295031 7. 369905  
11747318\_ 6. 502421 6. 436195 6. 462862 6. 257474 6. 343755 6. 384734  
11747319\_ 5. 823273 5. 888896 5. 775752 6. 138785 6. 089282 6. 089664  
11747320\_ 6. 002424 5. 838794 5. 977891 6. 097927 6. 114211 6. 153469  
11747321\_ 7. 305284 7. 372373 7. 337495 7. 128477 7. 218141 7. 096035  
11747322\_ 5. 935258 5. 808267 5. 973344 5. 894697 6. 022798 5. 887533  
11747323\_ 6. 78236 6. 742096 6. 763327 7. 843366 7. 7933 7. 755557  
11747324\_ 7. 972604 7. 938406 7. 995268 8. 389048 8. 422044 8. 369108  
11747325\_ 2. 81985 2. 883671 2. 508834 2. 949271 2. 901591 3. 005526  
11747326\_ 8. 562338 8. 517092 8. 519697 8. 735335 8. 64042 8. 749006  
11747327\_ 8. 319811 8. 285511 8. 270751 8. 309654 8. 293252 8. 207977  
11747328\_ 6. 393356 6. 496042 6. 328398 6. 310444 6. 262205 6. 305307  
11747329\_ 6. 739006 6. 658144 6. 640601 6. 610555 6. 747533 6. 721629  
11747330\_ 7. 343723 7. 33416 7. 324474 7. 433944 7. 398312 7. 409349

11747331\_ 9. 548325 9. 44261 9. 445843 9. 548325 9. 534229 9. 567079  
11747332\_ 8. 058158 8. 025054 8. 106595 8. 290111 8. 350155 8. 318746  
11747333\_ 8. 676099 8. 679875 8. 627169 8. 940282 8. 884851 8. 773123  
11747334\_ 9. 972997 9. 908051 9. 981771 10. 17199 10. 20173 10. 17704  
11747335\_ 6. 91653 6. 765911 6. 847073 7. 427556 7. 426633 7. 500583  
11747336\_ 7. 661278 7. 674086 7. 725612 7. 755812 7. 737968 7. 810974  
11747337\_ 11. 19107 11. 14314 11. 17263 10. 8883 10. 90474 10. 85522  
11747338\_ 7. 214944 7. 115057 7. 221483 6. 540814 6. 621482 6. 697102  
11747339\_ 7. 480877 7. 57711 7. 615853 6. 930052 7. 166155 6. 994378  
11747340\_ 7. 678873 7. 828765 7. 933376 6. 966693 6. 925573 7. 021392  
11747341\_ 6. 528401 6. 600041 6. 616166 6. 392411 6. 327111 6. 460262  
11747342\_ 6. 585517 6. 495022 6. 490268 6. 967816 7. 003664 7. 013085  
11747343\_ 6. 013039 6. 111684 5. 997654 6. 051898 6. 081228 6. 10059  
11747344\_ 7. 069124 7. 018239 7. 047795 7. 040692 6. 941188 6. 798084  
11747345\_ 9. 621071 9. 556559 9. 540118 9. 36632 9. 369486 9. 384813  
11747346\_ 8. 312245 8. 321049 8. 358585 8. 204785 8. 216722 8. 154691  
11747347\_ 5. 983321 5. 928951 5. 899049 5. 884499 5. 857298 5. 81518  
11747348\_ 9. 373579 9. 293199 9. 403313 10. 15326 10. 20518 10. 18656  
11747349\_ 8. 935633 8. 800049 8. 962712 9. 859317 9. 872677 9. 884566  
11747350\_ 8. 817217 8. 700859 8. 768898 8. 157602 8. 137033 8. 197782  
11747351\_ 7. 298265 7. 2619 7. 322702 7. 265205 7. 23719 7. 179426  
11747352\_ 6. 147749 6. 010003 6. 118379 5. 949275 5. 973836 5. 993829  
11747353\_ 8. 750737 8. 645994 8. 614241 8. 548845 8. 509327 8. 476707  
11747354\_ 3. 316088 3. 356352 3. 458663 3. 360979 3. 04211 3. 238756  
11747355\_ 7. 933225 7. 911007 7. 944741 8. 139727 8. 134691 8. 201904  
11747356\_ 7. 263804 7. 179801 7. 283844 7. 470269 7. 466769 7. 503786  
11747357\_ 8. 829921 8. 785331 8. 833119 9. 257897 9. 29996 9. 201295  
11747358\_ 8. 278813 8. 152514 8. 211864 8. 540195 8. 629386 8. 563359  
11747359\_ 5. 608452 5. 655051 5. 618757 5. 741863 5. 817302 5. 867153  
11747360\_ 4. 107923 4. 174945 4. 192747 4. 192747 4. 235054 4. 277112  
11747361\_ 10. 14564 10. 0449 10. 18027 10. 45532 10. 5078 10. 53819  
11747362\_ 6. 656846 6. 448502 6. 62947 6. 714277 6. 744101 6. 686431  
11747363\_ 6. 628838 6. 612181 6. 621257 6. 683414 6. 618006 6. 774697  
11747364\_ 7. 080559 7. 140668 7. 11437 7. 350382 7. 28108 7. 294398  
11747365\_ 9. 057293 8. 927493 9. 044886 9. 253421 9. 275294 9. 265585  
11747366\_ 4. 102771 3. 926518 3. 953285 3. 854039 3. 922673 3. 954157  
11747367\_ 8. 763048 8. 796226 8. 718934 8. 288334 8. 233225 8. 223956  
11747368\_ 6. 601581 6. 608268 6. 629599 6. 716913 6. 810431 6. 846607  
11747369\_ 6. 442335 6. 384547 6. 468105 6. 967739 6. 922773 7. 085498  
11747370\_ 6. 213455 6. 116466 6. 279213 5. 768053 5. 921189 6. 010366  
11747371\_ 9. 767673 9. 747093 9. 760434 9. 550831 9. 524078 9. 475986  
11747372\_ 5. 763634 5. 809061 5. 77199 5. 738563 5. 692655 5. 795511  
11747373\_ 3. 590271 3. 739012 3. 676939 3. 730617 3. 631368 3. 284681  
11747374\_ 6. 875239 6. 859385 6. 849474 6. 536194 6. 421699 6. 695543  
11747375\_ 7. 734292 7. 644238 7. 637166 7. 681209 7. 69354 7. 675051  
11747376\_ 7. 215373 7. 154768 7. 079788 7. 000431 6. 901611 6. 842418  
11747377\_ 2. 25483 2. 361778 2. 235709 2. 25483 2. 25483 2. 25483  
11747378\_ 9. 475039 9. 511354 9. 457263 9. 500832 9. 45069 9. 337455  
11747379\_ 9. 86227 9. 859556 9. 838965 9. 768726 9. 743173 9. 72021  
11747380\_ 6. 33258 6. 260871 6. 401391 6. 051334 6. 01521 5. 989738  
11747381\_ 4. 94894 5. 151678 4. 885696 5. 18923 5. 122112 5. 118338



11747382\_ 6. 574571 6. 577197 6. 533311 6. 680727 6. 763716 6. 750793  
11747383\_ 7. 889474 7. 805278 7. 817599 7. 291182 7. 285518 7. 241268  
11747384\_ 7. 845512 7. 798263 7. 918446 7. 282457 7. 296418 7. 31093  
11747385\_ 7. 114274 7. 003013 7. 099734 7. 372691 7. 409933 7. 352689  
11747386\_ 6. 842787 6. 715423 6. 939393 7. 137203 7. 201813 7. 145442  
11747387\_ 9. 169973 9. 064009 9. 199399 9. 028604 8. 95718 9. 049894  
11747388\_ 9. 5971 9. 547508 9. 604018 9. 518861 9. 4631 9. 500797  
11747389\_ 8. 819457 8. 746244 8. 84965 9. 095526 9. 122764 9. 128964  
11747390\_ 5. 789947 5. 599211 5. 802533 5. 975201 5. 957954 5. 87187  
11747391\_ 4. 065209 4. 121729 3. 996975 4. 365467 4. 36221 4. 095688  
11747392\_ 7. 792517 7. 671704 7. 716069 8. 015473 8. 042957 8. 014008  
11747393\_ 6. 278503 6. 364792 6. 238524 6. 39844 6. 395445 6. 28008  
11747394\_ 6. 811798 6. 816701 6. 860746 7. 08856 7. 094938 7. 041809  
11747395\_ 5. 885406 5. 962579 5. 822768 5. 832698 5. 960081 5. 919741  
11747396\_ 8. 08628 8. 045519 8. 142991 8. 165077 8. 203266 8. 176573  
11747397\_ 5. 029529 5. 189628 5. 060197 5. 334221 5. 183024 5. 118469  
11747398\_ 8. 322795 8. 222368 8. 26739 8. 240877 8. 215826 8. 31843  
11747399\_ 8. 368395 8. 241487 8. 318897 8. 271089 8. 194703 8. 256579  
11747400\_ 6. 953807 6. 963752 6. 945833 7. 97406 8. 036624 8. 159227  
11747401\_ 7. 987563 7. 795808 7. 794683 8. 868732 8. 894787 8. 914024  
11747402\_ 7. 077919 7. 118291 7. 251116 8. 170487 8. 105281 8. 114895  
11747403\_ 3. 139347 3. 063493 2. 955213 3. 076329 3. 237094 2. 781418  
11747404\_ 7. 172225 7. 071442 7. 124889 6. 223867 6. 159771 6. 168293  
11747405\_ 7. 284869 7. 279245 7. 303948 7. 079447 7. 105896 7. 106455  
11747406\_ 9. 690835 9. 627109 9. 672128 9. 692857 9. 733503 9. 658505  
11747407\_ 6. 321128 6. 258199 6. 370497 6. 181569 6. 188126 6. 247833  
11747408\_ 6. 306932 6. 499043 6. 40167 6. 366984 6. 413189 6. 440922  
11747409\_ 9. 214573 9. 192794 9. 205433 9. 401798 9. 431733 9. 456661  
11747410\_ 7. 865187 7. 706544 7. 81303 7. 537968 7. 607392 7. 572006  
11747411\_ 6. 892356 6. 88293 6. 870678 7. 392275 7. 487808 7. 422778  
11747412\_ 8. 091828 7. 99868 8. 047616 7. 976913 7. 916899 8. 073222  
11747413\_ 6. 254195 6. 198464 6. 183299 6. 193102 6. 313922 6. 263567  
11747414\_ 5. 252257 5. 176641 5. 354283 4. 652279 4. 633661 4. 781533  
11747415\_ 9. 172851 9. 127126 9. 16728 9. 389973 9. 411446 9. 35803  
11747416\_ 6. 413004 6. 612964 6. 543 6. 712019 6. 718561 6. 708973  
11747417\_ 6. 475211 6. 6361 6. 597489 6. 66771 6. 741696 6. 944553  
11747418\_ 6. 715446 6. 818473 6. 662331 6. 715982 6. 679205 6. 731001  
11747419\_ 5. 285218 5. 320571 5. 18302 5. 317977 5. 263727 5. 409222  
11747420\_ 6. 520005 6. 481046 6. 336359 6. 956111 7. 076762 6. 913422  
11747421\_ 3. 811934 4. 270182 3. 906051 3. 922823 3. 81533 4. 089043  
11747422\_ 8. 210653 8. 092621 8. 114457 8. 049801 8. 055549 7. 996082  
11747423\_ 3. 437815 3. 494291 3. 430842 3. 658682 3. 490833 3. 335749  
11747424\_ 9. 840497 9. 789837 9. 795479 9. 987276 10. 07989 10. 03754  
11747425\_ 7. 453916 7. 292761 7. 478392 7. 439445 7. 453889 7. 464013  
11747426\_ 4. 606152 4. 642832 4. 937596 4. 607353 4. 595553 4. 736607  
11747427\_ 4. 676597 4. 709463 4. 721081 4. 941016 4. 875183 4. 88875  
11747428\_ 5. 28543 5. 239855 5. 115143 4. 99288 5. 03434 4. 908752  
11747429\_ 4. 597616 4. 476592 4. 57726 4. 139913 3. 871599 4. 119568  
11747430\_ 6. 147608 6. 141166 6. 139478 5. 027036 4. 994346 5. 140109  
11747431\_ 4. 519843 4. 3454 4. 243913 4. 52373 4. 40461 4. 420927  
11747432\_ 3. 40572 3. 313785 3. 211942 3. 202419 3. 101013 3. 283289

11747433\_ 7. 44241 7. 415455 7. 532956 7. 272274 7. 296299 7. 258147  
11747434\_ 5. 273899 5. 405979 5. 407833 5. 282165 5. 292436 5. 411684  
11747435\_ 2. 910467 2. 850753 2. 83778 2. 854989 2. 854989 2. 811851  
11747436\_ 5. 504312 5. 664345 5. 598244 5. 644159 5. 568998 5. 55522  
11747437\_ 5. 409222 5. 464748 5. 584813 5. 25266 5. 343575 5. 43166  
11747438\_ 3. 249011 3. 290188 3. 074426 3. 306793 3. 182934 3. 159898  
11747439\_ 11. 56988 11. 54812 11. 56643 11. 58238 11. 58532 11. 52633  
11747440\_ 5. 999888 6. 077279 6. 082713 6. 49045 6. 543258 6. 583196  
11747441\_ 8. 099113 8. 074754 8. 192401 7. 957271 7. 97027 7. 940529  
11747442\_ 5. 930123 5. 826041 5. 762626 5. 106111 5. 03947 5. 0705  
11747443\_ 8. 08832 8. 017598 8. 104109 7. 509568 7. 560854 7. 509488  
11747444\_ 4. 275543 4. 239263 4. 276608 4. 384818 4. 441145 4. 607032  
11747445\_ 7. 775253 7. 782846 7. 867245 7. 873215 7. 928811 7. 937762  
11747446\_ 5. 168466 4. 969702 4. 821989 5. 069711 5. 084587 5. 103701  
11747447\_ 5. 592733 5. 592733 5. 438289 5. 572256 5. 531106 5. 601571  
11747448\_ 6. 71875 6. 72846 6. 763239 6. 863649 6. 846273 6. 726062  
11747449\_ 5. 624333 5. 584813 5. 629126 5. 619057 5. 658797 5. 638665  
11747450\_ 7. 280832 7. 133864 7. 174804 7. 088519 7. 138751 7. 151645  
11747451\_ 4. 393999 4. 526735 4. 430522 4. 645855 4. 724708 4. 59284  
11747452\_ 6. 529553 6. 427777 6. 67941 6. 201998 6. 234556 6. 194129  
11747453\_ 7. 867077 7. 86802 7. 835108 7. 688998 7. 740533 7. 780234  
11747454\_ 8. 907622 8. 824081 8. 885472 9. 23531 9. 281539 9. 277848  
11747455\_ 7. 344409 7. 266753 7. 38104 7. 118889 7. 218576 7. 154768  
11747456\_ 5. 226801 5. 309267 5. 36188 5. 067465 5. 067269 5. 374812  
11747457\_ 6. 037625 6. 176591 6. 070374 6. 234952 6. 222054 6. 266444  
11747458\_ 7. 799715 7. 708857 7. 807394 7. 203392 7. 195161 7. 24961  
11747459\_ 7. 188127 7. 160458 7. 152005 7. 420763 7. 383661 7. 397638  
11747460\_ 9. 682731 9. 645737 9. 796308 10. 06127 10. 11437 10. 09719  
11747461\_ 8. 426766 8. 371752 8. 448464 8. 397862 8. 422192 8. 378347  
11747462\_ 4. 878919 4. 874234 4. 829256 4. 874234 4. 848455 5. 057776  
11747463\_ 8. 274973 8. 224208 8. 306999 8. 078569 8. 089203 8. 092073  
11747464\_ 9. 775053 9. 721622 9. 754359 9. 465599 9. 451089 9. 407122  
11747465\_ 4. 776417 4. 81375 4. 75137 4. 283202 4. 351337 4. 706021  
11747466\_ 6. 094413 6. 04887 5. 922553 6. 118838 6. 209415 6. 204461  
11747467\_ 6. 513976 6. 594872 6. 466249 6. 525875 6. 637212 6. 646187  
11747468\_ 7. 802399 7. 938081 7. 885339 7. 794143 7. 907147 7. 892947  
11747469\_ 6. 56911 6. 613731 6. 744417 6. 589202 6. 689968 6. 665429  
11747470\_ 7. 467651 7. 482472 7. 440066 7. 800236 7. 718584 7. 736056  
11747471\_ 5. 362654 5. 38225 5. 466483 5. 82094 5. 705615 5. 636114  
11747472\_ 6. 363991 6. 295259 6. 191718 6. 699975 6. 658851 6. 635407  
11747473\_ 6. 441239 6. 382184 6. 523303 6. 506508 6. 506508 6. 507153  
11747474\_ 5. 694902 5. 793886 5. 697807 5. 799293 5. 796703 5. 874178  
11747475\_ 5. 95442 5. 854867 5. 918831 5. 965559 5. 913185 5. 981845  
11747476\_ 6. 280964 6. 21952 6. 267927 6. 339854 6. 384477 6. 41113  
11747477\_ 5. 976699 5. 953237 6. 022508 5. 358927 5. 510928 5. 557036  
11747478\_ 6. 073142 6. 036322 5. 926248 6. 08021 6. 073264 6. 089246  
11747479\_ 7. 669996 7. 679058 7. 695625 8. 027229 8. 105388 8. 1238  
11747480\_ 6. 4262 6. 503021 6. 45288 6. 507006 6. 586083 6. 629467  
11747481\_ 6. 467524 6. 417325 6. 398758 6. 32386 6. 459962 6. 381912  
11747482\_ 10. 45559 10. 37458 10. 399 10. 54869 10. 55557 10. 52736  
11747483\_ 3. 7309 3. 630302 3. 196249 3. 979087 3. 827304 3. 928098

11747484\_ 4. 88422 5. 031659 5. 038005 5. 263402 5. 278309 5. 251798  
11747485\_ 9. 059381 8. 963463 9. 044288 8. 980744 9. 058562 8. 986643  
11747486\_ 6. 469252 6. 550776 6. 36417 6. 644667 6. 602169 6. 785385  
11747487\_ 4. 270475 4. 30243 4. 307874 4. 100112 4. 106313 4. 030063  
11747488\_ 10. 15052 10. 07436 10. 14104 10. 04757 10. 02675 10. 02974  
11747489\_ 8. 550271 8. 410931 8. 548212 7. 36627 7. 38955 7. 443345  
11747490\_ 4. 874234 5. 048346 4. 725717 4. 939802 4. 901076 4. 975721  
11747491\_ 4. 816232 4. 972039 4. 775702 5. 10542 4. 964107 5. 015943  
11747492\_ 6. 331803 6. 313398 6. 341073 6. 201929 6. 226739 6. 167799  
11747493\_ 8. 154225 8. 138224 8. 094111 8. 532826 8. 549968 8. 528749  
11747494\_ 5. 20288 5. 248453 5. 105908 5. 19965 5. 20288 5. 20611  
11747495\_ 6. 97441 7. 036304 6. 956814 6. 985158 6. 987109 6. 990009  
11747496\_ 6. 393349 6. 344674 6. 346438 6. 36562 6. 362288 6. 377951  
11747497\_ 3. 04685 2. 792736 2. 871261 3. 241335 2. 958003 3. 453297  
11747498\_ 8. 560511 8. 372452 8. 517261 8. 887703 8. 918367 8. 955151  
11747499\_ 7. 151697 7. 170913 7. 270579 6. 833299 6. 768003 6. 705778  
11747500\_ 6. 512637 6. 440243 6. 496375 7. 656391 7. 653407 7. 69997  
11747501\_ 6. 848443 6. 632045 6. 690518 6. 513858 6. 695179 6. 660143  
11747502\_ 8. 136232 8. 045496 8. 162386 7. 705136 7. 706529 7. 779446  
11747503\_ 4. 320592 4. 335594 4. 25067 4. 40461 4. 608577 4. 458363  
11747504\_ 6. 117992 6. 053229 6. 156067 5. 753793 5. 806588 5. 753983  
11747505\_ 7. 373008 7. 30049 7. 314867 7. 659542 7. 668478 7. 664543  
11747506\_ 8. 00242 7. 936023 8. 026334 8. 370375 8. 436932 8. 396431  
11747507\_ 7. 813124 7. 686841 7. 803684 8. 132063 8. 185795 8. 145294  
11747508\_ 4. 372821 4. 513954 4. 216613 4. 372821 4. 439056 4. 295894  
11747509\_ 6. 384683 6. 339761 6. 341011 6. 400721 6. 481046 6. 420087  
11747510\_ 5. 938538 5. 946088 5. 989962 5. 972023 5. 895832 6. 051952  
11747511\_ 6. 396829 6. 419011 6. 440062 6. 424691 6. 392423 6. 538924  
11747512\_ 8. 189281 8. 225558 8. 16647 8. 473033 8. 549008 8. 457662  
11747513\_ 7. 4631 7. 271579 7. 404081 7. 252176 7. 256169 7. 346994  
11747514\_ 10. 32668 10. 27714 10. 35018 10. 06995 10. 06082 10. 07059  
11747515\_ 9. 600119 9. 511327 9. 589855 9. 523785 9. 499216 9. 571124  
11747516\_ 8. 071202 7. 978285 8. 018454 8. 213054 8. 192927 8. 083735  
11747517\_ 7. 822192 7. 772656 7. 840684 9. 319266 9. 384113 9. 331133  
11747518\_ 8. 57458 8. 566092 8. 567937 7. 722533 7. 520148 7. 813943  
11747519\_ 4. 837033 4. 9018 4. 660051 4. 867006 4. 957103 5. 047926  
11747520\_ 6. 790416 6. 503329 6. 65127 6. 065223 6. 145532 6. 229916  
11747521\_ 5. 810545 5. 705691 5. 764059 5. 932236 5. 948891 5. 98513  
11747522\_ 5. 728251 5. 639564 5. 751243 5. 095201 5. 10442 5. 161719  
11747523\_ 7. 605822 7. 52434 7. 667321 7. 05884 7. 194947 7. 060224  
11747524\_ 6. 420364 6. 434418 6. 490463 6. 318829 6. 312793 6. 31479  
11747525\_ 7. 515892 7. 561909 7. 589926 7. 443261 7. 45117 7. 411416  
11747526\_ 8. 112592 8. 038373 8. 151411 8. 042439 8. 033396 7. 936532  
11747527\_ 6. 5154 6. 607549 6. 643699 6. 644068 6. 565117 6. 587151  
11747528\_ 4. 688957 4. 986806 4. 990955 4. 71978 5. 014265 4. 979858  
11747529\_ 5. 044178 4. 947378 5. 250431 5. 2736 5. 279494 5. 279494  
11747530\_ 9. 130789 9. 065505 9. 12471 8. 932257 8. 999576 8. 911386  
11747531\_ 4. 197447 4. 168381 4. 167218 4. 213226 4. 158368 4. 115856  
11747532\_ 6. 185165 6. 25457 6. 152169 6. 299905 6. 267142 6. 411338  
11747533\_ 9. 815941 9. 742571 9. 802267 9. 703607 9. 731311 9. 68474  
11747534\_ 8. 736188 8. 625682 8. 702163 8. 665149 8. 66852 8. 64661

11747535\_ 7. 117524 7. 083779 7. 081749 7. 005115 7. 073173 7. 076497  
11747536\_ 5. 785175 5. 732464 5. 643713 5. 627797 5. 692908 5. 673849  
11747537\_ 9. 314924 9. 220769 9. 286849 9. 61571 9. 715953 9. 608452  
11747538\_ 7. 137885 7. 09354 7. 060142 6. 944888 6. 980824 7. 156107  
11747539\_ 7. 326385 7. 243509 7. 193066 7. 126918 7. 203427 7. 272101  
11747540\_ 9. 744819 9. 752472 9. 734089 9. 337075 9. 381109 9. 340324  
11747541\_ 2. 853507 2. 581297 2. 377784 2. 377784 2. 234852 2. 331212  
11747542\_ 7. 134375 6. 97833 7. 042517 7. 565239 7. 42814 7. 445054  
11747543\_ 7. 501592 7. 459391 7. 409349 7. 763168 7. 837071 7. 820049  
11747544\_ 4. 960053 4. 919692 4. 751569 5. 107347 5. 021734 5. 029529  
11747545\_ 5. 781965 5. 861282 5. 893132 5. 414869 5. 63686 5. 477082  
11747546\_ 3. 37164 3. 598131 3. 322529 3. 425307 3. 42567 3. 613029  
11747547\_ 6. 533042 6. 54251 6. 47226 6. 669249 6. 635275 6. 60975  
11747548\_ 7. 007439 6. 951211 7. 018418 6. 815853 6. 86806 6. 930109  
11747549\_ 6. 992175 6. 984154 7. 074522 6. 932812 6. 955934 6. 93048  
11747550\_ 7. 544579 7. 487161 7. 53023 7. 504145 7. 53023 7. 50474  
11747551\_ 8. 131882 8. 083919 8. 122763 8. 110232 8. 108099 8. 125235  
11747552\_ 6. 779149 6. 728088 6. 733472 6. 857094 6. 8367 6. 734981  
11747553\_ 7. 427624 7. 39245 7. 358974 6. 94441 6. 9097 7. 000545  
11747554\_ 6. 229963 6. 280671 6. 17981 6. 231079 6. 176191 6. 247657  
11747555\_ 6. 13424 6. 343322 6. 255534 5. 971871 6. 117499 6. 007203  
11747556\_ 4. 282332 4. 335594 4. 43786 4. 449463 4. 40461 4. 301194  
11747557\_ 6. 429071 6. 322396 6. 441868 6. 428718 6. 445813 6. 513615  
11747558\_ 2. 195398 2. 36913 2. 119905 2. 228732 2. 255629 2. 25483  
11747559\_ 6. 852552 6. 873503 6. 891693 6. 922592 6. 844137 6. 97913  
11747560\_ 4. 943227 4. 846807 4. 891025 5. 111611 4. 991293 4. 980785  
11747561\_ 6. 395519 6. 387485 6. 574924 6. 595869 6. 595735 6. 613075  
11747562\_ 7. 148187 7. 034621 7. 287084 6. 59738 6. 576361 6. 574032  
11747563\_ 7. 674836 7. 581163 7. 709455 7. 674332 7. 708475 7. 717545  
11747564\_ 4. 87201 5. 021207 4. 753766 5. 058179 4. 890539 5. 004128  
11747565\_ 6. 748596 6. 698858 6. 665103 6. 880002 7. 055228 7. 005364  
11747566\_ 5. 874902 5. 749753 5. 693161 5. 625368 5. 662796 5. 517502  
11747567\_ 6. 851269 6. 656551 6. 745893 7. 119346 7. 066292 7. 11264  
11747568\_ 4. 582238 4. 918051 4. 78165 4. 958923 4. 95862 4. 991539  
11747569\_ 5. 639135 5. 724877 5. 628568 5. 686686 5. 844524 5. 722386  
11747570\_ 9. 913626 9. 849658 9. 899477 9. 922272 9. 972964 9. 986648  
11747571\_ 6. 688175 6. 623896 6. 562628 6. 5954 6. 582082 6. 643512  
11747572\_ 7. 283724 7. 288004 7. 17003 7. 278439 7. 244144 7. 33182  
11747573\_ 7. 998823 8. 268772 8. 101535 8. 198968 8. 135466 8. 125576  
11747574\_ 5. 590933 5. 656236 5. 639692 5. 509626 5. 624401 5. 549536  
11747575\_ 5. 156303 5. 325567 5. 17639 5. 672285 5. 697849 5. 46859  
11747576\_ 8. 820672 8. 748021 8. 818009 8. 861314 8. 83654 8. 877215  
11747577\_ 5. 952048 6. 109278 5. 647793 5. 941756 5. 880893 5. 82916  
11747578\_ 7. 825536 7. 962786 7. 827869 8. 245148 8. 274432 8. 264442  
11747579\_ 7. 1782 7. 174876 7. 120618 7. 53631 7. 504533 7. 507984  
11747580\_ 6. 358572 6. 272498 6. 323971 6. 263511 6. 28296 6. 318829  
11747581\_ 6. 926437 6. 989331 6. 900061 7. 061984 6. 970831 6. 899105  
11747582\_ 5. 923255 5. 877079 5. 869954 5. 839876 5. 997806 5. 905949  
11747583\_ 3. 287303 3. 349553 3. 294318 3. 290188 3. 398236 3. 376503  
11747584\_ 6. 191828 6. 26614 6. 178666 6. 113184 6. 085987 6. 113884  
11747585\_ 4. 992915 5. 2666 5. 23765 4. 554882 4. 700962 4. 624338

11747586\_ 7. 75864 7. 711183 7. 820989 7. 487926 7. 486083 7. 555083  
11747587\_ 8. 62836 8. 604396 8. 657989 8. 714299 8. 747103 8. 764227  
11747588\_ 5. 439281 5. 447918 5. 500542 4. 698689 4. 736149 4. 617982  
11747589\_ 9. 225788 9. 174244 9. 233179 9. 270108 9. 219818 9. 222873  
11747590\_ 6. 456435 6. 526187 6. 518061 5. 990669 6. 073628 6. 140896  
11747591\_ 7. 554866 7. 466911 7. 446151 7. 11221 7. 03493 7. 174876  
11747592\_ 8. 608727 8. 557167 8. 621788 8. 870541 8. 850471 8. 755209  
11747593\_ 7. 971808 7. 981503 7. 932502 7. 691996 7. 646223 7. 66885  
11747594\_ 8. 119038 8. 212675 8. 142499 7. 906724 7. 864254 7. 886881  
11747595\_ 2. 210955 2. 0546 2. 01026 2. 085195 2. 063325 2. 067777  
11747596\_ 3. 925181 4. 067703 4. 235313 4. 173337 3. 92515 4. 174489  
11747597\_ 4. 094689 3. 935866 3. 935866 4. 016902 3. 982196 3. 924107  
11747598\_ 8. 553158 8. 444329 8. 517478 8. 231958 8. 362753 8. 266153  
11747599\_ 8. 335189 8. 280792 8. 400357 8. 143281 8. 169631 8. 177682  
11747600\_ 6. 646657 6. 626853 6. 70705 6. 716465 6. 601571 6. 622672  
11747601\_ 6. 789568 6. 744015 6. 76777 6. 975899 6. 850229 6. 809945  
11747602\_ 3. 764389 3. 698922 3. 62884 3. 644564 3. 902176 3. 83927  
11747603\_ 6. 428096 6. 457514 6. 354987 6. 480803 6. 454988 6. 388388  
11747604\_ 5. 745907 5. 755543 5. 825478 5. 845078 5. 805369 5. 785937  
11747605\_ 8. 964506 8. 847281 8. 877113 9. 04463 9. 047033 9. 053266  
11747606\_ 8. 355997 8. 256994 8. 424587 8. 961497 9. 069863 9. 011301  
11747607\_ 5. 232376 5. 25031 5. 09861 5. 280743 5. 376826 5. 505624  
11747608\_ 4. 421859 4. 220015 4. 138229 4. 430907 4. 236357 4. 226536  
11747609\_ 4. 007853 3. 956784 4. 131032 4. 119514 3. 985676 3. 940816  
11747610\_ 4. 366687 4. 374887 4. 52373 4. 104397 4. 131149 3. 979927  
11747611\_ 7. 770262 7. 780385 7. 696813 7. 813461 7. 879996 7. 783553  
11747612\_ 4. 359477 4. 323622 4. 289215 4. 32357 4. 325648 4. 33181  
11747613\_ 5. 097209 5. 26429 5. 038107 5. 141451 5. 294474 5. 071999  
11747614\_ 5. 271442 5. 459241 5. 244255 5. 462177 5. 499606 5. 414867  
11747615\_ 5. 75953 5. 705129 5. 807911 5. 850239 5. 676425 5. 904585  
11747616\_ 7. 22212 7. 206152 7. 10089 7. 551183 7. 576482 7. 575814  
11747617\_ 8. 503316 8. 45325 8. 508435 8. 486303 8. 481845 8. 508281  
11747618\_ 5. 146611 5. 036539 5. 119145 5. 032117 5. 205407 5. 247349  
11747619\_ 7. 979159 7. 88106 7. 998397 7. 566875 7. 508807 7. 563995  
11747620\_ 8. 801133 8. 682387 8. 73767 8. 548066 8. 561531 8. 563459  
11747621\_ 5. 333723 5. 345598 5. 299892 5. 451105 5. 356665 5. 390102  
11747622\_ 6. 35582 6. 377847 6. 260596 6. 423965 6. 526095 6. 44855  
11747623\_ 3. 443266 3. 314173 3. 409036 3. 344163 3. 317537 3. 38748  
11747624\_ 8. 454622 8. 405352 8. 396264 8. 256418 8. 305279 8. 257364  
11747625\_ 3. 125572 2. 992181 3. 062334 2. 965362 3. 063731 3. 026101  
11747626\_ 2. 461013 2. 461013 2. 461013 2. 468295 2. 650074 2. 366919  
11747627\_ 6. 477536 6. 38958 6. 393629 6. 622498 6. 660315 6. 657698  
11747628\_ 9. 104582 9. 127738 9. 163261 9. 020143 9. 009348 9. 009932  
11747629\_ 3. 367791 3. 45035 3. 442014 3. 677686 3. 487899 3. 547323  
11747630\_ 2. 374253 2. 528113 2. 361778 2. 177428 2. 349449 2. 299484  
11747631\_ 2. 713461 2. 913851 2. 855067 2. 91929 2. 793863 2. 904365  
11747632\_ 5. 349027 5. 295011 5. 367391 5. 337294 5. 397217 5. 352781  
11747633\_ 3. 541815 3. 541815 3. 590082 3. 702121 3. 654621 3. 563558  
11747634\_ 9. 499266 9. 478123 9. 504139 9. 764373 9. 804123 9. 725014  
11747635\_ 9. 289078 9. 267507 9. 286158 9. 534033 9. 631164 9. 549458  
11747636\_ 6. 153852 6. 044492 6. 117254 6. 283409 6. 300643 6. 175057

11747637\_ 4. 681983 4. 775755 4. 666666 4. 874862 4. 855338 4. 878225  
11747638\_ 8. 295209 8. 274621 8. 175754 8. 440849 8. 373356 8. 344777  
11747639\_ 4. 929517 4. 84702 4. 787237 4. 178309 4. 759028 4. 816477  
11747640\_ 6. 996275 6. 940443 7. 09182 7. 299162 7. 199487 7. 179411  
11747641\_ 5. 736187 5. 722802 5. 903417 5. 824807 5. 910824 5. 965139  
11747642\_ 5. 605826 5. 644374 5. 624786 5. 90767 5. 768626 5. 768626  
11747643\_ 10. 21654 10. 23753 10. 21775 10. 51787 10. 48359 10. 43029  
11747644\_ 2. 986656 3. 623714 3. 417973 3. 262148 3. 117737 2. 864287  
11747645\_ 6. 906356 6. 885926 6. 965327 6. 426949 6. 471359 6. 410609  
11747646\_ 5. 670438 5. 615511 5. 533395 5. 615947 5. 77333 5. 623874  
11747647\_ 7. 522659 7. 423765 7. 514623 7. 342834 7. 44567 7. 351672  
11747648\_ 6. 718461 6. 626142 6. 765911 6. 686271 6. 659032 6. 703432  
11747649\_ 6. 014787 6. 238593 5. 950197 6. 141895 6. 175347 6. 231842  
11747650\_ 7. 854251 7. 698764 7. 842319 8. 048457 8. 001645 8. 025513  
11747651\_ 5. 531576 5. 4503 5. 494935 5. 463283 5. 472912 5. 593332  
11747652\_ 8. 41369 8. 390497 8. 432492 8. 888406 8. 926775 8. 852254  
11747653\_ 8. 71833 8. 631492 8. 680535 9. 063043 9. 106467 9. 135064  
11747654\_ 1. 844155 1. 920102 1. 736698 1. 966018 1. 890457 1. 890457  
11747655\_ 6. 77488 6. 643868 6. 702183 6. 556515 6. 50505 6. 628269  
11747656\_ 5. 28006 5. 517057 5. 263854 5. 391511 5. 370694 5. 28945  
11747657\_ 7. 886682 7. 919647 7. 900557 7. 994428 7. 979948 8. 029648  
11747658\_ 7. 783022 7. 831932 7. 658562 7. 765319 7. 829691 7. 756661  
11747659\_ 4. 058808 4. 250777 4. 249453 4. 429792 3. 983265 4. 200678  
11747660\_ 4. 652444 4. 582588 4. 580192 4. 60561 4. 635335 4. 686843  
11747661\_ 4. 552446 4. 489697 4. 57556 4. 708287 4. 660776 4. 663927  
11747662\_ 11. 34939 11. 36294 11. 34281 11. 80008 11. 79619 11. 75324  
11747663\_ 6. 935531 6. 899282 6. 925345 6. 815444 6. 815386 6. 828768  
11747664\_ 7. 437199 7. 364478 7. 421221 7. 222599 7. 200656 7. 216596  
11747665\_ 5. 148806 5. 307943 5. 246856 5. 189043 5. 3036 5. 336818  
11747666\_ 8. 818745 8. 710284 8. 775677 9. 063727 9. 069155 8. 985621  
11747667\_ 6. 613059 6. 713994 6. 505123 6. 663778 6. 733391 6. 78556  
11747668\_ 7. 71984 7. 612328 7. 704843 7. 572122 7. 51258 7. 63417  
11747669\_ 6. 36236 6. 332486 6. 307742 6. 523805 6. 558089 6. 630645  
11747670\_ 8. 623935 8. 547985 8. 590633 7. 732416 7. 719482 7. 719482  
11747671\_ 8. 383046 8. 311241 8. 410766 8. 374941 8. 441224 8. 435419  
11747672\_ 10. 11901 10. 25397 10. 16393 9. 94767 9. 881012 9. 827891  
11747673\_ 6. 342727 6. 327824 6. 412709 6. 857861 6. 86688 6. 916065  
11747674\_ 5. 080488 4. 961448 4. 87564 5. 12448 4. 964564 4. 910003  
11747675\_ 7. 779145 7. 665108 7. 763393 7. 443968 7. 508946 7. 470769  
11747676\_ 7. 681022 7. 508892 7. 597523 7. 582418 7. 566016 7. 563884  
11747677\_ 10. 61723 10. 51181 10. 57267 10. 44133 10. 48086 10. 49089  
11747678\_ 10. 28619 10. 25542 10. 27432 10. 18749 10. 21663 10. 22205  
11747679\_ 10. 82843 10. 75794 10. 82641 10. 78504 10. 78008 10. 78586  
11747680\_ 5. 887241 5. 927383 5. 775498 6. 143295 6. 139424 6. 320777  
11747681\_ 5. 807182 5. 838737 5. 792893 6. 185536 6. 043111 6. 306278  
11747682\_ 4. 691514 4. 783716 4. 611204 4. 810939 4. 713464 4. 885915  
11747683\_ 5. 311492 5. 284969 5. 35589 5. 388314 5. 382122 5. 45952  
11747684\_ 10. 01291 9. 966266 9. 972074 10. 12249 10. 11726 10. 08166  
11747685\_ 7. 850591 7. 867416 7. 801602 7. 737224 7. 779534 7. 780034  
11747686\_ 7. 834999 7. 819069 7. 762626 7. 757415 7. 692641 7. 717723  
11747687\_ 8. 178567 8. 035922 8. 199326 7. 910052 7. 859729 7. 949278

11747688\_ 6. 162196 6. 076709 6. 081437 5. 575081 5. 62616 5. 631149  
11747689\_ 7. 743604 7. 658842 7. 704823 7. 563627 7. 54325 7. 559678  
11747690\_ 8. 280123 8. 179225 8. 292715 7. 941293 7. 920971 7. 931946  
11747691\_ 4. 426777 4. 384125 4. 435596 4. 569848 4. 401819 4. 348767  
11747692\_ 2. 817521 3. 174027 2. 900804 2. 99908 3. 195142 3. 112671  
11747693\_ 5. 264373 5. 198649 5. 228167 5. 164377 5. 169467 5. 033172  
11747694\_ 4. 449404 4. 471696 4. 296362 4. 80287 4. 525698 4. 51393  
11747695\_ 3. 910291 3. 909593 3. 843379 3. 866335 3. 96018 3. 957214  
11747696\_ 5. 765959 5. 518169 5. 629097 5. 894221 5. 867196 5. 795664  
11747697\_ 8. 382825 8. 307839 8. 373347 8. 135931 8. 124998 8. 140727  
11747698\_ 6. 727392 6. 489768 6. 557811 6. 294142 6. 313882 6. 360694  
11747699\_ 6. 056916 6. 217159 5. 979581 6. 089664 6. 1538 6. 082238  
11747700\_ 6. 914999 6. 885612 6. 81235 6. 844958 6. 813717 6. 888648  
11747701\_ 5. 477721 5. 409714 5. 444924 5. 487133 5. 42199 5. 517557  
11747702\_ 5. 991818 5. 909612 6. 002393 5. 898389 5. 876981 6. 017293  
11747703\_ 5. 170517 5. 170469 5. 345935 5. 076576 5. 046945 5. 1555  
11747704\_ 4. 434304 4. 52849 4. 332017 4. 577683 4. 496911 4. 546613  
11747705\_ 3. 606313 3. 684944 3. 895704 3. 490141 3. 520846 3. 526632  
11747706\_ 5. 125361 5. 384949 5. 297498 5. 354206 5. 26034 5. 339673  
11747707\_ 6. 004566 6. 035053 5. 922714 6. 029658 6. 001582 6. 009898  
11747708\_ 7. 092426 6. 936579 7. 175162 6. 34864 6. 366235 6. 389366  
11747709\_ 8. 764674 8. 650264 8. 69873 8. 392013 8. 409622 8. 396296  
11747710\_ 5. 902887 5. 908144 5. 943416 6. 105391 6. 187544 6. 133302  
11747711\_ 6. 604607 6. 545442 6. 553317 6. 221081 6. 16519 6. 208092  
11747712\_ 5. 616865 5. 584813 5. 709414 5. 745821 5. 679839 5. 589814  
11747713\_ 7. 561581 7. 466797 7. 589926 8. 304392 8. 332708 8. 254159  
11747714\_ 3. 358826 3. 724707 3. 679456 3. 690029 3. 645447 3. 690029  
11747715\_ 3. 308817 3. 604518 3. 412446 3. 41602 3. 317843 3. 380509  
11747716\_ 4. 815683 4. 986616 4. 926357 5. 039995 4. 880558 5. 004566  
11747717\_ 5. 126857 5. 136681 5. 138195 5. 042031 5. 30091 5. 058023  
11747718\_ 6. 101896 6. 325849 6. 262529 6. 299625 6. 329161 6. 354529  
11747719\_ 7. 694748 7. 639512 7. 751124 8. 047793 8. 042273 8. 070974  
11747720\_ 8. 3692 8. 325273 8. 364482 8. 969439 9. 052789 8. 961218  
11747721\_ 9. 246166 9. 221067 9. 260757 8. 900024 8. 908282 8. 927269  
11747722\_ 4. 912999 4. 873906 4. 601964 4. 816853 4. 767797 4. 906987  
11747723\_ 9. 284512 9. 142518 9. 224083 9. 058765 9. 05121 9. 016698  
11747724\_ 6. 296307 6. 12845 6. 278263 6. 697258 6. 609917 6. 646187  
11747725\_ 7. 113329 7. 057899 7. 177616 5. 977166 6. 104931 5. 922579  
11747726\_ 4. 982452 4. 893359 4. 943944 4. 275543 4. 351701 4. 411516  
11747727\_ 6. 741213 6. 669027 6. 68818 6. 489698 6. 548868 6. 46093  
11747728\_ 5. 773155 5. 747423 5. 670575 5. 642815 5. 494383 5. 526463  
11747729\_ 9. 730552 9. 630051 9. 719581 9. 952249 9. 891593 9. 985126  
11747730\_ 7. 435578 7. 380897 7. 476455 6. 653889 6. 700371 6. 667101  
11747731\_ 8. 547487 8. 506984 8. 446504 8. 710535 8. 579926 8. 569237  
11747732\_ 5. 640051 5. 703951 5. 710713 5. 720798 5. 857178 5. 870293  
11747733\_ 6. 149451 6. 017188 6. 234787 6. 535702 6. 644455 6. 679156  
11747734\_ 5. 646393 5. 420267 5. 538514 4. 692562 4. 81702 4. 722578  
11747735\_ 8. 304366 8. 25561 8. 291731 7. 87435 7. 924207 7. 928538  
11747736\_ 4. 258513 4. 333054 4. 378199 4. 277724 4. 277724 4. 413759  
11747737\_ 5. 355781 5. 459572 5. 446323 5. 453166 5. 475828 5. 57625  
11747738\_ 9. 249977 9. 151941 9. 212332 9. 240363 9. 251918 9. 255978

11747739\_ 7. 421763 7. 384377 7. 445754 8. 004812 7. 986941 8. 024729  
11747740\_ 8. 052033 7. 964049 8. 03407 8. 73362 8. 782442 8. 733194  
11747741\_ 6. 817986 6. 758447 6. 85868 6. 802214 6. 850442 6. 871134  
11747742\_ 8. 317929 8. 289938 8. 323282 7. 814259 7. 872613 7. 79865  
11747743\_ 9. 343236 9. 24565 9. 283294 8. 696242 8. 646546 8. 657174  
11747744\_ 6. 475665 6. 578559 6. 443028 6. 45057 6. 45753 6. 550957  
11747745\_ 9. 487117 9. 398901 9. 478495 9. 663454 9. 633115 9. 676395  
11747746\_ 9. 498174 9. 406903 9. 482432 9. 68632 9. 697 9. 665166  
11747747\_ 6. 53173 6. 568804 6. 631926 6. 836692 6. 780841 6. 81747  
11747748\_ 5. 232853 5. 302249 5. 285327 5. 018677 4. 907485 5. 006242  
11747749\_ 7. 031531 6. 978465 6. 907527 6. 938732 6. 94238 6. 850961  
11747750\_ 6. 709102 6. 70115 6. 684745 6. 763053 6. 765107 6. 694905  
11747751\_ 8. 464856 8. 421343 8. 441513 7. 3851 7. 383672 7. 410001  
11747752\_ 11. 8647 11. 85761 11. 863 11. 58533 11. 55836 11. 58308  
11747753\_ 7. 456316 7. 399075 7. 451026 7. 409454 7. 448324 7. 4857  
11747754\_ 6. 020034 5. 83901 5. 922714 6. 443923 6. 500134 6. 481046  
11747755\_ 3. 357441 3. 3693 3. 599143 3. 599143 3. 606313 3. 398236  
11747756\_ 4. 643717 4. 615043 4. 40488 4. 744758 4. 675687 4. 585058  
11747757\_ 7. 692802 7. 693545 7. 685258 7. 901077 7. 872188 7. 851187  
11747758\_ 8. 579926 8. 5366 8. 520633 8. 283352 8. 286004 8. 247626  
11747759\_ 6. 402244 6. 300442 6. 491794 5. 877358 5. 76628 5. 93709  
11747760\_ 5. 051548 5. 091616 5. 0803 5. 035335 5. 010469 5. 041128  
11747761\_ 8. 206323 8. 140952 8. 260635 8. 499491 8. 528199 8. 532278  
11747762\_ 8. 421239 8. 373754 8. 46209 8. 94381 8. 909234 8. 877679  
11747763\_ 7. 426176 7. 329656 7. 483271 7. 849268 7. 879064 7. 911235  
11747764\_ 4. 719072 4. 58531 4. 584933 4. 649804 5. 004407 4. 667836  
11747765\_ 7. 438581 7. 379257 7. 567284 7. 466952 7. 42364 7. 511532  
11747766\_ 6. 932317 7. 093074 7. 02436 7. 02436 6. 943214 7. 028359  
11747767\_ 6. 147445 6. 146943 6. 126515 5. 943194 6. 02205 6. 054302  
11747768\_ 3. 466936 3. 723624 3. 386338 3. 84696 3. 767482 3. 841275  
11747769\_ 5. 870242 5. 878597 5. 709521 5. 871765 5. 714352 5. 795258  
11747770\_ 6. 37462 6. 354512 6. 40649 6. 371648 6. 551503 6. 439742  
11747771\_ 2. 774269 2. 610669 2. 516737 2. 480103 2. 516289 2. 798072  
11747772\_ 9. 343571 9. 188728 9. 28467 9. 468614 9. 527449 9. 523461  
11747773\_ 5. 944345 6. 05189 5. 88492 6. 150825 5. 980474 6. 111154  
11747774\_ 4. 244582 4. 250934 4. 2652 4. 40461 4. 39111 4. 231612  
11747775\_ 10. 30362 10. 21503 10. 29538 10. 25302 10. 27532 10. 27432  
11747776\_ 6. 631711 6. 475036 6. 618482 6. 485078 6. 525867 6. 389366  
11747777\_ 7. 984125 7. 812741 7. 933758 7. 587679 7. 53907 7. 540765  
11747778\_ 8. 439198 8. 367029 8. 455885 8. 179331 8. 175376 8. 183383  
11747779\_ 7. 771609 7. 659444 7. 778484 7. 754936 7. 855876 7. 812672  
11747780\_ 7. 065381 7. 040548 6. 980423 6. 752593 6. 673758 6. 704406  
11747781\_ 7. 979254 7. 892766 7. 949302 7. 566965 7. 596153 7. 520563  
11747782\_ 9. 727386 9. 713899 9. 715853 9. 781339 9. 784679 9. 740974  
11747783\_ 7. 849441 7. 851338 7. 885101 8. 210621 8. 216722 8. 235079  
11747784\_ 6. 300643 6. 421363 6. 275971 6. 418242 6. 447164 6. 477242  
11747785\_ 5. 587804 5. 584813 5. 687397 5. 541632 5. 49919 5. 554111  
11747786\_ 6. 829664 7. 040618 6. 947187 7. 136804 7. 056679 7. 258063  
11747787\_ 6. 916914 6. 823006 6. 847517 6. 903774 6. 968719 6. 966612  
11747788\_ 5. 309343 5. 310803 5. 29597 5. 513588 5. 346973 5. 378453  
11747789\_ 5. 787113 5. 735625 5. 802604 5. 693995 5. 757214 5. 643081



11747790\_ 6. 291158 6. 27785 6. 284587 6. 276101 6. 284587 6. 348032  
11747791\_ 5. 213889 5. 39133 5. 356647 5. 476071 5. 321221 5. 379537  
11747792\_ 6. 841432 6. 857482 6. 965868 6. 588785 6. 719234 6. 594003  
11747793\_ 8. 488446 8. 493307 8. 514603 8. 202198 8. 276996 8. 120509  
11747794\_ 6. 990262 6. 939404 7. 059704 6. 905408 6. 945312 7. 022716  
11747795\_ 7. 406196 7. 305479 7. 44758 6. 867935 6. 87884 6. 905681  
11747796\_ 6. 910833 6. 84385 6. 807291 7. 293505 7. 383311 7. 280725  
11747797\_ 3. 513692 3. 821704 3. 565504 3. 756925 3. 646438 3. 710229  
11747798\_ 8. 012748 8. 027094 7. 987976 8. 018733 8. 061301 8. 026455  
11747799\_ 12. 2988 12. 32265 12. 30794 12. 40183 12. 45239 12. 42286  
11747800\_ 9. 80015 9. 717511 9. 743701 9. 727998 9. 753102 9. 759188  
11747801\_ 6. 513389 6. 169552 6. 356954 5. 218077 5. 285418 5. 40518  
11747802\_ 7. 477214 7. 431256 7. 555512 7. 426887 7. 442902 7. 479605  
11747803\_ 9. 530722 9. 427607 9. 552446 9. 477943 9. 521777 9. 499442  
11747804\_ 7. 999206 7. 950284 8. 027506 8. 032144 8. 071441 8. 033396  
11747805\_ 6. 6533 6. 514166 6. 695739 6. 421422 6. 422282 6. 4625  
11747806\_ 6. 172009 6. 225513 6. 21243 6. 159012 6. 122294 6. 096554  
11747807\_ 6. 820574 6. 512522 6. 691279 6. 580611 6. 666716 6. 542582  
11747808\_ 6. 748126 6. 682455 6. 847517 6. 92607 6. 775382 6. 851542  
11747809\_ 5. 954081 6. 034097 5. 958915 5. 834106 5. 952202 5. 992607  
11747810\_ 6. 023488 6. 11995 5. 994803 6. 07717 6. 025035 6. 033965  
11747811\_ 5. 542074 5. 585845 5. 686757 5. 494379 5. 496253 5. 513501  
11747812\_ 5. 655189 5. 672642 5. 698053 5. 628607 5. 570715 5. 560912  
11747813\_ 7. 076576 6. 906031 7. 043394 7. 416442 7. 482724 7. 478178  
11747814\_ 6. 846919 6. 764266 6. 795183 7. 327299 7. 494809 7. 442292  
11747815\_ 6. 13945 6. 181503 6. 285558 6. 113253 6. 049527 6. 193016  
11747816\_ 7. 168694 7. 17179 7. 226572 6. 589989 6. 562152 6. 601062  
11747817\_ 6. 135818 6. 151275 6. 197398 6. 059481 6. 044285 6. 17981  
11747818\_ 9. 282521 9. 260342 9. 270852 9. 428221 9. 391734 9. 359233  
11747819\_ 5. 989962 6. 204214 6. 046953 6. 21234 6. 282615 6. 250411  
11747820\_ 7. 076762 6. 977484 7. 023927 6. 523484 6. 603928 6. 428408  
11747821\_ 4. 680757 4. 79213 4. 680757 4. 631272 4. 967357 4. 583587  
11747822\_ 5. 13534 5. 126486 5. 01178 5. 142303 5. 121175 5. 135666  
11747823\_ 7. 881413 7. 832954 7. 906701 8. 113414 8. 131197 8. 167402  
11747824\_ 9. 251695 9. 186556 9. 216203 9. 156762 9. 171663 9. 143033  
11747825\_ 5. 357287 5. 397232 5. 394106 5. 292378 5. 420544 5. 456988  
11747826\_ 5. 160553 5. 296001 5. 230593 5. 230593 5. 230593 5. 224304  
11747827\_ 6. 310239 6. 348133 6. 217842 6. 383618 6. 414878 6. 405695  
11747828\_ 10. 02081 9. 988724 10. 07275 10. 05274 9. 997451 10. 04742  
11747829\_ 5. 971845 5. 98478 6. 148641 5. 931757 5. 808547 5. 961925  
11747830\_ 6. 195382 6. 215335 6. 255225 6. 316961 6. 329613 6. 431802  
11747831\_ 7. 082894 7. 208243 7. 249974 6. 93256 6. 85749 6. 811727  
11747832\_ 8. 027552 7. 980543 7. 987068 8. 056715 8. 048612 8. 079498  
11747833\_ 3. 021479 3. 021479 3. 021479 3. 284543 3. 347381 3. 503743  
11747834\_ 5. 247739 5. 445867 5. 470971 5. 629753 5. 72655 5. 773966  
11747835\_ 9. 081102 9. 073236 9. 065512 8. 943481 8. 941729 8. 89728  
11747836\_ 8. 024306 8. 036269 8. 0043 7. 64195 7. 538465 7. 566346  
11747837\_ 8. 767271 8. 659948 8. 697892 8. 491224 8. 468154 8. 481849  
11747838\_ 6. 734387 6. 830416 6. 751964 6. 75095 6. 747271 6. 789842  
11747839\_ 4. 812486 4. 886108 4. 784237 4. 140277 3. 969526 4. 140723  
11747840\_ 8. 907666 8. 892688 8. 944335 9. 38662 9. 369929 9. 378485

11747841\_ 6. 7637 6. 72708 6. 894806 6. 998064 6. 928704 6. 920342  
11747842\_ 2. 320482 2. 40327 2. 645756 2. 55883 2. 563761 2. 577645  
11747843\_ 2. 962489 3. 559254 3. 256498 3. 328971 3. 289707 3. 208568  
11747844\_ 5. 85884 5. 789947 5. 709521 5. 847449 6. 040758 6. 012732  
11747845\_ 6. 595525 6. 68646 6. 623929 6. 466985 6. 510356 6. 497  
11747846\_ 3. 61339 3. 602316 3. 832159 3. 60475 3. 769804 3. 321828  
11747847\_ 9. 615057 9. 569258 9. 590288 9. 602165 9. 552742 9. 564425  
11747848\_ 5. 19953 5. 261568 5. 101617 4. 903203 5. 149545 5. 156303  
11747849\_ 6. 975851 6. 969318 6. 957703 7. 033953 6. 929099 6. 917826  
11747850\_ 6. 803143 6. 83449 6. 83826 6. 843349 6. 795854 6. 77921  
11747851\_ 9. 008882 8. 966687 8. 920834 8. 924582 8. 947117 8. 925704  
11747852\_ 5. 530665 5. 852951 5. 629739 5. 745821 5. 568316 5. 75201  
11747853\_ 5. 469258 5. 448308 5. 433586 5. 447895 5. 47585 5. 475436  
11747854\_ 7. 109859 7. 20656 7. 047276 7. 188223 7. 162953 6. 998328  
11747855\_ 10. 56709 10. 52108 10. 53078 10. 57288 10. 61913 10. 573  
11747856\_ 6. 165884 5. 969222 6. 018553 6. 395321 6. 383618 6. 480821  
11747857\_ 7. 514346 7. 400837 7. 576132 7. 363988 7. 335031 7. 4045  
11747858\_ 7. 371109 7. 340792 7. 356022 7. 598825 7. 545573 7. 521626  
11747859\_ 8. 708541 8. 645445 8. 734724 8. 880385 8. 828907 8. 886572  
11747860\_ 8. 25937 8. 286281 8. 22962 8. 470629 8. 381053 8. 409177  
11747861\_ 5. 870242 5. 82015 5. 817039 5. 413442 5. 478976 5. 472207  
11747862\_ 6. 889088 6. 830244 6. 909984 6. 787449 6. 696392 6. 85453  
11747863\_ 6. 945191 7. 039087 6. 898793 6. 965727 7. 09832 7. 07496  
11747864\_ 5. 300775 5. 092936 5. 349895 4. 553346 4. 474874 4. 528975  
11747865\_ 11. 32074 11. 32361 11. 30384 11. 52758 11. 54907 11. 48903  
11747866\_ 7. 072973 6. 987352 7. 08741 7. 698646 7. 659366 7. 635396  
11747867\_ 3. 55391 3. 740823 3. 73033 3. 329507 3. 673764 3. 713965  
11747868\_ 9. 503153 9. 421218 9. 442091 9. 70751 9. 770761 9. 675799  
11747869\_ 6. 194821 6. 247067 6. 189162 6. 343226 6. 216516 6. 235331  
11747870\_ 6. 809785 6. 735504 6. 860588 6. 671269 6. 6071 6. 609499  
11747871\_ 5. 655763 5. 572763 5. 79198 5. 331381 5. 310744 5. 384113  
11747872\_ 4. 108592 4. 342601 4. 224272 4. 307493 4. 163875 4. 242195  
11747873\_ 5. 523441 5. 595452 5. 471505 5. 598902 5. 486985 5. 546955  
11747874\_ 6. 659595 6. 629396 6. 754894 6. 648201 6. 785534 6. 767321  
11747875\_ 6. 165991 6. 075858 6. 2244 6. 091012 6. 073746 6. 087052  
11747876\_ 2. 730838 2. 928442 2. 448394 2. 925506 2. 938869 2. 936098  
11747877\_ 10. 3055 10. 26835 10. 34933 10. 32855 10. 26671 10. 35555  
11747878\_ 7. 644808 7. 555156 7. 626711 7. 489524 7. 492536 7. 494905  
11747879\_ 2. 271759 2. 282214 2. 42449 2. 373093 2. 614223 2. 560326  
11747880\_ 8. 860176 8. 975009 8. 923415 8. 776877 8. 820162 8. 81915  
11747881\_ 7. 117738 7. 070311 7. 07393 6. 897266 6. 853404 6. 935904  
11747882\_ 7. 341553 7. 509755 7. 32126 7. 446283 7. 429239 7. 487417  
11747883\_ 7. 044291 6. 911055 6. 984957 6. 985487 7. 076273 6. 926189  
11747884\_ 6. 135512 6. 293183 6. 094935 6. 416878 6. 104586 6. 300002  
11747885\_ 6. 403243 6. 546818 6. 461668 6. 538785 6. 565277 6. 646187  
11747886\_ 5. 658723 5. 556352 5. 565253 7. 553235 7. 566049 7. 484913  
11747887\_ 5. 960188 6. 066051 5. 996126 6. 040637 6. 104931 5. 970712  
11747888\_ 4. 374317 4. 469929 4. 643958 4. 154202 4. 051675 4. 300935  
11747889\_ 4. 694784 4. 662527 4. 520489 4. 362716 4. 461705 4. 449814  
11747890\_ 8. 317461 8. 235422 8. 323858 8. 467643 8. 489047 8. 400331  
11747891\_ 5. 844486 5. 86525 5. 812933 5. 954081 6. 019633 5. 798613

11747892\_ 6. 267857 6. 203724 6. 242171 6. 058023 6. 242008 6. 16159  
11747893\_ 6. 209969 6. 207782 6. 218577 6. 195946 6. 193759 6. 179503  
11747894\_ 5. 732567 5. 732315 5. 582334 5. 700302 5. 723848 5. 725333  
11747895\_ 7. 072902 7. 001755 7. 202233 7. 044787 7. 048362 7. 095982  
11747896\_ 7. 031531 7. 012646 7. 018608 7. 043031 7. 007109 7. 080055  
11747897\_ 8. 091816 7. 94467 8. 084474 7. 985466 7. 986296 7. 979316  
11747898\_ 5. 17314 5. 399564 5. 343885 5. 275366 5. 347605 5. 429094  
11747899\_ 5. 552476 5. 554436 5. 519196 5. 623175 5. 554436 5. 554436  
11747900\_ 6. 541542 6. 385951 6. 590323 6. 423658 6. 302692 6. 330848  
11747901\_ 6. 453598 6. 322244 6. 33598 6. 195256 6. 277291 6. 233038  
11747902\_ 5. 830367 5. 894697 5. 911419 5. 732164 5. 658069 5. 707428  
11747903\_ 4. 910448 5. 106563 4. 947191 5. 125501 5. 145039 5. 136461  
11747904\_ 5. 696241 5. 735418 5. 764869 5. 896849 5. 696241 5. 787559  
11747905\_ 3. 607761 3. 576381 3. 444725 3. 848797 4. 055722 3. 872973  
11747906\_ 3. 152834 3. 328915 3. 092779 3. 025972 3. 318322 3. 290188  
11747907\_ 4. 610462 4. 740762 4. 671614 4. 525463 4. 553634 4. 555951  
11747908\_ 6. 381591 6. 31575 6. 410284 6. 091932 6. 277479 6. 289489  
11747909\_ 6. 370047 6. 197813 6. 234291 6. 151916 6. 251228 6. 201333  
11747910\_ 5. 999582 6. 011116 5. 894319 5. 847328 5. 914443 5. 849954  
11747911\_ 6. 577373 6. 649764 6. 644667 6. 602965 6. 670523 6. 625531  
11747912\_ 7. 186698 7. 028272 7. 212107 7. 23066 7. 246212 7. 285711  
11747913\_ 8. 352541 8. 25815 8. 300711 8. 231315 8. 188152 8. 192268  
11747914\_ 6. 056112 5. 976299 6. 023625 6. 143295 6. 155213 6. 130276  
11747915\_ 6. 345863 6. 303005 6. 391374 6. 452762 6. 400563 6. 544895  
11747916\_ 7. 326852 7. 23613 7. 280882 7. 337579 7. 32869 7. 290907  
11747917\_ 5. 409222 5. 549612 5. 400759 5. 457032 5. 448936 5. 391109  
11747918\_ 5. 419261 5. 260206 5. 449748 5. 180973 5. 102502 5. 170003  
11747919\_ 9. 153114 9. 086908 9. 123554 9. 063533 9. 073376 8. 974235  
11747920\_ 7. 099746 7. 03978 7. 017126 6. 924399 6. 914786 6. 95574  
11747921\_ 6. 797612 6. 769419 6. 874176 6. 448378 6. 622098 6. 541066  
11747922\_ 9. 175703 9. 147827 9. 191138 8. 688318 8. 724079 8. 673718  
11747923\_ 6. 891708 7. 085216 6. 862059 7. 008918 7. 036366 7. 089793  
11747924\_ 5. 294067 5. 38147 5. 598357 5. 120314 5. 128018 4. 977226  
11747925\_ 8. 555363 8. 520626 8. 600853 8. 262129 8. 244418 8. 235064  
11747926\_ 9. 854058 9. 834455 9. 852335 9. 932794 9. 974011 9. 945439  
11747927\_ 3. 965235 4. 067703 3. 740892 3. 803978 3. 807325 4. 206792  
11747928\_ 2. 836756 2. 727932 3. 024106 2. 839846 2. 723981 2. 673421  
11747929\_ 5. 45285 5. 585811 5. 435259 5. 494043 5. 518933 5. 463722  
11747930\_ 6. 1661 6. 112516 6. 159771 6. 303851 6. 15695 6. 213601  
11747931\_ 5. 287381 5. 108273 5. 333723 5. 797641 5. 837825 5. 898838  
11747932\_ 5. 875028 5. 788935 5. 951365 6. 321441 6. 39491 6. 344572  
11747933\_ 7. 305756 7. 297635 7. 292952 7. 472989 7. 433036 7. 463386  
11747934\_ 6. 434826 6. 590034 6. 559235 6. 412222 6. 398821 6. 370906  
11747935\_ 8. 871859 8. 762858 8. 803628 8. 4216 8. 471653 8. 452043  
11747936\_ 6. 191441 6. 269092 6. 292318 6. 188719 6. 279672 6. 363884  
11747937\_ 9. 494028 9. 43257 9. 451704 9. 231224 9. 193908 9. 246849  
11747938\_ 8. 980458 8. 89695 8. 945281 8. 935159 8. 912918 8. 941692  
11747939\_ 5. 614563 5. 440087 5. 463368 5. 217367 5. 359914 5. 317586  
11747940\_ 3. 17304 3. 071652 3. 23756 3. 042207 3. 357437 3. 244676  
11747941\_ 5. 150429 5. 262188 5. 101375 5. 156303 5. 189525 5. 250799  
11747942\_ 6. 732594 6. 531304 6. 620903 5. 989205 5. 924351 5. 849541

11747943\_ 5. 584813 5. 583629 5. 644355 6. 169262 6. 104931 6. 17981  
11747944\_ 5. 885696 5. 906431 5. 787678 5. 894697 5. 894697 5. 847077  
11747945\_ 3. 385285 3. 498009 3. 285994 3. 17396 3. 270623 3. 229254  
11747946\_ 8. 220089 8. 119791 8. 211864 8. 517485 8. 54328 8. 570283  
11747947\_ 5. 785941 5. 567329 5. 573317 5. 835838 5. 962122 5. 848079  
11747948\_ 7. 626954 7. 367119 7. 504227 7. 299876 7. 264708 7. 342771  
11747949\_ 5. 209259 5. 528427 5. 344424 5. 487983 5. 443951 5. 456782  
11747950\_ 4. 868991 4. 921032 4. 844523 4. 891698 4. 855205 4. 945977  
11747951\_ 4. 0743 4. 249163 4. 145216 4. 130882 4. 244234 4. 319678  
11747952\_ 2. 144441 2. 583794 2. 341372 2. 382429 2. 21321 2. 346912  
11747953\_ 5. 291366 5. 149315 5. 229364 4. 977326 5. 029529 5. 042907  
11747954\_ 7. 701304 7. 558383 7. 701561 7. 384019 7. 361242 7. 394293  
11747955\_ 6. 319561 6. 32376 6. 28725 6. 396218 6. 416808 6. 367511  
11747956\_ 6. 421685 6. 531304 6. 357663 6. 510196 6. 586671 6. 621708  
11747957\_ 4. 513241 4. 518485 4. 52373 4. 52373 4. 590516 4. 60946  
11747958\_ 5. 555508 5. 643713 5. 465172 5. 827552 5. 705944 5. 824302  
11747959\_ 8. 048986 8. 034438 8. 075283 7. 978536 7. 992569 7. 947306  
11747960\_ 10. 15935 10. 1914 10. 16746 10. 22767 10. 19802 10. 11709  
11747961\_ 8. 192003 8. 084272 8. 136955 8. 491847 8. 435147 8. 395283  
11747962\_ 5. 924996 6. 024368 6. 083174 6. 015717 5. 962961 5. 888143  
11747963\_ 6. 909745 6. 790674 6. 995145 7. 060521 7. 118532 7. 149037  
11747964\_ 9. 705322 9. 658314 9. 72963 8. 958626 9. 021035 8. 905926  
11747965\_ 2. 238953 2. 238953 2. 238953 2. 485599 2. 043726 2. 18238  
11747966\_ 4. 513539 4. 554185 4. 52934 4. 644073 4. 57902 4. 59384  
11747967\_ 7. 664713 7. 628275 7. 66025 7. 232787 7. 145211 7. 170267  
11747968\_ 6. 688764 6. 452349 6. 665015 7. 14264 7. 184826 7. 160261  
11747969\_ 6. 702243 6. 449419 6. 526095 5. 756636 5. 709075 5. 706954  
11747970\_ 5. 11527 5. 140581 5. 26034 4. 550932 4. 707116 4. 668183  
11747971\_ 6. 044202 5. 972648 5. 92877 5. 866807 5. 908465 5. 92877  
11747972\_ 3. 920141 3. 869279 3. 735607 3. 838956 3. 890207 3. 817185  
11747973\_ 2. 498088 2. 608676 2. 122783 2. 367162 2. 166552 2. 224074  
11747974\_ 4. 119887 4. 265309 4. 07525 4. 400925 4. 215297 4. 18199  
11747975\_ 7. 239095 7. 180218 7. 325879 6. 971776 6. 938555 6. 920774  
11747976\_ 4. 745241 4. 856292 4. 758522 4. 942663 4. 955524 4. 840194  
11747977\_ 7. 562074 7. 396018 7. 437891 7. 066781 7. 099902 7. 032875  
11747978\_ 5. 674663 5. 615804 5. 594137 5. 683563 5. 658129 5. 592952  
11747979\_ 8. 202677 8. 163143 8. 182449 8. 416687 8. 4328 8. 400319  
11747980\_ 7. 822724 7. 840709 7. 911911 8. 099802 8. 072329 8. 104652  
11747981\_ 5. 09837 5. 102431 4. 929763 5. 223396 5. 191799 5. 109738  
11747982\_ 5. 11294 4. 839752 4. 901257 4. 385781 4. 726395 4. 69494  
11747983\_ 5. 843406 5. 763634 5. 833367 5. 854367 5. 795754 5. 919958  
11747984\_ 6. 666702 6. 603364 6. 663178 6. 64518 6. 630515 6. 693133  
11747985\_ 4. 854656 4. 854574 4. 912477 5. 003985 4. 833938 4. 815884  
11747986\_ 7. 735987 7. 784304 7. 732371 7. 53912 7. 565679 7. 449109  
11747987\_ 8. 095047 8. 032188 8. 078765 7. 371921 7. 414472 7. 342771  
11747988\_ 7. 145469 7. 060936 7. 120003 6. 701604 6. 686169 6. 694519  
11747989\_ 8. 324861 8. 372349 8. 361511 8. 643236 8. 699197 8. 702573  
11747990\_ 6. 0233 6. 058786 6. 069567 5. 312973 5. 474638 5. 529477  
11747991\_ 5. 342353 5. 380649 5. 312548 5. 435782 5. 374277 5. 346074  
11747992\_ 5. 947976 6. 024908 5. 955003 5. 970605 5. 866842 5. 971463  
11747993\_ 4. 513241 4. 785651 4. 824195 4. 531704 4. 475541 4. 645165

11747994\_ 6. 509739 6. 469735 6. 507107 6. 40754 6. 293076 6. 249588  
11747995\_ 7. 447949 7. 369875 7. 478392 7. 355322 7. 288249 7. 134375  
11747996\_ 8. 692849 8. 598531 8. 628117 8. 918665 9. 054899 8. 95057  
11747997\_ 7. 955374 7. 847116 8. 004681 7. 745953 7. 839469 7. 818143  
11747998\_ 8. 180828 8. 155082 8. 209597 8. 052716 8. 114485 8. 05139  
11747999\_ 5. 440303 5. 241872 5. 446257 5. 745821 5. 723939 5. 78708  
11748000\_ 8. 506571 8. 45538 8. 446199 7. 932893 7. 923212 7. 910838  
11748001\_ 7. 493747 7. 644337 7. 626025 7. 640972 7. 626232 7. 649502  
11748002\_ 8. 999757 8. 947572 9. 058356 9. 174633 9. 193221 9. 18103  
11748003\_ 7. 670297 7. 488369 7. 621702 7. 69554 7. 63127 7. 690887  
11748004\_ 7. 022399 6. 916918 7. 013021 5. 991851 5. 877479 6. 098347  
11748005\_ 4. 271474 4. 40461 4. 200762 4. 390201 4. 506785 4. 678188  
11748006\_ 5. 768685 5. 928328 5. 514801 5. 745095 5. 773452 5. 919352  
11748007\_ 3. 747223 3. 865401 3. 79505 3. 94874 3. 975329 3. 831944  
11748008\_ 5. 209733 5. 446174 5. 297975 5. 256102 5. 165099 5. 312728  
11748009\_ 4. 425026 4. 40461 4. 713072 4. 40461 4. 413152 4. 454003  
11748010\_ 4. 786666 4. 681181 4. 835998 5. 018852 4. 930929 4. 920423  
11748011\_ 8. 969718 8. 996497 9. 037991 9. 329923 9. 386216 9. 41177  
11748012\_ 9. 007045 8. 897643 9. 040738 9. 367425 9. 341552 9. 347374  
11748013\_ 2. 235709 2. 333319 2. 111826 2. 196368 2. 163766 2. 207597  
11748014\_ 9. 651201 9. 571521 9. 656714 10. 42762 10. 44643 10. 41156  
11748015\_ 8. 692405 8. 641477 8. 694258 9. 552228 9. 559397 9. 5528  
11748016\_ 2. 741941 2. 675644 2. 605516 2. 708062 2. 62193 2. 649896  
11748017\_ 5. 682921 5. 597155 5. 638146 6. 223768 6. 211966 6. 205144  
11748018\_ 5. 288617 5. 344484 5. 256698 5. 408019 5. 341174 5. 463627  
11748019\_ 6. 414905 6. 590814 6. 667525 6. 316404 6. 39353 6. 528274  
11748020\_ 7. 639799 7. 497471 7. 602918 7. 24233 7. 210958 7. 236478  
11748021\_ 7. 37592 7. 398891 7. 361621 7. 268741 7. 306776 7. 319282  
11748022\_ 4. 718091 4. 605285 4. 621267 4. 690985 4. 470789 4. 443491  
11748023\_ 7. 339929 7. 432409 7. 315565 7. 283913 7. 365418 7. 331204  
11748024\_ 7. 046942 6. 991618 6. 965938 5. 817569 5. 89485 5. 882622  
11748025\_ 4. 074967 3. 691235 3. 946938 4. 030339 3. 906601 4. 015012  
11748026\_ 4. 965329 4. 895885 4. 873207 4. 856246 4. 854111 4. 820932  
11748027\_ 7. 048681 7. 08485 7. 007698 7. 332572 7. 310836 7. 337345  
11748028\_ 5. 923968 5. 69019 5. 858967 6. 032472 6. 070701 6. 095369  
11748029\_ 7. 118416 7. 156345 7. 101845 7. 177167 7. 199544 7. 208734  
11748030\_ 7. 376073 7. 286897 7. 397386 7. 701561 7. 741588 7. 733353  
11748031\_ 6. 379131 6. 220322 6. 196262 6. 196691 6. 16198 6. 130173  
11748032\_ 6. 011421 6. 094104 5. 959857 5. 954077 6. 016322 6. 045179  
11748033\_ 5. 109662 5. 159172 5. 354298 4. 342475 4. 422155 4. 4953  
11748034\_ 3. 122507 3. 234506 3. 108962 2. 903387 2. 6515 2. 641582  
11748035\_ 7. 680219 7. 864381 7. 73386 7. 917848 7. 880969 7. 913619  
11748036\_ 4. 636133 4. 551476 4. 516502 4. 513625 4. 522371 4. 52373  
11748037\_ 10. 42936 10. 39152 10. 45256 10. 577 10. 574 10. 59207  
11748038\_ 8. 721048 8. 66793 8. 704345 8. 842887 8. 845409 8. 853971  
11748039\_ 9. 246937 9. 201973 9. 235589 8. 955584 8. 887819 8. 942601  
11748040\_ 8. 376466 8. 267685 8. 422319 8. 321906 8. 307336 8. 247255  
11748041\_ 5. 750176 5. 695335 5. 649846 5. 820052 5. 942783 5. 906816  
11748042\_ 7. 670192 7. 668687 7. 775635 7. 805084 7. 805084 7. 799749  
11748043\_ 7. 02068 6. 92707 6. 953777 6. 732145 6. 797489 6. 826954  
11748044\_ 2. 96409 2. 864542 2. 736636 2. 86735 2. 961282 2. 90841

11748045\_ 7. 2927 7. 275738 7. 251982 7. 675281 7. 78904 7. 76041  
11748046\_ 5. 083263 5. 120786 5. 217759 5. 27752 5. 248636 5. 217759  
11748047\_ 7. 846342 7. 76463 7. 952942 7. 961512 7. 988132 7. 972167  
11748048\_ 3. 916408 4. 067703 3. 850246 3. 931453 3. 879309 3. 766966  
11748049\_ 3. 755038 3. 747344 3. 572579 3. 681572 3. 868572 3. 785319  
11748050\_ 4. 9226 4. 955529 5. 073036 5. 145895 5. 145895 5. 156303  
11748051\_ 6. 632249 6. 520535 6. 665265 6. 385849 6. 498999 6. 427857  
11748052\_ 9. 79549 9. 754866 9. 904237 9. 660627 9. 679046 9. 678047  
11748053\_ 6. 620392 6. 544218 6. 602341 6. 57857 6. 67305 6. 577846  
11748054\_ 4. 312337 4. 331712 4. 190597 4. 556174 4. 596405 4. 443591  
11748055\_ 9. 031676 8. 985321 9. 031604 9. 216454 9. 28382 9. 195331  
11748056\_ 4. 251796 4. 171515 4. 357274 3. 770625 3. 85423 4. 097636  
11748057\_ 5. 132881 5. 149545 5. 132881 4. 796604 4. 93837 5. 014087  
11748058\_ 5. 574339 5. 609692 5. 604281 5. 642382 5. 56509 5. 650258  
11748059\_ 6. 359789 6. 477285 6. 574834 5. 717051 5. 890936 5. 969512  
11748060\_ 5. 262918 5. 092842 5. 2222 5. 419276 5. 542152 5. 464553  
11748061\_ 7. 482427 7. 399834 7. 545986 7. 182818 7. 291045 7. 346307  
11748062\_ 2. 69242 2. 510716 2. 527207 2. 77143 3. 050905 2. 782231  
11748063\_ 5. 1421 5. 201205 5. 105543 5. 332119 5. 251825 5. 362253  
11748064\_ 6. 726964 6. 690261 6. 794186 6. 736209 6. 672355 6. 644237  
11748065\_ 5. 645049 5. 592476 5. 719864 5. 54336 5. 653832 5. 515263  
11748066\_ 6. 889373 6. 995982 6. 985934 6. 826074 6. 874408 6. 805885  
11748067\_ 5. 500425 5. 444456 5. 50324 5. 554436 5. 413998 5. 409222  
11748068\_ 6. 939866 6. 940946 6. 993859 6. 705311 6. 755635 6. 762773  
11748069\_ 3. 440774 3. 541646 3. 430337 3. 263975 3. 619178 3. 507705  
11748070\_ 7. 795744 7. 724323 7. 702031 7. 711639 7. 692514 7. 67958  
11748071\_ 9. 090947 9. 064729 9. 043469 9. 730004 9. 780448 9. 757726  
11748072\_ 10. 04621 10. 01099 10. 00464 9. 976746 9. 969408 9. 940778  
11748073\_ 4. 19855 4. 396683 4. 212652 4. 551768 4. 537749 4. 468744  
11748074\_ 6. 493693 6. 436638 6. 50101 6. 892136 6. 986676 6. 899739  
11748075\_ 6. 051537 6. 118262 6. 135746 6. 431763 6. 341976 6. 378123  
11748076\_ 4. 036864 4. 022545 4. 022545 4. 374603 4. 135351 4. 106999  
11748077\_ 5. 663073 5. 807107 5. 790333 5. 543829 5. 609647 5. 623847  
11748078\_ 5. 008114 5. 175358 5. 153168 5. 190851 5. 229869 5. 11527  
11748079\_ 4. 235442 4. 067703 4. 135496 4. 150998 3. 876473 4. 059809  
11748080\_ 6. 305631 6. 248167 6. 384692 6. 795227 6. 963243 7. 003275  
11748081\_ 6. 447392 6. 423806 6. 444895 6. 975094 6. 944966 6. 93943  
11748082\_ 7. 164857 7. 056338 7. 130755 7. 69028 7. 811849 7. 666543  
11748083\_ 5. 14944 5. 179697 5. 059068 5. 103108 5. 133232 5. 051708  
11748084\_ 4. 584952 4. 357461 4. 334043 4. 444227 4. 40291 4. 41716  
11748085\_ 4. 836308 4. 839069 4. 789026 5. 025102 4. 884957 4. 929104  
11748086\_ 3. 886521 3. 771439 3. 665005 3. 858902 3. 651489 3. 667194  
11748087\_ 6. 29865 6. 100815 6. 33679 6. 839538 6. 854805 6. 841156  
11748088\_ 7. 727898 7. 620007 7. 701188 7. 830039 7. 765217 7. 736057  
11748089\_ 6. 118838 6. 118838 5. 959756 6. 076853 6. 095861 6. 172413  
11748090\_ 4. 977054 5. 149545 4. 794488 5. 069738 5. 13942 5. 145693  
11748091\_ 8. 822596 8. 72625 8. 796299 8. 821186 8. 785234 8. 819959  
11748092\_ 5. 540759 5. 835552 5. 770228 5. 768053 5. 543169 5. 693296  
11748093\_ 2. 942701 2. 801848 2. 662529 2. 641961 2. 826772 2. 302122  
11748094\_ 9. 293584 9. 301311 9. 252345 8. 615141 8. 572887 8. 477657  
11748095\_ 5. 092459 5. 116552 5. 196602 5. 073036 4. 940345 5. 1361

11748096\_ 8. 596506 8. 580741 8. 65746 8. 557764 8. 564131 8. 592094  
11748097\_ 12. 88972 12. 89234 12. 88049 12. 7832 12. 82713 12. 80087  
11748098\_ 7. 1782 7. 088878 7. 321438 7. 49336 7. 476255 7. 49336  
11748099\_ 2. 544114 2. 864381 2. 822366 3. 075547 2. 853226 2. 822366  
11748100\_ 6. 256793 6. 301957 6. 398083 6. 175674 6. 336791 6. 311108  
11748101\_ 4. 371683 4. 435063 4. 40219 4. 462359 4. 40219 4. 310533  
11748102\_ 4. 815683 4. 988358 5. 029529 4. 978734 4. 773841 4. 874885  
11748103\_ 7. 12407 7. 09889 7. 168572 7. 010728 7. 064308 7. 031011  
11748104\_ 6. 894853 6. 633366 6. 735733 7. 526781 7. 481821 7. 501381  
11748105\_ 8. 674601 8. 617756 8. 661544 8. 382312 8. 339618 8. 352675  
11748106\_ 5. 552326 5. 582666 5. 588774 5. 695754 5. 67628 5. 546329  
11748107\_ 7. 007279 6. 789946 6. 946361 6. 598934 6. 581963 6. 639761  
11748108\_ 2. 561418 2. 885243 2. 867796 2. 181648 2. 275023 2. 178051  
11748109\_ 3. 462898 3. 683997 3. 78097 3. 711611 3. 771032 3. 827529  
11748110\_ 6. 988574 7. 008672 6. 987338 7. 057238 7. 062033 7. 045762  
11748111\_ 5. 385065 5. 5272 5. 656744 6. 281211 6. 291993 6. 15403  
11748112\_ 6. 683097 6. 460238 6. 704222 7. 074614 7. 090856 7. 085641  
11748113\_ 10. 17799 10. 11583 10. 1897 10. 08322 10. 11494 10. 06498  
11748114\_ 4. 795405 4. 688197 4. 811654 4. 756809 4. 921591 4. 866013  
11748115\_ 5. 106633 5. 116505 5. 03325 5. 305444 5. 116505 5. 039595  
11748116\_ 4. 750439 4. 741188 4. 614188 4. 801896 4. 873721 4. 80478  
11748117\_ 6. 631711 6. 668734 6. 732204 6. 6057 6. 676695 6. 63388  
11748118\_ 5. 343264 5. 33966 5. 343264 5. 405835 5. 333723 5. 343264  
11748119\_ 5. 358158 5. 428498 5. 414869 5. 509067 5. 499933 5. 475325  
11748120\_ 2. 519432 2. 538268 2. 791485 2. 556178 2. 523126 2. 695719  
11748121\_ 9. 321527 9. 317987 9. 319534 9. 230636 9. 265796 9. 254946  
11748122\_ 4. 343179 4. 388381 4. 368476 4. 354867 4. 37359 4. 351102  
11748123\_ 6. 290865 6. 308289 6. 218932 6. 15612 6. 135826 6. 139387  
11748124\_ 5. 206313 5. 11527 5. 259416 5. 284654 5. 2588 5. 346783  
11748125\_ 10. 00021 9. 917387 9. 953814 9. 783103 9. 780565 9. 758329  
11748126\_ 8. 211377 8. 15632 8. 199754 8. 070903 8. 124096 8. 110187  
11748127\_ 4. 261499 3. 961438 4. 244332 4. 336196 4. 097549 4. 055369  
11748128\_ 8. 162809 8. 123583 8. 093552 7. 704575 7. 646101 7. 676287  
11748129\_ 7. 294142 7. 287252 7. 353258 7. 423359 7. 500421 7. 497147  
11748130\_ 4. 52911 4. 450202 4. 591038 4. 696545 4. 584303 4. 728825  
11748131\_ 7. 756425 7. 675148 7. 766213 7. 341639 7. 290738 7. 257321  
11748132\_ 6. 939488 7. 031294 6. 904651 6. 982999 6. 958175 6. 936158  
11748133\_ 6. 274933 6. 291523 6. 406302 6. 073838 6. 120451 6. 070311  
11748134\_ 6. 450975 6. 413832 6. 252804 6. 532104 6. 49968 6. 519956  
11748135\_ 7. 05532 6. 877829 6. 96845 7. 325089 7. 315859 7. 211029  
11748136\_ 8. 962448 8. 858801 8. 965439 9. 691315 9. 658946 9. 631164  
11748137\_ 5. 075858 5. 067393 4. 999125 5. 054441 5. 088591 5. 144192  
11748138\_ 5. 587741 5. 569322 5. 484402 5. 610402 5. 587741 5. 633425  
11748139\_ 8. 731305 8. 71141 8. 792515 8. 414796 8. 430587 8. 456995  
11748140\_ 9. 53567 9. 506667 9. 56451 9. 351716 9. 346192 9. 384739  
11748141\_ 8. 893925 8. 815367 8. 89505 8. 901036 8. 916145 8. 915106  
11748142\_ 5. 792033 5. 955891 5. 811296 6. 014609 6. 196913 6. 106377  
11748143\_ 6. 513872 6. 416556 6. 494831 6. 632926 6. 626568 6. 653028  
11748144\_ 6. 885589 6. 926636 6. 845653 6. 922813 7. 014484 6. 881234  
11748145\_ 9. 362298 9. 301268 9. 35354 9. 368209 9. 443037 9. 390875  
11748146\_ 2. 235709 2. 058689 2. 235709 2. 25483 2. 079884 2. 326666

11748147\_ 4. 977054 5. 104658 5. 092782 5. 690991 5. 536574 5. 701186  
11748148\_ 7. 198896 7. 218047 7. 229071 7. 038797 7. 082597 7. 031766  
11748149\_ 8. 181535 8. 088061 8. 159367 7. 489943 7. 588677 7. 484449  
11748150\_ 3. 64359 3. 712453 3. 445779 4. 057374 4. 084975 4. 106119  
11748151\_ 5. 484703 5. 530204 5. 392533 5. 584813 5. 532449 5. 463246  
11748152\_ 7. 38091 7. 387126 7. 402631 7. 099631 7. 054319 7. 164559  
11748153\_ 7. 627412 7. 634829 7. 707104 7. 476997 7. 399429 7. 491594  
11748154\_ 7. 154768 7. 158637 7. 228583 7. 184826 7. 200608 7. 148474  
11748155\_ 6. 817986 6. 583295 6. 853232 7. 170577 7. 182921 7. 18063  
11748156\_ 8. 225088 8. 123233 8. 169562 7. 748891 7. 792384 7. 739505  
11748157\_ 9. 773575 9. 780904 9. 779611 10. 12765 10. 05864 10. 04855  
11748158\_ 6. 558468 6. 557313 6. 488951 6. 076239 6. 158442 6. 11448  
11748159\_ 6. 49572 6. 517426 6. 451353 6. 413325 6. 413325 6. 387448  
11748160\_ 7. 50511 7. 36348 7. 476867 7. 224948 7. 222748 7. 23318  
11748161\_ 5. 926672 6. 186428 5. 996126 6. 164308 6. 064685 6. 031228  
11748162\_ 3. 785007 3. 821095 3. 672434 3. 482812 3. 359704 3. 542984  
11748163\_ 6. 701993 6. 671516 6. 699269 6. 679857 6. 761426 6. 765911  
11748164\_ 3. 632507 3. 361955 3. 208718 3. 269048 3. 147199 3. 332839  
11748165\_ 2. 909654 2. 95802 2. 945929 2. 83198 2. 82833 2. 933837  
11748166\_ 8. 180188 8. 165676 8. 29887 7. 75233 7. 906192 7. 826858  
11748167\_ 2. 859798 3. 256128 3. 096597 2. 827166 3. 167917 3. 460661  
11748168\_ 3. 499187 3. 568491 3. 474866 3. 829387 3. 606313 3. 524581  
11748169\_ 3. 601552 4. 085746 4. 017855 3. 606313 4. 079222 3. 985351  
11748170\_ 6. 278239 6. 283496 6. 221825 6. 296821 6. 290928 6. 400981  
11748171\_ 9. 587685 9. 551723 9. 607504 9. 016638 9. 01206 8. 978699  
11748172\_ 2. 361778 2. 25483 2. 300011 2. 482362 2. 332029 2. 133412  
11748173\_ 2. 684624 2. 454781 2. 741406 2. 405971 2. 201018 2. 514129  
11748174\_ 8. 476664 8. 483871 8. 480625 9. 029652 9. 036849 9. 006078  
11748175\_ 7. 476245 7. 281967 7. 37951 7. 874503 7. 960938 7. 882866  
11748176\_ 6. 14582 6. 180362 6. 023571 6. 220686 6. 160046 6. 225946  
11748177\_ 5. 373929 5. 414869 5. 439063 5. 475177 5. 453793 5. 518736  
11748178\_ 6. 060673 6. 130796 5. 908655 6. 208076 6. 176596 6. 111526  
11748179\_ 5. 803036 5. 854266 5. 989292 5. 73633 5. 848279 5. 813595  
11748180\_ 8. 069551 7. 942078 8. 077389 7. 59878 7. 684132 7. 718203  
11748181\_ 3. 063764 3. 232095 3. 065998 3. 122853 3. 122853 3. 311066  
11748182\_ 5. 1881 5. 303586 5. 127023 5. 303997 5. 303586 5. 529586  
11748183\_ 4. 925611 4. 974772 5. 193265 4. 914651 4. 93837 4. 822121  
11748184\_ 4. 802948 5. 149545 5. 175543 4. 998984 5. 06468 5. 029529  
11748185\_ 5. 199569 5. 17293 5. 2222 5. 30225 5. 204899 5. 221187  
11748186\_ 5. 696937 5. 704919 5. 745068 6. 061278 6. 10818 6. 13945  
11748187\_ 4. 231397 4. 391097 4. 22655 4. 26177 4. 249638 4. 360502  
11748188\_ 6. 757445 6. 622 6. 717484 6. 997816 7. 041489 7. 109797  
11748189\_ 5. 472369 5. 464631 5. 373737 5. 377037 5. 367404 5. 455682  
11748190\_ 5. 152365 5. 303868 5. 26034 5. 34204 5. 326189 5. 332862  
11748191\_ 2. 78369 2. 999319 2. 895327 2. 860238 2. 944072 2. 971695  
11748192\_ 4. 745007 4. 988031 4. 75096 4. 893891 4. 819202 4. 95086  
11748193\_ 8. 044028 7. 968982 8. 040327 7. 878586 7. 920705 7. 917392  
11748194\_ 3. 609053 3. 803362 3. 818764 3. 864991 3. 899536 4. 146775  
11748195\_ 6. 346244 6. 1763 6. 3856 5. 790959 5. 668017 5. 669784  
11748196\_ 5. 683338 5. 666426 5. 732633 5. 476261 5. 706007 5. 430981  
11748197\_ 4. 180845 4. 398839 4. 183402 4. 377003 4. 327633 4. 311472



11748198\_ 2.192369 2.25483 2.265932 2.277031 2.312377 2.245338  
11748199\_ 8.216559 8.19677 8.123231 7.966502 8.027903 8.053619  
11748200\_ 7.179327 7.154768 7.139863 7.344252 7.286618 7.303408  
11748201\_ 6.144017 6.084679 6.160524 5.549417 5.469531 5.417599  
11748202\_ 4.780935 4.785345 4.806837 4.992243 5.101469 5.165191  
11748203\_ 6.889162 6.870333 6.823323 6.635883 6.63688 6.575505  
11748204\_ 4.532149 4.482211 4.356814 4.570028 4.665522 4.584933  
11748205\_ 8.389809 8.433754 8.474196 7.896391 7.824599 7.840682  
11748206\_ 5.247968 5.178267 5.099319 4.897464 4.872302 4.968933  
11748207\_ 2.006828 2.180862 2.034059 2.044129 2.006903 1.920318  
11748208\_ 7.096469 6.954315 7.116663 6.505618 6.469695 6.553804  
11748209\_ 5.241982 5.043616 5.241982 5.466879 5.350849 5.29286  
11748210\_ 5.419255 5.322715 5.618057 4.772366 4.700243 4.892199  
11748211\_ 9.038692 9.00464 9.042062 8.737584 8.803577 8.745963  
11748212\_ 10.16456 10.15945 10.12275 10.18301 10.074 10.07761  
11748213\_ 8.878247 8.898838 8.898978 8.028093 7.990549 7.979522  
11748214\_ 7.69814 7.624111 7.67697 6.953024 6.785385 6.929156  
11748215\_ 4.856503 4.933849 4.659624 4.947888 4.978069 4.943036  
11748216\_ 7.672267 7.615209 7.645828 7.679445 7.740187 7.71463  
11748217\_ 5.361291 5.309674 5.174788 5.326614 5.390052 5.285227  
11748218\_ 5.442592 5.3172 5.624314 5.824681 5.867546 5.892861  
11748219\_ 5.640166 5.675294 5.709521 5.845365 5.813377 5.851379  
11748220\_ 7.849633 7.804603 7.759823 7.665737 7.701471 7.613446  
11748221\_ 6.867007 6.735752 6.994297 6.8877 6.790012 6.845334  
11748222\_ 8.115213 8.029021 8.158164 7.925423 7.995038 7.976932  
11748223\_ 3.585906 3.469407 3.871803 3.20262 3.318723 3.015557  
11748224\_ 6.063519 6.268737 6.254707 6.311103 6.37327 6.379853  
11748225\_ 8.071801 8.080577 8.136825 8.272272 8.278486 8.171118  
11748226\_ 2.718322 2.86229 2.401483 2.638111 2.718322 2.851921  
11748227\_ 6.196401 6.212395 6.135687 6.511963 6.537602 6.504784  
11748228\_ 8.02939 7.992919 8.047097 8.192052 8.200925 8.263856  
11748229\_ 6.432134 6.590844 6.468445 6.421524 6.477536 6.348744  
11748230\_ 6.225513 6.159072 6.178627 6.634134 6.47678 6.593711  
11748231\_ 5.538968 5.448585 5.527291 5.325383 5.410756 5.484224  
11748232\_ 8.684731 8.598098 8.692962 8.390646 8.361368 8.304623  
11748233\_ 8.919887 8.929912 8.905849 8.875499 8.81002 8.889338  
11748234\_ 6.456381 6.616951 6.672047 6.49753 6.422992 6.434545  
11748235\_ 3.502454 3.542844 3.497256 3.72201 3.500532 3.504704  
11748236\_ 3.133012 3.24417 3.120391 3.06229 3.217344 3.281655  
11748237\_ 4.763543 4.778034 4.77044 4.896869 4.738731 4.815683  
11748238\_ 5.947269 6.041247 6.059239 6.15415 6.324543 6.241538  
11748239\_ 6.44728 6.32074 6.237211 6.602061 6.567911 6.633888  
11748240\_ 5.502883 5.544129 5.475509 5.51038 5.583523 5.670351  
11748241\_ 2.29371 2.180904 2.074468 2.265372 2.26537 2.169815  
11748242\_ 6.261488 6.25806 6.280664 6.281974 6.330812 6.37594  
11748243\_ 7.940875 7.930144 7.895634 8.090115 8.105615 8.081437  
11748244\_ 7.658209 7.612525 7.647913 7.534213 7.531603 7.430135  
11748245\_ 7.124441 7.164857 7.183172 7.137407 7.154768 7.178028  
11748246\_ 8.855133 8.813097 8.895179 8.889265 8.968865 8.946233  
11748247\_ 5.622086 5.572969 5.652571 4.987935 5.26007 5.191267  
11748248\_ 8.884299 8.799832 8.877516 9.326764 9.354138 9.397933

11748249\_ 7. 156256 7. 04434 7. 21019 7. 018146 7. 011424 6. 984547  
11748250\_ 7. 329149 7. 269591 7. 292577 7. 125971 7. 177641 7. 179566  
11748251\_ 9. 786158 9. 703596 9. 729471 9. 550928 9. 512033 9. 571427  
11748252\_ 8. 871892 8. 84566 8. 889457 9. 105688 9. 132244 9. 086767  
11748253\_ 3. 882353 3. 88787 3. 885111 3. 963039 3. 845915 3. 927067  
11748254\_ 7. 132977 7. 093632 7. 097732 7. 043272 7. 144298 7. 086339  
11748255\_ 5. 981303 5. 842154 5. 922291 6. 507716 6. 44199 6. 528702  
11748256\_ 5. 049675 5. 192662 5. 129265 5. 191687 5. 112236 5. 132343  
11748257\_ 6. 846903 6. 786098 6. 885267 6. 818202 6. 886652 7. 00719  
11748258\_ 6. 087071 6. 2282 6. 27368 5. 524794 5. 316015 5. 144825  
11748259\_ 6. 773142 6. 695136 6. 735682 6. 534142 6. 514113 6. 514735  
11748260\_ 7. 849849 7. 842875 7. 917567 7. 719635 7. 746349 7. 684015  
11748261\_ 5. 614563 5. 474604 5. 589082 5. 516777 5. 600788 5. 503872  
11748262\_ 5. 773862 5. 838132 5. 950197 6. 029437 6. 044285 6. 155793  
11748263\_ 4. 505615 4. 533149 4. 291018 3. 384176 3. 384192 3. 303168  
11748264\_ 4. 113688 4. 174945 4. 316952 3. 025972 3. 252238 3. 29629  
11748265\_ 6. 574381 6. 554393 6. 64299 6. 735932 6. 728727 6. 853835  
11748266\_ 5. 644713 5. 614563 5. 766606 5. 649826 5. 84533 5. 648514  
11748267\_ 5. 073036 5. 001809 5. 108463 4. 998241 4. 924067 4. 815683  
11748268\_ 5. 710863 5. 629716 5. 695887 5. 584813 5. 734883 5. 545915  
11748269\_ 8. 734693 8. 676174 8. 688078 8. 581513 8. 618747 8. 641848  
11748270\_ 7. 280745 7. 160848 7. 155208 7. 04539 7. 095216 7. 087049  
11748271\_ 4. 332336 4. 536723 4. 316277 4. 481576 4. 347179 4. 504605  
11748272\_ 6. 563994 6. 612181 6. 488845 6. 594872 6. 575901 6. 594824  
11748273\_ 8. 426936 8. 341504 8. 31152 7. 962254 8. 075641 8. 026384  
11748274\_ 8. 395311 8. 24612 8. 362084 8. 906898 8. 964217 8. 919419  
11748275\_ 9. 149683 9. 061784 9. 09898 9. 682447 9. 713172 9. 746985  
11748276\_ 7. 05247 7. 022485 7. 073919 7. 167568 7. 231649 7. 257993  
11748277\_ 7. 669071 7. 567441 7. 611159 7. 503066 7. 468834 7. 544456  
11748278\_ 7. 65054 7. 636589 7. 654243 7. 541519 7. 527944 7. 599876  
11748279\_ 7. 115455 7. 115776 7. 050506 7. 052955 7. 101697 7. 000094  
11748280\_ 8. 58701 8. 498045 8. 526202 8. 300837 8. 212611 8. 218697  
11748281\_ 4. 097618 4. 393181 4. 166184 4. 594289 4. 327268 4. 586687  
11748282\_ 6. 930644 6. 898299 7. 021981 7. 084958 7. 076762 7. 189832  
11748283\_ 5. 987937 5. 983748 5. 896924 5. 996126 6. 037268 6. 075769  
11748284\_ 5. 118914 5. 361097 5. 165108 5. 287432 5. 101564 5. 157045  
11748285\_ 6. 001316 5. 803614 6. 096738 5. 487959 5. 460894 5. 394944  
11748286\_ 6. 290929 6. 377847 6. 38154 6. 075819 5. 962053 6. 019738  
11748287\_ 3. 838175 3. 877481 3. 768646 3. 95955 4. 102672 3. 816584  
11748288\_ 5. 929568 5. 804541 5. 833112 6. 102996 5. 794286 5. 861129  
11748289\_ 5. 538053 5. 699474 5. 439922 5. 568079 5. 661053 5. 731424  
11748290\_ 7. 933177 7. 909434 7. 902116 8. 103825 8. 041652 8. 081553  
11748291\_ 9. 075738 8. 991241 9. 039988 9. 448794 9. 539472 9. 506611  
11748292\_ 7. 328533 7. 265729 7. 277276 7. 258563 7. 271214 7. 232133  
11748293\_ 5. 386843 5. 397497 5. 497386 5. 406167 5. 49064 5. 452525  
11748294\_ 5. 050905 4. 979035 4. 956275 5. 12353 5. 355897 5. 077371  
11748295\_ 10. 19099 10. 11555 10. 17446 10. 04101 10. 08524 10. 05384  
11748296\_ 8. 304643 8. 342294 8. 33465 8. 237585 8. 113212 8. 038892  
11748297\_ 9. 567454 9. 499071 9. 54111 9. 386771 9. 306949 9. 365908  
11748298\_ 9. 223829 9. 125987 9. 167434 9. 019415 8. 949838 8. 920094  
11748299\_ 6. 133346 5. 988137 6. 10837 5. 606841 5. 866682 5. 687834

11748300\_ 4. 247202 4. 487395 4. 351049 4. 560523 4. 347179 4. 601054  
11748301\_ 6. 901707 6. 78889 6. 833747 7. 103734 7. 196298 7. 178932  
11748302\_ 8. 420182 8. 414688 8. 4914 8. 338926 8. 329974 8. 326731  
11748303\_ 9. 796132 9. 761312 9. 824936 9. 90691 9. 894999 9. 816491  
11748304\_ 7. 378949 7. 349232 7. 373429 7. 231382 7. 279326 7. 208065  
11748305\_ 4. 989114 5. 014757 4. 912187 4. 821273 4. 93042 4. 996524  
11748306\_ 4. 037213 4. 104982 4. 097114 4. 152312 4. 222786 4. 184301  
11748307\_ 9. 592376 9. 566499 9. 588567 9. 745919 9. 755184 9. 722514  
11748308\_ 4. 754559 4. 734339 4. 870342 4. 906338 4. 831025 4. 779562  
11748309\_ 6. 796573 7. 001731 6. 825624 6. 920252 6. 986097 6. 866999  
11748310\_ 5. 77167 5. 86621 5. 83408 5. 879197 5. 870242 5. 847791  
11748311\_ 3. 342 3. 432807 3. 342 3. 342 3. 262244 3. 342  
11748312\_ 6. 92496 6. 795097 6. 898263 6. 498892 6. 575815 6. 50656  
11748313\_ 7. 609233 7. 537256 7. 613805 7. 922867 7. 786782 7. 827486  
11748314\_ 8. 866803 8. 742711 8. 798811 9. 647556 9. 793011 9. 648635  
11748315\_ 10. 20875 10. 18128 10. 22867 10. 17683 10. 11059 10. 1502  
11748316\_ 5. 894697 6. 008301 5. 842542 6. 119276 6. 023763 6. 148757  
11748317\_ 8. 494682 8. 554749 8. 532661 8. 330403 8. 264419 8. 239261  
11748318\_ 6. 375313 6. 326383 6. 496127 5. 893382 5. 929414 6. 045859  
11748319\_ 5. 562919 5. 654123 5. 534691 5. 621239 5. 730572 5. 689339  
11748320\_ 3. 581454 3. 559452 3. 59501 3. 341042 3. 677185 3. 53671  
11748321\_ 6. 378886 6. 262903 6. 510356 6. 216954 6. 320801 6. 276601  
11748322\_ 7. 329028 7. 481207 7. 276973 7. 38768 7. 35854 7. 435696  
11748323\_ 7. 340423 7. 432386 7. 306085 7. 3772 7. 375776 7. 299477  
11748324\_ 4. 400964 4. 79318 4. 696379 4. 927425 5. 150245 4. 941059  
11748325\_ 8. 633846 8. 673924 8. 618489 8. 769951 8. 754295 8. 673209  
11748326\_ 6. 062134 6. 13945 6. 069063 6. 10937 6. 129601 6. 147887  
11748327\_ 6. 517542 6. 494542 6. 23831 5. 724971 5. 726711 5. 707251  
11748328\_ 3. 292712 3. 337615 3. 459119 3. 45631 3. 714629 3. 751036  
11748329\_ 5. 680267 5. 573274 5. 805022 5. 600516 5. 594275 5. 448969  
11748330\_ 5. 401948 5. 414869 5. 345373 5. 3515 5. 297498 5. 360441  
11748331\_ 6. 415167 6. 480356 6. 49765 6. 387324 6. 445178 6. 544244  
11748332\_ 6. 95663 6. 970346 7. 020405 6. 711431 6. 844399 6. 736342  
11748333\_ 8. 295363 8. 306039 8. 31096 8. 311343 8. 336186 8. 327156  
11748334\_ 6. 587403 6. 465545 6. 531414 6. 553798 6. 610072 6. 608166  
11748335\_ 9. 833975 9. 859588 9. 785056 9. 802937 9. 783434 9. 749283  
11748336\_ 4. 257637 4. 231869 4. 256006 4. 126314 4. 11421 4. 215621  
11748337\_ 8. 547901 8. 498607 8. 567486 8. 511296 8. 590971 8. 545516  
11748338\_ 7. 982429 8. 077961 8. 004382 7. 444298 7. 484864 7. 498629  
11748339\_ 4. 724566 4. 824111 4. 656226 5. 025764 4. 668453 4. 734835  
11748340\_ 4. 715836 4. 860577 4. 77798 4. 917858 4. 790208 4. 872772  
11748341\_ 7. 00765 6. 809436 7. 058812 6. 772853 6. 686431 6. 814353  
11748342\_ 6. 911751 6. 765472 6. 930323 6. 716138 6. 753296 6. 830664  
11748343\_ 7. 479507 7. 508644 7. 588835 7. 43873 7. 477989 7. 438446  
11748344\_ 7. 807604 7. 798616 7. 828713 7. 741001 7. 760194 7. 717753  
11748345\_ 2. 465474 2. 560764 2. 432605 2. 25483 2. 478415 2. 56488  
11748346\_ 5. 656778 5. 425575 5. 802466 5. 801992 5. 72625 5. 776181  
11748347\_ 9. 238026 9. 147192 9. 210652 8. 91686 8. 943827 8. 898043  
11748348\_ 5. 269768 5. 406195 5. 171095 5. 193309 5. 303006 5. 298421  
11748349\_ 3. 95893 4. 092218 3. 850246 3. 884117 4. 003275 3. 935018  
11748350\_ 8. 003894 7. 962997 8. 050711 8. 055506 7. 992306 8. 035863

11748351\_ 6. 489606 6. 330928 6. 400396 6. 366812 6. 383468 6. 324283  
11748352\_ 4. 443322 4. 679502 4. 462044 4. 68281 4. 6993 4. 619612  
11748353\_ 6. 278821 6. 190705 6. 243773 6. 148813 6. 347147 6. 354662  
11748354\_ 6. 356851 6. 096773 6. 10067 6. 066529 6. 08784 6. 230157  
11748355\_ 8. 204547 8. 124926 8. 199165 8. 601941 8. 593791 8. 52876  
11748356\_ 5. 946271 5. 901582 5. 991983 6. 25696 6. 164329 6. 263434  
11748357\_ 7. 289973 7. 199336 7. 16318 7. 556186 7. 559658 7. 548516  
11748358\_ 5. 876098 5. 717041 5. 869623 5. 77483 5. 954778 5. 882408  
11748359\_ 5. 124344 5. 26331 4. 888119 5. 057788 5. 01102 5. 043403  
11748360\_ 10. 26863 10. 20958 10. 27861 10. 40821 10. 41439 10. 38114  
11748361\_ 11. 16537 11. 15542 11. 14642 10. 92466 10. 89366 10. 90895  
11748362\_ 6. 284098 6. 183482 6. 293733 5. 243081 5. 179448 5. 111882  
11748363\_ 5. 658865 5. 775083 5. 330486 5. 723241 5. 726571 5. 589179  
11748364\_ 4. 454634 4. 464179 4. 166788 4. 461214 4. 662981 4. 477384  
11748365\_ 7. 630001 7. 456802 7. 550377 6. 718158 6. 754246 6. 724395  
11748366\_ 4. 578193 4. 652004 4. 461754 4. 518865 4. 658726 4. 866013  
11748367\_ 7. 446133 7. 491278 7. 477357 5. 404077 5. 52955 5. 474766  
11748368\_ 6. 859689 6. 676523 6. 708729 7. 232762 7. 23633 7. 18143  
11748369\_ 7. 086335 7. 216049 7. 095922 7. 230373 7. 15201 7. 223105  
11748370\_ 6. 847024 6. 844264 6. 828251 6. 693571 6. 660618 6. 680737  
11748371\_ 7. 251041 7. 136489 7. 231349 6. 893362 6. 880858 6. 820362  
11748372\_ 7. 279813 7. 17101 7. 291509 7. 087991 7. 143516 7. 115472  
11748373\_ 2. 809611 2. 865968 3. 06343 2. 772477 2. 77769 2. 793518  
11748374\_ 6. 434788 6. 376874 6. 52543 6. 448663 6. 366714 6. 430049  
11748375\_ 3. 174114 3. 036253 3. 199245 2. 712162 2. 668599 2. 51469  
11748376\_ 3. 432788 3. 127181 3. 446829 3. 509872 3. 439243 3. 392108  
11748377\_ 5. 894697 6. 057884 5. 789034 5. 930475 6. 138089 6. 011116  
11748378\_ 6. 344135 6. 223894 6. 344135 5. 977166 6. 151397 6. 055178  
11748379\_ 4. 699568 4. 669294 4. 67912 4. 716562 4. 606334 4. 794282  
11748380\_ 4. 714566 4. 788036 4. 82223 4. 868858 4. 666523 4. 851337  
11748381\_ 5. 735014 5. 549695 5. 616683 5. 334333 5. 226899 5. 396604  
11748382\_ 9. 525853 9. 568372 9. 568344 8. 525966 8. 504344 8. 482317  
11748383\_ 7. 222319 7. 013654 7. 18502 7. 205345 7. 261366 7. 28067  
11748384\_ 6. 679949 6. 670106 6. 607344 6. 72684 6. 706037 6. 638821  
11748385\_ 4. 670411 4. 687023 4. 626534 5. 428015 5. 373534 5. 374866  
11748386\_ 5. 544167 5. 448296 5. 377082 5. 595521 5. 54353 5. 524545  
11748387\_ 6. 061936 6. 033313 5. 987547 5. 97533 6. 109537 6. 051554  
11748388\_ 6. 428376 6. 456266 6. 578403 6. 571041 6. 613853 6. 561896  
11748389\_ 8. 143901 8. 137576 8. 156936 7. 930281 8. 010951 7. 924715  
11748390\_ 8. 898383 8. 787319 8. 845628 8. 64198 8. 663887 8. 697912  
11748391\_ 8. 518456 8. 549766 8. 579297 8. 259184 8. 380607 8. 328251  
11748392\_ 5. 803487 5. 810116 5. 82315 5. 946535 6. 027239 5. 923026  
11748393\_ 7. 288715 7. 120458 7. 203932 6. 594872 6. 627946 6. 527375  
11748394\_ 5. 194602 5. 311914 5. 213698 5. 310849 5. 255908 5. 314782  
11748395\_ 7. 430498 7. 449251 7. 419847 7. 343988 7. 386577 7. 339005  
11748396\_ 7. 119677 7. 15525 7. 14419 7. 118045 7. 085651 7. 102444  
11748397\_ 8. 596142 8. 466202 8. 535779 8. 476374 8. 472608 8. 489932  
11748398\_ 5. 864787 5. 948218 5. 869592 5. 81053 5. 94998 5. 789411  
11748399\_ 7. 553029 7. 459909 7. 583672 7. 28227 7. 338634 7. 385275  
11748400\_ 10. 09781 9. 989952 10. 12202 10. 1352 10. 11447 10. 1417  
11748401\_ 9. 291159 9. 182483 9. 297702 9. 343514 9. 302147 9. 332474

11748402\_ 4. 610969 4. 711088 4. 780489 5. 045087 4. 983884 5. 11527  
11748403\_ 7. 188127 7. 129622 7. 282203 6. 580346 6. 597184 6. 662328  
11748404\_ 9. 363333 9. 318005 9. 42137 9. 422326 9. 417448 9. 419638  
11748405\_ 6. 034466 5. 960018 6. 30371 6. 915367 6. 782102 7. 044399  
11748406\_ 7. 834726 7. 723987 7. 759634 7. 828416 7. 74184 7. 70379  
11748407\_ 8. 239543 8. 150085 8. 265389 8. 192268 8. 169512 8. 219754  
11748408\_ 6. 357294 6. 418246 6. 369087 7. 126461 7. 098985 7. 238742  
11748409\_ 6. 61915 6. 546818 6. 52059 6. 62963 6. 541728 6. 571934  
11748410\_ 9. 193196 9. 109403 9. 187962 8. 958696 8. 977695 8. 982029  
11748411\_ 9. 500643 9. 447886 9. 546463 9. 215358 9. 212991 9. 189071  
11748412\_ 5. 353596 5. 279046 5. 17492 5. 192432 5. 183041 5. 269016  
11748413\_ 9. 521933 9. 495077 9. 501395 9. 679313 9. 724799 9. 687219  
11748414\_ 2. 198481 2. 302105 2. 227152 2. 221312 2. 312466 2. 318017  
11748415\_ 6. 573044 6. 667394 6. 430053 6. 596925 6. 687803 6. 644213  
11748416\_ 9. 389862 9. 371291 9. 376151 9. 047475 8. 93692 8. 957291  
11748417\_ 5. 108674 4. 789805 5. 031522 4. 844218 5. 088879 4. 700243  
11748418\_ 5. 051465 5. 292276 4. 988854 5. 601953 5. 328892 5. 404094  
11748419\_ 4. 403314 4. 686379 4. 54626 4. 675916 4. 826873 4. 759548  
11748420\_ 5. 371817 5. 305262 5. 187528 4. 874234 4. 988853 5. 133679  
11748421\_ 4. 796461 4. 957505 4. 948158 5. 182126 5. 098702 5. 216998  
11748422\_ 9. 643359 9. 592448 9. 618907 9. 599116 9. 589444 9. 577489  
11748423\_ 8. 83415 8. 731483 8. 785369 8. 912114 8. 978859 8. 91429  
11748424\_ 5. 565799 5. 683339 5. 423513 5. 691122 5. 688204 5. 691122  
11748425\_ 3. 205063 3. 34363 3. 025972 2. 896436 2. 967365 3. 162536  
11748426\_ 4. 197126 4. 189263 3. 967182 4. 144203 4. 08435 4. 102678  
11748427\_ 7. 061617 7. 031531 7. 153079 7. 032634 7. 055228 7. 07494  
11748428\_ 6. 43472 6. 429625 6. 48838 6. 393973 6. 465903 6. 458851  
11748429\_ 5. 480966 5. 549072 5. 404363 5. 479562 5. 579329 5. 442778  
11748430\_ 6. 544611 6. 584792 6. 62309 6. 48872 6. 607796 6. 536892  
11748431\_ 8. 166923 8. 138673 8. 239474 7. 898823 7. 970599 7. 947903  
11748432\_ 7. 341609 7. 306455 7. 30087 7. 334886 7. 403876 7. 443532  
11748433\_ 5. 319879 5. 270554 5. 229675 5. 384904 5. 34416 5. 336059  
11748434\_ 7. 572556 7. 535233 7. 629296 8. 258998 8. 304629 8. 283077  
11748435\_ 7. 366645 7. 283996 7. 333268 6. 582589 6. 591591 6. 574581  
11748436\_ 6. 934793 6. 825177 6. 934267 6. 181961 6. 19751 6. 242562  
11748437\_ 3. 955463 4. 128638 4. 016116 3. 83821 4. 064797 3. 781475  
11748438\_ 5. 550425 5. 428917 5. 654275 5. 782695 5. 765716 5. 7637  
11748439\_ 8. 039529 7. 917433 8. 09305 7. 061673 7. 179602 7. 342427  
11748440\_ 3. 488554 3. 595934 3. 44224 3. 430687 3. 289444 3. 452329  
11748441\_ 6. 064171 5. 873681 6. 065261 5. 72675 5. 704606 5. 587626  
11748442\_ 6. 210159 6. 055523 6. 192549 6. 161204 6. 18103 6. 347968  
11748443\_ 3. 830534 3. 816289 3. 806106 3. 858242 3. 868425 3. 84811  
11748444\_ 2. 980729 3. 051095 2. 997523 3. 035053 3. 293654 2. 964609  
11748445\_ 7. 73092 7. 647688 7. 623488 7. 494901 7. 505666 7. 504425  
11748446\_ 7. 880654 7. 896131 7. 797513 7. 932399 7. 990549 7. 997229  
11748447\_ 5. 721605 5. 754458 5. 559156 5. 768728 5. 760372 5. 825356  
11748448\_ 8. 333285 8. 2899 8. 39435 8. 287442 8. 312815 8. 385841  
11748449\_ 6. 468546 6. 554619 6. 643948 6. 174044 6. 016795 6. 156772  
11748450\_ 7. 909249 7. 728309 7. 868318 8. 069289 8. 080319 8. 048757  
11748451\_ 5. 285218 5. 472312 5. 216393 5. 388987 5. 309533 5. 2666  
11748452\_ 6. 025952 5. 957954 5. 870242 6. 448378 6. 481046 6. 408531

11748453\_ 8. 685224 8. 547978 8. 659007 8. 915894 8. 92272 8. 820636  
11748454\_ 5. 241156 5. 228693 5. 333723 5. 528624 5. 54619 5. 411903  
11748455\_ 5. 860639 5. 804087 5. 753472 5. 681971 5. 689681 5. 594657  
11748456\_ 5. 038631 5. 220727 5. 299797 5. 219045 5. 23967 5. 137943  
11748457\_ 7. 613305 7. 586621 7. 61054 7. 083891 7. 037788 7. 115689  
11748458\_ 7. 426479 7. 451529 7. 332281 7. 474102 7. 571157 7. 537033  
11748459\_ 7. 523278 7. 433262 7. 567284 7. 172036 7. 12652 7. 183172  
11748460\_ 5. 001535 4. 83481 5. 007891 4. 729955 4. 700286 4. 605304  
11748461\_ 5. 836828 5. 882438 5. 774315 5. 683029 5. 656778 5. 667528  
11748462\_ 7. 994961 7. 947419 8. 050638 8. 013863 7. 944245 8. 058464  
11748463\_ 3. 030766 3. 074612 3. 290188 3. 155752 2. 912551 3. 154301  
11748464\_ 4. 458233 4. 584933 4. 643717 4. 308453 4. 423018 4. 566526  
11748465\_ 8. 223621 8. 079643 8. 095676 7. 963341 7. 999866 7. 982681  
11748466\_ 7. 432156 7. 307844 7. 469885 7. 328213 7. 269859 7. 289973  
11748467\_ 8. 687997 8. 692254 8. 747502 8. 727904 8. 671045 8. 791147  
11748468\_ 7. 220733 7. 156666 7. 290959 6. 76509 6. 889406 6. 864125  
11748469\_ 4. 927468 4. 62381 4. 824225 4. 772366 4. 789789 4. 851492  
11748470\_ 6. 232953 6. 174908 6. 19068 6. 43679 6. 361985 6. 427635  
11748471\_ 2. 254899 2. 151126 2. 155286 2. 249218 2. 172345 2. 156047  
11748472\_ 3. 489554 3. 382606 3. 47556 3. 382606 3. 21279 3. 371029  
11748473\_ 5. 381471 5. 236224 5. 484512 4. 956933 4. 825133 4. 865931  
11748474\_ 6. 431902 6. 443678 6. 354529 6. 34759 6. 368788 6. 389718  
11748475\_ 8. 522192 8. 416717 8. 580355 8. 51018 8. 482464 8. 473152  
11748476\_ 6. 046578 6. 002817 6. 161974 6. 606643 6. 64676 6. 696046  
11748477\_ 8. 013529 8. 094972 7. 953521 8. 50513 8. 477653 8. 485923  
11748478\_ 6. 162518 6. 092247 6. 059822 6. 20407 6. 189214 6. 122139  
11748479\_ 5. 215989 5. 168446 5. 123112 5. 2222 5. 256273 5. 172788  
11748480\_ 4. 936815 5. 107961 4. 999132 5. 048598 5. 153575 5. 126419  
11748481\_ 11. 76905 11. 74865 11. 77378 12. 09249 12. 08972 12. 07853  
11748482\_ 8. 89861 8. 895819 8. 900131 8. 872252 8. 788584 8. 860547  
11748483\_ 2. 837827 2. 899368 2. 906315 3. 004342 2. 945442 2. 764535  
11748484\_ 4. 278608 4. 132738 4. 162612 4. 198158 4. 397374 4. 290764  
11748485\_ 4. 811181 4. 829858 4. 532205 4. 752459 4. 785682 4. 827295  
11748486\_ 8. 126129 8. 072339 8. 159709 7. 616464 7. 719811 7. 738951  
11748487\_ 6. 919605 6. 808848 6. 931301 6. 80517 6. 79695 6. 830793  
11748488\_ 10. 53907 10. 4573 10. 5004 10. 43518 10. 41822 10. 43062  
11748489\_ 7. 197511 7. 066036 7. 088786 6. 881925 6. 956076 6. 947979  
11748490\_ 7. 256481 7. 182304 7. 149607 7. 212027 7. 131547 7. 213128  
11748491\_ 8. 519146 8. 450216 8. 479213 9. 132915 9. 155227 9. 075453  
11748492\_ 3. 181749 3. 193137 3. 138626 3. 21279 3. 119757 3. 214543  
11748493\_ 3. 525597 3. 180062 3. 687064 3. 371494 3. 705625 3. 578977  
11748494\_ 2. 128639 2. 160529 1. 972956 2. 091625 2. 255172 2. 355841  
11748495\_ 5. 26263 5. 334777 5. 102645 5. 166902 5. 174301 4. 815683  
11748496\_ 5. 816779 5. 963244 5. 922714 6. 118453 6. 018889 6. 018889  
11748497\_ 6. 755446 6. 468195 6. 508271 6. 742612 6. 743482 6. 697756  
11748498\_ 3. 018894 2. 981417 2. 736636 2. 624911 2. 721883 2. 806465  
11748499\_ 5. 592626 5. 580386 5. 480966 5. 688235 5. 632738 5. 65912  
11748500\_ 2. 150446 2. 13426 2. 242181 2. 225139 2. 146216 2. 209342  
11748501\_ 7. 090026 6. 986547 7. 093456 6. 369813 6. 546117 6. 584816  
11748502\_ 5. 956873 5. 830099 6. 004151 5. 6179 5. 652984 5. 604638  
11748503\_ 6. 917602 6. 864329 6. 823814 6. 706543 6. 741387 6. 754032

11748504\_ 6.44441 6.457929 6.530064 6.500068 6.580065 6.549995  
11748505\_ 5.480966 5.643444 5.825878 5.614479 5.401696 5.561906  
11748506\_ 4.273521 4.362544 4.305007 4.513053 4.472709 4.362544  
11748507\_ 5.935542 5.857228 6.03395 5.873358 5.998158 5.965276  
11748508\_ 7.346793 7.342644 7.302747 7.382715 7.363602 7.362454  
11748509\_ 11.54737 11.50507 11.52532 11.43606 11.43623 11.45028  
11748510\_ 3.829023 3.837662 3.750451 3.830734 3.986309 3.886771  
11748511\_ 7.510116 7.434282 7.518438 7.63838 7.728013 7.716008  
11748512\_ 6.834886 6.664518 6.929686 6.89657 6.981277 7.036295  
11748513\_ 2.338198 2.143728 2.464093 2.488122 2.295098 2.338198  
11748514\_ 5.154068 5.13069 5.148288 5.355722 5.279361 5.282019  
11748515\_ 5.337232 5.342725 5.17639 5.676561 5.549349 5.525792  
11748516\_ 2.173418 2.196601 2.178979 2.173418 2.32206 2.045672  
11748517\_ 6.446961 6.431763 6.461089 6.600386 6.572275 6.619561  
11748518\_ 7.942218 7.880573 7.866225 8.12734 8.15052 8.133962  
11748519\_ 8.105009 8.101272 8.081989 8.588696 8.591494 8.510397  
11748520\_ 5.261938 5.32896 5.08793 5.26919 5.246626 5.230106  
11748521\_ 6.881987 6.921323 7.019842 7.16899 7.190956 7.173007  
11748522\_ 6.869593 6.628873 6.770282 6.586665 6.567198 6.49248  
11748523\_ 6.400222 6.051458 6.22832 5.157871 4.962984 5.280306  
11748524\_ 6.742605 6.634429 6.594152 6.882646 6.80683 6.762528  
11748525\_ 7.621346 7.589325 7.624105 7.415066 7.4972 7.429636  
11748526\_ 4.323813 4.488457 4.418176 4.812976 4.72315 4.658348  
11748527\_ 4.954863 4.942123 5.055097 4.588198 4.547074 4.618508  
11748528\_ 8.01399 7.896805 7.974745 7.422315 7.535032 7.554354  
11748529\_ 9.51837 9.433871 9.48078 8.728235 8.763256 8.673732  
11748530\_ 5.739646 5.639744 5.5731 5.79031 5.69895 5.619463  
11748531\_ 5.321285 5.456493 5.411434 5.56905 5.493267 5.428759  
11748532\_ 8.922888 8.854185 8.950827 8.686356 8.757486 8.658299  
11748533\_ 9.212767 9.163652 9.239277 8.956849 9.005428 8.957541  
11748534\_ 7.940633 7.892766 7.930264 6.727853 6.725582 6.702614  
11748535\_ 7.065254 7.112252 7.069147 6.665969 6.530555 6.627211  
11748536\_ 7.987916 7.950284 8.03101 8.322592 8.219322 8.239177  
11748537\_ 3.804743 3.907312 3.74692 4.111894 3.864239 3.879309  
11748538\_ 5.507385 5.476586 5.531117 5.423333 5.52475 5.251811  
11748539\_ 4.569243 4.859593 4.949583 4.906076 5.014533 4.744488  
11748540\_ 6.003926 5.867937 6.038847 5.921457 5.916581 5.996272  
11748541\_ 7.232152 7.079856 7.254194 7.579478 7.519573 7.535233  
11748542\_ 4.357548 4.243344 4.209168 4.261862 4.129879 4.308129  
11748543\_ 7.630935 7.620449 7.589043 8.035227 8.064209 8.03129  
11748544\_ 8.123218 8.101616 8.027714 8.507069 8.502463 8.511207  
11748545\_ 4.133664 4.22949 4.075124 4.237149 4.353397 4.219077  
11748546\_ 3.791414 3.394427 3.929865 3.820623 3.925256 3.678435  
11748547\_ 6.402227 6.360394 6.369539 6.531427 6.525683 6.526891  
11748548\_ 4.625928 4.984422 4.643717 4.845575 4.921233 4.843658  
11748549\_ 5.831553 5.656855 5.728077 5.278244 5.32757 5.281854  
11748550\_ 6.515995 6.5179 6.569818 6.389206 6.177553 6.279154  
11748551\_ 1.918493 1.88853 2.002746 1.979409 2.073341 1.884419  
11748552\_ 7.693463 7.593399 7.624139 7.924783 7.846241 7.837434  
11748553\_ 7.088286 6.885134 6.897495 6.811907 6.931855 6.922436  
11748554\_ 5.675925 5.809181 5.648088 5.837003 5.837344 5.790666

11748555\_ 6. 008382 5. 907529 6. 085326 5. 670199 5. 592133 5. 828998  
11748556\_ 8. 025705 7. 938647 7. 973974 7. 58446 7. 679725 7. 639391  
11748557\_ 9. 419696 9. 395335 9. 439488 9. 459414 9. 413568 9. 386087  
11748558\_ 6. 851942 6. 806929 6. 786867 6. 90998 6. 967649 6. 99345  
11748559\_ 7. 260481 7. 255754 7. 202891 7. 353578 7. 404904 7. 381912  
11748560\_ 9. 855643 9. 791908 9. 817443 9. 385625 9. 423815 9. 456524  
11748561\_ 4. 678877 4. 612706 4. 84725 4. 895486 4. 906755 4. 858385  
11748562\_ 6. 805142 7. 066619 6. 909188 6. 971562 7. 01548 6. 890411  
11748563\_ 10. 11362 10. 07321 10. 11665 9. 314493 9. 38814 9. 363498  
11748564\_ 8. 81639 8. 785244 8. 777775 8. 418643 8. 364166 8. 20781  
11748565\_ 9. 44741 9. 367508 9. 358978 9. 294432 9. 326461 9. 22842  
11748566\_ 5. 656864 5. 759285 5. 463872 5. 631165 5. 639907 5. 666399  
11748567\_ 5. 364219 5. 558675 5. 234854 5. 533527 5. 472151 5. 537278  
11748568\_ 8. 045016 7. 970053 8. 080378 8. 183365 8. 133295 8. 205085  
11748569\_ 5. 442308 5. 627935 5. 639959 5. 598786 5. 438015 5. 393444  
11748570\_ 4. 497028 4. 40391 4. 40024 4. 545308 4. 446558 4. 74102  
11748571\_ 5. 14616 5. 159089 5. 08796 5. 182398 5. 186837 5. 084528  
11748572\_ 5. 813791 5. 802657 5. 817913 5. 430068 5. 393552 5. 502856  
11748573\_ 6. 354964 6. 392438 6. 40874 5. 891726 6. 100425 5. 959128  
11748574\_ 5. 86955 5. 989607 5. 967371 6. 077547 6. 132867 6. 07899  
11748575\_ 7. 608668 7. 516422 7. 606873 7. 609382 7. 613793 7. 542981  
11748576\_ 7. 118004 7. 079963 7. 052822 7. 305671 7. 25916 7. 290213  
11748577\_ 8. 042665 8. 118163 8. 010515 7. 806856 7. 716859 7. 72487  
11748578\_ 8. 69059 8. 604695 8. 72666 8. 773499 8. 759523 8. 757813  
11748579\_ 8. 064137 7. 895292 8. 088388 8. 117354 8. 094858 8. 101837  
11748580\_ 5. 621189 5. 554436 5. 535687 5. 029529 4. 592218 5. 08177  
11748581\_ 2. 370759 2. 865969 2. 531675 2. 68612 2. 638284 2. 472961  
11748582\_ 7. 075897 7. 064425 7. 060558 7. 135829 7. 251407 7. 170889  
11748583\_ 7. 526416 7. 417811 7. 528741 7. 582536 7. 57345 7. 571083  
11748584\_ 5. 90967 6. 026937 5. 865278 5. 886153 5. 944436 5. 880409  
11748585\_ 9. 706762 9. 7039 9. 700051 9. 805903 9. 851359 9. 812441  
11748586\_ 9. 726416 9. 706487 9. 718013 9. 867544 9. 841819 9. 85165  
11748587\_ 4. 513241 4. 40461 4. 449101 4. 045112 4. 347179 4. 171822  
11748588\_ 6. 779107 6. 814552 6. 816941 7. 038541 7. 044691 6. 922597  
11748589\_ 1. 754341 1. 941432 2. 034653 1. 841931 1. 938697 1. 803491  
11748590\_ 2. 850317 3. 056909 2. 926738 2. 998447 2. 718322 3. 061205  
11748591\_ 9. 152695 9. 1508 9. 235459 9. 154605 9. 136473 9. 150158  
11748592\_ 4. 906779 4. 843269 4. 902727 4. 739981 4. 751749 4. 808385  
11748593\_ 3. 705625 4. 045157 3. 797166 4. 270266 4. 02765 4. 0647  
11748594\_ 8. 101712 8. 070511 8. 11854 7. 709504 7. 771944 7. 708136  
11748595\_ 4. 636105 4. 78591 4. 726801 4. 939158 4. 797178 4. 93744  
11748596\_ 6. 905472 6. 727183 6. 77974 6. 438699 6. 466565 6. 5617  
11748597\_ 9. 685879 9. 653645 9. 698658 9. 7093 9. 573877 9. 621015  
11748598\_ 5. 215506 5. 513881 5. 228954 5. 196587 5. 276179 5. 11501  
11748599\_ 6. 370588 6. 368506 6. 444396 6. 391079 6. 327342 6. 366461  
11748600\_ 8. 301422 8. 285149 8. 345815 7. 936131 7. 990549 7. 891189  
11748601\_ 6. 364249 6. 322556 6. 17982 6. 303126 6. 303072 6. 311401  
11748602\_ 8. 383069 8. 393044 8. 243882 8. 159841 8. 18354 8. 068125  
11748603\_ 6. 120416 6. 176042 6. 215084 5. 677476 5. 727222 5. 704748  
11748604\_ 5. 611309 5. 661848 5. 568092 5. 617697 5. 682802 5. 614828  
11748605\_ 8. 417009 8. 332656 8. 419609 8. 007655 7. 988365 7. 888879



11748606\_ 8. 52898 8. 557125 8. 570438 8. 100408 8. 132152 8. 213537  
11748607\_ 6. 660529 6. 708213 6. 717746 6. 714406 6. 842519 6. 707074  
11748608\_ 7. 001999 6. 963802 6. 976344 6. 884682 6. 886457 6. 890936  
11748609\_ 4. 872854 5. 029529 4. 873178 4. 675923 4. 581991 4. 714175  
11748610\_ 8. 375474 8. 395169 8. 367914 8. 305284 8. 252192 8. 196372  
11748611\_ 4. 056602 3. 818401 3. 7449 3. 6758 3. 803062 3. 7449  
11748612\_ 7. 326385 7. 26971 7. 325111 7. 499838 7. 541682 7. 501381  
11748613\_ 6. 16866 6. 118838 6. 085621 5. 972426 5. 918745 6. 144208  
11748614\_ 4. 864825 4. 884842 4. 84774 4. 867355 4. 664617 4. 910593  
11748615\_ 6. 939167 6. 963895 7. 019431 7. 103388 6. 998535 7. 12562  
11748616\_ 4. 3554 4. 471712 4. 310598 4. 565977 4. 465477 4. 388808  
11748617\_ 8. 253527 8. 271467 8. 234382 8. 20786 8. 113763 8. 138673  
11748618\_ 5. 497584 5. 700755 5. 663447 5. 063108 5. 380318 5. 353218  
11748619\_ 9. 318127 9. 260056 9. 284877 9. 265994 9. 269505 9. 212553  
11748620\_ 7. 998448 7. 980363 8. 012186 8. 059768 8. 052176 8. 0173  
11748621\_ 7. 955028 7. 877944 7. 870814 7. 815735 7. 780196 7. 793304  
11748622\_ 9. 506173 9. 451722 9. 477386 9. 191916 9. 294179 9. 243253  
11748623\_ 5. 846369 5. 870347 5. 734585 5. 865059 5. 967113 5. 792063  
11748624\_ 9. 686813 9. 561644 9. 642643 9. 432387 9. 444759 9. 431061  
11748625\_ 8. 960361 8. 898116 8. 97428 8. 862336 8. 837805 8. 901065  
11748626\_ 2. 824845 2. 918784 3. 025972 2. 942928 2. 926662 2. 77793  
11748627\_ 6. 951682 7. 044372 7. 042517 6. 910771 6. 97913 6. 897375  
11748628\_ 5. 073036 5. 017545 5. 315842 4. 722703 4. 894609 4. 875306  
11748629\_ 9. 219426 9. 164393 9. 17918 8. 859367 8. 827454 8. 813866  
11748630\_ 6. 704561 6. 705263 6. 732651 6. 783609 6. 880043 6. 764147  
11748631\_ 6. 876166 6. 865435 6. 876203 7. 476663 7. 417435 7. 47006  
11748632\_ 5. 866149 5. 858146 5. 879217 5. 828396 5. 738493 5. 730914  
11748633\_ 7. 421465 7. 416319 7. 413358 7. 330894 7. 409198 7. 36385  
11748634\_ 5. 333723 5. 322813 5. 251067 5. 583695 5. 503871 5. 587884  
11748635\_ 8. 330772 8. 308541 8. 317676 8. 368334 8. 327448 8. 332736  
11748636\_ 5. 633567 5. 555363 5. 578559 5. 789359 5. 718182 5. 882099  
11748637\_ 6. 768568 6. 826032 7. 012769 7. 232634 7. 373155 7. 321981  
11748638\_ 7. 163382 6. 941692 7. 082678 6. 489481 6. 459037 6. 481046  
11748639\_ 7. 288124 7. 181988 7. 321291 7. 060717 7. 041351 7. 094977  
11748640\_ 4. 385606 4. 80186 4. 491483 4. 834387 4. 653497 4. 792486  
11748641\_ 7. 553351 7. 439562 7. 55138 7. 638707 7. 654046 7. 83723  
11748642\_ 4. 588318 5. 031017 4. 856741 5. 013506 4. 904188 4. 870842  
11748643\_ 3. 4546 3. 176869 3. 105416 3. 336461 3. 337618 3. 507644  
11748644\_ 6. 906105 6. 751177 6. 889572 6. 706932 6. 799188 6. 788059  
11748645\_ 4. 74996 4. 724227 4. 712412 4. 74996 4. 719535 4. 784708  
11748646\_ 5. 132999 5. 236256 5. 23162 5. 228193 5. 164837 5. 136826  
11748647\_ 3. 650252 3. 996212 3. 92331 2. 953318 2. 662365 3. 232663  
11748648\_ 4. 501799 4. 556852 4. 750949 4. 241352 4. 066277 4. 418532  
11748649\_ 5. 871835 5. 641718 5. 67263 5. 241942 5. 286247 5. 401581  
11748650\_ 6. 207459 6. 284132 6. 182596 6. 374142 6. 366235 6. 309761  
11748651\_ 6. 293964 6. 395092 6. 277684 6. 571779 6. 557453 6. 607157  
11748652\_ 6. 414953 6. 472597 6. 318328 6. 738696 6. 557461 6. 578013  
11748653\_ 6. 322433 6. 430967 6. 21351 6. 35161 6. 273093 6. 326531  
11748654\_ 4. 927902 4. 955132 4. 927902 4. 904523 4. 858745 4. 778325  
11748655\_ 5. 76231 5. 668053 5. 840957 5. 838307 5. 661899 5. 699761  
11748656\_ 5. 932475 5. 964624 5. 778993 6. 020333 5. 994446 6. 066547

11748657\_ 9. 003435 8. 950603 8. 969466 8. 655902 8. 711187 8. 681793  
11748658\_ 4. 584933 5. 019713 4. 861035 4. 911133 4. 844467 4. 763543  
11748659\_ 7. 513798 7. 439686 7. 43389 5. 983605 6. 052458 6. 218339  
11748660\_ 9. 639633 9. 622611 9. 638199 9. 126813 9. 143442 9. 104149  
11748661\_ 4. 200678 4. 30622 4. 065501 4. 595788 4. 54942 4. 399725  
11748662\_ 6. 979115 7. 022593 6. 979115 6. 874408 7. 005157 7. 033134  
11748663\_ 6. 367253 6. 401689 6. 323519 6. 202102 6. 419022 6. 423036  
11748664\_ 4. 709292 4. 866025 4. 571158 4. 763455 4. 833729 4. 856964  
11748665\_ 7. 213444 7. 247806 7. 302184 7. 132962 7. 125674 7. 084987  
11748666\_ 5. 940128 5. 622134 5. 870242 5. 704702 5. 763486 5. 809661  
11748667\_ 7. 7933 7. 670973 7. 682393 7. 442902 7. 451383 7. 481813  
11748668\_ 5. 269986 5. 287427 5. 506798 5. 279701 5. 251851 5. 398391  
11748669\_ 5. 569887 5. 63053 5. 777049 5. 554969 5. 58567 5. 592964  
11748670\_ 5. 86512 5. 885409 5. 888091 5. 581805 5. 687151 5. 581786  
11748671\_ 9. 361629 9. 332271 9. 338666 9. 471748 9. 483565 9. 424648  
11748672\_ 7. 692144 7. 546066 7. 676013 7. 426387 7. 399207 7. 467339  
11748673\_ 4. 888591 4. 801995 4. 846653 4. 665721 4. 776507 4. 761841  
11748674\_ 7. 1782 7. 159683 7. 333052 6. 928812 7. 055228 6. 892802  
11748675\_ 5. 844337 5. 827764 5. 815428 6. 292462 6. 427237 6. 331968  
11748676\_ 5. 533972 5. 721631 5. 68381 5. 540926 5. 623157 5. 693547  
11748677\_ 6. 586814 6. 469081 6. 608189 6. 318829 6. 393444 6. 482828  
11748678\_ 9. 051823 8. 946937 8. 98029 7. 823758 7. 847647 7. 843126  
11748679\_ 3. 925181 4. 174945 3. 806022 4. 08745 4. 032869 4. 146458  
11748680\_ 7. 409349 7. 51896 7. 338394 7. 44772 7. 45751 7. 396651  
11748681\_ 4. 593043 4. 613035 4. 445898 4. 36609 4. 508709 4. 674238  
11748682\_ 5. 379781 5. 383201 5. 275705 5. 380649 5. 333723 5. 424431  
11748683\_ 5. 45769 5. 443925 5. 448296 5. 562275 5. 545226 5. 747108  
11748684\_ 5. 772058 5. 918745 5. 707051 5. 907753 5. 806194 5. 725262  
11748685\_ 4. 560866 4. 60054 4. 474992 4. 697006 4. 719659 4. 661511  
11748686\_ 10. 01948 9. 930428 9. 977988 9. 664483 9. 70874 9. 678914  
11748687\_ 11. 10357 11. 09788 11. 13116 10. 60348 10. 62211 10. 60294  
11748688\_ 10. 56652 10. 52288 10. 53736 10. 05057 10. 06427 10. 01838  
11748689\_ 7. 535108 7. 461287 7. 489939 6. 998534 7. 051487 7. 009222  
11748690\_ 7. 682033 7. 64529 7. 666485 7. 753132 7. 861922 7. 81161  
11748691\_ 6. 558106 6. 505919 6. 671636 6. 515887 6. 541665 6. 553549  
11748692\_ 6. 353127 6. 192221 6. 325536 6. 386179 6. 332866 6. 366595  
11748693\_ 7. 220801 7. 153762 7. 134262 6. 773123 6. 80021 6. 818458  
11748694\_ 7. 628849 7. 632569 7. 649679 7. 174876 7. 154642 7. 141265  
11748695\_ 7. 227709 7. 114152 7. 145496 7. 340113 7. 32369 7. 307011  
11748696\_ 3. 76207 3. 796417 3. 795633 3. 88714 3. 856057 3. 849195  
11748697\_ 4. 998301 4. 986805 4. 937534 4. 867046 4. 908804 5. 106173  
11748698\_ 5. 369105 5. 387697 5. 307386 5. 441842 5. 616464 5. 431653  
11748699\_ 5. 776589 5. 809849 5. 802252 5. 700302 5. 773161 5. 826227  
11748700\_ 9. 17189 9. 108947 9. 23052 9. 427485 9. 497462 9. 403489  
11748701\_ 4. 871647 5. 084807 4. 76344 4. 867855 4. 896918 5. 140055  
11748702\_ 9. 32207 9. 273039 9. 340738 8. 909793 8. 925796 8. 902531  
11748703\_ 6. 959944 6. 924219 6. 950438 7. 025058 6. 946361 7. 106022  
11748704\_ 6. 152687 6. 052292 6. 115656 6. 189583 6. 227262 6. 118838  
11748705\_ 9. 733234 9. 624604 9. 677167 9. 852769 9. 915428 9. 87166  
11748706\_ 7. 667901 7. 514513 7. 608169 7. 955582 7. 969373 7. 941805  
11748707\_ 5. 666512 5. 559119 5. 612537 5. 856237 5. 786187 5. 880986

11748708\_ 5. 267029 5. 182 5. 190203 5. 479504 5. 480722 5. 611809  
11748709\_ 7. 392275 7. 451397 7. 445974 7. 201472 7. 164857 7. 183172  
11748710\_ 5. 036599 5. 253311 4. 97543 4. 961357 5. 027568 5. 027568  
11748711\_ 9. 550179 9. 448794 9. 541533 9. 374771 9. 38982 9. 417827  
11748712\_ 8. 345724 8. 329929 8. 409727 8. 219463 8. 33681 8. 253978  
11748713\_ 9. 522022 9. 466151 9. 453419 10. 13716 10. 15246 10. 16326  
11748714\_ 2. 423608 2. 50113 2. 53041 2. 438412 2. 325245 2. 33639  
11748715\_ 7. 146413 6. 999234 7. 051725 6. 774742 6. 719902 6. 880246  
11748716\_ 6. 618443 6. 575887 6. 69168 6. 322807 6. 445709 6. 426673  
11748717\_ 5. 9668 5. 710899 5. 84823 5. 589055 5. 59482 5. 445255  
11748718\_ 6. 905864 6. 843808 6. 768397 6. 749506 6. 899246 6. 840913  
11748719\_ 5. 404087 5. 676175 5. 423613 5. 492323 5. 370573 5. 469886  
11748720\_ 6. 712706 6. 536098 6. 640534 6. 81551 6. 861897 6. 931218  
11748721\_ 9. 013439 8. 972633 8. 956795 9. 134337 9. 212263 9. 179654  
11748722\_ 3. 619534 3. 482108 3. 643643 3. 625361 3. 581437 3. 853277  
11748723\_ 6. 591819 6. 43694 6. 528691 6. 419985 6. 576498 6. 527902  
11748724\_ 6. 300643 6. 263567 6. 094413 6. 175253 6. 227296 6. 166712  
11748725\_ 5. 57845 5. 51524 5. 584813 5. 064867 5. 296661 5. 149994  
11748726\_ 4. 929752 4. 901199 4. 890438 4. 883299 4. 901532 4. 905113  
11748727\_ 3. 872079 4. 078199 3. 914743 3. 908268 4. 108183 4. 099925  
11748728\_ 6. 974126 6. 897718 7. 018874 6. 727853 6. 688658 6. 71316  
11748729\_ 6. 118838 6. 035267 6. 145236 5. 82173 5. 88154 5. 837798  
11748730\_ 5. 927261 5. 936811 6. 136035 5. 821723 5. 805825 5. 803143  
11748731\_ 5. 939228 5. 765498 5. 681489 5. 607977 5. 597407 5. 677656  
11748732\_ 7. 100331 6. 996165 7. 005951 7. 991209 7. 992427 8. 056805  
11748733\_ 9. 001729 8. 982029 8. 944792 8. 413045 8. 374843 8. 341302  
11748734\_ 6. 562422 6. 538849 6. 592592 6. 522719 6. 684071 6. 665881  
11748735\_ 10. 06109 10. 06209 10. 03425 10. 14299 10. 10594 9. 991223  
11748736\_ 7. 269071 7. 304155 7. 358974 7. 576132 7. 518536 7. 444416  
11748737\_ 5. 742701 5. 775569 5. 709521 5. 821945 5. 849071 5. 758449  
11748738\_ 5. 942926 5. 61211 5. 897223 4. 505812 4. 463153 4. 583534  
11748739\_ 3. 459468 3. 586851 3. 587278 3. 650373 3. 652939 3. 587278  
11748740\_ 8. 040359 8. 024277 8. 007547 8. 026374 8. 000911 8. 075676  
11748741\_ 5. 895788 5. 967887 5. 809771 5. 975895 5. 975895 6. 120604  
11748742\_ 4. 827318 4. 544028 4. 808899 3. 813112 3. 502977 3. 969453  
11748743\_ 6. 933353 6. 965821 6. 900825 6. 977447 7. 020677 7. 024283  
11748744\_ 6. 484586 6. 383114 6. 344105 6. 751019 6. 784885 6. 771058  
11748745\_ 7. 689017 7. 645159 7. 717587 7. 745921 7. 71578 7. 790973  
11748746\_ 5. 174247 5. 469838 5. 414869 5. 277614 5. 386151 5. 359256  
11748747\_ 4. 351329 4. 26164 4. 260973 4. 217183 4. 350077 4. 365448  
11748748\_ 2. 234016 2. 328568 2. 408779 2. 343495 2. 260373 2. 283785  
11748749\_ 9. 258947 9. 259959 9. 237995 9. 268735 9. 359373 9. 340161  
11748750\_ 7. 816216 7. 737874 7. 81891 7. 934307 7. 81268 7. 816952  
11748751\_ 7. 007563 6. 983261 7. 033121 7. 009962 6. 97913 7. 049507  
11748752\_ 3. 254769 3. 0548 3. 024839 3. 140917 3. 150187 2. 85483  
11748753\_ 5. 344356 5. 339334 5. 373569 5. 26034 5. 359058 5. 428072  
11748754\_ 4. 700243 4. 798846 4. 772366 4. 799513 4. 771936 4. 554042  
11748755\_ 5. 614563 5. 686415 5. 761459 5. 878971 5. 845365 5. 866257  
11748756\_ 7. 171911 7. 196731 7. 128423 7. 350821 7. 36023 7. 263614  
11748757\_ 4. 633041 4. 953851 4. 676399 4. 824195 4. 760136 4. 794066  
11748758\_ 3. 099546 3. 205053 3. 104572 3. 178924 3. 182033 3. 101463

11748759\_ 3. 781205 3. 945331 3. 708578 3. 832395 3. 781205 3. 836572  
11748760\_ 3. 371815 3. 527473 3. 383521 3. 572712 3. 606313 3. 413837  
11748761\_ 8. 548161 8. 4276 8. 47476 7. 56003 7. 555701 7. 523128  
11748762\_ 8. 949834 8. 797913 8. 906832 8. 05985 8. 090636 8. 050649  
11748763\_ 11. 08992 11. 03304 11. 10631 11. 10897 11. 13165 11. 10263  
11748764\_ 11. 35644 11. 31953 11. 35237 11. 32988 11. 36318 11. 34856  
11748765\_ 4. 707615 4. 732064 5. 139205 4. 732428 4. 732064 4. 707615  
11748766\_ 7. 284256 7. 11568 7. 244603 6. 304801 6. 28162 6. 22357  
11748767\_ 4. 936743 4. 913091 4. 907278 5. 029529 4. 890539 4. 952512  
11748768\_ 8. 182867 8. 108821 8. 231084 8. 012843 8. 065128 7. 995387  
11748769\_ 6. 569965 6. 627703 6. 605179 6. 670362 6. 655072 6. 661797  
11748770\_ 10. 42304 10. 40057 10. 42603 10. 19006 10. 24441 10. 25094  
11748771\_ 8. 226789 8. 22257 8. 235605 7. 748432 7. 756214 7. 667636  
11748772\_ 6. 658045 6. 659877 6. 752593 6. 625695 6. 64661 6. 680647  
11748773\_ 2. 878154 2. 963944 2. 683333 3. 746484 3. 713759 3. 717544  
11748774\_ 3. 900147 3. 972097 3. 850246 4. 907157 4. 890539 5. 029529  
11748775\_ 8. 832412 8. 823988 8. 905586 8. 164005 8. 170216 8. 2306  
11748776\_ 5. 374222 5. 395768 5. 292915 5. 467725 5. 378273 5. 40272  
11748777\_ 4. 962308 4. 982998 5. 084335 4. 587213 4. 617835 4. 566074  
11748778\_ 7. 00632 6. 999643 6. 941084 6. 792183 6. 788041 6. 834685  
11748779\_ 6. 083011 6. 047228 6. 111286 6. 052073 6. 101096 6. 091045  
11748780\_ 7. 051859 6. 947371 7. 028887 6. 781303 6. 781303 6. 778156  
11748781\_ 7. 022047 7. 112254 6. 999234 7. 018608 7. 055266 7. 133535  
11748782\_ 7. 501025 7. 463024 7. 541881 7. 460131 7. 460266 7. 488395  
11748783\_ 7. 787001 7. 63749 7. 789768 8. 55393 8. 542576 8. 548441  
11748784\_ 7. 068965 6. 953996 7. 142907 6. 910769 7. 030563 6. 988251  
11748785\_ 7. 096921 7. 194708 7. 208405 7. 946318 7. 992801 8. 038892  
11748786\_ 4. 104745 4. 150236 4. 090679 4. 177533 4. 247914 3. 967767  
11748787\_ 4. 905738 4. 96925 4. 681424 4. 760053 4. 948826 4. 917289  
11748788\_ 7. 611556 7. 671102 7. 671851 7. 574409 7. 548718 7. 490974  
11748789\_ 7. 117149 7. 122009 7. 149247 7. 010096 7. 045097 7. 089806  
11748790\_ 8. 828343 8. 698518 8. 761825 8. 363778 8. 313588 8. 337111  
11748791\_ 7. 036659 6. 914448 6. 972108 7. 135133 7. 071894 7. 147399  
11748792\_ 3. 782077 3. 753927 3. 752241 3. 928156 4. 196757 3. 934525  
11748793\_ 8. 772068 8. 727704 8. 778329 9. 654329 9. 62355 9. 64715  
11748794\_ 2. 610838 2. 610838 2. 703185 2. 469552 2. 605516 2. 694499  
11748795\_ 5. 506874 5. 554436 5. 483044 5. 463862 5. 476904 5. 524657  
11748796\_ 5. 674781 5. 461891 5. 645924 5. 511195 5. 369691 5. 659087  
11748797\_ 4. 546684 4. 649958 4. 793739 4. 583862 4. 59509 4. 657116  
11748798\_ 5. 289944 5. 449305 5. 373443 5. 097869 5. 436284 5. 328979  
11748799\_ 5. 384892 5. 590046 5. 389342 5. 368269 5. 394475 5. 430807  
11748800\_ 5. 13377 5. 497866 5. 251527 5. 156941 5. 285989 5. 214485  
11748801\_ 8. 595272 8. 507497 8. 609541 9. 192686 9. 248954 9. 186443  
11748802\_ 5. 247739 5. 285813 5. 155264 5. 380649 5. 388797 5. 337431  
11748803\_ 3. 255104 3. 095562 2. 91581 3. 043281 2. 930475 3. 043281  
11748804\_ 6. 90023 6. 891377 6. 862252 7. 115704 7. 167542 7. 061309  
11748805\_ 3. 948611 3. 956772 3. 979207 3. 919035 3. 983088 4. 071386  
11748806\_ 9. 744545 9. 740616 9. 727945 9. 821899 9. 803956 9. 786877  
11748807\_ 8. 782674 8. 666758 8. 774771 8. 879486 8. 922958 8. 961238  
11748808\_ 7. 239949 7. 064633 7. 247764 5. 996126 5. 950551 6. 083689  
11748809\_ 7. 478762 7. 491813 7. 446077 7. 525559 7. 493489 7. 503786

11748810\_ 5. 61426 5. 459256 5. 721148 6. 209356 6. 02645 6. 058433  
11748811\_ 5. 976912 5. 954777 5. 920386 6. 097927 5. 946521 5. 978952  
11748812\_ 4. 576747 4. 653183 4. 459939 4. 635043 4. 565529 4. 693928  
11748813\_ 7. 481362 7. 382221 7. 416015 7. 134717 7. 076762 7. 178132  
11748814\_ 6. 303331 6. 424374 6. 366477 6. 387716 6. 336145 6. 354529  
11748815\_ 8. 857073 8. 726614 8. 856121 7. 7593 7. 748159 7. 789205  
11748816\_ 4. 389513 4. 447701 4. 350965 4. 294915 4. 38038 4. 294063  
11748817\_ 4. 275543 4. 269681 4. 340094 4. 229955 4. 347179 4. 060573  
11748818\_ 8. 759341 8. 766168 8. 797927 9. 020584 9. 067659 9. 006485  
11748819\_ 6. 706973 6. 759442 6. 593739 6. 78478 6. 845141 6. 759996  
11748820\_ 9. 334562 9. 240704 9. 321906 9. 235243 9. 239339 9. 164032  
11748821\_ 5. 934547 6. 041939 6. 021462 5. 950955 5. 997544 5. 903352  
11748822\_ 4. 51227 4. 459593 4. 393847 4. 384804 4. 700871 4. 605083  
11748823\_ 6. 480862 6. 608352 6. 51416 6. 563271 6. 479452 6. 594816  
11748824\_ 7. 042766 7. 068534 6. 932994 7. 371384 7. 473489 7. 408877  
11748825\_ 7. 453916 7. 401164 7. 277986 7. 746684 7. 83327 7. 846256  
11748826\_ 5. 732506 5. 591551 5. 651355 6. 430604 6. 583778 6. 492548  
11748827\_ 5. 976274 6. 049858 6. 027355 6. 030516 6. 011565 5. 95884  
11748828\_ 6. 5827 6. 579672 6. 652816 6. 329723 6. 426807 6. 510736  
11748829\_ 6. 220648 6. 316085 6. 152927 6. 324656 6. 341401 6. 273111  
11748830\_ 7. 732745 7. 643267 7. 739236 7. 305872 7. 310152 7. 344203  
11748831\_ 2. 933212 3. 06312 3. 138626 2. 892739 3. 08275 2. 905867  
11748832\_ 5. 567268 5. 438126 5. 564011 5. 211119 5. 229247 5. 139188  
11748833\_ 5. 660352 5. 724181 5. 783972 5. 660352 5. 800288 5. 786985  
11748834\_ 8. 007257 7. 957541 7. 969273 7. 939183 8. 006195 7. 998849  
11748835\_ 4. 910123 5. 135102 4. 982783 4. 948215 4. 982783 5. 02417  
11748836\_ 6. 034262 6. 193634 6. 136035 6. 191435 6. 17266 6. 17266  
11748837\_ 6. 291151 6. 137417 6. 245592 5. 488709 5. 45701 5. 544687  
11748838\_ 8. 609898 8. 653283 8. 571734 8. 982504 8. 959772 8. 989924  
11748839\_ 8. 623863 8. 498677 8. 594059 8. 771549 8. 86228 8. 757254  
11748840\_ 9. 028353 8. 985567 8. 994375 9. 10326 9. 084795 9. 112177  
11748841\_ 6. 931087 6. 739752 6. 880164 6. 716465 6. 638883 6. 727853  
11748842\_ 7. 530042 7. 497326 7. 360063 7. 53915 7. 621216 7. 513422  
11748843\_ 6. 143655 6. 082989 6. 133126 5. 807679 5. 870497 5. 937602  
11748844\_ 7. 582868 7. 484572 7. 55199 7. 662302 7. 695039 7. 540209  
11748845\_ 4. 632105 4. 538605 4. 613923 4. 450833 4. 171161 4. 516662  
11748846\_ 8. 557168 8. 485056 8. 583801 8. 36915 8. 3671 8. 374917  
11748847\_ 3. 290486 3. 17768 3. 053738 3. 17768 3. 38348 3. 528899  
11748848\_ 4. 109673 4. 109673 4. 00586 4. 135496 4. 193477 4. 232324  
11748849\_ 7. 280725 7. 348735 7. 276858 7. 277606 7. 448424 7. 334599  
11748850\_ 4. 815683 4. 915886 4. 984669 4. 881612 5. 065408 4. 801507  
11748851\_ 7. 528628 7. 518705 7. 519202 7. 834376 7. 781642 7. 815941  
11748852\_ 4. 282157 4. 750859 4. 482891 4. 664451 4. 664451 4. 89752  
11748853\_ 2. 506936 2. 285352 1. 869919 2. 163374 2. 150435 1. 816066  
11748854\_ 7. 616593 7. 475175 7. 624366 7. 334753 7. 223976 7. 223725  
11748855\_ 7. 952182 7. 837775 7. 924526 8. 001 8. 036724 8. 039446  
11748856\_ 5. 00606 5. 143187 4. 993913 5. 073036 4. 997932 4. 992314  
11748857\_ 9. 026583 8. 93965 8. 964904 8. 702947 8. 654096 8. 708365  
11748858\_ 9. 22138 9. 103712 9. 216101 9. 925031 9. 935731 9. 924382  
11748859\_ 2. 755256 2. 741361 2. 710984 2. 453675 2. 593699 2. 358685  
11748860\_ 3. 004906 3. 122355 3. 197276 3. 271429 2. 819353 2. 813593

11748861\_ 5. 11504 5. 10723 5. 212668 4. 601699 4. 735652 4. 896876  
11748862\_ 10. 10312 10. 11467 10. 05992 9. 857989 9. 821522 9. 787254  
11748863\_ 10. 08969 10. 06507 10. 06249 9. 816449 9. 824099 9. 797302  
11748864\_ 6. 836953 6. 876206 6. 81347 6. 843914 6. 917428 6. 840872  
11748865\_ 5. 884002 5. 735198 5. 794523 5. 414869 5. 616442 5. 523281  
11748866\_ 5. 248068 5. 16019 5. 006424 5. 475583 5. 200444 5. 109566  
11748867\_ 4. 049649 4. 095465 3. 8781 4. 041647 4. 041647 3. 990362  
11748868\_ 4. 741752 4. 6886 4. 751637 4. 683344 4. 718491 4. 652462  
11748869\_ 8. 387512 8. 40309 8. 372604 8. 61415 8. 547716 8. 582079  
11748870\_ 7. 099433 7. 084599 7. 166051 7. 156454 7. 206934 7. 235637  
11748871\_ 5. 987918 5. 952399 5. 822785 5. 817545 5. 718213 5. 763543  
11748872\_ 5. 048976 5. 048976 4. 984669 5. 019225 5. 061777 5. 139331  
11748873\_ 5. 379688 5. 291067 5. 320643 5. 334223 5. 26034 5. 29958  
11748874\_ 6. 073142 5. 921471 5. 903323 6. 058786 6. 030152 6. 177124  
11748875\_ 7. 062205 7. 062677 7. 124101 7. 038328 7. 068126 7. 105308  
11748876\_ 3. 122119 3. 041585 3. 150244 3. 20842 3. 156588 2. 921058  
11748877\_ 7. 756634 7. 843201 7. 812904 8. 504786 8. 482257 8. 49953  
11748878\_ 8. 104457 8. 101319 8. 102957 8. 657231 8. 640486 8. 708853  
11748879\_ 6. 255253 6. 270347 6. 437311 6. 387359 6. 356235 6. 371708  
11748880\_ 4. 415744 4. 578701 4. 643717 4. 614644 4. 352168 4. 63069  
11748881\_ 6. 629045 6. 924513 6. 704903 6. 65715 6. 773537 6. 673658  
11748882\_ 8. 243226 8. 171899 8. 194221 7. 625672 7. 6994 7. 704544  
11748883\_ 5. 684246 5. 409109 5. 603086 5. 773565 5. 764027 5. 707836  
11748884\_ 10. 81556 10. 76387 10. 78327 10. 55903 10. 53331 10. 54174  
11748885\_ 9. 205457 9. 152452 9. 149005 9. 477565 9. 560382 9. 491782  
11748886\_ 6. 489077 6. 409699 6. 438427 6. 41506 6. 302447 6. 389366  
11748887\_ 9. 012012 9. 147469 9. 100756 9. 200783 9. 203342 9. 308896  
11748888\_ 5. 553848 5. 429569 5. 502712 5. 738849 5. 686361 5. 883593  
11748889\_ 8. 148875 8. 149179 8. 267544 7. 647187 7. 901757 7. 829691  
11748890\_ 6. 030761 5. 98276 6. 084664 5. 954081 5. 977421 5. 992354  
11748891\_ 5. 979798 5. 988567 5. 93909 5. 954673 6. 022841 5. 992354  
11748892\_ 5. 423224 5. 414869 5. 432515 5. 838948 5. 845365 5. 704919  
11748893\_ 7. 363463 7. 502868 7. 429814 7. 434473 7. 417811 7. 48993  
11748894\_ 7. 531314 7. 573609 7. 51999 7. 745793 7. 772557 7. 78316  
11748895\_ 8. 265519 8. 148875 8. 321802 7. 741681 7. 668897 7. 765944  
11748896\_ 3. 852484 3. 818346 3. 732604 3. 997131 3. 704858 3. 988241  
11748897\_ 5. 32447 5. 39886 5. 369828 5. 457805 5. 419763 5. 442778  
11748898\_ 6. 509734 6. 515621 6. 725582 6. 582763 6. 624043 6. 579943  
11748899\_ 3. 443903 3. 312632 3. 136514 3. 242021 3. 004853 3. 081762  
11748900\_ 2. 324977 2. 399078 2. 410471 2. 553492 2. 444651 2. 445129  
11748901\_ 6. 817986 6. 774584 6. 786196 5. 894697 5. 863399 6. 032211  
11748902\_ 4. 887309 4. 917222 4. 77091 4. 980677 4. 896949 4. 811183  
11748903\_ 4. 727051 4. 782626 4. 762412 4. 85312 4. 903442 4. 914919  
11748904\_ 4. 857585 4. 798463 4. 509576 4. 91738 4. 86608 4. 725116  
11748905\_ 8. 078431 7. 992754 8. 045972 7. 815493 7. 79654 7. 819322  
11748906\_ 4. 839189 4. 99814 4. 774245 5. 054542 4. 874048 4. 896904  
11748907\_ 4. 245559 4. 275469 4. 380565 3. 892641 3. 645339 3. 678837  
11748908\_ 6. 263993 6. 464805 6. 418589 6. 28676 6. 19807 6. 291097  
11748909\_ 8. 721537 8. 714454 8. 763357 8. 658098 8. 622867 8. 60563  
11748910\_ 6. 220954 6. 1462 6. 230831 6. 099868 6. 039694 6. 042781  
11748911\_ 7. 230373 7. 161713 7. 161713 7. 04092 6. 963291 7. 0947

11748912\_ 5. 06958 5. 231654 5. 0937 5. 235338 5. 26144 5. 332445  
11748913\_ 6. 911451 6. 729063 6. 797355 7. 023588 6. 965522 7. 034327  
11748914\_ 3. 426823 3. 701621 3. 676167 3. 444376 3. 536745 3. 346882  
11748915\_ 4. 57634 4. 709463 4. 897405 4. 643717 4. 740223 4. 758772  
11748916\_ 4. 473161 4. 103229 4. 232704 4. 069479 4. 028356 3. 890204  
11748917\_ 2. 732054 2. 667623 2. 756662 2. 775784 2. 825169 2. 843943  
11748918\_ 9. 150082 9. 127489 9. 112453 9. 188552 9. 113601 9. 069748  
11748919\_ 6. 525279 6. 532992 6. 660543 6. 912176 6. 834875 6. 772195  
11748920\_ 5. 478725 5. 504194 5. 44186 5. 455932 5. 433725 5. 48762  
11748921\_ 8. 043244 7. 991494 7. 95309 8. 175822 8. 126986 8. 119312  
11748922\_ 7. 134334 7. 139021 7. 167217 7. 106061 7. 254225 7. 282922  
11748923\_ 6. 48642 6. 515852 6. 494743 6. 414336 6. 416287 6. 388828  
11748924\_ 4. 591046 4. 636101 4. 489182 4. 490774 4. 354795 4. 646145  
11748925\_ 3. 227506 3. 457133 3. 591156 3. 199123 3. 020527 3. 081765  
11748926\_ 7. 065857 6. 891728 6. 991932 7. 288607 7. 208704 7. 27464  
11748927\_ 8. 058276 7. 912015 7. 995282 6. 99393 7. 01794 6. 999793  
11748928\_ 4. 879868 4. 630529 4. 924603 4. 400986 4. 394002 4. 495612  
11748929\_ 6. 413457 6. 616252 6. 432073 6. 435571 6. 392897 6. 512726  
11748930\_ 6. 88176 6. 892066 6. 817423 7. 101914 7. 045924 7. 041884  
11748931\_ 6. 15013 6. 107655 6. 098159 6. 271347 6. 287205 6. 282224  
11748932\_ 2. 711898 2. 718322 2. 605516 2. 917047 2. 631956 2. 918155  
11748933\_ 2. 223886 2. 302816 2. 540415 2. 653502 2. 556338 2. 537664  
11748934\_ 3. 308515 3. 218351 3. 359947 3. 31665 3. 406924 3. 353981  
11748935\_ 5. 806451 5. 782032 5. 573306 5. 686194 5. 677354 5. 657521  
11748936\_ 6. 164783 6. 145802 6. 188138 6. 056063 6. 099067 6. 098918  
11748937\_ 7. 055228 7. 026193 7. 152356 7. 200321 7. 176869 7. 082166  
11748938\_ 6. 325177 6. 404983 6. 320242 7. 495344 7. 460571 7. 548175  
11748939\_ 5. 138978 5. 268295 5. 264899 5. 089685 5. 089966 5. 193559  
11748940\_ 6. 447097 6. 330198 6. 466057 6. 376251 6. 315296 6. 457351  
11748941\_ 5. 149174 5. 242462 5. 21684 5. 042364 5. 252963 5. 196201  
11748942\_ 9. 490841 9. 338663 9. 388182 8. 609815 8. 56584 8. 641478  
11748943\_ 9. 039836 8. 932937 9. 035244 9. 077393 9. 160279 9. 085293  
11748944\_ 6. 025952 5. 96477 5. 973344 6. 040637 6. 022427 5. 993023  
11748945\_ 7. 79805 7. 770818 7. 735269 7. 807281 7. 903381 7. 872214  
11748946\_ 6. 923168 6. 873144 6. 890406 7. 261847 7. 32891 7. 157774  
11748947\_ 6. 096824 6. 038386 6. 065659 6. 518466 6. 473661 6. 538873  
11748948\_ 6. 934615 6. 812696 6. 856776 6. 570611 6. 650903 6. 354529  
11748949\_ 8. 082646 8. 131264 8. 081607 8. 082646 8. 103321 8. 029958  
11748950\_ 5. 653905 5. 723964 5. 794286 5. 073036 5. 158476 5. 139054  
11748951\_ 9. 395899 9. 316481 9. 395399 9. 486187 9. 418961 9. 425234  
11748952\_ 9. 723513 9. 631657 9. 683636 9. 609822 9. 635684 9. 61964  
11748953\_ 2. 262396 2. 259899 2. 235709 2. 359369 2. 380024 2. 359369  
11748954\_ 6. 777898 6. 702356 6. 781794 6. 410228 6. 554293 6. 567104  
11748955\_ 5. 399125 5. 35457 5. 288827 4. 94908 4. 797012 4. 8651  
11748956\_ 6. 910833 6. 859877 6. 814164 6. 197254 6. 286212 6. 231863  
11748957\_ 9. 115556 9. 130234 9. 119017 9. 154321 9. 182601 9. 177822  
11748958\_ 5. 116442 5. 103493 5. 306114 5. 433091 5. 36843 5. 472764  
11748959\_ 6. 938716 6. 921261 7. 005249 6. 853999 6. 770363 6. 901126  
11748960\_ 8. 8891 8. 882322 8. 929737 8. 456787 8. 493798 8. 414429  
11748961\_ 2. 990013 3. 050194 3. 196734 3. 046648 3. 173321 3. 547736  
11748962\_ 7. 38718 7. 361981 7. 404236 6. 944795 6. 999798 7. 069087

11748963\_ 6.462756 6.45864 6.488175 6.46368 6.512261 6.487211  
11748964\_ 4.847487 5.163775 4.894086 4.84557 4.66078 4.808367  
11748965\_ 5.143824 5.017446 5.197421 5.110488 5.119469 5.118643  
11748966\_ 5.817855 5.755829 5.910428 5.829634 5.7236 5.74405  
11748967\_ 6.515804 6.525487 6.501969 6.333812 6.345017 6.372053  
11748968\_ 7.546593 7.46109 7.545155 7.342227 7.342771 7.296793  
11748969\_ 7.795437 7.991225 7.802104 8.013236 7.96502 8.124925  
11748970\_ 9.111397 9.144894 9.126413 9.009384 8.963032 8.876847  
11748971\_ 4.933208 5.02451 4.860868 4.951422 5.054022 4.913617  
11748972\_ 8.073031 7.91866 7.972243 8.439431 8.561723 8.508318  
11748973\_ 8.079983 7.969723 8.037568 8.444311 8.524513 8.512063  
11748974\_ 7.57885 7.45053 7.664364 7.995653 7.944907 7.953978  
11748975\_ 7.044656 6.969349 7.082981 7.567633 7.449278 7.49329  
11748976\_ 6.009569 6.098971 6.130846 6.84268 6.846913 6.801035  
11748977\_ 5.420559 5.482832 5.332105 5.561834 5.53225 5.545861  
11748978\_ 4.193762 4.023978 4.112926 4.111366 4.182177 4.266075  
11748979\_ 9.047886 9.013524 9.0262 9.043016 8.969626 8.952294  
11748980\_ 6.847747 6.829847 7.103431 6.513016 6.538097 6.427176  
11748981\_ 6.536494 6.579869 6.665265 6.47178 6.556197 6.594165  
11748982\_ 5.197363 5.416705 5.252863 5.54592 5.441826 5.399592  
11748983\_ 6.183074 6.199964 6.178474 6.189342 6.219376 6.232303  
11748984\_ 9.199609 9.076714 9.133634 8.833672 8.769712 8.8533  
11748985\_ 8.244699 8.243647 8.265163 7.999526 7.958269 7.947947  
11748986\_ 4.763543 4.815683 4.783704 4.826707 4.74574 4.815514  
11748987\_ 6.971954 7.046137 7.089376 7.337885 7.214466 7.236618  
11748988\_ 7.362375 7.437965 7.447207 7.706113 7.498884 7.643513  
11748989\_ 5.561217 5.508045 5.538291 5.655149 5.63831 5.664659  
11748990\_ 6.066673 5.98478 6.116318 5.894697 6.010464 5.970929  
11748991\_ 7.32268 7.37325 7.358814 7.615553 7.563084 7.536888  
11748992\_ 5.918224 5.909416 5.747149 6.032953 6.083474 6.166963  
11748993\_ 6.520868 6.546818 6.493614 6.328324 6.302918 6.460601  
11748994\_ 4.858893 5.073036 5.104706 5.273977 5.180395 5.180395  
11748995\_ 9.255796 9.158278 9.267438 8.820912 8.792157 8.764711  
11748996\_ 8.228063 8.161462 8.132477 8.075605 8.070449 8.079248  
11748997\_ 3.415026 3.220311 3.166211 3.490307 3.333117 3.417919  
11748998\_ 6.014088 6.174358 6.153775 6.249119 6.206752 6.16032  
11748999\_ 3.756703 3.676393 3.740892 3.645242 3.492503 3.522436  
11749000\_ 8.707256 8.612588 8.608253 9.135417 9.153973 9.071002  
11749001\_ 4.375943 4.569338 4.57499 4.722109 4.582478 4.571975  
11749002\_ 4.684193 4.488026 4.463348 4.406239 4.66892 4.66739  
11749003\_ 7.177431 7.089177 7.174682 6.735772 6.56978 6.603289  
11749004\_ 6.716402 6.652998 6.698339 6.38753 6.419665 6.41365  
11749005\_ 9.949523 9.975289 9.953704 9.945443 9.900105 9.807943  
11749006\_ 5.680996 5.652504 5.634686 5.731531 5.870242 5.730823  
11749007\_ 2.06437 2.091773 1.984268 2.06437 1.835698 2.06437  
11749008\_ 3.694008 3.774889 3.794919 3.485153 3.890433 3.745794  
11749009\_ 6.694541 6.481922 6.564373 7.027664 7.032361 7.068307  
11749010\_ 5.947274 6.206103 6.072005 6.339828 6.247224 6.300531  
11749011\_ 5.483105 5.496305 5.466694 5.598341 5.55215 5.634617  
11749012\_ 4.191731 4.332461 4.030348 4.204097 4.122446 4.327125  
11749013\_ 5.769779 5.715122 5.826933 6.48 6.569705 6.599807



11749014\_ 5. 029529 4. 950867 5. 012838 5. 071253 5. 153586 5. 151308  
11749015\_ 4. 021299 4. 033397 4. 000128 4. 15169 4. 222421 4. 040889  
11749016\_ 4. 790827 4. 567037 4. 649295 4. 389215 4. 499342 4. 275543  
11749017\_ 4. 053779 4. 184167 3. 914548 4. 180201 4. 322986 4. 0962  
11749018\_ 6. 598171 6. 818253 6. 761401 6. 844078 6. 691388 6. 809896  
11749019\_ 8. 048788 8. 033449 8. 082169 7. 560229 7. 522683 7. 538232  
11749020\_ 6. 322991 6. 328222 6. 474399 6. 08838 6. 132041 6. 141408  
11749021\_ 10. 65381 10. 64218 10. 62431 10. 52333 10. 55616 10. 56233  
11749022\_ 8. 277776 8. 171343 8. 297106 8. 400858 8. 296129 8. 301483  
11749023\_ 7. 235412 7. 146002 7. 175288 5. 808345 5. 882366 6. 032426  
11749024\_ 7. 315495 7. 240469 7. 277861 6. 333294 6. 223877 6. 39308  
11749025\_ 5. 712343 5. 682623 5. 691691 5. 744666 5. 857279 5. 90435  
11749026\_ 8. 536552 8. 528751 8. 493196 8. 513086 8. 560314 8. 422509  
11749027\_ 6. 768542 6. 71912 6. 77355 6. 741084 6. 685249 6. 669078  
11749028\_ 8. 258066 8. 229188 8. 261668 7. 727929 7. 768867 7. 7918  
11749029\_ 6. 60338 6. 558774 6. 55662 6. 771483 6. 826126 6. 862527  
11749030\_ 6. 391377 6. 263567 6. 468241 6. 506377 6. 408502 6. 396378  
11749031\_ 6. 772607 6. 623635 6. 704687 5. 978561 5. 9082 5. 964988  
11749032\_ 6. 660519 6. 641378 6. 653792 5. 962741 6. 039791 5. 966241  
11749033\_ 8. 374801 8. 479086 8. 3808 8. 701388 8. 772214 8. 757064  
11749034\_ 6. 285322 6. 212577 6. 468593 6. 047568 5. 944483 5. 937033  
11749035\_ 6. 359305 6. 248402 6. 240645 6. 076709 6. 183388 6. 103711  
11749036\_ 4. 86769 4. 849648 4. 849648 4. 86769 4. 980606 4. 959869  
11749037\_ 5. 344273 5. 480011 5. 532554 5. 406183 5. 524222 5. 524624  
11749038\_ 4. 695234 4. 637829 4. 648726 4. 788261 4. 723536 4. 713908  
11749039\_ 8. 752871 8. 674693 8. 676063 8. 807146 8. 771214 8. 815019  
11749040\_ 9. 062367 8. 979516 9. 016138 8. 961277 8. 949322 8. 936927  
11749041\_ 9. 228012 9. 186705 9. 197457 9. 236002 9. 189387 9. 206489  
11749042\_ 5. 908583 6. 130509 6. 094413 6. 680139 6. 800836 6. 747871  
11749043\_ 6. 007274 6. 133343 6. 007274 5. 88391 6. 007274 5. 922262  
11749044\_ 8. 863139 8. 786699 8. 845399 8. 836208 8. 870489 8. 876561  
11749045\_ 6. 959944 6. 874408 6. 97213 6. 319757 6. 159771 6. 33679  
11749046\_ 6. 135037 5. 94415 6. 183445 5. 558875 5. 621724 5. 621724  
11749047\_ 6. 242396 6. 310698 6. 076201 6. 178389 6. 12926 6. 180487  
11749048\_ 7. 611242 7. 636334 7. 637796 8. 153069 8. 12816 8. 087218  
11749049\_ 2. 723586 2. 575801 3. 09512 2. 704187 2. 702706 2. 60886  
11749050\_ 5. 399015 5. 389091 5. 765619 5. 528047 5. 667701 5. 590984  
11749051\_ 6. 597823 6. 554001 6. 512242 6. 544251 6. 584973 6. 588252  
11749052\_ 6. 66851 6. 670127 6. 582465 6. 524852 6. 625973 6. 56242  
11749053\_ 6. 037979 6. 033027 5. 979191 5. 311257 5. 650004 5. 35262  
11749054\_ 6. 64895 6. 764208 6. 743763 6. 616266 6. 51747 6. 673874  
11749055\_ 4. 781482 4. 888934 4. 643909 4. 9377 4. 913095 5. 073831  
11749056\_ 4. 482418 4. 542224 4. 660918 4. 564196 4. 565764 4. 578961  
11749057\_ 5. 822255 5. 9923 5. 911255 5. 906548 5. 896437 5. 825502  
11749058\_ 5. 944027 6. 046627 5. 939893 6. 20018 6. 104931 6. 071956  
11749059\_ 11. 17369 11. 15247 11. 07998 11. 31746 11. 28746 11. 24175  
11749060\_ 6. 792076 6. 877206 6. 775549 6. 934489 7. 039661 7. 008457  
11749061\_ 9. 322483 9. 289943 9. 346561 8. 939004 8. 990427 8. 928829  
11749062\_ 2. 302972 2. 212617 2. 280383 2. 30313 2. 191353 2. 175043  
11749063\_ 5. 306385 5. 226018 5. 229152 5. 177333 5. 23505 5. 312419  
11749064\_ 5. 823638 5. 810771 5. 573709 5. 616368 5. 791142 5. 811427

11749065\_ 6. 719113 6. 666521 6. 755737 6. 576725 6. 407274 6. 416125  
11749066\_ 7. 085681 7. 006698 7. 090371 7. 308734 7. 253483 7. 345379  
11749067\_ 6. 146352 6. 145455 6. 219072 5. 419485 5. 642422 5. 554436  
11749068\_ 7. 799409 7. 778139 7. 874166 7. 682498 7. 646223 7. 72902  
11749069\_ 6. 973783 7. 117852 7. 053419 7. 172305 7. 209576 7. 263159  
11749070\_ 6. 516474 6. 698863 6. 610107 6. 84395 6. 751041 6. 777655  
11749071\_ 5. 143102 5. 287289 5. 125629 5. 257884 5. 27681 5. 288593  
11749072\_ 6. 12155 6. 280818 6. 264445 6. 039702 6. 277141 6. 246432  
11749073\_ 5. 929676 6. 13945 6. 022123 6. 799403 6. 790012 6. 725203  
11749074\_ 5. 853062 5. 862251 6. 015024 5. 409566 5. 502241 5. 45066  
11749075\_ 6. 220636 6. 250487 6. 310832 5. 884413 5. 915748 5. 902646  
11749076\_ 3. 351655 3. 252407 3. 104155 3. 213655 3. 028492 3. 078331  
11749077\_ 7. 045974 7. 147001 7. 085923 7. 574235 7. 552956 7. 467374  
11749078\_ 6. 922003 6. 791713 6. 990852 6. 718971 6. 68773 6. 7183  
11749079\_ 4. 028081 4. 006138 4. 053843 3. 837761 4. 074154 4. 049646  
11749080\_ 5. 32217 5. 522269 5. 297498 5. 43062 5. 564708 5. 511118  
11749081\_ 5. 056172 5. 286922 5. 031931 5. 148948 5. 235228 5. 000063  
11749082\_ 3. 942566 3. 934853 3. 896252 4. 117358 4. 03714 4. 136735  
11749083\_ 7. 049341 6. 980244 7. 061504 6. 936601 6. 981057 6. 967649  
11749084\_ 5. 395818 5. 31241 5. 53133 5. 555476 5. 381482 5. 494358  
11749085\_ 4. 43455 4. 453671 4. 450115 4. 367111 4. 516049 4. 415744  
11749086\_ 3. 561446 3. 627567 3. 561446 3. 47162 3. 607663 3. 630467  
11749087\_ 6. 008463 5. 938482 6. 080014 6. 151357 6. 104931 6. 276441  
11749088\_ 8. 540432 8. 50513 8. 544961 7. 618442 7. 678094 7. 58776  
11749089\_ 7. 747105 7. 765251 7. 742233 7. 738098 7. 726836 7. 82308  
11749090\_ 5. 820052 5. 744429 5. 764319 5. 477713 5. 58866 5. 508113  
11749091\_ 6. 975264 6. 993253 6. 991777 6. 530066 6. 530213 6. 510159  
11749092\_ 7. 600118 7. 5162 7. 664814 7. 51153 7. 611725 7. 584536  
11749093\_ 4. 932797 5. 138654 5. 183234 5. 244403 5. 115198 5. 244403  
11749094\_ 5. 663825 5. 613947 5. 709521 4. 992243 4. 931198 4. 87031  
11749095\_ 3. 457914 3. 522721 3. 734561 3. 639985 3. 639985 3. 739298  
11749096\_ 7. 80097 7. 699792 7. 737259 7. 220941 7. 273775 7. 218392  
11749097\_ 5. 095025 5. 156545 5. 093891 5. 189273 5. 189273 5. 031795  
11749098\_ 6. 30711 6. 318078 6. 329643 6. 347578 6. 30711 6. 293788  
11749099\_ 6. 3324 6. 252618 6. 395572 6. 805292 7. 002566 6. 988995  
11749100\_ 6. 689858 6. 774626 6. 736608 6. 748267 6. 71025 6. 764946  
11749101\_ 6. 716688 6. 730883 6. 783892 6. 705244 6. 683255 6. 719439  
11749102\_ 7. 080617 7. 005824 7. 072373 6. 762589 6. 748697 6. 920913  
11749103\_ 6. 590038 6. 551725 6. 511361 6. 118838 6. 005946 6. 240253  
11749104\_ 5. 873964 5. 872436 5. 992966 5. 932003 6. 021577 6. 10224  
11749105\_ 4. 764114 4. 843274 4. 667807 4. 754382 4. 826668 4. 749259  
11749106\_ 6. 27275 6. 363256 6. 222091 6. 371535 6. 434856 6. 27275  
11749107\_ 7. 480142 7. 5041 7. 358974 7. 446669 7. 348702 7. 476012  
11749108\_ 3. 461508 3. 519005 3. 443826 3. 523424 3. 584856 3. 678613  
11749109\_ 4. 453631 4. 44512 4. 399551 4. 514283 4. 536598 4. 659266  
11749110\_ 3. 815117 3. 963073 3. 943061 3. 711516 3. 988837 4. 014304  
11749111\_ 4. 366897 4. 319951 4. 370337 4. 569667 4. 409733 4. 689653  
11749112\_ 7. 199425 7. 197738 7. 337088 7. 276713 7. 309655 7. 310136  
11749113\_ 6. 435986 6. 401563 6. 295114 6. 150189 6. 107955 6. 180746  
11749114\_ 7. 053803 7. 013848 7. 073701 6. 742186 6. 848273 6. 805621  
11749115\_ 6. 873087 6. 765189 6. 802747 6. 904141 6. 88054 6. 916971

11749116\_ 7. 087127 7. 072728 7. 043068 7. 224602 7. 153394 7. 157836  
11749117\_ 5. 258253 5. 414869 5. 244899 5. 37455 5. 400096 5. 381267  
11749118\_ 4. 270069 4. 071225 4. 104047 3. 718538 3. 446929 3. 581425  
11749119\_ 6. 884014 6. 721435 6. 864721 6. 204307 6. 372125 6. 372053  
11749120\_ 3. 578507 3. 373872 3. 486001 3. 3932 3. 21279 3. 280394  
11749121\_ 6. 025726 5. 975405 5. 950197 5. 845365 5. 609647 5. 806956  
11749122\_ 6. 714599 6. 564709 6. 746908 6. 909631 6. 910731 6. 850628  
11749123\_ 9. 34547 9. 344738 9. 364752 9. 488088 9. 416707 9. 416065  
11749124\_ 8. 440236 8. 396832 8. 509555 8. 286911 8. 216858 8. 240845  
11749125\_ 8. 339828 8. 272346 8. 307971 8. 282159 8. 259978 8. 256311  
11749126\_ 2. 498446 2. 69248 2. 588388 2. 651193 2. 57809 2. 762901  
11749127\_ 3. 39274 3. 488463 3. 534303 3. 460292 3. 488463 3. 495236  
11749128\_ 4. 704015 4. 224975 4. 65626 4. 525587 4. 441093 4. 460374  
11749129\_ 7. 020462 6. 998206 7. 153079 6. 898793 6. 907913 6. 946361  
11749130\_ 7. 230633 7. 31625 7. 261416 7. 655501 7. 548682 7. 734136  
11749131\_ 8. 864415 8. 781154 8. 871329 8. 777168 8. 772501 8. 734693  
11749132\_ 5. 999888 6. 011116 6. 053904 5. 963075 6. 020929 5. 944432  
11749133\_ 6. 554254 6. 644623 6. 631644 6. 710954 6. 737815 6. 781624  
11749134\_ 6. 666215 6. 386494 6. 578271 6. 414979 6. 368512 6. 419432  
11749135\_ 5. 926672 5. 961628 5. 864436 6. 256824 6. 401446 6. 27916  
11749136\_ 5. 725466 5. 680046 5. 676992 5. 788632 5. 6506 5. 589814  
11749137\_ 6. 766854 6. 765739 6. 855614 6. 43626 6. 404252 6. 528702  
11749138\_ 6. 957202 7. 04074 6. 83756 6. 983824 7. 049316 7. 004195  
11749139\_ 8. 542798 8. 441626 8. 518516 7. 550825 7. 555348 7. 560866  
11749140\_ 3. 919743 4. 078291 3. 921032 3. 97057 4. 023177 3. 962812  
11749141\_ 6. 382073 6. 224221 6. 433149 6. 198388 6. 064526 6. 224221  
11749142\_ 6. 469823 6. 514724 6. 450193 6. 551937 6. 664286 6. 727853  
11749143\_ 5. 401727 5. 381406 5. 334797 5. 358527 5. 497534 5. 288605  
11749144\_ 6. 848992 6. 658558 6. 743286 6. 903469 6. 87924 6. 86399  
11749145\_ 5. 948697 5. 926475 5. 924242 5. 357172 5. 417231 5. 633159  
11749146\_ 7. 930039 7. 942411 7. 864133 8. 232021 8. 183629 8. 155607  
11749147\_ 4. 26769 4. 425433 4. 286845 4. 576181 4. 502146 4. 449287  
11749148\_ 3. 818401 3. 503743 3. 532936 3. 898966 3. 533591 3. 734575  
11749149\_ 7. 053159 6. 931567 7. 029703 7. 095 7. 179234 7. 035821  
11749150\_ 7. 854013 7. 839619 7. 848661 7. 861572 7. 806249 7. 820068  
11749151\_ 3. 504219 3. 398236 3. 236367 3. 104828 3. 306585 3. 253483  
11749152\_ 6. 051928 6. 091847 6. 146374 6. 08262 6. 30451 6. 212602  
11749153\_ 7. 192542 7. 093076 7. 162728 6. 621332 6. 845446 6. 684226  
11749154\_ 3. 814884 3. 82482 3. 874767 3. 950203 3. 85821 3. 749477  
11749155\_ 8. 426805 8. 429024 8. 438036 8. 139868 8. 169007 8. 063584  
11749156\_ 7. 381052 7. 359032 7. 419408 7. 677418 7. 694613 7. 710191  
11749157\_ 5. 679392 5. 4467 5. 763634 5. 030936 5. 11173 5. 005777  
11749158\_ 9. 132504 9. 092304 9. 096314 9. 918448 9. 925052 9. 914102  
11749159\_ 3. 263699 3. 384461 3. 281491 3. 274401 3. 102765 3. 190612  
11749160\_ 5. 526533 5. 557946 5. 734909 5. 696919 5. 707358 5. 742736  
11749161\_ 5. 37999 5. 226136 5. 384208 5. 507637 5. 416539 5. 503999  
11749162\_ 3. 811285 3. 827311 3. 711326 3. 83966 3. 948699 3. 868065  
11749163\_ 5. 409222 5. 584813 5. 438596 5. 520467 5. 585841 5. 457498  
11749164\_ 8. 448218 8. 378497 8. 481933 8. 227927 8. 324742 8. 317615  
11749165\_ 3. 463445 3. 319464 3. 625408 3. 571811 3. 564557 3. 657616  
11749166\_ 5. 578323 5. 710165 5. 668242 5. 731188 5. 701011 5. 674884

11749167\_ 6. 17981 6. 145608 6. 153783 7. 261145 7. 264395 7. 187414  
11749168\_ 1. 795078 1. 660314 1. 710709 1. 762924 1. 771685 1. 774771  
11749169\_ 5. 409222 5. 412046 5. 472432 5. 400066 5. 367879 5. 426849  
11749170\_ 4. 172175 4. 051592 4. 117646 4. 333748 4. 172175 4. 320388  
11749171\_ 5. 192248 5. 285749 5. 137613 5. 115805 5. 078805 5. 192248  
11749172\_ 7. 303887 7. 211789 7. 298304 6. 404854 6. 419155 6. 441922  
11749173\_ 6. 270821 6. 058365 6. 284669 6. 695441 6. 792076 6. 674331  
11749174\_ 4. 718329 4. 72561 4. 755923 4. 876599 4. 890539 4. 826862  
11749175\_ 6. 939952 6. 862669 7. 021086 7. 019835 7. 063862 7. 067151  
11749176\_ 8. 795487 8. 766005 8. 857195 7. 622517 7. 775975 7. 782834  
11749177\_ 5. 703723 5. 563445 5. 582002 5. 127345 5. 426098 5. 440165  
11749178\_ 8. 429936 8. 312921 8. 465906 7. 782051 7. 797126 7. 912892  
11749179\_ 6. 930181 6. 837529 6. 961342 6. 429235 6. 606775 6. 627157  
11749180\_ 6. 09355 6. 268934 6. 184288 6. 236211 6. 205204 6. 121447  
11749181\_ 6. 703674 6. 604361 6. 779107 6. 514491 6. 649864 6. 547954  
11749182\_ 8. 564837 8. 52127 8. 658402 8. 522087 8. 503051 8. 502192  
11749183\_ 6. 040961 6. 218671 6. 085078 6. 212949 6. 234863 6. 266713  
11749184\_ 2. 795602 3. 080969 3. 157467 2. 896159 2. 896159 2. 952547  
11749185\_ 5. 267973 5. 552298 5. 449034 5. 647232 5. 417632 5. 496464  
11749186\_ 4. 799492 4. 928733 4. 712587 4. 900032 5. 060045 4. 908637  
11749187\_ 5. 137668 5. 076511 5. 099118 5. 103577 5. 129026 5. 148451  
11749188\_ 3. 543759 3. 531538 3. 478679 3. 348957 3. 346622 3. 335813  
11749189\_ 5. 963503 6. 066294 5. 895315 5. 936592 6. 04898 6. 008053  
11749190\_ 4. 9226 4. 941556 4. 891054 5. 073036 4. 956825 5. 122636  
11749191\_ 5. 350534 5. 457464 5. 468245 5. 527497 5. 503609 5. 657993  
11749192\_ 6. 717823 6. 663734 6. 849693 7. 360438 7. 407201 7. 377909  
11749193\_ 8. 270922 8. 198383 8. 249833 8. 905965 8. 884664 8. 855572  
11749194\_ 4. 551848 4. 838486 4. 691258 4. 832036 4. 876962 4. 601093  
11749195\_ 8. 977266 8. 867554 9. 000215 9. 615036 9. 624849 9. 611028  
11749196\_ 7. 221511 7. 202323 7. 152528 7. 639003 7. 698271 7. 680842  
11749197\_ 7. 165243 7. 154768 7. 222839 7. 007529 6. 970424 7. 083134  
11749198\_ 4. 587099 4. 798744 4. 613854 4. 672326 4. 71682 4. 766069  
11749199\_ 4. 643717 4. 4853 4. 594911 4. 643717 4. 578352 4. 672143  
11749200\_ 7. 151774 7. 134375 7. 213601 7. 066165 7. 04957 7. 017041  
11749201\_ 8. 670559 8. 624722 8. 620353 7. 838858 7. 764672 7. 809475  
11749202\_ 7. 373547 7. 516974 7. 426472 7. 317977 7. 34829 7. 400888  
11749203\_ 3. 661759 3. 847096 3. 77376 3. 599911 3. 650624 3. 727181  
11749204\_ 3. 643652 3. 71662 3. 462364 3. 834071 3. 497151 3. 712218  
11749205\_ 6. 162778 6. 196102 6. 23831 6. 975313 6. 955008 6. 963978  
11749206\_ 3. 705625 3. 938036 3. 821174 3. 402795 3. 621849 3. 606313  
11749207\_ 6. 479689 6. 447921 6. 358214 6. 325096 6. 176354 6. 252475  
11749208\_ 7. 09511 7. 178232 7. 161569 6. 394964 6. 326908 6. 411081  
11749209\_ 5. 569197 5. 713766 5. 456798 5. 652529 5. 654399 5. 757662  
11749210\_ 10. 00444 10. 07531 9. 90413 10. 33483 10. 26696 10. 16749  
11749211\_ 3. 044389 3. 016848 3. 089503 3. 294193 3. 363524 3. 209664  
11749212\_ 5. 279211 5. 254935 4. 95165 4. 940613 5. 031909 4. 88154  
11749213\_ 2. 665827 2. 545858 2. 759759 2. 687638 3. 040702 2. 850194  
11749214\_ 4. 991768 5. 084565 4. 954961 5. 012554 5. 051999 5. 026417  
11749215\_ 5. 959211 6. 075541 6. 010686 6. 071468 6. 033759 6. 135563  
11749216\_ 3. 060883 2. 896436 2. 662296 3. 240358 2. 735018 3. 118826  
11749217\_ 3. 089848 3. 07682 2. 80147 3. 05771 3. 102553 2. 79895

11749218\_ 3. 822551 3. 96684 3. 934725 4. 019393 4. 0843 4. 001369  
11749219\_ 4. 837316 4. 742756 4. 709015 4. 685505 4. 648694 4. 656776  
11749220\_ 6. 549779 6. 546818 6. 586978 6. 402393 6. 451728 6. 362592  
11749221\_ 4. 108002 4. 153779 4. 119362 4. 067703 4. 033954 4. 058545  
11749222\_ 5. 213893 5. 09546 5. 26034 5. 067284 5. 217865 5. 182053  
11749223\_ 6. 785938 6. 612732 6. 705512 6. 876819 6. 987465 7. 035122  
11749224\_ 7. 049334 7. 009306 7. 032799 7. 072246 7. 095811 7. 07498  
11749225\_ 5. 798658 5. 665397 5. 813594 5. 79447 5. 891374 5. 688694  
11749226\_ 5. 946076 5. 914129 5. 997105 5. 909721 5. 982602 5. 942312  
11749227\_ 8. 09431 8. 036321 8. 04218 8. 03363 8. 154372 8. 098639  
11749228\_ 8. 734895 8. 691024 8. 703302 7. 970495 7. 957862 7. 954187  
11749229\_ 5. 214165 5. 358394 5. 136871 5. 636004 5. 723202 5. 727801  
11749230\_ 4. 643397 4. 625442 4. 524075 4. 629179 4. 552812 4. 537891  
11749231\_ 6. 004257 6. 076409 6. 134127 6. 244666 6. 104931 6. 11896  
11749232\_ 5. 924961 5. 958171 6. 051682 5. 683814 5. 816181 5. 559955  
11749233\_ 9. 630726 9. 628224 9. 558865 9. 967633 9. 947928 9. 958738  
11749234\_ 11. 21671 11. 18472 11. 22885 11. 3897 11. 33949 11. 35445  
11749235\_ 5. 531746 5. 58103 5. 509196 5. 489109 5. 658069 5. 612974  
11749236\_ 6. 42009 6. 33994 6. 224187 6. 369025 6. 394117 6. 423688  
11749237\_ 8. 052977 7. 950967 7. 979372 7. 760305 7. 781064 7. 728357  
11749238\_ 5. 886619 5. 949204 5. 887936 5. 899742 5. 912426 5. 857768  
11749239\_ 6. 539458 6. 559803 6. 594023 6. 668801 6. 690807 6. 568349  
11749240\_ 7. 456502 7. 32075 7. 409349 6. 103208 6. 144557 6. 201143  
11749241\_ 7. 32543 7. 288084 7. 38824 7. 132129 7. 083509 7. 093206  
11749242\_ 4. 979365 5. 087369 4. 937853 5. 093884 5. 141365 5. 089133  
11749243\_ 7. 571717 7. 603179 7. 646292 7. 400451 7. 352783 7. 319708  
11749244\_ 6. 850116 6. 886652 6. 999209 6. 74302 6. 835891 6. 806156  
11749245\_ 6. 039678 5. 892135 6. 129284 4. 977097 4. 859412 5. 162335  
11749246\_ 7. 528932 7. 505899 7. 600786 7. 274086 7. 212899 7. 297534  
11749247\_ 5. 611493 5. 637856 5. 584813 5. 199075 5. 169185 5. 29026  
11749248\_ 6. 195345 6. 471824 6. 282224 6. 539082 6. 460563 6. 421782  
11749249\_ 6. 80567 6. 729759 6. 634134 6. 733331 6. 740569 6. 812861  
11749250\_ 3. 706972 3. 701572 3. 701572 3. 54691 3. 823872 3. 701572  
11749251\_ 6. 362016 6. 407437 6. 510862 6. 49628 6. 471188 6. 584001  
11749252\_ 8. 466995 8. 527395 8. 584013 8. 195964 8. 241784 8. 232584  
11749253\_ 4. 366185 4. 316667 4. 213226 4. 269213 4. 172536 4. 254197  
11749254\_ 9. 925974 9. 859102 9. 931947 9. 669524 9. 664948 9. 605785  
11749255\_ 7. 301207 7. 26674 7. 41435 7. 502461 7. 496523 7. 475015  
11749256\_ 4. 955635 4. 884721 4. 955635 4. 726731 4. 859918 4. 908043  
11749257\_ 8. 56187 8. 60144 8. 56014 8. 724107 8. 689909 8. 722512  
11749258\_ 9. 008882 8. 958719 8. 996224 8. 614998 8. 668001 8. 670365  
11749259\_ 8. 141339 8. 133545 8. 281904 8. 032478 8. 039752 8. 00429  
11749260\_ 10. 53473 10. 47285 10. 45977 10. 99247 11. 08093 11. 03754  
11749261\_ 8. 887205 8. 880067 8. 877895 8. 907944 8. 955749 8. 965288  
11749262\_ 4. 854903 4. 804282 4. 995324 4. 905622 4. 910425 4. 820679  
11749263\_ 6. 41848 6. 467452 6. 394519 6. 45903 6. 411421 6. 478366  
11749264\_ 2. 5448 2. 644542 2. 407277 2. 71539 2. 687575 2. 75259  
11749265\_ 4. 358459 4. 512704 4. 408415 4. 464679 4. 503956 4. 573653  
11749266\_ 6. 159771 6. 17408 5. 99605 6. 110943 6. 252679 6. 191911  
11749267\_ 5. 789716 5. 672285 5. 839471 6. 040637 6. 069539 6. 072135  
11749268\_ 4. 075978 4. 394321 3. 960619 4. 206355 4. 173527 4. 065542

11749269\_ 3. 818401 3. 758211 3. 811019 3. 759973 3. 819951 3. 731651  
11749270\_ 3. 815834 3. 831758 4. 027717 4. 079546 3. 922636 4. 29326  
11749271\_ 2. 772227 3. 003323 2. 805053 3. 097308 3. 13821 2. 992447  
11749272\_ 5. 303007 5. 409795 5. 359439 5. 425718 5. 455176 5. 417812  
11749273\_ 2. 119938 2. 202642 2. 383999 2. 175484 2. 252548 2. 25483  
11749274\_ 5. 415964 5. 531747 5. 446005 5. 446005 5. 531747 5. 348597  
11749275\_ 6. 814997 6. 727853 6. 873537 6. 657405 6. 733412 6. 625545  
11749276\_ 6. 359892 6. 359892 6. 296807 6. 26596 6. 37322 6. 359892  
11749277\_ 6. 210658 6. 232571 6. 107453 6. 298357 6. 208286 6. 202674  
11749278\_ 4. 655258 4. 607672 4. 772366 4. 581243 4. 406869 4. 435076  
11749279\_ 5. 123596 5. 309537 4. 850088 5. 26353 5. 289086 5. 26353  
11749280\_ 6. 569291 6. 404082 6. 550579 5. 954081 5. 719126 5. 611078  
11749281\_ 7. 579458 7. 461258 7. 447739 7. 028607 7. 072289 7. 134523  
11749282\_ 9. 434772 9. 413481 9. 39683 9. 610852 9. 616216 9. 560596  
11749283\_ 9. 781723 9. 76222 9. 809559 9. 890045 9. 949331 9. 887701  
11749284\_ 3. 879182 3. 798144 3. 566525 3. 996763 3. 730048 3. 971441  
11749285\_ 3. 337588 3. 434599 3. 272995 3. 364165 3. 171008 3. 337588  
11749286\_ 6. 821688 6. 721467 6. 849142 6. 857704 6. 915137 6. 828982  
11749287\_ 9. 942057 9. 890929 9. 937501 9. 741336 9. 735239 9. 745396  
11749288\_ 5. 877155 5. 981534 5. 882642 6. 070598 6. 044285 6. 110367  
11749289\_ 7. 994498 7. 894423 7. 979639 8. 180889 8. 188933 8. 201311  
11749290\_ 6. 175364 6. 140173 6. 306428 6. 315154 6. 25976 6. 284419  
11749291\_ 7. 836833 7. 598214 7. 740297 6. 673517 6. 711224 6. 691564  
11749292\_ 4. 9106 4. 69267 4. 847408 4. 240809 4. 604022 4. 526704  
11749293\_ 4. 467177 4. 678969 4. 544441 4. 547839 4. 713585 4. 503019  
11749294\_ 7. 834018 7. 698133 7. 870125 7. 986025 7. 997802 7. 977355  
11749295\_ 4. 684615 4. 729735 4. 624953 4. 983514 5. 222868 4. 960253  
11749296\_ 5. 409284 5. 515893 5. 519227 5. 511535 5. 484417 5. 383011  
11749297\_ 6. 92342 6. 95737 6. 841308 6. 936254 6. 963007 6. 954145  
11749298\_ 3. 923876 4. 023422 4. 008938 3. 850246 4. 023422 4. 043588  
11749299\_ 9. 962222 9. 90831 9. 91172 9. 882237 9. 876765 9. 86239  
11749300\_ 9. 533168 9. 473842 9. 540056 9. 394617 9. 405746 9. 393264  
11749301\_ 7. 16491 7. 122994 7. 201709 7. 101929 7. 141566 7. 271039  
11749302\_ 10. 12198 10. 11977 10. 06875 10. 20656 10. 22586 10. 10794  
11749303\_ 10. 34022 10. 3268 10. 35495 10. 65463 10. 75893 10. 69057  
11749304\_ 10. 1597 10. 1535 10. 14902 10. 61882 10. 60808 10. 57247  
11749305\_ 5. 58291 5. 629469 5. 679963 5. 648208 5. 650213 5. 713323  
11749306\_ 9. 461289 9. 470884 9. 40584 8. 846277 8. 882909 8. 721652  
11749307\_ 10. 23055 10. 20817 10. 15246 9. 598353 9. 640411 9. 571238  
11749308\_ 6. 10982 6. 047556 6. 199565 5. 759372 5. 790358 5. 893084  
11749309\_ 6. 793617 6. 682472 6. 806823 6. 545165 6. 564424 6. 57696  
11749310\_ 6. 980855 6. 997211 6. 915263 6. 87613 6. 794011 6. 854756  
11749311\_ 9. 346304 9. 250681 9. 297669 9. 17602 9. 228406 9. 196184  
11749312\_ 6. 303635 6. 191452 6. 379477 6. 60257 6. 589649 6. 607746  
11749313\_ 8. 689938 8. 631257 8. 735247 8. 540146 8. 55071 8. 590387  
11749314\_ 8. 100339 8. 11024 8. 152279 8. 010001 8. 009513 7. 966465  
11749315\_ 5. 704919 5. 706777 5. 790358 5. 64308 5. 739398 5. 732315  
11749316\_ 7. 993229 7. 95804 8. 012287 8. 268851 8. 278616 8. 316389  
11749317\_ 8. 619339 8. 532661 8. 603006 8. 345375 8. 386515 8. 313373  
11749318\_ 8. 297116 8. 217284 8. 245507 8. 107956 8. 0275 8. 049659  
11749319\_ 6. 318057 6. 225513 6. 321163 5. 799439 5. 727704 5. 777036

11749320\_ 8. 351435 8. 278251 8. 411116 8. 57663 8. 573959 8. 573959  
11749321\_ 7. 462373 7. 34812 7. 399068 7. 266566 7. 461846 7. 457469  
11749322\_ 4. 625229 4. 571927 4. 709619 4. 598578 4. 598578 4. 470714  
11749323\_ 4. 38816 4. 490938 4. 296937 4. 51948 4. 275935 4. 439215  
11749324\_ 4. 423996 4. 103931 4. 213164 4. 651102 4. 634465 4. 492164  
11749325\_ 5. 480924 5. 428999 5. 427991 5. 572448 5. 580237 5. 611805  
11749326\_ 4. 700905 4. 470292 4. 688199 4. 661197 4. 720437 4. 840976  
11749327\_ 6. 036156 6. 276806 6. 015397 6. 249466 6. 241491 6. 196172  
11749328\_ 5. 558255 5. 655605 5. 446382 5. 835289 5. 712811 5. 689499  
11749329\_ 5. 392609 5. 464602 5. 162754 5. 687546 5. 609725 5. 544207  
11749330\_ 7. 749648 7. 669233 7. 810959 7. 935115 8. 037067 7. 928864  
11749331\_ 6. 001118 5. 895101 5. 938932 5. 75158 5. 677177 5. 840123  
11749332\_ 8. 04566 8. 011199 8. 03104 8. 856441 8. 851356 8. 874916  
11749333\_ 9. 371403 9. 348043 9. 357997 9. 200532 9. 232327 9. 228299  
11749334\_ 6. 792996 6. 83918 6. 767175 6. 685052 6. 73141 6. 884806  
11749335\_ 5. 868078 5. 813205 5. 772287 5. 845365 5. 821808 5. 798613  
11749336\_ 10. 56664 10. 51627 10. 56521 10. 51224 10. 4907 10. 54608  
11749337\_ 4. 564123 4. 694635 4. 637248 4. 558203 4. 718659 4. 766671  
11749338\_ 6. 565155 6. 372014 6. 470465 6. 660272 6. 733503 6. 681259  
11749339\_ 6. 298887 6. 201726 6. 27401 6. 294242 6. 289418 6. 206184  
11749340\_ 7. 147699 7. 07198 7. 205091 6. 933761 6. 988562 7. 050605  
11749341\_ 8. 364548 8. 271522 8. 334369 8. 36884 8. 388708 8. 300226  
11749342\_ 4. 977054 4. 884425 4. 98359 4. 987707 4. 988735 5. 056726  
11749343\_ 5. 275062 5. 363019 5. 277761 5. 36892 5. 504506 5. 477197  
11749344\_ 3. 857594 3. 798927 3. 974773 3. 839257 3. 777842 3. 880302  
11749345\_ 4. 017091 3. 913759 3. 7573 3. 758465 3. 794203 3. 756067  
11749346\_ 8. 099072 8. 066846 8. 039599 8. 020109 8. 109103 8. 000275  
11749347\_ 8. 362653 8. 412645 8. 360459 8. 359429 8. 353772 8. 369085  
11749348\_ 6. 493304 6. 552851 6. 541176 6. 280489 6. 253264 6. 363756  
11749349\_ 8. 146912 8. 119689 8. 111991 9. 074796 9. 145753 9. 064487  
11749350\_ 5. 532048 5. 472254 5. 400657 5. 204061 5. 398722 5. 344608  
11749351\_ 6. 052176 6. 217919 6. 046381 6. 145857 6. 193112 6. 128633  
11749352\_ 5. 525086 5. 509556 5. 497657 5. 646329 5. 48634 5. 626035  
11749353\_ 8. 60001 8. 520723 8. 557718 8. 178446 8. 189902 8. 237307  
11749354\_ 8. 726631 8. 722027 8. 805217 8. 356063 8. 382637 8. 393321  
11749355\_ 4. 832381 5. 073036 4. 906463 4. 998182 5. 044017 4. 86312  
11749356\_ 7. 498648 7. 3619 7. 443713 6. 882256 6. 960237 6. 88894  
11749357\_ 6. 614023 6. 621245 6. 691372 5. 961628 6. 091106 6. 199943  
11749358\_ 4. 770342 4. 674714 4. 733453 4. 67795 4. 74574 4. 796771  
11749359\_ 6. 664142 6. 642781 6. 69021 6. 528636 6. 593017 6. 643418  
11749360\_ 8. 873876 8. 85305 8. 805374 8. 668931 8. 640896 8. 669406  
11749361\_ 6. 940485 6. 83966 6. 909766 6. 828602 6. 910833 6. 953816  
11749362\_ 7. 382932 7. 301059 7. 397674 7. 27801 7. 225164 7. 296901  
11749363\_ 9. 222153 9. 141088 9. 27486 9. 278599 9. 265334 9. 195476  
11749364\_ 8. 163435 8. 209447 8. 244632 8. 220549 8. 286998 8. 254078  
11749365\_ 7. 829405 7. 808677 7. 867589 7. 874227 7. 934209 7. 821728  
11749366\_ 4. 921054 4. 921581 4. 865507 4. 747734 4. 711434 4. 723844  
11749367\_ 10. 01277 9. 964877 10. 02008 9. 905719 9. 932917 9. 898884  
11749368\_ 8. 417704 8. 283332 8. 374443 8. 361955 8. 366417 8. 385383  
11749369\_ 7. 08095 6. 961212 7. 093296 7. 110214 7. 045072 7. 061301  
11749370\_ 4. 396569 4. 464159 4. 23844 4. 353361 4. 405333 4. 267622

11749371\_ 6. 199883 6. 159708 6. 202914 6. 017382 5. 876369 6. 090436  
11749372\_ 3. 952844 3. 902513 4. 074939 3. 850246 4. 272795 3. 994692  
11749373\_ 6. 986675 6. 927327 7. 029627 6. 171516 6. 328254 6. 288288  
11749374\_ 7. 903604 7. 892533 7. 899921 7. 909338 8. 041231 7. 930098  
11749375\_ 2. 954291 2. 917397 2. 754979 2. 695945 2. 653806 2. 796466  
11749376\_ 4. 860549 4. 546744 4. 584933 4. 826551 4. 629397 4. 519517  
11749377\_ 4. 613734 4. 412081 4. 535628 4. 370619 4. 459939 4. 415744  
11749378\_ 5. 544167 5. 544474 5. 566815 5. 530129 5. 50662 5. 50224  
11749379\_ 6. 985024 6. 862494 7. 047691 7. 054637 7. 120783 7. 134225  
11749380\_ 9. 015021 8. 929737 8. 999623 9. 074836 9. 057461 9. 032687  
11749381\_ 5. 350278 5. 571203 5. 579579 5. 357942 5. 428819 5. 424175  
11749382\_ 7. 399639 7. 460195 7. 317859 7. 5131 7. 563728 7. 541572  
11749383\_ 4. 68364 4. 786127 4. 547074 4. 75211 4. 706454 4. 531029  
11749384\_ 5. 544167 5. 418044 5. 632857 5. 327799 5. 320677 5. 369776  
11749385\_ 5. 417086 5. 517679 5. 307578 5. 318127 5. 541785 5. 489042  
11749386\_ 6. 336747 6. 250999 6. 336747 5. 820574 5. 95503 5. 922714  
11749387\_ 5. 644787 5. 59402 5. 490224 5. 251264 5. 26034 5. 297498  
11749388\_ 6. 225513 6. 166889 6. 184242 5. 63311 5. 750483 5. 754755  
11749389\_ 5. 373519 5. 203354 5. 310404 6. 570129 6. 540281 6. 387679  
11749390\_ 10. 177 10. 1286 10. 19275 9. 867974 9. 876765 9. 876179  
11749391\_ 5. 710736 5. 80282 5. 694815 5. 917552 5. 903921 5. 95937  
11749392\_ 10. 1601 10. 09807 10. 11587 10. 15572 10. 16195 10. 1671  
11749393\_ 9. 62587 9. 611526 9. 625564 9. 843128 9. 801743 9. 780687  
11749394\_ 7. 513534 7. 465738 7. 611114 7. 099734 7. 167544 7. 122796  
11749395\_ 7. 553754 7. 594196 7. 585206 7. 153689 7. 176598 7. 266618  
11749396\_ 6. 955099 6. 959168 6. 942292 6. 958325 6. 997087 7. 090175  
11749397\_ 5. 36906 5. 2666 5. 501709 5. 244478 5. 453582 5. 37679  
11749398\_ 8. 891509 8. 856065 8. 849823 8. 687743 8. 667659 8. 673454  
11749399\_ 8. 379421 8. 300213 8. 360459 8. 374097 8. 394833 8. 333917  
11749400\_ 9. 146074 9. 059982 9. 145919 9. 742933 9. 762361 9. 73921  
11749401\_ 6. 76071 6. 673009 6. 722321 6. 2471 6. 208737 6. 22043  
11749402\_ 3. 917514 4. 253322 3. 990525 4. 036498 4. 075113 4. 090484  
11749403\_ 6. 455345 6. 635985 6. 478152 6. 609355 6. 615364 6. 493103  
11749404\_ 3. 746092 3. 801523 3. 84304 3. 823944 3. 880588 3. 773429  
11749405\_ 5. 409222 5. 331248 5. 251167 5. 528267 5. 467153 5. 547745  
11749406\_ 7. 340057 7. 473026 7. 335756 7. 639535 7. 606002 7. 666555  
11749407\_ 3. 539873 3. 818401 3. 537847 3. 691857 3. 561176 3. 572504  
11749408\_ 9. 185037 9. 164302 9. 220818 9. 045234 9. 086915 9. 122915  
11749409\_ 5. 477349 5. 261209 5. 490095 5. 008584 5. 113019 4. 928205  
11749410\_ 4. 108592 4. 014889 3. 913167 4. 275543 3. 969526 4. 161146  
11749411\_ 6. 617088 6. 447775 6. 605195 6. 520993 6. 557068 6. 617088  
11749412\_ 5. 835815 5. 841177 5. 903295 5. 156303 4. 942349 5. 189139  
11749413\_ 6. 377233 6. 341185 6. 416332 6. 326096 6. 325191 6. 300643  
11749414\_ 8. 887847 8. 798726 8. 842594 8. 592498 8. 641911 8. 639624  
11749415\_ 5. 417583 5. 304136 5. 348991 5. 379039 5. 379758 5. 244522  
11749416\_ 10. 50017 10. 52216 10. 5145 10. 52095 10. 50107 10. 47422  
11749417\_ 4. 865889 4. 88764 4. 990337 5. 119928 5. 017359 5. 18705  
11749418\_ 4. 810088 4. 749145 4. 282191 4. 660514 4. 743965 4. 577449  
11749419\_ 6. 849743 7. 108198 6. 997002 7. 464126 7. 403923 7. 521898  
11749420\_ 4. 977619 5. 127989 5. 14294 5. 189724 5. 225114 5. 274532  
11749421\_ 5. 74373 5. 560007 5. 658418 6. 202731 6. 205902 6. 255231



11749422\_ 6. 800885 6. 832664 6. 838707 7. 01937 6. 910833 6. 90131  
11749423\_ 7. 070891 6. 964111 7. 092814 7. 38659 7. 381707 7. 447591  
11749424\_ 6. 006643 6. 097927 5. 994805 6. 481046 6. 34864 6. 452937  
11749425\_ 8. 03347 8. 057929 8. 086979 8. 350047 8. 358636 8. 358166  
11749426\_ 6. 421741 6. 373277 6. 451476 6. 184448 6. 261449 6. 304048  
11749427\_ 6. 270245 6. 291328 6. 35129 6. 14 6. 019118 6. 008104  
11749428\_ 3. 069522 3. 039432 3. 209975 3. 244071 3. 234563 3. 072394  
11749429\_ 9. 364489 9. 352056 9. 29996 9. 223947 9. 304658 9. 23777  
11749430\_ 8. 260432 8. 204649 8. 348021 7. 98823 8. 034308 8. 035901  
11749431\_ 7. 676539 7. 839269 7. 623232 7. 707559 7. 696876 7. 724661  
11749432\_ 1. 904991 2. 172554 2. 011793 1. 84259 1. 804393 1. 848939  
11749433\_ 3. 842434 4. 179295 3. 890394 3. 706932 3. 98171 4. 054288  
11749434\_ 2. 148413 2. 25483 2. 268006 2. 085826 2. 383725 2. 18238  
11749435\_ 4. 897304 5. 194762 5. 14543 5. 067418 5. 159894 5. 03238  
11749436\_ 6. 037634 6. 096887 6. 035645 6. 288209 6. 269036 6. 261587  
11749437\_ 7. 575808 7. 454091 7. 488 7. 799822 7. 837654 7. 764771  
11749438\_ 8. 328653 8. 187327 8. 324541 8. 305279 8. 24363 8. 280793  
11749439\_ 6. 863703 6. 912141 6. 843227 6. 767189 6. 85029 6. 853613  
11749440\_ 7. 948703 7. 893826 7. 915123 7. 625672 7. 505146 7. 527438  
11749441\_ 9. 325743 9. 2613 9. 301498 8. 876032 8. 874376 8. 852709  
11749442\_ 7. 337828 7. 419448 7. 30546 7. 419738 7. 459513 7. 448994  
11749443\_ 4. 627546 4. 611658 4. 689852 4. 777331 4. 88109 4. 783499  
11749444\_ 7. 546856 7. 57032 7. 616373 5. 850712 6. 00364 5. 900675  
11749445\_ 2. 663446 2. 372583 2. 537396 2. 427225 2. 444349 2. 423339  
11749446\_ 3. 606541 3. 780963 3. 454805 3. 789323 3. 733515 3. 640979  
11749447\_ 5. 807563 5. 676443 5. 828255 5. 950691 5. 919225 6. 008148  
11749448\_ 5. 69855 5. 539652 5. 588526 5. 7177 5. 721408 5. 74735  
11749449\_ 7. 960065 8. 004946 8. 089773 8. 520926 8. 549597 8. 532967  
11749450\_ 5. 676992 5. 774244 5. 859947 5. 964729 6. 003938 5. 923971  
11749451\_ 6. 960496 6. 853343 7. 001406 7. 57196 7. 516014 7. 447015  
11749452\_ 7. 048404 7. 055228 7. 032798 7. 051846 6. 859688 6. 884115  
11749453\_ 6. 345716 6. 608994 6. 451682 6. 470122 6. 391303 6. 490202  
11749454\_ 6. 202904 6. 139091 6. 22317 5. 420555 5. 324007 5. 40259  
11749455\_ 8. 419533 8. 46398 8. 54963 8. 148866 8. 053933 8. 240176  
11749456\_ 1. 981459 1. 853476 2. 505559 2. 079884 2. 094328 2. 002746  
11749457\_ 6. 873272 6. 862059 6. 834707 5. 977166 6. 048881 6. 128263  
11749458\_ 4. 4518 4. 343065 4. 169328 4. 20896 4. 209537 4. 280595  
11749459\_ 6. 059881 6. 089656 5. 984009 6. 220465 6. 243948 6. 247833  
11749460\_ 9. 225972 9. 193045 9. 198232 7. 751026 7. 743503 7. 662648  
11749461\_ 2. 788192 2. 718322 2. 674511 2. 605516 2. 98391 2. 718322  
11749462\_ 6. 704198 6. 637039 6. 634134 6. 539082 6. 291155 6. 479998  
11749463\_ 4. 349613 4. 516348 4. 379737 4. 521372 4. 643717 4. 526632  
11749464\_ 5. 66471 5. 584813 5. 532678 5. 614563 5. 784703 5. 647206  
11749465\_ 3. 60008 3. 699661 3. 62535 4. 067703 3. 848267 3. 807531  
11749466\_ 7. 136427 7. 315944 7. 257285 7. 346097 7. 431026 7. 383204  
11749467\_ 6. 38408 6. 246944 6. 408749 6. 513175 6. 498655 6. 5057  
11749468\_ 7. 36524 7. 349167 7. 362402 7. 343139 7. 345501 7. 285524  
11749469\_ 9. 104106 9. 027706 9. 099644 8. 642728 8. 646485 8. 633976  
11749470\_ 5. 015155 4. 801376 4. 922578 4. 874234 4. 733261 4. 643717  
11749471\_ 3. 779297 3. 70153 3. 510904 3. 565265 3. 613163 3. 56013  
11749472\_ 10. 04908 10. 03466 10. 02741 10. 22078 10. 2983 10. 15869

11749473\_ 8. 520913 8. 522878 8. 547041 7. 81215 7. 894504 7. 828073  
11749474\_ 8. 782289 8. 735566 8. 796475 8. 681344 8. 628538 8. 628092  
11749475\_ 5. 227929 5. 228627 5. 36807 5. 791605 5. 786722 5. 78132  
11749476\_ 5. 804793 5. 869581 5. 693815 5. 854536 5. 904933 5. 953805  
11749477\_ 6. 746456 6. 581945 6. 657246 6. 033448 6. 065269 6. 125773  
11749478\_ 8. 015852 7. 927217 7. 941239 8. 611732 8. 667264 8. 589549  
11749479\_ 4. 00856 3. 89022 3. 89022 3. 960373 3. 722812 4. 003025  
11749480\_ 9. 090707 9. 051714 9. 084328 9. 199806 9. 321708 9. 248211  
11749481\_ 6. 282224 6. 397161 6. 443802 5. 965934 5. 9627 6. 159771  
11749482\_ 7. 164618 7. 206225 7. 229303 6. 801306 6. 847299 6. 82532  
11749483\_ 2. 736149 2. 997331 2. 570709 2. 84891 2. 796177 2. 796177  
11749484\_ 2. 850317 2. 718322 2. 405022 2. 984085 2. 726772 2. 974429  
11749485\_ 8. 447729 8. 394362 8. 406256 8. 123233 8. 080554 8. 063194  
11749486\_ 4. 760056 4. 752304 4. 73354 4. 681223 4. 650814 4. 699986  
11749487\_ 9. 521398 9. 563723 9. 531635 9. 424459 9. 45682 9. 391764  
11749488\_ 7. 261249 7. 26918 7. 229034 7. 227741 7. 133625 7. 186041  
11749489\_ 5. 51484 5. 597964 5. 505683 5. 682295 5. 652742 5. 804469  
11749490\_ 7. 764721 7. 748979 7. 766016 8. 454196 8. 453973 8. 40228  
11749491\_ 9. 051195 9. 032553 9. 044345 9. 063849 9. 119361 9. 157749  
11749492\_ 6. 922773 6. 85537 6. 847517 7. 002759 6. 999488 6. 962617  
11749493\_ 9. 353401 9. 257062 9. 336795 8. 803248 8. 729788 8. 696149  
11749494\_ 8. 727983 8. 678206 8. 714101 8. 181467 8. 166643 8. 121415  
11749495\_ 6. 186475 6. 250364 6. 16278 5. 836586 5. 742569 5. 754755  
11749496\_ 6. 792183 6. 78334 6. 874408 6. 769047 6. 739151 6. 765911  
11749497\_ 5. 241517 5. 361734 5. 310714 5. 19455 5. 36323 5. 297498  
11749498\_ 7. 598631 7. 549425 7. 506829 7. 781257 7. 76686 7. 719487  
11749499\_ 7. 368115 7. 372096 7. 415692 7. 471841 7. 568908 7. 484534  
11749500\_ 7. 77315 7. 725357 7. 838923 7. 557202 7. 604995 7. 692172  
11749501\_ 5. 796689 5. 80355 5. 730237 5. 897321 5. 92366 5. 607235  
11749502\_ 2. 029479 2. 084242 2. 257287 1. 994527 1. 872691 1. 975504  
11749503\_ 4. 956199 5. 016263 4. 982776 4. 854723 4. 861247 4. 990679  
11749504\_ 2. 874919 3. 061205 2. 847535 2. 822117 2. 717132 2. 779883  
11749505\_ 7. 13249 7. 165072 7. 132122 7. 133056 7. 269368 7. 2803  
11749506\_ 7. 579907 7. 513145 7. 574204 7. 595955 7. 663602 7. 696839  
11749507\_ 5. 592575 5. 566874 5. 886778 5. 755681 5. 771088 5. 715019  
11749508\_ 4. 795945 4. 728944 4. 66011 4. 723014 4. 884029 4. 884976  
11749509\_ 4. 287048 4. 232482 4. 166942 4. 213226 4. 436029 4. 636391  
11749510\_ 7. 130106 7. 062427 7. 106039 6. 751475 6. 797523 6. 81799  
11749511\_ 6. 193525 6. 189372 6. 249497 6. 254385 6. 162121 6. 182539  
11749512\_ 4. 206153 4. 219943 4. 258355 4. 13388 4. 09232 4. 108844  
11749513\_ 6. 448636 6. 383597 6. 396144 6. 461544 6. 538994 6. 423539  
11749514\_ 5. 806048 5. 765279 5. 806048 5. 494424 5. 374219 5. 303336  
11749515\_ 7. 242037 7. 251984 7. 166244 7. 426986 7. 518076 7. 358974  
11749516\_ 7. 615824 7. 55708 7. 6146 7. 493087 7. 461567 7. 511898  
11749517\_ 7. 363924 7. 351631 7. 457881 7. 117151 7. 146498 7. 065158  
11749518\_ 6. 300643 6. 234845 6. 376342 6. 603198 6. 537412 6. 622774  
11749519\_ 7. 241499 7. 19828 7. 295539 7. 265178 7. 265046 7. 318471  
11749520\_ 5. 524088 5. 482565 5. 542249 5. 347664 5. 397861 5. 527669  
11749521\_ 5. 273075 5. 180892 5. 172815 5. 36055 5. 36323 5. 278405  
11749522\_ 3. 65708 3. 558554 3. 528645 3. 613085 3. 464012 3. 606313  
11749523\_ 7. 894886 7. 892985 7. 942595 7. 838502 7. 901923 7. 908644

11749524\_ 3. 801393 4. 15534 4. 126572 4. 15534 4. 079517 4. 307065  
11749525\_ 6. 371546 6. 288226 6. 44782 6. 633523 6. 714643 6. 797018  
11749526\_ 7. 053929 7. 031066 7. 153079 6. 797935 6. 739151 6. 721353  
11749527\_ 1. 950401 2. 211463 2. 141306 2. 209046 2. 253353 2. 141306  
11749528\_ 6. 353599 6. 367191 6. 389799 7. 245733 7. 444949 7. 272972  
11749529\_ 6. 300643 6. 305688 6. 362111 6. 317252 6. 323389 6. 345217  
11749530\_ 8. 069986 8. 09376 8. 123646 8. 681221 8. 601524 8. 754368  
11749531\_ 9. 226898 9. 312105 9. 25256 9. 240266 9. 265603 9. 189812  
11749532\_ 5. 824302 5. 874039 5. 996126 5. 547821 5. 487893 5. 589814  
11749533\_ 4. 98902 5. 212051 4. 777636 5. 013002 5. 084358 5. 056183  
11749534\_ 4. 815683 4. 07506 4. 551044 3. 994868 4. 045634 4. 444674  
11749535\_ 5. 993933 6. 188218 5. 964605 6. 025678 6. 08233 5. 991373  
11749536\_ 5. 032036 5. 173724 4. 804738 5. 138754 5. 045321 5. 138754  
11749537\_ 2. 688278 2. 666188 2. 688278 2. 645779 2. 730366 2. 656526  
11749538\_ 5. 880808 5. 982566 5. 996906 6. 186054 6. 062259 6. 129851  
11749539\_ 5. 845365 5. 788035 5. 845365 5. 970241 5. 839322 5. 943252  
11749540\_ 10. 16269 10. 11908 10. 13217 10. 09748 10. 0663 10. 07062  
11749541\_ 6. 254831 6. 369369 6. 193636 6. 264737 6. 410541 6. 408349  
11749542\_ 4. 646071 4. 634031 4. 669853 4. 591841 4. 656242 4. 863937  
11749543\_ 3. 818401 3. 813473 3. 710787 3. 850246 3. 804809 3. 982362  
11749544\_ 2. 531067 2. 44282 2. 365464 2. 45238 2. 44282 2. 581985  
11749545\_ 5. 960819 6. 038314 5. 940098 6. 057189 5. 971512 5. 991419  
11749546\_ 8. 547132 8. 499162 8. 511733 9. 096474 9. 098458 9. 015593  
11749547\_ 5. 70763 5. 748431 5. 735968 5. 83212 5. 777041 5. 781656  
11749548\_ 6. 185126 6. 171828 6. 314724 6. 11056 6. 25327 6. 287793  
11749549\_ 6. 715399 6. 545451 6. 702945 7. 324878 7. 279036 7. 229272  
11749550\_ 6. 4911 6. 50458 6. 694841 6. 700766 6. 712427 6. 810433  
11749551\_ 6. 491579 6. 478797 6. 510283 6. 403527 6. 402759 6. 35178  
11749552\_ 4. 482534 4. 459009 4. 299233 4. 520503 4. 671077 4. 525305  
11749553\_ 4. 200678 4. 262632 4. 269008 4. 135496 4. 275543 4. 300271  
11749554\_ 5. 713497 5. 730614 5. 704627 5. 717218 5. 664688 5. 714795  
11749555\_ 9. 268154 9. 223075 9. 207583 9. 288916 9. 300599 9. 303835  
11749556\_ 5. 017329 5. 028659 5. 018367 5. 053917 5. 070359 5. 028007  
11749557\_ 4. 243933 4. 376476 4. 189314 4. 399382 4. 28966 4. 42194  
11749558\_ 6. 971486 6. 976461 6. 959449 7. 146306 7. 049052 7. 052679  
11749559\_ 5. 462622 5. 503773 5. 44604 5. 663356 5. 692216 5. 530323  
11749560\_ 7. 537827 7. 518626 7. 493503 7. 522382 7. 530042 7. 39616  
11749561\_ 4. 085759 4. 411441 4. 148309 4. 40149 4. 345521 4. 286737  
11749562\_ 4. 452184 4. 547326 4. 370337 4. 17028 4. 347179 4. 371643  
11749563\_ 4. 677023 4. 824925 4. 930507 4. 774074 4. 880343 4. 773395  
11749564\_ 7. 264655 7. 272557 7. 22469 5. 910984 6. 175217 6. 048624  
11749565\_ 5. 597568 5. 613661 5. 624382 5. 577892 5. 540316 5. 480205  
11749566\_ 7. 057178 6. 920302 7. 032838 7. 154461 7. 12298 7. 158599  
11749567\_ 8. 630576 8. 561095 8. 594562 8. 526836 8. 500502 8. 479809  
11749568\_ 8. 979201 8. 928376 8. 991358 8. 826632 8. 822819 8. 818293  
11749569\_ 10. 25657 10. 23322 10. 25829 10. 22488 10. 19309 10. 21257  
11749570\_ 4. 871323 4. 763543 4. 84221 4. 855758 4. 807587 4. 633543  
11749571\_ 7. 821787 7. 833676 7. 814896 7. 865865 7. 878568 7. 856619  
11749572\_ 7. 369541 7. 251887 7. 275044 7. 302752 7. 34049 7. 276376  
11749573\_ 5. 170808 5. 271561 5. 2222 5. 703172 5. 601974 5. 691951  
11749574\_ 8. 18934 8. 133893 8. 143783 8. 794043 8. 773544 8. 785485

11749575\_ 5. 265354 5. 380649 5. 161708 5. 412757 5. 240229 5. 392866  
11749576\_ 6. 265703 6. 356679 6. 296781 6. 348167 6. 393674 6. 383608  
11749577\_ 4. 666219 4. 678194 4. 524198 4. 654286 4. 74574 4. 578009  
11749578\_ 6. 986739 6. 876772 6. 989507 6. 831378 6. 850812 6. 858539  
11749579\_ 8. 334226 8. 263194 8. 38711 8. 269925 8. 291291 8. 251491  
11749580\_ 6. 061166 6. 110498 6. 110498 5. 904127 6. 0253 5. 911311  
11749581\_ 5. 181193 5. 117977 5. 290156 5. 394095 5. 41986 5. 304727  
11749582\_ 4. 876333 4. 640079 4. 872571 4. 15127 4. 198505 4. 255031  
11749583\_ 3. 411748 3. 38274 3. 3379 3. 290188 3. 431509 3. 326823  
11749584\_ 9. 261187 9. 220664 9. 266597 9. 451614 9. 459323 9. 383126  
11749585\_ 4. 638939 4. 961972 4. 810709 4. 495615 4. 278985 4. 40449  
11749586\_ 6. 61734 6. 470984 6. 606673 6. 279673 6. 185722 6. 21847  
11749587\_ 6. 731966 6. 593239 6. 745152 6. 443921 6. 313613 6. 389366  
11749588\_ 9. 225057 9. 090099 9. 21449 9. 166704 9. 139154 9. 134476  
11749589\_ 6. 176601 6. 377847 6. 413976 5. 282232 5. 326475 5. 404772  
11749590\_ 5. 74628 5. 692671 5. 569195 6. 099624 6. 085205 6. 207341  
11749591\_ 3. 97579 3. 768915 3. 906435 3. 92859 4. 046335 3. 906435  
11749592\_ 6. 730888 6. 828528 6. 685389 6. 663599 6. 735289 6. 741474  
11749593\_ 3. 757273 3. 637774 3. 678576 3. 663187 3. 761372 3. 586718  
11749594\_ 6. 996306 7. 20308 7. 070371 7. 008851 7. 078761 7. 148273  
11749595\_ 2. 128945 2. 316339 2. 39738 2. 131633 2. 39738 2. 301928  
11749596\_ 3. 213176 3. 582983 3. 248021 3. 645004 3. 482417 3. 484748  
11749597\_ 8. 397566 8. 283771 8. 433912 8. 424917 8. 432946 8. 440749  
11749598\_ 2. 736132 2. 804424 2. 79561 2. 836049 2. 672074 3. 011979  
11749599\_ 7. 725429 7. 665697 7. 659562 6. 809842 6. 759535 6. 831971  
11749600\_ 8. 14245 8. 104781 8. 161482 8. 18017 8. 158666 8. 175706  
11749601\_ 4. 385964 4. 035687 4. 299441 3. 533031 3. 762888 3. 470608  
11749602\_ 4. 328171 4. 354602 4. 367245 4. 588248 4. 61854 4. 421291  
11749603\_ 4. 381462 4. 379907 4. 339942 4. 562106 4. 394908 4. 420895  
11749604\_ 7. 001181 7. 05051 7. 033106 6. 885006 6. 97654 6. 967755  
11749605\_ 5. 643713 5. 584813 5. 667624 5. 379836 5. 496689 5. 162865  
11749606\_ 4. 790171 4. 751244 4. 723318 4. 795469 4. 999204 4. 864601  
11749607\_ 4. 995377 4. 774186 5. 00086 5. 087491 5. 143582 5. 223763  
11749608\_ 8. 059998 7. 914726 8. 028683 7. 408475 7. 408657 7. 410567  
11749609\_ 5. 81455 5. 82216 5. 893724 6. 23544 5. 988349 6. 045909  
11749610\_ 8. 19202 8. 15285 8. 24297 7. 968353 7. 942257 7. 967678  
11749611\_ 5. 67577 5. 699056 5. 727356 5. 574466 5. 718386 5. 712853  
11749612\_ 5. 19328 5. 151753 5. 428959 5. 310339 5. 390954 5. 421817  
11749613\_ 10. 01129 10. 01568 10. 04185 10. 01832 10. 03055 10. 07142  
11749614\_ 9. 17326 9. 21793 9. 178726 9. 652138 9. 603218 9. 557212  
11749615\_ 9. 90195 9. 912303 9. 934034 10. 18848 10. 21445 10. 20069  
11749616\_ 5. 410924 5. 334406 5. 674676 6. 607243 6. 631711 6. 698983  
11749617\_ 3. 025644 2. 96595 2. 990752 2. 969455 3. 142775 3. 011367  
11749618\_ 3. 021633 2. 828967 2. 905297 2. 863506 2. 855284 2. 604717  
11749619\_ 9. 705922 9. 671201 9. 737912 9. 705104 9. 730869 9. 669906  
11749620\_ 7. 364821 7. 273175 7. 441579 8. 563045 8. 647265 8. 642172  
11749621\_ 4. 794415 5. 034128 4. 857814 4. 919233 4. 859182 4. 950459  
11749622\_ 4. 896872 4. 962201 4. 943079 4. 833462 4. 769719 4. 787398  
11749623\_ 7. 407278 7. 277711 7. 374996 7. 522289 7. 528695 7. 462699  
11749624\_ 5. 054568 5. 179439 5. 151513 5. 2222 5. 149545 5. 223458  
11749625\_ 5. 612796 5. 434039 5. 441229 5. 319393 5. 304044 5. 436994

11749626\_ 4. 877651 4. 947587 4. 754399 4. 877125 4. 766499 4. 940088  
11749627\_ 5. 757404 5. 687542 5. 968296 5. 77199 5. 742593 5. 795273  
11749628\_ 4. 188778 4. 231571 3. 940495 4. 09116 4. 088624 4. 171229  
11749629\_ 4. 777702 4. 913866 4. 638161 4. 878599 4. 861713 4. 835093  
11749630\_ 9. 553744 9. 524837 9. 548962 9. 533104 9. 518219 9. 497111  
11749631\_ 3. 155666 3. 225456 3. 410678 3. 263168 3. 435097 3. 352843  
11749632\_ 3. 325757 3. 288278 3. 435494 3. 940226 4. 045738 3. 859655  
11749633\_ 6. 150225 6. 054612 6. 391918 5. 971965 5. 975638 5. 958579  
11749634\_ 4. 92134 5. 048545 4. 780296 5. 11607 5. 126549 5. 054657  
11749635\_ 9. 260385 9. 109897 9. 168382 8. 949739 8. 997506 8. 982029  
11749636\_ 7. 874649 7. 773487 7. 876244 7. 834312 7. 86844 7. 901887  
11749637\_ 7. 748681 7. 680495 7. 769625 7. 453034 7. 45117 7. 555857  
11749638\_ 7. 474938 7. 516974 7. 612217 7. 534642 7. 661277 7. 527333  
11749639\_ 5. 029156 5. 11527 4. 921703 4. 659536 4. 678651 4. 815683  
11749640\_ 6. 467524 6. 554886 6. 502154 6. 131528 6. 129149 6. 129408  
11749641\_ 6. 7637 6. 765911 6. 512353 6. 402027 6. 338727 6. 267321  
11749642\_ 3. 30078 3. 410962 3. 398236 3. 398236 3. 21279 3. 293114  
11749643\_ 6. 397946 6. 223803 6. 390767 6. 282224 6. 365958 6. 300744  
11749644\_ 8. 313512 8. 222368 8. 29787 8. 241452 8. 25972 8. 289779  
11749645\_ 6. 520868 6. 496339 6. 521033 6. 193777 6. 330828 6. 244271  
11749646\_ 4. 194952 4. 329854 4. 221724 4. 196247 4. 263821 4. 334895  
11749647\_ 4. 987009 4. 96099 5. 042071 4. 707708 4. 484729 4. 750644  
11749648\_ 9. 663855 9. 641304 9. 684546 9. 694725 9. 747767 9. 67503  
11749649\_ 10. 08143 10. 05893 10. 03942 10. 11609 10. 11562 10. 08991  
11749650\_ 3. 6738 3. 7379 3. 430062 3. 554818 3. 430062 3. 37398  
11749651\_ 6. 325506 6. 34404 6. 207447 6. 528514 6. 406028 6. 481991  
11749652\_ 5. 333723 5. 211057 5. 366301 4. 955823 4. 798511 5. 023687  
11749653\_ 6. 325646 6. 349073 6. 334031 6. 282224 6. 379217 6. 367283  
11749654\_ 7. 372085 7. 395394 7. 334984 7. 241484 7. 395521 7. 314818  
11749655\_ 5. 177466 5. 192491 5. 453716 5. 3515 5. 402264 5. 228627  
11749656\_ 7. 159184 7. 065683 7. 130948 7. 363513 7. 373984 7. 426816  
11749657\_ 5. 004625 5. 189277 5. 14374 5. 094586 4. 983135 5. 123663  
11749658\_ 3. 249012 3. 475476 3. 525481 3. 316007 3. 814635 3. 39451  
11749659\_ 10. 18754 10. 18523 10. 17143 10. 01882 10. 01344 9. 995182  
11749660\_ 6. 855644 6. 824149 6. 947948 6. 727638 6. 682826 6. 709482  
11749661\_ 8. 405105 8. 459633 8. 317402 8. 456433 8. 412037 8. 398682  
11749662\_ 6. 876741 6. 768271 6. 919738 6. 797265 6. 863994 6. 897879  
11749663\_ 2. 466714 2. 28002 2. 362631 2. 142313 2. 166552 2. 336455  
11749664\_ 6. 300643 6. 215379 6. 204572 5. 858786 5. 65836 5. 861137  
11749665\_ 7. 684912 7. 622733 7. 684912 7. 373439 7. 314888 7. 350159  
11749666\_ 9. 102673 9. 051376 9. 15274 8. 470185 8. 45935 8. 418807  
11749667\_ 6. 743797 6. 810107 6. 678802 6. 34864 6. 459764 6. 512991  
11749668\_ 4. 163807 4. 086952 4. 067661 4. 078535 4. 142702 4. 096299  
11749669\_ 3. 210016 3. 469394 3. 345453 3. 486259 3. 345453 3. 20064  
11749670\_ 6. 355572 6. 309466 6. 354529 6. 218323 6. 347685 6. 341673  
11749671\_ 7. 7408 7. 59992 7. 756832 7. 457897 7. 461528 7. 384667  
11749672\_ 5. 804236 5. 705727 5. 71533 5. 331025 5. 297498 5. 442778  
11749673\_ 10. 27146 10. 28711 10. 22861 10. 18509 10. 19202 10. 16741  
11749674\_ 6. 321838 6. 22794 6. 389366 5. 842152 5. 941442 5. 9426  
11749675\_ 4. 655585 4. 746059 4. 654138 4. 813774 4. 854387 4. 746059  
11749676\_ 5. 845365 5. 8178 5. 733429 5. 891282 5. 881329 5. 868386

11749677\_ 7. 132446 6. 979881 7. 187008 7. 051866 7. 103471 7. 225558  
11749678\_ 6. 698555 6. 582826 6. 683632 6. 669035 6. 419477 6. 669999  
11749679\_ 7. 595506 7. 563572 7. 464574 7. 721065 7. 662428 7. 547091  
11749680\_ 3. 51439 3. 568574 3. 341855 3. 419481 3. 731129 3. 555028  
11749681\_ 8. 395114 8. 41517 8. 416955 7. 929182 7. 943049 7. 871825  
11749682\_ 9. 045797 8. 975314 9. 028296 8. 592842 8. 510181 8. 586382  
11749683\_ 7. 4946 7. 457394 7. 54294 7. 712379 7. 711004 7. 658486  
11749684\_ 6. 67402 6. 505427 6. 645875 6. 650935 6. 670051 6. 746653  
11749685\_ 2. 897911 2. 932001 2. 9524 2. 926954 2. 928849 2. 868147  
11749686\_ 4. 474757 4. 527926 4. 333539 4. 743266 4. 52373 4. 419877  
11749687\_ 7. 375887 7. 250641 7. 303735 6. 399286 6. 589092 6. 434293  
11749688\_ 7. 042241 7. 126472 7. 097734 7. 079967 7. 124494 6. 936223  
11749689\_ 8. 305772 8. 306765 8. 349205 8. 274735 8. 328791 8. 313703  
11749690\_ 3. 58563 3. 625294 3. 486425 3. 670217 3. 406106 3. 507759  
11749691\_ 7. 04946 6. 999703 7. 022089 7. 439554 7. 425683 7. 39775  
11749692\_ 7. 083949 7. 067993 7. 172759 6. 455733 6. 312793 6. 473995  
11749693\_ 6. 991591 7. 03477 7. 029844 6. 911139 6. 837039 6. 914652  
11749694\_ 6. 451762 6. 363372 6. 26508 6. 593083 6. 588039 6. 540618  
11749695\_ 9. 204716 9. 093171 9. 166209 9. 062482 9. 015027 8. 999103  
11749696\_ 2. 640061 2. 568481 2. 553832 2. 57416 2. 692917 2. 543089  
11749697\_ 8. 651328 8. 629328 8. 652555 8. 783013 8. 840722 8. 775412  
11749698\_ 5. 787857 5. 879536 5. 810575 5. 646452 5. 724395 5. 683723  
11749699\_ 6. 71875 6. 735797 6. 600981 6. 742672 6. 760475 6. 682443  
11749700\_ 6. 038173 6. 040378 5. 835869 6. 018201 6. 028807 6. 038173  
11749701\_ 4. 329031 4. 541786 4. 409892 4. 371121 4. 527399 4. 429013  
11749702\_ 6. 18084 6. 302567 6. 274293 6. 324156 6. 211135 6. 282573  
11749703\_ 6. 026381 5. 958813 5. 985075 6. 13288 6. 159771 6. 148692  
11749704\_ 5. 154699 5. 094153 5. 092534 5. 045623 5. 096055 4. 977178  
11749705\_ 6. 377955 6. 395092 6. 386511 6. 482049 6. 503201 6. 417769  
11749706\_ 6. 54551 6. 569444 6. 550745 6. 689538 6. 594015 6. 698785  
11749707\_ 5. 90406 5. 860838 5. 871639 5. 947436 5. 869025 5. 950211  
11749708\_ 6. 584888 6. 525957 6. 639625 6. 234313 6. 144478 6. 190482  
11749709\_ 6. 285498 6. 326722 6. 213242 6. 013414 5. 982386 5. 921116  
11749710\_ 6. 748126 6. 658115 6. 655196 6. 627151 6. 567735 6. 512991  
11749711\_ 6. 17981 6. 025355 6. 257395 5. 528624 5. 638895 5. 589814  
11749712\_ 5. 52237 5. 78979 5. 473703 5. 74982 5. 628979 5. 699543  
11749713\_ 6. 234379 6. 176194 6. 428975 6. 574352 6. 654326 6. 70054  
11749714\_ 7. 172061 7. 144608 7. 244152 7. 244509 7. 174127 7. 206011  
11749715\_ 5. 859041 5. 938482 5. 554436 6. 335576 6. 184156 6. 186685  
11749716\_ 5. 044147 5. 052448 5. 334476 5. 434965 5. 270346 5. 2666  
11749717\_ 2. 708355 2. 805185 2. 725974 3. 047416 2. 805185 2. 813099  
11749718\_ 7. 713475 7. 675826 7. 642112 7. 386324 7. 393647 7. 344394  
11749719\_ 5. 917482 6. 002684 6. 10902 6. 11706 6. 049868 6. 059112  
11749720\_ 5. 933205 5. 990809 5. 824547 6. 05779 5. 93161 5. 967113  
11749721\_ 4. 943648 4. 922759 4. 941049 3. 952025 3. 860866 4. 028909  
11749722\_ 8. 560314 8. 562016 8. 585405 8. 755167 8. 76506 8. 748561  
11749723\_ 7. 101352 7. 157676 7. 168232 7. 257341 7. 204584 7. 284015  
11749724\_ 4. 99784 5. 074467 4. 84481 5. 069272 4. 869048 5. 026363  
11749725\_ 7. 909544 7. 958298 8. 001683 8. 050044 8. 143291 8. 103604  
11749726\_ 7. 966316 7. 940318 7. 979691 8. 023093 8. 061045 8. 083328  
11749727\_ 7. 534993 7. 337457 7. 379961 7. 222919 7. 345735 7. 320157

11749728\_ 7. 12407 7. 102493 7. 139109 7. 056302 6. 999524 7. 103038  
11749729\_ 6. 732567 6. 757405 6. 9015 6. 865568 6. 716246 6. 828089  
11749730\_ 5. 143143 5. 255177 5. 232868 5. 314945 5. 153352 5. 314945  
11749731\_ 7. 467705 7. 50411 7. 488267 7. 275314 7. 254728 7. 268599  
11749732\_ 8. 207174 8. 149717 8. 200745 8. 105009 8. 097855 8. 11721  
11749733\_ 4. 364604 4. 169129 4. 287593 4. 525315 4. 296332 4. 381094  
11749734\_ 5. 973687 5. 828321 6. 071361 6. 097927 6. 089669 6. 025204  
11749735\_ 6. 650699 6. 510919 6. 553988 6. 434567 6. 443438 6. 484679  
11749736\_ 5. 047357 4. 889731 5. 121426 4. 832992 4. 881853 4. 788384  
11749737\_ 4. 927223 4. 884989 5. 032728 4. 222131 4. 396886 4. 611295  
11749738\_ 8. 652726 8. 661259 8. 678486 8. 731049 8. 716547 8. 727767  
11749739\_ 8. 308755 8. 197539 8. 294288 8. 416646 8. 446501 8. 511093  
11749740\_ 8. 809717 8. 755003 8. 811156 8. 329887 8. 340585 8. 398633  
11749741\_ 3. 51821 3. 571325 3. 680747 3. 571011 3. 454381 3. 508923  
11749742\_ 4. 484882 4. 713054 4. 739725 4. 6281 4. 672152 4. 632344  
11749743\_ 6. 234328 6. 174294 6. 181868 6. 200785 6. 229036 6. 294798  
11749744\_ 9. 090881 9. 035932 9. 047959 8. 41782 8. 496411 8. 466449  
11749745\_ 9. 475309 9. 374049 9. 458318 9. 399445 9. 377601 9. 411609  
11749746\_ 8. 339588 8. 193646 8. 302281 8. 065319 8. 147363 8. 109159  
11749747\_ 9. 570163 9. 54991 9. 552339 9. 535819 9. 558804 9. 556177  
11749748\_ 8. 75764 8. 714743 8. 7041 8. 699926 8. 668219 8. 638808  
11749749\_ 3. 68597 3. 651517 3. 688589 3. 683858 3. 553975 3. 712426  
11749750\_ 6. 20628 6. 124321 6. 220692 6. 077209 6. 241491 6. 187945  
11749751\_ 6. 46828 6. 491923 6. 46056 6. 27625 6. 211736 6. 391406  
11749752\_ 6. 167957 6. 305381 6. 256348 6. 248173 6. 222296 6. 192186  
11749753\_ 4. 100039 4. 156028 4. 135496 4. 172304 4. 172304 4. 176933  
11749754\_ 4. 825699 4. 750151 4. 925309 5. 540325 5. 346011 4. 984895  
11749755\_ 7. 762108 7. 7061 7. 767849 6. 954584 6. 896161 6. 956377  
11749756\_ 7. 675361 7. 587037 7. 574292 6. 885146 6. 723918 6. 870906  
11749757\_ 8. 721293 8. 672103 8. 749966 8. 917257 8. 964183 8. 873307  
11749758\_ 6. 935802 7. 086899 6. 904886 6. 811587 6. 932163 6. 960108  
11749759\_ 3. 538553 3. 409072 3. 729317 3. 366972 3. 509565 3. 227782  
11749760\_ 4. 617273 4. 505269 4. 798025 4. 491611 4. 457533 4. 728682  
11749761\_ 7. 515601 7. 481422 7. 528741 7. 40978 7. 409349 7. 422256  
11749762\_ 6. 387897 6. 355591 6. 404827 6. 384938 6. 387897 6. 455998  
11749763\_ 10. 03196 9. 974896 10. 00368 10. 2767 10. 31879 10. 24654  
11749764\_ 6. 570369 6. 530573 6. 541237 6. 754413 6. 594562 6. 676506  
11749765\_ 5. 068737 5. 189628 5. 283927 5. 119252 5. 093411 5. 25084  
11749766\_ 4. 637859 4. 805929 4. 877401 4. 50408 4. 428291 4. 763543  
11749767\_ 7. 443631 7. 391843 7. 51258 7. 799789 7. 631747 7. 673951  
11749768\_ 5. 148996 5. 067462 5. 030275 4. 99355 5. 09556 5. 040349  
11749769\_ 5. 92296 5. 834867 5. 895518 6. 040637 5. 998581 6. 058919  
11749770\_ 5. 219918 5. 351291 4. 697616 5. 09222 5. 2222 5. 055107  
11749771\_ 4. 430168 4. 639258 4. 451489 4. 536076 4. 489158 4. 384382  
11749772\_ 2. 539414 2. 591106 2. 513597 2. 322202 2. 362901 2. 366509  
11749773\_ 5. 133647 5. 029261 5. 102734 4. 364628 4. 218196 4. 502251  
11749774\_ 5. 198248 4. 912892 5. 058137 4. 411144 4. 17636 4. 221793  
11749775\_ 6. 646021 6. 704292 6. 824152 6. 448473 6. 534215 6. 619112  
11749776\_ 8. 701913 8. 626479 8. 665318 9. 105458 9. 109836 9. 141119  
11749777\_ 6. 320609 6. 52655 6. 355488 6. 3445 6. 345684 6. 383161  
11749778\_ 10. 67931 10. 58352 10. 66313 10. 65999 10. 65269 10. 6178

11749779\_ 6. 622135 6. 471852 6. 619536 6. 240912 6. 259299 6. 381715  
11749780\_ 8. 558075 8. 648865 8. 617585 8. 174806 8. 191122 8. 120242  
11749781\_ 8. 061664 7. 893433 7. 953741 7. 639654 7. 687879 7. 688798  
11749782\_ 9. 411469 9. 289529 9. 389988 8. 969021 8. 929538 8. 857217  
11749783\_ 5. 210643 5. 2666 5. 333723 5. 161475 5. 307939 5. 268304  
11749784\_ 3. 503743 3. 503743 3. 503743 3. 503743 3. 503743 3. 337933  
11749785\_ 2. 574565 2. 73857 2. 591244 2. 226796 2. 543343 2. 61249  
11749786\_ 9. 000889 9. 063965 8. 983131 9. 293219 9. 229725 9. 131206  
11749787\_ 9. 005611 9. 035523 9. 081486 8. 897257 8. 913521 8. 895222  
11749788\_ 6. 230038 6. 263163 6. 252494 6. 339902 6. 486817 6. 330606  
11749789\_ 9. 035185 9. 022024 9. 051565 8. 534689 8. 622195 8. 622351  
11749790\_ 7. 561199 7. 499345 7. 594601 6. 834016 6. 837039 7. 00691  
11749791\_ 3. 181692 2. 945929 3. 174093 3. 119977 3. 225644 3. 11349  
11749792\_ 5. 209259 4. 960835 5. 191646 4. 835513 4. 924009 5. 095975  
11749793\_ 8. 258259 8. 190958 8. 189339 7. 828606 7. 863167 7. 938234  
11749794\_ 8. 52876 8. 461459 8. 48114 8. 138305 8. 177716 8. 232023  
11749795\_ 7. 486633 7. 425959 7. 437793 7. 509726 7. 541891 7. 499004  
11749796\_ 7. 354849 7. 340226 7. 386592 8. 212637 8. 130428 8. 159352  
11749797\_ 3. 676524 3. 819666 3. 949162 3. 841768 3. 705625 3. 70954  
11749798\_ 6. 76372 6. 711677 6. 794633 6. 017073 5. 974586 5. 894697  
11749799\_ 4. 977344 4. 696104 4. 984357 4. 923878 4. 923878 4. 918843  
11749800\_ 8. 116156 8. 105009 8. 116173 8. 168733 8. 140782 8. 237583  
11749801\_ 6. 12468 6. 07032 6. 119375 6. 306687 6. 177338 6. 212669  
11749802\_ 8. 432032 8. 440642 8. 433555 8. 329995 8. 261695 8. 320256  
11749803\_ 8. 773238 8. 829903 8. 747938 8. 658553 8. 632136 8. 620202  
11749804\_ 2. 372339 2. 198771 2. 298744 2. 180576 2. 237843 2. 317628  
11749805\_ 3. 494353 3. 692649 3. 59928 3. 713804 3. 677719 3. 836494  
11749806\_ 9. 417144 9. 308398 9. 355741 8. 506642 8. 530357 8. 463291  
11749807\_ 6. 11921 6. 257426 6. 254951 6. 251781 6. 263175 6. 230007  
11749808\_ 5. 333723 5. 238757 5. 409462 5. 135808 4. 984669 5. 129895  
11749809\_ 7. 923748 7. 853754 7. 885872 7. 837634 7. 857706 7. 847836  
11749810\_ 7. 830334 7. 790197 7. 821822 7. 628327 7. 665888 7. 619572  
11749811\_ 8. 18383 8. 205235 8. 199321 8. 305279 8. 260999 8. 203808  
11749812\_ 7. 05189 6. 975313 7. 03715 6. 850646 6. 886771 6. 864534  
11749813\_ 7. 381552 7. 51583 7. 538304 8. 289886 8. 076461 8. 109642  
11749814\_ 7. 504699 7. 488446 7. 547605 8. 016181 7. 972136 8. 040575  
11749815\_ 7. 597271 7. 488648 7. 532221 7. 249018 7. 282737 7. 241735  
11749816\_ 6. 520691 6. 464805 6. 412874 6. 356392 6. 378603 6. 425699  
11749817\_ 4. 586063 4. 682422 4. 581723 4. 46907 4. 413487 4. 430057  
11749818\_ 7. 107803 6. 981018 7. 075558 6. 789923 6. 806557 6. 765911  
11749819\_ 8. 888814 8. 862762 8. 87646 8. 951584 8. 967211 8. 956271  
11749820\_ 6. 056128 6. 097652 6. 186928 5. 875545 6. 019211 5. 882888  
11749821\_ 11. 86817 11. 8278 11. 84456 11. 95883 11. 96567 11. 94426  
11749822\_ 5. 32758 5. 318934 5. 150094 5. 414869 5. 504042 5. 456663  
11749823\_ 4. 751464 4. 73679 4. 692951 4. 844518 4. 874981 4. 874529  
11749824\_ 4. 55822 4. 569821 4. 52373 4. 569809 4. 30443 4. 407492  
11749825\_ 7. 378868 7. 427953 7. 322286 7. 457371 7. 366879 7. 449378  
11749826\_ 2. 811457 3. 290188 3. 201052 3. 18686 3. 04074 2. 945929  
11749827\_ 4. 006278 3. 897647 4. 054054 3. 953069 3. 840415 4. 25873  
11749828\_ 8. 370269 8. 37871 8. 403742 8. 037977 8. 092542 8. 088182  
11749829\_ 5. 935247 5. 958755 6. 09562 5. 958755 5. 908137 6. 117838



11749830\_ 8. 912047 8. 892366 8. 879838 8. 942123 8. 987724 8. 938122  
11749831\_ 2. 850317 2. 919888 2. 874619 2. 856392 2. 919888 2. 820341  
11749832\_ 6. 744966 6. 655572 6. 799219 6. 562086 6. 587852 6. 511973  
11749833\_ 3. 433969 3. 496632 3. 291494 3. 38617 3. 39812 3. 421598  
11749834\_ 6. 295822 6. 298497 6. 25682 6. 739765 6. 633336 6. 572767  
11749835\_ 6. 998375 7. 14772 7. 015542 7. 189541 7. 268055 7. 228634  
11749836\_ 4. 31289 4. 428504 4. 370337 4. 265114 4. 372062 4. 298662  
11749837\_ 5. 420137 5. 502233 5. 466477 5. 442927 5. 469468 5. 375042  
11749838\_ 8. 270587 8. 179486 8. 293207 7. 987577 7. 996078 7. 946918  
11749839\_ 4. 016738 4. 0268 4. 021348 3. 956228 4. 082484 4. 013384  
11749840\_ 6. 934759 6. 875859 6. 89447 6. 496401 6. 474014 6. 658232  
11749841\_ 5. 016258 5. 059247 4. 932216 4. 965947 5. 086825 4. 939101  
11749842\_ 7. 279799 7. 220897 7. 243127 6. 849035 6. 910833 6. 915768  
11749843\_ 6. 782057 6. 831827 6. 840628 6. 75678 6. 686431 6. 871601  
11749844\_ 3. 942534 3. 850333 3. 900429 3. 938042 3. 969526 4. 06103  
11749845\_ 6. 44697 6. 304777 6. 495683 6. 524482 6. 507474 6. 497107  
11749846\_ 10. 49556 10. 49043 10. 49393 10. 50239 10. 53386 10. 47515  
11749847\_ 3. 912429 3. 775876 3. 693077 3. 58757 3. 75231 3. 4763  
11749848\_ 4. 849762 4. 852756 4. 899314 5. 030234 5. 00441 4. 981187  
11749849\_ 4. 985623 4. 75657 4. 713108 4. 919756 4. 944184 4. 915914  
11749850\_ 6. 629104 6. 548294 6. 499669 6. 437001 6. 53654 6. 442787  
11749851\_ 7. 13711 7. 066939 7. 106524 6. 773315 6. 788416 7. 033832  
11749852\_ 7. 50729 7. 500597 7. 630481 6. 869436 6. 762685 6. 828602  
11749853\_ 6. 15909 6. 099197 6. 121378 6. 120525 6. 025667 6. 086112  
11749854\_ 5. 655361 5. 810781 5. 643713 5. 79785 5. 736293 5. 758042  
11749855\_ 6. 803706 6. 878554 6. 701957 6. 969279 6. 794256 6. 979825  
11749856\_ 6. 884619 6. 849603 6. 876927 6. 460253 6. 505255 6. 544888  
11749857\_ 5. 564658 5. 43905 5. 36102 5. 047149 5. 325754 5. 155695  
11749858\_ 7. 376606 7. 415966 7. 556115 7. 093706 7. 148818 7. 123871  
11749859\_ 6. 54728 6. 77539 6. 667547 6. 679108 6. 701948 6. 748276  
11749860\_ 5. 894697 6. 146923 5. 912856 5. 950039 6. 025952 5. 979891  
11749861\_ 5. 023039 5. 009862 5. 126141 4. 992243 5. 276155 5. 139317  
11749862\_ 5. 614563 5. 529629 5. 489337 5. 669346 5. 644071 5. 648514  
11749863\_ 7. 423067 7. 348629 7. 545305 7. 214691 7. 244058 7. 237915  
11749864\_ 6. 944729 6. 761102 6. 999708 6. 66236 6. 672601 6. 621048  
11749865\_ 5. 820997 5. 938482 5. 840487 5. 874501 5. 95285 5. 951127  
11749866\_ 7. 059153 7. 031525 7. 050681 7. 322673 7. 247651 7. 310357  
11749867\_ 6. 981789 7. 059959 6. 931872 7. 85342 7. 887358 7. 921046  
11749868\_ 4. 183483 4. 338495 4. 220059 4. 355285 4. 267437 4. 228724  
11749869\_ 3. 960449 3. 673863 3. 787379 3. 844645 3. 881311 3. 758799  
11749870\_ 6. 491941 6. 41933 6. 720029 6. 465849 6. 557068 6. 597187  
11749871\_ 5. 402441 5. 454559 5. 32307 5. 635782 5. 571852 5. 67551  
11749872\_ 7. 625729 7. 537465 7. 587424 7. 25532 7. 248076 7. 254194  
11749873\_ 7. 952053 7. 937044 8. 020922 7. 619572 7. 647311 7. 646401  
11749874\_ 8. 391678 8. 288806 8. 447063 8. 256905 8. 233698 8. 225283  
11749875\_ 6. 381453 6. 358035 6. 36898 6. 386318 6. 37933 6. 392993  
11749876\_ 3. 508434 3. 606313 3. 710762 3. 997131 3. 859741 3. 938942  
11749877\_ 7. 506166 7. 573609 7. 504451 7. 595045 7. 54919 7. 753849  
11749878\_ 4. 783188 4. 973572 4. 96421 4. 752315 4. 863525 4. 903558  
11749879\_ 5. 149558 5. 099682 5. 219754 5. 341909 5. 36882 5. 50511  
11749880\_ 6. 370971 6. 183156 6. 418373 6. 515303 6. 543084 6. 429047

11749881\_ 6. 83735 6. 800554 6. 863607 6. 480052 6. 519247 6. 403139  
11749882\_ 7. 054599 7. 030171 7. 048483 7. 290922 7. 280833 7. 296143  
11749883\_ 7. 521146 7. 426223 7. 512425 7. 156454 7. 212554 7. 161749  
11749884\_ 6. 324833 6. 361863 6. 33679 6. 372835 6. 379074 6. 438364  
11749885\_ 4. 886715 4. 976157 4. 759759 5. 080611 4. 931501 4. 959827  
11749886\_ 6. 631711 6. 482677 6. 706135 6. 076709 6. 040143 6. 227034  
11749887\_ 7. 056967 7. 064512 7. 066036 7. 067829 7. 076898 7. 07498  
11749888\_ 6. 375449 6. 583248 6. 502796 6. 649876 6. 583248 6. 634438  
11749889\_ 8. 404665 8. 37066 8. 393181 8. 110851 8. 157105 8. 159005  
11749890\_ 8. 843294 8. 80713 8. 805015 8. 551387 8. 600635 8. 524849  
11749891\_ 4. 697679 4. 815683 4. 709463 4. 931726 4. 948691 4. 89262  
11749892\_ 4. 175333 4. 293359 4. 251923 4. 489643 4. 297407 4. 404915  
11749893\_ 4. 928049 4. 986833 4. 904101 4. 893027 5. 013085 4. 911728  
11749894\_ 7. 186232 7. 114744 7. 192555 7. 478609 7. 337719 7. 426223  
11749895\_ 8. 930219 8. 890519 8. 951756 8. 405598 8. 479942 8. 461346  
11749896\_ 4. 677479 4. 838466 4. 880942 4. 806305 5. 060225 5. 033912  
11749897\_ 4. 108592 4. 174945 4. 142268 4. 011136 4. 274985 4. 388072  
11749898\_ 7. 29052 7. 271597 7. 272972 7. 269534 7. 295506 7. 272425  
11749899\_ 9. 733007 9. 74051 9. 798696 9. 42286 9. 403684 9. 446951  
11749900\_ 7. 256979 7. 239514 7. 311325 6. 937309 7. 012216 6. 985506  
11749901\_ 4. 10536 3. 892699 4. 183161 3. 522735 3. 865094 3. 959593  
11749902\_ 10. 61615 10. 57837 10. 56151 10. 70426 10. 72181 10. 65045  
11749903\_ 5. 658048 5. 750072 5. 787545 5. 554436 5. 743609 5. 64104  
11749904\_ 6. 13945 6. 283016 6. 260434 6. 250183 6. 229637 6. 223233  
11749905\_ 8. 791417 8. 746931 8. 818572 7. 751742 7. 736361 7. 808397  
11749906\_ 3. 779015 3. 870007 3. 454077 3. 835412 3. 864799 3. 779015  
11749907\_ 2. 043261 1. 992341 2. 12213 2. 082841 1. 958193 2. 055541  
11749908\_ 6. 343184 6. 412133 6. 446873 5. 626338 5. 617966 5. 698896  
11749909\_ 5. 132748 5. 139711 5. 203715 5. 22243 5. 236746 5. 475575  
11749910\_ 6. 534638 6. 481682 6. 480556 6. 754754 6. 776065 6. 769623  
11749911\_ 5. 510647 5. 514181 5. 471592 5. 646581 5. 549012 5. 480854  
11749912\_ 7. 798521 7. 74125 7. 805174 7. 283774 7. 435425 7. 391221  
11749913\_ 6. 76046 6. 691982 6. 792659 6. 718895 6. 692796 6. 700825  
11749914\_ 2. 217238 2. 380249 2. 116139 2. 188854 2. 136512 2. 380249  
11749915\_ 1. 942159 1. 971075 2. 030134 2. 245199 1. 934715 2. 054702  
11749916\_ 3. 63002 3. 503743 3. 667215 3. 360852 3. 309552 3. 422557  
11749917\_ 2. 988093 3. 209557 3. 102848 3. 27126 3. 166371 3. 17333  
11749918\_ 4. 82028 4. 870211 5. 037588 4. 71771 4. 736401 4. 838747  
11749919\_ 1. 849627 1. 863597 1. 653492 1. 98185 1. 790878 1. 674723  
11749920\_ 6. 360394 6. 195244 6. 104263 6. 190671 6. 146476 6. 154933  
11749921\_ 8. 293891 8. 259271 8. 278365 8. 604414 8. 541554 8. 566863  
11749922\_ 4. 961632 4. 966109 5. 147515 5. 035124 5. 065897 4. 970078  
11749923\_ 6. 45569 6. 531304 6. 486565 6. 494443 6. 449702 6. 503226  
11749924\_ 7. 297613 7. 329259 7. 295247 7. 268598 7. 314565 7. 29658  
11749925\_ 6. 851022 6. 672355 6. 967355 6. 173161 6. 327565 6. 246055  
11749926\_ 3. 11817 3. 294159 3. 420409 3. 283892 3. 331127 3. 42541  
11749927\_ 7. 374615 7. 338623 7. 434587 7. 100645 7. 023455 7. 062242  
11749928\_ 5. 758279 5. 88319 5. 924996 5. 575037 5. 686361 5. 619463  
11749929\_ 4. 934228 5. 070039 5. 103149 4. 634899 4. 583967 4. 522519  
11749930\_ 4. 570399 4. 535152 4. 514365 4. 920587 4. 913388 4. 835063  
11749931\_ 5. 623943 5. 527315 5. 615184 5. 895369 5. 801875 5. 768385

11749932\_ 2. 344791 2. 053928 2. 467727 2. 281503 2. 291438 2. 178362  
11749933\_ 5. 375164 5. 420691 5. 130458 5. 436373 5. 506302 5. 399116  
11749934\_ 12. 03879 12. 02176 12. 03167 12. 39733 12. 42551 12. 43002  
11749935\_ 11. 20405 11. 17096 11. 16263 11. 27639 11. 23187 11. 29562  
11749936\_ 5. 843932 5. 652517 5. 877758 6. 034245 6. 052782 6. 116979  
11749937\_ 5. 480337 5. 666256 5. 615331 5. 61677 5. 736831 5. 643918  
11749938\_ 5. 347057 5. 470872 5. 373904 5. 265663 5. 313283 5. 466597  
11749939\_ 5. 864926 6. 104673 5. 99412 6. 022698 6. 062516 6. 089545  
11749940\_ 7. 469828 7. 334601 7. 442798 7. 039336 7. 164857 7. 08516  
11749941\_ 6. 070672 6. 272516 6. 12323 6. 214176 6. 234279 6. 301421  
11749942\_ 5. 763634 5. 810393 5. 754467 5. 935747 5. 870242 5. 829695  
11749943\_ 7. 827682 7. 750201 7. 835661 7. 465334 7. 484566 7. 477876  
11749944\_ 2. 452805 2. 410042 2. 359983 2. 366539 2. 219138 2. 142091  
11749945\_ 4. 447793 4. 479665 4. 131171 4. 213226 4. 110257 4. 218262  
11749946\_ 6. 751688 6. 88302 6. 789903 6. 865534 6. 833126 6. 765911  
11749947\_ 7. 919492 7. 904102 8. 00903 7. 916766 7. 832976 7. 992582  
11749948\_ 5. 853996 5. 755708 5. 883071 5. 765746 5. 807116 5. 894697  
11749949\_ 5. 147024 5. 288912 5. 018859 5. 334159 5. 283241 5. 239988  
11749950\_ 8. 598287 8. 516961 8. 561629 8. 004988 7. 987155 7. 987812  
11749951\_ 5. 71977 5. 786668 5. 650596 5. 761541 5. 768053 5. 707089  
11749952\_ 3. 963268 4. 252804 4. 092158 3. 933036 4. 16019 3. 91757  
11749953\_ 6. 847204 6. 699182 6. 793177 6. 686 6. 653363 6. 695645  
11749954\_ 4. 443143 4. 546236 4. 34646 4. 64624 4. 441037 4. 617588  
11749955\_ 8. 486723 8. 481786 8. 466589 8. 250939 8. 22195 8. 159973  
11749956\_ 6. 335432 6. 271328 6. 300928 6. 885512 6. 851447 6. 831614  
11749957\_ 8. 802852 8. 779468 8. 779161 8. 402595 8. 409035 8. 299806  
11749958\_ 7. 080996 7. 085935 6. 987902 6. 878789 6. 839227 6. 887755  
11749959\_ 6. 477307 6. 711704 6. 568064 6. 632127 6. 709454 6. 630823  
11749960\_ 6. 077186 6. 244192 6. 206279 6. 268961 6. 315975 6. 206279  
11749961\_ 11. 50256 11. 517 11. 48975 11. 57386 11. 57702 11. 53078  
11749962\_ 4. 871643 5. 039661 4. 884439 5. 153845 5. 009523 5. 22209  
11749963\_ 2. 726758 2. 660112 2. 878287 2. 505602 2. 742052 2. 770238  
11749964\_ 8. 965841 8. 922083 8. 906369 10. 11957 10. 17473 10. 072  
11749965\_ 8. 151714 8. 067987 8. 116388 9. 329849 9. 324544 9. 332317  
11749966\_ 5. 246189 5. 18246 5. 137407 5. 347734 5. 405623 5. 232751  
11749967\_ 4. 667992 4. 727916 4. 620548 4. 775872 4. 727916 4. 812289  
11749968\_ 6. 138344 6. 080073 6. 063446 5. 802562 5. 952727 5. 915383  
11749969\_ 7. 231739 7. 324886 7. 351236 7. 18695 7. 199103 7. 159252  
11749970\_ 5. 761074 5. 919487 5. 956723 6. 698854 6. 857306 6. 754317  
11749971\_ 5. 942372 5. 890977 5. 989042 5. 758594 5. 768053 5. 775063  
11749972\_ 6. 192215 6. 356039 6. 258929 6. 448378 6. 397946 6. 379185  
11749973\_ 6. 285719 6. 372493 6. 318829 6. 460229 6. 464987 6. 464479  
11749974\_ 3. 459501 3. 494506 3. 463441 3. 690658 3. 606313 3. 509919  
11749975\_ 5. 543554 5. 554436 5. 370836 5. 528624 5. 587467 5. 570181  
11749976\_ 6. 148082 6. 019263 6. 054803 5. 963206 6. 033125 6. 069567  
11749977\_ 5. 183195 5. 366061 5. 408668 4. 72688 4. 657204 4. 831337  
11749978\_ 7. 609739 7. 605028 7. 687175 7. 259032 7. 401909 7. 352919  
11749979\_ 9. 825746 9. 743389 9. 767338 9. 715628 9. 75014 9. 756235  
11749980\_ 2. 979568 2. 907643 2. 713609 2. 681871 2. 703048 2. 918115  
11749981\_ 2. 862731 3. 148837 3. 198049 3. 124667 3. 039441 3. 125183  
11749982\_ 5. 45472 5. 522421 5. 480966 5. 392954 5. 388741 5. 464166

11749983\_ 5. 088504 5. 149545 5. 336691 5. 458536 5. 476985 5. 354963  
11749984\_ 3. 580531 3. 444357 3. 29016 3. 368105 3. 468598 3. 427383  
11749985\_ 5. 94324 5. 839268 5. 736831 5. 828359 5. 817693 5. 83542  
11749986\_ 5. 176322 5. 027252 5. 057686 5. 969876 6. 045925 6. 010685  
11749987\_ 5. 007148 4. 939853 5. 003985 5. 045027 5. 044012 5. 096824  
11749988\_ 6. 958189 6. 833586 6. 93794 6. 56781 6. 61492 6. 611732  
11749989\_ 5. 10708 5. 075871 5. 222536 5. 236433 5. 074451 5. 200808  
11749990\_ 8. 91787 8. 936002 8. 962882 8. 586564 8. 661364 8. 595885  
11749991\_ 7. 685012 7. 691907 7. 576292 7. 636695 7. 625408 7. 620996  
11749992\_ 6. 519318 6. 569255 6. 464648 6. 520489 6. 493046 6. 460431  
11749993\_ 4. 643717 4. 639034 4. 552094 4. 738351 4. 584933 4. 629055  
11749994\_ 5. 582648 5. 627964 5. 627716 5. 777549 5. 6865 5. 750595  
11749995\_ 7. 423599 7. 535995 7. 426146 7. 226412 7. 27504 7. 264296  
11749996\_ 5. 613694 5. 333328 5. 582555 5. 749589 5. 881921 5. 798613  
11749997\_ 6. 035945 6. 013006 6. 093911 6. 368933 6. 403286 6. 370138  
11749998\_ 3. 263935 3. 383742 3. 148431 3. 594981 3. 513541 3. 611402  
11749999\_ 5. 012007 4. 969245 4. 824195 4. 914651 4. 984669 4. 94329  
11750000\_ 2. 335195 2. 554008 2. 496356 2. 387796 2. 209069 2. 197674  
11750001\_ 3. 595649 3. 734188 3. 76748 3. 846345 3. 739438 3. 7355  
11750002\_ 9. 631098 9. 606899 9. 591469 9. 741875 9. 812447 9. 735354  
11750003\_ 7. 598937 7. 511359 7. 624995 7. 394232 7. 56583 7. 394731  
11750004\_ 3. 398236 3. 416489 3. 821966 3. 720039 3. 558375 3. 700542  
11750005\_ 4. 306278 4. 347889 4. 288405 4. 464537 4. 402631 4. 388946  
11750006\_ 9. 136927 9. 131582 9. 081318 9. 320312 9. 275912 9. 240912  
11750007\_ 3. 821746 3. 650542 4. 013276 3. 621179 3. 638418 3. 659306  
11750008\_ 8. 554725 8. 56796 8. 578398 8. 574966 8. 630311 8. 548471  
11750009\_ 9. 01774 8. 948962 8. 981207 9. 020503 9. 039652 8. 979832  
11750010\_ 6. 745786 6. 703415 6. 814829 7. 247486 7. 274027 7. 324329  
11750011\_ 7. 38686 7. 334095 7. 374996 7. 579855 7. 625672 7. 587235  
11750012\_ 7. 671983 7. 612217 7. 671833 7. 397645 7. 392275 7. 402205  
11750013\_ 8. 3625 8. 254218 8. 471697 8. 078039 8. 04409 8. 151561  
11750014\_ 10. 92263 10. 87996 10. 92573 11. 08667 11. 06676 11. 01103  
11750015\_ 6. 511946 6. 525146 6. 455685 6. 474329 6. 49725 6. 499671  
11750016\_ 5. 789947 5. 307146 5. 414869 4. 459939 4. 589179 4. 837826  
11750017\_ 7. 020144 6. 956979 7. 059693 6. 852398 6. 886673 6. 827611  
11750018\_ 3. 506309 3. 631559 3. 440801 3. 474689 3. 379394 3. 429079  
11750019\_ 6. 713485 6. 624867 6. 695435 7. 056246 7. 12054 7. 076171  
11750020\_ 7. 826817 7. 82866 7. 824814 8. 052653 8. 148116 8. 163285  
11750021\_ 7. 938331 7. 970372 8. 002979 8. 165349 8. 208962 8. 227132  
11750022\_ 6. 996182 6. 965844 6. 912156 6. 845738 6. 862059 6. 922037  
11750023\_ 3. 609675 3. 783093 3. 730615 3. 87664 3. 883307 3. 785537  
11750024\_ 6. 467524 6. 448378 6. 589889 6. 41929 6. 43898 6. 447197  
11750025\_ 5. 811873 5. 811873 5. 862257 5. 870242 5. 870242 5. 924679  
11750026\_ 8. 789111 8. 74849 8. 815367 8. 932133 8. 919905 8. 936031  
11750027\_ 6. 412182 6. 378175 6. 412133 6. 277599 6. 241491 6. 257747  
11750028\_ 8. 795807 8. 740399 8. 75044 8. 68093 8. 637119 8. 632962  
11750029\_ 7. 585173 7. 581163 7. 589926 7. 922334 7. 865134 7. 95747  
11750030\_ 3. 319726 3. 4255 3. 319191 3. 387608 3. 442087 3. 47474  
11750031\_ 6. 848915 6. 931275 6. 898225 6. 857081 6. 814878 6. 94952  
11750032\_ 6. 404451 6. 474471 6. 404451 6. 429901 6. 474501 6. 339893  
11750033\_ 3. 738612 3. 699074 3. 732244 3. 762127 3. 7955 3. 718731

11750034\_ 10. 25513 10. 16612 10. 22235 9. 626682 9. 702164 9. 665005  
11750035\_ 10. 52605 10. 48295 10. 52385 9. 996623 10. 01707 9. 994534  
11750036\_ 5. 617931 5. 643713 5. 522944 6. 133703 6. 021364 6. 128423  
11750037\_ 6. 274286 6. 215456 6. 242301 6. 469903 6. 497107 6. 509351  
11750038\_ 6. 121107 6. 008293 6. 043194 6. 148739 6. 091579 6. 194108  
11750039\_ 7. 347623 7. 29012 7. 362357 6. 971268 6. 984249 7. 05613  
11750040\_ 9. 273212 9. 286624 9. 258115 9. 121258 9. 154705 8. 975482  
11750041\_ 10. 78327 10. 77052 10. 76606 10. 56537 10. 54922 10. 50919  
11750042\_ 10. 96981 10. 93114 10. 94587 10. 69075 10. 69158 10. 66283  
11750043\_ 8. 578064 8. 52876 8. 544301 8. 701536 8. 690299 8. 700741  
11750044\_ 8. 623863 8. 534111 8. 558538 8. 743735 8. 830612 8. 814343  
11750045\_ 10. 88729 10. 80341 10. 90267 10. 94836 10. 95314 10. 95915  
11750046\_ 7. 30372 7. 269863 7. 29496 7. 64326 7. 5854 7. 630419  
11750047\_ 3. 59512 3. 292652 3. 421308 3. 321894 3. 305257 3. 561611  
11750048\_ 4. 313273 4. 445369 4. 181153 4. 466826 4. 256194 4. 450667  
11750049\_ 4. 414008 4. 184165 4. 283431 4. 35685 4. 275543 4. 415744  
11750050\_ 9. 656257 9. 621405 9. 661175 9. 289613 9. 340952 9. 326779  
11750051\_ 9. 521402 9. 445522 9. 48974 9. 152695 9. 179771 9. 117266  
11750052\_ 5. 750362 5. 697875 5. 584813 5. 692266 5. 686361 5. 704919  
11750053\_ 4. 971048 4. 964898 5. 05903 4. 962586 4. 92081 4. 99063  
11750054\_ 6. 050524 6. 14467 6. 273641 6. 487252 6. 574151 6. 438294  
11750055\_ 5. 794924 5. 533956 5. 630221 5. 633736 5. 519822 5. 598569  
11750056\_ 6. 204391 6. 324376 6. 3367 6. 27528 6. 341234 6. 381151  
11750057\_ 5. 982345 5. 858972 5. 904979 6. 01832 6. 059022 6. 132452  
11750058\_ 6. 536494 6. 481046 6. 418535 6. 727853 6. 852551 6. 734984  
11750059\_ 10. 20578 10. 14406 10. 16342 10. 05057 10. 08857 10. 04485  
11750060\_ 6. 110384 6. 499302 6. 240292 6. 342111 6. 459871 6. 43823  
11750061\_ 9. 490275 9. 401153 9. 550559 9. 615224 9. 632999 9. 648395  
11750062\_ 9. 117771 9. 079127 9. 0454 9. 103033 9. 170747 9. 050639  
11750063\_ 4. 754878 4. 804469 4. 702055 4. 774292 4. 890539 4. 52373  
11750064\_ 9. 310197 9. 318673 9. 320772 9. 240836 9. 222423 9. 265719  
11750065\_ 8. 446341 8. 449966 8. 520046 8. 269906 8. 275565 8. 335368  
11750066\_ 7. 342619 7. 173623 7. 206118 6. 598758 6. 606986 6. 569287  
11750067\_ 3. 153032 3. 365254 3. 290161 3. 261214 3. 463859 3. 339089  
11750068\_ 5. 799397 5. 465943 5. 743778 5. 501897 5. 407044 5. 607704  
11750069\_ 7. 851765 7. 822546 7. 871379 8. 001849 8. 130266 8. 009864  
11750070\_ 5. 156303 5. 056191 4. 989115 5. 225177 5. 148359 5. 228627  
11750071\_ 6. 025952 6. 068123 6. 075998 6. 214756 6. 07841 6. 114413  
11750072\_ 5. 446445 5. 581697 5. 440418 5. 595069 5. 625031 5. 748929  
11750073\_ 7. 585234 7. 626347 7. 787394 8. 22409 8. 299272 8. 16217  
11750074\_ 5. 166133 5. 168841 5. 197802 5. 018006 5. 137703 5. 026771  
11750075\_ 3. 38657 3. 476553 3. 556597 3. 793854 3. 630666 3. 630666  
11750076\_ 2. 012675 2. 17225 2. 151175 1. 997304 2. 249088 2. 151175  
11750077\_ 3. 840188 3. 883696 4. 18485 3. 986904 3. 74903 3. 816494  
11750078\_ 9. 218746 9. 135744 9. 223887 8. 91253 8. 995262 8. 902709  
11750079\_ 9. 118945 9. 045291 9. 128826 9. 202885 9. 263649 9. 168847  
11750080\_ 9. 495169 9. 470571 9. 519475 9. 428987 9. 48058 9. 446991  
11750081\_ 4. 434061 4. 627156 4. 531695 4. 800542 4. 763665 4. 768666  
11750082\_ 5. 641642 5. 584813 5. 690143 5. 355918 5. 458298 5. 469825  
11750083\_ 4. 868431 4. 921373 4. 866671 4. 798745 4. 984669 4. 766712  
11750084\_ 4. 259375 4. 027187 4. 320495 4. 410799 4. 577731 4. 320902

11750085\_ 6. 34588 6. 282224 6. 445912 5. 440665 5. 373108 5. 676992  
11750086\_ 5. 209259 5. 079811 5. 18239 5. 28809 5. 36323 5. 302736  
11750087\_ 4. 456856 4. 330497 4. 434271 4. 362924 4. 366859 4. 542832  
11750088\_ 9. 022196 8. 918264 9. 029439 8. 935251 8. 987939 8. 97953  
11750089\_ 10. 43478 10. 4102 10. 45399 10. 35553 10. 37678 10. 32121  
11750090\_ 8. 993211 8. 97908 9. 070325 8. 914584 8. 873901 8. 878947  
11750091\_ 9. 117763 9. 184098 9. 088825 9. 620471 9. 452527 9. 367963  
11750092\_ 9. 573606 9. 551961 9. 495771 9. 774082 9. 766797 9. 691304  
11750093\_ 9. 746971 9. 746908 9. 743905 9. 982085 9. 908608 9. 795258  
11750094\_ 9. 695936 9. 689989 9. 623872 9. 815329 9. 81446 9. 736377  
11750095\_ 3. 380888 3. 3247 3. 273617 3. 634758 3. 608396 3. 503743  
11750096\_ 4. 700243 4. 569226 4. 304287 4. 389581 4. 275543 4. 555637  
11750097\_ 2. 797521 2. 720734 2. 63895 2. 415676 2. 720734 2. 605516  
11750098\_ 4. 944627 4. 974627 5. 122191 4. 968186 4. 956439 5. 023441  
11750099\_ 3. 707708 3. 891718 3. 93601 3. 67607 3. 930869 3. 877226  
11750100\_ 4. 264231 4. 127198 4. 249578 4. 524113 4. 341057 4. 185999  
11750101\_ 9. 101626 9. 036941 9. 074903 9. 626616 9. 656217 9. 647666  
11750102\_ 9. 178804 9. 140723 9. 206056 9. 696071 9. 743646 9. 700021  
11750103\_ 7. 996906 7. 997267 7. 998355 8. 500924 8. 500969 8. 524912  
11750104\_ 6. 898793 7. 037995 6. 968709 6. 98478 6. 852626 7. 020462  
11750105\_ 10. 82727 10. 80327 10. 80988 11. 17822 11. 2182 11. 17814  
11750106\_ 3. 79363 3. 867474 3. 79501 3. 725511 3. 933351 4. 114538  
11750107\_ 6. 115356 6. 125536 6. 183146 6. 252485 6. 308462 6. 410854  
11750108\_ 6. 947699 6. 924374 6. 913453 7. 108366 7. 184826 7. 132606  
11750109\_ 4. 999253 5. 041904 5. 073036 5. 147955 5. 377925 5. 320633  
11750110\_ 5. 582559 5. 613199 5. 628623 5. 688481 5. 777965 5. 76208  
11750111\_ 3. 320405 3. 449796 3. 363612 3. 238472 3. 523178 3. 277581  
11750112\_ 7. 271417 7. 145231 7. 250699 7. 099734 7. 168577 7. 119124  
11750113\_ 4. 507707 4. 467594 4. 428353 4. 507707 4. 507707 4. 720832  
11750114\_ 5. 986948 6. 025799 5. 961857 6. 162083 6. 044285 6. 084982  
11750115\_ 5. 865998 5. 963496 5. 803921 6. 045296 5. 94289 6. 093101  
11750116\_ 6. 445713 6. 502471 6. 487724 6. 564567 6. 458688 6. 525382  
11750117\_ 6. 93927 6. 959975 6. 977146 6. 832166 6. 788427 6. 950713  
11750118\_ 2. 791399 3. 119067 2. 587267 2. 983881 3. 07793 3. 119067  
11750119\_ 5. 290364 5. 260886 5. 289102 4. 827266 4. 900744 4. 781017  
11750120\_ 5. 22477 5. 063537 5. 239631 3. 761908 3. 95408 3. 820786  
11750121\_ 4. 424689 4. 459939 4. 429973 4. 584933 4. 477708 4. 579227  
11750122\_ 7. 352782 7. 455274 7. 409349 7. 437265 7. 498271 7. 488356  
11750123\_ 6. 453613 6. 316315 6. 431448 6. 809868 6. 89408 6. 948651  
11750124\_ 5. 598266 5. 400139 5. 500017 5. 843866 5. 727942 5. 919303  
11750125\_ 5. 880852 5. 943015 5. 884034 5. 849621 5. 874161 5. 94777  
11750126\_ 7. 099734 7. 127374 7. 020211 6. 794413 6. 807341 6. 84124  
11750127\_ 6. 585042 6. 561833 6. 610737 6. 513506 6. 366235 6. 354545  
11750128\_ 9. 370667 9. 330176 9. 383039 9. 717231 9. 711586 9. 668093  
11750129\_ 7. 497682 7. 358485 7. 521788 7. 02354 7. 141382 7. 030825  
11750130\_ 3. 504464 3. 344877 3. 245514 3. 390126 3. 57345 3. 414448  
11750131\_ 5. 32086 5. 097347 5. 032525 5. 353173 5. 305906 5. 455641  
11750132\_ 6. 934615 6. 827524 6. 881335 6. 560291 6. 648141 6. 572309  
11750133\_ 8. 081178 8. 009654 8. 017791 7. 868436 7. 893146 7. 876693  
11750134\_ 7. 003546 7. 088916 7. 095389 6. 68482 6. 728459 6. 693029  
11750135\_ 4. 810746 4. 638243 4. 810746 4. 800274 4. 813487 4. 899745

11750136\_ 5. 152584 5. 517123 5. 171486 5. 371714 5. 395182 5. 393422  
11750137\_ 3. 979487 4. 009547 3. 98137 3. 817758 3. 83069 3. 894784  
11750138\_ 8. 048038 7. 998208 8. 041703 7. 983292 7. 960938 7. 970677  
11750139\_ 3. 941464 3. 997131 3. 72562 3. 91964 3. 734354 3. 935085  
11750140\_ 7. 296163 7. 1508 7. 38379 7. 219341 7. 224121 7. 211842  
11750141\_ 8. 911161 8. 853533 8. 851411 9. 077922 9. 080362 9. 074079  
11750142\_ 9. 407895 9. 361029 9. 426234 8. 958551 9. 103744 9. 029384  
11750143\_ 5. 919286 5. 985484 5. 936071 6. 102689 6. 093426 6. 260186  
11750144\_ 10. 92413 10. 88545 10. 93937 10. 87386 10. 89 10. 82691  
11750145\_ 6. 415965 6. 397597 6. 405139 6. 303408 6. 293069 6. 335793  
11750146\_ 4. 748181 4. 709463 4. 902855 4. 726304 4. 678238 4. 6864  
11750147\_ 8. 184874 8. 079209 8. 100172 7. 520503 7. 57742 7. 654501  
11750148\_ 5. 082125 4. 955224 5. 021576 5. 022374 4. 985298 5. 086758  
11750149\_ 2. 893789 2. 99532 2. 795222 2. 965496 2. 899635 2. 79678  
11750150\_ 4. 68695 4. 900209 4. 983302 4. 929542 4. 96412 4. 929509  
11750151\_ 8. 745392 8. 663731 8. 733246 9. 020503 9. 028147 9. 03413  
11750152\_ 6. 0076 6. 049553 5. 939252 5. 94952 5. 868534 5. 812482  
11750153\_ 4. 584933 4. 547809 3. 893213 4. 643717 4. 584933 4. 584933  
11750154\_ 7. 626889 7. 602243 7. 688963 7. 076762 7. 140655 7. 081563  
11750155\_ 6. 424362 6. 489081 6. 419474 6. 376642 6. 504585 6. 477038  
11750156\_ 5. 85093 5. 952654 5. 594705 5. 90037 5. 865799 5. 930798  
11750157\_ 4. 390166 4. 57899 4. 424144 4. 584933 4. 478779 4. 5467  
11750158\_ 4. 692795 4. 700513 4. 860705 4. 835882 4. 798511 4. 889612  
11750159\_ 3. 008846 3. 257356 3. 222123 3. 292711 3. 161022 3. 121076  
11750160\_ 9. 489073 9. 452447 9. 491538 9. 443986 9. 454857 9. 457235  
11750161\_ 4. 610084 4. 588428 4. 459939 4. 52373 4. 510126 4. 546606  
11750162\_ 6. 91704 6. 787277 6. 848701 6. 913074 6. 937433 7. 009369  
11750163\_ 6. 489634 6. 561378 6. 393985 6. 571814 6. 588055 6. 621063  
11750164\_ 7. 789854 7. 783906 7. 680365 7. 589848 7. 625086 7. 623505  
11750165\_ 8. 818448 8. 857967 8. 873827 9. 069418 9. 097088 9. 051792  
11750166\_ 9. 03581 9. 011512 9. 007782 9. 450261 9. 380979 9. 436836  
11750167\_ 10. 2698 10. 26236 10. 22538 10. 05766 10. 07735 9. 992781  
11750168\_ 9. 932452 9. 883415 9. 916222 10. 01311 10. 04722 10. 03355  
11750169\_ 5. 259051 5. 229567 5. 174338 5. 298193 5. 11527 5. 22376  
11750170\_ 7. 124034 7. 066794 6. 922773 6. 836328 6. 70911 6. 77857  
11750171\_ 6. 042536 6. 146109 6. 00803 6. 082895 6. 14133 6. 148438  
11750172\_ 6. 061719 6. 10753 6. 368648 5. 822641 5. 793542 5. 769039  
11750173\_ 6. 304105 6. 070332 6. 23831 5. 870242 5. 829968 5. 902344  
11750174\_ 4. 845434 4. 815683 4. 848237 5. 380268 4. 856112 4. 862412  
11750175\_ 8. 134929 8. 038744 8. 155717 7. 50066 7. 620346 7. 553313  
11750176\_ 6. 282224 6. 261267 6. 311357 6. 403629 6. 328137 6. 424881  
11750177\_ 2. 72956 2. 740009 2. 613782 2. 60925 2. 648355 2. 650681  
11750178\_ 4. 472255 4. 379243 4. 390641 4. 431303 4. 40461 4. 415744  
11750179\_ 5. 855397 5. 821585 5. 819729 5. 734039 5. 726955 5. 830429  
11750180\_ 9. 065627 9. 067523 9. 051239 8. 885273 8. 855372 8. 806799  
11750181\_ 5. 43703 5. 709876 5. 436335 5. 651988 5. 552339 5. 539933  
11750182\_ 5. 706025 5. 786832 5. 618626 5. 784017 5. 715154 5. 663922  
11750183\_ 4. 856345 4. 421843 4. 605802 4. 690283 4. 528363 4. 686543  
11750184\_ 5. 977166 5. 918761 6. 082917 6. 048762 6. 065501 6. 061006  
11750185\_ 8. 439854 8. 359517 8. 421343 8. 078569 8. 160987 8. 191786  
11750186\_ 9. 123005 9. 054828 9. 122641 9. 749252 9. 756965 9. 749252

11750187\_ 7. 434587 7. 430538 7. 415645 7. 582418 7. 694221 7. 571763  
11750188\_ 6. 487684 6. 395702 6. 458053 6. 747777 6. 861261 6. 901982  
11750189\_ 10. 74296 10. 73063 10. 77258 10. 57747 10. 62194 10. 5275  
11750190\_ 10. 86072 10. 85999 10. 82363 10. 75669 10. 77703 10. 69646  
11750191\_ 9. 126633 9. 035702 9. 135786 9. 142965 9. 18654 9. 157229  
11750192\_ 9. 706136 9. 731034 9. 699564 9. 722799 9. 64685 9. 512412  
11750193\_ 6. 194348 6. 301276 6. 279503 6. 428581 6. 383618 6. 344784  
11750194\_ 6. 28181 6. 321838 6. 282282 6. 293129 6. 265956 6. 259532  
11750195\_ 5. 118033 5. 187496 5. 140569 5. 210835 5. 029046 5. 268469  
11750196\_ 9. 651453 9. 62874 9. 702287 9. 121829 9. 166171 9. 174628  
11750197\_ 8. 545593 8. 48751 8. 518178 8. 219572 8. 145981 8. 146797  
11750198\_ 6. 587712 6. 57918 6. 707398 7. 050934 7. 079593 7. 122932  
11750199\_ 5. 698144 5. 703116 5. 557469 5. 731834 5. 80613 5. 780418  
11750200\_ 5. 441071 5. 465126 5. 448296 5. 402839 5. 358414 5. 319151  
11750201\_ 5. 69782 5. 894697 5. 97861 6. 333812 6. 327812 6. 162131  
11750202\_ 8. 866675 8. 758844 8. 879861 8. 408393 8. 480725 8. 512618  
11750203\_ 5. 790964 5. 85512 5. 98993 6. 383809 6. 301751 6. 196759  
11750204\_ 6. 255752 6. 282224 6. 321846 6. 799716 6. 596282 6. 714177  
11750205\_ 2. 340228 2. 340228 2. 348445 2. 40835 2. 47102 2. 340213  
11750206\_ 7. 741153 7. 6046 7. 677484 7. 692304 7. 680726 7. 687791  
11750207\_ 9. 935575 9. 877146 9. 912908 9. 985655 9. 980899 9. 943011  
11750208\_ 4. 396401 4. 503082 4. 340798 4. 551378 4. 599546 4. 594143  
11750209\_ 4. 632737 4. 682993 4. 459643 4. 690688 4. 707614 4. 791298  
11750210\_ 2. 084281 1. 950133 1. 949785 2. 218989 1. 949785 2. 122017  
11750211\_ 4. 275543 4. 124413 4. 124413 4. 274778 4. 336951 4. 50421  
11750212\_ 4. 580836 4. 535825 4. 70504 4. 804858 4. 622653 4. 654131  
11750213\_ 6. 536826 6. 436897 6. 585666 6. 750499 6. 687677 6. 808322  
11750214\_ 7. 15287 7. 232665 6. 994297 7. 339069 7. 325775 7. 208193  
11750215\_ 7. 623525 7. 765944 7. 757131 8. 057045 8. 062438 7. 967678  
11750216\_ 6. 688764 6. 529395 6. 567056 6. 9001 6. 965231 6. 990334  
11750217\_ 6. 048777 6. 206003 6. 067877 6. 092866 5. 958054 6. 159771  
11750218\_ 7. 491843 7. 413376 7. 463193 7. 481773 7. 474858 7. 592186  
11750219\_ 6. 118189 6. 052489 6. 081529 6. 105914 6. 168207 6. 197684  
11750220\_ 6. 810816 6. 666056 6. 822466 6. 747375 6. 727324 6. 872085  
11750221\_ 3. 277236 3. 279206 3. 097584 3. 34658 3. 306585 3. 109287  
11750222\_ 7. 470389 7. 445918 7. 558053 7. 094926 7. 088009 7. 129103  
11750223\_ 9. 764314 9. 725843 9. 731476 9. 933666 9. 967246 9. 938802  
11750224\_ 3. 768494 3. 672484 3. 954514 3. 936353 3. 647831 3. 685156  
11750225\_ 5. 849179 5. 957954 5. 994729 6. 018553 6. 113079 6. 002818  
11750226\_ 4. 772754 4. 67075 4. 654228 4. 858037 4. 772754 4. 886431  
11750227\_ 7. 213917 7. 306776 7. 232886 7. 273326 7. 344663 7. 331625  
11750228\_ 5. 893578 5. 872461 5. 796058 5. 818096 5. 881545 6. 016919  
11750229\_ 4. 81898 4. 618623 4. 35146 4. 445835 4. 60082 4. 443043  
11750230\_ 7. 49786 7. 489112 7. 486488 7. 579079 7. 664267 7. 626822  
11750231\_ 5. 209573 5. 24543 4. 843696 5. 192961 5. 293946 5. 147575  
11750232\_ 3. 705625 3. 860532 3. 812352 3. 835813 3. 672945 3. 775616  
11750233\_ 7. 940777 7. 880573 7. 920919 7. 66528 7. 512882 7. 503786  
11750234\_ 6. 529782 6. 654097 6. 46488 6. 473337 6. 571931 6. 522394  
11750235\_ 4. 678215 4. 779108 4. 779108 4. 92573 4. 848395 4. 730211  
11750236\_ 5. 226686 5. 169222 5. 036311 5. 480966 5. 434946 5. 446804  
11750237\_ 5. 275121 5. 386922 5. 243482 5. 270246 5. 213669 5. 388618



11750238\_ 5. 152304 5. 205413 5. 085631 5. 204191 5. 327257 5. 214733  
11750239\_ 6. 779107 6. 727549 6. 693773 6. 57926 6. 543281 6. 631731  
11750240\_ 11. 27016 11. 23754 11. 2558 11. 11423 11. 11325 11. 10842  
11750241\_ 3. 397833 3. 285366 3. 236731 3. 800152 3. 449466 3. 606313  
11750242\_ 5. 442778 5. 552259 5. 422491 5. 592725 5. 542573 5. 409612  
11750243\_ 3. 890839 4. 228954 3. 923725 4. 416646 4. 155336 4. 080378  
11750244\_ 7. 546856 7. 558856 7. 594977 7. 049794 7. 16451 7. 101197  
11750245\_ 8. 122741 8. 045589 8. 151897 7. 581603 7. 540751 7. 654772  
11750246\_ 4. 857877 4. 866874 4. 930615 4. 879492 4. 930615 4. 866013  
11750247\_ 5. 509193 5. 847536 5. 389679 5. 72521 5. 8786 5. 687812  
11750248\_ 5. 798899 6. 060504 5. 877208 5. 750709 5. 761415 5. 856843  
11750249\_ 2. 91655 3. 112457 2. 924902 2. 752217 2. 897167 2. 793992  
11750250\_ 6. 000642 6. 101649 5. 986109 6. 041897 6. 041897 6. 153018  
11750251\_ 3. 631855 3. 605258 3. 720906 3. 673849 3. 646386 3. 663444  
11750252\_ 4. 795279 4. 882708 4. 855352 4. 801267 4. 858423 4. 979328  
11750253\_ 7. 784516 7. 779491 7. 761423 7. 708759 7. 872523 7. 803126  
11750254\_ 3. 409808 3. 476584 3. 312836 3. 479159 3. 361995 3. 676081  
11750255\_ 8. 250243 8. 200298 8. 208343 8. 385322 8. 368907 8. 37716  
11750256\_ 7. 597423 7. 461443 7. 589207 7. 162319 7. 017554 7. 091194  
11750257\_ 7. 860882 7. 795429 7. 900955 6. 640374 6. 673149 6. 81709  
11750258\_ 6. 631711 6. 600905 6. 628031 7. 125373 6. 916565 7. 009678  
11750259\_ 8. 339828 8. 274539 8. 319895 8. 514623 8. 611096 8. 495241  
11750260\_ 3. 893122 3. 79761 3. 944447 3. 79761 3. 858814 3. 625654  
11750261\_ 6. 848672 6. 748775 6. 810247 6. 717621 6. 76243 6. 76002  
11750262\_ 4. 33538 4. 477813 4. 412455 4. 459939 4. 360089 4. 581609  
11750263\_ 5. 941351 5. 910895 5. 90101 5. 759059 5. 76314 5. 757759  
11750264\_ 4. 702969 4. 764221 4. 65791 4. 986098 5. 07031 5. 06374  
11750265\_ 9. 75934 9. 724032 9. 765735 9. 744456 9. 78489 9. 724337  
11750266\_ 4. 338481 4. 420385 4. 370337 4. 385152 4. 338528 4. 458616  
11750267\_ 5. 547529 5. 608311 5. 419377 5. 64468 5. 558363 5. 58444  
11750268\_ 2. 062573 1. 956278 2. 327546 1. 791573 1. 819639 1. 885565  
11750269\_ 3. 545966 3. 484277 3. 546498 3. 769484 3. 64731 3. 584505  
11750270\_ 2. 588657 2. 5702 2. 588657 2. 639235 2. 519944 2. 645808  
11750271\_ 5. 69297 5. 777848 5. 63281 5. 58283 5. 737165 5. 70068  
11750272\_ 9. 834898 9. 792891 9. 839161 9. 817149 9. 8649 9. 810831  
11750273\_ 3. 818401 3. 909593 3. 740892 3. 661701 3. 824386 3. 807117  
11750274\_ 1. 993414 1. 995297 2. 025581 2. 02178 2. 096877 2. 118752  
11750275\_ 6. 777217 6. 828636 6. 643009 6. 756512 6. 846541 6. 889611  
11750276\_ 6. 646187 6. 557817 6. 639788 6. 231887 6. 397946 6. 26386  
11750277\_ 7. 04424 7. 08236 7. 062265 7. 153782 7. 225348 7. 170205  
11750278\_ 4. 402375 4. 298822 4. 376287 4. 487193 4. 395067 4. 283359  
11750279\_ 6. 038508 5. 930921 5. 936723 5. 365226 5. 358594 5. 516943  
11750280\_ 7. 118748 7. 125158 7. 09549 7. 21148 7. 162709 7. 164857  
11750281\_ 6. 632061 6. 421542 6. 559505 6. 648586 6. 848175 6. 752593  
11750282\_ 7. 922803 7. 869886 7. 976139 8. 128398 8. 190183 8. 113522  
11750283\_ 4. 829975 4. 93165 4. 764642 4. 946202 4. 970929 4. 858819  
11750284\_ 6. 815667 6. 811222 6. 9323 6. 438958 6. 357584 6. 426177  
11750285\_ 7. 539152 7. 457894 7. 576204 7. 637367 7. 586051 7. 631478  
11750286\_ 11. 79669 11. 79396 11. 79743 11. 81605 11. 79767 11. 79827  
11750287\_ 3. 327125 3. 054041 3. 527898 3. 135729 3. 372051 3. 315833  
11750288\_ 3. 478121 3. 503743 3. 625408 3. 369887 3. 320813 3. 290188

11750289\_ 4. 562006 4. 861601 4. 709463 4. 70678 4. 849431 4. 719566  
11750290\_ 4. 016743 4. 047389 3. 93055 3. 850246 3. 877026 3. 905354  
11750291\_ 8. 816216 8. 853126 8. 811917 8. 659321 8. 715363 8. 630339  
11750292\_ 9. 244074 9. 202699 9. 254491 8. 990865 9. 079834 9. 031783  
11750293\_ 9. 269076 9. 167589 9. 259888 8. 969035 9. 00786 9. 02896  
11750294\_ 5. 671598 5. 808976 5. 671598 5. 803072 5. 739261 5. 813091  
11750295\_ 6. 846736 6. 847532 6. 949873 6. 931538 6. 959542 7. 036592  
11750296\_ 6. 187829 6. 102288 6. 159771 6. 187829 6. 302343 6. 17981  
11750297\_ 5. 1925 5. 131 5. 023346 4. 761779 4. 748985 4. 717324  
11750298\_ 7. 271533 7. 200609 7. 334044 7. 29136 7. 194708 7. 30634  
11750299\_ 6. 933498 6. 801311 6. 881826 6. 431763 6. 309415 6. 33679  
11750300\_ 6. 875662 6. 671629 6. 745109 6. 671938 6. 676181 6. 600302  
11750301\_ 8. 374932 8. 328525 8. 339383 8. 409477 8. 388258 8. 388258  
11750302\_ 6. 772812 6. 703233 6. 769137 7. 456656 7. 484937 7. 516494  
11750303\_ 3. 311454 3. 342301 3. 461704 3. 45611 3. 295732 2. 990987  
11750304\_ 2. 788608 2. 957462 2. 661572 2. 762954 2. 760816 2. 931939  
11750305\_ 3. 391828 3. 53394 3. 398236 3. 605571 3. 593941 3. 410949  
11750306\_ 2. 116996 1. 986431 2. 213969 2. 39623 2. 123572 2. 199284  
11750307\_ 6. 870245 6. 924753 6. 904183 6. 600422 6. 39158 6. 604788  
11750308\_ 7. 851848 7. 858245 7. 884527 7. 920314 7. 955755 8. 000202  
11750309\_ 6. 998032 6. 979101 6. 979101 7. 199605 7. 043182 7. 043182  
11750310\_ 5. 209259 5. 298892 5. 24094 5. 26034 5. 359412 5. 379894  
11750311\_ 4. 124843 4. 104593 4. 283274 4. 235285 4. 200733 4. 198343  
11750312\_ 4. 620747 4. 865007 4. 584933 4. 874234 4. 919905 4. 700243  
11750313\_ 6. 782315 6. 792896 6. 831082 6. 857846 6. 895127 6. 8899  
11750314\_ 5. 18576 5. 203392 5. 103626 5. 288329 5. 379598 5. 266908  
11750315\_ 7. 254198 7. 085819 6. 994251 6. 501668 6. 51646 6. 509214  
11750316\_ 5. 723112 5. 767912 5. 878239 5. 568042 5. 705863 5. 885131  
11750317\_ 5. 591639 5. 458893 5. 585966 5. 656277 5. 58536 5. 558604  
11750318\_ 3. 274613 3. 020919 3. 122634 3. 195254 3. 21279 3. 303418  
11750319\_ 6. 206953 6. 237137 6. 244709 6. 240368 6. 218674 6. 136723  
11750320\_ 5. 76723 5. 51482 5. 635415 5. 556332 5. 645689 5. 629898  
11750321\_ 7. 525328 7. 519808 7. 386692 6. 249655 6. 295318 6. 212778  
11750322\_ 4. 773587 4. 915446 4. 933149 4. 927641 4. 998507 4. 843053  
11750323\_ 2. 770816 2. 88919 2. 813968 3. 010148 3. 020591 3. 010148  
11750324\_ 5. 119479 5. 023234 5. 073036 5. 150358 5. 178245 5. 058707  
11750325\_ 3. 9308 4. 108056 4. 184892 4. 202574 4. 248097 4. 333378  
11750326\_ 5. 389167 5. 321776 5. 242438 5. 354106 5. 360694 5. 49026  
11750327\_ 5. 029529 5. 189628 5. 258589 5. 222835 5. 021058 5. 064664  
11750328\_ 7. 290394 7. 231372 7. 347518 7. 485858 7. 411219 7. 474556  
11750329\_ 7. 491597 7. 405621 7. 458569 7. 537746 7. 526689 7. 598449  
11750330\_ 4. 451764 4. 501416 4. 395851 4. 590915 4. 491188 4. 551252  
11750331\_ 7. 441862 7. 462242 7. 444652 7. 279437 7. 167296 7. 14516  
11750332\_ 2. 257909 2. 362077 2. 47102 2. 172902 2. 008516 2. 251951  
11750333\_ 5. 144989 5. 058935 5. 000949 5. 021605 5. 153427 5. 086419  
11750334\_ 6. 346755 6. 264779 6. 289557 5. 815508 5. 977658 5. 922392  
11750335\_ 4. 771164 4. 795391 4. 700047 4. 820384 4. 795391 4. 795391  
11750336\_ 5. 156303 5. 239455 5. 214063 5. 453774 5. 11231 5. 239455  
11750337\_ 6. 16619 6. 195378 6. 263107 6. 657798 6. 60821 6. 530328  
11750338\_ 2. 663189 2. 596612 2. 575971 2. 572565 2. 588659 2. 502121  
11750339\_ 5. 131341 5. 212961 5. 104396 5. 273013 5. 433421 5. 358763

11750340\_ 5. 498853 5. 714555 5. 572464 5. 680684 5. 712132 5. 78029  
11750341\_ 4. 030226 3. 900117 4. 129953 4. 193989 4. 024446 4. 098791  
11750342\_ 3. 128994 3. 13496 3. 053133 3. 060835 3. 146188 3. 119292  
11750343\_ 2. 676656 2. 740934 2. 705701 2. 748471 2. 59228 2. 552193  
11750344\_ 6. 349241 6. 554835 6. 318302 6. 523019 6. 481046 6. 372053  
11750345\_ 5. 209004 5. 058339 5. 193349 5. 28821 5. 318043 5. 081732  
11750346\_ 4. 781058 4. 983753 4. 875164 4. 938236 4. 853672 4. 94619  
11750347\_ 2. 308362 2. 602103 2. 447486 2. 550521 2. 470829 2. 544175  
11750348\_ 5. 545167 5. 61162 5. 641127 5. 575876 5. 68891 5. 603491  
11750349\_ 4. 661396 4. 83506 4. 760985 4. 954233 4. 833685 4. 895488  
11750350\_ 4. 927739 4. 92529 4. 930507 4. 893434 4. 911875 4. 906658  
11750351\_ 4. 990386 4. 9226 4. 908531 5. 086569 5. 029529 4. 993606  
11750352\_ 5. 65691 5. 610342 5. 669082 5. 666841 5. 662137 5. 766612  
11750353\_ 5. 278267 5. 078766 5. 25966 4. 819093 4. 807247 4. 83255  
11750354\_ 6. 470834 6. 183704 6. 33679 6. 098809 6. 103931 6. 118848  
11750355\_ 7. 943925 7. 831272 7. 915234 7. 762446 7. 726465 7. 820902  
11750356\_ 5. 028231 5. 272696 4. 905297 5. 156387 5. 166195 4. 948664  
11750357\_ 6. 275829 6. 35983 6. 313574 6. 514926 6. 34864 6. 455131  
11750358\_ 4. 100834 4. 059857 3. 934883 4. 341884 4. 139772 4. 093706  
11750359\_ 7. 000291 7. 009306 6. 918753 7. 350821 7. 273756 7. 30967  
11750360\_ 7. 326023 7. 349957 7. 25478 7. 511553 7. 26881 7. 312213  
11750361\_ 4. 97317 5. 021041 4. 931052 5. 167459 5. 145341 5. 086114  
11750362\_ 3. 412201 3. 503743 3. 438203 3. 721592 3. 642016 3. 716881  
11750363\_ 4. 129117 4. 131657 4. 315879 4. 080271 4. 253274 4. 136724  
11750364\_ 4. 412181 4. 622364 4. 481293 4. 37772 4. 508242 4. 689091  
11750365\_ 4. 724963 4. 552205 4. 751366 4. 993981 4. 727953 4. 766192  
11750366\_ 2. 213137 2. 364211 2. 128884 2. 268792 2. 244144 2. 253435  
11750367\_ 4. 608986 4. 52373 4. 643717 4. 495838 4. 477548 4. 17773  
11750368\_ 5. 766481 5. 75478 5. 690029 6. 017466 5. 80913 5. 829597  
11750369\_ 6. 813209 6. 932894 6. 738256 6. 938257 6. 855189 6. 915117  
11750370\_ 8. 033174 8. 022516 7. 939378 8. 015102 8. 050967 7. 957117  
11750371\_ 3. 173899 3. 261853 3. 20942 3. 261853 3. 344942 3. 386359  
11750372\_ 4. 200678 4. 556703 4. 17931 4. 277704 4. 459939 4. 275543  
11750373\_ 6. 082744 6. 060093 6. 137242 6. 434711 6. 529348 6. 485474  
11750374\_ 7. 083679 7. 036173 7. 151006 6. 896656 6. 874408 6. 871126  
11750375\_ 6. 927082 6. 867876 6. 872138 6. 71095 6. 631711 6. 795302  
11750376\_ 4. 915382 5. 034769 5. 130434 5. 156303 5. 177525 5. 289219  
11750377\_ 4. 464051 4. 564828 4. 610238 4. 665807 4. 42565 4. 411602  
11750378\_ 2. 131107 2. 176546 2. 148021 2. 226218 2. 210293 2. 390391  
11750379\_ 7. 740673 7. 701662 7. 706811 7. 6704 7. 764365 7. 722804  
11750380\_ 4. 011299 4. 032821 3. 928605 4. 033552 3. 99438 4. 044087  
11750381\_ 4. 681152 4. 667046 4. 58418 4. 70159 4. 855461 4. 681152  
11750382\_ 6. 875712 7. 032227 7. 052768 7. 05773 7. 125291 7. 058561  
11750383\_ 8. 184851 8. 154793 8. 216842 8. 543127 8. 684347 8. 571559  
11750384\_ 9. 686674 9. 676449 9. 708809 9. 382035 9. 408283 9. 344075  
11750385\_ 8. 079221 8. 202303 8. 094596 8. 207524 8. 139499 8. 24037  
11750386\_ 10. 16607 10. 08026 10. 14197 9. 995061 10. 03134 9. 959512  
11750387\_ 9. 869641 9. 838858 9. 798648 10. 07656 10. 03831 10. 05607  
11750388\_ 3. 470942 3. 562534 3. 569021 3. 624763 3. 563222 3. 637366  
11750389\_ 2. 377569 2. 181934 2. 469949 2. 251736 2. 272883 2. 251736  
11750390\_ 5. 424891 5. 68925 5. 41708 5. 53738 5. 396971 5. 555044

11750391\_ 5. 634983 5. 78502 5. 553676 5. 662391 5. 752673 5. 778024  
11750392\_ 6. 053485 6. 202248 5. 936239 6. 277287 6. 234729 6. 204417  
11750393\_ 6. 894873 6. 976947 6. 857771 6. 906517 6. 977903 6. 88253  
11750394\_ 7. 249565 7. 289426 7. 19416 7. 392319 7. 40267 7. 409349  
11750395\_ 6. 454488 6. 292636 6. 333789 5. 990203 6. 245709 6. 084167  
11750396\_ 7. 654315 7. 55511 7. 586985 7. 28276 7. 252871 7. 33979  
11750397\_ 4. 435415 4. 495516 4. 572534 4. 647319 4. 859376 4. 599692  
11750398\_ 2. 525641 2. 416399 2. 502672 2. 451968 2. 800379 2. 548693  
11750399\_ 2. 636449 2. 753402 2. 872031 2. 878475 2. 69705 2. 711138  
11750400\_ 8. 753925 8. 633039 8. 662675 8. 02234 8. 04588 8. 016781  
11750401\_ 7. 335346 7. 196088 7. 37454 6. 917149 6. 954568 6. 917149  
11750402\_ 6. 021103 5. 78091 6. 1692 5. 655592 5. 825536 5. 644712  
11750403\_ 8. 086937 8. 107548 8. 055188 8. 155606 8. 088599 8. 086937  
11750404\_ 7. 522981 7. 482875 7. 567404 7. 305366 7. 25602 7. 286813  
11750405\_ 5. 265244 5. 209421 5. 23885 5. 275005 5. 439787 5. 252317  
11750406\_ 5. 90069 5. 84839 5. 845365 5. 614563 5. 78722 5. 754755  
11750407\_ 3. 915761 3. 77747 3. 660439 3. 750042 3. 976409 3. 66902  
11750408\_ 7. 833167 7. 686292 7. 785638 7. 429569 7. 398269 7. 389491  
11750409\_ 5. 047099 4. 98795 4. 912302 4. 96471 4. 93837 4. 94619  
11750410\_ 3. 756066 3. 656107 3. 382644 3. 489446 3. 465203 3. 535974  
11750411\_ 8. 288561 8. 25657 8. 296129 8. 443301 8. 497297 8. 475713  
11750412\_ 4. 635692 4. 688166 4. 270538 4. 567317 4. 796931 4. 60255  
11750413\_ 5. 039427 5. 078074 4. 952004 4. 945167 4. 916455 5. 092636  
11750414\_ 6. 209615 6. 183987 6. 325006 5. 899057 6. 013096 5. 99959  
11750415\_ 11. 56995 11. 52252 11. 53365 11. 79146 11. 82933 11. 80292  
11750416\_ 8. 398756 8. 282293 8. 388177 9. 788766 9. 764314 9. 764314  
11750417\_ 2. 937101 3. 085384 3. 115842 3. 088224 3. 156439 2. 907182  
11750418\_ 4. 523701 4. 560128 4. 591069 4. 719186 4. 623965 4. 606752  
11750419\_ 2. 660418 2. 646607 2. 555094 2. 514779 2. 646607 2. 669406  
11750420\_ 7. 052756 7. 083153 7. 089873 7. 080063 7. 120602 6. 986366  
11750421\_ 8. 418917 8. 358263 8. 472332 8. 484222 8. 548019 8. 493764  
11750422\_ 5. 545145 5. 477254 5. 48695 5. 53181 5. 453638 5. 475572  
11750423\_ 7. 13347 7. 074601 7. 13754 6. 631621 6. 515599 6. 624623  
11750424\_ 7. 373654 7. 277629 7. 308981 6. 835108 6. 91625 6. 856934  
11750425\_ 3. 908239 4. 132525 3. 983959 4. 083148 4. 112788 4. 38131  
11750426\_ 3. 479605 3. 307081 3. 343348 3. 586411 3. 330723 3. 458786  
11750427\_ 2. 62485 2. 616923 2. 785768 2. 716731 2. 702226 2. 749732  
11750428\_ 2. 822383 2. 829833 2. 939229 2. 906794 2. 912551 2. 947265  
11750429\_ 4. 284011 4. 419915 4. 032416 4. 263846 4. 234123 4. 402373  
11750430\_ 5. 438799 5. 56985 5. 46375 5. 527906 5. 550012 5. 564941  
11750431\_ 4. 597601 4. 693846 4. 643717 4. 59799 4. 553754 4. 602173  
11750432\_ 10. 52148 10. 52045 10. 57717 10. 52707 10. 5178 10. 48207  
11750433\_ 11. 05181 11. 0001 11. 04132 10. 98533 10. 9997 10. 9817  
11750434\_ 7. 295553 7. 245746 7. 382254 7. 366485 7. 419471 7. 426223  
11750435\_ 6. 152433 5. 938482 6. 122205 6. 184643 6. 24682 6. 287091  
11750436\_ 5. 950523 5. 780124 5. 788896 5. 960426 5. 987424 6. 097649  
11750437\_ 6. 559101 6. 657655 6. 461904 6. 575254 6. 483269 6. 592971  
11750438\_ 11. 30039 11. 27498 11. 30501 11. 31998 11. 36843 11. 32756  
11750439\_ 2. 815674 3. 155558 3. 025972 3. 258252 3. 377532 3. 38454  
11750440\_ 3. 847019 3. 939244 3. 939983 3. 971061 3. 896983 3. 879309  
11750441\_ 5. 706576 5. 855646 5. 861352 6. 479495 6. 495677 6. 459068

11750442\_ 5. 524458 5. 343391 5. 67483 6. 579869 6. 65814 6. 545788  
11750443\_ 6. 805142 6. 828192 6. 782008 6. 63915 6. 612887 6. 592702  
11750444\_ 4. 969972 5. 131802 5. 095274 5. 069875 5. 069875 4. 991872  
11750445\_ 4. 286031 4. 230213 4. 248131 4. 50372 4. 346155 4. 387944  
11750446\_ 7. 836716 7. 723845 7. 839513 8. 542755 8. 551879 8. 593459  
11750447\_ 3. 067978 3. 171027 2. 96802 3. 052607 3. 075784 3. 067314  
11750448\_ 7. 827576 8. 080979 7. 874004 8. 043456 8. 030909 8. 031983  
11750449\_ 5. 145076 5. 188561 5. 05001 5. 035076 4. 904116 5. 049802  
11750450\_ 7. 765944 7. 78787 7. 784174 7. 95541 7. 894776 7. 838219  
11750451\_ 8. 522009 8. 429645 8. 51805 8. 587621 8. 588208 8. 58769  
11750452\_ 4. 415744 4. 546413 4. 518586 4. 589606 4. 575898 4. 676018  
11750453\_ 5. 087184 5. 096804 4. 990174 5. 096804 5. 067472 5. 156741  
11750454\_ 3. 97174 3. 885874 3. 832988 3. 826456 3. 859925 3. 841369  
11750455\_ 3. 840252 3. 886229 3. 886229 3. 98425 3. 869384 3. 957593  
11750456\_ 3. 059189 3. 061205 2. 897942 3. 156182 3. 095968 3. 256121  
11750457\_ 5. 235314 5. 204487 5. 267934 5. 033179 4. 798511 4. 974056  
11750458\_ 2. 778596 2. 402157 2. 723008 2. 511129 2. 572259 2. 580883  
11750459\_ 4. 807097 4. 815683 4. 727869 4. 723076 4. 798511 4. 807097  
11750460\_ 6. 779546 6. 855977 6. 744256 6. 856905 6. 831221 6. 898722  
11750461\_ 4. 987447 5. 035813 5. 009564 4. 972737 5. 13072 5. 079842  
11750462\_ 3. 600168 3. 594528 3. 647166 3. 425755 3. 565153 3. 506712  
11750463\_ 5. 605825 5. 689481 5. 649333 5. 71456 5. 630919 5. 567828  
11750464\_ 5. 029529 5. 009101 5. 073036 5. 110384 5. 239354 4. 97618  
11750465\_ 7. 485729 7. 474342 7. 468829 7. 942571 7. 985238 7. 864194  
11750466\_ 7. 837047 7. 913524 7. 98829 7. 898094 7. 936484 7. 904147  
11750467\_ 6. 995567 6. 948834 6. 950388 7. 226203 7. 218789 7. 183869  
11750468\_ 7. 402617 7. 274687 7. 327812 7. 272554 7. 268162 7. 323646  
11750469\_ 5. 342865 5. 528444 5. 184044 5. 514687 5. 465215 5. 528444  
11750470\_ 6. 08459 6. 161852 6. 11418 6. 177727 6. 154646 6. 209523  
11750471\_ 5. 340163 5. 392963 5. 118303 5. 481467 5. 552506 5. 518054  
11750472\_ 4. 954896 5. 055169 4. 757463 5. 011286 5. 149545 4. 900157  
11750473\_ 3. 298225 3. 606313 3. 625408 3. 621073 3. 530985 3. 606313  
11750474\_ 4. 999043 4. 892815 4. 987722 4. 972122 5. 112139 5. 091393  
11750475\_ 3. 588181 3. 510867 3. 379206 3. 701807 3. 722945 3. 608949  
11750476\_ 5. 402643 5. 222866 5. 094696 5. 327101 5. 399324 5. 191798  
11750477\_ 6. 556335 6. 671597 6. 575839 6. 792183 6. 755625 6. 844291  
11750478\_ 7. 023755 7. 091698 6. 946625 7. 297049 7. 391125 7. 341025  
11750479\_ 4. 422625 4. 4847 4. 456973 4. 497188 4. 528187 4. 486481  
11750480\_ 7. 152807 7. 019587 7. 088468 6. 812797 6. 677408 6. 829435  
11750481\_ 4. 40393 4. 525938 4. 334554 4. 468507 4. 475844 4. 470714  
11750482\_ 5. 092229 5. 185566 4. 994462 5. 189628 5. 212506 5. 091821  
11750483\_ 4. 512417 4. 611722 4. 556926 4. 727614 4. 61275 4. 722156  
11750484\_ 6. 436816 6. 367276 6. 416488 7. 34765 7. 235329 7. 203573  
11750485\_ 4. 512183 4. 53556 4. 409003 4. 547722 4. 597844 4. 63383  
11750486\_ 6. 08858 5. 847847 5. 940651 6. 090891 6. 17586 6. 266704  
11750487\_ 3. 443554 3. 449777 3. 51098 3. 757746 3. 452203 3. 508555  
11750488\_ 5. 896577 5. 985345 6. 018368 6. 081215 6. 079679 6. 062764  
11750489\_ 4. 575404 4. 406378 4. 785795 4. 372158 4. 389369 4. 366375  
11750490\_ 4. 604929 4. 869143 4. 672831 4. 764137 4. 793446 4. 951765  
11750491\_ 6. 484247 6. 616083 6. 484154 6. 543636 6. 584124 6. 511724  
11750492\_ 7. 685543 7. 767585 7. 778464 7. 63046 7. 575889 7. 686342

11750493\_ 7. 446454 7. 459391 7. 573322 7. 242576 7. 233963 7. 237458  
11750494\_ 6. 353753 6. 333165 6. 215739 6. 409685 6. 252022 6. 373455  
11750495\_ 3. 487795 3. 313104 3. 408398 3. 410076 3. 729485 3. 227537  
11750496\_ 4. 793276 4. 852023 4. 786278 4. 864912 4. 941072 4. 896121  
11750497\_ 3. 125304 3. 064391 3. 141811 3. 104199 3. 193965 3. 136759  
11750498\_ 7. 033675 7. 173165 7. 111081 7. 323206 7. 275667 7. 186956  
11750499\_ 1. 896798 1. 987576 1. 990685 1. 962361 1. 938817 1. 770139  
11750500\_ 5. 996728 6. 058786 6. 044285 6. 204804 6. 104197 6. 215599  
11750501\_ 4. 132058 4. 050777 3. 918993 4. 292224 4. 132058 4. 132185  
11750502\_ 4. 766823 4. 883242 4. 711997 5. 096039 4. 858636 4. 806161  
11750503\_ 7. 761728 7. 708475 7. 806253 7. 392072 7. 45117 7. 454731  
11750504\_ 6. 271912 6. 488584 6. 27982 6. 465052 6. 525096 6. 488584  
11750505\_ 3. 817909 3. 907735 4. 061646 3. 992323 4. 006625 3. 905781  
11750506\_ 3. 818401 3. 766055 3. 914807 3. 756925 4. 005162 3. 791441  
11750507\_ 4. 69838 4. 704913 4. 720081 4. 74556 4. 754488 4. 647642  
11750508\_ 6. 910959 6. 960611 6. 710344 6. 905534 6. 98551 6. 989846  
11750509\_ 5. 972185 5. 916584 5. 876378 6. 071152 6. 202951 6. 025975  
11750510\_ 6. 434231 6. 53209 6. 431792 6. 625132 6. 580159 6. 712457  
11750511\_ 6. 502421 6. 600967 6. 433553 6. 658685 6. 476684 6. 735763  
11750512\_ 10. 65383 10. 63532 10. 6308 10. 90716 10. 94726 10. 91296  
11750513\_ 4. 809733 4. 763543 4. 76293 4. 824195 4. 814072 4. 812539  
11750514\_ 6. 299053 6. 23781 6. 246322 6. 376095 6. 388579 6. 355636  
11750515\_ 6. 599839 6. 445985 6. 464591 6. 444975 6. 479479 6. 587842  
11750516\_ 9. 434304 9. 353415 9. 380779 9. 274384 9. 329333 9. 314625  
11750517\_ 2. 27257 2. 361778 2. 361778 2. 422546 2. 652729 2. 268551  
11750518\_ 3. 818401 3. 873958 3. 530732 3. 925181 4. 091748 4. 007161  
11750519\_ 5. 070064 4. 987889 5. 001284 4. 86759 5. 02783 4. 969126  
11750520\_ 5. 853204 5. 841177 5. 845365 5. 830816 5. 784581 5. 814386  
11750521\_ 3. 817318 3. 723624 3. 707523 3. 723946 3. 814818 3. 620483  
11750522\_ 5. 13765 5. 092891 5. 089854 5. 103646 5. 11183 5. 155631  
11750523\_ 6. 848996 6. 96046 6. 811564 6. 807815 6. 915887 6. 853767  
11750524\_ 4. 731754 4. 608419 4. 556556 4. 666512 4. 563986 4. 542673  
11750525\_ 5. 007673 5. 064582 5. 110928 5. 084299 5. 040866 5. 159116  
11750526\_ 3. 26734 3. 209309 3. 417298 3. 577066 3. 504942 3. 649055  
11750527\_ 8. 71844 8. 685041 8. 696873 8. 741432 8. 781755 8. 667607  
11750528\_ 3. 272191 3. 322174 3. 272191 3. 267417 3. 322174 3. 265514  
11750529\_ 7. 020462 7. 009771 7. 016336 7. 3851 7. 345027 7. 22591  
11750530\_ 7. 733266 7. 688927 7. 683552 8. 00283 8. 019486 7. 986528  
11750531\_ 5. 543695 5. 609205 5. 55314 5. 404522 5. 567099 5. 554436  
11750532\_ 6. 664201 6. 629481 6. 673293 6. 71339 6. 675493 6. 735504  
11750533\_ 3. 457818 3. 383626 3. 367702 3. 296714 3. 353234 3. 398094  
11750534\_ 5. 575822 5. 591031 5. 821308 5. 425121 5. 619496 5. 467827  
11750535\_ 5. 813885 5. 771388 5. 584279 5. 616727 5. 69041 5. 756581  
11750536\_ 5. 173898 5. 293914 5. 266325 5. 143968 5. 210995 5. 330453  
11750537\_ 3. 839178 3. 503814 3. 678297 3. 571711 3. 770675 3. 798447  
11750538\_ 11. 61032 11. 60523 11. 61965 11. 73431 11. 73932 11. 74301  
11750539\_ 7. 04777 7. 172059 7. 089049 7. 263787 7. 308747 7. 240623  
11750540\_ 4. 403789 4. 550199 4. 430211 4. 64246 4. 560708 4. 547  
11750541\_ 9. 043652 9. 008719 9. 124647 8. 691848 8. 798403 8. 71619  
11750542\_ 8. 918959 8. 872297 8. 929756 8. 309715 8. 343194 8. 317053  
11750543\_ 6. 105141 6. 182165 6. 146566 6. 226195 6. 185912 6. 19035

11750544\_ 5. 915535 6. 065612 6. 001381 5. 989407 5. 927998 6. 038212  
11750545\_ 9. 152422 9. 126502 9. 194168 9. 499973 9. 514179 9. 479964  
11750546\_ 6. 244666 6. 318927 6. 241783 6. 344441 6. 282896 6. 318829  
11750547\_ 7. 283729 7. 098469 7. 230147 7. 045864 7. 104983 7. 111953  
11750548\_ 6. 628728 6. 725542 6. 606462 6. 840868 6. 858064 6. 932942  
11750549\_ 4. 420138 4. 470933 4. 315805 4. 614116 4. 470933 4. 517404  
11750550\_ 5. 636995 5. 735144 5. 658175 5. 687658 5. 771266 5. 760434  
11750551\_ 8. 719648 8. 654766 8. 686483 8. 579297 8. 522731 8. 552009  
11750552\_ 5. 772967 5. 512368 5. 786462 4. 853919 5. 096344 4. 733045  
11750553\_ 5. 073036 5. 029662 5. 073036 4. 888281 4. 936358 5. 047098  
11750554\_ 8. 485241 8. 431305 8. 453457 7. 994337 7. 888703 7. 847019  
11750555\_ 7. 832061 7. 754929 7. 846842 7. 960797 7. 928816 7. 880512  
11750556\_ 4. 179103 4. 388041 4. 270326 4. 307752 4. 263645 4. 290641  
11750557\_ 6. 933988 6. 728526 6. 845939 6. 435357 6. 448378 6. 364387  
11750558\_ 2. 265509 2. 397583 2. 43698 2. 233494 2. 325952 2. 267168  
11750559\_ 5. 610341 5. 715375 5. 540377 5. 674227 5. 686361 5. 721218  
11750560\_ 9. 685139 9. 612783 9. 61401 9. 579621 9. 577105 9. 540118  
11750561\_ 6. 615946 6. 619513 6. 445622 6. 417715 6. 33709 6. 438592  
11750562\_ 5. 959658 5. 905748 5. 922714 5. 727801 5. 756113 5. 727435  
11750563\_ 2. 436763 2. 441724 2. 47102 2. 595202 2. 47102 2. 508051  
11750564\_ 7. 359711 7. 325428 7. 309909 7. 267213 7. 295149 7. 300941  
11750565\_ 5. 152495 5. 258105 5. 333723 5. 081325 5. 368093 5. 329512  
11750566\_ 6. 199216 6. 158406 6. 209653 5. 992856 6. 030029 6. 028603  
11750567\_ 4. 367758 4. 459939 4. 290249 4. 586688 4. 671803 4. 598997  
11750568\_ 7. 113916 7. 116063 7. 20131 7. 088743 7. 164906 7. 148903  
11750569\_ 11. 26791 11. 25328 11. 27876 11. 21508 11. 18778 11. 22066  
11750570\_ 5. 620741 5. 646864 5. 498562 5. 613855 5. 805705 5. 636199  
11750571\_ 6. 648584 6. 47523 6. 65098 6. 732511 6. 667751 6. 695356  
11750572\_ 6. 059691 6. 091075 6. 151211 6. 068271 6. 118974 6. 018329  
11750573\_ 5. 628651 5. 70861 5. 695947 5. 713498 5. 641339 5. 714832  
11750574\_ 4. 648265 4. 850336 4. 594897 4. 921896 5. 210804 4. 983131  
11750575\_ 6. 478383 6. 31694 6. 42721 6. 611627 6. 762853 6. 666935  
11750576\_ 7. 97097 7. 904669 7. 901904 7. 515414 7. 605063 7. 561666  
11750577\_ 5. 65071 5. 670429 5. 77492 5. 70015 5. 679395 5. 667545  
11750578\_ 9. 61465 9. 573789 9. 624657 9. 853806 9. 891618 9. 849109  
11750579\_ 4. 932506 4. 904211 4. 868108 5. 049774 4. 997987 5. 066118  
11750580\_ 6. 799337 6. 624671 6. 844343 5. 894697 5. 837004 5. 964438  
11750581\_ 7. 231042 7. 118151 7. 199693 7. 086947 7. 045097 7. 159258  
11750582\_ 4. 945695 5. 225463 4. 804835 5. 694235 5. 637787 5. 76879  
11750583\_ 5. 281207 5. 3016 5. 402789 5. 321722 5. 2222 5. 339942  
11750584\_ 3. 645315 3. 742101 3. 645315 3. 680895 3. 818387 3. 714929  
11750585\_ 11. 04 10. 98289 11. 02713 10. 89662 10. 93344 10. 91016  
11750586\_ 4. 112809 4. 213488 4. 054043 4. 098733 4. 054288 4. 107147  
11750587\_ 6. 467524 6. 494999 6. 592821 6. 279242 6. 197354 6. 21537  
11750588\_ 6. 683939 6. 575373 6. 797107 6. 298268 6. 298419 6. 267969  
11750589\_ 2. 441142 2. 537844 2. 369605 2. 455233 2. 54086 2. 455233  
11750590\_ 2. 240072 2. 394743 2. 688405 2. 361778 2. 497255 2. 619381  
11750591\_ 3. 894815 3. 818401 3. 905829 3. 9095 3. 844385 3. 990886  
11750592\_ 2. 605516 2. 745026 2. 693674 2. 680184 2. 645404 2. 693493  
11750593\_ 7. 303967 7. 286897 7. 377861 7. 779331 7. 86064 7. 883473  
11750594\_ 2. 461894 2. 516459 2. 380368 2. 256623 2. 069375 2. 199988

11750595\_ 4. 933262 5. 149545 5. 073036 5. 190652 5. 073036 5. 28179  
11750596\_ 2. 362698 2. 54697 2. 45348 2. 162617 2. 353522 2. 374172  
11750597\_ 5. 276237 5. 149428 5. 199146 5. 243544 5. 179995 5. 135804  
11750598\_ 9. 445377 9. 382392 9. 411731 9. 924223 9. 888948 9. 896234  
11750599\_ 6. 555471 6. 544442 6. 510018 6. 697711 6. 712862 6. 796457  
11750600\_ 2. 025578 2. 099601 1. 995297 1. 669207 1. 795936 1. 862869  
11750601\_ 5. 885114 5. 921754 5. 922714 5. 924893 5. 870385 5. 853527  
11750602\_ 5. 999888 5. 926102 5. 773083 5. 887809 5. 844831 5. 844436  
11750603\_ 7. 738082 7. 774754 7. 791632 7. 811918 7. 877501 7. 806249  
11750604\_ 7. 398343 7. 389578 7. 473572 7. 622887 7. 614434 7. 540637  
11750605\_ 4. 560026 4. 574764 4. 506899 4. 491473 4. 599522 4. 565223  
11750606\_ 4. 912192 4. 994567 4. 883375 4. 979545 5. 085773 4. 995596  
11750607\_ 8. 081745 7. 964034 8. 073698 7. 393761 7. 30304 7. 353161  
11750608\_ 7. 025947 6. 987983 6. 947131 7. 327959 7. 254354 7. 228673  
11750609\_ 5. 391439 5. 54948 5. 614048 6. 022704 6. 187631 6. 269328  
11750610\_ 4. 62127 4. 600452 4. 58648 4. 365921 4. 442366 4. 248346  
11750611\_ 5. 693945 5. 630322 5. 651177 5. 79236 5. 736831 5. 77685  
11750612\_ 6. 141991 6. 017596 6. 317586 5. 156303 5. 183024 5. 295228  
11750613\_ 3. 542567 3. 674634 3. 564768 3. 449932 3. 536696 3. 552937  
11750614\_ 5. 076212 5. 115306 4. 931965 5. 26034 5. 184537 5. 196201  
11750615\_ 3. 261088 3. 373106 3. 395081 3. 23792 3. 345735 3. 311832  
11750616\_ 7. 1513 7. 181754 7. 193887 7. 151392 7. 145202 7. 074806  
11750617\_ 7. 563476 7. 572447 7. 657755 7. 674329 7. 614634 7. 667603  
11750618\_ 6. 680081 6. 659285 6. 622869 6. 717229 6. 699226 6. 643998  
11750619\_ 5. 777278 5. 601672 5. 744447 5. 635013 5. 692626 5. 72579  
11750620\_ 3. 417824 3. 220893 3. 189126 3. 290188 3. 203808 3. 29897  
11750621\_ 4. 442815 4. 503046 4. 721501 3. 869765 4. 22851 4. 04689  
11750622\_ 5. 645209 5. 63463 5. 676992 5. 309396 5. 434409 5. 388113  
11750623\_ 1. 830644 2. 047823 2. 019196 2. 152712 2. 118218 2. 244754  
11750624\_ 5. 835062 5. 827104 5. 989825 5. 610495 5. 750041 5. 2666  
11750625\_ 4. 27988 4. 421063 4. 285883 4. 421818 4. 334896 4. 23913  
11750626\_ 4. 467237 4. 456281 4. 532655 4. 399143 4. 531373 4. 736202  
11750627\_ 6. 868784 6. 924753 6. 916198 6. 379971 6. 389321 6. 481046  
11750628\_ 6. 116491 6. 018442 5. 838938 5. 835192 5. 945852 6. 048851  
11750629\_ 5. 413482 5. 434073 5. 37608 5. 489825 5. 388034 5. 498726  
11750630\_ 5. 815574 5. 711587 5. 785451 5. 504248 5. 425065 5. 47141  
11750631\_ 6. 884619 7. 111953 6. 989904 7. 115756 7. 041546 7. 113445  
11750632\_ 5. 676992 5. 561981 5. 790184 5. 547757 5. 355101 5. 516045  
11750633\_ 7. 117423 7. 088951 7. 150363 7. 184922 7. 259925 7. 251469  
11750634\_ 9. 644785 9. 69823 9. 679778 9. 247523 9. 247186 9. 153738  
11750635\_ 5. 972896 5. 919568 5. 827248 5. 77988 5. 754314 5. 854371  
11750636\_ 4. 737917 5. 014171 4. 840787 4. 86315 4. 819024 4. 945381  
11750637\_ 3. 287091 3. 543999 3. 452598 3. 377478 3. 483653 3. 57159  
11750638\_ 9. 074268 8. 987702 9. 079509 9. 355656 9. 334635 9. 3784  
11750639\_ 8. 504353 8. 527096 8. 559677 8. 263495 8. 266937 8. 252642  
11750640\_ 6. 660519 6. 758728 6. 653877 6. 649342 6. 654234 6. 658277  
11750641\_ 8. 087177 8. 111727 8. 114677 7. 920259 8. 004751 8. 01285  
11750642\_ 2. 850842 2. 738037 2. 702554 2. 589133 2. 545302 2. 545302  
11750643\_ 3. 957 3. 595605 3. 939983 3. 850246 3. 671932 3. 869661  
11750644\_ 3. 365238 3. 369202 3. 545703 3. 651247 3. 522545 3. 56712  
11750645\_ 5. 781962 5. 76731 5. 989629 5. 868158 5. 863078 5. 893638



11750646\_ 6. 025132 6. 061695 5. 972899 6. 10711 6. 10711 6. 103556  
11750647\_ 4. 393561 4. 301324 4. 502616 4. 181499 3. 956455 4. 221791  
11750648\_ 9. 17346 9. 110402 9. 184282 8. 671087 8. 592726 8. 6152  
11750649\_ 3. 914175 4. 008861 4. 000017 3. 997131 4. 026011 4. 061211  
11750650\_ 5. 145259 5. 230644 5. 179572 5. 095867 5. 102439 5. 175653  
11750651\_ 7. 308407 7. 060717 7. 202891 6. 970806 6. 944781 6. 955159  
11750652\_ 2. 491739 2. 65675 2. 363778 2. 709942 2. 519037 2. 350703  
11750653\_ 3. 148986 3. 115882 3. 303992 3. 332561 3. 20366 3. 317055  
11750654\_ 5. 18115 5. 336855 4. 954435 5. 356344 5. 341274 5. 427103  
11750655\_ 2. 283566 2. 30996 2. 416908 2. 249194 2. 202387 2. 419493  
11750656\_ 8. 746265 8. 627703 8. 772677 8. 193778 8. 251973 8. 241521  
11750657\_ 4. 698095 4. 6698 4. 462923 4. 586866 4. 554889 4. 5655  
11750658\_ 6. 74247 6. 796643 6. 825518 6. 853453 6. 786815 6. 871576  
11750659\_ 5. 188628 5. 36324 5. 237046 5. 322224 5. 329658 5. 329658  
11750660\_ 6. 180804 6. 168886 6. 190634 6. 183477 6. 116044 6. 123099  
11750661\_ 2. 457089 2. 472383 2. 468374 2. 384325 2. 578553 2. 538268  
11750662\_ 5. 453235 5. 645943 5. 604107 5. 613308 5. 672128 5. 561062  
11750663\_ 5. 427801 5. 679683 5. 627391 5. 687474 5. 759322 5. 598716  
11750664\_ 4. 438083 4. 318096 4. 510115 3. 607353 3. 684608 3. 684325  
11750665\_ 5. 173483 5. 290001 5. 350884 5. 285352 5. 268428 5. 475572  
11750666\_ 6. 401919 6. 42791 6. 619536 6. 414953 6. 363926 6. 362  
11750667\_ 9. 263649 9. 223584 9. 249253 9. 957159 9. 873693 9. 915915  
11750668\_ 5. 122984 5. 029529 5. 154537 5. 018494 4. 93837 4. 981534  
11750669\_ 7. 470475 7. 501009 7. 40148 7. 435935 7. 400837 7. 423502  
11750670\_ 3. 925181 3. 909593 3. 935289 3. 765976 3. 917387 3. 9592  
11750671\_ 4. 972354 4. 893716 4. 872351 5. 034588 5. 140578 5. 038409  
11750672\_ 4. 504234 4. 540077 4. 641331 4. 443516 4. 603262 4. 727193  
11750673\_ 3. 824095 3. 784444 4. 156785 3. 998136 4. 093234 4. 049883  
11750674\_ 9. 223938 9. 137972 9. 229773 8. 490315 8. 483101 8. 46724  
11750675\_ 2. 231029 2. 005266 2. 324267 2. 190077 2. 139456 2. 204602  
11750676\_ 6. 51033 6. 566981 6. 424955 6. 054382 5. 764033 5. 845522  
11750677\_ 4. 528316 4. 579913 4. 528316 4. 631182 4. 625288 4. 733479  
11750678\_ 3. 74708 3. 661063 3. 696729 3. 724367 3. 745533 3. 61409  
11750679\_ 3. 816013 3. 85648 3. 827764 3. 850246 3. 801444 3. 799049  
11750680\_ 9. 475544 9. 412216 9. 47876 9. 446944 9. 391132 9. 342974  
11750681\_ 6. 9307 6. 883397 6. 894302 6. 163344 6. 069247 6. 308736  
11750682\_ 6. 085012 6. 104132 6. 120278 6. 244666 6. 282224 6. 118838  
11750683\_ 7. 474191 7. 434612 7. 480673 7. 234312 7. 235051 7. 191572  
11750684\_ 7. 74513 7. 595816 7. 688885 7. 136086 7. 19161 7. 225469  
11750685\_ 5. 963282 5. 784866 5. 973344 5. 843361 5. 870242 5. 841289  
11750686\_ 6. 871686 6. 814863 6. 912828 6. 950431 7. 059493 6. 989876  
11750687\_ 5. 480966 5. 451405 5. 492005 5. 672285 5. 468164 5. 471138  
11750688\_ 4. 241917 4. 255985 4. 270053 4. 221951 4. 270053 4. 352351  
11750689\_ 5. 179683 5. 305479 5. 26034 5. 448296 5. 484415 5. 4522  
11750690\_ 5. 733121 6. 045252 5. 803579 6. 142993 6. 086798 6. 13945  
11750691\_ 6. 032647 5. 749641 5. 890118 5. 721931 5. 876759 5. 795338  
11750692\_ 7. 530628 7. 397465 7. 401791 7. 393513 7. 434587 7. 449795  
11750693\_ 10. 3474 10. 31191 10. 36305 10. 18291 10. 21625 10. 20086  
11750694\_ 8. 852977 8. 829212 8. 859889 9. 147802 9. 128812 9. 048447  
11750695\_ 8. 9624 9. 001009 8. 98377 9. 210314 9. 237956 9. 133007  
11750696\_ 3. 205354 3. 085257 3. 20821 3. 323757 3. 315545 3. 225872

11750697\_ 5. 018187 5. 0245 4. 754557 4. 266737 4. 474472 4. 607972  
11750698\_ 3. 248362 3. 398236 3. 388325 3. 142143 3. 320234 3. 22134  
11750699\_ 6. 104767 6. 066608 6. 115374 6. 144052 6. 121576 6. 166156  
11750700\_ 6. 251814 6. 360394 6. 333255 6. 177842 6. 27825 6. 237099  
11750701\_ 5. 954081 6. 016314 5. 987619 5. 911479 5. 852653 5. 884454  
11750702\_ 4. 920438 4. 955057 4. 821416 4. 982854 4. 920438 4. 87401  
11750703\_ 3. 543708 3. 605548 3. 602024 3. 463001 3. 470028 3. 422543  
11750704\_ 5. 50252 5. 592685 5. 525441 5. 780926 5. 845241 5. 903277  
11750705\_ 4. 701927 4. 880621 4. 84264 4. 745668 4. 714275 4. 942599  
11750706\_ 4. 879497 4. 9226 4. 805782 4. 914651 4. 834637 4. 815926  
11750707\_ 3. 606313 3. 573365 3. 480668 3. 690658 3. 629167 3. 719622  
11750708\_ 3. 547864 3. 354524 3. 47215 3. 589319 3. 643435 3. 55861  
11750709\_ 5. 676992 5. 564875 5. 709534 4. 953968 4. 920781 5. 127416  
11750710\_ 5. 162104 4. 917954 5. 113492 4. 855297 4. 901738 4. 994995  
11750711\_ 6. 448649 6. 502843 6. 620341 6. 524314 6. 425723 6. 550151  
11750712\_ 5. 469807 5. 580669 5. 463978 5. 555255 5. 47945 5. 590752  
11750713\_ 4. 797255 4. 862394 4. 940276 4. 983542 4. 922901 4. 995001  
11750714\_ 5. 991408 5. 918745 6. 088197 5. 886725 5. 813836 6. 057326  
11750715\_ 3. 570925 3. 556569 3. 444465 3. 675197 3. 500426 3. 454116  
11750716\_ 4. 258809 4. 340965 4. 114362 4. 40461 4. 396176 4. 373197  
11750717\_ 4. 712403 4. 988521 4. 741767 5. 057039 5. 128889 5. 165256  
11750718\_ 2. 222425 2. 25483 2. 293345 2. 190376 2. 215681 2. 185304  
11750719\_ 8. 022666 7. 91684 8. 084804 7. 142905 7. 175816 7. 131246  
11750720\_ 4. 584933 4. 410663 4. 619501 4. 73056 4. 798511 4. 643717  
11750721\_ 4. 24012 4. 355951 4. 388148 4. 403596 4. 413678 4. 336102  
11750722\_ 7. 591297 7. 443067 7. 572263 7. 061212 6. 937544 7. 030797  
11750723\_ 8. 02083 8. 011199 7. 980825 8. 148875 8. 272973 8. 291407  
11750724\_ 4. 622393 4. 653237 4. 563871 4. 689582 4. 590463 4. 56527  
11750725\_ 2. 183995 2. 450518 2. 346607 2. 25483 2. 155702 2. 271119  
11750726\_ 3. 134835 3. 361299 3. 379291 3. 262206 3. 037965 3. 012805  
11750727\_ 5. 750693 5. 738539 5. 726318 5. 83581 5. 795696 5. 847344  
11750728\_ 2. 184124 2. 569049 2. 203255 2. 220256 2. 222376 2. 062801  
11750729\_ 6. 460661 6. 175166 6. 445622 6. 70993 6. 826278 6. 795953  
11750730\_ 5. 537818 5. 618117 5. 387417 5. 714508 5. 486057 5. 517273  
11750731\_ 3. 373083 3. 284525 3. 192188 3. 395328 3. 482325 3. 673261  
11750732\_ 6. 096751 5. 93508 6. 1772 7. 109162 6. 974738 7. 132681  
11750733\_ 5. 723662 5. 729452 5. 483073 5. 462516 5. 682913 5. 65358  
11750734\_ 3. 565254 3. 429322 3. 540463 3. 199971 3. 180312 3. 181477  
11750735\_ 6. 356228 6. 606843 6. 302152 6. 483406 6. 383758 6. 466767  
11750736\_ 2. 960196 2. 949906 3. 138626 3. 16489 3. 255312 3. 065923  
11750737\_ 6. 44085 6. 391666 6. 153694 6. 705547 6. 573141 6. 511969  
11750738\_ 5. 91279 5. 907416 6. 019718 6. 526104 6. 487146 6. 546406  
11750739\_ 7. 313867 7. 210269 7. 234942 7. 42759 7. 39881 7. 381993  
11750740\_ 8. 623863 8. 581504 8. 63715 7. 945355 8. 028372 7. 935841  
11750741\_ 8. 410306 8. 304101 8. 369212 7. 839647 7. 829153 7. 827215  
11750742\_ 4. 274457 4. 115982 4. 312165 4. 150161 4. 454355 4. 37377  
11750743\_ 5. 697318 5. 821425 5. 821747 5. 854929 5. 853293 5. 925788  
11750744\_ 7. 630666 7. 83869 7. 713255 7. 803822 7. 940288 7. 815935  
11750745\_ 11. 32225 11. 32685 11. 27692 11. 24604 11. 21047 11. 22163  
11750746\_ 7. 401591 7. 357229 7. 362386 7. 258659 7. 29037 7. 319883  
11750747\_ 5. 409222 5. 392677 5. 279396 5. 232497 5. 114761 5. 194309

11750748\_ 4. 66838 4. 80168 4. 520798 4. 719574 4. 638003 4. 724846  
11750749\_ 4. 720353 4. 669566 4. 661766 4. 746314 4. 688033 4. 754195  
11750750\_ 9. 424278 9. 413092 9. 424301 9. 137859 9. 117438 9. 119171  
11750751\_ 9. 607763 9. 614444 9. 519299 9. 379648 9. 282249 9. 284238  
11750752\_ 2. 956337 3. 040585 3. 064893 3. 060728 3. 121156 3. 14191  
11750753\_ 4. 673857 4. 542589 4. 539279 4. 605262 4. 772126 4. 617332  
11750754\_ 4. 431993 4. 641042 4. 587081 4. 596245 4. 587081 4. 584459  
11750755\_ 1. 877732 2. 041798 2. 025875 2. 078466 1. 999051 2. 068622  
11750756\_ 6. 964192 6. 926926 7. 006447 6. 891892 6. 805697 6. 873814  
11750757\_ 7. 937659 7. 925782 7. 966632 7. 801061 7. 787808 7. 900362  
11750758\_ 5. 908031 6. 019103 5. 835938 6. 092377 6. 085181 6. 043228  
11750759\_ 3. 425551 3. 329249 3. 229888 3. 237074 3. 182276 3. 31451  
11750760\_ 2. 095256 2. 177509 2. 227294 2. 040871 2. 28922 2. 11585  
11750761\_ 6. 937185 6. 957294 6. 987268 7. 021307 7. 024817 6. 952407  
11750762\_ 7. 883504 7. 801166 7. 891052 8. 24833 8. 241045 8. 264047  
11750763\_ 5. 594205 5. 672427 5. 690905 5. 700302 5. 751805 5. 81191  
11750764\_ 6. 211425 6. 317077 6. 303251 6. 564728 6. 526216 6. 660882  
11750765\_ 7. 217885 7. 182384 7. 307386 7. 551691 7. 588677 7. 484974  
11750766\_ 6. 817986 6. 783365 6. 735187 6. 573993 6. 541665 6. 470733  
11750767\_ 4. 957939 5. 172457 5. 045081 5. 133552 5. 187831 5. 138728  
11750768\_ 5. 576321 5. 536364 5. 460138 5. 628754 5. 646935 5. 50095  
11750769\_ 3. 565908 3. 620586 3. 523782 3. 581497 3. 777812 3. 745507  
11750770\_ 7. 0822 7. 097109 7. 087284 6. 952289 6. 87628 6. 91781  
11750771\_ 3. 251662 3. 578321 3. 285008 3. 272206 3. 241548 3. 402231  
11750772\_ 4. 020015 4. 011705 4. 026092 4. 101775 4. 023923 4. 0849  
11750773\_ 8. 755375 8. 799989 8. 818121 8. 40151 8. 390868 8. 282784  
11750774\_ 7. 628744 7. 728638 7. 692667 8. 039913 7. 944606 7. 934516  
11750775\_ 4. 078882 3. 963859 4. 103184 3. 667527 3. 705625 3. 606313  
11750776\_ 6. 285253 6. 4128 6. 35542 6. 397946 6. 246862 6. 357653  
11750777\_ 4. 845506 4. 699636 4. 71427 4. 703997 4. 535589 4. 779451  
11750778\_ 5. 489405 5. 428188 5. 566247 5. 02716 5. 136341 4. 999991  
11750779\_ 2. 996158 3. 320677 3. 069061 3. 145731 3. 295573 3. 135424  
11750780\_ 2. 514174 2. 671714 2. 383152 2. 698924 2. 64206 2. 647808  
11750781\_ 3. 691285 3. 541515 3. 44253 3. 723075 3. 560884 3. 839077  
11750782\_ 7. 507753 7. 382825 7. 521813 7. 164803 7. 238383 7. 227231  
11750783\_ 7. 846482 7. 865208 7. 918834 7. 932835 7. 885033 7. 876772  
11750784\_ 4. 570677 4. 700581 4. 560951 4. 718615 4. 695032 4. 524953  
11750785\_ 9. 783197 9. 694439 9. 763342 9. 722136 9. 759524 9. 722809  
11750786\_ 5. 403205 5. 441812 5. 380883 5. 497395 5. 51357 5. 445537  
11750787\_ 4. 347179 4. 379636 4. 240838 4. 40461 4. 195933 4. 383534  
11750788\_ 6. 98228 6. 811579 7. 007946 6. 459042 6. 557068 6. 470384  
11750789\_ 8. 300711 8. 154793 8. 314376 7. 859535 7. 909054 7. 910863  
11750790\_ 8. 311679 8. 297025 8. 354278 7. 822709 7. 928046 7. 881875  
11750791\_ 5. 048902 5. 026424 5. 026424 4. 942333 4. 736051 4. 757578  
11750792\_ 5. 185914 5. 141179 5. 284933 5. 632686 5. 61294 5. 494514  
11750793\_ 5. 271053 5. 414869 5. 407267 5. 647426 5. 587671 5. 502342  
11750794\_ 7. 127932 7. 090893 7. 198084 6. 513359 6. 43953 6. 563469  
11750795\_ 5. 118579 5. 214143 5. 122191 5. 28586 5. 333723 5. 224047  
11750796\_ 6. 155799 5. 929879 5. 939898 5. 730705 5. 698649 5. 67509  
11750797\_ 6. 541147 6. 574395 6. 667629 5. 858974 5. 922748 5. 850412  
11750798\_ 6. 032306 6. 124134 6. 115374 5. 966445 6. 037742 6. 146336

11750799\_ 5. 910442 5. 93449 5. 989089 4. 902594 5. 069177 5. 148865  
11750800\_ 6. 171967 6. 263567 6. 376803 6. 056735 5. 862923 5. 891925  
11750801\_ 8. 342505 8. 383411 8. 369423 8. 480382 8. 382273 8. 406538  
11750802\_ 4. 995172 4. 893842 5. 120549 4. 777678 4. 892603 4. 839746  
11750803\_ 4. 495739 4. 589967 4. 484087 4. 579435 4. 589162 4. 57414  
11750804\_ 9. 20765 9. 182882 9. 249195 7. 853386 7. 920772 8. 009183  
11750805\_ 8. 265982 8. 289229 8. 329175 7. 086592 7. 04434 7. 095714  
11750806\_ 5. 760181 5. 819396 5. 71528 5. 83437 5. 722747 5. 722307  
11750807\_ 5. 441014 5. 443601 5. 330318 5. 493091 5. 515659 5. 503067  
11750808\_ 6. 222854 6. 410249 6. 152941 6. 389248 6. 366761 6. 410249  
11750809\_ 6. 257923 6. 386093 6. 34487 6. 367838 6. 411341 6. 433617  
11750810\_ 4. 95294 4. 92674 4. 883504 4. 907176 4. 917749 5. 121711  
11750811\_ 5. 639938 5. 554436 5. 498373 5. 594496 5. 524145 5. 502342  
11750812\_ 7. 12362 7. 049423 7. 065974 6. 400635 6. 541665 6. 563144  
11750813\_ 5. 078176 4. 826569 5. 073036 5. 011018 4. 989721 5. 235696  
11750814\_ 3. 2043 3. 35575 3. 564729 3. 312838 3. 347624 3. 435471  
11750815\_ 11. 69205 11. 69146 11. 67581 11. 4709 11. 51319 11. 4643  
11750816\_ 8. 856494 8. 722754 8. 808142 8. 682292 8. 673912 8. 726666  
11750817\_ 5. 189898 5. 296639 5. 20561 5. 236271 5. 233891 5. 303849  
11750818\_ 5. 704919 5. 52466 5. 874893 5. 502285 5. 409788 5. 409222  
11750819\_ 5. 238183 5. 263063 5. 229094 5. 263063 5. 288863 5. 263063  
11750820\_ 3. 690299 3. 726567 3. 89599 3. 705635 3. 717634 3. 708919  
11750821\_ 5. 630023 5. 554436 5. 70973 5. 554436 5. 529632 5. 496221  
11750822\_ 7. 50918 7. 475061 7. 581824 7. 391897 7. 342367 7. 336362  
11750823\_ 6. 521604 6. 429505 6. 465637 6. 932648 7. 001294 6. 881533  
11750824\_ 8. 648035 8. 53969 8. 65853 9. 208477 9. 232663 9. 20611  
11750825\_ 3. 510445 3. 313447 3. 189175 3. 503414 3. 468823 3. 428756  
11750826\_ 2. 808186 2. 692703 2. 505625 2. 659784 2. 926194 2. 699646  
11750827\_ 7. 910895 7. 871652 7. 957689 7. 615137 7. 586531 7. 596625  
11750828\_ 4. 560163 4. 836025 4. 821912 5. 074176 4. 905041 4. 877994  
11750829\_ 2. 979445 3. 07037 2. 999372 3. 346726 3. 064032 3. 083604  
11750830\_ 3. 06819 3. 032279 2. 647354 3. 265763 3. 002049 3. 130057  
11750831\_ 6. 544517 6. 41719 6. 557068 5. 643713 5. 567367 5. 502661  
11750832\_ 3. 557348 3. 44156 3. 358998 3. 54834 3. 545816 3. 444084  
11750833\_ 6. 483723 6. 401382 6. 589889 6. 471503 6. 351891 6. 475632  
11750834\_ 1. 759904 1. 898324 1. 898324 2. 009065 1. 898324 1. 971054  
11750835\_ 5. 029529 5. 100994 5. 024635 5. 073036 5. 073036 4. 83143  
11750836\_ 6. 927961 6. 784982 6. 958012 6. 638044 6. 552667 6. 730696  
11750837\_ 6. 014319 6. 13945 6. 115374 5. 784422 5. 886526 5. 849541  
11750838\_ 7. 426414 7. 406796 7. 368355 6. 613955 6. 722151 6. 582464  
11750839\_ 7. 031537 7. 085109 7. 010631 6. 167663 6. 243311 6. 237901  
11750840\_ 7. 293303 7. 203002 7. 289694 6. 41878 6. 429332 6. 553324  
11750841\_ 6. 863207 6. 886991 6. 874408 6. 444379 6. 574967 6. 536004  
11750842\_ 6. 14475 6. 18841 6. 12377 6. 284593 6. 218801 6. 247833  
11750843\_ 7. 731841 7. 803705 7. 694613 7. 816211 7. 909863 7. 806059  
11750844\_ 4. 99916 5. 237741 5. 134055 5. 200094 5. 178915 5. 031954  
11750845\_ 4. 266886 4. 356783 4. 396156 4. 470509 4. 722587 4. 584933  
11750846\_ 5. 438736 5. 547321 5. 376288 5. 512207 5. 596666 5. 578046  
11750847\_ 3. 707145 3. 586302 3. 789946 3. 610437 3. 718486 3. 520279  
11750848\_ 8. 539555 8. 519476 8. 552681 8. 530345 8. 507599 8. 411933  
11750849\_ 4. 622408 4. 733225 4. 564629 4. 776312 4. 785896 4. 719392

11750850\_ 4. 633111 4. 412573 4. 511698 4. 466942 4. 425818 4. 456743  
11750851\_ 5. 434786 5. 881161 5. 627166 5. 395707 5. 287884 5. 339673  
11750852\_ 5. 555808 5. 674543 5. 629782 5. 845365 5. 679462 5. 754755  
11750853\_ 5. 685237 5. 64081 5. 722109 5. 942701 5. 816209 5. 85209  
11750854\_ 6. 958682 7. 024155 6. 779107 6. 767816 6. 898793 6. 974167  
11750855\_ 6. 680748 6. 795169 6. 73206 6. 70454 6. 734362 6. 809895  
11750856\_ 3. 379464 3. 489699 3. 44365 3. 423485 3. 432268 3. 336697  
11750857\_ 4. 55997 4. 471256 4. 456235 4. 621387 4. 571461 4. 478078  
11750858\_ 3. 469134 3. 476041 3. 605346 3. 284323 3. 338676 3. 372899  
11750859\_ 6. 179432 6. 233432 6. 159771 5. 729039 5. 781836 5. 966935  
11750860\_ 4. 220048 4. 081712 4. 218381 3. 54407 3. 24153 3. 645685  
11750861\_ 4. 947198 4. 928086 5. 039714 4. 390444 4. 146826 4. 515142  
11750862\_ 2. 359405 2. 47102 2. 605662 2. 226911 2. 440515 2. 298492  
11750863\_ 4. 881568 5. 029529 4. 930507 5. 053721 5. 137109 5. 156303  
11750864\_ 6. 051051 6. 1445 6. 133362 6. 352644 6. 453706 6. 38972  
11750865\_ 6. 023263 6. 029928 5. 996716 6. 290711 6. 421318 6. 300643  
11750866\_ 3. 61611 3. 798511 3. 798511 3. 798511 3. 989416 3. 691417  
11750867\_ 2. 42817 2. 545368 2. 40806 2. 416212 2. 365741 2. 470917  
11750868\_ 3. 85616 4. 078812 4. 012718 3. 863671 3. 781917 3. 87637  
11750869\_ 3. 669157 3. 81168 3. 691261 3. 594288 3. 546708 3. 630354  
11750870\_ 7. 004257 6. 765613 6. 901695 6. 64316 6. 562445 6. 593386  
11750871\_ 7. 503985 7. 476073 7. 564727 7. 930836 7. 87704 7. 848469  
11750872\_ 4. 117444 4. 349148 4. 370337 4. 535027 4. 517179 4. 470714  
11750873\_ 4. 337533 4. 496521 4. 366481 4. 609144 4. 490527 4. 493142  
11750874\_ 5. 042533 4. 735144 4. 563735 4. 876508 4. 763972 4. 892862  
11750875\_ 4. 763971 4. 913882 4. 505679 4. 888651 4. 786461 4. 721807  
11750876\_ 8. 153368 8. 17719 8. 134368 7. 940656 7. 907746 7. 829691  
11750877\_ 6. 228796 6. 321838 6. 290294 6. 231284 6. 199949 6. 131492  
11750878\_ 6. 539709 6. 520037 6. 520037 6. 509729 6. 524856 6. 453338  
11750879\_ 6. 342727 6. 186136 6. 156704 4. 911109 4. 700243 4. 986705  
11750880\_ 6. 397946 6. 285991 6. 17981 6. 460845 6. 56978 6. 561471  
11750881\_ 8. 451371 8. 360747 8. 384998 8. 030299 8. 022992 8. 064979  
11750882\_ 4. 108592 4. 052735 3. 92796 3. 738077 3. 931976 3. 503743  
11750883\_ 10. 6542 10. 61028 10. 61318 10. 47958 10. 46493 10. 41078  
11750884\_ 6. 79712 6. 625134 6. 807291 6. 070315 6. 290999 6. 225406  
11750885\_ 6. 540449 6. 449058 6. 43106 6. 462246 6. 524089 6. 508246  
11750886\_ 6. 603499 6. 558845 6. 565843 6. 492666 6. 557068 6. 513012  
11750887\_ 9. 633633 9. 596491 9. 638422 9. 172242 9. 173684 9. 155975  
11750888\_ 1. 870177 1. 625666 1. 893791 1. 973318 1. 885065 2. 057369  
11750889\_ 10. 24488 10. 20234 10. 25787 9. 964445 10. 00584 9. 942551  
11750890\_ 7. 715975 7. 70537 7. 886678 6. 989328 7. 122234 7. 252449  
11750891\_ 7. 205468 7. 015262 7. 164408 6. 857127 6. 921711 6. 636121  
11750892\_ 4. 637574 4. 882411 4. 612948 4. 753465 4. 806574 4. 703459  
11750893\_ 5. 754295 5. 803682 5. 761171 5. 886384 5. 845365 5. 803108  
11750894\_ 3. 504307 3. 264016 3. 205187 3. 139318 3. 040853 3. 42785  
11750895\_ 4. 499621 4. 642998 4. 53531 4. 691315 4. 486795 4. 622521  
11750896\_ 4. 756758 4. 865201 4. 824195 4. 862274 4. 882439 4. 922275  
11750897\_ 4. 9226 4. 952013 4. 933467 5. 189628 5. 184109 5. 475572  
11750898\_ 6. 263567 6. 431763 6. 372727 6. 420249 6. 437745 6. 334711  
11750899\_ 4. 835806 4. 981234 4. 874797 4. 78164 5. 005785 4. 798164  
11750900\_ 1. 908315 1. 765878 1. 678398 1. 85981 1. 815903 1. 908315

11750901\_ 2. 636742 2. 301497 2. 369097 2. 55885 2. 53234 2. 544123  
11750902\_ 9. 168815 9. 153323 9. 170501 9. 210996 9. 185651 9. 173248  
11750903\_ 10. 14587 10. 05385 10. 09759 9. 848829 9. 903273 9. 860593  
11750904\_ 6. 741752 6. 593561 6. 784718 6. 494443 6. 551794 6. 517648  
11750905\_ 2. 987152 3. 026746 2. 783883 3. 044638 2. 938467 3. 095486  
11750906\_ 5. 803626 5. 636745 5. 786966 6. 094852 6. 179875 6. 063955  
11750907\_ 7. 894241 7. 770257 7. 818816 8. 05299 7. 978298 7. 948027  
11750908\_ 3. 663348 3. 818401 3. 740892 3. 766504 3. 846908 3. 778112  
11750909\_ 7. 858068 7. 753283 7. 780407 7. 73808 7. 725974 7. 806249  
11750910\_ 4. 651154 4. 643717 4. 68961 4. 526732 4. 474723 4. 55845  
11750911\_ 9. 633016 9. 563033 9. 637052 9. 323 9. 301321 9. 399751  
11750912\_ 4. 93403 5. 207707 5. 110581 5. 273634 5. 164392 5. 053214  
11750913\_ 8. 721954 8. 756483 8. 757096 8. 585236 8. 53009 8. 467087  
11750914\_ 7. 682701 7. 596712 7. 783202 7. 178512 7. 185466 7. 235568  
11750915\_ 1. 809505 1. 898324 1. 898324 1. 898324 1. 814031 1. 898324  
11750916\_ 6. 800599 6. 717652 6. 83751 6. 20026 6. 211164 6. 18864  
11750917\_ 6. 467524 6. 506806 6. 433269 6. 351136 6. 404718 6. 30351  
11750918\_ 2. 862231 2. 786702 2. 880863 2. 9634 2. 836606 2. 921198  
11750919\_ 5. 507835 5. 537607 5. 461598 5. 404655 5. 3933 5. 498437  
11750920\_ 5. 711053 5. 591092 5. 449612 5. 636746 5. 625311 5. 702971  
11750921\_ 6. 186677 6. 045817 6. 073682 5. 585863 5. 59768 5. 799642  
11750922\_ 7. 26296 7. 390843 7. 205515 7. 146306 7. 268995 7. 225864  
11750923\_ 4. 643717 4. 787244 4. 338483 4. 738708 4. 459939 4. 665011  
11750924\_ 3. 849487 3. 97177 3. 816887 3. 861561 3. 766811 3. 938882  
11750925\_ 3. 521507 3. 521507 3. 467807 3. 320887 3. 270876 3. 44642  
11750926\_ 3. 179147 3. 220237 3. 220237 3. 220237 3. 348796 3. 250839  
11750927\_ 4. 275543 4. 262128 4. 141606 4. 177331 4. 042551 4. 326213  
11750928\_ 6. 144998 6. 186152 6. 157104 6. 080622 6. 120926 6. 007005  
11750929\_ 6. 715442 6. 713426 6. 772444 5. 954081 6. 041596 6. 060694  
11750930\_ 3. 220988 3. 217233 3. 473786 3. 245097 3. 182463 3. 319436  
11750931\_ 3. 067013 3. 021659 2. 777921 3. 143606 3. 328694 3. 067013  
11750932\_ 3. 030084 3. 066764 2. 833153 3. 237226 3. 181236 2. 833153  
11750933\_ 7. 271627 7. 111953 7. 174085 7. 042506 7. 08378 7. 111953  
11750934\_ 5. 483009 5. 407152 5. 383728 5. 480966 5. 505076 5. 407152  
11750935\_ 4. 775171 4. 761236 4. 620284 4. 995688 4. 899251 5. 06572  
11750936\_ 2. 685877 2. 403692 2. 500664 2. 358705 2. 444492 2. 489464  
11750937\_ 5. 747269 5. 666362 5. 467473 5. 581267 5. 575484 5. 639843  
11750938\_ 6. 686721 6. 663185 6. 60427 6. 696676 6. 66599 6. 705278  
11750939\_ 6. 566152 6. 731005 6. 657416 6. 791053 6. 832784 6. 797883  
11750940\_ 6. 092921 5. 975237 6. 06361 6. 130402 6. 087357 6. 074681  
11750941\_ 2. 605516 2. 491102 2. 303708 2. 450855 2. 359928 2. 491102  
11750942\_ 2. 911469 3. 372873 3. 323111 3. 232232 3. 345067 3. 396259  
11750943\_ 2. 687864 2. 76338 2. 61939 2. 800826 2. 778965 2. 574502  
11750944\_ 6. 791184 6. 836029 6. 889133 6. 827077 6. 843118 6. 794465  
11750945\_ 5. 742569 5. 951004 5. 677489 5. 840546 5. 682425 5. 653788  
11750946\_ 7. 101163 7. 247657 7. 139142 7. 265178 7. 310925 7. 327495  
11750947\_ 5. 588609 5. 648414 5. 585191 5. 639713 5. 699819 5. 60551  
11750948\_ 5. 896659 5. 796399 5. 82962 5. 943539 5. 894697 5. 84328  
11750949\_ 7. 286537 7. 279168 7. 384144 7. 040681 6. 913207 7. 020674  
11750950\_ 4. 218538 4. 157031 4. 026092 4. 157031 4. 161812 4. 161812  
11750951\_ 4. 799778 4. 657023 4. 937958 5. 015688 5. 078685 5. 218206

11750952\_ 6. 625489 6. 60463 6. 524639 6. 554512 6. 494463 6. 557068  
11750953\_ 6. 530899 6. 515621 6. 478276 6. 530899 6. 530521 6. 672381  
11750954\_ 6. 854619 7. 01891 6. 845347 7. 029692 7. 087112 6. 853767  
11750955\_ 3. 938118 4. 04492 4. 070132 4. 213226 3. 969526 4. 04492  
11750956\_ 3. 92063 3. 923869 4. 051122 4. 122719 3. 970619 4. 122446  
11750957\_ 4. 223702 3. 859379 4. 026092 3. 860838 3. 741077 3. 818475  
11750958\_ 5. 441481 5. 463398 5. 555734 5. 501996 5. 569189 5. 593372  
11750959\_ 4. 643112 4. 527978 4. 68464 4. 75139 4. 643717 4. 711771  
11750960\_ 6. 7869 6. 728685 6. 633095 6. 038103 6. 083387 5. 914577  
11750961\_ 5. 870242 5. 841177 5. 921999 6. 365835 6. 335178 6. 339984  
11750962\_ 6. 392433 6. 483 6. 426436 6. 507716 6. 516896 6. 502411  
11750963\_ 5. 208686 5. 342258 5. 032839 5. 278291 5. 360282 5. 297498  
11750964\_ 5. 795093 5. 895109 5. 734434 5. 888135 5. 845365 6. 035189  
11750965\_ 4. 829595 4. 8537 4. 834578 5. 183846 4. 960648 4. 966119  
11750966\_ 5. 393265 5. 63765 5. 659763 5. 503852 5. 643899 5. 532825  
11750967\_ 7. 950726 7. 929335 7. 958428 7. 070562 7. 197912 7. 128522  
11750968\_ 7. 755155 7. 689383 7. 72797 8. 013352 7. 975866 8. 039185  
11750969\_ 8. 019118 7. 836019 7. 973989 8. 31567 8. 302615 8. 271326  
11750970\_ 3. 459319 3. 517871 3. 554199 3. 218039 3. 21279 3. 180062  
11750971\_ 4. 636351 4. 758009 4. 459939 4. 570846 4. 491163 4. 583066  
11750972\_ 5. 904672 5. 966518 5. 845365 5. 996126 6. 092613 6. 060843  
11750973\_ 8. 560933 8. 572583 8. 52899 8. 756274 8. 729292 8. 725937  
11750974\_ 6. 776887 6. 788838 6. 827312 6. 126689 6. 24028 6. 163454  
11750975\_ 7. 889254 7. 856364 7. 878793 7. 783944 7. 801195 7. 791301  
11750976\_ 8. 394451 8. 36815 8. 36082 7. 806249 7. 842309 7. 766475  
11750977\_ 6. 230995 6. 121353 6. 270583 6. 522991 6. 51693 6. 400241  
11750978\_ 4. 174675 4. 202307 4. 162637 4. 240812 4. 247883 4. 262436  
11750979\_ 5. 736831 5. 899363 5. 751066 5. 971739 5. 875261 5. 847802  
11750980\_ 6. 929009 6. 879248 6. 92188 6. 762943 6. 751642 6. 835594  
11750981\_ 7. 879663 7. 798942 7. 786574 7. 998265 7. 999928 7. 916889  
11750982\_ 7. 227509 7. 14358 7. 21293 7. 391432 7. 509647 7. 480074  
11750983\_ 4. 539824 4. 484002 4. 489879 4. 609192 4. 578069 4. 471121  
11750984\_ 8. 511535 8. 49942 8. 509532 8. 463079 8. 437688 8. 548859  
11750985\_ 7. 144107 6. 985659 7. 098153 7. 253404 7. 22638 7. 232886  
11750986\_ 7. 020239 6. 948621 7. 034234 6. 745113 6. 890216 6. 837107  
11750987\_ 6. 815867 6. 85198 6. 971486 6. 594255 6. 737995 6. 707507  
11750988\_ 8. 127867 8. 078497 8. 202916 8. 365838 8. 408304 8. 340559  
11750989\_ 6. 453457 6. 417761 6. 419588 6. 369101 6. 411888 6. 360981  
11750990\_ 3. 511672 3. 569616 3. 311142 3. 694452 3. 602344 3. 443932  
11750991\_ 5. 822739 5. 614563 5. 858873 5. 653426 5. 61635 5. 774473  
11750992\_ 9. 241471 9. 156154 9. 231428 9. 55426 9. 648049 9. 556242  
11750993\_ 8. 732111 8. 647495 8. 703119 8. 432755 8. 380724 8. 447206  
11750994\_ 7. 330172 7. 414605 7. 340135 7. 108372 7. 090545 7. 178198  
11750995\_ 9. 161135 9. 143272 9. 132694 8. 884664 8. 809142 8. 811735  
11750996\_ 4. 953511 4. 846547 4. 920161 4. 824709 4. 820824 4. 819883  
11750997\_ 5. 664332 5. 576595 5. 600567 5. 849906 5. 792214 5. 850998  
11750998\_ 2. 414533 2. 393141 2. 471651 2. 373909 2. 446055 2. 414533  
11750999\_ 6. 83948 6. 664703 6. 670465 6. 688428 6. 750728 6. 635692  
11751000\_ 8. 458728 8. 319462 8. 382869 7. 924305 8. 089047 8. 010553  
11751001\_ 6. 396116 6. 465699 6. 539865 6. 703017 6. 70987 6. 752593  
11751002\_ 7. 72444 7. 716898 7. 747842 7. 862055 7. 730017 7. 81465

11751003\_ 5. 781619 5. 763634 5. 860134 5. 477407 5. 410679 5. 539667  
11751004\_ 6. 409419 6. 308434 6. 555942 5. 887449 5. 959169 5. 857453  
11751005\_ 6. 883362 7. 002431 6. 925197 6. 944466 6. 866663 6. 973185  
11751006\_ 5. 655883 5. 657357 5. 737282 5. 779088 5. 662497 5. 747968  
11751007\_ 4. 667725 4. 747368 4. 662985 4. 777694 4. 816974 4. 599159  
11751008\_ 5. 406509 5. 2276 5. 448726 5. 437562 5. 504054 5. 499621  
11751009\_ 8. 442314 8. 403529 8. 448158 8. 554411 8. 501977 8. 493755  
11751010\_ 9. 899925 9. 918739 9. 921342 9. 881339 9. 923315 9. 869863  
11751011\_ 6. 922068 6. 846866 6. 874776 7. 370671 7. 423822 7. 381551  
11751012\_ 4. 316356 4. 536268 4. 288319 4. 475931 4. 52373 4. 49779  
11751013\_ 6. 243194 6. 224107 6. 124699 5. 990622 5. 875175 5. 960879  
11751014\_ 5. 331072 5. 384736 5. 350292 5. 358204 5. 376246 5. 401969  
11751015\_ 3. 143708 2. 945929 2. 874619 3. 21279 3. 066692 3. 090379  
11751016\_ 4. 90505 5. 065247 5. 05732 5. 123351 5. 059305 5. 045639  
11751017\_ 6. 814761 6. 764371 6. 822861 6. 733708 6. 726433 6. 734206  
11751018\_ 8. 203995 8. 243735 8. 347131 7. 386369 7. 487135 7. 449073  
11751019\_ 5. 346598 5. 310017 5. 274944 5. 528624 5. 472149 5. 537662  
11751020\_ 3. 217995 3. 088691 2. 920289 3. 165243 3. 010746 3. 107718  
11751021\_ 5. 027364 4. 998542 4. 776413 5. 076878 5. 183024 5. 016226  
11751022\_ 9. 815449 9. 816515 9. 810915 9. 784628 9. 8362 9. 744361  
11751023\_ 3. 247542 3. 257585 3. 306326 3. 276934 3. 218885 3. 627251  
11751024\_ 6. 671396 6. 509928 6. 567428 6. 511509 6. 483431 6. 459016  
11751025\_ 7. 236672 7. 25227 7. 275457 7. 64331 7. 663335 7. 739796  
11751026\_ 6. 440136 6. 501176 6. 259655 6. 399601 6. 559529 6. 288157  
11751027\_ 5. 638345 5. 334962 5. 439651 4. 946633 4. 746798 4. 942109  
11751028\_ 5. 849727 5. 856434 5. 836276 5. 810918 5. 81327 5. 882595  
11751029\_ 6. 996583 7. 030814 6. 979684 7. 053924 7. 061551 7. 09078  
11751030\_ 6. 170304 6. 125452 6. 441665 5. 844597 5. 643138 5. 766784  
11751031\_ 8. 038179 7. 909525 7. 960759 7. 883676 7. 845039 7. 859583  
11751032\_ 6. 776464 6. 798188 6. 807105 8. 109369 8. 165644 8. 073158  
11751033\_ 6. 360953 6. 213004 6. 263265 6. 381183 6. 27218 6. 349798  
11751034\_ 7. 250047 7. 305869 7. 237833 7. 488373 7. 470845 7. 535132  
11751035\_ 4. 981595 5. 042348 4. 919647 5. 065191 5. 022323 5. 19364  
11751036\_ 6. 44905 6. 124384 6. 527873 5. 614563 5. 607649 5. 554436  
11751037\_ 8. 345206 8. 140949 8. 294095 7. 878425 7. 938128 7. 928007  
11751038\_ 7. 335346 7. 234806 7. 347662 6. 973662 6. 968895 6. 956076  
11751039\_ 7. 629026 7. 615856 7. 626809 7. 708795 7. 653929 7. 653853  
11751040\_ 8. 78467 8. 735919 8. 793729 8. 282104 8. 241042 8. 311155  
11751041\_ 4. 498684 4. 723371 4. 570607 4. 295138 4. 40583 4. 330729  
11751042\_ 3. 98955 4. 161618 3. 870172 4. 185531 4. 273379 4. 047399  
11751043\_ 2. 549575 2. 727804 2. 841651 2. 806928 2. 487433 2. 727804  
11751044\_ 4. 108592 4. 140964 4. 163315 4. 313676 4. 16923 4. 127482  
11751045\_ 6. 765736 6. 817164 6. 739133 6. 862789 6. 928867 6. 790963  
11751046\_ 5. 074869 5. 407041 5. 353644 5. 362974 5. 322565 5. 326724  
11751047\_ 6. 536494 6. 381784 6. 300643 6. 501942 6. 387095 6. 503039  
11751048\_ 6. 72852 6. 67478 6. 530081 6. 638979 6. 549047 6. 469713  
11751049\_ 7. 602888 7. 588985 7. 604825 7. 736382 7. 832581 7. 768265  
11751050\_ 7. 902863 7. 84669 7. 853156 8. 035625 8. 039197 8. 057992  
11751051\_ 9. 429417 9. 417125 9. 452215 9. 342951 9. 305969 9. 297941  
11751052\_ 11. 17295 11. 12829 11. 1175 11. 19514 11. 17315 11. 18281  
11751053\_ 5. 285218 5. 414869 5. 26034 5. 288049 5. 212402 5. 335766



11751054\_ 1. 69759 1. 935769 2. 093357 2. 120585 2. 135651 2. 114496  
11751055\_ 6. 025742 6. 061053 5. 861757 5. 914827 6. 069345 6. 073142  
11751056\_ 4. 141898 4. 653483 4. 426448 4. 611224 4. 769526 4. 803478  
11751057\_ 6. 29171 6. 335769 6. 452365 6. 256045 6. 118346 6. 236213  
11751058\_ 5. 073036 5. 16202 5. 030335 5. 187657 5. 309258 5. 242638  
11751059\_ 7. 772557 7. 870099 7. 904856 8. 173686 8. 197541 8. 152428  
11751060\_ 9. 123527 9. 051067 9. 059161 8. 517365 8. 676367 8. 557318  
11751061\_ 6. 053373 6. 244666 6. 13753 6. 572831 6. 643784 6. 635957  
11751062\_ 6. 711076 6. 681582 6. 608324 7. 050824 7. 022276 7. 11395  
11751063\_ 6. 14859 6. 113049 6. 191787 6. 276435 6. 297294 6. 290213  
11751064\_ 6. 07765 5. 916355 5. 99377 5. 553828 5. 646613 5. 70879  
11751065\_ 7. 046229 7. 031071 6. 999844 6. 505598 6. 567182 6. 673401  
11751066\_ 11. 11971 11. 27258 11. 19294 11. 31534 11. 26513 11. 14494  
11751067\_ 8. 86325 8. 73284 8. 814107 8. 308067 8. 19582 8. 216722  
11751068\_ 4. 160264 4. 041242 3. 885635 4. 171356 4. 198975 4. 074846  
11751069\_ 8. 910289 8. 911699 8. 872258 8. 899413 8. 899302 8. 888497  
11751070\_ 7. 408349 7. 327104 7. 227407 7. 483221 7. 626454 7. 476462  
11751071\_ 3. 671807 3. 609537 3. 64112 3. 745319 3. 663244 3. 807889  
11751072\_ 6. 832901 6. 859493 6. 824182 6. 810067 6. 815967 6. 84799  
11751073\_ 4. 505768 4. 628596 4. 352144 4. 477798 4. 475521 4. 622302  
11751074\_ 9. 400712 9. 379527 9. 398101 9. 600127 9. 622874 9. 628765  
11751075\_ 3. 726567 3. 46406 3. 482019 3. 398236 3. 55706 3. 705625  
11751076\_ 7. 238732 7. 122311 7. 161437 6. 284026 6. 417071 6. 449506  
11751077\_ 3. 511142 3. 909593 3. 211369 3. 446991 3. 503743 3. 503743  
11751078\_ 4. 861702 4. 836786 4. 610164 4. 656428 4. 865945 5. 045457  
11751079\_ 6. 414953 6. 473794 6. 396365 6. 53499 6. 564944 6. 450297  
11751080\_ 8. 46779 8. 389431 8. 492512 8. 750026 8. 777835 8. 717067  
11751081\_ 9. 370326 9. 326395 9. 408312 8. 815367 8. 795022 8. 818566  
11751082\_ 7. 116728 7. 472636 7. 33216 7. 437478 7. 463391 7. 355005  
11751083\_ 6. 405525 6. 655758 6. 478352 6. 57996 6. 679813 6. 586237  
11751084\_ 6. 477877 6. 511767 6. 56594 6. 612821 6. 655083 6. 692  
11751085\_ 7. 497147 7. 420989 7. 516723 7. 363954 7. 366256 7. 356176  
11751086\_ 7. 86977 7. 74796 7. 87744 7. 779558 7. 753196 7. 839273  
11751087\_ 7. 451536 7. 489414 7. 485078 7. 373694 7. 433925 7. 412773  
11751088\_ 5. 198986 5. 315353 5. 325328 5. 285487 5. 249709 5. 228852  
11751089\_ 6. 784956 6. 812352 6. 773916 7. 018608 6. 958139 7. 07498  
11751090\_ 5. 209025 5. 105258 5. 507226 4. 752925 4. 826305 4. 871994  
11751091\_ 5. 551689 5. 502942 5. 592833 5. 480966 5. 522496 5. 693538  
11751092\_ 6. 587483 6. 561067 6. 665285 6. 466926 6. 423418 6. 569147  
11751093\_ 2. 042263 1. 995297 1. 995297 1. 995297 1. 857452 1. 995297  
11751094\_ 4. 704839 4. 579649 4. 492859 3. 941212 3. 772171 3. 974053  
11751095\_ 7. 034901 7. 120082 7. 042517 6. 76746 6. 791163 6. 653261  
11751096\_ 7. 634644 7. 380877 7. 542525 8. 024188 7. 927887 8. 05815  
11751097\_ 7. 959973 7. 977124 7. 97257 8. 370499 8. 389643 8. 359734  
11751098\_ 7. 320014 7. 298407 7. 287238 7. 289736 7. 325427 7. 238379  
11751099\_ 7. 656231 7. 504435 7. 64019 7. 530373 7. 530184 7. 54094  
11751100\_ 3. 109188 2. 993708 2. 950421 3. 032611 3. 131167 3. 032611  
11751101\_ 7. 750801 7. 732633 7. 784046 7. 310219 7. 493669 7. 415503  
11751102\_ 6. 197528 6. 203336 6. 326177 6. 143058 6. 045293 6. 197528  
11751103\_ 4. 477874 4. 620467 4. 477938 4. 68595 4. 648824 4. 661463  
11751104\_ 4. 700243 4. 559668 4. 513211 4. 459939 4. 399539 4. 489839

11751105\_ 6. 324128 6. 255983 6. 330199 6. 329742 6. 285223 6. 300233  
11751106\_ 8. 09905 8. 107672 8. 117256 8. 000738 7. 949233 7. 951963  
11751107\_ 6. 75316 6. 827162 6. 855471 6. 419222 6. 382146 6. 379151  
11751108\_ 6. 959944 7. 04434 6. 862059 7. 013127 7. 106905 7. 038711  
11751109\_ 5. 550567 5. 419023 5. 635996 5. 095053 5. 029529 5. 360472  
11751110\_ 6. 131995 6. 168142 6. 152197 5. 294817 5. 244178 5. 332458  
11751111\_ 2. 472481 2. 596333 2. 748599 2. 62469 2. 659764 2. 616849  
11751112\_ 7. 171824 6. 950255 7. 103809 6. 727853 6. 923408 6. 778902  
11751113\_ 7. 617444 7. 441265 7. 438878 7. 300857 7. 140087 7. 131758  
11751114\_ 7. 288992 7. 325672 7. 289758 7. 084485 7. 043334 7. 124271  
11751115\_ 9. 375847 9. 331999 9. 388389 7. 907996 8. 003081 8. 049836  
11751116\_ 9. 914765 9. 802845 9. 866836 9. 544554 9. 535404 9. 543908  
11751117\_ 9. 111071 9. 002971 9. 022664 8. 627516 8. 694916 8. 68164  
11751118\_ 5. 242417 5. 214026 5. 008555 5. 214026 5. 365099 5. 380537  
11751119\_ 6. 62168 6. 718614 6. 590527 6. 718614 6. 665527 6. 824707  
11751120\_ 5. 668094 5. 741207 5. 584813 5. 89129 5. 701151 5. 732315  
11751121\_ 7. 147079 7. 192344 7. 194571 7. 223191 7. 196812 7. 292133  
11751122\_ 8. 080475 8. 041703 8. 077454 6. 797754 6. 769108 6. 837967  
11751123\_ 6. 750568 6. 75633 6. 877972 7. 560517 7. 551224 7. 602452  
11751124\_ 4. 284447 4. 39779 4. 113586 4. 311108 4. 284447 4. 312111  
11751125\_ 2. 47102 2. 642229 2. 546162 3. 10572 2. 903873 2. 771834  
11751126\_ 5. 668239 5. 620777 5. 610767 5. 727945 5. 742779 5. 649621  
11751127\_ 6. 852753 6. 896643 6. 873312 6. 969342 6. 886652 6. 958122  
11751128\_ 7. 058985 7. 076189 7. 158915 7. 319338 7. 298587 7. 32976  
11751129\_ 4. 97736 4. 950552 4. 95612 4. 992243 5. 039337 5. 018705  
11751130\_ 7. 97446 7. 918113 7. 968211 7. 577399 7. 629668 7. 594622  
11751131\_ 5. 945479 6. 058284 5. 988411 5. 900052 6. 026455 5. 933274  
11751132\_ 4. 230172 4. 326071 4. 147234 4. 361374 4. 270632 4. 290995  
11751133\_ 8. 800659 8. 684018 8. 799134 8. 258191 8. 264631 8. 30007  
11751134\_ 9. 607321 9. 518058 9. 567283 9. 365141 9. 400102 9. 338174  
11751135\_ 5. 303848 5. 353489 5. 289176 5. 429585 5. 265636 5. 449901  
11751136\_ 3. 622817 3. 998965 3. 666384 3. 849281 3. 695381 3. 716801  
11751137\_ 6. 504761 6. 682322 6. 728603 6. 701659 6. 701659 6. 624256  
11751138\_ 7. 084814 6. 994573 7. 155129 6. 512305 6. 507738 6. 642313  
11751139\_ 5. 866308 5. 677575 5. 7553 6. 011126 5. 924132 5. 992354  
11751140\_ 3. 89695 3. 943589 3. 906496 4. 148946 3. 951788 3. 845862  
11751141\_ 9. 543387 9. 542416 9. 516344 9. 412275 9. 390559 9. 336867  
11751142\_ 6. 665962 6. 64521 6. 640957 6. 669342 6. 623715 6. 686431  
11751143\_ 7. 688622 7. 595511 7. 699328 7. 606238 7. 569671 7. 603951  
11751144\_ 6. 961042 6. 900049 6. 989554 6. 876837 6. 902903 6. 834469  
11751145\_ 6. 671599 6. 481641 6. 690648 7. 05884 7. 096518 7. 098092  
11751146\_ 4. 652874 4. 652874 4. 634674 4. 76295 4. 709286 4. 816892  
11751147\_ 5. 534646 5. 651238 5. 446279 5. 564809 5. 630582 5. 598506  
11751148\_ 6. 549167 6. 412133 6. 528598 6. 419117 6. 481046 6. 456681  
11751149\_ 6. 22334 6. 066504 6. 301222 6. 145739 6. 208465 6. 223694  
11751150\_ 7. 099734 7. 055228 7. 15405 6. 829375 6. 830578 6. 844143  
11751151\_ 7. 055868 6. 820288 7. 002383 6. 588203 6. 484328 6. 410261  
11751152\_ 5. 544167 5. 737264 5. 698094 5. 745821 5. 620962 5. 650512  
11751153\_ 7. 088693 7. 078542 7. 122302 7. 989737 8. 161666 8. 110707  
11751154\_ 5. 758435 5. 668291 5. 927624 7. 934606 7. 864092 7. 835158  
11751155\_ 6. 669578 6. 611469 6. 701732 6. 427325 6. 471066 6. 460818

11751156\_ 5. 514449 5. 234716 5. 295432 5. 158207 5. 296094 5. 176318  
11751157\_ 6. 460933 6. 411964 6. 494443 6. 420044 6. 431763 6. 563392  
11751158\_ 6. 819745 6. 713773 6. 77074 6. 771375 6. 745315 6. 785201  
11751159\_ 5. 074195 5. 11322 4. 680316 5. 131114 5. 18587 5. 059779  
11751160\_ 2. 481389 2. 441166 2. 441166 2. 624476 2. 334218 2. 718322  
11751161\_ 5. 018929 5. 118579 4. 874272 5. 076716 4. 986923 5. 058585  
11751162\_ 5. 623504 5. 7039 5. 680248 5. 755289 5. 719169 5. 711297  
11751163\_ 6. 197649 6. 175042 6. 181515 6. 154102 6. 221049 6. 129886  
11751164\_ 7. 696231 7. 594527 7. 692468 7. 173802 7. 093563 7. 112984  
11751165\_ 8. 888119 8. 818775 8. 920834 8. 029831 8. 105279 8. 128398  
11751166\_ 5. 364085 5. 390106 5. 57995 5. 380506 5. 341696 5. 390106  
11751167\_ 6. 572376 6. 567129 6. 472837 6. 386061 6. 298998 6. 370337  
11751168\_ 5. 011734 4. 972813 4. 532794 5. 166811 5. 059022 5. 154263  
11751169\_ 5. 14901 5. 203243 5. 058548 5. 244669 5. 303196 5. 160609  
11751170\_ 10. 36402 10. 29462 10. 30488 10. 37376 10. 35237 10. 33312  
11751171\_ 9. 956907 9. 881871 9. 905354 9. 965656 9. 959375 9. 879616  
11751172\_ 6. 613822 6. 538272 6. 724294 6. 702832 6. 943259 6. 939599  
11751173\_ 5. 464405 5. 401871 5. 389694 5. 186155 5. 209543 5. 231414  
11751174\_ 6. 194891 6. 092327 6. 199796 5. 902083 5. 768057 5. 825506  
11751175\_ 4. 169347 4. 317603 4. 192552 4. 731576 4. 406652 4. 368092  
11751176\_ 3. 184661 3. 465703 3. 343055 3. 098653 3. 334787 2. 920266  
11751177\_ 6. 595455 6. 579869 6. 630376 6. 532914 6. 474077 6. 522299  
11751178\_ 7. 709659 7. 621454 7. 64382 6. 984123 7. 006706 6. 994864  
11751179\_ 5. 126743 5. 29598 5. 178334 5. 456291 5. 413023 5. 483205  
11751180\_ 8. 97353 8. 893501 8. 977562 8. 215016 8. 214531 8. 278821  
11751181\_ 5. 104628 5. 11527 4. 94281 4. 837351 5. 041381 4. 844828  
11751182\_ 7. 097511 7. 04434 7. 060291 6. 680281 6. 717111 6. 784412  
11751183\_ 5. 907138 5. 818293 6. 003236 5. 621513 5. 560761 5. 614938  
11751184\_ 3. 239415 3. 256104 3. 184794 3. 266887 3. 239415 3. 196971  
11751185\_ 6. 617088 6. 713678 6. 600206 6. 799871 6. 610388 6. 660519  
11751186\_ 9. 133487 9. 039075 9. 073732 9. 038631 8. 996803 8. 843292  
11751187\_ 6. 414523 6. 360394 6. 411086 5. 506866 5. 638895 5. 543071  
11751188\_ 3. 705032 3. 712618 3. 635529 3. 811083 3. 678625 3. 791431  
11751189\_ 3. 913844 4. 000472 3. 782881 3. 868477 3. 979886 3. 949138  
11751190\_ 4. 039629 4. 193398 4. 082696 4. 133205 4. 18669 4. 176628  
11751191\_ 3. 736957 3. 937059 3. 944723 3. 991991 3. 991052 3. 944723  
11751192\_ 3. 09993 2. 972475 3. 003747 3. 111795 3. 174357 3. 09583  
11751193\_ 5. 277895 5. 391553 5. 296544 5. 313585 5. 374487 5. 397947  
11751194\_ 3. 964088 3. 961855 3. 771993 4. 064424 4. 019295 3. 906489  
11751195\_ 5. 220142 5. 364789 5. 28704 5. 104976 4. 93837 5. 156303  
11751196\_ 4. 911438 5. 125629 5. 178569 5. 328154 5. 218107 5. 394647  
11751197\_ 2. 908578 2. 712329 2. 534483 2. 694058 2. 605779 2. 617529  
11751198\_ 6. 192127 6. 076709 6. 191381 6. 164831 6. 222296 6. 37679  
11751199\_ 6. 434032 6. 501109 6. 416598 6. 485454 6. 501109 6. 637261  
11751200\_ 6. 019481 6. 090135 6. 021418 6. 169494 6. 142526 6. 260172  
11751201\_ 6. 184754 6. 118838 6. 201129 6. 275692 6. 281964 6. 212415  
11751202\_ 6. 597632 6. 563624 6. 685189 6. 376009 6. 543135 6. 477552  
11751203\_ 7. 531615 7. 642534 7. 554033 6. 825513 6. 825076 6. 891815  
11751204\_ 2. 499027 2. 538339 2. 42238 2. 403459 2. 35033 2. 432482  
11751205\_ 5. 031828 4. 981822 4. 897083 5. 120113 5. 010723 5. 029529  
11751206\_ 9. 046846 9. 076346 9. 045667 9. 762136 9. 729722 9. 659551

11751207\_ 8. 415721 8. 385597 8. 440097 8. 204696 8. 200625 8. 141745  
11751208\_ 5. 11527 5. 198749 5. 054691 5. 242768 5. 103448 5. 198332  
11751209\_ 6. 166825 6. 28256 6. 081875 6. 23655 6. 284999 6. 219513  
11751210\_ 6. 398261 6. 360286 6. 335671 6. 511873 6. 540736 6. 540235  
11751211\_ 5. 36906 5. 267549 5. 521079 5. 793278 5. 943702 5. 98314  
11751212\_ 5. 943824 5. 957952 6. 060938 5. 776626 5. 79488 5. 929521  
11751213\_ 8. 692977 8. 64852 8. 681018 8. 988075 8. 973587 8. 882304  
11751214\_ 5. 787679 5. 706955 5. 761408 4. 477665 4. 510685 4. 575883  
11751215\_ 7. 341294 7. 230373 7. 305353 7. 624696 7. 570728 7. 557106  
11751216\_ 4. 110303 4. 349577 4. 202553 4. 40461 4. 229739 4. 224496  
11751217\_ 6. 617088 6. 461187 6. 459458 6. 13945 6. 025952 6. 074553  
11751218\_ 3. 818401 3. 586527 3. 608032 3. 9501 3. 79645 3. 884729  
11751219\_ 8. 425545 8. 570183 8. 492367 8. 159005 7. 957412 7. 94208  
11751220\_ 8. 235728 8. 117322 8. 181799 8. 457956 8. 393017 8. 452208  
11751221\_ 5. 351264 5. 398436 5. 307657 5. 531343 5. 477508 5. 455593  
11751222\_ 5. 314201 5. 358896 5. 364942 5. 297498 5. 269317 5. 44512  
11751223\_ 8. 064064 8. 047743 8. 043141 7. 631093 7. 701944 7. 640435  
11751224\_ 8. 670766 8. 633595 8. 693185 8. 242058 8. 246076 8. 260058  
11751225\_ 3. 705625 3. 787643 4. 005817 3. 924633 3. 697042 3. 922703  
11751226\_ 6. 660417 6. 676475 6. 713895 7. 307426 7. 305781 7. 372078  
11751227\_ 8. 463336 8. 371004 8. 422689 8. 123233 8. 154423 8. 150294  
11751228\_ 5. 172529 5. 424419 5. 388919 5. 528624 5. 400761 5. 413197  
11751229\_ 8. 008618 7. 972797 7. 978205 7. 869123 7. 825817 7. 85795  
11751230\_ 7. 717662 7. 659917 7. 681484 8. 883829 8. 846877 8. 768715  
11751231\_ 4. 107387 4. 256873 3. 82016 4. 322995 4. 227333 4. 238108  
11751232\_ 5. 025311 5. 145863 5. 016713 4. 875239 5. 0617 5. 076752  
11751233\_ 8. 553508 8. 476495 8. 563408 8. 566307 8. 589906 8. 575005  
11751234\_ 3. 491789 3. 451611 3. 788642 2. 969072 3. 004853 3. 290188  
11751235\_ 7. 280196 7. 06836 7. 26882 7. 025154 7. 099238 7. 030612  
11751236\_ 6. 815582 6. 686431 6. 830774 6. 479789 6. 5167 6. 532425  
11751237\_ 7. 464636 7. 453421 7. 495359 6. 652332 6. 69804 6. 623762  
11751238\_ 6. 554674 6. 571792 6. 663995 6. 528549 6. 584888 6. 550115  
11751239\_ 5. 33876 5. 189628 5. 012883 5. 624829 5. 604823 5. 778351  
11751240\_ 4. 899354 5. 140847 4. 768273 5. 029529 5. 008811 5. 150574  
11751241\_ 4. 37319 4. 567289 4. 520552 4. 582869 4. 567289 4. 700243  
11751242\_ 6. 356369 6. 234904 6. 455645 6. 154828 6. 114596 6. 17981  
11751243\_ 5. 474352 5. 442887 5. 363134 5. 555805 5. 609901 5. 660694  
11751244\_ 7. 822031 7. 855094 7. 852823 7. 44607 7. 475015 7. 523923  
11751245\_ 7. 461002 7. 45077 7. 450931 7. 014859 6. 945132 7. 016765  
11751246\_ 6. 930762 6. 836449 6. 965845 6. 731835 6. 74092 6. 756428  
11751247\_ 4. 887405 4. 946189 4. 84602 4. 762411 5. 027769 5. 021328  
11751248\_ 5. 226953 5. 442278 5. 374866 5. 526229 5. 468539 5. 491007  
11751249\_ 6. 626032 6. 685245 6. 725582 6. 647836 6. 56978 6. 671848  
11751250\_ 4. 174845 4. 117081 4. 082689 4. 208425 4. 054288 4. 169451  
11751251\_ 7. 708315 7. 717758 7. 805524 7. 871763 7. 943462 7. 957045  
11751252\_ 6. 020594 5. 960531 6. 053404 6. 087255 5. 984904 6. 00262  
11751253\_ 8. 045372 7. 965568 7. 995935 8. 245254 8. 290639 8. 225567  
11751254\_ 5. 283287 5. 380649 5. 451167 5. 3515 5. 275791 5. 460967  
11751255\_ 4. 989993 4. 901816 4. 912565 5. 119644 5. 136676 5. 02162  
11751256\_ 5. 333723 5. 41855 5. 274467 5. 322875 5. 322875 5. 138245  
11751257\_ 7. 686288 7. 606954 7. 587551 7. 588155 7. 597947 7. 655683

11751258\_ 8. 48969 8. 437437 8. 497167 9. 193402 9. 213986 9. 221348  
11751259\_ 5. 165537 4. 996686 4. 960006 4. 62642 4. 81986 4. 966833  
11751260\_ 6. 134146 6. 084446 5. 975335 7. 201867 7. 341254 7. 218162  
11751261\_ 6. 221315 6. 338823 6. 283756 6. 442022 6. 430371 6. 445267  
11751262\_ 4. 629197 4. 526519 4. 54117 4. 738252 4. 717084 4. 715521  
11751263\_ 3. 76694 3. 628695 3. 675642 3. 95661 3. 765417 3. 675642  
11751264\_ 5. 480495 5. 557944 5. 485753 5. 589815 5. 595526 5. 634791  
11751265\_ 8. 139198 8. 080601 8. 074086 8. 347968 8. 393911 8. 362162  
11751266\_ 4. 814988 5. 089842 5. 012712 4. 838298 4. 879893 4. 679276  
11751267\_ 3. 618061 3. 645187 3. 61857 3. 645187 3. 727737 3. 652682  
11751268\_ 4. 595821 4. 594152 4. 685945 4. 736759 4. 950673 5. 029356  
11751269\_ 6. 960352 6. 876669 6. 982937 6. 434264 6. 313451 6. 554892  
11751270\_ 5. 614444 5. 559638 5. 589988 4. 835017 4. 984669 4. 827953  
11751271\_ 6. 559238 6. 62151 6. 595303 6. 628718 6. 603717 6. 666563  
11751272\_ 8. 276608 8. 152772 8. 27525 7. 118328 7. 160663 7. 079694  
11751273\_ 3. 716943 3. 635309 3. 398236 3. 443912 3. 586782 3. 492808  
11751274\_ 3. 741577 3. 748081 3. 602483 3. 841426 4. 061711 3. 673462  
11751275\_ 8. 783777 8. 706191 8. 822358 8. 889379 8. 846184 8. 842858  
11751276\_ 8. 682333 8. 65562 8. 727904 8. 827354 8. 79507 8. 798186  
11751277\_ 7. 591329 7. 697727 7. 563506 7. 612217 7. 627312 7. 667111  
11751278\_ 4. 551529 4. 543 4. 49741 4. 584076 4. 47559 4. 554558  
11751279\_ 5. 755141 5. 673721 5. 76563 5. 70872 5. 654861 5. 717629  
11751280\_ 5. 715723 5. 711395 5. 622486 5. 75838 5. 748076 5. 664512  
11751281\_ 4. 781207 4. 930586 4. 593733 4. 810754 4. 93837 4. 94619  
11751282\_ 5. 708469 5. 80642 5. 715989 6. 140255 6. 073727 6. 059373  
11751283\_ 3. 894727 4. 061832 3. 767888 4. 139611 4. 17358 4. 026167  
11751284\_ 5. 875978 6. 086737 5. 841888 5. 937396 5. 929845 5. 987522  
11751285\_ 7. 668701 7. 514304 7. 586183 7. 463335 7. 421382 7. 606675  
11751286\_ 7. 772765 7. 668693 7. 764836 7. 840485 7. 845358 7. 839514  
11751287\_ 7. 596614 7. 583611 7. 551864 5. 983598 6. 166837 6. 153539  
11751288\_ 8. 69931 8. 668867 8. 729696 8. 48782 8. 548618 8. 513058  
11751289\_ 6. 844078 6. 878496 6. 950055 7. 145983 7. 212445 7. 175359  
11751290\_ 4. 248855 4. 291002 4. 446325 4. 350385 4. 483662 4. 536921  
11751291\_ 7. 432164 7. 390789 7. 364179 7. 554796 7. 449626 7. 562236  
11751292\_ 7. 640359 7. 602482 7. 663318 7. 312027 7. 352273 7. 368073  
11751293\_ 4. 763543 4. 826122 4. 802138 4. 816901 4. 807375 4. 797897  
11751294\_ 7. 134375 6. 946975 7. 272972 5. 80574 6. 011312 5. 985406  
11751295\_ 7. 376265 7. 342138 7. 352794 7. 924363 7. 896741 7. 842738  
11751296\_ 5. 030875 5. 113984 5. 150575 5. 301127 5. 238329 5. 265383  
11751297\_ 6. 020493 5. 833631 5. 917024 6. 494443 6. 453614 6. 528702  
11751298\_ 7. 761404 7. 745142 7. 777893 7. 679896 7. 683524 7. 655886  
11751299\_ 5. 064818 5. 154561 5. 324612 5. 242099 5. 210488 5. 109093  
11751300\_ 3. 630606 3. 997131 3. 633667 3. 72901 3. 77477 3. 764458  
11751301\_ 7. 688018 7. 592658 7. 764124 6. 971745 6. 9689 7. 14277  
11751302\_ 9. 151238 9. 108079 9. 177343 9. 122665 9. 121952 9. 115277  
11751303\_ 7. 060072 6. 955617 6. 951981 6. 855535 6. 976626 6. 94806  
11751304\_ 6. 122302 6. 176217 6. 094413 6. 101162 6. 108659 6. 139807  
11751305\_ 8. 223396 8. 126881 8. 155631 8. 13506 8. 213002 8. 171233  
11751306\_ 8. 451934 8. 440242 8. 461309 7. 629165 7. 559658 7. 606707  
11751307\_ 5. 176493 5. 28987 5. 348868 5. 487447 5. 241654 5. 272194  
11751308\_ 5. 038092 4. 846249 5. 091596 4. 263285 4. 063103 4. 286652

11751309\_ 8. 475132 8. 403427 8. 490523 8. 401503 8. 393378 8. 364004  
11751310\_ 7. 803159 7. 707651 7. 774228 7. 238794 7. 184593 7. 310328  
11751311\_ 7. 418277 7. 53394 7. 462121 7. 48534 7. 405904 7. 473153  
11751312\_ 4. 169629 4. 250868 4. 215628 4. 362741 4. 27958 4. 285268  
11751313\_ 5. 911047 5. 80234 5. 87914 5. 738842 5. 849336 5. 767764  
11751314\_ 7. 667787 7. 656855 7. 706465 7. 955292 8. 022996 8. 055765  
11751315\_ 7. 809068 7. 679445 7. 732276 8. 054137 8. 123335 8. 164044  
11751316\_ 5. 506887 5. 467616 5. 445683 5. 58783 5. 552648 5. 483276  
11751317\_ 9. 903643 9. 886371 9. 980095 9. 853894 9. 797336 9. 849919  
11751318\_ 12. 74595 12. 72171 12. 71623 12. 85984 12. 86314 12. 86973  
11751319\_ 11. 25635 11. 26522 11. 26451 11. 45214 11. 43099 11. 46698  
11751320\_ 5. 583535 5. 584813 5. 654829 5. 668682 5. 609647 5. 529691  
11751321\_ 6. 510934 6. 425735 6. 478352 5. 799368 5. 862624 5. 946303  
11751322\_ 2. 533934 2. 432346 2. 401675 2. 533294 2. 501325 2. 520193  
11751323\_ 5. 154538 5. 263142 5. 166132 5. 23629 5. 204322 5. 39638  
11751324\_ 8. 131293 8. 082519 8. 257935 8. 26095 8. 234355 8. 220014  
11751325\_ 6. 446561 6. 546818 6. 387629 6. 540996 6. 431763 6. 443128  
11751326\_ 8. 314198 8. 272559 8. 301851 8. 39772 8. 396417 8. 411315  
11751327\_ 7. 608283 7. 615707 7. 633408 7. 585444 7. 574353 7. 68505  
11751328\_ 6. 883517 6. 827454 6. 791332 6. 300643 6. 086307 6. 17981  
11751329\_ 8. 76086 8. 713078 8. 737512 8. 094491 8. 099273 8. 121309  
11751330\_ 8. 603994 8. 577663 8. 691274 8. 06549 8. 066401 8. 025403  
11751331\_ 6. 48642 6. 32357 6. 419964 6. 366891 6. 477707 6. 587335  
11751332\_ 6. 796189 6. 836901 6. 940387 6. 670756 6. 672355 6. 701804  
11751333\_ 3. 342753 3. 332762 3. 213585 3. 326591 3. 29556 3. 362889  
11751334\_ 6. 989984 6. 945963 7. 034541 7. 077128 7. 183349 7. 091045  
11751335\_ 7. 357235 7. 373355 7. 299184 8. 074774 8. 041973 8. 062349  
11751336\_ 7. 14907 7. 088658 7. 272972 7. 712601 7. 676485 7. 644398  
11751337\_ 6. 07654 5. 977199 6. 01334 6. 590513 6. 679329 6. 849326  
11751338\_ 5. 853105 5. 924797 5. 856278 6. 769111 6. 818493 6. 796572  
11751339\_ 2. 235709 2. 327604 2. 235709 2. 150454 2. 235709 2. 181462  
11751340\_ 5. 109077 5. 189411 5. 162989 5. 124904 5. 363178 5. 29948  
11751341\_ 5. 715142 5. 662264 5. 600146 5. 658627 5. 772196 5. 779715  
11751342\_ 4. 74403 4. 758712 4. 942538 4. 829116 4. 987451 4. 931424  
11751343\_ 5. 964067 6. 070984 5. 969052 6. 040637 6. 025636 6. 014397  
11751344\_ 3. 142098 3. 196443 3. 266858 3. 14605 3. 193801 3. 123993  
11751345\_ 4. 700152 4. 652677 4. 756451 4. 708976 4. 78429 4. 580327  
11751346\_ 8. 822356 8. 772424 8. 829653 8. 510681 8. 50955 8. 556575  
11751347\_ 6. 707173 6. 561388 6. 707907 6. 263013 6. 219348 6. 369983  
11751348\_ 8. 81431 8. 776757 8. 796158 8. 455311 8. 396427 8. 44227  
11751349\_ 3. 757562 3. 650098 3. 866804 3. 716532 3. 465287 3. 596545  
11751350\_ 9. 6634 9. 719977 9. 654548 9. 462151 9. 408337 9. 3003  
11751351\_ 7. 430421 7. 473654 7. 448607 7. 456656 7. 459425 7. 472037  
11751352\_ 5. 9957 6. 06908 6. 211865 6. 366235 6. 3561 6. 245978  
11751353\_ 8. 57931 8. 508728 8. 483924 8. 402981 8. 393403 8. 432916  
11751354\_ 4. 470682 4. 257351 4. 331961 4. 327639 4. 473541 4. 250601  
11751355\_ 4. 763543 4. 916444 4. 850901 5. 17217 4. 93837 4. 916444  
11751356\_ 10. 08759 10. 0219 10. 06083 9. 653991 9. 663191 9. 682366  
11751357\_ 6. 391849 6. 58331 6. 502874 6. 593969 6. 49361 6. 427896  
11751358\_ 5. 508143 5. 713049 5. 499628 5. 665054 5. 783019 5. 813196  
11751359\_ 10. 12814 10. 0933 10. 11913 10. 13966 10. 1374 10. 10761

11751360\_ 9. 799684 9. 769105 9. 869035 9. 859813 9. 778948 9. 795398  
11751361\_ 4. 128829 3. 865178 4. 151285 4. 07879 3. 898312 3. 856594  
11751362\_ 4. 341074 4. 156496 4. 370337 3. 925181 4. 068147 4. 154476  
11751363\_ 8. 16857 8. 075317 8. 16476 7. 959469 8. 014089 7. 976832  
11751364\_ 3. 192448 3. 11349 2. 89587 4. 013554 3. 895055 4. 033583  
11751365\_ 4. 195065 3. 936002 4. 253869 4. 465552 4. 560598 4. 504955  
11751366\_ 5. 748592 5. 546607 5. 748884 5. 845365 5. 845365 5. 899028  
11751367\_ 6. 37143 6. 613778 6. 748734 6. 097849 6. 008476 5. 875515  
11751368\_ 4. 597986 4. 710115 4. 660482 4. 67261 4. 764115 4. 886165  
11751369\_ 6. 7637 6. 686431 6. 808782 6. 206542 6. 2928 6. 243885  
11751370\_ 7. 027593 7. 08173 7. 082856 5. 953654 5. 800485 6. 018561  
11751371\_ 5. 760935 6. 016199 5. 825781 5. 778438 6. 122294 5. 881325  
11751372\_ 6. 028857 6. 026946 5. 881997 5. 947173 6. 146736 6. 109658  
11751373\_ 7. 497147 7. 297009 7. 486455 6. 554512 6. 510536 6. 617354  
11751374\_ 3. 00219 3. 026566 2. 950666 3. 355036 3. 286087 3. 232898  
11751375\_ 6. 074394 6. 191691 5. 977831 6. 182053 6. 074957 6. 115201  
11751376\_ 5. 576566 5. 679165 5. 683353 5. 859663 5. 599185 5. 753976  
11751377\_ 7. 251132 7. 264874 7. 177279 7. 239702 7. 274688 7. 280751  
11751378\_ 7. 7933 7. 723117 7. 757345 7. 42124 7. 411544 7. 428201  
11751379\_ 3. 432578 3. 420798 3. 316641 3. 473702 3. 672186 3. 43191  
11751380\_ 4. 59227 4. 5355 4. 72492 4. 633463 4. 719935 4. 694563  
11751381\_ 4. 623212 4. 421655 4. 528681 3. 378315 3. 518421 3. 192103  
11751382\_ 3. 306683 3. 244841 3. 528902 3. 377023 3. 591278 3. 439152  
11751383\_ 6. 070684 5. 99776 6. 134185 6. 022664 6. 153657 6. 148446  
11751384\_ 7. 275399 7. 173232 7. 244989 6. 883103 6. 898512 6. 967323  
11751385\_ 7. 151626 7. 264386 7. 125154 7. 211335 7. 21903 7. 340658  
11751386\_ 8. 119964 8. 037212 8. 010965 8. 102393 8. 074615 8. 106336  
11751387\_ 6. 101862 6. 079371 5. 971432 6. 076709 6. 087357 6. 182473  
11751388\_ 9. 059884 8. 981096 9. 061889 9. 624718 9. 663659 9. 623533  
11751389\_ 8. 064966 8. 015754 8. 063144 8. 678849 8. 616435 8. 703901  
11751390\_ 3. 889376 3. 914472 4. 132212 3. 585664 3. 479117 3. 971398  
11751391\_ 7. 96994 7. 914753 8. 020826 7. 930118 7. 980798 7. 906754  
11751392\_ 5. 464667 5. 745221 5. 53298 5. 625396 5. 523406 5. 566612  
11751393\_ 6. 319742 6. 38014 6. 337005 6. 387785 6. 389737 6. 287087  
11751394\_ 5. 290116 5. 345598 5. 296443 5. 389793 5. 333622 5. 335914  
11751395\_ 5. 308094 5. 254215 5. 162199 5. 401239 5. 465732 5. 370471  
11751396\_ 4. 395534 4. 564281 4. 370337 4. 486395 4. 632776 4. 700243  
11751397\_ 5. 526159 5. 584813 5. 553065 5. 638157 5. 745086 5. 627951  
11751398\_ 6. 471767 6. 509439 6. 543204 6. 282481 6. 371579 6. 339374  
11751399\_ 7. 295899 7. 19411 7. 249741 7. 029692 7. 10343 7. 073403  
11751400\_ 3. 197535 3. 183179 3. 138626 3. 157507 3. 052928 3. 135509  
11751401\_ 7. 551143 7. 562352 7. 593603 7. 910885 7. 869199 7. 960825  
11751402\_ 5. 365447 5. 284041 5. 223512 5. 40657 5. 360267 5. 398564  
11751403\_ 6. 36298 6. 396678 6. 407158 6. 432182 6. 435795 6. 461801  
11751404\_ 6. 609025 6. 425726 6. 516392 6. 364622 6. 33615 6. 469418  
11751405\_ 5. 12451 5. 472062 5. 274818 5. 497217 5. 427419 5. 409  
11751406\_ 6. 77883 6. 802608 6. 81919 6. 806921 6. 744752 6. 851983  
11751407\_ 5. 993262 6. 271234 6. 018852 6. 118838 6. 186363 6. 084227  
11751408\_ 6. 570752 6. 668161 6. 593954 6. 716465 6. 750229 6. 700371  
11751409\_ 5. 484975 5. 708087 5. 52177 5. 572467 5. 701347 5. 676245  
11751410\_ 5. 734957 5. 864523 5. 758952 5. 651102 5. 709521 5. 798613

11751411\_ 5. 691971 5. 647991 5. 691514 5. 803877 5. 890643 5. 730677  
11751412\_ 7. 536923 7. 536164 7. 551896 8. 209646 8. 107786 8. 124056  
11751413\_ 6. 70875 6. 900675 6. 660366 6. 829423 6. 769296 6. 7473  
11751414\_ 2. 593043 2. 47102 2. 605516 2. 549061 2. 396112 2. 564125  
11751415\_ 5. 997017 5. 939441 5. 91528 5. 761142 5. 907856 5. 78894  
11751416\_ 4. 310622 4. 406234 4. 187055 4. 419915 4. 446164 4. 43464  
11751417\_ 5. 8076 5. 866126 5. 858526 6. 164514 6. 044285 6. 067023  
11751418\_ 4. 176539 4. 065528 4. 051981 4. 12648 4. 310907 4. 1048  
11751419\_ 5. 343367 5. 263746 5. 177731 5. 420467 5. 465516 5. 364955  
11751420\_ 4. 790666 4. 608981 4. 793278 4. 775295 4. 793278 4. 819987  
11751421\_ 4. 807887 4. 797653 4. 698354 4. 739857 4. 720017 4. 828944  
11751422\_ 5. 769941 5. 747406 5. 477424 5. 828492 5. 736831 5. 683475  
11751423\_ 3. 548621 3. 818401 3. 589876 3. 300071 3. 397923 3. 433579  
11751424\_ 2. 476209 2. 557294 2. 412881 2. 52397 2. 533681 2. 589014  
11751425\_ 2. 581519 2. 695346 2. 699131 2. 619672 2. 726172 2. 718322  
11751426\_ 2. 891375 2. 945929 2. 772531 2. 889316 3. 004853 2. 809273  
11751427\_ 8. 744459 8. 705759 8. 764196 8. 719509 8. 748735 8. 721652  
11751428\_ 8. 23407 8. 237103 8. 103913 8. 140724 8. 228104 8. 154877  
11751429\_ 6. 581943 6. 59844 6. 498955 6. 592819 6. 633808 6. 438401  
11751430\_ 5. 36906 5. 328466 5. 333723 5. 408491 5. 438454 5. 250621  
11751431\_ 6. 370464 6. 342177 6. 250284 6. 003602 6. 155761 6. 193016  
11751432\_ 4. 573043 4. 652253 4. 637012 4. 454971 4. 69239 4. 531583  
11751433\_ 6. 41415 6. 433377 6. 380852 6. 430118 6. 400979 6. 44905  
11751434\_ 5. 709399 5. 635005 5. 623746 5. 587712 5. 526403 5. 585978  
11751435\_ 6. 659913 6. 604387 6. 491466 6. 59693 6. 66282 6. 606584  
11751436\_ 4. 125844 4. 144196 4. 144196 4. 142417 4. 144196 4. 115782  
11751437\_ 3. 556793 3. 397519 3. 19726 3. 40008 3. 381038 3. 189579  
11751438\_ 6. 755574 6. 728437 6. 873316 5. 958052 5. 987687 6. 015887  
11751439\_ 7. 591255 7. 524829 7. 621046 7. 435872 7. 352227 7. 442387  
11751440\_ 3. 346558 3. 23062 3. 009759 3. 283013 3. 385758 3. 42481  
11751441\_ 7. 244499 7. 27349 7. 171116 7. 152849 7. 156839 7. 212213  
11751442\_ 5. 00659 4. 914411 4. 710714 4. 848916 4. 74574 4. 872433  
11751443\_ 5. 652966 5. 98123 5. 803723 5. 886192 5. 960105 6. 007503  
11751444\_ 7. 199184 7. 195656 7. 08648 7. 239189 7. 257789 7. 292795  
11751445\_ 6. 392548 6. 287398 6. 422114 6. 482677 6. 417753 6. 571148  
11751446\_ 6. 935928 6. 822688 6. 808712 7. 810127 7. 749715 7. 732504  
11751447\_ 4. 444412 4. 52373 4. 52373 4. 544741 4. 52373 4. 52373  
11751448\_ 8. 43473 8. 326407 8. 380021 8. 598429 8. 57552 8. 683765  
11751449\_ 6. 631684 6. 455171 6. 61623 6. 643885 6. 74813 6. 795303  
11751450\_ 7. 965247 7. 943462 7. 975047 8. 150225 8. 136772 8. 189627  
11751451\_ 6. 937245 6. 655758 6. 755108 5. 811525 5. 847995 5. 978814  
11751452\_ 4. 265609 4. 120383 4. 090359 4. 048059 4. 048227 4. 06678  
11751453\_ 8. 206425 8. 139945 8. 188847 8. 079237 8. 1733 8. 057773  
11751454\_ 5. 222654 5. 338094 4. 98235 5. 452256 5. 464589 5. 271968  
11751455\_ 2. 605516 2. 830023 2. 669222 2. 920443 2. 892295 2. 830023  
11751456\_ 5. 255583 5. 287494 5. 187919 5. 332405 5. 360627 5. 287494  
11751457\_ 9. 391949 9. 429561 9. 503569 9. 249195 9. 315657 9. 291612  
11751458\_ 5. 068503 5. 14573 5. 119124 5. 297498 5. 17565 5. 230818  
11751459\_ 5. 153817 5. 377881 5. 061756 5. 162721 5. 35786 5. 2666  
11751460\_ 7. 968549 7. 893621 7. 925098 7. 797928 7. 82788 7. 801349  
11751461\_ 2. 148387 2. 257018 2. 116113 1. 975124 2. 302931 2. 115825



11751462\_ 3. 801572 3. 962795 3. 765762 3. 953656 4. 068095 3. 888697  
11751463\_ 4. 040405 4. 403933 4. 197601 4. 412757 4. 309103 4. 312911  
11751464\_ 3. 694717 4. 189395 3. 991099 3. 992012 3. 984912 3. 868213  
11751465\_ 2. 988093 2. 95647 2. 731776 3. 092233 3. 031963 2. 945929  
11751466\_ 9. 203978 9. 109229 9. 205509 8. 521308 8. 515049 8. 518329  
11751467\_ 7. 725484 7. 656199 7. 823336 7. 868277 8. 007015 7. 972446  
11751468\_ 5. 845365 5. 938482 5. 894096 5. 900635 5. 959234 6. 035192  
11751469\_ 6. 67471 6. 689616 6. 791446 6. 233355 6. 234734 6. 187472  
11751470\_ 3. 359054 3. 454677 3. 503743 3. 465151 3. 539313 3. 538303  
11751471\_ 5. 178215 5. 287157 5. 15351 5. 213777 5. 237823 5. 3116  
11751472\_ 4. 874234 5. 11527 5. 040613 5. 214938 4. 963661 5. 027478  
11751473\_ 8. 148875 8. 016781 8. 061062 7. 351465 7. 241248 7. 355048  
11751474\_ 7. 626889 7. 674817 7. 701561 7. 198095 7. 099565 7. 13253  
11751475\_ 7. 59279 7. 549622 7. 488081 7. 299389 7. 285336 7. 314224  
11751476\_ 5. 820368 5. 761048 5. 73958 5. 422504 5. 698543 5. 597533  
11751477\_ 5. 462427 5. 464655 5. 463192 5. 464655 5. 633919 5. 570878  
11751478\_ 6. 194059 6. 216708 6. 309075 6. 122772 6. 223108 6. 208841  
11751479\_ 2. 680112 2. 718322 2. 613166 2. 361778 2. 226772 2. 419145  
11751480\_ 5. 43433 5. 377134 5. 57847 5. 798149 5. 638895 5. 756748  
11751481\_ 4. 91075 4. 9694 4. 939942 5. 067365 4. 976859 5. 075399  
11751482\_ 7. 07693 6. 936579 7. 024234 7. 039253 7. 08741 7. 088841  
11751483\_ 7. 109376 7. 007499 7. 085577 7. 30394 7. 389151 7. 420044  
11751484\_ 7. 007547 6. 937073 6. 888839 7. 348148 7. 331025 7. 304441  
11751485\_ 7. 008002 7. 055228 7. 016369 7. 022397 7. 044962 7. 017242  
11751486\_ 3. 439522 3. 558231 3. 524693 3. 817115 3. 511214 3. 452156  
11751487\_ 5. 63242 5. 712702 5. 681543 5. 629738 5. 589892 5. 637209  
11751488\_ 8. 188905 8. 125019 8. 183197 7. 816659 7. 779646 7. 666624  
11751489\_ 2. 317419 2. 442862 2. 232939 2. 111364 2. 280284 2. 274847  
11751490\_ 7. 199466 7. 177705 7. 239243 7. 270712 7. 276234 7. 30601  
11751491\_ 7. 649713 7. 696334 7. 713721 7. 28396 7. 332161 7. 357035  
11751492\_ 4. 347969 4. 523343 4. 461831 4. 44646 4. 4601 4. 347179  
11751493\_ 3. 243838 3. 1143 3. 313531 3. 036816 3. 309047 3. 26762  
11751494\_ 8. 154407 8. 026688 8. 05289 7. 359006 7. 30633 7. 447253  
11751495\_ 8. 37727 8. 248768 8. 328455 7. 659651 7. 67851 7. 707638  
11751496\_ 5. 715152 5. 557028 5. 64177 4. 840728 5. 080529 5. 219776  
11751497\_ 6. 150276 6. 081012 6. 080333 6. 136855 6. 132935 6. 154704  
11751498\_ 5. 678799 5. 664684 5. 706958 5. 537581 5. 64406 5. 619463  
11751499\_ 2. 554793 2. 264601 2. 816537 2. 260736 2. 350424 2. 595943  
11751500\_ 5. 283561 5. 400403 5. 290127 5. 502845 5. 504687 5. 497008  
11751501\_ 5. 426351 5. 44532 5. 330378 5. 478333 5. 523406 5. 475759  
11751502\_ 7. 214735 7. 187117 7. 20461 7. 457102 7. 564609 7. 514627  
11751503\_ 4. 949547 5. 104042 4. 957722 4. 812119 4. 948662 4. 95828  
11751504\_ 5. 621515 5. 54347 5. 641664 5. 420226 5. 528762 5. 469557  
11751505\_ 8. 309833 8. 208617 8. 297916 7. 932177 7. 914107 8. 02948  
11751506\_ 2. 391734 2. 842653 2. 658864 2. 658864 2. 608892 2. 704948  
11751507\_ 5. 625266 5. 625266 5. 369106 5. 458183 5. 564063 5. 644299  
11751508\_ 3. 681003 3. 495312 3. 939983 3. 747441 3. 546337 3. 75736  
11751509\_ 8. 962982 8. 97424 8. 973826 8. 761008 8. 787546 8. 669847  
11751510\_ 5. 977166 6. 011116 6. 018553 5. 681282 5. 846155 5. 843499  
11751511\_ 4. 485672 4. 570506 4. 342567 4. 210237 4. 328409 4. 317762  
11751512\_ 5. 646049 5. 586666 5. 586666 5. 568187 5. 622943 5. 512068

11751513\_ 3. 490853 3. 487483 3. 436112 3. 428939 3. 490853 3. 458694  
11751514\_ 5. 262582 5. 294384 5. 293451 5. 186568 5. 095213 5. 26963  
11751515\_ 8. 990889 8. 945429 8. 989716 8. 913643 8. 936139 8. 931935  
11751516\_ 4. 446025 4. 617364 4. 348284 4. 614095 4. 614807 4. 507859  
11751517\_ 6. 611434 6. 472894 6. 575655 5. 926482 5. 786293 5. 926249  
11751518\_ 3. 250211 3. 195283 3. 059306 3. 053055 2. 951545 3. 179629  
11751519\_ 8. 406955 8. 379829 8. 440585 8. 255605 8. 377848 8. 271262  
11751520\_ 7. 197114 7. 111953 7. 181397 8. 278426 8. 279405 8. 233241  
11751521\_ 4. 197199 4. 134102 4. 172209 4. 171596 4. 101697 4. 195952  
11751522\_ 5. 208297 5. 367747 5. 110078 5. 316308 5. 30243 5. 154712  
11751523\_ 7. 260561 7. 50047 7. 278817 6. 96305 6. 961477 6. 831232  
11751524\_ 7. 542364 7. 528079 7. 466794 6. 928578 6. 932292 6. 975812  
11751525\_ 4. 482883 4. 54517 4. 390188 4. 667683 4. 692347 4. 748705  
11751526\_ 9. 427055 9. 36584 9. 445234 9. 130987 9. 183438 9. 149763  
11751527\_ 9. 342036 9. 29346 9. 305116 8. 994256 9. 01531 9. 007261  
11751528\_ 7. 733346 7. 673453 7. 648992 7. 494452 7. 426075 7. 469855  
11751529\_ 4. 767334 4. 815683 4. 791636 4. 940165 4. 791919 4. 763543  
11751530\_ 6. 277756 6. 181745 6. 134277 6. 229594 6. 244637 6. 231926  
11751531\_ 6. 022414 6. 212108 6. 044285 6. 270391 6. 196098 6. 282224  
11751532\_ 9. 1056 9. 016262 9. 090722 8. 61932 8. 679302 8. 627412  
11751533\_ 3. 113004 2. 911993 3. 347218 3. 118591 3. 193632 3. 081179  
11751534\_ 5. 509687 5. 607149 5. 248277 5. 380649 5. 503647 5. 387524  
11751535\_ 4. 664168 4. 64985 4. 712118 4. 496015 4. 776182 4. 520949  
11751536\_ 6. 556355 6. 566138 6. 529359 6. 5075 6. 58399 6. 576287  
11751537\_ 6. 595512 6. 583591 6. 591041 6. 634134 6. 598743 6. 466342  
11751538\_ 8. 062137 7. 940639 8. 048672 8. 088092 8. 082281 8. 011589  
11751539\_ 5. 556787 5. 440343 5. 475109 5. 414869 5. 448248 5. 494229  
11751540\_ 7. 110271 7. 105794 7. 110214 7. 341315 7. 44695 7. 465315  
11751541\_ 5. 723146 5. 920114 5. 865861 5. 724127 5. 832126 5. 734879  
11751542\_ 4. 871253 5. 097036 5. 082444 5. 331452 5. 222512 5. 271941  
11751543\_ 5. 182542 5. 133414 5. 239482 5. 436027 5. 492553 5. 218027  
11751544\_ 2. 73344 3. 2297 3. 046528 3. 062451 3. 226776 2. 889287  
11751545\_ 4. 149385 4. 164165 3. 817398 4. 112493 4. 049847 3. 879309  
11751546\_ 5. 466988 5. 30859 5. 275494 5. 252678 5. 371381 5. 32761  
11751547\_ 4. 565301 4. 612627 4. 352516 4. 752881 4. 636937 4. 606941  
11751548\_ 4. 727011 5. 110802 4. 83647 4. 913926 4. 872557 4. 894545  
11751549\_ 8. 774114 8. 775186 8. 789536 8. 328664 8. 330069 8. 358522  
11751550\_ 9. 666467 9. 538444 9. 591656 9. 128411 9. 13557 9. 118647  
11751551\_ 5. 950399 6. 089103 6. 039912 5. 989971 5. 957954 5. 992354  
11751552\_ 6. 840345 6. 785638 6. 608608 6. 775439 6. 89554 6. 77293  
11751553\_ 9. 140005 9. 094944 9. 065178 8. 721652 8. 666308 8. 666467  
11751554\_ 7. 814249 7. 872566 7. 868665 7. 847622 7. 939489 7. 9651  
11751555\_ 6. 632295 6. 612196 6. 619536 6. 622359 6. 606283 6. 641494  
11751556\_ 5. 114877 5. 071369 5. 138675 4. 773365 4. 719982 5. 052789  
11751557\_ 7. 688538 7. 494372 7. 650257 7. 580727 7. 530716 7. 618686  
11751558\_ 6. 898793 6. 710305 6. 773651 6. 364099 6. 373831 6. 383852  
11751559\_ 5. 098867 5. 331189 5. 217401 5. 436723 5. 511321 5. 460089  
11751560\_ 7. 22124 7. 258109 7. 220507 7. 088575 6. 975561 6. 980828  
11751561\_ 4. 757779 4. 936088 4. 775547 4. 863088 4. 801835 4. 836728  
11751562\_ 6. 924873 6. 860998 6. 910076 6. 936363 6. 942879 6. 944945  
11751563\_ 7. 114044 7. 053386 6. 978405 7. 270826 7. 218929 7. 324494

11751564\_ 7.99774 7.910921 8.050007 8.066778 7.945584 7.904856  
11751565\_ 6.297146 6.412176 6.34505 6.514743 6.378798 6.434461  
11751566\_ 5.704628 5.877656 5.718081 5.892547 5.77992 5.826815  
11751567\_ 5.378696 5.415864 5.525557 5.306623 5.333836 5.161409  
11751568\_ 6.213703 6.155785 6.219072 6.211752 6.222795 6.097513  
11751569\_ 4.303686 4.462299 4.385157 5.11763 5.106052 5.075396  
11751570\_ 3.754895 3.802911 3.672779 3.732133 3.775654 3.744089  
11751571\_ 5.672717 5.793177 5.610878 5.86282 5.763857 5.80489  
11751572\_ 6.069368 6.087972 5.995185 5.861169 5.841997 6.004171  
11751573\_ 8.352988 8.358092 8.405145 8.18178 8.180529 8.218151  
11751574\_ 6.916177 7.000533 6.92081 6.971219 6.989624 7.032633  
11751575\_ 5.086319 5.122389 4.882428 4.680856 4.584933 4.777217  
11751576\_ 4.146025 4.251632 4.146245 4.134697 4.236732 4.275543  
11751577\_ 9.59403 9.625362 9.625621 9.825054 9.790965 9.69298  
11751578\_ 6.093707 6.041691 6.148325 6.13653 6.206103 6.189269  
11751579\_ 6.295928 6.239341 6.350546 6.338751 6.42057 6.396523  
11751580\_ 6.670495 6.771916 6.637578 6.639402 6.722806 6.709503  
11751581\_ 6.656821 6.515621 6.49663 7.224541 7.24259 7.08468  
11751582\_ 5.895371 5.8568 5.917949 5.797984 5.935119 5.986082  
11751583\_ 4.799089 4.923525 5.004412 5.001618 4.969764 5.127362  
11751584\_ 7.055228 7.04042 7.208363 7.057733 7.182646 7.144608  
11751585\_ 7.361805 7.306776 7.323215 7.344322 7.378048 7.363558  
11751586\_ 4.752599 4.739983 4.708832 4.590378 4.532758 4.51001  
11751587\_ 8.679748 8.764953 8.675506 8.976789 8.900812 8.826085  
11751588\_ 8.852511 8.883407 8.830584 8.989023 8.976887 8.906595  
11751589\_ 8.937671 8.919461 8.956147 8.745632 8.763499 8.785472  
11751590\_ 9.061035 8.963721 9.103589 8.766557 8.872555 8.815367  
11751591\_ 7.356531 7.207628 7.406376 6.9595 7.125793 6.956076  
11751592\_ 7.692623 7.575572 7.777641 7.431078 7.527739 7.509947  
11751593\_ 6.983654 6.999278 6.856331 6.836646 6.846154 6.8259  
11751594\_ 7.128043 7.224775 7.225546 7.434587 7.299162 7.215365  
11751595\_ 9.000564 8.92791 9.04438 8.97104 8.882435 9.001251  
11751596\_ 8.667589 8.603233 8.654438 8.542214 8.527081 8.526866  
11751597\_ 7.730153 7.635014 7.62187 7.567109 7.588677 7.536519  
11751598\_ 4.794335 4.472402 4.71832 5.010657 5.050078 4.977409  
11751599\_ 6.669984 6.579869 6.74556 6.728044 6.862059 6.883978  
11751600\_ 2.186209 2.268614 2.279682 2.366692 2.401344 2.495718  
11751601\_ 7.12407 7.109723 7.190258 7.215476 7.310025 7.324422  
11751602\_ 11.32472 11.32558 11.29065 11.26195 11.2893 11.20721  
11751603\_ 10.75909 10.77942 10.7764 10.73621 10.72925 10.74656  
11751604\_ 3.250471 2.945929 3.044982 3.102704 3.230104 3.061205  
11751605\_ 2.689985 2.743036 2.711597 2.450723 2.614804 2.530217  
11751606\_ 4.524599 4.659773 4.643717 4.459939 4.527745 4.583089  
11751607\_ 2.859843 2.88051 2.846361 3.16426 2.967664 2.944025  
11751608\_ 6.101176 6.011116 6.229682 6.308826 6.26442 6.279618  
11751609\_ 7.636627 7.56849 7.597395 7.014302 7.033368 7.038311  
11751610\_ 4.432613 4.860122 4.643292 4.702134 4.640689 4.90402  
11751611\_ 6.070584 6.107702 6.166076 5.902503 6.063577 6.160232  
11751612\_ 6.708993 6.615031 6.724761 6.433625 6.334569 6.339254  
11751613\_ 10.51308 10.48597 10.48769 10.87918 10.88661 10.84802  
11751614\_ 5.875209 5.917157 5.859553 5.789014 5.775142 5.748446

11751615\_ 9. 273085 9. 214022 9. 326822 8. 883107 8. 966369 9. 004889  
11751616\_ 8. 429452 8. 351693 8. 417128 8. 794039 8. 772941 8. 733331  
11751617\_ 5. 817673 5. 77772 5. 847642 5. 785521 5. 703663 5. 741484  
11751618\_ 8. 402758 8. 399181 8. 409219 8. 300125 8. 3123 8. 361191  
11751619\_ 3. 951807 3. 963745 3. 87948 3. 898 3. 9869 3. 832456  
11751620\_ 7. 001812 6. 842256 7. 03164 7. 26259 7. 257655 7. 310914  
11751621\_ 2. 502612 2. 479653 2. 471934 2. 721239 2. 681955 2. 807693  
11751622\_ 7. 095985 7. 111953 7. 08741 7. 087617 7. 011172 7. 125911  
11751623\_ 7. 29199 7. 308052 7. 386772 7. 216099 7. 274386 7. 33321  
11751624\_ 5. 61661 5. 590854 5. 61661 5. 559295 5. 612054 5. 732315  
11751625\_ 8. 708207 8. 629782 8. 661267 8. 364519 8. 290518 8. 354968  
11751626\_ 5. 99786 5. 947098 6. 010844 6. 04698 5. 970923 5. 953042  
11751627\_ 9. 173939 9. 029648 9. 174088 8. 819148 8. 790906 8. 880031  
11751628\_ 5. 24954 5. 01823 4. 806208 4. 959704 5. 162714 5. 058015  
11751629\_ 7. 072869 7. 009967 7. 138266 8. 740423 8. 699927 8. 689372  
11751630\_ 5. 319616 5. 42759 5. 389882 5. 426851 5. 542487 5. 392024  
11751631\_ 7. 29199 7. 308052 7. 386772 7. 216099 7. 274386 7. 33321  
11751632\_ 4. 850183 4. 757994 4. 796881 4. 914651 5. 011635 4. 984669  
11751633\_ 9. 806542 9. 789135 9. 786742 9. 592819 9. 588393 9. 572988  
11751634\_ 7. 524932 7. 418303 7. 470279 7. 564434 7. 543948 7. 509465  
11751635\_ 7. 102836 7. 027065 7. 165988 6. 594291 6. 598988 6. 615156  
11751636\_ 4. 819205 4. 831588 4. 838145 4. 874234 4. 953701 4. 906658  
11751637\_ 5. 784311 5. 842863 5. 826121 5. 924562 5. 998157 5. 913887  
11751638\_ 8. 484179 8. 450109 8. 475254 8. 508634 8. 606486 8. 5425  
11751639\_ 7. 028634 6. 912249 7. 09179 6. 956558 6. 94641 6. 911921  
11751640\_ 5. 719602 5. 761043 5. 709521 5. 596864 5. 514102 5. 507224  
11751641\_ 6. 86671 6. 91283 6. 902075 6. 464805 6. 541665 6. 637449  
11751642\_ 3. 423728 3. 371085 3. 217506 3. 423728 3. 707616 3. 516076  
11751643\_ 7. 596153 7. 650188 7. 661807 6. 940491 7. 00448 6. 969604  
11751644\_ 4. 9226 4. 921035 4. 879801 4. 939936 4. 93837 4. 971128  
11751645\_ 4. 472947 4. 505532 4. 401671 4. 469563 4. 581259 4. 536933  
11751646\_ 8. 503649 8. 519243 8. 541102 8. 532661 8. 48648 8. 467005  
11751647\_ 8. 171581 8. 178787 8. 139116 6. 89137 6. 735799 6. 822415  
11751648\_ 7. 230373 7. 211458 7. 300815 7. 132114 7. 138882 7. 128793  
11751649\_ 2. 846224 2. 932153 2. 684851 2. 991997 2. 950035 2. 846224  
11751650\_ 7. 134375 7. 050086 7. 096343 7. 058977 7. 251847 7. 135762  
11751651\_ 8. 646531 8. 589972 8. 632245 8. 639108 8. 611871 8. 625219  
11751652\_ 8. 03345 8. 006053 8. 058725 8. 047156 8. 014698 7. 996603  
11751653\_ 5. 746905 5. 775515 5. 599009 5. 767679 5. 806349 5. 659903  
11751654\_ 4. 080758 4. 304776 4. 155509 4. 389209 4. 361977 4. 379096  
11751655\_ 11. 37172 11. 36002 11. 34457 11. 47013 11. 49926 11. 39013  
11751656\_ 5. 969444 5. 837989 5. 933734 6. 182044 6. 28775 6. 256858  
11751657\_ 5. 896374 6. 024063 5. 858168 5. 938431 6. 05891 5. 970176  
11751658\_ 7. 007439 6. 886604 6. 934518 6. 315144 6. 291509 6. 432099  
11751659\_ 4. 026092 4. 144177 3. 875889 3. 930941 3. 624116 3. 507789  
11751660\_ 8. 730736 8. 565203 8. 685022 8. 648433 8. 648519 8. 647739  
11751661\_ 8. 190176 8. 079775 8. 108318 8. 092336 8. 150529 8. 146999  
11751662\_ 2. 877166 2. 767924 2. 692989 2. 843773 2. 767924 3. 011662  
11751663\_ 3. 248467 3. 277625 3. 129775 3. 388985 3. 500541 3. 323795  
11751664\_ 2. 256332 2. 353304 2. 280575 2. 512144 2. 303325 2. 403283  
11751665\_ 6. 138076 6. 001122 6. 034403 6. 279829 6. 26226 6. 369784

11751666\_ 4. 656197 4. 806396 4. 921774 4. 661192 4. 434106 4. 404147  
11751667\_ 8. 295396 8. 200758 8. 279957 8. 298885 8. 260461 8. 281614  
11751668\_ 7. 419923 7. 433362 7. 35975 7. 630433 7. 56896 7. 665651  
11751669\_ 4. 355812 4. 067703 4. 275595 4. 467275 4. 454108 4. 402287  
11751670\_ 5. 512619 5. 608231 5. 351578 5. 606409 5. 593202 5. 69253  
11751671\_ 8. 605447 8. 536755 8. 600437 8. 252116 8. 204174 8. 198504  
11751672\_ 8. 656609 8. 618211 8. 723442 8. 32931 8. 359503 8. 312165  
11751673\_ 6. 792739 6. 733356 6. 75748 6. 587124 6. 762654 6. 615509  
11751674\_ 6. 099776 6. 141256 6. 065105 6. 076709 6. 112331 6. 053269  
11751675\_ 10. 47611 10. 41471 10. 4201 10. 36754 10. 43499 10. 37628  
11751676\_ 6. 865758 6. 82091 6. 985066 7. 051078 7. 048393 7. 031066  
11751677\_ 4. 780752 4. 686853 4. 578669 4. 736759 4. 806989 4. 470714  
11751678\_ 9. 399328 9. 344558 9. 359576 9. 190328 9. 223185 9. 227489  
11751679\_ 5. 083732 5. 145579 5. 297498 5. 206417 5. 247783 5. 346848  
11751680\_ 6. 27058 6. 271544 6. 373261 6. 159771 6. 241486 6. 260582  
11751681\_ 6. 557291 6. 593559 6. 607477 6. 589221 6. 601515 6. 688456  
11751682\_ 5. 6753 5. 643713 5. 589559 5. 643713 5. 621097 5. 723365  
11751683\_ 7. 712398 7. 695901 7. 763263 7. 802144 7. 815566 7. 78974  
11751684\_ 6. 223529 6. 177335 6. 176102 6. 186795 6. 147162 6. 182034  
11751685\_ 6. 797254 6. 722738 6. 82947 6. 475513 6. 486678 6. 390715  
11751686\_ 9. 222909 9. 20823 9. 221412 9. 117667 9. 146959 9. 144154  
11751687\_ 5. 811485 5. 816151 5. 968943 5. 300394 5. 28881 5. 287875  
11751688\_ 7. 275333 7. 245424 7. 2901 7. 198811 7. 25788 7. 211793  
11751689\_ 6. 350609 6. 285625 6. 21723 5. 622036 5. 658069 5. 779556  
11751690\_ 4. 81016 4. 909072 4. 674109 4. 76783 4. 908307 4. 886898  
11751691\_ 7. 242758 7. 21282 7. 212651 7. 269777 7. 234819 7. 259429  
11751692\_ 4. 834698 4. 798292 4. 790133 5. 085636 4. 876163 4. 921275  
11751693\_ 5. 409222 5. 345279 5. 334745 5. 475412 5. 615244 5. 675006  
11751694\_ 8. 574369 8. 56698 8. 567793 8. 557028 8. 561314 8. 509818  
11751695\_ 5. 310791 5. 417708 5. 267474 5. 448296 5. 297498 5. 28982  
11751696\_ 6. 244666 6. 159771 6. 349146 5. 672285 5. 709521 5. 767776  
11751697\_ 9. 074574 9. 017732 9. 110088 9. 723652 9. 763475 9. 726428  
11751698\_ 5. 771762 5. 671187 5. 850413 5. 887703 5. 986559 5. 946598  
11751699\_ 7. 678756 7. 592102 7. 746368 7. 325503 7. 360905 7. 323582  
11751700\_ 3. 705422 3. 683177 3. 759174 3. 913868 3. 838304 3. 838304  
11751701\_ 7. 566271 7. 557435 7. 560307 6. 874408 6. 824551 6. 886652  
11751702\_ 5. 03392 4. 9937 4. 994676 4. 979282 4. 990071 5. 065985  
11751703\_ 3. 502341 3. 503708 3. 47123 3. 403524 3. 318873 3. 568735  
11751704\_ 6. 955963 7. 01586 6. 971486 6. 956076 6. 97884 6. 956076  
11751705\_ 4. 111784 4. 272146 4. 568804 4. 506826 4. 51543 4. 492078  
11751706\_ 6. 44909 6. 405972 6. 418996 6. 455295 6. 436742 6. 496947  
11751707\_ 6. 599662 6. 4488 6. 625181 6. 293476 6. 231958 6. 213948  
11751708\_ 4. 89345 4. 98697 5. 073115 5. 091756 5. 017623 5. 033113  
11751709\_ 4. 39013 4. 395614 4. 360324 4. 540842 4. 346504 4. 438755  
11751710\_ 6. 879311 6. 841134 6. 859907 6. 494443 6. 590704 6. 590061  
11751711\_ 7. 575474 7. 589674 7. 515042 7. 237093 7. 240309 7. 235723  
11751712\_ 3. 584834 3. 64119 3. 593255 3. 53754 3. 387244 3. 687403  
11751713\_ 8. 868258 8. 756951 8. 879257 9. 076922 9. 021822 9. 023733  
11751714\_ 4. 134609 4. 233816 4. 363199 4. 551828 4. 393643 4. 597769  
11751715\_ 5. 037713 4. 966212 5. 118085 5. 036607 5. 180179 5. 029161  
11751716\_ 9. 440271 9. 383001 9. 389483 9. 06172 9. 041139 9. 030287

11751717\_ 6.999182 7.12407 7.066036 7.202891 7.267608 7.111953  
11751718\_ 4.782395 4.58574 4.667779 4.705384 4.700243 4.575989  
11751719\_ 5.926672 5.789947 5.947272 5.806045 5.83964 5.882998  
11751720\_ 3.591428 3.711222 3.470107 3.713516 3.708155 3.742811  
11751721\_ 4.908407 5.149545 4.805838 5.059545 5.10263 5.038828  
11751722\_ 7.734906 7.703354 7.781467 7.620306 7.617009 7.710699  
11751723\_ 2.616249 2.619382 2.818113 2.687942 2.714882 2.634312  
11751724\_ 5.873955 5.743367 5.863886 5.26034 5.183024 5.260245  
11751725\_ 4.657303 4.778721 4.626926 4.778721 4.733474 4.620668  
11751726\_ 6.839492 6.810643 6.795849 6.829255 6.844321 6.93661  
11751727\_ 9.122633 9.059645 9.121167 9.055181 9.016332 9.039452  
11751728\_ 5.236687 5.021956 4.984669 4.546942 4.294201 4.52373  
11751729\_ 10.16071 10.10122 10.12773 10.34432 10.30462 10.31873  
11751730\_ 9.998583 9.94531 10.01773 10.15644 10.09883 10.12519  
11751731\_ 5.493239 5.386459 5.202021 5.58819 5.583714 5.526293  
11751732\_ 8.85662 8.789537 8.821062 8.811724 8.84325 8.808753  
11751733\_ 7.24293 7.174876 7.249798 6.946803 6.904418 6.783731  
11751734\_ 6.498653 6.330709 6.510356 6.584434 6.510356 6.57419  
11751735\_ 2.625897 3.185495 2.666763 2.97163 2.826631 2.923604  
11751736\_ 5.712561 5.633104 5.601833 5.779658 5.844843 5.601706  
11751737\_ 6.089036 6.09228 6.185081 5.528551 5.571046 5.502342  
11751738\_ 4.9226 4.55632 4.772366 4.487931 4.347179 4.778794  
11751739\_ 4.62998 4.695665 4.736023 4.373611 4.280638 4.122446  
11751740\_ 5.260588 5.189628 5.186391 5.11527 4.957148 5.186945  
11751741\_ 5.736831 5.73714 5.765277 5.709004 5.648626 5.785327  
11751742\_ 7.838797 7.85212 7.872377 7.432456 7.459391 7.481087  
11751743\_ 6.235022 6.209178 6.118394 6.486007 6.325868 6.322836  
11751744\_ 6.347129 6.287634 6.26459 6.595135 6.591671 6.597844  
11751745\_ 4.998622 5.149545 4.870562 5.16696 5.164575 5.023955  
11751746\_ 8.195553 8.173236 8.192258 8.371639 8.44891 8.407842  
11751747\_ 2.86065 3.067218 3.129298 3.471814 3.147774 3.263251  
11751748\_ 3.990236 4.149696 3.951992 4.391817 4.348007 4.232758  
11751749\_ 4.989603 4.884507 4.949025 4.871713 4.855231 4.959967  
11751750\_ 8.33639 8.243618 8.359616 7.784291 7.833829 7.850759  
11751751\_ 9.275205 9.206847 9.272218 9.58416 9.523028 9.547357  
11751752\_ 6.177252 6.395092 6.436377 6.539342 6.491914 6.573832  
11751753\_ 6.774308 6.608843 6.806837 7.095032 7.070228 7.132197  
11751754\_ 8.462141 8.573012 8.481259 8.603048 8.620052 8.548275  
11751755\_ 6.779107 6.755439 6.776144 7.352368 7.31084 7.318771  
11751756\_ 6.746539 6.65963 6.784371 6.860669 6.860669 7.061255  
11751757\_ 3.217481 3.423618 3.379062 3.449143 3.36334 3.414869  
11751758\_ 3.475531 3.606313 3.58067 3.569416 3.503743 3.427979  
11751759\_ 9.970736 9.973092 9.940789 9.739416 9.758492 9.669651  
11751760\_ 9.971871 9.963827 9.986999 9.708672 9.752094 9.712468  
11751761\_ 7.434587 7.276024 7.445882 6.986734 7.01567 7.097645  
11751762\_ 6.448378 6.505522 6.471945 6.117 6.084795 6.094413  
11751763\_ 6.465442 6.330701 6.558833 5.893843 5.980072 6.040831  
11751764\_ 7.196145 7.259559 7.322072 6.761846 6.759717 6.91812  
11751765\_ 5.341864 5.372523 5.316986 5.471515 5.407556 5.611097  
11751766\_ 5.838186 5.76698 5.783903 5.825953 5.947197 5.780554  
11751767\_ 4.858795 4.944554 4.871764 4.953335 4.944554 4.858858

11751768\_ 6. 649274 6. 683598 6. 814213 6. 617787 6. 678367 6. 617088  
11751769\_ 7. 223816 7. 430226 7. 204742 7. 411731 7. 413445 7. 466669  
11751770\_ 6. 376197 6. 325943 6. 390052 6. 405194 6. 316698 6. 381438  
11751771\_ 6. 244666 6. 3272 6. 161094 6. 252827 6. 18729 6. 200179  
11751772\_ 6. 669595 6. 899228 6. 712981 6. 845939 6. 879101 6. 829858  
11751773\_ 6. 670491 6. 686573 6. 714083 6. 509451 6. 60308 6. 604291  
11751774\_ 4. 599653 4. 557638 4. 520192 4. 55326 4. 475064 4. 596423  
11751775\_ 4. 352341 4. 404815 4. 714254 4. 391204 4. 584933 4. 584917  
11751776\_ 8. 464381 8. 378954 8. 380153 8. 581728 8. 5936 8. 546702  
11751777\_ 8. 149118 8. 096773 8. 154173 8. 547865 8. 539216 8. 52905  
11751778\_ 9. 298912 9. 218348 9. 291786 9. 173311 9. 184852 9. 167553  
11751779\_ 6. 658481 6. 735996 6. 581308 6. 789677 6. 813717 6. 752432  
11751780\_ 7. 386157 7. 3619 7. 317235 7. 274526 7. 342373 7. 342686  
11751781\_ 4. 401849 4. 274018 4. 22531 4. 436993 4. 46744 4. 247287  
11751782\_ 4. 147562 4. 32127 4. 236561 4. 254364 4. 163485 4. 339456  
11751783\_ 8. 248918 8. 167489 8. 262071 8. 012176 7. 944861 8. 0595  
11751784\_ 5. 109726 5. 32082 4. 900957 5. 285317 5. 235649 5. 312339  
11751785\_ 4. 585093 4. 55909 4. 545173 4. 516023 4. 868556 4. 627169  
11751786\_ 4. 817284 5. 045257 4. 822835 5. 138299 4. 984669 4. 986473  
11751787\_ 4. 152527 4. 073943 4. 050434 4. 29553 4. 165882 4. 303743  
11751788\_ 4. 919507 4. 858049 4. 764633 4. 890521 4. 901019 5. 003515  
11751789\_ 3. 317658 3. 258088 3. 302992 3. 34217 3. 293368 3. 371233  
11751790\_ 5. 339382 5. 50657 5. 292434 5. 367948 5. 404442 5. 374866  
11751791\_ 6. 020026 5. 840296 6. 111227 5. 333144 5. 535697 5. 507773  
11751792\_ 5. 618457 5. 603853 5. 518169 5. 621085 5. 757518 5. 704919  
11751793\_ 6. 06055 6. 037533 5. 987728 6. 194826 6. 210876 6. 12095  
11751794\_ 3. 590136 3. 588973 3. 517471 3. 338104 3. 424794 3. 382892  
11751795\_ 3. 963444 3. 997131 4. 153815 3. 866677 3. 811938 3. 504021  
11751796\_ 5. 187727 5. 384056 5. 102252 5. 190164 5. 187727 5. 290038  
11751797\_ 6. 102103 6. 198085 5. 982997 6. 163419 6. 04915 6. 094413  
11751798\_ 3. 484271 3. 417366 3. 438079 3. 403974 3. 232844 3. 515543  
11751799\_ 11. 72765 11. 69808 11. 68727 11. 60589 11. 67096 11. 60109  
11751800\_ 6. 732596 6. 763495 6. 615582 6. 986122 7. 046521 7. 130572  
11751801\_ 6. 173556 6. 121722 6. 074949 5. 931834 5. 990066 6. 071466  
11751802\_ 8. 123233 8. 019304 8. 131158 8. 383075 8. 466113 8. 417832  
11751803\_ 5. 451881 5. 25239 5. 605953 6. 013149 6. 231399 6. 224939  
11751804\_ 5. 886558 5. 766753 5. 7842 6. 53505 6. 584165 6. 522027  
11751805\_ 9. 904281 9. 842618 9. 86109 10. 27401 10. 27219 10. 23091  
11751806\_ 6. 595405 6. 344849 6. 528748 6. 289414 6. 393116 6. 312942  
11751807\_ 2. 638972 2. 691628 2. 603491 2. 716116 2. 702219 2. 877702  
11751808\_ 5. 812956 5. 815789 5. 861041 5. 796844 5. 948088 5. 894697  
11751809\_ 5. 141792 5. 193062 4. 962851 5. 158246 5. 205221 5. 176116  
11751810\_ 5. 338584 5. 323476 5. 481792 6. 408473 6. 259761 6. 362668  
11751811\_ 4. 536873 4. 610295 4. 507197 4. 642495 4. 552426 4. 60892  
11751812\_ 5. 855308 6. 030757 5. 90834 6. 08511 6. 196139 6. 063312  
11751813\_ 7. 205861 7. 109412 7. 200574 7. 870594 7. 93891 7. 912146  
11751814\_ 4. 394163 4. 354451 4. 298837 4. 441437 4. 534148 4. 584933  
11751815\_ 6. 849083 6. 626861 6. 823057 6. 840411 6. 990324 6. 937539  
11751816\_ 3. 249924 3. 503743 3. 069291 3. 235803 3. 374494 3. 23066  
11751817\_ 7. 960941 7. 918468 7. 941722 7. 701711 7. 673696 7. 689542  
11751818\_ 10. 58671 10. 61113 10. 60389 11. 13592 11. 12342 11. 07172

11751819\_ 6. 230149 6. 210519 6. 305464 6. 157818 6. 177315 6. 117215  
11751820\_ 6. 996182 6. 960902 6. 988539 6. 835675 6. 804563 6. 805142  
11751821\_ 3. 835686 4. 056437 3. 950874 4. 126344 4. 331812 4. 171006  
11751822\_ 6. 555944 6. 373749 6. 532419 7. 877624 7. 867573 7. 835858  
11751823\_ 5. 656277 5. 600805 5. 708234 5. 672285 5. 676688 6. 01508  
11751824\_ 5. 335593 5. 325369 5. 271679 5. 543848 5. 477751 5. 530478  
11751825\_ 2. 933947 3. 159088 3. 027879 3. 027879 3. 108915 3. 159088  
11751826\_ 7. 031531 6. 838285 7. 068829 6. 576448 6. 535515 6. 492116  
11751827\_ 6. 118838 5. 967141 6. 117509 5. 93062 5. 989422 6. 052722  
11751828\_ 6. 996182 6. 966565 7. 108697 7. 130165 7. 169464 7. 299162  
11751829\_ 3. 728761 3. 79194 3. 719958 3. 480668 3. 493882 3. 377002  
11751830\_ 7. 412827 7. 482494 7. 272972 7. 465465 7. 419987 7. 464845  
11751831\_ 4. 91823 4. 990361 4. 988627 4. 970576 4. 936281 4. 829652  
11751832\_ 6. 759993 6. 629266 6. 924833 6. 178725 6. 122294 6. 187281  
11751833\_ 5. 510969 5. 380649 5. 398163 5. 510969 5. 514228 5. 415909  
11751834\_ 2. 113532 2. 087198 1. 934791 2. 056392 1. 988873 2. 095256  
11751835\_ 8. 626358 8. 486766 8. 587125 8. 190283 8. 126298 8. 179833  
11751836\_ 5. 056554 5. 267587 5. 012761 5. 452835 5. 498308 5. 535298  
11751837\_ 9. 444696 9. 451127 9. 464028 9. 600803 9. 588282 9. 522048  
11751838\_ 3. 535134 3. 53486 3. 546 3. 675805 3. 64794 3. 726034  
11751839\_ 3. 81818 4. 147925 3. 945899 3. 917522 3. 916787 3. 75411  
11751840\_ 3. 350375 2. 887718 3. 049283 3. 285702 3. 086396 2. 864386  
11751841\_ 3. 024649 2. 938113 3. 159847 2. 954482 3. 025975 3. 024649  
11751842\_ 11. 3413 11. 31701 11. 32451 11. 26542 11. 31316 11. 30984  
11751843\_ 4. 835491 5. 22621 5. 071144 5. 184899 5. 328232 5. 466569  
11751844\_ 6. 520868 6. 57167 6. 479155 6. 532556 6. 64829 6. 543759  
11751845\_ 3. 378986 3. 809845 3. 381199 3. 670535 3. 825272 3. 518238  
11751846\_ 5. 905303 5. 733211 5. 869407 5. 711297 5. 57548 5. 807362  
11751847\_ 5. 261634 4. 946869 5. 297834 4. 890382 4. 825162 4. 859604  
11751848\_ 4. 644485 4. 643717 4. 723024 4. 850949 4. 83032 4. 639947  
11751849\_ 6. 484529 6. 545609 6. 569195 6. 450893 6. 584069 6. 333615  
11751850\_ 4. 146472 4. 234149 4. 210419 4. 273425 4. 29957 4. 306773  
11751851\_ 3. 35497 3. 491608 3. 422559 3. 307201 3. 415639 3. 494284  
11751852\_ 7. 020312 7. 023984 7. 10031 6. 770119 6. 85913 6. 907367  
11751853\_ 9. 002109 8. 872661 9. 01613 8. 884953 8. 881319 8. 962344  
11751854\_ 6. 56978 6. 665475 6. 589246 6. 804952 6. 692142 6. 732539  
11751855\_ 5. 231052 5. 248088 5. 26318 5. 240461 5. 241747 5. 246803  
11751856\_ 4. 851489 4. 764583 4. 759186 5. 043765 5. 021936 4. 978428  
11751857\_ 3. 299861 3. 136207 3. 142721 3. 183865 3. 140188 3. 183865  
11751858\_ 8. 875148 8. 897678 8. 864533 8. 845738 8. 889518 8. 846128  
11751859\_ 4. 642613 4. 638157 4. 564094 4. 148748 4. 124324 4. 194008  
11751860\_ 4. 701945 5. 003237 4. 637507 4. 875473 4. 971786 4. 795429  
11751861\_ 6. 078429 6. 132896 6. 006492 6. 167786 6. 190989 6. 251309  
11751862\_ 5. 375291 5. 723391 5. 340936 5. 458737 5. 624138 5. 681115  
11751863\_ 4. 592984 4. 33745 4. 33745 4. 563914 4. 489456 4. 441197  
11751864\_ 4. 5994 4. 410838 4. 384541 4. 552322 4. 490769 4. 357206  
11751865\_ 4. 615045 4. 604194 4. 472753 5. 006263 4. 740073 4. 731893  
11751866\_ 4. 482843 4. 768974 4. 72255 4. 845759 4. 801603 4. 415744  
11751867\_ 8. 557069 8. 516948 8. 609801 8. 795216 8. 798742 8. 817772  
11751868\_ 8. 413496 8. 332553 8. 473894 8. 701083 8. 649115 8. 65351  
11751869\_ 8. 565378 8. 461097 8. 646953 9. 03261 8. 998033 9. 060942



11751870\_ 3. 746815 4. 172086 3. 625408 3. 850246 3. 737002 3. 868436  
11751871\_ 3. 760883 3. 876468 3. 700102 3. 900836 3. 806904 3. 900836  
11751872\_ 4. 04135 4. 003839 4. 083125 3. 78466 3. 950109 3. 936326  
11751873\_ 1. 710186 1. 785821 1. 718088 1. 788656 1. 782603 1. 967932  
11751874\_ 6. 091356 5. 9673 5. 940504 5. 955049 5. 786518 5. 74316  
11751875\_ 5. 347982 5. 294442 5. 358471 4. 993659 5. 195541 5. 168347  
11751876\_ 3. 047733 3. 27739 3. 331806 3. 334753 3. 572508 3. 334753  
11751877\_ 4. 369113 4. 310432 4. 629068 4. 321418 4. 455001 4. 488119  
11751878\_ 7. 402507 7. 399523 7. 467155 6. 524199 6. 627355 6. 631711  
11751879\_ 2. 987868 2. 824668 2. 986694 3. 095262 3. 150899 3. 028301  
11751880\_ 5. 794279 5. 92081 5. 883608 5. 856406 5. 964899 5. 937601  
11751881\_ 4. 726306 4. 933015 5. 051872 4. 821323 4. 639253 4. 775327  
11751882\_ 5. 503847 5. 283205 5. 398107 5. 006153 5. 252175 5. 17915  
11751883\_ 4. 533214 4. 550437 4. 602794 4. 550437 4. 735249 4. 62366  
11751884\_ 6. 27975 6. 136126 6. 282224 6. 006732 5. 986518 6. 038051  
11751885\_ 6. 048618 5. 98478 5. 716195 5. 707579 5. 651972 5. 803302  
11751886\_ 10. 37883 10. 36506 10. 35935 9. 892994 9. 904663 9. 843409  
11751887\_ 2. 74729 3. 06416 2. 872071 2. 699002 2. 872071 3. 038153  
11751888\_ 4. 590784 4. 856748 4. 929453 4. 794089 4. 477444 4. 483836  
11751889\_ 8. 347747 8. 375718 8. 34707 8. 361215 8. 371688 8. 398451  
11751890\_ 5. 733551 5. 776492 5. 797967 5. 848275 5. 819439 5. 762243  
11751891\_ 6. 903872 6. 831179 6. 806793 6. 554364 6. 641563 6. 692787  
11751892\_ 5. 278729 5. 364428 5. 297498 5. 321741 5. 226239 5. 224769  
11751893\_ 3. 489208 3. 49919 3. 224211 3. 417932 3. 141032 2. 994796  
11751894\_ 2. 804168 3. 010384 2. 919654 3. 101539 2. 967043 3. 317271  
11751895\_ 6. 257632 6. 205636 6. 327968 5. 766329 5. 790077 5. 821489  
11751896\_ 7. 968325 7. 932417 8. 160427 6. 844304 6. 844304 6. 968299  
11751897\_ 7. 906791 7. 881816 7. 799989 7. 936633 7. 83166 7. 799713  
11751898\_ 5. 018865 5. 027213 5. 021567 5. 061008 4. 987418 5. 03265  
11751899\_ 6. 587818 6. 585211 6. 592489 6. 5562 6. 622187 6. 537629  
11751900\_ 7. 854837 7. 76579 7. 81209 7. 523523 7. 44204 7. 455528  
11751901\_ 8. 606156 8. 537104 8. 57914 8. 369236 8. 260876 8. 299272  
11751902\_ 5. 963941 6. 007448 5. 869936 6. 172196 6. 156612 6. 174538  
11751903\_ 5. 697249 5. 692324 5. 683973 5. 534886 5. 649952 5. 681729  
11751904\_ 3. 276018 3. 771591 3. 26711 2. 987309 3. 003923 3. 002174  
11751905\_ 9. 46944 9. 516414 9. 459737 9. 553425 9. 485285 9. 45908  
11751906\_ 8. 705615 8. 576038 8. 658779 7. 855876 7. 81502 7. 928579  
11751907\_ 7. 84388 7. 840663 7. 765779 7. 187448 7. 168777 7. 232667  
11751908\_ 2. 190862 2. 057271 2. 143503 2. 027507 2. 205544 2. 143503  
11751909\_ 5. 676992 5. 639211 5. 778213 5. 745821 5. 58223 5. 572871  
11751910\_ 4. 102295 4. 143191 4. 033356 4. 205171 4. 226808 3. 96562  
11751911\_ 7. 182968 7. 072191 7. 132474 6. 418298 6. 383618 6. 521385  
11751912\_ 2. 372501 2. 597003 2. 585955 2. 333681 2. 531856 2. 376522  
11751913\_ 5. 174453 5. 284924 5. 188245 4. 97452 5. 183024 5. 134916  
11751914\_ 4. 169522 4. 171243 4. 062606 4. 313264 4. 292656 4. 200871  
11751915\_ 4. 078111 4. 18557 4. 043665 4. 045519 4. 094385 4. 159323  
11751916\_ 7. 620445 7. 542345 7. 586029 7. 825492 7. 817828 7. 818717  
11751917\_ 7. 285362 7. 253214 7. 320923 7. 319311 7. 324566 7. 24788  
11751918\_ 4. 963606 4. 908947 5. 131948 4. 776205 4. 607263 4. 779804  
11751919\_ 6. 349702 6. 208173 6. 363804 5. 962687 6. 073423 6. 100451  
11751920\_ 7. 66978 7. 528284 7. 664781 7. 231915 7. 243496 7. 278639

11751921\_ 9. 259146 9. 289465 9. 276721 9. 407749 9. 401927 9. 346683  
11751922\_ 7. 072346 6. 921593 7. 083947 6. 255362 6. 236689 6. 428086  
11751923\_ 7. 878777 7. 890124 7. 937504 7. 257341 7. 299162 7. 232138  
11751924\_ 4. 837723 5. 026475 4. 642549 4. 789357 4. 954698 4. 92634  
11751925\_ 4. 347179 4. 468517 4. 327917 4. 57987 4. 459939 4. 468517  
11751926\_ 4. 567031 4. 640143 4. 525906 4. 510534 4. 491488 4. 525906  
11751927\_ 10. 16152 10. 16831 10. 18693 9. 823928 9. 843432 9. 852782  
11751928\_ 7. 911333 7. 943466 7. 888246 7. 765944 7. 765944 7. 748159  
11751929\_ 4. 851548 4. 545472 4. 849104 3. 801989 3. 755948 4. 034115  
11751930\_ 5. 108414 5. 029529 5. 089237 5. 028497 5. 035081 5. 073036  
11751931\_ 5. 718249 5. 661439 5. 661895 5. 647875 5. 680152 5. 661439  
11751932\_ 6. 499673 6. 467695 6. 474976 7. 009306 6. 98545 7. 090809  
11751933\_ 3. 443377 3. 408547 3. 292642 3. 238689 3. 395783 3. 28789  
11751934\_ 7. 507295 7. 488523 7. 519597 7. 474418 7. 486802 7. 434587  
11751935\_ 3. 925181 4. 171382 4. 194981 3. 446245 3. 545373 3. 293741  
11751936\_ 5. 869055 5. 866126 5. 875679 5. 782307 5. 833971 5. 805209  
11751937\_ 4. 103025 4. 001089 4. 196098 3. 452028 3. 488906 3. 699229  
11751938\_ 3. 705625 3. 821554 3. 786043 3. 998449 3. 811897 3. 954157  
11751939\_ 7. 064689 7. 083583 6. 959228 6. 98273 7. 023508 6. 983136  
11751940\_ 5. 305907 5. 146771 5. 21529 4. 775957 4. 62114 4. 542465  
11751941\_ 5. 338642 5. 46528 5. 358811 5. 430364 5. 552155 5. 46528  
11751942\_ 6. 037066 6. 241804 6. 219072 6. 397946 6. 220497 6. 314699  
11751943\_ 5. 628626 5. 66556 5. 739208 5. 971396 5. 953055 6. 094467  
11751944\_ 2. 36734 2. 47102 2. 36734 2. 464131 2. 242497 2. 459898  
11751945\_ 6. 679147 6. 769284 6. 742041 6. 558747 6. 56978 6. 617088  
11751946\_ 6. 239178 6. 266333 6. 218246 6. 207547 6. 207547 6. 246155  
11751947\_ 5. 877063 5. 730448 5. 65316 5. 670595 5. 743197 5. 735093  
11751948\_ 6. 142546 6. 114462 6. 330652 6. 13945 6. 234567 6. 17981  
11751949\_ 7. 547162 7. 50047 7. 589926 7. 302159 7. 329971 7. 396412  
11751950\_ 5. 632792 5. 646811 5. 666999 5. 723241 5. 791835 5. 698951  
11751951\_ 7. 944299 7. 905295 7. 941478 7. 664734 7. 708475 7. 6697  
11751952\_ 7. 43558 7. 391271 7. 379171 8. 28885 8. 304014 8. 221563  
11751953\_ 4. 3984 4. 40461 4. 251281 4. 100789 4. 315638 4. 233325  
11751954\_ 4. 108592 4. 260513 4. 345205 4. 567122 4. 579455 4. 674994  
11751955\_ 7. 33071 7. 187075 7. 154109 6. 824478 6. 80154 6. 868398  
11751956\_ 3. 174608 3. 30646 3. 218988 3. 147464 3. 255223 3. 233875  
11751957\_ 6. 30005 6. 067006 6. 152655 6. 092853 6. 043693 6. 07255  
11751958\_ 5. 582069 5. 630884 5. 60873 5. 557146 5. 678154 5. 622698  
11751959\_ 5. 170528 5. 191288 5. 198676 4. 867712 4. 642536 5. 095222  
11751960\_ 4. 976248 5. 031546 4. 769129 4. 938963 4. 837381 4. 765421  
11751961\_ 4. 30371 4. 389168 4. 389168 4. 28222 4. 331338 4. 20977  
11751962\_ 6. 54092 6. 438662 6. 365568 5. 211071 5. 251507 5. 185042  
11751963\_ 4. 362529 4. 342255 4. 418243 4. 298658 4. 406707 4. 175678  
11751964\_ 4. 9226 4. 861354 4. 930507 4. 992243 4. 836553 5. 077368  
11751965\_ 2. 569406 2. 83824 2. 659038 2. 842374 3. 122222 3. 025323  
11751966\_ 11. 35722 11. 40052 11. 40698 11. 31703 11. 30552 11. 33813  
11751967\_ 5. 953237 5. 738328 5. 977883 5. 772949 5. 708166 5. 800113  
11751968\_ 7. 154408 7. 182921 7. 16318 7. 017833 7. 077699 7. 051339  
11751969\_ 7. 099457 7. 127759 7. 153055 6. 956953 7. 034049 7. 015647  
11751970\_ 3. 13264 2. 842141 2. 766851 2. 614844 2. 693676 2. 62238  
11751971\_ 2. 83698 2. 848922 2. 848922 2. 852903 2. 75714 2. 863189

11751972\_ 7. 825486 7. 79987 7. 810733 7. 81291 7. 854878 7. 81142  
11751973\_ 6. 936218 7. 037629 6. 9432 6. 986734 7. 027795 7. 035658  
11751974\_ 5. 360193 5. 346866 5. 278067 5. 318629 5. 312592 5. 32294  
11751975\_ 2. 529375 2. 569791 2. 554497 2. 517994 2. 59251 2. 676967  
11751976\_ 5. 222373 5. 371444 5. 192623 5. 406111 5. 333723 5. 475572  
11751977\_ 6. 898793 6. 875076 6. 889001 6. 56215 6. 623185 6. 542003  
11751978\_ 5. 209259 5. 25016 4. 988775 5. 168266 5. 10686 4. 968377  
11751979\_ 2. 968237 2. 907523 2. 975316 2. 570018 2. 962266 2. 738739  
11751980\_ 6. 548315 6. 359596 6. 405428 5. 845365 6. 116182 6. 130371  
11751981\_ 7. 239949 7. 254427 7. 244792 7. 266671 7. 303157 7. 318959  
11751982\_ 7. 12767 7. 291586 7. 29069 6. 937307 6. 861306 6. 923564  
11751983\_ 5. 759714 5. 568397 5. 614563 5. 291242 5. 322007 5. 323876  
11751984\_ 7. 168778 7. 111953 6. 922773 6. 999347 7. 066036 7. 101486  
11751985\_ 7. 989472 8. 012502 7. 905875 7. 838517 7. 767594 7. 777879  
11751986\_ 4. 782557 4. 885127 4. 984669 5. 025033 4. 923031 4. 78471  
11751987\_ 3. 140148 2. 902333 3. 023998 3. 209708 2. 927725 3. 144115  
11751988\_ 7. 606273 7. 531406 7. 645637 7. 656646 7. 640016 7. 677023  
11751989\_ 5. 177173 5. 149545 5. 167268 4. 467468 4. 628411 4. 659122  
11751990\_ 9. 726715 9. 692451 9. 751675 9. 748185 9. 761982 9. 844921  
11751991\_ 2. 431041 2. 530588 2. 478463 2. 618983 2. 530588 2. 598073  
11751992\_ 3. 296484 3. 509374 3. 472815 3. 600585 3. 452142 3. 436923  
11751993\_ 5. 610512 5. 400837 5. 346499 3. 771612 3. 782544 3. 684137  
11751994\_ 4. 074185 4. 030424 4. 0145 3. 910535 3. 834372 3. 606313  
11751995\_ 4. 03735 4. 329163 4. 067286 4. 152561 3. 954833 4. 109231  
11751996\_ 6. 446568 6. 52514 6. 494443 6. 494443 6. 448378 6. 435146  
11751997\_ 5. 213836 5. 124026 5. 289095 5. 607496 5. 589709 5. 729344  
11751998\_ 2. 266042 2. 281965 2. 266042 2. 167802 1. 949869 2. 053907  
11751999\_ 8. 638565 8. 633 8. 666378 8. 475522 8. 5233 8. 488296  
11752000\_ 5. 571845 5. 720698 5. 589221 5. 938486 5. 745582 5. 692255  
11752001\_ 8. 784207 8. 719605 8. 725905 9. 379878 9. 323014 9. 138282  
11752002\_ 3. 951583 3. 870683 3. 740892 3. 571828 3. 688491 3. 602529  
11752003\_ 8. 144187 8. 044136 8. 113247 8. 372908 8. 286315 8. 368778  
11752004\_ 7. 67094 7. 491454 7. 536621 7. 262669 7. 223826 7. 232245  
11752005\_ 6. 715811 6. 643412 6. 700648 6. 337668 6. 324212 6. 450986  
11752006\_ 5. 195521 5. 240405 5. 317757 5. 156303 5. 32842 5. 173137  
11752007\_ 6. 789421 6. 898793 6. 847517 6. 860017 7. 003845 6. 954178  
11752008\_ 5. 92446 5. 92446 5. 817488 5. 958232 5. 894697 5. 961267  
11752009\_ 6. 748126 6. 757142 6. 949498 6. 634246 6. 624858 6. 67297  
11752010\_ 4. 117785 4. 02146 3. 966871 3. 400123 3. 574084 3. 508663  
11752011\_ 6. 476341 6. 50462 6. 526095 6. 849264 6. 913179 6. 788872  
11752012\_ 6. 872357 6. 934938 6. 827517 7. 200554 7. 230373 7. 391618  
11752013\_ 6. 754874 6. 448674 6. 587529 6. 395911 6. 348555 6. 312827  
11752014\_ 3. 131074 3. 226016 2. 952895 2. 5211 3. 196632 2. 802395  
11752015\_ 4. 63489 4. 763168 4. 630995 4. 383039 4. 470784 4. 241868  
11752016\_ 4. 815974 4. 704851 4. 661861 4. 327251 4. 40461 4. 277605  
11752017\_ 5. 584813 5. 608357 5. 599145 5. 784495 5. 724199 5. 807973  
11752018\_ 4. 664841 4. 449157 4. 349458 4. 26008 4. 617349 4. 406439  
11752019\_ 1. 919247 1. 739546 1. 76847 1. 833478 1. 93517 1. 734473  
11752020\_ 4. 079513 4. 053979 4. 03487 4. 322817 3. 920397 3. 933574  
11752021\_ 5. 277663 5. 452838 5. 2222 5. 404472 5. 514443 5. 502342  
11752022\_ 7. 2026 7. 209882 7. 13043 6. 906799 6. 994319 6. 929908

11752023\_ 3. 530528 3. 749461 3. 484662 3. 766742 3. 67204 3. 80987  
11752024\_ 2. 248732 2. 135926 2. 078668 2. 36239 2. 299875 2. 098156  
11752025\_ 8. 722127 8. 745241 8. 782843 8. 33647 8. 197489 8. 286956  
11752026\_ 4. 824676 4. 976069 4. 923536 4. 954311 4. 863309 5. 026267  
11752027\_ 4. 643717 4. 581464 4. 445198 4. 730448 4. 52373 4. 593022  
11752028\_ 6. 821126 6. 762602 6. 797396 6. 558072 6. 544788 6. 732422  
11752029\_ 6. 232753 6. 05952 6. 223388 6. 246469 6. 211966 6. 244928  
11752030\_ 7. 751007 7. 854559 7. 794232 7. 834852 7. 824897 7. 899605  
11752031\_ 6. 630128 6. 509889 6. 627838 5. 920009 5. 899877 5. 798613  
11752032\_ 7. 543148 7. 658495 7. 576132 7. 593657 7. 618349 7. 599174  
11752033\_ 7. 382221 7. 390783 7. 390286 7. 362732 7. 374996 7. 366931  
11752034\_ 2. 213145 2. 319947 2. 213145 2. 471771 2. 324535 2. 264963  
11752035\_ 3. 086811 3. 01701 3. 174077 3. 136035 3. 167319 3. 196181  
11752036\_ 10. 77881 10. 74842 10. 81412 11. 31169 11. 24938 11. 2382  
11752037\_ 5. 7494 5. 854681 5. 753763 6. 084238 6. 216256 6. 158726  
11752038\_ 3. 306465 3. 306119 3. 633293 3. 605706 3. 456017 3. 375383  
11752039\_ 5. 291809 5. 270488 5. 265066 4. 709016 4. 559069 4. 378515  
11752040\_ 6. 236751 6. 13195 6. 298043 5. 311281 5. 409708 5. 100927  
11752041\_ 7. 823849 7. 930652 7. 888708 7. 922194 7. 912594 7. 88222  
11752042\_ 3. 398236 3. 49779 3. 415796 3. 377097 3. 407542 3. 669792  
11752043\_ 5. 376428 5. 643713 5. 369691 5. 626853 5. 554436 5. 54696  
11752044\_ 8. 896786 8. 815367 8. 823582 8. 523007 8. 525501 8. 48222  
11752045\_ 5. 477698 5. 521893 5. 614563 5. 457049 5. 466564 5. 530729  
11752046\_ 6. 614687 6. 615996 6. 513001 6. 658519 6. 627692 6. 61023  
11752047\_ 6. 72932 6. 843171 6. 762444 6. 805365 6. 828717 6. 862459  
11752048\_ 2. 510192 2. 612619 2. 594218 2. 351475 2. 397073 2. 453764  
11752049\_ 6. 971486 6. 954563 7. 002696 6. 517662 6. 606879 6. 520881  
11752050\_ 7. 232149 7. 145286 7. 243406 6. 780687 6. 762062 6. 760718  
11752051\_ 7. 188127 7. 054333 7. 19144 7. 009124 7. 075046 7. 031531  
11752052\_ 7. 499893 7. 351631 7. 466654 7. 297375 7. 387732 7. 343297  
11752053\_ 5. 406297 5. 416868 5. 353077 5. 351905 5. 36794 5. 402339  
11752054\_ 5. 633645 5. 551177 5. 822045 5. 321749 5. 488417 5. 338108  
11752055\_ 3. 699852 3. 851215 3. 740892 3. 943964 4. 092042 4. 054288  
11752056\_ 6. 779107 6. 829077 6. 717736 6. 670937 6. 790012 6. 814941  
11752057\_ 8. 738551 8. 806094 8. 765464 8. 983656 8. 88985 8. 761197  
11752058\_ 5. 762459 5. 747351 5. 870242 6. 565328 6. 58637 6. 580557  
11752059\_ 5. 67181 5. 89899 5. 827935 5. 957969 5. 926119 5. 901493  
11752060\_ 7. 295612 7. 482153 7. 173647 7. 508553 7. 437526 7. 508052  
11752061\_ 7. 639933 7. 570854 7. 559658 7. 265178 7. 194595 7. 143953  
11752062\_ 5. 694213 5. 884115 5. 745095 5. 916673 6. 046118 5. 995603  
11752063\_ 3. 587543 3. 492275 3. 451445 3. 421791 3. 266634 3. 266634  
11752064\_ 4. 34649 4. 344899 4. 446449 4. 34649 4. 256664 4. 220369  
11752065\_ 3. 529393 3. 419442 3. 418875 3. 493916 3. 438621 3. 529393  
11752066\_ 5. 789465 5. 839899 5. 554436 5. 82646 5. 819926 5. 88744  
11752067\_ 8. 677115 8. 558934 8. 630674 8. 214033 8. 139049 8. 139049  
11752068\_ 6. 764641 6. 786721 6. 714931 6. 763792 6. 742996 6. 750494  
11752069\_ 8. 050039 7. 9304 7. 940906 7. 685917 7. 673568 7. 652925  
11752070\_ 3. 832653 3. 888469 4. 039999 3. 997131 3. 877733 4. 063179  
11752071\_ 5. 584813 5. 732315 5. 861881 5. 574118 5. 676308 5. 753664  
11752072\_ 8. 2832 8. 188505 8. 261497 8. 17303 8. 245451 8. 110112  
11752073\_ 3. 534114 3. 689225 4. 077348 3. 905938 3. 992777 3. 710867

11752074\_ 5.198786 5.144543 5.162179 4.932827 5.041362 4.901401  
11752075\_ 3.73076 4.08218 3.76521 3.93631 3.823994 3.961971  
11752076\_ 8.523542 8.480707 8.475493 8.735193 8.686483 8.670752  
11752077\_ 5.986125 5.976221 5.927661 6.090262 6.129084 6.03131  
11752078\_ 6.979264 7.012019 6.882724 7.050586 7.042099 7.021035  
11752079\_ 5.148703 5.18842 5.333789 5.448296 5.333951 5.295875  
11752080\_ 5.495638 5.386333 5.429825 5.459229 5.409083 5.397258  
11752081\_ 8.354357 8.288343 8.346994 7.2997 7.25139 7.258791  
11752082\_ 5.92912 5.981351 6.114982 5.80861 5.905143 5.980786  
11752083\_ 4.545844 4.563999 4.418128 4.507614 4.643717 4.52373  
11752084\_ 3.899459 4.067703 3.759736 4.118425 3.894675 4.201554  
11752085\_ 5.226265 5.26371 5.09541 5.194166 5.219041 5.125711  
11752086\_ 6.687984 6.876676 6.752593 6.792674 6.742609 6.941946  
11752087\_ 4.363809 4.216673 4.619427 3.952867 4.01256 4.032277  
11752088\_ 2.082854 2.112388 2.361968 2.14033 2.107658 2.098296  
11752089\_ 3.560197 3.677915 3.678958 3.898766 3.613732 3.700904  
11752090\_ 7.926335 7.872246 7.823336 7.018608 6.898793 7.006286  
11752091\_ 6.720787 6.804519 6.670412 6.579869 6.494125 6.58542  
11752092\_ 5.723449 5.751776 5.656805 5.732298 5.697498 5.630134  
11752093\_ 2.182402 2.018148 2.118107 2.011492 2.079784 2.018493  
11752094\_ 10.64344 10.59419 10.59086 10.51537 10.53931 10.50808  
11752095\_ 2.240695 2.131936 2.099084 1.958912 2.020839 1.995297  
11752096\_ 6.749225 6.652408 6.605887 6.448651 6.375183 6.421227  
11752097\_ 1.995297 2.155477 1.818046 1.873595 1.995297 2.029762  
11752098\_ 8.117947 7.944243 8.074565 7.868272 7.894119 7.948635  
11752099\_ 3.714961 3.796567 3.540044 3.579775 3.651851 3.567342  
11752100\_ 8.59341 8.475038 8.598034 8.353871 8.413607 8.45615  
11752101\_ 7.344858 7.235171 7.343396 7.809691 7.842193 7.855116  
11752102\_ 8.462186 8.435059 8.441372 8.115102 8.127589 8.161239  
11752103\_ 8.236921 8.224895 8.272247 8.365744 8.455972 8.408215  
11752104\_ 5.904579 5.868118 5.809047 5.876031 5.907926 5.826806  
11752105\_ 1.882209 2.029433 1.828698 1.982677 1.875437 1.841977  
11752106\_ 4.403066 4.327177 3.958904 4.103051 4.155369 4.155369  
11752107\_ 4.933142 5.008532 4.951989 5.018987 4.942383 5.090338  
11752108\_ 8.175702 8.201903 8.175159 8.041456 7.930751 8.02675  
11752109\_ 5.273979 5.516599 5.518169 5.425164 5.48436 5.48436  
11752110\_ 4.598005 4.52373 4.101704 4.402455 4.523051 4.495436  
11752111\_ 5.443804 5.073036 5.676992 5.457326 5.397861 5.386534  
11752112\_ 5.389255 5.414869 5.396287 5.380649 5.389255 5.389255  
11752113\_ 8.996224 9.008882 8.90928 8.524849 8.539955 8.441846  
11752114\_ 5.612257 5.538023 5.374161 5.717111 5.679767 5.678678  
11752115\_ 3.229389 3.41029 3.085722 3.204575 3.420498 3.42632  
11752116\_ 3.435476 3.569073 3.367324 3.561726 3.477916 3.508946  
11752117\_ 6.067302 6.055851 6.22031 6.385151 6.356575 6.397859  
11752118\_ 6.102804 6.1907 6.095536 6.255185 6.122456 6.218012  
11752119\_ 5.994327 5.894697 5.889914 5.757601 5.841757 5.754755  
11752120\_ 7.109143 7.061315 7.123572 7.805566 7.765389 7.806889  
11752121\_ 7.326385 7.24456 7.336602 6.903578 6.910833 6.844721  
11752122\_ 4.474019 4.466122 4.593583 4.435005 4.343083 4.531988  
11752123\_ 3.903854 3.853047 3.791048 3.719354 3.778473 3.954241  
11752124\_ 8.872209 8.784629 8.818132 8.786253 8.786223 8.778576

11752125\_ 8. 864166 8. 815367 8. 932493 8. 784401 8. 812161 8. 825745  
11752126\_ 5. 151259 5. 266706 5. 122191 5. 153725 5. 208484 5. 226206  
11752127\_ 4. 108592 4. 038675 4. 038862 4. 038675 4. 066293 3. 981639  
11752128\_ 11. 30044 11. 30645 11. 28241 11. 24795 11. 22479 11. 26007  
11752129\_ 8. 393727 8. 191112 8. 379438 7. 718855 7. 800752 7. 792177  
11752130\_ 7. 418393 7. 411145 7. 443522 7. 170429 7. 283449 7. 255759  
11752131\_ 10. 35417 10. 27244 10. 32255 10. 63046 10. 65964 10. 65759  
11752132\_ 2. 305206 2. 320499 2. 196198 2. 333861 2. 407467 2. 408212  
11752133\_ 6. 756886 6. 788887 6. 887807 6. 459755 6. 553696 6. 58706  
11752134\_ 5. 38459 5. 394985 5. 281453 5. 259726 5. 419611 5. 399773  
11752135\_ 6. 969087 6. 821214 6. 869444 6. 816825 6. 927903 6. 899677  
11752136\_ 4. 635536 4. 700613 4. 626678 4. 468916 4. 682143 4. 55932  
11752137\_ 4. 695904 4. 5976 4. 407997 4. 316001 4. 406603 4. 287247  
11752138\_ 5. 401033 5. 227703 5. 22784 5. 26043 5. 242211 5. 196201  
11752139\_ 6. 211521 6. 23272 6. 195712 6. 195712 6. 201061 6. 212958  
11752140\_ 6. 600707 6. 643247 6. 595496 6. 799778 6. 783659 6. 810173  
11752141\_ 3. 189784 3. 365816 3. 400368 3. 523221 3. 537624 3. 404713  
11752142\_ 7. 849497 7. 891327 7. 843571 8. 18167 8. 191762 8. 135113  
11752143\_ 2. 502037 2. 708995 2. 665889 2. 909215 2. 708995 2. 67569  
11752144\_ 5. 508598 5. 53685 5. 627979 5. 162811 5. 003807 5. 095306  
11752145\_ 4. 959198 5. 093265 5. 073036 5. 179007 5. 26034 5. 106156  
11752146\_ 8. 681071 8. 718112 8. 704987 8. 951591 8. 929 8. 912217  
11752147\_ 5. 187074 5. 171273 5. 102467 5. 141196 5. 167566 5. 177408  
11752148\_ 2. 817609 2. 833033 2. 844513 2. 983399 2. 897434 3. 098034  
11752149\_ 4. 0287 4. 277637 3. 938335 4. 298653 4. 3815 4. 294841  
11752150\_ 5. 74718 5. 43863 5. 639477 5. 025398 5. 208332 5. 197788  
11752151\_ 2. 816574 2. 92938 2. 780546 2. 963856 2. 872977 2. 92938  
11752152\_ 3. 131682 3. 270266 3. 085159 3. 153464 2. 908475 3. 189555  
11752153\_ 6. 838372 6. 809436 6. 740184 6. 930936 6. 967649 7. 056309  
11752154\_ 5. 820052 5. 730664 5. 786147 5. 912926 5. 921263 5. 891289  
11752155\_ 7. 266726 7. 247591 7. 269096 6. 803611 6. 858932 6. 835908  
11752156\_ 4. 436696 4. 338219 4. 370604 4. 521459 4. 47368 4. 571468  
11752157\_ 4. 497012 4. 52373 4. 456632 4. 459939 4. 551532 4. 470646  
11752158\_ 5. 125685 5. 160052 5. 242115 5. 415994 5. 154603 5. 331219  
11752159\_ 9. 203744 9. 163527 9. 183628 9. 316265 9. 372378 9. 319349  
11752160\_ 4. 002935 4. 112177 3. 982341 4. 142044 4. 191873 4. 117556  
11752161\_ 2. 607101 2. 599865 2. 472605 2. 498256 2. 580623 2. 502892  
11752162\_ 4. 491806 4. 360251 4. 208992 4. 737919 4. 673232 4. 836011  
11752163\_ 6. 96928 6. 835471 6. 953498 6. 850836 6. 870716 6. 969473  
11752164\_ 7. 188344 7. 086932 7. 104025 7. 082565 7. 082565 7. 15784  
11752165\_ 11. 4247 11. 3823 11. 4244 11. 60921 11. 61019 11. 66793  
11752166\_ 10. 03692 9. 983128 10. 02988 10. 32002 10. 32542 10. 27453  
11752167\_ 5. 409222 5. 295053 5. 482393 4. 364818 4. 597823 4. 584933  
11752168\_ 5. 004113 5. 062056 5. 17639 4. 953968 5. 009082 5. 062056  
11752169\_ 5. 387821 5. 716456 5. 569682 5. 614563 5. 638733 5. 648514  
11752170\_ 3. 398236 3. 478256 3. 34466 3. 398236 3. 500259 3. 170263  
11752171\_ 10. 22842 10. 20743 10. 22974 10. 27666 10. 23002 10. 25207  
11752172\_ 6. 08493 6. 038538 5. 882947 6. 317547 6. 290984 6. 293779  
11752173\_ 8. 680452 8. 577105 8. 589064 7. 563196 7. 455898 7. 55166  
11752174\_ 4. 587528 4. 499204 4. 344003 4. 691317 4. 604702 4. 644505  
11752175\_ 8. 578924 8. 528793 8. 623325 8. 652696 8. 608635 8. 648871

11752176\_ 5. 913176 5. 813065 5. 876437 5. 584863 5. 714625 5. 605267  
11752177\_ 7. 452958 7. 406709 7. 513928 7. 422512 7. 411426 7. 354217  
11752178\_ 4. 383886 4. 431479 4. 284594 4. 666893 4. 322883 4. 375665  
11752179\_ 8. 512757 8. 441341 8. 457318 8. 294325 8. 395401 8. 360744  
11752180\_ 8. 348706 8. 335368 8. 270033 8. 506379 8. 562675 8. 536984  
11752181\_ 3. 705625 3. 826321 3. 561147 3. 690658 3. 618716 3. 7393  
11752182\_ 6. 884941 6. 758397 6. 700519 6. 480409 6. 42145 6. 461109  
11752183\_ 9. 193587 9. 231148 9. 194078 9. 157617 9. 158372 9. 144284  
11752184\_ 7. 145322 7. 215889 7. 318161 6. 468861 6. 491808 6. 481046  
11752185\_ 6. 517462 6. 454509 6. 574834 6. 763271 6. 840814 6. 729272  
11752186\_ 5. 768329 5. 762858 5. 868794 5. 967762 5. 83536 5. 862516  
11752187\_ 5. 022372 4. 927596 5. 054218 3. 957268 3. 773126 3. 972236  
11752188\_ 8. 054681 7. 965967 8. 0809 8. 128713 8. 094761 8. 125652  
11752189\_ 5. 648615 5. 370852 5. 643713 5. 185954 5. 202813 5. 305426  
11752190\_ 7. 399199 7. 335979 7. 431986 6. 80886 6. 868645 6. 854748  
11752191\_ 5. 103834 5. 204195 5. 133627 5. 179148 5. 209538 5. 362635  
11752192\_ 4. 399586 4. 586863 4. 26631 4. 761327 4. 681576 4. 565302  
11752193\_ 5. 88335 6. 117418 5. 948777 6. 076709 6. 142856 5. 971827  
11752194\_ 10. 26216 10. 22891 10. 26628 10. 22651 10. 22893 10. 24181  
11752195\_ 10. 37859 10. 35219 10. 35969 10. 42377 10. 39867 10. 39026  
11752196\_ 8. 184555 8. 105767 8. 149818 8. 052777 8. 029115 8. 036088  
11752197\_ 8. 01469 8. 05038 8. 069846 7. 804842 7. 804912 7. 864739  
11752198\_ 6. 743645 6. 764807 6. 817609 6. 473469 6. 486977 6. 417769  
11752199\_ 9. 743228 9. 727088 9. 632595 9. 492401 9. 448849 9. 380402  
11752200\_ 10. 54587 10. 52596 10. 51165 10. 24458 10. 25178 10. 22885  
11752201\_ 4. 885686 5. 124399 4. 878934 4. 577273 4. 493647 4. 861821  
11752202\_ 4. 513241 4. 693718 4. 257005 4. 727573 4. 716872 4. 779862  
11752203\_ 7. 23973 7. 249337 7. 399495 7. 130358 7. 220463 7. 172778  
11752204\_ 8. 93154 8. 898838 8. 951756 9. 031733 9. 098657 9. 084306  
11752205\_ 3. 515008 3. 037425 3. 457729 3. 319591 3. 443304 3. 373202  
11752206\_ 5. 29056 5. 29056 5. 333421 5. 414869 5. 273326 5. 392466  
11752207\_ 6. 797807 6. 545522 6. 521533 5. 727827 5. 576001 5. 634785  
11752208\_ 6. 350378 6. 186428 6. 473331 6. 551724 6. 598834 6. 646748  
11752209\_ 2. 783528 2. 565735 2. 658442 2. 671242 2. 53979 2. 640255  
11752210\_ 5. 063895 5. 044485 4. 826095 5. 139025 5. 079873 4. 977832  
11752211\_ 2. 802696 2. 739329 2. 928766 2. 626465 2. 730286 2. 649652  
11752212\_ 3. 193892 3. 210024 3. 337753 3. 414605 2. 903023 3. 203451  
11752213\_ 6. 002392 6. 208201 6. 009649 6. 115609 6. 122294 6. 074097  
11752214\_ 5. 632125 5. 643633 5. 535153 5. 507637 5. 595015 5. 523645  
11752215\_ 8. 336471 8. 298255 8. 366671 8. 263255 8. 410743 8. 278204  
11752216\_ 4. 977054 5. 005004 5. 021634 5. 065109 5. 017349 4. 92306  
11752217\_ 8. 006568 7. 912657 7. 965925 7. 855261 7. 858207 7. 848232  
11752218\_ 5. 397068 5. 316836 5. 228958 5. 410559 5. 400381 5. 403904  
11752219\_ 4. 601538 4. 804506 4. 653438 5. 042464 4. 646056 4. 664404  
11752220\_ 4. 066506 4. 188863 4. 20696 4. 092067 4. 108127 4. 202847  
11752221\_ 3. 939099 4. 131068 4. 087623 4. 187195 4. 036895 4. 03651  
11752222\_ 4. 005066 3. 909593 4. 148022 4. 101048 3. 994436 4. 078618  
11752223\_ 7. 193494 7. 053453 7. 193066 6. 652046 6. 712052 6. 894301  
11752224\_ 6. 755012 6. 622588 6. 714168 6. 375008 6. 401569 6. 473521  
11752225\_ 6. 94 6. 810984 6. 898547 6. 508517 6. 555116 6. 530736  
11752226\_ 3. 562184 3. 525915 3. 579162 3. 658984 3. 594348 3. 574379

11752227\_ 9. 344214 9. 33183 9. 408765 9. 343205 9. 343399 9. 334556  
11752228\_ 5. 985922 5. 931242 5. 837727 6. 041605 6. 025952 6. 159771  
11752229\_ 6. 278389 6. 325547 6. 413894 6. 346457 6. 374998 6. 376287  
11752230\_ 8. 0211 7. 986488 8. 083357 7. 813331 7. 927058 7. 792946  
11752231\_ 4. 395501 4. 388446 4. 38497 4. 452428 4. 380685 4. 374438  
11752232\_ 4. 347179 4. 15043 4. 283229 4. 39082 4. 40461 4. 341334  
11752233\_ 4. 652175 4. 697863 4. 489044 4. 5888 4. 496366 4. 700243  
11752234\_ 6. 50316 6. 521245 6. 478352 6. 42388 6. 464805 6. 485175  
11752235\_ 6. 241222 6. 166907 6. 253732 6. 295093 6. 428007 6. 332425  
11752236\_ 4. 843392 4. 583829 4. 598111 4. 757786 4. 847265 4. 759553  
11752237\_ 7. 584594 7. 566427 7. 701487 6. 95158 6. 932391 7. 063008  
11752238\_ 6. 061126 6. 202849 6. 069784 6. 447009 6. 552276 6. 477503  
11752239\_ 9. 894274 9. 860391 9. 912836 9. 616692 9. 632205 9. 60882  
11752240\_ 7. 251041 7. 185573 7. 157792 6. 84805 6. 975914 6. 931595  
11752241\_ 6. 872009 6. 966425 6. 807172 7. 076762 7. 023043 6. 990224  
11752242\_ 5. 099488 5. 029529 5. 098536 4. 947259 4. 829717 5. 041243  
11752243\_ 5. 36906 5. 523597 5. 423378 5. 599358 5. 479051 5. 589814  
11752244\_ 6. 130559 6. 186428 6. 025708 6. 179152 6. 19241 6. 23045  
11752245\_ 3. 226981 3. 104269 3. 39186 3. 23076 3. 172889 3. 206097  
11752246\_ 4. 448461 4. 49427 4. 416016 4. 830643 4. 626004 4. 514637  
11752247\_ 9. 039232 9. 09893 9. 038977 8. 845356 8. 858311 8. 854607  
11752248\_ 5. 247739 5. 331552 5. 318567 5. 136492 5. 2222 5. 242496  
11752249\_ 4. 353783 3. 924028 4. 008214 4. 030809 3. 758215 3. 950263  
11752250\_ 4. 814292 4. 951364 4. 890161 5. 014555 5. 004635 5. 020006  
11752251\_ 3. 366413 3. 458418 3. 382216 3. 568188 3. 636609 3. 535567  
11752252\_ 5. 069256 4. 934877 5. 025839 5. 005121 4. 984669 5. 142299  
11752253\_ 6. 462818 6. 466792 6. 462818 6. 50874 6. 49512 6. 489463  
11752254\_ 5. 52063 5. 625945 5. 620589 5. 479059 5. 423658 5. 701182  
11752255\_ 3. 782568 3. 83378 3. 898705 3. 812146 3. 531842 3. 641134  
11752256\_ 7. 453916 7. 426822 7. 359081 8. 157561 8. 133491 8. 119354  
11752257\_ 3. 480845 3. 621185 3. 561307 3. 657608 3. 792031 3. 636636  
11752258\_ 6. 824426 6. 792756 6. 808886 6. 429813 6. 588034 6. 442964  
11752259\_ 3. 786148 3. 766517 3. 705575 3. 882253 4. 033365 3. 501686  
11752260\_ 4. 079464 4. 202979 4. 164087 4. 246405 4. 272334 4. 098436  
11752261\_ 3. 771462 3. 82457 3. 702213 3. 982904 3. 600821 3. 716521  
11752262\_ 6. 75523 6. 862059 6. 744592 6. 734346 6. 808383 6. 859295  
11752263\_ 5. 412333 5. 472128 5. 34477 5. 598703 5. 599609 5. 358549  
11752264\_ 5. 156558 5. 076253 5. 019006 5. 029529 4. 969606 4. 972563  
11752265\_ 4. 583973 4. 651917 4. 632477 4. 599866 4. 675814 4. 561568  
11752266\_ 7. 951284 7. 868277 7. 939132 7. 921935 7. 869079 7. 875571  
11752267\_ 7. 336227 7. 307545 7. 392567 7. 490319 7. 51469 7. 548429  
11752268\_ 4. 466706 4. 477503 4. 30985 4. 355629 4. 391269 4. 278463  
11752269\_ 2. 085833 2. 253243 2. 38607 2. 4084 2. 29201 2. 220714  
11752270\_ 4. 246392 4. 32386 4. 280987 4. 37633 4. 327357 4. 387689  
11752271\_ 4. 854669 4. 972962 5. 027813 5. 023238 4. 886885 4. 974217  
11752272\_ 6. 687762 6. 692045 6. 710584 6. 808776 6. 779107 6. 806158  
11752273\_ 6. 021546 5. 946701 5. 88924 6. 18531 5. 984269 6. 177264  
11752274\_ 5. 156303 5. 14044 5. 12583 4. 914651 5. 043599 5. 015704  
11752275\_ 4. 05795 3. 910413 3. 839104 4. 177274 3. 963411 4. 02569  
11752276\_ 5. 090868 5. 049243 5. 122191 5. 114949 5. 24423 5. 233221  
11752277\_ 2. 895714 3. 391911 3. 220958 3. 169299 2. 987739 2. 948186



11752278\_ 12. 86688 12. 88537 12. 85337 12. 87151 12. 83593 12. 79608  
11752279\_ 4. 513241 4. 480725 4. 301875 4. 51702 4. 493964 4. 50555  
11752280\_ 9. 070683 8. 953834 9. 052795 8. 393727 8. 380079 8. 485444  
11752281\_ 8. 424929 8. 315544 8. 435078 7. 756296 7. 839448 7. 795648  
11752282\_ 4. 874234 4. 639847 4. 772366 4. 603757 4. 52373 4. 639847  
11752283\_ 3. 330244 3. 264174 3. 215235 3. 52227 3. 408675 3. 225402  
11752284\_ 3. 51965 3. 588761 3. 418266 3. 668695 3. 688299 3. 606387  
11752285\_ 5. 672707 5. 7488 5. 750721 5. 719826 5. 78182 5. 773867  
11752286\_ 2. 897264 2. 900067 3. 00384 2. 949563 2. 934683 3. 119512  
11752287\_ 7. 690673 7. 684394 7. 797767 7. 624785 7. 605822 7. 674138  
11752288\_ 6. 02761 6. 12306 6. 086694 6. 018553 6. 049552 6. 159771  
11752289\_ 7. 946872 7. 779776 7. 927765 7. 345312 7. 353363 7. 25693  
11752290\_ 7. 099734 6. 94098 6. 994297 5. 723241 5. 36323 5. 250529  
11752291\_ 5. 638623 5. 433252 5. 560222 5. 344209 5. 297498 5. 283827  
11752292\_ 7. 469641 7. 40184 7. 589926 7. 417811 7. 442528 7. 45878  
11752293\_ 6. 542681 6. 396837 6. 546932 5. 685391 5. 784672 5. 639274  
11752294\_ 4. 840066 4. 665182 4. 548938 4. 558172 4. 509762 4. 555942  
11752295\_ 3. 389586 3. 492637 3. 28217 3. 231011 3. 318024 3. 375713  
11752296\_ 9. 581765 9. 537856 9. 614476 9. 200765 9. 306071 9. 194828  
11752297\_ 5. 073374 5. 242099 5. 105389 5. 038854 5. 095484 5. 164104  
11752298\_ 5. 926672 5. 98383 6. 052268 5. 977901 5. 960076 5. 989555  
11752299\_ 6. 41552 6. 376615 6. 498981 6. 263567 6. 337638 6. 33679  
11752300\_ 5. 559982 5. 575647 5. 54183 5. 622216 5. 670605 5. 686807  
11752301\_ 6. 314832 6. 284727 6. 138696 6. 451007 6. 40929 6. 33568  
11752302\_ 6. 276366 6. 186428 6. 311767 6. 033622 5. 907466 6. 016859  
11752303\_ 6. 886692 6. 872436 6. 906777 6. 886692 6. 872863 6. 875155  
11752304\_ 4. 24273 4. 257725 4. 269742 3. 987724 4. 12698 3. 946149  
11752305\_ 6. 681705 6. 740085 6. 902502 7. 05884 7. 104983 7. 001455  
11752306\_ 6. 297035 6. 21008 6. 435855 6. 374438 6. 429819 6. 302695  
11752307\_ 4. 38199 4. 448184 4. 536844 4. 470181 4. 558818 4. 45798  
11752308\_ 3. 506687 3. 398511 3. 604646 3. 784046 3. 736571 3. 604646  
11752309\_ 5. 28471 5. 552604 5. 430094 5. 40983 5. 27888 5. 375125  
11752310\_ 6. 225513 6. 385355 6. 136035 6. 499383 6. 584888 6. 424734  
11752311\_ 5. 815447 5. 936873 5. 902183 5. 938095 5. 914072 5. 93556  
11752312\_ 4. 273959 4. 426938 4. 368154 4. 555587 4. 539506 4. 598904  
11752313\_ 2. 733282 2. 815928 3. 048945 2. 718322 3. 044701 3. 009821  
11752314\_ 7. 270686 7. 216219 7. 232922 7. 31107 7. 325233 7. 35511  
11752315\_ 5. 831681 5. 7972 5. 783304 5. 812799 5. 806656 5. 803343  
11752316\_ 5. 687857 5. 70138 5. 609364 5. 934061 5. 997216 5. 986244  
11752317\_ 8. 290478 8. 178679 8. 264224 8. 000099 8. 044703 8. 054032  
11752318\_ 6. 15289 6. 136777 6. 228131 6. 362126 6. 3302 6. 321668  
11752319\_ 5. 435154 5. 284719 5. 223377 5. 554636 5. 458321 5. 678397  
11752320\_ 5. 860132 5. 820895 5. 676992 6. 087032 5. 994498 6. 10684  
11752321\_ 5. 148221 4. 862925 5. 216742 4. 980934 4. 933087 4. 950259  
11752322\_ 7. 146674 7. 170967 7. 144381 7. 115664 7. 184794 7. 153011  
11752323\_ 3. 644622 3. 892812 3. 967675 3. 902079 3. 812494 4. 002037  
11752324\_ 4. 430635 4. 353026 4. 287593 4. 453278 4. 430635 4. 532038  
11752325\_ 5. 55549 5. 409597 5. 519829 5. 519829 5. 543809 5. 562852  
11752326\_ 4. 426337 4. 468801 4. 589279 4. 229406 4. 31037 4. 229406  
11752327\_ 6. 323993 6. 334668 6. 300643 5. 72319 5. 611674 5. 797367  
11752328\_ 6. 41643 6. 251344 6. 475581 5. 911083 5. 948207 6. 111401

11752329\_ 4.70655 4.817157 4.682528 4.715455 4.664572 4.710021  
11752330\_ 7.114403 7.078044 7.194458 7.111124 7.101047 7.113692  
11752331\_ 9.810667 9.751904 9.82119 9.48283 9.476736 9.483426  
11752332\_ 4.191415 4.048334 4.130011 4.143735 4.137219 4.407255  
11752333\_ 7.39503 7.35726 7.420892 7.788568 7.708857 7.788004  
11752334\_ 7.192848 7.144608 7.230373 6.715461 6.726054 6.752287  
11752335\_ 7.967931 7.984865 8.015053 7.474418 7.520109 7.549045  
11752336\_ 7.15134 7.142898 7.362155 6.776031 6.767566 6.828655  
11752337\_ 5.763634 5.840266 5.68023 5.810686 5.846154 5.849541  
11752338\_ 5.960291 5.800384 6.011007 5.674222 5.794723 5.737802  
11752339\_ 4.288286 4.468324 3.842254 4.335642 4.250002 4.417045  
11752340\_ 10.44773 10.43335 10.47328 10.47638 10.5511 10.51392  
11752341\_ 4.99921 4.906404 4.944051 4.998032 5.098022 4.983426  
11752342\_ 10.68303 10.6152 10.6552 10.84129 10.86369 10.87144  
11752343\_ 5.533057 5.783818 5.681009 5.738669 5.72595 5.69899  
11752344\_ 5.050017 5.097929 4.884441 5.32363 5.404643 5.404126  
11752345\_ 2.830683 2.925688 2.874619 2.834993 2.798956 2.783863  
11752346\_ 7.397576 7.340071 7.45117 7.220733 7.252564 7.231437  
11752347\_ 7.541455 7.425079 7.586768 7.399419 7.429851 7.5286  
11752348\_ 3.818401 4.036411 4.019323 3.95812 4.135724 4.011673  
11752349\_ 8.520035 8.489369 8.427233 8.173572 8.185566 8.193277  
11752350\_ 6.609476 6.387592 6.522039 5.861309 5.843595 5.855211  
11752351\_ 7.380937 7.151783 7.341597 7.07714 7.12794 7.031531  
11752352\_ 2.208592 2.09589 2.225584 2.189011 2.127603 1.927453  
11752353\_ 5.334138 5.188346 5.187064 5.309965 5.297498 5.274189  
11752354\_ 4.805981 5.04071 4.824195 4.324425 4.275543 4.396443  
11752355\_ 5.845365 5.906815 6.051643 5.562168 5.609647 5.673096  
11752356\_ 6.547993 6.373789 6.479199 6.174551 6.216157 6.044859  
11752357\_ 7.117098 7.055212 7.068029 6.727768 6.608407 6.6822  
11752358\_ 2.47102 2.105967 2.241314 2.349362 2.257711 2.197412  
11752359\_ 9.206135 9.170305 9.168696 9.080505 9.113912 9.074768  
11752360\_ 9.358764 9.345394 9.344928 9.211786 9.201343 9.225818  
11752361\_ 5.770587 5.781808 5.896454 4.887759 4.916822 4.907817  
11752362\_ 8.375779 8.361769 8.42902 8.263992 8.272719 8.098407  
11752363\_ 8.511074 8.422005 8.54775 8.309379 8.355658 8.266897  
11752364\_ 6.279712 6.403721 6.318592 6.414863 6.429014 6.263673  
11752365\_ 4.721693 4.792195 4.88241 4.787975 4.798511 5.083279  
11752366\_ 3.949965 3.690265 3.614687 4.188316 4.165835 4.198837  
11752367\_ 5.285218 5.257419 5.14665 5.564974 5.528171 5.549233  
11752368\_ 7.244312 7.200167 7.180732 7.352455 7.359358 7.343151  
11752369\_ 12.05024 12.02943 12.03837 12.01273 12.05404 12.0163  
11752370\_ 11.59093 11.52874 11.57785 11.56619 11.57995 11.55229  
11752371\_ 6.557441 6.601682 6.558284 6.361935 6.382725 6.422507  
11752372\_ 5.164549 5.12242 5.260648 4.943311 4.923154 4.94619  
11752373\_ 6.239 6.246256 6.048095 6.252855 6.246256 6.30093  
11752374\_ 4.833138 4.831619 4.532282 4.897534 4.773011 4.628393  
11752375\_ 5.145912 5.049937 5.094833 5.061026 5.11527 5.195448  
11752376\_ 4.643717 4.757514 4.52373 4.571688 4.558548 4.583575  
11752377\_ 7.02577 6.981672 7.033341 7.085904 7.11321 7.104321  
11752378\_ 4.036123 3.941954 3.494479 3.941635 4.087 3.954763  
11752379\_ 6.151964 5.866651 6.162547 5.723381 5.582485 5.760749

11752380\_ 4. 73026 4. 814017 4. 739011 4. 863031 4. 931875 4. 705094  
11752381\_ 5. 14965 5. 138641 4. 983383 5. 14965 5. 194059 5. 173273  
11752382\_ 7. 38062 7. 382725 7. 522354 6. 168397 6. 054888 6. 179931  
11752383\_ 5. 547119 5. 456782 5. 431809 5. 374755 5. 368414 5. 442778  
11752384\_ 10. 20194 10. 22848 10. 17713 9. 754762 9. 798655 9. 798336  
11752385\_ 4. 903886 5. 032906 4. 892007 5. 177436 5. 181922 5. 232885  
11752386\_ 6. 330849 6. 325447 6. 378411 5. 992342 6. 002146 5. 858063  
11752387\_ 7. 666978 7. 557242 7. 555462 6. 777268 6. 611116 6. 654579  
11752388\_ 7. 054903 6. 945632 7. 003837 7. 26387 7. 241814 7. 191425  
11752389\_ 6. 021041 6. 334364 6. 119304 6. 098484 6. 129513 6. 094413  
11752390\_ 6. 894878 6. 898793 6. 841067 7. 008431 7. 033368 7. 043999  
11752391\_ 2. 82309 2. 945237 2. 701499 2. 9562 3. 079996 2. 722454  
11752392\_ 5. 867252 5. 762722 5. 960106 5. 770682 5. 894697 5. 87306  
11752393\_ 5. 845365 6. 033313 6. 084716 6. 018553 6. 025952 5. 999557  
11752394\_ 2. 678037 2. 822536 2. 736636 2. 937301 2. 912551 2. 851601  
11752395\_ 4. 957055 4. 8258 4. 908423 4. 801345 4. 930842 5. 049941  
11752396\_ 4. 22407 4. 065344 4. 349793 3. 871994 3. 60742 4. 001496  
11752397\_ 5. 408889 5. 635661 5. 510028 5. 77891 5. 717273 5. 618628  
11752398\_ 4. 411747 4. 423061 4. 368068 4. 416933 4. 33891 4. 423786  
11752399\_ 9. 343666 9. 373053 9. 342528 9. 154455 9. 174969 9. 130875  
11752400\_ 5. 058699 5. 132542 5. 25312 5. 123172 5. 13075 5. 264161  
11752401\_ 6. 170315 6. 321355 6. 005619 6. 019834 6. 064991 6. 097908  
11752402\_ 5. 520837 5. 521892 5. 359917 5. 605943 5. 502027 5. 500385  
11752403\_ 4. 472069 4. 40461 4. 510104 4. 60548 4. 685741 4. 681541  
11752404\_ 4. 261264 3. 957379 4. 209328 4. 200509 4. 377333 4. 526857  
11752405\_ 7. 345309 7. 389839 7. 266835 7. 479602 7. 426478 7. 450799  
11752406\_ 6. 884619 6. 820676 6. 909946 6. 915432 6. 933117 6. 946361  
11752407\_ 7. 248855 7. 287653 7. 3473 7. 896941 8. 006942 7. 90512  
11752408\_ 5. 558737 5. 554436 5. 639546 5. 701718 5. 58905 5. 628306  
11752409\_ 8. 802684 8. 709267 8. 782986 8. 608142 8. 57226 8. 511469  
11752410\_ 4. 316407 4. 204872 4. 319236 4. 33233 4. 403507 4. 437386  
11752411\_ 4. 105452 4. 206934 4. 088242 4. 264317 4. 335614 4. 052123  
11752412\_ 7. 28973 7. 220376 7. 257445 7. 652701 7. 677376 7. 772983  
11752413\_ 4. 88527 5. 021909 4. 94359 4. 956683 4. 979814 4. 967817  
11752414\_ 3. 703098 3. 756668 3. 850246 3. 925181 3. 956572 3. 893727  
11752415\_ 3. 848684 3. 895611 4. 064759 3. 969031 3. 999156 4. 097493  
11752416\_ 2. 62904 2. 624347 2. 67811 2. 722972 2. 62904 2. 62904  
11752417\_ 10. 05856 9. 983052 10. 01374 10. 26582 10. 29542 10. 27454  
11752418\_ 4. 984932 5. 013996 5. 034692 5. 211399 5. 101479 5. 215878  
11752419\_ 5. 382932 5. 428978 5. 501799 4. 946486 5. 002675 5. 11527  
11752420\_ 5. 74983 5. 570492 5. 715211 5. 287141 5. 210331 5. 155387  
11752421\_ 4. 258037 4. 538004 4. 41011 4. 631493 4. 568414 4. 546078  
11752422\_ 5. 103194 5. 090033 5. 095873 5. 419233 5. 504866 5. 333831  
11752423\_ 4. 558244 4. 752452 4. 577409 4. 886132 4. 74574 4. 984669  
11752424\_ 5. 643713 5. 584813 5. 697909 5. 506869 5. 611018 5. 654571  
11752425\_ 8. 942421 8. 841356 8. 902025 8. 799944 8. 894275 8. 836149  
11752426\_ 3. 925181 3. 938263 4. 027085 3. 842274 3. 805666 3. 876178  
11752427\_ 4. 822279 5. 053006 4. 905873 4. 874234 5. 058999 4. 959543  
11752428\_ 4. 721366 4. 815585 5. 024076 4. 804055 4. 896155 4. 815585  
11752429\_ 6. 988977 7. 034674 7. 018608 6. 684584 6. 573585 6. 662017  
11752430\_ 4. 379307 4. 390877 4. 315175 4. 49155 4. 559885 4. 472511

11752431\_ 5. 333723 5. 128666 5. 312349 5. 356383 5. 453793 5. 433457  
11752432\_ 5. 489938 5. 56206 5. 481204 5. 529024 5. 537282 5. 474903  
11752433\_ 5. 737237 5. 859459 5. 738855 6. 013288 6. 014825 6. 026483  
11752434\_ 8. 041499 8. 04244 8. 094134 7. 906718 7. 844506 7. 87987  
11752435\_ 8. 744495 8. 787721 8. 744256 8. 531658 8. 570059 8. 51753  
11752436\_ 7. 192624 7. 194212 7. 244707 6. 977715 6. 971366 6. 977878  
11752437\_ 3. 802368 3. 818401 3. 741545 2. 983028 3. 137707 3. 290188  
11752438\_ 6. 401096 6. 509715 6. 496983 6. 480761 6. 533929 6. 430931  
11752439\_ 9. 311984 9. 253085 9. 218727 8. 82788 8. 773161 8. 802723  
11752440\_ 6. 300643 6. 282085 6. 282085 6. 425225 6. 40027 6. 290936  
11752441\_ 5. 926672 6. 209905 6. 048104 6. 173161 6. 180759 6. 056785  
11752442\_ 6. 808827 6. 760387 6. 89808 6. 756752 6. 672355 6. 720168  
11752443\_ 4. 06045 4. 018702 3. 842589 3. 885266 3. 879309 4. 091169  
11752444\_ 6. 180595 6. 24895 6. 260106 5. 723241 5. 828744 5. 772867  
11752445\_ 6. 185613 6. 124036 6. 20433 5. 730106 5. 594429 5. 648514  
11752446\_ 3. 726215 3. 667307 3. 612378 3. 70511 3. 79383 3. 840475  
11752447\_ 4. 565886 4. 347363 4. 146187 4. 416257 4. 466949 4. 470714  
11752448\_ 9. 488329 9. 544319 9. 518784 9. 618197 9. 57454 9. 491019  
11752449\_ 9. 66393 9. 648063 9. 672007 9. 680738 9. 69603 9. 63346  
11752450\_ 4. 238751 4. 331207 3. 987582 4. 365565 4. 199595 4. 02507  
11752451\_ 6. 523784 6. 692701 6. 538007 6. 657603 6. 703935 6. 728597  
11752452\_ 4. 368848 4. 233153 4. 21683 4. 452069 4. 449342 4. 408867  
11752453\_ 7. 29926 7. 3076 7. 390259 7. 405242 7. 421921 7. 407  
11752454\_ 4. 301415 4. 334527 4. 153221 4. 459939 4. 524318 4. 347179  
11752455\_ 4. 643717 4. 6503 4. 608017 4. 602602 4. 614729 4. 584933  
11752456\_ 8. 592436 8. 557908 8. 669714 8. 869653 8. 898966 8. 882899  
11752457\_ 2. 927539 2. 590154 2. 590154 2. 605516 2. 567114 2. 754136  
11752458\_ 6. 02355 5. 946653 6. 120945 5. 081207 4. 992839 5. 09413  
11752459\_ 7. 432668 7. 443324 7. 397501 7. 239803 7. 269645 7. 232049  
11752460\_ 3. 346504 3. 404447 3. 514573 3. 437175 3. 306585 3. 199692  
11752461\_ 7. 709004 7. 708112 7. 756316 7. 209366 7. 163029 7. 158853  
11752462\_ 7. 018675 7. 022345 7. 028785 7. 133829 7. 046545 7. 043795  
11752463\_ 6. 145103 6. 153619 6. 17981 6. 522345 6. 517099 6. 417769  
11752464\_ 5. 832308 5. 662196 5. 6088 5. 299912 5. 297498 5. 380413  
11752465\_ 6. 012655 5. 923127 6. 018553 5. 674411 5. 612823 5. 822385  
11752466\_ 6. 865659 6. 870201 6. 884794 6. 824654 6. 700371 6. 775526  
11752467\_ 4. 827879 4. 88966 4. 988019 4. 791151 4. 965565 4. 914557  
11752468\_ 5. 815523 5. 744932 5. 779873 6. 160457 6. 174353 6. 245831  
11752469\_ 5. 23601 5. 11527 5. 213999 5. 220515 5. 170491 5. 257783  
11752470\_ 10. 91379 10. 89175 10. 90421 10. 60984 10. 67558 10. 60842  
11752471\_ 5. 018701 5. 046705 4. 982619 5. 174072 5. 176569 5. 080341  
11752472\_ 6. 440175 6. 314154 6. 426433 6. 447487 6. 290879 6. 491371  
11752473\_ 6. 561639 6. 42874 6. 557068 6. 523267 6. 586178 6. 612237  
11752474\_ 3. 856807 3. 747927 3. 665903 3. 756925 3. 801444 3. 738038  
11752475\_ 2. 647259 2. 718322 2. 895671 2. 589026 2. 703811 2. 528259  
11752476\_ 2. 601251 2. 598452 2. 614249 2. 735943 2. 610708 2. 498681  
11752477\_ 6. 513418 6. 39809 6. 593333 6. 411445 6. 495868 6. 478504  
11752478\_ 4. 611811 4. 711677 4. 60121 4. 693068 4. 812996 4. 903629  
11752479\_ 3. 029858 3. 093978 2. 892313 2. 997005 3. 093048 3. 093048  
11752480\_ 5. 15399 5. 108817 5. 178088 5. 321148 5. 029529 5. 108117  
11752481\_ 9. 723368 9. 727354 9. 724348 9. 391233 9. 423048 9. 334194

11752482\_ 4. 572495 4. 568307 4. 589886 4. 588835 4. 597372 4. 470714  
11752483\_ 7. 903523 7. 747141 7. 899201 7. 68663 7. 70188 7. 721719  
11752484\_ 7. 753647 7. 579204 7. 645712 7. 621983 7. 529835 7. 616828  
11752485\_ 7. 612138 7. 413498 7. 657156 7. 522583 7. 673918 7. 599529  
11752486\_ 7. 069139 6. 994237 7. 026464 6. 993064 7. 046556 7. 077657  
11752487\_ 7. 404663 7. 280376 7. 464474 6. 922319 6. 871411 6. 872614  
11752488\_ 7. 549278 7. 450328 7. 488522 6. 65277 6. 776104 6. 791584  
11752489\_ 5. 137234 5. 573679 5. 134601 6. 137229 6. 01331 5. 976023  
11752490\_ 5. 845365 5. 779087 5. 650835 5. 839543 5. 900719 5. 987772  
11752491\_ 5. 43077 5. 448271 5. 384206 5. 375273 5. 42715 5. 481122  
11752492\_ 6. 270348 6. 022186 6. 12429 5. 213038 5. 095641 5. 133299  
11752493\_ 5. 932872 5. 987258 5. 963989 5. 914536 5. 995106 5. 963989  
11752494\_ 4. 748894 4. 724045 4. 722364 4. 728997 4. 735629 4. 801114  
11752495\_ 8. 058505 8. 042653 8. 064267 8. 054351 8. 071433 8. 091229  
11752496\_ 7. 52975 7. 520954 7. 592819 7. 449911 7. 566924 7. 444928  
11752497\_ 8. 340669 8. 350938 8. 460874 7. 869538 8. 15383 7. 911772  
11752498\_ 9. 490729 9. 465941 9. 439073 9. 484122 9. 483468 9. 490904  
11752499\_ 8. 57915 8. 581973 8. 634484 8. 291395 8. 27237 8. 281116  
11752500\_ 4. 695514 5. 0613 4. 826337 5. 019879 4. 918112 5. 052228  
11752501\_ 4. 070795 4. 199862 4. 055497 4. 260456 4. 200033 4. 124675  
11752502\_ 8. 839884 8. 736604 8. 844615 8. 74731 8. 716536 8. 648024  
11752503\_ 6. 995141 7. 039832 6. 889804 7. 244408 6. 960213 6. 89451  
11752504\_ 5. 070771 5. 086387 5. 072351 5. 070771 5. 151142 5. 062173  
11752505\_ 7. 894172 7. 770838 7. 784443 7. 661627 7. 781961 7. 801395  
11752506\_ 9. 222641 9. 162399 9. 209595 9. 314005 9. 324 9. 300875  
11752507\_ 10. 44236 10. 42425 10. 4398 10. 51576 10. 57603 10. 56652  
11752508\_ 9. 819881 9. 784201 9. 822934 9. 804598 9. 804845 9. 807884  
11752509\_ 10. 75187 10. 6806 10. 7383 10. 54732 10. 52962 10. 57211  
11752510\_ 10. 042 10. 06955 10. 11252 9. 919204 9. 966776 9. 956449  
11752511\_ 4. 774093 5. 033971 4. 885467 5. 025216 5. 149545 4. 94619  
11752512\_ 4. 922934 4. 874234 4. 888409 4. 839254 4. 890539 4. 712408  
11752513\_ 4. 836599 4. 694641 4. 596236 4. 76844 4. 78763 4. 762043  
11752514\_ 5. 861131 5. 791338 5. 817381 6. 042511 5. 987602 5. 962993  
11752515\_ 9. 523238 9. 414558 9. 509023 9. 434965 9. 444314 9. 42835  
11752516\_ 8. 476821 8. 365811 8. 460129 8. 21998 8. 270557 8. 27134  
11752517\_ 7. 818598 7. 773701 7. 816999 7. 731295 7. 741497 7. 843908  
11752518\_ 5. 699721 5. 476307 5. 741334 4. 926452 5. 321563 5. 031959  
11752519\_ 5. 321563 5. 370445 5. 047762 5. 274252 5. 350364 5. 14649  
11752520\_ 3. 229667 3. 003936 3. 372762 3. 214296 3. 21279 3. 276211  
11752521\_ 2. 78123 3. 14219 2. 864618 2. 980472 3. 162031 2. 952521  
11752522\_ 5. 704601 5. 667476 5. 691397 5. 839176 5. 625651 5. 789445  
11752523\_ 5. 894697 6. 087305 5. 833557 6. 147963 6. 115393 6. 094413  
11752524\_ 3. 684044 3. 616142 3. 806253 3. 887976 3. 886544 3. 740042  
11752525\_ 5. 620756 5. 530273 5. 77939 5. 768702 5. 711471 5. 821357  
11752526\_ 4. 646415 4. 778328 4. 643302 4. 741692 4. 700243 4. 75834  
11752527\_ 5. 126284 4. 945695 5. 11613 5. 177989 5. 106182 5. 331506  
11752528\_ 3. 764687 3. 754833 3. 62464 3. 764144 3. 815475 3. 7138  
11752529\_ 4. 138878 4. 293536 4. 312463 4. 382939 4. 309793 4. 188947  
11752530\_ 6. 077024 6. 0553 6. 044285 6. 049173 6. 158502 6. 118838  
11752531\_ 4. 986861 4. 9226 5. 074625 5. 139895 5. 226972 5. 013525  
11752532\_ 5. 954081 5. 733184 6. 065516 5. 768053 5. 476246 5. 654069

11752533\_ 5. 264477 5. 192683 5. 281325 5. 361449 5. 264462 5. 317998  
11752534\_ 4. 469799 4. 522597 4. 426119 4. 49872 4. 388571 4. 452272  
11752535\_ 9. 603638 9. 537739 9. 566373 8. 897359 8. 914943 8. 894758  
11752536\_ 2. 850317 2. 970297 3. 069179 2. 593818 2. 729509 2. 743833  
11752537\_ 4. 951607 4. 9569 4. 726358 4. 810217 4. 945646 4. 84545  
11752538\_ 2. 097445 1. 990664 1. 822135 2. 119841 2. 108225 1. 928937  
11752539\_ 2. 505672 2. 413121 2. 365119 2. 579356 2. 447165 2. 548241  
11752540\_ 7. 15019 7. 150168 7. 111137 7. 2757 7. 2354 7. 187591  
11752541\_ 6. 244666 6. 073788 6. 028531 6. 20396 6. 143907 6. 222214  
11752542\_ 4. 811196 4. 715963 4. 606793 4. 844368 4. 879338 4. 829119  
11752543\_ 7. 380526 7. 420016 7. 398377 7. 268908 7. 279177 7. 309242  
11752544\_ 8. 722449 8. 717363 8. 726732 8. 787134 8. 779247 8. 774132  
11752545\_ 9. 265762 9. 211392 9. 232642 8. 196771 8. 225347 8. 20054  
11752546\_ 6. 145303 6. 225513 6. 080688 6. 28983 6. 055711 6. 188834  
11752547\_ 5. 904537 5. 931622 5. 776407 5. 913875 6. 054964 5. 958291  
11752548\_ 3. 092869 3. 193406 2. 984026 2. 866286 2. 971533 2. 83198  
11752549\_ 3. 674968 3. 661991 3. 674968 3. 658929 3. 69409 3. 697038  
11752550\_ 11. 57041 11. 57171 11. 57378 11. 57393 11. 57073 11. 54615  
11752551\_ 4. 85953 4. 756482 4. 584933 4. 964114 4. 88567 4. 860077  
11752552\_ 8. 059768 7. 94722 8. 064164 7. 645022 7. 619955 7. 741612  
11752553\_ 4. 237246 4. 12444 4. 044413 4. 303573 4. 138502 4. 326142  
11752554\_ 7. 134883 7. 099734 7. 197473 7. 137 7. 02292 7. 099386  
11752555\_ 7. 979867 7. 931899 7. 980298 7. 434814 7. 420636 7. 458024  
11752556\_ 6. 532504 6. 267764 6. 577867 5. 663793 5. 790037 5. 704919  
11752557\_ 7. 483979 7. 409791 7. 516955 6. 558142 6. 672702 6. 557068  
11752558\_ 3. 011483 2. 980411 2. 828849 2. 966457 2. 996808 2. 900039  
11752559\_ 7. 467174 7. 426223 7. 492143 7. 152175 7. 279274 7. 280725  
11752560\_ 7. 250842 7. 294828 7. 107434 7. 25466 7. 321564 7. 265124  
11752561\_ 8. 726727 8. 652697 8. 708154 8. 533198 8. 573151 8. 515947  
11752562\_ 8. 445821 8. 411995 8. 420156 8. 169822 8. 207231 8. 192524  
11752563\_ 6. 077303 6. 066319 6. 070288 5. 939523 6. 04632 6. 141534  
11752564\_ 3. 33909 3. 489009 3. 360801 3. 659629 3. 482506 3. 436563  
11752565\_ 2. 808347 3. 017697 2. 629632 2. 741955 2. 82247 2. 856096  
11752566\_ 7. 65776 7. 72828 7. 693664 7. 568552 7. 617194 7. 688408  
11752567\_ 4. 467772 4. 531989 4. 37384 4. 487173 4. 794834 4. 563758  
11752568\_ 4. 609561 4. 643733 4. 605985 4. 571813 4. 658712 4. 53078  
11752569\_ 3. 928888 3. 969085 3. 977597 3. 86451 4. 069335 4. 129258  
11752570\_ 7. 363878 7. 230537 7. 397006 6. 885003 6. 696771 6. 790742  
11752571\_ 4. 982035 4. 800464 4. 95761 5. 004068 4. 889149 5. 041848  
11752572\_ 8. 442565 8. 409133 8. 486244 8. 79871 8. 84659 8. 795681  
11752573\_ 5. 554659 5. 614563 5. 574259 5. 614563 5. 584813 5. 638943  
11752574\_ 5. 382628 5. 426276 5. 354273 5. 367315 5. 359091 5. 455713  
11752575\_ 6. 718474 6. 56684 6. 769906 6. 592475 6. 629095 6. 6894  
11752576\_ 5. 245189 5. 218064 5. 122191 5. 218064 5. 359558 5. 291991  
11752577\_ 9. 166987 9. 100332 9. 107466 9. 289249 9. 199272 9. 30982  
11752578\_ 8. 174349 8. 043893 8. 11308 8. 290169 8. 29283 8. 266916  
11752579\_ 4. 759596 4. 742833 4. 700324 4. 76104 4. 874417 4. 780685  
11752580\_ 7. 684611 7. 484342 7. 689118 7. 021769 6. 99155 7. 079199  
11752581\_ 4. 668995 4. 601434 4. 628104 5. 026794 4. 719991 4. 723126  
11752582\_ 4. 816571 4. 66025 4. 781233 4. 754182 4. 851155 4. 815683  
11752583\_ 4. 926326 4. 893741 4. 695687 5. 041715 5. 156318 5. 088016

11752584\_ 6. 965832 6. 874408 6. 864642 6. 59551 6. 637372 6. 617539  
11752585\_ 6. 301112 6. 497107 6. 398257 6. 51218 6. 529802 6. 56545  
11752586\_ 5. 44773 5. 414869 5. 249082 5. 487697 5. 511156 5. 519939  
11752587\_ 6. 085307 6. 037256 6. 033644 6. 342207 6. 403049 6. 314376  
11752588\_ 8. 352471 8. 3884 8. 319141 8. 665318 8. 590267 8. 585823  
11752589\_ 4. 348818 4. 459939 4. 37312 4. 421823 4. 272563 4. 305941  
11752590\_ 2. 895309 2. 620575 2. 714507 2. 946608 2. 896067 2. 693427  
11752591\_ 5. 172544 5. 0961 5. 329148 5. 28601 5. 533408 5. 319045  
11752592\_ 7. 484045 7. 380091 7. 459542 7. 363958 7. 368799 7. 396157  
11752593\_ 8. 152085 8. 132534 8. 156934 7. 940502 7. 988183 7. 924172  
11752594\_ 4. 548505 4. 573096 4. 67687 4. 707234 4. 607712 4. 377469  
11752595\_ 10. 86356 10. 89751 10. 91944 10. 81742 10. 83068 10. 81224  
11752596\_ 7. 637555 7. 607325 7. 480213 7. 523523 7. 586933 7. 626889  
11752597\_ 4. 833159 4. 794056 4. 706535 4. 91457 4. 726107 4. 784499  
11752598\_ 6. 523847 6. 448936 6. 553249 5. 88664 5. 827488 5. 940526  
11752599\_ 2. 056309 2. 06675 2. 156268 2. 127178 2. 14732 1. 995297  
11752600\_ 5. 401067 5. 540024 5. 449357 5. 398825 5. 609655 5. 423281  
11752601\_ 2. 851311 2. 983988 2. 849492 3. 209806 3. 21279 2. 896754  
11752602\_ 6. 177315 6. 223573 6. 223573 6. 35993 6. 255032 6. 275149  
11752603\_ 8. 331021 8. 450491 8. 356914 8. 49031 8. 520461 8. 423948  
11752604\_ 9. 17058 9. 142632 9. 189816 9. 199334 9. 175856 9. 18228  
11752605\_ 4. 950486 5. 058738 4. 946708 4. 967468 5. 152368 5. 073036  
11752606\_ 5. 667067 5. 676391 5. 564361 5. 701331 5. 760151 5. 566847  
11752607\_ 7. 485998 7. 450547 7. 474077 7. 237332 7. 337937 7. 358974  
11752608\_ 7. 077515 7. 078542 7. 115684 6. 965727 6. 956076 6. 905137  
11752609\_ 6. 78036 6. 677395 6. 731599 7. 019333 7. 014636 7. 027128  
11752610\_ 4. 284665 4. 313496 4. 210915 4. 764093 4. 636212 4. 707848  
11752611\_ 8. 898097 8. 791269 8. 763749 8. 556921 8. 593068 8. 521581  
11752612\_ 6. 330247 6. 394953 6. 363177 6. 344242 6. 60307 6. 353623  
11752613\_ 5. 104389 4. 9694 5. 00624 5. 26034 5. 2222 5. 111669  
11752614\_ 6. 058753 6. 055691 6. 045198 6. 129855 6. 185611 6. 118357  
11752615\_ 5. 857772 5. 87844 5. 98086 5. 676491 5. 838357 5. 754755  
11752616\_ 6. 359498 6. 379886 6. 363132 5. 988274 6. 147556 6. 191897  
11752617\_ 6. 914267 6. 809285 6. 999464 6. 884692 6. 936696 6. 917898  
11752618\_ 7. 280725 7. 293514 7. 386004 7. 360438 7. 39277 7. 43035  
11752619\_ 2. 420926 2. 328497 2. 527728 2. 671905 2. 561635 2. 599197  
11752620\_ 9. 001868 8. 98133 9. 019114 8. 733814 8. 776397 8. 769294  
11752621\_ 5. 830434 5. 875568 5. 860261 5. 783945 5. 930679 5. 774384  
11752622\_ 5. 842949 5. 9116 6. 039121 6. 215347 6. 206103 6. 105561  
11752623\_ 6. 623162 6. 481046 6. 634134 6. 604104 6. 683502 6. 628697  
11752624\_ 5. 655203 5. 564075 5. 596437 5. 799203 5. 820922 5. 74276  
11752625\_ 6. 25787 6. 174442 6. 198133 6. 176557 6. 192764 6. 181478  
11752626\_ 6. 14882 6. 118838 6. 063727 6. 214412 6. 256399 6. 424088  
11752627\_ 3. 80475 3. 89936 3. 939017 3. 955858 3. 969526 4. 051787  
11752628\_ 7. 735522 7. 670366 7. 77087 7. 81284 7. 854355 7. 830699  
11752629\_ 9. 319881 9. 313008 9. 397432 9. 268218 9. 230098 9. 195738  
11752630\_ 10. 44796 10. 41078 10. 45079 10. 39856 10. 33826 10. 32719  
11752631\_ 3. 330194 3. 417384 3. 272287 3. 543499 3. 622165 3. 444341  
11752632\_ 8. 232531 8. 281337 8. 259172 8. 807833 8. 857556 8. 815064  
11752633\_ 5. 043777 4. 935486 4. 867931 5. 131081 5. 218362 5. 155864  
11752634\_ 7. 650152 7. 482432 7. 583831 7. 495461 7. 502657 7. 517587

11752635\_ 5. 704919 5. 603652 5. 704887 5. 923864 5. 768053 5. 781531  
11752636\_ 8. 442688 8. 338076 8. 431675 8. 177242 8. 211864 8. 182008  
11752637\_ 5. 413381 5. 438089 5. 413381 5. 374268 5. 492435 5. 349243  
11752638\_ 5. 778718 5. 851042 5. 850486 5. 807255 5. 919912 5. 721513  
11752639\_ 5. 411213 5. 477539 5. 358748 5. 433906 5. 463857 5. 502584  
11752640\_ 4. 30666 4. 704183 4. 497206 4. 606487 4. 606255 4. 532584  
11752641\_ 3. 819271 3. 419796 3. 551921 3. 661325 3. 964717 3. 715459  
11752642\_ 5. 360736 5. 51621 5. 469302 5. 445951 5. 470261 5. 454442  
11752643\_ 5. 138466 5. 203382 4. 998642 5. 142289 5. 06012 5. 095165  
11752644\_ 9. 707719 9. 734313 9. 691297 9. 629731 9. 621918 9. 582487  
11752645\_ 10. 28099 10. 19027 10. 25369 10. 19162 10. 23584 10. 179  
11752646\_ 4. 13594 4. 450958 4. 355091 4. 382193 4. 395116 4. 424726  
11752647\_ 4. 990204 5. 228627 4. 959256 5. 112677 5. 078338 5. 001233  
11752648\_ 2. 450566 2. 496925 2. 450566 2. 373704 2. 577432 2. 51339  
11752649\_ 7. 485672 7. 335702 7. 468957 7. 522419 7. 563979 7. 540297  
11752650\_ 5. 894697 5. 938482 5. 927783 5. 60743 5. 698193 5. 648007  
11752651\_ 3. 334558 3. 441953 3. 57497 3. 332711 3. 376615 3. 334558  
11752652\_ 5. 574851 5. 367897 5. 563461 5. 848214 5. 820052 5. 807637  
11752653\_ 5. 587915 5. 741157 5. 593562 5. 655407 5. 631654 5. 654265  
11752654\_ 6. 182265 6. 180019 6. 260513 6. 318901 6. 170419 6. 288068  
11752655\_ 3. 739333 3. 576087 3. 341244 3. 665163 3. 606313 3. 532149  
11752656\_ 5. 228266 5. 196319 5. 26034 6. 085539 6. 176949 6. 061869  
11752657\_ 4. 610636 4. 50246 4. 577725 4. 52373 4. 70213 4. 732905  
11752658\_ 4. 763543 4. 702728 4. 68746 4. 685788 4. 651327 4. 689312  
11752659\_ 4. 419335 4. 427205 4. 54208 4. 403595 4. 395725 4. 370449  
11752660\_ 4. 476886 4. 471433 4. 358114 4. 635178 4. 577123 4. 593125  
11752661\_ 7. 34126 7. 398307 7. 29143 7. 454079 7. 463241 7. 413568  
11752662\_ 7. 088322 6. 975313 7. 039671 7. 099886 7. 281362 7. 171009  
11752663\_ 5. 409222 5. 371488 5. 628046 5. 344399 5. 280608 5. 464386  
11752664\_ 5. 01381 5. 149545 4. 946618 5. 513368 5. 459389 5. 595411  
11752665\_ 6. 633037 6. 642226 6. 623848 7. 163839 7. 206631 7. 245578  
11752666\_ 5. 794746 5. 732315 5. 912243 5. 605504 5. 675127 5. 682947  
11752667\_ 3. 691283 3. 667235 3. 504572 3. 915911 3. 703087 3. 705625  
11752668\_ 6. 735743 6. 610579 6. 671057 6. 282224 6. 274616 6. 334054  
11752669\_ 7. 467245 7. 47344 7. 561347 7. 146306 7. 193403 7. 211029  
11752670\_ 7. 045906 7. 065581 7. 053419 7. 823729 7. 881637 7. 90461  
11752671\_ 5. 408903 5. 572374 5. 478981 5. 570796 5. 591823 5. 584688  
11752672\_ 6. 126283 6. 06166 6. 097498 6. 225033 6. 253807 6. 224633  
11752673\_ 10. 41181 10. 35443 10. 39182 10. 54308 10. 56168 10. 53915  
11752674\_ 4. 846573 5. 094538 4. 817103 4. 929242 5. 128751 4. 971102  
11752675\_ 7. 416814 7. 519525 7. 442902 7. 586909 7. 573609 7. 549425  
11752676\_ 7. 924559 7. 945182 7. 95745 8. 041108 8. 044458 8. 076922  
11752677\_ 9. 691939 9. 65281 9. 68992 9. 768763 9. 803753 9. 788253  
11752678\_ 4. 30234 4. 258584 4. 171354 4. 229716 4. 34739 4. 072697  
11752679\_ 5. 627072 5. 711771 5. 760238 5. 346178 5. 57796 5. 588955  
11752680\_ 8. 073755 7. 946576 8. 008153 7. 335227 7. 294421 7. 27365  
11752681\_ 8. 690518 8. 704073 8. 705353 8. 131451 8. 144773 8. 171498  
11752682\_ 4. 347179 4. 516103 4. 246806 4. 438556 4. 472401 4. 584933  
11752683\_ 7. 594514 7. 488866 7. 518732 6. 595468 6. 482046 6. 471634  
11752684\_ 1. 824697 1. 804393 1. 787489 1. 883531 1. 881421 1. 90417  
11752685\_ 2. 322353 2. 337647 2. 351748 2. 331582 2. 25483 2. 374799



11752686\_ 2.432438 2.444874 2.47102 2.409346 2.379615 2.500225  
11752687\_ 4.556847 4.8251 4.401656 4.730322 4.811672 4.837713  
11752688\_ 5.32148 5.417227 5.300691 5.421225 5.426098 5.363794  
11752689\_ 7.158955 7.037966 7.152973 7.008272 6.952795 7.043412  
11752690\_ 7.009866 6.888261 7.043944 6.882344 6.881779 6.814587  
11752691\_ 5.32162 5.507819 5.252734 5.472482 5.676998 5.389997  
11752692\_ 7.70756 7.75139 7.740983 7.445597 7.514346 7.457111  
11752693\_ 6.225868 6.313134 6.282265 6.649111 6.783767 6.752593  
11752694\_ 7.173723 7.129743 7.200108 7.709196 7.802039 7.662463  
11752695\_ 3.28563 3.13181 3.287449 3.305454 3.425142 3.316621  
11752696\_ 8.385758 8.325391 8.342934 8.170199 8.262132 8.261224  
11752697\_ 7.796934 7.73128 7.811329 7.722801 7.691937 7.732383  
11752698\_ 7.054489 7.009306 7.010403 6.943475 6.992031 6.924052  
11752699\_ 6.397946 6.446148 6.408641 6.328412 6.418789 6.391304  
11752700\_ 8.513863 8.54596 8.474562 7.765944 7.86209 7.810421  
11752701\_ 4.54698 4.547629 4.49091 4.591087 4.717763 4.682749  
11752702\_ 3.660894 3.777499 3.750542 3.883312 3.974746 3.949205  
11752703\_ 5.219753 5.106351 5.053916 5.293319 5.500188 5.277903  
11752704\_ 3.441743 3.509743 3.20062 3.28885 3.480234 3.326275  
11752705\_ 6.469891 6.582751 6.407793 6.676355 6.737996 6.727889  
11752706\_ 6.56978 6.676712 6.558853 6.67471 6.712603 6.661063  
11752707\_ 6.358071 6.385838 6.373531 6.705111 6.714687 6.622458  
11752708\_ 5.973643 5.98341 6.036967 5.868908 5.965557 5.98341  
11752709\_ 4.613307 4.385749 4.678028 4.190096 4.360735 4.374053  
11752710\_ 4.941287 4.763543 5.073036 4.525121 4.699168 4.708168  
11752711\_ 3.947813 3.958624 3.847277 3.78651 3.927614 3.648226  
11752712\_ 3.284138 3.284138 3.524638 3.751103 3.888355 3.596453  
11752713\_ 3.906161 3.503743 4.176591 4.009922 4.347179 4.133052  
11752714\_ 8.485964 8.392106 8.474914 8.452894 8.410483 8.427898  
11752715\_ 9.943558 9.920334 9.897287 9.846005 9.847989 9.831647  
11752716\_ 10.58753 10.52489 10.55859 10.56722 10.59337 10.60205  
11752717\_ 10.27681 10.24404 10.28874 10.34374 10.31464 10.28264  
11752718\_ 8.072383 8.016781 8.015923 7.900944 7.870163 7.834966  
11752719\_ 6.599839 6.611435 6.541665 6.687788 6.73812 6.597621  
11752720\_ 6.523071 6.612181 6.466475 6.504947 6.557068 6.58433  
11752721\_ 8.971372 8.890054 8.991908 8.808913 8.759402 8.855923  
11752722\_ 4.939183 4.78205 4.830001 4.80094 4.587195 4.837548  
11752723\_ 2.614747 2.773295 2.709306 2.43352 2.253155 2.606526  
11752724\_ 4.966405 4.987548 4.97386 4.871992 5.029529 5.037666  
11752725\_ 13.26335 13.29005 13.24605 13.22006 13.24488 13.22292  
11752726\_ 13.28986 13.29319 13.28962 13.2788 13.2884 13.26331  
11752727\_ 3.725323 3.821032 3.838302 3.930087 3.783176 3.894723  
11752728\_ 6.423548 6.358613 6.245287 6.569244 6.597988 6.585485  
11752729\_ 4.116258 4.298172 4.192671 4.275543 4.222711 4.332862  
11752730\_ 5.35582 5.2666 5.095245 5.395023 5.534401 5.381606  
11752731\_ 5.590176 5.649234 5.535466 5.636729 5.532856 5.480253  
11752732\_ 7.666489 7.717076 7.701749 7.643834 7.697949 7.790033  
11752733\_ 8.664074 8.601436 8.691462 8.242294 8.190453 8.314899  
11752734\_ 6.210824 6.206103 6.060186 5.206563 5.277897 5.193167  
11752735\_ 10.25304 10.19705 10.23875 10.5559 10.61047 10.59874  
11752736\_ 7.792804 7.723343 7.806967 7.945491 8.03929 7.938585

11752737\_ 3. 666961 3. 851357 3. 851357 3. 28673 2. 847766 3. 035654  
11752738\_ 7. 662102 7. 651992 7. 716998 7. 741822 7. 810331 7. 854995  
11752739\_ 8. 948534 8. 81366 8. 930702 7. 86325 7. 942264 7. 868262  
11752740\_ 4. 104923 4. 157656 4. 002775 4. 21166 4. 297223 4. 056156  
11752741\_ 4. 35305 4. 511227 4. 56193 4. 656458 4. 59243 4. 577061  
11752742\_ 6. 50813 6. 551185 6. 464014 6. 533936 6. 501851 6. 545656  
11752743\_ 6. 623475 6. 649225 6. 583981 6. 683701 6. 623767 6. 647065  
11752744\_ 6. 983249 6. 927542 7. 001968 7. 04735 7. 062984 7. 082187  
11752745\_ 7. 767214 7. 54503 7. 741301 7. 817339 7. 794254 7. 798502  
11752746\_ 5. 789947 5. 729757 5. 79041 5. 894697 6. 090156 5. 950883  
11752747\_ 7. 318137 7. 171384 7. 204357 6. 632434 6. 808194 6. 591468  
11752748\_ 7. 465718 7. 442709 7. 464276 6. 783226 6. 956076 6. 886652  
11752749\_ 3. 576178 3. 426488 3. 990923 3. 268789 3. 353466 3. 556462  
11752750\_ 2. 506796 2. 262896 2. 414636 2. 321836 2. 47102 2. 406882  
11752751\_ 6. 245583 6. 212978 6. 199575 6. 127053 6. 200828 6. 200828  
11752752\_ 2. 65855 2. 84715 2. 703089 2. 747627 2. 533417 2. 703089  
11752753\_ 3. 611331 3. 611331 3. 535549 3. 59128 3. 666453 3. 564402  
11752754\_ 6. 263567 6. 085217 6. 23831 6. 800147 6. 810277 6. 744471  
11752755\_ 5. 687153 5. 699857 5. 614573 6. 068624 6. 062051 6. 021115  
11752756\_ 5. 11527 5. 11527 5. 073036 5. 103379 5. 127162 5. 091137  
11752757\_ 10. 05648 10. 10831 10. 02191 10. 10971 10. 04942 10. 02513  
11752758\_ 10. 5796 10. 56923 10. 59177 10. 47735 10. 49664 10. 50141  
11752759\_ 2. 390807 2. 347982 2. 190073 2. 303675 2. 300534 2. 495705  
11752760\_ 9. 686911 9. 640463 9. 622043 9. 522036 9. 498725 9. 521612  
11752761\_ 6. 28219 6. 32987 6. 233365 6. 287294 6. 387719 6. 469484  
11752762\_ 2. 036191 2. 048125 1. 957365 2. 040389 1. 93782 1. 951306  
11752763\_ 4. 99907 5. 184489 5. 021463 5. 146771 5. 093002 5. 287114  
11752764\_ 5. 473009 5. 535179 5. 385298 5. 532799 5. 520177 5. 587252  
11752765\_ 8. 844979 8. 730483 8. 785879 9. 232432 9. 258852 9. 295353  
11752766\_ 5. 512912 5. 477979 5. 567535 5. 425939 5. 664915 5. 541477  
11752767\_ 5. 926672 5. 911869 5. 964905 5. 762533 5. 820052 5. 815784  
11752768\_ 7. 164961 7. 197431 7. 226441 7. 882418 7. 99573 8. 005032  
11752769\_ 4. 962448 4. 874234 4. 800853 5. 034777 4. 890289 4. 909609  
11752770\_ 7. 633972 7. 495833 7. 576972 8. 676179 8. 703294 8. 672889  
11752771\_ 4. 040281 3. 821366 3. 654134 3. 553855 3. 794191 3. 640067  
11752772\_ 4. 58793 4. 806036 4. 881501 4. 916016 4. 885419 4. 867135  
11752773\_ 5. 877436 5. 718662 5. 62172 5. 954081 5. 954943 5. 873477  
11752774\_ 4. 142811 4. 321541 4. 061223 4. 420509 4. 203719 4. 15254  
11752775\_ 5. 220111 5. 380649 5. 122191 5. 223878 5. 309241 5. 328494  
11752776\_ 6. 471582 6. 460742 6. 445622 6. 442864 6. 481046 6. 554512  
11752777\_ 5. 89711 6. 033611 6. 090948 5. 920097 5. 815229 5. 865198  
11752778\_ 7. 083622 7. 160598 7. 078943 7. 136086 7. 203204 7. 178525  
11752779\_ 7. 049712 6. 986734 6. 973041 7. 502048 7. 419781 7. 395274  
11752780\_ 7. 081207 6. 996837 7. 081848 6. 685871 6. 729458 6. 720389  
11752781\_ 7. 702279 7. 681539 7. 783573 7. 120013 7. 091776 7. 211029  
11752782\_ 6. 735349 6. 545679 6. 618 6. 563696 6. 698685 6. 572362  
11752783\_ 4. 644014 4. 822832 4. 530564 3. 970786 3. 809322 4. 019498  
11752784\_ 5. 581214 5. 554436 5. 797798 5. 02513 4. 93837 5. 109967  
11752785\_ 5. 120684 5. 340192 5. 175827 5. 303935 5. 319208 5. 211159  
11752786\_ 3. 920904 3. 756708 3. 825579 3. 418627 3. 511676 3. 825579  
11752787\_ 4. 351997 4. 351997 4. 018873 4. 34213 4. 490059 4. 415744

11752788\_ 7. 11917 7. 166511 7. 341573 6. 64379 6. 677484 6. 6436  
11752789\_ 9. 36836 9. 361933 9. 356808 9. 710507 9. 763977 9. 630865  
11752790\_ 6. 017991 6. 393255 6. 26408 6. 289408 6. 442358 6. 351493  
11752791\_ 4. 739817 4. 725782 4. 686784 4. 861586 4. 858466 4. 979165  
11752792\_ 7. 867963 7. 849379 7. 839511 7. 963755 7. 815108 7. 772016  
11752793\_ 6. 859089 6. 745576 6. 846282 6. 788864 6. 779107 6. 84385  
11752794\_ 5. 676992 5. 784546 5. 757761 5. 820052 5. 839142 5. 846512  
11752795\_ 5. 16032 5. 052271 5. 020549 5. 066907 5. 029529 5. 077842  
11752796\_ 3. 716641 3. 606313 3. 91071 3. 654564 3. 534801 3. 586863  
11752797\_ 6. 987612 6. 800335 6. 929316 7. 388651 7. 420692 7. 326337  
11752798\_ 7. 442465 7. 390843 7. 473724 6. 405858 6. 547553 6. 528702  
11752799\_ 4. 055362 3. 883129 3. 74939 4. 137278 3. 926384 3. 655458  
11752800\_ 7. 068401 7. 180937 7. 025144 7. 26869 7. 273135 7. 206481  
11752801\_ 6. 643559 6. 694977 6. 731178 6. 560245 6. 63584 6. 588059  
11752802\_ 6. 263567 6. 165836 5. 981498 6. 055557 6. 094668 6. 011116  
11752803\_ 6. 210882 6. 192439 6. 144562 6. 422768 6. 354388 6. 239306  
11752804\_ 3. 385558 3. 415756 3. 415756 3. 595841 3. 398236 3. 371286  
11752805\_ 2. 747814 2. 893252 2. 628047 3. 01617 2. 766137 2. 917226  
11752806\_ 2. 636118 2. 605516 2. 437864 2. 447811 2. 605516 2. 701715  
11752807\_ 4. 439307 4. 512716 4. 52373 4. 512716 4. 601513 4. 52373  
11752808\_ 4. 570077 4. 671938 4. 655534 4. 690985 4. 737353 4. 655534  
11752809\_ 2. 378418 2. 439911 2. 439911 2. 3491 2. 521395 2. 527384  
11752810\_ 7. 031936 7. 09081 7. 032045 6. 92033 6. 933739 6. 960307  
11752811\_ 6. 386291 6. 427108 6. 390869 6. 34864 6. 358038 6. 435749  
11752812\_ 5. 57416 5. 560303 5. 324792 5. 531553 5. 627277 5. 568968  
11752813\_ 3. 508446 3. 22157 3. 043839 3. 101013 3. 21279 3. 10448  
11752814\_ 8. 475465 8. 444561 8. 501032 8. 125126 8. 274829 8. 129189  
11752815\_ 9. 743169 9. 716664 9. 795094 9. 665508 9. 656673 9. 594233  
11752816\_ 5. 62299 5. 759616 5. 757629 5. 791741 5. 877533 5. 892833  
11752817\_ 7. 730153 7. 549874 7. 609399 7. 37789 7. 401863 7. 508374  
11752818\_ 3. 08031 2. 927699 3. 034358 2. 926824 3. 098109 2. 976754  
11752819\_ 3. 059604 2. 414527 2. 607995 2. 521475 2. 527089 2. 44582  
11752820\_ 3. 927848 3. 734074 3. 678752 3. 41368 3. 443817 3. 21813  
11752821\_ 7. 874836 7. 834612 7. 846052 8. 174175 8. 264419 8. 163796  
11752822\_ 8. 219556 8. 188761 8. 199371 8. 574081 8. 624631 8. 575169  
11752823\_ 8. 303933 8. 237585 8. 344218 8. 133545 8. 129596 8. 126371  
11752824\_ 7. 278949 7. 320921 7. 271539 7. 259603 7. 247881 7. 250586  
11752825\_ 4. 891413 4. 749416 4. 793268 4. 585727 4. 640804 4. 733889  
11752826\_ 4. 469114 4. 459969 4. 580417 4. 580417 4. 531439 4. 548123  
11752827\_ 5. 495098 5. 327488 5. 661199 5. 386829 5. 779315 5. 556184  
11752828\_ 5. 303206 5. 294983 5. 298702 5. 307381 5. 473939 5. 30475  
11752829\_ 8. 029188 7. 978719 7. 963689 7. 870995 7. 867581 7. 832491  
11752830\_ 4. 60011 4. 610244 4. 811882 4. 918784 4. 953677 4. 8332  
11752831\_ 5. 042874 4. 96254 4. 749136 4. 900087 4. 987063 4. 908478  
11752832\_ 8. 403012 8. 455614 8. 466722 8. 350088 8. 337057 8. 326234  
11752833\_ 6. 788323 6. 700371 6. 739687 7. 010693 6. 980254 6. 888273  
11752834\_ 4. 380421 4. 164775 4. 254351 4. 169096 4. 250252 4. 195125  
11752835\_ 7. 362127 7. 279846 7. 320459 7. 2407 7. 371149 7. 284968  
11752836\_ 7. 010246 7. 035243 6. 960633 6. 993032 7. 005053 7. 049912  
11752837\_ 6. 078595 6. 093079 6. 103068 6. 048798 6. 002996 6. 141259  
11752838\_ 7. 172646 7. 392803 7. 310899 7. 300513 7. 341424 7. 379993

11752839\_ 3. 597426 3. 685844 3. 503743 3. 542654 3. 739352 3. 709923  
11752840\_ 7. 590521 7. 636589 7. 584429 6. 690992 6. 56978 6. 732916  
11752841\_ 4. 536033 4. 747718 4. 682409 4. 693464 4. 404624 4. 785504  
11752842\_ 7. 514943 7. 45117 7. 476807 7. 00326 6. 994014 7. 105922  
11752843\_ 9. 937366 9. 946412 10. 00262 9. 580277 9. 622043 9. 568924  
11752844\_ 5. 352761 5. 467361 5. 297498 5. 451925 5. 397861 5. 467361  
11752845\_ 6. 502421 6. 300643 6. 455434 6. 120301 6. 116896 6. 120301  
11752846\_ 7. 11038 7. 031531 7. 065983 6. 767049 6. 820851 6. 799758  
11752847\_ 7. 825619 7. 800783 7. 89064 8. 014874 7. 994271 8. 092263  
11752848\_ 5. 092278 5. 101027 4. 800235 5. 113629 4. 886912 4. 96428  
11752849\_ 8. 169273 8. 126707 8. 102405 8. 379664 8. 293759 8. 213846  
11752850\_ 9. 021731 8. 953048 8. 97909 9. 001553 8. 984879 8. 984879  
11752851\_ 6. 520868 6. 481046 6. 605353 6. 134967 6. 05152 6. 168171  
11752852\_ 6. 577559 6. 518411 6. 60937 6. 230363 6. 141868 6. 160054  
11752853\_ 5. 485663 5. 3955 5. 339429 5. 280529 5. 281544 5. 216101  
11752854\_ 5. 780206 5. 829165 5. 822486 5. 558443 5. 678717 5. 640928  
11752855\_ 5. 363999 5. 511832 5. 313321 5. 26151 5. 362399 5. 303195  
11752856\_ 3. 674233 3. 606313 3. 398236 3. 480121 3. 524428 3. 421287  
11752857\_ 5. 3371 5. 22781 5. 317444 5. 431051 5. 418065 5. 311926  
11752858\_ 1. 972781 2. 324533 2. 007519 2. 351298 2. 099732 1. 802351  
11752859\_ 6. 175005 6. 034946 6. 120364 5. 939888 5. 910367 5. 92104  
11752860\_ 5. 121174 5. 162788 5. 013192 5. 200501 5. 171244 5. 341515  
11752861\_ 5. 146132 5. 240976 5. 151938 5. 122452 5. 157167 5. 330498  
11752862\_ 5. 232672 5. 395403 5. 197599 5. 089087 5. 035879 5. 111302  
11752863\_ 5. 171671 5. 14995 5. 12085 5. 132917 5. 2222 5. 132367  
11752864\_ 6. 063895 6. 072712 6. 241932 5. 881196 5. 954618 5. 971459  
11752865\_ 11. 49264 11. 52519 11. 43786 11. 55328 11. 51063 11. 40443  
11752866\_ 4. 735553 5. 151503 4. 96287 5. 146406 5. 107431 5. 241159  
11752867\_ 5. 333723 5. 267815 5. 26034 5. 341128 5. 266402 5. 234761  
11752868\_ 7. 358667 7. 425872 7. 506734 7. 552192 7. 505352 7. 553585  
11752869\_ 9. 003349 8. 944014 9. 013394 7. 77064 7. 86168 7. 967028  
11752870\_ 5. 039787 5. 139628 5. 210545 5. 60348 5. 48462 5. 380839  
11752871\_ 5. 208351 5. 110106 5. 029529 5. 224792 5. 301259 5. 122717  
11752872\_ 8. 294853 8. 195459 8. 30295 7. 932836 7. 937752 8. 020481  
11752873\_ 4. 584933 4. 772488 4. 350179 4. 40461 4. 725905 4. 456872  
11752874\_ 6. 095986 6. 22664 5. 887514 6. 234093 6. 335829 6. 463367  
11752875\_ 4. 173362 4. 174945 4. 168627 4. 33857 4. 260434 4. 231125  
11752876\_ 3. 342792 3. 324455 3. 421781 3. 290188 3. 21279 3. 479755  
11752877\_ 10. 61336 10. 57879 10. 62035 11. 22257 11. 17728 11. 20513  
11752878\_ 4. 42352 4. 470508 4. 46703 4. 551078 4. 511907 4. 700243  
11752879\_ 6. 661635 6. 664225 6. 745452 6. 693516 6. 768658 6. 847976  
11752880\_ 2. 513111 2. 672996 2. 661919 2. 514051 2. 547147 2. 768403  
11752881\_ 4. 007839 4. 191378 4. 128484 4. 043766 4. 487589 4. 395121  
11752882\_ 6. 485175 6. 48404 6. 223549 6. 458899 6. 35459 6. 391918  
11752883\_ 8. 120178 8. 042964 8. 106755 7. 836856 7. 825457 7. 851859  
11752884\_ 7. 645373 7. 688112 7. 669993 7. 575004 7. 48058 7. 527068  
11752885\_ 7. 35311 7. 266712 7. 443851 7. 305304 7. 291025 7. 342831  
11752886\_ 7. 504985 7. 517588 7. 607758 7. 151508 7. 043593 7. 211348  
11752887\_ 7. 062544 6. 904006 7. 044938 6. 733428 6. 646854 6. 666934  
11752888\_ 4. 487534 4. 596199 4. 402165 4. 468744 4. 602803 4. 226847  
11752889\_ 6. 110479 6. 118838 5. 973344 6. 08851 6. 084793 6. 020847

11752890\_ 4. 863261 5. 07895 5. 042534 5. 3515 5. 320569 5. 475572  
11752891\_ 2. 874404 2. 672643 2. 95514 3. 00578 2. 822405 2. 924594  
11752892\_ 4. 802809 5. 010845 4. 774459 4. 882685 4. 976722 4. 9153  
11752893\_ 5. 089164 4. 988141 5. 074473 5. 093525 5. 123438 5. 174971  
11752894\_ 3. 27886 3. 417338 3. 260229 3. 387685 3. 463327 3. 389592  
11752895\_ 7. 053916 7. 230282 7. 067455 7. 155867 7. 178347 7. 182484  
11752896\_ 7. 584134 7. 599111 7. 638584 7. 692496 7. 674465 7. 702331  
11752897\_ 8. 255792 8. 1893 8. 234691 7. 810747 7. 860152 7. 891654  
11752898\_ 2. 740427 2. 968272 2. 512583 2. 678283 2. 732522 2. 546407  
11752899\_ 7. 452639 7. 470222 7. 524944 7. 072203 7. 057615 7. 043766  
11752900\_ 6. 091765 6. 089359 6. 091272 6. 114582 6. 144422 6. 150074  
11752901\_ 5. 947445 5. 704919 5. 794286 5. 988 5. 887731 6. 059499  
11752902\_ 7. 746238 7. 712865 7. 809139 7. 735394 7. 731464 7. 809525  
11752903\_ 3. 670812 3. 877215 3. 780872 4. 071207 3. 882741 3. 978709  
11752904\_ 4. 311219 4. 40461 4. 104696 4. 347179 4. 269266 4. 219074  
11752905\_ 7. 661286 7. 556838 7. 715066 8. 647135 8. 695291 8. 747211  
11752906\_ 6. 223968 6. 21835 6. 059692 6. 21835 6. 377 6. 257363  
11752907\_ 2. 527974 2. 754637 2. 47102 2. 441634 2. 528192 2. 350755  
11752908\_ 9. 775909 9. 789761 9. 744545 9. 984864 9. 868129 9. 830209  
11752909\_ 3. 106867 2. 845984 2. 859565 3. 032899 2. 948553 3. 137724  
11752910\_ 10. 39854 10. 37824 10. 34245 10. 44271 10. 44289 10. 41206  
11752911\_ 10. 46412 10. 53584 10. 43873 10. 56001 10. 54036 10. 46137  
11752912\_ 11. 3796 11. 38884 11. 34165 11. 37594 11. 34427 11. 28056  
11752913\_ 2. 582772 2. 686416 2. 805536 2. 145665 2. 206869 2. 384435  
11752914\_ 3. 345695 3. 342729 3. 388008 3. 283301 3. 251817 3. 486848  
11752915\_ 5. 544064 5. 688787 5. 934484 5. 066466 5. 27558 5. 249768  
11752916\_ 9. 309737 9. 243162 9. 249642 9. 001718 8. 990563 9. 036316  
11752917\_ 4. 96705 5. 079787 5. 137252 5. 179998 5. 114057 5. 135022  
11752918\_ 4. 59709 4. 733661 4. 469146 4. 731586 4. 718597 4. 645059  
11752919\_ 8. 875686 8. 788966 8. 803962 8. 689235 8. 717673 8. 657178  
11752920\_ 8. 3663 8. 3769 8. 334672 7. 969644 8. 089203 8. 0645  
11752921\_ 5. 801234 5. 872248 5. 95781 5. 76193 5. 637343 5. 717386  
11752922\_ 11. 60012 11. 55723 11. 61283 11. 87635 11. 89521 11. 89625  
11752923\_ 5. 244687 5. 290761 5. 089363 5. 089363 5. 204496 5. 249799  
11752924\_ 5. 437761 5. 295478 5. 26034 5. 148333 5. 46171 5. 405631  
11752925\_ 3. 241658 3. 040384 3. 137513 3. 221377 3. 281811 3. 188328  
11752926\_ 5. 081676 5. 30814 5. 200792 4. 998374 5. 090186 5. 294408  
11752927\_ 5. 724372 5. 667781 5. 611237 5. 651568 5. 651568 5. 635355  
11752928\_ 7. 186202 7. 061839 7. 08605 7. 391549 7. 474746 7. 570517  
11752929\_ 4. 2233 4. 24074 4. 228323 4. 32564 4. 230443 4. 367339  
11752930\_ 4. 949305 4. 659941 4. 69105 3. 638257 3. 61572 3. 767939  
11752931\_ 5. 598272 5. 354944 5. 540853 4. 754171 4. 624448 4. 539806  
11752932\_ 2. 702148 2. 620315 2. 789366 2. 663856 2. 576943 2. 777475  
11752933\_ 4. 667726 4. 720983 4. 834331 4. 756933 4. 844442 4. 881978  
11752934\_ 2. 878711 2. 945929 2. 874619 3. 135453 2. 928101 2. 7656  
11752935\_ 7. 628551 7. 615254 7. 652182 7. 713196 7. 675431 7. 68786  
11752936\_ 7. 25194 7. 193127 7. 291033 7. 236405 7. 235619 7. 266343  
11752937\_ 5. 704919 6. 011116 5. 735709 5. 785332 5. 843675 5. 715388  
11752938\_ 3. 606313 3. 529386 3. 338532 3. 529386 3. 529386 3. 529386  
11752939\_ 9. 970603 9. 911135 9. 969764 10. 63773 10. 66439 10. 66307  
11752940\_ 8. 899396 8. 855624 8. 865855 7. 608488 7. 65361 7. 780435

11752941\_ 3. 927857 4. 108172 3. 831311 3. 944116 4. 18901 4. 004447  
11752942\_ 7. 076762 7. 050883 7. 099389 7. 174356 7. 276722 7. 215191  
11752943\_ 4. 805181 4. 568209 4. 70583 4. 659999 4. 864793 4. 782581  
11752944\_ 5. 817965 5. 804303 5. 770703 5. 738961 5. 79504 5. 732315  
11752945\_ 6. 566815 6. 640036 6. 569644 6. 72691 6. 717685 6. 669685  
11752946\_ 7. 895294 7. 766184 7. 755967 7. 745663 7. 723354 7. 687864  
11752947\_ 6. 397909 6. 532996 6. 388223 6. 517413 6. 557068 6. 527787  
11752948\_ 9. 542997 9. 462878 9. 465198 9. 354969 9. 37209 9. 400869  
11752949\_ 5. 009381 4. 97919 4. 882355 5. 229566 5. 156295 4. 941941  
11752950\_ 2. 692751 2. 818821 2. 712224 2. 767911 2. 735904 2. 810203  
11752951\_ 10. 27489 10. 26217 10. 30527 10. 73908 10. 74083 10. 7348  
11752952\_ 5. 597537 5. 68727 5. 641792 5. 68575 5. 701378 5. 648514  
11752953\_ 2. 097702 1. 925747 2. 029503 1. 985978 1. 987734 1. 964077  
11752954\_ 6. 937276 7. 092436 7. 011541 7. 088413 7. 090775 6. 990907  
11752955\_ 5. 954081 6. 242258 5. 9787 6. 282224 6. 087357 6. 118838  
11752956\_ 5. 684978 5. 614563 5. 809183 5. 58941 5. 504344 5. 589814  
11752957\_ 5. 640305 5. 646308 5. 614563 5. 285353 5. 329458 5. 423058  
11752958\_ 6. 676172 6. 775164 6. 665265 6. 853386 6. 860155 6. 827525  
11752959\_ 11. 92919 11. 98456 11. 97841 11. 97596 11. 92531 11. 89142  
11752960\_ 3. 14477 3. 266302 3. 209441 3. 166564 3. 024027 3. 097783  
11752961\_ 4. 48662 4. 540815 4. 317351 4. 130445 4. 291307 4. 207737  
11752962\_ 3. 011527 2. 9755 2. 988946 2. 981261 2. 988946 2. 996632  
11752963\_ 4. 742085 4. 808437 4. 777592 4. 82082 4. 850975 4. 79946  
11752964\_ 7. 773323 7. 767903 7. 774425 7. 360467 7. 419513 7. 299  
11752965\_ 6. 637275 6. 531304 6. 695739 7. 619572 7. 729873 7. 678036  
11752966\_ 5. 647222 5. 639372 5. 39846 5. 483576 5. 373052 5. 538664  
11752967\_ 11. 26925 11. 34113 11. 29436 11. 53435 11. 47342 11. 39198  
11752968\_ 9. 420142 9. 357358 9. 441551 9. 344435 9. 355973 9. 363827  
11752969\_ 4. 448076 4. 578518 4. 288836 4. 446251 4. 656614 4. 578518  
11752970\_ 6. 353625 6. 186428 6. 242144 5. 895783 6. 104327 5. 971251  
11752971\_ 5. 989991 6. 144552 6. 086611 6. 107963 6. 098074 6. 111357  
11752972\_ 3. 388233 3. 219868 3. 17288 3. 290188 3. 527257 3. 267033  
11752973\_ 7. 43295 7. 40148 7. 456348 7. 403901 7. 503083 7. 556637  
11752974\_ 4. 370143 4. 563509 4. 509372 4. 522885 4. 428826 4. 433026  
11752975\_ 2. 339561 2. 100575 2. 185353 2. 202642 2. 184842 2. 208405  
11752976\_ 5. 070479 4. 852269 5. 065928 4. 758733 4. 791799 4. 719401  
11752977\_ 6. 192758 6. 282224 6. 197438 6. 097927 6. 091751 5. 96115  
11752978\_ 8. 635398 8. 654944 8. 641056 8. 278891 8. 249485 8. 244737  
11752979\_ 6. 663703 6. 655901 6. 657637 6. 814612 6. 741643 6. 697329  
11752980\_ 7. 137429 7. 273468 7. 252708 7. 357028 7. 424831 7. 408444  
11752981\_ 7. 598672 7. 577497 7. 572267 7. 659206 7. 595025 7. 587428  
11752982\_ 5. 157591 5. 199115 5. 449696 5. 29311 5. 483323 5. 330186  
11752983\_ 5. 460366 5. 674952 5. 452426 5. 614563 5. 654308 5. 556957  
11752984\_ 10. 04199 9. 926241 9. 996577 9. 747206 9. 755615 9. 804866  
11752985\_ 4. 359077 4. 067703 4. 275397 4. 213226 4. 275543 4. 183078  
11752986\_ 4. 228095 4. 338715 4. 208942 4. 387459 4. 117657 4. 358571  
11752987\_ 5. 711044 5. 882911 5. 795556 5. 658321 5. 709608 5. 747668  
11752988\_ 3. 384325 3. 392727 3. 316203 3. 850246 3. 545321 3. 507107  
11752989\_ 4. 275543 4. 607349 4. 238559 4. 448583 4. 52373 4. 482517  
11752990\_ 3. 262126 3. 191781 2. 663569 3. 025972 3. 342907 3. 290188  
11752991\_ 3. 08155 3. 176175 3. 20997 3. 117986 3. 104522 3. 309025

11752992\_ 2. 498253 2. 75923 2. 498253 2. 648619 2. 681279 2. 70433  
11752993\_ 7. 227329 7. 193802 7. 230372 6. 883015 6. 831635 6. 852751  
11752994\_ 4. 35407 4. 08669 3. 83063 4. 075658 3. 908369 4. 177275  
11752995\_ 8. 050711 8. 028789 8. 125332 8. 092461 8. 015384 8. 036768  
11752996\_ 6. 351285 6. 512244 6. 389366 6. 442123 6. 414953 6. 503785  
11752997\_ 4. 584933 4. 718793 4. 41566 4. 760618 4. 669459 4. 746544  
11752998\_ 3. 751453 3. 665515 3. 942743 3. 920693 4. 005682 3. 856158  
11752999\_ 6. 660519 6. 630588 6. 65182 6. 203817 6. 122294 6. 073142  
11753000\_ 4. 093061 4. 141014 3. 94396 4. 289275 4. 182378 4. 284874  
11753001\_ 7. 227948 7. 151362 7. 177905 7. 504766 7. 494407 7. 526756  
11753002\_ 3. 942017 4. 081321 3. 997756 4. 314338 4. 3042 4. 211944  
11753003\_ 3. 919509 4. 122404 3. 84144 4. 113388 4. 092119 3. 999588  
11753004\_ 9. 327541 9. 241329 9. 28738 9. 178237 9. 203744 9. 175387  
11753005\_ 3. 221043 3. 453968 3. 46957 3. 447029 3. 386226 3. 363886  
11753006\_ 3. 79275 3. 626626 3. 878071 3. 98064 3. 772564 3. 952387  
11753007\_ 3. 872537 3. 76277 3. 668984 4. 137982 3. 937211 3. 920592  
11753008\_ 2. 605516 2. 563415 2. 754319 2. 754319 2. 626816 2. 718322  
11753009\_ 6. 941367 6. 890044 6. 922561 7. 140216 7. 287028 7. 053321  
11753010\_ 6. 490283 6. 294919 6. 286414 6. 225062 6. 32266 6. 270474  
11753011\_ 9. 204223 9. 123902 9. 211963 9. 521949 9. 497667 9. 483185  
11753012\_ 8. 532148 8. 466665 8. 50094 8. 474834 8. 529283 8. 505618  
11753013\_ 5. 113672 5. 11527 5. 376301 5. 226183 5. 11527 5. 210202  
11753014\_ 4. 4531 4. 414321 4. 448126 4. 426196 4. 402521 4. 52373  
11753015\_ 7. 471476 7. 366352 7. 474381 7. 367319 7. 365149 7. 438736  
11753016\_ 4. 915456 4. 881932 4. 919719 5. 1931 5. 128237 5. 177711  
11753017\_ 11. 21894 11. 21744 11. 19232 11. 58597 11. 56681 11. 53541  
11753018\_ 11. 58909 11. 54692 11. 55159 11. 68938 11. 70033 11. 65613  
11753019\_ 5. 725601 5. 729217 5. 567037 5. 49053 5. 452564 5. 409222  
11753020\_ 4. 489347 4. 700308 4. 710024 4. 713683 4. 700308 4. 700308  
11753021\_ 5. 879579 5. 945278 6. 007346 6. 076709 6. 025952 6. 033105  
11753022\_ 5. 514836 5. 676021 5. 41875 5. 745821 5. 554436 5. 475294  
11753023\_ 5. 285218 4. 948293 5. 067413 4. 234341 4. 491802 4. 547453  
11753024\_ 6. 926064 7. 04434 7. 094096 7. 12201 7. 138054 7. 164857  
11753025\_ 4. 764558 4. 91174 4. 734809 5. 025884 5. 025884 4. 794026  
11753026\_ 4. 920533 4. 870612 4. 76235 4. 942258 5. 193822 4. 86348  
11753027\_ 8. 473501 8. 406172 8. 507004 8. 078238 8. 036188 7. 991386  
11753028\_ 6. 156983 5. 898098 6. 107795 6. 522967 6. 470656 6. 543845  
11753029\_ 2. 626026 2. 627179 2. 658165 2. 511472 2. 586241 2. 665673  
11753030\_ 6. 196599 6. 403404 6. 048921 6. 315439 6. 287786 6. 268842  
11753031\_ 8. 505954 8. 380111 8. 561393 8. 669355 8. 744817 8. 642382  
11753032\_ 4. 026092 3. 894419 4. 118469 3. 682896 3. 912051 3. 763688  
11753033\_ 3. 884491 4. 054927 4. 414725 3. 695996 3. 818299 3. 795955  
11753034\_ 7. 522324 7. 426223 7. 528741 7. 678272 7. 736109 7. 663834  
11753035\_ 5. 675623 5. 416046 5. 490655 5. 526553 5. 580859 5. 617928  
11753036\_ 2. 811492 2. 620793 2. 658295 2. 583573 2. 529586 2. 467391  
11753037\_ 3. 758051 3. 80963 3. 757411 3. 780218 3. 900246 3. 790015  
11753038\_ 5. 220973 5. 219638 5. 098699 5. 149064 5. 127523 5. 184561  
11753039\_ 6. 633614 6. 718157 6. 621869 7. 013638 7. 050081 7. 104037  
11753040\_ 4. 134104 3. 915929 4. 120772 3. 832064 3. 977479 4. 012387  
11753041\_ 6. 349327 6. 369062 6. 170751 6. 34864 6. 366235 6. 349327  
11753042\_ 4. 646628 4. 682626 4. 560512 4. 772225 4. 739783 4. 859631

11753043\_ 8. 164734 8. 006146 8. 064959 8. 190886 8. 160079 8. 155921  
11753044\_ 5. 999888 5. 917927 5. 855964 5. 380649 5. 636614 5. 521395  
11753045\_ 7. 345635 7. 259749 7. 27319 7. 123709 7. 019013 7. 062541  
11753046\_ 8. 219284 8. 126227 8. 207734 7. 846555 7. 877913 7. 910302  
11753047\_ 4. 278363 4. 12788 4. 188878 4. 176937 4. 06045 4. 122446  
11753048\_ 5. 888633 5. 848688 5. 825202 5. 963625 5. 924949 5. 996191  
11753049\_ 5. 106133 4. 899311 5. 050392 4. 944831 4. 979116 4. 986067  
11753050\_ 5. 411387 5. 594991 5. 672804 5. 57348 5. 59207 5. 419544  
11753051\_ 3. 333192 3. 478922 3. 185475 3. 432188 3. 444162 3. 492118  
11753052\_ 6. 097067 5. 938482 5. 993554 6. 016389 6. 003436 6. 094063  
11753053\_ 6. 685912 6. 700437 6. 83876 6. 862059 6. 824002 6. 877233  
11753054\_ 2. 47102 2. 592735 2. 800427 2. 5388 2. 699273 2. 621263  
11753055\_ 9. 3524 9. 299088 9. 24319 9. 193142 9. 103455 9. 041351  
11753056\_ 2. 224627 2. 283048 2. 187098 2. 312469 2. 283048 2. 32707  
11753057\_ 4. 307605 4. 4175 4. 294056 4. 318235 4. 249651 4. 242036  
11753058\_ 7. 035726 7. 009306 7. 129733 6. 861258 6. 837039 6. 828602  
11753059\_ 6. 465905 6. 503467 6. 420129 6. 356843 6. 344166 6. 512991  
11753060\_ 2. 192096 2. 192096 2. 49673 2. 348698 2. 256579 2. 305826  
11753061\_ 6. 584888 6. 442584 6. 551829 6. 193098 6. 18365 6. 309943  
11753062\_ 5. 865583 5. 898859 5. 801385 6. 040727 6. 048464 6. 031151  
11753063\_ 6. 770711 6. 844306 6. 779107 6. 748323 6. 756152 6. 665738  
11753064\_ 6. 424539 6. 300284 6. 30032 6. 500378 6. 565602 6. 549368  
11753065\_ 5. 870242 5. 963303 5. 90646 5. 996126 5. 94717 5. 92013  
11753066\_ 2. 230331 2. 047419 2. 253691 2. 272812 2. 303998 2. 457938  
11753067\_ 5. 410376 5. 392333 5. 450799 5. 470041 5. 468842 5. 352194  
11753068\_ 5. 241508 5. 199996 5. 542475 4. 584933 4. 390603 4. 727537  
11753069\_ 4. 271037 4. 238924 4. 189587 4. 28921 4. 301769 4. 222652  
11753070\_ 6. 178272 6. 218989 6. 11762 6. 224467 6. 330828 6. 255174  
11753071\_ 6. 065443 6. 056119 6. 076472 5. 887116 5. 981806 5. 979857  
11753072\_ 5. 724254 5. 571243 5. 737936 5. 917746 5. 829906 5. 715786  
11753073\_ 5. 146763 5. 025739 5. 426701 4. 591414 4. 515691 4. 71151  
11753074\_ 2. 599582 2. 599582 2. 321309 3. 05002 2. 730286 2. 83198  
11753075\_ 7. 182545 7. 090553 7. 190946 7. 072184 7. 011471 7. 022273  
11753076\_ 5. 383105 5. 512575 5. 518169 5. 334761 5. 69341 5. 586005  
11753077\_ 5. 889418 5. 849251 5. 753121 5. 745821 5. 787228 5. 883197  
11753078\_ 5. 007606 4. 814577 4. 936627 4. 955748 5. 112269 5. 036317  
11753079\_ 8. 538986 8. 643279 8. 581557 8. 647277 8. 635751 8. 691441  
11753080\_ 6. 786989 6. 784254 6. 799175 6. 887981 6. 852134 6. 780638  
11753081\_ 10. 80322 10. 74495 10. 77521 10. 87757 10. 86977 10. 82838  
11753082\_ 1. 996954 2. 034776 1. 937092 1. 837134 1. 754035 1. 768253  
11753083\_ 2. 386582 2. 63617 2. 502838 2. 582226 2. 385068 2. 577487  
11753084\_ 5. 944683 5. 780087 5. 736831 5. 894697 5. 854469 5. 745211  
11753085\_ 9. 225597 9. 179248 9. 191957 10. 06662 10. 00646 9. 915856  
11753086\_ 9. 800541 9. 761169 9. 757169 10. 52372 10. 51215 10. 40916  
11753087\_ 5. 435003 5. 586423 5. 308218 5. 721704 5. 52655 5. 619463  
11753088\_ 6. 857705 6. 841633 6. 962876 6. 494443 6. 455813 6. 380841  
11753089\_ 7. 093418 7. 036538 6. 994297 7. 082618 7. 179319 7. 190164  
11753090\_ 7. 528282 7. 418429 7. 44759 7. 637686 7. 670747 7. 657767  
11753091\_ 7. 134375 7. 069941 7. 183172 7. 59432 7. 601012 7. 544902  
11753092\_ 10. 24313 10. 21538 10. 21709 10. 45138 10. 46118 10. 3716  
11753093\_ 3. 683089 3. 757351 3. 973541 3. 931413 3. 713263 3. 757351



11753094\_ 5. 674935 5. 667312 5. 401588 5. 481097 5. 439455 5. 51949  
11753095\_ 5. 181034 5. 2666 5. 178405 4. 049225 4. 404235 4. 521448  
11753096\_ 6. 417627 6. 499333 6. 353598 6. 541202 6. 627842 6. 474745  
11753097\_ 4. 376702 4. 498001 4. 472536 4. 495458 4. 652795 4. 41335  
11753098\_ 3. 398236 3. 437611 3. 398236 3. 485587 3. 398236 3. 398236  
11753099\_ 5. 78452 6. 039031 6. 018877 6. 00488 6. 048421 6. 088149  
11753100\_ 5. 290396 5. 241987 5. 330757 5. 167986 5. 183024 5. 241987  
11753101\_ 3. 141892 3. 041759 3. 001845 3. 131467 2. 933483 3. 089946  
11753102\_ 4. 9226 5. 021163 5. 001474 5. 067155 5. 034826 5. 000777  
11753103\_ 4. 987694 5. 00869 4. 98366 4. 889093 4. 969046 5. 052123  
11753104\_ 5. 26001 5. 206934 5. 40737 5. 493129 5. 455146 5. 479592  
11753105\_ 6. 162743 6. 066002 6. 100596 6. 141905 6. 142856 6. 050225  
11753106\_ 6. 296564 6. 287063 6. 223273 6. 183078 6. 189803 6. 372053  
11753107\_ 6. 01953 6. 107097 5. 885525 6. 102032 6. 058443 6. 18023  
11753108\_ 5. 618096 5. 593519 5. 598298 5. 570114 5. 502034 5. 558944  
11753109\_ 3. 059492 3. 26747 3. 20409 3. 333948 3. 396751 3. 385372  
11753110\_ 3. 095479 2. 998507 3. 065938 3. 095479 3. 167037 3. 095741  
11753111\_ 7. 420809 7. 375153 7. 297371 7. 323691 7. 417801 7. 44536  
11753112\_ 6. 842022 6. 921118 6. 958012 6. 994213 7. 106281 7. 053419  
11753113\_ 6. 74641 6. 886652 6. 665265 6. 990405 6. 959694 6. 990405  
11753114\_ 5. 177014 5. 144148 5. 031101 5. 193693 5. 277123 5. 202327  
11753115\_ 3. 882146 3. 885899 3. 893173 3. 787589 3. 622075 3. 71406  
11753116\_ 7. 515039 7. 584289 7. 650772 7. 787005 7. 851807 7. 831577  
11753117\_ 7. 548461 7. 463405 7. 455919 7. 163989 7. 195175 7. 220589  
11753118\_ 6. 943534 6. 936046 6. 933258 7. 08459 7. 130135 7. 096456  
11753119\_ 6. 181415 6. 246929 6. 030823 6. 371938 6. 191824 6. 220424  
11753120\_ 6. 228569 6. 312334 6. 17981 6. 334553 6. 300643 6. 238769  
11753121\_ 2. 200807 2. 124525 2. 164206 2. 271665 2. 176063 2. 297779  
11753122\_ 7. 497147 7. 546764 7. 579366 7. 767385 7. 7933 7. 77537  
11753123\_ 4. 688769 4. 506621 4. 815908 4. 852609 4. 890423 5. 03519  
11753124\_ 4. 593468 4. 713293 4. 472524 4. 534684 4. 736318 4. 866013  
11753125\_ 7. 390807 7. 298869 7. 409928 7. 730113 7. 732362 7. 666272  
11753126\_ 7. 183965 7. 150434 7. 179131 7. 160945 7. 074644 7. 108606  
11753127\_ 6. 464176 6. 338007 6. 664675 6. 076709 5. 739761 5. 969937  
11753128\_ 4. 256487 4. 484172 4. 449649 4. 347179 4. 564488 4. 510495  
11753129\_ 10. 28283 10. 20924 10. 26471 9. 921249 9. 929722 9. 928758  
11753130\_ 10. 13491 10. 08629 10. 13179 9. 797659 9. 83891 9. 817534  
11753131\_ 9. 976681 9. 913046 9. 967862 9. 603988 9. 637562 9. 644099  
11753132\_ 7. 79858 7. 721074 7. 757295 7. 562014 7. 692856 7. 725383  
11753133\_ 6. 318186 6. 215232 6. 157126 6. 372595 6. 333392 6. 353335  
11753134\_ 4. 799036 5. 071598 5. 046762 5. 200932 5. 225739 5. 271224  
11753135\_ 5. 209259 5. 405713 5. 438891 5. 393237 5. 33183 5. 330842  
11753136\_ 5. 569123 5. 688134 5. 535558 5. 658977 5. 635844 5. 77013  
11753137\_ 5. 789569 5. 711957 5. 845769 5. 767764 5. 920633 6. 004893  
11753138\_ 3. 652702 3. 696452 3. 76519 3. 593163 3. 772401 3. 999071  
11753139\_ 2. 47057 2. 166918 2. 047298 2. 312319 2. 4878 2. 330332  
11753140\_ 4. 939108 5. 243407 5. 043145 5. 245603 5. 19803 5. 102211  
11753141\_ 5. 060498 5. 172084 5. 327021 5. 293929 5. 045127 5. 349678  
11753142\_ 9. 753487 9. 724256 9. 776425 9. 977996 9. 961201 9. 975925  
11753143\_ 3. 244571 2. 567382 3. 2326 2. 893886 3. 117081 3. 308249  
11753144\_ 2. 953335 3. 166478 3. 166735 3. 269047 3. 386154 3. 206535

11753145\_ 5. 170504 5. 228627 5. 238645 5. 745821 5. 70657 5. 579101  
11753146\_ 7. 245852 7. 263239 7. 063157 7. 282945 7. 240614 7. 311089  
11753147\_ 6. 065163 6. 248005 6. 075599 6. 155858 6. 114149 6. 161573  
11753148\_ 6. 441636 6. 469488 6. 227568 6. 524627 6. 479112 6. 519462  
11753149\_ 3. 145931 3. 254225 3. 180755 3. 066526 3. 004853 3. 069067  
11753150\_ 4. 362545 4. 240079 4. 11305 4. 466778 4. 582562 4. 497975  
11753151\_ 6. 66589 6. 662049 6. 604795 6. 828158 6. 892226 6. 856464  
11753152\_ 7. 17111 7. 084623 7. 235026 6. 776647 6. 750133 6. 777903  
11753153\_ 4. 589667 4. 939511 4. 571121 4. 696115 4. 634912 4. 707598  
11753154\_ 4. 043925 4. 111516 4. 035037 4. 043925 4. 14346 4. 043925  
11753155\_ 5. 528123 5. 605666 5. 508705 5. 448296 5. 641762 5. 730409  
11753156\_ 7. 770126 7. 583763 7. 683302 7. 162644 7. 222652 7. 327401  
11753157\_ 6. 512949 6. 407018 6. 504975 6. 286151 6. 349991 6. 272692  
11753158\_ 5. 684867 5. 583153 5. 796525 5. 196652 5. 422954 5. 535483  
11753159\_ 4. 547467 4. 440002 4. 556501 3. 793978 3. 953034 4. 066178  
11753160\_ 2. 501369 2. 697664 2. 479707 2. 68957 2. 786806 2. 664141  
11753161\_ 4. 931555 4. 966911 4. 966911 5. 322193 5. 207719 5. 291295  
11753162\_ 8. 605925 8. 610031 8. 602534 8. 343273 8. 364916 8. 42592  
11753163\_ 8. 649145 8. 633521 8. 554834 8. 519342 8. 470755 8. 435404  
11753164\_ 4. 24759 4. 609236 4. 517329 4. 645946 4. 84696 4. 887479  
11753165\_ 7. 032535 6. 971617 7. 00766 6. 741937 6. 649285 6. 747628  
11753166\_ 5. 993173 6. 026636 5. 85816 6. 032458 6. 11066 6. 167082  
11753167\_ 6. 170489 6. 175581 6. 048971 6. 239885 6. 274894 6. 327082  
11753168\_ 5. 65691 5. 703807 5. 698342 5. 768053 5. 690505 5. 778674  
11753169\_ 6. 018824 5. 762412 5. 971873 5. 047692 4. 88013 5. 186969  
11753170\_ 6. 357031 6. 464485 6. 255123 6. 544459 6. 493195 6. 460639  
11753171\_ 4. 2438 4. 398443 4. 308523 4. 657143 4. 418385 4. 452523  
11753172\_ 4. 605743 4. 655138 4. 558276 4. 52794 4. 493222 4. 488279  
11753173\_ 8. 556487 8. 482645 8. 572634 8. 113716 8. 127222 8. 088807  
11753174\_ 8. 235764 8. 079633 8. 241542 7. 7593 7. 885473 7. 833598  
11753175\_ 9. 623804 9. 536097 9. 568526 9. 340342 9. 387631 9. 429598  
11753176\_ 5. 095367 5. 277511 5. 181496 5. 365621 5. 444323 5. 376442  
11753177\_ 2. 337065 2. 351903 2. 224502 2. 366672 2. 257971 2. 190194  
11753178\_ 5. 475835 5. 578408 5. 51789 5. 869614 5. 75068 5. 743731  
11753179\_ 7. 589676 7. 563623 7. 559658 7. 707325 7. 687632 7. 686283  
11753180\_ 5. 458926 5. 532758 5. 408115 5. 438105 5. 420963 5. 400142  
11753181\_ 6. 367801 6. 330962 6. 308753 6. 592524 6. 68817 6. 526261  
11753182\_ 5. 993002 6. 017676 6. 041596 6. 195081 6. 087042 5. 997401  
11753183\_ 4. 807097 4. 782551 4. 741115 4. 83675 4. 815279 4. 842148  
11753184\_ 7. 316506 7. 286473 7. 263614 7. 526895 7. 588177 7. 53242  
11753185\_ 7. 035613 7. 112906 7. 064191 7. 206143 7. 185032 7. 267957  
11753186\_ 4. 182678 4. 352901 4. 269784 4. 298803 4. 367144 4. 356431  
11753187\_ 7. 820855 7. 74247 7. 771457 8. 081906 8. 147335 8. 106999  
11753188\_ 4. 312342 4. 26398 4. 234833 4. 431066 4. 35943 4. 381035  
11753189\_ 3. 129541 2. 945929 3. 045096 3. 278705 3. 301818 3. 690047  
11753190\_ 2. 327541 2. 057137 2. 336364 2. 393347 2. 207715 2. 549717  
11753191\_ 5. 98546 5. 904396 6. 12521 5. 404178 5. 407218 5. 501758  
11753192\_ 7. 271417 7. 336868 7. 319546 7. 296636 7. 348504 7. 329636  
11753193\_ 6. 793926 6. 896244 6. 686978 6. 917217 6. 90424 6. 822995  
11753194\_ 6. 228122 6. 28345 6. 089447 6. 338052 6. 355029 6. 385723  
11753195\_ 4. 39969 4. 455441 4. 483888 4. 596457 4. 561461 4. 512352

11753196\_ 7. 715034 7. 662209 7. 695877 7. 472989 7. 452844 7. 511713  
11753197\_ 3. 555829 3. 204598 3. 220105 3. 176847 3. 327997 3. 352399  
11753198\_ 7. 439211 7. 355359 7. 393104 7. 290339 7. 329583 7. 306161  
11753199\_ 7. 82866 7. 687705 7. 864646 7. 736158 7. 70376 7. 701119  
11753200\_ 6. 010506 5. 997163 5. 922714 6. 096175 6. 062104 6. 006894  
11753201\_ 6. 426846 6. 412133 6. 365984 6. 327208 6. 281845 6. 378133  
11753202\_ 2. 287633 2. 324133 2. 324133 2. 570243 2. 314447 2. 402054  
11753203\_ 5. 044484 5. 071704 5. 172241 5. 211467 5. 241844 5. 076124  
11753204\_ 7. 497147 7. 457343 7. 596755 7. 940266 7. 978738 8. 057802  
11753205\_ 3. 862799 3. 997131 4. 133221 4. 013165 3. 920688 4. 06719  
11753206\_ 3. 91057 3. 840708 3. 788216 3. 834231 3. 929246 3. 863514  
11753207\_ 5. 515321 5. 542234 5. 63073 4. 899731 4. 871912 5. 172808  
11753208\_ 6. 319513 6. 409737 6. 31551 6. 386078 6. 300643 6. 497107  
11753209\_ 5. 641395 5. 752677 5. 501924 5. 787098 5. 77591 5. 735004  
11753210\_ 5. 446562 5. 442923 5. 389106 5. 496329 5. 688682 5. 562672  
11753211\_ 8. 034934 7. 912826 7. 965756 8. 13772 8. 122316 8. 064782  
11753212\_ 5. 333376 5. 200567 5. 333723 5. 016768 4. 968183 5. 289831  
11753213\_ 9. 364643 9. 270368 9. 329281 9. 347916 9. 343031 9. 332738  
11753214\_ 8. 053443 8. 00433 8. 012131 7. 579587 7. 520658 7. 477476  
11753215\_ 5. 167649 5. 309674 5. 179929 5. 2973 5. 276594 5. 346346  
11753216\_ 9. 055558 8. 9753 9. 078726 9. 454054 9. 488353 9. 442307  
11753217\_ 4. 631191 4. 565417 4. 531232 4. 721715 4. 599674 4. 6707  
11753218\_ 7. 000709 6. 980158 7. 028893 6. 943706 6. 95308 7. 014814  
11753219\_ 2. 254844 2. 361778 2. 450998 2. 450855 2. 47892 2. 518092  
11753220\_ 5. 034877 5. 294179 5. 090382 5. 268255 5. 2222 5. 069587  
11753221\_ 7. 066049 7. 004599 7. 055122 7. 253834 7. 301758 7. 263886  
11753222\_ 8. 019002 7. 836647 7. 945514 7. 760448 7. 76752 7. 823557  
11753223\_ 3. 644502 3. 760856 4. 229844 3. 93673 3. 917169 3. 836598  
11753224\_ 9. 317077 9. 263597 9. 317141 9. 606839 9. 680841 9. 655431  
11753225\_ 4. 088258 4. 140399 4. 284637 4. 097082 4. 08144 4. 277728  
11753226\_ 4. 278316 4. 248984 4. 282194 4. 169611 4. 370495 4. 270662  
11753227\_ 5. 71166 5. 810232 5. 749742 5. 822306 5. 83428 5. 863052  
11753228\_ 4. 359569 4. 339356 3. 967038 4. 179585 4. 164611 4. 245662  
11753229\_ 5. 285937 5. 324844 5. 2222 5. 284864 5. 298813 5. 264088  
11753230\_ 5. 849853 5. 750024 5. 802005 5. 905801 5. 837144 5. 804328  
11753231\_ 7. 136427 7. 315944 7. 257285 7. 346097 7. 431026 7. 383204  
11753232\_ 4. 421934 4. 710921 4. 880915 4. 629764 4. 540959 4. 781115  
11753233\_ 6. 306819 6. 269346 6. 284352 6. 359441 6. 415259 6. 349184  
11753234\_ 7. 013991 7. 065055 7. 082402 6. 92177 7. 004202 6. 957202  
11753235\_ 7. 888137 7. 96188 7. 92775 7. 717997 7. 621108 7. 6515  
11753236\_ 7. 437514 7. 489899 7. 385489 7. 534982 7. 502798 7. 503005  
11753237\_ 3. 307539 3. 433608 3. 322005 3. 523886 3. 476073 3. 376166  
11753238\_ 4. 98563 4. 763543 4. 772366 4. 872126 4. 968522 5. 016309  
11753239\_ 5. 821059 5. 965613 5. 895061 5. 942354 6. 006144 5. 964976  
11753240\_ 4. 836971 4. 691526 4. 721661 4. 756521 4. 714784 4. 780445  
11753241\_ 2. 395183 2. 482631 2. 42491 2. 552363 2. 531244 2. 283056  
11753242\_ 5. 880247 5. 91359 5. 837593 5. 712885 5. 934051 5. 968846  
11753243\_ 10. 36533 10. 31533 10. 32802 9. 637265 9. 621872 9. 689261  
11753244\_ 8. 290395 8. 332077 8. 352418 7. 046298 7. 039298 7. 131332  
11753245\_ 6. 177545 6. 078008 6. 097327 6. 069757 6. 193631 6. 200732  
11753246\_ 4. 637912 5. 019537 4. 85664 4. 832459 4. 97273 4. 86211

11753247\_ 7. 014414 6. 886776 7. 073402 6. 503512 6. 635305 6. 430947  
11753248\_ 6. 511696 6. 394858 6. 43083 6. 238888 6. 262415 6. 309814  
11753249\_ 7. 481404 7. 484932 7. 386824 7. 470745 7. 485628 7. 374487  
11753250\_ 4. 687614 5. 14841 4. 757798 4. 779177 4. 591881 4. 52373  
11753251\_ 10. 86384 10. 80212 10. 83827 10. 65381 10. 71284 10. 65631  
11753252\_ 5. 596034 5. 752311 5. 740436 5. 721408 5. 716591 5. 673313  
11753253\_ 5. 368712 5. 307731 5. 136874 5. 418935 5. 575058 5. 44447  
11753254\_ 6. 830716 6. 724054 6. 834792 7. 398384 7. 380218 7. 380218  
11753255\_ 5. 169147 5. 360206 5. 176395 5. 379369 5. 272612 5. 297498  
11753256\_ 5. 46578 5. 548808 5. 415679 5. 69822 5. 591986 5. 743644  
11753257\_ 2. 165855 2. 447737 2. 444441 2. 352554 2. 197948 2. 455124  
11753258\_ 7. 272474 7. 267243 7. 244708 7. 508278 7. 554288 7. 524418  
11753259\_ 4. 643696 4. 861609 4. 734738 4. 87354 4. 741019 4. 887377  
11753260\_ 11. 30589 11. 394 11. 33722 11. 49081 11. 39306 11. 33849  
11753261\_ 9. 514638 9. 506385 9. 552339 9. 347796 9. 326338 9. 394689  
11753262\_ 3. 274252 3. 249899 3. 006819 3. 254909 3. 361857 3. 145478  
11753263\_ 7. 989122 8. 005015 8. 113416 7. 45 7. 461976 7. 466925  
11753264\_ 8. 359135 8. 344982 8. 352823 7. 732178 7. 721159 7. 829092  
11753265\_ 5. 999154 6. 076709 5. 9839 5. 98441 6. 029807 5. 954991  
11753266\_ 5. 977166 5. 796537 5. 970462 5. 499706 5. 341799 5. 554215  
11753267\_ 7. 996638 7. 949426 7. 966876 8. 114874 8. 154737 8. 100017  
11753268\_ 9. 398097 9. 334307 9. 40908 9. 159082 9. 162798 9. 154765  
11753269\_ 6. 255405 6. 258059 6. 436851 6. 148702 6. 131182 6. 052617  
11753270\_ 4. 648772 4. 822511 4. 676282 4. 822511 5. 010554 4. 889475  
11753271\_ 4. 526682 4. 572317 4. 28862 4. 649164 4. 459244 4. 52373  
11753272\_ 6. 145037 6. 138066 5. 964216 6. 108279 6. 07867 6. 099115  
11753273\_ 5. 829731 5. 776429 5. 951348 5. 710936 5. 776429 5. 822127  
11753274\_ 6. 088062 5. 966989 6. 06645 5. 944445 6. 124044 6. 110204  
11753275\_ 10. 49285 10. 39002 10. 47577 10. 77939 10. 77018 10. 80909  
11753276\_ 5. 637028 5. 614461 5. 584813 5. 726118 5. 732672 5. 661813  
11753277\_ 2. 565202 2. 479363 2. 400193 2. 527926 2. 518083 2. 441115  
11753278\_ 5. 768148 5. 690926 5. 654667 5. 827478 5. 795735 5. 704919  
11753279\_ 7. 859494 7. 745246 7. 815231 8. 449192 8. 414458 8. 402829  
11753280\_ 5. 384574 5. 142078 5. 098571 5. 156303 5. 195196 5. 121525  
11753281\_ 3. 395974 3. 655508 3. 495933 3. 64761 3. 689765 3. 503743  
11753282\_ 4. 383657 4. 240043 4. 427941 4. 16651 4. 454674 4. 343767  
11753283\_ 6. 373148 6. 388359 6. 533483 7. 082457 7. 04229 7. 10782  
11753284\_ 6. 92607 6. 868091 6. 971486 7. 516739 7. 457955 7. 469235  
11753285\_ 5. 925952 5. 982512 5. 944332 5. 92326 5. 930681 5. 958139  
11753286\_ 6. 769189 6. 684952 6. 672823 6. 535507 6. 682194 6. 658095  
11753287\_ 4. 942516 5. 158323 5. 398583 4. 899039 4. 926647 4. 909943  
11753288\_ 8. 376466 8. 296402 8. 166205 8. 619918 8. 550678 8. 47976  
11753289\_ 4. 657522 4. 222191 4. 56551 3. 708579 3. 755033 3. 805546  
11753290\_ 4. 442453 4. 51707 4. 468624 4. 588388 4. 605207 4. 578273  
11753291\_ 10. 7842 10. 72761 10. 80618 10. 63044 10. 63045 10. 59239  
11753292\_ 10. 87216 10. 84503 10. 85921 10. 71224 10. 73872 10. 69854  
11753293\_ 4. 773636 4. 683581 4. 751327 5. 142503 4. 979907 4. 815263  
11753294\_ 3. 508764 3. 529822 3. 516112 3. 663275 3. 508764 3. 31377  
11753295\_ 4. 964352 5. 034289 4. 750961 5. 027396 5. 039477 5. 221705  
11753296\_ 4. 494016 4. 332727 4. 319431 4. 658687 4. 515967 4. 415744  
11753297\_ 7. 334514 7. 49229 7. 362854 7. 478991 7. 496346 7. 528727

11753298\_ 7. 1782 7. 25755 7. 008612 7. 257477 7. 279177 7. 246134  
11753299\_ 2. 47021 2. 605516 2. 496571 2. 666094 2. 590651 2. 606878  
11753300\_ 3. 581148 3. 75224 3. 607413 3. 747975 3. 679309 3. 741909  
11753301\_ 8. 32048 8. 305108 8. 34895 8. 961431 8. 965377 8. 903136  
11753302\_ 8. 759697 8. 728471 8. 808471 9. 239398 9. 235287 9. 178192  
11753303\_ 6. 381019 6. 471327 6. 461077 6. 215625 6. 409517 6. 425192  
11753304\_ 6. 744637 6. 74133 6. 739583 6. 826297 6. 844759 6. 82621  
11753305\_ 5. 378985 5. 406382 5. 297498 5. 403541 5. 403541 5. 409222  
11753306\_ 3. 442157 3. 643077 3. 57792 3. 632266 3. 554016 3. 739614  
11753307\_ 5. 787267 5. 896936 5. 829066 5. 911448 5. 883844 6. 032693  
11753308\_ 6. 767662 6. 743604 6. 872204 7. 030279 7. 101942 7. 15763  
11753309\_ 6. 743715 7. 00047 6. 738679 6. 884597 6. 928908 6. 843173  
11753310\_ 7. 009196 6. 986804 7. 032776 7. 202933 7. 059135 7. 173201  
11753311\_ 6. 537971 6. 38691 6. 534201 6. 626484 6. 538179 6. 847361  
11753312\_ 5. 22786 5. 292355 5. 166727 5. 339871 5. 427202 5. 298176  
11753313\_ 10. 96395 10. 88954 10. 91908 11. 25171 11. 27111 11. 2617  
11753314\_ 6. 241081 6. 4581 6. 280928 6. 429064 6. 487705 6. 345424  
11753315\_ 5. 238405 5. 288108 5. 369139 5. 332512 5. 242756 5. 147701  
11753316\_ 4. 273231 4. 179639 4. 167283 4. 278878 4. 194244 4. 140024  
11753317\_ 4. 871257 5. 143571 4. 975048 4. 736759 4. 518572 4. 68218  
11753318\_ 6. 451372 6. 463489 6. 34391 6. 127879 6. 180169 6. 134453  
11753319\_ 5. 783143 5. 704919 5. 590399 5. 434795 5. 516597 5. 429231  
11753320\_ 7. 135454 7. 102322 7. 153316 7. 115775 7. 12011 7. 229294  
11753321\_ 4. 439122 4. 64856 4. 489455 4. 626963 4. 572051 4. 52196  
11753322\_ 7. 36404 7. 20351 7. 370536 7. 384561 7. 440634 7. 397673  
11753323\_ 5. 285218 5. 385701 5. 258794 5. 323607 5. 36323 5. 301284  
11753324\_ 4. 658473 4. 740118 4. 53312 4. 552075 4. 640957 4. 546151  
11753325\_ 5. 788026 5. 756507 5. 756507 6. 108283 6. 121862 6. 167992  
11753326\_ 7. 014486 7. 066036 6. 994569 7. 040279 6. 940264 6. 946361  
11753327\_ 6. 876624 6. 858467 6. 88268 6. 668715 6. 671367 6. 632133  
11753328\_ 11. 22016 11. 19283 11. 24086 11. 22045 11. 23656 11. 23747  
11753329\_ 11. 54134 11. 49018 11. 55328 11. 54861 11. 53552 11. 55067  
11753330\_ 11. 89665 11. 94799 11. 88417 11. 9478 11. 83432 11. 81164  
11753331\_ 5. 929916 6. 097927 5. 974811 6. 042642 6. 203931 6. 077831  
11753332\_ 8. 898778 8. 930176 8. 994116 9. 362233 9. 36576 9. 386146  
11753333\_ 9. 604719 9. 506617 9. 524209 9. 713534 9. 761121 9. 772523  
11753334\_ 9. 211961 9. 13153 9. 133796 8. 724519 8. 742589 8. 685589  
11753335\_ 6. 823438 6. 808755 6. 759926 6. 687974 6. 710797 6. 829408  
11753336\_ 7. 173542 7. 098692 7. 123675 7. 582418 7. 618411 7. 685673  
11753337\_ 4. 418458 4. 33193 4. 498197 4. 392039 4. 32932 4. 360701  
11753338\_ 6. 192862 6. 119962 6. 108803 6. 104227 6. 127589 6. 244678  
11753339\_ 4. 3389 4. 495456 4. 39764 4. 10337 4. 504243 4. 211924  
11753340\_ 5. 404312 5. 449562 5. 404312 5. 340647 5. 404312 5. 42282  
11753341\_ 5. 339155 5. 39444 5. 35053 5. 333718 5. 466315 5. 505175  
11753342\_ 12. 58657 12. 56067 12. 57784 12. 53217 12. 57821 12. 54313  
11753343\_ 3. 460547 3. 347742 3. 375943 3. 449491 3. 29299 3. 415959  
11753344\_ 2. 520173 2. 47102 2. 634352 2. 579007 2. 361778 2. 592998  
11753345\_ 7. 98896 7. 961695 7. 967849 7. 866345 7. 920819 7. 969015  
11753346\_ 2. 787653 2. 474175 2. 540352 2. 559039 2. 698995 2. 551861  
11753347\_ 5. 743797 5. 891682 5. 752207 5. 93062 6. 035245 5. 802522  
11753348\_ 3. 43265 3. 46933 3. 317525 3. 3947 3. 337956 3. 523403

11753349\_ 4. 270989 4. 335594 4. 240598 4. 496168 4. 240598 4. 35715  
11753350\_ 9. 268689 9. 267555 9. 269624 9. 23379 9. 113326 9. 2089  
11753351\_ 5. 18564 5. 234107 5. 029529 5. 225666 5. 369593 5. 377222  
11753352\_ 6. 098881 6. 088623 6. 012111 6. 331509 6. 334024 6. 416178  
11753353\_ 6. 330818 6. 454548 6. 389366 6. 501694 6. 454548 6. 65272  
11753354\_ 3. 064119 3. 195965 3. 394921 3. 449043 3. 285484 3. 315085  
11753355\_ 7. 622507 7. 651016 7. 698004 7. 621113 7. 661435 7. 616619  
11753356\_ 11. 79427 11. 74616 11. 81974 12. 05426 12. 09074 12. 07856  
11753357\_ 5. 368384 5. 31454 5. 584813 5. 491756 5. 261238 5. 441577  
11753358\_ 6. 08334 6. 073705 6. 086401 6. 241501 6. 166542 6. 215082  
11753359\_ 6. 270335 6. 148851 6. 22566 6. 121813 6. 008008 6. 155609  
11753360\_ 4. 669661 4. 934032 4. 621384 4. 728445 4. 728445 5. 013072  
11753361\_ 5. 318084 5. 264004 5. 26034 5. 37652 5. 302468 5. 156303  
11753362\_ 8. 158516 8. 022374 8. 160832 7. 866881 7. 829911 7. 918247  
11753363\_ 4. 160341 4. 230156 4. 161941 4. 304021 4. 129075 4. 229196  
11753364\_ 4. 85888 5. 021715 5. 017314 5. 08085 4. 911525 5. 08085  
11753365\_ 5. 149413 5. 189628 5. 100696 5. 272472 5. 174013 5. 169263  
11753366\_ 11. 35996 11. 35298 11. 32562 11. 8226 11. 82011 11. 74493  
11753367\_ 9. 609952 9. 567709 9. 650477 9. 739211 9. 743156 9. 774961  
11753368\_ 11. 4189 11. 40403 11. 41699 11. 52333 11. 58151 11. 46451  
11753369\_ 5. 446996 5. 375072 5. 446996 5. 420772 5. 360033 5. 475572  
11753370\_ 3. 747437 3. 963203 3. 649564 3. 804688 3. 773003 3. 963969  
11753371\_ 5. 715475 5. 798267 5. 736831 5. 910773 5. 849971 5. 588394  
11753372\_ 3. 842963 4. 067703 3. 693279 3. 884086 3. 79153 3. 731137  
11753373\_ 11. 56662 11. 51508 11. 56264 11. 37774 11. 35979 11. 39612  
11753374\_ 6. 125771 6. 267381 6. 199575 5. 82637 5. 792209 5. 795003  
11753375\_ 4. 23469 4. 389985 4. 436615 4. 433492 4. 484459 4. 580682  
11753376\_ 4. 762793 5. 062388 4. 997729 4. 94368 4. 928135 5. 104982  
11753377\_ 5. 408149 5. 554436 5. 554436 5. 533382 5. 583769 5. 591412  
11753378\_ 10. 85378 10. 79509 10. 88324 11. 16111 11. 15895 11. 18263  
11753379\_ 7. 60519 7. 602873 7. 697757 7. 12281 7. 064042 7. 055831  
11753380\_ 4. 51163 4. 335117 4. 39632 4. 593223 4. 491519 4. 6774  
11753381\_ 6. 330304 6. 22368 6. 203749 6. 148394 6. 08388 6. 043375  
11753382\_ 5. 192626 5. 217713 5. 134089 5. 330726 5. 30939 5. 287114  
11753383\_ 3. 94573 3. 763328 3. 753479 3. 795041 3. 754346 3. 815549  
11753384\_ 4. 9226 5. 205589 5. 039269 5. 394716 5. 420293 5. 308546  
11753385\_ 4. 544424 4. 6163 4. 493588 4. 814826 4. 974008 4. 94619  
11753386\_ 8. 821756 8. 755794 8. 80624 8. 753851 8. 740185 8. 694677  
11753387\_ 2. 464166 2. 505979 2. 422526 2. 503757 2. 384734 2. 515477  
11753388\_ 5. 033322 5. 276738 4. 97095 5. 2222 5. 07958 5. 156303  
11753389\_ 3. 773803 3. 794031 3. 760112 3. 87565 3. 799117 3. 820049  
11753390\_ 10. 26021 10. 25979 10. 25199 10. 08758 10. 04893 10. 09858  
11753391\_ 4. 488549 4. 509331 4. 732482 4. 502014 4. 700755 4. 544967  
11753392\_ 6. 528143 6. 602793 6. 484321 6. 846062 6. 626044 6. 714412  
11753393\_ 3. 818401 3. 957625 3. 830866 3. 654022 3. 792085 4. 002324  
11753394\_ 5. 848708 5. 844647 5. 823776 5. 923281 5. 880194 5. 77685  
11753395\_ 5. 393282 5. 510468 5. 34154 5. 451834 5. 527122 5. 547516  
11753396\_ 8. 376225 8. 368607 8. 421253 8. 236961 8. 358186 8. 2701  
11753397\_ 3. 362484 3. 433989 3. 334721 3. 515238 3. 521268 3. 468674  
11753398\_ 11. 10229 11. 07658 11. 07915 10. 96284 10. 94691 10. 91906  
11753399\_ 12. 03976 12. 03694 12. 01224 11. 74055 11. 78109 11. 74845

11753400\_ 4. 670392 4. 463615 4. 510297 4. 92128 4. 909095 4. 996557  
11753401\_ 11. 74332 11. 73574 11. 75049 11. 9432 11. 93864 11. 90452  
11753402\_ 3. 91969 3. 807415 3. 886132 3. 929406 3. 931714 4. 024086  
11753403\_ 5. 304431 5. 383451 5. 188487 5. 311366 5. 218324 5. 394825  
11753404\_ 7. 395126 7. 372906 7. 432485 7. 225148 7. 289414 7. 116837  
11753405\_ 8. 372002 8. 314784 8. 351478 8. 138846 8. 146782 8. 118961  
11753406\_ 5. 641309 5. 763232 5. 736831 5. 850644 5. 916527 5. 904017  
11753407\_ 5. 036702 5. 109956 4. 995668 4. 874234 4. 890539 4. 984669  
11753408\_ 4. 492996 4. 320564 4. 374639 4. 488665 4. 20635 4. 2345  
11753409\_ 3. 697449 3. 757041 3. 631633 3. 875371 3. 874964 4. 004336  
11753410\_ 10. 11606 10. 09781 10. 13546 10. 10595 10. 18399 10. 07043  
11753411\_ 8. 010558 7. 901651 7. 982305 7. 826748 7. 892395 7. 859602  
11753412\_ 2. 874712 2. 91411 2. 728318 2. 955247 2. 864088 2. 957476  
11753413\_ 4. 80937 4. 944477 4. 957385 5. 142981 5. 177748 4. 981233  
11753414\_ 7. 427512 7. 400837 7. 431698 7. 593768 7. 543908 7. 499206  
11753415\_ 7. 93252 7. 939782 7. 912507 8. 51765 8. 552847 8. 405119  
11753416\_ 5. 200361 5. 2666 5. 207658 5. 459963 5. 30293 5. 249951  
11753417\_ 6. 118838 6. 033313 6. 12342 6. 200654 6. 349824 6. 239334  
11753418\_ 6. 576851 6. 579869 6. 584348 6. 044371 5. 978958 6. 134792  
11753419\_ 6. 206103 5. 898204 6. 223045 6. 177688 6. 206103 6. 305669  
11753420\_ 8. 231614 8. 227933 8. 357191 7. 126991 7. 188693 7. 214124  
11753421\_ 7. 300657 7. 141747 7. 227576 5. 830476 5. 887893 5. 896433  
11753422\_ 8. 721537 8. 714454 8. 763357 8. 658098 8. 622867 8. 60563  
11753423\_ 4. 019557 4. 177673 3. 848653 3. 990123 4. 051638 4. 220917  
11753424\_ 5. 494272 5. 660051 5. 640754 5. 674383 5. 76349 5. 729865  
11753425\_ 4. 874167 5. 072399 4. 983866 5. 07619 5. 022416 5. 066005  
11753426\_ 4. 595103 4. 739276 4. 614753 4. 732677 4. 700662 4. 782105  
11753427\_ 8. 730582 8. 703063 8. 708478 8. 12134 8. 112673 8. 032427  
11753428\_ 9. 04948 9. 04506 8. 945012 9. 119182 9. 086307 9. 002046  
11753429\_ 7. 356339 7. 268901 7. 387008 7. 344252 7. 337389 7. 364411  
11753430\_ 7. 296561 7. 215889 7. 330654 7. 354152 7. 405951 7. 342771  
11753431\_ 5. 646358 5. 669058 5. 643713 5. 745821 5. 608511 5. 895491  
11753432\_ 4. 044956 3. 725204 3. 734948 3. 829007 4. 098121 3. 921202  
11753433\_ 4. 325513 4. 037552 4. 067111 4. 152976 4. 272963 4. 031876  
11753434\_ 10. 16334 10. 11778 10. 17417 9. 864878 9. 899446 9. 818003  
11753435\_ 10. 41586 10. 31946 10. 39128 10. 0489 10. 13254 10. 08367  
11753436\_ 5. 136403 5. 152394 5. 110288 5. 124512 5. 119434 5. 156303  
11753437\_ 3. 179885 3. 55565 3. 509043 3. 535484 3. 471804 3. 476647  
11753438\_ 6. 879716 6. 975313 6. 994297 6. 950362 7. 057186 6. 93598  
11753439\_ 7. 711857 7. 651016 7. 779217 7. 679036 7. 683012 7. 720987  
11753440\_ 7. 652223 7. 576272 7. 734196 7. 597395 7. 612446 7. 598806  
11753441\_ 5. 643713 5. 331285 5. 211814 5. 728705 5. 63832 5. 442778  
11753442\_ 8. 363251 8. 115451 8. 265384 6. 634134 6. 761064 6. 651687  
11753443\_ 4. 779998 4. 782705 4. 816582 4. 768239 4. 806386 4. 994764  
11753444\_ 3. 697179 3. 718634 3. 718634 3. 801596 3. 727883 3. 717743  
11753445\_ 6. 17981 6. 097927 6. 173481 5. 960068 6. 041254 6. 031796  
11753446\_ 6. 581869 6. 518198 6. 571956 6. 479057 6. 494684 6. 431001  
11753447\_ 4. 945387 5. 046439 5. 137225 5. 144799 5. 18749 5. 229312  
11753448\_ 8. 209117 8. 187607 8. 241029 8. 027878 8. 068552 8. 00558  
11753449\_ 5. 557427 5. 683949 5. 664579 5. 608255 5. 676878 5. 659153  
11753450\_ 5. 428057 5. 66469 5. 560388 5. 73209 5. 648967 5. 687088

11753451\_ 8. 508567 8. 455754 8. 555941 8. 15872 8. 091556 8. 073717  
11753452\_ 4. 144157 4. 286826 4. 146129 4. 424047 4. 422608 4. 297894  
11753453\_ 9. 622608 9. 604744 9. 618269 9. 539364 9. 539737 9. 545287  
11753454\_ 3. 815181 3. 920376 3. 981209 3. 944922 3. 842895 3. 927987  
11753455\_ 4. 32509 4. 474799 4. 214261 4. 482959 4. 439418 4. 423534  
11753456\_ 7. 578621 7. 559725 7. 700597 7. 556137 7. 510542 7. 55422  
11753457\_ 5. 740555 5. 680503 5. 705118 5. 598883 5. 593915 5. 458614  
11753458\_ 7. 636095 7. 653317 7. 620089 7. 609911 7. 58736 7. 637817  
11753459\_ 11. 6842 11. 69125 11. 64059 11. 94287 11. 88787 11. 82644  
11753460\_ 4. 308017 4. 174945 3. 878886 3. 987273 4. 119626 4. 078693  
11753461\_ 4. 916366 5. 032618 4. 867624 4. 970774 4. 881758 4. 942537  
11753462\_ 6. 702203 6. 433112 6. 579638 6. 054365 6. 019491 5. 964811  
11753463\_ 4. 50114 4. 643717 4. 617597 4. 680413 4. 606333 4. 583119  
11753464\_ 7. 210408 7. 262229 7. 14547 7. 309686 7. 343397 7. 356714  
11753465\_ 4. 955158 5. 11527 4. 807836 5. 120603 5. 065765 5. 084788  
11753466\_ 5. 946536 5. 930264 5. 971215 5. 57575 5. 761741 5. 746403  
11753467\_ 3. 150778 3. 255854 3. 138626 3. 319552 3. 454283 3. 168822  
11753468\_ 3. 565261 3. 58724 3. 549816 3. 274186 3. 421757 3. 316004  
11753469\_ 5. 409222 5. 264981 5. 082635 5. 236393 5. 160222 5. 073036  
11753470\_ 7. 277358 7. 198146 7. 203958 6. 954999 6. 989292 6. 808444  
11753471\_ 4. 972591 5. 082616 4. 941747 5. 187158 5. 29554 5. 349508  
11753472\_ 5. 522653 5. 677206 5. 590786 5. 708125 5. 673227 5. 503767  
11753473\_ 5. 494828 5. 553802 5. 542501 5. 547626 5. 579249 5. 512022  
11753474\_ 5. 442778 5. 352229 5. 422374 5. 243917 5. 433932 5. 358138  
11753475\_ 5. 385554 5. 414869 5. 293687 5. 49028 5. 392673 5. 554436  
11753476\_ 3. 700784 3. 553855 3. 403077 3. 511049 3. 561676 3. 54785  
11753477\_ 5. 842792 5. 794336 5. 754887 5. 72218 5. 768053 5. 752033  
11753478\_ 5. 635778 5. 715146 5. 719734 5. 47612 5. 57653 5. 539237  
11753479\_ 10. 47915 10. 48466 10. 53221 10. 52083 10. 55673 10. 51585  
11753480\_ 6. 022871 5. 948964 6. 112788 6. 266514 6. 397946 6. 412734  
11753481\_ 7. 303394 7. 20053 7. 318918 6. 901244 6. 956076 6. 99071  
11753482\_ 3. 638205 3. 568579 3. 477422 3. 750206 3. 839443 3. 659458  
11753483\_ 6. 743635 6. 54982 6. 625463 7. 208978 7. 127751 7. 192631  
11753484\_ 4. 260997 4. 174945 3. 956379 4. 159775 3. 923612 4. 122446  
11753485\_ 6. 90735 6. 714177 6. 904414 7. 379147 7. 297891 7. 3308  
11753486\_ 2. 095484 1. 927488 1. 905167 1. 927488 1. 927488 1. 872202  
11753487\_ 4. 101409 4. 091479 4. 103828 4. 081243 4. 28491 4. 023671  
11753488\_ 4. 744342 4. 874098 5. 006322 4. 821407 5. 052942 5. 146756  
11753489\_ 8. 617284 8. 646931 8. 686264 9. 059331 9. 050289 8. 994405  
11753490\_ 4. 513241 4. 466191 4. 459939 4. 41255 4. 53657 4. 579133  
11753491\_ 4. 129228 4. 245938 4. 16909 4. 751094 4. 966402 4. 87931  
11753492\_ 8. 425545 8. 302809 8. 380185 8. 945429 8. 961477 8. 977338  
11753493\_ 8. 117163 8. 166075 8. 181944 7. 751916 7. 572334 7. 606084  
11753494\_ 8. 372465 8. 468596 8. 435261 7. 903312 7. 82768 7. 852288  
11753495\_ 5. 92296 5. 853919 6. 062554 5. 910044 5. 880479 5. 947066  
11753496\_ 2. 747927 2. 855054 2. 747927 2. 767938 2. 742248 2. 687895  
11753497\_ 6. 66357 6. 494237 6. 536312 6. 038032 6. 104931 6. 123805  
11753498\_ 5. 810479 5. 964607 5. 840677 6. 016195 5. 962816 6. 064837  
11753499\_ 3. 186157 2. 96867 2. 757097 3. 304348 3. 031689 3. 180062  
11753500\_ 7. 10617 7. 070083 7. 115616 6. 982175 7. 000781 7. 036759  
11753501\_ 7. 059997 7. 209821 7. 028496 7. 281134 7. 249527 7. 052913



11753502\_ 5. 841619 5. 866126 5. 780416 5. 868658 5. 820321 5. 77685  
11753503\_ 3. 657257 3. 910912 3. 753289 3. 795474 3. 682352 3. 877421  
11753504\_ 7. 115849 7. 255369 7. 253719 7. 329043 7. 194129 7. 262035  
11753505\_ 7. 050867 7. 139787 7. 145854 7. 217246 7. 250473 7. 330213  
11753506\_ 6. 158586 6. 023926 6. 028886 5. 745821 5. 571783 5. 528624  
11753507\_ 6. 602023 6. 540223 6. 351095 6. 537171 6. 482145 6. 50605  
11753508\_ 4. 494772 4. 584933 4. 370337 4. 497935 4. 406995 4. 577459  
11753509\_ 6. 507925 6. 368288 6. 428975 6. 773811 6. 83431 6. 837641  
11753510\_ 6. 502021 6. 566877 6. 514574 6. 295667 6. 080522 6. 111271  
11753511\_ 8. 963035 8. 91991 8. 942965 8. 794671 8. 80285 8. 789606  
11753512\_ 9. 739299 9. 759468 9. 746173 9. 676913 9. 643246 9. 627525  
11753513\_ 7. 858226 7. 743838 7. 918834 7. 5854 7. 705237 7. 694613  
11753514\_ 7. 525185 7. 472589 7. 426223 7. 342427 7. 450088 7. 3342  
11753515\_ 8. 142202 8. 303324 8. 226594 6. 957115 7. 143876 7. 186577  
11753516\_ 5. 161548 5. 114454 5. 089986 4. 967499 4. 993187 5. 01648  
11753517\_ 9. 286546 9. 287758 9. 325596 9. 852736 9. 863048 9. 814174  
11753518\_ 9. 616791 9. 623971 9. 530906 9. 914108 9. 939137 9. 936286  
11753519\_ 5. 809601 5. 747172 5. 662128 5. 503791 5. 790336 5. 736788  
11753520\_ 3. 734534 4. 043976 3. 783156 3. 956711 3. 96074 4. 025382  
11753521\_ 8. 276101 8. 09976 8. 258887 8. 300249 8. 336892 8. 298057  
11753522\_ 5. 597542 5. 611959 5. 515426 5. 639621 5. 587155 5. 650243  
11753523\_ 7. 191182 7. 111953 7. 189467 7. 32455 7. 286883 7. 303735  
11753524\_ 12. 20424 12. 16228 12. 18791 12. 06631 12. 08605 12. 04538  
11753525\_ 7. 077791 7. 111953 7. 170411 7. 187472 7. 17726 7. 232932  
11753526\_ 6. 597815 6. 643733 6. 663854 6. 717877 6. 801639 6. 654193  
11753527\_ 5. 752907 5. 684868 5. 883497 5. 584813 5. 686361 5. 585641  
11753528\_ 6. 705524 6. 782631 6. 718219 6. 744307 6. 845577 6. 793821  
11753529\_ 7. 483471 7. 453765 7. 504351 7. 265874 7. 278008 7. 300516  
11753530\_ 11. 00123 10. 96396 10. 97206 10. 80577 10. 8018 10. 8079  
11753531\_ 4. 441027 4. 286357 4. 357064 4. 504627 4. 587429 4. 719346  
11753532\_ 3. 925163 3. 804402 3. 567949 3. 626614 3. 626614 3. 641419  
11753533\_ 5. 494841 5. 524857 5. 464392 5. 527509 5. 58918 5. 482098  
11753534\_ 2. 438708 2. 25483 2. 348292 2. 361599 2. 47102 2. 352034  
11753535\_ 2. 379986 2. 474923 2. 381688 2. 444538 2. 38331 2. 45197  
11753536\_ 7. 697785 7. 783527 7. 550285 7. 797582 7. 835666 7. 739969  
11753537\_ 6. 582762 6. 437736 6. 526607 6. 940099 6. 835749 6. 826598  
11753538\_ 4. 645773 4. 682073 4. 64749 4. 656824 4. 63114 4. 476584  
11753539\_ 3. 429506 3. 598048 3. 411056 3. 399088 3. 373404 3. 306094  
11753540\_ 6. 17981 6. 283462 6. 127509 6. 305975 6. 245986 6. 315615  
11753541\_ 4. 614261 4. 709728 4. 738389 4. 555278 4. 634502 4. 781212  
11753542\_ 4. 468624 4. 688785 4. 583118 4. 78097 4. 836896 4. 572166  
11753543\_ 5. 998835 6. 112892 5. 922714 6. 044339 5. 894697 6. 070149  
11753544\_ 5. 173435 5. 263984 5. 594676 4. 974017 4. 819389 4. 975695  
11753545\_ 5. 803956 5. 815656 5. 847464 5. 528758 5. 400611 5. 460413  
11753546\_ 10. 86007 10. 89363 10. 90369 11. 3111 11. 29797 11. 23995  
11753547\_ 4. 771577 4. 787527 4. 643717 4. 874234 4. 910873 4. 794629  
11753548\_ 7. 979159 7. 91236 7. 936635 8. 129095 8. 226709 8. 115451  
11753549\_ 8. 606178 8. 586661 8. 63395 8. 471317 8. 513687 8. 50852  
11753550\_ 6. 244666 6. 159771 6. 499078 5. 886757 6. 02759 5. 906931  
11753551\_ 3. 818895 3. 825273 3. 904158 3. 822331 3. 740966 3. 725425  
11753552\_ 3. 640133 3. 844492 3. 740892 3. 774912 3. 925194 3. 879309

11753553\_ 5. 290816 5. 168201 5. 333723 5. 189628 5. 039457 5. 196201  
11753554\_ 5. 029529 5. 149337 4. 916496 4. 798627 4. 74328 4. 94619  
11753555\_ 4. 830525 4. 904882 4. 75181 4. 746629 4. 857494 5. 071294  
11753556\_ 5. 220674 5. 244242 5. 288816 5. 384689 5. 425875 5. 368373  
11753557\_ 4. 14473 4. 253447 4. 304179 4. 117946 4. 054288 4. 435667  
11753558\_ 8. 748589 8. 690467 8. 736224 9. 51172 9. 548628 9. 48322  
11753559\_ 2. 656586 2. 901155 2. 775085 2. 926975 3. 037342 2. 916696  
11753560\_ 12. 14352 12. 09623 12. 11931 12. 27647 12. 25766 12. 28185  
11753561\_ 2. 863557 2. 949624 2. 605792 2. 903932 2. 760434 2. 880239  
11753562\_ 1. 885383 1. 902496 1. 930036 1. 955623 1. 934292 1. 933743  
11753563\_ 8. 305785 8. 277977 8. 338898 7. 598125 7. 675862 7. 611471  
11753564\_ 4. 603677 4. 617058 4. 566085 4. 439483 4. 518585 4. 569558  
11753565\_ 12. 80526 12. 79082 12. 79898 12. 7738 12. 79443 12. 76156  
11753566\_ 3. 071792 3. 238587 3. 223294 3. 197373 3. 234764 3. 392544  
11753567\_ 4. 489571 4. 548207 4. 500128 4. 697283 4. 546112 4. 548207  
11753568\_ 8. 325275 8. 276877 8. 247904 7. 899005 7. 93759 7. 925272  
11753569\_ 4. 056308 4. 127783 4. 056308 4. 337202 4. 666527 4. 231695  
11753570\_ 5. 454381 5. 744716 5. 572096 5. 596903 5. 634415 5. 568402  
11753571\_ 7. 800304 7. 781327 7. 701561 8. 08406 8. 073075 8. 04836  
11753572\_ 10. 57607 10. 53216 10. 55909 10. 63079 10. 66014 10. 65512  
11753573\_ 9. 825299 9. 784157 9. 838414 9. 844359 9. 908261 9. 869329  
11753574\_ 2. 47102 2. 46671 2. 618695 2. 396272 2. 402153 2. 505709  
11753575\_ 6. 71875 6. 595725 6. 752195 7. 173269 7. 129341 7. 142783  
11753576\_ 5. 104238 5. 205025 4. 907339 5. 140978 5. 113661 5. 098244  
11753577\_ 6. 335102 6. 490214 6. 223564 6. 539082 6. 556741 6. 436125  
11753578\_ 5. 704919 5. 718988 5. 516049 5. 59453 5. 673382 5. 739601  
11753579\_ 7. 559567 7. 351631 7. 409349 7. 166883 7. 079536 6. 984757  
11753580\_ 4. 158662 3. 9783 4. 131444 3. 79302 3. 802158 3. 74554  
11753581\_ 4. 548808 4. 292468 4. 175207 4. 22265 4. 339038 4. 123108  
11753582\_ 6. 323343 6. 249129 6. 312312 6. 744505 6. 768408 6. 772428  
11753583\_ 5. 204877 5. 123273 5. 115649 4. 817073 4. 768179 5. 059042  
11753584\_ 6. 226524 6. 370839 6. 197374 6. 305369 6. 382701 6. 310233  
11753585\_ 5. 9252 6. 008103 5. 921877 6. 061141 6. 094292 6. 134933  
11753586\_ 3. 144378 3. 079654 3. 064161 2. 718322 2. 539901 2. 976513  
11753587\_ 4. 735145 4. 661505 4. 661505 4. 767012 4. 665491 4. 730013  
11753588\_ 10. 60362 10. 53057 10. 572 10. 8799 10. 89855 10. 88499  
11753589\_ 2. 354869 2. 396833 2. 17287 2. 122855 2. 124175 2. 122855  
11753590\_ 7. 165745 7. 127186 7. 109487 7. 423035 7. 393499 7. 456089  
11753591\_ 9. 074121 9. 01803 9. 006488 9. 086735 9. 16076 9. 082932  
11753592\_ 12. 27237 12. 24156 12. 24458 12. 22442 12. 22924 12. 21289  
11753593\_ 7. 897998 7. 870546 7. 931915 7. 849783 7. 837844 7. 870764  
11753594\_ 8. 733136 8. 713089 8. 726499 8. 64625 8. 738484 8. 71356  
11753595\_ 3. 916561 3. 997131 3. 805384 4. 066646 3. 780262 4. 108492  
11753596\_ 9. 608012 9. 530114 9. 594019 9. 319673 9. 341482 9. 332354  
11753597\_ 10. 78732 10. 75342 10. 79017 11. 02047 11. 0456 11. 06746  
11753598\_ 6. 232321 6. 050026 6. 301951 5. 731547 5. 676562 5. 879387  
11753599\_ 5. 898245 5. 802629 5. 936235 5. 672285 5. 686361 5. 735116  
11753600\_ 5. 945415 5. 906423 5. 869231 6. 407872 6. 497107 6. 300643  
11753601\_ 4. 380054 4. 148199 4. 359003 4. 277816 4. 200678 4. 415744  
11753602\_ 5. 738568 5. 757842 5. 628248 5. 829405 5. 970534 5. 827246  
11753603\_ 10. 36029 10. 31801 10. 31747 10. 49196 10. 50837 10. 42088

11753604\_ 4. 543646 4. 498596 4. 595568 4. 821522 4. 643717 4. 700243  
11753605\_ 4. 60732 4. 945882 4. 852765 4. 821837 4. 915983 4. 810476  
11753606\_ 9. 581906 9. 529395 9. 580877 9. 603504 9. 626951 9. 58464  
11753607\_ 3. 413462 3. 581658 3. 523932 3. 52979 3. 647002 3. 892517  
11753608\_ 5. 491138 5. 554436 5. 499449 5. 529992 5. 644427 5. 709798  
11753609\_ 4. 338003 4. 122499 4. 219203 4. 34301 4. 213853 4. 320378  
11753610\_ 3. 398236 3. 611339 3. 364774 3. 50228 3. 503743 3. 567185  
11753611\_ 5. 481457 5. 543128 5. 226785 5. 442074 5. 47969 5. 484984  
11753612\_ 5. 986652 5. 796247 5. 903438 5. 866664 5. 954173 5. 962076  
11753613\_ 4. 106971 3. 818401 3. 932736 4. 018041 4. 057977 4. 012953  
11753614\_ 3. 523532 3. 751139 3. 739185 3. 563874 3. 652844 3. 606313  
11753615\_ 8. 93286 8. 904313 8. 921702 8. 886628 8. 838957 8. 792649  
11753616\_ 8. 448243 8. 46196 8. 478259 8. 35902 8. 353452 8. 362548  
11753617\_ 6. 845819 6. 88636 6. 881716 6. 884251 6. 866232 6. 843963  
11753618\_ 7. 98726 7. 862528 7. 981993 7. 600045 7. 573162 7. 578676  
11753619\_ 12. 08333 12. 07411 12. 07723 12. 26088 12. 30349 12. 24708  
11753620\_ 4. 908438 5. 155301 5. 020011 5. 139806 5. 094426 5. 076107  
11753621\_ 4. 438106 4. 309772 4. 135496 4. 275941 4. 522487 4. 217389  
11753622\_ 5. 967526 6. 048965 5. 909937 6. 06027 6. 173173 6. 066962  
11753623\_ 8. 815367 8. 81429 8. 834223 8. 75956 8. 646657 8. 576351  
11753624\_ 9. 368526 9. 337913 9. 301486 9. 545026 9. 620511 9. 565429  
11753625\_ 9. 289644 9. 218349 9. 244113 9. 536668 9. 567708 9. 540837  
11753626\_ 5. 461448 5. 569195 5. 389625 5. 54824 5. 457518 5. 367088  
11753627\_ 5. 882417 5. 764805 5. 921815 5. 914384 5. 792901 5. 845736  
11753628\_ 6. 830716 6. 796558 6. 876095 6. 924708 6. 939986 6. 913651  
11753629\_ 5. 95555 5. 788478 6. 001769 5. 884375 5. 942576 5. 929382  
11753630\_ 8. 31717 8. 230569 8. 284645 8. 498753 8. 441524 8. 365838  
11753631\_ 8. 260152 8. 284816 8. 389431 7. 669744 7. 725856 7. 727618  
11753632\_ 8. 552584 8. 535297 8. 607212 7. 769971 7. 848753 7. 858419  
11753633\_ 3. 670666 3. 611086 3. 625408 3. 6505 3. 606313 3. 926749  
11753634\_ 5. 289015 5. 089841 5. 292303 5. 280252 5. 289015 5. 307719  
11753635\_ 7. 381021 7. 444465 7. 428414 7. 411884 7. 48201 7. 474795  
11753636\_ 2. 566669 2. 950564 2. 934551 2. 724549 2. 585568 2. 718322  
11753637\_ 12. 7657 12. 73938 12. 74136 12. 66724 12. 6665 12. 63206  
11753638\_ 10. 04033 10. 01226 10. 02911 9. 902035 9. 990876 9. 962653  
11753639\_ 4. 95517 5. 103414 4. 900695 5. 025375 5. 114745 5. 078582  
11753640\_ 6. 82806 6. 870581 6. 851472 6. 993113 6. 896327 6. 975394  
11753641\_ 3. 29138 3. 491155 3. 350614 3. 50274 3. 551348 3. 356239  
11753642\_ 4. 098383 4. 329571 4. 198785 4. 282006 4. 354544 4. 231673  
11753643\_ 7. 257889 7. 250379 7. 20019 7. 393441 7. 41117 7. 325567  
11753644\_ 7. 370795 7. 407238 7. 256792 7. 283549 7. 319186 7. 283085  
11753645\_ 11. 94532 11. 88482 11. 95229 12. 18396 12. 20442 12. 1628  
11753646\_ 11. 66839 11. 61897 11. 66283 11. 89767 11. 92748 11. 89716  
11753647\_ 8. 655455 8. 552354 8. 58348 8. 1291 8. 152985 8. 120308  
11753648\_ 6. 560509 6. 580823 6. 507901 6. 369601 6. 369601 6. 386664  
11753649\_ 11. 70885 11. 67601 11. 70173 11. 76726 11. 77057 11. 77053  
11753650\_ 11. 04393 11. 02063 11. 03018 11. 11011 11. 17506 11. 09163  
11753651\_ 6. 736592 6. 63648 6. 773939 6. 775394 6. 775775 6. 782359  
11753652\_ 5. 812916 5. 682431 5. 736831 6. 025132 5. 925132 5. 988002  
11753653\_ 3. 82283 3. 567819 3. 398236 3. 567819 3. 685084 3. 60445  
11753654\_ 7. 070495 7. 253898 7. 071708 7. 251129 7. 24319 7. 375863

11753655\_ 4. 589101 4. 46123 4. 652656 3. 911886 3. 970408 4. 011845  
11753656\_ 13. 0004 13. 00899 12. 98802 12. 97502 12. 97842 12. 95868  
11753657\_ 4. 936755 5. 113775 4. 986514 4. 945673 4. 970909 4. 897758  
11753658\_ 5. 513665 5. 474313 5. 669504 5. 357077 5. 226981 5. 387837  
11753659\_ 12. 50764 12. 52198 12. 50979 12. 42158 12. 42458 12. 38575  
11753660\_ 10. 54496 10. 46801 10. 56587 10. 35718 10. 37268 10. 29914  
11753661\_ 8. 868978 8. 793357 8. 844901 9. 4121 9. 374458 9. 410741  
11753662\_ 4. 502591 4. 52671 4. 596053 4. 38531 4. 592765 4. 652323  
11753663\_ 2. 871682 3. 341624 3. 303816 4. 191923 4. 477767 4. 435533  
11753664\_ 3. 787081 4. 29594 4. 666483 5. 420763 5. 442415 5. 489032  
11753665\_ 8. 637409 8. 613911 8. 614407 7. 942374 7. 986783 8. 011238  
11753666\_ 5. 656718 5. 549 5. 653924 5. 321465 5. 549664 5. 3851  
11753667\_ 7. 160782 7. 104976 7. 085068 7. 389811 7. 391709 7. 33372  
11753668\_ 6. 382752 6. 557074 6. 373606 6. 488711 6. 45771 6. 527921  
11753669\_ 5. 613715 5. 627433 5. 659688 5. 839556 5. 686939 5. 823879  
11753670\_ 5. 411149 5. 352815 5. 361902 5. 07144 5. 03175 5. 125964  
11753671\_ 11. 43044 11. 43518 11. 39278 11. 51035 11. 48957 11. 44651  
11753672\_ 8. 789517 8. 703549 8. 750411 8. 633945 8. 645194 8. 56261  
11753673\_ 5. 06254 5. 028121 5. 009204 5. 249887 4. 982167 5. 242065  
11753674\_ 8. 19522 8. 081997 8. 174782 8. 315504 8. 368661 8. 337394  
11753675\_ 7. 935627 8. 146972 8. 122848 7. 885889 7. 943241 7. 932227  
11753676\_ 4. 815683 4. 978922 4. 812908 5. 107599 4. 943576 5. 069091  
11753677\_ 6. 190148 6. 183281 6. 234961 6. 029042 6. 050542 6. 137732  
11753678\_ 6. 360394 6. 581082 6. 494804 6. 549897 6. 446555 6. 49736  
11753679\_ 6. 030573 5. 928552 6. 051108 6. 202192 6. 219481 6. 240327  
11753680\_ 12. 74509 12. 78552 12. 76791 12. 79507 12. 7593 12. 73881  
11753681\_ 7. 417811 7. 34914 7. 431924 7. 146679 7. 212651 7. 174876  
11753682\_ 8. 684396 8. 658701 8. 73567 8. 47976 8. 462823 8. 456021  
11753683\_ 5. 621602 5. 857939 5. 707235 5. 853286 5. 907933 5. 88193  
11753684\_ 6. 136192 6. 254466 6. 32108 6. 257639 6. 264055 6. 292289  
11753685\_ 8. 925639 8. 963388 8. 96724 8. 942814 8. 943351 8. 955604  
11753686\_ 8. 39801 8. 277153 8. 372647 8. 341305 8. 380079 8. 345148  
11753687\_ 8. 165535 8. 160801 8. 198077 8. 192268 8. 160801 8. 179123  
11753688\_ 7. 79997 7. 801983 7. 813469 7. 270223 7. 247669 7. 225319  
11753689\_ 7. 88425 7. 813444 7. 86488 7. 214613 7. 18488 7. 167621  
11753690\_ 5. 224369 5. 21734 5. 235106 5. 194619 5. 346637 5. 493521  
11753691\_ 12. 73956 12. 72793 12. 71821 12. 76533 12. 78458 12. 76371  
11753692\_ 7. 642545 7. 73397 7. 576132 7. 61143 7. 648165 7. 635878  
11753693\_ 5. 831816 5. 744113 6. 042022 5. 777565 5. 870636 5. 846694  
11753694\_ 13. 0004 12. 9891 12. 98802 12. 98529 13. 00202 12. 96873  
11753695\_ 8. 622679 8. 561441 8. 471931 10. 27909 10. 18769 10. 12945  
11753696\_ 4. 34518 4. 468116 4. 527347 4. 352332 4. 462766 4. 46062  
11753697\_ 6. 378959 6. 441763 6. 387176 6. 385571 6. 365017 6. 375952  
11753698\_ 3. 769459 3. 747162 3. 572528 3. 769848 3. 61568 3. 200323  
11753699\_ 4. 91209 5. 036558 4. 918656 4. 98088 5. 031876 4. 9106  
11753700\_ 3. 285693 3. 252216 3. 45222 3. 461221 3. 294683 3. 20196  
11753701\_ 7. 24889 7. 230614 7. 293038 7. 274136 7. 374708 7. 324854  
11753702\_ 3. 956153 4. 067703 3. 869975 4. 124106 4. 060996 4. 237183  
11753703\_ 5. 284216 5. 097421 4. 953852 5. 24693 5. 291595 5. 26823  
11753704\_ 10. 14979 10. 07858 10. 0674 10. 42088 10. 43992 10. 36024  
11753705\_ 10. 79314 10. 73646 10. 78295 11. 0783 11. 09971 11. 04103

11753706\_ 8. 034243 7. 989186 8. 09741 7. 820708 7. 881415 7. 859808  
11753707\_ 5. 000165 5. 073036 5. 022784 5. 231985 4. 966218 5. 11527  
11753708\_ 4. 664567 4. 677265 4. 728963 4. 705551 4. 829115 4. 708625  
11753709\_ 4. 965536 4. 709463 4. 685588 4. 670787 4. 694382 4. 874935  
11753710\_ 2. 707687 2. 570553 2. 791679 2. 718322 2. 517896 2. 713668  
11753711\_ 2. 396743 2. 470569 2. 252249 2. 507164 2. 637173 2. 353146  
11753712\_ 6. 009301 6. 112788 6. 121255 6. 057762 6. 136361 6. 074003  
11753713\_ 5. 800222 5. 962952 5. 903455 5. 99248 6. 118031 6. 086245  
11753714\_ 7. 889354 7. 83277 7. 900409 7. 681978 7. 618529 7. 724576  
11753715\_ 9. 066801 9. 006584 8. 980352 8. 721396 8. 738111 8. 72905  
11753716\_ 5. 611641 5. 57727 5. 66706 5. 432003 5. 280844 5. 469324  
11753717\_ 4. 584933 4. 540347 4. 516118 4. 278969 4. 356353 4. 441114  
11753718\_ 5. 82659 5. 790791 5. 971617 5. 616477 5. 482428 5. 599483  
11753719\_ 6. 536494 6. 477486 6. 371595 6. 212726 6. 178299 6. 17981  
11753720\_ 7. 687602 7. 700552 7. 755578 7. 419363 7. 401801 7. 350159  
11753721\_ 8. 774764 8. 754979 8. 785138 8. 605383 8. 677115 8. 626299  
11753722\_ 11. 80022 11. 80106 11. 76566 11. 87517 11. 87696 11. 82856  
11753723\_ 5. 488445 5. 545826 5. 400135 5. 423292 5. 352222 5. 423956  
11753724\_ 4. 026648 4. 039269 3. 588625 3. 990037 4. 168152 4. 043052  
11753725\_ 4. 161896 4. 0229 4. 095249 4. 192972 4. 174908 4. 02881  
11753726\_ 6. 816382 6. 84652 6. 796964 6. 910998 6. 940703 6. 950984  
11753727\_ 13. 18101 13. 16888 13. 18847 13. 11452 13. 13135 13. 12041  
11753728\_ 7. 694613 7. 750014 7. 673568 7. 72202 7. 786782 7. 744382  
11753729\_ 5. 67843 5. 519719 5. 523317 5. 323623 5. 388063 5. 32789  
11753730\_ 7. 166137 7. 150493 7. 190752 6. 971713 7. 095606 7. 020426  
11753731\_ 7. 066149 7. 153937 7. 102679 6. 928222 7. 038675 7. 002539  
11753732\_ 5. 233849 5. 376371 5. 330964 5. 49831 5. 687524 5. 576869  
11753733\_ 5. 535004 5. 613526 5. 280735 5. 559316 5. 514075 5. 70615  
11753734\_ 6. 879866 6. 922004 6. 833401 7. 044728 7. 001821 6. 952932  
11753735\_ 9. 322362 9. 397882 9. 352807 9. 972704 9. 98583 9. 967484  
11753736\_ 5. 971312 5. 98169 5. 931434 6. 145353 6. 053033 6. 024144  
11753737\_ 3. 359181 3. 465983 3. 467445 3. 384256 3. 499105 3. 346111  
11753738\_ 2. 623355 2. 757612 2. 437073 2. 80688 2. 912551 2. 722667  
11753739\_ 7. 382221 7. 376768 7. 338197 7. 568552 7. 719104 7. 541555  
11753740\_ 8. 095696 8. 085463 8. 079104 8. 277856 8. 389295 8. 31883  
11753741\_ 3. 652229 3. 680594 3. 467039 3. 748178 3. 546212 3. 586985  
11753742\_ 9. 826549 9. 819702 9. 784779 9. 783176 9. 818452 9. 71437  
11753743\_ 9. 81243 9. 804943 9. 800073 9. 798085 9. 78538 9. 709967  
11753744\_ 4. 309272 4. 362954 4. 191671 4. 40186 4. 256618 4. 347819  
11753745\_ 4. 4016 4. 309997 4. 299031 4. 400876 4. 354165 4. 433746  
11753746\_ 6. 853269 6. 859529 6. 801592 6. 971764 6. 999482 6. 928702  
11753747\_ 7. 260481 7. 251358 7. 193119 7. 324272 7. 386037 7. 477685  
11753748\_ 6. 195318 6. 159771 6. 153836 6. 300692 6. 402264 6. 313685  
11753749\_ 8. 848086 8. 822445 8. 843994 9. 28133 9. 241292 9. 196597  
11753750\_ 10. 99331 11. 03195 11. 02685 11. 18768 11. 20485 11. 05449  
11753751\_ 6. 416383 6. 514243 6. 380298 6. 390844 6. 373369 6. 282224  
11753752\_ 8. 196373 8. 143783 8. 245189 7. 028065 6. 938789 7. 042517  
11753753\_ 4. 529144 4. 596189 4. 439273 4. 772366 4. 652968 4. 581333  
11753754\_ 5. 5785 5. 560795 5. 628125 5. 757853 5. 859134 5. 81903  
11753755\_ 11. 2253 11. 17502 11. 23466 11. 26445 11. 28661 11. 23608  
11753756\_ 6. 341638 6. 407383 6. 356126 6. 291735 6. 298595 6. 411049

11753757\_ 9. 715309 9. 724291 9. 73123 9. 898456 9. 913827 9. 90256  
11753758\_ 10. 84457 10. 79282 10. 81525 10. 92431 10. 92382 10. 89247  
11753759\_ 11. 39989 11. 35128 11. 37612 11. 33583 11. 34036 11. 31844  
11753760\_ 8. 282304 8. 248695 8. 29192 8. 773668 8. 770923 8. 708089  
11753761\_ 7. 471217 7. 510638 7. 366279 7. 561516 7. 673568 7. 607577  
11753762\_ 6. 004848 6. 125624 5. 919424 6. 138566 6. 205219 6. 072258  
11753763\_ 8. 402607 8. 389753 8. 411431 9. 19749 9. 249102 9. 195685  
11753764\_ 9. 089113 9. 103051 9. 094128 9. 726436 9. 7062 9. 693828  
11753765\_ 4. 679954 4. 827925 4. 658608 4. 882154 4. 907336 5. 034398  
11753766\_ 4. 181562 4. 289006 4. 282212 4. 170868 4. 286104 4. 193385  
11753767\_ 6. 797397 6. 819019 6. 727686 6. 833927 6. 801186 6. 901797  
11753768\_ 6. 798342 6. 735771 6. 752425 6. 832695 6. 780925 6. 920396  
11753769\_ 7. 117979 7. 34538 7. 28174 7. 248022 7. 095868 7. 188833  
11753770\_ 9. 280847 9. 245541 9. 236322 9. 236575 9. 209035 9. 164894  
11753771\_ 9. 599523 9. 554844 9. 571761 9. 411827 9. 465139 9. 453864  
11753772\_ 9. 049893 8. 922142 8. 946366 8. 978813 9. 000821 8. 906948  
11753773\_ 9. 345151 9. 282054 9. 25933 9. 322994 9. 301213 9. 267893  
11753774\_ 9. 054365 8. 945429 8. 984006 9. 295507 9. 243505 9. 238393  
11753775\_ 11. 57839 11. 59581 11. 59303 11. 80119 11. 74404 11. 68997  
11753776\_ 4. 752055 4. 709463 4. 690079 4. 639546 4. 52042 4. 52042  
11753777\_ 2. 177836 2. 075209 2. 133867 1. 869651 1. 85725 2. 034002  
11753778\_ 2. 514 2. 748382 2. 792273 2. 798808 2. 88249 2. 797681  
11753779\_ 6. 789643 6. 829798 6. 885179 7. 041108 7. 094212 6. 971838  
11753780\_ 7. 986743 7. 882899 7. 991978 8. 442171 8. 504966 8. 453628  
11753781\_ 4. 940272 5. 148339 5. 086389 5. 347581 5. 232059 5. 212615  
11753782\_ 7. 015862 6. 95487 7. 013037 6. 551155 6. 452978 6. 469268  
11753783\_ 4. 811002 4. 916439 4. 930507 5. 089465 4. 931625 4. 916141  
11753784\_ 12. 20208 12. 21653 12. 19315 12. 18611 12. 17517 12. 11762  
11753785\_ 8. 816821 8. 771768 8. 705998 8. 454356 8. 44597 8. 422405  
11753786\_ 5. 07501 4. 954167 4. 926414 4. 315445 4. 381543 4. 579958  
11753787\_ 2. 655007 2. 92153 2. 725234 2. 693036 2. 725234 2. 703976  
11753788\_ 8. 313971 8. 253355 8. 289244 9. 01872 9. 089951 9. 087293  
11753789\_ 5. 478844 5. 214329 5. 304746 5. 665931 5. 570322 5. 465868  
11753790\_ 3. 028557 2. 896563 3. 235563 3. 073392 3. 275925 3. 184466  
11753791\_ 7. 142256 7. 118207 7. 1834 7. 402326 7. 346392 7. 310875  
11753792\_ 3. 970984 3. 858178 3. 858178 3. 893032 3. 814577 3. 764392  
11753793\_ 10. 11496 10. 03627 10. 06339 10. 61634 10. 62464 10. 59517  
11753794\_ 4. 805642 4. 689196 4. 734507 4. 710736 4. 847624 4. 796338  
11753795\_ 4. 347179 4. 709463 4. 393395 4. 666903 4. 626332 4. 503645  
11753796\_ 5. 571868 5. 77008 5. 564335 5. 834463 5. 736831 5. 588117  
11753797\_ 8. 876123 8. 898762 8. 995825 8. 727937 8. 806478 8. 828331  
11753798\_ 9. 371831 9. 368673 9. 472161 9. 258087 9. 292908 9. 288569  
11753799\_ 7. 215947 7. 092669 7. 283404 7. 026369 7. 04836 7. 116809  
11753800\_ 6. 748324 6. 643752 6. 778641 6. 581173 6. 512457 6. 628018  
11753801\_ 3. 54342 3. 484392 3. 226355 3. 498534 3. 457325 3. 567235  
11753802\_ 8. 400168 8. 393727 8. 48061 8. 744256 8. 762831 8. 716273  
11753803\_ 10. 65874 10. 63131 10. 60906 10. 57933 10. 62189 10. 55717  
11753804\_ 12. 07207 12. 07284 12. 07864 12. 24273 12. 19068 12. 17369  
11753805\_ 5. 988384 6. 05524 6. 057165 6. 038813 6. 022198 5. 975917  
11753806\_ 5. 980796 6. 059261 6. 081518 5. 986507 6. 079136 5. 931246  
11753807\_ 8. 334623 8. 385122 8. 380135 8. 276615 8. 294778 8. 226937

11753808\_ 9. 170695 9. 034974 9. 095489 9. 649025 9. 621248 9. 568804  
11753809\_ 9. 767169 9. 804635 9. 764319 10. 24138 10. 29212 10. 23037  
11753810\_ 8. 152091 8. 085409 8. 177627 7. 439653 7. 452471 7. 411538  
11753811\_ 10. 4113 10. 38976 10. 41337 10. 48415 10. 47643 10. 42806  
11753812\_ 9. 627895 9. 527398 9. 608101 9. 967818 9. 949768 9. 946421  
11753813\_ 8. 576415 8. 575985 8. 626018 8. 475289 8. 444965 8. 471388  
11753814\_ 2. 948734 3. 085372 3. 116919 3. 066082 2. 88538 3. 007132  
11753815\_ 7. 015944 7. 064716 7. 074617 7. 075045 7. 048505 7. 098826  
11753816\_ 6. 581039 6. 56705 6. 491082 6. 567638 6. 554236 6. 599975  
11753817\_ 7. 169272 7. 140322 7. 073648 7. 442902 7. 435647 7. 42109  
11753818\_ 6. 688764 6. 910311 6. 896447 6. 993771 7. 095501 7. 073857  
11753819\_ 6. 800393 6. 570332 6. 735326 5. 884224 5. 942702 5. 954126  
11753820\_ 8. 036286 7. 919262 7. 938669 7. 224786 7. 304913 7. 200153  
11753821\_ 11. 33674 11. 31637 11. 34424 11. 30675 11. 34234 11. 3318  
11753822\_ 4. 637273 4. 673337 4. 699906 4. 902877 4. 9018 4. 691442  
11753823\_ 4. 035769 4. 222074 4. 232214 4. 135496 4. 286405 4. 334876  
11753824\_ 5. 24891 5. 189229 5. 414869 5. 123787 5. 240535 5. 131273  
11753825\_ 9. 951261 9. 977274 9. 995644 9. 688044 9. 721789 9. 703607  
11753826\_ 5. 180771 5. 173724 5. 070004 5. 275248 5. 252257 5. 137736  
11753827\_ 4. 746521 4. 892717 4. 716228 4. 748615 4. 86344 4. 673601  
11753828\_ 12. 17833 12. 14231 12. 13198 12. 2212 12. 21808 12. 2349  
11753829\_ 7. 275284 7. 29901 7. 311911 7. 30132 7. 320336 7. 288741  
11753830\_ 9. 296375 9. 23278 9. 292371 9. 38808 9. 434195 9. 380952  
11753831\_ 8. 375373 8. 376395 8. 389952 9. 31651 9. 205701 9. 275128  
11753832\_ 3. 445214 3. 445214 3. 377966 3. 738926 3. 324433 3. 320767  
11753833\_ 11. 36777 11. 33221 11. 3352 11. 3037 11. 26911 11. 23223  
11753834\_ 3. 751698 3. 905987 3. 834316 3. 748685 3. 456498 3. 569032  
11753835\_ 6. 711423 6. 768962 6. 611984 6. 850646 6. 752593 6. 691847  
11753836\_ 9. 247187 9. 192281 9. 264431 9. 949021 9. 98939 9. 967192  
11753837\_ 2. 511012 2. 547829 2. 529507 2. 563553 2. 62804 2. 511863  
11753838\_ 5. 436926 5. 510867 5. 562031 5. 671292 5. 602204 5. 432377  
11753839\_ 2. 665711 2. 53632 2. 736636 2. 643268 2. 639382 2. 687832  
11753840\_ 10. 90656 10. 89948 10. 90816 11. 38407 11. 37168 11. 34093  
11753841\_ 10. 50887 10. 49884 10. 51214 10. 35731 10. 31567 10. 23691  
11753842\_ 8. 927236 8. 980969 8. 96068 8. 738311 8. 812047 8. 723647  
11753843\_ 10. 40974 10. 38028 10. 42649 10. 31698 10. 286 10. 33799  
11753844\_ 10. 3655 10. 33381 10. 38174 10. 28328 10. 3172 10. 28706  
11753845\_ 5. 885277 5. 946721 5. 945402 5. 918549 6. 043674 5. 986229  
11753846\_ 4. 038509 4. 07697 4. 039736 4. 110459 4. 122446 4. 067485  
11753847\_ 4. 029713 3. 992189 3. 972303 4. 106417 4. 122446 4. 058689  
11753848\_ 6. 699634 6. 909806 6. 779107 6. 999866 6. 984189 6. 998951  
11753849\_ 10. 76064 10. 7323 10. 73784 10. 82789 10. 81183 10. 7455  
11753850\_ 11. 21432 11. 20628 11. 21479 11. 216 11. 20979 11. 17784  
11753851\_ 10. 31629 10. 30096 10. 3067 9. 803721 9. 786159 9. 737905  
11753852\_ 2. 605516 2. 893699 2. 710405 2. 63483 2. 734648 2. 718322  
11753853\_ 4. 835852 4. 99239 4. 932825 4. 914651 4. 927019 5. 02054  
11753854\_ 5. 092035 5. 166037 5. 060769 5. 279892 5. 246957 5. 25056  
11753855\_ 2. 396582 2. 668813 2. 477893 2. 665288 2. 68585 2. 595035  
11753856\_ 10. 46637 10. 39096 10. 43448 11. 16549 11. 12819 11. 10529  
11753857\_ 7. 132962 6. 956105 7. 260578 6. 623392 6. 792295 6. 697532  
11753858\_ 11. 19198 11. 1272 11. 13621 10. 52869 10. 52541 10. 49599

11753859\_ 10. 85443 10. 78126 10. 85317 10. 07225 10. 1061 10. 13462  
11753860\_ 7. 556184 7. 482854 7. 64382 7. 868488 7. 892766 7. 84786  
11753861\_ 9. 772255 9. 746136 9. 793359 9. 920344 9. 921338 9. 850928  
11753862\_ 5. 090316 5. 073036 5. 08905 5. 33031 5. 297179 5. 11527  
11753863\_ 4. 080918 4. 100698 4. 17946 4. 215527 4. 082937 4. 215884  
11753864\_ 4. 997733 5. 015764 4. 776866 4. 892567 4. 967608 4. 9148  
11753865\_ 5. 553883 5. 76194 5. 819421 5. 707875 5. 800178 5. 746113  
11753866\_ 4. 386024 4. 427544 4. 287593 4. 457792 4. 502324 4. 415744  
11753867\_ 11. 1546 11. 11902 11. 10113 11. 29254 11. 23273 11. 23428  
11753868\_ 6. 179798 6. 134528 5. 943005 6. 042766 6. 129845 6. 045473  
11753869\_ 3. 466878 3. 683199 3. 56716 3. 597189 3. 56716 3. 804231  
11753870\_ 10. 44241 10. 43801 10. 43828 10. 50366 10. 49567 10. 44606  
11753871\_ 5. 102631 5. 057744 5. 192323 5. 262746 5. 171596 5. 157056  
11753872\_ 5. 483649 5. 485436 5. 366723 5. 470072 5. 57598 5. 478326  
11753873\_ 4. 520406 4. 924426 4. 572562 4. 484831 4. 445866 4. 751883  
11753874\_ 4. 200678 4. 224191 4. 138201 4. 213728 4. 201017 4. 013805  
11753875\_ 10. 79058 10. 80132 10. 76768 10. 80434 10. 85623 10. 75516  
11753876\_ 10. 26418 10. 22353 10. 23119 10. 28732 10. 32305 10. 22592  
11753877\_ 8. 61756 8. 64106 8. 675129 7. 441889 7. 489139 7. 421218  
11753878\_ 7. 806918 7. 791979 7. 823582 7. 522044 7. 541143 7. 547144  
11753879\_ 7. 649081 7. 608506 7. 626534 7. 300603 7. 434593 7. 357186  
11753880\_ 6. 069479 6. 224363 6. 083139 7. 208863 7. 144608 7. 096851  
11753881\_ 5. 671305 5. 566555 5. 632821 5. 660661 5. 741991 5. 61867  
11753882\_ 4. 933423 5. 084409 5. 050717 5. 158397 5. 024483 4. 658159  
11753883\_ 5. 047888 5. 12208 5. 113246 5. 049141 4. 971562 5. 039264  
11753884\_ 7. 61488 7. 687495 7. 647833 7. 597395 7. 603589 7. 653538  
11753885\_ 5. 955036 5. 854629 6. 004995 6. 051178 6. 065982 5. 992354  
11753886\_ 6. 51414 6. 578996 6. 494405 6. 207315 6. 292835 6. 197586  
11753887\_ 11. 30335 11. 27505 11. 27131 11. 24604 11. 25395 11. 25682  
11753888\_ 7. 689348 7. 587242 7. 628092 7. 636221 7. 604444 7. 655097  
11753889\_ 6. 492543 6. 312265 6. 389366 6. 700217 6. 617109 6. 585353  
11753890\_ 8. 082258 8. 03369 8. 080051 8. 064956 8. 010702 8. 106446  
11753891\_ 12. 12182 12. 07963 12. 09568 12. 31933 12. 37249 12. 37677  
11753892\_ 11. 36576 11. 29371 11. 33883 11. 3204 11. 30798 11. 29959  
11753893\_ 6. 057502 6. 144245 6. 128301 6. 468758 6. 459752 6. 496731  
11753894\_ 7. 691551 7. 800923 7. 805174 7. 933264 7. 872541 7. 982199  
11753895\_ 7. 674102 7. 653435 7. 745 7. 659061 7. 799405 7. 795776  
11753896\_ 9. 257123 9. 273694 9. 285385 9. 486361 9. 579941 9. 497959  
11753897\_ 9. 500148 9. 635316 9. 608115 9. 931271 9. 774209 9. 749789  
11753898\_ 7. 431793 7. 32062 7. 429527 7. 495927 7. 466412 7. 520437  
11753899\_ 8. 484953 8. 464701 8. 454589 8. 447149 8. 512671 8. 481324  
11753900\_ 12. 60857 12. 59205 12. 56454 12. 65679 12. 66679 12. 68526  
11753901\_ 7. 863098 7. 792096 7. 900907 7. 86065 7. 703122 7. 855743  
11753902\_ 10. 03514 10. 04787 10. 05462 10. 30165 10. 30165 10. 33027  
11753903\_ 7. 360367 7. 281892 7. 412889 7. 14562 7. 159612 7. 077387  
11753904\_ 8. 08439 8. 063674 8. 140844 7. 459507 7. 475206 7. 480319  
11753905\_ 8. 562632 8. 637489 8. 574425 8. 740042 8. 627939 8. 76094  
11753906\_ 8. 332761 8. 310728 8. 356489 8. 497659 8. 454519 8. 436334  
11753907\_ 7. 373547 7. 359467 7. 436697 6. 874408 6. 888879 6. 85486  
11753908\_ 6. 447944 6. 517704 6. 59821 6. 408189 6. 429191 6. 580444  
11753909\_ 8. 528869 8. 550611 8. 611552 8. 493419 8. 494502 8. 503069



11753910\_ 5. 437143 5. 265452 5. 451076 5. 761681 5. 761681 5. 884166  
11753911\_ 5. 053065 5. 224964 5. 188151 5. 54172 5. 538284 5. 582597  
11753912\_ 7. 785411 7. 892766 7. 893639 7. 892766 7. 929071 7. 843256  
11753913\_ 6. 597118 6. 492638 6. 615847 7. 07037 7. 070886 7. 154768  
11753914\_ 6. 803734 6. 905326 6. 891519 7. 060005 6. 987414 7. 054387  
11753915\_ 6. 762519 6. 670097 6. 862695 7. 499446 7. 506433 7. 495126  
11753916\_ 5. 528972 5. 453785 5. 370891 5. 501296 5. 563379 5. 675961  
11753917\_ 8. 415721 8. 524727 8. 330949 8. 067856 8. 027878 8. 029165  
11753918\_ 7. 845225 7. 830719 7. 86209 8. 138774 8. 227191 8. 12982  
11753919\_ 8. 709995 8. 63213 8. 687971 8. 274409 8. 309058 8. 328411  
11753920\_ 6. 875545 6. 956021 6. 815571 6. 874408 6. 857519 6. 853767  
11753921\_ 6. 617673 6. 72766 6. 720522 6. 800696 6. 720522 6. 700178  
11753922\_ 6. 758702 6. 710539 6. 606302 6. 792127 6. 786263 6. 80879  
11753923\_ 4. 859174 5. 01718 4. 772366 4. 953968 4. 934672 4. 928563  
11753924\_ 9. 443183 9. 32267 9. 465893 9. 377764 9. 381503 9. 318426  
11753925\_ 9. 565693 9. 548364 9. 50852 9. 542109 9. 538635 9. 49357  
11753926\_ 8. 174073 8. 148462 8. 145301 8. 20866 8. 264746 8. 225375  
11753927\_ 12. 64766 12. 60594 12. 62285 12. 60544 12. 61724 12. 62212  
11753928\_ 5. 055532 4. 973649 4. 727535 5. 230202 5. 188515 5. 226056  
11753929\_ 6. 367941 6. 431153 6. 573477 6. 702472 6. 63115 6. 681258  
11753930\_ 5. 289068 5. 330495 5. 214496 5. 061344 4. 841813 5. 027696  
11753931\_ 4. 415744 4. 54905 4. 380348 4. 689907 4. 52373 4. 470005  
11753932\_ 7. 504944 7. 535037 7. 503786 7. 367043 7. 345582 7. 265734  
11753933\_ 8. 122984 8. 197192 8. 10332 8. 075531 7. 974184 7. 894714  
11753934\_ 4. 917151 5. 040068 4. 824195 5. 314083 5. 179734 5. 431725  
11753935\_ 3. 747759 3. 431635 3. 645784 3. 166272 3. 24246 3. 200681  
11753936\_ 5. 500098 5. 341194 5. 604835 5. 456509 5. 525945 5. 574903  
11753937\_ 5. 822602 5. 780261 5. 876656 5. 745901 5. 846589 5. 826927  
11753938\_ 5. 002685 5. 033189 4. 871331 5. 135546 4. 984669 5. 021131  
11753939\_ 8. 66176 8. 591422 8. 63068 8. 517068 8. 604054 8. 502223  
11753940\_ 4. 93747 4. 941343 5. 017115 5. 213402 5. 166512 4. 962549  
11753941\_ 7. 143605 7. 032534 7. 212651 7. 410402 7. 352932 7. 452631  
11753942\_ 6. 141238 6. 276183 6. 056241 5. 741425 5. 782891 5. 748564  
11753943\_ 6. 512005 6. 285635 6. 32667 6. 434807 6. 494629 6. 402628  
11753944\_ 8. 93083 8. 876708 9. 016149 9. 124126 9. 081143 9. 048019  
11753945\_ 8. 145745 8. 173236 8. 202916 8. 19529 8. 193958 8. 204513  
11753946\_ 11. 61897 11. 61607 11. 62239 11. 7568 11. 73194 11. 73876  
11753947\_ 7. 356041 7. 324542 7. 381131 6. 937603 6. 936176 7. 045769  
11753948\_ 7. 251649 7. 24788 7. 117757 7. 14336 7. 15921 7. 177713  
11753949\_ 7. 769761 7. 726156 7. 79113 8. 436003 8. 506453 8. 403938  
11753950\_ 6. 166411 6. 002662 6. 082842 5. 820052 5. 717657 5. 798613  
11753951\_ 8. 84848 8. 845403 8. 850767 7. 950069 8. 020944 7. 965671  
11753952\_ 8. 34658 8. 311069 8. 409134 7. 957332 8. 003708 8. 011959  
11753953\_ 3. 890016 3. 469851 3. 775625 3. 65562 3. 643072 3. 667297  
11753954\_ 8. 240475 8. 215726 8. 276203 8. 144379 8. 143618 8. 093611  
11753955\_ 9. 375732 9. 342792 9. 345566 9. 480459 9. 512286 9. 482798  
11753956\_ 8. 947384 8. 878299 8. 936546 9. 048239 9. 060265 9. 071943  
11753957\_ 8. 276875 8. 153856 8. 272979 8. 513708 8. 479086 8. 507338  
11753958\_ 11. 00035 10. 9235 10. 97481 10. 77687 10. 78517 10. 80219  
11753959\_ 5. 40761 5. 56244 5. 644226 5. 561392 5. 553918 5. 698557  
11753960\_ 9. 087139 9. 090099 9. 15582 9. 120565 9. 122527 9. 148098

11753961\_ 6. 075187 5. 967011 6. 151308 5. 887637 6. 063656 6. 115878  
11753962\_ 6. 339514 6. 345769 6. 219072 6. 488974 6. 483346 6. 607293  
11753963\_ 9. 984952 9. 926127 9. 968627 9. 989654 9. 99551 9. 995861  
11753964\_ 10. 97218 10. 94757 10. 94283 10. 90404 10. 84488 10. 83377  
11753965\_ 6. 138471 5. 815789 6. 114653 7. 104593 7. 052545 7. 21297  
11753966\_ 4. 553256 4. 775669 4. 678833 4. 551369 4. 510602 4. 213875  
11753967\_ 3. 688374 3. 671068 3. 524087 3. 995371 3. 997293 3. 928437  
11753968\_ 2. 25992 2. 710358 2. 657329 2. 471098 2. 575858 2. 692562  
11753969\_ 4. 315688 4. 347179 4. 250775 4. 396003 4. 44908 4. 252916  
11753970\_ 11. 98733 11. 96062 11. 94894 12. 00469 11. 97037 11. 99266  
11753971\_ 8. 772788 8. 711186 8. 781279 8. 662084 8. 726807 8. 772087  
11753972\_ 4. 809493 4. 868202 4. 75187 4. 857928 5. 01375 4. 866259  
11753973\_ 6. 696113 6. 616525 6. 580573 6. 643302 6. 624713 6. 457844  
11753974\_ 11. 80311 11. 75363 11. 78105 11. 84033 11. 88601 11. 87934  
11753975\_ 10. 71693 10. 70377 10. 73671 10. 87673 10. 8868 10. 84285  
11753976\_ 4. 977054 4. 879022 5. 001631 5. 191405 5. 229708 5. 179699  
11753977\_ 8. 781123 8. 773712 8. 7944 8. 939565 8. 960682 8. 947912  
11753978\_ 7. 513056 7. 47504 7. 472346 8. 089203 8. 10942 8. 073246  
11753979\_ 8. 375808 8. 211518 8. 29608 8. 589348 8. 603245 8. 548735  
11753980\_ 6. 182139 6. 087479 6. 254941 7. 408426 7. 512292 7. 462678  
11753981\_ 3. 748933 3. 215482 3. 555069 3. 38998 3. 236509 3. 483352  
11753982\_ 10. 39705 10. 36093 10. 40891 10. 58028 10. 5666 10. 64329  
11753983\_ 4. 784364 5. 017315 4. 9007 5. 082261 4. 94356 4. 975997  
11753984\_ 4. 798277 5. 11527 4. 9007 4. 969958 4. 925273 4. 975997  
11753985\_ 5. 073691 5. 149545 5. 000603 4. 803937 4. 945103 4. 930376  
11753986\_ 7. 619572 7. 540903 7. 657586 6. 764752 6. 841699 6. 946524  
11753987\_ 8. 540432 8. 435292 8. 462906 8. 237628 8. 314372 8. 209896  
11753988\_ 10. 25117 10. 2566 10. 24279 10. 16753 10. 1279 10. 12949  
11753989\_ 9. 365545 9. 265994 9. 271062 9. 153714 9. 183328 9. 201935  
11753990\_ 8. 401973 8. 301642 8. 385841 7. 862974 7. 820208 7. 922802  
11753991\_ 9. 936657 9. 821758 9. 840547 9. 816962 9. 865068 9. 86225  
11753992\_ 6. 029054 6. 091178 5. 977856 6. 914316 6. 872538 6. 881851  
11753993\_ 5. 650982 5. 678432 5. 530404 6. 485115 6. 414953 6. 544244  
11753994\_ 7. 631331 7. 609153 7. 72365 7. 351631 7. 361917 7. 411467  
11753995\_ 6. 051554 6. 049991 6. 027286 6. 316956 6. 288127 6. 23073  
11753996\_ 8. 389431 8. 362653 8. 373661 8. 851266 8. 829036 8. 825955  
11753997\_ 5. 513931 5. 692099 5. 485074 5. 807024 5. 82029 5. 672715  
11753998\_ 8. 81382 8. 80183 8. 757096 8. 615617 8. 617534 8. 546627  
11753999\_ 6. 260507 6. 388779 6. 449307 6. 532287 6. 460963 6. 431701  
11754000\_ 8. 763046 8. 730393 8. 736378 8. 529289 8. 529627 8. 521581  
11754001\_ 2. 671203 2. 587366 2. 560147 2. 641145 2. 459986 2. 572989  
11754002\_ 11. 87404 11. 84263 11. 7963 11. 88047 11. 83959 11. 87352  
11754003\_ 10. 86719 10. 82044 10. 90533 10. 86007 10. 89086 10. 89635  
11754004\_ 9. 143114 9. 049124 9. 13902 9. 599627 9. 618938 9. 575269  
11754005\_ 8. 943543 8. 873033 8. 963544 9. 373266 9. 35257 9. 355579  
11754006\_ 9. 087892 9. 063702 9. 056268 9. 484019 9. 441849 9. 425632  
11754007\_ 12. 29915 12. 28229 12. 27653 12. 37896 12. 37401 12. 37272  
11754008\_ 9. 349362 9. 274792 9. 335007 9. 506159 9. 511413 9. 526864  
11754009\_ 8. 447617 8. 427947 8. 504059 8. 836051 8. 884367 8. 80179  
11754010\_ 6. 884323 6. 771049 6. 848894 6. 644922 6. 633965 6. 622113  
11754011\_ 4. 135727 4. 303377 4. 274994 4. 245444 4. 363846 4. 289362

11754012\_ 7. 807286 7. 829313 7. 791541 7. 830635 7. 881484 7. 800782  
11754013\_ 13. 02666 13. 04059 13. 04325 12. 98534 13. 00053 12. 99133  
11754014\_ 6. 783368 6. 776543 6. 610519 6. 766543 6. 803209 6. 897035  
11754015\_ 9. 169481 9. 079043 9. 150415 9. 36292 9. 349512 9. 318284  
11754016\_ 9. 583211 9. 518783 9. 59913 9. 751759 9. 816842 9. 733247  
11754017\_ 7. 984425 8. 010965 8. 003266 8. 132433 8. 183372 8. 0962  
11754018\_ 11. 06248 11. 0387 11. 05044 11. 2307 11. 25882 11. 27082  
11754019\_ 8. 448273 8. 354114 8. 366488 8. 193486 8. 318605 8. 21065  
11754020\_ 7. 066105 7. 066594 7. 072834 6. 710619 6. 774774 6. 757345  
11754021\_ 7. 077428 7. 052926 7. 217912 6. 867172 6. 841314 6. 800293  
11754022\_ 7. 973475 8. 204981 7. 876649 7. 966915 8. 021272 8. 048914  
11754023\_ 9. 998583 9. 952515 9. 999819 9. 7881 9. 805759 9. 722982  
11754024\_ 8. 809166 8. 667674 8. 747133 9. 197513 9. 305441 9. 297098  
11754025\_ 12. 04469 12. 03355 12. 04376 12. 07422 12. 06271 11. 99875  
11754026\_ 7. 904856 7. 924974 7. 908866 7. 905866 7. 878334 7. 857389  
11754027\_ 10. 28295 10. 25561 10. 27758 10. 4898 10. 53673 10. 51496  
11754028\_ 9. 678153 9. 629606 9. 667931 9. 647 9. 68194 9. 673758  
11754029\_ 8. 769651 8. 693197 8. 680591 8. 584487 8. 466168 8. 449185  
11754030\_ 10. 19504 10. 15095 10. 19615 9. 977125 9. 993821 9. 950792  
11754031\_ 9. 887668 9. 799404 9. 829292 10. 44904 10. 50017 10. 39045  
11754032\_ 6. 623054 6. 676841 6. 554501 6. 609721 6. 666282 6. 67121  
11754033\_ 2. 456229 2. 521871 2. 443186 2. 52719 2. 571704 2. 571911  
11754034\_ 8. 408081 8. 379294 8. 409539 8. 40881 8. 413542 8. 429409  
11754035\_ 6. 213272 6. 213272 6. 354529 5. 561138 5. 308288 5. 540523  
11754036\_ 7. 244855 7. 265747 7. 353212 7. 16701 7. 187515 7. 168717  
11754037\_ 7. 284576 7. 158612 7. 249914 7. 039188 7. 125793 7. 067076  
11754038\_ 10. 88756 10. 83846 10. 85329 10. 66163 10. 70968 10. 62174  
11754039\_ 10. 94623 10. 8923 10. 94107 10. 73171 10. 75967 10. 70895  
11754040\_ 5. 864119 5. 862546 5. 997261 6. 189254 6. 224046 6. 216839  
11754041\_ 5. 820052 5. 757915 5. 820052 6. 232945 6. 328015 6. 210341  
11754042\_ 9. 766352 9. 693188 9. 724609 9. 681719 9. 705858 9. 623155  
11754043\_ 10. 73369 10. 74235 10. 73245 10. 71261 10. 71487 10. 69111  
11754044\_ 5. 754542 5. 717571 5. 779274 6. 373308 6. 492865 6. 519183  
11754045\_ 4. 958384 5. 358881 5. 140607 5. 126463 5. 23883 5. 242883  
11754046\_ 6. 14935 6. 144621 6. 028147 6. 268869 6. 119171 6. 159221  
11754047\_ 3. 458463 3. 717527 3. 740892 4. 667177 4. 617871 4. 807104  
11754048\_ 10. 30309 10. 24081 10. 27224 10. 55644 10. 57 10. 53243  
11754049\_ 8. 258604 8. 221883 8. 265906 7. 952006 7. 990549 8. 035663  
11754050\_ 4. 280301 4. 427078 4. 411784 4. 278624 4. 280301 4. 320321  
11754051\_ 12. 51724 12. 53502 12. 52904 12. 48872 12. 48924 12. 47177  
11754052\_ 8. 580104 8. 405275 8. 575124 8. 767401 8. 80852 8. 757553  
11754053\_ 11. 6219 11. 58675 11. 61041 11. 81433 11. 8605 11. 80567  
11754054\_ 12. 15092 12. 15015 12. 12838 12. 16287 12. 19825 12. 14303  
11754055\_ 9. 930689 9. 884463 9. 912383 9. 92335 9. 932947 9. 944059  
11754056\_ 10. 29122 10. 20459 10. 26557 10. 22921 10. 25917 10. 25567  
11754057\_ 5. 322668 5. 276471 5. 422753 5. 288019 5. 333628 5. 305531  
11754058\_ 10. 8701 10. 82511 10. 87674 10. 38293 10. 4278 10. 40611  
11754059\_ 11. 32448 11. 24178 11. 31184 10. 77884 10. 83546 10. 8033  
11754060\_ 10. 51272 10. 44558 10. 51431 10. 77637 10. 77403 10. 77656  
11754061\_ 9. 605965 9. 537546 9. 645049 9. 28316 9. 269505 9. 374416  
11754062\_ 8. 369914 8. 296345 8. 411097 8. 254316 8. 213481 8. 234394

11754063\_ 7. 006923 6. 906456 6. 926425 8. 282391 8. 381067 8. 319199  
11754064\_ 12. 55476 12. 53025 12. 52587 12. 34592 12. 36313 12. 33463  
11754065\_ 4. 469434 4. 566406 4. 643717 4. 676348 4. 74574 4. 643717  
11754066\_ 12. 46107 12. 45988 12. 46894 12. 76779 12. 79164 12. 72812  
11754067\_ 8. 445146 8. 387332 8. 463526 8. 264419 8. 340921 8. 315145  
11754068\_ 7. 836521 7. 888987 7. 821906 8. 105946 8. 096568 8. 139011  
11754069\_ 6. 427027 6. 518183 6. 303205 6. 482589 6. 434324 6. 531264  
11754070\_ 8. 519251 8. 44551 8. 60069 8. 89125 8. 962397 8. 911275  
11754071\_ 9. 992675 9. 977668 10. 01454 10. 27205 10. 29941 10. 30575  
11754072\_ 4. 108592 4. 133882 4. 043852 4. 171646 4. 225031 4. 197583  
11754073\_ 4. 726687 4. 582857 4. 629715 4. 772366 4. 860277 4. 94619  
11754074\_ 4. 785053 4. 987371 4. 764128 4. 901125 5. 0959 4. 92608  
11754075\_ 8. 649837 8. 652216 8. 671224 9. 485849 9. 505471 9. 460704  
11754076\_ 9. 93064 9. 908544 9. 966635 10. 14077 10. 24198 10. 1647  
11754077\_ 6. 104336 6. 17099 6. 129739 6. 431763 6. 264987 6. 196813  
11754078\_ 5. 276562 5. 489822 5. 503984 5. 482787 5. 554436 5. 465505  
11754079\_ 9. 421941 9. 288479 9. 346974 9. 422623 9. 41561 9. 377453  
11754080\_ 6. 262113 6. 060935 6. 24458 7. 421361 7. 466206 7. 63792  
11754081\_ 9. 651493 9. 508498 9. 652552 10. 98522 11. 0041 11. 05466  
11754082\_ 9. 125831 9. 06336 9. 072443 10. 51438 10. 49129 10. 51433  
11754083\_ 8. 75314 8. 686513 8. 727904 8. 848399 8. 829902 8. 887713  
11754084\_ 6. 046149 6. 159771 5. 996126 6. 030419 6. 045279 6. 048524  
11754085\_ 4. 044855 3. 956662 4. 272656 4. 792612 4. 779749 4. 755648  
11754086\_ 8. 806988 8. 644444 8. 682003 8. 509174 8. 497322 8. 485909  
11754087\_ 7. 003056 6. 802503 7. 024237 6. 559374 6. 392866 6. 459718  
11754088\_ 6. 124932 6. 177241 6. 128522 6. 10013 6. 142856 6. 112811  
11754089\_ 7. 853825 7. 8139 7. 841778 7. 42303 7. 415318 7. 37041  
11754090\_ 6. 992682 7. 08261 7. 124789 6. 928297 7. 01656 6. 966117  
11754091\_ 5. 85396 5. 770693 5. 809325 5. 998772 6. 019819 6. 07963  
11754092\_ 7. 98583 7. 918801 7. 999878 8. 498301 8. 447121 8. 417077  
11754093\_ 8. 099512 8. 041495 8. 148407 8. 302385 8. 384411 8. 373164  
11754094\_ 4. 404314 4. 555928 4. 000644 4. 431366 4. 496857 4. 544078  
11754095\_ 5. 934247 6. 022304 6. 008334 6. 021229 6. 130632 6. 271658  
11754096\_ 5. 787134 5. 83797 6. 048303 5. 986625 5. 975206 6. 081526  
11754097\_ 10. 55141 10. 54331 10. 55564 10. 3893 10. 345 10. 33144  
11754098\_ 8. 430387 8. 410554 8. 379389 8. 202738 8. 234189 8. 23729  
11754099\_ 5. 704919 5. 457703 5. 755053 5. 73203 5. 890818 5. 859209  
11754100\_ 5. 644914 5. 536267 5. 698519 5. 647618 5. 739045 5. 748056  
11754101\_ 8. 012582 7. 873666 7. 98641 7. 443532 7. 474299 7. 438738  
11754102\_ 9. 357249 9. 275942 9. 363572 9. 419941 9. 385533 9. 409266  
11754103\_ 7. 83386 7. 879071 7. 896639 7. 898256 7. 912109 7. 96249  
11754104\_ 8. 515755 8. 467463 8. 556257 8. 567326 8. 568857 8. 601538  
11754105\_ 11. 31065 11. 22603 11. 30443 11. 50567 11. 52076 11. 55286  
11754106\_ 8. 167627 8. 044367 8. 16292 7. 388142 7. 474652 7. 444174  
11754107\_ 9. 160306 9. 117007 9. 06701 9. 15553 9. 127218 9. 016559  
11754108\_ 6. 834944 6. 809436 6. 844048 6. 181138 6. 176282 6. 10176  
11754109\_ 7. 609728 7. 507537 7. 48549 8. 420691 8. 3957 8. 329199  
11754110\_ 8. 017863 8. 007453 8. 04344 8. 613681 8. 739465 8. 671849  
11754111\_ 5. 423864 5. 722981 5. 460283 5. 722981 5. 71885 5. 769481  
11754112\_ 9. 149045 9. 119429 9. 179067 9. 127227 9. 141794 9. 146239  
11754113\_ 6. 338064 6. 46862 6. 580969 6. 639039 6. 407519 6. 470905

11754114\_ 9. 30567 9. 281123 9. 325825 9. 27376 9. 305341 9. 326222  
11754115\_ 8. 348799 8. 443852 8. 458936 8. 209214 8. 231849 8. 208215  
11754116\_ 8. 008579 8. 136928 8. 107689 7. 876549 7. 854705 7. 860197  
11754117\_ 7. 160652 7. 119734 7. 194031 7. 376999 7. 475848 7. 419765  
11754118\_ 5. 41835 5. 349497 5. 374866 5. 448296 5. 388277 5. 477728  
11754119\_ 3. 212925 3. 119153 3. 079843 3. 137672 3. 054966 3. 039408  
11754120\_ 8. 277191 8. 321414 8. 288563 7. 979159 8. 040404 7. 94716  
11754121\_ 5. 781656 5. 675836 5. 888657 5. 52331 5. 3785 5. 50911  
11754122\_ 9. 135074 9. 069148 9. 066229 9. 516469 9. 443015 9. 454983  
11754123\_ 9. 539894 9. 450134 9. 495735 9. 468588 9. 444534 9. 464377  
11754124\_ 7. 580116 7. 566719 7. 539344 8. 062004 8. 077679 8. 061258  
11754125\_ 7. 333754 7. 328043 7. 418626 7. 869558 8. 033386 7. 965214  
11754126\_ 4. 188477 4. 196524 4. 215395 4. 151911 4. 022489 4. 161077  
11754127\_ 8. 348048 8. 292808 8. 297728 8. 403842 8. 375027 8. 377801  
11754128\_ 8. 280091 8. 221093 8. 30198 8. 274171 8. 319262 8. 347154  
11754129\_ 3. 670505 3. 669242 3. 551117 3. 655425 3. 605942 3. 583114  
11754130\_ 4. 815683 4. 898804 5. 294052 5. 880744 5. 870242 5. 930529  
11754131\_ 6. 555605 6. 560344 6. 894343 7. 429898 7. 482432 7. 503786  
11754132\_ 8. 442394 8. 379386 8. 438437 8. 113726 8. 19204 8. 139184  
11754133\_ 8. 452569 8. 363546 8. 479536 7. 836725 7. 907845 7. 95058  
11754134\_ 6. 300643 6. 117133 6. 292175 6. 665453 6. 584888 6. 720506  
11754135\_ 12. 0262 11. 95289 12. 00463 12. 43308 12. 40773 12. 37495  
11754136\_ 5. 814866 5. 665057 5. 775853 5. 828713 5. 70127 5. 660916  
11754137\_ 7. 430563 7. 231628 7. 330872 7. 948427 7. 979159 7. 951508  
11754138\_ 6. 627494 6. 540505 6. 531647 6. 845729 6. 648428 6. 707915  
11754139\_ 6. 321838 6. 31928 6. 183629 6. 448378 6. 276713 6. 389366  
11754140\_ 3. 735387 3. 724581 3. 86482 3. 993614 3. 879309 3. 778185  
11754141\_ 5. 248117 5. 353215 5. 237276 5. 516536 5. 421488 5. 504303  
11754142\_ 10. 50368 10. 42033 10. 53737 11. 15422 11. 23711 11. 22491  
11754143\_ 12. 24026 12. 18999 12. 18156 12. 17829 12. 16798 12. 16693  
11754144\_ 5. 593038 5. 44305 5. 489933 5. 073766 5. 150666 5. 304516  
11754145\_ 5. 264506 5. 148199 5. 111932 5. 059906 5. 04499 5. 033908  
11754146\_ 3. 849135 3. 848677 3. 633362 3. 964778 3. 980876 4. 170401  
11754147\_ 7. 179957 7. 3164 7. 151547 7. 355089 7. 434587 7. 436564  
11754148\_ 6. 405636 6. 422267 6. 418158 6. 40914 6. 409745 6. 454085  
11754149\_ 11. 0157 11. 01505 10. 9879 11. 05819 11. 04309 10. 96737  
11754150\_ 4. 206288 4. 240502 4. 226163 4. 331167 4. 305405 4. 348786  
11754151\_ 6. 474557 6. 349848 6. 479829 6. 098162 6. 152923 6. 226397  
11754152\_ 3. 255615 3. 298111 3. 152596 3. 216001 3. 086261 3. 216001  
11754153\_ 7. 821891 7. 761141 7. 907002 7. 322602 7. 296861 7. 272121  
11754154\_ 7. 730547 7. 549425 7. 618615 6. 896083 6. 682081 6. 779434  
11754155\_ 9. 952849 9. 866481 9. 968904 10. 18675 10. 18563 10. 19496  
11754156\_ 8. 227057 8. 232379 8. 252168 8. 4113 8. 40937 8. 457801  
11754157\_ 6. 167328 6. 175474 6. 150296 6. 498239 6. 413091 6. 698141  
11754158\_ 12. 11809 12. 04233 12. 13619 12. 36884 12. 35938 12. 35535  
11754159\_ 2. 715698 2. 606 2. 594741 2. 497769 2. 452014 2. 403837  
11754160\_ 7. 509602 7. 469499 7. 555333 7. 200293 7. 286758 7. 217917  
11754161\_ 9. 019395 8. 947092 9. 030969 9. 089462 9. 054219 9. 113777  
11754162\_ 4. 32344 4. 445865 4. 316789 4. 260343 4. 362373 4. 299282  
11754163\_ 6. 394353 6. 382776 6. 260434 6. 469851 6. 451321 6. 440196  
11754164\_ 4. 177788 4. 213142 4. 211189 3. 998528 4. 068546 4. 080069

11754165\_ 4. 248244 4. 365005 4. 168609 4. 324178 4. 340474 4. 502733  
11754166\_ 7. 80382 7. 70628 7. 761704 7. 80382 7. 821806 7. 818518  
11754167\_ 7. 497147 7. 495337 7. 624896 7. 644459 7. 560606 7. 691734  
11754168\_ 3. 689317 3. 636634 3. 557956 3. 647674 3. 697443 3. 640182  
11754169\_ 5. 705983 5. 694074 5. 70533 5. 695515 5. 731905 5. 704919  
11754170\_ 7. 071241 7. 044528 7. 166542 6. 921613 7. 017717 6. 938321  
11754171\_ 4. 849882 5. 04462 4. 936227 4. 890611 4. 936227 4. 948104  
11754172\_ 3. 324191 3. 420965 3. 025972 3. 179797 3. 31739 3. 158129  
11754173\_ 9. 189812 9. 155227 9. 211829 9. 23133 9. 264998 9. 192605  
11754174\_ 6. 010623 6. 147907 6. 033854 5. 820052 5. 922331 5. 924427  
11754175\_ 2. 277975 2. 662441 2. 623894 2. 466783 2. 470796 2. 486624  
11754176\_ 9. 739917 9. 67422 9. 700597 8. 600711 8. 583403 8. 603792  
11754177\_ 7. 417181 7. 353676 7. 383025 6. 204672 6. 420754 6. 271065  
11754178\_ 8. 506192 8. 380359 8. 413408 7. 37488 7. 262905 7. 32822  
11754179\_ 7. 777812 7. 755635 7. 82353 7. 58687 7. 592209 7. 699447  
11754180\_ 5. 623684 5. 498747 5. 46528 5. 70836 5. 724406 5. 540346  
11754181\_ 4. 768919 4. 537955 4. 813373 4. 697119 4. 724059 4. 532935  
11754182\_ 3. 457873 3. 501517 3. 313483 3. 377906 3. 078407 3. 150484  
11754183\_ 7. 125569 7. 02447 6. 999767 7. 844625 7. 762557 7. 770347  
11754184\_ 10. 51887 10. 50481 10. 48895 10. 96106 11. 01064 10. 94493  
11754185\_ 6. 965008 6. 951531 7. 000562 6. 962833 7. 03179 6. 980719  
11754186\_ 6. 848899 6. 611872 6. 867567 5. 759565 5. 782335 5. 931655  
11754187\_ 8. 085047 8. 0888 8. 156157 8. 386366 8. 444985 8. 45285  
11754188\_ 7. 765944 7. 666082 7. 820885 8. 060293 8. 130214 8. 096935  
11754189\_ 6. 255729 6. 219183 6. 118851 6. 703672 6. 581496 6. 736413  
11754190\_ 10. 25738 10. 26502 10. 22428 10. 0323 9. 930813 9. 960724  
11754191\_ 10. 15635 10. 18127 10. 17394 9. 953546 9. 913678 9. 885182  
11754192\_ 10. 70391 10. 62536 10. 70785 10. 39845 10. 4072 10. 4381  
11754193\_ 6. 833041 6. 808126 6. 784513 6. 65452 6. 736094 6. 634052  
11754194\_ 8. 189146 8. 155437 8. 164085 8. 157599 8. 103115 8. 163518  
11754195\_ 6. 746213 6. 738672 6. 86726 6. 459131 6. 36545 6. 493085  
11754196\_ 8. 081666 8. 020991 8. 027988 7. 855555 7. 806249 7. 867325  
11754197\_ 6. 817986 6. 748302 6. 774287 6. 648586 6. 694967 6. 678959  
11754198\_ 7. 354815 7. 174698 7. 333725 8. 022317 7. 948416 8. 165317  
11754199\_ 5. 818132 5. 823826 5. 723771 6. 062897 5. 933588 5. 914332  
11754200\_ 6. 964412 6. 772956 6. 91508 6. 654527 6. 588675 6. 71047  
11754201\_ 9. 234206 9. 165027 9. 217716 9. 12041 9. 026107 9. 050458  
11754202\_ 9. 65203 9. 594009 9. 651367 9. 651881 9. 652236 9. 654781  
11754203\_ 8. 622467 8. 547782 8. 597397 8. 42911 8. 443532 8. 446285  
11754204\_ 6. 4982 6. 385827 6. 46737 6. 263567 6. 26078 6. 282224  
11754205\_ 5. 945268 5. 946973 6. 019856 6. 057144 5. 948389 5. 993804  
11754206\_ 6. 99327 6. 986535 6. 958012 5. 94358 5. 725209 5. 75866  
11754207\_ 4. 990309 4. 966827 5. 069807 4. 779969 4. 918597 5. 004061  
11754208\_ 7. 836019 7. 661714 7. 832031 8. 066735 8. 077679 8. 015334  
11754209\_ 7. 772558 7. 670585 7. 691147 7. 90813 7. 899062 7. 840811  
11754210\_ 6. 406093 6. 525892 6. 426304 6. 626439 6. 541665 6. 606534  
11754211\_ 7. 765936 7. 817683 7. 831999 7. 928217 7. 830451 7. 93977  
11754212\_ 8. 123282 8. 140124 8. 221208 8. 195925 8. 253281 8. 135717  
11754213\_ 7. 826614 7. 844424 7. 836019 7. 860979 7. 934802 7. 863758  
11754214\_ 7. 303317 7. 242649 7. 252844 7. 483701 7. 270549 7. 174531  
11754215\_ 9. 317025 9. 241177 9. 333038 9. 68474 9. 654986 9. 65458

11754216\_ 9. 12708 9. 147742 9. 123418 9. 026049 9. 05759 9. 025126  
11754217\_ 12. 61305 12. 63196 12. 62531 12. 59729 12. 60164 12. 57829  
11754218\_ 5. 508565 5. 362497 5. 425972 5. 133971 5. 267333 5. 391092  
11754219\_ 6. 234773 6. 151901 6. 258447 6. 277349 6. 282124 6. 380597  
11754220\_ 9. 673628 9. 661832 9. 724152 9. 594447 9. 638565 9. 626912  
11754221\_ 7. 787843 7. 78787 7. 773232 8. 037075 8. 148875 8. 13566  
11754222\_ 4. 257689 4. 18183 4. 184268 4. 174628 4. 257689 4. 248049  
11754223\_ 8. 003105 7. 971798 8. 047563 8. 03927 7. 945375 8. 059396  
11754224\_ 4. 478591 3. 999388 4. 275794 4. 725893 4. 881394 4. 788003  
11754225\_ 9. 243954 9. 187168 9. 281916 9. 412583 9. 423479 9. 406365  
11754226\_ 6. 947129 6. 742513 6. 759552 6. 897129 6. 837039 6. 798601  
11754227\_ 7. 011894 6. 867592 6. 976084 6. 814154 6. 819962 6. 77147  
11754228\_ 6. 76446 6. 693435 6. 748526 6. 698339 6. 642019 6. 593938  
11754229\_ 10. 22243 10. 14952 10. 26028 10. 4069 10. 44583 10. 42245  
11754230\_ 3. 638297 3. 672902 3. 757069 3. 823268 3. 970095 3. 679234  
11754231\_ 6. 44445 6. 356327 6. 471972 7. 21317 7. 08911 7. 15122  
11754232\_ 7. 811674 7. 880198 7. 778502 7. 571398 7. 519617 7. 439505  
11754233\_ 6. 688764 6. 595599 6. 696348 7. 119084 7. 083841 7. 027012  
11754234\_ 7. 375351 7. 259648 7. 479193 6. 663664 6. 509461 6. 660149  
11754235\_ 9. 548881 9. 49939 9. 54415 10. 28222 10. 28697 10. 24515  
11754236\_ 5. 881385 5. 943469 5. 922714 6. 457517 6. 448996 6. 431776  
11754237\_ 6. 566152 6. 472693 6. 523806 6. 588441 6. 605637 6. 560669  
11754238\_ 3. 289321 3. 297907 3. 121494 3. 297907 3. 289321 3. 289321  
11754239\_ 3. 432876 3. 720828 3. 471005 3. 577723 3. 725623 3. 805329  
11754240\_ 8. 232615 8. 267357 8. 301164 8. 597673 8. 592036 8. 59203  
11754241\_ 9. 656003 9. 63425 9. 683264 9. 440486 9. 417097 9. 428608  
11754242\_ 7. 434355 7. 449462 7. 557001 7. 203778 7. 086367 7. 164323  
11754243\_ 11. 31189 11. 29371 11. 30574 11. 54134 11. 54628 11. 5581  
11754244\_ 8. 304405 8. 278351 8. 398334 8. 33577 8. 336595 8. 403274  
11754245\_ 10. 58389 10. 58035 10. 55769 10. 18566 10. 16586 10. 14079  
11754246\_ 12. 28779 12. 28529 12. 2513 12. 15664 12. 1454 12. 10204  
11754247\_ 9. 246158 9. 222798 9. 247375 9. 189732 9. 14252 9. 142184  
11754248\_ 6. 097897 6. 244666 6. 192656 5. 279559 5. 235123 5. 313276  
11754249\_ 6. 094413 6. 064702 6. 126476 5. 806136 5. 918745 5. 846034  
11754250\_ 5. 565529 5. 554745 5. 457082 5. 189628 5. 11527 5. 374866  
11754251\_ 6. 448115 6. 429143 6. 631078 6. 165031 6. 067525 6. 055819  
11754252\_ 9. 206407 9. 13647 9. 212757 8. 815939 8. 823664 8. 850561  
11754253\_ 4. 654683 4. 51013 4. 686304 4. 432732 4. 459939 4. 333297  
11754254\_ 3. 05161 3. 048702 3. 19623 3. 348302 3. 225293 3. 168392  
11754255\_ 6. 696164 6. 566389 6. 66661 6. 61672 6. 614092 6. 670829  
11754256\_ 6. 237581 6. 048711 6. 225724 6. 000157 6. 032062 5. 851008  
11754257\_ 8. 119169 8. 18657 8. 23148 7. 614714 7. 506433 7. 606783  
11754258\_ 6. 833743 6. 79026 6. 820115 7. 089177 7. 073239 7. 108618  
11754259\_ 9. 552633 9. 489873 9. 521586 10. 16501 10. 15526 10. 18398  
11754260\_ 5. 156303 5. 073036 5. 1807 5. 182623 5. 194598 5. 156303  
11754261\_ 9. 005088 8. 890441 8. 999542 9. 183962 9. 149056 9. 28549  
11754262\_ 7. 293072 7. 351631 7. 37365 7. 437912 7. 351501 7. 521143  
11754263\_ 8. 815367 8. 695791 8. 786258 8. 895313 8. 823725 8. 878547  
11754264\_ 6. 522302 6. 503988 6. 572374 6. 704235 6. 714997 6. 768854  
11754265\_ 8. 965441 8. 958055 8. 950931 9. 054244 9. 038905 9. 020221  
11754266\_ 8. 022103 7. 945651 8. 086787 8. 004426 7. 936819 7. 93223

11754267\_ 5. 245203 5. 321869 5. 245203 5. 507637 5. 392428 5. 476996  
11754268\_ 9. 08442 9. 017265 9. 081013 8. 676518 8. 736641 8. 655494  
11754269\_ 4. 644026 4. 957611 4. 665967 4. 58973 4. 4253 4. 584933  
11754270\_ 5. 215086 5. 414869 5. 264395 5. 245271 5. 323357 5. 185695  
11754271\_ 11. 04348 11. 00611 11. 01439 11. 17788 11. 22473 11. 15671  
11754272\_ 9. 336867 9. 32805 9. 330981 9. 398336 9. 465264 9. 401603  
11754273\_ 7. 428826 7. 322283 7. 387602 6. 826875 6. 974811 6. 898318  
11754274\_ 5. 448179 5. 408218 5. 46707 5. 114249 5. 267306 4. 984669  
11754275\_ 8. 203318 8. 160687 8. 173236 8. 063517 8. 135151 8. 147725  
11754276\_ 9. 987045 9. 972911 9. 999762 9. 985662 10. 00412 10. 00682  
11754277\_ 2. 182342 1. 916264 2. 182342 2. 06663 2. 184796 2. 003889  
11754278\_ 7. 682628 7. 661626 7. 718948 7. 768624 7. 770358 7. 785733  
11754279\_ 7. 514306 7. 565014 7. 651607 7. 442243 7. 336348 7. 440962  
11754280\_ 6. 330273 6. 491821 6. 482789 6. 499091 6. 58494 6. 517463  
11754281\_ 5. 501396 5. 448296 5. 30279 5. 35364 5. 36323 5. 374866  
11754282\_ 2. 777197 2. 718322 2. 708014 2. 589404 2. 686593 2. 480842  
11754283\_ 9. 420723 9. 431054 9. 437222 9. 127615 9. 153924 9. 128411  
11754284\_ 8. 889099 8. 793648 8. 862378 8. 672451 8. 679222 8. 677611  
11754285\_ 5. 891971 5. 88135 5. 736831 5. 838034 5. 831943 5. 891313  
11754286\_ 9. 119451 9. 083366 9. 210851 8. 960579 9. 070342 9. 007574  
11754287\_ 7. 260906 7. 267279 7. 258696 7. 711689 7. 647624 7. 783287  
11754288\_ 7. 523877 7. 513752 7. 589926 7. 253057 7. 279177 7. 348772  
11754289\_ 7. 088457 7. 012517 7. 083502 6. 792183 6. 875847 6. 910927  
11754290\_ 6. 735562 6. 644953 6. 606533 6. 443529 6. 498589 6. 45266  
11754291\_ 9. 724812 9. 784037 9. 740172 9. 672528 9. 716515 9. 679471  
11754292\_ 8. 39801 8. 376466 8. 408662 8. 50747 8. 480128 8. 497448  
11754293\_ 6. 591399 6. 515621 6. 653719 5. 939082 5. 934556 6. 068845  
11754294\_ 8. 340361 8. 343871 8. 303204 8. 019002 8. 093611 7. 987134  
11754295\_ 5. 408274 5. 366572 5. 450174 5. 732268 5. 648468 5. 756924  
11754296\_ 9. 399755 9. 377753 9. 465892 8. 632578 8. 59052 8. 58519  
11754297\_ 9. 263659 9. 205279 9. 278005 9. 027704 9. 113729 9. 04414  
11754298\_ 9. 263649 9. 270483 9. 185825 8. 976948 8. 947275 9. 013075  
11754299\_ 6. 938436 7. 008125 6. 978855 6. 481046 6. 589689 6. 541144  
11754300\_ 7. 446164 7. 444747 7. 391094 7. 429271 7. 412603 7. 43011  
11754301\_ 5. 793362 5. 768588 5. 948912 6. 368805 6. 289038 6. 233211  
11754302\_ 7. 618193 7. 587542 7. 714409 8. 387093 8. 458457 8. 401309  
11754303\_ 10. 94842 10. 90776 10. 79004 11. 30749 11. 14212 11. 15725  
11754304\_ 7. 453916 7. 385194 7. 31317 7. 636744 7. 601506 7. 670427  
11754305\_ 7. 237138 7. 329345 7. 272591 7. 146306 7. 16172 7. 167244  
11754306\_ 7. 97343 7. 801081 7. 8805 7. 407784 7. 473483 7. 385199  
11754307\_ 6. 444035 6. 517269 6. 478024 6. 617808 6. 743045 6. 694357  
11754308\_ 7. 752626 7. 677675 7. 771941 8. 227485 8. 129488 8. 172232  
11754309\_ 3. 82091 3. 798253 3. 82091 3. 650346 3. 82091 3. 879309  
11754310\_ 6. 360278 6. 418399 6. 489688 6. 523484 6. 455159 6. 53279  
11754311\_ 9. 064539 8. 99767 9. 02481 8. 827409 8. 847656 8. 828121  
11754312\_ 9. 33724 9. 391664 9. 418545 9. 348011 9. 37527 9. 342441  
11754313\_ 7. 519589 7. 457581 7. 557253 7. 065566 6. 995137 7. 040199  
11754314\_ 6. 918422 6. 826132 6. 805467 7. 166632 7. 11871 7. 161788  
11754315\_ 8. 774284 8. 660536 8. 635571 9. 375675 9. 313287 9. 240515  
11754316\_ 7. 834222 7. 847442 7. 863548 7. 486233 7. 360681 7. 417811  
11754317\_ 7. 812599 7. 827782 7. 810644 7. 673673 7. 642052 7. 593292



11754318\_ 7. 546856 7. 564689 7. 518032 7. 782296 7. 81714 7. 76041  
11754319\_ 8. 642635 8. 587943 8. 646537 8. 910598 8. 858208 8. 859718  
11754320\_ 10. 0815 10. 0151 10. 05048 10. 51711 10. 5419 10. 53471  
11754321\_ 8. 048725 8. 06901 8. 02234 7. 994209 8. 117391 8. 107195  
11754322\_ 7. 330132 7. 379995 7. 347882 7. 701937 7. 765085 7. 957081  
11754323\_ 9. 094065 9. 042276 9. 105239 9. 131556 9. 19327 9. 1274  
11754324\_ 4. 343735 4. 333106 4. 343735 4. 40461 4. 104475 4. 425844  
11754325\_ 8. 168229 8. 13736 8. 168229 8. 212548 8. 301475 8. 203873  
11754326\_ 7. 684082 7. 636589 7. 773013 7. 918669 7. 967684 7. 964682  
11754327\_ 6. 845428 6. 617364 6. 697545 6. 491537 6. 594995 6. 586786  
11754328\_ 7. 950617 7. 904631 7. 913705 7. 570739 7. 602526 7. 515605  
11754329\_ 7. 12407 7. 010379 7. 094612 7. 31837 7. 194708 7. 353546  
11754330\_ 7. 774828 7. 704798 7. 783915 7. 28227 7. 270538 7. 350723  
11754331\_ 6. 569589 6. 497455 6. 511849 6. 306702 6. 471011 6. 467274  
11754332\_ 6. 17981 6. 076709 6. 23831 5. 891088 6. 043852 6. 023472  
11754333\_ 7. 931803 7. 794838 7. 840202 7. 25118 7. 299162 7. 215802  
11754334\_ 10. 54319 10. 50542 10. 54842 9. 295863 9. 298748 9. 262562  
11754335\_ 6. 379613 6. 235883 6. 408964 5. 964568 5. 980978 5. 962697  
11754336\_ 8. 404024 8. 434379 8. 380234 8. 406831 8. 355611 8. 401924  
11754337\_ 8. 216638 8. 165165 8. 21978 8. 11608 8. 206572 8. 155832  
11754338\_ 8. 37219 8. 430432 8. 425523 8. 645072 8. 617977 8. 654968  
11754339\_ 7. 338957 7. 234472 7. 388099 6. 949716 7. 008469 7. 067559  
11754340\_ 10. 42783 10. 38378 10. 49494 10. 68716 10. 66697 10. 65445  
11754341\_ 9. 005611 9. 015926 9. 012145 9. 302247 9. 275492 9. 215602  
11754342\_ 9. 428604 9. 4945 9. 501716 9. 707713 9. 675557 9. 635483  
11754343\_ 7. 037305 6. 912004 7. 011667 6. 552417 6. 597669 6. 632098  
11754344\_ 8. 987616 8. 913559 8. 929737 8. 810947 8. 913559 8. 856967  
11754345\_ 7. 886682 7. 828381 7. 774078 8. 048914 8. 025122 8. 005532  
11754346\_ 7. 476609 7. 560555 7. 4878 7. 335346 7. 460604 7. 369091  
11754347\_ 6. 937598 6. 983454 6. 950518 6. 740885 6. 90558 6. 943805  
11754348\_ 6. 723923 6. 774955 6. 829568 6. 398207 6. 428123 6. 454694  
11754349\_ 8. 656175 8. 619988 8. 675735 8. 786253 8. 843442 8. 812696  
11754350\_ 8. 720945 8. 687442 8. 706433 8. 647884 8. 687442 8. 739622  
11754351\_ 6. 870803 6. 760594 6. 832655 6. 812781 6. 841549 6. 81117  
11754352\_ 7. 799448 7. 703512 7. 882367 7. 663602 7. 655087 7. 738157  
11754353\_ 5. 049851 5. 07866 4. 91902 5. 037513 5. 05272 5. 005832  
11754354\_ 1. 949494 2. 18567 2. 039979 2. 173696 2. 189794 2. 122442  
11754355\_ 8. 904165 8. 853093 8. 865381 8. 998078 9. 083719 9. 049267  
11754356\_ 9. 052729 9. 015437 9. 005446 9. 379596 9. 375892 9. 272206  
11754357\_ 9. 144221 9. 103094 9. 226541 9. 086319 9. 15742 9. 116764  
11754358\_ 10. 95031 10. 95437 10. 9495 10. 98591 10. 95495 10. 9458  
11754359\_ 8. 772248 8. 800356 8. 800548 8. 552868 8. 613365 8. 690352  
11754360\_ 10. 00484 9. 967401 10. 00085 10. 5779 10. 57436 10. 5581  
11754361\_ 9. 350853 9. 284771 9. 360995 9. 175063 9. 149135 9. 206758  
11754362\_ 4. 407673 4. 040168 3. 994095 4. 27197 4. 235795 4. 12536  
11754363\_ 9. 668331 9. 621516 9. 67621 10. 06059 10. 07494 10. 06294  
11754364\_ 5. 722281 5. 763634 5. 873041 5. 805326 5. 844552 5. 77685  
11754365\_ 4. 097952 4. 070725 4. 198863 4. 345265 4. 260787 4. 448314  
11754366\_ 7. 202473 7. 130262 7. 272 6. 971022 6. 942716 6. 965897  
11754367\_ 5. 583662 5. 566346 5. 446599 5. 574038 5. 595237 5. 554169  
11754368\_ 8. 256937 8. 179174 8. 264559 7. 632687 7. 681578 7. 609975

11754369\_ 5.180671 5.016094 5.011869 5.375861 5.325137 5.380579  
11754370\_ 5.726139 5.865228 5.656314 5.886565 5.851255 5.896696  
11754371\_ 7.434957 7.48066 7.479223 7.571627 7.526601 7.551545  
11754372\_ 4.094274 3.831926 3.836043 3.919881 3.945363 4.048321  
11754373\_ 7.316602 7.160285 7.230513 6.989803 6.887056 6.91925  
11754374\_ 7.882192 7.84595 7.950738 7.503344 7.487746 7.58621  
11754375\_ 8.882462 8.825836 8.779404 9.363957 9.298775 9.311139  
11754376\_ 7.821211 7.836352 7.880573 8.206176 8.186605 8.143783  
11754377\_ 6.413467 6.447417 6.445622 6.850646 6.917347 6.950131  
11754378\_ 8.949896 8.947711 8.9721 9.016227 9.07805 9.005924  
11754379\_ 6.71382 6.773812 6.727118 6.744309 6.739151 6.736931  
11754380\_ 3.671999 3.70916 3.65054 3.5444 3.671999 3.556439  
11754381\_ 5.441179 5.456956 5.480966 5.508073 5.46413 5.522399  
11754382\_ 4.0948 4.037892 4.055641 4.106354 4.092938 4.253749  
11754383\_ 6.660244 6.574335 6.535033 6.34864 6.392963 6.418342  
11754384\_ 8.878278 8.831021 8.909449 8.737855 8.768586 8.725866  
11754385\_ 9.691084 9.628791 9.674141 9.261034 9.354583 9.291318  
11754386\_ 5.20819 5.073036 5.121548 5.238843 5.263162 5.236021  
11754387\_ 7.517295 7.55826 7.570231 7.543121 7.509752 7.574301  
11754388\_ 7.334002 7.243998 7.292269 7.509408 7.45117 7.542979  
11754389\_ 7.711873 7.638501 7.55914 7.127994 7.189982 7.1656  
11754390\_ 3.468069 3.857662 3.687111 3.499897 3.797598 3.796738  
11754391\_ 8.08301 8.087021 8.121508 8.073738 8.025274 8.023547  
11754392\_ 6.005364 5.907548 6.059373 8.117199 8.020776 8.032237  
11754393\_ 11.04775 11.01462 10.98759 11.01006 11.05607 10.96962  
11754394\_ 6.438553 6.440766 6.460888 6.431808 6.496915 6.522558  
11754395\_ 9.613799 9.556639 9.628053 9.462093 9.481991 9.474618  
11754396\_ 5.249817 5.320781 5.170579 5.320294 5.183024 5.442397  
11754397\_ 4.494698 4.494698 4.233541 4.298451 4.591671 4.299167  
11754398\_ 2.548775 2.448817 2.27632 2.337751 2.351844 2.320216  
11754399\_ 5.950281 5.798821 6.123392 6.168188 6.251571 6.247833  
11754400\_ 8.547625 8.64308 8.590064 8.86083 8.917096 8.88085  
11754401\_ 4.907436 4.872964 5.045164 4.941843 4.985236 5.07473  
11754402\_ 5.832891 5.779369 5.736831 5.851474 5.896024 5.904822  
11754403\_ 6.14637 6.186428 6.230552 5.791856 5.967828 5.924013  
11754404\_ 7.280725 7.108901 7.25279 6.793046 6.906438 6.842033  
11754405\_ 10.36986 10.41701 10.36749 10.65493 10.63496 10.52215  
11754406\_ 8.287945 8.249784 8.304061 8.326407 8.342267 8.352389  
11754407\_ 6.815464 6.76959 7.007439 6.60884 6.448378 6.466362  
11754408\_ 2.189123 2.416399 2.356998 2.095833 2.283054 2.147925  
11754409\_ 3.956869 3.942033 4.052307 4.145828 3.911895 3.953156  
11754410\_ 5.069207 5.194274 5.125415 5.332911 5.2222 5.141258  
11754411\_ 6.871277 7.00021 6.984314 6.627493 6.71886 6.71886  
11754412\_ 7.07402 7.104492 7.009455 6.912929 6.932887 6.891077  
11754413\_ 6.800517 6.957855 6.604788 6.908523 6.862059 6.944241  
11754414\_ 4.661025 4.767184 4.730773 4.833156 4.739885 4.795932  
11754415\_ 3.941502 3.893272 4.00022 4.071978 3.745835 3.954515  
11754416\_ 9.326197 9.359217 9.34721 8.72928 8.738937 8.681014  
11754417\_ 12.64194 12.6112 12.6275 12.52085 12.52754 12.51842  
11754418\_ 9.958624 9.917365 9.881361 10.3559 10.27204 10.27268  
11754419\_ 6.683431 6.560235 6.670738 7.080873 7.124328 7.112486

11754420\_ 8. 205962 8. 16917 8. 114713 7. 905036 7. 920728 7. 963787  
11754421\_ 6. 690494 6. 798092 6. 669023 6. 781694 6. 811799 6. 967649  
11754422\_ 8. 891849 8. 903641 8. 917367 8. 455307 8. 493685 8. 475713  
11754423\_ 6. 111303 5. 971191 6. 035023 6. 098813 6. 166466 6. 17981  
11754424\_ 7. 058803 6. 89789 7. 06125 7. 420587 7. 408258 7. 414243  
11754425\_ 7. 044489 6. 910705 6. 919196 7. 403391 7. 4225 7. 347281  
11754426\_ 7. 45231 7. 441615 7. 407922 7. 517299 7. 523866 7. 544119  
11754427\_ 7. 455915 7. 390752 7. 415931 7. 460176 7. 40298 7. 489406  
11754428\_ 6. 124082 6. 131524 5. 967271 6. 16584 6. 183123 6. 25129  
11754429\_ 6. 189136 6. 201986 6. 204934 5. 859689 5. 859517 5. 867443  
11754430\_ 8. 004113 7. 947402 8. 02234 8. 276443 8. 28692 8. 272438  
11754431\_ 10. 06919 10. 0553 10. 00563 10. 38109 10. 36429 10. 31184  
11754432\_ 10. 30128 10. 2631 10. 25249 10. 54292 10. 53161 10. 50845  
11754433\_ 3. 122119 3. 294049 2. 94932 3. 264353 3. 400997 3. 221379  
11754434\_ 8. 065165 8. 112197 8. 148246 8. 437532 8. 433254 8. 410511  
11754435\_ 8. 879237 8. 856188 8. 92715 9. 001001 9. 056074 8. 986628  
11754436\_ 9. 723826 9. 673564 9. 734197 9. 26938 9. 279215 9. 351296  
11754437\_ 9. 771798 9. 678379 9. 748194 9. 270993 9. 295698 9. 288511  
11754438\_ 8. 923301 8. 803406 8. 896987 9. 133558 9. 153372 9. 156173  
11754439\_ 9. 254569 9. 209592 9. 26236 9. 519781 9. 513664 9. 452329  
11754440\_ 6. 143341 6. 118177 6. 220789 5. 919549 5. 83677 5. 97515  
11754441\_ 6. 82765 6. 768768 6. 83831 6. 773264 6. 73693 6. 863693  
11754442\_ 5. 679157 5. 814353 5. 687506 5. 845572 5. 879583 5. 766281  
11754443\_ 7. 499747 7. 464244 7. 525858 7. 397948 7. 369912 7. 347466  
11754444\_ 11. 18879 11. 15555 11. 19167 11. 18963 11. 18156 11. 16123  
11754445\_ 8. 704596 8. 674685 8. 71122 8. 854222 8. 860153 8. 853598  
11754446\_ 6. 315066 6. 232178 6. 212354 5. 942162 5. 92221 6. 137935  
11754447\_ 6. 427884 6. 431206 6. 404646 6. 118838 6. 178881 6. 176547  
11754448\_ 4. 006531 4. 174038 4. 039085 4. 15834 4. 102349 4. 330545  
11754449\_ 6. 918562 6. 756053 6. 938826 6. 669395 6. 599603 6. 69498  
11754450\_ 7. 1783 7. 111154 7. 063824 7. 000641 6. 976475 7. 125935  
11754451\_ 9. 482798 9. 452301 9. 475496 9. 293077 9. 2687 9. 2368  
11754452\_ 6. 990985 6. 971338 7. 038107 7. 038477 7. 151088 6. 994442  
11754453\_ 8. 432675 8. 423137 8. 461327 8. 443433 8. 497434 8. 510713  
11754454\_ 11. 77086 11. 76254 11. 78139 11. 7403 11. 75394 11. 75088  
11754455\_ 6. 723879 6. 706285 6. 700051 6. 463025 6. 540338 6. 550421  
11754456\_ 9. 245673 9. 155568 9. 238947 8. 706864 8. 736936 8. 742895  
11754457\_ 7. 68799 7. 664611 7. 767737 8. 094669 8. 099339 8. 033657  
11754458\_ 5. 772582 5. 940282 5. 690071 5. 923473 5. 968204 5. 871836  
11754459\_ 4. 492465 4. 583557 4. 860301 4. 765507 4. 907238 4. 731954  
11754460\_ 6. 395021 6. 585594 6. 33679 6. 828602 6. 711885 6. 651901  
11754461\_ 7. 231085 7. 20544 7. 183263 7. 796921 7. 74226 7. 791331  
11754462\_ 8. 157567 8. 106602 8. 126167 7. 655187 7. 630071 7. 644365  
11754463\_ 9. 466343 9. 396932 9. 468324 9. 50208 9. 526272 9. 52634  
11754464\_ 7. 330348 7. 340265 7. 397197 7. 508605 7. 583272 7. 666956  
11754465\_ 10. 53008 10. 63155 10. 53056 10. 53198 10. 55986 10. 58788  
11754466\_ 8. 465445 8. 37177 8. 46163 8. 02234 8. 020463 8. 098883  
11754467\_ 9. 011148 8. 899793 9. 054646 8. 63134 8. 599505 8. 655386  
11754468\_ 4. 245046 4. 087833 4. 38279 4. 179834 4. 074972 4. 30514  
11754469\_ 6. 950129 6. 883156 7. 042375 7. 254985 7. 2894 7. 352848  
11754470\_ 7. 502072 7. 552175 7. 567395 8. 195694 8. 166468 8. 227575

11754471\_ 5. 862717 5. 749358 5. 833266 6. 12257 6. 122294 5. 969512  
11754472\_ 3. 426071 3. 69492 3. 997937 3. 859257 3. 677748 3. 96155  
11754473\_ 5. 55608 5. 511319 5. 508506 4. 983777 4. 898419 5. 106768  
11754474\_ 4. 647527 4. 970717 4. 474772 4. 920936 4. 918946 4. 767178  
11754475\_ 7. 182082 7. 024759 7. 206518 6. 739449 6. 72696 6. 737321  
11754476\_ 7. 279171 7. 277629 7. 418946 7. 631584 7. 644082 7. 626889  
11754477\_ 6. 812487 6. 936579 6. 784991 7. 12543 7. 062961 7. 113776  
11754478\_ 9. 863928 9. 811988 9. 889521 9. 721091 9. 748658 9. 757651  
11754479\_ 4. 991053 4. 922092 4. 719207 4. 944153 4. 964145 5. 052599  
11754480\_ 4. 901195 5. 004847 4. 735143 4. 897326 4. 942409 4. 783336  
11754481\_ 6. 935627 6. 94742 6. 955232 7. 016237 7. 018121 7. 025561  
11754482\_ 10. 60122 10. 53095 10. 60068 10. 71318 10. 70046 10. 65464  
11754483\_ 6. 875845 6. 863552 6. 907016 7. 442957 7. 415341 7. 410528  
11754484\_ 7. 113423 7. 18611 7. 154429 7. 364147 7. 316775 7. 426547  
11754485\_ 2. 731765 2. 885635 2. 605516 2. 723968 2. 759721 2. 840023  
11754486\_ 9. 055149 9. 009287 9. 056569 9. 39254 9. 397373 9. 355816  
11754487\_ 7. 37004 7. 334601 7. 447997 7. 214117 7. 208002 7. 261591  
11754488\_ 9. 850688 9. 887181 9. 856713 9. 918308 9. 847999 9. 87135  
11754489\_ 8. 54483 8. 515561 8. 576494 8. 228795 8. 305279 8. 314372  
11754490\_ 3. 019295 3. 00041 3. 114504 2. 883893 3. 189598 3. 00041  
11754491\_ 5. 360812 5. 291641 5. 391957 5. 073036 5. 26034 4. 999355  
11754492\_ 6. 076643 6. 09871 5. 980205 6. 061352 6. 040418 6. 060652  
11754493\_ 9. 087378 9. 048536 9. 142451 9. 202481 9. 25302 9. 15419  
11754494\_ 5. 425545 5. 36801 5. 38057 5. 279251 5. 225147 5. 368957  
11754495\_ 10. 71163 10. 67799 10. 70383 10. 53257 10. 50434 10. 48011  
11754496\_ 2. 727108 2. 731451 2. 704208 2. 818989 2. 782186 2. 828659  
11754497\_ 7. 81976 7. 801466 7. 880195 7. 379038 7. 341035 7. 399439  
11754498\_ 5. 053596 5. 046446 4. 85754 4. 940116 4. 933496 4. 957951  
11754499\_ 8. 436267 8. 447177 8. 443441 8. 720986 8. 699737 8. 709312  
11754500\_ 3. 795003 3. 849785 4. 04682 3. 939872 3. 969526 3. 954157  
11754501\_ 3. 81258 3. 843236 3. 918726 3. 971262 3. 943729 3. 846757  
11754502\_ 8. 517986 8. 503074 8. 526231 8. 562385 8. 55948 8. 542837  
11754503\_ 8. 330491 8. 273831 8. 299335 8. 399677 8. 424648 8. 402418  
11754504\_ 7. 392052 7. 399787 7. 327472 7. 296554 7. 306529 7. 213339  
11754505\_ 7. 093727 7. 199291 7. 138417 7. 344067 7. 463814 7. 270697  
11754506\_ 5. 817857 5. 793059 5. 781506 5. 863767 5. 945721 5. 791924  
11754507\_ 6. 901953 7. 061836 7. 062284 7. 249308 7. 324886 7. 170872  
11754508\_ 9. 088951 8. 965825 9. 030274 8. 659588 8. 619853 8. 565352  
11754509\_ 4. 994501 5. 055788 4. 994865 4. 912099 4. 768565 4. 904807  
11754510\_ 9. 782269 9. 720565 9. 797284 10. 67811 10. 65464 10. 67986  
11754511\_ 6. 904224 6. 896468 6. 863784 6. 87764 6. 885567 7. 011032  
11754512\_ 5. 582643 5. 375949 5. 364921 5. 466256 5. 537877 5. 44713  
11754513\_ 7. 290266 7. 150626 7. 14587 6. 901073 6. 934785 6. 865949  
11754514\_ 6. 432881 6. 238547 6. 270134 6. 473888 6. 545996 6. 566517  
11754515\_ 8. 176283 8. 103436 8. 188889 7. 409223 7. 4178 7. 427503  
11754516\_ 9. 359581 9. 30927 9. 274225 8. 586782 8. 560202 8. 667426  
11754517\_ 9. 783827 9. 724622 9. 775708 9. 564775 9. 584675 9. 538613  
11754518\_ 5. 36906 5. 263694 5. 110168 5. 263694 5. 27768 5. 385689  
11754519\_ 7. 366132 7. 404733 7. 384946 7. 196741 7. 198672 7. 160536  
11754520\_ 7. 695039 7. 684698 7. 728992 7. 440184 7. 454803 7. 427019  
11754521\_ 8. 092477 7. 991494 8. 067604 7. 665552 7. 708414 7. 623544

11754522\_ 7. 547779 7. 502881 7. 512737 7. 536097 7. 424729 7. 351257  
11754523\_ 11. 14698 11. 14543 11. 08517 11. 206 11. 1441 11. 12706  
11754524\_ 6. 719906 6. 607373 6. 739151 6. 354405 6. 337826 6. 280103  
11754525\_ 8. 382132 8. 316826 8. 3868 8. 094166 8. 052869 8. 104136  
11754526\_ 6. 212769 6. 274094 6. 162403 6. 154462 6. 126913 6. 130539  
11754527\_ 8. 151922 8. 118905 8. 217775 7. 883981 7. 892163 7. 973062  
11754528\_ 7. 609318 7. 679357 7. 718619 7. 716216 7. 735271 7. 73528  
11754529\_ 10. 61087 10. 56 10. 563 10. 29964 10. 37303 10. 35554  
11754530\_ 8. 266498 8. 272995 8. 28277 8. 69856 8. 60916 8. 578039  
11754531\_ 8. 188269 8. 097805 8. 173525 8. 291278 8. 263312 8. 264274  
11754532\_ 6. 367487 6. 34588 6. 319267 6. 414953 6. 497107 6. 430433  
11754533\_ 5. 544167 5. 635585 5. 614563 5. 700302 5. 813025 5. 684111  
11754534\_ 6. 778079 6. 701809 6. 740221 6. 661897 6. 602696 6. 528702  
11754535\_ 2. 268522 2. 415774 2. 091786 2. 267672 2. 189362 2. 189362  
11754536\_ 6. 828397 6. 777082 6. 961317 6. 689926 6. 813921 6. 679317  
11754537\_ 8. 078888 8. 058848 8. 0469 8. 018476 8. 060297 7. 967495  
11754538\_ 7. 198969 7. 231109 7. 129224 7. 262822 7. 221068 7. 231109  
11754539\_ 5. 972142 5. 803834 5. 98043 5. 737648 5. 751238 5. 746722  
11754540\_ 5. 22852 5. 356026 4. 984669 5. 004365 5. 175622 5. 186507  
11754541\_ 7. 87798 7. 877515 7. 888426 7. 441663 7. 505112 7. 424072  
11754542\_ 5. 893428 5. 914302 5. 820012 5. 790904 5. 885194 5. 862192  
11754543\_ 4. 958774 5. 02566 4. 801917 4. 83456 4. 93905 4. 853523  
11754544\_ 5. 126274 5. 086674 5. 371204 4. 612401 4. 479202 4. 460991  
11754545\_ 8. 388695 8. 394234 8. 411078 8. 406602 8. 387527 8. 414454  
11754546\_ 4. 690317 4. 734512 4. 685867 4. 635438 4. 608529 4. 67987  
11754547\_ 6. 300643 6. 200497 6. 248026 6. 462521 6. 417913 6. 386842  
11754548\_ 7. 120151 7. 142564 7. 17368 7. 47437 7. 411715 7. 449795  
11754549\_ 6. 024473 5. 795777 5. 869125 5. 829508 5. 817197 5. 844875  
11754550\_ 10. 57868 10. 64583 10. 57254 10. 58916 10. 60516 10. 66666  
11754551\_ 11. 86599 11. 77271 11. 8072 11. 93118 11. 97226 11. 93608  
11754552\_ 10. 0136 9. 965352 10. 01773 9. 96873 10. 02232 9. 983376  
11754553\_ 8. 906415 8. 888012 9. 005952 9. 148429 9. 146083 9. 215925  
11754554\_ 5. 795778 5. 614563 5. 636079 5. 509896 5. 580909 5. 590528  
11754555\_ 5. 841992 5. 928463 5. 821451 5. 931284 5. 88568 5. 998508  
11754556\_ 9. 103634 9. 022933 9. 061798 8. 739078 8. 761843 8. 692504  
11754557\_ 7. 77475 7. 814818 7. 854068 7. 68375 7. 714543 7. 803173  
11754558\_ 5. 195891 5. 584813 5. 444078 5. 753928 5. 472815 5. 619463  
11754559\_ 4. 460326 4. 573087 4. 482522 4. 337129 4. 636877 4. 650396  
11754560\_ 3. 791224 3. 715182 3. 884001 3. 751428 3. 823327 3. 847293  
11754561\_ 9. 926436 9. 863743 9. 921087 9. 918625 9. 964585 9. 922055  
11754562\_ 6. 895328 6. 736375 6. 875698 6. 764209 6. 914495 6. 764313  
11754563\_ 5. 048347 5. 587363 5. 2778 5. 060587 4. 871329 4. 839616  
11754564\_ 4. 133206 4. 087329 3. 978679 4. 141521 4. 063267 4. 115701  
11754565\_ 4. 030858 3. 779286 4. 000412 3. 860732 3. 954113 4. 151595  
11754566\_ 6. 51363 6. 3437 6. 49857 5. 497144 5. 404562 5. 576722  
11754567\_ 8. 260515 8. 240634 8. 240966 7. 979657 7. 979657 8. 027463  
11754568\_ 7. 903111 7. 868557 7. 99947 8. 387909 8. 402629 8. 444783  
11754569\_ 8. 620196 8. 580708 8. 641868 8. 956423 8. 978605 8. 942699  
11754570\_ 6. 32593 6. 384027 6. 429076 6. 402021 6. 383238 6. 431682  
11754571\_ 6. 719167 6. 811071 6. 827856 6. 917843 7. 030161 6. 984898  
11754572\_ 6. 516067 6. 334174 6. 478371 6. 27265 6. 282663 6. 260793

11754573\_ 8. 327481 8. 336414 8. 373754 8. 33127 8. 337482 8. 384989  
11754574\_ 4. 854974 4. 9226 5. 122191 5. 05382 5. 029529 5. 043582  
11754575\_ 10. 11764 10. 18032 10. 19613 11. 08121 11. 03365 11. 04219  
11754576\_ 5. 099399 5. 066316 4. 978142 4. 953968 4. 925607 4. 821126  
11754577\_ 3. 705625 3. 631141 3. 498744 3. 515441 3. 631141 3. 670443  
11754578\_ 2. 416399 2. 439882 2. 392916 2. 439882 2. 52985 2. 486848  
11754579\_ 4. 653773 4. 671864 4. 64446 4. 708189 4. 673523 4. 409982  
11754580\_ 6. 844844 6. 826681 6. 76774 6. 867887 6. 826429 6. 907512  
11754581\_ 7. 109595 6. 999058 7. 059385 7. 565616 7. 64104 7. 630555  
11754582\_ 7. 339484 7. 331926 7. 373654 7. 317914 7. 180108 7. 343401  
11754583\_ 6. 467524 6. 623262 6. 67941 6. 567678 6. 626805 6. 765163  
11754584\_ 7. 079586 6. 898793 6. 939723 7. 235753 7. 204522 7. 238417  
11754585\_ 7. 230373 7. 134375 7. 268998 7. 089177 7. 011172 7. 06491  
11754586\_ 9. 100486 9. 05093 9. 091904 8. 930809 9. 041687 8. 93672  
11754587\_ 8. 285289 8. 225996 8. 298463 7. 857087 7. 908237 7. 863491  
11754588\_ 9. 250531 9. 137013 9. 218509 8. 640005 8. 596822 8. 695563  
11754589\_ 9. 284234 9. 248788 9. 269826 9. 138686 9. 173239 9. 112344  
11754590\_ 10. 14751 10. 11118 10. 13125 10. 10424 10. 09193 10. 11486  
11754591\_ 7. 862331 7. 800784 7. 859996 8. 111463 8. 167859 8. 144153  
11754592\_ 4. 886316 4. 867201 4. 789692 5. 340904 5. 500817 5. 399419  
11754593\_ 10. 80251 10. 75019 10. 83301 10. 87811 10. 90901 10. 92789  
11754594\_ 10. 88061 10. 83851 10. 8589 10. 69664 10. 71676 10. 69754  
11754595\_ 11. 29733 11. 33026 11. 27905 11. 14431 11. 12885 11. 12666  
11754596\_ 9. 959839 9. 951909 9. 989264 10. 65792 10. 68791 10. 67134  
11754597\_ 7. 259912 7. 18848 7. 257211 7. 254588 7. 28396 7. 2984  
11754598\_ 9. 155331 9. 186909 9. 146445 9. 191026 9. 141698 9. 117445  
11754599\_ 7. 716251 7. 672483 7. 827169 7. 619589 7. 631073 7. 621825  
11754600\_ 4. 752537 4. 913654 4. 916832 4. 924896 5. 11527 5. 073036  
11754601\_ 8. 034621 7. 922315 8. 028464 8. 018001 8. 04758 8. 114861  
11754602\_ 3. 379238 3. 530488 3. 300527 3. 358117 3. 452413 3. 48448  
11754603\_ 6. 481409 6. 48568 6. 419378 6. 466864 6. 491771 6. 633537  
11754604\_ 7. 640514 7. 580621 7. 561668 7. 136086 7. 016789 7. 07498  
11754605\_ 5. 477294 5. 420142 5. 502275 5. 305693 5. 299434 5. 246724  
11754606\_ 10. 70277 10. 75109 10. 68733 10. 92315 10. 91453 10. 81035  
11754607\_ 11. 36281 11. 45546 11. 39196 11. 52315 11. 49702 11. 45896  
11754608\_ 11. 53655 11. 50301 11. 54491 11. 5377 11. 52015 11. 49132  
11754609\_ 7. 217143 7. 095986 7. 098494 6. 554512 6. 657774 6. 643101  
11754610\_ 5. 93092 6. 020518 6. 018553 6. 23187 6. 24031 6. 179107  
11754611\_ 5. 60935 5. 709926 5. 806395 5. 85164 6. 010822 5. 825517  
11754612\_ 9. 241177 9. 167948 9. 214589 9. 416045 9. 363853 9. 381172  
11754613\_ 5. 568334 5. 626318 5. 492259 5. 530661 5. 666876 5. 584965  
11754614\_ 4. 946717 5. 06081 5. 051368 5. 101551 4. 964141 4. 964783  
11754615\_ 8. 938316 8. 970284 8. 89824 8. 821023 8. 777998 8. 861003  
11754616\_ 6. 834506 6. 859895 6. 834935 6. 902569 7. 022313 7. 085641  
11754617\_ 8. 527085 8. 487709 8. 60501 8. 509243 8. 585077 8. 518374  
11754618\_ 8. 259342 8. 223372 8. 243122 8. 238837 8. 321935 8. 213286  
11754619\_ 5. 847679 5. 855845 5. 754594 6. 07761 6. 149482 6. 182319  
11754620\_ 8. 001141 7. 951171 8. 097342 7. 467168 7. 534668 7. 465114  
11754621\_ 6. 397946 6. 407616 6. 283882 5. 93062 6. 153054 6. 216388  
11754622\_ 6. 535683 6. 564709 6. 484498 6. 182458 6. 216018 6. 231926  
11754623\_ 10. 91595 10. 87122 10. 8847 10. 97494 10. 92463 10. 96674

11754624\_ 7. 300777 7. 079127 7. 297924 7. 620632 7. 552252 7. 459192  
11754625\_ 8. 270591 8. 198128 8. 28842 7. 946138 7. 930294 7. 892875  
11754626\_ 2. 904963 3. 037937 2. 911839 2. 983153 2. 881449 3. 105697  
11754627\_ 4. 029442 4. 058512 3. 911846 3. 939143 4. 048148 3. 784354  
11754628\_ 6. 831996 6. 699116 6. 725582 6. 548968 6. 783923 6. 567869  
11754629\_ 5. 194539 4. 973693 5. 584059 4. 589955 4. 556627 4. 561966  
11754630\_ 7. 61609 7. 404461 7. 575903 7. 409271 7. 55199 7. 492109  
11754631\_ 6. 936369 6. 937511 7. 01709 6. 735626 6. 752593 6. 646187  
11754632\_ 6. 941936 6. 796801 6. 850695 7. 069323 7. 136774 7. 137751  
11754633\_ 10. 30017 10. 27009 10. 33817 10. 48662 10. 48619 10. 45541  
11754634\_ 5. 434336 5. 62063 5. 505252 5. 653851 5. 64096 5. 582605  
11754635\_ 4. 967699 5. 139484 4. 857311 4. 968258 5. 039499 4. 93383  
11754636\_ 6. 4859 6. 641183 6. 526095 5. 974165 6. 117701 5. 979156  
11754637\_ 6. 952734 7. 09395 6. 947703 7. 092519 7. 168631 7. 059342  
11754638\_ 5. 994957 5. 803395 5. 898124 6. 23294 6. 264396 6. 134299  
11754639\_ 6. 13945 6. 14152 6. 124164 6. 154697 6. 127389 5. 970179  
11754640\_ 2. 665601 2. 74592 2. 751193 2. 815979 2. 644702 2. 951243  
11754641\_ 6. 159072 6. 272193 6. 087193 6. 268476 6. 258106 6. 280957  
11754642\_ 5. 618629 5. 729817 5. 460763 5. 58114 5. 658489 5. 690549  
11754643\_ 6. 946361 6. 817544 6. 966889 6. 386218 6. 335821 6. 491869  
11754644\_ 9. 480404 9. 446083 9. 489883 8. 999849 8. 967956 8. 95562  
11754645\_ 8. 724647 8. 737948 8. 753781 8. 815807 8. 881524 8. 88189  
11754646\_ 6. 82981 6. 819018 6. 946361 6. 7805 6. 783818 6. 856281  
11754647\_ 7. 061382 7. 020462 7. 081345 7. 15756 7. 278184 7. 281761  
11754648\_ 8. 784525 8. 690979 8. 772237 9. 067644 9. 050091 9. 081167  
11754649\_ 2. 421486 2. 309674 2. 276441 2. 393103 2. 357156 2. 451088  
11754650\_ 3. 910425 3. 687638 3. 753274 3. 833873 3. 709201 3. 564268  
11754651\_ 6. 602649 6. 544955 6. 525059 6. 480446 6. 466346 6. 451642  
11754652\_ 9. 172912 9. 130417 9. 16647 9. 278674 9. 27979 9. 193232  
11754653\_ 7. 659407 7. 552832 7. 732915 7. 188527 7. 21342 7. 229215  
11754654\_ 5. 907443 5. 961721 5. 783479 6. 566723 6. 546923 6. 654199  
11754655\_ 6. 974699 6. 893503 6. 986621 6. 708614 6. 767169 6. 72556  
11754656\_ 4. 053573 3. 606313 3. 552372 4. 074527 3. 590119 3. 554109  
11754657\_ 5. 333723 5. 533981 5. 50565 5. 448296 5. 48634 5. 380945  
11754658\_ 4. 953942 5. 013987 5. 133985 5. 174741 5. 242171 5. 133985  
11754659\_ 8. 105598 8. 091999 8. 034951 9. 889625 9. 795009 9. 781706  
11754660\_ 5. 345338 5. 222898 5. 382155 4. 539842 4. 407359 4. 80741  
11754661\_ 5. 382306 5. 502782 5. 28381 5. 585513 5. 522961 5. 494367  
11754662\_ 5. 33156 5. 268575 5. 424093 5. 189192 5. 240829 5. 346054  
11754663\_ 8. 346977 8. 196823 8. 272717 9. 018505 9. 017871 9. 07425  
11754664\_ 8. 481506 8. 445021 8. 428658 8. 275772 8. 290339 8. 259225  
11754665\_ 4. 435432 4. 5079 4. 393233 4. 506385 4. 548238 4. 477284  
11754666\_ 6. 139524 6. 07338 6. 130954 6. 617428 6. 685206 6. 709459  
11754667\_ 5. 752048 5. 750108 5. 622422 5. 847182 5. 858167 5. 853922  
11754668\_ 6. 13945 6. 189386 6. 148524 6. 242518 6. 241491 6. 166212  
11754669\_ 2. 980477 3. 261066 3. 001456 3. 083668 3. 134488 3. 279263  
11754670\_ 6. 523799 6. 425551 6. 476507 7. 040692 6. 837219 6. 926027  
11754671\_ 7. 422213 7. 279463 7. 370797 7. 81621 7. 786714 7. 825712  
11754672\_ 8. 41149 8. 266098 8. 380319 7. 777787 7. 861224 7. 876555  
11754673\_ 7. 781668 7. 759615 7. 891706 7. 737442 7. 547424 7. 646549  
11754674\_ 5. 643051 5. 497385 5. 653337 5. 482878 5. 305677 5. 336961

11754675\_ 7. 879331 7. 767827 7. 892637 7. 373018 7. 362887 7. 335594  
11754676\_ 7. 89301 7. 83406 7. 98464 8. 532662 8. 50004 8. 512583  
11754677\_ 8. 085971 7. 982005 8. 042623 7. 876975 7. 96521 7. 952263  
11754678\_ 7. 408243 7. 453036 7. 441943 7. 481087 7. 429609 7. 435223  
11754679\_ 6. 628337 6. 590162 6. 703052 6. 68592 6. 657208 6. 744447  
11754680\_ 8. 543045 8. 574127 8. 542335 8. 014869 7. 97343 8. 076996  
11754681\_ 7. 708912 7. 666439 7. 66255 7. 914825 7. 923786 7. 944902  
11754682\_ 6. 095806 6. 241639 6. 094013 6. 139655 6. 139655 6. 087669  
11754683\_ 4. 836702 4. 821433 4. 678904 4. 636061 4. 456554 4. 54553  
11754684\_ 4. 779891 4. 977034 4. 976042 5. 115091 4. 975049 4. 977034  
11754685\_ 6. 627721 6. 656977 6. 597098 6. 634134 6. 662171 6. 692827  
11754686\_ 6. 717439 6. 678437 6. 556695 6. 580425 6. 574712 6. 567096  
11754687\_ 7. 30596 7. 318325 7. 357396 7. 901788 7. 905349 7. 874765  
11754688\_ 8. 615711 8. 550446 8. 632894 8. 374358 8. 424142 8. 522909  
11754689\_ 9. 539269 9. 486916 9. 471106 9. 266949 9. 219841 9. 207978  
11754690\_ 4. 451899 4. 52373 4. 572589 4. 768103 4. 804963 4. 800353  
11754691\_ 7. 306427 7. 544245 7. 173211 7. 36559 7. 394034 7. 423217  
11754692\_ 7. 936352 7. 892237 8. 009634 7. 969654 8. 040273 8. 038465  
11754693\_ 4. 874234 4. 689669 4. 685247 4. 380032 4. 458625 4. 671257  
11754694\_ 3. 672822 3. 863755 3. 859956 4. 3381 4. 2137 4. 174576  
11754695\_ 3. 705625 3. 630233 3. 699848 3. 670887 3. 705625 3. 860333  
11754696\_ 8. 683314 8. 649606 8. 658194 8. 6353 8. 69405 8. 638971  
11754697\_ 9. 964336 9. 929203 9. 999284 9. 68123 9. 709957 9. 695747  
11754698\_ 5. 424324 5. 631051 5. 694685 5. 799753 5. 62028 5. 756796  
11754699\_ 7. 329568 7. 250906 7. 431247 7. 42433 7. 444639 7. 454938  
11754700\_ 6. 477055 6. 515215 6. 462243 6. 747161 6. 547238 6. 534476  
11754701\_ 4. 357856 4. 530376 4. 418882 4. 480428 4. 503526 4. 513583  
11754702\_ 5. 706673 5. 693476 5. 739536 5. 172231 5. 225222 5. 050158  
11754703\_ 4. 01238 4. 084124 4. 023382 4. 078581 4. 14519 4. 023382  
11754704\_ 9. 007755 8. 976868 9. 044979 8. 906954 8. 966205 8. 967522  
11754705\_ 8. 178463 8. 098632 8. 1111 7. 597093 7. 652171 7. 644861  
11754706\_ 4. 270008 4. 240097 4. 175966 4. 199126 4. 280764 4. 260574  
11754707\_ 9. 564008 9. 410314 9. 516515 9. 536312 9. 508534 9. 535011  
11754708\_ 2. 402194 2. 46063 2. 50736 2. 548484 2. 175295 2. 223585  
11754709\_ 5. 676992 5. 749292 5. 562515 5. 614563 5. 80847 5. 704919  
11754710\_ 5. 112402 5. 111496 5. 058908 5. 399625 5. 446356 5. 267181  
11754711\_ 8. 626627 8. 60102 8. 652384 8. 672444 8. 645993 8. 680351  
11754712\_ 5. 576405 5. 522292 5. 768754 5. 421905 5. 518272 5. 411289  
11754713\_ 7. 204345 7. 209824 7. 200227 7. 099275 7. 097878 7. 066555  
11754714\_ 7. 065157 6. 996919 7. 048347 7. 19842 7. 320836 7. 441421  
11754715\_ 3. 766314 3. 948301 3. 769058 3. 734334 3. 740298 3. 834663  
11754716\_ 9. 324355 9. 227581 9. 321905 9. 555613 9. 595347 9. 611367  
11754717\_ 8. 90236 8. 8629 8. 917793 8. 655802 8. 626078 8. 616531  
11754718\_ 9. 144724 9. 034261 9. 060776 8. 838301 8. 86898 8. 885301  
11754719\_ 2. 497138 2. 130324 2. 23413 2. 39999 2. 499955 2. 303018  
11754720\_ 5. 304972 5. 375185 5. 356609 5. 59128 5. 728874 5. 717011  
11754721\_ 7. 203634 7. 076305 7. 093631 6. 992202 6. 892265 7. 024659  
11754722\_ 7. 661752 7. 622388 7. 696611 7. 776086 7. 817197 7. 829903  
11754723\_ 9. 150828 9. 138565 9. 202808 8. 809104 8. 840303 8. 833022  
11754724\_ 5. 220693 5. 202203 5. 095292 5. 352639 5. 200828 5. 209679  
11754725\_ 6. 477569 6. 326183 6. 469945 5. 97828 6. 048021 6. 163332



11754726\_ 8. 561919 8. 527713 8. 508739 8. 583856 8. 504501 8. 528968  
11754727\_ 8. 131549 8. 025731 8. 17761 8. 231546 8. 219823 8. 253963  
11754728\_ 6. 503758 6. 518543 6. 392473 6. 702681 6. 72169 6. 621927  
11754729\_ 4. 941966 5. 063688 4. 864588 5. 12175 5. 166601 5. 07689  
11754730\_ 6. 263433 6. 42605 6. 297212 6. 383195 6. 468346 6. 445405  
11754731\_ 8. 169183 8. 090594 8. 198698 8. 037116 8. 096721 8. 061906  
11754732\_ 5. 045573 5. 142207 4. 984669 4. 824195 4. 798511 4. 833485  
11754733\_ 5. 418216 5. 284047 5. 544222 5. 169598 5. 162414 5. 087083  
11754734\_ 2. 605516 2. 654272 2. 657465 2. 802623 2. 839928 2. 826178  
11754735\_ 2. 122347 2. 47102 2. 574412 2. 46099 2. 596 2. 38071  
11754736\_ 4. 020599 4. 067438 4. 026092 4. 276201 4. 101226 4. 030758  
11754737\_ 6. 194147 6. 325769 6. 27697 5. 854786 5. 785152 5. 959163  
11754738\_ 5. 041985 4. 836623 5. 132866 4. 954896 4. 864036 4. 865661  
11754739\_ 7. 066636 7. 157825 7. 031531 7. 502909 7. 462147 7. 471937  
11754740\_ 2. 47102 2. 077374 2. 47102 2. 416399 2. 416399 2. 539555  
11754741\_ 5. 674036 5. 632637 5. 625639 5. 524461 5. 563172 5. 488051  
11754742\_ 5. 414797 5. 534508 5. 406505 5. 545014 5. 764649 5. 788663  
11754743\_ 8. 204547 8. 095958 8. 095958 7. 913975 7. 849635 7. 900387  
11754744\_ 3. 814728 4. 048134 3. 799777 4. 106918 4. 007247 3. 860296  
11754745\_ 4. 188952 4. 301663 4. 310339 4. 385144 4. 368624 4. 435873  
11754746\_ 7. 908741 7. 819642 7. 878576 7. 291132 7. 304544 7. 306489  
11754747\_ 6. 842675 6. 837866 6. 963784 7. 005856 7. 023623 7. 125962  
11754748\_ 5. 299497 5. 287059 5. 135798 5. 287059 5. 274621 5. 287059  
11754749\_ 3. 819047 4. 001084 3. 866848 3. 967441 4. 004335 4. 015097  
11754750\_ 7. 014469 6. 939404 7. 083912 6. 931 6. 940035 7. 027891  
11754751\_ 9. 233608 9. 16639 9. 212045 8. 757096 8. 820051 8. 734016  
11754752\_ 5. 544956 5. 629226 5. 556774 5. 610219 5. 606532 5. 606532  
11754753\_ 8. 603608 8. 556004 8. 550187 8. 436604 8. 329929 8. 377189  
11754754\_ 2. 426625 2. 25483 2. 364197 2. 328883 2. 342513 2. 310867  
11754755\_ 7. 902797 7. 848592 8. 000911 7. 780313 7. 75492 7. 852382  
11754756\_ 2. 955245 3. 184999 2. 946007 3. 145336 3. 048361 3. 103971  
11754757\_ 5. 808368 5. 684688 5. 577117 6. 145719 6. 314473 6. 086728  
11754758\_ 7. 085855 7. 058787 7. 118282 7. 064989 7. 024283 7. 057738  
11754759\_ 7. 328722 7. 411325 7. 418507 7. 758078 7. 741194 7. 789844  
11754760\_ 7. 924103 7. 920087 7. 946787 7. 770379 7. 761647 7. 804352  
11754761\_ 11. 25181 11. 25596 11. 25907 11. 49905 11. 46229 11. 4335  
11754762\_ 7. 476 7. 503562 7. 484598 7. 410304 7. 426668 7. 420171  
11754763\_ 8. 662408 8. 598741 8. 707565 8. 79943 8. 780766 8. 766592  
11754764\_ 5. 416859 5. 377917 5. 324375 5. 43816 5. 183024 5. 336484  
11754765\_ 11. 43626 11. 41779 11. 39409 11. 63157 11. 63752 11. 571  
11754766\_ 9. 571523 9. 580382 9. 568366 9. 295053 9. 277742 9. 247626  
11754767\_ 7. 820444 7. 773052 7. 8926 8. 298308 8. 34361 8. 269682  
11754768\_ 6. 839716 6. 822242 6. 890254 6. 898552 6. 874408 6. 944072  
11754769\_ 4. 483476 4. 498721 4. 425797 4. 690985 4. 503519 4. 605399  
11754770\_ 6. 757615 6. 746785 6. 82192 6. 625634 6. 746257 6. 68512  
11754771\_ 8. 575928 8. 508618 8. 499151 8. 190696 8. 226003 8. 188885  
11754772\_ 7. 216142 7. 320061 7. 349577 7. 342238 7. 38824 7. 406659  
11754773\_ 7. 409349 7. 390268 7. 397549 6. 890595 6. 816568 6. 934615  
11754774\_ 8. 961707 8. 916648 8. 969093 8. 80754 8. 791141 8. 741112  
11754775\_ 11. 16704 11. 14963 11. 16929 11. 14331 11. 11257 11. 12279  
11754776\_ 7. 803502 7. 761418 7. 69006 7. 840126 7. 839429 7. 797565

11754777\_ 7. 111755 6. 992298 6. 917815 6. 517809 6. 36689 6. 611642  
11754778\_ 8. 844102 8. 797599 8. 857839 9. 058048 9. 088935 9. 111144  
11754779\_ 7. 702493 7. 639716 7. 585843 7. 198547 7. 269675 7. 237866  
11754780\_ 6. 307388 6. 331844 6. 338942 5. 789304 5. 875046 5. 946303  
11754781\_ 9. 94551 9. 968088 10. 00718 10. 07953 10. 02216 10. 04006  
11754782\_ 5. 332162 5. 013194 5. 086426 5. 460442 5. 395735 5. 377293  
11754783\_ 8. 884155 8. 855473 8. 836352 8. 635398 8. 637991 8. 651967  
11754784\_ 5. 869279 5. 835222 5. 811818 5. 760053 5. 813987 5. 788328  
11754785\_ 7. 204269 7. 200659 7. 130783 7. 427777 7. 474342 7. 417811  
11754786\_ 5. 845365 5. 864656 5. 864656 5. 899909 5. 800351 5. 820461  
11754787\_ 3. 066293 3. 101339 3. 048376 3. 115081 3. 033046 3. 012964  
11754788\_ 8. 8207 8. 788155 8. 874886 8. 707342 8. 805082 8. 692584  
11754789\_ 9. 754853 9. 728323 9. 644928 10. 00488 9. 851144 9. 896602  
11754790\_ 6. 13698 6. 190324 6. 272384 6. 038168 6. 061038 6. 16504  
11754791\_ 8. 230328 8. 134344 8. 181563 8. 158455 8. 185922 8. 134843  
11754792\_ 6. 327906 6. 48096 6. 320319 6. 842787 6. 81134 6. 84124  
11754793\_ 10. 0874 10. 06871 10. 07751 9. 550176 9. 567708 9. 47742  
11754794\_ 5. 02635 5. 2007 5. 086647 4. 993275 5. 086647 5. 11266  
11754795\_ 6. 696691 6. 549872 6. 634386 6. 820295 6. 869185 6. 934615  
11754796\_ 6. 329319 6. 266134 6. 413849 6. 215491 6. 281853 6. 266134  
11754797\_ 8. 28264 8. 205126 8. 21753 8. 122136 8. 031607 8. 012131  
11754798\_ 9. 824567 9. 833462 9. 772291 9. 445717 9. 397765 9. 432109  
11754799\_ 9. 819792 9. 823753 9. 783138 9. 466653 9. 42626 9. 321519  
11754800\_ 9. 373178 9. 307143 9. 355792 9. 048399 9. 026602 9. 029423  
11754801\_ 8. 850155 8. 735915 8. 805421 8. 767956 8. 710718 8. 691222  
11754802\_ 6. 454034 6. 449078 6. 507776 6. 098807 6. 057536 5. 943829  
11754803\_ 4. 026092 4. 250424 4. 235965 4. 135496 4. 075555 4. 173211  
11754804\_ 10. 11466 10. 04691 10. 06574 9. 736636 9. 73688 9. 66528  
11754805\_ 6. 943761 6. 851461 7. 050639 7. 05759 7. 012058 7. 09134  
11754806\_ 5. 496422 5. 420201 5. 473119 5. 081911 5. 176243 5. 19748  
11754807\_ 6. 157931 6. 224625 6. 196271 6. 188684 6. 129853 6. 11167  
11754808\_ 4. 824643 4. 85932 4. 969264 4. 997617 5. 04198 4. 999584  
11754809\_ 7. 906257 7. 884207 7. 86289 7. 955762 7. 884207 7. 889434  
11754810\_ 9. 16497 9. 053938 9. 1277 8. 963053 9. 048756 8. 990628  
11754811\_ 10. 64023 10. 60671 10. 58863 10. 47507 10. 51097 10. 48398  
11754812\_ 8. 133228 8. 12008 8. 131831 7. 458786 7. 550165 7. 548804  
11754813\_ 8. 842299 8. 821969 8. 86592 8. 825428 8. 812677 8. 858864  
11754814\_ 9. 235985 9. 146582 9. 200744 9. 551699 9. 60238 9. 597353  
11754815\_ 6. 688887 6. 680805 6. 64032 6. 768858 6. 837146 6. 825199  
11754816\_ 7. 673926 7. 720106 7. 620641 7. 558444 7. 528646 7. 459775  
11754817\_ 5. 161904 5. 233396 5. 220008 5. 3515 5. 3375 5. 363808  
11754818\_ 2. 558941 2. 83198 2. 655139 2. 96789 2. 798956 2. 718322  
11754819\_ 7. 929174 7. 82837 7. 990549 7. 838934 7. 934184 7. 862775  
11754820\_ 6. 222756 6. 353876 6. 33679 6. 382372 6. 34864 6. 380154  
11754821\_ 10. 32412 10. 2708 10. 29336 10. 16186 10. 16192 10. 17571  
11754822\_ 7. 588403 7. 449672 7. 720787 7. 849035 7. 797903 7. 919328  
11754823\_ 4. 451369 4. 217975 4. 07623 3. 252224 3. 629296 3. 629296  
11754824\_ 5. 614563 5. 68773 5. 808582 5. 203186 5. 414775 5. 528985  
11754825\_ 6. 237831 6. 367975 6. 341214 6. 291802 6. 287703 6. 389971  
11754826\_ 11. 34224 11. 32789 11. 38248 11. 23332 11. 28319 11. 22285  
11754827\_ 6. 570031 6. 515621 6. 698162 6. 879135 6. 911778 6. 774059

11754828\_ 7. 253428 7. 045858 7. 155025 7. 18375 7. 094733 6. 989588  
11754829\_ 10. 03916 9. 988909 10. 04759 9. 811112 9. 837248 9. 809217  
11754830\_ 4. 742902 4. 781193 5. 003438 4. 210717 4. 148537 4. 205772  
11754831\_ 8. 425545 8. 346115 8. 426516 7. 926114 7. 924251 8. 012131  
11754832\_ 6. 27112 6. 113935 6. 146693 6. 323278 6. 384219 6. 276876  
11754833\_ 2. 171081 2. 171081 2. 124414 2. 157816 2. 198956 2. 05298  
11754834\_ 8. 924161 8. 872094 8. 933493 8. 602632 8. 545047 8. 656193  
11754835\_ 5. 301181 5. 393205 5. 273392 5. 424364 5. 263231 5. 266693  
11754836\_ 7. 306533 7. 272662 7. 298226 7. 473997 7. 51863 7. 531934  
11754837\_ 6. 093848 6. 005724 6. 327833 6. 037841 6. 074763 6. 016194  
11754838\_ 5. 247739 5. 175021 5. 212385 5. 038514 4. 901984 5. 086092  
11754839\_ 6. 877638 6. 863157 6. 678674 6. 851388 6. 806911 6. 8743  
11754840\_ 4. 215788 4. 303671 4. 080356 4. 532196 4. 529794 4. 60224  
11754841\_ 6. 735393 6. 877915 6. 874694 6. 836595 6. 976454 6. 940506  
11754842\_ 6. 476459 6. 621073 6. 526741 6. 583462 6. 579404 6. 59411  
11754843\_ 6. 793704 6. 718046 6. 698974 6. 741033 6. 751632 6. 641787  
11754844\_ 10. 56911 10. 53951 10. 54794 10. 33193 10. 33597 10. 27142  
11754845\_ 6. 892906 6. 950708 6. 758381 7. 093314 7. 11789 7. 074922  
11754846\_ 6. 119052 6. 099283 6. 134025 5. 758632 5. 870242 5. 79506  
11754847\_ 4. 663971 4. 757072 4. 733282 4. 69074 4. 760252 4. 717646  
11754848\_ 5. 390059 5. 232955 5. 159652 5. 300914 5. 488804 5. 334292  
11754849\_ 5. 496912 5. 629026 5. 554436 5. 768053 5. 490959 5. 680302  
11754850\_ 3. 750347 3. 816256 3. 683464 3. 715827 3. 853095 3. 812776  
11754851\_ 6. 376784 6. 321838 6. 243623 6. 343303 6. 275703 6. 385356  
11754852\_ 6. 631711 6. 612181 6. 764608 6. 444022 6. 425931 6. 399094  
11754853\_ 4. 200678 4. 38118 4. 402643 3. 506127 3. 489759 3. 705625  
11754854\_ 6. 783481 6. 73679 6. 75969 6. 325513 6. 308565 6. 424006  
11754855\_ 5. 99635 6. 078218 6. 036177 5. 980979 6. 129148 5. 945333  
11754856\_ 2. 89746 3. 172087 3. 252101 3. 263807 3. 353646 3. 290188  
11754857\_ 10. 19329 10. 19463 10. 19951 10. 36007 10. 40155 10. 34736  
11754858\_ 5. 763634 5. 752495 6. 005801 4. 683438 4. 700243 4. 761153  
11754859\_ 5. 289726 5. 229597 5. 440629 4. 556404 4. 481221 4. 460875  
11754860\_ 7. 650015 7. 63485 7. 658353 7. 77738 7. 675414 7. 726133  
11754861\_ 10. 05753 9. 985682 10. 04393 10. 15717 10. 19611 10. 11799  
11754862\_ 6. 926061 7. 034151 6. 961673 7. 008504 7. 029473 7. 012624  
11754863\_ 8. 834251 8. 781645 8. 841093 8. 705294 8. 726781 8. 715137  
11754864\_ 3. 951419 4. 161258 4. 091872 4. 110994 4. 055678 4. 185283  
11754865\_ 7. 64497 7. 587872 7. 685417 7. 579799 7. 514346 7. 627454  
11754866\_ 5. 117997 5. 087863 4. 95228 5. 049252 4. 91885 5. 086959  
11754867\_ 7. 453916 7. 513022 7. 536771 7. 548637 7. 492928 7. 546817  
11754868\_ 10. 04621 10. 01896 10. 07119 9. 755431 9. 836319 9. 754139  
11754869\_ 8. 623328 8. 577523 8. 6257 6. 758011 6. 610846 6. 680442  
11754870\_ 4. 862019 4. 805316 4. 786723 4. 925292 4. 766984 4. 810556  
11754871\_ 6. 912153 6. 979534 7. 010944 7. 174876 7. 072838 7. 091608  
11754872\_ 7. 138546 7. 165605 7. 114128 7. 076418 7. 058998 7. 089343  
11754873\_ 5. 495436 5. 469416 5. 329537 5. 326932 5. 326726 5. 32608  
11754874\_ 3. 48879 3. 342783 3. 428662 3. 507212 3. 41024 3. 473758  
11754875\_ 4. 435606 4. 40461 4. 303592 4. 406192 4. 526278 4. 584933  
11754876\_ 2. 828565 2. 866354 2. 931737 2. 569799 2. 627268 2. 829674  
11754877\_ 7. 922207 7. 800082 7. 794995 7. 18649 7. 098294 7. 146334  
11754878\_ 8. 035706 8. 013273 8. 016334 7. 862793 7. 799308 7. 847597

11754879\_ 2. 408897 2. 25483 2. 319532 2. 544588 2. 361778 2. 44064  
11754880\_ 6. 67471 6. 721345 6. 687115 6. 594872 6. 476554 6. 51486  
11754881\_ 3. 7104 3. 61262 3. 632015 3. 799535 3. 701703 3. 695794  
11754882\_ 5. 451972 5. 518169 5. 536982 5. 5755 5. 498573 5. 591708  
11754883\_ 5. 563901 5. 378257 5. 389603 5. 828979 5. 758507 5. 836739  
11754884\_ 6. 748698 6. 747927 6. 760549 6. 809898 6. 828908 6. 817986  
11754885\_ 7. 143107 7. 140915 7. 168551 7. 216165 7. 189497 7. 274515  
11754886\_ 7. 438161 7. 258011 7. 390548 7. 352289 7. 459837 7. 400509  
11754887\_ 7. 671836 7. 591141 7. 558668 7. 170643 7. 077539 7. 186679  
11754888\_ 5. 6729 5. 764183 5. 990878 5. 333844 5. 460711 5. 366862  
11754889\_ 7. 452485 7. 466516 7. 523399 8. 094491 8. 067246 8. 08301  
11754890\_ 8. 157936 8. 161182 8. 180969 8. 138716 8. 203912 8. 143783  
11754891\_ 5. 482633 5. 524244 5. 333723 5. 601257 5. 658069 5. 50045  
11754892\_ 7. 998783 7. 840517 7. 939613 8. 220627 8. 310788 8. 312385  
11754893\_ 5. 463701 5. 410519 5. 239116 5. 261923 5. 323839 5. 353521  
11754894\_ 5. 02359 5. 029445 4. 988202 5. 075166 4. 970051 5. 090771  
11754895\_ 4. 015903 4. 082843 3. 811684 4. 125011 3. 947338 4. 169065  
11754896\_ 4. 18406 4. 174253 4. 172916 4. 147285 4. 152946 4. 180902  
11754897\_ 4. 415744 4. 514084 4. 517665 4. 473395 4. 454486 4. 537251  
11754898\_ 7. 54878 7. 43903 7. 494144 7. 266984 7. 317958 7. 181215  
11754899\_ 6. 181447 6. 251899 6. 232781 6. 218004 6. 066723 6. 134052  
11754900\_ 5. 112742 4. 993635 5. 048189 4. 923701 5. 05469 5. 001269  
11754901\_ 5. 13416 5. 342123 5. 297932 5. 414869 5. 3306 5. 156303  
11754902\_ 7. 17239 6. 998064 7. 124007 6. 626701 6. 683534 6. 644084  
11754903\_ 4. 872786 4. 939667 4. 782341 4. 841535 4. 931683 4. 938482  
11754904\_ 3. 925181 3. 781732 3. 850246 3. 872077 3. 7747 3. 725576  
11754905\_ 3. 387121 3. 141295 3. 043975 3. 031636 3. 053533 2. 688898  
11754906\_ 4. 815683 4. 814656 4. 832848 4. 211088 4. 189157 4. 270864  
11754907\_ 7. 153445 7. 070841 7. 292873 6. 460951 6. 460951 6. 524197  
11754908\_ 7. 905181 7. 952488 7. 970823 8. 285215 8. 287185 8. 308467  
11754909\_ 3. 249924 3. 195267 3. 070735 3. 261643 3. 21279 3. 290188  
11754910\_ 7. 020462 6. 980178 7. 007439 6. 850127 6. 790012 6. 898793  
11754911\_ 6. 874205 6. 737922 6. 696826 5. 858996 5. 918807 6. 051554  
11754912\_ 13. 22174 13. 21864 13. 20699 13. 28431 13. 29671 13. 25279  
11754913\_ 6. 401509 6. 382606 6. 459973 6. 036402 6. 019227 6. 007325  
11754914\_ 6. 060243 6. 134652 6. 039473 6. 041161 6. 021306 6. 096121  
11754915\_ 5. 840037 5. 821247 5. 860921 6. 066688 6. 074159 6. 073746  
11754916\_ 6. 673689 6. 607794 6. 637918 6. 886083 6. 726603 6. 816763  
11754917\_ 5. 902843 5. 932768 5. 98803 5. 782604 5. 791495 5. 68889  
11754918\_ 7. 50511 7. 633955 7. 578001 7. 50426 7. 489139 7. 435959  
11754919\_ 2. 023738 2. 141958 2. 167169 2. 178464 2. 225431 2. 114765  
11754920\_ 8. 602477 8. 539934 8. 643237 9. 145683 9. 157818 9. 188963  
11754921\_ 7. 164857 6. 989103 7. 246384 7. 040692 7. 08615 7. 078585  
11754922\_ 5. 597398 5. 626 5. 635896 5. 331338 5. 300893 5. 325999  
11754923\_ 5. 954054 6. 145994 6. 093473 6. 257394 6. 332576 6. 229636  
11754924\_ 4. 623606 4. 31015 4. 385373 4. 170526 4. 056868 4. 157471  
11754925\_ 3. 686176 3. 878145 3. 729669 3. 760983 3. 869159 4. 013978  
11754926\_ 4. 27091 4. 096431 4. 131173 3. 891191 4. 159575 4. 14452  
11754927\_ 5. 146038 5. 204753 5. 277836 4. 953968 5. 297498 5. 162134  
11754928\_ 11. 12288 11. 07815 11. 16295 10. 59888 10. 68817 10. 60648  
11754929\_ 10. 07161 10. 07799 10. 10776 10. 15291 10. 1738 10. 14805

11754930\_ 11. 26082 11. 22501 11. 25923 11. 18804 11. 19944 11. 18492  
11754931\_ 7. 533541 7. 445638 7. 576706 7. 533102 7. 542908 7. 526944  
11754932\_ 10. 76554 10. 68482 10. 74455 10. 86827 10. 93059 10. 88505  
11754933\_ 9. 957413 9. 912908 9. 889062 8. 968891 9. 037348 8. 952136  
11754934\_ 8. 309833 8. 252934 8. 440019 8. 81597 8. 873258 8. 860919  
11754935\_ 8. 177009 8. 123625 8. 177728 8. 332318 8. 421352 8. 324292  
11754936\_ 9. 599418 9. 56357 9. 591956 9. 482891 9. 454173 9. 439801  
11754937\_ 8. 754304 8. 584317 8. 650037 9. 632743 9. 616555 9. 630985  
11754938\_ 7. 421329 7. 246318 7. 472023 7. 453337 7. 575837 7. 468686  
11754939\_ 6. 602327 6. 566491 6. 525063 6. 955007 7. 071459 7. 02646  
11754940\_ 8. 345993 8. 382907 8. 445032 8. 643615 8. 670974 8. 653058  
11754941\_ 11. 25964 11. 21543 11. 22023 10. 91756 10. 9734 10. 9014  
11754942\_ 8. 342741 8. 328144 8. 285268 8. 423164 8. 499289 8. 490034  
11754943\_ 5. 791058 5. 799968 5. 753029 5. 876481 5. 992628 5. 869448  
11754944\_ 9. 219535 9. 255079 9. 197723 9. 328749 9. 338962 9. 322975  
11754945\_ 10. 78665 10. 71206 10. 83167 10. 74599 10. 77692 10. 74643  
11754946\_ 7. 821847 7. 679389 7. 794517 8. 052046 8. 11645 8. 143783  
11754947\_ 6. 340206 6. 267773 6. 30763 6. 480764 6. 557068 6. 573052  
11754948\_ 6. 549625 6. 464805 6. 451477 6. 43933 6. 47145 6. 500912  
11754949\_ 5. 91059 6. 09491 5. 852788 6. 13945 6. 117083 6. 051213  
11754950\_ 10. 75356 10. 69733 10. 74048 10. 4117 10. 40842 10. 42365  
11754951\_ 8. 932351 8. 899744 8. 986997 8. 852254 8. 899484 8. 840213  
11754952\_ 5. 408434 5. 594174 5. 486703 5. 518746 5. 565926 5. 576689  
11754953\_ 8. 586831 8. 498076 8. 625381 8. 606078 8. 626299 8. 747057  
11754954\_ 8. 123305 8. 147299 8. 131824 7. 82374 7. 885765 7. 880573  
11754955\_ 5. 736831 5. 878033 5. 78884 5. 792292 6. 016957 5. 854814  
11754956\_ 5. 954081 5. 896948 5. 881191 6. 097927 6. 016396 6. 104115  
11754957\_ 6. 094413 6. 280361 6. 214398 6. 895877 6. 791106 6. 765779  
11754958\_ 8. 596633 8. 646541 8. 631872 8. 231041 8. 217095 8. 300536  
11754959\_ 7. 98075 7. 997611 8. 010774 7. 662292 7. 751018 7. 728445  
11754960\_ 6. 49763 6. 536848 6. 640145 6. 52824 6. 643784 6. 622803  
11754961\_ 7. 866661 7. 89667 7. 935755 8. 083255 8. 049821 8. 054527  
11754962\_ 4. 793308 4. 7515 4. 681584 4. 693108 4. 718344 4. 80836  
11754963\_ 2. 681298 2. 664837 2. 681298 2. 610509 2. 87666 2. 697261  
11754964\_ 5. 926672 5. 796776 5. 636736 5. 977166 6. 121473 6. 080421  
11754965\_ 5. 208072 5. 043987 5. 136768 4. 690985 4. 874363 4. 874363  
11754966\_ 6. 657505 6. 574908 6. 636544 7. 244812 7. 249736 7. 24788  
11754967\_ 10. 35671 10. 31303 10. 35122 10. 72988 10. 72344 10. 71652  
11754968\_ 6. 67595 6. 685576 6. 584276 6. 653332 6. 690179 6. 709966  
11754969\_ 7. 412969 7. 520164 7. 432005 7. 40372 7. 443016 7. 497121  
11754970\_ 6. 390398 6. 321382 6. 466362 6. 414827 6. 557068 6. 489559  
11754971\_ 8. 05432 8. 036578 8. 047466 8. 066567 8. 124096 8. 151292  
11754972\_ 8. 035017 8. 057236 8. 037027 8. 993862 8. 964808 8. 854764  
11754973\_ 7. 666249 7. 77953 7. 842056 7. 486488 7. 343238 7. 410347  
11754974\_ 8. 094145 8. 026688 8. 069325 7. 51636 7. 534065 7. 565943  
11754975\_ 7. 883076 7. 839692 7. 878704 7. 681012 7. 658333 7. 712081  
11754976\_ 7. 395553 7. 486893 7. 413379 7. 477561 7. 576802 7. 520408  
11754977\_ 8. 147515 8. 103341 8. 140525 8. 306446 8. 359558 8. 332937  
11754978\_ 5. 718946 5. 751413 5. 85963 5. 751413 5. 628994 5. 751868  
11754979\_ 8. 813026 8. 751514 8. 849128 8. 471472 8. 57923 8. 489961  
11754980\_ 6. 293262 6. 186428 6. 258991 6. 058472 6. 092007 6. 013942

11754981\_ 6.480869 6.501658 6.662852 6.359089 6.472111 6.481047  
11754982\_ 9.590266 9.55955 9.587637 9.603308 9.645785 9.584013  
11754983\_ 9.257695 9.194745 9.239935 9.631286 9.69609 9.634963  
11754984\_ 10.09681 10.07208 10.10785 10.42207 10.42834 10.45639  
11754985\_ 7.516851 7.408098 7.380645 6.873202 6.945615 6.985438  
11754986\_ 6.54214 6.523794 6.528228 6.453728 6.449075 6.373767  
11754987\_ 5.730243 5.844728 5.874425 5.945984 5.985184 5.981815  
11754988\_ 4.999693 5.140577 5.198194 5.274405 5.223733 5.196335  
11754989\_ 6.779303 6.681993 6.848252 6.823656 6.80323 6.890277  
11754990\_ 6.545901 6.506857 6.646206 6.704634 6.682588 6.657676  
11754991\_ 3.687055 3.396673 3.290188 3.816122 3.871451 3.752417  
11754992\_ 9.359172 9.263763 9.32869 8.725083 8.711523 8.800867  
11754993\_ 8.216048 8.104107 8.143358 8.224782 8.216696 8.252642  
11754994\_ 8.266717 8.143292 8.170191 8.103587 8.100015 8.070752  
11754995\_ 7.008232 7.162226 7.109823 7.394958 7.430857 7.34934  
11754996\_ 12.67742 12.6865 12.69162 12.70595 12.72542 12.71345  
11754997\_ 6.507419 6.422376 6.571489 6.446447 6.510732 6.449211  
11754998\_ 6.812801 6.707706 6.924161 6.537142 6.500846 6.635382  
11754999\_ 9.068042 9.019704 9.063595 8.950887 8.945649 9.005561  
11755000\_ 6.896265 6.769443 6.994295 6.789678 6.711885 6.799016  
11755001\_ 6.940758 6.902777 6.988514 6.867329 6.922885 6.884882  
11755002\_ 7.031531 7.020462 6.98005 7.11873 7.121924 7.141244  
11755003\_ 4.805987 4.709463 4.851675 4.942127 4.932357 5.014063  
11755004\_ 3.995053 4.210924 4.255828 4.009144 4.160668 4.250063  
11755005\_ 6.89281 6.945326 6.968284 6.94935 6.955685 7.029146  
11755006\_ 8.386543 8.398247 8.298407 8.297671 8.396771 8.218281  
11755007\_ 8.365741 8.31682 8.362658 7.70311 7.805438 7.775875  
11755008\_ 6.645498 6.482302 6.706237 6.094313 6.149242 6.162092  
11755009\_ 5.163506 5.076679 5.140954 4.847659 4.794803 4.852429  
11755010\_ 6.779107 6.56112 6.668358 7.298747 7.315535 7.249201  
11755011\_ 7.456981 7.553868 7.537473 7.258329 7.345459 7.358974  
11755012\_ 8.16835 8.08439 8.199836 8.0743 8.049401 8.099195  
11755013\_ 5.593699 5.781989 5.414869 5.679595 5.845365 5.679595  
11755014\_ 7.392275 7.492671 7.488571 7.548162 7.484371 7.548162  
11755015\_ 6.64827 6.822092 6.769304 6.521959 6.565805 6.557068  
11755016\_ 6.513528 6.609731 6.556049 6.528189 6.438113 6.413323  
11755017\_ 8.94713 8.910582 8.961696 9.288258 9.343968 9.322595  
11755018\_ 10.56352 10.57033 10.53151 10.60543 10.64129 10.59898  
11755019\_ 5.704919 5.591842 5.480966 5.900741 5.768053 5.870242  
11755020\_ 5.278706 5.362858 5.215652 5.350652 5.367154 5.299072  
11755021\_ 5.625273 5.662929 5.656359 5.63865 5.578384 5.624605  
11755022\_ 10.34174 10.29807 10.26063 10.45515 10.43739 10.39147  
11755023\_ 10.2909 10.22469 10.28389 10.29456 10.31263 10.32083  
11755024\_ 5.156303 4.9226 5.049213 4.675588 4.700243 4.815683  
11755025\_ 6.30757 6.234552 6.311732 6.212463 6.127573 6.190161  
11755026\_ 6.949487 6.986734 6.966886 6.852184 6.830985 6.96245  
11755027\_ 7.827603 7.731901 7.880573 7.837071 8.013512 7.957602  
11755028\_ 7.172564 7.117943 7.142389 6.859483 6.839569 6.926387  
11755029\_ 7.007439 7.123849 6.988359 7.118889 7.164078 7.184038  
11755030\_ 6.323118 6.309628 6.106974 6.312936 6.324501 6.208403  
11755031\_ 4.431126 4.31178 4.350955 4.338905 4.215086 4.289363

11755032\_ 9. 098889 9. 031121 9. 084084 8. 674342 8. 675538 8. 648231  
11755033\_ 7. 267154 7. 149624 7. 156906 7. 750601 7. 593468 7. 605873  
11755034\_ 7. 299162 7. 19872 7. 366279 7. 282965 7. 388876 7. 361103  
11755035\_ 8. 458728 8. 380947 8. 448259 8. 384324 8. 367507 8. 385485  
11755036\_ 10. 89317 10. 83203 10. 92231 11. 05941 11. 10884 11. 1345  
11755037\_ 8. 379608 8. 291736 8. 266269 8. 118831 8. 015268 8. 093364  
11755038\_ 9. 265824 9. 280543 9. 236747 9. 193628 9. 069971 9. 091238  
11755039\_ 6. 981901 6. 936333 6. 959418 6. 238576 6. 329882 6. 29844  
11755040\_ 4. 21384 3. 909844 4. 234776 4. 064929 3. 958809 4. 253359  
11755041\_ 6. 118838 6. 383264 6. 188646 6. 391392 6. 352393 6. 32832  
11755042\_ 5. 529023 5. 801061 5. 537758 5. 594552 5. 660132 5. 695308  
11755043\_ 5. 654624 5. 495682 5. 528492 5. 408799 5. 479301 5. 520028  
11755044\_ 6. 448378 6. 117917 6. 39654 6. 133127 6. 190284 6. 24843  
11755045\_ 8. 632826 8. 55383 8. 558015 8. 571734 8. 657878 8. 684936  
11755046\_ 6. 880921 6. 872592 6. 877321 6. 85855 6. 934615 6. 859725  
11755047\_ 8. 730736 8. 635326 8. 729268 9. 26208 9. 218574 9. 283739  
11755048\_ 7. 032538 7. 128625 7. 011333 7. 351296 7. 37116 7. 33285  
11755049\_ 9. 068346 8. 997482 9. 027364 8. 584075 8. 606682 8. 577566  
11755050\_ 7. 194102 7. 145161 7. 200933 6. 349193 6. 295011 6. 299225  
11755051\_ 7. 530042 7. 437143 7. 610252 6. 853742 6. 956076 6. 956894  
11755052\_ 2. 815647 3. 213231 2. 919928 3. 101013 3. 138627 2. 945929  
11755053\_ 8. 842224 8. 752725 8. 790044 9. 081502 9. 050287 8. 980855  
11755054\_ 7. 660597 7. 592785 7. 679961 7. 724957 7. 773835 7. 742653  
11755055\_ 8. 074138 7. 924649 8. 064267 7. 981282 8. 033396 8. 058867  
11755056\_ 7. 778632 7. 809325 7. 805469 7. 785795 7. 818403 7. 720146  
11755057\_ 7. 847911 7. 884967 7. 921114 8. 033432 7. 892259 7. 871429  
11755058\_ 9. 218349 9. 107386 9. 063095 8. 763879 8. 748735 8. 761107  
11755059\_ 7. 967395 7. 906861 7. 904243 8. 206176 8. 230664 8. 105373  
11755060\_ 7. 211029 7. 157797 7. 197796 7. 304404 7. 350159 7. 372624  
11755061\_ 9. 428654 9. 384483 9. 434061 8. 937231 8. 922989 8. 968433  
11755062\_ 8. 364227 8. 249885 8. 222641 8. 185953 8. 162367 8. 07826  
11755063\_ 7. 394789 7. 284361 7. 308399 7. 43966 7. 453861 7. 416054  
11755064\_ 7. 148312 7. 107825 7. 051504 6. 944012 6. 958396 7. 075148  
11755065\_ 5. 389937 5. 387304 5. 289088 5. 111977 5. 167423 5. 061916  
11755066\_ 4. 889811 4. 838336 4. 772366 4. 861082 4. 761285 4. 823905  
11755067\_ 7. 574485 7. 500878 7. 556836 7. 402515 7. 501563 7. 480941  
11755068\_ 8. 389378 8. 309588 8. 400122 8. 410369 8. 444598 8. 443446  
11755069\_ 7. 464719 7. 402742 7. 498957 7. 287263 7. 167273 7. 22861  
11755070\_ 4. 529282 4. 509895 4. 702566 4. 523067 4. 580363 4. 480093  
11755071\_ 7. 317368 7. 309664 7. 295932 6. 650895 6. 676664 6. 799776  
11755072\_ 7. 166495 7. 136744 7. 271506 7. 621038 7. 627626 7. 623637  
11755073\_ 6. 388087 6. 448253 6. 514242 6. 141004 6. 071002 5. 989878  
11755074\_ 4. 955474 5. 059574 4. 88241 5. 068139 4. 992416 5. 100562  
11755075\_ 6. 906345 6. 72178 6. 832315 6. 233559 6. 47307 6. 35731  
11755076\_ 8. 097814 8. 134216 8. 143362 7. 809151 7. 911033 7. 918664  
11755077\_ 7. 379163 7. 332177 7. 280129 6. 779434 6. 753356 6. 867748  
11755078\_ 7. 288364 7. 267524 7. 408313 7. 146306 7. 172285 7. 200062  
11755079\_ 6. 42308 6. 390948 6. 497169 6. 295082 6. 378513 6. 352826  
11755080\_ 5. 157448 5. 08963 5. 236492 5. 094287 5. 162296 5. 215212  
11755081\_ 5. 070732 4. 977132 5. 161612 4. 976385 5. 038702 4. 94313  
11755082\_ 4. 275543 4. 439521 4. 591015 4. 584933 4. 737312 4. 704634

11755083\_ 7.494631 7.4576 7.437696 7.317368 7.251446 7.314016  
11755084\_ 8.45246 8.351347 8.455307 8.237585 8.298353 8.257364  
11755085\_ 8.745074 8.909989 8.717451 8.896561 8.904818 8.8593  
11755086\_ 8.526823 8.466962 8.537682 8.331576 8.357103 8.389384  
11755087\_ 3.918737 3.804355 3.750364 3.527508 3.636159 3.470285  
11755088\_ 7.87408 7.827041 7.881986 7.925028 7.920819 7.953834  
11755089\_ 6.259655 6.223748 6.149136 5.71293 5.77372 5.780714  
11755090\_ 8.396241 8.4142 8.444557 8.61228 8.65929 8.591179  
11755091\_ 5.137703 5.106483 5.164022 4.992243 5.341411 5.056672  
11755092\_ 8.603885 8.525654 8.605461 8.074788 8.075942 8.119927  
11755093\_ 8.915964 8.931701 8.939943 9.035987 9.050583 9.046323  
11755094\_ 5.518425 5.57408 5.451982 7.024569 7.084823 7.189594  
11755095\_ 9.510776 9.476122 9.516443 9.605086 9.655549 9.577297  
11755096\_ 5.212077 5.332133 5.264696 5.173778 5.172034 5.008519  
11755097\_ 5.632653 5.763735 5.609814 5.53995 5.609647 5.569032  
11755098\_ 4.29486 4.494844 4.198876 4.213226 4.403164 4.186286  
11755099\_ 10.24733 10.26647 10.21529 10.18162 10.18952 10.17792  
11755100\_ 7.211223 7.200101 7.16318 6.864603 6.912721 6.922496  
11755101\_ 6.71875 6.621523 6.739151 6.777166 6.779778 6.750789  
11755102\_ 6.729728 6.725021 6.773905 6.820789 6.85064 6.844596  
11755103\_ 2.905795 3.06537 3.398236 3.181939 2.892474 3.096805  
11755104\_ 7.545057 7.42861 7.526461 7.16374 7.176198 7.205262  
11755105\_ 9.348125 9.274328 9.369342 9.117466 9.11822 9.185109  
11755106\_ 5.935436 5.885933 6.031231 6.44302 6.475592 6.368222  
11755107\_ 5.855839 5.938482 5.875939 5.977446 6.019 5.955805  
11755108\_ 2.782762 2.855076 2.704565 2.985338 2.679006 2.904243  
11755109\_ 7.854521 7.690683 7.749779 7.089609 7.136939 7.066194  
11755110\_ 6.468324 6.463757 6.420494 6.382719 6.40106 6.320439  
11755111\_ 8.569759 8.513003 8.5961 8.480295 8.410215 8.45434  
11755112\_ 8.599036 8.536702 8.6371 8.680274 8.701665 8.729579  
11755113\_ 7.476794 7.456545 7.50675 7.273801 7.331641 7.359831  
11755114\_ 8.259771 8.157551 8.311172 8.087245 8.143165 8.136463  
11755115\_ 8.381944 8.351228 8.387987 8.245963 8.307224 8.209939  
11755116\_ 7.362352 7.442902 7.375524 7.510878 7.46935 7.420049  
11755117\_ 5.010675 4.789057 4.818695 4.841212 4.773065 4.788358  
11755118\_ 7.055313 7.142936 7.063141 7.125793 7.076762 7.062416  
11755119\_ 5.512912 5.61858 5.627846 5.62639 5.641957 5.506661  
11755120\_ 9.004919 8.91883 8.958358 8.3955 8.389513 8.355012  
11755121\_ 5.707891 5.828481 5.998424 5.464203 5.351982 5.359802  
11755122\_ 6.764177 6.7414 6.839818 6.80531 6.748211 6.698365  
11755123\_ 7.665254 7.560624 7.585246 8.080193 8.033871 8.118673  
11755124\_ 4.585465 4.435674 4.438488 4.643717 4.48317 4.613948  
11755125\_ 4.470765 4.534065 4.48659 4.558038 4.4242 4.605173  
11755126\_ 8.720836 8.742392 8.658194 8.786447 8.680001 8.726907  
11755127\_ 8.246786 8.220439 8.226395 7.428973 7.453877 7.444606  
11755128\_ 11.78375 11.75815 11.71095 11.9555 11.92199 11.90683  
11755129\_ 6.138257 6.335989 6.23382 6.26929 6.216246 6.285247  
11755130\_ 7.584745 7.699143 7.666485 7.557416 7.558616 7.589491  
11755131\_ 4.051089 3.810029 3.682308 3.810029 3.628589 3.778356  
11755132\_ 8.989664 8.970122 9.009348 8.698605 8.851369 8.753166  
11755133\_ 10.25344 10.21101 10.29012 10.02181 9.989008 10.04854



11755134\_ 6. 330185 6. 33589 6. 36474 6. 310385 6. 395392 6. 369477  
11755135\_ 4. 767124 4. 982932 5. 099678 5. 195633 5. 16486 5. 231962  
11755136\_ 8. 609363 8. 579789 8. 614398 9. 000962 8. 969922 8. 944418  
11755137\_ 5. 573104 5. 672285 5. 940458 8. 561897 8. 658215 8. 524849  
11755138\_ 4. 94284 5. 153118 5. 173762 5. 492491 5. 333723 5. 306095  
11755139\_ 12. 64649 12. 60814 12. 62888 12. 51385 12. 53592 12. 52589  
11755140\_ 5. 480966 5. 539174 5. 479825 5. 818742 5. 643447 5. 71641  
11755141\_ 4. 466328 4. 162725 4. 260445 3. 994998 3. 903463 3. 96032  
11755142\_ 8. 27049 8. 270977 8. 322899 7. 802964 7. 67759 7. 596756  
11755143\_ 7. 552342 7. 561452 7. 601812 7. 815537 7. 741106 7. 878162  
11755144\_ 4. 585469 4. 663582 4. 605627 3. 997131 4. 165266 4. 255678  
11755145\_ 6. 103745 6. 019496 6. 228903 6. 152457 6. 112155 6. 142844  
11755146\_ 3. 818401 3. 787165 3. 871236 3. 531681 3. 599435 3. 675794  
11755147\_ 8. 344715 8. 307132 8. 309255 8. 327441 8. 271844 8. 359316  
11755148\_ 5. 107277 5. 012737 5. 086846 4. 938924 4. 95218 5. 034462  
11755149\_ 7. 183318 7. 396217 7. 297634 7. 147414 7. 099212 7. 20123  
11755150\_ 6. 957058 6. 93556 6. 82932 6. 29605 6. 145085 6. 297512  
11755151\_ 7. 197987 7. 0781 7. 108209 6. 455738 6. 414953 6. 263567  
11755152\_ 4. 11981 4. 088279 4. 186929 4. 061237 4. 171311 4. 201085  
11755153\_ 6. 094166 6. 076443 6. 264221 6. 056737 6. 159771 6. 037371  
11755154\_ 5. 976347 6. 021121 5. 972771 5. 961991 5. 943313 6. 015806  
11755155\_ 7. 827982 7. 774426 7. 764589 8. 134449 8. 222154 8. 108686  
11755156\_ 7. 658176 7. 643676 7. 731835 7. 531739 7. 456552 7. 411759  
11755157\_ 5. 578697 5. 547282 5. 448296 5. 401044 5. 240718 5. 367708  
11755158\_ 3. 904216 3. 905585 3. 863627 3. 893671 3. 780865 3. 937772  
11755159\_ 6. 014651 5. 931889 5. 966894 5. 8018 5. 802362 5. 938383  
11755160\_ 8. 420245 8. 36681 8. 444924 7. 975161 8. 060717 8. 054039  
11755161\_ 10. 69432 10. 68959 10. 67141 10. 19799 10. 20371 10. 19236  
11755162\_ 2. 850317 2. 709696 2. 736636 2. 718322 2. 667686 2. 692444  
11755163\_ 9. 386374 9. 359078 9. 35149 9. 547829 9. 499391 9. 500614  
11755164\_ 3. 525831 3. 606313 3. 24914 3. 316263 3. 101013 3. 362365  
11755165\_ 7. 09282 7. 03075 7. 076874 7. 006295 7. 031654 7. 099433  
11755166\_ 5. 929679 6. 089745 5. 814567 5. 788822 5. 840945 5. 804411  
11755167\_ 5. 901966 6. 007453 5. 944933 6. 159889 6. 162538 6. 149451  
11755168\_ 7. 733807 7. 768539 7. 730402 7. 765272 7. 769016 7. 804322  
11755169\_ 8. 344274 8. 328656 8. 322743 8. 067443 8. 072329 8. 058867  
11755170\_ 9. 691418 9. 676819 9. 674012 9. 481194 9. 497842 9. 534576  
11755171\_ 5. 745035 5. 754138 5. 653994 5. 911386 5. 750257 5. 712716  
11755172\_ 3. 249924 3. 40174 3. 421165 3. 357375 3. 192708 3. 36506  
11755173\_ 7. 674616 7. 60352 7. 659674 7. 571796 7. 646223 7. 622366  
11755174\_ 4. 625968 4. 625581 4. 52373 4. 347179 4. 40461 4. 253791  
11755175\_ 6. 041563 5. 888142 5. 794861 6. 480005 6. 414953 6. 372053  
11755176\_ 7. 876889 7. 880972 7. 834376 7. 801564 7. 805799 7. 721568  
11755177\_ 6. 601809 6. 638511 6. 557068 6. 648583 6. 752593 6. 711105  
11755178\_ 2. 422209 2. 605516 2. 605516 2. 707187 2. 772938 2. 605516  
11755179\_ 3. 23516 3. 071667 3. 135809 3. 004689 3. 135457 3. 054214  
11755180\_ 5. 322264 5. 345598 5. 368357 5. 127625 5. 275847 5. 186842  
11755181\_ 9. 72154 9. 726695 9. 686492 9. 527347 9. 432912 9. 492845  
11755182\_ 4. 915786 4. 972204 4. 953804 5. 130209 5. 179803 5. 091324  
11755183\_ 4. 759145 4. 68463 4. 639051 4. 458347 4. 554562 4. 543908  
11755184\_ 6. 003142 5. 958515 6. 018553 5. 846379 5. 871692 5. 949041

11755185\_ 5. 544167 5. 513747 5. 523427 5. 505282 5. 54632 5. 600205  
11755186\_ 4. 250972 4. 484583 4. 242588 4. 525963 4. 072887 4. 235673  
11755187\_ 5. 64308 5. 714981 5. 661907 5. 669712 5. 834003 5. 705693  
11755188\_ 7. 880643 7. 822212 7. 832627 7. 856332 7. 865296 7. 965757  
11755189\_ 6. 037683 6. 127599 6. 041992 6. 284595 6. 244215 6. 229859  
11755190\_ 9. 688361 9. 60678 9. 738058 9. 227925 9. 252202 9. 317778  
11755191\_ 6. 183113 6. 097927 6. 0993 6. 118838 6. 208914 6. 115099  
11755192\_ 7. 971407 8. 028644 8. 059329 7. 883249 7. 890737 7. 859142  
11755193\_ 2. 791552 2. 89747 2. 744077 2. 689332 2. 646923 2. 789484  
11755194\_ 5. 81155 5. 789947 5. 45794 5. 837927 5. 890564 5. 77685  
11755195\_ 2. 603044 2. 431815 2. 311799 2. 338662 2. 434585 2. 421132  
11755196\_ 4. 250143 4. 394465 4. 476468 4. 49183 4. 439826 4. 448856  
11755197\_ 7. 372152 7. 376094 7. 544282 7. 187694 7. 194599 7. 206156  
11755198\_ 4. 78504 4. 928608 4. 767486 4. 949088 4. 826448 4. 878721  
11755199\_ 6. 241301 6. 331495 6. 129136 6. 201186 6. 139713 6. 228674  
11755200\_ 10. 9125 10. 92281 10. 99022 10. 55314 10. 57067 10. 53298  
11755201\_ 6. 351814 6. 442933 6. 349063 6. 501455 6. 404175 6. 418116  
11755202\_ 2. 838828 2. 998403 2. 950849 2. 910566 2. 926664 2. 878721  
11755203\_ 12. 60418 12. 65579 12. 61889 12. 6455 12. 61318 12. 57688  
11755204\_ 5. 876905 5. 9447 5. 878893 6. 043956 5. 906513 5. 883496  
11755205\_ 11. 02974 11. 12964 11. 06549 10. 88566 10. 88784 10. 82159  
11755206\_ 11. 02446 10. 97467 10. 97182 10. 80299 10. 83762 10. 76753  
11755207\_ 9. 224425 9. 224217 9. 148043 8. 375763 8. 336833 8. 255235  
11755208\_ 7. 936941 7. 872699 7. 892485 7. 916325 7. 991813 7. 894237  
11755209\_ 5. 11527 5. 262021 5. 146232 5. 11658 5. 191825 5. 191825  
11755210\_ 6. 048547 6. 008533 6. 041838 6. 096144 6. 122354 5. 936944  
11755211\_ 8. 51149 8. 456382 8. 503438 7. 501516 7. 587807 7. 580755  
11755212\_ 3. 08457 3. 342051 3. 174978 3. 492417 3. 448991 3. 351216  
11755213\_ 6. 568332 6. 718136 6. 778677 7. 017566 7. 0934 7. 067855  
11755214\_ 4. 848941 4. 883573 4. 90744 4. 947791 4. 952953 4. 923487  
11755215\_ 4. 002507 3. 992293 4. 16817 4. 448755 4. 464524 4. 315985  
11755216\_ 5. 964826 6. 038572 6. 044285 6. 13945 6. 05839 6. 001259  
11755217\_ 6. 239224 5. 994212 6. 222741 5. 912575 5. 652524 5. 696575  
11755218\_ 2. 549293 2. 436965 2. 709761 2. 471698 2. 701556 2. 540095  
11755219\_ 3. 72837 3. 843109 3. 610434 3. 555838 3. 879496 3. 772711  
11755220\_ 6. 105542 6. 100642 5. 958909 5. 903007 5. 968292 5. 995276  
11755221\_ 8. 577407 8. 549723 8. 583064 8. 447711 8. 40049 8. 474419  
11755222\_ 6. 223686 6. 201852 6. 271123 6. 485464 6. 581929 6. 63159  
11755223\_ 5. 145726 4. 9694 4. 954821 5. 189628 5. 072817 5. 178272  
11755224\_ 6. 478711 6. 319877 6. 529667 6. 556427 6. 673486 6. 687195  
11755225\_ 4. 757767 4. 493748 4. 542342 4. 772366 4. 78988 4. 822476  
11755226\_ 4. 444118 4. 305559 4. 27934 4. 172414 4. 066559 4. 215636  
11755227\_ 5. 207239 5. 42876 5. 280324 5. 198723 5. 26034 5. 303949  
11755228\_ 4. 858856 5. 044051 4. 98857 5. 1796 4. 952346 5. 03191  
11755229\_ 5. 029529 4. 950909 5. 154029 5. 189628 5. 191819 5. 238859  
11755230\_ 5. 756803 5. 771467 5. 729481 5. 871635 5. 969658 5. 843275  
11755231\_ 3. 488874 3. 431621 3. 164914 3. 476733 3. 413622 3. 156098  
11755232\_ 5. 896819 6. 063095 5. 997543 5. 631068 5. 609489 5. 368376  
11755233\_ 4. 923927 4. 960634 4. 930469 5. 073063 4. 991611 5. 037162  
11755234\_ 4. 798055 4. 81584 4. 774268 4. 982577 4. 761814 4. 80024  
11755235\_ 8. 361631 8. 262494 8. 391808 7. 694926 7. 718193 7. 75733

11755236\_ 2. 61453 2. 443197 2. 556663 2. 61453 2. 556663 2. 535484  
11755237\_ 6. 313181 6. 271247 6. 192468 6. 349198 6. 284562 6. 347617  
11755238\_ 6. 091427 6. 073474 5. 966646 5. 943112 6. 069968 5. 944815  
11755239\_ 7. 151765 7. 074689 7. 193008 7. 086398 7. 089409 7. 106492  
11755240\_ 8. 236788 8. 179505 8. 162118 8. 495493 8. 56109 8. 566946  
11755241\_ 7. 008473 6. 936579 6. 939825 6. 226057 6. 269252 6. 245897  
11755242\_ 6. 732383 6. 738138 6. 665571 4. 992243 5. 087485 5. 077404  
11755243\_ 7. 047125 7. 049003 6. 994793 7. 049003 7. 000661 7. 03735  
11755244\_ 5. 156303 5. 294028 5. 111447 5. 352361 5. 372176 5. 249086  
11755245\_ 8. 881906 8. 775979 8. 886818 8. 348272 8. 331349 8. 368753  
11755246\_ 5. 933478 5. 779265 5. 605149 5. 374136 5. 538805 5. 303494  
11755247\_ 3. 783012 3. 9322 3. 599853 4. 127706 3. 92645 3. 962261  
11755248\_ 6. 509848 6. 481046 6. 494389 6. 877336 6. 811532 6. 747838  
11755249\_ 9. 077655 9. 036836 9. 138098 8. 709619 8. 706429 8. 736724  
11755250\_ 11. 84497 11. 80801 11. 85102 12. 17761 12. 20121 12. 23495  
11755251\_ 5. 647559 5. 630772 5. 588767 6. 44355 6. 663715 6. 532473  
11755252\_ 8. 95107 8. 940429 8. 995641 8. 468059 8. 548861 8. 502664  
11755253\_ 7. 139034 7. 078542 7. 148287 7. 292844 7. 272445 7. 3958  
11755254\_ 7. 522137 7. 482432 7. 52895 8. 015655 7. 975721 8. 036059  
11755255\_ 5. 918264 5. 999037 6. 027627 5. 940063 5. 982062 5. 958957  
11755256\_ 6. 252541 6. 186428 6. 064534 6. 192038 6. 24351 6. 166277  
11755257\_ 3. 886848 3. 950088 3. 973383 4. 068408 4. 068408 3. 902525  
11755258\_ 2. 54518 2. 531918 2. 416682 2. 582781 2. 494502 2. 624549  
11755259\_ 3. 172415 3. 286147 3. 112477 3. 359101 3. 366463 3. 33199  
11755260\_ 7. 931865 7. 854837 7. 88235 7. 359614 7. 380199 7. 480674  
11755261\_ 9. 795368 9. 713169 9. 755318 9. 503648 9. 499357 9. 517516  
11755262\_ 7. 340229 7. 306776 7. 328322 7. 326385 7. 367735 7. 354248  
11755263\_ 2. 182266 2. 30309 2. 268699 2. 139183 2. 248353 2. 317923  
11755264\_ 5. 282071 5. 175154 5. 151131 5. 290506 5. 25001 5. 124644  
11755265\_ 6. 928649 6. 91506 6. 897539 7. 056247 6. 995094 7. 014036  
11755266\_ 8. 246081 8. 246981 8. 174676 8. 261315 8. 227479 8. 237623  
11755267\_ 9. 17322 9. 157755 9. 142789 9. 182108 9. 184352 9. 163658  
11755268\_ 8. 960972 8. 838757 8. 908672 8. 664125 8. 639563 8. 685053  
11755269\_ 10. 79832 10. 70953 10. 7662 10. 88581 10. 94958 10. 91227  
11755270\_ 7. 609575 7. 597929 7. 548856 7. 968445 7. 923661 7. 967402  
11755271\_ 2. 907289 2. 985849 2. 95257 2. 811836 2. 972522 2. 808033  
11755272\_ 5. 506058 5. 500125 5. 393233 5. 559117 5. 442312 5. 509934  
11755273\_ 4. 392685 4. 368987 4. 287593 4. 52373 4. 391769 4. 391769  
11755274\_ 3. 73979 3. 723624 3. 353211 3. 503743 3. 716773 3. 600512  
11755275\_ 7. 928358 7. 95804 7. 861483 7. 962219 7. 895312 8. 001665  
11755276\_ 4. 889148 4. 864267 4. 721906 4. 987342 4. 978728 5. 072107  
11755277\_ 6. 13945 6. 509432 6. 315124 6. 442588 6. 434703 6. 463506  
11755278\_ 5. 030213 4. 945601 4. 809983 5. 285539 5. 060807 5. 194174  
11755279\_ 7. 458229 7. 455199 7. 501682 7. 926763 8. 004106 7. 887253  
11755280\_ 12. 70462 12. 68302 12. 67928 12. 59967 12. 65209 12. 58894  
11755281\_ 8. 182046 8. 219564 8. 297906 6. 846757 6. 912635 6. 959327  
11755282\_ 5. 483474 5. 584813 5. 412234 5. 493016 5. 405242 5. 552281  
11755283\_ 9. 466343 9. 396932 9. 468324 9. 50208 9. 526272 9. 52634  
11755284\_ 8. 992293 8. 931412 8. 841642 9. 563111 9. 443614 9. 440764  
11755285\_ 6. 337937 6. 332514 6. 320542 6. 448378 6. 391852 6. 497838  
11755286\_ 7. 379366 7. 360629 7. 391024 6. 908358 6. 85313 6. 877284

11755287\_ 7. 066036 7. 194394 7. 16313 7. 116962 7. 11077 7. 087999  
11755288\_ 5. 316183 5. 362395 5. 315363 5. 392159 5. 684583 5. 514741  
11755289\_ 11. 18591 11. 16747 11. 20101 11. 0686 11. 06995 11. 07953  
11755290\_ 7. 286015 7. 357773 7. 30682 7. 633692 7. 626456 7. 615028  
11755291\_ 3. 87528 3. 92404 4. 030344 4. 030344 4. 048592 4. 141564  
11755292\_ 8. 462344 8. 390539 8. 439418 8. 59938 8. 610446 8. 617174  
11755293\_ 9. 748684 9. 703478 9. 679366 9. 894564 9. 891308 9. 805576  
11755294\_ 2. 574727 2. 599291 2. 472702 2. 818216 2. 472158 2. 512706  
11755295\_ 9. 428729 9. 459904 9. 481175 9. 629528 9. 674066 9. 670368  
11755296\_ 10. 06025 9. 995162 10. 03494 9. 84507 9. 862974 9. 819994  
11755297\_ 7. 019557 6. 973997 6. 978948 7. 089783 7. 060699 7. 052048  
11755298\_ 8. 987112 8. 921944 9. 002172 8. 710837 8. 718077 8. 624156  
11755299\_ 6. 446855 6. 235698 6. 799095 7. 773044 7. 694589 7. 643613  
11755300\_ 6. 495472 6. 720659 6. 707829 7. 654346 7. 825316 7. 837255  
11755301\_ 5. 019896 4. 987873 5. 000926 4. 674434 4. 912838 4. 843601  
11755302\_ 4. 782978 4. 813644 4. 709463 4. 771098 4. 771098 4. 716672  
11755303\_ 10. 10412 10. 06071 10. 11501 9. 784238 9. 758074 9. 791627  
11755304\_ 6. 37427 6. 403297 6. 470994 6. 080494 6. 01054 5. 94605  
11755305\_ 8. 818352 8. 697036 8. 842507 8. 459659 8. 384037 8. 450877  
11755306\_ 8. 488296 8. 415742 8. 498209 8. 083603 8. 15776 8. 166742  
11755307\_ 4. 497929 4. 613333 4. 52373 4. 529997 4. 550705 4. 526747  
11755308\_ 9. 05596 8. 9937 9. 003738 8. 787408 8. 815367 8. 810054  
11755309\_ 11. 34397 11. 26839 11. 34513 10. 99751 11. 02161 11. 00574  
11755310\_ 6. 809695 6. 802528 6. 833788 6. 653662 6. 639296 6. 709018  
11755311\_ 9. 551963 9. 497549 9. 487448 9. 634758 9. 625 9. 620367  
11755312\_ 6. 504091 6. 333232 6. 458359 5. 94129 5. 834191 5. 959286  
11755313\_ 7. 224236 7. 122637 7. 338321 7. 095959 7. 062271 7. 163868  
11755314\_ 6. 254152 6. 286351 6. 13951 6. 323604 6. 307745 6. 360702  
11755315\_ 8. 889577 8. 832606 8. 875893 10. 04005 10. 0907 10. 03442  
11755316\_ 5. 413769 5. 436663 5. 415969 5. 305062 5. 298717 5. 223323  
11755317\_ 7. 645742 7. 624612 7. 732868 7. 501233 7. 586526 7. 487913  
11755318\_ 7. 658176 7. 715356 7. 707712 7. 720832 7. 760338 7. 694472  
11755319\_ 6. 7972 6. 875184 6. 782208 6. 81663 6. 763963 6. 79296  
11755320\_ 6. 7637 6. 586361 6. 606315 6. 576892 6. 510356 6. 563564  
11755321\_ 9. 193302 9. 152025 9. 130558 8. 789795 8. 803417 8. 79086  
11755322\_ 7. 088161 7. 071595 7. 078473 6. 713436 6. 755303 6. 695239  
11755323\_ 7. 508619 7. 44317 7. 550201 7. 146306 7. 031254 7. 140683  
11755324\_ 5. 029529 4. 830249 4. 870071 3. 964803 3. 991637 3. 921295  
11755325\_ 4. 606992 4. 768675 4. 73024 4. 777935 4. 711244 4. 675593  
11755326\_ 7. 416388 7. 376136 7. 503786 7. 211928 7. 365067 7. 365067  
11755327\_ 4. 053327 3. 882357 4. 002344 4. 096009 4. 177888 4. 00513  
11755328\_ 6. 467524 6. 44551 6. 494443 6. 460827 6. 570234 6. 540518  
11755329\_ 6. 461202 6. 478836 6. 54788 6. 454166 6. 55831 6. 532939  
11755330\_ 6. 168687 6. 321838 6. 077762 6. 818892 6. 863704 6. 670362  
11755331\_ 5. 484721 5. 32078 5. 393669 5. 791207 5. 761649 5. 841996  
11755332\_ 7. 708475 7. 644566 7. 789346 7. 49733 7. 506751 7. 55891  
11755333\_ 8. 026471 7. 928249 7. 984865 7. 522646 7. 588677 7. 650702  
11755334\_ 8. 711937 8. 734525 8. 71868 8. 676137 8. 678274 8. 735654  
11755335\_ 6. 852613 6. 893257 7. 031531 7. 049505 7. 070725 7. 095562  
11755336\_ 8. 226437 8. 117792 8. 263292 8. 053671 7. 995268 8. 084911  
11755337\_ 6. 159771 6. 011116 6. 159761 5. 841951 5. 826048 6. 008201

11755338\_ 8. 691223 8. 609839 8. 677447 8. 623617 8. 692135 8. 613821  
11755339\_ 5. 156303 5. 023139 4. 87071 5. 009552 5. 040249 5. 009552  
11755340\_ 7. 679079 7. 575739 7. 681376 7. 71103 7. 668797 7. 700748  
11755341\_ 8. 304129 8. 194808 8. 21354 8. 349929 8. 4079 8. 36246  
11755342\_ 10. 54952 10. 50939 10. 50267 10. 4725 10. 48593 10. 44518  
11755343\_ 6. 715963 6. 736907 6. 711989 6. 935894 6. 934044 7. 001332  
11755344\_ 10. 10433 10. 06064 10. 08911 9. 791318 9. 769244 9. 78907  
11755345\_ 8. 062758 8. 033963 8. 095379 8. 256178 8. 278317 8. 2676  
11755346\_ 10. 78593 10. 70097 10. 74757 10. 97376 11. 01581 10. 95594  
11755347\_ 9. 876792 9. 817828 9. 817828 9. 429671 9. 431478 9. 42161  
11755348\_ 5. 863108 5. 836184 5. 660958 5. 837856 5. 861734 5. 799548  
11755349\_ 5. 068435 4. 978211 4. 917878 5. 415796 5. 183024 5. 196201  
11755350\_ 5. 935266 6. 1362 6. 126923 6. 246234 6. 25167 6. 182122  
11755351\_ 4. 254631 4. 170961 4. 135496 4. 207468 4. 257293 4. 271496  
11755352\_ 5. 998797 6. 064937 6. 028618 6. 110927 5. 924503 5. 95194  
11755353\_ 5. 095606 5. 092393 4. 930507 5. 081115 5. 177405 5. 284135  
11755354\_ 6. 86932 6. 775429 6. 868002 6. 769485 6. 755119 6. 772687  
11755355\_ 2. 767748 2. 471199 2. 60479 2. 490847 2. 582837 2. 637904  
11755356\_ 8. 699127 8. 710957 8. 69753 8. 560654 8. 638455 8. 616827  
11755357\_ 8. 495418 8. 469622 8. 587904 8. 222872 8. 200893 8. 246444  
11755358\_ 5. 760381 5. 82256 5. 756954 5. 723241 5. 845365 5. 720732  
11755359\_ 6. 694321 6. 546818 6. 597668 6. 242419 6. 159771 6. 238506  
11755360\_ 7. 15342 7. 14064 7. 155631 7. 360736 7. 403839 7. 36885  
11755361\_ 6. 471576 6. 237817 6. 282224 7. 12806 7. 022313 7. 066752  
11755362\_ 6. 590009 6. 491726 6. 600885 6. 531738 6. 649004 6. 648589  
11755363\_ 5. 847569 5. 804031 5. 601155 6. 047538 5. 923566 5. 903833  
11755364\_ 4. 443273 4. 57243 4. 528773 5. 058221 5. 168773 5. 095586  
11755365\_ 5. 943316 6. 013251 6. 000815 5. 774815 5. 836351 5. 892533  
11755366\_ 5. 465666 5. 255474 5. 554436 5. 484567 5. 556968 5. 407491  
11755367\_ 6. 221641 6. 155635 6. 224714 6. 220502 6. 296357 6. 315749  
11755368\_ 9. 503141 9. 484735 9. 497354 10. 01765 10. 03627 10. 0161  
11755369\_ 4. 318999 4. 335594 4. 207701 4. 623373 4. 445858 4. 467312  
11755370\_ 3. 679642 3. 924637 3. 806822 3. 947985 4. 046983 4. 020377  
11755371\_ 6. 27682 6. 363449 6. 3735 6. 255741 6. 394327 6. 259026  
11755372\_ 4. 846946 4. 885996 4. 724745 4. 692967 4. 879617 4. 809179  
11755373\_ 6. 724849 6. 684556 6. 790658 6. 588773 6. 620507 6. 534465  
11755374\_ 5. 852448 5. 83785 5. 84127 5. 877332 5. 865308 5. 883429  
11755375\_ 4. 78728 5. 060643 4. 930507 4. 347179 4. 032423 4. 327818  
11755376\_ 6. 854362 6. 891992 6. 653035 6. 492496 6. 468612 6. 518107  
11755377\_ 7. 864415 7. 854544 7. 905874 7. 954388 7. 959373 7. 985004  
11755378\_ 5. 814893 5. 71297 5. 515762 5. 695157 5. 551489 5. 540475  
11755379\_ 4. 685173 4. 660079 4. 78217 4. 878636 4. 662476 4. 800483  
11755380\_ 6. 521227 6. 470324 6. 597115 6. 61843 6. 752545 6. 549346  
11755381\_ 6. 321838 6. 296072 6. 335537 5. 910773 5. 889116 6. 079789  
11755382\_ 2. 020109 1. 952178 1. 918407 1. 822376 2. 030886 1. 995297  
11755383\_ 7. 968473 7. 932422 7. 948338 7. 889486 7. 940025 7. 978547  
11755384\_ 7. 997037 7. 909361 7. 994293 8. 381036 8. 344274 8. 344274  
11755385\_ 7. 563888 7. 65938 7. 594315 7. 892766 7. 839999 7. 816762  
11755386\_ 2. 760576 2. 853564 2. 750918 2. 636082 2. 892377 2. 857105  
11755387\_ 8. 123686 8. 060444 8. 050709 9. 321669 9. 229856 9. 242002  
11755388\_ 8. 89698 8. 778417 8. 883837 8. 347375 8. 402688 8. 392235

11755389\_ 6. 300643 6. 302349 6. 188579 6. 410966 6. 360857 6. 263567  
11755390\_ 7. 850274 7. 829883 7. 84445 7. 733163 7. 734676 7. 747204  
11755391\_ 11. 02434 11. 00219 11. 04376 11. 02678 11. 10358 11. 05457  
11755392\_ 5. 51821 5. 429376 5. 475145 5. 298118 5. 396351 5. 3668  
11755393\_ 2. 066013 1. 898324 1. 698066 1. 597739 1. 981575 1. 687152  
11755394\_ 4. 980184 4. 845501 5. 123842 5. 23189 5. 423501 5. 298278  
11755395\_ 6. 168999 5. 939228 6. 026568 5. 25947 5. 33632 5. 267698  
11755396\_ 6. 076736 6. 034156 6. 003328 6. 062182 6. 025952 6. 107397  
11755397\_ 3. 398236 3. 070335 3. 14434 2. 842841 3. 004853 2. 837039  
11755398\_ 5. 245165 5. 176578 5. 177711 5. 318663 5. 538666 5. 497272  
11755399\_ 7. 444284 7. 394582 7. 256477 7. 291509 7. 326238 7. 291569  
11755400\_ 7. 082529 6. 857203 6. 928141 6. 685476 6. 874472 6. 793598  
11755401\_ 8. 39762 8. 41402 8. 478174 7. 71765 7. 697554 7. 722715  
11755402\_ 8. 593145 8. 557456 8. 594195 7. 840085 7. 903277 7. 869528  
11755403\_ 2. 19877 2. 216866 2. 011296 2. 170386 2. 167355 2. 125898  
11755404\_ 7. 743294 7. 687632 7. 71754 8. 048547 8. 039327 8. 002497  
11755405\_ 4. 876133 4. 667428 4. 694181 3. 92685 3. 853881 3. 864511  
11755406\_ 7. 124845 7. 15699 7. 124179 6. 828256 6. 874594 6. 880182  
11755407\_ 3. 214638 3. 278903 3. 195497 3. 226676 3. 313344 3. 214638  
11755408\_ 8. 37795 8. 369263 8. 391933 7. 602697 7. 580664 7. 600808  
11755409\_ 7. 154084 6. 973247 7. 138225 7. 390075 7. 431078 7. 416148  
11755410\_ 7. 501603 7. 585188 7. 55801 7. 401763 7. 445128 7. 483953  
11755411\_ 6. 382264 6. 369705 6. 46208 6. 468903 6. 504739 6. 450765  
11755412\_ 6. 263169 6. 210115 6. 178265 6. 265593 6. 472725 6. 363027  
11755413\_ 6. 026719 6. 012566 6. 205822 5. 897325 6. 062156 6. 155681  
11755414\_ 2. 793572 2. 969423 3. 028207 2. 732099 2. 957593 3. 180062  
11755415\_ 9. 449981 9. 376449 9. 470275 9. 140412 9. 20441 9. 173875  
11755416\_ 6. 101986 6. 03714 6. 139645 6. 641426 6. 519847 6. 509828  
11755417\_ 7. 140943 6. 945003 7. 01017 6. 66849 6. 672355 6. 610853  
11755418\_ 2. 711281 2. 111253 2. 235558 2. 235558 2. 32949 2. 095256  
11755419\_ 5. 132099 5. 105941 4. 921554 5. 204574 5. 228209 5. 16837  
11755420\_ 7. 285676 7. 278723 7. 289154 6. 472593 6. 436356 6. 571754  
11755421\_ 6. 469015 6. 412133 6. 378782 6. 336006 6. 354327 6. 364593  
11755422\_ 4. 736162 4. 970699 4. 967345 4. 994642 5. 010361 4. 993843  
11755423\_ 2. 370245 2. 624265 2. 397329 2. 399428 2. 416248 2. 416248  
11755424\_ 9. 521961 9. 488652 9. 527095 9. 322647 9. 347578 9. 313663  
11755425\_ 7. 201814 7. 174758 7. 222344 6. 68763 6. 481046 6. 634104  
11755426\_ 9. 238855 9. 137032 9. 19617 9. 185143 9. 21081 9. 200663  
11755427\_ 2. 484397 2. 775078 2. 846308 2. 928688 2. 775078 2. 880069  
11755428\_ 7. 189388 7. 199338 7. 293235 6. 863266 6. 976551 7. 019275  
11755429\_ 6. 635885 6. 52902 6. 559663 6. 331582 6. 484396 6. 360964  
11755430\_ 5. 826411 6. 010898 5. 744546 6. 154469 6. 182325 6. 073938  
11755431\_ 3. 090919 3. 078549 2. 958532 3. 118631 3. 090919 3. 180062  
11755432\_ 7. 53987 7. 501784 7. 400332 7. 350786 7. 428903 7. 374996  
11755433\_ 8. 386286 8. 338748 8. 34679 8. 566077 8. 565278 8. 543577  
11755434\_ 7. 532345 7. 359845 7. 464264 6. 669718 6. 632654 6. 793547  
11755435\_ 6. 685505 6. 655418 6. 765911 6. 518529 6. 360123 6. 451129  
11755436\_ 7. 807474 7. 665117 7. 694719 7. 818073 7. 816463 7. 831053  
11755437\_ 8. 994639 8. 942105 9. 05878 9. 058936 9. 014058 8. 979915  
11755438\_ 3. 631383 3. 692032 3. 364537 3. 635794 3. 565271 3. 740778  
11755439\_ 9. 020672 8. 967096 8. 985295 9. 073512 9. 071484 9. 107275

11755440\_ 4. 140932 4. 158558 4. 158944 3. 891725 3. 774174 3. 977589  
11755441\_ 7. 14331 7. 174876 7. 087882 7. 212651 7. 194152 7. 186543  
11755442\_ 7. 35554 7. 290767 7. 346268 7. 321384 7. 368547 7. 33497  
11755443\_ 6. 102618 6. 173577 6. 227621 6. 022288 5. 931094 5. 935128  
11755444\_ 5. 841045 5. 764442 5. 802723 5. 266317 5. 225589 5. 39096  
11755445\_ 7. 421385 7. 395221 7. 51179 6. 959178 6. 978095 7. 012914  
11755446\_ 10. 8024 10. 80119 10. 81346 10. 64191 10. 64002 10. 607  
11755447\_ 3. 810792 4. 402631 4. 45053 4. 548154 4. 457373 4. 611653  
11755448\_ 8. 675019 8. 671842 8. 616531 8. 684731 8. 678226 8. 624323  
11755449\_ 4. 946122 4. 921588 4. 861774 4. 939604 4. 925306 4. 878648  
11755450\_ 8. 138109 8. 190763 8. 225976 7. 257665 7. 333165 7. 236755  
11755451\_ 6. 792079 6. 967399 6. 858273 6. 588102 6. 552528 6. 447818  
11755452\_ 8. 333523 8. 288657 8. 415422 8. 451704 8. 438694 8. 376198  
11755453\_ 3. 063389 3. 207188 3. 150118 3. 103583 3. 313357 3. 07775  
11755454\_ 3. 331511 3. 257027 3. 54789 3. 353999 3. 257027 3. 156625  
11755455\_ 4. 874234 4. 804436 4. 61434 4. 863226 4. 863226 4. 891639  
11755456\_ 11. 01496 10. 97162 11. 03225 11. 47155 11. 52949 11. 50482  
11755457\_ 7. 53007 7. 573609 7. 514529 7. 964793 7. 804335 7. 780882  
11755458\_ 8. 915808 8. 866171 8. 893277 8. 930931 8. 916006 8. 886681  
11755459\_ 5. 441765 5. 51042 5. 392433 5. 518766 5. 342692 5. 51658  
11755460\_ 5. 053496 5. 228627 4. 919036 5. 029529 4. 926257 4. 933671  
11755461\_ 5. 1488 5. 155109 5. 145259 5. 106777 5. 183499 5. 228627  
11755462\_ 7. 535469 7. 480205 7. 554954 7. 88407 7. 85863 7. 85205  
11755463\_ 4. 681965 4. 603843 4. 725425 4. 529318 4. 721912 4. 505737  
11755464\_ 6. 469965 6. 447158 6. 473143 6. 746991 6. 765911 6. 910833  
11755465\_ 7. 227464 7. 283335 7. 196345 7. 299162 7. 264059 7. 159221  
11755466\_ 7. 30364 7. 27118 7. 268113 7. 653149 7. 616428 7. 601855  
11755467\_ 7. 042523 6. 907373 6. 95669 7. 317368 7. 363147 7. 345439  
11755468\_ 7. 66914 7. 64521 7. 692517 7. 484474 7. 437671 7. 496621  
11755469\_ 9. 991531 9. 897921 9. 964334 10. 53642 10. 56162 10. 5614  
11755470\_ 7. 251041 7. 2455 7. 281397 7. 304069 7. 33907 7. 323932  
11755471\_ 7. 238292 7. 273496 7. 161974 7. 358943 7. 425825 7. 31651  
11755472\_ 6. 880517 6. 818388 6. 832424 6. 661364 6. 65921 6. 701192  
11755473\_ 6. 289257 6. 33483 6. 329904 6. 239929 6. 354809 6. 210301  
11755474\_ 8. 275488 8. 260839 8. 342301 8. 404543 8. 4956 8. 482411  
11755475\_ 9. 16615 9. 095155 9. 144183 10. 3259 10. 29423 10. 30825  
11755476\_ 4. 451381 4. 616624 4. 594554 4. 565313 4. 495716 4. 586626  
11755477\_ 10. 10055 10. 05567 9. 979418 10. 36249 10. 35267 10. 27084  
11755478\_ 7. 262329 7. 220288 7. 228656 6. 999535 7. 040346 7. 016307  
11755479\_ 2. 572967 2. 483313 2. 465647 2. 19896 2. 092646 1. 976811  
11755480\_ 4. 742696 4. 926145 4. 840957 5. 112689 4. 765921 4. 912894  
11755481\_ 5. 832978 5. 996364 5. 960898 5. 268576 5. 391617 5. 543294  
11755482\_ 6. 28644 6. 49217 6. 314754 6. 47508 6. 287759 6. 404056  
11755483\_ 7. 677994 7. 64835 7. 635248 7. 207879 7. 077823 7. 232059  
11755484\_ 9. 665634 9. 581714 9. 665549 9. 878531 9. 883733 9. 876129  
11755485\_ 6. 045331 6. 166103 5. 957592 6. 19224 6. 139445 6. 247833  
11755486\_ 8. 955642 8. 854365 8. 965418 9. 067672 9. 011406 9. 012918  
11755487\_ 5. 161083 5. 187157 5. 595636 5. 153253 5. 14841 5. 101244  
11755488\_ 3. 785051 3. 831788 3. 614824 3. 604252 3. 704015 3. 634568  
11755489\_ 5. 879833 5. 789947 5. 95475 6. 668717 6. 570807 6. 507029  
11755490\_ 6. 845428 6. 689801 6. 695739 7. 318987 7. 333856 7. 277954

11755491\_ 5. 644088 5. 34104 5. 54518 5. 494864 5. 662252 5. 547318  
11755492\_ 8. 480189 8. 436625 8. 52876 8. 444994 8. 39743 8. 460878  
11755493\_ 7. 573836 7. 487245 7. 545499 7. 148263 7. 203312 7. 267275  
11755494\_ 6. 582428 6. 577152 6. 681897 7. 95563 8. 038042 7. 943631  
11755495\_ 5. 462908 5. 073036 5. 220843 4. 790352 4. 798511 4. 824339  
11755496\_ 8. 256847 8. 164274 8. 281486 8. 306806 8. 291532 8. 305279  
11755497\_ 5. 803933 5. 719972 5. 792394 5. 894697 5. 994047 5. 94709  
11755498\_ 7. 198228 7. 099278 7. 159901 7. 378771 7. 461294 7. 370993  
11755499\_ 5. 424046 5. 449899 5. 477678 5. 575849 5. 684733 5. 618268  
11755500\_ 2. 417072 2. 345148 2. 330223 2. 252854 2. 509792 2. 499575  
11755501\_ 3. 275327 3. 369595 3. 383916 3. 277665 3. 539824 3. 369595  
11755502\_ 9. 696198 9. 639464 9. 701981 9. 89378 9. 958789 9. 917527  
11755503\_ 12. 54933 12. 54639 12. 53539 12. 51956 12. 51559 12. 5497  
11755504\_ 4. 005679 3. 997131 4. 085126 3. 503743 3. 863386 3. 681016  
11755505\_ 8. 16577 8. 158161 8. 186611 7. 934544 7. 986916 7. 867587  
11755506\_ 7. 328523 7. 268515 7. 286231 7. 358149 7. 147788 7. 246561  
11755507\_ 7. 064987 7. 077325 7. 149004 7. 030415 7. 035134 7. 01205  
11755508\_ 6. 452402 6. 432149 6. 418831 6. 48472 6. 431763 6. 485024  
11755509\_ 7. 269786 7. 31501 7. 323466 7. 419245 7. 459256 7. 446988  
11755510\_ 8. 908346 8. 824203 8. 840762 8. 921939 8. 953836 8. 922032  
11755511\_ 5. 548753 5. 349951 5. 505245 5. 537876 5. 537876 5. 531879  
11755512\_ 5. 660947 5. 791317 5. 624532 5. 683432 5. 571306 5. 670619  
11755513\_ 3. 511847 3. 526081 3. 485899 2. 835892 2. 678815 2. 825226  
11755514\_ 8. 718268 8. 734388 8. 779779 8. 742804 8. 768669 8. 733615  
11755515\_ 6. 406432 6. 558795 6. 606264 6. 074161 5. 955191 6. 039663  
11755516\_ 6. 58312 6. 458845 6. 588094 6. 302333 6. 314996 6. 403637  
11755517\_ 6. 555748 6. 477227 6. 602608 6. 680457 6. 725386 6. 608244  
11755518\_ 5. 03934 5. 257824 5. 043929 5. 12964 5. 197103 5. 06244  
11755519\_ 7. 810087 7. 723343 7. 775528 8. 322204 8. 291938 8. 367948  
11755520\_ 6. 00886 5. 895791 5. 927301 6. 47402 6. 344429 6. 300643  
11755521\_ 4. 648651 4. 17262 4. 227235 5. 037652 5. 204515 5. 039907  
11755522\_ 9. 594245 9. 572817 9. 628893 8. 86592 8. 843259 8. 937446  
11755523\_ 6. 004768 5. 830066 5. 983535 6. 314163 6. 153147 6. 288135  
11755524\_ 9. 269658 9. 194474 9. 280225 8. 916061 8. 938644 8. 933184  
11755525\_ 6. 756858 6. 840707 6. 695493 6. 93629 6. 884687 6. 879506  
11755526\_ 3. 366873 3. 385995 3. 295363 3. 352775 3. 580311 3. 489363  
11755527\_ 7. 854027 7. 702247 7. 874439 7. 920416 7. 991136 7. 934638  
11755528\_ 3. 424784 3. 398236 3. 463608 3. 699359 3. 75826 3. 770527  
11755529\_ 6. 242683 6. 13105 6. 092373 6. 200575 6. 267814 6. 232113  
11755530\_ 5. 647905 5. 314011 5. 611171 5. 317331 5. 405719 5. 360242  
11755531\_ 5. 196915 5. 459062 5. 370354 5. 366263 5. 376278 5. 396529  
11755532\_ 6. 964275 6. 871623 6. 946685 7. 034068 7. 064276 6. 967649  
11755533\_ 7. 779636 7. 705715 7. 622719 7. 882309 7. 976326 7. 938769  
11755534\_ 7. 935953 8. 098955 8. 050467 8. 126627 8. 140679 8. 073222  
11755535\_ 2. 51953 2. 718322 2. 319111 2. 39691 2. 39691 2. 406724  
11755536\_ 5. 829713 5. 758374 5. 848839 5. 689251 5. 792649 5. 827429  
11755537\_ 2. 749389 2. 787271 2. 76815 2. 749751 2. 833422 2. 829891  
11755538\_ 8. 655464 8. 651034 8. 706864 8. 650037 8. 624138 8. 644444  
11755539\_ 4. 992799 4. 752939 4. 729866 4. 931206 4. 933085 4. 797884  
11755540\_ 7. 649114 7. 591541 7. 685901 7. 586361 7. 621005 7. 543076  
11755541\_ 6. 125536 6. 205406 6. 115374 7. 424166 7. 34302 7. 298815



11755542\_ 7. 40481 7. 132697 7. 330574 6. 701158 6. 435833 6. 617  
11755543\_ 3. 421184 3. 155437 3. 314813 3. 37226 3. 243285 3. 429118  
11755544\_ 3. 528827 3. 426276 3. 58579 3. 206395 3. 117159 3. 177339  
11755545\_ 2. 563174 2. 587689 2. 486817 2. 587689 2. 665971 2. 607547  
11755546\_ 6. 234055 6. 345733 6. 190207 6. 449188 6. 390536 6. 343965  
11755547\_ 4. 716287 4. 808181 4. 707554 4. 736759 4. 793214 4. 644019  
11755548\_ 7. 196627 7. 12003 7. 156297 7. 070669 7. 090268 6. 906545  
11755549\_ 5. 416718 5. 277398 5. 248484 5. 412046 5. 357477 5. 466319  
11755550\_ 5. 11527 5. 189628 5. 071367 5. 120279 5. 01385 5. 007058  
11755551\_ 3. 397158 3. 147184 3. 398687 3. 353709 3. 453942 3. 427955  
11755552\_ 4. 849744 4. 605288 4. 880201 4. 598071 4. 786364 4. 797561  
11755553\_ 10. 46554 10. 40323 10. 46764 10. 10241 10. 14142 10. 10277  
11755554\_ 2. 74967 3. 047457 2. 706163 2. 773045 2. 730705 2. 746203  
11755555\_ 5. 966668 5. 718513 5. 894697 6. 08627 6. 115856 6. 15273  
11755556\_ 7. 338654 7. 284599 7. 341414 7. 238982 7. 154101 7. 207191  
11755557\_ 6. 052466 6. 099013 6. 20659 5. 974526 6. 001585 6. 14441  
11755558\_ 5. 467061 5. 433734 5. 337074 5. 370701 5. 510285 5. 517292  
11755559\_ 7. 186509 7. 170544 7. 112992 7. 31942 7. 305738 7. 240005  
11755560\_ 4. 980409 5. 521381 5. 214096 5. 338936 4. 917007 5. 226977  
11755561\_ 9. 547425 9. 494117 9. 512523 10. 19436 10. 28869 10. 26853  
11755562\_ 5. 696783 5. 640076 5. 614563 5. 362778 5. 39009 5. 281756  
11755563\_ 9. 135225 9. 115455 9. 093905 8. 623956 8. 643967 8. 628919  
11755564\_ 5. 468152 5. 483189 5. 318862 5. 489996 5. 36323 5. 496936  
11755565\_ 4. 40286 4. 48448 4. 301786 4. 544887 4. 494968 4. 651544  
11755566\_ 5. 991898 5. 98478 5. 902873 6. 097927 6. 048616 6. 068264  
11755567\_ 6. 529212 6. 464805 6. 394009 6. 12395 6. 219381 6. 28436  
11755568\_ 5. 366074 5. 325133 5. 356377 5. 370601 5. 458034 5. 412537  
11755569\_ 7. 885587 7. 919827 7. 826001 6. 574463 6. 476799 6. 343041  
11755570\_ 2. 815747 2. 476662 2. 62175 2. 495165 2. 619899 2. 62175  
11755571\_ 6. 851877 6. 822242 6. 847514 6. 944699 6. 960301 6. 898793  
11755572\_ 8. 25122 8. 307442 8. 243856 8. 346891 8. 366058 8. 340517  
11755573\_ 6. 254967 6. 216983 6. 227997 6. 377533 6. 446308 6. 490403  
11755574\_ 7. 070063 7. 180302 7. 076762 7. 280096 7. 32856 7. 248809  
11755575\_ 3. 008261 3. 191666 3. 173914 3. 362027 3. 167705 3. 265682  
11755576\_ 2. 742141 2. 718322 2. 736636 2. 721975 2. 8157 2. 55629  
11755577\_ 6. 41482 6. 518351 6. 250154 6. 47278 6. 383618 6. 417769  
11755578\_ 3. 932349 3. 785277 3. 589767 3. 594255 3. 711094 3. 813849  
11755579\_ 3. 955481 3. 980682 3. 86176 3. 92317 4. 182653 3. 848871  
11755580\_ 3. 076015 2. 919567 2. 885018 3. 045638 3. 082124 3. 025423  
11755581\_ 10. 15776 10. 15196 10. 19013 9. 111393 9. 069407 9. 181227  
11755582\_ 3. 940421 3. 949942 4. 071032 3. 215178 3. 444654 3. 124082  
11755583\_ 5. 633406 5. 672285 5. 672633 6. 071429 6. 173583 6. 113931  
11755584\_ 5. 712247 5. 623553 5. 796005 6. 187524 6. 196469 6. 154068  
11755585\_ 7. 152889 7. 017375 7. 113261 7. 119045 7. 107981 7. 191821  
11755586\_ 7. 538174 7. 491813 7. 467606 7. 254282 7. 281851 7. 273047  
11755587\_ 6. 771427 7. 054591 7. 099734 5. 92635 5. 554436 5. 599578  
11755588\_ 2. 371453 2. 605516 2. 312875 2. 450855 2. 616492 2. 25483  
11755589\_ 4. 793068 4. 697888 4. 789956 4. 647492 4. 754539 4. 655292  
11755590\_ 5. 327909 5. 273982 5. 153822 5. 536562 5. 245131 5. 542355  
11755591\_ 7. 392275 7. 390926 7. 470153 7. 225068 7. 269859 7. 307297  
11755592\_ 6. 428438 6. 238659 6. 27697 6. 765911 6. 739151 6. 744115

11755593\_ 7. 681878 7. 593105 7. 673223 7. 984399 8. 003223 7. 930447  
11755594\_ 4. 763543 4. 950668 4. 870879 4. 724008 4. 850652 4. 906658  
11755595\_ 9. 055713 8. 992346 9. 018815 9. 131629 9. 137867 9. 099336  
11755596\_ 4. 865656 4. 9694 4. 86414 5. 073036 5. 121015 5. 021701  
11755597\_ 6. 267541 6. 544158 6. 431291 6. 555675 6. 522122 6. 546891  
11755598\_ 6. 685829 6. 684269 6. 691286 6. 674792 6. 707167 6. 617088  
11755599\_ 3. 668165 3. 503743 3. 634182 3. 47468 3. 503743 3. 503743  
11755600\_ 8. 505316 8. 438746 8. 476808 8. 809103 8. 896102 8. 885928  
11755601\_ 5. 180864 5. 341526 5. 15536 5. 336787 5. 220514 5. 269886  
11755602\_ 6. 662145 6. 406857 6. 459265 5. 926708 6. 090714 6. 071721  
11755603\_ 8. 432372 8. 448928 8. 433965 8. 329977 8. 261411 8. 300736  
11755604\_ 13. 06414 13. 05526 13. 04599 13. 12283 13. 11179 13. 10025  
11755605\_ 12. 36036 12. 34295 12. 30751 12. 35637 12. 35475 12. 29967  
11755606\_ 8. 628805 8. 6647 8. 713927 8. 38247 8. 339828 8. 391515  
11755607\_ 8. 033451 7. 949987 8. 050352 7. 857341 7. 853194 7. 822892  
11755608\_ 7. 928736 7. 822375 7. 902617 7. 681361 7. 772557 7. 818752  
11755609\_ 4. 331061 4. 335594 4. 287593 4. 505004 4. 464472 4. 423837  
11755610\_ 5. 03629 5. 008651 5. 00654 5. 073036 4. 984669 5. 126645  
11755611\_ 6. 384126 6. 499886 6. 447152 6. 628156 6. 630691 6. 597771  
11755612\_ 9. 593947 9. 543302 9. 619345 9. 56443 9. 632157 9. 564739  
11755613\_ 8. 372798 8. 37371 8. 354477 8. 546224 8. 520848 8. 588479  
11755614\_ 7. 523162 7. 350216 7. 471746 7. 595602 7. 588677 7. 592878  
11755615\_ 5. 025961 5. 093019 4. 897678 5. 160443 5. 125619 4. 980367  
11755616\_ 6. 670946 6. 610352 6. 662763 6. 725657 6. 638384 6. 670435  
11755617\_ 5. 307976 5. 342974 5. 213207 5. 28576 5. 305524 5. 30056  
11755618\_ 5. 047642 5. 030382 5. 22203 5. 490239 5. 453793 5. 58431  
11755619\_ 7. 149675 7. 228783 7. 268474 7. 270984 7. 269972 7. 358974  
11755620\_ 3. 87698 3. 93868 3. 821891 3. 904292 4. 058164 3. 978441  
11755621\_ 5. 704919 5. 787327 5. 845365 6. 372364 6. 392134 6. 249563  
11755622\_ 7. 435518 7. 199306 7. 469804 7. 886274 7. 970037 7. 985441  
11755623\_ 5. 460707 5. 345419 5. 518169 4. 736699 4. 759698 4. 962499  
11755624\_ 6. 355701 6. 207066 6. 345555 6. 844909 6. 802953 6. 791991  
11755625\_ 4. 688788 4. 372016 4. 477523 4. 338284 4. 235694 4. 200678  
11755626\_ 2. 852123 2. 872265 3. 097013 2. 83198 2. 912551 2. 827373  
11755627\_ 3. 012398 3. 028322 3. 018449 3. 022271 3. 028322 2. 973993  
11755628\_ 3. 930567 4. 079503 4. 050179 3. 988652 3. 897862 4. 086394  
11755629\_ 6. 118838 6. 252698 6. 235587 6. 345659 6. 428144 6. 451129  
11755630\_ 6. 497183 6. 6812 6. 6614 6. 782732 6. 775234 6. 675846  
11755631\_ 7. 057722 6. 862059 6. 97651 6. 447579 6. 49603 6. 493184  
11755632\_ 4. 406572 4. 528287 4. 426582 4. 543876 4. 45953 4. 734672  
11755633\_ 7. 661956 7. 664554 7. 666076 7. 702811 7. 616772 7. 634403  
11755634\_ 9. 172832 9. 121582 9. 127246 9. 048371 9. 087469 9. 098896  
11755635\_ 7. 694546 7. 587339 7. 629962 7. 573057 7. 625672 7. 593665  
11755636\_ 10. 23861 10. 20104 10. 24787 10. 10126 10. 11277 10. 10544  
11755637\_ 6. 622384 6. 544687 6. 607626 6. 477828 6. 568838 6. 468073  
11755638\_ 6. 693718 6. 589909 6. 753482 6. 579869 6. 580022 6. 66009  
11755639\_ 6. 244666 6. 188183 6. 144742 5. 664518 5. 658069 5. 67559  
11755640\_ 3. 249924 3. 20262 3. 223007 3. 550639 3. 601442 3. 601442  
11755641\_ 7. 378306 7. 251951 7. 341346 6. 685447 6. 630257 6. 627378  
11755642\_ 6. 094413 6. 206103 6. 141301 6. 173161 6. 21273 6. 216253  
11755643\_ 8. 878885 8. 830184 8. 88623 9. 195026 9. 206188 9. 244067

11755644\_ 9. 077829 8. 993895 9. 064506 8. 803532 8. 85995 8. 837964  
11755645\_ 8. 294392 8. 257159 8. 342267 7. 634456 7. 580563 7. 613215  
11755646\_ 5. 43605 5. 661675 5. 43644 5. 713861 5. 629258 5. 542724  
11755647\_ 6. 6352 6. 517111 6. 617345 6. 611722 6. 640294 6. 713311  
11755648\_ 6. 513121 6. 548089 6. 548089 6. 546503 6. 549674 6. 560573  
11755649\_ 4. 007521 4. 08947 4. 213048 4. 172618 4. 359979 4. 021033  
11755650\_ 5. 152064 5. 15099 4. 954397 5. 29868 5. 214252 5. 154066  
11755651\_ 5. 627488 5. 815789 5. 684372 5. 833329 5. 684372 5. 720523  
11755652\_ 6. 215102 6. 174815 6. 382464 7. 061832 7. 142203 7. 254677  
11755653\_ 5. 409222 5. 590269 5. 191398 5. 231944 5. 36323 5. 471757  
11755654\_ 4. 370567 4. 476263 4. 483386 4. 467188 4. 483386 4. 736301  
11755655\_ 3. 724455 3. 595446 3. 877229 3. 837008 3. 770034 3. 872954  
11755656\_ 8. 250234 8. 260481 8. 210225 8. 256451 8. 1935 8. 273344  
11755657\_ 6. 707845 6. 581983 6. 583259 6. 409868 6. 330828 6. 199345  
11755658\_ 4. 84796 4. 736566 4. 997252 4. 795984 4. 762194 4. 790002  
11755659\_ 6. 14874 6. 124205 6. 146862 6. 401719 6. 300643 6. 389366  
11755660\_ 6. 058952 5. 999201 6. 035348 6. 048662 5. 966966 5. 898345  
11755661\_ 4. 75365 4. 947875 4. 849632 4. 690985 4. 66254 4. 695614  
11755662\_ 6. 75894 6. 842314 6. 764895 6. 660519 6. 700371 6. 680628  
11755663\_ 7. 94988 7. 845117 7. 969436 7. 820567 7. 841554 7. 810574  
11755664\_ 6. 876507 6. 887717 6. 915905 6. 506637 6. 447604 6. 479174  
11755665\_ 7. 076762 7. 195935 7. 135459 7. 39492 7. 433749 7. 392275  
11755666\_ 4. 415744 4. 763543 4. 709463 4. 663505 4. 40461 4. 413227  
11755667\_ 5. 482259 5. 633225 5. 632833 5. 643713 5. 678673 5. 500566  
11755668\_ 8. 259385 8. 220949 8. 195469 8. 213431 8. 211094 8. 221504  
11755669\_ 6. 457896 6. 40874 6. 610964 6. 019148 6. 174053 6. 252638  
11755670\_ 4. 650033 4. 595902 4. 368043 4. 004709 3. 629632 3. 819187  
11755671\_ 8. 11024 8. 054214 8. 165095 7. 37789 7. 283756 7. 477337  
11755672\_ 5. 571592 5. 575864 5. 626921 5. 643381 5. 631296 5. 731999  
11755673\_ 6. 800427 6. 786795 6. 722353 6. 887942 6. 9102 6. 909483  
11755674\_ 7. 235535 7. 225216 7. 305693 7. 323519 7. 289973 7. 225811  
11755675\_ 5. 28939 5. 557127 5. 333723 5. 441725 5. 397861 5. 409222  
11755676\_ 4. 020699 4. 119576 3. 879763 3. 875021 4. 056276 4. 136818  
11755677\_ 6. 608269 6. 618063 6. 565021 6. 464805 6. 497107 6. 414248  
11755678\_ 6. 746677 6. 691814 6. 807291 6. 539082 6. 538511 6. 528702  
11755679\_ 3. 890744 3. 549846 3. 465146 3. 576151 3. 632353 3. 66588  
11755680\_ 5. 768939 5. 829319 5. 865145 5. 672285 5. 447925 5. 5779  
11755681\_ 10. 35094 10. 3705 10. 33476 11. 17966 11. 11472 11. 08219  
11755682\_ 4. 03547 4. 108226 4. 219892 4. 3946 4. 446286 4. 483445  
11755683\_ 4. 927217 4. 930276 5. 076015 5. 218613 5. 226661 5. 226661  
11755684\_ 10. 40513 10. 39535 10. 3796 10. 34679 10. 29234 10. 35876  
11755685\_ 5. 878611 5. 976582 5. 918618 6. 084789 6. 046712 6. 036613  
11755686\_ 9. 059782 8. 975997 8. 990118 9. 595327 9. 538226 9. 524079  
11755687\_ 8. 438078 8. 383874 8. 417301 8. 162738 8. 209396 8. 197192  
11755688\_ 5. 04365 5. 189628 5. 133394 5. 217981 5. 453793 5. 258517  
11755689\_ 7. 44543 7. 374324 7. 365803 7. 252261 7. 227103 7. 301086  
11755690\_ 7. 236755 7. 382253 7. 242227 7. 303002 7. 254424 7. 270277  
11755691\_ 9. 470213 9. 435056 9. 5311 8. 91291 8. 89336 8. 94064  
11755692\_ 4. 002504 4. 158988 3. 963571 3. 911068 3. 969068 3. 93215  
11755693\_ 6. 267431 6. 316834 6. 372053 6. 555009 6. 719156 6. 706824  
11755694\_ 8. 534903 8. 478118 8. 499735 8. 051429 8. 092089 8. 101556

11755695\_ 8. 17603 8. 047514 8. 087095 7. 176414 7. 274628 7. 210962  
11755696\_ 4. 869847 4. 880936 4. 947909 4. 874234 5. 149545 5. 015432  
11755697\_ 4. 511448 4. 773805 4. 566938 4. 489589 4. 538921 4. 430034  
11755698\_ 4. 612886 4. 75968 4. 842577 4. 779952 4. 52604 4. 75968  
11755699\_ 4. 328092 4. 137633 4. 214384 4. 269237 4. 240593 4. 520129  
11755700\_ 8. 645186 8. 582082 8. 632137 7. 719772 7. 627694 7. 652863  
11755701\_ 5. 307719 5. 345598 5. 341482 5. 321749 5. 385304 5. 298074  
11755702\_ 7. 868672 7. 717075 7. 769418 8. 245414 8. 340657 8. 311183  
11755703\_ 6. 599037 6. 539654 6. 586385 6. 69503 6. 656932 6. 588872  
11755704\_ 5. 941752 5. 79719 5. 9442 5. 565754 5. 72304 5. 714719  
11755705\_ 4. 230572 4. 109511 4. 17368 4. 163616 4. 142815 4. 282733  
11755706\_ 9. 144221 9. 063671 9. 14068 9. 026222 9. 056977 9. 009058  
11755707\_ 7. 837063 7. 774754 7. 809498 7. 127419 7. 08741 7. 154639  
11755708\_ 2. 822511 2. 728579 3. 138626 2. 788625 2. 633509 2. 765803  
11755709\_ 7. 79466 7. 745799 7. 806139 7. 444765 7. 36678 7. 426223  
11755710\_ 8. 44154 8. 448287 8. 445585 8. 262291 8. 283531 8. 21589  
11755711\_ 3. 102968 3. 253888 2. 886303 3. 216626 3. 217206 3. 347693  
11755712\_ 5. 613659 5. 782997 5. 919422 5. 802748 5. 86793 5. 844485  
11755713\_ 3. 560324 3. 666337 3. 590592 3. 607428 3. 653094 3. 707583  
11755714\_ 4. 588662 4. 699252 4. 604014 4. 6937 4. 702708 4. 738509  
11755715\_ 8. 715572 8. 64072 8. 700449 8. 226702 8. 228169 8. 267504  
11755716\_ 5. 840302 5. 893648 5. 922798 5. 78341 5. 765425 5. 939384  
11755717\_ 5. 002628 5. 095387 5. 080633 5. 14296 5. 134538 5. 284079  
11755718\_ 10. 55396 10. 54421 10. 55808 10. 55513 10. 53916 10. 5457  
11755719\_ 10. 69367 10. 64145 10. 68425 10. 88983 10. 89124 10. 90657  
11755720\_ 6. 016136 6. 005014 5. 64518 6. 068577 5. 872512 5. 935215  
11755721\_ 5. 209259 5. 226111 5. 126558 5. 556797 5. 768053 5. 712733  
11755722\_ 7. 767575 7. 636589 7. 836019 7. 843366 7. 889493 7. 899967  
11755723\_ 5. 069804 5. 222129 5. 264127 4. 813807 4. 776997 4. 896854  
11755724\_ 7. 400837 7. 318218 7. 503786 7. 86544 7. 909036 7. 914366  
11755725\_ 4. 275543 4. 19155 4. 07995 4. 135496 4. 360163 4. 224816  
11755726\_ 2. 710685 2. 879432 2. 743799 2. 76732 2. 751441 2. 695599  
11755727\_ 2. 995807 2. 83198 2. 709067 3. 050607 3. 26124 2. 899023  
11755728\_ 4. 368287 4. 581342 4. 609538 4. 485009 4. 575914 4. 594192  
11755729\_ 5. 797252 5. 894989 5. 661264 5. 740041 5. 748847 5. 661654  
11755730\_ 7. 823304 7. 564546 7. 689355 7. 167465 7. 171673 7. 193066  
11755731\_ 6. 507764 6. 694384 6. 304178 6. 766128 6. 670011 6. 727437  
11755732\_ 3. 101763 3. 327328 3. 427899 3. 333901 3. 519586 3. 271402  
11755733\_ 7. 234517 7. 319989 7. 322582 5. 74013 5. 767027 5. 697034  
11755734\_ 6. 248215 5. 982098 6. 058216 6. 026934 5. 991861 6. 011116  
11755735\_ 6. 85849 6. 786598 6. 835419 7. 291059 7. 343166 7. 264968  
11755736\_ 4. 899356 4. 388724 4. 732448 4. 376267 4. 22949 4. 3252  
11755737\_ 9. 683262 9. 588749 9. 688106 9. 656775 9. 685367 9. 711884  
11755738\_ 3. 229948 3. 508995 3. 229995 3. 373083 3. 427419 3. 245859  
11755739\_ 6. 770509 6. 743309 6. 740437 6. 720861 6. 653745 6. 749989  
11755740\_ 4. 078969 4. 177487 4. 195906 4. 291857 4. 230773 4. 26194  
11755741\_ 5. 951782 5. 938482 5. 987992 6. 008478 6. 019936 6. 051554  
11755742\_ 4. 550987 4. 627883 4. 396923 4. 721304 4. 61107 4. 663901  
11755743\_ 2. 718604 2. 858864 2. 607302 2. 718604 2. 795673 2. 753575  
11755744\_ 3. 722948 3. 490649 3. 731258 3. 650213 3. 657464 3. 662035  
11755745\_ 6. 893688 6. 71865 6. 824364 6. 948053 7. 00445 6. 912526

11755746\_ 11.16823 11.14337 11.14026 11.28138 11.22833 11.30249  
11755747\_ 8.37436 8.322725 8.411356 7.528359 7.544376 7.657515  
11755748\_ 8.216956 7.991494 8.153105 6.736023 6.934274 6.904865  
11755749\_ 6.145359 6.212894 6.190155 6.173088 6.2195 6.153106  
11755750\_ 3.288276 3.255302 3.244325 3.366791 3.317859 3.25307  
11755751\_ 2.605516 2.69012 2.594136 2.709756 2.711564 2.69012  
11755752\_ 4.974303 5.067205 5.0057 5.056087 5.087304 5.049799  
11755753\_ 6.719264 6.823356 6.784882 6.289411 6.256136 6.22615  
11755754\_ 9.019571 8.977846 8.989969 8.909875 8.867584 8.913575  
11755755\_ 5.073036 5.05846 5.177711 4.864065 5.056801 4.881822  
11755756\_ 7.762647 7.784778 7.856452 8.286152 8.252128 8.280278  
11755757\_ 8.221643 8.23939 8.305279 8.519911 8.51842 8.507114  
11755758\_ 6.39509 6.358546 6.354424 6.340124 6.358546 6.300643  
11755759\_ 3.488969 3.273891 3.035258 3.123854 2.97178 2.785251  
11755760\_ 6.28416 6.30005 6.223593 6.189221 6.108107 6.110921  
11755761\_ 2.901235 2.979084 2.769733 3.142781 2.970467 3.166167  
11755762\_ 9.923761 9.8316 9.847612 8.611073 8.684123 8.641797  
11755763\_ 8.733286 8.633896 8.762762 9.037175 9.020159 9.109019  
11755764\_ 3.442551 3.202638 3.370843 3.420812 3.420812 3.397885  
11755765\_ 5.630884 5.739396 5.644528 5.763109 5.713859 5.735076  
11755766\_ 8.202057 8.14603 8.197536 7.871892 7.800129 7.882875  
11755767\_ 7.711319 7.781939 7.937819 7.752192 7.690964 7.719841  
11755768\_ 5.888773 6.086923 5.870242 6.13945 6.142856 6.098821  
11755769\_ 6.089841 6.11089 6.103862 5.992452 5.979757 6.120408  
11755770\_ 6.948138 6.788518 6.95216 7.313172 7.350582 7.227326  
11755771\_ 7.915551 7.835388 7.870307 7.636943 7.564547 7.640811  
11755772\_ 6.719555 6.579869 6.779107 5.698659 5.709521 5.776765  
11755773\_ 6.891663 6.877814 7.049369 6.699314 6.652387 6.701161  
11755774\_ 9.699275 9.737403 9.690001 9.334454 9.382999 9.339322  
11755775\_ 7.002622 6.890796 6.989744 7.153693 7.116702 7.199663  
11755776\_ 2.578437 2.705833 2.746052 2.578437 2.695135 2.601094  
11755777\_ 6.240774 6.138556 6.30479 5.576417 5.568234 5.654006  
11755778\_ 7.694106 7.610369 7.798876 8.473362 8.464235 8.549263  
11755779\_ 3.727334 3.81047 3.980875 3.393992 3.514782 3.503743  
11755780\_ 3.712837 3.913253 4.01793 4.105402 4.119146 3.97837  
11755781\_ 6.474963 6.643693 6.580022 6.557762 6.57317 6.599373  
11755782\_ 6.484913 6.67125 6.561932 6.374545 6.289525 6.336988  
11755783\_ 6.073142 6.037232 5.988073 6.02957 6.035862 6.087931  
11755784\_ 6.182937 6.168748 6.200593 6.32696 6.343742 6.27798  
11755785\_ 5.480966 5.334447 5.681665 5.194326 5.445748 5.463749  
11755786\_ 5.872367 5.841177 5.760576 6.550874 6.480739 6.532394  
11755787\_ 8.094491 8.048645 8.093449 7.964793 7.95988 7.95804  
11755788\_ 5.687285 5.663723 5.781825 5.763406 5.737347 5.840342  
11755789\_ 10.39828 10.34656 10.39692 10.43028 10.46869 10.40367  
11755790\_ 5.691998 5.836064 6.048666 5.198588 5.362256 5.208645  
11755791\_ 7.378731 7.215889 7.325053 7.603885 7.426899 7.442902  
11755792\_ 6.381325 6.275758 6.328775 6.382554 6.470064 6.405384  
11755793\_ 5.439536 5.390066 5.39595 5.26034 5.307361 5.328419  
11755794\_ 3.023228 3.165651 3.564222 2.867403 3.306585 2.782816  
11755795\_ 6.6305 6.419679 6.553018 6.273136 6.055825 6.257603  
11755796\_ 10.36251 10.43653 10.3417 10.24432 10.14832 10.06519

11755797\_ 10. 33178 10. 40807 10. 34568 10. 25175 10. 14096 10. 09422  
11755798\_ 4. 841095 4. 874798 4. 790968 5. 217397 4. 911031 5. 078868  
11755799\_ 3. 875083 3. 753048 4. 182776 4. 490389 4. 39704 4. 370394  
11755800\_ 2. 465706 2. 605516 2. 577992 2. 663079 2. 622694 2. 756569  
11755801\_ 5. 198412 5. 21553 5. 152329 5. 232293 5. 282277 5. 285085  
11755802\_ 4. 403087 4. 413549 4. 240086 4. 359417 4. 41863 4. 159941  
11755803\_ 8. 500043 8. 546685 8. 513995 8. 640689 8. 733822 8. 691547  
11755804\_ 5. 009071 5. 175712 5. 047376 5. 345074 5. 162036 5. 156696  
11755805\_ 4. 438566 4. 61781 4. 628259 4. 732634 4. 605101 4. 505906  
11755806\_ 2. 463972 2. 54132 2. 54132 2. 531006 2. 42302 2. 564321  
11755807\_ 6. 073142 6. 098313 6. 014238 7. 076762 6. 984971 7. 041759  
11755808\_ 4. 66003 5. 023205 4. 667791 4. 913582 4. 795037 4. 761437  
11755809\_ 7. 782607 7. 638984 7. 866354 8. 278006 8. 259446 8. 160735  
11755810\_ 7. 815999 7. 859848 7. 911146 7. 58395 7. 607676 7. 542637  
11755811\_ 7. 525483 7. 370032 7. 426223 7. 420611 7. 442511 7. 466029  
11755812\_ 6. 919982 6. 70605 6. 808781 6. 928202 7. 013153 6. 932227  
11755813\_ 3. 956973 3. 834381 3. 764497 4. 067703 4. 06248 3. 834381  
11755814\_ 3. 262972 3. 233011 3. 142559 3. 139079 3. 17516 3. 263007  
11755815\_ 5. 396852 5. 369622 5. 511426 5. 452213 5. 368106 5. 523636  
11755816\_ 4. 589081 4. 571724 4. 608699 4. 798191 4. 771768 4. 56606  
11755817\_ 10. 57069 10. 49691 10. 55917 10. 54998 10. 60347 10. 55303  
11755818\_ 6. 646187 6. 538562 6. 627378 7. 179076 7. 19233 7. 215966  
11755819\_ 7. 645541 7. 507109 7. 649951 6. 825306 6. 714656 6. 793829  
11755820\_ 3. 612301 3. 595168 3. 721705 3. 675877 3. 772874 3. 717663  
11755821\_ 9. 467326 9. 419024 9. 459722 9. 530903 9. 590376 9. 549541  
11755822\_ 3. 155027 3. 295486 2. 961574 3. 157069 3. 220371 3. 256153  
11755823\_ 4. 347994 4. 460667 4. 243431 4. 515773 4. 341235 4. 347179  
11755824\_ 6. 426061 6. 579952 6. 54217 6. 521522 6. 483529 6. 567961  
11755825\_ 3. 286856 3. 132933 3. 217107 3. 335155 3. 169349 3. 286856  
11755826\_ 3. 849645 3. 937179 3. 860134 3. 814428 3. 773512 3. 879309  
11755827\_ 7. 815832 7. 824717 7. 809925 7. 930545 7. 948974 7. 948189  
11755828\_ 7. 368054 7. 297705 7. 42373 7. 618767 7. 673568 7. 677097  
11755829\_ 3. 396343 3. 437954 3. 342199 3. 496425 3. 258903 3. 198897  
11755830\_ 5. 584953 5. 558192 5. 480966 5. 732065 5. 820052 5. 704779  
11755831\_ 4. 397477 4. 40461 4. 709463 3. 756925 3. 778881 3. 854851  
11755832\_ 6. 810995 6. 678857 6. 765911 6. 610977 6. 550732 6. 508073  
11755833\_ 1. 768972 1. 943726 2. 040577 1. 991837 2. 062748 1. 961227  
11755834\_ 10. 37727 10. 33715 10. 33495 10. 01401 9. 870558 9. 912383  
11755835\_ 3. 285144 3. 332229 3. 135196 3. 27748 3. 183043 3. 2523  
11755836\_ 7. 004231 6. 998586 6. 922773 7. 070801 7. 087916 7. 130022  
11755837\_ 4. 055632 4. 0477 4. 028112 4. 338845 3. 951606 3. 926394  
11755838\_ 5. 923053 5. 909247 5. 896641 5. 808385 5. 820863 5. 881403  
11755839\_ 2. 90529 2. 801473 2. 661526 2. 841281 2. 512772 2. 564962  
11755840\_ 4. 45397 4. 486219 4. 558451 4. 545426 4. 577362 4. 605108  
11755841\_ 3. 57169 3. 539795 3. 674291 3. 498317 3. 458884 3. 509544  
11755842\_ 8. 581211 8. 498383 8. 432507 8. 518817 8. 580691 8. 560802  
11755843\_ 7. 737578 7. 607606 7. 623753 7. 082482 7. 033069 7. 075936  
11755844\_ 7. 954876 7. 800541 7. 91827 7. 668033 7. 657764 7. 572073  
11755845\_ 9. 907213 9. 867268 9. 937776 9. 888053 9. 945899 9. 909965  
11755846\_ 11. 1018 11. 08374 11. 10708 11. 28826 11. 31556 11. 27487  
11755847\_ 5. 879785 5. 894655 5. 853105 5. 769661 5. 799607 5. 793822

11755848\_ 5. 977166 6. 024089 6. 115559 5. 79882 6. 018992 5. 862896  
11755849\_ 7. 536431 7. 527807 7. 571029 7. 597608 7. 560865 7. 599876  
11755850\_ 6. 700515 6. 626853 6. 703661 5. 653754 5. 709521 5. 680602  
11755851\_ 9. 604656 9. 485701 9. 53406 9. 218469 9. 259044 9. 256476  
11755852\_ 8. 990142 9. 017587 8. 996079 9. 322891 9. 296302 9. 300821  
11755853\_ 4. 815683 4. 815683 4. 652766 4. 992243 5. 210742 5. 02561  
11755854\_ 3. 606313 3. 728666 3. 625408 3. 794111 3. 662446 3. 756378  
11755855\_ 5. 123998 5. 315159 5. 308556 5. 329688 5. 252086 5. 23203  
11755856\_ 6. 560065 6. 585095 6. 503174 6. 668457 6. 578634 6. 723681  
11755857\_ 10. 6202 10. 61191 10. 63408 11. 06585 11. 02216 11. 01487  
11755858\_ 2. 201891 2. 104918 2. 138318 2. 201891 2. 301498 2. 230033  
11755859\_ 6. 937977 6. 967184 7. 080382 7. 300185 7. 368635 7. 363962  
11755860\_ 3. 651174 3. 632838 3. 711837 3. 676958 3. 792259 3. 740436  
11755861\_ 3. 753242 3. 870496 3. 773837 4. 083784 3. 869028 3. 858272  
11755862\_ 3. 754312 3. 902878 3. 489613 3. 756925 3. 746775 3. 790283  
11755863\_ 4. 271608 4. 43629 4. 257288 4. 305276 4. 237917 4. 38489  
11755864\_ 2. 607769 2. 757934 2. 528628 2. 684044 2. 554595 2. 607769  
11755865\_ 6. 243955 6. 282224 6. 136035 6. 351512 6. 381394 6. 352868  
11755866\_ 2. 988093 3. 166823 3. 260755 3. 333311 3. 050657 3. 245356  
11755867\_ 8. 900192 8. 918352 8. 873332 8. 999803 9. 067553 8. 975469  
11755868\_ 7. 32686 7. 207057 7. 250022 7. 219875 7. 160439 7. 111953  
11755869\_ 8. 829425 8. 798726 8. 827794 9. 009519 9. 027738 8. 978927  
11755870\_ 8. 948373 8. 945441 8. 959044 8. 833504 8. 803947 8. 83963  
11755871\_ 9. 89179 9. 856772 9. 86733 8. 717195 8. 726675 8. 755568  
11755872\_ 8. 09028 8. 033981 8. 066638 7. 568552 7. 464506 7. 612145  
11755873\_ 6. 323027 6. 300643 6. 268914 6. 784483 6. 82935 6. 841617  
11755874\_ 7. 622284 7. 381701 7. 518025 8. 034878 8. 012622 8. 000924  
11755875\_ 6. 164929 6. 011116 6. 06623 5. 825823 5. 800437 5. 93047  
11755876\_ 8. 45961 8. 429523 8. 52876 8. 722029 8. 829781 8. 813124  
11755877\_ 5. 605809 5. 497867 5. 658986 5. 902271 5. 908145 5. 939663  
11755878\_ 6. 834848 6. 817724 6. 765773 6. 779107 6. 707262 6. 735674  
11755879\_ 7. 019991 7. 102706 7. 141764 7. 151446 7. 118567 7. 143739  
11755880\_ 7. 779139 7. 735364 7. 652704 7. 758416 7. 865889 7. 764261  
11755881\_ 4. 851818 4. 844668 4. 824195 4. 836447 4. 890539 4. 795813  
11755882\_ 7. 749925 7. 631787 7. 756856 7. 164448 7. 239006 7. 22517  
11755883\_ 5. 735578 5. 613082 5. 902576 5. 105631 5. 249322 5. 162952  
11755884\_ 5. 672722 5. 591415 5. 596552 5. 585709 5. 546555 5. 505166  
11755885\_ 7. 048486 6. 889373 7. 07869 7. 261898 7. 183804 7. 220733  
11755886\_ 7. 065589 7. 062925 7. 089128 6. 999043 6. 898235 6. 991739  
11755887\_ 7. 482466 7. 412319 7. 563785 7. 202891 7. 245559 7. 117088  
11755888\_ 4. 387075 4. 361537 4. 361537 4. 361537 4. 40461 4. 361537  
11755889\_ 2. 119458 1. 92074 2. 072487 1. 884177 2. 248675 2. 265919  
11755890\_ 5. 317869 5. 442395 5. 333635 5. 347416 5. 291705 5. 237366  
11755891\_ 3. 807956 4. 065077 3. 676846 3. 88005 3. 91943 3. 886318  
11755892\_ 5. 333723 5. 584813 5. 53373 5. 597375 5. 410552 5. 589485  
11755893\_ 6. 036665 5. 930695 6. 004549 5. 945765 5. 991691 5. 913262  
11755894\_ 8. 553259 8. 522857 8. 608536 8. 301364 8. 295607 8. 332226  
11755895\_ 7. 16152 7. 081878 7. 197258 7. 353976 7. 397209 7. 417811  
11755896\_ 5. 755354 5. 661103 5. 208112 5. 56189 5. 291315 5. 487144  
11755897\_ 6. 358376 6. 247082 6. 239909 5. 639444 5. 57911 5. 695232  
11755898\_ 6. 817986 6. 895821 6. 810308 6. 895563 6. 756886 6. 836574

11755899\_ 5. 4917 5. 63609 5. 620523 5. 674652 5. 61311 5. 624849  
11755900\_ 8. 903388 8. 849622 8. 899665 8. 42793 8. 436155 8. 372957  
11755901\_ 10. 43832 10. 38014 10. 43476 10. 42983 10. 43486 10. 43802  
11755902\_ 8. 818693 8. 745751 8. 825165 8. 168229 8. 177889 8. 223679  
11755903\_ 3. 521586 3. 451939 3. 488878 3. 8997 3. 879309 3. 907629  
11755904\_ 6. 542149 6. 456712 6. 557158 6. 249524 6. 285594 6. 212721  
11755905\_ 4. 146847 4. 294714 3. 661964 4. 131476 4. 215026 4. 175857  
11755906\_ 6. 934615 7. 066036 6. 930955 6. 941649 6. 653181 6. 862757  
11755907\_ 9. 050502 9. 040635 9. 080079 8. 889523 8. 977971 8. 987662  
11755908\_ 8. 020377 7. 915693 8. 003316 8. 732596 8. 826152 8. 716645  
11755909\_ 2. 226002 2. 330888 2. 224086 2. 34308 2. 118632 2. 226002  
11755910\_ 8. 798357 8. 731137 8. 774171 8. 306593 8. 236282 8. 327527  
11755911\_ 4. 415744 4. 049655 4. 02788 4. 430075 4. 247811 4. 276119  
11755912\_ 8. 253908 8. 178078 8. 214801 8. 315575 8. 357053 8. 28136  
11755913\_ 5. 248616 5. 312234 5. 29258 5. 522067 5. 484049 5. 62138  
11755914\_ 6. 06088 6. 255639 6. 09851 6. 100502 6. 149684 6. 170517  
11755915\_ 6. 522521 6. 476392 6. 629519 6. 838867 6. 877276 6. 930154  
11755916\_ 9. 275494 9. 268269 9. 219114 9. 30821 9. 292536 9. 326793  
11755917\_ 4. 918897 5. 001404 4. 782229 5. 135967 5. 010624 5. 164712  
11755918\_ 5. 977748 5. 873632 5. 902987 6. 073835 6. 090537 6. 044205  
11755919\_ 5. 57986 5. 637815 5. 57986 5. 571782 5. 575221 5. 593778  
11755920\_ 5. 136444 5. 225525 5. 112719 5. 147641 5. 225525 5. 2666  
11755921\_ 8. 373421 8. 336124 8. 378671 8. 618995 8. 724006 8. 653047  
11755922\_ 7. 199296 7. 006038 7. 086242 6. 558571 6. 448378 6. 420019  
11755923\_ 7. 854219 7. 797432 7. 897969 7. 14667 7. 17343 7. 197823  
11755924\_ 4. 719547 4. 763543 4. 640556 4. 874234 4. 849431 4. 844786  
11755925\_ 6. 975718 7. 027837 7. 031953 7. 072485 7. 17599 7. 080408  
11755926\_ 3. 778052 3. 702582 3. 934397 3. 97978 3. 906129 3. 986752  
11755927\_ 3. 280329 3. 409751 3. 21835 3. 377925 3. 515458 3. 386722  
11755928\_ 6. 766992 6. 748322 6. 807291 5. 26034 5. 126347 5. 266548  
11755929\_ 7. 047573 7. 105746 7. 001108 7. 477427 7. 503376 7. 524311  
11755930\_ 7. 272594 7. 292951 7. 191346 7. 218313 7. 226713 7. 183724  
11755931\_ 7. 620803 7. 701237 7. 508968 7. 627234 7. 688993 7. 641955  
11755932\_ 2. 416399 2. 32282 2. 537315 2. 283639 2. 525641 2. 508837  
11755933\_ 10. 03508 10. 0772 10. 09608 9. 802734 9. 752272 9. 734795  
11755934\_ 3. 165631 3. 113528 3. 242956 3. 217385 3. 118997 3. 158834  
11755935\_ 6. 745182 6. 730489 6. 793203 6. 510192 6. 545351 6. 544244  
11755936\_ 7. 759827 7. 713655 7. 712116 7. 76589 7. 799839 7. 869027  
11755937\_ 3. 729956 3. 871796 3. 642738 3. 739116 3. 739116 3. 809176  
11755938\_ 6. 584888 6. 561876 6. 478352 6. 849876 6. 898793 6. 819171  
11755939\_ 4. 15844 4. 184863 4. 099881 4. 121531 4. 158061 4. 293749  
11755940\_ 6. 875638 6. 852527 6. 878187 6. 849978 6. 869535 6. 85863  
11755941\_ 6. 430482 6. 430482 6. 410112 6. 716536 6. 815803 6. 817986  
11755942\_ 7. 060777 6. 967506 7. 012226 7. 420858 7. 431108 7. 453729  
11755943\_ 12. 92276 12. 92888 12. 92699 12. 99207 12. 98878 12. 9738  
11755944\_ 4. 178511 4. 158981 4. 242425 4. 596594 4. 505786 4. 381477  
11755945\_ 4. 874234 4. 934111 4. 772366 4. 964244 5. 16825 4. 851438  
11755946\_ 7. 584086 7. 483962 7. 59506 7. 610741 7. 596307 7. 635408  
11755947\_ 9. 734542 9. 724505 9. 802439 9. 305972 9. 327813 9. 231156  
11755948\_ 6. 686816 6. 581954 6. 495454 6. 136678 6. 263567 6. 383029  
11755949\_ 5. 029311 5. 003536 5. 089868 4. 96611 4. 906693 4. 991885



11755950\_ 5. 747341 5. 801162 5. 694166 5. 926575 5. 873914 5. 923396  
11755951\_ 9. 234781 9. 170759 9. 20485 9. 54087 9. 561415 9. 55426  
11755952\_ 6. 599839 6. 410817 6. 571832 6. 934698 7. 09798 7. 009306  
11755953\_ 6. 128944 5. 875254 6. 089903 5. 160241 5. 164829 5. 416843  
11755954\_ 4. 744165 4. 844708 4. 731556 4. 703277 4. 721313 4. 643717  
11755955\_ 2. 465844 2. 38166 2. 380993 2. 33471 2. 227606 2. 266011  
11755956\_ 9. 152794 9. 108947 9. 111557 9. 229785 9. 188683 9. 254592  
11755957\_ 5. 292927 5. 280053 5. 187736 5. 288033 5. 288033 5. 197154  
11755958\_ 6. 697205 6. 647147 6. 739151 6. 609721 6. 631763 6. 658036  
11755959\_ 2. 827697 2. 972175 2. 733915 2. 850298 2. 818519 2. 803262  
11755960\_ 4. 82694 4. 914652 4. 709463 4. 600411 4. 393898 4. 579199  
11755961\_ 6. 474451 6. 422468 6. 407945 6. 484505 6. 534575 6. 451204  
11755962\_ 6. 859991 6. 900434 6. 889546 7. 174875 7. 195087 7. 202255  
11755963\_ 3. 807232 3. 837192 3. 456214 4. 056053 3. 937254 3. 77445  
11755964\_ 3. 3109 3. 473091 3. 398236 3. 101013 3. 227437 3. 204499  
11755965\_ 7. 762987 7. 834171 7. 846032 7. 841957 7. 945725 7. 945943  
11755966\_ 10. 16325 10. 23924 10. 29075 9. 880233 9. 884627 9. 896839  
11755967\_ 4. 937179 4. 792785 4. 748231 4. 76808 4. 76808 4. 643717  
11755968\_ 4. 780485 4. 780485 4. 930507 4. 459939 4. 669476 4. 462935  
11755969\_ 8. 627553 8. 570572 8. 604761 8. 744237 8. 731787 8. 757418  
11755970\_ 2. 757356 2. 94347 3. 332499 3. 10969 2. 997913 2. 667716  
11755971\_ 4. 816005 4. 586343 4. 523982 4. 825414 4. 712823 4. 673971  
11755972\_ 8. 481074 8. 431836 8. 441905 8. 233142 8. 249485 8. 140638  
11755973\_ 5. 268599 5. 356428 5. 296019 5. 448296 5. 329237 5. 284997  
11755974\_ 11. 56055 11. 51444 11. 59224 11. 77744 11. 8117 11. 81518  
11755975\_ 3. 349143 3. 180605 3. 261071 3. 044069 3. 063493 3. 143925  
11755976\_ 2. 80619 2. 980625 2. 874619 2. 81399 2. 965764 2. 969255  
11755977\_ 6. 136104 6. 090432 5. 97469 6. 070891 6. 100858 6. 090033  
11755978\_ 4. 736499 4. 734512 5. 009802 4. 979773 4. 823093 4. 643717  
11755979\_ 4. 748619 4. 727708 4. 524478 4. 631338 4. 714761 4. 769278  
11755980\_ 12. 24951 12. 22923 12. 25496 12. 14737 12. 15729 12. 1578  
11755981\_ 5. 736831 5. 801653 5. 757352 4. 748379 4. 798511 5. 013575  
11755982\_ 7. 713523 7. 658176 7. 762766 7. 804055 7. 823994 7. 822235  
11755983\_ 5. 995728 6. 087998 6. 085228 5. 962363 5. 856664 5. 918809  
11755984\_ 7. 221698 7. 200259 7. 106966 6. 192636 6. 327049 6. 318829  
11755985\_ 2. 988093 3. 031475 3. 046745 3. 061489 2. 996254 3. 046745  
11755986\_ 6. 987124 7. 072625 7. 08682 6. 37812 6. 456926 6. 477036  
11755987\_ 3. 486502 3. 406961 3. 437524 3. 084486 3. 354507 3. 546226  
11755988\_ 5. 401053 5. 330846 5. 421688 5. 480966 5. 643423 5. 442778  
11755989\_ 8. 297763 8. 318359 8. 241099 8. 267218 8. 353747 8. 311607  
11755990\_ 4. 512618 4. 535515 4. 39035 4. 52373 4. 570074 4. 600089  
11755991\_ 7. 252042 7. 281713 7. 324113 7. 219938 7. 245174 7. 179144  
11755992\_ 5. 076223 5. 046646 5. 034771 5. 081697 5. 228049 5. 257761  
11755993\_ 5. 209908 5. 081325 5. 2222 5. 277994 5. 083134 5. 241389  
11755994\_ 5. 419801 5. 317304 5. 331147 4. 937901 5. 105701 5. 123638  
11755995\_ 11. 75281 11. 71647 11. 7371 11. 812 11. 81113 11. 80935  
11755996\_ 3. 028651 3. 153166 2. 989584 3. 15472 3. 117848 2. 975322  
11755997\_ 2. 245365 2. 382003 2. 336364 2. 148392 2. 126582 2. 17844  
11755998\_ 9. 094065 9. 021728 9. 066381 9. 010842 9. 062157 9. 022438  
11755999\_ 4. 681991 4. 27575 4. 808586 4. 914651 5. 029529 5. 109454  
11756000\_ 6. 528077 6. 554036 6. 553828 6. 554512 6. 542707 6. 558525

11756001\_ 8. 196005 8. 164341 8. 233707 8. 215759 8. 215887 8. 263743  
11756002\_ 6. 029733 5. 999068 6. 106112 5. 849663 6. 010528 5. 949047  
11756003\_ 3. 664614 3. 556565 3. 390785 3. 29235 2. 991568 3. 326966  
11756004\_ 6. 373103 6. 296633 6. 253933 6. 445392 6. 516874 6. 656538  
11756005\_ 9. 053212 9. 020651 9. 049147 9. 512799 9. 500119 9. 435076  
11756006\_ 4. 703533 4. 731404 4. 531899 4. 720788 4. 957043 4. 729819  
11756007\_ 3. 145479 3. 324413 3. 446578 3. 419354 3. 328215 3. 372615  
11756008\_ 6. 911859 6. 936579 6. 888856 6. 985928 6. 977776 7. 07498  
11756009\_ 4. 602203 4. 725945 4. 383451 4. 920321 4. 846905 4. 760069  
11756010\_ 4. 113014 4. 460813 4. 333883 4. 36098 4. 438293 4. 181029  
11756011\_ 7. 677541 7. 564604 7. 67367 7. 995476 8. 046614 7. 988708  
11756012\_ 5. 214227 5. 292133 5. 141223 5. 372177 5. 266678 5. 526266  
11756013\_ 4. 736915 4. 763543 4. 771086 4. 876116 4. 858924 4. 822872  
11756014\_ 4. 591604 4. 51615 4. 513113 4. 50808 4. 562557 4. 627837  
11756015\_ 6. 373103 6. 296633 6. 253933 6. 445392 6. 516874 6. 656538  
11756016\_ 7. 723377 7. 739184 7. 767512 7. 922758 7. 85994 7. 874439  
11756017\_ 7. 300671 7. 209322 7. 405313 7. 091871 7. 217411 7. 282473  
11756018\_ 2. 029109 2. 13789 2. 118768 2. 197323 2. 128329 2. 128329  
11756019\_ 10. 84012 10. 75856 10. 80811 10. 74581 10. 80636 10. 77005  
11756020\_ 4. 815683 4. 704146 4. 630578 4. 630578 4. 661907 4. 842807  
11756021\_ 11. 13228 11. 11417 11. 11508 11. 4818 11. 51372 11. 43249  
11756022\_ 5. 977166 5. 893179 6. 187264 5. 647004 5. 736831 5. 778813  
11756023\_ 4. 827847 4. 754584 5. 067157 4. 909401 4. 804746 4. 989556  
11756024\_ 4. 815683 4. 75 4. 370337 4. 665036 4. 889756 4. 743254  
11756025\_ 10. 49498 10. 43278 10. 48143 10. 27412 10. 26456 10. 24268  
11756026\_ 9. 288138 9. 256854 9. 273342 9. 661222 9. 648303 9. 600112  
11756027\_ 3. 542818 3. 730275 3. 608102 3. 660511 3. 63675 3. 593636  
11756028\_ 5. 847111 5. 671975 5. 517594 5. 584813 5. 426098 5. 648514  
11756029\_ 6. 792996 6. 665233 6. 740516 6. 687398 6. 647985 6. 689951  
11756030\_ 8. 839308 8. 814608 8. 851421 8. 745814 8. 803312 8. 718834  
11756031\_ 4. 195676 4. 163701 4. 019685 4. 06329 3. 962838 4. 076211  
11756032\_ 6. 438817 6. 457485 6. 438027 7. 111511 7. 174876 7. 049941  
11756033\_ 6. 073142 6. 161786 5. 978008 6. 018553 6. 144784 6. 051554  
11756034\_ 3. 398236 3. 288517 3. 272607 3. 547044 3. 306585 3. 400921  
11756035\_ 5. 102933 5. 201406 5. 241169 5. 380649 5. 282449 5. 399833  
11756036\_ 8. 74444 8. 737329 8. 747142 8. 884503 8. 864649 8. 906336  
11756037\_ 8. 064755 8. 166557 8. 176245 7. 825821 7. 741433 7. 727819  
11756038\_ 4. 200254 4. 08148 3. 792845 3. 938958 3. 883719 4. 016738  
11756039\_ 8. 030327 7. 957587 8. 077512 7. 924264 7. 989575 7. 862906  
11756040\_ 3. 705625 4. 011988 4. 045489 4. 130004 4. 071934 4. 185876  
11756041\_ 4. 65508 4. 546091 4. 347335 4. 536919 4. 473404 4. 620024  
11756042\_ 5. 603001 5. 751034 5. 757824 5. 806135 5. 787002 5. 712203  
11756043\_ 8. 721912 8. 627687 8. 702831 8. 748538 8. 755287 8. 723062  
11756044\_ 4. 892768 4. 814236 5. 018399 4. 946612 4. 815738 5. 000658  
11756045\_ 4. 262757 4. 40461 4. 350018 4. 457525 4. 507056 4. 44938  
11756046\_ 8. 308861 8. 260311 8. 270368 7. 513617 7. 508035 7. 56206  
11756047\_ 2. 38596 2. 659625 2. 589905 2. 46761 2. 486629 2. 5666  
11756048\_ 3. 308924 3. 522216 3. 321836 3. 481687 3. 621855 3. 58721  
11756049\_ 2. 959485 3. 160439 2. 952137 3. 005948 3. 110373 3. 085883  
11756050\_ 3. 503743 3. 909593 3. 663122 3. 738163 3. 738163 3. 791521  
11756051\_ 5. 775048 5. 527182 5. 706246 5. 870242 5. 959348 5. 894697

11756052\_ 3. 925181 3. 823572 3. 760221 3. 969728 3. 822993 3. 954157  
11756053\_ 7. 605005 7. 499288 7. 654918 6. 738924 6. 915298 6. 897808  
11756054\_ 11. 00752 10. 95379 11. 00164 11. 0619 11. 13067 11. 08293  
11756055\_ 7. 856202 7. 833413 7. 803695 7. 801222 7. 826608 7. 833466  
11756056\_ 8. 846209 8. 741584 8. 840047 9. 150731 9. 150548 9. 141038  
11756057\_ 5. 835057 5. 725354 5. 72638 5. 850972 5. 884576 5. 851812  
11756058\_ 6. 97186 6. 900658 6. 971486 6. 717915 6. 701488 6. 625163  
11756059\_ 3. 800899 3. 745025 3. 573588 3. 933411 3. 816193 3. 90404  
11756060\_ 12. 97214 12. 99418 12. 99807 12. 91427 12. 90765 12. 89888  
11756061\_ 13. 46115 13. 44145 13. 45296 13. 49129 13. 49129 13. 48794  
11756062\_ 6. 091022 6. 094354 6. 034184 5. 640966 5. 6968 5. 508051  
11756063\_ 8. 773672 8. 772865 8. 787886 9. 103572 9. 120015 9. 091863  
11756064\_ 8. 50362 8. 541298 8. 592699 8. 347968 8. 318121 8. 275603  
11756065\_ 5. 548234 5. 599463 5. 578338 5. 4468 5. 606491 5. 535587  
11756066\_ 7. 055228 6. 936579 6. 951478 7. 261844 7. 288831 7. 160047  
11756067\_ 7. 599715 7. 492943 7. 646882 7. 145631 7. 101052 7. 332615  
11756068\_ 8. 844668 8. 74564 8. 847246 8. 975082 8. 953015 8. 996676  
11756069\_ 8. 496711 8. 383034 8. 518594 9. 304907 9. 214214 9. 267945  
11756070\_ 6. 698955 6. 725707 6. 3749 6. 794791 6. 728666 6. 885708  
11756071\_ 12. 7506 12. 73031 12. 74596 12. 61331 12. 64205 12. 60473  
11756072\_ 4. 147107 4. 295313 4. 006653 3. 756925 3. 809722 3. 705625  
11756073\_ 7. 389075 7. 431583 7. 356892 7. 776949 7. 719672 7. 695111  
11756074\_ 2. 737653 2. 724956 2. 8469 2. 511458 2. 718322 2. 627984  
11756075\_ 4. 332979 4. 485491 4. 293431 4. 526934 4. 519726 4. 371777  
11756076\_ 7. 532541 7. 562089 7. 573108 7. 797146 7. 810449 7. 812863  
11756077\_ 7. 190301 7. 119772 7. 178331 7. 422862 7. 495843 7. 408193  
11756078\_ 5. 542861 5. 510165 5. 55611 5. 602403 5. 461436 5. 350274  
11756079\_ 6. 942925 6. 972074 7. 035518 7. 107765 7. 124409 7. 062872  
11756080\_ 7. 133229 7. 052046 6. 976385 7. 029419 7. 104983 7. 029668  
11756081\_ 2. 557441 2. 420607 2. 634471 2. 583004 2. 565088 2. 516584  
11756082\_ 6. 809551 6. 865848 6. 869977 6. 293973 6. 243132 6. 263567  
11756083\_ 2. 632931 2. 612445 2. 788455 2. 557548 2. 515797 2. 675771  
11756084\_ 6. 618273 6. 558671 6. 567973 6. 424972 6. 576303 6. 512991  
11756085\_ 5. 186484 5. 243915 5. 175327 5. 511192 5. 372442 5. 301278  
11756086\_ 5. 439381 5. 464435 5. 471278 5. 650254 5. 665244 5. 625742  
11756087\_ 8. 391087 8. 397916 8. 520926 8. 237941 8. 244723 8. 293763  
11756088\_ 2. 490534 2. 789516 2. 64798 2. 738253 2. 590142 2. 625704  
11756089\_ 3. 058395 3. 26176 3. 021477 2. 716705 2. 693152 2. 838624  
11756090\_ 8. 008997 7. 958289 7. 996292 7. 514528 7. 608296 7. 470558  
11756091\_ 5. 704919 5. 815789 5. 6116 5. 76069 5. 809034 5. 777608  
11756092\_ 6. 897586 6. 837039 6. 937016 7. 189814 7. 257804 7. 200988  
11756093\_ 6. 84152 6. 913452 6. 995282 7. 081165 7. 081165 7. 125012  
11756094\_ 3. 660088 3. 293607 3. 45628 3. 567638 3. 44423 3. 352243  
11756095\_ 2. 438221 2. 383083 2. 628604 2. 621847 2. 611367 2. 320584  
11756096\_ 6. 788566 6. 716076 6. 815616 6. 775414 6. 815616 6. 805884  
11756097\_ 3. 823933 3. 64072 3. 903505 4. 113928 3. 93598 3. 915295  
11756098\_ 7. 99621 7. 966245 8. 02972 7. 781327 7. 803571 7. 841185  
11756099\_ 12. 36775 12. 38799 12. 38799 12. 41547 12. 39955 12. 37542  
11756100\_ 7. 665301 7. 591387 7. 666256 7. 968638 7. 856641 7. 864045  
11756101\_ 2. 796966 2. 771673 2. 480637 2. 703594 2. 757458 2. 801905  
11756102\_ 3. 259459 3. 290336 2. 979925 3. 440772 3. 609049 3. 284699

11756103\_ 3. 59086 3. 648934 3. 690279 3. 364397 3. 503743 3. 503743  
11756104\_ 4. 723443 4. 655548 4. 136243 5. 411834 5. 183408 5. 360445  
11756105\_ 7. 904856 7. 812608 7. 898775 7. 623524 7. 635261 7. 677097  
11756106\_ 5. 587358 5. 547907 5. 524204 4. 943212 4. 917617 5. 001996  
11756107\_ 7. 243037 7. 197343 7. 232536 7. 356431 7. 256628 7. 295011  
11756108\_ 7. 220733 7. 220864 7. 120288 7. 434587 7. 374996 7. 409657  
11756109\_ 8. 929392 8. 949314 8. 935572 8. 816853 8. 812924 8. 832659  
11756110\_ 4. 767098 4. 993562 4. 640053 4. 598072 4. 879904 4. 784378  
11756111\_ 6. 953167 6. 98877 6. 949441 7. 344937 7. 368905 7. 36204  
11756112\_ 8. 397968 8. 385122 8. 407401 8. 44114 8. 425545 8. 392557  
11756113\_ 4. 808927 4. 874234 4. 727885 4. 772366 4. 769444 4. 838752  
11756114\_ 8. 403255 8. 367029 8. 412902 8. 666294 8. 628074 8. 650436  
11756115\_ 10. 01102 9. 97844 9. 96405 10. 06166 10. 06068 10. 02576  
11756116\_ 7. 075867 7. 154768 7. 121766 6. 645615 6. 775798 6. 760986  
11756117\_ 4. 903993 5. 016488 5. 25668 4. 500339 4. 575726 4. 630551  
11756118\_ 7. 89969 7. 800569 7. 819455 7. 604825 7. 677463 7. 472872  
11756119\_ 6. 119062 6. 03107 5. 891911 5. 900187 6. 020203 5. 948604  
11756120\_ 5. 891306 6. 037675 5. 98336 5. 993279 6. 092906 6. 094413  
11756121\_ 6. 44698 6. 163628 6. 22476 6. 132449 6. 306428 6. 261185  
11756122\_ 7. 06532 7. 007429 7. 1714 7. 160638 7. 070036 7. 04898  
11756123\_ 5. 828849 5. 890779 5. 922691 5. 888001 5. 883798 5. 815762  
11756124\_ 6. 253168 6. 110805 6. 043176 6. 029351 6. 087357 6. 031332  
11756125\_ 11. 06062 10. 99309 11. 08162 11. 13463 11. 13291 11. 1268  
11756126\_ 9. 366851 9. 529717 9. 290455 9. 443372 9. 393274 9. 402147  
11756127\_ 8. 543844 8. 515053 8. 47067 8. 725065 8. 745831 8. 663967  
11756128\_ 9. 136712 9. 125681 9. 181708 10. 05048 9. 975312 9. 945192  
11756129\_ 9. 004327 8. 991792 9. 021532 9. 031788 9. 055613 9. 080784  
11756130\_ 8. 760018 8. 716385 8. 662888 8. 796034 8. 793525 8. 822374  
11756131\_ 9. 191182 9. 177493 9. 216425 8. 991566 9. 019345 9. 005917  
11756132\_ 8. 369403 8. 280493 8. 408662 8. 347586 8. 360416 8. 358457  
11756133\_ 9. 273052 9. 217428 9. 303602 8. 844037 8. 886315 8. 855107  
11756134\_ 9. 058121 9. 05274 9. 094191 8. 168478 8. 069465 8. 155806  
11756135\_ 8. 138761 8. 144293 8. 15222 8. 326407 8. 311954 8. 3709  
11756136\_ 8. 462659 8. 487913 8. 532661 8. 58181 8. 571066 8. 602105  
11756137\_ 12. 38775 12. 40079 12. 39847 12. 32463 12. 34453 12. 29958  
11756138\_ 7. 824161 7. 758309 7. 726549 8. 77371 8. 707112 8. 822198  
11756139\_ 8. 204157 8. 136084 8. 239993 8. 553388 8. 585062 8. 560424  
11756140\_ 12. 6823 12. 68079 12. 64855 12. 72413 12. 63868 12. 62432  
11756141\_ 9. 174889 9. 122039 9. 189983 9. 733049 9. 7585 9. 773043  
11756142\_ 3. 763378 3. 284101 3. 496855 3. 406996 3. 656413 3. 511343  
11756143\_ 5. 093319 5. 07239 5. 179338 5. 12328 5. 160099 5. 187016  
11756144\_ 11. 28532 11. 25006 11. 26424 11. 21591 11. 22058 11. 22494  
11756145\_ 8. 746342 8. 605047 8. 71959 8. 683005 8. 698851 8. 652557  
11756146\_ 11. 6711 11. 60973 11. 65802 11. 48954 11. 51697 11. 49811  
11756147\_ 11. 17596 11. 14002 11. 15572 11. 19646 11. 17117 11. 15116  
11756148\_ 8. 261774 8. 225735 8. 227191 7. 977397 7. 970458 8. 021167  
11756149\_ 2. 805877 2. 777033 2. 529774 2. 758382 2. 610651 2. 777033  
11756150\_ 12. 30136 12. 30787 12. 28176 12. 30152 12. 25437 12. 22051  
11756151\_ 11. 92286 11. 9754 11. 92322 11. 90976 11. 8678 11. 84137  
11756152\_ 10. 60494 10. 62039 10. 56165 10. 74772 10. 72173 10. 71325  
11756153\_ 11. 65346 11. 65903 11. 64763 11. 47423 11. 4949 11. 49529

11756154\_ 3. 584417 3. 290188 3. 713161 3. 779759 3. 702143 3. 511239  
11756155\_ 5. 781267 5. 834309 5. 907067 4. 967156 5. 050504 5. 068006  
11756156\_ 10. 94429 10. 87459 10. 92944 11. 04257 11. 00211 10. 96914  
11756157\_ 2. 582257 2. 430736 2. 407273 2. 276402 2. 29976 2. 404419  
11756158\_ 3. 494826 3. 647578 3. 500535 3. 345492 3. 912517 3. 535358  
11756159\_ 8. 011264 8. 000376 7. 971568 8. 492153 8. 543821 8. 444873  
11756160\_ 9. 976949 9. 973205 9. 978038 9. 572619 9. 535025 9. 49278  
11756161\_ 5. 645423 5. 694528 5. 74335 6. 107684 6. 097293 6. 148582  
11756162\_ 7. 023872 6. 997863 7. 113001 6. 510985 6. 597146 6. 578224  
11756163\_ 9. 845613 9. 778125 9. 817042 10. 22621 10. 27757 10. 23946  
11756164\_ 9. 189687 9. 102344 9. 188765 9. 219785 9. 258131 9. 245434  
11756165\_ 4. 21224 4. 205666 3. 961928 4. 288069 4. 27552 4. 087339  
11756166\_ 7. 326977 7. 16461 7. 22898 7. 750266 7. 727243 7. 663273  
11756167\_ 7. 409349 7. 39996 7. 376337 7. 240872 7. 279177 7. 230303  
11756168\_ 9. 292083 9. 225999 9. 235468 9. 492851 9. 503485 9. 374091  
11756169\_ 12. 40851 12. 37311 12. 38123 12. 45642 12. 46524 12. 4778  
11756170\_ 8. 157768 8. 104615 8. 125683 7. 522292 7. 572416 7. 551057  
11756171\_ 4. 594684 4. 84154 4. 772366 5. 319746 5. 282486 5. 343223  
11756172\_ 6. 924924 6. 876232 6. 923465 7. 04025 7. 090498 7. 030784  
11756173\_ 6. 836955 6. 649424 6. 792863 6. 814681 6. 910641 6. 916096  
11756174\_ 9. 771756 9. 716738 9. 765486 10. 37796 10. 40718 10. 36996  
11756175\_ 9. 183197 9. 049128 9. 148203 9. 515557 9. 522809 9. 492824  
11756176\_ 10. 28974 10. 1935 10. 23959 10. 36511 10. 36211 10. 33567  
11756177\_ 9. 878299 9. 80491 9. 862874 9. 90427 9. 949542 9. 995696  
11756178\_ 10. 74208 10. 69646 10. 7507 10. 71288 10. 72537 10. 74097  
11756179\_ 9. 61953 9. 545598 9. 604017 9. 728142 9. 743407 9. 723834  
11756180\_ 7. 455794 7. 413104 7. 411982 7. 182347 7. 206693 7. 12227  
11756181\_ 11. 15453 11. 15385 11. 17897 11. 20647 11. 20385 11. 20855  
11756182\_ 9. 810475 9. 794567 9. 780805 10. 91308 10. 83657 10. 76141  
11756183\_ 8. 687468 8. 653438 8. 69236 9. 219616 9. 28034 9. 287052  
11756184\_ 4. 309832 4. 374132 4. 030784 4. 306966 3. 879309 4. 361359  
11756185\_ 8. 675784 8. 551387 8. 61721 8. 969928 8. 951049 8. 983967  
11756186\_ 10. 44053 10. 6509 10. 51584 10. 53371 10. 53433 10. 58116  
11756187\_ 9. 0284 9. 005768 9. 024813 9. 444517 9. 425337 9. 437371  
11756188\_ 8. 943792 8. 928448 8. 958993 8. 97873 8. 977085 8. 97299  
11756189\_ 5. 655143 5. 829134 5. 703732 5. 768811 5. 696103 5. 65174  
11756190\_ 8. 263554 8. 223036 8. 240822 8. 177155 8. 162155 8. 104259  
11756191\_ 3. 504419 3. 606313 3. 850246 3. 843273 4. 049891 3. 891394  
11756192\_ 4. 070141 3. 759765 4. 067416 4. 285286 4. 318948 4. 350899  
11756193\_ 8. 47041 8. 484176 8. 43138 8. 482375 8. 448292 8. 555291  
11756194\_ 6. 998737 6. 89182 6. 973329 7. 549959 7. 657719 7. 614855  
11756195\_ 9. 323117 9. 226521 9. 314632 9. 297009 9. 282164 9. 32216  
11756196\_ 7. 070617 7. 044458 7. 046151 7. 600059 7. 702015 7. 535294  
11756197\_ 10. 76632 10. 76524 10. 78189 10. 84249 10. 83174 10. 78013  
11756198\_ 10. 5367 10. 51559 10. 55978 10. 5934 10. 59502 10. 60848  
11756199\_ 8. 305605 8. 23769 8. 183045 8. 185822 8. 086176 8. 122847  
11756200\_ 3. 381555 3. 389533 3. 355506 3. 478528 3. 560456 3. 629946  
11756201\_ 5. 119993 4. 934291 5. 069824 5. 096495 5. 134145 5. 106091  
11756202\_ 8. 357032 8. 309634 8. 397932 8. 308054 8. 337842 8. 368209  
11756203\_ 7. 503498 7. 494059 7. 541142 8. 62455 8. 560886 8. 578039  
11756204\_ 3. 005473 2. 908501 3. 054295 2. 819455 3. 005473 2. 888763

11756205\_ 9. 391115 9. 414764 9. 421652 9. 013222 9. 04079 9. 021124  
11756206\_ 8. 510599 8. 376269 8. 416044 8. 103153 8. 159437 8. 163525  
11756207\_ 8. 426778 8. 373353 8. 461147 9. 580815 9. 581629 9. 617846  
11756208\_ 8. 659181 8. 611613 8. 682697 8. 408878 8. 400712 8. 358048  
11756209\_ 7. 038818 6. 941977 7. 010421 7. 390556 7. 50386 7. 508048  
11756210\_ 8. 487883 8. 403701 8. 437444 8. 116458 8. 134401 8. 114503  
11756211\_ 9. 805438 9. 731953 9. 72888 9. 639067 9. 605743 9. 597737  
11756212\_ 6. 769288 6. 64022 6. 723613 6. 750373 6. 79818 6. 751778  
11756213\_ 10. 11788 10. 09672 10. 08077 10. 40379 10. 34608 10. 36194  
11756214\_ 9. 600321 9. 521581 9. 574144 9. 749746 9. 819905 9. 769998  
11756215\_ 12. 78667 12. 7609 12. 76902 12. 72227 12. 74453 12. 74158  
11756216\_ 10. 29683 10. 23066 10. 28365 10. 19007 10. 20361 10. 24935  
11756217\_ 5. 03537 5. 059315 4. 957861 5. 152176 5. 258709 5. 109529  
11756218\_ 7. 323135 7. 312122 7. 339828 7. 399586 7. 428877 7. 36941  
11756219\_ 4. 434107 4. 679913 4. 523001 4. 690985 4. 803597 4. 586262  
11756220\_ 8. 09001 8. 060748 8. 070542 8. 20103 8. 260842 8. 162104  
11756221\_ 3. 77265 3. 795931 3. 867676 4. 075033 3. 991062 4. 083116  
11756222\_ 4. 584933 4. 554332 4. 477219 4. 690985 4. 449529 4. 52373  
11756223\_ 11. 16379 11. 12885 11. 11263 11. 03248 11. 00338 10. 98738  
11756224\_ 7. 506141 7. 51269 7. 452688 6. 896726 6. 844574 6. 983688  
11756225\_ 10. 46148 10. 37774 10. 43674 10. 23212 10. 2545 10. 22354  
11756226\_ 7. 163859 7. 181104 7. 208248 7. 046777 7. 163163 7. 158065  
11756227\_ 8. 099762 7. 977867 8. 115696 8. 245139 8. 26711 8. 326241  
11756228\_ 8. 493479 8. 424777 8. 581926 8. 121339 8. 247941 8. 263725  
11756229\_ 9. 732607 9. 723106 9. 785538 9. 391377 9. 424194 9. 349196  
11756230\_ 8. 033764 7. 936675 8. 036634 7. 666988 7. 708263 7. 69837  
11756231\_ 6. 281329 6. 275144 6. 219072 6. 377475 6. 388019 6. 35379  
11756232\_ 10. 55831 10. 51007 10. 54336 10. 46521 10. 46801 10. 43821  
11756233\_ 7. 54927 7. 459909 7. 533525 7. 972068 7. 931861 7. 974095  
11756234\_ 5. 506049 5. 497467 5. 559205 5. 560776 5. 618193 5. 585045  
11756235\_ 5. 434515 5. 600171 5. 611062 5. 666268 5. 640605 5. 801714  
11756236\_ 4. 524508 4. 499049 4. 683556 4. 818807 4. 884965 4. 76971  
11756237\_ 5. 116589 5. 346095 5. 24782 5. 448296 5. 528472 5. 418392  
11756238\_ 9. 415354 9. 428633 9. 433632 9. 727547 9. 800653 9. 735443  
11756239\_ 9. 971391 9. 977149 10. 00925 9. 999288 10. 00782 9. 967531  
11756240\_ 7. 528273 7. 451588 7. 457881 7. 419737 7. 499538 7. 495366  
11756241\_ 8. 067847 8. 02832 8. 10104 8. 162919 8. 122645 8. 168582  
11756242\_ 7. 154768 7. 154928 7. 225138 7. 20405 7. 231652 7. 229806  
11756243\_ 2. 457366 2. 219299 2. 072931 2. 112351 2. 191641 2. 072441  
11756244\_ 7. 153882 7. 035714 7. 234351 6. 918995 6. 949798 6. 949086  
11756245\_ 11. 74069 11. 72641 11. 7672 11. 53433 11. 56694 11. 52719  
11756246\_ 5. 731594 5. 732315 5. 727998 6. 100843 5. 962559 6. 131329  
11756247\_ 8. 306997 8. 215317 8. 285176 8. 095592 8. 130394 8. 130611  
11756248\_ 8. 316787 8. 233052 8. 232091 8. 048869 8. 099135 8. 045723  
11756249\_ 9. 580281 9. 542895 9. 539569 9. 645722 9. 60401 9. 571074  
11756250\_ 7. 899777 7. 884845 7. 983418 7. 854903 7. 920026 7. 881984  
11756251\_ 13. 01929 13. 00126 13. 00837 12. 93909 12. 96695 12. 89714  
11756252\_ 8. 808037 8. 756308 8. 822147 8. 528452 8. 615311 8. 51066  
11756253\_ 6. 015027 6. 147296 6. 056551 6. 250685 6. 134668 6. 129544  
11756254\_ 7. 090627 7. 165822 7. 153079 7. 136086 7. 154139 7. 1976  
11756255\_ 9. 233529 9. 191087 9. 245351 9. 499984 9. 481298 9. 465597

11756256\_ 6. 779107 6. 618531 6. 806854 7. 369612 7. 434587 7. 495678  
11756257\_ 7. 409349 7. 370562 7. 403785 7. 314876 7. 361117 7. 373344  
11756258\_ 12. 68452 12. 67846 12. 66304 12. 64791 12. 66033 12. 64344  
11756259\_ 6. 406312 6. 496866 6. 372117 6. 552806 6. 608777 6. 477034  
11756260\_ 8. 517814 8. 419859 8. 499565 8. 081325 8. 146234 8. 089798  
11756261\_ 7. 160588 7. 234912 7. 157866 7. 349607 7. 474119 7. 397282  
11756262\_ 7. 897164 7. 902425 7. 990549 8. 146048 8. 169573 8. 104136  
11756263\_ 7. 792504 7. 779059 7. 842362 7. 582414 7. 57524 7. 686505  
11756264\_ 3. 672069 3. 476174 3. 721592 4. 051343 4. 009355 4. 076219  
11756265\_ 7. 523622 7. 523714 7. 478392 7. 539182 7. 553769 7. 570643  
11756266\_ 6. 503651 6. 615957 6. 665884 6. 23075 6. 282224 6. 218414  
11756267\_ 10. 59725 10. 5957 10. 60238 10. 6094 10. 58809 10. 5163  
11756268\_ 6. 707065 6. 564233 6. 741124 7. 193057 7. 172798 7. 111974  
11756269\_ 7. 38907 7. 334601 7. 398464 7. 287208 7. 368523 7. 332482  
11756270\_ 7. 399578 7. 334126 7. 446186 7. 06403 6. 961457 6. 980009  
11756271\_ 4. 828346 4. 828346 4. 773593 4. 702518 4. 567255 4. 743806  
11756272\_ 7. 213758 7. 19981 7. 233786 6. 966655 6. 896753 6. 770055  
11756273\_ 7. 440184 7. 306151 7. 291509 7. 252897 7. 212651 7. 396321  
11756274\_ 3. 474846 3. 49192 3. 586086 3. 343996 3. 119246 3. 37921  
11756275\_ 9. 224418 9. 148904 9. 166597 8. 716148 8. 739445 8. 654001  
11756276\_ 5. 610945 5. 965174 5. 85935 6. 020672 5. 986212 6. 020719  
11756277\_ 5. 480966 5. 10276 5. 184627 5. 333692 5. 31588 5. 542234  
11756278\_ 6. 430241 6. 632801 6. 501233 6. 38013 6. 34864 6. 36909  
11756279\_ 7. 195507 7. 243861 7. 172975 7. 042484 7. 114188 7. 064758  
11756280\_ 9. 472342 9. 427225 9. 466576 9. 44466 9. 439003 9. 397833  
11756281\_ 4. 78607 4. 866291 4. 802349 4. 815006 4. 88392 4. 885145  
11756282\_ 9. 464732 9. 389308 9. 434417 9. 876914 9. 855639 9. 911793  
11756283\_ 10. 82592 10. 77902 10. 81389 10. 53136 10. 50033 10. 45447  
11756284\_ 4. 17398 4. 17398 4. 144337 4. 143643 4. 086606 4. 033337  
11756285\_ 10. 38146 10. 36597 10. 38628 10. 29277 10. 25122 10. 25139  
11756286\_ 6. 496481 6. 60088 6. 582899 6. 881306 6. 820673 6. 85248  
11756287\_ 3. 861899 3. 944544 3. 976121 3. 976121 4. 191233 4. 007698  
11756288\_ 6. 386236 6. 28302 6. 32477 6. 540238 6. 555066 6. 617088  
11756289\_ 7. 382952 7. 312428 7. 286256 7. 715253 7. 755374 7. 748159  
11756290\_ 8. 376466 8. 311354 8. 425447 8. 21535 8. 296031 8. 267681  
11756291\_ 7. 425122 7. 342771 7. 406867 7. 631747 7. 566016 7. 634668  
11756292\_ 5. 904901 5. 958209 5. 816597 5. 93062 5. 972021 5. 946303  
11756293\_ 7. 563551 7. 552915 7. 579902 7. 536501 7. 498772 7. 486213  
11756294\_ 4. 705071 4. 588905 4. 622571 4. 654431 4. 650766 4. 624716  
11756295\_ 8. 02234 7. 962867 8. 035801 7. 801944 7. 852225 7. 869789  
11756296\_ 8. 822297 8. 737132 8. 756274 8. 898896 8. 90428 8. 912177  
11756297\_ 11. 17657 11. 14462 11. 19076 11. 47629 11. 48829 11. 5152  
11756298\_ 9. 192281 9. 13406 9. 212229 9. 448701 9. 443023 9. 368859  
11756299\_ 9. 914831 9. 809044 9. 881361 10. 09406 10. 07436 10. 06507  
11756300\_ 9. 881966 9. 823942 9. 887091 10. 02254 9. 977875 9. 999568  
11756301\_ 8. 567802 8. 601599 8. 568473 8. 398571 8. 34451 8. 289439  
11756302\_ 4. 225644 4. 324489 4. 158813 4. 407722 4. 269766 4. 332295  
11756303\_ 6. 59595 6. 618038 6. 71404 6. 283068 6. 227362 6. 247646  
11756304\_ 11. 43078 11. 36615 11. 42347 11. 03698 11. 04757 11. 01916  
11756305\_ 9. 653064 9. 574564 9. 68123 9. 517304 9. 566961 9. 512493  
11756306\_ 6. 158312 6. 051939 6. 198988 6. 134897 5. 951646 5. 846906

11756307\_ 6. 155333 6. 106353 6. 156034 5. 37965 5. 556265 5. 285534  
11756308\_ 9. 488994 9. 373191 9. 473484 9. 324942 9. 361235 9. 292595  
11756309\_ 7. 920374 7. 877343 7. 951057 7. 707913 7. 778898 7. 645177  
11756310\_ 5. 763634 5. 602515 5. 613296 5. 977166 5. 772356 5. 915134  
11756311\_ 7. 224309 7. 200552 7. 250546 7. 442902 7. 449366 7. 374705  
11756312\_ 7. 788637 7. 708734 7. 83646 8. 089203 8. 053544 8. 058867  
11756313\_ 8. 269644 8. 257237 8. 36221 8. 580199 8. 528315 8. 578039  
11756314\_ 3. 372931 3. 487881 3. 408806 3. 507709 3. 302075 3. 550262  
11756315\_ 2. 127233 2. 566094 2. 461445 2. 641912 2. 229802 2. 193019  
11756316\_ 2. 998461 3. 079479 2. 937001 3. 101013 3. 000618 3. 177505  
11756317\_ 6. 242586 6. 385406 6. 262308 6. 132199 6. 195694 6. 093935  
11756318\_ 11. 03729 10. 99765 11. 00198 11. 13148 11. 11192 11. 1046  
11756319\_ 5. 565399 5. 610679 5. 437738 5. 616466 5. 562545 5. 754667  
11756320\_ 4. 180449 4. 327011 4. 228031 4. 209212 4. 200366 4. 31806  
11756321\_ 7. 541768 7. 442902 7. 463963 7. 441434 7. 521465 7. 612944  
11756322\_ 8. 649412 8. 634358 8. 628098 8. 808062 8. 881905 8. 794437  
11756323\_ 6. 653169 6. 747949 6. 781605 6. 734417 6. 8116 6. 857642  
11756324\_ 8. 367143 8. 433547 8. 310596 8. 335821 8. 237273 8. 229525  
11756325\_ 10. 22896 10. 16441 10. 16319 10. 10604 10. 14158 10. 11877  
11756326\_ 7. 385728 7. 384799 7. 321883 7. 588677 7. 582149 7. 620763  
11756327\_ 12. 64264 12. 61704 12. 63939 12. 46071 12. 53637 12. 46772  
11756328\_ 7. 024811 6. 87335 7. 00017 7. 403976 7. 426418 7. 457195  
11756329\_ 6. 776168 6. 795254 6. 897344 6. 834086 6. 765911 6. 84124  
11756330\_ 7. 055228 7. 023995 7. 111302 6. 463774 6. 50248 6. 529867  
11756331\_ 7. 808309 7. 762519 7. 866771 8. 130967 8. 176865 8. 201553  
11756332\_ 8. 973426 8. 959552 9. 023794 8. 864552 8. 805004 8. 8897  
11756333\_ 6. 088022 6. 13945 6. 18251 6. 124816 6. 052577 5. 959285  
11756334\_ 5. 187569 5. 066337 5. 34257 4. 719065 4. 649168 4. 64434  
11756335\_ 8. 463789 8. 351472 8. 408698 8. 347086 8. 400482 8. 343309  
11756336\_ 6. 932578 6. 963178 6. 934615 6. 348442 6. 229932 6. 211855  
11756337\_ 11. 89595 11. 88868 11. 87645 12. 0286 11. 99841 12. 03419  
11756338\_ 7. 392457 7. 393437 7. 388438 7. 837665 7. 846585 7. 83859  
11756339\_ 3. 83129 3. 973544 3. 77804 3. 926457 3. 917192 3. 944807  
11756340\_ 9. 388696 9. 357573 9. 397227 9. 138686 9. 134938 9. 122886  
11756341\_ 8. 515448 8. 475365 8. 524846 8. 446015 8. 446879 8. 474767  
11756342\_ 9. 893787 9. 855796 9. 912049 9. 172691 9. 163301 9. 144532  
11756343\_ 4. 113276 4. 269323 4. 228643 4. 445068 4. 346549 4. 272064  
11756344\_ 10. 09236 10. 03661 10. 08756 9. 724529 9. 78361 9. 831674  
11756345\_ 4. 371669 4. 598283 4. 53192 4. 690985 4. 67585 4. 5572  
11756346\_ 4. 065666 4. 123413 4. 232303 3. 66835 4. 054288 3. 879309  
11756347\_ 7. 260481 7. 140433 7. 28227 7. 787757 7. 850667 7. 829691  
11756348\_ 6. 922773 6. 773451 6. 994132 6. 871568 6. 890576 6. 876102  
11756349\_ 7. 867248 7. 711088 7. 847494 7. 807594 7. 825837 7. 884891  
11756350\_ 6. 762492 6. 708913 6. 823023 6. 84357 6. 807641 6. 786579  
11756351\_ 11. 31342 11. 31954 11. 30273 11. 41233 11. 43555 11. 40084  
11756352\_ 7. 582379 7. 593554 7. 548076 7. 527493 7. 640425 7. 603749  
11756353\_ 5. 019138 4. 861605 4. 88241 5. 507145 5. 449113 5. 437548  
11756354\_ 7. 904978 7. 867149 7. 886529 7. 395776 7. 388161 7. 380123  
11756355\_ 6. 440403 6. 492407 6. 318829 6. 559963 6. 601963 6. 557068  
11756356\_ 2. 610458 2. 797853 2. 862844 3. 144726 2. 912551 3. 079636  
11756357\_ 5. 326158 5. 529027 5. 467823 5. 52649 5. 610231 5. 299845



11756358\_ 7. 473955 7. 492488 7. 509478 6. 882865 6. 747199 6. 807751  
11756359\_ 6. 300643 6. 460019 6. 231513 6. 564967 6. 486322 6. 451655  
11756360\_ 11. 71684 11. 69581 11. 73274 12. 17585 12. 17003 12. 13927  
11756361\_ 6. 631017 6. 50768 6. 664385 6. 571532 6. 552639 6. 605769  
11756362\_ 2. 133492 2. 114637 1. 894011 2. 247242 1. 928017 1. 995297  
11756363\_ 6. 533006 6. 525119 6. 548114 6. 521989 6. 534507 6. 490505  
11756364\_ 5. 135745 5. 111895 5. 073036 5. 153104 5. 142316 5. 184962  
11756365\_ 8. 796227 8. 725596 8. 72599 9. 097929 9. 084488 9. 009649  
11756366\_ 9. 461627 9. 380666 9. 431843 9. 539816 9. 584455 9. 540118  
11756367\_ 8. 528815 8. 698295 8. 583391 8. 526307 8. 497975 8. 547789  
11756368\_ 8. 093168 8. 020078 8. 076595 8. 634778 8. 658778 8. 652526  
11756369\_ 7. 52282 7. 517754 7. 599877 7. 595226 7. 653298 7. 621667  
11756370\_ 9. 637092 9. 671769 9. 63845 9. 700253 9. 71235 9. 762097  
11756371\_ 3. 423618 3. 87119 3. 785641 3. 857857 3. 959376 3. 857857  
11756372\_ 6. 928461 6. 87729 6. 818453 6. 84817 6. 965913 6. 970508  
11756373\_ 7. 611133 7. 691194 7. 679695 8. 124758 8. 116666 8. 113745  
11756374\_ 9. 840733 9. 817091 9. 839959 9. 303637 9. 220408 9. 250421  
11756375\_ 5. 842121 5. 78868 5. 781499 5. 935013 5. 899723 5. 802104  
11756376\_ 8. 453374 8. 445313 8. 522277 8. 37299 8. 398048 8. 419883  
11756377\_ 6. 300643 6. 186428 6. 318317 6. 716582 6. 653267 6. 675842  
11756378\_ 10. 64145 10. 60384 10. 63738 10. 67316 10. 71067 10. 68084  
11756379\_ 11. 94731 11. 89425 11. 93052 12. 00624 12. 05773 12. 01963  
11756380\_ 10. 93628 10. 89284 10. 92012 11. 08513 11. 13789 11. 08024  
11756381\_ 12. 15751 12. 13215 12. 16163 12. 265 12. 28839 12. 29866  
11756382\_ 8. 559479 8. 495888 8. 61475 8. 320233 8. 277652 8. 332763  
11756383\_ 8. 156397 8. 041562 8. 044334 8. 234382 8. 274333 8. 125695  
11756384\_ 5. 870242 5. 815789 5. 779408 5. 794286 5. 848797 5. 800354  
11756385\_ 5. 88637 6. 064013 6. 00082 6. 050172 6. 054982 6. 041537  
11756386\_ 10. 16105 10. 12226 10. 20588 10. 29557 10. 35974 10. 32484  
11756387\_ 8. 200462 8. 102361 8. 183706 7. 908946 7. 894026 7. 911822  
11756388\_ 9. 43793 9. 405875 9. 443404 9. 430679 9. 394715 9. 36913  
11756389\_ 4. 9226 4. 926198 4. 926909 4. 899291 5. 028221 5. 01465  
11756390\_ 10. 10045 10. 04799 10. 07168 10. 0998 10. 10579 10. 03261  
11756391\_ 8. 065755 8. 047669 8. 11684 8. 09304 8. 021716 8. 065197  
11756392\_ 9. 094065 9. 007897 9. 043337 8. 984614 9. 028353 8. 975038  
11756393\_ 6. 182774 6. 172475 6. 267176 6. 783412 6. 757571 6. 901252  
11756394\_ 10. 08714 10. 05466 10. 0555 9. 770935 9. 77334 9. 73921  
11756395\_ 9. 902923 9. 760108 9. 867116 9. 552186 9. 591721 9. 545122  
11756396\_ 9. 084727 9. 020701 9. 099362 9. 34001 9. 33289 9. 261665  
11756397\_ 8. 690547 8. 613104 8. 657633 8. 874921 8. 902046 8. 915865  
11756398\_ 6. 560526 6. 643337 6. 724808 6. 851111 6. 819766 6. 808124  
11756399\_ 6. 455906 6. 446137 6. 518421 6. 434341 6. 557068 6. 493735  
11756400\_ 9. 589765 9. 548226 9. 595231 9. 722377 9. 63853 9. 705761  
11756401\_ 10. 15434 10. 15044 10. 17893 10. 03656 10. 07211 10. 05004  
11756402\_ 7. 449007 7. 531677 7. 516093 7. 957798 7. 975373 7. 90453  
11756403\_ 7. 725589 7. 632703 7. 687776 8. 694147 8. 701 8. 727387  
11756404\_ 10. 35479 10. 30614 10. 3275 10. 3027 10. 3248 10. 27796  
11756405\_ 11. 17977 11. 15338 11. 18955 11. 31804 11. 32769 11. 32012  
11756406\_ 9. 536008 9. 488238 9. 550228 9. 07594 9. 117699 9. 125682  
11756407\_ 5. 683655 5. 448296 5. 66122 5. 147818 5. 277393 5. 228627  
11756408\_ 7. 197554 6. 998904 6. 995299 6. 678172 6. 645998 6. 737538

11756409\_ 6. 704332 6. 651624 6. 703056 7. 432393 7. 452868 7. 430083  
11756410\_ 8. 776352 8. 723346 8. 742299 8. 341958 8. 370684 8. 401754  
11756411\_ 5. 505054 5. 753241 5. 474158 5. 815692 5. 786007 5. 709451  
11756412\_ 8. 622837 8. 595509 8. 6366 8. 583842 8. 599504 8. 536464  
11756413\_ 6. 030323 5. 741022 5. 771362 5. 845365 5. 709521 5. 74225  
11756414\_ 7. 687984 7. 638987 7. 754427 7. 733358 7. 75234 7. 767201  
11756415\_ 8. 393727 8. 286615 8. 354131 8. 197348 8. 189259 8. 164044  
11756416\_ 6. 997135 7. 03584 7. 08741 7. 314484 7. 321532 7. 381049  
11756417\_ 6. 533566 6. 563516 6. 614214 6. 870429 6. 859759 6. 89207  
11756418\_ 9. 31317 9. 307592 9. 321876 9. 316468 9. 273861 9. 211703  
11756419\_ 5. 218504 5. 265665 5. 070766 5. 133888 5. 205261 5. 11527  
11756420\_ 7. 554551 7. 563758 7. 387156 7. 624796 7. 617554 7. 674428  
11756421\_ 8. 059679 7. 958317 8. 003519 8. 244302 8. 20663 8. 164455  
11756422\_ 7. 119791 7. 169637 7. 127879 7. 049794 6. 990466 7. 132883  
11756423\_ 4. 90237 5. 083546 5. 140125 5. 28649 5. 124056 5. 1355  
11756424\_ 8. 988889 9. 02346 9. 023596 9. 382415 9. 402995 9. 350871  
11756425\_ 5. 740488 5. 789947 5. 703242 5. 833881 5. 957954 5. 989037  
11756426\_ 8. 36214 8. 323227 8. 404314 8. 147654 8. 106046 8. 160871  
11756427\_ 6. 646187 6. 671184 6. 753328 6. 481158 6. 528579 6. 484672  
11756428\_ 6. 415644 6. 312182 6. 295421 5. 946284 5. 861767 6. 033753  
11756429\_ 10. 78653 10. 7433 10. 79608 10. 49309 10. 51711 10. 43391  
11756430\_ 6. 884528 7. 020605 6. 917921 7. 137321 7. 141125 7. 127894  
11756431\_ 8. 551089 8. 524813 8. 446597 8. 893286 8. 967212 8. 996224  
11756432\_ 6. 911983 6. 836435 6. 912711 6. 634134 6. 664886 6. 671776  
11756433\_ 5. 474265 5. 277627 5. 275786 5. 189628 5. 016412 5. 242586  
11756434\_ 10. 29598 10. 3668 10. 3559 10. 65779 10. 67552 10. 63785  
11756435\_ 9. 369147 9. 32377 9. 368595 9. 320636 9. 334329 9. 387117  
11756436\_ 8. 655217 8. 575699 8. 67104 8. 600292 8. 648236 8. 65353  
11756437\_ 12. 73566 12. 71209 12. 70011 12. 68586 12. 70042 12. 62709  
11756438\_ 8. 7302 8. 682485 8. 717958 8. 591687 8. 660543 8. 599527  
11756439\_ 5. 733215 5. 868496 5. 852113 5. 868576 5. 913687 5. 866308  
11756440\_ 6. 180182 6. 206103 6. 17981 6. 149187 6. 199039 6. 22354  
11756441\_ 4. 784723 4. 8479 4. 670281 4. 786532 4. 673968 4. 780665  
11756442\_ 6. 774573 6. 73514 6. 774573 6. 777772 6. 773689 6. 807377  
11756443\_ 2. 593787 2. 815938 2. 773752 2. 94029 2. 821018 2. 76524  
11756444\_ 6. 964823 6. 924653 6. 911003 6. 908976 6. 898793 6. 926679  
11756445\_ 7. 842319 7. 885307 7. 780068 7. 678175 7. 731048 7. 642618  
11756446\_ 5. 330138 5. 373944 5. 376103 5. 58295 5. 647435 5. 56247  
11756447\_ 8. 580648 8. 563144 8. 62801 8. 240744 8. 231997 8. 218112  
11756448\_ 10. 96524 10. 89472 10. 90894 10. 86705 10. 86499 10. 79429  
11756449\_ 7. 463709 7. 413945 7. 415543 7. 301139 7. 285449 7. 24788  
11756450\_ 6. 646264 6. 543155 6. 650437 7. 047463 6. 981151 7. 040516  
11756451\_ 6. 910833 7. 020256 7. 01179 7. 01627 7. 020207 7. 111428  
11756452\_ 3. 837711 3. 805211 3. 581374 3. 808773 3. 69557 3. 805211  
11756453\_ 5. 221029 5. 32848 5. 086392 5. 210804 5. 200579 5. 210804  
11756454\_ 5. 740776 5. 68859 5. 676122 5. 859893 5. 854398 5. 884737  
11756455\_ 3. 535565 3. 63413 3. 682484 3. 655607 3. 682484 3. 771603  
11756456\_ 7. 062016 6. 969171 7. 008541 7. 731887 7. 730728 7. 646806  
11756457\_ 5. 435937 5. 33447 5. 300296 5. 444585 5. 323131 5. 475572  
11756458\_ 6. 722123 6. 735075 6. 729885 6. 902249 6. 92595 6. 979466  
11756459\_ 7. 032311 6. 869354 7. 036201 7. 168954 7. 238541 7. 160377

11756460\_ 6. 544585 6. 550726 6. 56815 6. 666416 6. 703811 6. 658969  
11756461\_ 3. 91258 4. 024072 3. 862283 3. 981728 3. 968678 3. 959256  
11756462\_ 2. 218175 2. 043237 2. 458588 2. 110148 2. 191957 2. 439254  
11756463\_ 8. 571501 8. 541968 8. 511293 8. 292552 8. 419907 8. 367418  
11756464\_ 7. 098801 6. 983675 7. 089454 7. 37789 7. 381104 7. 372563  
11756465\_ 9. 3524 9. 328788 9. 375089 8. 809595 8. 810579 8. 786437  
11756466\_ 6. 246779 6. 382123 6. 293432 6. 343471 6. 341623 6. 374367  
11756467\_ 9. 888125 9. 803101 9. 86471 9. 975124 9. 997055 9. 960632  
11756468\_ 7. 564034 7. 431155 7. 589022 7. 034401 7. 099067 7. 051216  
11756469\_ 6. 96328 6. 992031 7. 018608 6. 954266 6. 976027 7. 06424  
11756470\_ 5. 210585 5. 088143 5. 197385 5. 089585 5. 127748 5. 224507  
11756471\_ 6. 414953 6. 367413 6. 321051 6. 090127 6. 381633 6. 344604  
11756472\_ 7. 654718 7. 591575 7. 730408 7. 925126 7. 94796 7. 950096  
11756473\_ 1. 910593 2. 146061 2. 208222 1. 991608 2. 197834 1. 929871  
11756474\_ 7. 417034 7. 32721 7. 39787 7. 313026 7. 261679 7. 276463  
11756475\_ 7. 015015 6. 833185 6. 944218 7. 107241 7. 129709 7. 12617  
11756476\_ 12. 90592 12. 89215 12. 89443 12. 86551 12. 87558 12. 88053  
11756477\_ 5. 409222 5. 228628 5. 469706 4. 40461 4. 536757 4. 39675  
11756478\_ 9. 531332 9. 552191 9. 457879 9. 810291 9. 864732 9. 806796  
11756479\_ 6. 69753 6. 661683 6. 72324 6. 709 6. 703525 6. 632627  
11756480\_ 8. 90102 8. 898838 8. 920315 9. 029043 9. 028757 9. 024089  
11756481\_ 8. 119977 8. 164312 8. 21753 7. 934136 8. 021836 7. 96092  
11756482\_ 8. 725654 8. 691145 8. 747902 8. 809454 8. 879472 8. 81002  
11756483\_ 5. 107261 5. 11527 4. 98427 5. 189628 5. 144336 5. 04061  
11756484\_ 8. 331191 8. 234377 8. 28205 8. 31739 8. 350535 8. 405828  
11756485\_ 7. 737143 7. 668825 7. 725657 7. 715228 7. 772557 7. 757441  
11756486\_ 4. 92562 4. 89715 4. 844482 4. 901597 4. 948829 5. 023941  
11756487\_ 8. 695161 8. 644407 8. 717424 8. 741378 8. 748735 8. 75654  
11756488\_ 2. 718322 2. 778979 2. 726743 2. 791214 3. 004853 3. 078976  
11756489\_ 6. 960851 6. 964766 6. 937264 7. 304242 7. 405828 7. 308743  
11756490\_ 9. 738928 9. 740374 9. 739073 10. 13078 10. 12734 10. 13438  
11756491\_ 5. 824145 5. 765208 5. 79455 5. 441599 5. 411922 5. 444748  
11756492\_ 7. 533215 7. 499684 7. 663617 6. 837137 7. 067901 6. 905684  
11756493\_ 5. 58896 5. 76778 5. 715399 5. 589843 5. 760348 5. 740017  
11756494\_ 7. 250524 7. 215889 7. 282188 7. 149075 7. 182855 7. 183068  
11756495\_ 2. 4158 2. 511717 2. 288195 2. 552841 2. 589755 2. 525183  
11756496\_ 4. 570101 4. 534806 4. 496551 4. 569762 4. 596199 4. 691614  
11756497\_ 6. 025287 6. 06511 6. 044285 6. 025617 6. 037937 6. 082907  
11756498\_ 4. 108592 4. 597081 3. 967957 4. 22137 4. 278578 4. 050605  
11756499\_ 9. 246848 9. 199765 9. 285062 9. 329852 9. 393395 9. 362625  
11756500\_ 7. 722461 7. 765557 7. 675242 7. 880792 7. 855913 7. 775286  
11756501\_ 8. 294127 8. 223886 8. 342891 8. 292732 8. 346719 8. 307761  
11756502\_ 8. 742601 8. 749599 8. 735718 8. 919761 8. 808162 8. 852254  
11756503\_ 8. 272152 8. 186171 8. 2308 7. 858597 7. 931163 7. 953232  
11756504\_ 10. 1485 10. 15143 10. 11167 11. 37362 11. 3148 11. 33369  
11756505\_ 7. 21747 7. 056673 7. 074723 6. 420214 6. 42721 6. 295206  
11756506\_ 3. 693607 3. 606313 3. 606389 3. 535468 3. 503743 3. 415816  
11756507\_ 6. 932567 6. 844409 6. 864278 6. 800487 6. 855295 6. 807941  
11756508\_ 7. 397369 7. 357207 7. 326258 7. 569725 7. 560915 7. 58986  
11756509\_ 8. 438078 8. 399753 8. 436347 8. 19572 8. 180307 8. 279974  
11756510\_ 8. 202157 8. 006522 8. 146882 8. 027878 8. 042732 8. 153949

11756511\_ 5. 666202 5. 712674 5. 794286 5. 792846 5. 615701 5. 65685  
11756512\_ 7. 525299 7. 534411 7. 680378 7. 217017 7. 272187 7. 341522  
11756513\_ 5. 678491 5. 8826 5. 643402 5. 5945 5. 790388 5. 643402  
11756514\_ 4. 38669 4. 700345 4. 594009 4. 780495 4. 621098 4. 696834  
11756515\_ 9. 873859 9. 781964 9. 860732 9. 900545 9. 931475 9. 899198  
11756516\_ 7. 531526 7. 589926 7. 644403 7. 174957 7. 180363 7. 152584  
11756517\_ 6. 776139 6. 784589 6. 650244 6. 963395 6. 868418 6. 92164  
11756518\_ 4. 04135 3. 974102 3. 906854 3. 982011 3. 971755 4. 035141  
11756519\_ 2. 605516 2. 645789 2. 47102 2. 601303 2. 710545 2. 548816  
11756520\_ 8. 719372 8. 506956 8. 697265 9. 030492 9. 036427 9. 033223  
11756521\_ 9. 08197 9. 126863 9. 064249 9. 396951 9. 241209 9. 183282  
11756522\_ 8. 773277 8. 728144 8. 797113 8. 870744 8. 926567 8. 824943  
11756523\_ 9. 094065 9. 050714 9. 177547 9. 309225 9. 367428 9. 288623  
11756524\_ 7. 124571 7. 08355 7. 279298 7. 27048 7. 307022 7. 364387  
11756525\_ 6. 063314 6. 157079 6. 244944 5. 996987 6. 048929 5. 963355  
11756526\_ 9. 063108 8. 98921 9. 015188 9. 245134 9. 227427 9. 23586  
11756527\_ 6. 607409 6. 62754 6. 595184 7. 100152 7. 11806 6. 996857  
11756528\_ 7. 171409 7. 322305 7. 251121 7. 317094 7. 228939 7. 363378  
11756529\_ 3. 465269 3. 487729 3. 330896 3. 402723 3. 444793 3. 393427  
11756530\_ 6. 731406 6. 662943 6. 790273 5. 903463 5. 787664 5. 891055  
11756531\_ 4. 743796 4. 546065 4. 894469 4. 256551 4. 350974 4. 242029  
11756532\_ 7. 74974 7. 741516 7. 84906 7. 733073 7. 673945 7. 709919  
11756533\_ 9. 573578 9. 534279 9. 534916 9. 817298 9. 720152 9. 725072  
11756534\_ 4. 301903 4. 316604 4. 27421 4. 442933 4. 475503 4. 582983  
11756535\_ 7. 155579 7. 104916 7. 018174 6. 857574 6. 867357 6. 817466  
11756536\_ 8. 817879 8. 779554 8. 813649 8. 594688 8. 533272 8. 564791  
11756537\_ 4. 879324 4. 733854 4. 738695 4. 772366 4. 771453 4. 700243  
11756538\_ 5. 649044 5. 68286 5. 854417 5. 886745 5. 870814 6. 00369  
11756539\_ 2. 718098 2. 673785 2. 657861 2. 695011 2. 719544 2. 770509  
11756540\_ 6. 531077 6. 551785 6. 608075 6. 6615 6. 751417 6. 62203  
11756541\_ 7. 277412 7. 397778 7. 388816 7. 449782 7. 502885 7. 494218  
11756542\_ 4. 275543 4. 41064 4. 503928 3. 960202 4. 040259 4. 213312  
11756543\_ 9. 89679 9. 823625 9. 883578 9. 451254 9. 465896 9. 465091  
11756544\_ 6. 287688 6. 192147 6. 272887 6. 427003 6. 541665 6. 47438  
11756545\_ 2. 981238 3. 22983 3. 017776 3. 270954 3. 36466 3. 415942  
11756546\_ 9. 9976 9. 925094 9. 993769 10. 00215 9. 96116 9. 85026  
11756547\_ 7. 280697 7. 251839 7. 257476 7. 179591 7. 213035 7. 218671  
11756548\_ 7. 497147 7. 369604 7. 370258 6. 907195 7. 072417 6. 986322  
11756549\_ 6. 170188 6. 248249 6. 192971 6. 192971 6. 122294 6. 203293  
11756550\_ 8. 083028 8. 104455 8. 038665 7. 950831 8. 006137 7. 922803  
11756551\_ 7. 721191 7. 443016 7. 721999 6. 383618 6. 331028 6. 3127  
11756552\_ 6. 584888 6. 568584 6. 488066 6. 445382 6. 502017 6. 437093  
11756553\_ 10. 22798 10. 14493 10. 15519 10. 05626 10. 1223 10. 0343  
11756554\_ 9. 866283 9. 834708 9. 857335 10. 02115 10. 03972 9. 987439  
11756555\_ 6. 263567 6. 317938 6. 323871 6. 408439 6. 389679 6. 382462  
11756556\_ 10. 71547 10. 66466 10. 70744 10. 96905 11. 05183 11. 03335  
11756557\_ 8. 497118 8. 484932 8. 536552 8. 148875 8. 213626 8. 197995  
11756558\_ 7. 975835 7. 907913 7. 914827 7. 800253 7. 821439 7. 809406  
11756559\_ 9. 07791 9. 049486 9. 076971 9. 124998 9. 239379 9. 191593  
11756560\_ 2. 911214 3. 157645 3. 009055 3. 404184 3. 050697 3. 137661  
11756561\_ 8. 351105 8. 289859 8. 308483 8. 388214 8. 404416 8. 367678

11756562\_ 8. 072329 8. 003535 8. 03985 8. 248247 8. 183197 8. 015647  
11756563\_ 4. 970152 5. 095584 5. 006981 5. 082763 5. 038592 5. 090766  
11756564\_ 9. 476287 9. 425091 9. 469419 9. 040276 9. 104507 9. 067655  
11756565\_ 9. 037076 8. 98604 9. 010493 9. 190969 9. 133189 9. 169077  
11756566\_ 5. 013388 4. 939678 4. 957518 5. 024572 5. 013388 4. 942939  
11756567\_ 8. 949326 8. 938166 9. 006598 8. 939622 8. 993653 8. 904817  
11756568\_ 7. 789091 7. 904531 7. 790754 7. 747119 7. 851135 7. 902138  
11756569\_ 8. 162229 8. 180863 8. 196386 8. 88928 8. 933276 8. 875622  
11756570\_ 8. 195881 8. 165983 8. 231414 8. 149256 8. 016056 8. 062876  
11756571\_ 7. 087989 6. 892247 7. 012751 6. 644944 6. 583895 6. 643345  
11756572\_ 8. 100714 8. 014656 8. 092566 8. 081735 8. 121458 8. 070585  
11756573\_ 6. 851323 6. 663815 6. 734438 6. 165105 6. 183123 6. 247833  
11756574\_ 8. 105556 8. 172864 8. 142886 8. 307756 8. 286077 8. 296876  
11756575\_ 5. 721266 5. 713845 5. 820052 6. 024863 6. 069923 6. 029991  
11756576\_ 8. 203153 8. 127174 8. 195158 8. 327756 8. 463461 8. 405248  
11756577\_ 9. 693954 9. 663906 9. 662647 8. 986736 9. 062997 8. 996884  
11756578\_ 9. 006673 8. 964661 8. 995338 8. 87826 8. 858843 8. 894534  
11756579\_ 10. 28653 10. 24642 10. 27461 10. 36714 10. 37813 10. 41341  
11756580\_ 8. 977309 8. 875478 9. 022962 8. 887096 8. 895115 8. 885368  
11756581\_ 10. 55663 10. 45857 10. 50515 10. 238 10. 20612 10. 24986  
11756582\_ 7. 944017 7. 945902 7. 836019 7. 889939 7. 904426 7. 898823  
11756583\_ 2. 86382 2. 851605 2. 978925 2. 764507 2. 82803 2. 758962  
11756584\_ 7. 454921 7. 492887 7. 4847 7. 439738 7. 471795 7. 437023  
11756585\_ 5. 554461 5. 50727 5. 518169 5. 313228 5. 27546 5. 475922  
11756586\_ 8. 385621 8. 276834 8. 33523 8. 951532 8. 973405 8. 973351  
11756587\_ 4. 685349 4. 821684 4. 64436 4. 860912 4. 760515 4. 597501  
11756588\_ 3. 122119 3. 005447 2. 673224 2. 912551 2. 958584 2. 826048  
11756589\_ 8. 461693 8. 306712 8. 369877 8. 112129 8. 112129 8. 110918  
11756590\_ 6. 393632 6. 184782 6. 286276 4. 338152 4. 611149 4. 470714  
11756591\_ 8. 576666 8. 446143 8. 609611 8. 232031 8. 265722 8. 247608  
11756592\_ 7. 013404 6. 880522 6. 979187 7. 207937 7. 225656 7. 169404  
11756593\_ 9. 098286 8. 993999 9. 065178 9. 181909 9. 225171 9. 166987  
11756594\_ 8. 917643 8. 85929 8. 927269 9. 022192 9. 093716 9. 010881  
11756595\_ 6. 508894 6. 612181 6. 488443 6. 354067 6. 403919 6. 464805  
11756596\_ 6. 468772 6. 645149 6. 593431 6. 396936 6. 500072 6. 523187  
11756597\_ 6. 506704 6. 48385 6. 494443 6. 076709 6. 220162 6. 157464  
11756598\_ 6. 184235 6. 235528 6. 372053 5. 996126 6. 00364 6. 037845  
11756599\_ 9. 018384 9. 023538 9. 027647 9. 01848 9. 068483 9. 034226  
11756600\_ 7. 469686 7. 325581 7. 40963 9. 165147 9. 15069 9. 148769  
11756601\_ 6. 967969 6. 918929 6. 886259 6. 238183 6. 211868 6. 379058  
11756602\_ 1. 995297 2. 091185 2. 094198 2. 150454 2. 045728 2. 149771  
11756603\_ 9. 112372 9. 208535 9. 300113 8. 811956 8. 824841 8. 848045  
11756604\_ 7. 40802 7. 353566 7. 447051 7. 362284 7. 394342 7. 467563  
11756605\_ 7. 070991 7. 038554 7. 037295 7. 04091 6. 985143 7. 058411  
11756606\_ 7. 687632 7. 566168 7. 666335 7. 403503 7. 359363 7. 407959  
11756607\_ 4. 898906 4. 942324 5. 057908 4. 832091 4. 944403 4. 998413  
11756608\_ 3. 481225 3. 812043 3. 687455 3. 508027 3. 751765 3. 776179  
11756609\_ 1. 865214 2. 130891 2. 095856 1. 804393 2. 130891 2. 028322  
11756610\_ 3. 967843 3. 967843 3. 787734 3. 821846 4. 188949 4. 093331  
11756611\_ 9. 002598 8. 899372 8. 984465 8. 892632 8. 991205 8. 934896  
11756612\_ 6. 071491 5. 819169 6. 129337 6. 729042 6. 770286 6. 764568

11756613\_ 5. 812423 5. 493554 5. 692716 5. 520812 5. 654052 5. 6911  
11756614\_ 6. 872357 6. 867376 6. 899642 6. 707775 6. 720653 6. 693207  
11756615\_ 9. 160147 9. 072019 9. 147608 9. 472418 9. 566207 9. 456976  
11756616\_ 3. 623314 3. 57483 3. 557517 3. 578636 3. 578636 3. 680549  
11756617\_ 7. 332518 7. 298304 7. 249994 7. 182721 7. 279273 7. 208168  
11756618\_ 7. 795999 7. 842319 7. 865721 7. 675893 7. 74422 7. 750026  
11756619\_ 6. 084602 6. 054592 6. 069567 5. 972464 6. 001588 5. 992354  
11756620\_ 6. 483146 6. 60651 6. 361087 6. 703149 6. 643784 6. 728868  
11756621\_ 6. 481819 6. 38179 6. 500155 6. 778221 6. 836303 6. 864125  
11756622\_ 12. 77511 12. 7345 12. 7625 12. 71104 12. 74657 12. 71183  
11756623\_ 6. 593372 6. 436258 6. 531121 6. 880508 6. 944024 6. 940403  
11756624\_ 7. 150542 7. 351358 7. 298515 7. 074847 7. 076824 7. 053338  
11756625\_ 8. 261288 8. 257383 8. 255921 8. 673852 8. 648663 8. 646841  
11756626\_ 9. 684449 9. 652392 9. 645275 10. 2852 10. 24719 10. 28785  
11756627\_ 7. 325063 7. 335505 7. 407657 7. 700729 7. 846353 7. 825951  
11756628\_ 4. 204512 4. 251837 4. 093221 3. 74945 4. 082643 4. 082643  
11756629\_ 6. 092118 6. 126425 6. 159261 6. 12553 6. 306066 6. 112893  
11756630\_ 9. 440955 9. 355202 9. 444703 9. 102838 9. 169495 9. 14597  
11756631\_ 8. 75075 8. 695242 8. 802367 8. 772259 8. 677405 8. 738075  
11756632\_ 5. 553749 5. 675206 5. 522654 5. 528624 5. 528219 5. 522377  
11756633\_ 8. 934637 8. 852254 8. 878357 7. 604125 7. 628072 7. 68296  
11756634\_ 7. 055228 7. 020462 7. 043056 6. 944475 7. 090355 7. 095389  
11756635\_ 6. 811551 6. 587107 6. 754775 5. 980797 5. 832001 5. 754774  
11756636\_ 7. 507592 7. 554879 7. 395237 7. 38099 7. 446758 7. 342088  
11756637\_ 8. 503421 8. 389431 8. 466504 8. 722419 8. 666542 8. 712406  
11756638\_ 7. 608854 7. 608401 7. 455973 7. 52064 7. 475425 7. 460966  
11756639\_ 5. 576928 5. 505239 5. 530163 5. 743719 5. 604451 5. 77662  
11756640\_ 6. 98343 6. 96053 7. 066743 6. 659384 6. 803144 6. 876649  
11756641\_ 6. 950992 7. 096599 6. 974515 6. 224929 6. 319095 6. 419263  
11756642\_ 7. 922803 7. 874837 7. 888761 7. 752626 7. 840205 7. 835108  
11756643\_ 6. 798389 6. 637861 6. 693867 6. 637861 6. 480309 6. 498005  
11756644\_ 6. 863231 6. 950255 6. 796108 6. 898793 6. 896134 6. 886503  
11756645\_ 7. 025642 6. 979456 6. 919859 6. 736605 6. 833795 6. 817986  
11756646\_ 10. 41186 10. 4311 10. 39658 10. 26881 10. 26598 10. 22646  
11756647\_ 6. 389018 6. 317033 6. 412133 6. 018553 6. 096314 6. 037848  
11756648\_ 7. 754359 7. 756432 7. 73479 7. 715974 7. 686681 7. 752812  
11756649\_ 8. 924314 8. 846399 8. 878547 8. 823981 8. 825027 8. 782918  
11756650\_ 7. 137781 7. 066789 7. 077887 6. 850054 6. 862958 6. 898015  
11756651\_ 8. 115525 8. 014619 8. 131565 8. 309325 8. 321496 8. 298732  
11756652\_ 8. 977738 8. 941786 8. 978696 8. 952502 8. 949654 8. 926578  
11756653\_ 4. 873599 4. 874234 4. 961484 4. 732333 4. 643717 4. 650974  
11756654\_ 8. 438078 8. 430124 8. 499701 8. 764163 8. 707188 8. 756677  
11756655\_ 7. 190057 7. 031882 7. 081422 7. 323153 7. 369042 7. 365556  
11756656\_ 7. 48445 7. 47788 7. 492326 7. 616966 7. 651537 7. 579993  
11756657\_ 4. 314397 4. 459291 4. 205569 4. 391355 4. 584933 4. 200678  
11756658\_ 3. 391248 3. 500378 3. 340898 3. 398236 3. 450985 3. 527484  
11756659\_ 5. 489666 5. 5369 5. 508303 5. 614563 5. 591719 5. 697142  
11756660\_ 3. 298706 3. 579472 3. 691807 3. 725614 3. 680867 3. 611763  
11756661\_ 9. 891129 9. 852061 9. 926098 10. 1024 10. 06267 10. 10322  
11756662\_ 7. 463334 7. 473318 7. 48724 7. 759534 7. 881187 7. 806221  
11756663\_ 8. 073322 7. 945447 8. 08118 7. 965806 7. 957452 7. 934644

11756664\_ 5. 015881 5. 192502 4. 943001 5. 271435 5. 297498 5. 142823  
11756665\_ 9. 657012 9. 628973 9. 648623 9. 056571 8. 988701 9. 035244  
11756666\_ 8. 364839 8. 298594 8. 432128 9. 380332 9. 331494 9. 40579  
11756667\_ 7. 40952 7. 52244 7. 501761 7. 544712 7. 498589 7. 561814  
11756668\_ 8. 267662 8. 196976 8. 225493 8. 282945 8. 284116 8. 286907  
11756669\_ 4. 782702 4. 874234 4. 758247 4. 822546 4. 721536 4. 669449  
11756670\_ 11. 57664 11. 57781 11. 58596 11. 93372 11. 9843 11. 89833  
11756671\_ 7. 008213 7. 11681 7. 121946 7. 196982 7. 260919 7. 251642  
11756672\_ 5. 584813 5. 396374 5. 750882 5. 659997 5. 680379 5. 547837  
11756673\_ 8. 859492 8. 797207 8. 84965 8. 833285 8. 855372 8. 823187  
11756674\_ 7. 220226 7. 234062 7. 258374 7. 258604 7. 234062 7. 273898  
11756675\_ 7. 982615 7. 885432 7. 890858 8. 209773 8. 204602 8. 129648  
11756676\_ 6. 162936 5. 938482 6. 160513 5. 839767 5. 825875 5. 902963  
11756677\_ 7. 390257 7. 288809 7. 272972 7. 009306 7. 145113 7. 106686  
11756678\_ 7. 453286 7. 358341 7. 461866 7. 986898 7. 988377 7. 928885  
11756679\_ 7. 342215 7. 262682 7. 255773 7. 536567 7. 501159 7. 522258  
11756680\_ 4. 237855 4. 125905 4. 124175 3. 993055 3. 986414 3. 889944  
11756681\_ 8. 743749 8. 629318 8. 712513 8. 59004 8. 629384 8. 629384  
11756682\_ 8. 949054 8. 877689 8. 88095 8. 959252 8. 945695 8. 9407  
11756683\_ 2. 073467 2. 060321 2. 346967 2. 060321 2. 185635 2. 016989  
11756684\_ 3. 272256 2. 969278 3. 211053 3. 214407 3. 124521 3. 214407  
11756685\_ 8. 750422 8. 683437 8. 749282 8. 543071 8. 550053 8. 568773  
11756686\_ 4. 328524 4. 135816 4. 068914 4. 118435 4. 102438 4. 037807  
11756687\_ 8. 612125 8. 501043 8. 596658 8. 50397 8. 494922 8. 466075  
11756688\_ 2. 42442 2. 597332 2. 900143 2. 616869 2. 446051 2. 692798  
11756689\_ 6. 025952 5. 961349 6. 199575 6. 136865 6. 276752 6. 190944  
11756690\_ 6. 577356 6. 502064 6. 619837 6. 846705 6. 856663 6. 878284  
11756691\_ 4. 584687 4. 611343 4. 563359 4. 635971 4. 909212 4. 678628  
11756692\_ 5. 619109 5. 582007 5. 508338 5. 421447 5. 464388 5. 519957  
11756693\_ 9. 173796 9. 079263 9. 20848 9. 4654 9. 501173 9. 432251  
11756694\_ 8. 333613 8. 369595 8. 433912 8. 213834 8. 252024 8. 252642  
11756695\_ 9. 132377 9. 111186 9. 171265 8. 671963 8. 57368 8. 590564  
11756696\_ 6. 524087 6. 589677 6. 569529 5. 900791 5. 806188 5. 811406  
11756697\_ 4. 507383 4. 570528 4. 565579 4. 623306 4. 726196 4. 632596  
11756698\_ 5. 611349 5. 483131 5. 474626 5. 725611 5. 762268 5. 809575  
11756699\_ 6. 083311 6. 143746 6. 094413 6. 22808 6. 446389 6. 393562  
11756700\_ 7. 528422 7. 501597 7. 521986 7. 328975 7. 33832 7. 391479  
11756701\_ 5. 81541 5. 78594 5. 992473 5. 952071 6. 086727 5. 852827  
11756702\_ 5. 234718 5. 234718 5. 200232 5. 365977 5. 234718 5. 23561  
11756703\_ 7. 327044 7. 2243 7. 303323 6. 828176 6. 886826 6. 911963  
11756704\_ 2. 80675 2. 712092 2. 626351 2. 605516 2. 412956 2. 410516  
11756705\_ 9. 565139 9. 561757 9. 594128 9. 083536 9. 020181 9. 119363  
11756706\_ 5. 072615 5. 073036 4. 973314 5. 156303 4. 974338 5. 151592  
11756707\_ 4. 603787 4. 629848 4. 704294 4. 64793 4. 635576 4. 581514  
11756708\_ 3. 572942 3. 766279 3. 716562 3. 826281 3. 642745 3. 917436  
11756709\_ 4. 313491 4. 335594 4. 278454 4. 434116 4. 296534 4. 25184  
11756710\_ 5. 993525 6. 039124 5. 916203 6. 07615 6. 068092 6. 030797  
11756711\_ 9. 522693 9. 469417 9. 563267 9. 054736 9. 087609 9. 030194  
11756712\_ 6. 48642 6. 569718 6. 574834 6. 76237 6. 856957 6. 800242  
11756713\_ 5. 572396 5. 378814 5. 571204 5. 5751 5. 669357 5. 672108  
11756714\_ 8. 515907 8. 398936 8. 465933 9. 364782 9. 319255 9. 288177

11756715\_ 6. 641536 6. 434495 6. 440588 6. 620981 6. 66265 6. 52025  
11756716\_ 7. 086896 7. 161097 7. 159703 7. 166861 7. 195996 7. 251018  
11756717\_ 7. 71939 7. 730153 7. 784602 7. 326385 7. 277578 7. 308242  
11756718\_ 6. 075718 6. 181267 5. 901463 6. 015172 5. 998481 6. 009857  
11756719\_ 6. 784096 6. 853046 6. 645002 6. 771066 6. 79415 6. 676482  
11756720\_ 5. 073036 5. 23436 5. 282557 5. 294787 5. 34953 5. 297498  
11756721\_ 7. 953197 7. 852652 7. 955848 8. 231568 8. 258617 8. 197125  
11756722\_ 9. 051195 8. 993396 9. 055577 9. 251913 9. 304461 9. 220356  
11756723\_ 12. 01686 12. 00948 11. 98438 12. 25609 12. 22392 12. 16546  
11756724\_ 10. 18059 10. 10418 10. 14944 10. 06982 10. 1189 10. 03638  
11756725\_ 8. 194752 8. 183263 8. 296816 8. 441844 8. 47701 8. 495778  
11756726\_ 6. 12419 6. 132587 5. 944095 6. 04952 6. 137883 6. 079869  
11756727\_ 5. 535204 5. 505794 5. 409786 5. 63558 5. 564788 5. 549301  
11756728\_ 5. 120238 5. 193618 5. 16673 5. 444681 5. 265497 5. 302079  
11756729\_ 7. 509944 7. 536951 7. 603075 7. 309423 7. 334799 7. 405532  
11756730\_ 7. 862657 7. 922055 7. 749277 7. 560932 7. 588527 7. 57855  
11756731\_ 2. 133519 2. 195209 2. 149307 2. 109275 2. 060789 2. 189883  
11756732\_ 6. 060184 5. 855803 6. 047512 5. 277686 5. 124589 4. 972514  
11756733\_ 1. 986846 2. 023895 2. 223766 2. 103176 2. 038883 2. 135856  
11756734\_ 5. 094153 4. 90786 5. 091562 5. 136387 5. 094153 5. 030359  
11756735\_ 5. 538291 5. 569163 5. 558917 5. 643713 5. 569163 5. 547108  
11756736\_ 5. 684764 5. 793617 5. 438286 5. 663571 5. 638895 5. 624925  
11756737\_ 4. 068517 4. 01274 3. 971304 3. 977404 4. 187105 3. 947311  
11756738\_ 6. 442823 6. 300643 6. 447312 6. 626062 6. 545291 6. 533542  
11756739\_ 7. 301431 7. 301431 7. 270513 7. 326696 7. 277974 7. 295249  
11756740\_ 12. 59708 12. 59478 12. 58462 12. 36323 12. 33197 12. 30251  
11756741\_ 8. 401313 8. 295855 8. 314436 7. 98706 7. 854841 7. 870574  
11756742\_ 8. 493711 8. 395982 8. 42714 7. 94529 7. 859769 7. 911565  
11756743\_ 10. 71233 10. 6738 10. 75398 10. 43473 10. 43512 10. 38489  
11756744\_ 8. 464399 8. 356531 8. 372786 8. 255792 8. 297115 8. 291084  
11756745\_ 7. 427312 7. 351552 7. 45117 6. 535096 6. 46901 6. 684851  
11756746\_ 9. 102113 9. 039101 9. 101087 7. 576367 7. 659366 7. 510401  
11756747\_ 8. 752338 8. 715626 8. 664164 8. 061393 8. 119506 8. 093611  
11756748\_ 4. 78345 4. 653911 4. 842964 4. 62521 4. 455613 4. 789635  
11756749\_ 3. 737821 3. 922795 4. 035528 3. 683278 3. 665897 3. 694412  
11756750\_ 4. 936049 5. 156221 4. 88241 5. 265266 5. 137701 4. 984669  
11756751\_ 8. 531343 8. 512401 8. 552009 8. 460819 8. 519748 8. 496901  
11756752\_ 5. 978318 6. 154762 6. 167544 6. 292496 6. 142119 6. 204344  
11756753\_ 5. 333723 5. 238983 5. 406515 5. 534585 5. 624146 5. 764096  
11756754\_ 3. 543502 3. 502921 3. 416368 3. 582968 3. 489678 3. 538096  
11756755\_ 5. 307572 5. 407534 5. 182233 5. 155352 5. 328471 5. 201948  
11756756\_ 7. 287817 7. 178589 7. 344239 7. 237513 7. 340968 7. 300721  
11756757\_ 7. 687645 7. 604825 7. 704114 7. 827955 7. 831158 7. 928736  
11756758\_ 4. 780155 4. 755819 4. 852818 4. 781878 4. 698289 4. 635215  
11756759\_ 4. 85808 4. 645962 4. 637502 4. 854063 4. 84437 4. 681902  
11756760\_ 6. 78157 6. 781894 6. 779229 6. 839341 6. 959125 6. 889575  
11756761\_ 11. 10606 11. 09995 11. 09324 10. 74008 10. 75028 10. 7181  
11756762\_ 8. 332933 8. 282536 8. 347645 8. 339762 8. 364034 8. 40228  
11756763\_ 9. 057076 8. 939189 8. 930138 9. 503633 9. 525518 9. 521001  
11756764\_ 11. 70136 11. 70257 11. 68976 11. 60503 11. 6165 11. 53893  
11756765\_ 7. 844631 7. 75355 7. 874343 7. 596879 7. 526875 7. 585422



11756766\_ 10.6292 10.56258 10.62779 10.58758 10.65208 10.6401  
11756767\_ 3.040143 2.903684 2.912392 3.121005 3.306454 2.923763  
11756768\_ 4.911304 4.760621 4.910043 4.485255 4.610658 4.353852  
11756769\_ 5.267337 5.08817 5.155962 6.049995 5.969792 5.715312  
11756770\_ 4.329188 4.219946 4.244214 4.244214 4.206762 4.537378  
11756771\_ 7.522216 7.41966 7.497462 7.270361 7.292525 7.208384  
11756772\_ 9.309672 9.250146 9.265113 9.265744 9.226531 9.274617  
11756773\_ 7.995416 7.877935 7.954636 6.713258 6.76011 6.843757  
11756774\_ 4.316583 4.496561 4.247862 4.3305 4.413556 4.441882  
11756775\_ 8.3663 8.282293 8.348827 7.910596 7.94008 8.046518  
11756776\_ 5.965945 5.960873 5.859235 6.012438 6.010801 6.010413  
11756777\_ 3.249924 3.398236 3.399712 3.362729 3.493644 3.198231  
11756778\_ 8.272138 8.25245 8.290645 8.095027 8.034947 8.023523  
11756779\_ 11.15871 11.09165 11.15 10.994 11.03727 10.99977  
11756780\_ 2.90156 3.073312 2.968679 2.844194 2.968679 2.993596  
11756781\_ 4.343016 4.625206 4.370337 4.617707 4.591828 4.653853  
11756782\_ 4.559956 4.60909 4.64324 4.642391 4.766187 4.52373  
11756783\_ 2.90617 2.977135 2.783707 2.973782 2.913654 2.796228  
11756784\_ 7.054115 7.082496 7.056652 7.597591 7.569058 7.717819  
11756785\_ 6.56978 6.540833 6.611189 6.539082 6.551194 6.544135  
11756786\_ 7.202561 7.334676 7.265908 7.261014 7.18411 7.243847  
11756787\_ 6.175215 6.248136 6.011663 6.505137 6.491522 6.406262  
11756788\_ 9.223615 9.186078 9.198789 9.205639 9.146421 9.161746  
11756789\_ 5.412348 5.256217 5.389902 5.788803 5.660355 5.69743  
11756790\_ 8.629283 8.613038 8.64313 8.452466 8.439101 8.40228  
11756791\_ 9.09338 9.206222 9.088232 8.789466 8.735484 8.755637  
11756792\_ 8.695714 8.60916 8.652536 8.867778 8.868527 8.841093  
11756793\_ 3.521412 3.672693 3.761824 3.609318 3.633654 3.458669  
11756794\_ 1.957528 1.997456 1.959518 2.123069 1.80542 1.973451  
11756795\_ 5.308279 5.218763 5.343108 5.466601 5.4443 5.298913  
11756796\_ 7.631573 7.529769 7.519597 7.044409 7.038675 6.98751  
11756797\_ 6.278423 6.244666 6.20435 6.064784 6.115275 6.097772  
11756798\_ 4.001544 3.762097 3.869967 3.690658 3.705625 3.940469  
11756799\_ 9.593365 9.551054 9.573129 9.936793 9.891701 9.905641  
11756800\_ 6.192396 6.230544 6.298337 6.520015 6.529291 6.627885  
11756801\_ 3.451458 3.552229 3.659434 3.60532 3.455257 3.52457  
11756802\_ 5.138888 5.04195 5.121994 5.2222 5.229795 5.04195  
11756803\_ 2.441401 2.25483 2.30354 2.118813 2.108314 2.107514  
11756804\_ 5.913746 5.703881 5.730925 5.92292 5.909203 5.914024  
11756805\_ 8.814699 8.816188 8.824895 8.767485 8.757392 8.733492  
11756806\_ 8.620074 8.555021 8.652084 8.470369 8.495168 8.452682  
11756807\_ 6.933107 6.691096 6.805283 6.819609 6.84531 6.844531  
11756808\_ 6.126022 6.023471 6.1506 5.165604 5.183024 5.317672  
11756809\_ 2.605516 2.348308 2.417878 2.450855 2.27996 2.417878  
11756810\_ 9.360363 9.347084 9.395057 8.976711 9.077859 8.96946  
11756811\_ 6.793403 6.854713 6.811188 6.701282 6.591193 6.81365  
11756812\_ 7.133339 7.337307 7.073281 7.305945 7.209386 7.331778  
11756813\_ 5.959753 5.96589 5.554436 5.875288 5.90366 5.949207  
11756814\_ 5.653261 5.633587 5.667216 5.571618 5.668037 5.618811  
11756815\_ 6.696111 6.687005 6.666671 6.326267 6.576019 6.419218  
11756816\_ 6.087664 6.233323 6.036139 6.113307 5.999866 6.150006

11756817\_ 6. 039952 6. 106902 5. 932638 6. 089842 6. 054325 6. 082855  
11756818\_ 3. 917767 3. 805125 3. 892189 4. 084661 4. 121585 4. 122446  
11756819\_ 4. 818728 5. 091648 4. 855368 4. 944435 4. 855368 5. 123597  
11756820\_ 8. 205003 8. 24315 8. 21753 7. 932802 7. 874346 7. 878161  
11756821\_ 6. 066157 6. 130862 6. 057683 6. 051062 6. 058609 6. 058609  
11756822\_ 2. 47102 2. 44371 2. 302666 2. 361778 2. 69126 2. 383208  
11756823\_ 7. 316423 7. 346257 7. 292272 7. 339918 7. 520299 7. 394813  
11756824\_ 4. 373217 4. 418871 4. 236106 4. 354141 4. 40461 4. 4362  
11756825\_ 6. 853276 6. 886652 6. 810083 6. 822605 6. 836016 6. 726056  
11756826\_ 4. 183694 4. 529928 4. 183694 4. 529723 4. 290678 4. 42188  
11756827\_ 4. 26619 4. 425774 4. 223779 4. 425774 4. 442896 4. 572165  
11756828\_ 5. 320988 5. 284226 5. 182942 4. 952197 4. 905377 5. 121554  
11756829\_ 9. 06282 9. 021429 9. 08676 8. 721569 8. 78169 8. 781711  
11756830\_ 7. 693975 7. 64561 7. 633261 7. 546856 7. 605884 7. 64264  
11756831\_ 5. 693088 5. 828197 5. 703683 5. 913313 5. 907677 5. 878991  
11756832\_ 5. 292189 5. 349435 5. 293509 4. 841499 4. 759066 4. 638303  
11756833\_ 7. 646888 7. 604825 7. 608178 7. 667928 7. 602211 7. 694613  
11756834\_ 4. 101667 4. 299262 4. 095697 4. 230439 4. 288368 4. 230439  
11756835\_ 8. 407233 8. 3576 8. 38974 8. 452241 8. 327061 8. 383761  
11756836\_ 3. 078082 2. 959851 2. 738309 2. 938689 2. 748496 2. 925949  
11756837\_ 3. 907842 3. 921568 3. 815257 3. 922527 4. 00805 3. 94462  
11756838\_ 4. 445957 4. 54985 4. 434691 4. 334732 4. 33386 4. 414443  
11756839\_ 7. 04467 6. 97514 6. 972655 6. 161611 6. 209508 6. 175359  
11756840\_ 5. 901032 5. 596998 6. 046196 5. 756667 5. 840193 5. 730136  
11756841\_ 8. 658869 8. 622753 8. 666301 8. 694619 8. 751483 8. 713315  
11756842\_ 3. 323019 3. 471331 3. 223977 3. 199202 3. 193657 3. 383552  
11756843\_ 8. 361679 8. 308833 8. 366584 8. 032065 7. 945108 8. 033646  
11756844\_ 4. 763543 4. 818237 4. 565268 4. 75425 4. 700243 4. 655059  
11756845\_ 4. 78121 4. 800133 4. 48387 4. 82519 4. 788891 4. 8375  
11756846\_ 4. 898464 4. 976005 4. 732964 4. 823238 4. 770095 4. 940529  
11756847\_ 4. 957308 4. 84394 4. 844812 4. 696112 4. 875465 4. 887447  
11756848\_ 4. 58336 4. 756893 4. 798769 4. 827074 4. 775385 4. 822437  
11756849\_ 8. 945239 8. 850777 8. 901588 8. 642246 8. 637803 8. 669504  
11756850\_ 11. 78991 11. 82645 11. 78654 11. 79894 11. 75601 11. 77315  
11756851\_ 5. 221971 5. 108858 5. 254812 4. 922945 5. 144503 5. 124474  
11756852\_ 7. 330139 7. 306265 7. 430803 7. 466205 7. 450888 7. 523953  
11756853\_ 7. 220733 6. 981364 7. 144896 6. 021759 5. 950228 5. 992354  
11756854\_ 7. 307997 7. 286581 7. 255722 7. 159674 7. 132134 7. 213191  
11756855\_ 5. 319604 4. 983938 5. 012732 5. 044973 4. 693681 4. 959888  
11756856\_ 6. 036166 5. 85611 6. 10624 5. 672285 5. 770824 5. 667682  
11756857\_ 6. 473494 6. 384535 6. 432577 5. 908879 5. 839992 5. 824302  
11756858\_ 6. 896159 6. 833343 6. 916545 6. 579869 6. 631165 6. 641167  
11756859\_ 10. 00842 9. 975075 10. 01692 10. 13421 10. 11956 10. 13705  
11756860\_ 9. 271539 9. 203655 9. 302608 9. 157051 9. 170989 9. 124911  
11756861\_ 6. 828147 6. 7414 6. 8677 7. 051081 7. 116063 7. 154414  
11756862\_ 5. 229822 5. 509455 5. 177901 5. 273276 5. 29049 5. 282899  
11756863\_ 3. 09793 2. 900999 3. 081196 2. 799413 2. 815292 2. 869926  
11756864\_ 7. 319494 7. 17561 7. 19394 6. 88249 6. 885994 6. 901996  
11756865\_ 6. 59616 6. 569503 6. 517347 6. 678761 6. 719315 6. 68179  
11756866\_ 5. 205672 5. 357593 5. 220784 5. 262307 5. 25695 5. 442636  
11756867\_ 4. 651341 4. 534398 4. 743912 4. 418816 4. 630132 4. 66183

11756868\_ 6. 001107 5. 877827 6. 024083 6. 543024 6. 509662 6. 550102  
11756869\_ 5. 696809 5. 753673 5. 794614 6. 338593 6. 568809 6. 500122  
11756870\_ 6. 53134 6. 68814 6. 665709 6. 566928 6. 546099 6. 629311  
11756871\_ 6. 884619 6. 768684 6. 913388 7. 3325 7. 270696 7. 195095  
11756872\_ 7. 228616 6. 935849 7. 153079 6. 594872 6. 295511 6. 565687  
11756873\_ 2. 610576 2. 727987 2. 978612 2. 734874 2. 765112 2. 569906  
11756874\_ 2. 539728 2. 605516 2. 539728 2. 528503 2. 828422 2. 494072  
11756875\_ 10. 49185 10. 44746 10. 43445 10. 29059 10. 26737 10. 21859  
11756876\_ 8. 668328 8. 519185 8. 624224 9. 019091 9. 064446 8. 958192  
11756877\_ 4. 454703 4. 523337 4. 468996 4. 631042 4. 707115 4. 84849  
11756878\_ 11. 31799 11. 29896 11. 32656 11. 52859 11. 56399 11. 50587  
11756879\_ 5. 057267 5. 07608 5. 26034 5. 285455 5. 199866 5. 426336  
11756880\_ 9. 341886 9. 308741 9. 350467 9. 353557 9. 339303 9. 355891  
11756881\_ 4. 200678 4. 325669 4. 349932 3. 902292 3. 682138 3. 757036  
11756882\_ 5. 999888 5. 824456 5. 820052 6. 280267 6. 290547 6. 29885  
11756883\_ 11. 19618 11. 21518 11. 20481 11. 0772 11. 09103 11. 04955  
11756884\_ 10. 00187 10. 00093 10. 04833 9. 365824 9. 370313 9. 365373  
11756885\_ 8. 556283 8. 508474 8. 513377 9. 145919 9. 180311 9. 14252  
11756886\_ 8. 158152 8. 037176 8. 198204 7. 809793 7. 877508 7. 817022  
11756887\_ 6. 9581 6. 953755 6. 970812 7. 320459 7. 362301 7. 335646  
11756888\_ 5. 41128 5. 458444 5. 13562 5. 528873 5. 523651 5. 521299  
11756889\_ 2. 818284 2. 613291 2. 651152 2. 50169 2. 651152 2. 623073  
11756890\_ 11. 61594 11. 67493 11. 6407 11. 89388 11. 77638 11. 74685  
11756891\_ 7. 929108 7. 840448 7. 891208 7. 587083 7. 633881 7. 627873  
11756892\_ 3. 513049 3. 674855 3. 403184 3. 398664 3. 30979 3. 211227  
11756893\_ 8. 828785 8. 858365 8. 81648 8. 847646 8. 876783 8. 90096  
11756894\_ 6. 319754 6. 291681 6. 225803 6. 168806 6. 265569 6. 326682  
11756895\_ 6. 026588 6. 036529 6. 086385 6. 15233 6. 176089 6. 122673  
11756896\_ 3. 257392 3. 294061 3. 333157 3. 507967 3. 341112 3. 278984  
11756897\_ 9. 14252 9. 134263 9. 209377 8. 780845 8. 708668 8. 780148  
11756898\_ 3. 899263 3. 629492 3. 810702 3. 554519 3. 424307 3. 585114  
11756899\_ 9. 674175 9. 616304 9. 639995 10. 31294 10. 30492 10. 32273  
11756900\_ 3. 538941 3. 790996 3. 604506 3. 706223 3. 788139 3. 684214  
11756901\_ 5. 206358 5. 258218 5. 031754 5. 528624 5. 338788 5. 146519  
11756902\_ 4. 501305 4. 557096 4. 47618 4. 560577 4. 488023 4. 502666  
11756903\_ 6. 592543 6. 573408 6. 697264 5. 7604 5. 618422 5. 726746  
11756904\_ 3. 59606 3. 672464 3. 422568 3. 67156 3. 760341 3. 672464  
11756905\_ 6. 180191 5. 974064 6. 207038 5. 594389 5. 548951 5. 465613  
11756906\_ 7. 846826 7. 812355 7. 819863 7. 758343 7. 835317 7. 870057  
11756907\_ 3. 646731 3. 742391 3. 692541 3. 602031 3. 804348 3. 559086  
11756908\_ 6. 983538 6. 947688 7. 077229 6. 933696 6. 928918 6. 966854  
11756909\_ 3. 567916 3. 701389 3. 761095 3. 606313 3. 714417 3. 580568  
11756910\_ 7. 417811 7. 404913 7. 392392 7. 855876 7. 86297 7. 826156  
11756911\_ 2. 609186 2. 305116 2. 495296 2. 514418 2. 569613 2. 348507  
11756912\_ 6. 871115 7. 072623 6. 897186 6. 711432 6. 722728 6. 736656  
11756913\_ 5. 405405 5. 603725 5. 399707 5. 614177 5. 514479 5. 534172  
11756914\_ 2. 989029 2. 83198 3. 119854 2. 956708 2. 99962 3. 042734  
11756915\_ 3. 360203 3. 417924 3. 350292 3. 097139 3. 196306 3. 120506  
11756916\_ 2. 910258 3. 000182 2. 993228 3. 089259 2. 987843 3. 058772  
11756917\_ 6. 420647 6. 410498 6. 572655 6. 643032 6. 715589 6. 668195  
11756918\_ 8. 230171 8. 0929 8. 205745 8. 281817 8. 438107 8. 345208

11756919\_ 8. 105018 7. 917347 7. 985084 7. 38742 7. 384885 7. 486933  
11756920\_ 6. 543342 6. 583758 6. 551218 6. 567247 6. 587871 6. 583758  
11756921\_ 3. 976561 4. 011915 3. 840786 4. 227651 4. 029719 4. 011915  
11756922\_ 6. 921448 6. 936555 7. 030354 7. 031715 7. 056476 7. 141997  
11756923\_ 5. 835017 6. 035951 5. 941669 6. 087491 6. 09368 6. 051554  
11756924\_ 10. 20812 10. 14732 10. 19076 10. 13944 10. 11161 10. 11791  
11756925\_ 8. 008401 7. 894563 7. 959971 7. 281112 7. 191995 7. 233468  
11756926\_ 5. 523255 5. 554257 5. 694152 5. 412208 5. 451684 5. 452386  
11756927\_ 6. 865429 6. 73735 6. 874408 7. 212033 7. 307989 7. 279441  
11756928\_ 7. 81985 7. 789325 7. 880573 8. 132878 8. 12574 8. 182383  
11756929\_ 7. 263208 7. 142648 7. 330638 7. 263019 7. 336097 7. 316072  
11756930\_ 7. 381179 7. 273345 7. 285486 7. 749375 7. 820618 7. 690787  
11756931\_ 6. 630422 6. 765911 6. 739364 6. 495236 6. 533557 6. 366651  
11756932\_ 6. 575354 6. 65748 6. 574834 6. 526989 6. 479067 6. 362456  
11756933\_ 5. 340189 5. 225256 5. 32807 5. 341818 5. 340596 5. 398293  
11756934\_ 6. 153436 5. 95412 6. 151451 5. 585764 5. 419365 5. 403536  
11756935\_ 3. 902795 4. 088454 4. 151358 3. 946676 4. 088654 4. 071991  
11756936\_ 8. 046914 8. 016968 8. 054844 8. 053371 8. 02081 8. 02949  
11756937\_ 6. 580862 6. 595634 6. 707574 5. 820052 6. 047691 6. 013301  
11756938\_ 8. 760177 8. 723017 8. 724497 8. 805824 8. 719112 8. 798109  
11756939\_ 8. 846608 8. 786783 8. 86453 8. 651005 8. 59555 8. 588071  
11756940\_ 6. 778398 6. 625742 6. 957411 6. 837756 6. 927858 6. 90509  
11756941\_ 6. 619096 6. 698366 6. 528427 6. 513496 6. 663557 6. 539308  
11756942\_ 5. 82039 5. 939744 5. 721368 5. 413623 5. 344434 5. 196651  
11756943\_ 8. 356797 8. 236786 8. 329332 7. 728568 7. 65542 7. 725672  
11756944\_ 4. 080424 4. 048128 4. 137037 3. 943045 4. 043303 3. 941571  
11756945\_ 4. 001215 3. 657672 3. 740892 3. 720967 3. 711088 3. 707917  
11756946\_ 5. 94784 6. 17552 5. 804877 5. 929186 5. 912272 5. 922714  
11756947\_ 9. 508029 9. 485535 9. 500958 9. 551699 9. 56541 9. 542119  
11756948\_ 3. 422123 3. 494845 3. 425466 3. 571237 3. 339018 3. 301513  
11756949\_ 9. 721051 9. 655522 9. 677711 10. 39464 10. 39748 10. 42022  
11756950\_ 4. 150792 4. 177096 4. 116372 4. 215471 4. 200678 4. 210399  
11756951\_ 7. 840199 7. 890276 7. 918333 8. 016171 8. 051898 8. 007158  
11756952\_ 10. 0134 9. 972275 10. 04712 10. 06124 10. 10175 10. 03613  
11756953\_ 4. 246379 4. 130695 3. 963837 4. 434039 4. 325358 4. 153833  
11756954\_ 7. 612234 7. 766937 7. 627457 7. 289167 7. 188662 7. 201736  
11756955\_ 7. 114069 7. 026476 7. 173211 6. 631067 6. 739151 6. 805362  
11756956\_ 5. 346385 5. 350483 5. 337389 5. 344852 5. 304911 5. 333296  
11756957\_ 7. 996985 7. 821211 7. 954167 8. 262061 8. 337705 8. 346429  
11756958\_ 7. 379234 7. 372096 7. 355926 7. 542149 7. 571628 7. 599876  
11756959\_ 6. 907095 6. 764493 6. 930614 6. 923656 6. 96038 6. 853767  
11756960\_ 8. 654662 8. 665241 8. 746189 8. 612943 8. 669126 8. 627108  
11756961\_ 10. 5821 10. 52433 10. 56552 10. 38963 10. 39165 10. 3744  
11756962\_ 5. 554424 5. 628013 5. 763634 6. 302211 6. 422502 6. 302861  
11756963\_ 4. 625826 4. 580521 4. 628551 4. 463275 4. 449968 4. 538648  
11756964\_ 9. 285383 9. 270673 9. 346105 8. 925631 9. 006651 8. 993985  
11756965\_ 6. 319636 6. 275786 6. 412133 6. 365305 6. 448378 6. 4333  
11756966\_ 3. 164901 3. 087651 3. 072357 3. 174153 3. 177292 3. 266377  
11756967\_ 9. 466325 9. 381893 9. 296927 9. 298429 9. 312394 9. 277794  
11756968\_ 9. 177601 9. 135013 9. 190728 9. 126677 9. 139055 9. 152955  
11756969\_ 4. 122644 4. 003332 3. 96738 4. 292859 4. 210554 4. 045514

11756970\_ 5. 102594 5. 306562 5. 138622 5. 312649 5. 177377 5. 248969  
11756971\_ 6. 431763 6. 356877 6. 554429 5. 491431 5. 397861 5. 514219  
11756972\_ 12. 45248 12. 43728 12. 41854 12. 44154 12. 453 12. 46403  
11756973\_ 7. 753177 7. 62962 7. 712009 7. 747906 7. 77661 7. 703676  
11756974\_ 4. 939109 5. 064446 5. 089004 5. 140832 4. 830841 5. 103247  
11756975\_ 6. 4285 6. 341686 6. 354584 6. 283415 6. 235058 6. 283677  
11756976\_ 3. 956777 4. 045489 4. 231731 3. 997131 3. 966816 4. 073818  
11756977\_ 6. 206103 6. 430366 6. 20267 6. 328739 6. 282224 6. 318829  
11756978\_ 2. 47102 2. 781017 2. 593623 2. 645134 2. 696062 2. 611647  
11756979\_ 12. 57696 12. 60737 12. 57565 12. 78693 12. 7475 12. 72066  
11756980\_ 4. 275543 4. 510134 4. 178396 4. 078141 4. 400549 4. 398512  
11756981\_ 8. 099545 8. 210616 8. 172871 8. 270509 8. 241562 8. 226226  
11756982\_ 8. 467585 8. 407248 8. 454894 8. 447795 8. 442739 8. 518909  
11756983\_ 7. 385367 7. 398808 7. 429291 7. 389127 7. 421602 7. 457945  
11756984\_ 8. 654307 8. 616788 8. 653391 8. 834826 8. 929737 8. 88779  
11756985\_ 9. 455217 9. 406503 9. 434722 9. 258938 9. 217588 9. 233515  
11756986\_ 3. 609049 3. 538069 3. 587183 3. 609482 3. 801444 3. 675551  
11756987\_ 9. 500551 9. 61559 9. 45934 9. 754212 9. 773131 9. 802926  
11756988\_ 8. 268533 8. 20557 8. 265937 8. 637538 8. 66606 8. 600339  
11756989\_ 6. 603891 6. 532669 6. 541665 6. 397946 6. 504957 6. 456287  
11756990\_ 6. 554512 6. 581112 6. 738975 6. 139263 6. 148483 6. 115954  
11756991\_ 9. 110308 9. 107656 9. 116284 9. 398693 9. 429049 9. 407637  
11756992\_ 4. 745762 4. 741404 4. 858455 4. 83234 4. 724682 5. 156303  
11756993\_ 9. 538284 9. 520893 9. 507394 9. 527177 9. 479797 9. 347131  
11756994\_ 8. 162546 8. 115653 8. 189018 8. 330023 8. 444385 8. 372817  
11756995\_ 8. 212259 8. 173236 8. 193034 8. 425049 8. 457175 8. 437069  
11756996\_ 5. 706534 5. 805224 5. 951869 5. 483317 5. 523406 5. 506684  
11756997\_ 6. 719112 6. 649589 6. 70285 6. 56036 6. 514574 6. 580233  
11756998\_ 7. 067218 7. 10574 7. 119136 7. 179207 7. 117519 7. 135409  
11756999\_ 8. 493309 8. 495835 8. 50683 8. 533814 8. 522809 8. 597547  
11757000\_ 8. 527134 8. 372951 8. 512574 8. 488126 8. 546864 8. 553918  
11757001\_ 4. 782013 4. 764724 4. 900092 4. 58456 4. 584933 4. 647753  
11757002\_ 4. 971048 5. 050007 5. 128651 5. 110947 5. 128426 5. 128915  
11757003\_ 12. 71299 12. 73675 12. 6988 12. 8043 12. 74804 12. 70897  
11757004\_ 6. 722649 6. 699862 6. 589205 6. 832863 6. 766594 6. 875403  
11757005\_ 7. 258007 7. 045154 7. 180343 6. 083478 6. 161138 6. 247953  
11757006\_ 7. 70873 7. 841661 7. 842485 7. 562458 7. 550376 7. 515993  
11757007\_ 5. 401049 5. 645177 5. 541158 5. 683385 5. 700733 5. 721523  
11757008\_ 5. 992309 5. 746697 5. 851106 5. 929756 6. 008935 6. 035756  
11757009\_ 6. 754991 6. 76622 6. 691237 6. 816072 6. 910338 6. 913011  
11757010\_ 5. 961998 5. 760144 5. 952459 6. 104469 6. 046675 6. 067389  
11757011\_ 9. 038285 8. 973319 9. 028311 8. 752298 8. 706673 8. 66307  
11757012\_ 10. 82482 10. 78415 10. 80072 10. 7083 10. 80978 10. 68314  
11757013\_ 10. 34448 10. 30705 10. 37628 10. 12265 10. 15291 10. 15606  
11757014\_ 5. 447476 5. 503553 5. 440954 4. 918518 4. 974066 5. 157947  
11757015\_ 6. 576661 6. 618382 6. 324982 6. 624663 6. 638638 6. 48956  
11757016\_ 4. 765282 4. 744816 4. 619433 4. 710637 4. 751616 4. 823443  
11757017\_ 8. 488035 8. 352776 8. 425545 9. 268402 9. 27959 9. 269817  
11757018\_ 8. 92424 8. 914859 8. 949806 8. 564275 8. 624531 8. 587823  
11757019\_ 7. 417811 7. 513582 7. 472058 7. 43043 7. 500099 7. 496807  
11757020\_ 9. 752327 9. 664581 9. 721177 9. 819767 9. 845485 9. 818755

11757021\_ 12. 73631 12. 77053 12. 74547 12. 75397 12. 73992 12. 73008  
11757022\_ 7. 391898 7. 293593 7. 344149 6. 891134 6. 891522 7. 001994  
11757023\_ 12. 37321 12. 42283 12. 4103 12. 3546 12. 35389 12. 29949  
11757024\_ 10. 6254 10. 55677 10. 60345 10. 46874 10. 47382 10. 43001  
11757025\_ 7. 69778 7. 533742 7. 701627 7. 994653 7. 952517 8. 027082  
11757026\_ 8. 123233 8. 059792 8. 141116 8. 353906 8. 388388 8. 463564  
11757027\_ 12. 94014 12. 93788 12. 91763 12. 93335 12. 95097 12. 92997  
11757028\_ 12. 51701 12. 57265 12. 5439 12. 53907 12. 51344 12. 4746  
11757029\_ 9. 088978 8. 950173 9. 011781 9. 53951 9. 60443 9. 585336  
11757030\_ 9. 343268 9. 25479 9. 276588 9. 148269 9. 201194 9. 223185  
11757031\_ 11. 74821 11. 74457 11. 70519 11. 7991 11. 72562 11. 68715  
11757032\_ 6. 604083 6. 48931 6. 592947 6. 744062 6. 747368 6. 703194  
11757033\_ 11. 88385 11. 82625 11. 82351 11. 73397 11. 72262 11. 74532  
11757034\_ 5. 102464 5. 146355 5. 16645 5. 170411 5. 208424 5. 196396  
11757035\_ 6. 469666 6. 767735 6. 628705 6. 617162 6. 555628 6. 507368  
11757036\_ 9. 232368 9. 200347 9. 244936 9. 335517 9. 396366 9. 33489  
11757037\_ 12. 08821 12. 13723 12. 06981 12. 11968 12. 05291 12. 02529  
11757038\_ 12. 44628 12. 42249 12. 41656 12. 30643 12. 32311 12. 35041  
11757039\_ 6. 845428 6. 82736 6. 882543 5. 93062 5. 871763 5. 755844  
11757040\_ 7. 329685 7. 408406 7. 295614 7. 621905 7. 65538 7. 674357  
11757041\_ 7. 285924 7. 3619 7. 286665 7. 471247 7. 517019 7. 569249  
11757042\_ 4. 456078 4. 460915 4. 467533 4. 469739 4. 459939 4. 470714  
11757043\_ 7. 82787 7. 74204 7. 771361 7. 661543 7. 718129 7. 60027  
11757044\_ 6. 316296 6. 335188 6. 42992 6. 765233 6. 75615 6. 831922  
11757045\_ 3. 799731 3. 900859 3. 740892 3. 92128 4. 075228 4. 111709  
11757046\_ 8. 421787 8. 334535 8. 380947 8. 452857 8. 434249 8. 487016  
11757047\_ 10. 86625 10. 85731 10. 8776 11. 66933 11. 68635 11. 68329  
11757048\_ 9. 631091 9. 551171 9. 685884 9. 549991 9. 593037 9. 588761  
11757049\_ 5. 827099 5. 542901 5. 849148 6. 016016 5. 947951 6. 063343  
11757050\_ 10. 24744 10. 17375 10. 28941 10. 53139 10. 56322 10. 58887  
11757051\_ 9. 511556 9. 544176 9. 501012 9. 815874 9. 730141 9. 861076  
11757052\_ 8. 311978 8. 276285 8. 237585 8. 71823 8. 762499 8. 685502  
11757053\_ 10. 12614 10. 14571 10. 11391 9. 872062 9. 831996 9. 800472  
11757054\_ 9. 750285 9. 742735 9. 718369 9. 497199 9. 428178 9. 43427  
11757055\_ 6. 962074 7. 089177 7. 044504 7. 11888 7. 174876 7. 209271  
11757056\_ 12. 3666 12. 41037 12. 3778 12. 84882 12. 80726 12. 82023  
11757057\_ 5. 034425 5. 183463 4. 848216 5. 187071 5. 100097 5. 185971  
11757058\_ 10. 70753 10. 69079 10. 69934 10. 59801 10. 65561 10. 59636  
11757059\_ 12. 60022 12. 61642 12. 59776 12. 56864 12. 5881 12. 55169  
11757060\_ 12. 92035 12. 93028 12. 91419 12. 8882 12. 88234 12. 88258  
11757061\_ 11. 19139 11. 12708 11. 14855 11. 31936 11. 30056 11. 29512  
11757062\_ 9. 812643 9. 788809 9. 786947 9. 89835 9. 837015 9. 778069  
11757063\_ 8. 978308 8. 917854 8. 940854 8. 919348 8. 957753 8. 891761  
11757064\_ 8. 359844 8. 291514 8. 350756 8. 426747 8. 401355 8. 387838  
11757065\_ 9. 919915 9. 889069 9. 931109 10. 50712 10. 55231 10. 56319  
11757066\_ 4. 983583 4. 940075 5. 091062 4. 653766 4. 856011 4. 797087  
11757067\_ 7. 067371 6. 975313 7. 03262 7. 184579 7. 170721 7. 260078  
11757068\_ 7. 426223 7. 467739 7. 349021 7. 238747 7. 342771 7. 211029  
11757069\_ 9. 950183 9. 885041 9. 893687 9. 739418 9. 748843 9. 716967  
11757070\_ 9. 455295 9. 373096 9. 397092 9. 184388 9. 212094 9. 168836  
11757071\_ 8. 068419 8. 11999 8. 090816 8. 094935 8. 15698 8. 137902

11757072\_ 6. 67667 6. 801111 6. 774544 7. 033315 7. 04434 7. 019759  
11757073\_ 8. 722031 8. 60916 8. 711233 8. 774695 8. 818712 8. 844484  
11757074\_ 4. 120518 4. 288078 4. 093094 4. 38082 4. 325851 4. 280177  
11757075\_ 10. 10503 10. 00772 10. 11729 10. 64108 10. 6238 10. 61502  
11757076\_ 4. 683774 4. 985869 4. 70624 4. 987587 4. 959821 5. 008096  
11757077\_ 6. 804923 6. 740307 6. 792183 6. 909833 6. 978372 6. 981505  
11757078\_ 2. 08757 2. 08757 2. 010808 2. 08757 2. 0999 2. 340384  
11757079\_ 5. 914069 5. 915444 5. 817059 6. 030176 6. 049919 6. 093076  
11757080\_ 12. 91884 12. 96091 12. 92497 13. 02291 12. 96525 12. 92301  
11757081\_ 5. 157405 5. 256182 5. 204128 5. 462207 5. 393718 5. 442778  
11757082\_ 10. 37255 10. 33622 10. 34457 10. 28095 10. 25096 10. 2524  
11757083\_ 8. 847505 8. 852254 8. 844526 8. 989597 8. 987556 8. 933567  
11757084\_ 11. 09592 11. 03946 11. 08095 10. 96824 10. 88372 10. 94608  
11757085\_ 6. 06252 6. 071434 5. 932201 5. 730549 5. 671649 5. 771031  
11757086\_ 4. 817742 4. 853246 4. 872141 4. 819915 4. 881569 4. 783545  
11757087\_ 5. 190479 5. 197929 5. 045598 5. 273016 5. 287095 5. 289002  
11757088\_ 5. 374048 5. 597888 5. 446782 5. 479954 5. 479954 5. 474058  
11757089\_ 3. 212224 3. 230695 3. 153852 3. 154684 3. 192499 3. 281139  
11757090\_ 5. 789947 5. 690412 5. 584813 5. 664898 5. 735955 5. 741951  
11757091\_ 4. 898878 4. 88969 4. 842352 4. 918927 4. 877514 4. 836459  
11757092\_ 9. 840508 9. 834463 9. 783913 10. 33818 10. 36585 10. 35232  
11757093\_ 5. 194888 5. 309674 5. 359052 5. 311624 5. 36323 5. 281644  
11757094\_ 2. 272838 2. 160709 2. 165112 1. 981461 2. 216438 2. 033689  
11757095\_ 8. 744318 8. 825033 8. 731651 9. 024081 8. 89613 8. 911803  
11757096\_ 5. 784598 5. 586993 5. 786838 5. 922421 6. 032204 5. 938737  
11757097\_ 3. 718117 3. 98464 3. 783621 3. 806882 3. 802814 3. 984102  
11757098\_ 5. 360482 5. 380439 5. 30908 5. 49859 5. 510304 5. 529671  
11757099\_ 7. 589943 7. 535997 7. 657561 7. 459751 7. 478774 7. 360797  
11757100\_ 4. 160377 3. 920564 3. 590816 3. 740091 3. 879309 3. 703622  
11757101\_ 2. 805013 3. 030079 2. 944016 3. 126099 3. 137027 3. 057785  
11757102\_ 9. 116661 9. 094944 9. 123293 9. 260745 9. 302247 9. 348634  
11757103\_ 4. 566544 4. 590321 4. 696507 4. 594014 4. 642174 4. 763543  
11757104\_ 5. 914069 5. 915444 5. 817059 6. 030176 6. 049919 6. 093076  
11757105\_ 2. 30407 2. 407212 2. 49445 2. 579528 2. 572396 2. 688676  
11757106\_ 8. 217261 8. 156613 8. 190437 7. 784769 7. 826498 7. 730368  
11757107\_ 9. 699932 9. 707075 9. 72395 9. 794001 9. 733792 9. 695616  
11757108\_ 4. 986703 5. 088693 4. 837394 4. 984455 5. 122712 4. 95846  
11757109\_ 3. 673585 3. 790428 3. 663505 3. 925181 3. 645086 3. 609651  
11757110\_ 6. 075273 6. 179494 6. 186931 6. 163337 6. 181454 6. 112034  
11757111\_ 4. 39197 4. 633366 4. 646308 3. 695821 3. 602735 3. 903834  
11757112\_ 10. 98185 11. 00456 10. 85486 10. 74342 10. 71803 10. 65516  
11757113\_ 8. 594184 8. 543865 8. 524849 8. 827348 8. 875081 8. 824943  
11757114\_ 5. 164684 5. 034881 5. 250753 4. 922399 4. 971159 4. 775878  
11757115\_ 4. 739834 4. 52373 4. 53087 4. 872294 5. 026235 4. 900715  
11757116\_ 5. 673856 5. 600086 5. 58402 5. 703269 5. 638895 5. 739212  
11757117\_ 7. 574703 7. 625126 7. 695092 8. 192268 8. 300626 8. 209323  
11757118\_ 3. 034375 3. 250013 3. 398236 3. 252541 3. 204411 3. 353657  
11757119\_ 7. 029356 6. 946797 6. 970582 7. 004935 6. 99052 7. 106215  
11757120\_ 6. 729107 6. 448284 6. 705338 6. 902579 6. 922577 7. 124511  
11757121\_ 7. 311606 7. 106965 7. 282921 7. 506355 7. 5702 7. 572254  
11757122\_ 7. 672274 7. 604825 7. 786248 7. 699126 7. 742041 7. 658788

11757123\_ 7. 308294 7. 371749 7. 385007 7. 433737 7. 482432 7. 427814  
11757124\_ 6. 05983 6. 141097 6. 13406 6. 341809 6. 241308 6. 154943  
11757125\_ 3. 027272 2. 860089 3. 045586 3. 132803 3. 101013 3. 386687  
11757126\_ 3. 976443 3. 87874 4. 035037 4. 213226 3. 969507 4. 273764  
11757127\_ 4. 626522 4. 337221 4. 42553 4. 537128 4. 459939 4. 52373  
11757128\_ 7. 842319 7. 641 7. 844222 7. 849223 7. 938483 7. 931787  
11757129\_ 7. 778021 7. 785294 7. 79931 7. 811015 7. 691362 7. 717738  
11757130\_ 6. 512097 6. 49206 6. 526095 6. 507047 6. 512097 6. 377702  
11757131\_ 5. 632889 5. 696007 5. 661734 5. 795975 5. 806589 5. 951019  
11757132\_ 2. 737495 2. 805717 2. 73813 2. 6061 2. 770146 2. 639544  
11757133\_ 7. 551622 7. 408524 7. 627911 7. 754253 7. 853819 7. 773192  
11757134\_ 4. 763543 4. 588579 4. 670771 5. 013675 4. 859948 4. 866013  
11757135\_ 5. 009089 5. 149545 4. 959182 4. 981853 4. 951443 4. 94619  
11757136\_ 5. 902867 6. 114217 5. 963745 6. 114217 6. 087357 6. 0899  
11757137\_ 5. 834318 5. 875099 5. 845365 6. 040637 5. 957985 5. 830989  
11757138\_ 5. 378983 5. 200256 5. 323873 5. 463316 5. 212261 5. 268983  
11757139\_ 5. 851197 5. 84345 6. 090214 6. 108951 6. 160283 6. 078843  
11757140\_ 5. 823474 5. 763634 5. 641905 5. 766948 5. 8302 5. 815534  
11757141\_ 7. 245835 7. 148565 7. 183932 7. 060171 7. 164857 7. 176208  
11757142\_ 11. 09143 11. 23841 11. 22571 11. 15967 11. 18213 11. 27555  
11757143\_ 4. 489973 4. 990066 4. 681186 5. 197164 5. 007956 5. 139101  
11757144\_ 4. 088552 4. 230698 4. 137478 4. 113438 4. 04133 4. 28588  
11757145\_ 5. 264859 5. 484783 5. 374866 5. 403385 5. 369778 5. 468435  
11757146\_ 6. 205551 6. 169236 6. 142264 6. 189671 6. 179884 6. 164483  
11757147\_ 3. 825829 3. 879278 3. 999584 3. 726595 3. 780777 3. 993044  
11757148\_ 6. 533727 6. 390812 6. 487309 5. 948343 6. 092167 6. 001631  
11757149\_ 6. 661823 6. 653208 6. 726919 6. 789221 6. 750653 6. 871323  
11757150\_ 5. 163734 5. 311079 5. 2222 5. 363994 5. 351396 5. 18015  
11757151\_ 5. 785192 5. 866126 5. 813769 6. 118838 6. 040488 6. 019044  
11757152\_ 7. 726376 7. 712712 7. 743995 7. 890154 7. 905516 7. 897689  
11757153\_ 3. 532482 3. 444295 3. 588821 3. 767976 3. 475399 3. 629826  
11757154\_ 6. 502644 6. 516289 6. 507039 6. 776563 6. 797727 6. 719258  
11757155\_ 5. 934633 5. 901185 5. 950197 6. 001386 6. 071386 6. 126519  
11757156\_ 7. 192689 7. 129994 7. 203491 7. 633631 7. 596153 7. 659346  
11757157\_ 6. 512032 6. 469626 6. 505697 6. 84442 6. 801843 6. 703538  
11757158\_ 6. 453373 6. 344824 6. 382186 6. 727853 6. 686431 6. 59891  
11757159\_ 3. 835368 3. 909593 3. 766404 3. 952662 3. 858779 3. 919351  
11757160\_ 6. 122959 6. 142868 6. 157254 6. 337783 6. 216527 6. 362269  
11757161\_ 5. 736076 5. 896788 5. 948434 6. 06823 5. 946975 6. 085862  
11757162\_ 7. 268419 7. 176812 7. 134883 7. 59192 7. 504906 7. 473666  
11757163\_ 3. 019076 3. 249076 3. 284693 3. 281894 3. 212269 3. 282665  
11757164\_ 7. 560023 7. 409139 7. 604922 7. 580163 7. 567461 7. 610452  
11757165\_ 3. 046496 2. 799996 3. 058095 2. 760288 2. 899185 3. 242454  
11757166\_ 5. 765617 5. 776569 5. 77022 6. 060822 6. 081024 6. 192693  
11757167\_ 6. 340801 6. 358586 6. 318829 6. 548751 6. 599839 6. 66099  
11757168\_ 2. 8839 2. 985867 3. 292512 2. 980873 2. 997237 2. 964509  
11757169\_ 2. 538268 2. 538268 2. 807639 2. 821388 2. 659586 2. 603213  
11757170\_ 5. 837248 5. 901422 5. 727564 5. 906996 5. 845937 5. 930723  
11757171\_ 6. 959944 7. 031531 6. 911335 7. 008617 7. 008617 7. 053419  
11757172\_ 4. 737397 4. 8864 4. 769213 4. 907043 4. 929763 4. 991985  
11757173\_ 4. 953157 4. 974781 5. 015241 4. 934799 4. 977049 5. 006854



11757174\_ 5. 845758 5. 886711 5. 750879 5. 783183 5. 794286 5. 824183  
11757175\_ 2. 64465 2. 559379 2. 617391 2. 549222 2. 551974 2. 526512  
11757176\_ 3. 014196 2. 784619 2. 743157 2. 784619 2. 798274 2. 863144  
11757177\_ 6. 132327 6. 165557 6. 182386 6. 242695 6. 120408 6. 09787  
11757178\_ 3. 847675 4. 320027 4. 091802 4. 458793 4. 419376 4. 06869  
11757179\_ 7. 164713 7. 131589 7. 330872 6. 886822 6. 927889 7. 031386  
11757180\_ 8. 291711 8. 193301 8. 238286 8. 234234 8. 270417 8. 267243  
11757181\_ 6. 762521 6. 939998 6. 801672 7. 107338 7. 103997 7. 221869  
11757182\_ 9. 457059 9. 401326 9. 458531 9. 469347 9. 428377 9. 471717  
11757183\_ 5. 7366 5. 696162 5. 77054 5. 723241 5. 709521 5. 672682  
11757184\_ 6. 936019 6. 855056 6. 953318 6. 741324 6. 7681 6. 774196  
11757185\_ 6. 968656 7. 211816 6. 902165 7. 392275 7. 540613 7. 537161  
11757186\_ 6. 966965 7. 013162 6. 928737 7. 066839 7. 009779 6. 956076  
11757187\_ 6. 254196 6. 246088 6. 314319 6. 377094 6. 393284 6. 467129  
11757188\_ 6. 510244 6. 606852 6. 273849 6. 547624 6. 608134 6. 623962  
11757189\_ 2. 479309 2. 337194 2. 394712 2. 605516 2. 429798 2. 518077  
11757190\_ 9. 233245 9. 242114 9. 226573 9. 1141 9. 139884 9. 127113  
11757191\_ 3. 375046 3. 185019 3. 206436 3. 336616 3. 248041 3. 595886  
11757192\_ 2. 91546 3. 023936 3. 071561 3. 140157 2. 958139 3. 043344  
11757193\_ 5. 606842 5. 518726 5. 477282 5. 585574 5. 585574 5. 636996  
11757194\_ 5. 852854 5. 871076 5. 853109 6. 013462 5. 979625 5. 878815  
11757195\_ 1. 872141 2. 215446 2. 269806 2. 072875 2. 254435 2. 074331  
11757196\_ 3. 806558 3. 630368 3. 824695 3. 728643 3. 652618 3. 51642  
11757197\_ 6. 951515 6. 966667 6. 980243 7. 026683 6. 976763 7. 069037  
11757198\_ 3. 997659 4. 067703 4. 026092 3. 749832 3. 606313 3. 653573  
11757199\_ 3. 26681 3. 366351 3. 157548 3. 399924 3. 466471 3. 5343  
11757200\_ 5. 066442 4. 984076 4. 921162 5. 004313 4. 780965 4. 906169  
11757201\_ 4. 108592 4. 260493 4. 16081 4. 408112 4. 40461 4. 276715  
11757202\_ 5. 422916 5. 586537 5. 434202 5. 595885 5. 769207 5. 586868  
11757203\_ 2. 954087 3. 031679 2. 964477 2. 964477 2. 964477 2. 967941  
11757204\_ 4. 728574 5. 038184 4. 859575 4. 853431 4. 919478 4. 94619  
11757205\_ 5. 369572 5. 399043 5. 245818 5. 263997 5. 386963 5. 314512  
11757206\_ 4. 399546 4. 28928 4. 263591 4. 476138 4. 460369 4. 480427  
11757207\_ 4. 733079 4. 863126 4. 821514 4. 806925 4. 832994 4. 674731  
11757208\_ 4. 849287 4. 87557 4. 896105 5. 111777 4. 965779 5. 148181  
11757209\_ 4. 47963 4. 718439 4. 491815 4. 675479 4. 67319 4. 741912  
11757210\_ 5. 893822 5. 960665 5. 865048 6. 070381 5. 966847 6. 025006  
11757211\_ 5. 305036 5. 366996 5. 189862 5. 408365 5. 355321 5. 47984  
11757212\_ 5. 219531 5. 19788 4. 984669 5. 293153 5. 33194 5. 270527  
11757213\_ 3. 481532 3. 344851 3. 276199 3. 059051 3. 082796 3. 165452  
11757214\_ 4. 933125 4. 928167 4. 88241 4. 881942 4. 990962 4. 849858  
11757215\_ 5. 434516 5. 400156 5. 417494 5. 386813 5. 49289 5. 351248  
11757216\_ 3. 641055 3. 585712 3. 31221 3. 786729 3. 681728 3. 584614  
11757217\_ 2. 049571 2. 016939 2. 02115 1. 84773 2. 123214 2. 072437  
11757218\_ 2. 049314 2. 10655 2. 02224 1. 84773 2. 123214 2. 072179  
11757219\_ 4. 630682 4. 546869 4. 383182 4. 775261 4. 885128 4. 889016  
11757220\_ 7. 336131 7. 370524 7. 304255 7. 500407 7. 529221 7. 519597  
11757221\_ 6. 036786 6. 263235 6. 252562 6. 37935 6. 483866 6. 388425  
11757222\_ 5. 089598 4. 9949 5. 208656 5. 029529 5. 073036 5. 028626  
11757223\_ 3. 972177 4. 125037 3. 915821 4. 223251 4. 27465 4. 067882  
11757224\_ 7. 11489 7. 174513 7. 160356 7. 749333 7. 722766 7. 702222

11757225\_ 3. 029238 3. 399045 3. 051236 3. 291368 3. 249932 3. 306708  
11757226\_ 3. 184203 3. 16917 3. 149396 3. 003368 3. 111905 3. 126839  
11757227\_ 5. 488 5. 443982 5. 676992 5. 608113 5. 523406 5. 545767  
11757228\_ 4. 793351 4. 918634 4. 84143 4. 976782 4. 983284 5. 028636  
11757229\_ 1. 905939 2. 044344 2. 049209 2. 143141 2. 196035 2. 067396  
11757230\_ 4. 68372 4. 817794 4. 641466 4. 865744 4. 754494 4. 858884  
11757231\_ 3. 608713 3. 751924 3. 476559 3. 821946 3. 810848 3. 699343  
11757232\_ 6. 677241 6. 503863 6. 525751 6. 435033 6. 320211 6. 406946  
11757233\_ 3. 319668 3. 346326 3. 277401 3. 234762 3. 319668 3. 353313  
11757234\_ 5. 045524 5. 077191 4. 901945 5. 175536 5. 139476 4. 996662  
11757235\_ 6. 492302 6. 458569 6. 227883 6. 338588 6. 524544 6. 434545  
11757236\_ 2. 361778 2. 695088 2. 605516 2. 318236 2. 651367 2. 639801  
11757237\_ 4. 694004 4. 438627 4. 635471 4. 80288 4. 840954 4. 823037  
11757238\_ 3. 345358 3. 500111 3. 273647 3. 623531 3. 490419 3. 581638  
11757239\_ 3. 15136 3. 192303 3. 15136 3. 032175 2. 890296 2. 887555  
11757240\_ 4. 165603 4. 105062 4. 287593 4. 061648 4. 072179 4. 054288  
11757241\_ 5. 170989 5. 35686 5. 278332 5. 526249 5. 616576 5. 680541  
11757242\_ 6. 085599 6. 296113 6. 157984 6. 388978 6. 397531 6. 5241  
11757243\_ 7. 456839 7. 411852 7. 426223 7. 561238 7. 544303 7. 635211  
11757244\_ 2. 115251 2. 229418 2. 328618 2. 306029 2. 32681 2. 286953  
11757245\_ 2. 102989 2. 217118 2. 367021 2. 331723 2. 306311 2. 291474  
11757246\_ 4. 995975 4. 995975 4. 961098 4. 918771 4. 908306 4. 989352  
11757247\_ 4. 945581 4. 9226 4. 980636 5. 020658 5. 125609 5. 137524  
11757248\_ 1. 878103 1. 967939 2. 021821 1. 956301 1. 830917 1. 924849  
11757249\_ 2. 165548 2. 292186 2. 449142 2. 314552 2. 537753 2. 535924  
11757250\_ 2. 163049 2. 1694 2. 163049 2. 269851 2. 514194 2. 179024  
11757251\_ 3. 107496 3. 022511 2. 882505 3. 025972 2. 928769 3. 201428  
11757252\_ 3. 762598 3. 870577 3. 488264 3. 675879 3. 753205 3. 836316  
11757253\_ 4. 332342 4. 370668 4. 12771 4. 471738 4. 476359 4. 468357  
11757254\_ 5. 336716 5. 1415 5. 192262 5. 229237 5. 013825 5. 185369  
11757255\_ 4. 484771 4. 268364 4. 266937 4. 361626 4. 506753 4. 556818  
11757256\_ 5. 96961 5. 997006 5. 84027 5. 961163 6. 007764 6. 187405  
11757257\_ 5. 333723 5. 367597 5. 313863 5. 420781 5. 336194 5. 399605  
11757258\_ 3. 791655 3. 916343 3. 631407 3. 819951 3. 994447 3. 783492  
11757259\_ 5. 643014 5. 5516 5. 473374 5. 808748 5. 740291 5. 752731  
11757260\_ 3. 328924 3. 398236 3. 431651 3. 303521 3. 406264 3. 380596  
11757261\_ 4. 733086 4. 725701 4. 67656 4. 371601 4. 343529 4. 503557  
11757262\_ 5. 512927 5. 222692 5. 262901 5. 346865 4. 8806 5. 284691  
11757263\_ 5. 519159 5. 209263 5. 238154 5. 256906 5. 311278 5. 259944  
11757264\_ 13. 13152 13. 11393 13. 11666 13. 09529 13. 10933 13. 11491  
11757265\_ 10. 86743 10. 8263 10. 85119 10. 99546 11. 04027 11. 02682  
11757266\_ 5. 604756 5. 415675 5. 552134 5. 554717 5. 682964 5. 798361  
11757267\_ 8. 489937 8. 392732 8. 501154 8. 593221 8. 626467 8. 564014  
11757268\_ 11. 63521 11. 70483 11. 55627 11. 94685 11. 81644 11. 80842  
11757269\_ 12. 91802 12. 91526 12. 89797 12. 88306 12. 89096 12. 86566  
11757270\_ 6. 891445 7. 055207 6. 903645 6. 930008 6. 985985 6. 985985  
11757271\_ 7. 945528 7. 885547 7. 953444 7. 938007 7. 962697 7. 959442  
11757272\_ 11. 30506 11. 29946 11. 28801 11. 11945 11. 12518 11. 16536  
11757273\_ 4. 200871 4. 125158 4. 098403 4. 319269 4. 254316 4. 328932  
11757274\_ 10. 9433 10. 92391 10. 95649 10. 83033 10. 84804 10. 83749  
11757275\_ 10. 62837 10. 65131 10. 67257 10. 63538 10. 57084 10. 54928

11757276\_ 12. 3359 12. 38844 12. 35387 12. 52636 12. 45967 12. 3904  
11757277\_ 3. 660994 3. 619916 3. 644461 3. 644461 3. 655427 3. 53356  
11757278\_ 5. 3483 5. 476259 5. 337355 5. 445398 5. 445398 5. 523097  
11757279\_ 10. 32785 10. 26344 10. 286 10. 14514 10. 13702 10. 15829  
11757280\_ 10. 15544 10. 07213 10. 0417 10. 78703 10. 80233 10. 72138  
11757281\_ 11. 18912 11. 17819 11. 19008 11. 32689 11. 35251 11. 29746  
11757282\_ 11. 71604 11. 68435 11. 74532 11. 84356 11. 83436 11. 8212  
11757283\_ 4. 218391 4. 259895 4. 213226 3. 290188 3. 306585 3. 534263  
11757284\_ 6. 328361 6. 275482 6. 286659 6. 668116 6. 722465 6. 691204  
11757285\_ 8. 161215 8. 024513 8. 104398 7. 433275 7. 538965 7. 445731  
11757286\_ 3. 448996 3. 448601 3. 430775 3. 493631 3. 586623 3. 349415  
11757287\_ 10. 41924 10. 36355 10. 4367 10. 41713 10. 42814 10. 44485  
11757288\_ 9. 747294 9. 699058 9. 843348 9. 69317 9. 667301 9. 672518  
11757289\_ 10. 8106 10. 79506 10. 80292 10. 66207 10. 67544 10. 61346  
11757290\_ 11. 08612 11. 10873 11. 1308 10. 68646 10. 68886 10. 70038  
11757291\_ 10. 34938 10. 28786 10. 29902 9. 948736 9. 959884 9. 977336  
11757292\_ 8. 133545 8. 143783 7. 996607 7. 63319 7. 544282 7. 562422  
11757293\_ 8. 41883 8. 49434 8. 514104 8. 743198 8. 815508 8. 695487  
11757294\_ 10. 71007 10. 69584 10. 68968 10. 54376 10. 50055 10. 43622  
11757295\_ 10. 90438 10. 85972 10. 85694 11. 00301 10. 99452 10. 97347  
11757296\_ 11. 6671 11. 63968 11. 64671 11. 43149 11. 45458 11. 43557  
11757297\_ 3. 38579 3. 503743 3. 701402 3. 455228 3. 466767 3. 809053  
11757298\_ 7. 879491 7. 75751 7. 799068 8. 442672 8. 460509 8. 50771  
11757299\_ 9. 692442 9. 634597 9. 68123 9. 529728 9. 560845 9. 497695  
11757300\_ 9. 816113 9. 76751 9. 807352 10. 10181 10. 0312 10. 06117  
11757301\_ 10. 93667 10. 94231 10. 95328 10. 6161 10. 62647 10. 63016  
11757302\_ 9. 84163 9. 759457 9. 827336 10. 1802 10. 19281 10. 17404  
11757303\_ 8. 651974 8. 567941 8. 637646 8. 40772 8. 472151 8. 473662  
11757304\_ 9. 898499 9. 838665 9. 892198 9. 662639 9. 663362 9. 687415  
11757305\_ 13. 40828 13. 39853 13. 39853 13. 34094 13. 34623 13. 34961  
11757306\_ 11. 04409 10. 98869 11. 02845 10. 6254 10. 63829 10. 56123  
11757307\_ 7. 203477 7. 173489 7. 121764 7. 30564 7. 2542 7. 248098  
11757308\_ 10. 56963 10. 57526 10. 53408 10. 54977 10. 46503 10. 45187  
11757309\_ 3. 938453 3. 818401 4. 127353 3. 683011 4. 142594 3. 931805  
11757310\_ 8. 24263 8. 143004 8. 272864 8. 431484 8. 526136 8. 539173  
11757311\_ 11. 62172 11. 58752 11. 56725 11. 56335 11. 56036 11. 57784  
11757312\_ 6. 639589 6. 578243 6. 396147 5. 113118 5. 435715 5. 263604  
11757313\_ 7. 462121 7. 50047 7. 512575 7. 794384 7. 811416 7. 771878  
11757314\_ 13. 07726 13. 10091 13. 07386 13. 06606 13. 06946 13. 02634  
11757315\_ 8. 714432 8. 62321 8. 708962 8. 471884 8. 426629 8. 491017  
11757316\_ 8. 450067 8. 397488 8. 482138 8. 894258 8. 957256 8. 901424  
11757317\_ 9. 058427 8. 981321 9. 093229 9. 409203 9. 469262 9. 464174  
11757318\_ 7. 260481 7. 238191 7. 230991 7. 30491 7. 323811 7. 299162  
11757319\_ 11. 99144 12. 00197 12. 01872 11. 95564 11. 98486 11. 97247  
11757320\_ 8. 17766 7. 977442 8. 15949 8. 366569 8. 469359 8. 370451  
11757321\_ 8. 837466 8. 786339 8. 833757 8. 531601 8. 658955 8. 63204  
11757322\_ 6. 97183 6. 880778 7. 055403 7. 512503 7. 554651 7. 584235  
11757323\_ 9. 263649 9. 318507 9. 275688 9. 280544 9. 240352 9. 282772  
11757324\_ 9. 716408 9. 673577 9. 695432 9. 671188 9. 613615 9. 59162  
11757325\_ 8. 466579 8. 512535 8. 467348 9. 418933 9. 389804 9. 510342  
11757326\_ 12. 90018 12. 88852 12. 88412 12. 84136 12. 84895 12. 85547

11757327\_ 12. 57501 12. 54092 12. 53994 12. 44688 12. 43606 12. 46486  
11757328\_ 12. 88662 12. 874 12. 85509 12. 88102 12. 88474 12. 84856  
11757329\_ 12. 78384 12. 81637 12. 74952 12. 74552 12. 77379 12. 6939  
11757330\_ 11. 00014 10. 97057 11. 02609 11. 12297 11. 11481 11. 11728  
11757331\_ 13. 03603 12. 97805 13. 00214 13. 24296 13. 24722 13. 24419  
11757332\_ 11. 36798 11. 34132 11. 37967 11. 20168 11. 16252 11. 14922  
11757333\_ 7. 081911 7. 060462 7. 012583 7. 172075 7. 164275 7. 101053  
11757334\_ 10. 20507 10. 19847 10. 1872 10. 14222 10. 15217 10. 15546  
11757335\_ 8. 260075 8. 211508 8. 321653 8. 243762 8. 241562 8. 211864  
11757336\_ 7. 889187 7. 833023 7. 904733 7. 919791 7. 945499 7. 919445  
11757337\_ 9. 118599 8. 956209 9. 124879 9. 051103 9. 113729 9. 091863  
11757338\_ 9. 883879 9. 823625 9. 903576 9. 647946 9. 666879 9. 687752  
11757339\_ 8. 691503 8. 691145 8. 748081 8. 546966 8. 617842 8. 5547  
11757340\_ 8. 195086 8. 100895 8. 141711 7. 874038 7. 83895 7. 795144  
11757341\_ 5. 929226 5. 928648 5. 970848 5. 530489 5. 726823 5. 681249  
11757342\_ 10. 29882 10. 23604 10. 25533 10. 17759 10. 18939 10. 14142  
11757343\_ 10. 57983 10. 52378 10. 58699 10. 70145 10. 74118 10. 70606  
11757344\_ 11. 21036 11. 11168 11. 18397 11. 45834 11. 45447 11. 50414  
11757345\_ 3. 137093 2. 942839 2. 961555 2. 751399 2. 858462 2. 768204  
11757346\_ 12. 98108 12. 95044 12. 95132 12. 93194 12. 93131 12. 90561  
11757347\_ 7. 70969 7. 56717 7. 699092 7. 616324 7. 703387 7. 69055  
11757348\_ 8. 364372 8. 279327 8. 281048 8. 046908 8. 151735 8. 10699  
11757349\_ 3. 063952 3. 062139 3. 149484 3. 215753 3. 094154 3. 162737  
11757350\_ 4. 097129 4. 011825 3. 882756 3. 783545 3. 833538 4. 076529  
11757351\_ 8. 444386 8. 354699 8. 447063 7. 85451 7. 903103 7. 942265  
11757352\_ 6. 968085 6. 860052 7. 083695 6. 838632 6. 899912 6. 755651  
11757353\_ 5. 74331 5. 825635 5. 932244 5. 284202 5. 336845 5. 267758  
11757354\_ 6. 04383 6. 076709 6. 146538 5. 681248 5. 609533 5. 619463  
11757355\_ 13. 03401 13. 05957 13. 05622 13. 23343 13. 22367 13. 21247  
11757356\_ 11. 95477 11. 95496 11. 95262 11. 82676 11. 86301 11. 81355  
11757357\_ 7. 451907 7. 481605 7. 498469 7. 530728 7. 566302 7. 609237  
11757358\_ 9. 450229 9. 514262 9. 452874 9. 834695 9. 774658 9. 732045  
11757359\_ 11. 53614 11. 51208 11. 49801 11. 64391 11. 63144 11. 6053  
11757360\_ 9. 42566 9. 427541 9. 417653 9. 479908 9. 501272 9. 479682  
11757361\_ 10. 3814 10. 38571 10. 35898 10. 63964 10. 59971 10. 47391  
11757362\_ 12. 36185 12. 43635 12. 37876 12. 57769 12. 53369 12. 53518  
11757363\_ 12. 91986 12. 91935 12. 90545 12. 86495 12. 83538 12. 86124  
11757364\_ 9. 179331 9. 119505 9. 21569 9. 075265 9. 018159 9. 034287  
11757365\_ 8. 07737 8. 089203 8. 168242 9. 159718 9. 162798 9. 192321  
11757366\_ 9. 215957 9. 173869 9. 189363 9. 13763 9. 098154 9. 101783  
11757367\_ 5. 114951 5. 341857 5. 156022 5. 382161 5. 396013 5. 324475  
11757368\_ 9. 555348 9. 465171 9. 528218 9. 114163 9. 12358 9. 133631  
11757369\_ 7. 61612 7. 478232 7. 627315 7. 171963 7. 230427 7. 156845  
11757370\_ 9. 013418 8. 963178 8. 984473 9. 14288 9. 239182 9. 101768  
11757371\_ 8. 155169 8. 070729 8. 08343 7. 933831 8. 005493 7. 977012  
11757372\_ 7. 694916 7. 673643 7. 809888 8. 186502 8. 230128 8. 117753  
11757373\_ 5. 750529 5. 624985 5. 624985 6. 233781 6. 312793 6. 424773  
11757374\_ 13. 19647 13. 18212 13. 18604 13. 12929 13. 12906 13. 09995  
11757375\_ 12. 55638 12. 51957 12. 54277 12. 55944 12. 56686 12. 54875  
11757376\_ 11. 02594 11. 024 11. 04685 11. 03478 11. 01883 11. 00797  
11757377\_ 4. 246341 4. 41441 4. 259544 4. 153384 4. 102171 4. 161008

11757378\_ 8. 827553 8. 784282 8. 850453 8. 520117 8. 551793 8. 580112  
11757379\_ 8. 356485 8. 174489 8. 293435 8. 412144 8. 469166 8. 47504  
11757380\_ 10. 1028 10. 01631 10. 13975 10. 06624 10. 05475 10. 04967  
11757381\_ 10. 73227 10. 75864 10. 7507 10. 73048 10. 61546 10. 58499  
11757382\_ 8. 720821 8. 672287 8. 757142 8. 591953 8. 659625 8. 603548  
11757383\_ 6. 124815 6. 062871 6. 141952 6. 417103 6. 446166 6. 571347  
11757384\_ 10. 04734 9. 989884 10. 01773 10. 12466 10. 12332 10. 10118  
11757385\_ 13. 16315 13. 153 13. 16604 13. 39391 13. 41542 13. 39445  
11757386\_ 12. 34815 12. 3999 12. 38705 12. 73341 12. 77769 12. 72275  
11757387\_ 12. 8125 12. 78192 12. 79586 12. 65413 12. 68292 12. 64066  
11757388\_ 10. 90428 10. 87192 10. 87325 10. 97666 11. 01743 10. 92214  
11757389\_ 8. 013408 7. 979159 8. 036146 7. 95227 8. 011131 8. 013868  
11757390\_ 5. 94237 5. 879762 5. 780493 6. 38402 6. 266592 6. 223175  
11757391\_ 9. 132628 9. 056817 9. 080412 9. 104746 9. 071827 9. 108172  
11757392\_ 9. 711869 9. 699847 9. 751115 9. 712162 9. 740344 9. 695373  
11757393\_ 2. 095256 2. 25483 2. 124229 2. 333351 2. 254463 2. 195538  
11757394\_ 8. 95618 8. 841994 8. 911499 9. 00167 9. 096667 9. 094154  
11757395\_ 8. 445327 8. 281468 8. 379449 8. 188403 8. 218683 8. 186495  
11757396\_ 4. 571789 4. 590293 4. 563373 4. 665835 4. 700243 4. 71487  
11757397\_ 8. 843367 8. 899126 8. 911129 9. 29874 9. 219454 9. 185069  
11757398\_ 10. 15958 10. 24112 10. 13035 10. 34872 10. 31996 10. 28978  
11757399\_ 9. 984243 10. 04259 9. 992695 10. 35145 10. 22912 10. 1746  
11757400\_ 9. 052145 8. 996224 9. 106497 9. 125208 9. 165313 9. 117736  
11757401\_ 9. 657012 9. 680843 9. 645049 9. 485668 9. 453306 9. 440355  
11757402\_ 9. 332783 9. 335631 9. 379503 9. 48414 9. 527953 9. 501464  
11757403\_ 2. 955017 3. 115424 2. 984801 3. 022375 3. 004853 2. 945929  
11757404\_ 9. 840527 9. 771648 9. 82592 9. 984015 10. 05574 10. 01191  
11757405\_ 8. 016903 7. 936081 8. 101945 7. 99084 7. 992264 8. 005377  
11757406\_ 6. 52673 6. 361663 6. 625947 6. 300643 6. 381204 6. 338445  
11757407\_ 6. 138107 6. 144404 6. 217114 6. 20767 6. 258124 6. 194931  
11757408\_ 12. 54653 12. 56033 12. 5348 12. 52021 12. 47927 12. 46077  
11757409\_ 12. 45094 12. 42719 12. 4366 12. 48234 12. 53661 12. 4773  
11757410\_ 7. 620576 7. 503257 7. 580651 7. 793418 7. 850705 7. 819909  
11757411\_ 10. 85431 10. 8736 10. 79833 10. 80868 10. 75088 10. 64188  
11757412\_ 7. 144608 6. 944932 7. 260661 7. 832249 7. 918665 7. 804964  
11757413\_ 9. 909136 9. 820235 9. 909386 10. 37503 10. 3761 10. 40389  
11757414\_ 10. 09794 10. 07398 10. 06205 10. 16268 10. 14047 10. 14396  
11757415\_ 9. 540441 9. 516214 9. 557247 10. 29692 10. 24457 10. 29928  
11757416\_ 8. 393058 8. 329745 8. 404706 8. 335079 8. 330323 8. 327228  
11757417\_ 10. 18446 10. 12805 10. 22379 10. 05913 10. 10063 10. 05469  
11757418\_ 6. 520868 6. 590216 6. 468791 6. 5901 6. 7838 6. 572309  
11757419\_ 10. 04812 10. 01805 10. 0839 10. 15731 10. 21349 10. 20952  
11757420\_ 9. 66862 9. 60547 9. 693478 9. 453389 9. 517434 9. 435872  
11757421\_ 12. 9311 12. 93519 12. 90478 12. 94642 12. 94889 12. 92224  
11757422\_ 12. 70724 12. 6989 12. 71465 12. 56995 12. 63176 12. 62189  
11757423\_ 10. 09151 10. 0719 10. 10835 10. 15431 10. 16473 10. 16938  
11757424\_ 12. 73248 12. 79022 12. 73093 12. 78668 12. 75465 12. 70004  
11757425\_ 2. 496519 2. 698574 2. 400372 2. 375984 2. 377885 2. 232896  
11757426\_ 8. 176378 8. 048722 8. 10592 8. 228795 8. 221956 8. 23464  
11757427\_ 11. 71489 11. 68554 11. 6921 11. 67566 11. 71282 11. 69807  
11757428\_ 10. 19921 10. 12107 10. 16289 10. 77717 10. 66977 10. 74104

11757429\_ 10. 58302 10. 4826 10. 56464 10. 72326 10. 7981 10. 74916  
11757430\_ 10. 39225 10. 3801 10. 38548 9. 538947 9. 49939 9. 561741  
11757431\_ 10. 74677 10. 70004 10. 72776 10. 15947 10. 17435 10. 20413  
11757432\_ 7. 951855 7. 900837 7. 932977 8. 260121 8. 159005 8. 12352  
11757433\_ 8. 218174 8. 2405 8. 338618 8. 09777 8. 198228 8. 161644  
11757434\_ 11. 08915 11. 10984 11. 07798 11. 68297 11. 69833 11. 65642  
11757435\_ 7. 25312 7. 351631 7. 232364 7. 080546 6. 981602 7. 144608  
11757436\_ 10. 56908 10. 5642 10. 56961 10. 22781 10. 28941 10. 28333  
11757437\_ 6. 342466 6. 385127 6. 242913 6. 382302 6. 447117 6. 376812  
11757438\_ 11. 47894 11. 44695 11. 45723 11. 51035 11. 47156 11. 44536  
11757439\_ 10. 8302 10. 78773 10. 78471 10. 70173 10. 72336 10. 64643  
11757440\_ 10. 89988 10. 86173 10. 90642 10. 68525 10. 66607 10. 67375  
11757441\_ 8. 214689 8. 162662 8. 178792 7. 836019 7. 882912 7. 844327  
11757442\_ 12. 54797 12. 56013 12. 55714 12. 36811 12. 33648 12. 3434  
11757443\_ 7. 139417 7. 084544 7. 146007 7. 520755 7. 392632 7. 446361  
11757444\_ 3. 159787 3. 042156 3. 234853 3. 101013 3. 145873 3. 383886  
11757445\_ 8. 534514 8. 501751 8. 57552 8. 159005 8. 207382 8. 160472  
11757446\_ 11. 35625 11. 29621 11. 35595 11. 27156 11. 28879 11. 25592  
11757447\_ 8. 988067 8. 91965 8. 966834 8. 38035 8. 354849 8. 379155  
11757448\_ 10. 16881 10. 16122 10. 13077 10. 44491 10. 40313 10. 37584  
11757449\_ 6. 358199 6. 478851 6. 385622 6. 64639 6. 701781 6. 631711  
11757450\_ 8. 65265 8. 548389 8. 605118 8. 653116 8. 597644 8. 689681  
11757451\_ 7. 115836 6. 97057 7. 016565 8. 417175 8. 417192 8. 409447  
11757452\_ 7. 986876 7. 883459 7. 940585 7. 870701 7. 924195 7. 916585  
11757453\_ 6. 872357 6. 732212 6. 957574 6. 841205 6. 829549 7. 004834  
11757454\_ 9. 677996 9. 558988 9. 605596 9. 189812 9. 160218 9. 127446  
11757455\_ 12. 08596 12. 06499 12. 08397 11. 84226 11. 90528 11. 87432  
11757456\_ 12. 33937 12. 34704 12. 32674 12. 39723 12. 3737 12. 36552  
11757457\_ 8. 970202 9. 008882 9. 017 8. 899349 8. 976374 8. 824943  
11757458\_ 6. 892665 6. 849603 6. 916123 7. 075053 7. 251975 7. 143768  
11757459\_ 6. 415436 6. 488676 6. 433922 7. 011791 7. 113198 7. 003123  
11757460\_ 4. 909967 4. 981729 4. 772366 4. 987811 4. 987811 4. 97793  
11757461\_ 9. 861525 9. 83891 9. 837133 10. 02404 9. 989502 9. 951186  
11757462\_ 6. 348141 6. 324022 6. 384747 5. 983427 6. 082539 6. 11228  
11757463\_ 6. 623608 6. 577925 6. 537279 6. 784304 6. 752593 6. 745318  
11757464\_ 9. 103922 9. 063298 9. 116378 8. 692685 8. 76593 8. 682437  
11757465\_ 9. 884141 9. 879563 9. 826737 10. 26839 10. 21035 10. 15094  
11757466\_ 6. 592823 6. 585178 6. 479095 6. 723318 6. 642683 6. 656588  
11757467\_ 8. 877013 8. 850956 8. 821758 8. 670108 8. 695073 8. 7462  
11757468\_ 4. 792765 4. 818521 4. 666635 4. 804998 4. 669028 4. 74511  
11757469\_ 8. 728872 8. 701135 8. 737923 8. 702265 8. 755229 8. 750276  
11757470\_ 8. 192736 8. 076666 8. 150448 8. 282285 8. 300091 8. 328885  
11757471\_ 2. 961839 2. 698017 2. 85927 3. 205773 3. 171915 3. 074494  
11757472\_ 9. 619698 9. 699275 9. 696669 11. 06006 11. 08785 11. 11796  
11757473\_ 8. 848086 8. 717659 8. 717659 9. 3023 9. 328689 9. 285532  
11757474\_ 10. 66682 10. 60568 10. 65843 10. 62906 10. 68051 10. 67492  
11757475\_ 5. 885375 5. 704919 5. 950197 5. 728261 5. 889187 5. 936632  
11757476\_ 7. 842628 7. 931562 7. 982603 8. 260504 8. 309533 8. 239177  
11757477\_ 11. 12755 11. 10691 11. 1119 11. 02756 11. 0139 11. 04976  
11757478\_ 10. 23232 10. 16608 10. 22084 10. 37667 10. 35231 10. 34063  
11757479\_ 6. 225513 6. 145338 6. 11665 6. 777582 6. 661384 6. 820019

11757480\_ 4. 45795 4. 50271 4. 507947 4. 557269 4. 556746 4. 501026  
11757481\_ 8. 991528 8. 967212 8. 932711 9. 382746 9. 336992 9. 301323  
11757482\_ 9. 469971 9. 477697 9. 520562 9. 814859 9. 872154 9. 864694  
11757483\_ 4. 020558 4. 036177 4. 170756 4. 120522 4. 139205 4. 294592  
11757484\_ 6. 286569 6. 277208 6. 263553 6. 143062 6. 131759 6. 02051  
11757485\_ 10. 77813 10. 77047 10. 77647 10. 7604 10. 76852 10. 76406  
11757486\_ 8. 612511 8. 539402 8. 588264 8. 448079 8. 463788 8. 458052  
11757487\_ 8. 323856 8. 233774 8. 336227 8. 28739 8. 297049 8. 323421  
11757488\_ 8. 878105 8. 786542 8. 90403 9. 0336 9. 047385 8. 998972  
11757489\_ 10. 49599 10. 48483 10. 51094 10. 51552 10. 45637 10. 4439  
11757490\_ 9. 209769 9. 184724 9. 181861 8. 973922 8. 947054 8. 945332  
11757491\_ 11. 35273 11. 29746 11. 33747 11. 22881 11. 26747 11. 24176  
11757492\_ 8. 787199 8. 719407 8. 79516 8. 043456 8. 093611 8. 090287  
11757493\_ 2. 605516 2. 540535 2. 633706 2. 559053 2. 665349 2. 477408  
11757494\_ 9. 143884 9. 197051 9. 101087 9. 395162 9. 419247 9. 410718  
11757495\_ 6. 238409 6. 185952 6. 223066 6. 223024 6. 10319 6. 238409  
11757496\_ 6. 504395 6. 387455 6. 368499 6. 414953 6. 411404 6. 431906  
11757497\_ 9. 291159 9. 341376 9. 282534 9. 215999 9. 18445 9. 113962  
11757498\_ 9. 761701 9. 765383 9. 801378 10. 03069 9. 988018 10. 05926  
11757499\_ 8. 232097 8. 131065 8. 232923 7. 855228 7. 918524 7. 91782  
11757500\_ 6. 666664 6. 371945 6. 59362 6. 984657 6. 970737 6. 973113  
11757501\_ 9. 716838 9. 68096 9. 715429 9. 721941 9. 781103 9. 7429  
11757502\_ 3. 746476 3. 968611 4. 116091 3. 63164 3. 528491 3. 347943  
11757503\_ 7. 887819 7. 708657 7. 754752 8. 265052 8. 251973 8. 295214  
11757504\_ 9. 564265 9. 566638 9. 503499 8. 601203 8. 546198 8. 561451  
11757505\_ 10. 48474 10. 41346 10. 45395 10. 51366 10. 54675 10. 50052  
11757506\_ 7. 959973 8. 004661 7. 911861 8. 158767 8. 160009 8. 213224  
11757507\_ 6. 498193 6. 36914 6. 428975 6. 763017 6. 7528 6. 808058  
11757508\_ 6. 982419 7. 249038 7. 203112 7. 42423 7. 469533 7. 324886  
11757509\_ 9. 169495 9. 181781 9. 162745 8. 979649 8. 965107 9. 007384  
11757510\_ 8. 732016 8. 67476 8. 747578 9. 068106 9. 047622 9. 098573  
11757511\_ 9. 559432 9. 492358 9. 565727 9. 728479 9. 732502 9. 721835  
11757512\_ 8. 814776 8. 831787 8. 834455 9. 045525 9. 07326 8. 955217  
11757513\_ 8. 362749 8. 289655 8. 350647 8. 053943 8. 149428 8. 065703  
11757514\_ 13. 15271 13. 15271 13. 14399 13. 06462 13. 04448 13. 06974  
11757515\_ 8. 168791 8. 140459 8. 203683 8. 980969 9. 044188 8. 967331  
11757516\_ 3. 822636 3. 768182 3. 792757 3. 889152 3. 639574 3. 945645  
11757517\_ 8. 221594 8. 366378 8. 328491 8. 595405 8. 566661 8. 558228  
11757518\_ 9. 378355 9. 32914 9. 381882 9. 567111 9. 60238 9. 568969  
11757519\_ 9. 034025 8. 956458 9. 057753 9. 057646 9. 024269 9. 043014  
11757520\_ 10. 45541 10. 40363 10. 38176 10. 13674 10. 15833 10. 09396  
11757521\_ 8. 318585 8. 282003 8. 261857 8. 362495 8. 500567 8. 354282  
11757522\_ 5. 334988 5. 230055 5. 311994 5. 319568 5. 210881 5. 308177  
11757523\_ 7. 030532 6. 972946 7. 06449 7. 285854 7. 360814 7. 183172  
11757524\_ 10. 76868 10. 72193 10. 75916 10. 93985 10. 96744 10. 94517  
11757525\_ 8. 61301 8. 602684 8. 706194 8. 547388 8. 533648 8. 520466  
11757526\_ 8. 400078 8. 313703 8. 401354 8. 811203 8. 83905 8. 790727  
11757527\_ 9. 23432 9. 174078 9. 218122 9. 153876 9. 210437 9. 166527  
11757528\_ 8. 302508 8. 270854 8. 202916 8. 117594 8. 131016 8. 20699  
11757529\_ 10. 43066 10. 39234 10. 45264 10. 4188 10. 3986 10. 41533  
11757530\_ 10. 79086 10. 75872 10. 78537 10. 79292 10. 86111 10. 76725

11757531\_ 11.49079 11.49072 11.46204 11.57434 11.54273 11.56106  
11757532\_ 6.336152 6.244144 6.444251 6.700337 6.67263 6.862589  
11757533\_ 9.163604 9.129258 9.149543 9.152695 9.147103 9.147713  
11757534\_ 5.321717 5.207784 5.362366 3.865094 3.989618 4.207501  
11757535\_ 6.978143 7.021223 7.048661 6.768128 6.685834 6.699268  
11757536\_ 9.460296 9.433879 9.473846 9.47498 9.360466 9.376148  
11757537\_ 10.1447 10.09185 10.12093 10.25108 10.31236 10.27463  
11757538\_ 8.191808 8.201756 8.19309 8.321347 8.362584 8.32701  
11757539\_ 7.94844 7.954134 8.07764 7.720902 7.786782 7.790981  
11757540\_ 8.184638 8.20491 8.233466 7.951727 8.041111 8.035033  
11757541\_ 10.36173 10.33982 10.3403 10.21327 10.23976 10.1777  
11757542\_ 7.90524 7.867168 7.964481 8.316753 8.22846 8.321086  
11757543\_ 9.800056 9.750149 9.808022 9.762286 9.778069 9.803888  
11757544\_ 5.04421 5.096053 4.990503 5.134447 5.167644 5.2666  
11757545\_ 5.845365 5.934184 5.961021 6.061577 6.064852 6.011116  
11757546\_ 7.368611 7.238465 7.287238 7.265178 7.278132 7.252861  
11757547\_ 7.873043 7.817061 7.900053 7.856893 7.856412 7.924382  
11757548\_ 3.731105 3.564766 3.64657 3.296339 3.487368 3.33892  
11757549\_ 7.622382 7.589473 7.637706 7.908919 7.92677 7.909589  
11757550\_ 8.098381 7.978292 8.038997 8.240513 8.318758 8.226437  
11757551\_ 10.6739 10.6657 10.62205 10.78238 10.81527 10.72067  
11757552\_ 10.0872 9.995746 10.04393 9.943613 9.961979 9.943613  
11757553\_ 7.311775 7.249745 7.259275 7.241641 7.403185 7.378967  
11757554\_ 8.484467 8.45325 8.524164 8.779934 8.844991 8.862686  
11757555\_ 9.089386 9.052542 9.144562 9.034572 9.03879 9.064991  
11757556\_ 9.093718 9.07003 9.126761 9.432133 9.433476 9.419297  
11757557\_ 6.986821 6.822744 6.985937 6.525011 6.591011 6.495428  
11757558\_ 8.320192 8.178027 8.263466 7.587818 7.505459 7.509815  
11757559\_ 9.089599 9.048857 9.002425 9.162798 9.071673 9.114163  
11757560\_ 4.045152 3.828131 3.962651 4.051567 4.061972 4.131504  
11757561\_ 8.749294 8.658194 8.686208 8.838857 8.790539 8.855225  
11757562\_ 5.639125 5.704919 5.487711 5.826558 5.918745 5.732984  
11757563\_ 8.842615 8.807174 8.886447 9.308455 9.35852 9.292458  
11757564\_ 9.111337 9.020263 9.122818 9.40592 9.456894 9.389588  
11757565\_ 7.428333 7.403531 7.362285 7.339996 7.385729 7.445572  
11757566\_ 9.498664 9.51308 9.494512 9.302247 9.262873 9.273883  
11757567\_ 9.931509 9.851141 9.913879 9.922855 9.901768 9.921768  
11757568\_ 7.748509 7.691686 7.817572 8.559185 8.421006 8.551109  
11757569\_ 8.683553 8.66255 8.75564 9.15504 9.104751 9.111924  
11757570\_ 2.973184 3.329572 2.623928 3.096269 2.803847 2.903322  
11757571\_ 8.449816 8.498175 8.446754 8.242455 8.155982 8.124096  
11757572\_ 8.158082 8.089808 8.167184 8.230772 8.279546 8.232402  
11757573\_ 5.451431 5.459921 5.448296 5.383521 5.333723 5.363064  
11757574\_ 9.573462 9.715953 9.476736 10.43708 10.29378 10.14976  
11757575\_ 4.874234 5.073036 4.930507 4.962774 4.890539 4.955776  
11757576\_ 10.44962 10.38495 10.4831 10.29787 10.32057 10.28018  
11757577\_ 8.24725 8.115386 8.222835 8.147904 8.268255 8.289472  
11757578\_ 10.17595 10.15364 10.20161 9.813435 9.830364 9.826647  
11757579\_ 9.582442 9.477872 9.593104 9.068336 9.057978 9.148683  
11757580\_ 9.834488 9.798898 9.829886 9.840827 9.850985 9.857426  
11757581\_ 7.700817 7.647531 7.686779 8.329201 8.355037 8.239333



11757582\_ 8. 446697 8. 349116 8. 335248 8. 279599 8. 296946 8. 335908  
11757583\_ 2. 728483 2. 649671 2. 774068 2. 706097 3. 016153 2. 828653  
11757584\_ 9. 930398 9. 880919 9. 870982 8. 945709 9. 009624 8. 945206  
11757585\_ 9. 831909 9. 796498 9. 842832 10. 00051 10. 01839 10. 06102  
11757586\_ 7. 657193 7. 615719 7. 712385 7. 844902 7. 830349 7. 826605  
11757587\_ 9. 420672 9. 322651 9. 400589 9. 75013 9. 788166 9. 765674  
11757588\_ 9. 284594 9. 315567 9. 330045 9. 201121 9. 159453 9. 228204  
11757589\_ 10. 40229 10. 36707 10. 37526 10. 42772 10. 40709 10. 42324  
11757590\_ 7. 320279 7. 206421 7. 310823 7. 355859 7. 392275 7. 280725  
11757591\_ 9. 578234 9. 476208 9. 515033 9. 239927 9. 215916 9. 217978  
11757592\_ 11. 19323 11. 18236 11. 18239 11. 11255 11. 1338 11. 09327  
11757593\_ 7. 025168 7. 091362 6. 980703 6. 569554 6. 591912 6. 624114  
11757594\_ 10. 65063 10. 66389 10. 65463 10. 74469 10. 71659 10. 73336  
11757595\_ 5. 517596 5. 65316 5. 448296 5. 546306 5. 546306 5. 465238  
11757596\_ 8. 490437 8. 484576 8. 540432 8. 365128 8. 261339 8. 31696  
11757597\_ 7. 742077 7. 652376 7. 689441 8. 976216 8. 968434 8. 959508  
11757598\_ 8. 344892 8. 349354 8. 316337 8. 073964 8. 003198 8. 032574  
11757599\_ 11. 15017 11. 1128 11. 12438 11. 24039 11. 27263 11. 23021  
11757600\_ 7. 549676 7. 559711 7. 547656 7. 539602 7. 525084 7. 536841  
11757601\_ 9. 704355 9. 707121 9. 702004 9. 602626 9. 609919 9. 572267  
11757602\_ 9. 590763 9. 516908 9. 571743 9. 813865 9. 828276 9. 779438  
11757603\_ 4. 517134 4. 361021 4. 355202 4. 119676 4. 216547 4. 372446  
11757604\_ 8. 985824 8. 99918 9. 037991 9. 015401 9. 055572 9. 053912  
11757605\_ 5. 36906 5. 107378 5. 13642 5. 493394 5. 426098 5. 5835  
11757606\_ 10. 18486 10. 13307 10. 18349 10. 22279 10. 1857 10. 19256  
11757607\_ 3. 741337 3. 632095 3. 632095 3. 442261 3. 685746 3. 454934  
11757608\_ 2. 988093 3. 004956 2. 925393 2. 895802 3. 004853 2. 966829  
11757609\_ 7. 96959 7. 99192 8. 014472 7. 773916 7. 713977 7. 815799  
11757610\_ 5. 043425 5. 029529 4. 803059 5. 100856 5. 084913 4. 915831  
11757611\_ 10. 90962 10. 82713 10. 90786 11. 14043 11. 16753 11. 16712  
11757612\_ 6. 616954 6. 5335 6. 64442 6. 973385 6. 91858 6. 915885  
11757613\_ 11. 23641 11. 20742 11. 23963 11. 39763 11. 3891 11. 35019  
11757614\_ 7. 309314 7. 230373 7. 311325 7. 830589 7. 797886 7. 760844  
11757615\_ 4. 565526 4. 713571 4. 733432 4. 843343 4. 697259 4. 778722  
11757616\_ 7. 331316 7. 269821 7. 254801 7. 577649 7. 697869 7. 633789  
11757617\_ 5. 734076 5. 614563 5. 845365 5. 929122 5. 871492 5. 772999  
11757618\_ 7. 944151 7. 924676 8. 128506 7. 637149 7. 740353 7. 665722  
11757619\_ 10. 57734 10. 61968 10. 62699 10. 90906 10. 85313 10. 82641  
11757620\_ 7. 472989 7. 482432 7. 486134 7. 751669 7. 757474 7. 811615  
11757621\_ 6. 502379 6. 460274 6. 588563 6. 189359 6. 04215 6. 134038  
11757622\_ 2. 953314 2. 762409 2. 953314 2. 805615 3. 052933 2. 965256  
11757623\_ 8. 698027 8. 743338 8. 610475 8. 931808 8. 985533 9. 00644  
11757624\_ 7. 654602 7. 606412 7. 752637 7. 338563 7. 374996 7. 472989  
11757625\_ 5. 265151 5. 243898 5. 424807 6. 017659 6. 030414 6. 153953  
11757626\_ 8. 968152 8. 919396 8. 896317 8. 241325 8. 173236 8. 183213  
11757627\_ 10. 20736 10. 1168 10. 17264 10. 47995 10. 52904 10. 51579  
11757628\_ 8. 043421 8. 046673 8. 0984 7. 921196 7. 969213 7. 927767  
11757629\_ 12. 76041 12. 74241 12. 73587 12. 66195 12. 67157 12. 66842  
11757630\_ 8. 109999 8. 105112 8. 080122 8. 155023 8. 170836 8. 110844  
11757631\_ 4. 935654 5. 118129 5. 004036 4. 067703 4. 051466 4. 078714  
11757632\_ 6. 013931 6. 069184 5. 833477 5. 588996 5. 667507 5. 519774

11757633\_ 12. 81718 12. 90761 12. 84894 12. 80883 12. 7488 12. 72873  
11757634\_ 4. 359858 4. 52373 4. 464066 4. 549637 4. 584933 4. 828049  
11757635\_ 4. 833691 4. 937947 4. 753936 5. 016367 4. 888948 4. 769552  
11757636\_ 11. 82608 11. 85199 11. 78201 11. 87459 11. 87721 11. 83078  
11757637\_ 8. 416961 8. 260249 8. 407976 8. 268683 8. 321277 8. 235049  
11757638\_ 4. 742131 4. 802183 4. 754182 5. 008991 4. 990318 4. 813767  
11757639\_ 9. 632236 9. 62337 9. 675921 9. 382493 9. 355473 9. 381129  
11757640\_ 7. 882072 7. 799902 7. 898823 7. 930708 7. 987843 7. 951025  
11757641\_ 10. 07347 10. 02493 10. 07791 10. 05011 10. 04846 9. 975097  
11757642\_ 8. 890794 8. 85259 8. 908302 8. 539722 8. 567546 8. 547961  
11757643\_ 12. 09051 12. 12396 12. 07601 11. 96254 11. 91766 11. 89286  
11757644\_ 3. 847249 4. 005328 3. 924225 3. 903548 3. 934046 3. 663736  
11757645\_ 2. 70145 2. 656252 2. 850244 2. 801557 2. 912551 2. 859259  
11757646\_ 10. 79856 10. 86421 10. 84789 11. 06508 10. 95896 10. 88806  
11757647\_ 5. 652547 5. 585988 5. 675817 5. 41743 5. 572651 5. 397958  
11757648\_ 4. 248462 4. 264385 4. 248462 4. 514588 4. 264385 4. 355264  
11757649\_ 8. 223263 8. 146306 8. 207353 8. 605321 8. 695166 8. 589427  
11757650\_ 10. 57308 10. 62054 10. 53844 9. 408489 9. 336722 9. 295895  
11757651\_ 11. 29602 11. 29989 11. 31879 11. 15619 11. 14119 11. 14451  
11757652\_ 8. 817063 8. 790831 8. 770795 8. 558467 8. 616714 8. 527778  
11757653\_ 8. 666462 8. 639531 8. 701581 8. 946258 9. 023501 8. 937361  
11757654\_ 7. 213048 7. 098786 7. 248288 7. 544878 7. 55199 7. 638832  
11757655\_ 6. 920586 6. 914587 6. 956599 6. 83405 6. 894503 6. 914066  
11757656\_ 9. 186188 9. 10655 9. 167704 9. 066239 9. 060965 9. 037074  
11757657\_ 9. 829413 9. 851911 9. 833065 9. 811936 9. 829808 9. 832669  
11757658\_ 8. 263983 8. 256818 8. 337947 8. 429108 8. 490497 8. 436078  
11757659\_ 13. 15801 13. 1469 13. 15977 13. 14169 13. 1772 13. 13952  
11757660\_ 11. 35978 11. 31292 11. 35561 11. 62177 11. 59439 11. 58563  
11757661\_ 11. 38237 11. 34908 11. 3603 11. 60231 11. 6172 11. 59793  
11757662\_ 4. 952491 4. 855084 4. 954778 5. 154137 5. 146025 5. 077383  
11757663\_ 4. 957648 5. 09721 4. 981906 5. 104887 4. 958752 5. 041025  
11757664\_ 8. 848149 8. 778616 8. 855372 9. 360268 9. 364483 9. 384363  
11757665\_ 11. 20944 11. 16471 11. 20134 11. 26456 11. 26803 11. 21458  
11757666\_ 11. 97912 11. 95345 11. 9642 12. 14875 12. 1722 12. 13916  
11757667\_ 2. 543527 2. 662122 2. 734431 2. 718322 2. 725956 2. 637459  
11757668\_ 9. 53096 9. 512265 9. 517582 9. 604288 9. 530247 9. 495823  
11757669\_ 8. 258313 8. 246619 8. 223199 8. 464579 8. 421451 8. 447092  
11757670\_ 10. 95974 10. 8985 10. 91799 11. 00862 11. 03524 11. 02313  
11757671\_ 8. 744496 8. 712013 8. 683213 8. 329874 8. 346072 8. 306238  
11757672\_ 9. 465923 9. 375479 9. 413437 9. 338606 9. 379273 9. 371644  
11757673\_ 13. 17262 13. 1905 13. 15709 13. 13331 13. 13293 13. 13924  
11757674\_ 9. 127424 9. 062602 9. 16926 9. 46807 9. 554698 9. 47626  
11757675\_ 8. 44565 8. 437413 8. 443754 7. 991929 7. 960671 7. 85795  
11757676\_ 11. 03192 11. 02166 11. 01647 11. 11673 11. 18491 11. 05942  
11757677\_ 7. 894274 7. 836872 7. 84845 7. 798331 7. 855176 7. 726175  
11757678\_ 12. 37634 12. 35134 12. 37142 12. 29959 12. 33181 12. 30832  
11757679\_ 8. 080179 8. 114006 8. 09418 9. 199996 9. 190252 9. 132348  
11757680\_ 7. 042517 6. 950255 6. 980687 7. 275011 7. 347106 7. 336051  
11757681\_ 9. 457829 9. 393099 9. 472217 9. 664128 9. 671237 9. 605927  
11757682\_ 7. 390445 7. 426223 7. 418797 7. 707941 7. 706403 7. 795622  
11757683\_ 6. 732383 6. 611878 6. 84638 7. 094837 7. 230373 7. 134375

11757684\_ 8. 624861 8. 620244 8. 687518 8. 837193 8. 90789 8. 872851  
11757685\_ 5. 032211 4. 969782 4. 969782 4. 953968 5. 041235 5. 077002  
11757686\_ 10. 36735 10. 26149 10. 35427 10. 00378 10. 05625 10. 07995  
11757687\_ 10. 36709 10. 34443 10. 36738 10. 57514 10. 57627 10. 63668  
11757688\_ 6. 859883 6. 847994 6. 826743 6. 934642 6. 900125 6. 875051  
11757689\_ 3. 556189 3. 453326 3. 452069 3. 434791 3. 355097 3. 452069  
11757690\_ 8. 171464 8. 190926 8. 209972 8. 494941 8. 573166 8. 516725  
11757691\_ 7. 914253 7. 830105 7. 926468 7. 825457 7. 767538 7. 910863  
11757692\_ 6. 200908 6. 217798 6. 243283 6. 337946 6. 314911 6. 224368  
11757693\_ 8. 008771 7. 923533 8. 026443 8. 219951 8. 255448 8. 19553  
11757694\_ 5. 143329 5. 257919 5. 121402 5. 239311 5. 183024 5. 167392  
11757695\_ 7. 538709 7. 581163 7. 487083 7. 849845 7. 849635 7. 904145  
11757696\_ 9. 525695 9. 494532 9. 601776 10. 33337 10. 38753 10. 35237  
11757697\_ 10. 27841 10. 3013 10. 2852 10. 48716 10. 41544 10. 38831  
11757698\_ 3. 970409 3. 974079 4. 102779 3. 957256 4. 092815 4. 109971  
11757699\_ 10. 62349 10. 547 10. 62349 10. 70928 10. 71828 10. 67168  
11757700\_ 9. 009422 9. 021429 8. 993173 8. 806447 8. 764302 8. 813355  
11757701\_ 6. 804616 6. 786171 6. 808158 6. 609794 6. 579134 6. 617088  
11757702\_ 5. 029529 4. 980775 5. 11783 4. 956076 5. 058963 5. 029529  
11757703\_ 10. 77141 10. 78321 10. 85012 11. 06279 11. 02812 11. 03665  
11757704\_ 8. 245879 8. 2472 8. 257291 8. 304937 8. 355022 8. 298437  
11757705\_ 4. 543378 4. 584933 4. 390989 4. 691893 4. 448337 4. 507016  
11757706\_ 11. 12829 11. 15534 11. 13592 11. 08868 11. 06216 11. 07572  
11757707\_ 5. 268159 5. 124601 5. 243468 5. 355449 5. 351618 5. 345676  
11757708\_ 6. 081168 5. 888473 5. 859069 5. 686195 5. 751804 5. 519817  
11757709\_ 6. 99269 6. 862059 7. 029562 7. 369784 7. 417811 7. 527348  
11757710\_ 9. 604578 9. 608072 9. 574369 10. 00445 9. 934176 9. 939208  
11757711\_ 7. 219613 7. 213657 7. 204954 7. 172064 7. 29995 7. 174588  
11757712\_ 3. 480586 3. 46225 3. 587388 3. 166716 3. 593917 3. 462799  
11757713\_ 9. 2945 9. 277879 9. 355238 9. 497215 9. 522351 9. 452276  
11757714\_ 5. 11527 5. 15671 5. 097253 5. 214383 5. 029286 4. 993986  
11757715\_ 2. 099489 2. 36543 2. 265397 2. 170909 2. 291488 2. 347667  
11757716\_ 4. 815683 4. 874234 4. 788179 4. 826966 4. 806676 4. 90551  
11757717\_ 8. 757309 8. 674052 8. 731302 8. 358934 8. 387746 8. 33595  
11757718\_ 8. 275894 8. 267437 8. 241811 9. 532875 9. 433608 9. 447356  
11757719\_ 10. 97106 10. 90727 10. 93251 10. 91861 10. 93714 10. 88861  
11757720\_ 6. 213217 6. 306525 6. 326555 6. 338646 6. 358568 6. 452304  
11757721\_ 8. 28615 8. 477924 8. 481264 7. 29801 7. 442902 7. 420868  
11757722\_ 8. 826457 8. 769862 8. 850615 8. 529611 8. 587608 8. 560652  
11757723\_ 6. 032569 6. 203377 6. 415637 5. 340076 5. 325191 5. 32777  
11757724\_ 8. 420755 8. 410179 8. 411484 8. 568678 8. 65223 8. 543612  
11757725\_ 11. 38138 11. 37585 11. 36889 11. 45722 11. 47837 11. 45368  
11757726\_ 11. 39588 11. 32449 11. 36639 11. 44636 11. 47075 11. 46709  
11757727\_ 10. 52199 10. 53753 10. 51847 10. 83583 10. 8446 10. 73589  
11757728\_ 12. 96534 12. 96496 12. 95087 12. 93095 12. 93836 12. 91283  
11757729\_ 5. 655068 5. 577564 5. 52637 5. 641015 5. 723126 5. 612491  
11757730\_ 4. 632091 4. 780944 4. 912978 5. 037466 4. 598502 4. 79685  
11757731\_ 7. 282014 7. 281667 7. 377665 7. 186899 7. 210965 7. 285764  
11757732\_ 9. 952843 9. 925128 9. 943723 9. 96631 9. 98709 10. 00439  
11757733\_ 10. 50397 10. 46947 10. 50406 10. 51674 10. 48203 10. 48418  
11757734\_ 5. 016141 5. 165444 4. 921592 4. 899155 4. 965883 5. 096086

11757735\_ 8. 65421 8. 632259 8. 681588 7. 531343 7. 526588 7. 611026  
11757736\_ 2. 511144 2. 724767 2. 49886 2. 519569 2. 719574 2. 540004  
11757737\_ 9. 938155 9. 883416 9. 929479 10. 24138 10. 29108 10. 2832  
11757738\_ 10. 44328 10. 44844 10. 44406 10. 45224 10. 42061 10. 42434  
11757739\_ 9. 116496 9. 123272 9. 114615 8. 981966 8. 990271 9. 028603  
11757740\_ 9. 967102 9. 913386 9. 920337 9. 960446 10. 0007 10. 00146  
11757741\_ 5. 122925 5. 2666 5. 289203 5. 425646 5. 505353 5. 501015  
11757742\_ 8. 309023 8. 31435 8. 344815 8. 067991 8. 034722 7. 995647  
11757743\_ 4. 389583 4. 325243 4. 287593 4. 242291 4. 24234 4. 339264  
11757744\_ 7. 888301 7. 79714 7. 801031 7. 890621 7. 88782 7. 828262  
11757745\_ 7. 166186 7. 119257 7. 16318 7. 675979 7. 665439 7. 853011  
11757746\_ 9. 045243 9. 030197 9. 069093 9. 195289 9. 209543 9. 277534  
11757747\_ 7. 704107 7. 630313 7. 778073 7. 703807 7. 700656 7. 655155  
11757748\_ 13. 17497 13. 1553 13. 15826 13. 18558 13. 18825 13. 14698  
11757749\_ 6. 486486 6. 44941 6. 68699 6. 333812 6. 337528 6. 287813  
11757750\_ 8. 296117 8. 201678 8. 264822 8. 015892 8. 062153 8. 095569  
11757751\_ 6. 490919 6. 442764 6. 559505 6. 481046 6. 512213 6. 437563  
11757752\_ 6. 520509 6. 501944 6. 523019 6. 264142 6. 341535 6. 266841  
11757753\_ 10. 63528 10. 59985 10. 60196 10. 56684 10. 54672 10. 52421  
11757754\_ 9. 087733 9. 048019 9. 091645 9. 111064 9. 068317 9. 003661  
11757755\_ 8. 045494 8. 039053 8. 082418 7. 519808 7. 575163 7. 611056  
11757756\_ 9. 129917 9. 077509 9. 058706 8. 960832 8. 922918 8. 943906  
11757757\_ 6. 266734 6. 313351 6. 218219 6. 228723 6. 295826 6. 230032  
11757758\_ 12. 68446 12. 64242 12. 67899 12. 57853 12. 58307 12. 57712  
11757759\_ 3. 87318 3. 225526 3. 211549 4. 378821 4. 261984 4. 47006  
11757760\_ 7. 451536 7. 555184 7. 413794 7. 652514 7. 699807 7. 727271  
11757761\_ 12. 20307 12. 19124 12. 19663 12. 2522 12. 25144 12. 24658  
11757762\_ 8. 686249 8. 571753 8. 527476 8. 123804 8. 073909 8. 123804  
11757763\_ 10. 81685 10. 87575 10. 87718 10. 70433 10. 74839 10. 64234  
11757764\_ 8. 023064 8. 054665 8. 099869 8. 199009 8. 138673 8. 075461  
11757765\_ 3. 503743 3. 437061 3. 500407 3. 505799 3. 609649 3. 495015  
11757766\_ 8. 792637 8. 732412 8. 842461 8. 491736 8. 583643 8. 581971  
11757767\_ 7. 502821 7. 426223 7. 582837 8. 202099 8. 251515 8. 322132  
11757768\_ 8. 880177 8. 785618 8. 84875 8. 601294 8. 591754 8. 643702  
11757769\_ 10. 67911 10. 61594 10. 63203 10. 53049 10. 46688 10. 47993  
11757770\_ 9. 703234 9. 704387 9. 693728 9. 617906 9. 596474 9. 604986  
11757771\_ 3. 565972 3. 548644 3. 695626 3. 858693 3. 762818 3. 786777  
11757772\_ 13. 19703 13. 20129 13. 19703 13. 15698 13. 16051 13. 15769  
11757773\_ 12. 24174 12. 23015 12. 23654 11. 89396 11. 90539 11. 88895  
11757774\_ 7. 28356 7. 200027 7. 267727 7. 314227 7. 348406 7. 218331  
11757775\_ 7. 444168 7. 222566 7. 315398 6. 846695 6. 763957 6. 724291  
11757776\_ 7. 173751 7. 105782 7. 234081 7. 230373 7. 262059 7. 249054  
11757777\_ 1. 912102 2. 413716 2. 441615 2. 144269 2. 47102 2. 213109  
11757778\_ 11. 92671 11. 90197 11. 90542 11. 90757 11. 89137 11. 85862  
11757779\_ 8. 580781 8. 536378 8. 593753 8. 177455 8. 168034 8. 251352  
11757780\_ 12. 27324 12. 28151 12. 27314 12. 418 12. 36478 12. 34815  
11757781\_ 6. 458418 6. 689941 6. 531275 6. 60363 6. 557068 6. 587797  
11757782\_ 12. 87261 12. 86972 12. 86945 12. 7972 12. 83326 12. 79981  
11757783\_ 5. 205756 5. 296522 5. 2222 5. 204032 5. 142738 5. 27452  
11757784\_ 10. 34961 10. 30265 10. 31174 10. 29089 10. 32595 10. 34493  
11757785\_ 10. 93532 10. 96857 10. 91376 11. 68926 11. 67397 11. 62814

11757786\_ 9. 685748 9. 662165 9. 676689 9. 303026 9. 289346 9. 280757  
11757787\_ 12. 66132 12. 65192 12. 67327 12. 55237 12. 59141 12. 55402  
11757788\_ 9. 299576 9. 254777 9. 395792 9. 603126 9. 573663 9. 601085  
11757789\_ 8. 740449 8. 702501 8. 714228 8. 92822 8. 879043 8. 877541  
11757790\_ 5. 281453 5. 159847 5. 39271 5. 057157 5. 242536 5. 176838  
11757791\_ 6. 663664 6. 655758 6. 653691 7. 075132 6. 986812 6. 927482  
11757792\_ 7. 162691 7. 100665 7. 080438 8. 419528 8. 372379 8. 356724  
11757793\_ 6. 848536 6. 926542 6. 80436 6. 126435 6. 250556 6. 142809  
11757794\_ 8. 876696 8. 852124 8. 921245 8. 685259 8. 632402 8. 645446  
11757795\_ 8. 10917 7. 928016 8. 034724 7. 703559 7. 676469 7. 639895  
11757796\_ 7. 02539 6. 940986 6. 981475 7. 640612 7. 744476 7. 693849  
11757797\_ 3. 500471 3. 509305 3. 517561 3. 713333 3. 771733 3. 771733  
11757798\_ 5. 460895 5. 409838 5. 333615 5. 521661 5. 409838 5. 493705  
11757799\_ 9. 861481 9. 837101 9. 890089 9. 646745 9. 577105 9. 656416  
11757800\_ 6. 588512 6. 586858 6. 632154 7. 315646 7. 344738 7. 335547  
11757801\_ 7. 752626 7. 647518 7. 782045 7. 922094 7. 91862 7. 946379  
11757802\_ 2. 094138 1. 995297 1. 987335 2. 062423 1. 952911 2. 035553  
11757803\_ 8. 437962 8. 376466 8. 390508 8. 429899 8. 39521 8. 339296  
11757804\_ 7. 72889 7. 732213 7. 762877 8. 249184 8. 316378 8. 234818  
11757805\_ 10. 05322 10. 03227 10. 07569 10. 27437 10. 32908 10. 26639  
11757806\_ 11. 87667 11. 85438 11. 87895 11. 8046 11. 8451 11. 79399  
11757807\_ 12. 71639 12. 71332 12. 72881 12. 71444 12. 70998 12. 716  
11757808\_ 8. 514274 8. 471027 8. 480434 8. 643872 8. 690352 8. 689289  
11757809\_ 10. 31332 10. 29549 10. 28679 10. 25045 10. 23121 10. 20244  
11757810\_ 9. 548491 9. 570628 9. 611404 10. 00565 9. 993526 10. 00819  
11757811\_ 7. 304911 7. 145917 7. 293902 7. 35503 7. 309861 7. 333223  
11757812\_ 7. 527495 7. 469861 7. 553318 7. 941536 7. 982804 8. 042849  
11757813\_ 4. 945971 4. 76475 4. 922428 5. 086691 5. 205631 5. 212631  
11757814\_ 7. 483127 7. 563178 7. 511927 7. 604729 7. 562096 7. 635652  
11757815\_ 7. 228827 7. 054992 7. 151208 7. 116236 7. 00526 7. 112837  
11757816\_ 7. 708664 7. 636418 7. 642046 7. 910288 7. 897264 7. 885557  
11757817\_ 3. 731797 3. 663914 3. 529534 3. 799081 3. 90471 3. 873259  
11757818\_ 11. 32567 11. 27869 11. 35418 11. 57056 11. 61379 11. 58026  
11757819\_ 8. 506791 8. 459497 8. 559613 8. 321253 8. 265026 8. 318887  
11757820\_ 10. 33837 10. 29335 10. 26254 10. 66978 10. 67143 10. 69825  
11757821\_ 8. 389431 8. 348514 8. 447543 7. 765716 7. 817174 7. 806385  
11757822\_ 11. 92288 11. 89603 11. 93119 11. 73613 11. 77184 11. 76334  
11757823\_ 7. 9565 7. 901321 7. 984175 7. 867028 7. 865883 7. 855467  
11757824\_ 7. 715632 7. 638707 7. 71517 6. 94441 6. 743468 6. 879132  
11757825\_ 8. 920725 8. 946086 8. 944196 9. 046777 9. 104819 9. 031186  
11757826\_ 8. 133156 8. 096869 8. 185725 8. 069298 8. 082091 8. 018479  
11757827\_ 6. 191782 6. 116001 6. 166889 6. 251158 6. 297852 6. 326838  
11757828\_ 4. 650322 4. 512539 4. 674624 5. 739412 5. 671075 5. 61807  
11757829\_ 10. 48721 10. 45113 10. 50507 10. 93172 10. 90806 10. 89871  
11757830\_ 9. 2593 9. 221402 9. 278719 9. 582982 9. 548491 9. 603617  
11757831\_ 9. 327061 9. 355675 9. 320642 9. 165732 9. 057562 9. 007765  
11757832\_ 10. 5419 10. 5844 10. 5449 10. 76898 10. 72125 10. 72489  
11757833\_ 7. 440655 7. 40952 7. 365747 7. 238738 7. 230689 7. 187328  
11757834\_ 7. 359596 7. 278065 7. 384065 7. 274526 7. 245859 7. 300505  
11757835\_ 8. 276275 8. 25172 8. 246154 7. 063201 7. 084832 7. 041576  
11757836\_ 7. 960322 7. 895727 7. 947263 7. 89763 7. 808951 7. 81451

11757837\_ 11. 87223 11. 85933 11. 83726 12. 03793 12. 02606 12. 01549  
11757838\_ 9. 077297 9. 035573 9. 045967 9. 01614 9. 060848 9. 055187  
11757839\_ 8. 782858 8. 697846 8. 800884 8. 475713 8. 520221 8. 480158  
11757840\_ 4. 683904 4. 639645 4. 485213 4. 621167 4. 656643 4. 609243  
11757841\_ 9. 315516 9. 254602 9. 251373 9. 310896 9. 357482 9. 295825  
11757842\_ 6. 864572 6. 767148 6. 933349 6. 912869 6. 90403 6. 875814  
11757843\_ 9. 938085 9. 933511 9. 932019 9. 581969 9. 583364 9. 57223  
11757844\_ 11. 02365 11. 02736 11. 00617 10. 95608 10. 90851 10. 90987  
11757845\_ 6. 822675 6. 849603 6. 913806 7. 063715 7. 106255 7. 089576  
11757846\_ 7. 430505 7. 335506 7. 458648 6. 955235 6. 962486 7. 070614  
11757847\_ 10. 49968 10. 47166 10. 46642 10. 54602 10. 56986 10. 48498  
11757848\_ 7. 169076 7. 198752 7. 18968 7. 235998 7. 261023 7. 24719  
11757849\_ 5. 254365 5. 073577 5. 297498 6. 798249 6. 802022 6. 465245  
11757850\_ 11. 33047 11. 2866 11. 32469 11. 43587 11. 4316 11. 4275  
11757851\_ 9. 026974 8. 962724 9. 02546 9. 600406 9. 64724 9. 652677  
11757852\_ 8. 602732 8. 561765 8. 616531 8. 012144 7. 959155 8. 008757  
11757853\_ 6. 554823 6. 479452 6. 510356 6. 820608 6. 762308 6. 888048  
11757854\_ 9. 044821 8. 948259 9. 038445 8. 831966 8. 727684 8. 750024  
11757855\_ 10. 95963 10. 91588 10. 95734 10. 78057 10. 80236 10. 78713  
11757856\_ 7. 852311 7. 822409 7. 778044 7. 547327 7. 560532 7. 54014  
11757857\_ 9. 416912 9. 390811 9. 464054 9. 662256 9. 621374 9. 602589  
11757858\_ 10. 71026 10. 6952 10. 64862 10. 55683 10. 46198 10. 42084  
11757859\_ 5. 111826 5. 00859 4. 573551 5. 124428 5. 138283 4. 97776  
11757860\_ 6. 182162 6. 115876 6. 182162 6. 324287 6. 316658 6. 424947  
11757861\_ 7. 223071 7. 111119 7. 272972 7. 560932 7. 446506 7. 62538  
11757862\_ 5. 873546 5. 930413 5. 962236 5. 9669 6. 001484 5. 946303  
11757863\_ 9. 061682 8. 943213 9. 047411 10. 71521 10. 71269 10. 70712  
11757864\_ 3. 340998 3. 258715 3. 49304 3. 567462 3. 542529 3. 440024  
11757865\_ 6. 688764 6. 655758 6. 763324 6. 088352 6. 196908 6. 342188  
11757866\_ 8. 686762 8. 615604 8. 652709 8. 410186 8. 482885 8. 421851  
11757867\_ 10. 4345 10. 44219 10. 37871 10. 37312 10. 42286 10. 32463  
11757868\_ 5. 671314 5. 812011 5. 531535 5. 820741 5. 594618 5. 690436  
11757869\_ 6. 325412 6. 311052 6. 298629 6. 105907 6. 101061 6. 12904  
11757870\_ 4. 094567 4. 141279 4. 026092 4. 189596 4. 123589 4. 095527  
11757871\_ 6. 690829 6. 714177 6. 765773 7. 030617 6. 979813 6. 88066  
11757872\_ 6. 082291 6. 058049 5. 947795 6. 397946 6. 064778 6. 106534  
11757873\_ 11. 82966 11. 79722 11. 80283 12. 08416 12. 12552 12. 12413  
11757874\_ 8. 81483 8. 74017 8. 748593 9. 54817 9. 522149 9. 532241  
11757875\_ 7. 202691 7. 089817 7. 243927 7. 077091 7. 154763 7. 030606  
11757876\_ 5. 750263 5. 704919 5. 585295 6. 040637 5. 973998 6. 0535  
11757877\_ 5. 722749 5. 880109 5. 846682 6. 072017 6. 044135 5. 926114  
11757878\_ 10. 98074 10. 95898 10. 91963 10. 80704 10. 78628 10. 79766  
11757879\_ 8. 531465 8. 524474 8. 562196 8. 792232 8. 778169 8. 779079  
11757880\_ 8. 305279 8. 231724 8. 320273 8. 592509 8. 552643 8. 51765  
11757881\_ 10. 49513 10. 5076 10. 51646 10. 53201 10. 59401 10. 52027  
11757882\_ 3. 553245 3. 606313 3. 590158 3. 606313 3. 47087 3. 704382  
11757883\_ 8. 496482 8. 4986 8. 442383 8. 35343 8. 297987 8. 271643  
11757884\_ 8. 265153 8. 28692 8. 232746 7. 629354 7. 616059 7. 588311  
11757885\_ 5. 549959 5. 225216 5. 641936 5. 932816 5. 939682 5. 958002  
11757886\_ 7. 922836 7. 973558 7. 993424 7. 936427 7. 868277 7. 934771  
11757887\_ 11. 47821 11. 4785 11. 46995 11. 54851 11. 56939 11. 51631

11757888\_ 9. 888523 9. 858199 9. 877552 10. 25693 10. 22328 10. 2675  
11757889\_ 10. 79436 10. 81185 10. 77688 11. 30397 11. 24218 11. 22711  
11757890\_ 6. 895419 6. 831076 6. 96662 6. 97063 7. 028538 6. 97063  
11757891\_ 3. 379581 3. 591075 3. 398438 3. 374885 3. 422636 3. 086967  
11757892\_ 9. 058556 9. 053817 9. 08278 8. 979622 8. 953775 9. 009811  
11757893\_ 7. 940174 7. 920418 7. 896477 7. 757437 7. 724479 7. 771092  
11757894\_ 8. 966576 8. 868816 8. 899239 8. 506102 8. 541967 8. 510062  
11757895\_ 7. 067318 6. 828151 7. 027305 7. 379138 7. 430518 7. 527438  
11757896\_ 7. 966285 7. 869992 8. 028741 7. 555765 7. 496871 7. 631509  
11757897\_ 8. 484467 8. 37576 8. 532393 8. 520926 8. 511291 8. 560747  
11757898\_ 3. 222858 3. 054191 3. 374111 3. 445229 3. 283232 3. 266895  
11757899\_ 9. 974275 9. 955419 9. 9704 9. 901423 9. 921242 9. 951876  
11757900\_ 3. 31253 2. 863409 2. 874619 3. 178577 2. 894306 2. 726896  
11757901\_ 8. 058968 8. 031787 8. 099618 8. 17632 8. 183197 8. 300309  
11757902\_ 7. 060627 7. 019123 6. 983182 7. 687813 7. 748012 7. 656374  
11757903\_ 6. 966337 6. 823992 6. 880534 6. 251515 6. 229872 6. 480682  
11757904\_ 6. 719099 6. 837039 6. 651676 7. 103419 7. 133536 7. 086471  
11757905\_ 11. 33341 11. 29998 11. 30038 10. 99451 11. 06333 10. 97317  
11757906\_ 13. 09054 13. 08134 13. 06892 13. 03882 13. 04002 13. 03983  
11757907\_ 9. 637823 9. 62376 9. 593243 10. 01857 10. 00468 9. 989937  
11757908\_ 6. 859991 6. 832375 6. 850832 6. 600308 6. 565744 6. 587097  
11757909\_ 5. 727898 5. 448296 5. 772485 5. 955743 5. 937664 5. 887555  
11757910\_ 10. 50241 10. 45411 10. 46685 10. 27154 10. 25898 10. 24433  
11757911\_ 8. 6252 8. 524771 8. 620406 8. 200324 8. 245518 8. 207764  
11757912\_ 3. 389606 3. 581839 3. 427378 3. 208001 3. 526047 3. 237579  
11757913\_ 10. 40973 10. 43983 10. 37397 10. 41158 10. 43001 10. 39358  
11757914\_ 8. 035092 8. 012771 8. 07473 8. 222968 8. 248079 8. 174201  
11757915\_ 3. 993825 4. 279397 4. 278159 4. 160712 4. 105393 4. 160648  
11757916\_ 7. 590922 7. 526896 7. 512288 7. 372915 7. 399048 7. 446861  
11757917\_ 5. 355562 5. 239148 5. 355562 5. 838882 5. 792821 5. 879003  
11757918\_ 3. 84969 3. 784754 4. 119974 3. 748779 3. 784754 3. 440495  
11757919\_ 6. 269445 6. 175384 6. 311133 6. 076398 6. 078679 6. 051554  
11757920\_ 7. 746845 7. 774396 7. 772656 7. 881778 7. 935646 7. 821696  
11757921\_ 2. 270739 2. 25483 2. 320486 2. 129582 2. 186864 2. 038703  
11757922\_ 8. 022954 7. 906861 8. 042308 7. 673335 7. 64639 7. 740102  
11757923\_ 8. 317327 8. 243687 8. 369079 8. 125162 8. 066959 8. 228491  
11757924\_ 7. 668322 7. 603741 7. 663868 6. 523506 6. 510099 6. 570454  
11757925\_ 5. 084398 5. 216575 5. 263644 5. 106845 5. 081249 5. 101046  
11757926\_ 5. 032265 5. 136678 4. 984669 4. 803569 5. 149545 5. 010818  
11757927\_ 8. 077679 8. 053756 8. 120442 8. 346416 8. 390077 8. 376153  
11757928\_ 2. 47102 2. 485956 2. 532377 2. 684203 2. 338487 2. 657507  
11757929\_ 5. 651216 5. 652416 5. 68685 5. 765183 5. 772432 5. 75392  
11757930\_ 7. 846173 7. 749741 7. 804313 7. 914854 8. 066018 7. 967678  
11757931\_ 6. 244666 6. 233533 6. 247185 6. 561578 6. 643933 6. 546667  
11757932\_ 9. 132247 9. 095026 9. 109891 8. 87599 8. 884664 8. 89724  
11757933\_ 9. 908217 9. 836783 9. 966132 9. 135404 9. 149555 9. 247465  
11757934\_ 6. 858817 6. 845336 6. 862533 6. 841282 6. 878288 6. 845641  
11757935\_ 6. 89802 6. 843985 6. 86238 6. 846984 6. 927167 6. 851342  
11757936\_ 10. 31753 10. 26405 10. 3556 10. 3514 10. 30882 10. 34594  
11757937\_ 11. 10556 11. 10927 11. 11042 10. 71513 10. 69956 10. 75279  
11757938\_ 7. 679134 7. 626693 7. 637796 7. 590411 7. 479547 7. 582998

11757939\_ 8. 323639 8. 267553 8. 309934 8. 117003 8. 189717 8. 220391  
11757940\_ 6. 631277 6. 654795 6. 674901 6. 219153 6. 424974 6. 341709  
11757941\_ 2. 342685 2. 639892 2. 481405 2. 69655 2. 851212 2. 720276  
11757942\_ 8. 583202 8. 524602 8. 58609 7. 934377 7. 965427 7. 98525  
11757943\_ 10. 70043 10. 71891 10. 68474 10. 19032 10. 20564 10. 25171  
11757944\_ 7. 590576 7. 462329 7. 578498 7. 684098 7. 65366 7. 69488  
11757945\_ 8. 715763 8. 65618 8. 711512 9. 052447 8. 975058 9. 01569  
11757946\_ 8. 958149 8. 874239 8. 963155 9. 18884 9. 193577 9. 223416  
11757947\_ 9. 029636 8. 963635 8. 944574 8. 819719 8. 903684 8. 870667  
11757948\_ 8. 193136 8. 070079 8. 160381 8. 064267 8. 080275 8. 110402  
11757949\_ 5. 299132 5. 445952 5. 472319 5. 491271 5. 434744 5. 598206  
11757950\_ 9. 376476 9. 333558 9. 387911 9. 354495 9. 306241 9. 372071  
11757951\_ 9. 089773 9. 042169 9. 081692 8. 708492 8. 764826 8. 783842  
11757952\_ 6. 005899 5. 89655 5. 845719 6. 282224 6. 143229 6. 06166  
11757953\_ 6. 584888 6. 490819 6. 573008 6. 603643 6. 661983 6. 794806  
11757954\_ 7. 020462 7. 132803 7. 073909 6. 99787 6. 954554 6. 994597  
11757955\_ 5. 614563 5. 808272 5. 736831 5. 643808 5. 69855 5. 777125  
11757956\_ 2. 795754 2. 9727 2. 85298 3. 321553 3. 021825 3. 184735  
11757957\_ 5. 254525 5. 505521 5. 310054 5. 745821 5. 845365 5. 686692  
11757958\_ 9. 11285 9. 106684 9. 197123 9. 20486 9. 266218 9. 287492  
11757959\_ 10. 21518 10. 17567 10. 26467 10. 23749 10. 29671 10. 25825  
11757960\_ 5. 047448 4. 870783 4. 971288 4. 460865 4. 275543 4. 470714  
11757961\_ 4. 898524 4. 874234 5. 029529 4. 714106 4. 927684 4. 793404  
11757962\_ 8. 236788 8. 228752 8. 258785 8. 591807 8. 530992 8. 485438  
11757963\_ 2. 969521 2. 819383 2. 819383 2. 879941 2. 782969 2. 83198  
11757964\_ 6. 178446 6. 035371 6. 198525 6. 369805 6. 366235 6. 387293  
11757965\_ 5. 112999 5. 310156 5. 081633 5. 242206 5. 133295 5. 180382  
11757966\_ 5. 589568 5. 553908 5. 666009 5. 614563 5. 569027 5. 589814  
11757967\_ 5. 942552 5. 89065 6. 04658 6. 459142 6. 353027 6. 509236  
11757968\_ 8. 890682 8. 800203 8. 912528 8. 538687 8. 454674 8. 55829  
11757969\_ 7. 106305 7. 102385 7. 062321 7. 142282 7. 170325 7. 099309  
11757970\_ 8. 568571 8. 478101 8. 529489 7. 715356 7. 669031 7. 648621  
11757971\_ 7. 771129 7. 68535 7. 718881 7. 752565 7. 706734 7. 720094  
11757972\_ 7. 177358 7. 094273 7. 113149 7. 434587 7. 482432 7. 429136  
11757973\_ 7. 322054 7. 336057 7. 366279 6. 905811 6. 906435 6. 956076  
11757974\_ 6. 517337 6. 527237 6. 300643 6. 38804 6. 300643 6. 274784  
11757975\_ 9. 218959 9. 186927 9. 235603 8. 554338 8. 591444 8. 590968  
11757976\_ 9. 06152 9. 060972 9. 027245 9. 375801 9. 361784 9. 343545  
11757977\_ 7. 620026 7. 480192 7. 600612 7. 946726 7. 897815 7. 866538  
11757978\_ 10. 03898 9. 951519 10. 00602 9. 531372 9. 523692 9. 481458  
11757979\_ 9. 16237 9. 121805 9. 051712 9. 087465 9. 027314 8. 937819  
11757980\_ 7. 485525 7. 45917 7. 467524 7. 588523 7. 646584 7. 694146  
11757981\_ 8. 453106 8. 31119 8. 465302 8. 123466 8. 083971 8. 125524  
11757982\_ 7. 531126 7. 445315 7. 503786 7. 630559 7. 683379 7. 808168  
11757983\_ 9. 81051 9. 760168 9. 807729 9. 816641 9. 798738 9. 778375  
11757984\_ 8. 709589 8. 708754 8. 701929 8. 997304 8. 940964 8. 9439  
11757985\_ 4. 006474 3. 80091 3. 932741 3. 606313 3. 769068 3. 838272  
11757986\_ 8. 156796 8. 118575 8. 154965 8. 455092 8. 45046 8. 326763  
11757987\_ 7. 389671 7. 320858 7. 381565 7. 7593 7. 751807 7. 722204  
11757988\_ 3. 35539 3. 524797 3. 518241 3. 629547 3. 776701 3. 503743  
11757989\_ 7. 586036 7. 53394 7. 517014 6. 637367 6. 584888 6. 660983



11757990\_ 5. 475598 5. 456269 5. 492385 5. 211757 5. 16831 5. 266347  
11757991\_ 7. 824578 7. 684947 7. 693344 6. 921221 6. 920048 7. 036241  
11757992\_ 2. 47102 2. 701171 2. 409155 2. 605516 2. 540768 2. 609516  
11757993\_ 3. 555047 3. 321989 3. 555047 3. 364143 3. 544692 3. 555047  
11757994\_ 5. 258418 5. 157356 5. 471527 5. 001041 4. 609908 4. 733551  
11757995\_ 8. 811683 8. 755173 8. 802592 8. 217012 8. 129428 8. 137333  
11757996\_ 5. 735418 5. 665608 5. 744911 5. 979079 5. 794286 5. 743432  
11757997\_ 10. 80982 10. 83677 10. 73762 10. 98719 10. 92705 10. 83311  
11757998\_ 9. 019532 8. 986465 9. 028522 8. 957659 8. 922041 8. 927926  
11757999\_ 8. 938405 8. 903705 8. 934414 9. 091025 9. 049911 9. 108008  
11758000\_ 6. 523574 6. 30557 6. 508194 6. 172889 6. 226411 6. 180878  
11758001\_ 10. 62138 10. 58397 10. 61048 10. 97876 11. 06989 10. 92727  
11758002\_ 3. 535594 3. 669763 3. 316952 3. 730416 3. 535594 3. 652927  
11758003\_ 2. 72251 3. 101065 2. 88912 2. 726927 2. 786583 2. 726927  
11758004\_ 9. 484786 9. 33356 9. 438622 8. 977641 9. 004094 9. 00448  
11758005\_ 7. 246895 7. 187823 7. 341442 7. 098505 7. 035527 7. 093516  
11758006\_ 8. 074687 7. 965682 8. 048992 8. 16326 8. 132118 8. 179761  
11758007\_ 6. 120702 6. 027718 6. 181356 6. 378676 6. 432609 6. 497744  
11758008\_ 3. 410141 3. 348843 3. 595874 3. 586793 3. 406073 3. 594627  
11758009\_ 4. 35565 4. 40461 4. 20946 4. 057314 4. 131912 4. 292817  
11758010\_ 4. 660821 4. 628059 4. 434502 4. 721991 4. 783474 4. 866013  
11758011\_ 12. 89961 12. 97624 12. 94654 12. 9299 12. 91663 12. 95471  
11758012\_ 4. 474942 4. 681356 4. 429057 4. 635524 4. 830082 4. 82274  
11758013\_ 1. 899914 2. 25325 1. 770637 1. 805427 1. 992636 1. 984167  
11758014\_ 8. 614129 8. 57174 8. 608419 8. 710126 8. 664439 8. 694633  
11758015\_ 10. 31626 10. 30377 10. 34424 10. 47205 10. 45145 10. 47603  
11758016\_ 7. 372541 7. 340246 7. 354274 7. 589672 7. 61497 7. 600267  
11758017\_ 12. 49729 12. 51014 12. 47384 12. 60121 12. 59697 12. 57432  
11758018\_ 5. 459532 5. 317367 5. 420644 5. 198299 5. 06436 5. 243762  
11758019\_ 7. 062242 7. 015553 6. 855528 7. 029692 7. 058918 6. 993231  
11758020\_ 9. 716187 9. 714309 9. 709192 9. 371946 9. 357076 9. 341352  
11758021\_ 11. 19263 11. 19668 11. 18608 11. 07188 11. 01243 10. 99083  
11758022\_ 2. 866591 2. 699614 2. 625234 2. 830365 2. 791093 2. 624224  
11758023\_ 7. 182261 7. 089177 6. 994742 6. 564251 6. 573787 6. 663788  
11758024\_ 8. 030925 8. 022341 8. 023144 8. 170613 8. 203926 8. 141684  
11758025\_ 9. 482987 9. 431145 9. 464334 9. 575278 9. 550862 9. 53754  
11758026\_ 7. 996029 7. 90029 7. 931698 8. 166999 8. 140232 8. 175346  
11758027\_ 2. 010788 2. 167613 1. 995297 2. 053073 2. 033117 2. 07573  
11758028\_ 4. 683999 4. 643717 4. 593703 4. 806938 4. 747096 4. 639111  
11758029\_ 5. 793291 5. 910975 5. 838332 5. 611058 5. 636724 5. 749056  
11758030\_ 3. 037216 2. 940243 2. 950485 3. 505471 3. 121803 3. 519126  
11758031\_ 6. 628178 6. 655758 6. 820115 5. 96533 6. 044285 6. 088495  
11758032\_ 7. 740187 7. 791442 7. 631809 7. 955719 7. 869273 7. 877061  
11758033\_ 2. 052144 2. 064087 2. 158019 1. 936118 2. 134536 2. 064087  
11758034\_ 8. 385402 8. 368183 8. 419124 8. 358053 8. 369278 8. 403467  
11758035\_ 7. 511578 7. 529667 7. 46882 7. 197664 7. 290323 7. 367034  
11758036\_ 9. 059643 8. 992199 9. 055957 8. 858604 8. 854937 8. 815154  
11758037\_ 8. 497666 8. 447042 8. 433912 8. 631765 8. 476869 8. 525014  
11758038\_ 12. 83927 12. 82968 12. 8453 12. 87106 12. 88301 12. 83553  
11758039\_ 3. 227872 3. 449176 3. 290188 3. 566704 3. 606313 3. 384696  
11758040\_ 6. 708892 6. 928328 7. 046632 6. 215494 6. 414953 6. 202447

11758041\_ 9. 691553 9. 612309 9. 655348 9. 688557 9. 712575 9. 704468  
11758042\_ 12. 66997 12. 68741 12. 67276 12. 64064 12. 63337 12. 62049  
11758043\_ 9. 332695 9. 232804 9. 34525 8. 70174 8. 664831 8. 605551  
11758044\_ 8. 09976 8. 091961 8. 170504 7. 194353 7. 082891 7. 249053  
11758045\_ 6. 852862 6. 663819 6. 766946 7. 324111 7. 283688 7. 250608  
11758046\_ 6. 448367 6. 421272 6. 363852 7. 167615 7. 227267 7. 246645  
11758047\_ 9. 25382 9. 246724 9. 221406 9. 364973 9. 343376 9. 318149  
11758048\_ 8. 08314 8. 099238 8. 134035 7. 711101 7. 796946 7. 772977  
11758049\_ 5. 754367 5. 711492 5. 782387 6. 213069 6. 183123 6. 094413  
11758050\_ 8. 439498 8. 444642 8. 482974 7. 964793 7. 995268 8. 007506  
11758051\_ 6. 057924 5. 962138 6. 033134 6. 182849 5. 976222 6. 1472  
11758052\_ 7. 345751 7. 450932 7. 414994 7. 494252 7. 386971 7. 488151  
11758053\_ 8. 847104 8. 865694 8. 845868 8. 549471 8. 58566 8. 517172  
11758054\_ 9. 902734 9. 857438 9. 873199 9. 975058 9. 936871 9. 955217  
11758055\_ 8. 125354 8. 15462 8. 147705 8. 233798 8. 215399 8. 305306  
11758056\_ 4. 890769 4. 923096 5. 098817 4. 717948 4. 838265 4. 895873  
11758057\_ 4. 763543 4. 870793 4. 921652 4. 347179 4. 529429 4. 428255  
11758058\_ 8. 353125 8. 364413 8. 358083 8. 163957 8. 162087 8. 214875  
11758059\_ 7. 821211 7. 689512 7. 784634 7. 649721 7. 651692 7. 673149  
11758060\_ 7. 445377 7. 429981 7. 478227 6. 574712 6. 454043 6. 503233  
11758061\_ 5. 773525 5. 566519 5. 745898 4. 199436 4. 347179 4. 306069  
11758062\_ 9. 118348 9. 105613 9. 114163 9. 071481 9. 045195 9. 101485  
11758063\_ 5. 899297 5. 913394 5. 845365 5. 92089 5. 913394 5. 927492  
11758064\_ 8. 361826 8. 360616 8. 398049 8. 352062 8. 254218 8. 201402  
11758065\_ 4. 590188 4. 708185 4. 558979 4. 755733 4. 782874 4. 608974  
11758066\_ 5. 67473 5. 290744 5. 434834 5. 999974 5. 997473 5. 91645  
11758067\_ 12. 6824 12. 71512 12. 67758 12. 78047 12. 76377 12. 73956  
11758068\_ 5. 953052 5. 67601 5. 955476 5. 718447 5. 656877 5. 855363  
11758069\_ 3. 350618 3. 417098 3. 474363 3. 722588 3. 495745 3. 573412  
11758070\_ 6. 185558 6. 142501 6. 226672 6. 463774 6. 446517 6. 556649  
11758071\_ 7. 230373 7. 261574 7. 120618 6. 710012 6. 730336 6. 83713  
11758072\_ 8. 925199 8. 866915 8. 907535 8. 436907 8. 447906 8. 500517  
11758073\_ 10. 15054 10. 10569 10. 13035 9. 899853 9. 900171 9. 830502  
11758074\_ 3. 450044 3. 63542 3. 49586 3. 163309 3. 474741 3. 711926  
11758075\_ 8. 604243 8. 534233 8. 582039 8. 074571 8. 012994 8. 26973  
11758076\_ 5. 471645 5. 518169 5. 442397 5. 507338 5. 522096 5. 475572  
11758077\_ 4. 532287 4. 584933 4. 583368 4. 602015 4. 677102 4. 605944  
11758078\_ 3. 987824 3. 968472 4. 114825 4. 233897 4. 084857 4. 020893  
11758079\_ 3. 089442 3. 175511 3. 083915 3. 2333 3. 112403 3. 09772  
11758080\_ 7. 99401 8. 024254 7. 99786 7. 876505 7. 847491 7. 849589  
11758081\_ 7. 963796 7. 928114 7. 927479 7. 912798 7. 804912 7. 811212  
11758082\_ 3. 214402 3. 237229 3. 164009 3. 431221 3. 16853 3. 466455  
11758083\_ 2. 47102 2. 566725 2. 452054 2. 523568 2. 480503 2. 448633  
11758084\_ 5. 956405 6. 045576 6. 034291 5. 968336 6. 04148 5. 929129  
11758085\_ 6. 24883 6. 077102 6. 144915 6. 921387 6. 780019 6. 838803  
11758086\_ 2. 877063 2. 830879 2. 923541 2. 710796 2. 611835 2. 670861  
11758087\_ 3. 577793 3. 468798 3. 497576 3. 318145 3. 260806 3. 384747  
11758088\_ 6. 7932 6. 902693 6. 852265 7. 217519 7. 125793 7. 152454  
11758089\_ 9. 835214 9. 755287 9. 820212 10. 3229 10. 25997 10. 27788  
11758090\_ 4. 340043 4. 429079 4. 305864 4. 293922 4. 363551 4. 393705  
11758091\_ 8. 133545 8. 067893 8. 203118 8. 36677 8. 282293 8. 34857

11758092\_ 7. 076762 7. 106846 7. 054787 7. 456656 7. 433248 7. 557106  
11758093\_ 3. 626993 3. 761489 3. 729925 3. 780065 3. 457012 3. 509547  
11758094\_ 7. 191389 7. 154032 7. 203752 7. 963289 8. 006687 8. 067972  
11758095\_ 3. 768266 3. 738888 3. 65325 3. 84045 3. 98881 3. 684663  
11758096\_ 9. 068889 9. 098951 9. 08568 9. 315718 9. 269547 9. 219818  
11758097\_ 2. 240856 2. 303555 2. 323962 2. 366689 2. 371836 2. 721628  
11758098\_ 13. 2094 13. 20666 13. 19208 13. 09762 13. 10861 13. 1123  
11758099\_ 11. 56476 11. 50989 11. 5562 11. 70776 11. 74514 11. 70901  
11758100\_ 4. 623693 4. 347896 4. 350297 4. 278111 4. 300886 4. 250884  
11758101\_ 6. 343485 6. 278238 6. 267142 7. 036717 7. 165225 7. 131247  
11758102\_ 3. 605403 3. 606313 3. 620059 3. 703049 3. 728948 3. 482629  
11758103\_ 8. 542094 8. 516337 8. 610888 8. 653583 8. 689813 8. 676832  
11758104\_ 8. 14552 8. 067459 8. 191982 8. 276525 8. 223792 8. 317997  
11758105\_ 9. 366509 9. 344234 9. 358579 9. 090228 9. 029078 9. 024016  
11758106\_ 7. 389089 7. 49793 7. 465785 8. 230539 8. 285091 8. 240116  
11758107\_ 10. 72779 10. 71752 10. 71137 11. 03424 11. 03206 11. 01428  
11758108\_ 7. 349051 7. 303947 7. 284534 5. 798295 5. 950428 6. 023812  
11758109\_ 5. 143265 5. 149156 5. 088899 5. 229373 5. 307042 5. 444605  
11758110\_ 6. 373107 6. 309894 6. 355384 6. 496823 6. 464805 6. 463655  
11758111\_ 4. 57732 4. 84018 4. 534018 5. 197703 5. 460347 5. 15818  
11758112\_ 8. 222538 8. 153723 8. 289883 7. 764548 7. 731044 7. 831336  
11758113\_ 9. 198726 9. 174298 9. 223003 9. 201349 9. 207656 9. 223185  
11758114\_ 7. 771117 7. 616419 7. 688734 7. 685125 7. 679516 7. 706998  
11758115\_ 7. 917756 7. 965853 7. 781352 7. 505351 7. 319007 7. 232159  
11758116\_ 5. 622945 5. 745965 5. 763634 6. 318829 6. 391268 6. 362773  
11758117\_ 7. 013023 7. 062265 7. 053419 6. 777307 6. 764541 6. 853767  
11758118\_ 9. 9327 9. 920851 9. 941856 9. 997561 10. 00428 9. 957736  
11758119\_ 7. 048823 7. 067463 7. 126904 7. 478558 7. 465573 7. 558441  
11758120\_ 2. 868981 2. 818791 2. 85818 2. 912673 2. 875305 2. 886106  
11758121\_ 7. 636916 7. 540038 7. 6477 7. 743704 7. 698963 7. 773842  
11758122\_ 7. 461693 7. 426223 7. 462669 6. 792183 6. 806851 6. 781521  
11758123\_ 7. 526783 7. 390636 7. 456597 6. 983868 6. 913763 6. 904779  
11758124\_ 3. 920298 3. 990991 3. 884891 3. 917599 3. 907886 4. 290105  
11758125\_ 8. 728693 8. 74934 8. 686344 9. 18717 9. 168537 9. 16984  
11758126\_ 8. 272671 8. 326407 8. 277795 7. 742547 7. 659366 7. 631392  
11758127\_ 11. 68654 11. 64777 11. 69376 11. 83864 11. 86835 11. 84372  
11758128\_ 2. 788647 2. 826792 2. 665849 2. 818936 2. 829329 2. 894107  
11758129\_ 4. 329928 4. 274655 4. 227956 4. 227956 4. 072565 4. 301439  
11758130\_ 6. 767273 6. 630532 6. 823209 7. 206133 7. 190061 7. 111953  
11758131\_ 8. 195553 8. 09976 8. 189751 8. 276153 8. 219049 8. 277325  
11758132\_ 5. 050344 5. 005009 5. 029508 4. 981159 5. 049278 5. 022155  
11758133\_ 6. 195551 6. 063158 6. 155132 6. 3381 6. 313387 6. 41792  
11758134\_ 6. 496143 6. 30518 6. 387775 5. 970971 6. 051539 5. 993086  
11758135\_ 7. 973292 7. 999061 7. 976772 7. 733927 7. 790342 7. 774111  
11758136\_ 9. 719649 9. 727454 9. 705518 9. 057112 9. 032836 9. 10045  
11758137\_ 4. 398963 4. 573407 4. 833547 6. 68181 6. 748647 6. 585037  
11758138\_ 6. 278625 6. 125025 6. 260434 8. 12605 8. 138814 8. 181136  
11758139\_ 7. 236502 7. 291201 7. 312366 8. 674746 8. 719357 8. 734084  
11758140\_ 6. 831536 6. 720919 6. 788375 7. 410807 7. 303325 7. 365455  
11758141\_ 4. 769654 4. 807984 4. 682586 4. 746317 4. 73959 4. 67329  
11758142\_ 8. 873958 9. 027705 8. 711363 9. 333557 9. 184302 9. 000026

11758143\_ 5.095638 5.117137 5.063663 4.686064 4.723402 4.831104  
11758144\_ 11.74389 11.75662 11.7657 11.86041 11.86102 11.8577  
11758145\_ 4.733724 4.993849 5.24442 5.200751 5.105445 5.168686  
11758146\_ 7.232068 7.115694 7.120618 7.038851 7.09798 7.089205  
11758147\_ 3.362677 3.325792 3.350193 3.123237 3.509048 3.325792  
11758148\_ 12.04596 12.03172 12.04081 11.9293 11.90331 11.88498  
11758149\_ 8.806802 8.789245 8.765064 9.520609 9.29996 9.247783  
11758150\_ 8.281764 8.3808 8.178921 8.190317 8.277652 8.197192  
11758151\_ 8.295489 8.213918 8.225565 9.14607 9.189509 9.086152  
11758152\_ 4.78027 4.654322 4.709463 4.983283 4.86496 4.866013  
11758153\_ 5.496954 5.419686 5.479053 5.584813 5.493833 5.534785  
11758154\_ 5.307811 5.424724 5.37024 5.393549 5.33507 5.330792  
11758155\_ 7.636936 7.779494 7.917318 7.382723 7.378944 7.285794  
11758156\_ 6.903683 6.920824 6.906563 6.735891 6.634707 6.719859  
11758157\_ 8.586745 8.528167 8.602074 8.540432 8.545185 8.588446  
11758158\_ 6.89871 6.857454 6.936274 6.504907 6.561321 6.621744  
11758159\_ 7.332661 7.208823 7.16318 6.801075 6.765532 6.708411  
11758160\_ 6.92965 6.981618 6.897395 7.029475 7.000215 7.058273  
11758161\_ 4.556657 4.233325 4.449515 4.718016 4.588416 4.446903  
11758162\_ 6.166004 6.195205 6.234727 6.321098 6.384109 6.236652  
11758163\_ 6.915638 6.774308 6.88174 7.17204 7.199445 7.160679  
11758164\_ 9.544212 9.444314 9.511091 10.11093 10.09583 10.11198  
11758165\_ 8.819123 8.836208 8.830227 8.720248 8.797931 8.750493  
11758166\_ 3.229148 3.477281 3.511236 3.601353 3.378001 3.507421  
11758167\_ 8.530215 8.480525 8.5765 8.215104 8.183977 8.188152  
11758168\_ 9.320596 9.253836 9.372109 9.622043 9.546162 9.584068  
11758169\_ 11.73002 11.74572 11.75457 11.82475 11.81538 11.74933  
11758170\_ 5.786738 5.624242 5.822372 4.526939 4.663603 4.860693  
11758171\_ 11.02664 11.08048 10.99844 10.99313 10.88872 10.84644  
11758172\_ 5.907622 5.819833 5.894697 6.058786 6.036275 5.988723  
11758173\_ 9.776798 9.660095 9.694177 9.747813 9.660089 9.717663  
11758174\_ 5.825 5.711906 5.777987 5.563126 5.554436 5.740509  
11758175\_ 6.741217 6.615441 6.64852 5.975884 6.079517 5.967031  
11758176\_ 6.82342 6.842283 6.917943 6.685263 6.61642 6.711385  
11758177\_ 7.340907 7.248152 7.397796 7.049794 7.014755 7.032733  
11758178\_ 9.601263 9.598579 9.635407 9.477389 9.573708 9.520608  
11758179\_ 7.386756 7.297521 7.312809 6.983639 6.984354 7.13105  
11758180\_ 6.045638 5.911498 5.97295 5.911498 5.98784 5.912825  
11758181\_ 10.68241 10.65611 10.65958 11.37005 11.30577 11.2814  
11758182\_ 12.73917 12.72383 12.73918 12.65196 12.7023 12.63286  
11758183\_ 7.716292 7.575479 7.661258 7.656971 7.631102 7.62583  
11758184\_ 6.056268 6.047566 6.104699 5.951052 5.936076 5.971761  
11758185\_ 9.162911 9.162972 9.163218 9.129384 9.14252 9.102989  
11758186\_ 7.131043 6.903904 7.096872 6.978766 6.943406 6.999625  
11758187\_ 10.6508 10.61317 10.6257 10.47581 10.47362 10.47436  
11758188\_ 6.935986 6.936579 6.972457 6.821586 6.88924 6.84005  
11758189\_ 9.564935 9.507589 9.53311 9.729765 9.732583 9.73583  
11758190\_ 7.188127 7.055321 7.219679 7.777454 7.865769 7.979159  
11758191\_ 8.425789 8.429155 8.394438 8.433377 8.445772 8.477962  
11758192\_ 12.04596 12.03172 12.04081 11.9293 11.90331 11.88498  
11758193\_ 12.14208 12.14719 12.1029 12.04608 12.0035 12.00737

11758194\_ 2.738951 2.653601 2.819469 2.746294 2.873241 2.768091  
11758195\_ 12.93917 12.90723 12.90643 12.86909 12.84031 12.82733  
11758196\_ 7.22324 7.144608 7.222344 7.200392 7.156019 7.153282  
11758197\_ 4.16238 4.482441 4.440207 4.638721 4.441872 4.544398  
11758198\_ 8.762478 8.638005 8.774897 7.838137 7.859599 7.897213  
11758199\_ 10.57831 10.53862 10.55714 10.62768 10.55344 10.56065  
11758200\_ 9.87833 9.89455 9.935044 10.55968 10.61237 10.50207  
11758201\_ 8.030785 8.042011 8.176617 9.783827 9.784235 9.794685  
11758202\_ 5.6028 5.519989 5.620807 5.77017 5.743544 5.79766  
11758203\_ 9.43566 9.3524 9.347581 8.827998 8.866748 8.842858  
11758204\_ 7.370173 7.333282 7.306749 7.326866 7.2794 7.35364  
11758205\_ 10.61083 10.56366 10.62171 10.43201 10.50261 10.49338  
11758206\_ 6.102538 5.973739 6.090725 6.114771 6.136746 5.993827  
11758207\_ 7.979159 8.035586 7.892766 8.083622 8.000837 8.009215  
11758208\_ 9.028934 8.943453 9.030769 8.279315 8.29325 8.339746  
11758209\_ 8.146307 8.141225 8.176147 7.892807 7.826229 7.903757  
11758210\_ 9.079849 9.00344 9.045021 9.114163 9.108575 9.077464  
11758211\_ 8.055089 8.061037 8.083152 8.127427 8.10694 8.058867  
11758212\_ 8.37923 8.404796 8.44145 8.207972 8.131533 8.155456  
11758213\_ 8.449816 8.453705 8.480434 8.064267 8.060378 8.032539  
11758214\_ 8.195553 8.056764 8.207682 8.332063 8.385228 8.458496  
11758215\_ 6.983906 7.170226 7.10866 7.159139 7.051186 7.10866  
11758216\_ 5.030683 4.840273 4.930507 4.953968 5.035051 4.766189  
11758217\_ 10.16406 10.08621 10.18793 10.44967 10.46335 10.39776  
11758218\_ 7.787335 7.734992 7.709501 7.368792 7.227941 7.302879  
11758219\_ 8.892041 8.911377 8.879507 10.2367 10.14254 10.09363  
11758220\_ 9.210681 9.231753 9.220769 9.051255 9.017369 9.04667  
11758221\_ 8.350427 8.383867 8.313252 7.042169 7.072866 6.980698  
11758222\_ 10.68326 10.66318 10.69127 11.13561 11.1255 11.13712  
11758223\_ 8.133266 7.981584 8.132967 8.337414 8.407245 8.401363  
11758224\_ 6.423565 6.392039 6.494455 5.941183 5.820023 6.010048  
11758225\_ 6.01451 5.891191 5.761573 5.718066 5.64564 5.842304  
11758226\_ 7.979159 7.838219 7.971001 8.078711 8.038892 8.031589  
11758227\_ 9.245185 9.219372 9.18049 8.927381 8.85971 8.95833  
11758228\_ 8.026137 8.067511 7.995605 7.21867 7.126127 7.201258  
11758229\_ 2.112869 1.981217 2.226862 1.977683 1.928776 2.02199  
11758230\_ 5.90671 5.722611 6.053489 5.610227 5.542423 5.64118  
11758231\_ 9.950355 9.847572 9.890489 10.02384 10.04715 10.01633  
11758232\_ 7.226135 7.009938 7.229946 7.331639 7.253204 7.333856  
11758233\_ 2.61118 2.416637 2.830446 2.594188 2.61118 2.61118  
11758234\_ 8.031113 7.93532 8.029528 8.112186 8.181141 8.109369  
11758235\_ 10.16674 10.09781 10.10866 10.07493 10.11764 10.03274  
11758236\_ 5.352003 5.489375 5.2547 5.338705 5.36901 5.388602  
11758237\_ 5.392383 5.20844 5.041039 4.620995 4.728215 4.85126  
11758238\_ 9.174422 9.148255 9.132961 9.000321 8.989504 8.98365  
11758239\_ 6.326532 6.315377 6.324679 6.435126 6.323714 6.406622  
11758240\_ 8.153949 8.160435 8.213119 8.237585 8.295283 8.282001  
11758241\_ 9.351164 9.339508 9.374929 9.354431 9.297598 9.331916  
11758242\_ 8.171322 8.253825 8.159266 7.740021 7.791493 7.701059  
11758243\_ 3.507141 3.521556 3.431365 3.424568 3.482993 3.538167  
11758244\_ 3.757696 3.922502 3.79922 3.761691 3.84565 3.744929

11758245\_ 11.6696 11.66027 11.65793 11.57684 11.62279 11.5125  
11758246\_ 7.540333 7.483109 7.511713 7.692159 7.6611 7.639498  
11758247\_ 7.219372 7.119803 7.161439 7.280582 7.268181 7.276635  
11758248\_ 8.063972 7.948122 8.043628 8.94852 8.957035 8.947582  
11758249\_ 9.125238 9.150958 9.119611 9.747665 9.663971 9.665897  
11758250\_ 7.910418 7.84888 7.848224 7.523656 7.522379 7.532031  
11758251\_ 7.87699 7.912686 7.874308 7.850536 7.895607 7.909825  
11758252\_ 7.404658 7.482432 7.374996 7.485465 7.466751 7.521287  
11758253\_ 7.593311 7.522329 7.650095 7.953197 7.945491 7.958235  
11758254\_ 6.48642 6.597175 6.412133 7.835385 7.898561 7.899474  
11758255\_ 8.987724 9.045078 8.998576 9.208629 9.13607 9.152695  
11758256\_ 4.51709 4.584933 4.530387 4.554898 4.583961 4.491429  
11758257\_ 7.389204 7.459838 7.418919 7.486208 7.481576 7.491877  
11758258\_ 6.453819 6.431362 6.475721 6.428534 6.428281 6.419249  
11758259\_ 2.60684 2.337114 2.657921 2.553884 2.470617 2.38225  
11758260\_ 11.63126 11.85346 11.78075 11.78441 11.7013 11.72964  
11758261\_ 8.997525 8.908418 8.979891 9.706518 9.708272 9.661693  
11758262\_ 8.265715 8.215236 8.258153 7.627204 7.626365 7.633725  
11758263\_ 2.371631 2.507 2.445388 2.413057 2.470805 2.437486  
11758264\_ 8.611242 8.567387 8.530729 8.900309 8.843914 8.826593  
11758265\_ 6.56978 6.604491 6.665265 6.681866 6.729485 6.672093  
11758266\_ 10.06312 9.970762 10.00904 10.16186 10.16708 10.13677  
11758267\_ 6.617407 6.531304 6.644607 6.322629 6.305616 6.275431  
11758268\_ 6.021143 6.033313 5.982594 6.263567 6.366435 6.24005  
11758269\_ 10.44415 10.39893 10.36996 10.58415 10.49289 10.47029  
11758270\_ 8.178816 8.182153 8.158397 8.11706 8.101907 8.118795  
11758271\_ 5.930411 5.918745 5.807133 5.751802 5.801692 5.902121  
11758272\_ 4.529731 4.625304 4.534863 4.529731 4.393866 4.529731  
11758273\_ 8.835179 8.833482 8.915999 9.254547 9.227156 9.246485  
11758274\_ 6.533748 6.715007 6.594111 6.656231 6.724668 6.588563  
11758275\_ 9.914151 9.905993 9.890764 10.14082 10.07992 10.10701  
11758276\_ 11.06226 11.03199 11.05598 11.22373 11.22641 11.2259  
11758277\_ 11.49473 11.48891 11.50878 11.2414 11.20141 11.19121  
11758278\_ 4.760365 4.827562 4.792329 4.565418 4.601498 4.598337  
11758279\_ 9.345285 9.286423 9.284884 9.924762 9.941501 9.893816  
11758280\_ 7.335346 7.264877 7.301045 7.554419 7.482432 7.338979  
11758281\_ 5.138695 5.158753 5.083744 5.320495 5.134368 5.156194  
11758282\_ 11.83113 11.92457 11.83761 12.2159 12.1114 12.09543  
11758283\_ 7.390362 7.392232 7.441776 7.12919 7.210478 7.226585  
11758284\_ 7.979808 8.014888 7.971515 8.019889 7.978468 8.02019  
11758285\_ 9.048717 9.003216 9.057496 9.239612 9.315136 9.328422  
11758286\_ 3.516485 3.600567 3.449714 4.180678 4.151658 4.102507  
11758287\_ 3.735869 3.927741 3.915917 3.976204 3.846347 3.714186  
11758288\_ 8.216722 8.089534 8.206406 8.182114 8.183197 8.181093  
11758289\_ 12.98393 12.95392 12.96199 12.94638 12.93385 12.93786  
11758290\_ 8.851771 8.769809 8.83695 9.005651 8.975356 9.029312  
11758291\_ 7.850273 7.76041 7.845464 7.697956 7.722204 7.782008  
11758292\_ 5.495216 5.634206 5.449889 5.651823 5.592761 5.534503  
11758293\_ 7.374898 7.319756 7.327869 7.473986 7.470226 7.449795  
11758294\_ 2.074325 2.17258 2.144774 2.063181 1.890469 2.050842  
11758295\_ 9.985835 9.946556 9.971143 9.846145 9.868534 9.850931

11758296\_ 8. 851172 8. 891479 8. 914469 8. 699557 8. 730924 8. 706464  
11758297\_ 11. 4563 11. 41897 11. 47944 11. 45288 11. 4316 11. 42943  
11758298\_ 6. 3607 6. 266955 6. 369676 6. 187722 6. 241491 6. 212602  
11758299\_ 11. 92316 11. 94138 11. 90505 11. 89085 11. 89591 11. 84009  
11758300\_ 12. 18907 12. 20702 12. 19212 12. 06753 12. 04953 12. 07443  
11758301\_ 6. 582653 6. 570862 6. 659112 6. 501681 6. 553576 6. 554544  
11758302\_ 5. 914784 5. 916564 5. 902504 5. 927199 5. 96072 5. 95157  
11758303\_ 6. 762077 6. 699438 6. 665265 7. 852496 7. 914267 7. 794068  
11758304\_ 9. 273443 9. 23826 9. 261351 9. 044452 9. 084545 9. 038561  
11758305\_ 5. 630566 5. 698969 5. 693509 5. 583327 5. 605189 5. 682707  
11758306\_ 8. 473391 8. 35799 8. 437185 7. 696632 7. 646223 7. 727087  
11758307\_ 12. 58088 12. 62791 12. 60358 12. 5735 12. 52371 12. 49333  
11758308\_ 11. 97907 11. 96219 11. 93762 12. 35909 12. 3276 12. 35075  
11758309\_ 9. 166368 9. 18223 9. 15572 9. 433227 9. 341721 9. 356857  
11758310\_ 8. 746744 8. 709484 8. 738926 8. 743294 8. 748182 8. 752212  
11758311\_ 8. 063972 7. 948122 8. 043628 8. 94852 8. 957035 8. 947582  
11758312\_ 6. 08134 6. 062187 6. 368906 5. 129687 5. 433851 5. 042018  
11758313\_ 12. 62102 12. 6104 12. 62303 12. 61602 12. 58283 12. 59891  
11758314\_ 9. 546502 9. 522802 9. 528555 9. 425424 9. 480458 9. 396672  
11758315\_ 6. 987129 6. 92457 7. 009955 5. 784064 6. 009179 6. 039813  
11758316\_ 7. 912109 7. 934131 7. 883575 8. 490598 8. 49769 8. 568035  
11758317\_ 6. 763723 6. 836173 6. 808107 7. 054272 6. 956076 6. 910634  
11758318\_ 10. 62647 10. 52099 10. 58785 10. 5689 10. 61953 10. 57727  
11758319\_ 13. 16063 13. 145 13. 14559 13. 12822 13. 14031 13. 13816  
11758320\_ 5. 483988 5. 713853 5. 501471 5. 700302 5. 750312 5. 750312  
11758321\_ 6. 621826 6. 701269 6. 643431 6. 861894 6. 787516 6. 785645  
11758322\_ 6. 058136 6. 225513 6. 095775 6. 286836 6. 34864 6. 247833  
11758323\_ 6. 768635 6. 619472 6. 519949 7. 037699 6. 963213 6. 915636  
11758324\_ 6. 653906 6. 653906 6. 66027 6. 66027 6. 578374 6. 683096  
11758325\_ 8. 119451 7. 986734 8. 089611 8. 082863 7. 947472 8. 036494  
11758326\_ 7. 265618 7. 206152 7. 236987 7. 193269 7. 166914 7. 249145  
11758327\_ 8. 822478 8. 705095 8. 783937 8. 447052 8. 495625 8. 469899  
11758328\_ 7. 032244 6. 820302 6. 863574 6. 289921 6. 169967 6. 175613  
11758329\_ 8. 647805 8. 616336 8. 607783 9. 659222 9. 660799 9. 599068  
11758330\_ 8. 449289 8. 398722 8. 47199 9. 35922 9. 29771 9. 346436  
11758331\_ 5. 85984 6. 015069 5. 892004 5. 977099 5. 922811 5. 995602  
11758332\_ 6. 830716 6. 85587 6. 906357 6. 768397 6. 742653 6. 778713  
11758333\_ 6. 922209 6. 91283 6. 985032 6. 532863 6. 64097 6. 645424  
11758334\_ 6. 123924 6. 091962 6. 234242 6. 580402 6. 56029 6. 596133  
11758335\_ 8. 717809 8. 694136 8. 747153 8. 656085 8. 743911 8. 770826  
11758336\_ 8. 605405 8. 541372 8. 592329 7. 857065 7. 857507 7. 839254  
11758337\_ 7. 889692 7. 84125 7. 929321 7. 791764 7. 748159 7. 829691  
11758338\_ 3. 181464 3. 23306 2. 942904 3. 237967 3. 164266 3. 34172  
11758339\_ 5. 042991 5. 015182 5. 04733 5. 011847 5. 082686 5. 093408  
11758340\_ 5. 997349 6. 006806 6. 054791 6. 046625 6. 061663 6. 079028  
11758341\_ 13. 16176 13. 14883 13. 15794 13. 11359 13. 12924 13. 08599  
11758342\_ 2. 090995 1. 921044 1. 782873 1. 736233 1. 690794 1. 875605  
11758343\_ 11. 21436 11. 22528 11. 22038 11. 5364 11. 51471 11. 50048  
11758344\_ 10. 68881 10. 66243 10. 6742 10. 27513 10. 26105 10. 28237  
11758345\_ 5. 885649 6. 130575 6. 079166 5. 643713 5. 894697 5. 908818  
11758346\_ 7. 445364 7. 373253 7. 474895 7. 807506 7. 855182 7. 807789

11758347\_ 8. 41521 8. 301596 8. 434143 7. 526751 7. 551637 7. 510281  
11758348\_ 8. 940036 8. 889291 9. 010657 8. 695297 8. 79861 8. 771358  
11758349\_ 5. 331638 5. 357351 5. 327498 5. 385003 5. 282693 5. 278074  
11758350\_ 6. 848316 6. 648804 6. 716512 6. 676783 6. 574019 6. 568868  
11758351\_ 6. 614301 6. 767391 6. 519713 6. 561015 6. 616044 6. 592632  
11758352\_ 5. 909402 5. 883641 5. 905937 5. 984409 6. 050268 5. 955597  
11758353\_ 4. 249317 4. 436855 4. 380083 4. 593938 4. 52373 4. 415744  
11758354\_ 6. 894495 6. 798762 6. 83613 6. 9266 6. 838737 6. 889854  
11758355\_ 5. 149276 5. 073036 5. 228281 5. 530164 5. 564045 5. 770233  
11758356\_ 6. 874161 6. 799813 6. 898793 6. 716465 6. 830275 6. 813048  
11758357\_ 12. 79428 12. 79947 12. 82676 12. 87866 12. 84482 12. 82972  
11758358\_ 8. 067466 8. 072928 7. 97338 8. 148875 7. 967393 7. 866508  
11758359\_ 3. 03105 2. 907173 2. 945433 2. 937668 3. 054906 2. 958988  
11758360\_ 6. 928685 6. 911871 6. 923396 6. 738614 6. 650143 6. 638096  
11758361\_ 2. 83766 2. 742864 2. 691581 2. 964262 2. 788554 2. 737701  
11758362\_ 8. 895583 8. 81363 8. 880972 8. 960953 8. 929384 8. 979102  
11758363\_ 7. 751952 7. 612357 7. 698579 7. 716751 7. 769774 7. 756175  
11758364\_ 8. 531628 8. 435688 8. 46176 8. 598529 8. 638418 8. 620202  
11758365\_ 5. 198697 4. 960721 5. 110261 4. 736759 4. 960721 4. 911134  
11758366\_ 5. 021906 4. 835107 5. 013555 4. 712885 4. 658556 4. 616279  
11758367\_ 6. 995147 6. 992146 7. 034676 7. 297306 7. 412565 7. 289448  
11758368\_ 7. 745631 7. 716315 7. 78739 7. 979513 8. 001648 7. 934644  
11758369\_ 7. 609721 7. 560073 7. 562863 7. 911938 7. 864326 7. 784173  
11758370\_ 5. 279132 5. 310055 5. 449597 5. 318185 5. 314359 5. 443029  
11758371\_ 7. 118591 7. 010741 7. 119922 7. 773736 7. 74382 7. 75984  
11758372\_ 10. 21895 10. 16459 10. 20334 10. 04252 10. 11465 10. 07235  
11758373\_ 4. 453423 4. 433406 4. 310292 4. 513976 4. 453761 4. 443355  
11758374\_ 4. 222205 4. 395183 4. 390758 4. 409879 4. 44185 4. 268977  
11758375\_ 10. 25289 10. 18413 10. 21519 9. 554844 9. 576004 9. 579409  
11758376\_ 5. 550299 5. 648739 5. 639323 5. 428461 5. 162844 5. 374866  
11758377\_ 3. 984859 4. 0536 4. 06899 3. 785339 3. 600769 3. 529161  
11758378\_ 7. 48435 7. 396769 7. 510506 7. 564272 7. 546232 7. 544906  
11758379\_ 9. 708686 9. 654419 9. 681043 9. 286421 9. 27148 9. 342254  
11758380\_ 5. 977692 5. 780563 5. 820052 6. 025297 6. 018576 6. 033368  
11758381\_ 5. 436118 5. 228627 5. 349705 5. 681777 5. 554436 5. 535183  
11758382\_ 2. 266536 2. 24876 2. 361778 2. 309005 2. 259399 2. 314491  
11758383\_ 6. 390969 6. 524566 6. 538925 6. 255441 5. 999263 6. 047894  
11758384\_ 5. 11336 5. 112287 5. 038873 5. 240344 5. 181303 5. 238633  
11758385\_ 2. 636447 3. 138965 3. 079129 3. 237998 3. 21279 3. 294146  
11758386\_ 6. 658454 6. 431912 6. 401292 6. 190695 6. 204449 6. 134822  
11758387\_ 6. 515216 6. 385822 6. 420297 6. 160113 6. 016574 6. 214265  
11758388\_ 6. 617088 6. 651256 6. 695814 5. 770726 5. 850217 5. 817586  
11758389\_ 5. 125619 4. 969261 5. 083244 4. 970324 5. 085075 5. 085075  
11758390\_ 3. 998094 3. 736488 3. 508697 3. 707892 3. 66815 3. 854326  
11758391\_ 6. 679907 6. 650158 6. 672405 7. 049185 7. 057979 6. 94852  
11758392\_ 4. 756211 4. 508028 4. 549055 5. 093111 4. 990257 5. 086174  
11758393\_ 5. 04845 4. 990554 5. 098819 5. 086826 5. 042393 5. 207856  
11758394\_ 5. 696794 5. 832212 5. 733124 5. 69481 5. 708171 5. 718412  
11758395\_ 2. 731498 2. 958697 2. 598618 2. 857567 2. 730351 2. 83548  
11758396\_ 6. 832207 6. 754821 6. 755725 7. 725616 7. 814349 7. 797874  
11758397\_ 4. 173293 3. 832673 3. 880112 4. 183919 4. 036586 4. 051957



11758398\_ 8. 592527 8. 567937 8. 609654 8. 20809 8. 269537 8. 241427  
11758399\_ 4. 007287 3. 91884 3. 816612 4. 067703 3. 943987 4. 063534  
11758400\_ 5. 662067 5. 791178 5. 551761 5. 76942 5. 877834 5. 815763  
11758401\_ 5. 016961 4. 868593 4. 772366 5. 501768 5. 592836 5. 652188  
11758402\_ 7. 625185 7. 490696 7. 599298 7. 26056 7. 05852 7. 139357  
11758403\_ 7. 984865 7. 966505 8. 025979 6. 841179 6. 937808 6. 971101  
11758404\_ 4. 073096 4. 52373 4. 500567 4. 736759 4. 996662 4. 848218  
11758405\_ 6. 620864 6. 774529 6. 770192 6. 967106 7. 000907 7. 074338  
11758406\_ 4. 640013 4. 418665 4. 370337 4. 740688 4. 574485 4. 745237  
11758407\_ 2. 339971 2. 411244 2. 388336 2. 356954 2. 411244 2. 463907  
11758408\_ 4. 984161 5. 005941 4. 960071 4. 032169 4. 083852 3. 908873  
11758409\_ 13. 05599 13. 04055 13. 04022 13. 01192 12. 99668 12. 9913  
11758410\_ 3. 326965 3. 780526 3. 652828 3. 769963 3. 511953 3. 911208  
11758411\_ 5. 220809 5. 084207 5. 35087 5. 490014 5. 625652 5. 732315  
11758412\_ 5. 156772 5. 228627 5. 099012 5. 2222 5. 266843 5. 155388  
11758413\_ 3. 203751 2. 801248 2. 937111 2. 986059 3. 01187 2. 966373  
11758414\_ 7. 493572 7. 465235 7. 512415 7. 281644 7. 241221 7. 323895  
11758415\_ 3. 357083 3. 159126 3. 511997 3. 117647 3. 283869 3. 163833  
11758416\_ 3. 975031 4. 137383 4. 002605 4. 03217 4. 064925 4. 049299  
11758417\_ 9. 923767 9. 80017 9. 899911 10. 12386 10. 12177 10. 11594  
11758418\_ 6. 766913 6. 638452 6. 82265 6. 702681 6. 683171 6. 711093  
11758419\_ 4. 994368 4. 686979 5. 154713 4. 834736 4. 863871 4. 734858  
11758420\_ 5. 496996 5. 514946 5. 371452 5. 756912 5. 854369 5. 849541  
11758421\_ 8. 908387 8. 914505 8. 879553 8. 253796 8. 249485 8. 347028  
11758422\_ 7. 997978 7. 998355 7. 847973 7. 667347 7. 727943 7. 745584  
11758423\_ 13. 30699 13. 29964 13. 30256 13. 25098 13. 25075 13. 25869  
11758424\_ 8. 344274 8. 276877 8. 305774 8. 343503 8. 337236 8. 340553  
11758425\_ 5. 643713 5. 648666 5. 753861 5. 454263 5. 638895 5. 433986  
11758426\_ 5. 92661 5. 705834 5. 797677 5. 89498 5. 846074 6. 144455  
11758427\_ 2. 366216 2. 44371 2. 394411 2. 56695 2. 460143 2. 433648  
11758428\_ 6. 18785 6. 230044 6. 151655 5. 012837 4. 74574 4. 93811  
11758429\_ 6. 600975 6. 471449 6. 623241 6. 559842 6. 475717 6. 418692  
11758430\_ 4. 530389 4. 735864 4. 623465 4. 554669 4. 724788 4. 565332  
11758431\_ 4. 645142 4. 625573 4. 731941 4. 692878 4. 937654 4. 869801  
11758432\_ 6. 842741 6. 725969 6. 704809 6. 215813 6. 234715 6. 167908  
11758433\_ 8. 892437 8. 823918 8. 877681 8. 760426 8. 708509 8. 734041  
11758434\_ 5. 806028 5. 687475 5. 806594 6. 398135 6. 296262 6. 284819  
11758435\_ 9. 129918 9. 147214 9. 177208 9. 158734 9. 158734 9. 14972  
11758436\_ 5. 852974 5. 84139 5. 965735 6. 692237 6. 770469 6. 731328  
11758437\_ 7. 392432 7. 226031 7. 342104 7. 369942 7. 331662 7. 254194  
11758438\_ 2. 100821 2. 147787 2. 053855 2. 028091 2. 100821 2. 17355  
11758439\_ 4. 712052 4. 586253 4. 62104 4. 776004 4. 798511 4. 77143  
11758440\_ 7. 276296 7. 261654 7. 198375 7. 088062 7. 034038 6. 982016  
11758441\_ 7. 865234 7. 922669 8. 032608 7. 069266 7. 00285 7. 105884  
11758442\_ 8. 560314 8. 519031 8. 482178 7. 744607 7. 82484 7. 737174  
11758443\_ 5. 254462 5. 333749 5. 21344 5. 337957 5. 136124 5. 311644  
11758444\_ 7. 67448 7. 515598 7. 602369 8. 448391 8. 388104 8. 467946  
11758445\_ 5. 959407 6. 090491 5. 989923 5. 726094 5. 638013 5. 745666  
11758446\_ 9. 667204 9. 610209 9. 647302 9. 225119 9. 222342 9. 172269  
11758447\_ 7. 867133 7. 791951 7. 899086 7. 777603 7. 781077 7. 832917  
11758448\_ 7. 434364 7. 397137 7. 442902 7. 393242 7. 425328 7. 413255

11758449\_ 8. 166316 8. 135073 8. 158164 8. 163205 8. 112305 8. 135073  
11758450\_ 4. 874234 4. 850099 4. 453645 6. 076709 5. 8946 6. 263531  
11758451\_ 9. 244618 9. 155541 9. 185497 9. 454803 9. 415538 9. 394314  
11758452\_ 7. 144608 6. 964974 7. 062172 7. 447248 7. 366917 7. 421475  
11758453\_ 6. 728375 6. 791646 6. 778565 6. 796059 6. 790012 6. 765132  
11758454\_ 8. 069384 7. 980283 8. 008534 8. 312318 8. 291319 8. 246761  
11758455\_ 5. 927802 5. 921451 5. 985484 5. 712427 5. 443175 5. 752581  
11758456\_ 8. 060559 8. 128398 8. 121508 7. 467439 7. 395778 7. 377685  
11758457\_ 9. 873002 9. 884605 9. 869616 9. 984808 10. 01494 9. 978247  
11758458\_ 9. 863208 9. 852164 9. 82384 9. 997014 9. 99525 9. 942451  
11758459\_ 9. 831571 9. 824563 9. 826556 9. 615309 9. 669962 9. 565727  
11758460\_ 4. 643717 4. 706462 4. 517432 4. 833451 4. 686493 4. 686493  
11758461\_ 4. 481703 4. 461142 4. 866866 4. 525731 4. 69411 4. 597068  
11758462\_ 4. 790465 4. 709463 4. 701927 4. 186924 4. 545394 4. 593066  
11758463\_ 9. 642675 9. 539529 9. 589095 8. 902238 8. 833928 8. 811516  
11758464\_ 6. 606825 6. 618057 6. 34752 6. 640862 6. 603087 6. 677669  
11758465\_ 8. 260546 8. 236478 8. 256864 8. 330137 8. 276269 8. 313319  
11758466\_ 2. 225585 2. 08905 2. 220588 2. 192834 2. 04424 2. 046409  
11758467\_ 10. 764 10. 73429 10. 75463 10. 95803 10. 9261 10. 89195  
11758468\_ 3. 757347 3. 773813 3. 742019 3. 816183 3. 840953 3. 757347  
11758469\_ 2. 118895 2. 030598 1. 841956 2. 043348 2. 12757 2. 083246  
11758470\_ 4. 717772 4. 763543 4. 631009 4. 847641 4. 719142 4. 719142  
11758471\_ 5. 994837 5. 916019 5. 968007 5. 99634 5. 957954 6. 051445  
11758472\_ 6. 738281 6. 656169 6. 691407 6. 378987 6. 487591 6. 469656  
11758473\_ 7. 874905 7. 822892 7. 901596 7. 76393 7. 802049 7. 745314  
11758474\_ 3. 467547 3. 440612 3. 170115 3. 358305 3. 389981 3. 347747  
11758475\_ 8. 2465 8. 207571 8. 2454 8. 448329 8. 458728 8. 486082  
11758476\_ 6. 601456 6. 567576 6. 67092 7. 405361 7. 40322 7. 464011  
11758477\_ 6. 874559 6. 881614 6. 702977 6. 034283 6. 005846 6. 099266  
11758478\_ 7. 812973 7. 869013 7. 771597 9. 234213 9. 154207 9. 259304  
11758479\_ 2. 624813 2. 439059 2. 450751 2. 353779 2. 478057 2. 326473  
11758480\_ 10. 04038 9. 983619 10. 01756 9. 885302 9. 899537 9. 928422  
11758481\_ 4. 449623 4. 504112 4. 717425 4. 496162 4. 697809 4. 584933  
11758482\_ 6. 130092 6. 271092 6. 333995 6. 742399 6. 697563 6. 739359  
11758483\_ 5. 570926 5. 51235 5. 770912 6. 226409 6. 268258 6. 308737  
11758484\_ 4. 418969 4. 437033 4. 375863 4. 510247 4. 4198 4. 410622  
11758485\_ 6. 482661 6. 449655 6. 554619 6. 160894 6. 446913 6. 408035  
11758486\_ 8. 208039 8. 128398 8. 24326 8. 168903 8. 183835 8. 166326  
11758487\_ 5. 197578 5. 118135 5. 028443 4. 347179 4. 427036 4. 558212  
11758488\_ 3. 154319 3. 067044 3. 013522 3. 077077 3. 057011 3. 160741  
11758489\_ 8. 276022 8. 204028 8. 190047 7. 85204 7. 859199 7. 790169  
11758490\_ 7. 296083 7. 286897 7. 339542 6. 832671 6. 885672 6. 889297  
11758491\_ 6. 478746 6. 422972 6. 6607 6. 916007 6. 924375 6. 853449  
11758492\_ 6. 732775 6. 718207 6. 811328 6. 765911 6. 731583 6. 731583  
11758493\_ 6. 184706 6. 257931 6. 025342 6. 212645 6. 21675 6. 184312  
11758494\_ 5. 964224 6. 191168 6. 079811 6. 307007 6. 270989 6. 300643  
11758495\_ 4. 247035 4. 263683 4. 122976 4. 359929 4. 323719 4. 253539  
11758496\_ 7. 842506 7. 805014 7. 849476 8. 185921 8. 235418 8. 377121  
11758497\_ 5. 051057 5. 059222 5. 200589 4. 875034 5. 12293 4. 91731  
11758498\_ 7. 827178 7. 650238 7. 971359 5. 757118 5. 728196 5. 93739  
11758499\_ 7. 679871 7. 68126 7. 680809 8. 671749 8. 628747 8. 613667

11758500\_ 4. 924324 4. 775388 4. 754211 4. 824195 4. 805354 4. 847319  
11758501\_ 6. 093769 5. 951539 6. 006119 5. 977504 6. 058646 6. 097133  
11758502\_ 2. 646363 2. 448909 2. 537121 2. 45691 2. 57696 2. 412785  
11758503\_ 4. 789272 4. 712213 4. 789272 4. 760888 4. 93837 4. 88366  
11758504\_ 2. 183068 2. 159658 1. 995297 1. 998257 2. 073936 2. 058948  
11758505\_ 5. 518226 5. 643713 5. 645156 5. 791394 5. 887032 5. 822221  
11758506\_ 8. 378431 8. 435732 8. 365232 8. 074407 7. 945233 7. 925264  
11758507\_ 5. 795711 5. 682312 5. 723758 5. 509869 5. 330396 5. 318239  
11758508\_ 6. 781418 7. 004354 6. 995793 6. 540069 6. 53463 6. 559148  
11758509\_ 3. 860466 3. 640834 3. 818027 3. 531592 3. 497985 3. 194561  
11758510\_ 2. 28124 2. 378213 2. 187308 2. 145743 2. 250449 2. 245803  
11758511\_ 4. 43316 4. 265338 4. 490528 4. 516421 4. 645182 4. 767308  
11758512\_ 6. 282741 6. 244666 6. 270526 6. 82363 6. 686431 6. 777169  
11758513\_ 8. 738335 8. 694822 8. 726572 8. 458111 8. 49631 8. 508371  
11758514\_ 7. 944855 7. 76309 7. 932743 8. 564766 8. 520415 8. 559677  
11758515\_ 5. 789947 5. 617483 5. 713937 6. 874408 6. 826431 6. 812217  
11758516\_ 6. 332508 6. 118838 6. 331582 6. 209356 6. 255303 6. 214211  
11758517\_ 8. 465847 8. 335368 8. 421085 8. 034961 7. 95212 7. 898823  
11758518\_ 3. 691136 3. 82477 3. 788503 3. 710499 3. 79374 3. 762528  
11758519\_ 10. 28171 10. 2468 10. 26908 10. 26395 10. 32034 10. 30779  
11758520\_ 2. 338412 2. 605516 2. 517153 2. 554638 2. 457631 2. 526713  
11758521\_ 6. 58393 6. 614164 6. 687923 7. 523523 7. 434642 7. 610735  
11758522\_ 5. 946723 5. 859509 6. 05875 5. 886672 5. 912089 5. 912306  
11758523\_ 8. 801908 8. 862311 8. 798276 8. 798186 8. 800345 8. 781414  
11758524\_ 5. 908825 6. 053941 5. 845365 5. 662935 5. 686361 5. 934403  
11758525\_ 8. 023634 7. 983353 8. 076376 8. 136312 8. 151249 8. 116791  
11758526\_ 4. 017692 3. 826836 3. 636653 3. 82632 3. 649195 3. 534419  
11758527\_ 7. 440694 7. 432253 7. 50632 6. 952277 6. 909068 6. 886652  
11758528\_ 8. 222786 8. 231845 8. 222345 8. 163016 8. 139534 8. 108395  
11758529\_ 9. 082502 8. 985882 9. 080959 9. 717365 9. 695467 9. 691951  
11758530\_ 3. 369821 3. 259894 3. 279503 3. 226516 3. 135819 3. 309925  
11758531\_ 9. 219548 9. 215925 9. 253741 8. 972732 9. 000951 8. 943477  
11758532\_ 3. 019154 3. 227504 3. 009328 3. 327672 3. 129499 3. 355035  
11758533\_ 2. 221991 2. 243884 2. 280616 2. 159412 2. 332186 2. 25483  
11758534\_ 5. 845365 5. 732315 5. 750376 5. 955912 5. 873862 5. 958624  
11758535\_ 7. 025601 6. 88264 7. 022867 7. 16223 7. 125793 7. 259617  
11758536\_ 7. 374936 7. 372434 7. 346714 7. 863931 7. 798964 7. 81525  
11758537\_ 7. 563476 7. 563575 7. 637948 8. 400993 8. 333772 8. 30264  
11758538\_ 7. 06119 7. 126696 7. 042006 7. 047528 7. 102988 7. 079826  
11758539\_ 5. 297696 5. 225143 5. 229966 5. 091818 5. 102535 5. 048021  
11758540\_ 6. 100697 6. 118838 6. 192852 5. 741043 5. 755622 5. 922714  
11758541\_ 2. 571746 2. 565051 2. 669605 2. 652784 2. 654233 2. 734893  
11758542\_ 6. 032485 5. 93915 6. 050804 5. 620308 5. 631537 5. 50405  
11758543\_ 6. 693584 6. 621932 6. 654174 6. 673876 6. 711885 6. 714177  
11758544\_ 4. 293924 4. 237815 4. 176991 4. 624722 4. 487495 4. 415924  
11758545\_ 2. 226987 2. 263667 2. 087157 2. 191318 2. 26361 2. 300713  
11758546\_ 6. 870749 6. 762061 6. 918678 6. 815797 6. 977352 7. 01436  
11758547\_ 5. 303331 5. 029529 5. 430128 5. 042246 5. 191834 5. 080001  
11758548\_ 8. 991244 8. 932941 8. 916816 8. 592024 8. 651775 8. 677393  
11758549\_ 5. 454633 5. 163227 5. 305732 5. 483985 5. 393245 5. 394056  
11758550\_ 6. 552327 6. 427817 6. 441664 6. 530951 6. 610095 6. 618892

11758551\_ 7. 628156 7. 635975 7. 670052 7. 138498 7. 042337 7. 165488  
11758552\_ 2. 613748 2. 638214 2. 530165 2. 530165 2. 441887 2. 530165  
11758553\_ 4. 346336 4. 520804 4. 386867 4. 428822 4. 522618 4. 585776  
11758554\_ 9. 170422 9. 195278 9. 225533 8. 999514 9. 030064 8. 991355  
11758555\_ 2. 48241 2. 377781 2. 478845 2. 48241 2. 478845 2. 605351  
11758556\_ 8. 128138 8. 053565 8. 091074 7. 916013 7. 886682 8. 016781  
11758557\_ 9. 847189 9. 810785 9. 854454 9. 602724 9. 610018 9. 666582  
11758558\_ 11. 78745 11. 77732 11. 77162 11. 63291 11. 60594 11. 62041  
11758559\_ 7. 298954 7. 297635 7. 29302 7. 605982 7. 446457 7. 278243  
11758560\_ 7. 879555 7. 967026 7. 816214 7. 535554 7. 568354 7. 43401  
11758561\_ 5. 222296 4. 771607 4. 960066 4. 818499 4. 899133 4. 809357  
11758562\_ 7. 546856 7. 580487 7. 603228 7. 184826 7. 165093 7. 170555  
11758563\_ 5. 694709 5. 160891 5. 551015 6. 895838 6. 767182 6. 711178  
11758564\_ 6. 784365 6. 594155 6. 830454 9. 439848 9. 444314 9. 463566  
11758565\_ 3. 605695 3. 537496 3. 644444 3. 546795 3. 59097 3. 638974  
11758566\_ 8. 401366 8. 355384 8. 439559 8. 483024 8. 555359 8. 47567  
11758567\_ 8. 41945 8. 470353 8. 418662 8. 022206 7. 956366 8. 039907  
11758568\_ 6. 019642 6. 118838 6. 1559 6. 181528 6. 142856 6. 212326  
11758569\_ 5. 676992 5. 54 5. 759293 4. 397938 4. 238975 4. 470714  
11758570\_ 8. 098538 8. 011199 8. 06457 7. 854948 7. 874439 7. 943309  
11758571\_ 9. 758652 9. 711136 9. 74952 8. 887582 8. 921991 8. 906535  
11758572\_ 7. 85037 7. 820991 7. 882988 8. 264152 8. 273859 8. 317607  
11758573\_ 6. 439869 6. 459696 6. 315663 6. 209356 6. 159771 6. 201293  
11758574\_ 6. 301298 6. 159774 6. 41837 5. 774948 5. 786698 5. 74405  
11758575\_ 2. 542965 2. 630949 2. 818939 2. 605516 2. 605516 2. 605516  
11758576\_ 5. 534772 5. 956807 5. 826812 5. 700302 5. 523406 5. 736202  
11758577\_ 3. 979983 3. 952141 4. 029487 4. 350549 4. 291964 4. 444575  
11758578\_ 7. 516597 7. 425989 7. 528942 7. 345008 7. 297326 7. 347791  
11758579\_ 5. 951321 5. 952805 6. 028765 6. 287528 6. 302634 6. 340824  
11758580\_ 8. 531032 8. 588923 8. 618326 8. 390817 8. 427168 8. 428241  
11758581\_ 6. 161569 6. 032708 6. 061669 6. 256814 6. 336499 6. 300086  
11758582\_ 7. 816547 7. 780098 7. 794147 7. 616573 7. 578022 7. 687078  
11758583\_ 5. 813684 5. 737079 5. 773212 6. 281827 6. 26124 6. 263975  
11758584\_ 6. 829572 6. 828054 6. 886652 7. 823676 7. 787621 7. 759596  
11758585\_ 2. 044877 1. 993651 2. 065758 2. 113753 2. 05321 2. 095256  
11758586\_ 4. 639607 4. 499554 4. 618574 4. 616093 4. 75351 4. 643717  
11758587\_ 12. 16049 12. 16853 12. 12242 12. 19139 12. 15339 12. 09947  
11758588\_ 6. 009766 6. 105631 6. 027219 5. 962126 6. 033679 6. 040537  
11758589\_ 8. 049037 7. 988917 8. 049033 7. 753064 7. 661304 7. 765205  
11758590\_ 6. 661699 6. 602938 6. 619536 6. 17862 6. 183123 6. 217597  
11758591\_ 4. 409586 4. 623432 4. 584933 4. 532164 4. 842668 4. 593146  
11758592\_ 8. 881004 8. 889235 8. 866826 9. 175745 9. 175372 9. 154619  
11758593\_ 8. 558003 8. 494951 8. 635509 8. 981207 8. 935028 8. 983319  
11758594\_ 6. 383327 6. 472177 6. 488206 6. 67848 6. 685676 6. 699999  
11758595\_ 5. 51579 5. 725684 5. 592354 5. 297906 5. 322155 5. 37222  
11758596\_ 7. 523151 7. 404498 7. 46013 7. 170273 7. 063989 7. 120341  
11758597\_ 6. 373752 6. 49505 6. 545845 6. 596427 6. 691706 6. 702136  
11758598\_ 12. 83936 12. 87977 12. 86326 12. 67328 12. 66856 12. 68398  
11758599\_ 2. 218968 2. 329115 2. 202917 2. 512144 2. 02419 2. 220893  
11758600\_ 6. 897231 6. 754821 6. 82685 7. 374069 7. 237732 7. 346391  
11758601\_ 2. 832246 2. 945929 2. 89005 2. 874263 2. 893504 2. 837051

11758602\_ 6. 118648 6. 004735 6. 038989 5. 644792 5. 615984 5. 615984  
11758603\_ 8. 635229 8. 67204 8. 540432 7. 898823 7. 797552 7. 759261  
11758604\_ 7. 480631 7. 491813 7. 46785 7. 44627 7. 459391 7. 472018  
11758605\_ 2. 724234 2. 62185 3. 083992 2. 898816 2. 718322 2. 845574  
11758606\_ 7. 452181 7. 390892 7. 413651 7. 356628 7. 454039 7. 442683  
11758607\_ 8. 055121 7. 936942 7. 898434 7. 956283 7. 886682 7. 885195  
11758608\_ 2. 235709 2. 445422 2. 307845 2. 361778 2. 239591 2. 503172  
11758609\_ 3. 551338 3. 430033 3. 244542 3. 510769 3. 288119 3. 480511  
11758610\_ 7. 445063 7. 307542 7. 51726 8. 156954 8. 161753 8. 071803  
11758611\_ 4. 299694 4. 368697 4. 296905 4. 254681 4. 390788 4. 32886  
11758612\_ 3. 310711 3. 219717 3. 113497 3. 377995 3. 553579 3. 436025  
11758613\_ 7. 622639 7. 536153 7. 51742 7. 493173 7. 410288 7. 407599  
11758614\_ 2. 882663 3. 166109 3. 178869 3. 15629 2. 962221 3. 057248  
11758615\_ 5. 403938 5. 50425 5. 352577 5. 040796 4. 896118 4. 898254  
11758616\_ 9. 638745 9. 653873 9. 598029 10. 11401 10. 04996 9. 890731  
11758617\_ 7. 192599 7. 182179 7. 216394 6. 826269 6. 98079 6. 984318  
11758618\_ 7. 235268 7. 288553 7. 3362 7. 410441 7. 491719 7. 452108  
11758619\_ 9. 16932 9. 182699 9. 158795 8. 395302 8. 443175 8. 337322  
11758620\_ 5. 571513 5. 656303 5. 297152 6. 118838 5. 996186 6. 020017  
11758621\_ 8. 000154 7. 874439 7. 967664 7. 752748 7. 806094 7. 744398  
11758622\_ 10. 51057 10. 44484 10. 49466 10. 22582 10. 24616 10. 24399  
11758623\_ 8. 335428 8. 225311 8. 326203 8. 093344 8. 102785 8. 156954  
11758624\_ 5. 251994 5. 187378 5. 229085 4. 913618 4. 998821 4. 928686  
11758625\_ 7. 879599 7. 815974 7. 901542 7. 985643 7. 998748 7. 982231  
11758626\_ 10. 51387 10. 68749 10. 53119 10. 99459 10. 78749 10. 73418  
11758627\_ 3. 828987 3. 701814 3. 557718 3. 908222 3. 938918 3. 940639  
11758628\_ 3. 695296 3. 819555 3. 700553 3. 850246 3. 659421 3. 772496  
11758629\_ 7. 484156 7. 478072 7. 538355 8. 386035 8. 321533 8. 399454  
11758630\_ 4. 259353 4. 532419 4. 416389 4. 559396 4. 52373 4. 431639  
11758631\_ 3. 030545 3. 099764 2. 948201 3. 015174 2. 967153 3. 080812  
11758632\_ 3. 564019 3. 867526 3. 503743 3. 670252 3. 670252 3. 495787  
11758633\_ 10. 50632 10. 52937 10. 51076 10. 7319 10. 71747 10. 60924  
11758634\_ 6. 048238 5. 869737 5. 879383 5. 954408 5. 945669 5. 962633  
11758635\_ 6. 804668 6. 878671 6. 877464 7. 188133 7. 193474 7. 21699  
11758636\_ 2. 357825 2. 383494 2. 497109 2. 374817 2. 445483 2. 374817  
11758637\_ 2. 334646 2. 262841 2. 230692 2. 229481 2. 314189 2. 322853  
11758638\_ 7. 284265 7. 277935 7. 275105 7. 78787 7. 800599 7. 74486  
11758639\_ 10. 95886 10. 94387 10. 94937 10. 91499 10. 87761 10. 81555  
11758640\_ 9. 003985 8. 999433 9. 08213 9. 19277 9. 128148 9. 250565  
11758641\_ 8. 982784 8. 868969 8. 997759 8. 669352 8. 594327 8. 719098  
11758642\_ 7. 382929 7. 329945 7. 423902 7. 611672 7. 571882 7. 603996  
11758643\_ 7. 184165 7. 154589 7. 258907 7. 159942 7. 171898 7. 219185  
11758644\_ 7. 682367 7. 704559 7. 64382 7. 576569 7. 501504 7. 436944  
11758645\_ 6. 91388 6. 90074 6. 966825 7. 879485 7. 943029 7. 81232  
11758646\_ 8. 658194 8. 574364 8. 598953 8. 687465 8. 702768 8. 67363  
11758647\_ 9. 303473 9. 267772 9. 34665 9. 277968 9. 279908 9. 371188  
11758648\_ 8. 993528 8. 943529 8. 971948 9. 228074 9. 160279 9. 151555  
11758649\_ 6. 827829 6. 758706 6. 831875 7. 735927 7. 806918 7. 750754  
11758650\_ 11. 12888 11. 08114 11. 12359 11. 21827 11. 24978 11. 24366  
11758651\_ 5. 282357 5. 577048 5. 388283 5. 519298 5. 5618 5. 380241  
11758652\_ 9. 731028 9. 669558 9. 634371 9. 554123 9. 546877 9. 597167

11758653\_ 3. 865515 3. 937332 3. 838125 3. 825008 3. 713727 3. 606313  
11758654\_ 7. 226202 7. 091198 7. 211938 7. 346385 7. 386827 7. 374386  
11758655\_ 11. 47578 11. 46344 11. 51914 11. 30947 11. 33335 11. 32732  
11758656\_ 8. 75859 8. 740188 8. 679028 8. 939996 8. 926012 8. 887333  
11758657\_ 8. 767064 8. 771775 8. 767064 8. 663654 8. 693477 8. 670654  
11758658\_ 8. 817698 8. 855602 8. 827356 8. 591218 8. 479528 8. 577471  
11758659\_ 10. 45016 10. 47454 10. 45744 11. 4379 11. 41677 11. 38776  
11758660\_ 4. 28154 4. 365753 4. 308605 4. 528007 4. 442694 4. 333756  
11758661\_ 7. 924946 7. 890919 7. 764402 8. 375918 8. 296415 8. 314404  
11758662\_ 5. 444334 5. 414869 5. 54768 5. 615025 5. 676061 5. 598684  
11758663\_ 11. 53086 11. 5265 11. 52978 11. 5588 11. 57657 11. 5563  
11758664\_ 8. 786843 8. 696594 8. 648549 8. 502646 8. 483249 8. 420129  
11758665\_ 6. 71566 6. 579869 6. 727839 6. 954126 6. 884725 6. 929238  
11758666\_ 2. 762135 3. 034823 2. 900601 3. 072725 3. 030362 3. 016579  
11758667\_ 11. 72976 11. 75773 11. 71758 11. 88125 11. 81245 11. 8255  
11758668\_ 4. 762344 4. 709463 4. 770457 4. 55389 4. 584724 4. 411059  
11758669\_ 9. 305935 9. 409049 9. 347118 9. 068111 9. 051924 9. 053283  
11758670\_ 8. 60916 8. 54088 8. 578232 8. 712005 8. 684531 8. 670639  
11758671\_ 4. 532874 4. 756949 4. 587101 4. 640729 4. 560129 4. 664862  
11758672\_ 2. 596652 2. 39802 2. 526758 2. 391572 2. 569275 2. 513022  
11758673\_ 9. 609856 9. 61807 9. 638452 9. 825364 9. 819152 9. 771481  
11758674\_ 4. 198459 4. 174305 4. 192129 4. 277802 4. 192129 4. 139806  
11758675\_ 5. 744573 5. 602794 5. 676992 5. 528624 5. 535698 5. 408719  
11758676\_ 8. 195834 8. 089203 8. 085299 7. 571985 7. 661156 7. 605452  
11758677\_ 9. 410508 9. 343545 9. 358073 9. 420111 9. 390042 9. 389083  
11758678\_ 2. 156998 2. 25483 2. 235709 2. 546089 2. 242627 2. 410224  
11758679\_ 9. 899251 9. 858816 9. 869516 9. 800487 9. 800417 9. 792383  
11758680\_ 2. 821366 2. 886335 2. 821366 2. 684725 2. 873383 2. 624435  
11758681\_ 8. 32334 8. 237257 8. 2547 8. 189223 8. 207012 8. 236247  
11758682\_ 5. 82875 5. 946989 5. 977642 6. 151613 6. 142856 6. 322805  
11758683\_ 7. 934475 7. 793847 7. 930708 8. 89757 8. 905873 8. 92158  
11758684\_ 4. 442494 4. 399076 4. 464426 4. 197693 4. 034858 4. 273965  
11758685\_ 2. 65987 2. 834886 2. 601275 2. 551742 2. 718322 2. 65987  
11758686\_ 11. 42688 11. 38443 11. 41253 10. 83828 10. 86044 10. 8246  
11758687\_ 8. 356356 8. 341486 8. 377505 8. 384665 8. 390267 8. 340425  
11758688\_ 10. 81765 10. 7639 10. 7993 10. 7291 10. 70789 10. 69422  
11758689\_ 4. 602401 4. 417286 4. 219328 4. 466629 4. 268632 4. 456952  
11758690\_ 6. 802486 6. 725114 6. 834935 7. 142576 7. 154966 7. 183172  
11758691\_ 12. 26138 12. 25189 12. 23472 12. 26709 12. 2629 12. 25895  
11758692\_ 6. 976017 6. 923957 6. 982937 6. 792049 6. 862059 6. 913674  
11758693\_ 9. 355305 9. 296244 9. 288689 9. 209805 9. 177467 9. 166261  
11758694\_ 8. 153418 8. 078318 8. 11544 8. 317777 8. 42586 8. 364894  
11758695\_ 3. 180123 3. 298553 3. 183704 3. 10031 3. 153784 3. 178628  
11758696\_ 4. 212063 4. 231684 3. 734292 4. 089001 4. 215786 3. 94438  
11758697\_ 12. 33486 12. 35711 12. 30365 12. 34114 12. 33211 12. 25716  
11758698\_ 2. 175493 2. 277557 2. 25461 2. 187861 2. 418211 2. 39219  
11758699\_ 3. 077054 2. 966236 3. 13136 3. 007981 3. 091736 3. 101627  
11758700\_ 9. 049621 9. 079371 9. 088788 9. 355467 9. 30491 9. 224174  
11758701\_ 8. 908878 8. 815884 8. 911549 8. 87599 8. 927775 8. 924931  
11758702\_ 10. 0697 9. 990545 10. 05865 10. 08205 10. 11511 10. 10113  
11758703\_ 4. 8331 4. 930203 4. 927622 5. 06926 4. 963777 4. 920438

11758704\_ 8. 156065 8. 10255 8. 171004 8. 220758 8. 245775 8. 245128  
11758705\_ 6. 55464 6. 421629 6. 547673 6. 471185 6. 404007 6. 497107  
11758706\_ 5. 59108 5. 634026 5. 891259 5. 583107 5. 616734 5. 802736  
11758707\_ 7. 544196 7. 530579 7. 585969 7. 786785 7. 777941 7. 744794  
11758708\_ 5. 225789 5. 290782 5. 26034 5. 371385 5. 377385 5. 374866  
11758709\_ 9. 327541 9. 372084 9. 407845 9. 644113 9. 635432 9. 630865  
11758710\_ 4. 068517 4. 01274 3. 971304 3. 977404 4. 187105 3. 947311  
11758711\_ 11. 81264 11. 84989 11. 82128 11. 91463 11. 89607 11. 86725  
11758712\_ 7. 443384 7. 335347 7. 434886 7. 355155 7. 350159 7. 351493  
11758713\_ 5. 406017 5. 477857 5. 448296 5. 593669 5. 549427 5. 477481  
11758714\_ 2. 821891 2. 837814 2. 699351 2. 793507 2. 824345 2. 991088  
11758715\_ 3. 559273 3. 704054 3. 744869 3. 811002 3. 744869 3. 81621  
11758716\_ 3. 818401 4. 033219 3. 813633 3. 992043 4. 121953 4. 016151  
11758717\_ 11. 24623 11. 26321 11. 27487 11. 25227 11. 27985 11. 2827  
11758718\_ 5. 569407 5. 636069 5. 783404 5. 492508 5. 587488 5. 562672  
11758719\_ 8. 736126 8. 548736 8. 654618 9. 084895 9. 144365 9. 089459  
11758720\_ 9. 271257 9. 332234 9. 362664 9. 363682 9. 390432 9. 467356  
11758721\_ 5. 915283 5. 932331 5. 939738 5. 922691 5. 971817 5. 931975  
11758722\_ 4. 688142 4. 541845 4. 468029 4. 777416 4. 431719 4. 737732  
11758723\_ 4. 544568 4. 438566 3. 723483 4. 847785 4. 909509 4. 984669  
11758724\_ 10. 82354 10. 74803 10. 80508 10. 97683 11. 01275 11. 02278  
11758725\_ 6. 431763 6. 697245 6. 511186 6. 7414 6. 839543 6. 686522  
11758726\_ 6. 306209 6. 546818 6. 545359 6. 805911 6. 905422 7. 009306  
11758727\_ 9. 700716 9. 831398 9. 759099 10. 01965 9. 975363 9. 937333  
11758728\_ 2. 266254 2. 147997 2. 197019 2. 440168 2. 41947 2. 132703  
11758729\_ 7. 50511 7. 658176 7. 608083 7. 624623 7. 638161 7. 675477  
11758730\_ 5. 283674 5. 161947 5. 163773 5. 000953 5. 124469 5. 17015  
11758731\_ 5. 960793 5. 894697 6. 018553 6. 414953 6. 353456 6. 334648  
11758732\_ 5. 59928 5. 518169 5. 571776 5. 617065 5. 621613 5. 632318  
11758733\_ 3. 404992 3. 337724 3. 778524 3. 606313 3. 549571 3. 760209  
11758734\_ 12. 07574 12. 04174 12. 07662 12. 18483 12. 26169 12. 23556  
11758735\_ 6. 913442 6. 928423 6. 958012 7. 486483 7. 526385 7. 324886  
11758736\_ 5. 364669 5. 593435 5. 442903 5. 984062 5. 939476 5. 865473  
11758737\_ 6. 303699 6. 262311 6. 317944 6. 507716 6. 510356 6. 451129  
11758738\_ 7. 271417 7. 220986 7. 265104 7. 417811 7. 461863 7. 409349  
11758739\_ 5. 449551 5. 294863 5. 440637 5. 387635 5. 259308 5. 48091  
11758740\_ 3. 968746 3. 617018 3. 677671 4. 144408 3. 836461 3. 791082  
11758741\_ 5. 028071 4. 840852 4. 760892 5. 14517 5. 064254 5. 080567  
11758742\_ 8. 184851 8. 203246 8. 209175 7. 967236 8. 083896 8. 078569  
11758743\_ 5. 174189 5. 149545 4. 971366 5. 175651 5. 1906 5. 196934  
11758744\_ 3. 857866 3. 606313 3. 857866 3. 68202 3. 735379 3. 804507  
11758745\_ 4. 935571 4. 9226 4. 959852 4. 762428 4. 849431 4. 785202  
11758746\_ 4. 442096 4. 250934 4. 378988 4. 323047 4. 335148 4. 279846  
11758747\_ 3. 494258 3. 39484 3. 138626 3. 941531 3. 623365 3. 614839  
11758748\_ 6. 741307 7. 036576 6. 874935 6. 612669 6. 584753 6. 546062  
11758749\_ 2. 889066 3. 02218 2. 955954 2. 897716 2. 981102 3. 028593  
11758750\_ 11. 20839 11. 21491 11. 24155 11. 35405 11. 25973 11. 26295  
11758751\_ 6. 930199 7. 071806 6. 97537 6. 974315 6. 911762 7. 017537  
11758752\_ 9. 132967 9. 191533 9. 139965 9. 146963 9. 076357 9. 145059  
11758753\_ 7. 357716 7. 460581 7. 38239 7. 58608 7. 508362 7. 712979  
11758754\_ 4. 108592 4. 103577 4. 171369 4. 12518 4. 200678 4. 200678

11758755\_ 5. 022437 5. 071591 5. 224641 5. 239144 5. 21577 5. 184429  
11758756\_ 4. 170843 4. 568764 3. 923813 4. 236132 3. 947851 4. 266455  
11758757\_ 6. 918459 6. 758544 6. 783723 7. 265178 7. 162025 7. 145877  
11758758\_ 5. 233858 5. 156092 5. 234806 5. 42619 5. 377381 5. 297498  
11758759\_ 3. 710315 3. 792572 3. 564544 3. 607119 3. 672585 3. 564599  
11758760\_ 4. 977054 5. 031835 5. 073036 4. 851833 4. 798511 5. 019312  
11758761\_ 3. 85797 3. 817557 3. 842189 3. 756925 3. 879309 3. 801614  
11758762\_ 7. 089177 7. 031531 7. 155448 7. 046715 7. 096012 7. 042517  
11758763\_ 3. 386828 3. 873699 3. 717169 3. 559341 3. 737434 4. 017564  
11758764\_ 2. 82966 2. 943387 3. 0141 3. 005607 3. 058237 2. 950409  
11758765\_ 4. 83419 4. 791905 4. 844948 5. 096763 4. 827216 4. 975169  
11758766\_ 4. 83419 4. 791905 4. 844948 5. 096763 4. 827216 4. 975169  
11758767\_ 2. 653493 2. 507468 2. 735224 2. 784556 2. 903013 2. 929338  
11758768\_ 8. 749915 8. 696917 8. 781384 8. 59253 8. 584809 8. 67068  
11758769\_ 8. 730026 9. 064041 8. 884673 8. 236035 8. 467442 8. 492824  
11758770\_ 5. 954081 5. 751828 6. 030839 7. 501572 7. 466206 7. 535237  
11758771\_ 8. 321319 8. 352546 8. 217437 8. 363065 8. 38362 8. 372284  
11758772\_ 7. 8942 7. 945436 7. 850283 8. 010728 8. 066959 8. 100197  
11758773\_ 7. 941508 7. 793675 7. 962334 8. 767494 8. 750914 8. 756782  
11758774\_ 6. 831322 6. 805558 6. 659157 6. 834571 6. 797257 6. 950874  
11758775\_ 6. 735901 6. 630926 6. 782385 6. 571189 6. 562424 6. 537383  
11758776\_ 4. 751601 4. 908429 4. 881772 5. 203047 5. 31054 5. 232071  
11758777\_ 6. 265376 6. 045797 6. 222829 6. 885914 6. 861911 6. 891937  
11758778\_ 4. 047352 4. 113705 4. 071285 4. 22723 4. 215876 4. 207287  
11758779\_ 5. 063108 4. 962988 5. 086227 5. 143403 5. 254139 5. 092961  
11758780\_ 9. 271886 9. 223588 9. 211979 9. 090374 9. 141051 9. 132731  
11758781\_ 5. 496392 5. 552002 5. 696692 6. 357942 6. 171997 6. 134331  
11758782\_ 2. 894624 3. 044091 2. 918022 3. 004028 3. 187339 2. 985428  
11758783\_ 5. 188817 5. 155945 4. 954222 5. 280328 5. 282749 5. 282749  
11758784\_ 6. 676506 6. 762549 6. 650533 6. 716465 6. 738407 6. 646187  
11758785\_ 8. 259052 8. 296129 8. 281521 8. 543082 8. 490497 8. 48782  
11758786\_ 3. 10891 2. 685417 2. 951033 3. 018697 2. 932719 3. 10891  
11758787\_ 3. 839524 3. 754963 3. 584377 3. 831574 3. 948403 3. 946548  
11758788\_ 3. 766035 3. 86711 3. 815354 4. 189342 4. 410409 4. 086479  
11758789\_ 6. 18278 6. 20879 6. 050087 6. 115923 6. 208981 6. 212778  
11758790\_ 2. 444263 2. 686552 2. 395894 2. 647553 2. 710786 2. 878613  
11758791\_ 2. 668147 2. 898958 2. 841596 2. 376707 2. 918344 2. 724967  
11758792\_ 2. 742976 2. 980762 2. 930722 2. 455037 3. 022098 2. 80677  
11758793\_ 3. 895191 3. 491799 3. 701853 5. 847713 5. 778482 5. 88465  
11758794\_ 3. 524278 3. 527059 3. 475741 3. 756925 3. 651396 3. 763626  
11758795\_ 7. 60569 7. 619572 7. 651016 8. 564874 8. 532661 8. 539651  
11758796\_ 7. 154768 7. 09257 7. 201564 7. 579845 7. 524489 7. 671685  
11758797\_ 6. 482583 6. 33064 6. 765911 7. 358581 7. 417231 7. 382043  
11758798\_ 5. 202783 5. 601468 5. 26034 5. 327687 5. 453793 5. 540313  
11758799\_ 7. 980391 7. 956964 7. 892766 8. 067001 8. 099061 8. 096422  
11758800\_ 9. 379186 9. 337551 9. 258574 9. 520773 9. 524962 9. 517003  
11758801\_ 6. 91847 6. 974326 6. 967969 7. 168033 7. 093825 7. 110464  
11758802\_ 7. 286959 7. 159116 7. 217836 6. 891362 7. 012386 6. 97339  
11758803\_ 3. 684122 4. 411618 4. 119665 4. 141265 4. 341675 4. 066399  
11758804\_ 6. 263764 6. 158256 6. 300517 6. 419392 6. 559445 6. 46454  
11758805\_ 5. 070338 5. 011787 5. 242536 5. 241472 5. 418304 5. 159001



11758806\_ 5. 845365 5. 830937 5. 827195 5. 480966 5. 2668 5. 490164  
11758807\_ 7. 548702 7. 565643 7. 589926 7. 546856 7. 440892 7. 573434  
11758808\_ 6. 235007 6. 312131 6. 27036 6. 195186 6. 065982 6. 174574  
11758809\_ 7. 590326 7. 497515 7. 603852 7. 32714 7. 349312 7. 389536  
11758810\_ 4. 631019 4. 416621 4. 301798 4. 463011 4. 439318 4. 474377  
11758811\_ 9. 467027 9. 667371 9. 50135 9. 951774 9. 889764 9. 866103  
11758812\_ 5. 493264 5. 709367 5. 712971 5. 570693 5. 666841 5. 552238  
11758813\_ 6. 342727 6. 330806 6. 304979 6. 334292 6. 248821 6. 399533  
11758814\_ 9. 022526 9. 019927 9. 017567 9. 013561 8. 987598 8. 975643  
11758815\_ 3. 403661 3. 434408 3. 374101 3. 302307 3. 406987 3. 517981  
11758816\_ 5. 13114 5. 238878 5. 19749 4. 945112 5. 145714 5. 053038  
11758817\_ 5. 726097 5. 743197 5. 768046 5. 523039 5. 705586 5. 575374  
11758818\_ 6. 062095 6. 121187 6. 028024 6. 169998 6. 049149 6. 118626  
11758819\_ 6. 311482 6. 334392 6. 445622 6. 370497 6. 284814 6. 343183  
11758820\_ 5. 672762 5. 423211 5. 62925 6. 282224 6. 0933 6. 148021  
11758821\_ 6. 298201 6. 240237 6. 219072 6. 397946 6. 381659 6. 36754  
11758822\_ 6. 664384 6. 554382 6. 66872 6. 367162 6. 431763 6. 533917  
11758823\_ 6. 166603 6. 159771 6. 184767 6. 234416 6. 264739 6. 20886  
11758824\_ 4. 633249 4. 848085 4. 603136 4. 428467 4. 564559 4. 643608  
11758825\_ 3. 501245 3. 569547 3. 589311 3. 576447 3. 503743 3. 608373  
11758826\_ 4. 689923 4. 767967 4. 744996 4. 795985 4. 696772 4. 771651  
11758827\_ 5. 029529 5. 180612 5. 289046 5. 334431 5. 142515 5. 244402  
11758828\_ 4. 408735 3. 93911 4. 059136 4. 083602 3. 814154 4. 119434  
11758829\_ 8. 922848 8. 881474 8. 894551 9. 142107 9. 109091 9. 181197  
11758830\_ 2. 235251 2. 232826 2. 147356 2. 206867 2. 138894 2. 148033  
11758831\_ 8. 111621 8. 737224 8. 323179 8. 851527 8. 865855 8. 720639  
11758832\_ 5. 105724 5. 228627 5. 454265 5. 26034 5. 609647 5. 361752  
11758833\_ 5. 397111 5. 783701 5. 724341 5. 646562 5. 846096 5. 77685  
11758834\_ 4. 968561 5. 099996 5. 206136 5. 033943 5. 049561 5. 237223  
11758835\_ 6. 202437 6. 159771 6. 287761 6. 247368 6. 284358 6. 37881  
11758836\_ 2. 848859 2. 852225 3. 020325 3. 215617 3. 097559 3. 162903  
11758837\_ 5. 53429 5. 509681 5. 385794 5. 540283 5. 53429 5. 571797  
11758838\_ 7. 414093 7. 387772 7. 443023 7. 446774 7. 441524 7. 544741  
11758839\_ 4. 445497 4. 721402 4. 612771 4. 879344 4. 908499 4. 636508  
11758840\_ 5. 34928 5. 189994 5. 207741 5. 933625 6. 037532 6. 015991  
11758841\_ 7. 632959 7. 583498 7. 639619 7. 417636 7. 380324 7. 400318  
11758842\_ 9. 82962 9. 765043 9. 784648 8. 694321 8. 758207 8. 671737  
11758843\_ 4. 524001 4. 624492 4. 29892 4. 54378 4. 584933 4. 52373  
11758844\_ 2. 560296 2. 701856 2. 800709 2. 775277 2. 523129 2. 747379  
11758845\_ 4. 695596 4. 635199 4. 705628 4. 6833 4. 5772 4. 873746  
11758846\_ 8. 428794 8. 42795 8. 468264 8. 290288 8. 3429 8. 271581  
11758847\_ 5. 157041 4. 821411 4. 91119 4. 914651 4. 97137 4. 850771  
11758848\_ 6. 318434 6. 300888 6. 324634 6. 349205 6. 327422 6. 333622  
11758849\_ 7. 645854 7. 532138 7. 638121 7. 575332 7. 564803 7. 488451  
11758850\_ 5. 174014 5. 228627 5. 084737 5. 526427 5. 333964 5. 480036  
11758851\_ 5. 761991 5. 698326 5. 554436 5. 996126 5. 83537 5. 955572  
11758852\_ 4. 811342 4. 840879 4. 726347 4. 737067 4. 891354 4. 726347  
11758853\_ 7. 690642 7. 623144 7. 750126 7. 631169 7. 593398 7. 594381  
11758854\_ 8. 661381 8. 616759 8. 567937 8. 927734 8. 921598 8. 895173  
11758855\_ 6. 482225 6. 510882 6. 38583 6. 097874 6. 34864 6. 187267  
11758856\_ 7. 328266 7. 247534 7. 315832 7. 096532 7. 206972 7. 142703

11758857\_ 5. 354511 5. 267749 5. 474379 6. 037665 6. 077822 6. 088603  
11758858\_ 6. 755795 6. 670818 6. 735761 7. 422814 7. 245289 7. 486769  
11758859\_ 9. 480591 9. 475258 9. 456344 9. 900343 9. 841397 9. 824508  
11758860\_ 4. 139985 3. 361082 4. 30562 4. 371333 4. 395223 4. 687458  
11758861\_ 4. 117959 4. 071114 3. 952438 4. 378791 4. 096854 4. 098761  
11758862\_ 3. 439047 3. 499526 3. 418646 3. 594524 3. 562929 3. 747254  
11758863\_ 1. 918606 2. 30063 2. 203658 2. 28345 2. 475745 2. 317926  
11758864\_ 7. 551475 7. 543861 7. 599794 8. 344629 8. 226386 8. 274114  
11758865\_ 6. 779107 6. 857758 6. 833469 6. 812742 6. 827766 6. 864125  
11758866\_ 4. 956405 4. 887833 4. 956286 4. 979104 4. 910532 4. 815544  
11758867\_ 4. 166786 3. 873109 4. 088936 3. 603769 3. 571514 3. 417173  
11758868\_ 9. 116349 8. 998673 9. 006962 8. 738456 8. 772903 8. 752546  
11758869\_ 2. 60828 2. 645015 2. 737963 2. 68175 2. 60419 2. 645015  
11758870\_ 6. 99447 6. 851762 6. 932428 6. 783174 6. 790493 6. 647255  
11758871\_ 5. 794519 5. 847633 5. 75458 5. 732578 5. 758715 5. 811871  
11758872\_ 7. 978394 7. 852281 7. 96818 6. 972106 7. 081168 7. 135734  
11758873\_ 5. 029529 5. 14064 4. 905678 5. 547328 5. 432188 5. 528624  
11758874\_ 5. 427463 5. 269591 5. 250175 5. 44986 5. 487063 5. 509294  
11758875\_ 6. 018181 5. 995317 5. 705292 5. 954081 5. 915309 6. 025441  
11758876\_ 7. 288315 7. 231526 7. 297215 6. 375273 6. 326909 6. 294818  
11758877\_ 3. 756989 4. 018827 4. 038913 3. 848335 3. 969526 3. 952001  
11758878\_ 2. 757945 3. 359451 3. 139273 3. 034063 3. 13957 3. 159084  
11758879\_ 8. 052004 8. 058416 8. 083302 8. 098994 8. 081933 8. 049317  
11758880\_ 6. 226139 6. 097927 6. 15677 6. 176074 6. 288146 6. 27897  
11758881\_ 6. 028004 6. 042833 6. 136035 6. 086902 6. 275734 6. 212602  
11758882\_ 2. 172114 2. 369744 2. 085418 2. 194797 2. 28492 2. 210169  
11758883\_ 6. 520868 6. 358063 6. 468125 6. 733668 6. 770833 6. 802285  
11758884\_ 5. 626863 5. 517145 5. 440332 5. 471067 5. 733962 5. 687531  
11758885\_ 5. 36906 5. 344712 5. 297498 5. 398449 5. 48634 5. 465308  
11758886\_ 5. 643713 5. 732315 5. 786691 6. 294584 6. 283036 6. 21662  
11758887\_ 6. 455177 6. 539364 6. 548928 6. 738463 6. 716329 6. 792183  
11758888\_ 6. 051664 5. 778649 6. 069567 6. 465919 6. 386264 6. 561925  
11758889\_ 7. 283625 7. 116829 7. 259787 6. 761522 6. 691202 6. 642551  
11758890\_ 3. 955583 4. 056528 4. 213226 3. 876609 4. 056528 4. 054288  
11758891\_ 5. 856928 5. 645652 5. 843465 6. 318309 6. 287525 6. 306675  
11758892\_ 8. 408728 8. 400056 8. 377387 8. 973467 8. 998013 8. 940675  
11758893\_ 7. 948938 7. 875644 7. 958714 8. 008891 7. 997768 8. 077283  
11758894\_ 6. 04823 6. 033313 5. 922714 5. 778272 5. 923662 5. 984604  
11758895\_ 3. 62689 3. 540102 3. 650049 3. 953526 3. 915621 4. 042043  
11758896\_ 9. 497935 9. 562569 9. 519629 9. 716126 9. 702608 9. 686636  
11758897\_ 8. 620619 8. 676412 8. 665216 8. 588229 8. 572994 8. 527013  
11758898\_ 8. 531335 8. 625411 8. 555722 8. 498946 8. 482168 8. 441949  
11758899\_ 3. 817218 3. 659292 3. 645276 3. 619744 3. 740434 3. 553192  
11758900\_ 4. 056189 4. 096215 3. 748217 4. 22437 4. 057793 4. 214917  
11758901\_ 6. 051554 5. 758838 5. 894697 5. 773854 5. 536155 5. 709715  
11758902\_ 6. 066045 6. 114547 6. 102687 5. 32132 5. 459349 5. 451361  
11758903\_ 4. 397954 4. 194986 4. 38172 4. 582389 4. 152711 4. 415744  
11758904\_ 6. 300643 6. 417628 6. 38473 6. 65152 6. 529385 6. 728259  
11758905\_ 8. 433912 8. 429796 8. 497167 8. 620826 8. 558834 8. 649374  
11758906\_ 6. 940043 6. 999431 7. 051597 7. 24548 7. 111805 7. 199485  
11758907\_ 8. 144997 8. 076283 8. 178354 8. 340176 8. 354333 8. 432357

11758908\_ 6. 926606 6. 836966 6. 862059 6. 836966 6. 818704 6. 789896  
11758909\_ 4. 347179 4. 302541 4. 533309 4. 914651 5. 166877 5. 122994  
11758910\_ 5. 428829 5. 584616 5. 246834 5. 355391 5. 689603 5. 488861  
11758911\_ 5. 928524 6. 044862 5. 886111 6. 173161 6. 00273 6. 22557  
11758912\_ 2. 586296 2. 679763 2. 407679 2. 631945 2. 248911 2. 290384  
11758913\_ 3. 439868 3. 286409 3. 313799 3. 444916 3. 403489 3. 417925  
11758914\_ 6. 397946 6. 057748 6. 092944 6. 349405 6. 502683 6. 500568  
11758915\_ 6. 631711 6. 611518 6. 659259 7. 557922 7. 680618 7. 706212  
11758916\_ 6. 910833 6. 76106 6. 888537 7. 344252 7. 504918 7. 478941  
11758917\_ 5. 409222 5. 584813 5. 521612 5. 395231 5. 397892 5. 4434  
11758918\_ 7. 360049 7. 397025 7. 361758 7. 417151 7. 397025 7. 418915  
11758919\_ 6. 298619 6. 317941 6. 225492 6. 431763 6. 300643 6. 264926  
11758920\_ 5. 870242 5. 832124 5. 905294 5. 73614 5. 901897 6. 033313  
11758921\_ 6. 43872 6. 326276 6. 415132 6. 318411 6. 318844 6. 434669  
11758922\_ 4. 754412 5. 098567 5. 006911 4. 336478 3. 968678 4. 473605  
11758923\_ 5. 285191 5. 359693 5. 221059 5. 614563 5. 237697 5. 288106  
11758924\_ 5. 068919 5. 007313 5. 218885 5. 394344 5. 425758 5. 521619  
11758925\_ 3. 862662 4. 332864 3. 936461 4. 013028 3. 912005 4. 378553  
11758926\_ 4. 384523 4. 484189 4. 45763 4. 164256 4. 228813 4. 362547  
11758927\_ 5. 142761 5. 356917 5. 290944 5. 316042 5. 316042 5. 44541  
11758928\_ 7. 226211 7. 115816 7. 204849 7. 342833 7. 315859 7. 370177  
11758929\_ 5. 667578 5. 578473 5. 664505 5. 507637 5. 459503 5. 604597  
11758930\_ 8. 844952 8. 802609 8. 867431 8. 903842 8. 905175 8. 945556  
11758931\_ 6. 774445 6. 767887 6. 974429 6. 485703 6. 594647 6. 687305  
11758932\_ 4. 739516 4. 901512 4. 670273 4. 938802 4. 963371 4. 896214  
11758933\_ 7. 71588 7. 664976 7. 628793 7. 115912 6. 966934 7. 054906  
11758934\_ 5. 078636 4. 924079 5. 298434 5. 61266 5. 638421 5. 547885  
11758935\_ 7. 253121 7. 230373 7. 305304 7. 257341 7. 222344 7. 343382  
11758936\_ 5. 634044 5. 59444 5. 68998 6. 371826 6. 422202 6. 52365  
11758937\_ 5. 152837 5. 604649 5. 451379 5. 671997 5. 727544 5. 58338  
11758938\_ 4. 00054 3. 891379 4. 095232 4. 095979 3. 820527 3. 995273  
11758939\_ 8. 979533 8. 933184 8. 934069 9. 022029 9. 024979 9. 096702  
11758940\_ 8. 719745 8. 713102 8. 641612 8. 87837 8. 842306 8. 907162  
11758941\_ 9. 013893 9. 01796 9. 020678 9. 126234 9. 133986 9. 198842  
11758942\_ 9. 014646 9. 019809 9. 076545 9. 316643 9. 330762 9. 387492  
11758943\_ 5. 786163 5. 664646 5. 537945 5. 39385 5. 553311 5. 579864  
11758944\_ 3. 043647 3. 080327 3. 052817 3. 101013 3. 061987 3. 086864  
11758945\_ 3. 969035 3. 999905 3. 955922 4. 046702 4. 142548 4. 147775  
11758946\_ 5. 311247 5. 326052 5. 092371 5. 346506 5. 101679 5. 213568  
11758947\_ 4. 347179 4. 239839 4. 075146 4. 320846 4. 257338 4. 285628  
11758948\_ 10. 36828 10. 30708 10. 33077 9. 639574 9. 679993 9. 7024  
11758949\_ 7. 752885 7. 708475 7. 682575 7. 552408 7. 411812 7. 414123  
11758950\_ 3. 355934 3. 492582 3. 272046 3. 349285 3. 218158 3. 388726  
11758951\_ 4. 644802 4. 729618 4. 385909 5. 000642 4. 771753 4. 834617  
11758952\_ 3. 174349 3. 271213 3. 161197 3. 245785 3. 213372 3. 088608  
11758953\_ 9. 310256 9. 210302 9. 217323 9. 354531 9. 387884 9. 409488  
11758954\_ 2. 392585 2. 083506 2. 235709 2. 113428 2. 108942 2. 095256  
11758955\_ 7. 537827 7. 438769 7. 43062 7. 331052 7. 315859 7. 339786  
11758956\_ 5. 819375 5. 696808 5. 682348 5. 610545 5. 48634 5. 489219  
11758957\_ 6. 105512 6. 006961 5. 963563 5. 917605 5. 811494 5. 824302  
11758958\_ 4. 88071 5. 060889 4. 786778 4. 984098 4. 855368 4. 99099

11758959\_ 5. 056457 4. 935438 5. 08138 5. 472622 5. 363607 5. 305419  
11758960\_ 7. 474724 7. 426223 7. 478392 7. 370924 7. 497282 7. 473852  
11758961\_ 2. 988093 3. 336303 2. 826043 2. 834764 3. 082967 3. 115222  
11758962\_ 9. 458745 9. 350282 9. 425984 9. 87076 9. 866499 9. 888809  
11758963\_ 8. 358837 8. 372118 8. 31319 8. 982268 9. 052957 8. 993796  
11758964\_ 8. 984305 8. 932135 8. 975522 9. 452612 9. 46087 9. 489814  
11758965\_ 6. 981767 6. 957637 7. 027002 7. 288042 7. 252459 7. 318014  
11758966\_ 6. 061142 6. 124364 6. 115374 6. 217986 6. 104931 6. 018299  
11758967\_ 3. 424715 3. 710576 3. 573583 3. 215147 3. 104141 3. 104141  
11758968\_ 6. 43289 6. 546384 6. 372119 6. 389013 6. 509029 6. 528702  
11758969\_ 4. 825526 4. 777776 4. 699391 4. 652592 4. 710217 4. 828141  
11758970\_ 8. 856292 8. 818037 8. 875359 8. 164671 8. 090004 8. 111257  
11758971\_ 4. 584933 4. 678759 4. 88241 4. 703368 4. 703368 4. 688337  
11758972\_ 5. 373483 5. 521384 5. 448296 5. 553897 5. 54098 5. 635908  
11758973\_ 11. 09693 11. 01575 11. 05149 10. 97219 11. 11363 11. 01575  
11758974\_ 8. 314372 8. 285158 8. 323803 8. 788113 8. 707342 8. 744593  
11758975\_ 4. 715255 4. 746705 5. 029529 4. 788745 4. 887446 4. 94619  
11758976\_ 6. 543934 6. 594948 6. 589889 6. 665366 6. 556557 6. 735813  
11758977\_ 6. 163716 6. 114294 6. 199575 6. 094452 6. 216454 6. 102262  
11758978\_ 4. 612276 4. 433667 4. 484345 4. 472294 4. 680466 4. 580163  
11758979\_ 2. 605516 2. 790735 2. 605516 2. 714271 2. 608554 2. 586649  
11758980\_ 5. 499902 5. 677663 5. 729683 5. 586005 5. 526775 5. 765164  
11758981\_ 7. 112815 7. 132582 7. 145428 7. 366458 7. 36534 7. 389557  
11758982\_ 5. 861094 5. 960587 6. 33679 5. 544487 5. 393353 5. 611932  
11758983\_ 6. 994469 7. 015444 7. 009271 7. 071437 7. 055228 7. 09343  
11758984\_ 5. 36906 5. 536714 5. 351515 5. 83671 5. 794426 5. 752441  
11758985\_ 6. 118838 6. 00503 5. 973344 5. 84493 5. 941734 6. 087939  
11758986\_ 6. 110665 6. 301676 6. 113707 6. 23489 6. 177965 6. 218567  
11758987\_ 5. 162029 4. 960817 5. 127572 5. 198488 5. 153628 5. 228627  
11758988\_ 4. 823849 4. 768268 4. 864347 4. 791983 4. 923352 4. 893803  
11758989\_ 3. 124906 2. 94945 2. 975162 3. 503743 3. 463428 3. 082672  
11758990\_ 7. 715996 7. 777861 7. 725394 7. 93238 8. 039806 7. 982197  
11758991\_ 4. 057447 4. 27843 4. 304734 4. 445541 4. 427806 4. 399132  
11758992\_ 3. 269946 3. 482147 3. 257815 3. 487124 3. 285169 3. 586347  
11758993\_ 7. 220279 7. 186748 7. 424535 7. 299162 7. 291715 7. 334158  
11758994\_ 6. 967774 6. 880694 6. 977806 6. 80539 6. 790803 6. 817635  
11758995\_ 4. 218544 4. 448101 4. 191115 4. 459939 4. 200678 3. 903642  
11758996\_ 2. 364359 2. 119351 2. 502755 2. 120621 2. 252985 2. 143121  
11758997\_ 6. 567253 6. 584796 6. 571043 6. 487614 6. 567107 6. 559021  
11758998\_ 5. 809892 5. 751031 5. 806397 5. 927697 5. 987821 5. 914299  
11758999\_ 8. 544066 8. 353099 8. 521291 8. 560497 8. 573503 8. 589285  
11759000\_ 3. 50012 3. 652138 3. 513333 3. 330275 3. 560487 3. 774028  
11759001\_ 5. 797208 5. 790981 5. 76254 6. 023381 6. 073392 6. 152412  
11759002\_ 4. 05253 3. 997131 3. 966398 4. 275543 4. 12327 4. 191561  
11759003\_ 6. 926558 6. 81867 6. 993107 6. 979516 6. 97913 6. 946361  
11759004\_ 6. 05574 5. 916149 5. 818793 6. 287614 6. 313218 6. 457  
11759005\_ 2. 612436 2. 449538 3. 117144 2. 919471 2. 47794 2. 69684  
11759006\_ 3. 167636 3. 099419 3. 265177 2. 929957 3. 099419 3. 122076  
11759007\_ 3. 802222 4. 024805 4. 070116 4. 196487 4. 021597 4. 104618  
11759008\_ 3. 832281 3. 728104 3. 76979 3. 853886 3. 744753 3. 772897  
11759009\_ 3. 02441 3. 049157 2. 864538 2. 698929 3. 092164 2. 981963

11759010\_ 5. 649145 5. 614563 5. 643491 5. 883502 5. 765485 5. 77685  
11759011\_ 8. 155456 8. 069997 7. 971515 8. 211053 8. 147332 8. 121382  
11759012\_ 4. 179725 4. 163199 4. 192464 4. 200038 4. 226286 4. 229303  
11759013\_ 7. 610349 7. 417811 7. 567186 7. 623438 7. 659931 7. 699253  
11759014\_ 8. 640771 8. 629261 8. 64135 8. 517612 8. 48671 8. 596553  
11759015\_ 5. 010712 4. 793802 4. 899294 4. 40663 4. 511006 4. 438556  
11759016\_ 7. 993953 7. 928244 7. 971515 7. 489284 7. 47427 7. 481181  
11759017\_ 6. 305275 6. 37977 6. 151264 6. 494135 6. 513703 6. 394924  
11759018\_ 6. 596987 6. 510538 6. 48649 6. 951398 6. 960334 6. 94565  
11759019\_ 6. 684802 6. 641378 6. 630056 7. 043257 7. 06506 7. 031326  
11759020\_ 4. 396279 4. 700642 4. 563993 4. 721773 4. 569947 4. 634685  
11759021\_ 5. 696769 5. 687821 5. 683724 5. 756528 5. 709521 5. 817508  
11759022\_ 10. 47698 10. 47443 10. 4744 10. 37745 10. 40031 10. 39157  
11759023\_ 6. 54579 6. 540676 6. 599779 7. 08279 7. 142912 7. 155242  
11759024\_ 8. 103494 8. 020686 8. 127547 8. 389595 8. 272995 8. 22823  
11759025\_ 8. 640071 8. 665748 8. 735221 8. 877776 8. 825734 8. 861588  
11759026\_ 7. 443136 7. 428672 7. 415361 7. 602985 7. 621323 7. 670706  
11759027\_ 5. 156303 5. 193211 5. 376784 4. 951789 5. 102259 5. 067707  
11759028\_ 5. 230925 5. 266165 5. 201174 6. 51886 6. 262588 6. 305974  
11759029\_ 5. 654339 5. 526852 5. 764908 6. 816319 6. 82412 6. 879187  
11759030\_ 6. 448378 6. 47172 6. 429085 6. 452583 6. 352463 6. 408835  
11759031\_ 9. 362784 9. 342197 9. 408556 8. 746937 8. 730817 8. 740132  
11759032\_ 5. 708723 5. 545682 5. 526561 5. 546655 5. 661432 5. 731029  
11759033\_ 2. 513511 2. 607443 2. 581776 2. 512144 2. 531148 2. 718322  
11759034\_ 10. 06691 10. 01384 10. 04696 10. 25424 10. 21537 10. 2032  
11759035\_ 10. 04216 9. 974396 10. 00093 10. 19444 10. 15269 10. 13979  
11759036\_ 9. 564211 9. 503224 9. 55426 9. 573638 9. 608265 9. 609652  
11759037\_ 9. 987437 9. 862869 9. 927771 9. 721115 9. 701893 9. 673446  
11759038\_ 9. 195909 9. 092432 9. 160945 8. 619086 8. 597866 8. 644346  
11759039\_ 8. 017176 7. 966403 7. 990549 7. 730275 7. 724286 7. 786782  
11759040\_ 3. 661278 3. 757642 3. 557111 3. 599802 3. 464053 3. 625369  
11759041\_ 5. 651961 5. 6523 5. 709521 6. 093816 5. 98454 6. 014103  
11759042\_ 7. 271417 7. 175704 7. 215255 7. 275382 7. 358974 7. 403412  
11759043\_ 6. 792803 6. 792803 6. 886317 6. 750114 6. 749486 6. 8318  
11759044\_ 6. 425897 6. 426443 6. 471703 6. 355923 6. 355246 6. 347577  
11759045\_ 2. 676319 2. 384447 2. 531309 2. 782843 2. 495528 2. 688929  
11759046\_ 7. 226103 7. 205361 7. 21349 7. 243066 7. 231274 7. 252017  
11759047\_ 5. 211088 5. 084071 5. 182971 5. 179228 5. 173953 5. 227147  
11759048\_ 4. 106576 4. 034173 4. 298222 4. 319167 4. 173692 4. 197538  
11759049\_ 6. 236391 6. 434842 6. 185065 5. 828415 5. 736998 5. 737456  
11759050\_ 5. 175547 5. 2663 5. 323499 5. 20075 5. 397861 5. 299342  
11759051\_ 5. 679332 5. 84241 5. 738708 5. 640083 5. 763163 5. 732106  
11759052\_ 5. 282063 5. 242515 5. 142956 5. 194228 5. 101476 5. 432567  
11759053\_ 3. 975588 4. 299761 3. 86927 4. 495572 4. 027052 4. 31705  
11759054\_ 2. 932912 2. 794188 2. 851576 3. 192446 3. 101013 2. 738681  
11759055\_ 5. 598643 5. 914713 5. 605978 5. 788144 5. 901107 5. 832852  
11759056\_ 3. 253204 3. 180851 3. 148159 3. 253204 3. 2513 3. 257011  
11759057\_ 4. 700243 5. 006665 4. 7762 4. 903008 4. 749748 4. 731821  
11759058\_ 4. 874234 4. 9694 4. 928525 4. 973533 4. 973805 5. 056623  
11759059\_ 6. 837109 6. 804001 6. 916381 6. 834065 6. 932638 6. 889597  
11759060\_ 3. 903791 4. 246674 4. 135496 4. 347179 4. 103722 4. 200678

11759061\_ 5. 956422 5. 900357 5. 833866 6. 26478 6. 300643 6. 094939  
11759062\_ 7. 110312 7. 005968 7. 067419 7. 572447 7. 470785 7. 472989  
11759063\_ 5. 602253 5. 497835 5. 51653 6. 021461 6. 036583 6. 064455  
11759064\_ 5. 156303 5. 415428 5. 366926 5. 500631 5. 484584 5. 308033  
11759065\_ 5. 667267 5. 683405 5. 575602 5. 769057 5. 820052 6. 004374  
11759066\_ 5. 512912 5. 514296 5. 411505 5. 507637 5. 48634 5. 437097  
11759067\_ 5. 820052 5. 6105 6. 002033 6. 209356 6. 135798 6. 204769  
11759068\_ 7. 233929 7. 019755 7. 205439 7. 361089 7. 367735 7. 358974  
11759069\_ 3. 573266 3. 712321 3. 63174 3. 544124 3. 619569 3. 682868  
11759070\_ 6. 921809 7. 022003 7. 040866 6. 954193 6. 913164 6. 940846  
11759071\_ 6. 159771 5. 763634 5. 93058 5. 711625 5. 654825 5. 77685  
11759072\_ 5. 330259 5. 300063 5. 332349 5. 501715 5. 209904 5. 4332  
11759073\_ 6. 053419 6. 225513 6. 089989 6. 318829 6. 383618 6. 413394  
11759074\_ 4. 686413 4. 924773 4. 883595 4. 946965 4. 929685 5. 071851  
11759075\_ 4. 860312 4. 945542 4. 772366 4. 862248 4. 839207 4. 94619  
11759076\_ 4. 284669 4. 167094 4. 208799 4. 011868 3. 897583 3. 941818  
11759077\_ 3. 354974 3. 450586 3. 304008 3. 460273 3. 398236 3. 503743  
11759078\_ 6. 647298 6. 539908 6. 650395 6. 772064 6. 826146 6. 852775  
11759079\_ 6. 946361 6. 950255 6. 910833 7. 145771 7. 152176 7. 183172  
11759080\_ 9. 008016 8. 947353 8. 994989 9. 14742 9. 155359 9. 068203  
11759081\_ 7. 409301 7. 873738 7. 856327 7. 919899 7. 980591 7. 872701  
11759082\_ 2. 683119 2. 815794 2. 797067 2. 815794 2. 809188 2. 605516  
11759083\_ 5. 042922 4. 99701 5. 002714 5. 026244 5. 216187 5. 116998  
11759084\_ 6. 345053 6. 356608 6. 141999 6. 59273 6. 637259 6. 477791  
11759085\_ 6. 263567 6. 150113 6. 321427 6. 53365 6. 469879 6. 434114  
11759086\_ 6. 937082 6. 928981 6. 752593 7. 092148 7. 066036 7. 048628  
11759087\_ 6. 796845 6. 769805 6. 718567 6. 337151 6. 33571 6. 410909  
11759088\_ 5. 158947 4. 9694 5. 007296 4. 54708 4. 347179 4. 279639  
11759089\_ 4. 700243 4. 835238 4. 674969 4. 925194 4. 751653 4. 856649  
11759090\_ 2. 763379 2. 892285 2. 753127 2. 857654 2. 91119 2. 933161  
11759091\_ 3. 034822 3. 215219 3. 231117 3. 690658 3. 550472 3. 661828  
11759092\_ 8. 109553 8. 063695 8. 038853 8. 127234 8. 067273 8. 008936  
11759093\_ 8. 06352 8. 133545 8. 100636 8. 123981 8. 056409 8. 084074  
11759094\_ 7. 78626 7. 712573 7. 781814 7. 645022 7. 672746 7. 627092  
11759095\_ 8. 779019 8. 640227 8. 740186 8. 627244 8. 64594 8. 700982  
11759096\_ 7. 376364 7. 315859 7. 376364 7. 128507 7. 269859 7. 193066  
11759097\_ 5. 135154 5. 066545 5. 022799 5. 270977 5. 223089 5. 254103  
11759098\_ 5. 820052 5. 672285 5. 85425 5. 723463 5. 742932 5. 806232  
11759099\_ 4. 563206 4. 753042 4. 584933 4. 670643 4. 889628 4. 562355  
11759100\_ 11. 6542 11. 64798 11. 64319 11. 76601 11. 82636 11. 75247  
11759101\_ 2. 66358 2. 987059 2. 690947 3. 101104 3. 050542 3. 006027  
11759102\_ 5. 611689 5. 641498 5. 512308 5. 581867 5. 557991 5. 480505  
11759103\_ 3. 542652 3. 582667 3. 650672 3. 222086 3. 504402 3. 555241  
11759104\_ 2. 850317 2. 44116 2. 83407 2. 731199 2. 617337 2. 639993  
11759105\_ 3. 205207 3. 08788 3. 260119 3. 291779 3. 260119 3. 503743  
11759106\_ 5. 302963 5. 439371 5. 318781 5. 516562 5. 658647 5. 506348  
11759107\_ 5. 420199 5. 256497 5. 210792 5. 173404 4. 970384 5. 15099  
11759108\_ 4. 577125 4. 630885 4. 819812 4. 53572 4. 906276 4. 52373  
11759109\_ 6. 377847 6. 395092 6. 467839 6. 348283 6. 373121 6. 33994  
11759110\_ 3. 606313 3. 374572 3. 825539 3. 469762 3. 664444 3. 777151  
11759111\_ 3. 368728 3. 22138 3. 124991 3. 275356 3. 229578 3. 298803

11759112\_ 5. 156303 5. 149545 5. 277227 5. 402751 5. 149802 5. 256242  
11759113\_ 9. 008701 9. 032227 9. 013001 8. 734731 8. 776477 8. 664458  
11759114\_ 8. 107751 8. 014486 8. 152441 7. 964904 8. 019431 7. 957299  
11759115\_ 7. 112352 7. 221995 7. 213717 7. 125839 6. 940233 7. 013172  
11759116\_ 6. 853737 6. 668509 6. 665274 6. 582741 6. 631711 6. 674224  
11759117\_ 6. 694687 6. 794351 6. 589889 6. 770317 6. 736927 6. 727853  
11759118\_ 6. 940341 6. 903906 7. 064143 6. 839922 6. 802097 6. 896516  
11759119\_ 7. 239949 7. 241065 7. 230546 6. 917396 7. 009836 6. 997733  
11759120\_ 1. 916665 1. 994558 1. 715931 1. 913308 2. 043503 2. 095256  
11759121\_ 2. 349518 2. 366246 2. 444077 2. 365063 2. 280361 2. 093391  
11759122\_ 4. 567785 4. 61299 4. 505308 4. 688753 4. 664348 4. 619563  
11759123\_ 3. 244076 3. 478372 3. 183854 3. 520511 3. 27863 3. 290188  
11759124\_ 7. 12407 7. 045635 7. 142426 8. 184313 8. 157643 8. 313446  
11759125\_ 4. 960561 4. 878678 5. 192884 5. 390446 5. 344214 5. 391981  
11759126\_ 8. 62974 8. 54584 8. 591581 8. 570925 8. 589523 8. 666483  
11759127\_ 2. 718322 2. 830089 2. 589854 2. 770741 2. 789855 2. 799805  
11759128\_ 5. 238739 5. 175967 5. 1086 5. 220726 5. 356548 5. 308479  
11759129\_ 5. 649563 5. 841177 5. 468726 5. 402264 5. 523406 5. 754898  
11759130\_ 3. 336611 3. 381655 3. 296857 3. 275136 3. 465447 3. 296857  
11759131\_ 5. 440915 5. 588683 5. 758637 4. 405336 4. 374299 4. 681688  
11759132\_ 4. 520884 4. 580183 4. 69653 4. 711034 4. 751583 4. 710703  
11759133\_ 2. 309092 1. 995297 2. 47102 2. 079975 2. 106123 2. 108936  
11759134\_ 4. 059635 4. 147735 4. 12538 3. 972783 3. 911138 4. 093284  
11759135\_ 8. 250476 8. 295495 8. 192695 8. 271132 8. 264876 8. 272013  
11759136\_ 3. 049574 3. 222907 3. 049574 3. 049574 2. 88524 3. 269967  
11759137\_ 5. 192242 5. 208571 5. 031912 5. 296962 5. 214118 5. 317647  
11759138\_ 3. 369605 3. 593214 3. 503743 3. 600482 3. 879309 4. 122964  
11759139\_ 9. 251727 9. 270673 9. 310342 9. 732673 9. 740634 9. 795549  
11759140\_ 2. 740868 2. 722148 2. 768901 2. 83198 2. 47102 2. 980731  
11759141\_ 8. 174806 8. 072329 8. 109781 8. 372568 8. 310404 8. 344274  
11759142\_ 5. 143628 5. 045226 4. 753198 5. 032547 5. 021829 4. 995942  
11759143\_ 4. 415744 4. 529751 4. 512603 4. 555347 4. 553421 4. 502837  
11759144\_ 7. 196875 7. 373582 7. 321883 7. 426474 7. 440151 7. 417456  
11759145\_ 4. 347179 4. 52373 4. 331921 4. 403245 4. 525341 4. 532501  
11759146\_ 4. 415565 4. 352197 4. 260037 4. 571674 4. 350234 4. 352197  
11759147\_ 4. 972546 4. 827154 4. 8089 4. 977687 4. 962228 5. 018058  
11759148\_ 7. 42765 7. 388897 7. 460215 7. 592038 7. 586858 7. 66635  
11759149\_ 5. 480966 5. 134788 5. 3218 5. 64776 5. 631586 5. 947667  
11759150\_ 6. 193567 6. 131438 6. 175508 6. 334669 6. 427821 6. 40663  
11759151\_ 7. 345521 7. 194708 7. 219975 8. 177497 8. 272998 8. 244313  
11759152\_ 1. 789563 1. 866735 1. 898324 1. 815285 1. 866735 2. 02704  
11759153\_ 4. 727408 4. 691642 4. 992365 4. 736587 4. 775774 4. 858971  
11759154\_ 5. 147954 4. 908075 4. 984669 4. 896354 4. 901947 4. 991284  
11759155\_ 3. 141464 3. 068906 2. 923253 3. 17448 3. 037079 3. 022508  
11759156\_ 4. 634425 4. 733136 4. 505128 4. 833327 4. 503712 4. 563718  
11759157\_ 2. 434871 2. 627372 2. 572934 2. 543083 2. 524731 2. 709542  
11759158\_ 4. 118918 4. 574607 4. 279047 4. 476922 4. 474813 4. 387647  
11759159\_ 4. 426683 4. 459939 4. 235483 4. 401063 4. 244142 4. 412197  
11759160\_ 4. 747001 4. 687542 4. 604934 4. 561262 4. 715924 4. 59542  
11759161\_ 3. 754889 4. 012874 3. 850246 3. 835409 3. 74342 4. 178173  
11759162\_ 4. 49841 4. 624779 4. 596207 4. 699225 4. 61488 4. 729345

11759163\_ 3. 927427 3. 909593 3. 836993 4. 062861 3. 758844 3. 893871  
11759164\_ 4. 977054 5. 046782 4. 926396 5. 251552 5. 152462 5. 11527  
11759165\_ 6. 842962 6. 972398 7. 019259 7. 057642 7. 136524 7. 101248  
11759166\_ 3. 494933 3. 479991 3. 609777 3. 555028 3. 519799 3. 50069  
11759167\_ 5. 11527 5. 367516 5. 033262 5. 34149 5. 31269 5. 461532  
11759168\_ 5. 11527 5. 216431 4. 986083 5. 362039 5. 233385 5. 233385  
11759169\_ 4. 830167 4. 986077 4. 655733 4. 990324 5. 029529 4. 807484  
11759170\_ 2. 351 2. 131936 2. 258738 2. 142033 2. 37115 2. 364605  
11759171\_ 3. 275233 3. 057673 3. 487299 3. 160243 3. 147609 3. 22195  
11759172\_ 2. 861314 2. 990478 3. 085514 2. 845102 2. 960193 3. 1095  
11759173\_ 2. 678197 2. 83198 3. 025972 2. 757347 2. 698985 2. 794633  
11759174\_ 7. 649819 7. 516974 7. 555635 7. 984865 8. 030626 8. 021243  
11759175\_ 7. 936496 7. 891639 7. 869157 7. 228978 7. 204686 7. 286995  
11759176\_ 6. 98052 6. 803789 6. 994297 7. 357528 7. 369482 7. 390091  
11759177\_ 6. 431763 6. 42755 6. 24987 6. 706588 6. 613044 6. 541296  
11759178\_ 8. 647955 8. 625813 8. 630425 8. 59921 8. 551567 8. 671519  
11759179\_ 8. 749511 8. 727473 8. 767667 8. 803485 8. 828121 8. 788974  
11759180\_ 5. 065174 5. 069725 5. 078266 5. 121808 5. 319535 5. 139469  
11759181\_ 4. 262051 4. 3005 4. 107274 4. 166108 4. 367665 4. 174225  
11759182\_ 8. 202794 8. 159372 8. 205136 8. 340172 8. 361805 8. 372506  
11759183\_ 6. 590546 6. 63207 6. 570701 6. 665189 6. 652499 6. 571135  
11759184\_ 6. 055937 5. 8086 6. 085123 5. 685675 5. 650938 5. 548524  
11759185\_ 6. 38372 6. 42554 6. 407541 6. 695467 6. 647351 6. 68671  
11759186\_ 5. 798413 5. 855222 5. 654922 6. 043165 5. 991073 5. 961669  
11759187\_ 7. 613812 7. 470584 7. 508711 7. 671593 7. 765944 7. 753084  
11759188\_ 6. 209854 6. 351213 6. 183085 6. 35139 6. 336394 6. 246771  
11759189\_ 1. 82604 1. 98095 1. 804393 1. 780292 1. 898324 1. 871171  
11759190\_ 7. 34688 7. 318057 7. 351961 7. 351631 7. 306367 7. 367246  
11759191\_ 7. 021889 7. 054867 7. 091089 6. 632182 6. 601542 6. 569753  
11759192\_ 7. 805044 7. 842044 7. 900811 7. 442902 7. 344723 7. 422024  
11759193\_ 8. 680029 8. 607096 8. 620202 8. 362348 8. 409987 8. 342281  
11759194\_ 8. 749294 8. 594975 8. 68971 8. 2744 8. 222806 8. 269883  
11759195\_ 7. 521167 7. 419141 7. 530918 7. 254588 7. 232623 7. 351238  
11759196\_ 4. 445259 4. 790976 4. 441756 5. 780889 5. 693122 5. 950148  
11759197\_ 4. 763543 4. 876156 4. 645884 4. 984055 4. 898042 4. 942442  
11759198\_ 4. 451454 4. 116762 4. 21323 4. 295562 4. 199257 4. 490194  
11759199\_ 2. 128638 2. 150816 2. 47102 2. 286652 2. 22257 2. 501502  
11759200\_ 3. 198659 3. 189497 3. 01597 3. 222365 3. 198114 3. 240289  
11759201\_ 5. 556034 5. 8353 5. 709521 5. 895762 5. 9316 5. 922714  
11759202\_ 6. 642953 6. 519906 6. 634134 7. 202891 7. 107269 7. 058391  
11759203\_ 6. 782303 6. 785399 6. 767101 6. 265409 6. 302361 6. 404975  
11759204\_ 6. 248763 6. 207259 6. 109497 6. 159771 6. 104931 6. 241613  
11759205\_ 7. 460603 7. 398575 7. 401892 8. 159716 8. 096201 8. 146045  
11759206\_ 2. 282907 2. 330993 2. 330993 2. 330993 2. 674644 2. 308273  
11759207\_ 6. 493319 6. 361654 6. 472088 6. 040637 6. 017912 6. 128122  
11759208\_ 8. 476075 8. 478072 8. 476075 8. 127029 8. 146506 8. 147537  
11759209\_ 2. 511585 2. 65251 2. 752469 2. 70249 2. 744724 2. 70249  
11759210\_ 3. 394976 3. 145677 3. 417781 3. 384047 3. 426281 3. 404676  
11759211\_ 7. 192213 7. 009796 7. 16926 7. 574864 7. 489609 7. 603827  
11759212\_ 6. 894593 6. 884647 6. 884647 6. 99288 6. 876741 6. 778473  
11759213\_ 6. 688656 6. 668557 6. 824886 7. 243785 7. 213483 7. 379818



11759214\_ 6. 255715 6. 162046 6. 293902 6. 193586 6. 205566 6. 303672  
11759215\_ 2. 850317 2. 973362 2. 873141 2. 713065 2. 85475 2. 78739  
11759216\_ 4. 752305 4. 86427 4. 801906 4. 831753 5. 047463 4. 89696  
11759217\_ 6. 643267 6. 4222 6. 455631 6. 58549 6. 457233 6. 491159  
11759218\_ 2. 24151 2. 532134 2. 501671 2. 435161 2. 394666 2. 542746  
11759219\_ 2. 699163 2. 590192 2. 835557 2. 378093 2. 617385 2. 698739  
11759220\_ 2. 930259 3. 060925 3. 03418 3. 167283 3. 042411 3. 053301  
11759221\_ 4. 344171 4. 240398 4. 346248 4. 314055 4. 287822 4. 415744  
11759222\_ 5. 787855 5. 738666 5. 683914 5. 995443 6. 015987 6. 234585  
11759223\_ 6. 777454 6. 546818 6. 782763 7. 055071 7. 034678 7. 031849  
11759224\_ 6. 684656 6. 659995 6. 716568 6. 67166 6. 709038 6. 729778  
11759225\_ 7. 382909 7. 449081 7. 367397 7. 586926 7. 672709 7. 628905  
11759226\_ 3. 923515 3. 778762 3. 571147 3. 730296 3. 88571 3. 932814  
11759227\_ 2. 846893 3. 090507 2. 95876 3. 193348 2. 883358 2. 846893  
11759228\_ 5. 078071 5. 02678 4. 984669 5. 006208 5. 015013 5. 020855  
11759229\_ 2. 758193 2. 902188 2. 71841 2. 170391 2. 515486 2. 136827  
11759230\_ 4. 986693 5. 053725 4. 996102 5. 094379 4. 928924 4. 871364  
11759231\_ 4. 874234 4. 993356 5. 029529 4. 955669 4. 948095 4. 992954  
11759232\_ 4. 297731 4. 541171 4. 349518 4. 405249 4. 468654 4. 318792  
11759233\_ 2. 361778 1. 865012 2. 178736 1. 804393 1. 945645 2. 022822  
11759234\_ 2. 283544 2. 400856 2. 283544 2. 283544 2. 283544 2. 186572  
11759235\_ 6. 344045 6. 406098 6. 484917 6. 340289 6. 46582 6. 469295  
11759236\_ 6. 835754 6. 743786 6. 977187 6. 338721 6. 259959 6. 623392  
11759237\_ 1. 924022 2. 095107 2. 086149 1. 90983 1. 870067 1. 861496  
11759238\_ 1. 93013 2. 086963 2. 101601 1. 90983 1. 953866 1. 945025  
11759239\_ 5. 409891 5. 220221 5. 373309 4. 783365 4. 663377 4. 854727  
11759240\_ 2. 165635 2. 025061 2. 30253 2. 137251 2. 107304 2. 195582  
11759241\_ 3. 285058 3. 292916 3. 284566 3. 299429 3. 298386 3. 34336  
11759242\_ 4. 513241 4. 40461 4. 565442 4. 577962 4. 773518 4. 69655  
11759243\_ 5. 619599 5. 843258 5. 586829 5. 845365 5. 794286 5. 767722  
11759244\_ 2. 608066 2. 758998 2. 603443 2. 718322 2. 732124 2. 874051  
11759245\_ 2. 050093 2. 131936 2. 156268 2. 156268 2. 007841 2. 095256  
11759246\_ 2. 601288 2. 688759 2. 391341 2. 600468 2. 605039 2. 606289  
11759247\_ 4. 535154 4. 619308 4. 526886 4. 561587 4. 415615 4. 558969  
11759248\_ 3. 509488 3. 253072 3. 210477 3. 292193 3. 514203 3. 472211  
11759249\_ 4. 026092 3. 723624 3. 60685 3. 810764 3. 917712 3. 786777  
11759250\_ 5. 360905 5. 58859 5. 343175 5. 549449 5. 478758 5. 426104  
11759251\_ 5. 367777 5. 603877 5. 266937 5. 473138 5. 476947 5. 374171  
11759252\_ 2. 407468 2. 25483 2. 31375 2. 150454 2. 119616 2. 231092  
11759253\_ 3. 356915 3. 45233 3. 413442 3. 228631 3. 37629 3. 376036  
11759254\_ 4. 709772 4. 5399 4. 774033 3. 993541 3. 893425 4. 284974  
11759255\_ 2. 437768 2. 655425 2. 373543 2. 903601 2. 653059 2. 865232  
11759256\_ 4. 701271 4. 468125 4. 384973 4. 704486 4. 773837 4. 635657  
11759257\_ 5. 560671 5. 6026 5. 459491 5. 57616 5. 552345 5. 464435  
11759258\_ 7. 755734 7. 763649 7. 573247 8. 589198 8. 655678 8. 645305  
11759259\_ 7. 331046 7. 423287 7. 279273 7. 640153 7. 577409 7. 518581  
11759260\_ 9. 882541 9. 837662 9. 897425 10. 01028 10. 05179 10. 00084  
11759261\_ 3. 573971 3. 57019 3. 652039 3. 57019 3. 7511 3. 676288  
11759262\_ 5. 466268 5. 512119 5. 440943 5. 631526 5. 671982 5. 551662  
11759263\_ 4. 387341 4. 486888 4. 585973 4. 690985 4. 566224 4. 470714  
11759264\_ 5. 057247 5. 156793 5. 228718 5. 27219 5. 23525 5. 149737

11759265\_ 4. 300204 4. 599799 4. 20444 4. 450088 4. 40461 4. 347179  
11759266\_ 3. 583936 3. 503743 3. 433154 3. 4804 3. 573772 3. 539076  
11759267\_ 3. 637725 3. 381716 3. 772985 3. 786038 3. 929582 3. 456936  
11759268\_ 4. 284955 4. 384419 4. 200665 4. 399643 4. 361471 4. 277471  
11759269\_ 3. 778185 3. 848488 3. 721005 3. 756528 3. 768719 3. 821323  
11759270\_ 2. 854147 2. 714237 2. 487666 2. 787232 2. 88711 2. 83198  
11759271\_ 2. 961997 3. 16486 2. 630333 3. 161266 2. 870345 3. 252692  
11759272\_ 2. 1785 2. 558007 2. 733785 2. 656609 2. 721313 2. 631885  
11759273\_ 2. 785927 2. 891524 3. 075702 3. 039746 3. 20094 2. 898283  
11759274\_ 4. 864865 4. 949893 4. 828349 4. 822599 4. 869962 4. 984908  
11759275\_ 2. 482625 2. 711293 2. 464672 2. 665406 2. 825218 2. 605516  
11759276\_ 2. 451711 2. 718322 2. 409937 2. 62275 2. 798956 2. 62275  
11759277\_ 5. 442778 5. 391719 5. 26034 5. 367958 5. 398951 5. 361602  
11759278\_ 4. 211772 4. 242027 4. 085703 4. 0253 4. 27843 4. 206936  
11759279\_ 2. 485894 2. 391208 2. 521754 2. 385935 2. 195031 2. 582113  
11759280\_ 4. 213595 4. 308937 4. 084265 4. 275543 4. 13073 4. 13397  
11759281\_ 7. 108179 7. 209734 7. 071989 7. 231383 7. 268208 7. 208869  
11759282\_ 7. 028304 6. 994369 6. 792183 7. 090327 7. 128674 7. 067869  
11759283\_ 4. 197193 4. 40461 4. 253465 4. 202048 4. 486041 4. 284158  
11759284\_ 2. 47102 2. 438373 2. 254025 2. 205287 2. 395835 2. 25483  
11759285\_ 5. 209259 5. 059399 4. 946899 5. 151709 4. 953961 5. 1694  
11759286\_ 7. 290683 7. 134375 7. 212651 7. 257341 7. 303418 7. 258515  
11759287\_ 8. 594197 8. 73093 8. 704333 7. 888455 7. 81954 7. 890739  
11759288\_ 10. 61513 10. 53365 10. 57402 10. 58779 10. 56422 10. 60239  
11759289\_ 6. 250094 6. 329053 6. 219694 6. 666628 6. 679216 6. 498433  
11759290\_ 9. 5106 9. 495214 9. 535914 9. 098954 9. 024116 9. 115795  
11759291\_ 8. 603608 8. 572366 8. 641943 9. 623872 9. 571743 9. 540016  
11759292\_ 5. 856668 5. 932451 5. 75172 5. 956646 5. 979141 5. 855349  
11759293\_ 8. 226279 8. 163985 8. 265592 7. 969632 7. 954269 7. 973771  
11759294\_ 8. 306125 8. 261371 8. 320461 8. 244522 8. 248734 8. 247995  
11759295\_ 2. 47102 2. 361778 2. 227008 2. 150454 2. 311595 1. 995297  
11759296\_ 7. 472609 7. 372579 7. 503786 6. 348638 6. 49197 6. 510854  
11759297\_ 8. 055052 7. 990006 8. 008385 8. 10828 8. 119044 8. 17437  
11759298\_ 7. 619572 7. 591414 7. 696677 7. 838957 7. 747895 7. 726597  
11759299\_ 7. 449077 7. 3286 7. 404523 6. 595956 6. 719985 6. 652776  
11759300\_ 9. 434835 9. 305293 9. 354606 8. 777731 8. 801528 8. 84243  
11759301\_ 5. 011389 4. 815683 5. 033446 5. 011389 5. 10085 5. 008499  
11759302\_ 9. 094888 8. 993908 9. 056639 8. 704156 8. 766803 8. 805977  
11759303\_ 7. 245398 7. 133426 7. 212651 6. 907698 6. 858893 6. 920796  
11759304\_ 8. 092732 8. 064481 8. 128846 8. 385114 8. 316151 8. 385841  
11759305\_ 6. 247704 6. 223305 6. 17177 6. 223305 6. 141796 6. 158223  
11759306\_ 5. 584402 5. 644782 5. 550611 5. 502253 5. 723959 5. 726931  
11759307\_ 8. 023013 8. 01224 8. 122119 7. 794285 7. 754314 7. 849684  
11759308\_ 6. 620173 6. 369632 6. 594635 6. 310165 6. 223973 6. 238448  
11759309\_ 3. 686056 4. 067703 3. 550578 3. 895565 3. 905076 4. 044986  
11759310\_ 7. 754081 7. 666929 7. 827286 7. 963951 7. 963951 8. 053867  
11759311\_ 4. 542346 4. 52382 4. 432526 4. 477729 4. 357237 4. 533009  
11759312\_ 7. 150694 7. 188774 7. 280671 6. 764677 6. 719548 6. 86361  
11759313\_ 3. 939085 4. 003493 4. 016186 3. 868307 3. 739981 3. 809473  
11759314\_ 4. 891303 5. 021924 4. 93187 5. 297498 5. 002039 4. 94619  
11759315\_ 4. 950945 4. 769365 4. 987539 5. 068897 4. 971344 4. 904029

11759316\_ 8. 286366 8. 246562 8. 322165 8. 707001 8. 609775 8. 648821  
11759317\_ 7. 298343 7. 42325 7. 330253 7. 12217 7. 22102 7. 163138  
11759318\_ 9. 835253 9. 76182 9. 80752 9. 617345 9. 696008 9. 718649  
11759319\_ 6. 484596 6. 149009 6. 296576 6. 345715 6. 368271 6. 389818  
11759320\_ 3. 865779 3. 573174 3. 500854 3. 704115 3. 625468 3. 606313  
11759321\_ 2. 77133 2. 791462 2. 856365 2. 718322 2. 642807 2. 811594  
11759322\_ 5. 034915 5. 082423 5. 137003 4. 667746 4. 783896 4. 815683  
11759323\_ 6. 41071 6. 412133 6. 605808 5. 86885 5. 74027 5. 938225  
11759324\_ 8. 528686 8. 574605 8. 540801 7. 993362 7. 924137 8. 032767  
11759325\_ 4. 340487 4. 448825 4. 45827 4. 336544 4. 513057 4. 436085  
11759326\_ 3. 141022 3. 137424 2. 947002 3. 070229 3. 101013 3. 180062  
11759327\_ 5. 609125 5. 537081 5. 54952 5. 366972 5. 294928 5. 551059  
11759328\_ 9. 16806 9. 056096 9. 137867 9. 413945 9. 412334 9. 517629  
11759329\_ 2. 711797 2. 596129 2. 530608 2. 94219 2. 615086 2. 817225  
11759330\_ 4. 513241 4. 331086 4. 691458 4. 348571 4. 374393 4. 544931  
11759331\_ 5. 731936 5. 552861 5. 586064 5. 384986 5. 331609 5. 40823  
11759332\_ 4. 646461 4. 43495 4. 242113 3. 973881 3. 870338 3. 955124  
11759333\_ 5. 365396 5. 219636 5. 399269 5. 623285 5. 369149 5. 506835  
11759334\_ 6. 439018 6. 471524 6. 370134 6. 594872 6. 65814 6. 67471  
11759335\_ 3. 729863 3. 778554 3. 81376 3. 997131 3. 631593 3. 765086  
11759336\_ 2. 6176 2. 350852 2. 314171 2. 566902 2. 409524 2. 473746  
11759337\_ 5. 297291 5. 184115 5. 175273 5. 179776 5. 179776 5. 158461  
11759338\_ 2. 231689 2. 153625 2. 02117 1. 992786 2. 127972 2. 048337  
11759339\_ 4. 347179 4. 293452 4. 156745 4. 319134 4. 416967 4. 275543  
11759340\_ 7. 285023 7. 12407 7. 142907 6. 357878 6. 448378 6. 497343  
11759341\_ 2. 814923 2. 779428 2. 78933 2. 808 2. 654652 2. 927648  
11759342\_ 7. 836019 7. 760892 7. 845848 8. 62914 8. 626299 8. 581416  
11759343\_ 8. 444774 8. 376107 8. 524727 9. 238393 9. 204001 9. 207919  
11759344\_ 6. 598745 6. 564443 6. 651216 7. 123192 6. 99207 7. 211709  
11759345\_ 6. 225513 6. 140436 6. 279311 5. 730226 5. 620267 5. 8318  
11759346\_ 8. 758545 8. 695405 8. 818532 8. 563584 8. 49187 8. 573383  
11759347\_ 6. 271125 6. 191138 6. 237864 5. 131568 4. 965731 4. 802956  
11759348\_ 5. 88362 5. 857214 5. 834915 5. 89904 5. 870242 5. 872634  
11759349\_ 3. 428147 3. 346415 3. 313003 3. 295698 3. 409295 3. 677194  
11759350\_ 2. 605516 2. 300109 2. 626786 2. 553663 2. 850987 2. 497304  
11759351\_ 4. 794646 5. 063853 4. 824775 4. 982253 5. 096659 4. 903754  
11759352\_ 3. 073856 2. 877834 2. 876925 2. 99624 3. 004853 2. 945929  
11759353\_ 3. 785766 3. 491625 3. 399626 3. 418335 3. 624208 3. 443292  
11759354\_ 5. 706584 5. 636722 5. 727 5. 758772 5. 763245 5. 85539  
11759355\_ 5. 71096 5. 60294 5. 644473 5. 756034 5. 719518 5. 834958  
11759356\_ 3. 497956 3. 551368 3. 511432 3. 616229 3. 659416 3. 761635  
11759357\_ 4. 277392 4. 236851 4. 083071 3. 733372 3. 801444 3. 925418  
11759358\_ 5. 434702 5. 178322 5. 277588 5. 266463 4. 95135 5. 084342  
11759359\_ 3. 277289 3. 375341 3. 375341 3. 177669 3. 402066 3. 406226  
11759360\_ 3. 249924 3. 425092 3. 398236 3. 179631 3. 290596 3. 431864  
11759361\_ 4. 901359 4. 984801 4. 833559 4. 949589 4. 781217 4. 934153  
11759362\_ 5. 820052 5. 841177 5. 845365 5. 723241 5. 519185 5. 770034  
11759363\_ 4. 659024 4. 515149 4. 807335 4. 723637 4. 436289 4. 700243  
11759364\_ 4. 252145 4. 352388 4. 353435 4. 161266 4. 258819 4. 117624  
11759365\_ 6. 038489 5. 859105 6. 038914 5. 901337 5. 857586 5. 960121  
11759366\_ 4. 627416 4. 862289 4. 730077 4. 926201 4. 901686 4. 980666

11759367\_ 6. 836976 6. 839607 6. 887748 6. 968223 6. 832046 7. 044331  
11759368\_ 5. 374714 5. 275401 5. 279402 5. 321749 5. 297765 5. 339673  
11759369\_ 3. 41528 3. 513613 3. 41528 3. 423455 3. 616894 3. 253631  
11759370\_ 4. 095059 4. 240768 4. 107906 4. 088465 4. 208725 4. 316146  
11759371\_ 5. 224731 5. 42486 5. 201672 5. 189628 5. 193516 5. 11527  
11759372\_ 3. 159117 3. 219142 3. 189392 3. 201809 3. 201809 3. 224042  
11759373\_ 8. 965427 8. 983782 8. 90744 9. 183892 9. 140941 9. 108817  
11759374\_ 4. 383238 4. 2917 4. 294009 4. 697211 4. 620587 4. 601398  
11759375\_ 1. 829911 1. 898198 2. 023931 1. 933052 1. 884825 1. 771039  
11759376\_ 6. 094413 6. 033313 5. 903824 6. 071002 5. 965491 6. 078297  
11759377\_ 4. 424719 3. 981457 4. 053012 4. 20368 4. 326998 4. 227963  
11759378\_ 5. 029529 4. 775555 4. 913259 4. 936651 4. 743863 4. 870136  
11759379\_ 2. 988093 2. 829651 2. 755748 3. 057954 3. 022271 3. 009148  
11759380\_ 5. 597899 5. 786672 5. 617107 5. 620547 5. 674734 5. 867746  
11759381\_ 5. 287598 5. 42143 5. 447786 5. 447786 5. 678375 5. 589814  
11759382\_ 3. 343709 3. 394251 3. 125633 3. 617485 3. 503743 3. 587212  
11759383\_ 5. 394808 5. 573432 5. 619591 5. 657778 5. 769179 5. 710392  
11759384\_ 3. 461172 3. 527303 3. 579024 3. 726026 3. 790558 3. 735142  
11759385\_ 3. 202659 3. 030257 3. 080681 3. 238501 3. 32293 2. 938675  
11759386\_ 4. 154822 4. 119755 3. 980237 4. 24959 4. 352836 3. 958701  
11759387\_ 2. 095256 1. 920961 1. 959178 2. 315415 2. 371399 2. 207824  
11759388\_ 4. 336224 4. 45977 4. 27219 4. 521793 4. 46573 4. 536105  
11759389\_ 4. 63426 4. 782 4. 762156 4. 865297 4. 792897 4. 805052  
11759390\_ 6. 903186 6. 971991 6. 833237 6. 986088 6. 925188 7. 002938  
11759391\_ 5. 584813 5. 785614 5. 653837 5. 695695 5. 742801 5. 638295  
11759392\_ 3. 470723 3. 579965 3. 53121 3. 690658 3. 558564 3. 741963  
11759393\_ 4. 463685 4. 590985 4. 254767 4. 809719 4. 524428 4. 491994  
11759394\_ 3. 404291 3. 436378 3. 330075 3. 374639 3. 28376 3. 433787  
11759395\_ 4. 123289 4. 133976 4. 256861 3. 855004 4. 050088 3. 911955  
11759396\_ 6. 572098 6. 714109 6. 481423 6. 645325 6. 687306 6. 572309  
11759397\_ 5. 314193 5. 491793 5. 358755 5. 175724 5. 309954 5. 406433  
11759398\_ 5. 352039 5. 593827 5. 413282 5. 34376 5. 405574 5. 532411  
11759399\_ 6. 656285 6. 853839 6. 682314 6. 686177 6. 78616 6. 782297  
11759400\_ 5. 173063 5. 051592 5. 175318 5. 102619 4. 951665 5. 051592  
11759401\_ 6. 792183 6. 514634 6. 70959 7. 240617 7. 238194 7. 267003  
11759402\_ 4. 19079 4. 174945 3. 955937 3. 930751 3. 853666 3. 954563  
11759403\_ 5. 053472 5. 092931 4. 976184 5. 156303 4. 976642 4. 97481  
11759404\_ 6. 225513 6. 220572 6. 30988 6. 225461 6. 053011 6. 260487  
11759405\_ 9. 327659 9. 253925 9. 3189 9. 721143 9. 749125 9. 779495  
11759406\_ 3. 511083 3. 2725 3. 461699 3. 654949 3. 578243 3. 624228  
11759407\_ 7. 825982 7. 725666 7. 725674 7. 848245 7. 81009 7. 734068  
11759408\_ 6. 647357 6. 570673 6. 746335 6. 911575 6. 979325 6. 923439  
11759409\_ 3. 320685 3. 276929 3. 491943 3. 368665 3. 354862 3. 297923  
11759410\_ 2. 247326 2. 006914 2. 175606 2. 187223 2. 078634 1. 898324  
11759411\_ 10. 67356 10. 70492 10. 73474 10. 61179 10. 63291 10. 58932  
11759412\_ 2. 130344 1. 804393 1. 88764 1. 794076 1. 905753 1. 995297  
11759413\_ 2. 464323 2. 421855 2. 561061 2. 59531 2. 467129 2. 771903  
11759414\_ 5. 763634 5. 800848 5. 991744 6. 111764 6. 195524 6. 055581  
11759415\_ 3. 952651 4. 114074 3. 91334 4. 067703 4. 054288 4. 23097  
11759416\_ 6. 170167 5. 901348 6. 189263 6. 539082 6. 499311 6. 643879  
11759417\_ 8. 166039 8. 16122 8. 070248 8. 110305 8. 166039 8. 166906

11759418\_ 5. 361155 5. 61628 5. 453626 5. 631902 5. 68902 5. 480538  
11759419\_ 6. 289716 6. 271492 6. 26575 6. 255686 6. 423625 6. 228044  
11759420\_ 2. 767777 2. 594086 2. 703296 2. 512144 2. 687924 2. 612439  
11759421\_ 5. 478987 5. 200086 5. 333723 5. 554436 5. 522779 5. 595687  
11759422\_ 8. 370083 8. 271155 8. 281521 7. 603881 7. 530042 7. 60606  
11759423\_ 4. 648054 5. 038873 4. 720855 4. 6717 4. 653049 4. 332137  
11759424\_ 6. 330103 6. 421667 6. 498808 6. 650275 6. 583698 6. 762256  
11759425\_ 9. 329591 9. 243693 9. 303167 9. 236497 9. 267111 9. 227496  
11759426\_ 9. 503725 9. 483134 9. 537856 9. 473159 9. 46575 9. 443898  
11759427\_ 3. 623439 3. 486048 3. 82037 3. 529507 3. 561388 3. 642884  
11759428\_ 7. 609711 7. 516402 7. 571442 7. 285516 7. 296597 7. 211029  
11759429\_ 6. 624174 6. 321838 6. 574834 5. 630253 5. 724105 5. 893902  
11759430\_ 6. 051554 6. 203637 6. 138227 5. 870242 5. 904274 6. 110955  
11759431\_ 6. 220642 6. 176269 6. 36396 6. 095862 5. 92107 5. 894697  
11759432\_ 3. 164796 3. 325487 3. 305235 3. 465886 3. 418777 3. 383189  
11759433\_ 6. 711335 6. 700458 6. 76907 6. 509965 6. 590094 6. 58592  
11759434\_ 3. 62407 3. 556112 3. 372269 3. 382797 3. 409139 3. 650264  
11759435\_ 4. 633703 4. 624477 4. 40107 4. 380784 4. 587711 4. 843943  
11759436\_ 2. 465008 2. 496693 2. 43374 2. 553658 2. 496184 2. 394083  
11759437\_ 5. 806729 5. 821412 5. 890982 5. 79324 5. 764593 5. 717098  
11759438\_ 5. 867851 6. 013262 6. 109757 5. 643713 5. 814038 5. 793443  
11759439\_ 6. 360394 6. 317306 6. 219072 7. 029692 6. 865565 6. 910845  
11759440\_ 8. 071114 7. 995151 8. 170327 6. 746137 6. 578653 6. 845737  
11759441\_ 6. 206103 6. 370454 6. 059498 6. 386704 6. 216886 6. 263567  
11759442\_ 6. 50251 6. 313063 6. 366628 6. 333755 6. 256413 6. 221935  
11759443\_ 5. 916255 6. 075349 6. 043587 6. 105482 6. 199217 6. 217199  
11759444\_ 6. 661211 6. 701643 6. 619536 6. 578203 6. 61159 6. 648597  
11759445\_ 6. 530544 6. 425724 6. 514283 6. 47657 6. 535815 6. 603198  
11759446\_ 5. 167711 5. 397759 5. 292868 5. 36354 5. 394656 5. 139193  
11759447\_ 4. 088063 4. 208257 3. 669154 3. 985493 4. 022184 4. 112641  
11759448\_ 2. 380285 2. 474382 2. 278799 2. 346628 2. 365344 2. 375065  
11759449\_ 4. 336995 4. 392157 4. 27609 4. 360467 4. 272442 4. 297247  
11759450\_ 6. 488011 6. 286358 6. 462698 5. 940294 5. 834191 5. 975823  
11759451\_ 4. 622214 4. 978759 4. 544706 4. 873518 4. 815667 4. 86574  
11759452\_ 5. 528658 5. 674517 5. 614563 5. 624531 5. 645484 5. 620837  
11759453\_ 2. 990287 3. 255335 3. 132618 3. 287994 3. 062449 3. 267355  
11759454\_ 3. 606313 3. 513437 3. 832489 4. 257606 4. 285237 4. 63915  
11759455\_ 3. 865859 3. 580173 3. 677811 3. 882375 3. 975063 3. 637881  
11759456\_ 3. 876371 3. 915049 4. 035489 4. 164352 4. 199175 4. 050806  
11759457\_ 2. 47102 2. 674039 2. 812254 2. 718322 2. 718322 2. 798032  
11759458\_ 3. 511899 3. 614117 3. 850246 3. 377733 3. 64583 3. 885604  
11759459\_ 4. 579331 4. 431954 4. 457523 4. 54855 4. 378274 4. 493528  
11759460\_ 5. 387553 5. 322733 5. 395007 5. 448205 5. 56303 5. 504538  
11759461\_ 5. 30867 5. 084781 5. 149588 5. 228915 5. 282095 5. 213691  
11759462\_ 2. 446355 2. 772037 2. 791703 2. 361778 2. 639037 2. 709296  
11759463\_ 5. 3701 5. 370129 5. 387297 5. 758978 5. 617498 5. 535025  
11759464\_ 5. 366472 5. 448296 5. 431201 5. 448296 5. 537002 5. 507667  
11759465\_ 3. 671837 3. 723624 3. 722842 3. 702677 3. 685882 3. 79408  
11759466\_ 2. 256325 2. 054005 2. 245795 2. 548985 2. 327621 2. 245795  
11759467\_ 5. 097188 5. 032946 4. 961929 5. 193262 5. 127107 5. 18831  
11759468\_ 4. 763543 4. 903774 4. 454074 4. 874234 4. 81058 4. 894055

11759469\_ 3. 270368 3. 369915 3. 097683 3. 327889 3. 228459 3. 59913  
11759470\_ 5. 913385 5. 910031 5. 80049 5. 978712 5. 960964 5. 842308  
11759471\_ 5. 950191 5. 910009 5. 789508 5. 990809 5. 944308 5. 831325  
11759472\_ 6. 044442 6. 183406 6. 027873 6. 10529 6. 222296 6. 1388  
11759473\_ 2. 097156 2. 224928 2. 432798 2. 079884 2. 166552 1. 995297  
11759474\_ 5. 463905 5. 352242 5. 473009 5. 643713 5. 460798 5. 502342  
11759475\_ 3. 15527 2. 839787 2. 996495 3. 331935 3. 365085 3. 079451  
11759476\_ 5. 285218 5. 518359 5. 284748 5. 382285 5. 483676 5. 508793  
11759477\_ 5. 624116 5. 634313 5. 638787 5. 679325 5. 668335 5. 60941  
11759478\_ 4. 785092 4. 76937 4. 685215 4. 71521 4. 838383 4. 730893  
11759479\_ 9. 483609 9. 425751 9. 451003 9. 738189 9. 733799 9. 730821  
11759480\_ 10. 16979 10. 11932 10. 15765 10. 30335 10. 27023 10. 28347  
11759481\_ 4. 960041 4. 752691 4. 739311 4. 882698 4. 968219 4. 903408  
11759482\_ 10. 86212 10. 80309 10. 82562 10. 86298 10. 88675 10. 84665  
11759483\_ 11. 21785 11. 25307 11. 19711 11. 33776 11. 28975 11. 26266  
11759484\_ 8. 041968 7. 888044 8. 02972 8. 208806 8. 235877 8. 20301  
11759485\_ 3. 821491 3. 952148 3. 86526 4. 124715 4. 047154 3. 865563  
11759486\_ 7. 054682 7. 096206 7. 202891 7. 309822 7. 200689 7. 376392  
11759487\_ 4. 619533 4. 371072 4. 619533 4. 773149 4. 890539 4. 604345  
11759488\_ 9. 323746 9. 255804 9. 320319 9. 135697 9. 159524 9. 22558  
11759489\_ 5. 723256 5. 8228 5. 824796 5. 844018 5. 894697 5. 905561  
11759490\_ 7. 965646 7. 803851 7. 883053 7. 714986 7. 621842 7. 735804  
11759491\_ 6. 159227 6. 093946 6. 164942 6. 627971 6. 716629 6. 769156  
11759492\_ 3. 920355 3. 938354 4. 007546 3. 825348 3. 395477 3. 965395  
11759493\_ 4. 283176 4. 302745 4. 183058 4. 149994 4. 398207 4. 432577  
11759494\_ 3. 939007 4. 105223 4. 088072 4. 539328 4. 497459 4. 508233  
11759495\_ 8. 617848 8. 585492 8. 659349 8. 498779 8. 502388 8. 570661  
11759496\_ 6. 212159 5. 990072 5. 851839 5. 782693 6. 021351 5. 969512  
11759497\_ 6. 192748 6. 179612 6. 269849 6. 209356 6. 044285 6. 212602  
11759498\_ 2. 402888 2. 47102 2. 375289 2. 430488 2. 402888 2. 32093  
11759499\_ 2. 852439 2. 811149 2. 971698 2. 853102 3. 022097 2. 88072  
11759500\_ 7. 444175 7. 350789 7. 457739 7. 444175 7. 460629 7. 544263  
11759501\_ 6. 027792 5. 871305 6. 036757 5. 957946 6. 075244 5. 838643  
11759502\_ 7. 967301 7. 874439 7. 906489 8. 05351 8. 007379 8. 029718  
11759503\_ 7. 858 7. 814818 7. 828145 7. 481087 7. 45117 7. 455824  
11759504\_ 6. 414953 6. 27301 6. 516908 6. 479233 6. 517822 6. 622008  
11759505\_ 2. 824248 2. 844209 3. 13162 2. 769145 3. 04774 2. 826659  
11759506\_ 9. 205781 9. 211065 9. 245541 9. 258947 9. 197817 9. 093316  
11759507\_ 3. 390987 3. 18943 3. 886935 3. 031204 3. 306585 3. 398236  
11759508\_ 6. 174477 6. 270779 6. 300643 6. 1496 6. 18752 6. 193016  
11759509\_ 9. 811634 9. 844175 9. 723217 10. 48969 10. 38945 10. 39446  
11759510\_ 8. 944719 8. 94678 8. 989905 9. 601762 9. 559501 9. 604366  
11759511\_ 8. 069684 8. 106612 8. 122873 8. 448348 8. 262659 8. 347282  
11759512\_ 7. 862521 7. 774754 7. 730738 7. 416057 7. 235631 7. 333717  
11759513\_ 7. 722204 7. 546376 7. 682223 7. 930391 7. 89714 8. 027271  
11759514\_ 6. 132782 6. 164941 6. 173046 5. 986572 5. 883143 5. 926016  
11759515\_ 3. 051218 2. 987591 2. 972238 2. 671466 2. 708171 2. 762578  
11759516\_ 4. 235007 4. 293428 4. 182463 4. 336392 4. 349725 4. 638146  
11759517\_ 5. 000213 5. 088169 5. 096701 5. 338894 5. 476009 5. 243619  
11759518\_ 5. 196258 5. 308958 5. 29858 4. 922501 5. 081206 5. 127262  
11759519\_ 8. 113121 8. 128575 8. 159329 8. 132208 8. 124434 8. 109488

11759520\_ 3. 705826 3. 624111 3. 904246 3. 784258 3. 701931 4. 012978  
11759521\_ 8. 599139 8. 691145 8. 700245 7. 995268 8. 04325 8. 024906  
11759522\_ 7. 976981 7. 980808 7. 983216 8. 151001 8. 289992 8. 226273  
11759523\_ 7. 472989 7. 612093 7. 323855 7. 689619 7. 641356 7. 642715  
11759524\_ 5. 89819 5. 814659 5. 922714 5. 771415 5. 647863 5. 841349  
11759525\_ 8. 344553 8. 246152 8. 337105 7. 76265 7. 641397 7. 715855  
11759526\_ 6. 051554 5. 854056 6. 054747 6. 055805 6. 122294 6. 091278  
11759527\_ 3. 377227 3. 733734 3. 625408 3. 614956 3. 583926 3. 518617  
11759528\_ 3. 319484 2. 968123 3. 540197 3. 062055 3. 01529 3. 252361  
11759529\_ 2. 954926 3. 079928 2. 971401 2. 967122 3. 249674 3. 079928  
11759530\_ 3. 717637 3. 742046 4. 025569 3. 690153 3. 538125 3. 512821  
11759531\_ 4. 189979 4. 183221 4. 255876 4. 000132 3. 883107 3. 878152  
11759532\_ 4. 672098 4. 445954 4. 824195 5. 187898 5. 490116 5. 228627  
11759533\_ 6. 396564 6. 570178 6. 604788 7. 266649 7. 165108 7. 183172  
11759534\_ 4. 84329 4. 896877 4. 734805 4. 726917 4. 729462 4. 837946  
11759535\_ 3. 904152 4. 04331 3. 813945 3. 796597 4. 003712 3. 954955  
11759536\_ 6. 660519 6. 796792 6. 748542 7. 387541 7. 423683 7. 404308  
11759537\_ 4. 021278 4. 181618 4. 118905 4. 217675 4. 172218 4. 122446  
11759538\_ 6. 679541 6. 579869 6. 682711 6. 53585 6. 547147 6. 660519  
11759539\_ 7. 184309 7. 324904 7. 124435 7. 168904 7. 182258 7. 26544  
11759540\_ 9. 325574 9. 351236 9. 438998 9. 635105 9. 704879 9. 69039  
11759541\_ 7. 319755 7. 295688 7. 291509 7. 123712 7. 037828 7. 15701  
11759542\_ 6. 793323 6. 764259 6. 919371 7. 17701 7. 16286 7. 10527  
11759543\_ 8. 236071 8. 13947 8. 245566 8. 064236 8. 060401 8. 042912  
11759544\_ 6. 825499 6. 731217 6. 840933 6. 698854 6. 693116 6. 789835  
11759545\_ 6. 987341 6. 788556 7. 016642 7. 308324 7. 326104 7. 291486  
11759546\_ 8. 270609 8. 306424 8. 401858 8. 534157 8. 508277 8. 514366  
11759547\_ 4. 750972 4. 540689 4. 692188 4. 914603 4. 824903 5. 206556  
11759548\_ 7. 383208 7. 334601 7. 38139 7. 952704 8. 066959 7. 892066  
11759549\_ 5. 724499 5. 474723 5. 520676 5. 63003 5. 585479 5. 648514  
11759550\_ 7. 580122 7. 409349 7. 559658 8. 205663 8. 298236 8. 148389  
11759551\_ 7. 954064 7. 90227 7. 97588 8. 49 8. 602371 8. 633259  
11759552\_ 6. 321838 6. 321838 6. 391214 6. 539082 6. 410915 6. 497107  
11759553\_ 7. 934598 7. 747041 7. 848842 7. 335346 7. 435478 7. 46421  
11759554\_ 6. 025952 5. 980273 6. 153361 6. 263567 6. 033374 6. 113492  
11759555\_ 10. 17826 10. 19542 10. 12871 10. 37913 10. 34336 10. 3183  
11759556\_ 8. 441647 8. 370737 8. 444055 7. 631853 7. 635414 7. 572135  
11759557\_ 7. 916682 8. 069307 7. 915728 7. 21966 7. 163822 7. 094066  
11759558\_ 6. 558961 6. 727853 6. 565564 6. 767505 6. 5235 6. 604788  
11759559\_ 6. 020686 5. 957079 6. 099958 6. 502685 6. 397701 6. 383886  
11759560\_ 7. 310383 7. 24731 7. 402141 7. 703468 7. 774713 7. 799789  
11759561\_ 6. 444382 6. 34062 6. 448736 7. 065038 7. 022246 7. 001562  
11759562\_ 10. 07369 10. 02582 10. 01262 9. 787593 9. 851225 9. 857027  
11759563\_ 6. 71875 6. 630769 6. 733943 6. 520472 6. 300643 6. 560015  
11759564\_ 11. 10557 11. 35467 11. 01886 11. 68763 11. 52282 11. 41776  
11759565\_ 5. 075223 4. 87357 5. 297498 4. 987566 5. 11527 4. 969494  
11759566\_ 4. 062704 4. 127304 3. 962745 4. 3307 4. 25145 4. 268109  
11759567\_ 7. 034402 6. 825802 6. 871655 6. 227652 6. 133112 6. 507186  
11759568\_ 5. 275651 5. 008047 5. 128063 5. 374777 5. 624564 5. 46519  
11759569\_ 3. 911671 3. 798799 3. 680526 4. 182025 4. 048259 4. 138542  
11759570\_ 3. 009264 3. 227484 3. 111477 3. 123826 2. 975 3. 141558

11759571\_ 6. 743523 6. 832413 6. 662003 6. 972212 6. 978968 6. 851509  
11759572\_ 6. 668256 6. 735251 6. 649827 6. 847585 6. 76613 6. 927757  
11759573\_ 8. 196282 8. 062606 8. 188152 7. 778638 7. 767792 7. 791577  
11759574\_ 8. 563682 8. 424757 8. 519312 8. 142382 8. 200437 8. 206571  
11759575\_ 8. 500257 8. 448731 8. 49005 8. 191626 8. 252957 8. 232585  
11759576\_ 2. 022909 2. 222915 2. 147575 1. 96415 1. 980997 2. 159592  
11759577\_ 6. 838338 6. 736719 6. 817521 6. 57638 6. 626201 6. 618526  
11759578\_ 9. 26224 9. 231514 9. 29006 9. 622043 9. 61404 9. 59171  
11759579\_ 8. 320906 8. 259284 8. 300711 8. 178225 8. 17885 8. 186959  
11759580\_ 4. 023843 4. 453385 4. 422852 4. 789486 4. 988287 5. 168106  
11759581\_ 4. 347179 4. 271707 4. 118859 4. 026432 4. 24682 4. 111199  
11759582\_ 4. 230587 4. 219164 4. 143945 4. 270424 4. 335605 4. 243804  
11759583\_ 6. 935509 6. 948487 7. 054147 6. 517967 6. 660995 6. 629547  
11759584\_ 6. 445175 6. 239735 6. 496047 6. 393386 6. 396214 6. 465716  
11759585\_ 2. 627542 2. 786407 2. 733882 2. 786407 2. 893459 2. 813039  
11759586\_ 4. 364452 4. 459939 4. 295841 4. 477372 4. 455763 4. 460388  
11759587\_ 5. 409222 5. 513685 5. 474792 5. 841784 5. 836004 6. 092993  
11759588\_ 6. 273929 6. 219915 6. 286209 6. 568624 6. 436546 6. 524344  
11759589\_ 5. 005643 5. 108218 5. 073036 5. 096382 5. 225875 5. 102371  
11759590\_ 6. 235882 6. 357726 6. 180919 6. 31199 6. 282224 6. 227952  
11759591\_ 4. 658479 4. 246948 4. 381355 4. 514049 4. 611816 4. 658479  
11759592\_ 6. 991765 6. 920264 6. 953036 6. 645186 6. 66568 6. 62167  
11759593\_ 4. 347179 4. 58255 4. 584933 4. 584933 4. 756829 4. 584933  
11759594\_ 4. 431467 4. 431467 4. 626261 4. 152959 4. 104182 4. 262278  
11759595\_ 4. 41087 4. 473163 4. 519354 4. 361538 4. 047278 4. 217085  
11759596\_ 4. 608385 4. 618655 4. 548951 4. 76452 4. 722288 4. 644842  
11759597\_ 7. 438917 7. 524829 7. 516848 7. 260237 7. 260481 7. 285544  
11759598\_ 7. 128284 7. 017068 7. 202891 6. 821582 6. 794955 6. 828602  
11759599\_ 7. 674945 7. 556496 7. 591105 6. 980233 7. 013635 7. 0221  
11759600\_ 5. 93567 5. 765435 6. 018673 5. 820052 5. 886365 5. 760107  
11759601\_ 6. 284204 6. 2937 6. 23831 5. 805309 5. 768444 5. 811209  
11759602\_ 6. 192495 6. 183321 6. 393427 5. 830085 5. 697587 6. 124667  
11759603\_ 5. 375944 5. 193107 5. 22371 5. 474694 5. 48634 5. 442778  
11759604\_ 5. 620189 5. 793966 5. 608233 6. 038471 6. 022873 6. 044077  
11759605\_ 5. 215509 5. 375084 5. 298817 5. 345999 5. 371434 5. 397607  
11759606\_ 7. 503265 7. 371944 7. 567284 7. 597395 7. 702703 7. 627609  
11759607\_ 6. 850232 6. 790442 6. 665265 7. 123972 7. 114034 7. 238357  
11759608\_ 4. 306113 4. 249871 4. 242316 4. 17155 4. 347179 4. 035672  
11759609\_ 3. 303439 3. 392447 3. 400659 3. 412563 3. 525369 3. 403581  
11759610\_ 5. 594129 5. 558488 5. 366021 5. 561537 5. 588134 5. 491398  
11759611\_ 5. 667154 5. 743307 5. 500321 5. 54775 5. 388826 5. 415021  
11759612\_ 6. 645623 6. 707525 6. 70959 6. 567247 6. 600354 6. 637845  
11759613\_ 6. 872357 6. 773792 6. 879157 7. 415678 7. 494401 7. 465067  
11759614\_ 2. 980288 3. 139617 3. 385685 3. 101013 3. 21279 3. 111343  
11759615\_ 8. 376483 8. 286103 8. 400061 8. 264037 8. 218233 8. 290649  
11759616\_ 5. 156303 5. 256133 5. 239703 5. 277091 5. 252323 5. 380405  
11759617\_ 4. 979215 5. 367962 5. 224591 5. 275425 5. 070718 5. 354225  
11759618\_ 7. 251041 7. 264798 7. 160393 7. 183554 7. 225246 7. 231421  
11759619\_ 7. 150146 7. 194921 7. 182954 6. 989035 6. 982252 6. 965842  
11759620\_ 6. 187036 6. 288492 6. 249904 6. 264099 6. 328657 6. 341305  
11759621\_ 4. 415744 4. 563931 4. 368616 4. 602212 4. 603927 4. 664529



11759622\_ 11.49917 11.53283 11.52114 11.41966 11.41397 11.42244  
11759623\_ 6.145165 5.977915 6.059635 6.186469 6.317282 6.256526  
11759624\_ 7.29175 7.22775 7.313756 7.377327 7.304534 7.43182  
11759625\_ 5.55932 5.683149 5.615159 6.158115 6.10541 6.046019  
11759626\_ 5.149251 5.11527 5.073036 5.081865 5.115837 5.104185  
11759627\_ 6.094413 6.010977 6.199575 6.158951 6.252344 6.073106  
11759628\_ 7.066036 7.008733 6.976922 7.033243 7.033243 7.072475  
11759629\_ 6.660519 6.715365 6.719444 6.88045 6.694695 6.808047  
11759630\_ 7.891681 7.790454 7.911118 7.191387 7.215992 7.400837  
11759631\_ 7.421823 7.369074 7.354037 6.757194 6.755518 6.874422  
11759632\_ 5.474665 5.380648 5.494681 5.448296 5.616535 5.418476  
11759633\_ 4.786689 4.66734 4.680525 4.78039 4.896021 5.0002  
11759634\_ 6.640857 6.765633 6.77822 7.178444 7.080545 7.13605  
11759635\_ 8.223274 8.174027 8.085753 7.969091 7.944297 7.771496  
11759636\_ 8.818631 8.807887 8.84652 8.754236 8.767484 8.737298  
11759637\_ 5.137941 5.420825 5.426566 5.265309 5.334615 5.367435  
11759638\_ 5.872183 5.774636 5.66719 5.546527 5.48634 5.500812  
11759639\_ 5.423619 5.514998 5.543354 5.40107 5.415318 5.481645  
11759640\_ 5.442778 5.567029 5.855107 5.405814 5.345133 5.310566  
11759641\_ 6.508352 6.443456 6.581024 6.928893 6.90882 6.923579  
11759642\_ 8.88767 8.867491 8.952129 8.856554 8.867398 8.868129  
11759643\_ 5.604858 5.459836 5.604686 5.136354 5.094592 5.168078  
11759644\_ 6.712842 6.634802 6.734826 6.796184 6.764305 7.036268  
11759645\_ 7.145313 7.144832 7.159632 7.009058 7.088115 7.07275  
11759646\_ 5.10506 4.866267 5.078549 4.825334 4.583952 4.884913  
11759647\_ 6.546344 6.276573 6.530987 6.047399 5.907967 6.051554  
11759648\_ 4.996163 4.815683 4.71944 4.824195 4.643717 4.700243  
11759649\_ 5.447217 5.248648 5.260549 5.401628 5.297498 5.297498  
11759650\_ 3.07187 3.090992 3.103684 3.059822 3.059178 3.10304  
11759651\_ 5.637849 5.781903 5.706761 5.700302 5.768053 5.715126  
11759652\_ 2.138947 2.290653 2.403495 2.238542 2.069838 2.214668  
11759653\_ 3.436244 3.066609 3.282474 3.615396 3.752209 3.348535  
11759654\_ 2.572037 2.47102 2.336725 2.096313 2.166552 1.995297  
11759655\_ 2.235709 1.940025 1.898324 1.657427 1.845889 1.898324  
11759656\_ 8.672885 8.547754 8.573926 8.76883 8.761996 8.800984  
11759657\_ 6.573725 6.48353 6.476964 6.160028 6.203081 6.199025  
11759658\_ 5.19774 5.229176 5.122191 5.129143 5.052174 5.279781  
11759659\_ 5.163945 5.265742 5.286482 5.095489 5.175942 5.13671  
11759660\_ 4.803771 4.561865 4.577975 4.529748 4.720347 4.801107  
11759661\_ 5.422666 5.458175 5.369461 5.171536 5.361194 5.375721  
11759662\_ 5.244205 5.097215 5.26034 5.401472 5.413035 5.374866  
11759663\_ 6.416887 6.464805 6.578723 5.934643 5.806241 5.900636  
11759664\_ 5.07814 4.921368 4.870235 5.232724 5.124915 5.196201  
11759665\_ 3.388676 3.50646 3.345401 3.251986 3.456203 3.416711  
11759666\_ 7.334598 7.238788 7.449234 7.726539 7.878601 7.750062  
11759667\_ 8.834455 8.745096 8.862708 8.328042 8.23287 8.27269  
11759668\_ 2.831536 2.838805 2.960854 3.343456 3.176785 3.298596  
11759669\_ 5.870242 5.866126 6.018553 6.447693 6.349363 6.448676  
11759670\_ 6.244876 6.038616 6.189934 6.647821 6.557068 6.6154  
11759671\_ 8.742795 8.649956 8.707917 8.507191 8.478664 8.534254  
11759672\_ 6.780264 6.73956 6.759155 6.767147 6.658359 6.765911

11759673\_ 7. 007066 6. 809436 6. 960745 7. 344252 7. 451223 7. 412192  
11759674\_ 2. 840795 2. 550603 2. 743575 2. 725261 2. 820718 2. 494072  
11759675\_ 5. 880408 5. 816923 5. 788478 5. 88378 5. 822143 5. 876607  
11759676\_ 3. 434096 3. 467231 3. 392965 3. 336693 3. 450856 3. 491987  
11759677\_ 5. 572904 5. 398843 5. 465965 5. 402616 5. 297498 5. 329145  
11759678\_ 6. 319531 6. 475038 6. 580841 6. 810041 6. 680265 6. 776792  
11759679\_ 5. 326434 5. 415971 5. 134553 5. 502985 5. 39873 5. 40831  
11759680\_ 3. 664565 3. 597085 3. 676615 3. 673606 3. 673602 3. 870533  
11759681\_ 6. 165845 6. 175438 6. 165845 6. 109838 6. 270319 6. 231169  
11759682\_ 5. 954081 5. 604896 5. 730278 5. 860286 5. 90234 5. 920759  
11759683\_ 3. 574102 3. 326071 3. 290188 3. 207821 3. 400822 3. 41776  
11759684\_ 2. 891539 2. 875835 2. 965969 3. 112854 2. 853134 3. 172359  
11759685\_ 4. 725972 4. 725972 4. 746663 4. 918644 5. 056695 4. 733613  
11759686\_ 6. 99825 7. 019688 6. 908064 6. 978178 6. 940109 6. 978178  
11759687\_ 8. 641662 8. 602689 8. 610282 8. 647133 8. 59346 8. 641135  
11759688\_ 7. 488576 7. 53394 7. 579508 7. 335346 7. 361391 7. 434587  
11759689\_ 4. 831564 4. 907944 4. 533368 4. 837868 5. 073036 4. 822985  
11759690\_ 3. 477105 3. 359368 3. 305445 3. 598475 3. 359368 3. 425472  
11759691\_ 5. 466709 5. 542059 5. 535598 5. 626284 5. 463889 5. 603252  
11759692\_ 5. 275668 5. 169751 5. 333723 5. 189628 5. 297498 5. 204462  
11759693\_ 3. 05041 3. 274426 3. 133144 3. 290188 3. 521727 3. 704514  
11759694\_ 3. 166679 3. 051588 2. 864194 3. 609679 3. 420404 3. 520454  
11759695\_ 2. 666139 2. 72132 2. 479935 2. 282276 2. 584682 2. 562897  
11759696\_ 3. 897906 4. 221108 3. 825418 4. 181624 4. 461608 4. 584681  
11759697\_ 3. 154565 3. 142885 2. 945524 3. 10472 3. 432838 2. 962704  
11759698\_ 8. 200512 8. 188457 8. 153815 8. 178393 8. 131892 8. 078569  
11759699\_ 4. 490975 4. 387201 4. 664032 4. 736759 4. 284516 4. 354165  
11759700\_ 5. 778124 5. 765669 5. 744339 5. 764754 5. 737229 5. 738143  
11759701\_ 4. 57475 4. 57862 4. 625216 4. 690985 4. 763048 4. 763543  
11759702\_ 5. 736831 5. 760713 5. 649589 5. 799673 5. 739545 5. 687451  
11759703\_ 5. 603671 5. 624219 5. 553029 5. 689021 5. 540366 5. 483763  
11759704\_ 4. 627503 4. 555579 4. 8481 4. 673096 4. 452621 4. 704636  
11759705\_ 5. 219184 5. 152062 5. 185267 5. 195282 5. 248692 5. 438345  
11759706\_ 2. 556686 2. 524106 2. 47102 2. 450855 2. 693545 2. 339295  
11759707\_ 3. 72841 3. 685573 3. 290188 3. 025972 2. 94792 3. 05918  
11759708\_ 5. 619466 5. 584813 5. 587254 5. 794286 5. 778158 5. 634083  
11759709\_ 5. 474476 5. 413687 5. 614563 5. 303987 5. 305798 5. 334169  
11759710\_ 6. 554613 6. 529403 6. 60983 6. 368382 6. 431763 6. 522377  
11759711\_ 5. 898032 5. 87908 5. 983327 5. 964722 5. 747567 5. 648514  
11759712\_ 4. 148273 3. 8956 4. 149955 4. 110229 3. 834257 4. 054288  
11759713\_ 4. 113959 3. 879161 4. 149955 4. 005911 3. 773318 4. 054288  
11759714\_ 6. 656868 6. 624022 6. 589381 6. 672308 6. 65814 6. 690905  
11759715\_ 6. 76742 6. 731587 6. 774271 6. 15571 6. 125446 6. 123057  
11759716\_ 7. 950265 7. 730153 7. 929383 7. 744866 7. 760744 7. 780675  
11759717\_ 6. 41271 6. 573111 6. 374049 6. 578162 6. 481046 6. 561071  
11759718\_ 5. 284441 5. 34463 5. 111019 5. 475885 5. 521487 5. 30795  
11759719\_ 4. 308218 4. 335594 4. 342057 4. 563216 4. 708866 4. 737026  
11759720\_ 3. 03643 3. 144899 3. 066317 3. 08224 2. 964743 3. 257901  
11759721\_ 5. 934225 5. 951993 5. 907389 6. 060782 6. 083413 6. 13945  
11759722\_ 5. 377063 5. 237384 5. 362092 5. 484421 5. 254926 5. 275389  
11759723\_ 5. 817491 5. 6185 5. 863718 6. 189877 6. 188196 6. 167132

11759724\_ 6. 755896 6. 666664 6. 690724 6. 494765 6. 278271 6. 252525  
11759725\_ 4. 254632 4. 291798 4. 225962 3. 997131 4. 219042 4. 442234  
11759726\_ 6. 689906 6. 713603 6. 737026 6. 708169 6. 826485 6. 658319  
11759727\_ 6. 430604 6. 401594 6. 387572 6. 218634 6. 425641 6. 378353  
11759728\_ 6. 11623 6. 202207 6. 39265 5. 892266 5. 996552 5. 980709  
11759729\_ 7. 50511 7. 277629 7. 47812 6. 985294 7. 031655 7. 188231  
11759730\_ 7. 008638 6. 862059 7. 021767 8. 087059 7. 975864 8. 007467  
11759731\_ 4. 496866 4. 516394 4. 399215 4. 4767 4. 646679 4. 410281  
11759732\_ 3. 823896 3. 833259 3. 822445 3. 833259 3. 978155 3. 941307  
11759733\_ 4. 795049 4. 736041 4. 955931 3. 867415 3. 606313 4. 206412  
11759734\_ 4. 721884 4. 985618 5. 089129 3. 994561 3. 89755 4. 345121  
11759735\_ 4. 654299 4. 7114 4. 552969 4. 80024 4. 933706 4. 872502  
11759736\_ 3. 144942 3. 064407 3. 037689 3. 407921 3. 138895 3. 055952  
11759737\_ 5. 470323 5. 364765 5. 330944 5. 807082 5. 679961 5. 732155  
11759738\_ 7. 864864 7. 821622 7. 805174 7. 827027 7. 859481 7. 774467  
11759739\_ 7. 522582 7. 69338 7. 66444 7. 636105 7. 69131 7. 670341  
11759740\_ 7. 035625 7. 144077 7. 139737 7. 078765 7. 07956 7. 095285  
11759741\_ 3. 486997 2. 887066 3. 081058 3. 075584 2. 955395 2. 857409  
11759742\_ 2. 727479 2. 727479 2. 614673 2. 893371 2. 646069 2. 727479  
11759743\_ 6. 584888 6. 520027 6. 445622 6. 366235 6. 470814 6. 539844  
11759744\_ 2. 79647 2. 79647 2. 874619 3. 020785 2. 685168 2. 718322  
11759745\_ 3. 092092 3. 038958 3. 225132 3. 202869 3. 109687 3. 202309  
11759746\_ 7. 456246 7. 516974 7. 550712 6. 982118 6. 923275 7. 092558  
11759747\_ 6. 022007 6. 044856 6. 100266 5. 845365 5. 866387 5. 960324  
11759748\_ 8. 489453 8. 383974 8. 364113 8. 436691 8. 375018 8. 380123  
11759749\_ 4. 706433 4. 483023 4. 586052 4. 482753 4. 643717 4. 552924  
11759750\_ 5. 656902 5. 70618 5. 793049 5. 432966 5. 364808 5. 591351  
11759751\_ 5. 087762 4. 890831 5. 277701 5. 280846 5. 07239 5. 032701  
11759752\_ 4. 252094 4. 075334 4. 491356 4. 246479 4. 111626 4. 141928  
11759753\_ 5. 418814 5. 414869 5. 284861 5. 175537 5. 339894 5. 228627  
11759754\_ 2. 928278 3. 269603 2. 842324 2. 83379 2. 836314 3. 123933  
11759755\_ 5. 444079 5. 488756 5. 365279 5. 290027 5. 396065 5. 450013  
11759756\_ 4. 939562 4. 9694 4. 548192 4. 829032 4. 551571 4. 52373  
11759757\_ 7. 155886 7. 259167 7. 263614 7. 204438 7. 287692 7. 132921  
11759758\_ 5. 50581 5. 465867 5. 569784 5. 955596 5. 793835 5. 828537  
11759759\_ 8. 015871 7. 88138 7. 940446 8. 339828 8. 209481 8. 226956  
11759760\_ 4. 307342 4. 03819 4. 534987 3. 730993 3. 755571 3. 744482  
11759761\_ 10. 09696 10. 05342 10. 07861 11. 01973 11. 05324 11. 02337  
11759762\_ 5. 833305 5. 879966 5. 830484 5. 772341 5. 864249 5. 906109  
11759763\_ 6. 536494 6. 752522 6. 591249 6. 66987 6. 667102 6. 739351  
11759764\_ 5. 442778 5. 531629 5. 441274 5. 548205 5. 43003 5. 594305  
11759765\_ 4. 970046 4. 595032 4. 730384 5. 53574 5. 431453 5. 798613  
11759766\_ 5. 488726 5. 472584 5. 671721 5. 10148 5. 03431 5. 101765  
11759767\_ 5. 424445 5. 447567 5. 647722 5. 024109 4. 971068 5. 077765  
11759768\_ 7. 351112 7. 279749 7. 178991 7. 104724 7. 066519 7. 031531  
11759769\_ 5. 444227 5. 518169 5. 558525 5. 448296 5. 544783 5. 673822  
11759770\_ 8. 317225 8. 205764 8. 297981 8. 030969 8. 092269 8. 0043  
11759771\_ 8. 28615 8. 277662 8. 282692 8. 211053 8. 104136 8. 094933  
11759772\_ 5. 893173 5. 870468 5. 911901 5. 8128 5. 759575 5. 853482  
11759773\_ 4. 796835 4. 546097 4. 644934 4. 347179 4. 569341 4. 376127  
11759774\_ 4. 224719 4. 736076 4. 309261 4. 392689 4. 230021 4. 532108

11759775\_ 4. 569318 4. 605783 4. 619078 4. 59454 4. 679963 4. 823922  
11759776\_ 5. 46199 5. 55189 5. 394672 5. 474539 5. 313096 5. 440519  
11759777\_ 2. 78651 3. 097087 2. 909113 2. 912276 3. 270704 2. 725596  
11759778\_ 7. 063566 6. 988993 6. 970204 6. 621979 6. 713266 6. 876456  
11759779\_ 7. 438489 7. 209623 7. 446394 6. 318677 6. 130323 6. 34724  
11759780\_ 6. 218205 6. 118838 6. 2474 5. 189628 5. 019164 5. 015836  
11759781\_ 5. 461461 5. 554436 5. 454462 5. 528624 5. 554436 5. 555168  
11759782\_ 3. 271517 3. 235727 3. 267468 3. 357158 3. 34366 3. 290188  
11759783\_ 5. 093248 5. 073036 5. 053057 5. 189628 5. 100636 5. 121405  
11759784\_ 4. 726079 4. 9694 4. 809781 4. 913512 5. 103078 5. 098167  
11759785\_ 4. 700243 4. 809148 5. 122191 4. 922108 4. 90308 5. 006689  
11759786\_ 5. 045441 5. 08453 4. 824195 5. 114588 5. 183024 5. 186054  
11759787\_ 2. 928405 2. 739362 2. 770315 2. 752541 3. 179147 2. 776731  
11759788\_ 4. 275543 4. 496366 4. 195024 4. 507062 4. 584384 4. 871981  
11759789\_ 3. 069167 3. 08509 3. 025972 3. 117967 3. 101013 3. 062769  
11759790\_ 5. 833344 5. 738223 5. 626878 5. 63163 5. 58809 5. 574038  
11759791\_ 2. 178423 2. 178423 2. 369327 2. 079884 2. 178423 2. 178423  
11759792\_ 4. 830264 4. 52373 4. 718624 4. 638435 4. 692567 4. 618176  
11759793\_ 7. 542219 7. 423718 7. 521796 7. 700835 7. 604608 7. 599093  
11759794\_ 4. 026092 4. 238582 3. 864413 3. 949599 4. 110094 4. 108079  
11759795\_ 2. 945069 3. 039862 2. 75798 2. 988576 3. 119377 3. 045746  
11759796\_ 4. 602795 4. 574654 4. 46926 4. 385479 4. 428394 4. 40825  
11759797\_ 5. 358094 5. 2451 5. 282469 5. 13669 5. 087358 4. 993367  
11759798\_ 3. 771736 4. 01093 4. 072219 3. 975407 4. 046453 4. 01093  
11759799\_ 4. 245653 4. 396524 4. 131917 3. 813304 4. 228741 4. 049931  
11759800\_ 6. 090198 5. 980774 6. 247177 5. 954081 5. 932057 5. 862859  
11759801\_ 4. 973366 5. 095995 4. 874275 5. 09422 5. 147656 5. 079137  
11759802\_ 5. 786087 5. 686774 5. 674604 5. 835268 5. 693945 5. 754755  
11759803\_ 6. 468144 6. 468309 6. 496564 6. 64354 6. 643573 6. 776022  
11759804\_ 6. 146598 6. 253526 6. 273262 6. 574126 6. 510356 6. 490598  
11759805\_ 3. 798647 3. 066724 3. 60352 3. 575717 3. 503743 3. 502124  
11759806\_ 4. 935104 4. 920834 4. 864925 4. 992559 5. 021365 4. 95236  
11759807\_ 3. 235568 2. 987323 3. 022013 3. 022013 3. 181732 2. 83198  
11759808\_ 4. 72001 4. 442644 4. 676745 4. 289975 4. 173205 4. 318667  
11759809\_ 4. 502311 4. 636889 4. 525938 4. 000601 4. 355481 3. 705625  
11759810\_ 3. 543149 3. 777632 3. 592374 3. 035431 3. 311892 3. 180062  
11759811\_ 3. 723517 3. 72282 3. 939983 3. 850246 3. 644401 3. 954157  
11759812\_ 4. 059755 4. 276723 4. 152216 4. 082848 4. 190958 4. 21997  
11759813\_ 4. 990072 5. 14717 4. 719781 5. 086105 5. 079262 5. 134942  
11759814\_ 5. 853023 6. 003458 5. 860737 6. 003458 6. 146496 6. 015526  
11759815\_ 7. 476398 7. 432819 7. 374844 7. 545791 7. 475638 7. 523063  
11759816\_ 6. 639775 6. 669361 6. 505884 6. 703935 6. 779107 6. 660519  
11759817\_ 5. 656905 5. 462448 5. 754776 5. 700302 5. 724875 5. 769047  
11759818\_ 7. 256861 7. 18644 7. 43673 7. 475183 7. 456018 7. 470109  
11759819\_ 4. 36303 3. 886898 4. 046905 3. 874922 3. 980258 3. 928968  
11759820\_ 3. 398236 3. 290188 3. 213958 3. 199386 3. 400763 3. 350917  
11759821\_ 6. 326852 6. 300643 6. 431493 6. 727853 6. 656431 6. 820093  
11759822\_ 5. 084641 4. 9226 5. 297498 5. 645616 5. 318667 5. 366973  
11759823\_ 5. 944182 6. 058265 5. 894697 6. 159771 6. 445213 6. 094413  
11759824\_ 2. 893381 2. 675213 2. 772011 2. 847925 2. 977121 2. 938804  
11759825\_ 3. 871043 4. 044411 4. 033769 3. 740536 3. 835515 3. 342172

11759826\_ 7. 772557 7. 701561 7. 687632 7. 078252 6. 948304 7. 020891  
11759827\_ 3. 503743 3. 717368 3. 383747 3. 448996 3. 435474 3. 45434  
11759828\_ 7. 856161 7. 74938 7. 791663 7. 548972 7. 684655 7. 717757  
11759829\_ 6. 652654 6. 953796 6. 660663 7. 110266 7. 061442 7. 14377  
11759830\_ 6. 971486 6. 891449 7. 047549 6. 932648 6. 948053 6. 966035  
11759831\_ 7. 693721 7. 579782 7. 735882 7. 619401 7. 637794 7. 655776  
11759832\_ 3. 664596 3. 729726 3. 563853 3. 226148 3. 208372 2. 83198  
11759833\_ 3. 346215 3. 400468 3. 490945 3. 641739 3. 552662 3. 653603  
11759834\_ 4. 807918 4. 924893 5. 131086 4. 988374 4. 989496 5. 102402  
11759835\_ 6. 924252 6. 824067 6. 719981 6. 730266 6. 790561 6. 915505  
11759836\_ 2. 822659 2. 788933 2. 870603 3. 045518 2. 624041 2. 876781  
11759837\_ 4. 427791 4. 403769 4. 36261 4. 40461 4. 435486 4. 354915  
11759838\_ 5. 243044 5. 361819 5. 333723 4. 914651 4. 984669 4. 97797  
11759839\_ 3. 311711 3. 13047 3. 13047 2. 930882 3. 271143 3. 356131  
11759840\_ 4. 144815 3. 976889 4. 595149 4. 197648 4. 493651 4. 208782  
11759841\_ 4. 9588 4. 945087 4. 539237 4. 743778 4. 849431 4. 914803  
11759842\_ 6. 40428 6. 300643 6. 406375 6. 124283 6. 073033 6. 150371  
11759843\_ 5. 76234 5. 691192 5. 852979 5. 954781 6. 016568 5. 968571  
11759844\_ 5. 77474 5. 763577 5. 811205 5. 643713 5. 638895 5. 542054  
11759845\_ 5. 968302 6. 033313 6. 033955 6. 177096 5. 978675 6. 055061  
11759846\_ 5. 782318 6. 114443 5. 877088 6. 007803 5. 948826 5. 950167  
11759847\_ 5. 364283 5. 284621 5. 257623 4. 340294 4. 140467 4. 400647  
11759848\_ 6. 667502 6. 686054 6. 799391 6. 374433 6. 278021 6. 387629  
11759849\_ 3. 464844 3. 439111 3. 39796 3. 541047 3. 770165 3. 579741  
11759850\_ 2. 47102 2. 103179 2. 208625 2. 308344 2. 189949 2. 25483  
11759851\_ 6. 209637 6. 463456 6. 210062 6. 402292 6. 438408 6. 486208  
11759852\_ 5. 301216 5. 557979 5. 050693 5. 335252 5. 491032 5. 424169  
11759853\_ 6. 051554 5. 944273 5. 922714 6. 386397 6. 300643 6. 464805  
11759854\_ 6. 220615 6. 290155 6. 091774 6. 559229 6. 469703 6. 632705  
11759855\_ 5. 083985 5. 242529 5. 11583 5. 268951 5. 067028 5. 060869  
11759856\_ 5. 464788 5. 449516 5. 487908 5. 543496 5. 408358 5. 813707  
11759857\_ 3. 125113 3. 25695 3. 098486 3. 039905 3. 02723 3. 229407  
11759858\_ 2. 515973 2. 605516 2. 361778 2. 643711 2. 587004 2. 515973  
11759859\_ 3. 573672 3. 671192 3. 439375 3. 191095 2. 5726 2. 970014  
11759860\_ 4. 838347 4. 882762 4. 839708 4. 824195 4. 698516 4. 762495  
11759861\_ 5. 176252 4. 970717 5. 261657 5. 245151 5. 113077 5. 196201  
11759862\_ 2. 356227 2. 171416 2. 47102 2. 429765 2. 405477 2. 171416  
11759863\_ 4. 956367 4. 783775 4. 712471 4. 757369 4. 670406 4. 720065  
11759864\_ 4. 688322 4. 763543 4. 773782 4. 52373 4. 516844 4. 591207  
11759865\_ 4. 683718 4. 755682 4. 786898 4. 52996 4. 580782 4. 586602  
11759866\_ 4. 18818 4. 283368 4. 352077 4. 248975 4. 322676 4. 163815  
11759867\_ 5. 058475 5. 11275 5. 119148 5. 253671 5. 123922 5. 233082  
11759868\_ 6. 276406 6. 255326 6. 097929 5. 294985 5. 357244 5. 431859  
11759869\_ 7. 056558 7. 189427 7. 029853 7. 065098 7. 041187 7. 127343  
11759870\_ 3. 702566 3. 744676 3. 503743 3. 531563 4. 162055 3. 786777  
11759871\_ 4. 91513 5. 057997 4. 791894 4. 926451 4. 956853 5. 031099  
11759872\_ 3. 002361 3. 465844 3. 36176 3. 529255 3. 498476 3. 563643  
11759873\_ 2. 399887 2. 431899 2. 5777 2. 400899 2. 398875 2. 429875  
11759874\_ 2. 911854 2. 998186 3. 082257 3. 042834 2. 852035 3. 210086  
11759875\_ 4. 415744 4. 414726 4. 370337 4. 687384 4. 653944 4. 56586  
11759876\_ 6. 118838 5. 99174 6. 120433 6. 035081 5. 980978 5. 906827

11759877\_ 4. 02547 3. 63826 3. 814382 3. 986728 3. 946954 4. 040902  
11759878\_ 5. 379589 5. 499695 5. 100784 5. 446139 5. 412074 5. 528624  
11759879\_ 2. 47102 2. 254658 2. 317165 2. 605516 2. 496692 2. 384435  
11759880\_ 5. 994522 6. 031188 6. 04929 5. 995594 6. 006672 5. 997196  
11759881\_ 4. 645744 4. 872208 4. 693715 4. 828211 4. 933212 4. 749553  
11759882\_ 6. 733851 6. 590445 6. 578943 5. 860876 5. 929383 6. 011719  
11759883\_ 6. 333983 6. 263567 6. 327937 6. 065683 5. 95024 6. 13945  
11759884\_ 5. 946422 5. 803337 6. 093729 6. 764318 6. 593014 6. 907805  
11759885\_ 2. 881334 3. 02498 2. 755165 3. 027248 2. 890986 2. 886316  
11759886\_ 3. 629868 3. 963504 3. 837469 4. 381054 4. 259778 4. 243125  
11759887\_ 8. 958904 8. 9483 8. 900021 8. 662726 8. 59555 8. 639135  
11759888\_ 6. 129245 6. 066742 6. 18514 6. 112171 6. 146119 6. 22861  
11759889\_ 4. 222407 3. 926773 4. 339067 4. 238847 4. 175057 4. 16172  
11759890\_ 4. 783598 4. 681894 4. 771171 4. 702987 4. 925399 4. 745994  
11759891\_ 2. 984024 3. 011502 3. 151806 3. 165584 3. 182756 3. 039897  
11759892\_ 5. 413589 5. 480995 5. 614563 5. 103641 5. 237028 5. 297214  
11759893\_ 5. 71966 5. 633054 5. 551832 5. 236927 5. 21593 5. 172817  
11759894\_ 4. 799594 4. 788439 4. 995649 4. 757508 4. 823316 4. 790787  
11759895\_ 6. 883826 6. 828786 6. 961622 7. 080085 7. 088757 7. 102118  
11759896\_ 3. 482344 3. 488599 2. 996234 3. 509306 3. 395648 3. 423774  
11759897\_ 5. 710176 5. 625106 5. 554436 5. 444739 5. 427878 5. 510032  
11759898\_ 4. 220605 4. 327246 4. 499565 4. 629337 4. 758737 4. 345708  
11759899\_ 3. 874787 3. 856662 4. 097811 4. 219047 4. 160131 4. 438452  
11759900\_ 3. 997655 3. 934242 3. 656724 4. 026194 4. 139637 4. 104864  
11759901\_ 7. 226114 7. 083686 6. 987134 7. 058893 6. 946361 6. 999944  
11759902\_ 5. 370118 5. 380649 5. 483368 5. 878039 6. 000306 5. 929508  
11759903\_ 3. 582956 3. 65859 3. 871265 3. 690658 3. 700627 3. 811683  
11759904\_ 5. 619591 5. 490833 5. 870242 5. 820052 5. 919191 5. 731869  
11759905\_ 6. 287031 6. 244627 6. 232656 6. 385299 6. 347122 6. 46879  
11759906\_ 7. 050924 7. 095267 7. 010087 7. 196535 7. 215321 7. 202997  
11759907\_ 4. 779221 4. 645015 4. 772366 4. 481629 4. 422678 4. 442676  
11759908\_ 3. 438196 3. 546773 3. 478193 3. 467143 3. 439984 3. 424864  
11759909\_ 4. 926953 5. 028081 4. 9922 5. 012724 5. 050354 5. 175008  
11759910\_ 5. 139412 5. 263639 5. 261493 5. 257193 5. 349222 5. 178043  
11759911\_ 4. 346773 4. 40461 4. 24674 4. 327378 4. 275543 4. 484785  
11759912\_ 5. 206121 5. 24457 5. 333723 5. 425159 5. 341537 5. 403052  
11759913\_ 5. 865569 5. 98478 5. 869205 5. 778786 5. 929883 5. 881647  
11759914\_ 5. 148881 5. 00063 4. 925985 5. 295459 5. 199304 5. 316958  
11759915\_ 4. 995828 4. 667088 4. 845561 5. 137754 5. 074468 5. 113966  
11759916\_ 5. 247739 5. 23408 5. 237213 5. 340887 5. 378085 5. 446394  
11759917\_ 5. 490648 5. 342234 5. 554436 5. 362906 5. 308168 5. 417222  
11759918\_ 6. 858284 6. 686633 6. 886584 6. 871412 6. 934615 6. 903389  
11759919\_ 2. 915664 3. 413301 2. 913234 3. 460648 2. 842051 3. 35666  
11759920\_ 4. 091548 3. 818401 3. 806932 3. 756925 3. 829926 3. 628267  
11759921\_ 4. 513241 4. 558379 4. 486665 4. 472416 4. 690869 4. 643717  
11759922\_ 5. 922863 5. 994229 6. 084192 5. 406901 5. 513831 5. 556506  
11759923\_ 6. 379166 6. 378198 6. 251015 6. 103836 6. 156615 6. 252757  
11759924\_ 7. 616514 7. 535933 7. 659997 7. 335346 7. 199158 7. 354243  
11759925\_ 3. 757635 3. 60516 3. 586038 3. 60516 3. 427687 3. 646462  
11759926\_ 5. 186763 5. 237784 5. 036614 5. 090139 5. 185361 5. 124158  
11759927\_ 2. 481954 2. 602237 2. 47102 2. 602237 2. 159772 2. 473171

11759928\_ 5. 137289 4. 86556 4. 730093 4. 839748 4. 86451 4. 900938  
11759929\_ 3. 605464 4. 07046 3. 846147 4. 048064 3. 879309 4. 005644  
11759930\_ 5. 156999 5. 192181 5. 167291 5. 08423 4. 98805 5. 146522  
11759931\_ 7. 966622 7. 907216 7. 997743 7. 721065 7. 694613 7. 837911  
11759932\_ 5. 385407 5. 521978 5. 39905 5. 489948 5. 584813 5. 564782  
11759933\_ 3. 834348 3. 575423 3. 688442 4. 022094 3. 738947 3. 803752  
11759934\_ 5. 416819 5. 581262 5. 384226 5. 542685 5. 561889 5. 648443  
11759935\_ 5. 643972 5. 740804 5. 716349 5. 855039 5. 736831 5. 533101  
11759936\_ 6. 718427 6. 744106 6. 671068 6. 801377 6. 779675 6. 816946  
11759937\_ 7. 740915 7. 863999 7. 793626 7. 92272 7. 912529 7. 959803  
11759938\_ 5. 771343 5. 706824 5. 836797 5. 921498 5. 915936 5. 915514  
11759939\_ 5. 470887 5. 490004 5. 660679 5. 449229 5. 482271 5. 534539  
11759940\_ 2. 513436 2. 898361 2. 845678 3. 192181 2. 898361 2. 821552  
11759941\_ 5. 022763 5. 061848 4. 92871 5. 135568 5. 098931 5. 228627  
11759942\_ 2. 951865 2. 991049 2. 805097 3. 195603 3. 073672 2. 826455  
11759943\_ 5. 895474 5. 861859 6. 009626 5. 070731 5. 226059 5. 502987  
11759944\_ 2. 592317 2. 614218 2. 516839 2. 722338 2. 708123 2. 585503  
11759945\_ 2. 838038 2. 87887 2. 987529 2. 917973 3. 040383 2. 83198  
11759946\_ 6. 239797 6. 232359 6. 20407 6. 341942 6. 207822 6. 243514  
11759947\_ 2. 977269 2. 987256 3. 033783 3. 239386 3. 215272 3. 246976  
11759948\_ 6. 904185 6. 908081 6. 883381 6. 675807 6. 813938 6. 805376  
11759949\_ 4. 103098 4. 333848 3. 971869 4. 363042 4. 122446 4. 456658  
11759950\_ 4. 311396 4. 379456 4. 400299 4. 275543 4. 241383 4. 241383  
11759951\_ 4. 613992 4. 488998 4. 670809 5. 030691 4. 919598 5. 102095  
11759952\_ 6. 700859 6. 556475 6. 619536 6. 648586 6. 679555 6. 700371  
11759953\_ 5. 221971 5. 297526 5. 485661 5. 42187 5. 175979 5. 303757  
11759954\_ 6. 31736 6. 300643 6. 23831 6. 38931 6. 34864 6. 665039  
11759955\_ 3. 572493 3. 259365 3. 458479 3. 503743 3. 532138 3. 633786  
11759956\_ 3. 557822 3. 898234 3. 891583 3. 581062 3. 705625 3. 712145  
11759957\_ 5. 313186 5. 424259 5. 073523 5. 35429 5. 337193 5. 30965  
11759958\_ 5. 333723 5. 345598 5. 426838 5. 356227 5. 225669 5. 356227  
11759959\_ 6. 065183 6. 035654 6. 205497 5. 734291 5. 603201 5. 705883  
11759960\_ 2. 238759 2. 102221 2. 095467 2. 150665 2. 147907 2. 11221  
11759961\_ 4. 286447 4. 584933 4. 431661 4. 431661 4. 410718 4. 564304  
11759962\_ 5. 522834 5. 361641 5. 501258 5. 321749 5. 467529 5. 588811  
11759963\_ 2. 546402 2. 25483 2. 280277 2. 345523 2. 499849 2. 546506  
11759964\_ 3. 065573 3. 053369 2. 679133 3. 029196 3. 053369 3. 176838  
11759965\_ 5. 015673 5. 141981 4. 932034 4. 845725 5. 01096 4. 839191  
11759966\_ 3. 151533 3. 560235 3. 368058 3. 510901 3. 681379 3. 641614  
11759967\_ 7. 651166 7. 53204 7. 677743 7. 049794 6. 8237 7. 085228  
11759968\_ 6. 484765 6. 407097 6. 439686 6. 039694 5. 872357 5. 983867  
11759969\_ 6. 955858 6. 984373 6. 958379 7. 058711 7. 12266 7. 07769  
11759970\_ 6. 606647 6. 536718 6. 480263 6. 678451 6. 721087 6. 639906  
11759971\_ 3. 706509 3. 645882 3. 580855 3. 555004 3. 508931 3. 781589  
11759972\_ 4. 439214 4. 594598 4. 332995 4. 556653 4. 584933 4. 575387  
11759973\_ 4. 854869 4. 94151 5. 148433 5. 241909 5. 091867 5. 188993  
11759974\_ 5. 086589 5. 107526 5. 043104 5. 157415 5. 345086 5. 210707  
11759975\_ 4. 222024 4. 34897 4. 317134 4. 468696 4. 40461 4. 505832  
11759976\_ 2. 106014 2. 238407 2. 129237 2. 171828 2. 116502 2. 063811  
11759977\_ 5. 021477 5. 313538 4. 749874 5. 215415 5. 231248 5. 285704  
11759978\_ 3. 237462 3. 447344 3. 349128 3. 664138 3. 619836 3. 330033

11759979\_ 3. 369743 3. 25802 3. 251323 3. 329053 3. 517553 3. 139226  
11759980\_ 6. 900478 6. 852755 6. 923678 6. 744041 6. 684762 6. 691746  
11759981\_ 7. 001844 6. 963802 6. 971486 6. 829145 6. 853841 6. 78388  
11759982\_ 8. 580321 8. 541089 8. 534185 7. 814405 7. 735728 7. 824965  
11759983\_ 5. 148235 5. 243681 5. 000482 5. 20316 5. 207449 5. 151861  
11759984\_ 5. 578934 5. 491299 5. 654313 5. 832645 5. 954699 5. 748058  
11759985\_ 4. 355581 4. 335594 4. 518928 4. 355174 4. 305985 4. 366706  
11759986\_ 7. 043908 7. 072813 7. 108934 6. 765783 6. 844051 6. 922773  
11759987\_ 4. 456315 4. 324969 4. 36325 4. 216011 4. 11955 4. 44945  
11759988\_ 4. 28014 4. 220428 4. 751837 4. 220428 4. 251962 4. 700243  
11759989\_ 4. 0713 4. 388396 4. 102773 4. 111914 4. 284796 4. 12144  
11759990\_ 4. 815683 4. 698318 4. 459948 4. 837994 5. 059443 4. 812317  
11759991\_ 5. 569693 5. 521757 5. 676992 5. 762404 5. 609647 5. 609775  
11759992\_ 4. 564314 4. 410883 4. 541006 4. 460559 4. 455073 4. 455112  
11759993\_ 4. 901869 5. 15486 5. 07154 4. 612532 4. 642528 4. 633571  
11759994\_ 3. 307143 3. 367729 3. 228307 3. 27533 3. 178554 3. 350002  
11759995\_ 5. 601882 5. 827152 5. 633214 5. 676613 5. 783442 5. 695294  
11759996\_ 5. 281285 5. 23912 5. 242586 5. 384436 5. 195716 5. 277819  
11759997\_ 3. 213406 3. 246306 3. 315634 3. 246306 3. 246306 3. 237358  
11759998\_ 1. 898324 2. 010767 2. 095256 1. 884835 1. 842231 1. 898324  
11759999\_ 5. 670482 5. 684939 5. 742026 5. 710582 5. 768053 5. 628083  
11760000\_ 5. 15964 4. 979013 4. 927335 5. 097279 5. 093616 5. 26722  
11760001\_ 3. 532208 3. 442046 3. 320674 3. 351885 3. 596344 3. 442046  
11760002\_ 5. 080908 5. 212332 5. 166346 5. 082628 5. 073492 5. 15997  
11760003\_ 6. 260422 6. 239501 6. 476174 6. 535074 6. 314416 6. 465206  
11760004\_ 4. 947275 4. 870229 4. 906889 4. 873044 4. 799026 4. 904074  
11760005\_ 9. 673221 9. 749302 9. 61459 9. 65583 9. 557801 9. 53127  
11760006\_ 6. 474156 6. 547806 6. 609421 6. 781536 6. 681642 6. 73609  
11760007\_ 7. 134016 7. 184826 7. 093878 7. 164975 7. 214335 7. 32234  
11760008\_ 4. 958879 4. 906418 4. 927612 4. 98389 4. 922204 5. 05267  
11760009\_ 5. 012711 5. 004083 5. 13685 4. 916604 4. 895611 4. 990986  
11760010\_ 5. 086291 5. 392055 5. 236524 5. 460986 5. 532777 5. 430109  
11760011\_ 6. 244666 6. 271427 6. 348193 6. 542174 6. 525748 6. 509  
11760012\_ 3. 414475 3. 332604 3. 398236 3. 606313 3. 606313 3. 180062  
11760013\_ 4. 033258 3. 84948 3. 961461 4. 069321 4. 230269 4. 37671  
11760014\_ 4. 09169 4. 249516 4. 055793 4. 242126 4. 242126 4. 082244  
11760015\_ 4. 616429 4. 499292 4. 407011 4. 662127 4. 583814 4. 610564  
11760016\_ 3. 421596 3. 261388 3. 456779 3. 398236 3. 503743 3. 813534  
11760017\_ 6. 338952 6. 34737 6. 422431 6. 579445 6. 578775 6. 723576  
11760018\_ 4. 442193 4. 3512 4. 206881 4. 216208 4. 348983 4. 35906  
11760019\_ 7. 257717 7. 315797 7. 315797 7. 292995 7. 381029 7. 294901  
11760020\_ 8. 082168 8. 202916 8. 037388 8. 372982 8. 380079 8. 384631  
11760021\_ 2. 748844 2. 818285 2. 831076 2. 977961 2. 912551 3. 180062  
11760022\_ 4. 594839 4. 694382 4. 733047 4. 611561 4. 92371 4. 777444  
11760023\_ 5. 663444 5. 619951 5. 632075 5. 597673 5. 582854 5. 455524  
11760024\_ 5. 663444 5. 619951 5. 632075 5. 597673 5. 582854 5. 455524  
11760025\_ 7. 211029 7. 323436 7. 572959 6. 939077 6. 712974 6. 817654  
11760026\_ 4. 001934 4. 109304 4. 302001 4. 128553 4. 233504 4. 183858  
11760027\_ 4. 108592 3. 954167 4. 287593 3. 913452 4. 109251 3. 954157  
11760028\_ 4. 767394 5. 023174 4. 91869 5. 064465 5. 006218 5. 128354  
11760029\_ 2. 308304 2. 25483 2. 235709 2. 450655 2. 361778 2. 308304



11760030\_ 6. 36673 6. 496019 6. 447107 6. 379892 6. 432135 6. 382265  
11760031\_ 6. 672192 6. 656089 6. 688597 6. 305164 6. 420294 6. 338583  
11760032\_ 3. 982088 3. 942932 3. 63554 3. 872524 4. 019396 4. 036864  
11760033\_ 5. 517378 5. 433147 5. 432835 5. 461871 5. 466895 5. 528624  
11760034\_ 4. 62771 4. 734639 4. 890121 4. 704084 4. 814518 4. 516318  
11760035\_ 5. 392983 5. 390881 5. 423495 5. 494223 5. 495014 5. 489359  
11760036\_ 4. 612061 4. 533337 4. 468955 4. 767908 4. 868657 4. 612061  
11760037\_ 9. 922463 9. 916356 9. 921274 9. 501861 9. 459047 9. 472681  
11760038\_ 9. 920926 10. 05626 9. 958376 9. 745301 9. 630674 9. 599552  
11760039\_ 3. 678439 3. 635547 3. 625408 3. 950568 3. 809045 3. 871687  
11760040\_ 8. 476438 8. 320325 8. 237067 8. 413564 8. 417119 8. 417119  
11760041\_ 3. 024267 2. 961591 3. 092711 3. 268626 3. 073295 3. 188055  
11760042\_ 4. 347179 3. 990812 4. 032281 3. 718778 4. 107322 4. 122446  
11760043\_ 5. 404856 5. 218991 5. 184718 4. 491568 4. 776765 4. 778313  
11760044\_ 1. 878605 2. 22869 2. 195554 2. 160549 2. 190908 2. 091595  
11760045\_ 4. 290194 4. 414241 4. 21282 4. 222602 4. 36183 4. 290999  
11760046\_ 6. 532558 6. 666036 6. 568253 6. 767128 6. 609771 6. 685034  
11760047\_ 5. 505674 5. 397498 5. 385102 5. 343774 5. 444265 5. 442778  
11760048\_ 4. 341964 4. 427301 4. 412619 4. 440932 4. 437722 4. 331259  
11760049\_ 5. 294445 5. 295348 5. 248736 5. 322993 5. 519312 5. 400391  
11760050\_ 4. 46128 4. 442183 4. 451772 4. 543253 4. 659038 4. 56217  
11760051\_ 3. 642661 3. 836253 3. 80583 3. 82346 3. 700579 3. 878993  
11760052\_ 2. 436484 2. 361778 2. 605516 2. 439914 2. 545654 2. 439252  
11760053\_ 2. 405867 2. 447266 2. 797704 2. 461066 2. 305909 2. 35864  
11760054\_ 2. 612856 2. 645736 3. 004693 2. 668054 2. 512897 2. 58141  
11760055\_ 4. 9226 4. 8822 4. 474915 4. 591507 4. 546455 4. 741552  
11760056\_ 2. 85113 2. 603828 2. 736636 2. 585704 2. 417713 2. 822089  
11760057\_ 6. 625255 6. 672355 6. 777646 5. 977166 6. 069881 6. 020607  
11760058\_ 3. 170582 3. 201292 2. 998463 3. 216168 3. 292278 3. 109669  
11760059\_ 3. 920901 3. 712365 3. 735866 3. 862117 3. 906593 3. 969998  
11760060\_ 2. 682171 2. 613182 2. 572929 2. 824586 2. 445121 2. 424942  
11760061\_ 4. 513241 4. 547979 4. 192251 4. 736759 4. 643424 4. 516901  
11760062\_ 6. 870543 6. 900118 6. 922773 6. 827857 6. 92519 6. 922316  
11760063\_ 3. 556305 3. 665546 3. 51575 3. 766947 3. 693599 3. 550494  
11760064\_ 6. 158865 6. 276811 6. 123248 6. 229385 6. 294754 6. 376269  
11760065\_ 4. 134776 4. 165856 4. 200772 4. 192238 4. 209641 4. 218801  
11760066\_ 4. 690014 4. 759806 4. 819524 4. 819524 4. 792502 4. 889344  
11760067\_ 4. 554592 4. 592783 4. 434486 4. 693185 4. 667059 4. 701519  
11760068\_ 4. 714331 4. 68194 4. 68194 4. 823008 4. 890539 4. 775872  
11760069\_ 4. 30539 4. 30539 4. 33571 4. 304057 4. 30539 3. 956751  
11760070\_ 6. 317821 6. 471194 6. 354397 6. 526044 6. 526095 6. 464164  
11760071\_ 5. 109437 5. 204368 5. 056135 5. 372726 5. 284717 5. 277176  
11760072\_ 5. 779337 5. 691522 5. 787259 5. 597098 5. 519092 5. 732315  
11760073\_ 3. 801236 3. 899863 3. 769178 3. 860756 3. 777651 3. 882132  
11760074\_ 5. 126111 5. 459838 5. 277652 5. 299118 5. 26207 5. 277652  
11760075\_ 5. 381924 5. 444691 5. 438251 5. 374119 5. 421095 5. 402656  
11760076\_ 2. 297018 2. 361778 2. 47102 2. 447333 2. 534011 2. 318859  
11760077\_ 4. 981613 4. 632849 4. 849029 5. 130501 5. 081217 5. 037965  
11760078\_ 3. 122119 3. 110496 3. 0013 3. 104441 3. 007728 2. 950921  
11760079\_ 2. 863303 3. 194816 2. 967318 3. 151529 3. 245597 3. 112157  
11760080\_ 4. 684008 4. 764298 4. 714777 4. 704691 4. 803826 4. 737575

11760081\_ 5. 817446 5. 957954 5. 87243 5. 60902 5. 502268 5. 59804  
11760082\_ 5. 632386 5. 844581 5. 707978 5. 667771 5. 701344 5. 803677  
11760083\_ 4. 513241 4. 51005 4. 284593 4. 509212 4. 588565 4. 472015  
11760084\_ 5. 894152 5. 757478 5. 902783 6. 125325 6. 065982 5. 906234  
11760085\_ 10. 05397 10. 00733 10. 05889 9. 714237 9. 801001 9. 772486  
11760086\_ 4. 114553 3. 818401 3. 758809 3. 906392 3. 8226 3. 786777  
11760087\_ 3. 741483 3. 825955 3. 546679 3. 662378 3. 762817 3. 705625  
11760088\_ 4. 945544 4. 619083 4. 707296 4. 819176 4. 662015 4. 716792  
11760089\_ 2. 281291 2. 508293 2. 440533 2. 345173 2. 402329 2. 268001  
11760090\_ 5. 634419 5. 712645 5. 607884 5. 599451 5. 859871 5. 820114  
11760091\_ 5. 62844 5. 794585 5. 6327 5. 658528 5. 834028 5. 844931  
11760092\_ 5. 218268 5. 393928 5. 208659 5. 342926 5. 424113 5. 187688  
11760093\_ 10. 86959 10. 81487 10. 81345 9. 927396 9. 935005 9. 963934  
11760094\_ 2. 309173 1. 971789 2. 361778 2. 01765 2. 361778 2. 095256  
11760095\_ 3. 573952 3. 865458 3. 552977 3. 70495 3. 956185 3. 658484  
11760096\_ 4. 104272 4. 298307 4. 1913 4. 347179 4. 397601 4. 275543  
11760097\_ 7. 7593 7. 744503 7. 689329 8. 003228 8. 011518 8. 058867  
11760098\_ 5. 914497 5. 856546 5. 816658 5. 96717 6. 14674 6. 014405  
11760099\_ 4. 361652 4. 408614 4. 213226 4. 52373 4. 595807 4. 548602  
11760100\_ 7. 580306 7. 482403 7. 490534 7. 917118 7. 854527 8. 005644  
11760101\_ 5. 450555 5. 343278 5. 362316 5. 532998 5. 545202 5. 480413  
11760102\_ 4. 060167 3. 965695 4. 181885 3. 861319 3. 940531 3. 816  
11760103\_ 9. 18302 9. 107171 9. 184863 9. 364143 9. 374601 9. 372759  
11760104\_ 5. 243532 5. 12269 5. 037066 5. 230739 5. 217163 5. 033965  
11760105\_ 3. 734825 3. 568399 3. 79364 3. 659838 3. 949792 4. 015582  
11760106\_ 5. 480966 5. 414869 5. 489217 5. 571405 5. 523406 5. 735137  
11760107\_ 6. 356641 6. 524037 6. 633356 5. 976879 6. 061761 6. 03655  
11760108\_ 6. 17981 6. 177638 6. 260434 5. 845365 5. 841831 5. 761937  
11760109\_ 7. 428859 7. 325621 7. 407847 8. 232797 8. 068869 8. 074665  
11760110\_ 5. 672066 5. 706375 5. 637115 5. 957763 6. 075603 5. 898512  
11760111\_ 1. 836426 1. 774368 1. 912232 1. 888193 1. 945954 2. 026438  
11760112\_ 2. 984414 2. 880641 2. 977312 2. 95158 2. 867583 2. 85574  
11760113\_ 3. 122119 3. 230702 3. 174299 3. 174299 3. 117896 3. 180062  
11760114\_ 7. 514318 7. 560206 7. 607021 7. 642668 7. 666179 7. 637276  
11760115\_ 6. 717882 6. 727853 6. 665265 6. 669086 6. 716445 6. 631711  
11760116\_ 6. 140872 6. 256298 6. 249562 6. 1785 6. 124642 6. 162003  
11760117\_ 4. 22605 4. 398016 4. 314187 4. 375832 4. 224006 4. 17511  
11760118\_ 3. 491389 3. 627234 3. 533719 3. 810153 3. 486735 3. 619164  
11760119\_ 3. 957761 4. 335594 3. 932427 4. 135496 3. 976824 4. 357322  
11760120\_ 7. 179559 7. 006723 7. 140724 7. 202026 7. 160413 7. 316823  
11760121\_ 7. 817713 7. 800868 7. 8593 8. 280263 8. 213767 8. 228401  
11760122\_ 4. 860788 4. 9694 5. 049051 4. 560327 4. 834553 4. 681057  
11760123\_ 3. 300918 3. 292751 3. 104892 3. 393681 3. 40792 3. 492241  
11760124\_ 4. 275543 4. 149694 4. 040184 4. 430547 4. 347179 4. 347179  
11760125\_ 4. 094831 3. 905758 4. 110633 4. 090853 4. 252838 4. 262638  
11760126\_ 4. 179307 3. 845909 3. 878637 4. 098962 3. 981227 4. 027218  
11760127\_ 7. 259106 7. 199836 7. 247123 7. 003107 6. 954185 6. 908611  
11760128\_ 7. 369753 7. 303831 7. 373194 7. 108454 7. 066036 7. 020462  
11760129\_ 4. 726097 4. 947005 4. 798811 5. 030214 5. 144243 4. 891397  
11760130\_ 4. 978941 4. 787122 5. 041662 4. 906242 4. 929928 5. 052544  
11760131\_ 3. 418088 3. 416647 3. 155965 3. 416647 3. 587902 3. 416647

11760132\_ 3. 27178 3. 181081 3. 268526 3. 137406 3. 231329 3. 171778  
11760133\_ 7. 715356 7. 695638 7. 695793 7. 4083 7. 289973 7. 327171  
11760134\_ 4. 037486 4. 058143 4. 274238 4. 000351 3. 853722 3. 766637  
11760135\_ 6. 13945 6. 083399 6. 122657 6. 095545 6. 044285 5. 981999  
11760136\_ 6. 169603 6. 153779 6. 084284 6. 238384 6. 126055 6. 265464  
11760137\_ 6. 01246 6. 090541 6. 096226 6. 233437 6. 281495 6. 253699  
11760138\_ 5. 60505 5. 55088 5. 421572 5. 890883 5. 830103 5. 857661  
11760139\_ 5. 550999 5. 370097 5. 300014 5. 567075 5. 550901 5. 344333  
11760140\_ 4. 851184 4. 814492 4. 930483 4. 152035 4. 100329 4. 243205  
11760141\_ 5. 660584 5. 548949 5. 947373 5. 097403 5. 302814 5. 234845  
11760142\_ 4. 643717 4. 44221 4. 833406 5. 393077 5. 067696 5. 033568  
11760143\_ 4. 896951 4. 838167 4. 9095 4. 896951 4. 984669 4. 822754  
11760144\_ 5. 893466 5. 860315 5. 731299 5. 587503 5. 727492 5. 721051  
11760145\_ 6. 067919 6. 154289 6. 000199 6. 044012 6. 1779 6. 136738  
11760146\_ 3. 294767 3. 275854 3. 303924 3. 290188 3. 285609 3. 290188  
11760147\_ 5. 870242 5. 950258 6. 044285 5. 874064 5. 874064 5. 951161  
11760148\_ 4. 738963 4. 853794 4. 672541 4. 602128 4. 717418 4. 730978  
11760149\_ 6. 96122 7. 095762 7. 026997 7. 120421 7. 210209 7. 117816  
11760150\_ 6. 570431 6. 727853 6. 512026 6. 584799 6. 676524 6. 630286  
11760151\_ 5. 87274 5. 947063 5. 863141 6. 048503 5. 925595 5. 999497  
11760152\_ 3. 705625 3. 415565 3. 503743 3. 82721 3. 397566 3. 889527  
11760153\_ 4. 647168 4. 628642 4. 447817 4. 660846 4. 664888 4. 777374  
11760154\_ 5. 409222 5. 293744 5. 268883 5. 372022 5. 311323 5. 342353  
11760155\_ 6. 875206 6. 77147 6. 790246 6. 545655 6. 589683 6. 67573  
11760156\_ 4. 763543 4. 881504 4. 658783 4. 885248 5. 032272 4. 86463  
11760157\_ 5. 799547 6. 006093 6. 011539 6. 116615 5. 957954 6. 176411  
11760158\_ 6. 401336 6. 481046 6. 497172 6. 986342 6. 958243 7. 0049  
11760159\_ 6. 139302 5. 894697 6. 16517 6. 302219 6. 265842 6. 35799  
11760160\_ 6. 123919 6. 045671 6. 281709 6. 252524 6. 343417 6. 296274  
11760161\_ 5. 765516 5. 934758 5. 584813 5. 764284 5. 934556 5. 776884  
11760162\_ 5. 136334 4. 93723 5. 126053 5. 490704 5. 426098 5. 504909  
11760163\_ 5. 089013 4. 823625 4. 863216 5. 405544 5. 372172 5. 161337  
11760164\_ 5. 157893 5. 108573 5. 033526 4. 932278 5. 062589 4. 993468  
11760165\_ 6. 185172 6. 309596 6. 277974 6. 075037 6. 11854 6. 077277  
11760166\_ 3. 727917 3. 895343 3. 640843 3. 733952 3. 652108 3. 712998  
11760167\_ 3. 913205 3. 902994 3. 870444 3. 949376 3. 928244 4. 173194  
11760168\_ 6. 507662 6. 514616 6. 500296 6. 561873 6. 508815 6. 537751  
11760169\_ 3. 955668 4. 023387 3. 936889 4. 265552 4. 177063 4. 032233  
11760170\_ 10. 75037 10. 66845 10. 7558 10. 88504 10. 94951 10. 95072  
11760171\_ 5. 399652 5. 427578 5. 347953 5. 421906 5. 397861 5. 508092  
11760172\_ 4. 307159 4. 582254 4. 224804 4. 459939 4. 387938 4. 445582  
11760173\_ 8. 011513 8. 051724 7. 994889 8. 040961 7. 989621 8. 04863  
11760174\_ 5. 54308 5. 656437 5. 527073 5. 520423 5. 585807 5. 502342  
11760175\_ 5. 542063 5. 469207 5. 507546 5. 624228 5. 644085 5. 754755  
11760176\_ 4. 851429 4. 772275 4. 681485 4. 714912 4. 876263 4. 726616  
11760177\_ 5. 21317 5. 402376 5. 316525 5. 646877 5. 57532 5. 626778  
11760178\_ 5. 351579 5. 122267 5. 357223 5. 469346 5. 409625 5. 398951  
11760179\_ 5. 454788 5. 530647 5. 506693 5. 644915 5. 651164 5. 691456  
11760180\_ 5. 285218 5. 468476 5. 448296 5. 498794 5. 596915 5. 537572  
11760181\_ 3. 397903 3. 46771 3. 42052 3. 344947 3. 541253 3. 449346  
11760182\_ 6. 440749 6. 221686 6. 42422 6. 002777 6. 010275 6. 137007

11760183\_ 5. 870242 6. 08178 5. 791731 5. 961675 5. 870242 6. 07186  
11760184\_ 4. 599629 4. 696602 4. 421429 4. 599629 4. 675329 4. 643717  
11760185\_ 5. 862119 5. 721566 5. 416334 5. 553903 5. 537901 5. 464213  
11760186\_ 3. 229621 3. 104627 3. 118332 3. 320294 3. 244402 3. 663537  
11760187\_ 3. 102081 2. 839266 2. 975128 3. 187767 3. 349514 3. 051696  
11760188\_ 4. 976257 4. 806321 4. 855057 4. 96642 5. 143208 5. 228627  
11760189\_ 5. 979377 5. 985181 6. 004198 5. 960844 6. 038376 5. 946752  
11760190\_ 6. 2338 6. 10795 6. 114482 6. 288142 6. 290837 6. 261766  
11760191\_ 6. 100421 6. 093164 5. 996126 6. 159771 6. 179326 6. 178979  
11760192\_ 7. 864352 7. 762902 7. 931704 7. 660694 7. 596443 7. 686614  
11760193\_ 2. 882744 2. 756698 3. 127956 2. 662766 2. 853671 2. 884023  
11760194\_ 4. 328176 4. 655226 4. 245676 4. 579438 4. 768088 4. 347179  
11760195\_ 4. 17184 3. 917961 4. 069925 4. 296092 4. 375208 4. 509679  
11760196\_ 3. 660649 3. 633576 3. 64022 3. 660257 3. 567693 3. 747528  
11760197\_ 5. 449921 5. 340679 5. 448452 5. 584417 5. 232068 5. 374866  
11760198\_ 5. 590802 5. 454358 5. 599255 5. 572366 5. 438434 5. 486782  
11760199\_ 3. 674603 3. 789482 3. 790321 3. 826566 3. 850662 3. 835869  
11760200\_ 6. 384243 6. 473878 6. 4644 6. 478443 6. 443284 6. 429615  
11760201\_ 6. 307483 6. 451179 6. 313402 6. 578345 6. 4577 6. 53469  
11760202\_ 4. 309446 3. 952902 4. 115531 4. 442343 4. 428927 4. 348973  
11760203\_ 4. 085233 4. 095541 4. 115244 4. 298902 4. 090537 4. 103983  
11760204\_ 4. 54332 4. 34353 4. 414023 4. 576326 4. 670121 4. 424741  
11760205\_ 3. 199231 3. 180062 3. 378586 3. 398236 3. 312243 3. 134417  
11760206\_ 5. 462685 5. 602099 5. 471289 5. 663814 5. 67666 5. 628436  
11760207\_ 7. 387061 7. 39466 7. 383661 7. 406449 7. 416483 7. 350178  
11760208\_ 5. 858615 5. 814975 5. 960045 5. 745821 5. 609647 5. 754755  
11760209\_ 7. 85774 7. 936589 7. 764013 8. 029118 7. 986937 8. 002006  
11760210\_ 9. 015777 8. 928507 8. 975684 8. 970468 9. 037556 9. 050897  
11760211\_ 3. 226071 3. 226071 3. 128957 3. 435992 3. 128957 3. 418593  
11760212\_ 2. 109903 2. 307924 2. 580032 2. 203835 2. 580032 2. 395221  
11760213\_ 3. 509066 3. 641621 3. 54237 3. 721617 3. 603092 3. 697024  
11760214\_ 6. 211761 6. 179361 6. 198075 6. 205044 6. 128887 6. 262634  
11760215\_ 4. 249478 4. 163398 4. 167914 4. 284334 4. 033288 4. 163398  
11760216\_ 5. 264705 5. 08626 5. 403165 4. 882946 4. 831889 4. 720187  
11760217\_ 7. 704196 7. 636091 7. 64412 7. 582418 7. 585958 7. 672958  
11760218\_ 2. 456472 2. 456472 2. 696884 2. 417429 2. 178687 2. 278  
11760219\_ 5. 859663 5. 840961 5. 831202 5. 810656 5. 807092 5. 823534  
11760220\_ 6. 172695 6. 140373 6. 081025 6. 081025 6. 0406 6. 090452  
11760221\_ 5. 832383 5. 704269 5. 869356 4. 76213 5. 02691 4. 969572  
11760222\_ 8. 379643 8. 363205 8. 488263 7. 821699 7. 863541 7. 817159  
11760223\_ 5. 605108 5. 763634 5. 676992 5. 788712 5. 827454 5. 837073  
11760224\_ 5. 798449 5. 863305 5. 675753 5. 864807 5. 805719 5. 898149  
11760225\_ 5. 08388 5. 157747 5. 133123 5. 325002 5. 26471 5. 554436  
11760226\_ 7. 320499 7. 154532 7. 183172 6. 789964 6. 689029 6. 779563  
11760227\_ 6. 81786 6. 813713 6. 720911 7. 013868 6. 93079 6. 875739  
11760228\_ 6. 13945 6. 123532 6. 069567 6. 909189 6. 678817 6. 692117  
11760229\_ 4. 56973 4. 602228 4. 824293 5. 273001 5. 012588 5. 104435  
11760230\_ 5. 876616 5. 950062 5. 785869 6. 107202 5. 856686 5. 858046  
11760231\_ 5. 604539 5. 706913 5. 613258 5. 93803 5. 841892 5. 784943  
11760232\_ 6. 520868 6. 562673 6. 603257 6. 13945 6. 183276 6. 27013  
11760233\_ 5. 08128 5. 101757 5. 201785 4. 848761 4. 991517 4. 836133

11760234\_ 6.40245 6.406315 6.440877 6.639173 6.640084 6.616692  
11760235\_ 4.780499 4.99278 4.919456 5.030161 5.034564 4.961872  
11760236\_ 3.568102 3.568102 3.569037 3.673381 3.749662 3.661956  
11760237\_ 4.241896 4.327011 4.127539 4.535962 4.59171 4.643717  
11760238\_ 4.515508 4.383082 4.782817 4.017572 4.14234 4.383082  
11760239\_ 5.679147 5.673784 5.647579 5.8765 5.779253 5.87271  
11760240\_ 6.248008 6.331867 6.218153 6.124372 6.218153 6.188298  
11760241\_ 7.256066 7.141973 7.17812 6.837456 6.834891 6.923974  
11760242\_ 3.794596 3.723624 3.840669 3.952323 4.054288 3.928526  
11760243\_ 2.253117 2.4139 2.296566 2.510382 2.512499 2.513859  
11760244\_ 5.759498 5.643333 5.818768 6.097927 6.080469 6.094657  
11760245\_ 5.785949 5.516044 5.751444 5.576987 5.618613 5.593168  
11760246\_ 4.865251 4.915698 4.886353 4.434755 4.400667 4.434045  
11760247\_ 2.248469 2.361778 2.434166 2.150454 2.263763 2.114635  
11760248\_ 5.356959 5.2666 5.266323 5.120609 5.155712 5.205368  
11760249\_ 3.880655 3.565322 3.491852 4.046602 3.83804 3.765641  
11760250\_ 3.862687 3.567983 3.879453 3.816674 3.821742 3.862687  
11760251\_ 2.366611 2.010867 2.240784 2.194267 2.166552 2.075171  
11760252\_ 3.416178 3.091839 3.290109 2.946 3.134284 3.085575  
11760253\_ 3.212887 2.518435 3.005196 2.443003 2.529122 2.64804  
11760254\_ 5.136951 5.044665 5.2222 4.642318 4.878185 4.815683  
11760255\_ 4.422757 4.52373 4.473672 4.512768 4.52881 4.463452  
11760256\_ 4.717077 4.867513 4.438194 5.077633 4.898063 5.152724  
11760257\_ 5.36906 5.320173 5.298549 5.409206 5.162752 5.296126  
11760258\_ 5.584813 5.393171 5.448178 4.047959 3.879309 3.954157  
11760259\_ 5.333723 5.315936 5.217531 5.127339 5.283874 5.135999  
11760260\_ 4.744593 4.844581 4.772081 4.762633 4.555456 4.828738  
11760261\_ 4.517585 4.335594 4.210196 4.748366 4.516212 4.640892  
11760262\_ 4.232179 4.352943 4.301521 4.424084 4.558396 4.521749  
11760263\_ 6.817986 6.886652 6.850319 6.790306 6.906039 6.853767  
11760264\_ 6.902675 6.955172 6.965899 7.064013 7.125793 7.132853  
11760265\_ 4.523206 4.457615 4.376971 4.545784 4.55331 4.570746  
11760266\_ 4.83756 4.946401 4.748837 4.927979 4.890539 5.009882  
11760267\_ 2.084217 2.361778 2.235709 2.272727 2.35074 1.995297  
11760268\_ 3.035451 3.118043 2.940815 3.064035 2.793102 3.17471  
11760269\_ 6.0595 6.075154 5.995085 6.041794 6.053532 6.035491  
11760270\_ 6.996182 7.047204 7.218113 7.025322 6.851135 6.949354  
11760271\_ 2.765724 3.272025 3.13273 3.0607 3.147394 3.05531  
11760272\_ 5.679795 5.68971 5.414869 5.365137 5.605306 5.676992  
11760273\_ 6.087857 6.286712 5.9208 6.282224 6.246903 6.212602  
11760274\_ 5.108775 4.887029 4.830708 4.628388 4.640175 4.898375  
11760275\_ 2.473395 2.802133 2.47102 2.743092 2.361778 2.366447  
11760276\_ 5.782222 5.647628 5.654961 5.818869 5.775031 5.868796  
11760277\_ 5.584813 5.743474 5.480811 5.440105 5.709521 5.743474  
11760278\_ 4.476707 4.455637 4.535039 4.636671 4.533063 4.588033  
11760279\_ 4.014184 3.865103 3.996224 4.091567 3.758328 3.940179  
11760280\_ 6.733252 6.832905 6.604788 6.7414 6.753633 6.753633  
11760281\_ 1.856915 2.059152 1.651406 1.830034 2.267327 1.90985  
11760282\_ 5.15375 5.209367 5.046215 4.981916 5.048775 5.137485  
11760283\_ 7.135439 7.038457 7.187579 7.134943 7.10827 7.225048  
11760284\_ 7.244746 7.203514 7.231723 7.126123 7.249098 7.137921

11760285\_ 6. 201544 6. 364602 6. 21579 6. 245799 6. 279461 6. 247673  
11760286\_ 4. 917621 5. 16827 4. 897419 5. 24854 5. 120427 5. 203204  
11760287\_ 5. 860948 5. 880965 5. 780731 5. 814216 5. 820052 5. 836089  
11760288\_ 7. 77676 7. 67869 7. 576413 7. 332815 7. 286986 7. 502141  
11760289\_ 7. 007551 6. 840598 6. 942742 6. 487674 6. 539681 6. 631711  
11760290\_ 4. 099353 4. 267824 3. 967399 4. 280913 4. 137025 4. 232888  
11760291\_ 5. 156113 5. 22259 5. 04219 5. 204568 5. 13124 5. 093876  
11760292\_ 5. 118964 5. 003689 5. 016235 5. 073036 5. 149545 5. 146804  
11760293\_ 2. 547215 2. 50762 2. 625664 2. 661736 2. 561919 2. 708309  
11760294\_ 4. 486959 4. 41863 4. 415397 4. 500158 4. 460264 4. 340583  
11760295\_ 5. 870242 5. 806033 5. 9252 5. 073036 5. 098747 5. 260122  
11760296\_ 8. 975538 9. 020881 8. 943808 8. 911876 8. 954017 8. 848522  
11760297\_ 6. 618165 6. 577032 6. 595636 6. 442507 6. 501971 6. 441783  
11760298\_ 3. 264753 3. 323476 3. 026196 3. 226342 3. 338119 3. 379547  
11760299\_ 4. 829889 4. 625884 4. 801886 4. 766598 4. 906857 5. 006975  
11760300\_ 6. 689168 6. 724429 6. 517953 6. 554497 6. 497107 6. 559989  
11760301\_ 5. 726815 5. 663744 5. 77608 5. 419298 5. 494126 5. 514291  
11760302\_ 6. 559274 6. 458289 6. 513966 6. 547664 6. 615817 6. 604788  
11760303\_ 6. 518754 6. 557502 6. 484653 6. 288329 6. 466653 6. 423452  
11760304\_ 5. 682935 5. 572911 5. 632349 5. 721952 5. 726407 5. 754755  
11760305\_ 4. 119252 4. 14221 4. 123915 4. 134701 4. 293837 4. 101973  
11760306\_ 5. 848831 5. 856919 5. 769563 5. 884136 5. 818047 5. 832228  
11760307\_ 8. 640583 8. 564683 8. 637901 8. 641469 8. 672195 8. 680964  
11760308\_ 6. 118838 6. 123052 6. 019413 6. 227917 6. 24568 6. 222596  
11760309\_ 6. 730432 6. 884636 6. 778362 6. 771585 6. 778244 6. 700371  
11760310\_ 6. 000895 6. 229639 6. 116373 6. 116588 6. 105157 6. 113222  
11760311\_ 6. 297514 6. 382519 6. 328444 6. 257307 6. 263567 6. 372053  
11760312\_ 2. 843457 3. 048548 3. 144909 2. 912551 2. 805239 2. 92006  
11760313\_ 7. 687632 7. 863634 7. 660944 7. 438473 7. 426223 7. 449779  
11760314\_ 3. 777547 3. 753191 4. 020721 3. 72712 3. 696248 3. 770337  
11760315\_ 8. 480767 8. 434622 8. 481195 8. 291532 8. 378422 8. 367968  
11760316\_ 7. 847616 7. 804089 7. 898823 7. 673046 7. 748159 7. 721656  
11760317\_ 4. 95357 4. 9694 4. 857739 4. 900398 4. 983809 4. 94619  
11760318\_ 4. 275543 4. 32737 4. 287593 4. 219802 4. 298131 4. 25898  
11760319\_ 3. 550932 3. 379216 3. 862711 3. 949153 3. 879309 4. 008074  
11760320\_ 3. 655582 3. 750532 3. 678579 3. 829932 3. 763766 3. 862739  
11760321\_ 6. 242788 6. 152313 6. 312641 5. 808922 5. 694454 5. 784173  
11760322\_ 3. 70464 3. 846046 3. 625408 3. 850246 3. 927375 3. 75195  
11760323\_ 5. 769688 5. 778945 5. 732018 5. 620495 5. 396355 5. 536556  
11760324\_ 5. 821499 5. 792479 5. 884009 5. 762484 5. 652708 5. 635823  
11760325\_ 7. 072927 6. 864524 7. 020467 6. 695813 6. 529531 6. 815565  
11760326\_ 3. 92908 4. 049752 3. 973022 4. 036817 3. 898457 4. 016602  
11760327\_ 7. 852266 7. 856354 7. 805174 7. 671927 7. 646223 7. 647425  
11760328\_ 4. 162474 4. 369617 4. 365465 4. 35301 4. 439603 4. 316611  
11760329\_ 2. 585611 2. 64839 2. 640484 2. 759603 2. 742322 2. 702112  
11760330\_ 6. 613822 6. 641378 6. 649991 6. 681393 6. 819512 6. 781675  
11760331\_ 6. 342727 6. 20924 6. 408934 6. 434419 6. 397946 6. 355247  
11760332\_ 5. 889743 6. 053549 5. 896739 6. 154035 6. 150167 6. 209192  
11760333\_ 5. 332443 5. 622525 5. 414869 5. 561717 5. 459951 5. 543527  
11760334\_ 4. 038883 3. 758726 3. 747975 3. 871532 3. 835861 3. 726621  
11760335\_ 2. 803623 2. 884982 3. 107251 2. 900596 2. 803623 2. 803623

11760336\_ 4. 015963 3. 919536 3. 851403 4. 106383 3. 734069 4. 068616  
11760337\_ 6. 118838 6. 276851 6. 200345 6. 346134 6. 263567 6. 262926  
11760338\_ 4. 200678 4. 206244 4. 254314 4. 279197 4. 248285 4. 176506  
11760339\_ 2. 784046 2. 480284 2. 657977 2. 502152 2. 58882 2. 828129  
11760340\_ 4. 988933 5. 11527 4. 688191 5. 029529 5. 059981 5. 137379  
11760341\_ 4. 415744 4. 215663 4. 388689 4. 862786 4. 669983 4. 340969  
11760342\_ 7. 837233 7. 738367 7. 747604 7. 617704 7. 616627 7. 673514  
11760343\_ 5. 615356 5. 524477 5. 531067 6. 409706 6. 392587 6. 288051  
11760344\_ 3. 818401 3. 571931 3. 761338 3. 395713 3. 322994 3. 302064  
11760345\_ 6. 310441 6. 50035 6. 32573 6. 536782 6. 506849 6. 580895  
11760346\_ 4. 039541 4. 24185 4. 25088 4. 164308 4. 26362 4. 328968  
11760347\_ 6. 597735 6. 743697 6. 741331 6. 644358 6. 715592 6. 639572  
11760348\_ 3. 950315 3. 895861 3. 903767 4. 162889 4. 146049 3. 962084  
11760349\_ 5. 151557 5. 14948 5. 012842 5. 267391 5. 14805 5. 112108  
11760350\_ 3. 805628 3. 981152 3. 920377 3. 878479 3. 90877 3. 75485  
11760351\_ 5. 377055 5. 464086 5. 494668 5. 44133 5. 34508 5. 420538  
11760352\_ 3. 681093 3. 290188 3. 667505 3. 723327 3. 6905 3. 649067  
11760353\_ 5. 120845 5. 19004 4. 928625 5. 091182 5. 153707 4. 996622  
11760354\_ 3. 943134 3. 575336 3. 86033 4. 684741 4. 413326 5. 073036  
11760355\_ 7. 316659 7. 499766 7. 426239 7. 468099 7. 526321 7. 517413  
11760356\_ 4. 488908 4. 326967 4. 342564 4. 320245 4. 126295 3. 887801  
11760357\_ 4. 996549 5. 069311 4. 818326 4. 810868 5. 069311 5. 080306  
11760358\_ 3. 776472 4. 030291 3. 829708 3. 986853 3. 93981 3. 611689  
11760359\_ 2. 970028 2. 298144 2. 803943 2. 649074 2. 549687 2. 513979  
11760360\_ 3. 512188 3. 645495 3. 463379 3. 69395 3. 510579 3. 755973  
11760361\_ 2. 661352 2. 696401 2. 473889 2. 717547 2. 351177 2. 621976  
11760362\_ 6. 806143 6. 936733 6. 792183 7. 086695 7. 063874 7. 09013  
11760363\_ 2. 937133 3. 01642 3. 107075 3. 193434 3. 129804 3. 119929  
11760364\_ 5. 797574 5. 862787 5. 709521 5. 987712 5. 894475 6. 022969  
11760365\_ 5. 826325 5. 861494 5. 768382 5. 963698 5. 898724 5. 984332  
11760366\_ 2. 274832 2. 349634 2. 311841 2. 261357 2. 406492 2. 235685  
11760367\_ 2. 642713 2. 68502 2. 641874 2. 988775 2. 833618 2. 819516  
11760368\_ 3. 358452 3. 207264 3. 290188 3. 832334 3. 315487 3. 852056  
11760369\_ 4. 026092 4. 34685 3. 980584 3. 979021 3. 990102 4. 117846  
11760370\_ 4. 1128 4. 353233 4. 110361 3. 949492 4. 109965 3. 879309  
11760371\_ 5. 272196 5. 13061 5. 177818 4. 908715 4. 890539 4. 93085  
11760372\_ 5. 681398 5. 643469 5. 611901 5. 673527 5. 739314 5. 736292  
11760373\_ 8. 019132 8. 01278 8. 088884 7. 948918 8. 01512 7. 924169  
11760374\_ 2. 47102 2. 714364 2. 617391 2. 665877 2. 671601 2. 771559  
11760375\_ 4. 347179 4. 2748 4. 212834 4. 130551 4. 254178 4. 447543  
11760376\_ 6. 617088 6. 712402 6. 619536 6. 653992 6. 581789 6. 617088  
11760377\_ 5. 073438 5. 228627 5. 061692 5. 189628 5. 26034 5. 339673  
11760378\_ 4. 475931 4. 586364 4. 526327 4. 786407 4. 74574 4. 441236  
11760379\_ 5. 805864 5. 8616 5. 618692 5. 932007 5. 947098 5. 835548  
11760380\_ 4. 929724 4. 757877 4. 939265 5. 086014 5. 020948 5. 051978  
11760381\_ 3. 001308 3. 09729 2. 875504 3. 136729 3. 074532 3. 155684  
11760382\_ 4. 773716 4. 818164 4. 772366 4. 555724 4. 849431 4. 782824  
11760383\_ 3. 925181 4. 178199 4. 051953 3. 692864 4. 111539 3. 815249  
11760384\_ 6. 660519 6. 672355 6. 629552 6. 579509 6. 792694 6. 723496  
11760385\_ 3. 451587 3. 381244 3. 098159 3. 441587 3. 398236 3. 398236  
11760386\_ 4. 83085 4. 857652 4. 669588 4. 945217 4. 786605 4. 785117

11760387\_ 3. 619787 3. 433938 3. 396546 3. 583577 3. 702858 4. 101602  
11760388\_ 4. 651458 4. 812765 4. 749241 4. 584933 4. 622413 4. 839868  
11760389\_ 9. 226928 9. 32797 9. 24802 9. 366693 9. 382676 9. 343323  
11760390\_ 5. 79173 5. 600193 5. 82937 6. 024883 6. 097301 6. 150199  
11760391\_ 4. 14324 4. 034523 4. 154384 4. 361601 4. 14324 4. 234601  
11760392\_ 6. 367389 6. 421169 6. 3682 6. 504278 6. 479772 6. 392819  
11760393\_ 5. 385728 5. 393806 5. 646424 5. 176345 5. 226108 5. 325416  
11760394\_ 6. 525243 6. 707166 6. 505674 6. 696993 6. 57555 6. 692621  
11760395\_ 3. 94647 4. 150583 3. 986147 3. 592247 3. 758004 3. 585819  
11760396\_ 4. 564342 4. 666399 4. 588644 4. 815038 5. 021962 4. 735647  
11760397\_ 4. 785683 4. 822843 4. 88241 4. 933313 4. 814193 5. 001569  
11760398\_ 3. 094177 3. 210978 3. 039737 3. 365094 3. 463141 3. 483237  
11760399\_ 2. 990634 3. 213219 3. 055458 3. 296505 3. 443692 3. 340996  
11760400\_ 4. 222709 4. 174945 4. 018131 4. 235269 4. 275543 4. 275543  
11760401\_ 2. 798895 2. 607829 2. 600776 2. 413794 2. 609562 2. 600776  
11760402\_ 3. 468919 3. 33535 3. 473972 3. 440545 3. 503743 3. 528018  
11760403\_ 5. 126878 5. 208896 5. 188382 5. 078927 5. 289396 5. 196679  
11760404\_ 4. 320595 4. 335594 4. 280041 4. 449636 4. 380046 4. 268602  
11760405\_ 8. 623096 8. 465546 8. 59134 7. 897313 7. 89558 8. 017994  
11760406\_ 5. 838334 6. 155329 5. 942603 6. 026891 6. 072423 5. 985184  
11760407\_ 7. 27056 7. 41964 7. 412107 7. 062796 7. 049182 7. 005571  
11760408\_ 5. 808618 5. 910374 5. 840649 5. 894697 5. 92521 5. 898609  
11760409\_ 3. 738341 3. 648294 3. 59109 3. 633878 3. 506193 3. 842576  
11760410\_ 3. 638187 3. 376019 3. 290188 3. 471992 3. 27932 3. 442935  
11760411\_ 3. 580986 3. 778212 3. 745065 3. 672705 4. 112359 3. 712169  
11760412\_ 5. 630533 5. 582167 5. 677873 5. 549961 5. 774423 5. 688504  
11760413\_ 4. 275543 4. 470579 3. 939983 4. 086925 4. 076756 4. 25044  
11760414\_ 4. 190768 4. 115683 4. 282672 3. 865849 3. 727249 3. 809214  
11760415\_ 4. 193021 4. 024684 4. 205962 3. 607358 3. 408936 4. 013291  
11760416\_ 4. 513241 4. 465064 4. 642274 4. 351116 4. 45497 4. 351116  
11760417\_ 4. 69357 4. 889183 5. 160093 4. 552073 4. 800965 4. 977866  
11760418\_ 6. 306393 6. 344998 6. 336072 6. 424134 6. 38995 6. 398478  
11760419\_ 3. 852483 3. 635169 3. 651639 3. 865012 3. 72858 3. 753898  
11760420\_ 5. 614563 5. 836566 5. 636817 5. 787065 5. 794792 5. 849541  
11760421\_ 4. 74296 4. 874234 4. 679459 4. 855114 4. 730392 4. 782663  
11760422\_ 5. 847279 5. 841177 5. 762033 5. 810229 5. 847279 5. 849541  
11760423\_ 5. 042163 5. 295765 5. 150951 5. 215838 5. 513716 5. 301108  
11760424\_ 7. 143835 7. 034334 6. 99861 7. 372665 7. 640214 7. 484677  
11760425\_ 5. 36906 5. 448296 5. 295093 5. 38346 5. 392216 5. 481783  
11760426\_ 6. 712177 6. 803662 6. 651614 6. 75071 6. 78669 6. 775221  
11760427\_ 1. 910375 1. 97548 1. 891726 1. 889 1. 907649 1. 894344  
11760428\_ 4. 216146 4. 019345 4. 287593 4. 40461 4. 126293 4. 370031  
11760429\_ 3. 75963 3. 512328 3. 553218 3. 640838 3. 840263 3. 833466  
11760430\_ 5. 435248 5. 380649 5. 317835 5. 679606 5. 658069 5. 686257  
11760431\_ 6. 225952 6. 01465 6. 115374 6. 300643 6. 365316 6. 283806  
11760432\_ 4. 648277 4. 73947 4. 553752 4. 762594 4. 63972 4. 80694  
11760433\_ 4. 876936 4. 764099 4. 846075 4. 900605 4. 933499 4. 917098  
11760434\_ 7. 796918 7. 843622 7. 809467 7. 790629 7. 746191 7. 835846  
11760435\_ 4. 59877 4. 698314 4. 654036 4. 213487 4. 481914 4. 640936  
11760436\_ 5. 073036 5. 189628 5. 129707 4. 87747 4. 959631 5. 000497  
11760437\_ 6. 070453 6. 100779 6. 072532 6. 219804 6. 144905 6. 142022



11760438\_ 5. 153556 4. 884566 5. 091878 5. 181663 5. 333723 5. 199287  
11760439\_ 5. 153556 4. 884566 5. 091878 5. 181663 5. 333723 5. 199287  
11760440\_ 2. 938125 3. 143466 2. 879877 2. 992529 3. 018789 2. 868576  
11760441\_ 6. 049047 6. 137941 5. 978 5. 999648 5. 947286 6. 06968  
11760442\_ 3. 145202 3. 195459 2. 560939 3. 302708 3. 39431 3. 255854  
11760443\_ 2. 92611 2. 63577 2. 47102 2. 718322 2. 595688 2. 602446  
11760444\_ 9. 997162 9. 877326 9. 96065 9. 616346 9. 655224 9. 645727  
11760445\_ 6. 821437 6. 762094 6. 829647 6. 693197 6. 700552 6. 669954  
11760446\_ 4. 674588 4. 514282 4. 512312 4. 603516 4. 619614 4. 573398  
11760447\_ 3. 272925 3. 591112 3. 319685 3. 251117 3. 197154 3. 22517  
11760448\_ 6. 300643 6. 34561 6. 412133 6. 259162 6. 289573 6. 244457  
11760449\_ 5. 156303 5. 513941 5. 518169 5. 448296 5. 516533 5. 486616  
11760450\_ 6. 267234 6. 275618 6. 23831 6. 306733 6. 36905 6. 400903  
11760451\_ 5. 416612 5. 49747 5. 702959 4. 687016 4. 636826 4. 82789  
11760452\_ 2. 616651 2. 798784 2. 539251 2. 830605 2. 427875 2. 519348  
11760453\_ 4. 009053 4. 252485 3. 902316 4. 190976 3. 711411 3. 940195  
11760454\_ 7. 643584 7. 778514 7. 728364 7. 645022 7. 685155 7. 756242  
11760455\_ 5. 634941 5. 847338 5. 730343 5. 865271 5. 761652 5. 76392  
11760456\_ 4. 341328 4. 514622 4. 443547 4. 456976 4. 627859 4. 447091  
11760457\_ 2. 359105 2. 468906 2. 361778 2. 44371 2. 426273 2. 424921  
11760458\_ 5. 987915 6. 005187 6. 023702 6. 016533 5. 998018 6. 043504  
11760459\_ 6. 069472 6. 04318 6. 008479 6. 129849 6. 122294 6. 213754  
11760460\_ 3. 303684 3. 398236 3. 292729 3. 398236 3. 455401 3. 398236  
11760461\_ 4. 619863 4. 436457 4. 337243 5. 066456 4. 977525 5. 05178  
11760462\_ 7. 841438 7. 882292 7. 743679 7. 819083 7. 843366 7. 927908  
11760463\_ 5. 253747 5. 409562 5. 499807 4. 909344 4. 784036 4. 998723  
11760464\_ 5. 733421 5. 741777 5. 855114 5. 195908 5. 26032 5. 26032  
11760465\_ 7. 294184 7. 168818 7. 344239 6. 4231 6. 537911 6. 434026  
11760466\_ 7. 683063 7. 76041 7. 789716 6. 566575 6. 416427 6. 554336  
11760467\_ 6. 39795 6. 515621 6. 455018 6. 409227 6. 366235 6. 502874  
11760468\_ 4. 41684 4. 66244 4. 694285 4. 643717 4. 554109 4. 643717  
11760469\_ 3. 818401 3. 809922 3. 79524 3. 685829 3. 801444 3. 934016  
11760470\_ 3. 469482 3. 185741 3. 084557 3. 163062 3. 272304 3. 4068  
11760471\_ 4. 517145 4. 52373 4. 424267 4. 481822 4. 446594 4. 568125  
11760472\_ 4. 846027 4. 953797 4. 849617 4. 873007 4. 837779 4. 846027  
11760473\_ 6. 061681 5. 892845 5. 950197 6. 122362 6. 14144 6. 080297  
11760474\_ 7. 613874 7. 546237 7. 607127 7. 639003 7. 669491 7. 75098  
11760475\_ 6. 918407 6. 770458 6. 827919 6. 783473 6. 710006 6. 674898  
11760476\_ 2. 973467 2. 74906 2. 936364 3. 067399 3. 017358 3. 180062  
11760477\_ 6. 397246 6. 219643 6. 454201 6. 14057 6. 203582 6. 077065  
11760478\_ 2. 392517 2. 470622 2. 293546 2. 443296 2. 25483 2. 392517  
11760479\_ 6. 554512 6. 564709 6. 448415 6. 620202 6. 65814 6. 675734  
11760480\_ 4. 822175 4. 84713 4. 823979 4. 984995 4. 927584 5. 097671  
11760481\_ 3. 88232 4. 001533 4. 057727 3. 903209 4. 122446 3. 879062  
11760482\_ 7. 408495 7. 391385 7. 33743 8. 363721 8. 406761 8. 361509  
11760483\_ 7. 082106 7. 280556 7. 075138 7. 271468 7. 219969 7. 199024  
11760484\_ 4. 107981 4. 127875 4. 06076 4. 122337 4. 099163 4. 177346  
11760485\_ 3. 858228 3. 871587 3. 991254 3. 7516 3. 961986 3. 920297  
11760486\_ 4. 155134 4. 261761 4. 236863 4. 049352 3. 932475 4. 28075  
11760487\_ 6. 910833 6. 795181 6. 820115 6. 906431 6. 873828 6. 898793  
11760488\_ 4. 688529 4. 751132 4. 835245 4. 780923 5. 037424 4. 983817

11760489\_ 6. 226132 6. 320779 6. 173056 6. 431763 6. 313119 6. 373286  
11760490\_ 3. 895736 3. 967818 3. 760884 3. 759405 3. 602438 3. 833323  
11760491\_ 4. 576464 4. 399305 4. 451896 3. 971324 3. 627522 3. 622605  
11760492\_ 6. 983905 7. 154768 6. 997728 7. 153094 7. 0281 7. 211088  
11760493\_ 6. 46652 6. 351587 6. 349432 6. 450337 6. 406811 6. 405633  
11760494\_ 2. 154396 1. 963492 2. 130153 2. 21474 2. 079884 2. 494072  
11760495\_ 4. 700243 4. 622581 4. 830228 4. 599002 4. 74574 4. 681958  
11760496\_ 4. 666652 4. 508877 4. 819818 4. 513661 4. 734046 4. 646636  
11760497\_ 6. 641482 6. 712231 6. 654245 6. 784976 6. 775153 6. 669463  
11760498\_ 5. 042426 4. 9694 5. 143989 5. 126264 5. 090928 4. 995392  
11760499\_ 4. 965646 5. 03018 4. 860855 4. 876779 4. 736049 4. 689385  
11760500\_ 5. 622985 5. 568442 5. 515987 5. 304174 5. 113692 5. 054366  
11760501\_ 6. 725324 6. 681179 6. 699521 6. 980974 6. 853083 6. 949855  
11760502\_ 4. 938909 4. 834126 4. 77445 5. 231129 5. 280249 5. 282101  
11760503\_ 9. 518971 9. 519099 9. 503207 9. 870853 9. 865963 9. 818308  
11760504\_ 5. 094417 5. 149545 5. 145545 4. 956432 5. 11527 5. 178222  
11760505\_ 6. 468836 6. 415534 6. 43951 6. 62067 6. 464805 6. 57736  
11760506\_ 4. 376915 4. 70164 4. 529128 4. 687387 4. 536788 4. 637198  
11760507\_ 6. 87044 6. 886609 6. 915223 7. 163712 7. 066036 7. 198055  
11760508\_ 6. 155479 6. 008578 6. 070274 5. 682979 5. 497415 5. 855207  
11760509\_ 8. 618935 8. 590429 8. 640334 8. 892641 8. 863359 8. 852254  
11760510\_ 5. 490462 5. 496785 5. 518169 5. 378169 5. 36323 5. 655207  
11760511\_ 6. 836976 6. 839607 6. 887748 6. 968223 6. 832046 7. 044331  
11760512\_ 5. 235526 5. 251906 5. 274247 5. 249029 5. 210914 5. 401554  
11760513\_ 3. 702652 3. 970635 3. 776896 3. 925181 4. 036429 4. 221338  
11760514\_ 7. 590004 7. 54869 7. 546902 8. 039376 7. 989658 7. 893669  
11760515\_ 5. 209259 5. 222756 5. 248002 5. 571155 5. 565371 5. 764513  
11760516\_ 3. 219855 3. 226896 3. 364299 3. 306939 3. 297817 3. 220588  
11760517\_ 5. 07242 5. 11527 5. 120924 5. 26034 5. 355209 5. 458305  
11760518\_ 3. 68643 3. 921182 3. 748836 3. 799191 3. 762277 3. 723345  
11760519\_ 6. 736074 6. 736074 6. 74052 6. 385339 6. 393794 6. 33322  
11760520\_ 7. 70432 7. 609625 7. 688361 7. 265647 7. 213704 7. 298621  
11760521\_ 4. 551817 4. 419517 4. 287593 4. 530384 4. 450977 4. 447604  
11760522\_ 6. 681067 6. 794351 6. 650629 6. 805404 6. 777726 6. 772677  
11760523\_ 2. 573018 2. 316594 2. 588002 2. 361778 2. 137868 2. 467655  
11760524\_ 2. 810588 2. 757433 2. 671613 2. 737689 2. 761408 2. 741664  
11760525\_ 4. 950806 5. 070632 5. 122191 4. 986498 5. 063277 5. 029529  
11760526\_ 2. 070942 1. 813489 2. 086147 2. 150454 1. 995297 2. 131698  
11760527\_ 4. 378635 4. 375609 4. 270102 4. 677069 4. 638169 4. 63184  
11760528\_ 2. 792941 2. 899743 2. 685719 2. 986389 2. 899743 2. 718322  
11760529\_ 4. 766466 4. 746574 4. 695048 5. 22992 5. 010587 5. 027328  
11760530\_ 6. 988629 6. 836031 6. 902221 6. 131975 6. 00364 6. 196604  
11760531\_ 5. 399181 5. 424491 5. 486096 5. 452118 5. 461539 5. 45724  
11760532\_ 5. 133232 5. 179457 5. 122191 5. 235751 5. 155356 5. 281313  
11760533\_ 8. 705615 8. 549401 8. 589745 8. 540847 8. 512347 8. 483508  
11760534\_ 3. 237336 3. 514034 3. 343394 3. 179622 3. 310066 3. 310066  
11760535\_ 3. 706663 3. 722586 3. 658761 3. 755182 3. 696312 3. 697906  
11760536\_ 6. 245821 6. 073305 6. 053151 5. 993174 6. 026306 5. 963029  
11760537\_ 7. 388842 7. 308707 7. 382712 7. 068241 7. 067959 7. 08672  
11760538\_ 4. 12923 4. 243129 4. 202938 4. 161946 4. 503426 4. 283404  
11760539\_ 2. 850317 2. 566526 2. 401754 2. 52031 2. 726995 2. 721864

11760540\_ 4. 644396 4. 650645 4. 808915 4. 584302 4. 303502 4. 533355  
11760541\_ 3. 234993 3. 219553 3. 249842 3. 049517 3. 009429 3. 254173  
11760542\_ 6. 911312 7. 096007 7. 105512 7. 156454 7. 164857 7. 116565  
11760543\_ 5. 102142 5. 210624 5. 083334 5. 217016 5. 227358 5. 248276  
11760544\_ 6. 486075 6. 536391 6. 589922 6. 715299 6. 665213 6. 594923  
11760545\_ 2. 957944 3. 025484 2. 786473 3. 223763 3. 0353 3. 158678  
11760546\_ 3. 289135 3. 28175 3. 282365 3. 27531 3. 21279 3. 239897  
11760547\_ 3. 925181 3. 727276 3. 675044 3. 687007 3. 641582 3. 667634  
11760548\_ 6. 633173 6. 70059 6. 783299 6. 720885 6. 766398 6. 734296  
11760549\_ 3. 317527 3. 288837 3. 317527 3. 410341 3. 317527 3. 317527  
11760550\_ 7. 271163 7. 451038 7. 39159 7. 282402 7. 224663 7. 120559  
11760551\_ 7. 271163 7. 451038 7. 39159 7. 282402 7. 224663 7. 120559  
11760552\_ 7. 125429 7. 302536 7. 081181 7. 268143 7. 165774 7. 209029  
11760553\_ 4. 818676 4. 699242 4. 703845 4. 902783 4. 696428 4. 715068  
11760554\_ 4. 887804 4. 80169 4. 930507 4. 724499 4. 798511 4. 861819  
11760555\_ 4. 892381 4. 827958 4. 837371 4. 690985 4. 484006 4. 939695  
11760556\_ 4. 981626 4. 83968 4. 929578 4. 913842 4. 683509 4. 69914  
11760557\_ 3. 794126 3. 502575 3. 625408 3. 850246 3. 809964 3. 900928  
11760558\_ 5. 329504 5. 414869 5. 267839 5. 189628 5. 132731 5. 202481  
11760559\_ 4. 994531 4. 795533 4. 980959 4. 531801 4. 778748 4. 897602  
11760560\_ 6. 251032 6. 060846 6. 260792 6. 034842 5. 980978 6. 120262  
11760561\_ 7. 336932 7. 296361 7. 355301 7. 146238 7. 124616 7. 177909  
11760562\_ 4. 86066 4. 632295 4. 897611 4. 633395 4. 567674 4. 787485  
11760563\_ 6. 562514 6. 406381 6. 524801 6. 423741 6. 600674 6. 478428  
11760564\_ 2. 801876 3. 061205 2. 925275 2. 552114 2. 383529 2. 494487  
11760565\_ 5. 914971 5. 8743 5. 860145 5. 60521 5. 749706 5. 642313  
11760566\_ 2. 737608 2. 540677 2. 496007 2. 689843 2. 596879 2. 596879  
11760567\_ 3. 811968 3. 810463 3. 982611 3. 808959 3. 646819 3. 625743  
11760568\_ 2. 310158 2. 198875 2. 056411 2. 08104 2. 118728 1. 937953  
11760569\_ 3. 349121 3. 461927 3. 487367 3. 483283 3. 361376 3. 402195  
11760570\_ 3. 090636 3. 002789 3. 025972 3. 090636 3. 090636 3. 206221  
11760571\_ 5. 500371 5. 538506 5. 341982 5. 583638 5. 800922 5. 444552  
11760572\_ 5. 36906 5. 612552 5. 463012 5. 486473 5. 436396 5. 558653  
11760573\_ 7. 117189 7. 069988 7. 123036 6. 982075 7. 100033 6. 986684  
11760574\_ 8. 53574 8. 5337 8. 529465 8. 583756 8. 618032 8. 483099  
11760575\_ 5. 065371 5. 335801 5. 023306 5. 038961 5. 333723 5. 115485  
11760576\_ 6. 165657 5. 890248 6. 342556 6. 312194 6. 390353 6. 308212  
11760577\_ 4. 055319 3. 800384 3. 850092 4. 031667 3. 989009 3. 912259  
11760578\_ 2. 737908 2. 581355 2. 40957 2. 392102 2. 51874 2. 596144  
11760579\_ 3. 509758 3. 538907 3. 524332 3. 430401 3. 306585 3. 572187  
11760580\_ 5. 265007 5. 25531 5. 19387 5. 336994 5. 371795 5. 22156  
11760581\_ 4. 874234 4. 709463 4. 748351 4. 790647 4. 750833 4. 80806  
11760582\_ 4. 616617 4. 694429 4. 554844 4. 601787 4. 61164 4. 474376  
11760583\_ 3. 866464 3. 990862 4. 220264 3. 973056 4. 00441 4. 145192  
11760584\_ 5. 209259 5. 229582 5. 070331 5. 073036 4. 917872 5. 161109  
11760585\_ 5. 94421 5. 803799 5. 844931 5. 894697 5. 613962 5. 817435  
11760586\_ 5. 833619 5. 862615 6. 04504 5. 949399 5. 926304 5. 87841  
11760587\_ 5. 833619 5. 862615 6. 04504 5. 949399 5. 926304 5. 87841  
11760588\_ 5. 857029 5. 960592 5. 947955 5. 831459 5. 825613 5. 650899  
11760589\_ 3. 647372 3. 794498 3. 712883 3. 689597 3. 711196 3. 626834  
11760590\_ 5. 71128 5. 714239 5. 698781 4. 987574 4. 730591 5. 001299

11760591\_ 2. 561978 2. 317177 2. 220379 2. 338101 2. 457306 2. 557394  
11760592\_ 6. 622863 6. 673488 6. 71264 6. 471052 6. 549122 6. 525123  
11760593\_ 2. 738711 2. 54178 2. 5823 2. 718322 2. 486621 2. 587553  
11760594\_ 6. 046766 6. 098894 5. 841812 6. 05675 5. 980978 6. 066666  
11760595\_ 4. 508529 4. 582746 4. 797599 4. 403022 4. 700243 4. 834767  
11760596\_ 5. 80943 5. 806885 5. 745525 5. 813019 5. 754396 5. 775262  
11760597\_ 7. 041044 7. 098806 7. 095421 6. 933517 7. 050809 6. 962492  
11760598\_ 5. 060637 5. 027525 4. 996201 5. 141183 5. 147794 5. 073844  
11760599\_ 8. 165005 8. 271094 8. 003385 8. 153723 8. 238395 8. 288583  
11760600\_ 5. 661762 5. 735466 5. 66537 5. 774728 5. 777603 5. 774763  
11760601\_ 5. 635458 5. 938482 5. 526129 5. 872919 5. 800594 5. 650676  
11760602\_ 3. 731318 4. 09809 3. 781077 4. 027518 4. 231232 4. 160571  
11760603\_ 3. 445944 3. 418353 3. 298193 3. 468185 3. 423702 3. 457064  
11760604\_ 5. 340813 5. 196587 5. 159076 5. 143969 5. 213541 5. 255899  
11760605\_ 3. 606313 3. 606313 3. 490518 3. 350229 3. 526569 3. 831995  
11760606\_ 3. 552616 3. 622218 3. 60519 3. 593862 3. 723362 3. 786777  
11760607\_ 2. 952707 2. 786714 3. 208091 2. 683235 2. 672883 2. 763761  
11760608\_ 3. 196798 3. 200313 2. 996498 3. 34039 3. 189743 2. 98248  
11760609\_ 4. 383719 4. 643717 4. 287593 4. 47478 4. 559373 4. 538527  
11760610\_ 4. 925003 4. 821534 5. 118533 4. 874234 4. 804504 4. 984669  
11760611\_ 7. 129079 7. 217191 7. 116544 7. 267085 7. 212056 7. 268015  
11760612\_ 2. 988741 3. 046172 3. 131758 3. 081698 2. 890743 2. 95758  
11760613\_ 5. 141812 5. 200119 5. 052182 5. 452094 5. 157037 5. 344161  
11760614\_ 3. 850322 3. 972701 3. 801796 4. 057288 3. 933528 3. 935851  
11760615\_ 4. 388264 4. 51684 4. 459939 4. 512361 4. 700243 4. 645485  
11760616\_ 2. 940965 2. 975282 3. 230201 3. 042595 3. 025759 3. 037937  
11760617\_ 5. 812214 5. 792685 5. 828997 5. 850403 5. 82193 5. 836136  
11760618\_ 4. 757884 4. 827357 4. 669037 5. 062541 4. 970234 5. 114088  
11760619\_ 7. 249854 7. 26674 7. 321883 6. 850646 6. 886652 6. 847267  
11760620\_ 4. 247808 4. 45737 4. 339134 4. 196227 4. 405139 4. 396534  
11760621\_ 3. 75384 3. 985697 3. 868559 4. 128169 4. 079785 3. 708421  
11760622\_ 2. 453924 2. 606983 2. 592831 2. 73587 2. 820405 2. 826749  
11760623\_ 5. 599505 5. 715881 5. 604506 5. 332355 5. 556817 5. 365913  
11760624\_ 4. 61802 4. 19711 4. 608982 4. 484068 4. 571699 4. 458603  
11760625\_ 2. 528707 2. 547829 2. 393882 2. 547829 2. 565137 2. 524516  
11760626\_ 5. 426794 5. 562428 5. 619887 5. 593208 5. 540352 5. 622271  
11760627\_ 3. 550848 3. 550848 3. 682016 3. 420276 3. 061245 3. 417751  
11760628\_ 4. 419885 4. 52373 4. 327626 4. 320562 4. 294193 4. 080945  
11760629\_ 4. 632586 4. 593484 4. 441318 4. 867077 4. 6432 4. 701532  
11760630\_ 2. 895438 2. 88049 2. 904721 3. 025972 2. 876871 2. 946835  
11760631\_ 3. 742997 3. 760459 3. 675855 3. 791827 3. 675855 3. 970669  
11760632\_ 4. 026092 4. 277619 3. 983176 4. 258668 4. 098892 4. 111791  
11760633\_ 3. 091998 3. 460051 3. 305059 3. 202239 3. 448996 3. 141083  
11760634\_ 5. 786944 5. 881243 5. 981215 5. 832168 5. 784622 5. 619463  
11760635\_ 5. 085728 5. 265845 5. 057769 5. 104558 5. 178789 5. 25891  
11760636\_ 3. 651908 3. 390597 3. 408911 3. 816774 3. 503743 3. 519022  
11760637\_ 2. 095256 2. 014548 2. 26134 2. 048622 2. 287169 1. 995297  
11760638\_ 4. 999402 5. 112546 5. 085386 5. 084814 5. 012004 5. 236288  
11760639\_ 3. 789803 4. 180723 3. 69521 3. 666289 3. 691271 3. 789803  
11760640\_ 4. 096924 4. 523837 4. 261613 4. 347286 4. 384148 4. 36456  
11760641\_ 5. 174307 5. 007993 5. 026285 5. 207907 5. 103988 5. 228627

11760642\_ 5. 343589 5. 428484 5. 26034 5. 349505 5. 218282 5. 374866  
11760643\_ 2. 25671 2. 423841 2. 185362 2. 305177 2. 323789 2. 249688  
11760644\_ 4. 172417 4. 33876 4. 220911 4. 577248 4. 418657 4. 504161  
11760645\_ 3. 019634 3. 103919 3. 068023 2. 947965 3. 153537 3. 115246  
11760646\_ 2. 677136 2. 762526 2. 47102 2. 658799 2. 716857 2. 60991  
11760647\_ 2. 810808 2. 710849 2. 464026 2. 723151 2. 690126 2. 613877  
11760648\_ 4. 609546 4. 611764 4. 624395 4. 887459 4. 935889 4. 924535  
11760649\_ 4. 240433 4. 171151 4. 240433 4. 278262 4. 328099 4. 359901  
11760650\_ 2. 794616 2. 823162 2. 805646 2. 393104 2. 750453 2. 647832  
11760651\_ 3. 108812 3. 363295 3. 255157 3. 312744 3. 341616 3. 255313  
11760652\_ 3. 429556 3. 321159 3. 364375 3. 351626 3. 566748 3. 490145  
11760653\_ 3. 503743 3. 656271 3. 370671 3. 412533 3. 760577 3. 305585  
11760654\_ 6. 934615 7. 046355 6. 871627 7. 019655 7. 125859 7. 038593  
11760655\_ 4. 977054 5. 309674 5. 150031 5. 271918 5. 452334 5. 333152  
11760656\_ 6. 364605 6. 390255 6. 249529 6. 324795 6. 307354 6. 308357  
11760657\_ 3. 652148 3. 778217 3. 602925 3. 693939 3. 671269 3. 661709  
11760658\_ 4. 643717 4. 614049 4. 854223 4. 690985 4. 890539 4. 571509  
11760659\_ 5. 755229 5. 661603 5. 689812 5. 299195 5. 170204 5. 215936  
11760660\_ 6. 214623 6. 249516 6. 46208 4. 584933 4. 895708 4. 700243  
11760661\_ 3. 676815 4. 188584 3. 83826 3. 934717 4. 025078 3. 905615  
11760662\_ 4. 423405 4. 52373 4. 40484 4. 358208 4. 394984 4. 366352  
11760663\_ 4. 173814 4. 131585 4. 139527 3. 888832 4. 154448 4. 300295  
11760664\_ 2. 615881 2. 802476 2. 853038 2. 3841 2. 352878 2. 515653  
11760665\_ 2. 660095 2. 679216 2. 488392 2. 710813 2. 751746 2. 643529  
11760666\_ 3. 445688 3. 503743 3. 323472 3. 498726 3. 524892 3. 466463  
11760667\_ 6. 039027 6. 152415 6. 076906 5. 991593 6. 122294 6. 134143  
11760668\_ 2. 926268 3. 061205 2. 674342 3. 124733 3. 265883 3. 265883  
11760669\_ 3. 250724 3. 481805 3. 227617 3. 225531 3. 258573 3. 352778  
11760670\_ 3. 229377 3. 123296 3. 10833 3. 180196 3. 298386 3. 322476  
11760671\_ 2. 988093 2. 808906 2. 874734 2. 971707 2. 676726 2. 83198  
11760672\_ 5. 510536 5. 380649 5. 528431 5. 33642 5. 361655 5. 344158  
11760673\_ 4. 987974 5. 146328 5. 228158 5. 297498 5. 388329 5. 2666  
11760674\_ 5. 548557 5. 663452 5. 60078 5. 450544 5. 742306 5. 644288  
11760675\_ 5. 890464 5. 845844 5. 743287 5. 948185 6. 099793 6. 027342  
11760676\_ 5. 159224 5. 159224 5. 029529 5. 196437 5. 318114 5. 339673  
11760677\_ 4. 635363 4. 733481 4. 686444 4. 85885 4. 429873 4. 562996  
11760678\_ 3. 152539 3. 428106 3. 578675 3. 761152 3. 996047 3. 880476  
11760679\_ 4. 952049 4. 752205 4. 555485 4. 922673 5. 029087 4. 985475  
11760680\_ 6. 206103 6. 481046 6. 203337 6. 483734 6. 591958 6. 481046  
11760681\_ 2. 268308 2. 308304 2. 36224 2. 384147 2. 29279 2. 338757  
11760682\_ 4. 896081 4. 999977 4. 810724 5. 101438 5. 183024 4. 972224  
11760683\_ 4. 854825 4. 725874 4. 541549 4. 669588 4. 557276 4. 635314  
11760684\_ 7. 73609 7. 865741 7. 665503 7. 78787 7. 799789 7. 786782  
11760685\_ 9. 552339 9. 525237 9. 521821 9. 563629 9. 560005 9. 555113  
11760686\_ 5. 869115 5. 873732 5. 715004 5. 955339 5. 805814 5. 877981  
11760687\_ 1. 76594 1. 945056 1. 929132 1. 96635 2. 27444 1. 970055  
11760688\_ 4. 422053 4. 235264 4. 019292 4. 224252 4. 193385 4. 285709  
11760689\_ 3. 085129 2. 923968 2. 878191 3. 266689 3. 172649 3. 180062  
11760690\_ 4. 338473 3. 98273 3. 912563 4. 213226 4. 347179 3. 928154  
11760691\_ 4. 769393 4. 69991 4. 824195 5. 112627 5. 073036 4. 768851  
11760692\_ 4. 230886 4. 301974 4. 370337 4. 086242 4. 236464 4. 353754

11760693\_ 4. 832409 4. 763543 4. 722235 4. 913619 4. 99315 4. 918294  
11760694\_ 5. 497322 5. 527783 5. 577092 5. 60898 5. 60733 5. 741338  
11760695\_ 5. 790758 5. 789947 5. 870242 5. 884608 5. 736831 5. 615287  
11760696\_ 4. 584933 4. 776877 4. 70628 4. 726088 4. 671469 4. 635209  
11760697\_ 4. 040831 4. 289797 4. 181434 4. 313034 4. 35249 4. 421724  
11760698\_ 4. 007341 3. 799649 3. 831494 3. 827071 4. 121167 4. 192284  
11760699\_ 5. 207913 5. 100984 5. 132813 4. 988399 5. 081724 5. 021225  
11760700\_ 2. 571175 2. 410015 2. 529153 2. 62037 2. 638323 2. 664677  
11760701\_ 1. 972616 1. 994432 2. 089863 1. 995297 1. 968034 2. 028764  
11760702\_ 4. 802583 4. 765569 4. 892004 4. 824195 4. 849431 4. 845233  
11760703\_ 4. 508682 4. 452177 4. 540862 4. 430853 4. 566488 4. 656994  
11760704\_ 2. 106497 2. 070047 2. 407431 2. 13292 2. 108551 2. 13292  
11760705\_ 4. 733893 4. 706963 4. 786368 4. 406147 4. 538769 4. 834402  
11760706\_ 7. 188127 7. 009439 7. 063385 6. 960435 6. 946108 6. 825874  
11760707\_ 8. 102046 8. 016781 8. 182404 8. 066101 8. 028556 8. 049853  
11760708\_ 5. 930367 6. 006546 5. 883532 6. 040637 6. 049686 6. 034381  
11760709\_ 4. 035514 4. 059021 3. 932158 4. 046996 3. 99721 4. 031375  
11760710\_ 2. 290732 2. 293946 2. 253378 2. 265774 2. 243887 2. 393293  
11760711\_ 3. 27116 3. 293329 3. 143105 3. 232473 3. 195617 3. 340036  
11760712\_ 4. 012111 3. 90561 3. 964394 4. 305262 4. 459041 4. 305345  
11760713\_ 5. 689944 5. 817813 5. 736373 5. 962129 5. 817813 5. 895432  
11760714\_ 5. 364996 5. 419881 5. 383695 5. 566476 5. 421627 5. 494987  
11760715\_ 5. 916221 5. 913766 5. 772231 5. 905946 5. 916221 5. 856265  
11760716\_ 4. 278316 4. 106424 3. 959538 4. 034474 4. 103613 4. 06345  
11760717\_ 4. 899595 4. 529853 4. 469418 4. 52373 4. 33418 4. 470714  
11760718\_ 2. 940442 2. 973183 2. 971795 2. 953017 3. 101013 2. 850759  
11760719\_ 5. 329062 5. 296705 5. 177773 5. 32727 5. 247834 5. 296705  
11760720\_ 6. 857703 6. 823128 6. 766138 6. 845306 6. 862059 6. 882719  
11760721\_ 2. 590375 2. 817033 2. 746603 2. 724794 2. 675681 2. 581707  
11760722\_ 3. 167004 2. 857991 3. 212412 3. 317454 3. 336569 3. 220151  
11760723\_ 5. 269562 5. 434298 5. 380218 4. 715947 5. 042239 5. 209019  
11760724\_ 2. 966016 3. 152632 3. 345022 3. 062276 3. 164177 3. 298672  
11760725\_ 5. 11527 5. 266675 5. 041288 5. 167791 5. 23921 5. 144739  
11760726\_ 3. 344212 3. 344212 3. 398236 3. 290188 3. 21279 3. 606313  
11760727\_ 2. 356478 2. 233872 2. 342346 2. 179965 2. 299952 2. 356478  
11760728\_ 3. 801751 3. 655969 3. 596139 3. 873443 3. 655969 3. 449925  
11760729\_ 3. 595079 3. 631869 3. 760883 3. 257375 3. 427213 3. 370829  
11760730\_ 5. 004602 4. 987149 4. 983249 5. 097246 5. 04491 4. 880435  
11760731\_ 6. 332598 6. 223277 6. 30901 6. 145696 6. 183357 6. 390177  
11760732\_ 4. 62689 4. 459939 4. 494927 4. 584389 4. 569091 4. 523347  
11760733\_ 4. 504352 4. 589099 4. 444415 4. 735409 4. 564273 4. 604311  
11760734\_ 5. 965564 5. 749394 5. 881807 5. 861768 5. 88512 5. 760952  
11760735\_ 5. 786833 5. 625714 5. 56017 5. 627518 5. 727928 5. 755945  
11760736\_ 3. 116089 3. 248304 3. 086173 3. 331063 3. 152589 3. 248304  
11760737\_ 3. 034613 3. 105089 3. 105089 3. 271235 3. 134581 3. 01421  
11760738\_ 2. 235709 2. 468912 2. 508882 2. 671055 2. 641624 2. 718322  
11760739\_ 4. 881764 5. 041558 4. 795594 4. 944776 5. 018884 5. 074241  
11760740\_ 3. 526338 3. 631896 3. 64782 3. 749508 3. 803151 3. 668299  
11760741\_ 6. 159771 6. 209346 6. 109446 5. 775748 5. 638895 5. 765052  
11760742\_ 4. 492087 4. 335594 4. 280404 4. 45396 4. 45396 4. 602614  
11760743\_ 5. 578175 5. 882914 5. 458525 5. 942255 6. 166334 5. 987361

11760744\_ 5. 187837 5. 084315 4. 849542 5. 063199 5. 169119 4. 986909  
11760745\_ 2. 944815 3. 148112 3. 216692 2. 916906 2. 947489 2. 86086  
11760746\_ 5. 199487 5. 199487 5. 2222 5. 364838 5. 486018 5. 395891  
11760747\_ 2. 412474 2. 460203 2. 643994 2. 516536 2. 601124 2. 700318  
11760748\_ 3. 081555 3. 315493 3. 18606 3. 155025 3. 05514 2. 995156  
11760749\_ 2. 197519 2. 352968 2. 197519 2. 273919 2. 31819 1. 983225  
11760750\_ 4. 022921 4. 021358 4. 123004 4. 413473 4. 53346 4. 692593  
11760751\_ 3. 575192 3. 590694 3. 402738 3. 756925 3. 440703 3. 55925  
11760752\_ 3. 565047 3. 503743 3. 720596 3. 504791 3. 659452 3. 912539  
11760753\_ 4. 981771 4. 872299 4. 643717 4. 592711 4. 437554 4. 371097  
11760754\_ 4. 918623 4. 873052 4. 738557 4. 914651 4. 873052 4. 742468  
11760755\_ 4. 846351 4. 936576 4. 799804 4. 964899 4. 894342 4. 823253  
11760756\_ 5. 141255 5. 241482 5. 150339 5. 195017 5. 318384 5. 248943  
11760757\_ 5. 25751 5. 085072 5. 180859 5. 263539 5. 192742 5. 243309  
11760758\_ 3. 438168 3. 279085 2. 972477 2. 899872 3. 142535 2. 954162  
11760759\_ 3. 156864 3. 444816 3. 503743 3. 320736 3. 306585 3. 260005  
11760760\_ 4. 434783 4. 271418 4. 475791 4. 104054 4. 046687 4. 146285  
11760761\_ 2. 587861 2. 724454 2. 587888 2. 798039 2. 639589 2. 600659  
11760762\_ 3. 409767 3. 503743 3. 401386 3. 510102 3. 673986 3. 525533  
11760763\_ 5. 992498 6. 101321 5. 923885 6. 026355 6. 033575 6. 08031  
11760764\_ 3. 611657 3. 952814 3. 858687 4. 300982 4. 156387 4. 329189  
11760765\_ 6. 515643 6. 714177 6. 46208 6. 581524 6. 688097 6. 698439  
11760766\_ 4. 632076 4. 851359 4. 7289 4. 761945 4. 771134 4. 811297  
11760767\_ 4. 003385 4. 185451 3. 63112 3. 706161 4. 003385 4. 379759  
11760768\_ 6. 352917 6. 608918 6. 454952 6. 612179 6. 614637 6. 622954  
11760769\_ 5. 925056 5. 855969 5. 883564 6. 077954 6. 171194 5. 944988  
11760770\_ 4. 977203 5. 008254 4. 758203 5. 066716 4. 829101 4. 976535  
11760771\_ 5. 476669 5. 684594 5. 674696 5. 72247 5. 688934 5. 60482  
11760772\_ 5. 448895 5. 446562 5. 448391 5. 555001 5. 460502 5. 496134  
11760773\_ 3. 808747 3. 585976 3. 794996 3. 913963 4. 031133 4. 100847  
11760774\_ 3. 794285 3. 794285 3. 91823 3. 945833 4. 018854 3. 834718  
11760775\_ 5. 387578 5. 315797 5. 263886 5. 308095 5. 286881 5. 246435  
11760776\_ 4. 680046 4. 60257 4. 628334 4. 687192 4. 559506 4. 573098  
11760777\_ 5. 711591 5. 745148 5. 56264 5. 711591 5. 652796 5. 641391  
11760778\_ 4. 8501 5. 11894 4. 853475 4. 789873 4. 89949 4. 908044  
11760779\_ 4. 860569 4. 824824 4. 949626 4. 836184 4. 713326 4. 715269  
11760780\_ 3. 679505 3. 70034 3. 803968 3. 885115 3. 756002 3. 750941  
11760781\_ 2. 642051 2. 876898 2. 662397 2. 54791 2. 79308 2. 554833  
11760782\_ 2. 062636 2. 13004 2. 19846 2. 280747 2. 250031 2. 19846  
11760783\_ 6. 200979 6. 319186 6. 305663 6. 420431 6. 514347 6. 315134  
11760784\_ 3. 28713 3. 392655 3. 353238 3. 241325 3. 302365 3. 473007  
11760785\_ 4. 346779 4. 402229 4. 227801 4. 348949 4. 348949 4. 352729  
11760786\_ 4. 411599 4. 325122 4. 394994 4. 094115 4. 23595 4. 187392  
11760787\_ 4. 991117 5. 061948 5. 164739 4. 972111 4. 900489 4. 932304  
11760788\_ 5. 362312 5. 448296 5. 327115 5. 464742 5. 566025 5. 528624  
11760789\_ 5. 181873 5. 257756 5. 331141 5. 305141 5. 219059 5. 156551  
11760790\_ 6. 983092 6. 952135 6. 939807 6. 984524 6. 995997 6. 984524  
11760791\_ 3. 893649 4. 113124 4. 04361 4. 177267 4. 164428 3. 914071  
11760792\_ 5. 522723 5. 635528 5. 245008 5. 533276 5. 659648 5. 837733  
11760793\_ 4. 571997 4. 587921 4. 449249 4. 743328 4. 772732 4. 431403  
11760794\_ 4. 580475 4. 463976 4. 379648 4. 617318 4. 633009 4. 655776

11760795\_ 4. 24857 4. 301297 4. 218554 4. 29451 4. 380205 4. 134022  
11760796\_ 2. 988093 3. 274523 3. 184294 3. 045929 3. 136645 3. 131044  
11760797\_ 3. 818401 3. 796912 3. 585892 3. 838438 3. 969526 3. 764126  
11760798\_ 5. 424394 5. 375064 5. 327427 5. 549364 5. 628037 5. 605043  
11760799\_ 2. 740563 2. 857597 2. 492644 2. 560433 2. 804744 2. 781335  
11760800\_ 7. 539541 7. 653254 7. 459113 7. 643627 7. 629702 7. 71344  
11760801\_ 6. 653596 6. 790348 6. 679913 6. 837809 6. 948922 6. 925561  
11760802\_ 2. 498484 2. 728268 2. 548812 2. 567934 2. 429326 2. 64721  
11760803\_ 2. 605516 2. 47102 2. 469728 2. 439391 2. 549945 2. 549945  
11760804\_ 3. 384798 3. 533214 3. 379124 3. 454165 3. 39276 3. 376917  
11760805\_ 5. 756224 5. 696993 5. 446431 5. 837352 5. 702922 5. 789669  
11760806\_ 5. 948841 6. 033313 6. 04102 6. 173161 6. 160321 6. 157076  
11760807\_ 5. 156151 5. 11527 5. 173338 4. 954325 5. 1537 5. 185274  
11760808\_ 3. 697712 3. 938127 3. 828832 3. 940197 3. 682664 3. 789089  
11760809\_ 3. 925181 4. 199205 4. 234503 4. 37618 4. 38198 4. 477145  
11760810\_ 2. 161011 1. 988347 2. 160749 2. 161059 2. 34587 2. 251986  
11760811\_ 1. 913285 2. 327492 1. 902137 2. 209824 2. 184632 2. 274898  
11760812\_ 4. 739261 4. 675797 4. 77277 4. 581865 4. 793614 4. 52373  
11760813\_ 3. 66695 3. 880355 4. 092804 4. 107872 4. 152396 4. 054288  
11760814\_ 4. 706414 4. 774505 4. 77962 4. 52373 4. 584933 4. 52373  
11760815\_ 6. 054245 6. 23782 6. 154707 6. 228723 6. 29765 6. 246851  
11760816\_ 3. 699254 3. 730245 3. 987096 4. 085286 4. 100617 4. 004543  
11760817\_ 3. 739995 3. 69783 3. 621656 4. 194224 3. 84713 4. 255661  
11760818\_ 5. 763514 5. 854544 5. 926319 5. 744124 5. 679681 5. 727055  
11760819\_ 4. 584864 4. 608089 4. 287593 4. 45742 4. 566661 4. 495283  
11760820\_ 4. 262892 4. 098472 3. 939773 3. 637608 3. 646658 3. 558332  
11760821\_ 4. 22287 3. 851916 3. 831297 3. 997131 3. 833894 4. 112477  
11760822\_ 5. 371563 5. 338868 5. 338868 5. 557426 5. 214854 5. 346882  
11760823\_ 4. 679155 4. 655597 4. 5192 4. 922591 4. 522445 4. 654473  
11760824\_ 2. 395656 2. 586561 2. 489588 2. 639363 2. 543668 2. 740599  
11760825\_ 7. 619572 7. 639054 7. 747303 6. 611362 6. 725582 6. 817986  
11760826\_ 2. 664957 2. 542547 2. 585186 2. 34439 2. 756021 2. 316083  
11760827\_ 5. 415834 5. 416808 5. 466281 5. 657834 5. 704167 5. 657834  
11760828\_ 5. 087701 5. 274993 4. 942241 5. 156303 5. 161817 5. 161817  
11760829\_ 3. 494999 3. 541066 3. 398236 3. 476663 3. 43394 3. 563437  
11760830\_ 4. 557231 4. 559299 4. 582368 4. 52373 4. 485112 4. 584933  
11760831\_ 4. 51268 4. 562012 4. 550734 4. 530265 4. 462589 4. 67843  
11760832\_ 4. 492132 4. 459939 4. 600349 4. 584933 4. 499028 4. 719799  
11760833\_ 3. 335092 3. 678266 4. 015925 3. 690658 3. 503743 3. 503743  
11760834\_ 7. 149912 7. 026028 7. 195613 6. 558485 6. 637858 6. 636971  
11760835\_ 2. 956087 3. 058869 2. 982781 2. 913216 2. 999529 2. 83198  
11760836\_ 6. 898793 6. 989674 6. 913911 6. 975444 7. 091553 7. 040597  
11760837\_ 2. 721992 2. 970549 2. 731602 2. 169425 2. 19501 2. 544412  
11760838\_ 3. 996375 4. 181518 3. 785157 3. 900509 4. 039957 4. 216633  
11760839\_ 3. 963133 4. 144917 3. 878892 4. 136897 4. 264037 4. 136897  
11760840\_ 3. 655969 3. 730255 3. 592732 3. 781222 3. 814842 3. 620928  
11760841\_ 2. 309545 2. 368445 2. 40278 2. 02223 2. 347419 2. 234613  
11760842\_ 2. 477393 2. 404935 2. 29706 2. 451855 2. 451855 2. 530189  
11760843\_ 3. 319489 3. 292954 3. 179035 3. 385359 3. 434387 3. 398236  
11760844\_ 6. 861367 6. 889287 6. 890258 6. 876076 6. 861251 6. 794392  
11760845\_ 4. 200678 3. 885776 3. 964277 3. 986239 3. 978416 3. 931759



11760846\_ 2. 605516 2. 311486 2. 217554 2. 272447 2. 172649 2. 059601  
11760847\_ 3. 967534 3. 974103 3. 566244 4. 062148 3. 734497 3. 998614  
11760848\_ 2. 811218 3. 091617 3. 011274 3. 252748 2. 945714 3. 172178  
11760849\_ 4. 713679 5. 002067 4. 712699 4. 875144 4. 93837 5. 04004  
11760850\_ 5. 366745 5. 370673 4. 996171 5. 325364 5. 438261 5. 424086  
11760851\_ 4. 963884 4. 942914 5. 052822 5. 112851 5. 333723 5. 098061  
11760852\_ 3. 269878 3. 256719 3. 269878 3. 310498 3. 283036 3. 178139  
11760853\_ 4. 347179 4. 05449 4. 361136 4. 474531 4. 05076 4. 275543  
11760854\_ 4. 29822 3. 909593 4. 174488 4. 135496 3. 916478 4. 130577  
11760855\_ 5. 336649 5. 511981 5. 458095 5. 485583 5. 603459 5. 607354  
11760856\_ 4. 503513 4. 600715 4. 569152 4. 729251 4. 697687 4. 815131  
11760857\_ 6. 223484 6. 27437 6. 124903 6. 368434 6. 283295 6. 473747  
11760858\_ 5. 727276 5. 848761 5. 981436 5. 76523 5. 932391 5. 86793  
11760859\_ 5. 899619 5. 942298 5. 645622 5. 839728 5. 934556 5. 908927  
11760860\_ 2. 93094 2. 87061 2. 934271 3. 087135 2. 970923 3. 001864  
11760861\_ 3. 698401 3. 566459 3. 79836 3. 506884 3. 449453 3. 45099  
11760862\_ 2. 100223 2. 47102 2. 0081 2. 455822 2. 504438 2. 283183  
11760863\_ 5. 951807 6. 058786 5. 671559 6. 040637 6. 120996 6. 18255  
11760864\_ 2. 722864 2. 956092 2. 861431 2. 775007 2. 836181 2. 67662  
11760865\_ 4. 130264 4. 432275 4. 285883 4. 264526 4. 48269 4. 557269  
11760866\_ 6. 19208 6. 04809 6. 196798 6. 159786 6. 220721 6. 270512  
11760867\_ 4. 733383 4. 553086 4. 696724 4. 52373 4. 804021 4. 866013  
11760868\_ 4. 755631 4. 584933 4. 354959 4. 757763 4. 767361 4. 52373  
11760869\_ 5. 451166 5. 3777 5. 369453 5. 548775 5. 528364 5. 39376  
11760870\_ 3. 612392 3. 661054 3. 704562 3. 746796 4. 192658 4. 040747  
11760871\_ 6. 21303 6. 262051 6. 445622 6. 297187 6. 11876 6. 321015  
11760872\_ 5. 546214 5. 380649 5. 382975 5. 254786 5. 36323 5. 339673  
11760873\_ 4. 522255 4. 317018 4. 457042 4. 45336 4. 272276 4. 088035  
11760874\_ 4. 761195 4. 924232 5. 010917 4. 65088 4. 857013 4. 742948  
11760875\_ 4. 927316 4. 942854 4. 728355 4. 898633 4. 928448 4. 94195  
11760876\_ 4. 453951 4. 297838 4. 4089 4. 40461 4. 347179 4. 303393  
11760877\_ 6. 756839 6. 714592 6. 791651 7. 183347 7. 272833 7. 292601  
11760878\_ 5. 983093 5. 870804 5. 810324 6. 032368 6. 312869 6. 184397  
11760879\_ 7. 948072 7. 851048 8. 038429 8. 45066 8. 433845 8. 440351  
11760880\_ 6. 578213 6. 525451 6. 388601 6. 562129 6. 50418 6. 541268  
11760881\_ 6. 747192 6. 711861 6. 834935 7. 220997 7. 230552 7. 288389  
11760882\_ 5. 572319 5. 592249 5. 51661 5. 614563 5. 572319 5. 565027  
11760883\_ 4. 590815 4. 298822 4. 493975 4. 468741 4. 276751 4. 369492  
11760884\_ 5. 692648 5. 482404 5. 76571 5. 566558 5. 11527 5. 475572  
11760885\_ 4. 572312 4. 572115 4. 349891 4. 399761 4. 348259 4. 516123  
11760886\_ 4. 47196 4. 427416 4. 390352 4. 01463 3. 901511 3. 978114  
11760887\_ 3. 767342 3. 846376 3. 833765 3. 816626 4. 103834 3. 964128  
11760888\_ 4. 87506 5. 025097 4. 976979 4. 994486 4. 950191 4. 963919  
11760889\_ 2. 988093 3. 006057 3. 06218 3. 44517 3. 006057 2. 943546  
11760890\_ 3. 623714 3. 606313 3. 398236 3. 927674 3. 601895 3. 704864  
11760891\_ 4. 915144 4. 87561 4. 704074 4. 892058 5. 025054 5. 010105  
11760892\_ 4. 647225 4. 97139 4. 70937 5. 003465 4. 986399 5. 119291  
11760893\_ 5. 999888 5. 957954 6. 009946 6. 176633 6. 025952 6. 009946  
11760894\_ 5. 768044 5. 782695 5. 626322 5. 820976 5. 786006 5. 986976  
11760895\_ 3. 210201 3. 503743 3. 301068 3. 687466 3. 503743 3. 490915  
11760896\_ 5. 883192 5. 976182 5. 801031 6. 114774 5. 983616 6. 106301

11760897\_ 3. 982182 4. 094958 4. 029458 4. 441958 4. 242123 4. 155866  
11760898\_ 5. 218716 5. 317828 5. 225459 5. 332379 5. 00881 4. 970691  
11760899\_ 5. 429198 5. 262888 5. 555909 5. 397863 5. 495291 5. 676992  
11760900\_ 6. 081881 5. 98478 6. 035858 6. 056115 6. 098175 6. 247833  
11760901\_ 2. 087864 2. 278769 2. 291338 2. 518642 2. 454511 2. 295973  
11760902\_ 4. 531379 4. 528402 4. 487529 4. 764401 4. 636068 4. 588235  
11760903\_ 4. 049901 4. 200726 4. 125291 4. 403046 4. 130528 4. 424645  
11760904\_ 4. 31453 4. 275456 4. 387357 4. 404064 4. 376997 4. 414612  
11760905\_ 4. 172518 4. 10014 4. 059002 3. 989078 4. 059002 4. 081658  
11760906\_ 5. 165672 5. 467767 5. 053266 5. 366598 5. 355558 5. 488296  
11760907\_ 5. 446121 5. 057953 5. 122191 4. 953968 4. 849431 5. 05832  
11760908\_ 4. 387625 4. 646747 4. 370023 4. 653618 4. 613723 4. 777  
11760909\_ 6. 8776 6. 886134 6. 82094 6. 987558 6. 943548 7. 05328  
11760910\_ 4. 102018 4. 337276 4. 217258 4. 220386 3. 811155 4. 304561  
11760911\_ 6. 662879 6. 663099 6. 690081 6. 296072 6. 249649 6. 254625  
11760912\_ 7. 089284 7. 066317 7. 094337 7. 074016 7. 045372 7. 096983  
11760913\_ 6. 775156 6. 82433 6. 876947 6. 474057 6. 464829 6. 548036  
11760914\_ 7. 176772 7. 249035 7. 179514 7. 241219 7. 31352 7. 179394  
11760915\_ 2. 823084 2. 801224 3. 103798 2. 746117 2. 966456 2. 986937  
11760916\_ 5. 372194 5. 429525 5. 267794 5. 469166 5. 577022 5. 637601  
11760917\_ 4. 984279 4. 984825 4. 902028 4. 869387 4. 807419 4. 815683  
11760918\_ 5. 690151 5. 624343 5. 540519 5. 339616 5. 207385 5. 210497  
11760919\_ 3. 310356 3. 166412 3. 259284 3. 311597 3. 203097 3. 004563  
11760920\_ 7. 409349 7. 460596 7. 529499 7. 350578 7. 313573 7. 190737  
11760921\_ 6. 857502 6. 668062 6. 76663 6. 399804 6. 569048 6. 657798  
11760922\_ 4. 275543 4. 347929 4. 140733 4. 229508 4. 190923 4. 353994  
11760923\_ 6. 387057 6. 32114 6. 526101 6. 557235 6. 338709 6. 148881  
11760924\_ 5. 305535 5. 234795 5. 307763 5. 367196 5. 383547 5. 431434  
11760925\_ 4. 42201 4. 228617 4. 299487 4. 556207 4. 495516 4. 449088  
11760926\_ 5. 269743 5. 311205 5. 21159 5. 283793 5. 178092 5. 08198  
11760927\_ 6. 063224 6. 033199 6. 074051 6. 058786 5. 980978 5. 885843  
11760928\_ 7. 427302 7. 398973 7. 446039 7. 252541 7. 272375 7. 332225  
11760929\_ 4. 627726 4. 896332 4. 866763 4. 717502 4. 878957 4. 694146  
11760930\_ 6. 397299 6. 460054 6. 295007 6. 42332 6. 428572 6. 420218  
11760931\_ 5. 150913 5. 304727 5. 186288 5. 29427 5. 354846 5. 273056  
11760932\_ 3. 967684 3. 669597 3. 719577 3. 606313 3. 438579 3. 606313  
11760933\_ 3. 189048 3. 503743 3. 398236 3. 595896 3. 350705 3. 752713  
11760934\_ 4. 440555 4. 460795 4. 221218 4. 514957 4. 352187 4. 594853  
11760935\_ 5. 387399 5. 105489 5. 35829 5. 380649 5. 347856 5. 297498  
11760936\_ 3. 35 3. 449354 3. 443932 3. 333023 3. 282591 3. 443932  
11760937\_ 2. 950191 2. 488148 2. 605516 2. 605516 2. 497238 2. 605516  
11760938\_ 7. 531077 7. 442902 7. 589926 7. 206443 7. 315859 7. 207075  
11760939\_ 4. 345278 4. 454403 4. 415527 4. 40461 4. 584933 4. 493464  
11760940\_ 6. 342727 6. 33599 6. 17115 6. 499649 6. 431763 6. 449648  
11760941\_ 2. 874273 2. 887646 2. 643332 2. 584141 2. 6593 2. 792058  
11760942\_ 5. 601068 5. 545442 5. 490287 5. 289623 5. 26034 5. 409222  
11760943\_ 5. 336206 5. 345598 5. 371372 5. 239646 5. 36323 5. 475857  
11760944\_ 5. 688145 5. 742201 5. 608151 5. 659736 5. 649457 5. 784944  
11760945\_ 5. 816628 5. 918745 5. 789483 5. 961842 5. 928464 6. 014977  
11760946\_ 5. 356452 5. 283554 5. 508196 5. 407961 5. 232812 5. 511361  
11760947\_ 2. 350231 2. 47762 2. 284628 2. 416144 2. 307095 2. 097399

11760948\_ 4. 472205 4. 679334 4. 376246 4. 657992 4. 69237 4. 618434  
11760949\_ 2. 47102 1. 899856 2. 190719 2. 12747 2. 231847 2. 095256  
11760950\_ 7. 930129 7. 901701 8. 028173 8. 130976 8. 180329 8. 012627  
11760951\_ 5. 789947 5. 474971 5. 594203 5. 809307 5. 747459 5. 622405  
11760952\_ 4. 730738 4. 836577 4. 938383 5. 202948 5. 094093 4. 938383  
11760953\_ 5. 132671 4. 916006 4. 929713 4. 926049 4. 949795 4. 919857  
11760954\_ 6. 042887 5. 894697 5. 917339 6. 044182 6. 156418 6. 13945  
11760955\_ 4. 288389 4. 234325 4. 234325 4. 372228 4. 336894 4. 312844  
11760956\_ 6. 439895 6. 431763 6. 354955 6. 612156 6. 547149 6. 451527  
11760957\_ 4. 93368 5. 078548 5. 034106 5. 217622 5. 125901 5. 245789  
11760958\_ 4. 157521 4. 365431 4. 081255 4. 268169 4. 102415 4. 22592  
11760959\_ 5. 141238 4. 964899 4. 961927 4. 92609 5. 000736 4. 725501  
11760960\_ 3. 712372 3. 761403 3. 637838 3. 931379 3. 94736 3. 860716  
11760961\_ 6. 279081 6. 284976 6. 240531 6. 44009 6. 442623 6. 342078  
11760962\_ 3. 806272 3. 727182 3. 415778 3. 484146 3. 720923 3. 766002  
11760963\_ 9. 442606 9. 446098 9. 411828 9. 14698 9. 063382 9. 076357  
11760964\_ 9. 428456 9. 35391 9. 451466 9. 071658 9. 083525 9. 111557  
11760965\_ 6. 567913 6. 783982 6. 673382 6. 768647 6. 69889 6. 846485  
11760966\_ 2. 812735 2. 720696 2. 945959 2. 986316 3. 002238 3. 002238  
11760967\_ 2. 44927 2. 543202 2. 369717 2. 358391 2. 543202 2. 350409  
11760968\_ 4. 459292 4. 834043 4. 604362 4. 780227 4. 741883 4. 803758  
11760969\_ 5. 424748 5. 40916 5. 41964 5. 42928 5. 615713 5. 384891  
11760970\_ 3. 664865 3. 59912 3. 466471 3. 706476 3. 935648 3. 610401  
11760971\_ 3. 398236 3. 280358 3. 2106 3. 531248 3. 21279 3. 346607  
11760972\_ 6. 335915 6. 360394 6. 445817 6. 352531 6. 213024 6. 448396  
11760973\_ 5. 985037 5. 841177 6. 050095 6. 049603 5. 94725 5. 907154  
11760974\_ 2. 613716 2. 646928 2. 692089 2. 769365 2. 558526 2. 812529  
11760975\_ 3. 941283 4. 157036 4. 026092 4. 241011 3. 961847 4. 204121  
11760976\_ 3. 471703 3. 428092 3. 332768 3. 475808 3. 4939 3. 545122  
11760977\_ 5. 545712 5. 718464 5. 583259 5. 539267 5. 601228 5. 558216  
11760978\_ 4. 893922 5. 06434 4. 697385 4. 914651 5. 118759 4. 870551  
11760979\_ 3. 947707 4. 084703 3. 82772 4. 110976 4. 102501 4. 226536  
11760980\_ 5. 819611 6. 034519 5. 832968 5. 859424 5. 785147 5. 841481  
11760981\_ 4. 948169 5. 118962 4. 643717 4. 870775 4. 994778 4. 9512  
11760982\_ 5. 086877 5. 253693 5. 136025 5. 269344 5. 258819 5. 234881  
11760983\_ 4. 028301 4. 151996 3. 98391 3. 927389 3. 968966 3. 962217  
11760984\_ 4. 941507 4. 874941 4. 934169 4. 825479 5. 008811 4. 97751  
11760985\_ 4. 123181 4. 106444 3. 976946 4. 12752 4. 055395 3. 596184  
11760986\_ 5. 29727 5. 311108 5. 173351 5. 297498 5. 453793 5. 26276  
11760987\_ 5. 640601 5. 766892 5. 545589 5. 755851 5. 709256 5. 588052  
11760988\_ 5. 845365 5. 992687 5. 986492 6. 138318 6. 044285 6. 095607  
11760989\_ 6. 117695 5. 933527 5. 927421 5. 395515 5. 453793 5. 51746  
11760990\_ 4. 499761 4. 507374 4. 800523 4. 840486 4. 665944 4. 440016  
11760991\_ 2. 934889 2. 852058 2. 888142 2. 793616 3. 006582 2. 83198  
11760992\_ 2. 15766 2. 326255 1. 945644 1. 878853 1. 927 1. 966622  
11760993\_ 6. 862886 6. 872493 6. 856719 6. 871452 6. 841734 6. 852108  
11760994\_ 3. 630435 3. 356378 3. 546506 3. 209493 3. 119137 3. 477528  
11760995\_ 3. 249924 3. 679984 3. 48844 3. 891897 3. 835751 3. 835751  
11760996\_ 5. 025525 4. 785167 4. 63227 4. 70058 4. 798511 4. 725994  
11760997\_ 3. 659489 3. 591552 3. 573913 4. 137597 3. 768441 3. 659489  
11760998\_ 5. 073036 5. 015545 5. 12141 4. 780049 4. 885948 4. 92024

11760999\_ 6. 344411 6. 084734 6. 400826 5. 510297 5. 602736 5. 547455  
11761000\_ 3. 156791 3. 180062 3. 406871 3. 359109 3. 306585 3. 189179  
11761001\_ 3. 581268 3. 581268 3. 729638 3. 790113 3. 838287 3. 753234  
11761002\_ 4. 611609 4. 514401 4. 602694 4. 598608 4. 700243 4. 686545  
11761003\_ 2. 850317 2. 822549 2. 98727 2. 817173 2. 605516 2. 494072  
11761004\_ 4. 330302 4. 216787 4. 160133 4. 195062 4. 176056 4. 264185  
11761005\_ 7. 312244 7. 205916 7. 23315 7. 341319 7. 341216 7. 341216  
11761006\_ 5. 560799 5. 779793 5. 573805 5. 710264 5. 853195 5. 769726  
11761007\_ 3. 951172 3. 745631 3. 850761 3. 216408 3. 560185 3. 465697  
11761008\_ 5. 007854 5. 05471 4. 798573 4. 685892 4. 910046 4. 978142  
11761009\_ 5. 176368 5. 219709 5. 541216 4. 652951 4. 751818 4. 829589  
11761010\_ 4. 737589 4. 901751 4. 846245 5. 132343 4. 876071 4. 968957  
11761011\_ 4. 706119 4. 623692 4. 923292 4. 953968 4. 862086 4. 967692  
11761012\_ 5. 467476 5. 446371 5. 37816 5. 566775 5. 638895 5. 599769  
11761013\_ 5. 954081 5. 584813 6. 007877 5. 805462 5. 930227 5. 995756  
11761014\_ 5. 676992 5. 592918 5. 414869 6. 049831 5. 785227 5. 870242  
11761015\_ 3. 993787 3. 965495 4. 012882 4. 035091 4. 102515 3. 954157  
11761016\_ 4. 282909 4. 307911 4. 071601 4. 265204 4. 20091 4. 280575  
11761017\_ 6. 774547 6. 949714 6. 87994 7. 094066 7. 04434 7. 164247  
11761018\_ 4. 89529 4. 799044 4. 913699 4. 908736 4. 805747 4. 929747  
11761019\_ 3. 952392 4. 102836 4. 012437 4. 256652 4. 348738 4. 538012  
11761020\_ 3. 570639 3. 387369 3. 545862 3. 485384 3. 749606 3. 757331  
11761021\_ 10. 57038 10. 50283 10. 53223 10. 47949 10. 47345 10. 41589  
11761022\_ 10. 46021 10. 49001 10. 48048 10. 60918 10. 51919 10. 52961  
11761023\_ 4. 091044 4. 361317 4. 134797 4. 070509 4. 013065 4. 200678  
11761024\_ 5. 97866 6. 097927 5. 940553 6. 037494 5. 980978 6. 015244  
11761025\_ 5. 060098 5. 122034 5. 034258 5. 18582 5. 265712 5. 016455  
11761026\_ 6. 340069 6. 481458 6. 394199 6. 336946 6. 463275 6. 388501  
11761027\_ 5. 49564 5. 405951 5. 460358 5. 643243 5. 705402 5. 564939  
11761028\_ 4. 287044 4. 338274 4. 312659 4. 169381 4. 438148 4. 312659  
11761029\_ 4. 30988 4. 523445 4. 245487 4. 487731 4. 411704 4. 655814  
11761030\_ 4. 331843 4. 535811 4. 273077 4. 551399 4. 627725 4. 622835  
11761031\_ 12. 62554 12. 62593 12. 62343 12. 53839 12. 56964 12. 51883  
11761032\_ 5. 591951 5. 788173 5. 616107 5. 663643 5. 511692 5. 641904  
11761033\_ 4. 682792 4. 681551 4. 444075 4. 52373 4. 7244 4. 645017  
11761034\_ 3. 661532 3. 540485 3. 324147 3. 447057 3. 489377 3. 333367  
11761035\_ 5. 901471 5. 957954 6. 013213 5. 99265 5. 957954 5. 942217  
11761036\_ 2. 759429 2. 580808 2. 787341 2. 782365 2. 829582 2. 759429  
11761037\_ 5. 915246 5. 798575 5. 921106 5. 714626 5. 638895 5. 665989  
11761038\_ 4. 534297 4. 552104 4. 472922 4. 657611 4. 490386 4. 547303  
11761039\_ 3. 986035 3. 888084 3. 772898 3. 800194 3. 849979 3. 82398  
11761040\_ 4. 015963 4. 281408 4. 093261 4. 018345 4. 109895 3. 904296  
11761041\_ 5. 148424 5. 333235 5. 218365 5. 281624 5. 197279 5. 257689  
11761042\_ 4. 939926 5. 11527 5. 01276 5. 156773 5. 117415 5. 056229  
11761043\_ 6. 211616 6. 378665 6. 199575 6. 204897 6. 292323 6. 208503  
11761044\_ 4. 223551 4. 158361 4. 161003 4. 256346 4. 228587 4. 294  
11761045\_ 5. 034888 5. 19419 4. 945611 5. 043707 5. 219972 5. 077914  
11761046\_ 4. 489374 4. 638262 4. 682521 4. 848062 4. 811135 4. 672909  
11761047\_ 2. 491253 2. 392485 2. 361778 2. 617616 2. 718322 2. 633102  
11761048\_ 5. 247739 5. 423569 5. 199817 5. 444878 5. 36323 5. 474998  
11761049\_ 6. 79851 6. 833015 6. 695739 6. 725128 6. 773731 6. 779107

11761050\_ 4.488267 4.605112 4.574958 4.488267 4.575229 4.772323  
11761051\_ 5.601714 5.504742 5.673136 5.689785 5.811551 5.788797  
11761052\_ 7.085814 7.112144 6.892085 7.061173 7.051182 7.029374  
11761053\_ 5.98596 6.135676 5.811258 6.089717 6.101452 6.028475  
11761054\_ 5.458672 5.476135 5.32814 5.508007 5.458672 5.458672  
11761055\_ 5.508713 5.601831 5.444151 5.40773 5.538238 5.498231  
11761056\_ 3.193514 3.208755 3.449945 3.252626 3.29634 3.343306  
11761057\_ 5.990365 5.980447 6.115374 5.990365 5.86043 5.946858  
11761058\_ 2.675863 2.584984 2.601962 2.887212 2.811063 2.903292  
11761059\_ 6.144808 6.35691 6.05774 6.298904 6.195889 6.17404  
11761060\_ 5.22511 5.415833 5.095988 5.409677 5.522601 5.283253  
11761061\_ 6.287423 6.228483 6.303609 6.400715 6.366715 6.381252  
11761062\_ 3.850162 3.725169 3.781932 3.799724 3.747335 3.842607  
11761063\_ 2.100986 2.152505 2.16505 2.070562 1.925503 2.111778  
11761064\_ 6.758901 6.755516 6.780777 6.765911 6.791106 6.857045  
11761065\_ 5.763634 5.738366 5.807637 6.256421 6.00364 6.046283  
11761066\_ 2.854491 2.901158 2.995885 2.709211 2.901158 2.568016  
11761067\_ 3.64242 3.635775 3.706003 3.916644 3.848627 3.897551  
11761068\_ 3.340648 3.503743 3.260982 3.16761 3.214098 3.260982  
11761069\_ 2.84346 3.130943 2.875305 2.886037 2.77201 3.130943  
11761070\_ 5.653407 5.714972 5.785492 5.97786 5.894484 5.891599  
11761071\_ 3.925181 3.99473 3.939983 3.891525 3.964229 3.930225  
11761072\_ 4.276069 4.329719 4.163836 4.463316 4.333699 4.541824  
11761073\_ 5.270302 5.387613 5.17639 5.148092 5.424032 5.214835  
11761074\_ 5.31904 5.3223 5.332078 5.331006 5.341036 5.196201  
11761075\_ 4.952826 5.222247 4.878181 5.029529 5.11759 5.069245  
11761076\_ 5.983096 5.843204 6.029973 5.854522 5.752818 5.806841  
11761077\_ 3.867455 4.004962 4.017206 4.087544 4.147304 4.017206  
11761078\_ 3.042546 3.015809 3.144188 3.122757 3.069283 3.069283  
11761079\_ 3.908882 3.854292 3.914525 3.96124 3.921002 4.005854  
11761080\_ 4.275767 4.311715 4.216496 4.233553 4.275543 4.275543  
11761081\_ 4.786788 4.911912 4.666444 4.925977 4.828296 4.811831  
11761082\_ 4.525162 4.721151 4.52373 4.404132 4.603428 4.663409  
11761083\_ 4.176752 4.531531 4.287593 4.097611 4.200678 4.465786  
11761084\_ 4.179246 4.40055 4.33655 3.951118 4.199027 4.267049  
11761085\_ 3.306663 3.544783 3.268529 3.488222 3.505817 3.711601  
11761086\_ 6.206673 6.089251 6.052007 6.271342 6.217687 6.341963  
11761087\_ 4.514685 4.585074 4.564783 4.487686 4.543222 4.624718  
11761088\_ 5.647845 5.732315 5.763585 5.815085 5.707424 5.754755  
11761089\_ 5.062488 4.910331 4.555843 4.910331 5.004897 4.840131  
11761090\_ 4.667013 4.9226 4.824772 5.010194 4.921252 4.893935  
11761091\_ 4.644367 4.90099 4.855088 4.914651 4.791748 5.007104  
11761092\_ 3.653351 3.398236 3.583865 3.665849 3.655606 3.786777  
11761093\_ 2.992436 3.438342 3.503743 3.219407 3.415186 3.377361  
11761094\_ 5.385673 5.480966 5.554436 5.643713 5.59105 5.651658  
11761095\_ 4.899858 4.936882 4.975129 5.064406 5.023382 4.975129  
11761096\_ 4.026092 3.811053 3.871634 3.629543 4.193744 3.775794  
11761097\_ 4.763543 4.898861 4.688883 5.033639 5.033639 4.956324  
11761098\_ 3.001601 3.073686 3.101559 2.928889 3.025618 3.382124  
11761099\_ 2.795073 2.718322 2.605516 2.800136 2.718322 2.718322  
11761100\_ 5.594077 5.593387 5.277031 5.540074 5.441768 5.488221

11761101\_ 2. 142542 2. 374575 2. 30266 1. 916966 1. 722078 2. 051663  
11761102\_ 2. 436747 2. 69628 2. 597108 2. 150454 2. 117181 2. 249497  
11761103\_ 3. 510541 3. 519444 3. 237562 3. 510541 3. 452143 3. 358887  
11761104\_ 5. 661507 5. 853368 5. 811303 5. 85193 5. 853368 6. 080671  
11761105\_ 3. 738622 3. 818401 3. 940692 3. 73553 3. 760815 3. 888598  
11761106\_ 4. 248791 4. 14975 4. 058165 4. 193256 4. 245093 4. 041768  
11761107\_ 4. 584933 4. 52373 4. 562283 4. 515663 4. 65581 4. 777022  
11761108\_ 7. 03068 7. 111068 6. 993152 7. 140279 7. 118258 7. 172911  
11761109\_ 4. 513241 4. 775619 4. 449421 4. 563595 4. 40917 4. 697057  
11761110\_ 6. 835731 6. 741101 6. 905222 6. 890726 6. 906888 6. 827212  
11761111\_ 5. 90168 5. 997382 5. 954154 5. 951159 6. 030551 5. 964951  
11761112\_ 5. 450213 5. 406351 5. 201373 5. 198275 5. 174321 5. 284151  
11761113\_ 4. 643717 4. 566206 4. 438425 4. 612487 4. 577347 4. 61077  
11761114\_ 6. 051933 6. 097927 6. 195652 6. 282804 6. 448378 6. 419898  
11761115\_ 3. 626306 3. 743178 3. 590757 3. 841323 3. 74435 3. 67791  
11761116\_ 4. 56085 4. 343999 4. 305689 4. 606717 4. 420631 4. 814201  
11761117\_ 5. 601808 5. 704241 5. 744677 5. 672332 5. 616453 5. 648514  
11761118\_ 4. 893005 4. 800118 4. 706255 4. 793874 4. 90668 4. 948093  
11761119\_ 5. 437232 5. 53813 5. 465791 5. 507305 5. 601119 5. 653928  
11761120\_ 6. 106742 6. 242947 6. 078816 6. 062578 6. 063939 6. 17846  
11761121\_ 4. 415744 4. 568683 4. 537824 4. 713739 4. 774172 4. 686435  
11761122\_ 4. 820369 4. 735644 4. 754655 4. 94372 4. 909234 4. 86079  
11761123\_ 2. 167575 1. 915064 2. 182493 2. 069833 2. 281434 2. 083322  
11761124\_ 4. 281826 4. 232526 4. 278579 4. 130925 4. 270405 4. 275037  
11761125\_ 8. 576208 8. 478762 8. 593102 7. 822809 7. 901426 7. 955952  
11761126\_ 4. 227184 4. 290451 4. 227184 4. 223656 4. 285942 3. 988123  
11761127\_ 6. 359334 6. 616052 6. 478683 6. 633937 6. 686431 6. 728497  
11761128\_ 1. 989104 1. 895172 1. 930277 2. 206711 1. 961794 2. 001047  
11761129\_ 5. 189699 5. 362605 5. 073036 5. 321749 5. 142509 5. 475572  
11761130\_ 5. 47756 5. 546582 5. 722701 5. 425224 5. 295063 5. 365479  
11761131\_ 6. 377847 6. 470415 6. 382965 6. 594872 6. 585427 6. 604788  
11761132\_ 5. 166056 5. 22836 4. 892784 5. 330145 5. 269964 5. 109141  
11761133\_ 4. 815683 5. 135679 4. 705479 5. 135679 5. 044463 5. 126838  
11761134\_ 3. 606313 3. 838354 3. 257171 3. 503743 3. 47018 3. 587093  
11761135\_ 4. 199787 4. 52373 4. 263972 4. 312854 4. 228215 4. 246435  
11761136\_ 5. 79756 6. 086168 6. 018553 6. 267782 6. 383643 6. 134896  
11761137\_ 2. 975849 3. 14935 2. 923901 2. 912551 3. 021126 3. 049567  
11761138\_ 6. 183207 6. 15243 6. 118592 6. 406901 6. 526095 6. 431988  
11761139\_ 2. 596879 2. 633559 2. 584142 2. 513348 2. 78884 2. 596879  
11761140\_ 5. 332481 5. 337375 5. 079959 5. 171916 5. 362515 5. 348652  
11761141\_ 7. 695438 7. 621644 7. 706171 7. 330864 7. 28554 7. 321688  
11761142\_ 5. 501937 5. 557468 5. 246886 5. 643713 5. 497562 5. 409222  
11761143\_ 6. 833141 6. 647703 6. 717976 6. 882462 6. 826485 6. 765786  
11761144\_ 6. 509229 6. 418393 6. 43943 6. 399441 6. 427195 6. 380445  
11761145\_ 5. 805849 5. 572413 5. 753773 5. 974601 5. 922601 5. 899522  
11761146\_ 4. 584933 4. 713158 4. 559068 4. 798429 4. 694658 4. 628419  
11761147\_ 5. 603467 5. 505405 5. 467264 5. 548982 5. 682998 5. 586951  
11761148\_ 3. 104034 3. 355397 2. 934106 3. 139595 3. 087595 3. 189785  
11761149\_ 8. 482787 8. 375451 8. 400373 7. 887358 7. 874439 7. 863123  
11761150\_ 6. 196166 6. 140188 6. 025488 6. 254686 6. 258491 6. 143356  
11761151\_ 4. 414615 4. 643717 4. 420037 4. 643717 4. 579638 4. 66271

11761152\_ 5. 523091 5. 387418 5. 2222 5. 528037 5. 367259 5. 45627  
11761153\_ 3. 716647 3. 723624 3. 749714 3. 854863 3. 845845 3. 939445  
11761154\_ 3. 503743 3. 833513 3. 252031 3. 725465 3. 347827 3. 705625  
11761155\_ 5. 964196 5. 94353 5. 886373 6. 005341 5. 845457 5. 923693  
11761156\_ 3. 492176 3. 389986 3. 077755 3. 694795 3. 154791 3. 57286  
11761157\_ 6. 538218 6. 668747 6. 584685 6. 615733 6. 702705 6. 690222  
11761158\_ 5. 5024 5. 355339 5. 573514 5. 738404 5. 520908 5. 507278  
11761159\_ 4. 29048 4. 409457 4. 196365 4. 280681 4. 345425 4. 400407  
11761160\_ 5. 285218 4. 873532 5. 210074 5. 331911 4. 781571 5. 228627  
11761161\_ 5. 145169 4. 647258 4. 759906 4. 786236 4. 732949 4. 42647  
11761162\_ 4. 446229 4. 511251 4. 401677 4. 377668 4. 445509 4. 337292  
11761163\_ 5. 529008 5. 716819 5. 427742 5. 884012 5. 80083 5. 725863  
11761164\_ 3. 389751 3. 3082 2. 92417 3. 191861 3. 191861 3. 320116  
11761165\_ 5. 255088 5. 138306 5. 183289 5. 409315 5. 562228 5. 356493  
11761166\_ 4. 587321 4. 830776 4. 668278 4. 505531 4. 461608 4. 553189  
11761167\_ 5. 123176 5. 257517 5. 149641 5. 042693 5. 307642 5. 172298  
11761168\_ 4. 246041 4. 303146 4. 159038 4. 336573 4. 275543 4. 454538  
11761169\_ 5. 063973 5. 138056 5. 023783 5. 331001 5. 155452 5. 235654  
11761170\_ 5. 198528 5. 200948 5. 231601 5. 367934 5. 436282 5. 471803  
11761171\_ 4. 850483 4. 931271 4. 784427 4. 976462 4. 907221 4. 911391  
11761172\_ 5. 188276 5. 352896 5. 475607 5. 422539 5. 323189 5. 296309  
11761173\_ 1. 936807 2. 001573 1. 936807 1. 777585 1. 785672 1. 842875  
11761174\_ 1. 936807 2. 001573 1. 936807 1. 777585 1. 785672 1. 842875  
11761175\_ 5. 931743 5. 675099 5. 779645 5. 869461 5. 848442 5. 868173  
11761176\_ 5. 194034 5. 185322 5. 065012 5. 388784 5. 202533 5. 360984  
11761177\_ 4. 419693 4. 457547 4. 447622 4. 643717 4. 550192 4. 727408  
11761178\_ 4. 328568 4. 18332 4. 264788 4. 335215 4. 381257 4. 262602  
11761179\_ 6. 524389 6. 667107 6. 563545 6. 565512 6. 609618 6. 740779  
11761180\_ 4. 840716 4. 988698 4. 988086 5. 152304 5. 181525 5. 112424  
11761181\_ 5. 674185 5. 584813 5. 684482 5. 628307 5. 682069 5. 693816  
11761182\_ 3. 122119 3. 398236 2. 846625 3. 386172 3. 479544 3. 3681  
11761183\_ 4. 423703 4. 695069 4. 688404 4. 827105 4. 724379 4. 651257  
11761184\_ 6. 743735 6. 803037 6. 72269 6. 669627 6. 691049 6. 606228  
11761185\_ 4. 955472 5. 086963 4. 921901 4. 869542 4. 950112 5. 018255  
11761186\_ 3. 91501 3. 963191 3. 816605 4. 034942 3. 621108 3. 853065  
11761187\_ 2. 667247 2. 503122 2. 833703 2. 695451 2. 476185 2. 624146  
11761188\_ 4. 084806 4. 073167 4. 03855 3. 959219 3. 987899 4. 022299  
11761189\_ 6. 035925 6. 143458 6. 094413 6. 004017 6. 104931 6. 029457  
11761190\_ 7. 034131 7. 064707 6. 922054 6. 998902 7. 016797 7. 155074  
11761191\_ 4. 861983 4. 728153 4. 76996 4. 833022 4. 808223 4. 887491  
11761192\_ 3. 418905 3. 180062 3. 308471 3. 398974 3. 398236 3. 372975  
11761193\_ 5. 55207 5. 614563 5. 497193 5. 717163 5. 597603 5. 490994  
11761194\_ 3. 143642 3. 180062 3. 026774 3. 118756 2. 852688 2. 83198  
11761195\_ 3. 503743 3. 516917 3. 398236 3. 421008 3. 212448 3. 376148  
11761196\_ 6. 119254 6. 122195 5. 847608 6. 119003 6. 119003 6. 208568  
11761197\_ 2. 899856 2. 885274 2. 839721 2. 819556 2. 804727 2. 753136  
11761198\_ 5. 929792 5. 929792 5. 831031 6. 02749 5. 978072 5. 886257  
11761199\_ 5. 440939 5. 435749 5. 328734 5. 42793 5. 433139 5. 633128  
11761200\_ 4. 275543 4. 204219 4. 463247 4. 459939 4. 380027 4. 286329  
11761201\_ 5. 39086 5. 307593 5. 166493 5. 262183 5. 093123 5. 197188  
11761202\_ 5. 442778 5. 238393 5. 448296 5. 479906 5. 577985 5. 539835

11761203\_ 4. 707117 4. 845223 4. 801715 4. 912458 4. 704027 4. 816437  
11761204\_ 6. 095949 6. 244828 6. 224739 6. 234063 6. 187371 6. 294034  
11761205\_ 4. 70126 4. 763543 5. 079474 4. 907305 4. 7735 4. 93674  
11761206\_ 4. 631757 4. 769376 4. 577362 4. 557196 4. 403 4. 490777  
11761207\_ 5. 359162 5. 532421 5. 506522 5. 663413 5. 405886 5. 42485  
11761208\_ 6. 032844 6. 207523 6. 099001 6. 255658 6. 148333 6. 149641  
11761209\_ 3. 668654 3. 72539 3. 640463 3. 557064 3. 503743 3. 507216  
11761210\_ 4. 837731 5. 02249 4. 982801 5. 040133 4. 946767 4. 995957  
11761211\_ 2. 343347 2. 252468 2. 236545 2. 284447 2. 361778 2. 384435  
11761212\_ 5. 275386 5. 175176 5. 333723 5. 238856 5. 2222 5. 282681  
11761213\_ 3. 91494 4. 044007 3. 920987 4. 022959 4. 067362 3. 927075  
11761214\_ 5. 066742 5. 149545 5. 102945 4. 953968 5. 055352 4. 933756  
11761215\_ 3. 499868 3. 51905 3. 416996 3. 482354 3. 505706 3. 591006  
11761216\_ 4. 513241 4. 406264 4. 508395 4. 564192 4. 587544 4. 559023  
11761217\_ 4. 735135 4. 994992 4. 614238 4. 714523 4. 929658 4. 610736  
11761218\_ 5. 998404 6. 015715 5. 963682 5. 889162 5. 905445 5. 887749  
11761219\_ 6. 826918 6. 913455 6. 784792 6. 960181 6. 974099 6. 900783  
11761220\_ 7. 033802 7. 134123 6. 996658 7. 173481 7. 185078 7. 006087  
11761221\_ 5. 933165 5. 875599 5. 849064 5. 800497 5. 828585 5. 975444  
11761222\_ 4. 330038 4. 387469 4. 145032 4. 491972 4. 347179 4. 53082  
11761223\_ 4. 177027 4. 358739 4. 514102 4. 044559 4. 033351 4. 195889  
11761224\_ 3. 807089 3. 675105 3. 62274 3. 793318 3. 884766 3. 937227  
11761225\_ 5. 176551 5. 050878 4. 930507 5. 066523 5. 029308 5. 150191  
11761226\_ 3. 804773 3. 853306 3. 656767 3. 634565 3. 797078 3. 709132  
11761227\_ 2. 928333 2. 807561 2. 572646 2. 566223 2. 807561 2. 69686  
11761228\_ 5. 021565 5. 009326 4. 94854 5. 077601 4. 930564 4. 869516  
11761229\_ 4. 189297 4. 519727 4. 145522 4. 593023 4. 452911 4. 513846  
11761230\_ 4. 106211 4. 258632 4. 280366 4. 584933 4. 328485 4. 433632  
11761231\_ 6. 443143 6. 534883 6. 512195 6. 579632 6. 437525 6. 499643  
11761232\_ 6. 320332 6. 33462 6. 045487 6. 318829 6. 330972 6. 320332  
11761233\_ 6. 760076 6. 889131 6. 822762 6. 782759 6. 793438 6. 83472  
11761234\_ 5. 926672 6. 101821 5. 856537 6. 228723 6. 133915 6. 166413  
11761235\_ 5. 25707 5. 323482 5. 129924 5. 492925 5. 333723 5. 423343  
11761236\_ 5. 096396 5. 071047 5. 192723 5. 113103 5. 064315 5. 094625  
11761237\_ 3. 410635 3. 509504 3. 44071 3. 6287 3. 771573 3. 632399  
11761238\_ 4. 123399 4. 138669 4. 162717 4. 319147 4. 255092 4. 477508  
11761239\_ 3. 334875 3. 318781 3. 179639 3. 31471 3. 481163 3. 318781  
11761240\_ 4. 908777 5. 285438 5. 088531 5. 253348 5. 108704 5. 253348  
11761241\_ 5. 820052 5. 804247 5. 708101 5. 837507 5. 746727 5. 830196  
11761242\_ 5. 825368 5. 784632 5. 75614 5. 812344 5. 737164 5. 796876  
11761243\_ 5. 917319 5. 739182 5. 584677 5. 772971 5. 934556 5. 781433  
11761244\_ 7. 174782 7. 343801 7. 183172 7. 279296 7. 407024 7. 203099  
11761245\_ 4. 870949 5. 264177 4. 903733 5. 263217 5. 406277 5. 235917  
11761246\_ 4. 347179 4. 438666 4. 370337 4. 418045 4. 350132 4. 449346  
11761247\_ 3. 586926 3. 724605 3. 586926 3. 310861 3. 571555 3. 413357  
11761248\_ 4. 116819 3. 723624 3. 850246 3. 801249 3. 801444 4. 027349  
11761249\_ 5. 373228 5. 486319 5. 172969 5. 255913 5. 451384 5. 371457  
11761250\_ 8. 698839 8. 71796 8. 743227 8. 601866 8. 574588 8. 590675  
11761251\_ 5. 889059 5. 887155 6. 057156 5. 870242 5. 756224 5. 916743  
11761252\_ 5. 488073 5. 52516 5. 476824 5. 39077 5. 316167 5. 386585  
11761253\_ 6. 103357 6. 014758 6. 181988 5. 761667 5. 934556 6. 026961



11761254\_ 4. 516125 4. 371219 4. 565861 4. 628886 4. 601586 4. 726111  
11761255\_ 5. 845365 5. 724785 5. 774109 5. 836606 5. 880112 6. 081897  
11761256\_ 4. 113745 4. 081799 4. 081799 4. 10847 4. 130967 4. 16972  
11761257\_ 5. 57702 5. 662291 5. 519279 5. 696548 5. 851615 5. 691253  
11761258\_ 2. 594671 2. 75799 2. 55705 2. 618154 2. 688603 2. 627721  
11761259\_ 3. 736512 3. 868473 3. 941358 3. 914925 4. 261256 4. 177495  
11761260\_ 6. 131274 6. 127604 6. 171989 6. 170371 6. 252918 6. 33684  
11761261\_ 3. 421209 3. 249243 3. 325903 3. 101013 3. 307588 3. 07624  
11761262\_ 4. 447522 4. 354765 4. 354765 3. 819005 4. 230774 4. 131397  
11761263\_ 5. 687548 5. 696318 5. 648924 5. 845365 5. 714682 5. 669185  
11761264\_ 1. 875016 1. 929883 1. 756712 1. 816847 1. 834454 1. 922302  
11761265\_ 2. 577978 2. 811589 2. 609192 2. 684127 2. 728472 2. 713104  
11761266\_ 2. 797384 2. 836857 2. 550356 2. 644785 2. 697426 2. 652748  
11761267\_ 5. 82402 5. 880833 5. 69098 6. 039898 5. 930059 5. 989319  
11761268\_ 3. 013327 2. 74374 2. 872763 2. 927962 3. 089482 2. 922448  
11761269\_ 6. 010425 6. 149538 5. 948311 6. 154856 6. 179449 6. 01074  
11761270\_ 5. 70227 5. 40621 5. 759018 5. 643713 5. 656356 5. 731001  
11761271\_ 7. 440961 7. 446404 7. 444124 7. 142999 7. 148093 7. 193066  
11761272\_ 2. 523228 2. 523228 2. 390611 2. 29411 2. 358729 2. 795545  
11761273\_ 2. 360948 2. 318783 2. 235457 2. 084778 2. 285405 2. 368833  
11761274\_ 2. 510279 2. 867365 2. 600842 2. 523289 2. 672139 2. 46078  
11761275\_ 5. 267733 5. 222293 5. 222293 5. 176854 5. 222293 5. 239122  
11761276\_ 5. 213149 5. 323529 5. 122191 5. 238495 5. 222003 5. 228627  
11761277\_ 5. 519168 5. 399249 5. 448296 5. 529283 5. 421415 5. 589814  
11761278\_ 5. 075236 5. 308236 5. 057276 5. 401197 5. 410937 5. 115963  
11761279\_ 4. 601003 4. 731321 4. 617155 4. 51028 4. 630669 4. 590855  
11761280\_ 3. 708044 3. 398236 3. 850246 3. 407189 3. 622476 3. 563546  
11761281\_ 5. 562777 5. 668646 5. 584813 5. 68218 5. 638895 5. 634699  
11761282\_ 5. 824128 5. 939609 5. 824128 5. 996126 5. 938865 5. 860444  
11761283\_ 4. 326832 4. 610636 4. 459939 4. 319298 4. 200678 4. 554788  
11761284\_ 5. 981624 5. 894697 6. 068082 5. 452438 5. 523515 5. 404859  
11761285\_ 3. 030657 3. 176437 3. 06281 3. 027783 3. 306148 3. 532484  
11761286\_ 3. 821077 3. 717304 3. 498994 3. 840198 3. 701304 3. 96057  
11761287\_ 4. 848586 4. 954571 4. 89131 4. 708652 4. 658546 4. 808764  
11761288\_ 3. 3663 3. 324654 3. 182383 3. 503743 3. 500276 3. 473246  
11761289\_ 2. 911362 2. 667624 2. 819742 3. 416723 3. 21279 3. 275928  
11761290\_ 8. 88661 8. 823079 8. 848622 8. 958581 9. 047933 9. 076045  
11761291\_ 5. 820052 6. 121349 5. 898157 6. 050016 5. 993369 5. 922424  
11761292\_ 5. 348914 5. 241966 5. 160838 5. 350974 5. 348914 5. 411522  
11761293\_ 4. 408252 4. 390244 4. 424765 4. 369693 4. 351685 4. 33818  
11761294\_ 3. 101972 2. 490969 2. 670307 2. 717433 2. 68623 2. 583089  
11761295\_ 4. 919037 5. 101568 5. 198189 5. 025839 5. 225583 5. 054262  
11761296\_ 3. 501594 3. 321 3. 558121 3. 258609 3. 360082 3. 331988  
11761297\_ 5. 300949 5. 238043 5. 095625 5. 363594 5. 357022 5. 243419  
11761298\_ 5. 155202 4. 899513 4. 796469 4. 891383 5. 010503 5. 066186  
11761299\_ 9. 373579 9. 405706 9. 429697 9. 238968 9. 2003 9. 164464  
11761300\_ 6. 392584 6. 398746 6. 456929 6. 398185 6. 360609 6. 493444  
11761301\_ 2. 97327 2. 867267 2. 985871 3. 168113 2. 988415 3. 119767  
11761302\_ 3. 173556 3. 120768 2. 868397 3. 244425 3. 21707 3. 298579  
11761303\_ 5. 637973 5. 570971 5. 822582 5. 344109 5. 379776 5. 566405  
11761304\_ 4. 1439 4. 393005 4. 138569 4. 282826 4. 125143 4. 252908

11761305\_ 5. 088821 5. 266111 5. 029529 5. 231343 5. 182403 5. 489487  
11761306\_ 5. 016785 5. 2666 5. 26034 5. 143349 5. 33976 5. 284253  
11761307\_ 4. 874234 4. 915675 4. 88241 4. 769601 4. 985932 4. 872096  
11761308\_ 6. 045737 6. 123707 6. 084036 6. 045912 6. 104931 6. 148985  
11761309\_ 6. 766828 6. 756602 6. 828167 6. 816285 6. 854927 6. 868665  
11761310\_ 2. 653201 2. 630771 2. 630771 2. 735918 2. 608341 2. 558403  
11761311\_ 6. 874171 6. 819564 6. 808989 6. 606009 6. 282224 6. 379118  
11761312\_ 6. 085066 6. 063744 6. 003021 6. 222543 6. 19795 6. 077291  
11761313\_ 3. 705625 3. 548776 3. 394998 3. 60115 3. 56785 3. 624888  
11761314\_ 7. 155299 7. 156329 7. 283319 6. 418051 6. 74377 6. 573559  
11761315\_ 4. 873895 4. 811244 4. 824195 4. 873895 4. 873895 4. 94619  
11761316\_ 6. 358106 6. 247232 6. 433105 6. 100944 6. 189768 6. 081195  
11761317\_ 6. 457257 6. 395092 6. 437218 6. 421989 6. 420304 6. 471736  
11761318\_ 4. 275543 4. 47266 4. 320503 4. 347179 4. 397012 4. 299502  
11761319\_ 6. 223356 6. 32005 6. 312191 6. 180039 6. 131506 6. 223356  
11761320\_ 3. 433519 3. 731447 3. 433519 3. 451809 3. 348453 3. 421311  
11761321\_ 6. 36888 6. 400888 6. 276819 6. 544386 6. 646626 6. 47597  
11761322\_ 5. 671529 5. 636399 5. 502011 5. 523399 5. 660046 5. 522819  
11761323\_ 3. 786199 3. 808113 3. 740892 3. 693235 4. 053331 3. 953201  
11761324\_ 4. 699223 4. 895266 4. 606135 4. 805959 4. 776077 4. 732797  
11761325\_ 3. 644036 3. 6679 3. 913139 3. 804107 3. 731686 3. 799458  
11761326\_ 4. 758081 4. 799969 4. 731396 4. 65778 4. 787588 4. 766629  
11761327\_ 3. 656324 3. 909593 3. 630649 3. 842139 3. 77871 3. 9177  
11761328\_ 4. 306245 4. 332833 4. 255848 4. 36265 4. 329888 4. 358037  
11761329\_ 3. 346383 3. 181696 3. 102645 3. 383253 3. 243075 3. 412229  
11761330\_ 4. 203972 4. 195944 4. 135496 4. 391653 4. 33262 4. 245575  
11761331\_ 5. 019347 4. 688139 4. 397314 3. 716034 3. 716034 3. 872891  
11761332\_ 3. 033874 2. 591336 3. 058891 2. 684033 3. 220444 2. 927771  
11761333\_ 7. 280725 7. 370765 7. 268351 7. 327609 7. 289973 7. 263614  
11761334\_ 5. 790506 5. 85212 5. 643713 5. 897153 5. 860669 5. 962555  
11761335\_ 5. 36906 5. 517709 5. 324945 5. 504748 5. 433112 5. 600151  
11761336\_ 5. 46614 5. 65022 5. 579089 5. 715428 5. 66046 5. 582444  
11761337\_ 5. 136499 5. 143322 5. 137858 5. 145985 5. 112119 5. 073036  
11761338\_ 4. 779209 4. 847475 4. 7017 4. 650068 4. 612718 4. 752622  
11761339\_ 5. 991251 6. 206103 6. 094413 6. 159094 6. 109196 6. 319255  
11761340\_ 5. 239621 5. 435364 5. 186906 5. 148268 5. 123994 4. 99757  
11761341\_ 2. 610512 2. 41136 2. 640343 2. 609653 2. 677291 2. 550956  
11761342\_ 3. 254036 3. 135895 3. 178807 3. 262853 3. 27502 3. 197511  
11761343\_ 5. 12102 5. 332833 5. 097185 4. 975742 4. 994314 5. 068879  
11761344\_ 2. 251222 2. 086429 2. 15425 1. 977188 2. 235611 2. 07399  
11761345\_ 6. 137823 6. 181515 6. 190783 6. 110097 6. 071663 6. 033313  
11761346\_ 6. 007288 6. 13839 6. 163634 6. 086456 6. 159771 6. 038325  
11761347\_ 3. 531589 3. 564591 3. 397261 3. 615345 3. 814363 3. 50948  
11761348\_ 2. 716791 2. 619819 2. 722266 2. 63562 2. 599098 2. 913821  
11761349\_ 10. 68755 10. 62416 10. 658 9. 687245 9. 623838 9. 720299  
11761350\_ 2. 991136 2. 905506 2. 938189 3. 251614 3. 179596 3. 225571  
11761351\_ 6. 838659 6. 90425 6. 87536 7. 167993 7. 049183 7. 099641  
11761352\_ 5. 108265 5. 253577 5. 169385 5. 11527 5. 282253 5. 136287  
11761353\_ 5. 029529 5. 267832 5. 06708 5. 26034 5. 320103 5. 229627  
11761354\_ 6. 368887 6. 396237 6. 34049 6. 495774 6. 455168 6. 604788  
11761355\_ 5. 255517 5. 050208 4. 90081 5. 041844 4. 855038 5. 072776

11761356\_ 5. 556896 5. 489789 5. 403504 5. 3515 5. 413769 5. 492849  
11761357\_ 6. 08168 6. 214874 6. 349049 6. 329904 6. 386158 6. 286473  
11761358\_ 5. 368532 5. 514412 5. 433004 5. 576464 5. 638895 5. 615696  
11761359\_ 3. 876184 4. 103791 3. 939983 3. 989988 4. 185365 3. 989988  
11761360\_ 5. 874712 6. 040012 6. 132845 6. 106213 6. 1565 5. 989107  
11761361\_ 6. 241992 6. 225513 6. 132 6. 448378 6. 343953 6. 44332  
11761362\_ 4. 21284 4. 467327 4. 40276 4. 321352 4. 467474 4. 437068  
11761363\_ 2. 159141 2. 255687 2. 095256 2. 150454 2. 144509 1. 995297  
11761364\_ 4. 797265 4. 711497 4. 759321 4. 620751 4. 856191 4. 773496  
11761365\_ 6. 244666 6. 058786 6. 152499 5. 959092 5. 972175 6. 013834  
11761366\_ 5. 077662 5. 175949 5. 187365 5. 112029 5. 362211 5. 114746  
11761367\_ 3. 777915 3. 955757 3. 894283 3. 894283 3. 991255 3. 855853  
11761368\_ 5. 950344 6. 244666 6. 089221 6. 182328 6. 273289 6. 127954  
11761369\_ 2. 816419 2. 769489 2. 708167 2. 891142 2. 987684 2. 637361  
11761370\_ 4. 021009 3. 723624 3. 809477 3. 877967 3. 585747 3. 957718  
11761371\_ 2. 593207 2. 695186 2. 547683 2. 942488 2. 932608 2. 835635  
11761372\_ 6. 063501 6. 065462 5. 864668 6. 054084 6. 109973 6. 142824  
11761373\_ 4. 495894 4. 402399 4. 435391 4. 56812 4. 602 4. 701977  
11761374\_ 6. 438154 6. 240345 6. 2041 6. 32398 6. 32398 6. 310899  
11761375\_ 5. 149454 5. 383427 5. 16002 5. 390476 5. 345304 5. 284248  
11761376\_ 2. 99536 2. 977024 3. 050235 3. 509901 3. 217681 3. 690494  
11761377\_ 3. 89389 3. 659784 3. 818192 4. 074971 4. 000818 4. 204892  
11761378\_ 2. 281684 2. 441259 2. 358871 2. 136327 2. 469421 2. 419088  
11761379\_ 6. 709238 6. 819457 6. 711459 6. 776041 6. 673133 6. 73127  
11761380\_ 6. 553971 6. 645164 6. 59929 6. 588028 6. 520984 6. 615217  
11761381\_ 2. 109032 2. 091384 2. 113552 2. 13076 2. 118728 2. 209004  
11761382\_ 5. 644791 5. 77194 5. 644356 5. 672285 5. 686796 5. 744749  
11761383\_ 4. 620842 4. 595282 4. 744457 4. 768677 4. 721244 4. 727644  
11761384\_ 5. 805407 6. 047867 5. 87017 6. 016998 5. 905761 5. 91165  
11761385\_ 6. 481754 6. 372072 6. 376572 6. 258453 6. 315807 6. 371327  
11761386\_ 3. 16972 3. 522933 3. 381841 3. 537654 3. 449918 3. 583571  
11761387\_ 4. 718045 4. 431054 4. 597757 4. 67372 4. 73074 4. 545042  
11761388\_ 5. 676992 5. 642187 5. 448296 5. 80338 5. 48634 5. 784961  
11761389\_ 4. 864376 4. 976431 4. 850494 4. 824195 4. 835561 4. 906658  
11761390\_ 8. 530594 8. 463855 8. 496827 8. 671015 8. 704463 8. 667719  
11761391\_ 1. 806812 1. 839346 1. 891065 1. 895905 1. 895905 1. 801973  
11761392\_ 2. 657216 2. 527546 2. 78265 2. 60726 2. 695735 2. 736864  
11761393\_ 6. 179101 6. 147302 5. 990131 6. 040255 6. 070974 6. 120477  
11761394\_ 4. 193666 4. 154644 4. 190239 4. 210017 4. 188603 4. 174784  
11761395\_ 8. 205103 8. 227191 8. 127539 8. 227457 8. 254052 8. 192804  
11761396\_ 7. 21002 7. 262461 7. 290757 7. 18911 7. 206675 7. 256071  
11761397\_ 6. 721514 6. 662379 6. 630894 6. 594872 6. 615201 6. 620538  
11761398\_ 6. 682544 6. 642889 6. 616551 6. 60772 6. 584973 6. 632085  
11761399\_ 2. 943073 2. 83198 2. 770472 3. 169538 3. 074509 3. 063088  
11761400\_ 4. 641201 4. 55428 4. 573799 4. 584933 4. 584933 4. 378642  
11761401\_ 4. 528309 4. 524422 4. 584933 4. 535747 4. 533894 4. 470714  
11761402\_ 5. 512457 5. 530034 5. 365487 5. 297498 5. 361505 5. 374866  
11761403\_ 5. 194092 5. 154644 5. 171473 5. 113425 5. 07668 5. 187036  
11761404\_ 4. 454059 4. 443693 4. 356707 4. 602838 4. 558848 4. 49669  
11761405\_ 5. 203504 5. 149998 5. 171036 5. 06169 5. 125344 5. 332616  
11761406\_ 6. 485532 6. 60434 6. 573255 6. 654967 6. 708702 6. 599057

11761407\_ 4. 410389 4. 482364 4. 52373 4. 58474 4. 498247 4. 470714  
11761408\_ 4. 568272 4. 929537 4. 224639 4. 975291 4. 78057 4. 866013  
11761409\_ 5. 553763 5. 424468 5. 625864 5. 799454 5. 759453 5. 754755  
11761410\_ 5. 804092 5. 917209 5. 925757 5. 799983 5. 808967 5. 804092  
11761411\_ 4. 32973 4. 342335 4. 115871 4. 233584 4. 269119 4. 404093  
11761412\_ 4. 763543 4. 591198 4. 878699 4. 841086 5. 061129 5. 11527  
11761413\_ 3. 049959 2. 712178 3. 061837 3. 028853 2. 840391 2. 877026  
11761414\_ 3. 665429 3. 394801 3. 636278 3. 933884 3. 642109 3. 609665  
11761415\_ 4. 101549 4. 070012 4. 158442 4. 071172 4. 128937 4. 048316  
11761416\_ 5. 584813 5. 67904 5. 676662 5. 554436 5. 543018 5. 499641  
11761417\_ 6. 102411 6. 016911 5. 854097 5. 93062 6. 013495 6. 030651  
11761418\_ 7. 087477 7. 362032 7. 153202 7. 319659 7. 210241 7. 356687  
11761419\_ 4. 144096 4. 183342 4. 395676 4. 209943 4. 410287 4. 122446  
11761420\_ 3. 917498 4. 197931 4. 156372 4. 338278 4. 084848 4. 335245  
11761421\_ 7. 07277 6. 948886 7. 007554 6. 677901 6. 652878 6. 718211  
11761422\_ 6. 01824 5. 912104 5. 681974 5. 916945 6. 044285 5. 936984  
11761423\_ 4. 482297 4. 509896 4. 367252 4. 537495 4. 466926 4. 474398  
11761424\_ 2. 352809 2. 149215 2. 253877 2. 579273 2. 518846 2. 618804  
11761425\_ 3. 883634 4. 177766 4. 586563 3. 82467 3. 679481 3. 559933  
11761426\_ 3. 618605 3. 782942 3. 939983 3. 908464 3. 705625 3. 790926  
11761427\_ 5. 467488 5. 480966 5. 371342 5. 584813 5. 397861 5. 602457  
11761428\_ 4. 547683 4. 391897 4. 837243 3. 044607 3. 157413 3. 496679  
11761429\_ 5. 209483 5. 24423 5. 2222 5. 187334 5. 243523 5. 189309  
11761430\_ 3. 202659 3. 380557 3. 290032 3. 339929 3. 333643 3. 438918  
11761431\_ 3. 637814 3. 65174 3. 586846 3. 738625 3. 669983 3. 76336  
11761432\_ 4. 371948 4. 373342 4. 26065 4. 531262 4. 435102 4. 529893  
11761433\_ 3. 696545 3. 631096 3. 802052 3. 503743 3. 669161 3. 786777  
11761434\_ 4. 128449 4. 359338 4. 284349 4. 589181 4. 584933 4. 409782  
11761435\_ 3. 571152 3. 73086 3. 522845 3. 606112 3. 710149 3. 660801  
11761436\_ 5. 225266 5. 166576 5. 227124 5. 374652 5. 53394 5. 430717  
11761437\_ 4. 831365 4. 806188 5. 087971 4. 943271 5. 27946 5. 153854  
11761438\_ 4. 966914 4. 946013 4. 918959 4. 76822 4. 769983 4. 824376  
11761439\_ 5. 577385 5. 659928 5. 496781 5. 480966 5. 67411 5. 6993  
11761440\_ 4. 462468 4. 357262 4. 450381 4. 543718 4. 459939 4. 554647  
11761441\_ 2. 605516 2. 83853 2. 944395 3. 023342 3. 116628 2. 76798  
11761442\_ 6. 345566 6. 448669 6. 12175 6. 30364 6. 327759 6. 364053  
11761443\_ 5. 133265 5. 327779 5. 332868 5. 22592 5. 17111 5. 324336  
11761444\_ 3. 559567 3. 530073 3. 532086 3. 567642 3. 663047 3. 57483  
11761445\_ 3. 963041 4. 112052 4. 034157 4. 201628 3. 997616 4. 371651  
11761446\_ 5. 303774 5. 500449 5. 56972 5. 636048 5. 608643 5. 657311  
11761447\_ 5. 512912 5. 521222 5. 494908 5. 515748 5. 515748 5. 498625  
11761448\_ 4. 128563 4. 193453 4. 547521 4. 333625 4. 459939 4. 054288  
11761449\_ 3. 740069 3. 319941 3. 427006 3. 365814 3. 304611 3. 571114  
11761450\_ 7. 109346 7. 217571 7. 049497 7. 230478 7. 293235 7. 312761  
11761451\_ 3. 665611 3. 842875 3. 877698 3. 997131 3. 87325 4. 042689  
11761452\_ 3. 818401 3. 988976 4. 134997 4. 459939 4. 264115 4. 298765  
11761453\_ 3. 057713 3. 061205 3. 162381 2. 784744 2. 729111 2. 712714  
11761454\_ 2. 337169 1. 952728 2. 039462 2. 200796 2. 166552 2. 18238  
11761455\_ 1. 85067 1. 756738 1. 804393 1. 804393 1. 716929 1. 954475  
11761456\_ 4. 275543 4. 59426 4. 525214 4. 120989 4. 197482 4. 52373  
11761457\_ 5. 977166 6. 080684 6. 091853 6. 118838 5. 9012 5. 959984

11761458\_ 5. 966927 6. 229506 6. 045089 6. 018553 6. 081706 6. 084268  
11761459\_ 2. 412173 2. 200549 2. 278847 2. 35097 2. 599944 2. 622183  
11761460\_ 5. 34118 5. 305307 5. 333988 4. 947362 5. 07479 5. 150921  
11761461\_ 4. 533927 4. 639457 4. 449579 4. 44658 4. 422619 4. 469294  
11761462\_ 2. 483502 2. 4637 2. 433326 2. 455377 2. 545736 2. 605516  
11761463\_ 4. 61063 4. 9226 4. 73643 4. 698461 4. 795441 4. 701592  
11761464\_ 3. 383391 3. 606404 3. 502638 3. 508421 3. 596785 3. 398236  
11761465\_ 6. 694165 6. 686431 6. 672938 7. 009306 6. 8895 7. 105913  
11761466\_ 5. 98191 6. 118838 6. 093344 5. 554436 5. 489075 5. 566473  
11761467\_ 5. 377325 5. 639307 5. 150277 5. 444213 5. 480971 5. 408562  
11761468\_ 3. 844054 3. 839346 3. 644072 3. 536665 3. 546197 3. 541164  
11761469\_ 8. 189384 8. 35205 8. 222973 8. 277474 8. 208955 8. 289603  
11761470\_ 6. 079416 6. 058786 6. 097546 5. 999259 5. 910341 6. 017389  
11761471\_ 5. 069553 5. 104185 5. 118783 5. 171455 5. 338361 5. 14736  
11761472\_ 4. 073744 3. 889965 4. 065154 4. 347179 4. 08717 4. 086896  
11761473\_ 4. 931978 5. 024769 4. 88241 5. 189628 5. 240725 5. 390719  
11761474\_ 5. 584813 5. 586665 5. 693613 5. 438405 5. 411719 5. 648514  
11761475\_ 5. 721256 5. 62719 5. 959752 5. 468166 5. 285153 5. 451848  
11761476\_ 2. 933999 2. 965505 2. 864075 3. 196652 2. 966645 2. 966645  
11761477\_ 7. 020403 7. 005314 7. 005421 7. 01912 7. 030158 7. 1119  
11761478\_ 4. 766993 4. 657349 4. 820994 4. 766387 4. 862957 4. 759669  
11761479\_ 6. 322717 6. 226816 6. 392872 6. 387604 6. 481046 6. 351387  
11761480\_ 4. 68997 4. 820858 4. 859374 5. 01593 5. 055097 5. 010237  
11761481\_ 6. 122293 6. 081693 6. 282224 5. 769336 5. 584813 5. 756598  
11761482\_ 7. 579907 7. 691841 7. 566987 7. 521536 7. 416582 7. 458024  
11761483\_ 4. 081132 4. 049271 4. 083044 4. 140219 4. 247614 4. 153813  
11761484\_ 7. 475258 7. 426257 7. 356608 7. 331642 7. 263228 7. 365148  
11761485\_ 4. 570533 4. 569212 4. 818551 4. 352659 4. 627194 4. 649362  
11761486\_ 5. 400638 5. 518169 5. 298454 5. 480966 5. 440242 5. 469014  
11761487\_ 3. 217035 3. 043562 3. 110795 3. 118247 3. 083935 3. 307152  
11761488\_ 5. 346251 5. 495388 5. 387184 5. 297749 5. 250378 5. 37103  
11761489\_ 6. 118838 6. 139304 6. 159771 6. 139304 6. 00364 6. 162356  
11761490\_ 3. 677186 3. 677186 3. 677186 3. 684385 3. 698676 3. 583254  
11761491\_ 3. 997931 4. 307921 4. 160785 4. 233866 4. 003588 4. 139781  
11761492\_ 3. 249924 3. 021927 2. 953599 3. 047531 3. 047531 2. 945929  
11761493\_ 3. 206153 3. 206153 2. 947387 3. 206153 3. 211527 3. 188462  
11761494\_ 3. 742269 3. 853919 4. 013642 4. 04653 4. 0356 3. 981248  
11761495\_ 3. 666561 3. 709621 3. 422489 3. 361722 3. 636067 3. 376162  
11761496\_ 3. 001454 3. 303549 3. 404807 3. 549632 3. 354617 3. 66329  
11761497\_ 7. 117101 6. 864289 7. 008295 6. 787852 6. 756768 6. 905814  
11761498\_ 5. 262016 5. 238838 5. 129153 5. 291251 5. 434733 5. 273906  
11761499\_ 5. 176048 5. 233479 5. 106156 5. 060176 5. 156895 5. 215726  
11761500\_ 5. 965126 5. 874088 5. 847127 5. 794286 5. 980978 5. 930986  
11761501\_ 3. 773887 3. 854213 3. 867819 3. 964791 3. 948145 3. 956575  
11761502\_ 3. 407959 3. 458343 3. 51778 3. 546206 3. 467749 3. 444798  
11761503\_ 2. 319032 2. 52391 2. 257388 2. 353036 2. 359877 2. 717849  
11761504\_ 6. 037098 5. 908891 5. 973344 5. 83682 5. 968638 5. 990418  
11761505\_ 5. 766476 5. 777127 5. 696787 5. 586434 5. 730568 5. 744815  
11761506\_ 5. 3137 5. 182792 5. 302047 5. 266319 5. 18174 5. 211817  
11761507\_ 2. 924988 2. 962113 2. 734819 2. 702284 2. 718322 2. 61923  
11761508\_ 1. 902152 1. 930299 2. 249093 2. 109026 2. 331907 2. 045376

11761509\_ 4. 514853 4. 459939 4. 263396 4. 441474 4. 632857 4. 425444  
11761510\_ 3. 925181 4. 062154 4. 019058 3. 817793 3. 999353 3. 975513  
11761511\_ 4. 988201 4. 737845 4. 602944 4. 871442 5. 061454 5. 055492  
11761512\_ 3. 939124 3. 949613 4. 223155 3. 945804 4. 00994 4. 062275  
11761513\_ 5. 67219 5. 920542 5. 836497 5. 910773 5. 870242 5. 905892  
11761514\_ 11. 75117 11. 71358 11. 72823 11. 05199 11. 10174 11. 08566  
11761515\_ 12. 55754 12. 54157 12. 53445 12. 0457 12. 05065 12. 06905  
11761516\_ 11. 82759 11. 83671 11. 84478 11. 18012 11. 22968 11. 30763  
11761517\_ 3. 190278 3. 474637 3. 290188 3. 02182 3. 105818 3. 190278  
11761518\_ 4. 809052 4. 943548 4. 900562 4. 958547 4. 832992 5. 008753  
11761519\_ 2. 686296 2. 775364 2. 688883 2. 775364 2. 945224 2. 605516  
11761520\_ 5. 476892 5. 115441 5. 274373 5. 318418 5. 285328 5. 378876  
11761521\_ 3. 899683 4. 084613 4. 087653 4. 070456 4. 215185 4. 054288  
11761522\_ 4. 166179 4. 094447 4. 206073 4. 347179 4. 283177 4. 328724  
11761523\_ 5. 692558 5. 695361 5. 792073 5. 894697 5. 866616 5. 783195  
11761524\_ 2. 310465 2. 386013 2. 36727 2. 465806 2. 545776 2. 360201  
11761525\_ 4. 451273 4. 582483 4. 492577 4. 473611 4. 454586 4. 62154  
11761526\_ 4. 022772 4. 221574 3. 744185 4. 067703 4. 043054 3. 973929  
11761527\_ 4. 918001 5. 002349 4. 823116 5. 130151 5. 271975 5. 059506  
11761528\_ 4. 939452 4. 916356 4. 940284 4. 998236 4. 957562 5. 0185  
11761529\_ 5. 87527 5. 815789 5. 803804 5. 709769 5. 813738 5. 777844  
11761530\_ 7. 377441 7. 329685 7. 354797 7. 099734 6. 929957 7. 201258  
11761531\_ 5. 419565 5. 476746 5. 369752 5. 476271 5. 468803 5. 4786  
11761532\_ 4. 414823 4. 335594 4. 584933 4. 597051 4. 510102 4. 495754  
11761533\_ 2. 710505 2. 47102 2. 612375 2. 605516 2. 605516 2. 702489  
11761534\_ 4. 210422 4. 512341 4. 287593 4. 353075 4. 52263 4. 443273  
11761535\_ 6. 485113 6. 469658 6. 526174 6. 300302 6. 443525 6. 368148  
11761536\_ 2. 787313 3. 180062 3. 821952 2. 72016 2. 981542 2. 83198  
11761537\_ 4. 032989 3. 999562 4. 077981 4. 039317 4. 032989 3. 976312  
11761538\_ 7. 423952 7. 438442 7. 446462 7. 208375 7. 224865 7. 367735  
11761539\_ 6. 599839 6. 569019 6. 574834 6. 446718 6. 530832 6. 557068  
11761540\_ 5. 326184 5. 354741 5. 201022 5. 216942 5. 303381 5. 295677  
11761541\_ 2. 135523 2. 109963 2. 21372 2. 21372 2. 407754 2. 202508  
11761542\_ 4. 184031 4. 072772 4. 411857 4. 394346 4. 225401 4. 092899  
11761543\_ 4. 815683 4. 991403 5. 029529 4. 977216 5. 045491 4. 815335  
11761544\_ 2. 443861 2. 566201 2. 67997 2. 499923 2. 605866 2. 640303  
11761545\_ 3. 486436 3. 27365 3. 440649 3. 46393 3. 639769 3. 468514  
11761546\_ 2. 633483 2. 941124 2. 892608 3. 110811 3. 084577 3. 009995  
11761547\_ 4. 721245 4. 628373 4. 731826 4. 64819 4. 440594 4. 686541  
11761548\_ 3. 905542 4. 098859 3. 84737 4. 036574 4. 048716 4. 054288  
11761549\_ 4. 485823 4. 557759 4. 619737 4. 590821 4. 629401 4. 574186  
11761550\_ 6. 014267 6. 09349 5. 939746 5. 969089 5. 975938 5. 975938  
11761551\_ 4. 673383 4. 850379 4. 760916 4. 918014 4. 86179 4. 980886  
11761552\_ 5. 209259 5. 069523 5. 02444 5. 45182 5. 530239 5. 400302  
11761553\_ 5. 732161 5. 630764 5. 585547 5. 894227 5. 981677 5. 833803  
11761554\_ 5. 993966 6. 126744 5. 979037 6. 250897 6. 203122 6. 156017  
11761555\_ 4. 057517 4. 158572 3. 771155 4. 013659 4. 156863 4. 108472  
11761556\_ 2. 732148 2. 744426 2. 732148 3. 036464 2. 798956 2. 956242  
11761557\_ 2. 205376 2. 224497 2. 134482 2. 242023 2. 153032 2. 095256  
11761558\_ 3. 090256 3. 19223 3. 399298 3. 416218 3. 101013 3. 290188  
11761559\_ 7. 683543 7. 59988 7. 719303 7. 505964 7. 508399 7. 538811

11761560\_ 8. 627135 8. 611929 8. 667483 8. 31257 8. 268717 8. 270167  
11761561\_ 5. 443221 5. 408889 5. 383797 5. 50416 5. 714567 5. 308915  
11761562\_ 4. 816947 4. 709463 4. 780752 4. 678204 4. 623116 4. 708628  
11761563\_ 4. 900031 4. 770743 4. 942454 4. 773615 4. 79603 4. 866013  
11761564\_ 2. 455741 2. 489152 2. 47102 2. 325625 2. 505766 2. 714104  
11761565\_ 6. 215145 6. 148102 6. 225021 6. 621389 6. 645459 6. 623838  
11761566\_ 4. 423986 4. 402575 4. 627869 4. 520959 4. 471006 4. 546075  
11761567\_ 4. 226678 4. 351245 4. 351245 4. 40461 4. 459939 4. 347179  
11761568\_ 7. 599877 7. 634658 7. 521984 7. 777754 7. 786546 7. 609937  
11761569\_ 7. 400605 7. 454388 7. 417811 7. 699369 7. 701032 7. 615868  
11761570\_ 4. 763543 4. 584933 4. 52373 4. 790606 4. 713473 4. 82777  
11761571\_ 4. 62692 4. 769442 4. 429048 4. 81632 4. 895741 4. 881911  
11761572\_ 2. 045276 2. 045276 2. 029353 2. 098205 2. 045276 1. 999374  
11761573\_ 3. 202124 3. 105152 3. 344565 3. 299106 3. 202124 3. 111712  
11761574\_ 5. 332882 5. 312214 5. 345455 5. 321749 5. 415155 5. 347862  
11761575\_ 5. 544167 5. 543316 5. 414869 5. 496601 5. 717775 5. 567881  
11761576\_ 7. 74163 7. 821211 7. 719552 7. 829888 7. 866611 7. 953012  
11761577\_ 3. 878899 3. 855391 3. 740892 4. 192965 4. 057218 4. 323521  
11761578\_ 5. 361363 5. 323931 5. 050995 5. 376547 5. 367784 5. 318206  
11761579\_ 3. 051005 3. 278978 3. 131663 2. 979677 3. 141674 3. 078334  
11761580\_ 4. 643717 4. 514475 4. 597037 4. 64692 4. 555269 4. 52373  
11761581\_ 4. 602817 4. 335594 4. 570085 4. 698799 4. 56184 4. 701965  
11761582\_ 6. 67471 6. 602673 6. 587942 6. 448378 6. 455763 6. 51976  
11761583\_ 3. 809208 3. 907887 3. 850246 3. 715836 3. 801036 3. 954157  
11761584\_ 5. 76612 5. 982799 5. 710312 5. 750791 5. 888916 5. 88176  
11761585\_ 5. 706658 5. 75002 5. 657327 5. 517322 5. 847031 5. 782139  
11761586\_ 4. 853578 4. 918232 4. 930629 4. 924801 4. 957042 5. 021648  
11761587\_ 6. 315855 6. 55906 6. 373274 6. 542221 6. 658066 6. 402014  
11761588\_ 4. 312516 4. 450179 4. 246875 4. 099474 4. 259968 4. 246875  
11761589\_ 5. 633977 5. 551988 5. 587185 5. 765041 5. 791739 5. 704919  
11761590\_ 4. 395839 4. 52373 4. 234816 4. 755561 4. 892643 4. 879767  
11761591\_ 2. 825459 2. 875082 2. 834935 2. 825459 2. 838639 2. 848116  
11761592\_ 2. 789676 3. 003027 2. 954672 2. 764385 2. 887869 2. 901342  
11761593\_ 4. 193477 4. 020715 4. 023351 4. 559953 4. 0897 4. 347179  
11761594\_ 5. 566424 5. 79518 5. 764566 5. 548352 5. 907986 5. 782207  
11761595\_ 5. 065939 5. 189628 5. 098011 5. 178859 5. 132128 5. 140621  
11761596\_ 4. 73277 4. 513545 4. 687911 5. 051742 4. 776278 5. 073036  
11761597\_ 2. 875817 3. 046202 3. 146925 3. 043945 2. 976105 2. 843629  
11761598\_ 3. 412378 3. 463359 3. 400707 3. 349629 3. 355812 3. 398236  
11761599\_ 4. 961496 4. 989779 5. 118072 5. 194967 5. 318164 5. 118072  
11761600\_ 6. 244666 6. 453271 6. 334053 6. 448378 6. 418783 6. 401153  
11761601\_ 5. 703986 5. 88704 5. 629273 5. 816222 5. 84953 5. 80703  
11761602\_ 5. 09716 5. 472714 5. 017252 5. 373758 5. 469442 5. 302188  
11761603\_ 2. 54005 2. 54005 2. 54005 2. 443078 2. 54005 2. 858406  
11761604\_ 3. 117373 3. 460817 3. 229623 3. 221799 3. 485626 3. 328262  
11761605\_ 3. 325132 3. 406814 3. 421657 3. 282154 3. 30073 3. 294778  
11761606\_ 5. 73394 5. 789947 5. 623611 5. 965254 5. 798 5. 862081  
11761607\_ 2. 082512 1. 898324 2. 104012 2. 150454 2. 066217 2. 123133  
11761608\_ 4. 542326 4. 775239 4. 580205 4. 52373 4. 815122 4. 682281  
11761609\_ 3. 88957 3. 756497 4. 035419 3. 584531 3. 449524 3. 88957  
11761610\_ 6. 99199 7. 067112 6. 967807 6. 958091 7. 066036 6. 960184

11761611\_ 3. 878937 3. 685682 3. 949983 3. 654985 3. 676823 3. 796811  
11761612\_ 4. 53191 4. 56679 4. 643717 4. 643717 4. 766887 4. 643717  
11761613\_ 2. 96163 3. 212351 3. 088437 3. 101013 3. 088437 3. 012205  
11761614\_ 7. 487698 7. 701614 7. 685691 7. 56636 7. 644077 7. 588274  
11761615\_ 5. 511876 5. 71629 5. 691671 5. 674386 5. 674095 5. 641848  
11761616\_ 3. 46652 3. 361833 3. 342712 3. 361833 3. 300102 3. 372657  
11761617\_ 3. 772457 3. 688765 3. 445814 3. 723187 3. 715139 3. 716269  
11761618\_ 3. 914418 3. 961423 3. 667117 4. 096416 4. 108638 3. 891548  
11761619\_ 5. 397431 5. 448296 5. 26034 5. 461035 5. 453793 5. 418061  
11761620\_ 3. 792005 4. 067703 4. 01872 4. 310413 4. 258437 4. 11212  
11761621\_ 5. 030477 5. 016497 5. 086068 5. 019948 5. 130892 5. 12683  
11761622\_ 8. 47026 8. 426373 8. 520186 8. 520186 8. 60662 8. 704592  
11761623\_ 4. 8624 4. 40461 4. 584933 4. 617161 4. 635246 4. 681961  
11761624\_ 7. 417311 7. 372046 7. 307421 7. 411718 7. 482432 7. 377291  
11761625\_ 2. 306021 2. 060569 2. 3235 1. 969691 2. 107535 2. 084052  
11761626\_ 2. 632008 2. 359813 2. 253011 2. 588577 2. 405083 2. 341145  
11761627\_ 4. 44084 4. 465966 4. 09437 4. 2072 4. 253945 4. 194319  
11761628\_ 2. 227698 2. 030767 2. 178465 1. 957704 2. 211749 2. 19319  
11761629\_ 8. 405033 8. 405511 8. 442038 8. 466307 8. 393153 8. 429048  
11761630\_ 3. 638176 3. 727119 3. 917563 3. 847614 3. 441245 3. 797751  
11761631\_ 6. 773275 7. 031531 6. 902425 6. 94441 7. 018443 6. 986043  
11761632\_ 3. 818401 3. 854036 3. 433872 3. 394637 3. 606313 3. 319982  
11761633\_ 3. 249924 3. 239885 3. 597999 2. 83198 3. 190101 3. 200316  
11761634\_ 6. 379986 6. 314535 6. 358197 5. 529989 5. 957954 5. 955286  
11761635\_ 4. 354256 4. 629288 4. 503668 4. 606702 4. 96695 4. 44751  
11761636\_ 4. 720895 4. 898521 5. 004033 5. 162483 4. 772501 4. 83578  
11761637\_ 4. 798369 4. 934339 4. 976343 5. 073776 5. 074306 5. 046556  
11761638\_ 4. 416706 4. 333911 4. 392695 4. 387263 4. 408991 4. 672396  
11761639\_ 5. 396229 5. 518714 5. 453102 5. 611994 5. 406956 5. 543885  
11761640\_ 6. 489319 6. 564319 6. 44941 6. 301001 6. 423372 6. 464805  
11761641\_ 4. 924657 4. 745895 4. 790534 4. 956236 5. 060612 4. 705331  
11761642\_ 6. 238628 6. 27742 6. 329332 5. 589624 5. 438365 5. 564518  
11761643\_ 8. 642569 8. 677131 8. 575171 8. 767758 8. 816685 8. 843691  
11761644\_ 4. 345183 4. 249429 4. 351464 4. 443421 4. 476458 4. 439939  
11761645\_ 3. 003626 3. 013805 2. 770068 2. 915005 3. 306585 2. 964509  
11761646\_ 5. 054363 5. 183296 4. 989907 5. 15221 5. 080085 5. 046657  
11761647\_ 3. 901395 3. 82523 4. 043156 3. 815718 3. 836466 3. 777541  
11761648\_ 1. 946096 2. 11864 2. 11864 2. 025268 2. 231446 2. 027449  
11761649\_ 1. 914468 2. 324299 2. 205331 2. 26053 2. 341436 2. 141885  
11761650\_ 2. 801888 3. 10475 3. 243115 2. 934451 2. 837479 2. 894396  
11761651\_ 2. 725712 2. 638691 2. 764166 2. 575624 2. 70003 2. 725237  
11761652\_ 3. 080385 3. 149563 2. 753849 3. 05619 3. 038732 3. 114809  
11761653\_ 3. 96362 3. 932399 3. 567688 3. 945808 4. 061497 3. 912966  
11761654\_ 4. 124633 4. 211857 4. 206375 4. 261573 4. 354529 4. 234909  
11761655\_ 3. 525983 3. 892545 3. 445469 3. 573641 3. 503743 3. 787752  
11761656\_ 3. 84798 3. 884908 3. 939983 3. 884908 4. 101642 3. 954157  
11761657\_ 5. 285218 5. 46418 5. 243568 5. 30637 5. 349369 5. 284211  
11761658\_ 4. 700734 4. 459939 4. 5346 4. 562955 4. 55423 4. 624089  
11761659\_ 6. 564534 6. 675308 6. 454185 6. 598564 6. 601877 6. 535096  
11761660\_ 6. 159771 6. 302175 6. 081052 6. 173161 6. 238918 6. 17981  
11761661\_ 2. 142759 2. 022304 2. 213208 2. 024916 2. 268069 2. 09737



11761662\_ 3. 768354 3. 666107 3. 790452 3. 790452 3. 695625 3. 768354  
11761663\_ 6. 051554 6. 236551 5. 925091 5. 922176 6. 106423 5. 992354  
11761664\_ 7. 290468 7. 328588 7. 263614 7. 317368 7. 343382 7. 340244  
11761665\_ 3. 028552 3. 408465 2. 867432 3. 52302 3. 315083 3. 174332  
11761666\_ 5. 480966 5. 888231 5. 601837 5. 643713 5. 699305 5. 689178  
11761667\_ 5. 349008 5. 489361 5. 340509 5. 270449 5. 42324 5. 493708  
11761668\_ 5. 305134 5. 27926 5. 338585 5. 528624 5. 449997 5. 362322  
11761669\_ 2. 82988 3. 041686 3. 096403 3. 185479 2. 969537 3. 13804  
11761670\_ 4. 461818 4. 391004 4. 643717 4. 535172 4. 646284 4. 415744  
11761671\_ 4. 814477 4. 696944 4. 919984 4. 311613 4. 563849 4. 472971  
11761672\_ 4. 93206 4. 709463 4. 820835 4. 992243 5. 038185 4. 826059  
11761673\_ 1. 969752 2. 341957 2. 045276 1. 879246 2. 038111 2. 038111  
11761674\_ 3. 25942 3. 347546 3. 503743 3. 586335 3. 69681 3. 503743  
11761675\_ 4. 347179 4. 204797 4. 135496 4. 329874 4. 329874 4. 275281  
11761676\_ 7. 401492 7. 377238 7. 376078 7. 211995 7. 223812 7. 266317  
11761677\_ 4. 582506 4. 656821 4. 631179 4. 518525 4. 490498 4. 472373  
11761678\_ 5. 871516 5. 984377 5. 982904 5. 943841 6. 033062 5. 948599  
11761679\_ 4. 767302 4. 736081 4. 314523 4. 690985 4. 770587 4. 815683  
11761680\_ 3. 206153 3. 188028 3. 072122 3. 206153 3. 369539 3. 261151  
11761681\_ 5. 062679 5. 326745 5. 235787 5. 2222 5. 145654 5. 091517  
11761682\_ 4. 46963 4. 695734 4. 370337 4. 71328 4. 908189 4. 866013  
11761683\_ 5. 046016 4. 932093 5. 087715 5. 097316 5. 055109 5. 098783  
11761684\_ 4. 874234 4. 834538 4. 733566 4. 805214 4. 821518 4. 951764  
11761685\_ 4. 564036 4. 534542 4. 398584 4. 190156 4. 239462 4. 262033  
11761686\_ 5. 114335 4. 808369 4. 946436 4. 261311 4. 245396 4. 278774  
11761687\_ 7. 847307 7. 874439 7. 719677 7. 928766 7. 899359 7. 930628  
11761688\_ 1. 90165 1. 83548 1. 865808 1. 965783 1. 83208 1. 865808  
11761689\_ 4. 290406 4. 191991 4. 157112 4. 262618 4. 343576 4. 157112  
11761690\_ 6. 556667 6. 546818 6. 547285 6. 797562 6. 718354 6. 617088  
11761691\_ 4. 253283 4. 211336 4. 188586 4. 314656 4. 291906 4. 167787  
11761692\_ 3. 524625 3. 294782 3. 365273 3. 237804 3. 348885 3. 102965  
11761693\_ 3. 884656 3. 959795 4. 186486 3. 934918 4. 005243 4. 07822  
11761694\_ 5. 579821 5. 719844 5. 582952 5. 694566 5. 800391 5. 801018  
11761695\_ 1. 886885 1. 796006 1. 73951 1. 691983 1. 716539 1. 692864  
11761696\_ 7. 077512 7. 02936 6. 939483 7. 141692 7. 248752 7. 093435  
11761697\_ 4. 658662 4. 844246 4. 772366 4. 936784 4. 844246 4. 94619  
11761698\_ 4. 5485 4. 52373 4. 412482 4. 275543 4. 526546 4. 279203  
11761699\_ 3. 818401 3. 723624 3. 503743 3. 641182 3. 449585 3. 503743  
11761700\_ 6. 905886 6. 977622 6. 825449 6. 970836 6. 984376 6. 988861  
11761701\_ 3. 59069 3. 751519 3. 46145 3. 558864 3. 521532 3. 496683  
11761702\_ 6. 482691 6. 578629 6. 613451 6. 721991 6. 733923 6. 721991  
11761703\_ 10. 65277 10. 60312 10. 62225 10. 42256 10. 45164 10. 36426  
11761704\_ 4. 765439 4. 870612 4. 904832 4. 907679 4. 787461 4. 784807  
11761705\_ 6. 223508 6. 282224 6. 301783 6. 329081 6. 34864 6. 347019  
11761706\_ 2. 361778 2. 47102 2. 616388 2. 645352 2. 390473 2. 283423  
11761707\_ 2. 361778 2. 546391 2. 605516 2. 633863 2. 345718 2. 343872  
11761708\_ 3. 0445 3. 34256 3. 351905 3. 225458 3. 195803 3. 317736  
11761709\_ 3. 984061 3. 999702 4. 102256 4. 191332 4. 108731 4. 265152  
11761710\_ 3. 474482 3. 298292 3. 280894 3. 543123 3. 590886 3. 508357  
11761711\_ 4. 913228 4. 723825 4. 851065 5. 104247 4. 995692 4. 877841  
11761712\_ 5. 745516 5. 592248 5. 499761 5. 485585 5. 499131 5. 543634

11761713\_ 5. 663749 5. 789695 5. 711592 5. 891856 5. 912183 5. 762789  
11761714\_ 5. 013881 5. 073036 4. 841157 5. 263183 5. 150327 5. 118228  
11761715\_ 5. 409222 5. 360798 5. 44386 5. 239279 5. 426945 5. 297498  
11761716\_ 5. 36906 5. 533797 5. 376624 5. 499014 5. 585101 5. 535336  
11761717\_ 3. 840777 4. 009362 3. 850246 3. 925181 3. 912062 3. 856545  
11761718\_ 3. 793627 3. 974808 3. 899584 3. 900429 3. 801444 3. 879309  
11761719\_ 6. 304962 6. 321838 6. 318829 6. 25114 6. 258418 6. 307656  
11761720\_ 6. 218877 6. 315365 6. 284989 6. 266493 6. 207596 6. 203143  
11761721\_ 3. 326956 3. 23805 3. 482724 3. 482724 3. 787148 3. 421075  
11761722\_ 4. 533903 4. 331187 4. 434948 4. 584933 4. 715924 4. 359418  
11761723\_ 1. 746253 1. 75573 1. 746253 1. 96721 1. 853055 1. 843578  
11761724\_ 3. 395018 3. 53754 3. 503123 3. 130884 3. 36339 3. 39893  
11761725\_ 3. 090573 3. 1667 2. 861535 3. 242012 3. 374998 3. 429753  
11761726\_ 2. 342908 2. 60942 2. 541172 2. 281877 2. 550915 2. 476196  
11761727\_ 5. 508712 5. 704919 5. 726514 6. 101407 5. 936401 5. 76914  
11761728\_ 5. 403422 5. 096068 5. 412317 5. 490894 5. 523406 5. 550925  
11761729\_ 4. 493865 4. 368143 4. 595516 4. 820834 4. 605274 4. 359091  
11761730\_ 7. 58333 7. 604802 7. 557552 7. 508685 7. 619768 7. 657243  
11761731\_ 5. 584813 5. 519932 5. 582504 5. 461899 5. 575358 5. 446725  
11761732\_ 5. 611032 5. 664701 5. 595065 5. 626481 5. 648837 5. 730347  
11761733\_ 2. 986676 3. 119799 2. 683308 2. 881547 2. 815331 2. 764907  
11761734\_ 10. 93116 10. 91497 10. 87451 11. 26664 11. 30398 11. 30396  
11761735\_ 5. 44073 5. 574384 4. 991293 5. 48204 5. 491299 5. 609492  
11761736\_ 4. 146133 4. 393545 4. 158582 4. 379283 4. 201188 4. 347179  
11761737\_ 5. 820052 5. 841177 5. 820052 5. 814533 5. 839794 5. 940908  
11761738\_ 9. 337671 9. 215325 9. 290855 9. 704577 9. 634558 9. 593557  
11761739\_ 5. 927244 6. 002374 5. 799181 6. 020561 5. 910933 5. 878296  
11761740\_ 4. 228249 4. 467339 4. 628094 4. 405686 4. 569986 4. 390587  
11761741\_ 3. 070179 2. 928346 3. 103999 2. 744476 2. 801576 2. 809239  
11761742\_ 5. 61023 5. 527195 5. 802334 4. 429792 4. 350171 4. 29274  
11761743\_ 5. 584813 5. 43218 5. 331251 5. 539128 5. 638895 5. 570422  
11761744\_ 4. 855195 4. 783916 4. 407237 4. 675561 4. 676154 4. 712831  
11761745\_ 2. 581953 2. 845047 2. 849922 3. 072373 2. 858739 3. 09405  
11761746\_ 4. 669454 4. 734577 4. 844362 4. 658593 4. 744596 4. 590182  
11761747\_ 5. 315408 4. 882344 4. 922319 4. 882344 4. 866819 4. 765028  
11761748\_ 4. 778025 4. 866774 4. 820584 4. 866774 4. 949265 4. 834182  
11761749\_ 2. 372162 2. 836732 2. 549417 2. 730047 2. 640971 2. 461572  
11761750\_ 5. 198173 5. 165262 4. 969842 5. 143269 5. 103152 5. 029611  
11761751\_ 5. 079779 5. 148019 5. 205662 5. 25126 5. 235489 4. 982189  
11761752\_ 4. 495722 4. 527187 4. 392919 4. 079598 3. 950132 4. 107796  
11761753\_ 2. 693829 2. 563598 2. 517185 2. 582117 2. 677061 2. 614043  
11761754\_ 4. 820893 4. 959709 4. 831627 4. 949849 4. 964816 5. 013093  
11761755\_ 3. 159001 3. 097612 2. 99081 3. 097685 2. 984309 2. 990737  
11761756\_ 5. 577523 5. 737105 5. 636987 5. 667872 5. 720937 5. 670094  
11761757\_ 5. 361468 5. 510739 5. 297498 5. 459157 5. 563645 5. 370797  
11761758\_ 4. 197026 4. 35886 4. 484799 4. 389191 4. 20491 4. 202747  
11761759\_ 7. 488044 7. 681052 7. 502898 7. 630386 7. 600109 7. 456039  
11761760\_ 4. 372102 4. 401968 4. 289602 4. 370988 4. 40461 4. 416591  
11761761\_ 5. 993211 6. 194145 6. 084194 6. 261593 6. 250197 6. 229621  
11761762\_ 5. 311105 5. 29196 5. 212031 5. 350511 5. 453793 5. 34229  
11761763\_ 4. 996032 5. 212945 4. 802628 5. 058099 4. 944899 4. 961127

11761764\_ 3. 59835 3. 766349 3. 29144 3. 565962 3. 452304 3. 500041  
11761765\_ 3. 701405 3. 729675 3. 610344 4. 236924 3. 969526 4. 153842  
11761766\_ 5. 078175 5. 031394 4. 938825 5. 036818 5. 209797 5. 172261  
11761767\_ 5. 686987 5. 771824 5. 795978 5. 761804 5. 784557 5. 819911  
11761768\_ 4. 305881 4. 370649 4. 402641 4. 45554 4. 49892 4. 425882  
11761769\_ 3. 949521 3. 997131 4. 083062 3. 925181 4. 09779 3. 898251  
11761770\_ 5. 884046 5. 89104 5. 822013 5. 876392 5. 920668 6. 011116  
11761771\_ 6. 206103 6. 209996 6. 207892 6. 243368 6. 250885 6. 284928  
11761772\_ 7. 222953 7. 14521 7. 231465 7. 202854 7. 15301 7. 219509  
11761773\_ 7. 941508 7. 924035 7. 846848 7. 936609 7. 938324 8. 000375  
11761774\_ 3. 431285 3. 619113 3. 409539 3. 471704 3. 658522 3. 617847  
11761775\_ 6. 024439 5. 741092 6. 026242 5. 251348 5. 405948 5. 407157  
11761776\_ 2. 711709 2. 734969 2. 981639 2. 91978 2. 652809 2. 71651  
11761777\_ 6. 768675 6. 898227 6. 67941 6. 891304 6. 890037 6. 881058  
11761778\_ 5. 445442 5. 6008 5. 449931 5. 646567 5. 466411 5. 507897  
11761779\_ 5. 540126 5. 729661 5. 584813 5. 775445 5. 757836 5. 798613  
11761780\_ 6. 713715 6. 602134 6. 66837 6. 515441 6. 566696 6. 489868  
11761781\_ 8. 130135 7. 968024 8. 061399 7. 770364 7. 708856 7. 741467  
11761782\_ 4. 476164 4. 419661 4. 392467 4. 58357 4. 599875 4. 409579  
11761783\_ 6. 166483 6. 410543 6. 153958 6. 163724 6. 349144 6. 298982  
11761784\_ 4. 638471 4. 888841 4. 593776 4. 85654 4. 909225 4. 746855  
11761785\_ 5. 253962 5. 309674 5. 124955 5. 26034 5. 26034 5. 253962  
11761786\_ 5. 054692 5. 072254 4. 973824 5. 073036 4. 973824 5. 029529  
11761787\_ 3. 675907 4. 057075 3. 873109 3. 951032 4. 054288 4. 036867  
11761788\_ 3. 81701 3. 609658 3. 711503 3. 748597 3. 711503 3. 763969  
11761789\_ 5. 199203 5. 380649 5. 2222 5. 35436 5. 199203 5. 374866  
11761790\_ 3. 412262 3. 7348 3. 654993 3. 72263 3. 8377 3. 779062  
11761791\_ 5. 511697 5. 441401 5. 381543 5. 441401 5. 421346 5. 491614  
11761792\_ 5. 81789 6. 163797 5. 996126 6. 000601 5. 918745 6. 054271  
11761793\_ 2. 905446 2. 912667 2. 872104 2. 844179 2. 928239 2. 874081  
11761794\_ 4. 160142 4. 103366 4. 135496 4. 135496 4. 250199 4. 162934  
11761795\_ 4. 085102 3. 726169 4. 163805 3. 997131 4. 347179 4. 192  
11761796\_ 4. 827705 4. 811491 4. 705351 4. 827705 4. 892346 4. 811491  
11761797\_ 6. 328379 6. 600787 6. 372053 6. 538297 6. 480278 6. 512699  
11761798\_ 5. 576317 5. 554475 5. 511339 5. 579925 5. 584276 5. 596864  
11761799\_ 5. 800401 5. 779714 5. 726269 5. 836299 6. 014863 5. 781709  
11761800\_ 4. 843075 5. 089724 4. 983534 4. 848348 5. 116665 4. 983534  
11761801\_ 5. 708183 5. 756328 5. 667123 5. 720463 5. 893483 5. 853765  
11761802\_ 4. 643717 4. 351444 4. 299458 4. 397034 4. 590855 4. 350206  
11761803\_ 5. 698828 5. 619139 5. 419238 5. 544061 5. 614552 5. 589814  
11761804\_ 4. 743202 4. 904773 4. 788776 3. 882511 4. 035533 3. 983708  
11761805\_ 4. 432056 4. 373077 4. 412016 4. 544484 4. 395102 4. 563981  
11761806\_ 6. 54796 6. 497241 6. 406356 6. 487308 6. 427898 6. 389366  
11761807\_ 7. 57468 7. 443993 7. 591316 7. 732574 7. 64817 7. 63818  
11761808\_ 6. 335341 6. 518891 6. 282224 6. 618627 6. 427021 6. 51459  
11761809\_ 3. 441429 3. 386656 3. 441429 3. 411784 3. 417602 3. 46055  
11761810\_ 5. 630553 5. 513824 5. 547917 5. 7517 5. 54524 5. 569688  
11761811\_ 4. 564459 4. 337956 4. 256541 4. 407253 4. 367446 4. 470714  
11761812\_ 4. 793172 4. 924209 4. 876208 4. 807788 4. 667336 4. 837803  
11761813\_ 4. 59202 4. 634407 4. 524825 4. 644938 4. 520986 4. 531265  
11761814\_ 2. 660624 2. 010723 2. 463934 2. 361778 2. 605516 2. 567436

11761815\_ 5. 731062 5. 815789 5. 660828 5. 739572 5. 799043 5. 870242  
11761816\_ 4. 509911 4. 269112 4. 088892 4. 590119 4. 388197 4. 448771  
11761817\_ 4. 782982 4. 643717 4. 461895 4. 959533 4. 656248 4. 904435  
11761818\_ 2. 643624 2. 403212 2. 309422 2. 617145 2. 672493 2. 607887  
11761819\_ 2. 790761 2. 659511 2. 8163 2. 728571 2. 878676 2. 683814  
11761820\_ 4. 270256 4. 34477 4. 030113 4. 565447 4. 332781 4. 146968  
11761821\_ 3. 122119 2. 834222 3. 044891 3. 290188 3. 306585 3. 398236  
11761822\_ 4. 566294 4. 619301 4. 640702 4. 494772 4. 464151 4. 610081  
11761823\_ 2. 26877 2. 203231 2. 187308 2. 376756 2. 437959 2. 388042  
11761824\_ 3. 39764 3. 398236 3. 290188 2. 680989 2. 70916 2. 828504  
11761825\_ 4. 33178 4. 247142 4. 629567 4. 670648 4. 577928 4. 58212  
11761826\_ 5. 579241 5. 512925 5. 385121 5. 395824 5. 298969 5. 346556  
11761827\_ 4. 896493 5. 165332 5. 049222 5. 286455 5. 231126 5. 254032  
11761828\_ 5. 480966 5. 602809 5. 350247 5. 554749 5. 658069 5. 693261  
11761829\_ 3. 090323 3. 186567 3. 398236 3. 055191 3. 21279 3. 278031  
11761830\_ 6. 91345 7. 063077 6. 972234 6. 933641 6. 849603 6. 997272  
11761831\_ 6. 373046 6. 314473 6. 091109 6. 256789 6. 104931 6. 255922  
11761832\_ 6. 412821 6. 891412 6. 665265 6. 806621 6. 865884 6. 793025  
11761833\_ 5. 616077 5. 614709 5. 601243 5. 676669 5. 793767 5. 695381  
11761834\_ 5. 054476 4. 791563 4. 867877 4. 753581 4. 530202 4. 826255  
11761835\_ 2. 048915 1. 879349 1. 996044 1. 996044 1. 996044 1. 879349  
11761836\_ 2. 302374 2. 083544 2. 235709 2. 209609 2. 185004 2. 113702  
11761837\_ 5. 087054 5. 228726 5. 005345 5. 21136 5. 167558 5. 085533  
11761838\_ 2. 23656 2. 262326 2. 433491 2. 341195 2. 26633 2. 051749  
11761839\_ 4. 121684 4. 411831 4. 252083 4. 450969 4. 314066 4. 415744  
11761840\_ 6. 171475 6. 304043 6. 300643 6. 40554 6. 329564 6. 302778  
11761841\_ 4. 375647 4. 382695 4. 442373 4. 370102 4. 351831 4. 285766  
11761842\_ 4. 886095 5. 027196 4. 816249 5. 083665 4. 915329 5. 008468  
11761843\_ 2. 958244 3. 290188 3. 334009 3. 098049 3. 218592 2. 945929  
11761844\_ 4. 393322 4. 453753 4. 551467 4. 543903 4. 700243 4. 644657  
11761845\_ 2. 47102 2. 493341 2. 361778 2. 213226 2. 277151 2. 286344  
11761846\_ 4. 877794 4. 886326 4. 948027 4. 506765 4. 460764 4. 537946  
11761847\_ 5. 584813 5. 637856 5. 591867 5. 723241 5. 513105 5. 442778  
11761848\_ 3. 829809 3. 845199 3. 745128 3. 829809 4. 045073 3. 913428  
11761849\_ 3. 970034 3. 997131 3. 952334 4. 204463 4. 054288 4. 067735  
11761850\_ 5. 309604 5. 33523 5. 260851 5. 437473 5. 502766 5. 370512  
11761851\_ 5. 824824 5. 84605 5. 820052 6. 06224 5. 934556 5. 946303  
11761852\_ 6. 083502 6. 186428 5. 939853 6. 13255 6. 252426 6. 204255  
11761853\_ 5. 184524 5. 193427 5. 138317 4. 952215 5. 090237 4. 999407  
11761854\_ 5. 239493 5. 261683 5. 073036 5. 036974 5. 089272 5. 067663  
11761855\_ 5. 365886 5. 414869 5. 331426 5. 387896 5. 399465 5. 446559  
11761856\_ 6. 043643 5. 957954 5. 99206 6. 059012 5. 897416 5. 91954  
11761857\_ 4. 805683 4. 558888 4. 595736 4. 824195 4. 640838 4. 702239  
11761858\_ 5. 482402 5. 442886 5. 360694 5. 571697 5. 66083 5. 725768  
11761859\_ 4. 643583 4. 632824 4. 593393 4. 55107 4. 329815 4. 55107  
11761860\_ 7. 730391 7. 658523 7. 549028 7. 492528 7. 480077 7. 405347  
11761861\_ 4. 581217 4. 706267 4. 379603 4. 629505 4. 581217 4. 649783  
11761862\_ 3. 748587 3. 8629 3. 932059 3. 989373 3. 932087 3. 82259  
11761863\_ 5. 676289 5. 706259 5. 854137 5. 732078 5. 735685 5. 721257  
11761864\_ 7. 490146 7. 387306 7. 421896 6. 94363 6. 972708 6. 962499  
11761865\_ 3. 431299 3. 269809 3. 387982 3. 490568 3. 408282 3. 600285

11761866\_ 3. 791758 3. 720782 3. 625408 4. 000528 3. 801353 3. 876378  
11761867\_ 4. 967666 4. 967666 4. 82225 4. 858424 4. 967666 4. 967916  
11761868\_ 5. 29545 5. 160362 5. 219477 5. 003287 5. 022792 4. 916924  
11761869\_ 4. 513833 4. 513833 4. 568169 4. 905495 4. 905495 5. 124089  
11761870\_ 4. 655556 4. 696495 4. 406677 4. 696144 4. 712892 4. 700243  
11761871\_ 4. 096888 4. 135076 4. 191441 3. 95152 4. 208546 3. 95152  
11761872\_ 3. 875421 3. 704129 3. 918252 4. 23982 4. 074203 4. 061516  
11761873\_ 4. 702141 4. 608025 4. 421007 4. 459939 4. 643717 4. 643717  
11761874\_ 7. 061378 6. 91283 7. 066036 6. 609721 6. 622253 6. 800909  
11761875\_ 7. 188048 7. 103724 7. 0713 6. 933237 6. 981549 6. 818196  
11761876\_ 4. 815683 4. 797856 4. 772366 4. 692352 4. 67833 4. 724685  
11761877\_ 4. 309071 4. 193022 4. 370337 4. 210666 4. 200678 4. 27157  
11761878\_ 4. 108592 4. 214535 4. 135496 4. 136003 4. 067747 3. 801224  
11761879\_ 2. 618346 2. 458541 2. 682122 2. 643352 2. 535689 2. 510651  
11761880\_ 4. 73125 4. 881745 4. 687428 4. 73125 4. 904017 4. 578743  
11761881\_ 4. 822865 4. 493535 4. 554733 4. 611182 4. 761096 4. 879302  
11761882\_ 4. 061932 4. 427504 4. 047244 4. 200733 4. 200733 4. 200733  
11761883\_ 4. 097103 4. 085215 4. 135496 3. 887262 4. 298067 4. 31905  
11761884\_ 3. 327908 3. 220177 3. 290188 3. 218666 3. 218666 3. 326397  
11761885\_ 3. 712513 4. 007678 3. 87526 3. 686893 3. 920206 3. 606313  
11761886\_ 4. 295301 4. 174945 4. 268596 4. 671987 4. 419835 4. 286181  
11761887\_ 5. 282629 5. 366591 5. 023451 5. 380649 5. 523406 5. 322648  
11761888\_ 2. 993729 3. 138806 3. 104234 3. 289165 3. 249281 3. 288281  
11761889\_ 4. 831402 4. 895197 4. 680185 4. 935519 4. 941837 4. 910466  
11761890\_ 3. 885308 4. 001727 3. 548067 4. 049397 3. 812741 3. 895004  
11761891\_ 2. 605516 2. 722583 2. 507837 2. 741213 2. 648139 2. 674309  
11761892\_ 5. 427155 5. 345598 5. 394477 5. 427034 5. 389527 5. 406776  
11761893\_ 4. 463075 4. 495384 4. 230796 4. 515897 4. 515897 4. 697658  
11761894\_ 4. 98228 4. 825394 4. 882322 4. 833804 4. 785349 4. 785349  
11761895\_ 5. 073022 4. 918502 4. 965618 4. 927478 4. 87029 4. 864873  
11761896\_ 2. 944402 3. 002864 3. 060258 3. 196102 3. 154432 3. 14935  
11761897\_ 2. 80759 3. 092934 2. 95515 2. 958033 2. 978845 2. 731851  
11761898\_ 4. 279087 4. 260508 4. 071362 4. 275543 4. 192234 4. 507423  
11761899\_ 4. 975598 5. 163526 5. 080685 5. 071321 5. 022277 5. 196201  
11761900\_ 4. 431395 4. 428656 4. 52373 4. 75241 4. 584638 4. 488819  
11761901\_ 5. 083974 5. 271008 5. 17639 5. 256638 5. 228059 5. 178978  
11761902\_ 3. 749623 3. 870366 3. 565333 3. 946049 3. 946887 3. 798622  
11761903\_ 2. 149244 2. 131936 2. 14059 2. 331671 2. 118642 2. 203552  
11761904\_ 4. 200678 4. 384795 4. 370337 4. 438574 4. 591226 4. 470714  
11761905\_ 4. 569055 4. 798682 4. 738714 4. 77287 4. 953767 4. 863708  
11761906\_ 2. 02242 2. 065738 1. 96895 2. 04668 1. 983976 2. 320126  
11761907\_ 5. 546495 5. 409284 5. 480966 5. 2222 5. 185352 5. 19111  
11761908\_ 9. 175782 9. 222303 9. 124818 8. 011824 8. 011683 7. 977266  
11761909\_ 4. 577519 4. 759687 4. 601645 4. 525062 4. 859391 4. 745422  
11761910\_ 5. 592222 5. 731023 5. 596649 5. 641117 5. 715505 5. 710906  
11761911\_ 5. 60732 5. 707721 5. 602268 5. 763106 5. 783915 5. 709735  
11761912\_ 2. 850317 2. 817573 2. 847964 3. 156003 2. 798956 2. 817573  
11761913\_ 3. 918443 4. 203725 3. 734052 3. 807413 3. 823511 4. 172262  
11761914\_ 5. 820052 5. 584967 5. 596811 5. 480966 5. 285082 5. 247757  
11761915\_ 3. 667259 3. 539242 3. 392932 3. 629444 3. 600158 3. 667259  
11761916\_ 6. 281937 6. 300643 6. 250027 6. 097927 6. 248245 6. 325796

11761917\_ 5. 219684 5. 28909 5. 183016 5. 338752 5. 1776 5. 405125  
11761918\_ 6. 932514 7. 018581 6. 877459 6. 944209 6. 861272 6. 839454  
11761919\_ 3. 746765 3. 991264 3. 861558 3. 9546 3. 961295 4. 05629  
11761920\_ 5. 498895 5. 554436 5. 480966 5. 748986 5. 558142 5. 442778  
11761921\_ 4. 687666 4. 643717 4. 693938 4. 892377 4. 762532 4. 763543  
11761922\_ 1. 995297 2. 131936 2. 050899 2. 234732 2. 117015 2. 047338  
11761923\_ 3. 866991 4. 039992 3. 850246 3. 989995 4. 111152 4. 122446  
11761924\_ 1. 746326 1. 939922 1. 952733 2. 072941 1. 846164 1. 761828  
11761925\_ 4. 476734 4. 707851 4. 437162 4. 689168 4. 678527 4. 570479  
11761926\_ 5. 636007 5. 43674 5. 520697 5. 305191 5. 431922 5. 406478  
11761927\_ 3. 869052 3. 58635 3. 625408 3. 50202 3. 306585 3. 691195  
11761928\_ 3. 603938 3. 64222 3. 92088 3. 722078 3. 609195 3. 545027  
11761929\_ 5. 152007 4. 677607 5. 180116 4. 476323 4. 568375 4. 67624  
11761930\_ 4. 766992 4. 844488 4. 646096 4. 74262 4. 722697 4. 94743  
11761931\_ 6. 29996 6. 280985 6. 23831 6. 244666 6. 136244 6. 299176  
11761932\_ 5. 622913 5. 641385 5. 781481 5. 801168 5. 77431 5. 79751  
11761933\_ 5. 206352 4. 846661 5. 253438 5. 209813 5. 374533 5. 418283  
11761934\_ 2. 777244 2. 497751 2. 605516 2. 718322 2. 657992 2. 507473  
11761935\_ 5. 767222 5. 704919 5. 789222 5. 078471 5. 151955 5. 267265  
11761936\_ 5. 048918 5. 115271 4. 794279 5. 364475 5. 170077 5. 199757  
11761937\_ 3. 437429 3. 14532 3. 296841 3. 14216 3. 064636 3. 296841  
11761938\_ 8. 27168 8. 202642 8. 37712 7. 985564 7. 949311 7. 934644  
11761939\_ 4. 703015 4. 722136 4. 886585 4. 713069 4. 984345 4. 665884  
11761940\_ 1. 995297 2. 065846 1. 995297 1. 864963 1. 990647 2. 084271  
11761941\_ 5. 63595 5. 795909 5. 597832 5. 693755 5. 621802 5. 683538  
11761942\_ 2. 47102 3. 140546 3. 242451 2. 991678 2. 784802 3. 114936  
11761943\_ 4. 06249 4. 030706 3. 753159 4. 638973 4. 559373 4. 516816  
11761944\_ 5. 995071 6. 077538 5. 866459 5. 672285 5. 770296 5. 849541  
11761945\_ 5. 333723 5. 278326 5. 26034 5. 315147 5. 461408 5. 367972  
11761946\_ 4. 41772 4. 263062 4. 41772 4. 606098 4. 509125 4. 317762  
11761947\_ 4. 401905 4. 309502 4. 429612 4. 512724 4. 527132 4. 301947  
11761948\_ 3. 95928 3. 955849 4. 15124 3. 99413 4. 207222 3. 8716  
11761949\_ 4. 914572 5. 22236 4. 915187 4. 726068 4. 668348 4. 592145  
11761950\_ 3. 249924 3. 429579 3. 173012 3. 16316 3. 061522 3. 069945  
11761951\_ 3. 280774 3. 101049 2. 874619 3. 210583 3. 075539 3. 14938  
11761952\_ 4. 917412 4. 561157 4. 750881 4. 776388 5. 107005 5. 091512  
11761953\_ 4. 496262 4. 55808 4. 496203 4. 712715 4. 573955 4. 55808  
11761954\_ 4. 781338 4. 865772 4. 619626 4. 930702 4. 854027 4. 783306  
11761955\_ 4. 519515 4. 680409 4. 400013 4. 357374 4. 489799 4. 592368  
11761956\_ 4. 932395 4. 95041 4. 945961 5. 047178 5. 040909 4. 932924  
11761957\_ 4. 604544 4. 362503 4. 529562 4. 52864 4. 5224 4. 41588  
11761958\_ 2. 314167 2. 534048 2. 391787 2. 653918 2. 597882 2. 402975  
11761959\_ 5. 642619 5. 763634 5. 836835 5. 484233 5. 691757 5. 518254  
11761960\_ 6. 520458 6. 383999 6. 537584 6. 076855 6. 092916 6. 240156  
11761961\_ 3. 506058 3. 503496 3. 266791 3. 39607 3. 705459 3. 503496  
11761962\_ 4. 371156 4. 127418 4. 336799 4. 187743 4. 133542 4. 159918  
11761963\_ 3. 572262 3. 802702 3. 413935 3. 558104 3. 481383 3. 558104  
11761964\_ 4. 415744 4. 458859 4. 447598 4. 439135 4. 596532 4. 390619  
11761965\_ 3. 097916 3. 179371 3. 183022 3. 290188 3. 368291 3. 476011  
11761966\_ 4. 462174 4. 72056 4. 686412 4. 852489 4. 982632 4. 944562  
11761967\_ 3. 398236 3. 164506 3. 27294 3. 594895 3. 526665 3. 203014

11761968\_ 3. 849307 3. 88422 3. 946775 3. 931973 3. 969526 4. 116441  
11761969\_ 3. 818693 3. 831952 3. 96995 3. 906894 3. 906894 4. 050072  
11761970\_ 4. 598417 4. 106189 4. 128122 3. 876964 3. 763306 3. 812996  
11761971\_ 3. 863825 4. 038396 4. 022472 4. 016159 4. 112574 3. 663953  
11761972\_ 8. 975929 8. 908533 9. 03249 8. 951874 8. 943012 9. 020071  
11761973\_ 4. 403169 4. 446603 4. 331166 4. 377724 4. 425355 4. 307296  
11761974\_ 5. 254879 5. 103146 5. 052361 5. 24994 5. 028593 5. 065115  
11761975\_ 5. 260054 5. 073036 5. 122191 5. 192819 5. 041902 5. 065787  
11761976\_ 2. 292348 2. 258282 2. 232656 2. 218049 2. 191827 2. 196354  
11761977\_ 2. 451458 2. 454302 2. 639736 2. 450855 2. 519109 2. 621678  
11761978\_ 4. 091011 3. 818401 4. 171511 3. 955321 3. 955321 3. 999576  
11761979\_ 5. 570515 5. 491432 5. 448958 5. 027385 5. 139289 5. 191905  
11761980\_ 7. 948156 7. 926761 7. 828635 8. 094491 7. 91659 7. 840539  
11761981\_ 3. 215663 2. 837781 3. 290089 3. 111225 3. 306585 3. 046402  
11761982\_ 3. 090963 3. 061603 3. 079208 3. 340544 3. 170499 3. 184523  
11761983\_ 2. 533401 2. 983839 2. 557868 2. 721392 2. 627333 2. 642121  
11761984\_ 3. 459994 3. 26909 3. 459994 3. 297582 3. 196571 3. 398236  
11761985\_ 5. 902165 6. 032924 5. 951843 6. 054985 6. 054985 6. 054985  
11761986\_ 5. 861754 5. 847408 5. 916979 6. 275803 6. 301903 6. 273978  
11761987\_ 5. 617865 5. 524844 5. 498751 5. 540151 5. 530873 5. 544859  
11761988\_ 3. 732925 3. 9585 3. 851973 4. 014083 3. 9727 3. 871915  
11761989\_ 2. 038678 2. 075358 2. 156172 2. 394278 2. 402089 2. 18238  
11761990\_ 3. 003608 2. 967768 3. 072863 3. 290188 3. 201872 3. 003608  
11761991\_ 2. 838924 3. 307268 3. 163067 3. 212978 3. 257285 3. 292586  
11761992\_ 4. 673613 4. 66422 4. 666341 4. 986578 4. 902698 4. 831257  
11761993\_ 6. 118838 6. 255792 6. 080406 6. 255792 6. 148844 6. 309313  
11761994\_ 4. 157678 4. 270267 4. 135496 4. 052171 4. 054288 3. 956819  
11761995\_ 4. 228317 4. 220765 4. 062449 4. 255817 4. 339049 4. 230846  
11761996\_ 5. 314848 5. 229867 5. 335374 5. 365753 5. 339714 5. 363405  
11761997\_ 5. 372666 5. 467521 5. 413027 5. 405367 5. 482431 5. 384369  
11761998\_ 5. 231855 5. 274897 5. 138259 5. 245216 5. 27008 5. 260831  
11761999\_ 5. 025332 5. 174402 5. 266636 5. 158856 5. 166828 5. 2305  
11762000\_ 4. 737932 4. 9226 4. 987568 5. 11527 4. 898146 4. 998704  
11762001\_ 4. 078914 3. 869257 4. 135496 3. 932397 3. 969526 4. 042537  
11762002\_ 3. 937176 4. 046241 4. 04571 4. 057691 4. 016567 3. 880456  
11762003\_ 3. 53597 3. 612802 4. 026092 3. 617141 3. 71248 3. 717552  
11762004\_ 4. 007719 4. 003024 3. 860923 4. 109972 4. 007719 3. 909015  
11762005\_ 4. 729461 4. 787975 4. 459939 4. 948542 4. 709937 4. 630031  
11762006\_ 5. 688138 5. 842096 5. 676992 5. 652128 5. 549601 5. 870242  
11762007\_ 3. 75889 4. 079515 3. 976735 4. 189641 4. 127064 4. 427149  
11762008\_ 5. 383489 5. 514971 5. 3716 5. 718714 5. 555604 5. 588646  
11762009\_ 3. 601203 3. 766458 3. 418747 3. 692248 3. 843634 3. 55104  
11762010\_ 7. 183027 6. 963802 7. 196476 6. 559561 6. 624905 6. 674281  
11762011\_ 2. 182158 2. 419531 2. 126852 2. 150454 2. 07773 2. 30216  
11762012\_ 2. 608828 2. 610219 2. 856181 2. 747364 2. 590565 2. 77929  
11762013\_ 5. 333723 5. 518169 5. 372487 5. 750768 5. 460693 5. 448842  
11762014\_ 5. 409222 5. 614563 5. 406542 5. 460075 5. 652591 5. 426907  
11762015\_ 2. 690765 2. 709886 2. 661973 2. 709886 2. 495027 2. 849056  
11762016\_ 5. 255236 5. 304318 5. 122191 5. 400892 5. 293593 5. 396305  
11762017\_ 5. 118825 5. 213222 5. 051744 5. 148128 5. 041427 5. 199807  
11762018\_ 5. 358836 5. 325037 5. 480966 5. 199233 5. 352399 5. 349278

11762019\_ 3. 261247 3. 665669 3. 44882 3. 464743 3. 629351 3. 678068  
11762020\_ 3. 818401 3. 669781 3. 935397 3. 690658 3. 760826 3. 801093  
11762021\_ 2. 348444 2. 254512 2. 155519 2. 097871 2. 370102 2. 034683  
11762022\_ 2. 189561 2. 226941 2. 13626 2. 244368 2. 101593 2. 135232  
11762023\_ 3. 547629 4. 110481 3. 850246 3. 864725 3. 801444 3. 833802  
11762024\_ 2. 180588 1. 965242 2. 143992 2. 12862 2. 12862 1. 995297  
11762025\_ 5. 718523 5. 653593 5. 614563 5. 553815 5. 554052 5. 554436  
11762026\_ 5. 444564 5. 499763 5. 44207 5. 517396 5. 537876 5. 519253  
11762027\_ 3. 287194 2. 926326 2. 855877 2. 912551 2. 926326 2. 937426  
11762028\_ 4. 057846 3. 996367 3. 958762 3. 917443 3. 824401 3. 855964  
11762029\_ 3. 475275 3. 343754 3. 462621 3. 126202 3. 506618 3. 651283  
11762030\_ 2. 099805 1. 995297 1. 995297 1. 995297 1. 910668 1. 898324  
11762031\_ 2. 9453 3. 180062 2. 874619 2. 873139 2. 732348 2. 848553  
11762032\_ 4. 477195 4. 174945 4. 257231 4. 067703 4. 084149 4. 350551  
11762033\_ 3. 249924 3. 236976 3. 121875 2. 83198 3. 102059 3. 157108  
11762034\_ 4. 971453 4. 824203 4. 616741 4. 835684 4. 964137 4. 906786  
11762035\_ 6. 115092 6. 187493 5. 856075 6. 119846 6. 134554 6. 010425  
11762036\_ 4. 853237 5. 029529 4. 888703 5. 000134 5. 186751 5. 042086  
11762037\_ 4. 712927 4. 635611 4. 782473 4. 934873 4. 908059 4. 81169  
11762038\_ 5. 51368 5. 704919 5. 825796 4. 925047 4. 857667 4. 860268  
11762039\_ 3. 299703 3. 296943 3. 398862 3. 380109 3. 513385 3. 296943  
11762040\_ 2. 633524 2. 459573 2. 503584 2. 11789 2. 282583 2. 345914  
11762041\_ 5. 087078 5. 224531 4. 988394 5. 340983 5. 075219 5. 239992  
11762042\_ 3. 384199 3. 335833 3. 322496 3. 397537 3. 420102 3. 242452  
11762043\_ 7. 200884 7. 318446 7. 28227 7. 317713 7. 323214 7. 346488  
11762044\_ 4. 388247 4. 669521 4. 5753 4. 728158 4. 704672 4. 684005  
11762045\_ 4. 982976 5. 12254 4. 998467 5. 15676 5. 212045 5. 073036  
11762046\_ 4. 415744 4. 584933 4. 365638 4. 554085 4. 52373 4. 384505  
11762047\_ 5. 676992 5. 672285 5. 779628 5. 410709 5. 507402 5. 429392  
11762048\_ 4. 709502 4. 755821 4. 69113 4. 953968 4. 876508 4. 94619  
11762049\_ 8. 755171 8. 82699 8. 738388 8. 712301 8. 741962 8. 763916  
11762050\_ 8. 419902 8. 495304 8. 39346 8. 39084 8. 40512 8. 419902  
11762051\_ 5. 342762 5. 338993 5. 295448 5. 426035 5. 42481 5. 306119  
11762052\_ 4. 789572 5. 032541 4. 824203 4. 816688 4. 975074 4. 789572  
11762053\_ 5. 457109 5. 500617 5. 500617 5. 419214 5. 11527 5. 538089  
11762054\_ 5. 233353 5. 181649 5. 17639 5. 457103 5. 201279 5. 409222  
11762055\_ 3. 944482 3. 819464 3. 865832 4. 013692 3. 785426 3. 90439  
11762056\_ 7. 136549 7. 065555 7. 22737 6. 800227 6. 777895 6. 751279  
11762057\_ 4. 675605 4. 089744 4. 497159 4. 663808 4. 639051 4. 663808  
11762058\_ 5. 970576 5. 945586 5. 976201 5. 735608 5. 755725 5. 911174  
11762059\_ 3. 925181 4. 038552 3. 913558 3. 850246 3. 796286 3. 880539  
11762060\_ 8. 351637 8. 273425 8. 464115 8. 224782 8. 188152 8. 285775  
11762061\_ 3. 519136 3. 778185 3. 586491 3. 672465 3. 663094 3. 697778  
11762062\_ 4. 023971 4. 16544 4. 005563 4. 11156 4. 262495 4. 100907  
11762063\_ 3. 41875 3. 675574 3. 936514 3. 290188 3. 615044 3. 606313  
11762064\_ 4. 584933 4. 478169 4. 841844 4. 556758 4. 52373 4. 860393  
11762065\_ 4. 105098 4. 186423 4. 566425 4. 460918 4. 487274 4. 3249  
11762066\_ 4. 200678 4. 394312 4. 091914 4. 467792 4. 455944 4. 215662  
11762067\_ 6. 142928 6. 11371 6. 187516 6. 689863 6. 558853 6. 692147  
11762068\_ 6. 225513 6. 171894 6. 159771 6. 659384 6. 56838 6. 634072  
11762069\_ 4. 88969 5. 071807 4. 741186 5. 055195 5. 00186 5. 119108



11762070\_ 4. 088866 3. 992551 3. 992551 4. 235216 4. 33136 4. 093185  
11762071\_ 4. 358204 4. 261442 4. 352194 4. 215683 4. 376627 4. 365322  
11762072\_ 3. 588056 3. 647944 3. 503743 3. 607263 3. 515604 3. 711068  
11762073\_ 5. 772259 5. 978814 5. 72691 5. 672285 5. 724394 5. 696149  
11762074\_ 3. 197941 3. 07321 3. 290188 3. 270569 2. 957529 3. 217063  
11762075\_ 4. 305308 4. 037716 3. 939983 4. 048407 4. 312922 4. 275543  
11762076\_ 3. 669929 3. 453534 3. 909605 3. 404224 3. 533669 3. 432871  
11762077\_ 4. 507966 4. 707076 4. 637493 4. 713308 4. 478006 4. 612642  
11762078\_ 5. 013604 5. 211334 5. 123493 5. 222334 5. 026754 5. 104122  
11762079\_ 5. 117095 5. 272336 5. 26016 5. 271051 5. 253659 5. 294435  
11762080\_ 3. 326239 3. 503743 3. 264382 3. 224371 3. 301435 3. 774907  
11762081\_ 4. 355279 4. 767818 4. 726071 4. 499589 4. 900792 4. 760022  
11762082\_ 2. 534125 2. 368475 2. 568291 2. 550283 2. 468712 2. 621169  
11762083\_ 5. 38956 5. 251526 5. 585565 5. 53413 5. 549576 5. 676992  
11762084\_ 3. 830557 3. 700365 3. 813372 3. 777765 3. 734477 3. 638299  
11762085\_ 3. 420084 3. 078452 3. 122377 3. 474913 3. 504671 3. 33362  
11762086\_ 4. 722566 4. 36423 4. 461871 4. 253181 4. 361029 4. 470714  
11762087\_ 4. 8214 4. 893301 4. 807466 4. 988889 4. 98577 4. 949037  
11762088\_ 4. 06692 4. 310286 4. 630718 4. 268306 4. 397413 4. 297282  
11762089\_ 3. 477654 3. 606313 3. 503743 3. 252514 3. 775483 3. 424325  
11762090\_ 3. 612763 3. 820839 3. 71827 3. 584489 3. 705625 3. 705625  
11762091\_ 6. 463804 6. 445208 6. 50541 6. 441249 6. 67277 6. 549078  
11762092\_ 5. 978958 5. 963639 5. 988506 6. 178401 6. 131534 6. 019136  
11762093\_ 3. 887769 3. 790588 3. 882408 3. 581177 3. 620502 3. 249742  
11762094\_ 2. 988093 3. 044578 3. 152941 3. 044578 2. 933196 3. 061205  
11762095\_ 2. 621396 2. 958772 2. 874619 2. 605516 2. 781508 2. 965528  
11762096\_ 7. 216377 7. 126331 7. 270689 7. 300388 7. 154072 7. 04722  
11762097\_ 5. 167042 5. 032125 5. 037745 5. 117927 5. 304814 5. 134595  
11762098\_ 4. 525238 4. 337669 4. 381965 4. 833098 4. 832639 4. 900489  
11762099\_ 6. 023707 6. 141579 6. 048064 6. 19491 6. 391736 6. 247279  
11762100\_ 4. 346889 4. 512525 4. 506451 4. 541096 4. 536558 4. 638753  
11762101\_ 4. 239516 4. 314535 4. 15422 4. 23399 4. 40461 4. 230207  
11762102\_ 4. 551857 4. 481768 4. 493715 4. 623496 4. 541459 4. 470714  
11762103\_ 3. 274163 3. 321475 2. 989056 3. 091838 3. 127313 3. 11202  
11762104\_ 2. 796318 3. 098274 2. 757862 3. 290334 2. 995787 3. 042447  
11762105\_ 2. 977284 3. 098583 3. 141222 3. 175183 3. 158014 3. 180062  
11762106\_ 5. 709244 5. 735266 5. 547238 5. 832223 5. 736698 5. 652717  
11762107\_ 5. 139725 4. 815683 4. 917883 4. 941344 4. 612021 4. 973704  
11762108\_ 6. 467524 6. 305485 6. 46856 6. 862059 6. 908278 6. 830371  
11762109\_ 6. 533053 6. 425464 6. 56049 6. 965008 7. 015191 6. 901943  
11762110\_ 4. 446048 4. 507215 4. 257524 4. 476454 4. 573649 4. 517782  
11762111\_ 6. 408239 6. 34811 6. 40826 6. 464805 6. 567976 6. 519772  
11762112\_ 4. 386767 4. 423065 4. 534336 4. 43454 4. 159478 4. 536047  
11762113\_ 5. 694812 5. 798254 5. 69244 5. 792902 5. 802161 5. 871614  
11762114\_ 4. 5371 4. 685176 4. 400821 4. 85751 4. 774224 4. 675956  
11762115\_ 4. 473253 4. 587871 4. 48457 4. 685304 4. 545935 4. 686482  
11762116\_ 4. 482409 4. 662144 4. 404297 4. 616458 4. 472969 4. 770192  
11762117\_ 3. 983786 3. 729622 3. 734945 3. 8254 4. 088619 4. 032021  
11762118\_ 3. 816094 4. 033046 3. 941256 4. 063567 3. 95831 3. 989589  
11762119\_ 7. 434587 7. 342628 7. 255308 7. 274526 7. 426223 7. 313315  
11762120\_ 4. 627682 4. 651558 5. 185072 4. 454673 4. 170158 4. 253425

11762121\_ 3. 84044 4. 11391 4. 12388 4. 224437 4. 261243 4. 319849  
11762122\_ 6. 266352 6. 247581 6. 151042 6. 189726 6. 213764 6. 181167  
11762123\_ 2. 374291 2. 17736 2. 605516 2. 345063 2. 166552 2. 438994  
11762124\_ 3. 053076 3. 053076 3. 240025 2. 928082 3. 048837 3. 066609  
11762125\_ 4. 570065 4. 667196 4. 459939 4. 509944 4. 276377 4. 347179  
11762126\_ 4. 860545 4. 778189 4. 754217 4. 75971 4. 865447 4. 884409  
11762127\_ 6. 085724 6. 129942 5. 9505 6. 337917 6. 34864 6. 244695  
11762128\_ 4. 76312 4. 731345 4. 459939 4. 778105 4. 457858 4. 669188  
11762129\_ 3. 262032 3. 438071 3. 367539 3. 09511 3. 137597 3. 127409  
11762130\_ 3. 398236 3. 57153 3. 503743 3. 22507 3. 274653 3. 32131  
11762131\_ 5. 718438 5. 77911 5. 579835 5. 657042 5. 661886 5. 630636  
11762132\_ 4. 200678 4. 016992 4. 163541 4. 153471 4. 303247 4. 200678  
11762133\_ 5. 409222 5. 365519 5. 179505 5. 447829 5. 286307 5. 196201  
11762134\_ 5. 277178 5. 138427 5. 141347 5. 160956 5. 463066 5. 426217  
11762135\_ 5. 36906 5. 2666 5. 1735 3. 981756 4. 054981 4. 013003  
11762136\_ 6. 073142 6. 078647 6. 07243 6. 087727 6. 133401 6. 021137  
11762137\_ 3. 514173 3. 60584 3. 528988 3. 471125 3. 506877 3. 474344  
11762138\_ 3. 013873 3. 172159 2. 830013 2. 802623 2. 630436 2. 702717  
11762139\_ 3. 676699 3. 720612 3. 571115 3. 627497 3. 835255 3. 676699  
11762140\_ 4. 282738 4. 310636 4. 354262 4. 358029 4. 447834 4. 393133  
11762141\_ 3. 415241 3. 500269 3. 40897 3. 338581 3. 423703 3. 423703  
11762142\_ 2. 12078 2. 422109 2. 114641 2. 287523 2. 229142 2. 229142  
11762143\_ 5. 409222 5. 655329 5. 457865 5. 659517 5. 584813 5. 534781  
11762144\_ 2. 836293 2. 934783 3. 025662 2. 832315 2. 89086 2. 69308  
11762145\_ 6. 67471 6. 726095 6. 509756 6. 724646 6. 721114 6. 693266  
11762146\_ 5. 097003 5. 024571 5. 056381 4. 96329 5. 030615 4. 941248  
11762147\_ 6. 184645 6. 146786 6. 290033 6. 181985 6. 254289 6. 36638  
11762148\_ 2. 151632 2. 610852 2. 374484 2. 523953 2. 275374 2. 479991  
11762149\_ 3. 122119 3. 17548 3. 040482 3. 215927 3. 147012 3. 224532  
11762150\_ 7. 37598 7. 510398 7. 329246 7. 511677 7. 517721 7. 422469  
11762151\_ 5. 288046 5. 286733 5. 247894 5. 430081 5. 355604 5. 447139  
11762152\_ 5. 763113 5. 841177 5. 747189 5. 722097 5. 736831 5. 777275  
11762153\_ 8. 612637 8. 706514 8. 628398 8. 714296 8. 713467 8. 721613  
11762154\_ 2. 695281 2. 595968 2. 615064 2. 780899 2. 527968 2. 718873  
11762155\_ 3. 658371 3. 700045 3. 508661 3. 641363 3. 691796 3. 954157  
11762156\_ 4. 782823 4. 677244 4. 657783 4. 814271 4. 76521 4. 735537  
11762157\_ 4. 181364 4. 151886 4. 000187 4. 122717 3. 975318 4. 120213  
11762158\_ 3. 321888 3. 081584 3. 435892 3. 370033 3. 177361 3. 207324  
11762159\_ 3. 193511 3. 188803 3. 379442 3. 37867 3. 026685 3. 106333  
11762160\_ 3. 85094 3. 85094 3. 976937 4. 110474 3. 916338 4. 267024  
11762161\_ 7. 236617 7. 153809 7. 330037 7. 044799 7. 096853 7. 15719  
11762162\_ 5. 095693 5. 175412 5. 129339 5. 129339 5. 150142 5. 279141  
11762163\_ 6. 06475 6. 10807 6. 080107 6. 478303 6. 376156 6. 338603  
11762164\_ 4. 441082 4. 532412 4. 502987 4. 66446 4. 711691 4. 12244  
11762165\_ 6. 056297 6. 060048 5. 820181 6. 180394 6. 248184 6. 171172  
11762166\_ 3. 208583 3. 348326 3. 349036 3. 263781 3. 108937 3. 238144  
11762167\_ 4. 763543 4. 847194 4. 516592 4. 600809 4. 849431 4. 553654  
11762168\_ 2. 095256 1. 74897 2. 426318 2. 030754 2. 079884 2. 095256  
11762169\_ 5. 243451 5. 186926 4. 820091 5. 11527 5. 11527 5. 126224  
11762170\_ 2. 149492 2. 361778 2. 522653 2. 629254 2. 104467 2. 095256  
11762171\_ 2. 551493 2. 366623 2. 351329 2. 269599 2. 281758 2. 593176

11762172\_ 6. 149054 6. 227365 6. 158211 6. 121456 6. 139897 5. 930727  
11762173\_ 4. 070585 4. 049365 4. 146338 4. 250177 4. 305896 4. 146338  
11762174\_ 3. 538439 3. 795488 3. 758872 3. 467918 3. 669778 3. 653365  
11762175\_ 4. 150778 4. 217169 4. 217169 4. 149102 4. 360418 4. 318847  
11762176\_ 4. 009905 4. 010323 3. 780034 4. 028562 3. 77948 3. 976965  
11762177\_ 3. 19396 3. 027547 3. 154325 3. 221539 3. 078662 3. 19396  
11762178\_ 3. 122119 3. 096378 2. 825491 3. 019511 3. 019511 3. 002105  
11762179\_ 2. 235709 2. 313589 2. 071023 2. 119764 1. 948459 2. 192454  
11762180\_ 3. 435147 3. 710799 3. 656069 3. 685844 3. 552973 3. 486964  
11762181\_ 2. 488853 2. 25483 2. 642718 2. 661839 2. 486354 2. 574633  
11762182\_ 3. 842438 3. 763923 4. 057424 4. 135496 4. 31355 3. 782904  
11762183\_ 3. 442017 3. 585341 3. 597332 3. 756321 3. 660162 3. 290188  
11762184\_ 5. 186389 5. 105541 5. 191906 5. 090999 5. 167328 5. 083283  
11762185\_ 5. 6589 5. 853014 5. 763634 5. 977166 5. 931011 5. 898059  
11762186\_ 5. 671564 5. 561828 5. 600001 5. 553293 5. 624129 5. 568324  
11762187\_ 5. 073864 5. 174849 5. 137302 5. 11527 5. 2222 5. 245544  
11762188\_ 4. 160802 4. 154083 4. 007413 4. 219376 4. 279613 4. 06687  
11762189\_ 4. 605083 4. 800214 4. 443708 4. 806683 4. 550487 4. 717564  
11762190\_ 1. 956713 2. 190324 1. 937918 1. 854076 2. 050554 1. 795242  
11762191\_ 1. 908544 2. 016177 1. 990711 1. 880161 1. 967536 1. 859591  
11762192\_ 5. 567445 5. 63935 5. 60216 5. 612689 5. 634791 5. 624262  
11762193\_ 2. 804019 2. 704707 2. 920311 2. 694777 2. 725084 2. 498436  
11762194\_ 6. 355247 6. 420101 6. 267336 6. 451102 6. 388795 6. 401814  
11762195\_ 6. 407493 6. 401527 6. 459355 6. 570504 6. 493876 6. 469283  
11762196\_ 3. 102596 3. 032782 3. 107134 2. 995648 3. 007286 3. 020218  
11762197\_ 6. 07333 5. 894697 5. 698005 5. 915094 5. 904624 5. 904624  
11762198\_ 4. 836721 5. 112282 5. 082767 5. 201162 4. 950547 5. 013729  
11762199\_ 5. 588702 5. 407811 5. 41752 5. 891286 5. 675001 5. 805105  
11762200\_ 3. 503743 3. 503743 3. 247867 3. 252843 3. 512377 3. 394405  
11762201\_ 3. 826583 3. 885407 3. 956435 4. 046068 3. 723064 3. 916043  
11762202\_ 5. 92254 5. 850756 5. 820052 5. 703399 5. 800078 5. 894697  
11762203\_ 2. 241968 2. 454519 2. 237341 2. 351265 2. 431361 2. 305213  
11762204\_ 4. 769525 4. 472993 4. 664679 4. 357029 4. 550946 4. 717706  
11762205\_ 2. 908005 3. 023029 3. 148306 3. 228101 3. 274486 3. 340548  
11762206\_ 5. 973618 6. 173251 6. 168476 6. 132349 6. 211305 6. 314676  
11762207\_ 5. 676699 5. 73924 5. 572674 5. 772242 5. 714358 5. 73085  
11762208\_ 6. 104796 6. 033313 5. 957056 6. 11047 6. 175039 6. 224622  
11762209\_ 4. 508016 4. 874234 4. 771139 4. 782111 4. 830271 4. 708699  
11762210\_ 3. 263187 3. 200539 3. 249839 3. 522 3. 425754 3. 297511  
11762211\_ 2. 526698 2. 438573 2. 542785 2. 759559 2. 607331 2. 82684  
11762212\_ 4. 797593 4. 776478 4. 583181 4. 591245 4. 665598 4. 441348  
11762213\_ 2. 139537 2. 497398 2. 552251 2. 35525 2. 455174 2. 45832  
11762214\_ 4. 789988 4. 817752 4. 478354 4. 610505 4. 713665 4. 532677  
11762215\_ 4. 620557 4. 677878 4. 709196 4. 620557 4. 815804 4. 722413  
11762216\_ 3. 537877 3. 977748 3. 778105 3. 58668 3. 783198 4. 091897  
11762217\_ 4. 09167 4. 228309 4. 286705 4. 333972 4. 458152 4. 524882  
11762218\_ 5. 242773 5. 570317 5. 419113 5. 421887 5. 518362 5. 455235  
11762219\_ 4. 165247 4. 311347 4. 221744 4. 237473 4. 256018 4. 240289  
11762220\_ 4. 664866 4. 611769 4. 569972 4. 77256 4. 663954 4. 577648  
11762221\_ 6. 779767 6. 833195 6. 699242 6. 890626 6. 833195 6. 833195  
11762222\_ 4. 53138 4. 606725 4. 53138 4. 526574 4. 584933 4. 373114

11762223\_ 4. 934602 5. 030627 4. 886431 5. 037466 5. 144075 4. 805258  
11762224\_ 4. 775351 4. 58714 4. 703998 4. 79553 4. 885577 4. 803875  
11762225\_ 4. 884338 4. 874234 4. 913144 4. 914651 4. 885845 4. 877247  
11762226\_ 3. 422424 3. 346583 3. 604313 3. 405615 3. 427217 3. 345774  
11762227\_ 3. 693195 3. 691877 3. 637435 3. 680336 3. 71309 3. 599425  
11762228\_ 3. 73706 3. 684308 3. 807597 3. 143024 3. 143024 3. 507531  
11762229\_ 2. 379011 1. 973436 2. 022288 2. 150454 1. 995297 2. 051402  
11762230\_ 5. 502156 5. 677331 5. 439839 5. 709416 5. 631223 5. 685172  
11762231\_ 5. 287781 5. 257832 5. 355309 5. 224495 5. 224495 5. 317862  
11762232\_ 4. 746682 4. 667428 4. 514675 4. 812951 4. 834741 4. 954975  
11762233\_ 5. 530903 5. 607244 5. 400288 5. 55512 5. 506756 5. 629508  
11762234\_ 4. 709109 4. 763543 4. 809068 4. 817446 4. 798511 4. 680617  
11762235\_ 6. 845428 6. 96268 7. 076762 6. 729749 6. 76263 6. 699632  
11762236\_ 4. 513674 4. 745734 4. 469209 4. 753073 4. 727943 4. 653973  
11762237\_ 3. 566565 3. 406552 3. 460814 3. 424203 3. 617643 3. 263883  
11762238\_ 6. 015867 6. 214669 5. 830679 6. 008996 6. 080003 5. 949733  
11762239\_ 4. 307337 4. 352054 4. 382656 4. 219894 4. 196652 4. 25075  
11762240\_ 6. 595702 6. 74387 6. 614865 6. 724568 6. 724811 6. 601695  
11762241\_ 4. 763543 4. 847556 4. 829374 4. 772097 4. 705494 4. 739507  
11762242\_ 4. 24221 4. 33796 4. 30404 4. 224895 4. 24221 4. 229912  
11762243\_ 5. 766606 5. 940125 5. 650596 5. 912786 5. 940125 6. 015695  
11762244\_ 5. 185441 5. 478566 5. 419158 5. 568597 5. 734436 5. 419393  
11762245\_ 5. 162314 5. 064109 5. 222023 4. 49452 4. 459939 4. 487302  
11762246\_ 3. 556381 3. 632575 3. 54263 3. 575038 3. 786844 3. 604947  
11762247\_ 3. 592653 3. 606313 3. 579298 3. 573189 3. 619291 3. 611774  
11762248\_ 4. 928236 4. 902492 4. 896144 4. 883136 4. 92033 4. 830314  
11762249\_ 4. 62065 4. 74086 5. 088146 4. 481632 4. 484203 4. 566346  
11762250\_ 3. 774006 4. 105878 3. 748412 3. 968253 3. 920415 3. 865111  
11762251\_ 2. 33054 2. 402128 2. 2127 2. 290491 2. 440994 2. 196559  
11762252\_ 2. 184904 2. 345196 2. 095256 2. 171639 2. 25483 2. 233814  
11762253\_ 3. 000003 3. 290188 3. 13732 3. 279624 3. 503743 3. 195175  
11762254\_ 4. 021997 4. 277289 4. 35471 4. 320823 4. 229945 4. 217689  
11762255\_ 5. 292378 5. 494822 5. 270478 5. 445919 5. 47765 5. 752175  
11762256\_ 3. 776079 3. 785847 3. 801365 3. 678949 3. 676767 3. 676767  
11762257\_ 6. 092649 6. 086416 5. 973828 6. 198608 6. 046317 6. 052222  
11762258\_ 2. 517783 2. 605516 2. 775047 2. 718444 2. 61063 2. 49018  
11762259\_ 3. 818401 3. 997131 3. 812662 3. 949064 3. 946685 3. 949064  
11762260\_ 4. 763543 4. 9694 4. 855765 5. 045408 5. 38354 4. 984669  
11762261\_ 10. 28284 10. 26966 10. 21377 10. 37795 10. 40379 10. 34624  
11762262\_ 5. 784251 5. 615538 5. 686179 5. 503852 5. 404363 5. 502342  
11762263\_ 5. 98666 6. 052366 5. 995164 5. 898505 5. 870242 6. 082533  
11762264\_ 7. 377252 7. 570381 7. 377252 7. 625809 7. 563251 7. 537822  
11762265\_ 7. 378153 7. 571232 7. 378153 7. 623296 7. 557078 7. 581485  
11762266\_ 8. 15401 8. 026957 8. 158164 6. 899669 6. 86648 6. 981908  
11762267\_ 4. 389992 4. 539697 4. 338891 4. 381179 4. 55272 4. 257533  
11762268\_ 4. 108592 3. 827259 3. 850246 3. 937265 4. 086123 3. 929828  
11762269\_ 5. 064708 5. 149754 5. 236492 5. 237292 5. 279998 5. 17583  
11762270\_ 5. 145424 5. 234789 5. 240901 5. 297753 5. 250931 5. 14063  
11762271\_ 6. 491796 6. 616784 6. 438826 6. 663889 6. 439156 6. 589485  
11762272\_ 3. 519691 3. 212302 3. 2427 3. 374139 3. 3896 3. 3896  
11762273\_ 4. 587258 4. 632747 4. 690434 4. 632747 4. 609179 4. 656316

11762274\_ 4. 275411 4. 283161 4. 36611 4. 520677 4. 491503 4. 251923  
11762275\_ 6. 570196 6. 540905 6. 653921 6. 457194 6. 540905 6. 560991  
11762276\_ 2. 98696 2. 93831 2. 830731 3. 018059 3. 023402 2. 880012  
11762277\_ 7. 451848 7. 681265 7. 54296 7. 626579 7. 62625 7. 646981  
11762278\_ 7. 110423 7. 447053 7. 285685 7. 335673 7. 372372 7. 344383  
11762279\_ 5. 408901 5. 277794 5. 115726 5. 302777 5. 217711 5. 302777  
11762280\_ 7. 135514 6. 965225 6. 942933 7. 095105 7. 078626 6. 988168  
11762281\_ 3. 885471 3. 982443 3. 866375 4. 006301 4. 111808 3. 786777  
11762282\_ 9. 612734 9. 601881 9. 646303 9. 35864 9. 392289 9. 312569  
11762283\_ 7. 028717 7. 149594 7. 235927 6. 568144 6. 347276 6. 54965  
11762284\_ 3. 682717 3. 818401 3. 585744 3. 585744 3. 705625 3. 400933  
11762285\_ 3. 682717 3. 818401 3. 585744 3. 585744 3. 705625 3. 400933  
11762286\_ 5. 030142 5. 08356 5. 073422 4. 853325 4. 618665 4. 739301  
11762287\_ 7. 702354 7. 864142 7. 708475 7. 872436 7. 865891 7. 973878  
11762288\_ 3. 714914 3. 744497 3. 923574 3. 951078 3. 879101 3. 73761  
11762289\_ 7. 255827 7. 2631 7. 427694 7. 342012 7. 345011 7. 393304  
11762290\_ 4. 306775 4. 303339 4. 537253 4. 384822 4. 332578 4. 437933  
11762291\_ 6. 462028 6. 447671 6. 357053 6. 610489 6. 511179 6. 532754  
11762292\_ 2. 933613 2. 762823 2. 813666 2. 958587 2. 925134 2. 945929  
11762293\_ 6. 65846 6. 497107 6. 566285 6. 469199 6. 418048 6. 354529  
11762294\_ 6. 800989 6. 924753 6. 914642 6. 962071 6. 952215 6. 946361  
11762295\_ 5. 609693 5. 443532 5. 373006 5. 500856 5. 52198 5. 226191  
11762296\_ 2. 376789 2. 294338 2. 376789 2. 376789 2. 538297 2. 563872  
11762297\_ 6. 15963 6. 168401 5. 918815 6. 15963 6. 127836 6. 065015  
11762298\_ 6. 558102 6. 531304 6. 44092 6. 704563 6. 672355 6. 628191  
11762299\_ 6. 057201 6. 416016 6. 324862 6. 414953 6. 448378 6. 455014  
11762300\_ 3. 067188 3. 13477 2. 982488 3. 101804 3. 017458 2. 716502  
11762301\_ 4. 605509 4. 444165 4. 455242 4. 662896 4. 557679 4. 758591  
11762302\_ 2. 058822 2. 283801 2. 082774 2. 189576 2. 079884 2. 085977  
11762303\_ 4. 376202 4. 601182 4. 52373 4. 376729 4. 385124 4. 365376  
11762304\_ 3. 903847 3. 653087 3. 563485 3. 659047 3. 524551 3. 29743  
11762305\_ 4. 106138 3. 88854 3. 791873 3. 996783 4. 105542 4. 129076  
11762306\_ 6. 239617 6. 26036 6. 223595 6. 484531 6. 267012 6. 204103  
11762307\_ 4. 763543 5. 085958 5. 065796 5. 062039 4. 984669 4. 89115  
11762308\_ 4. 844519 4. 859901 4. 731653 4. 961744 4. 944993 4. 904775  
11762309\_ 3. 925181 4. 063743 3. 850246 4. 067703 3. 98979 3. 895818  
11762310\_ 3. 337236 3. 157806 3. 290188 3. 503743 3. 398236 3. 372764  
11762311\_ 5. 791586 5. 455839 5. 518169 6. 240239 6. 448378 6. 292813  
11762312\_ 4. 818398 4. 826981 4. 88241 4. 826981 4. 849431 4. 822644  
11762313\_ 6. 540925 6. 515621 6. 57103 6. 68176 6. 614637 6. 636655  
11762314\_ 4. 513152 4. 622836 4. 605814 4. 622836 4. 499113 4. 465715  
11762315\_ 5. 094706 5. 153719 5. 057013 5. 129863 5. 192864 5. 071312  
11762316\_ 3. 67546 3. 588346 3. 59296 3. 680529 3. 701152 3. 621156  
11762317\_ 3. 685538 3. 769372 3. 731275 3. 750324 3. 731275 3. 755593  
11762318\_ 4. 893889 4. 933669 4. 969441 4. 772051 5. 148804 4. 90111  
11762319\_ 5. 011625 4. 853 4. 868388 4. 848418 4. 863843 4. 980786  
11762320\_ 6. 299737 6. 29322 6. 175616 6. 35756 6. 350679 6. 352209  
11762321\_ 3. 606313 3. 702172 3. 808312 3. 600027 3. 504664 3. 633627  
11762322\_ 5. 076726 5. 234088 5. 130947 5. 401225 5. 324967 5. 314058  
11762323\_ 6. 157477 6. 286712 6. 22503 6. 013793 6. 070742 6. 13469  
11762324\_ 6. 414953 6. 334754 6. 139626 6. 407795 6. 34864 6. 329047

11762325\_ 3. 500961 3. 268452 3. 671857 3. 589721 3. 597811 3. 716904  
11762326\_ 7. 168437 7. 434587 6. 939931 7. 19417 7. 210412 7. 111446  
11762327\_ 4. 815683 4. 879682 4. 69976 4. 870609 4. 842353 4. 917054  
11762328\_ 3. 021941 2. 828889 2. 95425 2. 887989 3. 01622 2. 977869  
11762329\_ 2. 252679 2. 444386 2. 348663 2. 528103 2. 542313 2. 181657  
11762330\_ 5. 643083 5. 866126 5. 748161 5. 948514 5. 857865 5. 863116  
11762331\_ 5. 305108 5. 321827 5. 194536 5. 293974 5. 293974 5. 375873  
11762332\_ 4. 76924 4. 907995 5. 000657 4. 522183 4. 792814 4. 76924  
11762333\_ 4. 774924 4. 689421 4. 780693 4. 778681 4. 794922 4. 826867  
11762334\_ 4. 800344 5. 298045 4. 989103 5. 364304 5. 445781 5. 483896  
11762335\_ 4. 071865 4. 012151 3. 939983 3. 910019 4. 081693 4. 121492  
11762336\_ 5. 244508 4. 9694 4. 989022 5. 253332 5. 262023 5. 09779  
11762337\_ 3. 360711 3. 360711 3. 182542 3. 554869 3. 244868 3. 520267  
11762338\_ 6. 511174 6. 415237 6. 42114 6. 702681 6. 581516 6. 596153  
11762339\_ 6. 946361 6. 928603 7. 042517 7. 269509 7. 36684 7. 126767  
11762340\_ 3. 629692 3. 497956 3. 331985 3. 220313 3. 404024 3. 585401  
11762341\_ 4. 105881 4. 31446 4. 105881 4. 113429 4. 214174 4. 120726  
11762342\_ 7. 251041 7. 159732 7. 147252 6. 935385 6. 9032 7. 081947  
11762343\_ 4. 634742 4. 67441 4. 810397 4. 640667 4. 702207 4. 711144  
11762344\_ 6. 292713 6. 219757 6. 190143 5. 870437 5. 99905 5. 816181  
11762345\_ 5. 566355 5. 691802 5. 426405 5. 88509 5. 787148 5. 910262  
11762346\_ 6. 297689 6. 385839 6. 331313 6. 247463 6. 246299 6. 169048  
11762347\_ 7. 031531 6. 813234 6. 779107 6. 594872 6. 56978 6. 522073  
11762348\_ 4. 891872 4. 857517 4. 872754 4. 938309 4. 811152 4. 821614  
11762349\_ 5. 641123 5. 753742 5. 709521 5. 360731 5. 397861 5. 333346  
11762350\_ 5. 927098 5. 950139 5. 869681 6. 058756 6. 070158 6. 05027  
11762351\_ 6. 356083 6. 365982 6. 153291 6. 457703 6. 448378 6. 47788  
11762352\_ 2. 278719 2. 038307 2. 131993 2. 361778 2. 079884 2. 249064  
11762353\_ 3. 432253 3. 040399 2. 93532 2. 95149 2. 94952 2. 78555  
11762354\_ 2. 650576 2. 814689 2. 885887 2. 651366 2. 888356 2. 953658  
11762355\_ 3. 30456 3. 571162 3. 290188 3. 008772 3. 210425 3. 204586  
11762356\_ 3. 544265 3. 191569 3. 449723 3. 52601 3. 471233 3. 555142  
11762357\_ 7. 750656 7. 704163 7. 743624 7. 81691 7. 68815 7. 870149  
11762358\_ 5. 278661 5. 354745 5. 138662 5. 399314 5. 320103 5. 331464  
11762359\_ 6. 754044 7. 031531 6. 900794 6. 562869 6. 466794 6. 790649  
11762360\_ 5. 797917 5. 737896 5. 962752 5. 745821 6. 040039 6. 009239  
11762361\_ 5. 245549 4. 992272 4. 816929 5. 118298 4. 991473 4. 994273  
11762362\_ 4. 58344 4. 461118 4. 146475 4. 459939 4. 719437 4. 414494  
11762363\_ 4. 8121 4. 916656 4. 686938 5. 027245 4. 938028 5. 259539  
11762364\_ 4. 164488 3. 600315 3. 834857 3. 930201 3. 752037 3. 712602  
11762365\_ 6. 533923 6. 564752 6. 362628 6. 415008 6. 357531 6. 532732  
11762366\_ 8. 588131 8. 502051 8. 646207 9. 088736 9. 149222 9. 068706  
11762367\_ 4. 830413 4. 719207 4. 712976 5. 181839 5. 10756 5. 231439  
11762368\_ 6. 448378 6. 360394 6. 442111 6. 099287 6. 149543 6. 030371  
11762369\_ 2. 095256 1. 911386 2. 067714 2. 150454 2. 131645 1. 950738  
11762370\_ 5. 28384 5. 189628 5. 23394 5. 189628 5. 254608 5. 2666  
11762371\_ 2. 988093 3. 006875 3. 085236 3. 375228 3. 266796 3. 053862  
11762372\_ 5. 878815 6. 058966 5. 666952 6. 177255 6. 182273 6. 094493  
11762373\_ 8. 130675 8. 236667 8. 005127 8. 196222 8. 224717 8. 180434  
11762374\_ 2. 476812 2. 465228 2. 535959 2. 475364 2. 130025 2. 449374  
11762375\_ 2. 435641 2. 205975 2. 252942 2. 415475 2. 529228 2. 457931

11762376\_ 2. 504559 2. 586347 2. 427669 2. 247618 2. 382804 2. 67497  
11762377\_ 5. 130098 5. 220046 5. 101514 5. 426065 4. 981187 5. 177469  
11762378\_ 8. 356797 8. 344186 8. 400705 8. 348433 8. 287472 8. 371628  
11762379\_ 3. 939491 4. 083338 3. 863016 3. 928266 4. 200678 4. 285245  
11762380\_ 2. 022318 2. 130849 2. 11625 2. 385511 2. 150111 2. 313181  
11762381\_ 2. 138633 2. 43634 2. 364897 2. 702792 2. 3572 2. 367591  
11762382\_ 3. 894258 3. 863937 3. 87069 3. 810163 3. 772049 3. 864379  
11762383\_ 2. 880532 2. 62108 2. 862325 2. 921423 2. 937246 2. 801372  
11762384\_ 3. 720422 3. 530909 3. 440423 3. 170106 3. 157557 3. 247619  
11762385\_ 3. 237416 3. 284343 3. 167389 3. 167034 3. 21279 3. 180062  
11762386\_ 2. 149729 2. 494233 2. 300199 2. 450855 2. 242827 2. 640643  
11762387\_ 2. 834507 2. 945929 2. 947521 3. 162667 2. 966643 3. 393815  
11762388\_ 5. 265124 4. 837176 4. 862763 4. 650461 4. 8496 4. 934695  
11762389\_ 3. 398685 3. 04103 3. 00435 2. 974871 2. 809037 2. 815296  
11762390\_ 3. 378899 3. 591825 3. 157772 3. 384466 3. 327537 3. 378611  
11762391\_ 4. 940247 5. 258333 5. 028154 5. 073964 5. 185487 5. 118364  
11762392\_ 2. 85478 2. 888194 2. 976822 2. 912306 2. 854816 2. 785917  
11762393\_ 5. 606135 5. 44369 5. 417376 5. 452467 5. 452467 5. 343707  
11762394\_ 4. 364154 4. 577929 4. 52373 4. 497764 4. 588643 4. 568211  
11762395\_ 2. 23747 2. 47102 2. 272776 2. 319977 2. 491487 2. 272776  
11762396\_ 5. 041954 5. 191973 5. 041954 4. 84275 4. 780358 4. 741056  
11762397\_ 3. 749918 3. 439299 3. 411261 3. 587648 3. 880857 3. 668579  
11762398\_ 5. 968305 5. 918745 5. 845365 5. 86371 5. 80727 5. 946303  
11762399\_ 5. 098066 4. 901847 4. 912627 4. 91977 4. 839498 5. 158723  
11762400\_ 6. 023935 6. 064634 6. 14484 6. 228715 6. 264196 6. 33242  
11762401\_ 3. 71272 4. 024968 3. 720403 3. 863436 3. 945919 3. 973337  
11762402\_ 10. 05622 10. 1015 10. 08728 10. 6423 10. 61179 10. 60279  
11762403\_ 5. 52264 5. 476434 5. 40896 5. 630712 5. 356508 5. 520224  
11762404\_ 5. 869267 5. 92721 5. 968482 6. 005264 5. 870242 5. 781726  
11762405\_ 3. 434893 3. 738118 3. 4118 3. 636262 3. 587011 3. 561474  
11762406\_ 4. 911391 4. 914016 5. 070833 5. 262738 5. 326529 5. 376437  
11762407\_ 5. 029529 5. 13979 4. 937679 5. 11527 5. 101458 5. 228627  
11762408\_ 2. 871673 3. 367465 3. 100942 3. 396581 3. 325153 3. 390546  
11762409\_ 3. 100388 3. 061205 3. 255432 3. 216984 3. 128765 2. 891011  
11762410\_ 5. 676354 5. 741442 5. 717001 5. 429686 5. 506459 5. 62331  
11762411\_ 4. 242727 4. 422374 4. 41789 4. 471713 4. 445529 4. 556307  
11762412\_ 2. 413813 2. 243303 2. 216753 2. 39846 2. 37195 2. 090909  
11762413\_ 4. 026092 4. 105545 3. 957694 4. 209546 4. 363502 4. 476859  
11762414\_ 3. 605945 3. 723624 3. 465492 3. 925181 3. 842811 3. 788682  
11762415\_ 4. 166607 4. 115571 4. 08755 4. 20645 4. 243847 4. 155415  
11762416\_ 2. 824512 2. 739363 2. 413692 2. 808296 2. 661169 2. 794332  
11762417\_ 4. 166048 4. 111764 4. 070932 4. 078386 4. 078386 4. 113148  
11762418\_ 5. 073036 5. 103387 5. 060251 4. 882717 4. 921713 4. 883416  
11762419\_ 4. 55391 4. 696979 4. 525735 4. 604802 4. 664311 4. 814145  
11762420\_ 8. 056669 7. 914691 8. 057477 8. 223114 8. 158449 8. 187916  
11762421\_ 8. 832305 8. 697299 8. 750411 8. 62884 8. 722167 8. 657624  
11762422\_ 3. 909214 4. 200315 4. 025457 4. 200315 4. 190935 4. 376965  
11762423\_ 3. 682475 3. 931778 3. 942304 4. 268685 4. 023847 4. 107222  
11762424\_ 6. 312194 6. 374193 6. 32697 6. 417139 6. 429322 6. 417769  
11762425\_ 4. 503721 4. 65329 4. 592553 4. 731406 4. 649836 4. 728861  
11762426\_ 3. 711856 3. 706168 3. 627327 4. 133294 4. 052624 3. 84938

11762427\_ 4. 902219 4. 880106 4. 930507 4. 824195 4. 770964 4. 970679  
11762428\_ 5. 999888 5. 922579 5. 932921 6. 011474 6. 055124 6. 072677  
11762429\_ 6. 571874 6. 533661 6. 540933 6. 512549 6. 569471 6. 653539  
11762430\_ 3. 420884 3. 421386 3. 511914 3. 421521 3. 300896 3. 30911  
11762431\_ 7. 865814 7. 758258 7. 76657 7. 813026 7. 860239 7. 785864  
11762432\_ 4. 280096 4. 571469 4. 222975 4. 076212 4. 101651 4. 176466  
11762433\_ 2. 3037 2. 541009 2. 397632 2. 48694 2. 180049 2. 120459  
11762434\_ 8. 374786 8. 233942 8. 292438 8. 520027 8. 498386 8. 60299  
11762435\_ 4. 358617 4. 251749 3. 867559 4. 540408 4. 539586 4. 415744  
11762436\_ 3. 245975 3. 316007 3. 279688 3. 48355 3. 459423 3. 580745  
11762437\_ 4. 545341 4. 631799 4. 604424 4. 467343 4. 741883 4. 516522  
11762438\_ 3. 471845 3. 306522 3. 5518 3. 446968 3. 413369 3. 559447  
11762439\_ 4. 513241 4. 542371 4. 545513 4. 580577 4. 711677 4. 68539  
11762440\_ 4. 393442 4. 315774 4. 388723 4. 623488 4. 485695 4. 276716  
11762441\_ 2. 450695 2. 365776 2. 476963 2. 489679 2. 476963 2. 384435  
11762442\_ 2. 337175 2. 658188 2. 283362 2. 774725 2. 718322 2. 814891  
11762443\_ 6. 468163 6. 36721 6. 46208 6. 512668 6. 525229 6. 525229  
11762444\_ 2. 484277 2. 643196 2. 605516 2. 834437 2. 927809 2. 884012  
11762445\_ 6. 028872 5. 97197 6. 011363 5. 340155 5. 485466 5. 602623  
11762446\_ 4. 278202 4. 364799 4. 211558 4. 584933 4. 74749 4. 673181  
11762447\_ 6. 068834 6. 278641 6. 164068 6. 215172 6. 14915 6. 173322  
11762448\_ 2. 640674 2. 771502 2. 789816 2. 524297 2. 665883 2. 776275  
11762449\_ 3. 339596 3. 37794 3. 498018 3. 261278 3. 411497 3. 443083  
11762450\_ 5. 013431 5. 076598 4. 930507 4. 822837 4. 927213 4. 827304  
11762451\_ 4. 356034 4. 366004 4. 213226 4. 347179 4. 317675 4. 303494  
11762452\_ 2. 804325 2. 768358 2. 700711 2. 747668 2. 747668 2. 747668  
11762453\_ 2. 600736 2. 666246 2. 47102 2. 605516 2. 856862 2. 547406  
11762454\_ 2. 309429 2. 25483 2. 496128 1. 995297 1. 999032 2. 284366  
11762455\_ 2. 396325 2. 256052 2. 525155 2. 023728 2. 102937 2. 360627  
11762456\_ 4. 377699 4. 462477 4. 314947 4. 774495 4. 23146 4. 523023  
11762457\_ 1. 956013 2. 079659 1. 880758 2. 182477 2. 178465 2. 27659  
11762458\_ 1. 898324 2. 032369 1. 827439 1. 752118 1. 898324 1. 898324  
11762459\_ 6. 252325 6. 395092 6. 376432 6. 44179 6. 491556 6. 38423  
11762460\_ 4. 703947 4. 711499 4. 688013 4. 737217 4. 614901 4. 773053  
11762461\_ 5. 089287 5. 131637 5. 060772 5. 194185 5. 035039 5. 209518  
11762462\_ 2. 704346 2. 479149 2. 719153 2. 754641 2. 670054 2. 704346  
11762463\_ 4. 868817 4. 820451 4. 813168 4. 682976 4. 625057 4. 833369  
11762464\_ 5. 664304 5. 784363 5. 571179 5. 773211 5. 666633 5. 797643  
11762465\_ 4. 815683 4. 930046 5. 26038 4. 770231 4. 950914 4. 910866  
11762466\_ 6. 486092 6. 486092 6. 472367 6. 789558 6. 778986 6. 634141  
11762467\_ 2. 60917 2. 486858 2. 492746 2. 615233 2. 628291 2. 398814  
11762468\_ 2. 004243 2. 263777 2. 070938 2. 004243 2. 022136 2. 058737  
11762469\_ 3. 811311 3. 937381 3. 782444 4. 051275 3. 991919 3. 621956  
11762470\_ 5. 562848 5. 570913 5. 382805 5. 647465 5. 759843 5. 798775  
11762471\_ 2. 818908 3. 179952 3. 045772 3. 008241 2. 989206 3. 103407  
11762472\_ 4. 855747 4. 993858 4. 812396 5. 083402 5. 006872 4. 880572  
11762473\_ 4. 592165 4. 624055 4. 573368 4. 664506 4. 850064 4. 838495  
11762474\_ 4. 785092 5. 11527 4. 997757 4. 965184 4. 624987 5. 004184  
11762475\_ 4. 543828 4. 339558 4. 362958 4. 543828 4. 343508 4. 52876  
11762476\_ 2. 231883 2. 32797 2. 235709 2. 197211 2. 166552 2. 32797  
11762477\_ 5. 173817 5. 288694 5. 299666 5. 388785 5. 506952 5. 333136



11762478\_ 2. 389567 2. 47102 2. 47102 2. 208009 2. 618687 2. 5341  
11762479\_ 4. 091042 4. 186789 3. 867796 4. 210942 4. 138259 4. 054167  
11762480\_ 5. 655252 5. 795385 5. 838365 5. 460728 5. 491603 5. 508536  
11762481\_ 7. 339965 7. 404507 7. 339132 7. 307328 7. 331672 7. 320474  
11762482\_ 5. 647677 5. 774506 5. 551392 5. 656392 5. 705305 5. 658262  
11762483\_ 4. 45066 4. 386141 4. 474188 4. 621268 4. 562646 4. 361735  
11762484\_ 3. 011373 2. 618287 2. 662919 2. 800049 2. 813604 3. 167048  
11762485\_ 3. 313904 3. 415227 3. 028281 3. 454106 3. 397849 3. 724047  
11762486\_ 6. 717678 6. 60222 6. 543801 6. 792183 6. 633633 6. 741102  
11762487\_ 6. 353735 6. 447747 6. 266741 6. 349605 6. 370035 6. 34431  
11762488\_ 4. 415744 4. 577799 4. 213226 4. 468334 4. 270454 4. 301079  
11762489\_ 1. 807918 1. 995297 1. 835716 1. 892351 1. 810482 1. 795398  
11762490\_ 2. 771537 2. 707117 2. 64293 2. 83198 2. 95576 2. 98742  
11762491\_ 2. 878672 2. 969803 3. 025972 2. 940906 3. 060774 3. 079928  
11762492\_ 3. 484888 3. 481764 3. 407098 3. 384791 3. 459457 3. 384791  
11762493\_ 3. 661276 3. 872704 3. 823992 3. 607178 3. 607802 3. 601566  
11762494\_ 3. 55323 3. 548495 3. 243052 3. 471252 3. 423816 3. 537474  
11762495\_ 3. 613154 3. 54402 3. 446859 3. 551101 3. 706392 3. 537854  
11762496\_ 6. 114503 6. 253791 6. 170684 6. 219192 6. 295142 6. 320911  
11762497\_ 2. 45233 2. 277155 2. 134349 2. 080066 2. 150272 2. 261861  
11762498\_ 4. 200678 3. 949682 4. 240478 4. 252683 4. 43954 3. 82501  
11762499\_ 6. 348448 6. 301797 6. 494056 6. 955356 7. 128484 6. 999677  
11762500\_ 4. 306338 4. 238975 3. 932766 4. 06594 4. 275252 4. 333091  
11762501\_ 4. 736138 4. 741789 4. 697012 4. 840892 4. 963535 5. 02005  
11762502\_ 2. 501567 2. 450398 2. 559083 2. 493939 2. 555103 2. 494072  
11762503\_ 3. 50804 3. 506053 3. 49873 3. 390717 3. 401757 3. 395927  
11762504\_ 4. 815683 4. 712603 4. 832006 4. 841409 4. 984669 5. 045368  
11762505\_ 3. 606313 3. 806271 3. 576417 3. 735774 3. 735774 3. 669791  
11762506\_ 3. 627025 3. 984437 3. 78331 3. 726964 3. 711613 3. 834044  
11762507\_ 5. 119955 4. 903248 5. 129091 5. 176479 5. 226734 5. 336054  
11762508\_ 5. 94645 5. 850869 6. 002124 6. 018818 6. 204265 6. 067384  
11762509\_ 6. 763338 6. 78366 6. 940941 6. 572485 6. 619992 6. 720955  
11762510\_ 5. 641289 5. 69984 5. 480966 5. 627193 5. 839326 5. 744464  
11762511\_ 7. 2582 7. 08993 6. 9378 6. 722394 6. 845213 6. 73966  
11762512\_ 4. 375522 4. 523 4. 524619 4. 30787 4. 221936 4. 201566  
11762513\_ 2. 966776 2. 855455 3. 30416 2. 999328 3. 306585 2. 929399  
11762514\_ 3. 732622 3. 909593 3. 82714 4. 082545 4. 143264 4. 265383  
11762515\_ 2. 49768 2. 650216 2. 383693 2. 289545 2. 383299 2. 269707  
11762516\_ 5. 277777 5. 122197 5. 414607 5. 22916 5. 2222 5. 409221  
11762517\_ 4. 349188 4. 40461 4. 253042 4. 195674 4. 054288 4. 288275  
11762518\_ 4. 748859 4. 951015 4. 91823 4. 970059 5. 020457 5. 229638  
11762519\_ 2. 097329 2. 030034 2. 208321 2. 204131 2. 208321 2. 361628  
11762520\_ 3. 245727 3. 588171 3. 451082 3. 489766 3. 295257 3. 409356  
11762521\_ 4. 843179 5. 102642 4. 84685 5. 199722 5. 075312 5. 178486  
11762522\_ 3. 271842 3. 269028 3. 159786 3. 248862 3. 165815 3. 204853  
11762523\_ 2. 150707 2. 162407 2. 133835 2. 361778 2. 09977 2. 389039  
11762524\_ 3. 925181 3. 983066 3. 932582 3. 942706 3. 767297 3. 997483  
11762525\_ 11. 52332 11. 51338 11. 49064 11. 67006 11. 64005 11. 67151  
11762526\_ 4. 564201 4. 77664 4. 707809 4. 804782 4. 774734 4. 717049  
11762527\_ 5. 774361 5. 819431 5. 675647 5. 977166 5. 706562 5. 822045  
11762528\_ 3. 181352 3. 132649 3. 209327 3. 216182 3. 168373 3. 245771

11762529\_ 2. 235709 2. 423158 2. 487995 2. 710038 2. 665102 2. 598594  
11762530\_ 3. 593812 3. 717043 3. 526998 3. 982218 3. 969526 3. 897508  
11762531\_ 2. 108741 2. 251482 1. 956564 2. 255024 2. 282265 2. 066671  
11762532\_ 3. 096126 3. 186699 3. 070975 3. 128558 3. 17337 3. 070975  
11762533\_ 12. 23312 12. 16395 12. 23477 9. 668169 9. 651003 9. 630522  
11762534\_ 5. 156303 5. 252461 4. 869985 5. 156303 5. 133327 5. 11616  
11762535\_ 2. 35928 2. 35606 1. 987075 2. 390957 2. 127714 2. 206146  
11762536\_ 7. 074659 6. 969451 7. 080763 6. 875888 6. 828262 6. 948773  
11762537\_ 6. 374656 6. 395092 6. 524131 6. 27894 6. 276269 6. 33679  
11762538\_ 2. 821027 2. 817935 2. 776499 2. 850663 2. 944458 2. 802035  
11762539\_ 3. 26385 2. 725995 3. 141056 3. 39744 3. 219741 3. 219741  
11762540\_ 4. 703947 4. 322205 4. 643717 4. 603988 4. 608347 4. 590911  
11762541\_ 2. 780555 2. 883696 2. 375232 2. 799938 2. 816335 2. 780555  
11762542\_ 2. 59806 2. 59806 2. 592919 2. 602479 2. 602479 2. 741645  
11762543\_ 3. 905112 4. 020634 3. 70533 3. 923661 4. 110825 3. 864941  
11762544\_ 4. 145594 4. 042774 4. 174445 4. 129302 4. 149468 4. 297823  
11762545\_ 4. 940476 4. 881818 4. 930507 4. 82264 4. 940997 4. 915286  
11762546\_ 3. 320458 3. 393187 3. 393187 3. 393187 3. 320458 3. 393187  
11762547\_ 4. 245839 3. 976013 4. 210175 3. 954885 4. 087513 4. 178672  
11762548\_ 4. 957794 4. 874234 5. 101653 4. 77808 4. 665354 4. 648404  
11762549\_ 5. 285218 5. 179127 5. 179127 5. 029529 5. 072474 5. 091789  
11762550\_ 4. 5003 4. 378459 4. 135496 4. 711912 4. 526085 4. 567229  
11762551\_ 1. 92886 2. 153159 2. 353163 2. 357161 2. 084502 2. 137865  
11762552\_ 5. 279909 5. 300554 5. 218753 5. 076377 5. 114953 5. 166421  
11762553\_ 5. 342121 5. 162245 5. 222844 5. 189628 5. 148158 5. 265126  
11762554\_ 4. 700243 4. 360958 4. 480569 4. 459939 4. 618832 4. 604645  
11762555\_ 3. 373988 2. 971395 3. 136573 3. 46801 3. 24152 3. 199002  
11762556\_ 3. 614008 3. 523657 3. 511781 3. 707105 3. 575919 3. 495968  
11762557\_ 3. 364674 3. 237989 3. 293676 3. 261854 3. 431296 3. 398236  
11762558\_ 5. 643713 5. 80647 5. 568789 5. 706591 5. 638086 5. 655292  
11762559\_ 4. 780994 4. 78626 4. 580276 4. 80022 4. 780994 4. 993318  
11762560\_ 3. 61894 3. 64006 3. 744992 4. 006542 3. 836407 4. 05429  
11762561\_ 3. 50958 3. 751397 3. 712016 3. 712016 3. 694723 3. 649409  
11762562\_ 2. 867319 3. 205855 3. 290188 3. 125061 3. 117487 2. 945929  
11762563\_ 4. 061762 3. 876699 4. 093404 4. 096928 4. 116398 4. 380631  
11762564\_ 1. 998005 2. 14621 1. 882117 1. 820143 2. 082852 2. 014781  
11762565\_ 4. 976062 5. 134289 4. 963805 5. 079411 5. 046987 5. 116263  
11762566\_ 5. 511599 5. 772215 5. 484797 5. 66006 5. 585503 5. 727178  
11762567\_ 4. 70238 4. 865883 4. 926538 4. 830253 4. 8628 4. 899834  
11762568\_ 3. 825639 4. 194779 3. 825639 4. 210564 4. 153583 4. 01966  
11762569\_ 5. 139026 5. 350634 5. 14212 5. 438932 5. 312475 5. 313754  
11762570\_ 3. 301647 3. 248022 3. 231809 3. 182587 3. 231809 3. 215596  
11762571\_ 7. 284834 7. 215296 7. 197941 7. 090227 7. 133888 7. 204321  
11762572\_ 2. 551842 2. 573845 2. 570742 2. 588909 2. 6375 2. 6876  
11762573\_ 6. 615205 6. 547153 6. 625786 6. 327905 6. 29864 6. 353133  
11762574\_ 6. 732383 6. 875998 6. 450015 6. 938322 6. 775347 6. 815826  
11762575\_ 2. 154746 2. 250333 2. 173682 2. 141091 2. 605516 2. 18238  
11762576\_ 5. 264091 5. 363783 5. 196445 5. 295866 5. 15914 5. 420331  
11762577\_ 2. 235709 2. 052033 2. 306981 1. 995297 1. 995297 1. 940499  
11762578\_ 3. 114565 2. 944277 2. 956174 2. 963178 2. 804542 2. 813307  
11762579\_ 3. 122119 3. 082051 2. 992442 3. 013988 3. 17329 3. 098589

11762580\_ 3. 846899 3. 635684 3. 759811 3. 606313 3. 84862 3. 786777  
11762581\_ 3. 349225 3. 432468 3. 177752 3. 343614 3. 331539 3. 278145  
11762582\_ 3. 13463 3. 266211 2. 97518 3. 266211 3. 114765 3. 534397  
11762583\_ 1. 926007 2. 113596 2. 116777 2. 249059 2. 201364 2. 11251  
11762584\_ 2. 605516 2. 36286 2. 517686 2. 538591 2. 54442 2. 240552  
11762585\_ 2. 433264 2. 641677 2. 193302 2. 139285 2. 605516 2. 733651  
11762586\_ 2. 850317 3. 061205 3. 081161 3. 014099 3. 061205 3. 108031  
11762587\_ 4. 486507 4. 585895 4. 342282 4. 636289 4. 593728 4. 803847  
11762588\_ 2. 921988 2. 958668 3. 188511 2. 975613 2. 905043 2. 85591  
11762589\_ 5. 14822 5. 292649 5. 310849 5. 448296 5. 451544 5. 426348  
11762590\_ 4. 710528 4. 623352 4. 430042 4. 59413 4. 642015 4. 751671  
11762591\_ 4. 878143 4. 498242 4. 281828 4. 400234 4. 252056 4. 400234  
11762592\_ 6. 37253 6. 486188 6. 301988 6. 487821 6. 538085 6. 583919  
11762593\_ 3. 989332 3. 886167 3. 86499 3. 886167 3. 988513 3. 86499  
11762594\_ 4. 673699 4. 848677 4. 695893 4. 806436 4. 713378 4. 627542  
11762595\_ 4. 275543 4. 302832 4. 098668 4. 223599 4. 139761 4. 097132  
11762596\_ 4. 732804 4. 643276 4. 919367 4. 940422 5. 140243 4. 936888  
11762597\_ 5. 633796 5. 729271 5. 612679 5. 761843 5. 658069 5. 447159  
11762598\_ 3. 933538 3. 947275 3. 855455 3. 990816 4. 200678 4. 078903  
11762599\_ 4. 073913 3. 682963 3. 650106 4. 068873 3. 941199 4. 0451  
11762600\_ 5. 079948 5. 184557 5. 144169 5. 115208 5. 304013 5. 036503  
11762601\_ 4. 652444 4. 661664 4. 412141 4. 419707 4. 580813 4. 480069  
11762602\_ 6. 552766 6. 546838 6. 389366 6. 463986 6. 388518 6. 411781  
11762603\_ 4. 457291 4. 460913 4. 236363 4. 595463 4. 510668 4. 542796  
11762604\_ 3. 681462 3. 668844 3. 494406 3. 252165 3. 589795 3. 523224  
11762605\_ 3. 529493 3. 605423 3. 689524 3. 523109 3. 580358 3. 587437  
11762606\_ 3. 385482 3. 726259 3. 490123 3. 286943 3. 455211 3. 406528  
11762607\_ 2. 514629 2. 646267 2. 427411 2. 812336 2. 341556 2. 418502  
11762608\_ 2. 964943 3. 030301 2. 740772 3. 257276 2. 772091 2. 862884  
11762609\_ 3. 292372 2. 83198 3. 102752 3. 096491 2. 971004 3. 037341  
11762610\_ 5. 906413 6. 00016 5. 744771 6. 192686 6. 142856 5. 941217  
11762611\_ 5. 144256 5. 153413 5. 037005 5. 156303 5. 397861 5. 228273  
11762612\_ 4. 235358 3. 923091 3. 94259 4. 057149 4. 055035 4. 150914  
11762613\_ 6. 244666 6. 138537 6. 078848 6. 101144 6. 122265 5. 977466  
11762614\_ 5. 344277 5. 523717 5. 52946 5. 730167 5. 734611 5. 710449  
11762615\_ 3. 300185 3. 875694 3. 728158 3. 728849 3. 819596 3. 748872  
11762616\_ 3. 552774 3. 378053 3. 503743 3. 909318 3. 444887 3. 481492  
11762617\_ 6. 020002 6. 118838 5. 856975 6. 319597 6. 222296 6. 247833  
11762618\_ 6. 110295 6. 118838 6. 121349 6. 020498 6. 159771 6. 118838  
11762619\_ 3. 500037 3. 558512 3. 508453 3. 43077 3. 780192 3. 472228  
11762620\_ 3. 122119 3. 398236 3. 197299 3. 159633 3. 243003 3. 425816  
11762621\_ 1. 821501 1. 903779 1. 878116 1. 86422 1. 905701 1. 924163  
11762622\_ 2. 714092 2. 787901 2. 770364 2. 83198 3. 097461 2. 718322  
11762623\_ 3. 296822 3. 54942 3. 360136 3. 428373 3. 259687 3. 522305  
11762624\_ 6. 693544 6. 703147 6. 759983 6. 774216 6. 88355 6. 828602  
11762625\_ 7. 535554 7. 49827 7. 537351 7. 513365 7. 512943 7. 55065  
11762626\_ 4. 395168 4. 191929 4. 130401 4. 460806 4. 743726 4. 415744  
11762627\_ 7. 491386 7. 500301 7. 572857 7. 21431 7. 197505 7. 19624  
11762628\_ 4. 047663 3. 987872 4. 084 4. 00639 3. 964715 3. 910262  
11762629\_ 4. 622942 4. 818217 5. 009121 4. 818217 4. 839217 4. 977335  
11762630\_ 3. 091878 2. 943611 3. 10004 3. 053351 3. 131254 3. 173431

11762631\_ 5. 473049 5. 289819 5. 409036 4. 384404 4. 491619 4. 330025  
11762632\_ 4. 977054 4. 760831 4. 652783 3. 913157 3. 697287 3. 606313  
11762633\_ 4. 305172 4. 410824 4. 281275 4. 50864 4. 226012 3. 871276  
11762634\_ 3. 34569 3. 137801 3. 17708 3. 234229 3. 287059 3. 202315  
11762635\_ 4. 805159 4. 493904 4. 554332 4. 525684 4. 554332 4. 563  
11762636\_ 4. 560075 4. 233741 4. 11951 4. 30699 4. 229592 4. 178294  
11762637\_ 2. 219109 2. 317064 1. 941442 2. 303697 2. 008701 2. 39188  
11762638\_ 3. 303744 3. 666878 3. 320664 2. 977134 3. 356888 3. 374059  
11762639\_ 2. 075487 2. 228321 2. 300498 2. 108665 2. 083619 2. 130718  
11762640\_ 4. 56519 4. 491956 4. 717937 4. 533079 4. 509339 4. 708181  
11762641\_ 1. 977266 1. 995297 1. 69759 1. 883334 1. 898324 1. 86166  
11762642\_ 5. 083147 5. 095465 4. 996506 4. 977529 5. 348505 4. 982023  
11762643\_ 4. 523388 4. 626677 4. 582277 4. 554801 4. 752758 4. 58517  
11762644\_ 2. 714733 2. 660387 2. 786425 2. 635816 2. 767465 2. 82672  
11762645\_ 3. 790318 3. 667429 3. 941229 3. 48536 3. 503743 3. 574128  
11762646\_ 3. 776766 4. 102153 4. 040039 4. 255742 4. 056239 4. 00428  
11762647\_ 4. 480495 4. 175606 4. 196844 4. 480068 4. 263793 4. 33704  
11762648\_ 5. 821368 5. 822775 5. 741412 5. 802025 5. 894921 5. 987134  
11762649\_ 6. 330544 6. 145669 6. 406167 5. 109845 5. 432317 5. 303717  
11762650\_ 4. 885123 4. 882848 4. 891661 4. 961407 4. 941773 5. 057383  
11762651\_ 3. 921245 4. 289451 3. 850246 4. 347179 4. 060899 3. 943772  
11762652\_ 5. 850835 5. 7985 5. 763634 5. 951544 5. 850835 5. 894697  
11762653\_ 3. 842681 3. 96876 3. 716611 3. 901114 4. 005826 3. 865337  
11762654\_ 4. 933803 4. 914629 4. 984669 4. 856627 4. 933803 4. 906658  
11762655\_ 3. 740685 3. 679293 3. 541804 3. 810918 3. 698741 3. 398236  
11762656\_ 2. 377042 2. 366031 2. 453174 2. 43224 2. 592351 2. 366589  
11762657\_ 6. 241406 6. 096192 6. 009153 6. 287189 6. 383229 6. 298364  
11762658\_ 4. 832708 5. 196999 4. 854906 4. 909111 5. 169603 5. 153869  
11762659\_ 3. 65293 3. 856358 3. 587347 3. 756801 3. 577348 3. 520935  
11762660\_ 5. 131751 5. 142036 4. 961883 5. 090718 5. 022916 5. 090718  
11762661\_ 5. 629448 5. 745672 5. 738591 5. 779357 5. 366436 5. 744074  
11762662\_ 2. 774487 2. 6634 2. 848211 2. 557533 2. 750978 2. 6634  
11762663\_ 3. 28157 3. 045297 3. 19082 3. 385053 3. 149575 3. 263233  
11762664\_ 3. 465386 3. 145275 3. 147764 3. 574328 3. 431308 3. 104816  
11762665\_ 6. 090329 5. 937473 5. 910636 6. 058786 6. 206103 5. 870242  
11762666\_ 5. 209259 5. 052176 5. 269014 4. 852158 4. 815104 5. 083074  
11762667\_ 4. 181793 4. 40446 4. 287593 4. 369227 4. 374673 4. 415744  
11762668\_ 4. 396115 4. 281914 4. 345849 4. 315045 4. 169917 4. 287545  
11762669\_ 7. 482368 7. 54365 7. 4689 7. 377128 7. 283018 7. 339995  
11762670\_ 3. 177783 3. 34224 3. 442312 3. 42186 3. 39083 3. 566994  
11762671\_ 2. 408164 2. 469715 2. 578018 2. 423356 2. 496393 2. 579992  
11762672\_ 2. 663496 2. 650706 2. 598511 2. 594128 3. 201478 2. 807804  
11762673\_ 3. 322093 3. 6487 3. 709673 3. 832354 3. 529787 3. 448792  
11762674\_ 3. 943855 3. 754469 3. 623637 3. 487001 3. 72566 3. 879309  
11762675\_ 1. 971548 1. 922798 1. 995297 1. 830479 2. 001657 1. 904684  
11762676\_ 2. 746585 2. 697834 2. 749846 2. 803589 2. 770334 2. 651763  
11762677\_ 3. 600027 3. 419704 3. 454811 3. 957945 3. 538761 3. 599464  
11762678\_ 5. 001849 5. 219435 4. 928447 5. 11527 5. 015502 5. 196201  
11762679\_ 3. 249924 3. 371987 3. 328671 3. 200021 3. 373346 3. 413051  
11762680\_ 3. 029831 2. 869369 3. 138626 2. 553882 2. 961346 2. 791644  
11762681\_ 2. 822033 2. 718322 2. 565095 2. 652826 2. 605516 2. 833826

11762682\_ 5. 027155 4. 952835 4. 733215 4. 99728 4. 952835 5. 013056  
11762683\_ 2. 227653 2. 051463 2. 095256 2. 107775 2. 718322 2. 379697  
11762684\_ 3. 406196 3. 692726 3. 352783 3. 413264 3. 429135 3. 428635  
11762685\_ 6. 647624 6. 772831 6. 640338 6. 772831 6. 863823 6. 779107  
11762686\_ 6. 8621 7. 173804 7. 051681 7. 081224 7. 131591 7. 144008  
11762687\_ 5. 988607 5. 905928 5. 979398 5. 864993 5. 878755 5. 893174  
11762688\_ 5. 36729 5. 585366 5. 405031 5. 528624 5. 509661 5. 417914  
11762689\_ 4. 231069 4. 328042 4. 332026 4. 433455 4. 451189 4. 303589  
11762690\_ 3. 252074 3. 517599 3. 245794 2. 878006 3. 106526 3. 120281  
11762691\_ 2. 958926 2. 829859 3. 214636 2. 686534 3. 13608 2. 917628  
11762692\_ 4. 879419 5. 247594 5. 031432 5. 012015 4. 898021 5. 122009  
11762693\_ 4. 964142 5. 021715 4. 868321 5. 0018 5. 046724 5. 198483  
11762694\_ 3. 249924 3. 130765 3. 043689 3. 270963 3. 101013 3. 167822  
11762695\_ 3. 963878 4. 133067 4. 203603 3. 952744 3. 840066 3. 95179  
11762696\_ 3. 945411 3. 859916 3. 952618 4. 059376 4. 196765 3. 988251  
11762697\_ 4. 891191 4. 866239 5. 142283 5. 034194 4. 85142 4. 987734  
11762698\_ 2. 948593 3. 399031 3. 0841 3. 177819 3. 069392 3. 217345  
11762699\_ 2. 99998 3. 28825 3. 09762 3. 169212 2. 981949 3. 244055  
11762700\_ 4. 815683 4. 775671 4. 879155 4. 963105 4. 938668 4. 920719  
11762701\_ 3. 307082 3. 243644 3. 357657 3. 295947 3. 204365 3. 092015  
11762702\_ 2. 486558 2. 47102 2. 486558 2. 521789 2. 352062 2. 704673  
11762703\_ 3. 359407 3. 484143 3. 236885 3. 456766 3. 469243 3. 343108  
11762704\_ 5. 572412 5. 691184 5. 382497 5. 641247 5. 548109 5. 5405  
11762705\_ 5. 383059 5. 32789 5. 173513 5. 448296 5. 490381 5. 509416  
11762706\_ 3. 220658 3. 012082 2. 752471 2. 765595 2. 869972 3. 220158  
11762707\_ 5. 324278 5. 338935 5. 384486 5. 399143 5. 300369 5. 479597  
11762708\_ 2. 234982 2. 230789 2. 383022 2. 510222 2. 231977 2. 404171  
11762709\_ 3. 373855 3. 321348 3. 304502 3. 470828 3. 555415 3. 482381  
11762710\_ 2. 464886 2. 367913 2. 315778 2. 476597 2. 237104 2. 204793  
11762711\_ 4. 199802 4. 335594 4. 370337 4. 486829 4. 24602 4. 347179  
11762712\_ 3. 089592 3. 097127 2. 99167 3. 25106 3. 014049 3. 258631  
11762713\_ 5. 695232 5. 864423 5. 766752 5. 801091 5. 688389 5. 7902  
11762714\_ 2. 245505 2. 146718 2. 480816 2. 450855 2. 503367 2. 438025  
11762715\_ 2. 850317 2. 929798 2. 83221 3. 009842 3. 084883 3. 18118  
11762716\_ 4. 962081 5. 124399 4. 963329 5. 027553 5. 026217 5. 024451  
11762717\_ 4. 628497 4. 74287 4. 564981 4. 629804 4. 763512 4. 790758  
11762718\_ 5. 223093 5. 394907 5. 363963 5. 444864 5. 455412 5. 524196  
11762719\_ 5. 275663 5. 108974 5. 13067 5. 263993 5. 488032 5. 281009  
11762720\_ 3. 305525 3. 190044 3. 481644 3. 325347 3. 273463 3. 38815  
11762721\_ 2. 524428 2. 580384 2. 417626 2. 510041 2. 42136 2. 492996  
11762722\_ 3. 092711 3. 303116 3. 209745 3. 306717 3. 354091 3. 196168  
11762723\_ 3. 906922 3. 86876 3. 524345 4. 057228 3. 868278 3. 781693  
11762724\_ 3. 27085 3. 207838 3. 437677 2. 920802 3. 447401 3. 527747  
11762725\_ 3. 219047 2. 97735 3. 028572 3. 118022 3. 254966 3. 182104  
11762726\_ 7. 804575 7. 723715 7. 730153 7. 65258 7. 771744 7. 597583  
11762727\_ 3. 037003 2. 83198 2. 953115 3. 054208 2. 67948 3. 048805  
11762728\_ 5. 76634 5. 894697 5. 760927 5. 866385 5. 965871 5. 932562  
11762729\_ 5. 080628 5. 189628 4. 882257 5. 488532 5. 150342 5. 060933  
11762730\_ 1. 893109 1. 920329 1. 987597 1. 847107 2. 115334 2. 25483  
11762731\_ 2. 257076 2. 100354 2. 271971 2. 277354 2. 436627 2. 45781  
11762732\_ 3. 884748 3. 817701 3. 939983 3. 933315 4. 046351 3. 954157

11762733\_ 3. 872842 3. 752415 3. 968824 3. 823685 4. 005245 3. 925316  
11762734\_ 4. 026092 4. 196605 4. 370337 4. 283858 4. 371445 4. 403317  
11762735\_ 4. 559247 4. 516646 4. 192143 4. 580828 4. 406145 4. 416375  
11762736\_ 5. 158081 5. 248317 5. 052242 5. 214033 5. 425421 5. 176573  
11762737\_ 3. 272155 3. 557098 3. 172424 3. 301547 3. 272155 3. 165207  
11762738\_ 2. 779051 2. 924285 3. 078943 3. 034285 2. 673326 2. 887605  
11762739\_ 6. 709512 6. 715543 6. 541665 6. 76233 6. 761576 6. 864125  
11762740\_ 6. 254477 6. 228329 5. 988622 6. 261981 6. 305189 6. 187116  
11762741\_ 3. 503743 3. 909593 3. 791021 3. 824368 3. 681779 3. 645918  
11762742\_ 3. 365426 3. 606784 3. 403977 3. 378554 3. 590123 3. 510848  
11762743\_ 1. 958685 1. 918484 1. 831843 1. 944866 2. 04039 1. 852996  
11762744\_ 6. 502421 6. 655758 6. 602975 6. 68581 6. 790012 6. 650475  
11762745\_ 3. 640951 3. 577999 3. 603806 3. 626825 3. 702927 3. 57676  
11762746\_ 3. 398236 3. 470667 3. 290188 3. 925181 4. 015792 4. 164447  
11762747\_ 2. 404283 2. 247495 2. 361778 2. 169538 2. 169538 2. 151452  
11762748\_ 8. 014901 8. 059941 8. 053527 8. 120114 8. 085711 8. 106024  
11762749\_ 2. 736346 2. 736346 2. 527862 2. 736346 2. 846421 2. 736346  
11762750\_ 5. 149194 5. 300579 5. 178901 5. 297498 5. 227132 5. 2666  
11762751\_ 5. 630958 5. 752909 5. 526113 5. 847665 5. 870242 5. 80242  
11762752\_ 3. 263915 3. 53384 3. 448311 3. 377991 3. 404773 3. 276848  
11762753\_ 4. 048682 4. 298098 4. 138523 4. 123151 4. 16827 3. 947015  
11762754\_ 4. 700209 4. 713386 4. 709463 5. 009845 4. 670937 4. 933167  
11762755\_ 5. 602994 5. 727178 5. 698681 5. 604749 5. 51387 5. 688137  
11762756\_ 4. 844725 4. 860547 4. 663885 5. 035151 4. 870849 4. 863659  
11762757\_ 6. 927036 6. 998064 6. 899412 6. 880967 7. 011956 6. 936751  
11762758\_ 5. 961806 5. 979611 6. 015149 6. 068519 6. 067873 6. 050436  
11762759\_ 3. 219059 3. 318605 3. 270724 3. 20557 3. 346454 3. 479599  
11762760\_ 2. 850317 2. 47102 2. 467215 2. 605516 2. 570211 2. 792046  
11762761\_ 3. 483583 3. 783762 3. 794955 3. 953686 3. 836367 3. 856686  
11762762\_ 3. 269413 3. 351844 3. 456281 3. 437078 3. 754873 3. 44832  
11762763\_ 2. 999875 3. 119332 3. 028697 3. 058619 3. 08953 3. 138698  
11762764\_ 4. 716868 4. 815683 4. 730777 4. 789989 4. 762816 4. 839552  
11762765\_ 2. 896482 3. 244008 3. 076485 3. 050364 3. 123332 3. 130563  
11762766\_ 4. 200678 4. 329993 4. 274888 4. 223724 4. 100118 4. 04821  
11762767\_ 4. 200678 4. 332794 4. 284085 4. 244191 4. 097336 4. 05101  
11762768\_ 2. 8704 3. 037822 2. 793586 2. 966103 2. 860596 3. 122335  
11762769\_ 3. 369461 3. 607609 3. 290188 3. 503743 3. 398236 3. 656192  
11762770\_ 5. 015746 5. 080033 5. 129054 5. 018867 5. 123288 4. 996765  
11762771\_ 5. 545941 5. 61494 5. 504487 5. 448296 5. 532815 5. 595422  
11762772\_ 2. 725189 2. 743118 2. 278257 2. 455262 2. 405089 2. 688123  
11762773\_ 6. 104871 6. 275907 6. 069549 5. 987964 6. 000766 6. 282224  
11762774\_ 3. 386917 3. 406038 3. 157567 3. 388994 3. 512986 3. 403961  
11762775\_ 2. 434473 2. 664991 2. 989087 2. 552942 2. 314486 2. 42899  
11762776\_ 3. 060968 3. 11017 3. 44791 3. 060968 2. 989689 2. 882759  
11762777\_ 8. 291842 8. 276539 8. 258615 8. 260798 8. 228498 8. 244737  
11762778\_ 3. 106946 3. 068351 3. 025972 2. 995485 3. 327 3. 219098  
11762779\_ 3. 924463 4. 182732 4. 121281 4. 055535 4. 170759 4. 200678  
11762780\_ 5. 936653 6. 10537 5. 757377 6. 177075 5. 96314 6. 076167  
11762781\_ 3. 961075 4. 067703 4. 040991 4. 089724 4. 275543 4. 081903  
11762782\_ 7. 111953 7. 022305 7. 146917 7. 07479 7. 148271 7. 181373  
11762783\_ 4. 517538 4. 376769 4. 601532 4. 275543 4. 482293 4. 482293

11762784\_ 5. 026342 4. 932376 5. 042303 5. 115418 5. 215453 4. 938762  
11762785\_ 12. 09576 12. 13362 12. 13215 12. 11084 12. 09748 12. 12172  
11762786\_ 2. 114107 2. 56803 2. 37401 2. 536105 2. 56803 2. 484551  
11762787\_ 5. 462883 5. 517592 5. 53141 5. 678029 5. 517592 5. 520425  
11762788\_ 3. 641927 3. 786673 3. 900923 3. 712194 3. 757642 3. 683286  
11762789\_ 4. 3573 4. 552656 4. 392561 4. 56148 4. 374047 4. 468576  
11762790\_ 4. 383694 4. 333731 4. 4947 4. 744688 4. 475877 4. 715118  
11762791\_ 3. 795206 3. 938185 3. 68446 3. 762321 3. 754254 3. 92366  
11762792\_ 5. 442301 5. 405634 5. 374866 5. 528641 5. 444493 5. 487338  
11762793\_ 4. 947816 4. 990496 4. 797182 4. 932775 5. 071973 5. 092815  
11762794\_ 5. 197844 4. 815683 4. 928868 5. 154664 5. 019291 5. 049476  
11762795\_ 3. 334925 3. 29269 3. 258443 3. 398236 3. 440356 3. 491123  
11762796\_ 3. 928141 4. 041325 3. 978528 4. 356348 4. 132784 4. 05675  
11762797\_ 5. 90615 5. 937709 5. 973344 6. 027461 5. 976682 5. 94278  
11762798\_ 4. 643717 4. 677454 4. 589803 5. 063265 4. 928159 4. 935205  
11762799\_ 6. 742463 6. 849603 6. 799048 6. 839282 6. 874972 6. 956076  
11762800\_ 4. 497474 4. 666628 4. 615703 4. 582093 4. 59848 4. 573064  
11762801\_ 5. 938656 5. 855423 5. 868955 6. 064725 6. 261793 6. 234164  
11762802\_ 5. 238131 5. 428693 5. 197665 5. 303866 5. 371834 5. 387456  
11762803\_ 4. 366197 4. 318707 4. 032991 4. 176539 3. 968908 4. 101201  
11762804\_ 7. 145752 7. 125464 7. 099734 7. 081613 6. 973233 7. 041805  
11762805\_ 6. 853534 6. 876512 6. 789523 6. 964464 6. 943575 6. 854643  
11762806\_ 5. 11527 5. 161837 5. 19202 5. 280957 5. 326875 5. 2666  
11762807\_ 4. 519992 4. 573466 4. 570844 4. 679419 4. 573577 4. 686462  
11762808\_ 5. 664764 5. 584813 5. 695792 5. 681771 5. 761477 5. 668368  
11762809\_ 3. 016947 2. 945929 3. 024124 2. 663707 3. 010398 3. 191532  
11762810\_ 4. 087665 4. 084617 4. 078439 3. 739282 4. 05732 4. 176565  
11762811\_ 4. 847683 5. 079743 5. 018897 5. 104276 5. 135635 5. 01438  
11762812\_ 2. 259322 2. 831188 2. 878702 2. 563133 2. 509153 2. 602205  
11762813\_ 4. 053844 4. 000133 3. 740892 3. 681051 3. 735931 3. 918806  
11762814\_ 4. 500869 4. 584933 4. 43347 4. 531013 4. 552119 4. 593045  
11762815\_ 5. 371118 5. 208458 5. 374866 5. 372809 5. 428529 5. 308445  
11762816\_ 3. 939539 4. 112029 4. 135496 4. 152112 4. 054288 4. 077755  
11762817\_ 4. 975101 4. 741879 5. 024562 4. 798487 4. 948129 5. 063467  
11762818\_ 5. 231854 5. 161925 4. 944823 5. 336144 5. 220248 5. 123219  
11762819\_ 4. 612324 4. 604656 4. 529824 4. 634928 4. 575441 4. 507219  
11762820\_ 4. 55316 4. 588162 4. 231501 4. 52373 4. 645245 4. 380086  
11762821\_ 6. 244386 6. 620494 6. 448765 6. 572583 6. 498251 6. 601503  
11762822\_ 5. 62106 5. 570927 5. 445878 5. 45633 5. 509688 5. 499243  
11762823\_ 5. 715762 5. 672285 5. 769096 5. 95802 5. 920851 6. 092628  
11762824\_ 2. 657751 2. 795967 2. 791673 2. 688462 2. 71601 2. 819221  
11762825\_ 4. 556466 4. 204845 4. 524228 4. 27078 4. 382557 4. 143681  
11762826\_ 5. 736831 5. 875122 5. 798519 5. 992725 5. 894697 5. 837681  
11762827\_ 3. 575705 3. 704791 3. 771435 3. 990869 4. 004775 3. 598726  
11762828\_ 5. 811394 5. 872289 5. 709526 5. 672285 5. 513348 5. 753533  
11762829\_ 5. 431362 5. 563043 5. 397004 5. 615455 5. 426098 5. 575271  
11762830\_ 4. 019736 4. 297819 4. 38659 4. 352051 4. 276328 4. 297819  
11762831\_ 4. 697874 4. 835951 4. 710975 4. 713764 4. 871781 4. 960406  
11762832\_ 4. 449563 4. 703158 4. 437149 4. 581214 4. 793902 4. 535262  
11762833\_ 7. 722204 7. 900837 7. 684267 7. 826718 7. 819733 7. 786019  
11762834\_ 3. 753628 4. 002403 3. 884748 3. 962132 3. 866434 3. 975055

11762835\_ 5. 227419 5. 283931 5. 20783 5. 156303 5. 203996 5. 11527  
11762836\_ 4. 194511 4. 206798 4. 171614 4. 215143 4. 238062 4. 234305  
11762837\_ 4. 620935 4. 697924 4. 754739 4. 579612 4. 652454 4. 63914  
11762838\_ 4. 438614 4. 030454 4. 325401 4. 132919 4. 188468 4. 236701  
11762839\_ 4. 589019 4. 711442 4. 636947 4. 888489 4. 875624 4. 470714  
11762840\_ 4. 381596 4. 258421 4. 229003 4. 211226 4. 224366 4. 474513  
11762841\_ 2. 908997 2. 730271 2. 497088 2. 908997 2. 862252 2. 818118  
11762842\_ 3. 380333 3. 53651 3. 37484 3. 405751 3. 472121 3. 497164  
11762843\_ 3. 424705 3. 587616 3. 662439 3. 60036 3. 514948 3. 420239  
11762844\_ 6. 004004 6. 070207 6. 152057 6. 172322 6. 087357 6. 197595  
11762845\_ 4. 110262 4. 263978 4. 212677 4. 168813 4. 159976 4. 185986  
11762846\_ 5. 309868 5. 442868 5. 300224 5. 351303 5. 512717 5. 459676  
11762847\_ 2. 567754 2. 704967 2. 733498 2. 76289 3. 185974 2. 605516  
11762848\_ 6. 20063 6. 154223 6. 181413 6. 108133 6. 205303 6. 14516  
11762849\_ 3. 226156 2. 900118 3. 264035 3. 256869 3. 2436 2. 847365  
11762850\_ 5. 424703 5. 461301 5. 401337 5. 660113 5. 571281 5. 564805  
11762851\_ 4. 736252 4. 874234 4. 677924 4. 874234 4. 857394 4. 815683  
11762852\_ 3. 12346 3. 243669 3. 027737 3. 050484 3. 101013 3. 081287  
11762853\_ 4. 986476 5. 10373 5. 265058 5. 262129 5. 549124 5. 095128  
11762854\_ 7. 914244 7. 822286 7. 901519 7. 808018 7. 800876 7. 79489  
11762855\_ 2. 5677 2. 632321 2. 605516 2. 675965 2. 696806 2. 66823  
11762856\_ 2. 5677 2. 632321 2. 605516 2. 675965 2. 696806 2. 66823  
11762857\_ 2. 475309 2. 469751 2. 393133 2. 406381 2. 508674 2. 320421  
11762858\_ 7. 338259 7. 384821 7. 238819 7. 129446 7. 257568 7. 220733  
11762859\_ 6. 215 6. 066878 6. 316217 5. 493318 5. 708635 5. 554616  
11762860\_ 4. 720886 4. 803082 4. 539525 4. 754903 4. 779685 4. 925661  
11762861\_ 2. 235709 2. 138841 2. 402847 2. 423615 2. 605516 2. 402847  
11762862\_ 4. 482406 4. 729707 4. 584254 4. 698519 4. 613317 4. 603975  
11762863\_ 7. 263207 7. 190275 7. 073281 7. 399379 7. 33784 7. 348591  
11762864\_ 5. 801566 5. 847226 5. 759624 5. 953077 5. 882395 5. 746976  
11762865\_ 5. 271563 5. 38492 5. 376927 3. 695899 3. 358386 3. 720377  
11762866\_ 3. 814012 3. 765354 3. 457448 3. 665101 3. 896987 3. 625294  
11762867\_ 4. 171365 4. 184565 4. 150936 4. 037284 4. 054288 4. 05944  
11762868\_ 4. 210754 4. 115978 4. 162136 4. 334088 4. 255497 4. 154518  
11762869\_ 4. 495727 4. 705143 4. 574346 4. 832488 4. 495727 4. 593101  
11762870\_ 9. 32505 9. 367816 9. 245784 9. 404742 9. 392651 9. 203209  
11762871\_ 4. 311564 4. 340625 4. 232356 4. 388673 4. 513497 4. 459382  
11762872\_ 2. 122789 2. 107948 2. 0909 2. 12947 2. 011062 2. 202267  
11762873\_ 3. 122119 3. 170605 2. 872899 3. 105438 3. 034821 3. 170605  
11762874\_ 4. 794046 4. 856657 4. 722062 4. 97976 4. 989507 4. 932087  
11762875\_ 5. 407857 5. 340735 5. 396861 5. 332531 5. 370589 5. 318731  
11762876\_ 5. 709066 5. 789947 5. 755535 5. 955322 5. 870242 5. 894697  
11762877\_ 4. 643717 5. 078936 4. 612074 4. 829048 4. 99454 5. 09118  
11762878\_ 4. 802238 4. 988151 4. 805804 4. 870839 4. 872777 4. 952413  
11762879\_ 3. 198619 3. 305583 3. 277984 3. 333182 3. 305583 3. 357395  
11762880\_ 6. 958487 6. 893404 7. 032349 7. 063893 7. 039068 7. 121641  
11762881\_ 3. 273412 3. 22092 3. 16818 3. 055527 3. 063416 3. 212499  
11762882\_ 4. 183079 3. 77055 3. 989382 3. 51916 3. 66491 3. 527615  
11762883\_ 4. 83839 4. 884458 5. 049701 4. 661963 4. 841304 4. 815683  
11762884\_ 4. 770268 4. 953462 4. 643717 4. 897172 4. 970315 4. 925745  
11762885\_ 3. 364058 2. 832837 3. 29475 3. 605254 3. 191219 3. 132295



11762886\_ 2. 713972 3. 012148 2. 909007 2. 684 2. 922048 2. 762294  
11762887\_ 7. 727276 7. 729951 7. 63476 7. 769926 7. 767092 7. 747843  
11762888\_ 6. 303991 6. 213094 6. 206336 6. 367793 6. 35281 6. 309399  
11762889\_ 6. 059095 6. 046739 5. 988609 6. 116805 6. 227171 6. 167287  
11762890\_ 4. 860141 4. 879597 4. 913252 5. 037654 5. 031182 5. 045546  
11762891\_ 8. 394448 8. 20462 8. 389337 7. 796494 7. 765944 7. 910863  
11762892\_ 3. 213717 3. 398236 3. 357554 3. 157191 3. 191738 3. 172743  
11762893\_ 5. 425245 5. 587528 5. 475641 5. 631455 5. 572416 5. 41759  
11762894\_ 4. 331596 4. 31326 4. 062669 3. 993424 4. 054288 4. 054288  
11762895\_ 4. 092705 4. 157324 4. 204362 4. 185896 4. 128558 4. 152268  
11762896\_ 5. 776223 6. 063127 5. 811174 5. 950193 6. 116399 5. 892433  
11762897\_ 3. 986098 3. 926936 3. 988529 4. 135496 4. 107368 4. 131581  
11762898\_ 7. 089177 7. 10182 7. 088732 7. 128155 7. 121126 7. 164857  
11762899\_ 6. 176059 6. 238437 6. 220018 6. 289331 6. 277445 6. 231926  
11762900\_ 3. 412006 3. 373187 3. 33721 3. 31184 3. 470498 3. 398236  
11762901\_ 2. 47102 2. 591878 2. 405077 2. 450855 2. 305118 2. 63914  
11762902\_ 2. 850317 2. 780145 2. 630175 2. 691616 2. 536459 2. 790512  
11762903\_ 3. 064943 2. 966164 2. 947043 3. 05288 2. 877885 2. 969042  
11762904\_ 4. 342165 4. 527027 4. 311352 4. 361175 4. 472576 4. 694936  
11762905\_ 4. 433128 4. 589016 4. 37167 4. 387575 4. 498976 4. 650889  
11762906\_ 6. 347462 6. 481662 6. 347382 6. 325472 6. 25472 6. 25472  
11762907\_ 10. 68777 10. 7113 10. 64398 9. 456818 9. 3919 9. 349399  
11762908\_ 4. 763543 4. 709463 4. 64719 4. 492529 4. 471705 4. 42611  
11762909\_ 2. 758841 2. 619049 2. 674588 2. 718322 2. 759791 2. 861982  
11762910\_ 4. 517408 4. 467915 4. 740573 4. 261791 4. 365174 4. 293878  
11762911\_ 5. 186103 5. 391599 5. 362919 5. 465819 5. 434034 5. 184035  
11762912\_ 3. 606313 3. 400717 3. 796051 3. 21279 3. 658529 3. 400717  
11762913\_ 4. 416354 4. 763418 4. 681034 4. 812851 4. 745865 4. 731077  
11762914\_ 3. 689703 3. 689703 3. 482773 3. 695615 3. 655646 3. 755605  
11762915\_ 5. 439101 5. 518169 5. 26034 5. 480966 5. 523467 5. 589814  
11762916\_ 6. 67216 6. 765074 6. 665865 6. 715147 6. 866837 6. 790885  
11762917\_ 7. 236121 7. 267181 7. 217251 7. 212651 7. 220596 7. 183172  
11762918\_ 5. 890759 5. 917017 5. 937635 5. 874105 5. 863743 5. 890187  
11762919\_ 2. 30776 2. 511693 2. 567022 2. 408927 2. 454262 2. 519984  
11762920\_ 2. 407265 2. 630306 2. 744649 2. 555966 2. 572875 2. 418111  
11762921\_ 11. 68736 11. 95334 11. 78709 12. 05848 11. 92682 11. 88739  
11762922\_ 13. 44846 13. 44704 13. 44457 13. 42991 13. 45698 13. 45448  
11762923\_ 12. 63506 12. 73082 12. 69601 12. 81041 12. 73123 12. 72214  
11762924\_ 2. 172836 1. 58765 2. 097741 1. 773374 1. 79354 1. 809788  
11762925\_ 3. 067658 2. 973995 3. 340477 3. 126561 3. 3877 3. 334401  
11762926\_ 3. 734223 3. 920742 3. 713909 3. 756925 3. 823151 3. 786777  
11762927\_ 2. 804453 2. 948076 2. 836446 3. 001084 3. 003846 3. 070971  
11762928\_ 3. 108891 2. 966568 2. 737372 3. 121171 3. 293552 3. 148721  
11762929\_ 3. 215584 3. 416153 3. 290188 3. 383301 3. 479069 3. 39334  
11762930\_ 2. 402546 2. 741895 2. 586355 2. 647604 2. 829055 2. 521666  
11762931\_ 2. 623539 2. 684778 2. 372083 2. 353768 2. 642956 2. 289431  
11762932\_ 4. 559959 4. 520875 4. 713456 4. 656634 4. 700681 4. 785575  
11762933\_ 2. 929369 3. 20848 2. 996609 3. 096032 3. 100331 3. 085664  
11762934\_ 2. 660664 2. 88591 3. 082841 3. 044893 2. 88591 3. 151578  
11762935\_ 5. 381461 5. 469847 5. 337473 5. 643713 5. 33281 5. 569023  
11762936\_ 3. 865531 3. 851257 3. 801481 4. 035262 3. 894765 3. 944728

11762937\_ 6. 71875 6. 526594 6. 65098 6. 539082 6. 643784 6. 725953  
11762938\_ 4. 513694 4. 556768 4. 358927 4. 690985 4. 459939 4. 63723  
11762939\_ 3. 19013 3. 137787 3. 136623 3. 323728 3. 296197 3. 220611  
11762940\_ 8. 313824 8. 342428 8. 290764 8. 207967 8. 059032 8. 102423  
11762941\_ 4. 327327 4. 460685 4. 480957 4. 450627 4. 452364 4. 38051  
11762942\_ 4. 914108 4. 932361 4. 817136 5. 007122 4. 998696 4. 975322  
11762943\_ 3. 792565 3. 606313 3. 86783 3. 594934 3. 789492 3. 678422  
11762944\_ 4. 194274 4. 420738 4. 325394 4. 459939 4. 584933 4. 72164  
11762945\_ 4. 722453 4. 977313 5. 073036 4. 874234 4. 982542 4. 843871  
11762946\_ 3. 982465 4. 271812 4. 227684 4. 256085 4. 184347 3. 994378  
11762947\_ 3. 155596 3. 175426 3. 212239 3. 397635 3. 344734 3. 393052  
11762948\_ 3. 141235 3. 350527 3. 450486 3. 398236 3. 517151 3. 398236  
11762949\_ 3. 886531 3. 864777 3. 788377 3. 864777 3. 879309 4. 091241  
11762950\_ 5. 719724 5. 885195 5. 732223 6. 018553 5. 768053 5. 844933  
11762951\_ 5. 034331 5. 235076 5. 215998 5. 21268 5. 272051 5. 287381  
11762952\_ 5. 333723 5. 241075 5. 204807 5. 330351 5. 375974 5. 300429  
11762953\_ 5. 868246 5. 902381 5. 791381 5. 93062 6. 047018 6. 007858  
11762954\_ 4. 284707 4. 092235 4. 270961 4. 318325 4. 270961 4. 304906  
11762955\_ 2. 688764 2. 995447 2. 928159 2. 836678 2. 983571 2. 917609  
11762956\_ 4. 769443 5. 019207 4. 643717 4. 973699 4. 681564 4. 966708  
11762957\_ 8. 644756 8. 619791 8. 765086 8. 532188 8. 548192 8. 528186  
11762958\_ 3. 07009 2. 717689 2. 874619 2. 718322 2. 653589 2. 653457  
11762959\_ 5. 288853 5. 292742 4. 978548 5. 2278 5. 339744 5. 241623  
11762960\_ 4. 943237 5. 11709 4. 699987 5. 1983 5. 133852 5. 039472  
11762961\_ 3. 006321 2. 788413 2. 900815 3. 384934 2. 864357 3. 170981  
11762962\_ 4. 955755 5. 224086 4. 890412 5. 110502 5. 256214 5. 065525  
11762963\_ 5. 131785 5. 34593 5. 083867 5. 321749 5. 362034 5. 072475  
11762964\_ 1. 945216 1. 784602 1. 769919 1. 912863 2. 037769 2. 052018  
11762965\_ 2. 55035 2. 725467 2. 454125 2. 605516 2. 732398 2. 578367  
11762966\_ 7. 271706 7. 258691 7. 07197 7. 38484 7. 315859 7. 24788  
11762967\_ 3. 822961 4. 143283 3. 89636 4. 126877 4. 102073 3. 873004  
11762968\_ 3. 819533 3. 962901 3. 991962 4. 147857 4. 131043 4. 059025  
11762969\_ 5. 567033 5. 67598 5. 665983 5. 689456 5. 774373 5. 712732  
11762970\_ 4. 408666 4. 52373 4. 274509 4. 656803 4. 52373 4. 551563  
11762971\_ 5. 885534 5. 921095 5. 894697 5. 973999 6. 065982 6. 009559  
11762972\_ 7. 695047 7. 79441 7. 79113 7. 865214 7. 897815 7. 87957  
11762973\_ 5. 029529 5. 084279 4. 926477 4. 992243 4. 721666 4. 825182  
11762974\_ 4. 360112 4. 479006 4. 228005 4. 43244 4. 387203 4. 365491  
11762975\_ 3. 515198 3. 781772 3. 80315 3. 781772 3. 71206 3. 995807  
11762976\_ 2. 058186 2. 311957 2. 034323 2. 225228 2. 083808 2. 122816  
11762977\_ 4. 515729 4. 479899 4. 729866 4. 585007 4. 50377 4. 48065  
11762978\_ 6. 696256 6. 721098 6. 702583 6. 363385 6. 424336 6. 413842  
11762979\_ 5. 336904 5. 251623 5. 304921 5. 350761 5. 343767 5. 311136  
11762980\_ 5. 114368 5. 060747 5. 088075 5. 182517 5. 035772 5. 119049  
11762981\_ 2. 135878 2. 143839 2. 075276 2. 143839 2. 151801 2. 224692  
11762982\_ 1. 995297 1. 64639 2. 095256 1. 748445 1. 6136 1. 523998  
11762983\_ 5. 27989 5. 286822 5. 150592 5. 434906 5. 222063 5. 303249  
11762984\_ 4. 173285 4. 044851 4. 261041 4. 299827 4. 295822 4. 31285  
11762985\_ 2. 342722 2. 714153 3. 056809 2. 512144 2. 648103 2. 840803  
11762986\_ 4. 172989 4. 163005 4. 160142 4. 291374 4. 295035 4. 179263  
11762987\_ 4. 350333 4. 279141 4. 263218 4. 347179 4. 37002 4. 348236

11762988\_ 6. 948409 7. 266126 7. 153621 7. 315257 7. 346983 7. 384189  
11762989\_ 2. 612766 2. 681061 2. 736636 2. 774864 2. 912551 2. 893984  
11762990\_ 7. 056498 7. 177668 6. 96255 7. 066482 7. 103823 6. 965051  
11762991\_ 3. 2472 3. 557217 3. 313429 3. 776383 3. 450269 3. 668019  
11762992\_ 12. 3881 12. 38766 12. 38069 12. 3106 12. 27895 12. 29616  
11762993\_ 6. 21956 6. 221021 6. 078117 6. 015611 6. 005208 6. 029474  
11762994\_ 3. 899518 4. 297671 3. 886169 3. 956012 4. 169205 4. 187946  
11762995\_ 4. 472495 4. 412363 4. 557244 4. 417408 4. 432542 4. 366988  
11762996\_ 5. 915282 5. 704919 5. 814498 5. 455717 5. 473148 5. 79216  
11762997\_ 2. 695225 2. 695225 2. 695692 2. 50522 2. 742974 2. 560074  
11762998\_ 5. 069191 5. 107994 5. 115812 5. 037516 5. 014062 4. 952762  
11762999\_ 4. 11252 4. 182176 4. 09747 4. 17799 4. 219986 4. 408807  
11763000\_ 4. 347179 4. 187353 4. 130191 4. 331955 4. 200733 4. 054288  
11763001\_ 4. 284743 4. 38487 4. 602071 4. 573887 4. 317189 4. 394527  
11763002\_ 6. 67058 6. 750661 6. 587117 6. 677536 6. 711885 6. 72234  
11763003\_ 3. 505276 3. 461451 3. 306769 3. 367768 3. 765404 3. 573218  
11763004\_ 4. 906188 5. 057832 5. 026972 5. 088331 4. 966332 5. 084757  
11763005\_ 2. 606358 2. 660922 2. 352898 2. 594039 2. 718322 2. 578312  
11763006\_ 2. 398218 2. 438511 2. 313965 2. 434581 2. 434581 2. 416771  
11763007\_ 12. 2439 12. 32128 12. 27668 12. 33593 12. 24269 12. 1778  
11763008\_ 2. 147764 2. 246229 2. 147764 2. 244737 2. 033144 1. 995297  
11763009\_ 4. 202686 4. 250934 4. 086675 4. 457869 4. 297126 4. 331275  
11763010\_ 3. 593682 3. 290188 3. 277983 3. 537516 3. 6689 3. 550513  
11763011\_ 2. 404163 2. 117559 2. 153918 2. 053478 2. 117559 2. 095256  
11763012\_ 3. 831018 3. 934381 3. 717732 4. 062789 4. 025071 4. 071369  
11763013\_ 5. 349064 5. 457917 5. 372903 5. 352317 5. 473789 5. 179066  
11763014\_ 5. 349064 5. 457917 5. 372903 5. 352317 5. 473789 5. 179066  
11763015\_ 5. 601947 5. 854366 5. 566196 5. 689782 5. 587388 5. 620276  
11763016\_ 4. 387578 4. 256217 4. 38652 4. 514241 4. 295887 4. 150264  
11763017\_ 4. 125539 4. 121026 4. 267656 4. 096966 3. 866846 4. 055989  
11763018\_ 4. 124034 4. 10019 4. 349401 4. 143731 3. 974474 4. 174364  
11763019\_ 4. 592121 4. 538408 4. 588519 4. 408688 4. 563681 4. 415744  
11763020\_ 3. 240243 3. 240243 3. 331493 3. 312972 3. 337215 3. 259558  
11763021\_ 2. 562936 2. 653936 2. 382837 2. 848862 2. 658329 2. 740065  
11763022\_ 3. 21361 3. 077886 3. 19853 3. 43455 3. 384157 3. 662933  
11763023\_ 4. 400706 4. 51753 4. 287593 4. 507064 4. 526775 4. 484341  
11763024\_ 3. 120296 2. 663711 3. 079705 3. 025972 3. 091879 2. 985773  
11763025\_ 5. 643713 5. 648405 5. 510415 5. 740896 5. 732291 5. 676992  
11763026\_ 5. 327037 5. 452366 5. 281766 5. 456104 5. 412909 5. 515908  
11763027\_ 5. 945635 6. 029889 5. 931906 6. 060502 6. 239471 6. 091957  
11763028\_ 3. 039236 2. 94521 2. 952018 2. 978277 2. 897944 3. 031763  
11763029\_ 2. 115067 2. 043143 2. 027849 2. 05522 1. 967253 2. 098402  
11763030\_ 6. 11611 5. 94332 5. 996126 6. 153217 6. 035332 6. 094413  
11763031\_ 5. 831611 5. 769482 5. 738908 5. 878822 5. 781767 5. 77685  
11763032\_ 4. 982654 5. 006309 5. 131714 5. 095224 5. 040835 5. 007269  
11763033\_ 7. 546856 7. 558731 7. 503926 7. 736094 7. 675071 7. 719745  
11763034\_ 5. 654148 5. 518169 5. 639413 5. 656258 5. 845365 5. 868572  
11763035\_ 4. 290608 4. 245365 4. 225839 4. 179584 4. 405644 4. 335544  
11763036\_ 3. 610458 3. 745194 3. 944128 3. 610458 3. 574083 3. 709771  
11763037\_ 4. 626599 4. 535078 4. 460418 4. 505781 4. 550959 4. 671275  
11763038\_ 4. 678871 4. 385762 4. 378201 4. 543675 4. 54978 4. 70523

11763039\_ 3. 03538 3. 037129 3. 042639 2. 856639 2. 912551 2. 951127  
11763040\_ 2. 37316 2. 343817 2. 152912 2. 101483 2. 214519 2. 246844  
11763041\_ 4. 015036 4. 099806 4. 062224 4. 090514 3. 906465 3. 982698  
11763042\_ 3. 555413 3. 247111 3. 308314 3. 116212 3. 248024 3. 308314  
11763043\_ 3. 552357 3. 588005 3. 41309 3. 468904 3. 643974 3. 530929  
11763044\_ 2. 285929 2. 225848 2. 202376 2. 167064 2. 196456 2. 25483  
11763045\_ 2. 528914 2. 461646 2. 434427 2. 597002 2. 503227 2. 384435  
11763046\_ 5. 282961 5. 182011 5. 189916 4. 89084 4. 949624 5. 155634  
11763047\_ 5. 59622 5. 789313 5. 600966 5. 772297 5. 730144 5. 829822  
11763048\_ 2. 131843 1. 88851 1. 881238 1. 846577 2. 095664 2. 095834  
11763049\_ 2. 794652 2. 603747 2. 644615 2. 566418 2. 784375 2. 693496  
11763050\_ 6. 707402 6. 728463 6. 700531 6. 728433 6. 705282 6. 627228  
11763051\_ 5. 954006 6. 03388 5. 932959 6. 100507 6. 066101 6. 033373  
11763052\_ 5. 602887 5. 673271 5. 609863 5. 55007 5. 670629 5. 545835  
11763053\_ 5. 89756 6. 033313 5. 790259 5. 855229 6. 01686 6. 058788  
11763054\_ 2. 575488 2. 616648 2. 593049 2. 836043 2. 620465 2. 685785  
11763055\_ 12. 63414 12. 70538 12. 61825 12. 72692 12. 68794 12. 63635  
11763056\_ 3. 013604 3. 276513 3. 025972 3. 079049 3. 320993 3. 282048  
11763057\_ 3. 256322 3. 183765 2. 907732 2. 916298 3. 083067 3. 256322  
11763058\_ 3. 178083 3. 290188 2. 968387 3. 353362 2. 912551 3. 381037  
11763059\_ 4. 108592 4. 0646 4. 112583 4. 353138 4. 168742 4. 200678  
11763060\_ 7. 329954 7. 344561 7. 212651 7. 401339 7. 400837 7. 448291  
11763061\_ 2. 247373 2. 021684 2. 444304 2. 153441 2. 533551 2. 16621  
11763062\_ 2. 820007 2. 815169 2. 736636 2. 904286 2. 900641 2. 983925  
11763063\_ 2. 137656 2. 244633 2. 262538 2. 404433 1. 934232 2. 130298  
11763064\_ 5. 583455 5. 641981 5. 449308 5. 602797 5. 56265 5. 589814  
11763065\_ 4. 771593 4. 557122 4. 508676 4. 556335 4. 428991 4. 754053  
11763066\_ 3. 341987 3. 347543 3. 145056 3. 083583 3. 162096 3. 269565  
11763067\_ 2. 423177 2. 322193 2. 812637 2. 699976 2. 619786 2. 520578  
11763068\_ 3. 535428 3. 718014 3. 541255 3. 904462 3. 612507 3. 682134  
11763069\_ 3. 645885 3. 678327 3. 788957 3. 809914 3. 654461 3. 61901  
11763070\_ 2. 841502 2. 813105 2. 728028 2. 718322 2. 737592 2. 9069  
11763071\_ 3. 584514 3. 584514 3. 46709 3. 085973 3. 522983 3. 197502  
11763072\_ 3. 878687 4. 067982 3. 875154 4. 043833 3. 895646 4. 00673  
11763073\_ 6. 785648 6. 868877 6. 820115 7. 419986 7. 394568 7. 475478  
11763074\_ 3. 033616 3. 035974 3. 268955 3. 541573 3. 462976 3. 310485  
11763075\_ 3. 127663 3. 116112 3. 341525 3. 558222 3. 477621 3. 390623  
11763076\_ 4. 802694 4. 821387 4. 774786 4. 820447 4. 74574 4. 79644  
11763077\_ 3. 195492 3. 465891 3. 41789 3. 442981 3. 631444 3. 252742  
11763078\_ 2. 905642 3. 180062 3. 012444 3. 149558 2. 990372 3. 098481  
11763079\_ 3. 581059 3. 841813 3. 700789 3. 777665 3. 66719 3. 784269  
11763080\_ 2. 210428 2. 138504 2. 235709 1. 944469 2. 166552 2. 18238  
11763081\_ 3. 983817 3. 713321 3. 886429 3. 908876 3. 874571 3. 922486  
11763082\_ 4. 410286 4. 350878 4. 168845 4. 264511 4. 473009 4. 35476  
11763083\_ 7. 889744 7. 807439 7. 752389 7. 641257 7. 692315 7. 598835  
11763084\_ 5. 999888 6. 076709 6. 043704 6. 064587 6. 120929 5. 950128  
11763085\_ 5. 699101 6. 011116 5. 686019 5. 957067 5. 908033 5. 937781  
11763086\_ 4. 8004 4. 643717 4. 913288 4. 688233 4. 724677 4. 666858  
11763087\_ 3. 540187 3. 758525 3. 942303 3. 632443 3. 585516 3. 719436  
11763088\_ 4. 083567 4. 124036 4. 263203 4. 187328 4. 226058 4. 137436  
11763089\_ 7. 055344 7. 111902 7. 147769 7. 183137 7. 132202 7. 212001

11763090\_ 2. 375289 2. 288567 2. 202628 2. 332107 2. 321222 2. 28538  
11763091\_ 2. 203548 2. 054807 2. 12078 2. 098348 2. 133891 1. 971653  
11763092\_ 6. 330543 6. 512227 6. 292289 6. 255263 6. 496225 6. 327989  
11763093\_ 5. 512912 5. 554436 5. 447218 5. 507637 5. 65209 5. 475572  
11763094\_ 5. 373843 5. 700825 5. 510847 5. 582005 5. 516113 5. 612983  
11763095\_ 2. 31539 2. 153896 2. 235076 2. 086273 2. 25483 2. 224493  
11763096\_ 3. 977716 3. 988593 4. 200017 3. 885896 3. 945085 3. 891131  
11763097\_ 3. 940286 3. 940286 4. 168464 3. 966631 3. 885225 4. 034968  
11763098\_ 5. 489962 5. 678609 5. 544888 5. 328698 5. 435646 5. 443567  
11763099\_ 4. 9226 4. 879515 4. 797546 4. 879515 4. 840662 4. 879515  
11763100\_ 4. 550634 4. 566869 4. 838744 4. 666149 4. 422586 4. 567182  
11763101\_ 11. 20834 11. 207 11. 19023 11. 21076 11. 21273 11. 21129  
11763102\_ 4. 646016 4. 782325 4. 57561 4. 898856 4. 774837 4. 777818  
11763103\_ 4. 592336 4. 749568 4. 547153 4. 870399 4. 808352 4. 749361  
11763104\_ 2. 858061 2. 979989 3. 197301 3. 073528 3. 186333 3. 293769  
11763105\_ 4. 564022 4. 652 4. 267705 4. 239104 4. 211881 4. 202692  
11763106\_ 3. 26998 3. 263032 2. 910413 2. 960943 2. 939824 2. 858392  
11763107\_ 4. 499188 4. 443391 4. 383135 4. 365551 4. 383135 4. 584933  
11763108\_ 3. 503743 3. 274192 3. 168731 3. 201248 3. 230391 3. 45738  
11763109\_ 5. 417141 5. 577976 5. 406118 5. 497316 5. 554436 5. 570806  
11763110\_ 3. 606313 3. 553469 3. 41683 3. 55941 3. 366782 3. 398236  
11763111\_ 3. 484152 4. 014759 3. 495717 3. 554476 3. 759184 3. 851555  
11763112\_ 2. 675562 2. 654138 2. 235709 2. 568614 2. 208411 2. 494072  
11763113\_ 3. 875374 3. 727395 3. 850246 3. 754802 3. 701507 3. 793196  
11763114\_ 2. 351596 2. 300126 2. 235709 2. 07274 2. 284274 2. 190342  
11763115\_ 3. 600958 3. 999551 3. 545997 2. 969261 3. 495451 3. 663023  
11763116\_ 3. 208526 3. 608465 3. 321749 3. 224777 2. 866215 3. 268278  
11763117\_ 3. 475999 3. 361147 3. 588031 3. 290322 2. 952829 3. 254918  
11763118\_ 4. 510764 4. 533782 4. 541347 4. 617472 4. 597819 4. 567875  
11763119\_ 5. 594633 5. 884227 5. 512022 5. 510795 5. 550775 5. 459638  
11763120\_ 2. 433002 2. 218986 2. 095256 2. 378573 2. 079884 2. 292549  
11763121\_ 2. 92847 3. 124307 3. 100482 3. 102809 3. 088754 3. 132321  
11763122\_ 3. 211691 3. 279365 3. 211691 3. 045466 3. 308664 3. 395898  
11763123\_ 3. 780519 3. 749317 3. 898081 3. 718115 3. 685908 3. 749317  
11763124\_ 6. 163893 6. 380455 6. 212645 6. 430782 6. 482561 6. 364584  
11763125\_ 5. 645203 5. 782211 5. 758597 5. 804825 5. 878618 5. 754755  
11763126\_ 5. 245079 5. 187025 5. 374866 5. 331862 5. 32454 5. 500653  
11763127\_ 3. 746642 3. 835374 3. 740563 3. 808173 3. 769328 3. 871823  
11763128\_ 5. 11527 5. 307436 5. 208685 5. 365213 5. 405649 5. 408855  
11763129\_ 5. 11527 5. 307436 5. 208685 5. 365213 5. 405649 5. 408855  
11763130\_ 3. 911859 4. 139737 4. 139737 4. 067703 3. 765076 4. 014333  
11763131\_ 3. 663474 3. 785507 3. 609516 4. 012643 3. 909876 3. 983819  
11763132\_ 6. 071806 6. 286441 6. 065632 6. 392439 6. 396914 6. 347635  
11763133\_ 6. 859991 6. 905075 6. 85422 6. 652355 6. 623975 6. 607087  
11763134\_ 4. 809207 4. 503963 4. 48724 4. 229047 4. 419951 4. 314448  
11763135\_ 3. 446064 2. 959373 3. 446064 2. 755351 3. 364265 3. 350955  
11763136\_ 4. 091854 3. 654466 4. 229564 4. 025401 4. 220526 4. 149498  
11763137\_ 3. 892486 4. 048193 3. 795774 4. 437637 4. 070458 3. 999162  
11763138\_ 8. 038699 8. 077235 8. 173236 7. 956459 8. 044367 8. 015823  
11763139\_ 2. 438329 2. 555438 2. 390554 2. 561771 2. 717649 2. 83198  
11763140\_ 5. 510637 5. 699393 5. 657371 5. 64178 5. 812062 5. 967739

11763141\_ 4. 828212 4. 694137 4. 838838 4. 807816 4. 780072 4. 855635  
11763142\_ 2. 278283 2. 264984 2. 205136 2. 370294 2. 370294 2. 438972  
11763143\_ 4. 612646 4. 667969 4. 533379 4. 793464 4. 805896 4. 792906  
11763144\_ 1. 910779 2. 084313 2. 086526 2. 092339 2. 193555 1. 804393  
11763145\_ 4. 933219 4. 763543 4. 951299 5. 057171 5. 033031 5. 033564  
11763146\_ 3. 93977 4. 007192 3. 92666 4. 031604 4. 021044 4. 016023  
11763147\_ 3. 860061 4. 238579 4. 121562 4. 350661 4. 010814 4. 22132  
11763148\_ 3. 354372 3. 197583 3. 398236 3. 185192 3. 406685 3. 323874  
11763149\_ 3. 31275 3. 546234 3. 588937 3. 673832 3. 77128 3. 789576  
11763150\_ 3. 622246 3. 689929 3. 759681 3. 606313 3. 705625 3. 725877  
11763151\_ 2. 416117 2. 028695 1. 752493 2. 213505 2. 101433 2. 022541  
11763152\_ 2. 484754 2. 267342 1. 996216 2. 161925 2. 25483 2. 174696  
11763153\_ 3. 615648 3. 723091 3. 531041 3. 78807 3. 710814 3. 700369  
11763154\_ 6. 009965 6. 294715 5. 912745 6. 263567 6. 243786 6. 167803  
11763155\_ 3. 399018 3. 245804 3. 136556 3. 145423 3. 018351 3. 042386  
11763156\_ 3. 414091 3. 447962 3. 301457 3. 328836 3. 528748 3. 507646  
11763157\_ 4. 587651 4. 712191 4. 910704 4. 616568 4. 643717 4. 777082  
11763158\_ 7. 503333 7. 628105 7. 509911 7. 618935 7. 596098 7. 699263  
11763159\_ 3. 50865 3. 61257 3. 434471 3. 95744 3. 556218 3. 646004  
11763160\_ 5. 073846 5. 059907 4. 984669 5. 321335 4. 941857 5. 220979  
11763161\_ 6. 011079 6. 081514 5. 930744 5. 939166 5. 94112 5. 879232  
11763162\_ 5. 247739 5. 597508 5. 50652 5. 485383 5. 420902 5. 386873  
11763163\_ 4. 713494 4. 639686 4. 45475 4. 51696 4. 504412 4. 531052  
11763164\_ 7. 397038 7. 322347 7. 449643 8. 03515 7. 914854 7. 935249  
11763165\_ 6. 884044 6. 850095 6. 930285 6. 608272 6. 739151 6. 640241  
11763166\_ 4. 946637 5. 11771 5. 059429 5. 164062 4. 952544 5. 213266  
11763167\_ 6. 119839 6. 126384 6. 162562 6. 261662 6. 122294 6. 194675  
11763168\_ 7. 558568 7. 467076 7. 4759 7. 212651 7. 187752 7. 213946  
11763169\_ 7. 337464 7. 435187 7. 557504 6. 799167 6. 870954 6. 97913  
11763170\_ 7. 015733 6. 998064 6. 994297 6. 15184 6. 181026 6. 156278  
11763171\_ 6. 632988 6. 423645 6. 5552 5. 614563 5. 426098 5. 624781  
11763172\_ 5. 072039 5. 052231 5. 2222 5. 244736 5. 32489 4. 849986  
11763173\_ 7. 122136 7. 060952 7. 010226 7. 161863 7. 246522 7. 291927  
11763174\_ 6. 583253 6. 504492 6. 604788 6. 666129 6. 710734 6. 646187  
11763175\_ 5. 132428 5. 228484 5. 108326 5. 242822 5. 403101 4. 992874  
11763176\_ 6. 752035 6. 803975 6. 724108 6. 841402 6. 852283 6. 898581  
11763177\_ 6. 962048 6. 890676 6. 895151 6. 800792 6. 818545 6. 889504  
11763178\_ 5. 218793 5. 189728 5. 029529 4. 914651 5. 096104 4. 958972  
11763179\_ 5. 634233 5. 592149 5. 503297 5. 820052 5. 651488 5. 562702  
11763180\_ 5. 866688 5. 785247 5. 614023 5. 726795 5. 824748 5. 753042  
11763181\_ 7. 256223 7. 155556 7. 243122 7. 495815 7. 503342 7. 572711  
11763182\_ 8. 442332 8. 315702 8. 337546 8. 541079 8. 579667 8. 540795  
11763183\_ 7. 756294 7. 739184 7. 682122 7. 504947 7. 420737 7. 50277  
11763184\_ 8. 795581 8. 745797 8. 823486 8. 528158 8. 567716 8. 573024  
11763185\_ 8. 985864 8. 92681 9. 032861 9. 569881 9. 60953 9. 599636  
11763186\_ 2. 760591 2. 688747 2. 760591 2. 590314 2. 781417 2. 750815  
11763187\_ 6. 236147 6. 134823 6. 134823 6. 118838 6. 133749 6. 118838  
11763188\_ 9. 003715 8. 892618 9. 032007 9. 025286 9. 031874 9. 122436  
11763189\_ 5. 450553 5. 446364 5. 482339 5. 42714 5. 463809 5. 456134  
11763190\_ 7. 01315 7. 025577 6. 986784 7. 024374 7. 313133 7. 13272  
11763191\_ 6. 554512 6. 528225 6. 49219 6. 621979 6. 620601 6. 628801

11763192\_ 5. 982936 5. 93221 5. 836121 6. 003518 5. 978612 5. 980549  
11763193\_ 6. 15275 6. 092994 6. 218112 6. 076709 5. 979599 6. 033123  
11763194\_ 3. 999244 4. 476263 4. 577689 4. 462517 4. 629558 4. 488546  
11763195\_ 7. 260481 7. 305965 7. 348983 7. 07954 7. 221324 7. 064219  
11763196\_ 5. 511776 5. 504915 5. 644219 5. 905105 5. 684267 5. 859601  
11763197\_ 5. 511776 5. 504915 5. 644219 5. 905105 5. 684267 5. 859601  
11763198\_ 4. 40762 4. 310992 4. 300643 4. 570525 4. 500882 4. 372262  
11763199\_ 5. 974613 6. 162762 6. 018841 5. 942508 6. 009026 5. 900347  
11763200\_ 6. 805142 6. 667392 6. 747462 6. 870759 6. 813717 6. 991531  
11763201\_ 5. 820052 5. 910268 5. 794286 5. 827424 5. 885933 5. 849541  
11763202\_ 5. 605585 5. 614563 5. 460739 5. 607237 5. 584813 5. 758375  
11763203\_ 4. 09205 4. 181571 4. 498836 4. 505744 4. 418972 4. 787146  
11763204\_ 6. 859991 6. 954854 6. 904509 6. 999188 7. 021152 7. 066529  
11763205\_ 6. 894191 6. 954992 6. 94493 6. 965488 6. 987452 6. 97592  
11763206\_ 4. 196445 3. 975013 4. 04019 3. 932142 3. 742967 4. 04019  
11763207\_ 5. 276663 5. 505763 5. 445597 5. 407855 5. 472261 5. 535643  
11763208\_ 5. 053428 5. 189628 4. 840414 5. 768053 5. 609647 5. 641496  
11763209\_ 4. 259549 4. 259549 4. 459939 3. 925181 3. 890933 3. 948397  
11763210\_ 5. 412019 5. 455158 5. 627115 5. 635751 5. 584813 5. 647661  
11763211\_ 5. 078844 5. 22026 4. 991745 5. 430178 5. 305865 5. 264707  
11763212\_ 5. 609338 5. 365286 5. 566928 5. 107475 4. 967609 5. 158236  
11763213\_ 7. 94799 7. 898746 7. 931939 7. 7044 7. 706097 7. 760438  
11763214\_ 2. 658267 2. 634082 2. 755239 2. 532152 2. 700196 2. 856176  
11763215\_ 4. 315865 4. 350105 4. 720615 4. 290987 4. 00084 4. 186016  
11763216\_ 4. 679041 4. 787562 4. 560333 4. 765669 4. 588529 4. 719972  
11763217\_ 6. 937718 6. 851543 6. 991909 6. 956076 6. 886652 6. 925688  
11763218\_ 2. 295975 2. 361778 2. 266607 2. 448167 2. 47102 2. 361925  
11763219\_ 6. 554512 6. 618579 6. 51072 6. 644029 6. 699821 6. 671763  
11763220\_ 6. 784092 6. 806821 6. 897306 6. 794162 6. 881862 6. 803798  
11763221\_ 5. 431267 5. 241345 5. 18399 5. 215852 5. 324256 5. 258625  
11763222\_ 2. 755 2. 671076 2. 671076 2. 724681 2. 623409 2. 671076  
11763223\_ 2. 869303 2. 904042 2. 997974 3. 13179 3. 148187 3. 079897  
11763224\_ 4. 106898 4. 324466 4. 346722 4. 197941 4. 294914 4. 095829  
11763225\_ 5. 060276 5. 491324 5. 283248 5. 114004 5. 100844 5. 154872  
11763226\_ 7. 854837 7. 730153 7. 813109 7. 595208 7. 691027 7. 635915  
11763227\_ 4. 081098 4. 30351 3. 987092 4. 598527 4. 307627 4. 596392  
11763228\_ 5. 085501 5. 244559 5. 204368 5. 353175 5. 164712 5. 243137  
11763229\_ 5. 524392 5. 620004 5. 393537 5. 758597 5. 771467 5. 621987  
11763230\_ 4. 769815 4. 898 4. 764884 4. 56922 4. 485411 4. 584505  
11763231\_ 4. 129821 4. 174945 4. 116339 4. 216624 4. 123738 4. 122446  
11763232\_ 5. 181085 5. 190928 5. 23205 5. 327567 5. 292603 5. 238344  
11763233\_ 6. 135844 6. 253596 6. 19846 6. 207789 6. 15821 6. 159771  
11763234\_ 2. 675997 2. 858648 2. 707137 2. 591181 2. 605516 2. 675997  
11763235\_ 5. 267974 5. 316513 5. 215182 5. 44977 5. 421988 5. 346174  
11763236\_ 3. 129845 3. 189653 3. 113115 3. 249141 3. 250856 3. 309884  
11763237\_ 3. 897889 3. 911528 3. 911528 3. 891362 4. 052793 3. 93458  
11763238\_ 11. 2828 11. 28503 11. 33355 11. 91476 11. 97991 11. 92247  
11763239\_ 4. 507123 4. 612521 4. 827567 4. 740926 4. 633128 4. 686372  
11763240\_ 5. 60382 5. 73992 5. 382952 5. 936531 5. 927319 5. 856633  
11763241\_ 4. 673419 4. 694464 4. 593737 4. 728262 4. 746593 4. 718054  
11763242\_ 3. 754734 3. 519511 3. 618143 3. 599047 3. 496478 3. 290188

11763243\_ 4. 024257 3. 939199 4. 009133 4. 004092 4. 061886 4. 196544  
11763244\_ 4. 887689 4. 758824 4. 772366 4. 353415 4. 394502 4. 422969  
11763245\_ 3. 436301 3. 38503 3. 496518 3. 651495 3. 306585 3. 326859  
11763246\_ 4. 616441 4. 643717 4. 507199 4. 589679 4. 661601 4. 714933  
11763247\_ 4. 081401 4. 247753 4. 30955 4. 362191 4. 247 4. 270052  
11763248\_ 9. 598714 9. 584982 9. 598714 9. 772257 9. 828697 9. 807281  
11763249\_ 6. 651744 6. 620014 6. 604788 6. 779107 6. 668084 6. 654179  
11763250\_ 8. 335807 8. 402544 8. 441083 8. 391032 8. 367359 8. 411481  
11763251\_ 2. 510475 2. 746408 2. 736636 2. 512144 2. 80245 2. 601799  
11763252\_ 2. 391131 2. 239469 2. 139674 2. 25483 2. 318404 2. 362363  
11763253\_ 1. 913493 2. 128729 2. 044205 1. 978845 1. 950273 1. 979765  
11763254\_ 4. 275543 4. 378445 4. 127229 4. 254147 4. 416308 4. 372797  
11763255\_ 5. 62139 5. 697763 5. 420118 5. 723241 5. 653919 5. 549433  
11763256\_ 3. 738579 4. 202591 3. 740892 3. 806846 3. 969526 4. 046087  
11763257\_ 4. 733731 4. 706795 4. 584933 4. 834078 4. 843747 4. 815683  
11763258\_ 7. 495311 7. 467168 7. 50344 7. 5339 7. 55 7. 548264  
11763259\_ 10. 90577 10. 82968 10. 89633 11. 09518 11. 13965 11. 13498  
11763260\_ 6. 520868 6. 559667 6. 540546 6. 598741 6. 54083 6. 557068  
11763261\_ 4. 334799 4. 57114 4. 351259 4. 19541 4. 23782 4. 138279  
11763262\_ 3. 220934 3. 409305 3. 380747 3. 383408 3. 346188 3. 424221  
11763263\_ 7. 45869 7. 423154 7. 470193 8. 406407 8. 400858 8. 410239  
11763264\_ 7. 070108 6. 910927 6. 994297 6. 781988 6. 68229 6. 834597  
11763265\_ 7. 669273 7. 620897 7. 602597 7. 520425 7. 535397 7. 581246  
11763266\_ 7. 064431 6. 97578 7. 037219 6. 898177 6. 974196 6. 927222  
11763267\_ 4. 024287 4. 045069 4. 024287 3. 889724 4. 067671 4. 036726  
11763268\_ 6. 129389 6. 146029 6. 15681 6. 114146 6. 003578 5. 98194  
11763269\_ 7. 919501 7. 948795 7. 874142 7. 716269 7. 702582 7. 692172  
11763270\_ 5. 669263 5. 653294 5. 934095 6. 453015 6. 431763 6. 481046  
11763271\_ 6. 178292 6. 185473 6. 055952 6. 136299 6. 052578 6. 066855  
11763272\_ 7. 47674 7. 321409 7. 330872 7. 403688 7. 342293 7. 434587  
11763273\_ 7. 411148 7. 343082 7. 542212 7. 18371 7. 186287 7. 16821  
11763274\_ 2. 981412 3. 121527 2. 908519 3. 388388 3. 217174 3. 284978  
11763275\_ 8. 4576 8. 477489 8. 525929 8. 145529 8. 153949 8. 069686  
11763276\_ 7. 480303 7. 417811 7. 361952 7. 816618 7. 773934 7. 785553  
11763277\_ 5. 722382 5. 623293 5. 598609 5. 635168 5. 584813 5. 704919  
11763278\_ 8. 613642 8. 501768 8. 568882 8. 426755 8. 333719 8. 512363  
11763279\_ 6. 987921 6. 870591 7. 064475 6. 564419 6. 630934 6. 662267  
11763280\_ 5. 904114 5. 904459 5. 955755 5. 403245 5. 553426 5. 696763  
11763281\_ 5. 509464 5. 231693 5. 483466 4. 771249 4. 855836 4. 741776  
11763282\_ 4. 177251 3. 936714 4. 459939 3. 925181 3. 705964 3. 386147  
11763283\_ 7. 317073 7. 228232 7. 281459 7. 076717 6. 976217 7. 06424  
11763284\_ 6. 258016 6. 183024 6. 276635 6. 126427 6. 175663 6. 253796  
11763285\_ 7. 154304 7. 144608 7. 129058 7. 068646 7. 012429 6. 948954  
11763286\_ 5. 464993 5. 343302 5. 287718 5. 291602 5. 541259 5. 330233  
11763287\_ 7. 886177 8. 031086 7. 914171 7. 900376 7. 86354 7. 894053  
11763288\_ 6. 262901 6. 476661 6. 310796 6. 338933 6. 206103 6. 273062  
11763289\_ 6. 646918 6. 540386 6. 500302 5. 920244 5. 979475 6. 100567  
11763290\_ 4. 815683 5. 041594 5. 073036 5. 2222 5. 2222 4. 916811  
11763291\_ 5. 427251 5. 408523 5. 409503 5. 485663 5. 457497 5. 587101  
11763292\_ 7. 607265 7. 607265 7. 609711 7. 34409 7. 418352 7. 458024  
11763293\_ 5. 661937 5. 599868 5. 678136 4. 649307 4. 831844 4. 822352



11763294\_ 6. 441369 6. 431763 6. 498688 5. 97612 5. 875289 5. 809393  
11763295\_ 4. 549134 4. 737988 4. 495801 4. 736759 4. 654837 4. 649858  
11763296\_ 6. 978612 6. 886652 6. 990408 7. 359656 7. 255553 7. 535237  
11763297\_ 8. 544409 8. 42729 8. 407009 8. 185931 8. 181382 8. 181382  
11763298\_ 10. 29739 10. 23411 10. 27477 9. 777247 9. 806771 9. 770288  
11763299\_ 5. 639343 5. 773931 5. 810622 5. 773715 5. 748091 5. 792234  
11763300\_ 7. 089177 6. 909795 7. 105207 7. 017818 6. 903229 6. 975745  
11763301\_ 11. 93604 11. 90428 11. 89954 11. 83393 11. 82045 11. 8768  
11763302\_ 4. 405923 4. 584933 4. 414615 4. 719698 4. 52373 4. 525336  
11763303\_ 7. 593401 7. 574785 7. 584738 7. 497694 7. 52642 7. 47118  
11763304\_ 6. 819328 6. 827157 6. 982937 6. 777459 6. 776012 6. 861381  
11763305\_ 3. 011797 3. 10691 3. 266484 3. 151709 3. 235827 3. 113584  
11763306\_ 4. 939926 5. 113336 4. 969278 5. 11619 5. 007671 5. 061062  
11763307\_ 8. 270661 8. 209543 8. 301255 8. 644439 8. 581476 8. 675757  
11763308\_ 3. 751261 3. 732491 3. 896241 3. 958955 3. 845297 3. 518248  
11763309\_ 5. 25773 4. 892034 5. 073036 5. 198035 5. 139994 5. 180659  
11763310\_ 9. 731158 9. 689898 9. 734642 8. 993285 8. 983419 8. 989473  
11763311\_ 8. 52331 8. 430732 8. 514137 8. 50657 8. 511428 8. 476431  
11763312\_ 5. 777806 5. 74429 5. 740985 5. 872232 5. 835073 5. 924156  
11763313\_ 6. 579128 6. 745282 6. 566707 7. 136045 7. 075756 7. 150671  
11763314\_ 6. 230891 6. 11029 6. 304258 6. 043835 5. 943308 5. 992354  
11763315\_ 7. 01547 7. 233303 7. 039754 7. 367466 7. 289073 7. 308349  
11763316\_ 5. 550055 5. 330775 5. 320831 5. 448296 5. 525907 5. 426448  
11763317\_ 6. 212205 6. 056835 6. 030948 6. 217675 6. 126955 6. 123256  
11763318\_ 10. 53711 10. 44207 10. 46544 10. 37416 10. 31087 10. 40892  
11763319\_ 5. 895494 5. 79661 5. 873119 5. 810478 5. 870623 5. 903569  
11763320\_ 10. 28095 10. 35593 10. 28285 9. 995788 9. 952945 9. 940306  
11763321\_ 6. 995506 6. 862421 6. 936 6. 616654 6. 783209 6. 611622  
11763322\_ 8. 283547 8. 20675 8. 230402 8. 5696 8. 612217 8. 610427  
11763323\_ 6. 677218 6. 384004 6. 421462 6. 139006 6. 169663 6. 247642  
11763324\_ 5. 943056 6. 139266 6. 008482 5. 8521 5. 808784 5. 856208  
11763325\_ 7. 193576 7. 149097 7. 197505 7. 359856 7. 328568 7. 370304  
11763326\_ 6. 785111 6. 696431 6. 665265 6. 923477 6. 934615 6. 975627  
11763327\_ 6. 861957 6. 76736 6. 885366 7. 051741 7. 017051 7. 077289  
11763328\_ 7. 849048 7. 829164 7. 952482 7. 821814 7. 831851 7. 910048  
11763329\_ 7. 550289 7. 483795 7. 561062 7. 684365 7. 666925 7. 618726  
11763330\_ 3. 775919 3. 481089 3. 449292 3. 253632 3. 163957 3. 0658  
11763331\_ 7. 116652 7. 009178 7. 110214 6. 426988 6. 442554 6. 402835  
11763332\_ 8. 348706 8. 203906 8. 20459 7. 531343 7. 601917 7. 634882  
11763333\_ 5. 770523 5. 792842 5. 694458 5. 758249 5. 74816 5. 77685  
11763334\_ 4. 651174 4. 817282 4. 80371 4. 739168 4. 856823 4. 744257  
11763335\_ 7. 333707 7. 306776 7. 359766 7. 345723 7. 350965 7. 347718  
11763336\_ 6. 502421 6. 408329 6. 340597 6. 747793 6. 849847 6. 681785  
11763337\_ 6. 021689 5. 763634 5. 974129 6. 333812 6. 383618 6. 272724  
11763338\_ 2. 260835 2. 361778 2. 319693 2. 367637 2. 386037 2. 30744  
11763339\_ 6. 176058 6. 044526 6. 052454 6. 411843 6. 386155 6. 394532  
11763340\_ 6. 963007 6. 678763 6. 790477 6. 527434 6. 686431 6. 720323  
11763341\_ 4. 64705 4. 291306 4. 515764 4. 599559 4. 769325 4. 247111  
11763342\_ 7. 723661 7. 539544 7. 619904 8. 170533 8. 11978 8. 049979  
11763343\_ 5. 628505 5. 806092 5. 722812 5. 853402 5. 803794 5. 884602  
11763344\_ 4. 741011 5. 064104 4. 772366 5. 151841 5. 129621 5. 197842

11763345\_ 8. 728549 8. 773197 8. 756912 8. 949054 8. 868541 8. 88481  
11763346\_ 3. 168005 3. 713146 3. 26972 3. 511875 3. 398236 3. 290188  
11763347\_ 5. 682667 5. 757958 5. 573212 5. 603297 5. 656148 5. 629209  
11763348\_ 5. 660954 5. 685863 5. 741426 5. 660954 5. 535832 5. 607626  
11763349\_ 4. 048733 4. 054251 4. 114324 4. 240455 4. 172952 3. 984841  
11763350\_ 7. 059907 7. 146811 7. 070837 6. 940929 7. 048202 6. 942422  
11763351\_ 5. 252143 5. 107639 5. 159733 5. 614563 5. 669759 5. 644521  
11763352\_ 6. 886322 6. 89392 6. 733042 6. 973379 6. 997355 6. 9476  
11763353\_ 5. 685328 5. 582868 5. 638176 5. 643713 5. 688284 5. 866751  
11763354\_ 6. 852872 6. 932594 6. 908298 7. 028085 7. 072074 7. 012756  
11763355\_ 7. 002311 6. 847711 6. 971486 6. 660519 6. 74203 6. 684701  
11763356\_ 4. 275543 4. 529836 4. 168001 4. 486329 4. 513716 4. 53273  
11763357\_ 8. 021761 7. 932678 7. 961409 7. 661284 7. 557194 7. 701561  
11763358\_ 4. 275543 4. 38552 4. 540636 4. 253321 4. 40129 4. 372538  
11763359\_ 3. 759758 3. 98032 3. 807808 3. 900225 3. 808375 3. 786777  
11763360\_ 6. 801791 7. 059364 6. 834935 7. 119058 7. 078871 7. 119969  
11763361\_ 4. 643717 4. 361173 4. 546877 4. 589659 4. 519258 4. 418692  
11763362\_ 4. 750119 4. 7731 4. 66696 4. 789172 4. 580944 4. 746565  
11763363\_ 4. 719552 4. 777813 4. 673952 4. 652819 4. 719552 4. 716539  
11763364\_ 5. 301128 5. 409937 5. 360228 5. 293678 5. 48349 5. 414787  
11763365\_ 5. 379872 5. 272955 5. 441941 5. 746216 5. 592762 5. 734389  
11763366\_ 4. 468135 4. 301054 4. 402695 4. 231183 4. 164675 4. 128265  
11763367\_ 5. 583839 5. 104011 5. 493277 4. 646092 4. 815335 4. 775199  
11763368\_ 4. 516036 4. 515859 4. 711784 5. 246443 5. 341313 5. 282372  
11763369\_ 5. 279524 5. 189628 5. 297498 5. 447594 5. 454145 5. 402891  
11763370\_ 6. 430543 6. 433857 6. 543187 6. 515489 6. 556754 6. 55627  
11763371\_ 5. 614563 5. 67331 5. 554842 5. 60979 5. 554436 5. 60979  
11763372\_ 2. 799024 2. 780922 2. 799024 2. 739809 2. 922498 2. 639051  
11763373\_ 2. 038936 2. 131936 2. 104426 2. 200463 2. 010494 2. 058032  
11763374\_ 5. 501865 5. 566391 5. 480966 5. 639268 5. 474708 5. 585077  
11763375\_ 4. 927993 5. 020789 4. 799863 4. 967478 5. 024021 5. 093806  
11763376\_ 6. 094413 6. 029657 6. 12743 5. 977166 5. 929944 6. 036483  
11763377\_ 6. 291115 6. 213587 6. 154803 5. 954081 5. 922858 5. 927556  
11763378\_ 6. 516163 6. 441959 6. 4682 6. 48626 6. 48626 6. 530561  
11763379\_ 4. 765462 4. 897969 4. 728886 4. 818166 4. 819876 4. 735499  
11763380\_ 6. 778193 6. 847958 6. 687547 6. 768154 6. 665437 6. 717193  
11763381\_ 8. 381006 8. 278871 8. 471199 8. 526321 8. 563288 8. 606098  
11763382\_ 5. 9625 5. 675683 5. 771478 5. 54804 5. 297498 5. 542136  
11763383\_ 7. 724934 7. 619684 7. 765859 7. 816465 7. 88794 7. 845693  
11763384\_ 2. 124478 2. 094331 1. 920558 1. 898324 2. 022323 1. 898324  
11763385\_ 8. 66176 8. 689974 8. 723621 9. 123064 9. 137469 9. 16407  
11763386\_ 4. 257243 4. 542806 4. 412559 4. 478585 4. 352312 4. 565857  
11763387\_ 7. 97343 7. 889088 7. 983312 8. 491336 8. 512916 8. 519014  
11763388\_ 4. 19698 4. 174945 4. 258051 4. 233692 4. 076551 4. 201796  
11763389\_ 4. 700243 4. 71419 4. 422789 4. 775393 4. 706309 4. 813702  
11763390\_ 2. 09225 1. 864429 1. 898324 2. 319802 1. 995297 1. 818658  
11763391\_ 6. 000106 5. 800815 5. 97568 5. 920006 6. 024124 6. 151993  
11763392\_ 4. 48113 4. 513719 4. 253744 4. 469319 4. 720104 4. 465054  
11763393\_ 4. 830314 5. 042997 4. 823117 4. 846607 5. 198682 4. 940749  
11763394\_ 3. 32618 3. 177376 3. 290188 3. 65449 3. 402327 3. 503743  
11763395\_ 7. 132149 6. 959673 6. 943664 6. 730107 6. 690449 6. 724379

11763396\_ 3. 122119 3. 00645 3. 426754 3. 00645 2. 936461 2. 977494  
11763397\_ 3. 305932 3. 119808 3. 291761 3. 221132 3. 58205 3. 394331  
11763398\_ 5. 791621 5. 560108 5. 400521 5. 414869 5. 584813 5. 475572  
11763399\_ 4. 441654 4. 387752 4. 471043 4. 503406 4. 615337 4. 581272  
11763400\_ 4. 643717 4. 82032 4. 926078 4. 653724 4. 895761 4. 74787  
11763401\_ 4. 834964 4. 783215 4. 6759 4. 810042 4. 974263 5. 096278  
11763402\_ 3. 62058 3. 698915 3. 606062 3. 589251 3. 599375 3. 640013  
11763403\_ 10. 98347 10. 91577 10. 92013 10. 4396 10. 44414 10. 44669  
11763404\_ 4. 578166 4. 52373 4. 459939 4. 597638 4. 521381 4. 358635  
11763405\_ 4. 013764 3. 824234 4. 026092 4. 192354 4. 028193 3. 883418  
11763406\_ 5. 430538 5. 335099 5. 480966 5. 640853 5. 658069 5. 615095  
11763407\_ 6. 373103 6. 40708 6. 33679 6. 464805 6. 453749 6. 378898  
11763408\_ 1. 983943 1. 910927 2. 235709 2. 079884 1. 898324 2. 158228  
11763409\_ 4. 161104 4. 141172 4. 065881 4. 137921 4. 14997 4. 173154  
11763410\_ 4. 122289 4. 263961 4. 315595 3. 895816 3. 882723 4. 200678  
11763411\_ 4. 415744 4. 183814 4. 461418 4. 259928 4. 52373 4. 509841  
11763412\_ 4. 295121 4. 069594 4. 000392 4. 170468 4. 12175 4. 337502  
11763413\_ 5. 477824 5. 440237 5. 511544 5. 28455 5. 488592 5. 374866  
11763414\_ 4. 823625 4. 9694 4. 862455 4. 751358 4. 871556 5. 03271  
11763415\_ 2. 131558 2. 571429 2. 591183 2. 83198 2. 382254 2. 339996  
11763416\_ 4. 347179 4. 500438 4. 511054 4. 578146 4. 590721 4. 646221  
11763417\_ 4. 505275 4. 46417 4. 61326 4. 46417 4. 350512 4. 43671  
11763418\_ 5. 409259 5. 588423 5. 293151 5. 497047 5. 56112 5. 572978  
11763419\_ 7. 397949 7. 397627 7. 390385 7. 506244 7. 497482 7. 454302  
11763420\_ 4. 824336 4. 461731 4. 583924 4. 700839 4. 700243 4. 522392  
11763421\_ 2. 520429 2. 445821 2. 379584 2. 750118 2. 42909 2. 511361  
11763422\_ 8. 853213 8. 729016 8. 806068 8. 538059 8. 550885 8. 59866  
11763423\_ 9. 052876 9. 073184 9. 092744 8. 843382 8. 884664 8. 898398  
11763424\_ 2. 079333 2. 47102 2. 428238 2. 363411 2. 166552 2. 508612  
11763425\_ 2. 349026 2. 557428 2. 614985 2. 924012 2. 378071 2. 613762  
11763426\_ 3. 90904 3. 447333 3. 570881 3. 641561 3. 505499 3. 554024  
11763427\_ 3. 274979 3. 186808 3. 359513 3. 574659 3. 485582 3. 571517  
11763428\_ 6. 782444 6. 960994 6. 873917 6. 880503 6. 938257 6. 890661  
11763429\_ 7. 596153 7. 605996 7. 559658 7. 568333 7. 535888 7. 62625  
11763430\_ 4. 505264 4. 618922 4. 483695 4. 502309 4. 584933 4. 52373  
11763431\_ 4. 824933 4. 999073 4. 943668 4. 880856 4. 923411 4. 984669  
11763432\_ 2. 673941 2. 562152 2. 316681 2. 48476 2. 66957 2. 494072  
11763433\_ 4. 241628 4. 179601 4. 120702 4. 24272 4. 020045 3. 970334  
11763434\_ 5. 924756 5. 887778 5. 797981 5. 992989 6. 133786 6. 118774  
11763435\_ 5. 969578 5. 988922 5. 876899 6. 162451 6. 102145 6. 121418  
11763436\_ 5. 696752 5. 796088 5. 643713 5. 768053 5. 492148 5. 798613  
11763437\_ 5. 452877 5. 504842 5. 406034 5. 558972 5. 470047 5. 430546  
11763438\_ 7. 417811 7. 360429 7. 419014 6. 923117 6. 886652 7. 066442  
11763439\_ 10. 0909 10. 12418 10. 13205 10. 36553 10. 37408 10. 45852  
11763440\_ 6. 025973 6. 121012 6. 115374 6. 130996 6. 069802 6. 048935  
11763441\_ 7. 240486 7. 360326 7. 295846 7. 317564 7. 317564 7. 193452  
11763442\_ 7. 228126 7. 241558 7. 196186 7. 220733 7. 222344 7. 22971  
11763443\_ 5. 905602 5. 787318 5. 870242 5. 989057 6. 044285 5. 959023  
11763444\_ 8. 962385 8. 816613 8. 938651 8. 466181 8. 376212 8. 39507  
11763445\_ 7. 754251 7. 929536 7. 660916 7. 862286 7. 847733 7. 780414  
11763446\_ 1. 755146 1. 852119 1. 852119 1. 852119 1. 665787 1. 755146

11763447\_ 4. 634762 4. 567366 4. 554785 4. 707774 4. 840476 4. 573174  
11763448\_ 4. 917288 5. 076661 4. 760813 5. 089385 5. 123206 4. 977973  
11763449\_ 6. 820946 6. 726891 6. 907156 6. 190123 6. 054576 6. 241772  
11763450\_ 7. 845753 7. 816171 7. 898158 7. 757955 7. 745318 7. 662455  
11763451\_ 6. 455421 6. 383134 6. 38169 6. 585105 6. 634703 6. 608024  
11763452\_ 3. 378423 3. 646297 3. 581527 3. 561362 3. 46757 3. 639362  
11763453\_ 5. 001891 4. 868727 5. 114549 4. 994855 4. 817072 4. 85032  
11763454\_ 4. 764987 4. 643717 4. 883854 4. 772366 4. 586378 4. 631683  
11763455\_ 7. 152321 7. 148701 7. 145496 7. 472989 7. 532581 7. 619615  
11763456\_ 7. 356041 7. 35984 7. 410931 7. 777852 7. 775955 7. 82117  
11763457\_ 6. 884619 6. 856099 6. 820375 6. 747416 6. 837139 6. 767792  
11763458\_ 4. 730798 4. 560017 4. 327587 4. 539997 4. 436245 4. 549294  
11763459\_ 5. 297239 5. 446539 5. 442375 5. 243417 5. 413608 5. 216138  
11763460\_ 4. 60049 4. 721128 4. 569377 4. 628121 4. 422377 4. 628963  
11763461\_ 7. 409349 7. 400837 7. 449387 7. 493361 7. 588834 7. 51077  
11763462\_ 5. 247739 5. 398195 5. 480161 5. 11527 5. 11527 5. 205719  
11763463\_ 4. 320516 4. 358831 4. 186029 3. 850246 3. 969526 3. 899078  
11763464\_ 3. 393262 3. 626874 3. 441887 3. 709065 3. 677198 3. 723049  
11763465\_ 3. 299777 3. 430158 3. 289438 3. 401861 3. 389149 3. 518323  
11763466\_ 4. 584933 5. 00734 4. 530381 4. 901996 4. 685275 4. 643717  
11763467\_ 4. 114305 4. 365231 4. 238614 4. 643717 4. 670837 4. 620926  
11763468\_ 4. 07893 4. 027889 3. 965581 3. 815866 3. 879309 4. 122446  
11763469\_ 5. 802455 5. 885493 5. 723241 5. 93062 6. 00867 5. 895099  
11763470\_ 6. 405867 6. 512313 6. 23831 6. 479347 6. 464805 6. 697768  
11763471\_ 2. 942475 2. 650978 3. 039448 2. 649149 2. 834595 2. 757665  
11763472\_ 2. 789764 2. 910288 2. 915015 2. 707047 2. 954545 2. 913225  
11763473\_ 2. 481693 2. 443057 2. 415436 2. 512144 2. 328596 2. 095256  
11763474\_ 2. 789812 2. 788731 2. 895679 2. 750337 2. 89776 2. 707373  
11763475\_ 4. 385305 4. 386916 4. 428181 4. 391014 4. 447207 4. 234189  
11763476\_ 3. 606486 3. 773465 3. 598349 3. 782807 3. 797775 3. 92072  
11763477\_ 4. 266923 3. 753185 4. 340481 4. 116509 3. 909164 4. 130678  
11763478\_ 6. 728038 6. 897369 6. 895661 7. 218346 7. 143569 7. 045353  
11763479\_ 5. 639952 5. 633692 5. 502235 6. 039499 5. 696662 5. 844881  
11763480\_ 9. 049936 9. 03295 9. 004479 9. 197204 9. 180947 9. 235866  
11763481\_ 4. 093999 4. 40461 4. 313382 4. 412403 4. 181386 4. 329065  
11763482\_ 4. 92403 4. 958398 4. 96596 5. 078315 4. 998656 5. 167436  
11763483\_ 3. 080377 3. 379823 3. 398236 3. 217729 3. 236776 3. 248253  
11763484\_ 5. 186881 5. 135114 5. 367566 5. 022871 4. 893583 4. 871045  
11763485\_ 5. 418102 5. 189628 5. 377894 4. 987702 5. 000598 5. 058395  
11763486\_ 3. 807425 3. 799258 3. 774756 3. 774756 3. 792588 3. 6668  
11763487\_ 2. 330015 2. 341194 2. 146543 2. 425781 2. 401311 2. 592234  
11763488\_ 6. 878355 6. 955915 6. 92194 6. 645218 6. 803971 6. 829824  
11763489\_ 7. 355023 7. 270783 7. 286715 7. 524954 7. 413056 7. 471373  
11763490\_ 5. 251472 5. 205914 5. 17639 5. 2222 5. 029529 5. 205914  
11763491\_ 4. 136173 4. 325984 4. 189262 4. 00222 4. 179156 4. 064537  
11763492\_ 5. 188342 4. 915606 5. 068204 5. 21233 5. 297498 5. 36239  
11763493\_ 4. 845373 4. 666304 4. 758966 4. 707898 4. 74574 4. 614856  
11763494\_ 8. 296887 8. 23583 8. 236304 8. 160094 8. 04671 8. 149838  
11763495\_ 4. 869226 5. 030066 4. 912246 5. 031108 4. 950178 4. 904602  
11763496\_ 8. 702684 8. 551908 8. 681976 8. 547478 8. 582624 8. 605289  
11763497\_ 8. 249137 8. 15634 8. 258865 8. 255744 8. 252768 8. 291518

11763498\_ 5. 4383 5. 461961 5. 480031 5. 554482 5. 676597 5. 530221  
11763499\_ 5. 910996 5. 967144 5. 856788 5. 498766 5. 584432 5. 610273  
11763500\_ 6. 838984 6. 879868 6. 802294 6. 69147 6. 707569 6. 636188  
11763501\_ 5. 662718 5. 918745 5. 643713 5. 86665 5. 84866 5. 860672  
11763502\_ 5. 126406 5. 195636 4. 994911 5. 305786 5. 317784 5. 452033  
11763503\_ 6. 867015 6. 556473 6. 725582 5. 707326 5. 741285 5. 901141  
11763504\_ 5. 614563 5. 516891 5. 476881 5. 567875 5. 594562 5. 648514  
11763505\_ 6. 317347 6. 256567 6. 115464 6. 204709 5. 985306 6. 07516  
11763506\_ 4. 622691 4. 4116 4. 204953 4. 43685 4. 617151 4. 540171  
11763507\_ 2. 538994 2. 412875 2. 394726 2. 237712 2. 44504 2. 276599  
11763508\_ 5. 333371 5. 418167 5. 149878 5. 511992 5. 489638 5. 506747  
11763509\_ 4. 836562 5. 042804 4. 830586 5. 066722 5. 073036 4. 906658  
11763510\_ 3. 045255 3. 290188 3. 241465 3. 276786 3. 336228 3. 592337  
11763511\_ 5. 081475 4. 983624 4. 907719 4. 690647 4. 582694 4. 665031  
11763512\_ 6. 04287 6. 058786 6. 178701 5. 681003 5. 570566 5. 724527  
11763513\_ 6. 04162 5. 998174 6. 001059 5. 813273 5. 848378 5. 768455  
11763514\_ 7. 73021 7. 764711 7. 807461 8. 034889 8. 104136 8. 066984  
11763515\_ 4. 399636 4. 425614 4. 397119 4. 402154 4. 399636 4. 373659  
11763516\_ 6. 303348 6. 256368 6. 271758 6. 712315 6. 902427 6. 673624  
11763517\_ 5. 069129 5. 133394 4. 9546 5. 073036 5. 251357 5. 224493  
11763518\_ 7. 258469 7. 140936 7. 140216 7. 470298 7. 399688 7. 359572  
11763519\_ 2. 341823 2. 502797 2. 427799 2. 371126 2. 570761 2. 499109  
11763520\_ 3. 750615 3. 900518 4. 025296 4. 326798 3. 996609 4. 108357  
11763521\_ 8. 466467 8. 265529 8. 446902 7. 867836 7. 871253 7. 982312  
11763522\_ 6. 024389 5. 935716 6. 183436 5. 18176 5. 284969 5. 492544  
11763523\_ 5. 248742 5. 266142 5. 356532 5. 321749 5. 411374 5. 339673  
11763524\_ 5. 045482 4. 976805 5. 093304 4. 978086 5. 109485 5. 026916  
11763525\_ 3. 503743 3. 398236 3. 223085 3. 00246 2. 844442 3. 158917  
11763526\_ 5. 170375 5. 356069 5. 112367 5. 403474 5. 32424 5. 433299  
11763527\_ 4. 384385 4. 541735 4. 169351 4. 812459 4. 564193 4. 486954  
11763528\_ 8. 438078 8. 364021 8. 412902 7. 673475 7. 639783 7. 726756  
11763529\_ 6. 649091 6. 669172 6. 646827 6. 186274 6. 357392 6. 388012  
11763530\_ 2. 875696 3. 102645 3. 025972 3. 069915 3. 213581 3. 142334  
11763531\_ 4. 584933 4. 503862 4. 550164 4. 213226 3. 879309 4. 200678  
11763532\_ 3. 122119 2. 994339 3. 290188 3. 095646 3. 38383 3. 652867  
11763533\_ 5. 582842 5. 584813 5. 533151 5. 537034 5. 366023 5. 534121  
11763534\_ 5. 555116 5. 620632 5. 664389 4. 951824 5. 010608 5. 131659  
11763535\_ 1. 963078 2. 007611 2. 257747 2. 153982 2. 001497 2. 194693  
11763536\_ 6. 720233 6. 74545 6. 550951 6. 755799 6. 631827 6. 7414  
11763537\_ 4. 561208 4. 669383 4. 620321 4. 687955 4. 732824 4. 71784  
11763538\_ 4. 646064 4. 626318 4. 726889 4. 685701 4. 547673 4. 8474  
11763539\_ 5. 743612 5. 807414 5. 712579 5. 760515 5. 941751 5. 793894  
11763540\_ 6. 492948 6. 302269 6. 383269 6. 39221 6. 460371 6. 461061  
11763541\_ 5. 960226 6. 139304 5. 994101 6. 069847 6. 172219 6. 139304  
11763542\_ 6. 872182 6. 908366 6. 824693 6. 536102 6. 644885 6. 577496  
11763543\_ 3. 24893 3. 716116 3. 246246 3. 478362 3. 306585 3. 268903  
11763544\_ 5. 789947 5. 894697 5. 644768 5. 950735 5. 868051 5. 83454  
11763545\_ 3. 55923 3. 664718 3. 555197 3. 870417 3. 75712 3. 910941  
11763546\_ 4. 417925 4. 433927 4. 414412 4. 459939 4. 417616 4. 373942  
11763547\_ 2. 523284 2. 278796 2. 511756 2. 511756 2. 511756 2. 608728  
11763548\_ 2. 78352 2. 656856 2. 541058 2. 741792 2. 656856 3. 066263

11763549\_ 3. 741234 3. 893563 3. 805953 3. 960589 3. 879568 3. 879309  
11763550\_ 5. 395406 5. 467225 4. 979731 5. 507637 5. 543534 5. 430432  
11763551\_ 5. 756142 5. 852968 5. 761833 5. 984658 5. 873446 5. 843725  
11763552\_ 4. 538093 4. 763543 4. 768981 4. 964015 5. 09779 4. 952576  
11763553\_ 3. 082492 3. 229529 3. 082492 3. 135451 3. 291597 3. 228823  
11763554\_ 6. 959687 7. 058345 6. 915457 6. 96733 7. 131916 7. 103981  
11763555\_ 8. 046675 8. 11782 8. 165755 7. 949379 7. 964547 8. 026123  
11763556\_ 7. 191891 7. 282469 7. 311884 7. 323685 7. 326907 7. 300933  
11763557\_ 6. 132793 6. 162855 6. 253734 6. 159919 6. 344315 6. 225649  
11763558\_ 5. 313022 5. 484614 5. 374866 5. 525689 5. 608954 5. 642768  
11763559\_ 5. 004508 5. 03054 4. 817074 5. 150731 5. 050005 5. 10939  
11763560\_ 6. 353515 6. 419355 6. 383916 5. 770449 5. 894863 5. 900827  
11763561\_ 3. 380659 3. 32129 3. 398059 3. 559704 3. 442728 3. 12727  
11763562\_ 3. 394967 3. 090773 3. 394967 3. 300702 3. 21279 3. 468283  
11763563\_ 3. 398236 3. 066771 3. 3661 3. 254578 3. 21279 3. 317784  
11763564\_ 5. 533891 5. 471092 5. 448296 5. 593987 5. 605689 5. 434412  
11763565\_ 6. 17981 6. 225513 6. 19287 6. 328599 6. 354221 6. 364186  
11763566\_ 2. 194386 2. 338383 2. 441909 2. 740379 2. 379419 2. 470676  
11763567\_ 2. 141305 1. 898324 1. 921706 2. 078163 1. 818901 1. 956494  
11763568\_ 3. 261457 3. 055799 2. 952396 3. 025972 2. 798956 3. 196133  
11763569\_ 8. 606582 8. 732979 8. 726698 8. 658194 8. 588071 8. 743417  
11763570\_ 4. 94827 5. 023449 4. 953152 4. 870096 5. 090672 5. 100296  
11763571\_ 3. 95767 4. 194869 4. 178946 4. 379107 4. 170937 4. 101734  
11763572\_ 9. 216339 9. 184515 9. 282605 9. 40705 9. 41194 9. 399778  
11763573\_ 1. 804393 1. 888117 2. 079021 1. 898324 2. 170868 2. 052566  
11763574\_ 3. 989319 3. 960725 3. 884738 3. 857777 4. 029095 3. 91239  
11763575\_ 10. 02106 10. 00277 10. 10858 10. 68398 10. 69094 10. 68806  
11763576\_ 6. 540283 6. 342097 6. 712027 6. 856895 6. 89172 6. 860556  
11763577\_ 4. 448357 4. 400266 4. 61898 4. 526888 4. 547389 4. 73093  
11763578\_ 5. 500855 5. 703954 5. 50358 5. 486333 5. 336107 5. 491522  
11763579\_ 3. 625844 3. 523285 3. 728145 3. 90383 3. 736024 3. 736024  
11763580\_ 6. 46504 6. 355387 6. 251769 6. 701194 6. 870099 6. 824931  
11763581\_ 7. 465649 7. 436315 7. 502267 7. 442902 7. 472986 7. 493901  
11763582\_ 4. 260512 3. 983876 3. 724327 3. 961156 3. 892997 3. 892997  
11763583\_ 6. 205879 6. 442418 6. 439566 6. 411306 6. 571549 6. 489915  
11763584\_ 2. 872449 3. 099452 3. 138626 2. 941312 2. 812907 2. 945929  
11763585\_ 8. 224967 8. 244094 8. 148451 9. 590266 9. 507454 9. 408673  
11763586\_ 8. 108096 8. 04186 8. 060181 8. 087889 8. 099534 7. 882604  
11763587\_ 7. 5617 7. 441242 7. 539139 7. 625171 7. 581166 7. 624124  
11763588\_ 6. 444271 6. 470431 6. 372827 6. 195103 6. 20266 6. 319155  
11763589\_ 8. 677115 8. 801319 8. 723367 8. 708492 8. 739784 8. 736569  
11763590\_ 8. 143627 8. 206701 8. 205621 8. 139277 8. 122776 8. 165757  
11763591\_ 6. 317046 6. 3636 6. 265169 6. 349697 6. 37161 6. 328528  
11763592\_ 3. 155584 3. 117532 3. 177651 3. 37993 3. 359211 3. 356085  
11763593\_ 6. 261356 6. 382257 6. 32763 5. 97478 5. 957954 5. 889915  
11763594\_ 4. 610731 4. 457866 4. 457866 4. 347179 4. 457866 4. 364287  
11763595\_ 3. 336115 3. 242183 3. 182347 3. 194903 3. 614922 3. 383081  
11763596\_ 4. 789378 4. 756286 4. 781937 4. 932735 4. 937846 4. 847193  
11763597\_ 4. 393986 4. 455296 4. 638518 4. 485001 4. 424967 4. 459335  
11763598\_ 5. 900698 5. 915338 5. 962824 5. 87605 5. 839161 5. 819484  
11763599\_ 7. 006846 6. 91283 7. 077359 6. 327614 6. 365454 6. 328033

11763600\_ 4. 914721 4. 913967 5. 006152 4. 939528 4. 924944 4. 993102  
11763601\_ 4. 918812 4. 911342 4. 949623 4. 939528 4. 924944 4. 940053  
11763602\_ 4. 668164 4. 787808 4. 706043 4. 665727 4. 497968 4. 471393  
11763603\_ 4. 234956 4. 236688 4. 290372 4. 307204 4. 148471 4. 368982  
11763604\_ 5. 600008 5. 575268 5. 382275 5. 516741 5. 538782 5. 609469  
11763605\_ 5. 251121 5. 309674 5. 000678 5. 282615 5. 125102 5. 475888  
11763606\_ 4. 636924 4. 847812 4. 598158 4. 504929 4. 73371 5. 013727  
11763607\_ 4. 812249 4. 845673 4. 715098 4. 820605 4. 973646 4. 763543  
11763608\_ 4. 968438 5. 098578 4. 842759 5. 151475 5. 003407 5. 039045  
11763609\_ 9. 32517 9. 292504 9. 348928 9. 185106 9. 148589 9. 203744  
11763610\_ 2. 416788 2. 582837 2. 312305 2. 497095 2. 497717 2. 579075  
11763611\_ 4. 577295 4. 762671 4. 839526 4. 793048 4. 938541 4. 917539  
11763612\_ 4. 197545 4. 086577 3. 830389 4. 316419 4. 00442 4. 042691  
11763613\_ 5. 689606 5. 802366 5. 701288 5. 839518 5. 781896 5. 748  
11763614\_ 3. 728957 3. 651568 3. 558608 3. 56467 3. 562895 3. 65763  
11763615\_ 5. 261191 5. 509007 5. 089522 5. 596691 5. 475674 5. 537907  
11763616\_ 3. 925181 3. 818401 3. 844832 3. 851363 3. 954002 4. 177453  
11763617\_ 4. 608927 4. 51573 4. 611761 4. 082578 4. 137278 4. 40392  
11763618\_ 8. 416743 8. 344686 8. 390702 8. 046614 8. 040625 8. 086839  
11763619\_ 7. 678002 7. 541664 7. 611489 7. 174876 7. 178361 7. 231174  
11763620\_ 6. 127338 6. 156776 6. 273544 6. 25594 6. 464451 6. 325481  
11763621\_ 5. 362235 5. 309674 5. 088564 5. 448296 5. 370103 5. 349827  
11763622\_ 4. 437842 4. 437842 4. 255661 4. 693237 4. 550314 4. 521244  
11763623\_ 4. 744929 4. 709463 4. 873233 4. 786096 5. 02697 4. 866013  
11763624\_ 6. 059964 6. 181205 6. 116211 6. 118799 5. 944064 6. 084663  
11763625\_ 6. 828967 6. 824791 6. 76838 6. 731646 6. 775665 6. 796136  
11763626\_ 4. 643717 5. 219494 5. 138538 5. 402486 5. 341331 5. 337925  
11763627\_ 9. 440583 9. 401583 9. 425305 9. 884284 9. 920537 9. 940306  
11763628\_ 3. 162185 3. 360314 3. 467243 3. 57464 3. 79086 3. 54381  
11763629\_ 5. 269628 5. 463402 5. 13042 5. 566714 5. 475368 5. 446993  
11763630\_ 5. 031642 5. 131169 5. 155494 5. 033921 5. 14009 5. 210087  
11763631\_ 3. 82385 3. 760227 3. 926642 3. 986818 3. 777596 3. 773436  
11763632\_ 8. 022851 8. 08434 8. 044016 8. 012005 7. 986914 8. 040689  
11763633\_ 5. 110648 5. 303402 5. 077952 5. 173594 5. 24105 5. 321689  
11763634\_ 5. 900341 5. 894697 5. 763109 5. 778338 5. 7949 5. 911598  
11763635\_ 4. 599016 4. 775957 4. 851097 4. 972205 5. 014153 5. 003291  
11763636\_ 4. 256865 4. 379796 4. 459939 4. 347179 4. 40461 4. 436599  
11763637\_ 2. 605516 2. 925072 2. 699007 2. 50612 2. 798956 2. 764386  
11763638\_ 2. 698102 2. 7509 2. 78532 2. 605516 2. 894156 2. 884376  
11763639\_ 3. 129656 3. 288331 3. 097427 3. 263711 3. 289231 3. 067687  
11763640\_ 4. 085912 3. 786309 4. 092954 4. 067703 3. 879309 3. 900257  
11763641\_ 4. 026092 4. 185608 4. 264171 4. 24256 4. 158419 4. 364334  
11763642\_ 5. 221855 5. 32075 5. 107704 5. 448296 5. 493826 5. 400715  
11763643\_ 3. 398236 3. 176356 3. 376905 3. 219794 3. 370585 3. 223761  
11763644\_ 4. 683672 4. 610211 4. 381367 4. 656858 4. 512576 4. 840795  
11763645\_ 2. 779084 2. 823637 2. 78165 2. 834074 2. 726665 2. 718322  
11763646\_ 6. 176982 6. 240238 6. 199658 6. 275438 6. 227012 6. 17981  
11763647\_ 4. 04388 4. 084171 4. 009468 4. 084171 4. 031515 4. 018869  
11763648\_ 5. 450168 5. 542586 5. 347672 5. 583661 5. 437625 5. 430356  
11763649\_ 4. 454559 4. 521336 4. 208818 4. 617694 4. 836232 4. 411216  
11763650\_ 6. 057312 6. 221405 6. 021017 6. 267934 6. 309029 6. 27191

11763651\_ 4. 271925 4. 459939 4. 429962 4. 525264 4. 401574 4. 716547  
11763652\_ 4. 275543 4. 275749 4. 131578 3. 97468 4. 122631 4. 430369  
11763653\_ 5. 061085 4. 864167 4. 665922 4. 870516 4. 849431 4. 907675  
11763654\_ 3. 031578 3. 251718 3. 466323 3. 153562 3. 237634 3. 24267  
11763655\_ 2. 952117 3. 150797 2. 92419 3. 103888 2. 898372 2. 75042  
11763656\_ 4. 299495 4. 52373 4. 199351 4. 372761 4. 558238 4. 46364  
11763657\_ 4. 937528 4. 840051 4. 604985 4. 690985 4. 63815 4. 756718  
11763658\_ 3. 299778 3. 456433 3. 132562 3. 502369 3. 398236 3. 348574  
11763659\_ 4. 200678 4. 159145 4. 372701 4. 490366 4. 232104 4. 327197  
11763660\_ 2. 719782 2. 604649 2. 461185 2. 661919 2. 661919 2. 661919  
11763661\_ 4. 595666 4. 666428 4. 552159 4. 735473 4. 674953 4. 698807  
11763662\_ 4. 550435 4. 602256 4. 498288 4. 571185 4. 641485 4. 636242  
11763663\_ 3. 807594 3. 416701 3. 498025 3. 646337 3. 503743 3. 631207  
11763664\_ 2. 256723 2. 2417 2. 023364 2. 122386 2. 332345 2. 00867  
11763665\_ 5. 333126 5. 329878 5. 191783 5. 343727 5. 455847 5. 24151  
11763666\_ 3. 907844 4. 243162 3. 70894 3. 978839 3. 794028 4. 02795  
11763667\_ 6. 834516 6. 722789 6. 867531 7. 016326 7. 090276 6. 988374  
11763668\_ 3. 495289 3. 357173 3. 720833 4. 067703 3. 69042 3. 690087  
11763669\_ 3. 701883 3. 829616 3. 659041 3. 690658 3. 8368 3. 701883  
11763670\_ 2. 24125 2. 367695 2. 52071 2. 49059 2. 248052 2. 536891  
11763671\_ 4. 244005 4. 09252 4. 156975 4. 322363 4. 108153 4. 256934  
11763672\_ 6. 604548 6. 672355 6. 685973 6. 717023 6. 838114 6. 71025  
11763673\_ 5. 560845 5. 582633 5. 516968 5. 557005 5. 629909 5. 525339  
11763674\_ 5. 49808 5. 468143 5. 324571 5. 521723 5. 574632 5. 543317  
11763675\_ 4. 751732 4. 875269 4. 824254 4. 729202 4. 901987 4. 876551  
11763676\_ 1. 895496 1. 71677 1. 701012 1. 793114 2. 143476 1. 991875  
11763677\_ 3. 062453 2. 920776 2. 824661 2. 840815 3. 004853 3. 05105  
11763678\_ 7. 121548 7. 126978 7. 085367 7. 127389 7. 077953 7. 153477  
11763679\_ 5. 857715 5. 632692 5. 81492 5. 78524 5. 733708 5. 749079  
11763680\_ 6. 439762 6. 429783 6. 274899 6. 538117 6. 309475 6. 351846  
11763681\_ 5. 533825 5. 426695 5. 458832 5. 653325 5. 397861 5. 65619  
11763682\_ 6. 904544 7. 070956 6. 923621 7. 049794 7. 134463 7. 134375  
11763683\_ 7. 066036 7. 049749 7. 083216 7. 739184 7. 730443 7. 691514  
11763684\_ 6. 225513 6. 546818 6. 398318 6. 374656 6. 370017 6. 453284  
11763685\_ 2. 432973 2. 596205 2. 432973 2. 499659 2. 432973 2. 386881  
11763686\_ 4. 521195 4. 794853 4. 538455 4. 914651 4. 887702 4. 728127  
11763687\_ 3. 510039 3. 410024 3. 625408 3. 410081 3. 581336 3. 597164  
11763688\_ 7. 558333 7. 524704 7. 428399 7. 857328 7. 899319 7. 822511  
11763689\_ 6. 423825 6. 403671 6. 283994 6. 596457 6. 625335 6. 600673  
11763690\_ 6. 050605 6. 22476 6. 20182 6. 118838 6. 159771 6. 169907  
11763691\_ 5. 926672 6. 22635 6. 313242 6. 586818 6. 559336 6. 7414  
11763692\_ 6. 687394 6. 568719 6. 674194 7. 016079 6. 94441 7. 045474  
11763693\_ 9. 914049 10. 0021 9. 95782 9. 625956 9. 546563 9. 580219  
11763694\_ 8. 640054 8. 571883 8. 645532 7. 824215 7. 734459 7. 710095  
11763695\_ 5. 59303 5. 586923 5. 448296 5. 461346 5. 488101 5. 369992  
11763696\_ 8. 031936 7. 994359 8. 100986 8. 205075 8. 160171 8. 273841  
11763697\_ 6. 839135 6. 620836 6. 695419 6. 663741 6. 926364 6. 863345  
11763698\_ 7. 58257 7. 606995 7. 620591 7. 627607 7. 654944 7. 700294  
11763699\_ 6. 720753 6. 802616 6. 799614 6. 786024 6. 836704 6. 876456  
11763700\_ 8. 684462 8. 683216 8. 666374 8. 780865 8. 89217 8. 823427  
11763701\_ 8. 360771 8. 370176 8. 328936 8. 343319 8. 325756 8. 330997



11763702\_ 7. 858024 7. 819095 7. 862482 7. 608233 7. 524597 7. 535202  
11763703\_ 5. 95159 5. 966998 5. 775743 6. 033598 5. 972395 6. 048052  
11763704\_ 8. 575132 8. 598926 8. 564698 8. 326407 8. 369232 8. 348072  
11763705\_ 4. 870352 4. 863727 4. 470521 4. 772366 4. 52373 4. 698491  
11763706\_ 7. 021165 7. 045436 6. 959694 7. 003324 7. 049469 6. 89515  
11763707\_ 5. 209708 5. 264638 5. 354778 5. 173112 4. 929412 5. 160563  
11763708\_ 9. 059211 9. 028636 9. 019929 8. 573042 8. 593918 8. 561824  
11763709\_ 8. 331269 8. 389761 8. 227673 8. 410182 8. 420731 8. 389247  
11763710\_ 6. 93471 7. 015097 6. 922773 6. 906649 6. 978074 6. 937122  
11763711\_ 3. 832153 4. 230988 4. 172089 3. 702546 4. 122446 4. 141712  
11763712\_ 5. 842851 5. 976637 5. 878025 5. 194437 5. 029529 5. 162372  
11763713\_ 2. 215623 2. 239071 2. 287366 2. 030813 2. 215623 2. 05612  
11763714\_ 7. 296898 7. 281438 7. 271586 6. 693776 6. 725428 6. 7414  
11763715\_ 2. 837548 2. 819406 2. 730726 2. 833867 2. 757652 2. 730726  
11763716\_ 8. 184139 8. 028908 8. 118629 8. 687305 8. 75041 8. 736417  
11763717\_ 7. 162345 7. 099734 7. 171218 6. 757259 6. 954378 7. 047876  
11763718\_ 7. 135175 7. 144608 7. 153424 6. 739466 6. 881553 7. 024599  
11763719\_ 6. 352397 6. 447439 6. 557084 6. 6514 6. 698486 6. 680334  
11763720\_ 6. 840763 6. 974532 6. 910833 6. 965921 7. 135938 7. 08836  
11763721\_ 8. 220086 8. 079827 8. 094805 8. 449128 8. 443368 8. 404066  
11763722\_ 6. 27637 6. 120685 6. 103843 6. 061784 6. 062136 6. 055302  
11763723\_ 8. 235276 8. 207953 8. 222711 8. 182367 8. 138887 8. 103403  
11763724\_ 5. 532721 5. 648732 5. 486369 5. 377936 5. 369848 5. 350845  
11763725\_ 10. 43003 10. 52644 10. 49738 10. 61045 10. 61121 10. 53403  
11763726\_ 8. 883829 8. 857386 8. 898187 8. 797859 8. 777073 8. 839348  
11763727\_ 8. 927119 8. 939075 9. 001112 8. 80245 8. 863951 8. 8679  
11763728\_ 6. 483943 6. 494379 6. 433743 6. 50868 6. 484975 6. 542939  
11763729\_ 4. 366538 4. 589256 4. 420549 4. 311112 4. 59735 4. 489722  
11763730\_ 8. 203767 8. 1624 8. 294956 8. 826524 8. 904623 8. 840238  
11763731\_ 8. 163101 8. 170096 8. 206592 7. 686153 7. 585199 7. 705954  
11763732\_ 4. 148383 4. 261754 4. 093052 4. 213212 4. 024037 4. 138938  
11763733\_ 4. 148398 4. 131326 4. 026092 4. 042803 4. 043047 4. 106796  
11763734\_ 2. 77506 2. 528607 2. 585218 2. 783269 2. 929596 2. 595875  
11763735\_ 3. 145703 2. 963462 3. 254325 3. 047961 3. 058989 2. 888621  
11763736\_ 5. 29092 5. 329233 5. 060453 4. 992243 4. 984669 5. 085275  
11763737\_ 5. 778115 5. 684121 5. 645505 5. 660176 5. 750268 5. 925951  
11763738\_ 5. 808253 5. 833362 5. 554436 5. 789917 5. 894697 5. 856634  
11763739\_ 9. 03569 9. 055394 9. 036733 8. 787336 8. 780467 8. 779951  
11763740\_ 7. 05424 7. 113747 7. 153079 7. 265178 7. 247596 7. 276001  
11763741\_ 8. 08301 8. 059349 8. 159858 8. 191385 8. 111031 8. 233587  
11763742\_ 5. 726509 5. 719883 5. 867558 5. 977166 5. 938581 6. 011116  
11763743\_ 6. 671193 6. 786516 6. 799851 6. 92079 6. 88998 7. 004268  
11763744\_ 3. 149361 3. 168482 3. 11497 2. 718044 3. 136854 2. 91436  
11763745\_ 2. 772626 3. 117903 3. 080062 3. 065852 3. 067012 3. 004086  
11763746\_ 8. 010556 7. 886682 8. 011185 7. 736957 7. 823264 7. 823336  
11763747\_ 7. 983686 7. 914921 8. 014093 7. 739375 7. 781272 7. 795097  
11763748\_ 4. 615013 4. 40461 4. 244046 4. 643717 4. 408826 4. 650307  
11763749\_ 5. 681282 5. 687893 5. 702351 5. 801206 5. 686732 5. 831821  
11763750\_ 2. 387919 2. 670412 2. 510837 2. 666998 2. 454684 2. 470648  
11763751\_ 4. 607504 4. 705801 4. 701276 4. 763965 4. 655665 4. 690658  
11763752\_ 5. 641183 5. 741506 5. 653947 5. 506622 5. 570425 5. 186238

11763753\_ 4. 869444 4. 93207 4. 971552 4. 892587 4. 886726 4. 824968  
11763754\_ 4. 826605 4. 9226 4. 923926 4. 924966 4. 967823 5. 007615  
11763755\_ 4. 626145 4. 768667 4. 752822 5. 029529 4. 849431 4. 655121  
11763756\_ 3. 572819 3. 609948 3. 302156 3. 86551 3. 444794 3. 502158  
11763757\_ 8. 231197 8. 133545 8. 247904 7. 955982 7. 903852 7. 937853  
11763758\_ 4. 616672 4. 60447 4. 651546 4. 77529 4. 857271 4. 750167  
11763759\_ 4. 410054 4. 450779 4. 074425 4. 410054 4. 262823 4. 468562  
11763760\_ 5. 146001 5. 357647 5. 273383 5. 341655 5. 332982 5. 318697  
11763761\_ 6. 433076 6. 4799 6. 349632 6. 401349 6. 379996 6. 443137  
11763762\_ 7. 890194 7. 865771 7. 866887 7. 995602 8. 100708 8. 032049  
11763763\_ 7. 500735 7. 536256 7. 438829 7. 465016 7. 463409 7. 473079  
11763764\_ 5. 846057 5. 749231 5. 672556 5. 909391 5. 994525 5. 925927  
11763765\_ 2. 74093 2. 941664 2. 941664 2. 806323 2. 798956 3. 061205  
11763766\_ 3. 818013 4. 250934 4. 127121 4. 162481 4. 127121 4. 040535  
11763767\_ 3. 43265 3. 46933 3. 503743 3. 456992 3. 46016 3. 398236  
11763768\_ 4. 304664 4. 343273 4. 275764 4. 275543 4. 342435 4. 203895  
11763769\_ 5. 587313 5. 64116 5. 643713 5. 619214 5. 651371 5. 783027  
11763770\_ 7. 105203 7. 140661 7. 206114 6. 450062 6. 125511 6. 300643  
11763771\_ 6. 039367 5. 955646 5. 60791 5. 987359 5. 980978 6. 051554  
11763772\_ 6. 871331 6. 835373 6. 834935 6. 781056 6. 922773 6. 713091  
11763773\_ 6. 287097 6. 033677 6. 20919 6. 325372 6. 366235 6. 387879  
11763774\_ 6. 300803 6. 076709 6. 291178 6. 431763 6. 470769 6. 477654  
11763775\_ 2. 788601 2. 848814 2. 605516 3. 025972 3. 093013 2. 58928  
11763776\_ 7. 099021 6. 885898 6. 983976 7. 058658 7. 067581 7. 050471  
11763777\_ 4. 491859 4. 507782 4. 426766 4. 535381 4. 459939 4. 692593  
11763778\_ 4. 046662 3. 662972 3. 685426 3. 947108 3. 881146 3. 873659  
11763779\_ 5. 482608 5. 574624 5. 389521 5. 628915 5. 628915 5. 67042  
11763780\_ 2. 952754 2. 895108 2. 982631 3. 12301 2. 912551 3. 070469  
11763781\_ 4. 577605 4. 649555 4. 783585 4. 796753 4. 798511 4. 95853  
11763782\_ 6. 594818 6. 513292 6. 526674 6. 630544 6. 655137 6. 750419  
11763783\_ 7. 204154 7. 185412 7. 155706 7. 053635 7. 125081 7. 185412  
11763784\_ 6. 231038 6. 251957 6. 250218 6. 233831 6. 300643 6. 366745  
11763785\_ 9. 311915 9. 276549 9. 32471 9. 146314 9. 180419 9. 150579  
11763786\_ 5. 985674 6. 142877 5. 971227 6. 111034 6. 240168 6. 212602  
11763787\_ 4. 699721 4. 943126 4. 752197 4. 946868 4. 799034 4. 836381  
11763788\_ 3. 708615 3. 537654 3. 727292 3. 746413 3. 615789 3. 944502  
11763789\_ 5. 403345 5. 195505 5. 369748 5. 377402 5. 346613 5. 355926  
11763790\_ 2. 196014 2. 084312 2. 151155 2. 16661 2. 361778 2. 266569  
11763791\_ 4. 874234 4. 927563 4. 954142 5. 209359 5. 203228 5. 029529  
11763792\_ 2. 241492 2. 17163 2. 095256 2. 255961 2. 162442 2. 17163  
11763793\_ 4. 634997 4. 802957 4. 508928 4. 760795 4. 87008 4. 655288  
11763794\_ 3. 989671 3. 888778 3. 87297 3. 865278 3. 66812 4. 028663  
11763795\_ 2. 740068 2. 767578 2. 721728 2. 740068 2. 706356 2. 730898  
11763796\_ 2. 681744 2. 545001 2. 587699 2. 630719 2. 545001 2. 741932  
11763797\_ 5. 032856 5. 066294 5. 257195 4. 996326 5. 182854 4. 91843  
11763798\_ 3. 028704 3. 21315 3. 092224 2. 935762 2. 99248 2. 844883  
11763799\_ 3. 948842 4. 499363 4. 249885 3. 927497 4. 192776 3. 835906  
11763800\_ 4. 977054 4. 946535 5. 008964 5. 029127 4. 978259 5. 087891  
11763801\_ 5. 397197 5. 532173 5. 167795 5. 377271 5. 340111 5. 331886  
11763802\_ 5. 442303 5. 55225 5. 52476 5. 499758 5. 47689 5. 502342  
11763803\_ 7. 563476 7. 442902 7. 492707 6. 552302 6. 683256 6. 822384

11763804\_ 5. 997529 6. 06521 5. 889997 5. 184727 5. 393381 5. 299253  
11763805\_ 4. 122755 4. 042684 4. 287593 4. 459939 4. 46708 4. 504752  
11763806\_ 8. 819567 8. 773672 8. 811091 8. 703435 8. 640531 8. 659213  
11763807\_ 2. 539715 2. 534352 2. 778751 2. 605516 3. 089886 2. 806027  
11763808\_ 9. 246243 9. 204219 9. 246982 8. 974056 9. 031008 9. 017805  
11763809\_ 5. 039848 5. 125289 5. 040156 5. 06034 5. 084178 5. 226091  
11763810\_ 7. 050668 6. 913463 7. 153176 7. 056719 7. 074275 7. 099999  
11763811\_ 5. 25906 5. 565086 5. 203197 5. 441171 5. 45173 5. 532364  
11763812\_ 2. 045559 2. 045559 2. 029611 2. 138487 2. 028692 2. 045559  
11763813\_ 5. 398448 5. 47156 5. 368451 5. 61742 5. 375492 5. 528624  
11763814\_ 4. 314533 4. 496247 4. 160986 4. 550026 4. 610157 4. 588767  
11763815\_ 4. 833126 4. 917794 4. 945652 4. 54055 4. 86741 4. 819739  
11763816\_ 8. 069742 8. 034642 8. 139 7. 762635 7. 759159 7. 786797  
11763817\_ 4. 951593 4. 905556 4. 915472 4. 918507 4. 927613 4. 962322  
11763818\_ 5. 098242 4. 962679 5. 17639 4. 914651 5. 278449 5. 230543  
11763819\_ 5. 999888 6. 222163 6. 178707 6. 314777 6. 227617 6. 259302  
11763820\_ 3. 847975 3. 916912 3. 939983 4. 115552 3. 916912 4. 00755  
11763821\_ 4. 898061 4. 912957 4. 708511 5. 019361 5. 108088 4. 903011  
11763822\_ 2. 54303 2. 698968 2. 79594 2. 786697 2. 776636 2. 958233  
11763823\_ 3. 795493 3. 818401 3. 690527 3. 925181 3. 925839 4. 097079  
11763824\_ 2. 450244 2. 469366 2. 115988 2. 474123 2. 339628 2. 438118  
11763825\_ 5. 322007 5. 566459 5. 36081 5. 492142 5. 408765 5. 493548  
11763826\_ 7. 929775 7. 83922 7. 910234 7. 965177 8. 022747 8. 051132  
11763827\_ 5. 811218 6. 075432 6. 039226 5. 797345 5. 86603 6. 017665  
11763828\_ 5. 320659 5. 32333 5. 162654 5. 299555 5. 378126 5. 307608  
11763829\_ 2. 912145 2. 871122 2. 814719 2. 9748 2. 740598 2. 899695  
11763830\_ 2. 07112 1. 905795 1. 895158 2. 152946 2. 169386 2. 095256  
11763831\_ 6. 479045 6. 448378 6. 351165 6. 256186 6. 241491 6. 263567  
11763832\_ 4. 24976 4. 173697 4. 240105 4. 248664 4. 388805 4. 231546  
11763833\_ 5. 915532 5. 863744 5. 724628 5. 994903 5. 970099 5. 922714  
11763834\_ 8. 037871 8. 009078 8. 014891 7. 238884 7. 24543 7. 186566  
11763835\_ 3. 705625 4. 03508 3. 706309 4. 109356 4. 018653 4. 051321  
11763836\_ 6. 051419 6. 19958 5. 901916 6. 17808 6. 183123 6. 28511  
11763837\_ 6. 393181 6. 625637 6. 300643 6. 400396 6. 549616 6. 534604  
11763838\_ 2. 502544 2. 265211 2. 172027 2. 338913 2. 440254 2. 338913  
11763839\_ 4. 853499 4. 775712 4. 798689 4. 783482 4. 892172 4. 741775  
11763840\_ 5. 23127 5. 319679 5. 251439 5. 355754 5. 317639 5. 308371  
11763841\_ 3. 185964 3. 556953 3. 23364 3. 448905 3. 364345 3. 448905  
11763842\_ 1. 946822 2. 131936 2. 095256 2. 265231 2. 134334 1. 804015  
11763843\_ 7. 589061 7. 531555 7. 524376 7. 580344 7. 586487 7. 580344  
11763844\_ 8. 938114 8. 892032 8. 91907 8. 74577 8. 827098 8. 738395  
11763845\_ 6. 956952 7. 25796 7. 009099 6. 906839 7. 021237 6. 795009  
11763846\_ 5. 85899 5. 932095 5. 870242 5. 785195 5. 745247 5. 787354  
11763847\_ 6. 434869 6. 344682 6. 557314 5. 82456 5. 798326 5. 854575  
11763848\_ 5. 182645 5. 318357 5. 333723 5. 197809 5. 265556 5. 35226  
11763849\_ 5. 029529 5. 357292 5. 107338 5. 542775 5. 433243 5. 346357  
11763850\_ 3. 767251 3. 679959 3. 619249 3. 5492 3. 782891 3. 873615  
11763851\_ 5. 385206 5. 371093 5. 219054 5. 304413 5. 297498 5. 21267  
11763852\_ 7. 325224 7. 357201 7. 474975 6. 702681 6. 680704 6. 789551  
11763853\_ 5. 505774 5. 382949 5. 169028 5. 724187 5. 986458 6. 033313  
11763854\_ 9. 930211 9. 84396 9. 93022 10. 25615 10. 18303 10. 20658

11763855\_ 9. 741581 9. 700626 9. 739551 10. 02509 9. 986206 10. 00421  
11763856\_ 5. 512912 5. 443545 5. 448296 5. 408877 5. 628911 5. 605927  
11763857\_ 6. 555036 6. 497107 6. 583422 6. 406693 6. 526095 6. 427649  
11763858\_ 3. 105871 2. 99389 2. 887087 2. 763682 2. 952926 2. 878209  
11763859\_ 3. 034099 2. 869823 3. 130336 2. 539527 2. 754275 2. 610289  
11763860\_ 5. 122545 4. 98002 4. 989128 5. 321346 5. 271359 5. 346997  
11763861\_ 4. 380819 4. 343155 4. 014328 4. 407723 4. 397672 4. 472904  
11763862\_ 8. 343943 8. 402904 8. 370419 8. 017734 8. 039222 8. 074536  
11763863\_ 5. 702237 5. 747767 5. 678543 5. 389624 5. 451147 5. 243788  
11763864\_ 6. 953468 7. 046622 6. 99621 7. 026901 6. 98416 6. 94755  
11763865\_ 2. 927889 2. 873489 3. 025972 2. 912551 3. 004853 2. 799894  
11763866\_ 2. 556388 2. 725577 2. 743872 2. 786992 2. 818913 2. 728158  
11763867\_ 3. 705625 3. 717884 3. 398682 3. 578114 3. 511255 3. 43572  
11763868\_ 5. 485908 5. 385451 5. 618422 5. 445582 5. 386459 5. 345982  
11763869\_ 4. 693573 4. 693464 4. 541588 4. 683997 4. 58205 4. 651906  
11763870\_ 4. 564903 4. 52373 4. 425913 4. 466653 4. 342546 4. 61722  
11763871\_ 6. 646706 6. 612825 6. 57791 6. 320451 6. 354726 6. 368713  
11763872\_ 11. 40737 11. 36268 11. 39084 11. 10994 11. 07438 11. 08982  
11763873\_ 4. 950902 4. 96954 5. 17639 5. 123029 5. 126031 5. 03793  
11763874\_ 4. 517325 4. 665403 4. 558966 4. 657997 4. 883222 4. 790132  
11763875\_ 5. 610608 5. 631813 5. 494283 5. 775123 5. 873137 5. 696729  
11763876\_ 3. 249924 3. 396341 3. 164024 3. 123811 3. 386977 3. 327358  
11763877\_ 5. 359552 5. 569442 5. 371912 5. 528624 5. 471416 5. 484376  
11763878\_ 4. 78328 4. 697207 5. 277787 4. 760062 4. 915382 4. 807333  
11763879\_ 3. 808723 3. 909593 3. 956484 4. 022195 3. 55726 3. 912396  
11763880\_ 3. 821016 4. 227002 3. 759315 4. 135496 3. 969526 4. 275543  
11763881\_ 3. 087341 3. 018453 3. 139815 3. 102529 3. 25425 3. 199509  
11763882\_ 4. 759588 4. 704379 4. 647675 4. 878787 4. 798511 4. 70427  
11763883\_ 5. 704156 5. 729998 5. 677842 5. 639803 5. 682261 5. 705319  
11763884\_ 2. 277738 2. 190869 1. 996835 2. 003826 1. 923345 1. 783717  
11763885\_ 4. 602823 4. 643717 4. 383852 4. 687392 4. 571573 4. 609228  
11763886\_ 2. 216742 2. 358302 2. 073142 2. 224643 2. 310775 2. 234665  
11763887\_ 3. 396608 3. 564318 3. 145194 3. 397323 3. 272871 3. 242166  
11763888\_ 6. 225513 6. 498876 6. 391888 7. 174876 6. 922773 6. 922773  
11763889\_ 10. 02368 10. 02388 10. 03814 9. 747343 9. 747551 9. 665215  
11763890\_ 4. 210353 4. 102305 4. 235238 4. 40461 3. 838302 4. 415744  
11763891\_ 5. 584813 5. 715659 5. 414869 5. 686557 5. 694021 5. 723642  
11763892\_ 6. 467905 6. 261121 6. 318137 6. 191376 6. 206103 6. 304386  
11763893\_ 6. 54437 6. 293885 6. 219859 6. 272699 6. 270563 6. 285448  
11763894\_ 3. 359735 3. 447015 3. 290188 3. 242467 3. 297797 3. 353736  
11763895\_ 3. 93513 3. 895223 3. 838542 3. 790007 3. 845782 3. 918191  
11763896\_ 5. 957646 5. 8386 5. 953317 6. 120498 5. 821747 5. 896547  
11763897\_ 5. 926672 5. 95135 6. 01004 6. 076254 5. 991639 6. 13945  
11763898\_ 3. 410915 3. 318666 3. 396135 3. 396135 3. 554553 3. 430722  
11763899\_ 4. 299552 4. 637219 4. 417829 4. 313184 4. 207677 4. 251365  
11763900\_ 5. 723623 5. 662967 5. 709521 5. 845365 5. 691871 5. 857989  
11763901\_ 4. 73989 4. 657115 4. 561618 4. 930622 4. 859319 4. 933279  
11763902\_ 2. 664456 2. 435817 2. 662989 2. 407294 2. 417744 2. 541324  
11763903\_ 2. 038938 2. 232958 2. 261522 2. 073022 2. 008066 1. 927528  
11763904\_ 2. 14395 2. 151928 2. 24586 2. 131128 2. 266314 2. 18238  
11763905\_ 6. 56242 6. 672355 6. 441303 6. 318829 6. 553224 6. 509215

11763906\_ 4. 720651 4. 874251 4. 787284 4. 878693 4. 876887 4. 817847  
11763907\_ 4. 259087 4. 109399 4. 043849 4. 198378 4. 374693 4. 278254  
11763908\_ 5. 600208 5. 599466 5. 5548 5. 584813 5. 562229 5. 552432  
11763909\_ 5. 626102 5. 629134 5. 580694 5. 687015 5. 588123 5. 591896  
11763910\_ 3. 0911 2. 555275 3. 088395 2. 981447 3. 152008 3. 254702  
11763911\_ 3. 610996 3. 50204 3. 465349 3. 545548 3. 388033 3. 361312  
11763912\_ 4. 260591 4. 129618 4. 00098 4. 006532 3. 947704 4. 180252  
11763913\_ 7. 33403 7. 332818 7. 295845 7. 295845 7. 379447 7. 332069  
11763914\_ 5. 641152 5. 782638 5. 479721 5. 826069 5. 751586 5. 778725  
11763915\_ 5. 09714 5. 254799 5. 241282 5. 308259 5. 337797 5. 33223  
11763916\_ 7. 170616 6. 968893 7. 110214 6. 596588 6. 566608 6. 660519  
11763917\_ 6. 746013 6. 859342 6. 626012 6. 819561 6. 799973 6. 806585  
11763918\_ 3. 249924 3. 290188 3. 236242 3. 040812 3. 304098 3. 422828  
11763919\_ 3. 585093 3. 437358 3. 503743 3. 607582 3. 428305 3. 696095  
11763920\_ 4. 422544 4. 443936 4. 175242 4. 387894 4. 288345 4. 387894  
11763921\_ 3. 227178 3. 144263 3. 112868 3. 197624 3. 278759 3. 154608  
11763922\_ 5. 532062 5. 877977 5. 669003 5. 909822 5. 928672 5. 806893  
11763923\_ 7. 471304 7. 519322 7. 583672 7. 535326 7. 581163 7. 594279  
11763924\_ 5. 954902 6. 162415 5. 94687 6. 280635 6. 214159 6. 20262  
11763925\_ 4. 154122 4. 356482 4. 135496 4. 474702 4. 40461 4. 400969  
11763926\_ 5. 879139 5. 800399 5. 766907 5. 375306 5. 686361 5. 637233  
11763927\_ 4. 594711 4. 302616 4. 345786 4. 868829 4. 712201 4. 924456  
11763928\_ 2. 669929 2. 51249 2. 982661 2. 64989 2. 646986 2. 44894  
11763929\_ 3. 596281 3. 595949 3. 468417 3. 690658 3. 667705 3. 842746  
11763930\_ 2. 034304 2. 144038 2. 088247 2. 008839 2. 016323 1. 995297  
11763931\_ 2. 361778 2. 452768 2. 415722 2. 298107 2. 361778 2. 350778  
11763932\_ 3. 596467 3. 467568 3. 390813 3. 605959 3. 467568 3. 354763  
11763933\_ 3. 858733 3. 971353 3. 920982 3. 943321 4. 057634 4. 176167  
11763934\_ 5. 476221 5. 610678 5. 292264 5. 542118 5. 488225 5. 538688  
11763935\_ 5. 370514 5. 345765 5. 402823 5. 488993 5. 27283 5. 492854  
11763936\_ 4. 911163 4. 947952 4. 685888 4. 883289 5. 037176 5. 063754  
11763937\_ 4. 400722 4. 547455 4. 533852 4. 512931 4. 393811 4. 533852  
11763938\_ 4. 454443 4. 568691 4. 739285 4. 359963 4. 710394 4. 664137  
11763939\_ 5. 198842 5. 007709 5. 061544 4. 878135 4. 937924 4. 931636  
11763940\_ 4. 704351 4. 736539 4. 684482 4. 684482 4. 694717 4. 59895  
11763941\_ 3. 355988 3. 447971 3. 259865 3. 312414 3. 369106 3. 371911  
11763942\_ 5. 495538 5. 672285 5. 458218 5. 614563 5. 570552 5. 676992  
11763943\_ 4. 908792 5. 01794 4. 930507 4. 922002 5. 004996 5. 004854  
11763944\_ 5. 086728 5. 067096 4. 952934 4. 981415 5. 275329 4. 992549  
11763945\_ 8. 854499 8. 788186 8. 825627 8. 581833 8. 714039 8. 661274  
11763946\_ 4. 562216 4. 815683 4. 705677 4. 812315 4. 73971 4. 78656  
11763947\_ 2. 104373 1. 980539 1. 971051 2. 071418 1. 997603 1. 932902  
11763948\_ 5. 827291 5. 977024 5. 708178 6. 054659 5. 967192 5. 887747  
11763949\_ 4. 347179 4. 42889 4. 228353 4. 275543 4. 40461 4. 288796  
11763950\_ 5. 923686 6. 071172 6. 015832 6. 03823 6. 087365 6. 081014  
11763951\_ 6. 714967 6. 701242 6. 636689 6. 827594 6. 725654 6. 593256  
11763952\_ 5. 11527 4. 87886 4. 727896 4. 953968 4. 985337 5. 08277  
11763953\_ 5. 909696 5. 909696 5. 702459 5. 598009 5. 928996 5. 783541  
11763954\_ 3. 454038 3. 213839 3. 296219 3. 218338 3. 257107 3. 503743  
11763955\_ 4. 662801 4. 816035 4. 610706 4. 928044 4. 788242 4. 942135  
11763956\_ 4. 266623 4. 281099 4. 331181 4. 156168 4. 040645 3. 992458

11763957\_ 6. 863036 6. 898555 6. 845719 6. 845848 6. 845719 6. 869501  
11763958\_ 4. 170823 4. 170823 3. 919327 4. 347179 4. 251979 4. 165049  
11763959\_ 5. 58822 5. 66509 5. 502658 5. 532744 5. 406119 5. 582937  
11763960\_ 7. 398303 7. 518153 7. 512119 7. 784133 7. 659389 7. 708397  
11763961\_ 6. 704988 6. 718139 6. 758776 6. 812969 6. 758776 6. 886652  
11763962\_ 5. 662075 5. 648656 5. 50275 5. 658879 5. 636285 5. 715119  
11763963\_ 4. 788396 4. 813133 4. 764248 4. 941343 4. 892541 4. 912383  
11763964\_ 8. 116928 8. 049971 8. 203399 7. 697783 7. 685924 7. 734501  
11763965\_ 8. 658049 8. 612787 8. 653799 8. 323929 8. 389365 8. 335815  
11763966\_ 2. 767807 2. 862705 2. 736636 2. 8061 2. 794896 2. 981046  
11763967\_ 7. 288155 7. 279518 7. 215672 7. 252815 7. 144925 7. 318444  
11763968\_ 4. 597495 4. 776225 4. 723967 4. 835885 4. 989611 4. 944545  
11763969\_ 5. 79911 5. 863293 5. 664447 5. 943353 5. 843967 5. 917921  
11763970\_ 5. 914567 5. 950934 5. 618043 6. 047972 6. 118781 6. 064826  
11763971\_ 3. 292709 3. 207812 3. 15571 2. 949144 3. 136646 3. 035075  
11763972\_ 4. 982125 5. 07789 4. 858821 5. 160446 4. 966754 4. 984669  
11763973\_ 4. 716736 4. 614317 4. 613803 4. 588662 4. 682289 4. 866013  
11763974\_ 4. 411556 4. 484207 4. 468913 4. 522732 4. 447681 4. 398035  
11763975\_ 9. 009856 8. 963128 9. 049522 9. 285403 9. 323768 9. 285386  
11763976\_ 4. 449264 4. 335594 4. 584933 4. 364059 4. 349951 4. 32088  
11763977\_ 9. 930005 9. 89582 9. 901362 10. 29375 10. 33511 10. 33061  
11763978\_ 9. 307746 9. 265759 9. 331332 9. 236345 9. 292337 9. 303168  
11763979\_ 5. 555179 5. 549551 5. 584813 5. 424518 5. 598687 5. 484029  
11763980\_ 8. 246672 8. 270472 8. 321917 8. 153949 8. 193076 8. 216722  
11763981\_ 8. 389908 8. 339626 8. 335749 8. 619522 8. 623904 8. 55999  
11763982\_ 6. 915254 7. 060284 7. 076762 7. 235933 7. 150825 7. 082529  
11763983\_ 6. 919437 7. 058814 7. 076762 7. 236379 7. 15127 7. 082974  
11763984\_ 7. 520694 7. 515935 7. 666865 7. 319458 7. 360742 7. 301343  
11763985\_ 3. 723766 4. 174945 4. 213226 4. 301267 4. 320432 3. 954157  
11763986\_ 6. 817986 6. 936579 6. 873965 6. 893699 6. 970685 6. 959706  
11763987\_ 5. 280772 5. 372561 5. 565045 4. 229465 4. 468416 4. 755209  
11763988\_ 8. 809219 8. 77225 8. 804415 8. 565034 8. 488514 8. 565809  
11763989\_ 4. 151315 4. 055572 3. 763619 4. 092751 3. 913497 4. 186855  
11763990\_ 8. 090991 8. 020047 8. 162259 8. 201328 8. 283467 8. 267497  
11763991\_ 2. 991723 3. 118206 3. 026226 2. 963339 3. 367143 3. 0054  
11763992\_ 3. 907766 3. 892529 4. 019976 3. 942036 3. 502838 3. 594728  
11763993\_ 9. 38693 9. 355371 9. 335007 9. 220095 9. 319978 9. 245407  
11763994\_ 3. 44047 3. 846405 3. 664848 3. 79607 3. 425099 3. 461606  
11763995\_ 5. 156303 5. 309674 5. 366007 5. 301199 5. 26034 5. 317579  
11763996\_ 4. 700243 4. 559321 4. 741716 4. 485439 4. 450159 4. 495019  
11763997\_ 7. 279288 6. 963802 7. 294083 6. 590069 6. 55637 6. 660519  
11763998\_ 4. 892086 5. 09743 5. 009972 4. 974364 4. 924262 5. 111987  
11763999\_ 3. 173823 3. 118355 3. 070808 3. 200727 3. 505639 3. 393981  
11764000\_ 3. 461604 3. 697785 3. 655155 3. 503743 3. 655155 3. 672147  
11764001\_ 9. 045987 8. 998374 9. 003738 9. 310892 9. 297682 9. 30453  
11764002\_ 5. 310818 5. 414869 5. 073036 5. 418022 5. 396575 5. 352017  
11764003\_ 6. 268064 6. 068312 5. 988421 5. 749789 5. 908466 5. 976178  
11764004\_ 3. 596046 4. 123102 4. 278396 4. 120639 3. 653477 4. 073329  
11764005\_ 6. 694849 6. 732136 6. 868037 6. 559678 6. 826485 6. 73288  
11764006\_ 10. 61451 10. 58771 10. 61946 10. 44759 10. 41636 10. 42121  
11764007\_ 5. 953189 6. 057857 5. 97055 5. 639469 5. 658182 5. 721138

11764008\_ 4. 128831 4. 131424 4. 03212 4. 304684 4. 215482 4. 194293  
11764009\_ 5. 098465 5. 119757 5. 176982 5. 480966 5. 319239 5. 337896  
11764010\_ 6. 598482 6. 705192 6. 543386 7. 543431 7. 421132 7. 583081  
11764011\_ 2. 417368 2. 486036 2. 541172 2. 683277 2. 95626 2. 805272  
11764012\_ 2. 849292 2. 945929 3. 025972 3. 214067 3. 545437 3. 356194  
11764013\_ 4. 10925 4. 174945 4. 100032 4. 264407 4. 264889 4. 303531  
11764014\_ 5. 340689 5. 199647 5. 234509 4. 824195 4. 761034 4. 748982  
11764015\_ 2. 731621 2. 92832 2. 738676 2. 792021 2. 844427 2. 784028  
11764016\_ 5. 371809 5. 4051 5. 441238 5. 677913 5. 46043 5. 40625  
11764017\_ 8. 644882 8. 683178 8. 656173 8. 900397 8. 926057 8. 849482  
11764018\_ 8. 319836 8. 219159 8. 252373 8. 52618 8. 449553 8. 554666  
11764019\_ 7. 575239 7. 611791 7. 495612 7. 434587 7. 530042 7. 484974  
11764020\_ 9. 578418 9. 48562 9. 519384 9. 389929 9. 298113 9. 321764  
11764021\_ 9. 317682 9. 222888 9. 279876 9. 401793 9. 371464 9. 381342  
11764022\_ 3. 466137 3. 6238 3. 6238 3. 747556 3. 402642 3. 666871  
11764023\_ 4. 939456 5. 051114 4. 794176 5. 250555 5. 11527 4. 9059  
11764024\_ 4. 584716 4. 71557 4. 602766 4. 48005 4. 521557 4. 520627  
11764025\_ 5. 750306 5. 855698 5. 756998 5. 951846 5. 768053 5. 957753  
11764026\_ 4. 956814 4. 815683 5. 011036 4. 920157 4. 984669 5. 029529  
11764027\_ 4. 75155 5. 228627 5. 03754 5. 346572 5. 175814 5. 23414  
11764028\_ 4. 127325 4. 300847 3. 939983 4. 240085 4. 235018 4. 143203  
11764029\_ 6. 713779 6. 877216 6. 795511 6. 307177 6. 054661 6. 126698  
11764030\_ 6. 44555 6. 433975 6. 390831 5. 738136 5. 638895 5. 700825  
11764031\_ 5. 92947 6. 06743 5. 972054 5. 936748 5. 773606 5. 894775  
11764032\_ 6. 931394 6. 775048 6. 832631 6. 718497 6. 724151 6. 988628  
11764033\_ 8. 606708 8. 542668 8. 580679 8. 661647 8. 714708 8. 574856  
11764034\_ 5. 867258 5. 916359 5. 69843 5. 854673 5. 934485 5. 854228  
11764035\_ 5. 267621 5. 237246 5. 198172 5. 367673 5. 284464 5. 233499  
11764036\_ 8. 746182 8. 617546 8. 676137 9. 185276 9. 230019 9. 23981  
11764037\_ 11. 02973 10. 97622 10. 96458 10. 83009 10. 7808 10. 77386  
11764038\_ 7. 97624 7. 954607 8. 058867 8. 153573 8. 173441 8. 168229  
11764039\_ 7. 236756 7. 253403 7. 307161 7. 502461 7. 489112 7. 459601  
11764040\_ 3. 049231 3. 0457 2. 867863 2. 804124 3. 120528 2. 858306  
11764041\_ 4. 200678 4. 199936 4. 377692 4. 15723 4. 262613 4. 275543  
11764042\_ 5. 643095 5. 643713 5. 724852 5. 751912 5. 798636 5. 737705  
11764043\_ 5. 281158 5. 308522 5. 122191 5. 307029 5. 197563 5. 111876  
11764044\_ 5. 939305 5. 80199 5. 820052 5. 821474 5. 849106 5. 82325  
11764045\_ 4. 735321 4. 546759 4. 459939 4. 460276 4. 74574 4. 639435  
11764046\_ 6. 063025 6. 268655 6. 085522 6. 266268 6. 431996 6. 246394  
11764047\_ 4. 363401 4. 586901 4. 511966 4. 775333 4. 596941 4. 634907  
11764048\_ 7. 842319 7. 748282 7. 811526 7. 825457 7. 867179 7. 920689  
11764049\_ 6. 523188 6. 553034 6. 416567 6. 416563 6. 593535 6. 566027  
11764050\_ 4. 608593 4. 705565 4. 705565 4. 824208 4. 726898 4. 608593  
11764051\_ 5. 209259 5. 126025 5. 16288 5. 513428 5. 333723 5. 446343  
11764052\_ 3. 228935 2. 893966 3. 251489 3. 380043 3. 251489 3. 300797  
11764053\_ 5. 966158 6. 064632 6. 084049 6. 103989 6. 250204 6. 166037  
11764054\_ 7. 587844 7. 558383 7. 632184 7. 4623 7. 422057 7. 498907  
11764055\_ 6. 433453 6. 462984 6. 429235 6. 487785 6. 526095 6. 341118  
11764056\_ 6. 783768 6. 560107 6. 718233 6. 693155 6. 543298 6. 589889  
11764057\_ 4. 222317 3. 906512 4. 233395 3. 673824 3. 968376 3. 738739  
11764058\_ 7. 342729 7. 37214 7. 344913 7. 19885 7. 273529 7. 100299

11764059\_ 6. 48489 6. 672355 6. 477876 6. 686167 6. 692528 6. 692528  
11764060\_ 6. 641333 6. 691894 6. 494443 6. 699574 6. 710091 6. 699574  
11764061\_ 10. 82297 10. 7808 10. 76867 10. 99301 10. 93299 10. 92852  
11764062\_ 4. 292776 4. 222626 4. 2779 4. 095775 4. 010625 4. 03314  
11764063\_ 8. 562463 8. 477232 8. 616612 8. 562123 8. 522673 8. 554968  
11764064\_ 2. 9601 2. 685847 2. 929585 2. 929585 3. 041409 2. 687998  
11764065\_ 2. 853981 2. 999001 2. 847439 2. 982177 3. 120724 2. 853981  
11764066\_ 3. 639289 3. 166435 2. 967128 2. 812467 3. 108558 2. 883438  
11764067\_ 6. 104532 6. 116947 6. 094413 6. 184224 6. 206103 6. 370541  
11764068\_ 6. 309415 6. 140588 6. 085388 6. 084797 6. 071811 6. 026762  
11764069\_ 4. 584933 4. 24742 4. 410015 4. 733621 4. 52373 4. 427278  
11764070\_ 5. 27942 5. 358541 5. 221079 5. 501401 5. 413283 5. 420562  
11764071\_ 7. 833756 7. 81935 7. 856742 7. 840845 7. 900426 7. 896769  
11764072\_ 5. 849923 5. 699872 5. 922228 5. 768053 5. 780743 5. 487852  
11764073\_ 2. 361778 2. 337717 2. 429143 2. 361778 2. 337717 2. 522062  
11764074\_ 6. 229772 6. 241379 6. 178248 6. 144883 6. 282222 6. 256984  
11764075\_ 4. 69081 4. 935025 4. 750433 4. 77078 4. 729314 4. 809078  
11764076\_ 4. 821218 4. 959874 5. 064956 4. 843455 5. 11527 4. 941112  
11764077\_ 5. 07233 4. 831878 4. 920944 4. 165921 4. 39024 4. 349595  
11764078\_ 6. 025952 6. 0184 6. 026518 6. 101974 6. 075305 6. 159771  
11764079\_ 4. 551616 4. 52373 4. 459939 4. 755548 4. 452061 4. 402256  
11764080\_ 3. 119116 3. 290188 3. 385639 3. 52102 3. 629376 3. 703248  
11764081\_ 2. 907504 2. 81047 2. 741192 3. 049043 2. 955898 3. 035489  
11764082\_ 2. 890848 2. 984914 2. 874619 2. 961862 3. 015891 3. 290188  
11764083\_ 4. 156152 4. 080201 3. 939983 4. 13463 4. 25811 4. 326139  
11764084\_ 5. 025669 5. 130056 5. 024828 5. 207335 5. 182119 5. 11527  
11764085\_ 5. 529672 5. 611184 5. 560662 5. 647092 5. 762059 5. 560734  
11764086\_ 4. 601115 4. 68599 4. 595907 4. 482163 4. 524779 4. 617703  
11764087\_ 1. 811952 1. 804393 1. 898324 1. 868097 1. 895347 1. 921807  
11764088\_ 3. 427886 3. 046133 3. 503743 3. 101013 3. 239573 3. 386546  
11764089\_ 7. 751204 7. 816519 7. 725432 7. 85077 7. 86209 7. 900865  
11764090\_ 7. 771554 7. 669457 7. 78055 7. 539034 7. 476805 7. 575633  
11764091\_ 7. 823248 7. 757215 7. 828023 8. 492318 8. 558523 8. 614768  
11764092\_ 3. 703459 3. 4488 4. 054954 3. 793483 4. 004508 3. 843167  
11764093\_ 2. 963396 3. 117651 3. 025972 3. 138373 3. 067803 3. 126384  
11764094\_ 2. 568589 2. 536966 2. 317132 2. 392993 2. 44822 2. 532654  
11764095\_ 4. 513241 4. 586926 4. 643717 4. 67829 4. 423486 4. 747263  
11764096\_ 2. 095934 1. 830434 1. 920817 2. 022131 2. 017465 2. 131267  
11764097\_ 3. 609474 4. 265076 3. 850246 3. 988539 3. 911231 3. 913971  
11764098\_ 4. 832245 4. 791224 4. 833146 4. 916941 4. 907818 4. 825112  
11764099\_ 6. 026847 6. 02488 6. 026847 6. 103136 6. 024173 6. 029408  
11764100\_ 4. 251576 4. 48429 4. 389019 4. 518147 4. 409373 4. 486216  
11764101\_ 5. 489397 5. 832155 5. 446496 5. 745821 5. 800026 5. 619463  
11764102\_ 4. 053252 4. 051633 4. 103886 4. 227244 4. 354749 4. 220693  
11764103\_ 2. 233833 2. 315028 2. 478979 2. 315346 2. 23878 2. 324556  
11764104\_ 4. 192617 4. 415477 4. 324099 4. 226947 4. 439439 4. 398331  
11764105\_ 4. 180822 4. 110708 3. 935486 3. 957569 4. 001692 4. 250853  
11764106\_ 6. 073142 5. 994893 6. 028805 6. 228723 6. 101841 6. 011116  
11764107\_ 4. 280675 4. 406802 4. 35083 4. 40189 4. 390098 4. 479074  
11764108\_ 3. 504681 3. 737495 3. 391838 3. 756925 3. 398236 3. 75577  
11764109\_ 2. 549774 2. 49363 2. 47102 2. 258406 2. 727973 3. 064781



11764110\_ 2. 81657 2. 857812 2. 732317 2. 718828 3. 010614 2. 825275  
11764111\_ 7. 111545 7. 156006 7. 048896 7. 261051 7. 298679 7. 283166  
11764112\_ 4. 173782 4. 072003 4. 459939 4. 40461 4. 291742 4. 470714  
11764113\_ 2. 956701 2. 956701 2. 71417 2. 756805 2. 605516 2. 718322  
11764114\_ 4. 411986 4. 459939 4. 408227 4. 485444 4. 704822 4. 636355  
11764115\_ 3. 187843 3. 180062 2. 962677 3. 195545 3. 398236 3. 290188  
11764116\_ 7. 730153 7. 821548 7. 798119 7. 717838 7. 721417 7. 564691  
11764117\_ 8. 25564 8. 241956 8. 30304 8. 23963 8. 255499 8. 227519  
11764118\_ 2. 721252 2. 91409 3. 01497 3. 085955 3. 090502 3. 001609  
11764119\_ 3. 106844 3. 201509 3. 37577 3. 483292 3. 360399 3. 21965  
11764120\_ 2. 272441 1. 802851 2. 158206 2. 028863 1. 890699 1. 969931  
11764121\_ 2. 561348 2. 737797 2. 650765 2. 837466 2. 780999 2. 837351  
11764122\_ 4. 894437 4. 943221 4. 62721 4. 643717 5. 029529 4. 778625  
11764123\_ 3. 477366 3. 764048 3. 398236 3. 477366 3. 511023 3. 413362  
11764124\_ 2. 91641 2. 827538 2. 957936 2. 888792 2. 957936 2. 867057  
11764125\_ 2. 678022 2. 847821 2. 819999 2. 733872 2. 733872 2. 733872  
11764126\_ 1. 924424 2. 133521 1. 88057 2. 132787 1. 939718 2. 039589  
11764127\_ 4. 8262 4. 874234 4. 709463 4. 90184 4. 850096 4. 94515  
11764128\_ 4. 147606 4. 449819 4. 182872 4. 189789 4. 306082 4. 469118  
11764129\_ 2. 248018 2. 374087 2. 155237 2. 621057 2. 390721 2. 168364  
11764130\_ 4. 968931 5. 086243 5. 199633 4. 874234 4. 984669 5. 139098  
11764131\_ 4. 347321 4. 497457 4. 441253 4. 256442 4. 45016 4. 367689  
11764132\_ 3. 401972 3. 296877 3. 15906 3. 180095 3. 314048 3. 214959  
11764133\_ 2. 881373 3. 101771 2. 881829 2. 775681 2. 867535 2. 83198  
11764134\_ 4. 451035 4. 633859 4. 404335 4. 390063 4. 488439 4. 696996  
11764135\_ 2. 483534 2. 723632 2. 409175 2. 715457 2. 361778 2. 379366  
11764136\_ 5. 451056 5. 520376 5. 175322 5. 531828 5. 4995 5. 374866  
11764137\_ 2. 51535 2. 587326 2. 450789 2. 60039 2. 578824 2. 587739  
11764138\_ 3. 161356 2. 972821 2. 697903 2. 912654 2. 775068 3. 071084  
11764139\_ 4. 884147 4. 899313 4. 929617 5. 13345 4. 929617 5. 079778  
11764140\_ 5. 134978 5. 154903 5. 085589 5. 144905 5. 042081 5. 050924  
11764141\_ 8. 6345 8. 626773 8. 682189 8. 861136 8. 866276 8. 867341  
11764142\_ 2. 288075 2. 015528 1. 863836 2. 334447 2. 31627 2. 31627  
11764143\_ 5. 002598 4. 891766 4. 853891 4. 857799 4. 992298 4. 895327  
11764144\_ 3. 658276 3. 630747 3. 444516 3. 629892 3. 846096 3. 681191  
11764145\_ 2. 872625 2. 730378 2. 789545 2. 77045 2. 74742 2. 945929  
11764146\_ 8. 708906 8. 653192 8. 726438 8. 936378 8. 821758 8. 831312  
11764147\_ 4. 921045 4. 978251 5. 0023 4. 665754 4. 79826 4. 868089  
11764148\_ 2. 563225 2. 074272 2. 178046 2. 020171 2. 011455 2. 247778  
11764149\_ 4. 977054 4. 815683 4. 88031 5. 100622 5. 054723 5. 05552  
11764150\_ 9. 253836 9. 161549 9. 242843 9. 144013 9. 082285 9. 120482  
11764151\_ 7. 62826 7. 61414 7. 655554 8. 202154 8. 171487 8. 167311  
11764152\_ 5. 964044 6. 112151 5. 959322 5. 964065 6. 006432 6. 118726  
11764153\_ 6. 099204 6. 250691 5. 98005 6. 357443 6. 282224 6. 260068  
11764154\_ 4. 778144 4. 863387 4. 778144 5. 008719 4. 716297 4. 778144  
11764155\_ 2. 801364 2. 526167 2. 428603 2. 440618 2. 286155 2. 43798  
11764156\_ 7. 490136 7. 50047 7. 562923 8. 231012 8. 246828 8. 244737  
11764157\_ 2. 908582 3. 03378 2. 844355 3. 096946 3. 127579 3. 108278  
11764158\_ 4. 307568 4. 308617 4. 563575 4. 243009 4. 324328 4. 134673  
11764159\_ 3. 169408 3. 311131 3. 118921 3. 498289 3. 198817 3. 474272  
11764160\_ 5. 977166 5. 915645 5. 979029 5. 257541 5. 463066 5. 231259

11764161\_ 3. 580105 3. 545675 3. 617599 3. 541852 3. 508181 3. 530381  
11764162\_ 2. 964627 2. 76769 2. 87923 3. 162283 3. 038331 3. 266465  
11764163\_ 3. 345886 3. 528939 3. 560309 3. 673371 3. 56616 3. 500053  
11764164\_ 5. 080667 5. 00068 4. 864608 5. 113717 4. 919629 4. 911405  
11764165\_ 5. 254519 5. 309674 5. 307321 5. 414869 5. 343737 5. 459834  
11764166\_ 3. 225752 3. 095537 3. 290188 3. 101013 2. 763204 2. 917131  
11764167\_ 2. 812334 2. 509866 2. 480085 2. 66554 2. 587686 2. 480085  
11764168\_ 4. 277222 4. 649491 4. 565681 4. 662458 4. 680185 4. 353177  
11764169\_ 2. 605516 2. 734273 2. 510064 2. 605516 2. 687394 2. 510064  
11764170\_ 3. 720283 3. 606313 3. 546873 3. 809359 3. 693845 3. 819235  
11764171\_ 8. 187711 8. 094746 8. 259033 7. 782722 7. 687709 7. 792952  
11764172\_ 3. 820527 3. 484384 3. 847576 3. 688532 3. 950466 3. 860912  
11764173\_ 5. 85572 5. 799907 5. 915809 6. 460047 6. 394158 6. 501865  
11764174\_ 3. 961672 3. 703222 3. 871879 3. 950524 4. 204115 4. 108173  
11764175\_ 4. 026092 4. 081673 4. 023355 4. 141577 4. 141577 4. 275543  
11764176\_ 3. 616995 3. 905731 3. 982746 3. 827541 3. 639556 3. 755721  
11764177\_ 4. 268231 3. 920591 4. 222824 3. 849618 3. 852383 3. 639264  
11764178\_ 3. 381856 3. 696673 3. 519336 3. 575876 3. 484997 3. 575876  
11764179\_ 3. 249924 3. 37889 3. 019098 3. 330789 3. 140197 3. 347652  
11764180\_ 5. 134263 5. 280329 5. 115602 5. 115602 5. 149545 5. 196201  
11764181\_ 2. 263306 2. 437296 1. 935683 2. 21836 2. 366349 2. 550015  
11764182\_ 4. 397088 4. 158756 4. 198391 4. 286987 4. 122446 4. 276371  
11764183\_ 5. 110475 5. 044519 5. 113031 5. 216386 5. 080032 5. 110096  
11764184\_ 4. 852155 4. 994638 5. 018411 4. 902968 4. 993553 5. 031585  
11764185\_ 2. 73777 3. 157934 2. 909971 3. 106501 3. 216363 2. 990455  
11764186\_ 5. 583681 5. 378522 5. 380273 5. 347156 5. 265906 5. 484662  
11764187\_ 3. 66886 3. 823175 3. 640067 3. 929302 3. 879309 4. 075639  
11764188\_ 1. 906336 1. 906336 1. 863475 1. 883827 1. 972695 1. 898324  
11764189\_ 3. 45099 3. 45099 3. 45099 3. 531354 3. 435712 3. 463479  
11764190\_ 4. 550758 4. 786497 4. 574802 4. 707573 4. 720822 4. 601978  
11764191\_ 5. 614563 5. 708227 5. 590058 5. 691228 5. 712583 5. 60359  
11764192\_ 4. 310969 3. 970388 3. 992145 4. 249351 4. 034297 3. 979095  
11764193\_ 5. 974043 6. 069545 6. 117964 6. 294693 6. 159771 6. 263567  
11764194\_ 5. 955285 6. 104704 5. 894697 6. 00236 6. 11153 6. 080657  
11764195\_ 4. 962158 4. 935229 4. 576085 4. 618306 4. 738018 4. 77273  
11764196\_ 2. 679984 2. 96952 3. 138626 3. 15148 3. 005258 2. 853865  
11764197\_ 3. 959237 4. 133021 4. 01757 4. 098886 4. 135226 4. 216441  
11764198\_ 4. 362881 4. 070906 4. 171977 4. 287417 4. 171977 4. 242927  
11764199\_ 2. 204173 2. 318678 2. 20617 2. 206437 2. 246577 2. 106211  
11764200\_ 3. 902207 3. 937197 3. 659335 3. 864668 3. 88494 3. 864668  
11764201\_ 2. 974491 3. 064909 3. 025972 3. 21279 3. 212245 3. 179425  
11764202\_ 4. 698968 4. 668108 4. 442517 4. 471624 4. 865147 4. 917114  
11764203\_ 3. 976093 4. 134571 4. 033544 4. 100717 4. 123686 4. 10243  
11764204\_ 2. 119242 2. 181755 2. 083924 2. 372659 2. 458609 2. 306734  
11764205\_ 3. 770234 3. 674761 3. 745698 3. 920847 4. 087704 3. 624727  
11764206\_ 5. 216497 5. 262208 5. 17639 5. 373902 5. 218365 5. 248334  
11764207\_ 2. 868275 2. 919981 2. 926578 2. 938499 2. 954597 3. 11518  
11764208\_ 3. 094543 3. 364212 3. 137149 3. 134145 3. 215558 3. 134987  
11764209\_ 5. 224066 5. 325562 5. 21863 5. 492202 5. 35269 5. 332627  
11764210\_ 4. 623994 4. 550639 4. 38714 4. 743919 4. 573804 4. 611342  
11764211\_ 3. 181902 3. 284736 3. 062388 3. 179335 3. 080768 3. 069127

11764212\_ 4. 428639 4. 381458 4. 423418 4. 322632 4. 657631 4. 489507  
11764213\_ 5. 893655 6. 064585 5. 947912 5. 996126 5. 971022 5. 95833  
11764214\_ 3. 583784 3. 598143 3. 373267 3. 413114 3. 619389 3. 264845  
11764215\_ 5. 614563 5. 614563 5. 480966 5. 537396 5. 826259 5. 619463  
11764216\_ 1. 991481 1. 900979 2. 095256 2. 040625 1. 988826 2. 224625  
11764217\_ 4. 09186 4. 161296 4. 126106 4. 066656 4. 253474 4. 220746  
11764218\_ 3. 251793 3. 586651 3. 292328 3. 439333 3. 398236 3. 290188  
11764219\_ 4. 008768 4. 00914 3. 817526 4. 008768 4. 104377 4. 006037  
11764220\_ 2. 441619 2. 32468 2. 688963 2. 862075 2. 635059 2. 837844  
11764221\_ 3. 235533 3. 108341 3. 183862 3. 383833 3. 507525 3. 278181  
11764222\_ 4. 868139 5. 022921 4. 815838 5. 11527 4. 905478 4. 997246  
11764223\_ 5. 305024 5. 2175 4. 96137 5. 323631 5. 183024 5. 339673  
11764224\_ 2. 425113 2. 334355 2. 182353 2. 324028 2. 087728 2. 324768  
11764225\_ 4. 209944 4. 422105 4. 424285 4. 264635 4. 315595 4. 313377  
11764226\_ 5. 106017 5. 029529 4. 675059 5. 057004 5. 011726 4. 875267  
11764227\_ 5. 411794 5. 172369 4. 939232 5. 160262 5. 149545 5. 11527  
11764228\_ 4. 716561 4. 846955 4. 837892 4. 755454 4. 712459 4. 846331  
11764229\_ 3. 16776 3. 170388 3. 319899 3. 096316 3. 230126 2. 945929  
11764230\_ 5. 417153 5. 651556 5. 379558 5. 638664 5. 696259 5. 735517  
11764231\_ 4. 059043 4. 387619 4. 335636 4. 504868 4. 440967 4. 570329  
11764232\_ 4. 268231 3. 920591 4. 222824 3. 849618 3. 852383 3. 639264  
11764233\_ 3. 416746 3. 584242 3. 359401 3. 398409 3. 455754 3. 212617  
11764234\_ 5. 724588 5. 852094 6. 06005 6. 333812 6. 506093 6. 581516  
11764235\_ 6. 971948 7. 053219 6. 996962 6. 917472 6. 918976 6. 98834  
11764236\_ 4. 814125 4. 827903 4. 649294 4. 81304 4. 583248 4. 417916  
11764237\_ 2. 801694 2. 933927 2. 853264 2. 66236 2. 904835 2. 853264  
11764238\_ 3. 30823 3. 312854 3. 298172 3. 302796 3. 312824 3. 298202  
11764239\_ 8. 026133 7. 874853 8. 021845 7. 704007 7. 673568 7. 800234  
11764240\_ 3. 256893 2. 904782 3. 237976 3. 255468 2. 956082 3. 578558  
11764241\_ 6. 426059 6. 765911 6. 492724 6. 74607 6. 700371 6. 851917  
11764242\_ 3. 140341 3. 0848 3. 48204 3. 295008 3. 306585 3. 399874  
11764243\_ 4. 99603 5. 127324 5. 176588 5. 280211 5. 232585 5. 174102  
11764244\_ 6. 835012 6. 780389 6. 870941 6. 507716 6. 553547 6. 460739  
11764245\_ 5. 666184 5. 611078 5. 480966 5. 485951 5. 426098 5. 611224  
11764246\_ 9. 361422 9. 39338 9. 404263 9. 611615 9. 586518 9. 509882  
11764247\_ 3. 259448 3. 380179 3. 175952 3. 295207 3. 393944 3. 352023  
11764248\_ 8. 764016 8. 721242 8. 751094 9. 238189 9. 167759 9. 192668  
11764249\_ 2. 296405 2. 37206 2. 489069 2. 150454 2. 25483 2. 22781  
11764250\_ 4. 226023 4. 416299 4. 186351 4. 382974 4. 592505 4. 607382  
11764251\_ 5. 409222 5. 371977 5. 332528 5. 25307 5. 183024 5. 196201  
11764252\_ 2. 84743 2. 991777 3. 209067 3. 222162 3. 281289 3. 146175  
11764253\_ 4. 527392 4. 47409 4. 643717 4. 418761 4. 276109 4. 476054  
11764254\_ 1. 925139 1. 995297 1. 93725 2. 079884 1. 973583 1. 898324  
11764255\_ 4. 484943 4. 134958 4. 378696 4. 195295 4. 200678 4. 280788  
11764256\_ 13. 30411 13. 32804 13. 31016 13. 25248 13. 24784 13. 24784  
11764257\_ 6. 752471 6. 91283 6. 656992 6. 908998 6. 828011 6. 967649  
11764258\_ 4. 36035 4. 781211 4. 611722 4. 936099 4. 67048 4. 851821  
11764259\_ 7. 975954 8. 081122 7. 867868 8. 13872 8. 192287 8. 042699  
11764260\_ 4. 025831 4. 079893 3. 847927 4. 119869 4. 057072 4. 087447  
11764261\_ 1. 817919 1. 793928 1. 830176 1. 71534 1. 706081 1. 72782  
11764262\_ 6. 242296 6. 24996 6. 219072 6. 265286 6. 251138 6. 230919

11764263\_ 4. 413306 4. 570127 4. 511802 4. 519725 4. 575661 4. 475027  
11764264\_ 3. 630581 3. 698509 3. 765077 3. 641953 3. 657775 3. 751997  
11764265\_ 4. 956396 4. 974135 4. 89228 4. 873672 4. 688305 4. 790788  
11764266\_ 3. 263471 3. 224534 3. 120852 3. 101013 3. 306585 3. 209572  
11764267\_ 3. 382072 3. 289601 3. 325093 3. 392848 3. 398236 3. 403624  
11764268\_ 3. 775299 3. 767512 3. 749282 3. 875351 3. 695204 3. 990768  
11764269\_ 4. 283514 4. 05801 3. 949858 4. 186542 4. 018759 4. 276631  
11764270\_ 4. 815683 4. 84326 5. 054592 4. 609377 4. 348993 4. 540411  
11764271\_ 3. 819918 3. 578018 3. 295196 3. 449756 3. 393201 3. 578862  
11764272\_ 2. 850317 2. 779555 2. 812429 2. 912551 2. 880607 2. 926735  
11764273\_ 3. 750554 3. 930068 3. 850246 4. 024065 3. 937918 3. 872043  
11764274\_ 2. 790507 2. 47102 2. 47102 2. 795991 2. 798956 2. 640202  
11764275\_ 5. 950925 5. 984659 5. 93414 6. 138446 6. 141108 6. 185487  
11764276\_ 3. 901737 3. 80341 3. 702537 3. 871342 4. 056272 3. 765342  
11764277\_ 4. 387047 4. 228224 4. 467059 4. 374397 4. 283238 4. 122446  
11764278\_ 2. 361778 2. 14636 2. 234185 2. 089124 2. 404694 2. 470456  
11764279\_ 4. 152653 4. 228457 4. 254018 4. 175303 4. 053985 4. 241068  
11764280\_ 3. 591108 3. 906173 3. 669569 3. 70914 3. 937797 3. 6942  
11764281\_ 2. 864304 2. 792216 2. 792216 2. 952315 2. 912551 2. 83198  
11764282\_ 2. 779108 2. 83198 2. 704694 2. 746784 2. 827354 2. 746784  
11764283\_ 7. 03475 7. 003401 6. 991584 6. 889403 6. 790012 6. 896557  
11764284\_ 3. 321527 3. 445615 3. 43666 3. 520885 3. 705625 3. 337322  
11764285\_ 2. 356737 2. 366197 2. 356737 2. 346032 2. 694132 2. 356737  
11764286\_ 2. 522747 2. 415799 2. 570735 2. 617488 2. 421463 2. 551068  
11764287\_ 2. 605516 2. 857709 2. 736636 2. 898193 2. 787664 2. 737722  
11764288\_ 4. 05616 3. 906044 4. 09139 4. 175984 4. 244783 4. 363067  
11764289\_ 4. 163185 4. 324403 4. 17101 4. 189829 4. 264729 4. 439425  
11764290\_ 2. 189535 2. 270256 2. 180288 2. 316588 2. 397252 2. 283429  
11764291\_ 1. 610372 1. 794796 1. 904038 1. 946811 1. 847455 1. 847455  
11764292\_ 4. 3772 4. 280228 4. 135496 4. 09742 4. 244655 4. 186296  
200000\_PM 10. 11872 10. 05432 10. 158 10. 32921 10. 35498 10. 28392  
200001\_PM 10. 47376 10. 40082 10. 44432 10. 34863 10. 31339 10. 34293  
200002\_PM 12. 55273 12. 50273 12. 52388 12. 58484 12. 57094 12. 54277  
200003\_PM 12. 99306 12. 9952 13. 00938 12. 94246 12. 96125 12. 96854  
200004\_PM 11. 57238 11. 58346 11. 54564 11. 54177 11. 52023 11. 49706  
200005\_PM 10. 83875 10. 80635 10. 85894 10. 86385 10. 84738 10. 89191  
200006\_PM 12. 06009 12. 03845 12. 0358 11. 9731 11. 96626 11. 96677  
200007\_PM 11. 83449 11. 84905 11. 87709 11. 78164 11. 82301 11. 75801  
200008\_PM 10. 49727 10. 46387 10. 46789 10. 31856 10. 3811 10. 33929  
200009\_PM 11. 14628 11. 08361 11. 13269 11. 0266 11. 04045 11. 01321  
200010\_PM 12. 54264 12. 53697 12. 53996 12. 52066 12. 58411 12. 52303  
200011\_PM 7. 832163 7. 686766 7. 803471 9. 030438 9. 019132 9. 092144  
200012\_PM 12. 90893 12. 90041 12. 89472 12. 88514 12. 863 12. 84973  
200013\_PM 12. 81317 12. 80251 12. 79841 12. 86675 12. 87616 12. 85067  
200014\_PM 11. 17295 11. 13314 11. 13218 11. 3766 11. 3462 11. 27368  
200015\_PM 10. 52929 10. 50613 10. 55948 10. 5557 10. 55381 10. 52056  
200016\_PM 12. 46625 12. 44076 12. 44984 12. 56023 12. 54786 12. 56322  
200017\_PM 12. 58697 12. 61226 12. 57335 12. 58974 12. 56061 12. 54237  
200018\_PM 12. 94685 12. 93433 12. 92163 12. 87927 12. 8877 12. 864  
200019\_PM 12. 15634 12. 13412 12. 17443 12. 17079 12. 16985 12. 18414  
200020\_PM 10. 2496 10. 17249 10. 28044 10. 42486 10. 40387 10. 43769

200021\_PM 12. 50529 12. 47183 12. 48396 12. 63517 12. 63654 12. 6605  
200022\_PM 12. 55185 12. 51611 12. 53085 12. 48162 12. 52797 12. 4598  
200023\_PM 11. 82386 11. 78511 11. 81325 11. 5695 11. 5797 11. 57931  
200024\_PM 12. 96941 12. 95258 12. 95541 12. 88598 12. 91444 12. 8931  
200025\_PM 12. 95834 12. 95391 12. 95398 12. 95459 12. 95721 12. 94462  
200026\_PM 12. 27123 12. 23309 12. 26921 12. 24315 12. 23726 12. 2133  
200027\_PM 10. 56648 10. 47603 10. 57957 11. 05974 10. 98664 11. 03927  
200028\_PM 9. 330561 9. 288855 9. 334633 9. 506943 9. 507236 9. 51306  
200029\_PM 12. 68294 12. 66578 12. 70154 12. 66224 12. 67413 12. 67587  
200030\_PM 12. 45484 12. 44613 12. 4562 12. 32769 12. 36078 12. 36627  
200031\_PM 13. 04661 13. 02651 13. 02463 12. 98069 12. 99115 12. 97017  
200032\_PM 12. 80161 12. 79648 12. 77654 12. 82464 12. 81325 12. 80215  
200033\_PM 11. 82275 11. 82097 11. 80155 11. 67022 11. 63685 11. 62411  
200034\_PM 12. 75984 12. 77071 12. 76052 12. 74928 12. 74841 12. 72477  
200035\_PM 9. 217449 9. 125862 9. 274932 9. 265939 9. 271451 9. 182382  
200036\_PM 12. 22325 12. 22601 12. 2314 12. 19998 12. 22297 12. 13857  
200037\_PM 10. 65962 10. 61236 10. 64629 11. 06935 10. 99943 11. 03812  
200038\_PM 12. 69486 12. 67288 12. 65757 12. 71757 12. 72868 12. 71474  
200039\_PM 11. 07938 11. 02192 11. 0489 11. 08602 11. 15615 11. 16077  
200040\_PM 10. 32387 10. 25089 10. 29577 10. 84924 10. 81676 10. 81838  
200041\_PM 10. 71399 10. 65802 10. 70296 10. 66243 10. 66979 10. 65136  
200042\_PM 8. 76576 8. 677115 8. 756591 8. 738384 8. 799303 8. 794256  
200043\_PM 10. 85211 10. 77265 10. 81495 10. 99843 11. 04826 11. 01367  
200044\_PM 10. 90509 10. 90984 10. 92792 11. 01309 11. 03635 11. 01415  
200045\_PM 9. 003669 8. 910799 9. 021892 8. 832111 8. 876209 8. 904993  
200046\_PM 10. 09364 9. 982543 10. 04127 10. 27836 10. 29443 10. 27437  
200047\_PM 10. 28566 10. 26916 10. 25835 10. 12605 10. 0648 10. 0605  
200048\_PM 11. 24349 11. 17603 11. 17252 11. 04806 11. 09671 11. 03449  
200049\_PM 8. 185706 8. 065875 8. 16406 8. 079424 8. 162469 8. 161786  
200050\_PM 10. 01952 10. 03235 10. 15798 9. 938875 9. 90563 9. 923231  
200051\_PM 8. 07915 8. 063073 8. 067113 7. 959007 7. 981059 7. 939109  
200052\_PM 11. 02537 10. 98361 11. 04143 11. 20901 11. 19728 11. 17794  
200053\_PM 8. 951206 8. 977157 9. 0072 8. 918811 8. 915513 8. 881609  
200054\_PM 9. 464145 9. 401301 9. 493717 8. 974353 8. 92626 9. 06187  
200055\_PM 10. 54562 10. 44695 10. 53953 10. 45931 10. 50105 10. 50064  
200056\_PM 8. 951413 9. 072016 9. 035767 9. 148712 9. 093119 9. 111845  
200057\_PM 11. 80476 11. 76626 11. 80315 11. 87137 11. 84477 11. 85156  
200058\_PM 10. 30378 10. 30082 10. 31352 10. 28852 10. 28569 10. 24503  
200059\_PM 11. 97705 11. 94741 11. 97316 11. 87175 11. 87927 11. 91705  
200060\_PM 10. 01053 9. 984174 10. 02263 10. 38622 10. 39159 10. 40599  
200061\_PM 13. 05502 13. 04457 13. 03056 13. 01305 13. 02812 13. 00739  
200062\_PM 12. 70327 12. 70163 12. 69237 12. 61923 12. 62967 12. 62079  
200063\_PM 12. 71765 12. 74098 12. 70036 12. 93611 12. 95701 12. 94887  
200064\_PM 12. 24882 12. 22599 12. 22932 12. 28734 12. 31565 12. 30959  
200065\_PM 11. 66107 11. 63903 11. 65063 11. 76618 11. 78943 11. 7354  
200066\_PM 9. 596986 9. 625582 9. 659451 9. 58501 9. 572261 9. 549303  
200067\_PM 10. 35289 10. 24037 10. 32208 10. 38825 10. 42414 10. 41788  
200068\_PM 11. 19563 11. 13966 11. 17509 11. 4081 11. 4456 11. 42587  
200069\_PM 8. 290975 8. 167054 8. 257364 8. 450562 8. 493318 8. 528849  
200070\_PM 6. 734225 6. 671113 6. 764735 6. 817183 6. 811012 6. 820201  
200071\_PM 10. 22582 10. 17325 10. 22476 9. 853822 9. 809178 9. 795225

200072\_PM 10.73847 10.70019 10.75863 10.91185 10.96104 10.90423  
200073\_PM 11.06418 10.99891 10.97215 11.42648 11.37301 11.34987  
200074\_PM 12.21104 12.19829 12.21009 12.04889 12.08756 12.0372  
200075\_PM 10.22357 10.17693 10.25865 10.08222 10.1533 10.04811  
200076\_PM 9.718368 9.69573 9.703359 9.697276 9.721251 9.661963  
200077\_PM 12.19913 12.19459 12.20898 12.29196 12.29529 12.26531  
200078\_PM 10.02621 9.97372 10.05288 9.88103 9.897546 9.89535  
200079\_PM 10.99154 10.9138 10.96262 10.8168 10.8373 10.7929  
200080\_PM 12.29537 12.3218 12.25313 12.62944 12.55159 12.48547  
200081\_PM 13.1217 13.12266 13.12736 13.07551 13.08278 13.05514  
200082\_PM 12.75164 12.74168 12.7604 12.70946 12.75804 12.73163  
200083\_PM 10.18743 10.19501 10.24951 10.27507 10.26362 10.22298  
200084\_PM 10.25384 10.22749 10.22252 10.1988 10.17051 10.14031  
200085\_PM 11.06752 10.9821 11.03404 11.10606 11.20401 11.11021  
200086\_PM 11.32783 11.28766 11.2976 11.31219 11.33054 11.30335  
200087\_PM 11.15558 11.17213 11.19981 11.22717 11.19588 11.21489  
200088\_PM 13.10806 13.09605 13.11472 13.10978 13.15498 13.08527  
200089\_PM 12.4967 12.48655 12.48536 12.47504 12.47218 12.4552  
200090\_PM 10.05468 10.05064 10.10965 9.776828 9.716269 9.736522  
200091\_PM 12.56113 12.62663 12.53663 12.66599 12.62057 12.55549  
200092\_PM 12.84973 12.89525 12.85426 12.87061 12.87151 12.83216  
200093\_PM 11.71 11.68994 11.73303 11.71458 11.68467 11.64953  
200094\_PM 11.64867 11.63648 11.67137 11.61591 11.67216 11.62458  
200095\_PM 12.93559 12.91236 12.93784 12.92332 12.92875 12.93948  
200096\_PM 10.12667 10.03835 10.03724 9.612158 9.60449 9.600415  
200097\_PM 10.33814 10.3268 10.33264 10.50025 10.45165 10.399  
200098\_PM 10.22531 10.17924 10.19684 10.39412 10.39291 10.33784  
200099\_PM 13.0258 13.06159 13.02699 13.02992 13.00726 12.99947  
AFFX-BioE 7.577205 7.471614 7.650355 7.372796 7.334015 7.430852  
AFFX-BioE 7.920835 7.844169 7.896169 7.64926 7.65595 7.703858  
AFFX-BioE 7.731363 7.642386 7.803542 7.568584 7.537166 7.592629  
AFFX-BioC 9.2601 9.129541 9.235302 9.052111 9.024009 9.077316  
AFFX-BioC 9.074216 8.94185 9.01518 8.766146 8.84582 8.820366  
AFFX-BioI 11.32632 11.3053 11.32313 11.13123 11.13093 11.17515  
AFFX-BioI 10.34644 10.31153 10.32643 10.10594 10.1426 10.12935  
AFFX-BkGr 1.610372 1.628325 1.733047 1.700936 1.642168 1.712617  
AFFX-BkGr 1.661788 1.636471 1.665373 1.636659 1.599373 1.640943  
AFFX-BkGr 1.637284 1.630015 1.678888 1.609164 1.630015 1.630015  
AFFX-BkGr 1.682104 1.65139 1.671733 1.634251 1.648849 1.640379  
AFFX-BkGr 1.659825 1.649579 1.706428 1.613815 1.645518 1.642533  
AFFX-BkGr 1.730946 1.706276 1.762124 1.669202 1.706276 1.706276  
AFFX-BkGr 1.753752 1.740972 1.793738 1.71979 1.733876 1.740972  
AFFX-BkGr 1.841185 1.844415 1.844805 1.823135 1.834281 1.841185  
AFFX-BkGr 1.943018 1.948452 1.950093 1.936274 1.946811 1.952864  
AFFX-BkGr 2.118931 2.130874 2.130874 2.114981 2.134831 2.138811  
AFFX-BkGr 2.443166 2.451127 2.443166 2.429128 2.440704 2.463531  
AFFX-BkGr 2.749155 2.787164 2.737864 2.777082 2.803732 2.822849  
AFFX-BkGr 3.45992 3.475433 3.419361 3.434842 3.4573 3.462125  
AFFX-BkGr 4.115049 4.121158 4.072047 4.092328 4.119879 4.157491  
AFFX-BkGr 4.760234 4.802102 4.729484 4.726776 4.759216 4.785929  
AFFX-BkGr 5.286059 5.332692 5.220906 5.219422 5.269595 5.28705

AFFX-BkGr 5. 784499 5. 826119 5. 735447 5. 706866 5. 75955 5. 776183  
AFFX-BkGr 5. 901387 5. 937908 5. 869307 5. 793397 5. 854839 5. 889667  
AFFX-BkGr 6. 814412 6. 850781 6. 757432 6. 679664 6. 734599 6. 763589  
AFFX-BkGr 7. 50691 7. 547723 7. 482316 7. 366218 7. 442628 7. 485312  
AFFX-BkGr 8. 287229 8. 331859 8. 25557 8. 145884 8. 211779 8. 260243  
AFFX-BkGr 9. 014941 9. 049738 8. 991148 8. 848402 8. 906281 8. 989042  
AFFX-BkGr 10. 82376 10. 84991 10. 81729 10. 66623 10. 74644 10. 83935  
AFFX-CreX 12. 53982 12. 52351 12. 53098 12. 39573 12. 38467 12. 41015  
AFFX-CreX 12. 25751 12. 29577 12. 2453 12. 13705 12. 12535 12. 13943  
AFFX-DapX 8. 612502 8. 509197 8. 596148 8. 174598 8. 178689 8. 090521  
AFFX-DapX 7. 313112 7. 236721 7. 337126 6. 808432 6. 838758 6. 811492  
AFFX-DapX 8. 604681 8. 538108 8. 560252 8. 193053 8. 173485 8. 148706  
AFFX-HSAC 12. 81855 12. 80878 12. 80829 12. 76156 12. 74976 12. 7488  
AFFX-HSAC 12. 43814 12. 42845 12. 46306 12. 25792 12. 29538 12. 2666  
AFFX-HSAC 12. 6059 12. 59806 12. 60361 12. 47488 12. 4972 12. 47633  
AFFX-hum\_ 13. 31593 13. 32415 13. 29898 13. 30415 13. 31735 13. 28163  
AFFX-HUMG 13. 14462 13. 15782 13. 15485 13. 24281 13. 25757 13. 23989  
AFFX-HUMG 13. 26785 13. 25675 13. 24221 13. 33111 13. 34895 13. 328  
AFFX-HUMG 13. 25988 13. 24952 13. 24995 13. 32549 13. 34467 13. 33564  
AFFX-HUMI 8. 238248 8. 193336 8. 202339 7. 998928 7. 906907 7. 927911  
AFFX-HUMI 6. 664762 6. 531136 6. 67231 6. 31931 6. 308199 6. 375971  
AFFX-HUMI 8. 075625 8. 020144 8. 070216 7. 675665 7. 636811 7. 724049  
AFFX-HUMI 7. 169967 7. 097063 7. 139152 6. 785703 6. 750977 6. 708386  
AFFX-HUMR 11. 83307 11. 80355 11. 84148 12. 15445 12. 19232 12. 1496  
AFFX-HUMR 12. 64217 12. 61412 12. 62913 12. 83987 12. 8372 12. 83309  
AFFX-HUMR 12. 09478 12. 09377 12. 07015 12. 32935 12. 35034 12. 32173  
AFFX-LysX 5. 529147 5. 408442 5. 645135 5. 219086 5. 113935 5. 179504  
AFFX-LysX 4. 202359 4. 006879 4. 220152 3. 556188 3. 750756 3. 831465  
AFFX-LysX 4. 581848 4. 555713 4. 572803 4. 440912 4. 296423 4. 500911  
AFFX-M278 5. 56512 5. 742299 5. 642448 5. 76618 5. 777375 5. 794474  
AFFX-M278 11. 73822 11. 71189 11. 71842 11. 77431 11. 73495 11. 75384  
AFFX-M278 9. 657714 9. 697939 9. 701025 9. 471682 9. 499693 9. 539522  
AFFX-PheX 6. 085209 5. 945198 6. 219688 5. 85707 5. 964026 5. 884633  
AFFX-PheX 4. 838508 4. 611064 4. 881444 4. 408769 4. 561887 4. 506742  
AFFX-PheX 5. 57609 5. 430453 5. 535307 5. 317214 5. 186459 5. 105287  
AFFX-r2-E 8. 718941 8. 705032 8. 749715 8. 357332 8. 284334 8. 26749  
AFFX-r2-E 7. 841617 7. 846489 7. 816367 7. 336135 7. 42549 7. 358974  
AFFX-r2-E 8. 47826 8. 42561 8. 497212 7. 984298 8. 083188 8. 112674  
AFFX-r2-E 4. 504269 4. 451452 4. 930522 4. 353506 4. 508142 4. 561393  
AFFX-r2-E 4. 496773 4. 161167 4. 459939 3. 850246 3. 834195 3. 705625  
AFFX-r2-E 4. 695519 4. 529345 4. 66627 4. 118272 4. 086211 3. 91434  
AFFX-r2-E 6. 548406 6. 419947 6. 462283 6. 182196 6. 154686 6. 17717  
AFFX-r2-E 4. 843966 4. 921347 4. 876832 4. 459939 4. 584933 4. 359854  
AFFX-r2-E 5. 374593 5. 11223 5. 298837 4. 73363 4. 598964 5. 001538  
AFFX-r2-E 7. 182808 7. 109941 7. 176645 7. 300619 7. 333661 7. 344377  
AFFX-r2-E 6. 062712 5. 906066 6. 100003 6. 134412 6. 087357 6. 118838  
AFFX-r2-E 6. 762261 6. 754009 6. 886682 6. 907317 6. 939922 6. 963557  
AFFX-r2-E 7. 76147 7. 786921 7. 838284 7. 634704 7. 646227 7. 659453  
AFFX-r2-E 8. 133288 7. 998099 8. 168229 7. 859589 7. 854861 7. 942399  
AFFX-r2-E 8. 012027 7. 940221 8. 072704 7. 820921 7. 79989 7. 917627  
AFFX-r2-E 9. 677035 9. 596098 9. 676175 9. 457864 9. 486742 9. 463437

AFFX-r2-E 9. 436959 9. 351546 9. 448505 9. 234219 9. 205232 9. 250811  
AFFX-r2-E 11. 62614 11. 57194 11. 62872 11. 48196 11. 43432 11. 47734  
AFFX-r2-E 11. 38999 11. 3319 11. 34103 11. 23156 11. 21445 11. 18389  
AFFX-r2-F 12. 86622 12. 86181 12. 8535 12. 7751 12. 75412 12. 79663  
AFFX-r2-F 12. 80999 12. 78142 12. 7726 12. 66301 12. 66705 12. 67292  
AFFX-r2-T 3. 257839 3. 319511 3. 431057 2. 978364 3. 358435 3. 055293  
AFFX-r2-T 3. 74868 3. 750559 3. 461208 3. 924471 3. 647652 3. 63661  
AFFX-r2-T 2. 829307 2. 473815 2. 496507 2. 894725 2. 718322 2. 810138  
AFFX-r2-T 3. 088385 3. 018921 3. 290188 3. 290188 3. 382495 3. 255649  
AFFX-r2-T 2. 736815 2. 71015 2. 71015 2. 839325 2. 667657 2. 71015  
AFFX-r2-T 5. 087559 5. 131754 5. 169808 5. 131754 5. 166299 5. 117951  
AFFX-r2-T 4. 165597 3. 823376 3. 992598 3. 907343 4. 151312 4. 004062  
AFFX-r2-T 4. 050181 4. 047416 4. 098024 4. 050181 3. 950381 4. 111826  
AFFX-r2-T 4. 512502 4. 758037 4. 370337 4. 553626 4. 5404 4. 522783  
AFFX-r2-T 3. 509333 3. 475512 3. 290018 3. 381206 3. 504224 3. 554233  
AFFX-r2-T 3. 828034 4. 193168 3. 864551 4. 064474 4. 178028 4. 118897  
AFFX-r2-T 3. 825563 4. 067327 3. 941258 3. 806588 3. 969526 4. 127483  
AFFX-r2-T 3. 016625 3. 290188 3. 72575 3. 190745 3. 705625 3. 391602  
AFFX-r2-T 3. 925181 3. 851493 3. 850246 3. 766946 3. 885603 3. 899239  
AFFX-r2-T 2. 912994 3. 109461 2. 955476 3. 101538 3. 068704 2. 931655  
AFFX-r2-T 3. 194669 3. 327099 3. 216467 3. 332312 3. 52459 3. 30389  
AFFX-r2-T 3. 1497 3. 422213 3. 212921 3. 088846 3. 380068 3. 004503  
AFFX-ThrX 6. 879778 6. 855808 6. 80245 6. 991475 6. 94833 6. 989472  
AFFX-ThrX 5. 717123 5. 685001 5. 705329 5. 814369 5. 849278 5. 993814  
AFFX-ThrX 5. 974876 5. 822637 6. 056212 6. 153679 6. 166227 6. 218303  
AFFX-Trpn 2. 270207 2. 170756 2. 221951 2. 028659 2. 111175 2. 163852  
AFFX-Trpn 2. 456575 2. 466691 2. 439539 2. 417827 2. 472814 2. 417276  
AFFX-Trpn 3. 005097 3. 198691 3. 111503 3. 236064 3. 323787 3. 174967  
ERCC-000C 3. 838623 3. 794728 3. 979983 3. 965858 3. 855441 4. 06507  
ERCC-000C 1. 925933 1. 88963 1. 911901 1. 892102 1. 894366 1. 907563  
ERCC-000C 2. 231454 2. 18482 2. 206003 2. 205936 2. 278914 2. 260373  
ERCC-000C 3. 451786 3. 37329 3. 306465 3. 37348 3. 310161 3. 256742  
ERCC-000C 2. 38529 2. 402269 2. 459855 2. 507717 2. 518927 2. 515277  
ERCC-0001 3. 375436 3. 247144 3. 317318 3. 321267 3. 307961 3. 338141  
ERCC-0001 2. 165161 2. 062231 2. 095593 2. 074207 2. 118106 2. 196566  
ERCC-0001 7. 631522 7. 584986 7. 67129 7. 239568 7. 2465 7. 221028  
ERCC-0001 2. 956392 3. 157503 3. 128668 3. 085341 3. 12561 3. 268375  
ERCC-0001 2. 169641 2. 345431 2. 404581 2. 385426 2. 48955 2. 421109  
ERCC-0001 3. 082074 3. 127922 3. 067115 3. 191749 3. 066473 3. 025196  
ERCC-0002 2. 143185 2. 263214 2. 153877 2. 199475 2. 195904 2. 232201  
ERCC-0002 1. 758782 1. 759219 1. 744161 1. 740759 1. 744161 1. 684173  
ERCC-0002 2. 233327 2. 303409 2. 294609 2. 275402 2. 317631 2. 312996  
ERCC-0002 2. 246066 2. 447738 2. 465983 2. 359134 2. 412535 2. 344047  
ERCC-0002 2. 490277 2. 614569 2. 626699 2. 63154 2. 695816 2. 669776  
ERCC-0003 2. 595249 2. 872043 2. 6774 2. 664062 2. 679825 2. 62188  
ERCC-0003 1. 924239 1. 802259 1. 662086 1. 744417 1. 74247 1. 918993  
ERCC-0003 2. 320788 2. 294358 2. 138712 2. 333833 2. 341882 2. 380382  
ERCC-0003 3. 950504 3. 871857 3. 784899 3. 955621 3. 903612 3. 864738  
ERCC-0003 3. 38619 3. 250174 3. 383375 3. 441041 3. 41658 3. 443461  
ERCC-0003 2. 840563 2. 832115 2. 744445 2. 753315 2. 757554 2. 777115  
ERCC-0004 3. 12232 3. 220757 3. 18978 3. 24131 3. 247391 3. 16453



ERCC-0004 2. 465592 2. 350268 2. 406454 2. 285849 2. 381926 2. 345295  
ERCC-0004 2. 210578 2. 293315 2. 246236 2. 24091 2. 311403 2. 388012  
ERCC-0004 1. 847958 1. 744951 1. 761546 1. 912908 1. 786941 1. 84908  
ERCC-0004 3. 184674 3. 228306 3. 15689 3. 132938 3. 298821 3. 287911  
ERCC-0004 2. 432654 2. 492768 2. 397823 2. 475486 2. 363537 2. 464975  
ERCC-0004 2. 869387 2. 825668 2. 803566 2. 891889 2. 844151 2. 890503  
ERCC-0005 2. 247662 2. 233152 2. 166664 2. 284768 2. 324862 2. 359184  
ERCC-0005 2. 061894 2. 171531 2. 084984 2. 073155 2. 044532 2. 076766  
ERCC-0005 2. 01431 2. 005291 2. 255384 1. 980328 2. 003509 2. 131334  
ERCC-0005 2. 61667 2. 623048 2. 557688 2. 867966 2. 779983 2. 870883  
ERCC-0005 2. 565398 2. 75316 2. 653901 2. 677373 2. 658184 2. 750932  
ERCC-0005 3. 132118 2. 827422 2. 969698 2. 803696 2. 822323 2. 866081  
ERCC-0006 2. 142641 2. 158642 2. 199907 2. 036259 2. 176346 2. 142641  
ERCC-0006 2. 583777 2. 451238 2. 255957 2. 500067 2. 343219 2. 529062  
ERCC-0006 2. 187696 2. 189754 2. 17971 2. 191352 2. 22571 2. 160744  
ERCC-0006 1. 894862 1. 866086 2. 02354 2. 015401 1. 93061 2. 007153  
ERCC-0006 2. 559273 2. 909539 2. 740638 2. 842471 2. 796171 2. 859498  
ERCC-0006 2. 792429 2. 740521 2. 815273 2. 835634 2. 858806 2. 949549  
ERCC-0007 3. 236622 3. 451164 3. 324972 3. 470551 3. 614239 3. 455176  
ERCC-0007 2. 171763 2. 222189 2. 169093 2. 197889 2. 132905 2. 171763  
ERCC-0007 2. 889565 2. 843462 2. 727616 2. 6645 2. 815578 2. 673712  
ERCC-0007 3. 391889 3. 61485 3. 569934 3. 578674 3. 587616 3. 744096  
ERCC-0007 2. 213155 2. 195745 2. 194778 2. 132102 2. 173702 2. 16953  
ERCC-0007 3. 966243 3. 902433 3. 983247 3. 953346 3. 910015 3. 975525  
ERCC-0007 2. 721367 2. 830428 2. 788619 2. 689685 2. 757999 2. 889946  
ERCC-0008 3. 960788 4. 050142 4. 108602 3. 96768 4. 081852 4. 238259  
ERCC-0008 2. 151379 2. 239078 2. 243609 2. 11303 2. 113312 2. 176268  
ERCC-0008 2. 764879 2. 879473 2. 975797 2. 854018 2. 712793 2. 889353  
ERCC-0008 2. 830851 2. 819928 2. 661304 2. 907893 2. 754264 2. 812118  
ERCC-0008 1. 8272 2. 054689 2. 264499 1. 926943 1. 946901 1. 863158  
ERCC-0009 2. 207611 2. 353603 2. 349276 2. 455217 2. 414997 2. 517289  
ERCC-0009 2. 348886 2. 448724 2. 234155 2. 330394 2. 383744 2. 365744  
ERCC-0009 3. 107834 3. 142977 3. 098533 3. 075723 3. 010933 3. 117721  
ERCC-0009 3. 813353 3. 886551 3. 924854 4. 002112 3. 886671 3. 932739  
ERCC-0009 5. 852585 5. 701362 5. 892635 5. 520785 5. 588707 5. 667752  
ERCC-0010 2. 331865 2. 420969 2. 506456 2. 394625 2. 464448 2. 307008  
ERCC-0010 1. 791315 2. 030838 2. 002395 2. 104296 2. 182534 2. 222609  
ERCC-0010 1. 800993 1. 746335 1. 822588 1. 878902 1. 926219 1. 887875  
ERCC-0010 3. 249766 3. 3216 3. 27474 3. 189392 3. 323615 3. 293529  
ERCC-0010 2. 510487 2. 679063 2. 60746 2. 729333 2. 646468 2. 567041  
ERCC-0011 2. 619396 2. 68627 2. 56061 2. 78564 2. 653434 2. 883053  
ERCC-0011 2. 193749 2. 093098 2. 194631 2. 058771 2. 077215 2. 270531  
ERCC-0011 2. 299998 2. 301314 2. 257703 2. 342681 2. 298401 2. 239306  
ERCC-0011 1. 979309 2. 023984 2. 063506 2. 045483 2. 037591 2. 089249  
ERCC-0011 2. 516519 2. 483809 2. 397123 2. 590539 2. 469835 2. 333766  
ERCC-0011 3. 156411 3. 104541 3. 217565 3. 220363 3. 261544 3. 157032  
ERCC-0012 3. 489085 3. 520441 3. 253402 3. 323474 3. 416469 3. 496437  
ERCC-0012 2. 360835 2. 325676 2. 28259 2. 362276 2. 356099 2. 397159  
ERCC-0012 3. 542666 3. 695388 3. 591656 3. 613049 3. 501528 3. 657441  
ERCC-0012 2. 508039 2. 347194 2. 408275 2. 295422 2. 33146 2. 457898  
ERCC-0013 2. 504229 2. 591274 2. 583503 2. 440693 2. 532091 2. 413667

ERCC-0013 3. 178367 3. 134498 3. 077076 3. 144762 3. 112412 3. 09749  
ERCC-0013 2. 757506 2. 745063 2. 492874 2. 821358 2. 799784 2. 778913  
ERCC-0013 1. 784138 1. 875096 1. 8721 1. 862128 1. 815009 1. 920004  
ERCC-0013 1. 9678 1. 907954 2. 099012 2. 073137 1. 94461 2. 002021  
ERCC-0013 2. 43952 2. 612942 2. 488306 2. 668125 2. 554779 2. 61196  
ERCC-0013 2. 529804 2. 689784 2. 556474 2. 727335 2. 688343 2. 619378  
ERCC-0013 2. 045462 2. 039403 2. 176156 2. 137773 2. 138316 2. 072794  
ERCC-0014 3. 360392 3. 375306 3. 215302 3. 379026 3. 385699 3. 506865  
ERCC-0014 2. 853208 2. 935284 3. 037377 2. 915158 2. 956436 2. 999534  
ERCC-0014 4. 428921 4. 383194 4. 314526 4. 114675 4. 209009 4. 16882  
ERCC-0014 2. 016311 2. 029249 2. 103109 2. 16887 2. 040249 2. 011923  
ERCC-0014 2. 211518 2. 144213 2. 226527 2. 161377 2. 209978 2. 320327  
ERCC-0015 2. 968334 2. 971083 2. 833525 2. 94163 2. 856397 2. 96691  
ERCC-0015 3. 018249 3. 011751 2. 903494 2. 957973 3. 050704 2. 903933  
ERCC-0015 4. 117041 4. 04609 3. 782794 4. 091457 4. 043662 3. 996215  
ERCC-0015 2. 880387 2. 654076 2. 767373 2. 830433 2. 865273 2. 759739  
ERCC-0015 2. 360591 2. 087863 2. 153802 2. 186215 2. 220327 2. 265118  
ERCC-0016 2. 864878 2. 838433 3. 020222 2. 926902 2. 852611 2. 894402  
ERCC-0016 2. 811434 2. 893098 3. 020654 2. 9711 2. 939594 2. 91372  
ERCC-0016 3. 44781 3. 569045 3. 477427 3. 536805 3. 598741 3. 52894  
ERCC-0016 3. 433653 3. 462363 3. 375302 3. 444445 3. 366898 3. 44296  
ERCC-0016 2. 96505 3. 005066 3. 019325 2. 985959 2. 924692 2. 91001  
ERCC-0017 1. 969219 2. 07609 1. 91239 1. 767188 1. 974389 1. 955701  
ERCC-0017 2. 391573 2. 602933 2. 724522 2. 608149 2. 613432 2. 668083  
ERCC-0017 2. 545622 2. 433126 2. 443071 2. 608163 2. 683037 2. 602285  
ERCC-0017 3. 413913 3. 522848 3. 407545 3. 474187 3. 405225 3. 434846
